# Supplementary material
Source: PubMed Central journal article supplement (PMC5802357)
Supplement: NIHMS901075-supplement-Supplemental.pdf [file NIHMS901075-supplement-Supplemental.pdf]

Supplemental Table I. Patients characteristics

|                            |             |
|----------------------------|-------------|
| Number of Cases            | 36          |
| Median age, years (range)  | 62 (88-40)  |
| Sex                        |             |
| Male                       | 27 (75%)    |
| Female                     | 9 (25%)     |
| Diagnosis                  |             |
| DLBCL                      |             |
| GCB DLBCL                  | 3           |
| ABC DLBCL                  | 5           |
| FL                         | 12          |
| HL                         | 4           |
| Burkitt's/SLL/CLL/MZL/MCL/ | 12          |
| Disease status             |             |
| <i>De novo</i>             | 21 (58.3 %) |
| Relapsed/refractory        | 15 (41.7%)  |
| Prior rituximab therapy    | 42%         |

Supplemental table II. Selected genes of interest that were found to be up-regulated (U) or down-regulated (D) following entinostat exposure.

| Gene ID | Gene name                                                                  | Pathway                   | Net GEP change | RL           |             | RL4RH        |             | U2932        |             | U2932 4RH    |          |
|---------|----------------------------------------------------------------------------|---------------------------|----------------|--------------|-------------|--------------|-------------|--------------|-------------|--------------|----------|
|         |                                                                            |                           |                | Fold Change  | P Value     | Fold Change  | P Value     | Fold Change  | P Value     | Fold Change  | P Value  |
| ITGB1   | Integrin B1, CD29                                                          | Cell adhesion             | U              | 0.726888564  | 9.81E-07    | 0.741810913  | 3.48E-06    | 0.656602204  | 1.45E-09    | 0.633410637  | 1.43E-10 |
| CXCR4   | Chemokine (C-X-C motif) receptor 4                                         | Cell adhesion             | U              | 0.792454633  | 0.004828859 | 0.735538416  | 0.000285463 | 0.732817173  | 0.000245547 | 0.791276969  | 0.00458  |
| FCGRT   | Fc fragment of IgG, receptor, transporter, alpha                           | Cell adhesion             | U              | 0.756397819  | 0.000355    | 0.714718008  | 2.72E-05    | 0.740728618  | 0.000140805 | 0.741252937  | 0.00015  |
| CHEK1   | Checkpoint kinase 1                                                        | Cell cycle                | D              | -1.437305894 | 3.38E-05    | -1.321813713 | 0.001001929 | -1.27017783  | 0.004281251 | -1.310475626 | 0.00139  |
| KIF22   | Kinesin family member 22                                                   | Cell Cycle                | D              | -1.477405415 | 0.001011149 | -1.361123992 | 0.008166234 | -1.671340442 | 2.84E-05    | -1.319370096 | 0.01674  |
| MCM7    | Minichromosome maintenance complex component 7                             | Cell cycle                | D              | -1.712366885 | 1.91E-05    | -1.388826666 | 0.005940481 | -1.425291482 | 0.003159265 | -1.432293167 | 0.0028   |
| CCNA2   | Cyclin A2                                                                  | Cell cycle                | D              | -1.616564926 | 0.00015683  | -1.467630732 | 0.002002483 | -2.157928305 | 2.61E-08    | -2.17037097  | 2.17E-08 |
| CDK2AP1 | Cyclin-dependent kinase 2 associated protein 1                             | Cell cycle                | D              | -1.247904596 | 0.003472295 | -1.308901811 | 0.000482796 | -1.433788068 | 7.08E-06    | -1.499480896 | 7.71E-07 |
| ADA     | Adenosine deaminase                                                        | DNA synthesis             | U              | 0.831515491  | 0.020901301 | 0.714520041  | 6.43E-05    | 0.421507608  | 1.41E-15    | 0.215390548  | 2.49E-26 |
| TUBB2A  | Tubulin, beta 2A class IIA                                                 | Microtubule stabilization | U              | 0.813282892  | 0.040501519 | 0.81251282   | 0.039626226 | 0.816624194  | 0.044486821 | 0.638828095  | 3.09E-05 |
| CDCA8   | Cell division cycle associated 8                                           | Microtubule stabilization | D              | -1.445059055 | 7.25E-05    | -1.345627052 | 0.001042629 | -1.502070288 | 1.55E-05    | -1.494425625 | 1.90E-05 |
| PSMB5   | Proteasome subunit beta type 5                                             | UPS                       | D              | -1.221011505 | 0.003993824 | -1.280858835 | 0.000464333 | -1.681656386 | 1.93E-10    | -1.608766055 | 2.31E-09 |
| PSMB6   | Proteasome subunit beta type 6                                             | UPS                       | D              | -1.275246628 | 0.012593989 | -1.224160849 | 0.036275135 | -1.59116119  | 8.25E-06    | -1.522060518 | 4.22E-05 |
| PSMC3IP | Proteasome (prosome, macropain) 26S subunit, ATPase 3, interacting protein | UPS                       | D              | -1.210043445 | 0.000227846 | -1.324076395 | 3.38E-07    | -1.494714605 | 3.02E-11    | -1.397057961 | 5.49E-09 |
| PSMB9   | Proteasome (prosome, macropain) subunit, beta type, 9                      | UPS                       | U              | 0.77193095   | 0.005350904 | 0.7223881    | 0.000600426 | 0.65545941   | 1.63E-05    | 0.623573002  | 2.25E-06 |
| CUL4A   | Cullin 4A                                                                  | UPS                       | D              | -1.216167208 | 0.000864093 | -1.30652209  | 1.22E-05    | -1.242004773 | 0.000262715 | -1.316723121 | 7.43E-06 |

Supplemental Figure 1

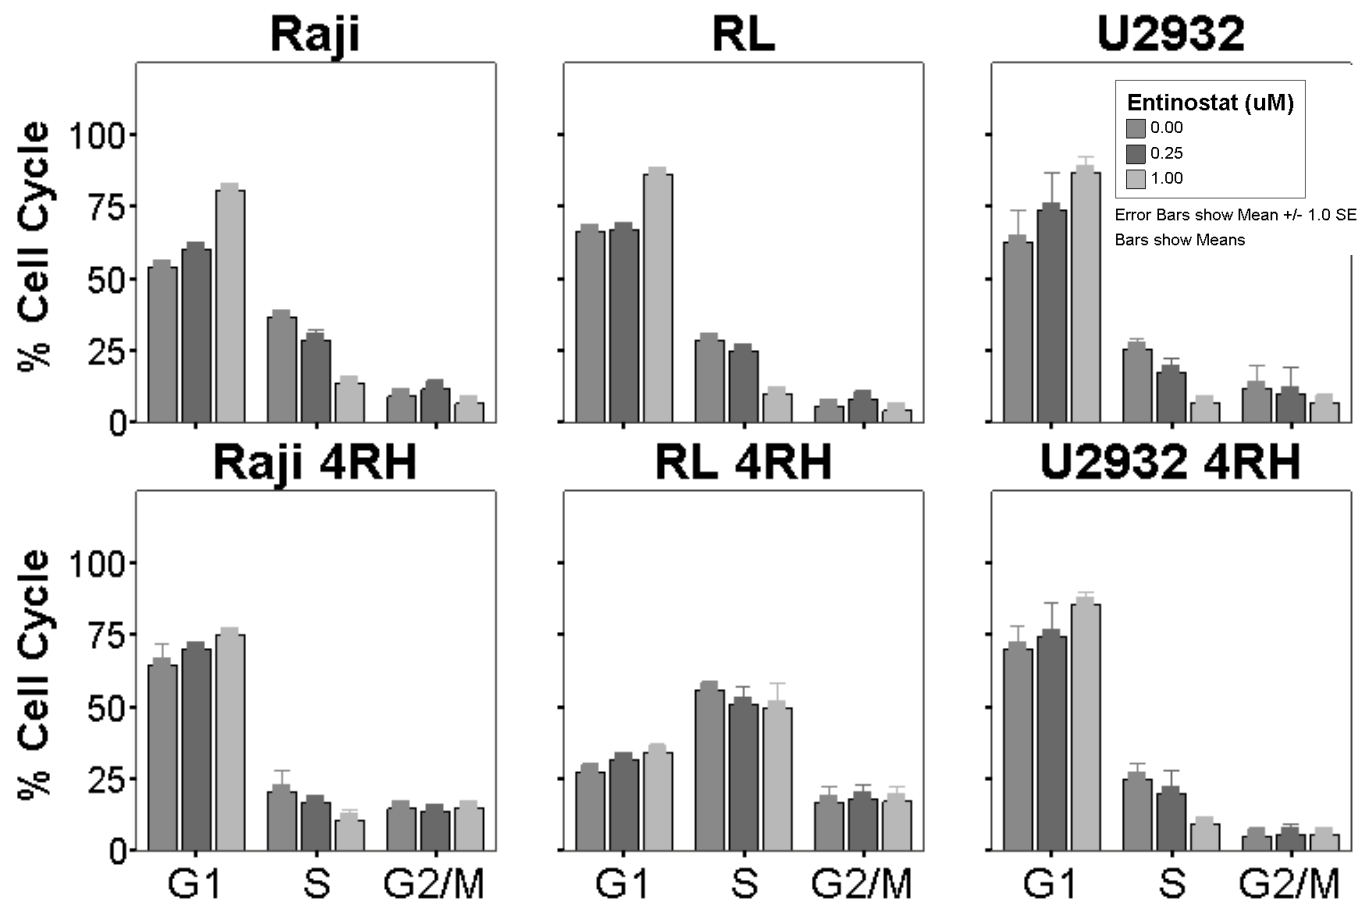

**Gene information**

| <b>TargetID</b> | <b>ENTREZ_GENE_ID</b> | <b>SYMBOL</b> | <b>CHROMOSOME</b> |
|-----------------|-----------------------|---------------|-------------------|
| 1-Mar           | 55016                 | 1-Mar         | 4                 |
| 2-Mar           | 51257                 | 2-Mar         | 19                |
| 3-Mar           | 115123                | 3-Mar         | 5                 |
| 5-Mar           | 54708                 | 5-Mar         | 10                |
| 7-Mar           | 64844                 | 7-Mar         | 2                 |
| 1-Sep           | 1731                  | 1-Sep         | 16                |
| 2-Sep           | 4735                  | 2-Sep         | 2                 |
| 3-Sep           | 55964                 | 3-Sep         | 22                |
| 4-Sep           | 5414                  | 4-Sep         | 17                |
| 5-Sep           | 5413                  | 5-Sep         | 22                |
| 6-Sep           | 23157                 | 6-Sep         | X                 |
| 7-Sep           | 989                   | 7-Sep         | 7                 |
| 8-Sep           | 23176                 | 8-Sep         | 5                 |
| 9-Sep           | 10801                 | 9-Sep         | 17                |
| 11-Sep          | 55752                 | 11-Sep        | 4                 |
| 12-Sep          | 124404                | 12-Sep        | 16                |
| 14-Sep          | 346288                | 14-Sep        | 7                 |
| 15-Sep          | 9403                  | 15-Sep        | 1                 |
| A2LD1           | 87769                 | A2LD1         | 13                |
| A4GALT          | 53947                 | A4GALT        | 22                |
| A4GNT           | 51146                 | A4GNT         | 3                 |
| AAAS            | 8086                  | AAAS          | 12                |
| AACS            | 65985                 | AACS          | 12                |
| AADACL1         | 57552                 | AADACL1       | 3                 |
| AADACL2         | 344752                | AADACL2       | 3                 |
| AAGAB           | 79719                 | AAGAB         | 15                |
| AAK1            | 22848                 | AAK1          | 2                 |
| AAMP            | 14                    | AAMP          | 2                 |
| AARS            | 16                    | AARS          | 16                |
| AARS2           | 57505                 | AARS2         | 6                 |
| AARSD1          | 80755                 | AARSD1        | 17                |
| AASDH           | 132949                | AASDH         | 4                 |
| AASDHPPT        | 60496                 | AASDHPPT      | 11                |
| AASS            | 10157                 | AASS          | 7                 |
| AATF            | 26574                 | AATF          | 17                |
| AATK            | 9625                  | AATK          | 17                |
| ABAT            | 18                    | ABAT          | 16                |
| ABCA1           | 19                    | ABCA1         | 9                 |
| ABCA11          | 79963                 | ABCA11        | 4                 |
| ABCA2           | 20                    | ABCA2         | 9                 |
| ABCA3           | 21                    | ABCA3         | 16                |
| ABCA6           | 23460                 | ABCA6         | 17                |

|         |        |         |    |
|---------|--------|---------|----|
| ABCA7   | 10347  | ABCA7   | 19 |
| ABCA8   | 10351  | ABCA8   | 17 |
| ABCA9   | 10350  | ABCA9   | 17 |
| ABCB1   | 5243   | ABCB1   | 7  |
| ABCB10  | 23456  | ABCB10  | 1  |
| ABCB4   | 5244   | ABCB4   | 7  |
| ABCB6   | 10058  | ABCB6   | 2  |
| ABCB7   | 22     | ABCB7   | X  |
| ABCB9   | 23457  | ABCB9   | 12 |
| ABCC2   | 1244   | ABCC2   | 10 |
| ABCC3   | 8714   | ABCC3   | 17 |
| ABCC4   | 10257  | ABCC4   | 13 |
| ABCC5   | 10057  | ABCC5   | 3  |
| ABCC6P1 | 653190 | ABCC6P1 | 16 |
| ABCD1   | 215    | ABCD1   | X  |
| ABCD3   | 5825   | ABCD3   | 1  |
| ABCE1   | 6059   | ABCE1   | 4  |
| ABCF1   | 23     | ABCF1   | 6  |
| ABCF2   | 10061  | ABCF2   | 7  |
| ABCF3   | 55324  | ABCF3   | 3  |
| ABCG1   | 9619   | ABCG1   | 21 |
| ABCG4   | 64137  | ABCG4   | 11 |
| ABCG5   | 64240  | ABCG5   | 2  |
| ABHD1   | 84696  | ABHD1   | 2  |
| ABHD10  | 55347  | ABHD10  | 3  |
| ABHD11  | 83451  | ABHD11  | 7  |
| ABHD12  | 26090  | ABHD12  | 20 |
| ABHD12B | 145447 | ABHD12B | 14 |
| ABHD13  | 84945  | ABHD13  | 13 |
| ABHD14A | 25864  | ABHD14A | 3  |
| ABHD14B | 84836  | ABHD14B | 3  |
| ABHD15  | 116236 | ABHD15  | 17 |
| ABHD2   | 11057  | ABHD2   | 15 |
| ABHD3   | 171586 | ABHD3   | 18 |
| ABHD4   | 63874  | ABHD4   | 14 |
| ABHD5   | 51099  | ABHD5   | 3  |
| ABHD6   | 57406  | ABHD6   | 3  |
| ABHD8   | 79575  | ABHD8   | 19 |
| ABI1    | 10006  | ABI1    | 10 |
| ABI2    | 10152  | ABI2    |    |
| ABI3    | 51225  | ABI3    | 17 |
| ABL1    | 25     | ABL1    | 9  |
| ABL2    | 27     | ABL2    | 1  |
| ABLIM1  | 3983   | ABLIM1  | 10 |

|        |        |        |    |
|--------|--------|--------|----|
| ABLIM2 | 84448  | ABLIM2 | 4  |
| ABR    | 29     | ABR    | 17 |
| ABT1   | 29777  | ABT1   | 6  |
| ABTB1  | 80325  | ABTB1  | 3  |
| ABTB2  | 25841  | ABTB2  | 11 |
| ACAA1  | 30     | ACAA1  | 3  |
| ACAA2  | 10449  | ACAA2  | 18 |
| ACACA  | 31     | ACACA  | 17 |
| ACACB  | 32     | ACACB  | 12 |
| ACAD10 | 80724  | ACAD10 | 12 |
| ACAD11 | 84129  | ACAD11 | 3  |
| ACAD8  | 27034  | ACAD8  | 11 |
| ACAD9  | 28976  | ACAD9  | 3  |
| ACADM  | 34     | ACADM  | 1  |
| ACADS  | 35     | ACADS  | 12 |
| ACADSB | 36     | ACADSB | 10 |
| ACADVL | 37     | ACADVL | 17 |
| ACAP1  | 9744   | ACAP1  | 17 |
| ACAP2  | 23527  | ACAP2  | 3  |
| ACAP3  | 116983 | ACAP3  | 1  |
| ACAT1  | 38     | ACAT1  | 11 |
| ACAT2  | 39     | ACAT2  | 6  |
| ACBD3  | 64746  | ACBD3  | 1  |
| ACBD4  | 79777  | ACBD4  | 17 |
| ACBD6  | 84320  | ACBD6  | 1  |
| ACBD7  | 414149 | ACBD7  | 10 |
| ACCN3  | 9311   | ACCN3  | 7  |
| ACCS   | 84680  | ACCS   | 11 |
| ACD    | 65057  | ACD    | 16 |
| ACER3  | 55331  | ACER3  | 11 |
| ACHE   | 43     | ACHE   | 7  |
| ACIN1  | 22985  | ACIN1  | 14 |
| ACLY   | 47     | ACLY   | 17 |
| ACN9   | 57001  | ACN9   | 7  |
| ACO1   | 48     | ACO1   | 9  |
| ACO2   | 50     | ACO2   | 22 |
| ACOT1  | 641371 | ACOT1  | 14 |
| ACOT12 | 134526 | ACOT12 | 5  |
| ACOT2  | 10965  | ACOT2  | 14 |
| ACOT4  | 122970 | ACOT4  | 14 |
| ACOT8  | 10005  | ACOT8  | 20 |
| ACOT9  | 23597  | ACOT9  | X  |
| ACOX1  | 51     | ACOX1  | 17 |
| ACOX2  | 8309   | ACOX2  | 3  |

|        |        |        |    |
|--------|--------|--------|----|
| ACOX3  | 8310   | ACOX3  | 4  |
| ACP1   | 52     | ACP1   | 2  |
| ACP2   | 53     | ACP2   | 11 |
| ACP6   | 51205  | ACP6   | 1  |
| ACPL2  | 92370  | ACPL2  | 3  |
| ACPP   | 55     | ACPP   | 3  |
| ACR    | 49     | ACR    | 22 |
| ACRBP  | 84519  | ACRBP  | 12 |
| ACRC   | 93953  | ACRC   | X  |
| ACSBG1 | 23205  | ACSBG1 | 15 |
| ACSF2  | 80221  | ACSF2  | 17 |
| ACSF3  | 197322 | ACSF3  | 16 |
| ACSL1  | 2180   | ACSL1  | 4  |
| ACSL3  | 2181   | ACSL3  | 2  |
| ACSL4  | 2182   | ACSL4  | X  |
| ACSL5  | 51703  | ACSL5  | 10 |
| ACSM3  | 6296   | ACSM3  | 16 |
| ACSS1  | 84532  | ACSS1  | 20 |
| ACSS2  | 55902  | ACSS2  | 20 |
| ACTA1  | 58     | ACTA1  | 1  |
| ACTA2  | 59     | ACTA2  | 10 |
| ACTB   | 60     | ACTB   | 7  |
| ACTBL2 | 345651 | ACTBL2 | 5  |
| ACTG1  | 71     | ACTG1  | 17 |
| ACTL6A | 86     | ACTL6A | 3  |
| ACTL8  | 81569  | ACTL8  | 1  |
| ACTN1  | 87     | ACTN1  | 14 |
| ACTN4  | 81     | ACTN4  | 19 |
| ACTR10 | 55860  | ACTR10 | 14 |
| ACTR1A | 10121  | ACTR1A | 10 |
| ACTR1B | 10120  | ACTR1B | 2  |
| ACTR2  | 10097  | ACTR2  | 2  |
| ACTR3  | 10096  | ACTR3  | 2  |
| ACTR3B | 57180  | ACTR3B | 7  |
| ACTR5  | 79913  | ACTR5  | 20 |
| ACTR6  | 64431  | ACTR6  | 12 |
| ACTR8  | 93973  | ACTR8  | 3  |
| ACTRT1 | 139741 | ACTRT1 | X  |
| ACVR1  | 90     | ACVR1  | 2  |
| ACVR2A | 92     | ACVR2A | 2  |
| ACY1   | 95     | ACY1   | 3  |
| ACY3   | 91703  | ACY3   | 11 |
| ACYP1  | 97     | ACYP1  | 14 |
| ACYP2  | 98     | ACYP2  | 2  |

|          |        |          |    |
|----------|--------|----------|----|
| ADA      | 100    | ADA      | 20 |
| ADAL     | 161823 | ADAL     | 15 |
| ADAM10   | 102    | ADAM10   | 15 |
| ADAM11   | 4185   | ADAM11   | 17 |
| ADAM15   | 8751   | ADAM15   | 1  |
| ADAM17   | 6868   | ADAM17   | 2  |
| ADAM22   | 53616  | ADAM22   | 7  |
| ADAM23   | 8745   | ADAM23   | 2  |
| ADAM28   | 10863  | ADAM28   | 8  |
| ADAM30   | 11085  | ADAM30   | 1  |
| ADAM32   | 203102 | ADAM32   |    |
| ADAM8    | 101    | ADAM8    | 10 |
| ADAM9    | 8754   | ADAM9    | 8  |
| ADAMTS15 | 170689 | ADAMTS15 | 11 |
| ADAMTS6  | 11174  | ADAMTS6  | 5  |
| ADAMTSL2 | 9719   | ADAMTSL2 | 9  |
| ADAMTSL4 | 54507  | ADAMTSL4 | 1  |
| ADAMTSL5 | 339366 | ADAMTSL5 | 19 |
| ADAP1    | 11033  | ADAP1    | 7  |
| ADAP2    | 55803  | ADAP2    | 17 |
| ADAR     | 103    | ADAR     | 1  |
| ADARB1   | 104    | ADARB1   | 21 |
| ADAT1    | 23536  | ADAT1    | 16 |
| ADAT2    | 134637 | ADAT2    | 6  |
| ADAT3    | 113179 | ADAT3    | 19 |
| ADC      | 113451 | ADC      | 1  |
| ADCK1    | 57143  | ADCK1    | 14 |
| ADCK2    | 90956  | ADCK2    | 7  |
| ADCK4    | 79934  | ADCK4    | 19 |
| ADCK5    | 203054 | ADCK5    | 8  |
| ADCY3    | 109    | ADCY3    | 2  |
| ADCY5    | 111    | ADCY5    | 3  |
| ADCY7    | 113    | ADCY7    | 16 |
| ADCY9    | 115    | ADCY9    | 16 |
| ADD1     | 118    | ADD1     | 4  |
| ADD3     | 120    | ADD3     | 10 |
| ADH5     | 128    | ADH5     | 4  |
| ADH7     | 131    | ADH7     | 4  |
| ADHFE1   | 137872 | ADHFE1   | 8  |
| ADI1     | 55256  | ADI1     | 2  |
| ADIPOR1  | 51094  | ADIPOR1  | 1  |
| ADIPOR2  | 79602  | ADIPOR2  | 12 |
| ADK      | 132    | ADK      | 10 |
| ADM      | 133    | ADM      | 11 |



|         |        |         |    |
|---------|--------|---------|----|
| ADM2    | 79924  | ADM2    | 22 |
| ADNP    | 23394  | ADNP    | 20 |
| ADNP2   | 22850  | ADNP2   | 18 |
| ADO     | 84890  | ADO     | 10 |
| ADORA2A | 135    | ADORA2A | 22 |
| ADORA2B | 136    | ADORA2B | 17 |
| ADORA3  | 140    | ADORA3  | 1  |
| ADPGK   | 83440  | ADPGK   | 15 |
| ADPRH   | 141    | ADPRH   | 3  |
| ADPRHL1 | 113622 | ADPRHL1 | 13 |
| ADPRHL2 | 54936  | ADPRHL2 | 1  |
| ADRA2A  | 150    | ADRA2A  | 10 |
| ADRB2   | 154    | ADRB2   | 5  |
| ADRBK1  | 156    | ADRBK1  | 11 |
| ADRM1   | 11047  | ADRM1   | 20 |
| ADSL    | 158    | ADSL    | 22 |
| ADSS    | 159    | ADSS    | 1  |
| ADSSL1  | 122622 | ADSSL1  | 14 |
| AEBP1   | 165    | AEBP1   | 7  |
| AEBP2   | 121536 | AEBP2   | 12 |
| AEN     | 64782  | AEN     | 15 |
| AES     | 166    | AES     | 19 |
| AFAP1L2 | 84632  | AFAP1L2 | 10 |
| AFAR3   | 246181 | AFAR3   | 1  |
| AFF1    | 4299   | AFF1    | 4  |
| AFF2    | 2334   | AFF2    | X  |
| AFF3    | 3899   | AFF3    | 2  |
| AFF4    | 27125  | AFF4    | 5  |
| AFG3L1  | 172    | AFG3L1  | 16 |
| AFG3L2  | 10939  | AFG3L2  | 18 |
| AFM     | 173    | AFM     | 4  |
| AFMID   | 125061 | AFMID   | 17 |
| AFTPH   | 54812  | AFTPH   | 2  |
| AGA     | 175    | AGA     | 4  |
| AGAP3   | 116988 | AGAP3   | 7  |
| AGAP8   | 728404 | AGAP8   | 10 |
| AGBL5   | 60509  | AGBL5   | 2  |
| AGER    | 177    | AGER    | 6  |
| AGFG1   | 3267   | AGFG1   | 2  |
| AGFG2   | 3268   | AGFG2   | 7  |
| AGGF1   | 55109  | AGGF1   | 5  |
| AGK     | 55750  | AGK     | 7  |
| AGMAT   | 79814  | AGMAT   | 1  |
| AGPAT2  | 10555  | AGPAT2  | 9  |

|         |        |         |    |
|---------|--------|---------|----|
| AGPAT3  | 56894  | AGPAT3  | 21 |
| AGPAT4  | 56895  | AGPAT4  | 6  |
| AGPAT5  | 55326  | AGPAT5  | 8  |
| AGPAT6  | 137964 | AGPAT6  | 8  |
| AGPAT9  | 84803  | AGPAT9  | 4  |
| AGR2    | 10551  | AGR2    | 7  |
| AGR3    | 155465 | AGR3    | 7  |
| AGRN    | 375790 | AGRN    | 1  |
| AGRP    | 181    | AGRP    | 16 |
| AGTPBP1 | 23287  | AGTPBP1 | 9  |
| AGTRAP  | 57085  | AGTRAP  | 1  |
| AGXT2L2 | 85007  | AGXT2L2 | 5  |
| AHCTF1  | 25909  | AHCTF1  |    |
| AHCY    | 191    | AHCY    | 20 |
| AHCYL1  | 10768  | AHCYL1  | 1  |
| AHCYL2  | 23382  | AHCYL2  | 7  |
| AHDC1   | 27245  | AHDC1   | 1  |
| AHI1    | 54806  | AHI1    | 6  |
| AHNAK2  | 113146 | AHNAK2  | 14 |
| AHR     | 196    | AHR     | 7  |
| AHSA1   | 10598  | AHSA1   | 14 |
| AHSA2   | 130872 | AHSA2   | 2  |
| AHSP    | 51327  | AHSP    | 16 |
| AICDA   | 57379  | AICDA   | 12 |
| AIDA    | 64853  | AIDA    | 1  |
| AIF1    | 199    | AIF1    | 6  |
| AIF1L   | 83543  | AIF1L   | 9  |
| AIFM1   | 9131   | AIFM1   | X  |
| AIFM2   | 84883  | AIFM2   | 10 |
| AIG1    | 51390  | AIG1    | 6  |
| AIM1    | 202    | AIM1    | 6  |
| AIM1L   | 55057  | AIM1L   | 1  |
| AIM2    | 9447   | AIM2    | 1  |
| AIMP2   | 7965   | AIMP2   | 7  |
| AIP     | 9049   | AIP     | 11 |
| AIRE    | 326    | AIRE    | 21 |
| AK1     | 203    | AK1     | 9  |
| AK2     | 204    | AK2     | 1  |
| AK3     | 50808  | AK3     | 9  |
| AK3L1   | 205    | AK3L1   | 1  |
| AKAP1   | 8165   | AKAP1   | 17 |
| AKAP11  | 11215  | AKAP11  | 13 |
| AKAP12  | 9590   | AKAP12  | 6  |
| AKAP13  | 11214  | AKAP13  | 15 |

|          |        |          |    |
|----------|--------|----------|----|
| AKAP5    | 9495   | AKAP5    | 14 |
| AKAP8    | 10270  | AKAP8    | 19 |
| AKAP8L   | 26993  | AKAP8L   | 19 |
| AKIRIN1  | 79647  | AKIRIN1  | 1  |
| AKIRIN2  | 55122  | AKIRIN2  | 6  |
| AKNA     | 80709  | AKNA     |    |
| AKR1A1   | 10327  | AKR1A1   | 1  |
| AKR1B1   | 231    | AKR1B1   | 7  |
| AKR1C3   | 8644   | AKR1C3   | 10 |
| AKR1CL1  | 340811 | AKR1CL1  |    |
| AKR1D1   | 6718   | AKR1D1   | 7  |
| AKR7A2   | 8574   | AKR7A2   | 1  |
| AKR7A3   | 22977  | AKR7A3   | 1  |
| AKT1     | 207    | AKT1     | 14 |
| AKT1S1   | 84335  | AKT1S1   | 19 |
| AKT2     | 208    | AKT2     | 19 |
| AKTIP    | 64400  | AKTIP    | 16 |
| ALAD     | 210    | ALAD     | 9  |
| ALAS1    | 211    | ALAS1    | 3  |
| ALB      | 213    | ALB      | 4  |
| ALCAM    | 214    | ALCAM    | 3  |
| ALDH16A1 | 126133 | ALDH16A1 | 19 |
| ALDH18A1 | 5832   | ALDH18A1 | 10 |
| ALDH1A1  | 216    | ALDH1A1  | 9  |
| ALDH1A3  | 220    | ALDH1A3  | 15 |
| ALDH1B1  | 219    | ALDH1B1  | 9  |
| ALDH1L2  | 160428 | ALDH1L2  | 12 |
| ALDH2    | 217    | ALDH2    | 12 |
| ALDH3A2  | 224    | ALDH3A2  | 17 |
| ALDH3B1  | 221    | ALDH3B1  | 11 |
| ALDH4A1  | 8659   | ALDH4A1  | 1  |
| ALDH5A1  | 7915   | ALDH5A1  | 6  |
| ALDH6A1  | 4329   | ALDH6A1  | 14 |
| ALDH7A1  | 501    | ALDH7A1  | 5  |
| ALDH9A1  | 223    | ALDH9A1  | 1  |
| ALDOA    | 226    | ALDOA    | 16 |
| ALDOC    | 230    | ALDOC    | 17 |
| ALG1     | 56052  | ALG1     | 16 |
| ALG10    | 84920  | ALG10    | 12 |
| ALG10B   | 144245 | ALG10B   | 12 |
| ALG11    | 440138 | ALG11    | 13 |
| ALG12    | 79087  | ALG12    | 22 |
| ALG13    | 55849  | ALG13    | X  |
| ALG14    | 199857 | ALG14    | 1  |

|          |        |          |    |
|----------|--------|----------|----|
| ALG1L    | 200810 | ALG1L    | 3  |
| ALG2     | 85365  | ALG2     | 9  |
| ALG3     | 10195  | ALG3     | 3  |
| ALG5     | 29880  | ALG5     | 13 |
| ALG6     | 29929  | ALG6     | 1  |
| ALG8     | 79053  | ALG8     | 11 |
| ALG9     | 79796  | ALG9     | 11 |
| ALKBH1   | 8846   | ALKBH1   | 14 |
| ALKBH2   | 121642 | ALKBH2   | 12 |
| ALKBH3   | 221120 | ALKBH3   | 11 |
| ALKBH4   | 54784  | ALKBH4   | 7  |
| ALKBH5   | 54890  | ALKBH5   | 17 |
| ALKBH6   | 84964  | ALKBH6   | 19 |
| ALKBH7   | 84266  | ALKBH7   | 19 |
| ALKBH8   | 91801  | ALKBH8   | 11 |
| ALMS1    | 7840   | ALMS1    | 2  |
| ALOX12B  | 242    | ALOX12B  | 17 |
| ALOX5    | 240    | ALOX5    | 10 |
| ALOX5AP  | 241    | ALOX5AP  | 13 |
| ALPI     | 248    | ALPI     | 2  |
| ALPK1    | 80216  | ALPK1    | 4  |
| ALPK2    | 115701 | ALPK2    | 18 |
| ALPL     | 249    | ALPL     | 1  |
| ALPP     | 250    | ALPP     | 2  |
| ALS2     | 57679  | ALS2     | 2  |
| ALS2CR12 | 130540 | ALS2CR12 | 2  |
| ALS2CR14 | 65068  | ALS2CR14 | 2  |
| ALS2CR16 | 130029 | ALS2CR16 | 2  |
| ALS2CR4  | 65062  | ALS2CR4  | 2  |
| ALS2CR8  | 79800  | ALS2CR8  |    |
| AMACR    | 23600  | AMACR    | 5  |
| AMBRA1   | 55626  | AMBRA1   | 11 |
| AMD1     | 262    | AMD1     | 6  |
| AMDHD1   | 144193 | AMDHD1   | 12 |
| AMDHD2   | 51005  | AMDHD2   | 16 |
| AMFR     | 267    | AMFR     | 16 |
| AMICA1   | 120425 | AMICA1   | 11 |
| AMIGO3   | 386724 | AMIGO3   | 3  |
| AMMECR1  | 9949   | AMMECR1  | X  |
| AMMECR1L | 83607  | AMMECR1L | 2  |
| AMN      | 81693  | AMN      | 14 |
| AMN1     | 196394 | AMN1     | 12 |
| AMOT     | 154796 | AMOT     | X  |
| AMOTL2   | 51421  | AMOTL2   | 3  |

|               |        |                |    |
|---------------|--------|----------------|----|
| AMPD3         | 272    | AMPD3          | 11 |
| AMT           | 275    | AMT            | 3  |
| AMY1A         | 276    | AMY1A          | 1  |
| AMY1B         | 277    | AMY1B          | 1  |
| AMY1C         | 278    | AMY1C          | 1  |
| AMY2A         | 279    | AMY2A          | 1  |
| AMY2B         | 280    | AMY2B          | 1  |
| AMZ2          | 51321  | AMZ2           | 17 |
| ANAPC1        | 64682  | ANAPC1         |    |
| ANAPC10       | 10393  | ANAPC10        | 4  |
| ANAPC11       | 51529  | ANAPC11        |    |
| ANAPC13       | 25847  | ANAPC13        | 3  |
| ANAPC2        | 29882  | ANAPC2         | 9  |
| ANAPC4        | 29945  | ANAPC4         | 4  |
| ANAPC7        | 51434  | ANAPC7         | 12 |
| ANG           | 283    | ANG            | 14 |
| ANGEL1        | 23357  | ANGEL1         | 14 |
| ANGEL2        | 90806  | ANGEL2         | 1  |
| ANGPTL4       | 51129  | ANGPTL4        | 19 |
| ANGPTL6       | 83854  | ANGPTL6        | 19 |
| ANGPTL7       | 10218  | ANGPTL7        | 1  |
| ANK3          | 288    | ANK3           | 10 |
| ANKDD1A       | 348094 | ANKDD1A        | 15 |
| ANKFY1        | 51479  | ANKFY1         | 17 |
| ANKHD1        | 54882  | ANKHD1         | 5  |
| ANKHD1-EIF4EB | 404734 | ANKHD1-EIF4EBF | 5  |
| ANKIB1        | 54467  | ANKIB1         | 7  |
| ANKLE1        | 126549 | ANKLE1         | 19 |
| ANKLE2        | 23141  | ANKLE2         | 12 |
| ANKMY2        | 57037  | ANKMY2         | 7  |
| ANKRA2        | 57763  | ANKRA2         | 5  |
| ANKRD1        | 27063  | ANKRD1         | 10 |
| ANKRD10       | 55608  | ANKRD10        | 13 |
| ANKRD11       | 29123  | ANKRD11        | 16 |
| ANKRD12       | 23253  | ANKRD12        | 18 |
| ANKRD13A      | 88455  | ANKRD13A       | 12 |
| ANKRD13B      | 124930 | ANKRD13B       | 17 |
| ANKRD13C      | 81573  | ANKRD13C       | 1  |
| ANKRD13D      | 338692 | ANKRD13D       |    |
| ANKRD16       | 54522  | ANKRD16        | 10 |
| ANKRD17       | 26057  | ANKRD17        | 4  |
| ANKRD18A      | 253650 | ANKRD18A       | 9  |
| ANKRD18B      | 441459 | ANKRD18B       |    |
| ANKRD19       | 138649 | ANKRD19        |    |

|           |        |           |    |
|-----------|--------|-----------|----|
| ANKRD20A1 | 84210  | ANKRD20A1 |    |
| ANKRD20A4 | 728747 | ANKRD20A4 | 9  |
| ANKRD22   | 118932 | ANKRD22   | 10 |
| ANKRD23   | 200539 | ANKRD23   | 2  |
| ANKRD24   | 170961 | ANKRD24   | 19 |
| ANKRD26   | 22852  | ANKRD26   | 10 |
| ANKRD27   | 84079  | ANKRD27   | 19 |
| ANKRD28   | 23243  | ANKRD28   | 3  |
| ANKRD32   | 84250  | ANKRD32   | 5  |
| ANKRD33   | 341405 | ANKRD33   | 12 |
| ANKRD34A  | 284615 | ANKRD34A  | 1  |
| ANKRD34C  | 390616 | ANKRD34C  | 15 |
| ANKRD35   | 148741 | ANKRD35   | 1  |
| ANKRD36   | 375248 | ANKRD36   | 2  |
| ANKRD37   | 353322 | ANKRD37   | 4  |
| ANKRD39   | 51239  | ANKRD39   | 2  |
| ANKRD40   | 91369  | ANKRD40   | 17 |
| ANKRD41   | 126549 | ANKRD41   | 19 |
| ANKRD43   | 134548 | ANKRD43   | 5  |
| ANKRD46   | 157567 | ANKRD46   | 8  |
| ANKRD47   | 256949 | ANKRD47   | 19 |
| ANKRD49   | 54851  | ANKRD49   | 11 |
| ANKRD5    | 63926  | ANKRD5    | 20 |
| ANKRD50   | 57182  | ANKRD50   | 4  |
| ANKRD52   | 283373 | ANKRD52   | 12 |
| ANKRD53   | 79998  | ANKRD53   | 2  |
| ANKRD54   | 129138 | ANKRD54   | 22 |
| ANKRD56   | 345079 | ANKRD56   | 4  |
| ANKRD58   | 347454 | ANKRD58   | X  |
| ANKRD6    | 22881  | ANKRD6    | 6  |
| ANKRD7    | 56311  | ANKRD7    | 7  |
| ANKRD9    | 122416 | ANKRD9    | 14 |
| ANKS1A    | 23294  | ANKS1A    | 6  |
| ANKS3     | 124401 | ANKS3     | 16 |
| ANKS6     | 203286 | ANKS6     | 9  |
| ANKZF1    | 55139  | ANKZF1    | 2  |
| ANLN      | 54443  | ANLN      | 7  |
| ANO10     | 55129  | ANO10     | 3  |
| ANO6      | 196527 | ANO6      | 12 |
| ANO8      | 57719  | ANO8      | 19 |
| ANP32A    | 8125   | ANP32A    | 15 |
| ANP32B    | 10541  | ANP32B    | 9  |
| ANP32D    | 23519  | ANP32D    | 12 |
| ANP32E    | 81611  | ANP32E    | 1  |

|         |        |         |    |
|---------|--------|---------|----|
| ANTXR1  | 84168  | ANTXR1  | 2  |
| ANTXR2  | 118429 | ANTXR2  | 4  |
| ANUBL1  | 93550  | ANUBL1  | 10 |
| ANXA1   | 301    | ANXA1   | 9  |
| ANXA11  | 311    | ANXA11  | 10 |
| ANXA2   | 302    | ANXA2   | 15 |
| ANXA2P1 | 303    | ANXA2P1 | 4  |
| ANXA2P2 | 304    | ANXA2P2 | 9  |
| ANXA3   | 306    | ANXA3   | 4  |
| ANXA4   | 307    | ANXA4   | 2  |
| ANXA5   | 308    | ANXA5   | 4  |
| ANXA6   | 309    | ANXA6   | 5  |
| ANXA7   | 310    | ANXA7   | 10 |
| AOC2    | 314    | AOC2    | 17 |
| AOC3    | 8639   | AOC3    | 17 |
| AOF2    | 23028  | AOF2    | 1  |
| AOX1    | 316    | AOX1    | 2  |
| AOX2P   | 344454 | AOX2P   | 2  |
| AP1B1   | 162    | AP1B1   | 22 |
| AP1G1   | 164    | AP1G1   | 16 |
| AP1G2   | 8906   | AP1G2   | 14 |
| AP1GBP1 | 11276  | AP1GBP1 | 17 |
| AP1S1   | 1174   | AP1S1   | 7  |
| AP1S2   | 8905   | AP1S2   | X  |
| AP1S3   | 130340 | AP1S3   | 2  |
| AP2A1   | 160    | AP2A1   | 19 |
| AP2M1   | 1173   | AP2M1   | 3  |
| AP2S1   | 1175   | AP2S1   | 19 |
| AP3B1   | 8546   | AP3B1   | 5  |
| AP3B2   | 8120   | AP3B2   | 15 |
| AP3D1   | 8943   | AP3D1   | 19 |
| AP3M1   | 26985  | AP3M1   | 10 |
| AP3M2   | 10947  | AP3M2   | 8  |
| AP3S1   | 1176   | AP3S1   | 5  |
| AP3S2   | 10239  | AP3S2   | 15 |
| AP4B1   | 10717  | AP4B1   | 1  |
| AP4E1   | 23431  | AP4E1   | 15 |
| APAF1   | 317    | APAF1   | 12 |
| APBA2BP | 63941  | APBA2BP | 20 |
| APBB1IP | 54518  | APBB1IP | 10 |
| APBB2   | 323    | APBB2   |    |
| APBB3   | 10307  | APBB3   | 5  |
| APC     | 324    | APC     | 5  |
| APCDD1  | 147495 | APCDD1  | 18 |

|          |        |          |    |
|----------|--------|----------|----|
| APEG1    | 10290  | APEG1    | 2  |
| APEH     | 327    | APEH     | 3  |
| APEX1    | 328    | APEX1    | 14 |
| APEX2    | 27301  | APEX2    | X  |
| APH1B    | 83464  | APH1B    | 15 |
| API5     | 8539   | API5     | 11 |
| APIP     | 51074  | APIP     | 11 |
| APITD1   | 378708 | APITD1   | 1  |
| APLP1    | 333    | APLP1    | 19 |
| APLP2    | 334    | APLP2    | 11 |
| APM-1    | 201501 | APM-1    | 18 |
| APOA1BP  | 128240 | APOA1BP  | 1  |
| APOA4    | 337    | APOA4    | 11 |
| APOBEC3B | 9582   | APOBEC3B | 22 |
| APOBEC3F | 200316 | APOBEC3F | 22 |
| APOBEC3G | 60489  | APOBEC3G | 22 |
| APOBEC3H | 164668 | APOBEC3H | 22 |
| APOC3    | 345    | APOC3    | 11 |
| APOE     | 348    | APOE     | 19 |
| APOL2    | 23780  | APOL2    | 22 |
| APOL3    | 80833  | APOL3    | 22 |
| APOL6    | 80830  | APOL6    | 22 |
| APOLD1   | 81575  | APOLD1   | 12 |
| APOM     | 55937  | APOM     | 6  |
| APOO     | 79135  | APOO     | X  |
| APOOL    | 139322 | APOOL    | X  |
| APPBP2   | 10513  | APPBP2   | 17 |
| APPL2    | 55198  | APPL2    | 12 |
| APRT     | 353    | APRT     | 16 |
| APTX     | 54840  | APTX     | 9  |
| AQP11    | 282679 | AQP11    | 11 |
| AQP3     | 360    | AQP3     | 9  |
| AQP7P1   | 375719 | AQP7P1   | 9  |
| AQR      | 9716   | AQR      | 15 |
| ARAF     | 369    | ARAF     | X  |
| ARAP1    | 116985 | ARAP1    | 11 |
| ARAP3    | 64411  | ARAP3    | 5  |
| ARC      | 23237  | ARC      | 8  |
| ARCN1    | 372    | ARCN1    | 11 |
| ARD1A    | 8260   | ARD1A    | X  |
| ARD1B    | 84779  | ARD1B    | 4  |
| ARF3     | 377    | ARF3     | 12 |
| ARF4     | 378    | ARF4     | 3  |
| ARF5     | 381    | ARF5     | 7  |



|           |        |           |    |
|-----------|--------|-----------|----|
| ARF6      | 382    | ARF6      | 14 |
| ARFGAP1   | 55738  | ARFGAP1   | 20 |
| ARFGAP2   | 84364  | ARFGAP2   | 11 |
| ARFGAP3   | 26286  | ARFGAP3   | 22 |
| ARFGEF1   | 10565  | ARFGEF1   | 8  |
| ARFGEF2   | 10564  | ARFGEF2   | 20 |
| ARFIP1    | 27236  | ARFIP1    | 4  |
| ARFIP2    | 23647  | ARFIP2    | 11 |
| ARG2      | 384    | ARG2      | 14 |
| ARG99     | 83857  | ARG99     | 12 |
| ARGFXP2   | 503640 | ARGFXP2   | 17 |
| ARGLU1    | 55082  | ARGLU1    | 13 |
| ARHGAP1   | 392    | ARHGAP1   | 11 |
| ARHGAP10  | 79658  | ARHGAP10  | 4  |
| ARHGAP11A | 9824   | ARHGAP11A | 15 |
| ARHGAP11B | 89839  | ARHGAP11B | 15 |
| ARHGAP12  | 94134  | ARHGAP12  | 10 |
| ARHGAP15  | 55843  | ARHGAP15  | 2  |
| ARHGAP17  | 55114  | ARHGAP17  | 16 |
| ARHGAP18  | 93663  | ARHGAP18  | 6  |
| ARHGAP19  | 84986  | ARHGAP19  | 10 |
| ARHGAP21  | 57584  | ARHGAP21  | 10 |
| ARHGAP23  | 57636  | ARHGAP23  | 17 |
| ARHGAP24  | 83478  | ARHGAP24  | 4  |
| ARHGAP25  | 9938   | ARHGAP25  | 2  |
| ARHGAP26  | 23092  | ARHGAP26  | 5  |
| ARHGAP27  | 201176 | ARHGAP27  | 17 |
| ARHGAP30  | 257106 | ARHGAP30  | 1  |
| ARHGAP4   | 393    | ARHGAP4   | X  |
| ARHGAP5   | 394    | ARHGAP5   | 14 |
| ARHGAP9   | 64333  | ARHGAP9   | 12 |
| ARHGDIA   | 396    | ARHGDIA   | 17 |
| ARHGDIB   | 397    | ARHGDIB   | 12 |
| ARHGEF1   | 9138   | ARHGEF1   | 19 |
| ARHGEF10  | 9639   | ARHGEF10  | 8  |
| ARHGEF11  | 9826   | ARHGEF11  | 1  |
| ARHGEF12  | 23365  | ARHGEF12  | 11 |
| ARHGEF16  | 27237  | ARHGEF16  | 1  |
| ARHGEF18  | 23370  | ARHGEF18  | 19 |
| ARHGEF19  | 128272 | ARHGEF19  | 1  |
| ARHGEF2   | 9181   | ARHGEF2   | 1  |
| ARHGEF3   | 50650  | ARHGEF3   | 3  |
| ARHGEF4   | 50649  | ARHGEF4   | 2  |
| ARHGEF6   | 9459   | ARHGEF6   | X  |

|         |        |         |    |
|---------|--------|---------|----|
| ARHGEF7 | 8874   | ARHGEF7 | 13 |
| ARHGEF9 | 23229  | ARHGEF9 | X  |
| ARID1B  | 57492  | ARID1B  | 6  |
| ARID2   | 196528 | ARID2   | 12 |
| ARID3A  | 1820   | ARID3A  | 19 |
| ARID3B  | 10620  | ARID3B  | 15 |
| ARID3C  | 138715 | ARID3C  | 9  |
| ARID4A  | 5926   | ARID4A  | 14 |
| ARID4B  | 51742  | ARID4B  | 1  |
| ARID5A  | 10865  | ARID5A  | 2  |
| ARID5B  | 84159  | ARID5B  | 10 |
| ARIH1   | 25820  | ARIH1   | 15 |
| ARL1    | 400    | ARL1    | 12 |
| ARL11   | 115761 | ARL11   | 13 |
| ARL13B  | 200894 | ARL13B  | 3  |
| ARL15   | 54622  | ARL15   | 5  |
| ARL16   | 339231 | ARL16   | 17 |
| ARL17B  | 641522 | ARL17B  | 17 |
| ARL17P1 | 51326  | ARL17P1 | 17 |
| ARL2    | 402    | ARL2    | 11 |
| ARL2BP  | 23568  | ARL2BP  | 16 |
| ARL3    | 403    | ARL3    | 10 |
| ARL4A   | 10124  | ARL4A   | 7  |
| ARL4C   | 10123  | ARL4C   | 2  |
| ARL5A   | 26225  | ARL5A   | 2  |
| ARL5B   | 221079 | ARL5B   | 10 |
| ARL5C   | 390790 | ARL5C   |    |
| ARL6    | 84100  | ARL6    | 3  |
| ARL6IP1 | 23204  | ARL6IP1 | 16 |
| ARL6IP4 | 51329  | ARL6IP4 | 12 |
| ARL6IP5 | 10550  | ARL6IP5 | 3  |
| ARL6IP6 | 151188 | ARL6IP6 | 2  |
| ARL8A   | 127829 | ARL8A   | 1  |
| ARL8B   | 55207  | ARL8B   | 3  |
| ARL9    | 132946 | ARL9    | 4  |
| ARMC10  | 83787  | ARMC10  | 7  |
| ARMC5   | 79798  | ARMC5   | 16 |
| ARMC6   | 93436  | ARMC6   | 19 |
| ARMC7   | 79637  | ARMC7   | 17 |
| ARMC8   | 25852  | ARMC8   | 3  |
| ARMCX1  | 51309  | ARMCX1  | X  |
| ARMCX2  | 9823   | ARMCX2  | X  |
| ARMCX3  | 51566  | ARMCX3  | X  |
| ARMCX6  | 54470  | ARMCX6  | X  |

|         |        |         |    |
|---------|--------|---------|----|
| ARMET   | 7873   | ARMET   | 3  |
| ARNT    | 405    | ARNT    | 1  |
| ARNT2   | 9915   | ARNT2   | 15 |
| ARNTL   | 406    | ARNTL   | 11 |
| ARP11   | 653857 | ARP11   | 7  |
| ARPC1A  | 10552  | ARPC1A  | 7  |
| ARPC1B  | 10095  | ARPC1B  | 7  |
| ARPC2   | 10109  | ARPC2   | 2  |
| ARPC3   | 10094  | ARPC3   | 12 |
| ARPC4   | 10093  | ARPC4   | 3  |
| ARPC5   | 10092  | ARPC5   | 1  |
| ARPC5L  | 81873  | ARPC5L  | 9  |
| ARPM1   | 84517  | ARPM1   | 3  |
| ARPP19  | 10776  | ARPP19  | 15 |
| ARPP-21 | 10777  | ARPP-21 | 3  |
| ARR3    | 407    | ARR3    | X  |
| ARRB2   | 409    | ARRB2   | 17 |
| ARRDC1  | 92714  | ARRDC1  | 9  |
| ARRDC2  | 27106  | ARRDC2  | 19 |
| ARRDC3  | 57561  | ARRDC3  | 5  |
| ARRDC4  | 91947  | ARRDC4  | 15 |
| ARRDC5  | 645432 | ARRDC5  | 19 |
| ARSA    | 410    | ARSA    | 22 |
| ARSB    | 411    | ARSB    | 5  |
| ARSK    | 153642 | ARSK    | 5  |
| ART3    | 419    | ART3    | 4  |
| ARV1    | 64801  | ARV1    | 1  |
| AS3MT   | 57412  | AS3MT   | 10 |
| ASAH1   | 427    | ASAH1   | 8  |
| ASAP1   | 50807  | ASAP1   | 8  |
| ASAP2   | 8853   | ASAP2   | 2  |
| ASAP3   | 55616  | ASAP3   | 1  |
| ASB1    | 51665  | ASB1    | 2  |
| ASB13   | 79754  | ASB13   | 10 |
| ASB16   | 92591  | ASB16   | 17 |
| ASB17   | 127247 | ASB17   | 1  |
| ASB2    | 51676  | ASB2    | 14 |
| ASB3    | 51130  | ASB3    | 2  |
| ASB6    | 140459 | ASB6    | 9  |
| ASB7    | 140460 | ASB7    | 15 |
| ASB8    | 140461 | ASB8    | 12 |
| ASCC1   | 51008  | ASCC1   | 10 |
| ASCL5   | 647219 | ASCL5   | 1  |
| ASF1A   | 25842  | ASF1A   | 6  |

|         |           |         |    |
|---------|-----------|---------|----|
| ASF1B   | 55723     | ASF1B   | 19 |
| ASFMR1  | 100126270 | ASFMR1  | X  |
| ASGR1   | 432       | ASGR1   | 17 |
| ASH1L   | 55870     | ASH1L   | 1  |
| ASH2L   | 9070      | ASH2L   |    |
| ASIP    | 434       | ASIP    | 20 |
| ASL     | 435       | ASL     | 7  |
| ASMT    | 438       | ASMT    | YX |
| ASMTL   | 8623      | ASMTL   |    |
| ASNS    | 440       | ASNS    | 7  |
| ASNSD1  | 54529     | ASNSD1  | 2  |
| ASPA    | 443       | ASPA    | 17 |
| ASPG    | 374569    | ASPG    | 14 |
| ASPH    | 444       | ASPH    | 8  |
| ASPHD2  | 57168     | ASPHD2  | 22 |
| ASPM    | 259266    | ASPM    | 1  |
| ASPRV1  | 151516    | ASPRV1  | 2  |
| ASPSCR1 | 79058     | ASPSCR1 | 17 |
| ASRGL1  | 80150     | ASRGL1  | 11 |
| ASS1    | 445       | ASS1    | 9  |
| ASTE1   | 28990     | ASTE1   | 3  |
| ASTN2   | 23245     | ASTN2   | 9  |
| ASXL1   | 171023    | ASXL1   | 20 |
| ASXL3   | 80816     | ASXL3   | 18 |
| ATAD1   | 84896     | ATAD1   | 10 |
| ATAD2   | 29028     | ATAD2   | 8  |
| ATAD2B  | 54454     | ATAD2B  | 2  |
| ATAD3A  | 55210     | ATAD3A  | 1  |
| ATAD3B  | 83858     | ATAD3B  | 1  |
| ATAD5   | 79915     | ATAD5   | 17 |
| ATE1    | 11101     | ATE1    | 10 |
| ATF1    | 466       | ATF1    | 12 |
| ATF2    | 1386      | ATF2    | 2  |
| ATF3    | 467       | ATF3    | 1  |
| ATF4    | 468       | ATF4    | 22 |
| ATF5    | 22809     | ATF5    | 19 |
| ATF6    | 22926     | ATF6    | 1  |
| ATF6B   | 1388      | ATF6B   | 6  |
| ATF7IP2 | 80063     | ATF7IP2 | 16 |
| ATG10   | 83734     | ATG10   | 5  |
| ATG12   | 9140      | ATG12   | 5  |
| ATG16L1 | 55054     | ATG16L1 | 2  |
| ATG16L2 | 89849     | ATG16L2 | 11 |
| ATG2A   | 23130     | ATG2A   | 11 |

|         |        |         |    |
|---------|--------|---------|----|
| ATG3    | 64422  | ATG3    | 3  |
| ATG4A   | 115201 | ATG4A   | X  |
| ATG4B   | 23192  | ATG4B   | 2  |
| ATG4C   | 84938  | ATG4C   | 1  |
| ATG4D   | 84971  | ATG4D   | 19 |
| ATG5    | 9474   | ATG5    | 6  |
| ATG7    | 10533  | ATG7    | 3  |
| ATG9A   | 79065  | ATG9A   | 2  |
| ATHL1   | 80162  | ATHL1   | 11 |
| ATIC    | 471    | ATIC    | 2  |
| ATL1    | 51062  | ATL1    | 14 |
| ATL2    | 64225  | ATL2    | 2  |
| ATL3    | 25923  | ATL3    | 11 |
| ATM     | 472    | ATM     | 11 |
| ATMIN   | 23300  | ATMIN   | 16 |
| ATN1    | 1822   | ATN1    | 12 |
| ATOH1   | 474    | ATOH1   | 4  |
| ATOH7   | 220202 | ATOH7   | 10 |
| ATOH8   | 84913  | ATOH8   | 2  |
| ATOX1   | 475    | ATOX1   | 5  |
| ATP10A  | 57194  | ATP10A  | 15 |
| ATP10B  | 23120  | ATP10B  | 5  |
| ATP11B  | 23200  | ATP11B  | 3  |
| ATP11C  | 286410 | ATP11C  | X  |
| ATP13A1 | 57130  | ATP13A1 | 19 |
| ATP13A2 | 23400  | ATP13A2 | 1  |
| ATP13A4 | 84239  | ATP13A4 | 3  |
| ATP1A1  | 476    | ATP1A1  | 1  |
| ATP1A3  | 478    | ATP1A3  | 19 |
| ATP1B1  | 481    | ATP1B1  | 1  |
| ATP1B2  | 482    | ATP1B2  | 17 |
| ATP1B3  | 483    | ATP1B3  |    |
| ATP2A2  | 488    | ATP2A2  | 12 |
| ATP2A3  | 489    | ATP2A3  | 17 |
| ATP2B1  | 490    | ATP2B1  | 12 |
| ATP2B4  | 493    | ATP2B4  | 1  |
| ATP2C2  | 9914   | ATP2C2  | 16 |
| ATP4A   | 495    | ATP4A   | 19 |
| ATP5A1  | 498    | ATP5A1  | 18 |
| ATP5B   | 506    | ATP5B   | 12 |
| ATP5C1  | 509    | ATP5C1  | 10 |
| ATP5D   | 513    | ATP5D   | 19 |
| ATP5E   | 514    | ATP5E   | 20 |
| ATP5EP2 | 432369 | ATP5EP2 | 13 |

|          |        |          |    |
|----------|--------|----------|----|
| ATP5F1   | 515    | ATP5F1   | 1  |
| ATP5G1   | 516    | ATP5G1   | 17 |
| ATP5G2   | 517    | ATP5G2   | 12 |
| ATP5G3   | 518    | ATP5G3   | 2  |
| ATP5H    | 10476  | ATP5H    | 17 |
| ATP5I    | 521    | ATP5I    | 4  |
| ATP5J    | 522    | ATP5J    | 21 |
| ATP5J2   | 9551   | ATP5J2   | 7  |
| ATP5L    | 10632  | ATP5L    | 11 |
| ATP5O    | 539    | ATP5O    | 21 |
| ATP5S    | 27109  | ATP5S    | 14 |
| ATP5SL   | 55101  | ATP5SL   | 19 |
| ATP6AP1  | 537    | ATP6AP1  | X  |
| ATP6AP1L | 92270  | ATP6AP1L | 5  |
| ATP6AP2  | 10159  | ATP6AP2  | X  |
| ATP6V0A1 | 535    | ATP6V0A1 | 17 |
| ATP6V0A2 | 23545  | ATP6V0A2 | 12 |
| ATP6V0B  | 533    | ATP6V0B  | 1  |
| ATP6V0C  | 527    | ATP6V0C  |    |
| ATP6V0D1 | 9114   | ATP6V0D1 | 16 |
| ATP6V0D2 | 245972 | ATP6V0D2 | 8  |
| ATP6V0E1 | 8992   | ATP6V0E1 | 5  |
| ATP6V0E2 | 155066 | ATP6V0E2 | 7  |
| ATP6V1A  | 523    | ATP6V1A  | 3  |
| ATP6V1B2 | 526    | ATP6V1B2 | 8  |
| ATP6V1C1 | 528    | ATP6V1C1 | 8  |
| ATP6V1C2 | 245973 | ATP6V1C2 | 2  |
| ATP6V1D  | 51382  | ATP6V1D  | 14 |
| ATP6V1E1 | 529    | ATP6V1E1 | 22 |
| ATP6V1E2 | 90423  | ATP6V1E2 | 2  |
| ATP6V1F  | 9296   | ATP6V1F  | 7  |
| ATP6V1G1 | 9550   | ATP6V1G1 | 9  |
| ATP6V1G2 | 534    | ATP6V1G2 | 6  |
| ATP6V1H  | 51606  | ATP6V1H  | 8  |
| ATP7A    | 538    | ATP7A    | X  |
| ATP7B    | 540    | ATP7B    | 13 |
| ATP8A1   | 10396  | ATP8A1   | 4  |
| ATP8B2   | 57198  | ATP8B2   | 1  |
| ATP9B    | 374868 | ATP9B    | 18 |
| ATPAF1   | 64756  | ATPAF1   | 1  |
| ATPAF2   | 91647  | ATPAF2   | 17 |
| ATPBD1B  | 54707  | ATPBD1B  | 1  |
| ATPBD3   | 90353  | ATPBD3   | 19 |
| ATPBD4   | 89978  | ATPBD4   | 15 |

|          |        |          |    |
|----------|--------|----------|----|
| ATPGD1   | 57571  | ATPGD1   | 11 |
| ATPIF1   | 93974  | ATPIF1   | 1  |
| ATRIP    | 84126  | ATRIP    | 3  |
| ATRN     | 8455   | ATRN     | 20 |
| ATXN1    | 6310   | ATXN1    | 6  |
| ATXN10   | 25814  | ATXN10   | 22 |
| ATXN1L   | 342371 | ATXN1L   | 16 |
| ATXN2    | 6311   | ATXN2    | 12 |
| ATXN2L   | 11273  | ATXN2L   | 16 |
| ATXN3    | 4287   | ATXN3    | 14 |
| ATXN7L2  | 127002 | ATXN7L2  | 1  |
| ATXN7L3  | 56970  | ATXN7L3  | 17 |
| AUH      | 549    | AUH      | 9  |
| AUP1     | 550    | AUP1     | 2  |
| AURKA    | 6790   | AURKA    | 20 |
| AURKAIP1 | 54998  | AURKAIP1 | 1  |
| AURKAPS1 | 6791   | AURKAPS1 | 1  |
| AURKB    | 9212   | AURKB    | 17 |
| AUTS2    | 26053  | AUTS2    | 7  |
| AVEN     | 57099  | AVEN     | 15 |
| AVIL     | 10677  | AVIL     | 12 |
| AVL9     | 23080  | AVL9     | 7  |
| AVP      | 551    | AVP      | 20 |
| AVPI1    | 60370  | AVPI1    | 10 |
| AXIN1    | 8312   | AXIN1    | 16 |
| AXIN2    | 8313   | AXIN2    | 17 |
| AXUD1    | 64651  | AXUD1    | 3  |
| AYP1P1   | 386608 | AYP1p1   |    |
| AZGP1    | 563    | AZGP1    | 7  |
| AZI1     | 22994  | AZI1     | 17 |
| AZI2     | 64343  | AZI2     | 3  |
| AZIN1    | 51582  | AZIN1    | 8  |
| B2M      | 567    | B2M      | 15 |
| B3GALNT1 | 8706   | B3GALNT1 | 3  |
| B3GALNT2 | 148789 | B3GALNT2 | 1  |
| B3GALT2  | 8707   | B3GALT2  | 1  |
| B3GALT6  | 126792 | B3GALT6  | 1  |
| B3GALTL  | 145173 | B3GALTL  | 13 |
| B3GAT3   | 26229  | B3GAT3   | 11 |
| B3GNT2   | 10678  | B3GNT2   | 2  |
| B3GNT3   | 10331  | B3GNT3   | 19 |
| B3GNT4   | 79369  | B3GNT4   | 12 |
| B3GNT6   | 11041  | B3GNT6   | 11 |
| B3GNT8   | 374907 | B3GNT8   | 19 |

|          |        |          |    |
|----------|--------|----------|----|
| B3GNTL1  | 146712 | B3GNTL1  | 17 |
| B4GALNT1 | 2583   | B4GALNT1 | 12 |
| B4GALNT3 | 283358 | B4GALNT3 | 12 |
| B4GALNT4 | 338707 | B4GALNT4 | 11 |
| B4GALT1  | 2683   | B4GALT1  | 9  |
| B4GALT2  | 8704   | B4GALT2  | 1  |
| B4GALT3  | 8703   | B4GALT3  | 1  |
| B4GALT4  | 8702   | B4GALT4  | 3  |
| B4GALT5  | 9334   | B4GALT5  | 20 |
| B4GALT6  | 9331   | B4GALT6  | 18 |
| B4GALT7  | 11285  | B4GALT7  | 5  |
| B9D1     | 27077  | B9D1     | 17 |
| B9D2     | 80776  | B9D2     | 19 |
| BACE2    | 25825  | BACE2    | 21 |
| BACH2    | 60468  | BACH2    | 6  |
| BAD      | 572    | BAD      | 11 |
| BAG1     | 573    | BAG1     | 9  |
| BAG2     | 9532   | BAG2     | 6  |
| BAG3     | 9531   | BAG3     | 10 |
| BAG5     | 9529   | BAG5     | 14 |
| BAGE2    | 85319  | BAGE2    |    |
| BAGE4    | 85317  | BAGE4    | 21 |
| BAI3     | 577    | BAI3     | 6  |
| BAIAP2   | 10458  | BAIAP2   | 17 |
| BAIAP2L1 | 55971  | BAIAP2L1 | 7  |
| BAIAP2L2 | 80115  | BAIAP2L2 | 22 |
| BAIAP3   | 8938   | BAIAP3   | 16 |
| BAMBI    | 25805  | BAMBI    | 10 |
| BANF1    | 8815   | BANF1    | 11 |
| BANF2    | 140836 | BANF2    | 20 |
| BANK1    | 55024  | BANK1    | 4  |
| BANP     | 54971  | BANP     | 16 |
| BAP1     | 8314   | BAP1     | 3  |
| BAPX1    | 579    | BAPX1    | 4  |
| BARD1    | 580    | BARD1    | 2  |
| BARX1    | 56033  | BARX1    | 9  |
| BASP1    | 10409  | BASP1    | 5  |
| BAT1     | 7919   | BAT1     | 6  |
| BAT2L    | 84726  | BAT2L    | 9  |
| BAT3     | 7917   | BAT3     | 6  |
| BAT4     | 7918   | BAT4     | 6  |
| BAT5     | 7920   | BAT5     | 6  |
| BATF     | 10538  | BATF     | 14 |
| BATF2    | 116071 | BATF2    | 11 |



|         |        |         |    |
|---------|--------|---------|----|
| BATF3   | 55509  | BATF3   | 1  |
| BAX     | 581    | BAX     | 19 |
| BAZ1A   | 11177  | BAZ1A   | 14 |
| BAZ1B   | 9031   | BAZ1B   | 7  |
| BAZ2B   | 29994  | BAZ2B   | 2  |
| BBC3    | 27113  | BBC3    | 19 |
| BBOX1   | 8424   | BBOX1   | 11 |
| BBS1    | 582    | BBS1    | 11 |
| BBS10   | 79738  | BBS10   | 12 |
| BBS12   | 166379 | BBS12   | 4  |
| BBS2    | 583    | BBS2    | 16 |
| BBS4    | 585    | BBS4    | 15 |
| BBS7    | 55212  | BBS7    | 4  |
| BBS9    | 27241  | BBS9    | 7  |
| BBX     | 56987  | BBX     | 3  |
| BCAM    | 4059   | BCAM    | 19 |
| BCAN    | 63827  | BCAN    | 1  |
| BCAP29  | 55973  | BCAP29  | 7  |
| BCAP31  | 10134  | BCAP31  | X  |
| BCAR1   | 9564   | BCAR1   | 16 |
| BCAR3   | 8412   | BCAR3   | 1  |
| BCAR4   | 400500 | BCAR4   | 16 |
| BCAS1   | 8537   | BCAS1   | 20 |
| BCAS4   | 55653  | BCAS4   | 20 |
| BCAT1   | 586    | BCAT1   | 12 |
| BCAT2   | 587    | BCAT2   | 19 |
| BCCIP   | 56647  | BCCIP   | 10 |
| BCDIN3D | 144233 | BCDIN3D | 12 |
| BCHE    | 590    | BCHE    | 3  |
| BCKDHA  | 593    | BCKDHA  | 19 |
| BCKDHB  | 594    | BCKDHB  | 6  |
| BCKDK   | 10295  | BCKDK   | 16 |
| BCL10   | 8915   | BCL10   | 1  |
| BCL11A  | 53335  | BCL11A  | 2  |
| BCL2    | 596    | BCL2    | 18 |
| BCL2A1  | 597    | BCL2A1  | 15 |
| BCL2L1  | 598    | BCL2L1  | 20 |
| BCL2L10 | 10017  | BCL2L10 | 15 |
| BCL2L11 | 10018  | BCL2L11 | 2  |
| BCL2L12 | 83596  | BCL2L12 | 19 |
| BCL2L13 | 23786  | BCL2L13 | 22 |
| BCL3    | 602    | BCL3    | 19 |
| BCL6    | 604    | BCL6    | 3  |
| BCL6B   | 255877 | BCL6B   | 17 |

|         |        |         |    |
|---------|--------|---------|----|
| BCL7A   | 605    | BCL7A   | 12 |
| BCL7B   | 9275   | BCL7B   | 7  |
| BCL7C   | 9274   | BCL7C   | 16 |
| BCL9    | 607    | BCL9    | 1  |
| BCL9L   | 283149 | BCL9L   | 11 |
| BCLAF1  | 9774   | BCLAF1  | 6  |
| BCOR    | 54880  | BCOR    | X  |
| BCORL1  | 63035  | BCORL1  | X  |
| BCR     | 613    | BCR     | 22 |
| BCS1L   | 617    | BCS1L   | 2  |
| BCYRN1  | 618    | BCYRN1  | 2  |
| BDKRB2  | 624    | BDKRB2  | 14 |
| BEAN    | 146227 | BEAN    | 16 |
| BECN1   | 8678   | BECN1   | 17 |
| BEGAIN  | 57596  | BEGAIN  | 14 |
| BEND3   | 57673  | BEND3   | 6  |
| BEND4   | 389206 | BEND4   | 4  |
| BEND5   | 79656  | BEND5   | 1  |
| BEND6   | 221336 | BEND6   | 6  |
| BEND7   | 222389 | BEND7   | 10 |
| BEST1   | 7439   | BEST1   | 11 |
| BEST3   | 144453 | BEST3   | 12 |
| BEST4   | 266675 | BEST4   | 1  |
| BET1    | 10282  | BET1    | 7  |
| BET1L   | 51272  | BET1L   | 11 |
| BEX2    | 84707  | BEX2    | X  |
| BEX4    | 56271  | BEX4    | X  |
| BEX5    | 340542 | BEX5    | X  |
| BEXL1   | 56271  | BEXL1   |    |
| BFAR    | 51283  | BFAR    | 16 |
| BFSP2   | 8419   | BFSP2   | 3  |
| BGLAP   | 632    | BGLAP   | 1  |
| BGN     | 633    | BGN     | X  |
| BHLHB2  | 8553   | BHLHB2  | 3  |
| BHLHB3  | 79365  | BHLHB3  | 12 |
| BHLHB9  | 80823  | BHLHB9  | X  |
| BHLHE22 | 27319  | BHLHE22 | 8  |
| BICC1   | 80114  | BICC1   | 10 |
| BICD1   | 636    | BICD1   | 12 |
| BICD2   | 23299  | BICD2   | 9  |
| BID     | 637    | BID     | 22 |
| BIK     | 638    | BIK     | 22 |
| BIN1    | 274    | BIN1    | 2  |
| BIN3    | 55909  | BIN3    | 8  |

|         |        |         |    |
|---------|--------|---------|----|
| BIRC2   | 329    | BIRC2   | 11 |
| BIRC3   | 330    | BIRC3   | 11 |
| BIRC5   | 332    | BIRC5   | 17 |
| BIVM    | 54841  | BIVM    | 13 |
| BLCAP   | 10904  | BLCAP   | 20 |
| BLK     | 640    | BLK     | 8  |
| BLM     | 641    | BLM     | 15 |
| BLMH    | 642    | BLMH    | 17 |
| BLNK    | 29760  | BLNK    | 10 |
| BLOC1S1 | 2647   | BLOC1S1 | 12 |
| BLOC1S2 | 282991 | BLOC1S2 | 10 |
| BLR1    | 643    | BLR1    | 11 |
| BLVRA   | 644    | BLVRA   | 7  |
| BLVRB   | 645    | BLVRB   |    |
| BLZF1   | 8548   | BLZF1   | 1  |
| BMF     | 90427  | BMF     | 15 |
| BMI1    | 648    | BMI1    | 10 |
| BMP2K   | 55589  | BMP2K   | 4  |
| BMP3    | 651    | BMP3    | 4  |
| BMP4    | 652    | BMP4    | 14 |
| BMP5    | 653    | BMP5    | 6  |
| BMP6    | 654    | BMP6    | 6  |
| BMP7    | 655    | BMP7    | 20 |
| BMP8B   | 656    | BMP8B   | 1  |
| BMPR1A  | 657    | BMPR1A  | 10 |
| BMPR2   | 659    | BMPR2   | 2  |
| BMS1P5  | 399761 | BMS1P5  | 10 |
| BMX     | 660    | BMX     | X  |
| BNIP1   | 662    | BNIP1   | 5  |
| BNIP2   | 663    | BNIP2   | 15 |
| BNIP3   | 664    | BNIP3   | 10 |
| BNIP3L  | 665    | BNIP3L  | 8  |
| BOLA2   | 552900 | BOLA2   | 16 |
| BOLA3   | 388962 | BOLA3   | 2  |
| BOP1    | 23246  | BOP1    | 8  |
| BP75    | 23629  | BP75    | 6  |
| BPGM    | 669    | BPGM    | 7  |
| BPHL    | 670    | BPHL    | 6  |
| BPIL1   | 80341  | BPIL1   | 20 |
| BPNT1   | 10380  | BPNT1   | 1  |
| BPY2B   | 442867 | BPY2B   | Y  |
| BRAF    | 673    | BRAF    | 7  |
| BRCA1   | 672    | BRCA1   | 17 |
| BRCA2   | 675    | BRCA2   | 13 |

|         |        |         |    |
|---------|--------|---------|----|
| BRCC3   | 79184  | BRCC3   | X  |
| BRD1    | 23774  | BRD1    | 22 |
| BRD2    | 6046   | BRD2    | 6  |
| BRD3    | 8019   | BRD3    | 9  |
| BRD4    | 23476  | BRD4    | 19 |
| BRD7    | 29117  | BRD7    | 16 |
| BRD7P2  | 647076 | BRD7P2  |    |
| BRD8    | 10902  | BRD8    | 5  |
| BRD9    | 65980  | BRD9    | 5  |
| BRDG1   | 26228  | BRDG1   | 4  |
| BRE     | 9577   | BRE     | 2  |
| BRF2    | 55290  | BRF2    | 8  |
| BRI3    | 25798  | BRI3    | 7  |
| BRI3BP  | 140707 | BRI3BP  |    |
| BRI3P1  | 730010 | BRI3P1  |    |
| BRIX1   | 55299  | BRIX1   | 5  |
| BRMS1   | 25855  | BRMS1   | 11 |
| BRMS1L  | 84312  | BRMS1L  | 14 |
| BRP44   | 25874  | BRP44   | 1  |
| BRP44L  | 51660  | BRP44L  | 6  |
| BRPF1   | 7862   | BRPF1   | 3  |
| BRPF3   | 27154  | BRPF3   | 6  |
| BRSK1   | 84446  | BRSK1   | 19 |
| BRUNOL6 | 60677  | BRUNOL6 | 15 |
| BRWD1   | 54014  | BRWD1   | 21 |
| BRWD2   | 55717  | BRWD2   | 10 |
| BRWD3   | 254065 | BRWD3   | X  |
| BSCL2   | 26580  | BSCL2   | 11 |
| BSDC1   | 55108  | BSDC1   | 1  |
| BSG     | 682    | BSG     | 19 |
| BSN     | 8927   | BSN     | 3  |
| BSND    | 7809   | BSND    | 1  |
| BSPRY   | 54836  | BSPRY   | 9  |
| BST2    | 684    | BST2    | 19 |
| BTAF1   | 9044   | BTAF1   | 10 |
| BTBD10  | 84280  | BTBD10  | 11 |
| BTBD12  | 84464  | BTBD12  | 16 |
| BTBD2   | 55643  | BTBD2   | 19 |
| BTBD3   | 22903  | BTBD3   | 20 |
| BTBD6   | 90135  | BTBD6   | 14 |
| BTBD9   | 114781 | BTBD9   | 6  |
| BTD     | 686    | BTD     | 3  |
| BTF3    | 689    | BTF3    | 5  |
| BTF3L4  | 91408  | BTF3L4  | 1  |

|           |        |           |    |
|-----------|--------|-----------|----|
| BTG1      | 694    | BTG1      | 12 |
| BTG2      | 7832   | BTG2      | 1  |
| BTG3      | 10950  | BTG3      | 21 |
| BTK       | 695    | BTK       | X  |
| BTLA      | 151888 | BTLA      | 3  |
| BTN1A1    | 696    | BTN1A1    | 6  |
| BTN2A1    | 11120  | BTN2A1    | 6  |
| BTN2A2    | 10385  | BTN2A2    | 6  |
| BTN2A3    | 54718  | BTN2A3    | 6  |
| BTN3A1    | 11119  | BTN3A1    | 6  |
| BTN3A2    | 11118  | BTN3A2    | 6  |
| BTN3A3    | 10384  | BTN3A3    | 6  |
| BTNL9     | 153579 | BTNL9     | 5  |
| BTRC      | 8945   | BTRC      | 10 |
| BUB1      | 699    | BUB1      | 2  |
| BUB1B     | 701    | BUB1B     | 15 |
| BUB3      | 9184   | BUB3      | 10 |
| BUD13     | 84811  | BUD13     | 11 |
| BUD31     | 8896   | BUD31     | 7  |
| BYSL      | 705    | BYSL      | 6  |
| BZRAP1    | 9256   | BZRAP1    | 17 |
| BZRPL1    | 222642 | BZRPL1    | 6  |
| BZW1      | 9689   | BZW1      |    |
| BZW2      | 28969  | BZW2      | 7  |
| C10ORF10  | 11067  | C10orf10  | 10 |
| C10ORF104 | 119504 | C10orf104 | 10 |
| C10ORF108 | 414235 | C10orf108 | 10 |
| C10ORF112 | 340895 | C10orf112 |    |
| C10ORF114 | 399726 | C10orf114 | 10 |
| C10ORF115 | 387642 | C10orf115 |    |
| C10ORF118 | 55088  | C10orf118 | 10 |
| C10ORF119 | 79892  | C10orf119 | 10 |
| C10ORF12  | 26148  | C10orf12  | 10 |
| C10ORF125 | 282969 | C10orf125 | 10 |
| C10ORF128 | 170371 | C10orf128 | 10 |
| C10ORF136 | 414260 | C10orf136 | 10 |
| C10ORF137 | 26098  | C10orf137 | 10 |
| C10ORF140 | 387640 | C10orf140 | 10 |
| C10ORF18  | 54906  | C10orf18  | 10 |
| C10ORF2   | 56652  | C10orf2   | 10 |
| C10ORF26  | 54838  | C10orf26  | 10 |
| C10ORF28  | 27291  | C10orf28  | 10 |
| C10ORF32  | 119032 | C10orf32  | 10 |
| C10ORF33  | 84795  | C10orf33  | 10 |

|          |        |          |    |
|----------|--------|----------|----|
| C10ORF47 | 254427 | C10orf47 | 10 |
| C10ORF54 | 64115  | C10orf54 | 10 |
| C10ORF57 | 80195  | C10orf57 | 10 |
| C10ORF58 | 84293  | C10orf58 | 10 |
| C10ORF59 | 55328  | C10orf59 | 10 |
| C10ORF6  | 55719  | C10orf6  | 10 |
| C10ORF61 | 26123  | C10orf61 | 10 |
| C10ORF64 | 159491 | C10orf64 |    |
| C10ORF65 | 112817 | C10orf65 | 10 |
| C10ORF67 | 256815 | C10orf67 | 10 |
| C10ORF73 | 170370 | C10orf73 | 10 |
| C10ORF75 | 90271  | C10orf75 | 10 |
| C10ORF78 | 119392 | C10orf78 | 10 |
| C10ORF84 | 63877  | C10orf84 | 10 |
| C10ORF88 | 80007  | C10orf88 |    |
| C10ORF93 | 255352 | C10orf93 |    |
| C11ORF1  | 64776  | C11orf1  | 11 |
| C11ORF10 | 746    | C11orf10 | 11 |
| C11ORF17 | 56672  | C11orf17 | 11 |
| C11ORF2  | 738    | C11orf2  | 11 |
| C11ORF24 | 53838  | C11orf24 | 11 |
| C11ORF30 | 56946  | C11orf30 | 11 |
| C11ORF31 | 280636 | C11orf31 | 11 |
| C11ORF35 | 256329 | C11orf35 | 11 |
| C11ORF39 | 399980 | C11orf39 | 11 |
| C11ORF41 | 25758  | C11orf41 | 11 |
| C11ORF46 | 120534 | C11orf46 | 11 |
| C11ORF47 | 283294 | C11orf47 | 11 |
| C11ORF48 | 79081  | C11orf48 | 11 |
| C11ORF49 | 79096  | C11orf49 | 11 |
| C11ORF51 | 25906  | C11orf51 | 11 |
| C11ORF54 | 28970  | C11orf54 | 11 |
| C11ORF57 | 55216  | C11orf57 | 11 |
| C11ORF58 | 10944  | C11orf58 | 11 |
| C11ORF59 | 55004  | C11orf59 | 11 |
| C11ORF60 | 56912  | C11orf60 | 11 |
| C11ORF61 | 79684  | C11orf61 | 11 |
| C11ORF63 | 79864  | C11orf63 | 11 |
| C11ORF65 | 160140 | C11orf65 | 11 |
| C11ORF67 | 28971  | C11orf67 | 11 |
| C11ORF68 | 83638  | C11orf68 | 11 |
| C11ORF70 | 85016  | C11orf70 | 11 |
| C11ORF71 | 54494  | C11orf71 | 11 |
| C11ORF73 | 51501  | C11orf73 | 11 |

|          |        |          |    |
|----------|--------|----------|----|
| C11ORF74 | 119710 | C11orf74 | 11 |
| C11ORF75 | 56935  | C11orf75 | 11 |
| C11ORF80 | 79703  | C11orf80 | 11 |
| C11ORF82 | 220042 | C11orf82 | 11 |
| C11ORF83 | 790955 | C11orf83 | 11 |
| C11ORF84 | 144097 | C11orf84 | 11 |
| C11ORF85 | 283129 | C11orf85 | 11 |
| C11ORF86 | 254439 | C11orf86 | 11 |
| C11ORF88 | 399949 | C11orf88 | 11 |
| C12ORF10 | 60314  | C12orf10 | 12 |
| C12ORF23 | 90488  | C12orf23 | 12 |
| C12ORF24 | 29902  | C12orf24 | 12 |
| C12ORF26 | 84190  | C12orf26 | 12 |
| C12ORF28 | 196446 | C12orf28 | 12 |
| C12ORF29 | 91298  | C12orf29 | 12 |
| C12ORF30 | 80018  | C12orf30 | 12 |
| C12ORF31 | 84298  | C12orf31 | 12 |
| C12ORF32 | 83695  | C12orf32 | 12 |
| C12ORF34 | 84915  | C12orf34 | 12 |
| C12ORF35 | 55196  | C12orf35 | 12 |
| C12ORF36 | 283422 | C12orf36 | 12 |
| C12ORF37 | 439916 | C12orf37 | 12 |
| C12ORF4  | 57102  | C12orf4  | 12 |
| C12ORF41 | 54934  | C12orf41 | 12 |
| C12ORF42 | 374470 | C12orf42 | 12 |
| C12ORF43 | 64897  | C12orf43 | 12 |
| C12ORF44 | 60673  | C12orf44 | 12 |
| C12ORF45 | 121053 | C12orf45 | 12 |
| C12ORF47 | 51275  | C12orf47 |    |
| C12ORF48 | 55010  | C12orf48 | 12 |
| C12ORF49 | 79794  | C12orf49 | 12 |
| C12ORF5  | 57103  | C12orf5  | 12 |
| C12ORF51 | 283450 | C12orf51 | 12 |
| C12ORF52 | 84934  | C12orf52 | 12 |
| C12ORF54 | 121273 | C12orf54 | 12 |
| C12ORF57 | 113246 | C12orf57 | 12 |
| C12ORF59 | 120939 | C12orf59 | 12 |
| C12ORF60 | 144608 | C12orf60 | 12 |
| C12ORF62 | 84987  | C12orf62 | 12 |
| C12ORF65 | 91574  | C12orf65 | 12 |
| C12ORF66 | 144577 | C12orf66 | 12 |
| C12ORF67 | 144360 | C12orf67 | 12 |
| C12ORF68 | 387856 | C12orf68 | 12 |
| C12ORF69 | 440087 | C12orf69 | 12 |

|           |        |           |    |
|-----------|--------|-----------|----|
| C12ORF71  | 728858 | C12orf71  | 12 |
| C12ORF72  | 254013 | C12orf72  | 12 |
| C12ORF73  | 728568 | C12orf73  | 12 |
| C12ORF76  | 400073 | C12orf76  | 12 |
| C12ORF77  | 196415 | C12orf77  | 12 |
| C13ORF1   | 57213  | C13orf1   | 13 |
| C13ORF15  | 28984  | C13orf15  | 13 |
| C13ORF18  | 80183  | C13orf18  | 13 |
| C13ORF23  | 80209  | C13orf23  | 13 |
| C13ORF25  | 407975 | C13orf25  | 13 |
| C13ORF3   | 221150 | C13orf3   | 13 |
| C13ORF31  | 144811 | C13orf31  | 13 |
| C13ORF34  | 79866  | C13orf34  | 13 |
| C13ORF37  | 440145 | C13orf37  | 13 |
| C14ORF100 | 51528  | C14orf100 | 14 |
| C14ORF101 | 54916  | C14orf101 | 14 |
| C14ORF102 | 55051  | C14orf102 | 14 |
| C14ORF104 | 55172  | C14orf104 | 14 |
| C14ORF106 | 55320  | C14orf106 | 14 |
| C14ORF109 | 26175  | C14orf109 | 14 |
| C14ORF112 | 51241  | C14orf112 | 14 |
| C14ORF118 | 55668  | C14orf118 | 14 |
| C14ORF121 | 90668  | C14orf121 | 14 |
| C14ORF126 | 112487 | C14orf126 | 14 |
| C14ORF128 | 84837  | C14orf128 |    |
| C14ORF129 | 51527  | C14orf129 | 14 |
| C14ORF131 | 55778  | C14orf131 | 14 |
| C14ORF132 | 56967  | C14orf132 | 14 |
| C14ORF133 | 63894  | C14orf133 | 14 |
| C14ORF135 | 64430  | C14orf135 | 14 |
| C14ORF138 | 79609  | C14orf138 | 14 |
| C14ORF143 | 90141  | C14orf143 | 14 |
| C14ORF145 | 145508 | C14orf145 | 14 |
| C14ORF147 | 171546 | C14orf147 | 14 |
| C14ORF149 | 112849 | C14orf149 | 14 |
| C14ORF153 | 84334  | C14orf153 | 14 |
| C14ORF156 | 81892  | C14orf156 | 14 |
| C14ORF159 | 80017  | C14orf159 |    |
| C14ORF162 | 56936  | C14orf162 |    |
| C14ORF166 | 51637  | C14orf166 | 14 |
| C14ORF167 | 55449  | C14orf167 | 14 |
| C14ORF169 | 79697  | C14orf169 | 14 |
| C14ORF173 | 64423  | C14orf173 | 14 |
| C14ORF174 | 161394 | C14orf174 | 14 |



|           |        |           |    |
|-----------|--------|-----------|----|
| C14ORF179 | 112752 | C14orf179 | 14 |
| C14ORF180 | 400258 | C14orf180 | 14 |
| C14ORF181 | 400223 | C14orf181 | 14 |
| C14ORF184 | 650662 | C14orf184 | 14 |
| C14ORF19  | 280655 | C14orf19  | 14 |
| C14ORF2   | 9556   | C14orf2   | 14 |
| C14ORF21  | 161424 | C14orf21  | 14 |
| C14ORF23  | 387978 | C14orf23  | 14 |
| C14ORF28  | 122525 | C14orf28  | 14 |
| C14ORF32  | 93487  | C14orf32  | 14 |
| C14ORF37  | 145407 | C14orf37  | 14 |
| C14ORF38  | 729665 | C14orf38  |    |
| C14ORF4   | 64207  | C14orf4   | 14 |
| C14ORF43  | 91748  | C14orf43  | 14 |
| C14ORF45  | 80127  | C14orf45  | 14 |
| C14ORF68  | 283600 | C14orf68  | 14 |
| C14ORF72  | 145200 | C14orf72  |    |
| C14ORF78  | 113146 | C14orf78  |    |
| C14ORF79  | 122616 | C14orf79  | 14 |
| C14ORF80  | 283643 | C14orf80  | 14 |
| C14ORF82  | 145438 | C14orf82  |    |
| C14ORF85  | 319085 | C14orf85  | 14 |
| C14ORF93  | 60686  | C14orf93  | 14 |
| C15ORF17  | 57184  | C15orf17  | 15 |
| C15ORF21  | 283651 | C15orf21  | 15 |
| C15ORF23  | 90417  | C15orf23  | 15 |
| C15ORF24  | 56851  | C15orf24  | 15 |
| C15ORF26  | 161502 | C15orf26  | 15 |
| C15ORF27  | 123591 | C15orf27  | 15 |
| C15ORF28  | 80035  | C15orf28  |    |
| C15ORF29  | 79768  | C15orf29  | 15 |
| C15ORF33  | 196951 | C15orf33  | 15 |
| C15ORF39  | 56905  | C15orf39  | 15 |
| C15ORF40  | 123207 | C15orf40  | 15 |
| C15ORF41  | 84529  | C15orf41  | 15 |
| C15ORF42  | 90381  | C15orf42  | 15 |
| C15ORF44  | 81556  | C15orf44  |    |
| C15ORF48  | 84419  | C15orf48  | 15 |
| C15ORF52  | 388115 | C15orf52  | 15 |
| C15ORF53  | 400359 | C15orf53  | 15 |
| C15ORF57  | 90416  | C15orf57  | 15 |
| C15ORF63  | 25764  | C15orf63  | 15 |
| C16ORF13  | 84326  | C16orf13  | 16 |
| C16ORF33  | 79622  | C16orf33  | 16 |

|           |           |           |    |
|-----------|-----------|-----------|----|
| C16ORF35  | 8131      | C16orf35  | 16 |
| C16ORF38  | 390667    | C16orf38  | 16 |
| C16ORF42  | 115939    | C16orf42  | 16 |
| C16ORF46  | 123775    | C16orf46  | 16 |
| C16ORF48  | 84080     | C16orf48  | 16 |
| C16ORF5   | 29965     | C16orf5   | 16 |
| C16ORF50  | 84229     | C16orf50  |    |
| C16ORF52  | 146174    | C16orf52  | 16 |
| C16ORF53  | 79447     | C16orf53  | 16 |
| C16ORF54  | 283897    | C16orf54  | 16 |
| C16ORF56  | 80152     | C16orf56  | 16 |
| C16ORF57  | 79650     | C16orf57  | 16 |
| C16ORF58  | 64755     | C16orf58  | 16 |
| C16ORF59  | 80178     | C16orf59  | 16 |
| C16ORF61  | 56942     | C16orf61  | 16 |
| C16ORF62  | 57020     | C16orf62  | 16 |
| C16ORF63  | 123811    | C16orf63  | 16 |
| C16ORF68  | 79091     | C16orf68  | 16 |
| C16ORF69  | 255919    | C16orf69  | 16 |
| C16ORF7   | 9605      | C16orf7   | 16 |
| C16ORF70  | 80262     | C16orf70  | 16 |
| C16ORF72  | 29035     | C16orf72  | 16 |
| C16ORF73  | 254528    | C16orf73  | 16 |
| C16ORF74  | 404550    | C16orf74  | 16 |
| C16ORF75  | 116028    | C16orf75  | 16 |
| C16ORF79  | 283870    | C16orf79  | 16 |
| C16ORF80  | 29105     | C16orf80  | 16 |
| C16ORF85  | 400555    | C16orf85  | 16 |
| C16ORF86  | 388284    | C16orf86  | 16 |
| C16ORF87  | 388272    | C16orf87  | 16 |
| C16ORF88  | 400506    | C16orf88  | 16 |
| C16ORF91  | 283951    | C16orf91  | 16 |
| C16ORF93  | 90835     | C16orf93  | 16 |
| C17ORF100 | 388327    | C17orf100 | 17 |
| C17ORF101 | 79701     | C17orf101 | 17 |
| C17ORF106 | 100134934 | C17orf106 | 17 |
| C17ORF108 | 201229    | C17orf108 | 17 |
| C17ORF28  | 283987    | C17orf28  | 17 |
| C17ORF37  | 84299     | C17orf37  | 17 |
| C17ORF39  | 79018     | C17orf39  | 17 |
| C17ORF41  | 79915     | C17orf41  |    |
| C17ORF42  | 79736     | C17orf42  | 17 |
| C17ORF44  | 284029    | C17orf44  | 17 |
| C17ORF45  | 125144    | C17orf45  | 17 |

|          |           |          |    |
|----------|-----------|----------|----|
| C17ORF48 | 56985     | C17orf48 | 17 |
| C17ORF49 | 124944    | C17orf49 | 17 |
| C17ORF53 | 78995     | C17orf53 | 17 |
| C17ORF56 | 146705    | C17orf56 | 17 |
| C17ORF58 | 284018    | C17orf58 | 17 |
| C17ORF59 | 54785     | C17orf59 | 17 |
| C17ORF60 | 284021    | C17orf60 | 17 |
| C17ORF61 | 254863    | C17orf61 | 17 |
| C17ORF62 | 79415     | C17orf62 | 17 |
| C17ORF63 | 55731     | C17orf63 | 17 |
| C17ORF64 | 124773    | C17orf64 | 17 |
| C17ORF65 | 339201    | C17orf65 | 17 |
| C17ORF67 | 339210    | C17orf67 | 17 |
| C17ORF68 | 80169     | C17orf68 |    |
| C17ORF70 | 80233     | C17orf70 | 17 |
| C17ORF71 | 55181     | C17orf71 | 17 |
| C17ORF74 | 201243    | C17orf74 | 17 |
| C17ORF79 | 55352     | C17orf79 | 17 |
| C17ORF80 | 55028     | C17orf80 | 17 |
| C17ORF81 | 23587     | C17orf81 | 17 |
| C17ORF82 | 388407    | C17orf82 | 17 |
| C17ORF85 | 55421     | C17orf85 | 17 |
| C17ORF86 | 654434    | C17orf86 | 17 |
| C17ORF87 | 388325    | C17orf87 | 17 |
| C17ORF88 | 23591     | C17orf88 |    |
| C17ORF89 | 284184    | C17orf89 | 17 |
| C17ORF90 | 339229    | C17orf90 | 17 |
| C17ORF91 | 84981     | C17orf91 | 17 |
| C17ORF95 | 124512    | C17orf95 | 17 |
| C17ORF96 | 100170841 | C17orf96 | 17 |
| C17ORF97 | 400566    | C17orf97 | 17 |
| C18ORF1  | 753       | C18orf1  | 18 |
| C18ORF18 | 147525    | C18orf18 |    |
| C18ORF19 | 125228    | C18orf19 | 18 |
| C18ORF20 | 221241    | C18orf20 | 18 |
| C18ORF21 | 83608     | C18orf21 | 18 |
| C18ORF22 | 79863     | C18orf22 | 18 |
| C18ORF25 | 147339    | C18orf25 | 18 |
| C18ORF26 | 284254    | C18orf26 | 18 |
| C18ORF32 | 497661    | C18orf32 | 18 |
| C18ORF45 | 85019     | C18orf45 | 18 |
| C18ORF54 | 162681    | C18orf54 | 18 |
| C18ORF55 | 29090     | C18orf55 | 18 |
| C18ORF56 | 494514    | C18orf56 | 18 |

|            |           |            |    |
|------------|-----------|------------|----|
| C18ORF58   | 284222    | C18orf58   | 18 |
| C18ORF8    | 29919     | C18orf8    | 18 |
| C19ORF10   | 56005     | C19orf10   | 19 |
| C19ORF12   | 83636     | C19orf12   | 19 |
| C19ORF2    | 8725      | C19orf2    | 19 |
| C19ORF20   | 91978     | C19orf20   | 19 |
| C19ORF22   | 91300     | C19orf22   | 19 |
| C19ORF23   | 148046    | C19orf23   | 19 |
| C19ORF24   | 55009     | C19orf24   | 19 |
| C19ORF25   | 148223    | C19orf25   | 19 |
| C19ORF26   | 255057    | C19orf26   | 19 |
| C19ORF28   | 126321    | C19orf28   | 19 |
| C19ORF29   | 58509     | C19orf29   | 19 |
| C19ORF29OS | 404665    | C19orf29OS |    |
| C19ORF30   | 284424    | C19orf30   | 19 |
| C19ORF31   | 404664    | C19orf31   | 19 |
| C19ORF36   | 113177    | C19orf36   | 19 |
| C19ORF39   | 126074    | C19orf39   | 19 |
| C19ORF4    | 25789     | C19orf4    | 19 |
| C19ORF40   | 91442     | C19orf40   | 19 |
| C19ORF42   | 79086     | C19orf42   | 19 |
| C19ORF43   | 79002     | C19orf43   | 19 |
| C19ORF44   | 84167     | C19orf44   | 19 |
| C19ORF45   | 374877    | C19orf45   | 19 |
| C19ORF47   | 126526    | C19orf47   | 19 |
| C19ORF48   | 84798     | C19orf48   | 19 |
| C19ORF50   | 79036     | C19orf50   | 19 |
| C19ORF51   | 352909    | C19orf51   | 19 |
| C19ORF52   | 90580     | C19orf52   | 19 |
| C19ORF53   | 28974     | C19orf53   | 19 |
| C19ORF54   | 284325    | C19orf54   | 19 |
| C19ORF55   | 148137    | C19orf55   | 19 |
| C19ORF56   | 51398     | C19orf56   | 19 |
| C19ORF59   | 199675    | C19orf59   | 19 |
| C19ORF6    | 91304     | C19orf6    | 19 |
| C19ORF60   | 55049     | C19orf60   | 19 |
| C19ORF61   | 56006     | C19orf61   | 19 |
| C19ORF62   | 29086     | C19orf62   | 19 |
| C19ORF64   | 100113377 | C19orf64   | 19 |
| C19ORF66   | 55337     | C19orf66   | 19 |
| C19ORF70   | 125988    | C19orf70   | 19 |
| C19ORF71   | 100128569 | C19orf71   | 19 |
| C19ORF73   | 55150     | C19orf73   | 19 |
| C1GALT1    | 56913     | C1GALT1    | 7  |

|           |        |           |   |
|-----------|--------|-----------|---|
| C1GALT1C1 | 29071  | C1GALT1C1 | X |
| C1ORF100  | 200159 | C1orf100  | 1 |
| C1ORF102  | 127700 | C1orf102  | 1 |
| C1ORF103  | 55791  | C1orf103  | 1 |
| C1ORF106  | 55765  | C1orf106  | 1 |
| C1ORF107  | 27042  | C1orf107  | 1 |
| C1ORF109  | 54955  | C1orf109  | 1 |
| C1ORF112  | 55732  | C1orf112  | 1 |
| C1ORF120  | 388719 | C1orf120  | 1 |
| C1ORF122  | 127687 | C1orf122  | 1 |
| C1ORF123  | 54987  | C1orf123  | 1 |
| C1ORF124  | 83932  | C1orf124  | 1 |
| C1ORF126  | 200197 | C1orf126  | 1 |
| C1ORF127  | 148345 | C1orf127  | 1 |
| C1ORF128  | 57095  | C1orf128  | 1 |
| C1ORF131  | 128061 | C1orf131  | 1 |
| C1ORF132  | 388732 | C1orf132  | 1 |
| C1ORF133  | 574036 | C1orf133  | 1 |
| C1ORF135  | 79000  | C1orf135  | 1 |
| C1ORF144  | 26099  | C1orf144  | 1 |
| C1ORF149  | 64769  | C1orf149  | 1 |
| C1ORF151  | 440574 | C1orf151  | 1 |
| C1ORF156  | 92342  | C1orf156  | 1 |
| C1ORF159  | 54991  | C1orf159  | 1 |
| C1ORF161  | 126868 | C1orf161  | 1 |
| C1ORF162  | 128346 | C1orf162  | 1 |
| C1ORF163  | 65260  | C1orf163  | 1 |
| C1ORF165  | 79656  | C1orf165  | 1 |
| C1ORF166  | 79594  | C1orf166  | 1 |
| C1ORF173  | 127254 | C1orf173  | 1 |
| C1ORF174  | 339448 | C1orf174  | 1 |
| C1ORF182  | 128229 | C1orf182  | 1 |
| C1ORF186  | 440712 | C1orf186  | 1 |
| C1ORF187  | 374946 | C1orf187  | 1 |
| C1ORF188  | 148646 | C1orf188  | 1 |
| C1ORF19   | 116461 | C1orf19   | 1 |
| C1ORF192  | 257177 | C1orf192  | 1 |
| C1ORF198  | 84886  | C1orf198  | 1 |
| C1ORF200  | 644997 | C1orf200  | 1 |
| C1ORF203  | 84852  | C1orf203  |   |
| C1ORF21   | 81563  | C1orf21   | 1 |
| C1ORF210  | 149466 | C1orf210  | 1 |
| C1ORF212  | 113444 | C1orf212  | 1 |
| C1ORF213  | 148898 | C1orf213  | 1 |

|          |        |          |    |
|----------|--------|----------|----|
| C1ORF216 | 127703 | C1orf216 | 1  |
| C1ORF218 | 54530  | C1orf218 | 1  |
| C1ORF220 | 400798 | C1orf220 | 1  |
| C1ORF24  | 116496 | C1orf24  | 1  |
| C1ORF25  | 81627  | C1orf25  | 1  |
| C1ORF26  | 54823  | C1orf26  |    |
| C1ORF31  | 388753 | C1orf31  | 1  |
| C1ORF35  | 79169  | C1orf35  | 1  |
| C1ORF38  | 9473   | C1orf38  | 1  |
| C1ORF41  | 51668  | C1orf41  | 1  |
| C1ORF43  | 25912  | C1orf43  | 1  |
| C1ORF49  | 84066  | C1orf49  | 1  |
| C1ORF50  | 79078  | C1orf50  | 1  |
| C1ORF52  | 148423 | C1orf52  | 1  |
| C1ORF53  | 388722 | C1orf53  | 1  |
| C1ORF54  | 79630  | C1orf54  | 1  |
| C1ORF55  | 163859 | C1orf55  | 1  |
| C1ORF56  | 54964  | C1orf56  | 1  |
| C1ORF57  | 84284  | C1orf57  | 1  |
| C1ORF58  | 148362 | C1orf58  | 1  |
| C1ORF59  | 113802 | C1orf59  | 1  |
| C1ORF61  | 10485  | C1orf61  | 1  |
| C1ORF63  | 57035  | C1orf63  | 1  |
| C1ORF65  | 164127 | C1orf65  | 1  |
| C1ORF66  | 51093  | C1orf66  | 1  |
| C1ORF69  | 200205 | C1orf69  | 1  |
| C1ORF74  | 148304 | C1orf74  | 1  |
| C1ORF77  | 26097  | C1orf77  | 1  |
| C1ORF83  | 127428 | C1orf83  | 1  |
| C1ORF85  | 112770 | C1orf85  | 1  |
| C1ORF86  | 199990 | C1orf86  | 1  |
| C1ORF9   | 51430  | C1orf9   | 1  |
| C1ORF91  | 56063  | C1orf91  | 1  |
| C1ORF93  | 127281 | C1orf93  | 1  |
| C1ORF97  | 84791  | C1orf97  | 1  |
| C1QA     | 712    | C1QA     | 1  |
| C1QBP    | 708    | C1QBP    | 17 |
| C1QL1    | 10882  | C1QL1    | 17 |
| C1QL2    | 165257 | C1QL2    |    |
| C1QL4    | 338761 | C1QL4    | 12 |
| C1QTNF2  | 114898 | C1QTNF2  | 5  |
| C1QTNF3  | 114899 | C1QTNF3  | 5  |
| C1QTNF6  | 114904 | C1QTNF6  | 22 |
| C1QTNF7  | 114905 | C1QTNF7  | 4  |

|           |        |           |    |
|-----------|--------|-----------|----|
| C1QTNF9   | 338872 | C1QTNF9   | 13 |
| C20ORF100 | 84969  | C20orf100 | 20 |
| C20ORF103 | 24141  | C20orf103 | 20 |
| C20ORF106 | 200232 | C20orf106 | 20 |
| C20ORF107 | 388799 | C20orf107 | 20 |
| C20ORF108 | 116151 | C20orf108 | 20 |
| C20ORF11  | 54994  | C20orf11  | 20 |
| C20ORF111 | 51526  | C20orf111 | 20 |
| C20ORF112 | 140688 | C20orf112 | 20 |
| C20ORF117 | 140710 | C20orf117 | 20 |
| C20ORF12  | 55184  | C20orf12  | 20 |
| C20ORF127 | 140851 | C20orf127 | 20 |
| C20ORF134 | 170487 | C20orf134 | 20 |
| C20ORF141 | 128653 | C20orf141 | 20 |
| C20ORF160 | 140706 | C20orf160 | 20 |
| C20ORF165 | 128497 | C20orf165 | 20 |
| C20ORF177 | 63939  | C20orf177 | 20 |
| C20ORF191 | 149934 | C20orf191 | 20 |
| C20ORF196 | 149840 | C20orf196 | 20 |
| C20ORF199 | 441951 | C20orf199 | 20 |
| C20ORF20  | 55257  | C20orf20  | 20 |
| C20ORF24  | 55969  | C20orf24  | 20 |
| C20ORF29  | 55317  | C20orf29  | 20 |
| C20ORF3   | 57136  | C20orf3   | 20 |
| C20ORF30  | 29058  | C20orf30  | 20 |
| C20ORF4   | 25980  | C20orf4   | 20 |
| C20ORF43  | 51507  | C20orf43  | 20 |
| C20ORF46  | 55321  | C20orf46  | 20 |
| C20ORF51  | 63930  | C20orf51  | 20 |
| C20ORF52  | 140823 | C20orf52  | 20 |
| C20ORF55  | 83541  | C20orf55  | 20 |
| C20ORF7   | 79133  | C20orf7   | 20 |
| C20ORF72  | 92667  | C20orf72  | 20 |
| C20ORF75  | 164312 | C20orf75  | 20 |
| C20ORF86  | 140731 | C20orf86  |    |
| C20ORF96  | 140680 | C20orf96  | 20 |
| C21ORF119 | 84996  | C21orf119 | 21 |
| C21ORF122 | 84739  | C21orf122 | 21 |
| C21ORF124 | 85006  | C21orf124 | 21 |
| C21ORF129 | 150135 | C21orf129 | 21 |
| C21ORF2   | 755    | C21orf2   | 21 |
| C21ORF24  | 400866 | C21orf24  | 21 |
| C21ORF30  | 54083  | C21orf30  | 21 |
| C21ORF33  | 8209   | C21orf33  | 21 |

|          |           |          |    |
|----------|-----------|----------|----|
| C21ORF34 | 388815    | C21orf34 | 21 |
| C21ORF37 | 54076     | C21orf37 | 21 |
| C21ORF42 | 54072     | C21orf42 | 21 |
| C21ORF45 | 54069     | C21orf45 | 21 |
| C21ORF51 | 54065     | C21orf51 |    |
| C21ORF54 | 728409    | C21orf54 | 21 |
| C21ORF55 | 54943     | C21orf55 | 21 |
| C21ORF56 | 84221     | C21orf56 | 21 |
| C21ORF57 | 54059     | C21orf57 | 21 |
| C21ORF58 | 54058     | C21orf58 | 21 |
| C21ORF59 | 56683     | C21orf59 | 21 |
| C21ORF63 | 59271     | C21orf63 | 21 |
| C21ORF66 | 94104     | C21orf66 | 21 |
| C21ORF67 | 84536     | C21orf67 | 21 |
| C21ORF69 | 84537     | C21orf69 | 21 |
| C21ORF7  | 56911     | C21orf7  | 21 |
| C21ORF70 | 85395     | C21orf70 | 21 |
| C21ORF77 | 55264     | C21orf77 | 21 |
| C21ORF84 | 114038    | C21orf84 | 21 |
| C21ORF91 | 54149     | C21orf91 | 21 |
| C21ORF93 | 246704    | C21orf93 | 21 |
| C21ORF96 | 80215     | C21orf96 |    |
| C22ORF13 | 83606     | C22orf13 | 22 |
| C22ORF23 | 84645     | C22orf23 | 22 |
| C22ORF24 | 25775     | C22orf24 | 22 |
| C22ORF25 | 128989    | C22orf25 | 22 |
| C22ORF26 | 55267     | C22orf26 | 22 |
| C22ORF28 | 51493     | C22orf28 | 22 |
| C22ORF29 | 79680     | C22orf29 | 22 |
| C22ORF30 | 253143    | C22orf30 | 22 |
| C22ORF32 | 91689     | C22orf32 | 22 |
| C22ORF33 | 339669    | C22orf33 | 22 |
| C22ORF34 | 348645    | C22orf34 | 22 |
| C22ORF36 | 388886    | C22orf36 | 22 |
| C22ORF39 | 128977    | C22orf39 | 22 |
| C22ORF40 | 150383    | C22orf40 | 22 |
| C22ORF9  | 23313     | C22orf9  | 22 |
| C2CD2    | 25966     | C2CD2    | 21 |
| C2CD2L   | 9854      | C2CD2L   | 11 |
| C2CD3    | 26005     | C2CD3    | 11 |
| C2CD4D   | 100191040 | C2CD4D   | 1  |
| C2ORF15  | 150590    | C2orf15  | 2  |
| C2ORF18  | 54978     | C2orf18  | 2  |
| C2ORF21  | 285175    | C2orf21  | 2  |



|          |        |          |   |
|----------|--------|----------|---|
| C2ORF24  | 27013  | C2orf24  | 2 |
| C2ORF25  | 27249  | C2orf25  | 2 |
| C2ORF27A | 29798  | C2orf27A | 2 |
| C2ORF28  | 51374  | C2orf28  | 2 |
| C2ORF30  | 27248  | C2orf30  | 2 |
| C2ORF37  | 80067  | C2orf37  | 2 |
| C2ORF42  | 54980  | C2orf42  | 2 |
| C2ORF43  | 60526  | C2orf43  | 2 |
| C2ORF44  | 80304  | C2orf44  | 2 |
| C2ORF47  | 79568  | C2orf47  | 2 |
| C2ORF48  | 348738 | C2orf48  | 2 |
| C2ORF49  | 79074  | C2orf49  | 2 |
| C2ORF52  | 151477 | C2orf52  | 2 |
| C2ORF56  | 55471  | C2orf56  | 2 |
| C2ORF63  | 130162 | C2orf63  | 2 |
| C2ORF64  | 493753 | C2orf64  | 2 |
| C2ORF65  | 130951 | C2orf65  | 2 |
| C2ORF68  | 388969 | C2orf68  | 2 |
| C2ORF69  | 205327 | C2orf69  | 2 |
| C2ORF7   | 84279  | C2orf7   | 2 |
| C2ORF73  | 129852 | C2orf73  | 2 |
| C2ORF76  | 130355 | C2orf76  | 2 |
| C2ORF77  | 129881 | C2orf77  | 2 |
| C2ORF79  | 391356 | C2orf79  | 2 |
| C2ORF80  | 389073 | C2orf80  | 2 |
| C2ORF82  | 389084 | C2orf82  | 2 |
| C2ORF88  | 84281  | C2orf88  | 2 |
| C2ORF89  | 129293 | C2orf89  | 2 |
| C3ORF1   | 51300  | C3orf1   | 3 |
| C3ORF10  | 55845  | C3orf10  | 3 |
| C3ORF14  | 57415  | C3orf14  | 3 |
| C3ORF15  | 89876  | C3orf15  | 3 |
| C3ORF17  | 25871  | C3orf17  | 3 |
| C3ORF18  | 51161  | C3orf18  | 3 |
| C3ORF19  | 51244  | C3orf19  | 3 |
| C3ORF21  | 152002 | C3orf21  | 3 |
| C3ORF23  | 285343 | C3orf23  | 3 |
| C3ORF25  | 90288  | C3orf25  | 3 |
| C3ORF26  | 84319  | C3orf26  | 3 |
| C3ORF31  | 132001 | C3orf31  | 3 |
| C3ORF32  | 51066  | C3orf32  | 3 |
| C3ORF34  | 84984  | C3orf34  | 3 |
| C3ORF37  | 56941  | C3orf37  | 3 |
| C3ORF38  | 285237 | C3orf38  | 3 |

|         |           |         |    |
|---------|-----------|---------|----|
| C3ORF39 | 84892     | C3orf39 | 3  |
| C3ORF42 | 84657     | C3orf42 | 3  |
| C3ORF46 | 255330    | C3orf46 | 3  |
| C3ORF52 | 79669     | C3orf52 | 3  |
| C3ORF54 | 389119    | C3orf54 | 3  |
| C3ORF57 | 165679    | C3orf57 | 3  |
| C3ORF58 | 205428    | C3orf58 | 3  |
| C3ORF59 | 151963    | C3orf59 | 3  |
| C3ORF60 | 25915     | C3orf60 | 3  |
| C3ORF62 | 375341    | C3orf62 | 3  |
| C3ORF63 | 23272     | C3orf63 | 3  |
| C3ORF64 | 285203    | C3orf64 | 3  |
| C3ORF70 | 285382    | C3orf70 | 3  |
| C3ORF71 | 646450    | C3orf71 | 3  |
| C3ORF74 | 100128378 | C3orf74 | 3  |
| C3ORF75 | 54859     | C3orf75 | 3  |
| C4BPB   | 725       | C4BPB   | 1  |
| C4ORF12 | 404201    | C4orf12 | 4  |
| C4ORF14 | 84273     | C4orf14 | 4  |
| C4ORF16 | 55435     | C4orf16 | 4  |
| C4ORF18 | 51313     | C4orf18 | 4  |
| C4ORF22 | 255119    | C4orf22 | 4  |
| C4ORF23 | 152992    | C4orf23 | 4  |
| C4ORF26 | 152816    | C4orf26 | 4  |
| C4ORF27 | 54969     | C4orf27 | 4  |
| C4ORF29 | 80167     | C4orf29 | 4  |
| C4ORF32 | 132720    | C4orf32 | 4  |
| C4ORF33 | 132321    | C4orf33 | 4  |
| C4ORF34 | 201895    | C4orf34 | 4  |
| C4ORF39 | 152756    | C4orf39 | 4  |
| C4ORF41 | 60684     | C4orf41 | 4  |
| C4ORF43 | 55319     | C4orf43 | 4  |
| C4ORF46 | 201725    | C4orf46 | 4  |
| C4ORF47 | 441054    | C4orf47 | 4  |
| C4ORF49 | 84709     | C4orf49 | 4  |
| C5      | 727       | C5      | 9  |
| C5AR1   | 728       | C5AR1   | 19 |
| C5ORF13 | 9315      | C5orf13 | 5  |
| C5ORF15 | 56951     | C5orf15 | 5  |
| C5ORF20 | 140947    | C5orf20 | 5  |
| C5ORF21 | 83989     | C5orf21 | 5  |
| C5ORF22 | 55322     | C5orf22 | 5  |
| C5ORF24 | 134553    | C5orf24 | 5  |
| C5ORF25 | 375484    | C5orf25 | 5  |

|          |        |          |   |
|----------|--------|----------|---|
| C5ORF27  | 202299 | C5orf27  | 5 |
| C5ORF28  | 64417  | C5orf28  | 5 |
| C5ORF30  | 90355  | C5orf30  | 5 |
| C5ORF32  | 84418  | C5orf32  | 5 |
| C5ORF33  | 133686 | C5orf33  | 5 |
| C5ORF34  | 375444 | C5orf34  | 5 |
| C5ORF35  | 133383 | C5orf35  | 5 |
| C5ORF36  | 285600 | C5orf36  | 5 |
| C5ORF37  | 134359 | C5orf37  | 5 |
| C5ORF39  | 389289 | C5orf39  | 5 |
| C5ORF41  | 153222 | C5orf41  | 5 |
| C5ORF42  | 65250  | C5orf42  | 5 |
| C5ORF44  | 80006  | C5orf44  | 5 |
| C5ORF45  | 51149  | C5orf45  | 5 |
| C5ORF5   | 51306  | C5orf5   | 5 |
| C5ORF51  | 285636 | C5orf51  | 5 |
| C5ORF53  | 492311 | C5orf53  | 5 |
| C6       | 729    | C6       | 5 |
| C6ORF1   | 221491 | C6orf1   | 6 |
| C6ORF100 | 729583 | C6orf100 |   |
| C6ORF105 | 84830  | C6orf105 | 6 |
| C6ORF106 | 64771  | C6orf106 | 6 |
| C6ORF107 | 54887  | C6orf107 | 6 |
| C6ORF108 | 10591  | C6orf108 | 6 |
| C6ORF111 | 25957  | C6orf111 | 6 |
| C6ORF114 | 85411  | C6orf114 | 6 |
| C6ORF115 | 58527  | C6orf115 | 6 |
| C6ORF117 | 112609 | C6orf117 | 6 |
| C6ORF120 | 387263 | C6orf120 | 6 |
| C6ORF124 | 653483 | C6orf124 | 6 |
| C6ORF125 | 84300  | C6orf125 | 6 |
| C6ORF129 | 154467 | C6orf129 | 6 |
| C6ORF130 | 221443 | C6orf130 | 6 |
| C6ORF136 | 221545 | C6orf136 | 6 |
| C6ORF138 | 442213 | C6orf138 | 6 |
| C6ORF140 | 389396 | C6orf140 |   |
| C6ORF145 | 221749 | C6orf145 |   |
| C6ORF148 | 80759  | C6orf148 | 6 |
| C6ORF150 | 115004 | C6orf150 | 6 |
| C6ORF154 | 221424 | C6orf154 | 6 |
| C6ORF155 | 79940  | C6orf155 | 6 |
| C6ORF160 | 387066 | C6orf160 |   |
| C6ORF162 | 57150  | C6orf162 | 6 |
| C6ORF163 | 206412 | C6orf163 | 6 |

|          |        |          |   |
|----------|--------|----------|---|
| C6ORF170 | 221322 | C6orf170 | 6 |
| C6ORF173 | 387103 | C6orf173 | 6 |
| C6ORF182 | 285753 | C6orf182 | 6 |
| C6ORF184 | 221261 | C6orf184 | 6 |
| C6ORF191 | 253582 | C6orf191 | 6 |
| C6ORF192 | 116843 | C6orf192 | 6 |
| C6ORF199 | 221264 | C6orf199 | 6 |
| C6ORF203 | 51250  | C6orf203 | 6 |
| C6ORF204 | 387119 | C6orf204 | 6 |
| C6ORF211 | 79624  | C6orf211 | 6 |
| C6ORF218 | 221718 | C6orf218 | 6 |
| C6ORF222 | 389384 | C6orf222 | 6 |
| C6ORF223 | 221416 | C6orf223 | 6 |
| C6ORF224 | 222521 | C6orf224 | 6 |
| C6ORF225 | 619208 | C6orf225 | 6 |
| C6ORF26  | 401251 | C6orf26  | 6 |
| C6ORF47  | 57827  | C6orf47  | 6 |
| C6ORF48  | 50854  | C6orf48  | 6 |
| C6ORF52  | 347744 | C6orf52  |   |
| C6ORF57  | 135154 | C6orf57  | 6 |
| C6ORF58  | 352999 | C6orf58  | 6 |
| C6ORF59  | 79992  | C6orf59  |   |
| C6ORF61  | 54844  | C6orf61  | 6 |
| C6ORF62  | 81688  | C6orf62  | 6 |
| C6ORF66  | 29078  | C6orf66  | 6 |
| C6ORF72  | 116254 | C6orf72  | 6 |
| C6ORF81  | 221481 | C6orf81  | 6 |
| C6ORF89  | 221477 | C6orf89  | 6 |
| C7ORF10  | 79783  | C7orf10  | 7 |
| C7ORF11  | 136647 | C7orf11  | 7 |
| C7ORF13  | 129790 | C7orf13  | 7 |
| C7ORF20  | 51608  | C7orf20  |   |
| C7ORF23  | 79161  | C7orf23  | 7 |
| C7ORF25  | 79020  | C7orf25  | 7 |
| C7ORF26  | 79034  | C7orf26  | 7 |
| C7ORF27  | 221927 | C7orf27  | 7 |
| C7ORF28A | 51622  | C7orf28A |   |
| C7ORF28B | 221960 | C7orf28B |   |
| C7ORF29  | 113763 | C7orf29  | 7 |
| C7ORF30  | 115416 | C7orf30  | 7 |
| C7ORF31  | 136895 | C7orf31  | 7 |
| C7ORF36  | 57002  | C7orf36  | 7 |
| C7ORF38  | 221786 | C7orf38  | 7 |
| C7ORF40  | 285958 | C7orf40  | 7 |

|           |        |           |   |
|-----------|--------|-----------|---|
| C7ORF41   | 222166 | C7orf41   | 7 |
| C7ORF42   | 55069  | C7orf42   | 7 |
| C7ORF43   | 55262  | C7orf43   | 7 |
| C7ORF44   | 55744  | C7orf44   | 7 |
| C7ORF47   | 221908 | C7orf47   | 7 |
| C7ORF49   | 78996  | C7orf49   | 7 |
| C7ORF50   | 84310  | C7orf50   | 7 |
| C7ORF51   | 222950 | C7orf51   | 7 |
| C7ORF53   | 286006 | C7orf53   | 7 |
| C7ORF54   | 27099  | C7orf54   | 7 |
| C7ORF55   | 154791 | C7orf55   | 7 |
| C7ORF57   | 136288 | C7orf57   | 7 |
| C7ORF58   | 79974  | C7orf58   | 7 |
| C7ORF59   | 389541 | C7orf59   | 7 |
| C7ORF61   | 402573 | C7orf61   | 7 |
| C7ORF65   | 401335 | C7orf65   | 7 |
| C7ORF68   | 29923  | C7orf68   | 7 |
| C7ORF70   | 84792  | C7orf70   | 7 |
| C8ORF12   | 83656  | C8orf12   |   |
| C8ORF13   | 83648  | C8orf13   | 8 |
| C8ORF17   | 56988  | C8orf17   | 8 |
| C8ORF30A  | 51236  | C8orf30A  |   |
| C8ORF30B  | 728071 | C8orf30B  | 8 |
| C8ORF33   | 65265  | C8orf33   | 8 |
| C8ORF37   | 157657 | C8orf37   | 8 |
| C8ORF38   | 137682 | C8orf38   | 8 |
| C8ORF40   | 114926 | C8orf40   | 8 |
| C8ORF41   | 80185  | C8orf41   | 8 |
| C8ORF44   | 56260  | C8orf44   | 8 |
| C8ORF45   | 157777 | C8orf45   | 8 |
| C8ORF46   | 254778 | C8orf46   | 8 |
| C8ORF51   | 78998  | C8orf51   | 8 |
| C8ORF55   | 51337  | C8orf55   | 8 |
| C8ORF58   | 541565 | C8orf58   | 8 |
| C8ORF59   | 401466 | C8orf59   | 8 |
| C8ORF71   | 26138  | C8orf71   | 8 |
| C8ORF77   | 286103 | C8orf77   |   |
| C8ORF80   | 389643 | C8orf80   | 8 |
| C8ORFK29  | 340393 | C8ORFK29  |   |
| C9ORF100  | 84904  | C9orf100  | 9 |
| C9ORF102  | 56959  | C9orf102  | 9 |
| C9ORF103  | 414328 | C9orf103  | 9 |
| C9ORF106  | 414318 | C9orf106  | 9 |
| C9ORF10OS | 158293 | C9orf10OS | 9 |

|           |        |           |   |
|-----------|--------|-----------|---|
| C9ORF114  | 51490  | C9orf114  | 9 |
| C9ORF116  | 138162 | C9orf116  | 9 |
| C9ORF119  | 375757 | C9orf119  | 9 |
| C9ORF123  | 90871  | C9orf123  | 9 |
| C9ORF126  | 286205 | C9orf126  | 9 |
| C9ORF127  | 51754  | C9orf127  | 9 |
| C9ORF130  | 286354 | C9orf130  |   |
| C9ORF135  | 138255 | C9orf135  | 9 |
| C9ORF140  | 89958  | C9orf140  | 9 |
| C9ORF142  | 286257 | C9orf142  | 9 |
| C9ORF144  | 389715 | C9orf144  |   |
| C9ORF144B | 259308 | C9orf144B | 9 |
| C9ORF152  | 401546 | C9orf152  | 9 |
| C9ORF156  | 51531  | C9orf156  | 9 |
| C9ORF16   | 79095  | C9orf16   | 9 |
| C9ORF167  | 54863  | C9orf167  | 9 |
| C9ORF169  | 375791 | C9orf169  |   |
| C9ORF171  | 389799 | C9orf171  | 9 |
| C9ORF173  | 441476 | C9orf173  | 9 |
| C9ORF21   | 195827 | C9orf21   | 9 |
| C9ORF23   | 138716 | C9orf23   | 9 |
| C9ORF24   | 84688  | C9orf24   | 9 |
| C9ORF25   | 203259 | C9orf25   | 9 |
| C9ORF3    | 84909  | C9orf3    | 9 |
| C9ORF30   | 91283  | C9orf30   | 9 |
| C9ORF31   | 57000  | C9orf31   | 9 |
| C9ORF37   | 85026  | C9orf37   | 9 |
| C9ORF40   | 55071  | C9orf40   | 9 |
| C9ORF41   | 138199 | C9orf41   | 9 |
| C9ORF43   | 257169 | C9orf43   | 9 |
| C9ORF45   | 81571  | C9orf45   | 9 |
| C9ORF46   | 55848  | C9orf46   | 9 |
| C9ORF5    | 23731  | C9orf5    | 9 |
| C9ORF53   | 51198  | C9orf53   |   |
| C9ORF6    | 54942  | C9orf6    | 9 |
| C9ORF64   | 84267  | C9orf64   | 9 |
| C9ORF66   | 157983 | C9orf66   | 9 |
| C9ORF69   | 90120  | C9orf69   | 9 |
| C9ORF7    | 11094  | C9orf7    | 9 |
| C9ORF70   | 84850  | C9orf70   | 9 |
| C9ORF72   | 203228 | C9orf72   | 9 |
| C9ORF75   | 286262 | C9orf75   | 9 |
| C9ORF78   | 51759  | C9orf78   | 9 |
| C9ORF80   | 58493  | C9orf80   | 9 |

|          |        |          |    |
|----------|--------|----------|----|
| C9ORF82  | 79886  | C9orf82  | 9  |
| C9ORF85  | 138241 | C9orf85  | 9  |
| C9ORF86  | 55684  | C9orf86  | 9  |
| C9ORF89  | 84270  | C9orf89  | 9  |
| C9ORF9   | 11092  | C9orf9   | 9  |
| C9ORF90  | 203245 | C9orf90  | 9  |
| C9ORF91  | 203197 | C9orf91  | 9  |
| C9ORF95  | 54981  | C9orf95  | 9  |
| C9ORF96  | 169436 | C9orf96  | 9  |
| CA10     | 56934  | CA10     | 17 |
| CA11     | 770    | CA11     | 19 |
| CA13     | 377677 | CA13     | 8  |
| CA2      | 760    | CA2      | 8  |
| CA5B     | 11238  | CA5B     | X  |
| CA8      | 767    | CA8      | 8  |
| CAB39    | 51719  | CAB39    | 2  |
| CAB39L   | 81617  | CAB39L   | 13 |
| CABC1    | 56997  | CABC1    | 1  |
| CABLES1  | 91768  | CABLES1  | 18 |
| CABLES2  | 81928  | CABLES2  | 20 |
| CABP4    | 57010  | CABP4    | 11 |
| CABP7    | 164633 | CABP7    | 22 |
| CACNA1A  | 773    | CACNA1A  | 19 |
| CACNA1B  | 774    | CACNA1B  | 9  |
| CACNA1C  | 775    | CACNA1C  | 12 |
| CACNA1S  | 779    | CACNA1S  | 1  |
| CACNB1   | 782    | CACNB1   | 17 |
| CACNB2   | 783    | CACNB2   | 10 |
| CACNB3   | 784    | CACNB3   | 12 |
| CACNG3   | 10368  | CACNG3   | 16 |
| CACYBP   | 27101  | CACYBP   | 1  |
| CAD      | 790    | CAD      | 2  |
| CADM1    | 23705  | CADM1    | 11 |
| CADM4    | 199731 | CADM4    | 19 |
| CALB2    | 794    | CALB2    | 16 |
| CALCA    | 796    | CALCA    | 11 |
| CALCB    | 797    | CALCB    | 11 |
| CALCOCO1 | 57658  | CALCOCO1 | 12 |
| CALCOCO2 | 10241  | CALCOCO2 | 17 |
| CALCRL   | 10203  | CALCRL   | 2  |
| CALD1    | 800    | CALD1    | 7  |
| CALHM1   | 255022 | CALHM1   | 10 |
| CALHM2   | 51063  | CALHM2   | 10 |
| CALHM3   | 119395 | CALHM3   | 10 |

|           |        |           |    |
|-----------|--------|-----------|----|
| CALM1     | 801    | CALM1     | 14 |
| CALM2     | 805    | CALM2     | 2  |
| CALM3     | 808    | CALM3     | 19 |
| CALML4    | 91860  | CALML4    | 15 |
| CALML5    | 51806  | CALML5    | 10 |
| CALR      | 811    | CALR      | 19 |
| CALU      | 813    | CALU      | 7  |
| CALY      | 50632  | CALY      | 10 |
| CAMK1     | 8536   | CAMK1     | 3  |
| CAMK1D    | 57118  | CAMK1D    | 10 |
| CAMK1G    | 57172  | CAMK1G    | 1  |
| CAMK2B    | 816    | CAMK2B    | 7  |
| CAMK2D    | 817    | CAMK2D    | 4  |
| CAMK2G    | 818    | CAMK2G    | 10 |
| CAMK2N1   | 55450  | CAMK2N1   | 1  |
| CAMK2N2   | 94032  | CAMK2N2   | 3  |
| CAMK4     | 814    | CAMK4     | 5  |
| CAMKK1    | 84254  | CAMKK1    | 17 |
| CAMKK2    | 10645  | CAMKK2    | 12 |
| CAMKV     | 79012  | CAMKV     | 3  |
| CAMLG     | 819    | CAMLG     | 5  |
| CAMP      | 820    | CAMP      | 3  |
| CAMSAP1L1 | 23271  | CAMSAP1L1 | 1  |
| CANT1     | 124583 | CANT1     | 17 |
| CANX      | 821    | CANX      | 5  |
| CAP1      | 10487  | CAP1      | 1  |
| CAPG      | 822    | CAPG      | 2  |
| CAPN1     | 823    | CAPN1     | 11 |
| CAPN10    | 11132  | CAPN10    | 2  |
| CAPN11    | 11131  | CAPN11    | 6  |
| CAPN12    | 147968 | CAPN12    | 19 |
| CAPN14    | 440854 | CAPN14    |    |
| CAPN3     | 825    | CAPN3     | 15 |
| CAPN5     | 726    | CAPN5     | 11 |
| CAPN6     | 827    | CAPN6     | X  |
| CAPN7     | 23473  | CAPN7     | 3  |
| CAPNS1    | 826    | CAPNS1    | 19 |
| CAPRIN1   | 4076   | CAPRIN1   | 11 |
| CAPRIN2   | 65981  | CAPRIN2   | 12 |
| CAPS      | 828    | CAPS      | 19 |
| CAPSL     | 133690 | CAPSL     | 5  |
| CAPZA1    | 829    | CAPZA1    | 1  |
| CAPZA2    | 830    | CAPZA2    | 7  |
| CAPZA3    | 93661  | CAPZA3    | 12 |



|            |        |            |    |
|------------|--------|------------|----|
| CAPZB      | 832    | CAPZB      | 1  |
| CARD10     | 29775  | CARD10     | 22 |
| CARD11     | 84433  | CARD11     | 7  |
| CARD16     | 114769 | CARD16     | 11 |
| CARD6      | 84674  | CARD6      | 5  |
| CARD8      | 22900  | CARD8      | 19 |
| CARD9      | 64170  | CARD9      | 9  |
| CARHSP1    | 23589  | CARHSP1    | 16 |
| CARKD      | 55739  | CARKD      | 13 |
| CARM1      | 10498  | CARM1      | 19 |
| CARS       | 833    | CARS       | 11 |
| CARS2      | 79587  | CARS2      | 13 |
| CASC1      | 55259  | CASC1      | 12 |
| CASC4      | 113201 | CASC4      | 15 |
| CASC5      | 57082  | CASC5      | 15 |
| CASD1      | 64921  | CASD1      | 7  |
| CASK       | 8573   | CASK       | X  |
| CASP1      | 834    | CASP1      | 11 |
| CASP10     | 843    | CASP10     | 2  |
| CASP14     | 23581  | CASP14     | 19 |
| CASP2      | 835    | CASP2      | 7  |
| CASP3      | 836    | CASP3      | 4  |
| CASP4      | 837    | CASP4      | 11 |
| CASP6      | 839    | CASP6      | 4  |
| CASP7      | 840    | CASP7      | 10 |
| CASP9      | 842    | CASP9      | 1  |
| CASRL1     | 344760 | CASRL1     | 3  |
| CAST       | 831    | CAST       | 5  |
| CASZ1      | 54897  | CASZ1      | 1  |
| CAT        | 847    | CAT        | 11 |
| CATSPER2   | 117155 | CATSPER2   | 15 |
| CATSPER2P1 | 440278 | CATSPER2P1 | 15 |
| CAV1       | 857    | CAV1       | 7  |
| CAV2       | 858    | CAV2       | 7  |
| CBARA1     | 10367  | CBARA1     | 10 |
| CBFA2T2    | 9139   | CBFA2T2    | 20 |
| CBFA2T3    | 863    | CBFA2T3    | 16 |
| CBFB       | 865    | CBFB       | 16 |
| CBL        | 867    | CBL        | 11 |
| CBLB       | 868    | CBLB       | 3  |
| CBLL1      | 79872  | CBLL1      | 7  |
| CBLN1      | 869    | CBLN1      | 16 |
| CBLN3      | 643866 | CBLN3      | 14 |
| CBR1       | 873    | CBR1       | 21 |

|          |        |          |    |
|----------|--------|----------|----|
| CBR3     | 874    | CBR3     | 21 |
| CBR4     | 84869  | CBR4     | 4  |
| CBS      | 875    | CBS      | 21 |
| CBWD3    | 445571 | CBWD3    | 9  |
| CBWD5    | 220869 | CBWD5    | 9  |
| CBWD6    | 644019 | CBWD6    | 9  |
| CBX1     | 10951  | CBX1     | 17 |
| CBX2     | 84733  | CBX2     | 17 |
| CBX3     | 11335  | CBX3     | 7  |
| CBX4     | 8535   | CBX4     | 17 |
| CBX5     | 23468  | CBX5     | 12 |
| CBX6     | 23466  | CBX6     | 22 |
| CBX7     | 23492  | CBX7     | 22 |
| CBX8     | 57332  | CBX8     | 17 |
| CBY1     | 25776  | CBY1     | 22 |
| CBY3     | 646019 | CBY3     | 5  |
| CC2D1B   | 200014 | CC2D1B   | 1  |
| CCAR1    | 55749  | CCAR1    | 10 |
| CCBE1    | 147372 | CCBE1    | 18 |
| CCBL1    | 883    | CCBL1    | 9  |
| CCBL2    | 56267  | CCBL2    | 1  |
| CCBP2    | 1238   | CCBP2    | 3  |
| CCDC101  | 112869 | CCDC101  | 16 |
| CCDC102A | 92922  | CCDC102A | 16 |
| CCDC103  | 388389 | CCDC103  | 17 |
| CCDC104  | 112942 | CCDC104  | 2  |
| CCDC106  | 29903  | CCDC106  | 19 |
| CCDC107  | 203260 | CCDC107  | 9  |
| CCDC109A | 90550  | CCDC109A | 10 |
| CCDC109B | 55013  | CCDC109B | 4  |
| CCDC11   | 220136 | CCDC11   | 18 |
| CCDC110  | 256309 | CCDC110  | 4  |
| CCDC111  | 201973 | CCDC111  | 4  |
| CCDC112  | 153733 | CCDC112  | 5  |
| CCDC113  | 29070  | CCDC113  | 16 |
| CCDC115  | 84317  | CCDC115  | 2  |
| CCDC117  | 150275 | CCDC117  | 22 |
| CCDC12   | 151903 | CCDC12   | 3  |
| CCDC120  | 90060  | CCDC120  | X  |
| CCDC121  | 79635  | CCDC121  | 2  |
| CCDC123  | 84902  | CCDC123  | 19 |
| CCDC124  | 115098 | CCDC124  | 19 |
| CCDC125  | 202243 | CCDC125  | 5  |
| CCDC126  | 90693  | CCDC126  | 7  |

|         |           |         |    |
|---------|-----------|---------|----|
| CCDC127 | 133957    | CCDC127 | 5  |
| CCDC128 | 129285    | CCDC128 | 2  |
| CCDC130 | 81576     | CCDC130 | 19 |
| CCDC132 | 55610     | CCDC132 | 7  |
| CCDC136 | 64753     | CCDC136 | 7  |
| CCDC137 | 339230    | CCDC137 | 17 |
| CCDC138 | 165055    | CCDC138 | 2  |
| CCDC14  | 64770     | CCDC14  | 3  |
| CCDC140 | 151278    | CCDC140 | 2  |
| CCDC142 | 84865     | CCDC142 | 2  |
| CCDC146 | 57639     | CCDC146 | 7  |
| CCDC147 | 159686    | CCDC147 | 10 |
| CCDC148 | 130940    | CCDC148 | 2  |
| CCDC15  | 80071     | CCDC15  | 11 |
| CCDC150 | 284992    | CCDC150 | 2  |
| CCDC151 | 115948    | CCDC151 | 19 |
| CCDC152 | 100129792 | CCDC152 | 5  |
| CCDC155 | 147872    | CCDC155 | 19 |
| CCDC16  | 91603     | CCDC16  | 17 |
| CCDC18  | 343099    | CCDC18  | 1  |
| CCDC19  | 25790     | CCDC19  | 1  |
| CCDC22  | 28952     | CCDC22  | X  |
| CCDC23  | 374969    | CCDC23  | 1  |
| CCDC24  | 149473    | CCDC24  | 1  |
| CCDC25  | 55246     | CCDC25  | 8  |
| CCDC27  | 148870    | CCDC27  | 1  |
| CCDC28A | 25901     | CCDC28A | 6  |
| CCDC28B | 79140     | CCDC28B | 1  |
| CCDC3   | 83643     | CCDC3   | 10 |
| CCDC34  | 91057     | CCDC34  | 11 |
| CCDC36  | 339834    | CCDC36  | 3  |
| CCDC39  | 339829    | CCDC39  | 3  |
| CCDC4   | 389206    | CCDC4   |    |
| CCDC41  | 51134     | CCDC41  | 12 |
| CCDC43  | 124808    | CCDC43  | 17 |
| CCDC45  | 90799     | CCDC45  | 17 |
| CCDC46  | 201134    | CCDC46  | 17 |
| CCDC47  | 57003     | CCDC47  | 17 |
| CCDC48  | 79825     | CCDC48  | 3  |
| CCDC49  | 54883     | CCDC49  | 17 |
| CCDC5   | 115106    | CCDC5   | 18 |
| CCDC50  | 152137    | CCDC50  | 3  |
| CCDC51  | 79714     | CCDC51  | 3  |
| CCDC52  | 152185    | CCDC52  | 3  |

|         |        |         |    |
|---------|--------|---------|----|
| CCDC53  | 51019  | CCDC53  | 12 |
| CCDC54  | 84692  | CCDC54  | 3  |
| CCDC55  | 84081  | CCDC55  | 17 |
| CCDC56  | 28958  | CCDC56  |    |
| CCDC57  | 284001 | CCDC57  | 17 |
| CCDC58  | 131076 | CCDC58  | 3  |
| CCDC59  | 29080  | CCDC59  |    |
| CCDC6   | 8030   | CCDC6   | 10 |
| CCDC64  | 92558  | CCDC64  | 12 |
| CCDC65  | 85478  | CCDC65  | 12 |
| CCDC66  | 285331 | CCDC66  | 3  |
| CCDC68  | 80323  | CCDC68  | 18 |
| CCDC69  | 26112  | CCDC69  | 5  |
| CCDC71  | 64925  | CCDC71  | 3  |
| CCDC72  | 51372  | CCDC72  | 3  |
| CCDC74A | 90557  | CCDC74A | 2  |
| CCDC74B | 91409  | CCDC74B | 2  |
| CCDC76  | 54482  | CCDC76  | 1  |
| CCDC77  | 84318  | CCDC77  | 12 |
| CCDC8   | 83987  | CCDC8   | 19 |
| CCDC84  | 338657 | CCDC84  | 11 |
| CCDC85A | 114800 | CCDC85A | 2  |
| CCDC85B | 11007  | CCDC85B | 11 |
| CCDC86  | 79080  | CCDC86  | 11 |
| CCDC88B | 283234 | CCDC88B | 11 |
| CCDC88C | 440193 | CCDC88C | 14 |
| CCDC89  | 220388 | CCDC89  | 11 |
| CCDC90A | 63933  | CCDC90A | 6  |
| CCDC90B | 60492  | CCDC90B | 11 |
| CCDC91  | 55297  | CCDC91  | 12 |
| CCDC92  | 80212  | CCDC92  | 12 |
| CCDC94  | 55702  | CCDC94  | 19 |
| CCDC97  | 90324  | CCDC97  | 19 |
| CCDC99  | 54908  | CCDC99  |    |
| CCHCR1  | 54535  | CCHCR1  | 6  |
| CCL1    | 6346   | CCL1    | 17 |
| CCL17   | 6361   | CCL17   | 16 |
| CCL20   | 6364   | CCL20   | 2  |
| CCL22   | 6367   | CCL22   | 16 |
| CCL26   | 10344  | CCL26   | 7  |
| CCL3    | 6348   | CCL3    | 17 |
| CCL3L1  | 6349   | CCL3L1  | 17 |
| CCL3L3  | 414062 | CCL3L3  | 17 |
| CCL4L1  | 9560   | CCL4L1  | 17 |

|          |        |          |    |
|----------|--------|----------|----|
| CCL4L2   | 388372 | CCL4L2   | 17 |
| CCL5     | 6352   | CCL5     | 17 |
| CCM2     | 83605  | CCM2     | 7  |
| CCNA1    | 8900   | CCNA1    | 13 |
| CCNA2    | 890    | CCNA2    | 4  |
| CCNB1    | 891    | CCNB1    | 5  |
| CCNB1IP1 | 57820  | CCNB1IP1 | 14 |
| CCNB2    | 9133   | CCNB2    | 15 |
| CCNB3    | 85417  | CCNB3    | X  |
| CCNC     | 892    | CCNC     | 6  |
| CCND1    | 595    | CCND1    | 11 |
| CCND2    | 894    | CCND2    | 12 |
| CCND3    | 896    | CCND3    | 6  |
| CCNDBP1  | 23582  | CCNDBP1  | 15 |
| CCNE1    | 898    | CCNE1    | 19 |
| CCNE2    | 9134   | CCNE2    | 8  |
| CCNF     | 899    | CCNF     | 16 |
| CCNG1    | 900    | CCNG1    | 5  |
| CCNG2    | 901    | CCNG2    | 4  |
| CCNI     | 10983  | CCNI     | 4  |
| CCNJ     | 54619  | CCNJ     | 10 |
| CCNK     | 8812   | CCNK     | 14 |
| CCNL1    | 57018  | CCNL1    | 3  |
| CCNL2    | 81669  | CCNL2    | 1  |
| CCNO     | 10309  | CCNO     | 5  |
| CCNT2    | 905    | CCNT2    | 2  |
| CCNYL1   | 151195 | CCNYL1   | 2  |
| CCPG1    | 9236   | CCPG1    | 15 |
| CCR10    | 2826   | CCR10    | 17 |
| CCR2     | 729230 | CCR2     | 3  |
| CCR6     | 1235   | CCR6     | 6  |
| CCR7     | 1236   | CCR7     | 17 |
| CCR8     | 1237   | CCR8     | 3  |
| CCRL1    | 51554  | CCRL1    | 3  |
| CCRL2    | 9034   | CCRL2    | 3  |
| CCRN4L   | 25819  | CCRN4L   | 4  |
| CCS      | 9973   | CCS      |    |
| CCT2     | 10576  | CCT2     | 12 |
| CCT3     | 7203   | CCT3     | 1  |
| CCT4     | 10575  | CCT4     | 2  |
| CCT5     | 22948  | CCT5     | 5  |
| CCT6A    | 908    | CCT6A    | 7  |
| CCT6B    | 10693  | CCT6B    | 17 |
| CCT6P1   | 643253 | CCT6P1   | 7  |

|         |           |         |    |
|---------|-----------|---------|----|
| CCT7    | 10574     | CCT7    | 2  |
| CCT8    | 10694     | CCT8    | 21 |
| CD14    | 929       | CD14    | 5  |
| CD151   | 977       | CD151   | 11 |
| CD163L1 | 283316    | CD163L1 | 12 |
| CD180   | 4064      | CD180   | 5  |
| CD19    | 930       | CD19    | 16 |
| CD1A    | 909       | CD1A    | 1  |
| CD1B    | 910       | CD1B    | 1  |
| CD1C    | 911       | CD1C    | 1  |
| CD1D    | 912       | CD1D    | 1  |
| CD1E    | 913       | CD1E    | 1  |
| CD2     | 914       | CD2     | 1  |
| CD200R1 | 131450    | CD200R1 | 3  |
| CD22    | 933       | CD22    | 19 |
| CD24    | 100133941 | CD24    | Y  |
| CD244   | 51744     | CD244   | 1  |
| CD247   | 919       | CD247   | 1  |
| CD248   | 57124     | CD248   | 11 |
| CD27    | 939       | CD27    | 12 |
| CD274   | 29126     | CD274   | 9  |
| CD276   | 80381     | CD276   | 15 |
| CD28    | 940       | CD28    | 2  |
| CD2AP   | 23607     | CD2AP   | 6  |
| CD2BP2  | 10421     | CD2BP2  | 16 |
| CD300C  | 10871     | CD300C  | 17 |
| CD302   | 9936      | CD302   | 2  |
| CD320   | 51293     | CD320   | 19 |
| CD33    | 945       | CD33    | 19 |
| CD36    | 948       | CD36    | 7  |
| CD37    | 951       | CD37    | 19 |
| CD38    | 952       | CD38    | 4  |
| CD3D    | 915       | CD3D    | 11 |
| CD3EAP  | 10849     | CD3EAP  | 19 |
| CD3G    | 917       | CD3G    | 11 |
| CD40    | 958       | CD40    | 20 |
| CD44    | 960       | CD44    | 11 |
| CD46    | 4179      | CD46    | 1  |
| CD47    | 961       | CD47    | 3  |
| CD48    | 962       | CD48    | 1  |
| CD52    | 1043      | CD52    | 1  |
| CD53    | 963       | CD53    | 1  |
| CD55    | 1604      | CD55    | 1  |
| CD58    | 965       | CD58    | 1  |

|          |        |          |    |
|----------|--------|----------|----|
| CD59     | 966    | CD59     | 11 |
| CD63     | 967    | CD63     | 12 |
| CD68     | 968    | CD68     | 17 |
| CD69     | 969    | CD69     | 12 |
| CD7      | 924    | CD7      | 17 |
| CD70     | 970    | CD70     | 19 |
| CD72     | 971    | CD72     | 9  |
| CD74     | 972    | CD74     | 5  |
| CD79A    | 973    | CD79A    | 19 |
| CD79B    | 974    | CD79B    | 17 |
| CD80     | 941    | CD80     | 3  |
| CD81     | 975    | CD81     | 11 |
| CD82     | 3732   | CD82     | 11 |
| CD83     | 9308   | CD83     | 6  |
| CD84     | 8832   | CD84     | 1  |
| CD86     | 942    | CD86     | 3  |
| CD8A     | 925    | CD8A     | 2  |
| CD9      | 928    | CD9      | 12 |
| CD96     | 10225  | CD96     | 3  |
| CD97     | 976    | CD97     | 19 |
| CD99     | 4267   | CD99     | Y  |
| CD99L2   | 83692  | CD99L2   | X  |
| CDA      | 978    | CDA      | 1  |
| CDAN1    | 146059 | CDAN1    |    |
| CDC123   | 8872   | CDC123   | 10 |
| CDC14B   | 8555   | CDC14B   | 9  |
| CDC16    | 8881   | CDC16    | 13 |
| CDC2     | 983    | CDC2     | 10 |
| CDC20    | 991    | CDC20    | 1  |
| CDC23    | 8697   | CDC23    | 5  |
| CDC25A   | 993    | CDC25A   | 3  |
| CDC25B   | 994    | CDC25B   | 20 |
| CDC25C   | 995    | CDC25C   | 5  |
| CDC26    | 246184 | CDC26    | 9  |
| CDC2L1   | 984    | CDC2L1   | 1  |
| CDC2L5   | 8621   | CDC2L5   | 7  |
| CDC2L6   | 23097  | CDC2L6   | 6  |
| CDC34    | 997    | CDC34    | 19 |
| CDC37    | 11140  | CDC37    | 19 |
| CDC37L1  | 55664  | CDC37L1  | 9  |
| CDC40    | 51362  | CDC40    | 6  |
| CDC42    | 998    | CDC42    | 1  |
| CDC42BPA | 8476   | CDC42BPA | 1  |
| CDC42BPB | 9578   | CDC42BPB | 14 |

|          |        |          |    |
|----------|--------|----------|----|
| CDC42BPG | 55561  | CDC42BPG | 11 |
| CDC42EP2 | 10435  | CDC42EP2 | 11 |
| CDC42EP3 | 10602  | CDC42EP3 | 2  |
| CDC42EP4 | 23580  | CDC42EP4 | 17 |
| CDC42EP5 | 148170 | CDC42EP5 | 19 |
| CDC42SE1 | 56882  | CDC42SE1 | 1  |
| CDC42SE2 | 56990  | CDC42SE2 | 5  |
| CDC45L   | 8318   | CDC45L   | 22 |
| CDC5L    | 988    | CDC5L    | 6  |
| CDC6     | 990    | CDC6     | 17 |
| CDC7     | 8317   | CDC7     | 1  |
| CDC73    | 79577  | CDC73    | 1  |
| CDCA1    | 83540  | CDCA1    | 1  |
| CDCA2    | 157313 | CDCA2    | 8  |
| CDCA3    | 83461  | CDCA3    | 12 |
| CDCA4    | 55038  | CDCA4    | 14 |
| CDCA5    | 113130 | CDCA5    | 11 |
| CDCA7    | 83879  | CDCA7    | 2  |
| CDCA7L   | 55536  | CDCA7L   | 7  |
| CDCA8    | 55143  | CDCA8    | 1  |
| CDCP1    | 64866  | CDCP1    | 3  |
| CDH12    | 1010   | CDH12    | 5  |
| CDH15    | 1013   | CDH15    | 16 |
| CDH17    | 1015   | CDH17    | 8  |
| CDH18    | 1016   | CDH18    | 5  |
| CDH2     | 1000   | CDH2     | 18 |
| CDH24    | 64403  | CDH24    | 14 |
| CDH8     | 1006   | CDH8     | 16 |
| CDH9     | 1007   | CDH9     | 5  |
| CDIPT    | 10423  | CDIPT    | 16 |
| CDK10    | 8558   | CDK10    | 16 |
| CDK2     | 1017   | CDK2     | 12 |
| CDK2AP1  | 8099   | CDK2AP1  | 12 |
| CDK2AP2  | 10263  | CDK2AP2  | 11 |
| CDK3     | 1018   | CDK3     | 17 |
| CDK4     | 1019   | CDK4     | 12 |
| CDK5     | 1020   | CDK5     | 7  |
| CDK5R1   | 8851   | CDK5R1   | 17 |
| CDK5R2   | 8941   | CDK5R2   | 2  |
| CDK5RAP1 | 51654  | CDK5RAP1 | 20 |
| CDK5RAP2 | 55755  | CDK5RAP2 | 9  |
| CDK5RAP3 | 80279  | CDK5RAP3 | 17 |
| CDK6     | 1021   | CDK6     | 7  |
| CDK7     | 1022   | CDK7     | 5  |



|            |        |            |    |
|------------|--------|------------|----|
| CDK8       | 1024   | CDK8       | 13 |
| CDK9       | 1025   | CDK9       | 9  |
| CDKAL1     | 54901  | CDKAL1     | 6  |
| CDKL1      | 8814   | CDKL1      | 14 |
| CDKL2      | 8999   | CDKL2      | 4  |
| CDKL3      | 51265  | CDKL3      | 5  |
| CDKN1A     | 1026   | CDKN1A     | 6  |
| CDKN1B     | 1027   | CDKN1B     | 12 |
| CDKN1C     | 1028   | CDKN1C     | 11 |
| CDKN2A     | 1029   | CDKN2A     | 9  |
| CDKN2AIP   | 55602  | CDKN2AIP   | 4  |
| CDKN2AIPNL | 91368  | CDKN2AIPNL | 5  |
| CDKN2B     | 1030   | CDKN2B     | 9  |
| CDKN2C     | 1031   | CDKN2C     | 1  |
| CDKN2D     | 1032   | CDKN2D     | 19 |
| CDKN3      | 1033   | CDKN3      | 14 |
| CDNF       | 441549 | CDNF       | 10 |
| CDO1       | 1036   | CDO1       | 5  |
| CDR2       | 1039   | CDR2       | 16 |
| CDR2L      | 30850  | CDR2L      | 17 |
| CDRT1      | 374286 | CDRT1      |    |
| CDS2       | 8760   | CDS2       | 20 |
| CDT1       | 81620  | CDT1       | 16 |
| CDV3       | 55573  | CDV3       |    |
| CDY1       | 9085   | CDY1       | Y  |
| CEACAM1    | 634    | CEACAM1    | 19 |
| CEACAM21   | 90273  | CEACAM21   | 19 |
| CEBPA      | 1050   | CEBPA      | 19 |
| CEBPB      | 1051   | CEBPB      | 20 |
| CEBPD      | 1052   | CEBPD      | 8  |
| CEBPE      | 1053   | CEBPE      | 14 |
| CEBPG      | 1054   | CEBPG      | 19 |
| CEBPZ      | 10153  | CEBPZ      | 2  |
| CECR1      | 51816  | CECR1      | 22 |
| CECR5      | 27440  | CECR5      | 22 |
| CECR6      | 27439  | CECR6      | 22 |
| CECR7      | 27438  | CECR7      | 22 |
| CEL        | 1056   | CEL        | 9  |
| CELP       | 1057   | CELP       | 9  |
| CELSR1     | 9620   | CELSR1     | 22 |
| CELSR2     | 1952   | CELSR2     | 1  |
| CELSR3     | 1951   | CELSR3     | 3  |
| CEMP1      | 752014 | CEMP1      |    |
| CEND1      | 51286  | CEND1      | 11 |

|         |        |         |    |
|---------|--------|---------|----|
| CENPA   | 1058   | CENPA   | 2  |
| CENPB   | 1059   | CENPB   | 20 |
| CENPBD1 | 92806  | CENPBD1 | 16 |
| CENPC1  | 1060   | CENPC1  | 4  |
| CENPE   | 1062   | CENPE   | 4  |
| CENPF   | 1063   | CENPF   | 1  |
| CENPH   | 64946  | CENPH   | 5  |
| CENPI   | 2491   | CENPI   | X  |
| CENPJ   | 55835  | CENPJ   | 13 |
| CENPK   | 64105  | CENPK   | 5  |
| CENPL   | 91687  | CENPL   | 1  |
| CENPM   | 79019  | CENPM   | 22 |
| CENPN   | 55839  | CENPN   | 16 |
| CENPO   | 79172  | CENPO   | 2  |
| CENPP   | 401541 | CENPP   | 9  |
| CENPQ   | 55166  | CENPQ   | 6  |
| CENPT   | 80152  | CENPT   | 16 |
| CENPV   | 201161 | CENPV   | 17 |
| CENTA1  | 11033  | CENTA1  |    |
| CENTB2  | 23527  | CENTB2  | 3  |
| CENTG3  | 116988 | CENTG3  | 7  |
| CEP110  | 11064  | CEP110  | 9  |
| CEP135  | 9662   | CEP135  | 4  |
| CEP152  | 22995  | CEP152  | 15 |
| CEP164  | 22897  | CEP164  | 11 |
| CEP192  | 55125  | CEP192  | 18 |
| CEP250  | 11190  | CEP250  | 20 |
| CEP290  | 80184  | CEP290  | 12 |
| CEP350  | 9857   | CEP350  | 1  |
| CEP55   | 55165  | CEP55   | 10 |
| CEP57   | 9702   | CEP57   | 11 |
| CEP68   | 23177  | CEP68   | 2  |
| CEP70   | 80321  | CEP70   | 3  |
| CEP72   | 55722  | CEP72   | 5  |
| CEP76   | 79959  | CEP76   | 18 |
| CEP78   | 84131  | CEP78   | 9  |
| CEP97   | 79598  | CEP97   | 3  |
| CEPT1   | 10390  | CEPT1   | 1  |
| CERCAM  | 51148  | CERCAM  | 9  |
| CERK    | 64781  | CERK    | 22 |
| CERKL   | 375298 | CERKL   | 2  |
| CES2    | 8824   | CES2    | 16 |
| CES3    | 23491  | CES3    | 16 |
| CES8    | 283848 | CES8    | 16 |

|         |        |         |    |
|---------|--------|---------|----|
| CETN2   | 1069   | CETN2   | X  |
| CETN3   | 1070   | CETN3   | 5  |
| CETP    | 1071   | CETP    | 16 |
| CFB     | 629    | CFB     | 6  |
| CFC1    | 55997  | CFC1    | 2  |
| CFD     | 1675   | CFD     | 19 |
| CFDP1   | 10428  | CFDP1   | 16 |
| CFH     | 3075   | CFH     | 1  |
| CFL1    | 1072   | CFL1    | 11 |
| CFL2    | 1073   | CFL2    | 14 |
| CFLAR   | 8837   | CFLAR   | 2  |
| CGB     | 1082   | CGB     | 19 |
| CGB1    | 114335 | CGB1    | 19 |
| CGB2    | 114336 | CGB2    | 19 |
| CGB5    | 93659  | CGB5    | 19 |
| CGGBP1  | 8545   | CGGBP1  | 3  |
| CGI-96  | 27341  | CGI-96  |    |
| CGN     | 57530  | CGN     | 1  |
| CGNL1   | 84952  | CGNL1   | 15 |
| CGRRF1  | 10668  | CGRRF1  | 14 |
| CH25H   | 9023   | CH25H   | 10 |
| CHAC1   | 79094  | CHAC1   | 15 |
| CHAC2   | 494143 | CHAC2   | 2  |
| CHAF1A  | 10036  | CHAF1A  | 19 |
| CHAF1B  | 8208   | CHAF1B  | 21 |
| CHCHD1  | 118487 | CHCHD1  | 10 |
| CHCHD10 | 400916 | CHCHD10 | 22 |
| CHCHD2  | 51142  | CHCHD2  | 7  |
| CHCHD3  | 54927  | CHCHD3  | 7  |
| CHCHD4  | 131474 | CHCHD4  | 3  |
| CHCHD5  | 84269  | CHCHD5  | 2  |
| CHCHD6  | 84303  | CHCHD6  | 3  |
| CHCHD7  | 79145  | CHCHD7  | 8  |
| CHCHD8  | 51287  | CHCHD8  | 11 |
| CHCHD9  | 645345 | CHCHD9  | 9  |
| CHD1    | 1105   | CHD1    | 5  |
| CHD1L   | 9557   | CHD1L   | 1  |
| CHD2    | 1106   | CHD2    | 15 |
| CHD3    | 1107   | CHD3    | 17 |
| CHD4    | 1108   | CHD4    | 12 |
| CHD6    | 84181  | CHD6    | 20 |
| CHD7    | 55636  | CHD7    | 8  |
| CHD8    | 57680  | CHD8    | 14 |
| CHD9    | 80205  | CHD9    | 16 |

|         |        |         |    |
|---------|--------|---------|----|
| CHDH    | 55349  | CHDH    | 3  |
| CHEK1   | 1111   | CHEK1   | 11 |
| CHEK2   | 11200  | CHEK2   | 22 |
| CHERP   | 10523  | CHERP   | 19 |
| CHES1   | 1112   | CHES1   | 14 |
| CHGA    | 1113   | CHGA    | 14 |
| CHGB    | 1114   | CHGB    | 20 |
| CHI3L1  | 1116   | CHI3L1  | 1  |
| CHI3L2  | 1117   | CHI3L2  | 1  |
| CHIC2   | 26511  | CHIC2   | 4  |
| CHKA    | 1119   | CHKA    |    |
| CHKB    | 1120   | CHKB    |    |
| CHM     | 1121   | CHM     | X  |
| CHML    | 1122   | CHML    | 1  |
| CHMP1A  | 5119   | CHMP1A  | 16 |
| CHMP1B  | 57132  | CHMP1B  | 18 |
| CHMP2A  | 27243  | CHMP2A  | 19 |
| CHMP2B  | 25978  | CHMP2B  | 3  |
| CHMP4A  | 29082  | CHMP4A  | 14 |
| CHMP4B  | 128866 | CHMP4B  | 20 |
| CHMP4C  | 92421  | CHMP4C  | 8  |
| CHMP5   | 51510  | CHMP5   | 9  |
| CHMP6   | 79643  | CHMP6   |    |
| CHMP7   | 91782  | CHMP7   | 8  |
| CHN2    | 1124   | CHN2    | 7  |
| CHODL   | 140578 | CHODL   | 21 |
| CHORDC1 | 26973  | CHORDC1 | 11 |
| CHP     | 11261  | CHP     | 15 |
| CHPF    | 79586  | CHPF    | 2  |
| CHPF2   | 54480  | CHPF2   | 7  |
| CHPT1   | 56994  | CHPT1   | 12 |
| CHRAC1  | 54108  | CHRAC1  | 8  |
| CHRD    | 8646   | CHRD    | 3  |
| CHRNA1  | 1134   | CHRNA1  | 2  |
| CHRNA10 | 57053  | CHRNA10 | 11 |
| CHRNA3  | 1136   | CHRNA3  | 15 |
| CHRNA5  | 1138   | CHRNA5  | 15 |
| CHRNA6  | 8973   | CHRNA6  | 8  |
| CHRNA7  | 1139   | CHRNA7  |    |
| CHRNB1  | 1140   | CHRNB1  | 17 |
| CHST1   | 8534   | CHST1   | 11 |
| CHST10  | 9486   | CHST10  | 2  |
| CHST12  | 55501  | CHST12  | 7  |
| CHST14  | 113189 | CHST14  | 15 |

|         |        |         |    |
|---------|--------|---------|----|
| CHST15  | 51363  | CHST15  | 10 |
| CHST2   | 9435   | CHST2   | 3  |
| CHST3   | 9469   | CHST3   | 10 |
| CHST7   | 56548  | CHST7   | X  |
| CHST9   | 83539  | CHST9   | 18 |
| CHSY1   | 22856  | CHSY1   | 15 |
| CHTF18  | 63922  | CHTF18  | 16 |
| CHTF8   | 54921  | CHTF8   | 16 |
| CHUK    | 1147   | CHUK    | 10 |
| CHURC1  | 91612  | CHURC1  | 14 |
| CIAO1   | 9391   | CIAO1   | 2  |
| CIAPIN1 | 57019  | CIAPIN1 | 16 |
| CIB1    | 10519  | CIB1    | 15 |
| CIB2    | 10518  | CIB2    | 15 |
| CIC     | 23152  | CIC     | 19 |
| CICE    | 152302 | CICE    | 3  |
| CIDEB   | 27141  | CIDEB   | 14 |
| CIDECP  | 152302 | CIDECP  | 3  |
| CIITA   | 4261   | CIITA   | 16 |
| CILP    | 8483   | CILP    | 15 |
| CINP    | 51550  | CINP    | 14 |
| CIP29   | 84324  | CIP29   | 12 |
| CIR1    | 9541   | CIR1    | 2  |
| CIRBP   | 1153   | CIRBP   | 19 |
| CIRH1A  | 84916  | CIRH1A  | 16 |
| CISD1   | 55847  | CISD1   | 10 |
| CISD2   | 493856 | CISD2   | 4  |
| CISH    | 1154   | CISH    | 3  |
| CITED1  | 4435   | CITED1  | X  |
| CITED2  | 10370  | CITED2  | 6  |
| CITED4  | 163732 | CITED4  | 1  |
| CKAP2   | 26586  | CKAP2   | 13 |
| CKAP2L  | 150468 | CKAP2L  | 2  |
| CKAP4   | 10970  | CKAP4   | 12 |
| CKAP5   | 9793   | CKAP5   | 11 |
| CKB     | 1152   | CKB     | 14 |
| CKLF    | 51192  | CKLF    | 16 |
| CKMT1A  | 548596 | CKMT1A  | 15 |
| CKMT1B  | 1159   | CKMT1B  | 15 |
| CKMT2   | 1160   | CKMT2   | 5  |
| CKS1B   | 1163   | CKS1B   | 1  |
| CKS2    | 1164   | CKS2    | 9  |
| CLASP1  | 23332  | CLASP1  | 2  |
| CLASP2  | 23122  | CLASP2  | 3  |

|         |           |         |    |
|---------|-----------|---------|----|
| CLC     | 1178      | CLC     | 19 |
| CLCA1   | 1179      | CLCA1   | 1  |
| CLCA4   | 22802     | CLCA4   | 1  |
| CLCC1   | 23155     | CLCC1   | 1  |
| CLCF1   | 23529     | CLCF1   | 11 |
| CLCN1   | 1180      | CLCN1   | 7  |
| CLCN2   | 1181      | CLCN2   | 3  |
| CLCN3   | 1182      | CLCN3   | 4  |
| CLCN4   | 1183      | CLCN4   | X  |
| CLCN5   | 1184      | CLCN5   | X  |
| CLCN6   | 1185      | CLCN6   | 1  |
| CLCN7   | 1186      | CLCN7   | 16 |
| CLCNKA  | 1187      | CLCNKA  | 1  |
| CLDN11  | 5010      | CLDN11  | 3  |
| CLDN12  | 9069      | CLDN12  | 7  |
| CLDN14  | 23562     | CLDN14  | 21 |
| CLDN15  | 24146     | CLDN15  | 7  |
| CLDN19  | 149461    | CLDN19  | 1  |
| CLDN2   | 9075      | CLDN2   | X  |
| CLDN22  | 53842     | CLDN22  |    |
| CLDN23  | 137075    | CLDN23  | 8  |
| CLDN24  | 100132463 | CLDN24  |    |
| CLDN4   | 1364      | CLDN4   | 7  |
| CLDN5   | 7122      | CLDN5   | 22 |
| CLDN7   | 1366      | CLDN7   | 17 |
| CLDND1  | 56650     | CLDND1  | 3  |
| CLDND2  | 125875    | CLDND2  | 19 |
| CLEC10A | 10462     | CLEC10A | 17 |
| CLEC11A | 6320      | CLEC11A | 19 |
| CLEC14A | 161198    | CLEC14A | 14 |
| CLEC16A | 23274     | CLEC16A | 16 |
| CLEC17A | 388512    | CLEC17A | 19 |
| CLEC18C | 283971    | CLEC18C | 16 |
| CLEC2B  | 9976      | CLEC2B  | 12 |
| CLEC2D  | 29121     | CLEC2D  | 12 |
| CLEC2L  | 154790    | CLEC2L  |    |
| CLEC4A  | 50856     | CLEC4A  | 12 |
| CLEC4C  | 170482    | CLEC4C  | 12 |
| CLEC4D  | 338339    | CLEC4D  | 12 |
| CLEC4F  | 165530    | CLEC4F  | 2  |
| CLEC4G  | 339390    | CLEC4G  | 19 |
| CLEC6A  | 93978     | CLEC6A  | 12 |
| CLEC7A  | 64581     | CLEC7A  | 12 |
| CLEC9A  | 283420    | CLEC9A  | 12 |

|         |        |         |    |
|---------|--------|---------|----|
| CLECL1  | 160365 | CLECL1  | 12 |
| CLGN    | 1047   | CLGN    | 4  |
| CLIC1   | 1192   | CLIC1   | 6  |
| CLIC2   | 1193   | CLIC2   | X  |
| CLIC3   | 9022   | CLIC3   | 9  |
| CLIC4   | 25932  | CLIC4   | 1  |
| CLIC6   | 54102  | CLIC6   | 21 |
| CLINT1  | 9685   | CLINT1  | 5  |
| CLIP1   | 6249   | CLIP1   | 12 |
| CLIP2   | 7461   | CLIP2   | 7  |
| CLIP3   | 25999  | CLIP3   | 19 |
| CLK1    | 1195   | CLK1    | 2  |
| CLK2    | 1196   | CLK2    |    |
| CLK3    | 1198   | CLK3    | 15 |
| CLK4    | 57396  | CLK4    | 5  |
| CLMN    | 79789  | CLMN    | 14 |
| CLN3    | 1201   | CLN3    | 16 |
| CLN5    | 1203   | CLN5    | 13 |
| CLN6    | 54982  | CLN6    | 15 |
| CLP1    | 10978  | CLP1    | 11 |
| CLPB    | 81570  | CLPB    | 11 |
| CLPP    | 8192   | CLPP    | 19 |
| CLPTM1  | 1209   | CLPTM1  | 19 |
| CLPTM1L | 81037  | CLPTM1L | 5  |
| CLPX    | 10845  | CLPX    | 15 |
| CLSPN   | 63967  | CLSPN   | 1  |
| CLSTN1  | 22883  | CLSTN1  | 1  |
| CLSTN2  | 64084  | CLSTN2  | 3  |
| CLSTN3  | 9746   | CLSTN3  | 12 |
| CLTA    | 1211   | CLTA    | 9  |
| CLTB    | 1212   | CLTB    | 5  |
| CLTC    | 1213   | CLTC    | 17 |
| CLTCL1  | 8218   | CLTCL1  | 22 |
| CLUAP1  | 23059  | CLUAP1  | 16 |
| CLVS2   | 134829 | CLVS2   | 6  |
| CLYBL   | 171425 | CLYBL   | 13 |
| CMAH    | 8418   | CMAH    | 6  |
| CMAS    | 55907  | CMAS    | 12 |
| CMBL    | 134147 | CMBL    | 5  |
| CMC1    | 152100 | CMC1    | 3  |
| CMIP    | 80790  | CMIP    | 16 |
| CMPK1   | 51727  | CMPK1   | 1  |
| CMTM1   | 113540 | CMTM1   | 16 |
| CMTM3   | 123920 | CMTM3   | 16 |

|         |        |         |    |
|---------|--------|---------|----|
| CMTM4   | 146223 | CMTM4   | 16 |
| CMTM6   | 54918  | CMTM6   | 3  |
| CMTM7   | 112616 | CMTM7   | 3  |
| CMTM8   | 152189 | CMTM8   | 3  |
| CNBP    | 7555   | CNBP    | 3  |
| CNDP2   | 55748  | CNDP2   | 18 |
| CNFN    | 84518  | CNFN    | 19 |
| CNIH2   | 254263 | CNIH2   |    |
| CNIH4   | 29097  | CNIH4   | 1  |
| CNKSR2  | 22866  | CNKSR2  | X  |
| CNN2    | 1265   | CNN2    | 19 |
| CNN3    | 1266   | CNN3    | 1  |
| CNNM2   | 54805  | CNNM2   | 10 |
| CNNM3   | 26505  | CNNM3   | 2  |
| CNNM4   | 26504  | CNNM4   | 2  |
| CNO     | 55330  | CNO     | 4  |
| CNOT1   | 23019  | CNOT1   | 16 |
| CNOT10  | 25904  | CNOT10  | 3  |
| CNOT2   | 4848   | CNOT2   | 12 |
| CNOT3   | 4849   | CNOT3   | 19 |
| CNOT4   | 4850   | CNOT4   | 7  |
| CNOT6   | 57472  | CNOT6   | 5  |
| CNOT6L  | 246175 | CNOT6L  | 4  |
| CNOT7   | 29883  | CNOT7   | 8  |
| CNOT8   | 9337   | CNOT8   | 5  |
| CNP     | 1267   | CNP     | 17 |
| CNPY2   | 10330  | CNPY2   | 12 |
| CNPY3   | 10695  | CNPY3   | 6  |
| CNPY4   | 245812 | CNPY4   | 7  |
| CNR1    | 1268   | CNR1    | 6  |
| CNR2    | 1269   | CNR2    | 1  |
| CNRIP1  | 25927  | CNRIP1  | 2  |
| CNTLN   | 54875  | CNTLN   | 9  |
| CNTN2   | 6900   | CNTN2   | 1  |
| CNTN6   | 27255  | CNTN6   | 3  |
| CNTNAP1 | 8506   | CNTNAP1 | 17 |
| CNTNAP3 | 79937  | CNTNAP3 | 9  |
| COASY   | 80347  | COASY   | 17 |
| COBL    | 23242  | COBL    | 7  |
| COBLL1  | 22837  | COBLL1  | 2  |
| COBRA1  | 25920  | COBRA1  |    |
| COCH    | 1690   | COCH    | 14 |
| COG1    | 9382   | COG1    | 17 |
| COG3    | 83548  | COG3    | 13 |



|         |        |         |    |
|---------|--------|---------|----|
| COG4    | 25839  | COG4    | 16 |
| COG5    | 10466  | COG5    | 7  |
| COG6    | 57511  | COG6    | 13 |
| COG7    | 91949  | COG7    | 16 |
| COIL    | 8161   | COIL    | 17 |
| COL14A1 | 7373   | COL14A1 | 8  |
| COL15A1 | 1306   | COL15A1 | 9  |
| COL16A1 | 1307   | COL16A1 | 1  |
| COL1A1  | 1277   | COL1A1  | 17 |
| COL1A2  | 1278   | COL1A2  | 7  |
| COL23A1 | 91522  | COL23A1 | 5  |
| COL24A1 | 255631 | COL24A1 | 1  |
| COL4A3  | 1285   | COL4A3  | 2  |
| COL5A1  | 1289   | COL5A1  | 9  |
| COL5A2  | 1290   | COL5A2  | 2  |
| COL6A3  | 1293   | COL6A3  | 2  |
| COL7A1  | 1294   | COL7A1  | 3  |
| COL8A2  | 1296   | COL8A2  | 1  |
| COL9A2  | 1298   | COL9A2  | 1  |
| COL9A3  | 1299   | COL9A3  | 20 |
| COLQ    | 8292   | COLQ    |    |
| COMMD1  | 150684 | COMMD1  | 2  |
| COMMD10 | 51397  | COMMD10 | 5  |
| COMMD2  | 51122  | COMMD2  | 3  |
| COMMD3  | 23412  | COMMD3  | 10 |
| COMMD4  | 54939  | COMMD4  | 15 |
| COMMD5  | 28991  | COMMD5  | 8  |
| COMMD6  | 170622 | COMMD6  | 13 |
| COMMD7  | 149951 | COMMD7  | 20 |
| COMMD8  | 54951  | COMMD8  | 4  |
| COMMD9  | 29099  | COMMD9  |    |
| COMP    | 1311   | COMP    | 19 |
| COMT    | 1312   | COMT    | 22 |
| COMTD1  | 118881 | COMTD1  | 10 |
| COPA    | 1314   | COPA    | 1  |
| COPB1   | 1315   | COPB1   | 11 |
| COPB2   | 9276   | COPB2   | 3  |
| COPE    | 11316  | COPE    | 19 |
| COPG2   | 26958  | COPG2   | 7  |
| COPS2   | 9318   | COPS2   | 15 |
| COPS3   | 8533   | COPS3   | 17 |
| COPS4   | 51138  | COPS4   | 4  |
| COPS5   | 10987  | COPS5   | 8  |
| COPS6   | 10980  | COPS6   | 7  |

|         |        |         |    |
|---------|--------|---------|----|
| COPS7A  | 50813  | COPS7A  | 12 |
| COPS7B  | 64708  | COPS7B  | 2  |
| COPS8   | 10920  | COPS8   | 2  |
| COPZ1   | 22818  | COPZ1   | 12 |
| COPZ2   | 51226  | COPZ2   | 17 |
| COQ10A  | 93058  | COQ10A  | 12 |
| COQ10B  | 80219  | COQ10B  | 2  |
| COQ2    | 27235  | COQ2    | 4  |
| COQ3    | 51805  | COQ3    | 6  |
| COQ5    | 84274  | COQ5    | 12 |
| COQ6    | 51004  | COQ6    | 14 |
| COQ7    | 10229  | COQ7    | 16 |
| COQ9    | 57017  | COQ9    | 16 |
| CORO1A  | 11151  | CORO1A  | 16 |
| CORO1B  | 57175  | CORO1B  | 11 |
| CORO1C  | 23603  | CORO1C  | 12 |
| CORO2A  | 7464   | CORO2A  | 9  |
| CORO2B  | 10391  | CORO2B  | 15 |
| CORO6   | 84940  | CORO6   | 17 |
| CORO7   | 79585  | CORO7   | 16 |
| CORT    | 1325   | CORT    | 1  |
| COTL1   | 23406  | COTL1   | 16 |
| COX10   | 1352   | COX10   | 17 |
| COX11   | 1353   | COX11   | 17 |
| COX11P  | 140468 | COX11P  | 6  |
| COX16   | 51241  | COX16   | 14 |
| COX17   | 10063  | COX17   | 3  |
| COX19   | 90639  | COX19   | 7  |
| COX4I1  | 1327   | COX4I1  | 16 |
| COX4NB  | 10328  | COX4NB  | 16 |
| COX5A   | 9377   | COX5A   | 15 |
| COX5B   | 1329   | COX5B   | 2  |
| COX6A1  | 1337   | COX6A1  | 12 |
| COX6B1  | 1340   | COX6B1  | 19 |
| COX6C   | 1345   | COX6C   | 8  |
| COX7A2L | 9167   | COX7A2L | 2  |
| COX7B   | 1349   | COX7B   | X  |
| COX7C   | 1350   | COX7C   | 5  |
| COX8A   | 1351   | COX8A   | 11 |
| CP110   | 9738   | CP110   | 16 |
| CPA2    | 1358   | CPA2    | 7  |
| CPA3    | 1359   | CPA3    | 3  |
| CPA4    | 51200  | CPA4    | 7  |
| CPA6    | 57094  | CPA6    | 8  |

|         |        |         |    |
|---------|--------|---------|----|
| CPD     | 1362   | CPD     | 17 |
| CPE     | 1363   | CPE     | 4  |
| CPEB1   | 64506  | CPEB1   | 15 |
| CPEB2   | 132864 | CPEB2   | 4  |
| CPEB3   | 22849  | CPEB3   | 10 |
| CPEB4   | 80315  | CPEB4   | 5  |
| CPLX1   | 10815  | CPLX1   | 4  |
| CPLX3   | 594855 | CPLX3   | 15 |
| CPN1    | 1369   | CPN1    | 10 |
| CPN2    | 1370   | CPN2    |    |
| CPNE1   | 8904   | CPNE1   | 20 |
| CPNE2   | 221184 | CPNE2   | 16 |
| CPNE3   | 8895   | CPNE3   | 8  |
| CPNE5   | 57699  | CPNE5   | 6  |
| CPNE7   | 27132  | CPNE7   | 16 |
| CPNE9   | 151835 | CPNE9   | 3  |
| CPOX    | 1371   | CPOX    | 3  |
| CPPED1  | 55313  | CPPED1  | 16 |
| CPSF1   | 29894  | CPSF1   | 8  |
| CPSF2   | 53981  | CPSF2   | 14 |
| CPSF3L  | 54973  | CPSF3L  | 1  |
| CPSF4   | 10898  | CPSF4   | 7  |
| CPSF6   | 11052  | CPSF6   | 12 |
| CPT1A   | 1374   | CPT1A   | 11 |
| CPT1B   | 1375   | CPT1B   |    |
| CPT1C   | 126129 | CPT1C   | 19 |
| CPT2    | 1376   | CPT2    | 1  |
| CPVL    | 54504  | CPVL    | 7  |
| CPXM1   | 56265  | CPXM1   | 20 |
| CR1L    | 1379   | CR1L    | 1  |
| CR2     | 1380   | CR2     | 1  |
| CRABP1  | 1381   | CRABP1  | 15 |
| CRABP2  | 1382   | CRABP2  | 1  |
| CRADD   | 8738   | CRADD   | 12 |
| CRAMP1L | 57585  | CRAMP1L | 16 |
| CRAT    | 1384   | CRAT    | 9  |
| CRB3    | 92359  | CRB3    | 19 |
| CRBN    | 51185  | CRBN    | 3  |
| CRCP    | 27297  | CRCP    | 7  |
| CRCT1   | 54544  | CRCT1   | 1  |
| CREB1   | 1385   | CREB1   | 2  |
| CREB3   | 10488  | CREB3   | 9  |
| CREB3L1 | 90993  | CREB3L1 | 11 |
| CREB3L2 | 64764  | CREB3L2 | 7  |

|          |        |          |    |
|----------|--------|----------|----|
| CREB3L4  | 148327 | CREB3L4  | 1  |
| CREBBP   | 1387   | CREBBP   | 16 |
| CREBL1   | 1388   | CREBL1   | 6  |
| CREBL2   | 1389   | CREBL2   | 12 |
| CREBZF   | 58487  | CREBZF   | 11 |
| CREG1    | 8804   | CREG1    | 1  |
| CRELD1   | 78987  | CRELD1   | 3  |
| CRELD2   | 79174  | CRELD2   | 22 |
| CREM     | 1390   | CREM     | 10 |
| CRHBP    | 1393   | CRHBP    | 5  |
| CRIM1    | 51232  | CRIM1    | 2  |
| CRIM2    | 375616 | CRIM2    | 7  |
| CRIP1    | 1396   | CRIP1    | 14 |
| CRIP2    | 1397   | CRIP2    | 14 |
| CRIPAK   | 285464 | CRIPAK   | 4  |
| CRIPT    | 9419   | CRIPT    | 2  |
| CRISPLD2 | 83716  | CRISPLD2 | 16 |
| CRK      | 1398   | CRK      | 17 |
| CRKRS    | 51755  | CRKRS    | 17 |
| CRLF1    | 9244   | CRLF1    | 19 |
| CRLF3    | 51379  | CRLF3    | 17 |
| CRLS1    | 54675  | CRLS1    | 20 |
| CRNKL1   | 51340  | CRNKL1   | 20 |
| CROCC    | 9696   | CROCC    | 1  |
| CROT     | 54677  | CROT     | 7  |
| CRSP9    | 9443   | CRSP9    | 5  |
| CRTAP    | 10491  | CRTAP    | 3  |
| CRTC1    | 23373  | CRTC1    | 19 |
| CRTC3    | 64784  | CRTC3    | 15 |
| CRX      | 1406   | CRX      | 19 |
| CRY2     | 1408   | CRY2     | 11 |
| CRYAA    | 1409   | CRYAA    | 21 |
| CRYBA4   | 1413   | CRYBA4   | 22 |
| CRYBB2   | 1415   | CRYBB2   | 22 |
| CRYBG3   | 131544 | CRYBG3   | 3  |
| CRYGS    | 1427   | CRYGS    | 3  |
| CRYL1    | 51084  | CRYL1    | 13 |
| CRYM     | 1428   | CRYM     | 16 |
| CRYZ     | 1429   | CRYZ     | 1  |
| CRYZL1   | 9946   | CRYZL1   | 21 |
| CS       | 1431   | CS       | 12 |
| CSAD     | 51380  | CSAD     | 12 |
| CSAG1    | 158511 | CSAG1    | X  |
| CSAG3    | 389903 | CSAG3    | X  |

|            |        |            |    |
|------------|--------|------------|----|
| CSAG3A     | 389903 | CSAG3A     | X  |
| CSAG3B     | 728461 | CSAG3B     |    |
| CSDA       | 8531   | CSDA       | 12 |
| CSDC2      | 27254  | CSDC2      | 22 |
| CSDE1      | 7812   | CSDE1      | 1  |
| CSE1L      | 1434   | CSE1L      | 20 |
| CSF1R      | 1436   | CSF1R      | 5  |
| CSF2RA     | 1438   | CSF2RA     | XY |
| CSF2RB     | 1439   | CSF2RB     | 22 |
| CSGALNACT2 | 55454  | CSGALNACT2 | 10 |
| CSHL1      | 1444   | CSHL1      | 17 |
| CSK        | 1445   | CSK        | 15 |
| CSNK1A1    | 1452   | CSNK1A1    | 5  |
| CSNK1D     | 1453   | CSNK1D     | 17 |
| CSNK1E     | 1454   | CSNK1E     | 22 |
| CSNK1G1    | 53944  | CSNK1G1    | 15 |
| CSNK1G2    | 1455   | CSNK1G2    | 19 |
| CSNK1G3    | 1456   | CSNK1G3    | 5  |
| CSNK2A1    | 1457   | CSNK2A1    | 20 |
| CSNK2A2    | 1459   | CSNK2A2    | 16 |
| CSPG4LYP1  | 114758 | CSPG4LYP1  | Y  |
| CSPG5      | 10675  | CSPG5      | 3  |
| CSPP1      | 79848  | CSPP1      | 8  |
| CSRNP2     | 81566  | CSRNP2     | 12 |
| CSRNP3     | 80034  | CSRNP3     | 2  |
| CSRP1      | 1465   | CSRP1      | 1  |
| CSRP2      | 1466   | CSRP2      | 12 |
| CSRP2BP    | 57325  | CSRP2BP    | 20 |
| CST3       | 1471   | CST3       | 20 |
| CST6       | 1474   | CST6       |    |
| CST7       | 8530   | CST7       | 20 |
| CST9       | 128822 | CST9       | 20 |
| CSTA       | 1475   | CSTA       | 3  |
| CSTB       | 1476   | CSTB       | 21 |
| CSTF1      | 1477   | CSTF1      | 20 |
| CSTF2      | 1478   | CSTF2      | X  |
| CSTF2T     | 23283  | CSTF2T     | 10 |
| CSTF3      | 1479   | CSTF3      | 11 |
| CT45A4     | 441520 | CT45A4     | X  |
| CTAGE6     | 340307 | CTAGE6     | 7  |
| CTBP1      | 1487   | CTBP1      | 4  |
| CTBP2      | 1488   | CTBP2      | 10 |
| CTBS       | 1486   | CTBS       | 1  |
| CTCF       | 10664  | CTCF       | 16 |

|           |        |           |    |
|-----------|--------|-----------|----|
| CTDP1     | 9150   | CTDP1     | 18 |
| CTDSP1    | 58190  | CTDSP1    | 2  |
| CTDSP2    | 10106  | CTDSP2    | 12 |
| CTDSPL    | 10217  | CTDSPL    | 3  |
| CTDSPL2   | 51496  | CTDSPL2   | 15 |
| CTGF      | 1490   | CTGF      | 6  |
| CTGLF3    | 414189 | CTGLF3    |    |
| CTGLF7    | 728127 | CTGLF7    | 10 |
| CTH       | 1491   | CTH       | 1  |
| CTHRC1    | 115908 | CTHRC1    | 8  |
| CTNNA1    | 1495   | CTNNA1    | 5  |
| CTNNA2    | 1496   | CTNNA2    | 2  |
| CTNNAL1   | 8727   | CTNNAL1   | 9  |
| CTNNB1    | 1499   | CTNNB1    |    |
| CTNNBIP1  | 56998  | CTNNBIP1  | 1  |
| CTNNBL1   | 56259  | CTNNBL1   | 20 |
| CTNS      | 1497   | CTNS      | 17 |
| CTPS      | 1503   | CTPS      | 1  |
| CTPS2     | 56474  | CTPS2     | X  |
| CTR9      | 9646   | CTR9      | 11 |
| CTRL      | 1506   | CTRL      | 16 |
| CTSA      | 5476   | CTSA      | 20 |
| CTSB      | 1508   | CTSB      | 8  |
| CTSC      | 1075   | CTSC      | 11 |
| CTSD      | 1509   | CTSD      | 11 |
| CTSF      | 8722   | CTSF      | 11 |
| CTSG      | 1511   | CTSG      | 14 |
| CTSH      | 1512   | CTSH      | 15 |
| CTSK      | 1513   | CTSK      | 1  |
| CTSL1     | 1514   | CTSL1     | 9  |
| CTSL2     | 1515   | CTSL2     | 9  |
| CTSS      | 1520   | CTSS      | 1  |
| CTSW      | 1521   | CTSW      | 11 |
| CTSZ      | 1522   | CTSZ      | 20 |
| CTTN      | 2017   | CTTN      | 11 |
| CTTNBP2NL | 55917  | CTTNBP2NL | 1  |
| CTU2      | 348180 | CTU2      | 16 |
| CTXN1     | 404217 | CTXN1     | 19 |
| CTXN3     | 613212 | CTXN3     | 5  |
| CUBN      | 8029   | CUBN      | 10 |
| CUEDC1    | 404093 | CUEDC1    | 17 |
| CUEDC2    | 79004  | CUEDC2    | 10 |
| CUGBP1    | 10658  | CUGBP1    | 11 |
| CUGBP2    | 10659  | CUGBP2    | 10 |

|          |        |          |    |
|----------|--------|----------|----|
| CUL1     | 8454   | CUL1     | 7  |
| CUL2     | 8453   | CUL2     | 10 |
| CUL4A    | 8451   | CUL4A    | 13 |
| CUL4B    | 8450   | CUL4B    | X  |
| CUL5     | 8065   | CUL5     | 11 |
| CUL9     | 23113  | CUL9     | 6  |
| CUTA     | 51596  | CUTA     | 6  |
| CUTC     | 51076  | CUTC     | 10 |
| CUTL1    | 1523   | CUTL1    | 7  |
| CUX1     | 1523   | CUX1     | 7  |
| CUX2     | 23316  | CUX2     | 12 |
| CWC15    | 51503  | CWC15    | 11 |
| CWC22    | 57703  | CWC22    | 2  |
| CWF19L1  | 55280  | CWF19L1  | 10 |
| CWF19L2  | 143884 | CWF19L2  | 11 |
| CX3CR1   | 1524   | CX3CR1   | 3  |
| CXADR    | 1525   | CXADR    | 21 |
| CXADRP2  | 646243 | CXADRP2  | 15 |
| CXCL10   | 3627   | CXCL10   | 4  |
| CXCL16   | 58191  | CXCL16   | 17 |
| CXCL3    | 2921   | CXCL3    | 4  |
| CXCL5    | 6374   | CXCL5    | 4  |
| CXCL9    | 4283   | CXCL9    | 4  |
| CXCR3    | 2833   | CXCR3    | X  |
| CXCR4    | 7852   | CXCR4    | 2  |
| CXCR5    | 643    | CXCR5    | 11 |
| CXCR7    | 57007  | CXCR7    | 2  |
| CXORF12  | 8269   | CXorf12  | X  |
| CXORF15  | 55787  | CXorf15  | X  |
| CXORF21  | 80231  | CXorf21  | X  |
| CXORF22  | 170063 | CXorf22  | X  |
| CXORF23  | 256643 | CXorf23  | X  |
| CXORF26  | 51260  | CXorf26  | X  |
| CXORF27  | 25763  | CXorf27  | X  |
| CXORF36  | 79742  | CXorf36  | X  |
| CXORF38  | 159013 | CXorf38  | X  |
| CXORF39  | 139231 | CXorf39  | X  |
| CXORF40A | 91966  | CXorf40A | X  |
| CXORF40B | 541578 | CXorf40B | X  |
| CXORF45  | 79868  | CXorf45  | X  |
| CXORF55  | 139804 | CXorf55  | X  |
| CXORF56  | 63932  | CXorf56  | X  |
| CXORF57  | 55086  | CXorf57  | X  |
| CXORF59  | 286464 | CXorf59  | X  |

|          |           |          |    |
|----------|-----------|----------|----|
| CXORF64  | 100130613 | CXorf64  | X  |
| CXXC1    | 30827     | CXXC1    | 18 |
| CXXC4    | 80319     | CXXC4    | 4  |
| CXXC5    | 51523     | CXXC5    | 5  |
| CXYORF2  | 80161     | CXYorf2  | XY |
| CYB561   | 1534      | CYB561   | 17 |
| CYB561D1 | 284613    | CYB561D1 | 1  |
| CYB561D2 | 11068     | CYB561D2 | 3  |
| CYB5A    | 1528      | CYB5A    | 18 |
| CYB5B    | 80777     | CYB5B    | 16 |
| CYB5D1   | 124637    | CYB5D1   | 17 |
| CYB5D2   | 124936    | CYB5D2   | 17 |
| CYB5R1   | 51706     | CYB5R1   | 1  |
| CYB5R2   | 51700     | CYB5R2   | 11 |
| CYB5R3   | 1727      | CYB5R3   | 22 |
| CYB5R4   | 51167     | CYB5R4   | 6  |
| CYB5RL   | 606495    | CYB5RL   | 1  |
| CYBA     | 1535      | CYBA     | 16 |
| CYBASC3  | 220002    | CYBASC3  | 11 |
| CYBB     | 1536      | CYBB     | X  |
| CYBRD1   | 79901     | CYBRD1   | 2  |
| CYC1     | 1537      | CYC1     | 8  |
| CYCS     | 54205     | CYCS     | 7  |
| CYCSL1   | 157317    | CYCSL1   | 6  |
| CYFIP2   | 26999     | CYFIP2   | 5  |
| CYHR1    | 50626     | CYHR1    | 8  |
| CYLD     | 1540      | CYLD     | 16 |
| CYLN2    | 7461      | CYLN2    | 7  |
| CYORF15A | 246126    | CYorf15A | Y  |
| CYP11A1  | 1583      | CYP11A1  | 15 |
| CYP11B1  | 1584      | CYP11B1  | 8  |
| CYP1A1   | 1543      | CYP1A1   | 15 |
| CYP1B1   | 1545      | CYP1B1   | 2  |
| CYP20A1  | 57404     | CYP20A1  | 2  |
| CYP26A1  | 1592      | CYP26A1  | 10 |
| CYP26B1  | 56603     | CYP26B1  | 2  |
| CYP27A1  | 1593      | CYP27A1  | 2  |
| CYP27B1  | 1594      | CYP27B1  | 12 |
| CYP2B6   | 1555      | CYP2B6   | 19 |
| CYP2C8   | 1558      | CYP2C8   | 10 |
| CYP2C9   | 1559      | CYP2C9   | 10 |
| CYP2D6   | 1565      | CYP2D6   | 22 |
| CYP2E1   | 1571      | CYP2E1   | 10 |
| CYP2F1   | 1572      | CYP2F1   | 19 |



|           |        |           |    |
|-----------|--------|-----------|----|
| CYP2R1    | 120227 | CYP2R1    | 11 |
| CYP39A1   | 51302  | CYP39A1   | 6  |
| CYP3A7    | 1551   | CYP3A7    | 7  |
| CYP46A1   | 10858  | CYP46A1   | 14 |
| CYP4F12   | 66002  | CYP4F12   | 19 |
| CYP4F2    | 8529   | CYP4F2    | 19 |
| CYP4V2    | 285440 | CYP4V2    | 4  |
| CYP51A1   | 1595   | CYP51A1   | 7  |
| CYSLTR1   | 10800  | CYSLTR1   | X  |
| CYTH1     | 9267   | CYTH1     | 17 |
| CYTH2     | 9266   | CYTH2     | 19 |
| CYTH3     | 9265   | CYTH3     | 7  |
| CYTH4     | 27128  | CYTH4     | 22 |
| CYTIP     | 9595   | CYTIP     | 2  |
| CYTL1     | 54360  | CYTL1     | 4  |
| CYTSA     | 23384  | CYTSA     | 22 |
| CYTSB     | 92521  | CYTSB     | 17 |
| D21S2056E | 8568   | D21S2056E | 21 |
| D2HGDH    | 728294 | D2HGDH    | 2  |
| D4S234E   | 27065  | D4S234E   | 4  |
| DAAM1     | 23002  | DAAM1     | 14 |
| DACT1     | 51339  | DACT1     | 14 |
| DACT3     | 147906 | DACT3     | 19 |
| DAD1      | 1603   | DAD1      | 14 |
| DAD1L     | 56286  | DAD1L     | 12 |
| DAG1      | 1605   | DAG1      | 3  |
| DAGLB     | 221955 | DAGLB     | 7  |
| DAK       | 26007  | DAK       | 11 |
| DAO       | 1610   | DAO       | 12 |
| DAP       | 1611   | DAP       | 5  |
| DAP3      | 7818   | DAP3      | 1  |
| DAPK1     | 1612   | DAPK1     | 9  |
| DAPK2     | 23604  | DAPK2     | 15 |
| DAPK3     | 1613   | DAPK3     | 19 |
| DAPL1     | 92196  | DAPL1     | 2  |
| DAPP1     | 27071  | DAPP1     | 4  |
| DARC      | 2532   | DARC      | 1  |
| DARS      | 1615   | DARS      | 2  |
| DARS2     | 55157  | DARS2     | 1  |
| DAXX      | 1616   | DAXX      | 6  |
| DAZAP1    | 26528  | DAZAP1    | 19 |
| DAZAP2    | 9802   | DAZAP2    | 12 |
| DAZL      | 1618   | DAZL      | 3  |
| DBC1      | 1620   | DBC1      | 9  |

|         |        |         |    |
|---------|--------|---------|----|
| DBF4    | 10926  | DBF4    | 7  |
| DBI     | 1622   | DBI     | 2  |
| DBN1    | 1627   | DBN1    | 5  |
| DBNDD1  | 79007  | DBNDD1  | 16 |
| DBNDD2  | 55861  | DBNDD2  | 20 |
| DBNL    | 28988  | DBNL    | 7  |
| DBP     | 1628   | DBP     | 19 |
| DBR1    | 51163  | DBR1    | 3  |
| DBT     | 1629   | DBT     | 1  |
| DC36    | 389760 | DC36    |    |
| DCAF10  | 79269  | DCAF10  | 9  |
| DCAF15  | 90379  | DCAF15  | 19 |
| DCAF16  | 54876  | DCAF16  | 4  |
| DCAF6   | 55827  | DCAF6   | 1  |
| DCAF7   | 10238  | DCAF7   | 17 |
| DCAKD   | 79877  | DCAKD   | 17 |
| DCBLD1  | 285761 | DCBLD1  | 6  |
| DCBLD2  | 131566 | DCBLD2  | 3  |
| DCDC1   | 341019 | DCDC1   | 11 |
| DCDC2B  | 149069 | DCDC2B  | 1  |
| DCI     | 1632   | DCI     | 16 |
| DCK     | 1633   | DCK     | 4  |
| DCLK2   | 166614 | DCLK2   | 4  |
| DCLRE1A | 9937   | DCLRE1A | 10 |
| DCLRE1B | 64858  | DCLRE1B | 1  |
| DCLRE1C | 64421  | DCLRE1C | 10 |
| DCP1A   | 55802  | DCP1A   | 3  |
| DCP1B   | 196513 | DCP1B   | 12 |
| DCP2    | 167227 | DCP2    | 5  |
| DCPS    | 28960  | DCPS    | 11 |
| DCTD    | 1635   | DCTD    | 4  |
| DCTN1   | 1639   | DCTN1   | 2  |
| DCTN2   | 10540  | DCTN2   | 12 |
| DCTN3   | 11258  | DCTN3   | 9  |
| DCTN5   | 84516  | DCTN5   | 16 |
| DCTN6   | 10671  | DCTN6   | 8  |
| DCTPP1  | 79077  | DCTPP1  | 16 |
| DCUN1D1 | 54165  | DCUN1D1 | 3  |
| DCUN1D3 | 123879 | DCUN1D3 | 16 |
| DCUN1D4 | 23142  | DCUN1D4 | 4  |
| DCUN1D5 | 84259  | DCUN1D5 | 11 |
| DCXR    | 51181  | DCXR    | 17 |
| DDA1    | 79016  | DDA1    | 19 |
| DDAH1   | 23576  | DDAH1   | 1  |

|              |           |              |    |
|--------------|-----------|--------------|----|
| DDAH2        | 23564     | DDAH2        | 6  |
| DDB1         | 1642      | DDB1         |    |
| DDB2         | 1643      | DDB2         | 11 |
| DDC          | 1644      | DDC          | 7  |
| DDEF2        | 8853      | DDEF2        | 2  |
| DDHD2        | 23259     | DDHD2        | 8  |
| DDIT3        | 1649      | DDIT3        | 12 |
| DDIT4        | 54541     | DDIT4        | 10 |
| DDIT4L       | 115265    | DDIT4L       | 4  |
| DDN          | 23109     | DDN          | 12 |
| DDOST        | 1650      | DDOST        | 1  |
| DDR1         | 780       | DDR1         | 6  |
| DDRGK1       | 65992     | DDRGK1       | 20 |
| DDT          | 1652      | DDT          | 22 |
| DDTL         | 100037417 | DDTL         | 22 |
| DDX1         | 1653      | DDX1         | 2  |
| DDX10        | 1662      | DDX10        | 11 |
| DDX11        | 1663      | DDX11        | 12 |
| DDX17        | 10521     | DDX17        | 22 |
| DDX18        | 8886      | DDX18        | 2  |
| DDX19A       | 55308     | DDX19A       | 16 |
| DDX19B       | 11269     | DDX19B       | 16 |
| DDX19-DDX19L | 544314    | DDX19-DDX19L | 16 |
| DDX20        | 11218     | DDX20        | 1  |
| DDX21        | 9188      | DDX21        | 10 |
| DDX23        | 9416      | DDX23        | 12 |
| DDX24        | 57062     | DDX24        | 14 |
| DDX26B       | 203522    | DDX26B       | X  |
| DDX27        | 55661     | DDX27        | 20 |
| DDX28        | 55794     | DDX28        | 16 |
| DDX31        | 64794     | DDX31        | 9  |
| DDX39        | 10212     | DDX39        | 19 |
| DDX3X        | 1654      | DDX3X        | X  |
| DDX3Y        | 8653      | DDX3Y        | Y  |
| DDX4         | 54514     | DDX4         | 5  |
| DDX41        | 51428     | DDX41        | 5  |
| DDX42        | 11325     | DDX42        | 17 |
| DDX46        | 9879      | DDX46        | 5  |
| DDX47        | 51202     | DDX47        | 12 |
| DDX49        | 54555     | DDX49        | 19 |
| DDX5         | 1655      | DDX5         | 17 |
| DDX50        | 79009     | DDX50        | 10 |
| DDX52        | 11056     | DDX52        | 17 |
| DDX54        | 79039     | DDX54        | 12 |

|          |        |          |    |
|----------|--------|----------|----|
| DDX55    | 57696  | DDX55    | 12 |
| DDX56    | 54606  | DDX56    | 7  |
| DDX58    | 23586  | DDX58    | 9  |
| DDX59    | 83479  | DDX59    | 1  |
| DDX6     | 1656   | DDX6     | 11 |
| DDX60    | 55601  | DDX60    | 4  |
| DEADC1   | 134637 | DEADC1   | 6  |
| DEAF1    | 10522  | DEAF1    | 11 |
| DECR1    | 1666   | DECR1    | 8  |
| DECR2    | 26063  | DECR2    | 16 |
| DEDD     | 9191   | DEDD     | 1  |
| DEDD2    | 162989 | DEDD2    | 19 |
| DEF6     | 50619  | DEF6     | 6  |
| DEF8     | 54849  | DEF8     | 16 |
| DEFB103B | 414325 | DEFB103B | 8  |
| DEFB116  | 245930 | DEFB116  | 20 |
| DEFB122  | 245935 | DEFB122  | 20 |
| DEFB123  | 245936 | DEFB123  | 20 |
| DEFB125  | 245938 | DEFB125  | 20 |
| DEFB130  | 245940 | DEFB130  | 8  |
| DEFB133  | 403339 | DEFB133  |    |
| DEFB134  | 613211 | DEFB134  | 8  |
| DEFB4    | 1673   | DEFB4    | 8  |
| DEGS1    | 8560   | DEGS1    | 1  |
| DEGS2    | 123099 | DEGS2    | 14 |
| DEK      | 7913   | DEK      | 6  |
| DEM1     | 64789  | DEM1     | 1  |
| DENND1A  | 57706  | DENND1A  | 9  |
| DENND1C  | 79958  | DENND1C  | 19 |
| DENND2C  | 163259 | DENND2C  | 1  |
| DENND2D  | 79961  | DENND2D  | 1  |
| DENND3   | 22898  | DENND3   | 8  |
| DENND4A  | 10260  | DENND4A  | 15 |
| DENND4B  | 9909   | DENND4B  | 1  |
| DENND4C  | 55667  | DENND4C  | 9  |
| DENND5A  | 23258  | DENND5A  | 11 |
| DENND5B  | 160518 | DENND5B  | 12 |
| DENR     | 8562   | DENR     | 12 |
| DEPDC1B  | 55789  | DEPDC1B  | 5  |
| DEPDC5   | 9681   | DEPDC5   | 22 |
| DEPDC6   | 64798  | DEPDC6   | 8  |
| DEPDC7   | 91614  | DEPDC7   | 11 |
| DERA     | 51071  | DERA     | 12 |
| DERL1    | 79139  | DERL1    | 8  |

|         |        |         |    |
|---------|--------|---------|----|
| DERL2   | 51009  | DERL2   | 17 |
| DERL3   | 91319  | DERL3   | 22 |
| DET1    | 55070  | DET1    | 15 |
| DEXI    | 28955  | DEXI    | 16 |
| DFFA    | 1676   | DFFA    | 1  |
| DFFB    | 1677   | DFFB    | 1  |
| DFNA5   | 1687   | DFNA5   | 7  |
| DFNB31  | 25861  | DFNB31  | 9  |
| DFNB59  | 494513 | DFNB59  | 2  |
| DGAT1   | 8694   | DGAT1   | 8  |
| DGAT2   | 84649  | DGAT2   | 11 |
| DGCR14  | 8220   | DGCR14  | 22 |
| DGCR2   | 9993   | DGCR2   | 22 |
| DGCR6   | 8214   | DGCR6   | 22 |
| DGCR6L  | 85359  | DGCR6L  | 22 |
| DGCR8   | 54487  | DGCR8   | 22 |
| DGKA    | 1606   | DGKA    | 12 |
| DGKD    | 8527   | DGKD    | 2  |
| DGKE    | 8526   | DGKE    | 17 |
| DGKQ    | 1609   | DGKQ    | 4  |
| DGUOK   | 1716   | DGUOK   | 2  |
| DHCR24  | 1718   | DHCR24  | 1  |
| DHCR7   | 1717   | DHCR7   | 11 |
| DHDDS   | 79947  | DHDDS   | 1  |
| DHDH    | 27294  | DHDH    | 19 |
| DHFR    | 1719   | DHFR    | 5  |
| DHH     | 50846  | DHH     | 12 |
| DHODH   | 1723   | DHODH   | 16 |
| DHRS1   | 115817 | DHRS1   | 14 |
| DHRS11  | 79154  | DHRS11  | 17 |
| DHRS12  | 79758  | DHRS12  | 13 |
| DHRS13  | 147015 | DHRS13  | 17 |
| DHRS2   | 10202  | DHRS2   | 14 |
| DHRS4   | 10901  | DHRS4   | 14 |
| DHRS4L2 | 317749 | DHRS4L2 | 14 |
| DHRS7   | 51635  | DHRS7   | 14 |
| DHRS7B  | 25979  | DHRS7B  | 17 |
| DHRS7C  | 201140 | DHRS7C  | 17 |
| DHRSX   | 207063 | DHRSX   | Y  |
| DHTKD1  | 55526  | DHTKD1  | 10 |
| DHX15   | 1665   | DHX15   | 4  |
| DHX16   | 8449   | DHX16   | 6  |
| DHX29   | 54505  | DHX29   | 5  |
| DHX30   | 22907  | DHX30   | 3  |

|               |        |               |    |
|---------------|--------|---------------|----|
| DHX32         | 55760  | DHX32         | 10 |
| DHX33         | 56919  | DHX33         | 17 |
| DHX34         | 9704   | DHX34         | 19 |
| DHX35         | 60625  | DHX35         | 20 |
| DHX36         | 170506 | DHX36         | 3  |
| DHX37         | 57647  | DHX37         | 12 |
| DHX38         | 9785   | DHX38         | 16 |
| DHX40         | 79665  | DHX40         |    |
| DHX58         | 79132  | DHX58         | 17 |
| DHX8          | 1659   | DHX8          | 17 |
| DHX9          | 1660   | DHX9          | 1  |
| DIABLO        | 56616  | DIABLO        | 12 |
| DIAPH1        | 1729   | DIAPH1        | 5  |
| DIAPH3        | 81624  | DIAPH3        | 13 |
| DICER1        | 23405  | DICER1        | 14 |
| DIDO1         | 11083  | DIDO1         | 20 |
| DIMT1L        | 27292  | DIMT1L        | 5  |
| DIP2A         | 23181  | DIP2A         | 21 |
| DIP2B         | 57609  | DIP2B         | 12 |
| DIP2C         | 22982  | DIP2C         | 10 |
| DIRAS1        | 148252 | DIRAS1        | 19 |
| DIRAS3        | 9077   | DIRAS3        | 1  |
| DIRC1         | 116093 | DIRC1         | 2  |
| DIRC2         | 84925  | DIRC2         | 3  |
| DIS3L         | 115752 | DIS3L         | 15 |
| DIS3L2        | 129563 | DIS3L2        | 2  |
| DISP1         | 84976  | DISP1         | 1  |
| DISP2         | 85455  | DISP2         | 15 |
| DIXDC1        | 85458  | DIXDC1        | 11 |
| DJ222E13.2    | 91695  | dJ222E13.2    | 22 |
| DJ341D10.1    | 286453 | dJ341D10.1    | X  |
| DKC1          | 1736   | DKC1          | X  |
| DKFZP434A062  | 26102  | DKFZP434A062  | 9  |
| DKFZP434J1015 | 54753  | DKFZp434J1015 |    |
| DKFZP434K191  | 29797  | DKFZp434K191  | 22 |
| DKFZP434L187  | 26082  | DKFZP434L187  | 15 |
| DKFZP434M131  | 441452 | DKFZp434M131  | 9  |
| DKFZP434N035  | 84222  | DKFZp434N035  | 22 |
| DKFZP451A211  | 400169 | DKFZp451A211  | 13 |
| DKFZP547K054  | 56974  | DKFZp547K054  |    |
| DKFZP564C196  | 284649 | DKFZP564C196  |    |
| DKFZP564O0523 | 84060  | DKFZP564O0523 | 7  |
| DKFZP586I1420 | 222161 | DKFZP586I1420 | 7  |
| DKFZP667M2411 | 147172 | DKFZp667M2411 | 17 |

|               |        |               |    |
|---------------|--------|---------------|----|
| DKFZP686C2281 | 644296 | DKFZP686C2281 |    |
| DKFZP686E2158 | 643155 | DKFZP686E2158 |    |
| DKFZP686K1684 | 440034 | DKFZp686K1684 | 11 |
| DKFZP686O1327 | 401014 | DKFZp686O1327 |    |
| DKFZP686O2416 | 374383 | DKFZp686O2416 | 11 |
| DKFZP761O2018 | 92293  | DKFZp761O2018 |    |
| DKFZP761P0423 | 157285 | DKFZp761P0423 | 8  |
| DKFZP779B1634 | 342850 | DKFZp779B1634 |    |
| DKFZP779M0652 | 374387 | DKFZp779M0652 |    |
| DKKL1         | 27120  | DKKL1         | 19 |
| DLAT          | 1737   | DLAT          | 11 |
| DLD           | 1738   | DLD           | 7  |
| DLEU1         | 10301  | DLEU1         | 13 |
| DLEU2         | 8847   | DLEU2         | 13 |
| DLEU2L        | 79469  | DLEU2L        | 1  |
| DLG1          | 1739   | DLG1          | 3  |
| DLG2          | 1740   | DLG2          | 11 |
| DLG3          | 1741   | DLG3          | X  |
| DLG4          | 1742   | DLG4          | 17 |
| DLGAP4        | 22839  | DLGAP4        | 20 |
| DLGAP5        | 9787   | DLGAP5        | 14 |
| DLK2          | 65989  | DLK2          | 6  |
| DLL1          | 28514  | DLL1          | 6  |
| DLL3          | 10683  | DLL3          | 19 |
| DLST          | 1743   | DLST          | 14 |
| DLX1          | 1745   | DLX1          | 2  |
| DLX2          | 1746   | DLX2          | 2  |
| DLX6AS        | 285987 | DLX6AS        | 7  |
| DMAP1         | 55929  | DMAP1         | 1  |
| DMBX1         | 127343 | DMBX1         | 1  |
| DMC1          | 11144  | DMC1          | 22 |
| DMKN          | 93099  | DMKN          | 19 |
| DMRT1         | 1761   | DMRT1         | 9  |
| DMRTA1        | 63951  | DMRTA1        | 9  |
| DMRTA2        | 63950  | DMRTA2        | 1  |
| DMTF1         | 9988   | DMTF1         | 7  |
| DMWD          | 1762   | DMWD          | 19 |
| DMXL1         | 1657   | DMXL1         | 5  |
| DMXL2         | 23312  | DMXL2         | 15 |
| DNA2          | 1763   | DNA2          | 10 |
| DNAH2         | 146754 | DNAH2         | 17 |
| DNAH3         | 55567  | DNAH3         | 16 |
| DNAI1         | 27019  | DNAI1         | 9  |
| DNAJA1        | 3301   | DNAJA1        | 9  |

|          |        |          |    |
|----------|--------|----------|----|
| DNAJA2   | 10294  | DNAJA2   | 16 |
| DNAJA3   | 9093   | DNAJA3   | 16 |
| DNAJA4   | 55466  | DNAJA4   | 15 |
| DNAJB1   | 3337   | DNAJB1   | 19 |
| DNAJB11  | 51726  | DNAJB11  | 3  |
| DNAJB12  | 54788  | DNAJB12  | 10 |
| DNAJB14  | 79982  | DNAJB14  | 4  |
| DNAJB2   | 3300   | DNAJB2   | 2  |
| DNAJB4   | 11080  | DNAJB4   | 1  |
| DNAJB5   | 25822  | DNAJB5   |    |
| DNAJB6   | 10049  | DNAJB6   | 7  |
| DNAJB9   | 4189   | DNAJB9   | 7  |
| DNAJC1   | 64215  | DNAJC1   | 10 |
| DNAJC10  | 54431  | DNAJC10  | 2  |
| DNAJC11  | 55735  | DNAJC11  | 1  |
| DNAJC12  | 56521  | DNAJC12  | 10 |
| DNAJC14  | 85406  | DNAJC14  | 12 |
| DNAJC15  | 29103  | DNAJC15  | 13 |
| DNAJC16  | 23341  | DNAJC16  | 1  |
| DNAJC17  | 55192  | DNAJC17  | 15 |
| DNAJC18  | 202052 | DNAJC18  | 5  |
| DNAJC19  | 131118 | DNAJC19  | 3  |
| DNAJC2   | 27000  | DNAJC2   | 7  |
| DNAJC21  | 134218 | DNAJC21  | 5  |
| DNAJC22  | 79962  | DNAJC22  | 12 |
| DNAJC24  | 120526 | DNAJC24  | 11 |
| DNAJC25  | 548645 | DNAJC25  | 9  |
| DNAJC27  | 51277  | DNAJC27  | 2  |
| DNAJC28  | 54943  | DNAJC28  | 21 |
| DNAJC3   | 5611   | DNAJC3   | 13 |
| DNAJC30  | 84277  | DNAJC30  | 7  |
| DNAJC4   | 3338   | DNAJC4   | 11 |
| DNAJC5   | 80331  | DNAJC5   | 20 |
| DNAJC5B  | 85479  | DNAJC5B  | 8  |
| DNAJC6   | 9829   | DNAJC6   | 1  |
| DNAJC7   | 7266   | DNAJC7   | 17 |
| DNAJC8   | 22826  | DNAJC8   | 1  |
| DNAJC9   | 23234  | DNAJC9   | 10 |
| DNAL1    | 83544  | DNAL1    | 14 |
| DNAL4    | 10126  | DNAL4    | 22 |
| DNALI1   | 7802   | DNALI1   | 1  |
| DNASE1   | 1773   | DNASE1   | 16 |
| DNASE1L1 | 1774   | DNASE1L1 | X  |
| DNASE1L2 | 1775   | DNASE1L2 | 16 |



|          |        |          |    |
|----------|--------|----------|----|
| DNASE1L3 | 1776   | DNASE1L3 | 3  |
| DNASE2   | 1777   | DNASE2   | 19 |
| DNCL1    | 8655   | DNCL1    | 12 |
| DNER     | 92737  | DNER     | 2  |
| DNHD1    | 144132 | DNHD1    | 11 |
| DNHD2    | 201625 | DNHD2    |    |
| DNLZ     | 728489 | DNLZ     | 9  |
| DNM1L    | 10059  | DNM1L    | 12 |
| DNM2     | 1785   | DNM2     | 19 |
| DNM3     | 26052  | DNM3     | 1  |
| DNMT1    | 1786   | DNMT1    | 19 |
| DNMT3A   | 1788   | DNMT3A   | 2  |
| DNMT3B   | 1789   | DNMT3B   | 20 |
| DNMT3L   | 29947  | DNMT3L   | 21 |
| DNPEP    | 23549  | DNPEP    | 2  |
| DNTT     | 1791   | DNTT     | 10 |
| DNTTIP1  | 116092 | DNTTIP1  | 20 |
| DNTTIP2  | 30836  | DNTTIP2  | 1  |
| DOC2A    | 8448   | DOC2A    | 16 |
| DOCK10   | 55619  | DOCK10   | 2  |
| DOCK11   | 139818 | DOCK11   | X  |
| DOCK2    | 1794   | DOCK2    | 5  |
| DOCK6    | 57572  | DOCK6    | 19 |
| DOCK7    | 85440  | DOCK7    | 1  |
| DOCK8    | 81704  | DOCK8    | 9  |
| DOCK9    | 23348  | DOCK9    | 13 |
| DOHH     | 83475  | DOHH     | 19 |
| DOK3     | 79930  | DOK3     | 5  |
| DOK4     | 55715  | DOK4     | 16 |
| DOK6     | 220164 | DOK6     | 18 |
| DOLK     | 22845  | DOLK     | 9  |
| DOLPP1   | 57171  | DOLPP1   | 9  |
| DOM3Z    | 1797   | DOM3Z    | 6  |
| DONSON   | 29980  | DONSON   | 21 |
| DOPEY1   | 23033  | DOPEY1   | 6  |
| DOPEY2   | 9980   | DOPEY2   | 21 |
| DOT1L    | 84444  | DOT1L    | 19 |
| DPAGT1   | 1798   | DPAGT1   | 11 |
| DPCR1    | 135656 | DPCR1    | 6  |
| DPEP2    | 64174  | DPEP2    | 16 |
| DPF1     | 8193   | DPF1     | 19 |
| DPF2     | 5977   | DPF2     | 11 |
| DPF3     | 8110   | DPF3     |    |
| DPH1     | 1801   | DPH1     | 17 |

|         |        |         |    |
|---------|--------|---------|----|
| DPH2    | 1802   | DPH2    | 1  |
| DPH3    | 285381 | DPH3    | 3  |
| DPH5    | 51611  | DPH5    | 1  |
| DPM1    | 8813   | DPM1    | 20 |
| DPM2    | 8818   | DPM2    | 9  |
| DPM3    | 54344  | DPM3    | 1  |
| DPP10   | 57628  | DPP10   | 2  |
| DPP3    | 10072  | DPP3    | 11 |
| DPP7    | 29952  | DPP7    | 9  |
| DPP8    | 54878  | DPP8    | 15 |
| DPP9    | 91039  | DPP9    | 19 |
| DPRXP4  | 503645 | DPRXP4  | 17 |
| DPY19L1 | 23333  | DPY19L1 | 7  |
| DPY19L3 | 147991 | DPY19L3 | 19 |
| DPY19L4 | 286148 | DPY19L4 | 8  |
| DPY30   | 84661  | DPY30   | 2  |
| DPYD    | 1806   | DPYD    | 1  |
| DPYSL2  | 1808   | DPYSL2  | 8  |
| DPYSL3  | 1809   | DPYSL3  | 5  |
| DR1     | 1810   | DR1     | 1  |
| DRAM1   | 55332  | DRAM1   | 12 |
| DRAP1   | 10589  | DRAP1   | 11 |
| DRD1IP  | 50632  | DRD1IP  | 10 |
| DRD4    | 1815   | DRD4    | 11 |
| DRG1    | 4733   | DRG1    | 22 |
| DRG2    | 1819   | DRG2    | 17 |
| DSC1    | 1823   | DSC1    | 18 |
| DSC2    | 1824   | DSC2    | 18 |
| DSC3    | 1825   | DSC3    | 18 |
| DSCAML1 | 57453  | DSCAML1 | 11 |
| DSCC1   | 79075  | DSCC1   | 8  |
| DSCR3   | 10311  | DSCR3   | 21 |
| DSG2    | 1829   | DSG2    | 18 |
| DSG3    | 1830   | DSG3    | 18 |
| DSN1    | 79980  | DSN1    | 20 |
| DSTN    | 11034  | DSTN    | 20 |
| DSTYK   | 25778  | DSTYK   | 1  |
| DTD1    | 92675  | DTD1    | 20 |
| DTL     | 51514  | DTL     | 1  |
| DTNA    | 1837   | DTNA    | 18 |
| DTNB    | 1838   | DTNB    | 2  |
| DTNBP1  | 84062  | DTNBP1  | 6  |
| DTWD1   | 56986  | DTWD1   | 15 |
| DTWD2   | 285605 | DTWD2   | 5  |

|          |        |          |    |
|----------|--------|----------|----|
| DTX1     | 1840   | DTX1     | 12 |
| DTX2     | 113878 | DTX2     | 7  |
| DTX3     | 196403 | DTX3     | 12 |
| DTX3L    | 151636 | DTX3L    | 3  |
| DTX4     | 23220  | DTX4     | 11 |
| DTYMK    | 1841   | DTYMK    | 2  |
| DULLARD  | 23399  | DULLARD  | 17 |
| DUS1L    | 64118  | DUS1L    | 17 |
| DUS2L    | 54920  | DUS2L    | 16 |
| DUS3L    | 56931  | DUS3L    | 19 |
| DUS4L    | 11062  | DUS4L    | 7  |
| DUSP1    | 1843   | DUSP1    | 5  |
| DUSP10   | 11221  | DUSP10   | 1  |
| DUSP11   | 8446   | DUSP11   | 2  |
| DUSP12   | 11266  | DUSP12   | 1  |
| DUSP14   | 11072  | DUSP14   | 17 |
| DUSP15   | 128853 | DUSP15   | 20 |
| DUSP16   | 80824  | DUSP16   | 12 |
| DUSP18   | 150290 | DUSP18   | 22 |
| DUSP19   | 142679 | DUSP19   | 2  |
| DUSP2    | 1844   | DUSP2    | 2  |
| DUSP22   | 56940  | DUSP22   | 6  |
| DUSP23   | 54935  | DUSP23   | 1  |
| DUSP26   | 78986  | DUSP26   | 8  |
| DUSP28   | 285193 | DUSP28   | 2  |
| DUSP3    | 1845   | DUSP3    | 17 |
| DUSP5    | 1847   | DUSP5    | 10 |
| DUSP7    | 1849   | DUSP7    | 3  |
| DUSP8    | 1850   | DUSP8    | 11 |
| DUSP9    | 1852   | DUSP9    | X  |
| DUT      | 1854   | DUT      | 15 |
| DUX3     | 26582  | DUX3     |    |
| DUXAP3   | 503632 | DUXAP3   | 10 |
| DVL1     | 1855   | DVL1     | 1  |
| DVL2     | 1856   | DVL2     | 17 |
| DVL3     | 1857   | DVL3     | 3  |
| DYM      | 54808  | DYM      | 18 |
| DYNC1H1  | 1778   | DYNC1H1  | 14 |
| DYNC1I1  | 1780   | DYNC1I1  | 7  |
| DYNC1I2  | 1781   | DYNC1I2  | 2  |
| DYNC1LI2 | 1783   | DYNC1LI2 | 16 |
| DYNC2H1  | 79659  | DYNC2H1  | 11 |
| DYNC2LI1 | 51626  | DYNC2LI1 | 2  |
| DYNLL1   | 8655   | DYNLL1   | 12 |

|          |        |          |    |
|----------|--------|----------|----|
| DYNLL2   | 140735 | DYNLL2   | 17 |
| DYNLRB1  | 83658  | DYNLRB1  | 20 |
| DYNLT1   | 6993   | DYNLT1   | 6  |
| DYNLT3   | 6990   | DYNLT3   | X  |
| DYRK1A   | 1859   | DYRK1A   | 21 |
| DYRK1B   | 9149   | DYRK1B   | 19 |
| DYRK2    | 8445   | DYRK2    | 12 |
| DYRK3    | 8444   | DYRK3    | 1  |
| DYRK4    | 8798   | DYRK4    | 12 |
| DYX1C1   | 161582 | DYX1C1   | 15 |
| E2F1     | 1869   | E2F1     | 20 |
| E2F2     | 1870   | E2F2     | 1  |
| E2F3     | 1871   | E2F3     | 6  |
| E2F4     | 1874   | E2F4     | 16 |
| E2F5     | 1875   | E2F5     | 8  |
| E2F6     | 1876   | E2F6     | 2  |
| E2F7     | 144455 | E2F7     | 12 |
| E2F8     | 79733  | E2F8     | 11 |
| E4F1     | 1877   | E4F1     | 16 |
| EA1F1    | 85403  | EA1F1    | 3  |
| EA2F2    | 55840  | EA2F2    | 3  |
| EAPP     | 55837  | EAPP     | 14 |
| EARS2    | 124454 | EARS2    | 16 |
| EBAG9    | 9166   | EBAG9    | 8  |
| EBF1     | 1879   | EBF1     | 5  |
| EBF3     | 253738 | EBF3     | 10 |
| EBF4     | 57593  | EBF4     | 20 |
| EBI2     | 1880   | EBI2     | 13 |
| EBI3     | 10148  | EBI3     | 19 |
| EBNA1BP2 | 10969  | EBNA1BP2 | 1  |
| EBP      | 10682  | EBP      | X  |
| EBPL     | 84650  | EBPL     | 13 |
| ECAT8    | 91646  | ECAT8    |    |
| ECD      | 11319  | ECD      | 10 |
| ECE1     | 1889   | ECE1     | 1  |
| ECE2     | 9718   | ECE2     | 3  |
| ECGF1    | 1890   | ECGF1    | 22 |
| ECH1     | 1891   | ECH1     | 19 |
| ECHDC1   | 55862  | ECHDC1   | 6  |
| ECHDC3   | 79746  | ECHDC3   | 10 |
| ECHS1    | 1892   | ECHS1    | 10 |
| ECOP     | 81552  | ECOP     | 7  |
| ECSIT    | 51295  | ECSIT    | 19 |
| ECT2     | 1894   | ECT2     | 3  |

|         |           |         |    |
|---------|-----------|---------|----|
| ECT2L   | 345930    | ECT2L   | 6  |
| EDAR    | 10913     | EDAR    | 2  |
| EDC3    | 80153     | EDC3    | 15 |
| EDEM1   | 9695      | EDEM1   | 3  |
| EDEM2   | 55741     | EDEM2   | 20 |
| EDEM3   | 80267     | EDEM3   | 1  |
| EDF1    | 8721      | EDF1    | 9  |
| EDG1    | 1901      | EDG1    | 1  |
| EDG4    | 9170      | EDG4    | 19 |
| EDN2    | 1907      | EDN2    | 1  |
| EEA1    | 8411      | EEA1    | 12 |
| EED     | 8726      | EED     | 11 |
| EEF1A2  | 1917      | EEF1A2  | 20 |
| EEF1AL7 | 441032    | EEF1AL7 | 4  |
| EEF1B2  | 1933      | EEF1B2  | 2  |
| EEF1D   | 1936      | EEF1D   | 8  |
| EEF1G   | 1937      | EEF1G   | 11 |
| EEF2    | 1938      | EEF2    | 19 |
| EEF2K   | 29904     | EEF2K   | 16 |
| EEFSEC  | 60678     | EEFSEC  | 3  |
| EEPD1   | 80820     | EEPD1   | 7  |
| EFCAB3  | 146779    | EFCAB3  | 17 |
| EFCAB4A | 283229    | EFCAB4A | 11 |
| EFCAB7  | 84455     | EFCAB7  | 1  |
| EFEMP2  | 30008     | EFEMP2  | 11 |
| EFHA1   | 221154    | EFHA1   | 13 |
| EFHC1   | 114327    | EFHC1   |    |
| EFHD1   | 80303     | EFHD1   | 2  |
| EFHD2   | 79180     | EFHD2   | 1  |
| EFNA1   | 1942      | EFNA1   | 1  |
| EFNA2   | 1943      | EFNA2   | 19 |
| EFNA4   | 1945      | EFNA4   | 1  |
| EFNB1   | 1947      | EFNB1   | X  |
| EFNB2   | 1948      | EFNB2   | 13 |
| EFNB3   | 1949      | EFNB3   | 17 |
| EFR3A   | 23167     | EFR3A   | 8  |
| EFR3B   | 22979     | EFR3B   | 2  |
| EFTUD1  | 79631     | EFTUD1  | 15 |
| EFTUD2  | 9343      | EFTUD2  | 17 |
| EGFL7   | 51162     | EGFL7   | 9  |
| EGLN1   | 54583     | EGLN1   | 1  |
| EGOT    | 100126791 | EGOT    | 3  |
| EGR1    | 1958      | EGR1    | 5  |
| EGR2    | 1959      | EGR2    | 10 |

|         |        |         |    |
|---------|--------|---------|----|
| EGR3    | 1960   | EGR3    | 8  |
| EHBP1   | 23301  | EHBP1   | 2  |
| EHBP1L1 | 254102 | EHBP1L1 | 11 |
| EHD1    | 10938  | EHD1    | 11 |
| EHD3    | 30845  | EHD3    | 2  |
| EHD4    | 30844  | EHD4    | 15 |
| EHHADH  | 1962   | EHHADH  | 3  |
| EHMT1   | 79813  | EHMT1   |    |
| EHMT2   | 10919  | EHMT2   | 6  |
| EI24    | 9538   | EI24    | 11 |
| EID1    | 23741  | EID1    | 15 |
| EID2B   | 126272 | EID2B   | 19 |
| EID3    | 493861 | EID3    | 12 |
| EIF1    | 10209  | EIF1    | 17 |
| EIF1AD  | 84285  | EIF1AD  | 11 |
| EIF1AX  | 1964   | EIF1AX  |    |
| EIF1AY  | 9086   | EIF1AY  | Y  |
| EIF1B   | 10289  | EIF1B   | 3  |
| EIF2A   | 83939  | EIF2A   | 3  |
| EIF2AK1 | 27102  | EIF2AK1 | 7  |
| EIF2AK2 | 5610   | EIF2AK2 | 2  |
| EIF2AK3 | 9451   | EIF2AK3 | 2  |
| EIF2AK4 | 440275 | EIF2AK4 | 15 |
| EIF2B1  | 1967   | EIF2B1  | 12 |
| EIF2B2  | 8892   | EIF2B2  | 14 |
| EIF2B3  | 8891   | EIF2B3  | 1  |
| EIF2B4  | 8890   | EIF2B4  | 2  |
| EIF2B5  | 8893   | EIF2B5  | 3  |
| EIF2C1  | 26523  | EIF2C1  | 1  |
| EIF2C2  | 27161  | EIF2C2  | 8  |
| EIF2C3  | 192669 | EIF2C3  | 1  |
| EIF2C4  | 192670 | EIF2C4  | 1  |
| EIF2S1  | 1965   | EIF2S1  | 14 |
| EIF2S2  | 8894   | EIF2S2  | 20 |
| EIF2S3  | 1968   | EIF2S3  | X  |
| EIF3A   | 8661   | EIF3A   | 10 |
| EIF3B   | 8662   | EIF3B   | 7  |
| EIF3C   | 8663   | EIF3C   | 16 |
| EIF3CL  | 728689 | EIF3CL  | 16 |
| EIF3D   | 8664   | EIF3D   | 22 |
| EIF3E   | 3646   | EIF3E   | 8  |
| EIF3F   | 8665   | EIF3F   | 11 |
| EIF3G   | 8666   | EIF3G   | 19 |
| EIF3H   | 8667   | EIF3H   | 8  |

|           |        |           |    |
|-----------|--------|-----------|----|
| EIF3I     | 8668   | EIF3I     | 1  |
| EIF3J     | 8669   | EIF3J     | 15 |
| EIF3K     | 27335  | EIF3K     | 19 |
| EIF3L     | 51386  | EIF3L     | 22 |
| EIF3M     | 10480  | EIF3M     | 11 |
| EIF4A1    | 1973   | EIF4A1    | 17 |
| EIF4A2    | 1974   | EIF4A2    | 3  |
| EIF4A3    | 9775   | EIF4A3    | 17 |
| EIF4B     | 1975   | EIF4B     | 12 |
| EIF4E     | 1977   | EIF4E     | 4  |
| EIF4E2    | 9470   | EIF4E2    | 2  |
| EIF4E3    | 317649 | EIF4E3    | 3  |
| EIF4EBP1  | 1978   | EIF4EBP1  | 8  |
| EIF4EBP2  | 1979   | EIF4EBP2  | 10 |
| EIF4EBP3  | 8637   | EIF4EBP3  | 5  |
| EIF4ENIF1 | 56478  | EIF4ENIF1 | 22 |
| EIF4G1    | 1981   | EIF4G1    | 3  |
| EIF4G2    | 1982   | EIF4G2    | 11 |
| EIF4G3    | 8672   | EIF4G3    | 1  |
| EIF4H     | 7458   | EIF4H     | 7  |
| EIF5      | 1983   | EIF5      | 14 |
| EIF5A     | 1984   | EIF5A     | 17 |
| EIF5A2    | 56648  | EIF5A2    | 3  |
| EIF6      | 3692   | EIF6      | 20 |
| ELA3A     | 10136  | ELA3A     | 1  |
| ELAC1     | 55520  | ELAC1     | 18 |
| ELAC2     | 60528  | ELAC2     | 17 |
| ELANE     | 1991   | ELANE     | 19 |
| ELAVL1    | 1994   | ELAVL1    | 19 |
| ELF1      | 1997   | ELF1      | 13 |
| ELF3      | 1999   | ELF3      | 1  |
| ELF4      | 2000   | ELF4      | X  |
| ELFN2     | 114794 | ELFN2     | 22 |
| ELK1      | 2002   | ELK1      | X  |
| ELK3      | 2004   | ELK3      | 12 |
| ELK4      | 2005   | ELK4      | 1  |
| ELL       | 8178   | ELL       | 19 |
| ELL2      | 22936  | ELL2      |    |
| ELL3      | 80237  | ELL3      | 15 |
| ELMO1     | 9844   | ELMO1     | 7  |
| ELMO2     | 63916  | ELMO2     | 20 |
| ELMO3     | 79767  | ELMO3     | 16 |
| ELMOD1    | 55531  | ELMOD1    | 11 |
| ELMOD2    | 255520 | ELMOD2    | 4  |

|         |           |         |    |
|---------|-----------|---------|----|
| ELN     | 2006      | ELN     | 7  |
| ELOF1   | 84337     | ELOF1   | 19 |
| ELOVL2  | 54898     | ELOVL2  | 6  |
| ELOVL3  | 83401     | ELOVL3  | 10 |
| ELOVL4  | 6785      | ELOVL4  | 6  |
| ELOVL5  | 60481     | ELOVL5  | 6  |
| ELOVL6  | 79071     | ELOVL6  | 4  |
| ELOVL7  | 79993     | ELOVL7  | 5  |
| ELP2    | 55250     | ELP2    | 18 |
| ELP2P   | 100131454 | ELP2P   | 17 |
| ELP3    | 55140     | ELP3    | 8  |
| ELP4    | 26610     | ELP4    | 11 |
| EMB     | 133418    | EMB     | 5  |
| EMD     | 2010      | EMD     | X  |
| EME1    | 146956    | EME1    | 17 |
| EMG1    | 10436     | EMG1    | 12 |
| EMILIN2 | 84034     | EMILIN2 | 18 |
| EML1    | 2009      | EML1    | 14 |
| EML2    | 24139     | EML2    | 19 |
| EML3    | 256364    | EML3    | 11 |
| EML4    | 27436     | EML4    | 2  |
| EMP3    | 2014      | EMP3    | 19 |
| EMR1    | 2015      | EMR1    | 19 |
| EMR2    | 30817     | EMR2    | 19 |
| EMR4    | 326342    | EMR4    | 19 |
| EMR4P   | 326342    | EMR4P   | 19 |
| EMX1    | 2016      | EMX1    | 2  |
| EMX2OS  | 196047    | EMX2OS  | 10 |
| ENAH    | 55740     | ENAH    | 1  |
| ENAM    | 10117     | ENAM    | 4  |
| ENC1    | 8507      | ENC1    | 5  |
| ENDOD1  | 23052     | ENDOD1  | 11 |
| ENDOG   | 2021      | ENDOG   | 9  |
| ENHO    | 375704    | ENHO    | 9  |
| ENO1    | 2023      | ENO1    | 1  |
| ENO2    | 2026      | ENO2    | 12 |
| ENO3    | 2027      | ENO3    | 17 |
| ENOPH1  | 58478     | ENOPH1  | 4  |
| ENOSF1  | 55556     | ENOSF1  | 18 |
| ENOX1   | 55068     | ENOX1   | 13 |
| ENOX2   | 10495     | ENOX2   | X  |
| ENPP1   | 5167      | ENPP1   | 6  |
| ENPP2   | 5168      | ENPP2   | 8  |
| ENPP3   | 5169      | ENPP3   | 6  |



|          |        |          |    |
|----------|--------|----------|----|
| ENPP4    | 22875  | ENPP4    | 6  |
| ENPP5    | 59084  | ENPP5    | 6  |
| ENSA     | 2029   | ENSA     | 1  |
| ENTHD1   | 150350 | ENTHD1   | 22 |
| ENTPD1   | 953    | ENTPD1   | 10 |
| ENTPD2   | 954    | ENTPD2   | 9  |
| ENTPD4   | 9583   | ENTPD4   | 8  |
| ENTPD6   | 955    | ENTPD6   | 20 |
| ENY2     | 56943  | ENY2     | 8  |
| EOMES    | 8320   | EOMES    | 3  |
| EP400    | 57634  | EP400    | 12 |
| EPAS1    | 2034   | EPAS1    | 2  |
| EPB41    | 2035   | EPB41    | 1  |
| EPB41L1  | 2036   | EPB41L1  | 20 |
| EPB41L2  | 2037   | EPB41L2  | 6  |
| EPB41L4B | 54566  | EPB41L4B | 9  |
| EPB41L5  | 57669  | EPB41L5  | 2  |
| EPC1     | 80314  | EPC1     | 10 |
| EPC2     | 26122  | EPC2     | 2  |
| EPCAM    | 4072   | EPCAM    | 2  |
| EPDR1    | 54749  | EPDR1    | 7  |
| EPGN     | 255324 | EPGN     | 4  |
| EPHA3    | 2042   | EPHA3    | 3  |
| EPHA4    | 2043   | EPHA4    | 2  |
| EPHB1    | 2047   | EPHB1    | 3  |
| EPHB4    | 2050   | EPHB4    | 7  |
| EPHB6    | 2051   | EPHB6    | 7  |
| EPHX1    | 2052   | EPHX1    | 1  |
| EPHX2    | 2053   | EPHX2    | 8  |
| EPM2A    | 7957   | EPM2A    | 6  |
| EPM2AIP1 | 9852   | EPM2AIP1 | 3  |
| EPN1     | 29924  | EPN1     | 19 |
| EPN2     | 22905  | EPN2     | 17 |
| EPOR     | 2057   | EPOR     | 19 |
| EPPB9    | 27077  | EPPB9    | 17 |
| EPR1     | 8475   | EPR1     | 17 |
| EPRS     | 2058   | EPRS     | 1  |
| EPS15    | 2060   | EPS15    | 1  |
| EPS15L1  | 58513  | EPS15L1  | 19 |
| EPS8     | 2059   | EPS8     | 12 |
| EPS8L2   | 64787  | EPS8L2   |    |
| EPSTI1   | 94240  | EPSTI1   | 13 |
| ERAL1    | 26284  | ERAL1    | 17 |
| ERAP1    | 51752  | ERAP1    | 5  |

|         |        |         |    |
|---------|--------|---------|----|
| ERAP2   | 64167  | ERAP2   | 5  |
| ERBB2   | 2064   | ERBB2   | 17 |
| ERBB3   | 2065   | ERBB3   | 12 |
| ERCC1   | 2067   | ERCC1   | 19 |
| ERCC2   | 2068   | ERCC2   | 19 |
| ERCC3   | 2071   | ERCC3   | 2  |
| ERCC5   | 2073   | ERCC5   | 13 |
| ERCC6   | 2074   | ERCC6   | 10 |
| ERCC6L  | 54821  | ERCC6L  | X  |
| ERCC8   | 1161   | ERCC8   | 5  |
| ERGIC1  | 57222  | ERGIC1  | 5  |
| ERGIC3  | 51614  | ERGIC3  | 20 |
| ERH     | 2079   | ERH     | 14 |
| ERI1    | 90459  | ERI1    | 8  |
| ERI2    | 112479 | ERI2    | 16 |
| ERICH1  | 157697 | ERICH1  | 8  |
| ERLIN1  | 10613  | ERLIN1  | 10 |
| ERLIN2  | 11160  | ERLIN2  | 8  |
| ERMAP   | 114625 | ERMAP   | 1  |
| ERMP1   | 79956  | ERMP1   | 9  |
| ERN1    | 2081   | ERN1    | 17 |
| ERO1L   | 30001  | ERO1L   | 14 |
| ERO1LB  | 56605  | ERO1LB  | 1  |
| ERP27   | 121506 | ERP27   | 12 |
| ERP29   | 10961  | ERP29   | 12 |
| ERP44   | 23071  | ERP44   | 9  |
| ERRFI1  | 54206  | ERRFI1  | 1  |
| ERV3    | 2086   | ERV3    | 7  |
| ESAM    | 90952  | ESAM    | 11 |
| ESCO1   | 114799 | ESCO1   | 18 |
| ESCO2   | 157570 | ESCO2   | 8  |
| ESD     | 2098   | ESD     | 13 |
| ESM1    | 11082  | ESM1    | 5  |
| ESPL1   | 9700   | ESPL1   | 12 |
| ESPN    | 83715  | ESPN    | 1  |
| ESPNL   | 339768 | ESPNL   | 2  |
| ESR2    | 2100   | ESR2    | 14 |
| ESRRA   | 2101   | ESRRA   | 11 |
| ESRRAP2 | 144832 | ESRRAP2 | 13 |
| ESRRG   | 2104   | ESRRG   | 1  |
| ESYT1   | 23344  | ESYT1   | 12 |
| ETAA1   | 54465  | ETAA1   | 2  |
| ETF1    | 2107   | ETF1    | 5  |
| ETFA    | 2108   | ETFA    | 15 |

|         |        |         |    |
|---------|--------|---------|----|
| ETFB    | 2109   | ETFB    | 19 |
| ETFDH   | 2110   | ETFDH   | 4  |
| ETHE1   | 23474  | ETHE1   | 19 |
| ETNK1   | 55500  | ETNK1   | 12 |
| ETNK2   | 55224  | ETNK2   | 1  |
| ETS1    | 2113   | ETS1    | 11 |
| ETS2    | 2114   | ETS2    | 21 |
| ETV3    | 2117   | ETV3    | 1  |
| ETV4    | 2118   | ETV4    | 17 |
| ETV5    | 2119   | ETV5    | 3  |
| ETV6    | 2120   | ETV6    | 12 |
| ETV7    | 51513  | ETV7    | 6  |
| EVI1    | 2122   | EVI1    | 3  |
| EVI2A   | 2123   | EVI2A   | 17 |
| EVI2B   | 2124   | EVI2B   | 17 |
| EVI5    | 7813   | EVI5    | 1  |
| EVI5L   | 115704 | EVI5L   | 19 |
| EVL     | 51466  | EVL     | 14 |
| EWSR1   | 2130   | EWSR1   | 22 |
| EXD2    | 55218  | EXD2    | 14 |
| EXO1    | 9156   | EXO1    | 1  |
| EXOC1   | 55763  | EXOC1   | 4  |
| EXOC2   | 55770  | EXOC2   | 6  |
| EXOC3   | 11336  | EXOC3   | 5  |
| EXOC4   | 60412  | EXOC4   | 7  |
| EXOC6   | 54536  | EXOC6   | 10 |
| EXOC7   | 23265  | EXOC7   | 17 |
| EXOC8   | 149371 | EXOC8   | 1  |
| EXOD1   | 112479 | EXOD1   | 16 |
| EXOG    | 9941   | EXOG    | 3  |
| EXOSC1  | 51013  | EXOSC1  | 10 |
| EXOSC10 | 5394   | EXOSC10 | 1  |
| EXOSC2  | 23404  | EXOSC2  | 9  |
| EXOSC3  | 51010  | EXOSC3  | 9  |
| EXOSC4  | 54512  | EXOSC4  | 8  |
| EXOSC5  | 56915  | EXOSC5  | 19 |
| EXOSC6  | 118460 | EXOSC6  | 16 |
| EXOSC7  | 23016  | EXOSC7  | 3  |
| EXOSC8  | 11340  | EXOSC8  | 13 |
| EXOSC9  | 5393   | EXOSC9  | 4  |
| EXT1    | 2131   | EXT1    | 8  |
| EXT2    | 2132   | EXT2    | 11 |
| EXTL2   | 2135   | EXTL2   | 1  |
| EYA3    | 2140   | EYA3    | 1  |

|          |        |          |    |
|----------|--------|----------|----|
| EYS      | 346007 | EYS      | 6  |
| EZH1     | 2145   | EZH1     | 17 |
| EZH2     | 2146   | EZH2     | 7  |
| EZR      | 7430   | EZR      | 6  |
| F11R     | 50848  | F11R     | 1  |
| F12      | 2161   | F12      | 5  |
| F2R      | 2149   | F2R      | 5  |
| F2RL3    | 9002   | F2RL3    | 19 |
| F5       | 2153   | F5       | 1  |
| F8A1     | 8263   | F8A1     | X  |
| F8A3     | 474384 | F8A3     | X  |
| FAAH     | 2166   | FAAH     | 1  |
| FABP1    | 2168   | FABP1    | 2  |
| FABP5    | 2171   | FABP5    | 8  |
| FABP5L2  | 729163 | FABP5L2  |    |
| FABP5L3  | 220832 | FABP5L3  | 7  |
| FABP5L7  | 728641 | FABP5L7  |    |
| FABP6    | 2172   | FABP6    | 5  |
| FABP7    | 2173   | FABP7    | 6  |
| FADD     | 8772   | FADD     | 11 |
| FADS1    | 3992   | FADS1    | 11 |
| FADS2    | 9415   | FADS2    | 11 |
| FADS3    | 3995   | FADS3    | 11 |
| FADS6    | 283985 | FADS6    | 17 |
| FAF1     | 11124  | FAF1     | 1  |
| FAF2     | 23197  | FAF2     | 5  |
| FAH      | 2184   | FAH      | 15 |
| FAHD1    | 81889  | FAHD1    | 16 |
| FAHD2A   | 51011  | FAHD2A   | 2  |
| FAHD2B   | 151313 | FAHD2B   | 2  |
| FAIM     | 55179  | FAIM     | 3  |
| FAIM2    | 23017  | FAIM2    | 12 |
| FAIM3    | 9214   | FAIM3    | 1  |
| FALZ     | 2186   | FALZ     | 17 |
| FAM100B  | 283991 | FAM100B  | 17 |
| FAM101A  | 144347 | FAM101A  | 12 |
| FAM101B  | 359845 | FAM101B  | 17 |
| FAM102A  | 399665 | FAM102A  | 9  |
| FAM102B  | 284611 | FAM102B  | 1  |
| FAM103A1 | 83640  | FAM103A1 | 15 |
| FAM104A  | 84923  | FAM104A  | 17 |
| FAM104B  | 90736  | FAM104B  | X  |
| FAM105A  | 54491  | FAM105A  | 5  |
| FAM105B  | 90268  | FAM105B  | 5  |

|           |        |           |    |
|-----------|--------|-----------|----|
| FAM107B   | 83641  | FAM107B   | 10 |
| FAM108A2  | 728917 | FAM108A2  |    |
| FAM108A3  | 653401 | FAM108A3  | 1  |
| FAM108B1  | 51104  | FAM108B1  | 9  |
| FAM108C1  | 58489  | FAM108C1  | 15 |
| FAM109A   | 144717 | FAM109A   | 12 |
| FAM10A4   | 145165 | FAM10A4   | 13 |
| FAM10A7   | 155019 | FAM10A7   | 7  |
| FAM110A   | 83541  | FAM110A   | 20 |
| FAM111A   | 63901  | FAM111A   | 11 |
| FAM111B   | 374393 | FAM111B   | 11 |
| FAM113A   | 64773  | FAM113A   | 20 |
| FAM113B   | 91523  | FAM113B   | 12 |
| FAM114A2  | 10827  | FAM114A2  | 5  |
| FAM115A   | 9747   | FAM115A   | 7  |
| FAM116A   | 201627 | FAM116A   |    |
| FAM116B   | 414918 | FAM116B   |    |
| FAM117A   | 81558  | FAM117A   | 17 |
| FAM117B   | 150864 | FAM117B   | 2  |
| FAM118B   | 79607  | FAM118B   | 11 |
| FAM119A   | 151194 | FAM119A   | 2  |
| FAM119B   | 25895  | FAM119B   | 12 |
| FAM120A   | 23196  | FAM120A   | 9  |
| FAM120AOS | 158293 | FAM120AOS | 9  |
| FAM120B   | 84498  | FAM120B   | 6  |
| FAM122A   | 116224 | FAM122A   | 9  |
| FAM122B   | 159090 | FAM122B   | X  |
| FAM123B   | 139285 | FAM123B   | X  |
| FAM123C   | 205147 | FAM123C   | 2  |
| FAM125A   | 93343  | FAM125A   | 19 |
| FAM125B   | 89853  | FAM125B   | 9  |
| FAM126A   | 84668  | FAM126A   | 7  |
| FAM126B   | 285172 | FAM126B   | 2  |
| FAM127A   | 8933   | FAM127A   | X  |
| FAM128A   | 653784 | FAM128A   | 2  |
| FAM128B   | 80097  | FAM128B   | 2  |
| FAM129B   | 64855  | FAM129B   | 9  |
| FAM129C   | 199786 | FAM129C   | 19 |
| FAM131A   | 131408 | FAM131A   | 3  |
| FAM131C   | 348487 | FAM131C   | 1  |
| FAM133B   | 257415 | FAM133B   | 7  |
| FAM134B   | 54463  | FAM134B   | 5  |
| FAM134C   | 162427 | FAM134C   | 17 |
| FAM135A   | 57579  | FAM135A   | 6  |

|          |        |          |    |
|----------|--------|----------|----|
| FAM136A  | 84908  | FAM136A  | 2  |
| FAM136B  | 387071 | FAM136B  | 6  |
| FAM13A   | 10144  | FAM13A   | 4  |
| FAM13B   | 51306  | FAM13B   | 5  |
| FAM149B1 | 317662 | FAM149B1 | 10 |
| FAM14B   | 122509 | FAM14B   | 14 |
| FAM150B  | 285016 | FAM150B  | 2  |
| FAM151A  | 338094 | FAM151A  |    |
| FAM153B  | 202134 | FAM153B  | 5  |
| FAM154B  | 283726 | FAM154B  | 15 |
| FAM156A  | 29057  | FAM156A  | X  |
| FAM156B  | 727866 | FAM156B  | X  |
| FAM158A  | 51016  | FAM158A  | 14 |
| FAM159A  | 348378 | FAM159A  | 1  |
| FAM160A2 | 84067  | FAM160A2 | 11 |
| FAM160B1 | 57700  | FAM160B1 | 10 |
| FAM160B2 | 64760  | FAM160B2 | 8  |
| FAM161A  | 84140  | FAM161A  | 2  |
| FAM161B  | 145483 | FAM161B  | 14 |
| FAM162B  | 221303 | FAM162B  | 6  |
| FAM164A  | 51101  | FAM164A  | 8  |
| FAM164C  | 79696  | FAM164C  | 14 |
| FAM165B  | 54065  | FAM165B  | 21 |
| FAM167A  | 83648  | FAM167A  | 8  |
| FAM167B  | 84734  | FAM167B  | 1  |
| FAM169A  | 26049  | FAM169A  | 5  |
| FAM170A  | 340069 | FAM170A  | 5  |
| FAM171A1 | 221061 | FAM171A1 | 10 |
| FAM172A  | 83989  | FAM172A  |    |
| FAM173A  | 65990  | FAM173A  | 16 |
| FAM174A  | 345757 | FAM174A  | 5  |
| FAM175A  | 84142  | FAM175A  | 4  |
| FAM175B  | 23172  | FAM175B  | 10 |
| FAM177A1 | 283635 | FAM177A1 | 14 |
| FAM177B  | 400823 | FAM177B  | 1  |
| FAM178A  | 55719  | FAM178A  | 10 |
| FAM179B  | 23116  | FAM179B  | 14 |
| FAM184A  | 79632  | FAM184A  | 6  |
| FAM184B  | 27146  | FAM184B  | 4  |
| FAM186B  | 84070  | FAM186B  | 12 |
| FAM188A  | 80013  | FAM188A  | 10 |
| FAM189B  | 10712  | FAM189B  | 1  |
| FAM18B   | 51030  | FAM18B   | 17 |
| FAM190B  | 54462  | FAM190B  | 10 |

|          |        |          |    |
|----------|--------|----------|----|
| FAM193A  | 8603   | FAM193A  | 4  |
| FAM193B  | 54540  | FAM193B  | 5  |
| FAM195A  | 84331  | FAM195A  | 16 |
| FAM195B  | 348262 | FAM195B  | 17 |
| FAM197Y2 | 252946 | FAM197Y2 | Y  |
| FAM19A5  | 25817  | FAM19A5  | 22 |
| FAM20B   | 9917   | FAM20B   | 1  |
| FAM21A   | 387680 | FAM21A   | 10 |
| FAM21C   | 253725 | FAM21C   | 10 |
| FAM21D   | 653450 | FAM21D   | 10 |
| FAM22C   | 727807 | FAM22C   | 10 |
| FAM22F   | 54754  | FAM22F   | 9  |
| FAM23B   | 340843 | FAM23B   | 10 |
| FAM24B   | 196792 | FAM24B   | 10 |
| FAM25C   | 644054 | FAM25C   | 10 |
| FAM26A   | 119395 | FAM26A   | 10 |
| FAM26E   | 254228 | FAM26E   | 6  |
| FAM26F   | 441168 | FAM26F   | 6  |
| FAM27A   | 548321 | FAM27A   |    |
| FAM27L   | 284123 | FAM27L   | 17 |
| FAM30A   | 29064  | FAM30A   |    |
| FAM32A   | 26017  | FAM32A   | 19 |
| FAM35A   | 54537  | FAM35A   |    |
| FAM36A   | 116228 | FAM36A   | 1  |
| FAM38A   | 9780   | FAM38A   | 16 |
| FAM38B   | 63895  | FAM38B   | 18 |
| FAM3A    | 60343  | FAM3A    | X  |
| FAM3B    | 54097  | FAM3B    | 21 |
| FAM3C    | 10447  | FAM3C    | 7  |
| FAM40A   | 85369  | FAM40A   | 1  |
| FAM41C   | 284593 | FAM41C   | 1  |
| FAM43A   | 131583 | FAM43A   | 3  |
| FAM43B   | 163933 | FAM43B   | 1  |
| FAM44B   | 91272  | FAM44B   | 5  |
| FAM45A   | 404636 | FAM45A   | 10 |
| FAM45B   | 55855  | FAM45B   | X  |
| FAM46A   | 55603  | FAM46A   | 6  |
| FAM46B   | 115572 | FAM46B   | 1  |
| FAM46C   | 54855  | FAM46C   | 1  |
| FAM49A   | 81553  | FAM49A   | 2  |
| FAM49B   | 51571  | FAM49B   | 8  |
| FAM50A   | 9130   | FAM50A   | X  |
| FAM50B   | 26240  | FAM50B   | 6  |
| FAM53A   | 152877 | FAM53A   | 4  |

|         |        |         |    |
|---------|--------|---------|----|
| FAM53B  | 9679   | FAM53B  | 10 |
| FAM53C  | 51307  | FAM53C  | 5  |
| FAM54A  | 113115 | FAM54A  | 6  |
| FAM54B  | 56181  | FAM54B  | 1  |
| FAM55C  | 91775  | FAM55C  | 3  |
| FAM57A  | 79850  | FAM57A  | 17 |
| FAM57B  | 83723  | FAM57B  | 16 |
| FAM58A  | 92002  | FAM58A  | X  |
| FAM59A  | 64762  | FAM59A  | 18 |
| FAM59B  | 150946 | FAM59B  | 2  |
| FAM5B   | 57795  | FAM5B   | 1  |
| FAM5C   | 339479 | FAM5C   | 1  |
| FAM60A  | 58516  | FAM60A  | 12 |
| FAM62B  | 57488  | FAM62B  | 7  |
| FAM62C  | 83850  | FAM62C  | 3  |
| FAM63A  | 55793  | FAM63A  | 1  |
| FAM64A  | 54478  | FAM64A  | 17 |
| FAM65B  | 9750   | FAM65B  | 6  |
| FAM65C  | 140876 | FAM65C  | 20 |
| FAM69A  | 388650 | FAM69A  | 1  |
| FAM69B  | 138311 | FAM69B  |    |
| FAM70A  | 55026  | FAM70A  | X  |
| FAM70B  | 348013 | FAM70B  |    |
| FAM71E1 | 112703 | FAM71E1 | 19 |
| FAM72A  | 729533 | FAM72A  | 1  |
| FAM72B  | 653820 | FAM72B  | 1  |
| FAM72D  | 728833 | FAM72D  | 1  |
| FAM73A  | 374986 | FAM73A  | 1  |
| FAM73B  | 84895  | FAM73B  | 9  |
| FAM75A2 | 642265 | FAM75A2 | 9  |
| FAM75A3 | 727830 | FAM75A3 | 9  |
| FAM75A6 | 389730 | FAM75A6 | 9  |
| FAM75B  | 404770 | FAM75B  | 9  |
| FAM75C1 | 441452 | FAM75C1 |    |
| FAM76A  | 199870 | FAM76A  | 1  |
| FAM78A  | 286336 | FAM78A  | 9  |
| FAM78B  | 149297 | FAM78B  | 1  |
| FAM7A1  | 89838  | FAM7A1  | 15 |
| FAM7A3  | 89837  | FAM7A3  | 15 |
| FAM80A  | 284716 | FAM80A  | 1  |
| FAM80B  | 57494  | FAM80B  | 12 |
| FAM81A  | 145773 | FAM81A  | 15 |
| FAM82A2 | 55177  | FAM82A2 | 15 |
| FAM83D  | 81610  | FAM83D  | 20 |



|          |        |          |    |
|----------|--------|----------|----|
| FAM83H   | 286077 | FAM83H   | 8  |
| FAM84B   | 157638 | FAM84B   | 8  |
| FAM86A   | 196483 | FAM86A   | 16 |
| FAM86B1  | 85002  | FAM86B1  | 8  |
| FAM86C   | 55199  | FAM86C   | 11 |
| FAM86D   | 692099 | FAM86D   | 3  |
| FAM87A   | 157693 | FAM87A   |    |
| FAM89A   | 375061 | FAM89A   | 1  |
| FAM89B   | 23625  | FAM89B   | 11 |
| FAM8A1   | 51439  | FAM8A1   | 6  |
| FAM90A1  | 55138  | FAM90A1  | 12 |
| FAM90A10 | 441328 | FAM90A10 | 8  |
| FAM90A17 | 728746 | FAM90A17 | 8  |
| FAM90A20 | 728430 | FAM90A20 | 8  |
| FAM90A2P | 389630 | FAM90A2P | 8  |
| FAM90A6P | 389618 | FAM90A6P | 8  |
| FAM90A7  | 441317 | FAM90A7  | 8  |
| FAM91A1  | 157769 | FAM91A1  | 8  |
| FAM92A1  | 137392 | FAM92A1  | 8  |
| FAM96A   | 84191  | FAM96A   | 15 |
| FAM96B   | 51647  | FAM96B   | 16 |
| FAM98A   | 25940  | FAM98A   | 2  |
| FAM98B   | 283742 | FAM98B   | 15 |
| FAM98C   | 147965 | FAM98C   | 19 |
| FAM9B    | 171483 | FAM9B    | X  |
| FANCA    | 2175   | FANCA    | 16 |
| FANCB    | 2187   | FANCB    | X  |
| FANCD2   | 2177   | FANCD2   | 3  |
| FANCE    | 2178   | FANCE    | 6  |
| FANCF    | 2188   | FANCF    | 11 |
| FANCG    | 2189   | FANCG    | 9  |
| FANCI    | 55215  | FANCI    | 15 |
| FANCL    | 55120  | FANCL    | 2  |
| FAR1     | 84188  | FAR1     | 11 |
| FARP1    | 10160  | FARP1    | 13 |
| FARP2    | 9855   | FARP2    | 2  |
| FARS2    | 10667  | FARS2    | 6  |
| FARSA    | 2193   | FARSA    | 19 |
| FARSLB   | 10056  | FARSLB   | 2  |
| FAS      | 355    | FAS      | 10 |
| FASLG    | 356    | FASLG    | 1  |
| FASN     | 2194   | FASN     | 17 |
| FASTK    | 10922  | FASTK    | 7  |
| FASTKD1  | 79675  | FASTKD1  | 2  |

|         |        |         |    |
|---------|--------|---------|----|
| FASTKD2 | 22868  | FASTKD2 | 2  |
| FASTKD3 | 79072  | FASTKD3 | 5  |
| FASTKD5 | 60493  | FASTKD5 | 20 |
| FAT1    | 2195   | FAT1    | 4  |
| FAU     | 2197   | FAU     | 11 |
| FBL     | 2091   | FBL     | 19 |
| FBLN1   | 2192   | FBLN1   | 22 |
| FBLN2   | 2199   | FBLN2   | 3  |
| FBLN5   | 10516  | FBLN5   | 14 |
| FBLN7   | 129804 | FBLN7   | 2  |
| FBP1    | 2203   | FBP1    | 9  |
| FBP2    | 8789   | FBP2    | 9  |
| FBRS    | 64319  | FBRS    | 16 |
| FBXL10  | 84678  | FBXL10  | 12 |
| FBXL11  | 22992  | FBXL11  | 11 |
| FBXL12  | 54850  | FBXL12  | 19 |
| FBXL13  | 222235 | FBXL13  | 7  |
| FBXL14  | 144699 | FBXL14  | 12 |
| FBXL15  | 79176  | FBXL15  | 10 |
| FBXL16  | 146330 | FBXL16  | 16 |
| FBXL18  | 80028  | FBXL18  |    |
| FBXL19  | 54620  | FBXL19  |    |
| FBXL2   | 25827  | FBXL2   | 3  |
| FBXL20  | 84961  | FBXL20  | 17 |
| FBXL21  | 26223  | FBXL21  | 5  |
| FBXL22  | 283807 | FBXL22  | 15 |
| FBXL3   | 26224  | FBXL3   | 13 |
| FBXL6   | 26233  | FBXL6   | 8  |
| FBXL8   | 55336  | FBXL8   | 16 |
| FBXO10  | 26267  | FBXO10  | 9  |
| FBXO11  | 80204  | FBXO11  | 2  |
| FBXO15  | 201456 | FBXO15  | 18 |
| FBXO16  | 157574 | FBXO16  | 8  |
| FBXO17  | 115290 | FBXO17  | 19 |
| FBXO2   | 26232  | FBXO2   | 1  |
| FBXO21  | 23014  | FBXO21  | 12 |
| FBXO22  | 26263  | FBXO22  | 15 |
| FBXO25  | 26260  | FBXO25  | 8  |
| FBXO28  | 23219  | FBXO28  | 1  |
| FBXO3   | 26273  | FBXO3   | 11 |
| FBXO30  | 84085  | FBXO30  | 6  |
| FBXO31  | 79791  | FBXO31  | 16 |
| FBXO32  | 114907 | FBXO32  | 8  |
| FBXO33  | 254170 | FBXO33  | 14 |

|        |        |        |    |
|--------|--------|--------|----|
| FBXO34 | 55030  | FBXO34 | 14 |
| FBXO36 | 130888 | FBXO36 | 2  |
| FBXO38 | 81545  | FBXO38 | 5  |
| FBXO4  | 26272  | FBXO4  | 5  |
| FBXO41 | 150726 | FBXO41 | 2  |
| FBXO42 | 54455  | FBXO42 | 1  |
| FBXO44 | 93611  | FBXO44 | 1  |
| FBXO45 | 200933 | FBXO45 | 3  |
| FBXO46 | 23403  | FBXO46 | 19 |
| FBXO48 | 554251 | FBXO48 | 2  |
| FBXO5  | 26271  | FBXO5  | 6  |
| FBXO6  | 26270  | FBXO6  | 1  |
| FBXO7  | 25793  | FBXO7  | 22 |
| FBXO8  | 26269  | FBXO8  | 4  |
| FBXW11 | 23291  | FBXW11 | 5  |
| FBXW2  | 26190  | FBXW2  | 9  |
| FBXW4  | 6468   | FBXW4  | 10 |
| FBXW5  | 54461  | FBXW5  | 9  |
| FBXW7  | 55294  | FBXW7  | 4  |
| FBXW8  | 26259  | FBXW8  | 12 |
| FBXW9  | 84261  | FBXW9  | 19 |
| FCAR   | 2204   | FCAR   | 19 |
| FCER1G | 2207   | FCER1G | 1  |
| FCER2  | 2208   | FCER2  | 19 |
| FCF1   | 51077  | FCF1   | 14 |
| FCGBP  | 8857   | FCGBP  | 19 |
| FCGR2A | 2212   | FCGR2A | 1  |
| FCGR2B | 2213   | FCGR2B |    |
| FCGR2C | 9103   | FCGR2C | 1  |
| FCGRT  | 2217   | FCGRT  | 19 |
| FCHO1  | 23149  | FCHO1  | 19 |
| FCHO2  | 115548 | FCHO2  | 5  |
| FCHSD2 | 9873   | FCHSD2 | 11 |
| FCN1   | 2219   | FCN1   | 9  |
| FCRL1  | 115350 | FCRL1  | 1  |
| FCRL2  | 79368  | FCRL2  | 1  |
| FCRL3  | 115352 | FCRL3  | 1  |
| FCRL4  | 83417  | FCRL4  | 1  |
| FCRL5  | 83416  | FCRL5  | 1  |
| FCRL6  | 343413 | FCRL6  | 1  |
| FCRLA  | 84824  | FCRLA  | 1  |
| FCRLB  | 127943 | FCRLB  | 1  |
| FDFT1  | 2222   | FDFT1  | 8  |
| FDPS   | 2224   | FDPS   | 1  |

|          |        |          |    |
|----------|--------|----------|----|
| FDPSL2A  | 619190 | FDPSL2A  | 7  |
| FDX1     | 2230   | FDX1     | 11 |
| FDX1L    | 112812 | FDX1L    | 19 |
| FDXACB1  | 91893  | FDXACB1  | 11 |
| FECH     | 2235   | FECH     | 18 |
| FEM1A    | 55527  | FEM1A    | 19 |
| FEM1B    | 10116  | FEM1B    | 15 |
| FEM1C    | 56929  | FEM1C    | 5  |
| FEN1     | 2237   | FEN1     | 11 |
| FER      | 2241   | FER      | 5  |
| FER1L4   | 80307  | FER1L4   |    |
| FERMT2   | 10979  | FERMT2   | 14 |
| FERMT3   | 83706  | FERMT3   | 11 |
| FES      | 2242   | FES      | 15 |
| FEZ1     | 9638   | FEZ1     | 11 |
| FEZ2     | 9637   | FEZ2     | 2  |
| FGD1     | 2245   | FGD1     | X  |
| FGD2     | 221472 | FGD2     | 6  |
| FGD3     | 89846  | FGD3     | 9  |
| FGD6     | 55785  | FGD6     | 12 |
| FGF11    | 2256   | FGF11    | 17 |
| FGF17    | 8822   | FGF17    | 8  |
| FGF18    | 8817   | FGF18    | 5  |
| FGF2     | 2247   | FGF2     | 4  |
| FGF20    | 26281  | FGF20    | 8  |
| FGF6     | 2251   | FGF6     | 12 |
| FGF9     | 2254   | FGF9     | 13 |
| FGFBP3   | 143282 | FGFBP3   | 10 |
| FGFR1OP  | 11116  | FGFR1OP  | 6  |
| FGFR1OP2 | 26127  | FGFR1OP2 | 12 |
| FGFR3    | 2261   | FGFR3    | 4  |
| FGFR4    | 2264   | FGFR4    | 5  |
| FGFRL1   | 53834  | FGFRL1   | 4  |
| FGGY     | 55277  | FGGY     | 1  |
| FGR      | 2268   | FGR      | 1  |
| FH       | 2271   | FH       | 1  |
| FHDC1    | 85462  | FHDC1    | 4  |
| FHIT     | 2272   | FHIT     | 3  |
| FHL1     | 2273   | FHL1     | X  |
| FHL2     | 2274   | FHL2     | 2  |
| FHL3     | 2275   | FHL3     | 1  |
| FHOD1    | 29109  | FHOD1    | 16 |
| FHOD3    | 80206  | FHOD3    | 18 |
| FIBCD1   | 84929  | FIBCD1   | 9  |

|          |        |          |    |
|----------|--------|----------|----|
| FIBP     | 9158   | FIBP     | 11 |
| FICD     | 11153  | FICD     | 12 |
| FIG4     | 9896   | FIG4     | 6  |
| FIGNL1   | 63979  | FIGNL1   | 7  |
| FIGNL2   | 401720 | FIGNL2   | 12 |
| FILIP1   | 27145  | FILIP1   | 6  |
| FILIP1L  | 11259  | FILIP1L  | 3  |
| FIS      | 202299 | FIS      | 5  |
| FIS1     | 51024  | FIS1     | 7  |
| FIT1     | 161247 | FIT1     | 14 |
| FIZ1     | 84922  | FIZ1     | 19 |
| FJX1     | 24147  | FJX1     | 11 |
| FKBP11   | 51303  | FKBP11   | 12 |
| FKBP14   | 55033  | FKBP14   | 7  |
| FKBP15   | 23307  | FKBP15   | 9  |
| FKBP1A   | 2280   | FKBP1A   | 20 |
| FKBP1B   | 2281   | FKBP1B   | 2  |
| FKBP2    | 2286   | FKBP2    | 11 |
| FKBP4    | 2288   | FKBP4    | 12 |
| FKBP5    | 2289   | FKBP5    | 6  |
| FKBP7    | 51661  | FKBP7    | 2  |
| FKBP9L   | 360132 | FKBP9L   | 7  |
| FKBPL    | 63943  | FKBPL    | 6  |
| FKRP     | 79147  | FKRP     | 19 |
| FKSG30   | 440915 | FKSG30   | 2  |
| FKTN     | 2218   | FKTN     | 9  |
| FLCN     | 201163 | FLCN     | 17 |
| FLI1     | 2313   | FLI1     | 11 |
| FLII     | 2314   | FLII     | 17 |
| FLJ10081 | 55683  | FLJ10081 | 2  |
| FLJ10213 | 55096  | FLJ10213 | 3  |
| FLJ10246 | 55104  | FLJ10246 |    |
| FLJ10357 | 55701  | FLJ10357 | 14 |
| FLJ10374 | 55702  | FLJ10374 | 19 |
| FLJ10781 | 55228  | FLJ10781 | 19 |
| FLJ10803 | 55744  | FLJ10803 | 7  |
| FLJ10916 | 55258  | FLJ10916 | 2  |
| FLJ10986 | 55277  | FLJ10986 | 1  |
| FLJ12688 | 79613  | FLJ12688 | 16 |
| FLJ12949 | 65095  | FLJ12949 | 19 |
| FLJ13305 | 84140  | FLJ13305 | 2  |
| FLJ13614 | 84142  | FLJ13614 | 4  |
| FLJ14712 | 221806 | FLJ14712 | 7  |
| FLJ16323 | 441390 | FLJ16323 | 9  |

|          |        |          |    |
|----------|--------|----------|----|
| FLJ16331 | 440044 | FLJ16331 | 11 |
| FLJ16369 | 122706 | FLJ16369 | 14 |
| FLJ16686 | 401124 | FLJ16686 |    |
| FLJ16793 | 645121 | FLJ16793 | 5  |
| FLJ20021 | 90024  | FLJ20021 | 4  |
| FLJ20254 | 54867  | FLJ20254 | 2  |
| FLJ20273 | 54502  | FLJ20273 | 4  |
| FLJ20444 | 403323 | FLJ20444 | 9  |
| FLJ20489 | 55652  | FLJ20489 | 12 |
| FLJ20628 | 55006  | FLJ20628 | 2  |
| FLJ20674 | 54621  | FLJ20674 | 12 |
| FLJ20699 | 55020  | FLJ20699 | 22 |
| FLJ20718 | 55027  | FLJ20718 | 16 |
| FLJ20850 | 55049  | FLJ20850 | 19 |
| FLJ20920 | 80221  | FLJ20920 | 17 |
| FLJ21511 | 80157  | FLJ21511 | 4  |
| FLJ21767 | 401331 | FLJ21767 |    |
| FLJ21839 | 60509  | FLJ21839 | 2  |
| FLJ21865 | 64772  | FLJ21865 | 17 |
| FLJ21986 | 79974  | FLJ21986 | 7  |
| FLJ22184 | 80164  | FLJ22184 |    |
| FLJ22222 | 79701  | FLJ22222 |    |
| FLJ22447 | 400221 | FLJ22447 |    |
| FLJ22531 | 79703  | FLJ22531 |    |
| FLJ22639 | 79854  | FLJ22639 |    |
| FLJ22662 | 79887  | FLJ22662 | 12 |
| FLJ22795 | 80154  | FLJ22795 | 15 |
| FLJ23754 | 201252 | FLJ23754 | 17 |
| FLJ23834 | 222256 | FLJ23834 | 7  |
| FLJ25006 | 124923 | FLJ25006 | 17 |
| FLJ25363 | 401082 | FLJ25363 |    |
| FLJ25404 | 146378 | FLJ25404 |    |
| FLJ25715 | 284241 | FLJ25715 | 18 |
| FLJ25758 | 497049 | FLJ25758 | 19 |
| FLJ26056 | 375127 | FLJ26056 | 22 |
| FLJ26850 | 400710 | FLJ26850 | 19 |
| FLJ27354 | 400761 | FLJ27354 | 1  |
| FLJ27465 | 374664 | FLJ27465 | 15 |
| FLJ30058 | 158763 | FLJ30058 | X  |
| FLJ30428 | 150519 | FLJ30428 | 2  |
| FLJ30679 | 146512 | FLJ30679 | 16 |
| FLJ31306 | 379025 | FLJ31306 | 14 |
| FLJ31568 | 150244 | FLJ31568 | 22 |
| FLJ32063 | 150538 | FLJ32063 | 2  |

|          |        |          |    |
|----------|--------|----------|----|
| FLJ32252 | 146336 | FLJ32252 | 16 |
| FLJ32569 | 148811 | FLJ32569 |    |
| FLJ32658 | 147872 | FLJ32658 |    |
| FLJ32679 | 440321 | FLJ32679 | 15 |
| FLJ32810 | 143872 | FLJ32810 |    |
| FLJ32955 | 150596 | FLJ32955 | 2  |
| FLJ33387 | 161145 | FLJ33387 | 14 |
| FLJ33534 | 285150 | FLJ33534 | 2  |
| FLJ33590 | 285093 | FLJ33590 | 2  |
| FLJ33630 | 644873 | FLJ33630 | 5  |
| FLJ33706 | 284805 | FLJ33706 | 20 |
| FLJ33996 | 283401 | FLJ33996 | 12 |
| FLJ34503 | 285759 | FLJ34503 |    |
| FLJ34969 | 201627 | FLJ34969 |    |
| FLJ35024 | 401491 | FLJ35024 | 9  |
| FLJ35220 | 284131 | FLJ35220 | 17 |
| FLJ35390 | 255031 | FLJ35390 | 7  |
| FLJ35767 | 400629 | FLJ35767 | 17 |
| FLJ35785 | 283796 | FLJ35785 | 15 |
| FLJ35801 | 150291 | FLJ35801 | 22 |
| FLJ35816 | 401114 | FLJ35816 | 4  |
| FLJ36032 | 284485 | FLJ36032 | 1  |
| FLJ36070 | 284358 | FLJ36070 | 19 |
| FLJ36131 | 338999 | FLJ36131 |    |
| FLJ36166 | 349152 | FLJ36166 | 7  |
| FLJ36848 | 647115 | FLJ36848 | 2  |
| FLJ37078 | 222183 | FLJ37078 | 7  |
| FLJ37201 | 283011 | FLJ37201 | 10 |
| FLJ37396 | 285754 | FLJ37396 | 6  |
| FLJ37587 | 283446 | FLJ37587 | 12 |
| FLJ37673 | 285456 | FLJ37673 | 4  |
| FLJ38377 | 205147 | FLJ38377 | 2  |
| FLJ38482 | 201931 | FLJ38482 | 4  |
| FLJ38576 | 651430 | FLJ38576 |    |
| FLJ38717 | 401261 | FLJ38717 | 6  |
| FLJ38723 | 255180 | FLJ38723 | 15 |
| FLJ38773 | 284808 | FLJ38773 | 20 |
| FLJ38969 | 401303 | FLJ38969 | 7  |
| FLJ39632 | 642477 | FLJ39632 | 14 |
| FLJ39653 | 202020 | FLJ39653 | 4  |
| FLJ39827 | 139285 | FLJ39827 | X  |
| FLJ40125 | 147699 | FLJ40125 | 19 |
| FLJ40296 | 122183 | FLJ40296 |    |
| FLJ40330 | 645784 | FLJ40330 | 2  |

|          |        |          |    |
|----------|--------|----------|----|
| FLJ40473 | 285226 | FLJ40473 | 3  |
| FLJ40722 | 285966 | FLJ40722 |    |
| FLJ41047 | 399968 | FLJ41047 |    |
| FLJ41352 | 150776 | FLJ41352 | 2  |
| FLJ41484 | 650669 | FLJ41484 |    |
| FLJ41603 | 389337 | FLJ41603 | 5  |
| FLJ42177 | 401271 | FLJ42177 | 6  |
| FLJ42289 | 388182 | FLJ42289 |    |
| FLJ42291 | 346547 | FLJ42291 | 7  |
| FLJ42393 | 401105 | FLJ42393 | 3  |
| FLJ42562 | 400954 | FLJ42562 | 2  |
| FLJ42627 | 645644 | FLJ42627 | 16 |
| FLJ42957 | 400077 | FLJ42957 | 12 |
| FLJ43080 | 642987 | FLJ43080 |    |
| FLJ43093 | 401258 | FLJ43093 | 6  |
| FLJ43276 | 388165 | FLJ43276 | 15 |
| FLJ43663 | 378805 | FLJ43663 | 7  |
| FLJ43752 | 401253 | FLJ43752 | 6  |
| FLJ43870 | 400686 | FLJ43870 | 19 |
| FLJ43987 | 388960 | FLJ43987 |    |
| FLJ44124 | 641737 | FLJ44124 | 7  |
| FLJ44216 | 375484 | FLJ44216 |    |
| FLJ44290 | 375347 | FLJ44290 | 3  |
| FLJ44313 | 400658 | FLJ44313 | 18 |
| FLJ44342 | 645460 | FLJ44342 | 17 |
| FLJ45244 | 400242 | FLJ45244 | 14 |
| FLJ45337 | 400754 | FLJ45337 | 1  |
| FLJ45422 | 441140 | FLJ45422 | 6  |
| FLJ45832 | 400841 | FLJ45832 | 20 |
| FLJ46020 | 400863 | FLJ46020 | 21 |
| FLJ46026 | 400627 | FLJ46026 | 17 |
| FLJ46156 | 341883 | FLJ46156 | 14 |
| FLJ46230 | 400679 | FLJ46230 | 19 |
| FLJ46284 | 441369 | FLJ46284 | 8  |
| FLJ46309 | 649598 | FLJ46309 | 9  |
| FLJ46361 | 375940 | FLJ46361 | 10 |
| FLJ46836 | 401554 | FLJ46836 | 9  |
| FLJ46906 | 441172 | FLJ46906 | 6  |
| FLJ77644 | 728772 | FLJ77644 | 17 |
| FLJ90757 | 440465 | FLJ90757 | 17 |
| FLNA     | 2316   | FLNA     | X  |
| FLNB     | 2317   | FLNB     | 3  |
| FLNC     | 2318   | FLNC     | 7  |
| FLOT1    | 10211  | FLOT1    | 6  |



|         |        |         |    |
|---------|--------|---------|----|
| FLOT2   | 2319   | FLOT2   | 17 |
| FLRT2   | 23768  | FLRT2   | 14 |
| FLT3LG  | 2323   | FLT3LG  | 19 |
| FLVCR2  | 55640  | FLVCR2  | 14 |
| FLYWCH2 | 114984 | FLYWCH2 | 16 |
| FMN1    | 342184 | FMN1    | 15 |
| FMNL1   | 752    | FMNL1   | 17 |
| FMNL2   | 114793 | FMNL2   | 2  |
| FMNL3   | 91010  | FMNL3   | 12 |
| FMO1    | 2326   | FMO1    | 1  |
| FMO4    | 2329   | FMO4    | 1  |
| FMO5    | 2330   | FMO5    | 1  |
| FMOD    | 2331   | FMOD    | 1  |
| FN3KRP  | 79672  | FN3KRP  | 17 |
| FNBP1   | 23048  | FNBP1   | 9  |
| FNBP1L  | 54874  | FNBP1L  | 1  |
| FNBP4   | 23360  | FNBP4   | 11 |
| FNDC1   | 84624  | FNDC1   | 6  |
| FNDC3B  | 64778  | FNDC3B  | 3  |
| FNDC5   | 252995 | FNDC5   | 1  |
| FNDC7   | 163479 | FNDC7   | 1  |
| FNIP1   | 96459  | FNIP1   | 5  |
| FNIP2   | 57600  | FNIP2   | 4  |
| FNTA    | 2339   | FNTA    | 8  |
| FNTB    | 2342   | FNTB    | 14 |
| FOLR2   | 2350   | FOLR2   | 11 |
| FOLR3   | 2352   | FOLR3   | 11 |
| FOS     | 2353   | FOS     | 14 |
| FOSB    | 2354   | FOSB    | 19 |
| FOXA3   | 3171   | FOXA3   | 19 |
| FOXC1   | 2296   | FOXC1   | 6  |
| FOXC2   | 2303   | FOXC2   | 16 |
| FOXD1   | 2297   | FOXD1   | 5  |
| FOXD2   | 2306   | FOXD2   | 1  |
| FOXD4L4 | 349334 | FOXD4L4 | 9  |
| FOXD4L5 | 653427 | FOXD4L5 | 9  |
| FOXF2   | 2295   | FOXF2   | 6  |
| FOXI2   | 399823 | FOXI2   | 10 |
| FOXJ1   | 2302   | FOXJ1   | 17 |
| FOXJ2   | 55810  | FOXJ2   | 12 |
| FOXJ3   | 22887  | FOXJ3   | 1  |
| FOXK1   | 221937 | FOXK1   | 7  |
| FOXL1   | 2300   | FOXL1   | 16 |
| FOXL2   | 668    | FOXL2   | 3  |

|         |           |         |                |
|---------|-----------|---------|----------------|
| FOXM1   | 2305      | FOXM1   | 12             |
| FOXN1   | 8456      | FOXN1   | 17             |
| FOXN2   | 3344      | FOXN2   | 2              |
| FOXO1   | 2308      | FOXO1   | 13             |
| FOXO3   | 2309      | FOXO3   | 6              |
| FOXO4   | 4303      | FOXO4   | X              |
| FOXP1   | 27086     | FOXP1   | 3              |
| FOXP3   | 50943     | FOXP3   | X              |
| FOXP4   | 116113    | FOXP4   | 6              |
| FOXR1   | 283150    | FOXR1   | 11             |
| FOXRED1 | 55572     | FOXRED1 | 11             |
| FOXRED2 | 80020     | FOXRED2 | 22             |
| FPR1    | 2357      | FPR1    | 19             |
| FRAG1   | 27315     | FRAG1   | 11             |
| FRAP1   | 2475      | FRAP1   | 1              |
| FRAT1   | 10023     | FRAT1   | 10             |
| FRAT2   | 23401     | FRAT2   | 10             |
| FRG1    | 2483      | FRG1    | 4              |
| FRG2C   | 100288801 | FRG2C   | Un NT_167216.1 |
| FRK     | 2444      | FRK     | 6              |
| FRMD3   | 257019    | FRMD3   | 9              |
| FRMD5   | 84978     | FRMD5   | 15             |
| FRMD6   | 122786    | FRMD6   | 14             |
| FRMD8   | 83786     | FRMD8   | 11             |
| FRRS1   | 391059    | FRRS1   | 1              |
| FRS3    | 10817     | FRS3    | 6              |
| FRYL    | 285527    | FRYL    | 4              |
| FRZB    | 2487      | FRZB    | 2              |
| FSBP    | 10646     | FSBP    | 8              |
| FSCB    | 84075     | FSCB    | 14             |
| FSCN1   | 6624      | FSCN1   | 7              |
| FSCN3   | 29999     | FSCN3   | 7              |
| FSD1    | 79187     | FSD1    | 19             |
| FSD2    | 123722    | FSD2    | 15             |
| FSIP1   | 161835    | FSIP1   | 15             |
| FST     | 10468     | FST     | 5              |
| FSTL3   | 10272     | FSTL3   | 19             |
| FSTL5   | 56884     | FSTL5   | 4              |
| FTH1    | 2495      | FTH1    | 11             |
| FTHL11  | 2503      | FTHL11  | 8              |
| FTHL12  | 2504      | FTHL12  | 9              |
| FTHL16  | 2508      | FTHL16  |                |
| FTHL2   | 2497      | FTHL2   | 1              |
| FTHL3   | 2498      | FTHL3   | 2              |

|        |        |        |    |
|--------|--------|--------|----|
| FTHL7  | 2500   | FTHL7  | 13 |
| FTHL8  | 2501   | FTHL8  | X  |
| FTL    | 2512   | FTL    | 19 |
| FTO    | 79068  | FTO    | 16 |
| FTSJ1  | 24140  | FTSJ1  | X  |
| FTSJ2  | 29960  | FTSJ2  | 7  |
| FTSJ3  | 117246 | FTSJ3  | 17 |
| FTSJD1 | 55783  | FTSJD1 | 16 |
| FTSJD2 | 23070  | FTSJD2 | 6  |
| FUBP1  | 8880   | FUBP1  | 1  |
| FUBP3  | 8939   | FUBP3  | 9  |
| FUCA1  | 2517   | FUCA1  | 1  |
| FUK    | 197258 | FUK    | 16 |
| FUNDC1 | 139341 | FUNDC1 | X  |
| FURIN  | 5045   | FURIN  | 15 |
| FUS    | 2521   | FUS    | 16 |
| FUT11  | 170384 | FUT11  | 10 |
| FUT4   | 2526   | FUT4   | 11 |
| FUT6   | 2528   | FUT6   | 19 |
| FUZ    | 80199  | FUZ    | 19 |
| FVT1   | 2531   | FVT1   | 18 |
| FXC1   | 26515  | FXC1   | 11 |
| FXN    | 2395   | FXN    | 9  |
| FXR1   | 8087   | FXR1   | 3  |
| FXR2   | 9513   | FXR2   | 17 |
| FXYD1  | 5348   | FXYD1  | 19 |
| FXYD4  | 53828  | FXYD4  | 10 |
| FXYD5  | 53827  | FXYD5  | 19 |
| FXYD6  | 53826  | FXYD6  | 11 |
| FXYD7  | 53822  | FXYD7  | 19 |
| FYCO1  | 79443  | FYCO1  | 3  |
| FYN    | 2534   | FYN    | 6  |
| FYTTD1 | 84248  | FYTTD1 | 3  |
| FZD1   | 8321   | FZD1   | 7  |
| FZD2   | 2535   | FZD2   | 17 |
| FZD3   | 7976   | FZD3   | 8  |
| FZD4   | 8322   | FZD4   | 11 |
| FZD5   | 7855   | FZD5   | 2  |
| FZD9   | 8326   | FZD9   | 7  |
| FZR1   | 51343  | FZR1   | 19 |
| G3BP1  | 10146  | G3BP1  | 5  |
| G3BP2  | 9908   | G3BP2  | 4  |
| G6PC3  | 92579  | G6PC3  | 17 |
| G6PD   | 2539   | G6PD   | X  |

|            |        |            |    |
|------------|--------|------------|----|
| GAA        | 2548   | GAA        | 17 |
| GAB1       | 2549   | GAB1       | 4  |
| GAB2       | 9846   | GAB2       | 11 |
| GAB3       | 139716 | GAB3       | X  |
| GABARAP    | 11337  | GABARAP    | 17 |
| GABARAPL1  | 23710  | GABARAPL1  | 12 |
| GABARAPL2  | 11345  | GABARAPL2  | 16 |
| GABBR1     | 2550   | GABBR1     | 6  |
| GABBR2     | 9568   | GABBR2     | 9  |
| GABPB1     | 2553   | GABPB1     | 15 |
| GABPB2     | 2553   | GABPB2     | 15 |
| GABRA5     | 2558   | GABRA5     | 15 |
| GABRB1     | 2560   | GABRB1     | 4  |
| GABRP      | 2568   | GABRP      | 5  |
| GAD1       | 2571   | GAD1       | 2  |
| GADD45A    | 1647   | GADD45A    | 1  |
| GADD45B    | 4616   | GADD45B    | 19 |
| GADD45G    | 10912  | GADD45G    | 9  |
| GADD45GIP1 | 90480  | GADD45GIP1 | 19 |
| GAGE12H    | 729442 | GAGE12H    | X  |
| GAK        | 2580   | GAK        | 4  |
| GAL3ST4    | 79690  | GAL3ST4    | 7  |
| GALC       | 2581   | GALC       | 14 |
| GALE       | 2582   | GALE       | 1  |
| GALK1      | 2584   | GALK1      | 17 |
| GALK2      | 2585   | GALK2      | 15 |
| GALM       | 130589 | GALM       | 2  |
| GALNS      | 2588   | GALNS      | 16 |
| GALNT1     | 2589   | GALNT1     | 18 |
| GALNT10    | 55568  | GALNT10    | 5  |
| GALNT11    | 63917  | GALNT11    | 7  |
| GALNT12    | 79695  | GALNT12    | 9  |
| GALNT14    | 79623  | GALNT14    | 2  |
| GALNT4     | 8693   | GALNT4     | 12 |
| GALNT6     | 11226  | GALNT6     | 12 |
| GALNTL1    | 57452  | GALNTL1    | 14 |
| GALNTL4    | 374378 | GALNTL4    | 11 |
| GALR2      | 8811   | GALR2      | 17 |
| GALT       | 2592   | GALT       | 9  |
| GAMT       | 2593   | GAMT       | 19 |
| GAN        | 8139   | GAN        | 16 |
| GANAB      | 23193  | GANAB      | 11 |
| GANC       | 2595   | GANC       | 15 |
| GAP43      | 2596   | GAP43      | 3  |

|         |        |         |    |
|---------|--------|---------|----|
| GAPDH   | 2597   | GAPDH   | 12 |
| GAPT    | 202309 | GAPT    | 5  |
| GAPVD1  | 26130  | GAPVD1  | 9  |
| GAR1    | 54433  | GAR1    | 4  |
| GARNL4  | 23108  | GARNL4  | 17 |
| GARS    | 2617   | GARS    | 7  |
| GART    | 2618   | GART    | 21 |
| GAS2    | 2620   | GAS2    | 11 |
| GAS5    | 60674  | GAS5    | 1  |
| GAS8    | 2622   | GAS8    | 16 |
| GATA3   | 2625   | GATA3   | 10 |
| GATAD1  | 57798  | GATAD1  | 7  |
| GATAD2A | 54815  | GATAD2A | 19 |
| GATAD2B | 57459  | GATAD2B | 1  |
| GATC    | 283459 | GATC    | 12 |
| GATM    | 2628   | GATM    | 15 |
| GATS    | 352954 | GATS    | 7  |
| GBA     | 2629   | GBA     | 1  |
| GBA2    | 57704  | GBA2    | 9  |
| GBAS    | 2631   | GBAS    | 7  |
| GBE1    | 2632   | GBE1    | 3  |
| GBF1    | 8729   | GBF1    | 10 |
| GBGT1   | 26301  | GBGT1   | 9  |
| GBP1    | 2633   | GBP1    | 1  |
| GBP2    | 2634   | GBP2    | 1  |
| GBP3    | 2635   | GBP3    | 1  |
| GBP4    | 115361 | GBP4    | 1  |
| GBP5    | 115362 | GBP5    | 1  |
| GBP7    | 388646 | GBP7    | 1  |
| GC      | 2638   | GC      | 4  |
| GCA     | 25801  | GCA     | 2  |
| GCAT    | 23464  | GCAT    | 22 |
| GCC1    | 79571  | GCC1    | 7  |
| GCC2    | 9648   | GCC2    | 2  |
| GCDH    | 2639   | GCDH    | 19 |
| GCET2   | 257144 | GCET2   | 3  |
| GCG     | 2641   | GCG     | 2  |
| GCH1    | 2643   | GCH1    | 14 |
| GCHFR   | 2644   | GCHFR   | 15 |
| GCLC    | 2729   | GCLC    | 6  |
| GCM1    | 8521   | GCM1    | 6  |
| GCM2    | 9247   | GCM2    | 6  |
| GCN1L1  | 10985  | GCN1L1  | 12 |
| GCNT1   | 2650   | GCNT1   | 9  |

|        |        |        |    |
|--------|--------|--------|----|
| GCNT2  | 2651   | GCNT2  | 6  |
| GCNT6  | 644378 | GCNT6  | 6  |
| GCOM1  | 145781 | Gcom1  | 15 |
| GCSH   | 2653   | GCSH   | 16 |
| GDA    | 9615   | GDA    | 9  |
| GDAP1  | 54332  | GDAP1  | 8  |
| GDAP2  | 54834  | GDAP2  | 1  |
| GDE1   | 51573  | GDE1   | 16 |
| GDF11  | 10220  | GDF11  | 12 |
| GDF5OS | 554250 | GDF5OS |    |
| GDI1   | 2664   | GDI1   | X  |
| GDI2   | 2665   | GDI2   | 10 |
| GDPD1  | 284161 | GDPD1  | 17 |
| GDPD2  | 54857  | GDPD2  | X  |
| GDPD5  | 81544  | GDPD5  | 11 |
| GEM    | 2669   | GEM    | 8  |
| GEMIN4 | 50628  | GEMIN4 | 17 |
| GEMIN5 | 25929  | GEMIN5 | 5  |
| GEMIN6 | 79833  | GEMIN6 | 2  |
| GEMIN8 | 54960  | GEMIN8 | X  |
| GEN1   | 348654 | GEN1   | 2  |
| GFI1   | 2672   | GFI1   | 1  |
| GFM1   | 85476  | GFM1   | 3  |
| GFM2   | 84340  | GFM2   | 5  |
| GFOD1  | 54438  | GFOD1  | 6  |
| GFPT1  | 2673   | GFPT1  | 2  |
| GFRA2  | 2675   | GFRA2  | 8  |
| GFRA3  | 2676   | GFRA3  | 5  |
| GGA1   | 26088  | GGA1   | 22 |
| GGA2   | 23062  | GGA2   | 16 |
| GGA3   | 23163  | GGA3   | 17 |
| GGCT   | 79017  | GGCT   | 7  |
| GGCX   | 2677   | GGCX   | 2  |
| GGH    | 8836   | GGH    | 8  |
| GGNBP2 | 79893  | GGNBP2 | 17 |
| GGT7   | 2686   | GGT7   | 20 |
| GGT8P  | 645367 | GGT8P  | 2  |
| GGTA1  | 2681   | GGTA1  | 9  |
| GGTL3  | 2686   | GGTL3  | 20 |
| GHDC   | 84514  | GHDC   | 17 |
| GHITM  | 27069  | GHITM  | 10 |
| GIGYF1 | 64599  | GIGYF1 | 7  |
| GIMAP2 | 26157  | GIMAP2 | 7  |
| GIMAP4 | 55303  | GIMAP4 | 7  |

|         |        |         |    |
|---------|--------|---------|----|
| GIMAP8  | 155038 | GIMAP8  | 7  |
| GIN1    | 54826  | GIN1    | 5  |
| GINS2   | 51659  | GINS2   | 16 |
| GINS3   | 64785  | GINS3   | 16 |
| GINS4   | 84296  | GINS4   | 8  |
| GIPC1   | 10755  | GIPC1   | 19 |
| GIT2    | 9815   | GIT2    | 12 |
| GIYD1   | 548593 | GIYD1   | 16 |
| GIYD2   | 79008  | GIYD2   | 16 |
| GJB2    | 2706   | GJB2    | 13 |
| GJB6    | 10804  | GJB6    | 13 |
| GJC1    | 10052  | GJC1    | 17 |
| GJC2    | 57165  | GJC2    | 1  |
| GJC3    | 349149 | GJC3    | 7  |
| GK      | 2710   | GK      | X  |
| GK5     | 256356 | GK5     | 3  |
| GKAP1   | 80318  | GKAP1   | 9  |
| GLA     | 2717   | GLA     | X  |
| GLB1    | 2720   | GLB1    | 3  |
| GLB1L   | 79411  | GLB1L   | 2  |
| GLB1L3  | 112937 | GLB1L3  | 11 |
| GLCCI1  | 113263 | GLCCI1  | 7  |
| GLCE    | 26035  | GLCE    | 15 |
| GLDC    | 2731   | GLDC    | 9  |
| GLE1    | 2733   | GLE1    | 9  |
| GLG1    | 2734   | GLG1    | 16 |
| GLI1    | 2735   | GLI1    | 12 |
| GLI4    | 2738   | GLI4    | 8  |
| GLIPR1  | 11010  | GLIPR1  | 12 |
| GLIPR2  | 152007 | GLIPR2  | 9  |
| GLIS3   | 169792 | GLIS3   | 9  |
| GLMN    | 11146  | GLMN    | 1  |
| GLO1    | 2739   | GLO1    | 6  |
| GLOD4   | 51031  | GLOD4   | 17 |
| GLRA2   | 2742   | GLRA2   | X  |
| GLRA3   | 8001   | GLRA3   | 4  |
| GLRX    | 2745   | GLRX    | 5  |
| GLRX2   | 51022  | GLRX2   | 1  |
| GLRX3   | 10539  | GLRX3   | 10 |
| GLRX5   | 51218  | GLRX5   | 14 |
| GLS     | 2744   | GLS     | 2  |
| GLS2    | 27165  | GLS2    | 12 |
| GLT1D1  | 144423 | GLT1D1  | 12 |
| GLT25D1 | 79709  | GLT25D1 | 19 |

|         |        |         |    |
|---------|--------|---------|----|
| GLT6D1  | 360203 | GLT6D1  | 9  |
| GLT8D1  | 55830  | GLT8D1  | 3  |
| GLT8D2  | 83468  | GLT8D2  | 12 |
| GLTP    | 51228  | GLTP    | 12 |
| GLTPD1  | 80772  | GLTPD1  | 1  |
| GLTSCR1 | 29998  | GLTSCR1 | 19 |
| GLUD1   | 2746   | GLUD1   | 10 |
| GLYATL2 | 219970 | GLYATL2 | 11 |
| GLYCTK  | 132158 | GLYCTK  | 3  |
| GM2A    | 2760   | GM2A    | 5  |
| GMCL1   | 64395  | GMCL1   | 2  |
| GMDS    | 2762   | GMDS    | 6  |
| GMEB1   | 10691  | GMEB1   | 1  |
| GMEB2   | 26205  | GMEB2   | 20 |
| GMFB    | 2764   | GMFB    | 14 |
| GMFG    | 9535   | GMFG    | 19 |
| GMIP    | 51291  | GMIP    | 19 |
| GMPPA   | 29926  | GMPPA   | 2  |
| GMPPB   | 29925  | GMPPB   | 3  |
| GMPR    | 2766   | GMPR    | 6  |
| GMPR2   | 51292  | GMPR2   | 14 |
| GMPS    | 8833   | GMPS    | 3  |
| GNA11   | 2767   | GNA11   | 19 |
| GNA12   | 2768   | GNA12   | 7  |
| GNA13   | 10672  | GNA13   | 17 |
| GNA14   | 9630   | GNA14   | 9  |
| GNA15   | 2769   | GNA15   | 19 |
| GNAI2   | 2771   | GNAI2   | 3  |
| GNAI3   | 2773   | GNAI3   | 1  |
| GNAT2   | 2780   | GNAT2   | 1  |
| GNAZ    | 2781   | GNAZ    | 22 |
| GNB1    | 2782   | GNB1    | 1  |
| GNB1L   | 54584  | GNB1L   | 22 |
| GNB2    | 2783   | GNB2    | 7  |
| GNB3    | 2784   | GNB3    | 12 |
| GNB4    | 59345  | GNB4    | 3  |
| GNB5    | 10681  | GNB5    | 15 |
| GNE     | 10020  | GNE     | 9  |
| GNG10   | 2790   | GNG10   | 9  |
| GNG11   | 2791   | GNG11   | 7  |
| GNG2    | 54331  | GNG2    | 14 |
| GNG4    | 2786   | GNG4    | 1  |
| GNG5    | 2787   | GNG5    | 1  |
| GNG7    | 2788   | GNG7    | 19 |



|           |        |           |    |
|-----------|--------|-----------|----|
| GNG8      | 94235  | GNG8      | 19 |
| GNGT2     | 2793   | GNGT2     | 17 |
| GNL1      | 2794   | GNL1      | 6  |
| GNL2      | 29889  | GNL2      | 1  |
| GNL3      | 26354  | GNL3      | 3  |
| GNL3L     | 54552  | GNL3L     | X  |
| GNPAT     | 8443   | GNPAT     | 1  |
| GNPDA1    | 10007  | GNPDA1    | 5  |
| GNPDA2    | 132789 | GNPDA2    | 4  |
| GNPNAT1   | 64841  | GNPNAT1   | 14 |
| GNPTAB    | 79158  | GNPTAB    | 12 |
| GNPTG     | 84572  | GNPTG     | 16 |
| GNS       | 2799   | GNS       | 12 |
| GOLGA2    | 2801   | GOLGA2    | 9  |
| GOLGA2LY2 | 401634 | GOLGA2LY2 | Y  |
| GOLGA3    | 2802   | GOLGA3    | 12 |
| GOLGA4    | 2803   | GOLGA4    | 3  |
| GOLGA5    | 9950   | GOLGA5    | 14 |
| GOLGA6A   | 342096 | GOLGA6A   | 15 |
| GOLGA6B   | 55889  | GOLGA6B   | 15 |
| GOLGA7    | 51125  | GOLGA7    | 8  |
| GOLGA8F   | 440244 | GOLGA8F   | 15 |
| GOLGB1    | 2804   | GOLGB1    | 3  |
| GOLIM4    | 27333  | GOLIM4    | 3  |
| GOLM1     | 51280  | GOLM1     | 9  |
| GOLPH3L   | 55204  | GOLPH3L   | 1  |
| GOLPH4    | 27333  | GOLPH4    | 3  |
| GOLSYN    | 55638  | GOLSYN    | 8  |
| GOLT1A    | 127845 | GOLT1A    | 1  |
| GOLT1B    | 51026  | GOLT1B    | 12 |
| GON4L     | 54856  | GON4L     | 1  |
| GOPC      | 57120  | GOPC      | 6  |
| GORASP1   | 64689  | GORASP1   | 3  |
| GORASP2   | 26003  | GORASP2   | 2  |
| GOSR1     | 9527   | GOSR1     | 17 |
| GOSR2     | 9570   | GOSR2     | 17 |
| GOT1      | 2805   | GOT1      | 10 |
| GOT1L1    | 137362 | GOT1L1    | 8  |
| GOT2      | 2806   | GOT2      | 16 |
| GP5       | 2814   | GP5       | 3  |
| GP9       | 2815   | GP9       | 3  |
| GPAA1     | 8733   | GPAA1     | 8  |
| GPAM      | 57678  | GPAM      | 10 |
| GPAT2     | 150763 | GPAT2     | 2  |

|         |        |         |    |
|---------|--------|---------|----|
| GPATC4  | 54865  | GPATC4  | 1  |
| GPATCH1 | 55094  | GPATCH1 | 19 |
| GPATCH2 | 55105  | GPATCH2 | 1  |
| GPATCH3 | 63906  | GPATCH3 | 1  |
| GPATCH4 | 54865  | GPATCH4 | 1  |
| GPBAR1  | 151306 | GPBAR1  | 2  |
| GPBP1   | 65056  | GPBP1   | 5  |
| GPBP1L1 | 60313  | GPBP1L1 | 1  |
| GPC2    | 221914 | GPC2    | 7  |
| GPC4    | 2239   | GPC4    | X  |
| GPC5    | 2262   | GPC5    | 13 |
| GPC6    | 10082  | GPC6    | 13 |
| GPD1    | 2819   | GPD1    | 12 |
| GPD1L   | 23171  | GPD1L   | 3  |
| GPER    | 2852   | GPER    | 7  |
| GPHB5   | 122876 | GPHB5   | 14 |
| GPI     | 2821   | GPI     | 19 |
| GPKOW   | 27238  | GPKOW   | X  |
| GPLD1   | 2822   | GPLD1   | 6  |
| GPM6A   | 2823   | GPM6A   | 4  |
| GPM6B   | 2824   | GPM6B   | X  |
| GPN1    | 11321  | GPN1    | 2  |
| GPN2    | 54707  | GPN2    | 1  |
| GPN3    | 51184  | GPN3    | 12 |
| GPNMB   | 10457  | GPNMB   | 7  |
| GPR1    | 2825   | GPR1    | 2  |
| GPR101  | 83550  | GPR101  | X  |
| GPR103  | 84109  | GPR103  | 4  |
| GPR107  | 57720  | GPR107  | 9  |
| GPR108  | 56927  | GPR108  | 19 |
| GPR114  | 221188 | GPR114  | 16 |
| GPR124  | 25960  | GPR124  | 8  |
| GPR126  | 57211  | GPR126  | 6  |
| GPR128  | 84873  | GPR128  | 3  |
| GPR132  | 29933  | GPR132  | 14 |
| GPR135  | 64582  | GPR135  | 14 |
| GPR137  | 56834  | GPR137  | 11 |
| GPR137B | 7107   | GPR137B | 1  |
| GPR137C | 283554 | GPR137C | 14 |
| GPR139  | 124274 | GPR139  | 16 |
| GPR143  | 4935   | GPR143  | X  |
| GPR144  | 347088 | GPR144  | 9  |
| GPR146  | 115330 | GPR146  | 7  |
| GPR148  | 344561 | GPR148  | 2  |

|         |        |         |    |
|---------|--------|---------|----|
| GPR15   | 2838   | GPR15   | 3  |
| GPR156  | 165829 | GPR156  | 3  |
| GPR160  | 26996  | GPR160  | 3  |
| GPR161  | 23432  | GPR161  | 1  |
| GPR162  | 27239  | GPR162  | 12 |
| GPR17   | 2840   | GPR17   | 2  |
| GPR172A | 79581  | GPR172A | 8  |
| GPR175  | 131601 | GPR175  | 3  |
| GPR18   | 2841   | GPR18   | 13 |
| GPR180  | 160897 | GPR180  | 13 |
| GPR182  | 11318  | GPR182  | 12 |
| GPR183  | 1880   | GPR183  | 13 |
| GPR19   | 2842   | GPR19   | 12 |
| GPR20   | 2843   | GPR20   | 8  |
| GPR27   | 2850   | GPR27   | 3  |
| GPR3    | 2827   | GPR3    | 1  |
| GPR45   | 11250  | GPR45   | 2  |
| GPR52   | 9293   | GPR52   | 1  |
| GPR55   | 9290   | GPR55   | 2  |
| GPR56   | 9289   | GPR56   | 16 |
| GPR6    | 2830   | GPR6    | 6  |
| GPR61   | 83873  | GPR61   | 1  |
| GPR63   | 81491  | GPR63   | 6  |
| GPR65   | 8477   | GPR65   | 14 |
| GPR75   | 10936  | GPR75   | 2  |
| GPR89A  | 51463  | GPR89A  | 1  |
| GPR89B  | 51463  | GPR89B  | 1  |
| GPR89C  | 728932 | GPR89C  | 1  |
| GPRC5C  | 55890  | GPRC5C  | 17 |
| GPRIN1  | 114787 | GPRIN1  | 5  |
| GPS2    | 2874   | GPS2    | 17 |
| GPSM1   | 26086  | GPSM1   |    |
| GPSM2   | 29899  | GPSM2   | 1  |
| GPSM3   | 63940  | GPSM3   | 6  |
| GPT2    | 84706  | GPT2    | 16 |
| GPX1    | 2876   | GPX1    | 3  |
| GPX3    | 2878   | GPX3    | 5  |
| GPX4    | 2879   | GPX4    | 19 |
| GPX7    | 2882   | GPX7    | 1  |
| GRAMD1A | 57655  | GRAMD1A | 19 |
| GRAMD1B | 57476  | GRAMD1B | 11 |
| GRAMD1C | 54762  | GRAMD1C | 3  |
| GRAMD3  | 65983  | GRAMD3  | 5  |
| GRAMD4  | 23151  | GRAMD4  | 22 |

|         |        |         |    |
|---------|--------|---------|----|
| GRAP    | 10750  | GRAP    |    |
| GRASP   | 160622 | GRASP   | 12 |
| GRB14   | 2888   | GRB14   | 2  |
| GRB2    | 2885   | GRB2    | 17 |
| GREB1   | 9687   | GREB1   | 2  |
| GRHL1   | 29841  | GRHL1   | 2  |
| GRHPR   | 9380   | GRHPR   | 9  |
| GRIA3   | 2892   | GRIA3   | X  |
| GRID2   | 2895   | GRID2   | 4  |
| GRIK2   | 2898   | GRIK2   | 6  |
| GRIK3   | 2899   | GRIK3   | 1  |
| GRIN1   | 2902   | GRIN1   | 9  |
| GRIN3B  | 116444 | GRIN3B  | 19 |
| GRINA   | 2907   | GRINA   | 8  |
| GRINL1A | 81488  | GRINL1A | 15 |
| GRIPAP1 | 56850  | GRIPAP1 | X  |
| GRK1    | 6011   | GRK1    | 13 |
| GRK4    | 2868   | GRK4    | 4  |
| GRK5    | 2869   | GRK5    | 10 |
| GRK6    | 2870   | GRK6    | 5  |
| GRM2    | 2912   | GRM2    | 3  |
| GRM8    | 2918   | GRM8    | 7  |
| GRN     | 2896   | GRN     | 17 |
| GRP     | 2922   | GRP     | 18 |
| GRPEL1  | 80273  | GRPEL1  | 4  |
| GRPEL2  | 134266 | GRPEL2  | 5  |
| GRRP1   | 79927  | GRRP1   | 1  |
| GRSF1   | 2926   | GRSF1   | 4  |
| GRTP1   | 79774  | GRTP1   | 13 |
| GRWD1   | 83743  | GRWD1   | 19 |
| GSDMA   | 284110 | GSDMA   | 17 |
| GSDMB   | 55876  | GSDMB   | 17 |
| GSDMC   | 56169  | GSDMC   | 8  |
| GSDMD   | 79792  | GSDMD   | 8  |
| GSG2    | 83903  | GSG2    | 17 |
| GSK3B   | 2932   | GSK3B   | 3  |
| GSPT1   | 2935   | GSPT1   | 16 |
| GSPT2   | 23708  | GSPT2   | X  |
| GSR     | 2936   | GSR     | 8  |
| GSS     | 2937   | GSS     | 20 |
| GSTA2   | 2939   | GSTA2   | 6  |
| GSTA3   | 2940   | GSTA3   | 6  |
| GSTA4   | 2941   | GSTA4   | 6  |
| GSTK1   | 373156 | GSTK1   | 7  |

|           |        |           |    |
|-----------|--------|-----------|----|
| GSTM1     | 2944   | GSTM1     | 1  |
| GSTM2     | 2946   | GSTM2     | 1  |
| GSTM3     | 2947   | GSTM3     | 1  |
| GSTM4     | 2948   | GSTM4     | 1  |
| GSTO1     | 9446   | GSTO1     | 10 |
| GSTO2     | 119391 | GSTO2     | 10 |
| GSTP1     | 2950   | GSTP1     | 11 |
| GSTT1     | 2952   | GSTT1     | 22 |
| GSTT2     | 653689 | GSTT2     |    |
| GSTT2B    | 653689 | GSTT2B    | 22 |
| GSTZ1     | 2954   | GSTZ1     | 14 |
| GTDC1     | 79712  | GTDC1     | 2  |
| GTF2B     | 2959   | GTF2B     | 1  |
| GTF2E1    | 2960   | GTF2E1    | 3  |
| GTF2E2    | 2961   | GTF2E2    | 8  |
| GTF2F1    | 2962   | GTF2F1    | 19 |
| GTF2F2    | 2963   | GTF2F2    | 13 |
| GTF2H1    | 2965   | GTF2H1    | 11 |
| GTF2H2    | 2966   | GTF2H2    | 5  |
| GTF2H2D   | 730394 | GTF2H2D   | 5  |
| GTF2H3    | 2967   | GTF2H3    | 12 |
| GTF2H4    | 2968   | GTF2H4    | 6  |
| GTF2H5    | 404672 | GTF2H5    | 6  |
| GTF2I     | 2969   | GTF2I     |    |
| GTF2IP1   | 2970   | GTF2IP1   | 7  |
| GTF2IRD1  | 9569   | GTF2IRD1  | 7  |
| GTF2IRD2  | 84163  | GTF2IRD2  |    |
| GTF2IRD2B | 389524 | GTF2IRD2B | 7  |
| GTF2IRD2P | 401375 | GTF2IRD2P | 7  |
| GTF3A     | 2971   | GTF3A     | 13 |
| GTF3C1    | 2975   | GTF3C1    | 16 |
| GTF3C2    | 2976   | GTF3C2    | 2  |
| GTF3C3    | 9330   | GTF3C3    | 2  |
| GTF3C5    | 9328   | GTF3C5    | 9  |
| GTPBP1    | 9567   | GTPBP1    | 22 |
| GTPBP10   | 85865  | GTPBP10   | 7  |
| GTPBP2    | 54676  | GTPBP2    | 6  |
| GTPBP3    | 84705  | GTPBP3    | 19 |
| GTPBP4    | 23560  | GTPBP4    | 10 |
| GTPBP6    | 8225   | GTPBP6    | Y  |
| GTPBP8    | 29083  | GTPBP8    | 3  |
| GTSCR1    | 220158 | GTSCR1    | 18 |
| GTSE1     | 51512  | GTSE1     | 22 |
| GTSF1     | 121355 | GTSF1     | 12 |

|         |        |         |    |
|---------|--------|---------|----|
| GUCA1A  | 2978   | GUCA1A  | 6  |
| GUCA2B  | 2981   | GUCA2B  | 1  |
| GUCY1A2 | 2977   | GUCY1A2 | 11 |
| GUCY1A3 | 2982   | GUCY1A3 | 4  |
| GUCY1B2 | 2974   | GUCY1B2 | 13 |
| GUCY2C  | 2984   | GUCY2C  | 12 |
| GUF1    | 60558  | GUF1    | 4  |
| GUK1    | 2987   | GUK1    | 1  |
| GUSB    | 2990   | GUSB    | 7  |
| GUSBL1  | 387036 | GUSBL1  | 6  |
| GUSBL2  | 375513 | GUSBL2  | 6  |
| GXYLT1  | 283464 | GXYLT1  | 12 |
| GXYLT2  | 727936 | GXYLT2  | 3  |
| GYG1    | 2992   | GYG1    | 3  |
| GYLTL1B | 120071 | GYLTL1B | 11 |
| GYPC    | 2995   | GYPC    | 2  |
| GYS1    | 2997   | GYS1    | 19 |
| GZF1    | 64412  | GZF1    | 20 |
| GZMK    | 3003   | GZMK    | 5  |
| GZMM    | 3004   | GZMM    | 19 |
| H1F0    | 3005   | H1F0    | 22 |
| H1FNT   | 341567 | H1FNT   | 12 |
| H1FX    | 8971   | H1FX    | 3  |
| H2AFB1  | 474382 | H2AFB1  | X  |
| H2AFJ   | 55766  | H2AFJ   | 12 |
| H2AFX   | 3014   | H2AFX   | 11 |
| H2AFY   | 9555   | H2AFY   | 5  |
| H2AFY2  | 55506  | H2AFY2  | 10 |
| H2AFZ   | 3015   | H2AFZ   | 4  |
| H2BFM   | 286436 | H2BFM   | X  |
| H3F3A   | 3020   | H3F3A   | 1  |
| H3F3B   | 3021   | H3F3B   | 17 |
| HABP4   | 22927  | HABP4   | 9  |
| HACE1   | 57531  | HACE1   | 6  |
| HACL1   | 26061  | HACL1   | 3  |
| HADH    | 3033   | HADH    | 4  |
| HADH2   | 3028   | HADH2   | X  |
| HADHA   | 3030   | HADHA   | 2  |
| HADHB   | 3032   | HADHB   | 2  |
| HAGH    | 3029   | HAGH    | 16 |
| HAGHL   | 84264  | HAGHL   | 16 |
| HAL     | 3034   | HAL     | 12 |
| HAMP    | 57817  | HAMP    | 19 |
| HAPLN2  | 60484  | HAPLN2  | 1  |

|         |        |         |    |
|---------|--------|---------|----|
| HAPLN3  | 145864 | HAPLN3  | 15 |
| HAPLN4  | 404037 | HAPLN4  | 19 |
| HARBI1  | 283254 | HARBI1  | 11 |
| HARS2   | 23438  | HARS2   | 5  |
| HAS2AS  | 594842 | HAS2AS  | 8  |
| HAT1    | 8520   | HAT1    | 2  |
| HAUS4   | 54930  | HAUS4   | 14 |
| HAUS5   | 23354  | HAUS5   | 19 |
| HAUS6   | 54801  | HAUS6   | 9  |
| HAUS8   | 93323  | HAUS8   | 19 |
| HAVCR2  | 84868  | HAVCR2  | 5  |
| HAX1    | 10456  | HAX1    | 1  |
| HBA1    | 3039   | HBA1    | 16 |
| HBA2    | 3040   | HBA2    | 16 |
| HBB     | 3043   | HBB     | 11 |
| HBD     | 3045   | HBD     | 11 |
| HBEGF   | 1839   | HBEGF   | 5  |
| HBM     | 3042   | HBM     | 16 |
| HBP1    | 26959  | HBP1    | 7  |
| HBQ1    | 3049   | HBQ1    | 16 |
| HBS1L   | 10767  | HBS1L   | 6  |
| HBXIP   | 10542  | HBXIP   | 1  |
| HCCA2   | 81532  | HCCA2   | 11 |
| HCCS    | 3052   | HCCS    | X  |
| HCFC1   | 3054   | HCFC1   | X  |
| HCFC1R1 | 54985  | HCFC1R1 | 16 |
| HCFC2   | 29915  | HCFC2   | 12 |
| HCG18   | 414777 | HCG18   |    |
| HCG22   | 285834 | HCG22   |    |
| HCG26   | 352961 | HCG26   | 6  |
| HCG27   | 253018 | HCG27   | 6  |
| HCG2P7  | 80867  | HCG2P7  | 6  |
| HCG4    | 54435  | HCG4    | 6  |
| HCK     | 3055   | HCK     | 20 |
| HCLS1   | 3059   | HCLS1   | 3  |
| HCN3    | 57657  | HCN3    | 1  |
| HCP5    | 10866  | HCP5    | 6  |
| HCRP1   | 387535 | HCRP1   |    |
| HCST    | 10870  | HCST    | 19 |
| HDAC1   | 3065   | HDAC1   | 1  |
| HDAC10  | 83933  | HDAC10  | 22 |
| HDAC11  | 79885  | HDAC11  | 3  |
| HDAC2   | 3066   | HDAC2   | 6  |
| HDAC3   | 8841   | HDAC3   | 5  |

|          |        |          |    |
|----------|--------|----------|----|
| HDAC4    | 9759   | HDAC4    | 2  |
| HDAC6    | 10013  | HDAC6    | X  |
| HDAC7    | 51564  | HDAC7    | 12 |
| HDAC7A   | 51564  | HDAC7A   | 12 |
| HDAC8    | 55869  | HDAC8    | X  |
| HDAC9    | 9734   | HDAC9    | 7  |
| HDDC2    | 51020  | HDDC2    | 6  |
| HDDC3    | 374659 | HDDC3    | 15 |
| HDGF     | 3068   | HDGF     | 1  |
| HDGF2    | 84717  | HDGF2    | 19 |
| HDGFL1   | 154150 | HDGFL1   | 6  |
| HDGFRP3  | 50810  | HDGFRP3  | 15 |
| HDHD1A   | 8226   | HDHD1A   | X  |
| HDHD2    | 84064  | HDHD2    | 18 |
| HDHD3    | 81932  | HDHD3    | 9  |
| HDLBP    | 3069   | HDLBP    | 2  |
| HEATR1   | 55127  | HEATR1   | 1  |
| HEATR2   | 54919  | HEATR2   | 7  |
| HEATR3   | 55027  | HEATR3   | 16 |
| HEATR5A  | 25938  | HEATR5A  | 14 |
| HEATR5B  | 54497  | HEATR5B  | 2  |
| HEATR6   | 63897  | HEATR6   | 17 |
| HEATR7A  | 727957 | HEATR7A  | 8  |
| HEBP1    | 50865  | HEBP1    | 12 |
| HEBP2    | 23593  | HEBP2    | 6  |
| HECA     | 51696  | HECA     | 6  |
| HECTD1   | 25831  | HECTD1   | 14 |
| HECTD2   | 143279 | HECTD2   | 10 |
| HECTD3   | 79654  | HECTD3   | 1  |
| HECW2    | 57520  | HECW2    | 2  |
| HEG1     | 57493  | HEG1     | 3  |
| HELB     | 92797  | HELB     | 12 |
| HELLS    | 3070   | HELLS    | 10 |
| HELQ     | 113510 | HELQ     | 4  |
| HELZ     | 9931   | HELZ     | 17 |
| HEMK1    | 51409  | HEMK1    | 3  |
| HEPACAM2 | 253012 | HEPACAM2 | 7  |
| HERC1    | 8925   | HERC1    | 15 |
| HERC2    | 8924   | HERC2    | 15 |
| HERC2P2  | 400322 | HERC2P2  | 15 |
| HERC3    | 8916   | HERC3    | 4  |
| HERC4    | 26091  | HERC4    | 10 |
| HERC5    | 51191  | HERC5    | 4  |
| HERC6    | 55008  | HERC6    | 4  |



|         |        |         |    |
|---------|--------|---------|----|
| HERPUD1 | 9709   | HERPUD1 | 16 |
| HERPUD2 | 64224  | HERPUD2 | 7  |
| HES1    | 3280   | HES1    | 3  |
| HES2    | 54626  | HES2    | 1  |
| HES4    | 57801  | HES4    | 1  |
| HES5    | 388585 | HES5    | 1  |
| HES6    | 55502  | HES6    | 2  |
| HESX1   | 8820   | HESX1   | 3  |
| HEXA    | 3073   | HEXA    | 15 |
| HEXB    | 3074   | HEXB    | 5  |
| HEXDC   | 284004 | HEXDC   | 17 |
| HEXIM2  | 124790 | HEXIM2  | 17 |
| HEY1    | 23462  | HEY1    | 8  |
| HEY2    | 23493  | HEY2    | 6  |
| HEYL    | 26508  | HEYL    | 1  |
| HFE     | 3077   | HFE     | 6  |
| HFM1    | 164045 | HFM1    | 1  |
| HGD     | 3081   | HGD     | 3  |
| HGF     | 3082   | HGF     | 7  |
| HGS     | 9146   | HGS     | 17 |
| HHAT    | 55733  | HHAT    | 1  |
| HHEX    | 3087   | HHEX    | 10 |
| HHLA3   | 11147  | HHLA3   | 1  |
| HIAT1   | 64645  | HIAT1   | 1  |
| HIATL1  | 84641  | HIATL1  | 9  |
| HIATL2  | 84278  | HIATL2  | 9  |
| HIBADH  | 11112  | HIBADH  | 7  |
| HIBCH   | 26275  | HIBCH   | 2  |
| HIC2    | 23119  | HIC2    | 22 |
| HIF1A   | 3091   | HIF1A   | 14 |
| HIF1AN  | 55662  | HIF1AN  | 10 |
| HIGD1A  | 25994  | HIGD1A  | 3  |
| HIGD2A  | 192286 | HIGD2A  | 5  |
| HIGD2B  | 123346 | HIGD2B  | 15 |
| HINFP   | 25988  | HINFP   | 11 |
| HINT1   | 3094   | HINT1   | 5  |
| HINT2   | 84681  | HINT2   | 9  |
| HINT3   | 135114 | HINT3   | 6  |
| HIP1    | 3092   | HIP1    | 7  |
| HIP1R   | 9026   | HIP1R   |    |
| HIP2    | 3093   | HIP2    | 4  |
| HIPK2   | 28996  | HIPK2   | 7  |
| HIRA    | 7290   | HIRA    | 22 |
| HIRIP3  | 8479   | HIRIP3  | 16 |

|            |        |            |    |
|------------|--------|------------|----|
| HISPPD2A   | 9677   | HISPPD2A   | 15 |
| HIST1H1A   | 3024   | HIST1H1A   | 6  |
| HIST1H1C   | 3006   | HIST1H1C   | 6  |
| HIST1H1D   | 3007   | HIST1H1D   | 6  |
| HIST1H1E   | 3008   | HIST1H1E   | 6  |
| HIST1H2AB  | 8335   | HIST1H2AB  | 6  |
| HIST1H2AC  | 8334   | HIST1H2AC  | 6  |
| HIST1H2AE  | 3012   | HIST1H2AE  | 6  |
| HIST1H2AG  | 8969   | HIST1H2AG  | 6  |
| HIST1H2AH  | 85235  | HIST1H2AH  | 6  |
| HIST1H2AM  | 8336   | HIST1H2AM  | 6  |
| HIST1H2BC  | 8347   | HIST1H2BC  | 6  |
| HIST1H2BD  | 3017   | HIST1H2BD  | 6  |
| HIST1H2BE  | 8344   | HIST1H2BE  | 6  |
| HIST1H2BF  | 8343   | HIST1H2BF  | 6  |
| HIST1H2BG  | 8339   | HIST1H2BG  | 6  |
| HIST1H2BH  | 8345   | HIST1H2BH  | 6  |
| HIST1H2BJ  | 8970   | HIST1H2BJ  | 6  |
| HIST1H2BK  | 85236  | HIST1H2BK  | 6  |
| HIST1H2BM  | 8342   | HIST1H2BM  | 6  |
| HIST1H2BN  | 8341   | HIST1H2BN  | 6  |
| HIST1H3A   | 8350   | HIST1H3A   | 6  |
| HIST1H3B   | 8358   | HIST1H3B   | 6  |
| HIST1H3D   | 8351   | HIST1H3D   | 6  |
| HIST1H3F   | 8968   | HIST1H3F   | 6  |
| HIST1H3G   | 8355   | HIST1H3G   | 6  |
| HIST1H3H   | 8357   | HIST1H3H   | 6  |
| HIST1H3J   | 8356   | HIST1H3J   | 6  |
| HIST1H4A   | 8359   | HIST1H4A   | 6  |
| HIST1H4B   | 8366   | HIST1H4B   | 6  |
| HIST1H4C   | 8364   | HIST1H4C   | 6  |
| HIST1H4E   | 8367   | HIST1H4E   | 6  |
| HIST1H4H   | 8365   | HIST1H4H   | 6  |
| HIST1H4I   | 8294   | HIST1H4I   | 6  |
| HIST1H4J   | 8363   | HIST1H4J   | 6  |
| HIST1H4K   | 8362   | HIST1H4K   | 6  |
| HIST2H2AA3 | 8337   | HIST2H2AA3 | 1  |
| HIST2H2AA4 | 723790 | HIST2H2AA4 | 1  |
| HIST2H2AB  | 317772 | HIST2H2AB  | 1  |
| HIST2H2AC  | 8338   | HIST2H2AC  | 1  |
| HIST2H2BE  | 8349   | HIST2H2BE  | 1  |
| HIST2H2BF  | 440689 | HIST2H2BF  | 1  |
| HIST2H3A   | 333932 | HIST2H3A   | 1  |
| HIST2H3C   | 126961 | HIST2H3C   | 1  |

|           |        |           |    |
|-----------|--------|-----------|----|
| HIST2H3D  | 653604 | HIST2H3D  | 1  |
| HIST2H4A  | 8370   | HIST2H4A  | 1  |
| HIST2H4B  | 554313 | HIST2H4B  | 1  |
| HIST3H2A  | 92815  | HIST3H2A  | 1  |
| HIST3H2BB | 128312 | HIST3H2BB | 1  |
| HIST4H4   | 121504 | HIST4H4   | 12 |
| HIVEP1    | 3096   | HIVEP1    | 6  |
| HIVEP2    | 3097   | HIVEP2    | 6  |
| HIVEP3    | 59269  | HIVEP3    | 1  |
| HJURP     | 55355  | HJURP     | 2  |
| HK1       | 3098   | HK1       | 10 |
| HK2       | 3099   | HK2       | 2  |
| HKDC1     | 80201  | HKDC1     | 10 |
| HLA-A     | 3105   | HLA-A     | 6  |
| HLA-A29.1 | 649853 | HLA-A29.1 |    |
| HLA-B     | 3106   | HLA-B     | 6  |
| HLA-C     | 3107   | HLA-C     | 6  |
| HLA-DMA   | 3108   | HLA-DMA   | 6  |
| HLA-DMB   | 3109   | HLA-DMB   | 6  |
| HLA-DOA   | 3111   | HLA-DOA   | 6  |
| HLA-DOB   | 3112   | HLA-DOB   | 6  |
| HLA-DPA1  | 3113   | HLA-DPA1  | 6  |
| HLA-DPB1  | 3115   | HLA-DPB1  | 6  |
| HLA-DPB2  | 3116   | HLA-DPB2  | 6  |
| HLA-DQA1  | 3117   | HLA-DQA1  |    |
| HLA-DQB1  | 3119   | HLA-DQB1  | 6  |
| HLA-DQB2  | 3120   | HLA-DQB2  | 6  |
| HLA-DRA   | 3122   | HLA-DRA   | 6  |
| HLA-DRB1  | 3123   | HLA-DRB1  | 6  |
| HLA-DRB3  | 3125   | HLA-DRB3  | 6  |
| HLA-DRB4  | 3126   | HLA-DRB4  | 6  |
| HLA-DRB6  | 3128   | HLA-DRB6  | 6  |
| HLA-E     | 3133   | HLA-E     | 6  |
| HLA-F     | 3134   | HLA-F     | 6  |
| HLA-G     | 3135   | HLA-G     | 6  |
| HLA-H     | 3136   | HLA-H     | 6  |
| HLCS      | 3141   | HLCS      | 21 |
| HLTF      | 6596   | HLTF      | 3  |
| HLX       | 3142   | HLX       | 1  |
| HLXB9     | 3110   | HLXB9     | 7  |
| HMBOX1    | 79618  | HMBOX1    | 8  |
| HMBS      | 3145   | HMBS      | 11 |
| HMG20A    | 10363  | HMG20A    | 15 |
| HMG20B    | 10362  | HMG20B    | 19 |

|           |        |           |    |
|-----------|--------|-----------|----|
| HMGA1     | 3159   | HMGA1     | 6  |
| HMGB1     | 3146   | HMGB1     | 13 |
| HMGB1L1   | 10357  | HMGB1L1   | 20 |
| HMGB2     | 3148   | HMGB2     | 4  |
| HMGB3     | 3149   | HMGB3     | X  |
| HMGCL     | 3155   | HMGCL     | 1  |
| HMGCR     | 3156   | HMGCR     | 5  |
| HMGCS1    | 3157   | HMGCS1    | 5  |
| HMGN1     | 3150   | HMGN1     | 21 |
| HMGN2     | 3151   | HMGN2     | 1  |
| HMGN3     | 9324   | HMGN3     | 6  |
| HMGN4     | 10473  | HMGN4     | 6  |
| HMGXB4    | 10042  | HMGXB4    | 22 |
| HMHB1     | 57824  | HMHB1     | 5  |
| HMMR      | 3161   | HMMR      | 5  |
| HMOX1     | 3162   | HMOX1     | 22 |
| HMOX2     | 3163   | HMOX2     | 16 |
| HMX2      | 3167   | HMX2      | 10 |
| HN1       | 51155  | HN1       | 17 |
| HN1L      | 90861  | HN1L      | 16 |
| HNRNPA0   | 10949  | HNRNPA0   | 5  |
| HNRNPA1   | 3178   | HNRNPA1   | 12 |
| HNRNPA1L2 | 144983 | HNRNPA1L2 | 7  |
| HNRNPA2B1 | 3181   | HNRNPA2B1 | 7  |
| HNRNPA3   | 220988 | HNRNPA3   | 2  |
| HNRNPA3P1 | 10151  | HNRNPA3P1 | 10 |
| HNRNPAB   | 3182   | HNRNPAB   | 5  |
| HNRNPC    | 3183   | HNRNPC    | 14 |
| HNRNPD    | 3184   | HNRNPD    | 4  |
| HNRNPF    | 3185   | HNRNPF    | 10 |
| HNRNPH1   | 3187   | HNRNPH1   | 5  |
| HNRNPH2   | 3188   | HNRNPH2   | X  |
| HNRNPH3   | 3189   | HNRNPH3   | 10 |
| HNRNPK    | 3190   | HNRNPK    | 9  |
| HNRNPL    | 3191   | HNRNPL    | 19 |
| HNRNPM    | 4670   | HNRNPM    | 19 |
| HNRNPR    | 10236  | HNRNPR    | 1  |
| HNRNPUL1  | 11100  | HNRNPUL1  | 19 |
| HNRNPUL2  | 221092 | HNRNPUL2  | 11 |
| HNRPA1L-2 | 664709 | HNRPA1L-2 | 19 |
| HNRPA1P4  | 389674 | HNRPA1P4  |    |
| HNRPA2B1  | 3181   | HNRPA2B1  | 7  |
| HNRPC     | 3183   | HNRPC     | 14 |
| HNRPDL    | 9987   | HNRPDL    | 4  |

|          |           |          |    |
|----------|-----------|----------|----|
| HNRPH1   | 3187      | HNRPH1   | 5  |
| HNRPH3   | 3189      | HNRPH3   | 10 |
| HNRPK    | 3190      | HNRPK    | 9  |
| HNRPLL   | 92906     | HNRPLL   | 2  |
| HNRPM    | 4670      | HNRPM    | 19 |
| HNRPR    | 10236     | HNRPR    | 1  |
| HNRPUL1  | 11100     | HNRPUL1  | 19 |
| HNRPUL2  | 221092    | HNRPUL2  |    |
| HOMER1   | 9456      | HOMER1   | 5  |
| HOMER2   | 9455      | HOMER2   | 15 |
| HOMER3   | 9454      | HOMER3   | 19 |
| HOMEZ    | 57594     | HOMEZ    | 14 |
| HOOK2    | 29911     | HOOK2    | 19 |
| HOOK3    | 84376     | HOOK3    | 8  |
| HOPX     | 84525     | HOPX     | 4  |
| HOTAIR   | 100124700 | HOTAIR   | 12 |
| HOXA11AS | 221883    | HOXA11AS | 7  |
| HOXA13   | 3209      | HOXA13   |    |
| HOXA5    | 3202      | HOXA5    | 7  |
| HOXA6    | 3203      | HOXA6    | 7  |
| HOXB2    | 3212      | HOXB2    | 17 |
| HOXB4    | 3214      | HOXB4    | 17 |
| HOXB7    | 3217      | HOXB7    | 17 |
| HOXB8    | 3218      | HOXB8    | 17 |
| HOXC4    | 3221      | HOXC4    | 12 |
| HOXC6    | 3223      | HOXC6    | 12 |
| HOXC8    | 3224      | HOXC8    | 12 |
| HOXD12   | 3238      | HOXD12   | 2  |
| HOXD3    | 3232      | HOXD3    | 2  |
| HOXD4    | 3233      | HOXD4    | 2  |
| HP1BP3   | 50809     | HP1BP3   | 1  |
| HPCA     | 3208      | HPCA     | 1  |
| HPCAL1   | 3241      | HPCAL1   | 2  |
| HPCAL4   | 51440     | HPCAL4   | 1  |
| HPDL     | 84842     | HPDL     | 1  |
| HPGD     | 3248      | HPGD     | 4  |
| HPRT1    | 3251      | HPRT1    | X  |
| HPS1     | 3257      | HPS1     | 10 |
| HPS3     | 84343     | HPS3     | 3  |
| HPS4     | 89781     | HPS4     | 22 |
| HPS5     | 11234     | HPS5     | 11 |
| HPSE     | 10855     | HPSE     | 4  |
| HRAS     | 3265      | HRAS     | 11 |
| HRASLS2  | 54979     | HRASLS2  | 11 |

|            |       |            |    |
|------------|-------|------------|----|
| HRASLS3    | 11145 | HRASLS3    | 11 |
| HRB        | 3267  | HRB        | 2  |
| HRC        | 3270  | HRC        | 19 |
| HRH1       | 3269  | HRH1       | 3  |
| HRIHFB2122 | 11078 | HRIHFB2122 | 22 |
| HRK        | 8739  | HRK        | 12 |
| HRSP12     | 10247 | HRSP12     | 8  |
| HS.100261  | NA    |            | 10 |
| HS.102428  | NA    |            | 2  |
| HS.103320  | NA    |            | 8  |
| HS.104091  | NA    |            | 9  |
| HS.104792  | NA    |            | 15 |
| HS.105102  | NA    |            | 2  |
| HS.105618  | NA    |            | X  |
| HS.105636  | NA    |            | 1  |
| HS.106234  | NA    |            | 21 |
| HS.107418  | NA    |            | 5  |
| HS.107801  | NA    |            | 13 |
| HS.108479  | NA    |            | 14 |
| HS.10862   | NA    |            | 1  |
| HS.111539  | NA    |            | 20 |
| HS.112932  | NA    |            | 8  |
| HS.116157  | NA    |            | 10 |
| HS.116828  | NA    |            | 8  |
| HS.116870  | NA    |            | 10 |
| HS.120287  | NA    |            |    |
| HS.120300  | NA    |            | 9  |
| HS.120364  | NA    |            | 3  |
| HS.120893  | NA    |            | 1  |
| HS.121070  | NA    |            | 7  |
| HS.121144  | NA    |            | 5  |
| HS.121224  | NA    |            | 11 |
| HS.121314  | NA    |            | 3  |
| HS.121322  | NA    |            | 9  |
| HS.121368  | NA    |            | 1  |
| HS.121413  | NA    |            | 2  |
| HS.121525  | NA    |            | 14 |
| HS.121635  | NA    |            | 20 |
| HS.121655  | NA    |            | 13 |
| HS.122007  | NA    |            |    |
| HS.122053  | NA    |            | 4  |
| HS.122288  | NA    |            | 2  |
| HS.122428  | NA    |            | 8  |
| HS.122994  | NA    |            | 7  |

|           |    |            |
|-----------|----|------------|
| HS.123214 | NA | 6_qbl_hap2 |
| HS.123278 | NA | 3          |
| HS.123317 | NA | 8          |
| HS.123474 | NA | 13         |
| HS.123511 | NA | 11         |
| HS.124623 | NA | 21         |
| HS.12489  | NA | 17         |
| HS.125056 | NA | 1          |
| HS.125087 | NA | 1          |
| HS.125395 | NA | 5          |
| HS.125470 | NA | 12         |
| HS.125537 | NA | 11         |
| HS.125570 | NA | 2          |
| HS.125695 | NA | 16         |
| HS.125983 | NA | 3          |
| HS.126108 | NA | 1          |
| HS.126160 | NA | 10         |
| HS.126678 | NA | 1          |
| HS.126768 | NA | 5          |
| HS.126811 | NA | 17         |
| HS.126889 | NA | 3          |
| HS.126963 | NA | 16         |
| HS.127016 | NA | 14         |
| HS.127148 | NA | 9          |
| HS.127242 | NA | 14         |
| HS.127310 | NA | 1          |
| HS.127352 | NA | 14         |
| HS.127398 | NA | 8          |
| HS.127509 | NA | 7          |
| HS.12764  | NA | 12         |
| HS.127715 | NA | 13         |
| HS.127874 | NA | 5          |
| HS.127934 | NA |            |
| HS.128018 | NA | 1          |
| HS.128615 | NA | 1          |
| HS.128708 | NA | 9          |
| HS.128709 | NA | 11         |
| HS.128753 | NA | 1          |
| HS.128848 | NA | 1          |
| HS.129244 | NA | 20         |
| HS.129392 | NA | 16         |
| HS.129547 | NA | 18         |
| HS.129603 | NA | 13         |
| HS.129636 | NA | 4          |

|           |    |    |
|-----------|----|----|
| HS.129800 | NA | 8  |
| HS.130036 | NA | 14 |
| HS.130155 | NA | 7  |
| HS.130178 | NA | 1  |
| HS.130260 | NA | Y  |
| HS.130344 | NA | 9  |
| HS.130455 | NA | 7  |
| HS.130562 | NA | 17 |
| HS.130590 | NA | X  |
| HS.130639 | NA | 8  |
| HS.130916 | NA | 11 |
| HS.130980 | NA | 1  |
| HS.131128 | NA | 6  |
| HS.131714 | NA | 14 |
| HS.132272 | NA | 1  |
| HS.132283 | NA | 14 |
| HS.132376 | NA | 11 |
| HS.132394 | NA | 9  |
| HS.132453 | NA | 20 |
| HS.132545 | NA | 17 |
| HS.132564 | NA | 8  |
| HS.132568 | NA | 15 |
| HS.13291  | NA | 4  |
| HS.133153 | NA | 1  |
| HS.133181 | NA | 3  |
| HS.133257 | NA | 3  |
| HS.133261 | NA | Y  |
| HS.133324 | NA | 13 |
| HS.133338 | NA | 16 |
| HS.133419 | NA | 6  |
| HS.134521 | NA | 20 |
| HS.134634 | NA |    |
| HS.135067 | NA | 4  |
| HS.135282 | NA | 15 |
| HS.135528 | NA | 2  |
| HS.135587 | NA | 4  |
| HS.136432 | NA | 1  |
| HS.136788 | NA | 5  |
| HS.137206 | NA | 12 |
| HS.137293 | NA | 1  |
| HS.137971 | NA | 5  |
| HS.14032  | NA | 14 |
| HS.142570 | NA | 3  |
| HS.143018 | NA | 7  |



|           |    |    |
|-----------|----|----|
| HS.143245 | NA | 20 |
| HS.143408 | NA | 19 |
| HS.143973 | NA | 20 |
| HS.144030 | NA | 8  |
| HS.144714 | NA | 10 |
| HS.144884 | NA |    |
| HS.144925 | NA | 20 |
| HS.145049 | NA | 1  |
| HS.145307 | NA | 12 |
| HS.14555  | NA | 10 |
| HS.145721 | NA | 17 |
| HS.145985 | NA | 19 |
| HS.146561 | NA | 7  |
| HS.146852 | NA | 14 |
| HS.146882 | NA | 4  |
| HS.146949 | NA | 3  |
| HS.146952 | NA | 2  |
| HS.147030 | NA | 3  |
| HS.14706  | NA | 17 |
| HS.147248 | NA | 1  |
| HS.147310 | NA | 3  |
| HS.147346 | NA | 18 |
| HS.147725 | NA | 10 |
| HS.148257 | NA | 11 |
| HS.148844 | NA | 9  |
| HS.149005 | NA | 14 |
| HS.149244 | NA | 17 |
| HS.149514 | NA | 3  |
| HS.150067 | NA | 1  |
| HS.150092 | NA | 5  |
| HS.150668 | NA | 2  |
| HS.150734 | NA | 18 |
| HS.150800 | NA | 14 |
| HS.151172 | NA | 19 |
| HS.151334 | NA | 9  |
| HS.153349 | NA | 8  |
| HS.154336 | NA | 9  |
| HS.154948 | NA | 5  |
| HS.155980 | NA | 4  |
| HS.156178 | NA | 8  |
| HS.156256 | NA | 19 |
| HS.156470 | NA | 1  |
| HS.156566 | NA | 10 |
| HS.157344 | NA |    |

|           |    |    |
|-----------|----|----|
| HS.157621 | NA | 2  |
| HS.162891 | NA | X  |
| HS.163084 | NA | 12 |
| HS.163264 | NA | 18 |
| HS.163752 | NA | 19 |
| HS.164221 | NA |    |
| HS.164254 | NA | 12 |
| HS.167721 | NA | 11 |
| HS.168162 | NA | 14 |
| HS.168950 | NA | 8  |
| HS.169896 | NA | 16 |
| HS.170035 | NA | 9  |
| HS.170946 | NA | 16 |
| HS.171009 | NA | 20 |
| HS.171082 | NA | 9  |
| HS.171481 | NA | 2  |
| HS.174158 | NA | 5  |
| HS.175285 | NA | 1  |
| HS.175569 | NA | 12 |
| HS.176475 | NA | 20 |
| HS.176498 | NA |    |
| HS.17661  | NA | 1  |
| HS.178244 | NA | 10 |
| HS.183176 | NA | 13 |
| HS.186848 | NA | 5  |
| HS.187290 | NA | 5  |
| HS.187293 | NA | X  |
| HS.187499 | NA | 13 |
| HS.189987 | NA | 13 |
| HS.190748 | NA |    |
| HS.191602 | NA | 2  |
| HS.19193  | NA |    |
| HS.192506 | NA | 5  |
| HS.19339  | NA | 3  |
| HS.193406 | NA | 1  |
| HS.193557 | NA | 1  |
| HS.194225 | NA |    |
| HS.195372 | NA |    |
| HS.195389 | NA | 19 |
| HS.195634 | NA | 6  |
| HS.196546 | NA |    |
| HS.196849 | NA | 7  |
| HS.197017 | NA | 8  |
| HS.197064 | NA | 2  |

|           |    |            |
|-----------|----|------------|
| HS.197435 | NA | 13         |
| HS.197700 | NA | 2          |
| HS.199272 | NA | 8          |
| HS.199657 | NA | 4          |
| HS.200095 | NA | 18         |
| HS.200267 | NA | 9          |
| HS.200669 | NA | 19         |
| HS.201600 | NA | 4          |
| HS.201950 | NA | 14         |
| HS.201996 | NA | 15         |
| HS.202140 | NA |            |
| HS.202577 | NA | 3          |
| HS.203201 | NA | 6_qbl_hap2 |
| HS.204736 | NA | 8          |
| HS.208405 | NA | 4          |
| HS.208554 | NA | 5          |
| HS.208715 | NA | 9          |
| HS.209165 | NA | 3          |
| HS.209253 | NA | X          |
| HS.209882 | NA | 5          |
| HS.210390 | NA | 4          |
| HS.210969 | NA | 5          |
| HS.211743 | NA | 11         |
| HS.21177  | NA | 6          |
| HS.212476 | NA | X          |
| HS.213061 | NA | 1          |
| HS.213541 | NA | 12         |
| HS.22302  | NA | 9          |
| HS.22347  | NA |            |
| HS.22381  | NA | 2          |
| HS.223856 | NA | 15         |
| HS.224678 | NA | 10         |
| HS.224794 | NA | 5          |
| HS.225083 | NA | 1          |
| HS.22566  | NA | 1          |
| HS.226564 | NA | 14         |
| HS.22689  | NA |            |
| HS.229275 | NA |            |
| HS.231861 | NA | 9          |
| HS.232535 | NA | 10         |
| HS.232573 | NA | 20         |
| HS.232649 | NA | 1          |
| HS.23459  | NA |            |
| HS.238996 | NA |            |

|           |    |    |
|-----------|----|----|
| HS.24119  | NA | 1  |
| HS.244740 | NA | 15 |
| HS.244777 | NA | 9  |
| HS.245812 | NA | 4  |
| HS.246508 | NA | 10 |
| HS.249577 | NA | 3  |
| HS.249957 | NA | 6  |
| HS.250011 | NA |    |
| HS.250648 | NA | 3  |
| HS.25151  | NA | 2  |
| HS.253196 | NA | 4  |
| HS.254006 | NA | 5  |
| HS.254477 | NA | 3  |
| HS.254752 | NA | 3  |
| HS.255208 | NA | 22 |
| HS.25555  | NA |    |
| HS.258266 | NA | 16 |
| HS.25892  | NA | 7  |
| HS.259386 | NA |    |
| HS.259679 | NA | 16 |
| HS.26010  | NA | 10 |
| HS.262789 | NA | 17 |
| HS.26306  | NA | 1  |
| HS.26579  | NA | 10 |
| HS.266775 | NA | 8  |
| HS.267120 | NA |    |
| HS.27048  | NA | 12 |
| HS.270778 | NA | 11 |
| HS.272065 | NA | 10 |
| HS.274526 | NA | 2  |
| HS.276795 | NA | 4  |
| HS.276860 | NA | 18 |
| HS.278265 | NA |    |
| HS.278285 | NA | 18 |
| HS.279842 | NA | 1  |
| HS.281931 | NA | 3  |
| HS.282800 | NA | 3  |
| HS.283139 | NA | 1  |
| HS.283188 | NA | 17 |
| HS.283402 | NA | 1  |
| HS.285193 | NA | 15 |
| HS.286666 | NA | 22 |
| HS.287720 | NA | 2  |
| HS.291319 | NA | X  |

|           |    |    |
|-----------|----|----|
| HS.292419 | NA | 3  |
| HS.293427 | NA | 10 |
| HS.294103 | NA | 5  |
| HS.294603 | NA | 14 |
| HS.296031 | NA | X  |
| HS.298873 | NA | 19 |
| HS.303217 | NA | 7  |
| HS.303889 | NA | 4  |
| HS.304046 | NA | 10 |
| HS.308031 | NA | 9  |
| HS.308202 | NA | 5  |
| HS.309493 | NA | 1  |
| HS.309660 | NA | 6  |
| HS.310040 | NA | 5  |
| HS.31007  | NA | 12 |
| HS.310085 | NA | 2  |
| HS.311208 | NA | 16 |
| HS.313056 | NA | 2  |
| HS.31532  | NA | X  |
| HS.318976 | NA | X  |
| HS.31961  | NA | 2  |
| HS.322859 | NA |    |
| HS.323190 | NA | 10 |
| HS.324250 | NA | 7  |
| HS.325015 | NA | 4  |
| HS.325396 | NA | 1  |
| HS.326560 | NA |    |
| HS.327917 | NA | 1  |
| HS.33032  | NA | 1  |
| HS.332056 | NA | 3  |
| HS.333185 | NA | 2  |
| HS.333288 | NA | 4  |
| HS.333693 | NA | 2  |
| HS.333703 | NA | 6  |
| HS.334066 | NA | 5  |
| HS.334093 | NA | 21 |
| HS.334272 | NA | 9  |
| HS.334275 | NA | 11 |
| HS.334493 | NA | 18 |
| HS.334831 | NA | 12 |
| HS.335413 | NA | 22 |
| HS.335525 | NA | 6  |
| HS.336511 | NA |    |
| HS.336593 | NA | 19 |

|           |    |    |
|-----------|----|----|
| HS.337087 | NA | 9  |
| HS.340072 | NA | 1  |
| HS.342412 | NA | 13 |
| HS.344169 | NA | 15 |
| HS.344170 | NA | 22 |
| HS.344350 | NA | 12 |
| HS.348477 | NA | 4  |
| HS.348514 | NA | 4  |
| HS.352549 | NA | 1  |
| HS.352818 | NA | 7  |
| HS.353387 | NA |    |
| HS.353831 | NA | 18 |
| HS.354359 | NA | 19 |
| HS.355933 | NA | 5  |
| HS.356079 | NA | 5  |
| HS.359754 | NA | 4  |
| HS.36053  | NA | 5  |
| HS.362932 | NA | 5  |
| HS.363510 | NA | 15 |
| HS.363526 | NA | 8  |
| HS.365163 | NA | 8  |
| HS.367995 | NA | 8  |
| HS.36808  | NA | 21 |
| HS.368690 | NA | 3  |
| HS.369017 | NA | 8  |
| HS.369643 | NA | 10 |
| HS.370110 | NA | 6  |
| HS.370359 | NA | 9  |
| HS.370423 | NA | 3  |
| HS.370872 | NA | 1  |
| HS.371339 | NA | 20 |
| HS.371609 | NA | 3  |
| HS.37204  | NA | 5  |
| HS.372654 | NA | 10 |
| HS.373705 | NA | 17 |
| HS.374023 | NA |    |
| HS.374221 | NA | 13 |
| HS.374278 | NA | 16 |
| HS.374832 | NA | 9  |
| HS.377021 | NA | 4  |
| HS.377257 | NA | 2  |
| HS.377419 | NA | X  |
| HS.378070 | NA | 15 |
| HS.379253 | NA | 1  |

|           |    |          |
|-----------|----|----------|
| HS.380575 | NA | 3        |
| HS.382212 | NA | 7        |
| HS.382669 | NA | 21       |
| HS.382845 | NA | 18       |
| HS.384605 | NA | 2        |
| HS.385749 | NA | 2        |
| HS.385760 | NA | 16       |
| HS.385784 | NA | 2        |
| HS.385813 | NA | 21       |
| HS.386275 | NA | 18       |
| HS.388347 | NA | 10       |
| HS.389313 | NA | X_random |
| HS.390374 | NA | 9        |
| HS.396491 | NA | 10       |
| HS.397465 | NA |          |
| HS.400256 | NA | 4        |
| HS.402146 | NA | 1        |
| HS.40289  | NA | 4        |
| HS.403584 | NA | 3        |
| HS.403972 | NA | 1        |
| HS.405877 | NA | 22       |
| HS.406106 | NA | 5        |
| HS.406790 | NA | 5        |
| HS.407666 | NA |          |
| HS.407822 | NA | 14       |
| HS.407903 | NA | 12       |
| HS.408168 | NA | 4        |
| HS.408455 | NA |          |
| HS.409512 | NA |          |
| HS.411472 | NA | 16       |
| HS.412918 | NA | Y        |
| HS.413397 | NA | 6        |
| HS.413494 | NA | 10       |
| HS.41423  | NA |          |
| HS.415576 | NA | 4        |
| HS.417262 | NA | 8        |
| HS.424165 | NA | 2        |
| HS.42612  | NA | 2        |
| HS.426929 | NA | 21       |
| HS.428001 | NA | 3        |
| HS.429450 | NA | 3        |
| HS.429843 | NA | 1        |
| HS.430335 | NA | X        |
| HS.430851 | NA | 19       |

|           |    |    |
|-----------|----|----|
| HS.434235 | NA | 18 |
| HS.434335 | NA | 18 |
| HS.434413 | NA | 6  |
| HS.434422 | NA | 5  |
| HS.434957 | NA | 8  |
| HS.435258 | NA | 2  |
| HS.435523 | NA | 2  |
| HS.435758 | NA | 1  |
| HS.436134 | NA | 11 |
| HS.436138 | NA | 6  |
| HS.436189 | NA | 20 |
| HS.436448 | NA | 16 |
| HS.436572 | NA | 17 |
| HS.436863 | NA | 19 |
| HS.437111 | NA | 1  |
| HS.437760 | NA | 3  |
| HS.438273 | NA | 8  |
| HS.438365 | NA | 15 |
| HS.438858 | NA | 9  |
| HS.438905 | NA | 5  |
| HS.438937 | NA | 9  |
| HS.438979 | NA |    |
| HS.43938  | NA | 5  |
| HS.439578 | NA | 3  |
| HS.440088 | NA | 5  |
| HS.440518 | NA | 6  |
| HS.441076 | NA | X  |
| HS.441560 | NA | 4  |
| HS.441813 | NA |    |
| HS.442504 | NA | 1  |
| HS.442696 | NA | 6  |
| HS.443067 | NA | 15 |
| HS.443123 | NA | 2  |
| HS.443490 | NA | X  |
| HS.443534 | NA | 4  |
| HS.443602 | NA | 6  |
| HS.443993 | NA | 5  |
| HS.444092 | NA | 14 |
| HS.444133 | NA | 19 |
| HS.444249 | NA | 21 |
| HS.444475 | NA | 15 |
| HS.444683 | NA | 7  |
| HS.444785 | NA | 7  |
| HS.444913 | NA |    |



|           |    |           |
|-----------|----|-----------|
| HS.444999 | NA | 15        |
| HS.445036 | NA | 2         |
| HS.445179 | NA | 6         |
| HS.445274 | NA |           |
| HS.445277 | NA | 2         |
| HS.445365 | NA | 10        |
| HS.445414 | NA | 1         |
| HS.445442 | NA | 11        |
| HS.445843 | NA | 2         |
| HS.44650  | NA | 13        |
| HS.44690  | NA | 8         |
| HS.447737 | NA | 5         |
| HS.449276 | NA | 7         |
| HS.450953 | NA | 13        |
| HS.452398 | NA | 2         |
| HS.452702 | NA | 3         |
| HS.453381 | NA | 6         |
| HS.454202 | NA | 9         |
| HS.458448 | NA | 15        |
| HS.459104 | NA | 15        |
| HS.459805 | NA | 16        |
| HS.460114 | NA | 10        |
| HS.462257 | NA | 17        |
| HS.463489 | NA | 1         |
| HS.463736 | NA | 17_random |
| HS.463996 | NA | 17        |
| HS.46506  | NA | 13        |
| HS.46555  | NA | 10        |
| HS.466840 | NA | 19        |
| HS.46689  | NA | 10        |
| HS.46693  | NA | 8         |
| HS.467586 | NA | 2         |
| HS.46839  | NA | X         |
| HS.470804 | NA | 2         |
| HS.471011 | NA | 2         |
| HS.473191 | NA |           |
| HS.473255 | NA |           |
| HS.473425 | NA | 21        |
| HS.474713 | NA | 17        |
| HS.474880 | NA | 22        |
| HS.475334 | NA | 11        |
| HS.475353 | NA |           |
| HS.475950 | NA | 3         |
| HS.47702  | NA | 5         |

|           |    |    |
|-----------|----|----|
| HS.478682 | NA | 3  |
| HS.479551 | NA | 4  |
| HS.481464 | NA | 5  |
| HS.481659 | NA | 5  |
| HS.483183 | NA | 5  |
| HS.483906 | NA |    |
| HS.484967 | NA | 6  |
| HS.485155 | NA | 6  |
| HS.487766 | NA | 7  |
| HS.4892   | NA | 2  |
| HS.489254 | NA | 15 |
| HS.489952 | NA | 7  |
| HS.490417 | NA | 7  |
| HS.49063  | NA |    |
| HS.491339 | NA | 8  |
| HS.491799 | NA | 13 |
| HS.492066 | NA | 8  |
| HS.492187 | NA | 8  |
| HS.492496 | NA | 8  |
| HS.493947 | NA | 9  |
| HS.495080 | NA | 14 |
| HS.497235 | NA | 14 |
| HS.497591 | NA | 14 |
| HS.4988   | NA | 2  |
| HS.499716 | NA |    |
| HS.501656 | NA | 1  |
| HS.504036 | NA | 2  |
| HS.505364 | NA | 12 |
| HS.505676 | NA | 12 |
| HS.50571  | NA | 5  |
| HS.507449 | NA | 13 |
| HS.508682 | NA |    |
| HS.508889 | NA | 14 |
| HS.511717 | NA | 7  |
| HS.512096 | NA | 14 |
| HS.512106 | NA | 14 |
| HS.512285 | NA | 15 |
| HS.512470 | NA | Y  |
| HS.513000 | NA | 15 |
| HS.513455 | NA | 16 |
| HS.513971 | NA | 17 |
| HS.514440 | NA | 17 |
| HS.514893 | NA |    |
| HS.515779 | NA |    |

|           |    |    |
|-----------|----|----|
| HS.515946 | NA | 1  |
| HS.516314 | NA | 2  |
| HS.516517 | NA | 2  |
| HS.516646 | NA | 2  |
| HS.516741 | NA | 2  |
| HS.518354 | NA | 3  |
| HS.518426 | NA | 4  |
| HS.518527 | NA |    |
| HS.519022 | NA | 5  |
| HS.519129 | NA | 1  |
| HS.520436 | NA | 6  |
| HS.520591 | NA | 7  |
| HS.520750 | NA | 7  |
| HS.520926 | NA | 8  |
| HS.521268 | NA | 7  |
| HS.521720 | NA | 8  |
| HS.521785 | NA | 8  |
| HS.522635 | NA | X  |
| HS.522790 | NA | X  |
| HS.522924 | NA | 10 |
| HS.523235 | NA | 10 |
| HS.524108 | NA | 11 |
| HS.524129 | NA | 10 |
| HS.524256 | NA | 12 |
| HS.524845 | NA | 12 |
| HS.524847 | NA | 12 |
| HS.525171 | NA | 13 |
| HS.525400 | NA |    |
| HS.525922 | NA | 12 |
| HS.525926 | NA |    |
| HS.526540 | NA | 2  |
| HS.526748 | NA | 2  |
| HS.526759 | NA | 3  |
| HS.526948 | NA | 6  |
| HS.527387 | NA | 7  |
| HS.527515 | NA | 1  |
| HS.527535 | NA | X  |
| HS.527657 | NA | 1  |
| HS.527671 | NA | 1  |
| HS.527758 | NA | 11 |
| HS.527885 | NA | 12 |
| HS.528284 | NA | 4  |
| HS.528873 | NA | 17 |
| HS.529284 | NA | 4  |

|           |    |    |
|-----------|----|----|
| HS.529324 | NA | 4  |
| HS.529499 | NA |    |
| HS.529514 | NA | 3  |
| HS.529631 | NA | 3  |
| HS.529633 | NA | 1  |
| HS.529743 | NA | 8  |
| HS.529962 | NA | 6  |
| HS.530149 | NA | 8  |
| HS.530359 | NA | X  |
| HS.530910 | NA | 12 |
| HS.531457 | NA | 9  |
| HS.531984 | NA | 3  |
| HS.532001 | NA | 4  |
| HS.532698 | NA | 15 |
| HS.532720 | NA |    |
| HS.533844 | NA | 13 |
| HS.534061 | NA | 17 |
| HS.534427 | NA | 7  |
| HS.534439 | NA | 14 |
| HS.534585 | NA | 6  |
| HS.534680 | NA |    |
| HS.534913 | NA | 16 |
| HS.534945 | NA |    |
| HS.535044 | NA |    |
| HS.535360 | NA | 12 |
| HS.535372 | NA |    |
| HS.535392 | NA | 12 |
| HS.535394 | NA | 13 |
| HS.535454 | NA | 16 |
| HS.535718 | NA | 3  |
| HS.535906 | NA | 8  |
| HS.536336 | NA | 12 |
| HS.536451 | NA | 17 |
| HS.536664 | NA | 3  |
| HS.536748 | NA | 10 |
| HS.536770 | NA | 4  |
| HS.537478 | NA |    |
| HS.537591 | NA |    |
| HS.537603 | NA |    |
| HS.537652 | NA | 1  |
| HS.537673 | NA | 1  |
| HS.537727 | NA | 1  |
| HS.537742 | NA | 1  |
| HS.537754 | NA | 1  |

|           |    |    |
|-----------|----|----|
| HS.537779 | NA | 1  |
| HS.537782 | NA | 1  |
| HS.537944 | NA | 1  |
| HS.538083 | NA | 1  |
| HS.538089 | NA | 1  |
| HS.538116 | NA | 1  |
| HS.538121 | NA | 1  |
| HS.538134 | NA | 1  |
| HS.538157 | NA |    |
| HS.538176 | NA |    |
| HS.538217 | NA | 1  |
| HS.538259 | NA | 1  |
| HS.538299 | NA | 10 |
| HS.538312 | NA | 10 |
| HS.538387 | NA | 10 |
| HS.538498 | NA | 10 |
| HS.538511 | NA | 12 |
| HS.538525 | NA | 10 |
| HS.538554 | NA | 10 |
| HS.538602 | NA | 10 |
| HS.538716 | NA | 11 |
| HS.538746 | NA | 11 |
| HS.538762 | NA | 11 |
| HS.538798 | NA | 11 |
| HS.538804 | NA | 11 |
| HS.538806 | NA | 11 |
| HS.538933 | NA | 11 |
| HS.538951 | NA | 11 |
| HS.538962 | NA |    |
| HS.538979 | NA | 11 |
| HS.539030 | NA | 11 |
| HS.539119 | NA | 12 |
| HS.539123 | NA | 12 |
| HS.539160 | NA |    |
| HS.539174 | NA | 12 |
| HS.539177 | NA |    |
| HS.539195 | NA | 12 |
| HS.539356 | NA | 12 |
| HS.539385 | NA | 12 |
| HS.539402 | NA |    |
| HS.539420 | NA | 12 |
| HS.539427 | NA | 12 |
| HS.539450 | NA | 12 |
| HS.539455 | NA | 12 |

|           |    |           |
|-----------|----|-----------|
| HS.539482 | NA |           |
| HS.539522 | NA |           |
| HS.539580 | NA | 13        |
| HS.539591 | NA | 13        |
| HS.539664 | NA | 13        |
| HS.539683 | NA | 13        |
| HS.539693 | NA | 13        |
| HS.539742 | NA | 13        |
| HS.539765 | NA | 13        |
| HS.539784 | NA |           |
| HS.539838 | NA | 14        |
| HS.539841 | NA | 14        |
| HS.539888 | NA | 14        |
| HS.539928 | NA |           |
| HS.539941 | NA | 14        |
| HS.539945 | NA | 14        |
| HS.539977 | NA |           |
| HS.539990 | NA | 14        |
| HS.540022 | NA | 14        |
| HS.540037 | NA | 14        |
| HS.540111 | NA | 14        |
| HS.540121 | NA | 14        |
| HS.540179 | NA | 15        |
| HS.540264 | NA | 15        |
| HS.540433 | NA |           |
| HS.540472 | NA |           |
| HS.540657 | NA | 16        |
| HS.540709 | NA | 17_random |
| HS.540712 | NA | 17        |
| HS.540722 | NA | 17        |
| HS.540741 | NA | 17        |
| HS.540805 | NA | 17        |
| HS.540819 | NA | 17        |
| HS.540824 | NA |           |
| HS.540915 | NA | 17        |
| HS.541025 | NA | 18        |
| HS.541066 | NA | 10        |
| HS.541226 | NA |           |
| HS.541235 | NA |           |
| HS.541237 | NA | 19        |
| HS.541273 | NA | 19        |
| HS.541506 | NA | 2         |
| HS.541541 | NA | 13        |
| HS.541654 | NA | 2         |

|           |    |    |
|-----------|----|----|
| HS.541669 | NA | 2  |
| HS.541731 | NA | 2  |
| HS.541752 | NA | 2  |
| HS.541801 | NA | 2  |
| HS.541820 | NA | 2  |
| HS.541829 | NA | 2  |
| HS.541834 | NA | 2  |
| HS.541858 | NA | 2  |
| HS.541868 | NA | 2  |
| HS.541892 | NA | 2  |
| HS.542001 | NA | 2  |
| HS.542071 | NA | 2  |
| HS.542112 | NA | 2  |
| HS.542230 | NA | 16 |
| HS.542356 | NA | 20 |
| HS.542408 | NA |    |
| HS.542409 | NA | 20 |
| HS.542413 | NA | 20 |
| HS.542425 | NA |    |
| HS.542495 | NA | 20 |
| HS.542571 | NA | 21 |
| HS.542575 | NA | 21 |
| HS.542579 | NA | 21 |
| HS.542622 | NA |    |
| HS.542667 | NA |    |
| HS.542669 | NA | 22 |
| HS.542687 | NA | 22 |
| HS.542713 | NA | 22 |
| HS.542732 | NA | 22 |
| HS.542846 | NA | 3  |
| HS.542897 | NA | 3  |
| HS.542920 | NA | 3  |
| HS.542962 | NA | 3  |
| HS.542993 | NA | 3  |
| HS.543052 | NA | 3  |
| HS.543063 | NA |    |
| HS.543092 | NA | 3  |
| HS.543093 | NA | 3  |
| HS.543097 | NA | 3  |
| HS.543113 | NA | 3  |
| HS.543144 | NA | 3  |
| HS.543163 | NA | 3  |
| HS.543175 | NA | 3  |
| HS.543242 | NA | 3  |

|           |    |   |
|-----------|----|---|
| HS.543250 | NA | 3 |
| HS.543261 | NA | 3 |
| HS.543270 | NA | 3 |
| HS.543412 | NA | 4 |
| HS.543470 | NA | 4 |
| HS.543561 | NA | 4 |
| HS.543617 | NA | 4 |
| HS.543654 | NA | 4 |
| HS.543663 | NA | 4 |
| HS.543683 | NA | 4 |
| HS.543712 | NA | 4 |
| HS.543736 | NA |   |
| HS.543820 | NA | 5 |
| HS.543828 | NA | 5 |
| HS.543844 | NA | 5 |
| HS.543865 | NA | 5 |
| HS.543887 | NA | 5 |
| HS.543907 | NA | 5 |
| HS.543951 | NA | 5 |
| HS.543987 | NA | 5 |
| HS.544017 | NA | 5 |
| HS.544018 | NA |   |
| HS.544030 | NA | 5 |
| HS.544140 | NA | 5 |
| HS.544149 | NA |   |
| HS.544228 | NA | 5 |
| HS.544238 | NA | 5 |
| HS.544242 | NA | 5 |
| HS.544261 | NA | 5 |
| HS.544263 | NA | 5 |
| HS.544265 | NA | 5 |
| HS.544353 | NA |   |
| HS.544375 | NA | 6 |
| HS.544487 | NA | 6 |
| HS.544557 | NA | 6 |
| HS.544637 | NA | 6 |
| HS.544692 | NA | 6 |
| HS.544721 | NA | 6 |
| HS.544791 | NA | 7 |
| HS.544828 | NA | 7 |
| HS.544832 | NA | 7 |
| HS.544849 | NA | 7 |
| HS.545003 | NA | 7 |
| HS.545008 | NA | 7 |



|           |    |   |
|-----------|----|---|
| HS.545009 | NA | 7 |
| HS.545044 | NA | 7 |
| HS.545045 | NA | 7 |
| HS.545048 | NA | 7 |
| HS.545068 | NA | 7 |
| HS.545069 | NA | 7 |
| HS.545074 | NA | 7 |
| HS.545230 | NA | 8 |
| HS.545232 | NA | 8 |
| HS.545236 | NA | 8 |
| HS.545243 | NA | 8 |
| HS.545246 | NA | 8 |
| HS.545250 | NA | 8 |
| HS.545277 | NA | 8 |
| HS.545298 | NA | 8 |
| HS.545299 | NA | 8 |
| HS.545338 | NA | 8 |
| HS.545352 | NA | 8 |
| HS.545364 | NA | 8 |
| HS.545388 | NA | 8 |
| HS.545397 | NA | 8 |
| HS.545426 | NA | 8 |
| HS.545428 | NA | 8 |
| HS.545462 | NA | 8 |
| HS.545507 | NA |   |
| HS.545514 | NA | 8 |
| HS.545519 | NA | 8 |
| HS.545536 | NA | 8 |
| HS.545554 | NA |   |
| HS.545587 | NA | 9 |
| HS.545589 | NA |   |
| HS.545626 | NA | 9 |
| HS.545650 | NA | 9 |
| HS.545680 | NA | 9 |
| HS.545726 | NA | 9 |
| HS.545759 | NA | 9 |
| HS.545838 | NA | 9 |
| HS.545844 | NA | 9 |
| HS.545887 | NA | 9 |
| HS.545893 | NA | 9 |
| HS.545947 | NA |   |
| HS.546114 | NA | X |
| HS.546119 | NA | X |
| HS.546148 | NA | 1 |

|           |    |    |
|-----------|----|----|
| HS.546150 | NA |    |
| HS.546375 | NA | 14 |
| HS.546379 | NA | 14 |
| HS.546661 | NA | 1  |
| HS.547160 | NA | 8  |
| HS.547175 | NA | 9  |
| HS.547201 | NA | 1  |
| HS.547245 | NA | 1  |
| HS.547272 | NA | 1  |
| HS.547277 | NA | 1  |
| HS.547293 | NA | 10 |
| HS.547332 | NA |    |
| HS.547341 | NA | 11 |
| HS.547366 | NA | 12 |
| HS.547587 | NA | 10 |
| HS.547601 | NA | 22 |
| HS.547715 | NA |    |
| HS.547861 | NA | 1  |
| HS.547985 | NA | 15 |
| HS.548415 | NA | 14 |
| HS.548635 | NA | 2  |
| HS.548645 | NA | 2  |
| HS.548787 | NA | 21 |
| HS.548804 | NA |    |
| HS.54940  | NA | 15 |
| HS.549435 | NA | 1  |
| HS.549668 | NA | 6  |
| HS.549783 | NA | 10 |
| HS.549784 | NA | 10 |
| HS.549989 | NA | 3  |
| HS.550042 | NA | 6  |
| HS.550068 | NA | 8  |
| HS.550111 | NA | 1  |
| HS.550118 | NA | 1  |
| HS.550126 | NA | 11 |
| HS.550275 | NA | 11 |
| HS.550287 | NA | 12 |
| HS.550310 | NA | 15 |
| HS.550320 | NA |    |
| HS.550382 | NA | 2  |
| HS.550799 | NA | 1  |
| HS.550822 | NA | 10 |
| HS.551002 | NA | 20 |
| HS.551024 | NA | 3  |

|           |    |          |
|-----------|----|----------|
| HS.551042 | NA | 4        |
| HS.551062 | NA | 5        |
| HS.551126 | NA | 8        |
| HS.551136 | NA | 9        |
| HS.551137 | NA | 9        |
| HS.551138 | NA | 9        |
| HS.551145 | NA | 9        |
| HS.551155 | NA | X        |
| HS.551253 | NA | 7        |
| HS.551307 | NA | 12       |
| HS.551340 | NA | 14       |
| HS.551358 | NA | 9        |
| HS.551361 | NA | 16       |
| HS.551458 | NA | 20       |
| HS.551538 | NA | 7        |
| HS.551815 | NA | 1        |
| HS.551832 | NA | 1        |
| HS.551847 | NA | 1        |
| HS.552025 | NA | 20       |
| HS.552045 | NA | 3        |
| HS.552082 | NA | 4        |
| HS.552160 | NA | 9        |
| HS.552183 | NA | 1        |
| HS.552207 | NA | 10       |
| HS.552263 | NA | 4        |
| HS.552282 | NA | 8        |
| HS.552297 | NA | 1        |
| HS.552354 | NA | 12       |
| HS.552357 | NA | 12       |
| HS.552423 | NA |          |
| HS.552427 | NA | 17       |
| HS.552561 | NA | 8        |
| HS.552799 | NA | 1        |
| HS.552871 | NA | 11       |
| HS.552896 | NA | 11       |
| HS.552910 | NA | 12       |
| HS.552917 | NA | 12       |
| HS.552934 | NA | 14       |
| HS.553019 | NA | 2        |
| HS.553158 | NA | 8_random |
| HS.553217 | NA | 11       |
| HS.553290 | NA | X        |
| HS.553301 | NA | 13       |
| HS.553351 | NA |          |

|           |    |    |
|-----------|----|----|
| HS.554039 | NA | 10 |
| HS.554056 | NA | 10 |
| HS.554075 | NA | 11 |
| HS.554084 | NA | 11 |
| HS.554169 | NA | 18 |
| HS.554203 | NA | 9  |
| HS.554211 | NA | 20 |
| HS.554282 | NA | 5  |
| HS.554298 | NA | 6  |
| HS.554324 | NA | 7  |
| HS.554445 | NA |    |
| HS.554452 | NA | 4  |
| HS.554478 | NA | 8  |
| HS.554507 | NA | 9  |
| HS.554595 | NA | 15 |
| HS.554603 | NA | 16 |
| HS.554615 | NA |    |
| HS.554642 | NA |    |
| HS.554965 | NA | 19 |
| HS.555115 | NA | 1  |
| HS.555126 | NA | 10 |
| HS.555138 | NA | 12 |
| HS.555181 | NA | 2  |
| HS.555208 | NA | 4  |
| HS.555244 | NA | 8  |
| HS.555247 | NA | 9  |
| HS.555252 | NA | 9  |
| HS.555260 | NA | X  |
| HS.555512 | NA | 14 |
| HS.556082 | NA | 16 |
| HS.556255 | NA | 11 |
| HS.556853 | NA | X  |
| HS.556879 | NA |    |
| HS.556994 | NA | 1  |
| HS.557039 | NA | 11 |
| HS.557218 | NA | 16 |
| HS.557622 | NA |    |
| HS.557800 | NA | 9  |
| HS.558072 | NA | 10 |
| HS.558212 | NA | X  |
| HS.558282 | NA | 8  |
| HS.558288 | NA | 9  |
| HS.558488 | NA | 14 |
| HS.558911 | NA |    |

|           |    |    |
|-----------|----|----|
| HS.559124 | NA | 1  |
| HS.559564 | NA | 1  |
| HS.559604 | NA | 1  |
| HS.559609 | NA | 8  |
| HS.559654 | NA |    |
| HS.559714 | NA | 1  |
| HS.559770 | NA | 1  |
| HS.559830 | NA | 10 |
| HS.559834 | NA |    |
| HS.559851 | NA | 10 |
| HS.559860 | NA |    |
| HS.560046 | NA |    |
| HS.560098 | NA | 12 |
| HS.560132 | NA | 13 |
| HS.560163 | NA | 13 |
| HS.560343 | NA | 15 |
| HS.560387 | NA |    |
| HS.560457 | NA | 16 |
| HS.560536 | NA | 17 |
| HS.560728 | NA | 16 |
| HS.560736 | NA | 2  |
| HS.560741 | NA | 2  |
| HS.560896 | NA | 9  |
| HS.560906 | NA | 2  |
| HS.560963 | NA | 20 |
| HS.560984 | NA | 20 |
| HS.561130 | NA |    |
| HS.561174 | NA | 3  |
| HS.561307 | NA |    |
| HS.561363 | NA | 5  |
| HS.561415 | NA |    |
| HS.561418 | NA | 5  |
| HS.561430 | NA | 5  |
| HS.561526 | NA | 6  |
| HS.561570 | NA | 6  |
| HS.561575 | NA | 6  |
| HS.561603 | NA |    |
| HS.561604 | NA |    |
| HS.561632 | NA | 16 |
| HS.561633 | NA | 6  |
| HS.561656 | NA | 7  |
| HS.561679 | NA | 7  |
| HS.561735 | NA | 7  |
| HS.561747 | NA | 7  |

|           |    |            |
|-----------|----|------------|
| HS.561814 | NA | 8          |
| HS.561844 | NA |            |
| HS.561874 | NA | 8          |
| HS.561885 | NA | 8          |
| HS.561999 | NA | X          |
| HS.562205 | NA | 1          |
| HS.562219 | NA | 1          |
| HS.562230 | NA | 1          |
| HS.562345 | NA |            |
| HS.562367 | NA | 11         |
| HS.562435 | NA | 12         |
| HS.562488 | NA | 13         |
| HS.562504 | NA | 8          |
| HS.562624 | NA | 15         |
| HS.562647 | NA | 16         |
| HS.562701 | NA | 17         |
| HS.562727 | NA | 17         |
| HS.562844 | NA | 2          |
| HS.562917 | NA |            |
| HS.562922 | NA | 2          |
| HS.563020 | NA | 20         |
| HS.563138 | NA | 3          |
| HS.563165 | NA | 3          |
| HS.563166 | NA | 3          |
| HS.563240 | NA | 4          |
| HS.563400 | NA | 6_qbl_hap2 |
| HS.563599 | NA | 9          |
| HS.563667 | NA | X          |
| HS.563847 | NA | 1          |
| HS.563870 | NA | 1          |
| HS.563922 | NA | 1          |
| HS.563926 | NA |            |
| HS.564000 | NA | 10         |
| HS.564077 | NA | 7          |
| HS.564097 | NA | 10         |
| HS.564111 | NA |            |
| HS.564150 | NA | 10         |
| HS.564159 | NA | 10         |
| HS.564211 | NA | 11         |
| HS.564216 | NA | 11         |
| HS.564221 | NA | 11         |
| HS.564297 | NA | 11         |
| HS.564338 | NA | 12         |
| HS.564428 | NA | 12         |

|           |    |    |
|-----------|----|----|
| HS.564485 | NA | 12 |
| HS.564578 | NA | 13 |
| HS.564676 | NA | 14 |
| HS.564718 | NA |    |
| HS.564805 | NA | 15 |
| HS.564848 | NA | 15 |
| HS.564874 | NA |    |
| HS.564948 | NA | 16 |
| HS.564962 | NA | 16 |
| HS.565001 | NA | 17 |
| HS.565029 | NA |    |
| HS.565075 | NA | 17 |
| HS.565130 | NA | 18 |
| HS.565146 | NA | 18 |
| HS.565151 | NA | 18 |
| HS.565180 | NA | 18 |
| HS.565189 | NA | 19 |
| HS.565248 | NA | 19 |
| HS.565250 | NA | 19 |
| HS.565303 | NA | 19 |
| HS.565309 | NA | 2  |
| HS.565311 | NA | 2  |
| HS.565314 | NA | 18 |
| HS.565338 | NA | 2  |
| HS.565377 | NA | 2  |
| HS.565402 | NA |    |
| HS.565461 | NA | 2  |
| HS.565503 | NA |    |
| HS.565507 | NA |    |
| HS.565532 | NA | 2  |
| HS.565552 | NA |    |
| HS.565557 | NA | 2  |
| HS.565597 | NA | 2  |
| HS.565708 | NA | 20 |
| HS.565734 | NA | 21 |
| HS.565778 | NA | 22 |
| HS.565801 | NA | 22 |
| HS.565863 | NA | 3  |
| HS.565871 | NA | 3  |
| HS.565921 | NA |    |
| HS.566010 | NA |    |
| HS.566103 | NA | 4  |
| HS.566139 | NA |    |
| HS.566279 | NA | 5  |

|           |    |    |
|-----------|----|----|
| HS.566280 | NA |    |
| HS.566306 | NA | 5  |
| HS.566307 | NA |    |
| HS.566309 | NA | 5  |
| HS.566332 | NA | 5  |
| HS.566420 | NA | 5  |
| HS.566484 | NA |    |
| HS.566539 | NA | 6  |
| HS.566614 | NA | 7  |
| HS.566647 | NA |    |
| HS.566669 | NA | 7  |
| HS.566751 | NA | 7  |
| HS.566763 | NA | 7  |
| HS.566764 | NA | 7  |
| HS.566864 | NA |    |
| HS.566881 | NA | 8  |
| HS.566930 | NA | 8  |
| HS.567033 | NA | 9  |
| HS.567036 | NA |    |
| HS.567094 | NA |    |
| HS.567096 | NA |    |
| HS.567184 | NA | X  |
| HS.567186 | NA |    |
| HS.567192 | NA | X  |
| HS.567392 | NA | 9  |
| HS.567436 | NA | 11 |
| HS.567461 | NA | 14 |
| HS.567464 | NA | 7  |
| HS.567472 | NA | 7  |
| HS.567480 | NA | 14 |
| HS.567677 | NA | 2  |
| HS.567759 | NA | 8  |
| HS.568058 | NA | 12 |
| HS.568148 | NA | 7  |
| HS.568329 | NA |    |
| HS.568407 | NA | 4  |
| HS.568498 | NA | 1  |
| HS.568640 | NA |    |
| HS.568690 | NA | 1  |
| HS.568696 | NA | 1  |
| HS.568741 | NA | 10 |
| HS.568810 | NA | 10 |
| HS.568928 | NA | 11 |
| HS.568951 | NA | 11 |



|           |    |    |
|-----------|----|----|
| HS.568964 | NA | 11 |
| HS.569104 | NA | 12 |
| HS.569154 | NA | 12 |
| HS.569162 | NA | 12 |
| HS.569199 | NA | 12 |
| HS.569204 | NA | 12 |
| HS.569270 | NA | 13 |
| HS.569298 | NA | 13 |
| HS.569313 | NA | 14 |
| HS.569323 | NA | 14 |
| HS.569404 | NA | 14 |
| HS.569411 | NA | 14 |
| HS.569692 | NA | 16 |
| HS.569823 | NA | 17 |
| HS.570028 | NA | 19 |
| HS.570107 | NA | 2  |
| HS.570176 | NA | 2  |
| HS.570189 | NA | 2  |
| HS.570192 | NA | 2  |
| HS.570229 | NA | 2  |
| HS.570237 | NA | 2  |
| HS.570291 | NA | 2  |
| HS.570308 | NA | 2  |
| HS.570338 | NA | 20 |
| HS.570343 | NA | 20 |
| HS.570403 | NA | 21 |
| HS.570442 | NA | 21 |
| HS.570460 | NA | 22 |
| HS.570467 | NA | 22 |
| HS.570581 | NA | 3  |
| HS.570636 | NA | 3  |
| HS.570650 | NA | 3  |
| HS.57079  | NA | 10 |
| HS.570821 | NA | 4  |
| HS.570838 | NA | 4  |
| HS.570988 | NA | 5  |
| HS.571013 | NA | 5  |
| HS.571024 | NA | 5  |
| HS.571028 | NA | 5  |
| HS.571035 | NA | 6  |
| HS.571039 | NA | 6  |
| HS.571047 | NA | 6  |
| HS.571130 | NA | 6  |
| HS.571151 | NA | 6  |

|           |    |    |
|-----------|----|----|
| HS.571181 | NA | 6  |
| HS.571223 | NA | 7  |
| HS.571241 | NA | 7  |
| HS.571245 | NA | 7  |
| HS.571249 | NA | 7  |
| HS.571297 | NA | 7  |
| HS.571344 | NA | 7  |
| HS.571376 | NA | 7  |
| HS.571415 | NA | 8  |
| HS.571426 | NA | 8  |
| HS.571481 | NA | 8  |
| HS.571502 | NA | 8  |
| HS.571515 | NA | 8  |
| HS.571536 | NA | 8  |
| HS.571602 | NA | 9  |
| HS.571741 | NA | X  |
| HS.571887 | NA | 7  |
| HS.571946 | NA | 1  |
| HS.572012 | NA | 10 |
| HS.572030 | NA | 10 |
| HS.572064 | NA | 11 |
| HS.572121 | NA | 11 |
| HS.572123 | NA | 11 |
| HS.572124 | NA |    |
| HS.572130 | NA | 11 |
| HS.572219 | NA |    |
| HS.572246 | NA | 13 |
| HS.572268 | NA | 14 |
| HS.5724   | NA | 3  |
| HS.572444 | NA | 1  |
| HS.572495 | NA | 17 |
| HS.572642 | NA | 2  |
| HS.572649 | NA | 7  |
| HS.572735 | NA | 2  |
| HS.572752 | NA | 9  |
| HS.572761 | NA | 2  |
| HS.572889 | NA |    |
| HS.573131 | NA | 4  |
| HS.573214 | NA | 5  |
| HS.573255 | NA | 6  |
| HS.573263 | NA | 6  |
| HS.573264 | NA | 6  |
| HS.573359 | NA | 7  |
| HS.573486 | NA | 11 |

|           |    |    |
|-----------|----|----|
| HS.573541 | NA | 9  |
| HS.573552 | NA | 9  |
| HS.573723 | NA | 1  |
| HS.573799 | NA |    |
| HS.574008 | NA | 12 |
| HS.574082 | NA | 12 |
| HS.574104 | NA | 13 |
| HS.574272 | NA | 15 |
| HS.574278 | NA | 15 |
| HS.574347 | NA | 16 |
| HS.574434 | NA | 17 |
| HS.574453 | NA | 12 |
| HS.574465 | NA |    |
| HS.574587 | NA | 19 |
| HS.574590 | NA |    |
| HS.574667 | NA | 2  |
| HS.574769 | NA | 2  |
| HS.574902 | NA |    |
| HS.574968 | NA |    |
| HS.574979 | NA | 3  |
| HS.575095 | NA | 14 |
| HS.575162 | NA | 5  |
| HS.575222 | NA | 5  |
| HS.575465 | NA |    |
| HS.575479 | NA | 7  |
| HS.575502 | NA | 7  |
| HS.575542 | NA | 8  |
| HS.575583 | NA | 8  |
| HS.575603 | NA | 1  |
| HS.575608 | NA | 8  |
| HS.575615 | NA | 9  |
| HS.575725 | NA | X  |
| HS.575737 | NA | X  |
| HS.575808 | NA | 1  |
| HS.575812 | NA | 1  |
| HS.575816 | NA | 1  |
| HS.575831 | NA | 1  |
| HS.575906 | NA | 1  |
| HS.576042 | NA | 1  |
| HS.576072 | NA | 1  |
| HS.576084 | NA | 1  |
| HS.576106 | NA | 10 |
| HS.576164 | NA | 1  |
| HS.576241 | NA | 18 |

|           |    |    |
|-----------|----|----|
| HS.576274 | NA | 1  |
| HS.576292 | NA | 1  |
| HS.576530 | NA | 1  |
| HS.576557 | NA | 10 |
| HS.576633 | NA | 7  |
| HS.576642 | NA | 10 |
| HS.576653 | NA | 10 |
| HS.576819 | NA | 10 |
| HS.576822 | NA | 10 |
| HS.576825 | NA | 10 |
| HS.576915 | NA | 10 |
| HS.576968 | NA | 11 |
| HS.577098 | NA | 20 |
| HS.577126 | NA | 11 |
| HS.577265 | NA | 11 |
| HS.577306 | NA | 11 |
| HS.577347 | NA | 11 |
| HS.577453 | NA | 12 |
| HS.577495 | NA | 12 |
| HS.577646 | NA | 12 |
| HS.577721 | NA | 12 |
| HS.577861 | NA | 13 |
| HS.577923 | NA |    |
| HS.577926 | NA | 13 |
| HS.577935 | NA | 13 |
| HS.578068 | NA |    |
| HS.578080 | NA | 14 |
| HS.578099 | NA | 14 |
| HS.578117 | NA | 14 |
| HS.578119 | NA | 14 |
| HS.578785 | NA | 16 |
| HS.578794 | NA | 16 |
| HS.578836 | NA | 16 |
| HS.578887 | NA | 16 |
| HS.578984 | NA | 16 |
| HS.579013 | NA | 16 |
| HS.579145 | NA | 17 |
| HS.579295 | NA | 17 |
| HS.579365 | NA |    |
| HS.579369 | NA | 18 |
| HS.579370 | NA | 18 |
| HS.579409 | NA |    |
| HS.579513 | NA | 18 |
| HS.579530 | NA | 18 |

|           |    |    |
|-----------|----|----|
| HS.579631 | NA | 19 |
| HS.579715 | NA | 19 |
| HS.579727 | NA |    |
| HS.580053 | NA | 2  |
| HS.580105 | NA | 2  |
| HS.580154 | NA | 2  |
| HS.580169 | NA | 2  |
| HS.580229 | NA |    |
| HS.580290 | NA | 2  |
| HS.580342 | NA | 2  |
| HS.580375 | NA | 2  |
| HS.580442 | NA | 2  |
| HS.580452 | NA | 2  |
| HS.580542 | NA | 2  |
| HS.580607 | NA | 2  |
| HS.580655 | NA |    |
| HS.580740 | NA | 20 |
| HS.580797 | NA | 20 |
| HS.580802 | NA | 20 |
| HS.580929 | NA | 21 |
| HS.581028 | NA | 22 |
| HS.581067 | NA | 22 |
| HS.581300 | NA | 3  |
| HS.581365 | NA | 3  |
| HS.581580 | NA | 3  |
| HS.581615 | NA | 3  |
| HS.581645 | NA | 3  |
| HS.581657 | NA | 3  |
| HS.581690 | NA | 4  |
| HS.581828 | NA | 4  |
| HS.581914 | NA | 4  |
| HS.581935 | NA | 4  |
| HS.581975 | NA | 4  |
| HS.582025 | NA | 4  |
| HS.582112 | NA | 5  |
| HS.582113 | NA | 5  |
| HS.582114 | NA |    |
| HS.582175 | NA | 5  |
| HS.582211 | NA | 5  |
| HS.582239 | NA | 5  |
| HS.582446 | NA | 5  |
| HS.582457 | NA | 5  |
| HS.582526 | NA | 5  |
| HS.582536 | NA | 5  |

|           |    |    |
|-----------|----|----|
| HS.582537 | NA | 5  |
| HS.582594 | NA | 6  |
| HS.582640 | NA |    |
| HS.582706 | NA |    |
| HS.582764 | NA | 6  |
| HS.582765 | NA | 6  |
| HS.582886 | NA | 6  |
| HS.582893 | NA | 6  |
| HS.582980 | NA | 6  |
| HS.582985 | NA | 6  |
| HS.583158 | NA | 7  |
| HS.583506 | NA | 7  |
| HS.583554 | NA | 7  |
| HS.583661 | NA | 8  |
| HS.583705 | NA |    |
| HS.583755 | NA | 8  |
| HS.583868 | NA | 8  |
| HS.584115 | NA | 9  |
| HS.584126 | NA | 9  |
| HS.584144 | NA | 9  |
| HS.584216 | NA | 9  |
| HS.584299 | NA | 9  |
| HS.584613 | NA | X  |
| HS.584731 | NA | Y  |
| HS.58896  | NA | 18 |
| HS.60257  | NA | 16 |
| HS.60260  | NA | 12 |
| HS.61151  | NA | 10 |
| HS.61208  | NA | 12 |
| HS.61481  | NA | 8  |
| HS.62314  | NA | 10 |
| HS.62645  | NA | 11 |
| HS.63311  | NA | 14 |
| HS.66049  | NA | 2  |
| HS.66187  | NA | 2  |
| HS.6729   | NA | 2  |
| HS.7023   | NA | 8  |
| HS.71657  | NA | 1  |
| HS.71947  | NA | 6  |
| HS.72010  | NA | 22 |
| HS.72367  | NA | 7  |
| HS.7572   | NA | 1  |
| HS.79881  | NA | 3  |
| HS.85888  | NA | 18 |

|           |        |           |    |
|-----------|--------|-----------|----|
| HS.86045  | NA     |           | X  |
| HS.87194  | NA     |           | 15 |
| HS.88156  | NA     |           | 12 |
| HS.91147  | NA     |           | 3  |
| HS.9123   | NA     |           | 2  |
| HS.91389  | NA     |           | X  |
| HS.92308  | NA     |           | 12 |
| HS.95481  | NA     |           | 1  |
| HS.96672  | NA     |           | 3  |
| HS.97337  | NA     |           | 3  |
| HS.97558  | NA     |           | 9  |
| HS.98197  | NA     |           | X  |
| HS.98330  | NA     |           |    |
| HS.98458  | NA     |           | 4  |
| HS.98462  | NA     |           | 3  |
| HS.98563  | NA     |           | 2  |
| HS.98588  | NA     |           | 12 |
| HS.98737  | NA     |           | 1  |
| HS.98754  | NA     |           | 5  |
| HS.98777  | NA     |           | 2  |
| HS.98815  | NA     |           | 17 |
| HS.99203  | NA     |           | 6  |
| HS.99253  | NA     |           | 9  |
| HS1BP3    | 64342  | HS1BP3    | 2  |
| HS2ST1    | 9653   | HS2ST1    | 1  |
| HSBP1     | 3281   | HSBP1     | 16 |
| HSD11B1L  | 374875 | HSD11B1L  | 19 |
| HSD11B2   | 3291   | HSD11B2   | 16 |
| HSD17B10  | 3028   | HSD17B10  | X  |
| HSD17B11  | 51170  | HSD17B11  | 4  |
| HSD17B12  | 51144  | HSD17B12  | 11 |
| HSD17B14  | 51171  | HSD17B14  | 19 |
| HSD17B3   | 3293   | HSD17B3   | 9  |
| HSD17B4   | 3295   | HSD17B4   | 5  |
| HSD17B6   | 8630   | HSD17B6   | 12 |
| HSD17B7   | 51478  | HSD17B7   | 1  |
| HSD17B7P2 | 158160 | HSD17B7P2 | 10 |
| HSD17B8   | 7923   | HSD17B8   | 6  |
| HSD3B1    | 3283   | HSD3B1    | 1  |
| HSDL1     | 83693  | HSDL1     | 16 |
| HSDL2     | 84263  | HSDL2     | 9  |
| HSF1      | 3297   | HSF1      | 8  |
| HSF2      | 3298   | HSF2      | 6  |
| HSF2BP    | 11077  | HSF2BP    | 21 |

|          |        |          |    |
|----------|--------|----------|----|
| HSH2D    | 84941  | HSH2D    | 19 |
| HSP90AA1 | 3320   | HSP90AA1 | 14 |
| HSP90AB1 | 3326   | HSP90AB1 | 6  |
| HSP90B1  | 7184   | HSP90B1  | 12 |
| HSPA13   | 6782   | HSPA13   | 21 |
| HSPA14   | 51182  | HSPA14   | 10 |
| HSPA1A   | 3303   | HSPA1A   | 6  |
| HSPA1B   | 3304   | HSPA1B   | 6  |
| HSPA1L   | 3305   | HSPA1L   | 6  |
| HSPA2    | 3306   | HSPA2    | 14 |
| HSPA4    | 3308   | HSPA4    | 5  |
| HSPA4L   | 22824  | HSPA4L   | 4  |
| HSPA5    | 3309   | HSPA5    | 9  |
| HSPA6    | 3310   | HSPA6    | 1  |
| HSPA7    | 3311   | HSPA7    | 1  |
| HSPA8    | 3312   | HSPA8    | 11 |
| HSPA9    | 3313   | HSPA9    | 5  |
| HSPB1    | 3315   | HSPB1    | 7  |
| HSPB2    | 3316   | HSPB2    | 11 |
| HSPB3    | 8988   | HSPB3    | 5  |
| HSPBAP1  | 79663  | HSPBAP1  | 3  |
| HSPBL2   | 653553 | HSPBL2   | 9  |
| HSPBP1   | 23640  | HSPBP1   |    |
| HSPC047  | 29060  | HSPC047  | 7  |
| HSPC111  | 51491  | HSPC111  | 5  |
| HSPC157  | 29092  | HSPC157  | 1  |
| HSPC159  | 29094  | HSPC159  | 2  |
| HSPC171  | 29100  | HSPC171  |    |
| HSPC268  | 154791 | HSPC268  | 7  |
| HSPCAL3  | 3324   | HSPCAL3  | 11 |
| HSPD1    | 3329   | HSPD1    | 2  |
| HSPE1    | 3336   | HSPE1    | 2  |
| HSPH1    | 10808  | HSPH1    | 13 |
| HSZFP36  | 55552  | HSZFP36  |    |
| HTATIP2  | 10553  | HTATIP2  | 11 |
| HTR3A    | 3359   | HTR3A    | 11 |
| HTR3B    | 9177   | HTR3B    | 11 |
| HTR7     | 3363   | HTR7     | 10 |
| HTRA2    | 27429  | HTRA2    | 2  |
| HTRA4    | 203100 | HTRA4    | 8  |
| HUNK     | 30811  | HUNK     | 21 |
| HUS1B    | 135458 | HUS1B    | 6  |
| HVCN1    | 84329  | HVCN1    | 12 |
| HYAL2    | 8692   | HYAL2    | 3  |



|        |        |        |    |
|--------|--------|--------|----|
| HYAL3  | 8372   | HYAL3  | 3  |
| HYAL4  | 23553  | HYAL4  | 7  |
| HYALP1 | 26062  | HYALP1 | 7  |
| HYLS1  | 219844 | HYLS1  | 11 |
| HYOU1  | 10525  | HYOU1  | 11 |
| HYPB   | 29072  | HYPB   | 3  |
| IAH1   | 285148 | IAH1   | 2  |
| IARS   | 3376   | IARS   | 9  |
| IARS2  | 55699  | IARS2  | 1  |
| IBSP   | 3381   | IBSP   | 4  |
| IBTK   | 25998  | IBTK   | 6  |
| ICA1   | 3382   | ICA1   | 7  |
| ICA1L  | 130026 | ICA1L  | 2  |
| ICAM1  | 3383   | ICAM1  | 19 |
| ICAM2  | 3384   | ICAM2  | 17 |
| ICAM3  | 3385   | ICAM3  | 19 |
| ICAM4  | 3386   | ICAM4  | 19 |
| ICAM5  | 7087   | ICAM5  | 19 |
| ICF45  | 54974  | ICF45  | 5  |
| ICK    | 22858  | ICK    | 6  |
| ICMT   | 23463  | ICMT   | 1  |
| ICOSLG | 23308  | ICOSLG | 21 |
| ICT1   | 3396   | ICT1   | 17 |
| ID1    | 3397   | ID1    | 20 |
| ID2    | 3398   | ID2    | 2  |
| ID3    | 3399   | ID3    | 1  |
| ID4    | 3400   | ID4    | 6  |
| IDE    | 3416   | IDE    | 10 |
| IDH1   | 3417   | IDH1   | 2  |
| IDH2   | 3418   | IDH2   | 15 |
| IDH3A  | 3419   | IDH3A  | 15 |
| IDH3B  | 3420   | IDH3B  | 20 |
| IDH3G  | 3421   | IDH3G  | X  |
| IDI1   | 3422   | IDI1   | 10 |
| IDI2   | 91734  | IDI2   | 10 |
| IDO1   | 3620   | IDO1   | 8  |
| IDS    | 3423   | IDS    | X  |
| IDUA   | 3425   | IDUA   | 4  |
| IER2   | 9592   | IER2   | 19 |
| IER3   | 8870   | IER3   | 6  |
| IER5   | 51278  | IER5   | 1  |
| IER5L  | 389792 | IER5L  | 9  |
| IFFO1  | 25900  | IFFO1  | 12 |
| IFFO2  | 126917 | IFFO2  | 1  |

|         |        |         |    |
|---------|--------|---------|----|
| IFI16   | 3428   | IFI16   | 1  |
| IFI27   | 3429   | IFI27   | 14 |
| IFI27L1 | 122509 | IFI27L1 | 14 |
| IFI27L2 | 83982  | IFI27L2 | 14 |
| IFI30   | 10437  | IFI30   | 19 |
| IFI35   | 3430   | IFI35   | 17 |
| IFI44   | 10561  | IFI44   | 1  |
| IFI44L  | 10964  | IFI44L  | 1  |
| IFI6    | 2537   | IFI6    | 1  |
| IFIH1   | 64135  | IFIH1   | 2  |
| IFIT1   | 3434   | IFIT1   | 10 |
| IFIT2   | 3433   | IFIT2   | 10 |
| IFIT3   | 3437   | IFIT3   | 10 |
| IFIT5   | 24138  | IFIT5   | 10 |
| IFITM1  | 8519   | IFITM1  | 11 |
| IFITM2  | 10581  | IFITM2  | 11 |
| IFITM3  | 10410  | IFITM3  | 11 |
| IFNA1   | 3439   | IFNA1   | 9  |
| IFNA16  | 3449   | IFNA16  | 9  |
| IFNA21  | 3452   | IFNA21  | 9  |
| IFNAR1  | 3454   | IFNAR1  | 21 |
| IFNAR2  | 3455   | IFNAR2  | 21 |
| IFNB1   | 3456   | IFNB1   | 9  |
| IFNE1   | 338376 | IFNE1   | 9  |
| IFNGR1  | 3459   | IFNGR1  | 6  |
| IFNGR2  | 3460   | IFNGR2  | 21 |
| IFNK    | 56832  | IFNK    | 9  |
| IFP38   | 83880  | IFP38   |    |
| IFRD1   | 3475   | IFRD1   | 7  |
| IFRD2   | 7866   | IFRD2   | 3  |
| IFRG15  | 64163  | IFRG15  | 1  |
| IFT122  | 55764  | IFT122  | 3  |
| IFT140  | 9742   | IFT140  | 16 |
| IFT20   | 90410  | IFT20   | 17 |
| IFT52   | 51098  | IFT52   | 20 |
| IFT57   | 55081  | IFT57   | 3  |
| IFT74   | 80173  | IFT74   | 9  |
| IFT80   | 57560  | IFT80   | 3  |
| IFT81   | 28981  | IFT81   | 12 |
| IFT88   | 8100   | IFT88   | 13 |
| IGBP1   | 3476   | IGBP1   | X  |
| IGDCC3  | 9543   | IGDCC3  | 15 |
| IGF2BP1 | 10642  | IGF2BP1 | 17 |
| IGF2BP2 | 10644  | IGF2BP2 | 3  |

|         |        |         |    |
|---------|--------|---------|----|
| IGF2BP3 | 10643  | IGF2BP3 | 7  |
| IGF2R   | 3482   | IGF2R   | 6  |
| IGFALS  | 3483   | IGFALS  | 16 |
| IGFBP1  | 3484   | IGFBP1  | 7  |
| IGFBP2  | 3485   | IGFBP2  | 2  |
| IGFBP3  | 3486   | IGFBP3  | 7  |
| IGFBP4  | 3487   | IGFBP4  | 17 |
| IGFBP6  | 3489   | IGFBP6  | 12 |
| IGFBPL1 | 347252 | IGFBPL1 | 9  |
| IGFL3   | 388555 | IGFL3   | 19 |
| IGHMBP2 | 3508   | IGHMBP2 | 11 |
| IGJ     | 3512   | IGJ     | 4  |
| IGLL1   | 3543   | IGLL1   | 22 |
| IGLL3   | 91353  | IGLL3   | 22 |
| IGSF10  | 285313 | IGSF10  | 3  |
| IGSF11  | 152404 | IGSF11  | 3  |
| IGSF3   | 3321   | IGSF3   | 1  |
| IGSF6   | 10261  | IGSF6   | 16 |
| IGSF8   | 93185  | IGSF8   | 1  |
| IGSF9   | 57549  | IGSF9   | 1  |
| IIP45   | 60672  | IIP45   | 1  |
| IK      | 3550   | IK      | 5  |
| IKBIP   | 121457 | IKBIP   | 12 |
| IKBKAP  | 8518   | IKBKAP  | 9  |
| IKBKB   | 3551   | IKBKB   | 8  |
| IKBKE   | 9641   | IKBKE   | 1  |
| IKBKG   | 8517   | IKBKG   | X  |
| IKZF1   | 10320  | IKZF1   | 7  |
| IKZF2   | 22807  | IKZF2   | 2  |
| IKZF3   | 22806  | IKZF3   | 17 |
| IKZF4   | 64375  | IKZF4   | 12 |
| IKZF5   | 64376  | IKZF5   |    |
| IL10    | 3586   | IL10    | 1  |
| IL10RA  | 3587   | IL10RA  | 11 |
| IL10RB  | 3588   | IL10RB  | 21 |
| IL11    | 3589   | IL11    | 19 |
| IL11RA  | 3590   | IL11RA  | 9  |
| IL12A   | 3592   | IL12A   | 3  |
| IL12RB1 | 3594   | IL12RB1 | 19 |
| IL12RB2 | 3595   | IL12RB2 | 1  |
| IL13RA1 | 3597   | IL13RA1 | X  |
| IL15    | 3600   | IL15    | 4  |
| IL16    | 3603   | IL16    | 15 |
| IL17A   | 3605   | IL17A   | 6  |

|         |        |         |    |
|---------|--------|---------|----|
| IL17D   | 53342  | IL17D   | 13 |
| IL17RA  | 23765  | IL17RA  | 22 |
| IL17RB  | 55540  | IL17RB  | 3  |
| IL17RD  | 54756  | IL17RD  | 3  |
| IL18    | 3606   | IL18    | 11 |
| IL18BP  | 10068  | IL18BP  | 11 |
| IL18RAP | 8807   | IL18RAP | 2  |
| IL1R2   | 7850   | IL1R2   | 2  |
| IL1RAP  | 3556   | IL1RAP  | 3  |
| IL1RL2  | 8808   | IL1RL2  | 2  |
| IL20RA  | 53832  | IL20RA  | 6  |
| IL20RB  | 53833  | IL20RB  | 3  |
| IL21R   | 50615  | IL21R   | 16 |
| IL22RA1 | 58985  | IL22RA1 | 1  |
| IL23A   | 51561  | IL23A   | 12 |
| IL27RA  | 9466   | IL27RA  | 19 |
| IL28A   | 282616 | IL28A   | 19 |
| IL28RA  | 163702 | IL28RA  | 1  |
| IL2RA   | 3559   | IL2RA   | 10 |
| IL2RB   | 3560   | IL2RB   | 22 |
| IL32    | 9235   | IL32    | 16 |
| IL34    | 146433 | IL34    | 16 |
| IL411   | 259307 | IL411   | 19 |
| IL4R    | 3566   | IL4R    | 16 |
| IL5RA   | 3568   | IL5RA   | 3  |
| IL6     | 3569   | IL6     | 7  |
| IL7R    | 3575   | IL7R    | 5  |
| IL8     | 3576   | IL8     | 4  |
| ILD1R1  | 286676 | ILD1R1  | 3  |
| ILD1R2  | 387597 | ILD1R2  | 1  |
| ILF2    | 3608   | ILF2    | 1  |
| ILF3    | 3609   | ILF3    | 19 |
| ILK     | 3611   | ILK     | 11 |
| ILKAP   | 80895  | ILKAP   | 2  |
| ILVBL   | 10994  | ILVBL   | 19 |
| IMAA    | 387254 | IMAA    | 16 |
| IMMP1L  | 196294 | IMMP1L  | 11 |
| IMMP2L  | 83943  | IMMP2L  | 7  |
| IMMT    | 10989  | IMMT    | 2  |
| IMP3    | 55272  | IMP3    | 15 |
| IMP4    | 92856  | IMP4    | 2  |
| IMPA1   | 3612   | IMPA1   | 8  |
| IMPA2   | 3613   | IMPA2   | 18 |
| IMPAD1  | 54928  | IMPAD1  | 8  |

|        |        |        |    |
|--------|--------|--------|----|
| IMPDH1 | 3614   | IMPDH1 | 7  |
| IMPDH2 | 3615   | IMPDH2 | 3  |
| IMPG1  | 3617   | IMPG1  | 6  |
| INA    | 9118   | INA    | 10 |
| INCA1  | 388324 | INCA1  | 17 |
| INCENP | 3619   | INCENP | 11 |
| INDO   | 3620   | INDO   | 8  |
| INF2   | 64423  | INF2   | 14 |
| ING1   | 3621   | ING1   | 13 |
| ING2   | 3622   | ING2   | 4  |
| ING3   | 54556  | ING3   | 7  |
| ING5   | 84289  | ING5   |    |
| INHBE  | 83729  | INHBE  | 12 |
| INO80  | 54617  | INO80  | 15 |
| INO80B | 83444  | INO80B | 2  |
| INO80C | 125476 | INO80C | 18 |
| INO80D | 54891  | INO80D | 2  |
| INO80E | 283899 | INO80E | 16 |
| INPP1  | 3628   | INPP1  | 2  |
| INPP4B | 8821   | INPP4B | 4  |
| INPP5A | 3632   | INPP5A |    |
| INPP5B | 3633   | INPP5B | 1  |
| INPP5D | 3635   | INPP5D | 2  |
| INPP5E | 56623  | INPP5E | 9  |
| INPP5K | 51763  | INPP5K | 17 |
| INPPL1 | 3636   | INPPL1 | 11 |
| INSC   | 387755 | INSC   | 11 |
| INSIG1 | 3638   | INSIG1 | 7  |
| INSIG2 | 51141  | INSIG2 | 2  |
| INSM1  | 3642   | INSM1  | 20 |
| INSM2  | 84684  | INSM2  | 14 |
| INSR   | 3643   | INSR   | 19 |
| INSRR  | 3645   | INSRR  | 1  |
| INTS1  | 26173  | INTS1  | 7  |
| INTS10 | 55174  | INTS10 | 8  |
| INTS12 | 57117  | INTS12 | 4  |
| INTS2  | 57508  | INTS2  | 17 |
| INTS3  | 65123  | INTS3  | 1  |
| INTS4  | 92105  | INTS4  | 11 |
| INTS5  | 80789  | INTS5  | 11 |
| INTS6  | 26512  | INTS6  | 13 |
| INTS7  | 25896  | INTS7  | 1  |
| INTS9  | 55756  | INTS9  | 8  |
| IP6K1  | 9807   | IP6K1  | 3  |

|          |        |          |    |
|----------|--------|----------|----|
| IP6K2    | 51447  | IP6K2    | 3  |
| IPO11    | 51194  | IPO11    | 5  |
| IPO13    | 9670   | IPO13    | 1  |
| IPO4     | 79711  | IPO4     | 14 |
| IPO5     | 3843   | IPO5     | 13 |
| IPO7     | 10527  | IPO7     | 11 |
| IPO8     | 10526  | IPO8     | 12 |
| IPO9     | 55705  | IPO9     | 1  |
| IPW      | 3653   | IPW      | 15 |
| IQCB1    | 9657   | IQCB1    | 3  |
| IQCC     | 55721  | IQCC     | 1  |
| IQCD     | 115811 | IQCD     | 12 |
| IQCG     | 84223  | IQCG     | 3  |
| IQCH     | 64799  | IQCH     | 15 |
| IQCK     | 124152 | IQCK     | 16 |
| IQGAP2   | 10788  | IQGAP2   | 5  |
| IQSEC1   | 9922   | IQSEC1   | 3  |
| IQUB     | 154865 | IQUB     | 7  |
| IRAK1    | 3654   | IRAK1    | X  |
| IRAK1BP1 | 134728 | IRAK1BP1 | 6  |
| IRAK2    | 3656   | IRAK2    | 3  |
| IRAK3    | 11213  | IRAK3    | 12 |
| IREB2    | 3658   | IREB2    | 15 |
| IRF1     | 3659   | IRF1     | 5  |
| IRF2     | 3660   | IRF2     | 4  |
| IRF2BP1  | 26145  | IRF2BP1  | 19 |
| IRF2BP2  | 359948 | IRF2BP2  | 1  |
| IRF3     | 3661   | IRF3     | 19 |
| IRF4     | 3662   | IRF4     | 6  |
| IRF5     | 3663   | IRF5     | 7  |
| IRF7     | 3665   | IRF7     | 11 |
| IRF8     | 3394   | IRF8     | 16 |
| IRF9     | 10379  | IRF9     | 14 |
| IRGC     | 56269  | IRGC     | 19 |
| IRGM     | 345611 | IRGM     |    |
| IRS1     | 3667   | IRS1     | 2  |
| IRS2     | 8660   | IRS2     | 13 |
| IRX3     | 79191  | IRX3     | 16 |
| IRX5     | 10265  | IRX5     | 16 |
| ISCA1    | 81689  | ISCA1    | 9  |
| ISCA1L   | 389293 | ISCA1L   | 5  |
| ISCA2    | 122961 | ISCA2    | 14 |
| ISCU     | 23479  | ISCU     | 12 |
| ISG15    | 9636   | ISG15    | 1  |

|          |        |          |    |
|----------|--------|----------|----|
| ISG20    | 3669   | ISG20    | 15 |
| ISG20L1  | 64782  | ISG20L1  | 15 |
| ISG20L2  | 81875  | ISG20L2  | 1  |
| ISL2     | 64843  | ISL2     | 15 |
| ISLR2    | 57611  | ISLR2    | 15 |
| ISM1     | 140862 | ISM1     | 20 |
| ISOC1    | 51015  | ISOC1    | 5  |
| ISOC2    | 79763  | ISOC2    | 19 |
| ISY1     | 57461  | ISY1     | 3  |
| ISYNA1   | 51477  | ISYNA1   | 19 |
| ITCH     | 83737  | ITCH     | 20 |
| ITFG1    | 81533  | ITFG1    | 16 |
| ITFG2    | 55846  | ITFG2    | 12 |
| ITFG3    | 83986  | ITFG3    | 16 |
| ITGA3    | 3675   | ITGA3    | 17 |
| ITGA4    | 3676   | ITGA4    | 2  |
| ITGA6    | 3655   | ITGA6    | 2  |
| ITGA9    | 3680   | ITGA9    | 3  |
| ITGAE    | 3682   | ITGAE    | 17 |
| ITGAL    | 3683   | ITGAL    | 16 |
| ITGAM    | 3684   | ITGAM    | 16 |
| ITGAV    | 3685   | ITGAV    | 2  |
| ITGB1    | 3688   | ITGB1    | 10 |
| ITGB1BP1 | 9270   | ITGB1BP1 | 2  |
| ITGB2    | 3689   | ITGB2    | 21 |
| ITGB3    | 3690   | ITGB3    | 17 |
| ITGB3BP  | 23421  | ITGB3BP  | 1  |
| ITGB4BP  | 3692   | ITGB4BP  | 20 |
| ITGB5    | 3693   | ITGB5    |    |
| ITGB7    | 3695   | ITGB7    | 12 |
| ITGBL1   | 9358   | ITGBL1   | 13 |
| ITIH4    | 3700   | ITIH4    | 3  |
| ITIH5    | 80760  | ITIH5    | 10 |
| ITK      | 3702   | ITK      | 5  |
| ITLN2    | 142683 | ITLN2    | 1  |
| ITM2A    | 9452   | ITM2A    | X  |
| ITM2B    | 9445   | ITM2B    | 13 |
| ITM2C    | 81618  | ITM2C    | 2  |
| ITPA     | 3704   | ITPA     | 20 |
| ITPK1    | 3705   | ITPK1    | 14 |
| ITPKA    | 3706   | ITPKA    | 15 |
| ITPKB    | 3707   | ITPKB    | 1  |
| ITPR1    | 3708   | ITPR1    | 3  |
| ITPR2    | 3709   | ITPR2    | 12 |

|          |           |          |    |
|----------|-----------|----------|----|
| ITPR3    | 3710      | ITPR3    | 6  |
| ITPRIP   | 85450     | ITPRIP   | 10 |
| ITPRIPL1 | 150771    | ITPRIPL1 | 2  |
| ITPRIPL2 | 162073    | ITPRIPL2 | 16 |
| ITSN1    | 6453      | ITSN1    | 21 |
| IVD      | 3712      | IVD      | 15 |
| IVNS1ABP | 10625     | IVNS1ABP | 1  |
| IWS1     | 55677     | IWS1     | 2  |
| IZUMO1   | 284359    | IZUMO1   | 19 |
| JAG1     | 182       | JAG1     | 20 |
| JAG2     | 3714      | JAG2     | 14 |
| JAGN1    | 84522     | JAGN1    | 3  |
| JAK1     | 3716      | JAK1     | 1  |
| JAK2     | 3717      | JAK2     | 9  |
| JAKMIP2  | 9832      | JAKMIP2  | 5  |
| JAKMIP3  | 282973    | JAKMIP3  | 10 |
| JAM2     | 58494     | JAM2     | 21 |
| JAM3     | 83700     | JAM3     | 11 |
| JARID1A  | 5927      | JARID1A  | 12 |
| JARID1C  | 8242      | JARID1C  | X  |
| JARID1D  | 8284      | JARID1D  | Y  |
| JARID2   | 3720      | JARID2   | 6  |
| JAZF1    | 221895    | JAZF1    | 7  |
| JDP2     | 122953    | JDP2     | 14 |
| JHDM1D   | 80853     | JHDM1D   | 7  |
| JMJD1A   | 55818     | JMJD1A   | 2  |
| JMJD1C   | 221037    | JMJD1C   | 10 |
| JMJD2A   | 9682      | JMJD2A   | 1  |
| JMJD2B   | 23030     | JMJD2B   | 19 |
| JMJD4    | 65094     | JMJD4    | 1  |
| JMJD5    | 79831     | JMJD5    | 16 |
| JMJD6    | 23210     | JMJD6    | 17 |
| JMJD7    | 100137047 | JMJD7    | 15 |
| JMJD8    | 339123    | JMJD8    | 16 |
| JMY      | 133746    | JMY      | 5  |
| JOSD1    | 9929      | JOSD1    | 22 |
| JOSD2    | 126119    | JOSD2    | 19 |
| JPH1     | 56704     | JPH1     | 8  |
| JPH2     | 57158     | JPH2     | 20 |
| JPH3     | 57338     | JPH3     | 16 |
| JPH4     | 84502     | JPH4     | 14 |
| JRK      | 8629      | JRK      | 8  |
| JRKL     | 8690      | JRKL     | 11 |
| JSRP1    | 126306    | JSRP1    | 19 |



|         |        |         |    |
|---------|--------|---------|----|
| JTB     | 10899  | JTB     | 1  |
| JUN     | 3725   | JUN     | 1  |
| JUNB    | 3726   | JUNB    | 19 |
| JUND    | 3727   | JUND    | 19 |
| JUP     | 3728   | JUP     | 17 |
| KANK2   | 25959  | KANK2   | 19 |
| KANK3   | 256949 | KANK3   | 19 |
| KARS    | 3735   | KARS    | 16 |
| KAT2A   | 2648   | KAT2A   | 17 |
| KAT2B   | 8850   | KAT2B   | 3  |
| KAT5    | 10524  | KAT5    | 11 |
| KATNA1  | 11104  | KATNA1  | 6  |
| KATNAL1 | 84056  | KATNAL1 | 13 |
| KATNAL2 | 83473  | KATNAL2 | 18 |
| KATNB1  | 10300  | KATNB1  | 16 |
| KBTBD11 | 9920   | KBTBD11 | 8  |
| KBTBD12 | 166348 | KBTBD12 | 3  |
| KBTBD2  | 25948  | KBTBD2  | 7  |
| KBTBD3  | 143879 | KBTBD3  | 11 |
| KBTBD4  | 55709  | KBTBD4  | 11 |
| KBTBD5  | 131377 | KBTBD5  | 3  |
| KBTBD6  | 89890  | KBTBD6  | 13 |
| KBTBD8  | 84541  | KBTBD8  | 3  |
| KBTBD9  | 114818 | KBTBD9  | 2  |
| KCMF1   | 56888  | KCMF1   | 2  |
| KCNA7   | 3743   | KCNA7   | 19 |
| KCNAB2  | 8514   | KCNAB2  | 1  |
| KCNC3   | 3748   | KCNC3   | 19 |
| KCND2   | 3751   | KCND2   | 7  |
| KCNE1L  | 23630  | KCNE1L  | X  |
| KCNE2   | 9992   | KCNE2   | 21 |
| KCNG2   | 26251  | KCNG2   |    |
| KCNH3   | 23416  | KCNH3   | 12 |
| KCNH4   | 23415  | KCNH4   | 17 |
| KCNH6   | 81033  | KCNH6   | 17 |
| KCNIP2  | 30819  | KCNIP2  | 10 |
| KCNJ12  | 3768   | KCNJ12  | 17 |
| KCNJ16  | 3773   | KCNJ16  | 17 |
| KCNJ2   | 3759   | KCNJ2   | 17 |
| KCNJ4   | 3761   | KCNJ4   | 22 |
| KCNK12  | 56660  | KCNK12  | 2  |
| KCNK13  | 56659  | KCNK13  | 14 |
| KCNK18  | 338567 | KCNK18  | 10 |
| KCNK6   | 9424   | KCNK6   | 19 |

|          |           |          |    |
|----------|-----------|----------|----|
| KCNMB1   | 3779      | KCNMB1   | 5  |
| KCNMB2   | 10242     | KCNMB2   | 3  |
| KCNMB3   | 27094     | KCNMB3   | 3  |
| KCNMB4   | 27345     | KCNMB4   | 12 |
| KCNN3    | 3782      | KCNN3    | 1  |
| KCNN4    | 3783      | KCNN4    | 19 |
| KCNQ1OT1 | 10984     | KCNQ1OT1 | 11 |
| KCNQ2    | 3785      | KCNQ2    | 20 |
| KCNQ5    | 56479     | KCNQ5    | 6  |
| KCNS3    | 3790      | KCNS3    | 2  |
| KCTD10   | 83892     | KCTD10   | 12 |
| KCTD11   | 147040    | KCTD11   | 17 |
| KCTD13   | 253980    | KCTD13   | 16 |
| KCTD14   | 65987     | KCTD14   | 11 |
| KCTD15   | 79047     | KCTD15   | 19 |
| KCTD17   | 79734     | KCTD17   | 22 |
| KCTD18   | 130535    | KCTD18   | 2  |
| KCTD21   | 283219    | KCTD21   | 11 |
| KCTD3    | 51133     | KCTD3    | 1  |
| KCTD5    | 54442     | KCTD5    | 16 |
| KCTD6    | 200845    | KCTD6    | 3  |
| KCTD8    | 386617    | KCTD8    | 4  |
| KCTD9    | 54793     | KCTD9    | 8  |
| KDELC1   | 79070     | KDELC1   | 13 |
| KDELC2   | 143888    | KDELC2   | 11 |
| KDELR1   | 10945     | KDELR1   | 19 |
| KDELR2   | 11014     | KDELR2   | 7  |
| KDELR3   | 11015     | KDELR3   | 22 |
| KDM1B    | 221656    | KDM1B    | 6  |
| KDM2B    | 84678     | KDM2B    | 12 |
| KDM3B    | 51780     | KDM3B    | 5  |
| KDM5B    | 10765     | KDM5B    | 1  |
| KDSR     | 2531      | KDSR     | 18 |
| KEAP1    | 9817      | KEAP1    | 19 |
| KHDC1    | 80759     | KHDC1    | 6  |
| KHDC1L   | 100129128 | KHDC1L   | 6  |
| KHDRBS1  | 10657     | KHDRBS1  | 1  |
| KHDRBS2  | 202559    | KHDRBS2  | 6  |
| KHDRBS3  | 10656     | KHDRBS3  | 8  |
| KHK      | 3795      | KHK      | 2  |
| KHNYN    | 23351     | KHNYN    | 14 |
| KIAA0020 | 9933      | KIAA0020 | 9  |
| KIAA0040 | 9674      | KIAA0040 | 1  |
| KIAA0082 | 23070     | KIAA0082 | 6  |

|           |        |           |    |
|-----------|--------|-----------|----|
| KIAA0090  | 23065  | KIAA0090  | 1  |
| KIAA0100  | 9703   | KIAA0100  | 17 |
| KIAA0101  | 9768   | KIAA0101  | 15 |
| KIAA0114  | 57291  | KIAA0114  | 4  |
| KIAA0125  | 9834   | KIAA0125  | 14 |
| KIAA0133  | 9816   | KIAA0133  | 1  |
| KIAA0141  | 9812   | KIAA0141  | 5  |
| KIAA0146  | 23514  | KIAA0146  | 8  |
| KIAA0174  | 9798   | KIAA0174  | 16 |
| KIAA0182  | 23199  | KIAA0182  | 16 |
| KIAA0195  | 9772   | KIAA0195  | 17 |
| KIAA0196  | 9897   | KIAA0196  | 8  |
| KIAA0226  | 9711   | KIAA0226  | 3  |
| KIAA0232  | 9778   | KIAA0232  | 4  |
| KIAA0240  | 23506  | KIAA0240  | 6  |
| KIAA0247  | 9766   | KIAA0247  | 14 |
| KIAA0251  | 23042  | KIAA0251  |    |
| KIAA0258  | 9827   | KIAA0258  |    |
| KIAA0261  | 23063  | KIAA0261  | 10 |
| KIAA0284  | 283638 | KIAA0284  | 14 |
| KIAA0319  | 9856   | KIAA0319  | 6  |
| KIAA0319L | 79932  | KIAA0319L | 1  |
| KIAA0355  | 9710   | KIAA0355  | 19 |
| KIAA0363  | 23148  | KIAA0363  | 7  |
| KIAA0367  | 23273  | KIAA0367  | 9  |
| KIAA0368  | 23392  | KIAA0368  | 9  |
| KIAA0391  | 9692   | KIAA0391  | 14 |
| KIAA0406  | 9675   | KIAA0406  | 20 |
| KIAA0415  | 9907   | KIAA0415  | 7  |
| KIAA0427  | 9811   | KIAA0427  | 18 |
| KIAA0430  | 9665   | KIAA0430  | 16 |
| KIAA0460  | 23248  | KIAA0460  | 1  |
| KIAA0494  | 9813   | KIAA0494  | 1  |
| KIAA0495  | 57212  | KIAA0495  | 1  |
| KIAA0513  | 9764   | KIAA0513  | 16 |
| KIAA0528  | 9847   | KIAA0528  | 12 |
| KIAA0556  | 23247  | KIAA0556  | 16 |
| KIAA0562  | 9731   | KIAA0562  | 1  |
| KIAA0564  | 23078  | KIAA0564  | 13 |
| KIAA0586  | 9786   | KIAA0586  | 14 |
| KIAA0649  | 9858   | KIAA0649  | 9  |
| KIAA0664  | 23277  | KIAA0664  | 17 |
| KIAA0672  | 9912   | KIAA0672  | 17 |
| KIAA0748  | 9840   | KIAA0748  | 12 |

|           |        |           |    |
|-----------|--------|-----------|----|
| KIAA0753  | 9851   | KIAA0753  | 17 |
| KIAA0773  | 9715   | KIAA0773  | 7  |
| KIAA0831  | 22863  | KIAA0831  | 14 |
| KIAA0888  | 26049  | KIAA0888  |    |
| KIAA0889  | 25781  | KIAA0889  | 20 |
| KIAA0892  | 23383  | KIAA0892  | 19 |
| KIAA0895  | 23366  | KIAA0895  | 7  |
| KIAA0895L | 653319 | KIAA0895L | 16 |
| KIAA0907  | 22889  | KIAA0907  | 1  |
| KIAA0913  | 23053  | KIAA0913  | 10 |
| KIAA0922  | 23240  | KIAA0922  | 4  |
| KIAA0947  | 23379  | KIAA0947  |    |
| KIAA1009  | 22832  | KIAA1009  | 6  |
| KIAA1012  | 22878  | KIAA1012  | 18 |
| KIAA1026  | 23254  | KIAA1026  | 1  |
| KIAA1033  | 23325  | KIAA1033  | 12 |
| KIAA1086  | 23217  | KIAA1086  |    |
| KIAA1128  | 54462  | KIAA1128  | 10 |
| KIAA1143  | 57456  | KIAA1143  | 3  |
| KIAA1147  | 57189  | KIAA1147  | 7  |
| KIAA1160  | 57461  | KIAA1160  |    |
| KIAA1161  | 57462  | KIAA1161  | 9  |
| KIAA1191  | 57179  | KIAA1191  | 5  |
| KIAA1199  | 57214  | KIAA1199  | 15 |
| KIAA1202  | 57477  | KIAA1202  | X  |
| KIAA1210  | 57481  | KIAA1210  | X  |
| KIAA1211  | 57482  | KIAA1211  |    |
| KIAA1239  | 57495  | KIAA1239  |    |
| KIAA1245  | 149013 | KIAA1245  |    |
| KIAA1257  | 57501  | KIAA1257  |    |
| KIAA1267  | 284058 | KIAA1267  | 17 |
| KIAA1271  | 57506  | KIAA1271  | 20 |
| KIAA1274  | 27143  | KIAA1274  | 10 |
| KIAA1279  | 26128  | KIAA1279  | 10 |
| KIAA1285  | 27153  | KIAA1285  | 7  |
| KIAA1310  | 55683  | KIAA1310  | 2  |
| KIAA1324  | 57535  | KIAA1324  | 1  |
| KIAA1324L | 222223 | KIAA1324L | 7  |
| KIAA1328  | 57536  | KIAA1328  | 18 |
| KIAA1333  | 55632  | KIAA1333  | 14 |
| KIAA1370  | 56204  | KIAA1370  | 15 |
| KIAA1377  | 57562  | KIAA1377  | 11 |
| KIAA1407  | 57577  | KIAA1407  | 3  |
| KIAA1429  | 25962  | KIAA1429  | 8  |

|          |        |          |    |
|----------|--------|----------|----|
| KIAA1430 | 57587  | KIAA1430 | 4  |
| KIAA1467 | 57613  | KIAA1467 | 12 |
| KIAA1468 | 57614  | KIAA1468 | 18 |
| KIAA1522 | 57648  | KIAA1522 | 1  |
| KIAA1524 | 57650  | KIAA1524 | 3  |
| KIAA1530 | 57654  | KIAA1530 |    |
| KIAA1539 | 80256  | KIAA1539 | 9  |
| KIAA1543 | 57662  | KIAA1543 |    |
| KIAA1545 | 57666  | KIAA1545 | 12 |
| KIAA1549 | 57670  | KIAA1549 | 7  |
| KIAA1553 | 57673  | KIAA1553 | 6  |
| KIAA1586 | 57691  | KIAA1586 | 6  |
| KIAA1598 | 57698  | KIAA1598 | 10 |
| KIAA1600 | 57700  | KIAA1600 | 10 |
| KIAA1602 | 57701  | KIAA1602 | 12 |
| KIAA1609 | 57707  | KIAA1609 | 16 |
| KIAA1618 | 57714  | KIAA1618 | 17 |
| KIAA1632 | 57724  | KIAA1632 | 18 |
| KIAA1641 | 57730  | KIAA1641 |    |
| KIAA1666 | 85376  | KIAA1666 | 22 |
| KIAA1671 | 85379  | KIAA1671 | 22 |
| KIAA1683 | 80726  | KIAA1683 | 19 |
| KIAA1688 | 80728  | KIAA1688 | 8  |
| KIAA1712 | 80817  | KIAA1712 | 4  |
| KIAA1715 | 80856  | KIAA1715 | 2  |
| KIAA1731 | 85459  | KIAA1731 | 11 |
| KIAA1737 | 85457  | KIAA1737 | 14 |
| KIAA1751 | 85452  | KIAA1751 | 1  |
| KIAA1797 | 54914  | KIAA1797 | 9  |
| KIAA1804 | 84451  | KIAA1804 | 1  |
| KIAA1826 | 84437  | KIAA1826 | 11 |
| KIAA1843 | 84540  | KIAA1843 |    |
| KIAA1862 | 84626  | KIAA1862 | 7  |
| KIAA1875 | 340390 | KIAA1875 | 8  |
| KIAA1881 | 114782 | KIAA1881 |    |
| KIAA1908 | 114796 | KIAA1908 |    |
| KIAA1922 | 114819 | KIAA1922 |    |
| KIAA1949 | 170954 | KIAA1949 | 6  |
| KIAA1958 | 158405 | KIAA1958 | 9  |
| KIAA1967 | 57805  | KIAA1967 | 8  |
| KIAA1975 | 119385 | KIAA1975 | 10 |
| KIAA1984 | 84960  | KIAA1984 | 9  |
| KIAA2010 | 55671  | KIAA2010 | 14 |
| KIAA2013 | 90231  | KIAA2013 | 1  |

|           |           |           |    |
|-----------|-----------|-----------|----|
| KIAA2018  | 205717    | KIAA2018  | 3  |
| KIAA2022  | 340533    | KIAA2022  | X  |
| KIAA2026  | 158358    | KIAA2026  | 9  |
| KIDINS220 | 57498     | KIDINS220 | 2  |
| KIF11     | 3832      | KIF11     | 10 |
| KIF13A    | 63971     | KIF13A    | 6  |
| KIF13B    | 23303     | KIF13B    | 8  |
| KIF14     | 9928      | KIF14     | 1  |
| KIF15     | 56992     | KIF15     | 3  |
| KIF16B    | 55614     | KIF16B    | 20 |
| KIF18A    | 81930     | KIF18A    | 11 |
| KIF18B    | 146909    | KIF18B    | 17 |
| KIF19     | 124602    | KIF19     |    |
| KIF1A     | 547       | KIF1A     | 2  |
| KIF1B     | 23095     | KIF1B     | 1  |
| KIF1C     | 10749     | KIF1C     | 17 |
| KIF20A    | 10112     | KIF20A    | 5  |
| KIF20B    | 9585      | KIF20B    | 10 |
| KIF21A    | 55605     | KIF21A    | 12 |
| KIF22     | 3835      | KIF22     | 16 |
| KIF23     | 9493      | KIF23     | 15 |
| KIF24     | 347240    | KIF24     | 9  |
| KIF26B    | 55083     | KIF26B    | 1  |
| KIF2A     | 3796      | KIF2A     | 5  |
| KIF2C     | 11004     | KIF2C     | 1  |
| KIF3A     | 11127     | KIF3A     | 5  |
| KIF3B     | 9371      | KIF3B     | 20 |
| KIF3C     | 3797      | KIF3C     | 2  |
| KIF4A     | 24137     | KIF4A     | X  |
| KIF5B     | 3799      | KIF5B     | 10 |
| KIF5C     | 3800      | KIF5C     | 2  |
| KIF7      | 374654    | KIF7      | 15 |
| KIF9      | 64147     | KIF9      | 3  |
| KIFAP3    | 22920     | KIFAP3    | 1  |
| KIFC1     | 3833      | KIFC1     | 6  |
| KIFC2     | 90990     | KIFC2     | 8  |
| KIFC3     | 3801      | KIFC3     | 16 |
| KILLIN    | 100144748 | KILLIN    | 10 |
| KIR2DL5B  | 553128    | KIR2DL5B  | 19 |
| KIR3DL1   | 3811      | KIR3DL1   | 19 |
| KIR3DL2   | 3812      | KIR3DL2   | 19 |
| KIRREL2   | 84063     | KIRREL2   | 19 |
| KISS1R    | 84634     | KISS1R    | 19 |
| KLB       | 152831    | KLB       | 4  |

|         |        |         |    |
|---------|--------|---------|----|
| KLC1    | 3831   | KLC1    | 14 |
| KLC3    | 147700 | KLC3    | 19 |
| KLF10   | 7071   | KLF10   | 8  |
| KLF12   | 11278  | KLF12   | 13 |
| KLF13   | 51621  | KLF13   | 15 |
| KLF2    | 10365  | KLF2    | 19 |
| KLF5    | 688    | KLF5    | 13 |
| KLF6    | 1316   | KLF6    | 10 |
| KLF7    | 8609   | KLF7    | 2  |
| KLF9    | 687    | KLF9    | 9  |
| KLHDC10 | 23008  | KLHDC10 | 7  |
| KLHDC2  | 23588  | KLHDC2  | 14 |
| KLHDC3  | 116138 | KLHDC3  | 6  |
| KLHDC4  | 54758  | KLHDC4  | 16 |
| KLHDC5  | 57542  | KLHDC5  | 12 |
| KLHDC7B | 113730 | KLHDC7B | 22 |
| KLHDC8B | 200942 | KLHDC8B | 3  |
| KLHDC9  | 126823 | KLHDC9  | 1  |
| KLHL1   | 57626  | KLHL1   | 13 |
| KLHL12  | 59349  | KLHL12  | 1  |
| KLHL13  | 90293  | KLHL13  | X  |
| KLHL14  | 57565  | KLHL14  | 18 |
| KLHL15  | 80311  | KLHL15  | X  |
| KLHL17  | 339451 | KLHL17  | 1  |
| KLHL18  | 23276  | KLHL18  | 3  |
| KLHL2   | 11275  | KLHL2   | 4  |
| KLHL20  | 27252  | KLHL20  | 1  |
| KLHL21  | 9903   | KLHL21  | 1  |
| KLHL22  | 84861  | KLHL22  | 22 |
| KLHL23  | 151230 | KLHL23  | 2  |
| KLHL24  | 54800  | KLHL24  | 3  |
| KLHL25  | 64410  | KLHL25  | 15 |
| KLHL26  | 55295  | KLHL26  | 19 |
| KLHL28  | 54813  | KLHL28  | 14 |
| KLHL29  | 114818 | KLHL29  | 2  |
| KLHL3   | 26249  | KLHL3   | 5  |
| KLHL30  | 377007 | KLHL30  | 2  |
| KLHL32  | 114792 | KLHL32  |    |
| KLHL36  | 79786  | KLHL36  | 16 |
| KLHL38  | 340359 | KLHL38  | 8  |
| KLHL4   | 56062  | KLHL4   | X  |
| KLHL5   | 51088  | KLHL5   | 4  |
| KLHL6   | 89857  | KLHL6   | 3  |
| KLHL7   | 55975  | KLHL7   | 7  |

|            |        |            |    |
|------------|--------|------------|----|
| KLHL9      | 55958  | KLHL9      | 9  |
| KLK1       | 3816   | KLK1       | 19 |
| KLK14      | 43847  | KLK14      | 19 |
| KLK4       | 9622   | KLK4       | 19 |
| KLRA1      | 10748  | KLRA1      | 12 |
| KLRAQ1     | 129285 | KLRAQ1     | 2  |
| KLRC2      | 3822   | KLRC2      | 12 |
| KLRK1      | 22914  | KLRK1      | 12 |
| KMO        | 8564   | KMO        | 1  |
| KNTC1      | 9735   | KNTC1      | 12 |
| KPNA1      | 3836   | KPNA1      | 3  |
| KPNA2      | 3838   | KPNA2      | 17 |
| KPNA3      | 3839   | KPNA3      | 13 |
| KPNA4      | 3840   | KPNA4      | 3  |
| KPNA5      | 3841   | KPNA5      | 6  |
| KPNA6      | 23633  | KPNA6      | 1  |
| KPNA7      | 402569 | KPNA7      |    |
| KPNB1      | 3837   | KPNB1      | 17 |
| KPTN       | 11133  | KPTN       | 19 |
| KRBA1      | 84626  | KRBA1      | 7  |
| KRCC1      | 51315  | KRCC1      | 2  |
| KREMEN2    | 79412  | KREMEN2    | 16 |
| KRI1       | 65095  | KRI1       | 19 |
| KRIT1      | 889    | KRIT1      | 7  |
| KRR1       | 11103  | KRR1       | 12 |
| KRT10      | 3858   | KRT10      | 17 |
| KRT12      | 3859   | KRT12      | 17 |
| KRT18      | 3875   | KRT18      | 12 |
| KRT18P17   | 344866 | KRT18P17   |    |
| KRT18P30   | 643858 | KRT18P30   | 6  |
| KRT18P50   | 442236 | KRT18P50   |    |
| KRT19      | 3880   | KRT19      | 17 |
| KRT20      | 54474  | KRT20      | 17 |
| KRT23      | 25984  | KRT23      | 17 |
| KRT25      | 147183 | KRT25      | 17 |
| KRT27      | 342574 | KRT27      | 17 |
| KRT76      | 51350  | KRT76      | 12 |
| KRT79      | 338785 | KRT79      | 12 |
| KRT8       | 3856   | KRT8       | 12 |
| KRT81      | 3887   | KRT81      | 12 |
| KRT86      | 3892   | KRT86      | 12 |
| KRT9       | 3857   | KRT9       | 17 |
| KRTAP10-1  | 386677 | KRTAP10-1  | 21 |
| KRTAP10-11 | 386678 | KRTAP10-11 | 21 |



|           |           |           |    |
|-----------|-----------|-----------|----|
| KRTAP10-3 | 386682    | KRTAP10-3 | 21 |
| KRTAP10-9 | 386676    | KRTAP10-9 | 21 |
| KRTAP13-3 | 337960    | KRTAP13-3 | 21 |
| KRTAP19-1 | 337882    | KRTAP19-1 | 21 |
| KRTAP19-2 | 337969    | KRTAP19-2 | 21 |
| KRTAP19-6 | 337973    | KRTAP19-6 | 21 |
| KRTAP20-1 | 337975    | KRTAP20-1 | 21 |
| KRTAP21-3 | 100288323 | KRTAP21-3 |    |
| KRTAP4-11 | 85282     | KRTAP4-11 | 17 |
| KRTAP4-4  | 84616     | KRTAP4-4  | 17 |
| KRTAP5-11 | 440051    | KRTAP5-11 | 11 |
| KRTAP6-3  | 337968    | KRTAP6-3  | 21 |
| KRTAP7-1  | 337878    | KRTAP7-1  | 21 |
| KRTAP9-4  | 85280     | KRTAP9-4  | 17 |
| KRTAP9-8  | 83901     | KRTAP9-8  |    |
| KTELC1    | 56983     | KTELC1    | 3  |
| KTI12     | 112970    | KTI12     | 1  |
| KTN1      | 3895      | KTN1      | 14 |
| KY        | 339855    | KY        | 3  |
| KYNU      | 8942      | KYNU      | 2  |
| L2HGDH    | 79944     | L2HGDH    | 14 |
| L3MBTL    | 26013     | L3MBTL    | 20 |
| L3MBTL2   | 83746     | L3MBTL2   | 22 |
| L3MBTL3   | 84456     | L3MBTL3   | 6  |
| LACTB     | 114294    | LACTB     | 15 |
| LACTB2    | 51110     | LACTB2    | 8  |
| LAG3      | 3902      | LAG3      | 12 |
| LAGE3     | 8270      | LAGE3     | X  |
| LAIR1     | 3903      | LAIR1     | 19 |
| LAIR2     | 3904      | LAIR2     | 19 |
| LAMA3     | 3909      | LAMA3     | 18 |
| LAMA5     | 3911      | LAMA5     | 20 |
| LAMB1     | 3912      | LAMB1     | 7  |
| LAMB2L    | 22973     | LAMB2L    | 3  |
| LAMB4     | 22798     | LAMB4     | 7  |
| LAMC1     | 3915      | LAMC1     | 1  |
| LAMC3     | 10319     | LAMC3     | 9  |
| LAMP1     | 3916      | LAMP1     | 13 |
| LAMP2     | 3920      | LAMP2     | X  |
| LAMP3     | 27074     | LAMP3     | 3  |
| LANCL1    | 10314     | LANCL1    | 2  |
| LANCL2    | 55915     | LANCL2    | 7  |
| LAP3      | 51056     | LAP3      | 4  |
| LAPTM4A   | 9741      | LAPTM4A   | 2  |

|         |        |         |    |
|---------|--------|---------|----|
| LAPTM4B | 55353  | LAPTM4B | 8  |
| LAPTM5  | 7805   | LAPTM5  | 1  |
| LARGE   | 9215   | LARGE   | 22 |
| LARP1B  | 55132  | LARP1B  | 4  |
| LARP4   | 113251 | LARP4   | 12 |
| LARP4B  | 23185  | LARP4B  | 10 |
| LARP6   | 55323  | LARP6   | 15 |
| LARP7   | 51574  | LARP7   | 4  |
| LARS    | 51520  | LARS    | 5  |
| LARS2   | 23395  | LARS2   | 3  |
| LAS1L   | 81887  | LAS1L   | X  |
| LASP1   | 3927   | LASP1   | 17 |
| LASS1   | 10715  | LASS1   | 19 |
| LASS2   | 29956  | LASS2   | 1  |
| LASS4   | 79603  | LASS4   | 19 |
| LASS5   | 91012  | LASS5   | 12 |
| LASS6   | 253782 | LASS6   | 2  |
| LAT2    | 7462   | LAT2    | 7  |
| LATS2   | 26524  | LATS2   | 13 |
| LAX1    | 54900  | LAX1    | 1  |
| LAYN    | 143903 | LAYN    | 11 |
| LBA1    | 9881   | LBA1    | 3  |
| LBH     | 81606  | LBH     |    |
| LBR     | 3930   | LBR     | 1  |
| LCA5L   | 150082 | LCA5L   | 21 |
| LCAT    | 3931   | LCAT    | 16 |
| LCE1C   | 353133 | LCE1C   | 1  |
| LCE2B   | 26239  | LCE2B   | 1  |
| LCE5A   | 254910 | LCE5A   | 1  |
| LCK     | 3932   | LCK     | 1  |
| LCMT1   | 51451  | LCMT1   | 16 |
| LCMT2   | 9836   | LCMT2   | 15 |
| LCN2    | 3934   | LCN2    | 9  |
| LCOR    | 84458  | LCOR    | 10 |
| LCP1    | 3936   | LCP1    | 13 |
| LCT     | 3938   | LCT     | 2  |
| LDB1    | 8861   | LDB1    | 10 |
| LDHA    | 3939   | LDHA    | 11 |
| LDHB    | 3945   | LDHB    | 12 |
| LDHD    | 197257 | LDHD    | 16 |
| LDLR    | 3949   | LDLR    | 19 |
| LDLRAD2 | 401944 | LDLRAD2 | 1  |
| LDLRAP1 | 26119  | LDLRAP1 | 1  |
| LEAP2   | 116842 | LEAP2   | 5  |

|          |        |          |    |
|----------|--------|----------|----|
| LEAP-2   | 116842 | LEAP-2   | 5  |
| LEF1     | 51176  | LEF1     | 4  |
| LEFTY1   | 10637  | LEFTY1   | 1  |
| LEMD1    | 93273  | LEMD1    | 1  |
| LEMD2    | 221496 | LEMD2    | 6  |
| LEMD3    | 23592  | LEMD3    | 12 |
| LENG1    | 79165  | LENG1    | 19 |
| LEO1     | 123169 | LEO1     | 15 |
| LEP      | 3952   | LEP      | 7  |
| LEPRE1   | 64175  | LEPRE1   | 1  |
| LEPREL1  | 55214  | LEPREL1  | 3  |
| LEPROT   | 54741  | LEPROT   | 1  |
| LEPROTL1 | 23484  | LEPROTL1 | 8  |
| LETM1    | 3954   | LETM1    | 4  |
| LETMD1   | 25875  | LETMD1   | 12 |
| LFNG     | 3955   | LFNG     | 7  |
| LGALS1   | 3956   | LGALS1   | 22 |
| LGALS14  | 56891  | LGALS14  | 19 |
| LGALS3   | 3958   | LGALS3   | 14 |
| LGALS3BP | 3959   | LGALS3BP | 17 |
| LGALS7   | 3963   | LGALS7   | 19 |
| LGALS7B  | 653499 | LGALS7B  | 19 |
| LGALS8   | 3964   | LGALS8   | 1  |
| LGALS9   | 3965   | LGALS9   | 17 |
| LGI1     | 9211   | LGI1     | 10 |
| LGMN     | 5641   | LGMN     | 14 |
| LGR5     | 8549   | LGR5     | 12 |
| LGR6     | 59352  | LGR6     | 1  |
| LGTN     | 1939   | LGTN     | 1  |
| LHFP     | 10186  | LHFP     | 13 |
| LHFPL2   | 10184  | LHFPL2   | 5  |
| LHPP     | 64077  | LHPP     | 10 |
| LHX2     | 9355   | LHX2     | 9  |
| LHX4     | 89884  | LHX4     | 1  |
| LHX6     | 26468  | LHX6     | 9  |
| LIAS     | 11019  | LIAS     | 4  |
| LIFR     | 3977   | LIFR     | 5  |
| LIG1     | 3978   | LIG1     | 19 |
| LIG3     | 3980   | LIG3     | 17 |
| LIG4     | 3981   | LIG4     | 13 |
| LILRA3   | 11026  | LILRA3   | 19 |
| LILRA5   | 353514 | LILRA5   | 19 |
| LILRB1   | 10859  | LILRB1   | 19 |
| LILRB2   | 10288  | LILRB2   | 19 |

|        |        |        |    |
|--------|--------|--------|----|
| LILRB3 | 11025  | LILRB3 | 19 |
| LILRB5 | 10990  | LILRB5 | 19 |
| LIMA1  | 51474  | LIMA1  | 12 |
| LIME1  | 54923  | LIME1  | 20 |
| LIMS1  | 3987   | LIMS1  |    |
| LIN28B | 389421 | LIN28B | 6  |
| LIN37  | 55957  | LIN37  | 19 |
| LIN52  | 91750  | LIN52  | 14 |
| LIN54  | 132660 | LIN54  | 4  |
| LIN7A  | 8825   | LIN7A  | 12 |
| LIN7B  | 64130  | LIN7B  | 19 |
| LIN7C  | 55327  | LIN7C  | 11 |
| LIN9   | 286826 | LIN9   | 1  |
| LINS1  | 55180  | LINS1  | 15 |
| LIPA   | 3988   | LIPA   | 10 |
| LIPE   | 3991   | LIPE   | 19 |
| LIPF   | 8513   | LIPF   | 10 |
| LIPI   | 149998 | LIPI   | 21 |
| LIPJ   | 142910 | LIPJ   | 10 |
| LIPL2  | 643414 | LIPL2  |    |
| LIPT1  | 51601  | LIPT1  | 2  |
| LITAF  | 9516   | LITAF  | 16 |
| LIX1L  | 128077 | LIX1L  | 1  |
| LLGL1  | 3996   | LLGL1  | 17 |
| LLGL2  | 3993   | LLGL2  |    |
| LLPH   | 84298  | LLPH   | 12 |
| LMAN1  | 3998   | LMAN1  | 18 |
| LMAN2  | 10960  | LMAN2  | 5  |
| LMAN2L | 81562  | LMAN2L | 2  |
| LMBR1  | 64327  | LMBR1  | 7  |
| LMBR1L | 55716  | LMBR1L | 12 |
| LMBRD1 | 55788  | LMBRD1 | 6  |
| LMBRD2 | 92255  | LMBRD2 | 5  |
| LMCD1  | 29995  | LMCD1  | 3  |
| LMF1   | 64788  | LMF1   | 16 |
| LMF2   | 91289  | LMF2   | 22 |
| LMLN   | 89782  | LMLN   | 3  |
| LMNA   | 4000   | LMNA   | 1  |
| LMNB1  | 4001   | LMNB1  | 5  |
| LMNB2  | 84823  | LMNB2  | 19 |
| LMO2   | 4005   | LMO2   | 11 |
| LMO3   | 55885  | LMO3   | 12 |
| LMO4   | 8543   | LMO4   | 1  |
| LMOD3  | 56203  | LMOD3  | 3  |

|              |           |              |    |
|--------------|-----------|--------------|----|
| LMTK2        | 22853     | LMTK2        | 7  |
| LMTK3        | 114783    | LMTK3        |    |
| LMX1B        | 4010      | LMX1B        | 9  |
| LNPEP        | 4012      | LNPEP        | 5  |
| LN2          | 222484    | LN2          | 13 |
| LOC100008588 | 100008588 | LOC100008588 |    |
| LOC100008589 | 100008589 | LOC100008589 |    |
| LOC100009676 | 100009676 | LOC100009676 | 3  |
| LOC100034248 | 100034248 | LOC100034248 |    |
| LOC100093631 | 100093631 | LOC100093631 | 7  |
| LOC100101266 | 100101266 | LOC100101266 | 19 |
| LOC100124692 | 100124692 | LOC100124692 | 7  |
| LOC100125556 | 100125556 | LOC100125556 | 3  |
| LOC100127887 | 100127887 | LOC100127887 |    |
| LOC100127891 | 100127891 | LOC100127891 |    |
| LOC100127918 | 100127918 | LOC100127918 |    |
| LOC100127922 | 100127922 | LOC100127922 | 5  |
| LOC100127944 | 100127944 | LOC100127944 | 5  |
| LOC100127951 | 100127951 | LOC100127951 |    |
| LOC100127952 | 100127952 | LOC100127952 |    |
| LOC100127971 | 100127971 | LOC100127971 | 12 |
| LOC100127974 | 100127974 | LOC100127974 |    |
| LOC100127975 | 100127975 | LOC100127975 |    |
| LOC100127982 | 100127982 | LOC100127982 |    |
| LOC100127983 | 100127983 | LOC100127983 |    |
| LOC100127999 | 100127999 | LOC100127999 | 9  |
| LOC100128007 | 100128007 | LOC100128007 |    |
| LOC100128016 | 100128016 | LOC100128016 |    |
| LOC100128028 | 100128028 | LOC100128028 |    |
| LOC100128055 | 100128055 | LOC100128055 | 4  |
| LOC100128056 | 100128056 | LOC100128056 |    |
| LOC100128062 | 100128062 | LOC100128062 |    |
| LOC100128081 | 100128081 | LOC100128081 |    |
| LOC100128083 | 100128083 | LOC100128083 |    |
| LOC100128084 | 100128084 | LOC100128084 |    |
| LOC100128086 | 100128086 | LOC100128086 |    |
| LOC100128096 | 100128096 | LOC100128096 |    |
| LOC100128098 | 100128098 | LOC100128098 | 10 |
| LOC100128115 | 100128115 | LOC100128115 |    |
| LOC100128126 | 100128126 | LOC100128126 | 8  |
| LOC100128163 | 100128163 | LOC100128163 |    |
| LOC100128174 | 100128174 | LOC100128174 |    |
| LOC100128191 | 100128191 | LOC100128191 |    |
| LOC100128193 | 100128193 | LOC100128193 |    |

|              |           |              |    |
|--------------|-----------|--------------|----|
| LOC100128196 | 100128196 | LOC100128196 | 2  |
| LOC100128202 | 100128202 | LOC100128202 | 13 |
| LOC100128203 | 100128203 | LOC100128203 | 2  |
| LOC100128221 | 100128221 | LOC100128221 |    |
| LOC100128256 | 100128256 | LOC100128256 | 18 |
| LOC100128266 | 100128266 | LOC100128266 |    |
| LOC100128269 | 100128269 | LOC100128269 |    |
| LOC100128274 | 100128274 | LOC100128274 | 9  |
| LOC100128283 | 100128283 | LOC100128283 | 17 |
| LOC100128288 | 100128288 | LOC100128288 | 17 |
| LOC100128291 | 100128291 | LOC100128291 |    |
| LOC100128295 | 100128295 | LOC100128295 | 10 |
| LOC100128300 | 100128300 | LOC100128300 |    |
| LOC100128304 | 100128304 | LOC100128304 |    |
| LOC100128309 | 100128309 | LOC100128309 | 10 |
| LOC100128326 | 100128326 | LOC100128326 |    |
| LOC100128337 | 100128337 | LOC100128337 | 13 |
| LOC100128353 | 100128353 | LOC100128353 |    |
| LOC100128354 | 100128354 | LOC100128354 | 11 |
| LOC100128374 | 100128374 | LOC100128374 |    |
| LOC100128389 | 100128389 | LOC100128389 |    |
| LOC100128398 | 100128398 | LOC100128398 |    |
| LOC100128403 | 100128403 | LOC100128403 |    |
| LOC100128410 | 100128410 | LOC100128410 | X  |
| LOC100128419 | 100128419 | LOC100128419 |    |
| LOC100128425 | 100128425 | LOC100128425 |    |
| LOC100128432 | 100128432 | LOC100128432 |    |
| LOC100128435 | 100128435 | LOC100128435 |    |
| LOC100128440 | 100128440 | LOC100128440 |    |
| LOC100128460 | 100128460 | LOC100128460 | 4  |
| LOC100128461 | 100128461 | LOC100128461 |    |
| LOC100128469 | 100128469 | LOC100128469 |    |
| LOC100128477 | 100128477 | LOC100128477 |    |
| LOC100128505 | 100128505 | LOC100128505 |    |
| LOC100128507 | 100128507 | LOC100128507 |    |
| LOC100128525 | 100128525 | LOC100128525 |    |
| LOC100128533 | 100128533 | LOC100128533 |    |
| LOC100128547 | 100128547 | LOC100128547 |    |
| LOC100128573 | 100128573 | LOC100128573 | 19 |
| LOC100128585 | 100128585 | LOC100128585 | 1  |
| LOC100128627 | 100128627 | LOC100128627 | 8  |
| LOC100128647 | 100128647 | LOC100128647 |    |
| LOC100128653 | 100128653 | LOC100128653 |    |
| LOC100128666 | 100128666 | LOC100128666 |    |

|              |           |              |    |
|--------------|-----------|--------------|----|
| LOC100128667 | 100128667 | LOC100128667 | 14 |
| LOC100128682 | 100128682 | LOC100128682 |    |
| LOC100128689 | 100128689 | LOC100128689 | 8  |
| LOC100128691 | 100128691 | LOC100128691 |    |
| LOC100128695 | 100128695 | LOC100128695 |    |
| LOC100128731 | 100128731 | LOC100128731 | 2  |
| LOC100128737 | 100128737 | LOC100128737 | 7  |
| LOC100128746 | 100128746 | LOC100128746 | 1  |
| LOC100128760 | 100128760 | LOC100128760 |    |
| LOC100128765 | 100128765 | LOC100128765 | 13 |
| LOC100128771 | 100128771 | LOC100128771 | 9  |
| LOC100128775 | 100128775 | LOC100128775 | 1  |
| LOC100128781 | 100128781 | LOC100128781 | 14 |
| LOC100128805 | 100128805 | LOC100128805 |    |
| LOC100128816 | 100128816 | LOC100128816 |    |
| LOC100128836 | 100128836 | LOC100128836 |    |
| LOC100128853 | 100128853 | LOC100128853 |    |
| LOC100128857 | 100128857 | LOC100128857 | 2  |
| LOC100128862 | 100128862 | LOC100128862 | 16 |
| LOC100128869 | 100128869 | LOC100128869 |    |
| LOC100128881 | 100128881 | LOC100128881 | 16 |
| LOC100128883 | 100128883 | LOC100128883 |    |
| LOC100128895 | 100128895 | LOC100128895 | 12 |
| LOC100128899 | 100128899 | LOC100128899 | 2  |
| LOC100128901 | 100128901 | LOC100128901 |    |
| LOC100128908 | 100128908 | LOC100128908 | 14 |
| LOC100128909 | 100128909 | LOC100128909 | 9  |
| LOC100128918 | 100128918 | LOC100128918 |    |
| LOC100128936 | 100128936 | LOC100128936 |    |
| LOC100128956 | 100128956 | LOC100128956 |    |
| LOC100128975 | 100128975 | LOC100128975 | 19 |
| LOC100128977 | 100128977 | LOC100128977 | 17 |
| LOC100128988 | 100128988 | LOC100128988 |    |
| LOC100128994 | 100128994 | LOC100128994 |    |
| LOC100129021 | 100129021 | LOC100129021 |    |
| LOC100129022 | 100129022 | LOC100129022 | 12 |
| LOC100129027 | 100129027 | LOC100129027 |    |
| LOC100129034 | 100129034 | LOC100129034 |    |
| LOC100129038 | 100129038 | LOC100129038 |    |
| LOC100129064 | 100129064 | LOC100129064 |    |
| LOC100129066 | 100129066 | LOC100129066 | 9  |
| LOC100129067 | 100129067 | LOC100129067 | 11 |
| LOC100129076 | 100129076 | LOC100129076 |    |
| LOC100129083 | 100129083 | LOC100129083 |    |

|              |           |              |    |
|--------------|-----------|--------------|----|
| LOC100129101 | 100129101 | LOC100129101 |    |
| LOC100129104 | 100129104 | LOC100129104 |    |
| LOC100129118 | 100129118 | LOC100129118 | 19 |
| LOC100129122 | 100129122 | LOC100129122 | 13 |
| LOC100129129 | 100129129 | LOC100129129 |    |
| LOC100129144 | 100129144 | LOC100129144 |    |
| LOC100129147 | 100129147 | LOC100129147 | 6  |
| LOC100129148 | 100129148 | LOC100129148 |    |
| LOC100129169 | 100129169 | LOC100129169 | 2  |
| LOC100129191 | 100129191 | LOC100129191 | 16 |
| LOC100129201 | 100129201 | LOC100129201 |    |
| LOC100129203 | 100129203 | LOC100129203 |    |
| LOC100129206 | 100129206 | LOC100129206 | 11 |
| LOC100129211 | 100129211 | LOC100129211 | 9  |
| LOC100129213 | 100129213 | LOC100129213 |    |
| LOC100129214 | 100129214 | LOC100129214 |    |
| LOC100129218 | 100129218 | LOC100129218 |    |
| LOC100129226 | 100129226 | LOC100129226 |    |
| LOC100129236 | 100129236 | LOC100129236 | X  |
| LOC100129237 | 100129237 | LOC100129237 |    |
| LOC100129239 | 100129239 | LOC100129239 | X  |
| LOC100129243 | 100129243 | LOC100129243 |    |
| LOC100129267 | 100129267 | LOC100129267 |    |
| LOC100129268 | 100129268 | LOC100129268 |    |
| LOC100129269 | 100129269 | LOC100129269 |    |
| LOC100129282 | 100129282 | LOC100129282 | 3  |
| LOC100129285 | 100129285 | LOC100129285 |    |
| LOC100129297 | 100129297 | LOC100129297 |    |
| LOC100129303 | 100129303 | LOC100129303 |    |
| LOC100129334 | 100129334 | LOC100129334 |    |
| LOC100129342 | 100129342 | LOC100129342 | 1  |
| LOC100129343 | 100129343 | LOC100129343 |    |
| LOC100129354 | 100129354 | LOC100129354 | 3  |
| LOC100129361 | 100129361 | LOC100129361 |    |
| LOC100129362 | 100129362 | LOC100129362 |    |
| LOC100129365 | 100129365 | LOC100129365 |    |
| LOC100129379 | 100129379 | LOC100129379 | 9  |
| LOC100129386 | 100129386 | LOC100129386 |    |
| LOC100129390 | 100129390 | LOC100129390 | 13 |
| LOC100129424 | 100129424 | LOC100129424 |    |
| LOC100129426 | 100129426 | LOC100129426 | 4  |
| LOC100129441 | 100129441 | LOC100129441 |    |
| LOC100129455 | 100129455 | LOC100129455 | 2  |
| LOC100129461 | 100129461 | LOC100129461 | 6  |



|              |           |              |    |
|--------------|-----------|--------------|----|
| LOC100129466 | 100129466 | LOC100129466 |    |
| LOC100129482 | 100129482 | LOC100129482 | 10 |
| LOC100129502 | 100129502 | LOC100129502 |    |
| LOC100129514 | 100129514 | LOC100129514 |    |
| LOC100129518 | 100129518 | LOC100129518 | 6  |
| LOC100129522 | 100129522 | LOC100129522 | 6  |
| LOC100129539 | 100129539 | LOC100129539 |    |
| LOC100129543 | 100129543 | LOC100129543 |    |
| LOC100129548 | 100129548 | LOC100129548 |    |
| LOC100129550 | 100129550 | LOC100129550 | 3  |
| LOC100129552 | 100129552 | LOC100129552 | 10 |
| LOC100129553 | 100129553 | LOC100129553 | 7  |
| LOC100129559 | 100129559 | LOC100129559 | 3  |
| LOC100129566 | 100129566 | LOC100129566 |    |
| LOC100129580 | 100129580 | LOC100129580 |    |
| LOC100129585 | 100129585 | LOC100129585 | X  |
| LOC100129588 | 100129588 | LOC100129588 | 2  |
| LOC100129599 | 100129599 | LOC100129599 |    |
| LOC100129602 | 100129602 | LOC100129602 | 11 |
| LOC100129608 | 100129608 | LOC100129608 | 5  |
| LOC100129619 | 100129619 | LOC100129619 |    |
| LOC100129637 | 100129637 | LOC100129637 | 16 |
| LOC100129638 | 100129638 | LOC100129638 |    |
| LOC100129652 | 100129652 | LOC100129652 | 6  |
| LOC100129656 | 100129656 | LOC100129656 | 1  |
| LOC100129660 | 100129660 | LOC100129660 |    |
| LOC100129667 | 100129667 | LOC100129667 |    |
| LOC100129668 | 100129668 | LOC100129668 | 6  |
| LOC100129673 | 100129673 | LOC100129673 | 17 |
| LOC100129674 | 100129674 | LOC100129674 |    |
| LOC100129681 | 100129681 | LOC100129681 | 19 |
| LOC100129697 | 100129697 | LOC100129697 |    |
| LOC100129707 | 100129707 | LOC100129707 | 3  |
| LOC100129708 | 100129708 | LOC100129708 |    |
| LOC100129716 | 100129716 | LOC100129716 | 5  |
| LOC100129759 | 100129759 | LOC100129759 | 20 |
| LOC100129778 | 100129778 | LOC100129778 |    |
| LOC100129781 | 100129781 | LOC100129781 | 16 |
| LOC100129826 | 100129826 | LOC100129826 | 11 |
| LOC100129827 | 100129827 | LOC100129827 |    |
| LOC100129828 | 100129828 | LOC100129828 | 1  |
| LOC100129837 | 100129837 | LOC100129837 |    |
| LOC100129842 | 100129842 | LOC100129842 | 19 |
| LOC100129866 | 100129866 | LOC100129866 |    |

|              |           |              |    |
|--------------|-----------|--------------|----|
| LOC100129882 | 100129882 | LOC100129882 |    |
| LOC100129905 | 100129905 | LOC100129905 |    |
| LOC100129906 | 100129906 | LOC100129906 |    |
| LOC100129907 | 100129907 | LOC100129907 |    |
| LOC100129912 | 100129912 | LOC100129912 | 9  |
| LOC100129916 | 100129916 | LOC100129916 | 5  |
| LOC100129924 | 100129924 | LOC100129924 |    |
| LOC100129928 | 100129928 | LOC100129928 | 14 |
| LOC100129933 | 100129933 | LOC100129933 |    |
| LOC100129934 | 100129934 | LOC100129934 |    |
| LOC100129954 | 100129954 | LOC100129954 |    |
| LOC100129958 | 100129958 | LOC100129958 | 6  |
| LOC100129960 | 100129960 | LOC100129960 |    |
| LOC100129975 | 100129975 | LOC100129975 |    |
| LOC100129988 | 100129988 | LOC100129988 |    |
| LOC100130003 | 100130003 | LOC100130003 | 18 |
| LOC100130009 | 100130009 | LOC100130009 |    |
| LOC100130053 | 100130053 | LOC100130053 | 10 |
| LOC100130055 | 100130055 | LOC100130055 | 18 |
| LOC100130070 | 100130070 | LOC100130070 |    |
| LOC100130071 | 100130071 | LOC100130071 | 1  |
| LOC100130079 | 100130079 | LOC100130079 |    |
| LOC100130084 | 100130084 | LOC100130084 |    |
| LOC100130092 | 100130092 | LOC100130092 | 8  |
| LOC100130093 | 100130093 | LOC100130093 | 1  |
| LOC100130100 | 100130100 | LOC100130100 |    |
| LOC100130131 | 100130131 | LOC100130131 | 1  |
| LOC100130134 | 100130134 | LOC100130134 |    |
| LOC100130141 | 100130141 | LOC100130141 |    |
| LOC100130148 | 100130148 | LOC100130148 | 17 |
| LOC100130155 | 100130155 | LOC100130155 |    |
| LOC100130157 | 100130157 | LOC100130157 | 20 |
| LOC100130168 | 100130168 | LOC100130168 |    |
| LOC100130171 | 100130171 | LOC100130171 |    |
| LOC100130178 | 100130178 | LOC100130178 |    |
| LOC100130179 | 100130179 | LOC100130179 |    |
| LOC100130187 | 100130187 | LOC100130187 |    |
| LOC100130190 | 100130190 | LOC100130190 |    |
| LOC100130217 | 100130217 | LOC100130217 | 7  |
| LOC100130224 | 100130224 | LOC100130224 |    |
| LOC100130229 | 100130229 | LOC100130229 | 2  |
| LOC100130230 | 100130230 | LOC100130230 | 5  |
| LOC100130233 | 100130233 | LOC100130233 |    |
| LOC100130264 | 100130264 | LOC100130264 | 20 |

|              |           |              |    |
|--------------|-----------|--------------|----|
| LOC100130276 | 100130276 | LOC100130276 | 16 |
| LOC100130285 | 100130285 | LOC100130285 |    |
| LOC100130289 | 100130289 | LOC100130289 | 1  |
| LOC100130291 | 100130291 | LOC100130291 | 12 |
| LOC100130298 | 100130298 | LOC100130298 |    |
| LOC100130308 | 100130308 | LOC100130308 |    |
| LOC100130320 | 100130320 | LOC100130320 |    |
| LOC100130324 | 100130324 | LOC100130324 | 4  |
| LOC100130332 | 100130332 | LOC100130332 |    |
| LOC100130351 | 100130351 | LOC100130351 | 7  |
| LOC100130354 | 100130354 | LOC100130354 |    |
| LOC100130367 | 100130367 | LOC100130367 |    |
| LOC100130387 | 100130387 | LOC100130387 |    |
| LOC100130413 | 100130413 | LOC100130413 |    |
| LOC100130445 | 100130445 | LOC100130445 |    |
| LOC100130452 | 100130452 | LOC100130452 | 2  |
| LOC100130458 | 100130458 | LOC100130458 |    |
| LOC100130465 | 100130465 | LOC100130465 |    |
| LOC100130476 | 100130476 | LOC100130476 |    |
| LOC100130503 | 100130503 | LOC100130503 | 3  |
| LOC100130506 | 100130506 | LOC100130506 |    |
| LOC100130508 | 100130508 | LOC100130508 |    |
| LOC100130511 | 100130511 | LOC100130511 |    |
| LOC100130516 | 100130516 | LOC100130516 |    |
| LOC100130522 | 100130522 | LOC100130522 | 18 |
| LOC100130542 | 100130542 | LOC100130542 | 14 |
| LOC100130550 | 100130550 | LOC100130550 |    |
| LOC100130555 | 100130555 | LOC100130555 |    |
| LOC100130556 | 100130556 | LOC100130556 |    |
| LOC100130557 | 100130557 | LOC100130557 | 1  |
| LOC100130561 | 100130561 | LOC100130561 |    |
| LOC100130562 | 100130562 | LOC100130562 |    |
| LOC100130592 | 100130592 | LOC100130592 |    |
| LOC100130598 | 100130598 | LOC100130598 |    |
| LOC100130604 | 100130604 | LOC100130604 | 8  |
| LOC100130624 | 100130624 | LOC100130624 | 22 |
| LOC100130633 | 100130633 | LOC100130633 |    |
| LOC100130652 | 100130652 | LOC100130652 | 10 |
| LOC100130667 | 100130667 | LOC100130667 |    |
| LOC100130696 | 100130696 | LOC100130696 |    |
| LOC100130707 | 100130707 | LOC100130707 |    |
| LOC100130712 | 100130712 | LOC100130712 |    |
| LOC100130743 | 100130743 | LOC100130743 | 11 |
| LOC100130746 | 100130746 | LOC100130746 |    |

|              |           |              |    |
|--------------|-----------|--------------|----|
| LOC100130769 | 100130769 | LOC100130769 | 14 |
| LOC100130775 | 100130775 | LOC100130775 | 12 |
| LOC100130776 | 100130776 | LOC100130776 |    |
| LOC100130803 | 100130803 | LOC100130803 |    |
| LOC100130816 | 100130816 | LOC100130816 |    |
| LOC100130824 | 100130824 | LOC100130824 |    |
| LOC100130835 | 100130835 | LOC100130835 | 11 |
| LOC100130837 | 100130837 | LOC100130837 | 10 |
| LOC100130840 | 100130840 | LOC100130840 |    |
| LOC100130849 | 100130849 | LOC100130849 |    |
| LOC100130856 | 100130856 | LOC100130856 | 19 |
| LOC100130886 | 100130886 | LOC100130886 |    |
| LOC100130905 | 100130905 | LOC100130905 |    |
| LOC100130906 | 100130906 | LOC100130906 |    |
| LOC100130914 | 100130914 | LOC100130914 |    |
| LOC100130919 | 100130919 | LOC100130919 | X  |
| LOC100130921 | 100130921 | LOC100130921 | 2  |
| LOC100130932 | 100130932 | LOC100130932 |    |
| LOC100130935 | 100130935 | LOC100130935 |    |
| LOC100130952 | 100130952 | LOC100130952 |    |
| LOC100130953 | 100130953 | LOC100130953 | 14 |
| LOC100130958 | 100130958 | LOC100130958 |    |
| LOC100130967 | 100130967 | LOC100130967 |    |
| LOC100130982 | 100130982 | LOC100130982 |    |
| LOC100130996 | 100130996 | LOC100130996 | 1  |
| LOC100131003 | 100131003 | LOC100131003 |    |
| LOC100131009 | 100131009 | LOC100131009 |    |
| LOC100131017 | 100131017 | LOC100131017 |    |
| LOC100131031 | 100131031 | LOC100131031 |    |
| LOC100131046 | 100131046 | LOC100131046 |    |
| LOC100131061 | 100131061 | LOC100131061 |    |
| LOC100131091 | 100131091 | LOC100131091 |    |
| LOC100131093 | 100131093 | LOC100131093 |    |
| LOC100131096 | 100131096 | LOC100131096 |    |
| LOC100131128 | 100131128 | LOC100131128 |    |
| LOC100131131 | 100131131 | LOC100131131 |    |
| LOC100131138 | 100131138 | LOC100131138 |    |
| LOC100131160 | 100131160 | LOC100131160 | 5  |
| LOC100131166 | 100131166 | LOC100131166 |    |
| LOC100131169 | 100131169 | LOC100131169 | 17 |
| LOC100131174 | 100131174 | LOC100131174 |    |
| LOC100131187 | 100131187 | LOC100131187 |    |
| LOC100131196 | 100131196 | LOC100131196 |    |
| LOC100131225 | 100131225 | LOC100131225 |    |

|              |           |              |    |
|--------------|-----------|--------------|----|
| LOC100131243 | 100131243 | LOC100131243 |    |
| LOC100131250 | 100131250 | LOC100131250 |    |
| LOC100131256 | 100131256 | LOC100131256 |    |
| LOC100131261 | 100131261 | LOC100131261 | 1  |
| LOC100131266 | 100131266 | LOC100131266 |    |
| LOC100131276 | 100131276 | LOC100131276 |    |
| LOC100131283 | 100131283 | LOC100131283 |    |
| LOC100131289 | 100131289 | LOC100131289 |    |
| LOC100131308 | 100131308 | LOC100131308 | 3  |
| LOC100131311 | 100131311 | LOC100131311 | 1  |
| LOC100131323 | 100131323 | LOC100131323 |    |
| LOC100131326 | 100131326 | LOC100131326 |    |
| LOC100131330 | 100131330 | LOC100131330 |    |
| LOC100131335 | 100131335 | LOC100131335 |    |
| LOC100131336 | 100131336 | LOC100131336 |    |
| LOC100131354 | 100131354 | LOC100131354 | 1  |
| LOC100131381 | 100131381 | LOC100131381 |    |
| LOC100131390 | 100131390 | LOC100131390 |    |
| LOC100131414 | 100131414 | LOC100131414 |    |
| LOC100131426 | 100131426 | LOC100131426 | 3  |
| LOC100131434 | 100131434 | LOC100131434 |    |
| LOC100131435 | 100131435 | LOC100131435 |    |
| LOC100131436 | 100131436 | LOC100131436 |    |
| LOC100131452 | 100131452 | LOC100131452 | 15 |
| LOC100131460 | 100131460 | LOC100131460 |    |
| LOC100131471 | 100131471 | LOC100131471 |    |
| LOC100131496 | 100131496 | LOC100131496 | 20 |
| LOC100131510 | 100131510 | LOC100131510 | 2  |
| LOC100131531 | 100131531 | LOC100131531 |    |
| LOC100131540 | 100131540 | LOC100131540 |    |
| LOC100131544 | 100131544 | LOC100131544 |    |
| LOC100131552 | 100131552 | LOC100131552 |    |
| LOC100131572 | 100131572 | LOC100131572 | 1  |
| LOC100131580 | 100131580 | LOC100131580 |    |
| LOC100131588 | 100131588 | LOC100131588 |    |
| LOC100131594 | 100131594 | LOC100131594 |    |
| LOC100131609 | 100131609 | LOC100131609 |    |
| LOC100131621 | 100131621 | LOC100131621 |    |
| LOC100131643 | 100131643 | LOC100131643 | 14 |
| LOC100131655 | 100131655 | LOC100131655 |    |
| LOC100131683 | 100131683 | LOC100131683 |    |
| LOC100131688 | 100131688 | LOC100131688 |    |
| LOC100131705 | 100131705 | LOC100131705 |    |
| LOC100131707 | 100131707 | LOC100131707 |    |

|              |           |              |    |
|--------------|-----------|--------------|----|
| LOC100131713 | 100131713 | LOC100131713 |    |
| LOC100131716 | 100131716 | LOC100131716 |    |
| LOC100131718 | 100131718 | LOC100131718 |    |
| LOC100131727 | 100131727 | LOC100131727 | 4  |
| LOC100131733 | 100131733 | LOC100131733 |    |
| LOC100131735 | 100131735 | LOC100131735 |    |
| LOC100131737 | 100131737 | LOC100131737 | 1  |
| LOC100131744 | 100131744 | LOC100131744 | 17 |
| LOC100131768 | 100131768 | LOC100131768 |    |
| LOC100131769 | 100131769 | LOC100131769 |    |
| LOC100131785 | 100131785 | LOC100131785 | 7  |
| LOC100131787 | 100131787 | LOC100131787 | 1  |
| LOC100131801 | 100131801 | LOC100131801 | 19 |
| LOC100131810 | 100131810 | LOC100131810 |    |
| LOC100131831 | 100131831 | LOC100131831 |    |
| LOC100131835 | 100131835 | LOC100131835 |    |
| LOC100131850 | 100131850 | LOC100131850 | 4  |
| LOC100131856 | 100131856 | LOC100131856 |    |
| LOC100131859 | 100131859 | LOC100131859 |    |
| LOC100131866 | 100131866 | LOC100131866 | 1  |
| LOC100131868 | 100131868 | LOC100131868 | 3  |
| LOC100131871 | 100131871 | LOC100131871 |    |
| LOC100131888 | 100131888 | LOC100131888 | 7  |
| LOC100131912 | 100131912 | LOC100131912 |    |
| LOC100131930 | 100131930 | LOC100131930 |    |
| LOC100131940 | 100131940 | LOC100131940 |    |
| LOC100131949 | 100131949 | LOC100131949 | 11 |
| LOC100131968 | 100131968 | LOC100131968 | 4  |
| LOC100131970 | 100131970 | LOC100131970 | 8  |
| LOC100131972 | 100131972 | LOC100131972 | 7  |
| LOC100131975 | 100131975 | LOC100131975 | 7  |
| LOC100131980 | 100131980 | LOC100131980 | 8  |
| LOC100131986 | 100131986 | LOC100131986 | Y  |
| LOC100131989 | 100131989 | LOC100131989 | 2  |
| LOC100132004 | 100132004 | LOC100132004 | 9  |
| LOC100132024 | 100132024 | LOC100132024 | 15 |
| LOC100132032 | 100132032 | LOC100132032 | 22 |
| LOC100132033 | 100132033 | LOC100132033 | 17 |
| LOC100132037 | 100132037 | LOC100132037 |    |
| LOC100132041 | 100132041 | LOC100132041 | 7  |
| LOC100132048 | 100132048 | LOC100132048 | 8  |
| LOC100132050 | 100132050 | LOC100132050 | 7  |
| LOC100132060 | 100132060 | LOC100132060 | 2  |
| LOC100132068 | 100132068 | LOC100132068 | 16 |

|              |           |              |    |
|--------------|-----------|--------------|----|
| LOC100132086 | 100132086 | LOC100132086 |    |
| LOC100132096 | 100132096 | LOC100132096 | 20 |
| LOC100132108 | 100132108 | LOC100132108 | 1  |
| LOC100132112 | 100132112 | LOC100132112 | 7  |
| LOC100132113 | 100132113 | LOC100132113 |    |
| LOC100132119 | 100132119 | LOC100132119 | 7  |
| LOC100132139 | 100132139 | LOC100132139 | 9  |
| LOC100132154 | 100132154 | LOC100132154 | 9  |
| LOC100132167 | 100132167 | LOC100132167 | 9  |
| LOC100132168 | 100132168 | LOC100132168 | 3  |
| LOC100132199 | 100132199 | LOC100132199 | 15 |
| LOC100132221 | 100132221 | LOC100132221 | 8  |
| LOC100132247 | 100132247 | LOC100132247 | 16 |
| LOC100132266 | 100132266 | LOC100132266 | 6  |
| LOC100132288 | 100132288 | LOC100132288 | 21 |
| LOC100132289 | 100132289 | LOC100132289 | 15 |
| LOC100132291 | 100132291 | LOC100132291 |    |
| LOC100132292 | 100132292 | LOC100132292 | 15 |
| LOC100132299 | 100132299 | LOC100132299 | 17 |
| LOC100132302 | 100132302 | LOC100132302 | X  |
| LOC100132308 | 100132308 | LOC100132308 | 7  |
| LOC100132323 | 100132323 | LOC100132323 | 9  |
| LOC100132324 | 100132324 | LOC100132324 | 20 |
| LOC100132336 | 100132336 | LOC100132336 | 8  |
| LOC100132346 | 100132346 | LOC100132346 | 16 |
| LOC100132347 | 100132347 | LOC100132347 | X  |
| LOC100132364 | 100132364 | LOC100132364 | 16 |
| LOC100132369 | 100132369 | LOC100132369 |    |
| LOC100132373 | 100132373 | LOC100132373 | X  |
| LOC100132377 | 100132377 | LOC100132377 | X  |
| LOC100132391 | 100132391 | LOC100132391 | 17 |
| LOC100132394 | 100132394 | LOC100132394 | X  |
| LOC100132395 | 100132395 | LOC100132395 | 1  |
| LOC100132402 | 100132402 | LOC100132402 | 10 |
| LOC100132413 | 100132413 | LOC100132413 | 2  |
| LOC100132418 | 100132418 | LOC100132418 | 10 |
| LOC100132425 | 100132425 | LOC100132425 | 10 |
| LOC100132439 | 100132439 | LOC100132439 | 9  |
| LOC100132442 | 100132442 | LOC100132442 | 9  |
| LOC100132444 | 100132444 | LOC100132444 |    |
| LOC100132457 | 100132457 | LOC100132457 |    |
| LOC100132485 | 100132485 | LOC100132485 | 8  |
| LOC100132491 | 100132491 | LOC100132491 | 7  |
| LOC100132493 | 100132493 | LOC100132493 |    |

|              |           |              |    |
|--------------|-----------|--------------|----|
| LOC100132499 | 100132499 | LOC100132499 | 7  |
| LOC100132503 | 100132503 | LOC100132503 | 9  |
| LOC100132506 | 100132506 | LOC100132506 | Y  |
| LOC100132510 | 100132510 | LOC100132510 |    |
| LOC100132513 | 100132513 | LOC100132513 | 11 |
| LOC100132518 | 100132518 | LOC100132518 | 7  |
| LOC100132519 | 100132519 | LOC100132519 | 9  |
| LOC100132521 | 100132521 | LOC100132521 | 14 |
| LOC100132526 | 100132526 | LOC100132526 | 3  |
| LOC100132528 | 100132528 | LOC100132528 |    |
| LOC100132529 | 100132529 | LOC100132529 | 16 |
| LOC100132532 | 100132532 | LOC100132532 |    |
| LOC100132535 | 100132535 | LOC100132535 |    |
| LOC100132552 | 100132552 | LOC100132552 | 3  |
| LOC100132553 | 100132553 | LOC100132553 |    |
| LOC100132562 | 100132562 | LOC100132562 |    |
| LOC100132564 | 100132564 | LOC100132564 | 12 |
| LOC100132565 | 100132565 | LOC100132565 | 15 |
| LOC100132585 | 100132585 | LOC100132585 | 7  |
| LOC100132593 | 100132593 | LOC100132593 |    |
| LOC100132598 | 100132598 | LOC100132598 | 13 |
| LOC100132628 | 100132628 | LOC100132628 | 7  |
| LOC100132635 | 100132635 | LOC100132635 |    |
| LOC100132652 | 100132652 | LOC100132652 | 6  |
| LOC100132655 | 100132655 | LOC100132655 |    |
| LOC100132656 | 100132656 | LOC100132656 | 4  |
| LOC100132657 | 100132657 | LOC100132657 | 10 |
| LOC100132658 | 100132658 | LOC100132658 |    |
| LOC100132663 | 100132663 | LOC100132663 |    |
| LOC100132701 | 100132701 | LOC100132701 |    |
| LOC100132705 | 100132705 | LOC100132705 | 22 |
| LOC100132715 | 100132715 | LOC100132715 |    |
| LOC100132716 | 100132716 | LOC100132716 | 1  |
| LOC100132717 | 100132717 | LOC100132717 | 1  |
| LOC100132727 | 100132727 | LOC100132727 | 15 |
| LOC100132728 | 100132728 | LOC100132728 | 1  |
| LOC100132733 | 100132733 | LOC100132733 | 1  |
| LOC100132740 | 100132740 | LOC100132740 | 7  |
| LOC100132742 | 100132742 | LOC100132742 | 1  |
| LOC100132760 | 100132760 | LOC100132760 |    |
| LOC100132767 | 100132767 | LOC100132767 |    |
| LOC100132770 | 100132770 | LOC100132770 | 9  |
| LOC100132794 | 100132794 | LOC100132794 | 14 |
| LOC100132795 | 100132795 | LOC100132795 |    |



|              |           |              |    |
|--------------|-----------|--------------|----|
| LOC100132797 | 100132797 | LOC100132797 |    |
| LOC100132810 | 100132810 | LOC100132810 | 6  |
| LOC100132826 | 100132826 | LOC100132826 | 16 |
| LOC100132839 | 100132839 | LOC100132839 |    |
| LOC100132863 | 100132863 | LOC100132863 |    |
| LOC100132864 | 100132864 | LOC100132864 | X  |
| LOC100132887 | 100132887 | LOC100132887 | 2  |
| LOC100132894 | 100132894 | LOC100132894 |    |
| LOC100132901 | 100132901 | LOC100132901 | 17 |
| LOC100132918 | 100132918 | LOC100132918 |    |
| LOC100132920 | 100132920 | LOC100132920 | 20 |
| LOC100132923 | 100132923 | LOC100132923 | 8  |
| LOC100132941 | 100132941 | LOC100132941 | 16 |
| LOC100132947 | 100132947 | LOC100132947 | 9  |
| LOC100132948 | 100132948 | LOC100132948 | 9  |
| LOC100132955 | 100132955 | LOC100132955 | 9  |
| LOC100132972 | 100132972 | LOC100132972 | 17 |
| LOC100132977 | 100132977 | LOC100132977 | 17 |
| LOC100132992 | 100132992 | LOC100132992 | 18 |
| LOC100132994 | 100132994 | LOC100132994 | X  |
| LOC100133002 | 100133002 | LOC100133002 | 4  |
| LOC100133005 | 100133005 | LOC100133005 | 7  |
| LOC100133008 | 100133008 | LOC100133008 | 1  |
| LOC100133012 | 100133012 | LOC100133012 | Y  |
| LOC100133018 | 100133018 | LOC100133018 | 9  |
| LOC100133019 | 100133019 | LOC100133019 |    |
| LOC100133033 | 100133033 | LOC100133033 | 9  |
| LOC100133036 | 100133036 | LOC100133036 | 9  |
| LOC100133042 | 100133042 | LOC100133042 | 12 |
| LOC100133045 | 100133045 | LOC100133045 |    |
| LOC100133047 | 100133047 | LOC100133047 |    |
| LOC100133053 | 100133053 | LOC100133053 | X  |
| LOC100133055 | 100133055 | LOC100133055 | 1  |
| LOC100133058 | 100133058 | LOC100133058 |    |
| LOC100133070 | 100133070 | LOC100133070 |    |
| LOC100133075 | 100133075 | LOC100133075 | 1  |
| LOC100133076 | 100133076 | LOC100133076 | 16 |
| LOC100133086 | 100133086 | LOC100133086 | 1  |
| LOC100133095 | 100133095 | LOC100133095 | 1  |
| LOC100133111 | 100133111 | LOC100133111 | 7  |
| LOC100133163 | 100133163 | LOC100133163 | 22 |
| LOC100133177 | 100133177 | LOC100133177 | 7  |
| LOC100133179 | 100133179 | LOC100133179 | 7  |
| LOC100133185 | 100133185 | LOC100133185 |    |

|              |           |              |    |
|--------------|-----------|--------------|----|
| LOC100133211 | 100133211 | LOC100133211 |    |
| LOC100133220 | 100133220 | LOC100133220 | 15 |
| LOC100133222 | 100133222 | LOC100133222 |    |
| LOC100133224 | 100133224 | LOC100133224 |    |
| LOC100133232 | 100133232 | LOC100133232 |    |
| LOC100133233 | 100133233 | LOC100133233 |    |
| LOC100133263 | 100133263 | LOC100133263 |    |
| LOC100133264 | 100133264 | LOC100133264 |    |
| LOC100133277 | 100133277 | LOC100133277 | 5  |
| LOC100133288 | 100133288 | LOC100133288 | 8  |
| LOC100133298 | 100133298 | LOC100133298 | 9  |
| LOC100133308 | 100133308 | LOC100133308 | 10 |
| LOC100133312 | 100133312 | LOC100133312 |    |
| LOC100133313 | 100133313 | LOC100133313 | 9  |
| LOC100133315 | 100133315 | LOC100133315 |    |
| LOC100133328 | 100133328 | LOC100133328 | 1  |
| LOC100133372 | 100133372 | LOC100133372 | 6  |
| LOC100133373 | 100133373 | LOC100133373 | 6  |
| LOC100133390 | 100133390 | LOC100133390 | 6  |
| LOC100133398 | 100133398 | LOC100133398 |    |
| LOC100133401 | 100133401 | LOC100133401 |    |
| LOC100133408 | 100133408 | LOC100133408 |    |
| LOC100133420 | 100133420 | LOC100133420 |    |
| LOC100133430 | 100133430 | LOC100133430 |    |
| LOC100133435 | 100133435 | LOC100133435 |    |
| LOC100133443 | 100133443 | LOC100133443 |    |
| LOC100133447 | 100133447 | LOC100133447 |    |
| LOC100133459 | 100133459 | LOC100133459 |    |
| LOC100133465 | 100133465 | LOC100133465 |    |
| LOC100133477 | 100133477 | LOC100133477 |    |
| LOC100133478 | 100133478 | LOC100133478 |    |
| LOC100133479 | 100133479 | LOC100133479 |    |
| LOC100133482 | 100133482 | LOC100133482 |    |
| LOC100133489 | 100133489 | LOC100133489 |    |
| LOC100133502 | 100133502 | LOC100133502 |    |
| LOC100133516 | 100133516 | LOC100133516 |    |
| LOC100133517 | 100133517 | LOC100133517 |    |
| LOC100133536 | 100133536 | LOC100133536 |    |
| LOC100133545 | 100133545 | LOC100133545 | 11 |
| LOC100133554 | 100133554 | LOC100133554 |    |
| LOC100133555 | 100133555 | LOC100133555 |    |
| LOC100133563 | 100133563 | LOC100133563 |    |
| LOC100133565 | 100133565 | LOC100133565 |    |
| LOC100133568 | 100133568 | LOC100133568 |    |

|              |           |              |
|--------------|-----------|--------------|
| LOC100133576 | 100133576 | LOC100133576 |
| LOC100133578 | 100133578 | LOC100133578 |
| LOC100133583 | 100133583 | LOC100133583 |
| LOC100133591 | 100133591 | LOC100133591 |
| LOC100133602 | 100133602 | LOC100133602 |
| LOC100133607 | 100133607 | LOC100133607 |
| LOC100133609 | 100133609 | LOC100133609 |
| LOC100133627 | 100133627 | LOC100133627 |
| LOC100133636 | 100133636 | LOC100133636 |
| LOC100133638 | 100133638 | LOC100133638 |
| LOC100133649 | 100133649 | LOC100133649 |
| LOC100133662 | 100133662 | LOC100133662 |
| LOC100133667 | 100133667 | LOC100133667 |
| LOC100133669 | 100133669 | LOC100133669 |
| LOC100133672 | 100133672 | LOC100133672 |
| LOC100133678 | 100133678 | LOC100133678 |
| LOC100133686 | 100133686 | LOC100133686 |
| LOC100133697 | 100133697 | LOC100133697 |
| LOC100133739 | 100133739 | LOC100133739 |
| LOC100133744 | 100133744 | LOC100133744 |
| LOC100133747 | 100133747 | LOC100133747 |
| LOC100133758 | 100133758 | LOC100133758 |
| LOC100133769 | 100133769 | LOC100133769 |
| LOC100133771 | 100133771 | LOC100133771 |
| LOC100133772 | 100133772 | LOC100133772 |
| LOC100133779 | 100133779 | LOC100133779 |
| LOC100133803 | 100133803 | LOC100133803 |
| LOC100133811 | 100133811 | LOC100133811 |
| LOC100133812 | 100133812 | LOC100133812 |
| LOC100133836 | 100133836 | LOC100133836 |
| LOC100133839 | 100133839 | LOC100133839 |
| LOC100133844 | 100133844 | LOC100133844 |
| LOC100133859 | 100133859 | LOC100133859 |
| LOC100133866 | 100133866 | LOC100133866 |
| LOC100133875 | 100133875 | LOC100133875 |
| LOC100133881 | 100133881 | LOC100133881 |
| LOC100133888 | 100133888 | LOC100133888 |
| LOC100133892 | 100133892 | LOC100133892 |
| LOC100133898 | 100133898 | LOC100133898 |
| LOC100133908 | 100133908 | LOC100133908 |
| LOC100133911 | 100133911 | LOC100133911 |
| LOC100133916 | 100133916 | LOC100133916 |
| LOC100133928 | 100133928 | LOC100133928 |
| LOC100133930 | 100133930 | LOC100133930 |

|              |           |              |   |
|--------------|-----------|--------------|---|
| LOC100133947 | 100133947 | LOC100133947 |   |
| LOC100133950 | 100133950 | LOC100133950 |   |
| LOC100133959 | 100133959 | LOC100133959 |   |
| LOC100133981 | 100133981 | LOC100133981 |   |
| LOC100133984 | 100133984 | LOC100133984 |   |
| LOC100133985 | 100133985 | LOC100133985 | 2 |
| LOC100134000 | 100134000 | LOC100134000 |   |
| LOC100134002 | 100134002 | LOC100134002 |   |
| LOC100134009 | 100134009 | LOC100134009 |   |
| LOC100134011 | 100134011 | LOC100134011 |   |
| LOC100134018 | 100134018 | LOC100134018 |   |
| LOC100134041 | 100134041 | LOC100134041 |   |
| LOC100134047 | 100134047 | LOC100134047 |   |
| LOC100134052 | 100134052 | LOC100134052 |   |
| LOC100134053 | 100134053 | LOC100134053 |   |
| LOC100134073 | 100134073 | LOC100134073 |   |
| LOC100134083 | 100134083 | LOC100134083 |   |
| LOC100134098 | 100134098 | LOC100134098 |   |
| LOC100134100 | 100134100 | LOC100134100 |   |
| LOC100134101 | 100134101 | LOC100134101 |   |
| LOC100134108 | 100134108 | LOC100134108 |   |
| LOC100134134 | 100134134 | LOC100134134 |   |
| LOC100134140 | 100134140 | LOC100134140 |   |
| LOC100134147 | 100134147 | LOC100134147 |   |
| LOC100134152 | 100134152 | LOC100134152 |   |
| LOC100134159 | 100134159 | LOC100134159 |   |
| LOC100134182 | 100134182 | LOC100134182 |   |
| LOC100134188 | 100134188 | LOC100134188 |   |
| LOC100134189 | 100134189 | LOC100134189 |   |
| LOC100134199 | 100134199 | LOC100134199 |   |
| LOC100134201 | 100134201 | LOC100134201 |   |
| LOC100134209 | 100134209 | LOC100134209 |   |
| LOC100134226 | 100134226 | LOC100134226 |   |
| LOC100134228 | 100134228 | LOC100134228 |   |
| LOC100134229 | 100134229 | LOC100134229 | 7 |
| LOC100134235 | 100134235 | LOC100134235 |   |
| LOC100134239 | 100134239 | LOC100134239 |   |
| LOC100134241 | 100134241 | LOC100134241 |   |
| LOC100134261 | 100134261 | LOC100134261 |   |
| LOC100134265 | 100134265 | LOC100134265 |   |
| LOC100134266 | 100134266 | LOC100134266 |   |
| LOC100134272 | 100134272 | LOC100134272 |   |
| LOC100134282 | 100134282 | LOC100134282 |   |
| LOC100134291 | 100134291 | LOC100134291 |   |

|              |           |              |   |
|--------------|-----------|--------------|---|
| LOC100134294 | 100134294 | LOC100134294 |   |
| LOC100134300 | 100134300 | LOC100134300 |   |
| LOC100134301 | 100134301 | LOC100134301 |   |
| LOC100134303 | 100134303 | LOC100134303 |   |
| LOC100134304 | 100134304 | LOC100134304 |   |
| LOC100134318 | 100134318 | LOC100134318 |   |
| LOC100134330 | 100134330 | LOC100134330 |   |
| LOC100134331 | 100134331 | LOC100134331 |   |
| LOC100134346 | 100134346 | LOC100134346 |   |
| LOC100134353 | 100134353 | LOC100134353 |   |
| LOC100134357 | 100134357 | LOC100134357 |   |
| LOC100134360 | 100134360 | LOC100134360 |   |
| LOC100134361 | 100134361 | LOC100134361 |   |
| LOC100134363 | 100134363 | LOC100134363 |   |
| LOC100134364 | 100134364 | LOC100134364 |   |
| LOC100134379 | 100134379 | LOC100134379 |   |
| LOC100134400 | 100134400 | LOC100134400 |   |
| LOC100134403 | 100134403 | LOC100134403 |   |
| LOC100134407 | 100134407 | LOC100134407 |   |
| LOC100134409 | 100134409 | LOC100134409 |   |
| LOC100134420 | 100134420 | LOC100134420 |   |
| LOC100134424 | 100134424 | LOC100134424 |   |
| LOC100134436 | 100134436 | LOC100134436 |   |
| LOC100134440 | 100134440 | LOC100134440 |   |
| LOC100134444 | 100134444 | LOC100134444 |   |
| LOC100134468 | 100134468 | LOC100134468 | 7 |
| LOC100134516 | 100134516 | LOC100134516 | 7 |
| LOC100134524 | 100134524 | LOC100134524 | 7 |
| LOC100134528 | 100134528 | LOC100134528 | 7 |
| LOC100134530 | 100134530 | LOC100134530 | 7 |
| LOC100134537 | 100134537 | LOC100134537 | 7 |
| LOC100134539 | 100134539 | LOC100134539 | 7 |
| LOC100134557 | 100134557 | LOC100134557 | 7 |
| LOC100134563 | 100134563 | LOC100134563 | 7 |
| LOC100134571 | 100134571 | LOC100134571 | 7 |
| LOC100134601 | 100134601 | LOC100134601 | 7 |
| LOC100134634 | 100134634 | LOC100134634 | 7 |
| LOC100134648 | 100134648 | LOC100134648 | 7 |
| LOC100134660 | 100134660 | LOC100134660 | 7 |
| LOC100134667 | 100134667 | LOC100134667 | 7 |
| LOC100134672 | 100134672 | LOC100134672 | 7 |
| LOC100134674 | 100134674 | LOC100134674 | 7 |
| LOC100134675 | 100134675 | LOC100134675 | 7 |
| LOC100134687 | 100134687 | LOC100134687 | 7 |

|              |           |              |    |
|--------------|-----------|--------------|----|
| LOC100134688 | 100134688 | LOC100134688 | 7  |
| LOC100134703 | 100134703 | LOC100134703 | 7  |
| LOC100134710 | 100134710 | LOC100134710 | 7  |
| LOC100134712 | 100134712 | LOC100134712 | 7  |
| LOC100134728 | 100134728 | LOC100134728 | 7  |
| LOC100134734 | 100134734 | LOC100134734 | 7  |
| LOC100134766 | 100134766 | LOC100134766 | 7  |
| LOC100134796 | 100134796 | LOC100134796 | 7  |
| LOC100134815 | 100134815 | LOC100134815 | 7  |
| LOC100134816 | 100134816 | LOC100134816 | 7  |
| LOC100134825 | 100134825 | LOC100134825 | 7  |
| LOC100134868 | 100134868 | LOC100134868 | 20 |
| LOC100144603 | 100144603 | LOC100144603 | 22 |
| LOC100144604 | 100144604 | LOC100144604 | 15 |
| LOC100169752 | 100169752 | LOC100169752 | 10 |
| LOC100170939 | 100170939 | LOC100170939 | 5  |
| LOC100188949 | 100188949 | LOC100188949 | 13 |
| LOC100190938 | 100190938 | LOC100190938 | 17 |
| LOC100190939 | 100190939 | LOC100190939 | 13 |
| LOC100233209 | 100233209 | LOC100233209 | 12 |
| LOC113230    | 113230    | LOC113230    | 19 |
| LOC113386    | 113386    | LOC113386    | 19 |
| LOC121006    | 121006    | LOC121006    |    |
| LOC121792    | 121792    | LOC121792    |    |
| LOC121952    | 121952    | LOC121952    | 13 |
| LOC123855    | 123855    | LOC123855    |    |
| LOC124216    | 124216    | LOC124216    | 16 |
| LOC124220    | 124220    | LOC124220    | 16 |
| LOC124512    | 124512    | LOC124512    |    |
| LOC124685    | 124685    | LOC124685    |    |
| LOC126661    | 126661    | LOC126661    |    |
| LOC126767    | 126767    | LOC126767    | 1  |
| LOC126860    | 126860    | LOC126860    | 1  |
| LOC127295    | 127295    | LOC127295    | 1  |
| LOC128102    | 128102    | LOC128102    | 1  |
| LOC128322    | 128322    | LOC128322    |    |
| LOC129870    | 129870    | LOC129870    | 2  |
| LOC130678    | 130678    | LOC130678    |    |
| LOC132203    | 132203    | LOC132203    | 3  |
| LOC133491    | 133491    | LOC133491    | 5  |
| LOC133609    | 133609    | LOC133609    |    |
| LOC133874    | 133874    | LOC133874    | 5  |
| LOC133993    | 133993    | LOC133993    | 5  |
| LOC134541    | 134541    | LOC134541    | 5  |

|           |        |           |    |
|-----------|--------|-----------|----|
| LOC134997 | 134997 | LOC134997 | 6  |
| LOC136143 | 136143 | LOC136143 | 7  |
| LOC139116 | 139116 | LOC139116 | X  |
| LOC139542 | 139542 | LOC139542 | X  |
| LOC143543 | 143543 | LOC143543 | 11 |
| LOC143666 | 143666 | LOC143666 | 11 |
| LOC143678 | 143678 | LOC143678 |    |
| LOC144383 | 144383 | LOC144383 |    |
| LOC144481 | 144481 | LOC144481 | 12 |
| LOC145783 | 145783 | LOC145783 | 15 |
| LOC145853 | 145853 | LOC145853 | 15 |
| LOC146177 | 146177 | LOC146177 | 16 |
| LOC146439 | 146439 | LOC146439 | 16 |
| LOC146517 | 146517 | LOC146517 | 16 |
| LOC147645 | 147645 | LOC147645 |    |
| LOC147650 | 147650 | LOC147650 | 19 |
| LOC147727 | 147727 | LOC147727 | 19 |
| LOC148137 | 148137 | LOC148137 | 19 |
| LOC148413 | 148413 | LOC148413 | 1  |
| LOC148430 | 148430 | LOC148430 |    |
| LOC148709 | 148709 | LOC148709 | 1  |
| LOC148915 | 148915 | LOC148915 |    |
| LOC149086 | 149086 | LOC149086 | 1  |
| LOC149224 | 149224 | LOC149224 | 1  |
| LOC149448 | 149448 | LOC149448 |    |
| LOC149837 | 149837 | LOC149837 | 20 |
| LOC150051 | 150051 | LOC150051 | 21 |
| LOC150223 | 150223 | LOC150223 | 22 |
| LOC150577 | 150577 | LOC150577 |    |
| LOC150763 | 150763 | LOC150763 | 2  |
| LOC151162 | 151162 | LOC151162 | 2  |
| LOC151234 | 151234 | LOC151234 |    |
| LOC151300 | 151300 | LOC151300 | 2  |
| LOC151457 | 151457 | LOC151457 |    |
| LOC151579 | 151579 | LOC151579 | 3  |
| LOC152024 | 152024 | LOC152024 |    |
| LOC152084 | 152084 | LOC152084 | 3  |
| LOC152195 | 152195 | LOC152195 | 3  |
| LOC152217 | 152217 | LOC152217 | 3  |
| LOC152845 | 152845 | LOC152845 |    |
| LOC153561 | 153561 | LOC153561 |    |
| LOC153684 | 153684 | LOC153684 |    |
| LOC154761 | 154761 | LOC154761 | 7  |
| LOC154860 | 154860 | LOC154860 |    |

|           |        |           |    |
|-----------|--------|-----------|----|
| LOC155060 | 155060 | LOC155060 | 7  |
| LOC158160 | 158160 | LOC158160 | 10 |
| LOC158257 | 158257 | LOC158257 | 9  |
| LOC158318 | 158318 | LOC158318 | 9  |
| LOC158825 | 158825 | LOC158825 |    |
| LOC161527 | 161527 | LOC161527 | 15 |
| LOC168474 | 168474 | LOC168474 | 7  |
| LOC197135 | 197135 | LOC197135 |    |
| LOC199800 | 199800 | LOC199800 | 19 |
| LOC199897 | 199897 | LOC199897 | 1  |
| LOC200030 | 200030 | LOC200030 | 1  |
| LOC200493 | 200493 | LOC200493 |    |
| LOC201140 | 201140 | LOC201140 | 17 |
| LOC201229 | 201229 | LOC201229 |    |
| LOC201725 | 201725 | LOC201725 | 4  |
| LOC202051 | 202051 | LOC202051 |    |
| LOC202181 | 202181 | LOC202181 | 5  |
| LOC202227 | 202227 | LOC202227 |    |
| LOC202781 | 202781 | LOC202781 |    |
| LOC203510 | 203510 | LOC203510 |    |
| LOC203547 | 203547 | LOC203547 | X  |
| LOC205251 | 205251 | LOC205251 |    |
| LOC219347 | 219347 | LOC219347 |    |
| LOC220077 | 220077 | LOC220077 | 11 |
| LOC220115 | 220115 | LOC220115 | 13 |
| LOC220416 | 220416 | LOC220416 | 13 |
| LOC220686 | 220686 | LOC220686 | 22 |
| LOC220998 | 220998 | LOC220998 | 10 |
| LOC221136 | 221136 | LOC221136 | 13 |
| LOC221442 | 221442 | LOC221442 | 6  |
| LOC221710 | 221710 | LOC221710 | 6  |
| LOC222699 | 222699 | LOC222699 | 6  |
| LOC253039 | 253039 | LOC253039 | 9  |
| LOC254398 | 254398 | LOC254398 | 14 |
| LOC255167 | 255167 | LOC255167 | 5  |
| LOC255326 | 255326 | LOC255326 | 10 |
| LOC255411 | 255411 | LOC255411 | 12 |
| LOC255620 | 255620 | LOC255620 | 11 |
| LOC255649 | 255649 | LOC255649 | 11 |
| LOC255783 | 255783 | LOC255783 | 19 |
| LOC256374 | 256374 | LOC256374 | 3  |
| LOC257054 | 257054 | LOC257054 | 2  |
| LOC257396 | 257396 | LOC257396 | 5  |
| LOC25845  | 25845  | LOC25845  | 5  |



|           |        |           |    |
|-----------|--------|-----------|----|
| LOC282997 | 282997 | LOC282997 |    |
| LOC283104 | 283104 | LOC283104 |    |
| LOC283116 | 283116 | LOC283116 |    |
| LOC283202 | 283202 | LOC283202 | 8  |
| LOC283267 | 283267 | LOC283267 | 11 |
| LOC283278 | 283278 | LOC283278 | 11 |
| LOC283314 | 283314 | LOC283314 |    |
| LOC283332 | 283332 | LOC283332 | 12 |
| LOC283340 | 283340 | LOC283340 | 10 |
| LOC283398 | 283398 | LOC283398 | 12 |
| LOC283412 | 283412 | LOC283412 |    |
| LOC283440 | 283440 | LOC283440 | 12 |
| LOC283663 | 283663 | LOC283663 | 15 |
| LOC283682 | 283682 | LOC283682 | 15 |
| LOC283683 | 283683 | LOC283683 | 15 |
| LOC283710 | 283710 | LOC283710 |    |
| LOC283867 | 283867 | LOC283867 | 16 |
| LOC283874 | 283874 | LOC283874 | 16 |
| LOC283932 | 283932 | LOC283932 | 16 |
| LOC283953 | 283953 | LOC283953 | 16 |
| LOC284023 | 284023 | LOC284023 |    |
| LOC284100 | 284100 | LOC284100 | 17 |
| LOC284167 | 284167 | LOC284167 |    |
| LOC284230 | 284230 | LOC284230 | 18 |
| LOC284260 | 284260 | LOC284260 | 18 |
| LOC284274 | 284274 | LOC284274 | 18 |
| LOC284293 | 284293 | LOC284293 | 18 |
| LOC284371 | 284371 | LOC284371 |    |
| LOC284393 | 284393 | LOC284393 | 19 |
| LOC284395 | 284395 | LOC284395 | 19 |
| LOC284422 | 284422 | LOC284422 | 19 |
| LOC284648 | 284648 | LOC284648 |    |
| LOC284688 | 284688 | LOC284688 |    |
| LOC284801 | 284801 | LOC284801 |    |
| LOC284821 | 284821 | LOC284821 | 21 |
| LOC284837 | 284837 | LOC284837 | 21 |
| LOC284861 | 284861 | LOC284861 | 22 |
| LOC284988 | 284988 | LOC284988 | 2  |
| LOC285016 | 285016 | LOC285016 | 2  |
| LOC285033 | 285033 | LOC285033 | 2  |
| LOC285047 | 285047 | LOC285047 |    |
| LOC285053 | 285053 | LOC285053 | 2  |
| LOC285074 | 285074 | LOC285074 | 2  |
| LOC285176 | 285176 | LOC285176 |    |

|           |        |           |    |
|-----------|--------|-----------|----|
| LOC285205 | 285205 | LOC285205 | 3  |
| LOC285216 | 285216 | LOC285216 | 3  |
| LOC285296 | 285296 | LOC285296 |    |
| LOC285346 | 285346 | LOC285346 | 3  |
| LOC285407 | 285407 | LOC285407 | 11 |
| LOC285412 | 285412 | LOC285412 |    |
| LOC285484 | 285484 | LOC285484 |    |
| LOC285501 | 285501 | LOC285501 | 4  |
| LOC285548 | 285548 | LOC285548 | 4  |
| LOC285556 | 285556 | LOC285556 |    |
| LOC285577 | 285577 | LOC285577 | 5  |
| LOC285588 | 285588 | LOC285588 | 5  |
| LOC285620 | 285620 | LOC285620 |    |
| LOC285697 | 285697 | LOC285697 | 5  |
| LOC285741 | 285741 | LOC285741 |    |
| LOC285804 | 285804 | LOC285804 | 6  |
| LOC285900 | 285900 | LOC285900 | 7  |
| LOC285908 | 285908 | LOC285908 | 7  |
| LOC285929 | 285929 | LOC285929 | 7  |
| LOC285941 | 285941 | LOC285941 | 7  |
| LOC285943 | 285943 | LOC285943 |    |
| LOC286016 | 286016 | LOC286016 | 7  |
| LOC286208 | 286208 | LOC286208 | 9  |
| LOC286260 | 286260 | LOC286260 | 9  |
| LOC286297 | 286297 | LOC286297 | 9  |
| LOC286367 | 286367 | LOC286367 | 9  |
| LOC286456 | 286456 | LOC286456 | X  |
| LOC286467 | 286467 | LOC286467 | X  |
| LOC286512 | 286512 | LOC286512 |    |
| LOC286528 | 286528 | LOC286528 |    |
| LOC338588 | 338588 | LOC338588 |    |
| LOC338758 | 338758 | LOC338758 | 12 |
| LOC338799 | 338799 | LOC338799 | 12 |
| LOC338870 | 338870 | LOC338870 |    |
| LOC339192 | 339192 | LOC339192 | 17 |
| LOC339209 | 339209 | LOC339209 | 17 |
| LOC339290 | 339290 | LOC339290 | 18 |
| LOC339352 | 339352 | LOC339352 |    |
| LOC339483 | 339483 | LOC339483 |    |
| LOC339524 | 339524 | LOC339524 | 1  |
| LOC339778 | 339778 | LOC339778 | 2  |
| LOC339788 | 339788 | LOC339788 | 2  |
| LOC339799 | 339799 | LOC339799 | 2  |
| LOC339804 | 339804 | LOC339804 | 2  |

|           |        |           |    |
|-----------|--------|-----------|----|
| LOC339879 | 339879 | LOC339879 |    |
| LOC339970 | 339970 | LOC339970 |    |
| LOC340221 | 340221 | LOC340221 | 7  |
| LOC340260 | 340260 | LOC340260 | 7  |
| LOC340274 | 340274 | LOC340274 | 7  |
| LOC340515 | 340515 | LOC340515 |    |
| LOC340529 | 340529 | LOC340529 | X  |
| LOC340549 | 340549 | LOC340549 | X  |
| LOC341112 | 341112 | LOC341112 |    |
| LOC341230 | 341230 | LOC341230 |    |
| LOC341315 | 341315 | LOC341315 | 12 |
| LOC341346 | 341346 | LOC341346 | 12 |
| LOC341457 | 341457 | LOC341457 | 12 |
| LOC341604 | 341604 | LOC341604 |    |
| LOC341651 | 341651 | LOC341651 | 13 |
| LOC341784 | 341784 | LOC341784 |    |
| LOC341965 | 341965 | LOC341965 |    |
| LOC342293 | 342293 | LOC342293 |    |
| LOC342541 | 342541 | LOC342541 | 17 |
| LOC342934 | 342934 | LOC342934 | 19 |
| LOC342979 | 342979 | LOC342979 | 19 |
| LOC343052 | 343052 | LOC343052 | 1  |
| LOC344065 | 344065 | LOC344065 | 2  |
| LOC344328 | 344328 | LOC344328 |    |
| LOC344405 | 344405 | LOC344405 |    |
| LOC344423 | 344423 | LOC344423 |    |
| LOC344593 | 344593 | LOC344593 |    |
| LOC344595 | 344595 | LOC344595 | 3  |
| LOC345041 | 345041 | LOC345041 |    |
| LOC345630 | 345630 | LOC345630 | 5  |
| LOC345645 | 345645 | LOC345645 |    |
| LOC346887 | 346887 | LOC346887 |    |
| LOC347281 | 347281 | LOC347281 |    |
| LOC347292 | 347292 | LOC347292 | 9  |
| LOC347364 | 347364 | LOC347364 |    |
| LOC347544 | 347544 | LOC347544 |    |
| LOC348021 | 348021 | LOC348021 |    |
| LOC348840 | 348840 | LOC348840 | 3  |
| LOC352909 | 352909 | LOC352909 | 19 |
| LOC360030 | 360030 | LOC360030 |    |
| LOC374395 | 374395 | LOC374395 | 11 |
| LOC374443 | 374443 | LOC374443 | 12 |
| LOC374768 | 374768 | LOC374768 | 17 |
| LOC374973 | 374973 | LOC374973 | 1  |

|           |        |           |    |
|-----------|--------|-----------|----|
| LOC375295 | 375295 | LOC375295 |    |
| LOC375748 | 375748 | LOC375748 | 9  |
| LOC376475 | 376475 | LOC376475 | X  |
| LOC387683 | 387683 | LOC387683 | 10 |
| LOC387686 | 387686 | LOC387686 | 10 |
| LOC387701 | 387701 | LOC387701 | 10 |
| LOC387703 | 387703 | LOC387703 | 10 |
| LOC387720 | 387720 | LOC387720 | 10 |
| LOC387723 | 387723 | LOC387723 | 10 |
| LOC387753 | 387753 | LOC387753 |    |
| LOC387762 | 387762 | LOC387762 | 11 |
| LOC387763 | 387763 | LOC387763 |    |
| LOC387770 | 387770 | LOC387770 |    |
| LOC387790 | 387790 | LOC387790 | 11 |
| LOC387791 | 387791 | LOC387791 |    |
| LOC387820 | 387820 | LOC387820 |    |
| LOC387825 | 387825 | LOC387825 | 12 |
| LOC387856 | 387856 | LOC387856 | 12 |
| LOC387867 | 387867 | LOC387867 |    |
| LOC387876 | 387876 | LOC387876 | 12 |
| LOC387882 | 387882 | LOC387882 | 12 |
| LOC387885 | 387885 | LOC387885 | 12 |
| LOC387924 | 387924 | LOC387924 | 13 |
| LOC387934 | 387934 | LOC387934 |    |
| LOC387939 | 387939 | LOC387939 |    |
| LOC387941 | 387941 | LOC387941 | 13 |
| LOC388002 | 388002 | LOC388002 |    |
| LOC388080 | 388080 | LOC388080 | 15 |
| LOC388122 | 388122 | LOC388122 | 15 |
| LOC388152 | 388152 | LOC388152 | 15 |
| LOC388210 | 388210 | LOC388210 |    |
| LOC388242 | 388242 | LOC388242 | 16 |
| LOC388248 | 388248 | LOC388248 | 16 |
| LOC388255 | 388255 | LOC388255 | 16 |
| LOC388259 | 388259 | LOC388259 | 16 |
| LOC388275 | 388275 | LOC388275 | 18 |
| LOC388276 | 388276 | LOC388276 | 16 |
| LOC388279 | 388279 | LOC388279 | 16 |
| LOC388312 | 388312 | LOC388312 | 5  |
| LOC388339 | 388339 | LOC388339 |    |
| LOC388381 | 388381 | LOC388381 |    |
| LOC388559 | 388559 | LOC388559 | 19 |
| LOC388564 | 388564 | LOC388564 | 19 |
| LOC388588 | 388588 | LOC388588 | 1  |

|           |        |           |    |
|-----------|--------|-----------|----|
| LOC388654 | 388654 | LOC388654 | 4  |
| LOC388681 | 388681 | LOC388681 |    |
| LOC388692 | 388692 | LOC388692 | 1  |
| LOC388743 | 388743 | LOC388743 |    |
| LOC388755 | 388755 | LOC388755 | 1  |
| LOC388789 | 388789 | LOC388789 |    |
| LOC388796 | 388796 | LOC388796 |    |
| LOC388813 | 388813 | LOC388813 | 21 |
| LOC388906 | 388906 | LOC388906 | 22 |
| LOC388955 | 388955 | LOC388955 | 2  |
| LOC388963 | 388963 | LOC388963 | 2  |
| LOC388965 | 388965 | LOC388965 | 2  |
| LOC388969 | 388969 | LOC388969 | 2  |
| LOC389049 | 389049 | LOC389049 | 2  |
| LOC389053 | 389053 | LOC389053 |    |
| LOC389072 | 389072 | LOC389072 |    |
| LOC389101 | 389101 | LOC389101 |    |
| LOC389111 | 389111 | LOC389111 |    |
| LOC389118 | 389118 | LOC389118 | 3  |
| LOC389124 | 389124 | LOC389124 |    |
| LOC389137 | 389137 | LOC389137 | 3  |
| LOC389168 | 389168 | LOC389168 |    |
| LOC389203 | 389203 | LOC389203 |    |
| LOC389286 | 389286 | LOC389286 | 2  |
| LOC389293 | 389293 | LOC389293 | 5  |
| LOC389322 | 389322 | LOC389322 |    |
| LOC389328 | 389328 | LOC389328 | 5  |
| LOC389333 | 389333 | LOC389333 | 5  |
| LOC389362 | 389362 | LOC389362 |    |
| LOC389365 | 389365 | LOC389365 |    |
| LOC389386 | 389386 | LOC389386 |    |
| LOC389404 | 389404 | LOC389404 |    |
| LOC389405 | 389405 | LOC389405 | 6  |
| LOC389422 | 389422 | LOC389422 | 6  |
| LOC389442 | 389442 | LOC389442 |    |
| LOC389457 | 389457 | LOC389457 | 7  |
| LOC389465 | 389465 | LOC389465 |    |
| LOC389517 | 389517 | LOC389517 |    |
| LOC389599 | 389599 | LOC389599 |    |
| LOC389607 | 389607 | LOC389607 |    |
| LOC389633 | 389633 | LOC389633 | 8  |
| LOC389634 | 389634 | LOC389634 | 8  |
| LOC389641 | 389641 | LOC389641 |    |
| LOC389672 | 389672 | LOC389672 | 8  |

|           |        |           |               |
|-----------|--------|-----------|---------------|
| LOC389748 | 389748 | LOC389748 | 9             |
| LOC389791 | 389791 | LOC389791 | 9             |
| LOC389816 | 389816 | LOC389816 |               |
| LOC389830 | 389830 | LOC389830 | 21            |
| LOC389834 | 389834 | LOC389834 | 4 NT_113889.1 |
| LOC389842 | 389842 | LOC389842 |               |
| LOC389873 | 389873 | LOC389873 |               |
| LOC389895 | 389895 | LOC389895 | X             |
| LOC389901 | 389901 | LOC389901 | X             |
| LOC389904 | 389904 | LOC389904 | X             |
| LOC389936 | 389936 | LOC389936 | 10            |
| LOC390183 | 390183 | LOC390183 |               |
| LOC390259 | 390259 | LOC390259 |               |
| LOC390298 | 390298 | LOC390298 |               |
| LOC390345 | 390345 | LOC390345 |               |
| LOC390349 | 390349 | LOC390349 | 12            |
| LOC390427 | 390427 | LOC390427 | 13            |
| LOC390466 | 390466 | LOC390466 | 14            |
| LOC390530 | 390530 | LOC390530 | 21            |
| LOC390547 | 390547 | LOC390547 | 15            |
| LOC390551 | 390551 | LOC390551 | 15            |
| LOC390557 | 390557 | LOC390557 | 15            |
| LOC390578 | 390578 | LOC390578 | 15            |
| LOC390669 | 390669 | LOC390669 |               |
| LOC390688 | 390688 | LOC390688 | 16            |
| LOC390705 | 390705 | LOC390705 | 16            |
| LOC390712 | 390712 | LOC390712 | 16            |
| LOC390829 | 390829 | LOC390829 |               |
| LOC390834 | 390834 | LOC390834 |               |
| LOC390856 | 390856 | LOC390856 |               |
| LOC390858 | 390858 | LOC390858 | 18            |
| LOC390876 | 390876 | LOC390876 | 19            |
| LOC390877 | 390877 | LOC390877 | 19            |
| LOC390975 | 390975 | LOC390975 | 19            |
| LOC391037 | 391037 | LOC391037 | 1             |
| LOC391044 | 391044 | LOC391044 |               |
| LOC391045 | 391045 | LOC391045 | 1             |
| LOC391073 | 391073 | LOC391073 |               |
| LOC391075 | 391075 | LOC391075 | 1             |
| LOC391124 | 391124 | LOC391124 | 1             |
| LOC391135 | 391135 | LOC391135 | 1             |
| LOC391157 | 391157 | LOC391157 | 1             |
| LOC391169 | 391169 | LOC391169 |               |
| LOC391241 | 391241 | LOC391241 |               |

|           |        |           |    |
|-----------|--------|-----------|----|
| LOC391322 | 391322 | LOC391322 |    |
| LOC391370 | 391370 | LOC391370 | 2  |
| LOC391427 | 391427 | LOC391427 | 2  |
| LOC391429 | 391429 | LOC391429 | 2  |
| LOC391532 | 391532 | LOC391532 | 15 |
| LOC391555 | 391555 | LOC391555 |    |
| LOC391574 | 391574 | LOC391574 |    |
| LOC391578 | 391578 | LOC391578 |    |
| LOC391592 | 391592 | LOC391592 |    |
| LOC391655 | 391655 | LOC391655 |    |
| LOC391656 | 391656 | LOC391656 | 4  |
| LOC391670 | 391670 | LOC391670 |    |
| LOC391692 | 391692 | LOC391692 | 4  |
| LOC391703 | 391703 | LOC391703 |    |
| LOC391746 | 391746 | LOC391746 | 5  |
| LOC391764 | 391764 | LOC391764 | 5  |
| LOC391769 | 391769 | LOC391769 |    |
| LOC391777 | 391777 | LOC391777 |    |
| LOC391810 | 391810 | LOC391810 | 5  |
| LOC391811 | 391811 | LOC391811 |    |
| LOC391833 | 391833 | LOC391833 |    |
| LOC392196 | 392196 | LOC392196 | 8  |
| LOC392197 | 392197 | LOC392197 | 8  |
| LOC392221 | 392221 | LOC392221 |    |
| LOC392264 | 392264 | LOC392264 |    |
| LOC392285 | 392285 | LOC392285 | 9  |
| LOC392301 | 392301 | LOC392301 | 9  |
| LOC392435 | 392435 | LOC392435 |    |
| LOC392437 | 392437 | LOC392437 | X  |
| LOC392447 | 392447 | LOC392447 |    |
| LOC392459 | 392459 | LOC392459 | X  |
| LOC392583 | 392583 | LOC392583 | Y  |
| LOC392635 | 392635 | LOC392635 | 7  |
| LOC392713 | 392713 | LOC392713 |    |
| LOC392787 | 392787 | LOC392787 | 7  |
| LOC392843 | 392843 | LOC392843 | 7  |
| LOC392871 | 392871 | LOC392871 | 7  |
| LOC392979 | 392979 | LOC392979 |    |
| LOC393076 | 393076 | LOC393076 | 7  |
| LOC399491 | 399491 | LOC399491 | 16 |
| LOC399715 | 399715 | LOC399715 |    |
| LOC399744 | 399744 | LOC399744 |    |
| LOC399746 | 399746 | LOC399746 |    |
| LOC399748 | 399748 | LOC399748 |    |

|           |        |           |    |
|-----------|--------|-----------|----|
| LOC399804 | 399804 | LOC399804 |    |
| LOC399815 | 399815 | LOC399815 |    |
| LOC399829 | 399829 | LOC399829 | 10 |
| LOC399888 | 399888 | LOC399888 |    |
| LOC399900 | 399900 | LOC399900 | 11 |
| LOC399939 | 399939 | LOC399939 | 11 |
| LOC399942 | 399942 | LOC399942 | 11 |
| LOC399965 | 399965 | LOC399965 |    |
| LOC399988 | 399988 | LOC399988 | 12 |
| LOC400013 | 400013 | LOC400013 |    |
| LOC400027 | 400027 | LOC400027 | 12 |
| LOC400061 | 400061 | LOC400061 |    |
| LOC400120 | 400120 | LOC400120 | 13 |
| LOC400163 | 400163 | LOC400163 |    |
| LOC400174 | 400174 | LOC400174 | 14 |
| LOC400236 | 400236 | LOC400236 |    |
| LOC400388 | 400388 | LOC400388 | 15 |
| LOC400403 | 400403 | LOC400403 |    |
| LOC400406 | 400406 | LOC400406 | 15 |
| LOC400446 | 400446 | LOC400446 |    |
| LOC400455 | 400455 | LOC400455 |    |
| LOC400456 | 400456 | LOC400456 | 15 |
| LOC400464 | 400464 | LOC400464 | 15 |
| LOC400506 | 400506 | LOC400506 | 16 |
| LOC400553 | 400553 | LOC400553 |    |
| LOC400558 | 400558 | LOC400558 |    |
| LOC400581 | 400581 | LOC400581 | 17 |
| LOC400590 | 400590 | LOC400590 |    |
| LOC400657 | 400657 | LOC400657 | 18 |
| LOC400696 | 400696 | LOC400696 | 19 |
| LOC400713 | 400713 | LOC400713 |    |
| LOC400721 | 400721 | LOC400721 |    |
| LOC400750 | 400750 | LOC400750 | 1  |
| LOC400759 | 400759 | LOC400759 |    |
| LOC400768 | 400768 | LOC400768 | 1  |
| LOC400793 | 400793 | LOC400793 | 1  |
| LOC400836 | 400836 | LOC400836 |    |
| LOC400858 | 400858 | LOC400858 |    |
| LOC400879 | 400879 | LOC400879 | 22 |
| LOC400890 | 400890 | LOC400890 | 22 |
| LOC400948 | 400948 | LOC400948 |    |
| LOC400954 | 400954 | LOC400954 | 2  |
| LOC400958 | 400958 | LOC400958 | 2  |
| LOC400963 | 400963 | LOC400963 | 2  |



|           |        |           |    |
|-----------|--------|-----------|----|
| LOC400987 | 400987 | LOC400987 |    |
| LOC401002 | 401002 | LOC401002 |    |
| LOC401010 | 401010 | LOC401010 | 2  |
| LOC401052 | 401052 | LOC401052 | 3  |
| LOC401056 | 401056 | LOC401056 | 3  |
| LOC401068 | 401068 | LOC401068 | 3  |
| LOC401076 | 401076 | LOC401076 |    |
| LOC401093 | 401093 | LOC401093 | 3  |
| LOC401098 | 401098 | LOC401098 |    |
| LOC401101 | 401101 | LOC401101 | 3  |
| LOC401115 | 401115 | LOC401115 |    |
| LOC401127 | 401127 | LOC401127 | 4  |
| LOC401131 | 401131 | LOC401131 | 1  |
| LOC401152 | 401152 | LOC401152 | 4  |
| LOC401164 | 401164 | LOC401164 | 4  |
| LOC401206 | 401206 | LOC401206 | 5  |
| LOC401218 | 401218 | LOC401218 | 5  |
| LOC401233 | 401233 | LOC401233 |    |
| LOC401237 | 401237 | LOC401237 | 6  |
| LOC401238 | 401238 | LOC401238 | 6  |
| LOC401242 | 401242 | LOC401242 |    |
| LOC401252 | 401252 | LOC401252 | 6  |
| LOC401284 | 401284 | LOC401284 | 6  |
| LOC401317 | 401317 | LOC401317 | 7  |
| LOC401321 | 401321 | LOC401321 | 7  |
| LOC401357 | 401357 | LOC401357 | 7  |
| LOC401397 | 401397 | LOC401397 | 7  |
| LOC401433 | 401433 | LOC401433 |    |
| LOC401442 | 401442 | LOC401442 | 8  |
| LOC401497 | 401497 | LOC401497 | 9  |
| LOC401525 | 401525 | LOC401525 | 9  |
| LOC401561 | 401561 | LOC401561 | 9  |
| LOC401640 | 401640 | LOC401640 | 10 |
| LOC401648 | 401648 | LOC401648 |    |
| LOC401650 | 401650 | LOC401650 | 10 |
| LOC401676 | 401676 | LOC401676 |    |
| LOC401778 | 401778 | LOC401778 | 14 |
| LOC401805 | 401805 | LOC401805 |    |
| LOC401845 | 401845 | LOC401845 | 16 |
| LOC401847 | 401847 | LOC401847 |    |
| LOC401895 | 401895 | LOC401895 |    |
| LOC401980 | 401980 | LOC401980 |    |
| LOC402057 | 402057 | LOC402057 | 22 |
| LOC402066 | 402066 | LOC402066 | 2  |

|           |        |           |    |
|-----------|--------|-----------|----|
| LOC402096 | 402096 | LOC402096 | 2  |
| LOC402112 | 402112 | LOC402112 |    |
| LOC402116 | 402116 | LOC402116 |    |
| LOC402145 | 402145 | LOC402145 |    |
| LOC402175 | 402175 | LOC402175 |    |
| LOC402198 | 402198 | LOC402198 |    |
| LOC402221 | 402221 | LOC402221 |    |
| LOC402251 | 402251 | LOC402251 |    |
| LOC402269 | 402269 | LOC402269 | 7  |
| LOC402282 | 402282 | LOC402282 |    |
| LOC402377 | 402377 | LOC402377 | 9  |
| LOC402483 | 402483 | LOC402483 | 7  |
| LOC402509 | 402509 | LOC402509 |    |
| LOC402571 | 402571 | LOC402571 |    |
| LOC402643 | 402643 | LOC402643 |    |
| LOC402665 | 402665 | LOC402665 | 19 |
| LOC402679 | 402679 | LOC402679 |    |
| LOC402694 | 402694 | LOC402694 | 7  |
| LOC407835 | 407835 | LOC407835 | 7  |
| LOC439949 | 439949 | LOC439949 |    |
| LOC439950 | 439950 | LOC439950 | 10 |
| LOC439951 | 439951 | LOC439951 |    |
| LOC439953 | 439953 | LOC439953 | 10 |
| LOC439994 | 439994 | LOC439994 | 10 |
| LOC440015 | 440015 | LOC440015 | 3  |
| LOC440027 | 440027 | LOC440027 | 11 |
| LOC440031 | 440031 | LOC440031 | 11 |
| LOC440043 | 440043 | LOC440043 |    |
| LOC440055 | 440055 | LOC440055 | 11 |
| LOC440061 | 440061 | LOC440061 |    |
| LOC440063 | 440063 | LOC440063 |    |
| LOC440092 | 440092 | LOC440092 | 12 |
| LOC440093 | 440093 | LOC440093 | 12 |
| LOC440104 | 440104 | LOC440104 | 12 |
| LOC440145 | 440145 | LOC440145 | 13 |
| LOC440157 | 440157 | LOC440157 | 14 |
| LOC440160 | 440160 | LOC440160 |    |
| LOC440226 | 440226 | LOC440226 | 15 |
| LOC440277 | 440277 | LOC440277 |    |
| LOC440291 | 440291 | LOC440291 | 15 |
| LOC440292 | 440292 | LOC440292 | 15 |
| LOC440313 | 440313 | LOC440313 | 15 |
| LOC440334 | 440334 | LOC440334 |    |
| LOC440335 | 440335 | LOC440335 |    |

|           |        |           |    |
|-----------|--------|-----------|----|
| LOC440341 | 440341 | LOC440341 | 16 |
| LOC440350 | 440350 | LOC440350 | 16 |
| LOC440353 | 440353 | LOC440353 | 16 |
| LOC440356 | 440356 | LOC440356 | 16 |
| LOC440359 | 440359 | LOC440359 | 16 |
| LOC440366 | 440366 | LOC440366 |    |
| LOC440386 | 440386 | LOC440386 | 16 |
| LOC440396 | 440396 | LOC440396 | 17 |
| LOC440402 | 440402 | LOC440402 | 17 |
| LOC440407 | 440407 | LOC440407 |    |
| LOC440434 | 440434 | LOC440434 | 17 |
| LOC440459 | 440459 | LOC440459 |    |
| LOC440461 | 440461 | LOC440461 |    |
| LOC440498 | 440498 | LOC440498 |    |
| LOC440503 | 440503 | LOC440503 | 19 |
| LOC440508 | 440508 | LOC440508 |    |
| LOC440518 | 440518 | LOC440518 | 19 |
| LOC440551 | 440551 | LOC440551 | 1  |
| LOC440563 | 440563 | LOC440563 | 1  |
| LOC440589 | 440589 | LOC440589 |    |
| LOC440687 | 440687 | LOC440687 |    |
| LOC440706 | 440706 | LOC440706 | 1  |
| LOC440731 | 440731 | LOC440731 | 1  |
| LOC440733 | 440733 | LOC440733 | 1  |
| LOC440748 | 440748 | LOC440748 | 1  |
| LOC440776 | 440776 | LOC440776 | 21 |
| LOC440820 | 440820 | LOC440820 |    |
| LOC440829 | 440829 | LOC440829 | 22 |
| LOC440836 | 440836 | LOC440836 | 22 |
| LOC440848 | 440848 | LOC440848 | 2  |
| LOC440864 | 440864 | LOC440864 |    |
| LOC440871 | 440871 | LOC440871 | 2  |
| LOC440895 | 440895 | LOC440895 | 2  |
| LOC440900 | 440900 | LOC440900 | 2  |
| LOC440917 | 440917 | LOC440917 |    |
| LOC440926 | 440926 | LOC440926 | 2  |
| LOC440927 | 440927 | LOC440927 |    |
| LOC440928 | 440928 | LOC440928 |    |
| LOC440934 | 440934 | LOC440934 |    |
| LOC440957 | 440957 | LOC440957 | 3  |
| LOC440991 | 440991 | LOC440991 | 3  |
| LOC440992 | 440992 | LOC440992 | 3  |
| LOC440993 | 440993 | LOC440993 | 3  |
| LOC441007 | 441007 | LOC441007 |    |

|           |        |           |    |
|-----------|--------|-----------|----|
| LOC441009 | 441009 | LOC441009 |    |
| LOC441019 | 441019 | LOC441019 | 4  |
| LOC441034 | 441034 | LOC441034 |    |
| LOC441046 | 441046 | LOC441046 | 4  |
| LOC441050 | 441050 | LOC441050 | 4  |
| LOC441054 | 441054 | LOC441054 |    |
| LOC441056 | 441056 | LOC441056 | 4  |
| LOC441061 | 441061 | LOC441061 | 5  |
| LOC441073 | 441073 | LOC441073 |    |
| LOC441087 | 441087 | LOC441087 | 5  |
| LOC441089 | 441089 | LOC441089 | 5  |
| LOC441097 | 441097 | LOC441097 |    |
| LOC441119 | 441119 | LOC441119 | 5  |
| LOC441124 | 441124 | LOC441124 | 1  |
| LOC441131 | 441131 | LOC441131 |    |
| LOC441150 | 441150 | LOC441150 |    |
| LOC441179 | 441179 | LOC441179 | 6  |
| LOC441191 | 441191 | LOC441191 |    |
| LOC441193 | 441193 | LOC441193 | 7  |
| LOC441196 | 441196 | LOC441196 | 7  |
| LOC441241 | 441241 | LOC441241 |    |
| LOC441242 | 441242 | LOC441242 | 7  |
| LOC441253 | 441253 | LOC441253 | 7  |
| LOC441282 | 441282 | LOC441282 |    |
| LOC441347 | 441347 | LOC441347 |    |
| LOC441378 | 441378 | LOC441378 |    |
| LOC441408 | 441408 | LOC441408 | 9  |
| LOC441420 | 441420 | LOC441420 | 9  |
| LOC441436 | 441436 | LOC441436 |    |
| LOC441453 | 441453 | LOC441453 | 11 |
| LOC441454 | 441454 | LOC441454 |    |
| LOC441455 | 441455 | LOC441455 |    |
| LOC441459 | 441459 | LOC441459 | 9  |
| LOC441461 | 441461 | LOC441461 | 9  |
| LOC441481 | 441481 | LOC441481 |    |
| LOC441484 | 441484 | LOC441484 |    |
| LOC441487 | 441487 | LOC441487 |    |
| LOC441505 | 441505 | LOC441505 | X  |
| LOC441506 | 441506 | LOC441506 | 16 |
| LOC441511 | 441511 | LOC441511 | X  |
| LOC441528 | 441528 | LOC441528 | X  |
| LOC441533 | 441533 | LOC441533 | Y  |
| LOC441554 | 441554 | LOC441554 |    |
| LOC441582 | 441582 | LOC441582 | 3  |

|           |        |           |    |
|-----------|--------|-----------|----|
| LOC441632 | 441632 | LOC441632 | 12 |
| LOC441642 | 441642 | LOC441642 |    |
| LOC441662 | 441662 | LOC441662 | 13 |
| LOC441666 | 441666 | LOC441666 | 10 |
| LOC441714 | 441714 | LOC441714 |    |
| LOC441728 | 441728 | LOC441728 | 15 |
| LOC441734 | 441734 | LOC441734 | 15 |
| LOC441762 | 441762 | LOC441762 | 16 |
| LOC441763 | 441763 | LOC441763 | 16 |
| LOC441773 | 441773 | LOC441773 | 16 |
| LOC441775 | 441775 | LOC441775 |    |
| LOC441782 | 441782 | LOC441782 |    |
| LOC441795 | 441795 | LOC441795 | 17 |
| LOC441806 | 441806 | LOC441806 | 18 |
| LOC441811 | 441811 | LOC441811 |    |
| LOC441864 | 441864 | LOC441864 | 19 |
| LOC441868 | 441868 | LOC441868 |    |
| LOC441870 | 441870 | LOC441870 |    |
| LOC441873 | 441873 | LOC441873 | 1  |
| LOC441876 | 441876 | LOC441876 | 1  |
| LOC441896 | 441896 | LOC441896 |    |
| LOC441956 | 441956 | LOC441956 |    |
| LOC441957 | 441957 | LOC441957 | 21 |
| LOC442020 | 442020 | LOC442020 | 2  |
| LOC442041 | 442041 | LOC442041 |    |
| LOC442057 | 442057 | LOC442057 |    |
| LOC442075 | 442075 | LOC442075 |    |
| LOC442153 | 442153 | LOC442153 | 6  |
| LOC442181 | 442181 | LOC442181 | 6  |
| LOC442283 | 442283 | LOC442283 |    |
| LOC442299 | 442299 | LOC442299 |    |
| LOC442501 | 442501 | LOC442501 |    |
| LOC442517 | 442517 | LOC442517 |    |
| LOC442519 | 442519 | LOC442519 |    |
| LOC442535 | 442535 | LOC442535 |    |
| LOC442572 | 442572 | LOC442572 |    |
| LOC442582 | 442582 | LOC442582 | 7  |
| LOC442609 | 442609 | LOC442609 |    |
| LOC442711 | 442711 | LOC442711 |    |
| LOC442726 | 442726 | LOC442726 |    |
| LOC442727 | 442727 | LOC442727 | 7  |
| LOC474170 | 474170 | LOC474170 | 17 |
| LOC497190 | 497190 | LOC497190 | 16 |
| LOC51145  | 51145  | LOC51145  | 9  |

|           |        |           |    |
|-----------|--------|-----------|----|
| LOC51149  | 51149  | LOC51149  | 5  |
| LOC541471 | 541471 | LOC541471 | 2  |
| LOC541473 | 541473 | LOC541473 | 7  |
| LOC550112 | 550112 | LOC550112 | 4  |
| LOC550631 | 550631 | LOC550631 | 22 |
| LOC550643 | 550643 | LOC550643 | X  |
| LOC552889 | 552889 | LOC552889 | 12 |
| LOC553158 | 553158 | LOC553158 | 22 |
| LOC554175 | 554175 | LOC554175 | 15 |
| LOC554203 | 554203 | LOC554203 | X  |
| LOC554206 | 554206 | LOC554206 |    |
| LOC554208 | 554208 | LOC554208 |    |
| LOC55908  | 55908  | LOC55908  | 19 |
| LOC57399  | 57399  | LOC57399  |    |
| LOC606724 | 606724 | LOC606724 | 16 |
| LOC613037 | 613037 | LOC613037 | 16 |
| LOC613266 | 613266 | LOC613266 | 20 |
| LOC641298 | 641298 | LOC641298 | 16 |
| LOC641365 | 641365 | LOC641365 | 4  |
| LOC641697 | 641697 | LOC641697 | 17 |
| LOC641700 | 641700 | LOC641700 | 5  |
| LOC641716 | 641716 | LOC641716 |    |
| LOC641724 | 641724 | LOC641724 |    |
| LOC641741 | 641741 | LOC641741 |    |
| LOC641746 | 641746 | LOC641746 | 7  |
| LOC641751 | 641751 | LOC641751 |    |
| LOC641753 | 641753 | LOC641753 |    |
| LOC641772 | 641772 | LOC641772 |    |
| LOC641784 | 641784 | LOC641784 | 7  |
| LOC641785 | 641785 | LOC641785 |    |
| LOC641788 | 641788 | LOC641788 |    |
| LOC641801 | 641801 | LOC641801 |    |
| LOC641806 | 641806 | LOC641806 |    |
| LOC641814 | 641814 | LOC641814 | 7  |
| LOC641815 | 641815 | LOC641815 |    |
| LOC641820 | 641820 | LOC641820 |    |
| LOC641825 | 641825 | LOC641825 |    |
| LOC641841 | 641841 | LOC641841 |    |
| LOC641844 | 641844 | LOC641844 | 7  |
| LOC641848 | 641848 | LOC641848 |    |
| LOC641849 | 641849 | LOC641849 |    |
| LOC641852 | 641852 | LOC641852 |    |
| LOC641860 | 641860 | LOC641860 |    |
| LOC641901 | 641901 | LOC641901 |    |

|           |        |           |    |
|-----------|--------|-----------|----|
| LOC641908 | 641908 | LOC641908 |    |
| LOC641922 | 641922 | LOC641922 | 7  |
| LOC641939 | 641939 | LOC641939 |    |
| LOC641941 | 641941 | LOC641941 |    |
| LOC641944 | 641944 | LOC641944 |    |
| LOC641953 | 641953 | LOC641953 |    |
| LOC641958 | 641958 | LOC641958 |    |
| LOC641964 | 641964 | LOC641964 |    |
| LOC641972 | 641972 | LOC641972 |    |
| LOC641975 | 641975 | LOC641975 |    |
| LOC641978 | 641978 | LOC641978 |    |
| LOC641987 | 641987 | LOC641987 |    |
| LOC641989 | 641989 | LOC641989 |    |
| LOC641990 | 641990 | LOC641990 | 7  |
| LOC641992 | 641992 | LOC641992 |    |
| LOC641996 | 641996 | LOC641996 |    |
| LOC642003 | 642003 | LOC642003 |    |
| LOC642017 | 642017 | LOC642017 |    |
| LOC642031 | 642031 | LOC642031 |    |
| LOC642035 | 642035 | LOC642035 |    |
| LOC642049 | 642049 | LOC642049 |    |
| LOC642072 | 642072 | LOC642072 |    |
| LOC642073 | 642073 | LOC642073 | 6  |
| LOC642076 | 642076 | LOC642076 | 6  |
| LOC642077 | 642077 | LOC642077 |    |
| LOC642082 | 642082 | LOC642082 |    |
| LOC642083 | 642083 | LOC642083 |    |
| LOC642093 | 642093 | LOC642093 |    |
| LOC642103 | 642103 | LOC642103 |    |
| LOC642104 | 642104 | LOC642104 |    |
| LOC642105 | 642105 | LOC642105 |    |
| LOC642109 | 642109 | LOC642109 |    |
| LOC642113 | 642113 | LOC642113 |    |
| LOC642120 | 642120 | LOC642120 |    |
| LOC642121 | 642121 | LOC642121 |    |
| LOC642127 | 642127 | LOC642127 |    |
| LOC642131 | 642131 | LOC642131 | 15 |
| LOC642141 | 642141 | LOC642141 |    |
| LOC642153 | 642153 | LOC642153 |    |
| LOC642155 | 642155 | LOC642155 |    |
| LOC642161 | 642161 | LOC642161 |    |
| LOC642168 | 642168 | LOC642168 |    |
| LOC642169 | 642169 | LOC642169 |    |
| LOC642176 | 642176 | LOC642176 |    |

|           |        |           |    |
|-----------|--------|-----------|----|
| LOC642181 | 642181 | LOC642181 |    |
| LOC642188 | 642188 | LOC642188 |    |
| LOC642194 | 642194 | LOC642194 |    |
| LOC642197 | 642197 | LOC642197 |    |
| LOC642198 | 642198 | LOC642198 |    |
| LOC642204 | 642204 | LOC642204 |    |
| LOC642214 | 642214 | LOC642214 |    |
| LOC642216 | 642216 | LOC642216 |    |
| LOC642249 | 642249 | LOC642249 |    |
| LOC642250 | 642250 | LOC642250 | 1  |
| LOC642252 | 642252 | LOC642252 | 3  |
| LOC642255 | 642255 | LOC642255 |    |
| LOC642257 | 642257 | LOC642257 | 11 |
| LOC642263 | 642263 | LOC642263 | 6  |
| LOC642267 | 642267 | LOC642267 | 11 |
| LOC642269 | 642269 | LOC642269 | 8  |
| LOC642277 | 642277 | LOC642277 | X  |
| LOC642282 | 642282 | LOC642282 | 4  |
| LOC642290 | 642290 | LOC642290 | 19 |
| LOC642299 | 642299 | LOC642299 | 1  |
| LOC642305 | 642305 | LOC642305 | 4  |
| LOC642312 | 642312 | LOC642312 | 3  |
| LOC642333 | 642333 | LOC642333 |    |
| LOC642340 | 642340 | LOC642340 | 2  |
| LOC642348 | 642348 | LOC642348 | 6  |
| LOC642357 | 642357 | LOC642357 |    |
| LOC642361 | 642361 | LOC642361 | 10 |
| LOC642362 | 642362 | LOC642362 | 11 |
| LOC642370 | 642370 | LOC642370 | 17 |
| LOC642373 | 642373 | LOC642373 | 9  |
| LOC642381 | 642381 | LOC642381 | 4  |
| LOC642393 | 642393 | LOC642393 | 1  |
| LOC642398 | 642398 | LOC642398 | 21 |
| LOC642399 | 642399 | LOC642399 | 1  |
| LOC642412 | 642412 | LOC642412 | 1  |
| LOC642418 | 642418 | LOC642418 | 4  |
| LOC642419 | 642419 | LOC642419 | 4  |
| LOC642420 | 642420 | LOC642420 | 6  |
| LOC642423 | 642423 | LOC642423 | 15 |
| LOC642443 | 642443 | LOC642443 | 6  |
| LOC642446 | 642446 | LOC642446 |    |
| LOC642447 | 642447 | LOC642447 | 18 |
| LOC642449 | 642449 | LOC642449 | X  |
| LOC642450 | 642450 | LOC642450 | X  |



|           |        |           |    |
|-----------|--------|-----------|----|
| LOC642456 | 642456 | LOC642456 | 1  |
| LOC642458 | 642458 | LOC642458 | 14 |
| LOC642460 | 642460 | LOC642460 | 21 |
| LOC642469 | 642469 | LOC642469 | 1  |
| LOC642486 | 642486 | LOC642486 | 21 |
| LOC642489 | 642489 | LOC642489 | 6  |
| LOC642502 | 642502 | LOC642502 | 17 |
| LOC642503 | 642503 | LOC642503 | 4  |
| LOC642513 | 642513 | LOC642513 |    |
| LOC642516 | 642516 | LOC642516 | 1  |
| LOC642538 | 642538 | LOC642538 | 10 |
| LOC642539 | 642539 | LOC642539 | 12 |
| LOC642546 | 642546 | LOC642546 |    |
| LOC642553 | 642553 | LOC642553 | 3  |
| LOC642559 | 642559 | LOC642559 | 12 |
| LOC642567 | 642567 | LOC642567 |    |
| LOC642571 | 642571 | LOC642571 | 2  |
| LOC642580 | 642580 | LOC642580 | 12 |
| LOC642585 | 642585 | LOC642585 |    |
| LOC642590 | 642590 | LOC642590 |    |
| LOC642591 | 642591 | LOC642591 | 10 |
| LOC642595 | 642595 | LOC642595 | 8  |
| LOC642606 | 642606 | LOC642606 | 12 |
| LOC642607 | 642607 | LOC642607 | 17 |
| LOC642637 | 642637 | LOC642637 | 4  |
| LOC642656 | 642656 | LOC642656 | 4  |
| LOC642661 | 642661 | LOC642661 | 14 |
| LOC642672 | 642672 | LOC642672 |    |
| LOC642675 | 642675 | LOC642675 | 1  |
| LOC642677 | 642677 | LOC642677 | 15 |
| LOC642678 | 642678 | LOC642678 | 2  |
| LOC642680 | 642680 | LOC642680 | 6  |
| LOC642681 | 642681 | LOC642681 |    |
| LOC642702 | 642702 | LOC642702 | 21 |
| LOC642707 | 642707 | LOC642707 |    |
| LOC642712 | 642712 | LOC642712 | 18 |
| LOC642732 | 642732 | LOC642732 |    |
| LOC642736 | 642736 | LOC642736 | 22 |
| LOC642740 | 642740 | LOC642740 |    |
| LOC642741 | 642741 | LOC642741 |    |
| LOC642751 | 642751 | LOC642751 | X  |
| LOC642755 | 642755 | LOC642755 | 15 |
| LOC642757 | 642757 | LOC642757 |    |
| LOC642759 | 642759 | LOC642759 | 10 |

|           |        |           |    |
|-----------|--------|-----------|----|
| LOC642761 | 642761 | LOC642761 | 16 |
| LOC642762 | 642762 | LOC642762 | 2  |
| LOC642765 | 642765 | LOC642765 | 6  |
| LOC642769 | 642769 | LOC642769 | 22 |
| LOC642771 | 642771 | LOC642771 | 15 |
| LOC642772 | 642772 | LOC642772 | 16 |
| LOC642773 | 642773 | LOC642773 | 16 |
| LOC642776 | 642776 | LOC642776 | X  |
| LOC642778 | 642778 | LOC642778 | 16 |
| LOC642781 | 642781 | LOC642781 | 5  |
| LOC642784 | 642784 | LOC642784 |    |
| LOC642799 | 642799 | LOC642799 | 16 |
| LOC642804 | 642804 | LOC642804 | X  |
| LOC642817 | 642817 | LOC642817 |    |
| LOC642820 | 642820 | LOC642820 | 10 |
| LOC642838 | 642838 | LOC642838 | 2  |
| LOC642843 | 642843 | LOC642843 | 17 |
| LOC642851 | 642851 | LOC642851 | 17 |
| LOC642852 | 642852 | LOC642852 | 21 |
| LOC642853 | 642853 | LOC642853 | 5  |
| LOC642856 | 642856 | LOC642856 | X  |
| LOC642859 | 642859 | LOC642859 | 8  |
| LOC642863 | 642863 | LOC642863 | 5  |
| LOC642866 | 642866 | LOC642866 | 8  |
| LOC642869 | 642869 | LOC642869 |    |
| LOC642888 | 642888 | LOC642888 | 9  |
| LOC642897 | 642897 | LOC642897 | 11 |
| LOC642904 | 642904 | LOC642904 | 13 |
| LOC642909 | 642909 | LOC642909 | 5  |
| LOC642914 | 642914 | LOC642914 | 8  |
| LOC642918 | 642918 | LOC642918 | 12 |
| LOC642930 | 642930 | LOC642930 | 3  |
| LOC642934 | 642934 | LOC642934 |    |
| LOC642939 | 642939 | LOC642939 | X  |
| LOC642943 | 642943 | LOC642943 | 9  |
| LOC642946 | 642946 | LOC642946 | 1  |
| LOC642947 | 642947 | LOC642947 | 9  |
| LOC642956 | 642956 | LOC642956 |    |
| LOC642962 | 642962 | LOC642962 | 3  |
| LOC642966 | 642966 | LOC642966 | 17 |
| LOC642969 | 642969 | LOC642969 | 12 |
| LOC642975 | 642975 | LOC642975 |    |
| LOC642978 | 642978 | LOC642978 | 15 |
| LOC642981 | 642981 | LOC642981 | 1  |

|           |        |           |    |
|-----------|--------|-----------|----|
| LOC643000 | 643000 | LOC643000 | X  |
| LOC643011 | 643011 | LOC643011 | 13 |
| LOC643018 | 643018 | LOC643018 | 20 |
| LOC643031 | 643031 | LOC643031 | 5  |
| LOC643033 | 643033 | LOC643033 | X  |
| LOC643035 | 643035 | LOC643035 | 1  |
| LOC643039 | 643039 | LOC643039 | 3  |
| LOC643040 | 643040 | LOC643040 | 4  |
| LOC643047 | 643047 | LOC643047 | 5  |
| LOC643075 | 643075 | LOC643075 | 6  |
| LOC643089 | 643089 | LOC643089 | 10 |
| LOC643094 | 643094 | LOC643094 | 4  |
| LOC643100 | 643100 | LOC643100 | 4  |
| LOC643109 | 643109 | LOC643109 | 2  |
| LOC643120 | 643120 | LOC643120 | 3  |
| LOC643131 | 643131 | LOC643131 | 3  |
| LOC643133 | 643133 | LOC643133 | 9  |
| LOC643167 | 643167 | LOC643167 |    |
| LOC643171 | 643171 | LOC643171 | 13 |
| LOC643176 | 643176 | LOC643176 | 13 |
| LOC643197 | 643197 | LOC643197 | 8  |
| LOC643201 | 643201 | LOC643201 | 5  |
| LOC643203 | 643203 | LOC643203 | 21 |
| LOC643210 | 643210 | LOC643210 | 9  |
| LOC643216 | 643216 | LOC643216 | 8  |
| LOC643219 | 643219 | LOC643219 | 2  |
| LOC643224 | 643224 | LOC643224 | 9  |
| LOC643226 | 643226 | LOC643226 | 5  |
| LOC643231 | 643231 | LOC643231 | 20 |
| LOC643233 | 643233 | LOC643233 |    |
| LOC643234 | 643234 | LOC643234 | 6  |
| LOC643236 | 643236 | LOC643236 | 10 |
| LOC643246 | 643246 | LOC643246 | 12 |
| LOC643262 | 643262 | LOC643262 | 9  |
| LOC643266 | 643266 | LOC643266 | 22 |
| LOC643275 | 643275 | LOC643275 | 12 |
| LOC643278 | 643278 | LOC643278 | 17 |
| LOC643284 | 643284 | LOC643284 | 9  |
| LOC643287 | 643287 | LOC643287 | 12 |
| LOC643296 | 643296 | LOC643296 | 4  |
| LOC643300 | 643300 | LOC643300 | 5  |
| LOC643310 | 643310 | LOC643310 | X  |
| LOC643311 | 643311 | LOC643311 | X  |
| LOC643319 | 643319 | LOC643319 | 8  |

|           |        |           |    |
|-----------|--------|-----------|----|
| LOC643331 | 643331 | LOC643331 | 12 |
| LOC643336 | 643336 | LOC643336 |    |
| LOC643338 | 643338 | LOC643338 |    |
| LOC643339 | 643339 | LOC643339 | 12 |
| LOC643344 | 643344 | LOC643344 | 21 |
| LOC643357 | 643357 | LOC643357 | 7  |
| LOC643358 | 643358 | LOC643358 |    |
| LOC643365 | 643365 | LOC643365 | 13 |
| LOC643368 | 643368 | LOC643368 | 15 |
| LOC643384 | 643384 | LOC643384 | 4  |
| LOC643387 | 643387 | LOC643387 | 2  |
| LOC643389 | 643389 | LOC643389 | 9  |
| LOC643396 | 643396 | LOC643396 | 1  |
| LOC643403 | 643403 | LOC643403 | 11 |
| LOC643409 | 643409 | LOC643409 | Y  |
| LOC643423 | 643423 | LOC643423 | 21 |
| LOC643429 | 643429 | LOC643429 | 11 |
| LOC643430 | 643430 | LOC643430 | 15 |
| LOC643432 | 643432 | LOC643432 | 6  |
| LOC643433 | 643433 | LOC643433 | 6  |
| LOC643435 | 643435 | LOC643435 | 12 |
| LOC643438 | 643438 | LOC643438 | 7  |
| LOC643446 | 643446 | LOC643446 | 4  |
| LOC643449 | 643449 | LOC643449 |    |
| LOC643451 | 643451 | LOC643451 | 9  |
| LOC643452 | 643452 | LOC643452 | 6  |
| LOC643461 | 643461 | LOC643461 |    |
| LOC643475 | 643475 | LOC643475 | 10 |
| LOC643503 | 643503 | LOC643503 | 20 |
| LOC643505 | 643505 | LOC643505 | 7  |
| LOC643507 | 643507 | LOC643507 |    |
| LOC643509 | 643509 | LOC643509 | 18 |
| LOC643534 | 643534 | LOC643534 |    |
| LOC643577 | 643577 | LOC643577 | 3  |
| LOC643580 | 643580 | LOC643580 | 10 |
| LOC643581 | 643581 | LOC643581 | 10 |
| LOC643590 | 643590 | LOC643590 | 11 |
| LOC643594 | 643594 | LOC643594 | 5  |
| LOC643596 | 643596 | LOC643596 | 9  |
| LOC643598 | 643598 | LOC643598 | 1  |
| LOC643604 | 643604 | LOC643604 | 5  |
| LOC643612 | 643612 | LOC643612 | 17 |
| LOC643624 | 643624 | LOC643624 |    |
| LOC643626 | 643626 | LOC643626 | 20 |

|           |        |           |    |
|-----------|--------|-----------|----|
| LOC643634 | 643634 | LOC643634 | 3  |
| LOC643637 | 643637 | LOC643637 |    |
| LOC643648 | 643648 | LOC643648 | 9  |
| LOC643652 | 643652 | LOC643652 |    |
| LOC643660 | 643660 | LOC643660 | 10 |
| LOC643662 | 643662 | LOC643662 | 12 |
| LOC643668 | 643668 | LOC643668 | 12 |
| LOC643670 | 643670 | LOC643670 | 1  |
| LOC643672 | 643672 | LOC643672 | 12 |
| LOC643700 | 643700 | LOC643700 | 19 |
| LOC643702 | 643702 | LOC643702 | 5  |
| LOC643712 | 643712 | LOC643712 | 14 |
| LOC643731 | 643731 | LOC643731 | 10 |
| LOC643733 | 643733 | LOC643733 |    |
| LOC643738 | 643738 | LOC643738 | 3  |
| LOC643747 | 643747 | LOC643747 | 12 |
| LOC643750 | 643750 | LOC643750 | 9  |
| LOC643755 | 643755 | LOC643755 | 12 |
| LOC643757 | 643757 | LOC643757 | X  |
| LOC643763 | 643763 | LOC643763 | 8  |
| LOC643768 | 643768 | LOC643768 |    |
| LOC643772 | 643772 | LOC643772 | 9  |
| LOC643790 | 643790 | LOC643790 | 15 |
| LOC643791 | 643791 | LOC643791 | 4  |
| LOC643809 | 643809 | LOC643809 |    |
| LOC643811 | 643811 | LOC643811 | 15 |
| LOC643831 | 643831 | LOC643831 | 8  |
| LOC643836 | 643836 | LOC643836 | 5  |
| LOC643837 | 643837 | LOC643837 | 1  |
| LOC643855 | 643855 | LOC643855 |    |
| LOC643856 | 643856 | LOC643856 | 12 |
| LOC643863 | 643863 | LOC643863 | 10 |
| LOC643870 | 643870 | LOC643870 | 6  |
| LOC643872 | 643872 | LOC643872 | 14 |
| LOC643873 | 643873 | LOC643873 |    |
| LOC643882 | 643882 | LOC643882 | 12 |
| LOC643888 | 643888 | LOC643888 | X  |
| LOC643894 | 643894 | LOC643894 | X  |
| LOC643903 | 643903 | LOC643903 | 7  |
| LOC643911 | 643911 | LOC643911 | 16 |
| LOC643912 | 643912 | LOC643912 | 17 |
| LOC643918 | 643918 | LOC643918 | 18 |
| LOC643920 | 643920 | LOC643920 | 7  |
| LOC643927 | 643927 | LOC643927 | 9  |

|           |        |           |    |
|-----------|--------|-----------|----|
| LOC643933 | 643933 | LOC643933 |    |
| LOC643948 | 643948 | LOC643948 | 1  |
| LOC643949 | 643949 | LOC643949 |    |
| LOC643955 | 643955 | LOC643955 | 7  |
| LOC643960 | 643960 | LOC643960 |    |
| LOC643965 | 643965 | LOC643965 | 1  |
| LOC643977 | 643977 | LOC643977 | 5  |
| LOC643982 | 643982 | LOC643982 | 17 |
| LOC643985 | 643985 | LOC643985 | 9  |
| LOC643988 | 643988 | LOC643988 | 1  |
| LOC643997 | 643997 | LOC643997 | 2  |
| LOC643998 | 643998 | LOC643998 | 5  |
| LOC644003 | 644003 | LOC644003 | 4  |
| LOC644010 | 644010 | LOC644010 | 5  |
| LOC644011 | 644011 | LOC644011 | 10 |
| LOC644019 | 644019 | LOC644019 | 9  |
| LOC644021 | 644021 | LOC644021 | 10 |
| LOC644029 | 644029 | LOC644029 | 15 |
| LOC644033 | 644033 | LOC644033 | 8  |
| LOC644037 | 644037 | LOC644037 | 5  |
| LOC644039 | 644039 | LOC644039 | 9  |
| LOC644046 | 644046 | LOC644046 | 9  |
| LOC644047 | 644047 | LOC644047 | 1  |
| LOC644056 | 644056 | LOC644056 | 2  |
| LOC644063 | 644063 | LOC644063 | 3  |
| LOC644068 | 644068 | LOC644068 | 1  |
| LOC644070 | 644070 | LOC644070 | 17 |
| LOC644074 | 644074 | LOC644074 | 9  |
| LOC644075 | 644075 | LOC644075 | 1  |
| LOC644083 | 644083 | LOC644083 | 1  |
| LOC644091 | 644091 | LOC644091 | 8  |
| LOC644093 | 644093 | LOC644093 |    |
| LOC644096 | 644096 | LOC644096 | 19 |
| LOC644097 | 644097 | LOC644097 | 2  |
| LOC644098 | 644098 | LOC644098 | 10 |
| LOC644099 | 644099 | LOC644099 |    |
| LOC644100 | 644100 | LOC644100 | 5  |
| LOC644101 | 644101 | LOC644101 |    |
| LOC644112 | 644112 | LOC644112 | 6  |
| LOC644124 | 644124 | LOC644124 | 17 |
| LOC644128 | 644128 | LOC644128 | 8  |
| LOC644132 | 644132 | LOC644132 | 17 |
| LOC644144 | 644144 | LOC644144 | 17 |
| LOC644155 | 644155 | LOC644155 | 1  |

|           |        |           |    |
|-----------|--------|-----------|----|
| LOC644157 | 644157 | LOC644157 | 17 |
| LOC644162 | 644162 | LOC644162 | 10 |
| LOC644168 | 644168 | LOC644168 |    |
| LOC644173 | 644173 | LOC644173 | 4  |
| LOC644184 | 644184 | LOC644184 | 12 |
| LOC644186 | 644186 | LOC644186 |    |
| LOC644191 | 644191 | LOC644191 | 17 |
| LOC644200 | 644200 | LOC644200 | X  |
| LOC644214 | 644214 | LOC644214 | 1  |
| LOC644215 | 644215 | LOC644215 | 10 |
| LOC644224 | 644224 | LOC644224 | 2  |
| LOC644234 | 644234 | LOC644234 | X  |
| LOC644241 | 644241 | LOC644241 | 6  |
| LOC644246 | 644246 | LOC644246 | 17 |
| LOC644250 | 644250 | LOC644250 | 13 |
| LOC644254 | 644254 | LOC644254 | 17 |
| LOC644256 | 644256 | LOC644256 | 17 |
| LOC644264 | 644264 | LOC644264 | 17 |
| LOC644266 | 644266 | LOC644266 | 21 |
| LOC644276 | 644276 | LOC644276 | 10 |
| LOC644285 | 644285 | LOC644285 | 5  |
| LOC644286 | 644286 | LOC644286 | 12 |
| LOC644295 | 644295 | LOC644295 | 14 |
| LOC644305 | 644305 | LOC644305 | X  |
| LOC644310 | 644310 | LOC644310 |    |
| LOC644311 | 644311 | LOC644311 | 9  |
| LOC644315 | 644315 | LOC644315 | 17 |
| LOC644322 | 644322 | LOC644322 | 9  |
| LOC644330 | 644330 | LOC644330 | 19 |
| LOC644334 | 644334 | LOC644334 |    |
| LOC644335 | 644335 | LOC644335 | 8  |
| LOC644350 | 644350 | LOC644350 | 17 |
| LOC644353 | 644353 | LOC644353 |    |
| LOC644359 | 644359 | LOC644359 | 12 |
| LOC644360 | 644360 | LOC644360 | 14 |
| LOC644363 | 644363 | LOC644363 |    |
| LOC644380 | 644380 | LOC644380 | 22 |
| LOC644391 | 644391 | LOC644391 | 17 |
| LOC644397 | 644397 | LOC644397 |    |
| LOC644404 | 644404 | LOC644404 | 1  |
| LOC644412 | 644412 | LOC644412 | 10 |
| LOC644415 | 644415 | LOC644415 |    |
| LOC644419 | 644419 | LOC644419 | 4  |
| LOC644420 | 644420 | LOC644420 | 5  |

|           |        |           |    |
|-----------|--------|-----------|----|
| LOC644421 | 644421 | LOC644421 | 8  |
| LOC644422 | 644422 | LOC644422 |    |
| LOC644423 | 644423 | LOC644423 | 17 |
| LOC644424 | 644424 | LOC644424 | 1  |
| LOC644429 | 644429 | LOC644429 |    |
| LOC644433 | 644433 | LOC644433 | 1  |
| LOC644444 | 644444 | LOC644444 | 3  |
| LOC644450 | 644450 | LOC644450 | 1  |
| LOC644464 | 644464 | LOC644464 |    |
| LOC644472 | 644472 | LOC644472 | 11 |
| LOC644474 | 644474 | LOC644474 | 1  |
| LOC644480 | 644480 | LOC644480 | 6  |
| LOC644500 | 644500 | LOC644500 | 5  |
| LOC644517 | 644517 | LOC644517 | 4  |
| LOC644519 | 644519 | LOC644519 | X  |
| LOC644528 | 644528 | LOC644528 | X  |
| LOC644537 | 644537 | LOC644537 | 9  |
| LOC644544 | 644544 | LOC644544 | 16 |
| LOC644548 | 644548 | LOC644548 | 4  |
| LOC644558 | 644558 | LOC644558 | 9  |
| LOC644563 | 644563 | LOC644563 |    |
| LOC644584 | 644584 | LOC644584 |    |
| LOC644586 | 644586 | LOC644586 | 7  |
| LOC644589 | 644589 | LOC644589 |    |
| LOC644590 | 644590 | LOC644590 | 1  |
| LOC644591 | 644591 | LOC644591 | 1  |
| LOC644593 | 644593 | LOC644593 | 2  |
| LOC644596 | 644596 | LOC644596 | X  |
| LOC644598 | 644598 | LOC644598 | 1  |
| LOC644607 | 644607 | LOC644607 | 12 |
| LOC644615 | 644615 | LOC644615 | 12 |
| LOC644617 | 644617 | LOC644617 | 2  |
| LOC644619 | 644619 | LOC644619 | 7  |
| LOC644623 | 644623 | LOC644623 | 13 |
| LOC644624 | 644624 | LOC644624 | 4  |
| LOC644625 | 644625 | LOC644625 | 6  |
| LOC644635 | 644635 | LOC644635 | 12 |
| LOC644640 | 644640 | LOC644640 | 9  |
| LOC644641 | 644641 | LOC644641 | 11 |
| LOC644642 | 644642 | LOC644642 | 1  |
| LOC644646 | 644646 | LOC644646 | 12 |
| LOC644652 | 644652 | LOC644652 | 22 |
| LOC644655 | 644655 | LOC644655 | 1  |
| LOC644668 | 644668 | LOC644668 | 8  |



|           |        |           |    |
|-----------|--------|-----------|----|
| LOC644669 | 644669 | LOC644669 | 9  |
| LOC644670 | 644670 | LOC644670 | X  |
| LOC644679 | 644679 | LOC644679 | 10 |
| LOC644681 | 644681 | LOC644681 | 3  |
| LOC644683 | 644683 | LOC644683 | 5  |
| LOC644684 | 644684 | LOC644684 | 9  |
| LOC644686 | 644686 | LOC644686 |    |
| LOC644694 | 644694 | LOC644694 | 17 |
| LOC644695 | 644695 | LOC644695 | 17 |
| LOC644701 | 644701 | LOC644701 | 15 |
| LOC644707 | 644707 | LOC644707 | 15 |
| LOC644711 | 644711 | LOC644711 | 8  |
| LOC644714 | 644714 | LOC644714 |    |
| LOC644719 | 644719 | LOC644719 | 14 |
| LOC644732 | 644732 | LOC644732 | X  |
| LOC644735 | 644735 | LOC644735 | 3  |
| LOC644736 | 644736 | LOC644736 | 3  |
| LOC644738 | 644738 | LOC644738 | 3  |
| LOC644739 | 644739 | LOC644739 | X  |
| LOC644748 | 644748 | LOC644748 | 9  |
| LOC644760 | 644760 | LOC644760 | 5  |
| LOC644761 | 644761 | LOC644761 |    |
| LOC644762 | 644762 | LOC644762 |    |
| LOC644763 | 644763 | LOC644763 | 10 |
| LOC644769 | 644769 | LOC644769 | 9  |
| LOC644774 | 644774 | LOC644774 | X  |
| LOC644782 | 644782 | LOC644782 | X  |
| LOC644787 | 644787 | LOC644787 | 7  |
| LOC644799 | 644799 | LOC644799 | 20 |
| LOC644816 | 644816 | LOC644816 |    |
| LOC644827 | 644827 | LOC644827 |    |
| LOC644830 | 644830 | LOC644830 | X  |
| LOC644844 | 644844 | LOC644844 | 15 |
| LOC644846 | 644846 | LOC644846 | X  |
| LOC644853 | 644853 | LOC644853 | 19 |
| LOC644860 | 644860 | LOC644860 | 6  |
| LOC644863 | 644863 | LOC644863 | 17 |
| LOC644865 | 644865 | LOC644865 | 5  |
| LOC644869 | 644869 | LOC644869 | 5  |
| LOC644877 | 644877 | LOC644877 |    |
| LOC644879 | 644879 | LOC644879 |    |
| LOC644889 | 644889 | LOC644889 | 11 |
| LOC644897 | 644897 | LOC644897 | 12 |
| LOC644907 | 644907 | LOC644907 | 7  |

|           |        |           |    |
|-----------|--------|-----------|----|
| LOC644912 | 644912 | LOC644912 | 7  |
| LOC644914 | 644914 | LOC644914 |    |
| LOC644916 | 644916 | LOC644916 | 15 |
| LOC644925 | 644925 | LOC644925 |    |
| LOC644929 | 644929 | LOC644929 | 1  |
| LOC644936 | 644936 | LOC644936 | 5  |
| LOC644937 | 644937 | LOC644937 |    |
| LOC644944 | 644944 | LOC644944 | 5  |
| LOC644950 | 644950 | LOC644950 | 3  |
| LOC644958 | 644958 | LOC644958 | 15 |
| LOC644961 | 644961 | LOC644961 | 1  |
| LOC644964 | 644964 | LOC644964 | 19 |
| LOC644978 | 644978 | LOC644978 | 16 |
| LOC644979 | 644979 | LOC644979 | 19 |
| LOC644988 | 644988 | LOC644988 | 17 |
| LOC644992 | 644992 | LOC644992 |    |
| LOC644994 | 644994 | LOC644994 | 5  |
| LOC645001 | 645001 | LOC645001 |    |
| LOC645006 | 645006 | LOC645006 | 4  |
| LOC645010 | 645010 | LOC645010 | 1  |
| LOC645015 | 645015 | LOC645015 | 11 |
| LOC645029 | 645029 | LOC645029 | 5  |
| LOC645032 | 645032 | LOC645032 | 15 |
| LOC645045 | 645045 | LOC645045 | 18 |
| LOC645052 | 645052 | LOC645052 | 1  |
| LOC645058 | 645058 | LOC645058 | 1  |
| LOC645070 | 645070 | LOC645070 | 6  |
| LOC645094 | 645094 | LOC645094 |    |
| LOC645100 | 645100 | LOC645100 |    |
| LOC645104 | 645104 | LOC645104 | 4  |
| LOC645137 | 645137 | LOC645137 | 15 |
| LOC645139 | 645139 | LOC645139 | 17 |
| LOC645144 | 645144 | LOC645144 | 18 |
| LOC645153 | 645153 | LOC645153 | 5  |
| LOC645157 | 645157 | LOC645157 | 6  |
| LOC645159 | 645159 | LOC645159 | 1  |
| LOC645166 | 645166 | LOC645166 | 1  |
| LOC645168 | 645168 | LOC645168 | 14 |
| LOC645175 | 645175 | LOC645175 |    |
| LOC645176 | 645176 | LOC645176 | 7  |
| LOC645177 | 645177 | LOC645177 | 12 |
| LOC645183 | 645183 | LOC645183 | 7  |
| LOC645195 | 645195 | LOC645195 |    |
| LOC645203 | 645203 | LOC645203 | 10 |

|           |        |           |    |
|-----------|--------|-----------|----|
| LOC645208 | 645208 | LOC645208 | 2  |
| LOC645233 | 645233 | LOC645233 |    |
| LOC645236 | 645236 | LOC645236 | 7  |
| LOC645246 | 645246 | LOC645246 | 15 |
| LOC645249 | 645249 | LOC645249 | 7  |
| LOC645251 | 645251 | LOC645251 |    |
| LOC645253 | 645253 | LOC645253 |    |
| LOC645261 | 645261 | LOC645261 | 5  |
| LOC645276 | 645276 | LOC645276 |    |
| LOC645279 | 645279 | LOC645279 | 21 |
| LOC645287 | 645287 | LOC645287 | 16 |
| LOC645289 | 645289 | LOC645289 | 22 |
| LOC645296 | 645296 | LOC645296 | 15 |
| LOC645304 | 645304 | LOC645304 | 11 |
| LOC645306 | 645306 | LOC645306 | 15 |
| LOC645307 | 645307 | LOC645307 | 16 |
| LOC645312 | 645312 | LOC645312 |    |
| LOC645313 | 645313 | LOC645313 | 17 |
| LOC645314 | 645314 | LOC645314 |    |
| LOC645322 | 645322 | LOC645322 | 20 |
| LOC645323 | 645323 | LOC645323 | 5  |
| LOC645325 | 645325 | LOC645325 | 16 |
| LOC645332 | 645332 | LOC645332 | 11 |
| LOC645335 | 645335 | LOC645335 | 4  |
| LOC645336 | 645336 | LOC645336 | 8  |
| LOC645342 | 645342 | LOC645342 | 4  |
| LOC645349 | 645349 | LOC645349 | 1  |
| LOC645351 | 645351 | LOC645351 | 5  |
| LOC645359 | 645359 | LOC645359 | 1  |
| LOC645363 | 645363 | LOC645363 | 10 |
| LOC645365 | 645365 | LOC645365 | 20 |
| LOC645378 | 645378 | LOC645378 | 8  |
| LOC645381 | 645381 | LOC645381 | X  |
| LOC645385 | 645385 | LOC645385 | 6  |
| LOC645387 | 645387 | LOC645387 |    |
| LOC645393 | 645393 | LOC645393 | 14 |
| LOC645418 | 645418 | LOC645418 | 9  |
| LOC645427 | 645427 | LOC645427 | 17 |
| LOC645430 | 645430 | LOC645430 | X  |
| LOC645436 | 645436 | LOC645436 | 1  |
| LOC645438 | 645438 | LOC645438 | 21 |
| LOC645442 | 645442 | LOC645442 | 1  |
| LOC645452 | 645452 | LOC645452 |    |
| LOC645476 | 645476 | LOC645476 | 6  |

|           |        |           |    |
|-----------|--------|-----------|----|
| LOC645478 | 645478 | LOC645478 | 16 |
| LOC645481 | 645481 | LOC645481 |    |
| LOC645485 | 645485 | LOC645485 | 12 |
| LOC645487 | 645487 | LOC645487 | 20 |
| LOC645489 | 645489 | LOC645489 | 8  |
| LOC645490 | 645490 | LOC645490 | 11 |
| LOC645492 | 645492 | LOC645492 | 6  |
| LOC645515 | 645515 | LOC645515 |    |
| LOC645534 | 645534 | LOC645534 | 7  |
| LOC645545 | 645545 | LOC645545 | 17 |
| LOC645552 | 645552 | LOC645552 | 11 |
| LOC645557 | 645557 | LOC645557 | 6  |
| LOC645558 | 645558 | LOC645558 | 8  |
| LOC645566 | 645566 | LOC645566 | 7  |
| LOC645574 | 645574 | LOC645574 | 2  |
| LOC645576 | 645576 | LOC645576 | 7  |
| LOC645582 | 645582 | LOC645582 | 16 |
| LOC645590 | 645590 | LOC645590 | 7  |
| LOC645620 | 645620 | LOC645620 | 15 |
| LOC645627 | 645627 | LOC645627 | 8  |
| LOC645634 | 645634 | LOC645634 |    |
| LOC645636 | 645636 | LOC645636 | 12 |
| LOC645638 | 645638 | LOC645638 |    |
| LOC645644 | 645644 | LOC645644 | 16 |
| LOC645649 | 645649 | LOC645649 | 8  |
| LOC645652 | 645652 | LOC645652 | 1  |
| LOC645662 | 645662 | LOC645662 | 19 |
| LOC645663 | 645663 | LOC645663 | 20 |
| LOC645669 | 645669 | LOC645669 | 19 |
| LOC645676 | 645676 | LOC645676 | 1  |
| LOC645681 | 645681 | LOC645681 | 8  |
| LOC645685 | 645685 | LOC645685 | 1  |
| LOC645688 | 645688 | LOC645688 | 17 |
| LOC645689 | 645689 | LOC645689 | 8  |
| LOC645691 | 645691 | LOC645691 |    |
| LOC645693 | 645693 | LOC645693 | 15 |
| LOC645701 | 645701 | LOC645701 | 8  |
| LOC645705 | 645705 | LOC645705 | 11 |
| LOC645708 | 645708 | LOC645708 | 6  |
| LOC645718 | 645718 | LOC645718 | 8  |
| LOC645722 | 645722 | LOC645722 |    |
| LOC645726 | 645726 | LOC645726 |    |
| LOC645733 | 645733 | LOC645733 | 2  |
| LOC645743 | 645743 | LOC645743 | 8  |

|           |        |           |    |
|-----------|--------|-----------|----|
| LOC645744 | 645744 | LOC645744 |    |
| LOC645752 | 645752 | LOC645752 | 15 |
| LOC645762 | 645762 | LOC645762 |    |
| LOC645777 | 645777 | LOC645777 | 20 |
| LOC645781 | 645781 | LOC645781 | 19 |
| LOC645799 | 645799 | LOC645799 | 16 |
| LOC645812 | 645812 | LOC645812 | 17 |
| LOC645848 | 645848 | LOC645848 | 5  |
| LOC645850 | 645850 | LOC645850 | 1  |
| LOC645852 | 645852 | LOC645852 | 3  |
| LOC645885 | 645885 | LOC645885 | 13 |
| LOC645888 | 645888 | LOC645888 | 8  |
| LOC645895 | 645895 | LOC645895 | 8  |
| LOC645904 | 645904 | LOC645904 | 22 |
| LOC645937 | 645937 | LOC645937 | 9  |
| LOC645941 | 645941 | LOC645941 | 16 |
| LOC645942 | 645942 | LOC645942 | 17 |
| LOC645944 | 645944 | LOC645944 |    |
| LOC645951 | 645951 | LOC645951 | 20 |
| LOC645955 | 645955 | LOC645955 | 2  |
| LOC645963 | 645963 | LOC645963 | 17 |
| LOC645966 | 645966 | LOC645966 |    |
| LOC645967 | 645967 | LOC645967 |    |
| LOC645968 | 645968 | LOC645968 | 7  |
| LOC645969 | 645969 | LOC645969 |    |
| LOC645971 | 645971 | LOC645971 | 19 |
| LOC645978 | 645978 | LOC645978 | 2  |
| LOC645983 | 645983 | LOC645983 | 7  |
| LOC645992 | 645992 | LOC645992 | 17 |
| LOC645993 | 645993 | LOC645993 | 17 |
| LOC646003 | 646003 | LOC646003 | 13 |
| LOC646004 | 646004 | LOC646004 | 18 |
| LOC646008 | 646008 | LOC646008 | 11 |
| LOC646009 | 646009 | LOC646009 | 8  |
| LOC646010 | 646010 | LOC646010 | 19 |
| LOC646012 | 646012 | LOC646012 |    |
| LOC646023 | 646023 | LOC646023 | 22 |
| LOC646026 | 646026 | LOC646026 | 17 |
| LOC646030 | 646030 | LOC646030 |    |
| LOC646034 | 646034 | LOC646034 | 10 |
| LOC646037 | 646037 | LOC646037 | 17 |
| LOC646038 | 646038 | LOC646038 | 17 |
| LOC646044 | 646044 | LOC646044 |    |
| LOC646049 | 646049 | LOC646049 |    |

|           |        |           |    |
|-----------|--------|-----------|----|
| LOC646066 | 646066 | LOC646066 | 5  |
| LOC646079 | 646079 | LOC646079 | 15 |
| LOC646093 | 646093 | LOC646093 |    |
| LOC646096 | 646096 | LOC646096 | 15 |
| LOC646097 | 646097 | LOC646097 | 19 |
| LOC646103 | 646103 | LOC646103 | 5  |
| LOC646123 | 646123 | LOC646123 | 22 |
| LOC646130 | 646130 | LOC646130 |    |
| LOC646132 | 646132 | LOC646132 | 20 |
| LOC646139 | 646139 | LOC646139 | 15 |
| LOC646144 | 646144 | LOC646144 | 7  |
| LOC646154 | 646154 | LOC646154 | Y  |
| LOC646156 | 646156 | LOC646156 | 15 |
| LOC646191 | 646191 | LOC646191 | 1  |
| LOC646193 | 646193 | LOC646193 |    |
| LOC646197 | 646197 | LOC646197 | 8  |
| LOC646198 | 646198 | LOC646198 | X  |
| LOC646210 | 646210 | LOC646210 | 5  |
| LOC646214 | 646214 | LOC646214 | 15 |
| LOC646215 | 646215 | LOC646215 | 2  |
| LOC646223 | 646223 | LOC646223 | Y  |
| LOC646226 | 646226 | LOC646226 | 3  |
| LOC646243 | 646243 | LOC646243 | 15 |
| LOC646246 | 646246 | LOC646246 | 10 |
| LOC646254 | 646254 | LOC646254 | 9  |
| LOC646262 | 646262 | LOC646262 | 1  |
| LOC646278 | 646278 | LOC646278 |    |
| LOC646294 | 646294 | LOC646294 |    |
| LOC646296 | 646296 | LOC646296 | 5  |
| LOC646301 | 646301 | LOC646301 | 17 |
| LOC646307 | 646307 | LOC646307 | 1  |
| LOC646309 | 646309 | LOC646309 | 10 |
| LOC646312 | 646312 | LOC646312 | 10 |
| LOC646316 | 646316 | LOC646316 | 4  |
| LOC646320 | 646320 | LOC646320 | 11 |
| LOC646330 | 646330 | LOC646330 | 1  |
| LOC646334 | 646334 | LOC646334 | 3  |
| LOC646335 | 646335 | LOC646335 | 5  |
| LOC646342 | 646342 | LOC646342 | 2  |
| LOC646347 | 646347 | LOC646347 | 1  |
| LOC646358 | 646358 | LOC646358 | 15 |
| LOC646372 | 646372 | LOC646372 |    |
| LOC646376 | 646376 | LOC646376 | 3  |
| LOC646381 | 646381 | LOC646381 | 1  |

|           |        |           |    |
|-----------|--------|-----------|----|
| LOC646426 | 646426 | LOC646426 | 10 |
| LOC646434 | 646434 | LOC646434 | 10 |
| LOC646437 | 646437 | LOC646437 | 8  |
| LOC646442 | 646442 | LOC646442 | 18 |
| LOC646443 | 646443 | LOC646443 | 7  |
| LOC646447 | 646447 | LOC646447 |    |
| LOC646448 | 646448 | LOC646448 | 18 |
| LOC646449 | 646449 | LOC646449 | 18 |
| LOC646458 | 646458 | LOC646458 | 2  |
| LOC646463 | 646463 | LOC646463 |    |
| LOC646476 | 646476 | LOC646476 | 7  |
| LOC646483 | 646483 | LOC646483 | 7  |
| LOC646486 | 646486 | LOC646486 | 8  |
| LOC646491 | 646491 | LOC646491 | 6  |
| LOC646496 | 646496 | LOC646496 | 13 |
| LOC646498 | 646498 | LOC646498 |    |
| LOC646501 | 646501 | LOC646501 | 19 |
| LOC646508 | 646508 | LOC646508 |    |
| LOC646509 | 646509 | LOC646509 | 2  |
| LOC646512 | 646512 | LOC646512 | 18 |
| LOC646515 | 646515 | LOC646515 | 4  |
| LOC646521 | 646521 | LOC646521 | 8  |
| LOC646527 | 646527 | LOC646527 | 13 |
| LOC646529 | 646529 | LOC646529 | 8  |
| LOC646531 | 646531 | LOC646531 |    |
| LOC646533 | 646533 | LOC646533 | 2  |
| LOC646547 | 646547 | LOC646547 | 3  |
| LOC646549 | 646549 | LOC646549 | X  |
| LOC646572 | 646572 | LOC646572 |    |
| LOC646575 | 646575 | LOC646575 | 19 |
| LOC646576 | 646576 | LOC646576 | 4  |
| LOC646580 | 646580 | LOC646580 | 22 |
| LOC646585 | 646585 | LOC646585 | X  |
| LOC646596 | 646596 | LOC646596 | 19 |
| LOC646609 | 646609 | LOC646609 | 9  |
| LOC646615 | 646615 | LOC646615 | 11 |
| LOC646625 | 646625 | LOC646625 | 13 |
| LOC646663 | 646663 | LOC646663 | 19 |
| LOC646672 | 646672 | LOC646672 | 16 |
| LOC646674 | 646674 | LOC646674 | 2  |
| LOC646675 | 646675 | LOC646675 | 22 |
| LOC646676 | 646676 | LOC646676 | 1  |
| LOC646677 | 646677 | LOC646677 | 22 |
| LOC646688 | 646688 | LOC646688 | 1  |

|           |        |           |    |
|-----------|--------|-----------|----|
| LOC646699 | 646699 | LOC646699 | 2  |
| LOC646700 | 646700 | LOC646700 |    |
| LOC646709 | 646709 | LOC646709 |    |
| LOC646723 | 646723 | LOC646723 | 5  |
| LOC646730 | 646730 | LOC646730 |    |
| LOC646743 | 646743 | LOC646743 | 2  |
| LOC646746 | 646746 | LOC646746 | 19 |
| LOC646748 | 646748 | LOC646748 | 15 |
| LOC646750 | 646750 | LOC646750 | 19 |
| LOC646762 | 646762 | LOC646762 | 7  |
| LOC646764 | 646764 | LOC646764 | 19 |
| LOC646780 | 646780 | LOC646780 | 1  |
| LOC646783 | 646783 | LOC646783 | 6  |
| LOC646785 | 646785 | LOC646785 | 6  |
| LOC646786 | 646786 | LOC646786 | 6  |
| LOC646791 | 646791 | LOC646791 |    |
| LOC646796 | 646796 | LOC646796 | 1  |
| LOC646801 | 646801 | LOC646801 |    |
| LOC646804 | 646804 | LOC646804 | 1  |
| LOC646808 | 646808 | LOC646808 |    |
| LOC646817 | 646817 | LOC646817 | 1  |
| LOC646821 | 646821 | LOC646821 | 1  |
| LOC646823 | 646823 | LOC646823 | 16 |
| LOC646836 | 646836 | LOC646836 |    |
| LOC646845 | 646845 | LOC646845 |    |
| LOC646849 | 646849 | LOC646849 | 3  |
| LOC646853 | 646853 | LOC646853 | 15 |
| LOC646855 | 646855 | LOC646855 | 2  |
| LOC646863 | 646863 | LOC646863 | 2  |
| LOC646882 | 646882 | LOC646882 | 13 |
| LOC646891 | 646891 | LOC646891 | 1  |
| LOC646897 | 646897 | LOC646897 | 15 |
| LOC646900 | 646900 | LOC646900 | 2  |
| LOC646906 | 646906 | LOC646906 | 19 |
| LOC646914 | 646914 | LOC646914 | 1  |
| LOC646920 | 646920 | LOC646920 | 7  |
| LOC646932 | 646932 | LOC646932 | 9  |
| LOC646933 | 646933 | LOC646933 | 13 |
| LOC646942 | 646942 | LOC646942 | 7  |
| LOC646956 | 646956 | LOC646956 | 15 |
| LOC646990 | 646990 | LOC646990 | 13 |
| LOC646993 | 646993 | LOC646993 |    |
| LOC646997 | 646997 | LOC646997 | 1  |
| LOC647000 | 647000 | LOC647000 | 13 |



|           |        |           |    |
|-----------|--------|-----------|----|
| LOC647009 | 647009 | LOC647009 | 7  |
| LOC647012 | 647012 | LOC647012 | 2  |
| LOC647030 | 647030 | LOC647030 |    |
| LOC647037 | 647037 | LOC647037 | 15 |
| LOC647042 | 647042 | LOC647042 | 15 |
| LOC647044 | 647044 | LOC647044 | 9  |
| LOC647050 | 647050 | LOC647050 | 13 |
| LOC647055 | 647055 | LOC647055 | 18 |
| LOC647058 | 647058 | LOC647058 | 1  |
| LOC647074 | 647074 | LOC647074 | 2  |
| LOC647081 | 647081 | LOC647081 | 7  |
| LOC647086 | 647086 | LOC647086 |    |
| LOC647099 | 647099 | LOC647099 | 3  |
| LOC647104 | 647104 | LOC647104 |    |
| LOC647121 | 647121 | LOC647121 | 1  |
| LOC647131 | 647131 | LOC647131 | 13 |
| LOC647150 | 647150 | LOC647150 | 1  |
| LOC647169 | 647169 | LOC647169 | 6  |
| LOC647171 | 647171 | LOC647171 | 16 |
| LOC647206 | 647206 | LOC647206 | 3  |
| LOC647213 | 647213 | LOC647213 | 13 |
| LOC647234 | 647234 | LOC647234 | 6  |
| LOC647243 | 647243 | LOC647243 |    |
| LOC647244 | 647244 | LOC647244 |    |
| LOC647246 | 647246 | LOC647246 | 1  |
| LOC647250 | 647250 | LOC647250 | 1  |
| LOC647281 | 647281 | LOC647281 |    |
| LOC647285 | 647285 | LOC647285 |    |
| LOC647286 | 647286 | LOC647286 |    |
| LOC647288 | 647288 | LOC647288 |    |
| LOC647297 | 647297 | LOC647297 | 2  |
| LOC647302 | 647302 | LOC647302 |    |
| LOC647306 | 647306 | LOC647306 | 13 |
| LOC647307 | 647307 | LOC647307 |    |
| LOC647309 | 647309 | LOC647309 |    |
| LOC647310 | 647310 | LOC647310 | 14 |
| LOC647322 | 647322 | LOC647322 | 2  |
| LOC647326 | 647326 | LOC647326 | 2  |
| LOC647335 | 647335 | LOC647335 |    |
| LOC647336 | 647336 | LOC647336 |    |
| LOC647339 | 647339 | LOC647339 |    |
| LOC647340 | 647340 | LOC647340 |    |
| LOC647343 | 647343 | LOC647343 |    |
| LOC647346 | 647346 | LOC647346 |    |

|           |        |           |
|-----------|--------|-----------|
| LOC647347 | 647347 | LOC647347 |
| LOC647349 | 647349 | LOC647349 |
| LOC647353 | 647353 | LOC647353 |
| LOC647370 | 647370 | LOC647370 |
| LOC647389 | 647389 | LOC647389 |
| LOC647400 | 647400 | LOC647400 |
| LOC647439 | 647439 | LOC647439 |
| LOC647448 | 647448 | LOC647448 |
| LOC647450 | 647450 | LOC647450 |
| LOC647451 | 647451 | LOC647451 |
| LOC647460 | 647460 | LOC647460 |
| LOC647461 | 647461 | LOC647461 |
| LOC647474 | 647474 | LOC647474 |
| LOC647480 | 647480 | LOC647480 |
| LOC647481 | 647481 | LOC647481 |
| LOC647485 | 647485 | LOC647485 |
| LOC647488 | 647488 | LOC647488 |
| LOC647493 | 647493 | LOC647493 |
| LOC647506 | 647506 | LOC647506 |
| LOC647509 | 647509 | LOC647509 |
| LOC647519 | 647519 | LOC647519 |
| LOC647535 | 647535 | LOC647535 |
| LOC647541 | 647541 | LOC647541 |
| LOC647542 | 647542 | LOC647542 |
| LOC647579 | 647579 | LOC647579 |
| LOC647589 | 647589 | LOC647589 |
| LOC647592 | 647592 | LOC647592 |
| LOC647597 | 647597 | LOC647597 |
| LOC647621 | 647621 | LOC647621 |
| LOC647645 | 647645 | LOC647645 |
| LOC647650 | 647650 | LOC647650 |
| LOC647673 | 647673 | LOC647673 |
| LOC647680 | 647680 | LOC647680 |
| LOC647691 | 647691 | LOC647691 |
| LOC647710 | 647710 | LOC647710 |
| LOC647713 | 647713 | LOC647713 |
| LOC647718 | 647718 | LOC647718 |
| LOC647719 | 647719 | LOC647719 |
| LOC647723 | 647723 | LOC647723 |
| LOC647742 | 647742 | LOC647742 |
| LOC647748 | 647748 | LOC647748 |
| LOC647766 | 647766 | LOC647766 |
| LOC647784 | 647784 | LOC647784 |
| LOC647785 | 647785 | LOC647785 |

|           |        |           |
|-----------|--------|-----------|
| LOC647802 | 647802 | LOC647802 |
| LOC647810 | 647810 | LOC647810 |
| LOC647819 | 647819 | LOC647819 |
| LOC647832 | 647832 | LOC647832 |
| LOC647834 | 647834 | LOC647834 |
| LOC647836 | 647836 | LOC647836 |
| LOC647839 | 647839 | LOC647839 |
| LOC647850 | 647850 | LOC647850 |
| LOC647855 | 647855 | LOC647855 |
| LOC647856 | 647856 | LOC647856 |
| LOC647859 | 647859 | LOC647859 |
| LOC647886 | 647886 | LOC647886 |
| LOC647920 | 647920 | LOC647920 |
| LOC647935 | 647935 | LOC647935 |
| LOC647947 | 647947 | LOC647947 |
| LOC647954 | 647954 | LOC647954 |
| LOC647958 | 647958 | LOC647958 |
| LOC647988 | 647988 | LOC647988 |
| LOC647993 | 647993 | LOC647993 |
| LOC647995 | 647995 | LOC647995 |
| LOC648000 | 648000 | LOC648000 |
| LOC648003 | 648003 | LOC648003 |
| LOC648024 | 648024 | LOC648024 |
| LOC648039 | 648039 | LOC648039 |
| LOC648050 | 648050 | LOC648050 |
| LOC648058 | 648058 | LOC648058 |
| LOC648059 | 648059 | LOC648059 |
| LOC648069 | 648069 | LOC648069 |
| LOC648133 | 648133 | LOC648133 |
| LOC648149 | 648149 | LOC648149 |
| LOC648164 | 648164 | LOC648164 |
| LOC648173 | 648173 | LOC648173 |
| LOC648176 | 648176 | LOC648176 |
| LOC648210 | 648210 | LOC648210 |
| LOC648220 | 648220 | LOC648220 |
| LOC648226 | 648226 | LOC648226 |
| LOC648237 | 648237 | LOC648237 |
| LOC648249 | 648249 | LOC648249 |
| LOC648277 | 648277 | LOC648277 |
| LOC648278 | 648278 | LOC648278 |
| LOC648279 | 648279 | LOC648279 |
| LOC648302 | 648302 | LOC648302 |
| LOC648304 | 648304 | LOC648304 |
| LOC648309 | 648309 | LOC648309 |

|           |        |           |
|-----------|--------|-----------|
| LOC648362 | 648362 | LOC648362 |
| LOC648364 | 648364 | LOC648364 |
| LOC648365 | 648365 | LOC648365 |
| LOC648366 | 648366 | LOC648366 |
| LOC648370 | 648370 | LOC648370 |
| LOC648390 | 648390 | LOC648390 |
| LOC648398 | 648398 | LOC648398 |
| LOC648399 | 648399 | LOC648399 |
| LOC648405 | 648405 | LOC648405 |
| LOC648432 | 648432 | LOC648432 |
| LOC648456 | 648456 | LOC648456 |
| LOC648470 | 648470 | LOC648470 |
| LOC648476 | 648476 | LOC648476 |
| LOC648494 | 648494 | LOC648494 |
| LOC648496 | 648496 | LOC648496 |
| LOC648526 | 648526 | LOC648526 |
| LOC648541 | 648541 | LOC648541 |
| LOC648568 | 648568 | LOC648568 |
| LOC648570 | 648570 | LOC648570 |
| LOC648581 | 648581 | LOC648581 |
| LOC648590 | 648590 | LOC648590 |
| LOC648622 | 648622 | LOC648622 |
| LOC648625 | 648625 | LOC648625 |
| LOC648638 | 648638 | LOC648638 |
| LOC648645 | 648645 | LOC648645 |
| LOC648657 | 648657 | LOC648657 |
| LOC648659 | 648659 | LOC648659 |
| LOC648665 | 648665 | LOC648665 |
| LOC648667 | 648667 | LOC648667 |
| LOC648695 | 648695 | LOC648695 |
| LOC648733 | 648733 | LOC648733 |
| LOC648740 | 648740 | LOC648740 |
| LOC648742 | 648742 | LOC648742 |
| LOC648749 | 648749 | LOC648749 |
| LOC648758 | 648758 | LOC648758 |
| LOC648771 | 648771 | LOC648771 |
| LOC648814 | 648814 | LOC648814 |
| LOC648815 | 648815 | LOC648815 |
| LOC648822 | 648822 | LOC648822 |
| LOC648827 | 648827 | LOC648827 |
| LOC648852 | 648852 | LOC648852 |
| LOC648859 | 648859 | LOC648859 |
| LOC648868 | 648868 | LOC648868 |
| LOC648876 | 648876 | LOC648876 |

2

1

1

|           |        |           |    |
|-----------|--------|-----------|----|
| LOC648897 | 648897 | LOC648897 |    |
| LOC648907 | 648907 | LOC648907 |    |
| LOC648921 | 648921 | LOC648921 |    |
| LOC648926 | 648926 | LOC648926 |    |
| LOC648927 | 648927 | LOC648927 |    |
| LOC648963 | 648963 | LOC648963 |    |
| LOC648974 | 648974 | LOC648974 |    |
| LOC648976 | 648976 | LOC648976 |    |
| LOC648979 | 648979 | LOC648979 |    |
| LOC648980 | 648980 | LOC648980 | 22 |
| LOC648982 | 648982 | LOC648982 |    |
| LOC648984 | 648984 | LOC648984 |    |
| LOC648993 | 648993 | LOC648993 |    |
| LOC649009 | 649009 | LOC649009 |    |
| LOC649023 | 649023 | LOC649023 |    |
| LOC649025 | 649025 | LOC649025 |    |
| LOC649037 | 649037 | LOC649037 |    |
| LOC649049 | 649049 | LOC649049 |    |
| LOC649067 | 649067 | LOC649067 |    |
| LOC649071 | 649071 | LOC649071 |    |
| LOC649086 | 649086 | LOC649086 |    |
| LOC649095 | 649095 | LOC649095 | 22 |
| LOC649107 | 649107 | LOC649107 |    |
| LOC649143 | 649143 | LOC649143 |    |
| LOC649150 | 649150 | LOC649150 |    |
| LOC649159 | 649159 | LOC649159 | 16 |
| LOC649160 | 649160 | LOC649160 |    |
| LOC649167 | 649167 | LOC649167 |    |
| LOC649169 | 649169 | LOC649169 |    |
| LOC649174 | 649174 | LOC649174 |    |
| LOC649179 | 649179 | LOC649179 |    |
| LOC649192 | 649192 | LOC649192 |    |
| LOC649198 | 649198 | LOC649198 | 9  |
| LOC649199 | 649199 | LOC649199 |    |
| LOC649210 | 649210 | LOC649210 |    |
| LOC649212 | 649212 | LOC649212 |    |
| LOC649214 | 649214 | LOC649214 |    |
| LOC649217 | 649217 | LOC649217 |    |
| LOC649227 | 649227 | LOC649227 |    |
| LOC649238 | 649238 | LOC649238 | X  |
| LOC649242 | 649242 | LOC649242 |    |
| LOC649248 | 649248 | LOC649248 |    |
| LOC649270 | 649270 | LOC649270 |    |
| LOC649276 | 649276 | LOC649276 |    |

|           |        |           |
|-----------|--------|-----------|
| LOC649279 | 649279 | LOC649279 |
| LOC649282 | 649282 | LOC649282 |
| LOC649318 | 649318 | LOC649318 |
| LOC649327 | 649327 | LOC649327 |
| LOC649330 | 649330 | LOC649330 |
| LOC649346 | 649346 | LOC649346 |
| LOC649360 | 649360 | LOC649360 |
| LOC649365 | 649365 | LOC649365 |
| LOC649385 | 649385 | LOC649385 |
| LOC649396 | 649396 | LOC649396 |
| LOC649414 | 649414 | LOC649414 |
| LOC649415 | 649415 | LOC649415 |
| LOC649417 | 649417 | LOC649417 |
| LOC649422 | 649422 | LOC649422 |
| LOC649431 | 649431 | LOC649431 |
| LOC649432 | 649432 | LOC649432 |
| LOC649436 | 649436 | LOC649436 |
| LOC649445 | 649445 | LOC649445 |
| LOC649447 | 649447 | LOC649447 |
| LOC649466 | 649466 | LOC649466 |
| LOC649477 | 649477 | LOC649477 |
| LOC649493 | 649493 | LOC649493 |
| LOC649500 | 649500 | LOC649500 |
| LOC649503 | 649503 | LOC649503 |
| LOC649553 | 649553 | LOC649553 |
| LOC649555 | 649555 | LOC649555 |
| LOC649583 | 649583 | LOC649583 |
| LOC649584 | 649584 | LOC649584 |
| LOC649596 | 649596 | LOC649596 |
| LOC649604 | 649604 | LOC649604 |
| LOC649613 | 649613 | LOC649613 |
| LOC649652 | 649652 | LOC649652 |
| LOC649679 | 649679 | LOC649679 |
| LOC649686 | 649686 | LOC649686 |
| LOC649702 | 649702 | LOC649702 |
| LOC649754 | 649754 | LOC649754 |
| LOC649762 | 649762 | LOC649762 |
| LOC649765 | 649765 | LOC649765 |
| LOC649775 | 649775 | LOC649775 |
| LOC649801 | 649801 | LOC649801 |
| LOC649812 | 649812 | LOC649812 |
| LOC649813 | 649813 | LOC649813 |
| LOC649823 | 649823 | LOC649823 |
| LOC649826 | 649826 | LOC649826 |

14

7

|           |        |           |
|-----------|--------|-----------|
| LOC649839 | 649839 | LOC649839 |
| LOC649864 | 649864 | LOC649864 |
| LOC649873 | 649873 | LOC649873 |
| LOC649878 | 649878 | LOC649878 |
| LOC649891 | 649891 | LOC649891 |
| LOC649902 | 649902 | LOC649902 |
| LOC649917 | 649917 | LOC649917 |
| LOC649921 | 649921 | LOC649921 |
| LOC649923 | 649923 | LOC649923 |
| LOC649951 | 649951 | LOC649951 |
| LOC649952 | 649952 | LOC649952 |
| LOC649970 | 649970 | LOC649970 |
| LOC649974 | 649974 | LOC649974 |
| LOC649987 | 649987 | LOC649987 |
| LOC649991 | 649991 | LOC649991 |
| LOC649999 | 649999 | LOC649999 |
| LOC650003 | 650003 | LOC650003 |
| LOC650010 | 650010 | LOC650010 |
| LOC650029 | 650029 | LOC650029 |
| LOC650030 | 650030 | LOC650030 |
| LOC650034 | 650034 | LOC650034 |
| LOC650037 | 650037 | LOC650037 |
| LOC650038 | 650038 | LOC650038 |
| LOC650087 | 650087 | LOC650087 |
| LOC650095 | 650095 | LOC650095 |
| LOC650111 | 650111 | LOC650111 |
| LOC650132 | 650132 | LOC650132 |
| LOC650144 | 650144 | LOC650144 |
| LOC650152 | 650152 | LOC650152 |
| LOC650155 | 650155 | LOC650155 |
| LOC650157 | 650157 | LOC650157 |
| LOC650159 | 650159 | LOC650159 |
| LOC650200 | 650200 | LOC650200 |
| LOC650210 | 650210 | LOC650210 |
| LOC650215 | 650215 | LOC650215 |
| LOC650238 | 650238 | LOC650238 |
| LOC650243 | 650243 | LOC650243 |
| LOC650251 | 650251 | LOC650251 |
| LOC650253 | 650253 | LOC650253 |
| LOC650254 | 650254 | LOC650254 |
| LOC650263 | 650263 | LOC650263 |
| LOC650268 | 650268 | LOC650268 |
| LOC650274 | 650274 | LOC650274 |
| LOC650276 | 650276 | LOC650276 |

17

2

|           |        |           |
|-----------|--------|-----------|
| LOC650278 | 650278 | LOC650278 |
| LOC650280 | 650280 | LOC650280 |
| LOC650314 | 650314 | LOC650314 |
| LOC650321 | 650321 | LOC650321 |
| LOC650330 | 650330 | LOC650330 |
| LOC650339 | 650339 | LOC650339 |
| LOC650342 | 650342 | LOC650342 |
| LOC650346 | 650346 | LOC650346 |
| LOC650361 | 650361 | LOC650361 |
| LOC650368 | 650368 | LOC650368 |
| LOC650369 | 650369 | LOC650369 |
| LOC650390 | 650390 | LOC650390 |
| LOC650392 | 650392 | LOC650392 |
| LOC650405 | 650405 | LOC650405 |
| LOC650407 | 650407 | LOC650407 |
| LOC650410 | 650410 | LOC650410 |
| LOC650427 | 650427 | LOC650427 |
| LOC650428 | 650428 | LOC650428 |
| LOC650454 | 650454 | LOC650454 |
| LOC650455 | 650455 | LOC650455 |
| LOC650459 | 650459 | LOC650459 |
| LOC650482 | 650482 | LOC650482 |
| LOC650491 | 650491 | LOC650491 |
| LOC650509 | 650509 | LOC650509 |
| LOC650515 | 650515 | LOC650515 |
| LOC650518 | 650518 | LOC650518 |
| LOC650526 | 650526 | LOC650526 |
| LOC650528 | 650528 | LOC650528 |
| LOC650546 | 650546 | LOC650546 |
| LOC650556 | 650556 | LOC650556 |
| LOC650568 | 650568 | LOC650568 |
| LOC650577 | 650577 | LOC650577 |
| LOC650621 | 650621 | LOC650621 |
| LOC650631 | 650631 | LOC650631 |
| LOC650634 | 650634 | LOC650634 |
| LOC650638 | 650638 | LOC650638 |
| LOC650646 | 650646 | LOC650646 |
| LOC650668 | 650668 | LOC650668 |
| LOC650673 | 650673 | LOC650673 |
| LOC650678 | 650678 | LOC650678 |
| LOC650689 | 650689 | LOC650689 |
| LOC650698 | 650698 | LOC650698 |
| LOC650706 | 650706 | LOC650706 |
| LOC650708 | 650708 | LOC650708 |



|           |        |           |
|-----------|--------|-----------|
| LOC650721 | 650721 | LOC650721 |
| LOC650733 | 650733 | LOC650733 |
| LOC650737 | 650737 | LOC650737 |
| LOC650780 | 650780 | LOC650780 |
| LOC650788 | 650788 | LOC650788 |
| LOC650799 | 650799 | LOC650799 |
| LOC650803 | 650803 | LOC650803 |
| LOC650823 | 650823 | LOC650823 |
| LOC650826 | 650826 | LOC650826 |
| LOC650832 | 650832 | LOC650832 |
| LOC650845 | 650845 | LOC650845 |
| LOC650850 | 650850 | LOC650850 |
| LOC650853 | 650853 | LOC650853 |
| LOC650862 | 650862 | LOC650862 |
| LOC650881 | 650881 | LOC650881 |
| LOC650889 | 650889 | LOC650889 |
| LOC650898 | 650898 | LOC650898 |
| LOC650909 | 650909 | LOC650909 |
| LOC650933 | 650933 | LOC650933 |
| LOC650938 | 650938 | LOC650938 |
| LOC650961 | 650961 | LOC650961 |
| LOC650975 | 650975 | LOC650975 |
| LOC651004 | 651004 | LOC651004 |
| LOC651006 | 651006 | LOC651006 |
| LOC651022 | 651022 | LOC651022 |
| LOC651029 | 651029 | LOC651029 |
| LOC651055 | 651055 | LOC651055 |
| LOC651075 | 651075 | LOC651075 |
| LOC651102 | 651102 | LOC651102 |
| LOC651115 | 651115 | LOC651115 |
| LOC651116 | 651116 | LOC651116 |
| LOC651126 | 651126 | LOC651126 |
| LOC651137 | 651137 | LOC651137 |
| LOC651141 | 651141 | LOC651141 |
| LOC651143 | 651143 | LOC651143 |
| LOC651149 | 651149 | LOC651149 |
| LOC651175 | 651175 | LOC651175 |
| LOC651186 | 651186 | LOC651186 |
| LOC651197 | 651197 | LOC651197 |
| LOC651198 | 651198 | LOC651198 |
| LOC651208 | 651208 | LOC651208 |
| LOC651212 | 651212 | LOC651212 |
| LOC651213 | 651213 | LOC651213 |
| LOC651268 | 651268 | LOC651268 |

|           |        |           |    |
|-----------|--------|-----------|----|
| LOC651280 | 651280 | LOC651280 |    |
| LOC651285 | 651285 | LOC651285 |    |
| LOC651302 | 651302 | LOC651302 |    |
| LOC651309 | 651309 | LOC651309 |    |
| LOC651316 | 651316 | LOC651316 |    |
| LOC651337 | 651337 | LOC651337 |    |
| LOC651341 | 651341 | LOC651341 |    |
| LOC651353 | 651353 | LOC651353 |    |
| LOC651373 | 651373 | LOC651373 |    |
| LOC651380 | 651380 | LOC651380 |    |
| LOC651386 | 651386 | LOC651386 | 13 |
| LOC651398 | 651398 | LOC651398 |    |
| LOC651429 | 651429 | LOC651429 |    |
| LOC651430 | 651430 | LOC651430 | 4  |
| LOC651436 | 651436 | LOC651436 |    |
| LOC651453 | 651453 | LOC651453 |    |
| LOC651465 | 651465 | LOC651465 |    |
| LOC651467 | 651467 | LOC651467 |    |
| LOC651468 | 651468 | LOC651468 |    |
| LOC651481 | 651481 | LOC651481 |    |
| LOC651493 | 651493 | LOC651493 |    |
| LOC651495 | 651495 | LOC651495 |    |
| LOC651520 | 651520 | LOC651520 |    |
| LOC651524 | 651524 | LOC651524 |    |
| LOC651536 | 651536 | LOC651536 |    |
| LOC651546 | 651546 | LOC651546 |    |
| LOC651552 | 651552 | LOC651552 |    |
| LOC651554 | 651554 | LOC651554 |    |
| LOC651565 | 651565 | LOC651565 |    |
| LOC651575 | 651575 | LOC651575 |    |
| LOC651576 | 651576 | LOC651576 |    |
| LOC651580 | 651580 | LOC651580 |    |
| LOC651609 | 651609 | LOC651609 |    |
| LOC651617 | 651617 | LOC651617 |    |
| LOC651619 | 651619 | LOC651619 |    |
| LOC651621 | 651621 | LOC651621 |    |
| LOC651624 | 651624 | LOC651624 |    |
| LOC651630 | 651630 | LOC651630 |    |
| LOC651643 | 651643 | LOC651643 |    |
| LOC651655 | 651655 | LOC651655 |    |
| LOC651697 | 651697 | LOC651697 |    |
| LOC651714 | 651714 | LOC651714 |    |
| LOC651729 | 651729 | LOC651729 |    |
| LOC651731 | 651731 | LOC651731 |    |

|           |        |           |
|-----------|--------|-----------|
| LOC651745 | 651745 | LOC651745 |
| LOC651746 | 651746 | LOC651746 |
| LOC651747 | 651747 | LOC651747 |
| LOC651751 | 651751 | LOC651751 |
| LOC651772 | 651772 | LOC651772 |
| LOC651809 | 651809 | LOC651809 |
| LOC651816 | 651816 | LOC651816 |
| LOC651820 | 651820 | LOC651820 |
| LOC651845 | 651845 | LOC651845 |
| LOC651849 | 651849 | LOC651849 |
| LOC651850 | 651850 | LOC651850 |
| LOC651860 | 651860 | LOC651860 |
| LOC651861 | 651861 | LOC651861 |
| LOC651872 | 651872 | LOC651872 |
| LOC651876 | 651876 | LOC651876 |
| LOC651881 | 651881 | LOC651881 |
| LOC651894 | 651894 | LOC651894 |
| LOC651914 | 651914 | LOC651914 |
| LOC651919 | 651919 | LOC651919 |
| LOC651921 | 651921 | LOC651921 |
| LOC651933 | 651933 | LOC651933 |
| LOC651951 | 651951 | LOC651951 |
| LOC651957 | 651957 | LOC651957 |
| LOC651959 | 651959 | LOC651959 |
| LOC651961 | 651961 | LOC651961 |
| LOC651963 | 651963 | LOC651963 |
| LOC651979 | 651979 | LOC651979 |
| LOC651987 | 651987 | LOC651987 |
| LOC651997 | 651997 | LOC651997 |
| LOC652015 | 652015 | LOC652015 |
| LOC652022 | 652022 | LOC652022 |
| LOC652038 | 652038 | LOC652038 |
| LOC652044 | 652044 | LOC652044 |
| LOC652045 | 652045 | LOC652045 |
| LOC652048 | 652048 | LOC652048 |
| LOC652067 | 652067 | LOC652067 |
| LOC652071 | 652071 | LOC652071 |
| LOC652078 | 652078 | LOC652078 |
| LOC652080 | 652080 | LOC652080 |
| LOC652094 | 652094 | LOC652094 |
| LOC652102 | 652102 | LOC652102 |
| LOC652113 | 652113 | LOC652113 |
| LOC652115 | 652115 | LOC652115 |
| LOC652126 | 652126 | LOC652126 |

|           |        |           |
|-----------|--------|-----------|
| LOC652127 | 652127 | LOC652127 |
| LOC652128 | 652128 | LOC652128 |
| LOC652134 | 652134 | LOC652134 |
| LOC652140 | 652140 | LOC652140 |
| LOC652141 | 652141 | LOC652141 |
| LOC652147 | 652147 | LOC652147 |
| LOC652155 | 652155 | LOC652155 |
| LOC652160 | 652160 | LOC652160 |
| LOC652163 | 652163 | LOC652163 |
| LOC652164 | 652164 | LOC652164 |
| LOC652175 | 652175 | LOC652175 |
| LOC652184 | 652184 | LOC652184 |
| LOC652190 | 652190 | LOC652190 |
| LOC652203 | 652203 | LOC652203 |
| LOC652209 | 652209 | LOC652209 |
| LOC652211 | 652211 | LOC652211 |
| LOC652226 | 652226 | LOC652226 |
| LOC652234 | 652234 | LOC652234 |
| LOC652235 | 652235 | LOC652235 |
| LOC652252 | 652252 | LOC652252 |
| LOC652255 | 652255 | LOC652255 |
| LOC652264 | 652264 | LOC652264 |
| LOC652274 | 652274 | LOC652274 |
| LOC652287 | 652287 | LOC652287 |
| LOC652291 | 652291 | LOC652291 |
| LOC652294 | 652294 | LOC652294 |
| LOC652305 | 652305 | LOC652305 |
| LOC652317 | 652317 | LOC652317 |
| LOC652322 | 652322 | LOC652322 |
| LOC652324 | 652324 | LOC652324 |
| LOC652335 | 652335 | LOC652335 |
| LOC652344 | 652344 | LOC652344 |
| LOC652373 | 652373 | LOC652373 |
| LOC652377 | 652377 | LOC652377 |
| LOC652379 | 652379 | LOC652379 |
| LOC652388 | 652388 | LOC652388 |
| LOC652389 | 652389 | LOC652389 |
| LOC652400 | 652400 | LOC652400 |
| LOC652408 | 652408 | LOC652408 |
| LOC652417 | 652417 | LOC652417 |
| LOC652437 | 652437 | LOC652437 |
| LOC652438 | 652438 | LOC652438 |
| LOC652448 | 652448 | LOC652448 |
| LOC652456 | 652456 | LOC652456 |

|           |        |           |
|-----------|--------|-----------|
| LOC652460 | 652460 | LOC652460 |
| LOC652463 | 652463 | LOC652463 |
| LOC652470 | 652470 | LOC652470 |
| LOC652479 | 652479 | LOC652479 |
| LOC652483 | 652483 | LOC652483 |
| LOC652489 | 652489 | LOC652489 |
| LOC652491 | 652491 | LOC652491 |
| LOC652492 | 652492 | LOC652492 |
| LOC652493 | 652493 | LOC652493 |
| LOC652495 | 652495 | LOC652495 |
| LOC652505 | 652505 | LOC652505 |
| LOC652508 | 652508 | LOC652508 |
| LOC652512 | 652512 | LOC652512 |
| LOC652519 | 652519 | LOC652519 |
| LOC652529 | 652529 | LOC652529 |
| LOC652530 | 652530 | LOC652530 |
| LOC652536 | 652536 | LOC652536 |
| LOC652541 | 652541 | LOC652541 |
| LOC652542 | 652542 | LOC652542 |
| LOC652543 | 652543 | LOC652543 |
| LOC652545 | 652545 | LOC652545 |
| LOC652553 | 652553 | LOC652553 |
| LOC652554 | 652554 | LOC652554 |
| LOC652565 | 652565 | LOC652565 |
| LOC652568 | 652568 | LOC652568 |
| LOC652570 | 652570 | LOC652570 |
| LOC652578 | 652578 | LOC652578 |
| LOC652586 | 652586 | LOC652586 |
| LOC652588 | 652588 | LOC652588 |
| LOC652589 | 652589 | LOC652589 |
| LOC652594 | 652594 | LOC652594 |
| LOC652595 | 652595 | LOC652595 |
| LOC652602 | 652602 | LOC652602 |
| LOC652607 | 652607 | LOC652607 |
| LOC652614 | 652614 | LOC652614 |
| LOC652615 | 652615 | LOC652615 |
| LOC652616 | 652616 | LOC652616 |
| LOC652620 | 652620 | LOC652620 |
| LOC652623 | 652623 | LOC652623 |
| LOC652628 | 652628 | LOC652628 |
| LOC652629 | 652629 | LOC652629 |
| LOC652633 | 652633 | LOC652633 |
| LOC652634 | 652634 | LOC652634 |
| LOC652637 | 652637 | LOC652637 |

|           |        |           |
|-----------|--------|-----------|
| LOC652651 | 652651 | LOC652651 |
| LOC652661 | 652661 | LOC652661 |
| LOC652663 | 652663 | LOC652663 |
| LOC652668 | 652668 | LOC652668 |
| LOC652670 | 652670 | LOC652670 |
| LOC652671 | 652671 | LOC652671 |
| LOC652675 | 652675 | LOC652675 |
| LOC652683 | 652683 | LOC652683 |
| LOC652685 | 652685 | LOC652685 |
| LOC652694 | 652694 | LOC652694 |
| LOC652697 | 652697 | LOC652697 |
| LOC652698 | 652698 | LOC652698 |
| LOC652699 | 652699 | LOC652699 |
| LOC652703 | 652703 | LOC652703 |
| LOC652707 | 652707 | LOC652707 |
| LOC652712 | 652712 | LOC652712 |
| LOC652721 | 652721 | LOC652721 |
| LOC652730 | 652730 | LOC652730 |
| LOC652735 | 652735 | LOC652735 |
| LOC652736 | 652736 | LOC652736 |
| LOC652743 | 652743 | LOC652743 |
| LOC652745 | 652745 | LOC652745 |
| LOC652747 | 652747 | LOC652747 |
| LOC652755 | 652755 | LOC652755 |
| LOC652757 | 652757 | LOC652757 |
| LOC652762 | 652762 | LOC652762 |
| LOC652764 | 652764 | LOC652764 |
| LOC652765 | 652765 | LOC652765 |
| LOC652768 | 652768 | LOC652768 |
| LOC652771 | 652771 | LOC652771 |
| LOC652773 | 652773 | LOC652773 |
| LOC652775 | 652775 | LOC652775 |
| LOC652779 | 652779 | LOC652779 |
| LOC652781 | 652781 | LOC652781 |
| LOC652790 | 652790 | LOC652790 |
| LOC652797 | 652797 | LOC652797 |
| LOC652799 | 652799 | LOC652799 |
| LOC652805 | 652805 | LOC652805 |
| LOC652806 | 652806 | LOC652806 |
| LOC652808 | 652808 | LOC652808 |
| LOC652809 | 652809 | LOC652809 |
| LOC652819 | 652819 | LOC652819 |
| LOC652826 | 652826 | LOC652826 |
| LOC652834 | 652834 | LOC652834 |

|           |        |           |    |
|-----------|--------|-----------|----|
| LOC652837 | 652837 | LOC652837 |    |
| LOC652838 | 652838 | LOC652838 |    |
| LOC652843 | 652843 | LOC652843 |    |
| LOC652848 | 652848 | LOC652848 |    |
| LOC652860 | 652860 | LOC652860 |    |
| LOC652864 | 652864 | LOC652864 |    |
| LOC652865 | 652865 | LOC652865 |    |
| LOC652875 | 652875 | LOC652875 |    |
| LOC652887 | 652887 | LOC652887 |    |
| LOC652900 | 652900 | LOC652900 |    |
| LOC652903 | 652903 | LOC652903 |    |
| LOC652904 | 652904 | LOC652904 |    |
| LOC652968 | 652968 | LOC652968 | 22 |
| LOC653057 | 653057 | LOC653057 | 4  |
| LOC653061 | 653061 | LOC653061 | 15 |
| LOC653066 | 653066 | LOC653066 | 2  |
| LOC653071 | 653071 | LOC653071 | 4  |
| LOC653075 | 653075 | LOC653075 | 15 |
| LOC653082 | 653082 | LOC653082 | 5  |
| LOC653086 | 653086 | LOC653086 | 2  |
| LOC653093 | 653093 | LOC653093 | 17 |
| LOC653094 | 653094 | LOC653094 | X  |
| LOC653097 | 653097 | LOC653097 | 10 |
| LOC653103 | 653103 | LOC653103 |    |
| LOC653105 | 653105 | LOC653105 | 1  |
| LOC653108 | 653108 | LOC653108 | 21 |
| LOC653113 | 653113 | LOC653113 | 12 |
| LOC653114 | 653114 | LOC653114 | 9  |
| LOC653115 | 653115 | LOC653115 | 3  |
| LOC653119 | 653119 | LOC653119 | 8  |
| LOC653125 | 653125 | LOC653125 | 15 |
| LOC653127 | 653127 | LOC653127 | 17 |
| LOC653129 | 653129 | LOC653129 | 10 |
| LOC653135 | 653135 | LOC653135 | 22 |
| LOC653145 | 653145 | LOC653145 | 10 |
| LOC653147 | 653147 | LOC653147 | 11 |
| LOC653158 | 653158 | LOC653158 | 5  |
| LOC653171 | 653171 | LOC653171 | 6  |
| LOC653175 | 653175 | LOC653175 | 7  |
| LOC653186 | 653186 | LOC653186 | 2  |
| LOC653189 | 653189 | LOC653189 | 2  |
| LOC653197 | 653197 | LOC653197 | 12 |
| LOC653199 | 653199 | LOC653199 |    |
| LOC653200 | 653200 | LOC653200 | 1  |

|           |        |           |    |
|-----------|--------|-----------|----|
| LOC653204 | 653204 | LOC653204 | X  |
| LOC653206 | 653206 | LOC653206 | 2  |
| LOC653211 | 653211 | LOC653211 | 20 |
| LOC653226 | 653226 | LOC653226 | 10 |
| LOC653234 | 653234 | LOC653234 | 10 |
| LOC653241 | 653241 | LOC653241 | 17 |
| LOC653242 | 653242 | LOC653242 | 2  |
| LOC653244 | 653244 | LOC653244 | X  |
| LOC653257 | 653257 | LOC653257 | 22 |
| LOC653260 | 653260 | LOC653260 | 3  |
| LOC653264 | 653264 | LOC653264 | 22 |
| LOC653265 | 653265 | LOC653265 | 21 |
| LOC653270 | 653270 | LOC653270 | 22 |
| LOC653276 | 653276 | LOC653276 | 12 |
| LOC653291 | 653291 | LOC653291 | 15 |
| LOC653297 | 653297 | LOC653297 | X  |
| LOC653308 | 653308 | LOC653308 | 10 |
| LOC653321 | 653321 | LOC653321 | 7  |
| LOC653324 | 653324 | LOC653324 | 12 |
| LOC653338 | 653338 | LOC653338 | 7  |
| LOC653344 | 653344 | LOC653344 | 15 |
| LOC653352 | 653352 | LOC653352 | 16 |
| LOC653354 | 653354 | LOC653354 | X  |
| LOC653366 | 653366 | LOC653366 | 11 |
| LOC653375 | 653375 | LOC653375 | 7  |
| LOC653377 | 653377 | LOC653377 | 10 |
| LOC653380 | 653380 | LOC653380 | 17 |
| LOC653381 | 653381 | LOC653381 | 15 |
| LOC653383 | 653383 | LOC653383 | 9  |
| LOC653387 | 653387 | LOC653387 | X  |
| LOC653420 | 653420 | LOC653420 | 18 |
| LOC653423 | 653423 | LOC653423 | 8  |
| LOC653425 | 653425 | LOC653425 | 8  |
| LOC653438 | 653438 | LOC653438 | 1  |
| LOC653450 | 653450 | LOC653450 | 10 |
| LOC653458 | 653458 | LOC653458 | 9  |
| LOC653464 | 653464 | LOC653464 | 1  |
| LOC653471 | 653471 | LOC653471 | 10 |
| LOC653472 | 653472 | LOC653472 | 15 |
| LOC653479 | 653479 | LOC653479 | 17 |
| LOC653481 | 653481 | LOC653481 | 6  |
| LOC653489 | 653489 | LOC653489 |    |
| LOC653496 | 653496 | LOC653496 | 1  |
| LOC653499 | 653499 | LOC653499 | 19 |



|           |        |           |    |
|-----------|--------|-----------|----|
| LOC653501 | 653501 | LOC653501 | 9  |
| LOC653505 | 653505 | LOC653505 | 1  |
| LOC653506 | 653506 | LOC653506 | 17 |
| LOC653513 | 653513 | LOC653513 | 1  |
| LOC653515 | 653515 | LOC653515 | X  |
| LOC653520 | 653520 | LOC653520 | 17 |
| LOC653539 | 653539 | LOC653539 | 2  |
| LOC653545 | 653545 | LOC653545 | 4  |
| LOC653555 | 653555 | LOC653555 | 14 |
| LOC653557 | 653557 | LOC653557 | 16 |
| LOC653559 | 653559 | LOC653559 | 18 |
| LOC653562 | 653562 | LOC653562 | 16 |
| LOC653566 | 653566 | LOC653566 |    |
| LOC653567 | 653567 | LOC653567 | 10 |
| LOC653579 | 653579 | LOC653579 | 19 |
| LOC653580 | 653580 | LOC653580 | X  |
| LOC653581 | 653581 | LOC653581 | 12 |
| LOC653591 | 653591 | LOC653591 | 1  |
| LOC653598 | 653598 | LOC653598 | 1  |
| LOC653600 | 653600 | LOC653600 | 8  |
| LOC653601 | 653601 | LOC653601 | 3  |
| LOC653610 | 653610 | LOC653610 | 1  |
| LOC653616 | 653616 | LOC653616 | 11 |
| LOC653620 | 653620 | LOC653620 | 21 |
| LOC653623 | 653623 | LOC653623 | 7  |
| LOC653625 | 653625 | LOC653625 | 15 |
| LOC653629 | 653629 | LOC653629 |    |
| LOC653630 | 653630 | LOC653630 | 2  |
| LOC653632 | 653632 | LOC653632 | 2  |
| LOC653641 | 653641 | LOC653641 | 15 |
| LOC653645 | 653645 | LOC653645 | 17 |
| LOC653650 | 653650 | LOC653650 | 16 |
| LOC653653 | 653653 | LOC653653 | 17 |
| LOC653658 | 653658 | LOC653658 |    |
| LOC653663 | 653663 | LOC653663 | 2  |
| LOC653664 | 653664 | LOC653664 | X  |
| LOC653667 | 653667 | LOC653667 | 8  |
| LOC653683 | 653683 | LOC653683 | 2  |
| LOC653684 | 653684 | LOC653684 | 17 |
| LOC653715 | 653715 | LOC653715 | 22 |
| LOC653717 | 653717 | LOC653717 |    |
| LOC653722 | 653722 | LOC653722 | 7  |
| LOC653735 | 653735 | LOC653735 | 18 |
| LOC653741 | 653741 | LOC653741 | 17 |

|           |        |           |    |
|-----------|--------|-----------|----|
| LOC653750 | 653750 | LOC653750 | 1  |
| LOC653752 | 653752 | LOC653752 | 16 |
| LOC653759 | 653759 | LOC653759 | 2  |
| LOC653778 | 653778 | LOC653778 | 8  |
| LOC653800 | 653800 | LOC653800 | 16 |
| LOC653803 | 653803 | LOC653803 | 3  |
| LOC653806 | 653806 | LOC653806 | 15 |
| LOC653820 | 653820 | LOC653820 | 1  |
| LOC653832 | 653832 | LOC653832 |    |
| LOC653855 | 653855 | LOC653855 |    |
| LOC653857 | 653857 | LOC653857 |    |
| LOC653874 | 653874 | LOC653874 |    |
| LOC653877 | 653877 | LOC653877 |    |
| LOC653878 | 653878 | LOC653878 |    |
| LOC653884 | 653884 | LOC653884 |    |
| LOC653885 | 653885 | LOC653885 |    |
| LOC653886 | 653886 | LOC653886 |    |
| LOC653888 | 653888 | LOC653888 |    |
| LOC653894 | 653894 | LOC653894 |    |
| LOC653895 | 653895 | LOC653895 |    |
| LOC653905 | 653905 | LOC653905 |    |
| LOC653907 | 653907 | LOC653907 |    |
| LOC653924 | 653924 | LOC653924 |    |
| LOC653930 | 653930 | LOC653930 |    |
| LOC653941 | 653941 | LOC653941 |    |
| LOC653972 | 653972 | LOC653972 |    |
| LOC653980 | 653980 | LOC653980 |    |
| LOC653994 | 653994 | LOC653994 |    |
| LOC654020 | 654020 | LOC654020 |    |
| LOC654032 | 654032 | LOC654032 |    |
| LOC654042 | 654042 | LOC654042 |    |
| LOC654053 | 654053 | LOC654053 |    |
| LOC654074 | 654074 | LOC654074 |    |
| LOC654092 | 654092 | LOC654092 |    |
| LOC654103 | 654103 | LOC654103 |    |
| LOC654113 | 654113 | LOC654113 |    |
| LOC654116 | 654116 | LOC654116 |    |
| LOC654117 | 654117 | LOC654117 |    |
| LOC654126 | 654126 | LOC654126 |    |
| LOC654127 | 654127 | LOC654127 |    |
| LOC654128 | 654128 | LOC654128 |    |
| LOC654133 | 654133 | LOC654133 |    |
| LOC654155 | 654155 | LOC654155 |    |
| LOC654163 | 654163 | LOC654163 |    |

|           |        |           |    |
|-----------|--------|-----------|----|
| LOC654165 | 654165 | LOC654165 |    |
| LOC654172 | 654172 | LOC654172 |    |
| LOC654174 | 654174 | LOC654174 |    |
| LOC654187 | 654187 | LOC654187 |    |
| LOC654189 | 654189 | LOC654189 |    |
| LOC654191 | 654191 | LOC654191 |    |
| LOC654202 | 654202 | LOC654202 |    |
| LOC654203 | 654203 | LOC654203 |    |
| LOC654209 | 654209 | LOC654209 |    |
| LOC654244 | 654244 | LOC654244 |    |
| LOC654254 | 654254 | LOC654254 |    |
| LOC654260 | 654260 | LOC654260 |    |
| LOC654335 | 654335 | LOC654335 | 19 |
| LOC654346 | 654346 | LOC654346 | 17 |
| LOC654433 | 654433 | LOC654433 | 2  |
| LOC678655 | 678655 | LOC678655 | 12 |
| LOC723972 | 723972 | LOC723972 | 15 |
| LOC727722 | 727722 | LOC727722 |    |
| LOC727726 | 727726 | LOC727726 | 10 |
| LOC727737 | 727737 | LOC727737 | 2  |
| LOC727751 | 727751 | LOC727751 | 15 |
| LOC727752 | 727752 | LOC727752 | 19 |
| LOC727753 | 727753 | LOC727753 | 4  |
| LOC727761 | 727761 | LOC727761 | 2  |
| LOC727762 | 727762 | LOC727762 | 3  |
| LOC727773 | 727773 | LOC727773 | 2  |
| LOC727775 | 727775 | LOC727775 | 3  |
| LOC727791 | 727791 | LOC727791 | 12 |
| LOC727803 | 727803 | LOC727803 |    |
| LOC727805 | 727805 | LOC727805 | 6  |
| LOC727808 | 727808 | LOC727808 |    |
| LOC727815 | 727815 | LOC727815 | 12 |
| LOC727820 | 727820 | LOC727820 | 1  |
| LOC727825 | 727825 | LOC727825 | 1  |
| LOC727826 | 727826 | LOC727826 | 12 |
| LOC727832 | 727832 | LOC727832 | 15 |
| LOC727833 | 727833 | LOC727833 |    |
| LOC727837 | 727837 | LOC727837 | X  |
| LOC727848 | 727848 | LOC727848 | 14 |
| LOC727849 | 727849 | LOC727849 | 15 |
| LOC727851 | 727851 | LOC727851 | 2  |
| LOC727865 | 727865 | LOC727865 |    |
| LOC727866 | 727866 | LOC727866 | X  |
| LOC727868 | 727868 | LOC727868 | 1  |

|           |        |           |    |
|-----------|--------|-----------|----|
| LOC727869 | 727869 | LOC727869 |    |
| LOC727877 | 727877 | LOC727877 | 1  |
| LOC727894 | 727894 | LOC727894 |    |
| LOC727895 | 727895 | LOC727895 |    |
| LOC727900 | 727900 | LOC727900 |    |
| LOC727908 | 727908 | LOC727908 |    |
| LOC727918 | 727918 | LOC727918 | 18 |
| LOC727934 | 727934 | LOC727934 |    |
| LOC727935 | 727935 | LOC727935 | 15 |
| LOC727941 | 727941 | LOC727941 |    |
| LOC727948 | 727948 | LOC727948 | 1  |
| LOC727962 | 727962 | LOC727962 | 22 |
| LOC727963 | 727963 | LOC727963 | 15 |
| LOC727967 | 727967 | LOC727967 |    |
| LOC727970 | 727970 | LOC727970 |    |
| LOC727980 | 727980 | LOC727980 | 14 |
| LOC727987 | 727987 | LOC727987 | 21 |
| LOC727992 | 727992 | LOC727992 | 16 |
| LOC727994 | 727994 | LOC727994 | 15 |
| LOC728006 | 728006 | LOC728006 | 16 |
| LOC728012 | 728012 | LOC728012 | 6  |
| LOC728014 | 728014 | LOC728014 | 12 |
| LOC728022 | 728022 | LOC728022 | 10 |
| LOC728024 | 728024 | LOC728024 | 8  |
| LOC728026 | 728026 | LOC728026 | 9  |
| LOC728031 | 728031 | LOC728031 |    |
| LOC728032 | 728032 | LOC728032 | 22 |
| LOC728037 | 728037 | LOC728037 | 16 |
| LOC728052 | 728052 | LOC728052 |    |
| LOC728059 | 728059 | LOC728059 |    |
| LOC728066 | 728066 | LOC728066 | 2  |
| LOC728069 | 728069 | LOC728069 | 12 |
| LOC728098 | 728098 | LOC728098 |    |
| LOC728105 | 728105 | LOC728105 | 3  |
| LOC728111 | 728111 | LOC728111 |    |
| LOC728115 | 728115 | LOC728115 |    |
| LOC728125 | 728125 | LOC728125 | 15 |
| LOC728126 | 728126 | LOC728126 |    |
| LOC728128 | 728128 | LOC728128 | 4  |
| LOC728129 | 728129 | LOC728129 | 17 |
| LOC728138 | 728138 | LOC728138 | 16 |
| LOC728139 | 728139 | LOC728139 | 22 |
| LOC728142 | 728142 | LOC728142 | X  |
| LOC728145 | 728145 | LOC728145 | 5  |

|           |        |           |    |
|-----------|--------|-----------|----|
| LOC728150 | 728150 | LOC728150 | X  |
| LOC728153 | 728153 | LOC728153 | 5  |
| LOC728170 | 728170 | LOC728170 | 12 |
| LOC728175 | 728175 | LOC728175 |    |
| LOC728178 | 728178 | LOC728178 |    |
| LOC728181 | 728181 | LOC728181 | 12 |
| LOC728185 | 728185 | LOC728185 | 2  |
| LOC728188 | 728188 | LOC728188 | X  |
| LOC728190 | 728190 | LOC728190 | 10 |
| LOC728193 | 728193 | LOC728193 | 4  |
| LOC728205 | 728205 | LOC728205 |    |
| LOC728207 | 728207 | LOC728207 |    |
| LOC728208 | 728208 | LOC728208 |    |
| LOC728226 | 728226 | LOC728226 | 22 |
| LOC728229 | 728229 | LOC728229 | 22 |
| LOC728241 | 728241 | LOC728241 |    |
| LOC728244 | 728244 | LOC728244 |    |
| LOC728249 | 728249 | LOC728249 | 2  |
| LOC728262 | 728262 | LOC728262 | 7  |
| LOC728263 | 728263 | LOC728263 |    |
| LOC728275 | 728275 | LOC728275 |    |
| LOC728288 | 728288 | LOC728288 |    |
| LOC728291 | 728291 | LOC728291 | 11 |
| LOC728310 | 728310 | LOC728310 | 15 |
| LOC728312 | 728312 | LOC728312 |    |
| LOC728318 | 728318 | LOC728318 |    |
| LOC728324 | 728324 | LOC728324 |    |
| LOC728343 | 728343 | LOC728343 | X  |
| LOC728348 | 728348 | LOC728348 | 7  |
| LOC728352 | 728352 | LOC728352 | 5  |
| LOC728362 | 728362 | LOC728362 |    |
| LOC728380 | 728380 | LOC728380 | 6  |
| LOC728405 | 728405 | LOC728405 | 4  |
| LOC728408 | 728408 | LOC728408 |    |
| LOC728411 | 728411 | LOC728411 | 5  |
| LOC728417 | 728417 | LOC728417 | 1  |
| LOC728431 | 728431 | LOC728431 |    |
| LOC728441 | 728441 | LOC728441 | 22 |
| LOC728448 | 728448 | LOC728448 | 1  |
| LOC728452 | 728452 | LOC728452 | 5  |
| LOC728453 | 728453 | LOC728453 |    |
| LOC728454 | 728454 | LOC728454 | 8  |
| LOC728457 | 728457 | LOC728457 | 7  |
| LOC728460 | 728460 | LOC728460 |    |

|           |        |           |    |
|-----------|--------|-----------|----|
| LOC728465 | 728465 | LOC728465 | 7  |
| LOC728467 | 728467 | LOC728467 | 12 |
| LOC728470 | 728470 | LOC728470 |    |
| LOC728485 | 728485 | LOC728485 | 19 |
| LOC728492 | 728492 | LOC728492 | 5  |
| LOC728499 | 728499 | LOC728499 | 5  |
| LOC728505 | 728505 | LOC728505 | 3  |
| LOC728516 | 728516 | LOC728516 |    |
| LOC728517 | 728517 | LOC728517 | 1  |
| LOC728519 | 728519 | LOC728519 | 5  |
| LOC728530 | 728530 | LOC728530 | 4  |
| LOC728532 | 728532 | LOC728532 | 10 |
| LOC728533 | 728533 | LOC728533 | 19 |
| LOC728537 | 728537 | LOC728537 |    |
| LOC728543 | 728543 | LOC728543 |    |
| LOC728554 | 728554 | LOC728554 | 5  |
| LOC728556 | 728556 | LOC728556 | 21 |
| LOC728558 | 728558 | LOC728558 |    |
| LOC728564 | 728564 | LOC728564 | 4  |
| LOC728565 | 728565 | LOC728565 | 5  |
| LOC728588 | 728588 | LOC728588 | 11 |
| LOC728602 | 728602 | LOC728602 |    |
| LOC728606 | 728606 | LOC728606 | 18 |
| LOC728607 | 728607 | LOC728607 |    |
| LOC728612 | 728612 | LOC728612 | 5  |
| LOC728620 | 728620 | LOC728620 |    |
| LOC728622 | 728622 | LOC728622 | 12 |
| LOC728626 | 728626 | LOC728626 |    |
| LOC728635 | 728635 | LOC728635 | 14 |
| LOC728640 | 728640 | LOC728640 | 10 |
| LOC728643 | 728643 | LOC728643 | 10 |
| LOC728650 | 728650 | LOC728650 |    |
| LOC728653 | 728653 | LOC728653 | X  |
| LOC728661 | 728661 | LOC728661 | 1  |
| LOC728666 | 728666 | LOC728666 |    |
| LOC728672 | 728672 | LOC728672 | 12 |
| LOC728678 | 728678 | LOC728678 |    |
| LOC728683 | 728683 | LOC728683 |    |
| LOC728686 | 728686 | LOC728686 |    |
| LOC728693 | 728693 | LOC728693 |    |
| LOC728694 | 728694 | LOC728694 |    |
| LOC728698 | 728698 | LOC728698 |    |
| LOC728711 | 728711 | LOC728711 |    |
| LOC728715 | 728715 | LOC728715 | 12 |

|           |        |           |    |
|-----------|--------|-----------|----|
| LOC728723 | 728723 | LOC728723 | 5  |
| LOC728728 | 728728 | LOC728728 |    |
| LOC728729 | 728729 | LOC728729 | 15 |
| LOC728732 | 728732 | LOC728732 | 11 |
| LOC728734 | 728734 | LOC728734 | 16 |
| LOC728739 | 728739 | LOC728739 | 12 |
| LOC728743 | 728743 | LOC728743 | 7  |
| LOC728748 | 728748 | LOC728748 | X  |
| LOC728755 | 728755 | LOC728755 |    |
| LOC728758 | 728758 | LOC728758 |    |
| LOC728774 | 728774 | LOC728774 | 8  |
| LOC728782 | 728782 | LOC728782 |    |
| LOC728787 | 728787 | LOC728787 | 3  |
| LOC728791 | 728791 | LOC728791 |    |
| LOC728802 | 728802 | LOC728802 | 1  |
| LOC728809 | 728809 | LOC728809 |    |
| LOC728816 | 728816 | LOC728816 | 21 |
| LOC728819 | 728819 | LOC728819 | 2  |
| LOC728820 | 728820 | LOC728820 |    |
| LOC728825 | 728825 | LOC728825 | X  |
| LOC728830 | 728830 | LOC728830 | 17 |
| LOC728835 | 728835 | LOC728835 | 17 |
| LOC728844 | 728844 | LOC728844 |    |
| LOC728853 | 728853 | LOC728853 | 19 |
| LOC728855 | 728855 | LOC728855 | 1  |
| LOC728873 | 728873 | LOC728873 | 3  |
| LOC728877 | 728877 | LOC728877 | 22 |
| LOC728882 | 728882 | LOC728882 | 20 |
| LOC728888 | 728888 | LOC728888 | 16 |
| LOC728889 | 728889 | LOC728889 | 17 |
| LOC728903 | 728903 | LOC728903 |    |
| LOC728904 | 728904 | LOC728904 |    |
| LOC728908 | 728908 | LOC728908 | 17 |
| LOC728910 | 728910 | LOC728910 | 19 |
| LOC728919 | 728919 | LOC728919 | 17 |
| LOC728924 | 728924 | LOC728924 | 10 |
| LOC728929 | 728929 | LOC728929 | 18 |
| LOC728931 | 728931 | LOC728931 |    |
| LOC728942 | 728942 | LOC728942 |    |
| LOC728944 | 728944 | LOC728944 | 2  |
| LOC728945 | 728945 | LOC728945 | 1  |
| LOC728955 | 728955 | LOC728955 | 10 |
| LOC728969 | 728969 | LOC728969 | 1  |
| LOC728973 | 728973 | LOC728973 | 1  |

|           |        |           |    |
|-----------|--------|-----------|----|
| LOC728975 | 728975 | LOC728975 |    |
| LOC728990 | 728990 | LOC728990 | 10 |
| LOC729003 | 729003 | LOC729003 | 1  |
| LOC729009 | 729009 | LOC729009 | 2  |
| LOC729010 | 729010 | LOC729010 | 4  |
| LOC729020 | 729020 | LOC729020 |    |
| LOC729021 | 729021 | LOC729021 | 4  |
| LOC729025 | 729025 | LOC729025 | 12 |
| LOC729028 | 729028 | LOC729028 |    |
| LOC729057 | 729057 | LOC729057 | 22 |
| LOC729059 | 729059 | LOC729059 |    |
| LOC729076 | 729076 | LOC729076 | 6  |
| LOC729082 | 729082 | LOC729082 |    |
| LOC729086 | 729086 | LOC729086 | 1  |
| LOC729090 | 729090 | LOC729090 | 5  |
| LOC729101 | 729101 | LOC729101 | 11 |
| LOC729102 | 729102 | LOC729102 | 3  |
| LOC729123 | 729123 | LOC729123 | 5  |
| LOC729148 | 729148 | LOC729148 | X  |
| LOC729150 | 729150 | LOC729150 | 3  |
| LOC729157 | 729157 | LOC729157 |    |
| LOC729164 | 729164 | LOC729164 |    |
| LOC729173 | 729173 | LOC729173 |    |
| LOC729196 | 729196 | LOC729196 | 11 |
| LOC729200 | 729200 | LOC729200 |    |
| LOC729217 | 729217 | LOC729217 |    |
| LOC729225 | 729225 | LOC729225 |    |
| LOC729234 | 729234 | LOC729234 | 2  |
| LOC729238 | 729238 | LOC729238 | 10 |
| LOC729242 | 729242 | LOC729242 | 17 |
| LOC729254 | 729254 | LOC729254 | 2  |
| LOC729277 | 729277 | LOC729277 | 6  |
| LOC729279 | 729279 | LOC729279 |    |
| LOC729296 | 729296 | LOC729296 |    |
| LOC729298 | 729298 | LOC729298 |    |
| LOC729301 | 729301 | LOC729301 |    |
| LOC729314 | 729314 | LOC729314 |    |
| LOC729317 | 729317 | LOC729317 | 2  |
| LOC729324 | 729324 | LOC729324 |    |
| LOC729327 | 729327 | LOC729327 |    |
| LOC729335 | 729335 | LOC729335 |    |
| LOC729342 | 729342 | LOC729342 | 2  |
| LOC729355 | 729355 | LOC729355 | 16 |
| LOC729366 | 729366 | LOC729366 | 2  |



|           |        |           |    |
|-----------|--------|-----------|----|
| LOC729369 | 729369 | LOC729369 | 13 |
| LOC729373 | 729373 | LOC729373 | 9  |
| LOC729375 | 729375 | LOC729375 | 3  |
| LOC729389 | 729389 | LOC729389 |    |
| LOC729390 | 729390 | LOC729390 | 13 |
| LOC729397 | 729397 | LOC729397 |    |
| LOC729399 | 729399 | LOC729399 | 2  |
| LOC729406 | 729406 | LOC729406 |    |
| LOC729417 | 729417 | LOC729417 | 17 |
| LOC729421 | 729421 | LOC729421 |    |
| LOC729423 | 729423 | LOC729423 |    |
| LOC729424 | 729424 | LOC729424 | 4  |
| LOC729433 | 729433 | LOC729433 | 19 |
| LOC729435 | 729435 | LOC729435 |    |
| LOC729438 | 729438 | LOC729438 | 7  |
| LOC729446 | 729446 | LOC729446 | 6  |
| LOC729456 | 729456 | LOC729456 | 8  |
| LOC729466 | 729466 | LOC729466 | 11 |
| LOC729486 | 729486 | LOC729486 | 16 |
| LOC729494 | 729494 | LOC729494 |    |
| LOC729495 | 729495 | LOC729495 | 22 |
| LOC729500 | 729500 | LOC729500 |    |
| LOC729505 | 729505 | LOC729505 |    |
| LOC729519 | 729519 | LOC729519 | 16 |
| LOC729524 | 729524 | LOC729524 | 13 |
| LOC729530 | 729530 | LOC729530 |    |
| LOC729535 | 729535 | LOC729535 |    |
| LOC729558 | 729558 | LOC729558 | 4  |
| LOC729559 | 729559 | LOC729559 | 1  |
| LOC729569 | 729569 | LOC729569 | 5  |
| LOC729570 | 729570 | LOC729570 | 2  |
| LOC729580 | 729580 | LOC729580 | 20 |
| LOC729581 | 729581 | LOC729581 |    |
| LOC729587 | 729587 | LOC729587 | 1  |
| LOC729595 | 729595 | LOC729595 | 5  |
| LOC729602 | 729602 | LOC729602 | 18 |
| LOC729603 | 729603 | LOC729603 | 6  |
| LOC729608 | 729608 | LOC729608 |    |
| LOC729623 | 729623 | LOC729623 | 7  |
| LOC729626 | 729626 | LOC729626 | 19 |
| LOC729629 | 729629 | LOC729629 |    |
| LOC729646 | 729646 | LOC729646 | 14 |
| LOC729647 | 729647 | LOC729647 | 11 |
| LOC729652 | 729652 | LOC729652 |    |

|           |        |           |    |
|-----------|--------|-----------|----|
| LOC729660 | 729660 | LOC729660 | 1  |
| LOC729666 | 729666 | LOC729666 |    |
| LOC729668 | 729668 | LOC729668 | 10 |
| LOC729675 | 729675 | LOC729675 | 4  |
| LOC729679 | 729679 | LOC729679 | 19 |
| LOC729680 | 729680 | LOC729680 |    |
| LOC729683 | 729683 | LOC729683 |    |
| LOC729686 | 729686 | LOC729686 |    |
| LOC729687 | 729687 | LOC729687 |    |
| LOC729692 | 729692 | LOC729692 | 3  |
| LOC729708 | 729708 | LOC729708 |    |
| LOC729732 | 729732 | LOC729732 | 8  |
| LOC729737 | 729737 | LOC729737 | 1  |
| LOC729742 | 729742 | LOC729742 |    |
| LOC729764 | 729764 | LOC729764 | 5  |
| LOC729766 | 729766 | LOC729766 | 1  |
| LOC729768 | 729768 | LOC729768 |    |
| LOC729769 | 729769 | LOC729769 | 2  |
| LOC729776 | 729776 | LOC729776 | 6  |
| LOC729777 | 729777 | LOC729777 | 16 |
| LOC729779 | 729779 | LOC729779 |    |
| LOC729780 | 729780 | LOC729780 |    |
| LOC729786 | 729786 | LOC729786 | 15 |
| LOC729792 | 729792 | LOC729792 | 6  |
| LOC729798 | 729798 | LOC729798 |    |
| LOC729806 | 729806 | LOC729806 |    |
| LOC729810 | 729810 | LOC729810 | 1  |
| LOC729816 | 729816 | LOC729816 | 6  |
| LOC729828 | 729828 | LOC729828 |    |
| LOC729832 | 729832 | LOC729832 | 22 |
| LOC729841 | 729841 | LOC729841 |    |
| LOC729843 | 729843 | LOC729843 | 2  |
| LOC729852 | 729852 | LOC729852 | 7  |
| LOC729858 | 729858 | LOC729858 |    |
| LOC729859 | 729859 | LOC729859 | 2  |
| LOC729879 | 729879 | LOC729879 | 2  |
| LOC729887 | 729887 | LOC729887 |    |
| LOC729898 | 729898 | LOC729898 | 2  |
| LOC729905 | 729905 | LOC729905 | 22 |
| LOC729907 | 729907 | LOC729907 | 1  |
| LOC729915 | 729915 | LOC729915 | 5  |
| LOC729926 | 729926 | LOC729926 |    |
| LOC729933 | 729933 | LOC729933 |    |
| LOC729944 | 729944 | LOC729944 |    |

|           |        |           |    |
|-----------|--------|-----------|----|
| LOC729952 | 729952 | LOC729952 | 1  |
| LOC729954 | 729954 | LOC729954 |    |
| LOC729964 | 729964 | LOC729964 |    |
| LOC729967 | 729967 | LOC729967 | 2  |
| LOC729983 | 729983 | LOC729983 |    |
| LOC729985 | 729985 | LOC729985 | 2  |
| LOC729992 | 729992 | LOC729992 | 2  |
| LOC729995 | 729995 | LOC729995 |    |
| LOC730004 | 730004 | LOC730004 |    |
| LOC730005 | 730005 | LOC730005 | 22 |
| LOC730015 | 730015 | LOC730015 | 6  |
| LOC730020 | 730020 | LOC730020 | 7  |
| LOC730024 | 730024 | LOC730024 | 2  |
| LOC730027 | 730027 | LOC730027 | 15 |
| LOC730029 | 730029 | LOC730029 |    |
| LOC730041 | 730041 | LOC730041 |    |
| LOC730051 | 730051 | LOC730051 | 19 |
| LOC730063 | 730063 | LOC730063 | 5  |
| LOC730074 | 730074 | LOC730074 | 6  |
| LOC730077 | 730077 | LOC730077 | 6  |
| LOC730078 | 730078 | LOC730078 |    |
| LOC730081 | 730081 | LOC730081 |    |
| LOC730087 | 730087 | LOC730087 |    |
| LOC730092 | 730092 | LOC730092 |    |
| LOC730098 | 730098 | LOC730098 |    |
| LOC730101 | 730101 | LOC730101 | 6  |
| LOC730107 | 730107 | LOC730107 | 1  |
| LOC730132 | 730132 | LOC730132 | 1  |
| LOC730134 | 730134 | LOC730134 |    |
| LOC730153 | 730153 | LOC730153 | 16 |
| LOC730159 | 730159 | LOC730159 |    |
| LOC730163 | 730163 | LOC730163 |    |
| LOC730167 | 730167 | LOC730167 |    |
| LOC730173 | 730173 | LOC730173 |    |
| LOC730176 | 730176 | LOC730176 | 14 |
| LOC730183 | 730183 | LOC730183 |    |
| LOC730184 | 730184 | LOC730184 | 2  |
| LOC730194 | 730194 | LOC730194 | 13 |
| LOC730202 | 730202 | LOC730202 | 14 |
| LOC730236 | 730236 | LOC730236 | 13 |
| LOC730246 | 730246 | LOC730246 |    |
| LOC730256 | 730256 | LOC730256 | 1  |
| LOC730268 | 730268 | LOC730268 |    |
| LOC730272 | 730272 | LOC730272 | 2  |

|           |        |           |   |
|-----------|--------|-----------|---|
| LOC730273 | 730273 | LOC730273 |   |
| LOC730274 | 730274 | LOC730274 |   |
| LOC730278 | 730278 | LOC730278 | 7 |
| LOC730281 | 730281 | LOC730281 | 7 |
| LOC730284 | 730284 | LOC730284 | 7 |
| LOC730286 | 730286 | LOC730286 | 7 |
| LOC730288 | 730288 | LOC730288 | 7 |
| LOC730302 | 730302 | LOC730302 |   |
| LOC730313 | 730313 | LOC730313 | 7 |
| LOC730316 | 730316 | LOC730316 |   |
| LOC730323 | 730323 | LOC730323 | 7 |
| LOC730324 | 730324 | LOC730324 | 7 |
| LOC730329 | 730329 | LOC730329 | 7 |
| LOC730344 | 730344 | LOC730344 |   |
| LOC730358 | 730358 | LOC730358 |   |
| LOC730376 | 730376 | LOC730376 |   |
| LOC730385 | 730385 | LOC730385 | 7 |
| LOC730389 | 730389 | LOC730389 | 7 |
| LOC730396 | 730396 | LOC730396 | 6 |
| LOC730413 | 730413 | LOC730413 |   |
| LOC730415 | 730415 | LOC730415 |   |
| LOC730417 | 730417 | LOC730417 |   |
| LOC730419 | 730419 | LOC730419 |   |
| LOC730432 | 730432 | LOC730432 |   |
| LOC730455 | 730455 | LOC730455 |   |
| LOC730461 | 730461 | LOC730461 |   |
| LOC730465 | 730465 | LOC730465 |   |
| LOC730496 | 730496 | LOC730496 |   |
| LOC730517 | 730517 | LOC730517 |   |
| LOC730525 | 730525 | LOC730525 |   |
| LOC730534 | 730534 | LOC730534 |   |
| LOC730546 | 730546 | LOC730546 |   |
| LOC730631 | 730631 | LOC730631 |   |
| LOC730658 | 730658 | LOC730658 |   |
| LOC730704 | 730704 | LOC730704 |   |
| LOC730740 | 730740 | LOC730740 |   |
| LOC730744 | 730744 | LOC730744 |   |
| LOC730746 | 730746 | LOC730746 |   |
| LOC730809 | 730809 | LOC730809 |   |
| LOC730818 | 730818 | LOC730818 |   |
| LOC730820 | 730820 | LOC730820 |   |
| LOC730833 | 730833 | LOC730833 |   |
| LOC730841 | 730841 | LOC730841 |   |
| LOC730877 | 730877 | LOC730877 |   |

|           |        |           |    |
|-----------|--------|-----------|----|
| LOC730908 | 730908 | LOC730908 |    |
| LOC730974 | 730974 | LOC730974 |    |
| LOC730990 | 730990 | LOC730990 |    |
| LOC730994 | 730994 | LOC730994 |    |
| LOC730995 | 730995 | LOC730995 |    |
| LOC730996 | 730996 | LOC730996 |    |
| LOC731007 | 731007 | LOC731007 |    |
| LOC731040 | 731040 | LOC731040 | 15 |
| LOC731049 | 731049 | LOC731049 |    |
| LOC731052 | 731052 | LOC731052 |    |
| LOC731075 | 731075 | LOC731075 | 7  |
| LOC731082 | 731082 | LOC731082 |    |
| LOC731096 | 731096 | LOC731096 |    |
| LOC731109 | 731109 | LOC731109 |    |
| LOC731139 | 731139 | LOC731139 | 1  |
| LOC731157 | 731157 | LOC731157 |    |
| LOC731170 | 731170 | LOC731170 |    |
| LOC731186 | 731186 | LOC731186 |    |
| LOC731227 | 731227 | LOC731227 |    |
| LOC731231 | 731231 | LOC731231 |    |
| LOC731236 | 731236 | LOC731236 |    |
| LOC731314 | 731314 | LOC731314 |    |
| LOC731338 | 731338 | LOC731338 |    |
| LOC731366 | 731366 | LOC731366 |    |
| LOC731377 | 731377 | LOC731377 |    |
| LOC731419 | 731419 | LOC731419 |    |
| LOC731444 | 731444 | LOC731444 |    |
| LOC731486 | 731486 | LOC731486 |    |
| LOC731496 | 731496 | LOC731496 |    |
| LOC731528 | 731528 | LOC731528 |    |
| LOC731542 | 731542 | LOC731542 |    |
| LOC731605 | 731605 | LOC731605 |    |
| LOC731656 | 731656 | LOC731656 |    |
| LOC731658 | 731658 | LOC731658 |    |
| LOC731682 | 731682 | LOC731682 |    |
| LOC731724 | 731724 | LOC731724 | 14 |
| LOC731742 | 731742 | LOC731742 |    |
| LOC731751 | 731751 | LOC731751 |    |
| LOC731779 | 731779 | LOC731779 | 8  |
| LOC731789 | 731789 | LOC731789 |    |
| LOC731835 | 731835 | LOC731835 |    |
| LOC731878 | 731878 | LOC731878 |    |
| LOC731881 | 731881 | LOC731881 |    |
| LOC731915 | 731915 | LOC731915 |    |

|           |        |           |    |
|-----------|--------|-----------|----|
| LOC731950 | 731950 | LOC731950 |    |
| LOC731985 | 731985 | LOC731985 |    |
| LOC731999 | 731999 | LOC731999 |    |
| LOC732007 | 732007 | LOC732007 |    |
| LOC732075 | 732075 | LOC732075 |    |
| LOC732138 | 732138 | LOC732138 |    |
| LOC732150 | 732150 | LOC732150 |    |
| LOC732165 | 732165 | LOC732165 |    |
| LOC732172 | 732172 | LOC732172 |    |
| LOC732215 | 732215 | LOC732215 |    |
| LOC732275 | 732275 | LOC732275 |    |
| LOC732360 | 732360 | LOC732360 |    |
| LOC732372 | 732372 | LOC732372 |    |
| LOC732419 | 732419 | LOC732419 |    |
| LOC732424 | 732424 | LOC732424 |    |
| LOC732425 | 732425 | LOC732425 |    |
| LOC732443 | 732443 | LOC732443 |    |
| LOC732445 | 732445 | LOC732445 |    |
| LOC732446 | 732446 | LOC732446 |    |
| LOC791120 | 791120 | LOC791120 |    |
| LOC85389  | 85389  | LOC85389  | 11 |
| LOC85390  | 85390  | LOC85390  | 11 |
| LOC88523  | 88523  | LOC88523  | 13 |
| LOC90113  | 90113  | LOC90113  |    |
| LOC90120  | 90120  | LOC90120  | 9  |
| LOC90342  | 90342  | LOC90342  |    |
| LOC90586  | 90586  | LOC90586  | 17 |
| LOC90925  | 90925  | LOC90925  |    |
| LOC91316  | 91316  | LOC91316  |    |
| LOC91431  | 91431  | LOC91431  | 4  |
| LOC91561  | 91561  | LOC91561  |    |
| LOC92249  | 92249  | LOC92249  | X  |
| LOC92497  | 92497  | LOC92497  | 12 |
| LOC92659  | 92659  | LOC92659  | 17 |
| LOC92755  | 92755  | LOC92755  | 8  |
| LOC92973  | 92973  | LOC92973  | 9  |
| LOC93349  | 93349  | LOC93349  | 2  |
| LOC93432  | 93432  | LOC93432  | 7  |
| LOC93463  | 93463  | LOC93463  | 2  |
| LOC93556  | 93556  | LOC93556  | 3  |
| LOC93622  | 93622  | LOC93622  |    |
| LOC96597  | 96597  | LOC96597  | 17 |
| LOC96610  | 96610  | LOC96610  | 22 |
| LOH12CR2  | 503693 | LOH12CR2  | 12 |

|          |        |          |    |
|----------|--------|----------|----|
| LOH3CR2A | 29931  | LOH3CR2A | 3  |
| LONP1    | 9361   | LONP1    | 19 |
| LONP2    | 83752  | LONP2    | 16 |
| LONRF1   | 91694  | LONRF1   | 8  |
| LONRF3   | 79836  | LONRF3   | X  |
| LOXHD1   | 125336 | LOXHD1   | 18 |
| LPA      | 4018   | LPA      | 6  |
| LPAR1    | 1902   | LPAR1    | 9  |
| LPAR2    | 9170   | LPAR2    | 19 |
| LPAR3    | 23566  | LPAR3    | 1  |
| LPAR4    | 2846   | LPAR4    | X  |
| LPAR5    | 57121  | LPAR5    | 12 |
| LPCAT1   | 79888  | LPCAT1   | 5  |
| LPCAT2   | 54947  | LPCAT2   | 16 |
| LPCAT3   | 10162  | LPCAT3   | 12 |
| LPCAT4   | 254531 | LPCAT4   | 15 |
| LPGAT1   | 9926   | LPGAT1   | 1  |
| LPHN1    | 22859  | LPHN1    | 19 |
| LPHN2    | 23266  | LPHN2    | 1  |
| LPIN1    | 23175  | LPIN1    | 2  |
| LPIN2    | 9663   | LPIN2    | 18 |
| LPP      | 4026   | LPP      | 3  |
| LPPR2    | 64748  | LPPR2    | 19 |
| LPXN     | 9404   | LPXN     | 11 |
| LQK1     | 642946 | LQK1     | 1  |
| LRAP     | 64167  | LRAP     | 5  |
| LRBA     | 987    | LRBA     | 4  |
| LRCH3    | 84859  | LRCH3    | 3  |
| LRCH4    | 4034   | LRCH4    | 7  |
| LRDD     | 55367  | LRDD     | 11 |
| LRFN1    | 57622  | LRFN1    | 19 |
| LRFN3    | 79414  | LRFN3    | 19 |
| LRFN4    | 78999  | LRFN4    | 11 |
| LRGUK    | 136332 | LRGUK    | 7  |
| LRIG1    | 26018  | LRIG1    | 3  |
| LRIG2    | 9860   | LRIG2    | 1  |
| LRIG3    | 121227 | LRIG3    | 12 |
| LRIT3    | 345193 | LRIT3    | 4  |
| LRMP     | 4033   | LRMP     | 12 |
| LRP1     | 4035   | LRP1     | 12 |
| LRP10    | 26020  | LRP10    | 14 |
| LRP11    | 84918  | LRP11    | 6  |
| LRP1B    | 53353  | LRP1B    | 2  |
| LRP3     | 4037   | LRP3     | 19 |

|          |        |          |    |
|----------|--------|----------|----|
| LRP4     | 4038   | LRP4     | 11 |
| LRP5     | 4041   | LRP5     | 11 |
| LRP8     | 7804   | LRP8     | 1  |
| LRPAP1   | 4043   | LRPAP1   | 4  |
| LRRC1    | 55227  | LRRC1    | 6  |
| LRRC14   | 9684   | LRRC14   | 8  |
| LRRC15   | 131578 | LRRC15   | 3  |
| LRRC16   | 55604  | LRRC16   | 6  |
| LRRC16A  | 55604  | LRRC16A  | 6  |
| LRRC16B  | 90668  | LRRC16B  | 14 |
| LRRC18   | 474354 | LRRC18   | 10 |
| LRRC20   | 55222  | LRRC20   | 10 |
| LRRC23   | 10233  | LRRC23   | 12 |
| LRRC24   | 441381 | LRRC24   | 8  |
| LRRC25   | 126364 | LRRC25   | 19 |
| LRRC26   | 389816 | LRRC26   | 9  |
| LRRC28   | 123355 | LRRC28   | 15 |
| LRRC29   | 26231  | LRRC29   | 16 |
| LRRC3    | 81543  | LRRC3    | 21 |
| LRRC31   | 79782  | LRRC31   | 3  |
| LRRC32   | 2615   | LRRC32   | 11 |
| LRRC33   | 375387 | LRRC33   | 3  |
| LRRC34   | 151827 | LRRC34   | 3  |
| LRRC36   | 55282  | LRRC36   | 16 |
| LRRC37A2 | 474170 | LRRC37A2 | 17 |
| LRRC37A4 | 55073  | LRRC37A4 | 17 |
| LRRC37B  | 114659 | LRRC37B  |    |
| LRRC37B2 | 147172 | LRRC37B2 |    |
| LRRC38   | 126755 | LRRC38   |    |
| LRRC40   | 55631  | LRRC40   | 1  |
| LRRC41   | 10489  | LRRC41   | 1  |
| LRRC42   | 115353 | LRRC42   | 1  |
| LRRC44   | 127255 | LRRC44   | 1  |
| LRRC45   | 201255 | LRRC45   | 17 |
| LRRC46   | 90506  | LRRC46   | 17 |
| LRRC47   | 57470  | LRRC47   | 1  |
| LRRC48   | 83450  | LRRC48   |    |
| LRRC49   | 54839  | LRRC49   | 15 |
| LRRC56   | 115399 | LRRC56   | 11 |
| LRRC57   | 255252 | LRRC57   | 15 |
| LRRC58   | 116064 | LRRC58   | 3  |
| LRRC59   | 55379  | LRRC59   | 17 |
| LRRC6    | 23639  | LRRC6    | 8  |
| LRRC67   | 286187 | LRRC67   | 8  |



|           |           |           |    |
|-----------|-----------|-----------|----|
| LRRRC69   | 100130742 | LRRRC69   | 8  |
| LRRRC7    | 57554     | LRRRC7    | 1  |
| LRRRC8A   | 56262     | LRRRC8A   | 9  |
| LRRRC8C   | 84230     | LRRRC8C   | 1  |
| LRRRC8D   | 55144     | LRRRC8D   | 1  |
| LRRRC8E   | 80131     | LRRRC8E   | 19 |
| LRRCC1    | 85444     | LRRCC1    | 8  |
| LRRFIP1   | 9208      | LRRFIP1   | 2  |
| LRRFIP2   | 9209      | LRRFIP2   | 3  |
| LRRIQ3    | 127255    | LRRIQ3    | 1  |
| LRRK2     | 120892    | LRRK2     | 12 |
| LRRN1     | 57633     | LRRN1     | 3  |
| LRRN2     | 10446     | LRRN2     | 1  |
| LRRN3     | 54674     | LRRN3     | 7  |
| LRRN4     | 164312    | LRRN4     | 20 |
| LRTOMT    | 220074    | LRTOMT    | 11 |
| LRWD1     | 222229    | LRWD1     | 7  |
| LSAMP     | 4045      | LSAMP     | 3  |
| LSG1      | 55341     | LSG1      | 3  |
| LSM1      | 27257     | LSM1      | 8  |
| LSM10     | 84967     | LSM10     | 1  |
| LSM12     | 124801    | LSM12     | 17 |
| LSM14A    | 26065     | LSM14A    | 19 |
| LSM14B    | 149986    | LSM14B    | 20 |
| LSM2      | 57819     | LSM2      | 6  |
| LSM3      | 27258     | LSM3      | 3  |
| LSM4      | 25804     | LSM4      | 19 |
| LSM5      | 23658     | LSM5      | 7  |
| LSM6      | 11157     | LSM6      | 4  |
| LSM7      | 51690     | LSM7      | 19 |
| LSM8      | 51691     | LSM8      | 7  |
| LSMD1     | 84316     | LSMD1     | 17 |
| LSP1      | 4046      | LSP1      | 11 |
| LSR       | 51599     | LSR       | 19 |
| LSS       | 4047      | LSS       | 21 |
| LST1      | 7940      | LST1      | 6  |
| LST-3TM12 | 338821    | LST-3TM12 | 12 |
| LTA       | 4049      | LTA       | 6  |
| LTA4H     | 4048      | LTA4H     | 12 |
| LTB       | 4050      | LTB       | 6  |
| LTB4R     | 1241      | LTB4R     | 14 |
| LTBP1     | 4052      | LTBP1     | 2  |
| LTBP3     | 4054      | LTBP3     | 11 |
| LTBP4     | 8425      | LTBP4     | 19 |

|          |        |          |    |
|----------|--------|----------|----|
| LTC4S    | 4056   | LTC4S    | 5  |
| LTF      | 4057   | LTF      | 3  |
| LTK      | 4058   | LTK      | 15 |
| LTV1     | 84946  | LTV1     | 6  |
| LUC7L    | 55692  | LUC7L    | 16 |
| LUC7L2   | 51631  | LUC7L2   | 7  |
| LUZP1    | 7798   | LUZP1    | 1  |
| LXN      | 56925  | LXN      | 3  |
| LY6E     | 4061   | LY6E     | 8  |
| LY6G6D   | 58530  | LY6G6D   | 6  |
| LY6G6F   | 259215 | LY6G6F   | 6  |
| LY6H     | 4062   | LY6H     |    |
| LY75     | 4065   | LY75     | 2  |
| LY86     | 9450   | LY86     | 6  |
| LY9      | 4063   | LY9      | 1  |
| LY96     | 23643  | LY96     | 8  |
| LYAR     | 55646  | LYAR     | 4  |
| LYG1     | 129530 | LYG1     | 2  |
| LYL1     | 4066   | LYL1     | 19 |
| LYN      | 4067   | LYN      | 8  |
| LYPD1    | 116372 | LYPD1    | 2  |
| LYPD4    | 147719 | LYPD4    | 19 |
| LYPD6    | 130574 | LYPD6    | 2  |
| LYPD6B   | 130576 | LYPD6B   | 2  |
| LYPLA1   | 10434  | LYPLA1   | 8  |
| LYPLA2   | 11313  | LYPLA2   | 1  |
| LYPLA2P1 | 653639 | LYPLA2P1 | 6  |
| LYPLAL1  | 127018 | LYPLAL1  | 1  |
| LYRM1    | 57149  | LYRM1    | 16 |
| LYRM2    | 57226  | LYRM2    | 6  |
| LYRM4    | 57128  | LYRM4    | 6  |
| LYRM5    | 144363 | LYRM5    | 12 |
| LYRM7    | 90624  | LYRM7    | 5  |
| LYSMD1   | 388695 | LYSMD1   | 1  |
| LYSMD2   | 256586 | LYSMD2   | 15 |
| LYSMD3   | 116068 | LYSMD3   | 5  |
| LYSMD4   | 145748 | LYSMD4   | 15 |
| LYST     | 1130   | LYST     | 1  |
| LYZ      | 4069   | LYZ      | 12 |
| LZIC     | 84328  | LZIC     | 1  |
| LZTFL1   | 54585  | LZTFL1   | 3  |
| LZTR1    | 8216   | LZTR1    | 22 |
| LZTS1    | 11178  | LZTS1    | 8  |
| LZTS2    | 84445  | LZTS2    | 10 |

|         |        |         |    |
|---------|--------|---------|----|
| M160    | 283316 | M160    | 12 |
| M6PR    | 4074   | M6PR    | 12 |
| M6PRBP1 | 10226  | M6PRBP1 | 19 |
| MAB21L2 | 10586  | MAB21L2 | 4  |
| MACC1   | 346389 | MACC1   | 7  |
| MACROD1 | 28992  | MACROD1 | 11 |
| MAD1L1  | 8379   | MAD1L1  | 7  |
| MAD2L1  | 4085   | MAD2L1  | 4  |
| MAD2L2  | 10459  | MAD2L2  | 1  |
| MADD    | 8567   | MADD    | 11 |
| MAEA    | 10296  | MAEA    | 4  |
| MAEL    | 84944  | MAEL    | 1  |
| MAF1    | 84232  | MAF1    | 8  |
| MAFA    | 389692 | MAFA    | 8  |
| MAFB    | 9935   | MAFB    | 20 |
| MAFF    | 23764  | MAFF    | 22 |
| MAG     | 4099   | MAG     | 19 |
| MAGEA3  | 4102   | MAGEA3  | X  |
| MAGEA5  | 4104   | MAGEA5  | X  |
| MAGEB5  | 347541 | MAGEB5  |    |
| MAGED1  | 9500   | MAGED1  | X  |
| MAGED2  | 10916  | MAGED2  | X  |
| MAGEE1  | 57692  | MAGEE1  | X  |
| MAGEF1  | 64110  | MAGEF1  | 3  |
| MAGEH1  | 28986  | MAGEH1  | X  |
| MAGIX   | 79917  | MAGIX   | X  |
| MAGMAS  | 51025  | Magmas  | 16 |
| MAGOH   | 4116   | MAGOH   | 1  |
| MAGOHB  | 55110  | MAGOHB  | 12 |
| MAGT1   | 84061  | MAGT1   | X  |
| MAK     | 4117   | MAK     | 6  |
| MAK10   | 60560  | MAK10   | 9  |
| MAK16   | 84549  | MAK16   | 8  |
| MAL     | 4118   | MAL     | 2  |
| MAMDC4  | 158056 | MAMDC4  | 9  |
| MAML1   | 9794   | MAML1   |    |
| MAMLD1  | 10046  | MAMLD1  | X  |
| MAN1A2  | 10905  | MAN1A2  | 1  |
| MAN1B1  | 11253  | MAN1B1  | 9  |
| MAN2A2  | 4122   | MAN2A2  | 15 |
| MAN2B1  | 4125   | MAN2B1  | 19 |
| MAN2B2  | 23324  | MAN2B2  | 4  |
| MAN2C1  | 4123   | MAN2C1  | 15 |
| MANBA   | 4126   | MANBA   | 4  |

|           |        |           |    |
|-----------|--------|-----------|----|
| MANBAL    | 63905  | MANBAL    | 20 |
| MANEA     | 79694  | MANEA     |    |
| MANEAL    | 149175 | MANEAL    | 1  |
| MANSC1    | 54682  | MANSC1    | 12 |
| MAP1A     | 4130   | MAP1A     | 15 |
| MAP1B     | 4131   | MAP1B     | 5  |
| MAP1D     | 254042 | MAP1D     | 2  |
| MAP1LC3A  | 84557  | MAP1LC3A  | 20 |
| MAP1LC3B  | 81631  | MAP1LC3B  | 16 |
| MAP1LC3C  | 440738 | MAP1LC3C  | 1  |
| MAP1S     | 55201  | MAP1S     | 19 |
| MAP2      | 4133   | MAP2      | 2  |
| MAP2K1    | 5604   | MAP2K1    | 15 |
| MAP2K1IP1 | 8649   | MAP2K1IP1 | 4  |
| MAP2K2    | 5605   | MAP2K2    | 19 |
| MAP2K3    | 5606   | MAP2K3    | 17 |
| MAP2K4    | 6416   | MAP2K4    | 17 |
| MAP2K6    | 5608   | MAP2K6    | 17 |
| MAP2K7    | 5609   | MAP2K7    | 19 |
| MAP3K1    | 4214   | MAP3K1    | 5  |
| MAP3K11   | 4296   | MAP3K11   | 11 |
| MAP3K12   | 7786   | MAP3K12   | 12 |
| MAP3K13   | 9175   | MAP3K13   | 3  |
| MAP3K15   | 389840 | MAP3K15   | X  |
| MAP3K3    | 4215   | MAP3K3    | 17 |
| MAP3K4    | 4216   | MAP3K4    | 6  |
| MAP3K5    | 4217   | MAP3K5    | 6  |
| MAP3K6    | 9064   | MAP3K6    | 1  |
| MAP3K7    | 6885   | MAP3K7    | 6  |
| MAP3K7IP1 | 10454  | MAP3K7IP1 | 22 |
| MAP3K7IP2 | 23118  | MAP3K7IP2 | 6  |
| MAP3K7IP3 | 257397 | MAP3K7IP3 | X  |
| MAP3K8    | 1326   | MAP3K8    | 10 |
| MAP3K9    | 4293   | MAP3K9    | 14 |
| MAP4K1    | 11184  | MAP4K1    | 19 |
| MAP4K2    | 5871   | MAP4K2    | 11 |
| MAP4K3    | 8491   | MAP4K3    | 2  |
| MAP4K4    | 9448   | MAP4K4    | 2  |
| MAP4K5    | 11183  | MAP4K5    | 14 |
| MAP6      | 4135   | MAP6      | 11 |
| MAP6D1    | 79929  | MAP6D1    | 3  |
| MAP7      | 9053   | MAP7      | 6  |
| MAP7D1    | 55700  | MAP7D1    | 1  |
| MAP7D2    | 256714 | MAP7D2    | X  |

|          |        |          |    |
|----------|--------|----------|----|
| MAP9     | 79884  | MAP9     | 4  |
| MAPBPIP  | 28956  | MAPBPIP  | 1  |
| MAPK1    | 5594   | MAPK1    | 22 |
| MAPK10   | 5602   | MAPK10   | 4  |
| MAPK11   | 5600   | MAPK11   | 22 |
| MAPK12   | 6300   | MAPK12   | 22 |
| MAPK13   | 5603   | MAPK13   | 6  |
| MAPK14   | 1432   | MAPK14   | 6  |
| MAPK15   | 225689 | MAPK15   | 8  |
| MAPK3    | 5595   | MAPK3    |    |
| MAPK6    | 5597   | MAPK6    | 15 |
| MAPK7    | 5598   | MAPK7    | 17 |
| MAPK8    | 5599   | MAPK8    | 10 |
| MAPK8IP1 | 9479   | MAPK8IP1 | 11 |
| MAPK8IP3 | 23162  | MAPK8IP3 | 16 |
| MAPK9    | 5601   | MAPK9    | 5  |
| MAPKAPK2 | 9261   | MAPKAPK2 | 1  |
| MAPKAPK3 | 7867   | MAPKAPK3 | 3  |
| MAPKAPK5 | 8550   | MAPKAPK5 | 12 |
| MAPKBP1  | 23005  | MAPKBP1  | 15 |
| MAPKSP1  | 8649   | MAPKSP1  | 4  |
| MAPRE1   | 22919  | MAPRE1   | 20 |
| MAPRE2   | 10982  | MAPRE2   | 18 |
| MAPRE3   | 22924  | MAPRE3   | 2  |
| MAPT     | 4137   | MAPT     | 17 |
| MARCKS   | 4082   | MARCKS   | 6  |
| MARCKSL1 | 65108  | MARCKSL1 | 1  |
| MARK1    | 4139   | MARK1    | 1  |
| MARK2    | 2011   | MARK2    | 11 |
| MARK3    | 4140   | MARK3    | 14 |
| MARK4    | 57787  | MARK4    | 19 |
| MARS     | 4141   | MARS     | 12 |
| MARS2    | 92935  | MARS2    | 2  |
| MAST1    | 22983  | MAST1    | 19 |
| MAST2    | 23139  | MAST2    | 1  |
| MAST3    | 23031  | MAST3    | 19 |
| MAST4    | 375449 | MAST4    | 5  |
| MASTL    | 84930  | MASTL    | 10 |
| MAT1A    | 4143   | MAT1A    | 10 |
| MAT2A    | 4144   | MAT2A    | 2  |
| MAT2B    | 27430  | MAT2B    | 5  |
| MATK     | 4145   | MATK     | 19 |
| MATN1    | 4146   | MATN1    | 1  |
| MATR3    | 9782   | MATR3    | 5  |

|          |        |          |    |
|----------|--------|----------|----|
| MAX      | 4149   | MAX      | 14 |
| MAZ      | 4150   | MAZ      | 16 |
| MBD1     | 4152   | MBD1     | 18 |
| MBD2     | 8932   | MBD2     | 18 |
| MBD3     | 53615  | MBD3     | 19 |
| MBD3L2   | 125997 | MBD3L2   | 19 |
| MBD4     | 8930   | MBD4     | 3  |
| MBD6     | 114785 | MBD6     | 12 |
| MBIP     | 51562  | MBIP     | 14 |
| MBLAC1   | 255374 | MBLAC1   | 7  |
| MBLAC2   | 153364 | MBLAC2   | 5  |
| MBNL1    | 4154   | MBNL1    | 3  |
| MBNL2    | 10150  | MBNL2    | 13 |
| MBNL3    | 55796  | MBNL3    | X  |
| MBOAT2   | 129642 | MBOAT2   |    |
| MBOAT7   | 79143  | MBOAT7   | 19 |
| MBP      | 4155   | MBP      | 18 |
| MBTD1    | 54799  | MBTD1    | 17 |
| MBTPS1   | 8720   | MBTPS1   | 16 |
| MBTPS2   | 51360  | MBTPS2   | X  |
| MC1R     | 4157   | MC1R     | 16 |
| MC2R     | 4158   | MC2R     | 18 |
| MC4R     | 4160   | MC4R     | 18 |
| MC5R     | 4161   | MC5R     | 18 |
| MCAM     | 4162   | MCAM     | 11 |
| MCART1   | 92014  | MCART1   | 9  |
| MCAT     | 27349  | MCAT     | 22 |
| MCCC1    | 56922  | MCCC1    | 3  |
| MCCC2    | 64087  | MCCC2    | 5  |
| MCCD1    | 401250 | MCCD1    | 6  |
| MCEE     | 84693  | MCEE     | 2  |
| MCF2L    | 23263  | MCF2L    | 13 |
| MCFD2    | 90411  | MCFD2    | 2  |
| MCHR1    | 2847   | MCHR1    | 22 |
| MCL1     | 4170   | MCL1     | 1  |
| MCM10    | 55388  | MCM10    | 10 |
| MCM2     | 4171   | MCM2     | 3  |
| MCM3     | 4172   | MCM3     | 6  |
| MCM3AP   | 8888   | MCM3AP   | 21 |
| MCM3APAS | 114044 | MCM3APAS | 21 |
| MCM4     | 4173   | MCM4     | 8  |
| MCM5     | 4174   | MCM5     | 22 |
| MCM6     | 4175   | MCM6     | 2  |
| MCM7     | 4176   | MCM7     | 7  |

|        |        |        |    |
|--------|--------|--------|----|
| MCOLN1 | 57192  | MCOLN1 | 19 |
| MCOLN2 | 255231 | MCOLN2 | 1  |
| MCOLN3 | 55283  | MCOLN3 | 1  |
| MCPH1  | 79648  | MCPH1  | 8  |
| MCRS1  | 10445  | MCRS1  | 12 |
| MCTP1  | 79772  | MCTP1  | 5  |
| MCTS1  | 28985  | MCTS1  | X  |
| MDC1   | 9656   | MDC1   | 6  |
| MDFIC  | 29969  | MDFIC  | 7  |
| MDGA1  | 266727 | MDGA1  | 6  |
| MDH1   | 4190   | MDH1   | 2  |
| MDH2   | 4191   | MDH2   | 7  |
| MDM1   | 56890  | MDM1   | 12 |
| MDM2   | 4193   | MDM2   | 12 |
| MDM4   | 4194   | MDM4   | 1  |
| MDN1   | 23195  | MDN1   | 6  |
| MDP1   | 145553 | MDP1   | 14 |
| ME2    | 4200   | ME2    | 18 |
| MEA1   | 4201   | MEA1   | 6  |
| MEAF6  | 64769  | MEAF6  | 1  |
| MECR   | 51102  | MECR   | 1  |
| MED1   | 5469   | MED1   | 17 |
| MED10  | 84246  | MED10  | 5  |
| MED11  | 400569 | MED11  | 17 |
| MED12  | 9968   | MED12  | X  |
| MED12L | 116931 | MED12L | 3  |
| MED13  | 9969   | MED13  | 17 |
| MED13L | 23389  | MED13L | 12 |
| MED14  | 9282   | MED14  | X  |
| MED15  | 51586  | MED15  | 22 |
| MED16  | 10025  | MED16  | 19 |
| MED17  | 9440   | MED17  | 11 |
| MED19  | 219541 | MED19  | 11 |
| MED20  | 9477   | MED20  | 6  |
| MED21  | 9412   | MED21  | 12 |
| MED22  | 6837   | MED22  | 9  |
| MED23  | 9439   | MED23  | 6  |
| MED24  | 9862   | MED24  | 17 |
| MED25  | 81857  | MED25  | 19 |
| MED26  | 9441   | MED26  | 19 |
| MED27  | 9442   | MED27  | 9  |
| MED28  | 80306  | MED28  | 4  |
| MED29  | 55588  | MED29  | 19 |
| MED30  | 90390  | MED30  | 8  |

|           |        |           |    |
|-----------|--------|-----------|----|
| MED31     | 51003  | MED31     | 17 |
| MED4      | 29079  | MED4      | 13 |
| MED6      | 10001  | MED6      | 14 |
| MED7      | 9443   | MED7      | 5  |
| MED8      | 112950 | MED8      | 1  |
| MED9      | 55090  | MED9      | 17 |
| MEF2A     | 4205   | MEF2A     | 15 |
| MEF2B     | 4207   | MEF2B     | 19 |
| MEF2C     | 4208   | MEF2C     | 5  |
| MEF2D     | 4209   | MEF2D     | 1  |
| MEGF11    | 84465  | MEGF11    | 15 |
| MEGF8     | 1954   | MEGF8     | 19 |
| MEGF9     | 1955   | MEGF9     | 9  |
| MEI1      | 150365 | MEI1      | 22 |
| MEIG1     | 644890 | MEIG1     |    |
| MEIS2     | 4212   | MEIS2     | 15 |
| MEIS3     | 56917  | MEIS3     | 19 |
| MELK      | 9833   | MELK      | 9  |
| MEMO1     | 51072  | MEMO1     | 2  |
| MEN1      | 4221   | MEN1      | 11 |
| MEPCE     | 56257  | MEPCE     | 7  |
| MEPE      | 56955  | MEPE      | 4  |
| MERTK     | 10461  | MERTK     | 2  |
| MESDC1    | 59274  | MESDC1    | 15 |
| MESP1     | 55897  | MESP1     | 15 |
| MESP2     | 145873 | MESP2     | 15 |
| MEST      | 4232   | MEST      | 7  |
| MET       | 4233   | MET       | 7  |
| METAP1    | 23173  | METAP1    | 4  |
| METAP2    | 10988  | METAP2    | 12 |
| METRN     | 79006  | METRN     | 16 |
| METRNL    | 284207 | METRNL    |    |
| METT10D   | 79066  | METT10D   | 17 |
| METT11D1  | 64745  | METT11D1  | 14 |
| METT5D1   | 196074 | METT5D1   | 11 |
| METTTL1   | 4234   | METTTL1   | 12 |
| METTTL11A | 28989  | METTTL11A | 9  |
| METTTL11B | 149281 | METTTL11B | 1  |
| METTTL12  | 751071 | METTTL12  | 11 |
| METTTL13  | 51603  | METTTL13  | 1  |
| METTTL14  | 57721  | METTTL14  | 4  |
| METTTL2A  | 339175 | METTTL2A  | 17 |
| METTTL3   | 56339  | METTTL3   | 14 |
| METTTL4   | 64863  | METTTL4   | 18 |



|          |        |          |    |
|----------|--------|----------|----|
| METTL5   | 29081  | METTL5   | 2  |
| METTL7A  | 25840  | METTL7A  | 12 |
| METTL7B  | 196410 | METTL7B  | 12 |
| METTL9   | 51108  | METTL9   | 16 |
| MEX3A    | 92312  | MEX3A    | 1  |
| MEX3B    | 84206  | MEX3B    | 15 |
| MEX3C    | 51320  | MEX3C    | 18 |
| MEX3D    | 399664 | MEX3D    | 19 |
| MFAP1    | 4236   | MFAP1    | 15 |
| MFAP2    | 4237   | MFAP2    | 1  |
| MFAP3    | 4238   | MFAP3    | 5  |
| MFAP4    | 4239   | MFAP4    | 17 |
| MFAP5    | 8076   | MFAP5    | 12 |
| MFF      | 56947  | MFF      | 2  |
| MFGE8    | 4240   | MFGE8    | 15 |
| MFHAS1   | 9258   | MFHAS1   | 8  |
| MFI2     | 4241   | MFI2     | 3  |
| MFN2     | 9927   | MFN2     | 1  |
| MFNG     | 4242   | MFNG     | 22 |
| MFSD1    | 64747  | MFSD1    | 3  |
| MFSD10   | 10227  | MFSD10   | 4  |
| MFSD11   | 79157  | MFSD11   | 17 |
| MFSD2    | 84879  | MFSD2    | 1  |
| MFSD3    | 113655 | MFSD3    | 8  |
| MFSD5    | 84975  | MFSD5    | 12 |
| MFSD6    | 54842  | MFSD6    | 2  |
| MFSD8    | 256471 | MFSD8    | 4  |
| MGA      | 23269  | MGA      | 15 |
| MGAT1    | 4245   | MGAT1    | 5  |
| MGAT2    | 4247   | MGAT2    | 14 |
| MGAT4A   | 11320  | MGAT4A   | 2  |
| MGAT4B   | 11282  | MGAT4B   | 5  |
| MGC10646 | 84779  | MGC10646 | 4  |
| MGC10701 | 84744  | MGC10701 |    |
| MGC10981 | 84740  | MGC10981 |    |
| MGC10997 | 84741  | MGC10997 | 15 |
| MGC12760 | 84809  | MGC12760 | 1  |
| MGC12965 | 374408 | MGC12965 | 11 |
| MGC12982 | 84793  | MGC12982 | 1  |
| MGC13005 | 84771  | MGC13005 | 9  |
| MGC13057 | 84281  | MGC13057 | 2  |
| MGC13168 | 84821  | MGC13168 | 12 |
| MGC15763 | 92106  | MGC15763 | 3  |
| MGC16025 | 85009  | MGC16025 | 2  |

|          |        |          |    |
|----------|--------|----------|----|
| MGC16075 | 84847  | MGC16075 | 7  |
| MGC16121 | 84848  | MGC16121 | X  |
| MGC16169 | 93627  | MGC16169 | 4  |
| MGC16384 | 114130 | MGC16384 |    |
| MGC16703 | 113691 | MGC16703 | 22 |
| MGC18216 | 145815 | MGC18216 | 15 |
| MGC20983 | 115948 | MGC20983 | 19 |
| MGC21881 | 389741 | MGC21881 | 9  |
| MGC23270 | 196872 | MGC23270 | 14 |
| MGC23284 | 197187 | MGC23284 | 16 |
| MGC24103 | 158295 | MGC24103 | 9  |
| MGC24125 | 439935 | MGC24125 | 4  |
| MGC25181 | 257054 | MGC25181 | 2  |
| MGC26356 | 642280 | MGC26356 |    |
| MGC27345 | 157247 | MGC27345 | 7  |
| MGC27348 | 256355 | MGC27348 | 7  |
| MGC27382 | 149047 | MGC27382 | 1  |
| MGC2752  | 65996  | MGC2752  | 19 |
| MGC29506 | 51237  | MGC29506 | 5  |
| MGC3020  | 79014  | MGC3020  | 16 |
| MGC3032  | 65998  | MGC3032  | 11 |
| MGC3196  | 79064  | MGC3196  |    |
| MGC33556 | 339541 | MGC33556 | 1  |
| MGC33948 | 160140 | MGC33948 | 11 |
| MGC35361 | 222234 | MGC35361 | 7  |
| MGC35440 | 147990 | MGC35440 | 19 |
| MGC3731  | 79159  | MGC3731  | 22 |
| MGC39372 | 221756 | MGC39372 | 6  |
| MGC39545 | 403312 | MGC39545 | 11 |
| MGC39900 | 286527 | MGC39900 |    |
| MGC40168 | 148645 | MGC40168 | 1  |
| MGC40489 | 146880 | MGC40489 | 17 |
| MGC40499 | 245812 | MGC40499 |    |
| MGC40574 | 285048 | MGC40574 | 2  |
| MGC42105 | 167359 | MGC42105 | 5  |
| MGC42630 | 286301 | MGC42630 | 9  |
| MGC42638 | 340561 | MGC42638 | X  |
| MGC45491 | 221416 | MGC45491 | 6  |
| MGC45922 | 284365 | MGC45922 |    |
| MGC4677  | 112597 | MGC4677  | 2  |
| MGC48637 | 285622 | MGC48637 | 5  |
| MGC52000 | 375260 | MGC52000 | 2  |
| MGC61598 | 441478 | MGC61598 |    |
| MGC70857 | 414919 | MGC70857 | 8  |

|           |           |           |    |
|-----------|-----------|-----------|----|
| MGC70863  | 284942    | MGC70863  | 22 |
| MGC71993  | 440400    | MGC71993  |    |
| MGC72080  | 389538    | MGC72080  | 7  |
| MGC72104  | 284802    | MGC72104  | 20 |
| MGC87042  | 256227    | MGC87042  | 7  |
| MGC87895  | 644068    | MGC87895  |    |
| MGEA5     | 10724     | MGEA5     | 10 |
| MGLL      | 11343     | MGLL      | 3  |
| MGMT      | 4255      | MGMT      | 10 |
| MGP       | 4256      | MGP       | 12 |
| MGST1     | 4257      | MGST1     | 12 |
| MGST2     | 4258      | MGST2     | 4  |
| MGST3     | 4259      | MGST3     | 1  |
| MIA       | 8190      | MIA       | 19 |
| MIA3      | 375056    | MIA3      | 1  |
| MIAT      | 440823    | MIAT      | 22 |
| MIB1      | 57534     | MIB1      | 18 |
| MIB2      | 142678    | MIB2      |    |
| MICA      | 4276      | MICA      | 6  |
| MICAL1    | 64780     | MICAL1    | 6  |
| MICAL2    | 9645      | MICAL2    | 11 |
| MICALCL   | 84953     | MICALCL   | 11 |
| MICALL1   | 85377     | MICALL1   | 22 |
| MICB      | 4277      | MICB      | 6  |
| MID1IP1   | 58526     | MID1IP1   | X  |
| MIDN      | 90007     | MIDN      | 19 |
| MIER1     | 57708     | MIER1     | 1  |
| MIER3     | 166968    | MIER3     | 5  |
| MIF       | 4282      | MIF       | 22 |
| MIF4GD    | 57409     | MIF4GD    | 17 |
| MIIP      | 60672     | MIIP      | 1  |
| MIMT1     | 100073347 | MIMT1     | 19 |
| MINA      | 84864     | MINA      | 3  |
| MINPP1    | 9562      | MINPP1    | 10 |
| MIOS      | 54468     | MIOS      | 7  |
| MIPEP     | 4285      | MIPEP     | 13 |
| MIR100    | 406892    | MIR100    |    |
| MIR106B   | 406900    | MIR106B   |    |
| MIR1185-1 | 100302157 | MIR1185-1 |    |
| MIR1204   | 100302185 | MIR1204   |    |
| MIR1208   | 100302281 | MIR1208   |    |
| MIR122    | 406906    | MIR122    |    |
| MIR1224   | 100187716 | MIR1224   |    |
| MIR1228   | 100302201 | MIR1228   |    |

|           |           |           |
|-----------|-----------|-----------|
| MIR1237   | 100302280 | MIR1237   |
| MIR1243   | 100302188 | MIR1243   |
| MIR1255B2 | 100313835 | MIR1255B2 |
| MIR125B2  | 406912    | MIR125B2  |
| MIR1265   | 100302116 | MIR1265   |
| MIR1267   | 100302286 | MIR1267   |
| MIR1269   | 100302177 | MIR1269   |
| MIR1272   | 100302184 | MIR1272   |
| MIR1274A  | 100313805 | MIR1274A  |
| MIR1277   | 100302214 | MIR1277   |
| MIR1281   | 100302237 | MIR1281   |
| MIR129-1  | 406917    | MIR129-1  |
| MIR1293   | 100302220 | MIR1293   |
| MIR130A   | 406919    | MIR130A   |
| MIR1321   | 100302171 | MIR1321   |
| MIR1323   | 100302255 | MIR1323   |
| MIR138-2  | 406930    | MIR138-2  |
| MIR1471   | 100302126 | MIR1471   |
| MIR1537   | 100302139 | MIR1537   |
| MIR155HG  | 114614    | MIR155HG  |
| MIR16-2   | 406951    | MIR16-2   |
| MIR182    | 406958    | MIR182    |
| MIR1910   | 100302261 | MIR1910   |
| MIR1914   | 100302137 | MIR1914   |
| MIR192    | 406967    | MIR192    |
| MIR1974   | 100302207 | MIR1974   |
| MIR1978   | 100302173 | MIR1978   |
| MIR1979   | 100302176 | MIR1979   |
| MIR199B   | 406978    | MIR199B   |
| MIR204    | 406987    | MIR204    |
| MIR21     | 406991    | MIR21     |
| MIR214    | 406996    | MIR214    |
| MIR215    | 406997    | MIR215    |
| MIR219-2  | 407003    | MIR219-2  |
| MIR2276   | 100313842 | MIR2276   |
| MIR23A    | 407010    | MIR23A    |
| MIR25     | 407014    | MIR25     |
| MIR298    | 100126296 | MIR298    |
| MIR300    | 100126297 | MIR300    |
| MIR30B    | 407030    | MIR30B    |
| MIR30C2   | 407032    | MIR30C2   |
| MIR32     | 407036    | MIR32     |
| MIR320A   | 407037    | MIR320A   |
| MIR320C1  | 100302135 | MIR320C1  |

|          |           |          |
|----------|-----------|----------|
| MIR326   | 442900    | MIR326   |
| MIR330   | 442902    | MIR330   |
| MIR340   | 442908    | MIR340   |
| MIR365-1 | 100126355 | MIR365-1 |
| MIR370   | 442915    | MIR370   |
| MIR371   | 442916    | MIR371   |
| MIR376C  | 442913    | MIR376C  |
| MIR377   | 494326    | MIR377   |
| MIR382   | 494331    | MIR382   |
| MIR425   | 494337    | MIR425   |
| MIR429   | 554210    | MIR429   |
| MIR448   | 554212    | MIR448   |
| MIR451   | 574411    | MIR451   |
| MIR453   | 574410    | MIR453   |
| MIR455   | 619556    | MIR455   |
| MIR489   | 574442    | MIR489   |
| MIR498   | 574460    | MIR498   |
| MIR505   | 574508    | MIR505   |
| MIR507   | 574512    | MIR507   |
| MIR511-2 | 574446    | MIR511-2 |
| MIR517B  | 574483    | MIR517B  |
| MIR532   | 693124    | MIR532   |
| MIR548F4 | 100313895 | MIR548F4 |
| MIR550-2 | 693134    | MIR550-2 |
| MIR557   | 693142    | MIR557   |
| MIR561   | 693146    | MIR561   |
| MIR564   | 693149    | MIR564   |
| MIR568   | 693153    | MIR568   |
| MIR569   | 693154    | MIR569   |
| MIR572   | 693157    | MIR572   |
| MIR578   | 693163    | MIR578   |
| MIR586   | 693171    | MIR586   |
| MIR593   | 693178    | MIR593   |
| MIR599   | 693184    | MIR599   |
| MIR603   | 693188    | MIR603   |
| MIR616   | 693201    | MIR616   |
| MIR635   | 693220    | MIR635   |
| MIR638   | 693223    | MIR638   |
| MIR643   | 693228    | MIR643   |
| MIR658   | 724028    | MIR658   |
| MIR665   | 100126315 | MIR665   |
| MIR708   | 100126333 | MIR708   |
| MIR761   | 100313892 | MIR761   |
| MIR770   | 768222    | MIR770   |

|          |           |          |    |
|----------|-----------|----------|----|
| MIR886   | 100126299 | MIR886   |    |
| MIR93    | 407050    | MIR93    |    |
| MIR940   | 100126328 | MIR940   |    |
| MIR942   | 100126331 | MIR942   |    |
| MIR943   | 100126332 | MIR943   |    |
| MIR944   | 100126340 | MIR944   |    |
| MIRH1    | 407975    | MIRH1    |    |
| MIRLET7C | 406885    | MIRLET7C |    |
| MIS12    | 79003     | MIS12    | 17 |
| MITD1    | 129531    | MITD1    | 2  |
| MITF     | 4286      | MITF     | 3  |
| MIXL1    | 83881     | MIXL1    | 1  |
| MKI67    | 4288      | MKI67    | 10 |
| MKI67IP  | 84365     | MKI67IP  | 2  |
| MKKS     | 8195      | MKKS     | 20 |
| MKL1     | 57591     | MKL1     | 22 |
| MKL2     | 57496     | MKL2     | 16 |
| MKLN1    | 4289      | MKLN1    | 7  |
| MKNK1    | 8569      | MKNK1    | 1  |
| MKNK2    | 2872      | MKNK2    | 19 |
| MKRN1    | 23608     | MKRN1    | 7  |
| MKRN2    | 23609     | MKRN2    | 3  |
| MKS1     | 54903     | MKS1     | 17 |
| MKX      | 283078    | MKX      | 10 |
| MLEC     | 9761      | MLEC     | 12 |
| MLF1     | 4291      | MLF1     | 3  |
| MLF1IP   | 79682     | MLF1IP   | 4  |
| MLF2     | 8079      | MLF2     | 12 |
| MLH1     | 4292      | MLH1     | 3  |
| MLKL     | 197259    | MLKL     |    |
| MLL      | 4297      | MLL      | 11 |
| MLL2     | 8085      | MLL2     | 12 |
| MLL3     | 58508     | MLL3     | 7  |
| MLL4     | 9757      | MLL4     | 19 |
| MLL5     | 55904     | MLL5     | 7  |
| MLLT1    | 4298      | MLLT1    | 19 |
| MLLT10   | 8028      | MLLT10   | 10 |
| MLLT11   | 10962     | MLLT11   | 1  |
| MLLT6    | 4302      | MLLT6    | 17 |
| MLPH     | 79083     | MLPH     | 2  |
| MLST8    | 64223     | MLST8    | 16 |
| MLX      | 6945      | MLX      | 17 |
| MLYCD    | 23417     | MLYCD    | 16 |
| MMAA     | 166785    | MMAA     | 4  |

|         |        |         |    |
|---------|--------|---------|----|
| MMACHC  | 25974  | MMACHC  | 1  |
| MMADHC  | 27249  | MMADHC  | 2  |
| MMD     | 23531  | MMD     | 17 |
| MME     | 4311   | MME     | 3  |
| MMGT1   | 93380  | MMGT1   | X  |
| MMP1    | 4312   | MMP1    | 11 |
| MMP11   | 4320   | MMP11   | 22 |
| MMP16   | 4325   | MMP16   | 8  |
| MMP23B  | 8510   | MMP23B  | 1  |
| MMP24   | 10893  | MMP24   | 20 |
| MMP28   | 79148  | MMP28   | 17 |
| MMP7    | 4316   | MMP7    | 11 |
| MMP9    | 4318   | MMP9    | 20 |
| MMS19   | 64210  | MMS19   | 10 |
| MMS19L  | 64210  | MMS19L  | 10 |
| MN1     | 4330   | MN1     | 22 |
| MNAT1   | 4331   | MNAT1   | 14 |
| MND1    | 84057  | MND1    | 4  |
| MNDA    | 4332   | MNDA    | 1  |
| MNS1    | 55329  | MNS1    | 15 |
| MNT     | 4335   | MNT     | 17 |
| MX1     | 3110   | MX1     | 7  |
| MOAP1   | 64112  | MOAP1   | 14 |
| MOBK1B  | 55233  | MOBK1B  | 2  |
| MOBK1A  | 92597  | MOBK1A  | 4  |
| MOBK1B  | 55233  | MOBK1B  | 2  |
| MOBK2A  | 126308 | MOBK2A  | 19 |
| MOBK2B  | 79817  | MOBK2B  | 9  |
| MOBK2C  | 148932 | MOBK2C  | 1  |
| MOBK3   | 25843  | MOBK3   | 2  |
| MOCOS   | 55034  | MOCOS   | 18 |
| MOCS2   | 4338   | MOCS2   | 5  |
| MOCS3   | 27304  | MOCS3   | 20 |
| MOGS    | 7841   | MOGS    | 2  |
| MON1A   | 84315  | MON1A   | 3  |
| MON1B   | 22879  | MON1B   | 16 |
| MON2    | 23041  | MON2    | 12 |
| MORC1   | 27136  | MORC1   | 3  |
| MORC3   | 23515  | MORC3   | 21 |
| MORC4   | 79710  | MORC4   | X  |
| MORF4L1 | 10933  | MORF4L1 | 15 |
| MORF4L2 | 9643   | MORF4L2 | X  |
| MORG1   | 84292  | MORG1   | 19 |
| MORN2   | 378464 | MORN2   | 2  |

|           |        |           |    |
|-----------|--------|-----------|----|
| MORN3     | 283385 | MORN3     | 12 |
| MORN4     | 118812 | MORN4     | 10 |
| MORN5     | 254956 | MORN5     | 9  |
| MOS       | 4342   | MOS       | 8  |
| MOSPD1    | 56180  | MOSPD1    | X  |
| MOSPD2    | 158747 | MOSPD2    | X  |
| MOSPD3    | 64598  | MOSPD3    | 7  |
| MOV10     | 4343   | MOV10     | 1  |
| MOXD1     | 26002  | MOXD1     | 6  |
| MPDU1     | 9526   | MPDU1     | 17 |
| MPEG1     | 219972 | MPEG1     | 11 |
| MPHOSPH10 | 10199  | MPHOSPH10 | 2  |
| MPHOSPH6  | 10200  | MPHOSPH6  | 16 |
| MPHOSPH8  | 54737  | MPHOSPH8  | 13 |
| MPHOSPH9  | 10198  | MPHOSPH9  | 12 |
| MPI       | 4351   | MPI       | 15 |
| MPND      | 84954  | MPND      | 19 |
| MPO       | 4353   | MPO       | 17 |
| MPP1      | 4354   | MPP1      | X  |
| MPP2      | 4355   | MPP2      | 17 |
| MPP5      | 64398  | MPP5      | 14 |
| MPP6      | 51678  | MPP6      | 7  |
| MPPE1     | 65258  | MPPE1     | 18 |
| MPPED2    | 744    | MPPED2    | 11 |
| MPRIP     | 23164  | MPRIP     | 17 |
| MPST      | 4357   | MPST      | 22 |
| MPV17     | 4358   | MPV17     | 2  |
| MPV17L    | 255027 | MPV17L    | 16 |
| MPV17L2   | 84769  | MPV17L2   | 19 |
| MPZL1     | 9019   | MPZL1     | 1  |
| MPZL2     | 10205  | MPZL2     | 11 |
| MR1       | 3140   | MR1       | 1  |
| MRC2      | 9902   | MRC2      | 17 |
| MRE11A    | 4361   | MRE11A    | 11 |
| MREG      | 55686  | MREG      | 2  |
| MRFAP1    | 93621  | MRFAP1    | 4  |
| MRFAP1L1  | 114932 | MRFAP1L1  | 4  |
| MRGPRD    | 116512 | MRGPRD    | 11 |
| MRGPRX3   | 117195 | MRGPRX3   | 11 |
| MRI1      | 84245  | MRI1      | 19 |
| MRLC2     | 103910 | MRLC2     | 18 |
| MRM1      | 79922  | MRM1      | 17 |
| MRPL1     | 65008  | MRPL1     | 4  |
| MRPL10    | 124995 | MRPL10    | 17 |



|          |        |          |    |
|----------|--------|----------|----|
| MRPL11   | 65003  | MRPL11   | 11 |
| MRPL12   | 6182   | MRPL12   | 17 |
| MRPL13   | 28998  | MRPL13   | 8  |
| MRPL14   | 64928  | MRPL14   | 6  |
| MRPL15   | 29088  | MRPL15   | 8  |
| MRPL16   | 54948  | MRPL16   | 11 |
| MRPL17   | 63875  | MRPL17   | 11 |
| MRPL18   | 29074  | MRPL18   | 6  |
| MRPL19   | 9801   | MRPL19   | 2  |
| MRPL2    | 51069  | MRPL2    | 6  |
| MRPL20   | 55052  | MRPL20   | 1  |
| MRPL21   | 219927 | MRPL21   | 11 |
| MRPL22   | 29093  | MRPL22   | 5  |
| MRPL23   | 6150   | MRPL23   | 11 |
| MRPL24   | 79590  | MRPL24   | 1  |
| MRPL27   | 51264  | MRPL27   | 17 |
| MRPL28   | 10573  | MRPL28   | 16 |
| MRPL3    | 11222  | MRPL3    | 3  |
| MRPL32   | 64983  | MRPL32   | 7  |
| MRPL33   | 9553   | MRPL33   | 2  |
| MRPL34   | 64981  | MRPL34   | 19 |
| MRPL35   | 51318  | MRPL35   | 2  |
| MRPL36   | 64979  | MRPL36   | 5  |
| MRPL37   | 51253  | MRPL37   | 1  |
| MRPL38   | 64978  | MRPL38   | 17 |
| MRPL39   | 54148  | MRPL39   | 21 |
| MRPL4    | 51073  | MRPL4    | 19 |
| MRPL40   | 64976  | MRPL40   | 22 |
| MRPL41   | 64975  | MRPL41   | 9  |
| MRPL42   | 28977  | MRPL42   | 12 |
| MRPL42P5 | 359821 | MRPL42P5 | 15 |
| MRPL43   | 84545  | MRPL43   | 10 |
| MRPL44   | 65080  | MRPL44   | 2  |
| MRPL45   | 84311  | MRPL45   | 17 |
| MRPL46   | 26589  | MRPL46   | 15 |
| MRPL47   | 57129  | MRPL47   | 3  |
| MRPL48   | 51642  | MRPL48   | 11 |
| MRPL49   | 740    | MRPL49   | 11 |
| MRPL50   | 54534  | MRPL50   | 9  |
| MRPL51   | 51258  | MRPL51   | 12 |
| MRPL52   | 122704 | MRPL52   | 14 |
| MRPL53   | 116540 | MRPL53   | 2  |
| MRPL54   | 116541 | MRPL54   | 19 |
| MRPL55   | 128308 | MRPL55   | 1  |

|         |        |         |    |
|---------|--------|---------|----|
| MRPL9   | 65005  | MRPL9   | 1  |
| MRPS10  | 55173  | MRPS10  | 6  |
| MRPS11  | 64963  | MRPS11  | 15 |
| MRPS12  | 6183   | MRPS12  | 19 |
| MRPS15  | 64960  | MRPS15  | 1  |
| MRPS16  | 51021  | MRPS16  | 10 |
| MRPS17  | 51373  | MRPS17  | 7  |
| MRPS18A | 55168  | MRPS18A | 6  |
| MRPS18B | 28973  | MRPS18B | 6  |
| MRPS18C | 51023  | MRPS18C | 4  |
| MRPS2   | 51116  | MRPS2   | 9  |
| MRPS21  | 54460  | MRPS21  | 1  |
| MRPS22  | 56945  | MRPS22  | 3  |
| MRPS23  | 51649  | MRPS23  | 17 |
| MRPS24  | 64951  | MRPS24  | 7  |
| MRPS25  | 64432  | MRPS25  | 3  |
| MRPS26  | 64949  | MRPS26  | 20 |
| MRPS27  | 23107  | MRPS27  | 5  |
| MRPS28  | 28957  | MRPS28  | 8  |
| MRPS30  | 10884  | MRPS30  | 5  |
| MRPS31  | 10240  | MRPS31  | 13 |
| MRPS33  | 51650  | MRPS33  | 7  |
| MRPS34  | 65993  | MRPS34  | 16 |
| MRPS35  | 60488  | MRPS35  | 12 |
| MRPS36  | 92259  | MRPS36  | 5  |
| MRPS5   | 64969  | MRPS5   | 2  |
| MRPS6   | 64968  | MRPS6   | 21 |
| MRPS7   | 51081  | MRPS7   | 17 |
| MRPS9   | 64965  | MRPS9   | 2  |
| MRRF    | 92399  | MRRF    | 9  |
| MRS2P2  | 729633 | MRS2P2  |    |
| MRTO4   | 51154  | MRTO4   | 1  |
| MS4A1   | 931    | MS4A1   | 11 |
| MS4A3   | 932    | MS4A3   | 11 |
| MS4A6E  | 245802 | MS4A6E  | 11 |
| MS4A7   | 58475  | MS4A7   | 11 |
| MSH2    | 4436   | MSH2    | 2  |
| MSH3    | 4437   | MSH3    | 5  |
| MSH5    | 4439   | MSH5    | 6  |
| MSH6    | 2956   | MSH6    | 2  |
| MSI2    | 124540 | MSI2    | 17 |
| MSL1    | 339287 | MSL1    | 17 |
| MSL2    | 55167  | MSL2    | 3  |
| MSL3    | 10943  | MSL3    | X  |

|         |        |         |    |
|---------|--------|---------|----|
| MSL3L1  | 10943  | MSL3L1  | X  |
| MSLN    | 10232  | MSLN    | 16 |
| MSMP    | 692094 | MSMP    | 9  |
| MSN     | 4478   | MSN     | X  |
| MSR1    | 4481   | MSR1    | 8  |
| MSRA    | 4482   | MSRA    | 8  |
| MSRB2   | 22921  | MSRB2   | 10 |
| MSRB3   | 253827 | MSRB3   | 12 |
| MST1    | 4485   | MST1    | 3  |
| MST1R   | 4486   | MST1R   | 3  |
| MST4    | 51765  | MST4    | X  |
| MSTO1   | 55154  | MSTO1   | 1  |
| MSX1    | 4487   | MSX1    | 4  |
| MT1A    | 4489   | MT1A    | 16 |
| MT1E    | 4493   | MT1E    | 16 |
| MT1F    | 4494   | MT1F    | 16 |
| MT1G    | 4495   | MT1G    | 16 |
| MT1H    | 4496   | MT1H    | 16 |
| MT1JP   | 4498   | MT1JP   | 16 |
| MT1L    | 4500   | MT1L    | 16 |
| MT1X    | 4501   | MT1X    | 16 |
| MT2A    | 4502   | MT2A    | 16 |
| MT3     | 4504   | MT3     | 16 |
| MTA1    | 9112   | MTA1    | 14 |
| MTA2    | 9219   | MTA2    | 11 |
| MTA3    | 57504  | MTA3    | 2  |
| MTAP    | 4507   | MTAP    | 9  |
| MTBP    | 27085  | MTBP    | 8  |
| MTCH1   | 23787  | MTCH1   | 6  |
| MTCH2   | 23788  | MTCH2   | 11 |
| MTCP1   | 4515   | MTCP1   | X  |
| MTDH    | 92140  | MTDH    | 8  |
| MTE     | 644314 | MTE     |    |
| MTERF   | 7978   | MTERF   | 7  |
| MTERFD1 | 51001  | MTERFD1 | 8  |
| MTERFD2 | 130916 | MTERFD2 | 2  |
| MTF1    | 4520   | MTF1    | 1  |
| MTG1    | 92170  | MTG1    | 10 |
| MTHFD1  | 4522   | MTHFD1  | 14 |
| MTHFD1L | 25902  | MTHFD1L | 6  |
| MTHFD2  | 10797  | MTHFD2  | 2  |
| MTHFD2L | 441024 | MTHFD2L | 4  |
| MTHFR   | 4524   | MTHFR   | 1  |
| MTHFS   | 10588  | MTHFS   | 15 |

|        |        |        |    |
|--------|--------|--------|----|
| MTHFSD | 64779  | MTHFSD | 16 |
| MTIF2  | 4528   | MTIF2  | 2  |
| MTIF3  | 219402 | MTIF3  | 13 |
| MTM1   | 4534   | MTM1   | X  |
| MTMR1  | 8776   | MTMR1  | X  |
| MTMR10 | 54893  | MTMR10 | 15 |
| MTMR11 | 10903  | MTMR11 | 1  |
| MTMR12 | 54545  | MTMR12 | 5  |
| MTMR14 | 64419  | MTMR14 | 3  |
| MTMR15 | 22909  | MTMR15 | 15 |
| MTMR2  | 8898   | MTMR2  | 11 |
| MTMR3  | 8897   | MTMR3  | 22 |
| MTMR4  | 9110   | MTMR4  | 17 |
| MTMR6  | 9107   | MTMR6  | 13 |
| MTMR9  | 66036  | MTMR9  | 8  |
| MTNR1A | 4543   | MTNR1A | 4  |
| MTO1   | 25821  | MTO1   | 6  |
| MTP18  | 51537  | MTP18  | 22 |
| MTPN   | 136319 | MTPN   | 7  |
| MTR    | 4548   | MTR    | 1  |
| MTRF1  | 9617   | MTRF1  | 13 |
| MTRF1L | 54516  | MTRF1L | 6  |
| MTRR   | 4552   | MTRR   | 5  |
| MTSS1  | 9788   | MTSS1  | 8  |
| MTTP   | 4547   | MTTP   | 4  |
| MTUS1  | 57509  | MTUS1  | 8  |
| MTX1   | 4580   | MTX1   | 1  |
| MTX2   | 10651  | MTX2   | 2  |
| MTX3   | 345778 | MTX3   | 5  |
| MUC2   | 4583   | MUC2   | 11 |
| MUC20  | 200958 | MUC20  | 3  |
| MUC5AC | 4586   | MUC5AC | 11 |
| MUC6   | 4588   | MUC6   | 11 |
| MUCL1  | 118430 | MUCL1  | 12 |
| MUDENG | 55745  | MUDENG | 14 |
| MUL1   | 79594  | MUL1   | 1  |
| MUM1   | 84939  | MUM1   | 19 |
| MURC   | 347273 | MURC   | 9  |
| MUS81  | 80198  | MUS81  | 11 |
| MUT    | 4594   | MUT    | 6  |
| MUTED  | 63915  | MUTED  | 6  |
| MUTYH  | 4595   | MUTYH  | 1  |
| MVD    | 4597   | MVD    | 16 |
| MVK    | 4598   | MVK    | 12 |

|         |        |         |    |
|---------|--------|---------|----|
| MVP     | 9961   | MVP     | 16 |
| MX1     | 4599   | MX1     | 21 |
| MX2     | 4600   | MX2     | 21 |
| MXD1    | 4084   | MXD1    | 2  |
| MXD3    | 83463  | MXD3    | 5  |
| MXD4    | 10608  | MXD4    | 4  |
| MXI1    | 4601   | MXI1    | 10 |
| MXRA7   | 439921 | MXRA7   | 17 |
| MYADM   | 91663  | MYADM   | 19 |
| MYADML  | 151325 | MYADML  | 2  |
| MYB     | 4602   | MYB     | 6  |
| MYBBP1A | 10514  | MYBBP1A |    |
| MYBL1   | 4603   | MYBL1   | 8  |
| MYBL2   | 4605   | MYBL2   | 20 |
| MYBPC2  | 4606   | MYBPC2  | 19 |
| MYBPC3  | 4607   | MYBPC3  | 11 |
| MYBPH   | 4608   | MYBPH   | 1  |
| MYC     | 4609   | MYC     | 8  |
| MYCBP   | 26292  | MYCBP   | 1  |
| MYCBP2  | 23077  | MYCBP2  | 13 |
| MYCN    | 4613   | MYCN    | 2  |
| MYCT1   | 80177  | MYCT1   | 6  |
| MYD88   | 4615   | MYD88   | 3  |
| MYF5    | 4617   | MYF5    | 12 |
| MYF6    | 4618   | MYF6    | 12 |
| MYH10   | 4628   | MYH10   | 17 |
| MYH13   | 8735   | MYH13   | 17 |
| MYH3    | 4621   | MYH3    | 17 |
| MYH6    | 4624   | MYH6    | 14 |
| MYH9    | 4627   | MYH9    | 22 |
| MYL1    | 4632   | MYL1    | 2  |
| MYL12A  | 10627  | MYL12A  | 18 |
| MYL2    | 4633   | MYL2    | 12 |
| MYL3    | 4634   | MYL3    | 3  |
| MYL4    | 4635   | MYL4    | 17 |
| MYL5    | 4636   | MYL5    | 4  |
| MYL6    | 4637   | MYL6    | 12 |
| MYL6B   | 140465 | MYL6B   | 12 |
| MYLIP   | 29116  | MYLIP   | 6  |
| MYO10   | 4651   | MYO10   | 5  |
| MYO15A  | 51168  | MYO15A  | 17 |
| MYO19   | 80179  | MYO19   | 17 |
| MYO1B   | 4430   | MYO1B   | 2  |
| MYO1C   | 4641   | MYO1C   | 17 |

|          |        |          |    |
|----------|--------|----------|----|
| MYO1D    | 4642   | MYO1D    | 17 |
| MYO1E    | 4643   | MYO1E    | 15 |
| MYO1G    | 64005  | MYO1G    | 7  |
| MYO1H    | 283446 | MYO1H    | 12 |
| MYO3A    | 53904  | MYO3A    | 10 |
| MYO3B    | 140469 | MYO3B    | 2  |
| MYO5A    | 4644   | MYO5A    | 15 |
| MYO5C    | 55930  | MYO5C    | 15 |
| MYO6     | 4646   | MYO6     | 6  |
| MYO9A    | 4649   | MYO9A    | 15 |
| MYO9B    | 4650   | MYO9B    | 19 |
| MYOF     | 26509  | MYOF     | 10 |
| MYOG     | 4656   | MYOG     | 1  |
| MYOM1    | 8736   | MYOM1    | 18 |
| MYOM2    | 9172   | MYOM2    | 8  |
| MYOZ2    | 51778  | MYOZ2    | 4  |
| MYPOP    | 339344 | MYPOP    | 19 |
| MYST1    | 84148  | MYST1    | 16 |
| MYST2    | 11143  | MYST2    | 17 |
| MYST3    | 7994   | MYST3    | 8  |
| MYST4    | 23522  | MYST4    | 10 |
| MYT1     | 4661   | MYT1     | 20 |
| MZF1     | 7593   | MZF1     | 19 |
| N4BP1    | 9683   | N4BP1    | 16 |
| N4BP2L1  | 90634  | N4BP2L1  | 13 |
| N4BP2L2  | 10443  | N4BP2L2  | 13 |
| N4BP3    | 23138  | N4BP3    | 5  |
| N6AMT1   | 29104  | N6AMT1   | 21 |
| N6AMT2   | 221143 | N6AMT2   | 13 |
| NAAA     | 27163  | NAAA     | 4  |
| NAALAD2  | 10003  | NAALAD2  | 11 |
| NAALADL1 | 10004  | NAALADL1 | 11 |
| NAB1     | 4664   | NAB1     | 2  |
| NAB2     | 4665   | NAB2     | 12 |
| NACA     | 4666   | NACA     | 12 |
| NACAD    | 23148  | NACAD    |    |
| NACAP1   | 83955  | NACAP1   | 8  |
| NACC2    | 138151 | NACC2    | 9  |
| NADK     | 65220  | NADK     | 1  |
| NADSYN1  | 55191  | NADSYN1  | 11 |
| NAE1     | 8883   | NAE1     | 16 |
| NAF1     | 92345  | NAF1     | 4  |
| NAG18    | 57051  | NAG18    | 7  |
| NAGA     | 4668   | NAGA     | 22 |

|         |        |         |    |
|---------|--------|---------|----|
| NAGK    | 55577  | NAGK    | 2  |
| NAGLU   | 4669   | NAGLU   | 17 |
| NAGPA   | 51172  | NAGPA   | 16 |
| NAIF1   | 203245 | NAIF1   | 9  |
| NAIP    | 4671   | NAIP    | 5  |
| NALP5   | 126206 | NALP5   | 19 |
| NAMPT   | 10135  | NAMPT   | 7  |
| NANOS3  | 342977 | NANOS3  | 19 |
| NANS    | 54187  | NANS    | 9  |
| NAP1L1  | 4673   | NAP1L1  | 12 |
| NAP1L4  | 4676   | NAP1L4  | 11 |
| NAP1L5  | 266812 | NAP1L5  | 4  |
| NAPA    | 8775   | NAPA    | 19 |
| NAPEPLD | 222236 | NAPEPLD | 7  |
| NAPG    | 8774   | NAPG    | 18 |
| NAPRT1  | 93100  | NAPRT1  | 8  |
| NAPSA   | 9476   | NAPSA   | 19 |
| NAPSB   | 256236 | NAPSB   | 19 |
| NARF    | 26502  | NARF    | 17 |
| NARFL   | 64428  | NARFL   | 16 |
| NARG1   | 80155  | NARG1   | 4  |
| NARG1L  | 79612  | NARG1L  | 13 |
| NARG2   | 79664  | NARG2   | 15 |
| NARS    | 4677   | NARS    | 18 |
| NARS2   | 79731  | NARS2   | 11 |
| NASP    | 4678   | NASP    | 1  |
| NAT1    | 9      | NAT1    |    |
| NAT10   | 55226  | NAT10   | 11 |
| NAT12   | 122830 | NAT12   | 14 |
| NAT13   | 80218  | NAT13   | 3  |
| NAT14   | 57106  | NAT14   | 19 |
| NAT15   | 79903  | NAT15   | 16 |
| NAT5    | 51126  | NAT5    | 20 |
| NAT6    | 24142  | NAT6    | 3  |
| NAT8L   | 339983 | NAT8L   | 4  |
| NAV2    | 89797  | NAV2    | 11 |
| NAV3    | 89795  | NAV3    | 12 |
| NBEA    | 26960  | NBEA    | 13 |
| NBEAL2  | 23218  | NBEAL2  | 3  |
| NBL1    | 4681   | NBL1    | 1  |
| NBN     | 4683   | NBN     | 8  |
| NBPF1   | 55672  | NBPF1   | 1  |
| NBPF10  | 440673 | NBPF10  | 1  |
| NBPF14  | 25832  | NBPF14  | 1  |

|            |        |            |    |
|------------|--------|------------|----|
| NBPF15     | 284565 | NBPF15     | 1  |
| NBPF20     | 400818 | NBPF20     | 1  |
| NBPF22P    | 285622 | NBPF22P    | 5  |
| NBPF3      | 84224  | NBPF3      |    |
| NBPF4      | 148545 | NBPF4      | 1  |
| NBPF8      | 728841 | NBPF8      | 1  |
| NBR1       | 4077   | NBR1       | 17 |
| NBR2       | 10230  | NBR2       | 17 |
| NCALD      | 83988  | NCALD      | 8  |
| NCAM2      | 4685   | NCAM2      | 21 |
| NCAPD2     | 9918   | NCAPD2     | 12 |
| NCAPD3     | 23310  | NCAPD3     | 11 |
| NCAPG      | 64151  | NCAPG      | 4  |
| NCAPG2     | 54892  | NCAPG2     | 7  |
| NCAPH      | 23397  | NCAPH      | 2  |
| NCAPH2     | 29781  | NCAPH2     | 22 |
| NCBP1      | 4686   | NCBP1      | 9  |
| NCBP2      | 22916  | NCBP2      | 3  |
| NCCRP1     | 342897 | NCCRP1     | 19 |
| NCDN       | 23154  | NCDN       | 1  |
| NCF1       | 653361 | NCF1       | 7  |
| NCF1B      | 654816 | NCF1B      | 7  |
| NCF1C      | 654817 | NCF1C      | 7  |
| NCF2       | 4688   | NCF2       | 1  |
| NCF4       | 4689   | NCF4       | 22 |
| NCK1       | 4690   | NCK1       | 3  |
| NCK2       | 8440   | NCK2       | 2  |
| NCKAP1     | 10787  | NCKAP1     | 2  |
| NCKAP1L    | 3071   | NCKAP1L    | 12 |
| NCKIPSD    | 51517  | NCKIPSD    | 3  |
| NCL        | 4691   | NCL        | 2  |
| NCLN       | 56926  | NCLN       | 19 |
| NCOA1      | 8648   | NCOA1      | 2  |
| NCOA2      | 10499  | NCOA2      | 8  |
| NCOA3      | 8202   | NCOA3      | 20 |
| NCOA4      | 8031   | NCOA4      | 10 |
| NCOA5      | 57727  | NCOA5      | 20 |
| NCOA6      | 23054  | NCOA6      | 20 |
| NCOA6IP    | 96764  | NCOA6IP    | 8  |
| NCOA7      | 135112 | NCOA7      | 6  |
| NCOR1      | 9611   | NCOR1      | 17 |
| NCOR2      | 9612   | NCOR2      | 12 |
| NCR3       | 259197 | NCR3       | 6  |
| NCRNA00081 | 92482  | NCRNA00081 | 10 |



|            |           |            |    |
|------------|-----------|------------|----|
| NCRNA00085 | 147650    | NCRNA00085 | 19 |
| NCRNA00092 | 100188953 | NCRNA00092 | 9  |
| NCRNA00094 | 266655    | NCRNA00094 |    |
| NCRNA00115 | 79854     | NCRNA00115 | 1  |
| NCRNA00120 | 55389     | NCRNA00120 | 6  |
| NCRNA00152 | 112597    | NCRNA00152 | 2  |
| NCRNA00153 | 55857     | NCRNA00153 | 20 |
| NCRNA00158 | 54072     | NCRNA00158 | 21 |
| NCRNA00160 | 54064     | NCRNA00160 | 21 |
| NCRNA00161 | 118421    | NCRNA00161 | 21 |
| NCRNA00162 | 378825    | NCRNA00162 | 21 |
| NCRNA00173 | 100287569 | NCRNA00173 |    |
| NCRNA00181 | 503538    | NCRNA00181 | 19 |
| NCRNA00219 | 114915    | NCRNA00219 | 5  |
| NCSTN      | 23385     | NCSTN      | 1  |
| NDC80      | 10403     | NDC80      | 18 |
| NDE1       | 54820     | NDE1       | 16 |
| NDEL1      | 81565     | NDEL1      | 17 |
| NDFIP1     | 80762     | NDFIP1     | 5  |
| NDFIP2     | 54602     | NDFIP2     | 13 |
| NDP        | 4693      | NDP        | X  |
| NDRG1      | 10397     | NDRG1      | 8  |
| NDRG2      | 57447     | NDRG2      | 14 |
| NDRG3      | 57446     | NDRG3      | 20 |
| NDRG4      | 65009     | NDRG4      | 16 |
| NDST1      | 3340      | NDST1      | 5  |
| NDUFA1     | 4694      | NDUFA1     | X  |
| NDUFA10    | 4705      | NDUFA10    | 2  |
| NDUFA13    | 51079     | NDUFA13    |    |
| NDUFA2     | 4695      | NDUFA2     | 5  |
| NDUFA4L2   | 56901     | NDUFA4L2   | 12 |
| NDUFA5     | 4698      | NDUFA5     | 7  |
| NDUFA6     | 4700      | NDUFA6     | 22 |
| NDUFA7     | 4701      | NDUFA7     | 19 |
| NDUFA8     | 4702      | NDUFA8     | 9  |
| NDUFA9     | 4704      | NDUFA9     | 12 |
| NDUFAB1    | 4706      | NDUFAB1    | 16 |
| NDUFAF1    | 51103     | NDUFAF1    | 15 |
| NDUFAF2    | 91942     | NDUFAF2    | 5  |
| NDUFB1     | 4707      | NDUFB1     | 14 |
| NDUFB10    | 4716      | NDUFB10    | 16 |
| NDUFB2     | 4708      | NDUFB2     | 7  |
| NDUFB3     | 4709      | NDUFB3     | 2  |
| NDUFB5     | 4711      | NDUFB5     | 3  |

|        |        |        |    |
|--------|--------|--------|----|
| NDUFB6 | 4712   | NDUFB6 | 9  |
| NDUFB7 | 4713   | NDUFB7 | 19 |
| NDUFB8 | 4714   | NDUFB8 | 10 |
| NDUFC1 | 4717   | NDUFC1 | 4  |
| NDUFS1 | 4719   | NDUFS1 | 2  |
| NDUFS2 | 4720   | NDUFS2 | 1  |
| NDUFS3 | 4722   | NDUFS3 | 11 |
| NDUFS4 | 4724   | NDUFS4 | 5  |
| NDUFS5 | 4725   | NDUFS5 | 1  |
| NDUFS8 | 4728   | NDUFS8 | 11 |
| NDUFV1 | 4723   | NDUFV1 | 11 |
| NDUFV2 | 4729   | NDUFV2 | 18 |
| NDUFV3 | 4731   | NDUFV3 | 21 |
| NEB    | 4703   | NEB    | 2  |
| NEBL   | 10529  | NEBL   | 10 |
| NECAB1 | 64168  | NECAB1 | 8  |
| NECAB3 | 63941  | NECAB3 | 20 |
| NECAP1 | 25977  | NECAP1 | 12 |
| NECAP2 | 55707  | NECAP2 | 1  |
| NEDD1  | 121441 | NEDD1  | 12 |
| NEDD4  | 4734   | NEDD4  | 15 |
| NEDD4L | 23327  | NEDD4L | 18 |
| NEDD8  | 4738   | NEDD8  | 14 |
| NEDD9  | 4739   | NEDD9  | 6  |
| NEIL1  | 79661  | NEIL1  | 15 |
| NEIL2  | 252969 | NEIL2  | 8  |
| NEIL3  | 55247  | NEIL3  | 4  |
| NEK1   | 4750   | NEK1   | 4  |
| NEK10  | 152110 | NEK10  | 3  |
| NEK2   | 4751   | NEK2   | 1  |
| NEK3   | 4752   | NEK3   | 13 |
| NEK4   | 6787   | NEK4   | 3  |
| NEK6   | 10783  | NEK6   | 9  |
| NEK7   | 140609 | NEK7   | 1  |
| NEK8   | 284086 | NEK8   | 17 |
| NEK9   | 91754  | NEK9   | 14 |
| NELF   | 26012  | NELF   | 9  |
| NELL1  | 4745   | NELL1  | 11 |
| NELL2  | 4753   | NELL2  | 12 |
| NENF   | 29937  | NENF   | 1  |
| NEO1   | 4756   | NEO1   | 15 |
| NET1   | 10276  | NET1   | 10 |
| NETO2  | 81831  | NETO2  | 16 |
| NEU1   | 4758   | NEU1   | 6  |

|          |        |          |    |
|----------|--------|----------|----|
| NEURL1B  | 54492  | NEURL1B  | 5  |
| NEURL4   | 84461  | NEURL4   | 17 |
| NEUROD2  | 4761   | NEUROD2  | 17 |
| NEUROD4  | 58158  | NEUROD4  | 12 |
| NEUROG2  | 63973  | NEUROG2  | 4  |
| NEXN     | 91624  | NEXN     | 1  |
| NF1      | 4763   | NF1      | 17 |
| NFAM1    | 150372 | NFAM1    | 22 |
| NFAT5    | 10725  | NFAT5    | 16 |
| NFATC1   | 4772   | NFATC1   | 18 |
| NFATC2IP | 84901  | NFATC2IP | 16 |
| NFATC4   | 4776   | NFATC4   | 14 |
| NFE2L1   | 4779   | NFE2L1   | 17 |
| NFE2L2   | 4780   | NFE2L2   | 2  |
| NFE2L3   | 9603   | NFE2L3   | 7  |
| NFIA     | 4774   | NFIA     | 1  |
| NFIB     | 4781   | NFIB     | 9  |
| NFIL3    | 4783   | NFIL3    | 9  |
| NFIX     | 4784   | NFIX     | 19 |
| NFKB1    | 4790   | NFKB1    | 4  |
| NFKB2    | 4791   | NFKB2    | 10 |
| NFKBIA   | 4792   | NFKBIA   | 14 |
| NFKBIB   | 4793   | NFKBIB   | 19 |
| NFKBID   | 84807  | NFKBID   | 19 |
| NFKBIE   | 4794   | NFKBIE   | 6  |
| NFKBIL1  | 4795   | NFKBIL1  | 6  |
| NFKBIL2  | 4796   | NFKBIL2  | 8  |
| NFKBIZ   | 64332  | NFKBIZ   | 3  |
| NFRKB    | 4798   | NFRKB    | 11 |
| NFS1     | 9054   | NFS1     | 20 |
| NFU1     | 27247  | NFU1     | 2  |
| NFX1     | 4799   | NFX1     | 9  |
| NFXL1    | 152518 | NFXL1    | 4  |
| NFYB     | 4801   | NFYB     | 12 |
| NFYC     | 4802   | NFYC     | 1  |
| NGB      | 58157  | NGB      | 14 |
| NGDN     | 25983  | NGDN     | 14 |
| NGFRAP1  | 27018  | NGFRAP1  | X  |
| NGLY1    | 55768  | NGLY1    | 3  |
| NGRN     | 51335  | NGRN     | 15 |
| NHEDC1   | 150159 | NHEDC1   | 4  |
| NHEDC2   | 133308 | NHEDC2   | 4  |
| NHLRC2   | 374354 | NHLRC2   | 10 |
| NHP2     | 55651  | NHP2     | 5  |

|           |        |           |    |
|-----------|--------|-----------|----|
| NHP2L1    | 4809   | NHP2L1    | 22 |
| NICN1     | 84276  | NICN1     | 3  |
| NIF3L1    | 60491  | NIF3L1    | 2  |
| NIN       | 51199  | NIN       | 14 |
| NINJ1     | 4814   | NINJ1     | 9  |
| NINJ2     | 4815   | NINJ2     | 12 |
| NIP30     | 80011  | NIP30     | 16 |
| NIP7      | 51388  | NIP7      | 16 |
| NIPA1     | 123606 | NIPA1     | 15 |
| NIPA2     | 81614  | NIPA2     | 15 |
| NIPAL2    | 79815  | NIPAL2    | 8  |
| NIPAL4    | 348938 | NIPAL4    | 5  |
| NIPBL     | 25836  | NIPBL     | 5  |
| NIPSNAP1  | 8508   | NIPSNAP1  | 22 |
| NIPSNAP3A | 25934  | NIPSNAP3A | 9  |
| NIPSNAP3B | 55335  | NIPSNAP3B | 9  |
| NISCH     | 11188  | NISCH     | 3  |
| NIT1      | 4817   | NIT1      | 1  |
| NIT2      | 56954  | NIT2      | 3  |
| NKAIN2    | 154215 | NKAIN2    | 6  |
| NKAP      | 79576  | NKAP      | X  |
| NKD2      | 85409  | NKD2      | 5  |
| NKG7      | 4818   | NKG7      | 19 |
| NKIRAS1   | 28512  | NKIRAS1   | 3  |
| NKIRAS2   | 28511  | NKIRAS2   | 17 |
| NKTR      | 4820   | NKTR      | 3  |
| NKX2-6    | 137814 | NKX2-6    |    |
| NKX3-1    | 4824   | NKX3-1    | 8  |
| NLE1      | 54475  | NLE1      | 17 |
| NLGN1     | 22871  | NLGN1     | 3  |
| NLGN2     | 57555  | NLGN2     | 17 |
| NLGN4X    | 57502  | NLGN4X    | X  |
| NLK       | 51701  | NLK       | 17 |
| NLN       | 57486  | NLN       | 5  |
| NLRC3     | 197358 | NLRC3     | 16 |
| NLRC4     | 58484  | NLRC4     | 2  |
| NLRC5     | 84166  | NLRC5     | 16 |
| NLRP1     | 22861  | NLRP1     | 17 |
| NLRP11    | 204801 | NLRP11    | 19 |
| NLRP14    | 338323 | NLRP14    | 11 |
| NLRP2     | 55655  | NLRP2     | 19 |
| NLRP3     | 114548 | NLRP3     | 1  |
| NLRP4     | 147945 | NLRP4     | 19 |
| NLRP5     | 126206 | NLRP5     | 19 |

|           |        |           |    |
|-----------|--------|-----------|----|
| NLRP7     | 199713 | NLRP7     | 19 |
| NLRP8     | 126205 | NLRP8     | 19 |
| NLRX1     | 79671  | NLRX1     | 11 |
| NMB       | 4828   | NMB       | 15 |
| NMD3      | 51068  | NMD3      | 3  |
| NME1      | 4830   | NME1      | 17 |
| NME1-NME2 | 654364 | NME1-NME2 | 17 |
| NME2      | 4831   | NME2      | 17 |
| NME3      | 4832   | NME3      | 16 |
| NME4      | 4833   | NME4      | 16 |
| NME5      | 8382   | NME5      | 5  |
| NME6      | 10201  | NME6      | 3  |
| NME7      | 29922  | NME7      | 1  |
| NMI       | 9111   | NMI       | 2  |
| NMNAT3    | 349565 | NMNAT3    | 3  |
| NMRAL1    | 57407  | NMRAL1    | 16 |
| NMT1      | 4836   | NMT1      | 17 |
| NMT2      | 9397   | NMT2      | 10 |
| NMU       | 10874  | NMU       | 4  |
| NNAT      | 4826   | NNAT      | 20 |
| NNT       | 23530  | NNT       | 5  |
| NOB1      | 28987  | NOB1      | 16 |
| NOC2L     | 26155  | NOC2L     | 1  |
| NOC3L     | 64318  | NOC3L     | 10 |
| NOC4L     | 79050  | NOC4L     |    |
| NOD1      | 10392  | NOD1      | 7  |
| NOD2      | 64127  | NOD2      | 16 |
| NOD3      | 197358 | NOD3      | 16 |
| NOG       | 9241   | NOG       | 17 |
| NOL11     | 25926  | NOL11     | 17 |
| NOL12     | 79159  | NOL12     | 22 |
| NOL3      | 8996   | NOL3      | 16 |
| NOL4      | 8715   | NOL4      | 18 |
| NOL6      | 65083  | NOL6      | 9  |
| NOL7      | 51406  | NOL7      | 6  |
| NOL8      | 55035  | NOL8      | 9  |
| NOL9      | 79707  | NOL9      | 1  |
| NOLA1     | 54433  | NOLA1     | 4  |
| NOLC1     | 9221   | NOLC1     | 10 |
| NOM1      | 64434  | NOM1      | 7  |
| NOMO1     | 23420  | NOMO1     | 16 |
| NOMO2     | 283820 | NOMO2     | 16 |
| NOMO3     | 408050 | NOMO3     | 16 |
| NONO      | 4841   | NONO      | X  |

|          |        |          |    |
|----------|--------|----------|----|
| NOP10    | 55505  | NOP10    | 15 |
| NOP14    | 8602   | NOP14    | 4  |
| NOP16    | 51491  | NOP16    | 5  |
| NOP2     | 4839   | NOP2     | 12 |
| NOP56    | 10528  | NOP56    | 20 |
| NOP58    | 51602  | NOP58    | 2  |
| NOS1AP   | 9722   | NOS1AP   | 1  |
| NOS3     | 4846   | NOS3     | 7  |
| NOSIP    | 51070  | NOSIP    | 19 |
| NOTCH1   | 4851   | NOTCH1   | 9  |
| NOTCH2   | 4853   | NOTCH2   | 1  |
| NOTCH2NL | 388677 | NOTCH2NL | 1  |
| NOTCH3   | 4854   | NOTCH3   | 19 |
| NOTCH4   | 4855   | NOTCH4   | 6  |
| NOTUM    | 147111 | NOTUM    | 17 |
| NOVA1    | 4857   | NOVA1    | 14 |
| NOXA1    | 10811  | NOXA1    | 9  |
| NP       | 4860   | NP       | 14 |
| N-PAC    | 84656  | N-PAC    | 16 |
| NPAL3    | 57185  | NPAL3    | 1  |
| NPAS1    | 4861   | NPAS1    | 19 |
| NPAT     | 4863   | NPAT     | 11 |
| NPC1     | 4864   | NPC1     | 18 |
| NPC1L1   | 29881  | NPC1L1   | 7  |
| NPC2     | 10577  | NPC2     | 14 |
| NPDC1    | 56654  | NPDC1    | 9  |
| NPEPL1   | 79716  | NPEPL1   | 20 |
| NPHP3    | 27031  | NPHP3    | 3  |
| NPHP4    | 261734 | NPHP4    | 1  |
| NPIP     | 9284   | NPIP     | 16 |
| NPL      | 80896  | NPL      | 1  |
| NPLOC4   | 55666  | NPLOC4   | 17 |
| NPM1     | 4869   | NPM1     | 5  |
| NPM2     | 10361  | NPM2     | 8  |
| NPM3     | 10360  | NPM3     | 10 |
| NPPA     | 4878   | NPPA     | 1  |
| NPR2     | 4882   | NPR2     | 9  |
| NPR3     | 4883   | NPR3     | 5  |
| NPTN     | 27020  | NPTN     | 15 |
| NPTX1    | 4884   | NPTX1    |    |
| NPW      | 283869 | NPW      | 16 |
| NPY      | 4852   | NPY      | 7  |
| NQO1     | 1728   | NQO1     | 16 |
| NQO2     | 4835   | NQO2     |    |

|         |        |         |    |
|---------|--------|---------|----|
| NR1D2   | 9975   | NR1D2   |    |
| NR1H2   | 7376   | NR1H2   | 19 |
| NR1H3   | 10062  | NR1H3   | 11 |
| NR1H4   | 9971   | NR1H4   | 12 |
| NR2C1   | 7181   | NR2C1   | 12 |
| NR2C2   | 7182   | NR2C2   | 3  |
| NR2C2AP | 126382 | NR2C2AP | 19 |
| NR2E1   | 7101   | NR2E1   | 6  |
| NR2F1   | 7025   | NR2F1   | 5  |
| NR2F6   | 2063   | NR2F6   | 19 |
| NR3C1   | 2908   | NR3C1   | 5  |
| NR3C2   | 4306   | NR3C2   | 4  |
| NR4A1   | 3164   | NR4A1   | 12 |
| NR4A2   | 4929   | NR4A2   | 2  |
| NRAP    | 4892   | NRAP    | 10 |
| NRARP   | 441478 | NRARP   | 9  |
| NRAS    | 4893   | NRAS    | 1  |
| NRBF2   | 29982  | NRBF2   | 10 |
| NRBP2   | 340371 | NRBP2   | 8  |
| NRCAM   | 4897   | NRCAM   | 7  |
| NRD1    | 4898   | NRD1    | 1  |
| NRF1    | 4899   | NRF1    | 7  |
| NRG3    | 10718  | NRG3    | 10 |
| NRG4    | 145957 | NRG4    | 15 |
| NRGN    | 4900   | NRGN    | 11 |
| NRIP1   | 8204   | NRIP1   | 21 |
| NRIP3   | 56675  | NRIP3   | 11 |
| NRK     | 203447 | NRK     | X  |
| NRM     | 11270  | NRM     | 6  |
| NRP1    | 8829   | NRP1    | 10 |
| NRP2    | 8828   | NRP2    | 2  |
| NRSN2   | 80023  | NRSN2   | 20 |
| NRTN    | 4902   | NRTN    | 19 |
| NRXN2   | 9379   | NRXN2   | 11 |
| NRXN3   | 9369   | NRXN3   | 14 |
| NS3BP   | 171391 | NS3BP   | 11 |
| NSA2    | 10412  | NSA2    | 5  |
| NSBP1   | 79366  | NSBP1   | X  |
| NSD1    | 64324  | NSD1    | 5  |
| NSDHL   | 50814  | NSDHL   | X  |
| NSF     | 4905   | NSF     |    |
| NSFL1C  | 55968  | NSFL1C  | 20 |
| NSL1    | 25936  | NSL1    | 1  |
| NSMAF   | 8439   | NSMAF   | 8  |

|          |        |          |    |
|----------|--------|----------|----|
| NSMCE1   | 197370 | NSMCE1   | 16 |
| NSMCE2   | 286053 | NSMCE2   | 8  |
| NSMCE4A  | 54780  | NSMCE4A  | 10 |
| NSUN2    | 54888  | NSUN2    | 5  |
| NSUN3    | 63899  | NSUN3    | 3  |
| NSUN4    | 387338 | NSUN4    | 1  |
| NSUN5    | 55695  | NSUN5    | 7  |
| NSUN5B   | 155400 | NSUN5B   | 7  |
| NSUN5C   | 260294 | NSUN5C   | 7  |
| NSUN6    | 221078 | NSUN6    | 10 |
| NT5C     | 30833  | NT5C     | 17 |
| NT5C2    | 22978  | NT5C2    | 10 |
| NT5C3    | 51251  | NT5C3    | 7  |
| NT5C3L   | 115024 | NT5C3L   | 17 |
| NT5DC1   | 221294 | NT5DC1   | 6  |
| NT5DC2   | 64943  | NT5DC2   | 3  |
| NT5DC3   | 51559  | NT5DC3   | 12 |
| NT5M     | 56953  | NT5M     | 17 |
| NTAN1    | 123803 | NTAN1    | 16 |
| NTF3     | 4908   | NTF3     | 12 |
| NTHL1    | 4913   | NTHL1    | 16 |
| NTN4     | 59277  | NTN4     | 12 |
| NTN5     | 126147 | NTN5     | 19 |
| NTNG1    | 22854  | NTNG1    | 1  |
| NTNG2    | 84628  | NTNG2    | 9  |
| NUAK1    | 9891   | NUAK1    | 12 |
| NUAK2    | 81788  | NUAK2    | 1  |
| NUB1     | 51667  | NUB1     | 7  |
| NUBP1    | 4682   | NUBP1    | 16 |
| NUBP2    | 10101  | NUBP2    | 16 |
| NUBPL    | 80224  | NUBPL    | 14 |
| NUCB1    | 4924   | NUCB1    | 19 |
| NUCB2    | 4925   | NUCB2    | 11 |
| NUCKS1   | 64710  | NUCKS1   | 1  |
| NUDC     | 10726  | NUDC     | 1  |
| NUDCD1   | 84955  | NUDCD1   | 8  |
| NUDCD2   | 134492 | NUDCD2   | 5  |
| NUDCD3   | 23386  | NUDCD3   | 7  |
| NUDT1    | 4521   | NUDT1    | 7  |
| NUDT11   | 55190  | NUDT11   | X  |
| NUDT14   | 256281 | NUDT14   | 14 |
| NUDT15   | 55270  | NUDT15   | 13 |
| NUDT16   | 131870 | NUDT16   | 3  |
| NUDT16L1 | 84309  | NUDT16L1 | 16 |



|         |        |         |    |
|---------|--------|---------|----|
| NUDT17  | 200035 | NUDT17  | 1  |
| NUDT18  | 79873  | NUDT18  | 8  |
| NUDT19  | 390916 | NUDT19  | 19 |
| NUDT2   | 318    | NUDT2   | 9  |
| NUDT21  | 11051  | NUDT21  | 16 |
| NUDT22  | 84304  | NUDT22  | 11 |
| NUDT3   | 11165  | NUDT3   | 6  |
| NUDT5   | 11164  | NUDT5   | 10 |
| NUDT6   | 11162  | NUDT6   | 4  |
| NUDT7   | 283927 | NUDT7   | 16 |
| NUDT8   | 254552 | NUDT8   | 11 |
| NUF2    | 83540  | NUF2    | 1  |
| NUFIP1  | 26747  | NUFIP1  | 13 |
| NUFIP2  | 57532  | NUFIP2  | 17 |
| NUMA1   | 4926   | NUMA1   | 11 |
| NUMB    | 8650   | NUMB    | 14 |
| NUMBL   | 9253   | NUMBL   | 19 |
| NUP107  | 57122  | NUP107  | 12 |
| NUP133  | 55746  | NUP133  | 1  |
| NUP153  | 9972   | NUP153  | 6  |
| NUP155  | 9631   | NUP155  | 5  |
| NUP160  | 23279  | NUP160  | 11 |
| NUP188  | 23511  | NUP188  | 9  |
| NUP205  | 23165  | NUP205  | 7  |
| NUP210  | 23225  | NUP210  | 3  |
| NUP214  | 8021   | NUP214  | 9  |
| NUP35   | 129401 | NUP35   | 2  |
| NUP37   | 79023  | NUP37   | 12 |
| NUP43   | 348995 | NUP43   | 6  |
| NUP50   | 10762  | NUP50   | 22 |
| NUP54   | 53371  | NUP54   | 4  |
| NUP62   | 23636  | NUP62   | 19 |
| NUP62CL | 54830  | NUP62CL | X  |
| NUP85   | 79902  | NUP85   | 17 |
| NUP88   | 4927   | NUP88   | 17 |
| NUP93   | 9688   | NUP93   | 16 |
| NUP98   | 4928   | NUP98   | 11 |
| NUPL1   | 9818   | NUPL1   | 13 |
| NUPL2   | 11097  | NUPL2   | 7  |
| NUPR1   | 26471  | NUPR1   | 16 |
| NUS1    | 116150 | NUS1    | 6  |
| NUSAP1  | 51203  | NUSAP1  | 15 |
| NUTF2   | 10204  | NUTF2   | 16 |
| NVL     | 4931   | NVL     | 1  |

|         |        |         |    |
|---------|--------|---------|----|
| NXF1    | 10482  | NXF1    | 11 |
| NXF2B   | 728343 | NXF2B   | X  |
| NXF4    | 55999  | NXF4    | X  |
| NXF5    | 55998  | NXF5    | X  |
| NXN     | 64359  | NXN     | 17 |
| NXPH4   | 11247  | NXPH4   | 12 |
| NXT1    | 29107  | NXT1    | 20 |
| NXT2    | 55916  | NXT2    | X  |
| NYNRIN  | 57523  | NYNRIN  | 14 |
| NYX     | 60506  | NYX     | X  |
| OAF     | 220323 | OAF     | 11 |
| OAS1    | 4938   | OAS1    | 12 |
| OAS2    | 4939   | OAS2    | 12 |
| OAS3    | 4940   | OAS3    | 12 |
| OASL    | 8638   | OASL    | 12 |
| OAT     | 4942   | OAT     | 10 |
| OAZ1    | 4946   | OAZ1    | 19 |
| OAZ2    | 4947   | OAZ2    | 15 |
| OBFC1   | 79991  | OBFC1   | 10 |
| OBFC2A  | 64859  | OBFC2A  | 2  |
| OBFC2B  | 79035  | OBFC2B  | 12 |
| OBSCN   | 84033  | OBSCN   | 1  |
| OCA2    | 4948   | OCA2    | 15 |
| OCEL1   | 79629  | OCEL1   | 19 |
| OCIAD1  | 54940  | OCIAD1  | 4  |
| OCIAD2  | 132299 | OCIAD2  | 4  |
| OCRL    | 4952   | OCRL    | X  |
| ODC1    | 4953   | ODC1    | 2  |
| ODF1    | 4956   | ODF1    | 8  |
| ODF2    | 4957   | ODF2    | 9  |
| ODF2L   | 57489  | ODF2L   | 1  |
| ODF3L2  | 284451 | ODF3L2  | 19 |
| ODZ3    | 55714  | ODZ3    | 4  |
| OGDH    | 4967   | OGDH    | 7  |
| OGDHL   | 55753  | OGDHL   | 10 |
| OGFOD1  | 55239  | OGFOD1  | 16 |
| OGFOD2  | 79676  | OGFOD2  | 12 |
| OGFR    | 11054  | OGFR    | 20 |
| OGFRL1  | 79627  | OGFRL1  | 6  |
| OGG1    | 4968   | OGG1    | 3  |
| OGT     | 8473   | OGT     | X  |
| OIP5    | 11339  | OIP5    | 15 |
| OLAH    | 55301  | OLAH    | 10 |
| OLFML2A | 169611 | OLFML2A | 9  |

|         |        |         |    |
|---------|--------|---------|----|
| OLIG2   | 10215  | OLIG2   | 21 |
| OLR1    | 4973   | OLR1    | 12 |
| OMA1    | 115209 | OMA1    | 1  |
| OMD     | 4958   | OMD     | 9  |
| ONECUT2 | 9480   | ONECUT2 | 18 |
| ONECUT3 | 390874 | ONECUT3 | 19 |
| OOEP    | 441161 | OOEP    | 6  |
| OPA1    | 4976   | OPA1    | 3  |
| OPA3    | 80207  | OPA3    | 19 |
| OPLAH   | 26873  | OPLAH   | 8  |
| OPN1LW  | 5956   | OPN1LW  | X  |
| OPN1MW2 | 728458 | OPN1MW2 | X  |
| OPN3    | 23596  | OPN3    | 1  |
| OPN4    | 94233  | OPN4    | 10 |
| OPN5    | 221391 | OPN5    | 6  |
| OPRL1   | 4987   | OPRL1   | 20 |
| OPRS1   | 10280  | OPRS1   | 9  |
| OPTN    | 10133  | OPTN    | 10 |
| OR10A7  | 121364 | OR10A7  | 12 |
| OR10H1  | 26539  | OR10H1  | 19 |
| OR10H2  | 26538  | OR10H2  | 19 |
| OR10J3  | 441911 | OR10J3  | 1  |
| OR13A1  | 79290  | OR13A1  | 10 |
| OR14C36 | 127066 | OR14C36 | 1  |
| OR14I1  | 401994 | OR14I1  | 1  |
| OR1D4   | 8385   | OR1D4   | 17 |
| OR1L8   | 138881 | OR1L8   | 9  |
| OR2A2   | 442361 | OR2A2   | 7  |
| OR2AG2  | 338755 | OR2AG2  | 11 |
| OR2AK2  | 391191 | OR2AK2  | 1  |
| OR2G3   | 81469  | OR2G3   | 1  |
| OR2H2   | 7932   | OR2H2   | 6  |
| OR2L2   | 26246  | OR2L2   | 1  |
| OR2S2   | 56656  | OR2S2   | 9  |
| OR2T2   | 401992 | OR2T2   |    |
| OR2W1   | 26692  | OR2W1   | 6  |
| OR2W5   | 441932 | OR2W5   | 1  |
| OR3A1   | 4994   | OR3A1   | 17 |
| OR4A16  | 81327  | OR4A16  | 11 |
| OR4C16  | 219428 | OR4C16  | 11 |
| OR4D1   | 26689  | OR4D1   | 17 |
| OR4D6   | 219983 | OR4D6   | 11 |
| OR4K13  | 390433 | OR4K13  | 14 |
| OR4L1   | 122742 | OR4L1   | 14 |

|          |        |          |    |
|----------|--------|----------|----|
| OR4N4    | 283694 | OR4N4    | 15 |
| OR4S1    | 256148 | OR4S1    | 11 |
| OR4X1    | 390113 | OR4X1    | 11 |
| OR51E2   | 81285  | OR51E2   | 11 |
| OR51G1   | 79324  | OR51G1   | 11 |
| OR51I2   | 390064 | OR51I2   | 11 |
| OR51T1   | 401665 | OR51T1   | 11 |
| OR52J3   | 119679 | OR52J3   | 11 |
| OR52K2   | 119774 | OR52K2   | 11 |
| OR5A1    | 219982 | OR5A1    | 11 |
| OR5AP2   | 338675 | OR5AP2   | 11 |
| OR5F1    | 338674 | OR5F1    | 11 |
| OR5P2    | 120065 | OR5P2    | 11 |
| OR6C70   | 390327 | OR6C70   | 12 |
| OR6C75   | 390323 | OR6C75   | 12 |
| OR6M1    | 390261 | OR6M1    | 11 |
| OR7A10   | 390892 | OR7A10   | 19 |
| OR7E156P | 283491 | OR7E156P | 13 |
| OR7E24   | 26648  | OR7E24   | 19 |
| OR7E37P  | 26636  | OR7E37P  | 13 |
| OR7G2    | 390882 | OR7G2    | 19 |
| OR8K5    | 219453 | OR8K5    | 11 |
| OR9A4    | 130075 | OR9A4    | 7  |
| OR9I1    | 219954 | OR9I1    | 11 |
| OR9Q2    | 219957 | OR9Q2    | 11 |
| ORAI1    | 84876  | ORAI1    | 12 |
| ORAI2    | 80228  | ORAI2    | 7  |
| ORAI3    | 93129  | ORAI3    | 16 |
| ORAOV1   | 220064 | ORAOV1   | 11 |
| ORC1L    | 4998   | ORC1L    | 1  |
| ORC2L    | 4999   | ORC2L    | 2  |
| ORC3L    | 23595  | ORC3L    | 6  |
| ORC4L    | 5000   | ORC4L    | 2  |
| ORC5L    | 5001   | ORC5L    | 7  |
| ORC6L    | 23594  | ORC6L    | 16 |
| ORMDL1   | 94101  | ORMDL1   | 2  |
| ORMDL2   | 29095  | ORMDL2   | 12 |
| ORMDL3   | 94103  | ORMDL3   | 17 |
| OS9      | 10956  | OS9      | 12 |
| OSAP     | 84709  | OSAP     | 4  |
| OSBP     | 5007   | OSBP     | 11 |
| OSBP2    | 23762  | OSBP2    | 22 |
| OSBPL10  | 114884 | OSBPL10  | 3  |
| OSBPL11  | 114885 | OSBPL11  | 3  |

|          |        |          |    |
|----------|--------|----------|----|
| OSBPL1A  | 114876 | OSBPL1A  | 18 |
| OSBPL2   | 9885   | OSBPL2   | 20 |
| OSBPL3   | 26031  | OSBPL3   | 7  |
| OSBPL5   | 114879 | OSBPL5   | 11 |
| OSBPL6   | 114880 | OSBPL6   | 2  |
| OSBPL7   | 114881 | OSBPL7   | 17 |
| OSBPL8   | 114882 | OSBPL8   | 12 |
| OSBPL9   | 114883 | OSBPL9   | 1  |
| OSCAR    | 126014 | OSCAR    | 19 |
| OSCP1    | 127700 | OSCP1    | 1  |
| OSGEP    | 55644  | OSGEP    | 14 |
| OSGEPL1  | 64172  | OSGEPL1  | 2  |
| OSGIN2   | 734    | OSGIN2   | 8  |
| OSM      | 5008   | OSM      | 22 |
| OSR1     | 130497 | OSR1     | 2  |
| OSR2     | 116039 | OSR2     |    |
| OSTALPHA | 200931 | OSTalpha | 3  |
| OSTC     | 58505  | OSTC     | 4  |
| OSTF1    | 26578  | OSTF1    | 9  |
| OSTM1    | 28962  | OSTM1    | 6  |
| OTOG     | 340990 | OTOG     |    |
| OTP      | 23440  | OTP      | 5  |
| OTUB1    | 55611  | OTUB1    | 11 |
| OTUD1    | 220213 | OTUD1    |    |
| OTUD4    | 54726  | OTUD4    | 4  |
| OTUD5    | 55593  | OTUD5    | X  |
| OTUD6B   | 51633  | OTUD6B   | 8  |
| OTUD7A   | 161725 | OTUD7A   | 15 |
| OTX1     | 5013   | OTX1     | 2  |
| OVGP1    | 5016   | OVGP1    | 1  |
| OVOL2    | 58495  | OVOL2    | 20 |
| OVOS2    | 144203 | OVOS2    |    |
| OXA1L    | 5018   | OXA1L    | 14 |
| OXCT1    | 5019   | OXCT1    | 5  |
| OXCT2    | 64064  | OXCT2    | 1  |
| OXNAD1   | 92106  | OXNAD1   | 3  |
| OXR1     | 55074  | OXR1     | 8  |
| OXSM     | 54995  | OXSM     | 3  |
| OXSR1    | 9943   | OXSR1    | 3  |
| OXTR     | 5021   | OXTR     | 3  |
| P15RS    | 55197  | P15RS    | 18 |
| P2RX1    | 5023   | P2RX1    | 17 |
| P2RX4    | 5025   | P2RX4    | 12 |
| P2RX5    | 5026   | P2RX5    | 17 |

|          |        |          |    |
|----------|--------|----------|----|
| P2RX6P   | 440799 | P2RX6P   | 22 |
| P2RX7    | 5027   | P2RX7    | 12 |
| P2RY10   | 27334  | P2RY10   | X  |
| P2RY11   | 5032   | P2RY11   | 19 |
| P2RY12   | 64805  | P2RY12   | 3  |
| P2RY8    | 286530 | P2RY8    | Y  |
| P4HA1    | 5033   | P4HA1    | 10 |
| P4HA2    | 8974   | P4HA2    | 5  |
| P4HB     | 5034   | P4HB     | 17 |
| P4HTM    | 54681  | P4HTM    | 3  |
| P704P    | 641455 | P704P    | 14 |
| P76      | 196463 | P76      | 12 |
| PA2G4    | 5036   | PA2G4    | 12 |
| PAAF1    | 80227  | PAAF1    | 11 |
| PABPC1   | 26986  | PABPC1   | 8  |
| PABPC1L  | 80336  | PABPC1L  |    |
| PABPC4   | 8761   | PABPC4   | 1  |
| PABPN1   | 8106   | PABPN1   | 14 |
| PACAP    | 51237  | PACAP    | 5  |
| PACS1    | 55690  | PACS1    | 11 |
| PACS2    | 23241  | PACS2    | 14 |
| PACSIN1  | 29993  | PACSIN1  | 6  |
| PACSIN2  | 11252  | PACSIN2  | 22 |
| PACSIN3  | 29763  | PACSIN3  | 11 |
| PADI3    | 51702  | PADI3    | 1  |
| PAF1     | 54623  | PAF1     | 19 |
| PAFAH1B1 | 5048   | PAFAH1B1 | 17 |
| PAFAH1B2 | 5049   | PAFAH1B2 | 11 |
| PAFAH2   | 5051   | PAFAH2   | 1  |
| PAG1     | 55824  | PAG1     | 8  |
| PAGE4    | 9506   | PAGE4    | X  |
| PAICS    | 10606  | PAICS    | 4  |
| PAIP1    | 10605  | PAIP1    | 5  |
| PAIP2    | 51247  | PAIP2    | 5  |
| PAK1     | 5058   | PAK1     | 11 |
| PAK1IP1  | 55003  | PAK1IP1  | 6  |
| PAK2     | 5062   | PAK2     | 3  |
| PAK4     | 10298  | PAK4     | 19 |
| PAK6     | 56924  | PAK6     | 15 |
| PALB2    | 79728  | PALB2    | 16 |
| PALLD    | 23022  | PALLD    | 4  |
| PALM     | 5064   | PALM     | 19 |
| PAM      | 5066   | PAM      | 5  |
| PAN2     | 9924   | PAN2     | 12 |

|        |        |        |    |
|--------|--------|--------|----|
| PAN3   | 255967 | PAN3   | 13 |
| PANK1  | 53354  | PANK1  | 10 |
| PANK2  | 80025  | PANK2  | 20 |
| PANK3  | 79646  | PANK3  | 5  |
| PANK4  | 55229  | PANK4  | 1  |
| PANX1  | 24145  | PANX1  | 11 |
| PANX2  | 56666  | PANX2  | 22 |
| PAOX   | 196743 | PAOX   | 10 |
| PAPD1  | 55149  | PAPD1  | 10 |
| PAPD4  | 167153 | PAPD4  | 5  |
| PAPD5  | 64282  | PAPD5  | 16 |
| PAPLN  | 89932  | PAPLN  | 14 |
| PAPOLA | 10914  | PAPOLA | 14 |
| PAPOLG | 64895  | PAPOLG | 2  |
| PAPSS1 | 9061   | PAPSS1 | 4  |
| PAPSS2 | 9060   | PAPSS2 | 10 |
| PAQR3  | 152559 | PAQR3  | 4  |
| PAQR4  | 124222 | PAQR4  | 16 |
| PAQR7  | 164091 | PAQR7  | 1  |
| PAQR8  | 85315  | PAQR8  | 6  |
| PAQR9  | 344838 | PAQR9  | 3  |
| PARD3  | 56288  | PARD3  | 10 |
| PARD6A | 50855  | PARD6A | 16 |
| PARG   | 8505   | PARG   | 10 |
| PARK7  | 11315  | PARK7  | 1  |
| PARL   | 55486  | PARL   | 3  |
| PARM1  | 25849  | PARM1  | 4  |
| PARN   | 5073   | PARN   | 16 |
| PARP1  | 142    | PARP1  | 1  |
| PARP10 | 84875  | PARP10 | 8  |
| PARP11 | 57097  | PARP11 | 12 |
| PARP12 | 64761  | PARP12 | 7  |
| PARP14 | 54625  | PARP14 | 3  |
| PARP15 | 165631 | PARP15 | 3  |
| PARP16 | 54956  | PARP16 | 15 |
| PARP2  | 10038  | PARP2  | 14 |
| PARP3  | 10039  | PARP3  | 3  |
| PARP4  | 143    | PARP4  | 13 |
| PARP6  | 56965  | PARP6  | 15 |
| PARP8  | 79668  | PARP8  |    |
| PARP9  | 83666  | PARP9  | 3  |
| PARS2  | 25973  | PARS2  | 1  |
| PART1  | 25859  | PART1  | 5  |
| PARVB  | 29780  | PARVB  | 22 |

|          |           |          |    |
|----------|-----------|----------|----|
| PARVG    | 64098     | PARVG    | 22 |
| PASK     | 23178     | PASK     | 2  |
| PATE2    | 399967    | PATE2    | 11 |
| PATE3    | 100169851 | PATE3    |    |
| PATL1    | 219988    | PATL1    | 11 |
| PATL2    | 197135    | PATL2    |    |
| PATZ1    | 23598     | PATZ1    | 22 |
| PAWR     | 5074      | PAWR     | 12 |
| PAX6     | 5080      | PAX6     | 11 |
| PAXIP1   | 22976     | PAXIP1   | 7  |
| PBK      | 55872     | PBK      | 8  |
| PBRM1    | 55193     | PBRM1    | 3  |
| PBX2     | 5089      | PBX2     | 6  |
| PBX3     | 5090      | PBX3     | 9  |
| PBX4     | 80714     | PBX4     | 19 |
| PBXIP1   | 57326     | PBXIP1   | 1  |
| PCBD1    | 5092      | PCBD1    | 10 |
| PCBD2    | 84105     | PCBD2    | 5  |
| PCBP1    | 5093      | PCBP1    | 2  |
| PCBP2    | 5094      | PCBP2    | 12 |
| PCBP4    | 57060     | PCBP4    | 3  |
| PCCA     | 5095      | PCCA     | 13 |
| PCCB     | 5096      | PCCB     | 3  |
| PCDH11X  | 27328     | PCDH11X  | X  |
| PCDH21   | 92211     | PCDH21   | 10 |
| PCDH24   | 54825     | PCDH24   | 5  |
| PCDH9    | 5101      | PCDH9    | 13 |
| PCDHA11  | 56138     | PCDHA11  | 5  |
| PCDHA9   | 9752      | PCDHA9   | 5  |
| PCDHB17  | 54661     | PCDHB17  | 5  |
| PCDHB18  | 54660     | PCDHB18  | 5  |
| PCDHB19P | 84054     | PCDHB19P | 5  |
| PCDHB3   | 56132     | PCDHB3   | 5  |
| PCDHB9   | 56127     | PCDHB9   | 5  |
| PCDHGA12 | 26025     | PCDHGA12 | 5  |
| PCDHGA5  | 56110     | PCDHGA5  | 5  |
| PCDHGA8  | 9708      | PCDHGA8  | 5  |
| PCDHGA9  | 56107     | PCDHGA9  | 5  |
| PCDHGB5  | 56101     | PCDHGB5  | 5  |
| PCDHGC3  | 5098      | PCDHGC3  | 5  |
| PCDHGC4  | 56098     | PCDHGC4  | 5  |
| PCDP1    | 200373    | PCDP1    | 2  |
| PCF11    | 51585     | PCF11    | 11 |
| PCGF1    | 84759     | PCGF1    | 2  |



|         |        |         |    |
|---------|--------|---------|----|
| PCGF2   | 7703   | PCGF2   | 17 |
| PCGF5   | 84333  | PCGF5   | 10 |
| PCGF6   | 84108  | PCGF6   | 10 |
| PCID2   | 55795  | PCID2   | 13 |
| PCIF1   | 63935  | PCIF1   | 20 |
| PCK2    | 5106   | PCK2    | 14 |
| PCLO    | 27445  | PCLO    | 7  |
| PCM1    | 5108   | PCM1    | 8  |
| PCMT1   | 5110   | PCMT1   | 6  |
| PCMTD1  | 115294 | PCMTD1  | 8  |
| PCMTD2  | 55251  | PCMTD2  | 20 |
| PCNA    | 5111   | PCNA    | 20 |
| PCNP    | 57092  | PCNP    | 3  |
| PCNT    | 5116   | PCNT    | 21 |
| PCNX    | 22990  | PCNX    | 14 |
| PCNXL2  | 80003  | PCNXL2  | 1  |
| PCNXL3  | 399909 | PCNXL3  | 11 |
| PCOLCE  | 5118   | PCOLCE  | 7  |
| PCOLCE2 | 26577  | PCOLCE2 | 3  |
| PCP4L1  | 654790 | PCP4L1  | 1  |
| PCSK1N  | 27344  | PCSK1N  | X  |
| PCSK4   | 54760  | PCSK4   | 19 |
| PCSK7   | 9159   | PCSK7   | 11 |
| PCTK1   | 5127   | PCTK1   | X  |
| PCTK2   | 5128   | PCTK2   | 12 |
| PCTK3   | 5129   | PCTK3   | 1  |
| PCTP    | 58488  | PCTP    | 17 |
| PCYOX1  | 51449  | PCYOX1  | 2  |
| PCYOX1L | 78991  | PCYOX1L | 5  |
| PCYT1A  | 5130   | PCYT1A  | 3  |
| PCYT2   | 5833   | PCYT2   | 17 |
| PDAP1   | 11333  | PDAP1   | 7  |
| PDCD1   | 5133   | PDCD1   | 2  |
| PDCD11  | 22984  | PDCD11  | 10 |
| PDCD2   | 5134   | PDCD2   | 6  |
| PDCD2L  | 84306  | PDCD2L  | 19 |
| PDCD4   | 27250  | PDCD4   | 10 |
| PDCD5   | 9141   | PDCD5   | 19 |
| PDCD6   | 10016  | PDCD6   | 5  |
| PDCD7   | 10081  | PDCD7   | 15 |
| PDCL    | 5082   | PDCL    | 9  |
| PDCL3   | 79031  | PDCL3   | 2  |
| PDDC1   | 347862 | PDDC1   | 11 |
| PDE12   | 201626 | PDE12   | 3  |

|        |        |        |    |
|--------|--------|--------|----|
| PDE3A  | 5139   | PDE3A  | 12 |
| PDE3B  | 5140   | PDE3B  | 11 |
| PDE4A  | 5141   | PDE4A  | 19 |
| PDE4B  | 5142   | PDE4B  | 1  |
| PDE4C  | 5143   | PDE4C  | 19 |
| PDE6B  | 5158   | PDE6B  | 4  |
| PDE6D  | 5147   | PDE6D  | 2  |
| PDE6H  | 5149   | PDE6H  | 12 |
| PDE7A  | 5150   | PDE7A  | 8  |
| PDE7B  | 27115  | PDE7B  | 6  |
| PDE8A  | 5151   | PDE8A  | 15 |
| PDE9A  | 5152   | PDE9A  | 21 |
| PDF    | 64146  | PDF    | 16 |
| PDGFB  | 5155   | PDGFB  | 22 |
| PDGFD  | 80310  | PDGFD  | 11 |
| PDGFRL | 5157   | PDGFRL | 8  |
| PDHA1  | 5160   | PDHA1  | X  |
| PDHA2  | 5161   | PDHA2  | 4  |
| PDHB   | 5162   | PDHB   | 3  |
| PDHX   | 8050   | PDHX   | 11 |
| PDIA3P | 171423 | PDIA3P | 1  |
| PDIA4  | 9601   | PDIA4  | 7  |
| PDIA5  | 10954  | PDIA5  | 3  |
| PDIA6  | 10130  | PDIA6  | 2  |
| PDIK1L | 149420 | PDIK1L | 1  |
| PDK1   | 5163   | PDK1   | 2  |
| PDK3   | 5165   | PDK3   | X  |
| PDK4   | 5166   | PDK4   | 7  |
| PDLIM1 | 9124   | PDLIM1 | 10 |
| PDLIM3 | 27295  | PDLIM3 | 4  |
| PDLIM5 | 10611  | PDLIM5 | 4  |
| PDLIM7 | 9260   | PDLIM7 | 5  |
| PDP2   | 57546  | PDP2   | 16 |
| PDPK1  | 5170   | PDPK1  | 16 |
| PDPR   | 55066  | PDPR   |    |
| PDRG1  | 81572  | PDRG1  | 20 |
| PDS5A  | 23244  | PDS5A  | 4  |
| PDS5B  | 23047  | PDS5B  | 13 |
| PDSS1  | 23590  | PDSS1  | 10 |
| PDSS2  | 57107  | PDSS2  | 6  |
| PDXDC1 | 23042  | PDXDC1 | 16 |
| PDXK   | 8566   | PDXK   | 21 |
| PDXP   | 57026  | PDXP   | 22 |
| PDYN   | 5173   | PDYN   | 20 |

|         |        |         |    |
|---------|--------|---------|----|
| PDZD11  | 51248  | PDZD11  | X  |
| PDZD2   | 23037  | PDZD2   | 5  |
| PDZD3   | 79849  | PDZD3   | 11 |
| PDZD4   | 57595  | PDZD4   | X  |
| PDZD8   | 118987 | PDZD8   | 10 |
| PDZRN3  | 23024  | PDZRN3  |    |
| PDZRN4  | 29951  | PDZRN4  | 12 |
| PEA15   | 8682   | PEA15   | 1  |
| PEBP1   | 5037   | PEBP1   | 12 |
| PECAM1  | 5175   | PECAM1  | 17 |
| PECI    | 10455  | PECI    | 6  |
| PECR    | 55825  | PECR    | 2  |
| PEF1    | 553115 | PEF1    | 1  |
| PEG10   | 23089  | PEG10   | 7  |
| PEG3    | 5178   | PEG3    | 19 |
| PELI1   | 57162  | PELI1   | 2  |
| PELI2   | 57161  | PELI2   | 14 |
| PELP1   | 27043  | PELP1   | 17 |
| PEMT    | 10400  | PEMT    | 17 |
| PEPD    | 5184   | PEPD    | 19 |
| PER1    | 5187   | PER1    | 17 |
| PER3    | 8863   | PER3    | 1  |
| PERP    | 64065  | PERP    | 6  |
| PES1    | 23481  | PES1    | 22 |
| PET112L | 5188   | PET112L | 4  |
| PEX1    | 5189   | PEX1    | 7  |
| PEX11A  | 8800   | PEX11A  | 15 |
| PEX11B  | 8799   | PEX11B  | 1  |
| PEX11G  | 92960  | PEX11G  | 19 |
| PEX13   | 5194   | PEX13   | 2  |
| PEX14   | 5195   | PEX14   | 1  |
| PEX16   | 9409   | PEX16   | 11 |
| PEX19   | 5824   | PEX19   | 1  |
| PEX26   | 55670  | PEX26   | 22 |
| PEX3    | 8504   | PEX3    | 6  |
| PEX5    | 5830   | PEX5    | 12 |
| PEX6    | 5190   | PEX6    | 6  |
| PEX7    | 5191   | PEX7    | 6  |
| PFAAP5  | 10443  | PFAAP5  | 13 |
| PFAS    | 5198   | PFAS    | 17 |
| PFDN1   | 5201   | PFDN1   | 5  |
| PFDN4   | 5203   | PFDN4   | 20 |
| PFDN5   | 5204   | PFDN5   | 12 |
| PFDN6   | 10471  | PFDN6   | 6  |

|         |        |         |    |
|---------|--------|---------|----|
| PFKFB2  | 5208   | PFKFB2  | 1  |
| PFKFB3  | 5209   | PFKFB3  | 10 |
| PFKFB4  | 5210   | PFKFB4  | 3  |
| PFKL    | 5211   | PFKL    | 21 |
| PFKM    | 5213   | PFKM    | 12 |
| PFKP    | 5214   | PFKP    | 10 |
| PFN1    | 5216   | PFN1    | 17 |
| PFN4    | 375189 | PFN4    | 2  |
| PFTK1   | 5218   | PFTK1   | 7  |
| PGAM1   | 5223   | PGAM1   | 10 |
| PGAM4   | 441531 | PGAM4   | X  |
| PGAM5   | 192111 | PGAM5   | 12 |
| PGAP1   | 80055  | PGAP1   | 2  |
| PGBD1   | 84547  | PGBD1   | 6  |
| PGBD2   | 267002 | PGBD2   | 1  |
| PGBD3   | 267004 | PGBD3   | 10 |
| PGBD4   | 161779 | PGBD4   | 15 |
| PGBD5   | 79605  | PGBD5   | 1  |
| PGF     | 5228   | PGF     | 14 |
| PGGT1B  | 5229   | PGGT1B  | 5  |
| PGK1    | 5230   | PGK1    | X  |
| PGK2    | 5232   | PGK2    | 6  |
| PGLS    | 25796  | PGLS    | 19 |
| PGLYRP4 | 57115  | PGLYRP4 | 1  |
| PGM1    | 5236   | PGM1    | 1  |
| PGM2    | 55276  | PGM2    | 4  |
| PGM2L1  | 283209 | PGM2L1  | 11 |
| PGM3    | 5238   | PGM3    | 6  |
| PGP     | 283871 | PGP     | 16 |
| PGPEP1  | 54858  | PGPEP1  | 19 |
| PGRMC1  | 10857  | PGRMC1  | X  |
| PGRMC2  | 10424  | PGRMC2  | 4  |
| PGS1    | 9489   | PGS1    | 17 |
| PHACTR1 | 221692 | PHACTR1 | 6  |
| PHACTR3 | 116154 | PHACTR3 | 20 |
| PHAX    | 51808  | PHAX    | 5  |
| PHB     | 5245   | PHB     | 17 |
| PHB2    | 11331  | PHB2    | 12 |
| PHC1    | 1911   | PHC1    | 12 |
| PHC2    | 1912   | PHC2    | 1  |
| PHC3    | 80012  | PHC3    | 3  |
| PHCA    | 55331  | PHCA    | 11 |
| PHEX    | 5251   | PHEX    | X  |
| PHF1    | 5252   | PHF1    | 6  |

|          |        |          |    |
|----------|--------|----------|----|
| PHF10    | 55274  | PHF10    | 6  |
| PHF11    | 51131  | PHF11    | 13 |
| PHF12    | 57649  | PHF12    | 17 |
| PHF13    | 148479 | PHF13    | 1  |
| PHF14    | 9678   | PHF14    | 7  |
| PHF15    | 23338  | PHF15    | 5  |
| PHF16    | 9767   | PHF16    | X  |
| PHF17    | 79960  | PHF17    | 4  |
| PHF19    | 26147  | PHF19    | 9  |
| PHF2     | 5253   | PHF2     | 9  |
| PHF20L1  | 51105  | PHF20L1  | 8  |
| PHF21A   | 51317  | PHF21A   | 11 |
| PHF21B   | 112885 | PHF21B   | 22 |
| PHF23    | 79142  | PHF23    | 17 |
| PHF3     | 23469  | PHF3     | 6  |
| PHF5A    | 84844  | PHF5A    | 22 |
| PHF7     | 51533  | PHF7     | 3  |
| PHGDH    | 26227  | PHGDH    | 1  |
| PHIP     | 55023  | PHIP     | 6  |
| PHKA1    | 5255   | PHKA1    | X  |
| PHKA2    | 5256   | PHKA2    | X  |
| PHKB     | 5257   | PHKB     | 16 |
| PHKG1    | 5260   | PHKG1    | 7  |
| PHKG2    | 5261   | PHKG2    | 16 |
| PHLDA1   | 22822  | PHLDA1   | 12 |
| PHLDB1   | 23187  | PHLDB1   | 11 |
| PHLDB2   | 90102  | PHLDB2   | 3  |
| PHLPP1   | 23239  | PHLPP1   | 18 |
| PHLPP2   | 23035  | PHLPP2   | 16 |
| PHOSPHO2 | 493911 | PHOSPHO2 | 2  |
| PHOX2A   | 401    | PHOX2A   | 11 |
| PHPT1    | 29085  | PHPT1    | 9  |
| PHRF1    | 57661  | PHRF1    | 11 |
| PHTF1    | 10745  | PHTF1    | 1  |
| PHYH     | 5264   | PHYH     | 10 |
| PHYHD1   | 254295 | PHYHD1   | 9  |
| PI16     | 221476 | PI16     | 6  |
| PI3      | 5266   | PI3      | 20 |
| PI4K2A   | 55361  | PI4K2A   | 10 |
| PI4K2B   | 55300  | PI4K2B   | 4  |
| PI4KAP1  | 728233 | PI4KAP1  | 22 |
| PI4KAP2  | 375133 | PI4KAP2  |    |
| PI4KB    | 5298   | PI4KB    | 1  |
| PIAS1    | 8554   | PIAS1    | 15 |

|         |        |         |    |
|---------|--------|---------|----|
| PIAS2   | 9063   | PIAS2   |    |
| PIAS3   | 10401  | PIAS3   | 1  |
| PIBF1   | 10464  | PIBF1   | 13 |
| PICALM  | 8301   | PICALM  | 11 |
| PICK1   | 9463   | PICK1   | 22 |
| PID1    | 55022  | PID1    | 2  |
| PIF1    | 80119  | PIF1    | 15 |
| PIGA    | 5277   | PIGA    | X  |
| PIGB    | 9488   | PIGB    | 15 |
| PIGC    | 5279   | PIGC    | 1  |
| PIGF    | 5281   | PIGF    | 2  |
| PIGG    | 54872  | PIGG    | 4  |
| PIGH    | 5283   | PIGH    | 14 |
| PIGK    | 10026  | PIGK    | 1  |
| PIGL    | 9487   | PIGL    | 17 |
| PIGM    | 93183  | PIGM    | 1  |
| PIGN    | 23556  | PIGN    |    |
| PIGO    | 84720  | PIGO    | 9  |
| PIGP    | 51227  | PIGP    | 21 |
| PIGQ    | 9091   | PIGQ    | 16 |
| PIGR    | 5284   | PIGR    | 1  |
| PIGS    | 94005  | PIGS    | 17 |
| PIGT    | 51604  | PIGT    | 20 |
| PIGU    | 128869 | PIGU    | 20 |
| PIGV    | 55650  | PIGV    | 1  |
| PIGW    | 284098 | PIGW    | 17 |
| PIGX    | 54965  | PIGX    | 3  |
| PIGY    | 84992  | PIGY    | 4  |
| PIH1D1  | 55011  | PIH1D1  | 19 |
| PIH1D2  | 120379 | PIH1D2  | 11 |
| PIK3AP1 | 118788 | PIK3AP1 | 10 |
| PIK3C2A | 5286   | PIK3C2A | 11 |
| PIK3C2B | 5287   | PIK3C2B | 1  |
| PIK3C3  | 5289   | PIK3C3  | 18 |
| PIK3CA  | 5290   | PIK3CA  | 3  |
| PIK3CB  | 5291   | PIK3CB  | 3  |
| PIK3CD  | 5293   | PIK3CD  | 1  |
| PIK3CG  | 5294   | PIK3CG  | 7  |
| PIK3IP1 | 113791 | PIK3IP1 | 22 |
| PIK3R1  | 5295   | PIK3R1  | 5  |
| PIK3R2  | 5296   | PIK3R2  | 19 |
| PIK3R3  | 8503   | PIK3R3  | 1  |
| PIK3R4  | 30849  | PIK3R4  | 3  |
| PIK4CA  | 5297   | PIK4CA  | 22 |

|         |        |         |    |
|---------|--------|---------|----|
| PILRA   | 29992  | PILRA   | 7  |
| PILRB   | 29990  | PILRB   | 7  |
| PIM1    | 5292   | PIM1    | 6  |
| PIM2    | 11040  | PIM2    | X  |
| PIM3    | 415116 | PIM3    | 22 |
| PIN1    | 5300   | PIN1    | 19 |
| PIN4    | 5303   | PIN4    | X  |
| PINK1   | 65018  | PINK1   | 1  |
| PINX1   | 54984  | PINX1   | 8  |
| PION    | 54103  | PION    | 7  |
| PIP3-E  | 26034  | PIP3-E  | 6  |
| PIP4K2A | 5305   | PIP4K2A | 10 |
| PIP4K2B | 8396   | PIP4K2B | 17 |
| PIP4K2C | 79837  | PIP4K2C | 12 |
| PIP5K1B | 8395   | PIP5K1B | 9  |
| PIP5K1C | 23396  | PIP5K1C | 19 |
| PIP5K2A | 5305   | PIP5K2A | 10 |
| PIP5K2B | 8396   | PIP5K2B | 17 |
| PIP5K3  | 200576 | PIP5K3  | 2  |
| PIP5KL1 | 138429 | PIP5KL1 | 9  |
| PIPOX   | 51268  | PIPOX   | 17 |
| PIPSL   | 266971 | PIPSL   | 10 |
| PIR     | 8544   | PIR     | X  |
| PISD    | 23761  | PISD    | 22 |
| PITPNB  | 23760  | PITPNB  | 22 |
| PITPNC1 | 26207  | PITPNC1 | 17 |
| PITPNM1 | 9600   | PITPNM1 | 11 |
| PITPNM2 | 57605  | PITPNM2 | 12 |
| PITRM1  | 10531  | PITRM1  | 10 |
| PITX1   | 5307   | PITX1   | 5  |
| PITX2   | 5308   | PITX2   | 4  |
| PITX3   | 5309   | PITX3   | 10 |
| PJA1    | 64219  | PJA1    | X  |
| PJA2    | 9867   | PJA2    |    |
| PJCG6   | 645642 | PJCG6   | 8  |
| PKD1    | 5310   | PKD1    | 16 |
| PKD1L1  | 168507 | PKD1L1  | 7  |
| PKD2    | 5311   | PKD2    | 4  |
| PKDCC   | 91461  | PKDCC   | 2  |
| PKHD1L1 | 93035  | PKHD1L1 | 8  |
| PKIA    | 5569   | PKIA    | 8  |
| PKIB    | 5570   | PKIB    | 6  |
| PKIG    | 11142  | PKIG    | 20 |
| PKM2    | 5315   | PKM2    | 15 |

|          |        |          |    |
|----------|--------|----------|----|
| PKMYT1   | 9088   | PKMYT1   | 16 |
| PKN1     | 5585   | PKN1     | 19 |
| PKN2     | 5586   | PKN2     | 1  |
| PKN3     | 29941  | PKN3     | 9  |
| PKNOX1   | 5316   | PKNOX1   | 21 |
| PKP2     | 5318   | PKP2     | 12 |
| PKP4     | 8502   | PKP4     | 2  |
| PLA1A    | 51365  | PLA1A    | 3  |
| PLA2G10  | 8399   | PLA2G10  | 16 |
| PLA2G12A | 81579  | PLA2G12A | 4  |
| PLA2G12B | 84647  | PLA2G12B | 10 |
| PLA2G15  | 23659  | PLA2G15  | 16 |
| PLA2G2D  | 26279  | PLA2G2D  | 1  |
| PLA2G4B  | 8681   | PLA2G4B  | 15 |
| PLAA     | 9373   | PLAA     | 9  |
| PLAC1    | 10761  | PLAC1    | X  |
| PLAC2    | 257000 | PLAC2    | 19 |
| PLAC8    | 51316  | PLAC8    | 4  |
| PLAC8L1  | 153770 | PLAC8L1  | 5  |
| PLAG1    | 5324   | PLAG1    | 8  |
| PLAGL1   | 5325   | PLAGL1   | 6  |
| PLAGL2   | 5326   | PLAGL2   | 20 |
| PLAU     | 5328   | PLAU     | 10 |
| PLB1     | 151056 | PLB1     | 2  |
| PLCB1    | 23236  | PLCB1    | 20 |
| PLCB2    | 5330   | PLCB2    | 15 |
| PLCD1    | 5333   | PLCD1    | 3  |
| PLCD3    | 113026 | PLCD3    | 17 |
| PLCG1    | 5335   | PLCG1    | 20 |
| PLCG2    | 5336   | PLCG2    | 16 |
| PLCH1    | 23007  | PLCH1    | 3  |
| PLCH2    | 9651   | PLCH2    | 1  |
| PLCL1    | 5334   | PLCL1    | 2  |
| PLCL2    | 23228  | PLCL2    | 3  |
| PLCXD1   | 55344  | PLCXD1   | XY |
| PLD1     | 5337   | PLD1     | 3  |
| PLD2     | 5338   | PLD2     | 17 |
| PLD3     | 23646  | PLD3     | 19 |
| PLD4     | 122618 | PLD4     | 14 |
| PLD5     | 200150 | PLD5     | 1  |
| PLD6     | 201164 | PLD6     | 17 |
| PLDN     | 26258  | PLDN     | 15 |
| PLEC1    | 5339   | PLEC1    | 8  |
| PLEK     | 5341   | PLEK     | 2  |



|         |        |         |    |
|---------|--------|---------|----|
| PLEKHA1 | 59338  | PLEKHA1 | 10 |
| PLEKHA2 | 59339  | PLEKHA2 | 8  |
| PLEKHA3 | 65977  | PLEKHA3 | 2  |
| PLEKHA4 | 57664  | PLEKHA4 | 19 |
| PLEKHA9 | 51054  | PLEKHA9 | 12 |
| PLEKHB1 | 58473  | PLEKHB1 | 11 |
| PLEKHB2 | 55041  | PLEKHB2 | 2  |
| PLEKHF1 | 79156  | PLEKHF1 | 19 |
| PLEKHF2 | 79666  | PLEKHF2 | 8  |
| PLEKHG1 | 57480  | PLEKHG1 | 6  |
| PLEKHG2 | 64857  | PLEKHG2 | 19 |
| PLEKHG4 | 25894  | PLEKHG4 | 16 |
| PLEKHG6 | 55200  | PLEKHG6 | 12 |
| PLEKHH2 | 130271 | PLEKHH2 | 2  |
| PLEKHH3 | 79990  | PLEKHH3 | 17 |
| PLEKHJ1 | 55111  | PLEKHJ1 | 19 |
| PLEKHM1 | 9842   | PLEKHM1 |    |
| PLEKHO1 | 51177  | PLEKHO1 | 1  |
| PLEKHO2 | 80301  | PLEKHO2 | 15 |
| PLG     | 5340   | PLG     | 6  |
| PLGLA1  | 285189 | PLGLA1  | 2  |
| PLGLB1  | 5343   | PLGLB1  | 2  |
| PLGLB2  | 5342   | PLGLB2  | 2  |
| PLIN2   | 123    | PLIN2   | 9  |
| PLIN5   | 440503 | PLIN5   | 19 |
| PLK1    | 5347   | PLK1    | 16 |
| PLK3    | 1263   | PLK3    | 1  |
| PLK4    | 10733  | PLK4    | 4  |
| PLLP    | 51090  | PLLP    | 16 |
| PLOD1   | 5351   | PLOD1   | 1  |
| PLOD3   | 8985   | PLOD3   | 7  |
| PLP2    | 5355   | PLP2    | X  |
| PLRG1   | 5356   | PLRG1   | 4  |
| PLS1    | 5357   | PLS1    | 3  |
| PLSCR1  | 5359   | PLSCR1  | 3  |
| PLSCR3  | 57048  | PLSCR3  | 17 |
| PLSCR5  | 389158 | PLSCR5  |    |
| PLTP    | 5360   | PLTP    | 20 |
| PLXNA1  | 5361   | PLXNA1  | 3  |
| PLXNA3  | 55558  | PLXNA3  | X  |
| PLXNB2  | 23654  | PLXNB2  | 22 |
| PLXNB3  | 5365   | PLXNB3  | X  |
| PLXND1  | 23129  | PLXND1  | 3  |
| PM20D2  | 135293 | PM20D2  | 6  |

|        |        |        |    |
|--------|--------|--------|----|
| PMAIP1 | 5366   | PMAIP1 | 18 |
| PMEPA1 | 56937  | PMEPA1 | 20 |
| PMF1   | 11243  | PMF1   | 1  |
| PML    | 5371   | PML    | 15 |
| PMM1   | 5372   | PMM1   | 22 |
| PMM2   | 5373   | PMM2   | 16 |
| PMP22  | 5376   | PMP22  | 17 |
| PMPCA  | 23203  | PMPCA  | 9  |
| PMPCB  | 9512   | PMPCB  | 7  |
| PMS1   | 5378   | PMS1   | 2  |
| PMS2   | 5395   | PMS2   | 7  |
| PMS2CL | 441194 | PMS2CL |    |
| PMS2L1 | 5379   | PMS2L1 |    |
| PMS2L3 | 5387   | PMS2L3 | 7  |
| PMS2L4 | 5382   | PMS2L4 | 7  |
| PMS2L5 | 5383   | PMS2L5 | 7  |
| PMVK   | 10654  | PMVK   | 1  |
| PNCK   | 139728 | PNCK   | X  |
| PNKD   | 25953  | PNKD   | 2  |
| PNKP   | 11284  | PNKP   | 19 |
| PNMA1  | 9240   | PNMA1  | 14 |
| PNMA2  | 10687  | PNMA2  | 8  |
| PNMA3  | 29944  | PNMA3  | X  |
| PNMA6A | 84968  | PNMA6A | X  |
| PNMAL1 | 55228  | PNMAL1 | 19 |
| PNN    | 5411   | PNN    | 14 |
| PNO1   | 56902  | PNO1   | 2  |
| PNOC   | 5368   | PNOC   | 8  |
| PNPLA2 | 57104  | PNPLA2 | 11 |
| PNPLA4 | 8228   | PNPLA4 | X  |
| PNPLA6 | 10908  | PNPLA6 | 19 |
| PNPLA7 | 375775 | PNPLA7 | 9  |
| PNPLA8 | 50640  | PNPLA8 | 7  |
| PNPO   | 55163  | PNPO   | 17 |
| PNPT1  | 87178  | PNPT1  | 2  |
| PNRC1  | 10957  | PNRC1  | 6  |
| PNRC2  | 55629  | PNRC2  | 1  |
| PODXL  | 5420   | PODXL  | 7  |
| PODXL2 | 50512  | PODXL2 | 3  |
| POF1B  | 79983  | POF1B  | X  |
| POFUT1 | 23509  | POFUT1 | 20 |
| POFUT2 | 23275  | POFUT2 | 21 |
| POGK   | 57645  | POGK   | 1  |
| POL3S  | 339105 | POL3S  | 16 |

|         |        |         |    |
|---------|--------|---------|----|
| POLA1   | 5422   | POLA1   | X  |
| POLA2   | 23649  | POLA2   | 11 |
| POLB    | 5423   | POLB    | 8  |
| POLD1   | 5424   | POLD1   | 19 |
| POLD2   | 5425   | POLD2   | 7  |
| POLD3   | 10714  | POLD3   | 11 |
| POLD4   | 57804  | POLD4   | 11 |
| POLDIP2 | 26073  | POLDIP2 | 17 |
| POLDIP3 | 84271  | POLDIP3 | 22 |
| POLE    | 5426   | POLE    | 12 |
| POLE2   | 5427   | POLE2   | 14 |
| POLE3   | 54107  | POLE3   | 9  |
| POLE4   | 56655  | POLE4   | 2  |
| POLG    | 5428   | POLG    | 15 |
| POLG2   | 11232  | POLG2   | 17 |
| POLH    | 5429   | POLH    | 6  |
| POLI    | 11201  | POLI    | 18 |
| POLL    | 27343  | POLL    | 10 |
| POLM    | 27434  | POLM    | 7  |
| POLQ    | 10721  | POLQ    | 3  |
| POLR1A  | 25885  | POLR1A  | 2  |
| POLR1B  | 84172  | POLR1B  | 2  |
| POLR1C  | 9533   | POLR1C  | 6  |
| POLR1D  | 51082  | POLR1D  | 13 |
| POLR1E  | 64425  | POLR1E  | 9  |
| POLR2A  | 5430   | POLR2A  | 17 |
| POLR2B  | 5431   | POLR2B  | 4  |
| POLR2C  | 5432   | POLR2C  | 16 |
| POLR2D  | 5433   | POLR2D  | 2  |
| POLR2E  | 5434   | POLR2E  | 19 |
| POLR2F  | 5435   | POLR2F  | 22 |
| POLR2G  | 5436   | POLR2G  | 11 |
| POLR2H  | 5437   | POLR2H  | 3  |
| POLR2I  | 5438   | POLR2I  | 19 |
| POLR2J  | 5439   | POLR2J  | 7  |
| POLR2J2 | 246721 | POLR2J2 | 7  |
| POLR2J3 | 548644 | POLR2J3 | 7  |
| POLR2K  | 5440   | POLR2K  | 8  |
| POLR2L  | 5441   | POLR2L  | 11 |
| POLR3B  | 55703  | POLR3B  | 12 |
| POLR3C  | 10623  | POLR3C  | 1  |
| POLR3D  | 661    | POLR3D  | 8  |
| POLR3E  | 55718  | POLR3E  | 16 |
| POLR3F  | 10621  | POLR3F  | 20 |

|             |           |             |    |
|-------------|-----------|-------------|----|
| POLR3G      | 10622     | POLR3G      | 5  |
| POLR3GL     | 84265     | POLR3GL     | 1  |
| POLR3H      | 171568    | POLR3H      | 22 |
| POLR3K      | 51728     | POLR3K      | 16 |
| POLRMT      | 5442      | POLRMT      | 19 |
| POLS        | 11044     | POLS        | 5  |
| POM121C     | 100101267 | POM121C     | 7  |
| POM121L4P   | 266697    | POM121L4P   | 22 |
| POMC        | 5443      | POMC        | 2  |
| POMGNT1     | 55624     | POMGNT1     | 1  |
| POMP        | 51371     | POMP        | 13 |
| POMT1       | 10585     | POMT1       | 9  |
| POMT2       | 29954     | POMT2       | 14 |
| PON2        | 5445      | PON2        | 7  |
| POP1        | 10940     | POP1        | 8  |
| POP4        | 10775     | POP4        | 19 |
| POP5        | 51367     | POP5        | 12 |
| POP7        | 10248     | POP7        | 7  |
| POPDC2      | 64091     | POPDC2      | 3  |
| POR         | 5447      | POR         | 7  |
| PORCN       | 64840     | PORCN       | X  |
| POT1        | 25913     | POT1        | 7  |
| POTE2       | 445582    | POTE2       | 2  |
| POTEE       | 445582    | POTEE       | 2  |
| POTEF       | 728378    | POTEF       | 2  |
| POU2AF1     | 5450      | POU2AF1     | 11 |
| POU2F1      | 5451      | POU2F1      | 1  |
| POU2F2      | 5452      | POU2F2      | 19 |
| POU3F1      | 5453      | POU3F1      | 1  |
| POU3F2      | 5454      | POU3F2      | 6  |
| POU4F1      | 5457      | POU4F1      | 13 |
| POU5F1P1    | 5462      | POU5F1P1    | 8  |
| PPA1        | 5464      | PPA1        | 10 |
| PPA2        | 27068     | PPA2        | 4  |
| PPAN        | 56342     | PPAN        | 19 |
| PPAN-P2RY11 | 692312    | PPAN-P2RY11 | 19 |
| PPAP2A      | 8611      | PPAP2A      | 5  |
| PPAPDC1A    | 196051    | PPAPDC1A    | 10 |
| PPAPDC1B    | 84513     | PPAPDC1B    | 8  |
| PPAPDC2     | 403313    | PPAPDC2     | 9  |
| PPAPDC3     | 84814     | PPAPDC3     | 9  |
| PPARA       | 5465      | PPARA       | 22 |
| PPARD       | 5467      | PPARD       | 6  |
| PPARGC1B    | 133522    | PPARGC1B    | 5  |

|          |        |          |    |
|----------|--------|----------|----|
| PPAT     | 5471   | PPAT     | 4  |
| PPCS     | 79717  | PPCS     | 1  |
| PPDPF    | 79144  | PPDPF    | 20 |
| PPFIA1   | 8500   | PPFIA1   | 11 |
| PPFIA3   | 8541   | PPFIA3   | 19 |
| PPFIA4   | 8497   | PPFIA4   | 1  |
| PPFIBP1  | 8496   | PPFIBP1  | 12 |
| PPFIBP2  | 8495   | PPFIBP2  | 11 |
| PPHLN1   | 51535  | PPHLN1   | 12 |
| PPIA     | 5478   | PPIA     | 7  |
| PPIAL4A  | 164022 | PPIAL4A  | 1  |
| PPIAL4C  | 653598 | PPIAL4C  |    |
| PPIAP19  | 390006 | PPIAP19  |    |
| PPIB     | 5479   | PPIB     | 15 |
| PPIC     | 5480   | PPIC     | 5  |
| PPIE     | 10450  | PPIE     | 1  |
| PPIF     | 10105  | PPIF     | 10 |
| PPIG     | 9360   | PPIG     | 2  |
| PPIH     | 10465  | PPIH     | 1  |
| PPIL1    | 51645  | PPIL1    | 6  |
| PPIL2    | 23759  | PPIL2    | 22 |
| PPIL3    | 53938  | PPIL3    | 2  |
| PPIL5    | 122769 | PPIL5    | 14 |
| PPIL6    | 285755 | PPIL6    | 6  |
| PPL      | 5493   | PPL      | 16 |
| PPM1B    | 5495   | PPM1B    | 2  |
| PPM1D    | 8493   | PPM1D    | 17 |
| PPM1E    | 22843  | PPM1E    | 17 |
| PPM1H    | 57460  | PPM1H    | 12 |
| PPM1J    | 333926 | PPM1J    | 1  |
| PPM1K    | 152926 | PPM1K    | 4  |
| PPM1M    | 132160 | PPM1M    | 3  |
| PPM2C    | 54704  | PPM2C    | 8  |
| PPME1    | 51400  | PPME1    | 11 |
| PPOX     | 5498   | PPOX     | 1  |
| PPP1CA   | 5499   | PPP1CA   | 11 |
| PPP1CB   | 5500   | PPP1CB   | 2  |
| PPP1CC   | 5501   | PPP1CC   | 12 |
| PPP1R10  | 5514   | PPP1R10  | 6  |
| PPP1R11  | 6992   | PPP1R11  | 6  |
| PPP1R12A | 4659   | PPP1R12A | 12 |
| PPP1R12B | 4660   | PPP1R12B | 1  |
| PPP1R12C | 54776  | PPP1R12C | 19 |
| PPP1R13B | 23368  | PPP1R13B | 14 |

|          |        |          |    |
|----------|--------|----------|----|
| PPP1R13L | 10848  | PPP1R13L | 19 |
| PPP1R14A | 94274  | PPP1R14A | 19 |
| PPP1R14B | 26472  | PPP1R14B | 11 |
| PPP1R14C | 81706  | PPP1R14C | 6  |
| PPP1R15A | 23645  | PPP1R15A | 19 |
| PPP1R15B | 84919  | PPP1R15B | 1  |
| PPP1R16A | 84988  | PPP1R16A | 8  |
| PPP1R16B | 26051  | PPP1R16B | 20 |
| PPP1R1B  | 84152  | PPP1R1B  | 17 |
| PPP1R1C  | 151242 | PPP1R1C  | 2  |
| PPP1R2   | 5504   | PPP1R2   | 3  |
| PPP1R2P3 | 153743 | PPP1R2P3 | 5  |
| PPP1R3B  | 79660  | PPP1R3B  | 8  |
| PPP1R3D  | 5509   | PPP1R3D  | 20 |
| PPP1R3E  | 90673  | PPP1R3E  | 14 |
| PPP1R3F  | 89801  | PPP1R3F  | X  |
| PPP1R7   | 5510   | PPP1R7   | 2  |
| PPP1R8   | 5511   | PPP1R8   | 1  |
| PPP2CA   | 5515   | PPP2CA   | 5  |
| PPP2CB   | 5516   | PPP2CB   | 8  |
| PPP2R1A  | 5518   | PPP2R1A  | 19 |
| PPP2R1B  | 5519   | PPP2R1B  | 11 |
| PPP2R2D  | 55844  | PPP2R2D  | 10 |
| PPP2R3B  | 28227  | PPP2R3B  | Y  |
| PPP2R3C  | 55012  | PPP2R3C  | 14 |
| PPP2R4   | 5524   | PPP2R4   | 9  |
| PPP2R5A  | 5525   | PPP2R5A  | 1  |
| PPP2R5B  | 5526   | PPP2R5B  | 11 |
| PPP2R5C  | 5527   | PPP2R5C  | 14 |
| PPP2R5D  | 5528   | PPP2R5D  | 6  |
| PPP2R5E  | 5529   | PPP2R5E  | 14 |
| PPP3CA   | 5530   | PPP3CA   | 4  |
| PPP3CB   | 5532   | PPP3CB   | 10 |
| PPP3CC   | 5533   | PPP3CC   | 8  |
| PPP3R1   | 5534   | PPP3R1   | 2  |
| PPP4C    | 5531   | PPP4C    | 16 |
| PPP4R1   | 9989   | PPP4R1   | 18 |
| PPP4R4   | 57718  | PPP4R4   | 14 |
| PPP5C    | 5536   | PPP5C    | 19 |
| PPP6C    | 5537   | PPP6C    | 9  |
| PPPDE1   | 51029  | PPPDE1   | 1  |
| PPPDE2   | 27351  | PPPDE2   | 22 |
| PPRC1    | 23082  | PPRC1    | 10 |
| PPT1     | 5538   | PPT1     | 1  |

|          |        |          |    |
|----------|--------|----------|----|
| PPTC7    | 160760 | PPTC7    | 12 |
| PPWD1    | 23398  | PPWD1    | 5  |
| PPY      | 5539   | PPY      | 17 |
| PQBP1    | 10084  | PQBP1    | X  |
| PQLC1    | 80148  | PQLC1    | 18 |
| PQLC3    | 130814 | PQLC3    | 2  |
| PRAF2    | 11230  | PRAF2    | X  |
| PRAGMIN  | 157285 | PRAGMIN  | 8  |
| PRAME    | 23532  | PRAME    | 22 |
| PRAMEF4  | 400735 | PRAMEF4  | 1  |
| PRAMEF9  | 343070 | PRAMEF9  | 1  |
| PRB3     | 5544   | PRB3     | 12 |
| PRB4     | 5545   | PRB4     | 12 |
| PRC1     | 9055   | PRC1     | 15 |
| PRCC     | 5546   | PRCC     | 1  |
| PRCP     | 5547   | PRCP     | 11 |
| PRDM1    | 639    | PRDM1    | 6  |
| PRDM10   | 56980  | PRDM10   | 11 |
| PRDM15   | 63977  | PRDM15   | 21 |
| PRDM4    | 11108  | PRDM4    | 12 |
| PRDM7    | 11105  | PRDM7    | 16 |
| PRDM8    | 56978  | PRDM8    | 4  |
| PRDX1    | 5052   | PRDX1    | 1  |
| PRDX2    | 7001   | PRDX2    | 19 |
| PRDX3    | 10935  | PRDX3    | 10 |
| PRDX4    | 10549  | PRDX4    | X  |
| PRDX5    | 25824  | PRDX5    | 11 |
| PRDX6    | 9588   | PRDX6    | 1  |
| PREB     | 10113  | PREB     | 2  |
| PREI3    | 25843  | PREI3    | 2  |
| PRELID1  | 27166  | PRELID1  | 5  |
| PRELP    | 5549   | PRELP    | 1  |
| PREP     | 5550   | PREP     | 6  |
| PREPL    | 9581   | PREPL    | 2  |
| PREX1    | 57580  | PREX1    | 20 |
| PRF1     | 5551   | PRF1     | 10 |
| PRG2     | 5553   | PRG2     | 11 |
| PRG4     | 10216  | PRG4     | 1  |
| PRIC285  | 85441  | PRIC285  | 20 |
| PRICKLE1 | 144165 | PRICKLE1 | 12 |
| PRICKLE2 | 166336 | PRICKLE2 | 3  |
| PRICKLE4 | 29964  | PRICKLE4 | 6  |
| PRIM1    | 5557   | PRIM1    | 12 |
| PRIM2    | 5558   | PRIM2    | 6  |

|         |        |         |    |
|---------|--------|---------|----|
| PRIM2A  | 5558   | PRIM2A  |    |
| PRKAA1  | 5562   | PRKAA1  | 5  |
| PRKAB1  | 5564   | PRKAB1  | 12 |
| PRKAB2  | 5565   | PRKAB2  | 1  |
| PRKACB  | 5567   | PRKACB  | 1  |
| PRKAG1  | 5571   | PRKAG1  | 12 |
| PRKAG2  | 51422  | PRKAG2  | 7  |
| PRKAR1A | 5573   | PRKAR1A | 17 |
| PRKAR1B | 5575   | PRKAR1B | 7  |
| PRKAR2B | 5577   | PRKAR2B | 7  |
| PRKCA   | 5578   | PRKCA   | 17 |
| PRKCABP | 9463   | PRKCABP | 22 |
| PRKCB   | 5579   | PRKCB   | 16 |
| PRKCB1  | 5579   | PRKCB1  | 16 |
| PRKCD   | 5580   | PRKCD   | 3  |
| PRKCE   | 5581   | PRKCE   | 2  |
| PRKCH   | 5583   | PRKCH   | 14 |
| PRKCI   | 5584   | PRKCI   | 3  |
| PRKCQ   | 5588   | PRKCQ   | 10 |
| PRKCSH  | 5589   | PRKCSH  | 19 |
| PRKCZ   | 5590   | PRKCZ   | 1  |
| PRKD1   | 5587   | PRKD1   | 14 |
| PRKD2   | 25865  | PRKD2   | 19 |
| PRKD3   | 23683  | PRKD3   | 2  |
| PRKDC   | 5591   | PRKDC   | 8  |
| PRKRA   | 8575   | PRKRA   | 2  |
| PRKRIR  | 5612   | PRKRIR  | 11 |
| PRKX    | 5613   | PRKX    | X  |
| PRKY    | 5616   | PRKY    | Y  |
| PRL     | 5617   | PRL     | 6  |
| PRLH    | 51052  | PRLH    | 2  |
| PRM1    | 5619   | PRM1    | 16 |
| PRMT1   | 3276   | PRMT1   | 19 |
| PRMT10  | 90826  | PRMT10  | 4  |
| PRMT2   | 3275   | PRMT2   | 21 |
| PRMT3   | 10196  | PRMT3   | 11 |
| PRMT5   | 10419  | PRMT5   | 14 |
| PRMT6   | 55170  | PRMT6   | 1  |
| PRMT7   | 54496  | PRMT7   | 16 |
| PRMT8   | 56341  | PRMT8   | 12 |
| PRNP    | 5621   | PRNP    | 20 |
| PRNPIP  | 79033  | PRNPIP  |    |
| PROC    | 5624   | PROC    | 2  |
| PROCA1  | 147011 | PROCA1  | 17 |



|           |        |           |    |
|-----------|--------|-----------|----|
| PROCR     | 10544  | PROCR     | 20 |
| PROK1     | 84432  | PROK1     | 1  |
| PROK2     | 60675  | PROK2     | 3  |
| PROL1     | 58503  | PROL1     | 4  |
| PROM1     | 8842   | PROM1     | 4  |
| PROS1     | 5627   | PROS1     | 3  |
| PROSAPIP1 | 9762   | ProSAPiP1 | 20 |
| PROSC     | 11212  | PROSC     | 8  |
| PROX2     | 283571 | PROX2     | 14 |
| PRPF18    | 8559   | PRPF18    | 10 |
| PRPF19    | 27339  | PRPF19    | 11 |
| PRPF3     | 9129   | PRPF3     | 1  |
| PRPF31    | 26121  | PRPF31    | 19 |
| PRPF38A   | 84950  | PRPF38A   | 1  |
| PRPF38B   | 55119  | PRPF38B   | 1  |
| PRPF4     | 9128   | PRPF4     | 9  |
| PRPF4B    | 8899   | PRPF4B    | 6  |
| PRPF6     | 24148  | PRPF6     | 20 |
| PRPF8     | 10594  | PRPF8     | 17 |
| PRPH      | 5630   | PRPH      | 12 |
| PRPS1     | 5631   | PRPS1     | X  |
| PRPS2     | 5634   | PRPS2     | X  |
| PRPSAP1   | 5635   | PRPSAP1   | 17 |
| PRPSAP2   | 5636   | PRPSAP2   | 17 |
| PRR10     | 283165 | PRR10     | 11 |
| PRR11     | 55771  | PRR11     | 17 |
| PRR12     | 57479  | PRR12     | 19 |
| PRR13     | 54458  | PRR13     | 12 |
| PRR14     | 78994  | PRR14     | 16 |
| PRR15L    | 79170  | PRR15L    | 17 |
| PRR16     | 51334  | PRR16     | 5  |
| PRR17     | 284739 | PRR17     | 20 |
| PRR19     | 284338 | PRR19     | 19 |
| PRR20C    | 729240 | PRR20C    | 13 |
| PRR20E    | 729250 | PRR20E    | 13 |
| PRR22     | 163154 | PRR22     | 19 |
| PRR3      | 80742  | PRR3      | 6  |
| PRR4      | 11272  | PRR4      | 12 |
| PRR5      | 55615  | PRR5      | 22 |
| PRR7      | 80758  | PRR7      | 5  |
| PRR8      | 92454  | PRR8      | 7  |
| PRRC1     | 133619 | PRRC1     | 5  |
| PRRG2     | 5639   | PRRG2     | 19 |
| PRRG4     | 79056  | PRRG4     | 11 |

|           |        |           |    |
|-----------|--------|-----------|----|
| PRRT1     | 80863  | PRRT1     | 6  |
| PRRT2     | 112476 | PRRT2     | 16 |
| PRRT3     | 285368 | PRRT3     | 3  |
| PRRX2     | 51450  | PRRX2     | 9  |
| PRSS12    | 8492   | PRSS12    | 4  |
| PRSS21    | 10942  | PRSS21    | 16 |
| PRSS35    | 167681 | PRSS35    | 6  |
| PRSS7     | 5651   | PRSS7     | 21 |
| PRUNE     | 58497  | PRUNE     | 1  |
| PRY       | 9081   | PRY       | Y  |
| PSAP      | 5660   | PSAP      | 10 |
| PSAPL1    | 768239 | PSAPL1    | 4  |
| PSCA      | 8000   | PSCA      | 8  |
| PSCD1     | 9267   | PSCD1     | 17 |
| PSCD2     | 9266   | PSCD2     | 19 |
| PSCD4     | 27128  | PSCD4     | 22 |
| PSCDBP    | 9595   | PSCDBP    | 2  |
| PSD       | 5662   | PSD       | 10 |
| PSD3      | 23362  | PSD3      | 8  |
| PSD4      | 23550  | PSD4      | 2  |
| PSEN2     | 5664   | PSEN2     | 1  |
| PSENEEN   | 55851  | PSENEEN   | 19 |
| PSG2      | 5670   | PSG2      | 19 |
| PSG3      | 5671   | PSG3      | 19 |
| PSIP1     | 11168  | PSIP1     | 9  |
| PSITPTE22 | 387590 | psiTPTE22 | 22 |
| PSKH1     | 5681   | PSKH1     | 16 |
| PSMA1     | 5682   | PSMA1     | 11 |
| PSMA2     | 5683   | PSMA2     | 7  |
| PSMA3     | 5684   | PSMA3     | 14 |
| PSMA4     | 5685   | PSMA4     | 15 |
| PSMA5     | 5686   | PSMA5     | 1  |
| PSMA6     | 5687   | PSMA6     | 14 |
| PSMA7     | 5688   | PSMA7     | 20 |
| PSMA8     | 143471 | PSMA8     | 18 |
| PSMB10    | 5699   | PSMB10    | 16 |
| PSMB2     | 5690   | PSMB2     | 1  |
| PSMB3     | 5691   | PSMB3     | 17 |
| PSMB4     | 5692   | PSMB4     | 1  |
| PSMB5     | 5693   | PSMB5     | 14 |
| PSMB6     | 5694   | PSMB6     | 17 |
| PSMB7     | 5695   | PSMB7     | 9  |
| PSMB8     | 5696   | PSMB8     | 6  |
| PSMB9     | 5698   | PSMB9     | 6  |

|          |           |          |    |
|----------|-----------|----------|----|
| PSMC1    | 5700      | PSMC1    | 14 |
| PSMC2    | 5701      | PSMC2    | 7  |
| PSMC3    | 5702      | PSMC3    | 11 |
| PSMC3IP  | 29893     | PSMC3IP  | 17 |
| PSMC4    | 5704      | PSMC4    | 19 |
| PSMC5    | 5705      | PSMC5    | 17 |
| PSMC6    | 5706      | PSMC6    | 14 |
| PSMD1    | 5707      | PSMD1    | 2  |
| PSMD10   | 5716      | PSMD10   | X  |
| PSMD11   | 5717      | PSMD11   | 17 |
| PSMD12   | 5718      | PSMD12   |    |
| PSMD14   | 10213     | PSMD14   | 2  |
| PSMD2    | 5708      | PSMD2    | 3  |
| PSMD3    | 5709      | PSMD3    | 17 |
| PSMD4    | 5710      | PSMD4    | 1  |
| PSMD5    | 5711      | PSMD5    | 9  |
| PSMD6    | 9861      | PSMD6    | 3  |
| PSMD7    | 5713      | PSMD7    | 16 |
| PSMD8    | 5714      | PSMD8    | 19 |
| PSMD9    | 5715      | PSMD9    | 12 |
| PSME1    | 5720      | PSME1    | 14 |
| PSME2    | 5721      | PSME2    | 14 |
| PSME3    | 10197     | PSME3    | 17 |
| PSMF1    | 9491      | PSMF1    | 20 |
| PSMG1    | 8624      | PSMG1    | 21 |
| PSMG2    | 56984     | PSMG2    | 18 |
| PSMG3    | 84262     | PSMG3    | 7  |
| PSMG4    | 389362    | PSMG4    | 6  |
| PSORS1C1 | 170679    | PSORS1C1 | 6  |
| PSORS1C3 | 100130889 | PSORS1C3 | 6  |
| PSPC1    | 55269     | PSPC1    | 13 |
| PSPH     | 5723      | PSPH     | 7  |
| PSRC1    | 84722     | PSRC1    | 1  |
| PSTK     | 118672    | PSTK     | 10 |
| PSTPIP1  | 9051      | PSTPIP1  | 15 |
| PSTPIP2  | 9050      | PSTPIP2  | 18 |
| PTAFR    | 5724      | PTAFR    | 1  |
| PTAR1    | 375743    | PTAR1    | 9  |
| PTBP1    | 5725      | PTBP1    | 19 |
| PTBP2    | 58155     | PTBP2    | 1  |
| PTCD1    | 26024     | PTCD1    | 7  |
| PTCD2    | 79810     | PTCD2    | 5  |
| PTCD3    | 55037     | PTCD3    | 2  |
| PTCH1    | 5727      | PTCH1    | 9  |

|         |        |         |    |
|---------|--------|---------|----|
| PTCRA   | 171558 | PTCRA   | 6  |
| PTDSS1  | 9791   | PTDSS1  | 8  |
| PTDSS2  | 81490  | PTDSS2  | 11 |
| PTEN    | 5728   | PTEN    | 10 |
| PTF1A   | 256297 | PTF1A   | 10 |
| PTGDS   | 5730   | PTGDS   | 9  |
| PTGER4  | 5734   | PTGER4  | 5  |
| PTGES   | 9536   | PTGES   | 9  |
| PTGES2  | 80142  | PTGES2  | 9  |
| PTGES3  | 10728  | PTGES3  | 12 |
| PTGFR   | 5737   | PTGFR   | 1  |
| PTGIS   | 5740   | PTGIS   | 20 |
| PTGR1   | 22949  | PTGR1   | 9  |
| PTGS1   | 5742   | PTGS1   | 9  |
| PTH2    | 113091 | PTH2    | 19 |
| PTH2R   | 5746   | PTH2R   | 2  |
| PTK2    | 5747   | PTK2    | 8  |
| PTK2B   | 2185   | PTK2B   | 8  |
| PTK7    | 5754   | PTK7    | 6  |
| PTK9    | 5756   | PTK9    | 12 |
| PTMA    | 5757   | PTMA    | 2  |
| PTMS    | 5763   | PTMS    | 12 |
| PTOV1   | 53635  | PTOV1   | 19 |
| PTP4A2  | 8073   | PTP4A2  |    |
| PTP4A3  | 11156  | PTP4A3  |    |
| PTPLA   | 9200   | PTPLA   | 10 |
| PTPLAD1 | 51495  | PTPLAD1 | 15 |
| PTPLB   | 201562 | PTPLB   | 3  |
| PTPMT1  | 114971 | PTPMT1  | 11 |
| PTPN1   | 5770   | PTPN1   | 20 |
| PTPN11  | 5781   | PTPN11  | 12 |
| PTPN12  | 5782   | PTPN12  | 7  |
| PTPN18  | 26469  | PTPN18  | 2  |
| PTPN2   | 5771   | PTPN2   | 18 |
| PTPN20  | 26095  | PTPN20  |    |
| PTPN21  | 11099  | PTPN21  | 14 |
| PTPN22  | 26191  | PTPN22  | 1  |
| PTPN3   | 5774   | PTPN3   | 9  |
| PTPN4   | 5775   | PTPN4   | 2  |
| PTPN6   | 5777   | PTPN6   | 12 |
| PTPN7   | 5778   | PTPN7   | 1  |
| PTPN9   | 5780   | PTPN9   |    |
| PTPRA   | 5786   | PTPRA   | 20 |
| PTPRC   | 5788   | PTPRC   | 1  |

|         |        |         |    |
|---------|--------|---------|----|
| PTPRCAP | 5790   | PTPRCAP | 11 |
| PTPRE   | 5791   | PTPRE   | 10 |
| PTPRF   | 5792   | PTPRF   | 1  |
| PTPRG   | 5793   | PTPRG   | 3  |
| PTPRH   | 5794   | PTPRH   | 19 |
| PTPRJ   | 5795   | PTPRJ   | 11 |
| PTPRO   | 5800   | PTPRO   | 12 |
| PTPRU   | 10076  | PTPRU   | 1  |
| PTPRV   | 148713 | PTPRV   | 1  |
| PTRF    | 284119 | PTRF    | 17 |
| PTRH1   | 138428 | PTRH1   | 9  |
| PTRH2   | 51651  | PTRH2   | 17 |
| PTS     | 5805   | PTS     | 11 |
| PTTG1   | 9232   | PTTG1   | 5  |
| PTTG1IP | 754    | PTTG1IP | 21 |
| PTTG3P  | 26255  | PTTG3P  | 8  |
| PUF60   | 22827  | PUF60   | 8  |
| PUM1    | 9698   | PUM1    | 1  |
| PUM2    | 23369  | PUM2    | 2  |
| PURA    | 5813   | PURA    | 5  |
| PURB    | 5814   | PURB    | 7  |
| PUS1    | 80324  | PUS1    | 12 |
| PUS10   | 150962 | PUS10   | 2  |
| PUS3    | 83480  | PUS3    | 11 |
| PUS7    | 54517  | PUS7    | 7  |
| PUS7L   | 83448  | PUS7L   | 12 |
| PUSL1   | 126789 | PUSL1   | 1  |
| PVR     | 5817   | PVR     | 19 |
| PVRIG   | 79037  | PVRIG   | 7  |
| PVRL2   | 5819   | PVRL2   | 19 |
| PVRL3   | 25945  | PVRL3   | 3  |
| PVT1    | 5820   | PVT1    | 8  |
| PWP1    | 11137  | PWP1    | 12 |
| PWP2    | 5822   | PWP2    | 21 |
| PWWP2   | 170394 | PWWP2   |    |
| PWWP2A  | 114825 | PWWP2A  | 5  |
| PWWP2B  | 170394 | PWWP2B  | 10 |
| PXDN    | 7837   | PXDN    | 2  |
| PXK     | 54899  | PXK     | 3  |
| PXMP2   | 5827   | PXMP2   |    |
| PXMP3   | 5828   | PXMP3   | 8  |
| PXMP4   | 11264  | PXMP4   | 20 |
| PXN     | 5829   | PXN     | 12 |
| PYCARD  | 29108  | PYCARD  | 16 |

|           |        |           |    |
|-----------|--------|-----------|----|
| PYCR1     | 5831   | PYCR1     | 17 |
| PYCR2     | 29920  | PYCR2     | 1  |
| PYCRL     | 65263  | PYCRL     | 8  |
| PYDC2     | 152138 | PYDC2     | 3  |
| PYGB      | 5834   | PYGB      | 20 |
| PYGL      | 5836   | PYGL      | 14 |
| PYGO1     | 26108  | PYGO1     | 15 |
| PYGO2     | 90780  | PYGO2     | 1  |
| PYHIN1    | 149628 | PYHIN1    | 1  |
| PYROXD1   | 79912  | PYROXD1   | 12 |
| PZP       | 5858   | PZP       | 12 |
| QARS      | 5859   | QARS      | 3  |
| QDPR      | 5860   | QDPR      | 4  |
| QKI       | 9444   | QKI       |    |
| QPCT      | 25797  | QPCT      | 2  |
| QPCTL     | 54814  | QPCTL     | 19 |
| QPRT      | 23475  | QPRT      | 16 |
| QRFPR     | 84109  | QRFPR     | 4  |
| QRICH1    | 54870  | QRICH1    | 3  |
| QRICH2    | 84074  | QRICH2    | 17 |
| QRSL1     | 55278  | QRSL1     | 6  |
| QSOX1     | 5768   | QSOX1     | 1  |
| QSOX2     | 169714 | QSOX2     | 9  |
| QTRT1     | 81890  | QTRT1     | 19 |
| QTRTD1    | 79691  | QTRTD1    | 3  |
| R3HCC1    | 203069 | R3HCC1    |    |
| R3HDM1    | 23518  | R3HDM1    | 2  |
| R3HDM2    | 22864  | R3HDM2    | 12 |
| RAB10     | 10890  | RAB10     | 2  |
| RAB11A    | 8766   | RAB11A    | 15 |
| RAB11B    | 9230   | RAB11B    | 19 |
| RAB11FIP1 | 80223  | RAB11FIP1 | 8  |
| RAB11FIP2 | 22841  | RAB11FIP2 | 10 |
| RAB11FIP3 | 9727   | RAB11FIP3 | 16 |
| RAB11FIP4 | 84440  | RAB11FIP4 | 17 |
| RAB11FIP5 | 26056  | RAB11FIP5 | 2  |
| RAB12     | 201475 | RAB12     | 18 |
| RAB13     | 5872   | RAB13     | 1  |
| RAB15     | 376267 | RAB15     | 14 |
| RAB17     | 64284  | RAB17     | 2  |
| RAB1A     | 5861   | RAB1A     | 2  |
| RAB1B     | 81876  | RAB1B     | 11 |
| RAB1C     | 389721 | rab1c     | 9  |
| RAB20     | 55647  | RAB20     | 13 |

|          |        |          |    |
|----------|--------|----------|----|
| RAB21    | 23011  | RAB21    | 12 |
| RAB22A   | 57403  | RAB22A   | 20 |
| RAB23    | 51715  | RAB23    | 6  |
| RAB24    | 53917  | RAB24    | 5  |
| RAB25    | 57111  | RAB25    | 1  |
| RAB26    | 25837  | RAB26    | 16 |
| RAB28    | 9364   | RAB28    | 4  |
| RAB2B    | 84932  | RAB2B    | 14 |
| RAB30    | 27314  | RAB30    | 11 |
| RAB31    | 11031  | RAB31    | 18 |
| RAB33A   | 9363   | RAB33A   | X  |
| RAB33B   | 83452  | RAB33B   | 4  |
| RAB34    | 83871  | RAB34    | 17 |
| RAB37    | 326624 | RAB37    | 17 |
| RAB38    | 23682  | RAB38    | 11 |
| RAB39B   | 116442 | RAB39B   | X  |
| RAB3A    | 5864   | RAB3A    | 19 |
| RAB3B    | 5865   | RAB3B    | 1  |
| RAB3C    | 115827 | RAB3C    | 5  |
| RAB3D    | 9545   | RAB3D    | 19 |
| RAB3GAP2 | 25782  | RAB3GAP2 | 1  |
| RAB3IP   | 117177 | RAB3IP   | 12 |
| RAB40B   | 10966  | RAB40B   | 17 |
| RAB40C   | 57799  | RAB40C   | 16 |
| RAB42    | 115273 | RAB42    | 1  |
| RAB43    | 339122 | RAB43    | 3  |
| RAB4A    | 5867   | RAB4A    | 1  |
| RAB4B    | 53916  | RAB4B    |    |
| RAB5A    | 5868   | RAB5A    | 3  |
| RAB5B    | 5869   | RAB5B    | 12 |
| RAB5C    | 5878   | RAB5C    | 17 |
| RAB6A    | 5870   | RAB6A    | 11 |
| RAB6B    | 51560  | RAB6B    | 3  |
| RAB7A    | 7879   | RAB7A    | 3  |
| RAB7L1   | 8934   | RAB7L1   | 1  |
| RAB8A    | 4218   | RAB8A    | 19 |
| RAB8B    | 51762  | RAB8B    | 15 |
| RAB9A    | 9367   | RAB9A    | X  |
| RABAC1   | 10567  | RABAC1   | 19 |
| RABEP1   | 9135   | RABEP1   | 17 |
| RABEP2   | 79874  | RABEP2   | 16 |
| RABEPK   | 10244  | RABEPK   | 9  |
| RABGAP1  | 23637  | RABGAP1  | 9  |
| RABGAP1L | 9910   | RABGAP1L | 1  |

|          |        |          |    |
|----------|--------|----------|----|
| RABGEF1  | 27342  | RABGEF1  | 7  |
| RABGGTA  | 5875   | RABGGTA  | 14 |
| RABGGTB  | 5876   | RABGGTB  | 1  |
| RABL2A   | 11159  | RABL2A   | 2  |
| RABL2B   | 11158  | RABL2B   | 22 |
| RABL3    | 285282 | RABL3    | 3  |
| RABL4    | 11020  | RABL4    | 22 |
| RABL5    | 64792  | RABL5    | 7  |
| RAC1     | 5879   | RAC1     | 7  |
| RAC2     | 5880   | RAC2     | 22 |
| RAC3     | 5881   | RAC3     | 17 |
| RACGAP1  | 29127  | RACGAP1  | 12 |
| RAD1     | 5810   | RAD1     | 5  |
| RAD17    | 5884   | RAD17    | 5  |
| RAD18    | 56852  | RAD18    | 3  |
| RAD21    | 5885   | RAD21    | 8  |
| RAD23A   | 5886   | RAD23A   | 19 |
| RAD23B   | 5887   | RAD23B   | 9  |
| RAD51    | 5888   | RAD51    | 15 |
| RAD51AP1 | 10635  | RAD51AP1 | 12 |
| RAD51AP2 | 729475 | RAD51AP2 | 2  |
| RAD51C   | 5889   | RAD51C   | 17 |
| RAD51L3  | 5892   | RAD51L3  | 17 |
| RAD54B   | 25788  | RAD54B   | 8  |
| RAD54L   | 8438   | RAD54L   | 1  |
| RAD54L2  | 23132  | RAD54L2  | 3  |
| RAD9A    | 5883   | RAD9A    | 11 |
| RADIL    | 55698  | RADIL    | 7  |
| RAE1     | 8480   | RAE1     | 20 |
| RAET1E   | 135250 | RAET1E   | 6  |
| RAET1G   | 353091 | RAET1G   | 6  |
| RAF1     | 5894   | RAF1     | 3  |
| RAG1     | 5896   | RAG1     | 11 |
| RAG1AP1  | 55974  | RAG1AP1  | 1  |
| RAGE     | 5891   | RAGE     | 14 |
| RAI1     | 10743  | RAI1     | 17 |
| RAI2     | 10742  | RAI2     | X  |
| RALA     | 5898   | RALA     | 7  |
| RALB     | 5899   | RALB     | 2  |
| RALBP1   | 10928  | RALBP1   | 18 |
| RALGAPA1 | 253959 | RALGAPA1 | 14 |
| RALGAPB  | 57148  | RALGAPB  | 20 |
| RALGPS1  | 9649   | RALGPS1  | 9  |
| RALGPS2  | 55103  | RALGPS2  | 1  |



|          |        |          |    |
|----------|--------|----------|----|
| RALY     | 22913  | RALY     | 20 |
| RAMP1    | 10267  | RAMP1    | 2  |
| RAMP2    | 10266  | RAMP2    | 17 |
| RAMP3    | 10268  | RAMP3    | 7  |
| RAN      | 5901   | RAN      | 12 |
| RANBP1   | 5902   | RANBP1   | 22 |
| RANBP10  | 57610  | RANBP10  | 16 |
| RANBP2   | 5903   | RANBP2   | 2  |
| RANBP3   | 8498   | RANBP3   | 19 |
| RANBP3L  | 202151 | RANBP3L  | 5  |
| RANBP6   | 26953  | RANBP6   | 9  |
| RANGAP1  | 5905   | RANGAP1  | 22 |
| RANGRF   | 29098  | RANGRF   | 17 |
| RAP1B    | 5908   | RAP1B    | 12 |
| RAP1BL   | 643752 | RAP1BL   |    |
| RAP1GAP  | 5909   | RAP1GAP  | 1  |
| RAP2A    | 5911   | RAP2A    | 13 |
| RAP2C    | 57826  | RAP2C    | X  |
| RAPGEF1  | 2889   | RAPGEF1  | 9  |
| RAPGEF2  | 9693   | RAPGEF2  | 4  |
| RAPGEF5  | 9771   | RAPGEF5  | 7  |
| RAPGEF6  | 51735  | RAPGEF6  | 5  |
| RAPGEFL1 | 51195  | RAPGEFL1 | 17 |
| RARA     | 5914   | RARA     | 17 |
| RARRES3  | 5920   | RARRES3  | 11 |
| RARS     | 5917   | RARS     | 5  |
| RARS2    | 57038  | RARS2    | 6  |
| RASA1    | 5921   | RASA1    | 5  |
| RASA2    | 5922   | RASA2    | 3  |
| RASA4    | 10156  | RASA4    | 7  |
| RASAL1   | 8437   | RASAL1   | 12 |
| RASAL3   | 64926  | RASAL3   | 19 |
| RASD1    | 51655  | RASD1    | 17 |
| RASD2    | 23551  | RASD2    | 22 |
| RASGEF1B | 153020 | RASGEF1B | 4  |
| RASGRP1  | 10125  | RASGRP1  | 15 |
| RASGRP2  | 10235  | RASGRP2  | 11 |
| RASGRP3  | 25780  | RASGRP3  | 2  |
| RASIP1   | 54922  | RASIP1   | 19 |
| RASL10A  | 10633  | RASL10A  | 22 |
| RASL10B  | 91608  | RASL10B  | 17 |
| RASL11A  | 387496 | RASL11A  | 13 |
| RASL11B  | 65997  | RASL11B  | 4  |
| RASSF1   | 11186  | RASSF1   | 3  |

|        |        |        |    |
|--------|--------|--------|----|
| RASSF2 | 9770   | RASSF2 | 20 |
| RASSF3 | 283349 | RASSF3 | 12 |
| RASSF4 | 83937  | RASSF4 | 10 |
| RASSF5 | 83593  | RASSF5 | 1  |
| RASSF6 | 166824 | RASSF6 | 4  |
| RASSF7 | 8045   | RASSF7 | 11 |
| RAVER1 | 125950 | RAVER1 | 19 |
| RAVER2 | 55225  | RAVER2 | 1  |
| RAX    | 30062  | RAX    | 18 |
| RAXL1  | 84839  | RAXL1  | 19 |
| RB1    | 5925   | RB1    | 13 |
| RB1CC1 | 9821   | RB1CC1 | 8  |
| RBAK   | 57786  | RBAK   | 7  |
| RBBP4  | 5928   | RBBP4  | 1  |
| RBBP5  | 5929   | RBBP5  | 1  |
| RBBP6  | 5930   | RBBP6  | 16 |
| RBBP7  | 5931   | RBBP7  | X  |
| RBBP8  | 5932   | RBBP8  | 18 |
| RBBP9  | 10741  | RBBP9  | 20 |
| RBCK1  | 10616  | RBCK1  |    |
| RBED1  | 84173  | RBED1  | 2  |
| RBKS   | 64080  | RBKS   | 2  |
| RBL1   | 5933   | RBL1   | 20 |
| RBL2   | 5934   | RBL2   | 16 |
| RBM    | 650805 | RBM    |    |
| RBM10  | 8241   | RBM10  | X  |
| RBM11  | 54033  | RBM11  | 21 |
| RBM12  | 10137  | RBM12  | 20 |
| RBM12B | 389677 | RBM12B | 8  |
| RBM14  | 10432  | RBM14  | 11 |
| RBM15  | 64783  | RBM15  | 1  |
| RBM15B | 29890  | RBM15B | 3  |
| RBM16  | 22828  | RBM16  | 6  |
| RBM17  | 84991  | RBM17  | 10 |
| RBM18  | 92400  | RBM18  | 9  |
| RBM19  | 9904   | RBM19  |    |
| RBM20  | 282996 | RBM20  |    |
| RBM22  | 55696  | RBM22  | 5  |
| RBM23  | 55147  | RBM23  | 14 |
| RBM24  | 221662 | RBM24  | 6  |
| RBM25  | 58517  | RBM25  | 14 |
| RBM26  | 64062  | RBM26  | 13 |
| RBM27  | 54439  | RBM27  | 5  |
| RBM28  | 55131  | RBM28  | 7  |

|         |        |         |    |
|---------|--------|---------|----|
| RBM3    | 5935   | RBM3    | X  |
| RBM33   | 155435 | RBM33   | 7  |
| RBM34   | 23029  | RBM34   | 1  |
| RBM38   | 55544  | RBM38   | 20 |
| RBM39   | 9584   | RBM39   | 20 |
| RBM4    | 5936   | RBM4    | 11 |
| RBM41   | 55285  | RBM41   | X  |
| RBM42   | 79171  | RBM42   | 19 |
| RBM45   | 129831 | RBM45   | 2  |
| RBM47   | 54502  | RBM47   | 4  |
| RBM4B   | 83759  | RBM4B   | 11 |
| RBM5    | 10181  | RBM5    | 3  |
| RBM6    | 10180  | RBM6    | 3  |
| RBM7    | 10179  | RBM7    | 11 |
| RBM8A   | 9939   | RBM8A   | 1  |
| RBM9    | 23543  | RBM9    | 22 |
| RBMS1   | 5937   | RBMS1   | 2  |
| RBMS2   | 5939   | RBMS2   | 12 |
| RBMS2P  | 643427 | RBMS2P  |    |
| RBMX    | 27316  | RBMX    | X  |
| RBMX2   | 51634  | RBMX2   | X  |
| RBMX1E  | 378950 | RBMX1E  | Y  |
| RBMX2FP | 159162 | RBMX2FP | Y  |
| RBMX3AP | 64593  | RBMX3AP | Y  |
| RBP4    | 5950   | RBP4    | 10 |
| RBP5    | 83758  | RBP5    | 12 |
| RBP7    | 116362 | RBP7    | 1  |
| RBPJ    | 3516   | RBPJ    | 4  |
| RBPMS2  | 348093 | RBPMS2  | 15 |
| RBX1    | 9978   | RBX1    | 22 |
| RC3H2   | 54542  | RC3H2   | 9  |
| RCADH5  | 642443 | RCADH5  | 6  |
| RCAN1   | 1827   | RCAN1   | 21 |
| RCAN2   | 10231  | RCAN2   | 6  |
| RCAN3   | 11123  | RCAN3   | 1  |
| RCBTB1  | 55213  | RCBTB1  | 13 |
| RCBTB2  | 1102   | RCBTB2  | 13 |
| RCC1    | 1104   | RCC1    | 1  |
| RCC2    | 55920  | RCC2    | 1  |
| RCCD1   | 91433  | RCCD1   | 15 |
| RCE1    | 9986   | RCE1    | 11 |
| RCHY1   | 25898  | RCHY1   | 4  |
| RCL1    | 10171  | RCL1    | 9  |
| RCN3    | 57333  | RCN3    | 19 |

|        |        |        |    |
|--------|--------|--------|----|
| RCOR1  | 23186  | RCOR1  | 14 |
| RCOR2  | 283248 | RCOR2  | 11 |
| RCOR3  | 55758  | RCOR3  | 1  |
| RCP9   | 27297  | RCP9   | 7  |
| RCSD1  | 92241  | RCSD1  | 1  |
| RDBP   | 7936   | RDBP   | 6  |
| RDH10  | 157506 | RDH10  | 8  |
| RDH11  | 51109  | RDH11  | 14 |
| RDH13  | 112724 | RDH13  | 19 |
| RDH5   | 5959   | RDH5   | 12 |
| RDH8   | 50700  | RDH8   | 19 |
| RDM1   | 201299 | RDM1   | 17 |
| RDX    | 5962   | RDX    | 11 |
| REC8   | 9985   | REC8   | 14 |
| RECK   | 8434   | RECK   | 9  |
| RECQL  | 5965   | RECQL  | 12 |
| RECQL4 | 9401   | RECQL4 | 8  |
| RECQL5 | 9400   | RECQL5 | 17 |
| REEP1  | 65055  | REEP1  | 2  |
| REEP2  | 51308  | REEP2  | 5  |
| REEP3  | 221035 | REEP3  | 10 |
| REEP4  | 80346  | REEP4  | 8  |
| REEP5  | 7905   | REEP5  | 5  |
| REEP6  | 92840  | REEP6  | 19 |
| REL    | 5966   | REL    | 2  |
| RELA   | 5970   | RELA   | 11 |
| RELB   | 5971   | RELB   | 19 |
| RELL1  | 768211 | RELL1  | 4  |
| RELL2  | 285613 | RELL2  | 5  |
| REM2   | 161253 | REM2   | 14 |
| RENBP  | 5973   | RENBP  | X  |
| REP15  | 387849 | REP15  | 12 |
| REPIN1 | 29803  | REPIN1 | 7  |
| REPS2  | 9185   | REPS2  | X  |
| RER1   | 11079  | RER1   | 1  |
| RERE   | 473    | RERE   | 1  |
| RERG   | 85004  | RERG   | 12 |
| RERGL  | 79785  | RERGL  | 12 |
| RETSAT | 54884  | RETSAT | 2  |
| REV1   | 51455  | REV1   | 2  |
| REV3L  | 5980   | REV3L  | 6  |
| REXO1  | 57455  | REXO1  | 19 |
| REXO2  | 25996  | REXO2  | 11 |
| REXO4  | 57109  | REXO4  | 9  |

|         |        |         |    |
|---------|--------|---------|----|
| RFC1    | 5981   | RFC1    | 4  |
| RFC2    | 5982   | RFC2    | 7  |
| RFC3    | 5983   | RFC3    | 13 |
| RFC4    | 5984   | RFC4    | 3  |
| RFC5    | 5985   | RFC5    | 12 |
| RFESD   | 317671 | RFESD   | 5  |
| RFFL    | 117584 | RFFL    | 17 |
| RFNG    | 5986   | RFNG    | 17 |
| RFP     | 5987   | RFP     | 6  |
| RFPL2   | 10739  | RFPL2   | 22 |
| RFPL3S  | 10737  | RFPL3S  | 22 |
| RFPL4A  | 342931 | RFPL4A  |    |
| RFT1    | 91869  | RFT1    | 3  |
| RFTN1   | 23180  | RFTN1   | 3  |
| RFWD2   | 64326  | RFWD2   | 1  |
| RFWD3   | 55159  | RFWD3   | 16 |
| RFX1    | 5989   | RFX1    | 19 |
| RFX2    | 5990   | RFX2    | 19 |
| RFX3    | 5991   | RFX3    | 9  |
| RFX5    | 5993   | RFX5    | 1  |
| RFX7    | 64864  | RFX7    | 15 |
| RFXANK  | 8625   | RFXANK  | 19 |
| RFXDC2  | 64864  | RFXDC2  |    |
| RG9MTD2 | 93587  | RG9MTD2 | 4  |
| RG9MTD3 | 158234 | RG9MTD3 | 9  |
| RGAG4   | 340526 | RGAG4   | X  |
| RGL1    | 23179  | RGL1    | 1  |
| RGL2    | 5863   | RGL2    | 6  |
| RGL4    | 266747 | RGL4    | 22 |
| RGMA    | 56963  | RGMA    | 15 |
| RGMB    | 285704 | RGMB    | 5  |
| RGS1    | 5996   | RGS1    | 1  |
| RGS10   | 6001   | RGS10   | 10 |
| RGS11   | 8786   | RGS11   | 16 |
| RGS13   | 6003   | RGS13   | 1  |
| RGS14   | 10636  | RGS14   | 5  |
| RGS16   | 6004   | RGS16   | 1  |
| RGS17   | 26575  | RGS17   | 6  |
| RGS18   | 64407  | RGS18   | 1  |
| RGS19   | 10287  | RGS19   | 20 |
| RGS2    | 5997   | RGS2    | 1  |
| RGS22   | 26166  | RGS22   | 8  |
| RGS4    | 5999   | RGS4    | 1  |
| RGS9BP  | 388531 | RGS9BP  | 19 |

|         |        |         |    |
|---------|--------|---------|----|
| RHBDD1  | 84236  | RHBDD1  | 2  |
| RHBDD2  | 57414  | RHBDD2  | 7  |
| RHBDD3  | 25807  | RHBDD3  | 22 |
| RHBDF1  | 64285  | RHBDF1  | 16 |
| RHBDF2  | 79651  | RHBDF2  | 17 |
| RHBDL1  | 9028   | RHBDL1  | 16 |
| RHBDL2  | 54933  | RHBDL2  | 1  |
| RHBDL3  | 162494 | RHBDL3  | 17 |
| RHCE    | 6006   | RHCE    | 1  |
| RHEBL1  | 121268 | RHEBL1  | 12 |
| RHOA    | 387    | RHOA    | 3  |
| RHOB    | 388    | RHOB    | 2  |
| RHOBTB2 | 23221  | RHOBTB2 | 8  |
| RHOBTB3 | 22836  | RHOBTB3 | 5  |
| RHOC    | 389    | RHOC    | 1  |
| RHOD    | 29984  | RHOD    | 11 |
| RHOF    | 54509  | RHOF    | 12 |
| RHOG    | 391    | RHOG    | 11 |
| RHOH    | 399    | RHOH    | 4  |
| RHOQ    | 23433  | RHOQ    | 2  |
| RHOT1   | 55288  | RHOT1   | 17 |
| RHOT2   | 89941  | RHOT2   | 16 |
| RHOV    | 171177 | RHOV    | 15 |
| RHOXF2B | 727940 | RHOXF2B | X  |
| RHPN1   | 114822 | RHPN1   | 8  |
| RHPN2   | 85415  | RHPN2   | 19 |
| RIC8A   | 60626  | RIC8A   | 11 |
| RIC8B   | 55188  | RIC8B   | 12 |
| RICH2   | 9912   | RICH2   | 17 |
| RICS    | 9743   | RICS    | 11 |
| RIF1    | 55183  | RIF1    | 2  |
| RILPL1  | 353116 | RILPL1  | 12 |
| RILPL2  | 196383 | RILPL2  | 12 |
| RIMKLB  | 57494  | RIMKLB  | 12 |
| RIMS2   | 9699   | RIMS2   | 8  |
| RIMS3   | 9783   | RIMS3   | 1  |
| RIN2    | 54453  | RIN2    | 20 |
| RING1   | 6015   | RING1   | 6  |
| RINL    | 126432 | RINL    | 19 |
| RINT1   | 60561  | RINT1   | 7  |
| RIOK1   | 83732  | RIOK1   | 6  |
| RIOK2   | 55781  | RIOK2   | 5  |
| RIOK3   | 8780   | RIOK3   | 18 |
| RIPK1   | 8737   | RIPK1   | 6  |

|          |           |          |    |
|----------|-----------|----------|----|
| RIPK2    | 8767      | RIPK2    | 8  |
| RIPK3    | 11035     | RIPK3    | 14 |
| RIPK4    | 54101     | RIPK4    | 21 |
| RIPK5    | 25778     | RIPK5    | 1  |
| RLF      | 6018      | RLF      |    |
| RLN1     | 6013      | RLN1     | 9  |
| RLN2     | 6019      | RLN2     | 9  |
| RLN3     | 117579    | RLN3     | 19 |
| RLTPR    | 146206    | RLTPR    | 16 |
| RMI1     | 80010     | RMI1     | 9  |
| RMND1    | 55005     | RMND1    | 6  |
| RMND5A   | 64795     | RMND5A   | 2  |
| RMND5B   | 64777     | RMND5B   | 5  |
| RMRP     | 6023      | RMRP     | 9  |
| RN5S9    | 100169760 | RN5S9    | 1  |
| RN7SK    | 125050    | RN7SK    | 6  |
| RNASE10  | 338879    | RNASE10  | 14 |
| RNASE2   | 6036      | RNASE2   | 14 |
| RNASE4   | 6038      | RNASE4   | 14 |
| RNASE9   | 390443    | RNASE9   | 14 |
| RNASEH1  | 246243    | RNASEH1  | 2  |
| RNASEH2A | 10535     | RNASEH2A | 19 |
| RNASEH2B | 79621     | RNASEH2B | 13 |
| RNASEH2C | 84153     | RNASEH2C | 11 |
| RNASEK   | 440400    | RNASEK   | 17 |
| RNASEL   | 6041      | RNASEL   | 1  |
| RNASEN   | 29102     | RNASEN   |    |
| RNASET2  | 8635      | RNASET2  | 6  |
| RND1     | 27289     | RND1     | 12 |
| RND2     | 8153      | RND2     | 17 |
| RNF10    | 9921      | RNF10    | 12 |
| RNF103   | 7844      | RNF103   | 2  |
| RNF11    | 26994     | RNF11    | 1  |
| RNF111   | 54778     | RNF111   | 15 |
| RNF114   | 55905     | RNF114   | 20 |
| RNF115   | 27246     | RNF115   | 1  |
| RNF121   | 55298     | RNF121   | 11 |
| RNF122   | 79845     | RNF122   | 8  |
| RNF123   | 63891     | RNF123   | 3  |
| RNF125   | 54941     | RNF125   | 18 |
| RNF126   | 55658     | RNF126   | 19 |
| RNF13    | 11342     | RNF13    | 3  |
| RNF130   | 55819     | RNF130   | 5  |
| RNF133   | 168433    | RNF133   | 7  |

|         |        |         |    |
|---------|--------|---------|----|
| RNF135  | 84282  | RNF135  | 17 |
| RNF138  | 51444  | RNF138  | 18 |
| RNF14   | 9604   | RNF14   | 5  |
| RNF141  | 50862  | RNF141  | 11 |
| RNF144B | 255488 | RNF144B | 6  |
| RNF145  | 153830 | RNF145  | 5  |
| RNF146  | 81847  | RNF146  | 6  |
| RNF149  | 284996 | RNF149  | 2  |
| RNF150  | 57484  | RNF150  | 4  |
| RNF152  | 220441 | RNF152  | 18 |
| RNF160  | 26046  | RNF160  | 21 |
| RNF167  | 26001  | RNF167  | 17 |
| RNF170  | 81790  | RNF170  | 8  |
| RNF175  | 285533 | RNF175  | 4  |
| RNF180  | 285671 | RNF180  | 5  |
| RNF181  | 51255  | RNF181  | 2  |
| RNF182  | 221687 | RNF182  | 6  |
| RNF183  | 138065 | RNF183  | 9  |
| RNF187  | 149603 | RNF187  | 1  |
| RNF19A  | 25897  | RNF19A  | 8  |
| RNF19B  | 127544 | RNF19B  | 1  |
| RNF20   | 56254  | RNF20   | 9  |
| RNF208  | 727800 | RNF208  | 9  |
| RNF213  | 57674  | RNF213  | 17 |
| RNF215  | 200312 | RNF215  | 22 |
| RNF216  | 54476  | RNF216  | 7  |
| RNF216L | 441191 | RNF216L | 7  |
| RNF220  | 55182  | RNF220  | 1  |
| RNF24   | 11237  | RNF24   | 20 |
| RNF25   | 64320  | RNF25   | 2  |
| RNF26   | 79102  | RNF26   | 11 |
| RNF31   | 55072  | RNF31   | 14 |
| RNF34   | 80196  | RNF34   | 12 |
| RNF38   | 152006 | RNF38   | 9  |
| RNF4    | 6047   | RNF4    | 4  |
| RNF40   | 9810   | RNF40   | 16 |
| RNF41   | 10193  | RNF41   | 12 |
| RNF43   | 54894  | RNF43   | 17 |
| RNF44   | 22838  | RNF44   | 5  |
| RNF5    | 6048   | RNF5    | 6  |
| RNF5P1  | 286140 | RNF5P1  | 8  |
| RNF7    | 9616   | RNF7    | 3  |
| RNF8    | 9025   | RNF8    | 6  |
| RNFT1   | 51136  | RNFT1   | 17 |



|               |           |               |    |
|---------------|-----------|---------------|----|
| RNFT2         | 84900     | RNFT2         | 12 |
| RNGTT         | 8732      | RNGTT         | 6  |
| RNH1          | 6050      | RNH1          | 11 |
| RNMT          | 8731      | RNMT          | 18 |
| RNMTL1        | 55178     | RNMTL1        | 17 |
| RNPC2         | 9584      | RNPC2         | 20 |
| RNPEP         | 6051      | RNPEP         | 1  |
| RNPEPL1       | 57140     | RNPEPL1       | 2  |
| RNPS1         | 10921     | RNPS1         | 16 |
| RNU105A       | 26768     | RNU105A       | 1  |
| RNU105B       | 26767     | RNU105B       | 20 |
| RNU105C       | 26766     | RNU105C       | 8  |
| RNU11         | 26824     | RNU11         | 1  |
| RNU12         | 26823     | RNU12         | X  |
| RNU1-3        | 26869     | RNU1-3        | 1  |
| RNU1-5        | 26863     | RNU1-5        | 1  |
| RNU1A3        | 26871     | RNU1A3        | 1  |
| RNU1F1        | 26866     | RNU1F1        | 14 |
| RNU1G2        | 26864     | RNU1G2        | 1  |
| RNU2-1        | 6066      | RNU2-1        | 17 |
| RNU4-1        | 26835     | RNU4-1        | 12 |
| RNU4-2        | 26834     | RNU4-2        |    |
| RNU4ATAC      | 100151683 | RNU4ATAC      | 2  |
| RNU5A         | 26831     | RNU5A         | 15 |
| RNU6-1        | 26827     | RNU6-1        | 15 |
| RNU6-15       | 100302741 | RNU6-15       |    |
| RNU6ATAC      | 100151684 | RNU6ATAC      | 9  |
| RNU86         | 116936    | RNU86         | 22 |
| RNY1          | 6084      | RNY1          | 7  |
| RNY4          | 6086      | RNY4          | 7  |
| RNY5          | 6090      | RNY5          | 7  |
| ROBLD3        | 28956     | ROBLD3        |    |
| ROBO3         | 64221     | ROBO3         | 11 |
| ROBO4         | 54538     | ROBO4         | 11 |
| ROCK2         | 9475      | ROCK2         | 2  |
| ROD1          | 9991      | ROD1          | 9  |
| ROGDI         | 79641     | ROGDI         | 16 |
| ROM1          | 6094      | ROM1          | 11 |
| ROMO1         | 140823    | ROMO1         | 20 |
| ROPN1L        | 83853     | ROPN1L        | 5  |
| ROR1          | 4919      | ROR1          | 1  |
| RP1           | 6101      | RP1           | 8  |
| RP11-529I10.4 | 25911     | RP11-529I10.4 | 10 |
| RP2           | 6102      | RP2           | X  |

|              |        |              |    |
|--------------|--------|--------------|----|
| RP5-1022P6.2 | 56261  | RP5-1022P6.2 | 20 |
| RPA1         | 6117   | RPA1         | 17 |
| RPA2         | 6118   | RPA2         | 1  |
| RPA3         | 6119   | RPA3         | 7  |
| RPAIN        | 84268  | RPAIN        | 17 |
| RPAP1        | 26015  | RPAP1        | 15 |
| RPAP2        | 79871  | RPAP2        | 1  |
| RPAP3        | 79657  | RPAP3        | 12 |
| RPF1         | 80135  | RPF1         | 1  |
| RPF2         | 84154  | RPF2         | 6  |
| RPGR         | 6103   | RPGR         | X  |
| RPGRIP1      | 57096  | RPGRIP1      | 14 |
| RPH3AL       | 9501   | RPH3AL       | 17 |
| RPIA         | 22934  | RPIA         | 2  |
| RPL10L       | 140801 | RPL10L       | 14 |
| RPL12        | 6136   | RPL12        | 9  |
| RPL13        | 6137   | RPL13        | 16 |
| RPL13A       | 23521  | RPL13A       | 19 |
| RPL14        | 9045   | RPL14        | 3  |
| RPL15        | 6138   | RPL15        | 3  |
| RPL17        | 6139   | RPL17        | 18 |
| RPL21        | 6144   | RPL21        | 13 |
| RPL22        | 6146   | RPL22        | 1  |
| RPL22L1      | 200916 | RPL22L1      | 3  |
| RPL23A       | 6147   | RPL23A       | 17 |
| RPL23AP53    | 644128 | RPL23AP53    | 8  |
| RPL26L1      | 51121  | RPL26L1      | 5  |
| RPL28        | 6158   | RPL28        | 19 |
| RPL29        | 6159   | RPL29        | 3  |
| RPL3         | 6122   | RPL3         | 22 |
| RPL30        | 6156   | RPL30        | 8  |
| RPL31P11     | 641311 | RPL31P11     | 1  |
| RPL32        | 6161   | RPL32        | 3  |
| RPL34        | 6164   | RPL34        | 4  |
| RPL36        | 25873  | RPL36        | 19 |
| RPL36A       | 6173   | RPL36A       | X  |
| RPL37        | 6167   | RPL37        | 5  |
| RPL37A       | 6168   | RPL37A       | 2  |
| RPL39        | 6170   | RPL39        | X  |
| RPL39L       | 116832 | RPL39L       | 3  |
| RPL3L        | 6123   | RPL3L        | 16 |
| RPL4         | 6124   | RPL4         | 15 |
| RPL5         | 6125   | RPL5         | 1  |
| RPL8         | 6132   | RPL8         | 8  |

|          |        |          |    |
|----------|--------|----------|----|
| RPL9     | 6133   | RPL9     | 4  |
| RPN1     | 6184   | RPN1     | 3  |
| RPP14    | 11102  | RPP14    | 3  |
| RPP25    | 54913  | RPP25    | 15 |
| RPP38    | 10557  | RPP38    | 10 |
| RPP40    | 10799  | RPP40    | 6  |
| RPPH1    | 85495  | RPPH1    | 14 |
| RPRC1    | 55700  | RPRC1    | 1  |
| RPRD1A   | 55197  | RPRD1A   | 18 |
| RPRD1B   | 58490  | RPRD1B   | 20 |
| RPRD2    | 23248  | RPRD2    | 1  |
| RPRM     | 56475  | RPRM     | 2  |
| RPRML    | 388394 | RPRML    | 17 |
| RPS10P3  | 158104 | RPS10P3  | 9  |
| RPS11    | 6205   | RPS11    | 19 |
| RPS12    | 6206   | RPS12    | 6  |
| RPS15A   | 6210   | RPS15A   | 16 |
| RPS18    | 6222   | RPS18    | 6  |
| RPS19BP1 | 91582  | RPS19BP1 | 22 |
| RPS2     | 6187   | RPS2     | 16 |
| RPS21    | 6227   | RPS21    | 20 |
| RPS23    | 6228   | RPS23    | 5  |
| RPS26P10 | 401470 | RPS26P10 | 8  |
| RPS29    | 6235   | RPS29    | 14 |
| RPS4X    | 6191   | RPS4X    | X  |
| RPS4Y1   | 6192   | RPS4Y1   | Y  |
| RPS4Y2   | 140032 | RPS4Y2   | Y  |
| RPS5     | 6193   | RPS5     | 19 |
| RPS6KA1  | 6195   | RPS6KA1  | 1  |
| RPS6KA4  | 8986   | RPS6KA4  | 11 |
| RPS6KA5  | 9252   | RPS6KA5  | 14 |
| RPS6KB1  | 6198   | RPS6KB1  | 17 |
| RPS6KB2  | 6199   | RPS6KB2  | 11 |
| RPS6KC1  | 26750  | RPS6KC1  | 1  |
| RPS6KL1  | 83694  | RPS6KL1  | 14 |
| RPS6P1   | 440086 | RPS6P1   |    |
| RPS7     | 6201   | RPS7     | 2  |
| RPSA     | 3921   | RPSA     | 3  |
| RPTOR    | 57521  | RPTOR    | 17 |
| RPUSD1   | 113000 | RPUSD1   | 16 |
| RPUSD2   | 27079  | RPUSD2   | 15 |
| RPUSD3   | 285367 | RPUSD3   | 3  |
| RPUSD4   | 84881  | RPUSD4   | 11 |
| RQCD1    | 9125   | RQCD1    | 2  |

|         |        |         |    |
|---------|--------|---------|----|
| RRAD    | 6236   | RRAD    | 16 |
| RRAGA   | 10670  | RRAGA   | 9  |
| RRAGB   | 10325  | RRAGB   | X  |
| RRAGC   | 64121  | RRAGC   | 1  |
| RRAGD   | 58528  | RRAGD   | 6  |
| RRAS    | 6237   | RRAS    | 19 |
| RRAS2   | 22800  | RRAS2   | 11 |
| RRBP1   | 6238   | RRBP1   | 20 |
| RREB1   | 6239   | RREB1   | 6  |
| RRM1    | 6240   | RRM1    | 11 |
| RRM2    | 6241   | RRM2    | 2  |
| RRM2B   | 50484  | RRM2B   | 8  |
| RRN3    | 54700  | RRN3    | 16 |
| RRN3P2  | 653390 | RRN3P2  | 16 |
| RRP1    | 8568   | RRP1    | 21 |
| RRP12   | 23223  | RRP12   | 10 |
| RRP15   | 51018  | RRP15   | 1  |
| RRP1B   | 23076  | RRP1B   | 21 |
| RRP7A   | 27341  | RRP7A   | 22 |
| RRP8    | 23378  | RRP8    | 11 |
| RRP9    | 9136   | RRP9    | 3  |
| RRS1    | 23212  | RRS1    | 8  |
| RSAD1   | 55316  | RSAD1   | 17 |
| RSAD2   | 91543  | RSAD2   | 2  |
| RSBN1   | 54665  | RSBN1   | 1  |
| RSBN1L  | 222194 | RSBN1L  | 7  |
| RSC1A1  | 6248   | RSC1A1  | 1  |
| RSF1    | 51773  | RSF1    | 11 |
| RSHL1   | 81492  | RSHL1   | 19 |
| RSHL3   | 345895 | RSHL3   | 6  |
| RSL1D1  | 26156  | RSL1D1  | 16 |
| RSL24D1 | 51187  | RSL24D1 | 15 |
| RSPH1   | 89765  | RSPH1   | 21 |
| RSPH3   | 83861  | RSPH3   | 6  |
| RSPRY1  | 89970  | RSPRY1  | 16 |
| RSRC1   | 51319  | RSRC1   | 3  |
| RSRC2   | 65117  | RSRC2   | 12 |
| RSU1    | 6251   | RSU1    | 10 |
| RTBDN   | 83546  | RTBDN   | 19 |
| RTCD1   | 8634   | RTCD1   | 1  |
| RTDR1   | 27156  | RTDR1   | 22 |
| RTEL1   | 51750  | RTEL1   | 20 |
| RTF1    | 23168  | RTF1    | 15 |
| RTKN    | 6242   | RTKN    | 2  |

|         |        |         |    |
|---------|--------|---------|----|
| RTN2    | 6253   | RTN2    | 19 |
| RTN3    | 10313  | RTN3    | 11 |
| RTN4    | 57142  | RTN4    | 2  |
| RTN4IP1 | 84816  | RTN4IP1 | 6  |
| RTN4RL2 | 349667 | RTN4RL2 | 11 |
| RTP2    | 344892 | RTP2    | 3  |
| RTP4    | 64108  | RTP4    | 3  |
| RTTN    | 25914  | RTTN    | 18 |
| RUFY1   | 80230  | RUFY1   | 5  |
| RUFY3   | 22902  | RUFY3   | 4  |
| RUNDC1  | 146923 | RUNDC1  | 17 |
| RUNDC2A | 84127  | RUNDC2A | 16 |
| RUNDC2C | 440352 | RUNDC2C | 16 |
| RUNDC3A | 10900  | RUNDC3A | 17 |
| RUNDC3B | 154661 | RUNDC3B | 7  |
| RUNX1T1 | 862    | RUNX1T1 | 8  |
| RUNX2   | 860    | RUNX2   | 6  |
| RUNX3   | 864    | RUNX3   | 1  |
| RUSC1   | 23623  | RUSC1   | 1  |
| RUVBL1  | 8607   | RUVBL1  |    |
| RUVBL2  | 10856  | RUVBL2  | 19 |
| RWDD1   | 51389  | RWDD1   | 6  |
| RWDD2A  | 112611 | RWDD2A  | 6  |
| RWDD2B  | 10069  | RWDD2B  | 21 |
| RWDD3   | 25950  | RWDD3   | 1  |
| RWDD4A  | 201965 | RWDD4A  | 4  |
| RXFP3   | 51289  | RXFP3   | 5  |
| RXRA    | 6256   | RXRA    | 9  |
| RYBP    | 23429  | RYBP    | 3  |
| RYK     | 6259   | RYK     | 3  |
| RYR1    | 6261   | RYR1    | 19 |
| RYR2    | 6262   | RYR2    | 1  |
| S100A10 | 6281   | S100A10 | 1  |
| S100A11 | 6282   | S100A11 | 1  |
| S100A4  | 6275   | S100A4  | 1  |
| S100A6  | 6277   | S100A6  | 1  |
| S100A7  | 6278   | S100A7  | 1  |
| S100A7A | 338324 | S100A7A | 1  |
| S100A9  | 6280   | S100A9  | 1  |
| S100PBP | 64766  | S100PBP | 1  |
| S100Z   | 170591 | S100Z   | 5  |
| S1PR1   | 1901   | S1PR1   | 1  |
| S1PR2   | 9294   | S1PR2   | 19 |
| S1PR4   | 8698   | S1PR4   | 19 |

|         |        |         |    |
|---------|--------|---------|----|
| S1PR5   | 53637  | S1PR5   | 19 |
| SAAL1   | 113174 | SAAL1   | 11 |
| SAC3D1  | 29901  | SAC3D1  | 11 |
| SACM1L  | 22908  | SACM1L  | 3  |
| SACS    | 26278  | SACS    | 13 |
| SAE1    | 10055  | SAE1    | 19 |
| SAFB    | 6294   | SAFB    | 19 |
| SAFB2   | 9667   | SAFB2   | 19 |
| SALL2   | 6297   | SALL2   | 14 |
| SALL3   | 27164  | SALL3   | 18 |
| SAMD1   | 90378  | SAMD1   | 19 |
| SAMD10  | 140700 | SAMD10  | 20 |
| SAMD11  | 148398 | SAMD11  | 1  |
| SAMD13  | 148418 | SAMD13  | 1  |
| SAMD14  | 201191 | SAMD14  | 17 |
| SAMD4A  | 23034  | SAMD4A  | 14 |
| SAMD4B  | 55095  | SAMD4B  | 19 |
| SAMD6   | 203286 | SAMD6   |    |
| SAMD7   | 344658 | SAMD7   | 3  |
| SAMD8   | 142891 | SAMD8   | 10 |
| SAMD9   | 54809  | SAMD9   | 7  |
| SAMD9L  | 219285 | SAMD9L  | 7  |
| SAMHD1  | 25939  | SAMHD1  | 20 |
| SAMM50  | 25813  | SAMM50  | 22 |
| SAMSN1  | 64092  | SAMSN1  | 21 |
| SAP130  | 79595  | SAP130  | 2  |
| SAP18   | 10284  | SAP18   | 13 |
| SAP30   | 8819   | SAP30   | 4  |
| SAP30BP | 29115  | SAP30BP | 17 |
| SAP30L  | 79685  | SAP30L  | 5  |
| SAPS1   | 22870  | SAPS1   | 19 |
| SAPS3   | 55291  | SAPS3   | 11 |
| SAR1A   | 56681  | SAR1A   | 10 |
| SAR1B   | 51128  | SAR1B   | 5  |
| SARM1   | 23098  | SARM1   | 17 |
| SARS    | 6301   | SARS    | 1  |
| SARS2   | 54938  | SARS2   | 19 |
| SART3   | 9733   | SART3   | 12 |
| SASH3   | 54440  | SASH3   | X  |
| SASS6   | 163786 | SASS6   | 1  |
| SAT1    | 6303   | SAT1    | X  |
| SAT2    | 112483 | SAT2    | 17 |
| SATB1   | 6304   | SATB1   | 3  |
| SATB2   | 23314  | SATB2   | 2  |

|          |           |          |    |
|----------|-----------|----------|----|
| SAV1     | 60485     | SAV1     | 14 |
| SBDS     | 51119     | SBDS     | 7  |
| SBDSP    | 155370    | SBDSP    | 7  |
| SBF1     | 6305      | SBF1     | 22 |
| SBF2     | 81846     | SBF2     | 11 |
| SBNO1    | 55206     | SBNO1    | 12 |
| SBNO2    | 22904     | SBNO2    | 19 |
| SC4MOL   | 6307      | SC4MOL   | 4  |
| SC5DL    | 6309      | SC5DL    | 11 |
| SC65     | 10609     | SC65     | 17 |
| SCAMP1   | 9522      | SCAMP1   | 5  |
| SCAMP5   | 192683    | SCAMP5   | 15 |
| SCAND3   | 114821    | SCAND3   | 6  |
| SCAP     | 22937     | SCAP     | 3  |
| SCAPER   | 49855     | SCAPER   | 15 |
| SCARA5   | 286133    | SCARA5   | 8  |
| SCARB1   | 949       | SCARB1   | 12 |
| SCARB2   | 950       | SCARB2   | 4  |
| SCARNA10 | 692148    | SCARNA10 | 12 |
| SCARNA11 | 677780    | SCARNA11 | 12 |
| SCARNA12 | 677777    | SCARNA12 | 12 |
| SCARNA13 | 677768    | SCARNA13 | 14 |
| SCARNA14 | 692149    | SCARNA14 | 15 |
| SCARNA16 | 677781    | SCARNA16 | 17 |
| SCARNA17 | 677769    | SCARNA17 | 18 |
| SCARNA18 | 677765    | SCARNA18 | 5  |
| SCARNA2  | 677766    | SCARNA2  | 1  |
| SCARNA20 | 677681    | SCARNA20 | 17 |
| SCARNA21 | 677763    | SCARNA21 | 17 |
| SCARNA22 | 677770    | SCARNA22 | 4  |
| SCARNA23 | 677773    | SCARNA23 | X  |
| SCARNA4  | 677771    | SCARNA4  | 1  |
| SCARNA5  | 677775    | SCARNA5  | 2  |
| SCARNA6  | 677772    | SCARNA6  | 2  |
| SCARNA7  | 677767    | SCARNA7  | 3  |
| SCARNA8  | 677776    | SCARNA8  | 9  |
| SCARNA9  | 619383    | SCARNA9  | 11 |
| SCARNA9L | 100158262 | SCARNA9L | X  |
| SCCPDH   | 51097     | SCCPDH   | 1  |
| SCD      | 6319      | SCD      | 10 |
| SCD5     | 79966     | SCD5     | 4  |
| SCEL     | 8796      | SCEL     | 13 |
| SCFD2    | 152579    | SCFD2    | 4  |
| SCG2     | 7857      | SCG2     | 2  |

|          |           |          |    |
|----------|-----------|----------|----|
| SCG3     | 29106     | SCG3     | 15 |
| SCG5     | 6447      | SCG5     | 15 |
| SCGB1D2  | 10647     | SCGB1D2  | 11 |
| SCGB1D4  | 404552    | SCGB1D4  | 11 |
| SCGB2A1  | 4246      | SCGB2A1  | 11 |
| SCLT1    | 132320    | SCLT1    | 4  |
| SCLY     | 51540     | SCLY     | 2  |
| SCMH1    | 22955     | SCMH1    | 1  |
| SCML1    | 6322      | SCML1    | X  |
| SCML2    | 10389     | SCML2    | X  |
| SCN1A    | 6323      | SCN1A    | 2  |
| SCN1B    | 6324      | SCN1B    | 19 |
| SCN2A    | 6326      | SCN2A    | 2  |
| SCN2B    | 6327      | SCN2B    | 11 |
| SCN3A    | 6328      | SCN3A    | 2  |
| SCN4A    | 6329      | SCN4A    | 17 |
| SCN5A    | 6331      | SCN5A    |    |
| SCNM1    | 79005     | SCNM1    | 1  |
| SCNN1D   | 6339      | SCNN1D   | 1  |
| SCNN1G   | 6340      | SCNN1G   | 16 |
| SCO1     | 6341      | SCO1     | 17 |
| SCO2     | 9997      | SCO2     | 22 |
| SCOC     | 60592     | SCOC     | 4  |
| SCPEP1   | 59342     | SCPEP1   | 17 |
| SCRIB    | 23513     | SCRIB    | 8  |
| SCRN1    | 9805      | SCRN1    | 7  |
| SCXA     | 100129885 | SCXA     | 8  |
| SCXB     | 642658    | SCXB     | 8  |
| SCYL1    | 57410     | SCYL1    | 11 |
| SCYL1BP1 | 92344     | SCYL1BP1 | 1  |
| SCYL2    | 55681     | SCYL2    | 12 |
| SCYL3    | 57147     | SCYL3    | 1  |
| SDAD1    | 55153     | SDAD1    | 4  |
| SDC1     | 6382      | SDC1     | 2  |
| SDC4     | 6385      | SDC4     | 20 |
| SDCBP    | 6386      | SDCBP    | 8  |
| SDCCAG10 | 10283     | SDCCAG10 | 5  |
| SDCCAG3  | 10807     | SDCCAG3  | 9  |
| SDCCAG3L | 388478    | SDCCAG3L | 18 |
| SDCCAG8  | 10806     | SDCCAG8  | 1  |
| SDF2     | 6388      | SDF2     | 17 |
| SDF2L1   | 23753     | SDF2L1   | 22 |
| SDF4     | 51150     | SDF4     | 1  |
| SDHA     | 6389      | SDHA     | 5  |



|           |        |           |    |
|-----------|--------|-----------|----|
| SDHAF1    | 644096 | SDHAF1    | 19 |
| SDHALP1   | 255812 | SDHALP1   |    |
| SDHAP2    | 727956 | SDHAP2    | 3  |
| SDHB      | 6390   | SDHB      | 1  |
| SDHC      | 6391   | SDHC      | 1  |
| SDHD      | 6392   | SDHD      | 11 |
| SDR42E1   | 93517  | SDR42E1   | 16 |
| SDR9C7    | 121214 | SDR9C7    | 12 |
| SDS       | 10993  | SDS       | 12 |
| SDSL      | 113675 | SDSL      | 12 |
| SEC1      | 653677 | SEC1      | 19 |
| SEC11A    | 23478  | SEC11A    | 15 |
| SEC11C    | 90701  | SEC11C    | 18 |
| SEC13     | 6396   | SEC13     | 3  |
| SEC14L1   | 6397   | SEC14L1   | 17 |
| SEC14L5   | 9717   | SEC14L5   | 16 |
| SEC15L2   | 23233  | SEC15L2   |    |
| SEC16A    | 9919   | SEC16A    | 9  |
| SEC22A    | 26984  | SEC22A    | 3  |
| SEC22B    | 9554   | SEC22B    | 1  |
| SEC22C    | 9117   | SEC22C    | 3  |
| SEC23A    | 10484  | SEC23A    | 14 |
| SEC23B    | 10483  | SEC23B    | 20 |
| SEC23IP   | 11196  | SEC23IP   | 10 |
| SEC24A    | 10802  | SEC24A    | 5  |
| SEC24B    | 10427  | SEC24B    |    |
| SEC24C    | 9632   | SEC24C    | 10 |
| SEC24D    | 9871   | SEC24D    | 4  |
| SEC31A    | 22872  | SEC31A    | 4  |
| SEC61A1   | 29927  | SEC61A1   | 3  |
| SEC61A2   | 55176  | SEC61A2   | 10 |
| SEC61B    | 10952  | SEC61B    | 9  |
| SEC61G    | 23480  | SEC61G    | 7  |
| SEC62     | 7095   | SEC62     | 3  |
| SEC63     | 11231  | SEC63     | 6  |
| SECISBP2  | 79048  | SECISBP2  | 9  |
| SECISBP2L | 9728   | SECISBP2L | 15 |
| SEH1L     | 81929  | SEH1L     | 18 |
| SEL1L     | 6400   | SEL1L     | 14 |
| SEL1L3    | 23231  | SEL1L3    | 4  |
| SELE      | 6401   | SELE      | 1  |
| SELI      | 85465  | SELI      | 2  |
| SELK      | 58515  | SELK      | 3  |
| SELL      | 6402   | SELL      | 1  |

|          |        |          |    |
|----------|--------|----------|----|
| SELM     | 140606 | SELM     | 22 |
| SELO     | 83642  | SELO     | 22 |
| SELS     | 55829  | SELS     | 15 |
| SELT     | 51714  | SELT     | 3  |
| SEMA3E   | 9723   | SEMA3E   | 7  |
| SEMA3F   | 6405   | SEMA3F   | 3  |
| SEMA4A   | 64218  | SEMA4A   | 1  |
| SEMA4B   | 10509  | SEMA4B   | 15 |
| SEMA4C   | 54910  | SEMA4C   | 2  |
| SEMA4D   | 10507  | SEMA4D   | 9  |
| SEMA4F   | 10505  | SEMA4F   | 2  |
| SEMA5B   | 54437  | SEMA5B   | 3  |
| SEMA6A   | 57556  | SEMA6A   | 5  |
| SEMA6B   | 10501  | SEMA6B   | 19 |
| SEMA6C   | 10500  | SEMA6C   | 1  |
| SEMA7A   | 8482   | SEMA7A   | 15 |
| SENP1    | 29843  | SENP1    | 12 |
| SENP2    | 59343  | SENP2    | 3  |
| SENP3    | 26168  | SENP3    | 17 |
| SENP5    | 205564 | SENP5    | 3  |
| SENP6    | 26054  | SENP6    | 6  |
| SENP7    | 57337  | SENP7    | 3  |
| SEPHS1   | 22929  | SEPHS1   | 10 |
| SEPHS2   | 22928  | SEPHS2   | 16 |
| SEPN1    | 57190  | SEPN1    | 1  |
| SEPP1    | 6414   | SEPP1    | 5  |
| SEPSECS  | 51091  | SEPSECS  | 4  |
| SEPW1    | 6415   | SEPW1    | 19 |
| SEPX1    | 51734  | SEPX1    | 16 |
| SERAC1   | 84947  | SERAC1   | 6  |
| SERBP1   | 26135  | SERBP1   | 1  |
| SERF1A   | 8293   | SERF1A   | 5  |
| SERF1B   | 728492 | SERF1B   | 5  |
| SERF2    | 10169  | SERF2    | 15 |
| SERGEF   | 26297  | SERGEF   | 11 |
| SERHL    | 94009  | SERHL    |    |
| SERHL2   | 253190 | SERHL2   | 22 |
| SERINC1  | 57515  | SERINC1  | 6  |
| SERINC2  | 347735 | SERINC2  | 1  |
| SERINC3  | 10955  | SERINC3  | 20 |
| SERINC4  | 619189 | SERINC4  | 15 |
| SERP1    | 27230  | SERP1    | 3  |
| SERP2    | 387923 | SERP2    | 13 |
| SERPINA1 | 5265   | SERPINA1 | 14 |

|           |        |           |    |
|-----------|--------|-----------|----|
| SERPINA10 | 51156  | SERPINA10 | 14 |
| SERPINA11 | 256394 | SERPINA11 | 14 |
| SERPINA2  | 390502 | SERPINA2  | 14 |
| SERPINA4  | 5267   | SERPINA4  | 14 |
| SERPINA9  | 327657 | SERPINA9  | 14 |
| SERPINB1  | 1992   | SERPINB1  | 6  |
| SERPINB10 | 5273   | SERPINB10 | 18 |
| SERPINB13 | 5275   | SERPINB13 | 18 |
| SERPINB2  | 5055   | SERPINB2  | 18 |
| SERPINB7  | 8710   | SERPINB7  | 18 |
| SERPINB8  | 5271   | SERPINB8  | 18 |
| SERPINB9  | 5272   | SERPINB9  | 6  |
| SERPINE1  | 5054   | SERPINE1  | 7  |
| SERPINE2  | 5270   | SERPINE2  | 2  |
| SERPINF1  | 5176   | SERPINF1  | 17 |
| SERPINI1  | 5274   | SERPINI1  | 3  |
| SERTAD1   | 29950  | SERTAD1   | 19 |
| SERTAD2   | 9792   | SERTAD2   | 2  |
| SERTAD3   | 29946  | SERTAD3   | 19 |
| SESN1     | 27244  | SESN1     | 6  |
| SESN2     | 83667  | SESN2     | 1  |
| SESN3     | 143686 | SESN3     | 11 |
| SESTD1    | 91404  | SESTD1    | 2  |
| SET       | 6418   | SET       | 9  |
| SETBP1    | 26040  | SETBP1    | 18 |
| SETD1A    | 9739   | SETD1A    | 16 |
| SETD1B    | 23067  | SETD1B    | 12 |
| SETD2     | 29072  | SETD2     | 3  |
| SETD3     | 84193  | SETD3     | 14 |
| SETD4     | 54093  | SETD4     | 21 |
| SETD6     | 79918  | SETD6     | 16 |
| SETD7     | 80854  | SETD7     | 4  |
| SETD8     | 387893 | SETD8     | 12 |
| SETDB1    | 9869   | SETDB1    | 1  |
| SETDB2    | 83852  | SETDB2    | 13 |
| SETMAR    | 6419   | SETMAR    | 3  |
| SETX      | 23064  | SETX      | 9  |
| SEZ6L2    | 26470  | SEZ6L2    |    |
| SF1       | 7536   | SF1       | 11 |
| SF3A1     | 10291  | SF3A1     | 22 |
| SF3A3     | 10946  | SF3A3     | 1  |
| SF3B1     | 23451  | SF3B1     | 2  |
| SF3B14    | 51639  | SF3B14    | 2  |
| SF3B2     | 10992  | SF3B2     | 11 |

|           |        |           |    |
|-----------|--------|-----------|----|
| SF3B3     | 23450  | SF3B3     | 16 |
| SF3B4     | 10262  | SF3B4     | 1  |
| SF3B5     | 83443  | SF3B5     | 6  |
| SF4       | 57794  | SF4       | 19 |
| SFI1      | 9814   | SFI1      | 22 |
| SFMBT1    | 51460  | SFMBT1    | 3  |
| SFN       | 2810   | SFN       | 1  |
| SFPQ      | 6421   | SFPQ      | 1  |
| SFRP2     | 6423   | SFRP2     | 4  |
| SFRS1     | 6426   | SFRS1     | 17 |
| SFRS10    | 6434   | SFRS10    | 3  |
| SFRS12    | 140890 | SFRS12    | 5  |
| SFRS12IP1 | 285672 | SFRS12IP1 | 5  |
| SFRS13A   | 10772  | SFRS13A   | 1  |
| SFRS13B   | 135295 | SFRS13B   | 6  |
| SFRS14    | 10147  | SFRS14    | 19 |
| SFRS16    | 11129  | SFRS16    | 19 |
| SFRS17A   | 8227   | SFRS17A   | Y  |
| SFRS18    | 25957  | SFRS18    | 6  |
| SFRS2     | 6427   | SFRS2     | 17 |
| SFRS2B    | 10929  | SFRS2B    | 11 |
| SFRS2IP   | 9169   | SFRS2IP   | 12 |
| SFRS3     | 6428   | SFRS3     | 6  |
| SFRS4     | 6429   | SFRS4     | 1  |
| SFRS5     | 6430   | SFRS5     | 14 |
| SFRS6     | 6431   | SFRS6     | 20 |
| SFRS7     | 6432   | SFRS7     | 2  |
| SFRS8     | 6433   | SFRS8     | 12 |
| SFRS9     | 8683   | SFRS9     | 12 |
| SFT2D1    | 113402 | SFT2D1    | 6  |
| SFT2D2    | 375035 | SFT2D2    | 1  |
| SFT2D3    | 84826  | SFT2D3    | 2  |
| SFTPA1    | 653509 | SFTPA1    | 10 |
| SFTPD     | 6441   | SFTPD     | 10 |
| SFXN1     | 94081  | SFXN1     | 5  |
| SFXN2     | 118980 | SFXN2     | 10 |
| SFXN3     | 81855  | SFXN3     | 10 |
| SFXN4     | 119559 | SFXN4     | 10 |
| SFXN5     | 94097  | SFXN5     | 2  |
| SGCA      | 6442   | SGCA      | 17 |
| SGCE      | 8910   | SGCE      | 7  |
| SGEF      | 26084  | SGEF      | 3  |
| SGIP1     | 84251  | SGIP1     | 1  |
| SGK       | 6446   | SGK       | 6  |

|          |        |          |    |
|----------|--------|----------|----|
| SGK1     | 6446   | SGK1     | 6  |
| SGK196   | 84197  | SGK196   | 8  |
| SGK3     | 23678  | SGK3     | 8  |
| SGMS1    | 259230 | SGMS1    | 10 |
| SGMS2    | 166929 | SGMS2    | 4  |
| SGOL1    | 151648 | SGOL1    | 3  |
| SGOL2    | 151246 | SGOL2    | 2  |
| SGPL1    | 8879   | SGPL1    | 10 |
| SGPP1    | 81537  | SGPP1    | 14 |
| SGPP2    | 130367 | SGPP2    | 2  |
| SGSH     | 6448   | SGSH     | 17 |
| SGSM1    | 129049 | SGSM1    | 22 |
| SGTA     | 6449   | SGTA     | 19 |
| SH2B1    | 25970  | SH2B1    | 16 |
| SH2B2    | 10603  | SH2B2    | 7  |
| SH2B3    | 10019  | SH2B3    | 12 |
| SH2D1A   | 4068   | SH2D1A   | X  |
| SH2D2A   | 9047   | SH2D2A   | 1  |
| SH2D3A   | 10045  | SH2D3A   | 19 |
| SH2D3C   | 10044  | SH2D3C   | 9  |
| SH2D4A   | 63898  | SH2D4A   | 8  |
| SH2D5    | 400745 | SH2D5    |    |
| SH3BGR   | 6450   | SH3BGR   | 21 |
| SH3BGRL  | 6451   | SH3BGRL  | X  |
| SH3BGRL2 | 83699  | SH3BGRL2 | 6  |
| SH3BGRL3 | 83442  | SH3BGRL3 | 1  |
| SH3BP1   | 23616  | SH3BP1   | 22 |
| SH3BP4   | 23677  | SH3BP4   | 2  |
| SH3BP5L  | 80851  | SH3BP5L  | 1  |
| SH3GL1   | 6455   | SH3GL1   | 19 |
| SH3GL2   | 6456   | SH3GL2   | 9  |
| SH3GLB1  | 51100  | SH3GLB1  | 1  |
| SH3GLB2  | 56904  | SH3GLB2  | 9  |
| SH3KBP1  | 30011  | SH3KBP1  | X  |
| SH3PXD2A | 9644   | SH3PXD2A | 10 |
| SH3TC1   | 54436  | SH3TC1   | 4  |
| SH3YL1   | 26751  | SH3YL1   | 2  |
| SHANK3   | 85358  | SHANK3   | 22 |
| SHARPIN  | 81858  | SHARPIN  | 8  |
| SHB      | 6461   | SHB      | 9  |
| SHBG     | 6462   | SHBG     | 17 |
| SHC1     | 6464   | SHC1     | 1  |
| SHC4     | 399694 | SHC4     | 15 |
| SHCBP1   | 79801  | SHCBP1   | 16 |

|          |           |          |    |
|----------|-----------|----------|----|
| SHD      | 56961     | SHD      | 19 |
| SHE      | 126669    | SHE      | 1  |
| SHFM1    | 7979      | SHFM1    | 7  |
| SHISA2   | 387914    | SHISA2   | 13 |
| SHISA3   | 152573    | SHISA3   | 4  |
| SHISA5   | 51246     | SHISA5   | 3  |
| SHKBP1   | 92799     | SHKBP1   | 19 |
| SHMT1    | 6470      | SHMT1    | 17 |
| SHMT2    | 6472      | SHMT2    | 12 |
| SHOC2    | 8036      | SHOC2    | 10 |
| SHOX2    | 6474      | SHOX2    | 3  |
| SHPK     | 23729     | SHPK     | 17 |
| SHPRH    | 257218    | SHPRH    | 6  |
| SHQ1     | 55164     | SHQ1     | 3  |
| SHRM     | 57619     | SHRM     | 4  |
| SHROOM1  | 134549    | SHROOM1  | 5  |
| SHROOM2  | 357       | SHROOM2  | X  |
| SHROOM4  | 57477     | SHROOM4  | X  |
| SIAH1    | 6477      | SIAH1    | 16 |
| SIAH2    | 6478      | SIAH2    | 3  |
| SIDT1    | 54847     | SIDT1    | 3  |
| SIDT2    | 51092     | SIDT2    | 11 |
| SIGLEC10 | 89790     | SIGLEC10 | 19 |
| SIGLEC14 | 100049587 | SIGLEC14 | 19 |
| SIGLECP3 | 284367    | SIGLECP3 | 19 |
| SIGMAR1  | 10280     | SIGMAR1  | 9  |
| SIK1     | 150094    | SIK1     | 21 |
| SIK2     | 23235     | SIK2     | 11 |
| SIK3     | 23387     | SIK3     | 11 |
| SIKE     | 80143     | SIKE     | 1  |
| SIL1     | 64374     | SIL1     | 5  |
| SILV     | 6490      | SILV     | 12 |
| SIN3A    | 25942     | SIN3A    | 15 |
| SIN3B    | 23309     | SIN3B    | 19 |
| SIP1     | 8487      | SIP1     | 14 |
| SIPA1    | 6494      | SIPA1    | 11 |
| SIPA1L1  | 26037     | SIPA1L1  | 14 |
| SIPA1L2  | 57568     | SIPA1L2  | 1  |
| SIRPA    | 140885    | SIRPA    | 20 |
| SIRT1    | 23411     | SIRT1    | 10 |
| SIRT2    | 22933     | SIRT2    | 19 |
| SIRT4    | 23409     | SIRT4    | 12 |
| SIRT5    | 23408     | SIRT5    | 6  |
| SIRT7    | 51547     | SIRT7    | 17 |

|         |           |         |    |
|---------|-----------|---------|----|
| SIT1    | 27240     | SIT1    | 9  |
| SIVA    | 10572     | SIVA    | 14 |
| SIVA1   | 10572     | SIVA1   | 14 |
| SIX1    | 6495      | SIX1    | 14 |
| SIX2    | 10736     | SIX2    | 2  |
| SIX4    | 51804     | SIX4    | 14 |
| SIX5    | 147912    | SIX5    | 19 |
| SIX6    | 4990      | SIX6    | 14 |
| SKA1    | 220134    | SKA1    | 18 |
| SKA2    | 348235    | SKA2    | 17 |
| SKAP1   | 8631      | SKAP1   | 17 |
| SKAP2   | 8935      | SKAP2   | 7  |
| SKCG-1  | 100049615 | SKCG-1  |    |
| SKI     | 6497      | SKI     | 1  |
| SKIL    | 6498      | SKIL    | 3  |
| SKIP    | 51763     | SKIP    | 17 |
| SKIV2L  | 6499      | SKIV2L  | 6  |
| SKIV2L2 | 23517     | SKIV2L2 | 5  |
| SKP1    | 6500      | SKP1    | 5  |
| SKP2    | 6502      | SKP2    | 5  |
| SLA     | 6503      | SLA     | 8  |
| SLA2    | 84174     | SLA2    | 20 |
| SLAIN1  | 122060    | SLAIN1  | 13 |
| SLAIN2  | 57606     | SLAIN2  | 4  |
| SLAMF1  | 6504      | SLAMF1  | 1  |
| SLAMF6  | 114836    | SLAMF6  | 1  |
| SLAMF7  | 57823     | SLAMF7  | 1  |
| SLAMF9  | 89886     | SLAMF9  | 1  |
| SLBP    | 7884      | SLBP    | 4  |
| SLC10A3 | 8273      | SLC10A3 | X  |
| SLC10A7 | 84068     | SLC10A7 | 4  |
| SLC11A2 | 4891      | SLC11A2 | 12 |
| SLC12A2 | 6558      | SLC12A2 | 5  |
| SLC12A4 | 6560      | SLC12A4 | 16 |
| SLC12A6 | 9990      | SLC12A6 | 15 |
| SLC12A8 | 84561     | SLC12A8 | 3  |
| SLC12A9 | 56996     | SLC12A9 | 7  |
| SLC13A1 | 6561      | SLC13A1 | 7  |
| SLC13A2 | 9058      | SLC13A2 | 17 |
| SLC13A4 | 26266     | SLC13A4 | 7  |
| SLC15A2 | 6565      | SLC15A2 | 3  |
| SLC15A3 | 51296     | SLC15A3 | 11 |
| SLC15A4 | 121260    | SLC15A4 | 12 |
| SLC16A1 | 6566      | SLC16A1 | 1  |

|          |        |          |    |
|----------|--------|----------|----|
| SLC16A10 | 117247 | SLC16A10 | 6  |
| SLC16A12 | 387700 | SLC16A12 | 10 |
| SLC16A3  | 9123   | SLC16A3  | 17 |
| SLC16A6  | 9120   | SLC16A6  | 17 |
| SLC17A4  | 10050  | SLC17A4  | 6  |
| SLC17A7  | 57030  | SLC17A7  | 19 |
| SLC17A9  | 63910  | SLC17A9  | 20 |
| SLC18A1  | 6570   | SLC18A1  | 8  |
| SLC19A1  | 6573   | SLC19A1  | 21 |
| SLC1A1   | 6505   | SLC1A1   | 9  |
| SLC1A4   | 6509   | SLC1A4   | 2  |
| SLC1A5   | 6510   | SLC1A5   | 19 |
| SLC20A1  | 6574   | SLC20A1  | 2  |
| SLC20A2  | 6575   | SLC20A2  | 8  |
| SLC22A1  | 6580   | SLC22A1  | 6  |
| SLC22A17 | 51310  | SLC22A17 | 14 |
| SLC22A18 | 5002   | SLC22A18 | 11 |
| SLC22A20 | 440044 | SLC22A20 | 11 |
| SLC22A4  | 6583   | SLC22A4  | 5  |
| SLC22A5  | 6584   | SLC22A5  | 5  |
| SLC22A9  | 114571 | SLC22A9  | 11 |
| SLC23A1  | 9963   | SLC23A1  | 5  |
| SLC23A3  | 151295 | SLC23A3  | 2  |
| SLC24A1  | 9187   | SLC24A1  | 15 |
| SLC24A2  | 25769  | SLC24A2  | 9  |
| SLC24A4  | 123041 | SLC24A4  | 14 |
| SLC24A6  | 80024  | SLC24A6  | 12 |
| SLC25A1  | 6576   | SLC25A1  | 22 |
| SLC25A10 | 1468   | SLC25A10 | 17 |
| SLC25A11 | 8402   | SLC25A11 | 17 |
| SLC25A12 | 8604   | SLC25A12 | 2  |
| SLC25A13 | 10165  | SLC25A13 | 7  |
| SLC25A14 | 9016   | SLC25A14 | X  |
| SLC25A15 | 10166  | SLC25A15 | 13 |
| SLC25A17 | 10478  | SLC25A17 | 22 |
| SLC25A18 | 83733  | SLC25A18 | 22 |
| SLC25A19 | 60386  | SLC25A19 | 17 |
| SLC25A20 | 788    | SLC25A20 |    |
| SLC25A22 | 79751  | SLC25A22 | 11 |
| SLC25A23 | 79085  | SLC25A23 | 19 |
| SLC25A24 | 29957  | SLC25A24 | 1  |
| SLC25A25 | 114789 | SLC25A25 | 9  |
| SLC25A26 | 115286 | SLC25A26 | 3  |
| SLC25A27 | 9481   | SLC25A27 | 6  |



|          |        |          |    |
|----------|--------|----------|----|
| SLC25A28 | 81894  | SLC25A28 | 10 |
| SLC25A29 | 123096 | SLC25A29 | 14 |
| SLC25A3  | 5250   | SLC25A3  | 12 |
| SLC25A34 | 284723 | SLC25A34 | 1  |
| SLC25A35 | 399512 | SLC25A35 | 17 |
| SLC25A36 | 55186  | SLC25A36 | 3  |
| SLC25A37 | 51312  | SLC25A37 | 8  |
| SLC25A38 | 54977  | SLC25A38 | 3  |
| SLC25A39 | 51629  | SLC25A39 | 17 |
| SLC25A4  | 291    | SLC25A4  | 4  |
| SLC25A40 | 55972  | SLC25A40 | 7  |
| SLC25A41 | 284427 | SLC25A41 | 19 |
| SLC25A42 | 284439 | SLC25A42 | 19 |
| SLC25A43 | 203427 | SLC25A43 | X  |
| SLC25A44 | 9673   | SLC25A44 | 1  |
| SLC25A46 | 91137  | SLC25A46 | 5  |
| SLC25A5  | 292    | SLC25A5  | X  |
| SLC25A6  | 293    | SLC25A6  | XY |
| SLC26A2  | 1836   | SLC26A2  | 5  |
| SLC26A6  | 65010  | SLC26A6  | 3  |
| SLC27A1  | 376497 | SLC27A1  | 19 |
| SLC27A2  | 11001  | SLC27A2  | 15 |
| SLC27A5  | 10998  | SLC27A5  | 19 |
| SLC29A1  | 2030   | SLC29A1  | 6  |
| SLC29A2  | 3177   | SLC29A2  | 11 |
| SLC29A3  | 55315  | SLC29A3  | 10 |
| SLC29A4  | 222962 | SLC29A4  | 7  |
| SLC2A1   | 6513   | SLC2A1   | 1  |
| SLC2A11  | 66035  | SLC2A11  | 22 |
| SLC2A12  | 154091 | SLC2A12  | 6  |
| SLC2A14  | 144195 | SLC2A14  | 12 |
| SLC2A3   | 6515   | SLC2A3   | 12 |
| SLC2A4RG | 56731  | SLC2A4RG | 20 |
| SLC2A5   | 6518   | SLC2A5   | 1  |
| SLC2A6   | 11182  | SLC2A6   | 9  |
| SLC2A8   | 29988  | SLC2A8   | 9  |
| SLC30A1  | 7779   | SLC30A1  | 1  |
| SLC30A3  | 7781   | SLC30A3  | 2  |
| SLC30A5  | 64924  | SLC30A5  | 5  |
| SLC30A7  | 148867 | SLC30A7  | 1  |
| SLC30A9  | 10463  | SLC30A9  | 4  |
| SLC31A1  | 1317   | SLC31A1  | 9  |
| SLC31A2  | 1318   | SLC31A2  | 9  |
| SLC33A1  | 9197   | SLC33A1  | 3  |

|          |        |          |    |
|----------|--------|----------|----|
| SLC35A1  | 10559  | SLC35A1  | 6  |
| SLC35A2  | 7355   | SLC35A2  | X  |
| SLC35A3  | 23443  | SLC35A3  | 1  |
| SLC35A4  | 113829 | SLC35A4  | 5  |
| SLC35A5  | 55032  | SLC35A5  | 3  |
| SLC35B1  | 10237  | SLC35B1  | 17 |
| SLC35B2  | 347734 | SLC35B2  | 6  |
| SLC35B3  | 51000  | SLC35B3  | 6  |
| SLC35B4  | 84912  | SLC35B4  | 7  |
| SLC35C1  | 55343  | SLC35C1  | 11 |
| SLC35C2  | 51006  | SLC35C2  | 20 |
| SLC35D1  | 23169  | SLC35D1  | 1  |
| SLC35E1  | 79939  | SLC35E1  | 19 |
| SLC35E3  | 55508  | SLC35E3  | 12 |
| SLC35E4  | 339665 | SLC35E4  | 22 |
| SLC35F1  | 222553 | SLC35F1  | 6  |
| SLC35F2  | 54733  | SLC35F2  | 11 |
| SLC35F5  | 80255  | SLC35F5  | 2  |
| SLC36A1  | 206358 | SLC36A1  | 5  |
| SLC36A4  | 120103 | SLC36A4  | 11 |
| SLC37A1  | 54020  | SLC37A1  | 21 |
| SLC37A3  | 84255  | SLC37A3  | 7  |
| SLC37A4  | 2542   | SLC37A4  | 11 |
| SLC38A1  | 81539  | SLC38A1  | 12 |
| SLC38A10 | 124565 | SLC38A10 | 17 |
| SLC38A2  | 54407  | SLC38A2  | 12 |
| SLC38A5  | 92745  | SLC38A5  | X  |
| SLC38A6  | 145389 | SLC38A6  | 14 |
| SLC38A7  | 55238  | SLC38A7  | 16 |
| SLC38A9  | 153129 | SLC38A9  | 5  |
| SLC39A1  | 27173  | SLC39A1  | 1  |
| SLC39A10 | 57181  | SLC39A10 | 2  |
| SLC39A11 | 201266 | SLC39A11 | 17 |
| SLC39A12 | 221074 | SLC39A12 | 10 |
| SLC39A14 | 23516  | SLC39A14 | 8  |
| SLC39A3  | 29985  | SLC39A3  | 19 |
| SLC39A4  | 55630  | SLC39A4  | 8  |
| SLC39A5  | 283375 | SLC39A5  | 12 |
| SLC39A8  | 64116  | SLC39A8  | 4  |
| SLC39A9  | 55334  | SLC39A9  | 14 |
| SLC3A2   | 6520   | SLC3A2   | 11 |
| SLC40A1  | 30061  | SLC40A1  | 2  |
| SLC41A1  | 254428 | SLC41A1  | 1  |
| SLC41A2  | 84102  | SLC41A2  | 12 |

|          |        |          |    |
|----------|--------|----------|----|
| SLC41A3  | 54946  | SLC41A3  | 3  |
| SLC43A1  | 8501   | SLC43A1  | 11 |
| SLC43A2  | 124935 | SLC43A2  | 17 |
| SLC43A3  | 29015  | SLC43A3  | 11 |
| SLC44A1  | 23446  | SLC44A1  | 9  |
| SLC44A2  | 57153  | SLC44A2  | 19 |
| SLC44A3  | 126969 | SLC44A3  | 1  |
| SLC44A4  | 80736  | SLC44A4  | 6  |
| SLC45A2  | 51151  | SLC45A2  | 5  |
| SLC45A3  | 85414  | SLC45A3  | 1  |
| SLC45A4  | 57210  | SLC45A4  | 8  |
| SLC46A1  | 113235 | SLC46A1  | 17 |
| SLC46A3  | 283537 | SLC46A3  | 13 |
| SLC48A1  | 55652  | SLC48A1  | 12 |
| SLC4A1   | 6521   | SLC4A1   | 17 |
| SLC4A11  | 83959  | SLC4A11  | 20 |
| SLC4A1AP | 22950  | SLC4A1AP | 2  |
| SLC4A2   | 6522   | SLC4A2   | 7  |
| SLC4A5   | 57835  | SLC4A5   | 2  |
| SLC4A7   | 9497   | SLC4A7   | 3  |
| SLC4A8   | 9498   | SLC4A8   | 12 |
| SLC5A10  | 125206 | SLC5A10  | 17 |
| SLC5A3   | 6526   | SLC5A3   | 21 |
| SLC5A6   | 8884   | SLC5A6   | 2  |
| SLC5A9   | 200010 | SLC5A9   | 1  |
| SLC6A10P | 386757 | SLC6A10P | 16 |
| SLC6A12  | 6539   | SLC6A12  | 12 |
| SLC6A16  | 28968  | SLC6A16  | 19 |
| SLC6A19  | 340024 | SLC6A19  | 5  |
| SLC6A6   | 6533   | SLC6A6   | 3  |
| SLC6A8   | 6535   | SLC6A8   | X  |
| SLC6A9   | 6536   | SLC6A9   | 1  |
| SLC7A1   | 6541   | SLC7A1   | 13 |
| SLC7A3   | 84889  | SLC7A3   | X  |
| SLC7A4   | 6545   | SLC7A4   | 22 |
| SLC7A5   | 8140   | SLC7A5   | 16 |
| SLC7A5P1 | 81893  | SLC7A5P1 | 16 |
| SLC7A6   | 9057   | SLC7A6   | 16 |
| SLC7A6OS | 84138  | SLC7A6OS | 16 |
| SLC7A7   | 9056   | SLC7A7   | 14 |
| SLC7A9   | 11136  | SLC7A9   | 19 |
| SLC8A2   | 6543   | SLC8A2   | 19 |
| SLC9A1   | 6548   | SLC9A1   | 1  |
| SLC9A10  | 285335 | SLC9A10  | 3  |

|          |        |          |    |
|----------|--------|----------|----|
| SLC9A3R1 | 9368   | SLC9A3R1 | 17 |
| SLC9A5   | 6553   | SLC9A5   | 16 |
| SLC9A6   | 10479  | SLC9A6   | X  |
| SLC9A7   | 84679  | SLC9A7   | X  |
| SLC9A8   | 23315  | SLC9A8   | 20 |
| SLC9A9   | 285195 | SLC9A9   | 3  |
| SLCO2B1  | 11309  | SLCO2B1  | 11 |
| SLCO3A1  | 28232  | SLCO3A1  | 15 |
| SLCO4A1  | 28231  | SLCO4A1  | 20 |
| SLCO4C1  | 353189 | SLCO4C1  | 5  |
| SLFN11   | 91607  | SLFN11   | 17 |
| SLFN12   | 55106  | SLFN12   | 17 |
| SLFN5    | 162394 | SLFN5    | 17 |
| SLK      | 9748   | SLK      | 10 |
| SLMAP    | 7871   | SLMAP    | 3  |
| SLMO1    | 10650  | SLMO1    | 18 |
| SLMO2    | 51012  | SLMO2    | 20 |
| SLN      | 6588   | SLN      | 11 |
| SLTM     | 79811  | SLTM     | 15 |
| SLU7     | 10569  | SLU7     | 5  |
| SMA4     | 11039  | SMA4     |    |
| SMA5     | 11042  | SMA5     | 5  |
| SMAD2    | 4087   | SMAD2    | 18 |
| SMAD3    | 4088   | SMAD3    | 15 |
| SMAD4    | 4089   | SMAD4    | 18 |
| SMAD5    | 4090   | SMAD5    | 5  |
| SMAD6    | 4091   | SMAD6    | 15 |
| SMAD7    | 4092   | SMAD7    | 18 |
| SMAGP    | 57228  | SMAGP    | 12 |
| SMAP1    | 60682  | SMAP1    | 6  |
| SMAP2    | 64744  | SMAP2    | 1  |
| SMARCA1  | 6594   | SMARCA1  | X  |
| SMARCA2  | 6595   | SMARCA2  | 9  |
| SMARCA4  | 6597   | SMARCA4  | 19 |
| SMARCA5  | 8467   | SMARCA5  | 4  |
| SMARCAD1 | 56916  | SMARCAD1 | 4  |
| SMARCAL1 | 50485  | SMARCAL1 | 2  |
| SMARCB1  | 6598   | SMARCB1  | 22 |
| SMARCC1  | 6599   | SMARCC1  | 3  |
| SMARCC2  | 6601   | SMARCC2  | 12 |
| SMARCD1  | 6602   | SMARCD1  | 12 |
| SMARCD2  | 6603   | SMARCD2  | 17 |
| SMARCD3  | 6604   | SMARCD3  | 7  |
| SMARCE1  | 6605   | SMARCE1  | 17 |

|         |        |         |    |
|---------|--------|---------|----|
| SMC1A   | 8243   | SMC1A   | X  |
| SMC2    | 10592  | SMC2    | 9  |
| SMC4    | 10051  | SMC4    | 3  |
| SMC6    | 79677  | SMC6    | 2  |
| SMCHD1  | 23347  | SMCHD1  | 18 |
| SMCP    | 4184   | SMCP    | 1  |
| SMCR5   | 140771 | SMCR5   | 17 |
| SMCR7L  | 54471  | SMCR7L  | 22 |
| SMEK1   | 55671  | SMEK1   | 14 |
| SMEK2   | 57223  | SMEK2   | 2  |
| SMG1    | 23049  | SMG1    | 16 |
| SMG5    | 23381  | SMG5    | 1  |
| SMG6    | 23293  | SMG6    | 17 |
| SMG7    | 9887   | SMG7    | 1  |
| SMN1    | 6606   | SMN1    | 5  |
| SMN2    | 6607   | SMN2    | 5  |
| SMNDC1  | 10285  | SMNDC1  | 10 |
| SMO     | 6608   | SMO     | 7  |
| SMOX    | 54498  | SMOX    | 20 |
| SMPD1   | 6609   | SMPD1   | 11 |
| SMPD2   | 6610   | SMPD2   | 6  |
| SMPD3   | 55512  | SMPD3   | 16 |
| SMPD4   | 55627  | SMPD4   | 2  |
| SMPDL3A | 10924  | SMPDL3A | 6  |
| SMPDL3B | 27293  | SMPDL3B | 1  |
| SMR3A   | 26952  | SMR3A   | 4  |
| SMS     | 6611   | SMS     | X  |
| SMTN    | 6525   | SMTN    | 22 |
| SMTNL2  | 342527 | SMTNL2  | 17 |
| SMU1    | 55234  | SMU1    | 9  |
| SMUG1   | 23583  | SMUG1   | 12 |
| SMYD2   | 56950  | SMYD2   |    |
| SMYD3   | 64754  | SMYD3   | 1  |
| SMYD4   | 114826 | SMYD4   | 17 |
| SMYD5   | 10322  | SMYD5   | 2  |
| SNAI1   | 6615   | SNAI1   | 20 |
| SNAI2   | 6591   | SNAI2   | 8  |
| SNAI3   | 333929 | SNAI3   | 16 |
| SNAP23  | 8773   | SNAP23  | 15 |
| SNAP29  | 9342   | SNAP29  | 22 |
| SNAP47  | 116841 | SNAP47  | 1  |
| SNAPC1  | 6617   | SNAPC1  | 14 |
| SNAPC2  | 6618   | SNAPC2  | 19 |
| SNAPC3  | 6619   | SNAPC3  | 9  |

|            |           |            |    |
|------------|-----------|------------|----|
| SNAPC4     | 6621      | SNAPC4     | 9  |
| SNAPC5     | 10302     | SNAPC5     | 15 |
| SNAPIN     | 23557     | SNAPIN     | 1  |
| SNCAIP     | 9627      | SNCAIP     | 5  |
| SNCB       | 6620      | SNCB       | 5  |
| SND1       | 27044     | SND1       | 7  |
| SNF8       | 11267     | SNF8       | 17 |
| SNHG1      | 23642     | SNHG1      | 11 |
| SNHG10     | 283596    | SNHG10     | 14 |
| SNHG12     | 85028     | SNHG12     | 1  |
| SNHG3      | 8420      | SNHG3      | 1  |
| SNHG3-RCC1 | 751867    | SNHG3-RCC1 | 1  |
| SNHG4      | 724102    | SNHG4      |    |
| SNHG5      | 387066    | SNHG5      | 6  |
| SNHG6      | 641638    | SNHG6      | 8  |
| SNHG7      | 84973     | SNHG7      | 9  |
| SNHG8      | 440957    | SNHG8      |    |
| SNHG9      | 735301    | SNHG9      | 16 |
| SNIP1      | 79753     | SNIP1      | 1  |
| SNN        | 8303      | SNN        | 16 |
| SNORA1     | 677792    | SNORA1     | 11 |
| SNORA10    | 574042    | SNORA10    | 16 |
| SNORA11D   | 100124541 | SNORA11D   | X  |
| SNORA12    | 677800    | SNORA12    | 10 |
| SNORA13    | 654322    | SNORA13    | 5  |
| SNORA14A   | 677801    | SNORA14A   | 7  |
| SNORA14B   | 677802    | SNORA14B   | 1  |
| SNORA16A   | 692073    | SNORA16A   | 1  |
| SNORA17    | 677804    | SNORA17    | 9  |
| SNORA18    | 677805    | SNORA18    | 11 |
| SNORA20    | 677806    | SNORA20    | 6  |
| SNORA21    | 619505    | SNORA21    | 17 |
| SNORA22    | 677807    | SNORA22    | 7  |
| SNORA23    | 677808    | SNORA23    | 11 |
| SNORA24    | 677809    | SNORA24    | 4  |
| SNORA25    | 684959    | SNORA25    | 11 |
| SNORA26    | 677810    | SNORA26    | 4  |
| SNORA27    | 619499    | SNORA27    | 13 |
| SNORA28    | 677811    | SNORA28    | 14 |
| SNORA2A    | 677793    | SNORA2A    | 12 |
| SNORA2B    | 677794    | SNORA2B    | 12 |
| SNORA3     | 619562    | SNORA3     | 11 |
| SNORA30    | 677813    | SNORA30    | 16 |
| SNORA31    | 677814    | SNORA31    | 13 |

|          |           |          |    |
|----------|-----------|----------|----|
| SNORA32  | 692063    | SNORA32  | 11 |
| SNORA33  | 594839    | SNORA33  | 6  |
| SNORA34  | 677815    | SNORA34  | 12 |
| SNORA38  | 677820    | SNORA38  | 6  |
| SNORA38B | 100124536 | SNORA38B | 17 |
| SNORA4   | 619568    | SNORA4   | 3  |
| SNORA40  | 677822    | SNORA40  | 11 |
| SNORA41  | 619569    | SNORA41  | 2  |
| SNORA42  | 677823    | SNORA42  | 1  |
| SNORA43  | 677824    | SNORA43  | 9  |
| SNORA45  | 677826    | SNORA45  | 11 |
| SNORA47  | 677828    | SNORA47  | 5  |
| SNORA48  | 652965    | SNORA48  | 17 |
| SNORA49  | 677829    | SNORA49  | 12 |
| SNORA51  | 677831    | SNORA51  | 20 |
| SNORA52  | 619565    | SNORA52  | 11 |
| SNORA54  | 677833    | SNORA54  | 11 |
| SNORA55  | 677834    | SNORA55  | 1  |
| SNORA56  | 677835    | SNORA56  | X  |
| SNORA57  | 692158    | SNORA57  | 11 |
| SNORA58  | 677836    | SNORA58  | 3  |
| SNORA59A | 677885    | SNORA59A | 1  |
| SNORA59B | 677882    | SNORA59B | 17 |
| SNORA5B  | 677795    | SNORA5B  | 7  |
| SNORA5C  | 677796    | SNORA5C  | 7  |
| SNORA6   | 574040    | SNORA6   | 3  |
| SNORA60  | 677837    | SNORA60  | 20 |
| SNORA61  | 677838    | SNORA61  | 1  |
| SNORA62  | 6044      | SNORA62  | 3  |
| SNORA63  | 6043      | SNORA63  | 3  |
| SNORA64  | 26784     | SNORA64  | 16 |
| SNORA65  | 26783     | SNORA65  | 9  |
| SNORA66  | 26782     | SNORA66  | 1  |
| SNORA67  | 26781     | SNORA67  | 17 |
| SNORA68  | 26780     | SNORA68  | 19 |
| SNORA70  | 26778     | SNORA70  | X  |
| SNORA70B | 100124537 | SNORA70B | 2  |
| SNORA70C | 100124538 | SNORA70C |    |
| SNORA71A | 26777     | SNORA71A | 20 |
| SNORA71B | 26776     | SNORA71B | 20 |
| SNORA72  | 26775     | SNORA72  | 8  |
| SNORA73A | 6080      | SNORA73A | 1  |
| SNORA73B | 6081      | SNORA73B | 1  |
| SNORA74A | 26821     | SNORA74A | 5  |

|             |           |             |    |
|-------------|-----------|-------------|----|
| SNORA74B    | 677841    | SNORA74B    | 5  |
| SNORA75     | 654321    | SNORA75     | 2  |
| SNORA76     | 677842    | SNORA76     | 17 |
| SNORA77     | 677843    | SNORA77     | 1  |
| SNORA78     | 677844    | SNORA78     | 16 |
| SNORA79     | 677845    | SNORA79     | 14 |
| SNORA7A     | 619563    | SNORA7A     | 3  |
| SNORA7B     | 677797    | SNORA7B     | 3  |
| SNORA8      | 654320    | SNORA8      | 11 |
| SNORA80     | 677846    | SNORA80     | 21 |
| SNORA81     | 677847    | SNORA81     | 3  |
| SNORA84     | 100124534 | SNORA84     | 9  |
| SNORA9      | 677798    | SNORA9      | 7  |
| SNORD10     | 652966    | SNORD10     | 17 |
| SNORD100    | 594838    | SNORD100    | 6  |
| SNORD101    | 594837    | SNORD101    | 6  |
| SNORD102    | 26771     | SNORD102    | 13 |
| SNORD103A   | 692234    | SNORD103A   | 1  |
| SNORD104    | 692227    | SNORD104    | 17 |
| SNORD105    | 692229    | SNORD105    | 19 |
| SNORD108    | 338427    | SNORD108    | 15 |
| SNORD109A   | 338428    | SNORD109A   | 15 |
| SNORD109B   | 338429    | SNORD109B   | 15 |
| SNORD11     | 692058    | SNORD11     | 2  |
| SNORD110    | 692213    | SNORD110    | 20 |
| SNORD111    | 692214    | SNORD111    | 16 |
| SNORD113-1  | 767561    | SNORD113-1  | 14 |
| SNORD113-3  | 767563    | SNORD113-3  | 14 |
| SNORD114-2  | 767578    | SNORD114-2  | 14 |
| SNORD114-29 | 767610    | SNORD114-29 | 14 |
| SNORD114-7  | 767583    | SNORD114-7  | 14 |
| SNORD117    | 692233    | SNORD117    | 6  |
| SNORD119    | 100113378 | SNORD119    | 20 |
| SNORD12     | 692057    | SNORD12     | 20 |
| SNORD121B   | 100113385 | SNORD121B   | 9  |
| SNORD125    | 100113380 | SNORD125    | 22 |
| SNORD126    | 100113391 | SNORD126    | 14 |
| SNORD12B    | 100113393 | SNORD12B    | 20 |
| SNORD12C    | 26765     | SNORD12C    | 20 |
| SNORD13     | 692084    | SNORD13     | 8  |
| SNORD14A    | 26822     | SNORD14A    | 11 |
| SNORD14B    | 85388     | SNORD14B    | 11 |
| SNORD15B    | 114599    | SNORD15B    | 11 |
| SNORD16     | 595097    | SNORD16     | 15 |



|          |        |          |    |
|----------|--------|----------|----|
| SNORD17  | 692086 | SNORD17  | 20 |
| SNORD18A | 595098 | SNORD18A | 15 |
| SNORD18C | 595100 | SNORD18C | 15 |
| SNORD1A  | 677848 | SNORD1A  | 17 |
| SNORD1B  | 677849 | SNORD1B  | 17 |
| SNORD1C  | 677850 | SNORD1C  | 17 |
| SNORD2   | 619567 | SNORD2   | 3  |
| SNORD21  | 6083   | SNORD21  | 1  |
| SNORD24  | 26820  | SNORD24  | 9  |
| SNORD25  | 9303   | SNORD25  | 11 |
| SNORD27  | 9301   | SNORD27  | 11 |
| SNORD30  | 9299   | SNORD30  | 11 |
| SNORD31  | 9298   | SNORD31  | 11 |
| SNORD32A | 26819  | SNORD32A | 19 |
| SNORD32B | 692092 | SNORD32B | 6  |
| SNORD33  | 26818  | SNORD33  | 19 |
| SNORD34  | 26817  | SNORD34  | 19 |
| SNORD35A | 26816  | SNORD35A | 19 |
| SNORD35B | 84546  | SNORD35B | 19 |
| SNORD36A | 26815  | SNORD36A | 9  |
| SNORD36C | 26813  | SNORD36C | 9  |
| SNORD37  | 26812  | SNORD37  | 19 |
| SNORD38A | 94162  | SNORD38A | 1  |
| SNORD38B | 94163  | SNORD38B | 1  |
| SNORD3A  | 780851 | SNORD3A  | 17 |
| SNORD3C  | 780853 | SNORD3C  | 17 |
| SNORD3D  | 780854 | SNORD3D  | 17 |
| SNORD41  | 26810  | SNORD41  | 19 |
| SNORD42B | 26808  | SNORD42B | 17 |
| SNORD43  | 26807  | SNORD43  | 22 |
| SNORD46  | 94161  | SNORD46  | 1  |
| SNORD47  | 26802  | SNORD47  | 1  |
| SNORD48  | 26801  | SNORD48  | 6  |
| SNORD49A | 26800  | SNORD49A | 17 |
| SNORD4A  | 26773  | SNORD4A  | 17 |
| SNORD4B  | 26772  | SNORD4B  | 17 |
| SNORD5   | 692072 | SNORD5   | 11 |
| SNORD50B | 692088 | SNORD50B | 6  |
| SNORD51  | 26798  | SNORD51  | 2  |
| SNORD52  | 26797  | SNORD52  | 6  |
| SNORD54  | 26795  | SNORD54  | 8  |
| SNORD55  | 26811  | SNORD55  | 1  |
| SNORD56  | 26793  | SNORD56  | 20 |
| SNORD57  | 26792  | SNORD57  | 20 |

|          |        |          |    |
|----------|--------|----------|----|
| SNORD59A | 26789  | SNORD59A | 12 |
| SNORD59B | 692090 | SNORD59B | 12 |
| SNORD6   | 692075 | SNORD6   | 11 |
| SNORD62B | 692093 | SNORD62B | 9  |
| SNORD63  | 26785  | SNORD63  | 5  |
| SNORD65  | 692106 | SNORD65  | 17 |
| SNORD66  | 692107 | SNORD66  | 3  |
| SNORD68  | 606500 | SNORD68  | 16 |
| SNORD69  | 692109 | SNORD69  | 3  |
| SNORD7   | 692076 | SNORD7   | 17 |
| SNORD71  | 692111 | SNORD71  | 16 |
| SNORD73A | 8944   | SNORD73A | 4  |
| SNORD74  | 619498 | SNORD74  | 1  |
| SNORD76  | 692196 | SNORD76  | 1  |
| SNORD78  | 692198 | SNORD78  | 1  |
| SNORD8   | 319103 | SNORD8   | 14 |
| SNORD80  | 26774  | SNORD80  | 1  |
| SNORD83A | 116937 | SNORD83A | 22 |
| SNORD83B | 116938 | SNORD83B | 22 |
| SNORD84  | 692199 | SNORD84  | 6  |
| SNORD85  | 692200 | SNORD85  | 1  |
| SNORD87  | 641648 | SNORD87  | 8  |
| SNORD88B | 692203 | SNORD88B | 19 |
| SNORD88C | 692204 | SNORD88C | 19 |
| SNORD89  | 692205 | SNORD89  | 2  |
| SNORD91A | 692207 | SNORD91A | 17 |
| SNORD91B | 692208 | SNORD91B | 17 |
| SNORD92  | 692209 | SNORD92  | 2  |
| SNORD94  | 692225 | SNORD94  | 2  |
| SNORD95  | 619570 | SNORD95  | 5  |
| SNORD96A | 619571 | SNORD96A | 5  |
| SNORD96B | 692226 | SNORD96B | X  |
| SNORD99  | 692212 | SNORD99  | 1  |
| SNPH     | 9751   | SNPH     | 20 |
| SNRK     | 54861  | SNRK     | 3  |
| SNRNP200 | 23020  | SNRNP200 | 2  |
| SNRNP25  | 79622  | SNRNP25  | 16 |
| SNRNP27  | 11017  | SNRNP27  | 2  |
| SNRNP35  | 11066  | SNRNP35  | 12 |
| SNRNP40  | 9410   | SNRNP40  | 1  |
| SNRNP48  | 154007 | SNRNP48  | 6  |
| SNRNP70  | 6625   | SNRNP70  | 19 |
| SNRP70   | 6625   | SNRP70   | 19 |
| SNRPA    | 6626   | SNRPA    | 19 |

|        |        |        |    |
|--------|--------|--------|----|
| SNRPA1 | 6627   | SNRPA1 | 15 |
| SNRPB  | 6628   | SNRPB  | 20 |
| SNRPB2 | 6629   | SNRPB2 | 20 |
| SNRPC  | 6631   | SNRPC  | 6  |
| SNRPD1 | 6632   | SNRPD1 | 18 |
| SNRPD2 | 6633   | SNRPD2 | 19 |
| SNRPD3 | 6634   | SNRPD3 | 22 |
| SNRPE  | 6635   | SNRPE  | 1  |
| SNRPF  | 6636   | SNRPF  | 12 |
| SNRPG  | 6637   | SNRPG  | 2  |
| SNRPN  | 6638   | SNRPN  | 15 |
| SNTA1  | 6640   | SNTA1  | 20 |
| SNTB1  | 6641   | SNTB1  | 8  |
| SNTB2  | 6645   | SNTB2  | 16 |
| SNUPN  | 10073  | SNUPN  | 15 |
| SNURF  | 8926   | SNURF  | 15 |
| SNW1   | 22938  | SNW1   | 14 |
| SNX1   | 6642   | SNX1   | 15 |
| SNX10  | 29887  | SNX10  | 7  |
| SNX11  | 29916  | SNX11  | 17 |
| SNX12  | 29934  | SNX12  | X  |
| SNX13  | 23161  | SNX13  | 7  |
| SNX14  | 57231  | SNX14  | 6  |
| SNX15  | 29907  | SNX15  | 11 |
| SNX16  | 64089  | SNX16  | 8  |
| SNX17  | 9784   | SNX17  | 2  |
| SNX19  | 399979 | SNX19  | 11 |
| SNX2   | 6643   | SNX2   | 5  |
| SNX22  | 79856  | SNX22  | 15 |
| SNX24  | 28966  | SNX24  | 5  |
| SNX25  | 83891  | SNX25  | 4  |
| SNX26  | 115703 | SNX26  | 19 |
| SNX27  | 81609  | SNX27  | 1  |
| SNX29  | 92017  | SNX29  | 16 |
| SNX3   | 8724   | SNX3   | 6  |
| SNX30  | 401548 | SNX30  | 9  |
| SNX31  | 169166 | SNX31  | 8  |
| SNX4   | 8723   | SNX4   | 3  |
| SNX5   | 27131  | SNX5   | 20 |
| SNX8   | 29886  | SNX8   | 7  |
| SOBP   | 55084  | SOBP   | 6  |
| SOCS1  | 8651   | SOCS1  | 16 |
| SOCS2  | 8835   | SOCS2  | 12 |
| SOCS3  | 9021   | SOCS3  | 17 |

|         |        |         |    |
|---------|--------|---------|----|
| SOCS4   | 122809 | SOCS4   | 14 |
| SOCS5   | 9655   | SOCS5   | 2  |
| SOD2    | 6648   | SOD2    | 6  |
| SOLH    | 6650   | SOLH    | 16 |
| SON     | 6651   | SON     | 21 |
| SORBS2  | 8470   | SORBS2  | 4  |
| SORBS3  | 10174  | SORBS3  | 8  |
| SORCS3  | 22986  | SORCS3  | 10 |
| SORD    | 6652   | SORD    |    |
| SORL1   | 6653   | SORL1   | 11 |
| SORT1   | 6272   | SORT1   | 1  |
| SOS1    | 6654   | SOS1    | 2  |
| SOSTDC1 | 25928  | SOSTDC1 | 7  |
| SOX12   | 6666   | SOX12   | 20 |
| SOX15   | 6665   | SOX15   | 17 |
| SOX18   | 54345  | SOX18   | 20 |
| SOX2    | 6657   | SOX2    | 3  |
| SOX4    | 6659   | SOX4    | 6  |
| SOX7    | 83595  | SOX7    | 8  |
| SOX8    | 30812  | SOX8    | 16 |
| SP1     | 6667   | SP1     | 12 |
| SP100   | 6672   | SP100   | 2  |
| SP110   | 3431   | SP110   | 2  |
| SP140   | 11262  | SP140   | 2  |
| SP140L  | 93349  | SP140L  | 2  |
| SP2     | 6668   | SP2     | 17 |
| SP3     | 6670   | SP3     | 2  |
| SP4     | 6671   | SP4     | 7  |
| SP6     | 80320  | SP6     | 17 |
| SPA17   | 53340  | SPA17   | 11 |
| SPACA1  | 81833  | SPACA1  | 6  |
| SPACA3  | 124912 | SPACA3  | 17 |
| SPACA4  | 171169 | SPACA4  | 19 |
| SPAG1   | 6674   | SPAG1   | 8  |
| SPAG16  | 79582  | SPAG16  | 2  |
| SPAG4   | 6676   | SPAG4   | 20 |
| SPAG5   | 10615  | SPAG5   | 17 |
| SPAG6   | 9576   | SPAG6   | 10 |
| SPAG7   | 9552   | SPAG7   | 17 |
| SPAG9   | 9043   | SPAG9   | 17 |
| SPANXN3 | 139067 | SPANXN3 | X  |
| SPARCL1 | 8404   | SPARCL1 | 4  |
| SPAST   | 6683   | SPAST   | 2  |
| SPATA12 | 353324 | SPATA12 | 3  |

|          |        |          |    |
|----------|--------|----------|----|
| SPATA18  | 132671 | SPATA18  | 4  |
| SPATA2   | 9825   | SPATA2   | 20 |
| SPATA20  | 64847  | SPATA20  | 17 |
| SPATA2L  | 124044 | SPATA2L  | 16 |
| SPATA3   | 130560 | SPATA3   | 2  |
| SPATA5L1 | 79029  | SPATA5L1 | 15 |
| SPATA7   | 55812  | SPATA7   | 14 |
| SPATS2   | 65244  | SPATS2   | 12 |
| SPATS2L  | 26010  | SPATS2L  | 2  |
| SPC24    | 147841 | SPC24    | 19 |
| SPC25    | 57405  | SPC25    | 2  |
| SPCS1    | 28972  | SPCS1    | 3  |
| SPCS2    | 9789   | SPCS2    | 11 |
| SPCS3    | 60559  | SPCS3    |    |
| SPEF1    | 25876  | SPEF1    | 20 |
| SPEF2    | 79925  | SPEF2    | 5  |
| SPEN     | 23013  | SPEN     | 1  |
| SPG11    | 80208  | SPG11    | 15 |
| SPG21    | 51324  | SPG21    |    |
| SPG3A    | 51062  | SPG3A    | 14 |
| SPG7     | 6687   | SPG7     | 16 |
| SPHAR    | 10638  | SPHAR    | 1  |
| SPHK2    | 56848  | SPHK2    | 19 |
| SPI1     | 6688   | SPI1     | 11 |
| SPIB     | 6689   | SPIB     | 19 |
| SPIC     | 121599 | SPIC     | 12 |
| SPIN1    | 10927  | SPIN1    | 9  |
| SPIN2A   | 54466  | SPIN2A   | X  |
| SPIN2B   | 474343 | SPIN2B   | X  |
| SPIN3    | 169981 | SPIN3    | X  |
| SPIN4    | 139886 | SPIN4    | X  |
| SPINK2   | 6691   | SPINK2   | 4  |
| SPINK5   | 11005  | SPINK5   | 5  |
| SPINK5L3 | 153218 | SPINK5L3 | 5  |
| SPINT1   | 6692   | SPINT1   | 15 |
| SPINT2   | 10653  | SPINT2   | 19 |
| SPIRE1   | 56907  | SPIRE1   | 18 |
| SPIRE2   | 84501  | SPIRE2   | 16 |
| SPN      | 6693   | SPN      | 16 |
| SPNS1    | 83985  | SPNS1    | 16 |
| SPNS2    | 124976 | SPNS2    | 17 |
| SPNS3    | 201305 | SPNS3    | 17 |
| SPOCK1   | 6695   | SPOCK1   | 5  |
| SPOCK2   | 9806   | SPOCK2   | 10 |

|         |        |         |    |
|---------|--------|---------|----|
| SPON1   | 10418  | SPON1   | 11 |
| SPOPL   | 339745 | SPOPL   | 2  |
| SPP1    | 6696   | SPP1    | 4  |
| SPP2    | 6694   | SPP2    | 2  |
| SPPL2A  | 84888  | SPPL2A  | 15 |
| SPPL2B  | 56928  | SPPL2B  | 19 |
| SPPL3   | 121665 | SPPL3   | 12 |
| SPR     | 6697   | SPR     | 2  |
| SPRED1  | 161742 | SPRED1  | 15 |
| SPRED2  | 200734 | SPRED2  | 2  |
| SPRR2A  | 6700   | SPRR2A  | 1  |
| SPRR4   | 163778 | SPRR4   | 1  |
| SPRY1   | 10252  | SPRY1   | 4  |
| SPRY2   | 10253  | SPRY2   | 13 |
| SPRY4   | 81848  | SPRY4   | 5  |
| SPRYD3  | 84926  | SPRYD3  | 12 |
| SPRYD4  | 283377 | SPRYD4  | 12 |
| SPRYD5  | 84767  | SPRYD5  | 11 |
| SPSB1   | 80176  | SPSB1   | 1  |
| SPSB2   | 84727  | SPSB2   | 12 |
| SPSB3   | 90864  | SPSB3   | 16 |
| SPTA1   | 6708   | SPTA1   | 1  |
| SPTAN1  | 6709   | SPTAN1  | 9  |
| SPTBN1  | 6711   | SPTBN1  | 2  |
| SPTBN2  | 6712   | SPTBN2  | 11 |
| SPTBN4  | 57731  | SPTBN4  | 19 |
| SPTLC1  | 10558  | SPTLC1  | 9  |
| SPTLC2  | 9517   | SPTLC2  | 14 |
| SPTLC3  | 55304  | SPTLC3  | 20 |
| SPTY2D1 | 144108 | SPTY2D1 | 11 |
| SQLE    | 6713   | SQLE    | 8  |
| SQRDL   | 58472  | SQRDL   | 15 |
| SQSTM1  | 8878   | SQSTM1  | 5  |
| SR140   | 23350  | SR140   | 3  |
| SRA1    | 10011  | SRA1    | 5  |
| SRBD1   | 55133  | SRBD1   | 2  |
| SRC     | 6714   | SRC     | 20 |
| SRD5A1  | 6715   | SRD5A1  | 5  |
| SRD5A3  | 79644  | SRD5A3  | 4  |
| SREBF1  | 6720   | SREBF1  | 17 |
| SRF     | 6722   | SRF     | 6  |
| SRFBP1  | 153443 | SRFBP1  | 5  |
| SRGAP1  | 57522  | SRGAP1  | 12 |
| SRGAP2  | 23380  | SRGAP2  | 1  |

|         |           |         |    |
|---------|-----------|---------|----|
| SRGAP2L | 647135    | SRGAP2L | 1  |
| SRGAP3  | 9901      | SRGAP3  | 3  |
| SRGN    | 5552      | SRGN    | 10 |
| SRI     | 6717      | SRI     | 7  |
| SRL     | 6345      | SRL     | 16 |
| SRM     | 6723      | SRM     | 1  |
| SRP14   | 6727      | SRP14   | 15 |
| SRP14P1 | 390284    | SRP14P1 | 12 |
| SRP19   | 6728      | SRP19   | 5  |
| SRP54   | 6729      | SRP54   | 14 |
| SRP68   | 6730      | SRP68   | 17 |
| SRP72   | 6731      | SRP72   | 4  |
| SRP9    | 6726      | SRP9    | 1  |
| SRPK1   | 6732      | SRPK1   | 6  |
| SRPK2   | 6733      | SRPK2   | 7  |
| SRPR    | 6734      | SRPR    | 11 |
| SRPRB   | 58477     | SRPRB   | 3  |
| SRPX    | 8406      | SRPX    | X  |
| SRR     | 63826     | SRR     | 17 |
| SRRD    | 402055    | SRRD    | 22 |
| SRRM1   | 10250     | SRRM1   | 1  |
| SRRM1L  | 401475    | SRRM1L  |    |
| SRRM2   | 23524     | SRRM2   | 16 |
| SRRM5   | 100170229 | SRRM5   | 19 |
| SRXN1   | 140809    | SRXN1   | 20 |
| SS18    | 6760      | SS18    | 18 |
| SS18L1  | 26039     | SS18L1  | 20 |
| SS18L2  | 51188     | SS18L2  | 3  |
| SSB     | 6741      | SSB     | 2  |
| SSBP1   | 6742      | SSBP1   | 7  |
| SSBP2   | 23635     | SSBP2   | 5  |
| SSBP3   | 23648     | SSBP3   | 1  |
| SSBP4   | 170463    | SSBP4   | 19 |
| SSFA2   | 6744      | SSFA2   | 2  |
| SSH2    | 85464     | SSH2    | 17 |
| SSH3    | 54961     | SSH3    | 11 |
| SSNA1   | 8636      | SSNA1   | 9  |
| SSPN    | 8082      | SSPN    | 12 |
| SSR1    | 6745      | SSR1    | 6  |
| SSR2    | 6746      | SSR2    | 1  |
| SSR3    | 6747      | SSR3    | 3  |
| SSR4    | 6748      | SSR4    | X  |
| SSRP1   | 6749      | SSRP1   | 11 |
| SSSCA1  | 10534     | SSSCA1  | 11 |

|            |        |            |    |
|------------|--------|------------|----|
| SSTR2      | 6752   | SSTR2      | 17 |
| SSU72      | 29101  | SSU72      | 1  |
| SSX2IP     | 117178 | SSX2IP     | 1  |
| SSX3       | 10214  | SSX3       | X  |
| ST13       | 6767   | ST13       | 22 |
| ST14       | 6768   | ST14       | 11 |
| ST20       | 400410 | ST20       | 15 |
| ST3GAL1    | 6482   | ST3GAL1    | 8  |
| ST3GAL2    | 6483   | ST3GAL2    | 16 |
| ST3GAL3    | 6487   | ST3GAL3    | 1  |
| ST3GAL4    | 6484   | ST3GAL4    | 11 |
| ST3GAL5    | 8869   | ST3GAL5    | 2  |
| ST3GAL6    | 10402  | ST3GAL6    | 3  |
| ST6GAL1    | 6480   | ST6GAL1    | 3  |
| ST6GALNAC4 | 27090  | ST6GALNAC4 | 9  |
| ST6GALNAC6 | 30815  | ST6GALNAC6 | 9  |
| ST7        | 7982   | ST7        | 7  |
| ST7OT2     | 93654  | ST7OT2     | 7  |
| ST7OT4     | 338069 | ST7OT4     | 7  |
| ST8SIA1    | 6489   | ST8SIA1    | 12 |
| ST8SIA2    | 8128   | ST8SIA2    | 15 |
| ST8SIA3    | 51046  | ST8SIA3    | 18 |
| ST8SIA4    | 7903   | ST8SIA4    | 5  |
| ST8SIA5    | 29906  | ST8SIA5    | 18 |
| STAB2      | 55576  | STAB2      | 12 |
| STAC2      | 342667 | STAC2      | 17 |
| STAC3      | 246329 | STAC3      | 12 |
| STAG1      | 10274  | STAG1      | 3  |
| STAG2      | 10735  | STAG2      | X  |
| STAG3      | 10734  | STAG3      | 7  |
| STAG3L1    | 54441  | STAG3L1    | 7  |
| STAG3L2    | 442582 | STAG3L2    | 7  |
| STAG3L3    | 442578 | STAG3L3    | 7  |
| STAG3L4    | 64940  | STAG3L4    | 7  |
| STAM       | 8027   | STAM       | 10 |
| STAM2      | 10254  | STAM2      | 2  |
| STAMBP     | 10617  | STAMBP     | 2  |
| STAMBPL1   | 57559  | STAMBPL1   | 10 |
| STAP1      | 26228  | STAP1      | 4  |
| STARD10    | 10809  | STARD10    | 11 |
| STARD3     | 10948  | STARD3     | 17 |
| STARD3NL   | 83930  | STARD3NL   | 7  |
| STARD4     | 134429 | STARD4     | 5  |
| STARD5     | 80765  | STARD5     | 15 |



|         |        |         |    |
|---------|--------|---------|----|
| STARD7  | 56910  | STARD7  | 2  |
| STAT1   | 6772   | STAT1   | 2  |
| STAT2   | 6773   | STAT2   | 12 |
| STAT3   | 6774   | STAT3   | 17 |
| STAT4   | 6775   | STAT4   | 2  |
| STAT5A  | 6776   | STAT5A  | 17 |
| STAT5B  | 6777   | STAT5B  | 17 |
| STAT6   | 6778   | STAT6   | 12 |
| STAU1   | 6780   | STAU1   | 20 |
| STAU2   | 27067  | STAU2   | 8  |
| STC1    | 6781   | STC1    | 8  |
| STC2    | 8614   | STC2    | 5  |
| STEAP1  | 26872  | STEAP1  |    |
| STGC3   | 474171 | STGC3   |    |
| STIL    | 6491   | STIL    | 1  |
| STIM1   | 6786   | STIM1   | 11 |
| STIM2   | 57620  | STIM2   | 4  |
| STIP1   | 10963  | STIP1   | 11 |
| STK10   | 6793   | STK10   | 5  |
| STK11   | 6794   | STK11   | 19 |
| STK11IP | 114790 | STK11IP | 2  |
| STK16   | 8576   | STK16   | 2  |
| STK17B  | 9262   | STK17B  | 2  |
| STK19   | 8859   | STK19   | 6  |
| STK25   | 10494  | STK25   | 2  |
| STK3    | 6788   | STK3    | 8  |
| STK32A  | 202374 | STK32A  | 5  |
| STK33   | 65975  | STK33   | 11 |
| STK35   | 140901 | STK35   | 20 |
| STK36   | 27148  | STK36   | 2  |
| STK38   | 11329  | STK38   | 6  |
| STK38L  | 23012  | STK38L  | 12 |
| STK39   | 27347  | STK39   | 2  |
| STK4    | 6789   | STK4    | 20 |
| STK40   | 83931  | STK40   | 1  |
| STMN1   | 3925   | STMN1   | 1  |
| STMN2   | 11075  | STMN2   | 8  |
| STMN3   | 50861  | STMN3   | 20 |
| STMN4   | 81551  | STMN4   | 8  |
| STOM    | 2040   | STOM    | 9  |
| STOML1  | 9399   | STOML1  | 15 |
| STOML2  | 30968  | STOML2  | 9  |
| STOX1   | 219736 | STOX1   | 10 |
| STRA13  | 201254 | STRA13  | 17 |

|         |        |         |    |
|---------|--------|---------|----|
| STRA6   | 64220  | STRA6   | 15 |
| STRADA  | 92335  | STRADA  | 17 |
| STRADB  | 55437  | STRADB  | 2  |
| STRAP   | 11171  | STRAP   | 12 |
| STRBP   | 55342  | STRBP   | 9  |
| STRC    | 161497 | STRC    | 15 |
| STRN    | 6801   | STRN    | 2  |
| STRN3   | 29966  | STRN3   | 14 |
| STRN4   | 29888  | STRN4   | 19 |
| STS     | 412    | STS     | X  |
| STS-1   | 84959  | STS-1   | 11 |
| STT3A   | 3703   | STT3A   | 11 |
| STT3B   | 201595 | STT3B   | 3  |
| STUB1   | 10273  | STUB1   | 16 |
| STX11   | 8676   | STX11   | 6  |
| STX12   | 23673  | STX12   | 1  |
| STX16   | 8675   | STX16   | 20 |
| STX17   | 55014  | STX17   | 9  |
| STX1A   | 6804   | STX1A   | 7  |
| STX2    | 2054   | STX2    | 12 |
| STX3    | 6809   | STX3    | 11 |
| STX4    | 6810   | STX4    | 16 |
| STX5    | 6811   | STX5    | 11 |
| STX6    | 10228  | STX6    | 1  |
| STX7    | 8417   | STX7    | 6  |
| STX8    | 9482   | STX8    | 17 |
| STXBP1  | 6812   | STXBP1  | 9  |
| STXBP2  | 6813   | STXBP2  | 19 |
| STXBP3  | 6814   | STXBP3  | 1  |
| STXBP4  | 252983 | STXBP4  | 17 |
| STXBP5  | 134957 | STXBP5  | 6  |
| STXBP5L | 9515   | STXBP5L | 3  |
| STXBP6  | 29091  | STXBP6  | 14 |
| STYXL1  | 51657  | STYXL1  | 7  |
| SUB1    | 10923  | SUB1    | 5  |
| SUCLA2  | 8803   | SUCLA2  | 13 |
| SUCLG1  | 8802   | SUCLG1  | 2  |
| SUCLG2  | 8801   | SUCLG2  | 3  |
| SUCNR1  | 56670  | SUCNR1  | 3  |
| SUDS3   | 64426  | SUDS3   | 12 |
| SUGT1   | 10910  | SUGT1   | 13 |
| SULF1   | 23213  | SULF1   | 8  |
| SULF2   | 55959  | SULF2   | 20 |
| SULT1A1 | 6817   | SULT1A1 | 16 |

|          |           |          |    |
|----------|-----------|----------|----|
| SULT1A2  | 6799      | SULT1A2  | 16 |
| SULT1A3  | 6818      | SULT1A3  | 16 |
| SULT1A4  | 445329    | SULT1A4  | 16 |
| SULT1B1  | 27284     | SULT1B1  | 4  |
| SULT2A1  | 6822      | SULT2A1  | 19 |
| SULT2B1  | 6820      | SULT2B1  | 19 |
| SULT6B1  | 391365    | SULT6B1  | 2  |
| SUMF1    | 285362    | SUMF1    | 3  |
| SUMF2    | 25870     | SUMF2    | 7  |
| SUMO2    | 6613      | SUMO2    | 17 |
| SUMO3    | 6612      | SUMO3    | 21 |
| SUOX     | 6821      | SUOX     | 12 |
| SUPT16H  | 11198     | SUPT16H  | 14 |
| SUPT3H   | 8464      | SUPT3H   | 6  |
| SUPT4H1  | 6827      | SUPT4H1  | 17 |
| SUPT5H   | 6829      | SUPT5H   | 19 |
| SUPT6H   | 6830      | SUPT6H   | 17 |
| SUPV3L1  | 6832      | SUPV3L1  | 10 |
| SURF1    | 6834      | SURF1    | 9  |
| SURF2    | 6835      | SURF2    | 9  |
| SURF4    | 6836      | SURF4    | 9  |
| SURF6    | 6838      | SURF6    | 9  |
| SUSD1    | 64420     | SUSD1    | 9  |
| SUSD2    | 56241     | SUSD2    | 22 |
| SUSD3    | 203328    | SUSD3    | 9  |
| SUV39H1  | 6839      | SUV39H1  | X  |
| SUV39H2  | 79723     | SUV39H2  | 10 |
| SUV420H1 | 51111     | SUV420H1 | 11 |
| SUV420H2 | 84787     | SUV420H2 | 19 |
| SUZ12    | 23512     | SUZ12    | 17 |
| SV2A     | 9900      | SV2A     | 1  |
| SV2B     | 9899      | SV2B     | 15 |
| SVOP     | 55530     | SVOP     | 12 |
| SWAP70   | 23075     | SWAP70   | 11 |
| SYAP1    | 94056     | SYAP1    | X  |
| SYCE1    | 93426     | SYCE1    | 10 |
| SYCE1L   | 100130958 | SYCE1L   | 16 |
| SYDE1    | 85360     | SYDE1    | 19 |
| SYF2     | 25949     | SYF2     | 1  |
| SYK      | 6850      | SYK      | 9  |
| SYMPK    | 8189      | SYMPK    | 19 |
| SYN1     | 6853      | SYN1     | X  |
| SYN2     | 6854      | SYN2     | 3  |
| SYNC1    | 81493     | SYNC1    | 1  |

|         |        |         |    |
|---------|--------|---------|----|
| SYNCRIP | 10492  | SYNCRIP | 6  |
| SYNE2   | 23224  | SYNE2   | 14 |
| SYNGR1  | 9145   | SYNGR1  | 22 |
| SYNGR3  | 9143   | SYNGR3  | 16 |
| SYNJ1   | 8867   | SYNJ1   | 21 |
| SYNJ2BP | 55333  | SYNJ2BP | 14 |
| SYNM    | 23336  | SYNM    | 15 |
| SYNPO   | 11346  | SYNPO   | 5  |
| SYP     | 6855   | SYP     | X  |
| SYPL1   | 6856   | SYPL1   | 7  |
| SYPL2   | 284612 | SYPL2   | 1  |
| SYS1    | 90196  | SYS1    | 20 |
| SYT11   | 23208  | SYT11   | 1  |
| SYT13   | 57586  | SYT13   | 11 |
| SYT14   | 255928 | SYT14   | 1  |
| SYT15   | 83849  | SYT15   | 10 |
| SYT16   | 83851  | SYT16   | 14 |
| SYT17   | 51760  | SYT17   | 16 |
| SYT2    | 127833 | SYT2    | 1  |
| SYT3    | 84258  | SYT3    | 19 |
| SYT9    | 143425 | SYT9    | 11 |
| SYTL1   | 84958  | SYTL1   | 1  |
| SYTL2   | 54843  | SYTL2   | 11 |
| SYTL3   | 94120  | SYTL3   | 6  |
| SYVN1   | 84447  | SYVN1   | 11 |
| TAAR2   | 9287   | TAAR2   | 6  |
| TAAR5   | 9038   | TAAR5   | 6  |
| TAC3    | 6866   | TAC3    | 12 |
| TACC1   | 6867   | TACC1   | 8  |
| TACC2   | 10579  | TACC2   | 10 |
| TACC3   | 10460  | TACC3   | 4  |
| TACO1   | 51204  | TACO1   | 17 |
| TACR2   | 6865   | TACR2   | 10 |
| TACSTD1 | 4072   | TACSTD1 | 2  |
| TADA1L  | 117143 | TADA1L  | 1  |
| TADA2A  | 6871   | TADA2A  | 17 |
| TADA2B  | 93624  | TADA2B  | 4  |
| TADA3   | 10474  | TADA3   | 3  |
| TAF1    | 6872   | TAF1    | X  |
| TAF10   | 6881   | TAF10   | 11 |
| TAF11   | 6882   | TAF11   | 6  |
| TAF12   | 6883   | TAF12   | 1  |
| TAF13   | 6884   | TAF13   | 1  |
| TAF15   | 8148   | TAF15   | 17 |

|         |        |         |    |
|---------|--------|---------|----|
| TAF1A   | 9015   | TAF1A   | 1  |
| TAF1B   | 9014   | TAF1B   | 2  |
| TAF1C   | 9013   | TAF1C   | 16 |
| TAF1D   | 79101  | TAF1D   | 11 |
| TAF1L   | 138474 | TAF1L   | 9  |
| TAF2    | 6873   | TAF2    | 8  |
| TAF4    | 6874   | TAF4    | 20 |
| TAF4B   | 6875   | TAF4B   | 18 |
| TAF5    | 6877   | TAF5    | 10 |
| TAF5L   | 27097  | TAF5L   | 1  |
| TAF6L   | 10629  | TAF6L   | 11 |
| TAF7    | 6879   | TAF7    | 5  |
| TAF9    | 6880   | TAF9    | 5  |
| TAF9L   | 51616  | TAF9L   | X  |
| TAGAP   | 117289 | TAGAP   | 6  |
| TAGLN   | 6876   | TAGLN   | 11 |
| TAGLN2  | 8407   | TAGLN2  | 1  |
| TAGLN3  | 29114  | TAGLN3  | 3  |
| TAKR    | 389932 | tAKR    | 10 |
| TALDO1  | 6888   | TALDO1  |    |
| TANC1   | 85461  | TANC1   | 2  |
| TANC2   | 26115  | TANC2   | 17 |
| TANK    | 10010  | TANK    | 2  |
| TAOK2   | 9344   | TAOK2   | 16 |
| TAOK3   | 51347  | TAOK3   | 12 |
| TAP1    | 6890   | TAP1    | 6  |
| TAP2    | 6891   | TAP2    | 6  |
| TAPBP   | 6892   | TAPBP   | 6  |
| TAPBPL  | 55080  | TAPBPL  | 12 |
| TAPT1   | 202018 | TAPT1   | 4  |
| TARBP1  | 6894   | TARBP1  | 1  |
| TARBP2  | 6895   | TARBP2  | 12 |
| TARDBP  | 23435  | TARDBP  | 1  |
| TARS    | 6897   | TARS    | 5  |
| TARS2   | 80222  | TARS2   | 1  |
| TARSL2  | 123283 | TARSL2  | 15 |
| TAS2R14 | 50840  | TAS2R14 | 12 |
| TAS2R3  | 50831  | TAS2R3  | 7  |
| TAS2R4  | 50832  | TAS2R4  | 7  |
| TAS2R40 | 259286 | TAS2R40 | 7  |
| TASP1   | 55617  | TASP1   | 20 |
| TATDN2  | 9797   | TATDN2  | 3  |
| TATDN3  | 128387 | TATDN3  | 1  |
| TAX1BP1 | 8887   | TAX1BP1 | 7  |

|          |        |          |    |
|----------|--------|----------|----|
| TAX1BP3  | 30851  | TAX1BP3  | 17 |
| TAZ      | 6901   | TAZ      | X  |
| TBC1D1   | 23216  | TBC1D1   | 4  |
| TBC1D10A | 83874  | TBC1D10A | 22 |
| TBC1D10B | 26000  | TBC1D10B | 16 |
| TBC1D10C | 374403 | TBC1D10C | 11 |
| TBC1D13  | 54662  | TBC1D13  | 9  |
| TBC1D14  | 57533  | TBC1D14  | 4  |
| TBC1D15  | 64786  | TBC1D15  | 12 |
| TBC1D16  | 125058 | TBC1D16  | 17 |
| TBC1D17  | 79735  | TBC1D17  | 19 |
| TBC1D19  | 55296  | TBC1D19  | 4  |
| TBC1D2   | 55357  | TBC1D2   | 9  |
| TBC1D20  | 128637 | TBC1D20  | 20 |
| TBC1D22A | 25771  | TBC1D22A | 22 |
| TBC1D22B | 55633  | TBC1D22B | 6  |
| TBC1D23  | 55773  | TBC1D23  | 3  |
| TBC1D24  | 57465  | TBC1D24  | 16 |
| TBC1D26  | 353149 | TBC1D26  | 17 |
| TBC1D2B  | 23102  | TBC1D2B  | 15 |
| TBC1D3F  | 729873 | TBC1D3F  | 17 |
| TBC1D3H  | 727735 | TBC1D3H  |    |
| TBC1D3I  | 643947 | TBC1D3I  | 17 |
| TBC1D4   | 9882   | TBC1D4   | 13 |
| TBC1D7   | 51256  | TBC1D7   | 6  |
| TBC1D8   | 11138  | TBC1D8   |    |
| TBC1D8B  | 54885  | TBC1D8B  | X  |
| TBC1D9   | 23158  | TBC1D9   | 4  |
| TBC1D9B  | 23061  | TBC1D9B  | 5  |
| TBCA     | 6902   | TBCA     | 5  |
| TBCB     | 1155   | TBCB     | 19 |
| TBCC     | 6903   | TBCC     | 6  |
| TBCCD1   | 55171  | TBCCD1   | 3  |
| TBCD     | 6904   | TBCD     | 17 |
| TBCE     | 6905   | TBCE     | 1  |
| TBCEL    | 219899 | TBCEL    | 11 |
| TBK1     | 29110  | TBK1     | 12 |
| TBKBP1   | 9755   | TBKBP1   | 17 |
| TBL1X    | 6907   | TBL1X    | X  |
| TBL1XR1  | 79718  | TBL1XR1  | 3  |
| TBL2     | 26608  | TBL2     | 7  |
| TBL3     | 10607  | TBL3     | 16 |
| TBP      | 6908   | TBP      | 6  |
| TBPL1    | 9519   | TBPL1    | 6  |

|         |        |         |    |
|---------|--------|---------|----|
| TBRG4   | 9238   | TBRG4   | 7  |
| TBX18   | 9096   | TBX18   | 6  |
| TBX20   | 57057  | TBX20   | 7  |
| TBX22   | 50945  | TBX22   | X  |
| TBX3    | 6926   | TBX3    | 12 |
| TC2N    | 123036 | TC2N    | 14 |
| TCAM1   | 146771 | TCAM1   | 17 |
| TCBA1   | 154215 | TCBA1   | 6  |
| TCEA1   | 6917   | TCEA1   | 8  |
| TCEA2   | 6919   | TCEA2   | 20 |
| TCEA3   | 6920   | TCEA3   | 1  |
| TCEAL1  | 9338   | TCEAL1  | X  |
| TCEAL2  | 140597 | TCEAL2  | X  |
| TCEAL3  | 85012  | TCEAL3  | X  |
| TCEAL4  | 79921  | TCEAL4  | X  |
| TCEAL7  | 56849  | TCEAL7  | X  |
| TCEAL8  | 90843  | TCEAL8  | X  |
| TCEB1   | 6921   | TCEB1   | 8  |
| TCEB1P3 | 644540 | TCEB1P3 |    |
| TCEB3   | 6924   | TCEB3   | 1  |
| TCEB3B  | 51224  | TCEB3B  | 18 |
| TCERG1  | 10915  | TCERG1  | 5  |
| TCF12   | 6938   | TCF12   | 15 |
| TCF19   | 6941   | TCF19   | 6  |
| TCF25   | 22980  | TCF25   | 16 |
| TCF3    | 6929   | TCF3    | 19 |
| TCF4    | 6925   | TCF4    | 18 |
| TCFL5   | 10732  | TCFL5   | 20 |
| TCHH    | 7062   | TCHH    | 1  |
| TCHP    | 84260  | TCHP    | 12 |
| TCIRG1  | 10312  | TCIRG1  | 11 |
| TCL1A   | 8115   | TCL1A   | 14 |
| TCL1B   | 9623   | TCL1B   | 14 |
| TCL6    | 27004  | TCL6    | 14 |
| TCN2    | 6948   | TCN2    | 22 |
| TCOF1   | 6949   | TCOF1   | 5  |
| TCP1    | 6950   | TCP1    | 6  |
| TCP10   | 6953   | TCP10   | 6  |
| TCP11L1 | 55346  | TCP11L1 | 11 |
| TCP11L2 | 255394 | TCP11L2 | 12 |
| TCTA    | 6988   | TCTA    | 3  |
| CTEX1D2 | 255758 | CTEX1D2 | 3  |
| TCTN1   | 79600  | TCTN1   | 12 |
| TCTN3   | 26123  | TCTN3   |    |

|         |        |         |    |
|---------|--------|---------|----|
| TDG     | 6996   | TDG     | 12 |
| TDGF1   | 6997   | TDGF1   | 3  |
| TDH     | 157739 | TDH     | 8  |
| TDP1    | 55775  | TDP1    | 14 |
| TDRD1   | 56165  | TDRD1   | 10 |
| TDRD3   | 81550  | TDRD3   | 13 |
| TDRD7   | 23424  | TDRD7   | 9  |
| TDRKH   | 11022  | TDRKH   | 1  |
| TEAD2   | 8463   | TEAD2   | 19 |
| TEAD3   | 7005   | TEAD3   | 6  |
| TEAD4   | 7004   | TEAD4   | 12 |
| TECPR1  | 25851  | TECPR1  | 7  |
| TECR    | 9524   | TECR    | 19 |
| TEDDM1  | 127670 | TEDDM1  | 1  |
| TEF     | 7008   | TEF     | 22 |
| TEKT1   | 83659  | TEKT1   | 17 |
| TEKT4   | 150483 | TEKT4   | 2  |
| TEKT5   | 146279 | TEKT5   | 16 |
| TELO2   | 9894   | TELO2   | 16 |
| TERC    | 7012   | TERC    | 3  |
| TERF2IP | 54386  | TERF2IP | 16 |
| TERT    | 7015   | TERT    | 5  |
| TES     | 26136  | TES     | 7  |
| TESC    | 54997  | TESC    | 12 |
| TESK1   | 7016   | TESK1   | 9  |
| TESK2   | 10420  | TESK2   | 1  |
| TESSP5  | 377047 | TESSP5  | 3  |
| TET1    | 80312  | TET1    | 10 |
| TEX10   | 54881  | TEX10   | 9  |
| TEX2    | 55852  | TEX2    | 17 |
| TEX261  | 113419 | TEX261  | 2  |
| TEX264  | 51368  | TEX264  | 3  |
| TFAM    | 7019   | TFAM    | 10 |
| TFAMP1  | 260341 | TFAMP1  | 7  |
| TFAP2A  | 7020   | TFAP2A  | 6  |
| TFAP2D  | 83741  | TFAP2D  | 6  |
| TFAP4   | 7023   | TFAP4   | 16 |
| TFB1M   | 51106  | TFB1M   | 6  |
| TFB2M   | 64216  | TFB2M   | 1  |
| TFCP2L1 | 29842  | TFCP2L1 | 2  |
| TFDP1   | 7027   | TFDP1   | 13 |
| TFDP2   | 7029   | TFDP2   | 3  |
| TFEB    | 7942   | TFEB    | 6  |
| TFEC    | 22797  | TFEC    | 7  |



|          |        |          |    |
|----------|--------|----------|----|
| TFF3     | 7033   | TFF3     | 21 |
| TFG      | 10342  | TFG      | 3  |
| TFIP11   | 24144  | TFIP11   | 22 |
| TFPI     | 7035   | TFPI     | 2  |
| TFPI2    | 7980   | TFPI2    | 7  |
| TFPT     | 29844  | TFPT     | 19 |
| TFR2     | 7036   | TFR2     | 7  |
| TFRC     | 7037   | TFRC     | 3  |
| TGDS     | 23483  | TGDS     | 13 |
| TGFA     | 7039   | TGFA     | 2  |
| TGFB1I1  | 7041   | TGFB1I1  | 16 |
| TGFBI    | 7045   | TGFBI    | 5  |
| TGFBR2   | 7048   | TGFBR2   | 3  |
| TGFBR3   | 7049   | TGFBR3   | 1  |
| TGFBRAP1 | 9392   | TGFBRAP1 | 2  |
| TGIF1    | 7050   | TGIF1    | 18 |
| TGIF2    | 60436  | TGIF2    | 20 |
| TGM2     | 7052   | TGM2     | 20 |
| TGM7     | 116179 | TGM7     | 15 |
| TGOLN2   | 10618  | TGOLN2   | 2  |
| TH1L     | 51497  | TH1L     | 20 |
| THADA    | 63892  | THADA    | 2  |
| THAP1    | 55145  | THAP1    | 8  |
| THAP10   | 56906  | THAP10   | 15 |
| THAP11   | 57215  | THAP11   | 16 |
| THAP3    | 90326  | THAP3    | 1  |
| THAP4    | 51078  | THAP4    | 2  |
| THAP5    | 168451 | THAP5    | 7  |
| THAP6    | 152815 | THAP6    | 4  |
| THAP7    | 80764  | THAP7    | 22 |
| THAP8    | 199745 | THAP8    | 19 |
| THAP9    | 79725  | THAP9    | 4  |
| THBS4    | 7060   | THBS4    | 5  |
| THEM2    | 55856  | THEM2    | 6  |
| THEM4    | 117145 | THEM4    | 1  |
| THEM5    | 284486 | THEM5    | 1  |
| THG1L    | 54974  | THG1L    | 5  |
| THNSL1   | 79896  | THNSL1   | 10 |
| THNSL2   | 55258  | THNSL2   | 2  |
| THOC1    | 9984   | THOC1    | 18 |
| THOC3    | 84321  | THOC3    | 5  |
| THOC4    | 10189  | THOC4    |    |
| THOC5    | 8563   | THOC5    | 22 |
| THOC6    | 79228  | THOC6    | 16 |

|          |        |          |    |
|----------|--------|----------|----|
| THOC7    | 80145  | THOC7    | 3  |
| THOP1    | 7064   | THOP1    | 19 |
| THPO     | 7066   | THPO     | 3  |
| THRAP5   | 10025  | THRAP5   |    |
| THSD3    | 145501 | THSD3    | 14 |
| THSD7A   | 221981 | THSD7A   | 7  |
| THTPA    | 79178  | THTPA    | 14 |
| THUMPD1  | 55623  | THUMPD1  | 16 |
| THUMPD2  | 80745  | THUMPD2  | 2  |
| THUMPD3  | 25917  | THUMPD3  | 3  |
| THY1     | 7070   | THY1     | 11 |
| THYN1    | 29087  | THYN1    | 11 |
| TIA1     | 7072   | TIA1     | 2  |
| TIAF1    | 9220   | TIAF1    | 17 |
| TIAL1    | 7073   | TIAL1    | 10 |
| TIAM1    | 7074   | TIAM1    | 21 |
| TIAM2    | 26230  | TIAM2    | 6  |
| TICAM1   | 148022 | TICAM1   | 19 |
| TICAM2   | 353376 | TICAM2   | 5  |
| TIFA     | 92610  | TIFA     | 4  |
| TIGA1    | 114915 | TIGA1    | 5  |
| TIGD2    | 166815 | TIGD2    | 4  |
| TIGD5    | 84948  | TIGD5    | 8  |
| TIGD6    | 81789  | TIGD6    | 5  |
| TIGD7    | 91151  | TIGD7    | 16 |
| TIGIT    | 201633 | TIGIT    | 3  |
| TIMD4    | 91937  | TIMD4    | 5  |
| TIMELESS | 8914   | TIMELESS | 12 |
| TIMM10   | 26519  | TIMM10   | 11 |
| TIMM17A  | 10440  | TIMM17A  | 1  |
| TIMM17B  | 10245  | TIMM17B  | X  |
| TIMM22   | 29928  | TIMM22   | 17 |
| TIMM23   | 10431  | TIMM23   | 10 |
| TIMM44   | 10469  | TIMM44   | 19 |
| TIMM8A   | 1678   | TIMM8A   | X  |
| TIMM8B   | 26521  | TIMM8B   | 11 |
| TIMM9    | 26520  | TIMM9    | 14 |
| TIMP1    | 7076   | TIMP1    | X  |
| TIMP2    | 7077   | TIMP2    |    |
| TINF2    | 26277  | TINF2    | 14 |
| TINP1    | 10412  | TINP1    | 5  |
| TIPARP   | 25976  | TIPARP   | 3  |
| TIPIN    | 54962  | TIPIN    | 15 |
| TIRAP    | 114609 | TIRAP    | 11 |

|        |        |        |    |
|--------|--------|--------|----|
| TJAP1  | 93643  | TJAP1  | 6  |
| TJP1   | 7082   | TJP1   | 15 |
| TJP2   | 9414   | TJP2   | 9  |
| TJP3   | 27134  | TJP3   | 19 |
| TK1    | 7083   | TK1    |    |
| TK2    | 7084   | TK2    | 16 |
| TKT    | 7086   | TKT    | 3  |
| TKTL1  | 8277   | TKTL1  | X  |
| TLCD1  | 116238 | TLCD1  | 17 |
| TLE1   | 7088   | TLE1   | 9  |
| TLE2   | 7089   | TLE2   | 19 |
| TLE3   | 7090   | TLE3   | 15 |
| TLE4   | 7091   | TLE4   | 9  |
| TLE6   | 79816  | TLE6   | 19 |
| TLK1   | 9874   | TLK1   | 2  |
| TLK2   | 11011  | TLK2   | 17 |
| TLN1   | 7094   | TLN1   | 9  |
| TLN2   | 83660  | TLN2   | 15 |
| TLR1   | 7096   | TLR1   | 4  |
| TLR10  | 81793  | TLR10  | 4  |
| TLR4   | 7099   | TLR4   | 9  |
| TLR5   | 7100   | TLR5   | 1  |
| TLR6   | 10333  | TLR6   | 4  |
| TLR7   | 51284  | TLR7   | X  |
| TLR9   | 54106  | TLR9   | 3  |
| TLX2   | 3196   | TLX2   | 2  |
| TM2D2  | 83877  | TM2D2  | 8  |
| TM2D3  | 80213  | TM2D3  | 15 |
| TM4SF1 | 4071   | TM4SF1 | 3  |
| TM6SF1 | 53346  | TM6SF1 | 15 |
| TM7SF2 | 7108   | TM7SF2 | 11 |
| TM7SF3 | 51768  | TM7SF3 | 12 |
| TM9SF1 | 10548  | TM9SF1 | 14 |
| TM9SF2 | 9375   | TM9SF2 | 13 |
| TM9SF3 | 56889  | TM9SF3 | 10 |
| TM9SF4 | 9777   | TM9SF4 | 20 |
| TMBIM1 | 64114  | TMBIM1 | 2  |
| TMBIM4 | 51643  | TMBIM4 | 12 |
| TMBIM6 | 7009   | TMBIM6 | 12 |
| TMC1   | 117531 | TMC1   | 9  |
| TMC3   | 342125 | TMC3   | 15 |
| TMC4   | 147798 | TMC4   | 19 |
| TMC6   | 11322  | TMC6   | 17 |
| TMC8   | 147138 | TMC8   | 17 |

|          |        |          |    |
|----------|--------|----------|----|
| TMCC1    | 23023  | TMCC1    | 3  |
| TMCC2    | 9911   | TMCC2    | 1  |
| TMCC3    | 57458  | TMCC3    | 12 |
| TMCO1    | 54499  | TMCO1    | 1  |
| TMCO3    | 55002  | TMCO3    | 13 |
| TMCO4    | 255104 | TMCO4    | 1  |
| TMCO6    | 55374  | TMCO6    | 5  |
| TMCO7    | 79613  | TMCO7    | 16 |
| TMED1    | 11018  | TMED1    | 19 |
| TMED10P  | 286102 | TMED10P  | 8  |
| TMED2    | 10959  | TMED2    | 12 |
| TMED3    | 23423  | TMED3    | 15 |
| TMED4    | 222068 | TMED4    | 7  |
| TMED5    | 50999  | TMED5    | 1  |
| TMED7    | 51014  | TMED7    | 5  |
| TMED9    | 54732  | TMED9    | 5  |
| TMEFF1   | 8577   | TMEFF1   | 9  |
| TMEFF2   | 23671  | TMEFF2   | 2  |
| TMEM1    | 7109   | TMEM1    | 21 |
| TMEM100  | 55273  | TMEM100  | 17 |
| TMEM101  | 84336  | TMEM101  | 17 |
| TMEM104  | 54868  | TMEM104  | 17 |
| TMEM105  | 284186 | TMEM105  | 17 |
| TMEM106A | 113277 | TMEM106A | 17 |
| TMEM106B | 54664  | TMEM106B | 7  |
| TMEM106C | 79022  | TMEM106C | 12 |
| TMEM107  | 84314  | TMEM107  | 17 |
| TMEM109  | 79073  | TMEM109  | 11 |
| TMEM11   | 8834   | TMEM11   | 17 |
| TMEM111  | 55831  | TMEM111  | 3  |
| TMEM115  | 11070  | TMEM115  | 3  |
| TMEM116  | 89894  | TMEM116  | 12 |
| TMEM117  | 84216  | TMEM117  | 12 |
| TMEM118  | 84900  | TMEM118  |    |
| TMEM119  | 338773 | TMEM119  | 12 |
| TMEM120A | 83862  | TMEM120A | 7  |
| TMEM120B | 144404 | TMEM120B | 12 |
| TMEM121  | 80757  | TMEM121  | 14 |
| TMEM123  | 114908 | TMEM123  | 11 |
| TMEM126A | 84233  | TMEM126A | 11 |
| TMEM126B | 55863  | TMEM126B | 11 |
| TMEM127  | 55654  | TMEM127  | 2  |
| TMEM128  | 85013  | TMEM128  | 4  |
| TMEM129  | 92305  | TMEM129  | 4  |

|          |           |          |    |
|----------|-----------|----------|----|
| TMEM131  | 23505     | TMEM131  | 2  |
| TMEM132A | 54972     | TMEM132A | 11 |
| TMEM133  | 83935     | TMEM133  | 11 |
| TMEM134  | 80194     | TMEM134  | 11 |
| TMEM135  | 65084     | TMEM135  | 11 |
| TMEM136  | 219902    | TMEM136  | 11 |
| TMEM138  | 51524     | TMEM138  | 11 |
| TMEM140  | 55281     | TMEM140  | 7  |
| TMEM141  | 85014     | TMEM141  | 9  |
| TMEM143  | 55260     | TMEM143  | 19 |
| TMEM145  | 284339    | TMEM145  | 19 |
| TMEM147  | 10430     | TMEM147  | 19 |
| TMEM149  | 79713     | TMEM149  | 19 |
| TMEM14A  | 28978     | TMEM14A  | 6  |
| TMEM14B  | 81853     | TMEM14B  | 6  |
| TMEM14C  | 51522     | TMEM14C  | 6  |
| TMEM14D  | 645203    | TMEM14D  | 10 |
| TMEM150A | 129303    | TMEM150A | 2  |
| TMEM150B | 284417    | TMEM150B | 19 |
| TMEM151A | 256472    | TMEM151A | 11 |
| TMEM154  | 201799    | TMEM154  | 4  |
| TMEM155  | 132332    | TMEM155  | 4  |
| TMEM156  | 80008     | TMEM156  | 4  |
| TMEM158  | 25907     | TMEM158  | 3  |
| TMEM159  | 57146     | TMEM159  | 16 |
| TMEM161A | 54929     | TMEM161A | 19 |
| TMEM163  | 81615     | TMEM163  | 2  |
| TMEM165  | 55858     | TMEM165  | 4  |
| TMEM167A | 153339    | TMEM167A | 5  |
| TMEM167B | 56900     | TMEM167B | 1  |
| TMEM168  | 64418     | TMEM168  | 7  |
| TMEM169  | 92691     | TMEM169  | 2  |
| TMEM16J  | 338440    | TMEM16J  |    |
| TMEM17   | 200728    | TMEM17   | 2  |
| TMEM170A | 124491    | TMEM170A | 16 |
| TMEM170B | 100113407 | TMEM170B | 6  |
| TMEM173  | 340061    | TMEM173  | 5  |
| TMEM174  | 134288    | TMEM174  | 5  |
| TMEM175  | 84286     | TMEM175  | 4  |
| TMEM176A | 55365     | TMEM176A | 7  |
| TMEM177  | 80775     | TMEM177  | 2  |
| TMEM179B | 374395    | TMEM179B | 11 |
| TMEM18   | 129787    | TMEM18   | 2  |
| TMEM180  | 79847     | TMEM180  | 10 |

|          |           |          |    |
|----------|-----------|----------|----|
| TMEM181  | 57583     | TMEM181  | 6  |
| TMEM183A | 92703     | TMEM183A | 1  |
| TMEM183B | 653659    | TMEM183B | 3  |
| TMEM184A | 202915    | TMEM184A | 7  |
| TMEM184B | 25829     | TMEM184B | 22 |
| TMEM184C | 55751     | TMEM184C | 4  |
| TMEM185A | 84548     | TMEM185A | X  |
| TMEM185B | 79134     | TMEM185B | 2  |
| TMEM187  | 8269      | TMEM187  | X  |
| TMEM188  | 255919    | TMEM188  | 16 |
| TMEM189  | 387521    | TMEM189  | 20 |
| TMEM19   | 55266     | TMEM19   | 12 |
| TMEM191A | 84222     | TMEM191A | 22 |
| TMEM191B | 728229    | TMEM191B | 22 |
| TMEM192  | 201931    | TMEM192  | 4  |
| TMEM194  | 23306     | TMEM194  | 12 |
| TMEM194A | 23306     | TMEM194A | 12 |
| TMEM194B | 100131211 | TMEM194B | 2  |
| TMEM198  | 130612    | TMEM198  | 2  |
| TMEM199  | 147007    | TMEM199  | 17 |
| TMEM2    | 23670     | TMEM2    | 9  |
| TMEM20   | 159371    | TMEM20   | 10 |
| TMEM200A | 114801    | TMEM200A | 6  |
| TMEM201  | 199953    | TMEM201  | 1  |
| TMEM202  | 338949    | TMEM202  | 15 |
| TMEM203  | 94107     | TMEM203  | 9  |
| TMEM205  | 374882    | TMEM205  | 19 |
| TMEM206  | 55248     | TMEM206  | 1  |
| TMEM208  | 29100     | TMEM208  | 16 |
| TMEM209  | 84928     | TMEM209  | 7  |
| TMEM213  | 155006    | TMEM213  | 7  |
| TMEM214  | 54867     | TMEM214  | 2  |
| TMEM216  | 51259     | TMEM216  | 11 |
| TMEM219  | 124446    | TMEM219  | 16 |
| TMEM22   | 80723     | TMEM22   | 3  |
| TMEM222  | 84065     | TMEM222  | 1  |
| TMEM231  | 79583     | TMEM231  | 16 |
| TMEM25   | 84866     | TMEM25   | 11 |
| TMEM26   | 219623    | TMEM26   | 10 |
| TMEM27   | 57393     | TMEM27   | X  |
| TMEM30A  | 55754     | TMEM30A  | 6  |
| TMEM30B  | 161291    | TMEM30B  | 14 |
| TMEM33   | 55161     | TMEM33   | 4  |
| TMEM34   | 55751     | TMEM34   | 4  |

|         |        |         |    |
|---------|--------|---------|----|
| TMEM38A | 79041  | TMEM38A | 19 |
| TMEM38B | 55151  | TMEM38B | 9  |
| TMEM39A | 55254  | TMEM39A | 3  |
| TMEM39B | 55116  | TMEM39B | 1  |
| TMEM4   | 10330  | TMEM4   | 12 |
| TMEM41A | 90407  | TMEM41A | 3  |
| TMEM41B | 440026 | TMEM41B | 11 |
| TMEM42  | 131616 | TMEM42  | 3  |
| TMEM43  | 79188  | TMEM43  | 3  |
| TMEM44  | 93109  | TMEM44  | 3  |
| TMEM45A | 55076  | TMEM45A | 3  |
| TMEM48  | 55706  | TMEM48  | 1  |
| TMEM49  | 81671  | TMEM49  | 17 |
| TMEM5   | 10329  | TMEM5   | 12 |
| TMEM50A | 23585  | TMEM50A | 1  |
| TMEM50B | 757    | TMEM50B | 21 |
| TMEM51  | 55092  | TMEM51  | 1  |
| TMEM52  | 339456 | TMEM52  | 1  |
| TMEM53  | 79639  | TMEM53  | 1  |
| TMEM54  | 113452 | TMEM54  | 1  |
| TMEM55A | 55529  | TMEM55A | 8  |
| TMEM55B | 90809  | TMEM55B | 14 |
| TMEM56  | 148534 | TMEM56  | 1  |
| TMEM57  | 55219  | TMEM57  | 1  |
| TMEM59  | 9528   | TMEM59  | 1  |
| TMEM59L | 25789  | TMEM59L | 19 |
| TMEM60  | 85025  | TMEM60  | 7  |
| TMEM61  | 199964 | TMEM61  | 1  |
| TMEM62  | 80021  | TMEM62  | 15 |
| TMEM63A | 9725   | TMEM63A | 1  |
| TMEM63B | 55362  | TMEM63B | 6  |
| TMEM63C | 57156  | TMEM63C | 14 |
| TMEM64  | 169200 | TMEM64  | 8  |
| TMEM66  | 51669  | TMEM66  | 8  |
| TMEM67  | 91147  | TMEM67  | 8  |
| TMEM68  | 137695 | TMEM68  | 8  |
| TMEM69  | 51249  | TMEM69  | 1  |
| TMEM70  | 54968  | TMEM70  | 8  |
| TMEM71  | 137835 | TMEM71  | 8  |
| TMEM74  | 157753 | TMEM74  | 8  |
| TMEM77  | 128338 | TMEM77  | 1  |
| TMEM79  | 84283  | TMEM79  | 1  |
| TMEM8   | 58986  | TMEM8   | 16 |
| TMEM80  | 283232 | TMEM80  |    |

|           |        |           |    |
|-----------|--------|-----------|----|
| TMEM83    | 145978 | TMEM83    | 15 |
| TMEM85    | 51234  | TMEM85    | 15 |
| TMEM86B   | 255043 | TMEM86B   | 19 |
| TMEM87A   | 25963  | TMEM87A   | 15 |
| TMEM87B   | 84910  | TMEM87B   | 2  |
| TMEM88    | 92162  | TMEM88    | 17 |
| TMEM8B    | 51754  | TMEM8B    | 9  |
| TMEM9     | 252839 | TMEM9     | 1  |
| TMEM91    | 641649 | TMEM91    |    |
| TMEM93    | 83460  | TMEM93    | 17 |
| TMEM95    | 339168 | TMEM95    | 17 |
| TMEM97    | 27346  | TMEM97    | 17 |
| TMEM98    | 26022  | TMEM98    | 17 |
| TMEM99    | 147184 | TMEM99    | 17 |
| TMEM9B    | 56674  | TMEM9B    | 11 |
| TMF1      | 7110   | TMF1      | 3  |
| TMIGD1    | 388364 | TMIGD1    | 17 |
| TMLHE     | 55217  | TMLHE     | X  |
| TMOD1     | 7111   | TMOD1     | 9  |
| TMOD2     | 29767  | TMOD2     | 15 |
| TMOD3     | 29766  | TMOD3     | 15 |
| TMPO      | 7112   | TMPO      | 12 |
| TMPRSS11A | 339967 | TMPRSS11A | 4  |
| TMPRSS11B | 132724 | TMPRSS11B | 4  |
| TMPRSS12  | 283471 | TMPRSS12  | 12 |
| TMPRSS13  | 84000  | TMPRSS13  | 11 |
| TMPRSS7   | 344805 | TMPRSS7   |    |
| TMPRSS9   | 360200 | TMPRSS9   | 19 |
| TMSB10    | 9168   | TMSB10    | 2  |
| TMSB15A   | 11013  | TMSB15A   | X  |
| TMSB4X    | 7114   | TMSB4X    | X  |
| TMSB4Y    | 9087   | TMSB4Y    | Y  |
| TMSL3     | 7117   | TMSL3     | 4  |
| TMTC3     | 160418 | TMTC3     | 12 |
| TMTC4     | 84899  | TMTC4     | 13 |
| TMUB1     | 83590  | TMUB1     | 7  |
| TMUB2     | 79089  | TMUB2     | 17 |
| TMX1      | 81542  | TMX1      | 14 |
| TMX3      | 54495  | TMX3      | 18 |
| TMX4      | 56255  | TMX4      | 20 |
| TNF       | 7124   | TNF       | 6  |
| TNFAIP1   | 7126   | TNFAIP1   | 17 |
| TNFAIP3   | 7128   | TNFAIP3   | 6  |
| TNFAIP8   | 25816  | TNFAIP8   | 5  |



|               |        |                  |    |
|---------------|--------|------------------|----|
| TNFAIP8L1     | 126282 | TNFAIP8L1        | 19 |
| TNFAIP8L2     | 79626  | TNFAIP8L2        |    |
| TNFAIP8L3     | 388121 | TNFAIP8L3        | 15 |
| TNFRSF10A     | 8797   | TNFRSF10A        | 8  |
| TNFRSF10B     | 8795   | TNFRSF10B        | 8  |
| TNFRSF10C     | 8794   | TNFRSF10C        | 8  |
| TNFRSF10D     | 8793   | TNFRSF10D        | 8  |
| TNFRSF11A     | 8792   | TNFRSF11A        | 18 |
| TNFRSF12A     | 51330  | TNFRSF12A        | 16 |
| TNFRSF13B     | 23495  | TNFRSF13B        | 17 |
| TNFRSF13C     | 115650 | TNFRSF13C        | 22 |
| TNFRSF14      | 8764   | TNFRSF14         | 1  |
| TNFRSF17      | 608    | TNFRSF17         | 16 |
| TNFRSF18      | 8784   | TNFRSF18         | 1  |
| TNFRSF1A      | 7132   | TNFRSF1A         | 12 |
| TNFRSF1B      | 7133   | TNFRSF1B         | 1  |
| TNFRSF21      | 27242  | TNFRSF21         | 6  |
| TNFRSF25      | 8718   | TNFRSF25         | 1  |
| TNFRSF4       | 7293   | TNFRSF4          | 1  |
| TNFRSF6B      | 8771   | TNFRSF6B         | 20 |
| TNFRSF8       | 943    | TNFRSF8          | 1  |
| TNFRSF9       | 3604   | TNFRSF9          | 1  |
| TNFSF10       | 8743   | TNFSF10          | 3  |
| TNFSF12-TNFSF | 407977 | TNFSF12-TNFSF117 |    |
| TNFSF13B      | 10673  | TNFSF13B         | 13 |
| TNFSF14       | 8740   | TNFSF14          | 19 |
| TNFSF15       | 9966   | TNFSF15          | 9  |
| TNFSF4        | 7292   | TNFSF4           | 1  |
| TNFSF8        | 944    | TNFSF8           | 9  |
| TNFSF9        | 8744   | TNFSF9           | 19 |
| TNIP1         | 10318  | TNIP1            | 5  |
| TNIP2         | 79155  | TNIP2            | 4  |
| TNK2          | 10188  | TNK2             | 3  |
| TNKS          | 8658   | TNKS             | 8  |
| TNKS1BP1      | 85456  | TNKS1BP1         | 11 |
| TNNI2         | 7136   | TNNI2            | 11 |
| TNNI3         | 7137   | TNNI3            | 19 |
| TNNT1         | 7138   | TNNT1            | 19 |
| TNP1          | 7141   | TNP1             | 2  |
| TNPO1         | 3842   | TNPO1            | 5  |
| TNPO2         | 30000  | TNPO2            | 19 |
| TNR           | 7143   | TNR              | 1  |
| TNRC15        | 26058  | TNRC15           | 2  |
| TNRC4         | 11189  | TNRC4            | 1  |

|          |           |          |    |
|----------|-----------|----------|----|
| TNRC6A   | 27327     | TNRC6A   | 16 |
| TNRC6B   | 23112     | TNRC6B   | 22 |
| TNRC9    | 27324     | TNRC9    | 16 |
| TNS3     | 64759     | TNS3     | 7  |
| TOB1     | 10140     | TOB1     | 17 |
| TOB2     | 10766     | TOB2     | 22 |
| TOE1     | 114034    | TOE1     | 1  |
| TOLLIP   | 54472     | TOLLIP   | 11 |
| TOM1     | 10043     | TOM1     | 22 |
| TOM1L2   | 146691    | TOM1L2   | 17 |
| TOMM20   | 9804      | TOMM20   | 1  |
| TOMM22   | 56993     | TOMM22   | 22 |
| TOMM34   | 10953     | TOMM34   | 20 |
| TOMM40   | 10452     | TOMM40   | 19 |
| TOMM40L  | 84134     | TOMM40L  | 1  |
| TOMM5    | 401505    | TOMM5    | 9  |
| TOMM6    | 100188893 | TOMM6    | 6  |
| TOMM7    | 54543     | TOMM7    | 7  |
| TOMM70A  | 9868      | TOMM70A  | 3  |
| TOP      | 649159    | TOP      |    |
| TOP1MT   | 116447    | TOP1MT   |    |
| TOP1P1   | 7151      | TOP1P1   | 1  |
| TOP2A    | 7153      | TOP2A    | 17 |
| TOP2B    | 7155      | TOP2B    | 3  |
| TOP3B    | 8940      | TOP3B    | 22 |
| TOPBP1   | 11073     | TOPBP1   | 3  |
| TOPORS   | 10210     | TOPORS   | 9  |
| TOR1A    | 1861      | TOR1A    | 9  |
| TOR1AIP1 | 26092     | TOR1AIP1 | 1  |
| TOR1AIP2 | 163590    | TOR1AIP2 | 1  |
| TOR1B    | 27348     | TOR1B    | 9  |
| TOR2A    | 27433     | TOR2A    | 9  |
| TOR3A    | 64222     | TOR3A    | 1  |
| TOX      | 9760      | TOX      | 8  |
| TOX2     | 84969     | TOX2     | 20 |
| TOX4     | 9878      | TOX4     | 14 |
| TP53     | 7157      | TP53     | 17 |
| TP53AP1  | 11257     | TP53AP1  | 7  |
| TP53BP1  | 7158      | TP53BP1  | 15 |
| TP53BP2  | 7159      | TP53BP2  | 1  |
| TP53I11  | 9537      | TP53I11  | 11 |
| TP53I13  | 90313     | TP53I13  | 17 |
| TP53INP1 | 94241     | TP53INP1 | 8  |
| TP53INP2 | 58476     | TP53INP2 | 20 |

|          |        |          |    |
|----------|--------|----------|----|
| TP53RK   | 112858 | TP53RK   | 20 |
| TP53TG1  | 11257  | TP53TG1  | 7  |
| TP53TG5  | 27296  | TP53TG5  | 20 |
| TP63     | 8626   | TP63     | 3  |
| TP73L    | 8626   | TP73L    | 3  |
| TPCN1    | 53373  | TPCN1    | 12 |
| TPD52    | 7163   | TPD52    | 8  |
| TPD52L1  | 7164   | TPD52L1  | 6  |
| TPD52L2  | 7165   | TPD52L2  | 20 |
| TPI1     | 7167   | TPI1     | 12 |
| TPM1     | 7168   | TPM1     | 15 |
| TPM2     | 7169   | TPM2     | 9  |
| TPM3     | 7170   | TPM3     | 1  |
| TPM4     | 7171   | TPM4     | 19 |
| TPMT     | 7172   | TPMT     | 6  |
| TPP1     | 1200   | TPP1     | 11 |
| TPP2     | 7174   | TPP2     | 13 |
| TPPP     | 11076  | TPPP     | 5  |
| TPR      | 7175   | TPR      | 1  |
| TPRG1L   | 127262 | TPRG1L   | 1  |
| TPRKB    | 51002  | TPRKB    | 2  |
| TPST1    | 8460   | TPST1    | 7  |
| TPST2    | 8459   | TPST2    | 22 |
| TPT1     | 7178   | TPT1     | 13 |
| TPTE2    | 93492  | TPTE2    | 13 |
| TPX2     | 22974  | TPX2     | 20 |
| TRA1P2   | 343477 | TRA1P2   |    |
| TRA2A    | 29896  | TRA2A    | 7  |
| TRABD    | 80305  | TRABD    | 22 |
| TRADD    | 8717   | TRADD    | 16 |
| TRAF1    | 7185   | TRAF1    | 9  |
| TRAF2    | 7186   | TRAF2    | 9  |
| TRAF3    | 7187   | TRAF3    | 14 |
| TRAF3IP1 | 26146  | TRAF3IP1 | 2  |
| TRAF3IP2 | 10758  | TRAF3IP2 | 6  |
| TRAF3IP3 | 80342  | TRAF3IP3 | 1  |
| TRAF4    | 9618   | TRAF4    | 17 |
| TRAF6    | 7189   | TRAF6    | 11 |
| TRAF7    | 84231  | TRAF7    | 16 |
| TRAFD1   | 10906  | TRAFD1   | 12 |
| TRAIP    | 10293  | TRAIP    | 3  |
| TRAK1    | 22906  | TRAK1    | 3  |
| TRAK2    | 66008  | TRAK2    | 2  |
| TRAM1    | 23471  | TRAM1    | 8  |

|           |        |           |    |
|-----------|--------|-----------|----|
| TRAM2     | 9697   | TRAM2     | 6  |
| TRAP1     | 10131  | TRAP1     | 16 |
| TRAPPC1   | 58485  | TRAPPC1   | 17 |
| TRAPPC2   | 6399   | TRAPPC2   | X  |
| TRAPPC2L  | 51693  | TRAPPC2L  | 16 |
| TRAPPC2P1 | 10597  | TRAPPC2P1 | 19 |
| TRAPPC4   | 51399  | TRAPPC4   | 11 |
| TRAPPC5   | 126003 | TRAPPC5   | 19 |
| TRAPPC6A  | 79090  | TRAPPC6A  | 19 |
| TRAPPC6B  | 122553 | TRAPPC6B  | 14 |
| TRAPPC9   | 83696  | TRAPPC9   | 8  |
| TRDMT1    | 1787   | TRDMT1    | 10 |
| TREML1    | 340205 | TREML1    | 6  |
| TRERF1    | 55809  | TRERF1    | 6  |
| TRIAP1    | 51499  | TRIAP1    | 12 |
| TRIB1     | 10221  | TRIB1     | 8  |
| TRIB2     | 28951  | TRIB2     | 2  |
| TRIB3     | 57761  | TRIB3     | 20 |
| TRIM11    | 81559  | TRIM11    | 1  |
| TRIM13    | 10206  | TRIM13    | 13 |
| TRIM14    | 9830   | TRIM14    | 9  |
| TRIM16    | 10626  | TRIM16    |    |
| TRIM16L   | 147166 | TRIM16L   | 17 |
| TRIM2     | 23321  | TRIM2     | 4  |
| TRIM21    | 6737   | TRIM21    | 11 |
| TRIM22    | 10346  | TRIM22    | 11 |
| TRIM23    | 373    | TRIM23    | 5  |
| TRIM24    | 8805   | TRIM24    | 7  |
| TRIM25    | 7706   | TRIM25    | 17 |
| TRIM26    | 7726   | TRIM26    | 6  |
| TRIM27    | 5987   | TRIM27    | 6  |
| TRIM28    | 10155  | TRIM28    | 19 |
| TRIM29    | 23650  | TRIM29    | 11 |
| TRIM3     | 10612  | TRIM3     | 11 |
| TRIM31    | 11074  | TRIM31    | 6  |
| TRIM32    | 22954  | TRIM32    | 9  |
| TRIM33    | 51592  | TRIM33    | 1  |
| TRIM35    | 23087  | TRIM35    | 8  |
| TRIM36    | 55521  | TRIM36    | 5  |
| TRIM37    | 4591   | TRIM37    | 17 |
| TRIM38    | 10475  | TRIM38    | 6  |
| TRIM39    | 56658  | TRIM39    | 6  |
| TRIM4     | 89122  | TRIM4     | 7  |
| TRIM41    | 90933  | TRIM41    | 5  |

|         |        |         |    |
|---------|--------|---------|----|
| TRIM44  | 54765  | TRIM44  | 11 |
| TRIM45  | 80263  | TRIM45  | 1  |
| TRIM46  | 80128  | TRIM46  | 1  |
| TRIM47  | 91107  | TRIM47  | 17 |
| TRIM5   | 85363  | TRIM5   | 11 |
| TRIM52  | 84851  | TRIM52  | 5  |
| TRIM53  | 642569 | TRIM53  | 11 |
| TRIM55  | 84675  | TRIM55  | 8  |
| TRIM56  | 81844  | TRIM56  | 7  |
| TRIM59  | 286827 | TRIM59  | 3  |
| TRIM61  | 391712 | TRIM61  | 4  |
| TRIM62  | 55223  | TRIM62  | 1  |
| TRIM65  | 201292 | TRIM65  | 17 |
| TRIM66  | 9866   | TRIM66  | 11 |
| TRIM68  | 55128  | TRIM68  | 11 |
| TRIM69  | 140691 | TRIM69  | 15 |
| TRIM7   | 81786  | TRIM7   | 5  |
| TRIM72  | 493829 | TRIM72  | 16 |
| TRIM78P | 117852 | TRIM78P | 11 |
| TRIM8   | 81603  | TRIM8   | 10 |
| TRIM9   | 114088 | TRIM9   | 14 |
| TRIML1  | 339976 | TRIML1  | 4  |
| TRIOBP  | 11078  | TRIOBP  | 22 |
| TRIP10  | 9322   | TRIP10  | 19 |
| TRIP11  | 9321   | TRIP11  | 14 |
| TRIP12  | 9320   | TRIP12  | 2  |
| TRIP13  | 9319   | TRIP13  | 5  |
| TRIP4   | 9325   | TRIP4   | 15 |
| TRIP6   | 7205   | TRIP6   | 7  |
| TRIT1   | 54802  | TRIT1   | 1  |
| TRK1    | 7206   | TRK1    |    |
| TRMT1   | 55621  | TRMT1   | 19 |
| TRMT11  | 60487  | TRMT11  | 6  |
| TRMT112 | 51504  | TRMT112 | 11 |
| TRMT12  | 55039  | TRMT12  |    |
| TRMT2A  | 27037  | TRMT2A  | 22 |
| TRMT2B  | 79979  | TRMT2B  | X  |
| TRMT5   | 57570  | TRMT5   | 14 |
| TRMT6   | 51605  | TRMT6   | 20 |
| TRMT61A | 115708 | TRMT61A | 14 |
| TRMU    | 55687  | TRMU    | 22 |
| TRNP1   | 388610 | TRNP1   | 1  |
| TRNT1   | 51095  | TRNT1   | 3  |
| TRO     | 7216   | TRO     | X  |

|          |        |          |    |
|----------|--------|----------|----|
| TROAP    | 10024  | TROAP    | 12 |
| TROVE2   | 6738   | TROVE2   | 1  |
| TRPA1    | 8989   | TRPA1    | 8  |
| TRPC1    | 7220   | TRPC1    | 3  |
| TRPC3    | 7222   | TRPC3    | 4  |
| TRPC4AP  | 26133  | TRPC4AP  | 20 |
| TRPC5    | 7224   | TRPC5    | X  |
| TRPM4    | 54795  | TRPM4    | 19 |
| TRPM7    | 54822  | TRPM7    | 15 |
| TRPS1    | 7227   | TRPS1    | 8  |
| TRPV1    | 7442   | TRPV1    | 17 |
| TRPV2    | 51393  | TRPV2    | 17 |
| TRRAP    | 8295   | TRRAP    | 7  |
| TRUB1    | 142940 | TRUB1    | 10 |
| TRUB2    | 26995  | TRUB2    | 9  |
| TSC1     | 7248   | TSC1     | 9  |
| TSC2     | 7249   | TSC2     | 16 |
| TSC22D1  | 8848   | TSC22D1  | 13 |
| TSC22D2  | 9819   | TSC22D2  | 3  |
| TSC22D3  | 1831   | TSC22D3  | X  |
| TSC22D4  | 81628  | TSC22D4  | 7  |
| TSEN15   | 116461 | TSEN15   | 1  |
| TSEN2    | 80746  | TSEN2    | 3  |
| TSEN34   | 79042  | TSEN34   | 19 |
| TSEN54   | 283989 | TSEN54   | 17 |
| TSFM     | 10102  | TSFM     | 12 |
| TSG101   | 7251   | TSG101   | 11 |
| TSGA10   | 80705  | TSGA10   | 2  |
| TSGA14   | 95681  | TSGA14   | 7  |
| TSHR     | 7253   | TSHR     | 14 |
| TSHZ1    | 10194  | TSHZ1    | 18 |
| TSHZ2    | 128553 | TSHZ2    | 20 |
| TSIX     | 9383   | TSIX     | X  |
| TSKU     | 25987  | TSKU     | 11 |
| TSLP     | 85480  | TSLP     | 5  |
| TSN      | 7247   | TSN      | 2  |
| TSNAX    | 7257   | TSNAX    | 1  |
| TSNAXIP1 | 55815  | TSNAXIP1 | 16 |
| T-SP1    | 203074 | T-SP1    | 8  |
| TSP50    | 29122  | TSP50    | 3  |
| TSPAN10  | 83882  | TSPAN10  | 17 |
| TSPAN13  | 27075  | TSPAN13  | 7  |
| TSPAN14  | 81619  | TSPAN14  | 10 |
| TSPAN15  | 23555  | TSPAN15  | 10 |

|         |           |         |    |
|---------|-----------|---------|----|
| TSPAN17 | 26262     | TSPAN17 | 5  |
| TSPAN19 | 144448    | TSPAN19 | 12 |
| TSPAN3  | 10099     | TSPAN3  | 15 |
| TSPAN31 | 6302      | TSPAN31 | 12 |
| TSPAN32 | 10077     | TSPAN32 | 11 |
| TSPAN33 | 340348    | TSPAN33 | 7  |
| TSPAN5  | 10098     | TSPAN5  | 4  |
| TSPAN7  | 7102      | TSPAN7  | X  |
| TSPAN8  | 7103      | TSPAN8  | 12 |
| TSPAN9  | 10867     | TSPAN9  | 12 |
| TSPO    | 706       | TSPO    | 22 |
| TSPYL1  | 7259      | TSPYL1  | 6  |
| TSPYL2  | 64061     | TSPYL2  | X  |
| TSPYL3  | 128854    | TSPYL3  |    |
| TSPYL4  | 23270     | TSPYL4  | 6  |
| TSR1    | 55720     | TSR1    | 17 |
| TSR2    | 90121     | TSR2    | X  |
| TSSC4   | 10078     | TSSC4   | 11 |
| TSSK4   | 283629    | TSSK4   | 14 |
| TSSK6   | 83983     | TSSK6   | 19 |
| TST     | 7263      | TST     | 22 |
| TSTA3   | 7264      | TSTA3   | 8  |
| TSTD1   | 100131187 | TSTD1   | 1  |
| TTC1    | 7265      | TTC1    | 5  |
| TTC13   | 79573     | TTC13   | 1  |
| TTC14   | 151613    | TTC14   | 3  |
| TTC15   | 51112     | TTC15   | 2  |
| TTC17   | 55761     | TTC17   | 11 |
| TTC18   | 118491    | TTC18   | 10 |
| TTC19   | 54902     | TTC19   | 17 |
| TTC21A  | 199223    | TTC21A  | 3  |
| TTC22   | 55001     | TTC22   | 1  |
| TTC23   | 64927     | TTC23   | 15 |
| TTC23L  | 153657    | TTC23L  | 5  |
| TTC25   | 83538     | TTC25   | 17 |
| TTC26   | 79989     | TTC26   | 7  |
| TTC27   | 55622     | TTC27   | 2  |
| TTC28   | 23331     | TTC28   | 22 |
| TTC29   | 83894     | TTC29   | 4  |
| TTC30A  | 92104     | TTC30A  | 2  |
| TTC30B  | 150737    | TTC30B  | 2  |
| TTC31   | 64427     | TTC31   | 2  |
| TTC32   | 130502    | TTC32   | 2  |
| TTC33   | 23548     | TTC33   | 5  |

|        |           |        |    |
|--------|-----------|--------|----|
| TTC35  | 9694      | TTC35  | 8  |
| TTC37  | 9652      | TTC37  | 5  |
| TTC38  | 55020     | TTC38  | 22 |
| TTC39B | 158219    | TTC39B | 9  |
| TTC39C | 125488    | TTC39C | 18 |
| TTC3L  | 286495    | TTC3L  |    |
| TTC4   | 7268      | TTC4   | 1  |
| TTC5   | 91875     | TTC5   | 14 |
| TTC7A  | 57217     | TTC7A  | 2  |
| TTC8   | 123016    | TTC8   | 14 |
| TTC9   | 23508     | TTC9   | 14 |
| TTC9C  | 283237    | TTC9C  | 11 |
| TTF1   | 7270      | TTF1   | 9  |
| TTF2   | 8458      | TTF2   | 1  |
| TTK    | 7272      | TTK    | 6  |
| TTLL1  | 25809     | TTLL1  | 22 |
| TTLL10 | 254173    | TTLL10 | 1  |
| TTLL11 | 158135    | TTLL11 | 9  |
| TTLL12 | 23170     | TTLL12 | 22 |
| TTLL3  | 26140     | TTLL3  | 3  |
| TTLL4  | 9654      | TTLL4  | 2  |
| TTLL5  | 23093     | TTLL5  | 14 |
| TTLL6  | 284076    | TTLL6  | 17 |
| TTLL7  | 79739     | TTLL7  | 1  |
| TTLL8  | 164714    | TTLL8  | 22 |
| TTPAL  | 79183     | TTPAL  | 20 |
| TTY10  | 246119    | TTY10  | Y  |
| TTY19  | 252952    | TTY19  | Y  |
| TTY3   | 114760    | TTY3   | Y  |
| TTY4B  | 474149    | TTY4B  | Y  |
| TTY7B  | 100101120 | TTY7B  | Y  |
| TYH2   | 94015     | TYH2   | 17 |
| TYH3   | 80727     | TYH3   | 7  |
| TUBA1A | 7846      | TUBA1A | 12 |
| TUBA1B | 10376     | TUBA1B | 12 |
| TUBA1C | 84790     | TUBA1C | 12 |
| TUBA3D | 113457    | TUBA3D | 2  |
| TUBA3E | 112714    | TUBA3E | 2  |
| TUBA4A | 7277      | TUBA4A | 2  |
| TUBAL3 | 79861     | TUBAL3 | 10 |
| TUBB   | 203068    | TUBB   | 6  |
| TUBB2A | 7280      | TUBB2A | 6  |
| TUBB2B | 347733    | TUBB2B | 6  |
| TUBB2C | 10383     | TUBB2C | 9  |



|         |        |         |    |
|---------|--------|---------|----|
| TUBB3   | 10381  | TUBB3   | 16 |
| TUBB4   | 10382  | TUBB4   | 19 |
| TUBB4Q  | 56604  | TUBB4Q  | 4  |
| TUBB6   | 84617  | TUBB6   |    |
| TUBD1   | 51174  | TUBD1   | 17 |
| TUBE1   | 51175  | TUBE1   | 6  |
| TUBG1   | 7283   | TUBG1   | 17 |
| TUBG2   | 27175  | TUBG2   | 17 |
| TUBGCP2 | 10844  | TUBGCP2 | 10 |
| TUBGCP4 | 27229  | TUBGCP4 | 15 |
| TUBGCP5 | 114791 | TUBGCP5 |    |
| TUBGCP6 | 85378  | TUBGCP6 | 22 |
| TUFT1   | 7286   | TUFT1   | 1  |
| TUG1    | 55000  | TUG1    | 22 |
| TULP3   | 7289   | TULP3   | 12 |
| TULP4   | 56995  | TULP4   | 6  |
| TUSC2   | 11334  | TUSC2   | 3  |
| TUSC4   | 10641  | TUSC4   | 3  |
| TUT1    | 64852  | TUT1    | 11 |
| TWF1    | 5756   | TWF1    | 12 |
| TWF2    | 11344  | TWF2    | 3  |
| TWIST1  | 7291   | TWIST1  | 7  |
| TWISTNB | 221830 | TWISTNB | 7  |
| TWSG1   | 57045  | TWSG1   | 18 |
| TXLNA   | 200081 | TXLNA   | 1  |
| TXLNB   | 167838 | TXLNB   | 6  |
| TXN     | 7295   | TXN     | 9  |
| TXN2    | 25828  | TXN2    | 22 |
| TXNDC11 | 51061  | TXNDC11 | 16 |
| TXNDC12 | 51060  | TXNDC12 | 1  |
| TXNDC14 | 51075  | TXNDC14 | 11 |
| TXNDC15 | 79770  | TXNDC15 | 5  |
| TXNDC16 | 57544  | TXNDC16 | 14 |
| TXNDC17 | 84817  | TXNDC17 | 17 |
| TXNDC2  | 84203  | TXNDC2  | 18 |
| TXNDC5  | 81567  | TXNDC5  | 6  |
| TXNDC9  | 10190  | TXNDC9  | 2  |
| TXNIP   | 10628  | TXNIP   | 1  |
| TXNL2   | 10539  | TXNL2   | 10 |
| TXNL4B  | 54957  | TXNL4B  | 16 |
| TXNRD1  | 7296   | TXNRD1  | 12 |
| TXNRD2  | 10587  | TXNRD2  | 22 |
| TYK2    | 7297   | TYK2    | 19 |
| TYMP    | 1890   | TYMP    | 22 |

|           |        |           |    |
|-----------|--------|-----------|----|
| TYMS      | 7298   | TYMS      | 18 |
| TYRO3     | 7301   | TYRO3     | 15 |
| TYROBP    | 7305   | TYROBP    | 19 |
| TYSND1    | 219743 | TYSND1    | 10 |
| TYW1      | 55253  | TYW1      | 7  |
| TYW1B     | 441250 | TYW1B     | 7  |
| TYW3      | 127253 | TYW3      | 1  |
| U1SNRNPBP | 11066  | U1SNRNPBP | 12 |
| U2AF1     | 7307   | U2AF1     | 21 |
| U2AF1L2   | 8233   | U2AF1L2   | X  |
| U2AF1L4   | 199746 | U2AF1L4   | 19 |
| U2AF2     | 11338  | U2AF2     | 19 |
| UAP1      | 6675   | UAP1      | 1  |
| UAP1L1    | 91373  | UAP1L1    | 9  |
| UBA1      | 7317   | UBA1      | X  |
| UBA2      | 10054  | UBA2      | 19 |
| UBA3      | 9039   | UBA3      | 3  |
| UBA5      | 79876  | UBA5      | 3  |
| UBA52     | 7311   | UBA52     | 19 |
| UBA6      | 55236  | UBA6      | 4  |
| UBA7      | 7318   | UBA7      | 3  |
| UBAC1     | 10422  | UBAC1     | 9  |
| UBAC2     | 337867 | UBAC2     | 13 |
| UBAP1     | 51271  | UBAP1     | 9  |
| UBAP2     | 55833  | UBAP2     | 9  |
| UBAP2L    | 9898   | UBAP2L    | 1  |
| UBASH3B   | 84959  | UBASH3B   | 11 |
| UBB       | 7314   | UBB       | 17 |
| UBC       | 7316   | UBC       | 12 |
| UBD       | 10537  | UBD       | 6  |
| UBE1      | 7317   | UBE1      | X  |
| UBE1C     | 9039   | UBE1C     | 3  |
| UBE1DC1   | 79876  | UBE1DC1   | 3  |
| UBE2A     | 7319   | UBE2A     | X  |
| UBE2B     | 7320   | UBE2B     | 5  |
| UBE2C     | 11065  | UBE2C     | 20 |
| UBE2CBP   | 90025  | UBE2CBP   | 6  |
| UBE2D2    | 7322   | UBE2D2    | 5  |
| UBE2D3    | 7323   | UBE2D3    | 4  |
| UBE2D4    | 51619  | UBE2D4    | 7  |
| UBE2E1    | 7324   | UBE2E1    | 3  |
| UBE2E2    | 7325   | UBE2E2    | 3  |
| UBE2E3    | 10477  | UBE2E3    | 2  |
| UBE2F     | 140739 | UBE2F     | 2  |

|         |           |         |    |
|---------|-----------|---------|----|
| UBE2G1  | 7326      | UBE2G1  | 17 |
| UBE2G2  | 7327      | UBE2G2  | 21 |
| UBE2H   | 7328      | UBE2H   | 7  |
| UBE2I   | 7329      | UBE2I   | 16 |
| UBE2J1  | 51465     | UBE2J1  | 6  |
| UBE2J2  | 118424    | UBE2J2  | 1  |
| UBE2K   | 3093      | UBE2K   | 4  |
| UBE2L3  | 7332      | UBE2L3  | 22 |
| UBE2L6  | 9246      | UBE2L6  | 11 |
| UBE2M   | 9040      | UBE2M   | 19 |
| UBE2MP1 | 606551    | UBE2MP1 | 16 |
| UBE2N   | 7334      | UBE2N   | 12 |
| UBE2O   | 63893     | UBE2O   | 17 |
| UBE2Q1  | 55585     | UBE2Q1  | 1  |
| UBE2Q2  | 92912     | UBE2Q2  | 15 |
| UBE2QP2 | 100134869 | UBE2QP2 | 15 |
| UBE2R2  | 54926     | UBE2R2  | 9  |
| UBE2S   | 27338     | UBE2S   | 19 |
| UBE2T   | 29089     | UBE2T   | 1  |
| UBE2V1  | 7335      | UBE2V1  | 20 |
| UBE2V2  | 7336      | UBE2V2  | 8  |
| UBE2W   | 55284     | UBE2W   | 8  |
| UBE2Z   | 65264     | UBE2Z   | 17 |
| UBE3A   | 7337      | UBE3A   | 15 |
| UBE3B   | 89910     | UBE3B   | 12 |
| UBE4A   | 9354      | UBE4A   | 11 |
| UBE4B   | 10277     | UBE4B   | 1  |
| UBFD1   | 56061     | UBFD1   | 16 |
| UBIAD1  | 29914     | UBIAD1  | 1  |
| UBL3    | 5412      | UBL3    | 13 |
| UBL4A   | 8266      | UBL4A   | X  |
| UBL5    | 59286     | UBL5    | 19 |
| UBL7    | 84993     | UBL7    | 15 |
| UBLCP1  | 134510    | UBLCP1  | 5  |
| UBN1    | 29855     | UBN1    | 16 |
| UBN2    | 254048    | UBN2    | 7  |
| UBP1    | 7342      | UBP1    | 3  |
| UBQLN1  | 29979     | UBQLN1  | 9  |
| UBQLN2  | 29978     | UBQLN2  | X  |
| UBQLN4  | 56893     | UBQLN4  | 1  |
| UBR1    | 197131    | UBR1    | 15 |
| UBR2    | 23304     | UBR2    | 6  |
| UBR3    | 130507    | UBR3    | 2  |
| UBR4    | 23352     | UBR4    | 1  |

|           |        |           |    |
|-----------|--------|-----------|----|
| UBR5      | 51366  | UBR5      | 8  |
| UBR7      | 55148  | UBR7      | 14 |
| UBTD1     | 80019  | UBTD1     | 10 |
| UBTD2     | 92181  | UBTD2     | 5  |
| UBTF      | 7343   | UBTF      | 17 |
| UBTFL5    | 728231 | UBTFL5    | 2  |
| UBXN1     | 51035  | UBXN1     | 11 |
| UBXN11    | 91544  | UBXN11    | 1  |
| UBXN2B    | 137886 | UBXN2B    | 8  |
| UBXN4     | 23190  | UBXN4     | 2  |
| UBXN6     | 80700  | UBXN6     | 19 |
| UBXN7     | 26043  | UBXN7     | 3  |
| UBXN8     | 7993   | UBXN8     | 8  |
| UCHL1     | 7345   | UCHL1     | 4  |
| UCHL3     | 7347   | UCHL3     | 13 |
| UCHL5     | 51377  | UCHL5     | 1  |
| UCHL5IP   | 55559  | UCHL5IP   | X  |
| UCK1      | 83549  | UCK1      | 9  |
| UCK2      | 7371   | UCK2      | 1  |
| UCKL1     | 54963  | UCKL1     | 20 |
| UCP2      | 7351   | UCP2      | 11 |
| UCRC      | 29796  | UCRC      | 22 |
| UEVLD     | 55293  | UEVLD     | 11 |
| UFC1      | 51506  | UFC1      | 1  |
| UFD1L     | 7353   | UFD1L     | 22 |
| UFM1      | 51569  | UFM1      | 13 |
| UFSP2     | 55325  | UFSP2     | 4  |
| UGCG      | 7357   | UGCG      | 9  |
| UGCGL2    | 55757  | UGCGL2    | 13 |
| UGDH      | 7358   | UGDH      | 4  |
| UGP2      | 7360   | UGP2      | 2  |
| UGT1A3    | 54659  | UGT1A3    | 2  |
| UGT2A3    | 79799  | UGT2A3    | 4  |
| UGT2B17   | 7367   | UGT2B17   | 4  |
| UGT2B7    | 7364   | UGT2B7    |    |
| UGT8      | 7368   | UGT8      | 4  |
| UHRF1     | 29128  | UHRF1     | 19 |
| UHRF1BP1  | 54887  | UHRF1BP1  | 6  |
| UHRF1BP1L | 23074  | UHRF1BP1L | 12 |
| UIMC1     | 51720  | UIMC1     | 5  |
| ULBP1     | 80329  | ULBP1     | 6  |
| ULBP2     | 80328  | ULBP2     | 6  |
| ULK1      | 8408   | ULK1      |    |
| ULK2      | 9706   | ULK2      | 17 |

|         |           |         |    |
|---------|-----------|---------|----|
| ULK3    | 25989     | ULK3    | 15 |
| ULK4    | 54986     | ULK4    | 3  |
| UMOD    | 7369      | UMOD    | 16 |
| UMODL1  | 89766     | UMODL1  | 21 |
| UMPS    | 7372      | UMPS    | 3  |
| UNC119  | 9094      | UNC119  | 17 |
| UNC13A  | 23025     | UNC13A  |    |
| UNC13C  | 440279    | UNC13C  | 15 |
| UNC13D  | 201294    | UNC13D  | 17 |
| UNC45A  | 55898     | UNC45A  | 15 |
| UNC50   | 25972     | UNC50   | 2  |
| UNC5A   | 90249     | UNC5A   | 5  |
| UNC5CL  | 222643    | UNC5CL  | 6  |
| UNC84A  | 23353     | UNC84A  | 7  |
| UNC84B  | 25777     | UNC84B  | 22 |
| UNC93B1 | 81622     | UNC93B1 | 11 |
| UNG     | 7374      | UNG     | 12 |
| UNKL    | 64718     | UNKL    | 16 |
| UNQ1940 | 389558    | UNQ1940 | 7  |
| UNQ6975 | 400952    | UNQ6975 |    |
| UPB1    | 51733     | UPB1    | 22 |
| UPF1    | 5976      | UPF1    | 19 |
| UPF2    | 26019     | UPF2    | 10 |
| UPF3A   | 65110     | UPF3A   | 13 |
| UPF3B   | 65109     | UPF3B   | X  |
| UPK1A   | 11045     | UPK1A   | 19 |
| UPLP    | 100134938 | UPLP    |    |
| UPP1    | 7378      | UPP1    | 7  |
| UPP2    | 151531    | UPP2    | 2  |
| UPRT    | 139596    | UPRT    | X  |
| UQCC    | 55245     | UQCC    | 20 |
| UQCR    | 10975     | UQCR    | 19 |
| UQCRB   | 7381      | UQCRB   | 8  |
| UQCRC1  | 7384      | UQCRC1  | 3  |
| UQCRFS1 | 7386      | UQCRFS1 | 19 |
| UQCRQ   | 27089     | UQCRQ   | 5  |
| URB2    | 9816      | URB2    | 1  |
| URG4    | 55665     | URG4    | 7  |
| URM1    | 81605     | URM1    | 9  |
| UROD    | 7389      | UROD    | 1  |
| UROS    | 7390      | UROS    | 10 |
| USE1    | 55850     | USE1    | 19 |
| USF1    | 7391      | USF1    | 1  |
| USF2    | 7392      | USF2    | 19 |

|        |        |        |    |
|--------|--------|--------|----|
| USH1G  | 124590 | USH1G  | 17 |
| USHBP1 | 83878  | USHBP1 | 19 |
| USMG5  | 84833  | USMG5  | 10 |
| USO1   | 8615   | USO1   | 4  |
| USP1   | 7398   | USP1   | 1  |
| USP10  | 9100   | USP10  | 16 |
| USP11  | 8237   | USP11  | X  |
| USP12  | 219333 | USP12  | 13 |
| USP13  | 8975   | USP13  | 3  |
| USP15  | 9958   | USP15  | 12 |
| USP16  | 10600  | USP16  | 21 |
| USP18  | 11274  | USP18  | 22 |
| USP2   | 9099   | USP2   | 11 |
| USP21  | 27005  | USP21  | 1  |
| USP22  | 23326  | USP22  |    |
| USP24  | 23358  | USP24  | 1  |
| USP25  | 29761  | USP25  | 21 |
| USP3   | 9960   | USP3   | 15 |
| USP30  | 84749  | USP30  | 12 |
| USP33  | 23032  | USP33  | 1  |
| USP35  | 57558  | USP35  | 11 |
| USP36  | 57602  | USP36  | 17 |
| USP37  | 57695  | USP37  | 2  |
| USP38  | 84640  | USP38  | 4  |
| USP39  | 10713  | USP39  | 2  |
| USP4   | 7375   | USP4   | 3  |
| USP41  | 373856 | USP41  | 22 |
| USP42  | 84132  | USP42  | 7  |
| USP44  | 84101  | USP44  | 12 |
| USP46  | 64854  | USP46  | 4  |
| USP47  | 55031  | USP47  | 11 |
| USP48  | 84196  | USP48  | 1  |
| USP49  | 25862  | USP49  | 6  |
| USP5   | 8078   | USP5   | 12 |
| USP53  | 54532  | USP53  | 4  |
| USP7   | 7874   | USP7   | 16 |
| USP8   | 9101   | USP8   | 15 |
| USP9X  | 8239   | USP9X  | X  |
| USPL1  | 10208  | USPL1  | 13 |
| UST    | 10090  | UST    | 6  |
| UTP11L | 51118  | UTP11L | 1  |
| UTP14A | 10813  | UTP14A | X  |
| UTP14C | 9724   | UTP14C | 13 |
| UTP15  | 84135  | UTP15  | 5  |

|        |        |        |    |
|--------|--------|--------|----|
| UTP18  | 51096  | UTP18  | 17 |
| UTP20  | 27340  | UTP20  | 12 |
| UTP23  | 84294  | UTP23  | 8  |
| UTP6   | 55813  | UTP6   | 17 |
| UTRN   | 7402   | UTRN   | 6  |
| UTS2   | 10911  | UTS2   | 1  |
| UTS2D  | 257313 | UTS2D  | 3  |
| UTX    | 7403   | UTX    | X  |
| UTY    | 7404   | UTY    | Y  |
| UVRAG  | 7405   | UVRAG  | 11 |
| UXT    | 8409   | UXT    | X  |
| VAC14  | 55697  | VAC14  |    |
| VAMP1  | 6843   | VAMP1  | 12 |
| VAMP2  | 6844   | VAMP2  | 17 |
| VAMP3  | 9341   | VAMP3  | 1  |
| VAMP4  | 8674   | VAMP4  | 1  |
| VAMP5  | 10791  | VAMP5  | 2  |
| VAMP7  | 6845   | VAMP7  | XY |
| VAMP8  | 8673   | VAMP8  | 2  |
| VANGL2 | 57216  | VANGL2 | 1  |
| VAPA   | 9218   | VAPA   | 18 |
| VAR5   | 7407   | VAR5   | 6  |
| VAR52  | 57176  | VAR52  | 6  |
| VASH1  | 22846  | VASH1  | 14 |
| VASH2  | 79805  | VASH2  | 1  |
| VASN   | 114990 | VASN   | 16 |
| VAT1   | 10493  | VAT1   | 17 |
| VAT1L  | 57687  | VAT1L  | 16 |
| VAV1   | 7409   | VAV1   | 19 |
| VAV2   | 7410   | VAV2   | 9  |
| VAV3   | 10451  | VAV3   | 1  |
| VAX2   | 25806  | VAX2   | 2  |
| VBP1   | 7411   | VBP1   | X  |
| VCAM1  | 7412   | VCAM1  | 1  |
| VCL    | 7414   | VCL    | 10 |
| VCP    | 7415   | VCP    | 9  |
| VCPIP1 | 80124  | VCPIP1 | 8  |
| VCX-C  | 425054 | VCX-C  | X  |
| VDAC1  | 7416   | VDAC1  | 5  |
| VDAC3  | 7419   | VDAC3  | 8  |
| VDR    | 7421   | VDR    | 12 |
| VEGFB  | 7423   | VEGFB  |    |
| VEGFC  | 7424   | VEGFC  | 4  |
| VEZF1  | 7716   | VEZF1  | 17 |

|          |        |          |    |
|----------|--------|----------|----|
| VEZT     | 55591  | VEZT     | 12 |
| VGf      | 7425   | VGf      | 7  |
| VGLL2    | 245806 | VGLL2    | 6  |
| VGLL4    | 9686   | VGLL4    | 3  |
| VHL      | 7428   | VHL      | 3  |
| VIL2     | 7430   | VIL2     | 6  |
| VILL     | 50853  | VILL     | 3  |
| VIM      | 7431   | VIM      | 10 |
| VIPR1    | 7433   | VIPR1    | 3  |
| VIPR2    | 7434   | VIPR2    | 7  |
| VISA     | 57506  | VISA     | 20 |
| VIT      | 5212   | VIT      | 2  |
| VKORC1   | 79001  | VKORC1   | 16 |
| VKORC1L1 | 154807 | VKORC1L1 | 7  |
| VMAC     | 400673 | VMAC     | 19 |
| VMD2L3   | 144453 | VMD2L3   | 12 |
| VMO1     | 284013 | VMO1     | 17 |
| VN1R2    | 317701 | VN1R2    | 19 |
| VN1R5    | 317705 | VN1R5    | 1  |
| VNN1     | 8876   | VNN1     | 6  |
| VNN2     | 8875   | VNN2     | 6  |
| VNN3     | 55350  | VNN3     | 6  |
| VOPP1    | 81552  | VOPP1    | 7  |
| VPRBP    | 9730   | VPRBP    | 3  |
| VPREB1   | 7441   | VPREB1   | 22 |
| VPREB3   | 29802  | VPREB3   | 22 |
| VPS11    | 55823  | VPS11    | 11 |
| VPS13B   | 157680 | VPS13B   | 8  |
| VPS16    | 64601  | VPS16    | 20 |
| VPS18    | 57617  | VPS18    | 15 |
| VPS24    | 51652  | VPS24    | 2  |
| VPS25    | 84313  | VPS25    | 17 |
| VPS26    | 9559   | VPS26    | 10 |
| VPS26A   | 9559   | VPS26A   | 10 |
| VPS26B   | 112936 | VPS26B   | 11 |
| VPS28    | 51160  | VPS28    | 8  |
| VPS29    | 51699  | VPS29    | 12 |
| VPS33A   | 65082  | VPS33A   | 12 |
| VPS33B   | 26276  | VPS33B   | 15 |
| VPS35    | 55737  | VPS35    | 16 |
| VPS36    | 51028  | VPS36    | 13 |
| VPS37A   | 137492 | VPS37A   | 8  |
| VPS37B   | 79720  | VPS37B   | 12 |
| VPS37C   | 55048  | VPS37C   | 11 |



|          |        |          |    |
|----------|--------|----------|----|
| VPS37D   | 155382 | VPS37D   | 7  |
| VPS39    | 23339  | VPS39    | 15 |
| VPS41    | 27072  | VPS41    | 7  |
| VPS45    | 11311  | VPS45    | 1  |
| VPS4A    | 27183  | VPS4A    | 16 |
| VPS4B    | 9525   | VPS4B    | 18 |
| VPS52    | 6293   | VPS52    | 6  |
| VPS53    | 55275  | VPS53    | 17 |
| VPS54    | 51542  | VPS54    | 2  |
| VPS72    | 6944   | VPS72    | 1  |
| VPS8     | 23355  | VPS8     | 3  |
| VRK1     | 7443   | VRK1     | 14 |
| VRK2     | 7444   | VRK2     | 2  |
| VRK3     | 51231  | VRK3     | 19 |
| VSIG4    | 11326  | VSIG4    | X  |
| VSIG6    | 388078 | VSIG6    | 15 |
| VTA1     | 51534  | VTA1     | 6  |
| VTI1B    | 10490  | VTI1B    | 14 |
| VTRNA1-1 | 56664  | VTRNA1-1 | 5  |
| VWA1     | 64856  | VWA1     | 1  |
| VWA5A    | 4013   | VWA5A    | 11 |
| VWA5B1   | 127731 | VWA5B1   | 1  |
| VWC2     | 375567 | VWC2     | 7  |
| VWCE     | 220001 | VWCE     | 11 |
| WAC      | 51322  | WAC      | 10 |
| WARS     | 7453   | WARS     | 14 |
| WARS2    | 10352  | WARS2    | 1  |
| WAS      | 7454   | WAS      | X  |
| WASF1    | 8936   | WASF1    | 6  |
| WASF2    | 10163  | WASF2    | 1  |
| WASF3    | 10810  | WASF3    | 13 |
| WASH2P   | 375260 | WASH2P   | 2  |
| WASPIP   | 7456   | WASPIP   | 2  |
| WBP1     | 23559  | WBP1     | 2  |
| WBP11    | 51729  | WBP11    | 12 |
| WBP11P1  | 441818 | WBP11P1  | 18 |
| WBP2     | 23558  | WBP2     | 17 |
| WBP4     | 11193  | WBP4     | 13 |
| WBP5     | 51186  | WBP5     | X  |
| WBSCR16  | 81554  | WBSCR16  | 7  |
| WBSCR19  | 285955 | WBSCR19  |    |
| WBSCR22  | 114049 | WBSCR22  | 7  |
| WBSCR27  | 155368 | WBSCR27  | 7  |
| WDFY1    | 57590  | WDFY1    | 2  |

|        |        |        |    |
|--------|--------|--------|----|
| WDFY2  | 115825 | WDFY2  | 13 |
| WDFY4  | 57705  | WDFY4  | 10 |
| WDHD1  | 11169  | WDHD1  | 14 |
| WDR1   | 9948   | WDR1   | 4  |
| WDR12  | 55759  | WDR12  | 2  |
| WDR13  | 64743  | WDR13  | X  |
| WDR17  | 116966 | WDR17  | 4  |
| WDR18  | 57418  | WDR18  | 19 |
| WDR19  | 57728  | WDR19  | 4  |
| WDR20  | 91833  | WDR20  | 14 |
| WDR21A | 26094  | WDR21A | 14 |
| WDR23  | 80344  | WDR23  | 14 |
| WDR24  | 84219  | WDR24  | 16 |
| WDR25  | 79446  | WDR25  | 14 |
| WDR26  | 80232  | WDR26  | 1  |
| WDR27  | 253769 | WDR27  | 6  |
| WDR3   | 10885  | WDR3   | 1  |
| WDR31  | 114987 | WDR31  | 9  |
| WDR33  | 55339  | WDR33  | 2  |
| WDR34  | 89891  | WDR34  | 9  |
| WDR35  | 57539  | WDR35  | 2  |
| WDR36  | 134430 | WDR36  | 5  |
| WDR37  | 22884  | WDR37  | 10 |
| WDR4   | 10785  | WDR4   | 21 |
| WDR40A | 25853  | WDR40A | 9  |
| WDR41  | 55255  | WDR41  | 5  |
| WDR42A | 50717  | WDR42A | 1  |
| WDR43  | 23160  | WDR43  |    |
| WDR44  | 54521  | WDR44  | X  |
| WDR45  | 11152  | WDR45  | X  |
| WDR45L | 56270  | WDR45L | 17 |
| WDR46  | 9277   | WDR46  | 6  |
| WDR47  | 22911  | WDR47  | 1  |
| WDR48  | 57599  | WDR48  | 3  |
| WDR49  | 151790 | WDR49  | 3  |
| WDR5   | 11091  | WDR5   | 9  |
| WDR51A | 25886  | WDR51A | 3  |
| WDR51B | 282809 | WDR51B | 12 |
| WDR53  | 348793 | WDR53  | 3  |
| WDR54  | 84058  | WDR54  | 2  |
| WDR55  | 54853  | WDR55  | 5  |
| WDR57  | 9410   | WDR57  | 1  |
| WDR59  | 79726  | WDR59  | 16 |
| WDR5B  | 54554  | WDR5B  | 3  |

|         |        |         |    |
|---------|--------|---------|----|
| WDR6    | 11180  | WDR6    | 3  |
| WDR60   | 55112  | WDR60   |    |
| WDR61   | 80349  | WDR61   | 15 |
| WDR62   | 284403 | WDR62   | 19 |
| WDR63   | 126820 | WDR63   | 1  |
| WDR66   | 144406 | WDR66   | 12 |
| WDR67   | 93594  | WDR67   | 8  |
| WDR68   | 10238  | WDR68   | 17 |
| WDR7    | 23335  | WDR7    | 18 |
| WDR70   | 55100  | WDR70   | 5  |
| WDR73   | 84942  | WDR73   | 15 |
| WDR74   | 54663  | WDR74   |    |
| WDR75   | 84128  | WDR75   | 2  |
| WDR76   | 79968  | WDR76   | 15 |
| WDR77   | 79084  | WDR77   | 1  |
| WDR78   | 79819  | WDR78   | 1  |
| WDR79   | 55135  | WDR79   | 17 |
| WDR8    | 49856  | WDR8    | 1  |
| WDR81   | 124997 | WDR81   | 17 |
| WDR82   | 80335  | WDR82   | 3  |
| WDR85   | 92715  | WDR85   | 9  |
| WDR88   | 126248 | WDR88   | 19 |
| WDR89   | 112840 | WDR89   | 14 |
| WDR90   | 197335 | WDR90   | 16 |
| WDR91   | 29062  | WDR91   | 7  |
| WDR92   | 116143 | WDR92   | 2  |
| WDSOF1  | 25879  | WDSOF1  | 8  |
| WDSUB1  | 151525 | WDSUB1  | 2  |
| WDTC1   | 23038  | WDTC1   | 1  |
| WDYHV1  | 55093  | WDYHV1  | 8  |
| WEE1    | 7465   | WEE1    | 11 |
| WFDC11  | 259239 | WFDC11  | 20 |
| WFDC13  | 164237 | WFDC13  | 20 |
| WFDC3   | 140686 | WFDC3   | 20 |
| WFDC6   | 140870 | WFDC6   | 20 |
| WFDC8   | 90199  | WFDC8   | 20 |
| WFS1    | 7466   | WFS1    | 4  |
| WHAMM   | 123720 | WHAMM   | 15 |
| WHDC1L1 | 339005 | WHDC1L1 | 15 |
| WHDC1L2 | 440253 | WHDC1L2 |    |
| WHSC1   | 7468   | WHSC1   | 4  |
| WHSC1L1 | 54904  | WHSC1L1 | 8  |
| WHSC2   | 7469   | WHSC2   | 4  |
| WIBG    | 84305  | WIBG    | 12 |

|        |        |        |    |
|--------|--------|--------|----|
| WIF1   | 11197  | WIF1   | 12 |
| WIPI1  | 55062  | WIPI1  |    |
| WIPI2  | 26100  | WIPI2  | 7  |
| WISP2  | 8839   | WISP2  | 20 |
| WNK1   | 65125  | WNK1   | 12 |
| WNK2   | 65268  | WNK2   | 9  |
| WNK4   | 65266  | WNK4   | 17 |
| WNT1   | 7471   | WNT1   | 12 |
| WNT10A | 80326  | WNT10A | 2  |
| WNT10B | 7480   | WNT10B | 12 |
| WNT3   | 7473   | WNT3   | 17 |
| WNT5A  | 7474   | WNT5A  | 3  |
| WNT7B  | 7477   | WNT7B  | 22 |
| WNT8A  | 7478   | WNT8A  | 5  |
| WRB    | 7485   | WRB    | 21 |
| WRN    | 7486   | WRN    | 8  |
| WRNIP1 | 56897  | WRNIP1 | 6  |
| WSB1   | 26118  | WSB1   | 17 |
| WSB2   | 55884  | WSB2   | 12 |
| WSCD1  | 23302  | WSCD1  | 17 |
| WTAP   | 9589   | WTAP   | 6  |
| WTIP   | 126374 | WTIP   | 19 |
| WWC1   | 23286  | WWC1   | 5  |
| WWC3   | 55841  | WWC3   | X  |
| WWOX   | 51741  | WWOX   | 16 |
| WWP1   | 11059  | WWP1   | 8  |
| WWP2   | 11060  | WWP2   | 16 |
| XAB2   | 56949  | XAB2   | 19 |
| XAF1   | 54739  | XAF1   | 17 |
| XAGE1B | 653220 | XAGE1B | X  |
| XAGE1C | 653048 | XAGE1C | X  |
| XAGE1D | 9503   | XAGE1D | X  |
| XAGE1E | 653067 | XAGE1E | X  |
| XAGE-4 | 139629 | XAGE-4 | X  |
| XBP1   | 7494   | XBP1   | 22 |
| XDH    | 7498   | XDH    | 2  |
| XIAP   | 331    | XIAP   | X  |
| XIRP1  | 165904 | XIRP1  | 3  |
| XIST   | 7503   | XIST   | X  |
| XK     | 7504   | XK     | X  |
| XKR3   | 150165 | XKR3   | 22 |
| XKR6   | 286046 | XKR6   | 8  |
| XKRX   | 402415 | XKRX   | X  |
| XPA    | 7507   | XPA    | 9  |

|          |        |          |    |
|----------|--------|----------|----|
| XPC      | 7508   | XPC      | 3  |
| XPNPEP1  | 7511   | XPNPEP1  | 10 |
| XPNPEP3  | 63929  | XPNPEP3  | 22 |
| XPO1     | 7514   | XPO1     | 2  |
| XPO4     | 64328  | XPO4     | 13 |
| XPO5     | 57510  | XPO5     | 6  |
| XPO6     | 23214  | XPO6     | 16 |
| XPO7     | 23039  | XPO7     | 8  |
| XPOT     | 11260  | XPOT     | 12 |
| XPR1     | 9213   | XPR1     | 1  |
| XRCC1    | 7515   | XRCC1    | 19 |
| XRCC2    | 7516   | XRCC2    | 7  |
| XRCC3    | 7517   | XRCC3    | 14 |
| XRCC4    | 7518   | XRCC4    | 5  |
| XRCC5    | 7520   | XRCC5    | 2  |
| XRCC6    | 2547   | XRCC6    | 22 |
| XRCC6BP1 | 91419  | XRCC6BP1 | 12 |
| XRN1     | 54464  | XRN1     | 3  |
| XYLB     | 9942   | XYLB     | 3  |
| XYLT1    | 64131  | XYLT1    | 16 |
| XYLT2    | 64132  | XYLT2    | 17 |
| YAF2     | 10138  | YAF2     | 12 |
| YAP1     | 10413  | YAP1     | 11 |
| YARS     | 8565   | YARS     | 1  |
| YARS2    | 51067  | YARS2    | 12 |
| YBX1     | 4904   | YBX1     | 1  |
| YBX2     | 51087  | YBX2     |    |
| YDJC     | 150223 | YDJC     | 22 |
| YEATS2   | 55689  | YEATS2   | 3  |
| YEATS4   | 8089   | YEATS4   | 12 |
| YES1     | 7525   | YES1     | 18 |
| YIF1A    | 10897  | YIF1A    | 11 |
| YIF1B    | 90522  | YIF1B    | 19 |
| YIPF1    | 54432  | YIPF1    | 1  |
| YIPF3    | 25844  | YIPF3    | 6  |
| YIPF4    | 84272  | YIPF4    | 2  |
| YIPF5    | 81555  | YIPF5    | 5  |
| YIPF6    | 286451 | YIPF6    | X  |
| YIPF7    | 285525 | YIPF7    | 4  |
| YJEFN3   | 374887 | YJEFN3   | 19 |
| YKT6     | 10652  | YKT6     | 7  |
| YLPM1    | 56252  | YLPM1    | 14 |
| YME1L1   | 10730  | YME1L1   | 10 |
| YOD1     | 55432  | YOD1     | 1  |

|        |        |        |    |
|--------|--------|--------|----|
| YPEL1  | 29799  | YPEL1  | 22 |
| YPEL2  | 388403 | YPEL2  | 17 |
| YPEL3  | 83719  | YPEL3  | 16 |
| YPEL4  | 219539 | YPEL4  | 11 |
| YPEL5  | 51646  | YPEL5  | 2  |
| YRDC   | 79693  | YRDC   | 1  |
| YSK4   | 80122  | YSK4   | 2  |
| YTHDC1 | 91746  | YTHDC1 | 4  |
| YTHDC2 | 64848  | YTHDC2 | 5  |
| YTHDF1 | 54915  | YTHDF1 | 20 |
| YTHDF2 | 51441  | YTHDF2 | 1  |
| YTHDF3 | 253943 | YTHDF3 | 8  |
| YWHAB  | 7529   | YWHAB  | 20 |
| YWHAE  | 7531   | YWHAE  | 17 |
| YWHAG  | 7532   | YWHAG  | 7  |
| YWHAH  | 7533   | YWHAH  | 22 |
| YWHAQ  | 10971  | YWHAQ  | 2  |
| YWHAZ  | 7534   | YWHAZ  | 8  |
| YY1    | 7528   | YY1    | 14 |
| ZADH2  | 284273 | ZADH2  | 18 |
| ZAK    | 51776  | ZAK    | 2  |
| ZBED1  | 9189   | ZBED1  | Y  |
| ZBED2  | 79413  | ZBED2  | 3  |
| ZBED3  | 84327  | ZBED3  | 5  |
| ZBED4  | 9889   | ZBED4  | 22 |
| ZBED5  | 58486  | ZBED5  | 11 |
| ZBP1   | 81030  | ZBP1   | 20 |
| ZBTB10 | 65986  | ZBTB10 | 8  |
| ZBTB11 | 27107  | ZBTB11 | 3  |
| ZBTB17 | 7709   | ZBTB17 | 1  |
| ZBTB2  | 57621  | ZBTB2  | 6  |
| ZBTB20 | 26137  | ZBTB20 | 3  |
| ZBTB22 | 9278   | ZBTB22 | 6  |
| ZBTB24 | 9841   | ZBTB24 | 6  |
| ZBTB25 | 7597   | ZBTB25 | 14 |
| ZBTB26 | 57684  | ZBTB26 | 9  |
| ZBTB3  | 79842  | ZBTB3  | 11 |
| ZBTB32 | 27033  | ZBTB32 | 19 |
| ZBTB33 | 10009  | ZBTB33 | X  |
| ZBTB34 | 403341 | ZBTB34 | 9  |
| ZBTB38 | 253461 | ZBTB38 |    |
| ZBTB39 | 9880   | ZBTB39 | 12 |
| ZBTB4  | 57659  | ZBTB4  | 17 |
| ZBTB41 | 360023 | ZBTB41 | 1  |

|          |           |          |    |
|----------|-----------|----------|----|
| ZBTB42   | 100128927 | ZBTB42   | 14 |
| ZBTB43   | 23099     | ZBTB43   | 9  |
| ZBTB44   | 29068     | ZBTB44   | 11 |
| ZBTB45   | 84878     | ZBTB45   | 19 |
| ZBTB46   | 140685    | ZBTB46   | 20 |
| ZBTB47   | 92999     | ZBTB47   | 3  |
| ZBTB48   | 3104      | ZBTB48   | 1  |
| ZBTB5    | 9925      | ZBTB5    | 9  |
| ZBTB7C   | 201501    | ZBTB7C   | 18 |
| ZBTB8A   | 653121    | ZBTB8A   | 1  |
| ZBTB8OS  | 339487    | ZBTB8OS  | 1  |
| ZBTB9    | 221504    | ZBTB9    | 6  |
| ZC3H10   | 84872     | ZC3H10   | 12 |
| ZC3H11B  | 643136    | ZC3H11B  |    |
| ZC3H12A  | 80149     | ZC3H12A  | 1  |
| ZC3H12B  | 340554    | ZC3H12B  | X  |
| ZC3H12C  | 85463     | ZC3H12C  | 11 |
| ZC3H12D  | 340152    | ZC3H12D  | 6  |
| ZC3H13   | 23091     | ZC3H13   | 13 |
| ZC3H14   | 79882     | ZC3H14   | 14 |
| ZC3H15   | 55854     | ZC3H15   | 2  |
| ZC3H18   | 124245    | ZC3H18   | 16 |
| ZC3H3    | 23144     | ZC3H3    | 8  |
| ZC3H4    | 23211     | ZC3H4    | 19 |
| ZC3H5    | 85451     | ZC3H5    |    |
| ZC3H7A   | 29066     | ZC3H7A   | 16 |
| ZC3H8    | 84524     | ZC3H8    | 2  |
| ZC3HAV1  | 56829     | ZC3HAV1  | 7  |
| ZC3HAV1L | 92092     | ZC3HAV1L | 7  |
| ZC3HC1   | 51530     | ZC3HC1   | 7  |
| ZC4H2    | 55906     | ZC4H2    | X  |
| ZCCHC10  | 54819     | ZCCHC10  | 5  |
| ZCCHC11  | 23318     | ZCCHC11  | 1  |
| ZCCHC12  | 170261    | ZCCHC12  | X  |
| ZCCHC14  | 23174     | ZCCHC14  | 16 |
| ZCCHC17  | 51538     | ZCCHC17  | 1  |
| ZCCHC2   | 54877     | ZCCHC2   | 18 |
| ZCCHC24  | 219654    | ZCCHC24  | 10 |
| ZCCHC3   | 85364     | ZCCHC3   | 20 |
| ZCCHC4   | 29063     | ZCCHC4   | 4  |
| ZCCHC6   | 79670     | ZCCHC6   | 9  |
| ZCCHC7   | 84186     | ZCCHC7   | 9  |
| ZCCHC8   | 55596     | ZCCHC8   | 12 |
| ZCCHC9   | 84240     | ZCCHC9   | 5  |

|         |        |         |    |
|---------|--------|---------|----|
| ZCRB1   | 85437  | ZCRB1   | 12 |
| ZCWPW1  | 55063  | ZCWPW1  | 7  |
| ZCWPW2  | 152098 | ZCWPW2  | 3  |
| ZDHHC11 | 79844  | ZDHHC11 | 5  |
| ZDHHC12 | 84885  | ZDHHC12 | 9  |
| ZDHHC13 | 54503  | ZDHHC13 | 11 |
| ZDHHC14 | 79683  | ZDHHC14 | 6  |
| ZDHHC16 | 84287  | ZDHHC16 | 10 |
| ZDHHC17 | 23390  | ZDHHC17 | 12 |
| ZDHHC2  | 51201  | ZDHHC2  | 8  |
| ZDHHC23 | 254887 | ZDHHC23 | 3  |
| ZDHHC24 | 254359 | ZDHHC24 | 11 |
| ZDHHC3  | 51304  | ZDHHC3  | 3  |
| ZDHHC4  | 55146  | ZDHHC4  | 7  |
| ZDHHC5  | 25921  | ZDHHC5  | 11 |
| ZDHHC6  | 64429  | ZDHHC6  | 10 |
| ZDHHC7  | 55625  | ZDHHC7  | 16 |
| ZDHHC8  | 29801  | ZDHHC8  | 22 |
| ZDHHC8P | 150244 | ZDHHC8P | 22 |
| ZDHHC9  | 51114  | ZDHHC9  | X  |
| ZEB1    | 6935   | ZEB1    | 10 |
| ZEB2    | 9839   | ZEB2    | 2  |
| ZER1    | 10444  | ZER1    | 9  |
| ZFAND1  | 79752  | ZFAND1  | 8  |
| ZFAND2A | 90637  | ZFAND2A | 7  |
| ZFAND2B | 130617 | ZFAND2B | 2  |
| ZFAND3  | 60685  | ZFAND3  | 6  |
| ZFAND5  | 7763   | ZFAND5  | 9  |
| ZFAND6  | 54469  | ZFAND6  | 15 |
| ZFC3H1  | 196441 | ZFC3H1  | 12 |
| ZFHX2   | 85446  | ZFHX2   | 14 |
| ZFHX3   | 463    | ZFHX3   | 16 |
| ZFP1    | 162239 | ZFP1    | 16 |
| ZFP106  | 64397  | ZFP106  | 15 |
| ZFP14   | 57677  | ZFP14   | 19 |
| ZFP161  | 7541   | ZFP161  | 18 |
| ZFP3    | 124961 | ZFP3    | 17 |
| ZFP30   | 22835  | ZFP30   | 19 |
| ZFP36   | 7538   | ZFP36   | 19 |
| ZFP36L1 | 677    | ZFP36L1 | 14 |
| ZFP36L2 | 678    | ZFP36L2 | 2  |
| ZFP37   | 7539   | ZFP37   | 9  |
| ZFP57   | 346171 | ZFP57   | 6  |
| ZFP62   | 643836 | ZFP62   | 5  |



|          |        |          |    |
|----------|--------|----------|----|
| ZFP64    | 55734  | ZFP64    | 20 |
| ZFP82    | 284406 | ZFP82    | 19 |
| ZFP90    | 146198 | ZFP90    | 16 |
| ZFP91    | 80829  | ZFP91    | 11 |
| ZFP92    | 139735 | ZFP92    | X  |
| ZFPL1    | 7542   | ZFPL1    | 11 |
| ZFPM1    | 161882 | ZFPM1    | 16 |
| ZFR      | 51663  | ZFR      | 5  |
| ZFX      | 7543   | ZFX      | X  |
| ZFY      | 7544   | ZFY      | Y  |
| ZFYVE1   | 53349  | ZFYVE1   | 14 |
| ZFYVE16  | 9765   | ZFYVE16  | 5  |
| ZFYVE19  | 84936  | ZFYVE19  | 15 |
| ZFYVE20  | 64145  | ZFYVE20  | 3  |
| ZFYVE21  | 79038  | ZFYVE21  | 14 |
| ZFYVE26  | 23503  | ZFYVE26  | 14 |
| ZHX1     | 11244  | ZHX1     | 8  |
| ZHX2     | 22882  | ZHX2     | 8  |
| ZHX3     | 23051  | ZHX3     | 20 |
| ZIC1     | 7545   | ZIC1     | 3  |
| ZIC2     | 7546   | ZIC2     | 13 |
| ZIC5     | 85416  | ZIC5     | 13 |
| ZIK1     | 284307 | ZIK1     | 19 |
| ZIM2     | 23619  | ZIM2     | 19 |
| ZIM3     | 114026 | ZIM3     | 19 |
| ZKSCAN1  | 7586   | ZKSCAN1  | 7  |
| ZKSCAN2  | 342357 | ZKSCAN2  | 16 |
| ZKSCAN3  | 80317  | ZKSCAN3  | 6  |
| ZKSCAN4  | 387032 | ZKSCAN4  | 6  |
| ZKSCAN5  | 23660  | ZKSCAN5  | 7  |
| ZMAT2    | 153527 | ZMAT2    | 5  |
| ZMAT3    | 64393  | ZMAT3    | 3  |
| ZMAT5    | 55954  | ZMAT5    | 22 |
| ZMIZ1    | 57178  | ZMIZ1    | 10 |
| ZMIZ2    | 83637  | ZMIZ2    | 7  |
| ZMPSTE24 | 10269  | ZMPSTE24 | 1  |
| ZMYM1    | 79830  | ZMYM1    | 1  |
| ZMYM3    | 9203   | ZMYM3    | X  |
| ZMYM4    | 9202   | ZMYM4    | 1  |
| ZMYM5    | 9205   | ZMYM5    | 13 |
| ZMYM6    | 9204   | ZMYM6    | 1  |
| ZMYND11  | 10771  | ZMYND11  | 10 |
| ZMYND12  | 84217  | ZMYND12  | 1  |
| ZMYND19  | 116225 | ZMYND19  | 9  |

|        |        |        |    |
|--------|--------|--------|----|
| ZMYND8 | 23613  | ZMYND8 | 20 |
| ZNF10  | 7556   | ZNF10  | 12 |
| ZNF101 | 94039  | ZNF101 | 19 |
| ZNF107 | 51427  | ZNF107 | 7  |
| ZNF114 | 163071 | ZNF114 | 19 |
| ZNF121 | 7675   | ZNF121 | 19 |
| ZNF124 | 7678   | ZNF124 | 1  |
| ZNF131 | 7690   | ZNF131 | 5  |
| ZNF133 | 7692   | ZNF133 | 20 |
| ZNF134 | 7693   | ZNF134 | 19 |
| ZNF136 | 7695   | ZNF136 |    |
| ZNF137 | 7696   | ZNF137 |    |
| ZNF138 | 7697   | ZNF138 | 7  |
| ZNF14  | 7561   | ZNF14  | 19 |
| ZNF140 | 7699   | ZNF140 | 12 |
| ZNF142 | 7701   | ZNF142 | 2  |
| ZNF143 | 7702   | ZNF143 | 11 |
| ZNF146 | 7705   | ZNF146 | 19 |
| ZNF148 | 7707   | ZNF148 | 3  |
| ZNF154 | 7710   | ZNF154 | 19 |
| ZNF16  | 7564   | ZNF16  | 8  |
| ZNF160 | 90338  | ZNF160 | 19 |
| ZNF165 | 7718   | ZNF165 | 6  |
| ZNF17  | 7565   | ZNF17  | 19 |
| ZNF174 | 7727   | ZNF174 | 16 |
| ZNF175 | 7728   | ZNF175 | 19 |
| ZNF177 | 7730   | ZNF177 | 19 |
| ZNF18  | 7566   | ZNF18  | 17 |
| ZNF181 | 339318 | ZNF181 | 19 |
| ZNF184 | 7738   | ZNF184 | 6  |
| ZNF185 | 7739   | ZNF185 | X  |
| ZNF187 | 7741   | ZNF187 | 6  |
| ZNF193 | 7746   | ZNF193 | 6  |
| ZNF195 | 7748   | ZNF195 | 11 |
| ZNF197 | 10168  | ZNF197 | 3  |
| ZNF20  | 7568   | ZNF20  | 19 |
| ZNF200 | 7752   | ZNF200 | 16 |
| ZNF202 | 7753   | ZNF202 | 11 |
| ZNF205 | 7755   | ZNF205 | 16 |
| ZNF207 | 7756   | ZNF207 | 17 |
| ZNF211 | 10520  | ZNF211 | 19 |
| ZNF212 | 7988   | ZNF212 | 7  |
| ZNF213 | 7760   | ZNF213 | 16 |
| ZNF214 | 7761   | ZNF214 | 11 |

|         |        |         |    |
|---------|--------|---------|----|
| ZNF215  | 7762   | ZNF215  | 11 |
| ZNF217  | 7764   | ZNF217  | 20 |
| ZNF219  | 51222  | ZNF219  | 14 |
| ZNF22   | 7570   | ZNF22   | 10 |
| ZNF223  | 7766   | ZNF223  |    |
| ZNF226  | 7769   | ZNF226  | 19 |
| ZNF227  | 7770   | ZNF227  | 19 |
| ZNF23   | 7571   | ZNF23   | 16 |
| ZNF232  | 7775   | ZNF232  | 17 |
| ZNF234  | 10780  | ZNF234  | 19 |
| ZNF235  | 9310   | ZNF235  | 19 |
| ZNF236  | 7776   | ZNF236  | 18 |
| ZNF238  | 10472  | ZNF238  | 1  |
| ZNF239  | 8187   | ZNF239  | 10 |
| ZNF24   | 7572   | ZNF24   | 18 |
| ZNF248  | 57209  | ZNF248  | 10 |
| ZNF25   | 219749 | ZNF25   | 10 |
| ZNF250  | 58500  | ZNF250  | 8  |
| ZNF252  | 286101 | ZNF252  | 8  |
| ZNF253  | 56242  | ZNF253  | 19 |
| ZNF254  | 9534   | ZNF254  | 19 |
| ZNF256  | 10172  | ZNF256  | 19 |
| ZNF259  | 8882   | ZNF259  | 11 |
| ZNF26   | 7574   | ZNF26   | 12 |
| ZNF260  | 339324 | ZNF260  | 19 |
| ZNF266  | 10781  | ZNF266  | 19 |
| ZNF271  | 10778  | ZNF271  | 18 |
| ZNF273  | 10793  | ZNF273  | 7  |
| ZNF274  | 10782  | ZNF274  | 19 |
| ZNF275  | 10838  | ZNF275  | X  |
| ZNF276  | 92822  | ZNF276  | 16 |
| ZNF277  | 11179  | ZNF277  | 7  |
| ZNF280A | 129025 | ZNF280A | 22 |
| ZNF280B | 140883 | ZNF280B | 22 |
| ZNF280C | 55609  | ZNF280C | X  |
| ZNF280D | 54816  | ZNF280D | 15 |
| ZNF281  | 23528  | ZNF281  | 1  |
| ZNF282  | 8427   | ZNF282  | 7  |
| ZNF285A | 26974  | ZNF285A | 19 |
| ZNF286A | 57335  | ZNF286A | 17 |
| ZNF286C | 729288 | ZNF286C |    |
| ZNF292  | 23036  | ZNF292  | 6  |
| ZNF295  | 49854  | ZNF295  | 21 |
| ZNF296  | 162979 | ZNF296  | 19 |

|          |           |          |    |
|----------|-----------|----------|----|
| ZNF3     | 7551      | ZNF3     | 7  |
| ZNF30    | 90075     | ZNF30    | 19 |
| ZNF302   | 55900     | ZNF302   | 19 |
| ZNF318   | 24149     | ZNF318   | 6  |
| ZNF319   | 57567     | ZNF319   | 16 |
| ZNF322A  | 79692     | ZNF322A  | 6  |
| ZNF323   | 64288     | ZNF323   | 6  |
| ZNF324   | 25799     | ZNF324   | 19 |
| ZNF326   | 284695    | ZNF326   | 1  |
| ZNF329   | 79673     | ZNF329   | 19 |
| ZNF330   | 27309     | ZNF330   | 4  |
| ZNF331   | 55422     | ZNF331   | 19 |
| ZNF333   | 84449     | ZNF333   | 19 |
| ZNF335   | 63925     | ZNF335   | 20 |
| ZNF337   | 26152     | ZNF337   | 20 |
| ZNF33A   | 7581      | ZNF33A   | 10 |
| ZNF33B   | 7582      | ZNF33B   | 10 |
| ZNF34    | 80778     | ZNF34    | 8  |
| ZNF341   | 84905     | ZNF341   | 20 |
| ZNF343   | 79175     | ZNF343   | 20 |
| ZNF345   | 25850     | ZNF345   | 19 |
| ZNF347   | 84671     | ZNF347   | 19 |
| ZNF35    | 7584      | ZNF35    | 3  |
| ZNF350   | 59348     | ZNF350   | 19 |
| ZNF354B  | 117608    | ZNF354B  | 5  |
| ZNF358   | 140467    | ZNF358   | 19 |
| ZNF362   | 149076    | ZNF362   | 1  |
| ZNF364   | 27246     | ZNF364   | 1  |
| ZNF367   | 195828    | ZNF367   | 9  |
| ZNF37A   | 7587      | ZNF37A   | 10 |
| ZNF37B   | 256112    | ZNF37B   |    |
| ZNF382   | 84911     | ZNF382   | 19 |
| ZNF383   | 163087    | ZNF383   | 19 |
| ZNF384   | 171017    | ZNF384   | 12 |
| ZNF385A  | 25946     | ZNF385A  | 12 |
| ZNF385B  | 151126    | ZNF385B  | 2  |
| ZNF385C  | 201181    | ZNF385C  | 17 |
| ZNF394   | 84124     | ZNF394   | 7  |
| ZNF395   | 55893     | ZNF395   | 8  |
| ZNF396   | 252884    | ZNF396   | 18 |
| ZNF397   | 84307     | ZNF397   | 18 |
| ZNF397OS | 100101467 | ZNF397OS |    |
| ZNF398   | 57541     | ZNF398   | 7  |
| ZNF404   | 342908    | ZNF404   | 19 |

|        |        |        |    |
|--------|--------|--------|----|
| ZNF407 | 55628  | ZNF407 | 18 |
| ZNF408 | 79797  | ZNF408 | 11 |
| ZNF410 | 57862  | ZNF410 | 14 |
| ZNF414 | 84330  | ZNF414 | 19 |
| ZNF416 | 55659  | ZNF416 | 19 |
| ZNF417 | 147687 | ZNF417 | 19 |
| ZNF419 | 79744  | ZNF419 | 19 |
| ZNF420 | 147923 | ZNF420 | 19 |
| ZNF425 | 155054 | ZNF425 | 7  |
| ZNF426 | 79088  | ZNF426 | 19 |
| ZNF428 | 126299 | ZNF428 | 19 |
| ZNF429 | 353088 | ZNF429 | 19 |
| ZNF430 | 80264  | ZNF430 | 19 |
| ZNF431 | 170959 | ZNF431 | 19 |
| ZNF433 | 163059 | ZNF433 | 19 |
| ZNF434 | 54925  | ZNF434 | 16 |
| ZNF436 | 80818  | ZNF436 | 1  |
| ZNF439 | 90594  | ZNF439 | 19 |
| ZNF442 | 79973  | ZNF442 | 19 |
| ZNF444 | 55311  | ZNF444 | 19 |
| ZNF446 | 55663  | ZNF446 | 19 |
| ZNF45  | 7596   | ZNF45  | 19 |
| ZNF454 | 285676 | ZNF454 | 5  |
| ZNF460 | 10794  | ZNF460 | 19 |
| ZNF461 | 92283  | ZNF461 | 19 |
| ZNF467 | 168544 | ZNF467 | 7  |
| ZNF468 | 90333  | ZNF468 | 19 |
| ZNF469 | 84627  | ZNF469 | 16 |
| ZNF470 | 388566 | ZNF470 | 19 |
| ZNF473 | 25888  | ZNF473 | 19 |
| ZNF479 | 90827  | ZNF479 | 7  |
| ZNF480 | 147657 | ZNF480 | 19 |
| ZNF483 | 158399 | ZNF483 | 9  |
| ZNF485 | 220992 | ZNF485 | 10 |
| ZNF486 | 90649  | ZNF486 | 19 |
| ZNF490 | 57474  | ZNF490 | 19 |
| ZNF492 | 57615  | ZNF492 | 19 |
| ZNF493 | 284443 | ZNF493 | 19 |
| ZNF498 | 221785 | ZNF498 | 7  |
| ZNF500 | 26048  | ZNF500 | 16 |
| ZNF507 | 22847  | ZNF507 | 19 |
| ZNF509 | 166793 | ZNF509 | 4  |
| ZNF510 | 22869  | ZNF510 | 9  |
| ZNF511 | 118472 | ZNF511 | 10 |

|         |        |         |    |
|---------|--------|---------|----|
| ZNF512  | 84450  | ZNF512  | 2  |
| ZNF513  | 130557 | ZNF513  | 2  |
| ZNF514  | 84874  | ZNF514  | 2  |
| ZNF516  | 9658   | ZNF516  | 18 |
| ZNF518A | 9849   | ZNF518A | 10 |
| ZNF518B | 85460  | ZNF518B | 4  |
| ZNF519  | 162655 | ZNF519  |    |
| ZNF521  | 25925  | ZNF521  | 18 |
| ZNF525  | 170958 | ZNF525  | 19 |
| ZNF526  | 116115 | ZNF526  | 19 |
| ZNF529  | 57711  | ZNF529  | 19 |
| ZNF530  | 348327 | ZNF530  | 19 |
| ZNF532  | 55205  | ZNF532  | 18 |
| ZNF533  | 151126 | ZNF533  | 2  |
| ZNF540  | 163255 | ZNF540  | 19 |
| ZNF541  | 84215  | ZNF541  | 19 |
| ZNF543  | 125919 | ZNF543  | 19 |
| ZNF547  | 284306 | ZNF547  | 19 |
| ZNF548  | 147694 | ZNF548  | 19 |
| ZNF549  | 256051 | ZNF549  | 19 |
| ZNF550  | 162972 | ZNF550  | 19 |
| ZNF551  | 90233  | ZNF551  | 19 |
| ZNF555  | 148254 | ZNF555  | 19 |
| ZNF556  | 80032  | ZNF556  | 19 |
| ZNF557  | 79230  | ZNF557  | 19 |
| ZNF558  | 148156 | ZNF558  | 19 |
| ZNF559  | 84527  | ZNF559  | 19 |
| ZNF561  | 93134  | ZNF561  | 19 |
| ZNF562  | 54811  | ZNF562  | 19 |
| ZNF563  | 147837 | ZNF563  | 19 |
| ZNF564  | 163050 | ZNF564  | 19 |
| ZNF566  | 84924  | ZNF566  | 19 |
| ZNF57   | 126295 | ZNF57   | 19 |
| ZNF570  | 148268 | ZNF570  | 19 |
| ZNF571  | 51276  | ZNF571  | 19 |
| ZNF572  | 137209 | ZNF572  | 8  |
| ZNF573  | 126231 | ZNF573  | 19 |
| ZNF574  | 64763  | ZNF574  | 19 |
| ZNF576  | 79177  | ZNF576  | 19 |
| ZNF577  | 84765  | ZNF577  | 19 |
| ZNF579  | 163033 | ZNF579  | 19 |
| ZNF580  | 51157  | ZNF580  | 19 |
| ZNF581  | 51545  | ZNF581  | 19 |
| ZNF583  | 147949 | ZNF583  | 19 |

|         |        |         |    |
|---------|--------|---------|----|
| ZNF584  | 201514 | ZNF584  | 19 |
| ZNF585A | 199704 | ZNF585A | 19 |
| ZNF585B | 92285  | ZNF585B | 19 |
| ZNF586  | 54807  | ZNF586  | 19 |
| ZNF587  | 84914  | ZNF587  | 19 |
| ZNF589  | 51385  | ZNF589  | 3  |
| ZNF592  | 9640   | ZNF592  | 15 |
| ZNF593  | 51042  | ZNF593  |    |
| ZNF594  | 84622  | ZNF594  | 17 |
| ZNF595  | 152687 | ZNF595  | 4  |
| ZNF596  | 169270 | ZNF596  | 8  |
| ZNF597  | 146434 | ZNF597  | 16 |
| ZNF598  | 90850  | ZNF598  | 16 |
| ZNF599  | 148103 | ZNF599  | 19 |
| ZNF605  | 90462  | ZNF605  | 12 |
| ZNF607  | 84775  | ZNF607  | 19 |
| ZNF608  | 57507  | ZNF608  | 5  |
| ZNF609  | 23060  | ZNF609  | 15 |
| ZNF611  | 81856  | ZNF611  | 19 |
| ZNF613  | 79898  | ZNF613  | 19 |
| ZNF614  | 80110  | ZNF614  | 19 |
| ZNF615  | 284370 | ZNF615  | 19 |
| ZNF616  | 90317  | ZNF616  | 19 |
| ZNF618  | 114991 | ZNF618  | 9  |
| ZNF619  | 285267 | ZNF619  | 3  |
| ZNF620  | 253639 | ZNF620  | 3  |
| ZNF621  | 285268 | ZNF621  | 3  |
| ZNF622  | 90441  | ZNF622  | 5  |
| ZNF626  | 199777 | ZNF626  | 19 |
| ZNF627  | 199692 | ZNF627  | 19 |
| ZNF629  | 23361  | ZNF629  | 16 |
| ZNF630  | 57232  | ZNF630  | X  |
| ZNF642  | 339559 | ZNF642  | 1  |
| ZNF643  | 65243  | ZNF643  | 1  |
| ZNF644  | 84146  | ZNF644  | 1  |
| ZNF650  | 130507 | ZNF650  | 2  |
| ZNF652  | 22834  | ZNF652  | 17 |
| ZNF653  | 115950 | ZNF653  | 19 |
| ZNF654  | 55279  | ZNF654  | 3  |
| ZNF655  | 79027  | ZNF655  | 7  |
| ZNF658  | 26149  | ZNF658  |    |
| ZNF658B | 401509 | ZNF658B | 9  |
| ZNF664  | 144348 | ZNF664  | 12 |
| ZNF668  | 79759  | ZNF668  | 16 |

|         |        |         |    |
|---------|--------|---------|----|
| ZNF669  | 79862  | ZNF669  | 1  |
| ZNF672  | 79894  | ZNF672  | 1  |
| ZNF674  | 641339 | ZNF674  | X  |
| ZNF676  | 163223 | ZNF676  | 19 |
| ZNF679  | 168417 | ZNF679  | 7  |
| ZNF680  | 340252 | ZNF680  | 7  |
| ZNF681  | 148213 | ZNF681  | 19 |
| ZNF682  | 91120  | ZNF682  | 19 |
| ZNF684  | 127396 | ZNF684  | 1  |
| ZNF687  | 57592  | ZNF687  | 1  |
| ZNF688  | 146542 | ZNF688  | 16 |
| ZNF689  | 115509 | ZNF689  | 16 |
| ZNF69   | 7620   | ZNF69   | 19 |
| ZNF692  | 55657  | ZNF692  | 1  |
| ZNF695  | 57116  | ZNF695  | 1  |
| ZNF696  | 79943  | ZNF696  | 8  |
| ZNF699  | 374879 | ZNF699  |    |
| ZNF7    | 7553   | ZNF7    | 8  |
| ZNF700  | 90592  | ZNF700  | 19 |
| ZNF701  | 55762  | ZNF701  | 19 |
| ZNF705A | 440077 | ZNF705A | 12 |
| ZNF705D | 728957 | ZNF705D | 8  |
| ZNF706  | 51123  | ZNF706  | 8  |
| ZNF707  | 286075 | ZNF707  | 8  |
| ZNF708  | 7562   | ZNF708  | 19 |
| ZNF71   | 58491  | ZNF71   | 19 |
| ZNF713  | 349075 | ZNF713  | 7  |
| ZNF714  | 148206 | ZNF714  | 19 |
| ZNF717  | 377064 | ZNF717  |    |
| ZNF721  | 170960 | ZNF721  | 4  |
| ZNF738  | 148203 | ZNF738  | 19 |
| ZNF740  | 283337 | ZNF740  | 12 |
| ZNF746  | 155061 | ZNF746  | 7  |
| ZNF747  | 65988  | ZNF747  | 16 |
| ZNF749  | 388567 | ZNF749  | 19 |
| ZNF75A  | 7627   | ZNF75A  | 16 |
| ZNF75D  | 7626   | ZNF75D  | X  |
| ZNF76   | 7629   | ZNF76   | 6  |
| ZNF763  | 284390 | ZNF763  | 19 |
| ZNF764  | 92595  | ZNF764  | 16 |
| ZNF765  | 91661  | ZNF765  | 19 |
| ZNF768  | 79724  | ZNF768  | 16 |
| ZNF77   | 58492  | ZNF77   | 19 |
| ZNF770  | 54989  | ZNF770  | 15 |



|         |        |         |    |
|---------|--------|---------|----|
| ZNF772  | 400720 | ZNF772  | 19 |
| ZNF774  | 342132 | ZNF774  | 15 |
| ZNF775  | 285971 | ZNF775  | 7  |
| ZNF776  | 284309 | ZNF776  | 19 |
| ZNF777  | 27153  | ZNF777  | 7  |
| ZNF778  | 197320 | ZNF778  | 16 |
| ZNF780B | 163131 | ZNF780B | 19 |
| ZNF781  | 163115 | ZNF781  | 19 |
| ZNF783  | 155060 | ZNF783  | 7  |
| ZNF784  | 147808 | ZNF784  | 19 |
| ZNF786  | 136051 | ZNF786  | 7  |
| ZNF787  | 126208 | ZNF787  | 19 |
| ZNF788  | 388507 | ZNF788  |    |
| ZNF789  | 285989 | ZNF789  | 7  |
| ZNF79   | 7633   | ZNF79   | 9  |
| ZNF791  | 163049 | ZNF791  | 19 |
| ZNF792  | 126375 | ZNF792  | 19 |
| ZNF800  | 168850 | ZNF800  | 7  |
| ZNF804A | 91752  | ZNF804A | 2  |
| ZNF805  | 390980 | ZNF805  | 19 |
| ZNF813  | 126017 | ZNF813  | 19 |
| ZNF816A | 125893 | ZNF816A | 19 |
| ZNF821  | 55565  | ZNF821  | 16 |
| ZNF823  | 55552  | ZNF823  | 19 |
| ZNF827  | 152485 | ZNF827  | 4  |
| ZNF828  | 283489 | ZNF828  | 13 |
| ZNF830  | 91603  | ZNF830  | 17 |
| ZNF831  | 128611 | ZNF831  | 20 |
| ZNF836  | 162962 | ZNF836  | 19 |
| ZNF839  | 55778  | ZNF839  | 14 |
| ZNF84   | 7637   | ZNF84   | 12 |
| ZNF843  | 283933 | ZNF843  | 16 |
| ZNF844  | 284391 | ZNF844  | 19 |
| ZNF845  | 91664  | ZNF845  | 19 |
| ZNF846  | 162993 | ZNF846  | 19 |
| ZNF860  | 344787 | ZNF860  | 3  |
| ZNF878  | 729747 | ZNF878  | 19 |
| ZNF91   | 7644   | ZNF91   | 19 |
| ZNF92   | 168374 | ZNF92   | 7  |
| ZNF93   | 81931  | ZNF93   | 19 |
| ZNF99   | 7652   | ZNF99   | 19 |
| ZNFX1   | 57169  | ZNFX1   | 20 |
| ZNHIT1  | 10467  | ZNHIT1  | 7  |
| ZNHIT2  | 741    | ZNHIT2  | 11 |

|           |        |           |    |
|-----------|--------|-----------|----|
| ZNHIT3    | 9326   | ZNHIT3    | 17 |
| ZNHIT6    | 54680  | ZNHIT6    | 1  |
| ZNRD1     | 30834  | ZNRD1     | 6  |
| ZNRF3     | 84133  | ZNRF3     | 22 |
| ZP3       | 7784   | ZP3       | 7  |
| ZPBP      | 11055  | ZPBP      | 7  |
| ZPBP2     | 124626 | ZPBP2     | 17 |
| ZRANB1    | 54764  | ZRANB1    | 10 |
| ZRANB2    | 9406   | ZRANB2    | 1  |
| ZRANB3    | 84083  | ZRANB3    | 2  |
| ZRSR2     | 8233   | ZRSR2     | X  |
| ZSCAN12L1 | 221584 | ZSCAN12L1 | 6  |
| ZSCAN16   | 80345  | ZSCAN16   | 6  |
| ZSCAN18   | 65982  | ZSCAN18   | 19 |
| ZSCAN2    | 54993  | ZSCAN2    | 15 |
| ZSCAN20   | 7579   | ZSCAN20   | 1  |
| ZSCAN21   | 7589   | ZSCAN21   | 7  |
| ZSCAN22   | 342945 | ZSCAN22   | 19 |
| ZSCAN29   | 146050 | ZSCAN29   | 15 |
| ZSCAN5A   | 79149  | ZSCAN5A   | 19 |
| ZSWIM1    | 90204  | ZSWIM1    | 20 |
| ZSWIM3    | 140831 | ZSWIM3    |    |
| ZSWIM4    | 65249  | ZSWIM4    | 19 |
| ZSWIM5    | 57643  | ZSWIM5    | 1  |
| ZSWIM6    | 57688  | ZSWIM6    | 5  |
| ZSWIM7    | 125150 | ZSWIM7    | 17 |
| ZUFSP     | 221302 | ZUFSP     | 6  |
| ZW10      | 9183   | ZW10      | 11 |
| ZWILCH    | 55055  | ZWILCH    | 15 |
| ZWINT     | 11130  | ZWINT     | 10 |
| ZXDA      | 7789   | ZXDA      | X  |
| ZXDB      | 158586 | ZXDB      | X  |
| ZXDC      | 79364  | ZXDC      | 3  |
| ZYG11B    | 79699  | ZYG11B    | 1  |
| ZYX       | 7791   | ZYX       | 7  |
| ZZEF1     | 23140  | ZZEF1     | 17 |
| ZZZ3      | 26009  | ZZZ3      | 1  |

**PROBE\_CHR\_ORIENTATIO CYTOBAND**

|   |                 |
|---|-----------------|
| - | 4q32.3a         |
| + | 19p13.2d        |
| - | 5q23.2e-q23.2f  |
| + | 10q23.32b       |
| + | 2q24.2a         |
| - | 16p11.2d        |
| + | 2q37.3f         |
| + | 22q13.2b        |
| - | 17q22d          |
| + | 22q11.21c       |
| - | Xq24c           |
| + | 7p14.2a         |
| - | 5q31.1c         |
| + | 17q25.2b-q25.3a |
| + | 4q21.1b         |
| - | 16p13.3b        |
| - | 7p11.2b         |
| - | 1p22.3b         |
| - | 13q32.3c        |
| - | 22q13.2b        |
| - | 3q22.3b         |
| - | 12q13.13e       |
| + | 12q24.31f       |
| - | 3q26.31b        |
| + | 3q25.1c         |
| - | 15q22.33c-q23a  |
| - | 2p14a           |
| - | 2q35e           |
| - | 16q22.1f        |
| - | 6p21.1b         |
| - | 17q21.31a       |
| - | 4q12d-q12e      |
| + | 11q22.3b        |
| - | 7q31.32a        |
| + | 17q12b          |
| - | 17q25.3f        |
| + | 16p13.2b        |
| - | 9q31.1d         |
| - | 4p16.3d         |
| - | 9q34.3e         |
| - | 16p13.3d        |
| - | 17q24.2c-q24.3a |

|   |                  |
|---|------------------|
| + | 19p13.3i         |
| - | 17q24.2c         |
| - | 17q24.2c         |
| - | 7q21.12a-q21.12b |
| - | 1q42.13e         |
| - | 7q21.12a         |
| - | 2q35f            |
| - | Xq13.3a          |
| - | 12q24.31d        |
| + | 10q24.2c         |
| + | 17q21.33b        |
| - | 13q32.1a         |
| - | 3q27.1b          |
| + | 16p12.3b         |
| + | Xq28f            |
| + | 1p21.3d          |
| + | 4q31.22a         |
| + | 6p21.33b         |
| - | 7q36.1d          |
| + | 3q27.1b          |
| + | 21q22.3b         |
| + | 11q23.3e         |
| - | 2p21d            |
| + | 2p23.3a          |
| + | 3q13.2a          |
| - | 7q11.23b         |
| - | 20p11.21a        |
| + | 14q22.1c         |
| + | 13q33.3b         |
| + | 3p21.1e          |
| - | 3p21.1e          |
| - | 17q11.2b         |
| + | 15q26.1a         |
| - | 18q11.2a         |
| + | 14q11.2e         |
| + | 3p21.33e         |
| + | 3p14.3a          |
| - | 19p13.11e        |
| - | 10p12.1b         |
|   | 2q33.2a          |
| + | 17q21.32c        |
| + | 9q34.12a         |
| - | 1q25.2c          |
| - | 10q25.3a         |

- 4p16.1d  
- 17p13.3f-p13.3e  
+ 6p22.1d  
+ 3q21.3b  
- 11p13c  
- 3p22.2a  
- 18q21.1f  
- 17q12b  
+ 12q24.11a-q24.11b  
+ 12q24.12b  
- 3q22.1c  
+ 11q25e  
+ 3q21.3c  
+ 1p31.1g  
+ 12q24.31a  
+ 10q26.13b  
+ 17p13.1d  
+ 17p13.1d  
- 3q29e  
- 1p36.33a  
+ 11q22.3c  
+ 6q25.3f  
- 1q42.12c  
+ 17q21.31d  
- 1q25.2c-q25.3a  
- 10p13c  
+ 7q36.1d  
+ 11p11.2e  
- 16q22.1b  
+ 11q13.5c  
- 7q22.1c  
- 14q11.2f  
- 17q21.2b  
+ 7q21.3d  
+ 9p21.1a  
+ 22q13.2a  
+ 14q24.3a  
- 5q14.1f  
+ 14q24.3a  
+ 14q24.3a  
- 20q13.12b  
- Xp22.11a  
- 17q25.1d  
- 3p14.3a

- 4p16.1d-p16.1c  
+ 2p25.3g  
- 11p11.2b  
- 1q21.1c  
+ 3q23c  
+ 3q22.1c  
+ 22q13.33b  
- 12p13.31d  
+ Xq13.1d  
- 15q25.1a  
+ 17q21.33b  
+ 16q24.3a  
- 4q35.1e  
+ 2q36.1c  
- Xq22.3c-q22.3d  
+ 10q25.2b  
+ 16p12.2c  
- 20p11.21a  
+ 20q11.22b  
- 1q42.13e  
- 10q23.31b  
- 7p22.1c  
- 5q11.2g  
- 17q25.3f  
+ 3q26.33a  
+ 1p36.13d  
- 14q24.1d  
+ 19q13.2a  
+ 14q23.1b  
- 10q24.32b  
- 2q11.2b  
+ 2p14c  
+ 2q14.1a  
+ 7q36.1e  
+ 20q11.23c  
+ 12q23.1d  
- 3p21.1a  
- Xq25f  
- 2q24.1d  
+ 2q22.3c-q23.1a  
+ 3p21.1e  
- 11q13.2a  
- 14q24.3b  
+ 2p16.2a

- 20q13.12a  
+ 15q15.3a  
- 15q22.1b  
+ 17q21.31c  
+ 1q21.3e-q22a  
- 2p25.1d  
+ 7q21.12b  
+ 2q33.3b  
+ 8p21.2d  
- 1p12a  
8p11.23b-p11.23a  
- 10q26.3f  
+ 8p11.23b  
+ 11q24.3c  
- 5q12.3a-q12.3b  
+ 9q34.2a  
+ 1q21.2b-q21.2c  
- 19p13.3h  
- 7p22.3c  
+ 17q11.2c  
- 1q21.3e  
+ 21q22.3e  
- 16q23.1a  
- 6q24.2a  
+ 19p13.3h  
+ 1p35.1a  
+ 14q24.3d  
+ 7q34c  
- 19q13.2b  
+ 8q24.3h  
- 2p23.3c  
- 3q21.1b  
+ 16q12.1c  
- 16p13.3c  
+ 4p16.3a  
+ 10q25.1e-q25.2a  
- 4q23a  
- 4q23b  
+ 8q13.1b  
- 2p25.3b  
- 1q32.1d  
+ 12p13.33b  
+ 10q22.2b  
+ 11p15.4a

|   |                |
|---|----------------|
| + | 22q13.33b      |
| - | 20q13.13f      |
| + | 18q23d         |
| + | 10q21.2b       |
| + | 22q11.23b      |
| + | 17p12a         |
| - | 1p13.2d        |
| - | 15q24.1a       |
| + | 3q13.33a       |
| - | 13q34d         |
| + | 1p34.3d        |
| + | 10q25.2a       |
| + | 5q33.1b        |
| + | 11q13.1f       |
| + | 20q13.33c      |
| + | 22q13.1e       |
| - | 1q44b          |
| + | 14q32.33b      |
| + | 7p13d          |
| + | 12p12.3a       |
| + | 15q26.1a       |
| - | 19p13.3f       |
| - | 10q25.3a       |
| - | 1p36.13b       |
| + | 4q21.3e-q22.1a |
| + | Xq28a          |
| - | 2q11.2c-q11.2d |
| - | 5q31.1c        |
| + | 16q24.3b       |
| - | 18p11.21e      |
| + | 4q13.3d        |
| + | 17q25.3b       |
| + | 2p14c          |
| - | 4q34.3a        |
| + | 7q36.1d        |
| - | 10q11.23a      |
| + | 2p23.3a        |
| - | 6p21.32b       |
| + | 2q36.3c        |
| + | 7q22.1c        |
| + | 5q13.3d        |
| + | 7q34d-q34e     |
| - | 1p36.21a       |
| - | 9q34.3d-q34.3e |



+ 21q22.3c-q22.3d  
- 6q26a  
+ 8p23.1f  
+ 8p11.21b  
+ 4q21.23a  
- 7p21.1b  
- 7p21.1b  
+ 1p36.33b  
- 16q22.1b  
- 9q21.33b  
+ 1p36.22b  
- 5q35.3b  
1q44d  
- 20q11.22a  
+ 1p13.3b  
+ 7q32.1a  
- 1p36.11a-p35.3b  
- 6q23.3a  
- 14q32.33c  
+ 7p21.1b  
+ 14q24.3c  
+ 2p15d  
+ 16p11.2c  
- 12p13.31b  
- 1q41e  
+ 6p21.33a  
+ 9q34.13a  
- Xq25h  
- 10q22.1a  
+ 6q24.2a  
+ 6q21c  
- 1p36.11b  
- 1q23.1g-q23.2a  
+ 7p22.1b  
+ 11q13.1f  
+ 21q22.3d  
- 9q34.11a  
- 1p35.1b  
- 9p24.1c  
+ 1p31.3b  
+ 17q22c  
+ 13q14.11c  
+ 6q25.1c  
+ 15q25.3a-q25.3b

|   |                   |
|---|-------------------|
| + | 14q23.3a          |
| - | 19p13.12b-p13.12a |
| - | 19p13.12a         |
| + | 1p34.3a           |
| - | 6q15b             |
|   | 9q32d-q32e        |
| + | 1p34.1b           |
| - | 7q33b             |
| + | 10p15.1c          |
|   | 10p15.1c          |
| + | 7q34a             |
| - | 1p36.13b          |
| - | 1p36.13b          |
| - | 14q32.33b         |
| - | 19q13.33b         |
| - | 19q13.2b          |
| - | 16q12.2a          |
| - | 9q32c             |
| + | 3p21.1e           |
| + | 4q13.3d           |
| + | 3q13.11c          |
| + | 19q13.33b         |
| - | 10q23.33d         |
| - | 9q21.13a          |
| + | 15q26.3c          |
| + | 9p13.1b           |
| - | 12q23.3b          |
| + | 12q24.12b         |
| + | 17p11.2d          |
| + | 11q13.2a          |
| - | 1p36.13b          |
| + | 6p22.2b           |
| - | 14q24.3a          |
| - | 5q23.2e           |
| - | 1q24.1a           |
| + | 16p11.2d          |
| - | 17q11.2a          |
| + | 16p13.3b          |
| + | 12p11.1b          |
| + | 12q12a            |
| + | 13q14.3d          |
| - | 22q13.33a         |
| + | Xq23a             |
| - | 1p21.3d           |

- 3q21.2c  
- 9q22.33c  
- 3q27.1b  
- 13q13.3b  
+ 1p31.3c  
- 11q14.1a  
- 11q23.1b  
- 14q24.3d  
- 12q24.11a  
+ 11p11.2e  
- 7q22.1e  
+ 17p11.2f  
- 19q13.12a  
+ 19p13.3a  
- 11q22.3c  
+ 2p13.2a  
- 17p13.1c  
+ 10q11.21d  
+ 13q12.3c  
+ 2q37.1c  
+ 4q25f  
- 18q21.31b-q21.32a  
+ 1p36.12b  
+ 2q37.1c  
- 2q33.1f  
- 2q33.1f  
-  
+ 2q33.2a  
- 2q33.1f  
2q33.1g-q33.2a  
- 5p13.3a  
- 11p11.2c  
+ 6q21h  
+ 12q23.1a  
+ 16p13.3d  
- 16q13a  
- 11q23.3d  
- 3p21.31c  
- Xq22.3d  
- 2q14.3e  
+ 14q32.32a  
- 12p11.21b  
- Xq23b  
- 3q22.1e

|   |                 |
|---|-----------------|
| + | 11p15.4a        |
| - | 3p21.31d        |
| + | 1p21.1c         |
| - | 1p21.1c         |
| + | 1p21.1c         |
| + | 1p21.1c         |
| + | 1p21.1c         |
| + | 17q24.2c        |
|   | 2q13c           |
| - | 4q31.22a        |
|   | 17q25.3g        |
| - | 3q22.1e         |
| - | 9q34.3e         |
| + | 4p15.2c         |
| - | 12q24.11c       |
| + | 14q11.2b        |
| - | 14q24.3c        |
| - | 1q32.3c         |
| + | 19p13.2d        |
| - | 19p13.2c        |
| + | 1p36.22b        |
| - | 10q21.2a        |
| + | 15q22.31b       |
| - | 17p13.2c        |
| + | 5q31.3a-q31.3b  |
| + | 5q31.3a-q31.3b  |
| + | 7q21.2a-q21.2b  |
| + | 19p13.11e       |
| - | 12q24.33d       |
| - | 7p21.1c-p21.1b  |
| - | 5q13.2c         |
| - | 10q23.31d       |
| - | 13q34a-q34b     |
| - | 16q24.3a-q24.3b |
| + | 18p11.22c       |
| + | 12q24.11c       |
| + | 17q11.2b        |
| - | 1p31.1k         |
|   | 11q13.1f        |
| - | 10p15.1b        |
| - | 4q13.3d         |
| - | 9p13.1b         |
|   | 9p13.3d         |
|   | 9q22.31b        |

|   |                 |
|---|-----------------|
|   | 9q12h           |
| + | 9q12i           |
| - | 10q23.31b       |
| - | 2q11.2a         |
| + | 19p13.3e-p13.3d |
| - | 10p12.1a        |
| - | 19q13.11a       |
| - | 3p24.3e         |
| + | 5q15b           |
| + | 12q13.13c       |
| + | 1q21.1b         |
| + | 15q25.1a        |
| + | 1q21.1b         |
| + | 2q11.2b         |
| + | 4q35.1f         |
| - | 2q11.2a         |
| - | 17q21.33b       |
| + | 19p13.11e       |
| + | 5q31.1c         |
| - | 8q22.3a         |
| - | 19p13.2d        |
| + | 11q21b          |
| + | 20p12.2b        |
| - | 4q28.1b         |
| - | 12q13.2c        |
| + | 2p13.3c         |
| - | 22q13.1a        |
| - | 4q21.1b         |
| + | Xq24c           |
| + | 6q15c-q15d      |
| + | 7q31.31a        |
| - | 14q32.31c       |
| + | 6p21.31d        |
| - | 16p13.3b        |
| - | 9q22.33c        |
| + | 2q35f           |
| + | 7p14.2a         |
| - | 3p22.1a-p21.33e |
| + | 12q12h          |
| - | 19p13.11e       |
| - | 15q23a          |
| + | 9q22.33b        |
| + | 12q13.11c       |
| - | 1q21.2b         |

|   |                 |
|---|-----------------|
| + | 2p14a           |
| - | 4q21.21b        |
| - | 10q11.21d       |
| + | 9q21.13a        |
| - | 10q22.3f        |
| - | 15q22.2a        |
| - | 4q31.3d         |
| + | 9p13.3d         |
| + | 4q21.21a        |
| + | 2p14a           |
| - | 4q27c           |
| - | 5q33.1d         |
| - | 10q22.2a        |
| + | 17q21.31a       |
| + | 17q21.31a       |
| + | 1p36.12a        |
| + | 2q33.1e         |
| + | 2q33.1e         |
| - | 22q12.2a        |
| - | 16q22.3a        |
| - | 14q11.2g        |
| - | 17q12b          |
| + | 7q22.1d         |
| - | Xp22.2          |
| - | 2q36.1d         |
| + | 19q13.33b       |
| + | 3q27.1b         |
| - | 19q13.32b       |
| - | 5q14.1b         |
| - | 15q25.2a        |
| - | 19p13.3h-p13.3g |
| - | 10q22.2b        |
| + | 8p11.21a        |
| + | 5q23.1a         |
| - | 15q26.1b        |
| - | 1p13.2b         |
| + | 15q21.2b        |
| + | 12q23.1c        |
| - | 20q11.22a       |
| + | 10p12.1b        |
| - | 4p14a-p13d      |
| - | 5q31.3b         |
| + | 5q22.2a         |
| + | 18p11.22a       |

|   |                 |
|---|-----------------|
| + | 2q35f           |
| + | 3p21.31c        |
| + | 14q11.2b        |
| + | Xp11.21a        |
| + | 15q22.2b        |
| + | 11p12a          |
| - | 11p13b          |
| + | 1p36.22c        |
| + | 19q13.12a       |
| + | 11q24.3c        |
| - | 18q21.1d        |
| + | 1q23.1a         |
| - | 11q23.3b        |
| + | 22q13.1c        |
| + | 22q13.1c        |
| + | 22q13.1c        |
| + | 22q13.1c        |
| + | 11q23.3b        |
| + | 19q13.32a       |
| - | 22q12.3d        |
| - | 22q12.3d        |
| + | 22q12.3c        |
| + | 12p13.1b        |
| + | 6p21.33a        |
| - | Xp22.11a        |
| + | Xq21.1e         |
| - | 17q23.2a        |
| - | 12q23.3b        |
| - | 16q24.3a        |
| - | 9p13.3e         |
| + | 11q14.1a        |
| - | 9p13.3e         |
| - | 9q12g           |
| - | 15q14a-q14b     |
| + | Xp11.23f        |
| - | 11q13.4a-q13.4b |
| - | 5q31.3c         |
| - | 8q24.3e         |
| + | 11q23.3d        |
| - | Xq28f           |
| - | 4q21.21b        |
| - | 12q13.12a       |
| - | 3p14.3a         |
| + | 7q32.1a         |

|   |                 |
|---|-----------------|
| + | 14q22.1b        |
| + | 20q13.33d       |
| - | 11p11.2b        |
| - | 22q13.2c        |
| - | 8q13.2a         |
| + | 20q13.13c       |
| + | 4q31.3c         |
| - | 11p15.4c        |
| + | 14q24.1a        |
| - | 12p11.22a       |
| - | 17q11.2d        |
| - | 13q33.3a        |
| - | 11p11.2b        |
| + | 4q31.23b        |
| + | 15q13.3c        |
| + | 15q13.2b        |
| - | 10p11.22c       |
| + | 2q22.2a         |
| - | 16p12.1b        |
| - | 6q22.33e        |
| - | 10q24.1b        |
| - | 10p12.1d        |
| + | 17q12c          |
| + | 4q21.23b-q21.3a |
| + | 2p14a           |
| + | 5q31.3d-q31.3e  |
| - | 17q21.31d       |
| - | 1q23.3a         |
| - | Xq28f           |
| + | 14q12e          |
| - | 12q13.3b        |
| - | 17q25.3g        |
| - | 12p12.3e        |
| + | 19q13.2c        |
| + | 8p23.3a         |
| - | 1q23.1b         |
| + | 11q23.3g        |
| + | 1p36.32b        |
| + | 19p13.2e        |
| - | 1p36.13f        |
| - | 1q22c           |
| - | 3p14.3b         |
| + | 2q21.1c         |
| - | Xq26.3b-q26.3c  |



|   |                |
|---|----------------|
| + | 13q34b         |
| - | Xq11.1b        |
| + | 6q25.3b-q25.3c |
| + | 12q12h         |
| + | 19p13.3i       |
| + | 15q24.1b       |
| - | 9p13.3c        |
| + | 14q23.1b       |
| - | 1q42.3b        |
| + | 2q11.2a        |
| + | 10q21.2b       |
| + | 15q24.1a       |
| - | 12q23.2a       |
| + | 13q14.3a       |
| + | 3q11.2a        |
| - | 5q11.2c        |
| - | 17q25.3f       |
| - | 17q21.31e      |
| - | 17q21.32a      |
| + | 11q13.1c       |
| + | 16q13c         |
| - | 10q24.32b      |
| + | 7p21.3a        |
| - | 2q37.1e        |
| - | 2q23.3c        |
| + | 10p12.33b      |
| + | 3q11.2c        |
| - | 16p12.3b       |
| + | 12q24.31d      |
| + | 3p14.1b        |
| + | 2q23.3d        |
| - | 1q32.1c        |
| + | 3p26.2a        |
| + | 4q12e          |
| + | 7q22.1f        |
| + | 16p11.2c       |
| + | 19p13.11b      |
| + | 17q25.1c       |
| + | 3q22.3b-q22.3c |
| + | Xq22.1c        |
| - | Xq22.1d        |
| + | Xq22.1c        |
| - | Xq22.1c        |

|   |                 |
|---|-----------------|
| + | 3p21.31a-p21.2c |
| - | 1q21.2c         |
| + | 15q25.1b        |
| + | 11p15.2c        |
| - | 7q36.1c         |
| + | 7q22.1b         |
| + | 7q22.1b         |
| + | 2q35e           |
| - | 12q24.11c       |
| + | 3p25.3c         |
| - | 1q25.3e         |
| + | 9q33.3a         |
| - | 3q26.2b         |
| - | 15q21.2c        |
| + | 3p22.3a         |
| + | Xq13.1b         |
| + | 17p13.2c        |
| + | 9q34.3f         |
| + | 19p13.11c       |
| - | 5q14.3h         |
| + | 15q26.3a        |
| - | 19p13.3c        |
| - | 22q13.33b       |
| - | 5q14.1c         |
| + | 5q15c           |
| + | 4q21.1a         |
| + | 1q42.2a         |
| + | 10q24.32b       |
| - | 8p22a           |
| - | 8q24.21c        |
| + | 2p25.1e         |
| - | 1p36.12a        |
| + | 2q37.3c         |
| - | 10p15.1b        |
| + | 17q21.31c       |
| - | 1p31.1g         |
| - | 14q32.13a       |
| - | 2p16.2a         |
| - | 9q34.11d        |
| + | 15q26.3c        |
| - | 12q13.11c       |
| - | 10q22.1e        |
| - | 1q32.1b         |
| + | 6q22.31a        |

- 19p13.12c  
-  
- 17p13.1d  
- 1q22a-q22b  
8p12a  
+ 20q11.22a  
+ 7q11.21e  
+ "Xp22.33d,Yp11.32a-p11.31c"  
"Xp22.33d,Yp11.32a"  
- 7q21.3d  
+ 2q32.2a  
+ 17p13.3a  
+ 14q32.33a  
- 8q12.3a  
+ 22q12.1a  
- 1q31.3c  
- 2p14a  
+ 17q25.3g  
+ 11q12.3a  
+ 9q34.11e  
- 3q22.1a  
- 9q33.1b  
+ 20q11.21b-q11.21c  
+ 18q12.1f  
- 10q23.2b  
- 8q24.13b-q24.13c  
- 2p24.1a-p23.3d  
+ 1p36.33a  
+ 1p36.33a  
+ 17q11.2c  
- 10q26.13a  
+ 12q13.13b  
- 2q31.1g  
+ 1q32.3c  
+ 22q13.1d  
+ 19q13.33b  
+ 1q23.3b  
- 6p21.32b  
+ 16p13.13d  
+ 5q14.2a  
- 5q22.3b-q23.1a  
+ 2q37.1d  
+ 11q13.4b  
- 11q13.1b-q13.1c

- 3q13.2a  
+ Xq22.3c  
+ 2q37.3g  
+ 1p31.3c  
+ 19p13.2b  
- 6q21c  
+ 3p25.3a-p25.2b  
- 2q35f  
+ 11p15.5d  
+ 2q35a  
+ 14q22.1b  
- 2p22.2a-p22.1c  
- 11q13.1a  
+ 11q22.3c  
+ 16q23.2b  
+ 12p13.31d  
+ 4q22.2b  
- 10q21.3d  
+ 2p11.2f  
- 5q33.1d  
- 15q12a  
- 5q34a  
+ 3q26.33c  
- Xq27.1b  
- 19p13.11a  
- 1p36.13e  
- 3q29b  
+ 1p13.1c  
- 19q13.2c  
+ 1q24.2b  
+ 17p13.1d  
3q23c  
+ 12q24.11c  
- 17p13.2c  
- 12q21.33b  
+ 1q32.1e  
+ 16q24.1a  
- 19q13.12a  
- 18q21.1a  
- 12q13.3a  
+ 10p14d  
+ 19p13.3i  
- 20q13.32b  
+ 13q12.2b

|   |                  |
|---|------------------|
| + | 1p13.2d          |
| + | 17q21.32c        |
| - | 12q13.13f        |
| - | 2q31.1g          |
| - | 17q25.1c         |
| - | 4p16.3d          |
| - | 21q21.3a         |
| - | 7q22.1b          |
| + | 11q23.3d         |
| - | 21q22.11c        |
| + | 14q22.1b         |
| - | 19q13.2c         |
| + | Xq28g            |
| + | 5q14.2a          |
| + | Xp11.4c          |
| + | 17q21.31a        |
| + | 12q24.31e        |
| + | 1p34.1f          |
|   | 16p13.3d         |
| - | 16q22.1b         |
| + | 8q21.2b-q21.3a   |
| + | 5q35.2a          |
| + | 7q36.1b          |
| + | 3q13.2b-q13.31a  |
| + | 8p21.3c          |
| + | 8q22.3c          |
| + | 2p25.1c          |
| - | 14q23.3b         |
| - | 22q11.21a        |
| - | 2p21b-p21a       |
| + | 7q32.1a          |
| + | 9q32e            |
| - | 6p21.33a         |
| - | 8q11.23c-q11.23d |
| + | Xq21.1a          |
| - | 13q14.3d         |
| - | 4p13c            |
| + | 1q21.3e          |
| + | 18q23d           |
| - | 1p33d            |
| - | 17p11.2g         |
| - | 1p36.11a         |
| - | 19q13.33d        |
| - | 15q14b           |

|   |                   |
|---|-------------------|
| + | 11q13.1f          |
| + | 1p35.3b           |
| + | 3p21.31e          |
| + | 20p13b            |
| - | 6p22.3f-p22.3e    |
| + | 22q13.31c         |
| + | 16q22.3a          |
| - | 12q24.12a-q24.12b |
| + | 16p11.2e          |
| - | 14q32.12a         |
| + | 1p13.3b           |
| - | 17q21.31c         |
| - | 9q22.31a          |
| - | 2p13.1b           |
| - | 20q13.2d-q13.31a  |
| - | 1p36.33a          |
| - | 1q41d             |
| - | 17p13.1c          |
| + | 7q11.22b          |
| - | 15q14a            |
| - | 12q14.1a          |
| + | 7p14.3c           |
| - | 20p13c            |
| - | 10q24.2a          |
| - | 16p13.3f          |
| - | 17q24.1a          |
| - | 3p22.2a           |
| - | Yp11.31b          |
| - | 7q22.1b           |
| - | 17q25.3f          |
| - | 3p24.1c           |
| - | 8q22.3c           |
| + | 15q21.1a          |
| - | 3q26.1a           |
| - | 1q42.3c           |
| - | 1q31.2b           |
| + | 1p36.33a          |
| + | 13q12.3d          |
| - | 11q12.3a          |
| + | 2p15c             |
| + | 19p13.11d         |
| + | 12q24.31c         |
| - | 11q13.1e          |
| - | 19q13.2c          |

- 17q25.3h  
- 12q14.1a  
+ 12p13.33d  
+ 11p15.5d  
- 9p13.3e  
+ 1p34.1f  
- 1q23.3a  
- 3q13.32b  
- 20q13.13d  
- 18q12.1d  
+ 5q35.3a  
- 17p11.2e  
- 19q13.2c  
+ 21q22.3a  
- 6q15d  
- 11q13.1b  
- 9p13.3e  
+ 6p12.1a  
+ 10q26.11d  
- 14q32.33a  
  
- 21p11.1d  
+ 6q12g-q13a  
+ 17q25.3f  
- 7q21.3d  
- 22q13.1b  
+ 16p13.3e  
+ 10p11.23c  
+ 11q13.1d  
+ 20p12.1a  
+ 4q24a  
+ 16q24.2b  
- 3p21.1d  
- 4p15.33c  
- 2q35a  
- 9q22.32a  
+ 5p15.1b  
- 6p21.33a  
+ 9q34.13a  
- 6p21.33a  
- 6p21.33a  
- 6p21.33a  
+ 14q24.3b  
- 11q13.1c

- 1q32.3c  
+ 19q13.33a  
- 14q13.2a  
- 7q11.23a  
- 2q24.2a  
- 19q13.32b  
+ 11p14.2a  
+ 11q13.1e  
- 12q21.2a  
+ 4q27d  
- 16q13b  
+ 15q24.1a  
- 4q27c  
+ 7p14.3b  
+ 3q13.12b  
+ 19q13.32a  
+ 1q23.1a  
+ 7q22.3c  
- Xq28f  
- 16q23.1a  
- 1p22.1b  
-  
- 20q13.2c  
+ 20q13.13f  
- 12p12.1b  
- 19q13.33a  
+ 10q26.2a  
- 12q13.13a  
- 3q26.1e  
+ 19q13.2c  
+ 6q14.1d  
+ 16p11.2c  
- 1p22.3e  
- 2p16.1a  
- 18q21.33b  
- 15q25.1b  
- 20q11.21b  
- 15q21.2c  
+ 2q13c  
+ 19q13.33b  
+ 22q11.21a  
+ 19q13.31b  
- 3q27.3c  
+ 17p13.1d



|   |                  |
|---|------------------|
| + | 12q24.31c        |
| - | 7q11.23a-q11.23b |
| - | 16p11.2c         |
| + | 1q21.1c          |
| - | 11q23.3e         |
| - | 6q23.3b          |
| - | Xp11.4c          |
| + | Xq25h            |
| + | 22q11.23a        |
| + | 2q35e            |
| + | 2p21a            |
| + | 14q32.2a         |
| + | 16q21e           |
| - | 17q21.31a        |
| - | 14q32.2b         |
| - | 6q21c            |
| - | 4p13d            |
| - | 1p33b            |
| + | 6p12.1a          |
| - | 10p13d           |
| + | 11q12.3a         |
| - | 12q15c           |
| - | 1p34.1d          |
| - | 7q21.3a          |
| - | 11p15.5d         |
| - | Xq22.1e          |
| + | Xq22.1e          |
| - | Xq22.1d          |
|   | Xq22.1e          |
| + | 16p13.12a        |
| + | 3q22.1d          |
| + | 1q22d            |
| + | Xq28f            |
| + | 3p26.2a          |
| - | 12p12.1a         |
| + | Xq22.1e          |
| + | 8q12.3c          |
| + | 10q21.1f         |
| + | 12p11.21a        |
| - | 9q22.31b         |
| - | 22q11.21a        |
| + | 22q13.2c         |
| - | 2q14.3d          |
| - | 8p21.3a          |

+ 11q22.2a  
+ 11q22.2a  
+ 17q25.3b  
+ 13q33.1b  
- 20q11.23b  
+ 8p23.1b  
+ 15q26.1c  
- 17q11.2c  
- 10q23.33d-q24.1a  
+ 12q13.2b  
- 10q24.31a  
+ 11q23.3e  
+ 7p13e  
19q13.2b  
+ 1q24.2b  
- 15q15.1a  
+ 10p12.31a  
+ 4q21.21a  
+ 4q21.21c  
- 14q22.2b  
- 6p12.1b  
+ 6p24.3c  
- 20q13.31a  
- 1p34.2d  
+ 10q23.2a  
+ 2q33.1g  
- 10q11.22c  
+ Xp22.2  
+ 5q35.2a  
- 15q22.2a  
- 10q26.3d  
+ 8p21.2b  
- 16p11.2d  
- 2p13.1b  
- 8q24.3g  
+ 6q22.31a  
+ 7q33b  
+ 6p25.2b  
+ 20q11.21c  
- 1q41d  
+ Yq11.223e  
- 7q34d  
- 17q21.31a  
+ 13q13.1a

|   |                  |
|---|------------------|
| + | Xq28h            |
| - | 22q13.33a        |
| + | 6p21.32a         |
| - | 9q34.2b          |
| - | 19p13.12b        |
| - | 16q12.1c         |
|   | 3q26.1a          |
| - | 5q31.2c          |
| - | 5p15.33d         |
| + | 4q13.2b          |
| + | 2p23.2b          |
| - | 8p12a            |
| + | 7q21.3d          |
|   | 12q24.31f        |
|   | 1p21.2a          |
| + | 5p13.2d          |
| - | 11q13.1e         |
| + | 14q13.2b         |
| - | 1q24.2a          |
| - | 6q27c            |
| + | 3p25.3c          |
| + | 6p21.31a         |
| + | 19q13.42b        |
| - | 15q23b           |
| - | 21q22.2a-q22.2b  |
| + | 10q26.12b        |
| - | Xq21.1c          |
| - | 11q12.3a         |
| - | 1p35.1b          |
| + | 19p13.3j         |
| + | 3p21.31d-p21.31c |
| + | 1p32.3a          |
| + | 9q32c            |
| - | 19p13.11d        |
| + | 10q23.32b        |
| - | 11p15.2c         |
| - | 16p13.3c         |
| - | 19p13.3h         |
| + | 20p12.2a         |
| + | 14q32.33c        |
| - | 6p21.2b          |
| + | 3p24.3e          |
| + | 5q13.2c          |
| + | 1p32.3d          |

- 12q21.33d  
+ 1q32.1e  
- 21q21.1c  
- Xq22.1c  
- 3q13.2a  
+ 6p22.1d  
+ 5q35.3g  
+ 10q24.32a  
- 2q13b  
+ 15q15.1a  
+ 10q26.13c  
- 11q23.3b  
+ 7q22.1b  
+ 6p21.1f  
- 17q22d  
+ 6p21.1h  
2q33.1e  
+ 7p21.1b  
- 10q11.21c  
+ 10q22.1e-q22.1f  
+ 10p15.3d  
10p12.33a  
- 10p12.31b  
10p12.2a  
- 10q25.3a  
- 10q26.11d  
+ 10q24.1b  
- 10q26.3f  
- 10q11.22d  
+ 10q11.21b  
+ 10q26.13e-q26.2a  
- 10p12.31b  
+ 10p15.1b  
+ 10q24.31a  
+ 10q24.32b  
+ 10q24.2a  
+ 10q24.32b  
- 10q24.2a

|   |                 |
|---|-----------------|
| + | 10p14a          |
| - | 10q22.1d-q22.1e |
| + | 10q22.3f        |
| + | 10q23.1a        |
| - | 10q23.31a       |
| + | 10q24.31a       |
| - | 10q23.33d       |
|   | 10q11.22d       |
| + | 10q24.1b        |
| - | 10p12.2a        |
| - | 10q11.22d       |
| + | 10q24.31a       |
| + | 10q25.1a        |
| - | 10q26.11b       |
|   | 10q26.13b       |
|   | 10q26.3f        |
| + | 11q23.1b        |
| - | 11q12.2b        |
| + | 11p15.4a        |
| + | 11q13.1c        |
| - | 11q13.2a        |
| + | 11q13.5b        |
| + | 11q12.1b        |
| - | 11p15.5d        |
| - | 11q25a          |
| + | 11p13d          |
| + | 11p14.1a        |
| + | 11p15.4c        |
| - | 11q12.3a        |
| + | 11p11.2b        |
| - | 11q13.4a        |
| + | 11q21a          |
| + | 11q23.1c        |
| + | 11p15.1e        |
| - | 11q13.4a        |
| - | 11q23.3d        |
| - | 11q24.2a        |
| + | 11q24.1b        |
| - | 11q22.3c        |
| + | 11q14.1a        |
| - | 11q13.1d        |
| + | 11q22.1d        |
| - | 11q23.2b        |
| + | 11q14.2a        |

|   |                 |
|---|-----------------|
| + | 11p12d          |
| - | 11q21a          |
| + | 11q13.1e        |
| + | 11q14.1d        |
| + | 11q12.3a        |
| + | 11q13.1a        |
| - | 11q13.1c        |
| + | 11q13.1f        |
| + | 11q23.1b        |
| + | 12q13.13e       |
| + | 12q23.3c        |
| + | 12q24.11c       |
| + | 12q21.31c       |
| + | 12q15c          |
| + | 12q21.32a       |
| - | 12q24.13a       |
| - | 12q14.3b        |
| + | 12p13.33a       |
| + | 12q24.11b       |
| + | 12p11.21a       |
| - | 12p13.1b        |
| + | 12q21.33c       |
| - | 12p13.32a       |
| - | 12q13.11c       |
| - | 12q23.2a-q23.3a |
| - | 12q24.31a       |
| + | 12q13.13d       |
| + | 12q23.3b        |
|   | 12q24.12b       |
| + | 12q23.2a        |
| - | 12q24.22a       |
| + | 12p13.32a       |
| - | 12q24.13a       |
| + | 12q24.13b       |
| + | 12q13.11c       |
| + | 12p13.31d       |
| + | 12p13.2c        |
| + | 12p12.3e        |
| + | 12q13.13a       |
| + | 12q24.31d       |
| - | 12q14.2b        |
| - | 12p12.1b        |
| + | 12q13.11c       |
| - | 12p12.3e        |

- 12p11.23a  
+ 12p11.21b  
- 12q23.3a  
- 12q24.11c  
- 12p12.1b  
- 13q14.3a  
+ 13q14.11b  
- 13q14.12b  
- 13q13.3d  
+ 13q31.3b  
- 13q12.11b  
+ 13q14.11e  
+ 13q22.1a  
- 13q22.1a  
+ 14q23.1b  
+ 14q23.1a  
- 14q32.11a  
- 14q22.1a  
- 14q21.3b  
+ 14q32.12b  
- 14q24.2a  
+ 14q24.3c  
+ 14q11.2g-q12a  
- 14q12e  
- 14q12e  
+ 14q32.2a  
+ 14q32.31c  
+ 14q32.2a  
- 14q24.3c  
+ 14q23.1c  
- 14q22.1b  
- 14q32.11a  
- 14q31.1b  
- 14q13.1c  
- 14q23.1b  
+ 14q32.33a  
+ 14q24.3d  
- 14q32.12a  
- 14q24.1e  
+ 14q22.1d  
-  
+ 14q24.3a  
+ 14q32.33b  
+ 14q24.3c

|   |                 |
|---|-----------------|
| + | 14q24.3b        |
| + | 14q32.33b       |
| - | 14q24.1c        |
| - | 14q32.12a       |
| + | 14q13.2a        |
| - | 14q32.33a       |
| + | 14q12a          |
| + | 14q12c          |
| + | 14q21.3a        |
| + | 14q22.3a        |
| - | 14q23.1a-q23.1b |
|   | 14q23.1b        |
| - | 14q24.3c        |
| - | 14q24.3a        |
| + | 14q24.3a        |
| + | 14q32.2b        |
|   | 14q32.31b       |
|   | 14q32.33c       |
| + | 14q32.33c       |
| + | 14q32.33d       |
|   | 14q22.1c        |
| + | 14q32.12b       |
| - | 14q11.2f        |
| - | 15q24.1b        |
| + | 15q21.1a        |
| + | 15q15.1a        |
| - | 15q14a          |
| + | 15q25.1b        |
| + | 15q24.2a        |
|   | 15q23a          |
| - | 15q14a          |
| - | 15q21.1d-q21.2a |
| + | 15q24.2a        |
| - | 15q25.2b        |
| + | 15q14c          |
| + | 15q26.1a-q26.1b |
|   | 15q22.31b       |
| + | 15q21.1a        |
| - | 15q15.1a        |
| + | 15q14d          |
| - | 15q15.1b        |
| + | 15q15.3b        |
| - | 16p13.3f        |
| + | 16p13.3f        |



|   |           |
|---|-----------|
| - | 16p13.3f  |
| - | 16p13.3e  |
| - | 16p13.3e  |
| - | 16q23.2b  |
| - | 16q22.1b  |
| - | 16p13.3b  |
|   | 16q13d    |
| + |           |
| + | 16p11.2d  |
| - | 16p11.2d  |
| - | 16q22.1b  |
| + | 16q13d    |
| - | 16p11.2c  |
| + | 16p13.3d  |
| - | 16q23.2b  |
| + | 16p12.3a  |
| - | 16p13.11a |
| + | 16p13.2b  |
| + | 16q12.1c  |
| - | 16q24.3b  |
| + | 16q22.1a  |
| + | 16p13.2b  |
| - | 16p13.3e  |
| - | 16q24.1b  |
| + | 16p13.13c |
| - | 16p13.3d  |
| - | 16q21a    |
| - | 16q24.2b  |
| + | 16q22.1b  |
| - | 16q11.2i  |
| - | 16p12.3a  |
| - | 16p13.3e  |
| - | 16p11.2c  |
| + | 17p13.2a  |
| - | 17q25.3g  |
| + |           |
| - | 17q11.2a  |
| - | 17q25.1c  |
| - | 17q12c    |
| + | 17p11.2g  |
|   | 17q11.2c  |
| - | 17q11.2c  |
| - | 17p13.1c  |
| + | 17p11.2i  |

|   |           |
|---|-----------|
| + | 17p13.1a  |
| + | 17p13.1d  |
| + | 17q21.31c |
| - | 17q25.3f  |
| - | 17q24.2b  |
| - | 17p13.1c  |
| + | 17q23.3b  |
| - | 17p13.1d  |
| - | 17q25.3g  |
| - | 17q11.2a  |
| + | 17q23.2a  |
| - | 17q21.31c |
| - | 17q22c    |
|   | 17p13.1c  |
| - | 17q25.3f  |
| + | 17q22d    |
| + | 17p13.1d  |
| - | 17q11.2d  |
| + | 17q25.1a  |
| + | 17p13.1d  |
| + | 17q23.2b  |
| - | 17p13.2c  |
| + | 17q25.2b  |
| - | 17p13.2b  |
|   | 17q21.31b |
| + | 17q25.3f  |
| - | 17q25.3f  |
| - | 17p13.3d  |
| + | 17q25.2a  |
| - |           |
| + | 17p13.3g  |
| + | 18p11.21c |
|   | 18p11.31c |
| - | 18p11.21c |
| - | 18q22.1a  |
| + | 18q12.2a  |
| + | 18q23d    |
| + | 18q21.1a  |
| + | 18q21.2c  |
| - | 18q21.1f  |
| - | 18q11.2b  |
| + | 18q21.2c  |
| + | 18q22.3c  |
| - | 18p11.32c |

|   |           |
|---|-----------|
| - | 18p11.22a |
| + | 18q11.2b  |
| - | 19p13.3d  |
| - | 19q12c    |
| + | 19q12c    |
| + | 19p13.3j  |
| - | 19p13.3i  |
| - | 19p13.3i  |
| + | 19p13.3i  |
| - | 19p13.3h  |
| - | 19p13.3i  |
| - | 19p13.3e  |
| - | 19p13.3e  |
|   | 19p13.3e  |
| + | 19p13.3d  |
| - | 19p13.3c  |
| + | 19p13.3h  |
| + | 19p13.2b  |
| + | 19p13.11b |
| + | 19q13.11a |
| - | 19p13.11f |
| - | 19p13.13c |
| + | 19p13.11f |
| + | 19p13.2e  |
| - | 19q13.2b  |
| - | 19q13.33c |
| + | 19p13.11c |
| - | 19q13.42b |
| + | 19p13.2b  |
| + | 19p13.13a |
| - | 19q13.2b  |
| + | 19q13.12a |
| - | 19p13.13c |
| + | 19p13.2e  |
| - | 19p13.3i  |
| + | 19p13.11c |
| - | 19q13.31b |
| + | 19p13.11e |
| + | 19p13.3e  |
| + | 19p13.2c  |
| - | 19p13.3b  |
| + | 19p13.3e  |
| - | 19q13.33a |
| + | 7p21.3e   |

|   |                  |
|---|------------------|
| - | Xq24d            |
| + | 1q44a            |
| - | 1p34.3d          |
| - | 1p13.3a          |
| + | 1q32.1b          |
| + | 1q32.2b          |
| - | 1p34.3b          |
| + | 1q24.2c          |
| + | 1q25.3c          |
| + | 1p34.3b          |
| - | 1p32.3c          |
| + | 1q42.2a          |
| - | 1p36.21a         |
| - | 1p36.22b         |
| + | 1p36.11d         |
| - | 1q42.2a          |
| - |                  |
| - | 1q32.2c          |
| - | 1p36.11b         |
| + | 1p36.13f         |
| - | 1p34.3c          |
| + | 1p36.13a         |
| - | 1q24.2c          |
| - | 1p36.33b         |
| + | 1p13.1c          |
| + | 1p13.2d          |
| - | 1p32.3d          |
| - | 1p33b            |
| - | 1p36.12b         |
| - | 1p31.1h          |
| - | 1p36.32b         |
| + | 1q22d            |
| - | 1q32.1h          |
| + | 1p36.22b         |
| + | 1p36.31b-p36.31a |
| + | 1q25.3e          |
| - | 1q23.3a          |
| - | 1q42.2a          |
| - | 1p36.22d         |
| + | 1q25.3f          |
| - | 1p34.2a          |
| - | 1p34.3f          |
| + | 1p36.12a         |

|   |           |
|---|-----------|
| - | 1p34.3e   |
| - | 1q31.3c   |
| + | 1q25.2b   |
| - | 1q25.3f   |
| - | 1q25.3g   |
|   | 1q25.3g   |
| + | 1q42.2c   |
| - | 1q42.13c  |
| + | 1p35.3b   |
| - | 1p32.3c   |
| - | 1q21.3d   |
| + | 1q25.2b   |
| + | 1p34.2a   |
| - | 1p22.3e   |
| + | 1q31.3c   |
| + | 1q21.2b   |
| - | 1q42.12c  |
| + | 1q21.2d   |
| + | 1q42.2b   |
| + | 1q41e     |
| - | 1p13.3c   |
| - | 1q22d     |
| - | 1p36.11c  |
| + | 1q41e     |
| + | 1q23.1a   |
| + | 1q42.13c  |
| - | 1q32.2b   |
| + | 1q21.3d   |
| + | 1p32.3b   |
| - | 1q22d     |
| - | 1p36.33a  |
| + | 1q24.3d   |
| - | 1p35.1b   |
| + | 1p36.32c  |
| + | 1q32.3a   |
| + | 1p36.12a  |
| - | 17p13.2b  |
| - | 17q21.31d |
|   | 2q14.2b   |
| - | 12q13.12b |
| - | 5q33.3d   |
| - | 5p13.3a   |
| - | 22q13.1a  |
| + | 4p15.33a  |

|   |           |
|---|-----------|
| + | 13q12.12b |
| + | 20q13.12a |
| + | 20p12.2b  |
| + | 20q13.31a |
| + | 20q13.31a |
| + | 20q13.2d  |
| + | 20q13.33d |
| - | 20q13.12a |
| - | 20q11.21c |
| - | 20q11.23a |
| - | 20p11.23d |
| + | 20q11.22b |
| + | 20q11.22a |
| + | 20p13c    |
| + | 20q11.21b |
| - | 20q13.12b |
| + | 20q13.33a |
| - | 20p11.1c  |
| + | 20p12.3c  |
| + | 20q13.13c |
| + | 20q13.33d |
| + | 20q11.23a |
| + | 20p13b    |
| - | 20p11.21a |
| - | 20p12.3c  |
| + | 20q11.23a |
| + | 20q13.31a |
| - | 20p13e    |
| - | 20q13.33d |
| + | 20q11.22b |
| + | 20p13f    |
| + | 20p12.1d  |
| + | 20p11.23d |
| - | 20p12.3c  |
|   | 20q13.32a |
| - | 20p13f    |
| + | 21q22.11b |
| - |           |
| + | 21q22.3c  |
| - | 21q22.3a  |
| - | 21q22.3d  |
| - | 21q22.2a  |
| + | 21q22.3d  |
| + | 21q22.3d  |

|   |                   |
|---|-------------------|
| + | 21q21.1b          |
| + | 21q21.1c          |
| - |                   |
| - | 21q22.11b         |
|   | 21q22.11c         |
| - | 21q22.11c         |
| - | 21q22.11c         |
| - | 21q22.3f          |
| + | 21q22.3f          |
| - | 21q22.3f          |
| - | 21q22.11b         |
| + | 21q22.11b         |
| - | 21q22.11b         |
| - | 21q22.3e          |
| - | 21q22.3e          |
| + | 21q21.3c          |
| + | 21q22.3e          |
| - | 21q22.11b         |
| - | 21q22.3c          |
| - | 21q21.1c          |
| - | 21q22.3e          |
|   | 21q22.12a         |
| - | 22q11.23b         |
| - | 22q13.1b          |
| - | 22q12.3a          |
| + | 22q11.21c-q11.21d |
| - | 22q13.31d         |
| - | 22q12.3a          |
| - | 22q11.21c         |
| - | 22q12.2c          |
| + | 22q13.2b          |
| - | 22q12.3d          |
| - | 22q13.33a         |
| - | 22q11.23b         |
| - | 22q11.21c         |
| - | 22q13.31d         |
| - | 22q13.31b         |
| - | 21q22.3a          |
| + | 11q23.3e          |
| - | 11q13.4b-q13.4c   |
| - |                   |
| + | 2q11.2c           |
| + | 2p23.3a           |
| + | 2q34b             |

- 2q35f  
- 2q23.2a  
+ 2q21.1d-q21.2a  
+ 2p23.3a  
+ 2p16.2a  
+ 2q31.1c  
- 2p14a  
- 2p24.1c  
- 2p23.3d  
+ 2q33.1d  
+ 2p25.1d  
+ 2q12.2a  
- 2q37.1b  
+ 2p22.2b  
- 2p16.1d  
- 2q11.2c  
- 2p13.1b-p13.1a  
- 2p11.2f  
+ 2q33.1d  
- 2p13.2a  
+ 2p16.2a  
- 2q14.2b  
- 2q31.1a  
- 2p23.3c  
- 2q33.3d  
+ 2q37.1c  
+ 2q32.2b  
- 2p11.2g  
+ 3q13.33a  
+ 3p25.3b  
+ 3p14.2b  
+ 3q13.33a  
- 3q13.2b  
- 3p21.31b  
+ 3p25.1a  
- 3q29d-q29e  
+ 3p21.33a-p21.32c  
- 3q21.3d  
+ 3q12.1c  
- 3p25.2b  
- 3p26.1a  
- 3q29g  
+ 3q21.3c  
+ 3p11.2a



|   |            |
|---|------------|
| - | 3p22.1a    |
| + | 3p25.3b    |
| + | 3q21.3a    |
| + | 3q13.2a    |
| + | 3p21.31c   |
| - | 3q26.1b    |
| + | 3q24a      |
| - | 3q29a      |
| + | 3p21.31d   |
| - | 3p21.31d   |
| - | 3p14.3b    |
| - | 3p14.1b    |
| - | 3q27.2a    |
| - | 3p21.31e   |
| - | 3p21.1e    |
| - | 3p21.31g   |
| + | 1q32.2a    |
| + | 4q21.23b   |
| - | 4q12e      |
| + | 4q25f      |
| - | 4q32.1d    |
| + | 4q21.21c   |
| + | 4p16.1c    |
| + | 4q21.1a    |
| - | 4q33a      |
| + | 4q28.2a    |
| + | 4q25f      |
| + | 4q28.2b    |
| - | 4p14b      |
| + | 4q32.3b    |
| + | 4q35.1c    |
| + | 4q32.3a    |
| - | 4q32.1e    |
| + | 4q35.1f    |
| - | 4q31.1c    |
| - | 9q33.2a    |
| + | 19q13.32b  |
| - | 5q22.1b    |
| - | 5q31.1d    |
| - | 5q31.1f    |
| - | 5q15a-q15b |
| + | 5p13.3c    |
| + | 5q31.1e    |
| + | 5q35.2d    |

|   |                  |
|---|------------------|
| + | 5q15d            |
| - | 5p12c            |
| + | 5q21.1d          |
| + | 5q31.3a          |
| - | 5p13.2c          |
| - | 5p12c-p12b       |
| + | 5q11.2f          |
| - | 5q15b            |
| - | 5q13.3c          |
| - | 5p12c            |
| + | 5q35.2a          |
| - | 5p13.2b          |
| + | 5q12.3b          |
| - | 5q35.3e          |
| - | 5q31.2c          |
| + | 5p13.1a          |
| + | 5q31.3a          |
| - | 5p13.1a          |
| - | 6p21.31e         |
|   | 6p22.1a          |
| - | 6p24.1c          |
| - | 6p21.31e-p21.31d |
| + | 6p21.31d         |
| - | 6p21.1d          |
| - | 6q16.3a          |
| - | 6p23b            |
| + | 6q24.1a          |
| + | 6q14.3a          |
| + | 6q27f            |
| - | 6q27d            |
| - | 6p21.31f         |
| - | 6p21.2c          |
| - | 6p21.1h          |
| + | 6p21.33b         |
| - | 6p12.3d          |
|   | 6p25.2a          |
| - | 6q13c            |
| - | 6q13c            |
| - | 6p21.1c          |
| - | 6q13b            |
|   | 6q14.3c          |
| + | 6q15a            |
| + | 6q15a            |

- 6q22.31b-q22.31c  
+ 6q22.32b  
+ 6q21f  
+ 6q21f  
- 6q22.33e  
- 6q23.2b  
- 6q21f  
+ 6q21c  
- 6q22.31a  
+ 6q25.1c  
- 6p24.3a  
- 6p21.31a  
+ 6p21.1b  
- 6q21f  
+ 6q21i  
+ 6p21.33a  
- 6p21.33a  
+ 6p21.32b  
6p24.2a  
+ 6q13a  
+ 6q22.33b  
6q26a  
-  
- 6p22.2b  
- 6q16.1f  
+ 6q25.1a  
+ 6p21.31b  
+ 6p21.2c  
+ 7p14.1c  
- 7p14.1c  
- 7q36.3b  
7p22.3c  
- 7q21.12a  
- 7p14.1a  
+ 7p22.1a  
- 7p22.2c  
7p22.1b  
7p22.1a  
+ 7q36.1c  
+ 7p15.3b  
- 7p15.2c  
+ 7p14.1d  
- 7q22.1b  
- 7p13c

|   |                |
|---|----------------|
| + | 7p15.1b        |
| + | 7q11.21e       |
| - | 7q22.1c        |
| - | 7p13e          |
| - | 7q22.1c        |
| - | 7q33b          |
| - | 7p22.3c-p22.3b |
| + | 7q22.1c        |
| + | 7q31.1c        |
| + | 7q32.1a        |
| + | 7q34b          |
| + | 7p12.3b        |
| + | 7q31.31d       |
| + | 7q22.1c        |
| - | 7q22.1c        |
| + | 7p12.3c        |
| + | 7q32.1a        |
| - | 7p22.1b        |
|   | 8p23.1b        |
| - | 8p23.1b        |
| + | 8q24.3b        |
|   | 8q24.3g        |
| + | 8q24.3g        |
| + | 8q24.3h        |
| - | 8q22.1c        |
| + | 8q22.1c        |
| + | 8p11.21a       |
| - | 8p12c          |
| + | 8q13.1b        |
| + | 8q13.1b        |
| + | 8q13.1b        |
| - | 8q24.3f        |
| + | 8q24.3e        |
| + | 8p21.3a        |
| - | 8q21.2b        |
| + | 8q12.1b        |
|   | 8q24.3h        |
| - | 8p21.1d        |
|   | 8q24.3h        |
| - | 9p13.3a        |
| + | 9q22.32b       |
| + | 9q21.32c       |
| + | 9q34.11c       |
| - | 9q22.31b       |

|   |          |
|---|----------|
| - | 9q34.11c |
| - | 9q34.3b  |
| + | 9q34.11b |
| - | 9p24.1a  |
| - | 9q33.3a  |
| + | 9p13.3a  |
| + | 9q21.11b |
| - | 9q34.3e  |
| + | 9q34.3e  |
|   | 9p13.3c  |
| - | 9p13.3c  |
| - | 9q31.3a  |
| - | 9q22.33b |
| + | 9q34.11b |
| + | 9q34.3f  |
| + | 9q34.13b |
| + | 9q34.3f  |
| - | 9q22.33a |
| - | 9p13.3c  |
| - | 9p13.3c  |
| - | 9p13.3c  |
| + | 9q22.32a |
| + | 9q31.1a  |
| - | 9q33.2a  |
| - | 9q34.3f  |
| - | 9q21.13b |
| - | 9q21.13b |
| + | 9q32c    |
| - | 9q33.2b  |
| - | 9p24.1c  |
| - | 9q31.3a  |
|   | 9p21.3c  |
| + | 9q31.3a  |
| - | 9q21.32c |
| - | 9p24.3b  |
| - | 9q34.3c  |
| + | 9q34.2a  |
| + | 9p24.2a  |
| - | 9p21.2a  |
| - | 9q34.3e  |
| - | 9q34.11d |
| - | 9q32b    |

- 9p21.2a  
+ 9q21.13a  
+ 9q34.3e  
+ 9q22.31b  
+ 9q34.13b  
- 9q34.11a  
+ 9q32e  
- 9q21.13b  
+ 9q34.2a  
- 17q21.33c  
- 19q13.33a  
+ 8q21.2b  
+ 8q21.2b  
+ Xp22.2  
- 8q12.1d  
+ 2q37.1a  
- 13q14.2c-q14.3a  
+ 1q42.13a  
+ 18q11.2b  
- 20q13.33c  
+ 11q13.1f  
+ 22q12.2a  
- 19p13.13b-p13.13a  
+ 9q34.3g  
+ 12p13.33b-p13.33a  
- 1q32.1b  
- 17q12c  
+ 10p12.33b  
+ 12q13.12a  
+ 16p12.1b  
+ 1q25.1b  
+ 2p23.3a  
- 11q23.2c  
- 19q13.31a  
+ 16q22.3a  
- 11p15.2a  
+ 11p15.2a  
- 12q13.13f  
+ 17q21.32c  
- 2q32.1e  
+ 7q33b  
- 10q24.33a  
- 10q24.33a  
- 10q24.33a

|   |           |
|---|-----------|
| + | 14q32.11a |
| - | 2p21a     |
| + | 19q13.32b |
| - | 15q23a    |
| - | 10p15.1c  |
| + | 19p13.13c |
| + | 7q32.1a   |
| - | 10q26.3f  |
| - | 3p25.3c   |
| + | 10p13e    |
| + | 1q32.2b   |
| - | 7p13d     |
| - | 4q26a     |
| - | 10q22.2a  |
| - | 1p36.12b  |
| - | 3q27.1b   |
| + | 5q22.1b   |
| - | 17p13.2c  |
| - | 12q24.31b |
| - | 3p21.31c  |
| + | 5q31.1e   |
| + | 3p21.31f  |
| + | 1q32.1b   |
| - | 17q25.3c  |
| + | 5q35.3e   |
| + | 1p34.2d   |
| - | 2p11.2g   |
| + | 11q13.1c  |
| + | 2q37.3e   |
| + | 6p21.1b   |
| - | 19q13.2a  |
|   | 2p23.1a   |
| + | 15q15.1d  |
| + | 11q13.5c  |
| - | Xq22.3d   |
| + | 3p24.3e   |
| + | 19q13.12b |
| + | 11p13c    |
| - | 12p11.21b |
| + | 19p13.3b  |
| - | 5p13.2c   |
| + | 1p13.2c   |
| + | 7q31.2c   |
| + | 12p12.3b  |

- 1p36.13b-p36.13a  
- 22q13.1a  
- 7p22.2b  
- 11q22.3b  
+ 5p13.1b  
- 19q13.32c  
- 9q34.3d  
- 16p13.2b  
+ 13q34a  
+ 19p13.2b  
- 11p15.4d  
- 13q34a  
- 12p12.1b  
+ 15q15.3c  
+ 15q15.1b  
+ 7q21.3b  
- Xp11.4b-p11.4a  
- 11q22.3b  
+ 2q33.1f  
+ 19p13.12b  
+ 7q34f  
- 4q35.1e  
- 11q22.3b  
- 4q25c  
+ 10q25.3a  
- 1p36.21a  
+ 3q25.31b  
+ 5q15d  
- 1p36.22c  
+ 11p13c  
- 15q15.3a  
- 15q15.3a  
+ 7q31.2b  
+ 7q31.2b  
- 10q22.1f  
+ 20q11.22a  
- 16q24.3a  
+ 16q22.1a  
+ 11q23.3e  
- 3q13.11c-q13.11d  
+ 7q22.3c  
- 16q12.1b  
- 14q12a  
+ 21q22.12b



|   |                   |
|---|-------------------|
| + | 21q22.12b         |
| - | 4q32.3e           |
| - | 21q22.3c          |
| + | 9q13a             |
| - | 9q12j             |
| - | 9q12i             |
| - | 17q21.32b         |
| + | 17q25.3d          |
| + | 7p15.2b           |
| - | 17q25.3d          |
| - | 12q13.13f         |
| - | 22q13.1c          |
| - | 22q13.1c          |
| - | 17q25.3d          |
| + | 22q13.1c          |
| - | 5q35.3e           |
| - | 1p32.3d           |
| + | 10q21.3e          |
| - | 18q21.32a-q21.32b |
| - | 9q34.11c          |
| - | 1p22.2c           |
| + | 3p22.1a           |
| + | 16p11.2e          |
| - | 16q13c            |
| + | 17q21.31d         |
| + | 2p16.1d           |
| + | 19q13.42c         |
| + | 9p13.3a           |
| + | 10q22.1f-q22.1g   |
| + | 4q25c             |
| - | 18q21.1g          |
| - | 4q35.1f           |
| + | 4q35.1e           |
| - | 5q22.3b           |
| + | 16q21a            |
| - | 2q21.1b           |
| + | 22q12.1c          |
| - | 3p21.31h          |
| + | Xp11.23c          |
| - | 2p23.2b           |
| - | 19q13.11a         |
| + | 19p13.11d         |
| - | 5q13.2a           |
| + | 7p15.3b           |

- 5p15.33e  
+ 2p16.3d  
+ 19p13.13a  
+ 7q21.3a  
+ 7q32.1a  
+ 17q25.3f  
+ 2q13a  
- 3q21.1c  
+ 2q36.1b  
- 2p13.1b  
+ 7q11.23f-q11.23g  
+ 10q25.1a  
- 2q24.1e  
+ 11q24.2a  
+ 2q33.1a  
- 19p13.2b  
+ 5p12c  
+ 19q13.33b  
+ 17q12a  
+ 1p22.1c-p22.1b  
- 1q23.2c  
+ Xp11.23b  
- 1p34.2a  
+ 1p34.1f  
- 8p21.1e  
+ 1p36.32b  
+ 6q24.1a  
+ 1p35.1b  
- 10p13e  
- 11p14.1d  
+ 3p21.31d  
- 3q26.33b  
4p13d  
- 12q22c  
- 17q21.31c  
+ 17q24.1a  
- 17q24.1a-q24.2a  
- 17q23.3b  
+ 3q21.3c  
- 17q12c  
+ 18q21.1a  
+ 3q28d  
- 3p21.31e  
- 3q13.2b

- 12q23.2a  
+ 3q13.12a  
+ 17q11.2c  
17q21.31a  
- 17q25.3g  
- 3q21.1a  
12q21.31c  
- 10q21.2a  
+ 12q24.23c  
+ 12q13.12a  
+ 3p14.3b  
- 18q21.2d  
- 5q33.1d  
- 3p21.31d  
+ 3p21.31e  
+ 2q21.1d  
- 2q21.1b  
+ 1p21.2a  
+ 12p13.33d  
- 19q13.32b  
+ 11q23.3e  
+ 2p16.1d-p16.1c  
+ 11q13.1d  
+ 11q12.2a  
+ 11q13.1b  
- 14q32.12a  
- 11q14.1e  
- 6p23b  
- 11q14.1d  
+ 12p11.22b  
- 12q24.31e  
+ 19p13.3d  
+ 19q13.2c  
5q35.1b  
- 6p21.33a  
- 17q12a  
+ 16q13c  
+ 2q36.3c  
+ 16q13c  
- 7q11.23e  
- 17q12b  
- 17q12b  
- 17q12b  
+ 17q12b

+ 17q12b  
- 17q12b  
+ 7p13c  
+ 13q13.3b  
- 4q27c  
+ 5q13.2a  
- 14q11.2b  
+ 15q22.2a  
+ Xp11.22c  
- 6q16.3a  
+ 11q13.2c  
+ 12p13.32a  
- 6p21.1f  
+ 15q15.2b  
+ 19q12c  
- 8q22.1c  
+ 16p13.3d  
+ 5q34c  
+ 4q21.1b-q21.1c  
- 4q21.1b  
+ 10q23.33d  
+ 14q32.2b  
- 3q25.32a  
+ 1p36.33a  
- 5q11.2d  
+ 2q21.3a  
+ 2q33.3d  
- 15q21.3b-q21.3c  
- 17q21.31a  
+ 3p21.31i  
+ 6q27c  
- 17q21.2a  
+ 3p22.1c  
+ 3q22.1c  
+ 3p21.31i  
+ 4q31.1b  
+ 11q13.1e  
+ 12q15c  
- 1q22d  
- 2p15c  
+ 5p15.2c  
+ 7p11.2b  
- 17q12a  
+ 7q11.21d

+ 2p13.2a  
- 21q21.3c  
- 5q31.3b  
+ 11p15.5c  
- 12p13.31c  
- 5q13.1a  
+ 16p11.2e  
+ 1q23.1e  
- 1q23.1e  
+ 1q23.1e  
+ 1q23.1e  
+ 1q23.1f  
+ 1p13.1b  
- 3q13.2b  
+ 19q13.12a  
-  
- 1q23.3a  
- 1q24.2a  
- 11q13.1e  
+ 12p13.31d  
+ 9p24.1c  
+ 15q24.1b  
+ 2q33.2a  
+ 6p12.3d  
- 16p11.2d  
- 17q25.1b  
- 2q24.2a  
- 19p13.2d  
+ 19q13.33d  
+ 7q21.11c  
+ 19q13.33a  
+ 4p15.32d  
- 11q23.3d  
+ 19q13.32a  
+ 11q23.3d  
+ 20q13.12b  
+ 11p13b  
+ 1q32.2a  
- 3q13.12b  
- 1q23.3a  
+ 1p36.11b  
+ 1p13.3a  
+ 1q32.2a  
- 1p13.1b

- 11p13d-p13c  
- 12q13.2b  
+ 17p13.1d  
- 12p13.31a  
- 17q25.3g  
- 19p13.3a  
- 9p13.3b-p13.3a  
- 5q33.1c  
+ 19q13.2c  
- 17q23.3b  
- 3q13.33a  
+ 11p15.5a  
+ 11p11.2d  
+ 6p23b  
- 1q23.2d-q23.3a  
+ 3q13.33c  
- 2p11.2e  
+ 12p13.31e  
+ 3q13.13d-q13.2a  
+ 19p13.12c  
+ "Xp22.33c,Yp11.31b"  
- Xq28c  
+ 1p36.12b  
15q15.2a  
+ 10p14a-p13e  
- 9q22.33a  
+ 13q34d  
+ 10q21.2a  
+ 1p34.2a  
- 5q31.2c  
- 3p21.31f  
+ 20p13b  
- 5q31.2c  
- 9q32c  
- 1p36.33a  
+ 7p14.1c  
- 6q21g-q21h  
+ 19p13.3j  
- 19p13.2b  
+ 9p24.1c  
+ 6q21g  
+ 1p36.12a  
- 1q42.13a  
- 14q32.32a

- 11q13.1b  
+ 11q13.1c  
- 2p22.2a  
- 17q25.1a  
- 19q13.42a  
- 1q21.2d  
+ 5q31.1a  
+ 22q11.21c  
+ 6p21.1b  
+ 17q21.2a  
+ 1p22.2a  
+ 1q31.2b  
+ 1q23.3c  
+ 8p21.2c-p21.2b  
- 12p13.31d  
- 14q32.33c  
- 11q13.1c  
+ 2q31.1e  
- 7p15.3c  
+ 1p34.3b  
- 3p21.31k  
- 5p14.3b-p14.3a  
+ 16q24.3a  
- 8q22.1b  
- 5p14.3d  
- 18q12.1a  
- 14q11.2f  
- 16q21c  
- 5p14.1c  
- 16p11.2d  
+ 16q24.3b  
+ 12q13.2c  
- 12q24.31d  
- 11q13.1f  
+ 17q25.1d  
- 12q14.1a  
- 7q36.1d  
+ 17q11.2e  
+ 2q35f  
- 20q11.21c  
- 9q33.2a  
+ 17q21.32b  
- 7q21.2b  
+ 5q13.2a

+ 13q12.13b  
+ 9q34.11a  
+ 6p22.3c-p22.3b  
- 14q22.1b  
- 4q21.1a  
- 5q31.1d  
+ 6p21.31a  
+ 12p13.1b  
- 11p15.4d  
- 9p21.3c  
+ 4q35.1c  
- 5q31.1e  
- 9p21.3c  
+ 1p33a  
- 19p13.2b  
+ 14q22.2b  
- 10p13c  
- 5q22.3b  
- 16p12.1c  
+ 17q25.1c  
17p12a  
+ 20p12.3c  
+ 16q24.3a  
3q22.1d  
+ Yq11.23b  
- 19q13.2c  
+ 19q13.2c  
- 19q13.11b  
+ 20q13.13e  
- 8q11.21a  
- 14q11.2f  
+ 19q13.11b  
- 2p22.2b  
- 22q11.1d  
- 22q11.1d  
- 22q11.1d  
+  
+ 9q34.2a  
+ 9q34.2a  
- 22q13.31d  
+ 1p13.3b  
- 3p21.31e  
16p13.3d  
- 11p15.5c



|   |                  |
|---|------------------|
| + | 2p23.3a          |
| - | 20p13b           |
| - | 16q24.3b         |
| - | 4q13.2b          |
| - | 4q24b            |
| + | 1q41a            |
| + | 5q13.2a          |
| + | Xq22.1c          |
| - | 13q12.12b        |
| - | 5q12.3b          |
| - | 1q25.1a          |
| - | 22q13.2b         |
| + | 16q23.2b         |
| + | 2p23.3c          |
| + | 9q22.31a-q22.31b |
| + | 6p12.3b          |
| - | 16q22.1b         |
| - | 17p11.2i         |
|   | 7p22.3c          |
| - | 3q29e            |
| + | 7q36.1d          |
| + | 9q33.2a          |
| + | 4q12d            |
| - | 15q21.1d         |
| + | 11q23.3b-q23.3c  |
| + | 18p11.21d        |
| + | 20q11.22b        |
| - | 12q21.32a        |
| + | 1q25.2c          |
| + | 10q23.33b        |
| + | 11q21c           |
| + | 2p14c            |
| - | 3q22.3c          |
| + | 5p15.33e         |
| - | 18p11.21d        |
| + | 9q21.2c          |
| + | 3q12.3a          |
| + | 1p13.3a          |
| + | 9q34.11b         |
| - | 22q13.31d        |
| - | 2q31.3b          |
| + | 16q22.1a         |
| + | 16q22.1a         |
| + | 16q22.1a         |

- Xq28e  
- 5q14.3g  
+ 16q13b  
+ 6p21.32b  
- 2q21.1c  
+ 19p13.3i  
- 16q23.1a  
+ 1q31.3c  
- 11q13.1d  
- 14q13.2a  
+ 2q33.1f  
- 19q13.33a  
- 19q13.33a  
+ 19q13.33a  
+ 19q13.33a  
- 3p11.2a  
22q13.2b  
+ 1q21.3a  
+ 15q21.3d  
+ 14q22.2b  
- 10q23.31b  
+ 15q15.1b  
+ 2p16.2a  
+ 19p13.3d  
+ 21q22.12b-q22.13a  
+ 10q22.2a  
- 22q11.23a  
- 7p11.2b  
- 7q32.3d-q33a  
- 3p25.1a  
+ 2q13d  
+ 3q21.3a  
+ 8q12.1b  
- 11q13.4b  
+ 9q21.31b  
- 5q21.1a  
+ 1q21.1c  
+ 15q26.1e  
+ 17p13.1d  
- 12p13.31d  
- 20q12c  
+ 8q12.2a  
- 14q11.2c  
+ 16q12.2a

- 3p21.1b  
+ 11q24.2b  
- 22q12.1c  
- 19p13.11f  
- 14q31.3d-q32.11a  
+ 14q32.12b  
+ 20p12.3c  
- 1q32.1e  
+ 1p13.3a  
- 4q12b  
11q13.2a  
22q13.33b  
- Xq21.2a  
- 1q43e  
- 16q24.3b  
+ 18p11.21e  
- 19q13.43c  
+ 3p11.2a  
- 14q12a  
+ 20q11.22a  
+ 8q21.13c  
+ 9p13.3e  
17q25.3f  
+ 8p21.3a  
+ 7p15.1c  
+ 21q21.1d  
- 11q14.3b  
+ 15q15.1c  
- 2q35f  
+ 7q36.1d  
+ 12q23.2a  
+ 8q24.3c  
+ 3q27.1b  
- 2q31.1g  
- 11p15.4d  
- 15q25.1a  
+ 15q25.1a  
- 8p11.21a  
15q13.3b-q13.3c  
+ 17p13.1d  
- 11p11.2c  
- 2q11.2d  
+ 7p22.2c  
+ 15q15.1a

- 10q26.13d  
+ 3q23d  
+ 10q22.1e  
+ Xp11.3a  
- 18q11.2e  
- 15q26.3d  
+ 16p13.3f  
- 16q22.1d  
- 10q24.2c  
+ 14q23.3a  
+ 2q11.2a  
- 16q13c  
- 15q26.1b  
- 15q25.1a  
+ 19q13.2c  
- 3p25.3c  
- 14q12a  
- 3p25.3c  
+ 16p13.13c  
- 15q22.31b  
- 14q32.31c  
- 12q13.2b  
- 2q31.1f-q31.1g  
+ 19p13.3i  
+ 16q22.1d  
+ 10q21.1e  
+ 4q24b  
- 3p21.31b  
- Xq13.1e  
- 6q24.1a  
- 1p34.2c  
+ 13q14.3d  
- 2q13d  
- 12q23.3c  
- 11p11.2b  
- 14q32.33a  
+ 16q21e  
+ 15q15.3a  
+ 15q15.3a  
+ 5q14.1f  
+ 1q21.3e  
+ 9q22.2a  
- 2q14.2e-q14.3a  
- 3p22.3c-p22.3b

- 19q13.2b  
+ 1p22.3c  
+ 1p22.3c  
- 1p13.3c-p13.3b  
- 11q13.1f  
+ 7q34f  
- 3q27.1b  
+ 4q33a  
+ Xp22.2  
+ Xp11.22c  
+ 1p36.22a  
- 16p13.3e  
+ 1p36.13f  
+ 3q26.2c  
+ 7q21.13b  
- 21q22.13a  
- 7q22.1d  
- 1p34.2a  
+ Xq22.3b  
4q35.1c  
+ 8p23.1d  
4q35.1c  
+ 7q11.23b  
- 22q11.21c  
- 17p13.1d  
- 3q11.2c  
- 19q13.33d  
- 17p13.1d  
+ 19q13.33c  
- 14q21.1a  
+ 16p13.13c  
+ 19p13.12c-p13.12b  
+ 16q22.1f  
- 12p13.31a  
+ 12p13.31a  
7q34b  
+ 12p13.31b  
- 12p13.31c  
+ 12p13.31b  
- 2p13.3c  
- 19p13.2e  
+ 12p13.31b  
- 12p13.2c  
+ 12p13.2c

- 12p13.31a  
- 4q31.1f  
- 6p21.33a  
- Xq28h  
- 9q34.3e  
+ 1p36.11c  
+ 21q22.12a  
- 5q33.3b  
- 12q24.31c  
+ 7q11.23b-q11.23c  
- 19q13.12a-q13.12b  
- 2q33.1e  
1q22a  
+ 15q24.1b  
- 5q35.3c  
- 14q32.13b  
- 16p11.2e  
+ 13q22.3a  
- 15q23a  
+ 11q12.1a  
- 11q13.4a  
+ 19p13.3a  
+ 19q13.32a  
- 5p15.33d  
- 15q22.31b  
- 1p34.3e  
- 1p36.22d  
+ 3q23a-q23b  
+ 12p13.31d-p13.31c  
+ 9p13.3a  
- 5q35.2d  
+ 17q23.1a  
- 22q11.21b  
+ 16p13.3c  
+ 6q22.31d  
+ 13q32.3b  
- 6p22.2b-p22.2a  
+ 12p12.1e  
- 5p15.2c  
+ 3p24.1c  
+ 16q23.2b  
+ 1p33d  
+ 16q21e  
+ 16q21e-q22.1a

|   |                |
|---|----------------|
| - | 16q22.1a       |
| - | 3p22.3c        |
| + | 3p22.3c        |
| + | 3p22.3c        |
| - | 3q21.3c        |
| + | 18q22.3d       |
| - | 19q13.2c       |
|   | 11q13.1e       |
| + | 1q42.11b       |
| + | Xp22.12a       |
| + | 19p13.3i       |
| - | 1p21.3d        |
| + | 10q24.32b      |
| + | 2q11.2a        |
| + | 2q11.2a        |
| + | 4p16.1f        |
| - | 16q21a         |
| + | 3p22.3c        |
| + | 12q15d         |
| + | 19q13.42a      |
| - | 7q33b          |
| + | 5q35.3f        |
| - | 4q21.1c        |
| - | 8p22b          |
| + | 5q33.2b        |
| + | 17q21.2b       |
| - | 12q13.2c       |
| + | 6p21.1d        |
| + | 7q22.1c        |
| - | 6q15b          |
| - | 1p36.11d       |
| - | 2p14a          |
| + | 9p22.2b        |
| + | 1q32.1f        |
| + | 3p26.3c-p26.3b |
| + | 17q21.31a      |
| - | 9p13.1b-p13.1a |
| + | 17q21.31a      |
| - | 7p12.1c        |
| - | 2q24.3b        |
|   | 9q34.3f        |
| + | 14q12e         |
| + | 17q25.1a       |
| + | 13q14.12a      |

- 16q22.1f  
- 7q22.3b-q22.3c  
+ 13q13.3e  
- 16p12.1c  
- 17q22c  
+ 8q24.12c  
+ 9q22.33c  
- 1p35.2a  
- 17q21.33a  
+ 7q21.3a  
- 5q35.3b-q35.3c  
- 1p22.3d  
+ 2q36.3b-q36.3c  
+ 9q34.3a  
- 2q32.2a  
- 2q37.3b  
- 3p21.31e  
- 1p34.3d  
- 1p34.2d  
+ 20q13.33d  
3p24.3e  
+ 2p15c  
+ 5q23.1a  
- 3q25.1a  
+ 10p12.31a  
+ 15q24.2a  
- 8q24.3h  
- 13q22.2a  
- 20q11.21c  
- 4p12b-p12a  
11p13a  
- 19p13.11b  
+ 22q11.21c  
- 10q22.2c  
- 1q23.2d  
- 11p15.2b  
- 3q23a  
- 19p13.11b  
- 7q32.2b  
- 15q21.1d  
- 17p11.2h  
+ 4q21.22a  
- 8q13.2a  
+ 7q22.1b-q22.1c



|   |           |
|---|-----------|
| + | 12p13.31d |
| + | 2q37.1b   |
| + | 2q37.3a   |
| + | 12q13.13f |
| - | 17q21.32b |
| + | 12q13.2c  |
| + | 2q33.1b   |
| - | 4q21.23a  |
| - | 6q16.3a   |
| - | 12q24.31a |
| + | 14q24.3a  |
| + | 16p12.3b  |
| + | 16q13c    |
| + | 16p11.2d  |
| - | 11q13.1f  |
| - | 12q24.11a |
| - | 9q22.33b  |
| + | 15q23a    |
| - | 17q11.2b  |
| - | 16p13.3b  |
| + | 1p36.22c  |
| - | 16q24.1a  |
| + | 17p12b    |
| - | 17q22b    |
| + | 6p22.1b   |
| - | 14q24.2a  |
| - | 3q13.33a  |
| - | 7p22.3c   |
| + | 16q24.1b  |
| - | 16q24.1b  |
| - | 15q24.1b  |
| + | 2q11.2b   |
| + | 12q24.31a |
| + | 19q13.12a |
| - | 8q22.2b   |
| - | 2p21f     |
| + | Xq21.1a   |
| + | 5q14.3d   |
| + | 11q13.1a  |
| + | 16p12.3a  |
| + | 7q32.2b   |
| + | 3q24f     |
| + | 7q32.2b   |
| - | 8q13.2a   |

+ 17q11.2c  
+ 4q32.3b  
- 15q25.2a  
+ 4p15.33a  
- 10q23.32b  
+ 5q35.2a-q35.2b  
- 4p16.3d-p16.3c  
+ 15q24.1b  
- 10q24.2c  
3q29c  
- 20q11.22b  
+ 16q13c  
+ 8q21.3a  
- 6p21.2c  
+ 16q24.3b  
+ 3p25.3c  
- 3q11.2c  
- 16p13.12b  
- 8q24.3h  
+ 14q32.12b  
- 1p36.33a  
+ 7q22.1b  
+ 12q15c  
- 11q13.2b  
22q13.33b  
+ 19q13.33b  
+ 1p32.3c  
- 7p15.1c  
- 20p13c  
+ 1q32.2a  
+ 1q32.2a  
+ 15q25.1a  
- 1q23.1a  
+ 12q22b  
+ 16p13.3e  
- 9q34.11c  
+ 19p13.3a  
- 3p26.3a  
+ 7q11.21e  
+ 1q21.3b  
+ 2q33.3c  
+ 9p13.3a  
+ 11p11.2c  
- 7q33d-q34a

|   |                   |
|---|-------------------|
| + | 1q21.3d           |
| - | 16p13.3c          |
| - | 6p21.32b          |
| + | 12p13.1b          |
| - | 11q14.1e          |
| - | 1q24.2a           |
| + | 3p25.3c           |
| + | 22q13.33a         |
| + | 10p11.21c         |
| + | 5q13.3d           |
| + | 2p22.2b           |
| - | 7q32.1a           |
| + | 14q32.33d         |
| + | 14q32.33c         |
| + | 4p16.3c           |
| + | 2p21a             |
| + | 16q24.1a          |
| - | 17p13.3e          |
| + | 17q12c            |
| - | 19p13.11c-p13.11b |
| - | 17q11.2c          |
| + | 20p12.3c          |
| - | 20p11.23b         |
| + | 1p36.13e          |
| + | 7q21.12a          |
| - | 5q33.3a           |
| + | 3p22.3c           |
| + | 19p13.11b         |
| + | 15q26.1b-q26.1c   |
| + | 19q13.32c         |
| + | 11p11.2c          |
| + | 21q22.3c          |
| + | 22q12.1a          |
| + | 22q11.23c         |
| + | 3q11.2c           |
| - | 3q27.3a           |
| - | 13q12.11b         |
| - | 16p12.2b          |
| - | 1p31.1h           |
| - | 21q22.11c         |
| - | 12q13.2c          |
| - | 12q13.13e         |
| + | Xq28e             |
| - |                   |

- Xq28e  
Xq28e  
- 12p13.2c  
+ 22q13.2a  
- 1p13.2a  
+ 20q13.13c  
- 5q33.1c  
+ "Xp22.33e,Yp11.32a"  
+ 22q12.3d  
+ 10q11.21a  
- 17q23.3b  
+ 15q24.1b  
- 5q33.1b  
- 17q25.3g  
- 22q13.1b  
- 15q22.31a  
+ 19p13.3h  
+ 5q23.2b  
- 20p13f  
- 16q21a  
+ Yq11.23b  
- 3p21.31g  
+ 8q13.2a  
- 12q13.13b  
+ 2q24.3c  
- 1q32.1c  
- 12q21.2b  
+ 20p11.23d  
- 20p11.21b  
11q13.1d  
+ 20p11.21a  
- 20p11.21b  
+ 3q21.1a  
- 21q22.3c  
+ 20q13.31a  
+ Xq22.1c  
- 10q11.23c  
- 11p13d  
- Xq26.3b  
- 7q35a  
- 4p16.3c  
- 10q26.13e  
- 1p22.3f  
+ 16q22.1b

|   |                 |
|---|-----------------|
| + | 18q23d          |
| + | 2q35e           |
| - | 12q14.1a        |
| + | 3p22.2b-p22.2a  |
| + | 15q15.3c        |
| - | 6q23.2b         |
|   | 10q11.23b       |
| - | 10q11.22a       |
| + | 1p31.1k         |
| + | 8q22.3c         |
| + | 5q31.2d         |
| + | 2p12e-p12d      |
| - | 9q31.3a         |
|   | 3p22.1b         |
| - | 1p36.22d        |
| + | 20q11.23b       |
| + | 17p13.3a        |
| + | 1p34.2c         |
| - | Xp22.2          |
| + | 11p15.3e        |
| - | 16q22.1b        |
| + | 20q13.12b       |
| - | 8p23.1a         |
| - | 11q14.2b        |
| - | 11p15.5b        |
| - | 11q13.1e        |
| - | 14q12a          |
| - | 15q25.1a        |
| - | 1q21.2c         |
| + | 9q21.33c        |
| - | 9q22.33a        |
| - | 1q21.2c         |
| + | 11q13.1d        |
| - | 20q13.32b       |
| + | 11q13.3c-q13.3d |
| + | 1p13.2c         |
| + | 16q24.3a        |
| - | 19p13.2e        |
| + | 5q23.2f         |
| - | 10p13a          |
| - | 17q22d          |
| - | 10q24.32b       |
| - | 11p11.2b        |
| + | 10p14b-p14a     |

|   |                   |
|---|-------------------|
| + | 7q36.1a           |
| - | 10p11.21c         |
| + | 13q34d            |
| - | Xq24d             |
| + | 11q22.3c          |
| + | 6p21.1d           |
| - | 6p21.32a          |
| + | 10q24.2c          |
| + | 7q22.1e           |
| + | 7q22.1e           |
| + | 12q24.11d-q24.12a |
| - | 11q21b            |
| - | 2q31.3a           |
| - | 10q24.2c-q24.31a  |
| - | 11q22.3c          |
| - | 3p22.2a           |
| + | 21q21.1c          |
| - | 15q11.2a          |
| - | 4q21.1a           |
| - | 17p13.2c          |
| - | 4q13.3d           |
| - | 4q13.3d           |
| - | 4q21.1a           |
| - | Xq13.1d           |
| - | 2q21.3b           |
| + | 11q23.3e          |
| + | 2q37.3a           |
| + | Xq28f             |
| + | Xp22.2            |
| - | Xp21.2a           |
| + | Xp21.1b           |
| - | Xp22.12b          |
| + | Xq13.3c           |
| + | Xp11.4e           |
| - | Xp11.3b           |
| - | Xp11.4c-p11.4b    |
| + | Xq22.2b           |
| + | Xq28b             |
| - | Xq28b             |
| + | Xq23a             |
| + | Xq23d             |
| - | Xq24c             |
| + | Xq22.3b           |
| + | Xp21.1b           |

|   |                     |
|---|---------------------|
| + | Xq25e               |
| - | 18q21.1g            |
| - | 4q24c               |
| + | 5q31.3a             |
| + | "Xp22.33d,Yp11.32a" |
| - | 17q23.3a            |
| + | 1p13.3b             |
| + | 3p21.31b            |
| - | 18q22.3c            |
| + | 16q22.1e            |
| + | 17p13.1d            |
| + | 17p13.2c            |
| - | 1q32.1d             |
| - | 11p15.4b            |
| - | 22q13.2b            |
| + | 6q14.2b-q14.3a      |
| - | 1p32.3b             |
| - | 16q24.3a            |
| - | 11q12.2b            |
| + | Xp11.4e             |
| + | 2q31.1c             |
| + | 8q24.3g             |
| - | 7p15.2c             |
| + | 6p21.31e            |
| + | 5q33.3a-q33.3b      |
| - | 8q24.3h             |
| + | 16q12.1c            |
| + | 7q11.23b-q11.23c    |
| + | Yq11.222b           |
| - | 15q24.1b            |
| - | 8q24.3f             |
| - | 15q24.1b            |
| - | 2p22.2a             |
| + | 2q33.2a             |
| + | 10q23.33a           |
| - | 2p13.3a             |
| + | 2q35e               |
| - | 12q14.1a            |
| + | 19q13.2b            |
| - | 10q23.33c           |
| + | 10q23.33c           |
| - | 22q13.2b            |
| + | 10q26.3f            |
| + | 19q13.2b            |

- 11p15.2b  
- 6p12.3e  
- 7q22.1b  
+ 14q32.2b  
+ 19p13.12a  
- 19p13.12a  
+ 4q35.2a  
- 7q21.2a  
- Xq21.1a  
- 17q25.3b  
+ 19q13.32c  
- 7p22.1b  
+ 22q13.1a  
- 2q24.1d  
- 4p16.2a  
+ 22q11.23b  
+ 17p11.2d-p11.2c  
+ 21q22.3c  
+ 2q37.3g  
+ 4p16.2b  
+ 14q23.1b  
+ 14q23.1b  
- 19q13.32b  
- 14q11.2e  
-  
+ 3p21.31d  
- 7p22.1b  
+ 11q12.2b  
+ 12q24.11a  
- 5p15.2c  
+ 1q22b  
+ 9q21.33c  
- 15q22.31a  
- 19p13.3e  
+ 2q24.1e  
+ 4q23b  
+ 1q23.2a  
- 2q21.3b  
+ 1q25.1a  
- 6p21.32a  
+ 19p13.3i-p13.3h  
+ 12q13.13b  
- 3p24.3d  
- 9q33.1d



|   |                |
|---|----------------|
| + | 7q21.12b       |
| + | 2q14.2b        |
| - | 5q35.3a        |
| - | 16q24.3b       |
| + | 20q13.12b      |
| + | 7p13d          |
| - | 19q13.33a      |
| - | 3q22.3b        |
| - | 1p21.2a        |
| + | 9p13.2a        |
| + | 19p13.12c      |
| - | 4p15.32b       |
| + | 1q24.2a        |
| + | 17q23.3a       |
| - | 17q21.31d      |
| + | 6q22.2b        |
| - | 3q12.1a        |
| - | 11p13f         |
| + | 1p35.1b        |
| - | 16p13.3d       |
| + | 4q13.3b        |
| + | 4q31.3a        |
| - | 10q25.3a       |
| + | 1p13.2b        |
| - | 10p13c         |
| - | 3p21.1c-p21.1b |
| - | 12p13.33b      |
| + | 5q22.2b        |
| + | 11q24.2c       |
| - | 4q35.1b        |
| - | 2p13.1b        |
| - | 12q13.3b       |
| - | 9p13.3c        |
| + | 16p12.1c       |
| + | 8p12e          |
| - | 16p11.2c       |
| - | 3q26.33c       |
| - | 16p12.2c       |
| + | 4q12a          |
| - | 11q22.3a       |
| - | 17q25.3g       |
| + | 19p13.11e      |
| - | 1p22.3e        |

- 6p21.33a  
11q12.2b  
+ 11p11.2b  
- 7p12.2a  
+ 2p25.1e  
+ 8p12a  
- 12q13.3b  
+ 10q22.1f  
- 4q23b  
- 12q13.12a  
- 1p36.12b  
+ 6p21.33a  
- 20p13c  
- 22q11.23b  
+ 22q11.23b  
+ 2p24.3b  
+ 11q22.3c-q22.3d  
+ 12p11.21b  
- 22q13.1b  
+ 2q14.1d  
+ 16q22.1f  
+ 16q22.1f  
+ 16q22.1f  
+ 1p13.2d  
+ 10q21.3e  
- 12q13.12a  
- 14q32.13a  
+ Xq26.3a  
+ 20q13.13c  
- 16q22.1c  
- 9q34.13b  
- 19p13.12c  
+ Xp11.4b  
+ Yq11.21b  
+ 5q11.2e  
- 5q35.3a  
+ 17q23.3b  
+ 5q31.1e  
+ 12p13.1b  
+ 19p13.11b  
- 17q24.1a  
+ 10q21.3e  
- 17q12b  
- 12q24.13b

|   |                   |
|---|-------------------|
| + | 12q24.31d         |
| - | 7p13d             |
| - | 9p21.1a           |
| - | 1q32.1b           |
| - | 11q23.3e          |
| - | 4q32.3e           |
| - | 6q24.2a           |
| - | 11p15.5d          |
| + | 8q21.3d           |
| + | 16p13.3f          |
| - | 1q23.3a           |
| - | 19q13.2c          |
| + | 6p21.31c          |
| + | 16q24.3b          |
| + | 8p23.1e           |
| - | 20q11.21a         |
| + | 20q11.21b         |
| + | 20q11.21b         |
| + | 20p13f            |
| - | 8p23.1a           |
| - | 8p23.1a           |
| + | 8p23.1e           |
| + | 1q42.11b          |
| - | 14q32.2b          |
| - | 6p22.3d           |
| + | 1p34.2c           |
| - | 9q33.2b           |
| - | 19p13.3a          |
| - | 1p13.2a           |
| - | 1p13.3a           |
| + | 8q24.3c           |
| - | 15q22.31b-q22.31c |
| - | 1q21.3d           |
| + | 9p22.1a           |
| - | 11p15.4a          |
| - | 12p11.21b         |
| + | 12q24.31d         |
| - | 5q12.1b           |
| + | 22q12.2c-q12.3a   |
| + | 8q24.12c          |
| + | 11p13d            |
| + | 12p12.3d          |
| - | 8q24.13b          |

- 17p13.2b  
- 22q11.23a  
- 15q25.3d  
- 16p13.13c  
- 1p36.22c  
+ 1p36.32b  
- 7p15.3a  
- 9q32e  
+ 2q31.2b  
- 8q24.3h  
+ 11q13.5a  
- 22q11.21b  
- 22q11.21b  
+ 22q11.21b  
- 22q11.21d  
+ 22q11.21d  
+ 12q13.2c  
+ 2q37.1d  
+ 17q22c  
- 4p16.3c  
+ 2p13.1b  
- 1p32.3b  
- 11q13.4a  
+ 1p36.11b  
+ 19q13.33a  
- 5q14.1e  
- 12q13.12b  
+ 16q22.3a  
- 14q12a  
+ 17q12b  
- 13q14.3c  
- 17q11.2a  
+ 14q11.2g  
+ 14q11.2g  
+ 14q11.2g  
- 14q23.1c  
+ 17p11.2b  
- 17p13.1b  
- "Xp22.33d-p22.33c,Yp11.31c-p11  
+ 10p14a  
- 4p15.2d  
- 6p21.33b  
- 5q11.2d  
+ 3p21.31f

- 10q26.2a  
- 17p13.2b  
+ 19q13.32c  
+ 20q11.23c-q12a  
- 3q25.2c  
- 12q24.31f  
+ 16q22.3a  
17q23.1a  
- 17q21.2b  
+ 17q21.31b  
+ 1q25.3d  
- 12q24.31c  
- 5q31.3c  
- 13q21.2b  
- 14q32.13b  
- 20q13.33d  
- 5q12.1c  
+ 21q22.3f  
+ 12q13.13b  
- 10p15.3d  
- 19p13.3g  
- 1p31.3a  
- 2q32.2a  
+ 3q21.1a-q21.1b  
+ 15q22.31c  
+ 2q37.1b-q37.1c  
+ 1q41e  
+ 15q15.1a  
+ 11q23.1b  
- 22q13.2b  
+ Xq22.1c  
+ Xq28g  
- 9q34.3d  
7p22.1a  
+ 22q11.21f  
+  
+ 9q22.1a  
+ 22q11.21e  
- 13q34d  
7p22.1a  
1q25.3e  
+ 7q21.2b  
+ 7p15.1b  
+ 17q11.2c

|   |                   |
|---|-------------------|
|   | 15q13.3d          |
|   | 5q12.1b           |
| + |                   |
| + | 11p15.1d          |
|   | 12q24.32c         |
| - | 8p23.1e           |
|   | 18p11.21e         |
|   | 11p11.2c          |
| + | 19q13.33a-q13.33b |
| + | 11q23.1c          |
| + | 7q31.1a           |
| + | 13q14.3a          |
| - | 13q14.3a          |
| + | 1p31.3c           |
| - | 3q29h             |
| - | 11q14.1d-q14.1e   |
| + | Xq13.1c           |
| - | 17p13.1d          |
| + | 20q11.23a         |
| - | 14q22.3a          |
| - | 6p21.1c           |
| - | 6q27f             |
| + | 19q13.2a          |
| + | 14q24.3b          |
| + | 2q31.1d           |
| - | 2q31.1d           |
| - | 7q21.3c           |
| + | 1p34.1e           |
| + | 1p33d             |
| - | 22q13.1b-q13.1c   |
| - | 19q13.12a         |
| + | 9p24.3b           |
| + | 9p21.3c           |
| - | 1p33a             |
| + | 7q21.12a          |
| - | 19q13.32a         |
| + | 5q23.1c           |
| - | 15q21.2b          |
| - | 10q21.3d          |
| + | 17p13.1d          |
| - | 16p12.2c-p12.2b   |
| + | 9p13.3c           |
| + | 9p13.3e           |

- 16q12.1a  
+ 16p13.3b  
+ 15q25.1a  
- 19p13.12c  
+ 3q27.3a  
- 10q22.1f  
- 4q23b  
+ 2q35f  
+ 1p31.1e  
9p13.3b  
+ 7q36.3c  
+ 7q31.1a  
- 10p12.31a  
+ 2q32.1a  
- 1p36.31a  
- 10q21.3d  
- 12q13.2c  
+ 13q14.11d  
+ 1p36.21a  
- 15q15.1b  
- 5q31.2d  
- 3q26.33b  
- 7q22.1f  
+ 5p13.2d  
+ 12q13.12b  
+ 11p13f  
+ 9q31.3b  
- 2p23.3c  
- 21q22.11c  
+ 13q32.1b  
- 7q11.23b  
+ 11q13.1a  
+ 20q13.33e  
+ 8q13.1a-q13.1b  
+ 1p31.3b  
- 17q21.2b  
- 1p35.3b  
- 10q22.2a  
+ 14q24.3a  
- 22q13.1c  
+ 1p34.3c  
+ 16p13.3c  
- Xq28g  
+ 16p13.3d

- 3p14.3a  
- 19p13.13c  
+ 12q24.31a  
- 2q36.3e  
+ 11p15.4c  
3p14.3b  
- 9q34.3d  
+ 12p11.21a  
+ 19p13.2b  
+ 1q24.3b-q24.3c  
- 19p13.2c  
- 2p23.3c  
+ 20q11.21c  
- 21q22.3d  
- 2q35f  
+ 10q24.1a  
+ 20q13.12b  
- 1p22.1a  
- 16p11.2d  
- 2q36.2a  
+ Xq24a-q24b  
+ 5q35.1b-q35.1c  
- 19p13.2b  
- 1p31.3d-p31.3c  
+ 9p24.3b  
- 13q32.3a  
- 19p13.3f-p13.3e  
- 5q35.3a  
- 16q13c  
+ 18q22.2a  
- 9q34.11c  
+ 9q34.11c  
- 6p21.32b  
- 21q22.11c  
+ 6q14.1e-q14.2a  
+ 21q22.12b  
+ 19p13.3g  
- 11q23.3e  
+ 6p21.33a  
- 16q22.1b  
- 19q13.13d-q13.2a  
+ 11q13.1c  
14q24.2b  
+



|   |                   |
|---|-------------------|
| + | 1p34.1f           |
| - | 3p24.3e           |
| - | 1p21.2a           |
| - | 20q13.13f         |
| - | 9q34.11a          |
| - | 1q22a             |
| + | 2q14.1a-q14.1c    |
| + | 11q13.1e          |
| - | 9q34.3e           |
| - | 15q22.31b         |
| - | 19p13.3d          |
| + | 17q11.2c          |
| - | 7p14.3a           |
| + | 19q13.11a         |
| + | 8q22.1c           |
| - | 2p22.3e           |
| - | 1p21.3b           |
| + | 8p21.2a           |
| - | 5q32e             |
| + | 1p22.1b           |
| + | 12q23.2a          |
| + | 11q13.1d          |
| - | 10q26.3f          |
| + | 11p15.5d          |
| + | 22q12.2c          |
| + | 17p11.2g          |
| - | 18q12.1d          |
| - | 18q12.1d          |
| - | 18q12.1d          |
| - | 11q23.3c          |
| - | 8q24.12c          |
| - | 21q22.13a         |
| + | 18q12.1d          |
| + | 18q12.1d          |
| - | 20q11.23a         |
| + | 20p12.1a          |
| - | 1q32.1g           |
| + | 20p11.23d-p11.23c |
| + | 1q32.3b           |
| + | 18q12.1g          |
| - | 2p23.3c           |
| - | 6p22.3f           |
| + | 15q21.2a          |
| - | 5q23.1c           |

|   |                 |
|---|-----------------|
| + | 12q24.13b       |
| + | 7q11.23f        |
| + | 12q13.3b        |
| + | 3q21.1a         |
| + | 11q12.1c        |
| - | 2q37.3g         |
| - | 17p13.1d        |
| - | 17q25.3g        |
| + | 16q22.1c        |
| - | 19p13.3b        |
| + | 7q22.3c         |
| - | 5q35.1e         |
| - | 1q41d           |
| - | 2p13.2a         |
| + | 1q23.3b         |
| + | 17q12b          |
| - | 20q11.21b       |
| - | 12p13.2a-p13.1b |
| - | 22q12.2b        |
| + | 2q32.1a         |
| - | 2q11.2a         |
| + | 6p25.3b         |
| + | 1q23.2b         |
| - | 8p12c           |
| + | 2q37.3e         |
| - | 17q21.31b       |
| + | 10q25.2a        |
| - | 3p21.1e         |
| - | 11p15.5b        |
| + | Xq28f           |
| + | 15q21.1d        |
| - | 10q11.21a       |
| - | 1p36.33a        |
| - | 17p13.1d        |
| + | 3q27.1b         |
| - | 18q21.1e-q21.1f |
| + | 14q32.31b       |
| + | 7q21.3b-q21.3c  |
| + | 2q31.1d         |
| - | 16q22.1a        |
| + | 11q22.3a        |
| + | 2p21d           |
| + | 12q24.31a       |

|   |           |
|---|-----------|
| + | 17q22d    |
| + | 20q11.22a |
| - | 6q25.3d   |
| - | Xp11.4e   |
| + | 21q22.13b |
| - | 19q13.2b  |
| + | 12q15a    |
| + | 1q32.1h   |
| + | 12p13.32a |
| - | 15q21.3c  |
| - | 20q11.22a |
| - | 1p36.12a  |
| + | 6p22.3c   |
| + | 16q22.1a  |
| + | 8q21.2b   |
| - | 2p25.1b   |
| - | 12q21.2b  |
| - | 11p15.1c  |
| + | 16p13.3d  |
| + | 3p24.3e   |
| + | 3q13.33c  |
| - | 14q13.1c  |
| - | 16p12.1c  |
| + | 8q23.2a   |
| - | 5q33.3c   |
| - | 10q26.3b  |
| + | 20p13c    |
| - | 13q32.3a  |
| + | 19p13.3d  |
| - | 1p34.2a   |
| + | Xp11.23d  |
| - | 13q14.3a  |
| - | 19q13.11a |
| - | 10q22.1g  |
| - | 1p36.12b  |
| + | 3q27.1b   |
| - | 22q13.33b |
| - | 19q13.2a  |
| - | 6q22.33a  |
| + | 10p14a    |
| - | 10q26.3f  |
| - | 7p11.2c   |
| - | 19p13.2a  |
| + | 3q26.31b  |

|   |                |
|---|----------------|
| + | 6q24.1a        |
| - | 2q13a          |
| - | 15q24.1b       |
| + | 3p26.2a        |
| - | 20q11.22b      |
| - | 1q25.3f        |
| - | 9q34.3e        |
| + | 1p21.2a        |
| - | 19p13.11a      |
| - | 1p34.2c        |
| - | 12q22a         |
| + | 11q14.2a       |
| - | 20q13.33e      |
| + | 4q24d          |
| + | 2q33.3b        |
| - | 8q24.3g        |
| - | 11q12.3a       |
| - | 19p13.3e       |
| + | 16p12.1c       |
| + | 3q21.3b-q21.3c |
| + | 7p14.2a        |
| + | 17q23.2d       |
| + | 11p15.5c       |
| + | 1p31.3c        |
| - | 11q13.1d       |
| - | 13q12.11c      |
|   | 6p12.2a        |
| + | 2q37.1c        |
| + | 1p36.21a       |
| + | 1q22a          |
| + | 19p13.3i       |
| + | 1q22a          |
| + | Xq13.1a        |
| - | 13q33.3a       |
| + | 17p13.1d       |
| + | 8q24.22b       |
| + | 2p23.3c        |
| - | 15q25.2a       |
| - | 17q21.31d      |
| + | 9q34.3d        |
| - | 1q42.2a        |
| - |                |
| + | 5q31.2c        |
| - | 10q21.2b       |

- 8p21.3a  
+ 2p15b  
+ 11q13.1d  
- 11q13.1b  
+ 2p23.1a  
- 15q15.1c-q15.1d  
- 3q27.2a  
9q34.3f-q34.3g  
- 6p21.32b  
+ 11q24.2b  
+ 15q21.1d  
- 19q13.2a  
+ 12q23.3a  
+ 17q21.2b  
- 11q13.1d  
Xp22.12b  
+ Yq11.222c  
+ 3p22.1c  
+ 3q25.1b  
- 7p22.1b  
- 2p22.2b  
- 2p11.2c  
+ 15q15.1a  
- 12q24.31d  
+ 14q24.3b  
- 1p34.1d-p34.1c  
- 2p23.3a  
+ 3q27.1b  
+ 1p34.3e-p34.3d  
- 8q24.3c  
+ 1p34.3d  
+ 1p34.3e  
+ 14q23.3b  
- 20q11.22a  
+ Xp22.11a  
- 10q26.11c  
+ 7p22.2c  
+ 16p11.2e  
- 16p11.2e  
- 22q12.3d  
- 8q23.1c  
+ 11p15.4b  
- 19p13.2c  
- 8q24.11a

|   |                 |
|---|-----------------|
| + | 1p35.1b         |
| + | 15q15.3c        |
| + | 19q13.2a        |
| + | 22q13.1a-q13.1b |
| + | 11p13e          |
| + | 17p13.1d        |
| + | 3q27.3a         |
| - | 17q25.3d        |
| + | 12q13.13e       |
| - | 4q23a           |
| + | 2q37.1c         |
| - | 3p13d           |
| + | 8p12a           |
| + | 10q22.1b        |
| + | 5q31.3b         |
| - | 22q12.2c        |
| + | 3q27.1b         |
| - | 11p15.3e        |
| - | 1p36.12b        |
| + | 7q11.23b        |
| + | 14q32.32b       |
| + | 17p13.1d        |
| - | 3q26.2c         |
| - | 20q11.22b       |
| + | 1p36.12a        |
| + | 18q21.2a        |
| - | 17p12c          |
| + | 19p13.3i        |
| - | 19p13.2e        |
| - | 13q14.11a       |
| + | 1q32.1c         |
| - | Xq25h           |
| - | 22q13.1a        |
| - | Xp11.23f        |
| + | 12q23.1a        |
| - | 1q32.1g         |
| - | 19p13.11c       |
|   | 5q15d           |
| - | 15q15.3b        |
| - | 7p14.2a         |
| - | 20q13.12c       |
| + | 16q22.1a        |
| + | 11q22.3c        |
| + | 4q31.1f         |

|   |                   |
|---|-------------------|
| + | 7q11.23b          |
| - | 19p13.2a          |
| - | 6p24.2a           |
| + | 10q24.32b         |
| - | 6q14.1c-q14.1d    |
| - | 6p12.1d           |
| - | 4q25d             |
| - | 5q12.1b           |
| + | 18q12.2a          |
| + | 17p13.3f          |
| + | 8p21.1d           |
| + | 11p13f            |
| - | 5q11.1c           |
| + | Xq28g             |
| + | 17q21.33b         |
| + | 12p13.31d         |
| + | 18p11.32a-p11.31e |
| + | 14q32.2b          |
| - | 19q13.32a         |
| - | 11q12.3a          |
| + | 2p21f             |
| + | 19q13.32c         |
| + | 19p13.3a          |
| - | 19p13.12b         |
| - | 19p13.2e          |
| - | 19p13.2e          |
| + | 2p13.2b           |
| - | 10q26.11a         |
| - | 1q42.12b-q42.12c  |
| + | 4q13.3b           |
| - | 5q13.3a           |
| + | 11q21b-q21c       |
| + | 9q34.11c          |
| - | 9p13.3c           |
| - | 1p36.23a          |
| + | 12p13.31d         |
| + | 17p13.2b          |
| + | 4q21.22a          |
| - | 18p11.32c         |
| - | 13q14.11d         |
| - | Xq25h-q26.1a      |
| + | 6q23.2a           |
| - | 8q24.12b          |
| + | 6q23.2a           |

|   |                   |
|---|-------------------|
| + | 6p12.3e           |
| - | 6p12.3e           |
| - | 1q21.2c           |
| - | 22q13.1d          |
| + | 10q23.33d         |
| - | 9q34.3e           |
| - | 8p21.3a           |
| + | 20p11.21a         |
| + | 8q23.1d           |
| - | 3p24.1c           |
| + | 12q24.33c         |
| + | 2p21b             |
| + | 1p35.3a           |
| + | 20q11.23a         |
| - | 6q23.1e-q23.2a    |
| - | 9q31.3a           |
| + | 2q14.2c           |
| - | 10p11.22b         |
| + | 2q23.1b           |
| + | 2p21a             |
| + | 7p14.1e           |
| + | 4q13.3e           |
| + | 3p11.2a-p11.1b    |
| - | 2q36.1a           |
| + | 3q22.2a           |
| - | 7q22.1c           |
| + | 7q34f             |
| + | 1q42.12c          |
| + | 8p21.1e           |
| - | 6q24.3a           |
| - | 3p22.2b           |
| + | 19q13.42c         |
| + | 17p11.2e          |
| - | 19p13.2b          |
| - | 17p11.2e          |
| - | 17q25.3b          |
| - | 1q41d             |
| - | 1p32.3e           |
| - | 19p13.11f         |
| - | 12p12.3e-p12.3d   |
| - | 11p15.5d-p15.5c   |
| - | 13q14.11c-q14.11d |
| + | 17q11.2a          |
| - | 5q15d             |



+ 5q15e  
+ 17q12c  
+ 12q13.2c  
- 19q13.32a  
- 19q13.32a  
- 2q14.3d  
+ 13q33.1b  
- 10q11.23a  
- Xq13.1e  
- 5q12.1b  
+ 5q35.1e-q35.2a  
+ 20q11.22b  
- 14q24.1e  
+ 8p23.1d  
- 16p12.2c  
- 8p23.3b  
- 10q24.2c  
+ 8p12a  
+ 1p34.2a  
- 9p24.1c  
- 17q23.3b  
- 14q22.1d  
- 1q42.3d  
- 12p12.3e  
+ 12q24.13a  
- 9q31.1a  
- 1p36.23b  
- 7q11.21c  
- 11q24.2a  
- 18q11.2a  
+ 8p21.1e  
- 13q14.2a  
- 5q11.2d  
+ 12q13.13e  
+ 1p36.31a  
+ 2q37.3b-q37.3c  
- 14q23.2b  
+ 11q13.1b  
+ 13q12.11b  
- 1q41b  
+ 12q13.2c  
+ 2p14b  
- 5q31.2c  
- 15q24.2a

- 19q13.33d  
+ 4q32.1e  
- 19q13.31a  
+ 12p12.1d  
- 1q32.1e-q32.1f  
- 11q24.3a  
+ 21q22.2a  
- 1q23.1b  
- 17q21.31b  
- 3q27.2b  
+ 12p13.2b-p13.2a  
- 6p21.31a  
- 3q26.2a-q26.2b  
- 17q11.2d  
- 17q11.2d  
- 1p22.1d-p22.1c  
+ 19p13.2e  
+ 14q32.2b  
+ 22q12.2a  
+ 14q24.1d  
+ 1q43e  
+ 4q12d  
- 6p25.3b  
+ 5p15.33e  
+ 7q33a  
+ 10q23.33a  
- 17q25.1d  
- 1q42.2a  
- 16p12.2c  
+ 3p22.2a  
- 10q24.1b  
- 1p36.22b  
+ 9q34.12a  
- 9p13.2a  
+ 8q24.3g  
- 19q13.2c  
- 16q22.1f  
+ 3p21.31k  
+ 13q13.3b  
+ 4q27c  
- 8q24.11b  
+ 11p11.2e  
- 1p21.2a  
- 1p35.3b

- 6q12c-q12d  
- 17q21.31a  
- 7q36.1a  
- 6q25.3d-q25.3e  
- 1q23.3a  
- 5q35.3a  
+ 5q13.3d  
+ 19p13.11e  
- 1q24.2b  
+ Xq28g  
- Xq28h  
+ 1p33d  
- 2p11.2d  
+ 8q21.13b  
13q14.3d  
+ 7q36.1e  
11q12.1d  
+ 5q33.3d  
+ 6q22.31c  
+ 11q13.3c  
- 11q12.2b  
+ 11q12.2b  
- 11q12.2b-q12.3a  
- 17q25.1c  
- 1p33a  
+ 5q35.2d  
+ 15q25.1b  
+ 16p13.3e  
+ 2q11.1c  
- 2q11.2b  
+ 3q22.3c  
- 12q13.13a  
- 1q32.1h  
+ 17q24.2b  
+ 17q25.1d  
+ 12q24.31e  
- 17p13.3g  
- 9q34.11a  
+ 1p13.3c  
+ 15q25.2b  
- 17q25.1a  
- Xp11.21a  
+ 5p15.2a  
+ 5p15.2a

- 10p13c  
1q21.1d  
+ 1q21.1c  
- 9q21.13a  
+ 15q25.1b  
- 12q24.12a  
+ 13q14.3a  
- 7q33a  
+ 20p13f  
+ 11q12.1c  
+ 11q12.1c  
- 20p13c  
+ 12q13.11b  
- 5q33.2b  
- 7q35a  
3p14.3a  
22q13.33b  
- 17q21.33a  
+ 2q33.1g  
+ 11q24.2c  
- 2q33.3c  
+ 12q14.1a  
+ 9q22.31b  
- 9q22.31b  
+ 6q27f  
+ 9q21.11a  
- Xq26.3a  
- Xq11.1c  
+ 2q21.1c  
+ 19p13.11d  
+ 9q33.3b  
- 7p15.3b  
- 2q33.1e  
+ Xq26.3a  
- 2q21.1d  
+ 2q21.1b  
- 9q34.11a  
+ 19p13.11d  
+ 3q27.1b  
- 1p36.13f  
- 7q21.2b  
- 5p15.1b  
- 17q21.31a  
+ 6q13a

- 2p14a  
+  
- 4q22.1c  
- 5q31.2c  
+ 10q22.1g-q22.2a  
+ 14q32.13a  
- 2p25.3g  
1p32.3b  
+ 5q35.2d  
+ 15q25.2a  
- Xp11.22b  
+ Xp11.22b  
- 14q12a  
+ 1p32.3d  
- 11p15.4c  
+ 10q25.3a  
+ 8p21.3a  
- 2p15c  
- 14q24.3a  
- 6q22.2a  
+ 8q21.12a  
+ 14q24.3b  
+ 21q22.11c  
- 8p23.1b  
+ 1p35.1b  
- 5q13.3b  
+ 5q23.1d  
- 10p13c-p13b  
5q15a-q15b  
+ 16p13.3f  
+ 5q21.1b  
- 4q21.23a  
+ 10q26.13d  
+ 14q13.2a  
+ 1q41e  
+ 10q24.31a  
+ 14q21.3b  
- 6q22.31a  
- 4p15.32b  
- 12q13.12c  
- 10p13b  
- 1q22a  
+ 17p11.2f  
+ 10q23.1c

|   |           |
|---|-----------|
| + | 4p16.3a   |
| - | 5q35.3a   |
| + | 16p13.3f  |
| - |           |
| - | Yp11.2c   |
| + | 22q13.32a |
| + | 1q25.2c   |
| + | 10q11.23b |
| + | 10q11.21d |
| + | 10q11.23a |
| + | 10q22.3f  |
| - | 9q22.32a  |
| + | 10p12.33c |
| - | 10q26.13b |
| - | 10q11.22c |
| - | 10q24.33a |
| + | 6q22.1d   |
| + | 6q22.1d   |
|   |           |
| + | 17p11.2a  |
|   |           |
| + | 19p13.11f |
|   | 10q23.2b  |
| + | 1q44b     |
| - | 16q24.3a  |
| - | 18p11.22a |
| - | Xq28g     |
| + | 21q22.3a  |
| - | 7q31.31d  |
| + | 1p13.3b   |
| - |           |
| + | 3q29d     |
| + | 1p36.12b  |
| - | 5q35.2a   |
| + | 10q26.11c |
| + | Xq25h     |
| - | 6q14.1e   |
| - | 1p36.11a  |
| + | 1p12c     |
| - | 2p24.3a   |
| - | 8q24.21c  |
| + | Xq28g     |
| + | 6p25.2a   |
| - | 4p16.3b   |

- 10q26.13d  
+ 5q31.2c  
- 6q23.3b  
+ 1p36.11b  
+ 3q12.3a  
+ 17p13.3f  
- 16p11.2d  
- Xq28f  
- 18q12.1e  
+ 2p23.3b  
+ 1q25.2a  
- 1q31.1d  
- 12p11.21b  
- 7q36.3e  
+ 3q22.3c  
- 1q21.2d  
+ 17p13.2a  
- 6p22.2b  
- 20q13.13f  
- 1p22.1c  
- 9q34.3e  
- Xq24d  
- 13q34d  
- 19q13.33c  
+ 1q32.1g  
+ 1p12a  
- 1q21.1a  
+ 1p31.1e  
+ 9q34.11c  
+ 9p13.1a  
+ 9p12b  
- 9p11.2c  
- 9q21.32a  
- 9q22.1a  
+ 1p35.3b  
- 9q34.13a  
- 1q24.1a-q24.1b  
- 15q13.3c  
+ 15q13.2a  
+ 1p34.2b  
+ 12p13.31b  
+ 15q22.2a  
- 15q15.1b  
+ 20q11.23c

- 8q24.3g  
- 8q24.21a  
- 16p13.3b  
- 8p23.1a  
+ 11q13.4a  
- 3p12.3d  
8p23.3b  
- 1q42.2a  
+ 11q13.1c  
+ 6p22.3e  
- 12p13.31b  
+ 8p23.1e  
+ 8p23.1e  
+ 8p23.1f  
+ 8p23.1f  
- 8p23.1e  
- 8p23.1e  
+ 8q24.13c  
+ 8q22.1b  
- 15q22.31a  
- 16q22.1a  
- 2p22.3d  
+ 15q14d  
+ 19q13.2a  
- Xp22.31a  
- 16q24.3b  
- Xp22.2  
+ 3p25.3c-p25.3b  
+ 6p21.31c  
- 11p14.3d  
- 9p13.3b  
+ 15q26.1a  
- 2p16.1b  
+ 11p15.2c  
+ 13q32.2b  
+ 2q37.3f  
+ 6p25.1b  
- 19p13.13c  
- 2q36.1c  
+ 10q23.31b  
+ 1q24.3d  
- 17q25.3g  
- 7q36.1d  
- 2q31.1a



+ 2q33.3b-q33.3c  
- 5p15.31a  
- 20p13c  
- 4q35.2a  
- 11q13.1c  
- 19q13.2b  
+ 22q13.31c  
+ 3p25.1b  
- 14q32.12a  
+ 2q13d  
- 9q22.32a  
- 9q22.32a  
+ 16p11.2c  
- 12q24.31b  
+ 11q13.1f  
- 19p13.2c  
- 7q22.1f  
- 12p13.33c-p13.33b  
+ 10q24.32b  
- 16p13.3f  
7p22.1c  
16p11.2c  
+ 3p22.3c  
- 17q12c  
+ 5q31.1f  
+ 15q22.31a  
- 13q22.3a  
- 8q24.3h  
+ 16q22.1a  
- 9p13.2a  
- 2p16.3d  
- 18q22.3c  
- 8p21.1c  
- 19q13.2a  
- 1p36.22b  
- 12q24.22b  
+ 15q24.2a  
+ 8p23.3b  
+ 1q42.11a-q42.11b  
- 11p13c  
- 6q24.3a  
- 16q24.2a  
- 8q24.13c  
- 14q21.1b

+ 14q22.3a  
+ 2q36.3e  
+ 5q33.1a  
+ 5p13.1a  
- 2p13.2a  
- 1p36.13f  
+ 1p36.22b  
+ 3q29g  
- 19q13.32a  
- 2p14a  
- 6q25.2a  
+ 1p36.22b  
+ 22q12.3a  
- 4q34.1c  
- 5q35.1d-q35.1e  
- 9q33.2a  
- 10q24.32a  
- 9q34.3e  
- 4q31.3c  
+ 12q24.22a  
- 19p13.13c  
+ 19q13.42b  
+ 1q23.3a  
- 19p13.2e  
+ 14q24.3a  
- 19q13.2b  
+ 1q23.3a  
1q23.3b  
+ 1q23.3b  
+ 19q13.33b  
+ 19p13.11d  
+ 5q13.2c  
- 11q13.4b  
- 9q34.3a  
- 1q23.1d  
- 1q23.1d  
- 1q23.1d  
- 1q23.1c  
- 1q23.1c  
+ 1q23.2b-q23.2c  
+ 1q23.3b  
+ 1q23.3b  
+ 8p23.1a  
+ 1q22a

- 7q11.23f  
+ 11q22.3d  
- 19p13.2c  
- 11q23.1b  
- 18q21.31b  
+ 19p13.3d  
+ 15q23a  
- 5q22.3b  
+ 11q12.2b  
+ 5q21.3d  
20q11.22b  
- 14q22.2a  
+ 11q13.1a  
+ 15q26.1c  
- 11q24.2b  
- 2p22.2b  
- Xp11.22a  
+ 6p21.2c  
+ 9q22.31b  
- 12q22d  
+ 17p13.1d  
+ 8p21.3b  
+ 5q35.1d  
+ 4q27d-q28.1a  
- 8p22b  
- 12p13.32a  
+ 13q12.11c  
- 10q23.32b  
+ 6q27c  
+ 12p11.23b-p11.23a  
+ 4p16.3b  
+ 5q35.2d  
+ 4p16.3c  
+ 1p32.1d-p32.1c  
- 1p35.3b  
- 1q43e  
+ 4q31.3d  
- 3p14.2d-p14.2b  
+ Xq26.3b  
- 2q12.2a  
- 1p34.3b  
- 16q22.1a  
+ 18q12.2b  
- 9q34.12a-q34.13a

- 11q13.1d  
+ 12q23.3d  
+ 6q21f  
- 7p12.2a  
- 12q13.13c  
- 6q14.1a  
- 3q12.1c  
+ 5q15d  
- 7q22.1d  
+ 14q12a  
- 19q13.42c  
+ 11p13a  
- 12q13.12a  
- 7p15.1b  
- 9q32b-q32c  
- 20p13e  
+ 2p23.3d  
+ 11q13.1a-q13.1b  
+ 12p13.33a  
- 6p21.31c-p21.31b  
- 2q31.2b  
- 7p11.2b  
- 6p21.32b  
+ 19q13.32b  
+ 2q21.1d  
+ 9q31.2a  
- 17p11.2h  
+ 11q24.3a  
- 17p11.2f  
- 2q11.2a  
+ 3p13b  
  
+ 14q11.2c  
+ 19p13.3d  
- 19q13.32b  
- 7p13e  
+ 2p11.2d-p11.2c  
+ 1p32.1d-p32.1c  
+ 16q22.1d  
- 19p13.2b  
- 2p15c  
- 4q21.23a  
- 7p21.3a  
+ 9p21.2b

|   |                |
|---|----------------|
| + | 11q13.1c       |
| + | 14q11.2f       |
|   | 4p14f          |
| + | 5q31.1c        |
| + | 4q23c          |
| + | 2p23.3a        |
| - | 4p14a          |
| - | 9q12g          |
| + | 12q13.11b      |
| - | 2p23.2a        |
| - | 12q24.23a      |
| + | 22q13.31d      |
| + | 16q12.1c       |
| + | 19p13.11c      |
| + | 17q21.33b      |
| + | 4p12a-p11c     |
|   | 7p13d          |
| + | 2p23.3a        |
| + | 17q25.3c       |
| + | 7q31.31d       |
|   | 19p13.2e       |
|   | 17q25.3g       |
|   | 14q23.1c       |
|   | 11q13.1e       |
|   | 1p36.33b       |
| - | 12p13.1a       |
| - | 15q25.2a       |
| - |                |
| + | 7q22.2b-q22.2c |
| - | 17q11.2a       |
|   | 3q13.13b       |
|   | 16p11.2d       |
| - | 18q23d         |
| - | 19p13.2e       |
| - | 22q11.21b      |
| + | 19q13.33b      |
| - |                |
| + |                |
| + | Xq26.1b        |
| + | 2q21.1d        |
| + | 16q24.1c       |
| - | 14q23.1b       |
| - | 22q11.23a      |
| + | 2q33.1d        |

- 16p13.3e  
1q32.1g  
19q13.33b

+ 11q22.1c

- 2q23.3a

- 14q24.1a

- 2p25.1b

+ 2q37.3g

-

- 20q11.21c

+ 6q22.1a  
3p14.3a  
9p24.2b  
17q25.3e

+ 17q25.3g

+ 15q11.2c

+ 22q12.2c

+ 4p16.3c

+ 1q21.3a

- 19q13.33a

- 7q22.1f

- 2p15a

+ 7q11.23e

- 10q23.31c

+ 6q21f

+ 12q24.11b

- 4q25b

+ 2q21.1c

- 4q32.3b  
4q35.2a

+ 6p21.1e

- 15q22.2b

-

+ 7p22.1c-p22.1b

- 14q11.1d

+ 4p15.32d

- Xq11.1c

+ 19q13.32a  
13q21.1d

+ 2p11.2c

|   |                 |
|---|-----------------|
| + | 3q21.3c         |
|   | 7q35a           |
|   | 11q24.2b        |
| + | 2q21.1d         |
|   | 13q34d          |
| + | 5q33.1b         |
| - | 6q21f           |
|   | 15q26.3c        |
| - | 7q36.2a         |
| + | 3q27.3c         |
| + | 2p16.1d         |
| + |                 |
| + | 12q24.22a       |
|   | 5q22.1a         |
| + | 6p21.31a-p21.2c |
| - | 15q25.2b        |
| - |                 |
| - | 6p21.31f        |
| + | 19q13.11c       |
|   | 2p13.2a         |
| + | 7p22.3c         |
|   | 5q35.2d         |
| - | 3p14.3b-p14.3a  |
| + | 18q23a          |
| - | 17q22d          |
| + | 14q32.13b       |
| + | 1p32.3a         |
| + | 6p21.33b        |
| - |                 |
| + | 21q22.11c       |
| - | 17q25.3e        |
| + | 14q23.1c        |
| - |                 |
| - | 8q22.1a         |
| + | 9p13.3b         |
| + | 10q26.13b       |
| - | 9q34.11e        |
| + | 6q23.3d         |
| + |                 |
| - | 17q25.3f        |
| - | Xq28g           |
| + | 3p14.3a         |
| + | 7q32.1a         |
| - | 6p21.33b        |

- 17q11.2a  
+ 14q31.3a  
+ 19q13.33b  
+ 14q24.3b  
+ 16p13.3d  
- 15q13.3d  
+ 17q21.31d  
+ 2q23.3d  
- 12q13.12c  
+ 1q24.3a  
+ 1q24.3a  
- 1q21.1c  
- 1q32.1e  
+ 17q25.3h  
- 9q34.11d  
+ 1p22.1b  
- 11p11.2b-p11.2a  
+ 6q25.3e  
+ 3q26.31a  
- 1p35.1b  
+ 1p13.3c  
- 5q31.1a  
+ 4q32.1e  
+ 8p11.21a  
+ 14q23.3a  
+ 11q13.4a  
+ 11q13.4a  
+ 14q24.3b  
+ 19q13.32a  
+ 19q13.32a  
+ 6p25.3a  
+ 16q24.1c  
- 5q13.2c  
+ 1p33d  
- 9q12j  
- 9q12j  
+ 6p25.3a  
+ 10q26.2c  
- 17q25.1d  
+ 12p13.31c  
- 1p34.2b  
+ 7p22.1d  
+ 16q24.1c  
- 3q22.3c



- 12p13.33a  
+ 17q11.2a  
+ 2p16.3d  
- 13q14.11a  
+ 6q21e  
+ Xq13.1c  
- 3p14.1a  
- Xp11.23b  
+ 6p21.1g  
+ 11q23.3e  
+ 11q24.2c  
- 22q12.3d  
- 19q13.33e  
+ 11p15.4d  
- 1p36.22b  
+ 10q24.1b  
- 10q24.1b  
+ 4q35.2d  
-  
- 6q22.1d  
- 9q21.32b-q21.32c  
- 15q15.3b-q15.3c  
+ 14q22.1c  
+ 11q13.1c  
- 1p21.2a  
- 6p21.1f  
- 4p12a  
- 2q32.1a  
-  
- 14q21.3a  
+ 7p22.1c  
+ 7q32.1a  
+ 19p13.3d  
- 15q25.2a-q25.2b  
- 15q14d  
+ 5q11.2c  
+ 19p13.3j  
- 4q32.2a-q32.2b  
- 11q12.3a  
- 8q21.13b  
- 9p22.3b  
- 11q14.1a  
+ 1q42.13c  
- 2p23.3a

- 13q12.11c  
+ Xq28a  
+ 19q13.33a  
+ 16q12.2a-q12.2b  
+ Xp11.23d  
- 7p22.2c  
- 17q23.3b  
- 16q22.3a  
+ 6p21.2c  
- 1p31.1e  
+ 9q34.11e-q34.12a  
- 1p36.11d  
+ 16q22.1f  
- Xp11.3b  
+ 15q26.1c  
+ 16p11.2c  
+ 10q22.2a  
+ 11q21b  
- 19p13.3b  
- 19q13.33b  
- 18q21.33b  
+ 11p15.4c  
+ 9q21.11a  
+ 3q26.33b  
- 17p13.1d  
+ 19q13.12a  
+ 10q11.21b  
+ 19q13.12a  
- 11q23.3c  
+ 19q13.12a  
- 3p21.31i  
- 6q21i  
+ 3q29i  
+ 7q21.13c  
+ 17q21.31c  
+ 8p21.1c  
- 11q14.2a  
- 2q33.3d  
+ 7q11.23a  
+ 19p13.3e  
+ 5q33.1e  
- 4q21.1a  
+ 17q21.31c  
- Xq28g

|   |                  |
|---|------------------|
| + | 17q25.3d         |
| + | 4q31.21c         |
| - | 11q14.1a         |
| - | Xq28g            |
| - | 17p13.1d         |
| + | 12p13.2c         |
| + | 16q23.1a         |
| - | 6p22.1a          |
| - | 9q22.33b-q22.33c |
| - | 15q21.2a         |
| - | 15q21.2a         |
| + | 15q12b           |
| + | 4p12b            |
| + | 5q35.1c          |
| + | 2q31.1c          |
| + | 1p31.3a          |
| + | 19p13.3g         |
| + | 9q22.2a          |
| - | 19p13.13c        |
| + | Xp11.23b         |
| - | 4p16.3c          |
| - | 7q22.1c          |
| - | 14q31.3c         |
| - | 1p36.11d         |
| - | 17q25.1d         |
| + | 15q21.1d         |
| + | 2p22.1c          |
| - | 16q24.3a         |
| + | 18q12.2a         |
| + | 5q33.2b          |
| + | 7q36.1e          |
| + | 9q22.33c         |
| - | 2p23.1a          |
| - | 12q21.33b        |
| - | 12q13.13c        |
| + | 14q24.1d-q24.1e  |
| - | 11p15.3d-p15.3c  |
| + | 17q25.1d         |
| + | 9p13.3c          |
| - | 19p13.3i         |
| + | 16q23.2b         |
| - | 11q12.3a         |
| + | 15q15.1d         |
| + | 3q13.31b         |

+ 12p13.31d  
+ 5q11.2g  
+ 9q33.3a  
+ 4q25c  
+ 17p13.3b  
+ 7p15.1b  
- 21q22.11c  
+ 11p14.3d-p14.3c  
- 1q25.1a  
+ 16q24.3b  
+ 10p14d  
+ 7q21.2b  
+ 19p13.11a  
- 1q21.3d  
+ 12q24.31a  
- 15q21.1a  
- 7q22.1c  
- 1q22a  
- 9p13.3a  
+ 7p11.2b  
- 3p12.3a-p12.2b  
+ 10q24.32b  
- 9q34.2a  
- 1p22.2c  
- 1p22.2c  
- 1p22.2c  
- 1p22.2c  
- 1p22.2c  
- 1p22.2c  
- 4q13.3b-q13.3c  
+ 2q24.2d  
+ 22q13.1a  
- 7q32.1a  
+ 2q12.3c  
+ 19p13.13c  
- 3q13.2a  
- 2q24.2d  
- 14q22.2b-q22.3a  
+ 15q15.1b  
- 6p12.1d  
- 6p12.1d  
- 6p24.2a  
- 12q24.23c-q24.31a  
+ 9q21.13c

|   |                 |
|---|-----------------|
| + | 6p24.2a         |
| + | 6p24.2a         |
| + | 15q21.3d        |
| - | 16q23.2b        |
| + | 9q21.13a        |
| + | 8q21.11b        |
| - | 1p12c           |
| - | 16p12.3a        |
| + | 12q13.2b        |
|   | 20q11.22b       |
| + | Xq28g           |
| - | 10p15.1b        |
| + | 17q22d          |
| + | Xq13.1c         |
| - | 11q13.4c-q13.5a |
| - | 8q22.1b         |
| - | 17p13.3f        |
| - | 5q33.2b         |
| + | 2p22.1c         |
| - | Xp22.2          |
| + | 2p24.2b         |
| - | 1p22.1d         |
| + | 3q25.32b        |
| - | 5q13.3a-q13.3b  |
| - | 6p24.1a-p23b    |
| - | 2p14a           |
| - | 8p21.3b         |
| - | 5q31.2c         |
| + | 22q13.1a        |
| - | 16p12.1c        |
| - | 17q25.1c        |
| - | 7p15.1b         |
| - | 2p11.2f         |
| - | 8q12.3b         |
| + | 17q12b          |
| - | 20q11.22b       |
| + | 2p11.1d         |
| - | 9q33.2a         |
| - | 20q11.22b       |
| - | 17q21.2b        |
| + | 10q23.1c        |
| - | 7q22.1c         |
| + | 7q36.1c         |
| + | 7q36.1c         |

|   |                   |
|---|-------------------|
| + | 7q36.1c           |
| - | 5q21.1d           |
| - | 16q24.1b          |
| + | 16q21a            |
| + | 8p11.21b          |
| - | 19p13.12c         |
| - | 12q24.11c         |
| + | 16p11.2d          |
| + | 16p11.2d          |
| - | 13q12.11a         |
| - | 13q12.11b         |
| - | 17q21.31c-q21.31d |
| + | 1q42.13c          |
| - | 7q22.1b           |
| + | Xp21.2a           |
| - | 3q23c-q23d        |
| - | 9q21.32c          |
| - | Xq22.1c           |
| - | 3p22.3c           |
| - | 2q35f             |
| + | 11q25e            |
| + | 7p21.3e           |
| + | 15q23a            |
| - | 9p24.1b           |
| + | 9q34.11b          |
| - | 16q22.3c          |
| + | 12q13.3b          |
| + | 8q24.3f           |
| + | 12q21.2a          |
| + | 9p13.3a           |
| - | 9p24.2a           |
| - | 1p22.1e-p22.1d    |
| - | 6p21.2b           |
| - | 17p13.3f          |
| + | Xp22.2            |
| - | 4q34.1d           |
| - | 5q15d             |
| - | 1q31.2b           |
| + | 10q26.3b          |
| + | 14q32.13b         |
| + | 2q32.2b           |
| - | 12q13.2c          |
| + | 12q24.32c         |
| + | 19p13.11d         |

- 9q34.3c  
- 3p21.1d  
- 12q23.3a  
- 12q24.11b  
+ 1p36.33a  
+ 19q13.32c  
- 10q23.2b  
- 11q12.1c  
+ 3p21.1d  
+ 5q33.1d  
+ 2p14a  
- 6p25.3a  
+ 1p35.3b-p35.3a  
- 20q13.33e  
- 14q22.2b  
- 19q13.2a  
- 19p13.11a  
+ 2q35f  
- 3p21.31c  
+ 6p22.3f  
+ 14q12a  
+ 3q25.31a  
+ 19p13.3f  
- 7p22.2c  
- 17q24.1a  
- 9q21.13c-q21.2a  
+ 19p13.3f  
+ 3p21.31b  
+ 1p13.3b  
- 1p13.3b  
+ 22q11.22b  
- 1p36.33a  
- 22q11.21c  
+ 7q22.1c  
+ 12p13.31d  
- 3q26.32c-q26.33a  
- 15q21.2c  
- 9p13.3a  
+ 9q31.3b  
+ 7q21.3a  
+ 14q22.1d  
- 1q42.3c  
- 1p22.3f  
- 19p13.3g

- 19q13.32b  
- 17q21.32c  
- 6p21.33b  
- 1p34.3c  
+ 3p21.1d  
+ Xp11.22a  
+ 1q42.2a  
- 5q31.3c  
- 4p13b  
- 14q22.2a  
- 12q23.2a  
+ 16p13.3e  
- 12q14.2b-q14.3a  
- 9q34.11b  
+ Yq11.23b  
- 12q24.33d  
+ 3p22.2b  
+ 14q32.12b  
- 15q24.1b  
+ 15q24.1a  
+ 8p11.21b  
+  
- 3q13.33c  
- 3q26.2a  
- 9q21.33b  
- 1q21.2c  
- 3q26.2a  
- 8q23.2a  
- 1q32.1f  
+ 12p12.1e  
- 1q22b-q22c  
- 6q22.2b  
- 3p22.2a  
+ 2q31.1c  
+ 17q11.2c  
+ 17q21.32a  
- 10q24.2c  
- 8p12a  
- 16q21a  
- 3q29c  
+ 3q21.3c  
+ 8q24.3g  
- 10q25.2b  
- 2q11.2a



- 1q23.1a  
+ 19q13.11b  
- 1q41b  
- 1p36.11a  
- 1q23.1a  
+ 2q35e  
+ 5q11.2f  
- 1p34.1b  
- 7q22.1c  
- Xq26.2b  
+ 13q31.3b-q31.3c  
+ 13q31.3c-q32.1a  
+ 12q13.13a  
+ 3p22.3c  
+ 7p22.3b  
- 14q23.2b  
+ 19q13.11c  
- Xp11.23c  
- 6p22.2b  
- 4q34.2a  
- Xp22.2  
+ 2p23.2b  
- 1p36.11a  
- 12q24.11c  
+ 7p15.3b  
- 2q33.3b  
- Xq26.3c  
- 4q27c  
+ 9q34.11d-q34.11e  
- 19p13.3a  
+ 16q13c-q13d  
+ 8p12a  
+ 6q24.1d  
+ 3q12.2a  
- 14q32.33c  
- 14q23.1b  
+ 11q13.1b  
+ 1q42.3d  
+ 14q22.1d  
- 16p12.3a  
- Xp22.2  
+ 9q33.3a  
+ 7p22.3b  
+ 2q21.1c

|   |                 |
|---|-----------------|
| + | 3q11.2c         |
| - | 3q13.33a        |
| + | 3q26.2b         |
| - | 1q24.2a         |
| + | 12p13.31d       |
| + | 2q14.3e         |
| + | 8q24.3h         |
| - | 3q21.3b         |
| - | 13q32.3a        |
| + | 13q32.1a        |
| + | 12q13.3a        |
| - | 13q32.3a        |
| - | 12p13.1b        |
| - | 8q24.3d         |
| + | 3p13d           |
| + | 1p36.11a        |
| + | 2q12.1d         |
| + | 1q25.1a         |
| - | 2q37.1a         |
| + | 16q13d          |
| + | 6q21g           |
| + | 1p13.3b         |
| - | 6q16.1f         |
| + | 14q31.3c        |
| - | 2p16.2a         |
| + | 1q21.1d         |
| + | 1q21.1d         |
| + | 1q21.1b         |
| + | 17q25.1b        |
| - | 5q35.2d         |
| - | 17p13.1d        |
|   | 9q34.3d         |
| + | 1p13.3c         |
| - | 6p21.32b        |
| + | 16q11.2i-q12.1a |
| - | 3p21.31d        |
| + | 5q33.1d         |
| + | 19p13.3i        |
| + | 1p32.3d         |
| + | 19q13.11c       |
| + | 11q24.1c        |
| + | 3q13.31a        |
| + | 5q23.2e         |
| + | 22q13.31d       |

|   |                   |
|---|-------------------|
|   | 17p11.2e          |
| + | 12q13.13c         |
| - | 2q24.3b           |
| - | 17q25.1c          |
| + | 2p25.1b           |
| + | 2p25.1d           |
| + | 9p13.2a           |
| + | Xq25b             |
| + | 4q22.1g-q22.2b    |
| + | 6q16.3c           |
| - | 1p34.3c           |
| + | 9q34.3e           |
| + | 19p13.3i          |
| + | 8q24.3g           |
| + | 15q21.3d          |
| - | Xp11.23c          |
| + | 13q34d            |
| + | 4p16.3a           |
| + | 10q26.11c-q26.11d |
| + | 5q35.3a           |
| + | 3p21.1e           |
| - | 7q31.33c          |
| + | 17q21.31c         |
| + | 18q21.32a         |
| - | 4p16.1e           |
| + | 5q33.1b           |
| + | 1p36.11b          |
| - | 4q13.3b           |
| - | 13q34d            |
| + | 19q13.32c         |
| + | 17q12c            |
| - | 17q12c            |
| - | 8q24.21c          |
| + | 8q24.3g           |
| + | 17p13.3a          |
| - | 3q13.33a          |
| - | 16p13.13b         |
| + | Xp11.22b          |
| - | 8p12e             |
| - | 20q11.22b         |
| - | 6p12.1d           |
| - | 6p12.1d           |
| - | 6p12.1d           |
| + | 7q34f             |

|   |                     |
|---|---------------------|
| + | 1p13.3b             |
| + | 1p13.3b             |
| - | 1p13.3b             |
| + | 1p13.3b             |
| + | 10q25.1a            |
| + | 10q25.1a            |
| + | 11q13.2a            |
| - | 22q11.23b           |
|   | 22q11.23a-q11.23b   |
| - | 22q11.23a-q11.23b   |
| + | 14q24.3c            |
| - | 2q22.2a-q22.3a      |
| - | 1p22.2c             |
| + | 3q13.33b            |
| - | 8p12e               |
| - | 19p13.3a            |
| + | 13q14.12a           |
| + | 11p15.1c            |
| - | 5q13.2b             |
| + |                     |
| + | 12q24.31d-q24.31e   |
| + | 6p21.33a            |
| + | 6q25.3d             |
|   | 7q11.23c            |
| - | 7q11.23d            |
| + | 7q11.23c            |
|   | 7q11.23c            |
| + | 7q11.23c-q11.23d    |
| - | 7q11.23a            |
| + | 13q12.2a            |
| - | 16p12.1a            |
| - | 2p23.3a             |
| - | 2q33.1a             |
| + | 9q34.13b-q34.2a     |
| + | 22q13.1c            |
| + | 7q21.13b            |
| - | 6p21.1c             |
| + | 19p13.11e           |
| + | 10p15.3c            |
| - | "Xp22.33f,Yp11.32c" |
| + | 3q13.2b             |
| - | 18q22.2b            |
| + | 22q13.31d           |
| - | 12q13.2a            |

|   |                 |
|---|-----------------|
| + | 6p21.1f         |
| + | 1p34.2b         |
| - | 11q22.3b-q22.3c |
| + | 4q32.1b         |
| - | 13q14.3b        |
| - | 12p13.1a        |
| + | 4p13b           |
| + | 1q42.13c        |
| - | 7q11.21d        |
| - | 6p22.1d         |
| - | 6p11.2a         |
| - | 12q12e          |
| + | 3p13b           |
| + | 3q24f           |
| + | 11p11.2c        |
| + | 2q14.3d         |
| - | 19q13.33a       |
| + | 20p11.21c       |
| + | 5q11.2d         |
| + | 19p13.3j        |
| + | 22q13.1a        |
| + | 12q13.11c       |
| - | 3q21.3c         |
| + | Xq28g           |
| + | 12p12.3e        |
| - | 11q23.3e        |
| - | 5q31.1f         |
| + | 10q22.1a        |
| - | 4q23b           |
| + | Xq22.2b         |
| + | 1q42.12c        |
| - | 17q25.1d        |
| + | 9q22.33a        |
| - | 6q21a           |
| - | 3p24.3e         |
| + | 4q25b           |
| - | Xp11.22a        |
| - | 2p23.3b         |
| + | 2p23.3b         |
| - | 16p13.3e        |
| + | 16p13.3f        |
| - | 12q23.1a        |
| + | 19q13.12a       |
| + | 1q23.1a         |

- 15q26.1a  
- 19p13.11a  
- 11p11.2c  
+ 5q31.3b  
+ 8q24.13a  
+ 2q31.1d  
- 14q11.2f  
+ 19q13.12a  
- 9p22.1b  
- 19p13.11e  
- 5q33.3a  
+ 1q21.3d  
+ 16p13.3f  
+ 16p13.3f  
- 11p15.4c  
- 11p15.4c  
- 5q31.3a  
+ 16p13.3f  
+ 7q22.3b  
+ 16p13.3f  
- 6q23.3a  
- 1p13.3a  
- 11p15.5b  
+ Xp22.2  
- Xq28f  
- 16p13.3d  
+ 12q23.3a  
  
6p21.33a  
+ 6p21.33a  
+ 6p21.33a  
+ 6p21.33b  
- 6p22.1a  
+ 20q11.21b  
- 3q13.33c  
+ 1q22a  
+ 6p21.33a  
6p21.1e  
+ 19q13.12a  
+ 1p35.1b  
- 22q13.33b  
+ 3p25.1c  
- 6q22.1a  
- 5q31.3c

- 2q37.3d  
+ Xp11.23c  
- 12q13.11b-q13.11c  
- 12q13.11b-q13.11c  
- Xq13.1e  
+ 7p21.1a  
- 6q22.31e  
- 15q26.1c  
- 1q23.1a  
+ 19p13.3d  
+ 6p22.3a  
- 15q25.2b  
- Xp22.31e  
- 18q21.1b  
- 9q32c  
- 2q37.3f  
- 1q43a  
+ 7p22.3c  
+ 16q12.1c  
- 14q12e  
- 2p22.2b  
- 17q23.1a  
+ 8q24.3g  
- 12p13.1b  
+ 6q23.3d  
+ 6q24.1a  
- 14q12e  
+ 10q23.32a  
- 1p34.1c  
- 2q32.3e-q33.1a  
- 3q21.2b  
+ 12q14.3b  
+ 10q23.33c  
- 4q21.23a  
- 17q24.2a-q24.2b  
+ 3p21.31b  
- 7q21.3a  
- 15q22.31a  
- 15q13.1a  
- 15q11.2c  
+ 4q22.1b  
- 10q21.3d  
+ 4q22.1b  
+ 4q22.1b

|   |                   |
|---|-------------------|
| + | 16q13b            |
| - | 7p14.2a           |
| + | 3q29c             |
| - | 1p36.31a          |
| - | 1p36.33b          |
| - | 1p36.32c          |
| - | 2q37.3c           |
| - | 3p14.3b           |
| - | 15q24.1a          |
| + | 5q13.3a           |
| + | 17q25.3g          |
| + | 17q21.31d         |
| - | 8q21.13a          |
| + | 6q22.31e          |
| - | 1p34.2d           |
| + | 6p22.1d           |
| - | 1p22.2a           |
| - | 3q13.33b          |
| - | 7q21.11c-q21.11d  |
| + | 17q25.3f          |
| + | 1q32.2c           |
| + | 10q23.33a         |
| + | 1p31.1k           |
| + | 1p21.2a           |
| + | 9q22.32a          |
| - | 9q22.33a          |
| - | 7p15.2a           |
| - | 2q32.2b           |
| + | 22q11.21f         |
| + | 14q23.2a          |
| + | 10q24.31a         |
| - | 3p22.1a           |
| + | 5q35.2d           |
| - | 15q24.1a          |
| + | 11q23.3e          |
| - | 5q31.1a           |
| - | 9p13.3a           |
| + | 6q22.32a          |
| - | 7q11.23e          |
|   | 12q24.31d         |
| + | 4p14b             |
| - | 7q34b             |
| - | 22q11.21b-q11.21c |
| - | 16p11.2d          |



|   |          |
|---|----------|
| - | 15q15.3a |
| - | 6p22.1d  |
| - | 6p22.1d  |
| - | 6p22.1d  |
| + | 6p22.1d  |
| - | 6p22.1d  |
| + | 6p22.1d  |
| + | 6p22.1d  |
| + | 6p22.1c  |
| + | 6p22.1c  |
| - | 6p22.1c  |
| - | 6p22.1d  |
| + | 6p22.1d  |
| + | 6p22.1d  |
| + | 6p22.1d  |
| - | 6p22.1d  |
| + | 6p22.1d  |
| - | 6p22.1c  |
| - | 6p22.1c  |
| + | 6p22.1c  |
| + | 6p22.1c  |
| + | 6p22.1d  |
| - | 6p22.1d  |
| - | 6p22.1d  |
| - | 6p22.1d  |
| - | 6p22.1d  |
| + | 6p22.1c  |
| - | 6p22.1c  |
| + | 6p22.1d  |
| - | 6p22.1d  |
| + | 6p22.1d  |
| + | 6p22.1d  |
| - | 6p22.1d  |
| + | 6p22.1c  |
| + | 6p22.1c  |
| - | 6p22.1c  |
| - | 1q21.2a  |
| + | 1q21.2a  |
| - | 1q21.2a  |
| + | 1q21.2a  |
| - | 1q21.2a  |
| - | 1q21.2a  |
| + | 1q21.2a  |
| - | 1q21.2a  |

- 1q21.2a  
+ 1q21.2a  
- 1q21.2a  
- 1q42.13c  
+ 1q42.13c  
- 12p12.3e  
+ 6p24.1b  
- 6q24.2a  
- 1p34.2c-p34.2b  
- 2q37.1e  
+ 10q21.3e  
+ 2p13.1a  
+ 10q21.3e  
+ 6p21.33b  
  
- 6p21.33a  
- 6p21.33a  
- 6p21.32a  
- 6p21.32a  
- 6p21.32a  
- 6p21.32a  
- 6p21.32a  
+ 6p21.32a  
+ 6p21.32a  
6p21.32b  
- 6p21.32b  
- 6p21.32a  
+ 6p21.32b  
- 6p21.32b  
-  
-  
- 6p21.32b  
+ 6p21.33b  
+ 6p22.1a  
+ 6p21.33b  
+ 6p21.33b  
- 21q22.13a  
- 3q24f  
+ 1q41d  
- 7q36.3c  
+ 8p21.1b  
+ 11q23.3e  
+ 15q24.3b  
+ 19p13.3e

|   |                 |
|---|-----------------|
| + | 6p21.31e        |
| - | 13q12.3c        |
| - | 20q13.31a       |
| - | 4q34.1c         |
| + | Xq28c-q28d      |
| - | 1p36.11d        |
| + | 5q13.3b         |
| - | 5p12c           |
| - | 21q22.2b        |
| + | 1p36.11b        |
| - | 6q14.1c         |
| + | 6p22.1d         |
| + | 22q12.3c        |
| + | 5q32a           |
| + | 5q34c           |
| + | 22q12.3c        |
| + | 16p13.3b        |
| + | 10q26.13c       |
| - | 17q25.1c        |
| + | 16p13.3e        |
| - | 5q31.2b         |
| + | 12q13.13f       |
| + | 13q14.3d        |
| - | 7p15.2b         |
| + | 2q31.2a         |
| - | 10q11.21b       |
| + | 5q35.3b         |
| - | 14q11.2c        |
| - | 4q21.22a        |
| - | 10q11.21b       |
| - | 5q35.3d         |
| + | Xq22.1c         |
| + | 10q21.3d        |
| - | 9q21.32c        |
| - | 19q13.2a        |
| + | 19p13.2d        |
| - | 1p36.12a        |
| + | 19q13.2c        |
| - | 11q12.3a-q12.3b |
| - | 19p13.2a        |
| - | 8q21.13c        |
| - | 7p15.2b         |
| - | 14q11.2c        |
| - | 4q21.22a        |

- 5q35.3d  
+ 10q21.3d  
- 9q21.32c  
- 2p22.1c  
+ 19p13.2d  
- 1p36.12a  
+ 19q13.2c  
11q12.3a-q12.3b  
- 5q14.1c  
- 15q25.2b  
- 19p13.11b  
- 14q11.2f  
- 19p13.13c  
+ 8p11.21a  
- 4q12e  
- 12q13.13f  
+ 7p15.2a  
7p15.2a  
- 7p15.2a  
- 7p15.2a  
- 17q21.32c  
- 17q21.32c  
- 17q21.32c  
- 17q21.32c  
+ 12q13.13f  
+ 12q13.13f  
+ 12q13.13f  
+ 2q31.1h  
+ 2q31.1h  
+ 2q31.1h  
- 1p36.12b  
+ 1p35.1b  
+ 2p25.1c  
- 1p34.2d  
+ 1p34.1c  
- 4q34.1d  
+ Xq26.2b  
- 10q24.2a  
+ 3q24f  
- 22q12.1a  
- 11p15.1d-p15.1c  
- 4q21.23a  
- 11p15.5d  
- 11q12.3b

- 11q12.3b-q13.1a  
+ 2q36.3c  
- 19q13.33a  
+ 3p25.3a  
+ 22q13.1a  
- 12q24.22a  
- 8q22.2a  
  
+  
+  
+  
+  
-  
+  
-  
-  
-  
+  
-  
+  
+  
-  
+  
+  
-  
+  
-  
-  
-  
  
+  
+  
+  
-  
+  
+  
-  
+  
-  
-  
-  
  
+  
+  
+  
-

-  
-  
+  
+  
-  
+  
-  
-  
+  
-  
-  
-  
+  
+  
+  
+  
-  
-  
-  
+  
+  
-  
+  
+  
+  
+  
+  
+  
+  
+  
-  
+  
-  
-  
-  
+  
-  
+  
-  
+  
-  
-  
-







-  
+  
+  
-  
-  
  
-  
-  
+  
+  
-  
+  
-  
-  
+  
+  
+  
-  
+  
-  
  
+  
-  
-  
+  
+  
+  
-  
+  
  
+  
  
-  
+  
-  
-  
  
+  
-  
  
+  
+  
+

+  
-  
-  
+  
-  
-  
-  
-  
-  
-  
-  
-  
-  
-  
+  
+  
+  
+  
-  
-  
+  
+  
+  
+  
+  
+  
-  
+  
-  
-  
-  
-  
+  
+  
+  
-  
+  
+

+  
+  
-  
-  
-  
+  
+  
  
-  
-  
-  
-  
-  
-  
-  
  
-  
-  
  
-  
+  
-  
-  
-  
-  
  
+  
-  
+  
+  
+  
+  
  
+  
+  
+  
-  
+  
-  
+  
-  
-  
-  
-

+  
-  
-  
-  
+  
-  
+  
-  
-  
+  
-  
-  
+  
+  
-  
-  
-  
-  
-  
+  
-  
  
+  
-  
-  
-  
  
+  
-  
-  
+  
+  
+  
-  
+  
-  
+  
+  
+  
+  
-  
+  
  
+

-  
+  
+  
-  
+  
+  
+  
+  
-  
  
-  
-  
-  
+  
-  
-  
+  
+  
+  
+  
+  
+  
+  
+  
+  
+  
+  
+  
+  
-  
-  
+  
-  
-  
-  
+  
-  
-  
  
-  
+  
-  
-  
+  
-  
-  
+

+  
+  
-  
-  
-  
+  
-  
+  
-  
-  
-  
+  
-  
+  
  
-  
+  
-  
-  
-  
+  
+  
+  
  
-  
+  
+  
  
-  
-  
-  
+  
  
+  
+  
-  
-  
+  
+  
+  
+  
+  
-  
-

-  
-  
+  
-  
-  
+  
+  
+  
-  
-  
-  
-  
+  
-  
+  
+  
-  
-  
-  
-  
-  
  
+  
+  
-  
-  
+  
-  
-  
+  
+  
+  
+  
-  
-  
+  
+  
+  
+  
-  
-  
+  
+  
+

+  
-  
-  
  
+  
+  
-  
+  
-  
+  
-  
+  
+  
-  
+  
-  
-  
+  
+  
-  
-  
-  
+  
-  
+  
+  
-  
-  
+  
-  
+  
-  
+  
+  
  
-  
-  
-  
-  
  
+  
+



+  
+  
-  
+  
+  
  
+  
-  
-  
+  
+  
-  
-  
  
-  
-  
+  
-  
+  
-  
+  
-  
-  
+  
  
-  
-  
+  
+  
+  
+  
  
+  
+  
+  
+  
+  
-  
-  
+  
+  
-

+  
-  
+  
+  
+  
+  
+  
  
-  
+  
+  
-  
+  
-  
+  
+  
-  
-  
+  
+  
+  
+  
+  
+  
-  
+  
+  
+  
  
+  
  
-  
-  
+  
+  
+  
+  
+  
-  
-  
+  
+  
+  
-  
-

-  
  
+  
-  
+  
+  
-  
-  
-  
-  
-  
+  
-  
+  
  
-  
+  
+  
+  
-  
  
-  
  
-  
  
+  
-  
-  
+  
+  
+  
+  
+  
+  
+  
-  
-  
  
+  
+  
+  
-  
+

+  
-  
-  
-  
-  
+  
+  
+  
  
+  
+  
+  
-  
-  
-  
-  
-  
+  
+  
-  
-  
+  
-  
-  
+  
+  
+  
  
+  
+  
+  
-  
  
+  
+  
+  
-  
  
+  
-  
+  
+

-  
+  
+  
-  
-  
-  
-  
+  
+  
+  
+  
-  
-  
-  
-  
-  
+  
+  
+  
-  
+  
-  
-  
-  
+  
+  
-  
+  
-  
+  
+  
-  
+  
-

-  
+  
+  
-  
-  
+  
-  
+  
+  
+  
-  
-  
+  
+  
+  
  
+  
+  
  
-  
-  
+  
+  
  
+  
-  
-  
+  
+  
+  
-  
-  
-  
+  
+  
  
+  
-  
-  
-  
-  
+  
-  
-

+  
-  
+  
+  
+  
-  
+  
+  
+  
-  
-  
  
+  
+  
-  
-  
+  
-  
-  
-  
+  
  
-  
+  
  
+  
-  
-  
+  
-  
+  
  
-  
-  
+  
-  
+  
+  
+  
+  
-  
+  
-  
-  
-





+  
+  
+  
+  
-  
-  
+  
-  
+  
+  
  
+  
+  
-  
-  
  
+  
-  
+  
+  
+  
+  
+  
  
-  
-  
+  
+  
+  
-  
+  
+  
+  
-  
+  
+  
-  
-  
  
+  
+  
-  
+  
-

-  
+  
+  
-  
-  
-  
+  
+  
+  
-  
+  
+  
-  
-  
-  
+  
-  
-  
-  
-  
-  
-  
+  
+  
+  
+  
-  
-  
+  
-  
+  
-  
-  
+

+  
+  
+  
-  
-  
-  
-  
+  
+  
+  
  
-  
+  
+  
+  
+  
  
+  
+  
+  
+  
+  
-  
-  
+  
-  
-  
+  
+  
+  
+  
  
+  
+  
-  
  
+  
-  
+  
-  
-  
+

+  
+  
+  
+  
  
+  
+  
+  
  
+  
  
-  
+  
+  
-  
  
-  
-  
-  
+  
-  
-  
-  
-  
+  
  
+  
  
-  
  
-  
+  
+  
-  
+  
  
+  
-  
-  
-  
+  
+

+  
-  
-  
+  
+  
+  
-  
-  
-  
+  
+  
-  
+  
-  
+  
+  
+  
+  
+  
+  
-  
+  
+  
-  
+  
-  
+  
-  
-  
-  
-  
+  
+  
+  
-  
-  
-

-  
-  
+  
  
-  
-  
  
-  
-  
+  
  
+  
+  
+  
+  
-  
-  
-  
-  
+  
+  
+  
-  
-  
+  
  
+  
  
+  
  
-  
+  
+  
+  
+  
-  
+  
+  
  
+  
  
+

+

-

+

+

+

-

+

-

-

-

-

-

-

-

+

+

-

+

+

+

+

+

-

-

-

-

+

-

+

-

+

-

-

+  
-  
-  
+  
+  
-  
-  
-  
-  
+  
+  
-  
-  
-  
-  
-  
+  
+  
-  
+  
-  
-  
-  
+  
-  
+  
+  
+  
+  
+  
+  
-  
-  
+  
+  
-  
+  
+  
-  
-  
+  
-  
+



+  
+  
+  
-  
-  
-  
+  
+  
-  
-  
+  
+  
+  
+  
+  
+  
+  
+  
+  
+  
+  
-  
+  
+  
-  
+  
-  
+  
+  
-  
-  
+  
-  
+  
+  
+  
+  
-  
-



+  
-  
+  
-  
+  
+  
+  
+  
-  
+  
+  
+  
-  
-  
+  
+  
+  
-  
-  
+  
+  
+  
-  
+  
+  
+  
-  
-  
+  
+  
+  
-  
-  
+  
+

+  
-  
  
-  
+  
+  
+  
  
-  
-  
-  
+  
+  
+  
-  
  
-  
-  
+  
+  
-  
-  
+  
-  
+  
-  
+  
+  
-  
-  
-  
  
-  
+  
-  
+  
+  
+  
+





|   |           |
|---|-----------|
| + | 19p13.11f |
| - | 14q32.31c |
| + | 6p21.1b   |
| + | 12q23.3a  |
| - | 21q11.2c  |
| + | 10p13c    |
| + | 6p21.33a  |
| + | 6p21.32b  |
| - | 6p21.33a  |
| + | 14q23.3a  |
| + | 5q31.1c   |
| + | 4q28.1e   |
| - | 9q33.3a   |
| + | 1q23.3a   |
| + |           |
| - | 11q24.1b  |
| - | 5q31.2c   |
| + | 7q11.23e  |
| + | 11q23.1b  |
| + | 5q11.2d   |
| - | 3q21.1a   |
| - | 9q21.13a  |
|   | 19q13.42b |
| - | 7q22.1e   |
| - | 5q35.2d   |
| + |           |
| + | 2p14c     |
|   | 16q22.1a  |
| + | 7q34b     |
| - | 11p14.1d  |
| - | 2q33.1b   |
| + | 2q33.1b   |
| - | 13q12.3d  |
|   | 19p13.2a  |
| + | 11p15.1b  |
| + | 11q23.2a  |
| + | 11q23.2a  |
| - | 10q23.31d |
| + | 2p13.1b   |
| + | 8p11.23b  |
| + | 21q22.11b |
| - | 6p25.3b   |
| - | 12q24.11d |
| - | 3p21.31b  |

- 3p21.31b  
+ 7q31.32b  
+ 7q31.32b  
+ 11q24.2b  
- 11q23.3e  
- 3p21.31h-p21.31g  
+ 2p25.1d  
- 9q22.31a  
+ 1q41d  
+ 4q22.1a  
- 6q14.1e  
- 7p21.3e  
- 2q33.1g  
+ 19p13.2c  
- 17q23.3b  
- 19p13.2c  
+ 19p13.2c  
+ 19p13.2c  
+ 5q33.3b  
- 6p12.1d  
- 1p36.31a  
- 21q22.3d  
+ 17q25.1c  
+ 20q11.21b  
+ 2p25.1e  
- 1p36.12a  
+ 6p22.3c  
- 10q23.33a  
- 2q33.3d  
- 15q26.1b  
+ 15q25.1a  
- 20p13c  
- Xq28f  
- 10p15.3c  
- 10p15.3c  
+ 8p11.22a-p11.21c  
- Xq28b  
+ 4p16.3c  
+ 19p13.13b  
- 6p21.33b  
+ 1q25.3a  
- 9q34.11c  
- 12p13.31d  
- 1p36.13b



|   |           |
|---|-----------|
| + | 1q23.1g   |
| + | 14q32.13a |
| + | 14q32.13a |
| - | 14q32.13a |
| + | 19p13.11c |
| + | 17q21.31a |
| + | 1p31.1e   |
| + | 1p31.1e   |
| - | 1p35.3b   |
| - | 2q24.2d   |
| + | 10q23.31b |
| + | 10q23.31b |
| + | 10q23.31b |
| + | 10q23.31b |
| + | 11p15.5d  |
| + | 11p15.5d  |
| - | 11p15.5d  |
| + | 9p21.3c   |
| - | 9p21.3d   |
| - | 9p21.3d   |
| + | 21q22.11c |
| + | 21q22.11c |
| - | 9p21.3d   |
| - | 9p21.3c   |
| - | 6q23.3c   |
| + | 21q22.11c |
| + | 9p21.2a   |
| + | 7q31.1c   |
| - | 3p21.31b  |
| - | 1q25.2c   |
| + | 3q21.3d   |
| - | 16p13.3e  |
| - | 17q11.2a  |
| + | 20q13.12a |
| - | 3q13.12b  |
| + | 9p21.2a   |
| - | 3q26.1a   |
| + | 12q24.11c |
| + | 13q12.11b |
| + | Xq13.1b   |
| - | 15q22.31b |
| + | 17q21.32c |
| - | 3q27.2b   |

- 7p15.3b  
+ 6q25.3f  
- 16p13.3e  
+ 7p13b  
+ 2q35c  
- 7p13b  
+ 17q21.2a  
+ 12q13.13e  
- 9p13.1b  
- 19q13.32b  
+ 11q13.2b  
- 4q13.3b  
- 22q11.23a  
+ 22q11.23c  
- 3q25.1c  
- 3q13.32b  
- 1p13.1b  
- 16p12.2a  
- 1q23.2c  
- 1q23.2c  
+ 1p36.22a  
+ 5q31.3b  
- 12q23.1c  
- 9q31.3a  
+ 8p11.21a  
+ 1q32.1h  
+ Xq28g  
+ 7p12.2a  
- 2q34e  
- 17q12c  
+ 12q13.2c  
- 10q26.13b  
+ 1q32.1h  
+ 11q23.3c  
+ 21q22.11c  
- 19q13.42b  
+ 9p13.3c  
+ 3q25.33b  
- 19p13.11c  
+ 1p31.3a  
+ Xq24b  
+ 4q31.21a-q31.21b  
+ 15q25.1b  
+ 6p12.2a

|   |                 |
|---|-----------------|
| + | 13q12.11b       |
| + | 22q11.1d        |
| + | 3p21.1b-p21.1a  |
| - | 3p14.3b         |
| - | 11q23.1c        |
| + | 11q13.4a        |
| + | 2q12.1a         |
| + | 2q11.2e         |
| + | 3q28c           |
| + | 2q12.1a         |
| - | 6q23.3c         |
| + | 3q22.3a         |
| + | 16p12.1a        |
| - | 1p36.11d        |
| + | 12q13.2c        |
| + | 19p13.12c       |
| + | 19q13.2a        |
| - | 1p36.11d        |
| - | 10p15.1b-p15.1a |
| - | 22q12.3d        |
| + | 16p13.3d        |
| + | 16q22.1f        |
| - | 19q13.33b       |
| + | 16p12.1a        |
| - | 3p26.3a         |
| + | 7p15.3c         |
| + | 5p13.2c         |
| + | 4q13.3d         |
| - | 3q13.33c        |
| - | 1q24.1c         |
| - | 1q21.3d         |
| + | 19p13.2b        |
| + | 11p15.4c        |
| - | 2q37.3c         |
| - | 19p13.12b       |
| - | 16p12.2a        |
| - | 11p13f          |
| - | 7q31.1b-q31.1c  |
| - | 2p11.2f         |
| - | 15q24.2a        |
| + | 2q21.1b         |
| - | 8q21.13c        |
| + | 18p11.21e       |
| - | 8q12.1b         |

- 7q32.1a  
- 3p21.31d  
- 6q14.1a  
+ 10q24.33a  
- 17p13.2b  
+ 11q12.3a  
+ 8p11.22a-p11.21c  
+ 14q32.33b  
+ 13q34a  
+ 4q35.1c  
+ 7q31.31d  
2q37.3g  
+ 12q13.3b  
- 15q15.1b  
+ 2p13.1b  
- 18q12.2a  
- 2q33.3b  
+ 16p11.2d  
+ 2q32.2b  
- 4q31.21b-q31.21c  
10q26.3e  
- 1p34.3b  
+ 2q37.1d  
- 9q34.3d  
- 17p13.3e  
+ 11q13.4a  
+ 11p15.2a  
+ 7q36.3a  
+ 2q14.1d  
+ 20p11.23b  
+ 14q13.2b  
- 19p13.2e  
- 1q23.1a  
- 7p22.3b  
+ 8p21.3c  
- 4q24e  
- 17q23.2c  
+ 1q21.3d  
- 11q14.1a  
- 11q12.3a  
- 13q14.3c  
- 1q32.3b  
- 8p21.1c-p21.1b  
- 3p21.31c

- 3p21.31e  
+ 5q12.1c  
+ 1p34.1f  
- 14q12a  
+ 13q32.2a  
+ 11p15.4a  
- 12p11.21b  
+ 1q32.1c  
+ 15q11.2e  
- 3q13.33c  
+ 1p35.1b  
- 12q24.13b  
- 3q29i  
+ 15q23a  
+ 16p12.3a  
+ 5q13.3d  
- 3p25.1d-p25.1c  
- 7q31.32b  
- Xq28g  
+ 6q14.1c  
+ 3p25.3b  
+ 12q14.3b  
+ 15q25.1a  
- 5q31.1b  
- 4q35.1d  
- 19q13.32a  
- 1q42.3a  
- 19q13.33b  
+ 6p25.3b  
+ 7q32.1a  
- 11p15.5d  
+ 16q24.1b  
+ 14q12a  
+ 19q13.31b  
5q33.1d  
- 2q36.3b  
- 13q34a  
- 16q12.2b  
+ 16q12.2c  
- 9q21.33b  
- 5q12.1d  
+ 14q24.3a  
+ 12q23.3d  
+ 1p36.33b

|   |                 |
|---|-----------------|
| + | 15q26.1a        |
| + | 15q26.1a        |
| - | 1q23.1a         |
| + | 15q24.3a        |
| + | 15q24.1b        |
| + | 20p12.1d        |
| + | 5q23.3b         |
| - | 19q13.42c       |
| - | 3q21.3c         |
| - | 19p13.11c       |
| + | 20q11.22a       |
| - | 16q12.1a        |
| + | 12p13.33a       |
| + | 16p13.3f        |
| + | 17q21.33a       |
| + | 2q31.3b         |
| + | 2q31.1d         |
| + | 3p22.2b         |
| - | 17p13.3a-p13.2c |
| + | 16p11.2c        |
| + | 16p11.2c        |
| + | 2q32.1e         |
| - | 10p11.22b       |
| - | 2p25.1e         |
| - | 21q22.3e        |
| + | 17q21.32a       |
| - | 1p31.3c         |
| - | 20q11.22b       |
|   | 3q21.2a         |
| - | 12q13.13e       |
| + | 13q33.1a        |
| - | 3p21.1c         |
| - | 10p14e          |
| + | 5q33.3a         |
| - | 1q23.3a         |
| - | Xq21.1b         |
| + | 13q14.2b        |
| + | 2q37.1a         |
| + | 20p13c          |
| - | 14q32.12b       |
| + | 15q15.1c        |
| - | 1q42.12d        |
| + | 3p26.2a         |
| - | 12p11.23b       |

+ 6p21.31f  
- 10q25.1a  
+ 2q11.2a  
+ 16p12.3b  
+ 21q22.11c  
+ 15q15.1a  
- 1q25.3g  
- 2q14.3d  
- 19q13.33a  
- 20p12.2a  
- 14q32.33c  
+ 3p25.3c  
- 1p31.3b  
+ 9p24.1c  
- 5q32e  
+ 10q26.3e  
+ 21q21.3a  
+ 11q25d  
- 12p13.33d  
- Xp11.22a  
- Yq11.222b  
+ 6p23a-p22.3f  
- 7p15.2a-p15.1d  
+ 14q24.3b  
- 7q34c  
+ 2p11.2e  
- 10q21.2b-q21.3a  
+ 1p34.2a-p34.1f  
+ 19p13.3c  
- 1q42.13b  
+ 16p12.1a  
- 17q25.2a  
  
+  
- 16p13.3f  
+ 5q14.1c  
- 22q13.1c  
- 19q13.33c  
- 8q21.11b  
- 20q13.12a  
+ 16q24.2a  
- 14q11.2g  
- 8q24.3e  
+ 11q21d  
- 19p13.3g

- 1q21.3d  
- 1p32.1f  
+ 19p13.13c  
- 19p13.11c  
- 17q21.2b  
- 19p13.2b  
- 19p13.2d  
- 16q23.1a  
- 17q21.2b  
+ 3p24.3c-p24.3b  
+ 11q13.1d  
- 6q25.1a  
- 13q12.3c  
+ 18q21.1b  
+ 16q13d  
+ 8p23.3a  
+ 3q21.3b  
- 7p14.3c  
- 11q22.3b  
- 11p11.2b  
+ 3p22.1a  
- 13q14.11b  
+ 3p14.1c  
+ 2p24.1a  
+ 2p11.2g  
- 19q13.33a  
+ 1p36.31b  
- 19q13.33c  
+ 7q31.31c-q31.31d  
- Xq22.3c  
+ 21q22.11c  
18q23d  
+ 12q13.12c  
- 17q21.2b  
+ 17q23.3a  
- 10q24.32a  
+ 17p11.2b  
+ 17q24.3a  
+ 17q24.3a  
- 22q13.1b  
- 2p16.3d  
+ 14q32.11a  
+ 10q25.3b  
+ 19q13.2a



- 5q35.1c  
+ 3q26.32c  
- 3q26.32c  
+ 12q15d  
- 1q21.3e  
- 19q13.31b  
- 11p15.5a  
- 20q13.33d-q13.33e  
+ 6q13b-q13c  
+ 2p24.2b  
- 12q24.11b  
+ 17p13.1d  
- 16p11.2d  
- 11q14.1a  
+ 19q13.11b  
+ 22q12.3d  
- 2q33.1e  
- 11q14.1a  
+ 1q41a  
+ 16p13.3d  
+ 3p14.3a  
- 4p13b  
- 8p21.2c  
- 13q33.1b  
- 11q22.3c  
- 19q13.32c  
- 7p22.1b  
+ 22q13.1b  
+ 6p22.3d  
- 12q24.31b  
+ 5q31.2c  
- 1q32.1d  
- 18q21.33b  
- 19p13.2b  
- 6q13c  
- 6q13c  
+ 1p35.1b  
- 6q11.1b  
+ 8q24.23a  
+ 2p23.3a  
+ 14q12a  
- 9p24.2b  
- 1q25.1b  
+ 6p21.2c

- 1p36.13b  
- 17q11.2a  
- 15q22.31a  
+  
+ 14q32.33d  
+ 1q42.13e  
+ 5q31.3c  
+ 8q11.21a  
+ 16q22.3a  
+ 16q24.1b  
+ 17q25.1c  
- 8q24.13d  
- 3q29i  
+ 4p16.1e  
+ 6p21.1e-p21.1d  
+ 14q24.1e  
16p13.11b  
9p13.3a  
- 10q23.2a  
+ 14q32.33c  
- 6p22.2b  
- 1p34.3e  
+ 19q13.11c  
- 7p13c  
- 9q21.13c  
- 9q31.3b  
+ 14q13.2a  
- 20q11.23c  
+ 7p22.1d  
+ 18q21.1d-q21.1e  
- 16p13.11b  
+ 1q21.2b  
- 1p33d  
- 1p36.32b  
+ 16q24.1a-q24.1b  
- 12p12.1d  
+ 16p12.1a-p11.2e  
- 1p36.32b  
- 13q14.11b-q14.11c  
+ 14q23.1b  
+ 9q34.3b  
- 17p13.3c  
+ 17p12c  
- 12q13.2a

- 17p13.2a  
- 7q34f  
- 14q22.3a  
5q13.3b  
-  
+ 19p13.11a  
- 7p14.2a  
- 16q22.1a  
- 1q22c  
+ 10q22.2a  
+ 4q31.3d  
5p15.32a  
- 6q14.3a  
- 18q12.1d-q12.1e  
+ 1p36.21b-p36.21a  
+ 12q23.3b  
19p13.3e  
+ 10q23.1c  
- 3p21.31k  
- 7q34e  
3q21.3c  
- 9p13.3c  
- 5q35.2d  
+ 15q25.1b  
- Xp11.22c  
- Xq24b  
4q12d  
4p14e  
  
3q21.3c  
- 17q21.31e  
+ 20p13b  
+ 10q22.1b  
+ 10q21.3e  
- 7q36.1b  
- 2q11.2a  
+ 1p13.3b  
- 7q21.12a  
+ 18q12.2b  
+ 14q12d  
- 15q21.2c  
+ 11q22.1d  
- 3q13.31a  
- 8q22.1b

- 4q35.1e  
+ 12p13.1b  
+ 18q21.33a  
+ 1p35.1b  
- 3q13.13a  
4p16.3c  
- 9p13.3b  
19p13.2e  
+ 12q24.33d  
- 7q34a-q34b  
- 6q21c  
+ 6p12.1a  
- 10q25.3b  
+ 10q25.3a  
- 12q13.13a  
- 16q24.1a  
+ 17q25.3e  
- 18q12.3f-q21.1a  
2q11.2b  
- 22q11.21d  
+ 22q11.23c  
- 19p13.11c  
- 8q24.3h  
+ 4q34.1c  
- 2q31.1h  
+  
+ 14q24.3c  
- 1p36.33a  
+ 9p21.3d  
+ 1q42.2c  
- 11q22.3b  
+ 7q36.1b  
+ 8q24.3g  
7p22.3a  
1p36.13f  
- 6p21.33b  
+ 9q32a-q32b  
+ 8p21.3a  
+ 10q23.2a-q23.2b  
+ 9q34.3e  
- 14q32.12a  
- 1p36.22a

- 3q13.2b  
- Xq13.3a  
- 9p24.1c  
- 2p25.1e  
+ 10q23.33a  
- 6p22.3e  
- 8p21.1b  
- 1q32.1b  
+ 3p21.31k  
- 20p12.1b  
- 11p14.1d  
- 17q21.31d  
- 17q25.1b  
- 2q37.3f  
+ 1p36.22c  
+ 17p13.2b  
+ 5q31.2c  
+ 10q23.31c  
- 12q12b  
+ 16p11.2d  
+ 15q23a  
- 9p13.3c  
+ 1q44b-q44c  
+ 5q12.1c  
+ 1p34.1d  
- 5q31.1b-q31.1c  
+ 20q11.21b  
- 2p23.3b  
+ Xq13.1b-q13.1c  
- 10p11.22c  
+ 2q23.1b  
- 15q26.1b  
- 3p21.31g  
- 1q24.2c  
+ 6p21.32a  
+ 8q24.3h  
- 16q13d  
-  
+  
+ 19q13.42b  
+ 19q13.42b  
+ 19q13.12a  
+ 19p13.3i  
+ 4p14c-p14b

|   |                 |
|---|-----------------|
| + | 14q32.33a       |
| + | 19q13.32a       |
| - | 8q22.3b         |
| - | 13q22.1b        |
| + | 15q13.3a        |
| + | 19p13.11f       |
| + | 13q22.1a        |
| - | 10p15.1e        |
| - | 2q33.3c         |
| - | 9q21.11c        |
| + | 7q32.2a-q32.2b  |
| + | 14q22.1b        |
| + | 6p21.1d         |
| - | 16q24.2a        |
| + | 12p11.22b       |
| + | 22q13.33b       |
| + | 3p21.31d        |
| + | 1q23.3a         |
| - | 13q21.33b       |
| - | 1q32.1d         |
| - | Xq24a           |
| - | 18q12.1e        |
| - | Xp22.11a        |
| + | 1p36.33b        |
| + | 3p21.31g        |
| + | 4q32.3b         |
| + | 1q25.1a         |
| - | 1p36.31a        |
| - | 22q11.21e       |
| + | 2q31.1a         |
| + | 3q27.1a         |
| - | 15q25.3b        |
| + | 19p13.11b       |
| - | 14q21.3a-q21.3b |
| + | 2p24.1a         |
| - | 5q31.2b         |
| + | 2q37.3c         |
|   | 6q16.1f         |
| + | 16q24.1a        |
| - | 8q24.13c        |
| + | Xq21.31a        |
| + | 4p14c           |
| - | 3q27.1a         |
| + | 7p15.3b         |

- 9p21.3c  
- 19q13.33c  
- 19q13.33d  
- 19q13.33d  
- 12p13.2c  
+ 2p16.3d  
- 12p13.2c  
- 12p13.2c  
+ 1q43e  
+ 12q24.31c  
- 3q21.1a  
+ 17q24.2b  
- 13q14.3a  
- 3q26.1a  
+ 6q22.2a  
+ 1p35.1b  
7q22.1a  
+ 17q21.32b  
- 19q13.32c  
+ 7q36.1b  
- 2p11.2d  
+ 16p13.3d  
- 19p13.2b  
- 7q21.2a  
- 12q21.2a  
- 17q21.2a  
- 17q21.2a  
+ 12q13.13e  
3p25.1d  
+ 6q14.3b  
6q16.1e  
- 17q21.2b  
- 17q21.2a  
- 17q21.2a  
- 17q21.2a  
- 17q21.2a  
- 12q13.13d  
- 12q13.13d  
- 12q13.13e  
- 12q13.13d  
+ 12q13.13d  
- 17q21.2b  
- 21q22.3d  
+ 21q22.3d

- 21q22.3d  
+ 21q22.3d  
- 21q22.11a  
- 21q22.11a  
- 21q22.11a  
- 21q22.11a  
+ 21q22.11a  
  
+  
- 17q21.2a  
- 11q13.4a  
+ 21q22.11a  
- 21q22.11a  
+ 17q21.2a  
17q21.2a  
+ 3q13.33a  
- 1p32.3e  
+ 14q22.3b  
- 3q22.2a  
+ 2q22.2a  
- 14q22.1b  
+ 20q13.11b-q13.12a  
+ 22q13.2a  
+ 6q22.33e-q23.1a  
+ 15q22.2b  
- 8q13.3b  
+ 12p13.31d  
- Xq28g  
- 19q13.42a  
+ 19q13.42a  
+ 18q11.2b-q11.2c  
- 20q13.33c  
- 7q31.1a  
-  
- 7q31.1a  
+ 1q25.3d  
+ 9q34.13a  
+ 13q34d  
- Xq24d  
- 3q27.1a  
- 2q34b  
+ 7p11.2c  
+ 4p15.32b  
- 2p24.1d



|   |                 |
|---|-----------------|
| + | 8q22.1e         |
| - | 1p35.2b         |
| - | 22q12.3b        |
| + | 4q28.2a         |
| + | 12q13.13a       |
| - | 10p15.3c        |
| - | 15q23b          |
| + | 4q25f           |
| - | 5q32c           |
| + | 3p21.31j        |
| - | Xq11.1c         |
| + | 17q12c          |
| - | 19p13.11b       |
| - | 1q21.2d         |
| + | 19p13.2d        |
| - | 12q13.13a       |
| + | 2q24.3f         |
| + | 7q11.23b        |
| - | 13q12.11b       |
| + | 1q32.1e         |
| + | 11q23.1b        |
| - | 3p22.2b         |
|   | 2p23.1b         |
| - | 1q42.12b        |
| - | 21q22.2b        |
| - | 16q22.1b        |
| - | 1q21.3b         |
| + | 1q21.3b         |
| + | 1q21.3b         |
| + | 1p35.1b         |
| + | 16p12.1b        |
| - | 15q15.3a        |
| + | 9q34.11b        |
| + | 10q24.1a-q24.1b |
| - | 13q14.12b       |
| - | 2q21.3b         |
| - | 10q24.32a       |
| + | 11p15.1c        |
| - | 12p12.1e        |
| - | 16q23.1a        |
| + | 19p13.2b        |
| + | 1p36.12b        |
| + | 1p36.11c        |
| + | 5q31.1c         |

|   |            |
|---|------------|
| + | 5q31.1c    |
| - | 4q25b      |
| - | 1q42.12c   |
| - | 1q32.1g    |
| - | 6p21.31f   |
| + | 12q14.3a   |
| - | 19q13.42a  |
| - | 15q21.2c   |
| + | 7q32.1a    |
| - | 1p34.2a    |
| - | 3q28b-q28c |
| + | 1p31.3b    |
| + | 8p12e      |
| - | 4p16.3b    |
| + | 12q13.13b  |
| + | 7p22.2c    |
| + | 22q13.1a   |
| + | 19q13.2b   |
| + | 14q22.3a   |
| - | 17q25.3c   |
| - | 19q13.2a   |
| + | 19q13.2a   |
| + | 1q43a      |
| + | 17q11.1c   |
| + | 10q23.33b  |
| - | 14q32.12b  |
| + | 12q21.1a   |
| + | 1q32.1d    |
| - | 1q32.1h    |
| - | 13q13.3e   |
| - | 5q14.1b    |
| + | 10q26.13d  |
| + | 9q33.3a    |
| + | 1q25.2c    |
| - | 9q33.2b    |
| + | 4p14b      |
| - | 5p13.1c    |
| - | 19q13.32c  |
| + | 17q12a     |
| - | 13q33.3b   |
| - | 19q13.42a  |
| - | 19q13.42a  |
| + | 19q13.42a  |
| - | 19q13.42a  |

- 19q13.42a  
- 19q13.42a  
- 12q13.13a  
+ 20q13.33e  
2q12.3c-q13a  
+ 6q21a  
+ 19q13.12a  
+ 14q24.3a  
- 4q21.22a  
- 12q21.31a  
+ 19q13.33a  
- 11p14.1d  
- 1q42.12c-q42.12d  
- 15q26.3c  
- 10q23.31b  
- 19q13.2c  
+ 10q23.31a-q23.31b  
- 21q11.2c  
+ 10q23.31a  
10q23.31b  
+ 2q11.2c  
- 16p13.13b  
+ 1q21.1b  
+ 17p11.2f  
17q25.1c  
- 12q14.3b  
- 18q21.32a  
- 5q35.3a  
- 2q11.2a  
- 7q36.3b-q36.3c  
- 12q13.12b  
- 6q13a  
- 5p13.2c  
+ 3p26.1a  
- 16p13.3f  
- 22q13.33b  
+ 3q29i  
+ 1q22c  
+ 5q23.2e  
- 19p13.3g  
- 11p13c  
- 12p12.3d  
+ 1p22.3a  
- 3p14.1b

|   |           |
|---|-----------|
| + | 7q21.3d   |
|   | 19q13.32c |
| + | 9q33.3b   |
| + | 5q15e     |
| - | 13q12.2a  |
|   |           |
| + | 19p13.2e  |
| + | 7q11.23a  |
| - | 19p12b    |
| + | 7q34e     |
| + | 3q21.2c   |
|   | 1q32.1d   |
|   | 7q32.2a   |
|   | 4q21.1b   |
| + | 5q35.2b   |
| - | 5p13.1b   |
|   | 16q22.3a  |
|   | 11q23.2a  |
| + | 12q13.13c |
|   | 12p13.31d |
|   | 19q13.33e |
|   | 8q22.1e   |
|   | 8q21.3e   |
| + | 9p24.1a   |
|   | 17p13.2a  |
|   | 17q21.31b |
|   | 20q13.12b |
| - | 4q31.21c  |
|   | 7q31.1b   |
|   | 5q35.1a   |
|   | 7p15.1d   |
|   | Xp21.1a   |
|   | 4p16.3d   |
|   | 9q31.2b   |
|   | 4p16.1c   |
| + | 10p12.33c |
|   | 18q23b    |
| + | 8q21.11a  |
|   | 18q21.32a |
|   | 8p23.1a   |
|   | 12q23.1c  |
|   | 21q22.3e  |

- 2q31.1b  
- 13q21.31c  
+ 2q35a  
1p36.22b  
+ 18q23c  
4q34.1c  
7q36.3c  
- 9p21.1a  
+ 17p11.2h  
- 17p13.1c  
20q13.32b  
+ 10q21.3a  
10q24.2a  
10q25.1d  
- 10q23.2a  
7p11.2b  
- 13q12.12b  
3p14.3a  
+ 11q21a  
7p22.3a  
12q12e  
19q13.43c  
15q26.1c  
+ Xq25c  
8q12.1a  
1p36.33a  
17p11.2a  
15q13.2a  
17q22d  
- 4q26f  
7q21.3d  
3q25.1b  
6q21h  
9q33.1b  
1p32.3d  
22q13.1d  
22q13.2b  
2q12.2a  
- 19p13.2e  
+ 1q22b  
+ 8q24.3f  
20p12.3c  
7p22.3b  
1p36.22d

- 14q32.2b  
19q13.12a  
- 8q11.21a  
5q23.1a  
5q31.2d  
- 2p23.3a  
- 7q22.3c  
+ 1q25.3c  
5q35.3a  
+ 13q12.11a  
+ 9q22.32b  
+ 1p31.1a  
+ 14q31.3c  
16p11.2a  
12p13.32b  
8q21.13c  
19p12b  
+ 2p14a  
+ 16q24.3b  
4q28.3b  
+ 16q24.3b  
Xq13.1b  
+ 12q24.23a  
- 2q35d  
5q35.3a  
- 14q11.2f  
- 9q22.2b  
6p21.1f  
3p14.2b  
5q23.2f  
- 19p12d  
- 17q21.31e  
20q12b  
7q21.2b  
12q21.2c  
+ 12q24.31a  
21q22.3f  
9q33.3a  
16p13.12a  
5p15.33e  
+ 9q22.2a  
+ 11q12.3a  
16p11.2c  
19q13.33d

1q32.2a  
8q24.22c  
+ 19p13.12b  
+ 13q32.3a  
8p23.1b  
Xq12c  
+ 6q25.1b  
7q34b  
- 2q31.1d-q31.1e  
- 16p11.2c  
11q23.3b  
11q21c  
- 11q23.3d  
+ 9p11.2c  
10p12.33b  
10p11.23a  
12q13.13d  
19q13.32a  
+ Xq28d  
8q12.1b  
- Xq27.3d  
1q41d  
10q21.3a  
1q22a  
1p13.2d  
+ 3p13a  
3q26.1b  
3q13.2b  
13q14.3c  
16p13.3a  
- 1p34.2d  
7p13b  
+ 3p21.31h  
12p13.2b  
12q13.13e  
19q13.12b  
+ 9p13.3b  
11p15.4b  
+ 13q34a  
7q22.1f  
+ 4q25c  
8p23.1b  
- 2q31.1h  
+ 6p25.1c

|   |                 |
|---|-----------------|
| - | 4p16.3d         |
| - | 10q11.21a       |
| - | 15q26.1b        |
| - | 7q34d           |
| - | 6q25.3f         |
| - | 6q27f           |
|   | 15q11.2b        |
|   | 19p12c          |
|   | 20q11.23a       |
| + | 3q21.1b         |
| + | 10q23.2b        |
| + | 7q22.2b         |
| - | 3q25.32b        |
|   | 5q13.3d         |
|   | 10q21.3d-q21.3e |
| - | Xq11.2b         |
| - | 2p23.1a         |
|   | 7p14.3c         |
| + | 11q22.1c        |
| + | 5p13.3c         |
|   | 7p13b           |
| - | 16q24.2a        |
|   | 7p13d           |
| + | 6q25.3d         |
| + | 1q44b           |
|   | Xq28b           |
|   | 8q11.23c        |
| + | 6p21.33a        |
| + | 17p13.2b        |
|   | 17q24.1a        |
| - | 19p13.11d       |
|   | 16q24.3a        |
| + | 3q13.33a        |
|   | Xp11.22b        |
| + | 5q14.3h         |
| - | 20p12.2b        |
|   | 11q24.2a        |
| + | 16p13.12a       |
| + | 11p15.5b        |
|   | 11p15.4a        |
| - | 1p36.33a        |
|   | 19p13.2a        |
| - | 19p12d          |
|   | 1q23.1f         |



12q24.11c  
11q23.3b  
10q11.21b  
16p11.2c  
- 9q33.3a  
+ 5p13.2a  
1p34.2a  
+ 14q23.2b  
11q12.1c  
6p21.1d  
8q11.21a  
+ 6q26b  
8q13.3a  
19p13.2c  
4q27b  
- 18q21.2c  
2p13.1b  
+ 10p13c  
- 18p11.21a  
4p15.31a  
+ 1p36.31a  
22q12.2a  
19q13.43a  
- 8q24.23a  
+ 1q42.13b  
2q14.1a  
+ 1q12p  
Xq21.31c  
  
+ 17q21.31e  
8q12.3c  
+ 20q13.12b  
13q33.1b  
2q31.1e  
4q31.21b  
6q15c  
7q33b  
Xq26.3c  
+ 7q36.1b  
  
- 2q32.3e  
- 5q35.3a  
Xp21.1e  
- 20p11.23c

+ 16p13.13c  
16p13.3f  
+ 1q32.1g  
+ 12p13.31d  
8q12.2a

+ 4q31.21c  
7q33c  
+ 7q11.21e  
3p24.2a  
17q21.32a  
17p13.1d

- 2q33.1a  
9p13.2b  
6q27c  
6q23.3d  
+ 3p22.3a

1q25.3a

+ 18q23d  
+ 14q24.1e  
3q22.1c  
12q21.32a  
15q11.2b  
- 1p34.2c  
22q12.1a  
12q24.23a  
1q23.3a  
13q32.2b  
- 8p21.3c  
- 22q12.1b  
1p34.3f  
- 10p15.1e  
1p12a  
10q23.33d

+ 11p15.4d  
5p14.2a

- 14q32.12a  
+ 12q23.2a  
12q14.1a  
5p13.3e  
18q21.1a  
  
+ 11q13.2a  
+ 10p15.3c  
9q22.32b  
7p11.2a  
- 19p13.3a  
  
12q23.3c  
12q12b  
7p12.1c  
- Xq22.1b  
+ 2p21f  
19p13.12c  
Xq28e  
  
- 14q23.2a  
16q23.1c  
6q25.3e  
4q12b  
- 1q25.3c  
  
2q37.1c  
7p22.1a  
6p21.2b  
16p12.3a  
15q26.1c  
17q22c  
12p11.21b  
17q25.3a  
Xq26.2b  
2q12.1a  
12q24.11d  
+ 5q14.1d  
  
+ 17p11.2f  
20q13.33c  
1q23.3a  
9q33.2b  
7q22.1c

- 15q15.2b  
4p16.1b  
1p12c

- 4q32.3b  
6p12.3e  
6p22.1c  
3q13.13d  
+ 1q21.2c  
11q23.3d  
11q12.2b

+ 3q21.3d  
6q14.3b  
1q32.1g  
11p11.2e  
2q31.1f  
9q21.11a  
+ 3q21.3c

+ 13q34a  
17q25.1d  
15q11.2b

+ 6q24.2a  
20q13.12c  
- 2p23.3c

+ 9q22.1d  
20q13.13c  
8q24.13b  
1p34.3c  
14q31.1a  
21q22.2a  
5p14.3b  
6p21.32b  
17p13.1a  
+ 14q12e

4q35.1f  
16p11.2a

3p22.2b

+ 8p23.1a  
4q35.1f  
12q24.11a

+ 1p13.2b  
- 17q12a  
6q23.1a

+ 7q22.2b  
+ 1q25.1a  
+ 19p13.2e

19p13.12c

+ 4q28.3b

+ 7q22.1b  
+ 1q31.3d  
+ 3q29h  
+ 7p12.1c  
7p15.3b  
10p12.1a

+ 4q21.1b  
+ 11q13.1e  
+ 4q28.3b  
- 8p23.1f  
- 7q11.23a  
+ 7q11.21b  
- 8p23.1f  
- Yq12w  
- 2q33.3d  
- 9q12g  
- 15q13.2b  
+ 22q11.1d  
+ 17q21.32b  
2p15d  
- 7q11.21b  
- 8p23.1e  
- 7p11.2b  
- 2q24.2c  
+ 16q22.3b

|   |           |
|---|-----------|
|   | 12p11.1b  |
| + | 20q13.13c |
| + | 1q22c     |
| + | 7q11.21b  |
|   | 20q13.33e |
| - | 7p12.1c   |
| + | 9q12i     |
| - | 9q12j     |
| - | 9p12a     |
| - | 3p22.3c   |
| + | 15q22.2a  |
| - | 8p23.1e   |
| + | 16p12.1c  |
| + | 6p25.3b   |
| - |           |
| - | 15q13.1b  |
|   | 19p12b    |
| - | 15q11.2c  |
| + | 17p13.3d  |
| - | Xq21.31e  |
| + | 7q11.21b  |
| - | 9q34.3f   |
| - | 20q13.33e |
| + |           |
| - | 16q22.3c  |
| + |           |
| + | 16q22.1e  |
|   | 12p13.33d |
| - |           |
| + |           |
| + | 17p11.2e  |
| + | Xq22.3c   |
| - | 1q21.1a   |
| - | 10q22.3f  |
| + | 2p14a     |
| + | 10q11.23b |
| - | 10p13e    |
| + | 9p11.2b   |
| + | 9p12a     |
|   | 14q11.2b  |
|   | 2q13a     |
| + | 8p23.1e   |
| + | 7q11.21b  |
|   | 6q13a     |

|   |                  |
|---|------------------|
| + | 7q22.1g          |
| + |                  |
| - | Yp11.2c          |
|   | 5q34b            |
| - | 11q23.2c         |
| - | 7p22.3d          |
| - | 9q12g            |
| + | 14q13.2a         |
| + | 3p25.1b          |
|   | 9q22.1b          |
| + | 16q22.3a         |
|   | 14q32.31b        |
|   | 9q34.11b         |
| + |                  |
|   | 8q21.3e          |
|   | 11p11.2a         |
| - | 12q24.32b        |
| + | 15q13.1a         |
| - | 7q11.23c         |
|   | 7q22.1e          |
| + | 13q11c           |
| - | 7q36.1c          |
|   | 11p15.5c         |
| + | 6q14.3a          |
|   | 3q13.31a-q13.31b |
| - | 4q26e            |
| + | 10q24.1b         |
|   | Xq22.1c          |
|   | 3q28e            |
|   | 9q22.31a         |
| - | 22q11.21f        |
|   | 11p15.1c         |
| - | 1p36.33b         |
| + | 1q23.3a          |
| - | 15q11.2a         |
| - | 1q32.1e          |
| - | 1q12p            |
| - | 7q11.23c         |
| + | 1p13.3b          |
|   | 13q14.3c         |
|   | 16p11.2d         |
| + | 9q12g            |
| + | 14q11.1d         |
|   | 12p11.21a        |

|   |           |
|---|-----------|
|   | 12q12e    |
| + |           |
| - | 16q24.3b  |
|   | 10q25.3a  |
|   | 9q33.2a   |
| - | Xp22.33a  |
| - | 2q21.1c   |
|   | 18q23a    |
| - | 17p11.2f  |
|   | 3q26.33c  |
| - | 20q13.33e |
| + | 8p23.1a   |
| + | 16p11.2b  |
| - | 9q12g     |
| + | 9p11.2b   |
| + | 9q12i     |
| - | 17q11.1b  |
| - | 17p11.2c  |
| - | 18q21.31b |
| + | Xq13.1d   |
| + | 4q28.3b   |
| - | 7q22.1f   |
| + | 1q21.1e   |
| + | Yq11.1b   |
| + | 9q12j     |
|   | 16p11.2d  |
| - | 9p11.2c   |
| + | 9p11.2d   |
| - | 12p13.31d |
|   | 17q25.3c  |
|   | 8q21.13a  |
| + | Xq27.3d   |
| + |           |
|   | 8q22.1a   |
|   | 19p13.3d  |
| - | 1q21.1e   |
| + | 16q24.3b  |
| + | 1q21.1e   |
| - | 1q21.1a   |
| + | 7p22.1a   |
| - | 22q11.21b |
| - | 7p12.1c   |
| + | 7q22.1e   |
|   | 1q32.1e   |



|   |           |
|---|-----------|
|   | 1p32.3d   |
| + | 15q25.3a  |
|   | 12p12.1a  |
|   | 22q12.2c  |
|   | 5q32d     |
|   | 1q32.2b   |
|   | 3q22.1b   |
|   | 10q26.11d |
| - | 5q15b     |
| - |           |
| - | 9p11.2a   |
| - | 10q11.21c |
|   | 9p11.2a   |
| + | 9p11.2d   |
|   | 11q13.4a  |
| + | 1q42.12c  |
| + |           |
| - |           |
| - |           |

-



-

+

-  
-  
-  
+  
+  
+  
+  
-  
+  
+  
-  
+  
+  
-  
-  
+  
+  
-  
-



|   |           |
|---|-----------|
| + | 6p22.2b   |
| - | 7q31.31d  |
| + |           |
| - | Xq26.3b   |
| + | 11q14.1d  |
| + | 11p15.5d  |
|   | 11p11.2c  |
|   | 12p11.21b |
| - | 12q22b    |
| - | 15q21.3d  |
| + | 15q23a    |
| + | 16p12.1c  |
| - | 16p13.3d  |
| + | 16q22.3a  |
|   | 19q13.33d |
| + | 19q13.33e |
| - | 19p13.2b  |
| + | 19q13.12a |
| + | 1p36.33a  |
|   | 1q23.3a   |
| + | 1q32.1d   |
| + |           |
| + | 1p35.2a   |
| - | 1p31.3a   |
| - |           |
| - | 20p12.3c  |
| + | 21q22.11a |
| - | 22q11.21f |
|   | 2q11.2d   |
| - | 2q11.2a   |
| + |           |
|   | 2q12.3c   |
| + | 2q35f     |
|   | 2p24.1c   |
| - | 3q13.31c  |
|   | 3p24.2b   |
| + | 3q25.31b  |
| + | 3q22.1b   |
| + | 3q29g     |
|   | 4q21.23a  |
|   | 5q13.2a   |
|   | 5p12c     |
| - |           |
|   | 7q31.32a  |

|   |           |
|---|-----------|
| + | 7q36.1b   |
| + | 10p11.21a |
| - | 9q22.32a  |
| - | 9p11.2a   |
| + | 15q25.2b  |
| - | 7q11.21c  |
|   | 15q21.1a  |
| + | 19q13.33b |
| - | 1p31.3c   |
| - | 1q21.1c   |
| - | 17p13.1b  |
|   | 17q11.2a  |
| - | 4q32.1e   |
|   | 5q31.2d   |
| - | 5q35.3a   |
|   | 5q12.3c   |
|   | 7q36.2c   |
|   | Xq23b     |
| + | Xq28d     |
|   | 2q13b     |
| - | 11q13.4a  |
| + | 13q14.3d  |
| + | 13q14.12b |
| - | 22q11.21f |
| + |           |
| - |           |
| + | 6p21.1g   |
| + | 6p24.1c   |
| - | 6p22.1b   |
| + | 9q33.2a   |
| + | 14q11.2a  |
| + | 5p15.31c  |
| - |           |
| + | 12q13.12a |
| + | 11q13.4a  |
| + | 11q12.1d  |
| + | 19q13.32b |
| - | 3q22.3c   |
| + |           |
| + | 5q11.2b   |
| - | 5p15.33e  |

|   |           |
|---|-----------|
|   | 10q25.2a  |
|   | 11p15.4a  |
|   | 11p11.12d |
| - |           |
| + |           |
| - |           |
|   | 12p13.31d |
| - | 12q13.13a |
| + |           |
| + | 12q22c    |
|   | 5p12b     |
| - | 12p13.33a |
| + | 15q21.3d  |
| - |           |
| - | 15q11.2c  |
|   | 15q13.3a  |
| - | 16q21e    |
| - | 16p13.3d  |
| - | 16p11.2c  |
| - | 16p13.2b  |
|   | 17p13.1d  |
| - | 17q12c    |
|   | 17q23.2c  |
| - | 18p11.21b |
| + | 18q12.3c  |
| - | 18q22.3d  |
| + | 18q21.33b |
|   | 19q13.33e |
| - | 19p13.13c |
| - | 19q12c    |
| - | 19p13.3f  |
|   | 1q25.3c   |
|   | 1q24.2c   |
|   | 20p11.1c  |
| + | 21q21.2b  |
| - | 21q22.3c  |
| + | 22q11.21f |
| - | 2q21.1b   |
| - | 2p25.3g   |
| + | 2q11.2a   |
|   | 2p21f     |
| - | 2p16.3d   |
| - | 2p11.2e   |
|   | 2q35a     |



|   |                |
|---|----------------|
| + | 3q13.12b       |
| - | 3q11.2b        |
|   | 3p12.3d        |
| - | 3p21.32b       |
| - | 11q13.4a       |
|   | 4q25f          |
|   | 4p16.1f        |
| + | 4q34.3a-q34.3b |
| - | 4p15.33c       |
|   | 4q23b          |
| - |                |
| + | 5q35.1e        |
|   |                |
| + | 5p15.1a        |
|   | 6q24.2b        |
| - | 6q27f          |
| - | 7q11.21c       |
| - | 7q11.21e       |
| - |                |
| + | 7p15.2b        |
|   | 7p15.2a        |
| + | 7q32.1a        |
| - |                |
| - |                |
| - |                |
| + |                |
| - | Xq28d          |
| - | Xq26.2a        |
|   | Xp11.22b       |
|   | Xq23c          |
|   | 10p15.1d       |
| + | 12q21.33b      |
| - | 12q24.31b      |
|   | 13q12.11b      |
| - | 17q21.31d      |
| + | 17q22a         |
| + | 18p11.31c      |
|   | 19q13.33d      |
|   | 1p35.1b        |
| + | 1p22.3b        |
| + | 2p23.3b        |
| - |                |
| + | 2p16.1b        |
| + | 2p15d          |

|   |           |
|---|-----------|
|   | 3p12.3d   |
|   | 4q13.2b   |
| + | 7p11.2a   |
| + | 7p22.3b   |
| - | 7p15.3d   |
|   | 9q22.2b   |
| - | Xq13.2a   |
| + |           |
|   | 11q12.1c  |
|   | 11q22.3c  |
| + | 12q14.2b  |
| + | 12p11.23a |
| - | 12q23.1c  |
|   | 13q33.3a  |
| + | 13q14.11c |
|   | 13q12.3a  |
|   | 14q32.2b  |
|   | 16p12.1c  |
| + | 17q23.3a  |
| + |           |
| - | 19p13.12c |
| + | 1q21.3d   |
| + | 2q11.1c   |
|   | 2q32.1f   |
|   | 2p16.1d   |
|   | 2p16.1a   |
|   | 3q13.12a  |
| + | 3q13.12a  |
|   | 4q31.22a  |
| + | 5q35.1a   |
|   | 5q11.2e   |
|   |           |
| + | 9q31.1d   |
|   | 9q31.3a   |
|   | Xq21.1c   |
|   | Xq28f     |
|   | 13q12.11a |
| - | 3q29i     |
| - | 19q13.42b |
|   | 12p13.31c |
| + | 11q12.3b  |
| + | 12p13.31a |
| + | 17p13.1d  |
| + | 1p33d     |

|   |                   |
|---|-------------------|
|   | 2q31.1i           |
| + | 9q22.32b          |
| + | Xq28h             |
| - | 10q21.1b          |
| - |                   |
| + |                   |
| - | 10q23.33a         |
| - | 10q26.2c          |
| - | 10q26.3b          |
|   | 11p15.4a          |
| + |                   |
|   | 11p11.2e          |
|   | 11p11.12c         |
| + |                   |
|   | 11q14.1a          |
|   | 11q24.2d          |
| - | 12p13.33a-p13.32b |
| + | 12q13.11c         |
|   | 12q15b            |
| + | 12q23.1a          |
| + | 12q23.3b          |
| + | 12q24.13b         |
| - | 13q14.2c          |
|   | 13q22.1a          |
|   | 13q31.1d          |
| - | 13q32.1a          |
|   | 14q31.1c          |
| - |                   |
| + | 15q21.2c          |
| - | 15q25.2b          |
|   | 16p13.13c         |
| - | 16p11.2d          |
| + | 16p11.2b          |
| + | 16p11.2b          |
| + | 16p11.2b          |
| - | 18q12.1e          |
| - | 16q12.1d          |
| - | 16q12.2c          |
| + | 5q35.3g           |
|   | 17p12b            |
|   | 17q12c            |
| - | 19q13.41a         |
| - | 19q13.42b         |
| + | 1p36.32b          |

+

+

1q21.1e  
1q41e

+

20p11.23d  
20q11.23c

-

21q11.2d

+

22q13.2b

-

2p15a

-

2p13.1b

+

2p11.2h

-

2p11.2f

-

2q21.1d

2q22.1a

2q33.3d

3p22.3c

-

3p21.31c

3p21.1e

-

3q11.2b

3q25.31a

4p15.2b

+

2q33.1f

-

5q12.1d

5q23.2f

-

5q31.1e

-

5q31.2d

6p25.2a

6p24.3b

6p21.31a

6q12a

-

6q12b

+

-

7p21.3a

7q11.23a

7q36.1c

8p23.3b

-

8p23.1a

-

12p13.31b

8p21.3a

+

8q21.13b

|   |           |
|---|-----------|
| + |           |
| + | 9q34.11a  |
|   | 9q34.3e   |
| + |           |
| - |           |
|   | Xp21.3d   |
|   | Xq13.2b   |
| + | Xq27.1c   |
| - | Xq28c     |
| + | Xq28f     |
| + | 10p14c    |
|   | 11q12.1a  |
|   | 11q24.1b  |
|   | 12p12.3c  |
|   | 12q21.2a  |
| - |           |
| - | 13q34d    |
| + |           |
| + | 21p11.2a  |
| + |           |
| + |           |
| + | 15q13.2a  |
| - | 15q15.1a  |
| - |           |
| - | 16p11.2e  |
| - | 16p11.2b  |
| + | 16p11.2a  |
|   | 18p11.22c |
|   | 18p11.21b |
|   | 18q21.2c  |
| + | 18q21.32a |
| + | 19p13.3f  |
| + | 19p13.3a  |
| - |           |
| - | 1p33c     |
|   | 1p32.1e   |
| - | 1p31.3b   |
|   | 1p12a     |
| - | 1p12a     |
| + | 1q23.2c   |
| - | 1q24.3b   |
| + | 1q32.2b   |
|   | 1q42.12d  |

|   |                  |
|---|------------------|
| - | 22q11.23b        |
| + | 2p21f            |
| + | 2q14.1b          |
| + | 15q24.2a         |
|   | 3q22.1d          |
|   | 3q26.31a         |
|   | 4q12e            |
| - | 4q13.1c          |
|   | 4q21.1c          |
| + | 4q31.22a         |
| + | 5p15.1a          |
| + | 5p15.1a          |
|   | 5p15.1a          |
|   | 5p13.2b          |
| - | 5q15a            |
|   | 5q15a            |
|   | 5q31.1e          |
| - | 8p23.1a          |
| - | 8p23.1a          |
|   | 8q11.23d         |
|   | 8q24.12b         |
| + | 9p24.1a          |
| - | 9p21.1a          |
|   | Xp21.3b          |
| + | Xp21.2a          |
|   | Xp11.4b          |
| + | Xp11.23f         |
| - |                  |
| + |                  |
|   | 7q22.1e          |
| - | 7q32.1a          |
| - | 7q36.1d          |
| - |                  |
|   | 7q31.31d-q31.32a |
| + | 7q36.3b          |
| - | 16p13.11b        |
|   | 10p15.1a         |
|   | 10p11.21a        |
|   | 10p11.1d         |
|   | 10q11.21b        |

|   |           |
|---|-----------|
|   | 10q23.33d |
|   | 10q26.13b |
| + | 10q26.3f  |
|   | 11p11.2b  |
| + | 11q12.3a  |
| - | 11q14.3b  |
| + | 11q14.3b  |
|   | 11q24.2b  |
| + | 12p13.32b |
|   | 12p12.2a  |
| - | 12q12h    |
|   | 12q22c    |
| + | 13q13.3b  |
|   |           |
| + | 14q11.2a  |
|   | 14q32.11a |
| + |           |
|   | 15q24.3b  |
| + | 15q24.3b  |
|   | 15q26.1b  |
|   | 15q26.2a  |
| - | 15q26.2b  |
| + | 15q26.3b  |
| - | 16p12.3a  |
|   | 16q24.2b  |
|   | 16q24.3a  |
| + | 17p11.2e  |
|   | 17q11.2c  |
| - | 18q22.3d  |
| + | 19q13.2a  |
|   | 19q13.33e |
|   |           |
| + | 1p34.3a   |
|   |           |
| + |           |
| + | 1q23.3b   |
|   | 20p12.2b  |
|   |           |
| - | 22q11.1c  |
| + |           |
|   |           |
| + | 2p16.1d   |
| - | 2p14c     |
| + | 2p11.2g   |

|   |                |
|---|----------------|
|   | 2q11.2a        |
|   | 2q21.1d        |
| - | 2q21.1d        |
| - | 3p25.3c        |
| + |                |
| + | 3p21.1c        |
|   | 3p12.3c        |
| - | 3q25.1c        |
|   | 3q26.1a        |
| + |                |
|   | 4p16.3b        |
| + | 4p14b          |
| - | 1q12p          |
| - | 4q26f          |
| + |                |
| - | 5q23.1a        |
| - | 5q35.1e        |
|   | 6p25.2b        |
| + |                |
| + |                |
|   | 6p22.1b        |
| + | 6p21.32b       |
| + | 6q27c          |
| + | 7p15.1d        |
| + | 7p14.3c        |
| - | 7p11.2a        |
| - | 7q31.1c        |
|   | 7q36.1d        |
| + | 8p23.3b        |
| - | 9p21.1c-p21.1b |
| - | 9q12h          |
| - | 9q34.3d        |
| - | 10p11.22b      |
|   | 10q24.33a      |
| + | 10q26.3f       |
|   | 11p15.2b       |
| + |                |
|   | 15q11.2a       |
| + |                |
|   | 16p11.2a       |
|   | 19p13.3i       |
|   | 1q32.1d        |
| + | 22q12.3a       |
| + |                |



+ 2q12.2b  
2q31.1f  
2q34a  
3q26.1a  
4p13b  
5p15.2a  
5q21.1a

+ 7q11.21b

+ 9q33.2a  
+ 7q32.1a  
7p11.2a

+ 7p15.2a  
19q13.33d  
7q21.3c  
+ 7q33c  
+ 7q32.1a  
10p15.1a  
- 10p14b  
10p14a  
- 10p11.22b  
+ 10q23.2b  
+ 3p12.3d  
+ 11p15.4a  
- 11p15.2a  
11q13.1c  
- 11q13.4c  
11q14.3b  
11q22.1c

+ 12p11.21b  
- 12q13.2c  
+ 13q22.1a  
- 14q11.1d

-

-

- 15q24.3b  
- 15q26.3c

16p13.3b

-  
- 16p11.2e  
- 16p11.2d  
+ 16p11.2d  
- 16p11.2c  
16p11.2b  
+ 16q22.3c  
+ 17p13.3c  
+  
  
+ 17q12c  
17q24.1a  
17q24.2c  
18q23d  
- 19p13.3d  
19p13.2e  
+ 19p12c  
- 1p36.33b  
- 1p36.21d  
1p32.3e  
  
+ 1q32.1b  
- 1q42.2a  
- 1q42.2c  
-  
- 21q11.2b  
  
- 22q13.2b  
- 22q13.33b  
+  
  
+ 2p11.2d  
- 2q13b  
+ 2q14.1a  
2q22.1b  
+ 2q31.1g  
  
2q36.1b  
+ 3p21.1d  
+ 3q27.1b  
+ 3q27.3a  
+ 3q29e

|   |           |
|---|-----------|
|   | 4p15.33a  |
| + | 4q13.2c   |
|   | 4q25f     |
| + | 4q31.21c  |
| - | 4q33a     |
|   | 4q35.1f   |
| + | 4q35.2d   |
| - | 5p15.1c   |
|   | 5q11.2f   |
| + | 5q13.3c   |
| - | 5q14.1e   |
|   | 5q15d     |
| - | 5q35.3b   |
| - | 1q42.11a  |
|   | 6p22.3f   |
|   | 6p21.1d   |
| + | 6q27d     |
|   | 7p22.1d   |
| - | 7p22.1c   |
| - |           |
|   | 7q11.21d  |
| - | 7q11.21d  |
| - | 7q11.23d  |
|   | 7q33b     |
|   | 8p11.21a  |
| + |           |
| + | 9p11.2b   |
| + |           |
|   | 11p15.1e  |
|   | 9q22.33a  |
|   | 9q22.33a  |
| + | 9p13.3d   |
| - | 9q31.1a   |
|   | Xp22.2    |
|   | Xp22.13a  |
|   | Xp21.3d   |
| - | Xq21.2a   |
| - | 16q22.3c  |
| + | Xq22.3c   |
| - | Xp22.33a  |
| - | Yp11.2j   |
|   | 10q11.22a |
| - |           |

|   |           |
|---|-----------|
| - | 12p11.21b |
|   | 12q21.2a  |
| - | 13q31.2a  |
| - | 10q11.21a |
|   |           |
| + | 15q24.2a  |
| + | 15q26.3d  |
| - |           |
| + |           |
| - |           |
|   | 16q23.1b  |
|   |           |
| + | 17q21.31a |
| + | 18p11.32c |
|   | 18p11.21a |
| - | 19q13.42a |
|   |           |
|   | 1p36.21d  |
| + | 1p36.21d  |
| + | 1p36.21a  |
|   | 1p13.3b   |
|   | 21q11.2b  |
| + | 21q11.2b  |
| + |           |
|   | 2q13b     |
|   |           |
|   | 3p25.3c   |
| + | 6p25.1c   |
| + | 6p22.1b   |
|   |           |
|   | 7p15.3b   |
|   |           |
|   | 7q11.22a  |
| - | 7q11.23c  |
|   | 7q22.1f   |
|   |           |
|   | 7q34a     |
| - | 7q34a     |
| + | 17q21.32a |
| - | 16q22.3c  |
| - | 9q33.3a   |

- 5q35.3e  
- 2q13c  
- 7q11.23d  
+ 4q13.2b  
+ 22q12.2b  
+ Xp11.1b  
+ 12q21.1c  
+ 22q13.31b  
- 15q24.1b  
+ Xq13.2b  
16p12.1b  
  
+ 19p13.2b  
  
+ 16p11.2d  
- 16p11.2d  
- 20p12.1b  
+ 16p12.1c  
-  
-  
- 5q31.2d  
  
+ 7q11.21c  
  
+  
  
+  
  
+

-

7p22.1a

+

-

+

-

15q11.2b

3p12.3d

-

+

-

-

-

-

+

-

-

-

-

+

+

-

+

-

+

+

-

-

-

-

+

+

+

+

-

-

-

-

+

-

6p25.3b

Xq21.1a

19q12b

4p15.1c

2q23.2a-q23.3a

Xq23d

10q22.3f

11q14.3b

9p12b

4q13.2c

15q25.3a

6q12d

11q14.3b

Xq23d

-  
- 14q11.1d  
- 21q11.2a-q11.2b  
-  
- 21q22.3d  
+ 6q12a  
- 17p13.3d  
-  
8p12e  
+  
- 10q22.3f  
- 12q12b  
Xq21.1c  
+  
- 12p13.31b  
3p13b  
-  
+ 12q24.12a  
Xq21.1c  
6q13a  
+  
+  
-  
+  
+ 4q13.3a  
+ 4q13.3a  
- 14q11.1d  
4q13.3a  
-  
- 15q25.2b  
- 2p11.1d  
-  
6q13b  
+ 21q22.3d  
4p16.3d  
+  
11q22.3b-q22.3c  
+  
1p36.22d  
6q21d  
+  
- 15q11.2c  
22q13.31e  
+ 10q26.2a



-  
+ 2p11.1d  
+ 6q16.3a  
-  
+  
-  
+  
- Xq23d  
+ 16p13.11b  
+ 5q11.2h  
Xq21.31e  
+ 16p13.11b  
+  
6p25.1b  
+  
+ 2p11.1d  
- 17q25.1a  
+ 17q12c  
+ 21q22.3e  
-  
-  
+  
-  
-  
Xq21.1e  
- 9p11.2d  
- 11q21a  
+  
+ 5q21.1a  
-  
+  
+  
10q23.1c  
+  
+ 9q22.31b  
- 1q32.3c  
+ 9q21.13c  
15q25.3a  
-  
+  
- 12q22b  
11q11c  
+  
-

+  
-  
-  
- 5q21.1b  
+ Xq24b  
-  
-  
+  
-  
-  
-  
- 4q13.3e  
- 2q37.3g  
+  
-  
- 9p11.2c  
Xp11.3c  
-  
+  
+  
- 5q35.2d  
+  
+ 9q34.3g  
+  
+ 2q11.2a  
+ 9q34.3g  
- 5q32c  
+  
6p25.2b  
+  
+ 10q11.21c  
+ 12q24.22a  
-  
+  
- 12q13.13a  
- 17q25.1d  
+  
+ 12p13.2a  
-  
+ 5p14.3b  
- Xq21.32a  
- Xq24d  
- 8q23.1b

-  
7p11.2b  
15q15.1b  
- 12q22a-q22b  
+  
+  
16q21b  
- 13q34d  
+ 15q26.1b  
- 4p16.2b  
+ 2q37.3c  
-  
+  
+  
-  
+  
+  
+  
+  
+  
+  
+  
+  
+  
+  
7q36.1a  
+ 4p15.33e  
+ 4p12a  
+  
+  
9q34.3d  
- 10p12.2a  
- 20p12.3c  
- 7q36.1b  
- Xp11.23f  
-  
5q21.3d  
+  
+  
+  
+  
- 5p15.33e  
+ 9q34.3f  
-  
-  
-  
-

+ 3p24.1c  
+ 11q12.1c  
- 11q12.1c  
+  
+ 12p12.3b  
- 1p36.33b  
+  
-  
-  
-  
- 11q22.3a  
-  
+  
-  
+  
+  
+ 8q12.3b  
+ 10q23.32b  
-  
+ 15q26.1d  
-  
+  
- 8q22.3b  
- 5q35.3f  
+ 11q22.3b  
+ 12p13.31b  
- 10q23.33a  
- 6q14.3c  
- 14q12a  
+ Xq23a  
+ Xq23a  
+ Xq28g  
+  
- 16q12.2c  
-  
-  
+  
+

|   |           |
|---|-----------|
|   | 17p13.1c  |
| + |           |
|   | 11q22.3c  |
| - | 7q11.21b  |
|   | 2q31.1e   |
| + | 1p36.33a  |
| - | 5p12c     |
| - |           |
| - |           |
| - | 1p36.33a  |
| - | 2q31.1f   |
| - |           |
| + |           |
| + | 5p12c     |
| + |           |
| - | 9q12i     |
| - | 10q11.22c |
| - | 15q21.1c  |
| - |           |
| - | 5q14.1e   |
| - |           |
| + |           |
| - |           |
| - | 2q31.1f   |
| + | 3q11.2b   |
| + | 1p36.13a  |
| - | 17p13.1b  |
| - |           |
| - | 1p36.13b  |
| + | 1p36.13b  |
| - |           |
|   | 2p16.3d   |
| + | 19q13.12a |
| - |           |
| - | 10q11.22d |
|   |           |
| + | 5q23.1a   |
|   | 6q22.1d   |
| + |           |
| - |           |
| - | 8p23.3b   |
| - |           |
| + |           |
| + |           |

|   |           |
|---|-----------|
| + | 17q21.31d |
| - |           |
| - | 10q11.23a |
| - | 4q12d     |
| + |           |
| + | 22q13.33b |
| + | 17q21.31d |
| - |           |
| - | 1q42.11a  |
| - | 10q24.1b  |
| - | 2q31.1f   |
| + |           |
| - |           |
| + |           |
| - |           |
| + |           |
| - | 17q21.31e |
| - | 17q21.31e |
| + |           |
| - | 10q26.3e  |
| - | 5q14.3d   |
| + |           |
| - | 14q13.1a  |
| - |           |
|   | Xp11.22b  |
| + |           |
| - | 17q21.32a |
| - |           |
| + | 19q13.2c  |
|   | 8q11.21c  |
| + | 8q23.2a   |
| + |           |
|   | Xq22.2b   |
| - |           |
| - |           |
|   | 8q21.12a  |
| + |           |
| - |           |
|   | 17q21.32a |
| + |           |
| + |           |
|   | Xq22.3a   |
| + | 4q13.1b   |
| + |           |

|   |          |
|---|----------|
| + | 17p11.2i |
| + |          |
| - |          |
|   | 4q22.2b  |
| - |          |
| + | 3q12.1c  |
| - |          |
|   | Xp11.3b  |
| + | 11q13.1a |
| + |          |
| + |          |
| + | 5q34a    |
| + | 4p16.1b  |
| + |          |
| - |          |
| + |          |
| - |          |
| + | 4q13.1d  |
| + | 9q12i    |
|   | Xq22.3b  |
|   | 14q13.2b |
| - |          |
|   | 14q21.3b |
| - | 1p34.2a  |
| - | 1q21.1a  |
| + |          |
| - | Xq26.3a  |
| - |          |
| - |          |
| - |          |
| + | 7q11.21d |
| - | 13q14.3d |
| + | 4q28.1a  |
| + | 6q24.3a  |
| - |          |
| + |          |
| + |          |
| - |          |
| + |          |
| + | 22q11.1c |
| - |          |
| + |          |

- 18p11.21a  
+  
+  
- 3q13.11a  
+  
- 9q12j  
  
+ 17p12a  
- 17q21.32c  
- 15q14d  
+  
- 8p23.3a  
3p21.31j  
  
+  
-  
-  
+  
+  
+ Xp11.23f  
+  
-  
  
15q22.2a  
5q33.1c  
  
+  
+  
-  
+  
+ 7q36.3a  
-  
  
4p15.33c  
1p36.23b  
  
+  
+ 15q15.1a  
+  
-  
+ 6q25.1b  
+  
+  
-  
  
2q32.1b  
4q31.1c  
  
-  
+  
+ 7p13d



-  
+ 4q31.1d  
- 14q22.2b  
- 5q14.1d  
- 5q35.1d  
+ 3q13.13b  
- 1p36.11a  
- 16q22.1a  
- 19p13.3j  
+ 17p11.2c  
+ 11p15.2c  
+ 5q35.1d  
+ 19q13.2c  
- 1p36.22d  
+ 11q13.2a  
- 18p11.32c  
+  
+ 15q15.1d  
+ 12q14.2a  
+ 4p15.32b  
- 17p11.2f  
+  
+ 6p22.3d  
+ 1q21.1e  
+ 1q21.1e  
+ 6q23.3a  
- 12p12.1b  
+ 7q36.3b  
+ 1p31.3b  
- 10q21.3d

+  
-  
-  
+ 12p12.1a  
-  
-  
+ 7q36.3c  
Xq11.1b  
12q14.3b  
- 5q14.3d  
10p12.31a  
-  
+  
-  
- 15q23b  
-  
-  
- 16q22.1f  
11p15.1d  
+ 17p11.2c  
2q32.3c  
-  
- 5q14.3f  
+  
- 11q13.2a  
-  
-  
-  
+  
+  
- 1p36.21d  
-  
+  
-  
+ Xq11.1c  
+ 6p22.2c  
18p11.31a  
+  
+  
+ 17p11.2b  
- Xq12a  
+ 1p32.3b  
+  
-  
- 6p22.2a  
-

- 16q22.3b  
4p15.2b  
+ 12p11.21b  
+  
+ 8p23.1e  
+ 11p15.1a  
-  
3q24a  
+  
- 17q22d  
-  
+  
- 8p23.1e  
+  
-  
+  
- 15q21.2c  
+ 8p23.1f  
1p36.13f  
-  
17q23.1a  
+ 16p13.3d  
-  
- 1p36.13f  
+  
-  
-  
+ 1q22b  
-  
- 1p36.13f  
- 17q23.2a  
-  
2q33.1e  
- 15q21.2c  
-  
+ 11p14.2a  
-  
-  
17q23.2b  
16q22.3c  
- 2q14.2a  
-

|   |           |
|---|-----------|
| - | 17q12a    |
| - | 15q24.3b  |
| - | 4q28.1b   |
| - |           |
| + | 19p13.2e  |
| - | 16q23.1a  |
| - |           |
| + | 5q35.3b   |
| - |           |
| - | 3q21.3a   |
| - |           |
| + |           |
| - | 8q13.1b   |
| + | 22q11.23a |
| - | 9q22.1a   |
| + | 16p13.3d  |
| + |           |
| - | 5q35.3d   |
| - |           |
| - | 2q14.2c   |
| + |           |
|   | 17q23.3b  |
|   | 6q25.1a   |
| - | 7q21.3b   |
|   | 9p24.1b   |
| + | 19q13.33b |
| - | 2q33.3b   |
| + |           |
| + |           |
| - | 17q23.3b  |
| + |           |
| + | 18p11.21f |
| - |           |
| - |           |
| + |           |
| - | 5p15.1b   |
| - | 22q11.23b |
| - |           |
|   | 17q11.2c  |
| + | 10p11.22c |
| - | 17q11.2c  |
| + |           |
|   | 18p11.21e |
|   | 2p23.3d   |

|   |           |
|---|-----------|
| + | 5p15.1a   |
| - | 15q11.2a  |
|   | 5q35.3e   |
| + | 15q11.2a  |
| - |           |
| + | 5p15.1a   |
| + |           |
|   | 11p13c    |
| - | 20q13.33e |
| + | 15q11.2a  |
| + |           |
| + |           |
| + |           |
|   | Xq13.3c   |
| - | 8q21.11a  |
| - |           |
| - |           |
| - | 15q11.2a  |
| + | 2q34b     |
| - |           |
| - |           |
| - | 15q11.2a  |
| + |           |
| + | 9q34.11e  |
| - | 1p36.12a  |
|   | 15q13.1b  |
|   | 6p21.1c   |
| + |           |
| + |           |
| - |           |
| - | 10p11.21b |
| - |           |
| - | 4q28.3g   |
| + |           |
| - | 1p36.11d  |
| + |           |
| - |           |
| - |           |
| + | 1q23.3a   |
| - | 15q22.31c |
|   |           |
| - |           |
| - |           |

-  
+ 10p11.21a  
+ 8q21.13b  
- 18p11.21b  
-  
- 18p11.21b  
- 18p11.21b  
-  
8q21.13b  
+ 7q22.1f  
+ 7q33d  
- 8q21.13b-q21.13c  
-  
+ 13q12.13b  
+ 3p21.31d  
+  
19q13.41b  
+ 2q14.3e  
-  
-  
-  
+ 13q12.13c  
-  
7q22.2b  
+  
3q22.3a  
-  
-  
1p36.11a  
+ 19p13.12a  
- 4q31.22a  
+  
- Xp21.1a  
- 19p13.12a  
+ 9p21.3b  
-  
- 13q12.2b  
+ 19q13.42c  
- 16p13.11a  
+ 2q21.1b  
- 22q12.3c  
-  
- 22q12.3c  
+ 1q24.1c

|   |           |
|---|-----------|
| + | 9p21.1d   |
|   | 19q13.43a |
| + | 5p13.2b   |
|   | 3q23c     |
| - | 2q21.1c   |
| + | 19q13.43a |
| + | 15q24.1b  |
| - |           |
| - | 7p15.1c   |
| + |           |
| - | 1p22.2a   |
| - |           |
| + | 6p21.31d  |
| + |           |
|   | 15q24.2a  |
| - |           |
|   | 11p11.12b |
| + | 1q24.3a   |
|   | 9p13.3e   |
| - | 1p22.1e   |
| - | 1p22.1e   |
| - | 16p12.2b  |
|   | 2q21.1d   |
|   | 3p14.1d   |
| - | 3q24e     |
| + | 15q24.3b  |
| + |           |
| - | 2q21.1d   |
| - |           |
| - | 1q25.1b   |
| + |           |
| - |           |
| + |           |
| + | 9p13.3b   |
| - |           |
| + | 7p14.2a   |
| + | 15q25.1a  |
| - |           |
|   | 9p13.3a   |
| - |           |
| - | 13q14.11b |

- 7p14.1c  
+ 2q22.1c  
7q32.3b  
- 15q25.2a  
- 15q25.2a  
+ 9p13.1b  
-  
+ 18q21.1d  
+  
- 2p15d  
+ 7q33b  
16p11.2c  
- 3q26.1b  
2p15b  
+ 1p11.2a  
- 13q14.2c  
- 1q31.2a  
- 6p12.1d  
-  
-  
+  
+  
  
1q32.1d  
3q26.32c  
+  
- 1q32.1e  
13q22.1a  
3q27.3a  
14q32.33a  
13q22.2a  
+  
  
2p11.2g  
+  
  
2p11.2g  
3q28d  
+ 14q32.33c  
-  
+



+

1q21.1a

10q26.3f

2p11.1d

5q13.2b

5q23.2b

+

5q14.1a

2q34b

8p23.2b

12q13.12c

- 2q22.1a

2q11.2d

9p22.2b

8p23.1f

+

+ 1q22a

10p11.1d

15q25.2a  
Xp11.22c  
Xq21.33b

- 22q11.21e

- 22q11.23c

- 16p11.2a

22q11.22a

- 9q22.1a

- Xq28f

8p23.1a

- 14q12a

+ 7q11.21d

11p15.5b

+

17p12a

8q24.13e

+

2p25.1b

7q21.3d

+

11p15.4d

11q13.3f

19p13.3g

-



- 13q12.13c

- 4q35.2a

3q29e

+

5p15.2c

15q11.2a



7p11.2b

3p12.3d

|   |            |
|---|------------|
| - | Xp21.2a    |
| + | 22q12.2b   |
| + |            |
| + | 15q11.2c   |
| + |            |
| - |            |
| + | 15q13.2a   |
| - | 5p15.33e   |
| - |            |
| - |            |
| + |            |
| + | 10q11.1d   |
|   | Xq27.3d    |
| + |            |
| + | 21q11.2b   |
| - | 12p13.31b  |
| - | 9p12b-p12a |
| + | 3p12.3d    |
| - |            |
| - | 15q13.3c   |
| + |            |
| - | 10q11.21d  |
| - | 22q11.21b  |
| - | 10q11.22b  |
| - | 11p15.5a   |
| + |            |
| + |            |
| + | 7p12.1a    |
| - | 2q11.1c    |
| + | 2q24.1e    |
| + |            |
|   | 7q35a      |
| - |            |

+  
-  
-  
- 10q23.32b  
+ 10q11.21d  
-  
+  
-  
-  
+  
- 22q11.21f  
+  
- 22q11.21f  
- 12q24.23a  
+  
-  
+ 10q11.23b  
+  
-  
-  
+  
-  
+ Xq22.1c  
+  
+ 7q11.23d  
+  
-  
- 15q21.1a  
-  
+  
- 18q21.1b  
+ 8p23.1e  
+  
+  
+ 10q11.23a  
+ 9q12g  
+ 1p11.2a  
-  
-  
- 17q21.32b  
-  
+ 2q12.2b  
+  
+ 19q13.2a

- 9p13.1a  
- 1q21.1a  
+  
- 1q21.1a  
+  
+  
+  
+ 4q35.2d  
+  
- 16p11.2a  
+  
+ 16p11.2a  
1p35.3b  
+ 10p12.33c  
- 19q13.31a  
+  
-  
+  
+ 1q21.1e  
-  
+  
+  
-  
-  
-  
-  
- 2q33.1b  
+  
+ 15q24.2a  
- 17q23.1a  
- 16p13.3d  
- 17q23.1a  
Xq13.1c  
+  
+  
+  
+  
+  
-  
-  
+ 18p11.21b  
-



+  
-  
-  
+  
-  
-  
+  
+

16p11.2e

1p12a

7q36.1c

10q11.23b

2q11.2b

4p16.3d

+

+

+

-

+

-

+

+

+

-

-

-

+

-

+

+

+

-

-

-

-

+

-

+

+

-

-

+

+

17p11.2f

2q13d

15q14b

3q13.33b

10q11.23a

15q25.2a

4q13.2c

12q24.11b

12q21.2b

6p11.2a

15q13.1c

12p13.31c

1q21.1a

12q24.33d

15q11.2a

16p13.2a

Xp11.22b

14q11.1d

15q25.2a

2q13d

19q12c

Xp11.22b

|   |           |
|---|-----------|
|   | 11q22.2a  |
| + |           |
|   | 10p15.1e  |
|   | 13q12.11a |
|   | 3q29g     |
| - |           |
|   | 18p11.31e |
|   | 13q32.1c  |
| + |           |
|   | 15q13.2b  |
|   | 1p13.3c   |
| - |           |
| + |           |
| + | 22q11.21b |
|   | 15q25.2b  |
|   | 8q24.3g   |
|   | 12p13.31b |
| + |           |
| + | 14q11.1d  |
| + | 21q11.2b  |
| + | 16q12.1c  |
| - |           |
| - | 15q25.2b  |
|   | 16q24.3b  |
| + |           |
| + | 6q16.3a   |
| + | 12q24.31d |
| + |           |
| + | 10q26.3f  |
| - |           |
| - | 8p12a     |
|   | 9q22.32a  |
|   | 13q12.11b |
| + |           |
| + | 22q11.21b |
|   |           |
|   | 6q12g     |
|   | 2q24.2a   |
| - |           |
|   | 2q24.1d   |
| + |           |
|   | 12q24.31d |
|   | 6q16.3b   |
| + |           |
|   | 3q29i     |
|   | 18q21.32c |
|   | 18q21.32b |
| - |           |
|   | 15q25.3a  |
|   | 3q29g     |
| - |           |
|   | 4q21.22a  |
| + |           |
|   | 17q12c    |
| - |           |
|   | 16p13.11b |
| + |           |
|   | 22q11.21c |
| + |           |
|   | Xp11.4b   |
| - |           |
|   | 5q35.1d   |

|   |            |
|---|------------|
| + | Xq21.31e   |
| + | 5q12.1b    |
| + | 12q22a     |
|   | 4q35.1d    |
|   | 5p15.2a    |
| - | 12q13.11c  |
| + | 2p25.3e    |
| - |            |
| - | 10q23.2b   |
| - | 4q12a      |
|   | 18q21.33b  |
|   | 17q21.2a   |
|   | 2q37.3f    |
| - | 22q11.21d  |
| + | 22q11.21d  |
|   | 2q14.3a    |
|   | 17p13.2c   |
| + | 2q37.3f    |
| - | 3q29i      |
|   | 4p16.2b    |
|   | 6q26c-q27a |
|   | 15q14c     |
| + | 11q23.1c   |
| - | 15q13.1b   |
|   |            |
|   | 17q21.2a   |
|   | 5q13.2a    |
| - | Xq22.1d    |
| - | 7p11.2b    |
| + | 5q35.2d    |
|   | 6q15a      |
| - | 6p22.3e    |
| + | 4p16.1c    |
|   | 2p23.2b    |
| + | 5p14.3b    |
| - | 1q41e      |
|   | 1p34.3c    |
| - | 22q11.21f  |
| - | 1p34.2d    |
| + | 5q13.2b    |
|   | 7q11.22c   |
| - | 8p23.1f    |
| - | 7p11.2a    |
|   | 5q23.2a    |

- 7p11.2a  
+ 12q23.1d  
Xq26.3a  
+ 19q13.12b  
+ 5q13.2a  
+ 5q13.2a  
- 3q11.2b  
3p24.3a  
+ 1p36.33b  
- 5q13.2a  
- 4q21.3e  
+ 10q11.23b  
+ 19q13.12c  
2q11.2b  
12q24.13a  
+ 5q35.3b  
+ 21q22.12b  
10q23.33d  
+ 4p16.1d  
- 5q13.2b  
+ 11q12.2a  
1p34.2d  
- 18q11.2e  
4q24b  
+ 5q23.3c  
5q13.2c  
+ 12p12.3c  
6q22.31e  
+ 14q11.2g  
+ 10q21.1f  
- 10q11.22a  
12p13.31b  
- Xq28g  
- 1p36.33a  
6q22.32c  
- 12p12.3a  
3p22.3c  
9q12h  
8p23.3b  
12q24.22a  
17q25.3h  
12q13.13e  
5q23.1e  
- 12p13.31a

|   |             |
|---|-------------|
| + | 5q14.1a     |
|   | 1q42.13b    |
| + | 15q25.2b    |
| - | 11p15.4c    |
| + | 16p11.2e    |
| - | 12q23.3d    |
| + | 7q36.1c     |
| - | Xq13.2c     |
|   | 14q12b-q12c |
|   | 15q15.3b    |
| - | 8q13.2b     |
|   | Xq13.3a     |
| + | 3q13.31a    |
|   | 3q13.31a    |
| + | 1q21.1c     |
|   | 16p11.2d    |
| - | 21q22.13a   |
| - | 2p21d       |
|   | 5q14.1c     |
| - | Xq23d       |
| - |             |
| + |             |
|   | 12q13.13f   |
| - | 19q13.13a   |
| - |             |
| + | 3q13.31c    |
| - |             |
| - | 20p11.1c    |
| - | 16p11.2d    |
| - |             |
|   | 9p11.2a     |
|   | 5q14.1b     |
| - |             |
| + | 19q13.2a    |
| + |             |
| + | 10p11.21a   |
| - | 18q21.1b    |
|   | 5p12b       |
|   | 19q13.2a    |
| - |             |
| + | 1q21.1e     |
| - | 10q11.23a   |
| + | 1p36.12b    |
| - | 1q42.2c     |

|   |           |
|---|-----------|
|   | 11q13.1c  |
| - | 10q11.23b |
| - | 1q21.1e   |
| - | 2q31.3a   |
| + | 4q26f     |
|   | 10q24.33a |
| + | 4q26f     |
| - | 12p12.3d  |
|   | 1q42.13b  |
| + | 22q11.1c  |
|   | 1p36.12a  |
| + | 6q24.1c   |
|   | 15q15.1c  |
| + | 1q21.1d   |
| + | 5q31.1c   |
| + | 11q13.1a  |
| + | 3p22.1a   |
| + | 5q31.3e   |
| - | Xp11.3a   |
| + | 3q21.2c   |
|   | 15q21.3d  |
|   | 2q13a     |
|   | 11q23.3g  |
| - | 11q13.2a  |
|   | 6q25.1a   |
|   | 16q21d    |
|   | 1p32.3d   |
| + | 2q11.2a   |
| - | 10q22.3e  |
| + | 17p11.2f  |
| + | 2q32.3a   |
| + | 6q27f     |
|   | 19p13.2a  |
|   | 20q13.33a |
|   | 12q14.3b  |
|   | 1p36.11b  |
|   | 22q11.21b |
| + | 2p14c     |
|   | 2p14c     |
|   | 20p11.21a |
|   | 14q22.1c  |
| - | 2q33.1a   |
| + | 16p11.2a  |
| - | 2q33.3b   |

-  
- 9q21.32c  
- 3q21.3d  
- 19p13.13c  
-  
+ 1q42.3a  
+ 2q33.1d  
- 2q33.3d  
- 17q22c  
+ 5q33.1e  
- 1p32.2a  
+ 4q28.1e  
- 19p13.3b  
- 12q14.2b  
- 7q11.23d  
+  
+ 8p23.1e  
+ 11q21a  
- 16p13.3f  
- 11q21b  
- 22q11.21e  
- 1p36.21a  
- 3p22.1c  
- 16q24.2b  
+ 13q11c  
- 15q21.3c  
+ 13q11c  
+ 4q31.3a  
- 1p36.13e  
+ 5q35.3d  
+ 2q33.3b  
- 20q11.22b  
- 3q21.3c  
- 1p36.13e  
+ 5q35.3e  
- 18p11.21f  
+ 6q25.3f  
- 20q11.22b  
-  
- 19q13.32c  
+ "Xp22.33d,Yp11.32a"  
- 14q23.1b  
- 11q13.2a  
- 16p13.3d



- 1q43f  
10q26.11c  
- 10p11.23a  
- 4q31.21c  
+ 19p13.11f  
13q12.11b  
17q23.3a  
15q24.1a  
3q23c  
- 3q22.1d  
1p31.1f  
- 8p23.1a  
- 1p36.33b  
2q14.3a  
+ 5q35.3g  
+ 1p31.1g  
1p31.1e  
+ 2p23.3b  
+ 6p21.31d  
+ 16q23.1d  
1p31.1d  
1q23.1e  
+ 15q11.2a  
+ 6p21.33a  
11p11.2e  
1q44e  
+ 1q44e  
- 6p21.33a  
1p31.1c-p31.1b  
- 22q11.23b  
11q13.4b  
- 2p11.2e  
+ 7p21.3e  
17q12b  
+ 2p11.2d  
- 2q37.1a  
16q24.1a  
- 2q37.1b  
+ 22q12.1a  
- 1q23.3a  
+ 5p13.3a  
19p12d  
  
11q14.1a

|   |                 |
|---|-----------------|
| + | 1q23.3d         |
|   | 16p13.13c       |
|   | 11q14.1d        |
| + | 2p22.1c         |
|   | 9p21.3c         |
| + | 2q21.1b         |
| + | 2p25.1a         |
|   | 3q26.2b         |
| - | 22q12.2b        |
| - |                 |
| + | 7p15.3b         |
| + | 2q21.1b         |
| + | 15q13.1b        |
|   | 1p21.1d         |
|   | 2q21.1d         |
| - | 19q13.43c       |
| - | 5p12b           |
| - |                 |
| + |                 |
|   | 2p21a           |
|   | 1p21.2a         |
|   | 19p12b          |
|   | 16p12.1c        |
|   | 9p13.3c         |
| + |                 |
| - | 1q24.2a         |
| - | 1q24.2c         |
|   | 2p16.1b         |
| + | 16p11.2e-p11.2d |
|   | 1q25.1a         |
|   | 22q13.2b        |
|   | 1q25.2a         |
|   | 19q13.43c       |
| - | 14q32.33a       |
|   | 16p11.2c        |
| + | 2p14c           |
| - | 13q14.3b        |
| - | 14q32.2a        |
| + | 13q21.32b       |
|   | 1q32.1d         |
| + | 1q21.1a         |
|   | 2p11.2d         |
| + | 2p11.2c         |

+  
+  
+  
-  
+

7q11.21b  
7q11.21b  
7p11.2a

+  
-  
-  
-

7p11.2b

-  
-  
+

12q12c

16p11.1c

1q21.2a

5p12c  
22q11.21f

- 15q25.2a

- 7q36.1e

- 1q42.13e  
5q14.3g

+ 14q32.31a

+ 10p12.1b

16q24.1c

|   |           |
|---|-----------|
|   | 7q36.1b   |
| - | 11q24.1b  |
| - | 11q24.1b  |
| - | 13q13.1a  |
|   | 3q27.1b   |
| - | 9q34.3c   |
|   | 2q11.2a   |
| + | 17q21.31a |
|   | 22q11.23a |
| - | 4q25f     |
|   | 11p15.1d  |
| - |           |
| - |           |
| + |           |
| + | 8p12e     |
| + | 9p13.3a   |
| + | 2q37.1a   |
| + | 7q34e     |
| - |           |
| + | 3q26.2a   |
|   | 4p16.1f   |
| - | 17p11.2h  |
| + | 22q11.22a |
| - |           |

+ 3p26.1a  
- 19p13.3b  
+ 16q12.1a-q12.1b  
- 8p23.1a  
+ Xq24b  
- 18q21.1a  
- 6q25.3f-q26a  
- 9q31.3b  
- 19p13.11a  
- 1p22.3f  
+ Xq21.1b  
- 12p13.31d  
- 5p15.33d  
+ 16q12.2c  
- 12p13.31d  
- 15q14a  
- 1q32.3a  
- 19p13.12c  
+ 1p31.1b  
+ 2p25.1b  
- 18p11.31e  
+ 3q28a  
+ 19p13.2b  
- 11q12.1c  
- 1q32.3c  
+ 5q15e  
- 4q31.3a-q31.3b  
+ 3q29i  
- 7q22.1c  
- 11p15.5c  
- 19q13.2a  
+ 19q13.12a  
+ 11q13.1e  
+ 7q33a  
- 3p14.1c  
+ 1p13.2c  
- 12q14.1a-q14.1b  
+ 4q25c-q25d  
+ 12p12.1b  
+ 12q13.3b  
+ 14q11.2f  
- 6q25.1a  
- 2q22.1d-q22.2a  
+ 19q13.11b

- 11p11.2b  
+ 11q13.2b  
- 1p32.3c  
- 4p16.2c  
+ 6p12.1c  
+ 8q24.3h  
- 3q29c  
+ 6p22.2a  
+ 6p22.2a  
+ 14q11.2g-q12a  
- 10q11.22d  
- 10q22.1a-q22.1b  
+ 12p13.31d  
- 8q24.3h  
- 19p13.11c  
- 9q34.3e  
+ 15q26.3b  
- 16q22.1a  
+ 21q22.3d  
- 3q26.2b  
- 11q13.5b  
+ 3q29g  
- 3q26.2b  
+ 16q22.1b  
+ 17q21.32a  
- 17q21.31d  
17q11.2d  
17q11.2c  
1p36.21c  
- 1p31.1k  
- 1p33d  
+ 1p32.3c  
- 1p31.1h  
+ 17q25.3g  
+ 17q21.32b  
- 1p36.32b  
17p11.2g  
+ 15q23b  
+ 11p15.5d  
- 15q15.1d  
- 3q13.33b  
- 17q21.33b  
- 8q24.22b  
- 8q13.1b-q13.2a

|   |                  |
|---|------------------|
| + | 8q21.3e          |
| + | 1p31.1k          |
| + | 9q34.11c         |
| + | 1p22.2c          |
| + | 1p22.2b          |
| + | 19p13.2e         |
| + | 8q21.2b          |
| + | 2q37.3b          |
| - | 3p22.2b          |
| - | 1p31.1h          |
| + | 12q12c           |
| + | 3p26.2b          |
| - | 1q32.1f          |
| + | 7q31.1b          |
| - | 20p12.3c         |
| + | 11q13.4a         |
| + | 7q22.1e          |
| - | 3q13.31b-q13.31c |
| - | 3q29d            |
| - | 8p12a            |
| - | 1p34.3d          |
| - | 17q21.31c        |
| + | 19q13.11c        |
| + | 20q13.33c        |
| - | 6p21.33a         |
| + | 3p25.1a          |
| - | 19p13.11c        |
| - | 7p14.3c          |
| + | 4q31.22b         |
| - | 19p13.3g         |
| + | 7q31.31a         |
| - | 17p13.1d         |
| + | 11p15.5b         |
| + | 19q13.12a        |
| - | 21q22.3f         |
| + | 6p21.33a         |
| + | 12p12.2a         |
| + | 6p21.33a         |
| - | 12q23.1a         |
| - | 6p21.33a         |
| + | 14q12a           |
| + | 2p22.3d          |
| - | 11q13.1c         |
| + | 19q13.2b         |



|   |                |
|---|----------------|
| + | 5q35.3e        |
| - | 3p21.31i       |
| - | 15q15.1c       |
| + | 6q24.2b        |
| - | 16p13.3f       |
| + | 7q34b          |
| - | 1p36.12a       |
| - | 3q25.32b       |
| + | 8q24.3f        |
| + | 6p21.33a       |
| + | 6p21.33a       |
|   | 8q24.3f        |
| - | 2q24.2a        |
| + | 6p25.1a        |
| + | 1q23.3a        |
| + | 8q21.11a       |
| - | 4p16.2b        |
| - | 2q11.2c        |
| - | 19p13.13b      |
| + | 8q12.1a        |
| - | 2q21.2b        |
| - | 19q13.2c       |
| + | 2q23.2a        |
| + | 2q23.2a        |
| - | 8q11.23d       |
| + | 1p36.11d       |
| - | 6p21.32a       |
| + | 1q41c          |
| + | 16p12.2c       |
| - | 6q15d          |
| - | 6p25.1c-p25.1b |
| + | 12p12.1b       |
| + | 5q31.1a        |
| - | 1q21.2d        |
| - | 15q21.2b       |
| - | 5q14.3g        |
| - | 15q26.3b       |
| - | 1q42.3c        |
| + | 12q15c         |
| - | 1p36.22d       |
| - | 3p21.31j       |
| + | 22q11.21e      |
| - | 8p21.3c        |
| + | 10q24.31a      |

- 12p13.31c  
- 12p13.31b  
- 19p13.3d  
+ 4q31.3a  
- 7p15.3e  
- 11q13.1a  
- 7p22.3a-p22.2c  
- 4q27a  
- 1p36.22b  
+ 11p11.2b  
+ 4p16.3c  
+ 1q24.1c  
+ 8q24.3g  
- 8q24.3f  
- 20q12b  
+ 22q13.1b  
+ 19q13.12a  
- Xq28e  
- Xq28e  
Xp21.3c  
+ Xp11.22b  
+ Xp11.21a  
+ Xq13.3c  
- 3q27.1b  
+ Xp11.21a  
+ Xp11.23b  
- 16p13.3b  
- 1p32.3c  
- 12p13.2c  
- Xq21.1a  
- 6p24.2a  
+ 9q21.33b  
+ 8p12c  
+ 2q11.1c  
+ 9q34.3e  
5q35.3e  
+ Xq28c  
+ 1p12c  
+ 9q34.3e  
+ 15q26.1c  
- 19p13.13c  
+ 4p16.1f  
- 15q24.2a  
- 4q24b

|   |                |
|---|----------------|
| + | 20q11.23b      |
|   | 6q16.1e        |
| + | 1p34.3b        |
| - | 12p13.2a       |
| + | 15q15.3a       |
| + | 5q13.2b        |
| + | 2q31.1d        |
| + | 20q11.22a      |
| + | 16q24.2a       |
| - | 1q43e          |
| + | 19p13.11d      |
| + | 2q34a-q34b     |
| + | 15q22.31c      |
| - | 4q23b          |
| - | 19p13.3e       |
| + | 17p11.2b       |
| + | 17p12d         |
| + | 17q24.3a       |
| + | 19p13.2e       |
| + | 5q11.2f        |
| - | 11q13.1d       |
| - | 12q13.13e      |
| + | 3q27.2a        |
| - | Xp22.12b       |
| + | 17q23.3a       |
| + | 6q26a          |
| - | 6q23.3b-q23.3c |
| - | 1p36.11a       |
| - | 6q15e          |
| + | 22q13.1d       |
| + | 6q25.1a        |
| - | Xp21.2a        |
| + | 10p11.23a      |
| - | 14q24.2a       |
| - | 19q13.2a       |
| - | 11q13.1b       |
| - | 2p22.1c-p22.1b |
| + | 2q11.2e        |
| - | 14q22.1b       |
| - | 11q13.5a       |
| - | 3q27.1a        |
| - | 6q23.3b        |
| + | 1p34.3d        |
| - | Xp22.12b       |

- 4q32.1b  
+ 1q22c  
- 22q11.21f-q11.22a  
- 4q21.3a-q21.3c  
- 22q13.33b  
- 22q13.33b  
+ 6p21.31b  
+ 6p21.31b  
+ 8q24.3g  
16p11.2d  
+ 15q21.2c  
+ 17p11.2e  
+ 10q11.22d  
+ 11p11.2c  
+ 16p13.3e  
- 5q35.3e-q35.3f  
+ 1q32.1h  
+ 3p21.31b  
+ 12q24.12b-q24.13a  
+ 15q15.1c  
- 4q23b  
+ 20q11.21c  
+ 18q12.1g  
+ 2p23.3a  
+ 17q21.31e  
+ 6q22.1a  
- 1p35.1b  
+ 1q41d  
+ 11q13.1a  
+ 14q32.32b-q32.33a  
+ 19q13.32a  
+ 12q13.3b  
+ 2q33.1b  
+ 19p13.13c  
+ 1p34.1b-p34.1a  
+ 19p13.11c  
+ 5q12.3c  
+ 10p12.1a  
- 10q23.1a  
+ 2p11.2f  
+ 5q34c  
- 19p13.3e  
- 1p35.2b  
+ 5q31.2d

- 14q23.3a  
+ 16p11.2d  
- 18q21.1g  
- 18q21.2c  
- 19p13.3h  
+ 19p13.2e  
- 3q21.3d  
+ 12q13.3b  
- 14q13.3a  
+ 7q22.1c  
- 5q14.3g  
+ 3q25.1c-q25.2a  
+ 13q32.1c  
- Xq26.2a  
2p25.1e  
- 19q13.42a  
- 18q23b  
- 17q21.33b  
- 16q23.3b-q24.1a  
+ Xp22.12a-p22.11b  
+ 16q24.3b  
- 18p11.21c-p11.21b  
- 18q21.32b  
+ 18p11.21c  
- 11q23.3e  
- 9p13.2a  
- 22q13.2c  
- 3q27.1a  
+ 5q13.2b  
+ 6p21.33a  
- 2p13.3c-p13.3b  
+ 13q34c  
- 2p21a  
+ 22q13.2a  
- 1q21.2c  
+ 10p13e  
+ 3q21.3b  
- 6p12.2a  
- 21q22.3f  
+ 21q22.3f  
+ 8q11.21b  
+ 22q12.3c  
- 2q21.3b  
- 7q22.1c

+ 19p13.2e  
- 1p22.3f  
- 1p22.3f-p22.3e  
+ 8p23.1f  
- 12q13.12c  
- 5q15c  
+ Xq24d  
- 6p21.33b  
+ 7q31.1d-q31.2a  
- 6p21.2c  
+ 2p15a  
+ 7q11.23e  
- 12q15b  
+ 12q15b  
+ 1q32.1f  
- 6q15d  
- 14q12a  
+ 18q21.2a  
- 6p21.1d  
- 1p34.3c  
- 1p35.3a  
- 17q12c  
- 5p15.31c  
+ 17p13.2c  
+ Xq13.1c  
+ 3q25.1b-q25.1c  
- 17q23.2c  
- 12q24.21c  
- Xp11.4b  
+ 22q11.21e  
- 19p13.3i  
+ 11q21a  
- 11q12.1b  
- 6p21.1f  
+ 12p11.23a  
- 9q34.2a  
- 6q23.2a  
- 17q21.1a-q21.1b  
+ 19q13.33b  
- 19p13.11f  
- 9q34.13a-q34.13b  
+ 4p15.32b  
+ 19q13.2a  
+ 8q24.11b

- 17p13.2a  
- 13q14.2b  
- 14q24.2a  
- 5q33.3a  
- 1p34.2a  
+ 17p11.2g  
+ 15q26.3b  
- 19p13.11b  
- 5q14.3f  
- 1q22d  
- 15q22.31c  
+ 19q13.2c  
- 9q33.2a  
+ 22q13.2b  
10p13c  
- 15q14c  
- 19q13.32c  
+ 9p13.2b  
- 2p22.3e  
- 11q13.1b  
+ 7q22.1c  
+ 4q22.1a  
+ 2q13c-q13d  
+ 15q25.1b  
- 15q26.1b  
+ 15q26.1b  
+ 7q32.2b  
+ 7q31.2b  
+ 4q23a  
+ 12q22d  
+ 16p13.3f  
17q25.3h  
- 17p13.3c  
+ 14q11.2c  
+ 11p14.1d-p14.1c  
- 12q14.1a  
+ 9q34.11d  
+ 1q24.2c  
+ 11q12.3a  
+ 1q24.3b  
+ 4q26f  
+ 17q23.2d  
- 14q11.2d  
- 18p11.32a

- 2q31.1a  
+ 12q13.13b  
+ 12q13.2b  
+ 16p12.2a  
- 1q22c  
- 15q25.2a  
- 18q21.2a  
- 19p13.3h  
- 15q15.3b  
- 1p36.13e  
+ 5q33.2b  
- 17p11.2e  
- 12p13.31b  
+ 2q36.3c  
- 15q26.1a  
- 8p23.1d  
- 3q29g-q29h  
+ 1p36.22a  
- 22q13.1a  
+ 3q25.33a  
- 4p16.3a  
+ 17q25.2a  
+ 1p34.2d  
+ 8q24.3h  
+ 12q13.13e  
+ 2q32.2b  
- 4q28.1e-q28.2a  
+ 15q15.1c  
- 5q35.3f  
+ 14q22.1a  
- 2q11.2c  
- 5q35.3e  
- 4q21.21b  
  
4p16.1d  
- 15q15.1a  
- 1p36.13e  
+ 11q13.4c  
-  
+ 9p24.3b  
+ 2q32.2b  
-  
+ 3p24.3e  
- 2q37.3d



|   |           |
|---|-----------|
| + |           |
| - | Xq26.3a   |
| - | 4q24e     |
|   |           |
| - | 22q11.21e |
| + |           |
| - | 19p13.2b  |
| - | 9p12a     |
| + |           |
| + |           |
| - | 9p22.3a   |
| - |           |
| + |           |
|   | 4p16.3d   |
| - |           |
| + | 7p15.3b   |
| + |           |
| + | 19q13.43c |
| - | 5q31.2d   |
| + |           |
| - | 11q13.1a  |
|   | 11q12.3b  |
| + | 1p34.1d   |
| - | 11q22.3c  |
| + | 7q22.1f   |
| + | 19q13.11a |
| + | 22q13.1a  |
| - | 6p25.2b   |
| + | 11q24.2b  |
|   | Xq22.2b   |
| + | 1p36.31a  |
| - | 17q24.1a  |
|   | 7q22.1c   |
| - | 2p21e     |
| + | 5p12c     |
| - |           |
| + |           |
| + | 6p21.1b   |
|   | 19q13.33c |
| + | 2p11.2d   |
| + | 5q14.3c   |
| + | 2q14.1a   |
|   | 9q34.3f   |
| - | 8q24.3h   |

+ 22q13.33b  
17p13.1d  
- 7q21.3d  
+ 20q11.1c  
- 7p15.3c  
1p36.13a  
- 10q24.32a  
- 3q21.3b  
+ 10q26.3a-q26.3b  
- 12p12.3e  
+ 12p12.3d  
+ 4q31.1d  
+ 1q24.1a  
+ 19q13.2b  
+ 1q41e  
+ 22q12.1a  
+ 18q11.2a  
1p36.33a  
+  
- 6q21f  
+ 11p15.3b-p15.3a  
+ 11p15.3a  
+ 22q13.1b  
+ 6p21.33a  
+ Xp11.4d  
+ 19p13.3i  
+ 1p31.3a  
- 5q11.2f  
+ 22q11.23a  
- 17q25.1c  
+ 1p36.22a  
+  
- 3q11.2c  
+ 10q23.2b  
+ 7p21.3e  
- 13q12.12a-q12.12b  
11q24.1a  
7q22.1c  
  
18q21.31b

21q21.1b

7q32.1a

11q12.1a

16q13b

+

21q21.3a

3q26.1a

7q32.2a

11q13.1b

9q34.11b

9q21.11c

17q23.1a

1q24.3c

1q41d

9q34.11b

19p13.12c

7q22.1c

20q13.32a

14q32.31a

8q24.22d

6q13b

9q31.3a

8p21.3a

11q13.4c  
19q13.32a  
5q35.3e  
16p13.12a  
14q32.31a  
19q13.41b  
14q32.31a  
14q32.31a  
14q32.31a  
3p21.31d  
1p36.33b  
Xq23c  
17q11.2a  
14q32.31a  
9q32d  
7q21.3a  
19q13.41b  
Xq27.1b  
Xq27.3e

19q13.41b  
Xp11.23a

7p14.3c  
1q24.2a  
2q32.1f  
3p21.31k

3q26.2c  
4p15.33e  
4q32.3b  
6p12.3f  
7q32.1a  
8q22.2b  
10p12.1d  
12q13.3b  
17q24.2c

19q13.33e  
22q13.1a  
14q32.31a  
11q14.1b

14q32.2b

|   |                   |
|---|-------------------|
|   | 5q31.2a           |
|   | 7q22.1c           |
|   | 16p13.3d          |
|   | 1p13.1a           |
|   | 4p16.3b           |
|   | 3q28b             |
|   | 13q31.3b          |
|   | 21q21.1b          |
| + | 17p13.2b          |
| - | 2q11.2c           |
| + | 3p14.1a           |
| + | 1q42.12c          |
| - | 10q26.2d          |
| - | 2q14.3a           |
| - | 20p12.2b          |
| - | 22q13.1e-q13.2a   |
| + | 16p13.12a         |
| + | 7q32.3a-q32.3b    |
| - | 1p33d             |
| - | 19p13.3h          |
| - | 7q34c             |
| + | 3p25.1d           |
| - | 17q22d            |
| - | 10p12.1a          |
| + | 12q24.31a         |
| + | 3q25.32b          |
| - | 4q35.1e           |
| - | 12p13.31d         |
| + | 3p22.2b           |
|   | 16q22.3c          |
| + | 11q23.3d          |
| - | 12q13.12a-q13.12b |
| - | 7q36.1e           |
| + | 19q13.12a         |
| + | 7q22.2a           |
| - | 19p13.3b-p13.3a   |
| + | 10p12.31b-p12.31a |
| + | 1q21.2d           |
| + | 17q12c            |
| + | 2q37.3b           |
| + | 16p13.3d          |
| + | 17q21.31a         |
| + | 16q23.3b          |
| + | 4q31.22b          |

|   |                 |
|---|-----------------|
| + | 1p34.1b         |
| - | 2q23.2a         |
| - | 17q22b          |
| + | 3q25.2c-q25.31a |
| - | Xq26.3b         |
| - | 11q22.2b        |
| + | 22q11.23a       |
| - | 8q21.3b-q21.3c  |
| + | 1p36.33a        |
| + | 20q11.22b       |
| - | 17q12b          |
| - | 11q22.2a        |
| + | 20q13.12b       |
| - | 10q24.1b        |
| - | 10q24.1b        |
| - | 22q12.1b        |
| + | 14q23.1c        |
| + | 4q31.3d         |
| + | 1q23.1g         |
| - | 15q21.3c        |
| - | 17p13.3c        |
| - | 7q36.3c         |
| - | 14q32.12b       |
| - | 2p13.1b         |
| + | 4q13.3b         |
| - | 2p13.1b         |
| - | 19p13.3h        |
| - | 9p21.2a         |
| - | 1p33d           |
| + | 2q33.1b         |
| + | 18q12.2a        |
| - | 5q11.2b         |
| + | 20q13.13f       |
| - | 2p13.1b         |
| - | 3p21.31c        |
| + | 16q23.1c        |
| + | 12q14.1d        |
| - | 3q13.13a        |
| + | 21q22.12b       |
| - | Xq22.3b         |
| + | 15q25.1a        |
| - | Xq22.2a         |
| + | 19p13.13c       |
| + | 2p22.1c         |

- 12q24.31b  
- 10q24.1b  
+ 9q33.2b  
- 8q12.1b  
- Xq26.3a  
+ Xp22.2  
+ 7q22.1c  
+ 1p13.2c  
- 6q23.2b  
+ 17p13.1d  
- 11q12.1c  
+ 2p13.3b  
- 16q23.3a  
+ 13q12.11a  
- 12q24.31d  
+ 15q24.1b  
+ 19p13.3d  
- 17q22d  
- Xq28g  
- 17q21.31b  
+ 14q23.3b  
+ 7p15.3a  
- 18p11.21e  
- 11p14.1a  
+ 17p11.2h  
+ 22q12.3d  
- 2p23.3a  
+ 16p13.11b  
+ 19p13.11c  
+ 1q24.2a  
- 11q23.3d  
+ 1q25.3a  
+ 17q23.2d  
- 11q21b  
- 2q35b  
+ 4p16.1f  
- 4p16.1f  
- 11q13.2c  
+ 11p15.1d  
+ 19p13.13a  
+ 18p11.31e  
+ 17q12b  
+ 4q21.1c  
- 17q21.32b

- 11q13.1e  
+ 17q25.3f  
- 8q24.12c  
- 6p21.1b  
+ 8q11.23d  
- 11q12.1d  
- 11p15.4c  
+ 6q25.3f  
+ 2p12i  
- 6p21.1d  
- 1p36.33a  
- 11q13.2b  
+ 5q33.2b  
+ 11p15.5b  
- 1q23.1a  
- 17q21.33b  
- 16p13.3f  
- 3q22.1b  
+ 7p14.1a  
+ 2p23.2b  
+ 19p13.11e  
+ 2p11.2f  
- 5p15.33c  
+ 1p32.3b  
- 17q25.1d  
- 21q21.3a  
+ 19p13.2c  
+ 22q11.21c  
+ 9q34.3f  
+ 12q22b  
- 15q15.1b  
- 10q24.31a  
+ 2q36.1d  
+ 17q12c  
- 15q25.3d  
- 3q26.33a  
+ 11q13.4b  
+ 11q13.1c  
- 9q31.1b  
- 12p13.31d  
+ 14q11.2f  
- 2p13.1b  
+ 19p13.3e  
- 1q42.13c



- 1q21.3a  
- 6p21.1f  
+ 15q25.3d  
+ 19q13.2a  
- 1p34.3d  
- 10q22.2a  
+ 7p11.2b  
- 6p21.1c  
+ 6p21.33b  
+ 4q21.23a  
+ 9q34.3b  
+ 1q21.2b  
+ 3q23a  
- 17q22d  
- 7p13e  
- 3p24.3e  
+ 20p13c  
- 5q13.2b  
- 8q21.13a  
+ 5p12a  
- 13q14.11a  
- 7q34d  
- 16p13.3e  
+ 12p11.22b  
+ 5q13.2a  
- 2q11.1c  
+ 21q22.11c  
+ 17q25.1c  
+ 2q12.1d  
+ 9q33.2b  
+ 12q21.1a  
+ 1p36.13b  
+ 11q12.2a  
+ 11q12.1d  
+ 11q12.2a  
+ 11q12.2a  
+ 2p21a  
+ 5q14.1e  
+ 6p21.33a  
+ 2p16.3d  
+ 17q22c-q22d  
+ 17q21.1c  
- 3q22.2b  
+ Xp22.2

|   |                |
|---|----------------|
| + | Xp22.2         |
| + | 16p13.3f       |
| - | 9p13.3a        |
| + | Xq11.1c        |
| - | 8p22c          |
| + | 8p23.1c        |
| + | 10p12.2a       |
| + | 12q14.3a       |
| - | 3p21.31c       |
| - | 3p21.31c       |
| + | Xq26.2a        |
| + | 1q22b          |
| + | 4p16.2a        |
| + | 16q13b         |
| + | 16q13b         |
| + | 16q13b         |
| - | 16q13b         |
| + | 16q13b         |
| + | 16q13b         |
| + | 16q13b         |
| + | 16q13b         |
| + | 16q13b         |
| + | 16q13b         |
| + | 14q32.33c      |
| - | 11q12.3a       |
| + | 2p21e          |
| + | 9p21.3c        |
| + | 8q24.12c       |
| - | 6p21.2c        |
| - | 11p11.2b       |
| - | Xq28h          |
| + | 8q22.1e        |
|   | 16q13b         |
| - | 7q21.2a        |
| - | 8q22.1d        |
| - | 2q37.3f        |
| - | 1p34.3b        |
| + | 10q26.3f       |
| + | 14q23.2b       |
| + | 6q25.1b-q25.1c |
| + | 2p13.1b        |
| + | 4q13.3d-q13.3e |
| - | 1p36.22a       |
| - | 15q25.1b       |

- 16q24.1c  
- 2p16.1d  
- 13q12.2a  
+ Xq28c  
+ Xq28c  
- 15q13.3a  
- 1q21.2a  
- 5p13.3c  
+ 3p25.3c  
+ 15q13.2b-q13.3a  
- 11q21c  
+ 22q12.2a  
- 17q22d  
- 13q12.13a  
+ 8p23.1b  
- 4q35.2a  
+ 6q13c  
+ 22q12.2b  
- 7q33c  
+ 1q43a  
- 13q14.11b  
- 6q25.2a  
+ 5p15.31a  
- 8q24.13d  
+ 4q23b  
- 8p22b  
+ 1q22a  
+ 2q31.1i  
- 5q14.1d  
+ 11p15.5c  
+ 3q29e  
+ 11p15.5c  
- 11p15.5c  
+ 12q13.2a  
+ 14q23.1a  
- 1p36.12b  
+ 19p13.3i  
+ 9q31.1a  
+ 11q13.1d  
- 6p12.3b  
- 6p24.3c  
- 1p34.1c  
- 16q24.3a  
+ 12q24.11b

|   |                 |
|---|-----------------|
| + | 16p11.2d        |
| + | 21q22.3a        |
| + | 21q22.3a        |
| + | 2p14a           |
| - | 5q35.3a         |
| - | 4p16.3b         |
| + | 10q25.2a        |
| - | 17q25.1d-q25.2a |
| + | 19q13.41b       |
| - | 2p22.3c         |
| + | 6q23.3a         |
|   | 17p13.2c        |
| - | 8q13.1b         |
| + | 20q13.12a       |
| + | 19q13.33c       |
| - | 11p11.2b        |
| - | 1q32.1e         |
| + | 8q24.21b        |
| - | 1p34.3a         |
| - | 13q22.3a        |
| + | 2p24.3a         |
| + | 6q25.2a         |
| + | 3p22.2a         |
| + | 12q21.31a       |
| + | 12q21.31a       |
| - | 17p13.1c        |
| - | 17p13.1a        |
| - | 17p13.1a        |
| - | 14q11.2f        |
| - | 22q12.3d        |
| - | 2q34b           |
| + | 18p11.31e       |
| - | 12q24.11d       |
| - | 3p21.31h        |
| + | 17q21.32a       |
| + | 4p16.3d         |
| + | 12q13.2c        |
| + | 12q13.2c        |
| + | 6p22.3f         |
| - | 5p15.1b         |
| + | 17p11.2g-p11.2f |
| - | 17q12b          |
| + | 2q32.3a         |
| - | 17p13.3e        |

- 17q11.2e  
- 15q22.2a  
- 7p13c  
+ 12q24.11b  
+ 10p12.1b  
+ 2q31.1b  
- 15q21.2c  
- 15q21.2c  
+ 6q14.1a  
- 15q23b  
+ 19p13.11e  
- 10q23.33a-q23.33b  
- 1q32.1d  
- 18p11.31e  
+ 8p23.3a  
+ 4q26f  
- 19q13.32a  
+ 16p11.2c  
+ 17q21.33a  
- 8p11.21b  
+ 10q22.2b  
+ 20q13.33e  
- 19q13.43c  
- 16q12.1b  
- 13q13.1a  
- 13q13.1a-q13.1b  
+ 5q35.3b  
- 21q21.3c  
- 13q12.11b  
- 4q21.1a  
+ 11q14.3b  
- 11q13.1c  
+ 2q32.2b  
+ 12q13.3b  
- 12q13.3a  
7p13c  
+ 8q22.3a  
- 9q34.3c  
- 1p36.33a  
+ 11q13.4a  
- 16q22.1a  
- 4q32.2b  
+ 19q13.43c  
- 22q13.2b

|   |                  |
|---|------------------|
| + | 2p13.3c          |
| + | 17q21.31a        |
| - | 16p13.3b         |
| - | 9q34.11a         |
| - | 5q13.2b          |
| + | 19q13.42c        |
| - | 7q22.2c          |
| + | 19p13.12c        |
| + | 9q22.33b         |
| - | 12q21.2a         |
| - | 11p15.4d         |
| - | 4q22.1b          |
| - | 19q13.32c        |
| - | 7q22.1f          |
| + | 18p11.22a        |
| - | 8q24.3g          |
| - | 19q13.33c        |
| - | 19q13.33c        |
| + | 17q25.3g         |
| - | 16p13.3f         |
| + | 4q31.1c          |
| + | 13q14.11b        |
| - | 15q22.2a         |
| - | 18q21.31b        |
| - | 11q14.1a         |
| + | 1p34.1b          |
|   | 8p22a            |
| + | 11p13c           |
| + | 14q23.1a         |
| - | 3q13.2b          |
| + | 19q13.42c        |
| + | 16p13.3c         |
| + | 20p11.23b        |
| - | 3p21.31b         |
| + | 4p16.3b          |
| + | 11p15.1b         |
| + | 12q21.2b         |
| + | 13q13.2b-q13.3a  |
| + | 3p21.31h         |
| + | 1p36.13a         |
| - | 8q21.3d          |
| - | 1p36.13f-p36.13e |
| - |                  |
| - | 1q21.1d          |

|   |                  |
|---|------------------|
| + | 1q21.1d          |
| + | 1q21.1d          |
| + | 5q14.3c          |
|   | 1p36.12b         |
| - | 1p13.3c          |
| + | 1q21.1a          |
| + | 17q21.31a        |
| + | 17q21.31a        |
| - | 8q22.3b          |
| + | 21q21.1g         |
| + | 12p13.31d        |
| - | 11q25d           |
| + | 4p15.32b         |
| - | 7q36.3e          |
| + | 2q11.2a          |
| + | 22q13.33b        |
| + | 9q22.33b         |
| - | 3q29g            |
| + | 19q13.2a         |
| + | 1p34.3e          |
| + | 7q11.23c         |
| + | 7q11.23a         |
| - | 7q11.23d         |
| - | 1q25.3e          |
| + | 22q12.3d         |
| + | 3q22.3a          |
| + | 2q12.2a          |
| - | 2q32.1a          |
| + | 12q13.2a         |
| - | 3p21.31e         |
| - | 2q37.1b          |
| + | 19p13.3f         |
| + | 2p23.3d          |
| - | 8q13.3a-q13.3b   |
| + | 20q13.12c        |
| + | 10q11.23b        |
| - | 20q13.12b        |
| - | 20q11.22b        |
| + | 8q12.1a          |
| + | 6q22.31e-q22.32a |
| - | 17p12a-p11.2i    |
| - | 12q24.31e        |
| - | 6p21.33a         |
| - | 10q25.2a         |

|   |                   |
|---|-------------------|
| + | 19q13.33e         |
| - |                   |
|   | 9q34.2b           |
| - | 1p36.33b          |
| - | 6q15b             |
| + | 2p11.2d           |
| + | 20p11.23a         |
| - |                   |
| + |                   |
| + |                   |
| - |                   |
|   |                   |
| + |                   |
| + | 5q22.2a           |
| + | 1q23.2d           |
| + | 18p11.32a         |
| + | 16p13.11b-p13.11a |
| + | 17p13.1c          |
| + | 5q31.3d           |
| + | 13q31.1a          |
| - | Xp11.3c           |
| - | 8q24.22c          |
| - | 14q11.2c          |
| - | 20q11.23a         |
| + | 16q21a            |
| + | 5q33.1c           |
| + | Xq24c             |
| - | 2q37.3e           |
|   | 19p13.11a         |
| - | 5q31.3b           |
| - | 12q13.3b          |
| - | 7q31.32b          |
| - | 22q13.2b          |
| - | 19p13.2d          |
| - | 9q33.2b           |
| + | 12p13.32a         |
| - | 16p12.1c          |
| - | 15q15.1c          |
| + | 5q12.1b           |
| - | 14q32.12b         |
| + | 16p13.3e          |
| + | 7q34c-q34d        |
| + | 2q33.1e           |
| + | 3q26.33a          |



- 9p21.1a  
- 19p13.12c  
- 10q24.31a  
- 4q31.1c  
- 2q33.3b  
+ 1q23.3a  
+ 11p11.2b  
+ 5q11.2c  
+ 1p34.3a  
+ 11q13.2a  
+ 11q13.2a  
+ 18p11.22c  
+ 21q22.3b  
- 2q23.3c  
- 10p12.31c-p12.31b  
+ 8q21.3e  
- 20q11.22a  
+ 12p13.31c-p13.31b  
+ 1p36.13f  
+ 12q23.1a  
- 15q21.3c  
+ 18q21.31b  
- 14q12a  
- 6p24.1c  
+ 15q24.2a  
+ 8p23.1a  
+ 4q34.3a  
- 4q33a  
- 3p24.1d  
- 1q32.3a  
- 13q14.3d  
- 3p21.1d  
+ 9q33.3a  
+ 1q31.3d  
+ 17q11.2a  
- 14q24.3b  
- 9q34.3f  
+ 11p15.1a  
- 12q12g  
+ 1q32.3b  
+ 15q24.1a  
+ 10p15.1c  
- 16q12.1a  
- 6p21.32b

+ 5q35.1e  
- 17p13.1d  
- 17q12c  
+ 12q13.2a  
- 4q25f  
+ 1p31.1e  
+ 17q11.2c-q11.2d  
- 22q13.2b  
+ 16q22.1e  
+ 18q23d  
+ 16p11.2e  
+ 14q12a  
+ 17q21.32b  
- 2q31.2a  
+ 7p15.2b  
+ 1p31.3d  
- 9p23a-p22.3c  
- 9q22.31a  
+ 19p13.13c-p13.13b  
+ 4q24b  
+ 10q24.32b  
- 14q13.2b  
+ 19q13.2a  
- 19q13.12a  
- 6p21.1b  
+ 6p21.33a  
- 8q24.3h  
+ 3q12.3a  
- 11q24.3b  
- 20q11.22b  
- 2p14a  
+ 9p13.3e  
- 4p12a  
- 12q23.3a  
+ 1p34.2c  
- 14q24.3c  
+ 14q11.2g  
+ Xq22.2a  
- 3p24.2a  
+ 15q26.1b  
- 4q24b  
- 4q24b  
+ 10q25.3a  
- 5q35.3b

- 22q13.2a-q13.2b  
- 3p21.31d  
+ 2q33.1e  
- 14q22.1b-q22.1c  
- 9q22.31b  
- 12p13.33d  
- 16q13c  
+ 16q22.1d  
- 15q11.2c  
- 15q11.2c  
- 8q22.2a  
+ 5q33.3b  
+ 5p13.2b  
- 22q12.2a  
+ 9q31.1d  
+ 9q31.1d  
+ 3p21.1d  
+ 1q23.3a  
+ 3q12.2a  
+ 6q22.31d-q22.31e  
- Xq24c  
+ 5p15.33d  
- 19q13.33d  
- 3p24.2b  
+ 17q21.2b  
+ 3p22.1a  
8p21.2d  
- 8p21.2d  
- 17q12a  
+ 3q26.31b-q26.31c  
+ 17p13.1d  
- Xp22.32a-p22.31f  
+ 17q11.2a  
+ 5q12.3b  
- 16p13.3c  
- 2p22.3e  
+ 16q13b-q13c  
- 17p13.2b  
- 19q13.42c  
+ 11p15.4b  
+ 19q13.42b  
+ 1q44e  
+ 19q13.42c  
+ 19q13.42c

- 19q13.42b  
+ 19q13.42c  
+ 11q23.3e  
- 15q25.2b-q25.3a  
+ 3q26.1a  
+ 17q21.33b  
+ 17q21.33b  
+ 17q21.33b  
- 16p13.3e  
+ 16p13.3f  
- 5q31.2c  
- 3p21.31f  
- 1q24.2b  
- 2q23.3b  
- 3q23a  
- 16p13.3b  
+ 17q21.31d  
- 10p13c  
- 4q12d  
+ 20q11.23b  
+ 5p12b  
- 16q22.1e  
- 1p36.33b  
- 10q23.33b-q23.33c  
12q24.33c  
- 7p15.1b  
+ 16q12.1c  
- 16p13.3c  
+ 17q22c  
+ 17q24.2b  
+ 22q13.1a  
+ 16q22.1a  
- 18q12.1f-q12.1g  
- 9p13.3e  
+ 6p23b  
- 9q22.31a  
- 1p36.31a  
+ 4q25c  
+ 10q24.32a  
+ 7q36.3c  
+ 16p13.11b  
- 16p12.3b  
+ 16p13.11a  
+ Xq13.1d

- 15q14a  
- 4p16.3a  
- 5q35.2d  
- 12p13.31d  
+ 20p13c  
+ 2q33.1g  
+ 1q23.3b  
+ 7q36.1c-q36.1d  
- 19q13.33b  
- 9q34.3d  
- 1p12a  
+ 1q21.1b  
- 19p13.12b  
- 6p21.32b  
- 17q25.3g  
- 14q12b  
+ 9q34.3f  
+ 14q11.2b  
- 16p13.3b  
+ 1p36.11d  
+ 19q13.32b  
- 11q22.3c  
- 18q11.2b  
- 7p13d  
- 14q24.3a  
- 9q34.3e  
+ 20q13.32a  
- 3q22.1c  
- 1p36.31b  
+ 16p13.11b  
+ 1q25.3d  
- 17q25.3f  
+ 5q35.1d  
+ 8p21.3b  
- 10q24.32a  
- 1p36.22a  
+ 9p13.3a  
+ 5p13.3b  
- 15q24.1a  
17q25.3e  
+ 16p13.3e  
+ 7p15.3a  
- 16q22.1e  
6p25.2b

|   |                 |
|---|-----------------|
|   | 3p24.2b         |
| + | 19q13.33c       |
| + | 11p11.2b        |
| + | 12q23.1d        |
| - | 12q22d          |
| + | 3p24.3e         |
| - | 19p13.11b       |
| + | 6q21e           |
| + | 5q15a           |
| - | 19p13.11e       |
| - | 5q31.3e         |
| - | 4q31.23b        |
| + | 12q13.13c       |
| - | 2q24.1c         |
| - | 10q25.3a        |
| - | 9q34.3f         |
| - | 1p13.2a         |
| + | 10q21.2b        |
| - | 8q24.3g         |
| - | 7q31.1a         |
| - | 1p32.3e         |
| + | 7q32.2a         |
| + | 10q23.1b        |
| - | 15q24.2a        |
| + | 11q24.2a        |
| - | 21q11.2d        |
| - | 11p15.4a        |
| + | Xq22.3a         |
| - | 6p21.33b        |
| - | 10p11.22a       |
| + | 2q33.3a         |
| + | 20p13f          |
| + | 19p13.3b        |
| - | 11q13.1b        |
| + | 14q24.3d-q31.1a |
| + | 11p15.5c        |
| + | 5q13.3b         |
| - | Xq21.1c         |
| + | 5q35.2d-q35.3a  |
| + | Xq28e           |
|   | 17q21.32a       |
| - | 20p13e          |
| - | 1q32.3c         |
| - | 8q12.1c         |

- 16p12.1a  
+ 8q24.13d-q24.13e  
- 10q26.13a  
- 5p15.31c  
+ 3q11.2a  
+ 1p33d  
- 7q11.23a  
+ 7q11.23d  
- 7q11.23a  
- 10p12.33b  
- 17q25.1c  
- 10q24.32b-q24.33a  
- 7p14.3c-p14.3b  
- 17q21.2b  
+ 6q22.1d  
- 3p21.1d  
- 12q23.3a  
+ 17p11.2h  
- 16p13.11b  
+ 12p13.31e  
- 16p13.3e  
- 12q22d  
- 19q13.33a  
+ 1p13.3d  
+ 9q34.13b  
- 12q23.3c  
- 1q32.1g  
+ 7q36.1d  
+ 16p13.13d  
+ 16p13.3e  
+ 14q12e  
+ 19q13.33a  
+ 11p15.1d  
- 1q32.1g  
+ 1p36.11a  
- 8q23.1d  
- 5q34c  
- 7p13d  
+ 7p22.2c  
- Xp11.22c  
- 14q32.33c  
+ 13q14.2b  
+ 3q22.1b  
+ 16p13.3b

- 1q21.1b  
- 8p21.3a  
+ 19q13.11a  
+ 9p13.3c  
- 16q13a  
+ 11q13.1a  
- 6p21.31e  
- 10p14a  
- 4q28.1a  
+ 16q23.1d  
- 11q13.2a  
+ 1q23.3c  
- 13q14.12a  
- 17q11.2b  
- 11q13.4a  
- 14q24.2b-q24.3a  
- 19q13.2b  
+ 12q15b  
- 1q42.13e  
- 6p22.3e  
- 5p13.2b  
- 11p11.2a  
+ 9q34.11c  
+ 7q33c  
- 3p25.1c  
+ 9q34.13a  
+ 2q32.1a  
- 12q23.2a  
- 6q25.1a  
+ 22q13.31b  
- 4q21.1a  
- 19q13.33b  
- Xq22.3b  
+ 17q25.1c  
- 17p13.2b  
+ 16q13b  
- 11p15.4d  
+ 13q12.13a  
+ 7p15.3b  
- 16p11.2e  
+ 6q22.2b  
+ 15q15.1c  
+ 16q22.1b  
- 1q42.11b



- 11q12.3b  
- Xq22.1d  
+ Xq22.1e  
- Xq22.1d  
- 17p13.3f  
+ 12q13.3b  
+ 20p11.21c  
+ Xq22.3c  
+ 14q12a  
+ Xp11.4b  
+ 11q23.3g  
+ 12q24.13b  
+ 12q24.13b  
+ 12q24.13b  
- 12q24.31a  
- 10q26.13d  
+ 19p13.3g  
- 15q22.31b  
- 10q24.33a  
+ 2q32.3a  
+ 12q13.2c  
+ 1q42.13c  
- 15q12c-q13.1a  
+ 19p13.11e  
+ 4p12a  
- 4p12a  
+ Xq25g  
- 2p25.1c  
+ 8q22.3b  
+ 9q34.11b  
- 1p22.3c  
- 19p13.3j  
+ 4q35.1b  
+ 7p13d-p13c  
- 10q11.23a  
+ 16q13a-q13b  
+ 12q24.31d  
+ 20q13.33d  
+ 6q13b  
+ 3p25.3c  
+ Xq13.1d  
- 15q15.1c  
+ 10p13c  
+ 9q33.3a

|   |           |
|---|-----------|
| + | 21q22.11c |
| - | 12p13.2c  |
| - | 1p32.1f   |
| - | 9q22.31a  |
| + | 18q21.31b |
| + | 19p13.3h  |
| - | 6q13c     |
| + | 3q29b     |
| - | 19q13.32a |
| - | 8q24.3g   |
| + | Xq28g     |
| + | Xq28g     |
| - | 1q43e     |
| + | 10q23.2a  |
| + | 6p12.3d   |
| + | 20q13.33e |
| - | 9p13.3c   |
| + | 10p13e    |
| + | 12q13.2b  |
| - | 19p13.12a |
| + | 19p13.12a |
| - | 1q23.2a   |
| - | 10q11.21d |
| + | 1q44f     |
| - | 1q44f     |
| - |           |
| - | 9q33.2b   |
| + | 7q35a     |
| - | 11p15.4c  |
| + | 1q44e     |
| + | 1q44e     |
| + | 6p22.1a   |
| + | 1q44e     |
| - | 9p13.3a   |
|   | 1q44f     |
| - | 6p22.1a   |
| + | 1q44e     |
| - | 17p13.3a  |
| + | 11q11b    |
| + | 11q11b    |
| + | 17q22d    |
| + | 11q12.1d  |
| - | 14q11.2a  |
| + | 14q11.2a  |

|   |                 |
|---|-----------------|
| + | 15q11.2b        |
| + | 11p11.2a        |
| + | 11p11.2a        |
| - | 11p15.4d        |
| - | 11p15.4c        |
| + | 11p15.4c        |
| + | 11p15.4c        |
| + | 11p15.4c        |
| + | 11p15.4d        |
| + | 11q12.1d        |
| - | 11q11c          |
| - | 11q11c          |
| - | 11p15.4b        |
| - | 12q13.2b        |
| + | 12q13.2b        |
| - | 11q24.1c        |
| - | 19p13.12b       |
| + | 13q21.31c       |
| + | 19p13.2c        |
| + | 13q14.11b       |
| - | 19p13.2d        |
| - | 11q11c          |
| + | 7q34e           |
| - | 11q12.1b        |
| + | 11q12.1b        |
| + | 12q24.31b       |
| + | 7q22.1e         |
| + | 16p11.2c        |
| - | 11q13.2c        |
| - | 1p32.3d         |
| - | 2q33.1e         |
| + | 6q15a-q15b      |
| - | 2q23.1a         |
| - | 7q22.1g-q22.1h  |
| + | 16q11.2i        |
| - | 2q32.2a-q32.2b  |
| + | 12q13.2b-q13.2c |
| - | 17q12c          |
| + | 12q14.1a        |
| - | 4q31.1c         |
| - | 11q12.1d        |
| + | 22q12.2b-q12.2c |
| - | 3p23a           |
| - | 3q21.2b         |

- 18q11.2c  
+ 20q13.33c  
- 7p15.3a-p15.2c  
- 11p15.4d  
+ 2q31.2b  
- 17q21.32b  
- 12q21.2a  
+ 1p32.3e  
- 19q13.42a  
- 1p34.3d  
- 14q11.2b  
- 2q32.2a  
+ 8q21.3d  
- 22q12.2b  
- 2p24.1d  
- 8q22.2a  
+ 3q29f  
+ 4q25b  
+ 9q21.13b  
- 6q21e  
- 11p15.1d  
- 5q14.1a  
+ 11q13.1a  
- 10p12.2a  
- 4q31.22a  
- Xp11.23c  
+ 8q21.3e  
- 15q13.3a-q13.3b  
+ 2p15b  
- 1p13.2d  
- 20p11.23d  
- 12p11.21b  
+ 14q11.2e  
- 5p13.1a  
- 1p34.2d  
+ 3p24.3e  
+ 8q23.1b  
+ 3p24.2a  
+ 3p22.2a  
- 3p25.3d  
- 18q12.2a  
- 17p13.2c  
+ 12q24.31b  
- 17p13.3a

- 22q11.21e  
+ 12q24.31b  
+ Xq21.1b  
+ 19p13.2c  
- 3q25.1c  
- "Xp22.33d,Yp11.32a"  
- 10q22.1g  
- 5q31.1b  
- 17q25.3g  
+ 3p21.31d  
- 14q11.1d  
+ 12q24.13b  
+ 12q13.2c  
+ 11q13.4b  
- 8q22.3a  
- 20q13.12a-q13.12b  
- 1p34.2d  
+ 14q11.2f  
- 5q31.2d  
+ 11q13.1d-q13.1e  
+ 14q32.33c  
+ 6p21.31e  
- 22q13.2c  
- 11p11.2b  
+ 1p36.13e  
- 19q13.2a  
+ 17p13.3c  
+ 11q23.3b  
- 1p36.11b  
- 8q21.13b  
+ Xp11.23a  
+ 4q12e  
- 5p12b  
+ 5q31.2d  
- 11q14.1a  
+ 6p24.2a  
+ 3q29g  
+ 19q13.2a  
+ 15q15.1a  
- 16p12.1c  
+ 4q32.3e  
+ 19p13.3j-p13.3i  
+ 5q21.1d  
- 12q13.2c

|   |                   |
|---|-------------------|
| + | 13q12.2b          |
| - | 10q23.31c         |
| + | 20p13b            |
| - | 5q35.1a           |
| - | 1p36.32c          |
| + | 11q21b            |
| + | 22q13.33b         |
| + | 10q26.3f          |
| - | 10p11.23a         |
| + | 5q14.1d           |
| + | 16q12.1c          |
| + | 14q24.2b          |
| + | 14q32.2a          |
| + | 2p16.1a           |
| - | 4q25a             |
| + | 10q23.2b          |
| - | 4q21.21a          |
| + | 16p13.3d          |
| - | 1p36.11b          |
| + | 6p12.2a           |
| - | 3q23d             |
| - | 10p11.22a-p11.21c |
| + | 16q22.1b          |
| - | 10q11.23b         |
| + | 1p36.23b          |
| - | 3q27.1a           |
| + | 4q13.3e           |
| - | 16p13.12a         |
| - | 1q42.12d          |
| - | 8q24.3g           |
| - | 12p13.32b         |
| - | 7q34c             |
| + | 3q21.1a           |
| + | 3q21.1a           |
| - | 15q22.31b         |
| + | 14q11.2b          |
| + | 3p21.1e           |
| - | 13q12.12b         |
| - | 15q23b            |
|   | 5q11.1d           |
| - | 3q21.1a           |
| - | 1p32.3b           |
| + | 5q12.1a           |
| + | 22q13.31a         |

|   |                 |
|---|-----------------|
| + | 22q13.31a       |
| - | 2q37.3f         |
| - | 11q24.2b        |
| - | 11q12.1d        |
| - | 15q21.1a        |
| - | 22q12.2c        |
| - | 12q21.2c        |
| - | 11p13f          |
| - | 7q36.2c         |
| - | 8p21.1e         |
| - | 3p21.1d         |
| - | 6p21.32b        |
| + | 9q33.3a-q33.3b  |
| - | 19p13.11a       |
| - | 1q21.3e         |
| - | 10q22.1c        |
| + | 5q31.1e         |
| + | 2p14a           |
| + | 12q13.13e       |
| - | 3p21.1e         |
| + | 13q32.3b-q32.3c |
| + | 3q22.3a         |
| + | Xq21.31e        |
| + | 10q23.1c        |
| + | 5q35.2d         |
| - | 13q21.32b       |
| + | 5q31.3b         |
| + | 5q31.3b         |
| + | 5q31.3b         |
| + | 5q31.3b         |
| + | 5q31.3b         |
| + | 5q31.3b         |
| + | 5q31.3b         |
| + | 5q31.3c         |
| + | 5q31.3c         |
| + | 5q31.3c         |
| + | 5q31.3c         |
| + | 5q31.3c         |
| + | 5q31.3c         |
| + | 5q31.3c         |
| + | 5q31.3c         |
| + | 5q31.3c         |
| + | 5q31.3c         |
| + | 2q14.2c         |
| + | 11q14.1d        |
| - | 2p13.1b         |

- 17q12c  
+ 10q23.32a  
- 10q24.33a  
- 13q34c-q34d  
+ 20q13.12b  
+ 14q12a  
- 7q21.11d-q21.11e  
+ 8p22a  
+ 6q25.1a  
- 8q11.23a  
+ 20q13.33e  
- 20p12.3c  
+ 3q12.3a  
+ 21q22.3f  
+ 14q24.2a  
- 1q42.2b-q42.2c  
+ 11q13.1d  
+ 7q22.1c  
- 3q23d  
+ 1q23.3a  
- Xp11.23c  
- 19p13.3h  
- 11q23.3b  
+ Xp11.3a  
- 12q23.1a  
+ 1q32.1g  
+ 17q22b  
+ 2p14a  
+ 5q33.1b  
- 3q29f  
- 17q25.3g  
- 7q22.1b  
- 2q37.3g  
+ 10q24.33a  
- 6q27f  
+ 19q13.11c  
+ 10q25.2a  
+ 19q13.11a  
+ 5p15.33e  
- 15q22.31b  
- 9q33.2b  
+ 2q11.2d  
- 11p15.5c  
+ 3p14.3a



|   |                |
|---|----------------|
| + | 12p12.2a       |
| + | 11p15.2b       |
| + | 19p13.2b       |
| + | 1p31.3b        |
| - | 19p13.11c      |
| + | 4p16.3d        |
| - | 2q37.1b        |
| + | 12p12.3e       |
| - | 8q13.1a        |
| + | 6q23.3b        |
| + | 15q25.3a       |
| + | 21q22.3b       |
| - | 16q22.1d       |
| - | 22q13.1d       |
| - | 11q22.3a       |
| + | 8p22b          |
| + | Xp22.12b       |
| + | 4q22.3b        |
| - | 3p14.3a        |
| + | 11p13b         |
| + | 1q21.1c        |
| - | 7q36.1a        |
| + | 3q21.1b        |
| - | 2p25.1c        |
| + | 1p36.11b       |
| + | 2q31.1d-q31.1e |
| + | Xp22.11a       |
| - | 7q21.3b        |
| - | 10q23.33c      |
| - | 4q35.1f        |
| + | 4q22.3a        |
| - | 5q35.3a        |
| + | 16q22.1a       |
| + | 16p13.3d       |
|   | 16q22.1f       |
| - | 20q11.21b      |
| - | 4p14b          |
| + | 13q13.1b       |
| + | 10p12.1b       |
| - | 6q21d          |
| + | 16p13.11b      |
| + | 21q22.3c       |
| + | 22q13.1a       |
| - | 20p13d         |

- Xq13.1b  
+ 5p13.3c  
+ 11q23.3e  
- Xq28f  
- 10q25.3b-q26.11a  
3p13b-p13a  
+ 12q12d  
+ 1q23.2d  
+ 12q24.23a  
- 17q23.3b  
- 6p25.2a  
- 2q35b  
- 1p35.2a  
+ 7q21.3b  
- 19q13.43a  
- 2p14c  
+ 14q22.3b-q23.1a  
- 17p13.2c  
- 17p11.2g  
- 19q13.11b  
- 17p13.1c  
+ 1p36.23b  
- 6q23.3d  
- 22q12.2b  
- 4q31.3b  
- 7q21.2b  
- 15q26.1b  
+ 1q21.1b  
- 19p13.2e  
+ 2p16.1a-p15d  
+ 1p36.22c  
- 11p11.2c  
- 1q23.2d  
+ 22q11.21a  
+ 6q24.2a-q24.2b  
+ 12p13.31c  
- 6p21.1d  
+ 6q23.3c  
- 13q13.1a-q13.1b  
+ 17p13.1c  
- 5q31.3a  
+ 20q13.2c  
+ 12q13.13e  
+ 6p21.32a

|   |                |
|---|----------------|
| + | 1q32.1h-q32.2a |
| + | 10p15.1a       |
| - | 3p21.31e       |
| + | 21q22.3d       |
| + | 12q13.11c      |
| + | 10p15.2b       |
| - | 17p13.2b       |
| - | 2p23.3d        |
| + | 7q21.13c       |
| + | 10q24.1b       |
| - | Xq21.1a        |
| + | 12q24.33d      |
| - | 2q33.1a        |
| + | 6p22.1b        |
| + | 1q44f          |
| - | 10q11.23a      |
| + | 15q14a         |
| - | 1q42.13f       |
| - | 14q24.3b       |
| - | 5q22.3b        |
| + | Xq21.1a        |
| - | 6p12.3b        |
| + | 19p13.11d      |
| - | 1q21.3c        |
| + | 1p31.3c        |
| + | 4p14d          |
| - | 11q13.4c       |
| - | 6q14.2a        |
| - | 16p13.3d       |
| + | 19p13.11c      |
| + | Xq24b          |
| - | 4q28.2a        |
| + | 17q25.3b       |
| + | 6p24.1a        |
| + | 20q13.32b      |
| + | 5q23.2e        |
| - | 17q21.33a      |
| - | 12p13.31d      |
| + | 12p13.31b      |
| - | 1p35.1a        |
| - | 3q26.2b        |
| + | 11q13.5c       |
| + | Xp22.11b       |
| + | 6p21.32a       |

- 6q27f  
+ 13q14.3a  
- 17q11.2a  
+ 1p36.31a  
+ 7p21.3b  
+ 5q31.1e  
+ Xp11.3a  
+ 4q28.2b  
- 9q33.2a  
+ 9q22.31b  
+ 8q24.22b  
- 11p11.2c  
- 22q13.31b  
- 17p13.1d  
+ 6q12a-q12b  
- 22q13.2a  
+ 3p21.1d  
+ 1p12a  
- 6q14.1c  
- Xq13.1e  
- Xp22.13a  
+ 16q12.1a  
- 7p11.2b  
+ 16p11.2c  
- 12q21.2a  
+ 11q23.3d  
+ 3q13.2a  
+ 18q21.33b  
- 16q22.3a  
+ 2q31.1a  
- 11q13.4a  
+ 9q34.3e  
+ 11p15.5d  
- 1p13.2b  
- 10p13d  
+ 9q34.11c  
+ 6p21.2c  
+ 20q13.12b  
+ 10q24.1b-q24.2a  
+ 4p15.2c  
- 22q11.21d  
- 22q11.21f  
- 1q21.2d  
+ 15q23a

|   |                   |
|---|-------------------|
|   | 18q21.1b          |
| + | 1q21.1b           |
| + | 13q22.1a          |
| - | 11q14.2a          |
| + | 22q13.1b          |
| - | 2q36.3d-q36.3e    |
| - | 15q22.31b         |
| - | Xp22.2            |
| + | 15q21.3b          |
| - | 1q24.3d           |
| - | 2p21a             |
| + | 4p16.3d           |
| - | 14q24.1a          |
| - | 1p31.1f           |
| + | 17p11.2i          |
| - | 1q23.2c           |
|   | 18q21.33a         |
| - | 9p13.3b           |
| - | 21q22.13a         |
| + | 16p13.3f          |
| - | 1q32.1h           |
| - | 17q11.2a          |
| + | 20q13.12b         |
| - | 20q11.22a-q11.22b |
| + | 1p36.11a          |
| + | 17q12b            |
| + | 3q29g             |
| - | 4q22.1b           |
| - | 19q13.33b         |
| - | 11q23.1c          |
| - | 10q24.1a          |
| - | 11p15.1e          |
| - | 1q32.1f           |
| + | 18q12.3c          |
| + | 3q26.32c          |
| - | 3q22.3c           |
| + | 1p36.22d          |
| + | 7q22.3a-q22.3b    |
| - | 22q12.2c          |
| + | 5q13.1c           |
| + | 19p13.11c         |
| - | 1p34.1a           |
| - | 3q22.1a           |
| - | 22q11.21e         |

|   |                 |
|---|-----------------|
| + | 7q22.1c         |
| + | 7q22.1c         |
| + | 6p21.2c         |
| - | Xp11.23c        |
| + | 22q13.33a       |
| + | 19p13.2c        |
| + | Xq13.1e         |
| + | 1p36.12b        |
| - | 8p23.1b         |
| - | 7q11.23g        |
| - | 6q25.2b-q25.2c  |
| - | 10p12.2a        |
| - | 17q12c          |
| + | 12q13.3b        |
| + | 9q21.11a        |
| - | 19p13.3e        |
| - | 10p12.2a        |
| - | 17q12c          |
| + | 2q33.3d         |
| - | 9q34.11a        |
| + | 17q11.2b        |
| - | 10q23.33b       |
| - | Xp22.2          |
| - | 22q12.2c        |
| - | 22q12.1b        |
| + | 17q24.2b        |
| - | 11q13.1f        |
| - | 12q24.31d       |
| - | 10p15.2b        |
| - | 5q31.1e         |
| - | 4q25d           |
| - | 10q24.32b       |
| - | Xq13.1a         |
| - | 5q21.3e         |
| - | 8p23.1f         |
| - | 16p13.3e-p13.3d |
| - | 7p12.3b         |
| + | 4q22.1b         |
| + | 2p21f           |
| + | 8q23.1d-q23.2a  |
| + | 8q21.12a        |
| + | 6q22.31c        |
| + | 20q13.12a       |
| - | 15q23b          |

- 16p13.3d  
+ 19p13.12c  
+ 1p22.2d  
+ 9q34.11b  
+ 21q22.3c  
- 12p11.21a  
+ 2q24.1e  
+ 3q13.33a  
- 16p13.12a  
- 4q25c  
- 10q22.1g  
+ 16q22.1c  
- 1p36.12b  
+ 15q15.1c  
- 9p21.2a  
- Xq26.3a  
- 19p13.3c  
- 4q21.22a  
- 5q32c  
- 8q12.1b  
- 6q24.2b  
- 20q11.21b  
+ 10q22.2a  
+ 2p23.2b  
+ 20p12.3a  
- 15q15.1a  
- 3p22.2a  
- 17q21.31d  
+ 20q12c  
+ 16q23.2b-q23.3a  
- 3q25.31a  
+ 1p36.32c  
+ 2q33.1b  
+ 3p24.3d  
+ "Xp22.33f,Yp11.32c"  
- 3q26.31a  
+ 17p13.2c-p13.2b  
+ 19q13.2b  
+ 14q32.33c  
- 1q43e-q43f  
- 17p11.2h  
+ 15q21.1a  
- 8q24.3g  
+ 2p14a

|   |           |
|---|-----------|
| + | 10q26.13b |
| + | 8p11.23b  |
| + | 2q31.2b   |
| - | 19q13.33a |
| - | 12q12h    |
| + | 11q13.4b  |
| + | 2q21.1d   |
| + | 19q12c    |
| + | 8q22.1c   |
| + | 6q25.1b   |
| + | 19q13.2a  |
| + | 16q22.1a  |
| + | 12p13.31d |
| + | 2p21d     |
| - | 17q21.31a |
| - | 19p13.3g  |
|   | 17q21.31d |
| + | 1q21.2a   |
| + | 15q22.31b |
| + | 6q26a     |
| + | 2q12.2b   |
| - | 2p11.2e   |
| + | 2p11.2d   |
| - | 9p22.1b   |
| - | 19p13.3d  |
| + | 16p12.1c  |
| + | 1p34.1d   |
| + | 4q28.1e   |
| - | 16q13c    |
| + | 1p36.22a  |
| - | 7q22.1d   |
| + | Xp11.23b  |
| - | 4q32.1a   |
| + | 3q23d     |
| - | 3q24d     |
| - | 17p13.1d  |
|   | 3q24d     |
| - | 20q13.12b |
| + | 3q21.3a   |
| + | Xq28g     |
| - | 22q13.33b |
| + | Xq28f     |
| - | 3q21.3d   |
| + | 6q15c     |



|   |                |
|---|----------------|
| + | 18q21.32b      |
| - | 20q13.31a      |
| + | 1q22d          |
| + | 15q24.1b       |
| - | 22q13.2a       |
| + | 16p13.2b       |
| - | 17p12a         |
| + | 9q34.3d        |
| + | 7q22.1f        |
| + | 2q32.2b        |
| - | 7p22.1b        |
|   | 7p22.1a        |
|   | 7q22.1c        |
| - | 7q11.23d       |
| - | 7q11.22a       |
| + | 7q11.23c       |
| - | 1q21.3e        |
| - | Xq28f          |
| + | 2q35e          |
| - | 19q13.33b      |
| - | 14q24.3a       |
| - | 8p21.2a        |
| + | Xq28f          |
| + | Xq28f          |
| - | 19q13.32b      |
| + | 14q21.1b       |
| + | 2p14b          |
| + | 8p21.1d        |
| + | 11p15.5c       |
| - | Xp22.31c       |
| + | 19p13.2e       |
| - | 9q34.3f        |
| - | 7q31.1a        |
| + | 17q21.32b      |
| - | 2p16.1d        |
| + | 6q15c          |
| + | 1p36.11d       |
| - | 7q32.3b        |
| + | 3q21.3b        |
| - | Xq21.1e-q21.2a |
| + | 20q11.21b      |
| - | 21q22.3e       |
| + | 1q24.1c        |
| - | 16p11.2c       |

|   |                 |
|---|-----------------|
| + | Xp22.11a-p21.3d |
| + | 11q13.1c        |
| + | 8p11.21a        |
| + | 19q13.33c       |
| - | 7p13d           |
| + | 11q13.4c        |
| - | 11q13.1f        |
| - | 17q11.2a        |
| - | 22q13.2b        |
| - | 12q24.33d       |
| - | 14q22.1a        |
| - | 9q32c           |
| + | 2p13.1a         |
| - | 15q26.1a        |
| - | 17q24.1a        |
| + | 6p21.1c         |
| + | 18q21.2c        |
| - | 10q24.32a       |
| - | 7p13d           |
| - | 3q13.33c        |
| - | 2p11.2f         |
| + | 2q13d           |
| + | 6p21.1c         |
| + | 13q12.2a        |
| + | 9p13.2a         |
| + | 17p13.1d        |
| + | 4q12e           |
| + | 16q13c          |
| - | 2q14.3e         |
| - | 19p13.3i        |
| + | 22q13.1b        |
| + | 11q12.3b        |
| + | 3q27.1b         |
| - | 19q13.12b       |
| - | 7q22.1e         |
| - | 7q22.1f         |
| - | 7q22.1f         |
| + | 8q22.2b         |
| - | 11p15.5c        |
| + | 12q23.3c        |
| - | 1q21.1b         |
| + | 8p21.3a         |
| + | 16p12.1c        |
| + | 20p11.23d       |

|   |                |
|---|----------------|
| + | 5q14.3g        |
| - | 1q21.1b        |
| - | 22q13.2a       |
| - | 16p13.3f       |
| - | 19p13.3j       |
| + | 5p15.31b       |
| - | 7q11.23d       |
| + | 22q11.21e      |
| - | 2p23.3c        |
| - | 1p34.1a        |
| + | 13q12.3a       |
| + | 9q34.13a       |
| - | 14q24.3c       |
| - | 7q21.3b        |
| + | 8q22.2a        |
| + | 19q12c         |
| - | 12q24.31a      |
| + | 7q22.1c        |
| - | 3q13.33a       |
| + | 7q11.23e       |
| + | Xp11.23d       |
| - | 7q31.33a       |
| + | 2q21.1d        |
| + | 2q21.1d        |
| - | 2q21.1b        |
| - | 11q23.1b       |
| + | 1q24.1c-q24.2a |
| - | 19q13.2c       |
| - | 1p34.3b        |
| + | 6q16.2a        |
| - | 13q31.1a       |
| + | 8q24.21a       |
| - | 10q22.1a       |
| - | 4q24d          |
| + | 19p13.2c       |
| + | 19p13.2c       |
| - | 5q11.2e        |
| + | 10q26.12a      |
| - | 8p12a          |
| + | 9p24.1c        |
| + | 9q34.13a       |
| + | 22q13.31d      |
| + | 6p21.31c       |
| + | 5q33.1b-q33.1c |

- 4q12e  
+ 1p34.2b  
+ 20q13.33e  
+ 11q13.3c  
+ 19q13.33a  
+ 1q32.1d  
+ 12p11.23a-p11.22b  
+ 11p15.4b  
+ 12q12e  
+ 7p13c  
- 1q21.1d  
1q21.1e  
10q25.3a  
- 15q22.31a  
- 5q23.2a  
+ 1p34.2d  
+ 10q22.3e  
+ 2q31.1a  
+ 1p34.2a  
- 6p21.2c  
+ 22q11.21f  
- 2q33.1e  
+ 14q22.1a  
- 6q21f  
- 16p13.3b  
+ 2p21d  
+ 17q23.2a  
+ 17q22d  
- 12q14.1d-q14.2a  
- 1p13.2c  
- 4q22.1b  
+ 3p21.1d  
+ 8q22.1b  
+ 11q13.4c  
+ 1q23.3a  
- 11q13.1f  
+ 2p23.2a  
- 12q24.11d  
- 6p21.33b  
+ 6p21.33b  
- 12q21.2c-q21.31a  
+ 1q32.1d  
- 19q13.42b  
- 14q32.33a

- 19q13.32a  
- 19q13.2a  
- 11q13.1b  
+ 6q25.1b  
+ 19q13.33a  
- 1q32.1f  
+ 8q24.3h  
+ 20q11.23c  
+ 17q12c  
+ 2q31.3b  
- 3q29e  
+ 5q33.3a  
- 8p23.1d  
- 20q13.33a  
- 14q11.2f  
+ Xp11.23b  
+ 2q37.3f  
+ 1p35.3b  
- 5q31.1d  
- 8p12e  
+ 19q13.33e  
- 11q23.1b  
+ 10q26.3d  
- "Xp22.33f,Yp11.32c"  
- 14q13.2a  
+ 9q34.11c  
+ 1q32.3b  
+ 11q13.1c  
+ 14q32.31b  
+ 6p21.1d  
- 14q23.2b  
- 4q23c  
- 10q22.2a  
+ 8p21.3a  
- 2p14b  
+ 16p11.2d  
- 18p11.22b  
+ 14q32.13a  
+ 19q13.32b  
- 9q33.3a  
+ 1q44b  
- 22q13.2a  
+ 10q24.32a  
- 1p34.2d

- 12q24.11c  
+ 5q12.3b  
- 17q21.31b  
+ Xp11.23c  
- 18q23d  
+ 2p25.1b  
- Xp11.23c  
- 8p23.1e  
- 22q11.22b  
- 1p36.21d  
+ 1p36.21d  
- 12p13.2b  
- 12p13.2b  
- 15q26.1c  
+ 1q23.1a  
- 11q14.1d  
+ 6q21c  
- 11q24.3b-q24.3c  
- 21q22.3a  
- 12q23.3d  
- 16q24.3b  
+ 4q21.21b  
- 1p34.1b  
- 19p13.13c  
- 10q26.11c  
+ Xp22.11a  
+ 11q13.1b  
+ 1q25.1a  
- 2p23.3a  
+ 2q33.1b  
+ 5q35.3a  
+ 1q32.1e  
- 6q21b  
- 2p21d  
- 20q13.13b  
- 10q22.1b  
- 11q12.1a  
+ 1q31.1a  
- 20q13.33e  
- 12q12e  
- 3p14.1d  
+ 6p21.1f  
- 12q13.3a  
+ 6p11.2a

- 6p11.2a  
+ 5p13.1b  
- 12q24.23c  
+ 1q21.1c  
- 1p31.1a  
- 12q13.12a  
- 7q36.1d  
+ 17q24.2c  
- 7p22.3c  
+ 7q22.3b  
+ 17q24.2a  
+ 22q13.1b  
+ 16p12.1b  
+ 16p12.1b  
+ 3p21.1c  
+ 2p21b  
+ 14q23.1c  
+ 3q26.2c  
- 10p15.1a  
+ 19p13.2b  
+ 1p36.33a  
- 14q12d  
- 19q13.32b  
- 2p22.2b  
- 8q11.21a-q11.21b  
- 2q31.2b  
- 11q13.5b  
- Xp22.33b-p22.33a  
+ Yp11.2g  
- 6p22.3a  
+ 2q37.3b  
- 16p13.13c  
+ 19q13.33b  
- 4q31.23a-q31.23b  
+ 21q22.3f  
+ 11p15.1b  
- 14q11.2f  
+ 1p13.3d  
+ 16q22.1c  
+ 12p13.32b  
+ 20p13a  
+ 1p34.1e  
+ 2q14.3d  
- 17q11.2a

|   |           |
|---|-----------|
| + | 20q11.22b |
| + | 1p13.3a   |
| - | 3p13d     |
| + | 4q13.3a   |
| - | 4p15.32d  |
| - | 3q11.2a   |
| - | 20p13c    |
| + | 8p12a     |
| - | 14q24.3b  |
| + | 10p13d    |
| - | 11q12.2a  |
| + | 1q21.2b   |
| + | 19q13.42a |
| + | 1p32.3d   |
| + | 1p13.3c   |
| + | 9q32c     |
| + | 6p25.2a   |
| + | 20q13.33e |
| - | 17p13.3e  |
| + | 12q13.12b |
| + | Xq22.3b   |
| + | Xp22.2    |
| - | 17q25.1d  |
| + | 17p11.2e  |
| + | 11q24.2c  |
| + | 17q22d    |
| + | 19q13.33b |
| + | 12q13.13e |
| + | 16p11.2c  |
| - | 17q21.32b |
| + | 5q23.1d   |
| + | 20q13.33e |
| + | 19q13.2c  |
| + | 13q21.1d  |
| + | 13q21.1d  |
| - | 19p13.3b  |
| + | 6p21.33b  |
| - | 12p13.2b  |
| + | 22q13.31b |
| + | 5q35.3a   |
| + | 7q36.3a   |
| + | 5q23.2f   |
| + | 19q13.33b |
| + | 11p13d    |



- 6p21.32b  
+ 16p11.2d  
- 3p25.3c  
+ 9q34.11d  
- 4q26e  
+ 16p13.3d  
+ 6q14.2a  
- 21q21.1d  
+ 1q21.2d  
+ Yq11.223c  
- 10q22.1e  
- 4p16.1e  
+ 8q24.3e  
- 17q25.3b  
+ 19q13.32c  
+ 22q13.1a  
- 2q24.1d  
- 10q24.32b  
- 8p22a  
+ 2q13d  
+ 1q42.13a  
+ 19q13.12a  
- 19q13.31a  
- 19q13.31a  
- 9p22.3b  
+ 22q11.1d  
+ 16q22.1b  
- 11p15.2b  
- 7p14.1a  
+ 14q23.1b  
+ 15q25.1a  
- 1p13.3b  
+ 14q13.2a-q13.2b  
- 20q13.33c  
+ 18q11.2d  
- 16q22.1b  
- 1p34.3e  
+ 17q12c  
+ 1q21.3a  
- 14q11.2f  
+ 17p13.2c  
- 9q33.3a  
- 6p21.32a  
+ 6p21.32a

+ 14q32.11a  
+ 7q22.1g  
- 11p11.2b  
- 17q21.31a  
+ 19q13.2b  
+ 17q23.3b  
+ 14q22.1d  
+ 2q37.1b  
- Xq22.3c  
+ 17q11.2e  
17q24.2b  
+ 2q24.2c  
+ 3q27.1b  
+ 17q12c-q21.1a  
+ 1q21.2d  
- 9q33.2a  
- 3p14.1d  
+ 16q22.3c  
+ 19q13.2a  
+ 12q24.31b  
+ 14q12a  
- 14q12a  
+ 17q21.31a  
+ 20p13e  
- 21q22.2a  
+ 18p11.21d  
- 7p22.3b-p22.3a  
+ 6p25.2a  
+ 6p21.33a  
- 6p21.33a  
- 13q12.11a  
- 7p11.2b  
- 1p13.3b  
+ 10q26.13b  
+ 15q24.3a  
- 18q21.1a  
- 1p35.3b  
- 9q21.11b  
+ 19p13.3i  
+ 1p21.3b  
- 7q22.1b  
+ 5q13.2b-q13.2c  
+ 2p11.2f  
- 9q22.32b

|   |                   |
|---|-------------------|
| + | 6p21.1d           |
| + | 8q22.1d           |
| + | 11p15.5d          |
| + | 10q23.31a         |
| + | 10p12.2a          |
| + | 9q34.3e           |
| + | 5p13.1b           |
| - | 9q34.11d          |
| - | 9q34.11a          |
| - | 12q13.3a          |
| + | 1p31.1e           |
| - | 20q13.13d         |
| - | 9q31.3b           |
| + | 9q33.2b           |
| - | 19q13.33b         |
| + | 2q33.3d           |
| - | 8q24.3c           |
| + | 8p21.2a           |
| + | 6p21.1d           |
| - | 12q12f            |
| + | 2q37.1b           |
| + | 12p13.31d         |
| + | 19q13.33b         |
|   | 1p35.2a           |
|   | 8q24.3d           |
| - | 10p12.33c         |
| + | 15q22.31b         |
| - | 3q21.1b-q21.1c    |
| + | 11p11.2b          |
| + | 20q13.13e-q13.13f |
| + | 12q24.13a         |
| + | 7q11.23g          |
| + | 2q21.1b           |
| - | 18p11.21d         |
|   | 10q11.22c         |
| - | 14q31.3d          |
| - | 1p13.2b           |
| - | 9q31.3a           |
| + | 2q14.2c           |
| + | 12p13.31d         |
| - | 1q32.1c           |
|   | 15q24.2a          |
| + | 20p13c            |
| + | 1q31.3d           |

- 11q13.1f  
+ 10q26.2c-q26.2d  
+ 1p34.2a  
+ 3p14.2b  
- 19q13.42b  
+ 11p11.2a  
+ 12p12.3e  
+ 1p35.3a  
+ 1q32.1c-q32.1d  
- 17q21.31a  
- 9q34.11a  
- 17q23.1a  
+ 11q23.1c  
+ 5q33.3d  
- 21q22.3d-q22.3e  
- 8q13.1b  
- 8q24.3g  
- 1p35.2a  
- 2p24.1c  
+ 5q31.3a  
- 7p13c  
+ 12q24.33c  
- 2p16.1a  
- 11q24.2b  
- 7q22.2a-q22.2b  
- 12q12f  
+ 1p36.33a  
+ 19q13.31b  
+ 7q22.1c  
+ 19q13.32a  
+ 3q13.13d  
+ 8q24.21b  
+ 12q23.3d  
+ 21q22.3d  
+ 10q26.3e  
- 5q33.3d  
+ 10q26.3e  
- 2p25.3e  
+ 3p14.3a  
+ 12q24.33d  
- 8q21.11d  
- 20q11.22a  
- 12q24.31a  
- 16p11.2c

- 17q25.3g  
- 1q42.12c  
- 8q24.3g  
+ 3q28d  
+ 20p11.21a  
- 14q22.1c  
- 15q21.3c  
- 1q21.3e  
+ 1q23.1g  
+ 12p12.1e  
- 12p13.31a  
- 3p21.31d  
- 4p15.32b  
6q26c  
+ 2p22.2a  
+ 19q13.32a  
+ 16p11.2d  
- 4q27c  
- 3p21.31d  
- 17q25.1d  
+ 6q21c  
+ 1q25.2c  
- 9q34.3d  
+ 19p13.2b  
+ 3q13.31a  
8p21.3a  
+ 2q21.3b  
- 12q13.3b  
+ 2p23.3b  
+ 15q22.31c  
+ 19p13.2d  
- 8p12a  
- 10q26.11b  
+ 16p13.3f  
+ 17q11.2d  
- 2p13.2b  
+ 18p11.22c  
- 1q21.3d  
- 14q23.3a  
- 2q37.3b  
- 2p14c  
+ 11q13.1e  
-  
- 13q34a

|   |                   |
|---|-------------------|
| + | 12q21.1a          |
| + | 20q13.32a         |
| - | 6p12.1a           |
| - | 5q35.3a           |
| + | 1q22c             |
| + | 16p13.3d          |
| - | 4p15.33c          |
| - | 14q11.2c          |
| - | 11q14.1d          |
| + | 18p11.22b         |
| + | Xq25h             |
| + | 4q31.1c-q31.1d    |
| - | 17q11.2a          |
| + | 17q25.1b          |
| - | 11q14.2b          |
| - | Xq28h             |
| - | 19p13.11c         |
| - | 1p32.3e           |
| + | 5q11.2h           |
| - | 19p13.2b          |
| - | 1q41d             |
| + | 12q15c            |
| - | 17q25.3h          |
| + | 16p13.3f          |
| + | 1p35.3b           |
| - | 3q21.3c           |
| + | 1q42.13d          |
|   | 19q13.2b          |
| + | 3p24.3c           |
| + | 12q13.2c          |
| - | 17q21.2b          |
| - | 11q13.4b          |
| - | 3q22.1e           |
| + | 3q21.3c           |
| - | 1q32.1g           |
| + | 19p13.12a-p13.11f |
| + | 15q22.2b          |
| + | Xp22.2            |
| - | 19q13.2c          |
| + | 17p13.2b          |
| - | 16p11.2e          |
| + | 9q33.3a           |
| + | 9q33.2b           |
| + | 1q25.1a-q25.1b    |

|   |              |
|---|--------------|
| + | 7q11.21e     |
| - | 14q12a       |
| + | 1p31.1g      |
| + | 2q14.1a      |
| - | 22q13.33b    |
| - | 3q13.33b     |
| - | 22q12.3d     |
| - | 7q22.1d      |
| + | 7p22.1b      |
| - | 22q13.1a     |
| + | 17q25.3g     |
| - | 12q13.13a    |
| - | 5p13.2d      |
| + | 5q13.2a      |
| - | 3p25.3d      |
| - | 8q24.11a     |
| + | 19p13.13c    |
| + | 9q31.2b      |
| + | 15q15.1b     |
| + | 12p13.32a    |
| - | 2p24.2b      |
| + | 17q22d       |
| - | 17q12a       |
| - | 8q22.1b      |
| + | 1p34.1a-p33d |
| + | 3p21.2a      |
| + | 11q13.1f     |
| - | 7p22.1d      |
| + | 20q13.31a    |
| - | 6q25.1a      |
| - | 6q25.1b      |
| - | 3p25.1d      |
| + | 11p12d       |
| + | 1q22a        |
| - | 14q32.31c    |
| + | 17p11.2g     |
| - | Xp22.13d     |
| + | 7p14.1d      |
| + | 2q14.2d      |
| + | 18p11.22b    |
| - | 14q13.2b     |
| + | 20q11.23c    |
| + | 9q33.3b      |
| + | 1q25.2b      |

+ 20q11.22a  
+ 2q37.3b  
+ 17q21.31a  
+ 7p13c  
+ 12q24.33b  
+ 22q11.21d  
- 16q22.1b  
+ 2q13a  
- 19p13.3b  
- 5p13.2c  
- 9p24.1c  
- 22q13.2a  
+ 17p13.1c  
+ 12q15b  
5q13.3c  
- 1p36.12b  
+ 13q32.1c  
- Xq26.2a  
- 9q34.13a  
+ 4q32.1e-q32.1f  
- 7p15.3c  
- 5q31.1a  
+ 17q21.1d-q21.2a  
+ 17q21.2a  
+ 11q12.3b  
+ 5q35.1a  
- 6q15a  
+ 5q14.3d  
+ 3q23c  
- 7q22.1f  
- 12q24.13b  
- 19p13.12a  
- 17p11.2g  
+ 22q12.3c  
- 4q21.21c-q21.22a  
- 15q14d  
- 11q13.1b  
+ 2p22.3d  
- 19q13.33a  
- 22q12.2a  
+ 17q12b  
+ 13q12.2a  
+ 4q12a  
- 3p21.31b



- 20p13a  
+ 12q14.2b  
+ 10q11.21c  
+ 1q32.1h  
- 4q13.3d  
+ 11p15.5d  
- 19p13.2c  
+ 1p31.3b  
- 18q21.32a  
- 19p13.3e  
+ 13q14.2b  
- 8q11.23b  
+ 7p22.1d  
+ 1p35.1b  
- 1q32.1f-q32.1g  
+ 16p12.1b  
- Xp22.2  
+ 18q11.2b  
- 20p11.23d  
20p13f  
+ 2p11.2g  
- 2p23.2b  
- 20q11.23b  
+ 16q12.2a  
  
+ Xp11.3a  
+ 21q11.2c  
- 20q11.22b  
- 8q22.1b  
+ 11q13.1e  
+ 1p13.3a  
+ 3p21.2c  
+ 6q25.2c  
+ 10p15.1a  
- 9q33.2b  
12q24.13b-q24.21a  
10q25.2a  
- 5q33.1c  
- 14q11.2f  
+ 6p22.3e  
+ 14q24.2b  
- 13q31.1a  
+ 5q32d  
- 7q32.1a

|   |                 |
|---|-----------------|
| + | Xp11.23d        |
| + | 7q36.3a         |
| - | 1q42.3b         |
| + | 20q13.31a       |
| - | 20q11.22b       |
| + | 11q13.1e        |
| - | Xq22.3b         |
| + | 19q13.12a       |
| + | 2q31.2b         |
| - | 4p14a           |
| - | 11q13.1e        |
| + | 3p21.31c        |
| + | 3p21.31c        |
| + | 11q23.2b        |
| + | 1q21.1b         |
| - | 22q12.3c-q12.3d |
| - | 2q24.2b         |
| + | 12q13.3a        |
|   | 12q22c          |
| - | Xq26.3c         |
| + | Xq25h           |
| - | Yq11.223b       |
| + | Yq11.223b       |
| - | Yp11.2b         |
| - | 10q23.33b       |
| - | 12p13.31d       |
| + | 1p36.22d        |
| + | 4p15.2b         |
| - | 15q22.31b       |
| + | 22q13.2a        |
| - | 9q33.2b         |
| - | 6q12d           |
| - | 21q22.12a       |
| - | 6p12.3e         |
| + | 1p36.11d        |
| - | 13q14.3a        |
| - | 13q14.2b-q14.2c |
| + | 1p35.3b         |
| - | 1p36.13d        |
| + | 15q26.1c        |
| + | 11q13.1e        |
| - | 4q21.1a         |
| + | 9p24.1c         |
| + | 19q13.33b       |

|   |                   |
|---|-------------------|
| + | 14q32.31c-q32.32a |
| - | 11q13.1a          |
| + | 1q32.2c-q32.3a    |
| + | 7q11.21e          |
| + | 1q24.2a           |
| - | 6p21.32b          |
| + | 8q21.11a          |
| - | 14q24.1a          |
| - | 19q13.42b         |
| + | 12q13.2b          |
| + | 19p13.2c          |
| - | 17q12b            |
| - | 11q22.3d          |
| + | 14q12a            |
| + | 9p13.3a           |
| - | 12p12.1e          |
| - | 8q24.3h           |
| - | 17q25.1c          |
| - | 2p11.2f           |
| + | 5q31.2c           |
| + | 10q21.3a          |
| - | 8p21.3a           |
| - | 5q22.2a           |
| + | 19p13.3h          |
| + | 2p16.1a           |
| - | 11q13.1d          |
| + | 19q13.32a         |
| - | 4p14e-p14d        |
| + | 5q31.3c           |
| + | 14q11.2f          |
| - | Xq28f             |
| + | 12p11.22b         |
| + | 7q36.1c           |
| + | Xp22.2            |
| + | 1p36.32c          |
| - | 1p36.23a          |
| - | 12p12.3e          |
| - | 12p12.3b          |
| - | 2p11.2g           |
| - | 2q11.2c           |
| - | 6q21h             |
| - | 19p13.3h          |
| + | 11q23.2b          |
| - | 9q34.2a           |

- 4p14c  
- 7q11.23b  
+ 13q13.2a  
- 3q27.3a  
+ 12q24.23a  
+ 5q15c  
- 17q12a  
- 17q25.3g  
- 6p22.1a  
- 22q12.3a  
- 22q12.3a  
- 19q13.42c  
- 3p21.1c  
- 3p24.3e-p24.3d  
- 1q25.1b-q25.2a  
- 16q22.3c  
- 19p13.12c  
- 19p13.3b  
- 9p24.2b-p24.2a  
- 1q21.2d  
- 15q21.3c  
+ 19p13.11b  
- 15q21.3c  
- 4q23b  
+ 9p13.2a  
- Xq13.1d  
+ 1q25.3e  
- 6p21.32a  
+ 22q11.23a  
- 15q26.1e  
+ 5q21.1a  
+ 1q31.2b  
- 10q26.11d  
- 16p13.3f  
+ 1q31.2b  
+ 5q35.3a  
- 1q25.3c  
- 6q25.2a  
+ 1q31.2a  
- 20q13.33e  
+ 1q31.2b  
- 8q22.2b  
+ 1q23.3c  
+ 19q13.11a

|   |                   |
|---|-------------------|
| + | 2q36.3b           |
| + | 7q11.23e          |
| - | 22q12.2a          |
| - | 16p13.3f          |
| - | 17q25.1d          |
| + | 16p13.3f          |
| - | 1p34.3a           |
| + | 17q11.2d          |
| - | 1p36.11c          |
| - | 12q13.12b         |
| - | 3p21.31d          |
| + | 2p24.1c           |
| + | 8p21.3a           |
| + | 5q15c-q15d        |
| - | 1p13.2c           |
| + | 11q13.1f          |
| - | 12q24.31b         |
| - | 11p15.4d          |
| + | 4p14b             |
| + | 2p21a             |
| + | 17q11.2d          |
| + | 16p13.3f          |
| - | 15q15.1b          |
| - | Xq24c             |
| + | 8q24.3f           |
| - | 19q13.11a-q13.11b |
| + | 11p15.5d          |
| + | 12q23.3c          |
| + | 17p12c            |
| - | 11q24.3a-q24.3b   |
| + | 2q23.3b-q23.3c    |
| - | 12q24.31d         |
| - | 12q24.31d         |
| + | 12p13.31b         |
| + | 8q22.3c-q22.3d    |
| - | 1p34.2c           |
| + | 20p11.23b         |
| + | 6p21.32a          |
| - | 19q13.2a          |
| + | 7q22.2b           |
| + | 6p24.3c           |
| - | 5q15e             |
| + | 18q11.2b          |
| + | 6p25.2b           |

|   |                 |
|---|-----------------|
| + | 8q21.3d         |
| - | 14q12a          |
| - | 21q22.3a        |
| - | 1q32.1g         |
|   | 1p34.2d         |
| - | 9p24.1c         |
| - | 9p24.1c         |
| + | 19p13.12c       |
| + | 16q22.1b        |
| + | 9q21.32c        |
| - | 6q25.1c         |
| + | 2p11.2e         |
| + | 5q35.3b         |
| - | 9p13.3a         |
| - |                 |
| + | 6p12.1d         |
| + | 14q11.2b        |
| + | 14q11.2c        |
| + | 14q11.2b        |
| - | 14q11.2b        |
| - | 2p25.3b         |
| + | 19p13.13c       |
| + | 13q14.3b        |
| - | 11q13.1d        |
| + | 17p13.1d        |
| - | 1q25.3c         |
|   | 5p13.3c         |
| - | 6q27c           |
| - | 12q13.12a       |
| + | 17q21.31a       |
| + | 12q24.31a       |
| - | 2p11.2e         |
| + | 1p32.3e         |
| + | 15q22.1b-q22.2a |
| + | 20q13.13d       |
| + | 1q21.1b         |
| + | 11q13.4a        |
| - | 8p12c           |
| + | 3p21.31c        |
| + | 18q12.1e        |
| - | 19p13.3j        |
| + | 3q25.1a         |
| - | 5q35.3e         |
| - | 7q31.32a        |

+ 17q11.2c  
+ 18q12.1e  
+ 5q31.3c  
- 11p15.4a  
+ 6p22.3d  
- 5q33.3c  
+ 6q22.33a  
- 2q11.2e  
- 4q31.21a  
- 18q21.33a  
- 21q21.3c  
+ 17p13.2b  
- 8p11.21a  
- 4q31.3d  
+ 5q12.2a  
+ 2p11.2f  
+ 6p23b  
- 9q32c  
+ 1q42.13c  
- 8q22.2b  
- 1p35.1b  
+ 9q31.1b  
- 9q34.3f  
+ 17q25.3e  
- 22q12.2b  
- 7p22.1c  
+ 7p22.1d  
+ 1p34.1e-p34.1d  
- 20p13b  
- 2q35e  
+ 11q23.3e-q23.3f  
+ 14q12a  
+ 12q24.31b  
- 9p13.2b  
+ 4p16.3a  
+ 16p11.2c  
- 12q13.2c  
- 17q22d  
- 5q35.2d  
+ 6p21.32b  
- 8p11.23c  
+ 3q23c  
+ 6p21.2c  
- 17q23.1a

|   |           |
|---|-----------|
| + | 12q24.22a |
| - | 6q15c     |
| - | 11p15.5d  |
| + | 18p11.21c |
| + | 17p13.3f  |
| - | 20q11.22b |
| + | 1q32.1c   |
| + | 2q37.3e   |
| - | 16p13.3d  |
| + |           |
| + |           |
| + |           |
| + |           |
| + | Xp11.3a   |
| - |           |
| - |           |
| - |           |
| - |           |
| - |           |
| - |           |
| - | 12q24.31a |
| + |           |
| + | 15q22.31b |
| - |           |
| - |           |
| - | 22q13.1d  |
| - |           |
| + |           |
| + | 7q36.1a   |
|   | 1q22c     |
| + | 11q24.2a  |
| - | 11q24.2a  |
| - | 2p25.1b   |
| - | 9q32a     |
| - | 16p13.3b  |
| + | 11q12.3a  |
| + | 20q11.22b |
| + | 5p15.2c   |
| + | 1p31.3c   |
| + | 8q12.1a   |
| + | 10q24.32a |
| + | Xp11.3a   |



- 20p12.3c  
+ 17p13.3d  
- 1p35.3b  
- 7p21.3e  
+ 17p13.2b  
- 15q15.1c  
+ 1p22.1d  
- 12q13.11b  
+ 1p22.3f  
+ 6q21h  
- Xp11.4e  
+ 14q11.2c  
- 17p13.3g  
+ 2p11.2c  
- 14q21.3c  
- 9q33.3b  
+ 16q24.3b  
+ 19q13.33b  
+ 3p22.1c  
+ 3p24.2b  
- 18q21.1f  
+ 13q12.2a  
- 1p36.31b  
- 3q26.2c  
+ 17q11.2a  
- 8p23.3b  
+ 5q35.2a  
+ 19q13.42b  
- 3p21.1e  
- 22q13.1d  
- 8q22.2a  
- 1q23.3b  
- 3p25.1d  
+ 4q25b  
+ 19p13.3b  
+ Xq22.1c  
- 5p13.1b  
+ 2q35c  
- Xq24c  
- 3q27.3b  
- 16p13.3e  
- 15q22.31c  
+ 1p22.1c  
- 8q24.3h

- 4p14b  
- 3q21.3c  
+ 3p14.3a  
- 15q24.1b  
+ 10p13c  
- 6p25.1c  
- 14q11.2b  
+ 1p34.3d  
- 18q12.2a  
+ 20q11.23c  
+ 1q21.2b  
- 2q23.3e  
- 17q21.32a  
+ 9q22.1a  
+ 19q13.33b  
+ 6q23.2b  
- 16p12.3b  
+ 6p21.32a  
- 22q13.1d  
- 16p13.3e  
+ 20q13.33c  
- 5q14.2a  
- 8q21.3f  
- 14q22.1a  
- Xq13.1e  
+ Yp11.31a  
+ Yq11.223a  
+ 19q13.43c  
+ 1p36.11b  
+ 11q13.1b  
- 14q32.11a-q32.12a  
+ 17q23.1a  
+ 11q13.1f  
+ 1q32.3c-q32.3d  
- 14q24.3b  
12p13.1b  
+ 2p25.3b  
+ 3p22.1c  
+ 17q25.3e  
- 16p13.3f  
+ 15q15.1b  
- 3p25.3c  
- 11q24.2c  
+ 2q35e

- 16q22.1a  
+ 9p22.1b  
+ Xp11.21a  
- 1p34.3a  
- 6q15c  
- 19q13.33b  
- 11p15.2b  
- 20p12.1a  
+ 6p24.3c  
+ 11p15.4d  
+ 2p25.1d  
- 8q22.3b  
- 16p13.11b  
+ 16p11.2d  
+ 21q22.3c  
- 10q24.1b  
+ 1q41c  
+ 21q22.3c  
- 22q13.2b  
- 11p15.4c  
- 3p21.1e  
+ 8q13.1b  
+ 17q21.33b  
+ 2p25.2a  
- 1p13.2b  
+ 7q11.23g  
+ 1p36.21a  
- 11q14.1a  
- 19q13.32a  
+ 6q22.1d  
- 16p13.13b  
- 15q21.3b  
- 21q22.3b  
- 6q25.3e  
+ 16q13c  
+ 3q25.32b  
- 12q24.31c  
- 10p13a  
- 19p13.13c  
+ 1p21.2a  
- 22q11.22b-q11.23a  
+ 20q13.33e  
+ 15q15.1c  
- 2p13.1b

- 19q13.32a  
+ 11q13.1a  
- 2p16.1d  
- 6q21c  
+ 11q12.1a  
- 3q27.3c  
+ 3q27.3b  
- 18q22.2a-q22.2b  
+ 5q35.3d  
+ 4q13.3b  
+ 17q21.31a  
+ 16p13.13a  
+ 16p12.2b-p12.2a  
+ 17q21.31c  
+ 7q21.12a-q21.12b  
- 8q21.3f  
+ 6p12.3f  
- 1p36.11c  
+ 1q22a  
3q21.3b  
+ 19q13.33a  
+ 6q22.1d  
+ 6q14.2a  
- 21q21.3c  
+ 1p21.3d  
- 4q35.1c  
+ 5p13.3a  
+ 9q34.2b  
- 3p13c  
- 3q22.1e  
+ 19q13.2a  
+ 1q43a-q43b  
- 1q21.3a  
- 1q21.3a  
- 1q21.3c  
- 1q21.3c  
- 1q21.3c  
+ 1q21.3c  
+ 1q21.3c  
+ 1p35.1b  
+ 5q13.3d  
+ 1p21.2a  
- 19p13.2c  
+ 19p13.3f

- 19p13.2b  
- 11p15.1d  
+ 11q13.1c  
+ 3p21.31j  
- 13q12.12a  
+ 19q13.32b  
+ 19p13.3b  
- 19p13.3b  
- 14q11.2d  
+ 18q23c  
- 19p13.12c  
- 20q13.33e  
+ 1p36.33b  
+ 1p31.1a  
- 17q21.33a  
+ 14q22.2b  
+ 19q13.2a  
9q22.33c  
+ 3q26.2b  
+ 10q22.2c  
- 7q21.2b  
- 7q21.2b-q21.3a  
- 20q11.23a-q11.23b  
+ 22q13.31a  
- 21q11.2d  
- 2q14.3e  
+ 13q12.11b  
+ 4q34.1c  
+ 17q25.1c  
+ 5q33.2b  
- 19q13.42b  
+ 11q13.2b  
- 10q22.1a  
- 5q31.1e  
+ 17q11.2a  
+ 1p13.3b  
- 19q13.2a  
- 12q23.3d  
+ Xq25h  
- 1p21.2a  
+ Xp22.11a  
- 17p13.1d  
- 3p24.3c  
- 2q33.1c-q33.1d

- 14q22.1b  
- 7q11.21e  
+ 7q11.23a  
- 22q13.33b  
- 11p15.4a  
- 12q24.31d  
- 19p13.3i  
+ 4q32.3b  
+ 11q23.3h  
- 17q21.2b  
+ 5q14.1b  
+ 15q24.1b-q24.2a  
- 6p22.1b  
- 3p21.31g  
- 15q24.3a  
- 8p21.1e-p21.1d  
- 12q24.31f  
- 4q21.1a  
+  
- 12p13.31d  
- 12p13.31d  
-  
-  
+ 17q25.2b  
+ 18q21.1f  
- 5q14.2c  
+ 1p13.3b  
- 17q23.2a  
+ 17p13.1d  
+ 4p16.3b  
+ Xp22.11a  
- 1q22c  
+ 2q37.1d  
+ 2q37.1d  
- 3q26.1a  
- 9p22.1b  
+ 11q21a  
-  
+ 1q44d  
+ 10q24.31a  
- 4q21.22a  
+ 13q22.3b  
- 4q12a-q12b  
- 2q36.1d

|   |                  |
|---|------------------|
| + | 15q21.2b         |
| + | 15q13.3c         |
| + | 11q12.3a         |
| - | 11q12.3a         |
| + | 11q12.3a         |
| - | 4q28.2b          |
| + | 2q37.3b          |
| - | 1p34.2c          |
| + | Xp22.13d         |
| - | Xp22.13c         |
| - | 2q24.3d          |
| + | 19q13.11c        |
| + | 2q24.3c          |
| - | 11q23.3d         |
| - | 2q24.3c          |
| - | 17q23.3b         |
|   | 3p22.2a          |
| + | 1q21.2d          |
| + | 1p36.33a         |
| + | 16p12.1c         |
| - | 17p13.1a         |
| - | 22q13.33b        |
| + | 4q31.1f          |
| + | 17q22c           |
| - | 8q24.3g          |
| - | 7p15.1b          |
| + | 8q24.3g          |
| + | 8q24.3g          |
| + | 11q13.1c         |
| + | 1q24.2c          |
| + | 12q23.1d         |
| - | 1q24.2c          |
| - | 4q21.1a          |
| - | 2p24.1d          |
| - | 20q13.12b        |
| + | 8q12.1c          |
| + | 5q12.3a          |
| - | 9q34.3d          |
| - | 18q21.32b        |
| + | 1q43f-q44a       |
| - | 17q11.2a         |
| + | 22q11.21f        |
| - | 1p36.33b-p36.33a |
| + | 5p15.33e         |

+ 19q13.12a  
3q29f  
+  
- 1p36.13e  
+ 1q23.3a  
+ 11q23.1c  
- 16q23.3a  
- 12q13.3a  
- 12q24.13b  
+ 12q24.13b  
+ 19q13.33a  
- 15q25.3a  
+ 18q21.32a  
- 3p25.3b  
+ 17q25.2b  
+ 16p13.3b  
2p13.3a-p13.2b  
- 9q34.3d  
+ 3q21.1b  
+ 1q21.1b  
- 3p22.1a  
- 14q21.1b  
+ 20p11.23d  
+ 10q26.11d  
+ 5q31.1e  
4q25c  
+ 10q22.2a  
- 4q26f  
- 4q21.22a  
+ 3q21.3b  
+ 10p14a  
+ 9q22.33c  
- 7p11.2c  
+ 3q26.2b  
- 6q21d  
+ 9q22.2a  
- 15q21.1d  
+ 18p11.21d  
- 14q31.1c  
- 4p15.2c  
- 1q24.2c  
+ 2p23.3b  
- 3p21.1a  
- 1q24.2c



- 22q12.2c  
+ 22q13.33b  
- 15q26.3d  
+ 3q25.1b  
- 7q21.11e  
+ 3p21.31c-p21.31b  
+ 1q22c  
+ 15q26.1b  
- 2q11.2a  
- 9q22.2a  
+ 2p13.1a  
- 3q21.1b  
- 5q23.1a  
- 19p13.3d  
- 1q21.2d  
- 15q24.1b  
- 12q13.11c  
+ 3q27.2b  
+ 17p13.1d  
+ 3q29g  
+ 6q14.1a  
- 3q12.3a  
- 10p13d  
- 16p11.2c  
+ 1p36.11b  
- 5p12c  
- 4p15.2c  
+ 19q13.32c  
- 16p13.3e  
- 6q25.3d  
- 1p31.3a  
+ 5q13.2b  
+ 5q13.2a  
+ 15q15.3b  
- 11p15.1d  
+ 22q13.2b  
- 22q13.2b  
+ 6q22.31c  
- 1p35.2a  
- 20q13.12a  
- 15q15.3b  
- 3q25.1b  
+ 13q14.11e  
- 14q32.13a

- 14q32.13a  
- 14q32.13a  
- 14q32.13a  
+ 14q32.13a-q32.13b  
- 14q32.13a  
- 6p25.2b  
+ 18q21.33b  
+ 18q21.33b  
+ 18q21.33b  
+ 18q21.33b  
+ 18q21.33b-q22.1a  
- 6p25.2b  
+ 7q22.1d  
- 2q36.1d  
+ 17p13.3d  
+ 3q26.1f  
- 19q13.2b  
- 2p14c  
- 19q13.2b  
- 6q21f  
+ 1p35.3b  
- 11q21c  
- 2q31.2c  
+ 9q34.11b  
+ 18q12.3e-q12.3f  
+ 16p11.2c  
+ 12q24.31b  
- 3p21.31h-p21.31g  
- 14q32.2b  
- 21q22.12b  
+ 16q21a  
- 4q31.1d  
+ 12q24.31d  
+ 1q21.2c-q21.2d  
+ 13q14.3a  
+ 3p26.2b  
- 9q34.13b  
- 16p11.2d  
- 11q13.1b  
- 22q12.2b  
- 1p34.3b  
- 2q33.1a  
- 2p23.3d  
+ 11q13.1d

+ 16q22.1f  
- 1q21.2a  
- 6q24.2b  
- 19p13.11a  
+ 22q12.2c  
- 3p21.1c  
+ 1p36.11a  
- 1p34.3e  
- 4q31.3d  
- 17q22d  
- 3q27.2b  
+ 5q12.3b  
- 5q12.3a  
- 1p36.11d  
- 6q15c  
- 19p13.11b  
+ 19q13.32a  
+ "Xp22.33d,Yp11.32a"  
- 6q16.3a  
- 17q25.2a  
+ 11q21b  
- 12q12h-q13.11a  
+ 6p21.31a  
- 1p35.3a  
+ 14q24.2a  
+ 20q13.11b  
- 2p22.1c  
+ 12q24.33c  
- 12q24.31a  
- 6q27c  
+ 1q24.2a  
+ 2q14.3e  
+ 10q22.3e  
- 10q22.3f  
+ 5q35.2c  
+ 10q24.32b  
+ 10q24.31a  
- 10q26.11c  
- 2p13.2b  
+ 17q21.33a  
- 7q21.3b  
+ 3q25.2b-q25.2c  
+ 1p31.3a  
- 6q23.2d

- 6q23.2d  
+ 8p11.21a  
+ 8q13.1b  
- 10q11.23b  
+ 4q25b  
- 3p24.3b  
+ 2q33.1e  
+ 10q22.1c  
- 14q23.2b  
+ 2q36.1b-q36.1c  
- 17q25.3d  
+ 22q11.23c  
- 19p13.3g  
+ 16p11.2e  
+ 7q22.1e  
+ 12q24.12a  
+ Xq25c  
- 1q23.1a  
- 19p13.3a  
- 9q34.11a  
+ 8p21.3c  
1p36.12b  
+ 21q22.2b  
+ Xq21.1c  
+ 6q14.1c  
+ 1p36.11b  
+ 22q13.1a  
+ 2q37.2a  
- 1q44f  
- 19p13.3d  
+ 9p22.2a  
+ 1p22.3c-p22.3b  
- 9q34.11c  
- Xp22.12b  
- 10q24.33a  
+ 4p16.1d  
- 2p25.3g  
+ 22q13.33b  
- 8q24.3g  
- 9p13.2a-p13.1b  
+ 17p13.1d  
- 1q21.3e  
- 15q21.1d  
- 16q11.2i

|   |                   |
|---|-------------------|
| + | 19p13.3d          |
| - | 1q21.3e           |
| - | 7q21.3c           |
| - | 13q12.13b         |
| + | 4p13c             |
| - | 3p21.31e          |
| + | 19q13.2b          |
| - | 17p11.2f          |
| + | 12q13.3b          |
| + | 10q25.2a          |
| - | 3q25.32b          |
| - | 17p13.3a          |
| - | 6q24.3a           |
| - | 3p13c             |
| + | 4q21.1b           |
| - | 5q31.1c           |
| + | Xp22.2            |
| - | Xp11.22c          |
| - | 16q12.1b          |
| - | 3q25.1b           |
| + | 3q13.2b           |
| + | 11q23.3b          |
| - | 19q13.33d         |
| - | 19q13.33d-q13.33e |
| + | 19q13.33d         |
| - | 9p13.3c           |
| - | 21q22.3c          |
| + | 11q23.1b          |
| - | 11q23.3b          |
| - | 1p13.2a           |
| - | 5q31.2d           |
| - | 12q13.2c          |
| - | 15q24.2a          |
| + | 19p13.11e         |
| + | 14q21.1b          |
| + | 11q13.1d          |
| + | 14q24.2a-q24.2b   |
| - | 1q42.2b           |
| + | 20p13d            |
| + | 10q21.3d          |
| - | 19q13.2a          |
| + | 12q24.31a         |
| + | 6p23b             |
| - | 17q25.3g          |

- 9p13.3a  
+ 14q32.33b  
+ 14q32.33b  
- 14q23.1c  
- 2p21c  
- 14q23.1c  
- 19q13.32a  
+ 14q23.1c  
+ 18q21.1g  
- 17q22d  
- 17q21.32b-q21.32c  
- 7p15.2b  
11q22.3d  
+ 1p36.33a  
+ 3q26.2c  
- 17p13.3e  
+ 6p21.32b  
+ 5q11.2d-q11.2e  
- 5q31.1d  
+ 5p13.2c  
- 8q24.22c  
- 20q11.23a  
+ 13q22.3b  
+ 4p12a  
- 1q23.3a  
- 1q23.2d  
+ 1q23.3a  
- 1q23.2c  
- 4p16.3b  
- Xq28g  
- 4q31.22b  
- 12q13.13b  
+ 5q23.3a  
- 16q22.1b  
- 15q14a  
- 3q21.2b  
+ 7q22.1c  
- 7q31.32b  
+ 17q11.2a  
- 7q33c  
+ 3q13.33c  
- 11q12.2a  
- 12q24.32c  
- 1p13.2c

|   |                   |
|---|-------------------|
| + | 6q21h             |
| - | 10q23.31b-q23.31c |
| + | 17q25.3g          |
| - | 17q24.2c          |
| + | 6p22.2a           |
| - | 19q13.33b         |
| + | 20q13.33d         |
| - | 8p21.3c           |
| - | 21q22.3e          |
| + | 9p24.2a           |
| + | 2p14c             |
| - | 19q13.32b         |
| + | 2q13d             |
| - | 8p11.21a          |
| + | 6q25.3f           |
| - | 14q11.2f          |
| + | 11p15.4d          |
| + | 11q13.1c          |
| + | 5q31.1b           |
| + | 5q31.1b           |
| + | 11q12.3b          |
| - | 5q31.2d           |
| - | 2q35f             |
| + | 15q22.31b         |
| - | 9p22.1a           |
| + | 14q32.12b         |
| - | 12q24.13b         |
| - | 22q11.21b         |
| + | 17q25.3f          |
| - | 17p13.2b          |
| - | 2q31.1d           |
| - | 7q21.3c           |
| + | Xq25h             |
| + | 13q14.11a         |
| - | 22q13.2a          |
| + | 22q11.21a         |
| - | 17q25.1c          |
| - | 3p21.31e          |
| - | 11p15.5c          |
| - | 19p13.3a          |
| - | 1p13.3c           |
| + | 9q34.11a          |
| + | 3p14.1c           |
| + | 6p12.3e           |

- 10q24.2c  
- 14q32.2b  
+ 12q23.1c  
+ 1p36.21a  
- 17p13.1c  
+ 3q23b  
+ 8p21.2d  
+ 3p22.1c  
- 17q21.31c  
+ 4q35.1e  
- 7q21.12b  
- 19p13.3a  
+ 19p13.11b  
+ Xq24c  
+ 1q22d  
+ 5q22.1a  
+ Xq24c  
- "Xp22.33d,Yp11.32a"  
+ 5q33.1c  
- 3p21.31e  
+ 19p13.11d  
+ 15q21.2a  
- 19q13.43c  
+ 6p21.1b  
- 11q13.1e  
+ 10q22.1d  
+ 7p22.1c  
- 1p34.2a  
+ 22q11.23a  
- 6q23.2d  
- 12p13.31c  
- 12p13.31c  
+ 20q13.33e  
- 1p36.23a  
- 9q34.2a  
+ 9q33.3b  
- 1q32.3a  
- 2p23.3a  
+ 5q13.2a  
+ 1p21.2a  
+ 4p13d  
+ 9q32c  
+ 9q32b  
- 3q25.31a



|   |                 |
|---|-----------------|
| + | 6q15a           |
| - | Xp11.23c        |
| + | 1p21.2a         |
| + | 5q31.3b         |
| + | 3q13.2a         |
| - | 17q21.33a       |
| - | 6p21.1b         |
| - | 6p24.3b         |
| - | 7q33a-q33b      |
| + | 11p11.2c        |
| - | 20q13.12c       |
| - | 1p31.3a         |
| - | 19p13.11f       |
| + | 12q15b          |
| + | 22q12.2b        |
| + | 6q22.2b-q22.31a |
| - | 11q22.3c        |
| - | 2q14.1a         |
| + | 5q33.1d         |
| - | 11q21a          |
| + | 21q22.3b        |
| - | 7q34c           |
| - | 11q23.3e        |
| - | 12q13.11a       |
| - | 17q25.3f        |
| - | 12q13.11a       |
| - | Xp11.23d        |
| + | 14q23.1c        |
| - | 16q21a          |
| - | 5q11.2e         |
| - | 1q21.3d         |
| + | 2q32.3e         |
| - | 17q24.3c-q25.1a |
| + | 10p12.33b       |
| + | 8p21.3a         |
| - | 19p13.3g        |
| - | 8q24.3h         |
| + | 12q13.2c        |
| - | 4q24a           |
| + | 14q24.1e        |
| + | 11q12.3b        |
| - | 2q32.2a         |
| - | 1q32.1g         |
| - | 12q23.3b        |

- 3q21.2c  
- 11q12.1a  
- 17p13.3e  
- 11q12.1a  
+ 9q31.1d  
+ 19p13.2b  
+ 1p21.3d  
- 6p21.32b  
- 5p13.3a  
- 1q32.1g  
- 8q24.3c  
- 17q11.2a  
- 13q12.3a  
+ 12q13.11b  
- 17q21.31c  
- 20p13c  
+ 2p23.2b  
+ 7q36.1d  
- 2p13.1b  
- 3p24.1d  
+ 12q13.13c  
+ 17p11.2e  
+ 21q22.11c  
- 2p23.3a  
+ 1p33c  
- 16p11.2b  
- 12p13.33d  
- 19q13.33a  
+ 5p15.33d  
+ 3p25.1a  
+ Xq28f  
- 1p34.1f  
- 13q12.3b  
- Xq13.1c  
- 22q11.21e  
- 16q24.2b  
- 16p11.2d  
+ 16q22.1c  
- 16q22.1c  
- 14q11.2e-q11.2f  
- 19q13.11a  
- 19q13.32c  
- 1p36.11a  
- 3q13.2a

|   |                   |
|---|-------------------|
| + | 17q25.1b          |
| + | 16q22.1a          |
| + | Xq26.3b           |
| - | Xp11.3a           |
| + | 20q13.13d         |
| - | 3q24a             |
| + | 11q13.4c          |
| + | 15q26.1d          |
| + | 20q13.33d         |
| - | 5q21.1d           |
| - | 17q12a            |
| - | 17q12a            |
| + | 17q12a            |
| + | 10q25.1a          |
| + | 3p14.3a           |
| + | 18p11.21e-p11.21d |
| - | 20q13.32b         |
| - | 11q22.3c          |
| - | 15q22.1b          |
| - | 5q33.3d           |
| - | 5q13.2a           |
| - | 5q13.2a           |
| - | 18q21.1c          |
| + | 15q22.33b-q22.33c |
| + | 18q21.2a          |
| + | 5q31.2a           |
| + | 15q22.31c         |
| - | 18q21.1e          |
| - | 12q13.13b         |
| + | 6q13a             |
| + | 1p34.2d           |
| - | Xq25g             |
| + | 9p24.3a           |
| + | 19p13.2b          |
| + | 4q31.21c          |
| + | 4q22.2b-q22.3a    |
| + | 2q35c             |
| + | 22q11.23a         |
| - | 3p21.31g-p21.31f  |
| - | 12q13.2c          |
| + | 12q13.13a         |
| - | 17q23.3b          |
| - | 7q36.1d           |
| - | 17q21.2a          |

- Xp11.22a  
+ 9q31.1d  
+ 3q26.1a  
- 2p24.2b  
+ 18p11.32a  
+ 1q21.3c  
- 17p11.2g  
+ 22q13.1d  
- 14q32.12a  
- 2p16.1d  
- 16p12.3b  
- 1q22d  
- 17p13.3d-p13.3c  
+ 1q25.3e  
+ 5q13.2b  
+ 5q13.2a  
- 10q25.2a  
+ 7q32.1a  
+ 20p13b  
+ 11p15.4c  
+ 6q21f  
- 16q22.1c  
- 2q21.1b  
+ 6q22.31c-q22.31d  
+ 1p35.3b  
+ 4q13.3a  
+ Xp22.11b  
+ 22q12.2c  
+ 17p13.2c  
- 9p13.3e  
- 12q13.13f  
1q41a  
- 1q44c-q44d  
- 17p13.3d  
+ 2p13.2a  
+ 20q13.13d  
- 8q11.21c  
- 16q24.3a  
+ 15q15.1d  
+ 22q11.21e  
+ 1q42.13b  
+ 14q23.2a  
+ 19p13.2e  
+ 9p22.3b

- 9q34.3d  
- 15q22.31c  
+ 1q21.3d  
+ 5q23.2a  
- 5q35.2d  
+ 7q32.1a  
- 17q21.32c  
- 11q12.3b  
- 14q32.13b  
-  
+  
+ 1p35.3b  
  
- 6q14.3c  
- 8q13.1b  
-  
  
3p21.1d  
+ 16p13.3e  
- 1p34.3c  
+ 16p13.13b  
- 11q21a  
- 16p13.3e  
+  
- 10q24.2c  
+ 5q22.2a  
+ 7q11.23e  
- 1q42.3b  
- 1p35.3b  
-  
- 11q21a  
- 6q25.3f  
- 17q12c  
+ 7q11.21d  
+ 11p15.4a  
+ 4q26e  
- 11q21a  
+ 4q12a  
+ 13q12.2a  
+ 14q32.32b  
- 12q13.11c  
- 12q13.11c  
+ 11p15.4b  
+ 16p11.2c  
- 13q14.12a

- 11q21a  
+ 6q23.2b  
- 12q13.11c  
+ 6p21.33a  
+ 17q24.2b  
+ 3q27.3a  
- 11q21a  
+ 2q33.3b  
- 1q22c  
- 9q34.3e  
+ 11p15.4b  
- 5q14.1a  
+ 17p13.1d  
+ 12q24.33c  
+ 20p13c  
+ 11p15.5c  
- 11p15.4d  
- 1p34.2d  
+ Xq28g  
+  
- 3q22.1b  
+  
+ 17p11.2d  
- 7p13c  
- 7p13c  
+ 3p22.1c  
+ 20q11.23c  
- 1p35.3b  
+ 3p22.1c  
+ 3q27.3a  
- 16p13.3e  
- 9q33.3b  
+ 1p22.1c  
+ 17p13.1d  
+ 19p13.11d  
+ Xq28g  
- 2p15d  
- 9q33.1b  
- 20q11.23c  
- 20q11.23c  
- 8q22.2a  
+ 1p35.3b  
+  
+ 5q31.2d

|   |           |
|---|-----------|
| + | 5q35.2a   |
| - | 2q37.1b   |
| + | 17q23.3b  |
| + | 1q32.1e   |
| + | 16p13.3e  |
| - | 14q31.1c  |
| - |           |
| - | 3q21.3d   |
| - | 11q21a    |
| - | 21q22.11b |
| + | 3q27.3a   |
| - | 9q22.31a  |
| - | 7p13c     |
| + | 17p13.1d  |
| + | 6q23.2b   |
| + | 6q23.2b   |
| + | 13q12.2a  |
| - |           |
| + |           |
| + |           |
| + | 15q11.2e  |
| + | 15q11.2e  |
| + | 15q11.2e  |
| + | 2q33.1g   |
| + | 20p13c    |
| + | 16q22.1f  |
| + | 14q32.31a |
| + | 14q32.31a |
| + | 14q32.31a |
| + | 14q32.31a |
| + | 14q32.31a |
| - | 6p21.33a  |
| - | 20p13d    |
| + | 20q13.13c |
| - | 9p13.3d   |
| - | 22q12.2a  |
| - | 14q11.2b  |
| + |           |
| + |           |
| + | 8p12c     |
| - | 11p15.1e  |
| - | 11p15.1e  |
| + | 11q13.4c  |
| - | 15q22.31c |

- 20p11.23d  
- 15q22.31c  
- 15q22.31c  
+  
+  
+  
+ 3q27.3a  
+ 1p22.1c  
+ 9q34.2a  
- 11q12.3b  
- 11q12.3b  
- 11q12.3b  
- 11q12.3b  
+ 19q13.33b  
+ 6p22.1a  
+ 19q13.33b  
+ 19q13.33b  
+ 19q13.33b  
+ 19q13.33b  
+ 9q34.2a  
+ 9q34.2a  
- 19p13.3e  
+ 1p34.1d  
+ 1p34.1d  
+  
-  
-  
- 19p13.13c  
+ 17q11.2a  
- 22q13.1d  
+ 1p34.1d  
- 1q25.1a  
+ 6p21.32b  
+ 17p11.2i  
+ 17q11.2a  
+ 17q11.2a  
- 11q21a  
- 6q14.3c  
+ 2q33.3b  
+ 6p21.32b  
- 8q12.1b  
+ 1p34.1d  
+ 20p13c  
+ 20p13c



- 12q13.3a  
- 12q13.3a  
- 11q21a  
+  
- 5q31.2c  
+ 17p11.2i  
+ 3q27.1b  
+ 16q24.3b  
+ 3p21.1d  
+ 17q12a  
- 16q22.3a  
+ 4q31.3b  
- 1q25.1a  
- 1q25.1a  
- 1q25.1a  
- 14q11.2c  
- 1q25.1a  
- 22q13.1d  
- 22q13.1d  
- 6p21.33a  
- 1p35.2a  
- 8q13.1b  
- 19q13.33c  
- 19q13.33c  
- 2q11.2e  
- 17p13.3c  
- 17p13.3c  
+ 2p23.2a  
+  
- 5q35.3g  
- 5q35.3g  
-  
- 1p35.3b  
+ 20p13e  
+ 3p22.1a  
- 2q11.2a  
+ 16p13.3f  
+ 2p14a  
+ 12q24.31d  
- 1p35.2a  
+ 6p24.3c  
+ 19q13.33a  
+ 19q13.33a  
+ 19q13.2b

- 15q26.3d  
- 20p13d  
+ 20p12.1a  
+ 6p21.31d  
+ 18q11.2a  
- 19q13.32a  
+ 22q11.23b  
+ 1q32.1e  
+ 12q22d  
- 2p14a  
+ 15q11.2e  
- 20q11.21c  
- 8q24.12c-q24.12d  
+ 16q22.1d  
- 15q24.2a  
+ 15q11.2e  
- 14q24.3d  
+ 15q22.31a  
+ 7p15.2b  
+ 17q21.32b  
- Xq13.1c  
- 7p21.1b  
- 6q14.3c  
+ 11q13.1c  
- 8q21.13c  
+ 2p23.3a  
- 11q24.3c  
+ 5q23.2a  
+ 15q22.31a  
+ 5q23.2a  
+ 4q35.1e-q35.1f  
+ 19q13.12a  
+ 1q21.3a  
+ 16p13.13a-p13.12b  
- 6q21e  
+ 9q32b  
- 8q22.3a  
- 3q21.2b  
- 20p11.23d  
- 7p22.2c  
+ 6q21d  
- 16p13.13c  
+ 12q22b  
- 17q25.3b

|   |                 |
|---|-----------------|
| + | 14q22.3a        |
| + | 2p21a           |
| - | 6q25.3f         |
| + | 16p13.3f        |
| + | 21q22.11c       |
| - | 4q35.1f         |
| + | 8p21.3a         |
| + | 10q25.1a-q25.1b |
|   | 15q21.1a        |
| + | 11q24.1a        |
| - | 1p13.3b         |
| - | 2p22.1c         |
| - | 7p21.1c         |
| + | 20p13f          |
| - | 17p13.1d        |
| - | 20q13.33e       |
| + | 3q26.33b        |
| + | 6p22.3b         |
| - | 8p23.1b         |
| + | 16p13.3f        |
| + | 12q13.13e       |
| + | 2q37.1a         |
| - | 2q37.1a         |
| + | 2q37.1a         |
| + | 2q37.1a         |
| + | 17q21.32b       |
| - | 2q31.1f         |
| + | 7p15.3d         |
| - | 17q21.32b       |
| + | 11q24.2a        |
| + | 6q15b           |
| + | 17q11.2e        |
| + | 19q13.33a       |
| + | 8q22.2b         |
| + | 2q34e-q34f      |
| + | 20q11.22b       |
| - | 17q11.2a        |
| + | 10p12.31a       |
| - | 17p13.2b        |
| - | 17q21.33b       |
| - | Xq27.3a         |
| - | 4q22.1a         |
| + | 2p22.3e         |
| + | 3p14.3b         |

|   |                   |
|---|-------------------|
| + | 4q12a             |
| - | 20q13.13d         |
| + | 17q21.33b         |
| - | 16q24.3b          |
| + | 2q37.1a           |
| + | 15q21.1a          |
| + | 14q31.3d          |
| + | 12q13.12b-q13.12c |
| + | 2q33.1e           |
| - | 19p13.2b          |
| - | 2q24.3f           |
| + | 3p21.1d           |
| + | 11q13.4c          |
|   | 4q34.2a           |
| - | 20p13b            |
| + | 5p13.2c           |
| + | 1p36.21a-p36.13f  |
| - | 15q15.3c-q21.1a   |
|   | 15q22.31b         |
| + | 14q22.1b          |
| + | 16q24.3b          |
| + | 1q42.13d          |
| + | 19q13.33a         |
| - | 11p11.2b          |
| + | 19q13.33c         |
| + | 12q23.2a          |
| + | 9q22.1b           |
| - | Xp11.1b           |
| - | Xp11.1b           |
| - | Xp11.1b           |
| - | Xq11.1b           |
| - | 4q12e             |
| + | 5q33.1a           |
| + | 5q33.1a           |
| + | 15q15.1b          |
| + | 19q13.2a          |
| - | 18p11.21d         |
| + | 16q24.3b          |
| + | 16p11.2d          |
| + | 16p11.2e          |
| + | 17p13.2c          |
| + | 17p13.2c          |
| - | 5q31.2b           |
| - | 10q22.1e          |

|   |                 |
|---|-----------------|
| + | 11p15.2b        |
| + | 2q22.1c         |
| + | 4q22.1b         |
| + | 2q37.1e         |
| - | 15q21.2b        |
| + | 19p13.3g        |
| - | 12q24.31a       |
| + | 2p13.2b         |
| + | 15q14d          |
| - | 2p14c           |
| - | 1q21.3c         |
| + | 1q21.3c         |
| + | 4q28.1a         |
| - | 13q31.1b        |
| - | 5q31.3d         |
| - | 12q13.13e       |
| + | 12q13.2c        |
| + | 11q11c          |
| + | 1p36.22d        |
| - | 12p13.31d       |
| - | 16p13.3e        |
| - | 1q23.1f         |
| + | 9q34.11b        |
| + | 2p16.2a         |
| - | 11q13.1e        |
| + | 19q13.2b        |
| - | 9q22.31a        |
| - | 14q24.3d        |
| + | 20p12.1e-p12.1d |
| - | 11p15.1c        |
| + | 8q24.13d        |
| + | 15q21.1a        |
| + | 5q35.3e         |
| + | 3q23d           |
| - | 5q31.3b         |
| - | 2p21c-p21b      |
| + | 20q11.23b       |
| + | 5p15.31c        |
| + | 4q12d           |
| - | 17p11.2g        |
| + | 6p21.1d         |
| + | 5q23.1e         |
| + | 12q14.2b        |
| + | 1q32.1h         |

|   |                 |
|---|-----------------|
| + | 1q21.1a         |
| - | 3p25.3d         |
| + | 10q21.3e        |
| - | 7q21.12b        |
| - | 16p13.3c-p13.3b |
| - | 1p36.22b        |
| - | 15q15.1a        |
| + | 12p13.31d       |
| + | 5q22.2a         |
| + | 14q13.2a        |
| - | 17q25.1d        |
| + | 4q12e           |
| + | 1q42.12c        |
| - | 6p21.31b        |
| - | 7q22.2a         |
| - | 11q24.2c        |
| + | 3q22.1e         |
| - | Xp11.4e         |
| + | 17p13.3c        |
| + | 22q12.1a        |
| + | 1p36.11c        |
| + | 16p13.3d        |
| + |                 |
| - | 20p13f          |
| - | 18q11.2d        |
| + | 20q13.33c       |
| + | 3p22.1a         |
| + | 2q31.1a         |
| + | 7q34e           |
| - | 5q14.1f         |
| - | 1p32.3b         |
| + | 19p13.11c       |
| + | 2q31.3b         |
| - | 17q11.2b        |
| + | 11q13.1f        |
| + | 9q34.3e         |
| + | 12p12.1a        |
| - | 6p24.3c         |
| - | 1q22c           |
| - | 3q25.31b        |
| + | Xq28f           |
| - | 11q12.1a        |
| + | 11q13.1c        |

+ 17q25.1a  
- 1p36.33a  
- 1p22.3f  
- Xp11.23e-p11.23d  
- 22q13.2a  
+ 11q24.3c  
- 15q25.1b  
- 8q24.22c  
- 16q22.1f  
+ 1p34.1f  
+ 11q24.2c  
- 2p11.2f  
+ 3q12.1a  
+ 3q27.3a-q27.3b  
- 9q34.11a  
- 9q34.11a  
+ 7q31.2c  
- 7q31.2c  
+ 7q31.2c  
- 12p12.1d  
+ 15q26.1d  
+ 18q21.31a  
- 5q21.1c  
- 18q21.1b  
+ 12q23.3a  
- 17q12c  
- 12q13.3b  
- 3q22.3a  
+ Xq25b-q25c  
+ 7q22.1c  
+ 7q11.23d  
- 7q11.23c  
- 7q11.23a  
+ 7q11.22a  
+ 10p12.33c  
- 2q23.3c  
+ 2p13.1b  
+ 10q23.31b  
+ 4q13.2b  
- 11q13.4b  
+ 17q12c  
+ 7p14.1e  
- 5q22.1b  
- 15q25.1b

- 2q11.2a  
- 2q32.2b  
- 12q13.2c  
- 17q21.2b  
- 2q32.3a  
+ 17q21.2b  
- 17q21.2b  
- 12q13.3b  
- 20q13.13c  
- 8q21.11a  
- 8p21.2d  
- 5q35.2a  
7q21.13b  
3p21.31d  
- 1p33d  
+ 11p15.4d  
+ 4p15.2b  
+ 11q13.1a  
- 5q35.1e  
+ 19p13.3i  
+ 2q35f  
+ 2q35f  
- 2q32.3e  
+ 6p21.32b  
- 2q37.3f  
- 8q22.2a  
+ 5q32e  
- 11p15.4b  
+ 20p13d  
+ 2q35e  
- 6p21.31a  
+ 12p11.23a  
- 2q24.3f  
+ 20q13.12b  
- 1p34.3d  
- 1p36.11b  
+ 8q21.13a  
- 20q13.33e  
- 8p21.2a  
- 9q33.2a  
- 15q24.1b  
- 9p13.3b  
+ 10q21.3e  
- 17q25.3g



- 15q24.1b  
- 17q23.3a-q23.3b  
+ 2q33.1f  
+ 12p12.3d  
- 9q33.2b  
- 15q15.3a  
- 2p22.2b  
- 14q12e  
- 19q13.32b  
+ Xp22.31e-p22.31d  
+ 11q24.1b  
+ 11q24.2b  
+ 3p23b  
+ 16p13.3f  
+ 6q24.2b  
+ 1p35.3b  
+ 20q13.32a  
+ 9q31.1a  
- 7q11.23b  
- 12q24.33b  
+ 11q12.1d  
+ 16p11.2c  
- 11q12.3b  
- 1q25.3a  
- 6q23.2b  
- 17p13.1b  
+ 9q34.11a  
+ 19p13.2e  
+ 1p13.3c  
+ 17q22b  
+ 6q24.3b  
+ 3q13.33b-q13.33c  
- 14q12a  
- 7q11.23e  
+ 5p13.3b  
- 13q14.2b  
- 2p11.2h  
- 3p14.1c-p14.1b  
+ 3q25.1c  
+ 12q24.23a  
+ 13q14.3d  
+ 8q13.2c-q13.3a  
- 20q13.12c-q13.13a  
- 16p11.2e

- 16p11.2e  
+ 16p11.2d  
+ 16p11.2d  
- 4q13.3a  
- 19q13.32c  
+ 19q13.32c  
- 2p22.2b  
- 3p26.2b  
+ 7p11.2b  
- 17q25.1c  
- 21q22.3d  
+ 12q13.2c  
- 14q11.2c  
- 6p21.1a-p12.3f  
- 17q22d  
+ 19q13.2a  
+ 17q11.2a  
+ 10q21.3e  
- 9q34.2a  
+ 9q34.2a  
- 9q34.2a  
- 9q34.2a  
- 9q31.3b-q32a  
+ 22q11.23b  
+ 9q22.31b  
+ Xp11.23d  
+ 10p13c  
- 11q13.2a  
+ 19q13.42b  
+ 17q11.2d  
- 1q21.2a  
+ 15q26.1c  
- 12q24.11a  
+ 11p15.4a  
+ Xp22.2  
- 10q26.3f  
+ 16q23.1c  
+ 19p13.12b  
- 1p36.11c  
+ 9q22.2b  
- 19q13.32a  
- Xp11.23f  
+ 3p25.2a  
- 1p35.1b

- 6q14.3c  
+ 14q23.2b  
+ 22q13.1d  
+ 16p13.3e  
- 21q22.11b  
- 14q24.2a  
+ 15q26.3b  
+ 5q33.1c  
- Xp11.23b  
- 7q22.2c  
+ 1p13.3b  
+ 20q13.12b  
+ 1q22c  
- 11p11.2d  
+ 1q32.2c  
- 10q11.22a  
+ 14q23.2a  
+ 16p12.3b  
- 1q32.1d  
- 19q13.33c  
+ 11p15.4b  
+ 1p36.11a  
- 11q14.1e  
+ 6q25.3d  
- 11q13.1c  
- 6q23.2b  
- 6q23.2b  
- 12q13.3a  
+ 8p11.23c  
+ 10q26.13a-q26.13b  
+ 4p16.3b  
+ 17q23.3a  
- 10q21.3e  
+ 2p21a  
- 1q24.1c  
+ 17q12b  
+ 4p16.1e  
- 3p25.3c  
+ Xq13.1d  
- 11p15.4c  
- 6p21.31d  
- 1p35.3b  
- 1p13.3b  
+ 17q12b

- 1q41e  
+ 2p25.1d  
- 16q24.1a  
- 11q21a  
- 9p21.1a  
- 8q24.12b-q24.12c  
- 20q13.33c  
+ 18q11.2d-q11.2e  
+ 10q24.33a  
- 1q42.13e  
+ 11q12.3b  
- 5q31.3c  
- 5q13.2a  
+ Xq21.1a  
- 6q25.3e  
+ 11q23.3b  
- 1q23.2c  
+ 3q13.2a  
- 10p15.1d  
11p15.5c  
+ 2q24.1e-q24.2a  
+ 17q23.3a  
+ 2q24.2c  
+ 16p11.2d  
- 12q24.23a  
- 6p21.32a  
- 6p21.32a  
- 6p21.32a  
+ 12p13.31d  
- 4p15.32d  
- 1q42.2c  
+ 12q13.13e  
+ 1p36.22b  
+ 5p13.3a  
+ 1q21.2b  
- 15q26.3d  
- 12p13.2b  
+ 7q34e  
+ 7q34e  
+ 7q34f  
- 20p12.1d  
+ 3p25.3b  
+ 1q32.3c  
+ 7p15.2a

- 17p13.3a  
+ Xq28g  
+ 4p14d  
- 22q12.2b  
- 16p11.2d  
+ 11q13.1f  
+ 9q34.11c  
+ 4p16.1e  
+ 12q21.1a  
- 17q25.3d  
+ 19q13.33b  
+ 4p15.2b  
- 9q22.33b  
- 20p13f  
+ 22q13.31e  
+ 6p21.2c  
+ 3q12.1c-q12.2a  
+ 16p13.3d  
+ 17p12a  
- 15q24.3b-q25.1a  
+ 17q12c  
17q12c  
  
+  
- 13q22.2a  
- 6p24.1a  
2q11.2e  
+ Xq22.3b  
- 4q31.21a  
- 5q35.3e  
- 5q14.1a  
+ 19q13.12b  
- 6p21.1e  
- 3q27.3a  
+ 17q25.3h  
+ 1q42.3b-q42.3c  
+ 11q23.3h  
+ 12q14.2b  
+ 17q21.32b  
+ Xp22.31a-p22.2  
- 3q26.32a  
- 7q11.23b  
+ 16p13.3e  
+ 6q27f  
+ 6q23.2d

- 7p13c  
- 6q14.3b  
- 7p14.3a  
+ Xq21.1b  
- 12q24.21a  
- 14q32.12a  
+ 17q23.3b  
+ 6q22.31d-q22.31e  
- 8q11.23d  
+ 20q13.33e  
- 1p36.12a  
+ Xq22.2a  
+ Xq22.1d  
+ Xq22.2a  
+ Xq22.2a  
+ Xq22.1e  
- Xq22.1e  
- 8q21.11a  
10p14b  
+ 1p36.11d  
- 18q21.1b  
+ 5q32d  
+ 15q21.3d  
+ 6p21.33a  
+ 16q24.3b  
- 19p13.3h  
- 18q21.2d  
- 20q13.33d  
- 1q21.3b  
+ 12q24.11b  
+ 11q13.2a  
- 14q32.13b  
+ 14q32.13b  
+ 14q32.13b  
+ 22q12.2b  
+ 5q33.1c  
- 6q25.3f  
- 6q27d  
+ 11p13d  
+ 12q23.3c  
+ 3p21.31d  
- 3q29f  
+ 12q24.11d  
10q23.33d

+ 12q23.3a  
+ 3p21.31h  
+ 8p23.1b  
+ 14q32.11a  
+ 10q25.3a  
+ 13q21.2b  
+ 9q22.33a  
- 1q21.3a  
- 19q13.33a  
- 6p21.31c  
+ 12p13.33a  
- 7q21.3d  
+ 19p13.12c  
- 1q25.3c  
+ 22q13.2a  
- 17p13.2a  
+ 2q11.1c  
- 16p13.13d  
+ 16p13.3e  
- 3q26.2b  
+ 16q23.1a  
- 5p15.33d  
+ 7q31.2b  
- 12q24.22a-q24.22b  
+ 9p13.3b-p13.3a  
- 1p34.1c-p34.1b  
- 3p21.31h  
+ 10q21.3d-q21.3e  
- 9q31.1a  
- 17q23.3b  
- 2p13.3c  
+ 3p21.2a-p21.1e  
+ 10q21.1e  
+ 7p22.3a  
- 6p24.3a  
+ 6p12.3a  
- 16p13.3b  
- 6q25.3a  
- 1q44d  
- 2q14.2e  
+ 13q34d  
- 3q23c  
- 6p21.1f  
- 7q31.2b

- 21q22.3b  
+ 3q12.2a  
- 22q12.1a  
- 2q32.1f  
- 7q21.3a  
- 19q13.42a  
- 7q22.1c  
- 3q29f  
- 13q32.1a  
- 2p13.3c  
+ 16p11.2c  
+ 5q31.1f-q31.2a  
+ 3p24.1a  
- 1p22.2a-p22.1e  
- 2q12.1d-q12.2a  
+ 18p11.31e  
+ 20q11.23a  
- 20q11.23c  
- 15q15.2b  
- 2p11.2g  
+ 20q13.32b  
- 2p21e-p21d  
- 8p11.21a  
- 15q23b  
+ 16q22.1b  
+ 1p36.31a  
- 2q37.3g  
- 7q31.1a  
+ 4q21.1a  
- 22q11.21e  
- 19q13.12b  
+ 4q21.22a  
+ 5q14.1d  
+ 6p22.2b  
- 1q21.3a  
- 1q21.3a  
+ 5q33.3b  
+ 10p12.1c  
+ 2p11.2d-p11.2c  
- 18p11.32c  
- 5q35.2c  
- 17q25.3g  
- 22q12.2a  
+ 16p13.3d



- 3p14.1d  
+ 19p13.3g-p13.3f  
- 3q27.1b  
19p13.3i  
- 14q24.3c-q24.3d  
- 7p21.3b  
+ 14q11.2g  
- 16p12.2c  
- 2p22.1b  
+ 3p25.3d-p25.3c  
- 11q23.3f  
- 11q25e  
- 2p14a  
- 17q11.2b  
- 10q26.11d  
- 21q22.11a  
+ 6q25.2c-q25.3a  
- 19p13.3d  
- 5q22.3b  
- 4q25f  
+ 5q22.2a  
+ 4q22.1c  
+ 8q24.3g  
- 5q33.1c  
- 16p13.3c  
+ 3q13.31a  
- 5q33.3a  
- 12q13.2c  
- 11q12.1a  
+ 1q32.1c  
- Xp11.23c  
+ 17p13.3f  
- 10q11.23b  
- 19p13.2e  
- Xq22.1c  
- 11q23.1c  
- 14q23.1b  
+ Xp11.23f  
17q25.3b-q25.3c  
- 14q12a  
+ 5q13.3b  
+ 3q25.31b  
- 15q22.31c  
+ 11q24.2c

|   |                  |
|---|------------------|
| + | 6p21.1c          |
| - | 15q13.1c         |
| + | 9q21.11a         |
| + | 19p13.3e         |
|   | 17q25.3b         |
| - | 16q21e           |
| - | 3p21.1c          |
| + | Xq28g            |
| - | 17q11.2a         |
| - | 9q21.31d-q21.32a |
| - | 19p13.3f         |
| - | 15q23b           |
| + | 9q21.31b         |
| + | 19p13.3f         |
| - | 2q31.1c          |
| + | 17q23.2d         |
| - | 9p13.3a          |
| + | 15q22.2b         |
| - | 4p14c            |
| - | 4p14c            |
| + | 9q33.1c          |
| - | 1q41e            |
| - | 4p14c            |
| + | Xp22.2           |
| - | 3p21.1e          |
| + | 2p13.1b          |
| - | 8p11.23b         |
| - | 15q26.3d         |
| - | 3q25.1a          |
| + | 15q25.2b         |
| + | 11q13.1c         |
| - | 12p11.23a        |
| - | 14q12a           |
| + | 13q32.3b         |
| - | 10q24.1a         |
| + | 20q11.21b        |
| - | 2q35e            |
| - | 12q14.3b         |
| + | 12q13.13a        |
| + | 9q21.13a         |
| - | 15q25.1b         |
| - | 19q13.42a        |
| - | 17q25.3a-q25.3b  |
| + | 17q25.3b         |

- 3q21.3d  
+ 1q32.1g  
- 12q22c  
- 1q24.1a  
+ 13q34d  
- 1p36.13a  
+ 5q31.3b  
+ 16q22.1d  
- 19p13.2b  
+ 8q24.3h  
+ 12q24.31d  
+ 15q25.1a  
- 7p13d  
- 1p22.1c  
- 5q22.3b  
+ 5q35.3a  
+ 9q31.1a  
- 2q32.3a-q32.3b  
+ 21q22.3d  
- 17q22b  
- 17q21.31c  
+ 17q25.1b-q25.1c  
- 17q25.3f  
+ 17q21.31b  
+ 7p21.3a  
+ 12q13.11c  
- 17p13.1c  
+ 11q12.2a  
- 17p11.2b  
- 3p25.3c  
- 3p21.31b  
- 12q24.13a  
+ 12q12f-q12g  
- 12q24.22a  
- 12q24.11a  
- 7q11.23e  
+ 12q24.31b  
+ 14q32.33d  
- 11q22.2a  
+ 11q14.1e  
+ 11q14.1e  
- 2q11.2a  
- 4p16.2b  
- 4p16.3b

- 2q11.2b  
+ 11q12.2a  
+ 11q22.1c  
- 11q13.1f  
+ 11q14.2a-q14.2b  
+ 11q23.3g  
+ 11q12.2b  
+ 7q33b  
+ 9q34.3e  
- 19q13.32c  
+ 19q13.2c  
+ 19q13.12a  
- 19q13.12a  
+ 6p12.1d  
+ 6p24.2a  
+ 6p24.2a  
- 10q21.3d  
- 2p11.2f  
- 19q13.42b  
+ 11q13.1e  
- 4q31.3c  
- 4q27c  
- 4p14c  
- 3p21.31k  
+ 16p12.2b  
- 19p13.11b  
- 2q21.3a  
+ 4q12d  
- 5q14.2c  
+ 1p13.3b  
- 7q31.1c  
+ 2q35b  
11p15.5d  
- 2p15b  
- 16q23.1a  
+ 6p24.1c  
- 5q31.2d  
+ 5q13.2c  
+ 4p16.3c  
+ 7q36.1c  
+ 2q14.2c  
+ 11q12.3b  
- 2p25.3f  
+ 10q24.32b

|   |                 |
|---|-----------------|
| + | 6q25.3d         |
| + | 1q32.1d         |
| - | 3q25.1a         |
| - | 7p22.3b         |
| - | 22q13.1b        |
| + | 4q31.23a        |
| - | Xq28b           |
| - | 2q14.2c         |
| + | Xq28f           |
| + | 16q12.1c        |
| - | 20q13.13e       |
| + | 12q21.1a        |
| + | 22q11.21e       |
| + | 22q11.21d       |
| - | 4q32.3b         |
| - | 12q13.3a-q13.3b |
| - | 12q13.3a-q13.3b |
| - | 2q32.2b         |
| + | 2q35f           |
| + | 17q11.2a        |
| - | 9q21.13a        |
| + | 10q23.33b       |
| + | 6q23.1c         |
| + | 1p36.22d        |
| + | 15q24.1a        |
| - | 9q34.3e         |
| - | 19p13.2b        |
| - | 1q32.3b         |
| + | 16q22.1a        |
| - | 7q32.2b         |
| + | 7q34a           |
| + | 2p23.3a         |
| + | 11q12.2b        |
| + | 16p11.2d        |
| + | 3q22.3a         |
| + | 1p36.11a        |
| - | 16q23.1a        |
| + | 11q23.3d        |
| - | 10q21.2a        |
| - | Xp22.2          |
| - | 6q14.1a         |
| - | 14q23.1c        |
| + | 4p13d           |
| + | 4q31.23a        |

|   |                |
|---|----------------|
| + | 19p13.11f      |
| + | 9q31.2a        |
| - | 3q13.33a       |
| + | 1p35.1b        |
| - | 12q13.2c       |
| - | 3q27.2a        |
| - | 11p15.4a       |
| + | 3p21.31k       |
| + | 3p25.1a        |
| - | 3q29d          |
| + | 3q12.2a        |
| - | 1p32.3c        |
| + | 17q23.1a       |
| + | 12q14.2b       |
| + | 1p36.11c       |
| - | 21q22.11c      |
| + | 1p36.21a       |
| - | 1p36.33a       |
| - | 1p34.1d        |
| - | 1p35.1b        |
| - | 8q21.3e        |
| - | 14q11.2b       |
| + | 1p21.3d        |
| + | 1p36.11c       |
| - | 1p32.3b        |
| + | 19p13.11b      |
| - | 7q11.23g       |
| + | 1p32.3b-p32.3a |
| + | 15q15.2b       |
| - | 1q42.12c       |
| + | 6p21.1b        |
| + | 14q24.3c       |
| - | 8q21.3e        |
| - | 8p12e          |
| + | 8q22.1b        |
| - | 8q12.1a        |
| + | 1p34.1b        |
| + | 8q21.11a       |
| - | 8q24.22b       |
| - | 8q23.1d        |
| - | 1p13.3a        |
| + | 1q22d          |
| - | 16p13.3f       |
|   | 11p15.5d       |

|   |                  |
|---|------------------|
| + | 15q25.3c         |
| + | 15q14a           |
| - | 19q13.42b        |
| - | 15q15.1d         |
| + | 2q13d            |
| + | 17p13.1d         |
| + | 9p13.3a          |
| - | 1q32.1b          |
|   | 19q13.2c         |
| + | 17p13.3a         |
| + | 17p13.1d         |
| + | 17q11.2a         |
| + | 17q11.2e         |
| + | 17q21.2a         |
| - | 11p15.4a         |
| - | 3p14.1b          |
| - | 17q11.2c         |
| - | Xq28h            |
| + | 9q22.33a-q22.33b |
| + | 15q21.2b         |
| + | 15q21.2b-q21.2c  |
| + | 12q23.1c         |
| - | 4q13.2b          |
| - | 4q13.2b          |
| + | 12q13.13b        |
| - | 11q23.3c         |
|   | 3q13.2a          |
| + | 19p13.3g         |
| + | 2p11.2g          |
| - | Xq22.1e          |
| + | Xp22.2           |
| + | Yq11.221a        |
| - | 4q22.1e          |
| + | 12q21.32a        |
| - | 13q32.3c         |
| - | 7q36.1d          |
| + | 17q21.31c        |
| + | 14q22.1c         |
| - | 18q22.1f         |
| - | 20p12.3a         |
| + | 6p21.33a         |
| + | 17q11.2a         |
| + | 6q23.3d          |
| + | 5q23.1c          |

|   |           |
|---|-----------|
| + | 19p13.3d  |
|   | 1q21.2d   |
| - | 15q21.2b  |
| - | 8p21.3a   |
| - | 8p21.3a   |
| + | 8p21.3a   |
| - | 8p21.3a   |
| + | 18q21.33a |
| + | 16p13.3d  |
| - | 17p11.2h  |
| - | 22q13.2b  |
| - | 1p36.32c  |
| + | 16p13.13a |
| - | 1p36.33b  |
| - | 12p13.31d |
| + | 1p36.22a  |
| - | 6p12.3d   |
| - | 1p36.31a  |
| - | 1p36.33b  |
| + | 20q13.33e |
| + | 1p36.22a  |
| - | 1p36.23b  |
| - | 3q26.31b  |
| + | 17p13.1d  |
| + | 13q33.3b  |
| - | 19p13.3a  |
| - | 9q32e     |
| - | 1q25.1a   |
| - | 9q33.1a   |
| + | 19p13.3a  |
| - | 5q33.1d   |
| - | 4p16.3a   |
| - | 3q29f     |
| + | 8p23.1c   |
| - | 11q12.1a  |
| + | 11p15.5b  |
| - | 19q13.42b |
| - | 19q13.42b |
| - | 2q35c     |
| + | 5q13.2c   |
| - | 19p13.13c |
| - | 1q25.1b   |
| + | 2q37.1c   |
| - | 1q21.3a   |



|   |                 |
|---|-----------------|
| + | 16p12.1b        |
| + | 22q13.1e        |
| - | 16q12.1d        |
| - | 7p12.3c         |
| - | 17q21.33b       |
| - | 22q13.2a        |
| + | 1p34.1c         |
| - | 11p15.5c        |
| + | 22q12.3c        |
| - | 17p11.2g        |
| - | 1q42.3b         |
| + | 22q13.1c        |
| - | 20q13.12b       |
| + | 19q13.32a       |
| + | 1q23.3a         |
| - | 9p13.2a         |
| + |                 |
| - | 7p15.3b         |
| - | 3q12.2a         |
|   | 16p11.2a        |
|   | 8q24.3f         |
| + | 1q24.3a         |
| - | 17q21.2a        |
| - | 3p24.2a         |
| - | 22q11.22a       |
| - | 3q22.1d-q22.1e  |
| - | 9p21.1a         |
| - | 9q34.11d        |
| + | 1q25.2c         |
| - | 1q25.2c         |
| + | 9q34.11d        |
| - | 9q34.11a        |
| + | 1q25.2c         |
| - | 8q12.1c-q12.1d  |
| + | 20q13.12a       |
| + | 14q11.2c-q11.2d |
| - | 17p13.1d        |
| - |                 |
| - | 15q15.3a        |
| - | 1q41e-q42.11a   |
| - | 11p11.2d        |
| + | 17q11.2b        |
| - | 8q22.1c         |
| + | 20q11.22b       |

- 20q13.12c  
-  
- 20q13.12b  
+ 3q28b  
+ 3q28b  
+ 12q24.13b  
- 8q21.13a  
+ 6q22.31e  
+ 20q13.33e  
+ 12p13.31d  
+ 15q22.2b  
- 9p13.3a  
- 1q21.3d  
+ 19p13.12a  
- 6p22.3d  
- 11p15.4c  
+ 13q33.1b  
- 5p15.33e  
- 1q31.1a  
+ 1p36.32b  
- 2p13.2a  
+ 7q11.21e  
- 22q12.1a  
- 13q14.12a  
- 13q12.11a  
+ 20q11.21b  
1p22.2a  
- 7p15.3b  
+ 22q13.33b  
- 16q22.1a  
- 9q33.2a  
+ 9q34.3e  
+ 14q32.32a  
+ 2q37.3c  
- 6q21h  
+ 1q32.2b  
+ 17q11.2a  
- 11p12d  
+ 16p13.3d  
+ 12q24.13a  
- 3p21.31c  
+ 3p22.1b-p22.1a  
- 2q33.1f  
- 8q13.3b

- 6p12.2a  
- 16p13.3c  
- 17p13.1d  
- Xp22.2  
+ 16q24.3a  
+  
+ 11q23.3e  
+ 19p13.2e  
- 19q13.32a  
- 14q21.1b  
- 8q24.3b  
- 10p13a  
- 6p21.1g  
- 6p21.1f-p21.1e  
- 12q24.31a  
+ 8q24.13e  
+ 2p25.1a-p24.3d  
+ 20p13f  
- 1q42.13c  
+ 13q14.3a  
- 9q22.33b  
- 17p12a  
+ 17p11.2f  
+ 4q31.3d  
- 11p15.4d  
+ 11p15.4c  
- 5q12.3b  
+ 7q34a  
- 17q22c  
- 6p21.33b  
- 6p22.1a  
+ 19q13.43c  
- 11q23.3g  
- 11p15.4c  
- 6p21.33b  
+ 9q33.1b  
- 1p13.2b-p13.2a  
- 8p21.2a  
- 5q22.3b  
- 17q22d  
+ 6p22.2a  
+ 6p21.33b  
- 7q22.1b  
+ 5q35.3g

|   |           |
|---|-----------|
| + | 11p13a    |
| - | 1p13.1a   |
| + | 1q22a     |
| - | 17q25.1d  |
| - | 11p15.4c  |
| - | 5q35.3g   |
| - | 11q14.3b  |
| + | 8q13.1b   |
| + | 7q22.1d   |
| - | 3q26.1a   |
| - | 4q32.3b   |
| - | 1p35.1a   |
| - | 17q25.1d  |
| - | 11p15.4b  |
| - | 11p15.4d  |
| + | 15q21.1a  |
| - | 5q35.3g   |
| + | 16p11.2c  |
| + | 11p15.4c  |
| + | 10q24.32b |
| - | 14q22.1c  |
| + | 4q35.2c   |
| + | 22q13.1a  |
| + | 19p13.3a  |
| - | 14q32.12a |
| - | 2q36.3e   |
| + | 5p15.33d  |
| + | 15q22.31a |
| + | 7q22.1c   |
| - | 1p34.2d   |
| - | 19p13.13b |
| + | 6q22.32a  |
| - | 11q13.1b  |
|   | 8q24.13d  |
| - | 22q11.21d |
| - | Xq22.1c   |
| - | 14q23.1c  |
| - | 20p12.3c  |
| + | 14q32.33a |
| + | 22q13.31d |
| + | 1p36.11a  |
| + | 3p26.3a   |
| + | Xp11.21a  |

|   |                 |
|---|-----------------|
| + | 12q13.12b       |
| + | 1q31.2b         |
| - | 8q13.3c-q13.3d  |
| + | 3q23d           |
| - | 4q27c           |
| - | 20q11.22b       |
| - | Xq23a           |
| + | 19q13.33a       |
| - | 15q21.2a        |
| - | 8q23.3e         |
| - | 17p13.3a        |
| + | 17p11.2i        |
| + | 7q22.1a         |
| + | 10q25.3a        |
| - | 9q34.11b        |
| - | 9q34.13b        |
| + | 16p13.3e        |
| - | 13q14.11e       |
| + | 3q25.1b         |
| - | Xq22.3b         |
| - | 7q22.1c         |
| + | 1q25.3e         |
| + | 3p25.1d         |
| + | 19q13.42a       |
| + | 17q25.1c        |
| + | 12q14.1a        |
| - | 11p15.1c        |
| - | 2q11.2c         |
| - | 7q32.2b         |
| + | 14q31.1b-q31.1c |
| + | 18q22.3d        |
| + | 20q13.2b        |
| + |                 |
| + | 11q13.5c        |
| + | 5q22.1a         |
| + | 2q14.3a         |
| + | 1q42.2a         |
| + | 16q22.1b        |
| + | 8p23.1c         |
| - | 3p21.31h        |
| + | 17q25.3f        |
| + | 7p21.1b         |
| + | 10q23.1a        |
| + | 10q21.3e        |

|   |                   |
|---|-------------------|
| + | 5q35.2d           |
| - | 12q21.31e         |
| - | 15q24.3a          |
| + | 12q14.1a          |
| + | 11p15.5a          |
| + | 7q32.1a           |
| - | 4q23a             |
| + | Xp11.4e           |
| - | 12q21.1a          |
| + | 12p13.33a-p13.32b |
| + | 22q13.2c          |
| - | 6q22.1d           |
| + | Xp11.22a          |
|   | 20q11.21b         |
| - | 6q22.1d           |
| - | 17p13.3c          |
| + | Xp11.22a          |
| + | 11p15.5a          |
| + | 14q12a            |
| - | 19p13.11a         |
| - | 22q12.3d          |
| - | 8q24.3g           |
| - | 1q23.3a           |
| + | 5q33.3d           |
| - | 1q42.2a           |
| + | 3q26.33b          |
| + | 2p25.3b           |
| + | 11p12a-p11.2e     |
| - | 10q22.2a          |
| + | 17p12a            |
| + | 3p22.2a           |
| - | 1p32.3b           |
| - | 15q26.3b          |
| + | 5p13.2d           |
| + | 17q21.2b          |
| + | 7q34b             |
| + | 2p22.3e-p22.3d    |
| - | 22q12.1c          |
| - | 4q31.23a          |
| - | 2q31.2a           |
| - | 2q31.2a           |
| + | 2p13.1b           |
| - | 2p24.1d           |
| - | 5p13.1b           |

|   |           |
|---|-----------|
| + | 8q23.1d   |
| - | 5q15c     |
| + | 22q13.31d |
| - | 9p22.3b   |
| + | 18q11.2c  |
|   | Xq13.3b   |
| + | 1p32.3b   |
| - | 14q11.2b  |
| + | 2p21a     |
| + | 14q31.3d  |
| + | 14q24.2a  |
| + | 11q12.3b  |
| - | 9q34.13b  |
| + | 1p13.1a   |
| + | 6q14.1d   |
| - | 22q13.2c  |
| + | 1p36.33b  |
| - | 9q33.2a   |
| - | 22q13.2c  |
| + | 3p25.3c   |
| + | 2q35e     |
| + | 14q24.3b  |
| - | 17q21.32c |
| - | 1p31.1a   |
| - | 22q13.33a |
| + | 20q13.12a |
| - | Yq11.222c |
| + | Yp11.2e   |
| + | Yq11.23b  |
| + | Yq11.223e |
| - | Yp11.2b   |
| + | 17q25.1b  |
| + | 7p22.2c   |
| - | 12q13.12b |
| - | 12q13.12b |
| + | 12q13.12b |
| + | 2q21.1d   |
| - | 2q21.1b   |
| - | 2q35f     |
| - | 10p15.1c  |
| + | 6p21.33b  |
| - | 6p25.2b   |
| - | 6p25.2b   |
| + | 9q34.3f   |

|   |                |
|---|----------------|
| + | 16q24.3b       |
| - | 19p13.3a       |
| - | 4q35.2d        |
|   | 18p11.21e      |
| - | 17q23.1a       |
| - | 6q21i          |
| + | 17q21.31a      |
| + | 17q21.31a      |
| - | 10q26.3f       |
| + | 15q15.3a       |
|   | 15q11.2c       |
| - | 22q13.33b      |
| + | 1q21.3a        |
| + | 22q12.2c       |
| + | 12p13.33a      |
| + | 6q25.3d        |
| - | 3p21.31b       |
| - | 3p21.31b       |
| - | 11q12.3a       |
| - | 12q12f         |
| - | 3p21.1e-p21.1d |
| - | 7p21.1a        |
| - | 7p15.3e        |
| + | 18p11.22b      |
| + | 1p35.1b        |
| - | 6q24.1a        |
| - | 9q31.3a        |
| - | 22q12.3d       |
| - | 16p13.13b      |
| - | 1p32.3e-p32.3d |
| + | 11q12.1b       |
| + | 5q31.1e        |
| - | 14q22.1d       |
| + | 17p13.2a       |
| + | 18p11.22b      |
| - | 6p24.3c        |
| - | 2q11.2c        |
| + | 1q21.1b        |
| + | 10q26.3b       |
| - | 16q22.3a       |
| + | 12q23.3a       |
| - | 22q11.21c      |
| - | 19p13.2b       |
| - | 22q13.33b      |



|   |                  |
|---|------------------|
| + | 18p11.32c        |
| + | 15q15.1c         |
| - | 19q13.12a        |
| - | 10q22.1a         |
| + | 7q11.21e-q11.22a |
| - | 7q11.22c-q11.23a |
| + | 1p31.1h          |
| + | 12q24.31d        |
| - | 21q22.3c         |
| + | Xp22.2           |
| - | 19q13.12a        |
| + | 19q13.42c        |
| + | 1q23.3b-q23.3c   |
| + | 9q34.3e          |
| + | Xp11.3a          |
| + | 19q13.11c        |
| - | 3p14.1b          |
| + | 3q22.1c          |
| + | 19p13.11c        |
| - | 4q13.2b          |
| - | 3p21.31c         |
| - | 9q34.3c          |
| + | 13q32.3a         |
| + | 9p13.3d-p13.3c   |
| - | 9p13.3d          |
| + | 1q21.3d          |
| + | 11q24.1b         |
| + | 17p11.2i         |
| - | 12q24.31f        |
| - | 6p22.1a          |
| + | Xp11.3a          |
| - | 3p14.1b          |
| + | 3q22.1c          |
| + | Xq24c            |
| + | 5q31.1e          |
| + | 20q13.12b        |
| - | 6q14.1e          |
| + | 5q31.2d          |
| - | 4q24b            |
| + | 7p13e            |
| + | 3p24.2b          |
| + | 3p24.3a          |
| + | 2q31.3b          |
| + | 2q37.3b          |

- 17p13.2c  
- 21q22.3d  
- 7q32.2a  
+ 16p13.3e  
- 6q15c  
- 1p36.33a  
+ 4p14b  
+ 22q11.21f  
- 11q12.1a  
- 19q13.43c  
- 16p11.2a  
- 12q22b  
- 17q25.1d  
- 1q21.3e  
+ 15q24.2a  
+  
+ 9p13.3d  
- 19q13.42b  
- 1q32.1d  
- 20q13.13e  
+ 8q11.21b  
- 8q21.11a  
+ 17q21.32c  
- 15q11.2e  
+ 12q24.11b  
+ 11q23.3d  
+ 1p36.22d-p36.22c  
+ 16p12.1c  
+ 1p36.22b  
- 13q12.3b  
- Xq28g  
+ 19p13.2c  
- 15q24.1b  
+ 5q33.3c  
+ 16p13.3b  
+ 7q34b  
- 3p22.3c  
- 9q21.32c  
+ Xp11.1b  
- 1q22c  
- 15q15.2a-q15.2b  
+ 6p21.1e  
+ 2q31.1b  
- 1p36.13b

- 8q22.3b  
+ 14q32.12b  
+ 10q24.1b  
- 5q35.1e  
- 17q21.31c  
- 2q11.1c  
- 11q12.3a  
- 1p36.11b  
+ 8q12.1c  
+ 2q21.3b  
- 19p13.3d  
- 3q29f-q29g  
+ 8p12e  
+ 4p13d  
+ 13q22.2a  
- 1q31.2b  
- Xq28f  
- 9q34.13a  
+ 1q24.1a  
- 20q13.33e  
- 11q13.4b  
+ 22q12.2a  
- 11p15.1c  
+ 1q23.3a  
- 22q11.21c  
+ 13q13.3d  
- 4q35.1f  
+ 9q31.3b  
- 13q32.1b  
- 4p14b  
+ 2p15a  
+ 2q37.1d  
- 4q13.2c  
- 4q13.2c  
+ 4q13.2c  
+ 4q26b  
+ 19p13.3c  
+ 6p21.31d  
- 12q23.1d  
- 5q35.2d  
+ 6q25.1b  
+ 6q25.1b  
- 12q24.33c  
- 17p11.2d

- 15q24.1b  
- 3p22.1b  
- 16p12.3a  
+ 21q22.3b  
+ 3q21.2a  
- 17q11.2a  
- 19p13.11d  
+ 15q21.3a-q21.3b  
- 17q25.1d  
+ 15q26.1c  
+ 2q11.2c  
+ 5q35.2d  
- 6p21.1h  
+ 7p22.3c  
- 22q13.1c  
- 11q13.2a  
+ 12q24.11a  
- 16p13.3e  
- 7q33c  
  
+ 22q11.23b  
+ 19p13.11b  
- 10p14a  
+ 13q34d  
- Xq24c  
+ 19q13.12a  
  
+ 7p12.3b  
+ 2q24.1d-q24.1e  
+ Xq13.3a  
- 20q11.22b  
- 19p13.3h  
- 8q22.1d  
- 3p21.31e  
- 19q12c  
+ 5q31.1c  
+ 1q42.13e  
- 7p13e  
+ 9q34.11b  
+ 1p34.1c  
- 10q26.2a  
+ 19p13.11e  
- 1q23.3a  
+ 19q13.12a

- 17q25.1c  
- 19p13.11e  
- 10q24.33a  
+ 4q21.1a  
+ 1p31.3d  
+ 16q24.1a  
+ Xp11.3a  
- 13q12.13c  
+ 3q26.33a  
+ 12q14.1d  
+ 21q21.3c  
+ 22q11.21b  
- 11q23.3f  
+ 1q23.3a  
17p11.2b  
- 1p32.3a  
+ 21q21.1a  
+ 15q22.31a  
+ 12q24.11a  
- 1p31.1e  
+ 11q14.1a  
- 17q25.3b  
- 2q35e  
+ 4q31.21c  
+ 2p11.2f  
- 3p21.31d  
- 22q11.21d  
+ 7p22.1b  
- 12q22d  
- 4q12a  
+ 11p15.3c-p15.3b  
- 1p36.12b  
- 6p21.1f  
+ 12p13.31d  
+ 4q26f  
- 16p13.2b  
+ 15q21.2a  
+ Xp11.4b  
+ 13q12.3c  
+ 6q25.1a  
+ 1p34.3b  
+ Xq25h  
+ 13q14.3d  
+ 5q13.2c

+ 17q21.33c  
+ 12q23.2a  
+ 8q24.11a  
- 17q11.2d  
+ 6q24.2b-q24.2c  
- 1p36.23b  
- 3q28d  
+ Xp11.3b  
- Yq11.21b  
+ 11q13.5a-q13.5b  
- Xp11.23f  
- 16q22.1f  
- 12p13.31d  
- 17p13.1c  
+ 1p36.23b  
- 1q24.3b  
+ 2p11.2f  
+ "Xq28h,Yq12w"  
+ 2p11.2f  
+ 1q23.2d  
+ 18p11.22b  
- 6p21.33a  
+ 6p21.33a  
+ 14q24.3c  
+ 1q32.3c  
+ 16p13.3b  
- 17q21.31a  
+ 16q23.1d  
+ 19p13.3a  
- 9q34.2a-q34.2b  
- 1p13.3d-p13.3c  
+ 2p13.3c  
+ Xq28h  
+ 1p21.2a  
+ 10q22.2a-q22.2b  
- 9p13.3b  
- 8q13.1b  
+ Xp22.31b  
- 5q31.1d  
+ 8p11.21a  
- 12q13.11c  
- 11q13.1a  
- 4q34.3a  
- 17q22d

|   |                |
|---|----------------|
| + | 12q22d         |
| - | 7q22.1d        |
| + | 6q22.2a        |
| - | 3p25.2b        |
| + | 3p25.3b        |
| - | 6q25.3d-q25.3e |
| + | 3p22.2a        |
| + | 10p12.33c      |
| + | 3p22.1a        |
| - | 7q36.3e        |
| + | 20p13b         |
| + | 2p22.2b        |
| - | 16p11.2c       |
| + | 7q11.21d       |
| + | 19p13.3b       |
| - | 12q15c         |
| - | 17p13.2c       |
| + | 19q13.41b      |
| + | 1q44e          |
| - | 6q23.2b        |
| - | 6q23.2b        |
| - | 6q23.2b        |
| - | 7p11.2c        |
| - | 3p21.2c-p21.2b |
| + | 22q11.22a      |
| - | 22q11.23a      |
| + | 11q23.3e       |
| + | 8q22.2a-q22.2b |
| + | 20p13c         |
| + | 15q15.1b       |
| - | 2p11.2e        |
| + | 17q21.31a      |
| + | 10q21.3e       |
| + | 10q21.3e       |
| + | 11q25d-q25e    |
| - | 8q24.3h        |
| - | 12q24.11c      |
| - | 12q24.31c      |
| - | 15q26.1c       |
| - | 16q11.2i       |
| - | 13q14.3d       |
| + | 8p22b          |
| - | 12q24.31d      |
| - | 11q12.2b       |

|   |                 |
|---|-----------------|
| + | 7q11.23b        |
| - | 15q15.1d        |
| - | 7p14.1d         |
| + | 1q21.2a         |
| + | 16q22.1d        |
| - | 18q21.33b       |
| - | 6p21.32a        |
| - | 17p13.3g-p13.3f |
| - | 2p15a-p14c      |
| - | 1q21.2d         |
| + | 3q27.2a         |
| + | 14q32.2a        |
| + | 2p16.1b         |
| - | 19q13.33b       |
| - | Xq12a           |
| - | 15q11.2b        |
| + | 6q24.1d         |
| - | 14q24.1a        |
| + |                 |
| + | 1p36.33a        |
| + | 11q24.1c-q24.2a |
| + | 1p36.12b        |
| + | 7p12.3a-p12.2a  |
| - | 11q12.2b        |
| + | 10p11.23c       |
| - | 14q32.2b        |
| - | 1p12b           |
| + | Xp11.23d        |
| - | 6q21g           |
| - | 1p36.11a        |
| + | 13q12.13c       |
| + | 2q14.1a         |
| - | 2q31.1g         |
| + | 2p13.1b         |
| - | 12p12.3e        |
| + | 18q12.1e        |
| - | 17q25.1d        |
| + | 13q14.11b       |
| + | Xq22.1e-q22.2a  |
| - | 7q11.23c        |
|   | 7p13d           |
| + | 7q11.23b        |
| - | 7q11.23b        |
| - | 2q36.1d         |



|   |                   |
|---|-------------------|
| + | 13q14.3c          |
| + | 10q11.22d         |
| - | 14q22.3a          |
| - | 4p16.1b           |
| - | 2q33.1g           |
| + | Xp11.23d          |
| + | 4q34.2a           |
| + | 19p13.3i          |
| + | 4p14c             |
| + | 14q32.31c         |
| + | 14q24.2b          |
| + | 14q12a            |
| - | 16p13.3f          |
| + | 14q32.2b          |
| - | 1q42.11b          |
| - | 6q27e-q27f        |
| + | 1p12c             |
| - | 9q32c             |
| - | 2q14.3e           |
| - | 9q34.11b          |
| - | 2p24.1d           |
| + | 5q22.1a           |
| + | 10p15.3c          |
| - | 21q22.3b          |
| - | 9p13.3d           |
| - | 5q14.1a           |
| - | 1q23.2d           |
|   | 2p23.2a           |
| + | Xq24a             |
| - | Xp11.23c          |
| - | 17q25.3h          |
| - | 6p21.32a          |
| - | 1p13.3b           |
| + | 3p22.2a           |
| - | 3q26.1f           |
| + | 9q34.2b           |
| - | 3p21.1e           |
| - | 12q21.33a-q21.33b |
| - | 3q29g             |
| + | 2p13.1b           |
| + | 5q31.3b           |
| - | 1p35.2a           |
| - | 16q23.1a          |
| - | 3q21.1a           |

|   |                   |
|---|-------------------|
| + | 3p21.31d          |
|   | 7q36.3e           |
| - | 15q25.1a          |
| + | 19q13.12b         |
| + | 1p22.3e           |
| + | 12q24.31b-q24.31c |
| + | 8q24.13b          |
| + | 17q23.3a          |
| + | 18q21.31a         |
| + | 5p13.2b-p13.2a    |
| - | 15q25.2b          |
|   | 11q12.3b          |
| + | 2q32.2a           |
| + | 15q15.3b          |
| - | 1p13.2d           |
| - | 1p31.3a           |
| + | 17p13.1d          |
| - | 1p36.32b          |
| + | 17p13.3d          |
| - | 3p21.1d           |
| - | 9q34.3f           |
| + | 19q13.11b         |
| - | 14q23.2b          |
| + | 16p13.3f          |
| - | 7q33b             |
| - | 2p14b             |
| + | 8q22.3c           |
| - | 2q24.2a           |
| + | 1p36.11a          |
| + | 8q24.13c          |
| + | 11p15.4a          |
| - | 20q13.12b         |
| + | 20q13.12b         |
| - | 20q13.12b         |
| - | 20q13.12b         |
| - | 20q13.12b         |
| + | 4p16.1f           |
| + | 15q25.2b          |
| - | 15q11.2c          |
|   | 15q13.1b          |
| + | 4p16.3b           |
| - | 8p12a             |
| - | 4p16.3b           |
| - | 12q13.2c          |

- 12q14.3a  
17q24.2c  
+ 7p22.1c  
+ 20q13.12a  
+ 12p13.33d-p13.33c  
+ 9q22.31b  
+ 17q21.31a  
+ 12q13.12a  
+ 2q35e  
- 12q13.12a  
- 17q21.32a  
- 3p14.3c  
- 22q13.31c  
+ 5q31.2c  
+ 21q22.2b  
+ 8p12e  
+ 6p25.2b  
+ 17q11.1b  
- 12q24.23a  
+ 17p13.2a  
+ 6q25.3f  
+ 19q13.11c  
+ 5q35.1a  
+ Xp22.2  
+ 16q23.1d-q23.1e  
+ 8q21.3a  
+ 16q22.1e  
- 19p13.2e  
+ 17p13.2a  
+ Xp11.22b  
+ Xp11.22b  
- Xp11.22b  
+ Xp11.22b  
- Xp11.21a  
- 22q12.1c  
- 2p23.1a  
+ Xq25b  
- 3p22.2a  
- Xq13.2b  
+ Xp21.1a  
- 22q11.1d  
- 8p23.1b  
- Xq22.1c  
- 9q22.33b

- 3p25.1a  
- 10q25.1e  
+ 22q13.2a  
- 2p15d  
- 13q12.11b  
- 6p21.1c  
- 16p11.2e  
+ 8p21.3b  
+ 12q14.2b  
+ 1q25.3a  
- 19q13.31a  
- 7q36.1e  
- 14q32.33a  
+ 5q14.2c  
+ 2q35b  
+ 22q13.2a  
+ 12q14.1a  
- 3q23d  
+ 3p22.2a  
- 16p12.3c  
+ 17q21.33b  
- 12q12e  
+ 11q22.1d-q22.2a  
- 1p35.1b  
- 12p11.21a  
+ 1p34.2a  
17p13.1d  
- 22q11.21f  
+ 3q27.1a  
+ 12q15c  
- 18p11.32c  
- 11q13.1e  
- 19q13.2a  
- 1p32.3c  
- 6p21.1c  
+ 2p22.3e  
- 5q32a  
+ Xq12d  
- 4p13b  
+ 19p13.11a  
+ 7p13d  
+ 14q24.3b  
- 10p12.1a  
- 1q32.1h

- 22q11.21f  
+ 17q22d  
- 16p11.2d  
- 11q12.1a  
+ 2p23.1b  
- 1p34.3b  
- 2q21.3a  
- 4q13.2b  
+ 5q22.2b  
- 20q13.33d  
+ 1p35.3a  
+ 8q12.3b  
+ 20q13.12a  
- 17p13.3e  
- 7q11.23e-q11.23f  
+ 22q12.3a  
- 2p25.1d  
- 8q22.3a  
+ 14q32.2b  
- 18q22.3d  
+ 2q31.1e  
- "Xp22.33c,Yp11.31b"  
- 3q13.13d  
- 5q14.1a  
+ 22q13.33a  
- 11p15.3e  
- 20q13.31a  
+ 8q21.13b  
- 3q12.3a  
- 1p36.13f  
- 6q25.1c  
- 3q13.31a-q13.31b  
- 6p21.32a  
- 6q21f  
- 14q23.3a  
- 9q33.2b  
- 11q12.3b  
+ 19q13.12a  
+ Xq24d  
+ 9q33.3b  
3q23c  
- 12q13.3a  
- 17p13.1d  
- 1q31.3c

|   |                 |
|---|-----------------|
| + | 14q32.33b       |
| + | 9q33.3b         |
| - | 11q24.3c        |
| - | 19q13.43c       |
| - | 20q13.33e       |
| + | 3p22.1a         |
| + | 1p36.31a        |
| - | 9p13.2a         |
| - | 18q21.1d        |
| + | 1p35.1b         |
| - | 1p35.1b         |
| + | 6p21.32a        |
| + | 12q13.2c        |
|   | 1q41c           |
| + | 1p34.3c         |
| + | Xq11.1c         |
| + | 11q22.3d        |
| - | 6q25.1a         |
| - | 13q14.12b       |
| + | 14q31.3d        |
| + | 2q32.1e         |
| + | 16q24.2b-q24.3a |
| - | 8q24.3f         |
| - | 19q13.32b       |
|   | 17q25.1d        |
| - | 16p13.13b       |
| - | 2q13d           |
| - | 7q34b           |
| - | 7q34b           |
| - | 7q32.2a         |
| - | Xq11.1c         |
| - | 5q31.1c         |
| - | 1p32.3d         |
| + | Xq24b           |
| - | 16q24.2a        |
| + | 1p35.2a         |
| + | 18q21.33a       |
| - | 10q22.3e        |
| + | 20p13f          |
| + | 4p15.2c         |
| - | 9q21.33b        |
| + | 9p13.2b-p13.2a  |
| - | 12q24.31c       |
| + | 5q14.1f         |

- 12q12e  
- 7q22.1c  
+ 3p24.1c  
- 5p15.33e-p15.33d  
- 9q34.11b  
+ 11p15.1c  
+ 6q25.3c  
+ 10q24.1b  
+ 12q21.2b  
+ 8p22b  
+ 3q13.31a  
- 11q13.1e  
- 3p21.31k  
+ 7p22.1a  
+ 11q12.1a-q12.1b  
- 10q25.2b  
- 16q24.1a  
+ 22q11.21d  
- 22q11.23a  
- Xq25h  
+ 10p11.22c  
- 2q22.3a  
- 9q34.11b  
- 8q21.13c  
- 7p22.3b  
+ 2q35f  
+ 6p21.2c-p21.2b  
- 9q21.13a  
+ 15q25.1b  
- 12q21.1a  
- 14q11.2g  
- 16q22.3b  
+ 16q23.1a  
- 15q15.1d  
- 19q13.12b  
- 18p11.31c  
+ 17p13.2b  
- 19q13.12c  
+ 19q13.2a  
- 14q24.1c  
- 2p21e  
- 9q32b  
- 6p22.1a  
- 5q35.3f

- 20q13.2a  
- 19q13.12b  
+ 16q22.1c  
+ 11q12.1c  
+ Xq28f  
+ 11q13.1c  
+ 16q24.2b  
- 5p13.3b  
+ Xp22.11a  
+ Yp11.31a  
- 14q24.2b  
+ 5q14.1e  
+ 15q15.1b  
- 3p24.3e  
+ 14q32.33a  
- 14q24.1a  
- 8q24.13b  
+ 8q24.13b  
- 20q12c  
+ 3q24e  
+ 13q32.3b  
- 13q32.3b  
+ 19q13.43b  
- 19q13.43a  
- 19q13.43b  
+ 7q22.1b  
- 16p12.1b  
+ 6p22.1b  
- 6p22.1b  
+ 7q22.1b  
+ 5q31.3b  
- 3q26.32c  
- 22q12.2a  
+ 10q22.3e  
+ 7p13c  
+ 1p34.2d  
+ 1p34.3e  
- Xq13.1c  
+ 1p34.3e  
- 13q12.11a  
- 1p34.3f-p34.3e  
+ 10p15.3d  
- 1p34.2b  
- 9q34.3f



- 20q13.12c  
+ 12q24.33d  
+ 19p13.11a  
+ 7q11.21c  
+ 19q13.32c  
- 19p13.2c  
- 1q44d-q44e  
+ 5p12c  
+ 20p11.23d  
+ 19q13.43b  
19p13.2a  
19q13.41a  
+ 7q11.21c  
- 19p13.11a  
+ 12q24.33d  
- 2q35e  
+ 11p15.4a  
+ 19q13.12b  
- 3q21.2b  
- 19q13.43b  
- 8q24.3h  
- 19q13.41a  
+ 6p22.1b  
+ 19q13.43b  
+ 16p13.3c  
+ 19q13.33d  
+ 19p13.2c  
- 17p12d  
+ 19q13.11c  
- 6p22.1c  
+ Xq28e  
+ 6p22.1b  
+ 6p22.1b  
- 11p15.4d  
+ 3p21.32a  
- 19p13.2a  
- 16p13.3c  
- 11q24.1c  
+ 16p13.3d  
+ 17q11.2e  
+ 19q13.43b  
+ 7q36.1b  
+ 16p13.3d  
- 11p15.4b

|   |           |
|---|-----------|
| + | 11p15.4b  |
| - | 20q13.2b  |
| - | 14q11.2c  |
| + | 10q11.21c |
|   | 19q13.31b |
| + | 19q13.31b |
| + | 19q13.31b |
| - | 16q22.3a  |
| - | 17p13.2b  |
| + | 19q13.31b |
| - | 19q13.31b |
| + | 18q23b    |
| + | 1q44a     |
| - | 10q11.21b |
| - | 18q12.2a  |
| - | 10p11.21a |
| - | 10p11.21a |
| - | 8q24.3h   |
| - | 8q24.3h   |
| + | 19p12d    |
| + | 19p12b    |
| - | 19q13.43c |
| - | 11q23.3b  |
| + | 12q24.33d |
| - | 19q13.12b |
| - | 19p13.2c  |
| + | 18q12.2a  |
| + | 7q11.21c  |
| + | 19q13.43c |
| + | Xq28f     |
| + | 16q24.3b  |
| + | 7q31.1c   |
| - | 22q11.22b |
| - | 22q11.22b |
| - | Xq25h     |
| - | 15q21.3d  |
| - | 1q32.1b   |
| + | 7q36.1b   |
| - | 19q13.31b |
| + | 17p12a    |
|   | 17p11.2f  |
| + | 6q15a     |
| - | 21q22.3a  |
| - | 19q13.32a |

- 7q22.1b  
+ 19q13.11c  
+ 19q13.11c  
- 6p21.1d  
- 16q13d  
- 6p22.1d  
- 6p22.1b  
+ 19q13.43c  
+ 1p22.2b  
- 19q13.43c  
+ 4q31.21a  
+ 19q13.41b  
+ 19p13.12b  
- 20q13.12b  
- 20p11.21a  
+ 10p11.21a  
- 10q11.21a  
- 8q24.3h  
+ 20q11.22a  
- 20p13d  
+ 19q13.12b  
- 19q13.41a-q13.41b  
+ 3p21.32a  
- 19q13.33e  
+ 5q35.3c  
+ 19p13.2e  
+ 1p35.1a  
+ 1q21.1b  
- 9q22.32b-q22.33a  
+ 10p11.21a  
10q11.21a  
+ 19q13.12b  
+ 19q13.12c  
- 12p13.31d  
- 12q13.13f  
- 2q31.2c-q31.3a  
- 17q21.2b  
- 7q22.1b  
- 8p21.1d  
- 18q12.2a  
+ 18q12.2a  
18q12.2a  
+ 7q36.1b  
- 19q13.31b

|   |                |
|---|----------------|
| + | 18q22.3d       |
| + | 11p11.2b       |
| + | 14q24.3a       |
| - | 19p13.2d       |
| - | 19q13.43b      |
| - | 19q13.43c      |
| + | 19q13.43b      |
| + | 19q13.12c      |
| - | 7q36.1a-q36.1b |
| - | 19p13.2c       |
| - | 19q13.31a      |
| + | 19p12d         |
| + | 19p12d         |
| + | 19p12d         |
| - | 19p13.2a       |
| - | 16p13.3c       |
| - | 1p36.12a       |
| + | 19p13.2a       |
| - | 19p13.2a       |
| + | 19q13.42c      |
| + | 19q13.43c      |
| - | 19q13.31b      |
| + | 5q35.3c        |
| + | 19q13.43b      |
| - | 19q13.12b      |
| - | 7q36.1b        |
| - | 19q13.41a      |
| + | 16q24.2b       |
| + | 19q13.43a      |
| + | 19q13.33b      |
| - | 7p11.2a        |
| + | 19q13.33e      |
| + | 9q31.3b        |
| + | 10q11.21b      |
| + | 19p12d         |
| - | 19p13.2a       |
| + | 19p12c         |
| + | 19p12d         |
| + | 7q22.1b        |
| - | 16p13.3b       |
| + | 19q13.11a      |
| + | 4p16.2b        |
| - | 9q22.33a       |
| + | 10q26.3f       |

|   |                 |
|---|-----------------|
| + | 2p23.3a         |
| - | 2p23.3a         |
| - | 2q11.1c         |
| - | 18q23a          |
| + | 10q23.33d       |
| - | 4p16.1b         |
|   | 18p11.21b       |
| - | 18q11.2c-q11.2d |
| + | 19q13.41b       |
| + | 19q13.2c        |
| - | 19q13.12b       |
| + | 19q13.43b       |
| + | 18q21.32a       |
| - | 2q31.2c-q31.3a  |
| + | 19q13.12c       |
| - | 19q13.32c       |
| + | 19q13.43b       |
| + | 19q13.43b       |
| + | 19q13.43b       |
| + | 19q13.43b       |
| - | 19q13.43b       |
| + | 19q13.43b       |
| + | 19p13.3f        |
| + | 19p13.3f        |
| + | 19p13.2e        |
| - | 19p13.2d        |
| + | 19p13.2c        |
| - | 19p13.2c        |
| - | 19p13.2c        |
| - | 19p13.2a        |
| - | 19p13.2a        |
| - | 19q13.12b       |
| + | 19p13.3f        |
| + | 19q13.12c       |
| - | 19q13.12c       |
| + | 8q24.13d        |
| - | 19q13.12c       |
| + | 19q13.2c        |
| + | 19q13.31a       |
| - | 19q13.33e       |
| - | 19q13.42c       |
| + | 19q13.42c       |
| + | 19q13.42c       |
| + | 19q13.43a       |

|   |                   |
|---|-------------------|
| + | 19q13.43c         |
| - | 19q13.12c         |
| - | 19q13.12c         |
| + | 19q13.43b         |
| + | 19q13.43c         |
| + | 3p21.31f          |
| + | 15q25.3a          |
|   | 1p36.11b          |
| - | 17p13.2b          |
| + | 4p16.3d           |
| + | 8p23.3b           |
| - | 16p13.3c          |
| - | 16p13.3e          |
| - | 19q13.11c         |
| - | 12q24.33d         |
| - | 19q13.12c         |
| - | 5q23.2c           |
| + | 15q22.31a-q22.31b |
| - | 19q13.41a         |
| + | 19q13.33e         |
| - | 19q13.33e         |
| - | 19q13.33e         |
| - | 19q13.33e         |
| + | 9q32d             |
| + | 3p22.1c           |
| + | 3p22.1c           |
| + | 3p22.1c           |
| - | 5p15.1b           |
| - | 19p12d            |
| + | 19p13.2a          |
| - | 16p11.2c          |
| - | Xp11.23e          |
| + | 1p34.2c           |
| + | 1p34.2c           |
| - | 1p22.2a           |
| + | 2q31.1b           |
| - | 17q21.32c         |
| - | 19p13.2b-p13.2a   |
| + | 3p11.2a           |
| + | 7q22.1b           |
|   | 9p12b             |
| - | 9p12a             |
| + | 12q24.31e         |
| - | 16p11.2c          |

- 1q44d  
+ 1q44f  
- Xp11.3a  
- 19p12c  
+ 7q11.21c  
- 7q11.21c  
- 19p12b  
- 19p12d  
+ 1p34.2c  
+ 1q21.2d  
- 16p11.2c  
- 16p11.2c  
+ 19p13.2a  
- 1q44f  
- 1q44d  
+ 8q24.3f  
19p13.2c  
+ 8q24.3h  
+ 19p13.2a  
+ 19q13.41a  
+ 12p13.31b  
+ 8p23.1a  
- 8q22.3a  
+ 8q24.3g  
- 19p12d  
+ 19q13.43a  
+ 7p11.2b  
+ 19p12d  
  
- 4p16.3d  
+ 19p12d  
+ 12q13.13e  
- 7q36.1b  
- 16p11.2c  
+ 19q13.43b  
+ 16p13.3c  
- Xq26.3a  
+ 6p21.31c  
+ 19p13.2a  
- 16p11.2c  
+ 19q13.41b  
- 16p11.2c  
- 19p13.3f  
- 15q14b

- 19q13.43b  
+ 15q26.1b  
+ 7q36.1c  
+ 19q13.43b  
- 7q36.1b  
+ 16q24.3a  
- 19q13.2b  
- 19q13.12c  
+ 7q36.1b  
- 19q13.42c  
- 7q36.1a  
- 19q13.42c  
19p13.2a  
+ 7q22.1b  
+ 9q33.3b  
+ 19p13.2a-p13.13c  
- 19q13.11c  
- 7q31.33c  
+ 2q32.1c  
+ 19q13.43b  
+ 19q13.41b  
- 19q13.41a  
- 16q22.3a  
- 19p13.2a  
- 4q31.22b  
+ 13q34d  
+ 17q12a  
+ 20q13.32b  
- 19q13.33e  
+ 14q32.31c  
+ 12q24.33d  
- 16p11.2c  
+ 19p13.2a  
+ 19q13.41b  
- 19p13.2c  
+ 3p23a  
- 19p13.2a  
- 19p12b  
+ 7q11.21d  
+ 19p12d  
- 19p12c  
- 20q13.13c  
+ 7q22.1d  
- 11q13.1c



|   |                   |
|---|-------------------|
| + | 17q12b            |
| - | 1p22.3d           |
| + | 6p21.33b          |
| + | 22q12.1c          |
| + | 7q11.23f          |
| - | 7p12.2a           |
| + | 17q12c            |
| + | 10q26.13e         |
| - | 1p31.1j           |
| - | 2q21.3a-q21.3b    |
| + | Xp22.2            |
| + |                   |
| + | 6p22.1b           |
| - | 19q13.43c         |
| + | 15q25.2b          |
| + | 1p35.1a           |
| + | 7q22.1b           |
| + | 19q13.43c         |
| - | 15q15.3a          |
| - | 19q13.43a         |
| + | 20q13.12b         |
|   | 20q13.12b         |
| + | 19p13.13a-p13.12c |
| - | 1p34.1c           |
| + | 5q12.1b           |
| - | 17p12a            |
| - | 6q22.1d           |
| - | 11q23.2a          |
| + | 15q22.31c         |
| - | 10q21.1d          |
| - | Xp11.1b           |
| + | Xp11.1b           |
| - | 3q21.2c           |
| + | 1p32.3d           |
| + | 7q34f             |
| - | 17p13.2c          |
| - | 1p31.1e           |

## DEFINITION

- "Homo sapiens membrane-associated ring finger (C3HC4) 1 (MARCH1), mRNA."
- "Homo sapiens membrane-associated ring finger (C3HC4) 2 (MARCH2), transcript variant 2, mRNA."
- "Homo sapiens membrane-associated ring finger (C3HC4) 3 (MARCH3), mRNA."
- "Homo sapiens membrane-associated ring finger (C3HC4) 5 (MARCH5), mRNA."
- "Homo sapiens membrane-associated ring finger (C3HC4) 7 (MARCH7), mRNA."
- "Homo sapiens septin 1 (SEPT1), mRNA. XM\_944608 XM\_944610"
- "Homo sapiens septin 2 (SEPT2), transcript variant 4, mRNA."
- "Homo sapiens septin 3 (SEPT3), transcript variant B, mRNA."
- "Homo sapiens septin 4 (SEPT4), transcript variant 1, mRNA."
- "Homo sapiens septin 5 (SEPT5), transcript variant 2, mRNA."
- "Homo sapiens septin 6 (SEPT6), transcript variant III, mRNA."
- "Homo sapiens septin 7 (SEPT7), transcript variant 1, mRNA."
- "Homo sapiens septin 8 (SEPT8), transcript variant 4, mRNA."
- "Homo sapiens septin 9 (SEPT9), mRNA."
- "Homo sapiens septin 11 (SEPT11), mRNA."
- "Homo sapiens septin 12 (SEPT12), mRNA."
- "Homo sapiens septin 14 (SEPT14), mRNA."
- "Homo sapiens 15 kDa selenoprotein (SEP15), transcript variant 1, mRNA."
- "Homo sapiens AIG2-like domain 1 (A2LD1), mRNA."
- "Homo sapiens alpha 1,4-galactosyltransferase (A4GALT), mRNA."
- "Homo sapiens alpha-1,4-N-acetylglucosaminyltransferase (A4GNT), mRNA."
- "Homo sapiens achalasia, adrenocortical insufficiency, alacrimia (Allgrove, triple-A) (AAAS), mRNA."
- "Homo sapiens acetoacetyl-CoA synthetase (AACS), mRNA."
- "Homo sapiens arylacetamide deacetylase-like 1 (AADACL1), mRNA."
- "Homo sapiens arylacetamide deacetylase-like 2 (AADACL2), mRNA."
- "Homo sapiens alpha- and gamma-adaptin binding protein (AAGAB), mRNA."
- "Homo sapiens AP2 associated kinase 1 (AAK1), mRNA."
- "Homo sapiens angio-associated, migratory cell protein (AAMP), mRNA."
- "Homo sapiens alanyl-tRNA synthetase (AARS), mRNA."
- "Homo sapiens alanyl-tRNA synthetase 2, mitochondrial (putative) (AARS2), nuclear gene encoding mitochondria"
- "Homo sapiens alanyl-tRNA synthetase domain containing 1 (AARSD1), mRNA."
- "Homo sapiens amino adipate-semialdehyde dehydrogenase (AASDH), mRNA."
- "Homo sapiens amino adipate-semialdehyde dehydrogenase-phosphopantetheinyl transferase (AASDH2), nuclear gene encoding mitochondria"
- "Homo sapiens amino adipate-semialdehyde synthase (AASS), nuclear gene encoding mitochondria"
- "Homo sapiens apoptosis antagonizing transcription factor (AATF), mRNA."
- "Homo sapiens apoptosis-associated tyrosine kinase (AATK), mRNA."
- "Homo sapiens 4-aminobutyrate aminotransferase (ABAT), nuclear gene encoding mitochondria"
- "Homo sapiens ATP-binding cassette, sub-family A (ABC1), member 1 (ABCA1), mRNA."
- "Homo sapiens ATP-binding cassette, sub-family A (ABC1), member 11 (pseudogene) (ABCA11), mRNA."
- "Homo sapiens ATP-binding cassette, sub-family A (ABC1), member 2 (ABCA2), transcript variant 1, mRNA."
- "Homo sapiens ATP-binding cassette, sub-family A (ABC1), member 3 (ABCA3), mRNA."
- "Homo sapiens ATP-binding cassette, sub-family A (ABC1), member 6 (ABCA6), mRNA."

"Homo sapiens ATP-binding cassette, sub-family A (ABC1), member 7 (ABCA7), mRNA."  
"Homo sapiens ATP-binding cassette, sub-family A (ABC1), member 8 (ABCA8), mRNA."  
"Homo sapiens ATP-binding cassette, sub-family A (ABC1), member 9 (ABCA9), mRNA."  
"Homo sapiens ATP-binding cassette, sub-family B (MDR/TAP), member 1 (ABCB1), mRNA."  
"Homo sapiens ATP-binding cassette, sub-family B (MDR/TAP), member 10 (ABCB10), nuclear  
"Homo sapiens ATP-binding cassette, sub-family B (MDR/TAP), member 4 (ABCB4), transcript  
"Homo sapiens ATP-binding cassette, sub-family B (MDR/TAP), member 6 (ABCB6), nuclear ge  
"Homo sapiens ATP-binding cassette, sub-family B (MDR/TAP), member 7 (ABCB7), nuclear ge  
"Homo sapiens ATP-binding cassette, sub-family B (MDR/TAP), member 9 (ABCB9), transcript  
"Homo sapiens ATP-binding cassette, sub-family C (CFTR/MRP), member 2 (ABCC2), mRNA."  
"Homo sapiens ATP-binding cassette, sub-family C (CFTR/MRP), member 3 (ABCC3), transcrip  
"Homo sapiens ATP-binding cassette, sub-family C (CFTR/MRP), member 4 (ABCC4), mRNA."  
"Homo sapiens ATP-binding cassette, sub-family C (CFTR/MRP), member 5 (ABCC5), transcrip  
"Homo sapiens ATP-binding cassette, sub-family C, member 6 pseudogene 1 (ABCC6P1), non-  
"Homo sapiens ATP-binding cassette, sub-family D (ALD), member 1 (ABCD1), mRNA."  
"Homo sapiens ATP-binding cassette, sub-family D (ALD), member 3 (ABCD3), mRNA."  
"Homo sapiens ATP-binding cassette, sub-family E (OABP), member 1 (ABCE1), transcript vari  
"Homo sapiens ATP-binding cassette, sub-family F (GCN20), member 1 (ABCF1), transcript var  
"Homo sapiens ATP-binding cassette, sub-family F (GCN20), member 2 (ABCF2), nuclear gene  
"Homo sapiens ATP-binding cassette, sub-family F (GCN20), member 3 (ABCF3), mRNA."  
"Homo sapiens ATP-binding cassette, sub-family G (WHITE), member 1 (ABCG1), transcript va  
"Homo sapiens ATP-binding cassette, sub-family G (WHITE), member 4 (ABCG4), mRNA."  
"Homo sapiens ATP-binding cassette, sub-family G (WHITE), member 5 (ABCG5), mRNA."  
"Homo sapiens abhydrolase domain containing 1 (ABHD1), mRNA."  
"Homo sapiens abhydrolase domain containing 10 (ABHD10), mRNA."  
"Homo sapiens abhydrolase domain containing 11 (ABHD11), transcript variant 6, mRNA."  
"Homo sapiens abhydrolase domain containing 12 (ABHD12), transcript variant 1, mRNA."  
"Homo sapiens abhydrolase domain containing 12B (ABHD12B), transcript variant 2, mRNA."  
"Homo sapiens abhydrolase domain containing 13 (ABHD13), mRNA."  
"Homo sapiens abhydrolase domain containing 14A (ABHD14A), mRNA."  
"Homo sapiens abhydrolase domain containing 14B (ABHD14B), mRNA."  
"Homo sapiens abhydrolase domain containing 15 (ABHD15), mRNA."  
"Homo sapiens abhydrolase domain containing 2 (ABHD2), transcript variant 2, mRNA."  
"Homo sapiens abhydrolase domain containing 3 (ABHD3), mRNA."  
"Homo sapiens abhydrolase domain containing 4 (ABHD4), mRNA."  
"Homo sapiens abhydrolase domain containing 5 (ABHD5), mRNA."  
"Homo sapiens abhydrolase domain containing 6 (ABHD6), mRNA."  
"Homo sapiens abhydrolase domain containing 8 (ABHD8), mRNA."  
"Homo sapiens abl-interactor 1 (ABI1), transcript variant 1, mRNA."  
"PREDICTED: Homo sapiens abl interactor 2 (ABI2), mRNA."  
"Homo sapiens ABI family, member 3 (ABI3), transcript variant 1, mRNA."  
"Homo sapiens c-abl oncogene 1, receptor tyrosine kinase (ABL1), transcript variant b, mRNA."  
"Homo sapiens v-abl Abelson murine leukemia viral oncogene homolog 2 (arg, Abelson-related  
"Homo sapiens actin binding LIM protein 1 (ABLIM1), transcript variant 2, mRNA."

"Homo sapiens actin binding LIM protein family, member 2 (ABLIM2), mRNA."  
"Homo sapiens active BCR-related gene (ABR), transcript variant 2, mRNA."  
"Homo sapiens activator of basal transcription 1 (ABT1), mRNA."  
"Homo sapiens ankyrin repeat and BTB (POZ) domain containing 1 (ABTB1), transcript variant :  
"Homo sapiens ankyrin repeat and BTB (POZ) domain containing 2 (ABTB2), mRNA."  
"Homo sapiens acetyl-Coenzyme A acyltransferase 1 (peroxisomal 3-oxoacyl-Coenzyme A thiol  
"Homo sapiens acetyl-Coenzyme A acyltransferase 2 (mitochondrial 3-oxoacyl-Coenzyme A thiol  
"Homo sapiens acetyl-Coenzyme A carboxylase alpha (ACACA), transcript variant 2, mRNA."  
"Homo sapiens acetyl-Coenzyme A carboxylase beta (ACACB), mRNA."  
"Homo sapiens acyl-Coenzyme A dehydrogenase family, member 10 (ACAD10), mRNA."  
"Homo sapiens acyl-Coenzyme A dehydrogenase family, member 11 (ACAD11), mRNA."  
"Homo sapiens acyl-Coenzyme A dehydrogenase family, member 8 (ACAD8), mRNA."  
"Homo sapiens acyl-Coenzyme A dehydrogenase family, member 9 (ACAD9), mRNA."  
"Homo sapiens acyl-Coenzyme A dehydrogenase, C-4 to C-12 straight chain (ACADM), nuclear  
"Homo sapiens acyl-Coenzyme A dehydrogenase, C-2 to C-3 short chain (ACADS), nuclear ge  
"Homo sapiens acyl-Coenzyme A dehydrogenase, short/branched chain (ACADSB), nuclear ge  
"Homo sapiens acyl-Coenzyme A dehydrogenase, very long chain (ACADVL), nuclear gene enc  
"Homo sapiens ArfGAP with coiled-coil, ankyrin repeat and PH domains 1 (ACAP1), mRNA."  
"Homo sapiens ArfGAP with coiled-coil, ankyrin repeat and PH domains 2 (ACAP2), mRNA."  
"Homo sapiens ArfGAP with coiled-coil, ankyrin repeat and PH domains 3 (ACAP3), mRNA."  
"Homo sapiens acetyl-Coenzyme A acetyltransferase 1 (ACAT1), nuclear gene encoding mitoch  
"Homo sapiens acetyl-Coenzyme A acetyltransferase 2 (acetoacetyl Coenzyme A thiolase) (AC  
"Homo sapiens acyl-Coenzyme A binding domain containing 3 (ACBD3), mRNA."  
"Homo sapiens acyl-Coenzyme A binding domain containing 4 (ACBD4), mRNA."  
"Homo sapiens acyl-Coenzyme A binding domain containing 6 (ACBD6), mRNA."  
"PREDICTED: Homo sapiens acyl-Coenzyme A binding domain containing 7 (ACBD7), mRNA."  
"Homo sapiens amiloride-sensitive cation channel 3 (ACCN3), transcript variant 2, mRNA."  
"Homo sapiens 1-aminocyclopropane-1-carboxylate synthase homolog (Arabidopsis)(non-functi  
"Homo sapiens adrenocortical dysplasia homolog (mouse) (ACD), transcript variant 2, mRNA."  
"Homo sapiens alkaline ceramidase 3 (ACER3), mRNA."  
"Homo sapiens acetylcholinesterase (YT blood group) (ACHE), transcript variant E4-E5, mRNA.  
"Homo sapiens apoptotic chromatin condensation inducer 1 (ACIN1), mRNA."  
"Homo sapiens ATP citrate lyase (ACLY), transcript variant 1, mRNA."  
"Homo sapiens ACN9 homolog (S. cerevisiae) (ACN9), mRNA."  
"Homo sapiens aconitase 1, soluble (ACO1), mRNA."  
"Homo sapiens aconitase 2, mitochondrial (ACO2), nuclear gene encoding mitochondrial protei  
"Homo sapiens acyl-CoA thioesterase 1 (ACOT1), mRNA."  
"Homo sapiens acyl-CoA thioesterase 12 (ACOT12), mRNA."  
"Homo sapiens acyl-CoA thioesterase 2 (ACOT2), nuclear gene encoding mitochondrial protein.  
"Homo sapiens acyl-CoA thioesterase 4 (ACOT4), mRNA."  
"Homo sapiens acyl-CoA thioesterase 8 (ACOT8), transcript variant 1, mRNA."  
"Homo sapiens acyl-CoA thioesterase 9 (ACOT9), transcript variant 1, mRNA."  
"Homo sapiens acyl-Coenzyme A oxidase 1, palmitoyl (ACOX1), transcript variant 1, mRNA."  
"Homo sapiens acyl-Coenzyme A oxidase 2, branched chain (ACOX2), mRNA."

"Homo sapiens acyl-Coenzyme A oxidase 3, pristanoyl (ACOX3), mRNA."  
"Homo sapiens acid phosphatase 1, soluble (ACP1), transcript variant 4, mRNA."  
"Homo sapiens acid phosphatase 2, lysosomal (ACP2), mRNA."  
"Homo sapiens acid phosphatase 6, lysophosphatidic (ACP6), mRNA."  
"Homo sapiens acid phosphatase-like 2 (ACPL2), mRNA."  
"Homo sapiens acid phosphatase, prostate (ACPP), mRNA."  
"Homo sapiens acrosin (ACR), mRNA."  
"Homo sapiens acrosin binding protein (ACRBP), mRNA."  
"Homo sapiens acidic repeat containing (ACRC), mRNA."  
"Homo sapiens acyl-CoA synthetase bubblegum family member 1 (ACSBG1), mRNA."  
"Homo sapiens acyl-CoA synthetase family member 2 (ACSF2), mRNA."  
"Homo sapiens acyl-CoA synthetase family member 3 (ACSF3), mRNA."  
"Homo sapiens acyl-CoA synthetase long-chain family member 1 (ACSL1), mRNA."  
"Homo sapiens acyl-CoA synthetase long-chain family member 3 (ACSL3), transcript variant 1,  
"Homo sapiens acyl-CoA synthetase long-chain family member 4 (ACSL4), transcript variant 2,  
"Homo sapiens acyl-CoA synthetase long-chain family member 5 (ACSL5), transcript variant 1,  
"Homo sapiens acyl-CoA synthetase medium-chain family member 3 (ACSM3), transcript variar  
"Homo sapiens acyl-CoA synthetase short-chain family member 1 (ACSS1), nuclear gene encod  
"Homo sapiens acyl-CoA synthetase short-chain family member 2 (ACSS2), transcript variant 2,  
"Homo sapiens actin, alpha 1, skeletal muscle (ACTA1), mRNA."  
"Homo sapiens actin, alpha 2, smooth muscle, aorta (ACTA2), mRNA."  
"Homo sapiens actin, beta (ACTB), mRNA."  
"Homo sapiens actin, beta-like 2 (ACTBL2), mRNA."  
"Homo sapiens actin, gamma 1 (ACTG1), mRNA."  
"Homo sapiens actin-like 6A (ACTL6A), transcript variant 1, mRNA."  
"Homo sapiens actin-like 8 (ACTL8), mRNA."  
"Homo sapiens actinin, alpha 1 (ACTN1), mRNA."  
"Homo sapiens actinin, alpha 4 (ACTN4), mRNA."  
"Homo sapiens actin-related protein 10 homolog (S. cerevisiae) (ACTR10), mRNA."  
"Homo sapiens ARP1 actin-related protein 1 homolog A, centractin alpha (yeast) (ACTR1A), mF  
"Homo sapiens ARP1 actin-related protein 1 homolog B, centractin beta (yeast) (ACTR1B), mRl  
"Homo sapiens ARP2 actin-related protein 2 homolog (yeast) (ACTR2), transcript variant 1, mRl  
"Homo sapiens ARP3 actin-related protein 3 homolog (yeast) (ACTR3), mRNA."  
"Homo sapiens ARP3 actin-related protein 3 homolog B (yeast) (ACTR3B), transcript variant 2,  
"Homo sapiens ARP5 actin-related protein 5 homolog (yeast) (ACTR5), mRNA."  
"Homo sapiens ARP6 actin-related protein 6 homolog (yeast) (ACTR6), mRNA."  
"Homo sapiens ARP8 actin-related protein 8 homolog (yeast) (ACTR8), mRNA."  
"Homo sapiens actin-related protein T1 (ACTRT1), mRNA."  
"Homo sapiens activin A receptor, type I (ACVR1), mRNA."  
"Homo sapiens activin A receptor, type IIA (ACVR2A), mRNA."  
"Homo sapiens aminoacylase 1 (ACY1), mRNA."  
"Homo sapiens aspartoacylase (aminocyclase) 3 (ACY3), mRNA."  
"Homo sapiens acylphosphatase 1, erythrocyte (common) type (ACYP1), transcript variant 1, m  
"Homo sapiens acylphosphatase 2, muscle type (ACYP2), mRNA."

"Homo sapiens adenosine deaminase (ADA), mRNA."  
"Homo sapiens adenosine deaminase-like (ADAL), mRNA."  
"Homo sapiens ADAM metallopeptidase domain 10 (ADAM10), mRNA."  
"Homo sapiens ADAM metallopeptidase domain 11 (ADAM11), mRNA."  
"Homo sapiens ADAM metallopeptidase domain 15 (ADAM15), transcript variant 4, mRNA."  
"Homo sapiens ADAM metallopeptidase domain 17 (ADAM17), mRNA."  
"Homo sapiens ADAM metallopeptidase domain 22 (ADAM22), transcript variant 1, mRNA."  
"Homo sapiens ADAM metallopeptidase domain 23 (ADAM23), mRNA."  
"Homo sapiens ADAM metallopeptidase domain 28 (ADAM28), transcript variant 3, mRNA."  
"Homo sapiens ADAM metallopeptidase domain 30 (ADAM30), mRNA."  
"PREDICTED: Homo sapiens ADAM metallopeptidase domain 32 (ADAM32), mRNA."  
"Homo sapiens ADAM metallopeptidase domain 8 (ADAM8), mRNA."  
"Homo sapiens ADAM metallopeptidase domain 9 (meltrin gamma) (ADAM9), transcript variant  
"Homo sapiens ADAM metallopeptidase with thrombospondin type 1 motif, 15 (ADAMTS15), mF  
"Homo sapiens ADAM metallopeptidase with thrombospondin type 1 motif, 6 (ADAMTS6), mRN  
"Homo sapiens ADAMTS-like 2 (ADAMTSL2), mRNA."  
"Homo sapiens ADAMTS-like 4 (ADAMTSL4), transcript variant 2, mRNA."  
"Homo sapiens ADAMTS-like 5 (ADAMTSL5), mRNA."  
"Homo sapiens ArfGAP with dual PH domains 1 (ADAP1), mRNA."  
"Homo sapiens ArfGAP with dual PH domains 2 (ADAP2), mRNA."  
"Homo sapiens adenosine deaminase, RNA-specific (ADAR), transcript variant 1, mRNA."  
"Homo sapiens adenosine deaminase, RNA-specific, B1 (RED1 homolog rat) (ADARB1), transc  
"Homo sapiens adenosine deaminase, tRNA-specific 1 (ADAT1), mRNA."  
"Homo sapiens adenosine deaminase, tRNA-specific 2, TAD2 homolog (S. cerevisiae) (ADAT2)  
"Homo sapiens adenosine deaminase, tRNA-specific 3, TAD3 homolog (S. cerevisiae) (ADAT3)  
"Homo sapiens arginine decarboxylase (ADC), mRNA."  
"Homo sapiens aarF domain containing kinase 1 (ADCK1), mRNA."  
"Homo sapiens aarF domain containing kinase 2 (ADCK2), mRNA."  
"Homo sapiens aarF domain containing kinase 4 (ADCK4), mRNA."  
"Homo sapiens aarF domain containing kinase 5 (ADCK5), mRNA."  
"Homo sapiens adenylate cyclase 3 (ADCY3), mRNA."  
"Homo sapiens adenylate cyclase 5 (ADCY5), mRNA."  
"Homo sapiens adenylate cyclase 7 (ADCY7), mRNA."  
"Homo sapiens adenylate cyclase 9 (ADCY9), mRNA."  
"Homo sapiens adducin 1 (alpha) (ADD1), transcript variant 4, mRNA."  
"Homo sapiens adducin 3 (gamma) (ADD3), transcript variant 2, mRNA."  
"Homo sapiens alcohol dehydrogenase 5 (class III), chi polypeptide (ADH5), mRNA."  
"Homo sapiens alcohol dehydrogenase 7 (class IV), mu or sigma polypeptide (ADH7), mRNA."  
"Homo sapiens alcohol dehydrogenase, iron containing, 1 (ADHFE1), nuclear gene encoding m  
"Homo sapiens acireductone dioxygenase 1 (ADI1), mRNA."  
"Homo sapiens adiponectin receptor 1 (ADIPOR1), mRNA."  
"Homo sapiens adiponectin receptor 2 (ADIPOR2), mRNA."  
"Homo sapiens adenosine kinase (ADK), transcript variant ADK-long, mRNA."  
"Homo sapiens adrenomedullin (ADM), mRNA."

"Homo sapiens adrenomedullin 2 (ADM2), mRNA."

"Homo sapiens activity-dependent neuroprotector homeobox (ADNP), transcript variant 1, mRNA."

"Homo sapiens ADNP homeobox 2 (ADNP2), mRNA."

"Homo sapiens 2-aminoethanethiol (cysteamine) dioxygenase (ADO), mRNA."

"Homo sapiens adenosine A2a receptor (ADORA2A), mRNA."

"Homo sapiens adenosine A2b receptor (ADORA2B), mRNA."

"Homo sapiens adenosine A3 receptor (ADORA3), transcript variant 2, mRNA."

"Homo sapiens ADP-dependent glucokinase (ADPGK), mRNA."

"Homo sapiens ADP-ribosylarginine hydrolase (ADPRH), mRNA."

"Homo sapiens ADP-ribosylhydrolase like 1 (ADPRHL1), transcript variant 2, mRNA."

"Homo sapiens ADP-ribosylhydrolase like 2 (ADPRHL2), mRNA."

"Homo sapiens adrenergic, alpha-2A-, receptor (ADRA2A), mRNA."

"Homo sapiens adrenergic, beta-2-, receptor, surface (ADRB2), mRNA."

"Homo sapiens adrenergic, beta, receptor kinase 1 (ADRBK1), mRNA."

"Homo sapiens adhesion regulating molecule 1 (ADRM1), transcript variant 2, mRNA."

"Homo sapiens adenylosuccinate lyase (ADSL), mRNA."

"Homo sapiens adenylosuccinate synthase (ADSS), mRNA."

"Homo sapiens adenylosuccinate synthase like 1 (ADSSL1), transcript variant 1, mRNA."

"Homo sapiens AE binding protein 1 (AEBP1), mRNA."

"Homo sapiens AE binding protein 2 (AEBP2), mRNA."

"Homo sapiens apoptosis enhancing nuclease (AEN), mRNA."

"Homo sapiens amino-terminal enhancer of split (AES), transcript variant 3, mRNA."

"Homo sapiens actin filament associated protein 1-like 2 (AFAP1L2), transcript variant 1, mRNA."

"Homo sapiens aflatoxin B1 aldehyde reductase 3 (AFAR3), mRNA."

"Homo sapiens AF4/FMR2 family, member 1 (AFF1), mRNA."

"Homo sapiens AF4/FMR2 family, member 2 (AFF2), mRNA."

"Homo sapiens AF4/FMR2 family, member 3 (AFF3), transcript variant 2, mRNA."

"Homo sapiens AF4/FMR2 family, member 4 (AFF4), mRNA."

"Homo sapiens AFG3 ATPase family gene 3-like 1 (S. cerevisiae) (AFG3L1), transcript variant 3"

"Homo sapiens AFG3 ATPase family gene 3-like 2 (yeast) (AFG3L2), nuclear gene encoding mi"

"Homo sapiens afamin (AFM), mRNA."

"Homo sapiens arylformamidase (AFMID), mRNA."

"Homo sapiens aftiphilin (AFTPH), transcript variant 2, mRNA."

"Homo sapiens aspartylglucosaminidase (AGA), mRNA."

"Homo sapiens ArfGAP with GTPase domain, ankyrin repeat and PH domain 3 (AGAP3), transc"

"Homo sapiens ArfGAP with GTPase domain, ankyrin repeat and PH domain 8 (AGAP8), mRNA/"

"Homo sapiens ATP/GTP binding protein-like 5 (AGBL5), transcript variant 1, mRNA."

"Homo sapiens advanced glycosylation end product-specific receptor (AGER), transcript variant"

"Homo sapiens ArfGAP with FG repeats 1 (AGFG1), transcript variant 4, mRNA."

"Homo sapiens ArfGAP with FG repeats 2 (AGFG2), mRNA."

"Homo sapiens angiogenic factor with G patch and FHA domains 1 (AGGF1), mRNA."

"Homo sapiens acylglycerol kinase (AGK), mRNA."

"Homo sapiens agmatine ureohydrolase (agmatinase) (AGMAT), mRNA."

"Homo sapiens 1-acylglycerol-3-phosphate O-acyltransferase 2 (lysophosphatidic acid acyltrans

"Homo sapiens 1-acylglycerol-3-phosphate O-acyltransferase 3 (AGPAT3), transcript variant 1,  
"Homo sapiens 1-acylglycerol-3-phosphate O-acyltransferase 4 (lysophosphatidic acid acyltrans  
"Homo sapiens 1-acylglycerol-3-phosphate O-acyltransferase 5 (lysophosphatidic acid acyltrans  
"Homo sapiens 1-acylglycerol-3-phosphate O-acyltransferase 6 (lysophosphatidic acid acyltrans  
"Homo sapiens 1-acylglycerol-3-phosphate O-acyltransferase 9 (AGPAT9), mRNA."  
"Homo sapiens anterior gradient homolog 2 (*Xenopus laevis*) (AGR2), mRNA."  
"Homo sapiens anterior gradient homolog 3 (*Xenopus laevis*) (AGR3), mRNA."  
"Homo sapiens agrin (AGRN), mRNA."  
"Homo sapiens agouti related protein homolog (mouse) (AGRP), transcript variant 1, mRNA."  
"Homo sapiens ATP/GTP binding protein 1 (AGTPBP1), mRNA."  
"Homo sapiens angiotensin II receptor-associated protein (AGTRAP), transcript variant 2, mRNA/  
"Homo sapiens alanine-glyoxylate aminotransferase 2-like 2 (AGXT2L2), mRNA."  
"PREDICTED: Homo sapiens AT hook containing transcription factor 1 (AHCTF1), mRNA."  
"Homo sapiens S-adenosylhomocysteine hydrolase (AHCY), mRNA."  
"Homo sapiens adenosylhomocysteinase-like 1 (AHCYL1), mRNA."  
"Homo sapiens S-adenosylhomocysteine hydrolase-like 2 (AHCYL2), mRNA."  
"Homo sapiens AT hook, DNA binding motif, containing 1 (AHDC1), mRNA."  
"Homo sapiens Abelson helper integration site 1 (AHI1), mRNA."  
"Homo sapiens AHNAK nucleoprotein 2 (AHNAK2), mRNA."  
"Homo sapiens aryl hydrocarbon receptor (AHR), mRNA."  
"Homo sapiens AHA1, activator of heat shock 90kDa protein ATPase homolog 1 (yeast) (AHSA  
"Homo sapiens AHA1, activator of heat shock 90kDa protein ATPase homolog 2 (yeast) (AHSA:  
"Homo sapiens alpha hemoglobin stabilizing protein (AHSP), mRNA."  
"Homo sapiens activation-induced cytidine deaminase (AICDA), mRNA."  
"Homo sapiens axin interactor, dorsalization associated (AIDA), mRNA."  
"Homo sapiens allograft inflammatory factor 1 (AIF1), transcript variant 3, mRNA."  
"Homo sapiens allograft inflammatory factor 1-like (AIF1L), transcript variant 1, mRNA."  
"Homo sapiens apoptosis-inducing factor, mitochondrion-associated, 1 (AIFM1), nuclear gene e  
"Homo sapiens apoptosis-inducing factor, mitochondrion-associated, 2 (AIFM2), nuclear gene e  
"Homo sapiens androgen-induced 1 (AIG1), mRNA."  
"Homo sapiens absent in melanoma 1 (AIM1), mRNA."  
"Homo sapiens absent in melanoma 1-like (AIM1L), mRNA."  
"Homo sapiens absent in melanoma 2 (AIM2), mRNA."  
"Homo sapiens aminoacyl tRNA synthetase complex-interacting multifunctional protein 2 (AIMP:  
"Homo sapiens aryl hydrocarbon receptor interacting protein (AIP), mRNA."  
"Homo sapiens autoimmune regulator (AIRE), transcript variant AIRE-2, mRNA."  
"Homo sapiens adenylate kinase 1 (AK1), mRNA."  
"Homo sapiens adenylate kinase 2 (AK2), transcript variant AK2B, mRNA."  
"Homo sapiens adenylate kinase 3 (AK3), nuclear gene encoding mitochondrial protein, mRNA.  
"Homo sapiens adenylate kinase 3-like 1 (AK3L1), nuclear gene encoding mitochondrial protein  
"Homo sapiens A kinase (PRKA) anchor protein 1 (AKAP1), nuclear gene encoding mitochondri  
"Homo sapiens A kinase (PRKA) anchor protein 11 (AKAP11), mRNA."  
"Homo sapiens A kinase (PRKA) anchor protein (gravin) 12 (AKAP12), transcript variant 1, mRN  
"Homo sapiens A kinase (PRKA) anchor protein 13 (AKAP13), transcript variant 3, mRNA."



"Homo sapiens A kinase (PRKA) anchor protein 5 (AKAP5), mRNA."  
"Homo sapiens A kinase (PRKA) anchor protein 8 (AKAP8), mRNA."  
"Homo sapiens A kinase (PRKA) anchor protein 8-like (AKAP8L), mRNA."  
"Homo sapiens akirin 1 (AKIRIN1), mRNA."  
"Homo sapiens akirin 2 (AKIRIN2), mRNA."  
"Homo sapiens AT-hook transcription factor (AKNA), mRNA."  
"Homo sapiens aldo-keto reductase family 1, member A1 (aldehyde reductase) (AKR1A1), trans  
"Homo sapiens aldo-keto reductase family 1, member B1 (aldose reductase) (AKR1B1), mRNA.  
"Homo sapiens aldo-keto reductase family 1, member C3 (3-alpha hydroxysteroid dehydrogenase)  
"Homo sapiens aldo-keto reductase family 1, member C-like 1 (AKR1CL1), mRNA."  
"Homo sapiens aldo-keto reductase family 1, member D1 (delta 4-3-ketosteroid-5-beta-reductase)  
"Homo sapiens aldo-keto reductase family 7, member A2 (aflatoxin aldehyde reductase) (AKR7.  
"Homo sapiens aldo-keto reductase family 7, member A3 (aflatoxin aldehyde reductase) (AKR7.  
"Homo sapiens v-akt murine thymoma viral oncogene homolog 1 (AKT1), transcript variant 1, m  
"Homo sapiens AKT1 substrate 1 (proline-rich) (AKT1S1), mRNA."  
"Homo sapiens v-akt murine thymoma viral oncogene homolog 2 (AKT2), mRNA."  
"Homo sapiens AKT interacting protein (AKTIP), transcript variant 2, mRNA."  
"Homo sapiens aminolevulinate, delta-, dehydratase (ALAD), transcript variant 2, mRNA."  
"Homo sapiens aminolevulinate, delta-, synthase 1 (ALAS1), transcript variant 1, mRNA."  
"Homo sapiens albumin (ALB), mRNA."  
"Homo sapiens activated leukocyte cell adhesion molecule (ALCAM), mRNA."  
"Homo sapiens aldehyde dehydrogenase 16 family, member A1 (ALDH16A1), mRNA."  
"Homo sapiens aldehyde dehydrogenase 18 family, member A1 (ALDH18A1), nuclear gene enc  
"Homo sapiens aldehyde dehydrogenase 1 family, member A1 (ALDH1A1), mRNA."  
"Homo sapiens aldehyde dehydrogenase 1 family, member A3 (ALDH1A3), mRNA."  
"Homo sapiens aldehyde dehydrogenase 1 family, member B1 (ALDH1B1), nuclear gene encoc  
"PREDICTED: Homo sapiens aldehyde dehydrogenase 1 family, member L2 (ALDH1L2), mRN/  
"Homo sapiens aldehyde dehydrogenase 2 family (mitochondrial) (ALDH2), nuclear gene encod  
"Homo sapiens aldehyde dehydrogenase 3 family, member A2 (ALDH3A2), transcript variant 2,  
"Homo sapiens aldehyde dehydrogenase 3 family, member B1 (ALDH3B1), transcript variant 1,  
"Homo sapiens aldehyde dehydrogenase 4 family, member A1 (ALDH4A1), nuclear gene encoc  
"Homo sapiens aldehyde dehydrogenase 5 family, member A1 (ALDH5A1), nuclear gene encoc  
"Homo sapiens aldehyde dehydrogenase 6 family, member A1 (ALDH6A1), nuclear gene encoc  
"Homo sapiens aldehyde dehydrogenase 7 family, member A1 (ALDH7A1), mRNA."  
"Homo sapiens aldehyde dehydrogenase 9 family, member A1 (ALDH9A1), mRNA."  
"Homo sapiens aldolase A, fructose-bisphosphate (ALDOA), transcript variant 2, mRNA."  
"Homo sapiens aldolase C, fructose-bisphosphate (ALDOC), mRNA."  
"Homo sapiens asparagine-linked glycosylation 1 homolog (S. cerevisiae, beta-1,4-mannosyltra  
"Homo sapiens asparagine-linked glycosylation 10, alpha-1,2-glucosyltransferase homolog (S. p  
"Homo sapiens asparagine-linked glycosylation 10, alpha-1,2-glucosyltransferase homolog B (ye  
"Homo sapiens asparagine-linked glycosylation 11, alpha-1,2-mannosyltransferase homolog (ye  
"Homo sapiens asparagine-linked glycosylation 12, alpha-1,6-mannosyltransferase homolog (S.  
"Homo sapiens asparagine-linked glycosylation 13 homolog (S. cerevisiae) (ALG13), mRNA."  
"Homo sapiens asparagine-linked glycosylation 14 homolog (S. cerevisiae) (ALG14), mRNA."

"Homo sapiens asparagine-linked glycosylation 1-like (ALG1L), mRNA."

"Homo sapiens asparagine-linked glycosylation 2 homolog (yeast, alpha-1,3-mannosyltransferase 2 homolog) (ALG2), mRNA."

"Homo sapiens asparagine-linked glycosylation 3 homolog (S. cerevisiae, alpha-1,3-mannosyltransferase 3 homolog) (ALG3), mRNA."

"Homo sapiens asparagine-linked glycosylation 5 homolog (S. cerevisiae, dolichyl-phosphate beta-1,4-glucosyltransferase 5 homolog) (ALG5), mRNA."

"Homo sapiens asparagine-linked glycosylation 6 homolog (S. cerevisiae, alpha-1,3-glucosyltransferase 6 homolog) (ALG6), mRNA."

"Homo sapiens asparagine-linked glycosylation 8, alpha-1,3-glucosyltransferase homolog (S. cerevisiae) (ALG8), mRNA."

"Homo sapiens asparagine-linked glycosylation 9, alpha-1,2-mannosyltransferase homolog (S. cerevisiae) (ALG9), mRNA."

"Homo sapiens alkB, alkylation repair homolog 1 (E. coli) (ALKBH1), mRNA."

"Homo sapiens alkB, alkylation repair homolog 2 (E. coli) (ALKBH2), mRNA."

"Homo sapiens alkB, alkylation repair homolog 3 (E. coli) (ALKBH3), mRNA."

"Homo sapiens alkB, alkylation repair homolog 4 (E. coli) (ALKBH4), mRNA."

"Homo sapiens alkB, alkylation repair homolog 5 (E. coli) (ALKBH5), mRNA."

"Homo sapiens alkB, alkylation repair homolog 6 (E. coli) (ALKBH6), transcript variant 1, mRNA."

"Homo sapiens alkB, alkylation repair homolog 7 (E. coli) (ALKBH7), mRNA."

"Homo sapiens alkB, alkylation repair homolog 8 (E. coli) (ALKBH8), mRNA."

"Homo sapiens Alstrom syndrome 1 (ALMS1), mRNA."

"Homo sapiens arachidonate 12-lipoxygenase, 12R type (ALOX12B), mRNA."

"Homo sapiens arachidonate 5-lipoxygenase (ALOX5), mRNA."

"Homo sapiens arachidonate 5-lipoxygenase-activating protein (ALOX5AP), mRNA."

"Homo sapiens alkaline phosphatase, intestinal (ALPI), mRNA."

"Homo sapiens alpha-kinase 1 (ALPK1), mRNA."

"Homo sapiens alpha-kinase 2 (ALPK2), mRNA."

"Homo sapiens alkaline phosphatase, liver/bone/kidney (ALPL), transcript variant 1, mRNA."

"Homo sapiens alkaline phosphatase, placental (Regan isozyme) (ALPP), mRNA."

"Homo sapiens amyotrophic lateral sclerosis 2 (juvenile) (ALS2), mRNA."

"Homo sapiens amyotrophic lateral sclerosis 2 (juvenile) chromosome region, candidate 12 (ALS2CR12), mRNA."

"Homo sapiens amyotrophic lateral sclerosis 2 (juvenile) chromosome region, candidate 14 (ALS2CR14), mRNA."

"PREDICTED: Homo sapiens amyotrophic lateral sclerosis 2 (juvenile) chromosome region, candidate 15 (ALS2CR15), mRNA."

"Homo sapiens amyotrophic lateral sclerosis 2 (juvenile) chromosome region, candidate 4 (ALS2CR4), mRNA."

"Homo sapiens amyotrophic lateral sclerosis 2 (juvenile) chromosome region, candidate 8 (ALS2CR8), mRNA."

"Homo sapiens alpha-methylacyl-CoA racemase (AMACR), transcript variant 1, mRNA."

"Homo sapiens autophagy/beclin-1 regulator 1 (AMBRA1), mRNA."

"Homo sapiens adenosylmethionine decarboxylase 1 (AMD1), transcript variant 2, mRNA."

"Homo sapiens amidohydrolase domain containing 1 (AMDHD1), mRNA."

"Homo sapiens amidohydrolase domain containing 2 (AMDHD2), mRNA."

"Homo sapiens autocrine motility factor receptor (AMFR), mRNA."

"Homo sapiens adhesion molecule, interacts with CXADR antigen 1 (AMICA1), mRNA."

"Homo sapiens adhesion molecule with Ig-like domain 3 (AMIGO3), mRNA."

"Homo sapiens Alport syndrome, mental retardation, midface hypoplasia and elliptocytosis chromosome region, candidate 1 (AMMECR1), mRNA."

"Homo sapiens AMME chromosomal region gene 1-like (AMMECR1L), mRNA."

"Homo sapiens amnionless homolog (mouse) (AMN), mRNA."

"Homo sapiens antagonist of mitotic exit network 1 homolog (S. cerevisiae) (AMN1), mRNA."

"Homo sapiens angiominin (AMOT), transcript variant 2, mRNA."

"Homo sapiens angiominin like 2 (AMOTL2), mRNA."

"Homo sapiens adenosine monophosphate deaminase (isoform E) (AMPD3), transcript variant 1, mRNA."

"Homo sapiens aminomethyltransferase (AMT), mRNA."

"Homo sapiens amylase, alpha 1A (salivary) (AMY1A), transcript variant 2, mRNA."

"Homo sapiens amylase, alpha 1B (salivary) (AMY1B), mRNA."

"Homo sapiens amylase, alpha 1C (salivary) (AMY1C), mRNA."

"Homo sapiens amylase, alpha 2A (pancreatic) (AMY2A), mRNA."

"Homo sapiens amylase, alpha 2B (pancreatic) (AMY2B), mRNA."

"Homo sapiens archaelysin family metallopeptidase 2 (AMZ2), transcript variant 2, mRNA."

"PREDICTED: Homo sapiens anaphase promoting complex subunit 1 (ANAPC1), mRNA."

"Homo sapiens anaphase promoting complex subunit 10 (ANAPC10), mRNA."

"PREDICTED: Homo sapiens APC11 anaphase promoting complex subunit 11 homolog (yeast) (ANAPC11), mRNA."

"Homo sapiens anaphase promoting complex subunit 13 (ANAPC13), mRNA."

"Homo sapiens anaphase promoting complex subunit 2 (ANAPC2), mRNA."

"Homo sapiens anaphase promoting complex subunit 4 (ANAPC4), mRNA."

"Homo sapiens anaphase promoting complex subunit 7 (ANAPC7), mRNA."

"Homo sapiens angiogenin, ribonuclease, RNase A family, 5 (ANG), transcript variant 2, mRNA."

"Homo sapiens angel homolog 1 (Drosophila) (ANGEL1), mRNA."

"Homo sapiens angel homolog 2 (Drosophila) (ANGEL2), mRNA."

"Homo sapiens angiopoietin-like 4 (ANGPTL4), transcript variant 3, mRNA."

"Homo sapiens angiopoietin-like 6 (ANGPTL6), mRNA."

"Homo sapiens angiopoietin-like 7 (ANGPTL7), mRNA."

"Homo sapiens ankyrin 3, node of Ranvier (ankyrin G) (ANK3), transcript variant 1, mRNA."

"Homo sapiens ankyrin repeat and death domain containing 1A (ANKDD1A), mRNA."

"Homo sapiens ankyrin repeat and FYVE domain containing 1 (ANKFY1), transcript variant 2, mRNA."

"Homo sapiens ankyrin repeat and KH domain containing 1 (ANKHD1), transcript variant 2, mRNA."

"Homo sapiens ANKHD1-EIF4EBP3 readthrough (ANKHD1-EIF4EBP3), mRNA."

"Homo sapiens ankyrin repeat and IBR domain containing 1 (ANKIB1), mRNA."

"Homo sapiens ankyrin repeat and LEM domain containing 1 (ANKLE1), mRNA."

"Homo sapiens ankyrin repeat and LEM domain containing 2 (ANKLE2), mRNA."

"Homo sapiens ankyrin repeat and MYND domain containing 2 (ANKMY2), mRNA."

"Homo sapiens ankyrin repeat, family A (RFXANK-like), 2 (ANKRA2), mRNA."

"Homo sapiens ankyrin repeat domain 1 (cardiac muscle) (ANKRD1), mRNA."

"Homo sapiens ankyrin repeat domain 10 (ANKRD10), mRNA."

"Homo sapiens ankyrin repeat domain 11 (ANKRD11), mRNA."

"Homo sapiens ankyrin repeat domain 12 (ANKRD12), transcript variant 1, mRNA."

"Homo sapiens ankyrin repeat domain 13A (ANKRD13A), mRNA."

"Homo sapiens ankyrin repeat domain 13B (ANKRD13B), mRNA."

"Homo sapiens ankyrin repeat domain 13C (ANKRD13C), mRNA."

"PREDICTED: Homo sapiens ankyrin repeat domain 13 family, member D, transcript variant 3 (ANKRD13D), mRNA."

"Homo sapiens ankyrin repeat domain 16 (ANKRD16), transcript variant 2, mRNA."

"Homo sapiens ankyrin repeat domain 17 (ANKRD17), transcript variant 2, mRNA."

"PREDICTED: Homo sapiens ankyrin repeat domain 18A (ANKRD18A), mRNA."

"PREDICTED: Homo sapiens ankyrin repeat domain 18B (ANKRD18B), mRNA."

"Homo sapiens ankyrin repeat domain 19 (ANKRD19), mRNA."

"Homo sapiens ankyrin repeat domain 20 family, member A1 (ANKRD20A1), mRNA."  
"Homo sapiens ankyrin repeat domain 20 family, member A4 (ANKRD20A4), mRNA."  
"Homo sapiens ankyrin repeat domain 22 (ANKRD22), mRNA."  
"Homo sapiens ankyrin repeat domain 23 (ANKRD23), mRNA."  
"Homo sapiens ankyrin repeat domain 24 (ANKRD24), mRNA."  
"Homo sapiens ankyrin repeat domain 26 (ANKRD26), mRNA."  
"Homo sapiens ankyrin repeat domain 27 (VPS9 domain) (ANKRD27), mRNA."  
"Homo sapiens ankyrin repeat domain 28 (ANKRD28), mRNA."  
"Homo sapiens ankyrin repeat domain 32 (ANKRD32), mRNA."  
"Homo sapiens ankyrin repeat domain 33 (ANKRD33), mRNA."  
"Homo sapiens ankyrin repeat domain 34A (ANKRD34A), mRNA."  
"PREDICTED: Homo sapiens ankyrin repeat domain 34C, transcript variant 2 (ANKRD34C), mR"  
"Homo sapiens ankyrin repeat domain 35 (ANKRD35), mRNA."  
"Homo sapiens ankyrin repeat domain 36 (ANKRD36), mRNA."  
"Homo sapiens ankyrin repeat domain 37 (ANKRD37), mRNA."  
"Homo sapiens ankyrin repeat domain 39 (ANKRD39), mRNA."  
"Homo sapiens ankyrin repeat domain 40 (ANKRD40), mRNA."  
"Homo sapiens ankyrin repeat domain 41 (ANKRD41), mRNA."  
"Homo sapiens ankyrin repeat domain 43 (ANKRD43), mRNA."  
"Homo sapiens ankyrin repeat domain 46 (ANKRD46), mRNA."  
"Homo sapiens ankyrin repeat domain 47 (ANKRD47), mRNA."  
"Homo sapiens ankyrin repeat domain 49 (ANKRD49), mRNA."  
"Homo sapiens ankyrin repeat domain 5 (ANKRD5), transcript variant 1, mRNA."  
"Homo sapiens ankyrin repeat domain 50 (ANKRD50), mRNA."  
"Homo sapiens ankyrin repeat domain 52 (ANKRD52), mRNA."  
"Homo sapiens ankyrin repeat domain 53 (ANKRD53), mRNA."  
"Homo sapiens ankyrin repeat domain 54 (ANKRD54), mRNA."  
"Homo sapiens ankyrin repeat domain 56 (ANKRD56), mRNA."  
"PREDICTED: Homo sapiens ankyrin repeat domain 58 (ANKRD58), mRNA."  
"Homo sapiens ankyrin repeat domain 6 (ANKRD6), mRNA."  
"Homo sapiens ankyrin repeat domain 7 (ANKRD7), transcript variant 1, mRNA."  
"Homo sapiens ankyrin repeat domain 9 (ANKRD9), mRNA."  
"Homo sapiens ankyrin repeat and sterile alpha motif domain containing 1A (ANKS1A), mRNA."  
"Homo sapiens ankyrin repeat and sterile alpha motif domain containing 3 (ANKS3), mRNA."  
"Homo sapiens ankyrin repeat and sterile alpha motif domain containing 6 (ANKS6), mRNA."  
"Homo sapiens ankyrin repeat and zinc finger domain containing 1 (ANKZF1), transcript variant"  
"Homo sapiens anillin, actin binding protein (ANLN), mRNA."  
"Homo sapiens anoctamin 10 (ANO10), mRNA."  
"Homo sapiens anoctamin 6 (ANO6), mRNA."  
"Homo sapiens anoctamin 8 (ANO8), mRNA."  
"Homo sapiens acidic (leucine-rich) nuclear phosphoprotein 32 family, member A (ANP32A), mF"  
"Homo sapiens acidic (leucine-rich) nuclear phosphoprotein 32 family, member B (ANP32B), mF"  
"Homo sapiens acidic (leucine-rich) nuclear phosphoprotein 32 family, member D (ANP32D), mF"  
"Homo sapiens acidic (leucine-rich) nuclear phosphoprotein 32 family, member E (ANP32E), mF"

"Homo sapiens anthrax toxin receptor 1 (ANTXR1), transcript variant 1, mRNA."  
"Homo sapiens anthrax toxin receptor 2 (ANTXR2), mRNA."  
"Homo sapiens AN1, ubiquitin-like, homolog (Xenopus laevis) (ANUBL1), mRNA."  
"Homo sapiens annexin A1 (ANXA1), mRNA."  
"Homo sapiens annexin A11 (ANXA11), transcript variant c, mRNA."  
"Homo sapiens annexin A2 (ANXA2), transcript variant 1, mRNA."  
Homo sapiens annexin A2 pseudogene 1 (ANXA2P1) on chromosome 4.  
"Homo sapiens annexin A2 pseudogene 2 (ANXA2P2), non-coding RNA."  
"Homo sapiens annexin A3 (ANXA3), mRNA."  
"Homo sapiens annexin A4 (ANXA4), mRNA."  
"Homo sapiens annexin A5 (ANXA5), mRNA."  
"Homo sapiens annexin A6 (ANXA6), transcript variant 1, mRNA."  
"Homo sapiens annexin A7 (ANXA7), transcript variant 2, mRNA."  
"Homo sapiens amine oxidase, copper containing 2 (retina-specific) (AOC2), transcript variant 1  
"Homo sapiens amine oxidase, copper containing 3 (vascular adhesion protein 1) (AOC3), mRNA  
"Homo sapiens amine oxidase (flavin containing) domain 2 (AOF2), transcript variant 2, mRNA."  
"Homo sapiens aldehyde oxidase 1 (AOX1), mRNA."  
"Homo sapiens aldehyde oxidase 2 pseudogene (AOX2P), non-coding RNA."  
"Homo sapiens adaptor-related protein complex 1, beta 1 subunit (AP1B1), transcript variant 2,  
"Homo sapiens adaptor-related protein complex 1, gamma 1 subunit (AP1G1), transcript variant  
"Homo sapiens adaptor-related protein complex 1, gamma 2 subunit (AP1G2), transcript variant  
"Homo sapiens AP1 gamma subunit binding protein 1 (AP1GBP1), transcript variant 1, mRNA."  
"Homo sapiens adaptor-related protein complex 1, sigma 1 subunit (AP1S1), transcript variant 2  
"Homo sapiens adaptor-related protein complex 1, sigma 2 subunit (AP1S2), mRNA."  
"Homo sapiens adaptor-related protein complex 1, sigma 3 subunit (AP1S3), mRNA."  
"Homo sapiens adaptor-related protein complex 2, alpha 1 subunit (AP2A1), transcript variant 1  
"Homo sapiens adaptor-related protein complex 2, mu 1 subunit (AP2M1), transcript variant 1, n  
"Homo sapiens adaptor-related protein complex 2, sigma 1 subunit (AP2S1), transcript variant A  
"Homo sapiens adaptor-related protein complex 3, beta 1 subunit (AP3B1), mRNA."  
"Homo sapiens adaptor-related protein complex 3, beta 2 subunit (AP3B2), mRNA."  
"Homo sapiens adaptor-related protein complex 3, delta 1 subunit (AP3D1), transcript variant 2,  
"Homo sapiens adaptor-related protein complex 3, mu 1 subunit (AP3M1), transcript variant 2, n  
"Homo sapiens adaptor-related protein complex 3, mu 2 subunit (AP3M2), mRNA."  
"Homo sapiens adaptor-related protein complex 3, sigma 1 subunit (AP3S1), transcript variant 2  
"Homo sapiens adaptor-related protein complex 3, sigma 2 subunit (AP3S2), mRNA."  
"Homo sapiens adaptor-related protein complex 4, beta 1 subunit (AP4B1), mRNA."  
"Homo sapiens adaptor-related protein complex 4, epsilon 1 subunit (AP4E1), mRNA."  
"Homo sapiens apoptotic peptidase activating factor 1 (APAF1), transcript variant 1, mRNA."  
"Homo sapiens amyloid beta (A4) precursor protein-binding, family A, member 2 binding protein  
"Homo sapiens amyloid beta (A4) precursor protein-binding, family B, member 1 interacting prot  
"Homo sapiens amyloid beta (A4) precursor protein-binding, family B, member 2 (APBB2), mRN  
"Homo sapiens amyloid beta (A4) precursor protein-binding, family B, member 3 (APBB3), trans  
"Homo sapiens adenomatous polyposis coli (APC), mRNA."  
"Homo sapiens adenomatosis polyposis coli down-regulated 1 (APCDD1), mRNA."

"Homo sapiens aortic preferentially expressed gene 1 (APEG1), mRNA."

"Homo sapiens N-acylaminoacyl-peptide hydrolase (APEH), mRNA."

"Homo sapiens APEX nuclease (multifunctional DNA repair enzyme) 1 (APEX1), transcript varia

"Homo sapiens APEX nuclease (apurinic/apyrimidinic endonuclease) 2 (APEX2), nuclear gene c

"Homo sapiens anterior pharynx defective 1 homolog B (C. elegans) (APH1B), mRNA."

"Homo sapiens apoptosis inhibitor 5 (API5), mRNA."

"Homo sapiens APAF1 interacting protein (APIP), mRNA."

"Homo sapiens apoptosis-inducing, TAF9-like domain 1 (APITD1), transcript variant B, mRNA."

"Homo sapiens amyloid beta (A4) precursor-like protein 1 (APLP1), transcript variant 2, mRNA."

"Homo sapiens amyloid beta (A4) precursor-like protein 2 (APLP2), mRNA."

"PREDICTED: Homo sapiens BTB/POZ-zinc finger protein-like (APM-1), mRNA."

"Homo sapiens apolipoprotein A-I binding protein (APOA1BP), mRNA."

"Homo sapiens apolipoprotein A-IV (APOA4), mRNA."

"Homo sapiens apolipoprotein B mRNA editing enzyme, catalytic polypeptide-like 3B (APOBEC:

"Homo sapiens apolipoprotein B mRNA editing enzyme, catalytic polypeptide-like 3F (APOBEC:

"Homo sapiens apolipoprotein B mRNA editing enzyme, catalytic polypeptide-like 3G (APOBEC:

"Homo sapiens apolipoprotein B mRNA editing enzyme, catalytic polypeptide-like 3H (APOBEC:

"Homo sapiens apolipoprotein C-III (APOC3), mRNA."

"Homo sapiens apolipoprotein E (APOE), mRNA."

"Homo sapiens apolipoprotein L, 2 (APOL2), transcript variant alpha, mRNA."

"Homo sapiens apolipoprotein L, 3 (APOL3), transcript variant beta/a, mRNA."

"Homo sapiens apolipoprotein L, 6 (APOL6), mRNA."

"Homo sapiens apolipoprotein L domain containing 1 (APOLD1), mRNA."

"Homo sapiens apolipoprotein M (APOM), mRNA."

"Homo sapiens apolipoprotein O (APOO), mRNA."

"Homo sapiens apolipoprotein O-like (APOOL), mRNA."

"Homo sapiens amyloid beta precursor protein (cytoplasmic tail) binding protein 2 (APPBP2), ml

"Homo sapiens adaptor protein, phosphotyrosine interaction, PH domain and leucine zipper con

"Homo sapiens adenine phosphoribosyltransferase (APRT), transcript variant 1, mRNA."

"Homo sapiens aprataxin (APTX), transcript variant 4, mRNA."

"Homo sapiens aquaporin 11 (AQP11), mRNA."

"Homo sapiens aquaporin 3 (Gill blood group) (AQP3), mRNA."

"Homo sapiens aquaporin 7 pseudogene 1 (AQP7P1), non-coding RNA."

"Homo sapiens aquarius homolog (mouse) (AQR), mRNA."

"Homo sapiens v-raf murine sarcoma 3611 viral oncogene homolog (ARAF), mRNA."

"Homo sapiens ArfGAP with RhoGAP domain, ankyrin repeat and PH domain 1 (ARAP1), trans

"Homo sapiens ArfGAP with RhoGAP domain, ankyrin repeat and PH domain 3 (ARAP3), mRN

"Homo sapiens activity-regulated cytoskeleton-associated protein (ARC), mRNA."

"Homo sapiens archain 1 (ARCN1), mRNA."

"Homo sapiens ARD1 homolog A, N-acetyltransferase (S. cerevisiae) (ARD1A), mRNA."

"Homo sapiens ARD1 homolog B (S. cerevisiae) (ARD1B), mRNA."

"Homo sapiens ADP-ribosylation factor 3 (ARF3), mRNA."

"Homo sapiens ADP-ribosylation factor 4 (ARF4), mRNA."

"Homo sapiens ADP-ribosylation factor 5 (ARF5), mRNA."

"Homo sapiens ADP-ribosylation factor 6 (ARF6), mRNA."  
"Homo sapiens ADP-ribosylation factor GTPase activating protein 1 (ARFGAP1), transcript vari  
"Homo sapiens ADP-ribosylation factor GTPase activating protein 2 (ARFGAP2), mRNA."  
"Homo sapiens ADP-ribosylation factor GTPase activating protein 3 (ARFGAP3), mRNA."  
"Homo sapiens ADP-ribosylation factor guanine nucleotide-exchange factor 1(brefeldin A-inhibi  
"Homo sapiens ADP-ribosylation factor guanine nucleotide-exchange factor 2 (brefeldin A-inhibi  
"Homo sapiens ADP-ribosylation factor interacting protein 1 (ARFIP1), transcript variant 2, mRN  
"Homo sapiens ADP-ribosylation factor interacting protein 2 (ARFIP2), mRNA."  
"Homo sapiens arginase, type II (ARG2), nuclear gene encoding mitochondrial protein, mRNA."  
"Homo sapiens ARG99 protein (ARG99), transcript variant 1, mRNA."  
"Homo sapiens arginine-fifty homeobox pseudogene 2 (ARGFXP2), non-coding RNA."  
"Homo sapiens arginine and glutamate rich 1 (ARGLU1), mRNA."  
"Homo sapiens Rho GTPase activating protein 1 (ARHGAP1), mRNA."  
"Homo sapiens Rho GTPase activating protein 10 (ARHGAP10), mRNA."  
"Homo sapiens Rho GTPase activating protein 11A (ARHGAP11A), transcript variant 1, mRNA."  
"Homo sapiens Rho GTPase activating protein 11B (ARHGAP11B), mRNA. XM\_931045 XM\_93  
"Homo sapiens Rho GTPase activating protein 12 (ARHGAP12), mRNA."  
"Homo sapiens Rho GTPase activating protein 15 (ARHGAP15), mRNA."  
"Homo sapiens Rho GTPase activating protein 17 (ARHGAP17), transcript variant 1, mRNA."  
"Homo sapiens Rho GTPase activating protein 18 (ARHGAP18), mRNA."  
"Homo sapiens Rho GTPase activating protein 19 (ARHGAP19), mRNA."  
"Homo sapiens Rho GTPase activating protein 21 (ARHGAP21), mRNA."  
"PREDICTED: Homo sapiens Rho GTPase activating protein 23, transcript variant 1 (ARHGAP2  
"Homo sapiens Rho GTPase activating protein 24 (ARHGAP24), transcript variant 3, mRNA."  
"Homo sapiens Rho GTPase activating protein 25 (ARHGAP25), transcript variant 1, mRNA."  
"Homo sapiens Rho GTPase activating protein 26 (ARHGAP26), mRNA."  
"Homo sapiens Rho GTPase activating protein 27 (ARHGAP27), mRNA."  
"Homo sapiens Rho GTPase activating protein 30 (ARHGAP30), transcript variant 1, mRNA."  
"Homo sapiens Rho GTPase activating protein 4 (ARHGAP4), mRNA."  
"Homo sapiens Rho GTPase activating protein 5 (ARHGAP5), transcript variant 2, mRNA."  
"Homo sapiens Rho GTPase activating protein 9 (ARHGAP9), transcript variant 2, mRNA."  
"Homo sapiens Rho GDP dissociation inhibitor (GDI) alpha (ARHGDIA), mRNA."  
"Homo sapiens Rho GDP dissociation inhibitor (GDI) beta (ARHGDIB), mRNA."  
"Homo sapiens Rho guanine nucleotide exchange factor (GEF) 1 (ARHGEF1), transcript variant  
"Homo sapiens Rho guanine nucleotide exchange factor (GEF) 10 (ARHGEF10), mRNA."  
"Homo sapiens Rho guanine nucleotide exchange factor (GEF) 11 (ARHGEF11), transcript vari  
"Homo sapiens Rho guanine nucleotide exchange factor (GEF) 12 (ARHGEF12), mRNA."  
"Homo sapiens Rho guanine exchange factor (GEF) 16 (ARHGEF16), mRNA."  
"Homo sapiens rho/rac guanine nucleotide exchange factor (GEF) 18 (ARHGEF18), mRNA."  
"Homo sapiens Rho guanine nucleotide exchange factor (GEF) 19 (ARHGEF19), mRNA."  
"Homo sapiens rho/rac guanine nucleotide exchange factor (GEF) 2 (ARHGEF2), mRNA."  
"Homo sapiens Rho guanine nucleotide exchange factor (GEF) 3 (ARHGEF3), mRNA."  
"Homo sapiens Rho guanine nucleotide exchange factor (GEF) 4 (ARHGEF4), transcript variant  
"Homo sapiens Rac/Cdc42 guanine nucleotide exchange factor (GEF) 6 (ARHGEF6), mRNA."

"Homo sapiens Rho guanine nucleotide exchange factor (GEF) 7 (ARHGEF7), transcript variant  
"Homo sapiens Cdc42 guanine nucleotide exchange factor (GEF) 9 (ARHGEF9), mRNA."  
"Homo sapiens AT rich interactive domain 1B (SWI1-like) (ARID1B), transcript variant 3, mRNA  
"Homo sapiens AT rich interactive domain 2 (ARID, RFX-like) (ARID2), mRNA."  
"Homo sapiens AT rich interactive domain 3A (BRIGHT-like) (ARID3A), mRNA."  
"Homo sapiens AT rich interactive domain 3B (BRIGHT-like) (ARID3B), mRNA."  
"Homo sapiens AT rich interactive domain 3C (BRIGHT-like) (ARID3C), mRNA."  
"Homo sapiens AT rich interactive domain 4A (RBP1-like) (ARID4A), transcript variant 3, mRNA  
"Homo sapiens AT rich interactive domain 4B (RBP1-like) (ARID4B), transcript variant 1, mRNA  
"Homo sapiens AT rich interactive domain 5A (MRF1-like) (ARID5A), mRNA."  
"Homo sapiens AT rich interactive domain 5B (MRF1-like) (ARID5B), mRNA."  
"Homo sapiens ariadne homolog, ubiquitin-conjugating enzyme E2 binding protein, 1 (Drosophil  
"Homo sapiens ADP-ribosylation factor-like 1 (ARL1), mRNA."  
"Homo sapiens ADP-ribosylation factor-like 11 (ARL11), mRNA."  
"Homo sapiens ADP-ribosylation factor-like 13B (ARL13B), transcript variant 1, mRNA."  
"Homo sapiens ADP-ribosylation factor-like 15 (ARL15), mRNA."  
"Homo sapiens ADP-ribosylation factor-like 16 (ARL16), mRNA."  
"Homo sapiens ADP-ribosylation factor-like 17B (ARL17B), transcript variant 2, mRNA."  
"Homo sapiens ADP-ribosylation factor-like 17 pseudogene 1 (ARL17P1), mRNA."  
"Homo sapiens ADP-ribosylation factor-like 2 (ARL2), mRNA."  
"Homo sapiens ADP-ribosylation factor-like 2 binding protein (ARL2BP), mRNA."  
"Homo sapiens ADP-ribosylation factor-like 3 (ARL3), mRNA."  
"Homo sapiens ADP-ribosylation factor-like 4A (ARL4A), transcript variant 3, mRNA."  
"Homo sapiens ADP-ribosylation factor-like 4C (ARL4C), mRNA."  
"Homo sapiens ADP-ribosylation factor-like 5A (ARL5A), transcript variant 3, mRNA."  
"Homo sapiens ADP-ribosylation factor-like 5B (ARL5B), mRNA."  
"PREDICTED: Homo sapiens ADP-ribosylation factor-like 5C (ARL5C), mRNA."  
"Homo sapiens ADP-ribosylation factor-like 6 (ARL6), transcript variant 1, mRNA."  
"Homo sapiens ADP-ribosylation factor-like 6 interacting protein 1 (ARL6IP1), mRNA."  
"Homo sapiens ADP-ribosylation-like factor 6 interacting protein 4 (ARL6IP4), transcript variant  
"Homo sapiens ADP-ribosylation-like factor 6 interacting protein 5 (ARL6IP5), mRNA."  
"Homo sapiens ADP-ribosylation-like factor 6 interacting protein 6 (ARL6IP6), mRNA."  
"Homo sapiens ADP-ribosylation factor-like 8A (ARL8A), mRNA."  
"Homo sapiens ADP-ribosylation factor-like 8B (ARL8B), mRNA."  
"Homo sapiens ADP-ribosylation factor-like 9 (ARL9), mRNA."  
"Homo sapiens armadillo repeat containing 10 (ARMC10), mRNA."  
"Homo sapiens armadillo repeat containing 5 (ARMC5), mRNA."  
"Homo sapiens armadillo repeat containing 6 (ARMC6), mRNA."  
"Homo sapiens armadillo repeat containing 7 (ARMC7), mRNA."  
"Homo sapiens armadillo repeat containing 8 (ARMC8), transcript variant 2, mRNA."  
"Homo sapiens armadillo repeat containing, X-linked 1 (ARMCX1), mRNA."  
"Homo sapiens armadillo repeat containing, X-linked 2 (ARMCX2), mRNA."  
"Homo sapiens armadillo repeat containing, X-linked 3 (ARMCX3), transcript variant 2, mRNA."  
"Homo sapiens armadillo repeat containing, X-linked 6 (ARMCX6), transcript variant 1, mRNA."



"Homo sapiens arginine-rich, mutated in early stage tumors (ARMET), mRNA."

"Homo sapiens aryl hydrocarbon receptor nuclear translocator (ARNT), transcript variant 1, mRNA."

"Homo sapiens aryl-hydrocarbon receptor nuclear translocator 2 (ARNT2), mRNA."

"Homo sapiens aryl hydrocarbon receptor nuclear translocator-like (ARNTL), transcript variant 2"

"PREDICTED: Homo sapiens misc\_RNA (ARP11), miscRNA."

"Homo sapiens actin related protein 2/3 complex, subunit 1A, 41kDa (ARPC1A), mRNA."

"Homo sapiens actin related protein 2/3 complex, subunit 1B, 41kDa (ARPC1B), mRNA."

"Homo sapiens actin related protein 2/3 complex, subunit 2, 34kDa (ARPC2), transcript variant 1"

"Homo sapiens actin related protein 2/3 complex, subunit 3, 21kDa (ARPC3), mRNA."

"Homo sapiens actin related protein 2/3 complex, subunit 4, 20kDa (ARPC4), transcript variant 1"

"Homo sapiens actin related protein 2/3 complex, subunit 5, 16kDa (ARPC5), mRNA."

"Homo sapiens actin related protein 2/3 complex, subunit 5-like (ARPC5L), mRNA."

"Homo sapiens actin related protein M1 (ARPM1), mRNA."

"Homo sapiens cAMP-regulated phosphoprotein, 19kDa (ARPP19), mRNA."

"Homo sapiens cyclic AMP-regulated phosphoprotein, 21 kD (ARPP-21), transcript variant 1, mRNA"

"Homo sapiens arrestin 3, retinal (X-arrestin) (ARR3), mRNA."

"Homo sapiens arrestin, beta 2 (ARRB2), transcript variant 2, mRNA."

"Homo sapiens arrestin domain containing 1 (ARRDC1), mRNA."

"Homo sapiens arrestin domain containing 2 (ARRDC2), transcript variant 1, mRNA."

"Homo sapiens arrestin domain containing 3 (ARRDC3), mRNA."

"Homo sapiens arrestin domain containing 4 (ARRDC4), mRNA."

"Homo sapiens arrestin domain containing 5 (ARRDC5), mRNA."

"Homo sapiens arylsulfatase A (ARSA), mRNA."

"Homo sapiens arylsulfatase B (ARSB), transcript variant 2, mRNA."

"Homo sapiens arylsulfatase K (ARSK), mRNA."

"Homo sapiens ADP-ribosyltransferase 3 (ART3), mRNA."

"Homo sapiens ARV1 homolog (S. cerevisiae) (ARV1), mRNA."

"Homo sapiens arsenic (+3 oxidation state) methyltransferase (AS3MT), mRNA."

"Homo sapiens N-acylsphingosine amidohydrolase (acid ceramidase) 1 (ASAH1), transcript variant 1"

"Homo sapiens ArfGAP with SH3 domain, ankyrin repeat and PH domain 1 (ASAP1), mRNA."

"Homo sapiens ArfGAP with SH3 domain, ankyrin repeat and PH domain 2 (ASAP2), transcript variant 1"

"Homo sapiens ArfGAP with SH3 domain, ankyrin repeat and PH domain 3 (ASAP3), mRNA."

"Homo sapiens ankyrin repeat and SOCS box-containing 1 (ASB1), mRNA."

"Homo sapiens ankyrin repeat and SOCS box-containing 13 (ASB13), mRNA."

"Homo sapiens ankyrin repeat and SOCS box-containing 16 (ASB16), mRNA."

"Homo sapiens ankyrin repeat and SOCS box-containing 17 (ASB17), mRNA."

"Homo sapiens ankyrin repeat and SOCS box-containing 2 (ASB2), mRNA."

"Homo sapiens ankyrin repeat and SOCS box-containing 3 (ASB3), transcript variant 1, mRNA."

"Homo sapiens ankyrin repeat and SOCS box-containing 6 (ASB6), transcript variant 1, mRNA."

"Homo sapiens ankyrin repeat and SOCS box-containing 7 (ASB7), transcript variant 2, mRNA."

"Homo sapiens ankyrin repeat and SOCS box-containing 8 (ASB8), mRNA."

"Homo sapiens activating signal cointegrator 1 complex subunit 1 (ASCC1), mRNA."

"PREDICTED: Homo sapiens achaete-scute complex homolog 5 (Drosophila) (ASCL5), mRNA."

"Homo sapiens ASF1 anti-silencing function 1 homolog A (S. cerevisiae) (ASF1A), mRNA."

"Homo sapiens ASF1 anti-silencing function 1 homolog B (*S. cerevisiae*) (ASF1B), mRNA."  
"Homo sapiens antisense fragile X mental retardation protein (ASFMR1), transcript variant 4, no  
"Homo sapiens asialoglycoprotein receptor 1 (ASGR1), mRNA."  
"Homo sapiens ash1 (absent, small, or homeotic)-like (*Drosophila*) (ASH1L), mRNA."  
"Homo sapiens ash2 (absent, small, or homeotic)-like (*Drosophila*) (ASH2L), mRNA."  
"Homo sapiens agouti signaling protein, nonagouti homolog (mouse) (ASIP), mRNA."  
"Homo sapiens argininosuccinate lyase (ASL), transcript variant 1, mRNA."  
"Homo sapiens acetylserotonin O-methyltransferase (ASMT), mRNA."  
"PREDICTED: Homo sapiens acetylserotonin O-methyltransferase-like (ASMTL), mRNA."  
"Homo sapiens asparagine synthetase (ASNS), transcript variant 1, mRNA."  
"Homo sapiens asparagine synthetase domain containing 1 (ASNSD1), mRNA."  
"Homo sapiens aspartoacylase (Canavan disease) (ASPA), transcript variant 1, mRNA."  
"Homo sapiens asparaginase homolog (*S. cerevisiae*) (ASPG), mRNA."  
"Homo sapiens aspartate beta-hydroxylase (ASPH), transcript variant 2, mRNA."  
"Homo sapiens aspartate beta-hydroxylase domain containing 2 (ASPHD2), mRNA."  
"Homo sapiens asp (abnormal spindle) homolog, microcephaly associated (*Drosophila*) (ASPM)  
"Homo sapiens aspartic peptidase, retroviral-like 1 (ASPRV1), mRNA."  
"Homo sapiens alveolar soft part sarcoma chromosome region, candidate 1 (ASPSR1), mRNA  
"Homo sapiens asparaginase like 1 (ASRGL1), mRNA."  
"Homo sapiens argininosuccinate synthetase 1 (ASS1), transcript variant 1, mRNA."  
"Homo sapiens asteroid homolog 1 (*Drosophila*) (ASTE1), mRNA."  
"Homo sapiens astrotactin 2 (ASTN2), transcript variant 3, mRNA."  
"Homo sapiens additional sex combs like 1 (*Drosophila*) (ASXL1), mRNA."  
"Homo sapiens additional sex combs like 3 (*Drosophila*) (ASXL3), mRNA."  
"Homo sapiens ATPase family, AAA domain containing 1 (ATAD1), mRNA."  
"Homo sapiens ATPase family, AAA domain containing 2 (ATAD2), mRNA."  
"Homo sapiens ATPase family, AAA domain containing 2B (ATAD2B), mRNA."  
"Homo sapiens ATPase family, AAA domain containing 3A (ATAD3A), mRNA."  
"Homo sapiens ATPase family, AAA domain containing 3B (ATAD3B), mRNA."  
"Homo sapiens ATPase family, AAA domain containing 5 (ATAD5), mRNA."  
"Homo sapiens arginyltransferase 1 (ATE1), transcript variant 2, mRNA."  
"Homo sapiens activating transcription factor 1 (ATF1), mRNA."  
"Homo sapiens activating transcription factor 2 (ATF2), mRNA."  
"Homo sapiens activating transcription factor 3 (ATF3), transcript variant 3, mRNA."  
"Homo sapiens activating transcription factor 4 (tax-responsive enhancer element B67) (ATF4),  
"Homo sapiens activating transcription factor 5 (ATF5), mRNA."  
"Homo sapiens activating transcription factor 6 (ATF6), mRNA."  
"Homo sapiens activating transcription factor 6 beta (ATF6B), transcript variant 1, mRNA."  
"Homo sapiens activating transcription factor 7 interacting protein 2 (ATF7IP2), mRNA."  
"Homo sapiens ATG10 autophagy related 10 homolog (*S. cerevisiae*) (ATG10), mRNA."  
"Homo sapiens ATG12 autophagy related 12 homolog (*S. cerevisiae*) (ATG12), mRNA."  
"Homo sapiens ATG16 autophagy related 16-like 1 (*S. cerevisiae*) (ATG16L1), transcript variant  
"Homo sapiens ATG16 autophagy related 16-like 2 (*S. cerevisiae*) (ATG16L2), mRNA."  
"Homo sapiens ATG2 autophagy related 2 homolog A (*S. cerevisiae*) (ATG2A), mRNA."

"Homo sapiens ATG3 autophagy related 3 homolog (S. cerevisiae) (ATG3), mRNA."  
"Homo sapiens ATG4 autophagy related 4 homolog A (S. cerevisiae) (ATG4A), transcript varian  
"Homo sapiens ATG4 autophagy related 4 homolog B (S. cerevisiae) (ATG4B), transcript varian  
"Homo sapiens ATG4 autophagy related 4 homolog C (S. cerevisiae) (ATG4C), transcript varian  
"Homo sapiens ATG4 autophagy related 4 homolog D (S. cerevisiae) (ATG4D), mRNA."  
"Homo sapiens ATG5 autophagy related 5 homolog (S. cerevisiae) (ATG5), mRNA."  
"Homo sapiens ATG7 autophagy related 7 homolog (S. cerevisiae) (ATG7), mRNA."  
"Homo sapiens ATG9 autophagy related 9 homolog A (S. cerevisiae) (ATG9A), transcript varian  
"Homo sapiens ATH1, acid trehalase-like 1 (yeast) (ATHL1), mRNA."  
"Homo sapiens 5-aminoimidazole-4-carboxamide ribonucleotide formyltransferase/IMP cyclohy  
"Homo sapiens atlastin GTPase 1 (ATL1), transcript variant 2, mRNA."  
"Homo sapiens atlastin GTPase 2 (ATL2), mRNA."  
"Homo sapiens atlastin GTPase 3 (ATL3), mRNA."  
"Homo sapiens ataxia telangiectasia mutated (ATM), transcript variant 2, mRNA."  
"Homo sapiens ATM interactor (ATMIN), mRNA."  
"Homo sapiens atrophin 1 (ATN1), transcript variant 1, mRNA."  
"Homo sapiens atonal homolog 1 (Drosophila) (ATOH1), mRNA."  
"Homo sapiens atonal homolog 7 (Drosophila) (ATOH7), mRNA."  
"Homo sapiens atonal homolog 8 (Drosophila) (ATOH8), mRNA."  
"Homo sapiens ATX1 antioxidant protein 1 homolog (yeast) (ATOX1), mRNA."  
"Homo sapiens ATPase, class V, type 10A (ATP10A), mRNA."  
"Homo sapiens ATPase, class V, type 10B (ATP10B), mRNA."  
"Homo sapiens ATPase, class VI, type 11B (ATP11B), mRNA."  
"Homo sapiens ATPase, class VI, type 11C (ATP11C), transcript variant 1, mRNA."  
"Homo sapiens ATPase type 13A1 (ATP13A1), mRNA."  
"Homo sapiens ATPase type 13A2 (ATP13A2), mRNA."  
"Homo sapiens ATPase type 13A4 (ATP13A4), mRNA."  
"Homo sapiens ATPase, Na<sup>+</sup>/K<sup>+</sup> transporting, alpha 1 polypeptide (ATP1A1), transcript variant  
"Homo sapiens ATPase, Na<sup>+</sup>/K<sup>+</sup> transporting, alpha 3 polypeptide (ATP1A3), mRNA."  
"Homo sapiens ATPase, Na<sup>+</sup>/K<sup>+</sup> transporting, beta 1 polypeptide (ATP1B1), transcript variant 2  
"Homo sapiens ATPase, Na<sup>+</sup>/K<sup>+</sup> transporting, beta 2 polypeptide (ATP1B2), mRNA."  
"PREDICTED: Homo sapiens ATPase, Na<sup>+</sup>/K<sup>+</sup> transporting, beta 3 polypeptide, transcript varia  
"Homo sapiens ATPase, Ca<sup>++</sup> transporting, cardiac muscle, slow twitch 2 (ATP2A2), transcript  
"Homo sapiens ATPase, Ca<sup>++</sup> transporting, ubiquitous (ATP2A3), transcript variant 2, mRNA."  
"Homo sapiens ATPase, Ca<sup>++</sup> transporting, plasma membrane 1 (ATP2B1), transcript variant 2  
"Homo sapiens ATPase, Ca<sup>++</sup> transporting, plasma membrane 4 (ATP2B4), transcript variant 2  
"Homo sapiens ATPase, Ca<sup>++</sup> transporting, type 2C, member 2 (ATP2C2), mRNA."  
"Homo sapiens ATPase, H<sup>+</sup>/K<sup>+</sup> exchanging, alpha polypeptide (ATP4A), mRNA."  
"Homo sapiens ATP synthase, H<sup>+</sup> transporting, mitochondrial F1 complex, alpha subunit 1, carc  
"Homo sapiens ATP synthase, H<sup>+</sup> transporting, mitochondrial F1 complex, beta polypeptide (AT  
"Homo sapiens ATP synthase, H<sup>+</sup> transporting, mitochondrial F1 complex, gamma polypeptide  
"Homo sapiens ATP synthase, H<sup>+</sup> transporting, mitochondrial F1 complex, delta subunit (ATP5I  
"Homo sapiens ATP synthase, H<sup>+</sup> transporting, mitochondrial F1 complex, epsilon subunit (ATP  
"Homo sapiens ATP synthase, H<sup>+</sup> transporting, mitochondrial F1 complex, epsilon subunit pseu

"Homo sapiens ATP synthase, H+ transporting, mitochondrial F0 complex, subunit B1 (ATP5F1), mRNA."

"Homo sapiens ATP synthase, H+ transporting, mitochondrial F0 complex, subunit C1 (subunit c) (ATP5C1), mRNA."

"Homo sapiens ATP synthase, H+ transporting, mitochondrial F0 complex, subunit c (subunit 9) (ATP5C9), mRNA."

"Homo sapiens ATP synthase, H+ transporting, mitochondrial F0 complex, subunit C3 (subunit c3) (ATP5C3), mRNA."

"Homo sapiens ATP synthase, H+ transporting, mitochondrial F0 complex, subunit d (ATP5H), mRNA."

"Homo sapiens ATP synthase, H+ transporting, mitochondrial F0 complex, subunit E (ATP5I), mRNA."

"Homo sapiens ATP synthase, H+ transporting, mitochondrial F0 complex, subunit F6 (ATP5J), mRNA."

"Homo sapiens ATP synthase, H+ transporting, mitochondrial F0 complex, subunit F2 (ATP5J2), mRNA."

"Homo sapiens ATP synthase, H+ transporting, mitochondrial F0 complex, subunit G (ATP5L), mRNA."

"Homo sapiens ATP synthase, H+ transporting, mitochondrial F1 complex, O subunit (ATP5O), mRNA."

"Homo sapiens ATP synthase, H+ transporting, mitochondrial F0 complex, subunit s (factor B) (ATP5S), mRNA."

"Homo sapiens ATP5S-like (ATP5SL), mRNA."

"Homo sapiens ATPase, H+ transporting, lysosomal accessory protein 1 (ATP6AP1), mRNA."

"Homo sapiens ATPase, H+ transporting, lysosomal accessory protein 1-like (ATP6AP1L), mRNA."

"Homo sapiens ATPase, H+ transporting, lysosomal accessory protein 2 (ATP6AP2), mRNA."

"Homo sapiens ATPase, H+ transporting, lysosomal V0 subunit a1 (ATP6V0A1), transcript variant 1, mRNA."

"Homo sapiens ATPase, H+ transporting, lysosomal V0 subunit a2 (ATP6V0A2), mRNA."

"Homo sapiens ATPase, H+ transporting, lysosomal 21kDa, V0 subunit b (ATP6V0B), transcript variant 1, mRNA."

"PREDICTED: Homo sapiens ATPase, H+ transporting, lysosomal 16kDa, V0 subunit c (ATP6V0C), mRNA."

"Homo sapiens ATPase, H+ transporting, lysosomal 38kDa, V0 subunit d1 (ATP6V0D1), mRNA."

"Homo sapiens ATPase, H+ transporting, lysosomal 38kDa, V0 subunit d2 (ATP6V0D2), mRNA."

"Homo sapiens ATPase, H+ transporting, lysosomal 9kDa, V0 subunit e1 (ATP6V0E1), mRNA."

"Homo sapiens ATPase, H+ transporting V0 subunit e2 (ATP6V0E2), transcript variant 1, mRNA."

"Homo sapiens ATPase, H+ transporting, lysosomal 70kDa, V1 subunit A (ATP6V1A), mRNA."

"Homo sapiens ATPase, H+ transporting, lysosomal 56/58kDa, V1 subunit B2 (ATP6V1B2), mRNA."

"Homo sapiens ATPase, H+ transporting, lysosomal 42kDa, V1 subunit C1 (ATP6V1C1), mRNA."

"Homo sapiens ATPase, H+ transporting, lysosomal 42kDa, V1 subunit C2 (ATP6V1C2), transcript variant 1, mRNA."

"Homo sapiens ATPase, H+ transporting, lysosomal 34kDa, V1 subunit D (ATP6V1D), mRNA."

"Homo sapiens ATPase, H+ transporting, lysosomal 31kDa, V1 subunit E1 (ATP6V1E1), transcript variant 1, mRNA."

"Homo sapiens ATPase, H+ transporting, lysosomal 31kDa, V1 subunit E2 (ATP6V1E2), mRNA."

"Homo sapiens ATPase, H+ transporting, lysosomal 14kDa, V1 subunit F (ATP6V1F), mRNA."

"Homo sapiens ATPase, H+ transporting, lysosomal 13kDa, V1 subunit G1 (ATP6V1G1), mRNA."

"Homo sapiens ATPase, H+ transporting, lysosomal 13kDa, V1 subunit G2 (ATP6V1G2), transcript variant 1, mRNA."

"Homo sapiens ATPase, H+ transporting, lysosomal 50/57kDa, V1 subunit H (ATP6V1H), transcript variant 1, mRNA."

"Homo sapiens ATPase, Cu++ transporting, alpha polypeptide (Menkes syndrome) (ATP7A), mRNA."

"Homo sapiens ATPase, Cu++ transporting, beta polypeptide (ATP7B), transcript variant 1, mRNA."

"Homo sapiens ATPase, aminophospholipid transporter (APLT), Class I, type 8A, member 1 (ATP8A1), mRNA."

"Homo sapiens ATPase, class I, type 8B, member 2 (ATP8B2), transcript variant 2, mRNA."

"Homo sapiens ATPase, class II, type 9B (ATP9B), mRNA."

"Homo sapiens ATP synthase mitochondrial F1 complex assembly factor 1 (ATPAF1), nuclear gene, mRNA."

"Homo sapiens ATP synthase mitochondrial F1 complex assembly factor 2 (ATPAF2), nuclear gene, mRNA."

"Homo sapiens ATP binding domain 1 family, member B (ATPBD1B), mRNA."

"Homo sapiens ATP binding domain 3 (ATPBD3), mRNA."

"Homo sapiens ATP binding domain 4 (ATPBD4), mRNA."

"Homo sapiens ATP-grasp domain containing 1 (ATPGD1), transcript variant 2, mRNA."  
"Homo sapiens ATPase inhibitory factor 1 (ATPIF1), nuclear gene encoding mitochondrial prote  
"Homo sapiens ATR interacting protein (ATRIP), transcript variant 2, mRNA."  
"Homo sapiens attractin (ATRN), transcript variant 1, mRNA."  
"Homo sapiens ataxin 1 (ATXN1), mRNA."  
"Homo sapiens ataxin 10 (ATXN10), mRNA."  
"Homo sapiens ataxin 1-like (ATXN1L), transcript variant 1, mRNA."  
"Homo sapiens ataxin 2 (ATXN2), mRNA."  
"Homo sapiens ataxin 2-like (ATXN2L), transcript variant A, mRNA."  
"Homo sapiens ataxin 3 (ATXN3), transcript variant 1, mRNA."  
"Homo sapiens ataxin 7-like 2 (ATXN7L2), mRNA."  
"Homo sapiens ataxin 7-like 3 (ATXN7L3), transcript variant 2, mRNA."  
"Homo sapiens AU RNA binding protein/enoyl-Coenzyme A hydratase (AUH), nuclear gene enc  
"Homo sapiens ancient ubiquitous protein 1 (AUP1), transcript variant 1, mRNA."  
"Homo sapiens aurora kinase A (AURKA), transcript variant 5, mRNA."  
"Homo sapiens aurora kinase A interacting protein 1 (AURKAIP1), mRNA."  
"Homo sapiens aurora kinase A pseudogene 1 (AURKAPS1), non-coding RNA."  
"Homo sapiens aurora kinase B (AURKB), mRNA."  
"Homo sapiens autism susceptibility candidate 2 (AUTS2), mRNA."  
"Homo sapiens apoptosis, caspase activation inhibitor (AVEN), mRNA."  
"Homo sapiens advillin (AVIL), mRNA."  
"Homo sapiens AVL9 homolog (S. cerevisiae) (AVL9), mRNA."  
"Homo sapiens arginine vasopressin (neurophysin II, antidiuretic hormone, diabetes insipidus, n  
"Homo sapiens arginine vasopressin-induced 1 (AVPI1), mRNA."  
"Homo sapiens axin 1 (AXIN1), transcript variant 2, mRNA."  
"Homo sapiens axin 2 (conductin, axil) (AXIN2), mRNA."  
"Homo sapiens AXIN1 up-regulated 1 (AXUD1), mRNA."  
"PREDICTED: Homo sapiens AYP1 pseudogene 1 (AYP1p1), misc RNA."  
"Homo sapiens alpha-2-glycoprotein 1, zinc-binding (AZGP1), mRNA."  
"Homo sapiens 5-azacytidine induced 1 (AZI1), transcript variant 1, mRNA."  
"Homo sapiens 5-azacytidine induced 2 (AZI2), mRNA."  
"Homo sapiens antizyme inhibitor 1 (AZIN1), transcript variant 1, mRNA."  
"Homo sapiens beta-2-microglobulin (B2M), mRNA."  
"Homo sapiens beta-1,3-N-acetylgalactosaminyltransferase 1 (globoside blood group) (B3GALN  
"Homo sapiens beta-1,3-N-acetylgalactosaminyltransferase 2 (B3GALNT2), mRNA."  
"Homo sapiens UDP-Gal:betaGlcNAc beta 1,3-galactosyltransferase, polypeptide 2 (B3GALT2)  
"Homo sapiens UDP-Gal:betaGal beta 1,3-galactosyltransferase polypeptide 6 (B3GALT6), mR  
"Homo sapiens beta 1,3-galactosyltransferase-like (B3GALTL), mRNA."  
"Homo sapiens beta-1,3-glucuronyltransferase 3 (glucuronosyltransferase I) (B3GAT3), mRNA.'  
"Homo sapiens UDP-GlcNAc:betaGal beta-1,3-N-acetylglucosaminyltransferase 2 (B3GNT2), m  
"Homo sapiens UDP-GlcNAc:betaGal beta-1,3-N-acetylglucosaminyltransferase 3 (B3GNT3), m  
"Homo sapiens UDP-GlcNAc:betaGal beta-1,3-N-acetylglucosaminyltransferase 4 (B3GNT4), m  
"Homo sapiens UDP-GlcNAc:betaGal beta-1,3-N-acetylglucosaminyltransferase 6 (B3GNT6), m  
"Homo sapiens UDP-GlcNAc:betaGal beta-1,3-N-acetylglucosaminyltransferase 8 (B3GNT8), m

"Homo sapiens UDP-GlcNAc:betaGal beta-1,3-N-acetylglucosaminyltransferase-like 1 (B3GNTL1), mRNA."

"Homo sapiens beta-1,4-N-acetyl-galactosaminyl transferase 1 (B4GALNT1), mRNA."

"Homo sapiens beta-1,4-N-acetyl-galactosaminyl transferase 3 (B4GALNT3), mRNA."

"Homo sapiens beta-1,4-N-acetyl-galactosaminyl transferase 4 (B4GALNT4), mRNA."

"Homo sapiens UDP-Gal:betaGlcNAc beta 1,4- galactosyltransferase, polypeptide 1 (B4GALT1), mRNA."

"Homo sapiens UDP-Gal:betaGlcNAc beta 1,4- galactosyltransferase, polypeptide 2 (B4GALT2), mRNA."

"Homo sapiens UDP-Gal:betaGlcNAc beta 1,4- galactosyltransferase, polypeptide 3 (B4GALT3), mRNA."

"Homo sapiens UDP-Gal:betaGlcNAc beta 1,4- galactosyltransferase, polypeptide 4 (B4GALT4), mRNA."

"Homo sapiens UDP-Gal:betaGlcNAc beta 1,4- galactosyltransferase, polypeptide 5 (B4GALT5), mRNA."

"Homo sapiens UDP-Gal:betaGlcNAc beta 1,4- galactosyltransferase, polypeptide 6 (B4GALT6), mRNA."

"Homo sapiens xylosylprotein beta 1,4-galactosyltransferase, polypeptide 7 (galactosyltransferase 7) (B4GALT7), mRNA."

"Homo sapiens B9 protein domain 1 (B9D1), mRNA."

"Homo sapiens B9 protein domain 2 (B9D2), mRNA."

"Homo sapiens beta-site APP-cleaving enzyme 2 (BACE2), transcript variant b, mRNA."

"Homo sapiens BTB and CNC homology 1, basic leucine zipper transcription factor 2 (BACH2), mRNA."

"Homo sapiens BCL2-antagonist of cell death (BAD), transcript variant 2, mRNA."

"Homo sapiens BCL2-associated athanogene (BAG1), mRNA."

"Homo sapiens BCL2-associated athanogene 2 (BAG2), mRNA."

"Homo sapiens BCL2-associated athanogene 3 (BAG3), mRNA."

"Homo sapiens BCL2-associated athanogene 5 (BAG5), transcript variant 2, mRNA."

"Homo sapiens B melanoma antigen family, member 2 (BAGE2), mRNA."

"Homo sapiens B melanoma antigen family, member 4 (BAGE4), mRNA."

"Homo sapiens brain-specific angiogenesis inhibitor 3 (BAI3), mRNA."

"Homo sapiens BAI1-associated protein 2 (BAIAP2), transcript variant 1, mRNA."

"Homo sapiens BAI1-associated protein 2-like 1 (BAIAP2L1), mRNA."

"Homo sapiens BAI1-associated protein 2-like 2 (BAIAP2L2), mRNA."

"Homo sapiens BAI1-associated protein 3 (BAIAP3), mRNA."

"Homo sapiens BMP and activin membrane-bound inhibitor homolog (Xenopus laevis) (BAMBI), mRNA."

"Homo sapiens barrier to autointegration factor 1 (BANF1), mRNA."

"Homo sapiens barrier to autointegration factor 2 (BANF2), transcript variant 2, mRNA."

"Homo sapiens B-cell scaffold protein with ankyrin repeats 1 (BANK1), transcript variant 2, mRNA."

"Homo sapiens BTG3 associated nuclear protein (BANP), transcript variant 1, mRNA."

"Homo sapiens BRCA1 associated protein-1 (ubiquitin carboxy-terminal hydrolase) (BAP1), mRNA."

"Homo sapiens bagpipe homeobox homolog 1 (Drosophila) (BAPX1), mRNA."

"Homo sapiens BRCA1 associated RING domain 1 (BARD1), mRNA."

"Homo sapiens BARX homeobox 1 (BARX1), mRNA."

"Homo sapiens brain abundant, membrane attached signal protein 1 (BASP1), mRNA."

"Homo sapiens HLA-B associated transcript 1 (BAT1), transcript variant 1, mRNA."

"Homo sapiens HLA-B associated transcript 2-like (BAT2L), mRNA."

"Homo sapiens HLA-B associated transcript 3 (BAT3), transcript variant 3, mRNA."

"Homo sapiens HLA-B associated transcript 4 (BAT4), mRNA."

"Homo sapiens HLA-B associated transcript 5 (BAT5), mRNA."

"Homo sapiens basic leucine zipper transcription factor, ATF-like (BATF), mRNA."

"Homo sapiens basic leucine zipper transcription factor, ATF-like 2 (BATF2), mRNA."

"Homo sapiens basic leucine zipper transcription factor, ATF-like 3 (BATF3), mRNA."  
"Homo sapiens BCL2-associated X protein (BAX), transcript variant sigma, mRNA."  
"Homo sapiens bromodomain adjacent to zinc finger domain, 1A (BAZ1A), transcript variant 2, r  
"Homo sapiens bromodomain adjacent to zinc finger domain, 1B (BAZ1B), transcript variant 1, r  
"Homo sapiens bromodomain adjacent to zinc finger domain, 2B (BAZ2B), mRNA."  
"Homo sapiens BCL2 binding component 3 (BBC3), mRNA."  
"Homo sapiens butyrobetaine (gamma), 2-oxoglutarate dioxygenase (gamma-butyrobetaine hyd  
"Homo sapiens Bardet-Biedl syndrome 1 (BBS1), mRNA."  
"Homo sapiens Bardet-Biedl syndrome 10 (BBS10), mRNA."  
"Homo sapiens Bardet-Biedl syndrome 12 (BBS12), mRNA."  
"Homo sapiens Bardet-Biedl syndrome 2 (BBS2), mRNA."  
"Homo sapiens Bardet-Biedl syndrome 4 (BBS4), mRNA."  
"Homo sapiens Bardet-Biedl syndrome 7 (BBS7), transcript variant 1, mRNA."  
"Homo sapiens Bardet-Biedl syndrome 9 (BBS9), transcript variant 2, mRNA."  
"Homo sapiens bobby sox homolog (Drosophila) (BBX), mRNA."  
"Homo sapiens basal cell adhesion molecule (Lutheran blood group) (BCAM), transcript variant  
"Homo sapiens brevican (BCAN), transcript variant 1, mRNA."  
"Homo sapiens B-cell receptor-associated protein 29 (BCAP29), transcript variant 4, mRNA."  
"Homo sapiens B-cell receptor-associated protein 31 (BCAP31), mRNA."  
"Homo sapiens breast cancer anti-estrogen resistance 1 (BCAR1), mRNA."  
"Homo sapiens breast cancer anti-estrogen resistance 3 (BCAR3), mRNA."  
"Homo sapiens breast cancer anti-estrogen resistance 4 (BCAR4), non-coding RNA."  
"Homo sapiens breast carcinoma amplified sequence 1 (BCAS1), mRNA."  
"Homo sapiens breast carcinoma amplified sequence 4 (BCAS4), transcript variant 1, mRNA."  
"Homo sapiens branched chain aminotransferase 1, cytosolic (BCAT1), mRNA."  
"Homo sapiens branched chain aminotransferase 2, mitochondrial (BCAT2), nuclear gene enco  
"Homo sapiens BRCA2 and CDKN1A interacting protein (BCCIP), transcript variant C, mRNA."  
"Homo sapiens BCDIN3 domain containing (BCDIN3D), mRNA."  
"Homo sapiens butyrylcholinesterase (BCHE), mRNA."  
"Homo sapiens branched chain keto acid dehydrogenase E1, alpha polypeptide (BCKDHA), mR  
"Homo sapiens branched chain keto acid dehydrogenase E1, beta polypeptide (maple syrup uri  
"Homo sapiens branched chain ketoacid dehydrogenase kinase (BCKDK), mRNA."  
"Homo sapiens B-cell CLL/lymphoma 10 (BCL10), mRNA."  
"Homo sapiens B-cell CLL/lymphoma 11A (zinc finger protein) (BCL11A), transcript variant 1, m  
"Homo sapiens B-cell CLL/lymphoma 2 (BCL2), nuclear gene encoding mitochondrial protein, tr  
"Homo sapiens BCL2-related protein A1 (BCL2A1), mRNA."  
"Homo sapiens BCL2-like 1 (BCL2L1), nuclear gene encoding mitochondrial protein, transcript v  
"Homo sapiens BCL2-like 10 (apoptosis facilitator) (BCL2L10), mRNA."  
"Homo sapiens BCL2-like 11 (apoptosis facilitator) (BCL2L11), transcript variant 9, mRNA."  
"Homo sapiens BCL2-like 12 (proline rich) (BCL2L12), transcript variant 3, mRNA."  
"Homo sapiens BCL2-like 13 (apoptosis facilitator) (BCL2L13), nuclear gene encoding mitochon  
"Homo sapiens B-cell CLL/lymphoma 3 (BCL3), mRNA."  
"Homo sapiens B-cell CLL/lymphoma 6 (zinc finger protein 51) (BCL6), transcript variant 1, mRN  
"Homo sapiens B-cell CLL/lymphoma 6, member B (zinc finger protein) (BCL6B), mRNA."

"Homo sapiens B-cell CLL/lymphoma 7A (BCL7A), transcript variant 1, mRNA."  
"Homo sapiens B-cell CLL/lymphoma 7B (BCL7B), transcript variant 2, mRNA."  
"Homo sapiens B-cell CLL/lymphoma 7C (BCL7C), mRNA."  
"Homo sapiens B-cell CLL/lymphoma 9 (BCL9), mRNA."  
"Homo sapiens B-cell CLL/lymphoma 9-like (BCL9L), mRNA."  
"Homo sapiens BCL2-associated transcription factor 1 (BCLAF1), transcript variant 2, mRNA."  
"Homo sapiens BCL6 co-repressor (BCOR), transcript variant 1, mRNA."  
"Homo sapiens BCL6 co-repressor-like 1 (BCORL1), mRNA."  
"Homo sapiens breakpoint cluster region (BCR), transcript variant 2, mRNA."  
"Homo sapiens BCS1-like (yeast) (BCS1L), nuclear gene encoding mitochondrial protein, transcribed from the mitochondrial genome."  
"Homo sapiens brain cytoplasmic RNA 1 (non-protein coding) (BCYRN1), non-coding RNA."  
"Homo sapiens bradykinin receptor B2 (BDKRB2), mRNA."  
"PREDICTED: Homo sapiens brain expressed, associated with Nedd4 (BEAN), mRNA."  
"Homo sapiens beclin 1, autophagy related (BECN1), mRNA."  
"Homo sapiens brain-enriched guanylate kinase-associated homolog (rat) (BEGAIN), mRNA."  
"Homo sapiens BEN domain containing 3 (BEND3), mRNA."  
"Homo sapiens BEN domain containing 4 (BEND4), mRNA."  
"Homo sapiens BEN domain containing 5 (BEND5), mRNA."  
"Homo sapiens BEN domain containing 6 (BEND6), mRNA."  
"Homo sapiens BEN domain containing 7 (BEND7), transcript variant 1, mRNA."  
"Homo sapiens bestrophin 1 (BEST1), mRNA."  
"Homo sapiens bestrophin 3 (BEST3), transcript variant 2, mRNA."  
"Homo sapiens bestrophin 4 (BEST4), mRNA."  
"Homo sapiens blocked early in transport 1 homolog (S. cerevisiae) (BET1), mRNA."  
"Homo sapiens blocked early in transport 1 homolog (S. cerevisiae)-like (BET1L), mRNA."  
"Homo sapiens brain expressed X-linked 2 (BEX2), mRNA."  
"Homo sapiens BEX family member 4 (BEX4), mRNA."  
"Homo sapiens brain expressed, X-linked 5 (BEX5), mRNA."  
"PREDICTED: Homo sapiens brain expressed X-linked-like 1 (BEXL1), mRNA."  
"Homo sapiens bifunctional apoptosis regulator (BFAR), mRNA."  
"Homo sapiens beaded filament structural protein 2, phakinin (BFSP2), mRNA."  
"Homo sapiens bone gamma-carboxyglutamate (gla) protein (osteocalcin) (BGLAP), mRNA."  
"Homo sapiens biglycan (BGN), mRNA."  
"Homo sapiens basic helix-loop-helix domain containing, class B, 2 (BHLHB2), mRNA."  
"Homo sapiens basic helix-loop-helix domain containing, class B, 3 (BHLHB3), mRNA."  
"Homo sapiens basic helix-loop-helix domain containing, class B, 9 (BHLHB9), mRNA."  
"Homo sapiens basic helix-loop-helix family, member e22 (BHLHE22), mRNA."  
"Homo sapiens bicaudal C homolog 1 (Drosophila) (BICC1), mRNA."  
"Homo sapiens bicaudal D homolog 1 (Drosophila) (BICD1), transcript variant 1, mRNA."  
"Homo sapiens bicaudal D homolog 2 (Drosophila) (BICD2), transcript variant 1, mRNA."  
"Homo sapiens BH3 interacting domain death agonist (BID), transcript variant 1, mRNA."  
"Homo sapiens BCL2-interacting killer (apoptosis-inducing) (BIK), mRNA."  
"Homo sapiens bridging integrator 1 (BIN1), transcript variant 1, mRNA."  
"Homo sapiens bridging integrator 3 (BIN3), mRNA."



"Homo sapiens baculoviral IAP repeat-containing 2 (BIRC2), mRNA."  
"Homo sapiens baculoviral IAP repeat-containing 3 (BIRC3), transcript variant 2, mRNA."  
"Homo sapiens baculoviral IAP repeat-containing 5 (BIRC5), transcript variant 3, mRNA."  
"Homo sapiens basic, immunoglobulin-like variable motif containing (BIVM), mRNA."  
"Homo sapiens bladder cancer associated protein (BLCAP), mRNA."  
"Homo sapiens B lymphoid tyrosine kinase (BLK), mRNA."  
"Homo sapiens Bloom syndrome, RecQ helicase-like (BLM), mRNA."  
"Homo sapiens bleomycin hydrolase (BLMH), mRNA."  
"Homo sapiens B-cell linker (BLNK), mRNA."  
"Homo sapiens biogenesis of lysosome-related organelles complex-1, subunit 1 (BLOC1S1), mRNA."  
"Homo sapiens biogenesis of lysosomal organelles complex-1, subunit 2 (BLOC1S2), transcript variant 1, mRNA."  
"Homo sapiens Burkitt lymphoma receptor 1, GTP binding protein (chemokine (C-X-C motif) receptor 1) (BLVR1), mRNA."  
"Homo sapiens biliverdin reductase A (BLVRA), mRNA."  
"Homo sapiens biliverdin reductase B (flavin reductase (NADPH)) (BLVRB), mRNA."  
"Homo sapiens basic leucine zipper nuclear factor 1 (BLZF1), mRNA."  
"Homo sapiens Bcl2 modifying factor (BMF), transcript variant 1, mRNA."  
"Homo sapiens BMI1 polycomb ring finger oncogene (BMI1), mRNA."  
"Homo sapiens BMP2 inducible kinase (BMP2K), transcript variant 1, mRNA."  
"Homo sapiens bone morphogenetic protein 3 (BMP3), mRNA."  
"Homo sapiens bone morphogenetic protein 4 (BMP4), transcript variant 1, mRNA."  
"Homo sapiens bone morphogenetic protein 5 (BMP5), mRNA."  
"Homo sapiens bone morphogenetic protein 6 (BMP6), mRNA."  
"Homo sapiens bone morphogenetic protein 7 (osteogenic protein 1) (BMP7), mRNA."  
"Homo sapiens bone morphogenetic protein 8b (BMP8B), mRNA."  
"Homo sapiens bone morphogenetic protein receptor, type IA (BMPRI1), mRNA."  
"Homo sapiens bone morphogenetic protein receptor, type II (serine/threonine kinase) (BMPRII), mRNA."  
"Homo sapiens BMS1 pseudogene 5 (BMS1P5), non-coding RNA."  
"Homo sapiens BMX non-receptor tyrosine kinase (BMX), mRNA."  
"Homo sapiens BCL2/adenovirus E1B 19kDa interacting protein 1 (BNIP1), transcript variant 1, mRNA."  
"Homo sapiens BCL2/adenovirus E1B 19kDa interacting protein 2 (BNIP2), mRNA."  
"Homo sapiens BCL2/adenovirus E1B 19kDa interacting protein 3 (BNIP3), nuclear gene encoding BCL2/adenovirus E1B 19kDa interacting protein 3-like (BNIP3L), mRNA."  
"Homo sapiens BCL2/adenovirus E1B 19kDa interacting protein 3-like (BNIP3L), mRNA."  
"Homo sapiens bolA homolog 2 (E. coli) (BOLA2), mRNA."  
"Homo sapiens bolA homolog 3 (E. coli) (BOLA3), transcript variant 1, mRNA."  
"Homo sapiens block of proliferation 1 (BOP1), mRNA."  
"Homo sapiens bromodomain containing protein 75 kDa pseudogene (BP75) on chromosome 6."  
"Homo sapiens 2,3-bisphosphoglycerate mutase (BPGM), transcript variant 2, mRNA."  
"Homo sapiens biphenyl hydrolase-like (serine hydrolase) (BPHL), mRNA."  
"Homo sapiens bactericidal/permeability-increasing protein-like 1 (BPIL1), mRNA."  
"Homo sapiens 3'(2'), 5'-bisphosphate nucleotidase 1 (BPNT1), mRNA."  
"Homo sapiens basic charge, Y-linked, 2B (BPY2B), mRNA."  
"Homo sapiens v-raf murine sarcoma viral oncogene homolog B1 (BRAF), mRNA."  
"Homo sapiens breast cancer 1, early onset (BRCA1), transcript variant BRCA1-delta11b, mRNA."  
"Homo sapiens breast cancer 2, early onset (BRCA2), mRNA."

"Homo sapiens BRCA1/BRCA2-containing complex, subunit 3 (BRCC3), transcript variant 1, mRNA."  
"Homo sapiens bromodomain containing 1 (BRD1), mRNA."  
"Homo sapiens bromodomain containing 2 (BRD2), mRNA."  
"Homo sapiens bromodomain containing 3 (BRD3), mRNA."  
"Homo sapiens bromodomain containing 4 (BRD4), transcript variant long, mRNA."  
"Homo sapiens bromodomain containing 7 (BRD7), mRNA."  
"PREDICTED: Homo sapiens misc\_RNA (BRD7P2), miscRNA."  
"Homo sapiens bromodomain containing 8 (BRD8), transcript variant 3, mRNA."  
"Homo sapiens bromodomain containing 9 (BRD9), transcript variant 1, mRNA."  
"Homo sapiens BCR downstream signaling 1 (BRDG1), mRNA."  
"Homo sapiens brain and reproductive organ-expressed (TNFRSF1A modulator) (BRE), transcript variant 1, mRNA."  
"Homo sapiens BRF2, subunit of RNA polymerase III transcription initiation factor, BRF1-like (BRF2), mRNA."  
"Homo sapiens brain protein I3 (BRI3), mRNA."  
"PREDICTED: Homo sapiens BRI3 binding protein (BRI3BP), mRNA."  
"PREDICTED: Homo sapiens misc\_RNA (BRI3P1), miscRNA."  
"Homo sapiens BRX1, biogenesis of ribosomes, homolog (S. cerevisiae) (BRX1), mRNA."  
"Homo sapiens breast cancer metastasis suppressor 1 (BRMS1), transcript variant 1, mRNA."  
"Homo sapiens breast cancer metastasis-suppressor 1-like (BRMS1L), mRNA."  
"Homo sapiens brain protein 44 (BRP44), transcript variant 2, mRNA."  
"Homo sapiens brain protein 44-like (BRP44L), mRNA."  
"Homo sapiens bromodomain and PHD finger containing, 1 (BRPF1), transcript variant 1, mRNA."  
"Homo sapiens bromodomain and PHD finger containing, 3 (BRPF3), mRNA."  
"Homo sapiens BR serine/threonine kinase 1 (BRSK1), mRNA."  
"Homo sapiens bruno-like 6, RNA binding protein (Drosophila) (BRUNOL6), mRNA."  
"Homo sapiens bromodomain and WD repeat domain containing 1 (BRWD1), transcript variant 1, mRNA."  
"Homo sapiens bromodomain and WD repeat domain containing 2 (BRWD2), mRNA."  
"Homo sapiens bromodomain and WD repeat domain containing 3 (BRWD3), mRNA."  
"Homo sapiens Bernardinelli-Seip congenital lipodystrophy 2 (seipin) (BSCL2), mRNA."  
"Homo sapiens BSD domain containing 1 (BSDC1), mRNA."  
"Homo sapiens basigin (Ok blood group) (BSG), transcript variant 1, mRNA."  
"Homo sapiens bassoon (presynaptic cytomatrix protein) (BSN), mRNA."  
"Homo sapiens Bartter syndrome, infantile, with sensorineural deafness (Barttin) (BSND), mRNA."  
"Homo sapiens B-box and SPRY domain containing (BSPRY), mRNA."  
"Homo sapiens bone marrow stromal cell antigen 2 (BST2), mRNA."  
"Homo sapiens BTAF1 RNA polymerase II, B-TFIID transcription factor-associated, 170kDa (Mcf2) (BTAF1), mRNA."  
"Homo sapiens BTB (POZ) domain containing 10 (BTBD10), mRNA."  
"Homo sapiens BTB (POZ) domain containing 12 (BTBD12), mRNA."  
"Homo sapiens BTB (POZ) domain containing 2 (BTBD2), mRNA."  
"Homo sapiens BTB (POZ) domain containing 3 (BTBD3), transcript variant 2, mRNA."  
"Homo sapiens BTB (POZ) domain containing 6 (BTBD6), mRNA."  
"Homo sapiens BTB (POZ) domain containing 9 (BTBD9), transcript variant 1, mRNA."  
"Homo sapiens biotinidase (BTD), mRNA."  
"Homo sapiens basic transcription factor 3 (BTF3), mRNA."  
"Homo sapiens basic transcription factor 3-like 4 (BTF3L4), mRNA."

"Homo sapiens B-cell translocation gene 1, anti-proliferative (BTG1), mRNA."  
"Homo sapiens BTG family, member 2 (BTG2), mRNA."  
"Homo sapiens BTG family, member 3 (BTG3), mRNA."  
"Homo sapiens Bruton agammaglobulinemia tyrosine kinase (BTK), mRNA."  
"Homo sapiens B and T lymphocyte associated (BTLA), transcript variant 1, mRNA."  
"Homo sapiens butyrophilin, subfamily 1, member A1 (BTN1A1), mRNA."  
"Homo sapiens butyrophilin, subfamily 2, member A1 (BTN2A1), transcript variant 1, mRNA."  
"Homo sapiens butyrophilin, subfamily 2, member A2 (BTN2A2), transcript variant 1, mRNA."  
"Homo sapiens butyrophilin, subfamily 2, member A3 (BTN2A3), mRNA."  
"Homo sapiens butyrophilin, subfamily 3, member A1 (BTN3A1), transcript variant 2, mRNA."  
"Homo sapiens butyrophilin, subfamily 3, member A2 (BTN3A2), mRNA."  
"Homo sapiens butyrophilin, subfamily 3, member A3 (BTN3A3), transcript variant 2, mRNA."  
"Homo sapiens butyrophilin-like 9 (BTNL9), mRNA."  
"Homo sapiens beta-transducin repeat containing (BTRC), transcript variant 1, mRNA."  
"Homo sapiens BUB1 budding uninhibited by benzimidazoles 1 homolog (yeast) (BUB1), mRNA"  
"Homo sapiens BUB1 budding uninhibited by benzimidazoles 1 homolog beta (yeast) (BUB1B),  
"Homo sapiens BUB3 budding uninhibited by benzimidazoles 3 homolog (yeast) (BUB3), transc  
"Homo sapiens BUD13 homolog (*S. cerevisiae*) (BUD13), mRNA."  
"Homo sapiens BUD31 homolog (*S. cerevisiae*) (BUD31), mRNA."  
"Homo sapiens bystin-like (BYSL), mRNA."  
"Homo sapiens benzodiazapine receptor (peripheral) associated protein 1 (BZRAP1), mRNA."  
"Homo sapiens benzodiazapine receptor (peripheral)-like 1 (BZRPL1), mRNA."  
"PREDICTED: Homo sapiens basic leucine zipper and W2 domains 1, transcript variant 5 (BZW  
"Homo sapiens basic leucine zipper and W2 domains 2 (BZW2), mRNA."  
"Homo sapiens chromosome 10 open reading frame 10 (C10orf10), mRNA."  
"Homo sapiens chromosome 10 open reading frame 104 (C10orf104), mRNA."  
"Homo sapiens chromosome 10 open reading frame 108 (C10orf108), mRNA."  
"PREDICTED: Homo sapiens chromosome 10 open reading frame 112 (C10orf112), mRNA."  
"Homo sapiens chromosome 10 open reading frame 114 (C10orf114), mRNA."  
"PREDICTED: Homo sapiens chromosome 10 open reading frame 115 (C10orf115), mRNA."  
"Homo sapiens chromosome 10 open reading frame 118 (C10orf118), mRNA."  
"Homo sapiens chromosome 10 open reading frame 119 (C10orf119), mRNA."  
"Homo sapiens chromosome 10 open reading frame 12 (C10orf12), mRNA."  
"Homo sapiens chromosome 10 open reading frame 125 (C10orf125), transcript variant 2, mRN  
"PREDICTED: Homo sapiens chromosome 10 open reading frame 128, transcript variant 5 (C10  
"PREDICTED: Homo sapiens chromosome 10 open reading frame 136 (C10orf136), mRNA."  
"Homo sapiens chromosome 10 open reading frame 137 (C10orf137), mRNA."  
"Homo sapiens chromosome 10 open reading frame 140 (C10orf140), mRNA."  
"PREDICTED: Homo sapiens chromosome 10 open reading frame 18, transcript variant 1 (C10  
"Homo sapiens chromosome 10 open reading frame 2 (C10orf2), mRNA."  
"Homo sapiens chromosome 10 open reading frame 26 (C10orf26), transcript variant 1, mRNA."  
"Homo sapiens chromosome 10 open reading frame 28 (C10orf28), mRNA."  
"Homo sapiens chromosome 10 open reading frame 32 (C10orf32), mRNA."  
"Homo sapiens chromosome 10 open reading frame 33 (C10orf33), mRNA."

"Homo sapiens chromosome 10 open reading frame 47 (C10orf47), mRNA."  
"Homo sapiens chromosome 10 open reading frame 54 (C10orf54), mRNA."  
"Homo sapiens chromosome 10 open reading frame 57 (C10orf57), mRNA."  
"Homo sapiens chromosome 10 open reading frame 58 (C10orf58), transcript variant 1, mRNA."  
"Homo sapiens chromosome 10 open reading frame 59 (C10orf59), transcript variant 1, mRNA."  
"Homo sapiens chromosome 10 open reading frame 6 (C10orf6), mRNA."  
"Homo sapiens chromosome 10 open reading frame 61 (C10orf61), transcript variant 2, mRNA."  
"PREDICTED: Homo sapiens chromosome 10 open reading frame 64 (C10orf64), mRNA."  
"Homo sapiens chromosome 10 open reading frame 65 (C10orf65), mRNA."  
"Homo sapiens chromosome 10 open reading frame 67 (C10orf67), mRNA."  
"PREDICTED: Homo sapiens chromosome 10 open reading frame 73 (C10orf73), mRNA."  
"PREDICTED: Homo sapiens misc\_RNA (C10orf75), miscRNA."  
"Homo sapiens chromosome 10 open reading frame 78 (C10orf78), transcript variant 2, mRNA."  
"Homo sapiens chromosome 10 open reading frame 84 (C10orf84), mRNA."  
"Homo sapiens chromosome 10 open reading frame 88 (C10orf88), mRNA."  
"PREDICTED: Homo sapiens chromosome 10 open reading frame 93, transcript variant 3 (C10orf93), mRNA."  
"Homo sapiens chromosome 11 open reading frame 1 (C11orf1), mRNA."  
"Homo sapiens chromosome 11 open reading frame 10 (C11orf10), mRNA."  
"Homo sapiens chromosome 11 open reading frame 17 (C11orf17), transcript variant 2, mRNA."  
"Homo sapiens chromosome 11 open reading frame 2 (C11orf2), mRNA."  
"Homo sapiens chromosome 11 open reading frame 24 (C11orf24), mRNA."  
"Homo sapiens chromosome 11 open reading frame 30 (C11orf30), mRNA."  
"Homo sapiens chromosome 11 open reading frame 31 (C11orf31), mRNA."  
"Homo sapiens chromosome 11 open reading frame 35 (C11orf35), mRNA."  
"Homo sapiens chromosome 11 open reading frame 39 (C11orf39), mRNA."  
"Homo sapiens chromosome 11 open reading frame 41 (C11orf41), mRNA."  
"Homo sapiens chromosome 11 open reading frame 46 (C11orf46), mRNA."  
"Homo sapiens chromosome 11 open reading frame 47 (C11orf47), mRNA."  
"Homo sapiens chromosome 11 open reading frame 48 (C11orf48), mRNA."  
"Homo sapiens chromosome 11 open reading frame 49 (C11orf49), transcript variant 2, mRNA."  
"Homo sapiens chromosome 11 open reading frame 51 (C11orf51), mRNA."  
"Homo sapiens chromosome 11 open reading frame 54 (C11orf54), mRNA."  
"Homo sapiens chromosome 11 open reading frame 57 (C11orf57), transcript variant 1, mRNA."  
"Homo sapiens chromosome 11 open reading frame 58 (C11orf58), mRNA."  
"Homo sapiens chromosome 11 open reading frame 59 (C11orf59), mRNA."  
"Homo sapiens chromosome 11 open reading frame 60 (C11orf60), mRNA."  
"Homo sapiens chromosome 11 open reading frame 61 (C11orf61), mRNA."  
"Homo sapiens chromosome 11 open reading frame 63 (C11orf63), transcript variant 1, mRNA."  
"Homo sapiens chromosome 11 open reading frame 65 (C11orf65), mRNA."  
"Homo sapiens chromosome 11 open reading frame 67 (C11orf67), mRNA."  
"Homo sapiens chromosome 11 open reading frame 68 (C11orf68), mRNA."  
"Homo sapiens chromosome 11 open reading frame 70 (C11orf70), mRNA."  
"Homo sapiens chromosome 11 open reading frame 71 (C11orf71), mRNA."  
"Homo sapiens chromosome 11 open reading frame 73 (C11orf73), mRNA."

"Homo sapiens chromosome 11 open reading frame 74 (C11orf74), mRNA."  
"Homo sapiens chromosome 11 open reading frame 75 (C11orf75), mRNA."  
"Homo sapiens chromosome 11 open reading frame 80 (C11orf80), mRNA."  
"Homo sapiens chromosome 11 open reading frame 82 (C11orf82), mRNA."  
"Homo sapiens chromosome 11 open reading frame 83 (C11orf83), mRNA."  
"Homo sapiens chromosome 11 open reading frame 84 (C11orf84), mRNA."  
"Homo sapiens chromosome 11 open reading frame 85 (C11orf85), mRNA."  
"Homo sapiens chromosome 11 open reading frame 86 (C11orf86), mRNA."  
"Homo sapiens chromosome 11 open reading frame 88 (C11orf88), transcript variant 2, mRNA."  
"Homo sapiens chromosome 12 open reading frame 10 (C12orf10), mRNA."  
"Homo sapiens chromosome 12 open reading frame 23 (C12orf23), mRNA."  
"Homo sapiens chromosome 12 open reading frame 24 (C12orf24), mRNA."  
"Homo sapiens chromosome 12 open reading frame 26 (C12orf26), mRNA."  
"Homo sapiens chromosome 12 open reading frame 28 (C12orf28), mRNA."  
"Homo sapiens chromosome 12 open reading frame 29 (C12orf29), mRNA."  
"Homo sapiens chromosome 12 open reading frame 30 (C12orf30), mRNA."  
"Homo sapiens chromosome 12 open reading frame 31 (C12orf31), mRNA."  
"Homo sapiens chromosome 12 open reading frame 32 (C12orf32), mRNA."  
"Homo sapiens chromosome 12 open reading frame 34 (C12orf34), mRNA."  
"Homo sapiens chromosome 12 open reading frame 35 (C12orf35), mRNA."  
"Homo sapiens chromosome 12 open reading frame 36 (C12orf36), mRNA."  
"PREDICTED: Homo sapiens chromosome 12 open reading frame 37 (C12orf37), mRNA."  
"Homo sapiens chromosome 12 open reading frame 4 (C12orf4), mRNA."  
"Homo sapiens chromosome 12 open reading frame 41 (C12orf41), mRNA."  
"Homo sapiens chromosome 12 open reading frame 42 (C12orf42), transcript variant 2, mRNA."  
"Homo sapiens chromosome 12 open reading frame 43 (C12orf43), mRNA."  
"Homo sapiens chromosome 12 open reading frame 44 (C12orf44), transcript variant 2, mRNA."  
"Homo sapiens chromosome 12 open reading frame 45 (C12orf45), mRNA."  
"PREDICTED: Homo sapiens chromosome 12 open reading frame 47 (C12orf47), misc RNA."  
"Homo sapiens chromosome 12 open reading frame 48 (C12orf48), mRNA."  
"Homo sapiens chromosome 12 open reading frame 49 (C12orf49), mRNA."  
"Homo sapiens chromosome 12 open reading frame 5 (C12orf5), mRNA."  
"Homo sapiens chromosome 12 open reading frame 51 (C12orf51), mRNA."  
"Homo sapiens chromosome 12 open reading frame 52 (C12orf52), mRNA."  
"Homo sapiens chromosome 12 open reading frame 54 (C12orf54), mRNA."  
"Homo sapiens chromosome 12 open reading frame 57 (C12orf57), mRNA."  
"Homo sapiens chromosome 12 open reading frame 59 (C12orf59), mRNA."  
"Homo sapiens chromosome 12 open reading frame 60 (C12orf60), mRNA."  
"Homo sapiens chromosome 12 open reading frame 62 (C12orf62), mRNA."  
"Homo sapiens chromosome 12 open reading frame 65 (C12orf65), mRNA."  
"Homo sapiens chromosome 12 open reading frame 66 (C12orf66), mRNA."  
"Homo sapiens chromosome 12 open reading frame 67 (C12orf67), mRNA."  
"Homo sapiens chromosome 12 open reading frame 68 (C12orf68), mRNA."  
"Homo sapiens chromosome 12 open reading frame 69 (C12orf69), mRNA."

"Homo sapiens chromosome 12 open reading frame 71 (C12orf71), mRNA."  
"Homo sapiens chromosome 12 open reading frame 72 (C12orf72), mRNA."  
"Homo sapiens chromosome 12 open reading frame 73 (C12orf73), mRNA."  
"Homo sapiens chromosome 12 open reading frame 76 (C12orf76), mRNA."  
"Homo sapiens chromosome 12 open reading frame 77 (C12orf77), mRNA."  
"Homo sapiens chromosome 13 open reading frame 1 (C13orf1), mRNA."  
"Homo sapiens chromosome 13 open reading frame 15 (C13orf15), mRNA."  
"Homo sapiens chromosome 13 open reading frame 18 (C13orf18), mRNA."  
"Homo sapiens chromosome 13 open reading frame 23 (C13orf23), transcript variant 1, mRNA."  
"PREDICTED: Homo sapiens chromosome 13 open reading frame 25 (C13orf25), mRNA."  
"Homo sapiens chromosome 13 open reading frame 3 (C13orf3), mRNA."  
"Homo sapiens chromosome 13 open reading frame 31 (C13orf31), mRNA."  
"Homo sapiens chromosome 13 open reading frame 34 (C13orf34), mRNA."  
"Homo sapiens chromosome 13 open reading frame 37 (C13orf37), mRNA."  
"Homo sapiens chromosome 14 open reading frame 100 (C14orf100), mRNA."  
"Homo sapiens chromosome 14 open reading frame 101 (C14orf101), mRNA."  
"Homo sapiens chromosome 14 open reading frame 102 (C14orf102), transcript variant 2, mRN  
"Homo sapiens chromosome 14 open reading frame 104 (C14orf104), transcript variant 1, mRN  
"Homo sapiens chromosome 14 open reading frame 106 (C14orf106), mRNA."  
"Homo sapiens chromosome 14 open reading frame 109 (C14orf109), transcript variant 2, mRN  
"Homo sapiens chromosome 14 open reading frame 112 (C14orf112), mRNA."  
"Homo sapiens chromosome 14 open reading frame 118 (C14orf118), transcript variant 1, mRN  
"Homo sapiens chromosome 14 open reading frame 121 (C14orf121), mRNA."  
"Homo sapiens chromosome 14 open reading frame 126 (C14orf126), mRNA."  
"PREDICTED: Homo sapiens chromosome 14 open reading frame 128 (C14orf128), misc RNA."  
"Homo sapiens chromosome 14 open reading frame 129 (C14orf129), mRNA."  
"Homo sapiens chromosome 14 open reading frame 131 (C14orf131), mRNA."  
"Homo sapiens chromosome 14 open reading frame 132 (C14orf132), mRNA."  
"Homo sapiens chromosome 14 open reading frame 133 (C14orf133), mRNA."  
"Homo sapiens chromosome 14 open reading frame 135 (C14orf135), mRNA."  
"Homo sapiens chromosome 14 open reading frame 138 (C14orf138), transcript variant 2, mRN  
"Homo sapiens chromosome 14 open reading frame 143 (C14orf143), mRNA."  
"Homo sapiens chromosome 14 open reading frame 145 (C14orf145), mRNA."  
"Homo sapiens chromosome 14 open reading frame 147 (C14orf147), mRNA."  
"Homo sapiens chromosome 14 open reading frame 149 (C14orf149), mRNA."  
"Homo sapiens chromosome 14 open reading frame 153 (C14orf153), mRNA."  
"Homo sapiens chromosome 14 open reading frame 156 (C14orf156), mRNA."  
"Homo sapiens chromosome 14 open reading frame 159 (C14orf159), mRNA."  
"Homo sapiens chromosome 14 open reading frame 162 (C14orf162), mRNA."  
"Homo sapiens chromosome 14 open reading frame 166 (C14orf166), mRNA."  
"Homo sapiens chromosome 14 open reading frame 167 (C14orf167), transcript variant 1, non-c  
"Homo sapiens chromosome 14 open reading frame 169 (C14orf169), mRNA."  
"Homo sapiens chromosome 14 open reading frame 173 (C14orf173), transcript variant 2, mRN  
"Homo sapiens chromosome 14 open reading frame 174 (C14orf174), mRNA."

"Homo sapiens chromosome 14 open reading frame 179 (C14orf179), mRNA."  
"Homo sapiens chromosome 14 open reading frame 180 (C14orf180), mRNA."  
"Homo sapiens chromosome 14 open reading frame 181 (C14orf181), mRNA."  
"Homo sapiens chromosome 14 open reading frame 184 (C14orf184), mRNA."  
Homo sapiens chromosome 14 open reading frame 19 (C14orf19) on chromosome 14.  
"Homo sapiens chromosome 14 open reading frame 2 (C14orf2), mRNA."  
"Homo sapiens chromosome 14 open reading frame 21 (C14orf21), mRNA."  
"PREDICTED: Homo sapiens chromosome 14 open reading frame 23 (C14orf23), mRNA."  
"Homo sapiens chromosome 14 open reading frame 28 (C14orf28), mRNA."  
"Homo sapiens chromosome 14 open reading frame 32 (C14orf32), mRNA."  
"Homo sapiens chromosome 14 open reading frame 37 (C14orf37), mRNA."  
"PREDICTED: Homo sapiens chromosome 14 open reading frame 38 (C14orf38), mRNA."  
"Homo sapiens chromosome 14 open reading frame 4 (C14orf4), mRNA."  
"Homo sapiens chromosome 14 open reading frame 43 (C14orf43), transcript variant 1, mRNA."  
"Homo sapiens chromosome 14 open reading frame 45 (C14orf45), mRNA."  
"Homo sapiens chromosome 14 open reading frame 68 (C14orf68), mRNA."  
"PREDICTED: Homo sapiens chromosome 14 open reading frame 72 (C14orf72), mRNA."  
"PREDICTED: Homo sapiens chromosome 14 open reading frame 78 (C14orf78), mRNA."  
"Homo sapiens chromosome 14 open reading frame 79 (C14orf79), mRNA."  
"Homo sapiens chromosome 14 open reading frame 80 (C14orf80), mRNA."  
"PREDICTED: Homo sapiens chromosome 14 open reading frame 82 (C14orf82), mRNA."  
"Homo sapiens chromosome 14 open reading frame 85 (C14orf85), non-coding RNA."  
"Homo sapiens chromosome 14 open reading frame 93 (C14orf93), mRNA."  
"Homo sapiens chromosome 15 open reading frame 17 (C15orf17), mRNA."  
"Homo sapiens chromosome 15 open reading frame 21 (C15orf21), transcript variant 2, mRNA."  
"Homo sapiens chromosome 15 open reading frame 23 (C15orf23), mRNA."  
"Homo sapiens chromosome 15 open reading frame 24 (C15orf24), mRNA."  
"Homo sapiens chromosome 15 open reading frame 26 (C15orf26), mRNA."  
"Homo sapiens chromosome 15 open reading frame 27 (C15orf27), mRNA."  
"PREDICTED: Homo sapiens chromosome 15 open reading frame 28 (C15orf28), misc RNA."  
"Homo sapiens chromosome 15 open reading frame 29 (C15orf29), mRNA."  
"Homo sapiens chromosome 15 open reading frame 33 (C15orf33), mRNA."  
"Homo sapiens chromosome 15 open reading frame 39 (C15orf39), mRNA."  
"Homo sapiens chromosome 15 open reading frame 40 (C15orf40), mRNA."  
"Homo sapiens chromosome 15 open reading frame 41 (C15orf41), mRNA."  
"Homo sapiens chromosome 15 open reading frame 42 (C15orf42), mRNA."  
"PREDICTED: Homo sapiens chromosome 15 open reading frame 44 (C15orf44), mRNA."  
"Homo sapiens chromosome 15 open reading frame 48 (C15orf48), transcript variant 2, mRNA."  
"Homo sapiens chromosome 15 open reading frame 52 (C15orf52), mRNA."  
"Homo sapiens chromosome 15 open reading frame 53 (C15orf53), mRNA."  
"Homo sapiens chromosome 15 open reading frame 57 (C15orf57), transcript variant 2, mRNA."  
"Homo sapiens chromosome 15 open reading frame 63 (C15orf63), mRNA."  
"Homo sapiens chromosome 16 open reading frame 13 (C16orf13), transcript variant 4, mRNA."  
"Homo sapiens chromosome 16 open reading frame 33 (C16orf33), mRNA."

"Homo sapiens chromosome 16 open reading frame 35 (C16orf35), transcript variant 2, mRNA."  
"Homo sapiens chromosome 16 open reading frame 38 (C16orf38), mRNA."  
"Homo sapiens chromosome 16 open reading frame 42 (C16orf42), mRNA."  
"Homo sapiens chromosome 16 open reading frame 46 (C16orf46), mRNA."  
"Homo sapiens chromosome 16 open reading frame 48 (C16orf48), mRNA."  
"Homo sapiens chromosome 16 open reading frame 5 (C16orf5), mRNA."  
"PREDICTED: Homo sapiens chromosome 16 open reading frame 50, transcript variant 3 (C16orf50), mRNA."  
"Homo sapiens chromosome 16 open reading frame 52 (C16orf52), mRNA."  
"Homo sapiens chromosome 16 open reading frame 53 (C16orf53), mRNA."  
"Homo sapiens chromosome 16 open reading frame 54 (C16orf54), mRNA."  
"Homo sapiens chromosome 16 open reading frame 56 (C16orf56), mRNA."  
"Homo sapiens chromosome 16 open reading frame 57 (C16orf57), mRNA."  
"Homo sapiens chromosome 16 open reading frame 58 (C16orf58), mRNA."  
"Homo sapiens chromosome 16 open reading frame 59 (C16orf59), mRNA."  
"Homo sapiens chromosome 16 open reading frame 61 (C16orf61), mRNA."  
"Homo sapiens chromosome 16 open reading frame 62 (C16orf62), mRNA."  
"Homo sapiens chromosome 16 open reading frame 63 (C16orf63), mRNA."  
"Homo sapiens chromosome 16 open reading frame 68 (C16orf68), mRNA."  
"Homo sapiens chromosome 16 open reading frame 69 (C16orf69), mRNA."  
"Homo sapiens chromosome 16 open reading frame 7 (C16orf7), mRNA."  
"Homo sapiens chromosome 16 open reading frame 70 (C16orf70), mRNA."  
"Homo sapiens chromosome 16 open reading frame 72 (C16orf72), mRNA."  
"Homo sapiens chromosome 16 open reading frame 73 (C16orf73), mRNA."  
"Homo sapiens chromosome 16 open reading frame 74 (C16orf74), mRNA."  
"Homo sapiens chromosome 16 open reading frame 75 (C16orf75), mRNA."  
"Homo sapiens chromosome 16 open reading frame 79 (C16orf79), mRNA."  
"Homo sapiens chromosome 16 open reading frame 80 (C16orf80), mRNA."  
"Homo sapiens chromosome 16 open reading frame 85 (C16orf85), mRNA."  
"Homo sapiens chromosome 16 open reading frame 86 (C16orf86), mRNA."  
"Homo sapiens chromosome 16 open reading frame 87 (C16orf87), mRNA."  
"Homo sapiens chromosome 16 open reading frame 88 (C16orf88), mRNA."  
"Homo sapiens chromosome 16 open reading frame 91 (C16orf91), mRNA."  
"Homo sapiens chromosome 16 open reading frame 93 (C16orf93), mRNA."  
"Homo sapiens chromosome 17 open reading frame 100 (C17orf100), mRNA."  
"Homo sapiens chromosome 17 open reading frame 101 (C17orf101), transcript variant 1, mRNA."  
"Homo sapiens chromosome 17 open reading frame 106 (C17orf106), mRNA."  
"Homo sapiens chromosome 17 open reading frame 108 (C17orf108), mRNA."  
"Homo sapiens chromosome 17 open reading frame 28 (C17orf28), mRNA."  
"Homo sapiens chromosome 17 open reading frame 37 (C17orf37), mRNA."  
"Homo sapiens chromosome 17 open reading frame 39 (C17orf39), mRNA."  
"PREDICTED: Homo sapiens chromosome 17 open reading frame 41 (C17orf41), mRNA."  
"Homo sapiens chromosome 17 open reading frame 42 (C17orf42), mRNA."  
"Homo sapiens chromosome 17 open reading frame 44 (C17orf44), mRNA."  
"Homo sapiens chromosome 17 open reading frame 45 (C17orf45), mRNA."



"Homo sapiens chromosome 17 open reading frame 48 (C17orf48), mRNA."  
"Homo sapiens chromosome 17 open reading frame 49 (C17orf49), mRNA."  
"Homo sapiens chromosome 17 open reading frame 53 (C17orf53), mRNA."  
"Homo sapiens chromosome 17 open reading frame 56 (C17orf56), mRNA."  
"Homo sapiens chromosome 17 open reading frame 58 (C17orf58), transcript variant 2, mRNA."  
"Homo sapiens chromosome 17 open reading frame 59 (C17orf59), mRNA."  
"Homo sapiens chromosome 17 open reading frame 60 (C17orf60), mRNA."  
"Homo sapiens chromosome 17 open reading frame 61 (C17orf61), mRNA."  
"Homo sapiens chromosome 17 open reading frame 62 (C17orf62), transcript variant 3, mRNA."  
"Homo sapiens chromosome 17 open reading frame 63 (C17orf63), transcript variant 1, mRNA."  
"Homo sapiens chromosome 17 open reading frame 64 (C17orf64), mRNA."  
"Homo sapiens chromosome 17 open reading frame 65 (C17orf65), mRNA."  
"Homo sapiens chromosome 17 open reading frame 67 (C17orf67), mRNA."  
"PREDICTED: Homo sapiens chromosome 17 open reading frame 68 (C17orf68), mRNA."  
"Homo sapiens chromosome 17 open reading frame 70 (C17orf70), mRNA."  
"Homo sapiens chromosome 17 open reading frame 71 (C17orf71), mRNA."  
"Homo sapiens chromosome 17 open reading frame 74 (C17orf74), mRNA."  
"Homo sapiens chromosome 17 open reading frame 79 (C17orf79), mRNA."  
"Homo sapiens chromosome 17 open reading frame 80 (C17orf80), mRNA."  
"Homo sapiens chromosome 17 open reading frame 81 (C17orf81), transcript variant 2, mRNA."  
"Homo sapiens chromosome 17 open reading frame 82 (C17orf82), mRNA."  
"Homo sapiens chromosome 17 open reading frame 85 (C17orf85), mRNA."  
"PREDICTED: Homo sapiens misc\_RNA (C17orf86), miscRNA."  
"Homo sapiens chromosome 17 open reading frame 87 (C17orf87), mRNA."  
"PREDICTED: Homo sapiens misc\_RNA (C17orf88), miscRNA."  
"Homo sapiens chromosome 17 open reading frame 89 (C17orf89), mRNA."  
"Homo sapiens chromosome 17 open reading frame 90 (C17orf90), mRNA."  
"Homo sapiens chromosome 17 open reading frame 91 (C17orf91), transcript variant 2, mRNA."  
"Homo sapiens chromosome 17 open reading frame 95 (C17orf95), mRNA."  
"Homo sapiens chromosome 17 open reading frame 96 (C17orf96), mRNA."  
"Homo sapiens chromosome 17 open reading frame 97 (C17orf97), mRNA."  
"Homo sapiens chromosome 18 open reading frame 1 (C18orf1), transcript variant b2, mRNA."  
"PREDICTED: Homo sapiens chromosome 18 open reading frame 18 (C18orf18), mRNA."  
"Homo sapiens chromosome 18 open reading frame 19 (C18orf19), mRNA."  
"Homo sapiens chromosome 18 open reading frame 20 (C18orf20), mRNA."  
"Homo sapiens chromosome 18 open reading frame 21 (C18orf21), mRNA."  
"Homo sapiens chromosome 18 open reading frame 22 (C18orf22), mRNA."  
"Homo sapiens chromosome 18 open reading frame 25 (C18orf25), transcript variant 2, mRNA."  
"Homo sapiens chromosome 18 open reading frame 26 (C18orf26), mRNA."  
"Homo sapiens chromosome 18 open reading frame 32 (C18orf32), mRNA."  
"Homo sapiens chromosome 18 open reading frame 45 (C18orf45), mRNA."  
"Homo sapiens chromosome 18 open reading frame 54 (C18orf54), mRNA."  
"Homo sapiens chromosome 18 open reading frame 55 (C18orf55), mRNA."  
"Homo sapiens chromosome 18 open reading frame 56 (C18orf56), mRNA."

"Homo sapiens chromosome 18 open reading frame 58 (C18orf58), mRNA."  
"Homo sapiens chromosome 18 open reading frame 8 (C18orf8), mRNA."  
"Homo sapiens chromosome 19 open reading frame 10 (C19orf10), mRNA."  
"Homo sapiens chromosome 19 open reading frame 12 (C19orf12), transcript variant 1, mRNA."  
"Homo sapiens chromosome 19 open reading frame 2 (C19orf2), transcript variant 2, mRNA."  
"Homo sapiens chromosome 19 open reading frame 20 (C19orf20), mRNA."  
"Homo sapiens chromosome 19 open reading frame 22 (C19orf22), mRNA."  
"Homo sapiens chromosome 19 open reading frame 23 (C19orf23), mRNA."  
"Homo sapiens chromosome 19 open reading frame 24 (C19orf24), mRNA."  
"Homo sapiens chromosome 19 open reading frame 25 (C19orf25), mRNA."  
"Homo sapiens chromosome 19 open reading frame 26 (C19orf26), mRNA."  
"Homo sapiens chromosome 19 open reading frame 28 (C19orf28), transcript variant 3, mRNA."  
"Homo sapiens chromosome 19 open reading frame 29 (C19orf29), transcript variant 1, mRNA."  
"PREDICTED: Homo sapiens chromosome 19 open reading frame 29 opposite strand (C19orf29), mRNA."  
"Homo sapiens chromosome 19 open reading frame 30 (C19orf30), mRNA."  
"Homo sapiens chromosome 19 open reading frame 31 (C19orf31), mRNA."  
"Homo sapiens chromosome 19 open reading frame 36 (C19orf36), transcript variant 3, mRNA."  
"Homo sapiens chromosome 19 open reading frame 39 (C19orf39), mRNA."  
"Homo sapiens chromosome 19 open reading frame 4 (C19orf4), mRNA."  
"Homo sapiens chromosome 19 open reading frame 40 (C19orf40), mRNA."  
"Homo sapiens chromosome 19 open reading frame 42 (C19orf42), mRNA."  
"Homo sapiens chromosome 19 open reading frame 43 (C19orf43), mRNA."  
"Homo sapiens chromosome 19 open reading frame 44 (C19orf44), mRNA."  
"Homo sapiens chromosome 19 open reading frame 45 (C19orf45), mRNA."  
"Homo sapiens chromosome 19 open reading frame 47 (C19orf47), mRNA."  
"Homo sapiens chromosome 19 open reading frame 48 (C19orf48), mRNA."  
"Homo sapiens chromosome 19 open reading frame 50 (C19orf50), mRNA."  
"Homo sapiens chromosome 19 open reading frame 51 (C19orf51), mRNA."  
"Homo sapiens chromosome 19 open reading frame 52 (C19orf52), mRNA."  
"Homo sapiens chromosome 19 open reading frame 53 (C19orf53), mRNA."  
"Homo sapiens chromosome 19 open reading frame 54 (C19orf54), mRNA."  
"Homo sapiens chromosome 19 open reading frame 55 (C19orf55), mRNA."  
"Homo sapiens chromosome 19 open reading frame 56 (C19orf56), mRNA."  
"Homo sapiens chromosome 19 open reading frame 59 (C19orf59), mRNA."  
"Homo sapiens chromosome 19 open reading frame 6 (C19orf6), transcript variant 1, mRNA."  
"Homo sapiens chromosome 19 open reading frame 60 (C19orf60), transcript variant 2, mRNA."  
"Homo sapiens chromosome 19 open reading frame 61 (C19orf61), mRNA."  
"Homo sapiens chromosome 19 open reading frame 62 (C19orf62), transcript variant 2, mRNA."  
"PREDICTED: Homo sapiens chromosome 19 open reading frame 64 (C19orf64), mRNA."  
"Homo sapiens chromosome 19 open reading frame 66 (C19orf66), mRNA."  
"Homo sapiens chromosome 19 open reading frame 70 (C19orf70), mRNA."  
"Homo sapiens chromosome 19 open reading frame 71 (C19orf71), mRNA."  
"Homo sapiens chromosome 19 open reading frame 73 (C19orf73), mRNA."  
"Homo sapiens core 1 synthase, glycoprotein-N-acetylgalactosamine 3-beta-galactosyltransferase"

"Homo sapiens C1GALT1-specific chaperone 1 (C1GALT1C1), transcript variant 1, mRNA."  
"Homo sapiens chromosome 1 open reading frame 100 (C1orf100), mRNA."  
"Homo sapiens chromosome 1 open reading frame 102 (C1orf102), transcript variant 1, mRNA."  
"Homo sapiens chromosome 1 open reading frame 103 (C1orf103), transcript variant 2, mRNA."  
"Homo sapiens chromosome 1 open reading frame 106 (C1orf106), mRNA."  
"Homo sapiens chromosome 1 open reading frame 107 (C1orf107), mRNA."  
"Homo sapiens chromosome 1 open reading frame 109 (C1orf109), mRNA."  
"Homo sapiens chromosome 1 open reading frame 112 (C1orf112), mRNA."  
"Homo sapiens chromosome 1 open reading frame 120 (C1orf120), mRNA."  
"Homo sapiens chromosome 1 open reading frame 122 (C1orf122), mRNA."  
"Homo sapiens chromosome 1 open reading frame 123 (C1orf123), mRNA."  
"Homo sapiens chromosome 1 open reading frame 124 (C1orf124), transcript variant 1, mRNA."  
"Homo sapiens chromosome 1 open reading frame 126 (C1orf126), mRNA."  
"Homo sapiens chromosome 1 open reading frame 127 (C1orf127), mRNA."  
"Homo sapiens chromosome 1 open reading frame 128 (C1orf128), mRNA."  
"Homo sapiens chromosome 1 open reading frame 131 (C1orf131), mRNA."  
"PREDICTED: Homo sapiens chromosome 1 open reading frame 132 (C1orf132), misc RNA."  
"Homo sapiens chromosome 1 open reading frame 133 (C1orf133), non-coding RNA. XM\_0017"  
"Homo sapiens chromosome 1 open reading frame 135 (C1orf135), mRNA."  
"Homo sapiens chromosome 1 open reading frame 144 (C1orf144), mRNA."  
"Homo sapiens chromosome 1 open reading frame 149 (C1orf149), mRNA."  
"Homo sapiens chromosome 1 open reading frame 151 (C1orf151), mRNA."  
"Homo sapiens chromosome 1 open reading frame 156 (C1orf156), mRNA."  
"Homo sapiens chromosome 1 open reading frame 159 (C1orf159), mRNA."  
"Homo sapiens chromosome 1 open reading frame 161 (C1orf161), mRNA."  
"Homo sapiens chromosome 1 open reading frame 162 (C1orf162), mRNA."  
"Homo sapiens chromosome 1 open reading frame 163 (C1orf163), mRNA."  
"Homo sapiens chromosome 1 open reading frame 165 (C1orf165), mRNA."  
"Homo sapiens chromosome 1 open reading frame 166 (C1orf166), mRNA."  
"Homo sapiens chromosome 1 open reading frame 173 (C1orf173), mRNA."  
"Homo sapiens chromosome 1 open reading frame 174 (C1orf174), mRNA."  
"Homo sapiens chromosome 1 open reading frame 182 (C1orf182), mRNA."  
"Homo sapiens chromosome 1 open reading frame 186 (C1orf186), mRNA."  
"Homo sapiens chromosome 1 open reading frame 187 (C1orf187), mRNA."  
"Homo sapiens chromosome 1 open reading frame 188 (C1orf188), mRNA."  
"Homo sapiens chromosome 1 open reading frame 19 (C1orf19), mRNA."  
"Homo sapiens chromosome 1 open reading frame 192 (C1orf192), mRNA."  
"Homo sapiens chromosome 1 open reading frame 198 (C1orf198), mRNA."  
"Homo sapiens chromosome 1 open reading frame 200 (C1orf200), mRNA."  
"Homo sapiens chromosome 1 open reading frame 203 (C1orf203), non-coding RNA."  
"Homo sapiens chromosome 1 open reading frame 21 (C1orf21), mRNA."  
"Homo sapiens chromosome 1 open reading frame 210 (C1orf210), mRNA."  
"Homo sapiens chromosome 1 open reading frame 212 (C1orf212), mRNA."  
"Homo sapiens chromosome 1 open reading frame 213 (C1orf213), transcript variant 2, mRNA."

"Homo sapiens chromosome 1 open reading frame 216 (C1orf216), mRNA."  
"Homo sapiens chromosome 1 open reading frame 218 (C1orf218), mRNA."  
"Homo sapiens chromosome 1 open reading frame 220 (C1orf220), mRNA."  
"Homo sapiens chromosome 1 open reading frame 24 (C1orf24), transcript variant 2, mRNA."  
"Homo sapiens chromosome 1 open reading frame 25 (C1orf25), mRNA."  
"Homo sapiens chromosome 1 open reading frame 26 (C1orf26), mRNA."  
"Homo sapiens chromosome 1 open reading frame 31 (C1orf31), mRNA."  
"Homo sapiens chromosome 1 open reading frame 35 (C1orf35), mRNA."  
"Homo sapiens chromosome 1 open reading frame 38 (C1orf38), transcript variant 1, mRNA."  
"Homo sapiens chromosome 1 open reading frame 41 (C1orf41), mRNA."  
"Homo sapiens chromosome 1 open reading frame 43 (C1orf43), transcript variant 1, mRNA."  
"Homo sapiens chromosome 1 open reading frame 49 (C1orf49), mRNA."  
"Homo sapiens chromosome 1 open reading frame 50 (C1orf50), mRNA."  
"Homo sapiens chromosome 1 open reading frame 52 (C1orf52), mRNA."  
"Homo sapiens chromosome 1 open reading frame 53 (C1orf53), mRNA."  
"Homo sapiens chromosome 1 open reading frame 54 (C1orf54), mRNA."  
"Homo sapiens chromosome 1 open reading frame 55 (C1orf55), mRNA."  
"Homo sapiens chromosome 1 open reading frame 56 (C1orf56), mRNA."  
"Homo sapiens chromosome 1 open reading frame 57 (C1orf57), mRNA."  
"Homo sapiens chromosome 1 open reading frame 58 (C1orf58), mRNA."  
"Homo sapiens chromosome 1 open reading frame 59 (C1orf59), mRNA."  
"Homo sapiens chromosome 1 open reading frame 61 (C1orf61), mRNA."  
"Homo sapiens chromosome 1 open reading frame 63 (C1orf63), transcript variant 1, mRNA."  
"Homo sapiens chromosome 1 open reading frame 65 (C1orf65), mRNA."  
"Homo sapiens chromosome 1 open reading frame 66 (C1orf66), mRNA."  
"Homo sapiens chromosome 1 open reading frame 69 (C1orf69), mRNA."  
"Homo sapiens chromosome 1 open reading frame 74 (C1orf74), mRNA."  
"Homo sapiens chromosome 1 open reading frame 77 (C1orf77), mRNA."  
"Homo sapiens chromosome 1 open reading frame 83 (C1orf83), mRNA."  
"Homo sapiens chromosome 1 open reading frame 85 (C1orf85), mRNA."  
"Homo sapiens chromosome 1 open reading frame 86 (C1orf86), transcript variant 2, mRNA."  
"Homo sapiens chromosome 1 open reading frame 9 (C1orf9), transcript variant 1, mRNA."  
"Homo sapiens chromosome 1 open reading frame 91 (C1orf91), mRNA."  
"Homo sapiens chromosome 1 open reading frame 93 (C1orf93), mRNA."  
"Homo sapiens chromosome 1 open reading frame 97 (C1orf97), mRNA."  
"Homo sapiens complement component 1, q subcomponent, alpha polypeptide (C1QA), mRNA."  
"Homo sapiens complement component 1, q subcomponent binding protein (C1QBP), nuclear g  
"Homo sapiens complement component 1, q subcomponent-like 1 (C1QL1), mRNA."  
"Homo sapiens complement component 1, q subcomponent-like 2 (C1QL2), mRNA."  
"Homo sapiens complement component 1, q subcomponent-like 4 (C1QL4), mRNA."  
"Homo sapiens C1q and tumor necrosis factor related protein 2 (C1QTNF2), mRNA."  
"Homo sapiens C1q and tumor necrosis factor related protein 3 (C1QTNF3), transcript variant 1.  
"Homo sapiens C1q and tumor necrosis factor related protein 6 (C1QTNF6), transcript variant 1.  
"Homo sapiens C1q and tumor necrosis factor related protein 7 (C1QTNF7), mRNA."

"Homo sapiens C1q and tumor necrosis factor related protein 9 (C1QTNF9), mRNA."  
"Homo sapiens chromosome 20 open reading frame 100 (C20orf100), mRNA."  
"Homo sapiens chromosome 20 open reading frame 103 (C20orf103), mRNA."  
"Homo sapiens chromosome 20 open reading frame 106 (C20orf106), mRNA."  
"Homo sapiens chromosome 20 open reading frame 107 (C20orf107), mRNA."  
"Homo sapiens chromosome 20 open reading frame 108 (C20orf108), mRNA."  
"Homo sapiens chromosome 20 open reading frame 11 (C20orf11), mRNA."  
"Homo sapiens chromosome 20 open reading frame 111 (C20orf111), mRNA."  
"Homo sapiens chromosome 20 open reading frame 112 (C20orf112), mRNA."  
"Homo sapiens chromosome 20 open reading frame 117 (C20orf117), transcript variant 1, mRN  
"Homo sapiens chromosome 20 open reading frame 12 (C20orf12), mRNA."  
"Homo sapiens chromosome 20 open reading frame 127 (C20orf127), mRNA."  
"Homo sapiens chromosome 20 open reading frame 134 (C20orf134), mRNA."  
"Homo sapiens chromosome 20 open reading frame 141 (C20orf141), mRNA."  
"Homo sapiens chromosome 20 open reading frame 160 (C20orf160), mRNA."  
"Homo sapiens chromosome 20 open reading frame 165 (C20orf165), mRNA."  
"Homo sapiens chromosome 20 open reading frame 177 (C20orf177), mRNA."  
"Homo sapiens chromosome 20 open reading frame 191 (C20orf191), mRNA."  
"Homo sapiens chromosome 20 open reading frame 196 (C20orf196), mRNA."  
"Homo sapiens chromosome 20 open reading frame 199 (C20orf199), transcript variant 3, non-c  
"Homo sapiens chromosome 20 open reading frame 20 (C20orf20), mRNA."  
"Homo sapiens chromosome 20 open reading frame 24 (C20orf24), transcript variant 2, mRNA.  
"Homo sapiens chromosome 20 open reading frame 29 (C20orf29), mRNA."  
"Homo sapiens chromosome 20 open reading frame 3 (C20orf3), mRNA."  
"Homo sapiens chromosome 20 open reading frame 30 (C20orf30), transcript variant 1, mRNA.'  
"Homo sapiens chromosome 20 open reading frame 4 (C20orf4), mRNA."  
"Homo sapiens chromosome 20 open reading frame 43 (C20orf43), mRNA."  
"Homo sapiens chromosome 20 open reading frame 46 (C20orf46), mRNA."  
"Homo sapiens chromosome 20 open reading frame 51 (C20orf51), mRNA."  
"Homo sapiens chromosome 20 open reading frame 52 (C20orf52), mRNA."  
"Homo sapiens chromosome 20 open reading frame 55 (C20orf55), transcript variant 1, mRNA.'  
"Homo sapiens chromosome 20 open reading frame 7 (C20orf7), transcript variant 1, mRNA."  
"Homo sapiens chromosome 20 open reading frame 72 (C20orf72), mRNA."  
"Homo sapiens chromosome 20 open reading frame 75 (C20orf75), mRNA."  
"PREDICTED: Homo sapiens chromosome 20 open reading frame 86 (C20orf86), mRNA."  
"Homo sapiens chromosome 20 open reading frame 96 (C20orf96), mRNA."  
"Homo sapiens chromosome 21 open reading frame 119 (C21orf119), mRNA."  
"PREDICTED: Homo sapiens chromosome 21 open reading frame 122 (C21orf122), mRNA."  
"Homo sapiens chromosome 21 open reading frame 124 (C21orf124), mRNA."  
"Homo sapiens chromosome 21 open reading frame 129 (C21orf129), mRNA."  
"Homo sapiens chromosome 21 open reading frame 2 (C21orf2), mRNA."  
"Homo sapiens chromosome 21 open reading frame 24 (C21orf24), mRNA."  
"PREDICTED: Homo sapiens chromosome 21 open reading frame 30 (C21orf30), mRNA."  
"Homo sapiens chromosome 21 open reading frame 33 (C21orf33), nuclear gene encoding mitc

"Homo sapiens chromosome 21 open reading frame 34 (C21orf34), transcript variant 3, mRNA."  
"Homo sapiens chromosome 21 open reading frame 37 (C21orf37), mRNA."  
"Homo sapiens chromosome 21 open reading frame 42 (C21orf42), mRNA."  
"Homo sapiens chromosome 21 open reading frame 45 (C21orf45), mRNA."  
"Homo sapiens chromosome 21 open reading frame 51 (C21orf51), transcript variant 2, mRNA."  
"Homo sapiens chromosome 21 open reading frame 54 (C21orf54), non-coding RNA."  
"Homo sapiens chromosome 21 open reading frame 55 (C21orf55), mRNA."  
"Homo sapiens chromosome 21 open reading frame 56 (C21orf56), mRNA."  
"Homo sapiens chromosome 21 open reading frame 57 (C21orf57), transcript variant 1, mRNA."  
"Homo sapiens chromosome 21 open reading frame 58 (C21orf58), transcript variant 2, mRNA."  
"Homo sapiens chromosome 21 open reading frame 59 (C21orf59), transcript variant 1, mRNA."  
"Homo sapiens chromosome 21 open reading frame 63 (C21orf63), mRNA."  
"Homo sapiens chromosome 21 open reading frame 66 (C21orf66), transcript variant 4, mRNA."  
"Homo sapiens chromosome 21 open reading frame 67 (C21orf67), mRNA."  
"Homo sapiens chromosome 21 open reading frame 69 (C21orf69), mRNA."  
"Homo sapiens chromosome 21 open reading frame 7 (C21orf7), mRNA."  
"Homo sapiens chromosome 21 open reading frame 70 (C21orf70), mRNA."  
"Homo sapiens chromosome 21 open reading frame 77 (C21orf77), mRNA."  
"Homo sapiens chromosome 21 open reading frame 84 (C21orf84), mRNA."  
"Homo sapiens chromosome 21 open reading frame 91 (C21orf91), transcript variant 2, mRNA."  
"Homo sapiens chromosome 21 open reading frame 93 (C21orf93), mRNA."  
"PREDICTED: Homo sapiens misc\_RNA (C21orf96), miscRNA."  
"Homo sapiens chromosome 22 open reading frame 13 (C22orf13), mRNA."  
"Homo sapiens chromosome 22 open reading frame 23 (C22orf23), mRNA."  
"Homo sapiens chromosome 22 open reading frame 24 (C22orf24), mRNA."  
"Homo sapiens chromosome 22 open reading frame 25 (C22orf25), mRNA."  
"Homo sapiens chromosome 22 open reading frame 26 (C22orf26), mRNA."  
"Homo sapiens chromosome 22 open reading frame 28 (C22orf28), mRNA."  
"Homo sapiens chromosome 22 open reading frame 29 (C22orf29), mRNA."  
"Homo sapiens chromosome 22 open reading frame 30 (C22orf30), mRNA."  
"Homo sapiens chromosome 22 open reading frame 32 (C22orf32), mRNA."  
"Homo sapiens chromosome 22 open reading frame 33 (C22orf33), mRNA."  
"Homo sapiens chromosome 22 open reading frame 34 (C22orf34), mRNA."  
"Homo sapiens chromosome 22 open reading frame 36 (C22orf36), mRNA."  
"Homo sapiens chromosome 22 open reading frame 39 (C22orf39), mRNA."  
"Homo sapiens chromosome 22 open reading frame 40 (C22orf40), mRNA."  
"Homo sapiens chromosome 22 open reading frame 9 (C22orf9), transcript variant 2, mRNA."  
"Homo sapiens C2 calcium-dependent domain containing 2 (C2CD2), transcript variant 1, mRNA."  
"Homo sapiens C2CD2-like (C2CD2L), mRNA."  
"Homo sapiens C2 calcium-dependent domain containing 3 (C2CD3), mRNA."  
"Homo sapiens C2 calcium-dependent domain containing 4D (C2CD4D), mRNA."  
"Homo sapiens chromosome 2 open reading frame 15 (C2orf15), mRNA."  
"Homo sapiens chromosome 2 open reading frame 18 (C2orf18), mRNA."  
"Homo sapiens chromosome 2 open reading frame 21 (C2orf21), mRNA."

"Homo sapiens chromosome 2 open reading frame 24 (C2orf24), mRNA."  
"Homo sapiens chromosome 2 open reading frame 25 (C2orf25), mRNA."  
"Homo sapiens chromosome 2 open reading frame 27A (C2orf27A), mRNA."  
"Homo sapiens chromosome 2 open reading frame 28 (C2orf28), transcript variant 2, mRNA."  
"Homo sapiens chromosome 2 open reading frame 30 (C2orf30), mRNA."  
"Homo sapiens chromosome 2 open reading frame 37 (C2orf37), mRNA."  
"Homo sapiens chromosome 2 open reading frame 42 (C2orf42), mRNA."  
"Homo sapiens chromosome 2 open reading frame 43 (C2orf43), mRNA."  
"Homo sapiens chromosome 2 open reading frame 44 (C2orf44), mRNA."  
"Homo sapiens chromosome 2 open reading frame 47 (C2orf47), mRNA."  
"Homo sapiens chromosome 2 open reading frame 48 (C2orf48), mRNA."  
"Homo sapiens chromosome 2 open reading frame 49 (C2orf49), mRNA."  
"Homo sapiens chromosome 2 open reading frame 52 (C2orf52), mRNA."  
"Homo sapiens chromosome 2 open reading frame 56 (C2orf56), transcript variant 3, mRNA."  
"Homo sapiens chromosome 2 open reading frame 63 (C2orf63), mRNA."  
"Homo sapiens chromosome 2 open reading frame 64 (C2orf64), mRNA."  
"Homo sapiens chromosome 2 open reading frame 65 (C2orf65), mRNA."  
"Homo sapiens chromosome 2 open reading frame 68 (C2orf68), mRNA."  
"Homo sapiens chromosome 2 open reading frame 69 (C2orf69), mRNA."  
"Homo sapiens chromosome 2 open reading frame 7 (C2orf7), mRNA."  
"Homo sapiens chromosome 2 open reading frame 73 (C2orf73), mRNA."  
"Homo sapiens chromosome 2 open reading frame 76 (C2orf76), mRNA."  
"Homo sapiens chromosome 2 open reading frame 77 (C2orf77), mRNA."  
"Homo sapiens chromosome 2 open reading frame 79 (C2orf79), mRNA."  
"Homo sapiens chromosome 2 open reading frame 80 (C2orf80), mRNA."  
"Homo sapiens chromosome 2 open reading frame 82 (C2orf82), mRNA."  
"Homo sapiens chromosome 2 open reading frame 88 (C2orf88), transcript variant 1, mRNA."  
"Homo sapiens chromosome 2 open reading frame 89 (C2orf89), mRNA."  
"Homo sapiens chromosome 3 open reading frame 1 (C3orf1), mRNA."  
"Homo sapiens chromosome 3 open reading frame 10 (C3orf10), mRNA."  
"Homo sapiens chromosome 3 open reading frame 14 (C3orf14), mRNA."  
"Homo sapiens chromosome 3 open reading frame 15 (C3orf15), mRNA."  
"Homo sapiens chromosome 3 open reading frame 17 (C3orf17), transcript variant 2, mRNA."  
"Homo sapiens chromosome 3 open reading frame 18 (C3orf18), mRNA."  
"Homo sapiens chromosome 3 open reading frame 19 (C3orf19), mRNA."  
"Homo sapiens chromosome 3 open reading frame 21 (C3orf21), mRNA."  
"Homo sapiens chromosome 3 open reading frame 23 (C3orf23), transcript variant 2, mRNA."  
"Homo sapiens chromosome 3 open reading frame 25 (C3orf25), mRNA."  
"Homo sapiens chromosome 3 open reading frame 26 (C3orf26), mRNA."  
"Homo sapiens chromosome 3 open reading frame 31 (C3orf31), mRNA."  
"Homo sapiens chromosome 3 open reading frame 32 (C3orf32), mRNA."  
"Homo sapiens chromosome 3 open reading frame 34 (C3orf34), mRNA."  
"Homo sapiens chromosome 3 open reading frame 37 (C3orf37), transcript variant 1, mRNA."  
"Homo sapiens chromosome 3 open reading frame 38 (C3orf38), mRNA."

"Homo sapiens chromosome 3 open reading frame 39 (C3orf39), mRNA."  
"Homo sapiens chromosome 3 open reading frame 42 (C3orf42), mRNA."  
"PREDICTED: Homo sapiens chromosome 3 open reading frame 46 (C3orf46), mRNA."  
"Homo sapiens chromosome 3 open reading frame 52 (C3orf52), mRNA."  
"Homo sapiens chromosome 3 open reading frame 54 (C3orf54), mRNA."  
"Homo sapiens chromosome 3 open reading frame 57 (C3orf57), mRNA."  
"Homo sapiens chromosome 3 open reading frame 58 (C3orf58), mRNA."  
"Homo sapiens chromosome 3 open reading frame 59 (C3orf59), mRNA."  
"Homo sapiens chromosome 3 open reading frame 60 (C3orf60), transcript variant 5, mRNA."  
"Homo sapiens chromosome 3 open reading frame 62 (C3orf62), mRNA."  
"Homo sapiens chromosome 3 open reading frame 63 (C3orf63), mRNA."  
"Homo sapiens chromosome 3 open reading frame 64 (C3orf64), mRNA."  
"Homo sapiens chromosome 3 open reading frame 70 (C3orf70), mRNA."  
"Homo sapiens chromosome 3 open reading frame 71 (C3orf71), mRNA."  
"Homo sapiens chromosome 3 open reading frame 74 (C3orf74), mRNA."  
"Homo sapiens chromosome 3 open reading frame 75 (C3orf75), mRNA."  
"Homo sapiens complement component 4 binding protein, beta (C4BPB), transcript variant 5, mRNA."  
"Homo sapiens chromosome 4 open reading frame 12 (C4orf12), mRNA."  
"Homo sapiens chromosome 4 open reading frame 14 (C4orf14), mRNA."  
"Homo sapiens chromosome 4 open reading frame 16 (C4orf16), mRNA."  
"Homo sapiens chromosome 4 open reading frame 18 (C4orf18), transcript variant 2, mRNA."  
"Homo sapiens chromosome 4 open reading frame 22 (C4orf22), mRNA."  
"Homo sapiens chromosome 4 open reading frame 23 (C4orf23), transcript variant 2, mRNA."  
"Homo sapiens chromosome 4 open reading frame 26 (C4orf26), mRNA."  
"Homo sapiens chromosome 4 open reading frame 27 (C4orf27), mRNA."  
"Homo sapiens chromosome 4 open reading frame 29 (C4orf29), mRNA."  
"Homo sapiens chromosome 4 open reading frame 32 (C4orf32), mRNA."  
"Homo sapiens chromosome 4 open reading frame 33 (C4orf33), transcript variant 2, mRNA."  
"Homo sapiens chromosome 4 open reading frame 34 (C4orf34), mRNA."  
"Homo sapiens chromosome 4 open reading frame 39 (C4orf39), mRNA."  
"Homo sapiens chromosome 4 open reading frame 41 (C4orf41), transcript variant 1, mRNA."  
"Homo sapiens chromosome 4 open reading frame 43 (C4orf43), mRNA."  
"Homo sapiens chromosome 4 open reading frame 46 (C4orf46), mRNA."  
"Homo sapiens chromosome 4 open reading frame 47 (C4orf47), mRNA."  
"Homo sapiens chromosome 4 open reading frame 49 (C4orf49), mRNA."  
"Homo sapiens complement component 5 (C5), mRNA."  
"Homo sapiens complement component 5a receptor 1 (C5AR1), mRNA."  
"Homo sapiens chromosome 5 open reading frame 13 (C5orf13), mRNA."  
"Homo sapiens chromosome 5 open reading frame 15 (C5orf15), mRNA."  
"Homo sapiens chromosome 5 open reading frame 20 (C5orf20), mRNA."  
"Homo sapiens chromosome 5 open reading frame 21 (C5orf21), mRNA."  
"Homo sapiens chromosome 5 open reading frame 22 (C5orf22), mRNA."  
"Homo sapiens chromosome 5 open reading frame 24 (C5orf24), mRNA."  
"Homo sapiens chromosome 5 open reading frame 25 (C5orf25), mRNA."



"PREDICTED: Homo sapiens misc\_RNA (C5orf27), miscRNA."  
"Homo sapiens chromosome 5 open reading frame 28 (C5orf28), mRNA."  
"Homo sapiens chromosome 5 open reading frame 30 (C5orf30), mRNA."  
"Homo sapiens chromosome 5 open reading frame 32 (C5orf32), mRNA."  
"Homo sapiens chromosome 5 open reading frame 33 (C5orf33), transcript variant 2, mRNA."  
"Homo sapiens chromosome 5 open reading frame 34 (C5orf34), mRNA."  
"Homo sapiens chromosome 5 open reading frame 35 (C5orf35), mRNA."  
"Homo sapiens chromosome 5 open reading frame 36 (C5orf36), mRNA."  
"Homo sapiens chromosome 5 open reading frame 37 (C5orf37), mRNA."  
"Homo sapiens chromosome 5 open reading frame 39 (C5orf39), mRNA."  
"Homo sapiens chromosome 5 open reading frame 41 (C5orf41), mRNA."  
"Homo sapiens chromosome 5 open reading frame 42 (C5orf42), mRNA."  
"Homo sapiens chromosome 5 open reading frame 44 (C5orf44), transcript variant 3, mRNA."  
"Homo sapiens chromosome 5 open reading frame 45 (C5orf45), transcript variant 2, mRNA."  
"Homo sapiens chromosome 5 open reading frame 5 (C5orf5), mRNA."  
"Homo sapiens chromosome 5 open reading frame 51 (C5orf51), mRNA."  
"Homo sapiens chromosome 5 open reading frame 53 (C5orf53), mRNA."  
"Homo sapiens complement component 6 (C6), mRNA."  
"Homo sapiens chromosome 6 open reading frame 1 (C6orf1), transcript variant 3, mRNA."  
"PREDICTED: Homo sapiens misc\_RNA (C6orf100), miscRNA."  
"Homo sapiens chromosome 6 open reading frame 105 (C6orf105), mRNA."  
"Homo sapiens chromosome 6 open reading frame 106 (C6orf106), transcript variant 1, mRNA."  
"Homo sapiens chromosome 6 open reading frame 107 (C6orf107), mRNA."  
"Homo sapiens chromosome 6 open reading frame 108 (C6orf108), transcript variant 2, mRNA."  
"Homo sapiens chromosome 6 open reading frame 111 (C6orf111), mRNA."  
"Homo sapiens chromosome 6 open reading frame 114 (C6orf114), mRNA."  
"Homo sapiens chromosome 6 open reading frame 115 (C6orf115), mRNA."  
"Homo sapiens chromosome 6 open reading frame 117 (C6orf117), mRNA."  
"Homo sapiens chromosome 6 open reading frame 120 (C6orf120), mRNA."  
"Homo sapiens chromosome 6 open reading frame 124 (C6orf124), mRNA."  
"Homo sapiens chromosome 6 open reading frame 125 (C6orf125), mRNA."  
"Homo sapiens chromosome 6 open reading frame 129 (C6orf129), mRNA."  
"Homo sapiens chromosome 6 open reading frame 130 (C6orf130), mRNA."  
"Homo sapiens chromosome 6 open reading frame 136 (C6orf136), mRNA."  
"Homo sapiens chromosome 6 open reading frame 138 (C6orf138), mRNA."  
"PREDICTED: Homo sapiens chromosome 6 open reading frame 140 (C6orf140), mRNA."  
"PREDICTED: Homo sapiens chromosome 6 open reading frame 145 (C6orf145), mRNA."  
"Homo sapiens chromosome 6 open reading frame 148 (C6orf148), mRNA."  
"Homo sapiens chromosome 6 open reading frame 150 (C6orf150), mRNA."  
"Homo sapiens chromosome 6 open reading frame 154 (C6orf154), mRNA."  
"Homo sapiens chromosome 6 open reading frame 155 (C6orf155), mRNA."  
"PREDICTED: Homo sapiens chromosome 6 open reading frame 160, transcript variant 4 (C6orf160), mRNA."  
"Homo sapiens chromosome 6 open reading frame 162 (C6orf162), transcript variant 2, mRNA."  
"Homo sapiens chromosome 6 open reading frame 163 (C6orf163), mRNA."

"Homo sapiens chromosome 6 open reading frame 170 (C6orf170), mRNA."  
"Homo sapiens chromosome 6 open reading frame 173 (C6orf173), mRNA."  
"Homo sapiens chromosome 6 open reading frame 182 (C6orf182), transcript variant 2, mRNA."  
"PREDICTED: Homo sapiens chromosome 6 open reading frame 184, transcript variant 2 (C6orf184), mRNA."  
"Homo sapiens chromosome 6 open reading frame 191 (C6orf191), mRNA."  
"Homo sapiens chromosome 6 open reading frame 192 (C6orf192), mRNA."  
"Homo sapiens chromosome 6 open reading frame 199 (C6orf199), mRNA."  
"Homo sapiens chromosome 6 open reading frame 203 (C6orf203), mRNA."  
"Homo sapiens chromosome 6 open reading frame 204 (C6orf204), transcript variant 2, mRNA."  
"Homo sapiens chromosome 6 open reading frame 211 (C6orf211), mRNA."  
"Homo sapiens chromosome 6 open reading frame 218 (C6orf218), mRNA."  
"Homo sapiens chromosome 6 open reading frame 222 (C6orf222), mRNA."  
"Homo sapiens chromosome 6 open reading frame 223 (C6orf223), mRNA."  
"Homo sapiens chromosome 6 open reading frame 224 (C6orf224), mRNA."  
"Homo sapiens chromosome 6 open reading frame 225 (C6orf225), mRNA."  
"Homo sapiens chromosome 6 open reading frame 26 (C6orf26), mRNA."  
"Homo sapiens chromosome 6 open reading frame 47 (C6orf47), mRNA."  
"Homo sapiens chromosome 6 open reading frame 48 (C6orf48), transcript variant 1, mRNA."  
"PREDICTED: Homo sapiens chromosome 6 open reading frame 52 (C6orf52), mRNA."  
"Homo sapiens chromosome 6 open reading frame 57 (C6orf57), mRNA."  
"Homo sapiens chromosome 6 open reading frame 58 (C6orf58), mRNA."  
"PREDICTED: Homo sapiens chromosome 6 open reading frame 59 (C6orf59), misc RNA."  
"PREDICTED: Homo sapiens chromosome 6 open reading frame 61 (C6orf61), mRNA."  
"Homo sapiens chromosome 6 open reading frame 62 (C6orf62), mRNA."  
"Homo sapiens chromosome 6 open reading frame 66 (C6orf66), mRNA."  
"Homo sapiens chromosome 6 open reading frame 72 (C6orf72), mRNA."  
"Homo sapiens chromosome 6 open reading frame 81 (C6orf81), mRNA."  
"Homo sapiens chromosome 6 open reading frame 89 (C6orf89), mRNA."  
"Homo sapiens chromosome 7 open reading frame 10 (C7orf10), mRNA."  
"Homo sapiens chromosome 7 open reading frame 11 (C7orf11), mRNA."  
"Homo sapiens chromosome 7 open reading frame 13 (C7orf13), mRNA."  
"PREDICTED: Homo sapiens chromosome 7 open reading frame 20, transcript variant 8 (C7orf20), mRNA."  
"Homo sapiens chromosome 7 open reading frame 23 (C7orf23), mRNA."  
"Homo sapiens chromosome 7 open reading frame 25 (C7orf25), transcript variant 1, mRNA."  
"Homo sapiens chromosome 7 open reading frame 26 (C7orf26), mRNA."  
"Homo sapiens chromosome 7 open reading frame 27 (C7orf27), mRNA."  
"PREDICTED: Homo sapiens chromosome 7 open reading frame 28A (C7orf28A), mRNA."  
"PREDICTED: Homo sapiens chromosome 7 open reading frame 28B (C7orf28B), mRNA."  
"Homo sapiens chromosome 7 open reading frame 29 (C7orf29), mRNA."  
"Homo sapiens chromosome 7 open reading frame 30 (C7orf30), mRNA."  
"Homo sapiens chromosome 7 open reading frame 31 (C7orf31), mRNA."  
"Homo sapiens chromosome 7 open reading frame 36 (C7orf36), mRNA."  
"Homo sapiens chromosome 7 open reading frame 38 (C7orf38), mRNA."  
"Homo sapiens chromosome 7 open reading frame 40 (C7orf40), non-coding RNA."

"Homo sapiens chromosome 7 open reading frame 41 (C7orf41), mRNA."  
"Homo sapiens chromosome 7 open reading frame 42 (C7orf42), mRNA."  
"Homo sapiens chromosome 7 open reading frame 43 (C7orf43), mRNA."  
"Homo sapiens chromosome 7 open reading frame 44 (C7orf44), mRNA."  
"Homo sapiens chromosome 7 open reading frame 47 (C7orf47), mRNA."  
"Homo sapiens chromosome 7 open reading frame 49 (C7orf49), mRNA."  
"Homo sapiens chromosome 7 open reading frame 50 (C7orf50), mRNA."  
"Homo sapiens chromosome 7 open reading frame 51 (C7orf51), mRNA."  
"Homo sapiens chromosome 7 open reading frame 53 (C7orf53), mRNA."  
"Homo sapiens chromosome 7 open reading frame 54 (C7orf54), mRNA."  
"Homo sapiens chromosome 7 open reading frame 55 (C7orf55), nuclear gene encoding mitoch  
"Homo sapiens chromosome 7 open reading frame 57 (C7orf57), mRNA."  
"Homo sapiens chromosome 7 open reading frame 58 (C7orf58), transcript variant 2, mRNA."  
"Homo sapiens chromosome 7 open reading frame 59 (C7orf59), mRNA."  
"Homo sapiens chromosome 7 open reading frame 61 (C7orf61), mRNA."  
"Homo sapiens chromosome 7 open reading frame 65 (C7orf65), mRNA."  
"Homo sapiens chromosome 7 open reading frame 68 (C7orf68), transcript variant 1, mRNA."  
"Homo sapiens chromosome 7 open reading frame 70 (C7orf70), mRNA."  
"PREDICTED: Homo sapiens misc\_RNA (C8orf12), miscRNA."  
"Homo sapiens chromosome 8 open reading frame 13 (C8orf13), mRNA."  
"Homo sapiens chromosome 8 open reading frame 17 (C8orf17), mRNA."  
"PREDICTED: Homo sapiens chromosome 8 open reading frame 30A (C8orf30A), mRNA."  
"PREDICTED: Homo sapiens chromosome 8 open reading frame 30B (C8orf30B), mRNA."  
"Homo sapiens chromosome 8 open reading frame 33 (C8orf33), mRNA."  
"Homo sapiens chromosome 8 open reading frame 37 (C8orf37), mRNA."  
"Homo sapiens chromosome 8 open reading frame 38 (C8orf38), mRNA."  
"Homo sapiens chromosome 8 open reading frame 40 (C8orf40), mRNA."  
"Homo sapiens chromosome 8 open reading frame 41 (C8orf41), mRNA."  
"Homo sapiens chromosome 8 open reading frame 44 (C8orf44), mRNA."  
"Homo sapiens chromosome 8 open reading frame 45 (C8orf45), mRNA."  
"Homo sapiens chromosome 8 open reading frame 46 (C8orf46), mRNA."  
"Homo sapiens chromosome 8 open reading frame 51 (C8orf51), mRNA."  
"Homo sapiens chromosome 8 open reading frame 55 (C8orf55), mRNA."  
"Homo sapiens chromosome 8 open reading frame 58 (C8orf58), mRNA."  
"Homo sapiens chromosome 8 open reading frame 59 (C8orf59), transcript variant 3, mRNA."  
"PREDICTED: Homo sapiens chromosome 8 open reading frame 71 (C8orf71), mRNA."  
"PREDICTED: Homo sapiens chromosome 8 open reading frame 77 (C8orf77), misc RNA."  
"Homo sapiens chromosome 8 open reading frame 80 (C8orf80), mRNA."  
"PREDICTED: Homo sapiens hypothetical LOC340393 (C8ORFK29), misc RNA."  
"Homo sapiens chromosome 9 open reading frame 100 (C9orf100), mRNA."  
"Homo sapiens chromosome 9 open reading frame 102 (C9orf102), mRNA."  
"Homo sapiens chromosome 9 open reading frame 103 (C9orf103), mRNA."  
"Homo sapiens chromosome 9 open reading frame 106 (C9orf106), mRNA."  
"Homo sapiens chromosome 9 open reading frame 10 opposite strand (C9orf10OS), mRNA."

"Homo sapiens chromosome 9 open reading frame 114 (C9orf114), mRNA."  
"Homo sapiens chromosome 9 open reading frame 116 (C9orf116), transcript variant 2, mRNA."  
"Homo sapiens chromosome 9 open reading frame 119 (C9orf119), mRNA."  
"Homo sapiens chromosome 9 open reading frame 123 (C9orf123), mRNA."  
"Homo sapiens chromosome 9 open reading frame 126 (C9orf126), mRNA."  
"Homo sapiens chromosome 9 open reading frame 127 (C9orf127), mRNA."  
"PREDICTED: Homo sapiens chromosome 9 open reading frame 130 (C9orf130), mRNA."  
"Homo sapiens chromosome 9 open reading frame 135 (C9orf135), mRNA."  
"Homo sapiens chromosome 9 open reading frame 140 (C9orf140), mRNA."  
"Homo sapiens chromosome 9 open reading frame 142 (C9orf142), mRNA."  
"PREDICTED: Homo sapiens chromosome 9 open reading frame 144 (C9orf144), mRNA."  
"Homo sapiens hypothetical protein LOC259308 (C9orf144B), mRNA."  
"Homo sapiens chromosome 9 open reading frame 152 (C9orf152), mRNA."  
"Homo sapiens chromosome 9 open reading frame 156 (C9orf156), mRNA."  
"Homo sapiens chromosome 9 open reading frame 16 (C9orf16), mRNA."  
"Homo sapiens chromosome 9 open reading frame 167 (C9orf167), mRNA."  
"Homo sapiens chromosome 9 open reading frame 169 (C9orf169), mRNA."  
"Homo sapiens chromosome 9 open reading frame 171 (C9orf171), mRNA."  
"Homo sapiens chromosome 9 open reading frame 173 (C9orf173), mRNA."  
"Homo sapiens chromosome 9 open reading frame 21 (C9orf21), mRNA."  
"Homo sapiens chromosome 9 open reading frame 23 (C9orf23), transcript variant 1, mRNA."  
"Homo sapiens chromosome 9 open reading frame 24 (C9orf24), transcript variant 2, mRNA."  
"Homo sapiens chromosome 9 open reading frame 25 (C9orf25), mRNA."  
"Homo sapiens chromosome 9 open reading frame 3 (C9orf3), mRNA."  
"Homo sapiens chromosome 9 open reading frame 30 (C9orf30), mRNA."  
"PREDICTED: Homo sapiens chromosome 9 open reading frame 31 (C9orf31), mRNA."  
"Homo sapiens chromosome 9 open reading frame 37 (C9orf37), mRNA."  
"Homo sapiens chromosome 9 open reading frame 40 (C9orf40), mRNA."  
"Homo sapiens chromosome 9 open reading frame 41 (C9orf41), mRNA."  
"Homo sapiens chromosome 9 open reading frame 43 (C9orf43), mRNA."  
"PREDICTED: Homo sapiens chromosome 9 open reading frame 45 (C9orf45), misc RNA."  
"Homo sapiens chromosome 9 open reading frame 46 (C9orf46), mRNA."  
"Homo sapiens chromosome 9 open reading frame 5 (C9orf5), mRNA."  
"PREDICTED: Homo sapiens chromosome 9 open reading frame 53 (C9orf53), mRNA."  
"Homo sapiens chromosome 9 open reading frame 6 (C9orf6), mRNA."  
"Homo sapiens chromosome 9 open reading frame 64 (C9orf64), mRNA."  
"Homo sapiens chromosome 9 open reading frame 66 (C9orf66), mRNA."  
"Homo sapiens chromosome 9 open reading frame 69 (C9orf69), mRNA."  
"Homo sapiens chromosome 9 open reading frame 7 (C9orf7), mRNA."  
"PREDICTED: Homo sapiens chromosome 9 open reading frame 70 (C9orf70), mRNA."  
"Homo sapiens chromosome 9 open reading frame 72 (C9orf72), transcript variant 1, mRNA."  
"Homo sapiens chromosome 9 open reading frame 75 (C9orf75), mRNA."  
"Homo sapiens chromosome 9 open reading frame 78 (C9orf78), mRNA."  
"Homo sapiens chromosome 9 open reading frame 80 (C9orf80), mRNA."

"Homo sapiens chromosome 9 open reading frame 82 (C9orf82), mRNA."  
"Homo sapiens chromosome 9 open reading frame 85 (C9orf85), mRNA."  
"Homo sapiens chromosome 9 open reading frame 86 (C9orf86), mRNA."  
"Homo sapiens chromosome 9 open reading frame 89 (C9orf89), mRNA."  
"Homo sapiens chromosome 9 open reading frame 9 (C9orf9), mRNA."  
"Homo sapiens chromosome 9 open reading frame 90 (C9orf90), mRNA."  
"Homo sapiens chromosome 9 open reading frame 91 (C9orf91), mRNA."  
"Homo sapiens chromosome 9 open reading frame 95 (C9orf95), mRNA."  
"Homo sapiens chromosome 9 open reading frame 96 (C9orf96), mRNA."  
"Homo sapiens carbonic anhydrase X (CA10), mRNA."  
"Homo sapiens carbonic anhydrase XI (CA11), mRNA."  
"Homo sapiens carbonic anhydrase XIII (CA13), mRNA."  
"Homo sapiens carbonic anhydrase II (CA2), mRNA."  
"Homo sapiens carbonic anhydrase VB, mitochondrial (CA5B), nuclear gene encoding mitochor  
"Homo sapiens carbonic anhydrase VIII (CA8), mRNA."  
"Homo sapiens calcium binding protein 39 (CAB39), mRNA."  
"Homo sapiens calcium binding protein 39-like (CAB39L), transcript variant 2, mRNA."  
"Homo sapiens chaperone, ABC1 activity of bc1 complex homolog (S. pombe) (CABC1), nuclea  
"Homo sapiens Cdk5 and Abl enzyme substrate 1 (CABLES1), transcript variant 1, mRNA."  
"Homo sapiens Cdk5 and Abl enzyme substrate 2 (CABLES2), mRNA."  
"Homo sapiens calcium binding protein 4 (CABP4), mRNA."  
"Homo sapiens calcium binding protein 7 (CABP7), mRNA."  
"Homo sapiens calcium channel, voltage-dependent, P/Q type, alpha 1A subunit (CACNA1A), tr  
"Homo sapiens calcium channel, voltage-dependent, N type, alpha 1B subunit (CACNA1B), mR  
"Homo sapiens calcium channel, voltage-dependent, L type, alpha 1C subunit (CACNA1C), mR  
"Homo sapiens calcium channel, voltage-dependent, L type, alpha 1S subunit (CACNA1S), mRI  
"Homo sapiens calcium channel, voltage-dependent, beta 1 subunit (CACNB1), transcript variar  
"Homo sapiens calcium channel, voltage-dependent, beta 2 subunit (CACNB2), transcript variar  
"Homo sapiens calcium channel, voltage-dependent, beta 3 subunit (CACNB3), mRNA."  
"Homo sapiens calcium channel, voltage-dependent, gamma subunit 3 (CACNG3), mRNA."  
"Homo sapiens calcyclin binding protein (CACYPB), transcript variant 2, mRNA."  
"Homo sapiens carbamoyl-phosphate synthetase 2, aspartate transcarbamylase, and dihydroor  
"Homo sapiens cell adhesion molecule 1 (CADM1), transcript variant 1, mRNA."  
"Homo sapiens cell adhesion molecule 4 (CADM4), mRNA."  
"Homo sapiens calbindin 2 (CALB2), transcript variant CALB2c, mRNA."  
"Homo sapiens calcitonin-related polypeptide alpha (CALCA), transcript variant 1, mRNA."  
"Homo sapiens calcitonin-related polypeptide beta (CALCB), mRNA."  
"Homo sapiens calcium binding and coiled-coil domain 1 (CALCOCO1), mRNA."  
"Homo sapiens calcium binding and coiled-coil domain 2 (CALCOCO2), mRNA."  
"Homo sapiens calcitonin receptor-like (CALCRL), mRNA."  
"Homo sapiens caldesmon 1 (CALD1), transcript variant 3, mRNA."  
"Homo sapiens calcium homeostasis modulator 1 (CALHM1), mRNA."  
"Homo sapiens calcium homeostasis modulator 2 (CALHM2), mRNA."  
"Homo sapiens calcium homeostasis modulator 3 (CALHM3), mRNA."

"Homo sapiens calmodulin 1 (phosphorylase kinase, delta) (CALM1), mRNA."  
"Homo sapiens calmodulin 2 (phosphorylase kinase, delta) (CALM2), mRNA."  
"Homo sapiens calmodulin 3 (phosphorylase kinase, delta) (CALM3), mRNA."  
"Homo sapiens calmodulin-like 4 (CALML4), transcript variant 2, mRNA."  
"Homo sapiens calmodulin-like 5 (CALML5), mRNA."  
"Homo sapiens calreticulin (CALR), mRNA."  
"Homo sapiens calumenin (CALU), mRNA."  
"Homo sapiens calcyon neuron-specific vesicular protein (CALY), mRNA."  
"Homo sapiens calcium/calmodulin-dependent protein kinase I (CAMK1), mRNA."  
"Homo sapiens calcium/calmodulin-dependent protein kinase ID (CAMK1D), transcript variant 2  
"Homo sapiens calcium/calmodulin-dependent protein kinase IG (CAMK1G), mRNA."  
"Homo sapiens calcium/calmodulin-dependent protein kinase (CaM kinase) II beta (CAMK2B), t  
"Homo sapiens calcium/calmodulin-dependent protein kinase (CaM kinase) II delta (CAMK2D),  
"Homo sapiens calcium/calmodulin-dependent protein kinase (CaM kinase) II gamma (CAMK2C  
"Homo sapiens calcium/calmodulin-dependent protein kinase II inhibitor 1 (CAMK2N1), mRNA."  
"Homo sapiens calcium/calmodulin-dependent protein kinase II inhibitor 2 (CAMK2N2), mRNA."  
"Homo sapiens calcium/calmodulin-dependent protein kinase IV (CAMK4), mRNA."  
"Homo sapiens calcium/calmodulin-dependent protein kinase kinase 1, alpha (CAMKK1), transc  
"Homo sapiens calcium/calmodulin-dependent protein kinase kinase 2, beta (CAMKK2), transcr  
"Homo sapiens CaM kinase-like vesicle-associated (CAMKV), mRNA."  
"Homo sapiens calcium modulating ligand (CAMLG), mRNA."  
"Homo sapiens cathelicidin antimicrobial peptide (CAMP), mRNA."  
"Homo sapiens calmodulin regulated spectrin-associated protein 1-like 1 (CAMSAP1L1), mRNA  
"Homo sapiens calcium activated nucleotidase 1 (CANT1), mRNA."  
"Homo sapiens calnexin (CANX), transcript variant 2, mRNA."  
"Homo sapiens CAP, adenylate cyclase-associated protein 1 (yeast) (CAP1), mRNA."  
"Homo sapiens capping protein (actin filament), gelsolin-like (CAPG), mRNA."  
"Homo sapiens calpain 1, (mu/I) large subunit (CAPN1), mRNA."  
"Homo sapiens calpain 10 (CAPN10), transcript variant 1, mRNA."  
"Homo sapiens calpain 11 (CAPN11), mRNA."  
"Homo sapiens calpain 12 (CAPN12), mRNA."  
"PREDICTED: Homo sapiens misc\_RNA (CAPN14), miscRNA."  
"Homo sapiens calpain 3, (p94) (CAPN3), transcript variant 3, mRNA."  
"Homo sapiens calpain 5 (CAPN5), mRNA."  
"Homo sapiens calpain 6 (CAPN6), mRNA."  
"Homo sapiens calpain 7 (CAPN7), mRNA."  
"Homo sapiens calpain, small subunit 1 (CAPNS1), transcript variant 2, mRNA."  
"Homo sapiens cell cycle associated protein 1 (CAPRIN1), transcript variant 1, mRNA."  
"Homo sapiens caprin family member 2 (CAPRIN2), transcript variant 2, mRNA."  
"Homo sapiens calcyphosine (CAPS), transcript variant 2, mRNA."  
"Homo sapiens calcyphosine-like (CAPSL), transcript variant 1, mRNA."  
"Homo sapiens capping protein (actin filament) muscle Z-line, alpha 1 (CAPZA1), mRNA."  
"Homo sapiens capping protein (actin filament) muscle Z-line, alpha 2 (CAPZA2), mRNA."  
"Homo sapiens capping protein (actin filament) muscle Z-line, alpha 3 (CAPZA3), mRNA."

"Homo sapiens capping protein (actin filament) muscle Z-line, beta (CAPZB), mRNA."  
"Homo sapiens caspase recruitment domain family, member 10 (CARD10), mRNA."  
"Homo sapiens caspase recruitment domain family, member 11 (CARD11), mRNA."  
"Homo sapiens caspase recruitment domain family, member 16 (CARD16), transcript variant 1,  
"Homo sapiens caspase recruitment domain family, member 6 (CARD6), mRNA."  
"Homo sapiens caspase recruitment domain family, member 8 (CARD8), mRNA."  
"Homo sapiens caspase recruitment domain family, member 9 (CARD9), mRNA."  
"Homo sapiens calcium regulated heat stable protein 1, 24kDa (CARHSP1), transcript variant 2,  
"Homo sapiens carbohydrate kinase domain containing (CARKD), mRNA."  
"Homo sapiens coactivator-associated arginine methyltransferase 1 (CARM1), mRNA."  
"Homo sapiens cysteinyl-tRNA synthetase (CARS), transcript variant 4, mRNA."  
"Homo sapiens cysteinyl-tRNA synthetase 2, mitochondrial (putative) (CARS2), nuclear gene er  
"Homo sapiens cancer susceptibility candidate 1 (CASC1), transcript variant 3, mRNA."  
"Homo sapiens cancer susceptibility candidate 4 (CASC4), transcript variant 2, mRNA."  
"Homo sapiens cancer susceptibility candidate 5 (CASC5), transcript variant 2, mRNA."  
"Homo sapiens CAS1 domain containing 1 (CASD1), mRNA."  
"Homo sapiens calcium/calmodulin-dependent serine protein kinase (MAGUK family) (CASK), n  
"Homo sapiens caspase 1, apoptosis-related cysteine peptidase (interleukin 1, beta, convertase  
"Homo sapiens caspase 10, apoptosis-related cysteine peptidase (CASP10), transcript variant I  
"Homo sapiens caspase 14, apoptosis-related cysteine peptidase (CASP14), mRNA."  
"Homo sapiens caspase 2, apoptosis-related cysteine peptidase (CASP2), transcript variant 3, r  
"Homo sapiens caspase 3, apoptosis-related cysteine peptidase (CASP3), transcript variant bet  
"Homo sapiens caspase 4, apoptosis-related cysteine peptidase (CASP4), transcript variant deli  
"Homo sapiens caspase 6, apoptosis-related cysteine peptidase (CASP6), transcript variant alp  
"Homo sapiens caspase 7, apoptosis-related cysteine peptidase (CASP7), transcript variant deli  
"Homo sapiens caspase 9, apoptosis-related cysteine peptidase (CASP9), transcript variant bet  
"PREDICTED: Homo sapiens calcium-sensing receptor like 1 (CASRL1), mRNA."  
"Homo sapiens calpastatin (CAST), transcript variant 4, mRNA."  
"Homo sapiens castor zinc finger 1 (CASZ1), transcript variant 1, mRNA."  
"Homo sapiens catalase (CAT), mRNA."  
"Homo sapiens cation channel, sperm associated 2 (CATSPER2), transcript variant 4, mRNA."  
"Homo sapiens cation channel, sperm associated 2 pseudogene 1 (CATSPER2P1), non-coding  
"Homo sapiens caveolin 1, caveolae protein, 22kDa (CAV1), mRNA."  
"Homo sapiens caveolin 2 (CAV2), transcript variant 1, mRNA."  
"Homo sapiens calcium binding atopy-related autoantigen 1 (CBARA1), mRNA."  
"Homo sapiens core-binding factor, runt domain, alpha subunit 2; translocated to, 2 (CBFA2T2),  
"Homo sapiens core-binding factor, runt domain, alpha subunit 2; translocated to, 3 (CBFA2T3),  
"Homo sapiens core-binding factor, beta subunit (CBFB), transcript variant 2, mRNA."  
"Homo sapiens Cas-Br-M (murine) ecotropic retroviral transforming sequence (CBL), mRNA."  
"Homo sapiens Cas-Br-M (murine) ecotropic retroviral transforming sequence b (CBLB), mRNA.  
"Homo sapiens Cas-Br-M (murine) ecotropic retroviral transforming sequence-like 1 (CBLL1), m  
"Homo sapiens cerebellin 1 precursor (CBLN1), mRNA."  
"Homo sapiens cerebellin 3 precursor (CBLN3), mRNA."  
"Homo sapiens carbonyl reductase 1 (CBR1), mRNA."

"Homo sapiens carbonyl reductase 3 (CBR3), mRNA."  
"Homo sapiens carbonyl reductase 4 (CBR4), mRNA."  
"Homo sapiens cystathionine-beta-synthase (CBS), mRNA."  
"Homo sapiens COBW domain containing 3 (CBWD3), mRNA."  
"Homo sapiens COBW domain containing 5 (CBWD5), mRNA."  
"Homo sapiens COBW domain containing 6 (CBWD6), mRNA."  
"Homo sapiens chromobox homolog 1 (HP1 beta homolog Drosophila ) (CBX1), mRNA."  
"Homo sapiens chromobox homolog 2 (Pc class homolog, Drosophila) (CBX2), transcript varian  
"Homo sapiens chromobox homolog 3 (HP1 gamma homolog, Drosophila) (CBX3), transcript va  
"Homo sapiens chromobox homolog 4 (Pc class homolog, Drosophila) (CBX4), mRNA."  
"Homo sapiens chromobox homolog 5 (HP1 alpha homolog, Drosophila) (CBX5), mRNA."  
"Homo sapiens chromobox homolog 6 (CBX6), mRNA."  
"Homo sapiens chromobox homolog 7 (CBX7), mRNA."  
"Homo sapiens chromobox homolog 8 (Pc class homolog, Drosophila) (CBX8), mRNA."  
"Homo sapiens chibby homolog 1 (Drosophila) (CBY1), transcript variant 1, mRNA."  
"PREDICTED: Homo sapiens chibby homolog 3 (Drosophila) (CBY3), mRNA."  
"Homo sapiens coiled-coil and C2 domain containing 1B (CC2D1B), mRNA."  
"Homo sapiens cell division cycle and apoptosis regulator 1 (CCAR1), mRNA."  
"Homo sapiens collagen and calcium binding EGF domains 1 (CCBE1), mRNA."  
"Homo sapiens cysteine conjugate-beta lyase, cytoplasmic (CCBL1), transcript variant 1, mRNA  
"Homo sapiens cysteine conjugate-beta lyase 2 (CCBL2), transcript variant 1, mRNA."  
"Homo sapiens chemokine binding protein 2 (CCBP2), mRNA."  
"Homo sapiens coiled-coil domain containing 101 (CCDC101), mRNA."  
"Homo sapiens coiled-coil domain containing 102A (CCDC102A), mRNA."  
"Homo sapiens coiled-coil domain containing 103 (CCDC103), mRNA."  
"Homo sapiens coiled-coil domain containing 104 (CCDC104), mRNA."  
"Homo sapiens coiled-coil domain containing 106 (CCDC106), mRNA."  
"Homo sapiens coiled-coil domain containing 107 (CCDC107), mRNA."  
"Homo sapiens coiled-coil domain containing 109A (CCDC109A), mRNA."  
"Homo sapiens coiled-coil domain containing 109B (CCDC109B), mRNA."  
"Homo sapiens coiled-coil domain containing 11 (CCDC11), mRNA."  
"Homo sapiens coiled-coil domain containing 110 (CCDC110), mRNA."  
"Homo sapiens coiled-coil domain containing 111 (CCDC111), mRNA."  
"Homo sapiens coiled-coil domain containing 112 (CCDC112), transcript variant 1, mRNA."  
"Homo sapiens coiled-coil domain containing 113 (CCDC113), mRNA."  
"Homo sapiens coiled-coil domain containing 115 (CCDC115), mRNA."  
"Homo sapiens coiled-coil domain containing 117 (CCDC117), mRNA."  
"Homo sapiens coiled-coil domain containing 12 (CCDC12), mRNA."  
"Homo sapiens coiled-coil domain containing 120 (CCDC120), transcript variant 3, mRNA."  
"Homo sapiens coiled-coil domain containing 121 (CCDC121), mRNA."  
"Homo sapiens coiled-coil domain containing 123 (CCDC123), mRNA."  
"Homo sapiens coiled-coil domain containing 124 (CCDC124), mRNA."  
"Homo sapiens coiled-coil domain containing 125 (CCDC125), mRNA."  
"Homo sapiens coiled-coil domain containing 126 (CCDC126), mRNA."



"Homo sapiens coiled-coil domain containing 127 (CCDC127), mRNA."  
"Homo sapiens coiled-coil domain containing 128 (CCDC128), mRNA."  
"Homo sapiens coiled-coil domain containing 130 (CCDC130), mRNA."  
"Homo sapiens coiled-coil domain containing 132 (CCDC132), transcript variant 1, mRNA."  
"Homo sapiens coiled-coil domain containing 136 (CCDC136), mRNA."  
"Homo sapiens coiled-coil domain containing 137 (CCDC137), mRNA."  
"Homo sapiens coiled-coil domain containing 138 (CCDC138), mRNA."  
"Homo sapiens coiled-coil domain containing 14 (CCDC14), mRNA."  
"Homo sapiens coiled-coil domain containing 140 (CCDC140), mRNA."  
"Homo sapiens coiled-coil domain containing 142 (CCDC142), mRNA."  
"Homo sapiens coiled-coil domain containing 146 (CCDC146), mRNA."  
"Homo sapiens coiled-coil domain containing 147 (CCDC147), mRNA."  
"Homo sapiens coiled-coil domain containing 148 (CCDC148), mRNA."  
"Homo sapiens coiled-coil domain containing 15 (CCDC15), mRNA."  
"Homo sapiens coiled-coil domain containing 150 (CCDC150), mRNA."  
"Homo sapiens coiled-coil domain containing 151 (CCDC151), mRNA."  
"Homo sapiens coiled-coil domain containing 152 (CCDC152), mRNA."  
"Homo sapiens coiled-coil domain containing 155 (CCDC155), mRNA."  
"Homo sapiens coiled-coil domain containing 16 (CCDC16), mRNA."  
"Homo sapiens coiled-coil domain containing 18 (CCDC18), mRNA."  
"Homo sapiens coiled-coil domain containing 19 (CCDC19), mRNA."  
"Homo sapiens coiled-coil domain containing 22 (CCDC22), mRNA."  
"Homo sapiens coiled-coil domain containing 23 (CCDC23), mRNA."  
"Homo sapiens coiled-coil domain containing 24 (CCDC24), mRNA."  
"Homo sapiens coiled-coil domain containing 25 (CCDC25), mRNA."  
"Homo sapiens coiled-coil domain containing 27 (CCDC27), mRNA."  
"Homo sapiens coiled-coil domain containing 28A (CCDC28A), mRNA."  
"Homo sapiens coiled-coil domain containing 28B (CCDC28B), mRNA."  
"Homo sapiens coiled-coil domain containing 3 (CCDC3), mRNA."  
"Homo sapiens coiled-coil domain containing 34 (CCDC34), transcript variant 1, mRNA."  
"Homo sapiens coiled-coil domain containing 36 (CCDC36), mRNA."  
"Homo sapiens coiled-coil domain containing 39 (CCDC39), mRNA."  
"PREDICTED: Homo sapiens coiled-coil domain containing 4 (CCDC4), mRNA."  
"Homo sapiens coiled-coil domain containing 41 (CCDC41), transcript variant 1, mRNA."  
"Homo sapiens coiled-coil domain containing 43 (CCDC43), transcript variant 2, mRNA."  
"Homo sapiens coiled-coil domain containing 45 (CCDC45), mRNA."  
"Homo sapiens coiled-coil domain containing 46 (CCDC46), transcript variant 1, mRNA."  
"Homo sapiens coiled-coil domain containing 47 (CCDC47), mRNA."  
"Homo sapiens coiled-coil domain containing 48 (CCDC48), mRNA."  
"Homo sapiens coiled-coil domain containing 49 (CCDC49), mRNA."  
"Homo sapiens coiled-coil domain containing 5 (spindle associated) (CCDC5), mRNA."  
"Homo sapiens coiled-coil domain containing 50 (CCDC50), transcript variant 1, mRNA."  
"Homo sapiens coiled-coil domain containing 51 (CCDC51), mRNA."  
"Homo sapiens coiled-coil domain containing 52 (CCDC52), mRNA."

"Homo sapiens coiled-coil domain containing 53 (CCDC53), mRNA."  
"Homo sapiens coiled-coil domain containing 54 (CCDC54), mRNA."  
"Homo sapiens coiled-coil domain containing 55 (CCDC55), transcript variant 1, mRNA."  
"PREDICTED: Homo sapiens coiled-coil domain containing 56 (CCDC56), misc RNA."  
"Homo sapiens coiled-coil domain containing 57 (CCDC57), mRNA."  
"Homo sapiens coiled-coil domain containing 58 (CCDC58), mRNA."  
"Homo sapiens coiled-coil domain containing 59 (CCDC59), mRNA."  
"Homo sapiens coiled-coil domain containing 6 (CCDC6), mRNA."  
"Homo sapiens coiled-coil domain containing 64 (CCDC64), mRNA."  
"Homo sapiens coiled-coil domain containing 65 (CCDC65), mRNA."  
"Homo sapiens coiled-coil domain containing 66 (CCDC66), mRNA."  
"Homo sapiens coiled-coil domain containing 68 (CCDC68), mRNA."  
"Homo sapiens coiled-coil domain containing 69 (CCDC69), mRNA."  
"Homo sapiens coiled-coil domain containing 71 (CCDC71), mRNA."  
"Homo sapiens coiled-coil domain containing 72 (CCDC72), mRNA."  
"Homo sapiens coiled-coil domain containing 74A (CCDC74A), mRNA."  
"Homo sapiens coiled-coil domain containing 74B (CCDC74B), mRNA."  
"Homo sapiens coiled-coil domain containing 76 (CCDC76), mRNA."  
"Homo sapiens coiled-coil domain containing 77 (CCDC77), mRNA."  
"Homo sapiens coiled-coil domain containing 8 (CCDC8), mRNA."  
"Homo sapiens coiled-coil domain containing 84 (CCDC84), mRNA."  
"Homo sapiens coiled-coil domain containing 85A (CCDC85A), mRNA."  
"Homo sapiens coiled-coil domain containing 85B (CCDC85B), mRNA."  
"Homo sapiens coiled-coil domain containing 86 (CCDC86), mRNA."  
"Homo sapiens coiled-coil domain containing 88B (CCDC88B), mRNA."  
"Homo sapiens coiled-coil domain containing 88C (CCDC88C), mRNA."  
"Homo sapiens coiled-coil domain containing 89 (CCDC89), mRNA."  
"Homo sapiens coiled-coil domain containing 90A (CCDC90A), mRNA."  
"Homo sapiens coiled-coil domain containing 90B (CCDC90B), mRNA."  
"Homo sapiens coiled-coil domain containing 91 (CCDC91), mRNA."  
"Homo sapiens coiled-coil domain containing 92 (CCDC92), mRNA."  
"Homo sapiens coiled-coil domain containing 94 (CCDC94), mRNA."  
"Homo sapiens coiled-coil domain containing 97 (CCDC97), mRNA."  
"Homo sapiens coiled-coil domain containing 99 (CCDC99), mRNA."  
"Homo sapiens coiled-coil alpha-helical rod protein 1 (CCHCR1), mRNA."  
"Homo sapiens chemokine (C-C motif) ligand 1 (CCL1), mRNA."  
"Homo sapiens chemokine (C-C motif) ligand 17 (CCL17), mRNA."  
"Homo sapiens chemokine (C-C motif) ligand 20 (CCL20), mRNA."  
"Homo sapiens chemokine (C-C motif) ligand 22 (CCL22), mRNA."  
"Homo sapiens chemokine (C-C motif) ligand 26 (CCL26), mRNA."  
"Homo sapiens chemokine (C-C motif) ligand 3 (CCL3), mRNA."  
"Homo sapiens chemokine (C-C motif) ligand 3-like 1 (CCL3L1), mRNA."  
"Homo sapiens chemokine (C-C motif) ligand 3-like 3 (CCL3L3), mRNA."  
"Homo sapiens chemokine (C-C motif) ligand 4-like 1 (CCL4L1), mRNA."

"Homo sapiens chemokine (C-C motif) ligand 4-like 2 (CCL4L2), mRNA."  
"Homo sapiens chemokine (C-C motif) ligand 5 (CCL5), mRNA."  
"Homo sapiens cerebral cavernous malformation 2 (CCM2), transcript variant 2, mRNA."  
"Homo sapiens cyclin A1 (CCNA1), mRNA."  
"Homo sapiens cyclin A2 (CCNA2), mRNA."  
"Homo sapiens cyclin B1 (CCNB1), mRNA."  
"Homo sapiens cyclin B1 interacting protein 1 (CCNB1IP1), transcript variant 3, mRNA."  
"Homo sapiens cyclin B2 (CCNB2), mRNA."  
"Homo sapiens cyclin B3 (CCNB3), transcript variant 3, mRNA."  
"Homo sapiens cyclin C (CCNC), transcript variant 2, mRNA."  
"Homo sapiens cyclin D1 (CCND1), mRNA."  
"Homo sapiens cyclin D2 (CCND2), mRNA."  
"Homo sapiens cyclin D3 (CCND3), mRNA."  
"Homo sapiens cyclin D-type binding-protein 1 (CCNDBP1), transcript variant 1, mRNA."  
"Homo sapiens cyclin E1 (CCNE1), transcript variant 2, mRNA."  
"Homo sapiens cyclin E2 (CCNE2), transcript variant 2, mRNA."  
"Homo sapiens cyclin F (CCNF), mRNA."  
"Homo sapiens cyclin G1 (CCNG1), transcript variant 2, mRNA."  
"Homo sapiens cyclin G2 (CCNG2), mRNA."  
"Homo sapiens cyclin I (CCNI), mRNA."  
"Homo sapiens cyclin J (CCNJ), mRNA."  
"Homo sapiens cyclin K (CCNK), transcript variant 2, mRNA."  
"Homo sapiens cyclin L1 (CCNL1), mRNA."  
"Homo sapiens cyclin L2 (CCNL2), mRNA."  
"Homo sapiens cyclin O (CCNO), mRNA."  
"Homo sapiens cyclin T2 (CCNT2), transcript variant a, mRNA."  
"Homo sapiens cyclin Y-like 1 (CCNYL1), mRNA."  
"Homo sapiens cell cycle progression 1 (CCPG1), transcript variant 2, mRNA."  
"Homo sapiens chemokine (C-C motif) receptor 10 (CCR10), mRNA."  
"Homo sapiens chemokine (C-C motif) receptor 2 (CCR2), transcript variant A, mRNA."  
"Homo sapiens chemokine (C-C motif) receptor 6 (CCR6), transcript variant 2, mRNA."  
"Homo sapiens chemokine (C-C motif) receptor 7 (CCR7), mRNA."  
"Homo sapiens chemokine (C-C motif) receptor 8 (CCR8), mRNA."  
"Homo sapiens chemokine (C-C motif) receptor-like 1 (CCRL1), transcript variant 1, mRNA."  
"Homo sapiens chemokine (C-C motif) receptor-like 2 (CCRL2), transcript variant 2, mRNA."  
"Homo sapiens CCR4 carbon catabolite repression 4-like (*S. cerevisiae*) (CCRN4L), mRNA."  
"PREDICTED: Homo sapiens copper chaperone for superoxide dismutase (CCS), mRNA."  
"Homo sapiens chaperonin containing TCP1, subunit 2 (beta) (CCT2), mRNA."  
"Homo sapiens chaperonin containing TCP1, subunit 3 (gamma) (CCT3), transcript variant 1, mRNA."  
"Homo sapiens chaperonin containing TCP1, subunit 4 (delta) (CCT4), mRNA."  
"Homo sapiens chaperonin containing TCP1, subunit 5 (epsilon) (CCT5), mRNA."  
"Homo sapiens chaperonin containing TCP1, subunit 6A (zeta 1) (CCT6A), transcript variant 1, mRNA."  
"Homo sapiens chaperonin containing TCP1, subunit 6B (zeta 2) (CCT6B), mRNA."  
"Homo sapiens chaperonin containing TCP1, subunit 6 (zeta) pseudogene 1 (CCT6P1), non-coding RNA."

"Homo sapiens chaperonin containing TCP1, subunit 7 (eta) (CCT7), transcript variant 2, mRNA  
"Homo sapiens chaperonin containing TCP1, subunit 8 (theta) (CCT8), mRNA."  
"Homo sapiens CD14 molecule (CD14), transcript variant 1, mRNA."  
"Homo sapiens CD151 molecule (Raph blood group) (CD151), transcript variant 4, mRNA."  
"Homo sapiens CD163 molecule-like 1 (CD163L1), mRNA."  
"Homo sapiens CD180 molecule (CD180), mRNA."  
"Homo sapiens CD19 molecule (CD19), mRNA."  
"Homo sapiens CD1a molecule (CD1A), mRNA."  
"Homo sapiens CD1b molecule (CD1B), mRNA."  
"Homo sapiens CD1c molecule (CD1C), mRNA."  
"Homo sapiens CD1d molecule (CD1D), mRNA."  
"Homo sapiens CD1e molecule (CD1E), transcript variant 3, mRNA."  
"Homo sapiens CD2 molecule (CD2), mRNA."  
"Homo sapiens CD200 receptor 1 (CD200R1), transcript variant 3, mRNA."  
"Homo sapiens CD22 molecule (CD22), mRNA."  
"Homo sapiens CD24 molecule (CD24), mRNA."  
"Homo sapiens CD244 molecule, natural killer cell receptor 2B4 (CD244), mRNA."  
"Homo sapiens CD247 molecule (CD247), transcript variant 2, mRNA."  
"Homo sapiens CD248 molecule, endosialin (CD248), mRNA."  
"Homo sapiens CD27 molecule (CD27), mRNA."  
"Homo sapiens CD274 molecule (CD274), mRNA."  
"Homo sapiens CD276 molecule (CD276), transcript variant 1, mRNA. XM\_945872 XM\_945874  
"Homo sapiens CD28 molecule (CD28), mRNA."  
"Homo sapiens CD2-associated protein (CD2AP), mRNA."  
"Homo sapiens CD2 (cytoplasmic tail) binding protein 2 (CD2BP2), mRNA."  
"Homo sapiens CD300c molecule (CD300C), mRNA."  
"Homo sapiens CD302 molecule (CD302), mRNA."  
"Homo sapiens CD320 molecule (CD320), mRNA."  
"Homo sapiens CD33 molecule (CD33), transcript variant 1, mRNA."  
"Homo sapiens CD36 molecule (thrombospondin receptor) (CD36), transcript variant 1, mRNA."  
"Homo sapiens CD37 antigen (CD37), mRNA."  
"Homo sapiens CD38 molecule (CD38), mRNA."  
"Homo sapiens CD3D antigen, delta polypeptide (TiT3 complex) (CD3D), mRNA."  
"Homo sapiens CD3e molecule, epsilon associated protein (CD3EAP), mRNA."  
"Homo sapiens CD3g molecule, gamma (CD3-TCR complex) (CD3G), mRNA."  
"Homo sapiens CD40 molecule, TNF receptor superfamily member 5 (CD40), transcript variant  
"Homo sapiens CD44 molecule (Indian blood group) (CD44), transcript variant 4, mRNA."  
"Homo sapiens CD46 molecule, complement regulatory protein (CD46), transcript variant m, mF  
"Homo sapiens CD47 molecule (CD47), transcript variant 2, mRNA."  
"Homo sapiens CD48 molecule (CD48), mRNA."  
"Homo sapiens CD52 molecule (CD52), mRNA."  
"Homo sapiens CD53 molecule (CD53), transcript variant 2, mRNA."  
"Homo sapiens CD55 molecule, decay accelerating factor for complement (Cromer blood group  
"Homo sapiens CD58 molecule (CD58), mRNA."

"Homo sapiens CD59 molecule, complement regulatory protein (CD59), transcript variant 2, mRNA"

"Homo sapiens CD63 molecule (CD63), transcript variant 2, mRNA."

"Homo sapiens CD68 molecule (CD68), transcript variant 1, mRNA."

"Homo sapiens CD69 molecule (CD69), mRNA."

"Homo sapiens CD7 molecule (CD7), mRNA."

"Homo sapiens CD70 molecule (CD70), mRNA."

"Homo sapiens CD72 molecule (CD72), mRNA."

"Homo sapiens CD74 molecule, major histocompatibility complex, class II invariant chain (CD74

"Homo sapiens CD79a molecule, immunoglobulin-associated alpha (CD79A), transcript variant

"Homo sapiens CD79b molecule, immunoglobulin-associated beta (CD79B), transcript variant 3

"Homo sapiens CD80 molecule (CD80), mRNA."

"Homo sapiens CD81 molecule (CD81), mRNA."

"Homo sapiens CD82 molecule (CD82), transcript variant 1, mRNA."

"Homo sapiens CD83 molecule (CD83), transcript variant 1, mRNA."

"Homo sapiens CD84 molecule (CD84), mRNA."

"Homo sapiens CD86 antigen (CD28 antigen ligand 2, B7-2 antigen) (CD86), transcript variant 1

"Homo sapiens CD8a molecule (CD8A), transcript variant 2, mRNA."

"Homo sapiens CD9 molecule (CD9), mRNA."

"Homo sapiens CD96 molecule (CD96), transcript variant 1, mRNA."

"Homo sapiens CD97 molecule (CD97), transcript variant 1, mRNA."

"Homo sapiens CD99 molecule (CD99), transcript variant 1, mRNA."

"Homo sapiens CD99 molecule-like 2 (CD99L2), transcript variant 3, mRNA."

"Homo sapiens cytidine deaminase (CDA), mRNA."

"PREDICTED: Homo sapiens congenital dyserythropoietic anemia, type I (CDAN1), mRNA."

"Homo sapiens cell division cycle 123 homolog (*S. cerevisiae*) (CDC123), mRNA."

"Homo sapiens CDC14 cell division cycle 14 homolog B (*S. cerevisiae*) (CDC14B), transcript va

"Homo sapiens cell division cycle 16 homolog (*S. cerevisiae*) (CDC16), transcript variant 2, mRN

"Homo sapiens cell division cycle 2, G1 to S and G2 to M (CDC2), transcript variant 1, mRNA."

"Homo sapiens cell division cycle 20 homolog (*S. cerevisiae*) (CDC20), mRNA."

"Homo sapiens cell division cycle 23 homolog (*S. cerevisiae*) (CDC23), mRNA."

"Homo sapiens cell division cycle 25 homolog A (*S. pombe*) (CDC25A), transcript variant 1, mRN

"Homo sapiens cell division cycle 25B (CDC25B), transcript variant 4, mRNA."

"Homo sapiens cell division cycle 25 homolog C (*S. pombe*) (CDC25C), transcript variant 1, mRN

"Homo sapiens cell division cycle 26 homolog (*S. cerevisiae*) (CDC26), mRNA."

"Homo sapiens cell division cycle 2-like 1 (PITSLRE proteins) (CDC2L1), transcript variant 3, mRN

"Homo sapiens cell division cycle 2-like 5 (cholinesterase-related cell division controller) (CDC2L

"Homo sapiens cell division cycle 2-like 6 (CDK8-like) (CDC2L6), mRNA."

"Homo sapiens cell division cycle 34 homolog (*S. cerevisiae*) (CDC34), mRNA."

"Homo sapiens cell division cycle 37 homolog (*S. cerevisiae*) (CDC37), mRNA."

"Homo sapiens cell division cycle 37 homolog (*S. cerevisiae*)-like 1 (CDC37L1), mRNA."

"Homo sapiens cell division cycle 40 homolog (*S. cerevisiae*) (CDC40), mRNA."

"Homo sapiens cell division cycle 42 (GTP binding protein, 25kDa) (CDC42), transcript variant 3

"Homo sapiens CDC42 binding protein kinase alpha (DMPK-like) (CDC42BPA), transcript variar

"Homo sapiens CDC42 binding protein kinase beta (DMPK-like) (CDC42BPB), mRNA."

"Homo sapiens CDC42 binding protein kinase gamma (DMPK-like) (CDC42BPG), mRNA."  
"Homo sapiens CDC42 effector protein (Rho GTPase binding) 2 (CDC42EP2), mRNA."  
"Homo sapiens CDC42 effector protein (Rho GTPase binding) 3 (CDC42EP3), mRNA."  
"Homo sapiens CDC42 effector protein (Rho GTPase binding) 4 (CDC42EP4), mRNA."  
"Homo sapiens CDC42 effector protein (Rho GTPase binding) 5 (CDC42EP5), mRNA."  
"Homo sapiens CDC42 small effector 1 (CDC42SE1), transcript variant 1, mRNA."  
"Homo sapiens CDC42 small effector 2 (CDC42SE2), transcript variant 2, mRNA."  
"Homo sapiens CDC45 cell division cycle 45-like (*S. cerevisiae*) (CDC45L), mRNA."  
"Homo sapiens CDC5 cell division cycle 5-like (*S. pombe*) (CDC5L), mRNA."  
"Homo sapiens cell division cycle 6 homolog (*S. cerevisiae*) (CDC6), mRNA."  
"Homo sapiens cell division cycle 7 homolog (*S. cerevisiae*) (CDC7), mRNA."  
"Homo sapiens cell division cycle 73, Paf1/RNA polymerase II complex component, homolog (S  
"Homo sapiens cell division cycle associated 1 (CDCA1), transcript variant 1, mRNA."  
"Homo sapiens cell division cycle associated 2 (CDCA2), mRNA."  
"Homo sapiens cell division cycle associated 3 (CDCA3), mRNA."  
"Homo sapiens cell division cycle associated 4 (CDCA4), transcript variant 13, mRNA."  
"Homo sapiens cell division cycle associated 5 (CDCA5), mRNA."  
"Homo sapiens cell division cycle associated 7 (CDCA7), transcript variant 1, mRNA."  
"Homo sapiens cell division cycle associated 7-like (CDCA7L), mRNA."  
"Homo sapiens cell division cycle associated 8 (CDCA8), mRNA."  
"Homo sapiens CUB domain containing protein 1 (CDCP1), transcript variant 1, mRNA."  
"Homo sapiens cadherin 12, type 2 (N-cadherin 2) (CDH12), mRNA."  
"Homo sapiens cadherin 15, type 1, M-cadherin (myotubule) (CDH15), mRNA."  
"Homo sapiens cadherin 17, LI cadherin (liver-intestine) (CDH17), mRNA."  
"Homo sapiens cadherin 18, type 2 (CDH18), mRNA."  
"Homo sapiens cadherin 2, type 1, N-cadherin (neuronal) (CDH2), mRNA."  
"Homo sapiens cadherin-like 24 (CDH24), transcript variant 1, mRNA."  
"Homo sapiens cadherin 8, type 2 (CDH8), mRNA."  
"Homo sapiens cadherin 9, type 2 (T1-cadherin) (CDH9), mRNA."  
"Homo sapiens CDP-diacylglycerol--inositol 3-phosphatidyltransferase (phosphatidylinositol synt  
"Homo sapiens cyclin-dependent kinase 10 (CDK10), transcript variant c, mRNA."  
"Homo sapiens cyclin-dependent kinase 2 (CDK2), transcript variant 1, mRNA."  
"Homo sapiens cyclin-dependent kinase 2 associated protein 1 (CDK2AP1), mRNA."  
"Homo sapiens cyclin-dependent kinase 2 associated protein 2 (CDK2AP2), mRNA."  
"Homo sapiens cyclin-dependent kinase 3 (CDK3), mRNA."  
"Homo sapiens cyclin-dependent kinase 4 (CDK4), mRNA."  
"Homo sapiens cyclin-dependent kinase 5 (CDK5), mRNA."  
"Homo sapiens cyclin-dependent kinase 5, regulatory subunit 1 (p35) (CDK5R1), mRNA."  
"Homo sapiens cyclin-dependent kinase 5, regulatory subunit 2 (p39) (CDK5R2), mRNA."  
"Homo sapiens CDK5 regulatory subunit associated protein 1 (CDK5RAP1), transcript variant 1,  
"Homo sapiens CDK5 regulatory subunit associated protein 2 (CDK5RAP2), transcript variant 1,  
"Homo sapiens CDK5 regulatory subunit associated protein 3 (CDK5RAP3), mRNA."  
"Homo sapiens cyclin-dependent kinase 6 (CDK6), mRNA."  
"Homo sapiens cyclin-dependent kinase 7 (MO15 homolog, *Xenopus laevis*, cdk-activating kina:

"Homo sapiens cyclin-dependent kinase 8 (CDK8), mRNA."

"Homo sapiens cyclin-dependent kinase 9 (CDC2-related kinase) (CDK9), mRNA."

"Homo sapiens CDK5 regulatory subunit associated protein 1-like 1 (CDKAL1), mRNA."

"Homo sapiens cyclin-dependent kinase-like 1 (CDC2-related kinase) (CDKL1), mRNA."

"Homo sapiens cyclin-dependent kinase-like 2 (CDC2-related kinase) (CDKL2), mRNA."

"Homo sapiens cyclin-dependent kinase-like 3 (CDKL3), mRNA."

"Homo sapiens cyclin-dependent kinase inhibitor 1A (p21, Cip1) (CDKN1A), transcript variant 2,

"Homo sapiens cyclin-dependent kinase inhibitor 1B (p27, Kip1) (CDKN1B), mRNA."

"Homo sapiens cyclin-dependent kinase inhibitor 1C (p57, Kip2) (CDKN1C), mRNA."

"Homo sapiens cyclin-dependent kinase inhibitor 2A (melanoma, p16, inhibits CDK4) (CDKN2A),

"Homo sapiens CDKN2A interacting protein (CDKN2AIP), mRNA."

"Homo sapiens CDKN2A interacting protein N-terminal like (CDKN2AIPNL), mRNA."

"Homo sapiens cyclin-dependent kinase inhibitor 2B (p15, inhibits CDK4) (CDKN2B), transcript 1,

"Homo sapiens cyclin-dependent kinase inhibitor 2C (p18, inhibits CDK4) (CDKN2C), transcript 1,

"Homo sapiens cyclin-dependent kinase inhibitor 2D (p19, inhibits CDK4) (CDKN2D), transcript 1,

"Homo sapiens cyclin-dependent kinase inhibitor 3 (CDK2-associated dual specificity phosphatase) (CDKN2C), transcript 1,

"Homo sapiens cerebral dopamine neurotrophic factor (CDNF), mRNA."

"Homo sapiens cysteine dioxygenase, type I (CDO1), mRNA."

"Homo sapiens cerebellar degeneration-related protein 2, 62kDa (CDR2), mRNA."

"Homo sapiens cerebellar degeneration-related protein 2-like (CDR2L), mRNA."

"PREDICTED: Homo sapiens CMT1A duplicated region transcript 1 (CDRT1), mRNA."

"Homo sapiens CDP-diacylglycerol synthase (phosphatidate cytidyltransferase) 2 (CDS2), mRNA."

"Homo sapiens chromatin licensing and DNA replication factor 1 (CDT1), mRNA."

"PREDICTED: Homo sapiens CDV3 homolog (mouse), transcript variant 3 (CDV3), mRNA."

"Homo sapiens chromodomain protein, Y-linked, 1 (CDY1), transcript variant 2, mRNA."

"Homo sapiens carcinoembryonic antigen-related cell adhesion molecule 1 (biliary glycoprotein) (CEACAM1), transcript variant 1,

"Homo sapiens carcinoembryonic antigen-related cell adhesion molecule 21 (CEACAM21), transcript variant 1,

"Homo sapiens CCAAT/enhancer binding protein (C/EBP), alpha (CEBPA), mRNA."

"Homo sapiens CCAAT/enhancer binding protein (C/EBP), beta (CEBPB), mRNA."

"Homo sapiens CCAAT/enhancer binding protein (C/EBP), delta (CEBPD), mRNA."

"Homo sapiens CCAAT/enhancer binding protein (C/EBP), epsilon (CEBPE), mRNA."

"Homo sapiens CCAAT/enhancer binding protein (C/EBP), gamma (CEBPG), mRNA."

"Homo sapiens CCAAT/enhancer binding protein (C/EBP), zeta (CEBPZ), mRNA."

"Homo sapiens cat eye syndrome chromosome region, candidate 1 (CECR1), transcript variant 1,

"Homo sapiens cat eye syndrome chromosome region, candidate 5 (CECR5), transcript variant 1,

"Homo sapiens cat eye syndrome chromosome region, candidate 6 (CECR6), mRNA."

"PREDICTED: Homo sapiens cat eye syndrome chromosome region, candidate 7 (CECR7), mRNA."

"Homo sapiens carboxyl ester lipase (bile salt-stimulated lipase) (CEL), mRNA."

"Homo sapiens carboxyl ester lipase pseudogene (CELP), non-coding RNA."

"Homo sapiens cadherin, EGF LAG seven-pass G-type receptor 1 (flamingo homolog, Drosophila) (CELSR1), transcript variant 1,

"Homo sapiens cadherin, EGF LAG seven-pass G-type receptor 2 (flamingo homolog, Drosophila) (CELSR2), transcript variant 1,

"Homo sapiens cadherin, EGF LAG seven-pass G-type receptor 3 (flamingo homolog, Drosophila) (CELSR3), transcript variant 1,

"Homo sapiens cementum protein 1 (CEMP1), mRNA."

"Homo sapiens cell cycle exit and neuronal differentiation 1 (CEND1), mRNA."

"Homo sapiens centromere protein A (CENPA), transcript variant 2, mRNA."  
"Homo sapiens centromere protein B, 80kDa (CENPB), mRNA."  
"Homo sapiens CENPB DNA-binding domains containing 1 (CENPBD1), mRNA."  
"Homo sapiens centromere protein C 1 (CENPC1), mRNA."  
"Homo sapiens centromere protein E, 312kDa (CENPE), mRNA."  
"Homo sapiens centromere protein F, 350/400ka (mitosin) (CENPF), mRNA."  
"Homo sapiens centromere protein H (CENPH), mRNA."  
"Homo sapiens centromere protein I (CENPI), mRNA."  
"Homo sapiens centromere protein J (CENPJ), mRNA."  
"Homo sapiens centromere protein K (CENPK), mRNA."  
"Homo sapiens centromere protein L (CENPL), mRNA."  
"Homo sapiens centromere protein M (CENPM), transcript variant 1, mRNA."  
"Homo sapiens centromere protein N (CENPN), mRNA."  
"Homo sapiens centromere protein O (CENPO), mRNA."  
"Homo sapiens centromere protein P (CENPP), mRNA."  
"Homo sapiens centromere protein Q (CENPQ), mRNA."  
"Homo sapiens centromere protein T (CENPT), mRNA."  
"Homo sapiens centromere protein V (CENPV), mRNA."  
"Homo sapiens centaurin, alpha 1 (CENTA1), mRNA."  
"Homo sapiens centaurin, beta 2 (CENTB2), mRNA."  
"Homo sapiens centaurin, gamma 3 (CENTG3), mRNA."  
"Homo sapiens centrosomal protein 110kDa (CEP110), mRNA."  
"Homo sapiens centrosomal protein 135kDa (CEP135), mRNA."  
"Homo sapiens centrosomal protein 152kDa (CEP152), mRNA."  
"Homo sapiens centrosomal protein 164kDa (CEP164), mRNA."  
"Homo sapiens centrosomal protein 192kDa (CEP192), mRNA."  
"Homo sapiens centrosomal protein 250kDa (CEP250), mRNA."  
"Homo sapiens centrosomal protein 290kDa (CEP290), mRNA."  
"Homo sapiens centrosomal protein 350kDa (CEP350), mRNA."  
"Homo sapiens centrosomal protein 55kDa (CEP55), mRNA."  
"Homo sapiens centrosomal protein 57kDa (CEP57), mRNA."  
"Homo sapiens centrosomal protein 68kDa (CEP68), mRNA."  
"Homo sapiens centrosomal protein 70kDa (CEP70), mRNA."  
"Homo sapiens centrosomal protein 72kDa (CEP72), mRNA."  
"Homo sapiens centrosomal protein 76kDa (CEP76), mRNA."  
"Homo sapiens centrosomal protein 78kDa (CEP78), transcript variant 1, mRNA."  
"Homo sapiens centrosomal protein 97kDa (CEP97), mRNA."  
"Homo sapiens choline/ethanolamine phosphotransferase 1 (CEPT1), transcript variant 1, mRNA."  
"Homo sapiens cerebral endothelial cell adhesion molecule (CERCAM), mRNA."  
"Homo sapiens ceramide kinase (CERK), transcript variant 2, mRNA."  
"Homo sapiens ceramide kinase-like (CERKL), transcript variant 1, mRNA."  
"Homo sapiens carboxylesterase 2 (intestine, liver) (CES2), transcript variant 1, mRNA."  
"Homo sapiens carboxylesterase 3 (brain) (CES3), mRNA."  
"Homo sapiens carboxylesterase 8 (putative) (CES8), mRNA."



"Homo sapiens centrin, EF-hand protein, 2 (CETN2), mRNA."  
"Homo sapiens centrin, EF-hand protein, 3 (CDC31 homolog, yeast) (CETN3), mRNA."  
"Homo sapiens cholesteryl ester transfer protein, plasma (CETP), mRNA."  
"Homo sapiens complement factor B (CFB), mRNA."  
"Homo sapiens cripto, FRL-1, cryptic family 1 (CFC1), mRNA."  
"Homo sapiens complement factor D (adipsin) (CFD), mRNA."  
"Homo sapiens craniofacial development protein 1 (CFDP1), mRNA."  
"Homo sapiens complement factor H (CFH), transcript variant 1, mRNA."  
"Homo sapiens cofilin 1 (non-muscle) (CFL1), mRNA."  
"Homo sapiens cofilin 2 (muscle) (CFL2), transcript variant 1, mRNA."  
"Homo sapiens CASP8 and FADD-like apoptosis regulator (CFLAR), mRNA."  
"Homo sapiens chorionic gonadotropin, beta polypeptide (CGB), mRNA."  
"Homo sapiens chorionic gonadotropin, beta polypeptide 1 (CGB1), mRNA."  
"Homo sapiens chorionic gonadotropin, beta polypeptide 2 (CGB2), mRNA."  
"Homo sapiens chorionic gonadotropin, beta polypeptide 5 (CGB5), mRNA."  
"Homo sapiens CGG triplet repeat binding protein 1 (CGGBP1), transcript variant 2, mRNA."  
"PREDICTED: Homo sapiens CGI-96 protein (CGI-96), mRNA."  
"Homo sapiens cingulin (CGN), mRNA."  
"Homo sapiens cingulin-like 1 (CGNL1), mRNA."  
"Homo sapiens cell growth regulator with ring finger domain 1 (CGRRF1), mRNA."  
"Homo sapiens cholesterol 25-hydroxylase (CH25H), mRNA."  
"Homo sapiens ChaC, cation transport regulator homolog 1 (E. coli) (CHAC1), mRNA."  
"Homo sapiens ChaC, cation transport regulator homolog 2 (E. coli) (CHAC2), mRNA."  
"Homo sapiens chromatin assembly factor 1, subunit A (p150) (CHAF1A), mRNA."  
"Homo sapiens chromatin assembly factor 1, subunit B (p60) (CHAF1B), mRNA."  
"Homo sapiens coiled-coil-helix-coiled-coil-helix domain containing 1 (CHCHD1), mRNA."  
"Homo sapiens coiled-coil-helix-coiled-coil-helix domain containing 10 (CHCHD10), mRNA."  
"Homo sapiens coiled-coil-helix-coiled-coil-helix domain containing 2 (CHCHD2), mRNA."  
"Homo sapiens coiled-coil-helix-coiled-coil-helix domain containing 3 (CHCHD3), mRNA."  
"Homo sapiens coiled-coil-helix-coiled-coil-helix domain containing 4 (CHCHD4), nuclear gene ε  
"Homo sapiens coiled-coil-helix-coiled-coil-helix domain containing 5 (CHCHD5), mRNA."  
"Homo sapiens coiled-coil-helix-coiled-coil-helix domain containing 6 (CHCHD6), mRNA."  
"Homo sapiens coiled-coil-helix-coiled-coil-helix domain containing 7 (CHCHD7), transcript varia  
"Homo sapiens coiled-coil-helix-coiled-coil-helix domain containing 8 (CHCHD8), mRNA."  
"PREDICTED: Homo sapiens coiled-coil-helix-coiled-coil-helix domain containing 9 (CHCHD9), i  
"Homo sapiens chromodomain helicase DNA binding protein 1 (CHD1), mRNA."  
"Homo sapiens chromodomain helicase DNA binding protein 1-like (CHD1L), mRNA."  
"Homo sapiens chromodomain helicase DNA binding protein 2 (CHD2), mRNA."  
"Homo sapiens chromodomain helicase DNA binding protein 3 (CHD3), transcript variant 3, mR  
"Homo sapiens chromodomain helicase DNA binding protein 4 (CHD4), mRNA."  
"Homo sapiens chromodomain helicase DNA binding protein 6 (CHD6), mRNA."  
"Homo sapiens chromodomain helicase DNA binding protein 7 (CHD7), mRNA."  
"Homo sapiens chromodomain helicase DNA binding protein 8 (CHD8), mRNA."  
"Homo sapiens chromodomain helicase DNA binding protein 9 (CHD9), mRNA."

"Homo sapiens choline dehydrogenase (CHDH), mRNA."  
"Homo sapiens CHK1 checkpoint homolog (S. pombe) (CHEK1), mRNA."  
"Homo sapiens CHK2 checkpoint homolog (S. pombe) (CHEK2), transcript variant 1, mRNA."  
"Homo sapiens calcium homeostasis endoplasmic reticulum protein (CHERP), mRNA."  
"Homo sapiens checkpoint suppressor 1 (CHES1), mRNA."  
"Homo sapiens chromogranin A (parathyroid secretory protein 1) (CHGA), mRNA."  
"Homo sapiens chromogranin B (secretogranin 1) (CHGB), mRNA."  
"Homo sapiens chitinase 3-like 1 (cartilage glycoprotein-39) (CHI3L1), mRNA."  
"Homo sapiens chitinase 3-like 2 (CHI3L2), transcript variant 1, mRNA."  
"Homo sapiens cysteine-rich hydrophobic domain 2 (CHIC2), mRNA."  
"PREDICTED: Homo sapiens choline kinase alpha, transcript variant 4 (CHKA), mRNA."  
"Homo sapiens choline kinase beta (CHKB), transcript variant 2, mRNA."  
"Homo sapiens choroideremia (Rab escort protein 1) (CHM), transcript variant 1, mRNA."  
"Homo sapiens choroideremia-like (Rab escort protein 2) (CHML), mRNA."  
"Homo sapiens chromatin modifying protein 1A (CHMP1A), transcript variant 2, mRNA."  
"Homo sapiens chromatin modifying protein 1B (CHMP1B), mRNA."  
"Homo sapiens chromatin modifying protein 2A (CHMP2A), transcript variant 2, mRNA."  
"Homo sapiens chromatin modifying protein 2B (CHMP2B), mRNA."  
"Homo sapiens chromatin modifying protein 4A (CHMP4A), mRNA."  
"Homo sapiens chromatin modifying protein 4B (CHMP4B), mRNA."  
"Homo sapiens chromatin modifying protein 4C (CHMP4C), mRNA."  
"Homo sapiens chromatin modifying protein 5 (CHMP5), mRNA."  
"PREDICTED: Homo sapiens chromatin modifying protein 6 (CHMP6), mRNA."  
"Homo sapiens CHMP family, member 7 (CHMP7), mRNA."  
"Homo sapiens chimerin (chimaerin) 2 (CHN2), transcript variant 2, mRNA."  
"Homo sapiens chondrolectin (CHODL), mRNA."  
"Homo sapiens cysteine and histidine-rich domain (CHORD)-containing 1 (CHORDC1), mRNA."  
"Homo sapiens calcium binding protein P22 (CHP), mRNA."  
"Homo sapiens chondroitin polymerizing factor (CHPF), mRNA."  
"Homo sapiens chondroitin polymerizing factor 2 (CHPF2), mRNA."  
"Homo sapiens choline phosphotransferase 1 (CHPT1), mRNA."  
"Homo sapiens chromatin accessibility complex 1 (CHRAC1), mRNA."  
"Homo sapiens chordin (CHRD), mRNA."  
"Homo sapiens cholinergic receptor, nicotinic, alpha 1 (muscle) (CHRNA1), transcript variant 2,  
"Homo sapiens cholinergic receptor, nicotinic, alpha 10 (CHRNA10), mRNA."  
"Homo sapiens cholinergic receptor, nicotinic, alpha 3 (CHRNA3), mRNA."  
"Homo sapiens cholinergic receptor, nicotinic, alpha 5 (CHRNA5), mRNA."  
"Homo sapiens cholinergic receptor, nicotinic, alpha 6 (CHRNA6), mRNA."  
"PREDICTED: Homo sapiens cholinergic receptor, nicotinic, alpha 7 (CHRNA7), mRNA."  
"Homo sapiens cholinergic receptor, nicotinic, beta 1 (muscle) (CHRNB1), mRNA."  
"Homo sapiens carbohydrate (keratan sulfate Gal-6) sulfotransferase 1 (CHST1), mRNA."  
"Homo sapiens carbohydrate sulfotransferase 10 (CHST10), mRNA."  
"Homo sapiens carbohydrate (chondroitin 4) sulfotransferase 12 (CHST12), mRNA."  
"Homo sapiens carbohydrate (N-acetylgalactosamine 4-O) sulfotransferase 14 (CHST14), mRNA."

"Homo sapiens carbohydrate (N-acetylgalactosamine 4-sulfate 6-O) sulfotransferase 15 (CHST15), mRNA."  
"Homo sapiens carbohydrate (N-acetylglucosamine-6-O) sulfotransferase 2 (CHST2), mRNA."  
"Homo sapiens carbohydrate (chondroitin 6) sulfotransferase 3 (CHST3), mRNA."  
"Homo sapiens carbohydrate (N-acetylglucosamine 6-O) sulfotransferase 7 (CHST7), mRNA."  
"Homo sapiens carbohydrate (N-acetylgalactosamine 4-O) sulfotransferase 9 (CHST9), mRNA."  
"Homo sapiens chondroitin sulfate synthase 1 (CHSY1), mRNA."  
"Homo sapiens CTF18, chromosome transmission fidelity factor 18 homolog (S. cerevisiae) (CTF18), mRNA."  
"Homo sapiens CTF8, chromosome transmission fidelity factor 8 homolog (S. cerevisiae) (CTF8), mRNA."  
"Homo sapiens conserved helix-loop-helix ubiquitous kinase (CHUK), mRNA."  
"Homo sapiens churchill domain containing 1 (CHURC1), mRNA."  
"Homo sapiens cytosolic iron-sulfur protein assembly 1 homolog (S. cerevisiae) (CIAO1), mRNA."  
"Homo sapiens cytokine induced apoptosis inhibitor 1 (CIAPIN1), mRNA."  
"Homo sapiens calcium and integrin binding 1 (calmyrin) (CIB1), mRNA."  
"Homo sapiens calcium and integrin binding family member 2 (CIB2), mRNA."  
"Homo sapiens capicua homolog (Drosophila) (CIC), mRNA."  
"PREDICTED: Homo sapiens cell death-inducing CIDE-like effector pseudogene (CICE), misc F."  
"Homo sapiens cell death-inducing DFFA-like effector b (CIDEB), mRNA."  
"Homo sapiens cell death-inducing DFFA-like effector c pseudogene (CIDECP), non-coding RN."  
"Homo sapiens class II, major histocompatibility complex, transactivator (CIITA), mRNA."  
"Homo sapiens cartilage intermediate layer protein, nucleotide pyrophosphohydrolase (CILP), mRNA."  
"Homo sapiens cyclin-dependent kinase 2 interacting protein (CINP), mRNA."  
"Homo sapiens cytokine induced protein 29 kDa (CIP29), mRNA."  
"Homo sapiens corepressor interacting with RBPJ, 1 (CIR1), mRNA."  
"Homo sapiens cold inducible RNA binding protein (CIRBP), mRNA."  
"Homo sapiens cirrhosis, autosomal recessive 1A (cirhin) (CIRH1A), mRNA."  
"Homo sapiens CDGSH iron sulfur domain 1 (CISD1), mRNA."  
"Homo sapiens CDGSH iron sulfur domain 2 (CISD2), mRNA."  
"Homo sapiens cytokine inducible SH2-containing protein (CISH), mRNA."  
"Homo sapiens Cbp/p300-interacting transactivator, with Glu/Asp-rich carboxy-terminal domain, 1 (CIS1), mRNA."  
"Homo sapiens Cbp/p300-interacting transactivator, with Glu/Asp-rich carboxy-terminal domain, 2 (CIS2), mRNA."  
"Homo sapiens Cbp/p300-interacting transactivator, with Glu/Asp-rich carboxy-terminal domain, 3 (CIS3), mRNA."  
"Homo sapiens cytoskeleton associated protein 2 (CKAP2), transcript variant 2, mRNA."  
"Homo sapiens cytoskeleton associated protein 2-like (CKAP2L), mRNA."  
"Homo sapiens cytoskeleton-associated protein 4 (CKAP4), mRNA."  
"Homo sapiens cytoskeleton associated protein 5 (CKAP5), transcript variant 1, mRNA."  
"Homo sapiens creatine kinase, brain (CKB), mRNA."  
"Homo sapiens chemokine-like factor (CKLF), transcript variant 5, mRNA."  
"Homo sapiens creatine kinase, mitochondrial 1A (CKMT1A), nuclear gene encoding mitochondrially encoded creatine kinase."  
"Homo sapiens creatine kinase, mitochondrial 1B (CKMT1B), nuclear gene encoding mitochondrially encoded creatine kinase."  
"Homo sapiens creatine kinase, mitochondrial 2 (sarcomeric) (CKMT2), nuclear gene encoding mitochondrially encoded creatine kinase."  
"Homo sapiens CDC28 protein kinase regulatory subunit 1B (CKS1B), mRNA."  
"Homo sapiens CDC28 protein kinase regulatory subunit 2 (CKS2), mRNA."  
"Homo sapiens cytoplasmic linker associated protein 1 (CLASP1), mRNA."  
"Homo sapiens cytoplasmic linker associated protein 2 (CLASP2), mRNA."

"Homo sapiens Charcot-Leyden crystal protein (CLC), mRNA."  
"Homo sapiens chloride channel accessory 1 (CLCA1), mRNA."  
"Homo sapiens chloride channel, calcium activated, family member 4 (CLCA4), mRNA."  
"Homo sapiens chloride channel CLIC-like 1 (CLCC1), mRNA."  
"Homo sapiens cardiotrophin-like cytokine factor 1 (CLCF1), transcript variant 1, mRNA."  
"Homo sapiens chloride channel 1, skeletal muscle (CLCN1), mRNA."  
"Homo sapiens chloride channel 2 (CLCN2), mRNA."  
"Homo sapiens chloride channel 3 (CLCN3), transcript variant e, mRNA."  
"Homo sapiens chloride channel 4 (CLCN4), mRNA."  
"Homo sapiens chloride channel 5 (CLCN5), transcript variant 3, mRNA."  
"Homo sapiens chloride channel 6 (CLCN6), transcript variant CIC-6d, mRNA."  
"Homo sapiens chloride channel 7 (CLCN7), mRNA."  
"Homo sapiens chloride channel Ka (CLCNKA), transcript variant 1, mRNA."  
"Homo sapiens claudin 11 (oligodendrocyte transmembrane protein) (CLDN11), mRNA."  
"Homo sapiens claudin 12 (CLDN12), mRNA."  
"Homo sapiens claudin 14 (CLDN14), transcript variant 1, mRNA."  
"Homo sapiens claudin 15 (CLDN15), mRNA."  
"Homo sapiens claudin 19 (CLDN19), mRNA."  
"Homo sapiens claudin 2 (CLDN2), mRNA."  
"PREDICTED: Homo sapiens claudin 22 (CLDN22), mRNA."  
"Homo sapiens claudin 23 (CLDN23), mRNA."  
"PREDICTED: Homo sapiens claudin-24-like (CLDN24), mRNA."  
"Homo sapiens claudin 4 (CLDN4), mRNA."  
"Homo sapiens claudin 5 (transmembrane protein deleted in velocardiofacial syndrome) (CLDN5), mRNA."  
"Homo sapiens claudin 7 (CLDN7), mRNA."  
"Homo sapiens claudin domain containing 1 (CLDND1), transcript variant 1, mRNA."  
"Homo sapiens claudin domain containing 2 (CLDND2), mRNA."  
"Homo sapiens C-type lectin domain family 10, member A (CLEC10A), transcript variant 1, mRNA."  
"Homo sapiens C-type lectin domain family 11, member A (CLEC11A), mRNA."  
"Homo sapiens C-type lectin domain family 14, member A (CLEC14A), mRNA."  
"Homo sapiens C-type lectin domain family 16, member A (CLEC16A), mRNA."  
"Homo sapiens C-type lectin domain family 17, member A (CLEC17A), mRNA."  
"Homo sapiens C-type lectin domain family 18, member C (CLEC18C), mRNA."  
"Homo sapiens C-type lectin domain family 2, member B (CLEC2B), mRNA."  
"Homo sapiens C-type lectin domain family 2, member D (CLEC2D), transcript variant 1, mRNA."  
"PREDICTED: Homo sapiens C-type lectin domain family 2, member L (CLEC2L), mRNA."  
"Homo sapiens C-type lectin domain family 4, member A (CLEC4A), transcript variant 4, mRNA."  
"Homo sapiens C-type lectin domain family 4, member C (CLEC4C), transcript variant 1, mRNA."  
"Homo sapiens C-type lectin domain family 4, member D (CLEC4D), mRNA."  
"Homo sapiens C-type lectin domain family 4, member F (CLEC4F), mRNA."  
"Homo sapiens C-type lectin superfamily 4, member G (CLEC4G), mRNA."  
"Homo sapiens C-type lectin domain family 6, member A (CLEC6A), mRNA."  
"Homo sapiens C-type lectin domain family 7, member A (CLEC7A), transcript variant 3, mRNA."  
"Homo sapiens C-type lectin domain family 9, member A (CLEC9A), mRNA."

"Homo sapiens C-type lectin-like 1 (CLECL1), mRNA."  
"Homo sapiens calmeglin (CLGN), mRNA."  
"Homo sapiens chloride intracellular channel 1 (CLIC1), mRNA."  
"Homo sapiens chloride intracellular channel 2 (CLIC2), mRNA."  
"Homo sapiens chloride intracellular channel 3 (CLIC3), mRNA."  
"Homo sapiens chloride intracellular channel 4 (CLIC4), nuclear gene encoding mitochondrial pr  
"Homo sapiens chloride intracellular channel 6 (CLIC6), mRNA."  
"Homo sapiens clathrin interactor 1 (CLINT1), mRNA."  
"Homo sapiens CAP-GLY domain containing linker protein 1 (CLIP1), transcript variant 1, mRNA/  
"Homo sapiens CAP-GLY domain containing linker protein 2 (CLIP2), transcript variant 2, mRNA/  
"Homo sapiens CAP-GLY domain containing linker protein 3 (CLIP3), mRNA."  
"Homo sapiens CDC-like kinase 1 (CLK1), mRNA."  
"PREDICTED: Homo sapiens CDC-like kinase 2, transcript variant 3 (CLK2), mRNA."  
"Homo sapiens CDC-like kinase 3 (CLK3), transcript variant phclk3, mRNA."  
"Homo sapiens CDC-like kinase 4 (CLK4), mRNA."  
"Homo sapiens calmin (calponin-like, transmembrane) (CLMN), mRNA."  
"Homo sapiens ceroid-lipofuscinosis, neuronal 3 (CLN3), transcript variant 1, mRNA."  
"Homo sapiens ceroid-lipofuscinosis, neuronal 5 (CLN5), mRNA."  
"Homo sapiens ceroid-lipofuscinosis, neuronal 6, late infantile, variant (CLN6), mRNA."  
"Homo sapiens CLP1, cleavage and polyadenylation factor I subunit, homolog (S. cerevisiae) (C  
"Homo sapiens ClpB caseinolytic peptidase B homolog (E. coli) (CLPB), mRNA."  
"Homo sapiens ClpP caseinolytic peptidase, ATP-dependent, proteolytic subunit homolog (E. cc  
"Homo sapiens cleft lip and palate associated transmembrane protein 1 (CLPTM1), mRNA."  
"Homo sapiens CLPTM1-like (CLPTM1L), mRNA."  
"Homo sapiens ClpX caseinolytic peptidase X homolog (E. coli) (CLPX), mRNA."  
"Homo sapiens claspin homolog (Xenopus laevis) (CLSPN), mRNA."  
"Homo sapiens calsyntenin 1 (CLSTN1), transcript variant 1, mRNA."  
"Homo sapiens calsyntenin 2 (CLSTN2), mRNA."  
"Homo sapiens calsyntenin 3 (CLSTN3), mRNA."  
"Homo sapiens clathrin, light chain (Lca) (CLTA), transcript variant 2, mRNA."  
"Homo sapiens clathrin, light chain (Lcb) (CLTB), transcript variant 2, mRNA."  
"Homo sapiens clathrin, heavy chain (Hc) (CLTC), mRNA."  
"Homo sapiens clathrin, heavy chain-like 1 (CLTCL1), mRNA."  
"Homo sapiens clusterin associated protein 1 (CLUAP1), transcript variant 2, mRNA."  
"Homo sapiens clavesin 2 (CLVS2), mRNA."  
"Homo sapiens citrate lyase beta like (CLYBL), transcript variant 1, mRNA."  
Homo sapiens cytidine monophosphate-N-acetylneuraminic acid hydroxylase (CMP-N-acetylne  
"Homo sapiens cytidine monophosphate N-acetylneuraminic acid synthetase (CMAS), mRNA."  
"Homo sapiens carboxymethylenebutenolidase homolog (Pseudomonas) (CMBL), mRNA."  
"Homo sapiens COX assembly mitochondrial protein homolog (S. cerevisiae) (CMC1), nuclear g  
"Homo sapiens c-Maf-inducing protein (CMIP), transcript variant C-mip, mRNA."  
"Homo sapiens cytidine monophosphate (UMP-CMP) kinase 1, cytosolic (CMPK1), mRNA."  
"Homo sapiens CKLF-like MARVEL transmembrane domain containing 1 (CMTM1), transcript v  
"Homo sapiens CKLF-like MARVEL transmembrane domain containing 3 (CMTM3), transcript v

"Homo sapiens CKLF-like MARVEL transmembrane domain containing 4 (CMTM4), transcript v  
"Homo sapiens CKLF-like MARVEL transmembrane domain containing 6 (CMTM6), mRNA."  
"Homo sapiens CKLF-like MARVEL transmembrane domain containing 7 (CMTM7), transcript v  
"Homo sapiens CKLF-like MARVEL transmembrane domain containing 8 (CMTM8), mRNA."  
"Homo sapiens CCHC-type zinc finger, nucleic acid binding protein (CNBP), transcript variant 3,  
"Homo sapiens CNDP dipeptidase 2 (metallopeptidase M20 family) (CNDP2), mRNA."  
"Homo sapiens cornifelin (CNFN), mRNA."  
"PREDICTED: Homo sapiens cornichon homolog 2 (Drosophila) (CNIH2), mRNA."  
"Homo sapiens cornichon homolog 4 (Drosophila) (CNIH4), mRNA."  
"Homo sapiens connector enhancer of kinase suppressor of Ras 2 (CNKSR2), mRNA."  
"Homo sapiens calponin 2 (CNN2), transcript variant 2, mRNA."  
"Homo sapiens calponin 3, acidic (CNN3), mRNA."  
"Homo sapiens cyclin M2 (CNNM2), transcript variant 3, mRNA."  
"Homo sapiens cyclin M3 (CNNM3), transcript variant 1, mRNA."  
"Homo sapiens cyclin M4 (CNNM4), mRNA."  
"Homo sapiens cappuccino homolog (mouse) (CNO), mRNA."  
"Homo sapiens CCR4-NOT transcription complex, subunit 1 (CNOT1), transcript variant 2, mRN  
"Homo sapiens CCR4-NOT transcription complex, subunit 10 (CNOT10), mRNA."  
"Homo sapiens CCR4-NOT transcription complex, subunit 2 (CNOT2), mRNA."  
"Homo sapiens CCR4-NOT transcription complex, subunit 3 (CNOT3), mRNA."  
"Homo sapiens CCR4-NOT transcription complex, subunit 4 (CNOT4), transcript variant 1, mRN  
"Homo sapiens CCR4-NOT transcription complex, subunit 6 (CNOT6), mRNA."  
"Homo sapiens CCR4-NOT transcription complex, subunit 6-like (CNOT6L), mRNA."  
"Homo sapiens CCR4-NOT transcription complex, subunit 7 (CNOT7), transcript variant 2, mRN  
"Homo sapiens CCR4-NOT transcription complex, subunit 8 (CNOT8), mRNA."  
"Homo sapiens 2',3'-cyclic nucleotide 3' phosphodiesterase (CNP), mRNA."  
"Homo sapiens canopy 2 homolog (zebrafish) (CNPY2), mRNA."  
"Homo sapiens canopy 3 homolog (zebrafish) (CNPY3), mRNA."  
"Homo sapiens canopy 4 homolog (zebrafish) (CNPY4), mRNA."  
"Homo sapiens cannabinoid receptor 1 (brain) (CNR1), transcript variant 1, mRNA."  
"Homo sapiens cannabinoid receptor 2 (macrophage) (CNR2), mRNA."  
"Homo sapiens cannabinoid receptor interacting protein 1 (CNRIP1), transcript variant CRIP1b,  
"Homo sapiens centlein, centrosomal protein (CNTLN), transcript variant 1, mRNA."  
"Homo sapiens contactin 2 (axonal) (CNTN2), mRNA."  
"Homo sapiens contactin 6 (CNTN6), mRNA."  
"Homo sapiens contactin associated protein 1 (CNTNAP1), mRNA."  
"Homo sapiens contactin associated protein-like 3 (CNTNAP3), mRNA."  
"Homo sapiens Coenzyme A synthase (COASY), nuclear gene encoding mitochondrial protein,  
"Homo sapiens cordon-bleu homolog (mouse) (COBL), mRNA."  
"Homo sapiens COBL-like 1 (COBLL1), mRNA."  
"PREDICTED: Homo sapiens cofactor of BRCA1 (COBRA1), mRNA."  
"Homo sapiens coagulation factor C homolog, cochlin (Limulus polyphemus) (COCH), mRNA."  
"Homo sapiens component of oligomeric golgi complex 1 (COG1), mRNA."  
"Homo sapiens component of oligomeric golgi complex 3 (COG3), mRNA."

"Homo sapiens component of oligomeric golgi complex 4 (COG4), mRNA."  
"Homo sapiens component of oligomeric golgi complex 5 (COG5), transcript variant 1, mRNA."  
"Homo sapiens component of oligomeric golgi complex 6 (COG6), mRNA."  
"Homo sapiens component of oligomeric golgi complex 7 (COG7), mRNA."  
"Homo sapiens coilin (COIL), mRNA."  
"Homo sapiens collagen, type XIV, alpha 1 (COL14A1), mRNA."  
"Homo sapiens collagen, type XV, alpha 1 (COL15A1), mRNA."  
"Homo sapiens collagen, type XVI, alpha 1 (COL16A1), mRNA."  
"Homo sapiens collagen, type I, alpha 1 (COL1A1), mRNA."  
"Homo sapiens collagen, type I, alpha 2 (COL1A2), mRNA."  
"Homo sapiens collagen, type XXIII, alpha 1 (COL23A1), mRNA."  
"Homo sapiens collagen, type XXIV, alpha 1 (COL24A1), mRNA."  
"Homo sapiens collagen, type IV, alpha 3 (Goodpasture antigen) (COL4A3), transcript variant 5,  
"Homo sapiens collagen, type V, alpha 1 (COL5A1), mRNA."  
"Homo sapiens collagen, type V, alpha 2 (COL5A2), mRNA."  
"Homo sapiens collagen, type VI, alpha 3 (COL6A3), transcript variant 1, mRNA."  
"Homo sapiens collagen, type VII, alpha 1 (epidermolysis bullosa, dystrophic, dominant and rec  
"Homo sapiens collagen, type VIII, alpha 2 (COL8A2), mRNA."  
"Homo sapiens collagen, type IX, alpha 2 (COL9A2), mRNA."  
"Homo sapiens collagen, type IX, alpha 3 (COL9A3), mRNA."  
"Homo sapiens collagen-like tail subunit (single strand of homotrimer) of asymmetric acetylcholin  
"Homo sapiens copper metabolism (Murr1) domain containing 1 (COMMD1), mRNA."  
"Homo sapiens COMM domain containing 10 (COMMD10), mRNA."  
"Homo sapiens COMM domain containing 2 (COMMD2), mRNA."  
"Homo sapiens COMM domain containing 3 (COMMD3), mRNA."  
"Homo sapiens COMM domain containing 4 (COMMD4), mRNA."  
"Homo sapiens COMM domain containing 5 (COMMD5), transcript variant 1, mRNA."  
"Homo sapiens COMM domain containing 6 (COMMD6), transcript variant 1, mRNA."  
"Homo sapiens COMM domain containing 7 (COMMD7), transcript variant 2, mRNA."  
"Homo sapiens COMM domain containing 8 (COMMD8), mRNA."  
"Homo sapiens COMM domain containing 9 (COMMD9), mRNA."  
"Homo sapiens cartilage oligomeric matrix protein (COMP), mRNA."  
"Homo sapiens catechol-O-methyltransferase (COMT), transcript variant MB-COMT, mRNA."  
"Homo sapiens catechol-O-methyltransferase domain containing 1 (COMTD1), mRNA."  
"Homo sapiens coatomer protein complex, subunit alpha (COPA), transcript variant 2, mRNA."  
"Homo sapiens coatomer protein complex, subunit beta 1 (COPB1), mRNA."  
"Homo sapiens coatomer protein complex, subunit beta 2 (beta prime) (COPB2), mRNA."  
"Homo sapiens coatomer protein complex, subunit epsilon (COPE), transcript variant 3, mRNA."  
"Homo sapiens coatomer protein complex, subunit gamma 2 (COPG2), mRNA."  
"Homo sapiens COP9 constitutive photomorphogenic homolog subunit 2 (Arabidopsis) (COPS2  
"Homo sapiens COP9 constitutive photomorphogenic homolog subunit 3 (Arabidopsis) (COPS3  
"Homo sapiens COP9 constitutive photomorphogenic homolog subunit 4 (Arabidopsis) (COPS4  
"Homo sapiens COP9 constitutive photomorphogenic homolog subunit 5 (Arabidopsis) (COPS5  
"Homo sapiens COP9 constitutive photomorphogenic homolog subunit 6 (Arabidopsis) (COPS6

"Homo sapiens COP9 constitutive photomorphogenic homolog subunit 7A (Arabidopsis) (COPS7A), mRNA."

"Homo sapiens COP9 constitutive photomorphogenic homolog subunit 7B (Arabidopsis) (COPS7B), mRNA."

"Homo sapiens COP9 constitutive photomorphogenic homolog subunit 8 (Arabidopsis) (COPS8), mRNA."

"Homo sapiens coatomer protein complex, subunit zeta 1 (COPZ1), mRNA."

"Homo sapiens coatomer protein complex, subunit zeta 2 (COPZ2), mRNA."

"Homo sapiens coenzyme Q10 homolog A (*S. cerevisiae*) (COQ10A), transcript variant 1, mRNA."

"Homo sapiens coenzyme Q10 homolog B (*S. cerevisiae*) (COQ10B), mRNA."

"Homo sapiens coenzyme Q2 homolog, prenyltransferase (*yeast*) (COQ2), mRNA."

"Homo sapiens coenzyme Q3 homolog, methyltransferase (*S. cerevisiae*) (COQ3), mRNA."

"Homo sapiens coenzyme Q5 homolog, methyltransferase (*S. cerevisiae*) (COQ5), mRNA."

"Homo sapiens coenzyme Q6 homolog, monooxygenase (*S. cerevisiae*) (COQ6), transcript variant 1, mRNA."

"Homo sapiens coenzyme Q7 homolog, ubiquinone (*yeast*) (COQ7), mRNA."

"Homo sapiens coenzyme Q9 homolog (*S. cerevisiae*) (COQ9), mRNA."

"Homo sapiens coronin, actin binding protein, 1A (CORO1A), mRNA."

"Homo sapiens coronin, actin binding protein, 1B (CORO1B), transcript variant 1, mRNA."

"Homo sapiens coronin, actin binding protein, 1C (CORO1C), transcript variant 1, mRNA."

"Homo sapiens coronin, actin binding protein, 2A (CORO2A), transcript variant 1, mRNA."

"Homo sapiens coronin, actin binding protein, 2B (CORO2B), mRNA."

"Homo sapiens coronin 6 (CORO6), mRNA."

"Homo sapiens coronin 7 (CORO7), mRNA."

"Homo sapiens cortistatin (CORT), mRNA."

"Homo sapiens coactosin-like 1 (*Dictyostelium*) (COTL1), mRNA."

"Homo sapiens COX10 homolog, cytochrome c oxidase assembly protein, heme A: farnesyltransferase (yeast) (COX10), nuclear gene encoding mitochondrial protein."

"Homo sapiens COX11 homolog, cytochrome c oxidase assembly protein (*yeast*) (COX11), nuclear gene encoding mitochondrial protein."

"Homo sapiens COX11 homolog, cytochrome c oxidase assembly protein (*yeast*) pseudogene (COX11P), nuclear gene encoding mitochondrial protein."

"Homo sapiens COX16 cytochrome c oxidase assembly homolog (*S. cerevisiae*) (COX16), nuclear gene encoding mitochondrial protein."

"Homo sapiens COX17 cytochrome c oxidase assembly homolog (*S. cerevisiae*) (COX17), nuclear gene encoding mitochondrial protein."

"Homo sapiens COX19 cytochrome c oxidase assembly homolog (*S. cerevisiae*) (COX19), nuclear gene encoding mitochondrial protein."

"Homo sapiens cytochrome c oxidase subunit IV isoform 1 (COX4I1), mRNA."

"Homo sapiens COX4 neighbor (COX4NB), mRNA."

"Homo sapiens cytochrome c oxidase subunit Va (COX5A), nuclear gene encoding mitochondrial protein."

"Homo sapiens cytochrome c oxidase subunit Vb (COX5B), mRNA."

"Homo sapiens cytochrome c oxidase subunit VIa polypeptide 1 (COX6A1), nuclear gene encoding mitochondrial protein."

"Homo sapiens cytochrome c oxidase subunit Vīb polypeptide 1 (ubiquitous) (COX6B1), nuclear gene encoding mitochondrial protein."

"Homo sapiens cytochrome c oxidase subunit VIc (COX6C), mRNA."

"Homo sapiens cytochrome c oxidase subunit VIIa polypeptide 2 like (COX7A2L), nuclear gene encoding mitochondrial protein."

"Homo sapiens cytochrome c oxidase subunit VIIb (COX7B), nuclear gene encoding mitochondrial protein."

"Homo sapiens cytochrome c oxidase subunit VIIc (COX7C), nuclear gene encoding mitochondrial protein."

"Homo sapiens cytochrome c oxidase subunit 8A (ubiquitous) (COX8A), mRNA."

"Homo sapiens CP110 protein (CP110), mRNA."

"Homo sapiens carboxypeptidase A2 (pancreatic) (CPA2), mRNA."

"Homo sapiens carboxypeptidase A3 (mast cell) (CPA3), mRNA."

"Homo sapiens carboxypeptidase A4 (CPA4), mRNA."

"Homo sapiens carboxypeptidase A6 (CPA6), mRNA."



"Homo sapiens carboxypeptidase D (CPD), mRNA."  
"Homo sapiens carboxypeptidase E (CPE), mRNA."  
"Homo sapiens cytoplasmic polyadenylation element binding protein 1 (CPEB1), transcript varia  
"Homo sapiens cytoplasmic polyadenylation element binding protein 2 (CPEB2), transcript varia  
"Homo sapiens cytoplasmic polyadenylation element binding protein 3 (CPEB3), mRNA."  
"Homo sapiens cytoplasmic polyadenylation element binding protein 4 (CPEB4), mRNA."  
"Homo sapiens complexin 1 (CPLX1), mRNA."  
"Homo sapiens complexin 3 (CPLX3), mRNA."  
"Homo sapiens carboxypeptidase N, polypeptide 1 (CPN1), mRNA."  
"PREDICTED: Homo sapiens carboxypeptidase N, polypeptide 2, 83kD (CPN2), mRNA."  
"Homo sapiens copine I (CPNE1), transcript variant 3, mRNA."  
"Homo sapiens copine II (CPNE2), mRNA."  
"Homo sapiens copine III (CPNE3), mRNA."  
"Homo sapiens copine V (CPNE5), mRNA."  
"Homo sapiens copine VII (CPNE7), transcript variant 1, mRNA."  
"Homo sapiens copine family member IX (CPNE9), mRNA."  
"Homo sapiens coproporphyrinogen oxidase (CPOX), mRNA."  
"Homo sapiens calcineurin-like phosphoesterase domain containing 1 (CPPED1), transcript vari  
"Homo sapiens cleavage and polyadenylation specific factor 1, 160kDa (CPSF1), mRNA."  
"Homo sapiens cleavage and polyadenylation specific factor 2, 100kDa (CPSF2), mRNA."  
"Homo sapiens cleavage and polyadenylation specific factor 3-like (CPSF3L), mRNA."  
"Homo sapiens cleavage and polyadenylation specific factor 4, 30kDa (CPSF4), transcript varia  
"Homo sapiens cleavage and polyadenylation specific factor 6, 68kDa (CPSF6), mRNA."  
"Homo sapiens carnitine palmitoyltransferase 1A (liver) (CPT1A), nuclear gene encoding mitoch  
"Homo sapiens carnitine palmitoyltransferase 1B (muscle) (CPT1B), nuclear gene encoding mit  
"Homo sapiens carnitine palmitoyltransferase 1C (CPT1C), transcript variant 2, mRNA."  
"Homo sapiens carnitine palmitoyltransferase II (CPT2), nuclear gene encoding mitochondrial pi  
"Homo sapiens carboxypeptidase, vitellogenic-like (CPVL), transcript variant 1, mRNA."  
"Homo sapiens carboxypeptidase X (M14 family), member 1 (CPXM1), mRNA."  
"Homo sapiens complement component (3b/4b) receptor 1-like (CR1L), mRNA."  
"Homo sapiens complement component (3d/Epstein Barr virus) receptor 2 (CR2), transcript vari  
"Homo sapiens cellular retinoic acid binding protein 1 (CRABP1), mRNA."  
"Homo sapiens cellular retinoic acid binding protein 2 (CRABP2), mRNA."  
"Homo sapiens CASP2 and RIPK1 domain containing adaptor with death domain (CRADD), mF  
"Homo sapiens Crm, cramped-like (Drosophila) (CRAMP1L), mRNA."  
"Homo sapiens carnitine acetyltransferase (CRAT), transcript variant 2, mRNA."  
"Homo sapiens crumbs homolog 3 (Drosophila) (CRB3), transcript variant 3, mRNA."  
"Homo sapiens cereblon (CRBN), mRNA."  
"Homo sapiens CGRP receptor component (CRCP), transcript variant 1, mRNA."  
"Homo sapiens cysteine-rich C-terminal 1 (CRCT1), mRNA."  
"Homo sapiens cAMP responsive element binding protein 1 (CREB1), transcript variant B, mRN  
"Homo sapiens cAMP responsive element binding protein 3 (CREB3), mRNA."  
"Homo sapiens cAMP responsive element binding protein 3-like 1 (CREB3L1), mRNA."  
"Homo sapiens cAMP responsive element binding protein 3-like 2 (CREB3L2), mRNA."

"Homo sapiens cAMP responsive element binding protein 3-like 4 (CREB3L4), mRNA."  
"Homo sapiens CREB binding protein (CREBBP), transcript variant 2, mRNA."  
"Homo sapiens cAMP responsive element binding protein-like 1 (CREBL1), mRNA."  
"Homo sapiens cAMP responsive element binding protein-like 2 (CREBL2), mRNA."  
"Homo sapiens CREB/ATF bZIP transcription factor (CREBZF), mRNA."  
"Homo sapiens cellular repressor of E1A-stimulated genes 1 (CREG1), mRNA."  
"Homo sapiens cysteine-rich with EGF-like domains 1 (CRELD1), transcript variant 2, mRNA."  
"Homo sapiens cysteine-rich with EGF-like domains 2 (CRELD2), mRNA."  
"Homo sapiens cAMP responsive element modulator (CREM), transcript variant 2, mRNA."  
"Homo sapiens corticotropin releasing hormone binding protein (CRHBP), mRNA."  
"Homo sapiens cysteine rich transmembrane BMP regulator 1 (chordin-like) (CRIM1), mRNA."  
"PREDICTED: Homo sapiens cysteine rich BMP regulator 2 (chordin-like) (CRIM2), mRNA."  
"Homo sapiens cysteine-rich protein 1 (intestinal) (CRIP1), mRNA."  
"Homo sapiens cysteine-rich protein 2 (CRIP2), mRNA."  
"Homo sapiens cysteine-rich PAK1 inhibitor (CRIPAK), mRNA."  
"Homo sapiens cysteine-rich PDZ-binding protein (CRIPT), mRNA."  
"Homo sapiens cysteine-rich secretory protein LCCL domain containing 2 (CRISPLD2), mRNA."  
"Homo sapiens v-crk sarcoma virus CT10 oncogene homolog (avian) (CRK), transcript variant II  
"Homo sapiens Cdc2-related kinase, arginine/serine-rich (CRKRS), mRNA."  
"Homo sapiens cytokine receptor-like factor 1 (CRLF1), mRNA."  
"Homo sapiens cytokine receptor-like factor 3 (CRLF3), mRNA."  
"Homo sapiens cardiolipin synthase 1 (CRLS1), mRNA."  
"Homo sapiens crooked neck pre-mRNA splicing factor-like 1 (Drosophila) (CRNKL1), mRNA."  
"Homo sapiens ciliary rootlet coiled-coil, rootletin (CROCC), mRNA."  
"Homo sapiens carnitine O-octanoyltransferase (CROT), mRNA."  
"Homo sapiens cofactor required for Sp1 transcriptional activation, subunit 9, 33kDa (CRSP9), r  
"Homo sapiens cartilage associated protein (CRTAP), mRNA."  
"Homo sapiens CREB regulated transcription coactivator 1 (CRTC1), transcript variant 1, mRNA  
"Homo sapiens CREB regulated transcription coactivator 3 (CRTC3), transcript variant 1, mRNA  
"Homo sapiens cone-rod homeobox (CRX), mRNA."  
"Homo sapiens cryptochrome 2 (photolyase-like) (CRY2), mRNA."  
"Homo sapiens crystallin, alpha A (CRYAA), mRNA."  
"Homo sapiens crystallin, beta A4 (CRYBA4), mRNA."  
"Homo sapiens crystallin, beta B2 (CRYBB2), mRNA."  
"Homo sapiens beta-gamma crystallin domain containing 3 (CRYBG3), mRNA."  
"Homo sapiens crystallin, gamma S (CRYGS), mRNA."  
"Homo sapiens crystallin, lambda 1 (CRYL1), mRNA."  
"Homo sapiens crystallin, mu (CRYM), transcript variant 1, mRNA."  
"Homo sapiens crystallin, zeta (quinone reductase) (CRYZ), mRNA."  
"Homo sapiens crystallin, zeta (quinone reductase)-like 1 (CRYZL1), transcript variant 3, mRNA  
"Homo sapiens citrate synthase (CS), nuclear gene encoding mitochondrial protein, transcript va  
"Homo sapiens cysteine sulfinic acid decarboxylase (CSAD), mRNA."  
"Homo sapiens chondrosarcoma associated gene 1 (CSAG1), transcript variant b, mRNA."  
"Homo sapiens CSAG family, member 3 (CSAG3), transcript variant 1, mRNA."

"Homo sapiens CSAG family, member 3A (CSAG3A), mRNA."  
"Homo sapiens CSAG family, member 3B (CSAG3B), mRNA."  
"Homo sapiens cold shock domain protein A (CSDA), mRNA."  
"Homo sapiens cold shock domain containing C2, RNA binding (CSDC2), mRNA."  
"Homo sapiens cold shock domain containing E1, RNA-binding (CSDE1), transcript variant 1, m  
"Homo sapiens CSE1 chromosome segregation 1-like (yeast) (CSE1L), mRNA."  
"Homo sapiens colony stimulating factor 1 receptor, formerly McDonough feline sarcoma viral (v  
"Homo sapiens colony stimulating factor 2 receptor, alpha, low-affinity (granulocyte-macrophage  
"Homo sapiens colony stimulating factor 2 receptor, beta, low-affinity (granulocyte-macrophage)  
"Homo sapiens chondroitin sulfate N-acetylgalactosaminyltransferase 2 (CSGALNACT2), mRNA/  
"Homo sapiens chorionic somatomammotropin hormone-like 1 (CSHL1), transcript variant 1, mF  
"Homo sapiens c-src tyrosine kinase (CSK), mRNA."  
"Homo sapiens casein kinase 1, alpha 1 (CSNK1A1), transcript variant 1, mRNA."  
"Homo sapiens casein kinase 1, delta (CSNK1D), transcript variant 1, mRNA."  
"Homo sapiens casein kinase 1, epsilon (CSNK1E), transcript variant 2, mRNA."  
"Homo sapiens casein kinase 1, gamma 1 (CSNK1G1), transcript variant 2, mRNA."  
"Homo sapiens casein kinase 1, gamma 2 (CSNK1G2), mRNA."  
"Homo sapiens casein kinase 1, gamma 3 (CSNK1G3), transcript variant 3, mRNA."  
"Homo sapiens casein kinase 2, alpha 1 polypeptide (CSNK2A1), transcript variant 2, mRNA."  
"Homo sapiens casein kinase 2, alpha prime polypeptide (CSNK2A2), mRNA."  
"Homo sapiens chondroitin sulfate proteoglycan 4-like, Y-linked pseudogene 1 (CSPG4LYP1), r  
"Homo sapiens chondroitin sulfate proteoglycan 5 (neuroglycan C) (CSPG5), mRNA."  
"Homo sapiens centrosome and spindle pole associated protein 1 (CSPP1), transcript variant 1,  
"Homo sapiens cysteine-serine-rich nuclear protein 2 (CSRNP2), mRNA."  
"Homo sapiens cysteine-serine-rich nuclear protein 3 (CSRNP3), mRNA."  
"Homo sapiens cysteine and glycine-rich protein 1 (CSRP1), mRNA."  
"Homo sapiens cysteine and glycine-rich protein 2 (CSRP2), mRNA."  
"Homo sapiens CSRP2 binding protein (CSRP2BP), transcript variant 1, mRNA."  
"Homo sapiens cystatin C (CST3), mRNA."  
"PREDICTED: Homo sapiens cystatin E/M (CST6), mRNA."  
"Homo sapiens cystatin F (leukocystatin) (CST7), mRNA."  
"Homo sapiens cystatin 9 (testatin) (CST9), mRNA."  
"Homo sapiens cystatin A (stefin A) (CSTA), mRNA."  
"Homo sapiens cystatin B (stefin B) (CSTB), mRNA."  
"Homo sapiens cleavage stimulation factor, 3' pre-RNA, subunit 1, 50kDa (CSTF1), transcript va  
"Homo sapiens cleavage stimulation factor, 3' pre-RNA, subunit 2, 64kDa (CSTF2), mRNA."  
"Homo sapiens cleavage stimulation factor, 3' pre-RNA, subunit 2, 64kDa, tau variant (CSTF2T)  
"Homo sapiens cleavage stimulation factor, 3' pre-RNA, subunit 3, 77kDa (CSTF3), transcript va  
"Homo sapiens cancer/testis antigen family 45, member A4 (CT45A4), mRNA."  
"Homo sapiens CTAGE family, member 6 (CTAGE6), mRNA."  
"Homo sapiens C-terminal binding protein 1 (CTBP1), transcript variant 1, mRNA."  
"Homo sapiens C-terminal binding protein 2 (CTBP2), transcript variant 2, mRNA."  
"Homo sapiens chitobiase, di-N-acetyl- (CTBS), mRNA."  
"Homo sapiens CCCTC-binding factor (zinc finger protein) (CTCF), mRNA."

"Homo sapiens CTD (carboxy-terminal domain, RNA polymerase II, polypeptide A) phosphatase  
"Homo sapiens CTD (carboxy-terminal domain, RNA polymerase II, polypeptide A) small phosphatase  
"Homo sapiens CTD (carboxy-terminal domain, RNA polymerase II, polypeptide A) small phosphatase  
"Homo sapiens CTD (carboxy-terminal domain, RNA polymerase II, polypeptide A) small phosphatase  
"Homo sapiens CTD (carboxy-terminal domain, RNA polymerase II, polypeptide A) small phosphatase  
"Homo sapiens connective tissue growth factor (CTGF), mRNA."  
"Homo sapiens centaurin, gamma-like family, member 3 (CTGLF3), mRNA."  
"PREDICTED: Homo sapiens centaurin, gamma-like family, member 7 (CTGLF7), mRNA."  
"Homo sapiens cystathionase (cystathionine gamma-lyase) (CTH), transcript variant 2, mRNA."  
"Homo sapiens collagen triple helix repeat containing 1 (CTHRC1), mRNA."  
"Homo sapiens catenin (cadherin-associated protein), alpha 1, 102kDa (CTNNA1), mRNA."  
"Homo sapiens catenin (cadherin-associated protein), alpha 2 (CTNNA2), mRNA."  
"Homo sapiens catenin (cadherin-associated protein), alpha-like 1 (CTNNAL1), mRNA."  
"PREDICTED: Homo sapiens catenin (cadherin-associated protein), beta 1, 88kDa, transcript variant 1  
"Homo sapiens catenin, beta interacting protein 1 (CTNNBIP1), transcript variant 1, mRNA."  
"Homo sapiens catenin, beta like 1 (CTNNBL1), mRNA."  
"Homo sapiens cystinosis, nephropathic (CTNS), transcript variant 2, mRNA."  
"Homo sapiens CTP synthase (CTPS), mRNA."  
"Homo sapiens CTP synthase II (CTPS2), transcript variant 1, mRNA."  
"Homo sapiens Ctr9, Paf1/RNA polymerase II complex component, homolog (S. cerevisiae) (CTR9)  
"Homo sapiens chymotrypsin-like (CTRL), mRNA."  
"Homo sapiens cathepsin A (CTSA), transcript variant 1, mRNA."  
"Homo sapiens cathepsin B (CTSB), transcript variant 1, mRNA."  
"Homo sapiens cathepsin C (CTSC), transcript variant 1, mRNA."  
"Homo sapiens cathepsin D (CTSD), mRNA."  
"Homo sapiens cathepsin F (CTSF), mRNA."  
"Homo sapiens cathepsin G (CTSG), mRNA."  
"Homo sapiens cathepsin H (CTSH), transcript variant 1, mRNA."  
"Homo sapiens cathepsin K (CTSK), mRNA."  
"Homo sapiens cathepsin L1 (CTSL1), transcript variant 2, mRNA."  
"Homo sapiens cathepsin L2 (CTSL2), mRNA."  
"Homo sapiens cathepsin S (CTSS), mRNA."  
"Homo sapiens cathepsin W (CTSW), mRNA."  
"Homo sapiens cathepsin Z (CTSZ), mRNA."  
"Homo sapiens cortactin (CTTN), transcript variant 2, mRNA."  
"Homo sapiens CTTNBP2 N-terminal like (CTTNBP2NL), mRNA."  
"Homo sapiens cytosolic thiouridylase subunit 2 homolog (S. pombe) (CTU2), transcript variant 1  
"Homo sapiens cortexin 1 (CTXN1), mRNA."  
"Homo sapiens cortexin 3 (CTXN3), mRNA."  
"Homo sapiens cubilin (intrinsic factor-cobalamin receptor) (CUBN), mRNA."  
"Homo sapiens CUE domain containing 1 (CUEDC1), mRNA."  
"Homo sapiens CUE domain containing 2 (CUEDC2), mRNA."  
"Homo sapiens CUG triplet repeat, RNA binding protein 1 (CUGBP1), transcript variant 2, mRNA."  
"Homo sapiens CUG triplet repeat, RNA binding protein 2 (CUGBP2), transcript variant 2, mRNA."

"Homo sapiens cullin 1 (CUL1), mRNA."  
"Homo sapiens cullin 2 (CUL2), mRNA."  
"Homo sapiens cullin 4A (CUL4A), transcript variant 1, mRNA."  
"Homo sapiens cullin 4B (CUL4B), transcript variant 2, mRNA."  
"Homo sapiens cullin 5 (CUL5), mRNA."  
"Homo sapiens cullin 9 (CUL9), mRNA."  
"Homo sapiens cutA divalent cation tolerance homolog (E. coli) (CUTA), transcript variant 4, mRNA."  
"Homo sapiens cutC copper transporter homolog (E. coli) (CUTC), mRNA."  
"Homo sapiens cut-like 1, CCAAT displacement protein (Drosophila) (CUTL1), transcript variant 1, mRNA."  
"Homo sapiens cut-like homeobox 1 (CUX1), transcript variant 2, mRNA."  
"Homo sapiens cut-like homeobox 2 (CUX2), mRNA."  
"Homo sapiens CWC15 spliceosome-associated protein homolog (S. cerevisiae) (CWC15), mRNA."  
"Homo sapiens CWC22 spliceosome-associated protein homolog (S. cerevisiae) (CWC22), mRNA."  
"Homo sapiens CWF19-like 1, cell cycle control (S. pombe) (CWF19L1), mRNA."  
"Homo sapiens CWF19-like 2, cell cycle control (S. pombe) (CWF19L2), mRNA."  
"Homo sapiens chemokine (C-X3-C motif) receptor 1 (CX3CR1), mRNA."  
"Homo sapiens coxsackie virus and adenovirus receptor (CXADR), mRNA."  
"Homo sapiens coxsackie virus and adenovirus receptor pseudogene 2 (CXADRP2), non-coding RNA."  
"Homo sapiens chemokine (C-X-C motif) ligand 10 (CXCL10), mRNA."  
"Homo sapiens chemokine (C-X-C motif) ligand 16 (CXCL16), mRNA."  
"Homo sapiens chemokine (C-X-C motif) ligand 3 (CXCL3), mRNA."  
"Homo sapiens chemokine (C-X-C motif) ligand 5 (CXCL5), mRNA."  
"Homo sapiens chemokine (C-X-C motif) ligand 9 (CXCL9), mRNA."  
"Homo sapiens chemokine (C-X-C motif) receptor 3 (CXCR3), transcript variant A, mRNA."  
"Homo sapiens chemokine (C-X-C motif) receptor 4 (CXCR4), transcript variant 1, mRNA."  
"Homo sapiens chemokine (C-X-C motif) receptor 5 (CXCR5), transcript variant 2, mRNA."  
"Homo sapiens chemokine (C-X-C motif) receptor 7 (CXCR7), mRNA."  
"Homo sapiens chromosome X open reading frame 12 (CXorf12), mRNA."  
"Homo sapiens chromosome X open reading frame 15 (CXorf15), mRNA."  
"Homo sapiens chromosome X open reading frame 21 (CXorf21), mRNA."  
"Homo sapiens chromosome X open reading frame 22 (CXorf22), mRNA."  
"Homo sapiens chromosome X open reading frame 23 (CXorf23), mRNA."  
"Homo sapiens chromosome X open reading frame 26 (CXorf26), mRNA."  
"Homo sapiens chromosome X open reading frame 27 (CXorf27), mRNA."  
"Homo sapiens chromosome X open reading frame 36 (CXorf36), mRNA."  
"Homo sapiens chromosome X open reading frame 38 (CXorf38), mRNA."  
"Homo sapiens chromosome X open reading frame 39 (CXorf39), mRNA."  
"Homo sapiens chromosome X open reading frame 40A (CXorf40A), mRNA."  
"Homo sapiens chromosome X open reading frame 40B (CXorf40B), mRNA."  
"Homo sapiens chromosome X open reading frame 45 (CXorf45), transcript variant 1, mRNA."  
"PREDICTED: Homo sapiens chromosome X open reading frame 55 (CXorf55), misc RNA."  
"Homo sapiens chromosome X open reading frame 56 (CXorf56), mRNA."  
"Homo sapiens chromosome X open reading frame 57 (CXorf57), mRNA."  
"Homo sapiens chromosome X open reading frame 59 (CXorf59), mRNA."

"Homo sapiens chromosome X open reading frame 64 (CXorf64), mRNA."  
"Homo sapiens CXXC finger 1 (PHD domain) (CXXC1), mRNA."  
"Homo sapiens CXXC finger 4 (CXXC4), mRNA."  
"Homo sapiens CXXC finger 5 (CXXC5), mRNA."  
"Homo sapiens chromosome X and Y open reading frame 2 (CXYorf2), mRNA."  
"Homo sapiens cytochrome b-561 (CYB561), transcript variant 1, mRNA."  
"Homo sapiens cytochrome b-561 domain containing 1 (CYB561D1), transcript variant 2, mRNA"  
"Homo sapiens cytochrome b-561 domain containing 2 (CYB561D2), mRNA."  
"Homo sapiens cytochrome b5 type A (microsomal) (CYB5A), transcript variant 2, mRNA."  
"Homo sapiens cytochrome b5 type B (outer mitochondrial membrane) (CYB5B), nuclear gene c"  
"Homo sapiens cytochrome b5 domain containing 1 (CYB5D1), mRNA."  
"Homo sapiens cytochrome b5 domain containing 2 (CYB5D2), mRNA."  
"Homo sapiens cytochrome b5 reductase 1 (CYB5R1), mRNA."  
"Homo sapiens cytochrome b5 reductase 2 (CYB5R2), transcript variant 2, mRNA."  
"Homo sapiens cytochrome b5 reductase 3 (CYB5R3), transcript variant S, mRNA."  
"Homo sapiens cytochrome b5 reductase 4 (CYB5R4), mRNA."  
"Homo sapiens cytochrome b5 reductase-like (CYB5RL), mRNA."  
"Homo sapiens cytochrome b-245, alpha polypeptide (CYBA), mRNA."  
"Homo sapiens cytochrome b, ascorbate dependent 3 (CYBASC3), mRNA."  
"Homo sapiens cytochrome b-245, beta polypeptide (chronic granulomatous disease) (CYBB), r"  
"Homo sapiens cytochrome b reductase 1 (CYBRD1), mRNA."  
"Homo sapiens cytochrome c-1 (CYC1), mRNA."  
"Homo sapiens cytochrome c, somatic (CYCS), nuclear gene encoding mitochondrial protein, m"  
"Homo sapiens cytochrome c, somatic-like 1 (CYCSL1) on chromosome 6."  
"Homo sapiens cytoplasmic FMR1 interacting protein 2 (CYFIP2), transcript variant 1, mRNA."  
"Homo sapiens cysteine/histidine-rich 1 (CYHR1), mRNA."  
"Homo sapiens cylindromatosis (turban tumor syndrome) (CYLD), mRNA."  
"Homo sapiens cytoplasmic linker 2 (CYLN2), transcript variant 2, mRNA."  
"Homo sapiens chromosome Y open reading frame 15A (CYorf15A), mRNA."  
"Homo sapiens cytochrome P450, family 11, subfamily A, polypeptide 1 (CYP11A1), nuclear ge"  
"Homo sapiens cytochrome P450, family 11, subfamily B, polypeptide 1 (CYP11B1), nuclear ge"  
"Homo sapiens cytochrome P450, family 1, subfamily A, polypeptide 1 (CYP1A1), mRNA."  
"Homo sapiens cytochrome P450, family 1, subfamily B, polypeptide 1 (CYP1B1), mRNA."  
"Homo sapiens cytochrome P450, family 20, subfamily A, polypeptide 1 (CYP20A1), transcript v"  
"Homo sapiens cytochrome P450, family 26, subfamily A, polypeptide 1 (CYP26A1), transcript v"  
"Homo sapiens cytochrome P450, family 26, subfamily B, polypeptide 1 (CYP26B1), mRNA."  
"Homo sapiens cytochrome P450, family 27, subfamily A, polypeptide 1 (CYP27A1), nuclear ge"  
"Homo sapiens cytochrome P450, family 27, subfamily B, polypeptide 1 (CYP27B1), nuclear ge"  
"Homo sapiens cytochrome P450, family 2, subfamily B, polypeptide 6 (CYP2B6), mRNA."  
"Homo sapiens cytochrome P450, family 2, subfamily C, polypeptide 8 (CYP2C8), mRNA."  
"Homo sapiens cytochrome P450, family 2, subfamily C, polypeptide 9 (CYP2C9), mRNA."  
"Homo sapiens cytochrome P450, family 2, subfamily D, polypeptide 6 (CYP2D6), transcript var"  
"Homo sapiens cytochrome P450, family 2, subfamily E, polypeptide 1 (CYP2E1), mRNA."  
"Homo sapiens cytochrome P450, family 2, subfamily F, polypeptide 1 (CYP2F1), mRNA."

"Homo sapiens cytochrome P450, family 2, subfamily R, polypeptide 1 (CYP2R1), mRNA."  
"Homo sapiens cytochrome P450, family 39, subfamily A, polypeptide 1 (CYP39A1), mRNA."  
"Homo sapiens cytochrome P450, family 3, subfamily A, polypeptide 7 (CYP3A7), mRNA."  
"Homo sapiens cytochrome P450, family 46, subfamily A, polypeptide 1 (CYP46A1), mRNA."  
"Homo sapiens cytochrome P450, family 4, subfamily F, polypeptide 12 (CYP4F12), mRNA."  
"Homo sapiens cytochrome P450, family 4, subfamily F, polypeptide 2 (CYP4F2), mRNA."  
"Homo sapiens cytochrome P450, family 4, subfamily V, polypeptide 2 (CYP4V2), mRNA."  
"Homo sapiens cytochrome P450, family 51, subfamily A, polypeptide 1 (CYP51A1), mRNA."  
"Homo sapiens cysteinyl leukotriene receptor 1 (CYSLTR1), mRNA."  
"Homo sapiens cytohesin 1 (CYTH1), transcript variant 2, mRNA."  
"Homo sapiens cytohesin 2 (CYTH2), transcript variant 1, mRNA."  
"Homo sapiens cytohesin 3 (CYTH3), mRNA."  
"Homo sapiens cytohesin 4 (CYTH4), mRNA."  
"Homo sapiens cytohesin 1 interacting protein (CYTIP), mRNA."  
"Homo sapiens cytokine-like 1 (CYTL1), mRNA."  
"Homo sapiens cytospin A (CYTSA), mRNA."  
"Homo sapiens cytospin B (CYTSB), transcript variant NSP5alpha3beta, mRNA."  
"Homo sapiens DNA segment on chromosome 21 (unique) 2056 expressed sequence (D21S20)  
"Homo sapiens D-2-hydroxyglutarate dehydrogenase (D2HGDH), nuclear gene encoding mitocot  
"Homo sapiens DNA segment on chromosome 4 (unique) 234 expressed sequence (D4S234E),  
"Homo sapiens dishevelled associated activator of morphogenesis 1 (DAAM1), mRNA."  
"Homo sapiens dapper, antagonist of beta-catenin, homolog 1 (Xenopus laevis) (DACT1), trans  
"Homo sapiens dapper, antagonist of beta-catenin, homolog 3 (Xenopus laevis) (DACT3), mRN  
"Homo sapiens defender against cell death 1 (DAD1), mRNA."  
"Homo sapiens defender against cell death 1-like (DAD1L), non-coding RNA."  
"Homo sapiens dystroglycan 1 (dystrophin-associated glycoprotein 1) (DAG1), mRNA."  
"Homo sapiens diacylglycerol lipase, beta (DAGLB), mRNA."  
"Homo sapiens dihydroxyacetone kinase 2 homolog (S. cerevisiae) (DAK), mRNA."  
"Homo sapiens D-amino-acid oxidase (DAO), mRNA."  
"Homo sapiens death-associated protein (DAP), mRNA."  
"Homo sapiens death associated protein 3 (DAP3), nuclear gene encoding mitochondrial proteir  
"Homo sapiens death-associated protein kinase 1 (DAPK1), mRNA."  
"Homo sapiens death-associated protein kinase 2 (DAPK2), mRNA."  
"Homo sapiens death-associated protein kinase 3 (DAPK3), mRNA."  
"Homo sapiens death associated protein-like 1 (DAPL1), mRNA."  
"Homo sapiens dual adaptor of phosphotyrosine and 3-phosphoinositides (DAPP1), mRNA."  
"Homo sapiens Duffy blood group, chemokine receptor (DARC), transcript variant 2, mRNA."  
"Homo sapiens aspartyl-tRNA synthetase (DARS), mRNA."  
"Homo sapiens aspartyl-tRNA synthetase 2, mitochondrial (DARS2), nuclear gene encoding mit  
"Homo sapiens death-domain associated protein (DAXX), mRNA."  
"Homo sapiens DAZ associated protein 1 (DAZAP1), transcript variant 1, mRNA."  
"Homo sapiens DAZ associated protein 2 (DAZAP2), mRNA."  
"Homo sapiens deleted in azoospermia-like (DAZL), mRNA."  
"Homo sapiens deleted in bladder cancer 1 (DBC1), mRNA."

"Homo sapiens DBF4 homolog (*S. cerevisiae*) (DBF4), mRNA."

"Homo sapiens diazepam binding inhibitor (GABA receptor modulator, acyl-Coenzyme A binding protein) (DBI), mRNA."

"Homo sapiens drebrin 1 (DBN1), transcript variant 1, mRNA."

"Homo sapiens dysbindin (dystrobrevin binding protein 1) domain containing 1 (DBNDD1), transcript variant 1, mRNA."

"Homo sapiens dysbindin (dystrobrevin binding protein 1) domain containing 2 (DBNDD2), transcript variant 2, mRNA."

"Homo sapiens drebrin-like (DBNL), transcript variant 1, mRNA."

"Homo sapiens D site of albumin promoter (albumin D-box) binding protein (DBP), mRNA."

"Homo sapiens debranching enzyme homolog 1 (*S. cerevisiae*) (DBR1), mRNA."

"Homo sapiens dihydrolipoamide branched chain transacylase E2 (DBT), nuclear gene encoding protein 1 (DBT1), mRNA."

"PREDICTED: Homo sapiens COBW-like placental protein (DC36), mRNA."

"Homo sapiens DDB1 and CUL4 associated factor 10 (DCAF10), mRNA."

"Homo sapiens DDB1 and CUL4 associated factor 15 (DCAF15), mRNA."

"Homo sapiens DDB1 and CUL4 associated factor 16 (DCAF16), mRNA."

"Homo sapiens DDB1 and CUL4 associated factor 6 (DCAF6), transcript variant 2, mRNA."

"Homo sapiens DDB1 and CUL4 associated factor 7 (DCAF7), mRNA."

"Homo sapiens dephospho-CoA kinase domain containing (DCAKD), mRNA."

"Homo sapiens discoidin, CUB and LCCL domain containing 1 (DCBLD1), mRNA."

"Homo sapiens discoidin, CUB and LCCL domain containing 2 (DCBLD2), mRNA."

"Homo sapiens doublecortin domain containing 1 (DCDC1), mRNA."

"Homo sapiens doublecortin domain containing 2B (DCDC2B), mRNA."

"Homo sapiens dodecenoyl-Coenzyme A delta isomerase (3,2 trans-enoyl-Coenzyme A isomerase) (DCI), mRNA."

"Homo sapiens deoxycytidine kinase (DCK), mRNA."

"Homo sapiens doublecortin-like kinase 2 (DCLK2), transcript variant 1, mRNA."

"Homo sapiens DNA cross-link repair 1A (PSO2 homolog, *S. cerevisiae*) (DCLRE1A), mRNA."

"Homo sapiens DNA cross-link repair 1B (PSO2 homolog, *S. cerevisiae*) (DCLRE1B), mRNA."

"Homo sapiens DNA cross-link repair 1C (PSO2 homolog, *S. cerevisiae*) (DCLRE1C), transcript variant 1, mRNA."

"Homo sapiens DCP1 decapping enzyme homolog A (*S. cerevisiae*) (DCP1A), mRNA."

"Homo sapiens DCP1 decapping enzyme homolog B (*S. cerevisiae*) (DCP1B), mRNA."

"Homo sapiens DCP2 decapping enzyme homolog (*S. cerevisiae*) (DCP2), mRNA."

"Homo sapiens decapping enzyme, scavenger (DCPS), mRNA."

"Homo sapiens dCMP deaminase (DCTD), transcript variant 2, mRNA."

"Homo sapiens dynactin 1 (p150, glued homolog, *Drosophila*) (DCTN1), transcript variant 2, mRNA."

"Homo sapiens dynactin 2 (p50) (DCTN2), mRNA."

"Homo sapiens dynactin 3 (p22) (DCTN3), transcript variant 1, mRNA."

"Homo sapiens dynactin 5 (p25) (DCTN5), mRNA."

"Homo sapiens dynactin 6 (DCTN6), mRNA."

"Homo sapiens dCTP pyrophosphatase 1 (DCTPP1), mRNA."

"Homo sapiens DCN1, defective in cullin neddylation 1, domain containing 1 (*S. cerevisiae*) (DCN1D1), mRNA."

"Homo sapiens DCN1, defective in cullin neddylation 1, domain containing 3 (*S. cerevisiae*) (DCN1D3), mRNA."

"Homo sapiens DCN1, defective in cullin neddylation 1, domain containing 4 (*S. cerevisiae*) (DCN1D4), mRNA."

"Homo sapiens DCN1, defective in cullin neddylation 1, domain containing 5 (*S. cerevisiae*) (DCN1D5), mRNA."

"Homo sapiens dicarbonyl/L-xylulose reductase (DCXR), mRNA."

"Homo sapiens DET1 and DDB1 associated 1 (DDA1), mRNA."

"Homo sapiens dimethylarginine dimethylaminohydrolase 1 (DDAH1), mRNA."



"Homo sapiens dimethylarginine dimethylaminohydrolase 2 (DDAH2), mRNA."  
"PREDICTED: Homo sapiens damage-specific DNA binding protein 1, 127kDa (DDB1), mRNA."  
"Homo sapiens damage-specific DNA binding protein 2, 48kDa (DDB2), mRNA."  
"Homo sapiens dopa decarboxylase (aromatic L-amino acid decarboxylase) (DDC), mRNA."  
"Homo sapiens development and differentiation enhancing factor 2 (DDEF2), mRNA."  
"Homo sapiens DDHD domain containing 2 (DDHD2), mRNA."  
"Homo sapiens DNA-damage-inducible transcript 3 (DDIT3), mRNA."  
"Homo sapiens DNA-damage-inducible transcript 4 (DDIT4), mRNA."  
"Homo sapiens DNA-damage-inducible transcript 4-like (DDIT4L), mRNA."  
"Homo sapiens dendrin (DDN), mRNA."  
"Homo sapiens dolichyl-diphosphooligosaccharide-protein glycosyltransferase (DDOST), mRNA"  
"Homo sapiens discoidin domain receptor tyrosine kinase 1 (DDR1), transcript variant 1, mRNA."  
"Homo sapiens DDRGK domain containing 1 (DDRGK1), mRNA."  
"Homo sapiens D-dopachrome tautomerase (DDT), transcript variant 1, mRNA."  
"Homo sapiens D-dopachrome tautomerase-like (DDTL), mRNA."  
"Homo sapiens DEAD (Asp-Glu-Ala-Asp) box polypeptide 1 (DDX1), mRNA."  
"Homo sapiens DEAD (Asp-Glu-Ala-Asp) box polypeptide 10 (DDX10), mRNA."  
"Homo sapiens DEAD/H (Asp-Glu-Ala-Asp/His) box polypeptide 11 (CHL1-like helicase homolog)"  
"Homo sapiens DEAD (Asp-Glu-Ala-Asp) box polypeptide 17 (DDX17), transcript variant 2, mRNA"  
"Homo sapiens DEAD (Asp-Glu-Ala-Asp) box polypeptide 18 (DDX18), mRNA."  
"Homo sapiens DEAD (Asp-Glu-Ala-As) box polypeptide 19A (DDX19A), mRNA."  
"Homo sapiens DEAD (Asp-Glu-Ala-As) box polypeptide 19B (DDX19B), transcript variant 3, mRNA"  
"Homo sapiens DDX19-DDX19L protein (DDX19-DDX19L), mRNA."  
"Homo sapiens DEAD (Asp-Glu-Ala-Asp) box polypeptide 20 (DDX20), mRNA."  
"Homo sapiens DEAD (Asp-Glu-Ala-Asp) box polypeptide 21 (DDX21), mRNA."  
"Homo sapiens DEAD (Asp-Glu-Ala-Asp) box polypeptide 23 (DDX23), mRNA."  
"Homo sapiens DEAD (Asp-Glu-Ala-Asp) box polypeptide 24 (DDX24), mRNA."  
"Homo sapiens DEAD/H (Asp-Glu-Ala-Asp/His) box polypeptide 26B (DDX26B), mRNA."  
"Homo sapiens DEAD (Asp-Glu-Ala-Asp) box polypeptide 27 (DDX27), mRNA."  
"Homo sapiens DEAD (Asp-Glu-Ala-Asp) box polypeptide 28 (DDX28), nuclear gene encoding r"  
"Homo sapiens DEAD (Asp-Glu-Ala-Asp) box polypeptide 31 (DDX31), transcript variant 2, mRNA"  
"Homo sapiens DEAD (Asp-Glu-Ala-Asp) box polypeptide 39 (DDX39), mRNA."  
"Homo sapiens DEAD (Asp-Glu-Ala-Asp) box polypeptide 3, X-linked (DDX3X), mRNA."  
"Homo sapiens DEAD (Asp-Glu-Ala-Asp) box polypeptide 3, Y-linked (DDX3Y), mRNA."  
"Homo sapiens DEAD (Asp-Glu-Ala-Asp) box polypeptide 4 (DDX4), mRNA."  
"Homo sapiens DEAD (Asp-Glu-Ala-Asp) box polypeptide 41 (DDX41), mRNA."  
"Homo sapiens DEAD (Asp-Glu-Ala-Asp) box polypeptide 42 (DDX42), transcript variant 1, mRNA"  
"Homo sapiens DEAD (Asp-Glu-Ala-Asp) box polypeptide 46 (DDX46), mRNA."  
"Homo sapiens DEAD (Asp-Glu-Ala-Asp) box polypeptide 47 (DDX47), transcript variant 1, mRNA"  
"Homo sapiens DEAD (Asp-Glu-Ala-Asp) box polypeptide 49 (DDX49), mRNA."  
"Homo sapiens DEAD (Asp-Glu-Ala-Asp) box polypeptide 5 (DDX5), mRNA."  
"Homo sapiens DEAD (Asp-Glu-Ala-Asp) box polypeptide 50 (DDX50), mRNA."  
"Homo sapiens DEAD (Asp-Glu-Ala-Asp) box polypeptide 52 (DDX52), transcript variant 1, mRNA"  
"Homo sapiens DEAD (Asp-Glu-Ala-Asp) box polypeptide 54 (DDX54), transcript variant 2, mRNA"

"Homo sapiens DEAD (Asp-Glu-Ala-Asp) box polypeptide 55 (DDX55), mRNA."  
"Homo sapiens DEAD (Asp-Glu-Ala-Asp) box polypeptide 56 (DDX56), mRNA."  
"Homo sapiens DEAD (Asp-Glu-Ala-Asp) box polypeptide 58 (DDX58), mRNA."  
"Homo sapiens DEAD (Asp-Glu-Ala-Asp) box polypeptide 59 (DDX59), transcript variant 2, mRNA."  
"Homo sapiens DEAD (Asp-Glu-Ala-Asp) box polypeptide 6 (DDX6), mRNA."  
"Homo sapiens DEAD (Asp-Glu-Ala-Asp) box polypeptide 60 (DDX60), mRNA."  
"Homo sapiens deaminase domain containing 1 (DEADC1), mRNA."  
"Homo sapiens deformed epidermal autoregulatory factor 1 (Drosophila) (DEAF1), mRNA."  
"Homo sapiens 2,4-dienoyl CoA reductase 1, mitochondrial (DECR1), nuclear gene encoding m"  
"Homo sapiens 2,4-dienoyl CoA reductase 2, peroxisomal (DECR2), mRNA."  
"Homo sapiens death effector domain containing (DEDD), transcript variant 4, mRNA."  
"Homo sapiens death effector domain containing 2 (DEDD2), mRNA."  
"Homo sapiens differentially expressed in FDCP 6 homolog (mouse) (DEF6), mRNA."  
"Homo sapiens differentially expressed in FDCP 8 homolog (mouse) (DEF8), transcript variant 1"  
"Homo sapiens defensin, beta 103B (DEFB103B), mRNA."  
"Homo sapiens defensin, beta 116 (DEFB116), mRNA."  
"Homo sapiens defensin, beta 122 (DEFB122) on chromosome 20."  
"Homo sapiens defensin, beta 123 (DEFB123), mRNA."  
"Homo sapiens defensin, beta 125 (DEFB125), mRNA."  
"Homo sapiens defensin, beta 130 (DEFB130), mRNA."  
"Homo sapiens defensin, beta 133 (DEFB133), mRNA."  
"Homo sapiens defensin, beta 134 (DEFB134), mRNA."  
"Homo sapiens defensin, beta 4 (DEFB4), mRNA."  
"Homo sapiens degenerative spermatocyte homolog 1, lipid desaturase (Drosophila) (DEGS1),"  
"Homo sapiens degenerative spermatocyte homolog 2, lipid desaturase (Drosophila) (DEGS2),"  
"Homo sapiens DEK oncogene (DNA binding) (DEK), mRNA."  
"Homo sapiens defects in morphology 1 homolog (S. cerevisiae) (DEM1), mRNA."  
"Homo sapiens DENN/MADD domain containing 1A (DENND1A), transcript variant 1, mRNA."  
"Homo sapiens DENN/MADD domain containing 1C (DENND1C), mRNA."  
"Homo sapiens DENN/MADD domain containing 2C (DENND2C), mRNA."  
"Homo sapiens DENN/MADD domain containing 2D (DENND2D), mRNA."  
"Homo sapiens DENN/MADD domain containing 3 (DENND3), mRNA."  
"Homo sapiens DENN/MADD domain containing 4A (DENND4A), mRNA."  
"Homo sapiens DENN/MADD domain containing 4B (DENND4B), mRNA."  
"Homo sapiens DENN/MADD domain containing 4C (DENND4C), mRNA."  
"Homo sapiens DENN/MADD domain containing 5A (DENND5A), mRNA."  
"Homo sapiens DENN/MADD domain containing 5B (DENND5B), mRNA."  
"Homo sapiens density-regulated protein (DENR), mRNA."  
"Homo sapiens DEP domain containing 1B (DEPDC1B), mRNA."  
"Homo sapiens DEP domain containing 5 (DEPDC5), transcript variant 2, mRNA."  
"Homo sapiens DEP domain containing 6 (DEPDC6), mRNA."  
"Homo sapiens DEP domain containing 7 (DEPDC7), transcript variant 1, mRNA."  
"Homo sapiens 2-deoxyribose-5-phosphate aldolase homolog (C. elegans) (DERA), mRNA."  
"Homo sapiens Der1-like domain family, member 1 (DERL1), mRNA."

"Homo sapiens Der1-like domain family, member 2 (DERL2), mRNA."  
"Homo sapiens Der1-like domain family, member 3 (DERL3), transcript variant 1, mRNA."  
"Homo sapiens de-etiolated homolog 1 (Arabidopsis) (DET1), mRNA."  
"Homo sapiens Dexi homolog (mouse) (DEXI), mRNA."  
"Homo sapiens DNA fragmentation factor, 45kDa, alpha polypeptide (DFFA), transcript variant 1  
"Homo sapiens DNA fragmentation factor, 40kDa, beta polypeptide (caspase-activated DNase)  
"Homo sapiens deafness, autosomal dominant 5 (DFNA5), transcript variant 1, mRNA."  
"Homo sapiens deafness, autosomal recessive 31 (DFNB31), mRNA."  
"Homo sapiens deafness, autosomal recessive 59 (DFNB59), mRNA."  
"Homo sapiens diacylglycerol O-acyltransferase homolog 1 (mouse) (DGAT1), mRNA."  
"Homo sapiens diacylglycerol O-acyltransferase homolog 2 (mouse) (DGAT2), mRNA."  
"Homo sapiens DiGeorge syndrome critical region gene 14 (DGCR14), mRNA."  
"Homo sapiens DiGeorge syndrome critical region gene 2 (DGCR2), mRNA."  
"Homo sapiens DiGeorge syndrome critical region gene 6 (DGCR6), mRNA."  
"Homo sapiens DiGeorge syndrome critical region gene 6-like (DGCR6L), mRNA."  
"Homo sapiens DiGeorge syndrome critical region gene 8 (DGCR8), mRNA."  
"Homo sapiens diacylglycerol kinase, alpha 80kDa (DGKA), transcript variant 1, mRNA."  
"Homo sapiens diacylglycerol kinase, delta 130kDa (DGKD), transcript variant 2, mRNA."  
"Homo sapiens diacylglycerol kinase, epsilon 64kDa (DGKE), mRNA."  
"Homo sapiens diacylglycerol kinase, theta 110kDa (DGKQ), mRNA."  
"Homo sapiens deoxyguanosine kinase (DGUOK), nuclear gene encoding mitochondrial protein  
"Homo sapiens 24-dehydrocholesterol reductase (DHCR24), mRNA."  
"Homo sapiens 7-dehydrocholesterol reductase (DHCR7), mRNA."  
"Homo sapiens dehydrodolichyl diphosphate synthase (DHDDS), transcript variant 2, mRNA."  
"Homo sapiens dihydrodiol dehydrogenase (dimeric) (DHDH), mRNA."  
"Homo sapiens dihydrofolate reductase (DHFR), mRNA."  
"Homo sapiens desert hedgehog homolog (Drosophila) (DHH), mRNA."  
"Homo sapiens dihydroorotate dehydrogenase (DHODH), nuclear gene encoding mitochondrial  
"Homo sapiens dehydrogenase/reductase (SDR family) member 1 (DHRS1), mRNA."  
"Homo sapiens dehydrogenase/reductase (SDR family) member 11 (DHRS11), mRNA."  
"Homo sapiens dehydrogenase/reductase (SDR family) member 12 (DHRS12), transcript varian  
"Homo sapiens dehydrogenase/reductase (SDR family) member 13 (DHRS13), mRNA."  
"Homo sapiens dehydrogenase/reductase (SDR family) member 2 (DHRS2), transcript variant 1  
"Homo sapiens dehydrogenase/reductase (SDR family) member 4 (DHRS4), mRNA."  
"Homo sapiens dehydrogenase/reductase (SDR family) member 4 like 2 (DHRS4L2), mRNA."  
"Homo sapiens dehydrogenase/reductase (SDR family) member 7 (DHRS7), mRNA."  
"Homo sapiens dehydrogenase/reductase (SDR family) member 7B (DHRS7B), mRNA."  
"Homo sapiens dehydrogenase/reductase (SDR family) member 7C (DHRS7C), mRNA."  
"Homo sapiens dehydrogenase/reductase (SDR family) X-linked (DHRSX), mRNA."  
"Homo sapiens dehydrogenase E1 and transketolase domain containing 1 (DHTKD1), mRNA."  
"Homo sapiens DEAH (Asp-Glu-Ala-His) box polypeptide 15 (DHX15), mRNA."  
"Homo sapiens DEAH (Asp-Glu-Ala-His) box polypeptide 16 (DHX16), mRNA."  
"Homo sapiens DEAH (Asp-Glu-Ala-His) box polypeptide 29 (DHX29), mRNA."  
"Homo sapiens DEAH (Asp-Glu-Ala-His) box polypeptide 30 (DHX30), transcript variant 1, mRN

"Homo sapiens DEAH (Asp-Glu-Ala-His) box polypeptide 32 (DHX32), mRNA."  
"Homo sapiens DEAH (Asp-Glu-Ala-His) box polypeptide 33 (DHX33), mRNA."  
"Homo sapiens DEAH (Asp-Glu-Ala-His) box polypeptide 34 (DHX34), transcript variant 2, mRNA."  
"Homo sapiens DEAH (Asp-Glu-Ala-His) box polypeptide 35 (DHX35), mRNA."  
"Homo sapiens DEAH (Asp-Glu-Ala-His) box polypeptide 36 (DHX36), mRNA."  
"Homo sapiens DEAH (Asp-Glu-Ala-His) box polypeptide 37 (DHX37), mRNA."  
"Homo sapiens DEAH (Asp-Glu-Ala-His) box polypeptide 38 (DHX38), mRNA."  
"PREDICTED: Homo sapiens DEAH (Asp-Glu-Ala-His) box polypeptide 40, transcript variant 2 (DHX40), mRNA."  
"Homo sapiens DEXH (Asp-Glu-X-His) box polypeptide 58 (DHX58), mRNA."  
"Homo sapiens DEAH (Asp-Glu-Ala-His) box polypeptide 8 (DHX8), mRNA."  
"Homo sapiens DEAH (Asp-Glu-Ala-His) box polypeptide 9 (DHX9), mRNA."  
"Homo sapiens diablo homolog (Drosophila) (DIABLO), nuclear gene encoding mitochondrial protein (Drosophila) (DIABLO), mRNA."  
"Homo sapiens diaphanous homolog 1 (Drosophila) (DIAPH1), mRNA."  
"Homo sapiens diaphanous homolog 3 (Drosophila) (DIAPH3), transcript variant 1, mRNA."  
"Homo sapiens Dicer1, Dcr-1 homolog (Drosophila) (DICER1), transcript variant 1, mRNA."  
"Homo sapiens death inducer-obliterators 1 (DIDO1), transcript variant 3, mRNA."  
"Homo sapiens DIM1 dimethyladenosine transferase 1-like (S. cerevisiae) (DIMT1L), mRNA."  
"Homo sapiens DIP2 disco-interacting protein 2 homolog A (Drosophila) (DIP2A), transcript variant 1, mRNA."  
"Homo sapiens DIP2 disco-interacting protein 2 homolog B (Drosophila) (DIP2B), mRNA."  
"Homo sapiens DIP2 disco-interacting protein 2 homolog C (Drosophila) (DIP2C), mRNA."  
"Homo sapiens DIRAS family, GTP-binding RAS-like 1 (DIRAS1), mRNA."  
"Homo sapiens DIRAS family, GTP-binding RAS-like 3 (DIRAS3), mRNA."  
"Homo sapiens disrupted in renal carcinoma 1 (DIRC1), mRNA."  
"Homo sapiens disrupted in renal carcinoma 2 (DIRC2), mRNA."  
"Homo sapiens DIS3 mitotic control homolog (S. cerevisiae)-like (DIS3L), mRNA."  
"Homo sapiens DIS3 mitotic control homolog (S. cerevisiae)-like 2 (DIS3L2), mRNA."  
"Homo sapiens dispatched homolog 1 (Drosophila) (DISP1), mRNA."  
"Homo sapiens dispatched homolog 2 (Drosophila) (DISP2), mRNA."  
"Homo sapiens DIX domain containing 1 (DIXDC1), transcript variant 1, mRNA."  
Homo sapiens similar to CGI-96 (dJ222E13.2) on chromosome 22.  
"Homo sapiens dJ341D10.1 (novel protein) (dJ341D10.1), mRNA."  
"Homo sapiens dyskeratosis congenita 1, dyskerin (DKC1), mRNA."  
"PREDICTED: Homo sapiens DKFZP434A062 protein (DKFZP434A062), mRNA."  
"PREDICTED: Homo sapiens hypothetical protein DKFZp434J1015 (DKFZp434J1015), mRNA."  
"Homo sapiens hypothetical protein DKFZp434K191 (DKFZp434K191), mRNA."  
"PREDICTED: Homo sapiens DKFZP434L187 protein (DKFZP434L187), mRNA."  
"PREDICTED: Homo sapiens hypothetical LOC441452 (DKFZp434M131), mRNA."  
"Homo sapiens hypothetical protein DKFZp434N035 (DKFZp434N035), mRNA."  
"Homo sapiens DKFZp451A211 protein (DKFZp451A211), mRNA."  
"PREDICTED: Homo sapiens hypothetical protein DKFZp547K054 (DKFZp547K054), mRNA."  
"PREDICTED: Homo sapiens DKFZP564C196 protein (DKFZP564C196), mRNA."  
"Homo sapiens hypothetical protein DKFZp564O0523 (DKFZP564O0523), mRNA."  
"Homo sapiens hypothetical protein DKFZp586I1420 (DKFZP586I1420), non-coding RNA."  
"Homo sapiens hypothetical protein DKFZp667M2411 (DKFZp667M2411), mRNA."

"PREDICTED: Homo sapiens similar to Formin-1 isoforms I/II/III (Limb deformity protein) (DKFZ  
"Homo sapiens hypothetical protein LOC643155 (DKFZP686E2158), mRNA."  
"PREDICTED: Homo sapiens hypothetical gene supported by BX648962 (DKFZp686K1684), m  
"PREDICTED: Homo sapiens hypothetical gene supported by BC043549; BX648102 (DKFZp68  
"Homo sapiens hypothetical protein DKFZp686O24166 (DKFZp686O24166), mRNA."  
"PREDICTED: Homo sapiens hypothetical protein DKFZp761O2018 (DKFZp761O2018), mRNA  
"PREDICTED: Homo sapiens hypothetical protein DKFZp761P0423 (DKFZp761P0423), mRNA.  
"PREDICTED: Homo sapiens similar to KIAA1074 protein, transcript variant 4 (DKFZp779B1634  
"PREDICTED: Homo sapiens hypothetical protein DKFZp779M0652 (DKFZp779M0652), mRNA  
"Homo sapiens dickkopf-like 1 (soggy) (DKKL1), mRNA."  
"Homo sapiens dihydrolipoamide S-acetyltransferase (DLAT), mRNA."  
"Homo sapiens dihydrolipoamide dehydrogenase (DLD), mRNA."  
"Homo sapiens deleted in lymphocytic leukemia 1 (non-protein coding) (DLEU1), non-coding RN  
"Homo sapiens deleted in lymphocytic leukemia 2 (non-protein coding) (DLEU2), non-coding RN  
"Homo sapiens deleted in lymphocytic leukemia 2-like (DLEU2L), non-coding RNA."  
"Homo sapiens discs, large homolog 1 (Drosophila) (DLG1), transcript variant 1, mRNA."  
"Homo sapiens discs, large homolog 2, chapsyn-110 (Drosophila) (DLG2), mRNA."  
"Homo sapiens discs, large homolog 3 (Drosophila) (DLG3), transcript variant 1, mRNA."  
"Homo sapiens discs, large homolog 4 (Drosophila) (DLG4), mRNA."  
"Homo sapiens discs, large (Drosophila) homolog-associated protein 4 (DLGAP4), transcript var  
"Homo sapiens discs, large (Drosophila) homolog-associated protein 5 (DLGAP5), mRNA."  
"Homo sapiens delta-like 2 homolog (Drosophila) (DLK2), transcript variant 2, mRNA."  
"Homo sapiens delta-like 1 (Drosophila) (DLL1), mRNA."  
"Homo sapiens delta-like 3 (Drosophila) (DLL3), transcript variant 1, mRNA."  
"Homo sapiens dihydrolipoamide S-succinyltransferase (E2 component of 2-oxo-glutarate comp  
"Homo sapiens distal-less homeobox 1 (DLX1), transcript variant 2, mRNA."  
"Homo sapiens distal-less homeobox 2 (DLX2), mRNA."  
"Homo sapiens DLX6 antisense RNA (non-protein coding) (DLX6AS), non-coding RNA."  
"Homo sapiens DNA methyltransferase 1 associated protein 1 (DMAP1), transcript variant 2, m  
"Homo sapiens diencephalon/mesencephalon homeobox 1 (DMBX1), transcript variant 1, mRN  
"Homo sapiens DMC1 dosage suppressor of mck1 homolog, meiosis-specific homologous reco  
"Homo sapiens dermokine (DMKN), transcript variant 1, mRNA."  
"Homo sapiens doublesex and mab-3 related transcription factor 1 (DMRT1), mRNA."  
"Homo sapiens DMRT-like family A1 (DMRTA1), mRNA."  
"Homo sapiens DMRT-like family A2 (DMRTA2), mRNA."  
"Homo sapiens cyclin D binding myb-like transcription factor 1 (DMTF1), mRNA."  
"Homo sapiens dystrophia myotonica, WD repeat containing (DMWD), mRNA."  
"Homo sapiens Dmx-like 1 (DMXL1), mRNA."  
"Homo sapiens Dmx-like 2 (DMXL2), mRNA."  
"Homo sapiens DNA replication helicase 2 homolog (yeast) (DNA2), mRNA."  
"Homo sapiens dynein, axonemal, heavy chain 2 (DNAH2), mRNA."  
"Homo sapiens dynein, axonemal, heavy chain 3 (DNAH3), mRNA."  
"Homo sapiens dynein, axonemal, intermediate chain 1 (DNAI1), mRNA."  
"Homo sapiens DnaJ (Hsp40) homolog, subfamily A, member 1 (DNAJA1), mRNA."

"Homo sapiens DnaJ (Hsp40) homolog, subfamily A, member 2 (DNAJA2), mRNA."  
"Homo sapiens DnaJ (Hsp40) homolog, subfamily A, member 3 (DNAJA3), mRNA."  
"Homo sapiens DnaJ (Hsp40) homolog, subfamily A, member 4 (DNAJA4), mRNA."  
"Homo sapiens DnaJ (Hsp40) homolog, subfamily B, member 1 (DNAJB1), mRNA."  
"Homo sapiens DnaJ (Hsp40) homolog, subfamily B, member 11 (DNAJB11), mRNA."  
"Homo sapiens DnaJ (Hsp40) homolog, subfamily B, member 12 (DNAJB12), transcript variant  
"Homo sapiens DnaJ (Hsp40) homolog, subfamily B, member 14 (DNAJB14), transcript variant  
"Homo sapiens DnaJ (Hsp40) homolog, subfamily B, member 2 (DNAJB2), transcript variant 2,  
"Homo sapiens DnaJ (Hsp40) homolog, subfamily B, member 4 (DNAJB4), mRNA."  
"PREDICTED: Homo sapiens DnaJ (Hsp40) homolog, subfamily B, member 5, transcript variant  
"Homo sapiens DnaJ (Hsp40) homolog, subfamily B, member 6 (DNAJB6), transcript variant 2,  
"Homo sapiens DnaJ (Hsp40) homolog, subfamily B, member 9 (DNAJB9), mRNA."  
"Homo sapiens DnaJ (Hsp40) homolog, subfamily C, member 1 (DNAJC1), mRNA."  
"Homo sapiens DnaJ (Hsp40) homolog, subfamily C, member 10 (DNAJC10), mRNA."  
"Homo sapiens DnaJ (Hsp40) homolog, subfamily C, member 11 (DNAJC11), mRNA."  
"Homo sapiens DnaJ (Hsp40) homolog, subfamily C, member 12 (DNAJC12), transcript variant  
"Homo sapiens DnaJ (Hsp40) homolog, subfamily C, member 14 (DNAJC14), mRNA."  
"Homo sapiens DnaJ (Hsp40) homolog, subfamily C, member 15 (DNAJC15), mRNA."  
"Homo sapiens DnaJ (Hsp40) homolog, subfamily C, member 16 (DNAJC16), mRNA."  
"Homo sapiens DnaJ (Hsp40) homolog, subfamily C, member 17 (DNAJC17), mRNA."  
"Homo sapiens DnaJ (Hsp40) homolog, subfamily C, member 18 (DNAJC18), mRNA."  
"Homo sapiens DnaJ (Hsp40) homolog, subfamily C, member 19 (DNAJC19), mRNA."  
"Homo sapiens DnaJ (Hsp40) homolog, subfamily C, member 2 (DNAJC2), transcript variant 1,  
"Homo sapiens DnaJ (Hsp40) homolog, subfamily C, member 21 (DNAJC21), transcript variant  
"Homo sapiens DnaJ (Hsp40) homolog, subfamily C, member 22 (DNAJC22), mRNA."  
"Homo sapiens DnaJ (Hsp40) homolog, subfamily C, member 24 (DNAJC24), mRNA."  
"Homo sapiens DnaJ (Hsp40) homolog, subfamily C, member 25 (DNAJC25), mRNA."  
"Homo sapiens DnaJ (Hsp40) homolog, subfamily C, member 27 (DNAJC27), mRNA."  
"Homo sapiens DnaJ (Hsp40) homolog, subfamily C, member 28 (DNAJC28), transcript variant  
"Homo sapiens DnaJ (Hsp40) homolog, subfamily C, member 3 (DNAJC3), mRNA."  
"Homo sapiens DnaJ (Hsp40) homolog, subfamily C, member 30 (DNAJC30), mRNA."  
"Homo sapiens DnaJ (Hsp40) homolog, subfamily C, member 4 (DNAJC4), mRNA."  
"Homo sapiens DnaJ (Hsp40) homolog, subfamily C, member 5 (DNAJC5), mRNA."  
"Homo sapiens DnaJ (Hsp40) homolog, subfamily C, member 5 beta (DNAJC5B), mRNA."  
"Homo sapiens DnaJ (Hsp40) homolog, subfamily C, member 6 (DNAJC6), mRNA."  
"Homo sapiens DnaJ (Hsp40) homolog, subfamily C, member 7 (DNAJC7), mRNA."  
"Homo sapiens DnaJ (Hsp40) homolog, subfamily C, member 8 (DNAJC8), mRNA."  
"Homo sapiens DnaJ (Hsp40) homolog, subfamily C, member 9 (DNAJC9), mRNA."  
"Homo sapiens dynein, axonemal, light chain 1 (DNAL1), mRNA."  
"Homo sapiens dynein, axonemal, light chain 4 (DNAL4), mRNA."  
"Homo sapiens dynein, axonemal, light intermediate chain 1 (DNALI1), mRNA."  
"Homo sapiens deoxyribonuclease I (DNASE1), mRNA."  
"Homo sapiens deoxyribonuclease I-like 1 (DNASE1L1), transcript variant 1, mRNA."  
"Homo sapiens deoxyribonuclease I-like 2 (DNASE1L2), mRNA."

"Homo sapiens deoxyribonuclease I-like 3 (DNASE1L3), mRNA."  
"Homo sapiens deoxyribonuclease II, lysosomal (DNASE2), mRNA."  
"Homo sapiens dynein, cytoplasmic, light polypeptide 1 (DNCL1), mRNA."  
"Homo sapiens delta/notch-like EGF repeat containing (DNER), mRNA."  
"Homo sapiens dynein heavy chain domain 1 (DNHD1), mRNA."  
"PREDICTED: Homo sapiens dynein heavy chain domain 2 (DNHD2), mRNA."  
"Homo sapiens DNL-type zinc finger (DNLZ), mRNA."  
"Homo sapiens dynamin 1-like (DNM1L), transcript variant 1, mRNA."  
"Homo sapiens dynamin 2 (DNM2), transcript variant 3, mRNA."  
"Homo sapiens dynamin 3 (DNM3), mRNA."  
"Homo sapiens DNA (cytosine-5-)-methyltransferase 1 (DNMT1), mRNA."  
"Homo sapiens DNA (cytosine-5-)-methyltransferase 3 alpha (DNMT3A), transcript variant 4, mRNA."  
"Homo sapiens DNA (cytosine-5-)-methyltransferase 3 beta (DNMT3B), transcript variant 1, mRNA."  
"Homo sapiens DNA (cytosine-5-)-methyltransferase 3-like (DNMT3L), transcript variant 2, mRNA."  
"Homo sapiens aspartyl aminopeptidase (DNPEP), mRNA."  
"Homo sapiens deoxynucleotidyltransferase, terminal (DNMT), transcript variant 2, mRNA."  
"Homo sapiens deoxynucleotidyltransferase, terminal, interacting protein 1 (DNMTIP1), mRNA."  
"Homo sapiens deoxynucleotidyltransferase, terminal, interacting protein 2 (DNMTIP2), mRNA."  
"Homo sapiens double C2-like domains, alpha (DOC2A), mRNA."  
"Homo sapiens dedicator of cytokinesis 10 (DOCK10), mRNA."  
"Homo sapiens dedicator of cytokinesis 11 (DOCK11), mRNA."  
"Homo sapiens dedicator of cytokinesis 2 (DOCK2), mRNA."  
"Homo sapiens dedicator of cytokinesis 6 (DOCK6), mRNA."  
"Homo sapiens dedicator of cytokinesis 7 (DOCK7), mRNA."  
"Homo sapiens dedicator of cytokinesis 8 (DOCK8), mRNA."  
"Homo sapiens dedicator of cytokinesis 9 (DOCK9), mRNA."  
"Homo sapiens deoxyhypusine hydroxylase/monooxygenase (DOHH), mRNA."  
"Homo sapiens docking protein 3 (DOK3), mRNA."  
"Homo sapiens docking protein 4 (DOK4), mRNA."  
"Homo sapiens docking protein 6 (DOK6), mRNA."  
"Homo sapiens dolichol kinase (DOLK), mRNA."  
"Homo sapiens dolichyl pyrophosphate phosphatase 1 (DOLPP1), mRNA."  
"Homo sapiens dom-3 homolog Z (C. elegans) (DOM3Z), mRNA."  
"Homo sapiens downstream neighbor of SON (DONSON), mRNA."  
"Homo sapiens dopey family member 1 (DOPEY1), mRNA."  
"Homo sapiens dopey family member 2 (DOPEY2), mRNA."  
"Homo sapiens DOT1-like, histone H3 methyltransferase (S. cerevisiae) (DOT1L), mRNA."  
"Homo sapiens dolichyl-phosphate (UDP-N-acetylglucosamine) N-acetylglucosaminephosphotransferase 1 (DOLPP1), mRNA."  
"Homo sapiens diffuse panbronchiolitis critical region 1 (DPCR1), mRNA."  
"Homo sapiens dipeptidase 2 (DPEP2), mRNA."  
"Homo sapiens D4, zinc and double PHD fingers family 1 (DPF1), mRNA."  
"Homo sapiens D4, zinc and double PHD fingers family 2 (DPF2), mRNA."  
"Homo sapiens D4, zinc and double PHD fingers, family 3 (DPF3), mRNA."  
"Homo sapiens DPH1 homolog (S. cerevisiae) (DPH1), mRNA."

"Homo sapiens DPH2 homolog (*S. cerevisiae*) (DPH2), transcript variant 1, mRNA."  
"Homo sapiens DPH3, KTI11 homolog (*S. cerevisiae*) (DPH3), transcript variant 2, mRNA."  
"Homo sapiens DPH5 homolog (*S. cerevisiae*) (DPH5), transcript variant 3, mRNA."  
"Homo sapiens dolichyl-phosphate mannosyltransferase polypeptide 1, catalytic subunit (DPM1)  
"Homo sapiens dolichyl-phosphate mannosyltransferase polypeptide 2, regulatory subunit (DPM2)  
"Homo sapiens dolichyl-phosphate mannosyltransferase polypeptide 3 (DPM3), transcript variant 1, mRNA."  
"Homo sapiens dipeptidyl-peptidase 10 (DPP10), transcript variant 2, mRNA."  
"Homo sapiens dipeptidyl-peptidase 3 (DPP3), transcript variant 1, mRNA."  
"Homo sapiens dipeptidyl-peptidase 7 (DPP7), mRNA."  
"Homo sapiens dipeptidyl-peptidase 8 (DPP8), transcript variant 2, mRNA."  
"Homo sapiens dipeptidyl-peptidase 9 (DPP9), mRNA."  
"Homo sapiens divergent-paired related homeobox pseudogene 4 (DPRXP4), non-coding RNA."  
"Homo sapiens dpy-19-like 1 (*C. elegans*) (DPY19L1), mRNA."  
"Homo sapiens dpy-19-like 3 (*C. elegans*) (DPY19L3), mRNA."  
"Homo sapiens dpy-19-like 4 (*C. elegans*) (DPY19L4), mRNA."  
"Homo sapiens dpy-30 homolog (*C. elegans*) (DPY30), mRNA."  
"Homo sapiens dihydropyrimidine dehydrogenase (DPYD), transcript variant 1, mRNA."  
"Homo sapiens dihydropyrimidinase-like 2 (DPYSL2), mRNA."  
"Homo sapiens dihydropyrimidinase-like 3 (DPYSL3), mRNA."  
"Homo sapiens down-regulator of transcription 1, TBP-binding (negative cofactor 2) (DR1), mRNA."  
"Homo sapiens DNA-damage regulated autophagy modulator 1 (DRAM1), mRNA."  
"Homo sapiens DR1-associated protein 1 (negative cofactor 2 alpha) (DRAP1), mRNA."  
"Homo sapiens dopamine receptor D1 interacting protein (DRD1IP), mRNA."  
"Homo sapiens dopamine receptor D4 (DRD4), mRNA."  
"Homo sapiens developmentally regulated GTP binding protein 1 (DRG1), mRNA."  
"Homo sapiens developmentally regulated GTP binding protein 2 (DRG2), mRNA."  
"Homo sapiens desmocollin 1 (DSC1), transcript variant Dsc1b, mRNA."  
"Homo sapiens desmocollin 2 (DSC2), transcript variant Dsc2b, mRNA."  
"Homo sapiens desmocollin 3 (DSC3), transcript variant Dsc3a, mRNA."  
"Homo sapiens Down syndrome cell adhesion molecule like 1 (DSCAML1), mRNA."  
"Homo sapiens defective in sister chromatid cohesion 1 homolog (*S. cerevisiae*) (DSCC1), mRNA."  
"Homo sapiens Down syndrome critical region gene 3 (DSCR3), mRNA."  
"Homo sapiens desmoglein 2 (DSG2), mRNA."  
"Homo sapiens desmoglein 3 (pemphigus vulgaris antigen) (DSG3), mRNA."  
"Homo sapiens DSN1, MIND kinetochore complex component, homolog (*S. cerevisiae*) (DSN1), mRNA."  
"Homo sapiens destrin (actin depolymerizing factor) (DSTN), transcript variant 1, mRNA."  
"Homo sapiens dual serine/threonine and tyrosine protein kinase (DSTYK), transcript variant 1, mRNA."  
"Homo sapiens D-tyrosyl-tRNA deacylase 1 homolog (*S. cerevisiae*) (DTD1), nuclear gene encoding protein, mRNA."  
"Homo sapiens denticleless homolog (*Drosophila*) (DTL), mRNA."  
"Homo sapiens dystrobrevin, alpha (DTNA), transcript variant 8, mRNA."  
"Homo sapiens dystrobrevin, beta (DTNB), transcript variant 1, mRNA."  
"Homo sapiens dystrobrevin binding protein 1 (DTNBP1), transcript variant 1, mRNA."  
"Homo sapiens DTW domain containing 1 (DTWD1), mRNA."  
"Homo sapiens DTW domain containing 2 (DTWD2), mRNA."



"Homo sapiens deltex homolog 1 (Drosophila) (DTX1), mRNA."  
"Homo sapiens deltex homolog 2 (Drosophila) (DTX2), mRNA."  
"Homo sapiens deltex homolog 3 (Drosophila) (DTX3), mRNA."  
"Homo sapiens deltex 3-like (Drosophila) (DTX3L), mRNA."  
"Homo sapiens deltex homolog 4 (Drosophila) (DTX4), mRNA."  
"Homo sapiens deoxythymidylate kinase (thymidylate kinase) (DTYMK), mRNA."  
"Homo sapiens dullard homolog (Xenopus laevis) (DULLARD), mRNA."  
"Homo sapiens dihydrouridine synthase 1-like (S. cerevisiae) (DUS1L), mRNA."  
"Homo sapiens dihydrouridine synthase 2-like, SMM1 homolog (S. cerevisiae) (DUS2L), mRNA."  
"Homo sapiens dihydrouridine synthase 3-like (S. cerevisiae) (DUS3L), mRNA."  
"Homo sapiens dihydrouridine synthase 4-like (S. cerevisiae) (DUS4L), mRNA."  
"Homo sapiens dual specificity phosphatase 1 (DUSP1), mRNA."  
"Homo sapiens dual specificity phosphatase 10 (DUSP10), transcript variant 1, mRNA."  
"Homo sapiens dual specificity phosphatase 11 (RNA/RNP complex 1-interacting) (DUSP11), mRNA."  
"Homo sapiens dual specificity phosphatase 12 (DUSP12), mRNA."  
"Homo sapiens dual specificity phosphatase 14 (DUSP14), mRNA."  
"Homo sapiens dual specificity phosphatase 15 (DUSP15), transcript variant 1, mRNA."  
"Homo sapiens dual specificity phosphatase 16 (DUSP16), mRNA."  
"Homo sapiens dual specificity phosphatase 18 (DUSP18), mRNA."  
"Homo sapiens dual specificity phosphatase 19 (DUSP19), mRNA."  
"Homo sapiens dual specificity phosphatase 2 (DUSP2), mRNA."  
"Homo sapiens dual specificity phosphatase 22 (DUSP22), mRNA."  
"Homo sapiens dual specificity phosphatase 23 (DUSP23), mRNA."  
"Homo sapiens dual specificity phosphatase 26 (putative) (DUSP26), mRNA."  
"Homo sapiens dual specificity phosphatase 28 (DUSP28), mRNA."  
"Homo sapiens dual specificity phosphatase 3 (vaccinia virus phosphatase VH1-related) (DUSP3), mRNA."  
"Homo sapiens dual specificity phosphatase 5 (DUSP5), mRNA."  
"Homo sapiens dual specificity phosphatase 7 (DUSP7), mRNA."  
"Homo sapiens dual specificity phosphatase 8 (DUSP8), mRNA."  
"Homo sapiens dual specificity phosphatase 9 (DUSP9), mRNA."  
"Homo sapiens deoxyuridine triphosphatase (DUT), nuclear gene encoding mitochondrial protein."  
"Homo sapiens double homeobox, 3 (DUX3), mRNA."  
Homo sapiens double homeobox A pseudogene 3 (DUXAP3) on chromosome 10.  
"Homo sapiens dishevelled, dsh homolog 1 (Drosophila) (DVL1), transcript variant 3, mRNA."  
"Homo sapiens dishevelled, dsh homolog 2 (Drosophila) (DVL2), mRNA."  
"Homo sapiens dishevelled, dsh homolog 3 (Drosophila) (DVL3), mRNA."  
"Homo sapiens dymeclin (DYM), mRNA."  
"Homo sapiens dynein, cytoplasmic 1, heavy chain 1 (DYNC1H1), mRNA."  
"Homo sapiens dynein, cytoplasmic 1, intermediate chain 1 (DYNC1I1), mRNA."  
"Homo sapiens dynein, cytoplasmic 1, intermediate chain 2 (DYNC1I2), mRNA."  
"Homo sapiens dynein, cytoplasmic 1, light intermediate chain 2 (DYNC1LI2), mRNA."  
"Homo sapiens dynein, cytoplasmic 2, heavy chain 1 (DYNC2H1), mRNA."  
"Homo sapiens dynein, cytoplasmic 2, light intermediate chain 1 (DYNC2LI1), transcript variant 1, mRNA."  
"Homo sapiens dynein, light chain, LC8-type 1 (DYNLL1), transcript variant 1, mRNA."

"Homo sapiens dynein, light chain, LC8-type 2 (DYNLL2), mRNA."  
"Homo sapiens dynein, light chain, roadblock-type 1 (DYNLRB1), mRNA."  
"Homo sapiens dynein, light chain, Tctex-type 1 (DYNLT1), mRNA."  
"Homo sapiens dynein, light chain, Tctex-type 3 (DYNLT3), mRNA."  
"Homo sapiens dual-specificity tyrosine-(Y)-phosphorylation regulated kinase 1A (DYRK1A), tra  
"Homo sapiens dual-specificity tyrosine-(Y)-phosphorylation regulated kinase 1B (DYRK1B), tra  
"Homo sapiens dual-specificity tyrosine-(Y)-phosphorylation regulated kinase 2 (DYRK2), transc  
"Homo sapiens dual-specificity tyrosine-(Y)-phosphorylation regulated kinase 3 (DYRK3), transc  
"Homo sapiens dual-specificity tyrosine-(Y)-phosphorylation regulated kinase 4 (DYRK4), mRNA/  
"Homo sapiens dyslexia susceptibility 1 candidate 1 (DYX1C1), transcript variant 1, mRNA."  
"Homo sapiens E2F transcription factor 1 (E2F1), mRNA."  
"Homo sapiens E2F transcription factor 2 (E2F2), mRNA."  
"Homo sapiens E2F transcription factor 3 (E2F3), mRNA."  
"Homo sapiens E2F transcription factor 4, p107/p130-binding (E2F4), mRNA."  
"Homo sapiens E2F transcription factor 5, p130-binding (E2F5), transcript variant 1, mRNA."  
"Homo sapiens E2F transcription factor 6 (E2F6), mRNA."  
"Homo sapiens E2F transcription factor 7 (E2F7), mRNA."  
"Homo sapiens E2F transcription factor 8 (E2F8), mRNA."  
"Homo sapiens E4F transcription factor 1 (E4F1), mRNA."  
"Homo sapiens ELL associated factor 1 (EAF1), mRNA."  
"Homo sapiens ELL associated factor 2 (EAF2), mRNA."  
"Homo sapiens E2F-associated phosphoprotein (EAPP), mRNA."  
"Homo sapiens glutamyl-tRNA synthetase 2, mitochondrial (putative) (EARS2), transcript varian  
"Homo sapiens estrogen receptor binding site associated, antigen, 9 (EBAG9), transcript variant  
"Homo sapiens early B-cell factor 1 (EBF1), mRNA."  
"Homo sapiens early B-cell factor 3 (EBF3), mRNA."  
"Homo sapiens early B-cell factor 4 (EBF4), mRNA."  
"Homo sapiens Epstein-Barr virus induced gene 2 (lymphocyte-specific G protein-coupled recep  
"Homo sapiens Epstein-Barr virus induced 3 (EBI3), mRNA."  
"Homo sapiens EBNA1 binding protein 2 (EBNA1BP2), mRNA."  
"Homo sapiens emopamil binding protein (sterol isomerase) (EBP), mRNA."  
"Homo sapiens emopamil binding protein-like (EBPL), mRNA."  
"Homo sapiens ES cell associated transcript 8 (ECAT8), mRNA."  
"Homo sapiens ecdysoneless homolog (Drosophila) (ECD), mRNA."  
"Homo sapiens endothelin converting enzyme 1 (ECE1), mRNA."  
"Homo sapiens endothelin converting enzyme 2 (ECE2), transcript variant 1, mRNA."  
"Homo sapiens endothelial cell growth factor 1 (platelet-derived) (ECGF1), mRNA."  
"Homo sapiens enoyl Coenzyme A hydratase 1, peroxisomal (ECH1), mRNA."  
"Homo sapiens enoyl Coenzyme A hydratase domain containing 1 (ECHDC1), mRNA."  
"Homo sapiens enoyl Coenzyme A hydratase domain containing 3 (ECHDC3), mRNA."  
"Homo sapiens enoyl Coenzyme A hydratase, short chain, 1, mitochondrial (ECHS1), nuclear ge  
"Homo sapiens EGFR-coamplified and overexpressed protein (ECOP), mRNA."  
"Homo sapiens ECSIT homolog (Drosophila) (ECSIT), mRNA."  
"Homo sapiens epithelial cell transforming sequence 2 oncogene (ECT2), mRNA."

"Homo sapiens epithelial cell transforming sequence 2 oncogene-like (ECT2L), mRNA."

"Homo sapiens ectodysplasin A receptor (EDAR), mRNA."

"Homo sapiens enhancer of mRNA decapping 3 homolog (*S. cerevisiae*) (EDC3), mRNA."

"Homo sapiens ER degradation enhancer, mannosidase alpha-like 1 (EDEM1), mRNA."

"Homo sapiens ER degradation enhancer, mannosidase alpha-like 2 (EDEM2), mRNA."

"Homo sapiens ER degradation enhancer, mannosidase alpha-like 3 (EDEM3), mRNA."

"Homo sapiens endothelial differentiation-related factor 1 (EDF1), transcript variant alpha, mRNA."

"Homo sapiens endothelial differentiation, sphingolipid G-protein-coupled receptor, 1 (EDG1), mRNA."

"Homo sapiens endothelial differentiation, lysophosphatidic acid G-protein-coupled receptor, 4 (EDG4), mRNA."

"Homo sapiens endothelin 2 (EDN2), mRNA."

"Homo sapiens early endosome antigen 1, 162kD (EEA1), mRNA."

"Homo sapiens embryonic ectoderm development (EED), transcript variant 1, mRNA."

"Homo sapiens eukaryotic translation elongation factor 1 alpha 2 (EEF1A2), mRNA."

"Homo sapiens eukaryotic translation elongation factor 1 alpha-like 7 (EEF1AL7), non-coding RNA."

"Homo sapiens eukaryotic translation elongation factor 1 beta 2 (EEF1B2), transcript variant 2, mRNA."

"Homo sapiens eukaryotic translation elongation factor 1 delta (guanine nucleotide exchange protein) (EEF1D), mRNA."

"Homo sapiens eukaryotic translation elongation factor 1 gamma (EEF1G), mRNA. XM\_935976"

"Homo sapiens eukaryotic translation elongation factor 2 (EEF2), mRNA."

"Homo sapiens eukaryotic elongation factor-2 kinase (EEF2K), mRNA."

"Homo sapiens eukaryotic elongation factor, selenocysteine-tRNA-specific (EEFSEC), mRNA."

"Homo sapiens endonuclease/exonuclease/phosphatase family domain containing 1 (EEDP1), mRNA."

"Homo sapiens EF-hand calcium binding domain 3 (EFCAB3), mRNA."

"Homo sapiens EF-hand calcium binding domain 4A (EFCAB4A), mRNA."

"Homo sapiens EF-hand calcium binding domain 7 (EFCAB7), mRNA."

"Homo sapiens EGF-containing fibulin-like extracellular matrix protein 2 (EFEMP2), mRNA."

"Homo sapiens EF-hand domain family, member A1 (EFHA1), mRNA."

"Homo sapiens EF-hand domain (C-terminal) containing 1 (EFHC1), mRNA."

"Homo sapiens EF-hand domain family, member D1 (EFHD1), mRNA."

"Homo sapiens EF-hand domain family, member D2 (EFHD2), mRNA."

"Homo sapiens ephrin-A1 (EFNA1), transcript variant 1, mRNA."

"Homo sapiens ephrin-A2 (EFNA2), mRNA."

"Homo sapiens ephrin-A4 (EFNA4), transcript variant 1, mRNA."

"Homo sapiens ephrin-B1 (EFNB1), mRNA."

"Homo sapiens ephrin-B2 (EFNB2), mRNA."

"Homo sapiens ephrin-B3 (EFNB3), mRNA."

"Homo sapiens EFR3 homolog A (*S. cerevisiae*) (EFR3A), mRNA."

"Homo sapiens EFR3 homolog B (*S. cerevisiae*) (EFR3B), mRNA."

"Homo sapiens elongation factor Tu GTP binding domain containing 1 (EFTUD1), transcript variant 1, mRNA."

"Homo sapiens elongation factor Tu GTP binding domain containing 2 (EFTUD2), mRNA."

"Homo sapiens EGF-like-domain, multiple 7 (EGFL7), transcript variant 2, mRNA."

"Homo sapiens egl nine homolog 1 (*C. elegans*) (EGLN1), mRNA."

"Homo sapiens eosinophil granule ontogeny transcript (non-protein coding) (EGOT), non-coding RNA."

"Homo sapiens early growth response 1 (EGR1), mRNA."

"Homo sapiens early growth response 2 (Krox-20 homolog, *Drosophila*) (EGR2), mRNA."

"Homo sapiens early growth response 3 (EGR3), mRNA."  
"Homo sapiens EH domain binding protein 1 (EHBP1), mRNA."  
"Homo sapiens EH domain binding protein 1-like 1 (EHBP1L1), mRNA."  
"Homo sapiens EH-domain containing 1 (EHD1), mRNA."  
"Homo sapiens EH-domain containing 3 (EHD3), mRNA."  
"Homo sapiens EH-domain containing 4 (EHD4), mRNA."  
"Homo sapiens enoyl-Coenzyme A, hydratase/3-hydroxyacyl Coenzyme A dehydrogenase (EHD)  
"PREDICTED: Homo sapiens euchromatic histone-lysine N-methyltransferase 1, transcript varia  
"Homo sapiens euchromatic histone-lysine N-methyltransferase 2 (EHMT2), transcript variant N  
"Homo sapiens etoposide induced 2.4 mRNA (EI24), transcript variant 1, mRNA."  
"Homo sapiens EP300 interacting inhibitor of differentiation 1 (EID1), mRNA."  
"Homo sapiens EP300 interacting inhibitor of differentiation 2B (EID2B), mRNA."  
"Homo sapiens EP300 interacting inhibitor of differentiation 3 (EID3), mRNA."  
"Homo sapiens eukaryotic translation initiation factor 1 (EIF1), mRNA."  
"Homo sapiens eukaryotic translation initiation factor 1A domain containing (EIF1AD), mRNA."  
"PREDICTED: Homo sapiens eukaryotic translation initiation factor 1A, X-linked (EIF1AX), mRN  
"Homo sapiens eukaryotic translation initiation factor 1A, Y-linked (EIF1AY), mRNA."  
"Homo sapiens eukaryotic translation initiation factor 1B (EIF1B), mRNA."  
"Homo sapiens eukaryotic translation initiation factor 2A, 65kDa (EIF2A), mRNA."  
"Homo sapiens eukaryotic translation initiation factor 2-alpha kinase 1 (EIF2AK1), transcript vari  
"Homo sapiens eukaryotic translation initiation factor 2-alpha kinase 2 (EIF2AK2), mRNA."  
"Homo sapiens eukaryotic translation initiation factor 2-alpha kinase 3 (EIF2AK3), mRNA."  
"Homo sapiens eukaryotic translation initiation factor 2 alpha kinase 4 (EIF2AK4), mRNA."  
"Homo sapiens eukaryotic translation initiation factor 2B, subunit 1 alpha, 26kDa (EIF2B1), mRN  
"Homo sapiens eukaryotic translation initiation factor 2B, subunit 2 beta, 39kDa (EIF2B2), mRN  
"Homo sapiens eukaryotic translation initiation factor 2B, subunit 3 gamma, 58kDa (EIF2B3), m  
"Homo sapiens eukaryotic translation initiation factor 2B, subunit 4 delta, 67kDa (EIF2B4), trans  
"Homo sapiens eukaryotic translation initiation factor 2B, subunit 5 epsilon, 82kDa (EIF2B5), mF  
"Homo sapiens eukaryotic translation initiation factor 2C, 1 (EIF2C1), mRNA."  
"Homo sapiens eukaryotic translation initiation factor 2C, 2 (EIF2C2), mRNA."  
"Homo sapiens eukaryotic translation initiation factor 2C, 3 (EIF2C3), transcript variant 2, mRNA  
"Homo sapiens eukaryotic translation initiation factor 2C, 4 (EIF2C4), mRNA."  
"Homo sapiens eukaryotic translation initiation factor 2, subunit 1 alpha, 35kDa (EIF2S1), mRN/  
"Homo sapiens eukaryotic translation initiation factor 2, subunit 2 beta, 38kDa (EIF2S2), mRNA.  
"Homo sapiens eukaryotic translation initiation factor 2, subunit 3 gamma, 52kDa (EIF2S3), mRI  
"Homo sapiens eukaryotic translation initiation factor 3, subunit A (EIF3A), mRNA."  
"Homo sapiens eukaryotic translation initiation factor 3, subunit B (EIF3B), transcript variant 1, n  
"Homo sapiens eukaryotic translation initiation factor 3, subunit C (EIF3C), transcript variant 2, r  
"Homo sapiens eukaryotic translation initiation factor 3, subunit C-like (EIF3CL), mRNA."  
"Homo sapiens eukaryotic translation initiation factor 3, subunit D (EIF3D), mRNA."  
"Homo sapiens eukaryotic translation initiation factor 3, subunit E (EIF3E), mRNA."  
"Homo sapiens eukaryotic translation initiation factor 3, subunit F (EIF3F), mRNA."  
"Homo sapiens eukaryotic translation initiation factor 3, subunit G (EIF3G), mRNA."  
"Homo sapiens eukaryotic translation initiation factor 3, subunit H (EIF3H), mRNA."

"Homo sapiens eukaryotic translation initiation factor 3, subunit I (EIF3I), mRNA."  
"Homo sapiens eukaryotic translation initiation factor 3, subunit J (EIF3J), mRNA."  
"Homo sapiens eukaryotic translation initiation factor 3, subunit K (EIF3K), mRNA."  
"Homo sapiens eukaryotic translation initiation factor 3, subunit L (EIF3L), mRNA."  
"Homo sapiens eukaryotic translation initiation factor 3, subunit M (EIF3M), mRNA."  
"Homo sapiens eukaryotic translation initiation factor 4A, isoform 1 (EIF4A1), mRNA."  
"Homo sapiens eukaryotic translation initiation factor 4A, isoform 2 (EIF4A2), mRNA."  
"Homo sapiens eukaryotic translation initiation factor 4A, isoform 3 (EIF4A3), mRNA."  
"Homo sapiens eukaryotic translation initiation factor 4B (EIF4B), mRNA."  
"Homo sapiens eukaryotic translation initiation factor 4E (EIF4E), transcript variant 1, mRNA."  
"Homo sapiens eukaryotic translation initiation factor 4E family member 2 (EIF4E2), mRNA."  
"Homo sapiens eukaryotic translation initiation factor 4E family member 3 (EIF4E3), mRNA."  
"Homo sapiens eukaryotic translation initiation factor 4E binding protein 1 (EIF4EBP1), mRNA."  
"Homo sapiens eukaryotic translation initiation factor 4E binding protein 2 (EIF4EBP2), mRNA."  
"Homo sapiens eukaryotic translation initiation factor 4E binding protein 3 (EIF4EBP3), mRNA."  
"Homo sapiens eukaryotic translation initiation factor 4E nuclear import factor 1 (EIF4ENIF1), mRNA."  
"Homo sapiens eukaryotic translation initiation factor 4 gamma, 1 (EIF4G1), transcript variant 1, mRNA."  
"Homo sapiens eukaryotic translation initiation factor 4 gamma, 2 (EIF4G2), transcript variant 1, mRNA."  
"Homo sapiens eukaryotic translation initiation factor 4 gamma, 3 (EIF4G3), mRNA."  
"Homo sapiens eukaryotic translation initiation factor 4H (EIF4H), transcript variant 2, mRNA."  
"Homo sapiens eukaryotic translation initiation factor 5 (EIF5), transcript variant 2, mRNA."  
"Homo sapiens eukaryotic translation initiation factor 5A (EIF5A), mRNA."  
"Homo sapiens eukaryotic translation initiation factor 5A2 (EIF5A2), mRNA."  
"Homo sapiens eukaryotic translation initiation factor 6 (EIF6), transcript variant 4, mRNA."  
"Homo sapiens elastase 3A, pancreatic (ELA3A), mRNA."  
"Homo sapiens elaC homolog 1 (E. coli) (ELAC1), mRNA."  
"Homo sapiens elaC homolog 2 (E. coli) (ELAC2), mRNA."  
"Homo sapiens elastase, neutrophil expressed (ELANE), mRNA."  
"Homo sapiens ELAV (embryonic lethal, abnormal vision, Drosophila)-like 1 (Hu antigen R) (ELAVL1), mRNA."  
"Homo sapiens E74-like factor 1 (ets domain transcription factor) (ELF1), mRNA."  
"Homo sapiens E74-like factor 3 (ets domain transcription factor, epithelial-specific) (ELF3), mRNA."  
"Homo sapiens E74-like factor 4 (ets domain transcription factor) (ELF4), mRNA."  
"Homo sapiens extracellular leucine-rich repeat and fibronectin type III domain containing 2 (ELF3L2), mRNA."  
"Homo sapiens ELK1, member of ETS oncogene family (ELK1), mRNA."  
"Homo sapiens ELK3, ETS-domain protein (SRF accessory protein 2) (ELK3), mRNA."  
"Homo sapiens ELK4, ETS-domain protein (SRF accessory protein 1) (ELK4), transcript variant 1, mRNA."  
"Homo sapiens elongation factor RNA polymerase II (ELL), mRNA."  
"Homo sapiens elongation factor, RNA polymerase II, 2 (ELL2), mRNA."  
"Homo sapiens elongation factor RNA polymerase II-like 3 (ELL3), mRNA."  
"Homo sapiens engulfment and cell motility 1 (ELMO1), transcript variant 1, mRNA."  
"Homo sapiens engulfment and cell motility 2 (ELMO2), transcript variant 2, mRNA."  
"Homo sapiens engulfment and cell motility 3 (ELMO3), mRNA."  
"Homo sapiens ELMO/CED-12 domain containing 1 (ELMOD1), mRNA."  
"Homo sapiens ELMO/CED-12 domain containing 2 (ELMOD2), mRNA."

"Homo sapiens elastin (ELN), transcript variant 4, mRNA."  
"Homo sapiens elongation factor 1 homolog (*S. cerevisiae*) (ELOF1), mRNA."  
"Homo sapiens elongation of very long chain fatty acids (FEN1/Elo2, SUR4/Elo3, yeast)-like 2 (E  
"Homo sapiens elongation of very long chain fatty acids (FEN1/Elo2, SUR4/Elo3, yeast)-like 3 (E  
"Homo sapiens elongation of very long chain fatty acids (FEN1/Elo2, SUR4/Elo3, yeast)-like 4 (E  
"Homo sapiens ELOVL family member 5, elongation of long chain fatty acids (FEN1/Elo2, SUR4  
"Homo sapiens ELOVL family member 6, elongation of long chain fatty acids (FEN1/Elo2, SUR4  
"Homo sapiens ELOVL family member 7, elongation of long chain fatty acids (yeast) (ELOVL7),  
"Homo sapiens elongation protein 2 homolog (*S. cerevisiae*) (ELP2), mRNA."  
"Homo sapiens endozepine-like peptide 2 pseudogene (ELP2P), non-coding RNA."  
"Homo sapiens elongation protein 3 homolog (*S. cerevisiae*) (ELP3), mRNA."  
"Homo sapiens elongation protein 4 homolog (*S. cerevisiae*) (ELP4), mRNA."  
"Homo sapiens embigin homolog (mouse) (EMB), mRNA."  
"Homo sapiens emerin (Emery-Dreifuss muscular dystrophy) (EMD), mRNA."  
"Homo sapiens essential meiotic endonuclease 1 homolog 1 (*S. pombe*) (EME1), mRNA."  
"Homo sapiens EMG1 nucleolar protein homolog (*S. cerevisiae*) (EMG1), mRNA."  
"Homo sapiens elastin microfibril interfacier 2 (EMILIN2), mRNA."  
"Homo sapiens echinoderm microtubule associated protein like 1 (EML1), transcript variant 1, m  
"Homo sapiens echinoderm microtubule associated protein like 2 (EML2), mRNA."  
"Homo sapiens echinoderm microtubule associated protein like 3 (EML3), mRNA."  
"Homo sapiens echinoderm microtubule associated protein like 4 (EML4), mRNA."  
"Homo sapiens epithelial membrane protein 3 (EMP3), mRNA."  
"Homo sapiens egf-like module containing, mucin-like, hormone receptor-like 1 (EMR1), mRNA.  
"Homo sapiens egf-like module containing, mucin-like, hormone receptor-like 2 (EMR2), transcri  
"Homo sapiens egf-like module containing, mucin-like, hormone receptor-like 4 (EMR4), mRNA.  
"Homo sapiens egf-like module containing, mucin-like, hormone receptor-like 4 pseudogene (EM  
"Homo sapiens empty spiracles homolog 1 (*Drosophila*) (EMX1), mRNA."  
"Homo sapiens EMX2 opposite strand (non-protein coding) (EMX2OS), non-coding RNA."  
"Homo sapiens enabled homolog (*Drosophila*) (ENAH), transcript variant 2, mRNA."  
"Homo sapiens enamelin (ENAM), mRNA."  
"Homo sapiens ectodermal-neural cortex (with BTB-like domain) (ENC1), mRNA."  
"Homo sapiens endonuclease domain containing 1 (ENDOD1), mRNA."  
"Homo sapiens endonuclease G (ENDOG), nuclear gene encoding mitochondrial protein, mRNA/  
"Homo sapiens energy homeostasis associated (ENHO), mRNA."  
"Homo sapiens enolase 1, (alpha) (ENO1), mRNA."  
"Homo sapiens enolase 2 (gamma, neuronal) (ENO2), mRNA."  
"Homo sapiens enolase 3 (beta, muscle) (ENO3), transcript variant 1, mRNA."  
"Homo sapiens enolase-phosphatase 1 (ENOPH1), mRNA."  
"Homo sapiens enolase superfamily member 1 (ENOSF1), mRNA."  
"Homo sapiens ecto-NOX disulfide-thiol exchanger 1 (ENOX1), mRNA."  
"Homo sapiens ecto-NOX disulfide-thiol exchanger 2 (ENOX2), transcript variant 1, mRNA."  
"Homo sapiens ectonucleotide pyrophosphatase/phosphodiesterase 1 (ENPP1), mRNA."  
"Homo sapiens ectonucleotide pyrophosphatase/phosphodiesterase 2 (ENPP2), transcript varia  
"Homo sapiens ectonucleotide pyrophosphatase/phosphodiesterase 3 (ENPP3), mRNA."

"Homo sapiens ectonucleotide pyrophosphatase/phosphodiesterase 4 (putative function) (ENPF  
"Homo sapiens ectonucleotide pyrophosphatase/phosphodiesterase 5 (putative function) (ENPF  
"Homo sapiens endosulfine alpha (ENSA), transcript variant 8, mRNA."  
"Homo sapiens ENTH domain containing 1 (ENTHD1), mRNA."  
"Homo sapiens ectonucleoside triphosphate diphosphohydrolase 1 (ENTPD1), transcript variant  
"Homo sapiens ectonucleoside triphosphate diphosphohydrolase 2 (ENTPD2), transcript variant  
"Homo sapiens ectonucleoside triphosphate diphosphohydrolase 4 (ENTPD4), mRNA."  
"Homo sapiens ectonucleoside triphosphate diphosphohydrolase 6 (putative function) (ENTPD6  
"Homo sapiens enhancer of yellow 2 homolog (Drosophila) (ENY2), mRNA."  
"Homo sapiens eomesodermin homolog (Xenopus laevis) (EOMES), mRNA."  
"Homo sapiens E1A binding protein p400 (EP400), mRNA."  
"Homo sapiens endothelial PAS domain protein 1 (EPAS1), mRNA."  
"Homo sapiens erythrocyte membrane protein band 4.1 (elliptocytosis 1, RH-linked) (EPB41), tr  
"Homo sapiens erythrocyte membrane protein band 4.1-like 1 (EPB41L1), transcript variant 2, r  
"Homo sapiens erythrocyte membrane protein band 4.1-like 2 (EPB41L2), mRNA."  
"Homo sapiens erythrocyte membrane protein band 4.1 like 4B (EPB41L4B), transcript variant 1  
"Homo sapiens erythrocyte membrane protein band 4.1 like 5 (EPB41L5), mRNA."  
"Homo sapiens enhancer of polycomb homolog 1 (Drosophila) (EPC1), mRNA."  
"Homo sapiens enhancer of polycomb homolog 2 (Drosophila) (EPC2), mRNA."  
"Homo sapiens epithelial cell adhesion molecule (EPCAM), mRNA."  
"Homo sapiens ependymin related protein 1 (zebrafish) (EPDR1), mRNA."  
"Homo sapiens epithelial mitogen homolog (mouse) (EPGN), mRNA."  
"Homo sapiens EPH receptor A3 (EPHA3), transcript variant 2, mRNA."  
"Homo sapiens EPH receptor A4 (EPHA4), mRNA."  
"Homo sapiens EPH receptor B1 (EPHB1), mRNA."  
"Homo sapiens EPH receptor B4 (EPHB4), mRNA."  
"Homo sapiens EPH receptor B6 (EPHB6), mRNA."  
"Homo sapiens epoxide hydrolase 1, microsomal (xenobiotic) (EPHX1), mRNA."  
"Homo sapiens epoxide hydrolase 2, cytoplasmic (EPHX2), mRNA."  
"Homo sapiens epilepsy, progressive myoclonus type 2A, Lafora disease (laforin) (EPM2A), trar  
"Homo sapiens EPM2A (laforin) interacting protein 1 (EPM2AIP1), mRNA."  
"Homo sapiens epsin 1 (EPN1), mRNA."  
"Homo sapiens epsin 2 (EPN2), transcript variant 2, mRNA."  
"Homo sapiens erythropoietin receptor (EPOR), mRNA."  
"Homo sapiens B9 protein (EPPB9), mRNA."  
"Homo sapiens effector cell peptidase receptor 1 (non-protein coding) (EPR1), non-coding RNA  
"Homo sapiens glutamyl-prolyl-tRNA synthetase (EPRS), mRNA."  
"Homo sapiens epidermal growth factor receptor pathway substrate 15 (EPS15), transcript varia  
"Homo sapiens epidermal growth factor receptor pathway substrate 15-like 1 (EPS15L1), mRNA/  
"Homo sapiens epidermal growth factor receptor pathway substrate 8 (EPS8), mRNA."  
"PREDICTED: Homo sapiens EPS8-like 2, transcript variant 4 (EPS8L2), mRNA."  
"Homo sapiens epithelial stromal interaction 1 (breast) (EPSTI1), transcript variant 2, mRNA."  
"Homo sapiens Era G-protein-like 1 (E. coli) (ERAL1), mRNA."  
"Homo sapiens endoplasmic reticulum aminopeptidase 1 (ERAP1), transcript variant 2, mRNA."

"Homo sapiens endoplasmic reticulum aminopeptidase 2 (ERAP2), mRNA."

"Homo sapiens v-erb-b2 erythroblastic leukemia viral oncogene homolog 2, neuro/glioblastoma

"Homo sapiens v-erb-b2 erythroblastic leukemia viral oncogene homolog 3 (avian) (ERBB3), tra

"Homo sapiens excision repair cross-complementing rodent repair deficiency, complementation

"Homo sapiens excision repair cross-complementing rodent repair deficiency, complementation

"Homo sapiens excision repair cross-complementing rodent repair deficiency, complementation

"Homo sapiens excision repair cross-complementing rodent repair deficiency, complementation

"Homo sapiens excision repair cross-complementing rodent repair deficiency, complementation

"Homo sapiens excision repair cross-complementing rodent repair deficiency, complementation

"Homo sapiens excision repair cross-complementing rodent repair deficiency, complementation

"Homo sapiens endoplasmic reticulum-golgi intermediate compartment (ERGIC) 1 (ERGIC1), tr

"Homo sapiens ERGIC and golgi 3 (ERGIC3), transcript variant 1, mRNA."

"Homo sapiens enhancer of rudimentary homolog (Drosophila) (ERH), mRNA."

"Homo sapiens exoribonuclease 1 (ERI1), mRNA."

"Homo sapiens ERI1 exoribonuclease family member 2 (ERI2), transcript variant 1, mRNA."

"Homo sapiens glutamate-rich 1 (ERIC1), mRNA."

"Homo sapiens ER lipid raft associated 1 (ERLIN1), mRNA."

"Homo sapiens ER lipid raft associated 2 (ERLIN2), transcript variant 3, mRNA."

"Homo sapiens erythroblast membrane-associated protein (Scianna blood group) (ERMAP), tra

"Homo sapiens endoplasmic reticulum metalloproteinase 1 (ERMP1), mRNA."

"Homo sapiens endoplasmic reticulum to nucleus signalling 1 (ERN1), transcript variant 2, mRN

"Homo sapiens ERO1-like (S. cerevisiae) (ERO1L), mRNA."

"Homo sapiens ERO1-like beta (S. cerevisiae) (ERO1LB), mRNA."

"Homo sapiens endoplasmic reticulum protein 27 kDa (ERP27), mRNA."

"Homo sapiens endoplasmic reticulum protein 29 (ERP29), transcript variant 1, mRNA."

"Homo sapiens endoplasmic reticulum protein 44 (ERP44), mRNA."

"Homo sapiens ERBB receptor feedback inhibitor 1 (ERRFI1), mRNA."

"Homo sapiens endogenous retroviral sequence 3 (includes zinc finger protein H-plk/HPF9) (ER

"Homo sapiens endothelial cell adhesion molecule (ESAM), mRNA."

"Homo sapiens establishment of cohesion 1 homolog 1 (S. cerevisiae) (ESCO1), mRNA."

"Homo sapiens establishment of cohesion 1 homolog 2 (S. cerevisiae) (ESCO2), mRNA."

"Homo sapiens esterase D/formylglutathione hydrolase (ESD), mRNA."

"Homo sapiens endothelial cell-specific molecule 1 (ESM1), mRNA."

"Homo sapiens extra spindle pole bodies homolog 1 (S. cerevisiae) (ESPL1), mRNA."

"Homo sapiens espin (ESPN), mRNA."

"Homo sapiens espin-like (ESPNL), mRNA."

"Homo sapiens estrogen receptor 2 (ER beta) (ESR2), transcript variant b, mRNA."

"Homo sapiens estrogen-related receptor alpha (ESRRA), mRNA."

Homo sapiens estrogen-related receptor alpha pseudogene 2 (ESRRAP2) on chromosome 13.

"Homo sapiens estrogen-related receptor gamma (ESRRG), transcript variant 1, mRNA."

"Homo sapiens extended synaptotagmin-like protein 1 (ESYT1), mRNA."

"Homo sapiens Ewing tumor-associated antigen 1 (ETAA1), mRNA."

"Homo sapiens eukaryotic translation termination factor 1 (ETF1), mRNA."

"Homo sapiens electron-transfer-flavoprotein, alpha polypeptide (glutaric aciduria II) (ETFA), nu



"Homo sapiens electron-transfer-flavoprotein, beta polypeptide (ETFB), transcript variant 2, mRNA"

"Homo sapiens electron-transferring-flavoprotein dehydrogenase (ETFDH), nuclear gene encod

"Homo sapiens ethylmalonic encephalopathy 1 (ETHE1), nuclear gene encoding mitochondrial p

"Homo sapiens ethanolamine kinase 1 (ETNK1), transcript variant 1, mRNA."

"Homo sapiens ethanolamine kinase 2 (ETNK2), mRNA."

"Homo sapiens v-ets erythroblastosis virus E26 oncogene homolog 1 (avian) (ETS1), mRNA."

"Homo sapiens v-ets erythroblastosis virus E26 oncogene homolog 2 (avian) (ETS2), mRNA."

"Homo sapiens ets variant 3 (ETV3), transcript variant 2, mRNA."

"Homo sapiens ets variant 4 (ETV4), transcript variant 1, mRNA."

"Homo sapiens ets variant gene 5 (ets-related molecule) (ETV5), mRNA."

"Homo sapiens ets variant 6 (ETV6), mRNA."

"Homo sapiens ets variant 7 (ETV7), mRNA."

"Homo sapiens ecotropic viral integration site 1 (EVI1), mRNA."

"Homo sapiens ecotropic viral integration site 2A (EVI2A), transcript variant 1, mRNA."

"Homo sapiens ecotropic viral integration site 2B (EVI2B), mRNA."

"Homo sapiens ecotropic viral integration site 5 (EVI5), mRNA."

"Homo sapiens ecotropic viral integration site 5-like (EVI5L), mRNA."

"Homo sapiens Enah/Vasp-like (EVL), mRNA."

"Homo sapiens Ewing sarcoma breakpoint region 1 (EWSR1), transcript variant EWS, mRNA."

"Homo sapiens exonuclease 3'-5' domain containing 2 (EXD2), mRNA."

"Homo sapiens exonuclease 1 (EXO1), transcript variant 1, mRNA."

"Homo sapiens exocyst complex component 1 (EXOC1), transcript variant 1, mRNA."

"Homo sapiens exocyst complex component 2 (EXOC2), mRNA."

"Homo sapiens exocyst complex component 3 (EXOC3), mRNA."

"Homo sapiens exocyst complex component 4 (EXOC4), transcript variant 2, mRNA."

"Homo sapiens exocyst complex component 6 (EXOC6), transcript variant 2, mRNA."

"Homo sapiens exocyst complex component 7 (EXOC7), transcript variant 1, mRNA."

"Homo sapiens exocyst complex component 8 (EXOC8), mRNA."

"Homo sapiens exonuclease domain containing 1 (EXOD1), mRNA."

"Homo sapiens endo/exonuclease (5'-3'), endonuclease G-like (EXOG), mRNA."

"Homo sapiens exosome component 1 (EXOSC1), mRNA. XM\_944315 XM\_944318 XM\_94432

"Homo sapiens exosome component 10 (EXOSC10), transcript variant 1, mRNA."

"Homo sapiens exosome component 2 (EXOSC2), mRNA."

"Homo sapiens exosome component 3 (EXOSC3), transcript variant 1, mRNA."

"Homo sapiens exosome component 4 (EXOSC4), mRNA."

"Homo sapiens exosome component 5 (EXOSC5), mRNA."

"Homo sapiens exosome component 6 (EXOSC6), mRNA."

"Homo sapiens exosome component 7 (EXOSC7), mRNA."

"Homo sapiens exosome component 8 (EXOSC8), mRNA."

"Homo sapiens exosome component 9 (EXOSC9), transcript variant 1, mRNA."

"Homo sapiens exostoses (multiple) 1 (EXT1), mRNA."

"Homo sapiens exostoses (multiple) 2 (EXT2), transcript variant 1, mRNA."

"Homo sapiens exostoses (multiple)-like 2 (EXTL2), transcript variant 2, mRNA."

"Homo sapiens eyes absent homolog 3 (Drosophila) (EYA3), mRNA."

"Homo sapiens eyes shut homolog (Drosophila) (EYS), transcript variant 3, mRNA."  
"Homo sapiens enhancer of zeste homolog 1 (Drosophila) (EZH1), mRNA."  
"Homo sapiens enhancer of zeste homolog 2 (Drosophila) (EZH2), transcript variant 2, mRNA."  
"Homo sapiens ezrin (EZR), transcript variant 1, mRNA."  
"Homo sapiens F11 receptor (F11R), transcript variant 1, mRNA."  
"Homo sapiens coagulation factor XII (Hageman factor) (F12), mRNA."  
"Homo sapiens coagulation factor II (thrombin) receptor (F2R), mRNA."  
"Homo sapiens coagulation factor II (thrombin) receptor-like 3 (F2RL3), mRNA."  
"Homo sapiens coagulation factor V (proaccelerin, labile factor) (F5), mRNA."  
"Homo sapiens coagulation factor VIII-associated (intronic transcript) 1 (F8A1), mRNA."  
"Homo sapiens coagulation factor VIII-associated (intronic transcript) 3 (F8A3), mRNA."  
"Homo sapiens fatty acid amide hydrolase (FAAH), mRNA."  
"Homo sapiens fatty acid binding protein 1, liver (FABP1), mRNA."  
"Homo sapiens fatty acid binding protein 5 (psoriasis-associated) (FABP5), mRNA."  
"PREDICTED: Homo sapiens fatty acid binding protein 5-like 2 (FABP5L2), mRNA."  
"Homo sapiens fatty acid binding protein 5-like 3 (pseudogene) (FABP5L3), non-coding RNA."  
"PREDICTED: Homo sapiens fatty acid binding protein 5-like 7 (FABP5L7), mRNA."  
"Homo sapiens fatty acid binding protein 6, ileal (FABP6), transcript variant 2, mRNA."  
"Homo sapiens fatty acid binding protein 7, brain (FABP7), mRNA."  
"Homo sapiens Fas (TNFRSF6)-associated via death domain (FADD), mRNA."  
"Homo sapiens fatty acid desaturase 1 (FADS1), mRNA."  
"Homo sapiens fatty acid desaturase 2 (FADS2), mRNA."  
"Homo sapiens fatty acid desaturase 3 (FADS3), mRNA."  
"Homo sapiens fatty acid desaturase domain family, member 6 (FADS6), mRNA."  
"Homo sapiens Fas (TNFRSF6) associated factor 1 (FAF1), mRNA."  
"Homo sapiens Fas associated factor family member 2 (FAF2), mRNA."  
"Homo sapiens fumarylacetoacetate hydrolase (fumarylacetoacetase) (FAH), mRNA."  
"Homo sapiens fumarylacetoacetate hydrolase domain containing 1 (FAHD1), nuclear gene enc  
"Homo sapiens fumarylacetoacetate hydrolase domain containing 2A (FAHD2A), mRNA."  
"Homo sapiens fumarylacetoacetate hydrolase domain containing 2B (FAHD2B), mRNA."  
"Homo sapiens Fas apoptotic inhibitory molecule (FAIM), transcript variant 4, mRNA."  
"Homo sapiens Fas apoptotic inhibitory molecule 2 (FAIM2), mRNA."  
"Homo sapiens Fas apoptotic inhibitory molecule 3 (FAIM3), mRNA."  
"Homo sapiens fetal Alzheimer antigen (FALZ), transcript variant 2, mRNA."  
"Homo sapiens family with sequence similarity 100, member B (FAM100B), mRNA."  
"Homo sapiens family with sequence similarity 101, member A (FAM101A), mRNA."  
"Homo sapiens family with sequence similarity 101, member B (FAM101B), mRNA."  
"Homo sapiens family with sequence similarity 102, member A (FAM102A), transcript variant 1,  
"Homo sapiens family with sequence similarity 102, member B (FAM102B), mRNA."  
"Homo sapiens family with sequence similarity 103, member A1 (FAM103A1), mRNA."  
"Homo sapiens family with sequence similarity 104, member A (FAM104A), mRNA."  
"Homo sapiens family with sequence similarity 104, member B (FAM104B), mRNA."  
"Homo sapiens family with sequence similarity 105, member A (FAM105A), mRNA."  
"Homo sapiens family with sequence similarity 105, member B (FAM105B), mRNA."

"Homo sapiens family with sequence similarity 107, member B (FAM107B), mRNA."  
"PREDICTED: Homo sapiens family with sequence similarity 108, member A2 (FAM108A2), mR  
"Homo sapiens family with sequence similarity 108, member A3 (FAM108A3), mRNA."  
"Homo sapiens family with sequence similarity 108, member B1 (FAM108B1), transcript variant  
"Homo sapiens family with sequence similarity 108, member C1 (FAM108C1), mRNA."  
"Homo sapiens family with sequence similarity 109, member A (FAM109A), mRNA."  
"Homo sapiens family with sequence similarity 10, member A4 pseudogene (FAM10A4), non-co  
"Homo sapiens family with sequence similarity 10, member A7 (pseudogene) (FAM10A7), non-c  
"Homo sapiens family with sequence similarity 110, member A (FAM110A), transcript variant 3,  
"Homo sapiens family with sequence similarity 111, member A (FAM111A), transcript variant 1,  
"Homo sapiens family with sequence similarity 111, member B (FAM111B), mRNA."  
"Homo sapiens family with sequence similarity 113, member A (FAM113A), mRNA."  
"Homo sapiens family with sequence similarity 113, member B (FAM113B), mRNA."  
"Homo sapiens family with sequence similarity 114, member A2 (FAM114A2), mRNA."  
"Homo sapiens family with sequence similarity 115, member A (FAM115A), mRNA."  
"PREDICTED: Homo sapiens family with sequence similarity 116, member A (FAM116A), mRN  
"Homo sapiens family with sequence similarity 116, member B (FAM116B), mRNA."  
"Homo sapiens family with sequence similarity 117, member A (FAM117A), mRNA."  
"Homo sapiens family with sequence similarity 117, member B (FAM117B), mRNA."  
"Homo sapiens family with sequence similarity 118, member B (FAM118B), mRNA."  
"Homo sapiens family with sequence similarity 119, member A (FAM119A), transcript variant 2,  
"Homo sapiens family with sequence similarity 119, member B (FAM119B), transcript variant 1,  
"Homo sapiens family with sequence similarity 120A (FAM120A), mRNA."  
"Homo sapiens family with sequence similarity 120A opposite strand (FAM120AOS), mRNA."  
"Homo sapiens family with sequence similarity 120B (FAM120B), mRNA."  
"Homo sapiens family with sequence similarity 122A (FAM122A), mRNA."  
"Homo sapiens family with sequence similarity 122B (FAM122B), mRNA."  
"Homo sapiens family with sequence similarity 123B (FAM123B), mRNA."  
"Homo sapiens family with sequence similarity 123C (FAM123C), transcript variant 2, mRNA."  
"Homo sapiens family with sequence similarity 125, member A (FAM125A), mRNA."  
"Homo sapiens family with sequence similarity 125, member B (FAM125B), transcript variant 2,  
"Homo sapiens family with sequence similarity 126, member A (FAM126A), mRNA."  
"Homo sapiens family with sequence similarity 126, member B (FAM126B), mRNA."  
"Homo sapiens family with sequence similarity 127, member A (FAM127A), mRNA."  
"Homo sapiens family with sequence similarity 128, member A (FAM128A), mRNA."  
"Homo sapiens family with sequence similarity 128, member B (FAM128B), mRNA."  
"Homo sapiens family with sequence similarity 129, member B (FAM129B), transcript variant 2,  
"Homo sapiens family with sequence similarity 129, member C (FAM129C), mRNA."  
"Homo sapiens family with sequence similarity 131, member A (FAM131A), mRNA."  
"Homo sapiens family with sequence similarity 131, member C (FAM131C), mRNA."  
"Homo sapiens family with sequence similarity 133, member B (FAM133B), transcript variant 2,  
"Homo sapiens family with sequence similarity 134, member B (FAM134B), transcript variant 1,  
"Homo sapiens family with sequence similarity 134, member C (FAM134C), mRNA."  
"Homo sapiens family with sequence similarity 135, member A (FAM135A), mRNA."

"Homo sapiens family with sequence similarity 136, member A (FAM136A), mRNA."  
"Homo sapiens family with sequence similarity 136, member B (FAM136B), mRNA."  
"Homo sapiens family with sequence similarity 13, member A (FAM13A), transcript variant 1, mF  
"Homo sapiens family with sequence similarity 13, member B (FAM13B), transcript variant 2, mF  
"Homo sapiens family with sequence similarity 149, member B1 (FAM149B1), mRNA."  
"Homo sapiens family with sequence similarity 14, member B (FAM14B), mRNA."  
"Homo sapiens family with sequence similarity 150, member B (FAM150B), mRNA."  
"Homo sapiens family with sequence similarity 151, member A (FAM151A), mRNA."  
"Homo sapiens family with sequence similarity 153, member B (FAM153B), mRNA."  
"Homo sapiens family with sequence similarity 154, member B (FAM154B), mRNA."  
"Homo sapiens family with sequence similarity 156, member A (FAM156A), mRNA."  
"Homo sapiens family with sequence similarity 156, member B (FAM156B), mRNA."  
"Homo sapiens family with sequence similarity 158, member A (FAM158A), mRNA."  
"Homo sapiens family with sequence similarity 159, member A (FAM159A), mRNA."  
"Homo sapiens family with sequence similarity 160, member A2 (FAM160A2), transcript variant  
"Homo sapiens family with sequence similarity 160, member B1 (FAM160B1), transcript variant  
"Homo sapiens family with sequence similarity 160, member B2 (FAM160B2), mRNA."  
"Homo sapiens family with sequence similarity 161, member A (FAM161A), mRNA. XM\_934538  
"Homo sapiens family with sequence similarity 161, member B (FAM161B), mRNA."  
"Homo sapiens family with sequence similarity 162, member B (FAM162B), mRNA."  
"Homo sapiens family with sequence similarity 164, member A (FAM164A), mRNA."  
"Homo sapiens family with sequence similarity 164, member C (FAM164C), transcript variant 2,  
"Homo sapiens family with sequence similarity 165, member B (FAM165B), mRNA."  
"Homo sapiens family with sequence similarity 167, member A (FAM167A), mRNA."  
"Homo sapiens family with sequence similarity 167, member B (FAM167B), mRNA."  
"Homo sapiens family with sequence similarity 169, member A (FAM169A), mRNA."  
"Homo sapiens family with sequence similarity 170, member A (FAM170A), mRNA."  
"Homo sapiens family with sequence similarity 171, member A1 (FAM171A1), mRNA."  
"Homo sapiens family with sequence similarity 172, member A (FAM172A), mRNA."  
"Homo sapiens family with sequence similarity 173, member A (FAM173A), mRNA."  
"Homo sapiens family with sequence similarity 174, member A (FAM174A), mRNA."  
"Homo sapiens family with sequence similarity 175, member A (FAM175A), mRNA."  
"Homo sapiens family with sequence similarity 175, member B (FAM175B), mRNA."  
"Homo sapiens family with sequence similarity 177, member A1 (FAM177A1), transcript variant  
"Homo sapiens family with sequence similarity 177, member B (FAM177B), mRNA."  
"Homo sapiens family with sequence similarity 178, member A (FAM178A), transcript variant 2,  
"Homo sapiens family with sequence similarity 179, member B (FAM179B), mRNA."  
"Homo sapiens family with sequence similarity 184, member A (FAM184A), transcript variant 1,  
"Homo sapiens family with sequence similarity 184, member B (FAM184B), mRNA."  
"Homo sapiens family with sequence similarity 186, member B (FAM186B), mRNA."  
"Homo sapiens family with sequence similarity 188, member A (FAM188A), mRNA."  
"Homo sapiens family with sequence similarity 189, member B (FAM189B), transcript variant 2,  
"Homo sapiens family with sequence similarity 18, member B (FAM18B), mRNA."  
"Homo sapiens family with sequence similarity 190, member B (FAM190B), mRNA."

"Homo sapiens family with sequence similarity 193, member A (FAM193A), mRNA."  
"Homo sapiens family with sequence similarity 193, member B (FAM193B), transcript variant 1,  
"Homo sapiens family with sequence similarity 195, member A (FAM195A), mRNA."  
"Homo sapiens family with sequence similarity 195, member B (FAM195B), transcript variant 1,  
"Homo sapiens family with sequence similarity 197, Y-linked, member 2 (FAM197Y2), non-codir  
"Homo sapiens family with sequence similarity 19 (chemokine (C-C motif)-like), member A5 (FA  
"Homo sapiens family with sequence similarity 20, member B (FAM20B), mRNA."  
"Homo sapiens family with sequence similarity 21, member A (FAM21A), mRNA."  
"Homo sapiens family with sequence similarity 21, member C (FAM21C), mRNA."  
"PREDICTED: Homo sapiens family with sequence similarity 21, member D (FAM21D), mRNA."  
"PREDICTED: Homo sapiens family with sequence similarity 22, member C (FAM22C), mRNA."  
"PREDICTED: Homo sapiens family with sequence similarity 22, member F (FAM22F), mRNA."  
"Homo sapiens family with sequence similarity 23, member B (FAM23B), mRNA."  
"Homo sapiens family with sequence similarity 24, member B (FAM24B), mRNA."  
"Homo sapiens family with sequence similarity 25, member C (FAM25C), mRNA."  
"Homo sapiens family with sequence similarity 26, member A (FAM26A), mRNA."  
"Homo sapiens family with sequence similarity 26, member E (FAM26E), mRNA."  
"Homo sapiens family with sequence similarity 26, member F (FAM26F), mRNA."  
"Homo sapiens family with sequence similarity 27, member A (FAM27A), non-coding RNA."  
"Homo sapiens family with sequence similarity 27-like (FAM27L), mRNA."  
"PREDICTED: Homo sapiens family with sequence similarity 30, member A (FAM30A), mRNA."  
"Homo sapiens family with sequence similarity 32, member A (FAM32A), mRNA."  
"PREDICTED: Homo sapiens family with sequence similarity 35, member A (FAM35A), mRNA."  
"Homo sapiens family with sequence similarity 36, member A (FAM36A), mRNA."  
"Homo sapiens family with sequence similarity 38, member A (FAM38A), mRNA."  
"Homo sapiens family with sequence similarity 38, member B (FAM38B), mRNA."  
"Homo sapiens family with sequence similarity 3, member A (FAM3A), mRNA."  
"Homo sapiens family with sequence similarity 3, member B (FAM3B), transcript variant 2, mRN  
"Homo sapiens family with sequence similarity 3, member C (FAM3C), transcript variant 2, mRN  
"Homo sapiens family with sequence similarity 40, member A (FAM40A), mRNA."  
"PREDICTED: Homo sapiens family with sequence similarity 41, member C (FAM41C), mRNA."  
"Homo sapiens family with sequence similarity 43, member A (FAM43A), mRNA."  
"Homo sapiens family with sequence similarity 43, member B (FAM43B), mRNA."  
"Homo sapiens family with sequence similarity 44, member B (FAM44B), mRNA."  
"Homo sapiens family with sequence similarity 45, member A (FAM45A), mRNA."  
"Homo sapiens family with sequence similarity 45, member B (FAM45B), mRNA."  
"Homo sapiens family with sequence similarity 46, member A (FAM46A), mRNA."  
"Homo sapiens family with sequence similarity 46, member B (FAM46B), mRNA."  
"Homo sapiens family with sequence similarity 46, member C (FAM46C), mRNA."  
"Homo sapiens family with sequence similarity 49, member A (FAM49A), mRNA."  
"Homo sapiens family with sequence similarity 49, member B (FAM49B), mRNA."  
"Homo sapiens family with sequence similarity 50, member A (FAM50A), mRNA."  
"Homo sapiens family with sequence similarity 50, member B (FAM50B), mRNA."  
"Homo sapiens family with sequence similarity 53, member A (FAM53A), mRNA."

"Homo sapiens family with sequence similarity 53, member B (FAM53B), mRNA."  
"Homo sapiens family with sequence similarity 53, member C (FAM53C), mRNA."  
"Homo sapiens family with sequence similarity 54, member A (FAM54A), transcript variant 1, mF"  
"Homo sapiens family with sequence similarity 54, member B (FAM54B), transcript variant 1, mF"  
"Homo sapiens family with sequence similarity 55, member C (FAM55C), mRNA."  
"Homo sapiens family with sequence similarity 57, member A (FAM57A), mRNA."  
"Homo sapiens family with sequence similarity 57, member B (FAM57B), mRNA."  
"Homo sapiens family with sequence similarity 58, member A (FAM58A), mRNA."  
"Homo sapiens family with sequence similarity 59, member A (FAM59A), mRNA."  
"PREDICTED: Homo sapiens family with sequence similarity 59, member B (FAM59B), mRNA."  
"Homo sapiens family with sequence similarity 5, member B (FAM5B), mRNA."  
"Homo sapiens family with sequence similarity 5, member C (FAM5C), mRNA."  
"Homo sapiens family with sequence similarity 60, member A (FAM60A), transcript variant 2, mF"  
"Homo sapiens family with sequence similarity 62 (C2 domain containing) member B (FAM62B);"  
"Homo sapiens family with sequence similarity 62 (C2 domain containing), member C (FAM62C);"  
"Homo sapiens family with sequence similarity 63, member A (FAM63A), transcript variant 1, mF"  
"Homo sapiens family with sequence similarity 64, member A (FAM64A), mRNA."  
"Homo sapiens family with sequence similarity 65, member B (FAM65B), transcript variant 2, mF"  
"Homo sapiens family with sequence similarity 65, member C (FAM65C), mRNA."  
"Homo sapiens family with sequence similarity 69, member A (FAM69A), mRNA."  
"PREDICTED: Homo sapiens family with sequence similarity 69, member B (FAM69B), mRNA."  
"Homo sapiens family with sequence similarity 70, member A (FAM70A), mRNA."  
"PREDICTED: Homo sapiens family with sequence similarity 70, member B (FAM70B), mRNA."  
"Homo sapiens family with sequence similarity 71, member E1 (FAM71E1), mRNA."  
"Homo sapiens family with sequence similarity 72, member A (FAM72A), mRNA."  
"Homo sapiens family with sequence similarity 72, member B (FAM72B), mRNA."  
"PREDICTED: Homo sapiens family with sequence similarity 72, member D (FAM72D), mRNA."  
"Homo sapiens family with sequence similarity 73, member A (FAM73A), mRNA."  
"Homo sapiens family with sequence similarity 73, member B (FAM73B), mRNA."  
"Homo sapiens family with sequence similarity 75, member A2 (FAM75A2), mRNA."  
"Homo sapiens family with sequence similarity 75, member A3 (FAM75A3), mRNA."  
"PREDICTED: Homo sapiens misc\_RNA (FAM75A6), miscRNA."  
"Homo sapiens family with sequence similarity 75, member B (FAM75B), mRNA."  
"PREDICTED: Homo sapiens misc\_RNA (FAM75C1), miscRNA."  
"Homo sapiens family with sequence similarity 76, member A (FAM76A), mRNA."  
"Homo sapiens family with sequence similarity 78, member A (FAM78A), mRNA."  
"Homo sapiens family with sequence similarity 78, member B (FAM78B), mRNA."  
"PREDICTED: Homo sapiens family with sequence similarity 7, member A1, transcript variant 4"  
"PREDICTED: Homo sapiens family with sequence similarity 7, member A3, transcript variant 2"  
"Homo sapiens family with sequence similarity 80, member A (FAM80A), mRNA."  
"Homo sapiens family with sequence similarity 80, member B (FAM80B), mRNA."  
"Homo sapiens family with sequence similarity 81, member A (FAM81A), mRNA."  
"Homo sapiens family with sequence similarity 82, member A2 (FAM82A2), mRNA."  
"Homo sapiens family with sequence similarity 83, member D (FAM83D), mRNA."

"Homo sapiens family with sequence similarity 83, member H (FAM83H), mRNA."

"Homo sapiens family with sequence similarity 84, member B (FAM84B), mRNA."

"Homo sapiens family with sequence similarity 86, member A (FAM86A), transcript variant 2, mRNA."

"Homo sapiens family with sequence similarity 86, member B1 (FAM86B1), transcript variant 1, mRNA."

"Homo sapiens family with sequence similarity 86, member C (FAM86C), transcript variant 2, mRNA."

"Homo sapiens family with sequence similarity 86, member D (FAM86D), non-coding RNA."

"PREDICTED: Homo sapiens family with sequence similarity 87, member A (FAM87A), mRNA."

"Homo sapiens family with sequence similarity 89, member A (FAM89A), mRNA."

"Homo sapiens family with sequence similarity 89, member B (FAM89B), transcript variant 3, mRNA."

"Homo sapiens family with sequence similarity 8, member A1 (FAM8A1), mRNA."

"Homo sapiens family with sequence similarity 90, member A1 (FAM90A1), mRNA."

"PREDICTED: Homo sapiens family with sequence similarity 90, member A10 (FAM90A10), mRNA."

"PREDICTED: Homo sapiens family with sequence similarity 90, member A17 (FAM90A17), mRNA."

"PREDICTED: Homo sapiens family with sequence similarity 90, member A20 (FAM90A20), mRNA."

"PREDICTED: Homo sapiens family with sequence similarity 90, member A2 pseudogene (FAM90A2), mRNA."

"PREDICTED: Homo sapiens family with sequence similarity 90, member A6 pseudogene (FAM90A6), mRNA."

"Homo sapiens family with sequence similarity 90, member A7 (FAM90A7), mRNA."

"Homo sapiens family with sequence similarity 91, member A1 (FAM91A1), mRNA."

"Homo sapiens family with sequence similarity 92, member A1 (FAM92A1), mRNA."

"Homo sapiens family with sequence similarity 96, member A (FAM96A), transcript variant 2, mRNA."

"Homo sapiens family with sequence similarity 96, member B (FAM96B), mRNA."

"Homo sapiens family with sequence similarity 98, member A (FAM98A), mRNA."

"Homo sapiens family with sequence similarity 98, member B (FAM98B), mRNA."

"Homo sapiens family with sequence similarity 98, member C (FAM98C), mRNA."

"Homo sapiens family with sequence similarity 9, member B (FAM9B), mRNA."

"Homo sapiens Fanconi anemia, complementation group A (FANCA), transcript variant 1, mRNA."

"Homo sapiens Fanconi anemia, complementation group B (FANCB), transcript variant 1, mRNA."

"Homo sapiens Fanconi anemia, complementation group D2 (FANCD2), transcript variant 2, mRNA."

"Homo sapiens Fanconi anemia, complementation group E (FANCE), mRNA."

"Homo sapiens Fanconi anemia, complementation group F (FANCF), mRNA."

"Homo sapiens Fanconi anemia, complementation group G (FANCG), mRNA."

"Homo sapiens Fanconi anemia, complementation group I (FANCI), transcript variant 2, mRNA."

"Homo sapiens Fanconi anemia, complementation group L (FANCL), mRNA."

"Homo sapiens fatty acyl CoA reductase 1 (FAR1), mRNA."

"Homo sapiens FERM, RhoGEF (ARHGEF) and pleckstrin domain protein 1 (chondrocyte-derived) (FARP1), mRNA."

"Homo sapiens FERM, RhoGEF and pleckstrin domain protein 2 (FARP2), mRNA."

"Homo sapiens phenylalanyl-tRNA synthetase 2, mitochondrial (FARS2), nuclear gene encoding mitochondrial protein (FARS2), mRNA."

"Homo sapiens phenylalanyl-tRNA synthetase, alpha subunit (FARSA), mRNA."

"Homo sapiens phenylalanine-tRNA synthetase-like, beta subunit (FARSLB), mRNA."

"Homo sapiens Fas (TNF receptor superfamily, member 6) (FAS), transcript variant 3, mRNA."

"Homo sapiens Fas ligand (TNF superfamily, member 6) (FASLG), mRNA."

"Homo sapiens fatty acid synthase (FASN), mRNA."

"Homo sapiens Fas-activated serine/threonine kinase (FASTK), transcript variant 4, mRNA."

"Homo sapiens FAST kinase domains 1 (FASTKD1), mRNA."

"Homo sapiens FAST kinase domains 2 (FASTKD2), mRNA."  
"Homo sapiens FAST kinase domains 3 (FASTKD3), mRNA."  
"Homo sapiens FAST kinase domains 5 (FASTKD5), mRNA."  
"Homo sapiens FAT tumor suppressor homolog 1 (Drosophila) (FAT1), mRNA."  
"Homo sapiens Finkel-Biskis-Reilly murine sarcoma virus (FBR-MuSV) ubiquitously expressed (  
"Homo sapiens fibrillarin (FBL), mRNA."  
"Homo sapiens fibulin 1 (FBLN1), transcript variant D, mRNA."  
"Homo sapiens fibulin 2 (FBLN2), transcript variant 1, mRNA."  
"Homo sapiens fibulin 5 (FBLN5), mRNA."  
"Homo sapiens fibulin 7 (FBLN7), mRNA."  
"Homo sapiens fructose-1,6-bisphosphatase 1 (FBP1), mRNA."  
"Homo sapiens fructose-1,6-bisphosphatase 2 (FBP2), mRNA."  
"Homo sapiens fibrosin (FBR5), mRNA."  
"Homo sapiens F-box and leucine-rich repeat protein 10 (FBXL10), transcript variant 1, mRNA."  
"Homo sapiens F-box and leucine-rich repeat protein 11 (FBXL11), mRNA."  
"Homo sapiens F-box and leucine-rich repeat protein 12 (FBXL12), mRNA."  
"Homo sapiens F-box and leucine-rich repeat protein 13 (FBXL13), mRNA."  
"Homo sapiens F-box and leucine-rich repeat protein 14 (FBXL14), mRNA."  
"Homo sapiens F-box and leucine-rich repeat protein 15 (FBXL15), mRNA."  
"Homo sapiens F-box and leucine-rich repeat protein 16 (FBXL16), mRNA."  
"Homo sapiens F-box and leucine-rich repeat protein 18 (FBXL18), mRNA."  
"Homo sapiens F-box and leucine-rich repeat protein 19 (FBXL19), mRNA."  
"Homo sapiens F-box and leucine-rich repeat protein 2 (FBXL2), mRNA."  
"Homo sapiens F-box and leucine-rich repeat protein 20 (FBXL20), mRNA."  
"Homo sapiens F-box and leucine-rich repeat protein 21 (FBXL21), mRNA."  
"Homo sapiens F-box and leucine-rich repeat protein 22 (FBXL22), mRNA."  
"Homo sapiens F-box and leucine-rich repeat protein 3 (FBXL3), mRNA."  
"Homo sapiens F-box and leucine-rich repeat protein 6 (FBXL6), transcript variant 1, mRNA."  
"Homo sapiens F-box and leucine-rich repeat protein 8 (FBXL8), mRNA."  
"Homo sapiens F-box protein 10 (FBXO10), mRNA."  
"Homo sapiens F-box protein 11 (FBXO11), transcript variant 2, mRNA."  
"Homo sapiens F-box protein 15 (FBXO15), mRNA."  
"Homo sapiens F-box protein 16 (FBXO16), mRNA."  
"Homo sapiens F-box protein 17 (FBXO17), transcript variant 1, mRNA."  
"Homo sapiens F-box protein 2 (FBXO2), mRNA."  
"Homo sapiens F-box protein 21 (FBXO21), transcript variant 1, mRNA."  
"Homo sapiens F-box protein 22 (FBXO22), transcript variant 1, mRNA."  
"Homo sapiens F-box protein 25 (FBXO25), transcript variant 2, mRNA."  
"Homo sapiens F-box protein 28 (FBXO28), mRNA."  
"Homo sapiens F-box protein 3 (FBXO3), transcript variant 1, mRNA."  
"Homo sapiens F-box protein 30 (FBXO30), mRNA."  
"Homo sapiens F-box protein 31 (FBXO31), mRNA."  
"Homo sapiens F-box protein 32 (FBXO32), transcript variant 2, mRNA."  
"Homo sapiens F-box protein 33 (FBXO33), mRNA."



"Homo sapiens F-box protein 34 (FBXO34), mRNA."  
"Homo sapiens F-box protein 36 (FBXO36), mRNA."  
"Homo sapiens F-box protein 38 (FBXO38), transcript variant 2, mRNA."  
"Homo sapiens F-box protein 4 (FBXO4), transcript variant 2, mRNA."  
"Homo sapiens F-box protein 41 (FBXO41), mRNA."  
"Homo sapiens F-box protein 42 (FBXO42), mRNA."  
"Homo sapiens F-box protein 44 (FBXO44), transcript variant 4, mRNA."  
"Homo sapiens F-box protein 45 (FBXO45), mRNA."  
"PREDICTED: Homo sapiens F-box protein 46, transcript variant 5 (FBXO46), mRNA."  
"Homo sapiens F-box protein 48 (FBXO48), mRNA."  
"Homo sapiens F-box protein 5 (FBXO5), mRNA."  
"Homo sapiens F-box protein 6 (FBXO6), mRNA."  
"Homo sapiens F-box protein 7 (FBXO7), transcript variant 2, mRNA."  
"Homo sapiens F-box protein 8 (FBXO8), mRNA."  
"Homo sapiens F-box and WD repeat domain containing 11 (FBXW11), transcript variant 1, mRNA."  
"Homo sapiens F-box and WD-40 domain protein 2 (FBXW2), mRNA."  
"Homo sapiens F-box and WD repeat domain containing 4 (FBXW4), mRNA."  
"Homo sapiens F-box and WD-40 domain protein 5 (FBXW5), transcript variant 3, mRNA."  
"Homo sapiens F-box and WD repeat domain containing 7 (FBXW7), transcript variant 2, mRNA."  
"Homo sapiens F-box and WD repeat domain containing 8 (FBXW8), transcript variant 2, mRNA."  
"Homo sapiens F-box and WD repeat domain containing 9 (FBXW9), mRNA."  
"Homo sapiens Fc fragment of IgA, receptor for (FCAR), transcript variant 9, mRNA."  
"Homo sapiens Fc fragment of IgE, high affinity I, receptor for; gamma polypeptide (FCER1G), mRNA."  
"Homo sapiens Fc fragment of IgE, low affinity II, receptor for (CD23) (FCER2), mRNA."  
"Homo sapiens FCF1 small subunit (SSU) processome component homolog (S. cerevisiae) (FCF1), mRNA."  
"Homo sapiens Fc fragment of IgG binding protein (FCGBP), mRNA."  
"Homo sapiens Fc fragment of IgG, low affinity IIa, receptor (CD32) (FCGR2A), mRNA."  
"PREDICTED: Homo sapiens Fc fragment of IgG, low affinity IIb, receptor (CD32) (FCGR2B), mRNA."  
"Homo sapiens Fc fragment of IgG, low affinity IIc, receptor for (CD32) (FCGR2C), transcript variant 1, mRNA."  
"Homo sapiens Fc fragment of IgG, receptor, transporter, alpha (FCGRT), transcript variant 1, mRNA."  
"Homo sapiens FCH domain only 1 (FCHO1), mRNA."  
"Homo sapiens FCH domain only 2 (FCHO2), mRNA."  
"Homo sapiens FCH and double SH3 domains 2 (FCHSD2), mRNA."  
"Homo sapiens ficolin (collagen/fibrinogen domain containing) 1 (FCN1), mRNA."  
"Homo sapiens Fc receptor-like 1 (FCRL1), mRNA."  
"Homo sapiens Fc receptor-like 2 (FCRL2), transcript variant 1, mRNA."  
"Homo sapiens Fc receptor-like 3 (FCRL3), mRNA."  
"Homo sapiens Fc receptor-like 4 (FCRL4), mRNA."  
"Homo sapiens Fc receptor-like 5 (FCRL5), mRNA."  
"Homo sapiens Fc receptor-like 6 (FCRL6), mRNA."  
"Homo sapiens Fc receptor-like A (FCRLA), mRNA."  
"Homo sapiens Fc receptor-like B (FCRLB), mRNA."  
"Homo sapiens farnesyl-diphosphate farnesyltransferase 1 (FDFT1), mRNA."  
"Homo sapiens farnesyl diphosphate synthase (farnesyl pyrophosphate synthetase, dimethylallyl)

"Homo sapiens MGC44478 (FDPSL2A), non-coding RNA."

"Homo sapiens ferredoxin 1 (FDX1), nuclear gene encoding mitochondrial protein, mRNA."

"Homo sapiens ferredoxin 1-like (FDX1L), mRNA."

"Homo sapiens ferredoxin-fold anticodon binding domain containing 1 (FDXACB1), mRNA."

"Homo sapiens ferrochelatase (protoporphyrin) (FECH), nuclear gene encoding mitochondrial protein, mRNA."

"Homo sapiens fem-1 homolog a (C. elegans) (FEM1A), mRNA."

"Homo sapiens fem-1 homolog b (C. elegans) (FEM1B), mRNA."

"Homo sapiens fem-1 homolog c (C. elegans) (FEM1C), mRNA."

"Homo sapiens flap structure-specific endonuclease 1 (FEN1), mRNA."

"Homo sapiens fer (fps/fes related) tyrosine kinase (FER), mRNA."

Homo sapiens fer-1-like 4 (C. elegans) (FER1L4) on chromosome 20.

"Homo sapiens fermitin family homolog 2 (Drosophila) (FERMT2), mRNA."

"Homo sapiens fermitin family homolog 3 (Drosophila) (FERMT3), transcript variant URP2SF, mRNA."

"Homo sapiens feline sarcoma oncogene (FES), mRNA."

"Homo sapiens fasciculation and elongation protein zeta 1 (zygin I) (FEZ1), transcript variant 2, mRNA."

"Homo sapiens fasciculation and elongation protein zeta 2 (zygin II) (FEZ2), transcript variant 1, mRNA."

"Homo sapiens FYVE, RhoGEF and PH domain containing 1 (FGD1), mRNA."

"Homo sapiens FYVE, RhoGEF and PH domain containing 2 (FGD2), mRNA."

"Homo sapiens FYVE, RhoGEF and PH domain containing 3 (FGD3), transcript variant 2, mRNA."

"Homo sapiens FYVE, RhoGEF and PH domain containing 6 (FGD6), mRNA."

"Homo sapiens fibroblast growth factor 11 (FGF11), mRNA."

"Homo sapiens fibroblast growth factor 17 (FGF17), mRNA."

"Homo sapiens fibroblast growth factor 18 (FGF18), mRNA."

"Homo sapiens fibroblast growth factor 2 (basic) (FGF2), mRNA."

"Homo sapiens fibroblast growth factor 20 (FGF20), mRNA."

"Homo sapiens fibroblast growth factor 6 (FGF6), mRNA."

"Homo sapiens fibroblast growth factor 9 (glia-activating factor) (FGF9), mRNA."

"Homo sapiens fibroblast growth factor binding protein 3 (FGFBP3), mRNA."

"Homo sapiens FGFR1 oncogene partner (FGFR1OP), transcript variant 1, mRNA."

"Homo sapiens FGFR1 oncogene partner 2 (FGFR1OP2), mRNA."

"Homo sapiens fibroblast growth factor receptor 3 (achondroplasia, thanatophoric dwarfism) (FGFR3), transcript variant 1, mRNA."

"Homo sapiens fibroblast growth factor receptor 4 (FGFR4), transcript variant 2, mRNA."

"Homo sapiens fibroblast growth factor receptor-like 1 (FGFRL1), transcript variant 3, mRNA."

"Homo sapiens FGGY carbohydrate kinase domain containing (FGGY), transcript variant 2, mRNA."

"Homo sapiens Gardner-Rasheed feline sarcoma viral (v-fgr) oncogene homolog (FGR), transcript variant 1, mRNA."

"Homo sapiens fumarate hydratase (FH), nuclear gene encoding mitochondrial protein, mRNA."

"Homo sapiens FH2 domain containing 1 (FHDC1), mRNA."

"Homo sapiens fragile histidine triad gene (FHIT), mRNA."

"Homo sapiens four and a half LIM domains 1 (FHL1), mRNA."

"Homo sapiens four and a half LIM domains 2 (FHL2), transcript variant 4, mRNA."

"Homo sapiens four and a half LIM domains 3 (FHL3), mRNA."

"Homo sapiens formin homology 2 domain containing 1 (FHOD1), mRNA."

"Homo sapiens formin homology 2 domain containing 3 (FHOD3), mRNA."

"Homo sapiens fibrinogen C domain containing 1 (FIBCD1), mRNA."

"Homo sapiens fibroblast growth factor (acidic) intracellular binding protein (FIBP), transcript var  
"Homo sapiens FIC domain containing (FICD), mRNA."  
"Homo sapiens FIG4 homolog (S. cerevisiae) (FIG4), mRNA."  
"Homo sapiens fidgetin-like 1 (FIGNL1), transcript variant 1, mRNA."  
"Homo sapiens fidgetin-like 2 (FIGNL2), mRNA."  
"Homo sapiens filamin A interacting protein 1 (FILIP1), mRNA."  
"Homo sapiens filamin A interacting protein 1-like (FILIP1L), transcript variant 2, mRNA."  
"Homo sapiens FIS (FIS), mRNA."  
"Homo sapiens fission 1 (mitochondrial outer membrane) homolog (S. cerevisiae) (FIS1), nuclea  
"Homo sapiens fat-inducing transcript 1 (FIT1), mRNA."  
"Homo sapiens FLT3-interacting zinc finger 1 (FIZ1), mRNA."  
"Homo sapiens four jointed box 1 (Drosophila) (FJX1), mRNA."  
"Homo sapiens FK506 binding protein 11, 19 kDa (FKBP11), mRNA."  
"Homo sapiens FK506 binding protein 14, 22 kDa (FKBP14), mRNA."  
"Homo sapiens FK506 binding protein 15, 133kDa (FKBP15), mRNA."  
"Homo sapiens FK506 binding protein 1A, 12kDa (FKBP1A), transcript variant 12B, mRNA."  
"Homo sapiens FK506 binding protein 1B, 12.6 kDa (FKBP1B), transcript variant 2, mRNA."  
"Homo sapiens FK506 binding protein 2, 13kDa (FKBP2), transcript variant 1, mRNA."  
"Homo sapiens FK506 binding protein 4, 59kDa (FKBP4), mRNA."  
"Homo sapiens FK506 binding protein 5 (FKBP5), mRNA."  
"Homo sapiens FK506 binding protein 7 (FKBP7), mRNA."  
"Homo sapiens FK506 binding protein 9-like (FKBP9L), mRNA."  
"Homo sapiens FK506 binding protein like (FKBPL), mRNA."  
"Homo sapiens fukutin related protein (FKRP), transcript variant 1, mRNA."  
"Homo sapiens actin-like protein (FKSG30), mRNA."  
"Homo sapiens fukutin (FKTN), transcript variant 2, mRNA."  
"Homo sapiens folliculin (FLCN), transcript variant 1, mRNA."  
"Homo sapiens Friend leukemia virus integration 1 (FLI1), mRNA."  
"Homo sapiens flightless I homolog (Drosophila) (FLII), mRNA."  
"Homo sapiens hypothetical protein FLJ10081 (FLJ10081), mRNA."  
"Homo sapiens hypothetical protein FLJ10213 (FLJ10213), mRNA."  
"PREDICTED: Homo sapiens FLJ10246 (FLJ10246), misc RNA."  
"Homo sapiens hypothetical protein FLJ10357 (FLJ10357), mRNA."  
"Homo sapiens hypothetical protein FLJ10374 (FLJ10374), mRNA."  
"Homo sapiens hypothetical protein FLJ10781 (FLJ10781), mRNA."  
"Homo sapiens hypothetical protein FLJ10803 (FLJ10803), mRNA."  
"Homo sapiens hypothetical protein FLJ10916 (FLJ10916), mRNA."  
"Homo sapiens hypothetical protein FLJ10986 (FLJ10986), mRNA."  
"PREDICTED: Homo sapiens hypothetical protein FLJ12688 (FLJ12688), mRNA."  
"Homo sapiens hypothetical protein FLJ12949 (FLJ12949), transcript variant 1, mRNA."  
"Homo sapiens hypothetical protein FLJ13305 (FLJ13305), mRNA. XM\_934538 XM\_934541 XM  
"Homo sapiens hypothetical protein FLJ13614 (FLJ13614), mRNA."  
"PREDICTED: Homo sapiens hypothetical protein FLJ14712 (FLJ14712), mRNA."  
"Homo sapiens FLJ16323 protein (FLJ16323), mRNA."

"Homo sapiens FLJ16331 protein (FLJ16331), mRNA."  
"PREDICTED: Homo sapiens similar to RIKEN cDNA 5830406J20 (FLJ16369), mRNA."  
"PREDICTED: Homo sapiens FLJ16686 protein (FLJ16686), mRNA."  
"Homo sapiens similar to cyclin I (FLJ16793), mRNA."  
"PREDICTED: Homo sapiens hypothetical LOC90024 (FLJ20021), mRNA."  
"Homo sapiens hypothetical protein FLJ20254 (FLJ20254), mRNA."  
"Homo sapiens RNA-binding protein (FLJ20273), mRNA."  
"PREDICTED: Homo sapiens hypothetical protein FLJ20444, transcript variant 2 (FLJ20444), m  
"Homo sapiens hypothetical protein FLJ20489 (FLJ20489), mRNA."  
"Homo sapiens hypothetical protein FLJ20628 (FLJ20628), mRNA."  
"Homo sapiens hypothetical protein FLJ20674 (FLJ20674), mRNA."  
"Homo sapiens hypothetical protein FLJ20699 (FLJ20699), mRNA."  
"Homo sapiens hypothetical protein FLJ20718 (FLJ20718), transcript variant 1, mRNA."  
"Homo sapiens hypothetical protein FLJ20850 (FLJ20850), mRNA."  
"Homo sapiens hypothetical protein FLJ20920 (FLJ20920), mRNA."  
"Homo sapiens hypothetical protein FLJ21511 (FLJ21511), mRNA."  
"PREDICTED: Homo sapiens hypothetical protein FLJ21767, transcript variant 2 (FLJ21767), m  
"Homo sapiens hypothetical protein FLJ21839 (FLJ21839), mRNA."  
"Homo sapiens endo-beta-N-acetylglucosaminidase (FLJ21865), mRNA."  
"Homo sapiens hypothetical protein FLJ21986 (FLJ21986), mRNA."  
"PREDICTED: Homo sapiens hypothetical protein FLJ22184 (FLJ22184), mRNA."  
"PREDICTED: Homo sapiens hypothetical protein FLJ22222 (FLJ22222), mRNA."  
"PREDICTED: Homo sapiens hypothetical gene supported by AK026100, transcript variant 2 (Fl  
"PREDICTED: Homo sapiens hypothetical protein FLJ22531, transcript variant 3 (FLJ22531), m  
"PREDICTED: Homo sapiens hypothetical protein FLJ22639 (FLJ22639), misc RNA."  
"Homo sapiens hypothetical protein FLJ22662 (FLJ22662), mRNA."  
"Homo sapiens hypothetical protein FLJ22795 (FLJ22795), mRNA."  
"Homo sapiens hypothetical protein FLJ23754 (FLJ23754), mRNA."  
"Homo sapiens hypothetical protein FLJ23834 (FLJ23834), mRNA."  
"Homo sapiens uncharacterized serine/threonine-protein kinase SgK494 (FLJ25006), mRNA."  
"PREDICTED: Homo sapiens similar to hypothetical protein FLJ25976 (FLJ25363), mRNA."  
"PREDICTED: Homo sapiens hypothetical protein FLJ25404, transcript variant 2 (FLJ25404), m  
"Homo sapiens hypothetical protein FLJ25715 (FLJ25715), mRNA."  
"Homo sapiens hypothetical locus FLJ25758 (FLJ25758), mRNA."  
"PREDICTED: Homo sapiens hypothetical protein LOC375127 (FLJ26056), mRNA."  
"Homo sapiens FLJ26850 protein (FLJ26850), mRNA."  
"PREDICTED: Homo sapiens hypothetical gene supported by AK130864 (FLJ27354), mRNA."  
"PREDICTED: Homo sapiens FLJ27465 protein, transcript variant 2 (FLJ27465), mRNA."  
"Homo sapiens hypothetical protein FLJ30058 (FLJ30058), mRNA."  
"PREDICTED: Homo sapiens similar to hypothetical protein A230046P18; cDNA sequence BC0  
"PREDICTED: Homo sapiens hypothetical protein FLJ30679 (FLJ30679), mRNA."  
"PREDICTED: Homo sapiens hypothetical protein FLJ31306 (FLJ31306), mRNA."  
"Homo sapiens FLJ31568 protein (FLJ31568), mRNA."  
"PREDICTED: Homo sapiens misc\_RNA (FLJ32063), miscRNA."

"Homo sapiens hypothetical protein FLJ32252 (FLJ32252), mRNA."  
"PREDICTED: Homo sapiens hypothetical protein FLJ32569 (FLJ32569), mRNA."  
"Homo sapiens hypothetical protein FLJ32658 (FLJ32658), mRNA."  
"Homo sapiens golgin-like hypothetical protein LOC440321 (FLJ32679), mRNA."  
"PREDICTED: Homo sapiens hypothetical protein FLJ32810, transcript variant 2 (FLJ32810), m  
"Homo sapiens hypothetical protein FLJ32955 (FLJ32955), mRNA."  
"Homo sapiens hypothetical protein FLJ33387 (FLJ33387), mRNA."  
"Homo sapiens hypothetical protein FLJ33534 (FLJ33534), mRNA."  
"Homo sapiens hypothetical protein FLJ33590 (FLJ33590), mRNA."  
"Homo sapiens hypothetical LOC644873 (FLJ33630), non-coding RNA."  
"Homo sapiens hypothetical protein FLJ33706 (FLJ33706), mRNA."  
"PREDICTED: Homo sapiens hypothetical protein FLJ33996 (FLJ33996), misc RNA."  
"PREDICTED: Homo sapiens misc\_RNA (FLJ34503), miscRNA."  
"PREDICTED: Homo sapiens hypothetical protein FLJ34969 (FLJ34969), mRNA."  
"Homo sapiens hypothetical LOC401491 (FLJ35024), non-coding RNA."  
"Homo sapiens hypothetical protein FLJ35220 (FLJ35220), mRNA."  
"Homo sapiens hypothetical LOC255031 (FLJ35390), transcript variant 1, non-coding RNA."  
"Homo sapiens FLJ35767 protein (FLJ35767), mRNA."  
"PREDICTED: Homo sapiens hypothetical protein FLJ35785, transcript variant 2 (FLJ35785), m  
"Homo sapiens hypothetical protein FLJ35801 (FLJ35801), mRNA."  
"Homo sapiens FLJ35816 protein (FLJ35816), mRNA."  
"PREDICTED: Homo sapiens hypothetical protein FLJ36032 (FLJ36032), mRNA."  
"Homo sapiens likely ortholog of MEF2-activating SAP transcriptional regulator (FLJ36070), mR  
"PREDICTED: Homo sapiens hypothetical protein FLJ36131, transcript variant 2 (FLJ36131), m  
"Homo sapiens hypothetical protein FLJ36166 (FLJ36166), mRNA. XM\_934944 XM\_934947 XM  
"PREDICTED: Homo sapiens hypothetical LOC647115 (FLJ36848), mRNA."  
"Homo sapiens hypothetical protein FLJ37078 (FLJ37078), mRNA."  
"PREDICTED: Homo sapiens hypothetical protein FLJ37201 (FLJ37201), misc RNA."  
"Homo sapiens hypothetical protein FLJ37396 (FLJ37396), mRNA."  
"Homo sapiens hypothetical protein FLJ37587 (FLJ37587), mRNA."  
"PREDICTED: Homo sapiens hypothetical protein FLJ37673 (FLJ37673), mRNA."  
"Homo sapiens hypothetical protein FLJ38377 (FLJ38377), mRNA."  
"Homo sapiens hypothetical protein FLJ38482 (FLJ38482), mRNA."  
"PREDICTED: Homo sapiens hypothetical LOC651430 (FLJ38576), mRNA."  
"Homo sapiens FLJ38717 protein (FLJ38717), mRNA."  
"PREDICTED: Homo sapiens misc\_RNA (FLJ38723), miscRNA."  
"PREDICTED: Homo sapiens hypothetical protein FLJ38773 (FLJ38773), misc RNA."  
"PREDICTED: Homo sapiens hypothetical protein FLJ38969 (FLJ38969), mRNA."  
"PREDICTED: Homo sapiens misc\_RNA (FLJ39632), miscRNA."  
"Homo sapiens hypothetical protein FLJ39653 (FLJ39653), mRNA."  
"Homo sapiens hypothetical protein FLJ39827 (FLJ39827), mRNA."  
"Homo sapiens protein phosphatase 1B-like (FLJ40125), mRNA."  
"PREDICTED: Homo sapiens FLJ40296 protein (FLJ40296), mRNA."  
"PREDICTED: Homo sapiens similar to protein immuno-reactive with anti-PTH polyclonal antibo

"PREDICTED: Homo sapiens hypothetical protein FLJ40473 (FLJ40473), misc RNA."  
"PREDICTED: Homo sapiens hypothetical protein FLJ40722, transcript variant 4 (FLJ40722), m  
"PREDICTED: Homo sapiens similar to Seminal vesicle protein 7 precursor (SVS VII) (Caltrin) (C  
"PREDICTED: Homo sapiens FLJ41352 protein, transcript variant 11 (FLJ41352), mRNA."  
"PREDICTED: Homo sapiens misc\_RNA (FLJ41484), miscRNA."  
"Homo sapiens FLJ41603 protein (FLJ41603), mRNA."  
"Homo sapiens FLJ42177 protein (FLJ42177), mRNA."  
"PREDICTED: Homo sapiens misc\_RNA (FLJ42289), miscRNA."  
"Homo sapiens FLJ42291 protein (FLJ42291), mRNA."  
"Homo sapiens FLJ42393 protein (FLJ42393), mRNA."  
"PREDICTED: Homo sapiens similar to echinoderm microtubule associated protein like 5, transc  
"Homo sapiens hypothetical LOC645644 (FLJ42627), non-coding RNA."  
"Homo sapiens FLJ42957 protein (FLJ42957), mRNA."  
"PREDICTED: Homo sapiens hypothetical protein LOC642987 (FLJ43080), mRNA."  
"Homo sapiens FLJ43093 protein (FLJ43093), mRNA."  
"Homo sapiens FLJ43276 protein (FLJ43276), mRNA."  
"PREDICTED: Homo sapiens hypothetical protein FLJ43663, transcript variant 2 (FLJ43663), m  
"Homo sapiens FLJ43752 protein (FLJ43752), mRNA."  
"Homo sapiens FLJ43870 protein (FLJ43870), mRNA."  
"PREDICTED: Homo sapiens similar to RIKEN cDNA 4930433111 gene (FLJ43987), mRNA."  
"Homo sapiens hypothetical protein LOC641737 (FLJ44124), mRNA."  
"PREDICTED: Homo sapiens FLJ44216 protein (FLJ44216), mRNA."  
"Homo sapiens FLJ44290 protein (FLJ44290), mRNA."  
"Homo sapiens FLJ44313 protein (FLJ44313), mRNA."  
"PREDICTED: Homo sapiens hypothetical LOC645460 (FLJ44342), miscRNA."  
"Homo sapiens FLJ45244 protein (FLJ45244), mRNA."  
"Homo sapiens FLJ45337 protein (FLJ45337), mRNA."  
"Homo sapiens FLJ45422 protein (FLJ45422), mRNA."  
"Homo sapiens FLJ45832 protein (FLJ45832), mRNA."  
"Homo sapiens FLJ46020 protein (FLJ46020), mRNA."  
"Homo sapiens FLJ46026 protein (FLJ46026), mRNA."  
"Homo sapiens FLJ46156 protein (FLJ46156), mRNA."  
"Homo sapiens FLJ46230 protein (FLJ46230), mRNA."  
"PREDICTED: Homo sapiens hypothetical gene supported by AK128161 (FLJ46284), mRNA."  
"Homo sapiens hypothetical protein LOC649598 (FLJ46309), mRNA."  
"PREDICTED: Homo sapiens FLJ46361 protein (FLJ46361), mRNA."  
"Homo sapiens FLJ46836 protein (FLJ46836), mRNA."  
"PREDICTED: Homo sapiens hypothetical gene supported by AK128874; BC071813 (FLJ46906  
"PREDICTED: Homo sapiens similar to transmembrane protein 106A, transcript variant 3 (FLJ7  
"PREDICTED: Homo sapiens hypothetical protein LOC440465 (FLJ90757), misc RNA."  
"Homo sapiens filamin A, alpha (actin binding protein 280) (FLNA), mRNA."  
"Homo sapiens filamin B, beta (actin binding protein 278) (FLNB), mRNA."  
"Homo sapiens filamin C, gamma (actin binding protein 280) (FLNC), mRNA."  
"Homo sapiens flotillin 1 (FLOT1), mRNA."

"Homo sapiens flotillin 2 (FLOT2), mRNA."  
"Homo sapiens fibronectin leucine rich transmembrane protein 2 (FLRT2), mRNA."  
"Homo sapiens fms-related tyrosine kinase 3 ligand (FLT3LG), mRNA."  
"Homo sapiens feline leukemia virus subgroup C cellular receptor family, member 2 (FLVCR2),  
"Homo sapiens FLYWCH family member 2 (FLYWCH2), mRNA."  
"Homo sapiens formin 1 (FMN1), mRNA."  
"Homo sapiens formin-like 1 (FMNL1), mRNA."  
"Homo sapiens formin-like 2 (FMNL2), mRNA."  
"Homo sapiens formin-like 3 (FMNL3), transcript variant 1, mRNA."  
"Homo sapiens flavin containing monooxygenase 1 (FMO1), mRNA."  
"Homo sapiens flavin containing monooxygenase 4 (FMO4), mRNA."  
"Homo sapiens flavin containing monooxygenase 5 (FMO5), mRNA."  
"Homo sapiens fibromodulin (FMOD), mRNA."  
"Homo sapiens fructosamine-3-kinase-related protein (FN3KRP), mRNA."  
"Homo sapiens formin binding protein 1 (FNBP1), mRNA."  
"Homo sapiens formin binding protein 1-like (FNBP1L), transcript variant 1, mRNA."  
"Homo sapiens formin binding protein 4 (FNBP4), mRNA."  
"Homo sapiens fibronectin type III domain containing 1 (FNDC1), mRNA."  
"Homo sapiens fibronectin type III domain containing 3B (FNDC3B), transcript variant 2, mRNA."  
"Homo sapiens fibronectin type III domain containing 5 (FNDC5), mRNA."  
"Homo sapiens fibronectin type III domain containing 7 (FNDC7), mRNA."  
"Homo sapiens folliculin interacting protein 1 (FNIP1), transcript variant 2, mRNA."  
"Homo sapiens folliculin interacting protein 2 (FNIP2), mRNA."  
"Homo sapiens farnesyltransferase, CAAX box, alpha (FNTA), transcript variant 3, mRNA."  
"Homo sapiens farnesyltransferase, CAAX box, beta (FNTB), mRNA."  
"Homo sapiens folate receptor 2 (fetal) (FOLR2), mRNA."  
"Homo sapiens folate receptor 3 (gamma) (FOLR3), mRNA."  
"Homo sapiens v-fos FBJ murine osteosarcoma viral oncogene homolog (FOS), mRNA."  
"Homo sapiens FBJ murine osteosarcoma viral oncogene homolog B (FOSB), mRNA."  
"Homo sapiens forkhead box A3 (FOXA3), mRNA."  
"Homo sapiens forkhead box C1 (FOXC1), mRNA."  
"Homo sapiens forkhead box C2 (MFH-1, mesenchyme forkhead 1) (FOXC2), mRNA."  
"Homo sapiens forkhead box D1 (FOXD1), mRNA."  
"Homo sapiens forkhead box D2 (FOXD2), mRNA."  
"Homo sapiens forkhead box D4-like 4 (FOXD4L4), mRNA."  
"Homo sapiens forkhead box D4-like 5 (FOXD4L5), mRNA."  
"Homo sapiens forkhead box F2 (FOXF2), mRNA."  
"Homo sapiens forkhead box I2 (FOXI2), mRNA."  
"Homo sapiens forkhead box J1 (FOXJ1), mRNA."  
"Homo sapiens forkhead box J2 (FOXJ2), mRNA."  
"Homo sapiens forkhead box J3 (FOXJ3), mRNA."  
"Homo sapiens forkhead box K1 (FO XK1), mRNA."  
"Homo sapiens forkhead box L1 (FOXL1), mRNA."  
"Homo sapiens forkhead box L2 (FOXL2), mRNA."

"Homo sapiens forkhead box M1 (FOXM1), transcript variant 3, mRNA."  
"Homo sapiens forkhead box N1 (FOXN1), mRNA."  
"Homo sapiens forkhead box N2 (FOXN2), mRNA."  
"Homo sapiens forkhead box O1 (FOXO1), mRNA."  
"Homo sapiens forkhead box O3 (FOXO3), transcript variant 1, mRNA."  
"Homo sapiens forkhead box O4 (FOXO4), mRNA."  
"Homo sapiens forkhead box P1 (FOXP1), transcript variant 1, mRNA."  
"Homo sapiens forkhead box P3 (FOXP3), mRNA."  
"Homo sapiens forkhead box P4 (FOXP4), transcript variant 1, mRNA."  
"Homo sapiens forkhead box R1 (FOXR1), mRNA."  
"Homo sapiens FAD-dependent oxidoreductase domain containing 1 (FOXRED1), mRNA."  
"Homo sapiens FAD-dependent oxidoreductase domain containing 2 (FOXRED2), mRNA."  
"Homo sapiens formyl peptide receptor 1 (FPR1), mRNA."  
"Homo sapiens FGF receptor activating protein 1 (FRAG1), mRNA."  
"Homo sapiens FK506 binding protein 12-rapamycin associated protein 1 (FRAP1), mRNA."  
"Homo sapiens frequently rearranged in advanced T-cell lymphomas (FRAT1), mRNA."  
"Homo sapiens frequently rearranged in advanced T-cell lymphomas 2 (FRAT2), mRNA."  
"Homo sapiens FSHD region gene 1 (FRG1), mRNA."  
"Homo sapiens FSHD region gene 2 family, member C (FRG2C), mRNA."  
"Homo sapiens fyn-related kinase (FRK), mRNA."  
"Homo sapiens FERM domain containing 3 (FRMD3), mRNA."  
"Homo sapiens FERM domain containing 5 (FRMD5), transcript variant 2, mRNA."  
"Homo sapiens FERM domain containing 6 (FRMD6), transcript variant 2, mRNA."  
"Homo sapiens FERM domain containing 8 (FRMD8), mRNA."  
"Homo sapiens ferric-chelate reductase 1 (FRRS1), mRNA."  
"Homo sapiens fibroblast growth factor receptor substrate 3 (FRS3), mRNA."  
"Homo sapiens FRY-like (FRYL), mRNA."  
"Homo sapiens frizzled-related protein (FRZB), mRNA."  
"Homo sapiens fibrinogen silencer binding protein (FSBP), mRNA."  
"Homo sapiens fibrous sheath CABYR binding protein (FSCB), mRNA."  
"Homo sapiens fascin homolog 1, actin-bundling protein (Strongylocentrotus purpuratus) (FSCN  
"Homo sapiens fascin homolog 3, actin-bundling protein, testicular (Strongylocentrotus purpurat  
"Homo sapiens fibronectin type III and SPRY domain containing 1 (FSD1), mRNA."  
"Homo sapiens fibronectin type III and SPRY domain containing 2 (FSD2), mRNA."  
"Homo sapiens fibrous sheath interacting protein 1 (FSIP1), mRNA."  
"Homo sapiens follistatin (FST), transcript variant FST317, mRNA."  
"Homo sapiens follistatin-like 3 (secreted glycoprotein) (FSTL3), mRNA."  
"Homo sapiens follistatin-like 5 (FSTL5), mRNA."  
"Homo sapiens ferritin, heavy polypeptide 1 (FTH1), mRNA."  
"Homo sapiens ferritin, heavy polypeptide-like 11 (FTHL11) on chromosome 8."  
"Homo sapiens ferritin, heavy polypeptide-like 12 (FTHL12) on chromosome 9."  
"PREDICTED: Homo sapiens misc\_RNA (FTHL16), miscRNA."  
"Homo sapiens ferritin, heavy polypeptide-like 2 (FTHL2) on chromosome 1."  
"Homo sapiens ferritin, heavy polypeptide-like 3 (FTHL3), non-coding RNA."



"Homo sapiens ferritin, heavy polypeptide-like 7 (FTHL7) on chromosome 13."

"Homo sapiens ferritin, heavy polypeptide-like 8 (FTHL8) on chromosome X."

"Homo sapiens ferritin, light polypeptide (FTL), mRNA."

"Homo sapiens fat mass and obesity associated (FTO), mRNA."

"Homo sapiens FtsJ homolog 1 (E. coli) (FTSJ1), transcript variant 1, mRNA."

"Homo sapiens FtsJ homolog 2 (E. coli) (FTSJ2), transcript variant 2, mRNA."

"Homo sapiens FtsJ homolog 3 (E. coli) (FTSJ3), mRNA."

"Homo sapiens FtsJ methyltransferase domain containing 1 (FTSJD1), transcript variant 1, mRNA."

"Homo sapiens FtsJ methyltransferase domain containing 2 (FTSJD2), mRNA."

"Homo sapiens far upstream element (FUSE) binding protein 1 (FUBP1), mRNA."

"Homo sapiens far upstream element (FUSE) binding protein 3 (FUBP3), mRNA. XM\_945904 X"

"Homo sapiens fucosidase, alpha-L- 1, tissue (FUCA1), mRNA."

"Homo sapiens fucokinase (FUK), mRNA."

"Homo sapiens FUN14 domain containing 1 (FUNDC1), mRNA."

"Homo sapiens furin (paired basic amino acid cleaving enzyme) (FURIN), mRNA."

"Homo sapiens fusion (involved in t(12;16) in malignant liposarcoma) (FUS), transcript variant 1."

"Homo sapiens fucosyltransferase 11 (alpha (1,3) fucosyltransferase) (FUT11), mRNA."

"Homo sapiens fucosyltransferase 4 (alpha (1,3) fucosyltransferase, myeloid-specific) (FUT4), n"

"Homo sapiens fucosyltransferase 6 (alpha (1,3) fucosyltransferase) (FUT6), transcript variant 1"

"Homo sapiens fuzzy homolog (Drosophila) (FUZ), mRNA."

"Homo sapiens follicular lymphoma variant translocation 1 (FVT1), mRNA."

"Homo sapiens fracture callus 1 homolog (rat) (FXC1), nuclear gene encoding mitochondrial prc"

"Homo sapiens frataxin (FXN), nuclear gene encoding mitochondrial protein, transcript variant 1"

"Homo sapiens fragile X mental retardation, autosomal homolog 1 (FXR1), transcript variant 3, r"

"Homo sapiens fragile X mental retardation, autosomal homolog 2 (FXR2), mRNA."

"Homo sapiens FXYD domain containing ion transport regulator 1 (FXYD1), transcript variant a,

"Homo sapiens FXYD domain containing ion transport regulator 4 (FXYD4), mRNA."

"Homo sapiens FXYD domain containing ion transport regulator 5 (FXYD5), transcript variant 2,

"Homo sapiens FXYD domain containing ion transport regulator 6 (FXYD6), mRNA."

"Homo sapiens FXYD domain containing ion transport regulator 7 (FXYD7), mRNA."

"Homo sapiens FYVE and coiled-coil domain containing 1 (FYCO1), mRNA."

"Homo sapiens FYN oncogene related to SRC, FGR, YES (FYN), transcript variant 2, mRNA."

"Homo sapiens forty-two-three domain containing 1 (FYTTD1), transcript variant 1, mRNA."

"Homo sapiens frizzled homolog 1 (Drosophila) (FZD1), mRNA."

"Homo sapiens frizzled homolog 2 (Drosophila) (FZD2), mRNA."

"Homo sapiens frizzled homolog 3 (Drosophila) (FZD3), mRNA."

"Homo sapiens frizzled homolog 4 (Drosophila) (FZD4), mRNA."

"Homo sapiens frizzled homolog 5 (Drosophila) (FZD5), mRNA."

"Homo sapiens frizzled homolog 9 (Drosophila) (FZD9), mRNA."

"Homo sapiens fizzy/cell division cycle 20 related 1 (Drosophila) (FZR1), mRNA."

"Homo sapiens GTPase activating protein (SH3 domain) binding protein 1 (G3BP1), transcript v"

"Homo sapiens GTPase activating protein (SH3 domain) binding protein 2 (G3BP2), transcript v"

"Homo sapiens glucose 6 phosphatase, catalytic, 3 (G6PC3), mRNA."

"Homo sapiens glucose-6-phosphate dehydrogenase (G6PD), transcript variant 1, mRNA."

"Homo sapiens glucosidase, alpha; acid (GAA), transcript variant 1, mRNA."  
"Homo sapiens GRB2-associated binding protein 1 (GAB1), transcript variant 1, mRNA."  
"Homo sapiens GRB2-associated binding protein 2 (GAB2), transcript variant 1, mRNA."  
"Homo sapiens GRB2-associated binding protein 3 (GAB3), transcript variant 1, mRNA."  
"Homo sapiens GABA(A) receptor-associated protein (GABARAP), mRNA."  
"Homo sapiens GABA(A) receptor-associated protein like 1 (GABARAPL1), mRNA."  
"Homo sapiens GABA(A) receptor-associated protein-like 2 (GABARAPL2), mRNA."  
"Homo sapiens gamma-aminobutyric acid (GABA) B receptor, 1 (GABBR1), transcript variant 4,  
"Homo sapiens gamma-aminobutyric acid (GABA) B receptor, 2 (GABBR2), mRNA."  
"Homo sapiens GA binding protein transcription factor, beta subunit 1 (GABPB1), transcript vari  
"Homo sapiens GA binding protein transcription factor, beta subunit 2 (GABPB2), transcript vari  
"Homo sapiens gamma-aminobutyric acid (GABA) A receptor, alpha 5 (GABRA5), mRNA."  
"Homo sapiens gamma-aminobutyric acid (GABA) A receptor, beta 1 (GABRB1), mRNA."  
"Homo sapiens gamma-aminobutyric acid (GABA) A receptor, pi (GABRP), mRNA."  
"Homo sapiens glutamate decarboxylase 1 (brain, 67kDa) (GAD1), transcript variant GAD25, ml  
"Homo sapiens growth arrest and DNA-damage-inducible, alpha (GADD45A), mRNA."  
"Homo sapiens growth arrest and DNA-damage-inducible, beta (GADD45B), mRNA."  
"Homo sapiens growth arrest and DNA-damage-inducible, gamma (GADD45G), mRNA."  
"Homo sapiens growth arrest and DNA-damage-inducible, gamma interacting protein 1 (GADD4  
"Homo sapiens G antigen 12H (GAGE12H), mRNA."  
"Homo sapiens cyclin G associated kinase (GAK), mRNA. XM\_943600 XM\_943603"  
"Homo sapiens galactose-3-O-sulfotransferase 4 (GAL3ST4), mRNA."  
"Homo sapiens galactosylceramidase (GALC), transcript variant 1, mRNA."  
"Homo sapiens UDP-galactose-4-epimerase (GALE), transcript variant 2, mRNA."  
"Homo sapiens galactokinase 1 (GALK1), mRNA."  
"Homo sapiens galactokinase 2 (GALK2), transcript variant 2, mRNA."  
"Homo sapiens galactose mutarotase (aldose 1-epimerase) (GALM), mRNA."  
"Homo sapiens galactosamine (N-acetyl)-6-sulfate sulfatase (Morquio syndrome, mucopolysacc  
"Homo sapiens UDP-N-acetyl-alpha-D-galactosamine:polypeptide N-acetylgalactosaminyltransf  
"Homo sapiens galanin receptor 2 (GALR2), mRNA."  
"Homo sapiens galactose-1-phosphate uridylyltransferase (GALT), mRNA."  
"Homo sapiens guanidinoacetate N-methyltransferase (GAMT), transcript variant 2, mRNA."  
"Homo sapiens gigaxonin (GAN), mRNA."  
"Homo sapiens glucosidase, alpha; neutral AB (GANAB), transcript variant 2, mRNA."  
"Homo sapiens glucosidase, alpha; neutral C (GANC), mRNA."  
"Homo sapiens growth associated protein 43 (GAP43), mRNA."

"Homo sapiens glyceraldehyde-3-phosphate dehydrogenase (GAPDH), mRNA."  
"Homo sapiens GRB2-binding adaptor protein, transmembrane (GAPT), mRNA."  
"Homo sapiens GTPase activating protein and VPS9 domains 1 (GAPVD1), mRNA."  
"Homo sapiens GAR1 ribonucleoprotein homolog (yeast) (GAR1), transcript variant 1, mRNA."  
"Homo sapiens GTPase activating Rap/RanGAP domain-like 4 (GARNL4), mRNA."  
"Homo sapiens glycyl-tRNA synthetase (GARS), mRNA."  
"Homo sapiens phosphoribosylglycinamide formyltransferase, phosphoribosylglycinamide synth  
"Homo sapiens growth arrest-specific 2 (GAS2), transcript variant 1, mRNA."  
"PREDICTED: Homo sapiens growth arrest-specific 5 (GAS5), misc RNA."  
"Homo sapiens growth arrest-specific 8 (GAS8), mRNA."  
"Homo sapiens GATA binding protein 3 (GATA3), transcript variant 2, mRNA."  
"Homo sapiens GATA zinc finger domain containing 1 (GATAD1), mRNA."  
"Homo sapiens GATA zinc finger domain containing 2A (GATAD2A), mRNA."  
"Homo sapiens GATA zinc finger domain containing 2B (GATAD2B), mRNA."  
"Homo sapiens glutamyl-tRNA(Gln) amidotransferase, subunit C homolog (bacterial) (GATC), m  
"Homo sapiens glycine amidinotransferase (L-arginine:glycine amidinotransferase) (GATM), nuc  
"Homo sapiens opposite strand transcription unit to STAG3 (GATS), mRNA."  
"Homo sapiens glucosidase, beta; acid (includes glucosylceramidase) (GBA), transcript variant :  
"Homo sapiens glucosidase, beta (bile acid) 2 (GBA2), mRNA."  
"Homo sapiens glioblastoma amplified sequence (GBAS), mRNA."  
"Homo sapiens glucan (1,4-alpha-), branching enzyme 1 (glycogen branching enzyme, Anderse  
"Homo sapiens golgi-specific brefeldin A resistant guanine nucleotide exchange factor 1 (GBF1)  
"Homo sapiens globoside alpha-1,3-N-acetylgalactosaminyltransferase 1 (GBGT1), mRNA."  
"Homo sapiens guanylate binding protein 1, interferon-inducible, 67kDa (GBP1), mRNA."  
"Homo sapiens guanylate binding protein 2, interferon-inducible (GBP2), mRNA."  
"Homo sapiens guanylate binding protein 3 (GBP3), mRNA."  
"Homo sapiens guanylate binding protein 4 (GBP4), mRNA."  
"Homo sapiens guanylate binding protein 5 (GBP5), mRNA."  
"Homo sapiens guanylate binding protein 7 (GBP7), mRNA."  
"Homo sapiens group-specific component (vitamin D binding protein) (GC), mRNA."  
"Homo sapiens grancalcin, EF-hand calcium binding protein (GCA), mRNA."  
"Homo sapiens glycine C-acetyltransferase (2-amino-3-ketobutyrate coenzyme A ligase) (GCAT  
"Homo sapiens GRIP and coiled-coil domain containing 1 (GCC1), mRNA."  
"Homo sapiens GRIP and coiled-coil domain containing 2 (GCC2), transcript variant 2, mRNA."  
"Homo sapiens glutaryl-Coenzyme A dehydrogenase (GCDH), nuclear gene encoding mitochon  
"Homo sapiens germinal center expressed transcript 2 (GCET2), transcript variant 1, mRNA."  
"Homo sapiens glucagon (GCG), mRNA."  
"Homo sapiens GTP cyclohydrolase 1 (GCH1), transcript variant 1, mRNA."  
"Homo sapiens GTP cyclohydrolase I feedback regulator (GCHFR), mRNA."  
"Homo sapiens glutamate-cysteine ligase, catalytic subunit (GCLC), mRNA."  
"Homo sapiens glial cells missing homolog 1 (Drosophila) (GCM1), mRNA."  
"Homo sapiens glial cells missing homolog 2 (Drosophila) (GCM2), mRNA."  
"Homo sapiens GCN1 general control of amino-acid synthesis 1-like 1 (yeast) (GCN1L1), mRNA/  
"Homo sapiens glucosaminyl (N-acetyl) transferase 1, core 2 (beta-1,6-N-acetylglucosaminyltr

"Homo sapiens glucosaminyl (N-acetyl) transferase 2, I-branching enzyme (I blood group) (GCN  
"PREDICTED: Homo sapiens glucosaminyl (N-acetyl) transferase 6 (GCNT6), mRNA."  
"Homo sapiens GRINL1A combined protein (Gcom1), transcript variant 7, mRNA."  
"Homo sapiens glycine cleavage system protein H (aminomethyl carrier) (GCSH), mRNA."  
"Homo sapiens guanine deaminase (GDA), mRNA."  
"Homo sapiens ganglioside-induced differentiation-associated protein 1 (GDAP1), transcript vari  
"Homo sapiens ganglioside induced differentiation associated protein 2 (GDAP2), mRNA."  
"Homo sapiens glycerophosphodiester phosphodiesterase 1 (GDE1), mRNA."  
"Homo sapiens growth differentiation factor 11 (GDF11), mRNA."  
"PREDICTED: Homo sapiens misc\_RNA (GDF5OS), miscRNA."  
"Homo sapiens GDP dissociation inhibitor 1 (GDI1), mRNA."  
"Homo sapiens GDP dissociation inhibitor 2 (GDI2), mRNA."  
"Homo sapiens glycerophosphodiester phosphodiesterase domain containing 1 (GDPD1), mRN  
"Homo sapiens glycerophosphodiester phosphodiesterase domain containing 2 (GDPD2), mRN  
"Homo sapiens glycerophosphodiester phosphodiesterase domain containing 5 (GDPD5), mRN  
"Homo sapiens GTP binding protein overexpressed in skeletal muscle (GEM), transcript variant  
"Homo sapiens gem (nuclear organelle) associated protein 4 (GEMIN4), mRNA."  
"Homo sapiens gem (nuclear organelle) associated protein 5 (GEMIN5), mRNA."  
"Homo sapiens gem (nuclear organelle) associated protein 6 (GEMIN6), mRNA."  
"Homo sapiens gem (nuclear organelle) associated protein 8 (GEMIN8), transcript variant 2, mR  
"Homo sapiens Gen homolog 1, endonuclease (Drosophila) (GEN1), mRNA."  
"Homo sapiens growth factor independent 1 transcription repressor (GFI1), mRNA."  
"Homo sapiens G elongation factor, mitochondrial 1 (GFM1), nuclear gene encoding mitochondi  
"Homo sapiens G elongation factor, mitochondrial 2 (GFM2), nuclear gene encoding mitochondi  
"Homo sapiens glucose-fructose oxidoreductase domain containing 1 (GFOD1), mRNA."  
"Homo sapiens glutamine-fructose-6-phosphate transaminase 1 (GFPT1), mRNA."  
"Homo sapiens GDNF family receptor alpha 2 (GFRA2), transcript variant 1, mRNA."  
"Homo sapiens GDNF family receptor alpha 3 (GFRA3), mRNA."  
"Homo sapiens golgi associated, gamma adaptin ear containing, ARF binding protein 1 (GGA1)  
"Homo sapiens golgi associated, gamma adaptin ear containing, ARF binding protein 2 (GGA2)  
"Homo sapiens golgi associated, gamma adaptin ear containing, ARF binding protein 3 (GGA3)  
"Homo sapiens gamma-glutamyl cyclotransferase (GGCT), mRNA."  
"Homo sapiens gamma-glutamyl carboxylase (GGCX), mRNA."  
"Homo sapiens gamma-glutamyl hydrolase (conjugase, foyllypolygammaglutamyl hydrolase) (GC  
"Homo sapiens gametogenetin binding protein 2 (GGNBP2), mRNA."  
"Homo sapiens gamma-glutamyltransferase 7 (GGT7), mRNA."  
"Homo sapiens gamma-glutamyltransferase 8 pseudogene (GGT8P), non-coding RNA."  
"Homo sapiens glycoprotein, alpha-galactosyltransferase 1 (GGTA1), non-coding RNA."  
"Homo sapiens gamma-glutamyltransferase-like 3 (GGTL3), transcript variant 2, mRNA."  
"Homo sapiens GH3 domain containing (GHDC), mRNA."  
"Homo sapiens growth hormone inducible transmembrane protein (GHITM), mRNA."  
"Homo sapiens GRB10 interacting GYF protein 1 (GIGYF1), mRNA."  
"Homo sapiens GTPase, IMAP family member 2 (GIMAP2), mRNA."  
"Homo sapiens GTPase, IMAP family member 4 (GIMAP4), mRNA."

"Homo sapiens GTPase, IMAP family member 8 (GIMAP8), mRNA."  
"Homo sapiens gypsy retrotransposon integrase 1 (GIN1), mRNA."  
"Homo sapiens GINS complex subunit 2 (Psf2 homolog) (GINS2), mRNA."  
"Homo sapiens GINS complex subunit 3 (Psf3 homolog) (GINS3), mRNA."  
"Homo sapiens GINS complex subunit 4 (Sld5 homolog) (GINS4), mRNA."  
"Homo sapiens GIPC PDZ domain containing family, member 1 (GIPC1), transcript variant 3, mRN."  
"Homo sapiens G protein-coupled receptor kinase interactor 2 (GIT2), transcript variant 3, mRN."  
"Homo sapiens GIY-YIG domain containing 1 (GIYD1), transcript variant 1, mRNA."  
"Homo sapiens GIY-YIG domain containing 2 (GIYD2), transcript variant 2, mRNA."  
"Homo sapiens gap junction protein, beta 2, 26kDa (GJB2), mRNA."  
"Homo sapiens gap junction protein, beta 6 (GJB6), mRNA."  
"Homo sapiens gap junction protein, gamma 1, 45kDa (GJC1), transcript variant 2, mRNA."  
"Homo sapiens gap junction protein, gamma 2, 47kDa (GJC2), mRNA."  
"Homo sapiens gap junction protein, gamma 3, 30.2kDa (GJC3), mRNA."  
"Homo sapiens glycerol kinase (GK), transcript variant 2, mRNA."  
"Homo sapiens glycerol kinase 5 (putative) (GK5), mRNA."  
"Homo sapiens G kinase anchoring protein 1 (GKAP1), mRNA."  
"Homo sapiens galactosidase, alpha (GLA), mRNA."  
"Homo sapiens galactosidase, beta 1 (GLB1), transcript variant 179423, mRNA."  
"Homo sapiens galactosidase, beta 1-like (GLB1L), mRNA."  
"Homo sapiens galactosidase, beta 1-like 3 (GLB1L3), mRNA."  
"Homo sapiens glucocorticoid induced transcript 1 (GLCCI1), mRNA."  
"Homo sapiens glucuronic acid epimerase (GLCE), mRNA."  
"Homo sapiens glycine dehydrogenase (decarboxylating) (GLDC), mRNA."  
"Homo sapiens GLE1 RNA export mediator homolog (yeast) (GLE1), transcript variant 1, mRNA."  
"Homo sapiens golgi apparatus protein 1 (GLG1), mRNA."  
"Homo sapiens glioma-associated oncogene homolog 1 (zinc finger protein) (GLI1), mRNA."  
"Homo sapiens GLI family zinc finger 4 (GLI4), mRNA."  
"Homo sapiens GLI pathogenesis-related 1 (GLIPR1), mRNA."  
"Homo sapiens GLI pathogenesis-related 2 (GLIPR2), mRNA."  
"Homo sapiens GLIS family zinc finger 3 (GLIS3), transcript variant 2, mRNA."  
"Homo sapiens glomulin, FKBP associated protein (GLMN), mRNA."  
"Homo sapiens glyoxalase I (GLO1), mRNA."  
"Homo sapiens glyoxalase domain containing 4 (GLOD4), mRNA."  
"Homo sapiens glycine receptor, alpha 2 (GLRA2), mRNA."  
"Homo sapiens glycine receptor, alpha 3 (GLRA3), transcript variant 2, mRNA."  
"Homo sapiens glutaredoxin (thioltransferase) (GLRX), mRNA."  
"Homo sapiens glutaredoxin 2 (GLRX2), transcript variant 1, mRNA."  
"Homo sapiens glutaredoxin 3 (GLRX3), mRNA."  
"Homo sapiens glutaredoxin 5 (GLRX5), mRNA."  
"Homo sapiens glutaminase (GLS), mRNA."  
"Homo sapiens glutaminase 2 (liver, mitochondrial) (GLS2), nuclear gene encoding mitochondri."  
"Homo sapiens glycosyltransferase 1 domain containing 1 (GLT1D1), mRNA."  
"Homo sapiens glycosyltransferase 25 domain containing 1 (GLT25D1), mRNA."

"Homo sapiens glycosyltransferase 6 domain containing 1 (GLT6D1), mRNA."  
"Homo sapiens glycosyltransferase 8 domain containing 1 (GLT8D1), transcript variant 3, mRNA."  
"Homo sapiens glycosyltransferase 8 domain containing 2 (GLT8D2), mRNA."  
"Homo sapiens glycolipid transfer protein (GLTP), mRNA."  
"Homo sapiens glycolipid transfer protein domain containing 1 (GLTPD1), mRNA."  
"Homo sapiens glioma tumor suppressor candidate region gene 1 (GLTSCR1), mRNA."  
"Homo sapiens glutamate dehydrogenase 1 (GLUD1), mRNA."  
"Homo sapiens glycine-N-acyltransferase-like 2 (GLYATL2), mRNA."  
"Homo sapiens glycerate kinase (GLYCTK), mRNA."  
"Homo sapiens GM2 ganglioside activator (GM2A), mRNA."  
"Homo sapiens germ cell-less homolog 1 (Drosophila) (GMCL1), mRNA."  
"Homo sapiens GDP-mannose 4,6-dehydratase (GMDS), mRNA."  
"Homo sapiens glucocorticoid modulatory element binding protein 1 (GMEB1), transcript variant 1, mRNA."  
"Homo sapiens glucocorticoid modulatory element binding protein 2 (GMEB2), mRNA."  
"Homo sapiens glia maturation factor, beta (GMFB), mRNA."  
"Homo sapiens glia maturation factor, gamma (GMFG), mRNA."  
"Homo sapiens GEM interacting protein (GMIP), mRNA."  
"Homo sapiens GDP-mannose pyrophosphorylase A (GMPPA), transcript variant 2, mRNA."  
"Homo sapiens GDP-mannose pyrophosphorylase B (GMPPB), transcript variant 2, mRNA."  
"Homo sapiens guanosine monophosphate reductase (GMPR), mRNA."  
"Homo sapiens guanosine monophosphate reductase 2 (GMPR2), transcript variant 2, mRNA."  
"Homo sapiens guanine monophosphate synthetase (GMPS), mRNA."  
"Homo sapiens guanine nucleotide binding protein (G protein), alpha 11 (Gq class) (GNA11), mRNA."  
"Homo sapiens guanine nucleotide binding protein (G protein) alpha 12 (GNA12), mRNA."  
"Homo sapiens guanine nucleotide binding protein (G protein), alpha 13 (GNA13), mRNA."  
"Homo sapiens guanine nucleotide binding protein (G protein), alpha 14 (GNA14), mRNA."  
"Homo sapiens guanine nucleotide binding protein (G protein), alpha 15 (Gq class) (GNA15), mRNA."  
"Homo sapiens guanine nucleotide binding protein (G protein), alpha inhibiting activity polypeptide 1 (GNAI1), mRNA."  
"Homo sapiens guanine nucleotide binding protein (G protein), alpha inhibiting activity polypeptide 2 (GNAI2), mRNA."  
"Homo sapiens guanine nucleotide binding protein (G protein), alpha transducing activity polypeptide 1 (GNAT1), mRNA."  
"Homo sapiens guanine nucleotide binding protein (G protein), alpha z polypeptide (GNAZ), mRNA."  
"Homo sapiens guanine nucleotide binding protein (G protein), beta polypeptide 1 (GNB1), mRNA."  
"Homo sapiens guanine nucleotide binding protein (G protein), beta polypeptide 1-like (GNB1L), mRNA."  
"Homo sapiens guanine nucleotide binding protein (G protein), beta polypeptide 2 (GNB2), mRNA."  
"Homo sapiens guanine nucleotide binding protein (G protein), beta polypeptide 3 (GNB3), mRNA."  
"Homo sapiens guanine nucleotide binding protein (G protein), beta polypeptide 4 (GNB4), mRNA."  
"Homo sapiens guanine nucleotide binding protein (G protein), beta 5 (GNB5), transcript variant 1, mRNA."  
"Homo sapiens glucosamine (UDP-N-acetyl)-2-epimerase/N-acetylmannosamine kinase (GNE), mRNA."  
"Homo sapiens guanine nucleotide binding protein (G protein), gamma 10 (GNG10), mRNA."  
"Homo sapiens guanine nucleotide binding protein (G protein), gamma 11 (GNG11), mRNA."  
"Homo sapiens guanine nucleotide binding protein (G protein), gamma 2 (GNG2), mRNA."  
"Homo sapiens guanine nucleotide binding protein (G protein), gamma 4 (GNG4), transcript variant 1, mRNA."  
"Homo sapiens guanine nucleotide binding protein (G protein), gamma 5 (GNG5), mRNA."  
"Homo sapiens guanine nucleotide binding protein (G protein), gamma 7 (GNG7), mRNA."

"Homo sapiens guanine nucleotide binding protein (G protein), gamma 8 (GNG8), mRNA."  
"Homo sapiens guanine nucleotide binding protein (G protein), gamma transducing activity poly  
"Homo sapiens guanine nucleotide binding protein-like 1 (GNL1), mRNA."  
"Homo sapiens guanine nucleotide binding protein-like 2 (nucleolar) (GNL2), mRNA."  
"Homo sapiens guanine nucleotide binding protein-like 3 (nucleolar) (GNL3), transcript variant 3  
"Homo sapiens guanine nucleotide binding protein-like 3 (nucleolar)-like (GNL3L), mRNA."  
"Homo sapiens glyceronephosphate O-acyltransferase (GNPAT), mRNA."  
"Homo sapiens glucosamine-6-phosphate deaminase 1 (GNPDA1), mRNA."  
"Homo sapiens glucosamine-6-phosphate deaminase 2 (GNPDA2), mRNA."  
"Homo sapiens glucosamine-phosphate N-acetyltransferase 1 (GNPNAT1), mRNA."  
"Homo sapiens N-acetylglucosamine-1-phosphate transferase, alpha and beta subunits (GNPT,  
"Homo sapiens N-acetylglucosamine-1-phosphate transferase, gamma subunit (GNPTG), mRN  
"Homo sapiens glucosamine (N-acetyl)-6-sulfatase (Sanfilippo disease IIID) (GNS), mRNA."  
"Homo sapiens golgi autoantigen, golgin subfamily a, 2 (GOLGA2), mRNA."  
"Homo sapiens golgi autoantigen, golgin subfamily a, 2-like, Y-linked 2 (GOLGA2LY2), non-codi  
"Homo sapiens golgi autoantigen, golgin subfamily a, 3 (GOLGA3), mRNA."  
"Homo sapiens golgi autoantigen, golgin subfamily a, 4 (GOLGA4), mRNA."  
"Homo sapiens golgi autoantigen, golgin subfamily a, 5 (GOLGA5), mRNA."  
"Homo sapiens golgi autoantigen, golgin subfamily a, 6A (GOLGA6A), mRNA."  
"Homo sapiens golgi autoantigen, golgin subfamily a, 6B (GOLGA6B), mRNA."  
"Homo sapiens golgi autoantigen, golgin subfamily a, 7 (GOLGA7), transcript variant 1, mRNA."  
"PREDICTED: Homo sapiens golgi autoantigen, golgin subfamily a, 8F, transcript variant 2 (GO  
"Homo sapiens golgin B1, golgi integral membrane protein (GOLGB1), mRNA."  
"Homo sapiens golgi integral membrane protein 4 (GOLIM4), mRNA."  
"Homo sapiens golgi membrane protein 1 (GOLM1), transcript variant 2, mRNA."  
"Homo sapiens golgi phosphoprotein 3-like (GOLPH3L), mRNA."  
"Homo sapiens golgi phosphoprotein 4 (GOLPH4), mRNA."  
"Homo sapiens Golgi-localized protein (GOLSYN), transcript variant 7, mRNA."  
"Homo sapiens golgi transport 1 homolog A (S. cerevisiae) (GOLT1A), mRNA."  
"Homo sapiens golgi transport 1 homolog B (S. cerevisiae) (GOLT1B), mRNA."  
"Homo sapiens gon-4-like (C. elegans) (GON4L), transcript variant 1, mRNA."  
"Homo sapiens golgi associated PDZ and coiled-coil motif containing (GOPC), transcript variant  
"Homo sapiens golgi reassembly stacking protein 1, 65kDa (GORASP1), mRNA."  
"Homo sapiens golgi reassembly stacking protein 2, 55kDa (GORASP2), mRNA."  
"Homo sapiens golgi SNAP receptor complex member 1 (GOSR1), transcript variant 1, mRNA."  
"Homo sapiens golgi SNAP receptor complex member 2 (GOSR2), transcript variant A, mRNA."  
"Homo sapiens glutamic-oxaloacetic transaminase 1, soluble (aspartate aminotransferase 1) (G  
"Homo sapiens glutamic-oxaloacetic transaminase 1-like 1 (GOT1L1), mRNA."  
"Homo sapiens glutamic-oxaloacetic transaminase 2, mitochondrial (aspartate aminotransferase  
"Homo sapiens glycoprotein V (platelet) (GP5), mRNA."  
"Homo sapiens glycoprotein IX (platelet) (GP9), mRNA."  
"Homo sapiens glycosylphosphatidylinositol anchor attachment protein 1 homolog (yeast) (GPA.  
"Homo sapiens glycerol-3-phosphate acyltransferase, mitochondrial (GPAM), nuclear gene enc  
"Homo sapiens glycerol-3-phosphate acyltransferase 2, mitochondrial (GPAT2), nuclear gene e

"Homo sapiens G patch domain containing 4 (GPATC4), transcript variant 3, mRNA."  
"Homo sapiens G patch domain containing 1 (GPATCH1), mRNA."  
"Homo sapiens G patch domain containing 2 (GPATCH2), mRNA."  
"Homo sapiens G patch domain containing 3 (GPATCH3), mRNA."  
"Homo sapiens G patch domain containing 4 (GPATCH4), transcript variant 2, mRNA."  
"Homo sapiens G protein-coupled bile acid receptor 1 (GPBAR1), transcript variant 3, mRNA."  
"Homo sapiens GC-rich promoter binding protein 1 (GPBP1), mRNA."  
"Homo sapiens GC-rich promoter binding protein 1-like 1 (GPBP1L1), mRNA."  
"Homo sapiens glypican 2 (GPC2), mRNA."  
"Homo sapiens glypican 4 (GPC4), mRNA."  
"Homo sapiens glypican 5 (GPC5), mRNA."  
"Homo sapiens glypican 6 (GPC6), mRNA."  
"Homo sapiens glycerol-3-phosphate dehydrogenase 1 (soluble) (GPD1), mRNA."  
"Homo sapiens glycerol-3-phosphate dehydrogenase 1-like (GPD1L), mRNA."  
"Homo sapiens G protein-coupled estrogen receptor 1 (GPER), transcript variant 3, mRNA."  
"Homo sapiens glycoprotein hormone beta 5 (GPHB5), mRNA."  
"Homo sapiens glucose phosphate isomerase (GPI), mRNA."  
"Homo sapiens G patch domain and KOW motifs (GPKOW), mRNA."  
"Homo sapiens glycosylphosphatidylinositol specific phospholipase D1 (GPLD1), transcript varia  
"Homo sapiens glycoprotein M6A (GPM6A), transcript variant 2, mRNA."  
"Homo sapiens glycoprotein M6B (GPM6B), transcript variant 1, mRNA."  
"Homo sapiens GPN-loop GTPase 1 (GPN1), mRNA."  
"Homo sapiens GPN-loop GTPase 2 (GPN2), mRNA."  
"Homo sapiens GPN-loop GTPase 3 (GPN3), mRNA."  
"Homo sapiens glycoprotein (transmembrane) nmb (GPNMB), transcript variant 2, mRNA."  
"Homo sapiens G protein-coupled receptor 1 (GPR1), transcript variant 2, mRNA."  
"Homo sapiens G protein-coupled receptor 101 (GPR101), mRNA."  
"Homo sapiens G protein-coupled receptor 103 (GPR103), mRNA."  
"Homo sapiens G protein-coupled receptor 107 (GPR107), mRNA."  
"Homo sapiens G protein-coupled receptor 108 (GPR108), transcript variant 1, mRNA."  
"Homo sapiens G protein-coupled receptor 114 (GPR114), mRNA."  
"Homo sapiens G protein-coupled receptor 124 (GPR124), mRNA."  
"Homo sapiens G protein-coupled receptor 126 (GPR126), transcript variant a2, mRNA."  
"Homo sapiens G protein-coupled receptor 128 (GPR128), mRNA."  
"Homo sapiens G protein-coupled receptor 132 (GPR132), mRNA."  
"Homo sapiens G protein-coupled receptor 135 (GPR135), mRNA."  
"Homo sapiens G protein-coupled receptor 137 (GPR137), mRNA."  
"Homo sapiens G protein-coupled receptor 137B (GPR137B), mRNA."  
"Homo sapiens G protein-coupled receptor 137C (GPR137C), mRNA."  
"Homo sapiens G protein-coupled receptor 139 (GPR139), mRNA."  
"Homo sapiens G protein-coupled receptor 143 (GPR143), mRNA."  
"Homo sapiens G protein-coupled receptor 144 (GPR144), mRNA."  
"Homo sapiens G protein-coupled receptor 146 (GPR146), mRNA."  
"Homo sapiens G protein-coupled receptor 148 (GPR148), mRNA."



"Homo sapiens G protein-coupled receptor 15 (GPR15), mRNA."  
"Homo sapiens G protein-coupled receptor 156 (GPR156), mRNA."  
"Homo sapiens G protein-coupled receptor 160 (GPR160), mRNA."  
"Homo sapiens G protein-coupled receptor 161 (GPR161), transcript variant 1, mRNA."  
"Homo sapiens G protein-coupled receptor 162 (GPR162), transcript variant A-2, mRNA."  
"Homo sapiens G protein-coupled receptor 17 (GPR17), mRNA."  
"Homo sapiens G protein-coupled receptor 172A (GPR172A), mRNA."  
"Homo sapiens G protein-coupled receptor 175 (GPR175), mRNA."  
"Homo sapiens G protein-coupled receptor 18 (GPR18), transcript variant 2, mRNA."  
"Homo sapiens G protein-coupled receptor 180 (GPR180), mRNA."  
"Homo sapiens G protein-coupled receptor 182 (GPR182), mRNA."  
"Homo sapiens G protein-coupled receptor 183 (GPR183), mRNA."  
"Homo sapiens G protein-coupled receptor 19 (GPR19), mRNA."  
"Homo sapiens G protein-coupled receptor 20 (GPR20), mRNA."  
"Homo sapiens G protein-coupled receptor 27 (GPR27), mRNA."  
"Homo sapiens G protein-coupled receptor 3 (GPR3), mRNA."  
"Homo sapiens G protein-coupled receptor 45 (GPR45), mRNA."  
"Homo sapiens G protein-coupled receptor 52 (GPR52), mRNA."  
"Homo sapiens G protein-coupled receptor 55 (GPR55), mRNA."  
"Homo sapiens G protein-coupled receptor 56 (GPR56), transcript variant 1, mRNA."  
"Homo sapiens G protein-coupled receptor 6 (GPR6), mRNA."  
"Homo sapiens G protein-coupled receptor 61 (GPR61), mRNA."  
"Homo sapiens G protein-coupled receptor 63 (GPR63), mRNA."  
"Homo sapiens G protein-coupled receptor 65 (GPR65), mRNA."  
"Homo sapiens G protein-coupled receptor 75 (GPR75), mRNA."  
"Homo sapiens G protein-coupled receptor 89A (GPR89A), mRNA."  
"Homo sapiens G protein-coupled receptor 89B (GPR89B), mRNA."  
"Homo sapiens G protein-coupled receptor 89C (GPR89C), mRNA."  
"Homo sapiens G protein-coupled receptor, family C, group 5, member C (GPCRC5C), transcript  
"Homo sapiens G protein regulated inducer of neurite outgrowth 1 (GPRIN1), mRNA."  
"Homo sapiens G protein pathway suppressor 2 (GPS2), mRNA."  
"PREDICTED: Homo sapiens G-protein signalling modulator 1 (AGS3-like, *C. elegans*) (GPSM1  
"Homo sapiens G-protein signalling modulator 2 (AGS3-like, *C. elegans*) (GPSM2), mRNA."  
"Homo sapiens G-protein signaling modulator 3 (AGS3-like, *C. elegans*) (GPSM3), mRNA."  
"Homo sapiens glutamic pyruvate transaminase (alanine aminotransferase) 2 (GPT2), mRNA."  
"Homo sapiens glutathione peroxidase 1 (GPX1), transcript variant 2, mRNA."  
"Homo sapiens glutathione peroxidase 3 (plasma) (GPX3), mRNA."  
"Homo sapiens glutathione peroxidase 4 (phospholipid hydroperoxidase) (GPX4), transcript vari  
"Homo sapiens glutathione peroxidase 7 (GPX7), mRNA."  
"Homo sapiens GRAM domain containing 1A (GRAMD1A), mRNA."  
"Homo sapiens GRAM domain containing 1B (GRAMD1B), mRNA."  
"Homo sapiens GRAM domain containing 1C (GRAMD1C), mRNA."  
"Homo sapiens GRAM domain containing 3 (GRAMD3), mRNA."  
"Homo sapiens GRAM domain containing 4 (GRAMD4), mRNA."

"PREDICTED: Homo sapiens GRB2-related adaptor protein (GRAP), mRNA."  
"Homo sapiens GRP1 (general receptor for phosphoinositides 1)-associated scaffold protein (GRIP1), mRNA."  
"Homo sapiens growth factor receptor-bound protein 14 (GRB14), mRNA."  
"Homo sapiens growth factor receptor-bound protein 2 (GRB2), transcript variant 1, mRNA."  
"Homo sapiens growth regulation by estrogen in breast cancer 1 (GREB1), transcript variant c, mRNA."  
"Homo sapiens grainyhead-like 1 (Drosophila) (GRHL1), transcript variant 1, mRNA."  
"Homo sapiens glyoxylate reductase/hydroxypyruvate reductase (GRHPR), mRNA."  
"Homo sapiens glutamate receptor, ionotropic, AMPA 3 (GRIA3), transcript variant flop, mRNA."  
"Homo sapiens glutamate receptor, ionotropic, delta 2 (GRID2), mRNA."  
"Homo sapiens glutamate receptor, ionotropic, kainate 2 (GRIK2), transcript variant 1, mRNA."  
"Homo sapiens glutamate receptor, ionotropic, kainate 3 (GRIK3), mRNA."  
"Homo sapiens glutamate receptor, ionotropic, N-methyl D-aspartate 1 (GRIN1), transcript variant 1, mRNA."  
"Homo sapiens glutamate receptor, ionotropic, N-methyl-D-aspartate 3B (GRIN3B), mRNA."  
"Homo sapiens glutamate receptor, ionotropic, N-methyl D-aspartate-associated protein 1 (GRIN1A), mRNA."  
"Homo sapiens glutamate receptor, ionotropic, N-methyl D-aspartate-like 1A (GRINL1A), transcript variant 1, mRNA."  
"Homo sapiens GRIP1 associated protein 1 (GRIPAP1), transcript variant 1, mRNA."  
"Homo sapiens G protein-coupled receptor kinase 1 (GRK1), mRNA."  
"Homo sapiens G protein-coupled receptor kinase 4 (GRK4), transcript variant 3, mRNA."  
"Homo sapiens G protein-coupled receptor kinase 5 (GRK5), mRNA."  
"Homo sapiens G protein-coupled receptor kinase 6 (GRK6), transcript variant 2, mRNA."  
"Homo sapiens glutamate receptor, metabotropic 2 (GRM2), mRNA."  
"Homo sapiens glutamate receptor, metabotropic 8 (GRM8), mRNA."  
"Homo sapiens granulin (GRN), mRNA."  
"Homo sapiens gastrin-releasing peptide (GRP), transcript variant 3, mRNA."  
"Homo sapiens GrpE-like 1, mitochondrial (E. coli) (GRPEL1), nuclear gene encoding mitochondrial protein."  
"Homo sapiens GrpE-like 2, mitochondrial (E. coli) (GRPEL2), nuclear gene encoding mitochondrial protein."  
"Homo sapiens glycine/arginine rich protein 1 (GRRP1), mRNA."  
"Homo sapiens G-rich RNA sequence binding factor 1 (GRSF1), transcript variant 2, mRNA."  
"Homo sapiens growth hormone regulated TBC protein 1 (GRTP1), mRNA."  
"Homo sapiens glutamate-rich WD repeat containing 1 (GRWD1), mRNA."  
"Homo sapiens gasdermin A (GSDMA), mRNA."  
"Homo sapiens gasdermin B (GSDMB), transcript variant 1, mRNA."  
"Homo sapiens gasdermin C (GSDMC), mRNA."  
"Homo sapiens gasdermin D (GSDMD), mRNA."  
"Homo sapiens germ cell associated 2 (haspin) (GSG2), mRNA."  
"Homo sapiens glycogen synthase kinase 3 beta (GSK3B), mRNA."  
"Homo sapiens G1 to S phase transition 1 (GSPT1), mRNA."  
"Homo sapiens G1 to S phase transition 2 (GSPT2), mRNA."  
"Homo sapiens glutathione reductase (GSR), mRNA."  
"Homo sapiens glutathione synthetase (GSS), mRNA."  
"Homo sapiens glutathione S-transferase alpha 2 (GSTA2), mRNA."  
"Homo sapiens glutathione S-transferase A3 (GSTA3), mRNA."  
"Homo sapiens glutathione S-transferase A4 (GSTA4), mRNA."  
"Homo sapiens glutathione S-transferase kappa 1 (GSTK1), mRNA."

"Homo sapiens glutathione S-transferase M1 (GSTM1), transcript variant 1, mRNA."  
"Homo sapiens glutathione S-transferase M2 (muscle) (GSTM2), mRNA."  
"Homo sapiens glutathione S-transferase M3 (brain) (GSTM3), mRNA."  
"Homo sapiens glutathione S-transferase M4 (GSTM4), transcript variant 1, mRNA."  
"Homo sapiens glutathione S-transferase omega 1 (GSTO1), mRNA."  
"Homo sapiens glutathione S-transferase omega 2 (GSTO2), mRNA."  
"Homo sapiens glutathione S-transferase pi (GSTP1), mRNA."  
"Homo sapiens glutathione S-transferase theta 1 (GSTT1), mRNA."  
"Homo sapiens glutathione S-transferase theta 2 (GSTT2), mRNA."  
"Homo sapiens glutathione S-transferase theta 2B (gene/pseudogene) (GSTT2B), mRNA."  
"Homo sapiens glutathione transferase zeta 1 (maleylacetoacetate isomerase) (GSTZ1), transcript variant 1, mRNA."  
"Homo sapiens glycosyltransferase-like domain containing 1 (GTDC1), transcript variant 1, mRNA."  
"Homo sapiens general transcription factor IIB (GTF2B), mRNA."  
"Homo sapiens general transcription factor IIE, polypeptide 1 (alpha subunit, 56kD) (GTF2E1), mRNA."  
"Homo sapiens general transcription factor IIE, polypeptide 2, beta 34kDa (GTF2E2), mRNA."  
"Homo sapiens general transcription factor IIF, polypeptide 1, 74kDa (GTF2F1), mRNA."  
"Homo sapiens general transcription factor IIF, polypeptide 2, 30kDa (GTF2F2), mRNA."  
"Homo sapiens general transcription factor IIH, polypeptide 1, 62kDa (GTF2H1), mRNA."  
"Homo sapiens general transcription factor IIH, polypeptide 2, 44kDa (GTF2H2), mRNA."  
"Homo sapiens general transcription factor IIH, polypeptide 2D (GTF2H2D), mRNA."  
"Homo sapiens general transcription factor IIH, polypeptide 3, 34kDa (GTF2H3), mRNA."  
"Homo sapiens general transcription factor IIH, polypeptide 4, 52kDa (GTF2H4), mRNA."  
"Homo sapiens general transcription factor IIH, polypeptide 5 (GTF2H5), mRNA."  
"PREDICTED: Homo sapiens general transcription factor II, i (GTF2I), mRNA."  
"Homo sapiens general transcription factor II, i, pseudogene 1 (GTF2IP1) on chromosome 7."  
"Homo sapiens GTF2I repeat domain containing 1 (GTF2IRD1), transcript variant 1, mRNA."  
"PREDICTED: Homo sapiens GTF2I repeat domain containing 2 (GTF2IRD2), mRNA."  
"Homo sapiens GTF2I repeat domain containing 2B (GTF2IRD2B), mRNA."  
"Homo sapiens GTF2I repeat domain containing 2 pseudogene (GTF2IRD2P), non-coding RNA."  
"Homo sapiens general transcription factor IIIA (GTF3A), mRNA."  
"Homo sapiens general transcription factor IIIC, polypeptide 1, alpha 220kDa (GTF3C1), mRNA."  
"Homo sapiens general transcription factor IIIC, polypeptide 2, beta 110kDa (GTF3C2), transcript variant 1, mRNA."  
"Homo sapiens general transcription factor IIIC, polypeptide 3, 102kDa (GTF3C3), mRNA."  
"Homo sapiens general transcription factor IIIC, polypeptide 5, 63kDa (GTF3C5), mRNA."  
"Homo sapiens GTP binding protein 1 (GTPBP1), mRNA."  
"Homo sapiens GTP-binding protein 10 (putative) (GTPBP10), transcript variant 1, mRNA."  
"Homo sapiens GTP binding protein 2 (GTPBP2), mRNA."  
"Homo sapiens GTP binding protein 3 (mitochondrial) (GTPBP3), nuclear gene encoding mitochondrial protein."  
"Homo sapiens GTP binding protein 4 (GTPBP4), mRNA."  
"Homo sapiens GTP binding protein 6 (putative) (GTPBP6), mRNA."  
"Homo sapiens GTP-binding protein 8 (putative) (GTPBP8), transcript variant 1, mRNA."  
"PREDICTED: Homo sapiens Gilles de la Tourette syndrome chromosome region, candidate 1 (GTSF1), mRNA."  
"Homo sapiens G-2 and S-phase expressed 1 (GTSE1), mRNA."  
"Homo sapiens gametocyte specific factor 1 (GTSF1), mRNA."

"Homo sapiens guanylate cyclase activator 1A (retina) (GUCA1A), mRNA."  
"Homo sapiens guanylate cyclase activator 2B (uroguanylin) (GUCA2B), mRNA."  
"Homo sapiens guanylate cyclase 1, soluble, alpha 2 (GUCY1A2), mRNA."  
"Homo sapiens guanylate cyclase 1, soluble, alpha 3 (GUCY1A3), mRNA."  
"Homo sapiens guanylate cyclase 1, soluble, beta 2 (GUCY1B2), mRNA."  
"Homo sapiens guanylate cyclase 2C (heat stable enterotoxin receptor) (GUCY2C), mRNA."  
"Homo sapiens GUF1 GTPase homolog (*S. cerevisiae*) (GUF1), mRNA."  
"Homo sapiens guanylate kinase 1 (GUK1), mRNA."  
"Homo sapiens glucuronidase, beta (GUSB), mRNA."  
"Homo sapiens glucuronidase, beta-like 1 (GUSBL1), mRNA."  
"Homo sapiens glucuronidase, beta-like 2 (GUSBL2), transcript variant 3, mRNA."  
"Homo sapiens glucoside xylosyltransferase 1 (GXYLT1), transcript variant 2, mRNA."  
"Homo sapiens glucoside xylosyltransferase 2 (GXYLT2), mRNA."  
"Homo sapiens glycogenin 1 (GYG1), mRNA."  
"Homo sapiens glycosyltransferase-like 1B (GYLTL1B), mRNA."  
"Homo sapiens glycophorin C (Gerbich blood group) (GYPC), transcript variant 2, mRNA."  
"Homo sapiens glycogen synthase 1 (muscle) (GYS1), mRNA."  
"Homo sapiens GDNF-inducible zinc finger protein 1 (GZF1), mRNA."  
"Homo sapiens granzyme K (granzyme 3; tryptase II) (GZMK), mRNA."  
"Homo sapiens granzyme M (lymphocyte met-ase 1) (GZMM), mRNA."  
"Homo sapiens H1 histone family, member 0 (H1F0), mRNA."  
"Homo sapiens H1 histone family, member N, testis-specific (H1FNT), mRNA."  
"Homo sapiens H1 histone family, member X (H1FX), mRNA."  
"Homo sapiens H2A histone family, member B1 (H2AFB1), mRNA."  
"Homo sapiens H2A histone family, member J (H2AFJ), transcript variant 1, mRNA."  
"Homo sapiens H2A histone family, member X (H2AFX), mRNA."  
"Homo sapiens H2A histone family, member Y (H2AFY), transcript variant 2, mRNA."  
"Homo sapiens H2A histone family, member Y2 (H2AFY2), mRNA."  
"Homo sapiens H2A histone family, member Z (H2AFZ), mRNA."  
"PREDICTED: Homo sapiens H2B histone family, member M (H2BFM), mRNA."  
"Homo sapiens H3 histone, family 3A (H3F3A), mRNA."  
"Homo sapiens H3 histone, family 3B (H3.3B) (H3F3B), mRNA."  
"Homo sapiens hyaluronan binding protein 4 (HABP4), mRNA."  
"Homo sapiens HECT domain and ankyrin repeat containing, E3 ubiquitin protein ligase 1 (HAC)  
"Homo sapiens 2-hydroxyacyl-CoA lyase 1 (HACL1), mRNA."  
"Homo sapiens hydroxyacyl-Coenzyme A dehydrogenase (HADH), nuclear gene encoding mitoch  
"Homo sapiens hydroxyacyl-Coenzyme A dehydrogenase, type II (HADH2), transcript variant 1,  
"Homo sapiens hydroxyacyl-Coenzyme A dehydrogenase/3-ketoacyl-Coenzyme A thiolase/enoy  
"Homo sapiens hydroxyacyl-Coenzyme A dehydrogenase/3-ketoacyl-Coenzyme A thiolase/enoy  
"Homo sapiens hydroxyacylglutathione hydrolase (HAGH), nuclear gene encoding mitochondria  
"Homo sapiens hydroxyacylglutathione hydrolase-like (HAGHL), transcript variant 2, mRNA."  
"Homo sapiens histidine ammonia-lyase (HAL), mRNA."  
"Homo sapiens hepcidin antimicrobial peptide (HAMP), mRNA."  
"Homo sapiens hyaluronan and proteoglycan link protein 2 (HAPLN2), mRNA."

"Homo sapiens hyaluronan and proteoglycan link protein 3 (HAPLN3), mRNA."  
"Homo sapiens hyaluronan and proteoglycan link protein 4 (HAPLN4), mRNA."  
"Homo sapiens harbinger transposase derived 1 (HARBI1), mRNA."  
"Homo sapiens histidyl-tRNA synthetase 2, mitochondrial (putative) (HARS2), nuclear gene enc  
"Homo sapiens HAS2 antisense RNA (non-protein coding) (HAS2AS), antisense RNA."  
"Homo sapiens histone acetyltransferase 1 (HAT1), transcript variant 1, mRNA."  
"Homo sapiens HAUS augmin-like complex, subunit 4 (HAUS4), mRNA."  
"Homo sapiens HAUS augmin-like complex, subunit 5 (HAUS5), mRNA. XM\_945898"  
"Homo sapiens HAUS augmin-like complex, subunit 6 (HAUS6), mRNA."  
"Homo sapiens HAUS augmin-like complex, subunit 8 (HAUS8), transcript variant 1, mRNA."  
"Homo sapiens hepatitis A virus cellular receptor 2 (HAVCR2), mRNA."  
"Homo sapiens HCLS1 associated protein X-1 (HAX1), transcript variant 1, mRNA."  
"Homo sapiens hemoglobin, alpha 1 (HBA1), mRNA."  
"Homo sapiens hemoglobin, alpha 2 (HBA2), mRNA."  
"Homo sapiens hemoglobin, beta (HBB), mRNA."  
"Homo sapiens hemoglobin, delta (HBD), mRNA."  
"Homo sapiens heparin-binding EGF-like growth factor (HBEGF), mRNA."  
"Homo sapiens hemoglobin, mu (HBM), mRNA."  
"Homo sapiens HMG-box transcription factor 1 (HBP1), mRNA."  
"Homo sapiens hemoglobin, theta 1 (HBQ1), mRNA."  
"Homo sapiens HBS1-like (*S. cerevisiae*) (HBS1L), mRNA."  
"Homo sapiens hepatitis B virus x interacting protein (HBXIP), mRNA."  
"Homo sapiens HCCA2 protein (HCCA2), mRNA."  
"Homo sapiens holocholesterol synthase (cytochrome c heme-lyase) (HCCS), mRNA."  
"Homo sapiens host cell factor C1 (VP16-accessory protein) (HCFC1), mRNA."  
"Homo sapiens host cell factor C1 regulator 1 (XPO1 dependent) (HCFC1R1), transcript variant  
"Homo sapiens host cell factor C2 (HCFC2), mRNA."  
"PREDICTED: Homo sapiens HLA complex group 18 (HCG18), mRNA."  
"PREDICTED: Homo sapiens HLA complex group 22 (HCG22), mRNA."  
"Homo sapiens HLA complex group 26 (non-protein coding) (HCG26), non-coding RNA."  
"Homo sapiens HLA complex group 27 (HCG27), mRNA."  
"Homo sapiens HLA complex group 2 pseudogene 7 (HCG2P7), non-coding RNA."  
"Homo sapiens HLA complex group 4 (HCG4), non-coding RNA."  
"Homo sapiens hemopoietic cell kinase (HCK), mRNA."  
"Homo sapiens hematopoietic cell-specific Lyn substrate 1 (HCLS1), mRNA."  
"Homo sapiens hyperpolarization activated cyclic nucleotide-gated potassium channel 3 (HCN3)  
"Homo sapiens HLA complex P5 (HCP5), mRNA."  
"PREDICTED: Homo sapiens hepatocellular carcinoma-related HCRP1 (HCRP1), mRNA."  
"Homo sapiens hematopoietic cell signal transducer (HCST), transcript variant 2, mRNA."  
"Homo sapiens histone deacetylase 1 (HDAC1), mRNA."  
"Homo sapiens histone deacetylase 10 (HDAC10), mRNA."  
"Homo sapiens histone deacetylase 11 (HDAC11), mRNA."  
"Homo sapiens histone deacetylase 2 (HDAC2), mRNA."  
"Homo sapiens histone deacetylase 3 (HDAC3), mRNA."

"Homo sapiens histone deacetylase 4 (HDAC4), mRNA."  
"Homo sapiens histone deacetylase 6 (HDAC6), mRNA."  
"Homo sapiens histone deacetylase 7 (HDAC7), transcript variant 4, mRNA."  
"Homo sapiens histone deacetylase 7A (HDAC7A), transcript variant 3, mRNA."  
"Homo sapiens histone deacetylase 8 (HDAC8), mRNA."  
"Homo sapiens histone deacetylase 9 (HDAC9), transcript variant 3, mRNA."  
"Homo sapiens HD domain containing 2 (HDDC2), mRNA."  
"Homo sapiens HD domain containing 3 (HDDC3), mRNA."  
"Homo sapiens hepatoma-derived growth factor (high-mobility group protein 1-like) (HDGF), mR  
"Homo sapiens hepatoma-derived growth factor-related protein 2 (HDGF2), transcript variant 1,  
"Homo sapiens hepatoma derived growth factor-like 1 (HDGFL1), mRNA."  
"Homo sapiens hepatoma-derived growth factor, related protein 3 (HDGFRP3), mRNA."  
"Homo sapiens haloacid dehalogenase-like hydrolase domain containing 1A (HDHD1A), mRNA  
"Homo sapiens haloacid dehalogenase-like hydrolase domain containing 2 (HDHD2), mRNA."  
"Homo sapiens haloacid dehalogenase-like hydrolase domain containing 3 (HDHD3), mRNA."  
"Homo sapiens high density lipoprotein binding protein (HDLBP), transcript variant 1, mRNA."  
"Homo sapiens HEAT repeat containing 1 (HEATR1), mRNA."  
"Homo sapiens HEAT repeat containing 2 (HEATR2), mRNA. XM\_935824 XM\_935825"  
"Homo sapiens HEAT repeat containing 3 (HEATR3), mRNA."  
"Homo sapiens HEAT repeat containing 5A (HEATR5A), mRNA."  
"Homo sapiens HEAT repeat containing 5B (HEATR5B), mRNA."  
"Homo sapiens HEAT repeat containing 6 (HEATR6), mRNA."  
"Homo sapiens HEAT repeat containing 7A (HEATR7A), transcript variant 3, mRNA."  
"Homo sapiens heme binding protein 1 (HEBP1), mRNA."  
"Homo sapiens heme binding protein 2 (HEBP2), mRNA."  
"Homo sapiens headcase homolog (Drosophila) (HECA), mRNA."  
"Homo sapiens HECT domain containing 1 (HECTD1), mRNA."  
"Homo sapiens HECT domain containing 2 (HECTD2), transcript variant 1, mRNA."  
"Homo sapiens HECT domain containing 3 (HECTD3), mRNA."  
"Homo sapiens HECT, C2 and WW domain containing E3 ubiquitin protein ligase 2 (HECW2), r  
"Homo sapiens HEG homolog 1 (zebrafish) (HEG1), mRNA."  
"Homo sapiens helicase (DNA) B (HELB), mRNA."  
"Homo sapiens helicase, lymphoid-specific (HELLS), mRNA."  
"Homo sapiens helicase, POLQ-like (HELQ), mRNA."  
"Homo sapiens helicase with zinc finger (HELZ), mRNA."  
"Homo sapiens HemK methyltransferase family member 1 (HEMK1), mRNA."  
"Homo sapiens HEPACAM family member 2 (HEPACAM2), transcript variant 2, mRNA."  
"Homo sapiens hect (homologous to the E6-AP (UBE3A) carboxyl terminus) domain and RCC1  
"Homo sapiens hect domain and RLD 2 (HERC2), mRNA."  
Homo sapiens hect domain and RLD 2 pseudogene 2 (HERC2P2) on chromosome 15.  
"Homo sapiens hect domain and RLD 3 (HERC3), mRNA."  
"Homo sapiens hect domain and RLD 4 (HERC4), transcript variant 2, mRNA."  
"Homo sapiens hect domain and RLD 5 (HERC5), mRNA."  
"Homo sapiens hect domain and RLD 6 (HERC6), transcript variant 1, mRNA."

"Homo sapiens homocysteine-inducible, endoplasmic reticulum stress-inducible, ubiquitin-like d  
"Homo sapiens HERPUD family member 2 (HERPUD2), mRNA."  
"Homo sapiens hairy and enhancer of split 1, (Drosophila) (HES1), mRNA."  
"Homo sapiens hairy and enhancer of split 2 (Drosophila) (HES2), mRNA."  
"Homo sapiens hairy and enhancer of split 4 (Drosophila) (HES4), mRNA."  
"Homo sapiens hairy and enhancer of split 5 (Drosophila) (HES5), mRNA."  
"Homo sapiens hairy and enhancer of split 6 (Drosophila) (HES6), mRNA."  
"Homo sapiens HESX homeobox 1 (HESX1), mRNA."  
"Homo sapiens hexosaminidase A (alpha polypeptide) (HEXA), mRNA."  
"Homo sapiens hexosaminidase B (beta polypeptide) (HEXB), mRNA."  
"Homo sapiens hexosaminidase (glycosyl hydrolase family 20, catalytic domain) containing (HE  
"Homo sapiens hexamethylene bis-acetamide inducible 2 (HEXIM2), mRNA."  
"Homo sapiens hairy/enhancer-of-split related with YRPW motif 1 (HEY1), transcript variant 2, n  
"Homo sapiens hairy/enhancer-of-split related with YRPW motif 2 (HEY2), mRNA."  
"Homo sapiens hairy/enhancer-of-split related with YRPW motif-like (HEYL), mRNA."  
"Homo sapiens hemochromatosis (HFE), transcript variant 1, mRNA."  
"Homo sapiens HFM1, ATP-dependent DNA helicase homolog (*S. cerevisiae*) (HFM1), mRNA."  
"Homo sapiens homogentisate 1,2-dioxygenase (homogentisate oxidase) (HGD), mRNA."  
"Homo sapiens hepatocyte growth factor (hepapoietin A; scatter factor) (HGF), transcript variant  
"Homo sapiens hepatocyte growth factor-regulated tyrosine kinase substrate (HGS), mRNA."  
"Homo sapiens hedgehog acyltransferase (HHAT), mRNA."  
"Homo sapiens hematopoietically expressed homeobox (HHEX), mRNA."  
"Homo sapiens HERV-H LTR-associating 3 (HHLA3), transcript variant 2, mRNA."  
"Homo sapiens hippocampus abundant transcript 1 (HIAT1), mRNA."  
"Homo sapiens hippocampus abundant transcript-like 1 (HIATL1), mRNA."  
"Homo sapiens hippocampus abundant transcript-like 2 (HIATL2), non-coding RNA."  
"Homo sapiens 3-hydroxyisobutyrate dehydrogenase (HIBADH), mRNA."  
"Homo sapiens 3-hydroxyisobutyryl-Coenzyme A hydrolase (HIBCH), nuclear gene encoding mi  
"Homo sapiens hypermethylated in cancer 2 (HIC2), mRNA."  
"Homo sapiens hypoxia-inducible factor 1, alpha subunit (basic helix-loop-helix transcription fact  
"Homo sapiens hypoxia inducible factor 1, alpha subunit inhibitor (HIF1AN), mRNA."  
"Homo sapiens HIG1 hypoxia inducible domain family, member 1A (HIGD1A), transcript variant  
"Homo sapiens HIG1 hypoxia inducible domain family, member 2A (HIGD2A), mRNA."  
"Homo sapiens HIG1 hypoxia inducible domain family, member 2B (pseudogene) (HIGD2B), no  
"Homo sapiens histone H4 transcription factor (HINFP), transcript variant 1, mRNA."  
"Homo sapiens histidine triad nucleotide binding protein 1 (HINT1), mRNA."  
"Homo sapiens histidine triad nucleotide binding protein 2 (HINT2), mRNA."  
"Homo sapiens histidine triad nucleotide binding protein 3 (HINT3), mRNA."  
"Homo sapiens huntingtin interacting protein 1 (HIP1), mRNA."  
"PREDICTED: Homo sapiens huntingtin interacting protein-1-related, transcript variant 2 (HIP1F  
"Homo sapiens huntingtin interacting protein 2 (HIP2), mRNA."  
"Homo sapiens homeodomain interacting protein kinase 2 (HIPK2), mRNA."  
"Homo sapiens HIR histone cell cycle regulation defective homolog A (*S. cerevisiae*) (HIRA), mF  
"Homo sapiens HIRA interacting protein 3 (HIRIP3), mRNA."

"Homo sapiens histidine acid phosphatase domain containing 2A (HISPPD2A), transcript varian  
"Homo sapiens histone 1, H1a (HIST1H1A), mRNA."  
"Homo sapiens histone cluster 1, H1c (HIST1H1C), mRNA."  
"Homo sapiens histone cluster 1, H1d (HIST1H1D), mRNA."  
"Homo sapiens histone cluster 1, H1e (HIST1H1E), mRNA."  
"Homo sapiens histone cluster 1, H2ab (HIST1H2AB), mRNA."  
"Homo sapiens histone cluster 1, H2ac (HIST1H2AC), mRNA."  
"Homo sapiens histone cluster 1, H2ae (HIST1H2AE), mRNA."  
"Homo sapiens histone cluster 1, H2ag (HIST1H2AG), mRNA."  
"Homo sapiens histone cluster 1, H2ah (HIST1H2AH), mRNA."  
"Homo sapiens histone cluster 1, H2am (HIST1H2AM), mRNA."  
"Homo sapiens histone cluster 1, H2bc (HIST1H2BC), mRNA."  
"Homo sapiens histone cluster 1, H2bd (HIST1H2BD), transcript variant 2, mRNA."  
"Homo sapiens histone cluster 1, H2be (HIST1H2BE), mRNA."  
"Homo sapiens histone cluster 1, H2bf (HIST1H2BF), mRNA."  
"Homo sapiens histone cluster 1, H2bg (HIST1H2BG), mRNA."  
"Homo sapiens histone cluster 1, H2bh (HIST1H2BH), mRNA."  
"Homo sapiens histone cluster 1, H2bj (HIST1H2BJ), mRNA."  
"Homo sapiens histone cluster 1, H2bk (HIST1H2BK), mRNA."  
"Homo sapiens histone cluster 1, H2bm (HIST1H2BM), mRNA."  
"Homo sapiens histone cluster 1, H2bn (HIST1H2BN), mRNA."  
"Homo sapiens histone cluster 1, H3a (HIST1H3A), mRNA."  
"Homo sapiens histone cluster 1, H3b (HIST1H3B), mRNA."  
"Homo sapiens histone cluster 1, H3d (HIST1H3D), mRNA."  
"Homo sapiens histone cluster 1, H3f (HIST1H3F), mRNA."  
"Homo sapiens histone cluster 1, H3g (HIST1H3G), mRNA."  
"Homo sapiens histone cluster 1, H3h (HIST1H3H), mRNA."  
"Homo sapiens histone cluster 1, H3j (HIST1H3J), mRNA."  
"Homo sapiens histone cluster 1, H4a (HIST1H4A), mRNA."  
"Homo sapiens histone cluster 1, H4b (HIST1H4B), mRNA."  
"Homo sapiens histone cluster 1, H4c (HIST1H4C), mRNA."  
"Homo sapiens histone cluster 1, H4e (HIST1H4E), mRNA."  
"Homo sapiens histone cluster 1, H4h (HIST1H4H), mRNA."  
"Homo sapiens histone cluster 1, H4i (HIST1H4I), mRNA."  
"Homo sapiens histone cluster 1, H4j (HIST1H4J), mRNA."  
"Homo sapiens histone cluster 1, H4k (HIST1H4K), mRNA."  
"Homo sapiens histone cluster 2, H2aa3 (HIST2H2AA3), mRNA."  
"Homo sapiens histone cluster 2, H2aa4 (HIST2H2AA4), mRNA."  
"Homo sapiens histone cluster 2, H2ab (HIST2H2AB), mRNA."  
"Homo sapiens histone cluster 2, H2ac (HIST2H2AC), mRNA."  
"Homo sapiens histone cluster 2, H2be (HIST2H2BE), mRNA."  
"Homo sapiens histone cluster 2, H2bf (HIST2H2BF), mRNA."  
"Homo sapiens histone cluster 2, H3a (HIST2H3A), mRNA."  
"Homo sapiens histone cluster 2, H3c (HIST2H3C), mRNA."



"Homo sapiens histone cluster 2, H3d (HIST2H3D), mRNA."  
"Homo sapiens histone cluster 2, H4a (HIST2H4A), mRNA."  
"Homo sapiens histone cluster 2, H4b (HIST2H4B), mRNA."  
"Homo sapiens histone cluster 3, H2a (HIST3H2A), mRNA."  
"Homo sapiens histone cluster 3, H2bb (HIST3H2BB), mRNA."  
"Homo sapiens histone cluster 4, H4 (HIST4H4), mRNA."  
"Homo sapiens human immunodeficiency virus type I enhancer binding protein 1 (HIVEP1), mR  
"Homo sapiens human immunodeficiency virus type I enhancer binding protein 2 (HIVEP2), mR  
"Homo sapiens human immunodeficiency virus type I enhancer binding protein 3 (HIVEP3), mR  
"Homo sapiens Holliday junction recognition protein (HJURP), mRNA."  
"Homo sapiens hexokinase 1 (HK1), nuclear gene encoding mitochondrial protein, transcript var  
"Homo sapiens hexokinase 2 (HK2), mRNA."  
"Homo sapiens hexokinase domain containing 1 (HKDC1), mRNA."  
"Homo sapiens major histocompatibility complex, class I, A (HLA-A), mRNA."  
"Homo sapiens major histocompatibility complex class I HLA-A29.1 (HLA-A29.1), mRNA. XM\_0  
"Homo sapiens major histocompatibility complex, class I, B (HLA-B), mRNA."  
"Homo sapiens major histocompatibility complex, class I, C (HLA-C), mRNA."  
"Homo sapiens major histocompatibility complex, class II, DM alpha (HLA-DMA), mRNA."  
"Homo sapiens major histocompatibility complex, class II, DM beta (HLA-DMB), mRNA."  
"Homo sapiens major histocompatibility complex, class II, DO alpha (HLA-DOA), mRNA."  
"Homo sapiens major histocompatibility complex, class II, DO beta (HLA-DOB), mRNA."  
"Homo sapiens major histocompatibility complex, class II, DP alpha 1 (HLA-DPA1), mRNA."  
"Homo sapiens major histocompatibility complex, class II, DP beta 1 (HLA-DPB1), mRNA."  
"Homo sapiens major histocompatibility complex, class II, DP beta 2 (pseudogene) (HLA-DPB2)  
"PREDICTED: Homo sapiens major histocompatibility complex, class II, DQ alpha 1, transcript v  
"Homo sapiens major histocompatibility complex, class II, DQ beta 1 (HLA-DQB1), mRNA."  
"Homo sapiens major histocompatibility complex, class II, DQ beta 2 (HLA-DQB2), mRNA."  
"Homo sapiens major histocompatibility complex, class II, DR alpha (HLA-DRA), mRNA."  
"Homo sapiens major histocompatibility complex, class II, DR beta 1 (HLA-DRB1), mRNA."  
"Homo sapiens major histocompatibility complex, class II, DR beta 3 (HLA-DRB3), mRNA."  
"Homo sapiens major histocompatibility complex, class II, DR beta 4 (HLA-DRB4), mRNA."  
"Homo sapiens major histocompatibility complex, class II, DR beta 6 (pseudogene) (HLA-DRB6)  
"Homo sapiens major histocompatibility complex, class I, E (HLA-E), mRNA."  
"Homo sapiens major histocompatibility complex, class I, F (HLA-F), transcript variant 1, mRNA.  
"Homo sapiens HLA-G histocompatibility antigen, class I, G (HLA-G), mRNA."  
"Homo sapiens major histocompatibility complex, class I, H (pseudogene) (HLA-H), non-coding  
"Homo sapiens holocarboxylase synthetase (biotin-(propionyl-Coenzyme A-carboxylase (ATP-t  
"Homo sapiens helicase-like transcription factor (HLTF), transcript variant 1, mRNA."  
"Homo sapiens H2.0-like homeobox (HLX), mRNA."  
"Homo sapiens homeobox HB9 (HLXB9), mRNA."  
"Homo sapiens homeobox containing 1 (HMBOX1), mRNA."  
"Homo sapiens hydroxymethylbilane synthase (HMBS), transcript variant 1, mRNA."  
"Homo sapiens high-mobility group 20A (HMG20A), mRNA."  
"Homo sapiens high-mobility group 20B (HMG20B), mRNA."

"Homo sapiens high mobility group AT-hook 1 (HMGA1), transcript variant 6, mRNA."  
"Homo sapiens high-mobility group box 1 (HMGB1), mRNA."  
"Homo sapiens high-mobility group box 1-like 1 (HMGB1L1), mRNA."  
"Homo sapiens high-mobility group box 2 (HMGB2), mRNA."  
"Homo sapiens high-mobility group box 3 (HMGB3), mRNA."  
"Homo sapiens 3-hydroxymethyl-3-methylglutaryl-Coenzyme A lyase (HMGCL), nuclear gene er  
"Homo sapiens 3-hydroxy-3-methylglutaryl-Coenzyme A reductase (HMGCR), mRNA."  
"Homo sapiens 3-hydroxy-3-methylglutaryl-Coenzyme A synthase 1 (soluble) (HMGCS1), transc  
"Homo sapiens high-mobility group nucleosome binding domain 1 (HMGN1), mRNA."  
"Homo sapiens high-mobility group nucleosomal binding domain 2 (HMGN2), mRNA."  
"Homo sapiens high mobility group nucleosomal binding domain 3 (HMGN3), transcript variant 1  
"Homo sapiens high mobility group nucleosomal binding domain 4 (HMGN4), mRNA."  
"Homo sapiens HMG box domain containing 4 (HMGXB4), transcript variant 2, mRNA."  
"Homo sapiens histocompatibility (minor) HB-1 (HMHB1), mRNA."  
"Homo sapiens hyaluronan-mediated motility receptor (RHAMM) (HMMR), transcript variant 2, n  
"Homo sapiens heme oxygenase (decycling) 1 (HMOX1), mRNA."  
"Homo sapiens heme oxygenase (decycling) 2 (HMOX2), mRNA."  
"Homo sapiens H6 family homeobox 2 (HMX2), mRNA."  
"Homo sapiens hematological and neurological expressed 1 (HN1), transcript variant 1, mRNA."  
"Homo sapiens hematological and neurological expressed 1-like (HN1L), mRNA."  
"Homo sapiens heterogeneous nuclear ribonucleoprotein A0 (HNRNPA0), mRNA."  
"Homo sapiens heterogeneous nuclear ribonucleoprotein A1 (HNRNPA1), transcript variant 2, n  
"Homo sapiens heterogeneous nuclear ribonucleoprotein A1-like 2 (HNRNPA1L2), transcript va  
"Homo sapiens heterogeneous nuclear ribonucleoprotein A2/B1 (HNRNPA2B1), transcript varia  
"Homo sapiens heterogeneous nuclear ribonucleoprotein A3 (HNRNPA3), mRNA."  
Homo sapiens heterogeneous nuclear ribonucleoprotein A3 pseudogene 1 (HNRNPA3P1) on ct  
"Homo sapiens heterogeneous nuclear ribonucleoprotein A/B (HNRNPAB), transcript variant 2,  
"Homo sapiens heterogeneous nuclear ribonucleoprotein C (C1/C2) (HNRNPC), transcript varia  
"Homo sapiens heterogeneous nuclear ribonucleoprotein D (AU-rich element RNA binding prote  
"Homo sapiens heterogeneous nuclear ribonucleoprotein F (HNRNPF), transcript variant 2, mRI  
"Homo sapiens heterogeneous nuclear ribonucleoprotein H1 (H) (HNRNPH1), mRNA."  
"Homo sapiens heterogeneous nuclear ribonucleoprotein H2 (H') (HNRNPH2), transcript variant  
"Homo sapiens heterogeneous nuclear ribonucleoprotein H3 (2H9) (HNRNPH3), transcript varia  
"Homo sapiens heterogeneous nuclear ribonucleoprotein K (HNRNPK), transcript variant 3, mR  
"Homo sapiens heterogeneous nuclear ribonucleoprotein L (HNRNPL), transcript variant 2, mR  
"Homo sapiens heterogeneous nuclear ribonucleoprotein M (HNRNPM), transcript variant 2, mF  
"Homo sapiens heterogeneous nuclear ribonucleoprotein R (HNRNPR), transcript variant 2, mR  
"Homo sapiens heterogeneous nuclear ribonucleoprotein U-like 1 (HNRNPUL1), transcript varia  
"Homo sapiens heterogeneous nuclear ribonucleoprotein U-like 2 (HNRNPUL2), mRNA."  
"Homo sapiens heterogeneous nuclear ribonucleoprotein A1 pseudogene (HNRPA1L-2), non-cc  
"PREDICTED: Homo sapiens heterogeneous nuclear ribonucleoprotein A1 pseudogene 4 (HNR  
"Homo sapiens heterogeneous nuclear ribonucleoprotein A2/B1 (HNRPA2B1), transcript variant  
"Homo sapiens heterogeneous nuclear ribonucleoprotein C (C1/C2) (HNRPC), transcript variant  
"Homo sapiens heterogeneous nuclear ribonucleoprotein D-like (HNRPDL), transcript variant 3,

"Homo sapiens heterogeneous nuclear ribonucleoprotein H1 (H) (HNRPH1), mRNA."  
"Homo sapiens heterogeneous nuclear ribonucleoprotein H3 (2H9) (HNRPH3), transcript variant 1, mRNA."  
"Homo sapiens heterogeneous nuclear ribonucleoprotein K (HNRPK), transcript variant 3, mRNA."  
"Homo sapiens heterogeneous nuclear ribonucleoprotein L-like (HNRPLL), mRNA."  
"Homo sapiens heterogeneous nuclear ribonucleoprotein M (HNRPM), transcript variant 1, mRNA."  
"Homo sapiens heterogeneous nuclear ribonucleoprotein R (HNRPR), mRNA."  
"Homo sapiens heterogeneous nuclear ribonucleoprotein U-like 1 (HNRPUL1), transcript variant 1, mRNA."  
"PREDICTED: Homo sapiens heterogeneous nuclear ribonucleoprotein U-like 2 (HNRPUL2), mRNA."  
"Homo sapiens homer homolog 1 (Drosophila) (HOMER1), mRNA."  
"Homo sapiens homer homolog 2 (Drosophila) (HOMER2), transcript variant 3, mRNA."  
"Homo sapiens homer homolog 3 (Drosophila) (HOMER3), mRNA."  
"Homo sapiens homeobox and leucine zipper encoding (HOMEZ), mRNA."  
"Homo sapiens hook homolog 2 (Drosophila) (HOOK2), transcript variant 1, mRNA."  
"Homo sapiens hook homolog 3 (Drosophila) (HOOK3), mRNA."  
"Homo sapiens HOP homeobox (HOPX), transcript variant 1, mRNA."  
"Homo sapiens hox transcript antisense RNA (non-protein coding) (HOTAIR), antisense RNA."  
"Homo sapiens HOXA11 antisense RNA (non-protein coding) (HOXA11AS), antisense RNA."  
"Homo sapiens homeobox A13 (HOXA13), mRNA."  
"Homo sapiens homeobox A5 (HOXA5), mRNA."  
"Homo sapiens homeobox A6 (HOXA6), mRNA."  
"Homo sapiens homeobox B2 (HOXB2), mRNA."  
"Homo sapiens homeobox B4 (HOXB4), mRNA."  
"Homo sapiens homeobox B7 (HOXB7), mRNA."  
"Homo sapiens homeobox B8 (HOXB8), mRNA."  
"Homo sapiens homeobox C4 (HOXC4), transcript variant 1, mRNA."  
"Homo sapiens homeobox C6 (HOXC6), transcript variant 2, mRNA."  
"Homo sapiens homeobox C8 (HOXC8), mRNA."  
"Homo sapiens homeobox D12 (HOXD12), mRNA."  
"Homo sapiens homeobox D3 (HOXD3), mRNA."  
"Homo sapiens homeobox D4 (HOXD4), mRNA."  
"Homo sapiens heterochromatin protein 1, binding protein 3 (HP1BP3), mRNA."  
"Homo sapiens hippocalcin (HPCA), mRNA."  
"Homo sapiens hippocalcin-like 1 (HPCAL1), transcript variant 2, mRNA."  
"Homo sapiens hippocalcin like 4 (HPCAL4), mRNA."  
"Homo sapiens 4-hydroxyphenylpyruvate dioxygenase-like (HPDL), mRNA."  
"Homo sapiens hydroxyprostaglandin dehydrogenase 15-(NAD) (HPGD), mRNA."  
"Homo sapiens hypoxanthine phosphoribosyltransferase 1 (Lesch-Nyhan syndrome) (HPRT1), mRNA."  
"Homo sapiens Hermansky-Pudlak syndrome 1 (HPS1), transcript variant 3, mRNA."  
"Homo sapiens Hermansky-Pudlak syndrome 3 (HPS3), mRNA."  
"Homo sapiens Hermansky-Pudlak syndrome 4 (HPS4), transcript variant 4, mRNA."  
"Homo sapiens Hermansky-Pudlak syndrome 5 (HPS5), transcript variant 1, mRNA."  
"Homo sapiens heparanase (HPSE), mRNA."  
"Homo sapiens v-Ha-ras Harvey rat sarcoma viral oncogene homolog (HRAS), transcript variant 1, mRNA."  
"Homo sapiens HRAS-like suppressor 2 (HRASLS2), mRNA."

"Homo sapiens HRAS-like suppressor 3 (HRASLS3), mRNA."  
"Homo sapiens HIV-1 Rev binding protein (HRB), mRNA."  
"Homo sapiens histidine rich calcium binding protein (HRC), mRNA."  
"Homo sapiens histamine receptor H1 (HRH1), mRNA."  
"Homo sapiens Tara-like protein (HRIHFB2122), transcript variant 2, mRNA."  
"Homo sapiens harakiri, BCL2 interacting protein (contains only BH3 domain) (HRK), mRNA."  
"Homo sapiens heat-responsive protein 12 (HRSP12), mRNA."  
"Homo sapiens cDNA FLJ26539 fis, clone KDN09310"  
"BX102688 NCI\_CGAP\_Kid11 Homo sapiens cDNA clone IMAGp998H094996, mRNA sequenc  
"BX106314 Soares retina N2b4HR Homo sapiens cDNA clone IMAGp998B20830, mRNA sequ  
"17000532611997 GRN\_EB Homo sapiens cDNA 5, mRNA sequence"  
"BX114061 Soares\_testis\_NHT Homo sapiens cDNA clone IMAGp998F051794, mRNA sequen  
"zu98b06.s1 NCI\_CGAP\_GCB1 Homo sapiens cDNA clone IMAGE:746003 3, mRNA sequence  
full-length cDNA clone CS0DM001YA20 of Fetal liver of Homo sapiens (human)  
"BX417162 Homo sapiens PLACENTA Homo sapiens cDNA clone CS0DE005YO02 5-PRIME, I  
"Homo sapiens cDNA FLJ37173 fis, clone BRACE2028392"  
"Homo sapiens cDNA FLJ41853 fis, clone NT2RI3004161"  
"AGENCOURT\_14360862 NIH\_MGC\_187 Homo sapiens cDNA clone IMAGE:30405414 5, mR  
"CR741548 Homo sapiens library (Ebert L) Homo sapiens cDNA clone IMAGp97111950 ; IMAGI  
"Homo sapiens cDNA: FLJ23313 fis, clone HEP11919"  
"BX117133 Soares infant brain 1NIB Homo sapiens cDNA clone IMAGp998M0769, mRNA sequ  
"ag03b01.s1 Soares\_testis\_NHT Homo sapiens cDNA clone IMAGE:1056169 3, mRNA sequen  
"BX108566 Soares\_testis\_NHT Homo sapiens cDNA clone IMAGp998K171830, mRNA sequen  
"AGENCOURT\_6824128 NIH\_MGC\_127 Homo sapiens cDNA clone IMAGE:5810498 5, mRNA  
"602663235F1 NIH\_MGC\_59 Homo sapiens cDNA clone IMAGE:4808457 5, mRNA sequence"  
"602275987F1 NIH\_MGC\_85 Homo sapiens cDNA clone IMAGE:4363989 5, mRNA sequence"  
"HESC4\_33\_E11.g1\_A037 NIH\_MGC\_262 Homo sapiens cDNA clone IMAGE:7474271 5, mRN  
"Homo sapiens hypothetical protein LOC285194, mRNA (cDNA clone IMAGE:5266409)"  
"oz10f04.x1 Soares\_fetal\_liver\_spleen\_1NFLS\_S1 Homo sapiens cDNA clone IMAGE:1674943  
"DKFZp686M05188\_r1 686 (synonym: hlcc3) Homo sapiens cDNA clone DKFZp686M05188 5,  
"df120d03.w1 Morton Fetal Cochlea Homo sapiens cDNA clone IMAGE:2539829 3, mRNA sequ  
"BX112643 Soares pineal gland 3NbHPG Homo sapiens cDNA clone IMAGp998A24920, mRN/  
"BX089093 Soares\_testis\_NHT Homo sapiens cDNA clone IMAGp998J203332 ; IMAGE:13218  
"BX088735 Soares\_testis\_NHT Homo sapiens cDNA clone IMAGp998C083329 ; IMAGE:13205  
"BX088952 Soares\_testis\_NHT Homo sapiens cDNA clone IMAGp998J223329 ; IMAGE:13206  
"BX089065 Soares\_testis\_NHT Homo sapiens cDNA clone IMAGp998M053390 ; IMAGE:13441  
"BX101252 NCI\_CGAP\_Lu24 Homo sapiens cDNA clone IMAGp998I115625, mRNA sequence  
"xj85h08.x1 Soares\_NFL\_T\_GBC\_S1 Homo sapiens cDNA clone IMAGE:2664063 3 similar to c  
"BX104407 Soares fetal liver spleen 1NFLS Homo sapiens cDNA clone IMAGp998O13369, mR  
"qn52b08.x1 NCI\_CGAP\_Kid5 Homo sapiens cDNA clone IMAGE:1901847 3, mRNA sequence  
"af87f08.s1 Soares\_testis\_NHT Homo sapiens cDNA clone 1049031 3, mRNA sequence"  
"ai78b04.s1 Soares\_testis\_NHT Homo sapiens cDNA clone 1376911 3, mRNA sequence"  
"UI-H-FT1-bhx-f-06-0-UI.s1 NCI\_CGAP\_FT1 Homo sapiens cDNA clone UI-H-FT1-bhx-f-06-0-U  
"UI-H-DH1-axg-m-05-0-UI.s1 NCI\_CGAP\_DH1 Homo sapiens cDNA clone IMAGE:5828524 3, r

"hd27b07.y1 Human Retina cDNA (Un-normalized, unamplified): hd/he Homo sapiens cDNA clone  
"BX118370 Soares\_NFL\_T\_GBC\_S1 Homo sapiens cDNA clone IMAGp998P183859, mRNA sequence  
"te57e04.x1 Soares\_NFL\_T\_GBC\_S1 Homo sapiens cDNA clone IMAGE:2090814 3, mRNA sequence  
Homo sapiens cDNA clone IMAGE:4812643  
"qh86e12.x1 Soares\_NFL\_T\_GBC\_S1 Homo sapiens cDNA clone IMAGE:1853902 3, mRNA sequence  
"BX118421 Soares\_NFL\_T\_GBC\_S1 Homo sapiens cDNA clone IMAGp998D144012, mRNA sequence  
"Homo sapiens cDNA FLJ34899 fis, clone NT2NE2018594"  
"Homo sapiens cDNA FLJ36663 fis, clone UTERU2002826"  
"AGENCOURT\_7914287 NIH\_MGC\_71 Homo sapiens cDNA clone IMAGE:6156595 5, mRNA sequence  
"BX110351 NCI\_CGAP\_Kid5 Homo sapiens cDNA clone IMAGp998C243778, mRNA sequence  
"BX091766 Soares\_NFL\_T\_GBC\_S1 Homo sapiens cDNA clone IMAGp998L023711 ; IMAGE:14096  
"BX097369 Soares\_NFL\_T\_GBC\_S1 Homo sapiens cDNA clone IMAGp998C223714, mRNA sequence  
"BX100484 Soares\_NFL\_T\_GBC\_S1 Homo sapiens cDNA clone IMAGp998P084001, mRNA sequence  
"kdef14 Soares\_NFL\_T\_GBC\_S1 Homo sapiens cDNA clone IMAGE:2349594, mRNA sequence  
Homo sapiens cDNA clone IMAGE:5269228  
"BX103136 Soares\_testis\_NHT Homo sapiens cDNA clone IMAGp998L033559, mRNA sequence  
"BX093647 Soares\_testis\_NHT Homo sapiens cDNA clone IMAGp998F023561 ; IMAGE:14096  
"oh02d10.y5 NCI\_CGAP\_Kid3 Homo sapiens cDNA clone IMAGE:1456627 5, mRNA sequence  
full-length cDNA clone CS0DI004YB08 of Placenta Cot 25-normalized of Homo sapiens (human  
"BX115064 NCI\_CGAP\_GC4 Homo sapiens cDNA clone IMAGp998N233982, mRNA sequence  
"Homo sapiens cDNA FLJ38215 fis, clone FCBBF2000291"  
"wq04a09.x1 NCI\_CGAP\_Kid12 Homo sapiens cDNA clone IMAGE:2470264 3, mRNA sequence  
"BX119471 Soares\_NFL\_T\_GBC\_S1 Homo sapiens cDNA clone IMAGp998N194004 ; IMAGE:14096  
"oj05h07.s1 NCI\_CGAP\_Mel3 Homo sapiens cDNA clone IMAGE:1491325 3, mRNA sequence  
full-length cDNA clone CS0DI001YE02 of Placenta Cot 25-normalized of Homo sapiens (human  
Homo sapiens mRNA; cDNA DKFZp434C1613 (from clone DKFZp434C1613)  
"BX089525 Soares\_NFL\_T\_GBC\_S1 Homo sapiens cDNA clone IMAGp998K043954 ; IMAGE:14096  
"BX104799 Soares\_NFL\_T\_GBC\_S1 Homo sapiens cDNA clone IMAGp998M093960, mRNA sequence  
"on85g03.s1 Soares\_NFL\_T\_GBC\_S1 Homo sapiens cDNA clone IMAGE:1563508 3, mRNA sequence  
"Homo sapiens cDNA clone IMAGE:5541046, partial cds"  
"BX093283 Soares\_NFL\_T\_GBC\_S1 Homo sapiens cDNA clone IMAGp998D104004 ; IMAGE:14096  
"wf68b04.x1 Soares\_NFL\_T\_GBC\_S1 Homo sapiens cDNA clone IMAGE:2360719 3, mRNA sequence  
"UI-H-BI1-afm-f-03-0-UI.s1 NCI\_CGAP\_Sub3 Homo sapiens cDNA clone IMAGE:2722324 3, mRNA sequence  
"UI-E-EJ0-aho-c-14-0-UI.s1 UI-E-EJ0 Homo sapiens cDNA clone UI-E-EJ0-aho-c-14-0-UI 3, mRNA sequence  
"BX097571 Soares\_NFL\_T\_GBC\_S1 Homo sapiens cDNA clone IMAGp998M213811, mRNA sequence  
"602505656F1 NIH\_MGC\_77 Homo sapiens cDNA clone IMAGE:4619364 5, mRNA sequence"  
"BX101632 Soares retina N2b4HR Homo sapiens cDNA clone IMAGp998C18440, mRNA sequence  
"Homo sapiens cDNA FLJ20769 fis, clone COL06674"  
"602779036F2 NCI\_CGAP\_Brn67 Homo sapiens cDNA clone IMAGE:4914488 5, mRNA sequence  
"os59g01.y5 NCI\_CGAP\_Br2 Homo sapiens cDNA clone IMAGE:1609680 5, mRNA sequence"  
"BX115880 Soares\_testis\_NHT Homo sapiens cDNA clone IMAGp998B114113, mRNA sequence  
"BX098816 Soares\_NFL\_T\_GBC\_S1 Homo sapiens cDNA clone IMAGp998D154124, mRNA sequence  
"BX097307 NCI\_CGAP\_Lu5 Homo sapiens cDNA clone IMAGp998P074068, mRNA sequence"  
"BX109290 NCI\_CGAP\_Br2 Homo sapiens cDNA clone IMAGp998A244082, mRNA sequence"

"RST12926 Athersys RAGE Library Homo sapiens cDNA, mRNA sequence"  
"Homo sapiens cDNA FLJ42306 fis, clone TRACH2001646"  
"ok04d03.s1 Soares\_NFL\_T\_GBC\_S1 Homo sapiens cDNA clone IMAGE:1506821 3, mRNA sequence"  
"qa90f08.x1 Soares\_fetal\_heart\_NbHH19W Homo sapiens cDNA clone IMAGE:1694055 3, mRNA sequence"  
"qk02b10.x1 NCI\_CGAP\_Kid3 Homo sapiens cDNA clone IMAGE:1867771 3, mRNA sequence"  
"BX098094 Soares pineal gland 3NbHPG Homo sapiens cDNA clone IMAGE:16998G09911, mRNA sequence"  
"BX118075 Soares\_NFL\_T\_GBC\_S1 Homo sapiens cDNA clone IMAGE:16998N163901, mRNA sequence"  
"BX103636 Soares\_testis\_NHT Homo sapiens cDNA clone IMAGE:16998J184112, mRNA sequence"  
"BX105859 Soares\_testis\_NHT Homo sapiens cDNA clone IMAGE:16998I034111, mRNA sequence"  
"BX109627 NCI\_CGAP\_Brn25 Homo sapiens cDNA clone IMAGE:16998C184969, mRNA sequence"  
"K-EST0218892 L18POOL1n1 Homo sapiens cDNA clone L18POOL1n1-30-G08 5, mRNA sequence"  
"DKFZp686H1820\_r1 686 (synonym: hlcc3) Homo sapiens cDNA clone DKFZp686H1820 5, mRNA sequence"  
"7q63f08.x1 NCI\_CGAP\_Lu24 Homo sapiens cDNA clone IMAGE:3703070 3, mRNA sequence"  
"Homo sapiens, clone IMAGE:5248198, mRNA"  
Homo sapiens mRNA; cDNA DKFZp762D186 (from clone DKFZp762D186)  
"BX089765 Soares\_testis\_NHT Homo sapiens cDNA clone IMAGE:16998G024171 ; IMAGE:164395"  
"DB335929 TESTI2 Homo sapiens cDNA clone TESTI2001868 3, mRNA sequence"  
"BX109538 Soares\_testis\_NHT Homo sapiens cDNA clone IMAGE:16998A134175, mRNA sequence"  
"om44d06.s1 Soares\_NFL\_T\_GBC\_S1 Homo sapiens cDNA clone IMAGE:1543883 3, mRNA sequence"  
"DA834832 PLACE5 Homo sapiens cDNA clone PLACE5000483 5, mRNA sequence"  
"BX108398 Soares\_NFL\_T\_GBC\_S1 Homo sapiens cDNA clone IMAGE:16998C163954, mRNA sequence"  
"qg50g03.x1 Soares\_testis\_NHT Homo sapiens cDNA clone IMAGE:1838644 3, mRNA sequence"  
"Homo sapiens cDNA FLJ35319 fis, clone PROST2011577"  
"BX111413 NCI\_CGAP\_Brn23 Homo sapiens cDNA clone IMAGE:16998D234237, mRNA sequence"  
"BX093329 Soares\_parathyroid\_tumor\_NbHPA Homo sapiens cDNA clone IMAGE:16998A124183"  
"oz26b02.x1 Soares\_total\_fetus\_Nb2HF8\_9w Homo sapiens cDNA clone IMAGE:1676427 3, mRNA sequence"  
"UI-E-EJ0-aiq-m-17-0-UI.r1 UI-E-EJ0 Homo sapiens cDNA clone UI-E-EJ0-aiq-m-17-0-UI 5, mRNA sequence"  
"AGENCOURT\_8120841 Lupski\_dorsal\_root\_ganglion Homo sapiens cDNA clone IMAGE:6178"  
"BX101207 Soares\_total\_fetus\_Nb2HF8\_9w Homo sapiens cDNA clone IMAGE:16998I124211, mRNA sequence"  
"BX100240 Soares\_fetal\_liver\_spleen\_1NFLS\_S1 Homo sapiens cDNA clone IMAGE:16998E1441"  
"BX108458 Soares\_NhHMPu\_S1 Homo sapiens cDNA clone IMAGE:16998J154261, mRNA sequence"  
"BX119186 Soares\_testis\_NHT Homo sapiens cDNA clone IMAGE:16998H214161, mRNA sequence"  
"tf89h12.x5 NCI\_CGAP\_Brn23 Homo sapiens cDNA clone IMAGE:2106503 3, mRNA sequence"  
"Homo sapiens cDNA FLJ11554 fis, clone HEMBA1003037"  
"Homo sapiens cDNA clone IMAGE:4393471, partial cds"  
Human clone 23629 mRNA sequence  
"UI-CF-FN0-afu-p-08-0-UI.s1 UI-CF-FN0 Homo sapiens cDNA clone UI-CF-FN0-afu-p-08-0-UI 3"  
"ac76f10.x5 Stratagene lung (#937210) Homo sapiens cDNA clone IMAGE:868555 3, mRNA sequence"  
Homo sapiens mRNA; cDNA DKFZp564H1663 (from clone DKFZp564H1663)  
"zb53f02.y5 Soares\_fetal\_lung\_NbHL19W Homo sapiens cDNA clone IMAGE:307323 5, mRNA sequence"  
"AV737943 CB Homo sapiens cDNA clone CBDAEG06 5, mRNA sequence"  
"UI-E-EJ0-ahj-a-16-0-UI.r2 UI-E-EJ0 Homo sapiens cDNA clone UI-E-EJ0-ahj-a-16-0-UI 5, mRNA sequence"  
Homo sapiens clone 24629 mRNA sequence  
"BX105338 Soares\_pregnant\_uterus\_NbHPU Homo sapiens cDNA clone IMAGE:16998C114347, mRNA sequence"

"CR738909 Soares\_testis\_NHT Homo sapiens cDNA clone IMAGp971E2247 ; IMAGE:744208 ; Homo sapiens cDNA clone IMAGE:30332316  
"wd36c10.x1 Soares\_NFL\_T\_GBC\_S1 Homo sapiens cDNA clone IMAGE:2330226 3, mRNA s  
"tx28f05.x1 NCI\_CGAP\_Lu24 Homo sapiens cDNA clone IMAGE:2270913 3, mRNA sequence"  
"BX095676 Soares\_testis\_NHT Homo sapiens cDNA clone IMAGp9981154418, mRNA sequenc  
"PREDICTED: Homo sapiens hypothetical LOC339875 (LOC339875), mRNA"  
"qh05g02.x1 Soares\_NFL\_T\_GBC\_S1 Homo sapiens cDNA clone IMAGE:1843826 3, mRNA s  
full-length cDNA clone CS0DF005YI08 of Fetal brain of Homo sapiens (human)  
"AV731331 HTF Homo sapiens cDNA clone HTFBAA12 5, mRNA sequence"  
"Homo sapiens cDNA: FLJ21513 fis, clone COL05778"  
"7d70a05.x1 NCI\_CGAP\_Lu24 Homo sapiens cDNA clone IMAGE:3278288 3, mRNA sequenc  
"qm64a10.x1 Soares\_placenta\_8to9weeks\_2NbHP8to9W Homo sapiens cDNA clone IMAGE:1  
"BX106374 Soares\_fetal\_heart\_NbHH19W Homo sapiens cDNA clone IMAGp998H194335, mF  
"oz40h01.s1 Soares\_NhHMPu\_S1 Homo sapiens cDNA clone IMAGE:1677841 3, mRNA sequ  
"qb54e12.x5 NCI\_CGAP\_Brn23 Homo sapiens cDNA clone IMAGE:1703950 3, mRNA sequenc  
"BX113358 Soares\_NFL\_T\_GBC\_S1 Homo sapiens cDNA clone IMAGp998F085778, mRNA s  
"BX103063 Soares\_NhHMPu\_S1 Homo sapiens cDNA clone IMAGp998M244217, mRNA sequ  
"UI-E-EJ1-ajl-h-09-0-UI.s1 UI-E-EJ1 Homo sapiens cDNA clone UI-E-EJ1-ajl-h-09-0-UI 3, mRN/  
"Homo sapiens clone DNA57836 GLPG464 (UNQ464) mRNA, complete cds"  
"DKFZp313J0114\_s1 313 (synonym: hlcc2) Homo sapiens cDNA clone DKFZp313J0114 3, mR  
"BX112950 Soares\_testis\_NHT Homo sapiens cDNA clone IMAGp998E054496, mRNA sequen  
"th02b02.x1 NCI\_CGAP\_CLL1 Homo sapiens cDNA clone IMAGE:2117067 3, mRNA sequence  
"BX092644 Soares\_NFL\_T\_GBC\_S1 Homo sapiens cDNA clone IMAGp998O144505 ; IMAGE:  
"BX100265 Soares\_NFL\_T\_GBC\_S1 Homo sapiens cDNA clone IMAGp998P113813, mRNA s  
"BX098874 Soares\_NhHMPu\_S1 Homo sapiens cDNA clone IMAGp998D154543, mRNA sequ  
"BX090577 Soares\_NFL\_T\_GBC\_S1 Homo sapiens cDNA clone IMAGp998K124519 ; IMAGE:  
"DB336496 TESTI2 Homo sapiens cDNA clone TESTI2007437 3, mRNA sequence"  
"BX111027 Soares\_NhHMPu\_S1 Homo sapiens cDNA clone IMAGp998H094605, mRNA sequ  
"Homo sapiens cDNA FLJ43367 fis, clone NT2RP8000435"  
"603042006F1 NIH\_MGC\_116 Homo sapiens cDNA clone IMAGE:5182585 5, mRNA sequenc  
"ok22e02.s1 Soares\_NSF\_F8\_9W\_OT\_PA\_P\_S1 Homo sapiens cDNA clone IMAGE:1508570  
"DA820827 PERIC2 Homo sapiens cDNA clone PERIC2000642 5, mRNA sequence"  
"xs53e01.x1 NCI\_CGAP\_Kid11 Homo sapiens cDNA clone IMAGE:2773368 3, mRNA sequenc  
"BX102092 Soares\_testis\_NHT Homo sapiens cDNA clone IMAGp998C034413, mRNA sequen  
"im52e03.y1 HR85 islet Homo sapiens cDNA clone IMAGE:6038860 5, mRNA sequence"  
"xs48g03.x1 NCI\_CGAP\_Kid11 Homo sapiens cDNA clone IMAGE:2772916 3, mRNA sequenc  
Homo sapiens clone 24583 mRNA sequence  
"BX106991 NCI\_CGAP\_GC4 Homo sapiens cDNA clone IMAGp998C124026, mRNA sequence  
"BP873470 Sugano cDNA library, embryonal kidney Homo sapiens cDNA clone HKR13362, mR  
"Homo sapiens cDNA FLJ34023 fis, clone FCBBF2003083"  
"603029375F1 NIH\_MGC\_114 Homo sapiens cDNA clone IMAGE:5199738 5, mRNA sequenc  
"qx91b01.x1 NCI\_CGAP\_GC6 Homo sapiens cDNA clone IMAGE:2009833 3, mRNA sequence  
"BX107715 Soares\_testis\_NHT Homo sapiens cDNA clone IMAGp998M073519, mRNA sequer  
Homo sapiens mRNA; cDNA DKFZp667A182 (from clone DKFZp667A182)

"EST366316 MAGE resequences, MAGC Homo sapiens cDNA, mRNA sequence"  
"BX093041 NCI\_CGAP\_Pr3 Homo sapiens cDNA clone IMAGp998E023027 ; IMAGE:1204585,  
"BX105942 NCI\_CGAP\_GCB1 Homo sapiens cDNA clone IMAGp998B223204, mRNA sequenc  
"EST391198 MAGE resequences, MAGP Homo sapiens cDNA, mRNA sequence"  
"zr87e09.r1 NCI\_CGAP\_GCB1 Homo sapiens cDNA clone IMAGE:682696 5, mRNA sequence"  
"PREDICTED: Homo sapiens LOC440998 (LOC440998), mRNA"  
"hb73c02.x1 NCI\_CGAP\_Ut2 Homo sapiens cDNA clone IMAGE:2888834 3, mRNA sequence"  
"Homo sapiens cDNA FLJ37425 fis, clone BRAWH2001530"  
"AGENCOURT\_13779116 NIH\_MGC\_184 Homo sapiens cDNA clone IMAGE:30349586 5, mR  
Homo sapiens cDNA clone IMAGE:5263960  
"qh09e06.x1 Soares\_NFL\_T\_GBC\_S1 Homo sapiens cDNA clone IMAGE:1844194 3, mRNA s  
"Homo sapiens cDNA FLJ35432 fis, clone SMINT2002311"  
Homo sapiens mRNA; cDNA DKFZp313M0331 (from clone DKFZp313M0331)  
"BX099476 NCI\_CGAP\_CLL1 Homo sapiens cDNA clone IMAGp998E054974, mRNA sequenc  
"DA210550 BRAWH2 Homo sapiens cDNA clone BRAWH2018679 5, mRNA sequence"  
"hx21e11.y1 Human primary human ocular pericytes. Equalized (hx) Homo sapiens cDNA clone  
"am20e02.s1 Soares\_NFL\_T\_GBC\_S1 Homo sapiens cDNA clone IMAGE:1467386 3, mRNA s  
Homo sapiens cDNA clone IMAGE:4831215  
"UI-H-FH1-bfo-f-15-0-UI.s1 NCI\_CGAP\_FH1 Homo sapiens cDNA clone UI-H-FH1-bfo-f-15-0-U  
"tn46f01.x1 NCI\_CGAP\_Kid11 Homo sapiens cDNA clone IMAGE:2171449 3, mRNA sequence  
"PREDICTED: Homo sapiens hypothetical LOC126435 (LOC126435), mRNA"  
"BX113460 Soares fetal liver spleen 1NFLS Homo sapiens cDNA clone IMAGp998F10115, mRI  
"zw80a10.s1 Soares\_testis\_NHT Homo sapiens cDNA clone IMAGE:782490 3, mRNA sequenc  
"BX109554 Soares\_testis\_NHT Homo sapiens cDNA clone IMAGp998M111862, mRNA sequer  
"602575538F1 NIH\_MGC\_77 Homo sapiens cDNA clone IMAGE:4703745 5, mRNA sequence"  
"BX109970 NCI\_CGAP\_Ut4 Homo sapiens cDNA clone IMAGp998L185412, mRNA sequence"  
"UI-H-BI4-apj-b-11-0-UI.s1 NCI\_CGAP\_Sub8 Homo sapiens cDNA clone IMAGE:3087333 3, ml  
"Homo sapiens cDNA clone IMAGE:6198874, partial cds"  
full-length cDNA clone CS0DI053YD12 of Placenta Cot 25-normalized of Homo sapiens (humar  
"PREDICTED: Homo sapiens hypothetical LOC388214 (LOC388214), mRNA"  
"nc62a02.x5 NCI\_CGAP\_Pr1 Homo sapiens cDNA clone IMAGE:745802, mRNA sequence"  
"PREDICTED: Homo sapiens hypothetical LOC400043 (LOC400043), mRNA"  
"UI-E-EJ1-ajw-k-15-0-UI.r1 UI-E-EJ1 Homo sapiens cDNA clone UI-E-EJ1-ajw-k-15-0-UI 5, mRN  
Homo sapiens cDNA clone IMAGE:5263177  
"Homo sapiens cDNA FLJ34755 fis, clone NHNPC1000034"  
"Homo sapiens cDNA FLJ32401 fis, clone SKMUS2000339"  
Homo sapiens mRNA; cDNA DKFZp686E0389 (from clone DKFZp686E0389)  
"wb40h11.x1 NCI\_CGAP\_GC6 Homo sapiens cDNA clone IMAGE:2308197 3, mRNA sequence  
"BX104313 NCI\_CGAP\_GC6 Homo sapiens cDNA clone IMAGp998E085554, mRNA sequence  
"BX116984 NCI\_CGAP\_Kid11 Homo sapiens cDNA clone IMAGp998H175699, mRNA sequenc  
Homo sapiens mRNA; cDNA DKFZp686I14117 (from clone DKFZp686I14117)  
"tu22e12.x1 NCI\_CGAP\_Pr28 Homo sapiens cDNA clone IMAGE:2251822 3, mRNA sequence"  
"wa17h04.x1 NCI\_CGAP\_Kid11 Homo sapiens cDNA clone IMAGE:2298391 3, mRNA sequenc  
"602285360F1 NIH\_MGC\_86 Homo sapiens cDNA clone IMAGE:4372671 5, mRNA sequence"



"Homo sapiens cDNA FLJ20239 fis, clone COLF5934"  
"7k12g03.x1 NCI\_CGAP\_GC6 Homo sapiens cDNA clone IMAGE:3444269 3, mRNA sequence"  
"nad30e12.x1 NCI\_CGAP\_Lu24 Homo sapiens cDNA clone IMAGE:3367030 3, mRNA sequence"  
"AJ571891 HM3/RH2 Homo sapiens cDNA clone HSPD44306, mRNA sequence"  
"BX096476 Soares\_NFL\_T\_GBC\_S1 Homo sapiens cDNA clone IMAGp998H125776, mRNA sequence"  
"Homo sapiens, clone IMAGE:4703783, mRNA"  
"BX108712 Soares\_NFL\_T\_GBC\_S1 Homo sapiens cDNA clone IMAGp998J175703, mRNA sequence"  
"tp90h02.x1 NCI\_CGAP\_Ut3 Homo sapiens cDNA clone IMAGE:2206611 3, mRNA sequence"  
"hu02g11.x1 NCI\_CGAP\_Lu24 Homo sapiens cDNA clone IMAGE:3165476 3, mRNA sequence"  
"wd43f04.x1 Soares\_NFL\_T\_GBC\_S1 Homo sapiens cDNA clone IMAGE:2330911 3, mRNA sequence"  
"BX114021 NCI\_CGAP\_Lu24 Homo sapiens cDNA clone IMAGp998F135800, mRNA sequence"  
"Homo sapiens cDNA FLJ34585 fis, clone KIDNE2008758"  
"BX105747 Barstead colon HPLRB7 Homo sapiens cDNA clone IMAGp998G155786, mRNA sequence"  
"DA570923 HEMBA1 Homo sapiens cDNA clone HEMBA1005696 5, mRNA sequence"  
"DA311740 BRHIP3 Homo sapiens cDNA clone BRHIP3000462 5, mRNA sequence"  
"wq09e07.x1 NCI\_CGAP\_Kid12 Homo sapiens cDNA clone IMAGE:2470788 3, mRNA sequence"  
"BX100285 Soares\_NFL\_T\_GBC\_S1 Homo sapiens cDNA clone IMAGp998L095850, mRNA sequence"  
"wj24d09.x1 NCI\_CGAP\_Kid12 Homo sapiens cDNA clone IMAGE:2403761 3, mRNA sequence"  
"Homo sapiens cDNA FLJ43362 fis, clone NT2RP7017365"  
"wh39c03.x1 NCI\_CGAP\_Kid11 Homo sapiens cDNA clone IMAGE:2383108 3, mRNA sequence"  
"Homo sapiens cDNA FLJ13457 fis, clone PLACE1003343"  
"wf12a11.x1 Soares\_NFL\_T\_GBC\_S1 Homo sapiens cDNA clone IMAGE:2350364 3, mRNA sequence"  
"CR978491 RZPD no.9017 Homo sapiens cDNA clone RZPDp9017I1519 5, mRNA sequence"  
Homo sapiens mRNA full length insert cDNA clone EUROIMAGE 966164  
"BX103929 Soares\_NFL\_T\_GBC\_S1 Homo sapiens cDNA clone IMAGp998B145777, mRNA sequence"  
"Homo sapiens cDNA FLJ38536 fis, clone HCHON2001200"  
"Homo sapiens cDNA FLJ32080 fis, clone OCBBF2000015"  
Homo sapiens mRNA full length insert cDNA clone EUROIMAGE 1674211  
"PREDICTED: Homo sapiens hypothetical LOC389182 (LOC389182), mRNA"  
"602419370F1 NIH\_MGC\_93 Homo sapiens cDNA clone IMAGE:4526368 5, mRNA sequence"  
"Homo sapiens cDNA FLJ26031 fis, clone PNC08078"  
"RST34529 Athersys RAGE Library Homo sapiens cDNA, mRNA sequence"  
"Homo sapiens cDNA FLJ33375 fis, clone BRACE2006137"  
"601122564F1 NIH\_MGC\_20 Homo sapiens cDNA clone IMAGE:3346815 5, mRNA sequence"  
"CR738732 NCI\_CGAP\_Kid11 Homo sapiens cDNA clone IMAGp971E16101 ; IMAGE:2384145"  
"zb69f09.x5 Soares\_fetal\_lung\_NbHL19W Homo sapiens cDNA clone IMAGE:308873 3, mRNA sequence"  
Homo sapiens mRNA; cDNA DKFZp586O1318 (from clone DKFZp586O1318)  
"PREDICTED: Homo sapiens LOC440728 (LOC440728), mRNA"  
"Homo sapiens cDNA FLJ13474 fis, clone PLACE1003593"  
"UI-E-EJ1-ajq-m-12-0-UI.s1 UI-E-EJ1 Homo sapiens cDNA clone UI-E-EJ1-ajq-m-12-0-UI 3, mRNA sequence"  
"DB299353 BRACE3 Homo sapiens cDNA clone BRACE3017094 3, mRNA sequence"  
"602353719F1 NIH\_MGC\_90 Homo sapiens cDNA clone IMAGE:4451716 5, mRNA sequence"  
"PREDICTED: Homo sapiens hypothetical LOC388727 (LOC388727), mRNA"  
Homo sapiens mRNA; cDNA DKFZp761E11121 (from clone DKFZp761E11121)

Homo sapiens cDNA clone IMAGE:5297467

"xc74a02.x1 NCI\_CGAP\_Ov32 Homo sapiens cDNA clone IMAGE:2589962 3, mRNA sequence"

"AGENCOURT\_14251538 NIH\_MGC\_180 Homo sapiens cDNA clone IMAGE:30386499 5, mRNA sequence"

"xf28f11.x1 NCI\_CGAP\_Ut1 Homo sapiens cDNA clone IMAGE:2619405 3, mRNA sequence"

"xb61e03.x1 Soares\_NFL\_T\_GBC\_S1 Homo sapiens cDNA clone IMAGE:2580796 3, mRNA sequence"

"AGENCOURT\_14550449 NIA Homo sapiens cDNA clone IMAGE:30426193 5, mRNA sequence"

"RC2-CT0321-110100-013-c08 CT0321 Homo sapiens cDNA, mRNA sequence"

"xj42a03.x1 Soares\_NFL\_T\_GBC\_S1 Homo sapiens cDNA clone IMAGE:2659852 3, mRNA sequence"

full-length cDNA clone CS0DC013Y110 of Neuroblastoma Cot 25-normalized of Homo sapiens (

"BX116245 Soares placenta Nb2HP Homo sapiens cDNA clone IMAGE:2659852 3, mRNA sequence"

"xn85c12.x1 Soares\_NFL\_T\_GBC\_S1 Homo sapiens cDNA clone IMAGE:2701270 3, mRNA sequence"

"Homo sapiens cDNA FLJ38835 fis, clone MESAN2002424"

"Homo sapiens cDNA FLJ20182 fis, clone COLF0190"

"xv32c11.x1 Soares\_NFL\_T\_GBC\_S1 Homo sapiens cDNA clone IMAGE:2814836 3 similar to"

"ir28b07.y1 HR85 islet Homo sapiens cDNA clone IMAGE:6546565 5, mRNA sequence"

"UI-H-FL1-bgw-i-15-0-UI.s1 NCI\_CGAP\_FL1 Homo sapiens cDNA clone UI-H-FL1-bgw-i-15-0-UI"

"K-EST0220612 L18POOL1n1 Homo sapiens cDNA clone L18POOL1n1-33-F12 5, mRNA sequence"

"Homo sapiens cDNA FLJ38860 fis, clone MESAN2011977"

"hi35a08.x1 NCI\_CGAP\_Co14 Homo sapiens cDNA clone IMAGE:2974262 3, mRNA sequence"

"EST368678 MAGE resequences, MAGD Homo sapiens cDNA, mRNA sequence"

"Homo sapiens cDNA FLJ44165 fis, clone THYMU2033308"

"xk07d09.x1 NCI\_CGAP\_Co20 Homo sapiens cDNA clone IMAGE:2666033 3, mRNA sequence"

"Homo sapiens primary neuroblastoma cDNA, clone:Nbla04072, full insert sequence"

"AGENCOURT\_6808794 NIH\_MGC\_71 Homo sapiens cDNA clone IMAGE:5784515 5, mRNA sequence"

"RST23048 Athersys RAGE Library Homo sapiens cDNA, mRNA sequence"

Homo sapiens mRNA; cDNA DKFZp666J249 (from clone DKFZp666J249)

"Homo sapiens cDNA FLJ31750 fis, clone NT2RI2007406"

"Homo sapiens cDNA FLJ41667 fis, clone FEBRA2028366"

"Homo sapiens cDNA FLJ37263 fis, clone BRAMY2011064"

Homo sapiens mRNA; cDNA DKFZp434C108 (from clone DKFZp434C108)

"Homo sapiens, clone IMAGE:5204729, mRNA"

"601441142F1 NIH\_MGC\_72 Homo sapiens cDNA clone IMAGE:3915971 5, mRNA sequence"

"PREDICTED: Homo sapiens hypothetical LOC221344 (LOC221344), mRNA"

Homo sapiens mRNA; cDNA DKFZp547G133 (from clone DKFZp547G133)

"Homo sapiens HSPC157 protein, mRNA (cDNA clone IMAGE:6672800), partial cds"

"Homo sapiens, clone IMAGE:5218705, mRNA"

"AV649053 GLC Homo sapiens cDNA clone GLCBPH07 3, mRNA sequence"

"AGENCOURT\_14098824 NIH\_MGC\_180 Homo sapiens cDNA clone IMAGE:30377874 5, mRNA sequence"

"Homo sapiens cDNA FLJ33171 fis, clone ADRGL2000644"

Homo sapiens cDNA clone IMAGE:5272804

"Homo sapiens cDNA clone IMAGE:6166085, partial cds"

"Homo sapiens cDNA clone IMAGE:3885734, partial cds"

"Homo sapiens cDNA: FLJ23081 fis, clone LNG06331"

Homo sapiens mRNA; cDNA DKFZp779M2422 (from clone DKFZp779M2422)

"Homo sapiens cDNA FLJ38328 fis, clone FCBBF3025142"  
"ai71e06.s1 Soares\_testis\_NHT Homo sapiens cDNA clone 1376290 3, mRNA sequence"  
Homo sapiens mRNA; cDNA DKFZp686P23119 (from clone DKFZp686P23119)  
"Homo sapiens cDNA FLJ12874 fis, clone NT2RP2003769"  
Homo sapiens cDNA clone IMAGE:5262734  
"BX090227 NCI\_CGAP\_GC6 Homo sapiens cDNA clone IMAGp998D135719 ; IMAGE:2307804"  
"603074540F1 NIH\_MGC\_119 Homo sapiens cDNA clone IMAGE:5166585 5, mRNA sequence"  
"7n77e04.x1 NCI\_CGAP\_Ov18 Homo sapiens cDNA clone IMAGE:3570535 3, mRNA sequence"  
"af42a06.s1 Soares\_total\_fetus\_Nb2HF8\_9w Homo sapiens cDNA clone IMAGE:1034290 3, mRNA sequence"  
"BX091457 Soares\_fetal\_heart\_NbHH19W Homo sapiens cDNA clone IMAGp998I134331 ; IMAGE:134331"  
Homo sapiens cDNA clone IMAGE:4814133  
"BX105881 NCI\_CGAP\_Pr28 Homo sapiens cDNA clone IMAGp998G035226, mRNA sequence"  
"BX111356 Soares\_NhHMPu\_S1 Homo sapiens cDNA clone IMAGp998K045149, mRNA sequence"  
"ij82b05.y1 Human insulinoma Homo sapiens cDNA clone IMAGE: 5777984 5, mRNA sequence"  
"EST176292 Colon carcinoma (Caco-2) cell line II Homo sapiens cDNA 5 end, mRNA sequence"  
"AGENCOURT\_14063731 NIH\_MGC\_181 Homo sapiens cDNA clone IMAGE:30375776 5, mRNA sequence"  
"Homo sapiens cDNA FLJ43818 fis, clone TESTI4001923"  
"UI-CF-EC1-abz-d-11-0-UI.s1 UI-CF-EC1 Homo sapiens cDNA clone UI-CF-EC1-abz-d-11-0-UI"  
"Homo sapiens cDNA FLJ26784 fis, clone PRS04220"  
"xk13b11.x1 NCI\_CGAP\_Co20 Homo sapiens cDNA clone IMAGE:2666589 3, mRNA sequence"  
"Homo sapiens cDNA FLJ37694 fis, clone BRHIP2015224"  
"BX106644 Soares\_multiple\_sclerosis\_2NbHMSP Homo sapiens cDNA clone IMAGp998E1962"  
"RC3-HT0883-020800-021-e12 HT0883 Homo sapiens cDNA, mRNA sequence"  
"Homo sapiens cDNA FLJ40776 fis, clone TRACH2005210"  
"Homo sapiens, clone IMAGE:4655360, mRNA"  
"BX090271 Soares\_fetal\_liver\_spleen\_1NFLS\_S1 Homo sapiens cDNA clone IMAGp998O1310"  
"PREDICTED: Homo sapiens LOC440151 (LOC440151), mRNA"  
"BX111675 NCI\_CGAP\_Kid11 Homo sapiens cDNA clone IMAGp998C235337, mRNA sequence"  
"Homo sapiens cDNA: FLJ21291 fis, clone COL01963"  
Homo sapiens mRNA; cDNA DKFZp686I07266 (from clone DKFZp686I07266)  
"RST20570 Athersys RAGE Library Homo sapiens cDNA, mRNA sequence"  
"xb71g09.x1 Soares\_NFL\_T\_GBC\_S1 Homo sapiens cDNA clone IMAGE:2581792 3, mRNA sequence"  
"RST32057 Athersys RAGE Library Homo sapiens cDNA, mRNA sequence"  
"RST23175 Athersys RAGE Library Homo sapiens cDNA, mRNA sequence"  
"Homo sapiens, clone IMAGE:5528576, mRNA"  
"RST3117 Athersys RAGE Library Homo sapiens cDNA, mRNA sequence"  
"RST40254 Athersys RAGE Library Homo sapiens cDNA, mRNA sequence"  
"RST44510 Athersys RAGE Library Homo sapiens cDNA, mRNA sequence"  
"Homo sapiens mRNA for HEIL1, complete cds"  
Homo sapiens mRNA; cDNA DKFZp686I05206 (from clone DKFZp686I05206)  
"Homo sapiens, clone IMAGE:5241654, mRNA"  
"QV2-NN0045-031200-511-f08 NN0045 Homo sapiens cDNA, mRNA sequence"  
"PREDICTED: Homo sapiens LOC439960 (LOC439960), mRNA"  
"UI-E-CI1-agf-n-11-0-UI.r1 UI-E-CI1 Homo sapiens cDNA clone UI-E-CI1-agf-n-11-0-UI 5, mRNA"

"BX103855 Soares\_NhHMPu\_S1 Homo sapiens cDNA clone IMAGp998D194606, mRNA sequ  
"BX099468 Soares\_NFL\_T\_GBC\_S1 Homo sapiens cDNA clone IMAGp998I024538, mRNA se  
Homo sapiens cDNA clone IMAGE:4825993  
"ov90a09.x1 Soares\_testis\_NHT Homo sapiens cDNA clone IMAGE:1644568 3, mRNA sequen  
"Homo sapiens cDNA FLJ30913 fis, clone FEBRA2006354"  
"603251294F1 NIH\_MGC\_96 Homo sapiens cDNA clone IMAGE:5303182 5, mRNA sequence"  
"EST-CD15N-025 human CD15+ myeloid progenitor cells cDNA Library Homo sapiens cDNA 3,  
"Homo sapiens, clone IMAGE:4052238, mRNA, partial cds"  
"AGENCOURT\_14360380 NIH\_MGC\_186 Homo sapiens cDNA clone IMAGE:30406177 5, mR  
"UI-E-EJ0-ahk-m-09-0-UI.r2 UI-E-EJ0 Homo sapiens cDNA clone UI-E-EJ0-ahk-m-09-0-UI 5, m  
Homo sapiens mRNA; cDNA DKFZp313A1935 (from clone DKFZp313A1935)  
"UI-E-EJ1-ajh-m-02-0-UI.s1 UI-E-EJ1 Homo sapiens cDNA clone UI-E-EJ1-ajh-m-02-0-UI 3, mF  
Homo sapiens cDNA clone IMAGE:5300199  
"Homo sapiens cDNA FLJ41921 fis, clone PERIC2002766"  
"Homo sapiens cDNA FLJ42149 fis, clone THYMU1000692"  
"wg84h06.x1 Soares\_NSF\_F8\_9W\_OT\_PA\_P\_S1 Homo sapiens cDNA clone IMAGE:2371835  
full-length cDNA clone CS0DA009YB08 of Neuroblastoma of Homo sapiens (human)  
"Homo sapiens cDNA FLJ25030 fis, clone CBL02631"  
"Homo sapiens cDNA FLJ33932 fis, clone CTONG2017798"  
Homo sapiens cDNA clone IMAGE:4837650  
"UI-1-BB1p-akd-h-11-0-UI.s1 NCI\_CGAP\_PI6 Homo sapiens cDNA clone UI-1-BB1p-akd-h-11-0-  
"BX096345 Soares\_testis\_NHT Homo sapiens cDNA clone IMAGp998I213558, mRNA sequenc  
"yu38g09.r1 Soares ovary tumor NbHOT Homo sapiens cDNA clone IMAGE:236128 5, mRNA s  
"BX108606 NCI\_CGAP\_Lu5 Homo sapiens cDNA clone IMAGp998B143579, mRNA sequence"  
Homo sapiens mRNA; cDNA DKFZp434P231 (from clone DKFZp434P231)  
"Homo sapiens cDNA FLJ42781 fis, clone BRAWH3005534"  
"BX113978 Soares\_pregnant\_uterus\_NbHPU Homo sapiens cDNA clone IMAGp998N131206, m  
Homo sapiens mRNA; cDNA DKFZp686F09166 (from clone DKFZp686F09166)  
full-length cDNA clone CS0DC025YP03 of Neuroblastoma Cot 25-normalized of Homo sapiens  
full-length cDNA clone CS0DL007YF06 of B cells (Ramos cell line) Cot 25-normalized of Homo  
"AL844467 Homo sapiens library (Ashcroft K) Homo sapiens cDNA, mRNA sequence"  
Homo sapiens cDNA clone IMAGE:5261213  
"BX116795 Soares fetal liver spleen 1NFLS Homo sapiens cDNA clone IMAGp998B13393, mR  
"Homo sapiens cDNA: FLJ23004 fis, clone LNG00391"  
"BX117372 NCI\_CGAP\_Co4 Homo sapiens cDNA clone IMAGp998E042410, mRNA sequence"  
Homo sapiens mRNA; cDNA DKFZp686N1644 (from clone DKFZp686N1644)  
"Homo sapiens cDNA clone IMAGE:5787947, partial cds"  
"Homo sapiens cDNA FLJ38388 fis, clone FEBRA2004485"  
"DA086964 BRACE2 Homo sapiens cDNA clone BRACE2041741 5, mRNA sequence"  
Homo sapiens mRNA; cDNA DKFZp686P2136 (from clone DKFZp686P2136)  
full-length cDNA clone CS0DF009YJ16 of Fetal brain of Homo sapiens (human)  
"nf71b03.s1 NCI\_CGAP\_Co3 Homo sapiens cDNA clone IMAGE:925325 3, mRNA sequence"  
"hn28d09.x1 NCI\_CGAP\_Thy7 Homo sapiens cDNA clone IMAGE:3023441 3, mRNA sequence"  
Homo sapiens mRNA; cDNA DKFZp686J23256 (from clone DKFZp686J23256)

"in32g09.y1 Human Fetal Pancreas 1B Homo sapiens cDNA clone IMAGE: 5, mRNA sequence"  
"DA825516 PERIC2 Homo sapiens cDNA clone PERIC2006629 5, mRNA sequence"  
Homo sapiens cDNA clone IMAGE:4828632  
"602387320F1 NIH\_MGC\_93 Homo sapiens cDNA clone IMAGE:4516253 5, mRNA sequence"  
Homo sapiens full length insert cDNA clone ZD44H09  
"Homo sapiens, clone IMAGE:3451264, mRNA"  
Homo sapiens cDNA clone IMAGE:5271145  
"Homo sapiens cDNA clone IMAGE:5418341, partial cds"  
Homo sapiens cDNA clone IMAGE:5297125  
"cl02h05.z1 Hembase; Erythroid Precursor Cells (LCB:cl library) Homo sapiens cDNA clone cl02  
Homo sapiens mRNA; cDNA DKFZp686J0156 (from clone DKFZp686J0156)  
"AGENCOURT\_10167693 NIH\_MGC\_71 Homo sapiens cDNA clone IMAGE:6527009 5, mRNA  
"UI-CF-DU1-adq-c-12-0-UI.s1 UI-CF-DU1 Homo sapiens cDNA clone UI-CF-DU1-adq-c-12-0-UI  
"UI-CF-EC1-ady-b-08-0-UI.s1 UI-CF-EC1 Homo sapiens cDNA clone UI-CF-EC1-ady-b-08-0-UI  
Homo sapiens mRNA; cDNA DKFZp686F1546 (from clone DKFZp686F1546)  
"Homo sapiens cDNA FLJ33738 fis, clone BRAWH2018527"  
"AGENCOURT\_8911223 NIH\_MGC\_141 Homo sapiens cDNA clone IMAGE:6386615 5, mRNA  
Homo sapiens mRNA; cDNA DKFZp686I23208 (from clone DKFZp686I23208)  
"UI-H-FE1-bei-a-08-0-UI.s2 NCI\_CGAP\_FE1 Homo sapiens cDNA clone UI-H-FE1-bei-a-08-0-L  
Homo sapiens cDNA clone IMAGE:6254031  
"Homo sapiens cDNA FLJ32881 fis, clone TESTI2004153"  
"BX090408 Soares fetal liver spleen 1NFLS Homo sapiens cDNA clone IMAGp998E08415 ; IM/  
Homo sapiens mRNA full length insert cDNA clone EUROIMAGE 2005635  
"PREDICTED: Homo sapiens hypothetical LOC388456 (LOC388456), mRNA"  
"DB041920 TESTI2 Homo sapiens cDNA clone TESTI2029126 5, mRNA sequence"  
Homo sapiens mRNA; cDNA DKFZp586B0220 (from clone DKFZp586B0220)  
"BX102511 Soares\_NFL\_T\_GBC\_S1 Homo sapiens cDNA clone IMAGp998M074123, mRNA s  
Homo sapiens mRNA; cDNA DKFZp686J1595 (from clone DKFZp686J1595)  
"qw67g08.x1 NCI\_CGAP\_Ov33 Homo sapiens cDNA clone IMAGE:1996190 3, mRNA sequenc  
"Homo sapiens cDNA FLJ42708 fis, clone BRAMY3007311"  
"Homo sapiens cDNA FLJ32550 fis, clone SPLEN1000056"  
"UI-H-DH1-awo-m-15-0-UI.s1 NCI\_CGAP\_DH1 Homo sapiens cDNA clone UI-H-DH1-awo-m-15  
"Homo sapiens cDNA: FLJ21333 fis, clone COL02535"  
"PREDICTED: Homo sapiens hypothetical gene supported by AK057085 (LOC440149), mRNA"  
"Homo sapiens cDNA FLJ25252 fis, clone STM03814"  
"BX091062 Soares\_testis\_NHT Homo sapiens cDNA clone IMAGp998F221782 ; IMAGE:72654  
"Homo sapiens cDNA FLJ32837 fis, clone TESTI2003280"  
"AGENCOURT\_7782569 NIH\_MGC\_67 Homo sapiens cDNA clone IMAGE:6137082 5, mRNA  
"UI-H-FG0-bcw-h-18-0-UI.s1 NCI\_CGAP\_EN1\_2 Homo sapiens cDNA clone UI-H-FG0-bcw-h-1  
"cs01f05.y1 Human Retinal pigment epithelium/choroid cDNA (Un-normalized, unamplified): cs I  
"ir69h03.y1 HR85 islet Homo sapiens cDNA clone IMAGE:6607902 5, mRNA sequence"  
"AGENCOURT\_10396508 NIH\_MGC\_141 Homo sapiens cDNA clone IMAGE:6605580 5, mRN  
"QV0-HT0398-210100-096-c03 HT0398 Homo sapiens cDNA, mRNA sequence"  
"ns68e03.y5 NCI\_CGAP\_Pr2 Homo sapiens cDNA clone IMAGE:1188796, mRNA sequence"

"Homo sapiens hypothetical gene supported by BC042493, mRNA (cDNA clone IMAGE:482664 Homo sapiens cDNA clone IMAGE:5296724  
"Homo sapiens, clone IMAGE:5163306, mRNA"  
"Homo sapiens hypothetical protein LOC340073, mRNA (cDNA clone IMAGE:5296163)"  
"Homo sapiens, clone IMAGE:3618365, mRNA"  
"NISC\_gj03b08.y1 NCI\_CGAP\_Pr28 Homo sapiens cDNA clone IMAGE:3270494 5, mRNA seq  
"BX103719 Soares infant brain 1NIB Homo sapiens cDNA clone IMAGp998M05175, mRNA sec  
"601142925F1 NIH\_MGC\_14 Homo sapiens cDNA clone IMAGE:3506575 5, mRNA sequence"  
"ta96c03.x1 NCI\_CGAP\_Lu26 Homo sapiens cDNA clone IMAGE:2051908 3, mRNA sequence  
"UI-H-ED0-axo-o-08-0-UI.s1 NCI\_CGAP\_ED0 Homo sapiens cDNA clone UI-H-ED0-axo-o-08-0  
"17000532640995 GRN\_ES Homo sapiens cDNA 5, mRNA sequence"  
"UI-E-EO1-aiu-k-12-0-UI.s1 UI-E-EO1 Homo sapiens cDNA clone UI-E-EO1-aiu-k-12-0-UI 3, mF  
"17000600107276 GRN\_PREHEP Homo sapiens cDNA 5, mRNA sequence"  
"UI-E-CK1-afn-b-08-0-UI.s1 UI-E-CK1 Homo sapiens cDNA clone UI-E-CK1-afn-b-08-0-UI 3, mF  
"AGENCOURT\_6796899 NIH\_MGC\_85 Homo sapiens cDNA clone IMAGE:5787825 5, mRNA  
"UI-H-BI2-agv-g-07-0-UI.s1 NCI\_CGAP\_Sub4 Homo sapiens cDNA clone IMAGE:2725813 3, m  
"UI-E-CL1-afa-p-05-0-UI.s1 UI-E-CL1 Homo sapiens cDNA clone UI-E-CL1-afa-p-05-0-UI 3, mR  
"BX105017 Soares\_fetal\_heart\_NbHH19W Homo sapiens cDNA clone IMAGp998A20842, mRf  
"Homo sapiens cDNA FLJ45905 fis, clone OCBBF3026576"  
"Homo sapiens cDNA FLJ30091 fis, clone BNGH41000017"  
"Homo sapiens cDNA FLJ41881 fis, clone OCBBF2021833"  
"PREDICTED: Homo sapiens hypothetical LOC389393 (LOC389393), mRNA"  
"UI-H-FT1-bke-f-07-0-UI.s1 NCI\_CGAP\_FT1 Homo sapiens cDNA clone UI-H-FT1-bke-f-07-0-U  
"UI-H-EU1-azz-i-23-0-UI.s1 NCI\_CGAP\_Ct1 Homo sapiens cDNA clone UI-H-EU1-azz-i-23-0-UI  
"BX393727 Homo sapiens NEUROBLASTOMA COT 25-NORMALIZED Homo sapiens cDNA cl  
"UI-CF-FN0-afs-l-17-18-UI.r18 UI-CF-FN0 Homo sapiens cDNA clone UI-CF-FN0-afs-l-17-18-UI  
"BX109127 Soares fetal liver spleen 1NFLS Homo sapiens cDNA clone IMAGp998C23389, mR  
"UI-E-EJ1-ajk-n-12-0-UI.s1 UI-E-EJ1 Homo sapiens cDNA clone UI-E-EJ1-ajk-n-12-0-UI 3, mRN  
"UI-H-CO0-asl-e-02-0-UI.s1 NCI\_CGAP\_Sub9 Homo sapiens cDNA clone IMAGE:5859147 3, n  
"AGENCOURT\_10407585 NIH\_MGC\_82 Homo sapiens cDNA clone IMAGE:6620990 5, mRNA  
"603024968F1 NIH\_MGC\_114 Homo sapiens cDNA clone IMAGE:5195560 5, mRNA sequence  
"BX102164 NCI\_CGAP\_GCB1 Homo sapiens cDNA clone IMAGp998B081743, mRNA sequenc  
"602507809F1 NIH\_MGC\_79 Homo sapiens cDNA clone IMAGE:4604835 5, mRNA sequence"  
"Homo sapiens cDNA FLJ32174 fis, clone PLACE6001064"  
"BX117171 NCI\_CGAP\_Co3 Homo sapiens cDNA clone IMAGp998J142299, mRNA sequence"  
"BX093900 Soares placenta Nb2HP Homo sapiens cDNA clone IMAGp998M23189, mRNA seq  
"NISC\_gf06b05.x1 NCI\_CGAP\_Kid12 Homo sapiens cDNA clone IMAGE:3252801 3, mRNA se  
"BX104914 Soares fetal liver spleen 1NFLS Homo sapiens cDNA clone IMAGp998A02134, mR  
"BX105847 Soares\_NFL\_T\_GBC\_S1 Homo sapiens cDNA clone IMAGp998K123696, mRNA s  
"UI-H-BI1-aet-a-03-0-UI.s1 NCI\_CGAP\_Sub3 Homo sapiens cDNA clone IMAGE:2720165 3, m  
"nj92b10.x5 NCI\_CGAP\_Pr11 Homo sapiens cDNA clone IMAGE:999931, mRNA sequence"  
"BX116997 Soares\_placenta\_8to9weeks\_2NbHP8to9W Homo sapiens cDNA clone IMAGp998  
full-length cDNA clone CS0DF032YA11 of Fetal brain of Homo sapiens (human)  
"PREDICTED: Homo sapiens LOC440143 (LOC440143), mRNA"

"BX114974 NCI\_CGAP\_Kid3 Homo sapiens cDNA clone IMAGp998C023886, mRNA sequence Homo sapiens mRNA; cDNA DKFZp686D22106 (from clone DKFZp686D22106)  
"hi12a04.x1 NCI\_CGAP\_GU1 Homo sapiens cDNA clone IMAGE:2972046 3, mRNA sequence"  
"DKFZp313P1922\_r1 313 (synonym: hlcc2) Homo sapiens cDNA clone DKFZp313P1922 5, mR  
"UI-H-EZ1-bcb-b-23-0-UI.s1 NCI\_CGAP\_Ch2 Homo sapiens cDNA clone UI-H-EZ1-bcb-b-23-0-  
"Homo sapiens primary neuroblastoma cDNA, clone:Nbla11485"  
"Homo sapiens cDNA FLJ41270 fis, clone BRAMY2036387"  
"BX107250 Soares\_pregnant\_uterus\_NbHPU Homo sapiens cDNA clone IMAGp998M081119,  
"602617110F1 NIH\_MGC\_79 Homo sapiens cDNA clone IMAGE:4730811 5, mRNA sequence"  
"ot37d03.s1 Soares\_testis\_NHT Homo sapiens cDNA clone IMAGE:1618949 3, mRNA sequenc  
Homo sapiens clone 24739 mRNA sequence  
"Homo sapiens cDNA FLJ30923 fis, clone FEBRA2006491"  
"BX437333 Homo sapiens THYMUS Homo sapiens cDNA clone CS0CAP006YG22 5-PRIME, n  
"RST42356 Athersys RAGE Library Homo sapiens cDNA, mRNA sequence"  
"Homo sapiens cDNA FLJ39178 fis, clone OCBBF2004104"  
Homo sapiens cDNA clone IMAGE:5259414  
"in27e08.x1 Human Fetal Pancreas 1B Homo sapiens cDNA clone IMAGE: 3, mRNA sequence"  
"CR743578 Soares\_fetal\_heart\_NbHH19W Homo sapiens cDNA clone IMAGp971L2174 ; IMAC  
"Homo sapiens cDNA FLJ11664 fis, clone HEMBA1004632"  
"AGENCOURT\_14556906 NIA Homo sapiens cDNA clone IMAGE:30424836 5, mRNA sequenc  
"UI-E-DW0-agi-o-06-0-UI.s1 UI-E-DW0 Homo sapiens cDNA clone UI-E-DW0-agi-o-06-0-UI 3, r  
"UI-E-EJ0-ahv-d-07-0-UI.s1 UI-E-EJ0 Homo sapiens cDNA clone UI-E-EJ0-ahv-d-07-0-UI 3, mR  
"AGENCOURT\_7978253 Lupski\_dorsal\_root\_ganglion Homo sapiens cDNA clone IMAGE:6185  
Homo sapiens cDNA clone IMAGE:5266832  
"RST9214 Athersys RAGE Library Homo sapiens cDNA, mRNA sequence"  
"UI-E-EJ1-ajv-o-24-0-UI.s1 UI-E-EJ1 Homo sapiens cDNA clone UI-E-EJ1-ajv-o-24-0-UI 3, mRN  
"Homo sapiens cDNA FLJ38039 fis, clone CTONG2013934"  
"AGENCOURT\_6552744 NIH\_MGC\_85 Homo sapiens cDNA clone IMAGE:5551930 5, mRNA  
"UI-H-FL1-bfz-b-04-0-UI.s1 NCI\_CGAP\_FL1 Homo sapiens cDNA clone UI-H-FL1-bfz-b-04-0-UI  
Homo sapiens full length insert cDNA clone YY74A01  
"BX096334 Soares\_multiple\_sclerosis\_2NbHMSP Homo sapiens cDNA clone IMAGp998J1561  
Homo sapiens mRNA; cDNA DKFZp547E107 (from clone DKFZp547E107)  
"BX112399 Soares\_multiple\_sclerosis\_2NbHMSP Homo sapiens cDNA clone IMAGp998B1862  
"Homo sapiens cDNA FLJ11226 fis, clone PLACE1008280"  
"UI-H-FG0-bcp-k-15-0-UI.s1 NCI\_CGAP\_EN1\_2 Homo sapiens cDNA clone UI-H-FG0-bcp-k-15  
"Homo sapiens cDNA FLJ34428 fis, clone HLUNG2000761"  
"Homo sapiens cDNA FLJ26692 fis, clone MPG07890"  
Homo sapiens D21S2089E form A mRNA sequence  
"AGENCOURT\_8228790 Lupski\_dorsal\_root\_ganglion Homo sapiens cDNA clone IMAGE:6182  
Homo sapiens cDNA clone IMAGE:5269351  
"Human mRNA for KIAA0280 gene, partial cds"  
Homo sapiens mRNA; cDNA DKFZp667H0610 (from clone DKFZp667H0610)  
"UI-H-EZ1-bba-l-21-0-UI.s1 NCI\_CGAP\_Ch2 Homo sapiens cDNA clone UI-H-EZ1-bba-l-21-0-L  
"BX111257 Soares fetal liver spleen 1NFLS Homo sapiens cDNA clone IMAGp998B19536, mR

"Homo sapiens cDNA FLJ31090 fis, clone IMR321000102"  
"UI-1-BC1p-asj-h-02-0-UI.s1 NCI\_CGAP\_PI3 Homo sapiens cDNA clone UI-1-BC1p-asj-h-02-0-"  
"Homo sapiens cDNA FLJ13116 fis, clone NT2RP3002659"  
"Homo sapiens cDNA FLJ27196 fis, clone SYN02831"  
"UI-H-FT2-bjj-o-11-0-UI.s1 NCI\_CGAP\_FT2 Homo sapiens cDNA clone UI-H-FT2-bjj-o-11-0-UI :  
Homo sapiens mRNA; cDNA DKFZp667L2214 (from clone DKFZp667L2214)  
full-length cDNA clone CS0DI042YD07 of Placenta Cot 25-normalized of Homo sapiens (humar  
"Homo sapiens cDNA: FLJ22515 fis, clone HRC12122, highly similar to AF052101 Homo sapien  
"K-EST0216649 L17N670205n1 Homo sapiens cDNA clone L17N670205n1-10-D09 5, mRNA s  
Homo sapiens clone 24841 mRNA sequence  
Homo sapiens cDNA clone IMAGE:5277162  
"ih26e02.x5 Human insulinoma Homo sapiens cDNA clone IMAGE:5615330 3, mRNA sequenc  
"UI-1-BB1p-atw-h-09-0-UI.s1 NCI\_CGAP\_PI6 Homo sapiens cDNA clone UI-1-BB1p-atw-h-09-0  
"BX091213 Soares\_multiple\_sclerosis\_2NbHMSP Homo sapiens cDNA clone IMAGp998H1463  
"yb65d04.r1 Stratagene ovary (#937217) Homo sapiens cDNA clone IMAGE:76039 5, mRNA se  
"BX111971 Soares\_testis\_NHT Homo sapiens cDNA clone IMAGp998P153559, mRNA sequen  
Homo sapiens mRNA; cDNA DKFZp686G02263 (from clone DKFZp686G02263)  
Homo sapiens mRNA; cDNA DKFZp761D112 (from clone DKFZp761D112)  
"UI-E-EJ0-ahm-h-09-0-UI.s1 UI-E-EJ0 Homo sapiens cDNA clone UI-E-EJ0-ahm-h-09-0-UI 3, nr  
"Homo sapiens cDNA FLJ41455 fis, clone BRSTN2012284"  
"EST7546 human nasopharynx Homo sapiens cDNA, mRNA sequence"  
"Homo sapiens cDNA FLJ39579 fis, clone SKMUS2003168"  
"Homo sapiens cDNA FLJ41846 fis, clone NT2RI3003162"  
Homo sapiens mRNA; cDNA DKFZp686B24166 (from clone DKFZp686B24166)  
"PREDICTED: Homo sapiens hypothetical LOC400571 (LOC400571), mRNA"  
"CR992331 RZPD no.9016 Homo sapiens cDNA clone RZPDp9016A0141 5, mRNA sequence"  
"BX335012 Homo sapiens PLACENTA COT 25-NORMALIZED Homo sapiens cDNA clone CS0  
"Homo sapiens cDNA FLJ13402 fis, clone PLACE1001456"  
"Homo sapiens cDNA FLJ33772 fis, clone BRSSN2000175"  
"BX091227 Soares\_fetal\_lung\_NbHL19W Homo sapiens cDNA clone IMAGp998E13670 ; IMAC  
"UI-E-EJ1-ajs-i-03-0-UI.s1 UI-E-EJ1 Homo sapiens cDNA clone UI-E-EJ1-ajs-i-03-0-UI 3, mRNA  
"AV762101 MDS Homo sapiens cDNA clone MDSEOA03 5, mRNA sequence"  
"DB113199 THYMU2 Homo sapiens cDNA clone THYMU2017679 5, mRNA sequence"  
"Homo sapiens clone 115D87 T cell receptor beta chain mRNA, partial cds"  
"RC5-ST0300-150200-013-D12 ST0300 Homo sapiens cDNA, mRNA sequence"  
"602712974F1 NIH\_MGC\_48 Homo sapiens cDNA clone IMAGE:4852962 5, mRNA sequence"  
Homo sapiens mRNA for FLJ00402 protein  
"UI-E-EJ1-ajn-n-16-0-UI.s1 UI-E-EJ1 Homo sapiens cDNA clone UI-E-EJ1-ajn-n-16-0-UI 3, mRNA  
Homo sapiens cDNA clone IMAGE:5299888  
"UI-CF-EC1-ack-d-21-0-UI.s1 UI-CF-EC1 Homo sapiens cDNA clone UI-CF-EC1-ack-d-21-0-UI  
"Homo sapiens cDNA FLJ34018 fis, clone FCBBF2002801"  
"xt14e05.x1 NCI\_CGAP\_Ut4 Homo sapiens cDNA clone IMAGE:2779136 3, mRNA sequence"  
"PREDICTED: Homo sapiens hypothetical LOC388477 (LOC388477), mRNA"  
"EST-CD34N-107 cDNA library of human CD 34+ stem/progenitor cells Homo sapiens cDNA 3,



"tu01b09.x1 NCI\_CGAP\_Pr28 Homo sapiens cDNA clone IMAGE:2249753 3, mRNA sequence"  
"BX094617 Soares\_fetal\_heart\_NbHH19W Homo sapiens cDNA clone IMAGE:224403, mRNA sequence"  
"hf37f06.x1 Soares\_NFL\_T\_GBC\_S1 Homo sapiens cDNA clone IMAGE:2934083 3, mRNA sequence"  
"Homo sapiens cDNA FLJ44370 fis, clone TRACH3008902"  
"UI-1-BC1-aiy-e-09-0-UI.s1 NCI\_CGAP\_PI2 Homo sapiens cDNA clone UI-1-BC1-aiy-e-09-0-UI"  
"bb28h05.x1 NIH\_MGC\_5 Homo sapiens cDNA clone IMAGE:2964249 3, mRNA sequence"  
"Homo sapiens cDNA FLJ41130 fis, clone BRACE2022549"  
"PREDICTED: Homo sapiens hypothetical LOC389189 (LOC389189), mRNA"  
"Homo sapiens cDNA FLJ42799 fis, clone BRAWH3009285"  
"DA782718 OCBBF2 Homo sapiens cDNA clone OCBBF2018618 5, mRNA sequence"  
"602566178F1 NIH\_MGC\_77 Homo sapiens cDNA clone IMAGE:4690722 5, mRNA sequence"  
"xv24e03.x1 Soares\_NFL\_T\_GBC\_S1 Homo sapiens cDNA clone IMAGE:2814076 3, mRNA sequence"  
"UI-E-EJ0-ahs-a-06-0-UI.s1 UI-E-EJ0 Homo sapiens cDNA clone UI-E-EJ0-ahs-a-06-0-UI 3, mRNA sequence"  
"Homo sapiens cDNA FLJ27124 fis, clone SPL07120"  
"UI-E-DW0-agh-n-18-0-UI.s1 UI-E-DW0 Homo sapiens cDNA clone UI-E-DW0-agh-n-18-0-UI 3, mRNA sequence"  
"Homo sapiens cDNA FLJ42969 fis, clone BRSTN2017084"  
"xv34c08.x1 Soares\_NFL\_T\_GBC\_S1 Homo sapiens cDNA clone IMAGE:2815022 3 similar to"  
"602349056F1 NIH\_MGC\_90 Homo sapiens cDNA clone IMAGE:4444260 5, mRNA sequence"  
"aj52a08.s1 Soares\_testis\_NHT Homo sapiens cDNA clone IMAGE:1393910 3, mRNA sequence"  
"Homo sapiens cDNA FLJ43160 fis, clone FCBBF2000199"  
"nq82a06.s1 NCI\_CGAP\_Co9 Homo sapiens cDNA clone IMAGE:1158802 3, mRNA sequence"  
"op28g08.s1 Soares\_NFL\_T\_GBC\_S1 Homo sapiens cDNA clone IMAGE:1578206 3, mRNA sequence"  
"Homo sapiens cDNA FLJ41106 fis, clone BLADE2007722"  
"AGENCOURT\_10546440 NIH\_MGC\_141 Homo sapiens cDNA clone IMAGE:6733288 5, mRNA sequence"  
"tj55c11.x1 Soares\_NSF\_F8\_9W\_OT\_PA\_P\_S1 Homo sapiens cDNA clone IMAGE:2145428 3, mRNA sequence"  
"xa10c07.x1 Soares\_NFL\_T\_GBC\_S1 Homo sapiens cDNA clone IMAGE:2567916 3, mRNA sequence"  
"Homo sapiens cDNA FLJ33739 fis, clone BRAWH2018601"  
"ts95a01.x1 NCI\_CGAP\_GC6 Homo sapiens cDNA clone IMAGE:2238984 3, mRNA sequence"  
"Homo sapiens cDNA clone IMAGE:3961179, partial cds"  
"CR744215 Soares\_NFL\_T\_GBC\_S1 Homo sapiens cDNA clone IMAGE:971M1962 ; IMAGE:1578206"  
"AGENCOURT\_7970838 NIH\_MGC\_72 Homo sapiens cDNA clone IMAGE:6163720 5, mRNA sequence"  
"UI-CF-FN0-afr-k-03-18-UI.s18 UI-CF-FN0 Homo sapiens cDNA clone UI-CF-FN0-afr-k-03-18-UI"  
"603043518F1 NIH\_MGC\_116 Homo sapiens cDNA clone IMAGE:5183932 5, mRNA sequence"  
"DA934455 SPLEN2 Homo sapiens cDNA clone SPLEN2005266 5, mRNA sequence"  
"ij28g12.x5 Melton Normalized Human Islet 4 N4-HIS 1 Homo sapiens cDNA clone IMAGE:613695"  
"AGENCOURT\_13631433 NIH\_MGC\_184 Homo sapiens cDNA clone IMAGE:30327753 5, mRNA sequence"  
"Homo sapiens cDNA: FLJ23063 fis, clone LNG04745"  
"BX356403 Homo sapiens PLACENTA COT 25-NORMALIZED Homo sapiens cDNA clone CS0"  
"UI-CF-FN0-age-p-21-18-UI.r18 UI-CF-FN0 Homo sapiens cDNA clone UI-CF-FN0-age-p-21-18-UI"  
"UI-CF-FN0-afx-e-17-18-UI.s18 UI-CF-FN0 Homo sapiens cDNA clone UI-CF-FN0-afx-e-17-18-UI"  
"BX106259 Soares\_testis\_NHT Homo sapiens cDNA clone IMAGE:998B211926, mRNA sequence"  
"CM0-CT0275-221199-105-c11 CT0275 Homo sapiens cDNA, mRNA sequence"  
"UI-E-CL1-afe-e-04-0-UI.r1 UI-E-CL1 Homo sapiens cDNA clone UI-E-CL1-afe-e-04-0-UI 5, mRNA sequence"  
"Homo sapiens hypothetical protein LOC285548, mRNA (cDNA clone IMAGE:4829419)"

"RST28959 Athersys RAGE Library Homo sapiens cDNA, mRNA sequence"  
"BX098062 NCI\_CGAP\_Lym12 Homo sapiens cDNA clone IMAGp998F045264, mRNA sequen  
"Homo sapiens cDNA FLJ31093 fis, clone IMR321000161"  
"Homo sapiens cDNA FLJ38251 fis, clone FCBBF3000184"  
"AGENCOURT\_7549809 NIH\_MGC\_68 Homo sapiens cDNA clone IMAGE:6057678 5, mRNA  
"UI-E-CQ1-aew-g-07-0-UI.r1 UI-E-CQ1 Homo sapiens cDNA clone UI-E-CQ1-aew-g-07-0-UI 5, I  
"EST389173 MAGE resequences, MAGO Homo sapiens cDNA, mRNA sequence"  
"xa01h03.x1 Soares\_NFL\_T\_GBC\_S1 Homo sapiens cDNA clone IMAGE:2567093 3, mRNA se  
"AGENCOURT\_14063909 NIH\_MGC\_181 Homo sapiens cDNA clone IMAGE:30375764 5, mR  
"BX094949 Soares infant brain 1NIB Homo sapiens cDNA clone IMAGp998F07269, mRNA seq  
"Homo sapiens cDNA FLJ37595 fis, clone BRCOC2007864"  
"ig42c06.y5 HR85 islet Homo sapiens cDNA clone IMAGE:5593739 5, mRNA sequence"  
"ig29e11.y5 HR85 islet Homo sapiens cDNA clone IMAGE:5592692 5, mRNA sequence"  
"Homo sapiens cDNA FLJ33115 fis, clone TRACH2001314"  
"PREDICTED: Homo sapiens hypothetical gene supported by BC042100 (LOC440602), mRNA"  
"UI-H-DT1-avw-k-11-0-UI.s1 NCI\_CGAP\_DT1 Homo sapiens cDNA clone UI-H-DT1-avw-k-11-0  
full-length cDNA clone XCL0BB001ZD04 of Neuroblastoma of Homo sapiens (human)  
Human mRNA for T-cell specific protein  
full-length cDNA clone CS0CAP005YH21 of Thymus of Homo sapiens (human)  
"Homo sapiens cDNA: FLJ23542 fis, clone LNG08295"  
"PREDICTED: Homo sapiens hypothetical LOC389089 (LOC389089), mRNA"  
full-length cDNA clone CS0DF034YK16 of Fetal brain of Homo sapiens (human)  
"PREDICTED: Homo sapiens LOC440554 (LOC440554), mRNA"  
"PREDICTED: Homo sapiens similar to FLJ00290 protein (LOC441310), mRNA"  
Homo sapiens cDNA clone IMAGE:6250506  
"AL566229 Homo sapiens FETAL BRAIN Homo sapiens cDNA clone CS0DF018YE06 3-PRIME  
"BX090843 Soares\_testis\_NHT Homo sapiens cDNA clone IMAGp998C074110 ; IMAGE:16204  
"603244595F1 NIH\_MGC\_96 Homo sapiens cDNA clone IMAGE:5287103 5, mRNA sequence"  
"Homo sapiens cDNA FLJ25810 fis, clone TST07303"  
"AGENCOURT\_6808690 NIH\_MGC\_71 Homo sapiens cDNA clone IMAGE:5784700 5, mRNA  
"RC2-CT0522-150900-012-g04 CT0522 Homo sapiens cDNA, mRNA sequence"  
"AGENCOURT\_7959481 NIH\_MGC\_72 Homo sapiens cDNA clone IMAGE:6165391 5, mRNA  
"BX105743 NCI\_CGAP\_GC6 Homo sapiens cDNA clone IMAGp998H135716, mRNA sequence  
"AV647692 GLC Homo sapiens cDNA clone GLCBBA02 3, mRNA sequence"  
"PT2.1\_10\_D05.r tumor2 Homo sapiens cDNA 3, mRNA sequence"  
"Homo sapiens cDNA FLJ45310 fis, clone BRHIP3004774"  
"Homo sapiens clone FS8-B3 nonfunctional immunoglobulin light chain (IGL) mRNA, partial seq  
"AGENCOURT\_14535385 NIH\_MGC\_191 Homo sapiens cDNA clone IMAGE:30416080 5, mR  
"xb04f08.x1 NCI\_CGAP\_GU1 Homo sapiens cDNA clone IMAGE:2575335 3 similar to contains  
"xc38b09.x1 NCI\_CGAP\_Co20 Homo sapiens cDNA clone IMAGE:2586521 3, mRNA sequence  
"zp19f11.s1 Stratagene fetal retina 937202 Homo sapiens cDNA clone IMAGE:609933 3, mRNA/  
"3EST-NCD15-139 human CD15+ myeloid progenitor cells cDNA Library Homo sapiens cDNA 3  
"zu71h01.s1 Soares\_testis\_NHT Homo sapiens cDNA clone IMAGE:743473 3, mRNA sequenc  
"xc56f12.x1 NCI\_CGAP\_Eso2 Homo sapiens cDNA clone IMAGE:2588303 3, mRNA sequence

"BP398340 Homo sapiens pancreatic islet Homo sapiens cDNA clone htp-29-07 3, mRNA sequ

"UI-CF-FN0-aff-a-18-0-UI.s1 UI-CF-FN0 Homo sapiens cDNA clone UI-CF-FN0-aff-a-18-0-UI 3,

"7171g02.x1 Soares\_NSF\_F8\_9W\_OT\_PA\_P\_S1 Homo sapiens cDNA clone IMAGE:3526851 3, mRNA sequen

"qe07b12.x1 Soares\_testis\_NHT Homo sapiens cDNA clone IMAGE:1738271 3, mRNA sequen

"qd92a06.x1 Soares\_testis\_NHT Homo sapiens cDNA clone IMAGE:1736914 3, mRNA sequen

"qf60h03.x1 Soares\_testis\_NHT Homo sapiens cDNA clone IMAGE:1754453 3, mRNA sequenc

"qg73e01.x1 Soares\_NFL\_T\_GBC\_S1 Homo sapiens cDNA clone IMAGE:1840824 3, mRNA se

"7b56d05.x1 NCI\_CGAP\_Lu24 Homo sapiens cDNA clone IMAGE:3232233 3, mRNA sequence

"EST12244 human nasopharynx Homo sapiens cDNA, mRNA sequence"

"tr12f11.x1 NCI\_CGAP\_Ov23 Homo sapiens cDNA clone IMAGE:2218125 3, mRNA sequence"

"wb74f05.x1 NCI\_CGAP\_GC6 Homo sapiens cDNA clone IMAGE:2311425 3, mRNA sequence  
Homo sapiens cDNA clone IMAGE:5260685

"ob97f11.s1 NCI\_CGAP\_GCB1 Homo sapiens cDNA clone IMAGE:1339341 3, mRNA sequenc

"ya93d04.r1 Stratagene placenta (#937225) Homo sapiens cDNA clone IMAGE:69223 5, mRNA

"naa03h05.x1 NCI\_CGAP\_Pr28 Homo sapiens cDNA clone IMAGE:3253880 3, mRNA sequenc

"hn85c04.x1 NCI\_CGAP\_Kid11 Homo sapiens cDNA clone IMAGE:3034662 3, mRNA sequenc  
Homo sapiens cDNA clone IMAGE:4826012

"qh24c08.x1 Soares\_NFL\_T\_GBC\_S1 Homo sapiens cDNA clone IMAGE:1845614 3, mRNA se

"tt17f06.x1 NCI\_CGAP\_GC6 Homo sapiens cDNA clone IMAGE:2241059 3, mRNA sequence"

"AGENCOURT\_14378000 NIH\_MGC\_181 Homo sapiens cDNA clone IMAGE:30399590 5, mR

"ob56a07.s1 NCI\_CGAP\_GCB1 Homo sapiens cDNA clone IMAGE:1335348 3, mRNA sequenc

"hd03d12.x1 Soares\_NFL\_T\_GBC\_S1 Homo sapiens cDNA clone IMAGE:2908439 3, mRNA se

"wf82f02.x1 Soares\_NFL\_T\_GBC\_S1 Homo sapiens cDNA clone IMAGE:2362107 3, mRNA se

"ah70e05.s1 Soares\_testis\_NHT Homo sapiens cDNA clone 1320992 3, mRNA sequence"

"PM1-UT0061-061100-010-b01 UT0061 Homo sapiens cDNA, mRNA sequence"

"AGENCOURT\_14352888 NIH\_MGC\_187 Homo sapiens cDNA clone IMAGE:30405721 5, mR

"AV716776 DCB Homo sapiens cDNA clone DCBBWE03 5, mRNA sequence"

"yz11a06.s1 Soares\_multiple\_sclerosis\_2NbHMSP Homo sapiens cDNA clone IMAGE:282706 :  
Homo sapiens mRNA; cDNA DKFZp564C152 (from clone DKFZp564C152)

"Homo sapiens RAG1 mRNA, exon 1A and partial sequence"

"xm12e03.x1 NCI\_CGAP\_Ut4 Homo sapiens cDNA clone IMAGE:2683996 3, mRNA sequence"

"DB337375 TESTI2 Homo sapiens cDNA clone TESTI2020522 3, mRNA sequence"

"zu74b05.s1 Soares\_testis\_NHT Homo sapiens cDNA clone IMAGE:743697 3, mRNA sequenc

"zh93f04.s1 Soares\_fetal\_liver\_spleen\_1NFLS\_S1 Homo sapiens cDNA clone IMAGE:428863 :

"tu21c08.x1 NCI\_CGAP\_Pr28 Homo sapiens cDNA clone IMAGE:2251694 3, mRNA sequence"

"qe14g03.x1 Soares\_testis\_NHT Homo sapiens cDNA clone IMAGE:1738996 3, mRNA sequen

"qb12g03.x1 Soares\_pregnant\_uterus\_NbHPU Homo sapiens cDNA clone IMAGE:1696084 3, r  
"Homo sapiens HBcAg-binding protein (HBCBP) mRNA, complete cds"

"qd83h02.x1 Soares\_testis\_NHT Homo sapiens cDNA clone IMAGE:1736115 3, mRNA sequen

"UI-E-EO0-ahx-p-21-0-UI.s1 UI-E-EO0 Homo sapiens cDNA clone UI-E-EO0-ahx-p-21-0-UI 3, n  
"Homo sapiens cDNA FLJ25156 fis, clone CBR07981"

"ak22d04.s1 Soares\_testis\_NHT Homo sapiens cDNA clone IMAGE:1406695 3, mRNA sequen

"oa85h04.s1 NCI\_CGAP\_GCB1 Homo sapiens cDNA clone IMAGE:1319095 3, mRNA sequenc

"UI-H-BW0-aig-a-11-0-UI.s1 NCI\_CGAP\_Sub6 Homo sapiens cDNA clone IMAGE:2729012 3, r

"or34g04.s1 NCI\_CGAP\_GC3 Homo sapiens cDNA clone IMAGE:1597782 3, mRNA sequence"  
"wt92b04.x1 NCI\_CGAP\_GC6 Homo sapiens cDNA clone IMAGE:2514895 3, mRNA sequence"  
"Homo sapiens apoptosis related protein APR-4 mRNA, partial cds"  
"wa38a03.x1 NCI\_CGAP\_Kid11 Homo sapiens cDNA clone IMAGE:2300332 3, mRNA sequence"  
"wf28g01.x1 Soares\_NFL\_T\_GBC\_S1 Homo sapiens cDNA clone IMAGE:2356944 3, mRNA sequence"  
"xp75b08.x1 NCI\_CGAP\_Ov40 Homo sapiens cDNA clone IMAGE:2746167 3, mRNA sequence"  
"UI-H-FL1-bgc-h-06-0-UI.s1 NCI\_CGAP\_FL1 Homo sapiens cDNA clone UI-H-FL1-bgc-h-06-0-UI  
"ol18d11.s1 Soares\_NFL\_T\_GBC\_S1 Homo sapiens cDNA clone IMAGE:1523829 3, mRNA sequence"  
"601823962F1 NIH\_MGC\_79 Homo sapiens cDNA clone IMAGE:4043678 5, mRNA sequence"  
"on50d02.s1 NCI\_CGAP\_Co8 Homo sapiens cDNA clone IMAGE:1560099 3 similar to contains  
"UI-H-BW1-ane-f-07-0-UI.s1 NCI\_CGAP\_Sub7 Homo sapiens cDNA clone IMAGE:3082117 3, mRNA  
"ny62f03.s1 NCI\_CGAP\_GCB1 Homo sapiens cDNA clone IMAGE:1282877 3, mRNA sequence"  
"qd70h10.x1 Soares\_testis\_NHT Homo sapiens cDNA clone IMAGE:1734883 3, mRNA sequence"  
"ov58f12.s1 Soares\_testis\_NHT Homo sapiens cDNA clone IMAGE:1641551 3, mRNA sequence"  
"xn75h05.x1 Soares\_NFL\_T\_GBC\_S1 Homo sapiens cDNA clone IMAGE:2700345 3, mRNA sequence"  
"UI-CF-FN0-aeu-h-17-0-UI.s1 UI-CF-FN0 Homo sapiens cDNA clone UI-CF-FN0-aeu-h-17-0-UI  
"UI-H-BI4-aoo-e-09-0-UI.s1 NCI\_CGAP\_Sub8 Homo sapiens cDNA clone IMAGE:3085552 3, mRNA  
"yy43f04.s1 Soares melanocyte 2NbHM Homo sapiens cDNA clone IMAGE:274015 3, mRNA sequence"  
"RST41364 Athersys RAGE Library Homo sapiens cDNA, mRNA sequence"  
"zi51g12.s1 Soares\_fetal\_liver\_spleen\_1NFLS\_S1 Homo sapiens cDNA clone IMAGE:434374 3  
"CR738291 Homo sapiens library (Ebert L) Homo sapiens cDNA clone IMAGE:971D2453 ; IMAGE  
"EST7714 human nasopharynx Homo sapiens cDNA, mRNA sequence"  
"qh45e01.x1 Soares\_NFL\_T\_GBC\_S1 Homo sapiens cDNA clone IMAGE:1847640 3, mRNA sequence"  
"UI-E-EJ0-aij-h-03-0-UI.s1 UI-E-EJ0 Homo sapiens cDNA clone UI-E-EJ0-aij-h-03-0-UI 3, mRNA  
"AGENCOURT\_14368041 NIH\_MGC\_181 Homo sapiens cDNA clone IMAGE:30408004 5, mRNA  
"ws79a03.x1 NCI\_CGAP\_Co3 Homo sapiens cDNA clone IMAGE:2504140 3, mRNA sequence"  
"wd34f10.x1 Soares\_NFL\_T\_GBC\_S1 Homo sapiens cDNA clone IMAGE:2330059 3, mRNA sequence"  
"UI-CF-EN0-acp-h-08-0-UI.s1 UI-CF-EN0 Homo sapiens cDNA clone UI-CF-EN0-acp-h-08-0-UI  
"qg81b10.x1 Soares\_NFL\_T\_GBC\_S1 Homo sapiens cDNA clone IMAGE:1841563 3, mRNA sequence"  
"ti70d10.x1 NCI\_CGAP\_Kid11 Homo sapiens cDNA clone IMAGE:2137363 3, mRNA sequence"  
"op63a09.s1 Soares\_NFL\_T\_GBC\_S1 Homo sapiens cDNA clone IMAGE:1581496 3, mRNA sequence"  
"hi94e01.x1 Soares\_NFL\_T\_GBC\_S1 Homo sapiens cDNA clone IMAGE:2979960 3, mRNA sequence"  
"df42e10.y1 Morton Fetal Cochlea Homo sapiens cDNA clone IMAGE:2486107 5, mRNA sequence"  
"UI-H-CO0-asw-b-08-0-UI.s1 NCI\_CGAP\_Sub9 Homo sapiens cDNA clone UI-H-CO0-asw-b-08  
"nf66b06.s1 NCI\_CGAP\_Co3 Homo sapiens cDNA clone IMAGE:924851 3, mRNA sequence"  
"wd19d08.x1 Soares\_NFL\_T\_GBC\_S1 Homo sapiens cDNA clone IMAGE:2328591 3, mRNA sequence"  
"BX383912 Homo sapiens HELA CELLS COT 25-NORMALIZED Homo sapiens cDNA clone C9  
"ab01h06.s1 Stratagene fetal retina 937202 Homo sapiens cDNA clone IMAGE:839579 3 similar  
"UI-1-BC1p-asm-a-07-0-UI.s1 NCI\_CGAP\_PI3 Homo sapiens cDNA clone UI-1-BC1p-asm-a-07  
"Homo sapiens cone rod homeobox protein (CRX) mRNA, 5UTR, alternatively spliced"  
"op25d10.s1 Soares\_NFL\_T\_GBC\_S1 Homo sapiens cDNA clone IMAGE:1577875 3, mRNA sequence"  
"tm27g06.x1 Soares\_NFL\_T\_GBC\_S1 Homo sapiens cDNA clone IMAGE:2157850 3, mRNA sequence"  
"HUMGS00712 Human promyelocyte Homo sapiens cDNA clone mm0970 3, mRNA sequence"  
"hc86a08.x2 NCI\_CGAP\_Kid1 Homo sapiens cDNA clone IMAGE:2899574, mRNA sequence"

"zm27a02.s1 Stratagene pancreas (#937208) Homo sapiens cDNA clone IMAGE:526826 3, mRNA sequence"

"UI-H-BW0-aju-f-04-0-UI.s1 NCI\_CGAP\_Sub6 Homo sapiens cDNA clone IMAGE:2733078 3, mRNA sequence"

"zu67a08.s1 Soares\_testis\_NHT Homo sapiens cDNA clone IMAGE:743030 3, mRNA sequence"

"wj17e02.x1 NCI\_CGAP\_Kid12 Homo sapiens cDNA clone IMAGE:2403098 3, mRNA sequence"

"tt54d05.x1 NCI\_CGAP\_GC6 Homo sapiens cDNA clone IMAGE:2244585 3, mRNA sequence"

"UI-CF-EN1-acz-c-09-0-UI.s1 UI-CF-EN1 Homo sapiens cDNA clone UI-CF-EN1-acz-c-09-0-UI 3, mRNA sequence"

"wf59c08.x1 Soares\_NFL\_T\_GBC\_S1 Homo sapiens cDNA clone IMAGE:2359886 3, mRNA sequence"

"ah72b09.s1 Soares\_testis\_NHT Homo sapiens cDNA clone 1321145 3, mRNA sequence"

"HTM1-160F1 HTM1 Homo sapiens cDNA, mRNA sequence"

"xw83e08.x1 NCI\_CGAP\_Pan1 Homo sapiens cDNA clone IMAGE:2834630 3, mRNA sequence"

"yz88g11.s1 Soares\_multiple\_sclerosis\_2NbHMSP Homo sapiens cDNA clone IMAGE:290180 3, mRNA sequence"

"oi54f08.s1 NCI\_CGAP\_HN3 Homo sapiens cDNA clone IMAGE:1486503 3, mRNA sequence"

"UI-H-BW1-amc-h-10-0-UI.s1 NCI\_CGAP\_Sub7 Homo sapiens cDNA clone IMAGE:3069570 3, mRNA sequence"

"BX463508 Homo sapiens ADULT BRAIN Homo sapiens cDNA clone CS0DN003YA08 3-PRIM 3, mRNA sequence"

"xs34d06.x1 NCI\_CGAP\_Kid11 Homo sapiens cDNA clone IMAGE:2771531 3, mRNA sequence"

"te50c11.x1 Soares\_NFL\_T\_GBC\_S1 Homo sapiens cDNA clone IMAGE:2090132 3, mRNA sequence"

"on55e04.s1 Soares\_NFL\_T\_GBC\_S1 Homo sapiens cDNA clone IMAGE:1560606 3, mRNA sequence"

"DA089649 BRACE2 Homo sapiens cDNA clone BRACE2045129 5, mRNA sequence"

"zu79c09.s1 Soares\_testis\_NHT Homo sapiens cDNA clone IMAGE:744208 3, mRNA sequence"

"7151e12.x1 Soares\_NSF\_F8\_9W\_OT\_PA\_P\_S1 Homo sapiens cDNA clone IMAGE:3524855 3, mRNA sequence"

"RST41868 Athersys RAGE Library Homo sapiens cDNA, mRNA sequence"

"xs04b01.x1 NCI\_CGAP\_Kid11 Homo sapiens cDNA clone IMAGE:2768617 3, mRNA sequence"

"ov62h01.s1 Soares\_testis\_NHT Homo sapiens cDNA clone IMAGE:1641937 3, mRNA sequence"

"ot30c11.s1 Soares\_testis\_NHT Homo sapiens cDNA clone IMAGE:1618292 3, mRNA sequence"

"hi45b07.x1 Soares\_NFL\_T\_GBC\_S1 Homo sapiens cDNA clone IMAGE:2975221 3, mRNA sequence"

"ti02a06.x1 NCI\_CGAP\_CLL1 Homo sapiens cDNA clone IMAGE:2129266 3, mRNA sequence"

"Homo sapiens cDNA FLJ43244 fis, clone HEART1000102"

"qf59f01.x1 Soares\_testis\_NHT Homo sapiens cDNA clone IMAGE:1754329 3, mRNA sequence"

"wd27e12.x1 Soares\_NFL\_T\_GBC\_S1 Homo sapiens cDNA clone IMAGE:2329390 3, mRNA sequence"

"tz60c06.x1 NCI\_CGAP\_Ov35 Homo sapiens cDNA clone IMAGE:2292970 3, mRNA sequence"

"xb61a11.x1 Soares\_NFL\_T\_GBC\_S1 Homo sapiens cDNA clone IMAGE:2580764 3, mRNA sequence"

"UI-H-CO0-aqq-a-10-0-UI.s1 NCI\_CGAP\_Sub9 Homo sapiens cDNA clone IMAGE:3104897 3, mRNA sequence"

"UI-E-EO1-aiy-c-16-0-UI.s1 UI-E-EO1 Homo sapiens cDNA clone UI-E-EO1-aiy-c-16-0-UI 3, mRNA sequence"

"xj89b12.x1 Soares\_NFL\_T\_GBC\_S1 Homo sapiens cDNA clone IMAGE:2664383 3, mRNA sequence"

"ti13b08.x1 NCI\_CGAP\_Kid11 Homo sapiens cDNA clone IMAGE:2130327 3, mRNA sequence"

"AGENCOURT\_14128120 NIH\_MGC\_181 Homo sapiens cDNA clone IMAGE:30374198 5, mRNA sequence"

"hg04h06.x1 Soares\_NFL\_T\_GBC\_S1 Homo sapiens cDNA clone IMAGE:2944667 3, mRNA sequence"

"UI-1-BC0-afw-h-09-0-UI.s1 NCI\_CGAP\_P11 Homo sapiens cDNA clone UI-1-BC0-afw-h-09-0-UI 3, mRNA sequence"

"UI-H-FL1-bga-d-03-0-UI.s1 NCI\_CGAP\_FL1 Homo sapiens cDNA clone UI-H-FL1-bga-d-03-0-UI 3, mRNA sequence"

"xm90f01.x1 NCI\_CGAP\_Kid11 Homo sapiens cDNA clone IMAGE:2691481 3, mRNA sequence"

"zx51g02.s1 Soares\_testis\_NHT Homo sapiens cDNA clone IMAGE:795794 3, mRNA sequence"

"AGENCOURT\_10242057 NIH\_MGC\_126 Homo sapiens cDNA clone IMAGE:6557415 5, mRNA sequence"

"UI-H-EU1-bag-d-07-0-UI.s1 NCI\_CGAP\_Ct1 Homo sapiens cDNA clone UI-H-EU1-bag-d-07-0-UI 3, mRNA sequence"

"hg13e09.x1 Soares\_NFL\_T\_GBC\_S1 Homo sapiens cDNA clone IMAGE:2945512 3, mRNA sequence"

"xt64f10.x1 NCI\_CGAP\_Ut2 Homo sapiens cDNA clone IMAGE:2791243 3, mRNA sequence"  
"DTL3P3H2 THP-1 OligodT Library Homo sapiens cDNA, mRNA sequence"  
"hh81c04.y1 NCI\_CGAP\_GU1 Homo sapiens cDNA clone IMAGE:2969190 5, mRNA sequence"  
"xm65h05.x1 NCI\_CGAP\_GC6 Homo sapiens cDNA clone IMAGE:2689113 3, mRNA sequence"  
"cs38e02.y1 Human Retinal pigment epithelium/choroid cDNA (Un-normalized, unamplified): cs  
"yz85f09.s1 Soares\_multiple\_sclerosis\_2NbHMSP Homo sapiens cDNA clone IMAGE:289865 3  
"ot56f09.s1 Soares\_testis\_NHT Homo sapiens cDNA clone IMAGE:1620809 3, mRNA sequence"  
"ha21g02.x1 NCI\_CGAP\_Kid12 Homo sapiens cDNA clone IMAGE:2874386 3, mRNA sequence"  
"EST00006 Human (activated) smooth muscle cells, DD/RT-PCR products Homo sapiens cDNA  
"qz55a12.x1 NCI\_CGAP\_Kid11 Homo sapiens cDNA clone IMAGE:2030782 3, mRNA sequence"  
"xw85a01.x1 NCI\_CGAP\_Pan1 Homo sapiens cDNA clone IMAGE:2834760 3, mRNA sequence"  
"oj49h04.s1 NCI\_CGAP\_Kid3 Homo sapiens cDNA clone IMAGE:1501687 3, mRNA sequence"  
"PM3-LT0032-090100-008-f10 LT0032 Homo sapiens cDNA, mRNA sequence"  
"7e81f05.x1 NCI\_CGAP\_Pr28 Homo sapiens cDNA clone IMAGE:3288897 3, mRNA sequence"  
"al60e03.s1 Soares\_NFL\_T\_GBC\_S1 Homo sapiens cDNA clone IMAGE:1461724 3, mRNA sequence"  
"UI-E-EJ1-ajq-h-17-0-UI.s1 UI-E-EJ1 Homo sapiens cDNA clone UI-E-EJ1-ajq-h-17-0-UI 3, mRNA  
"AGENCOURT\_14535501 NIH\_MGC\_191 Homo sapiens cDNA clone IMAGE:30415823 5, mRNA  
"xv31e02.x1 Soares\_NFL\_T\_GBC\_S1 Homo sapiens cDNA clone IMAGE:2814746 3, mRNA sequence  
Homo sapiens mRNA; cDNA DKFZp779A1168 (from clone DKFZp779A1168)  
"ti88c09.x1 NCI\_CGAP\_Kid11 Homo sapiens cDNA clone IMAGE:2139088 3, mRNA sequence"  
"ob25c03.s1 NCI\_CGAP\_Kid5 Homo sapiens cDNA clone IMAGE:1324708 3, mRNA sequence"  
"nj21b04.s1 NCI\_CGAP\_AA1 Homo sapiens cDNA clone IMAGE:993103 3, mRNA sequence"  
"qh38h03.x1 Soares\_NFL\_T\_GBC\_S1 Homo sapiens cDNA clone IMAGE:1846997 3, mRNA sequence"  
"xd83f04.x1 Soares\_NFL\_T\_GBC\_S1 Homo sapiens cDNA clone IMAGE:2604223 3, mRNA sequence"  
"UI-H-BI4-apz-d-11-0-UI.s1 NCI\_CGAP\_Sub8 Homo sapiens cDNA clone IMAGE:3088965 3, mRNA  
Homo sapiens clone HEA10 Cri-du-chat critical region mRNA  
"Human clone H8 Cri-du-chat critical region mRNA, partial sequence"  
Homo sapiens clone TEE11 Cri-du-chat region mRNA  
"ap14f06.x1 Schiller oligodendroglioma Homo sapiens cDNA clone IMAGE:1955363 3, mRNA sequence  
Homo sapiens clone TEE3 Cri-du-chat critical region mRNA  
"DB045003 TESTI2 Homo sapiens cDNA clone TESTI2033116 5, mRNA sequence"  
"nx25c07.s1 NCI\_CGAP\_GC4 Homo sapiens cDNA clone IMAGE:1257132 3, mRNA sequence"  
"7k03b12.x1 NCI\_CGAP\_GC6 Homo sapiens cDNA clone IMAGE:3443278 3, mRNA sequence"  
"naa41b05.x1 NCI\_CGAP\_Kid11 Homo sapiens cDNA clone IMAGE:3258944 3, mRNA sequence"  
"xm77f11.x1 NCI\_CGAP\_Kid11 Homo sapiens cDNA clone IMAGE:2690253 3, mRNA sequence"  
"xr14b10.x1 NCI\_CGAP\_Lu28 Homo sapiens cDNA clone IMAGE:2760091 3, mRNA sequence"  
"7q57g05.x1 NCI\_CGAP\_Lu24 Homo sapiens cDNA clone IMAGE:3702704 3, mRNA sequence"  
"qd66f02.x1 Soares\_testis\_NHT Homo sapiens cDNA clone IMAGE:1734459 3, mRNA sequence"  
"ov23g09.s1 Soares\_testis\_NHT Homo sapiens cDNA clone IMAGE:1638208 3, mRNA sequence  
Human (clone xip7) mRNA sequence  
"ie83c12.x5 Melton Normalized Human Islet 4 N4-HIS 1 Homo sapiens cDNA clone IMAGE:567  
"xn79c01.x1 Soares\_NFL\_T\_GBC\_S1 Homo sapiens cDNA clone IMAGE:2700672 3, mRNA sequence"  
"ov55a12.s1 Soares\_testis\_NHT Homo sapiens cDNA clone IMAGE:1641214 3, mRNA sequence"  
"xv41b01.x1 Soares\_NFL\_T\_GBC\_S1 Homo sapiens cDNA clone IMAGE:2815657 3, mRNA sequence"

"xe08f12.x1 Soares\_NFL\_T\_GBC\_S1 Homo sapiens cDNA clone IMAGE:2606543 3, mRNA se  
"AGENCOURT\_13980472 NIH\_MGC\_187 Homo sapiens cDNA clone IMAGE:30373500 5, mR  
"AGENCOURT\_10313445 NIH\_MGC\_141 Homo sapiens cDNA clone IMAGE:6563696 5, mRN  
"DKFZp434I1922\_s1 434 (synonym: htes3) Homo sapiens cDNA clone DKFZp434I1922 3, mRN  
"AGENCOURT\_14375665 NIH\_MGC\_181 Homo sapiens cDNA clone IMAGE:30407689 5, mR  
"am86b11.s1 Stratagene schizo brain S11 Homo sapiens cDNA clone IMAGE:1629981 3, mRN  
"ng07e12.s1 NCI\_CGAP\_Li1 Homo sapiens cDNA clone IMAGE:928750, mRNA sequence"  
"RST9912 Athersys RAGE Library Homo sapiens cDNA, mRNA sequence"  
"AGENCOURT\_10371337 NIH\_MGC\_141 Homo sapiens cDNA clone IMAGE:6601887 5, mRN  
"hw28b08.x1 NCI\_CGAP\_Kid11 Homo sapiens cDNA clone IMAGE:3184215 3 similar to contain  
"BX095352 NCI\_CGAP\_Gas4 Homo sapiens cDNA clone IMAGE:3184215 3 similar to contain  
"tj84d04.x1 Soares\_NSF\_F8\_9W\_OT\_PA\_P\_S1 Homo sapiens cDNA clone IMAGE:2148199 3  
"ai70b09.s1 Soares\_testis\_NHT Homo sapiens cDNA clone IMAGE:1376153 3, mRNA sequenc  
"yz32a01.s1 Soares\_multiple\_sclerosis\_2NbHMSP Homo sapiens cDNA clone IMAGE:284712 :  
"AGENCOURT\_14357881 NIH\_MGC\_191 Homo sapiens cDNA clone IMAGE:30409612 5, mR  
"ns54g01.s1 NCI\_CGAP\_Pr22 Homo sapiens cDNA clone IMAGE:1187472 3, mRNA sequence  
"qp15c06.x1 NCI\_CGAP\_Lu5 Homo sapiens cDNA clone IMAGE:1908586 3, mRNA sequence"  
"BX103864 NCI\_CGAP\_Co3 Homo sapiens cDNA clone IMAGE:3184215 3 similar to contain  
"UI-H-DT1-awl-p-24-0-UI.s1 NCI\_CGAP\_DT1 Homo sapiens cDNA clone UI-H-DT1-awl-p-24-0-  
"ne97f07.s1 NCI\_CGAP\_Kid1 Homo sapiens cDNA clone IMAGE:912229, mRNA sequence"  
"xu29c02.x1 NCI\_CGAP\_Ov40 Homo sapiens cDNA clone IMAGE:2801570 3, mRNA sequence  
"zj18f01.s1 Soares\_fetal\_liver\_spleen\_1NFLS\_S1 Homo sapiens cDNA clone IMAGE:450649 3  
"nac37g08.x1 Lupski\_sciatic\_nerve Homo sapiens cDNA clone IMAGE:3395534 3, mRNA sequ  
"UI-E-EJ1-ajz-m-04-0-UI.s1 UI-E-EJ1 Homo sapiens cDNA clone UI-E-EJ1-ajz-m-04-0-UI 3, mR  
"wt60c01.x1 NCI\_CGAP\_Pan1 Homo sapiens cDNA clone IMAGE:2511840 3, mRNA sequence  
"QV0-BN0041-070300-147-c07 BN0041 Homo sapiens cDNA, mRNA sequence"  
"UI-H-FG0-bcu-e-06-0-UI.s1 NCI\_CGAP\_EN1\_2 Homo sapiens cDNA clone UI-H-FG0-bcu-e-06-0-  
"xt81d06.x1 NCI\_CGAP\_Ut1 Homo sapiens cDNA clone IMAGE:2792843 3, mRNA sequence"  
"xd52h03.x1 NCI\_CGAP\_Ov23 Homo sapiens cDNA clone IMAGE:2597429 3, mRNA sequenc  
"tt31h10.x1 NCI\_CGAP\_GC6 Homo sapiens cDNA clone IMAGE:2242435 3, mRNA sequence"  
"Human small nuclear RNA U6atac, partial sequence"  
"AGENCOURT\_14098047 NIH\_MGC\_181 Homo sapiens cDNA clone IMAGE:30376866 5, mR  
"DKFZp434H057\_s1 434 (synonym: htes3) Homo sapiens cDNA clone DKFZp434H057 3, mRN  
"hd10c01.x1 Soares\_NFL\_T\_GBC\_S1 Homo sapiens cDNA clone IMAGE:2909088 3, mRNA se  
"am78e07.s1 Stratagene schizo brain S11 Homo sapiens cDNA clone IMAGE:1629252 3, mRN  
"DKFZp761L1324\_s1 761 (synonym: hamy2) Homo sapiens cDNA clone DKFZp761L1324 3, m  
"zj88e05.s1 Soares\_fetal\_liver\_spleen\_1NFLS\_S1 Homo sapiens cDNA clone IMAGE:461984 :  
"UI-H-EZ1-bcb-d-20-0-UI.s1 NCI\_CGAP\_Ch2 Homo sapiens cDNA clone UI-H-EZ1-bcb-d-20-0-  
"ac76d06.x5 Stratagene lung (#937210) Homo sapiens cDNA clone IMAGE:868523 3, mRNA se  
"od87e10.s1 NCI\_CGAP\_Ov2 Homo sapiens cDNA clone IMAGE:1374954, mRNA sequence"  
"nai42a05.x1 NCI\_CGAP\_HN20 Homo sapiens cDNA clone IMAGE:4262673 3, mRNA sequenc  
"DB350341 TRACH3 Homo sapiens cDNA clone TRACH3031882 3, mRNA sequence"  
"UI-CF-FN0-afr-n-09-0-UI.s1 UI-CF-FN0 Homo sapiens cDNA clone UI-CF-FN0-afr-n-09-0-UI 3,  
Homo sapiens cDNA clone IMAGE:5312516

"BX107107 Soares infant brain 1NIB Homo sapiens cDNA clone IMAGp998M06173, mRNA sec  
"Homo sapiens T cell receptor alpha locus, mRNA (cDNA clone MGC:88342 IMAGE:30352166)  
"Homo sapiens T-cell receptor alpha chain (TCRA) mRNA (HLA-A1, 24; B7, 8; DR 1, 3), comple  
"17000531371753 GRN\_EB Homo sapiens cDNA 5, mRNA sequence"  
"Homo sapiens, clone IMAGE:5245578, mRNA"  
"AGENCOURT\_6546687 NIH\_MGC\_119 Homo sapiens cDNA clone IMAGE:5742531 5, mRNA  
"UI-E-CL1-aez-g-19-0-UI.s1 UI-E-CL1 Homo sapiens cDNA clone UI-E-CL1-aez-g-19-0-UI 3, m  
"UI-1-BB1p-atr-a-09-0-UI.s1 NCI\_CGAP\_PI6 Homo sapiens cDNA clone UI-1-BB1p-atr-a-09-0-UI  
"RST12985 Athersys RAGE Library Homo sapiens cDNA, mRNA sequence"  
"zh47e08.r1 Soares\_fetal\_liver\_spleen\_1NFLS\_S1 Homo sapiens cDNA clone IMAGE:415238 :  
"hr63a10.x1 NCI\_CGAP\_Kid11 Homo sapiens cDNA clone IMAGE:3133146 3 similar to contain  
"UI-CF-FN0-afz-b-04-0-UI.s1 UI-CF-FN0 Homo sapiens cDNA clone UI-CF-FN0-afz-b-04-0-UI 3  
"UI-H-EU0-azk-h-02-0-UI.s1 NCI\_CGAP\_Car1 Homo sapiens cDNA clone UI-H-EU0-azk-h-02-0-UI  
"UI-E-EO0-ahw-b-19-0-UI.s1 UI-E-EO0 Homo sapiens cDNA clone UI-E-EO0-ahw-b-19-0-UI 3, m  
"AV650212 GLC Homo sapiens cDNA clone GLCCCD12 3, mRNA sequence"  
Homo sapiens full length insert cDNA clone YZ84G08  
"UI-E-EJ0-ahv-e-11-0-UI.s1 UI-E-EJ0 Homo sapiens cDNA clone UI-E-EJ0-ahv-e-11-0-UI 3, mR  
"Homo sapiens cDNA FLJ46067 fis, clone TESOP2002110"  
"UI-H-BI0p-abm-h-10-0-UI.s1 NCI\_CGAP\_Sub2 Homo sapiens cDNA clone IMAGE:2712450 3,  
"wv06f12.x1 NCI\_CGAP\_Kid3 Homo sapiens cDNA clone IMAGE:2528783 3 similar to gb:X171  
"Homo sapiens cDNA FLJ41556 fis, clone COLON2006282"  
"xj40e04.x1 Soares\_NFL\_T\_GBC\_S1 Homo sapiens cDNA clone IMAGE:2659710 3, mRNA se  
Homo sapiens D21S2090E mRNA sequence  
"ya74h09.s1 Stratagene placenta (#937225) Homo sapiens cDNA clone IMAGE:67457 3, mRNA/  
"AGENCOURT\_10425186 NIH\_MGC\_126 Homo sapiens cDNA clone IMAGE:6649626 5, mRN  
"zt86g03.r1 Soares\_testis\_NHT Homo sapiens cDNA clone IMAGE:729268 5, mRNA sequence  
"UI-H-BI1-afh-a-08-0-UI.s1 NCI\_CGAP\_Sub3 Homo sapiens cDNA clone IMAGE:2721687 3, m  
"ym60a11.s1 Soares infant brain 1NIB Homo sapiens cDNA clone IMAGE:52622 3, mRNA sequ  
"CR740207 NCI\_CGAP\_GCB1 Homo sapiens cDNA clone IMAGp971G2055 ; IMAGE:824852 5  
"Homo sapiens cDNA: FLJ22140 fis, clone HEP20977"  
"UI-H-EU1-bac-f-07-0-UI.s1 NCI\_CGAP\_Ct1 Homo sapiens cDNA clone UI-H-EU1-bac-f-07-0-UI  
"UI-E-EJ1-ajn-i-16-0-UI.s1 UI-E-EJ1 Homo sapiens cDNA clone UI-E-EJ1-ajn-i-16-0-UI 3, mRN/  
"AV647906 GLC Homo sapiens cDNA clone GLCBDC04 3, mRNA sequence"  
"oy41f08.s1 Soares\_parathyroid\_tumor\_NbHPA Homo sapiens cDNA clone IMAGE:1668423 3,  
"RC4-CN0048-120200-012-c10 CN0048 Homo sapiens cDNA, mRNA sequence"  
"UI-H-BI1-acy-f-03-0-UI.s1 NCI\_CGAP\_Sub3 Homo sapiens cDNA clone IMAGE:2716156 3, ml  
"imageqc\_6\_2000/sjp106bdf41.x1 NCI\_CGAP\_Lei2 Homo sapiens cDNA clone IMAGE:351979  
"naf63d01.x1 NCI\_CGAP\_Brn66 Homo sapiens cDNA clone IMAGE:4168729 3, mRNA sequen  
"UI-CF-EC1-abx-p-10-0-UI.s1 UI-CF-EC1 Homo sapiens cDNA clone UI-CF-EC1-abx-p-10-0-UI  
"UI-H-BW1-amw-c-04-0-UI.s1 NCI\_CGAP\_Sub7 Homo sapiens cDNA clone IMAGE:3071238 3  
"UI-CF-FN0-afv-g-21-0-UI.s1 UI-CF-FN0 Homo sapiens cDNA clone UI-CF-FN0-afv-g-21-0-UI 3  
"AGENCOURT\_7932584 NIH\_MGC\_72 Homo sapiens cDNA clone IMAGE:6157118 5, mRNA  
"603075305F1 NIH\_MGC\_119 Homo sapiens cDNA clone IMAGE:5167201 5, mRNA sequence  
"UI-E-EJ1-ajr-f-07-0-UI.s1 UI-E-EJ1 Homo sapiens cDNA clone UI-E-EJ1-ajr-f-07-0-UI 3, mRNA



"nc46d05.y5 NCI\_CGAP\_Pr3 Homo sapiens cDNA clone IMAGE:1011177, mRNA sequence"  
"AF150372 Human mRNA from cd34+ stem cells Homo sapiens cDNA clone CBMABE07, mRNA  
"Homo sapiens cDNA FLJ12023 fis, clone HEMBB1001785"  
"AGENCOURT\_10359846 NIH\_MGC\_82 Homo sapiens cDNA clone IMAGE:6616699 5, mRNA  
"BX115738 Soares melanocyte 2NbHM Homo sapiens cDNA clone IMAGp998D07589, mRNA s  
"Homo sapiens cDNA FLJ34826 fis, clone NT2NE2008803"  
"UI-E-CK1-afh-j-02-0-UI.r1 UI-E-CK1 Homo sapiens cDNA clone UI-E-CK1-afh-j-02-0-UI 5, mRN  
"UI-E-EJ0-aip-l-19-0-UI.s1 UI-E-EJ0 Homo sapiens cDNA clone UI-E-EJ0-aip-l-19-0-UI 3, mRNA/  
"UI-H-BW1-amx-a-09-0-UI.s1 NCI\_CGAP\_Sub7 Homo sapiens cDNA clone IMAGE:3071153 3,  
"AGENCOURT\_40974108 NIH\_MGC\_281 Homo sapiens cDNA clone IMAGE:7781834 3, mRN  
"Human mRNA for T-cell receptor alpha-chain J segment, partial cds, clone WADM36A"  
"7k14f11.x1 NCI\_CGAP\_GC6 Homo sapiens cDNA clone IMAGE:3444261 3, mRNA sequence'  
"th70e02.x1 Soares\_NhHMPu\_S1 Homo sapiens cDNA clone IMAGE:2124026 3, mRNA seque  
"zq45g07.s1 Stratagene hNT neuron (#937233) Homo sapiens cDNA clone IMAGE:632700 3, n  
Homo sapiens mRNA; cDNA DKFZp761E1721 (from clone DKFZp761E1721)  
Homo sapiens full length insert cDNA clone ZD58F01  
"602585614F1 NIH\_MGC\_76 Homo sapiens cDNA clone IMAGE:4714515 5, mRNA sequence"  
"601452348F1 NIH\_MGC\_66 Homo sapiens cDNA clone IMAGE:3856355 5, mRNA sequence"  
"UI-E-EJ0-ahk-f-18-0-UI.r2 UI-E-EJ0 Homo sapiens cDNA clone UI-E-EJ0-ahk-f-18-0-UI 5, mRN  
"RST9256 Athersys RAGE Library Homo sapiens cDNA, mRNA sequence"  
"UI-H-FH1-bfi-p-18-0-UI.s1 NCI\_CGAP\_FH1 Homo sapiens cDNA clone UI-H-FH1-bfi-p-18-0-UI  
"xd91c02.x1 Soares\_NFL\_T\_GBC\_S1 Homo sapiens cDNA clone IMAGE:2604962 3, mRNA se  
"ab78f08.s1 Stratagene fetal retina 937202 Homo sapiens cDNA clone IMAGE:853095 3, mRN/  
"RST44995 Athersys RAGE Library Homo sapiens cDNA, mRNA sequence"  
"BX094610 NCI\_CGAP\_Brn52 Homo sapiens cDNA clone IMAGp998I075675, mRNA sequence  
Homo sapiens mRNA; cDNA DKFZp313P0125 (from clone DKFZp313P0125)  
"HESC3\_16\_H10.b1\_A036 Human embryonic stem cells Homo sapiens cDNA clone IMAGE:74  
"xc52f06.x1 NCI\_CGAP\_Eso2 Homo sapiens cDNA clone IMAGE:2587907 3, mRNA sequence  
"al52b11.s1 Soares\_NFL\_T\_GBC\_S1 Homo sapiens cDNA clone IMAGE:1460925 3, mRNA se  
"HESC4\_34\_D01.b1\_A037 NIH\_MGC\_262 Homo sapiens cDNA clone IMAGE:7474204 3, mRN  
Homo sapiens mRNA; cDNA DKFZp686C1250 (from clone DKFZp686C1250)  
"BP396343 Homo sapiens pancreatic islet Homo sapiens cDNA clone hbt09690 3, mRNA sequ  
"17000600023745 GRN\_PRENEU Homo sapiens cDNA 5, mRNA sequence"  
"hi94g06.x1 Soares\_NFL\_T\_GBC\_S1 Homo sapiens cDNA clone IMAGE:2979994 3, mRNA se  
"Homo sapiens cDNA FLJ43491 fis, clone OCBBF3008230"  
"BX115902 Soares\_testis\_NHT Homo sapiens cDNA clone IMAGp998I162639, mRNA sequenc  
"BX102869 Soares fetal liver spleen 1NFLS Homo sapiens cDNA clone IMAGp998P17421, mR  
"UI-E-EJ0-ail-c-09-0-UI.s1 UI-E-EJ0 Homo sapiens cDNA clone UI-E-EJ0-ail-c-09-0-UI 3, mRNA  
"602693628F1 NIH\_MGC\_97 Homo sapiens cDNA clone IMAGE:4825783 5, mRNA sequence"  
"7g92g05.x1 NCI\_CGAP\_Co16 Homo sapiens cDNA clone IMAGE:3313976 3 similar to contain  
"DA645971 MAMMA1 Homo sapiens cDNA clone MAMMA1000318 5, mRNA sequence"  
"HESC3\_84\_D06.g1\_A036 Human embryonic stem cells Homo sapiens cDNA clone IMAGE:74  
"AV737317 CB Homo sapiens cDNA clone CBCAQH03 5, mRNA sequence"  
"UI-CF-EN1-acv-c-17-0-UI.s1 UI-CF-EN1 Homo sapiens cDNA clone UI-CF-EN1-acv-c-17-0-UI :

"nad91a12.x1 NCI\_CGAP\_Pr28 Homo sapiens cDNA clone IMAGE:3410615 3, mRNA sequence  
"CR741512 Soares\_parathyroid\_tumor\_NbHPA Homo sapiens cDNA clone IMAGE:97111858 ; IMAGE:111858  
"AGENCOURT\_10457217 NIH\_MGC\_109 Homo sapiens cDNA clone IMAGE:6644984 5, mRNA sequence  
"wa75e07.x1 Soares\_NFL\_T\_GBC\_S1 Homo sapiens cDNA clone IMAGE:2302020 3, mRNA sequence  
"RST33611 Athersys RAGE Library Homo sapiens cDNA, mRNA sequence"  
Homo sapiens clone FP7915 unknown mRNA  
"hg12h07.x1 Soares\_NFL\_T\_GBC\_S1 Homo sapiens cDNA clone IMAGE:2945437 3, mRNA sequence  
"BX344951 Homo sapiens NEUROBLASTOMA COT 25-NORMALIZED Homo sapiens cDNA clone  
"AGENCOURT\_10403887 NIH\_MGC\_82 Homo sapiens cDNA clone IMAGE:6621869 5, mRNA sequence  
full-length cDNA clone CS0DI056YK21 of Placenta Cot 25-normalized of Homo sapiens (human)  
"Homo sapiens cDNA FLJ16376 fis, clone TKIDN2008778"  
"602807977F1 NCI\_CGAP\_Brn67 Homo sapiens cDNA clone IMAGE:4940250 5, mRNA sequence  
"AGENCOURT\_7908489 NIH\_MGC\_82 Homo sapiens cDNA clone IMAGE:6105391 5, mRNA sequence  
"Homo sapiens primary neuroblastoma cDNA, clone:Nbla10527, full insert sequence"  
"AGENCOURT\_15609033 NIH\_MGC\_183 Homo sapiens cDNA clone IMAGE:30530585 5, mRNA sequence  
"UI-H-FE1-beb-a-11-0-UI.s1 NCI\_CGAP\_FE1 Homo sapiens cDNA clone UI-H-FE1-beb-a-11-0-UI  
"AGENCOURT\_14374590 NIH\_MGC\_181 Homo sapiens cDNA clone IMAGE:30399869 5, mRNA sequence  
"zh57h05.s1 Soares\_fetal\_liver\_spleen\_1NFLS\_S1 Homo sapiens cDNA clone IMAGE:416217  
Homo sapiens mRNA; cDNA DKFZp434J194 (from clone DKFZp434J194)  
"BX100513 Soares\_testis\_NHT Homo sapiens cDNA clone IMAGE:9980102576, mRNA sequence  
"CR743533 Soares\_testis\_NHT Homo sapiens cDNA clone IMAGE:971L1944 ; IMAGE:727458 ; IMAGE:727458  
"UI-CF-DU1-aap-e-15-0-UI.s1 UI-CF-DU1 Homo sapiens cDNA clone UI-CF-DU1-aap-e-15-0-UI  
"AGENCOURT\_6411402 NIH\_MGC\_71 Homo sapiens cDNA clone IMAGE:5530423 5, mRNA sequence  
"UI-E-EJ0-ahh-i-01-0-UI.s1 UI-E-EJ0 Homo sapiens cDNA clone UI-E-EJ0-ahh-i-01-0-UI 3, mRNA  
"Homo sapiens, clone IMAGE:3909165, mRNA"  
"UI-E-EJ0-ahr-o-19-0-UI.r1 UI-E-EJ0 Homo sapiens cDNA clone UI-E-EJ0-ahr-o-19-0-UI 5, mRNA  
"DA371742 BRTHA2 Homo sapiens cDNA clone BRTHA2001741 5, mRNA sequence"  
"17000532215901 GRN\_ES Homo sapiens cDNA 5, mRNA sequence"  
"q157c09.x1 Soares\_NhHMPu\_S1 Homo sapiens cDNA clone IMAGE:1876432 3, mRNA sequence  
"Homo sapiens cDNA clone MGC:13035 IMAGE:3613409, complete cds"  
Homo sapiens clone TESTIS-609 mRNA sequence  
"ir30e06.y1 HR85 islet Homo sapiens cDNA clone IMAGE:6546731 5, mRNA sequence"  
"ye98g12.s1 Soares fetal liver spleen 1NFLS Homo sapiens cDNA clone IMAGE:125830 3, mRNA  
"zx42c01.r1 Soares\_total\_fetus\_Nb2HF8\_9w Homo sapiens cDNA clone IMAGE:789120 5, mRNA  
"he11a05.x1 NCI\_CGAP\_CML1 Homo sapiens cDNA clone IMAGE:2918672 3, mRNA sequence  
"yv17e05.s1 Soares fetal liver spleen 1NFLS Homo sapiens cDNA clone IMAGE:243008 3, mRNA  
"tw46h08.x1 NCI\_CGAP\_Ut1 Homo sapiens cDNA clone IMAGE:2262783 3 similar to contains  
"wj57c10.x1 NCI\_CGAP\_Lu19 Homo sapiens cDNA clone IMAGE:2406930 3, mRNA sequence  
"Homo sapiens hypothetical protein LOC338620, mRNA (cDNA clone IMAGE:6023208), partial  
Human HeLa mRNA isolated as a false positive in a two-hybrid-screen  
"AGENCOURT\_6437618 NIH\_MGC\_71 Homo sapiens cDNA clone IMAGE:5532913 5, mRNA  
"UI-H-FT2-bjh-d-23-0-UI.s1 NCI\_CGAP\_FT2 Homo sapiens cDNA clone UI-H-FT2-bjh-d-23-0-UI  
"Homo sapiens T-cell receptor alpha chain-like protein mRNA, complete cds"  
"PREDICTED: Homo sapiens hypothetical LOC400999 (LOC400999), mRNA"

"Homo sapiens, clone IMAGE:5165425, mRNA"  
"BX451947 Homo sapiens FETAL BRAIN Homo sapiens cDNA clone CS0DF008YL16 5-PRIME  
"603089645F1 NIH\_MGC\_120 Homo sapiens cDNA clone IMAGE:5228627 5, mRNA sequence  
"Homo sapiens cDNA FLJ32840 fis, clone TESTI2003321"  
"qv45e03.x1 NCI\_CGAP\_Ov32 Homo sapiens cDNA clone IMAGE:1984540 3, mRNA sequence  
full-length cDNA clone CS0DJ011YN13 of T cells (Jurkat cell line) Cot 10-normalized of Homo s  
"df27f11.w1 Morton Fetal Cochlea Homo sapiens cDNA clone IMAGE:2484644 3, mRNA sequen  
"tm62e06.x5 NCI\_CGAP\_Brn25 Homo sapiens cDNA clone IMAGE:2162722 3, mRNA sequenc  
"UI-H-DF0-beu-j-10-0-UI.s1 NCI\_CGAP\_DF0 Homo sapiens cDNA clone UI-H-DF0-beu-j-10-0-U  
"UI-E-EJ0-aik-g-22-0-UI.s1 UI-E-EJ0 Homo sapiens cDNA clone UI-E-EJ0-aik-g-22-0-UI 3, mRN  
"ah41f08.s1 Soares\_testis\_NHT Homo sapiens cDNA clone 1292103 3, mRNA sequence"  
"CR741628 Soares\_testis\_NHT Homo sapiens cDNA clone IMAGp971I22106 ; IMAGE:137682;  
"AGENCOURT\_7543948 NIH\_MGC\_92 Homo sapiens cDNA clone IMAGE:6067074 5, mRNA  
Homo sapiens cDNA clone IMAGE:5297258  
"qp49h09.x1 NCI\_CGAP\_Co8 Homo sapiens cDNA clone IMAGE:1926401 3, mRNA sequence'  
Homo sapiens mRNA; cDNA DKFZp686M2414 (from clone DKFZp686M2414)  
"BX098227 Soares\_fetal\_lung\_NbHL19W Homo sapiens cDNA clone IMAGp998P174425, mRN  
"UI-H-BI3-akw-b-06-0-UI.s1 NCI\_CGAP\_Sub5 Homo sapiens cDNA clone IMAGE:2735578 3, r  
"UI-E-EJ0-ahp-k-03-0-UI.r1 UI-E-EJ0 Homo sapiens cDNA clone UI-E-EJ0-ahp-k-03-0-UI 5, mR  
"yg72g01.s1 Soares\_infant\_brain\_1NIB Homo sapiens cDNA clone IMAGE:38786 3, mRNA sequ  
"UI-H-BI4-aph-d-11-0-UI.s1 NCI\_CGAP\_Sub8 Homo sapiens cDNA clone IMAGE:3087405 3, rr  
"zx11g05.r1 Soares\_total\_fetus\_Nb2HF8\_9w Homo sapiens cDNA clone IMAGE:786200 5, mR  
"BY797688 Homo sapiens eye Homo sapiens cDNA clone HEmEye2032D8\_062.ab1 5, mRNA  
"DA173998 BRAMY2 Homo sapiens cDNA clone BRAMY2037005 5, mRNA sequence"  
"BX112872 Soares\_NFL\_T\_GBC\_S1 Homo sapiens cDNA clone IMAGp998B113810, mRNA s  
"UI-H-BI3-ali-h-04-0-UI.s1 NCI\_CGAP\_Sub5 Homo sapiens cDNA clone IMAGE:2737014 3, mF  
"UI-E-EJ0-ahs-k-21-0-UI.s1 UI-E-EJ0 Homo sapiens cDNA clone UI-E-EJ0-ahs-k-21-0-UI 3, mR  
"UI-H-EZ1-bbf-l-14-0-UI.s1 NCI\_CGAP\_Ch2 Homo sapiens cDNA clone UI-H-EZ1-bbf-l-14-0-UI  
"wl03f11.x1 NCI\_CGAP\_Ut1 Homo sapiens cDNA clone IMAGE:2423853 3, mRNA sequence"  
"UI-E-EJ0-ahg-n-20-0-UI.r2 UI-E-EJ0 Homo sapiens cDNA clone UI-E-EJ0-ahg-n-20-0-UI 5, mR  
"UI-H-EZ1-bba-f-06-0-UI.s1 NCI\_CGAP\_Ch2 Homo sapiens cDNA clone UI-H-EZ1-bba-f-06-0-U  
"UI-H-BI2-agg-d-11-0-UI.s1 NCI\_CGAP\_Sub4 Homo sapiens cDNA clone IMAGE:2724164 3, rr  
"tx53f04.x1 NCI\_CGAP\_Lu24 Homo sapiens cDNA clone IMAGE:2273311 3, mRNA sequence"  
full-length cDNA clone CS0DN003YC08 of Adult brain of Homo sapiens (human)  
"603183417F1 NIH\_MGC\_121 Homo sapiens cDNA clone IMAGE:5247269 5, mRNA sequence  
"tm56f06.x1 NCI\_CGAP\_Kid11 Homo sapiens cDNA clone IMAGE:2162147 3, mRNA sequence  
"in34h07.y1 Human Fetal Pancreas 1B Homo sapiens cDNA 5 similar to TR:Q14754 Q14754 O  
"hd24f04.x1 Soares\_NFL\_T\_GBC\_S1 Homo sapiens cDNA clone IMAGE:2910463 3 similar to  
"UI-H-BI1-afr-e-12-0-UI.s1 NCI\_CGAP\_Sub3 Homo sapiens cDNA clone IMAGE:2722679 3, mF  
"UI-E-EJ0-ahn-g-14-0-UI.s1 UI-E-EJ0 Homo sapiens cDNA clone UI-E-EJ0-ahn-g-14-0-UI 3, mF  
"UI-E-EJ1-ajh-a-03-0-UI.s1 UI-E-EJ1 Homo sapiens cDNA clone UI-E-EJ1-ajh-a-03-0-UI 3, mRN  
"DA830074 PLACE1 Homo sapiens cDNA clone PLACE1004374 5, mRNA sequence"  
"AL528570 Homo sapiens NEUROBLASTOMA COT 50-NORMALIZED Homo sapiens cDNA cl  
"AGENCOURT\_10520654 NIH\_MGC\_128 Homo sapiens cDNA clone IMAGE:6702588 5, mRN

"UI-E-EJ0-ahn-c-14-0-UI.s1 UI-E-EJ0 Homo sapiens cDNA clone UI-E-EJ0-ahn-c-14-0-UI 3, mRNA sequence  
"BX101194 Soares\_total\_fetus\_Nb2HF8\_9w Homo sapiens cDNA clone IMAGp998B082580, mRNA sequence  
Homo sapiens cDNA clone IMAGE:4794367  
"EST380840 MAGE resequencing, MAGJ Homo sapiens cDNA, mRNA sequence"  
"nx83a02.s1 NCI\_CGAP\_GCB1 Homo sapiens cDNA clone IMAGE:1268810 3, mRNA sequence  
"ho30a11.x1 NCI\_CGAP\_Lu24 Homo sapiens cDNA clone IMAGE:3038876 3, mRNA sequence  
"BP873537 Sugano cDNA library, embryonal kidney Homo sapiens cDNA clone HKR13896, mRNA sequence  
"UI-H-BW1-anh-h-12-0-UI.s1 NCI\_CGAP\_Sub7 Homo sapiens cDNA clone IMAGE:3082606 3, mRNA sequence  
"qf67e09.x1 Soares\_testis\_NHT Homo sapiens cDNA clone IMAGE:1755112 3, mRNA sequence  
"UI-E-CL1-ael-a-08-0-UI.s1 UI-E-CL1 Homo sapiens cDNA clone UI-E-CL1-ael-a-08-0-UI 3, mRNA sequence  
"UI-E-CL1-aeg-d-11-0-UI.r1 UI-E-CL1 Homo sapiens cDNA clone UI-E-CL1-aeg-d-11-0-UI 5, mRNA sequence  
"DA298023 BRHIP2 Homo sapiens cDNA clone BRHIP2011612 5, mRNA sequence"  
"PM3-DT0037-231299-001-e06 DT0037 Homo sapiens cDNA, mRNA sequence"  
"7p17e02.x1 NCI\_CGAP\_Br22 Homo sapiens cDNA clone IMAGE:3646155 3, mRNA sequence  
"DA101838 BRACE3 Homo sapiens cDNA clone BRACE3014187 5, mRNA sequence"  
"UI-E-CL1-aeg-c-22-0-UI.s1 UI-E-CL1 Homo sapiens cDNA clone UI-E-CL1-aeg-c-22-0-UI 3, mRNA sequence  
"UI-E-EJ0-ahj-f-02-0-UI.s1 UI-E-EJ0 Homo sapiens cDNA clone UI-E-EJ0-ahj-f-02-0-UI 3, mRNA sequence  
"UI-H-BI2-agg-b-01-0-UI.s1 NCI\_CGAP\_Sub4 Homo sapiens cDNA clone IMAGE:2724048 3, mRNA sequence  
"BX118281 NCI\_CGAP\_CLL1 Homo sapiens cDNA clone IMAGp998I204974, mRNA sequence  
"wy78b04.x1 Soares\_NSF\_F8\_9W\_OT\_PA\_P\_S1 Homo sapiens cDNA clone IMAGE:2554639  
"UI-E-EJ1-aka-e-09-0-UI.r1 UI-E-EJ1 Homo sapiens cDNA clone UI-E-EJ1-aka-e-09-0-UI 5, mRNA sequence  
"ye74b04.s1 Soares fetal liver spleen 1NFLS Homo sapiens cDNA clone IMAGE:123439 3, mRNA sequence  
"nc02h04.s1 NCI\_CGAP\_Pr3 Homo sapiens cDNA clone IMAGE:280, mRNA sequence"  
"wm30d11.x1 NCI\_CGAP\_Ut4 Homo sapiens cDNA clone IMAGE:2437461 3, mRNA sequence  
"UI-CF-EN1-acx-i-12-0-UI.s1 UI-CF-EN1 Homo sapiens cDNA clone UI-CF-EN1-acx-i-12-0-UI 3, mRNA sequence  
"UI-H-DT1-avz-n-24-0-UI.s1 NCI\_CGAP\_DT1 Homo sapiens cDNA clone IMAGE:5886551 3, mRNA sequence  
"UI-H-BI0p-abl-c-12-0-UI.s1 NCI\_CGAP\_Sub2 Homo sapiens cDNA clone IMAGE:2712191 3, mRNA sequence  
"UI-CF-EC0-abi-h-07-0-UI.s1 UI-CF-EC0 Homo sapiens cDNA clone UI-CF-EC0-abi-h-07-0-UI 3, mRNA sequence  
"UI-H-EU0-azp-n-06-0-UI.s1 NCI\_CGAP\_Car1 Homo sapiens cDNA clone UI-H-EU0-azp-n-06-0-UI 3, mRNA sequence  
"ze34g02.s1 Soares retina N2b4HR Homo sapiens cDNA clone IMAGE:360914 3, mRNA sequence  
"UI-CF-FN0-afh-f-03-0-UI.s1 UI-CF-FN0 Homo sapiens cDNA clone UI-CF-FN0-afh-f-03-0-UI 3, mRNA sequence  
"UI-H-BI2-ahe-h-11-0-UI.s1 NCI\_CGAP\_Sub4 Homo sapiens cDNA clone IMAGE:2726660 3, mRNA sequence  
"UI-H-DF0-bep-h-20-0-UI.s1 NCI\_CGAP\_DF0 Homo sapiens cDNA clone UI-H-DF0-bep-h-20-0-UI 3, mRNA sequence  
"DB074408 TESTI4 Homo sapiens cDNA clone TESTI4017996 5, mRNA sequence"  
"UI-H-DT0-aub-e-14-0-UI.s1 NCI\_CGAP\_DT0 Homo sapiens cDNA clone IMAGE:5867125 3, mRNA sequence  
"UI-CF-EC1-acc-m-06-0-UI.s1 UI-CF-EC1 Homo sapiens cDNA clone UI-CF-EC1-acc-m-06-0-UI 3, mRNA sequence  
"UI-H-BI0-aab-b-01-0-UI.s1 NCI\_CGAP\_Sub1 Homo sapiens cDNA clone IMAGE:2708665 3, mRNA sequence  
"DB069686 TESTI4 Homo sapiens cDNA clone TESTI4011986 5, mRNA sequence"  
"ai84e05.s1 Soares\_parathyroid\_tumor\_NbHPA Homo sapiens cDNA clone IMAGE:1387520 3, mRNA sequence  
"UI-E-EO0-aia-m-15-0-UI.s1 UI-E-EO0 Homo sapiens cDNA clone UI-E-EO0-aia-m-15-0-UI 3, mRNA sequence  
"UI-H-BW1-anf-b-07-0-UI.s1 NCI\_CGAP\_Sub7 Homo sapiens cDNA clone IMAGE:3081948 3, mRNA sequence  
"UI-H-ED0-axm-l-22-0-UI.s1 NCI\_CGAP\_ED0 Homo sapiens cDNA clone IMAGE:5830821 3, mRNA sequence  
"tw84c08.x1 NCI\_CGAP\_HN5 Homo sapiens cDNA clone IMAGE:2266382 3, mRNA sequence"  
"UI-H-BW0-aiv-b-03-0-UI.s1 NCI\_CGAP\_Sub6 Homo sapiens cDNA clone IMAGE:2730557 3, mRNA sequence"

"wb39e07.x1 NCI\_CGAP\_GC6 Homo sapiens cDNA clone IMAGE:2308068 3, mRNA sequence"

"UI-CF-DU1-aan-g-24-0-UI.s1 UI-CF-DU1 Homo sapiens cDNA clone UI-CF-DU1-aan-g-24-0-UI 3, mRNA sequence"

"UI-H-BW0-ajj-h-10-0-UI.s1 NCI\_CGAP\_Sub6 Homo sapiens cDNA clone IMAGE:2732035 3, mRNA sequence"

"tz62a11.x1 NCI\_CGAP\_Ov35 Homo sapiens cDNA clone IMAGE:2293148 3 similar to contains"

"602976638F1 NIH\_MGC\_12 Homo sapiens cDNA clone IMAGE:5115800 5, mRNA sequence"

"UI-E-EJ0-ain-n-16-0-UI.r1 UI-E-EJ0 Homo sapiens cDNA clone UI-E-EJ0-ain-n-16-0-UI 5, mRNA sequence"

"UI-H-DI0-auw-h-24-0-UI.s1 NCI\_CGAP\_DI0 Homo sapiens cDNA clone IMAGE:5875271 3, mRNA sequence"

"ai23h02.s1 Soares\_testis\_NHT Homo sapiens cDNA clone 1343667 3, mRNA sequence"

"UI-E-EJ1-ajk-p-22-0-UI.r1 UI-E-EJ1 Homo sapiens cDNA clone UI-E-EJ1-ajk-p-22-0-UI 5, mRNA sequence"

"UI-E-EJ0-aif-o-06-0-UI.s1 UI-E-EJ0 Homo sapiens cDNA clone UI-E-EJ0-aif-o-06-0-UI 3, mRNA sequence"

"UI-H-BI3-alb-c-06-0-UI.s1 NCI\_CGAP\_Sub5 Homo sapiens cDNA clone IMAGE:2736011 3, mRNA sequence"

"UI-H-BW0-ain-c-07-0-UI.s1 NCI\_CGAP\_Sub6 Homo sapiens cDNA clone IMAGE:2729845 3, mRNA sequence"

"602341884F1 NIH\_MGC\_89 Homo sapiens cDNA clone IMAGE:4452140 5, mRNA sequence"

"UI-H-CO0-aqu-f-10-0-UI.s1 NCI\_CGAP\_Sub9 Homo sapiens cDNA clone IMAGE:3105521 3, mRNA sequence"

"UI-H-BW1-anl-g-04-0-UI.s1 NCI\_CGAP\_Sub7 Homo sapiens cDNA clone IMAGE:3082926 3, mRNA sequence"

"BP423994 Homo sapiens small intestine Homo sapiens cDNA clone HIE07584r 3, mRNA sequence"

"xm41h02.x1 NCI\_CGAP\_GC6 Homo sapiens cDNA clone IMAGE:2686803 3, mRNA sequence"

"AGENCOURT\_14365016 NIH\_MGC\_181 Homo sapiens cDNA clone IMAGE:30395808 5, mRNA sequence"

"UI-H-EZ1-bbj-p-24-0-UI.s1 NCI\_CGAP\_Ch2 Homo sapiens cDNA clone UI-H-EZ1-bbj-p-24-0-UI 3, mRNA sequence"

"nk46b11.s1 NCI\_CGAP\_GC2 Homo sapiens cDNA clone IMAGE:1016541 3, mRNA sequence"

"UI-H-DT1-awb-m-01-0-UI.s1 NCI\_CGAP\_DT1 Homo sapiens cDNA clone IMAGE:5887272 3, mRNA sequence"

"UI-1-BC1-ajl-g-07-0-UI.s1 NCI\_CGAP\_PI2 Homo sapiens cDNA clone UI-1-BC1-ajl-g-07-0-UI 3, mRNA sequence"

"yc88d04.s1 Soares infant brain 1NIB Homo sapiens cDNA clone IMAGE:23095 3 similar to contains"

"UI-H-EU1-bac-c-08-0-UI.s1 NCI\_CGAP\_Ct1 Homo sapiens cDNA clone UI-H-EU1-bac-c-08-0-UI 3, mRNA sequence"

"nt78g02.s1 NCI\_CGAP\_Pr3 Homo sapiens cDNA clone IMAGE:1204658, mRNA sequence"

"cs02a11.x1 Human Retinal pigment epithelium/choroid cDNA (Un-normalized, unamplified): cs02a11.x1"

"UI-H-BW1-aml-e-05-0-UI.s1 NCI\_CGAP\_Sub7 Homo sapiens cDNA clone IMAGE:3070185 3, mRNA sequence"

"UI-CF-FN0-aey-j-05-0-UI.s1 UI-CF-FN0 Homo sapiens cDNA clone UI-CF-FN0-aey-j-05-0-UI 3, mRNA sequence"

"UI-H-BI4-apl-e-02-0-UI.s1 NCI\_CGAP\_Sub8 Homo sapiens cDNA clone IMAGE:3087819 3, mRNA sequence"

"UI-E-EJ0-ait-p-11-0-UI.s1 UI-E-EJ0 Homo sapiens cDNA clone UI-E-EJ0-ait-p-11-0-UI 3, mRNA sequence"

"UI-H-BI1-aew-c-10-0-UI.s1 NCI\_CGAP\_Sub3 Homo sapiens cDNA clone IMAGE:2720658 3, mRNA sequence"

"hv71a07.x1 NCI\_CGAP\_Lu24 Homo sapiens cDNA clone IMAGE:3178836 3, mRNA sequence"

"UI-H-FL1-bgc-p-14-0-UI.s1 NCI\_CGAP\_FL1 Homo sapiens cDNA clone UI-H-FL1-bgc-p-14-0-UI 3, mRNA sequence"

"wt23e07.x1 NCI\_CGAP\_Ut1 Homo sapiens cDNA clone IMAGE:2508324 3, mRNA sequence"

"DA873530 PROST2 Homo sapiens cDNA clone PROST2010803 5, mRNA sequence"

"UI-H-FE0-bby-e-02-0-UI.s1 NCI\_CGAP\_FE0 Homo sapiens cDNA clone UI-H-FE0-bby-e-02-0-UI 3, mRNA sequence"

"ai78h04.s1 Soares\_testis\_NHT Homo sapiens cDNA clone 1376983 3, mRNA sequence"

"DA877611 PROST2 Homo sapiens cDNA clone PROST2016121 5, mRNA sequence"

"BP419039 Homo sapiens small intestine Homo sapiens cDNA clone HIE02238r 3, mRNA sequence"

"DKFZp686E1489\_r1 686 (synonym: hlcc3) Homo sapiens cDNA clone DKFZp686E1489 5, mRNA sequence"

"ah67d02.s1 Soares\_testis\_NHT Homo sapiens cDNA clone 1320675 3, mRNA sequence"

"UI-CF-DU1-ads-e-15-0-UI.s1 UI-CF-DU1 Homo sapiens cDNA clone UI-CF-DU1-ads-e-15-0-UI 3, mRNA sequence"

"AGENCOURT\_14364557 NIH\_MGC\_181 Homo sapiens cDNA clone IMAGE:30397891 5, mRNA sequence"

"UI-H-BI3-akz-d-01-0-UI.s1 NCI\_CGAP\_Sub5 Homo sapiens cDNA clone IMAGE:2736025 3, mRNA sequence"

"7f80b05.x1 Lupski\_dorsal\_root\_ganglion Homo sapiens cDNA clone IMAGE:3303128 3, mRNA  
"op77c07.s1 Soares\_NFL\_T\_GBC\_S1 Homo sapiens cDNA clone IMAGE:1582860 3, mRNA se  
"UI-H-BI2-aid-d-05-0-UI.s1 NCI\_CGAP\_Sub4 Homo sapiens cDNA clone IMAGE:2728761 3, m  
"hk58d01.x1 NCI\_CGAP\_Lym12 Homo sapiens cDNA clone IMAGE:3000865 3, mRNA sequen  
"hh82d09.y1 NCI\_CGAP\_GU1 Homo sapiens cDNA clone IMAGE:2969297 5, mRNA sequence  
"UI-H-BW1-aoa-a-06-0-UI.s1 NCI\_CGAP\_Sub7 Homo sapiens cDNA clone IMAGE:3083819 3,  
"wx20a11.x1 NCI\_CGAP\_Gas4 Homo sapiens cDNA clone IMAGE:2544188 3 similar to contain  
"xc32c10.x1 NCI\_CGAP\_Co18 Homo sapiens cDNA clone IMAGE:2585970 3, mRNA sequence  
"UI-H-CO0-aqg-d-07-0-UI.s1 NCI\_CGAP\_Sub9 Homo sapiens cDNA clone IMAGE: 3103907 3,  
"UI-H-BI2-agn-g-04-0-UI.s1 NCI\_CGAP\_Sub4 Homo sapiens cDNA clone IMAGE:2725039 3, r  
"wu14g08.x1 NCI\_CGAP\_GC6 Homo sapiens cDNA clone IMAGE:2516990 3, mRNA sequence  
"UI-1-BC1p-ali-e-01-0-UI.s1 NCI\_CGAP\_PI3 Homo sapiens cDNA clone UI-1-BC1p-ali-e-01-0-U  
"UI-H-EU1-bad-j-13-0-UI.s1 NCI\_CGAP\_Ct1 Homo sapiens cDNA clone UI-H-EU1-bad-j-13-0-U  
"DKFZp781A1072\_s1 781 (synonym: hlcc4) Homo sapiens cDNA clone DKFZp781A1072 3, mF  
"UI-H-EU0-azv-i-08-0-UI.s1 NCI\_CGAP\_Car1 Homo sapiens cDNA clone IMAGE: 5854159 3, r  
"UI-H-CO0-aqy-h-10-0-UI.s1 NCI\_CGAP\_Sub9 Homo sapiens cDNA clone IMAGE:3106001 3, r  
"UI-H-EZ1-bbz-e-15-0-UI.s1 NCI\_CGAP\_Ch2 Homo sapiens cDNA clone UI-H-EZ1-bbz-e-15-0-  
"UI-E-CK1-agb-m-11-0-UI.s1 UI-E-CK1 Homo sapiens cDNA clone UI-E-CK1-agb-m-11-0-UI 3,  
"UI-E-CQ1-agd-d-24-0-UI.s1 UI-E-CQ1 Homo sapiens cDNA clone UI-E-CQ1-agd-d-24-0-UI 3, r  
"UI-H-DH1-axf-o-15-0-UI.s1 NCI\_CGAP\_DH1 Homo sapiens cDNA clone IMAGE:5828198 3, m  
"UI-E-CL1-afa-l-14-0-UI.s1 UI-E-CL1 Homo sapiens cDNA clone UI-E-CL1-afa-l-14-0-UI 3, mRNA  
"UI-E-CL1-afd-c-15-0-UI.r1 UI-E-CL1 Homo sapiens cDNA clone UI-E-CL1-afd-c-15-0-UI 5, mR  
"ty48b11.x1 NCI\_CGAP\_Ut2 Homo sapiens cDNA clone IMAGE:2282301 3, mRNA sequence"  
"xp82e07.x1 NCI\_CGAP\_Ov40 Homo sapiens cDNA clone IMAGE:2746884 3 similar to contain  
Homo sapiens mRNA; cDNA DKFZp686J12188 (from clone DKFZp686J12188)  
"Homo sapiens cDNA: FLJ23072 fis, clone LNG05713"  
"603087341F1 NIH\_MGC\_120 Homo sapiens cDNA clone IMAGE:5226155 5, mRNA sequence  
"Human T-cell receptor (V beta 4.1-variant, J beta 2.1, C beta 2) mRNA"  
"BX400436 Homo sapiens T CELLS (JURKAT CELL LINE) COT 10-NORMALIZED Homo sapie  
full-length cDNA clone CS0CAP004YG21 of Thymus of Homo sapiens (human)  
full-length cDNA clone CS0DI057YA22 of Placenta Cot 25-normalized of Homo sapiens (human)  
"Homo sapiens cDNA FLJ38153 fis, clone DFNES1000083"  
full-length cDNA clone CS0DF032YD19 of Fetal brain of Homo sapiens (human)  
"Homo sapiens cDNA FLJ26380 fis, clone HRT06687"  
"PREDICTED: Homo sapiens hypothetical gene supported by BX538329 (LOC441366), mRNA"  
"DA226018 BRAWH3 Homo sapiens cDNA clone BRAWH3019594 5, mRNA sequence"  
"zv54b02.s1 Soares\_testis\_NHT Homo sapiens cDNA clone IMAGE:757419 3, mRNA sequence  
"UI-E-EJ0-ahr-m-24-0-UI.s1 UI-E-EJ0 Homo sapiens cDNA clone UI-E-EJ0-ahr-m-24-0-UI 3, mF  
"PM0-ST0264-161199-001-b06 ST0264 Homo sapiens cDNA, mRNA sequence"  
"602679411F1 NIH\_MGC\_95 Homo sapiens cDNA clone IMAGE:4812266 5, mRNA sequence"  
"TC125227 Human breast cancer tissue, large insert, pCMV expression library Homo sapiens cl  
"qf40g04.x1 Soares\_testis\_NHT Homo sapiens cDNA clone IMAGE:1752534 3 similar to TR:OC  
Homo sapiens mRNA; cDNA DKFZp762M127 (from clone DKFZp762M127)  
"AGENCOURT\_10278999 NIH\_MGC\_82 Homo sapiens cDNA clone IMAGE:6591845 5, mRNA

"BX110961 Soares fetal liver spleen 1NFLS Homo sapiens cDNA clone IMAGp998C15474, mRNA sequence"

"BX337332 Homo sapiens PLACENTA COT 25-NORMALIZED Homo sapiens cDNA clone CSO"

"UI-H-BI4-aqd-b-02-0-UI.s1 NCI\_CGAP\_Sub8 Homo sapiens cDNA clone IMAGE:3089235 3, mRNA sequence"

"AV681673 GKB Homo sapiens cDNA clone GKBABD06 5, mRNA sequence"

"CR747253 NCI\_CGAP\_Kid11 Homo sapiens cDNA clone IMAGp998J216211 ; IMAGE:249573"

"wd36e06.x1 Soares\_NFL\_T\_GBC\_S1 Homo sapiens cDNA clone IMAGE:2330242 3 similar to"

"UI-H-FL1-bgx-k-02-0-UI.s1 NCI\_CGAP\_FL1 Homo sapiens cDNA clone UI-H-FL1-bgx-k-02-0-UI.s1"

"ov70a09.s1 Soares\_testis\_NHT Homo sapiens cDNA clone IMAGE:1642648 3, mRNA sequence"

"DA297081 BRHIP2 Homo sapiens cDNA clone BRHIP2010218 5, mRNA sequence"

"DKFZp434L2414\_r1 434 (synonym: htes3) Homo sapiens cDNA clone DKFZp434L2414 5, mRNA sequence"

"EST375647 MAGE resequences, MAGH Homo sapiens cDNA, mRNA sequence"

"7a57g12.x1 NCI\_CGAP\_GC6 Homo sapiens cDNA clone IMAGE:3222886 3, mRNA sequence"

"PM3-NN0223-200301-008-b09 NN0223 Homo sapiens cDNA, mRNA sequence"

"wd27c06.x1 Soares\_NFL\_T\_GBC\_S1 Homo sapiens cDNA clone IMAGE:2329354 3, mRNA sequence"

"DB305184 BRAWH3 Homo sapiens cDNA clone BRAWH3018751 3, mRNA sequence"

"UI-E-DW1-ahc-b-12-0-UI.s1 UI-E-DW1 Homo sapiens cDNA clone UI-E-DW1-ahc-b-12-0-UI.s1"

"Homo sapiens cDNA FLJ37257 fis, clone BRAMY2010171"

"UI-H-DI0-auz-o-21-0-UI.s1 NCI\_CGAP\_DI0 Homo sapiens cDNA clone UI-H-DI0-auz-o-21-0-UI.s1"

"DA532438 FEBRA2 Homo sapiens cDNA clone FEBRA2026055 5, mRNA sequence"

"602145539F1 NIH\_MGC\_48 Homo sapiens cDNA clone IMAGE:4309424 5, mRNA sequence"

"601301818F1 NIH\_MGC\_21 Homo sapiens cDNA clone IMAGE:3636412 5, mRNA sequence"

"MGC9.6.1.1.1.B04.R.1 NIH\_MGC\_331 Homo sapiens cDNA clone MGC9.6.1.1.1.B04, mRNA sequence"

"BX099724 Soares\_fetal\_liver\_spleen\_1NFLS\_S1 Homo sapiens cDNA clone IMAGp998F2010"

"Homo sapiens, clone IMAGE:5165100, mRNA"

"zn90c01.r1 Stratagene lung carcinoma 937218 Homo sapiens cDNA clone IMAGE:565440 5, mRNA sequence"

"BX384892 Homo sapiens B CELLS (RAMOS CELL LINE) COT 25-NORMALIZED Homo sapiens cDNA clone CSO"

"BX099637 Soares\_NFL\_T\_GBC\_S1 Homo sapiens cDNA clone IMAGp998H224003, mRNA sequence"

"BX109720 Soares adult brain N2b4HB55Y Homo sapiens cDNA clone IMAGp998O10332, mRNA sequence"

"wf24a04.x1 Soares\_NFL\_T\_GBC\_S1 Homo sapiens cDNA clone IMAGE:2356494 3, mRNA sequence"

"MGC9.7.1.1.1.A05.R.1 NIH\_MGC\_331 Homo sapiens cDNA clone MGC9.7.1.1.1.A05, mRNA sequence"

"Homo sapiens cDNA FLJ13309 fis, clone OVARC1001442"

"wf67f08.x1 Soares\_NFL\_T\_GBC\_S1 Homo sapiens cDNA clone IMAGE:2360679 3 similar to"

"Homo sapiens cDNA FLJ13267 fis, clone OVARC1000964"

"BX394411 Homo sapiens NEUROBLASTOMA COT 25-NORMALIZED Homo sapiens cDNA clone CSO"

"Homo sapiens cDNA FLJ36037 fis, clone TESTI2017256"

"Homo sapiens primary neuroblastoma cDNA, clone:Nbla10111, full insert sequence"

"AV750156 NPC Homo sapiens cDNA clone NPCCTG12 5, mRNA sequence"

"TCBAP1E6464 Pediatric pre-B cell acute lymphoblastic leukemia Baylor-HGSC project=TCBA"

"17000531973183 GRN\_ES Homo sapiens cDNA 5, mRNA sequence"

"Homo sapiens, clone IMAGE:5168221, mRNA"

"BX117128 Soares\_NFL\_T\_GBC\_S1 Homo sapiens cDNA clone IMAGp998H103715, mRNA sequence"

"AGENCOURT\_14364958 NIH\_MGC\_181 Homo sapiens cDNA clone IMAGE:30408213 5, mRNA sequence"

"603254821F1 NIH\_MGC\_97 Homo sapiens cDNA clone IMAGE:5297356 5, mRNA sequence"

"AV705309 ADB Homo sapiens cDNA clone ADBBWE05 5, mRNA sequence"

"DA040547 BLADE2 Homo sapiens cDNA clone BLADE2001729 5, mRNA sequence"  
"BX119501 Soares\_pregnant\_uterus\_NbHPU Homo sapiens cDNA clone IMAGp998A084374 ;  
"qk28a11.x1 NCI\_CGAP\_Kid3 Homo sapiens cDNA clone IMAGE:1870268 3, mRNA sequence"  
"603034918F1 NIH\_MGC\_115 Homo sapiens cDNA clone IMAGE:5175893 5, mRNA sequence"  
"DA953700 SPLEN2 Homo sapiens cDNA clone SPLEN2031745 5, mRNA sequence"  
"BX116657 Soares\_testis\_NHT Homo sapiens cDNA clone IMAGp998O114104, mRNA sequen  
"AGENCOURT\_8908314 NIH\_MGC\_142 Homo sapiens cDNA clone IMAGE:6451930 5, mRNA  
"602538817F1 NIH\_MGC\_59 Homo sapiens cDNA clone IMAGE:4659749 5, mRNA sequence"  
"AGENCOURT\_13445090 NIH\_MGC\_187 Homo sapiens cDNA clone IMAGE:30319313 5, mR  
"5000CED06 Fetal Brain 15 Homo sapiens cDNA 5, mRNA sequence"  
"CR740913 Soares\_testis\_NHT Homo sapiens cDNA clone IMAGp971H2144 ; IMAGE:727364  
full-length cDNA clone CS0DM012YE14 of Fetal liver of Homo sapiens (human)  
Homo sapiens cDNA clone IMAGE:5267453  
"DA189000 BRAMY3 Homo sapiens cDNA clone BRAMY3010565 5, mRNA sequence"  
"qd93a12.x1 Soares\_testis\_NHT Homo sapiens cDNA clone IMAGE:1737022 3, mRNA sequen  
"ny62g05.s1 NCI\_CGAP\_GCB1 Homo sapiens cDNA clone IMAGE:1282904 3, mRNA sequenc  
"Homo sapiens cDNA: FLJ21429 fis, clone COL04205"  
"CT000682 RZPD no.9017 Homo sapiens cDNA clone RZPDp9017N065 5, mRNA sequence"  
"DB303435 BRAMY3 Homo sapiens cDNA clone BRAMY3016564 3, mRNA sequence"  
"AGENCOURT\_8109349 Lupski\_sympathetic\_trunk Homo sapiens cDNA clone IMAGE:618940  
"UI-E-EJ1-ajh-l-06-0-UI.r1 UI-E-EJ1 Homo sapiens cDNA clone UI-E-EJ1-ajh-l-06-0-UI 5, mRNA  
"EST22604 human nasopharynx Homo sapiens cDNA, mRNA sequence"  
"BX092245 NCI\_CGAP\_GC4 Homo sapiens cDNA clone IMAGp998J163735 ; IMAGE:1476591  
"BX097124 Soares\_fetal\_lung\_NbHL19W Homo sapiens cDNA clone IMAGp998E19667, mRN,  
"BX096301 Soares retina N2b5HR Homo sapiens cDNA clone IMAGp998C16444, mRNA sequ  
"CM3-MT0357-260101-690-b10 MT0357 Homo sapiens cDNA, mRNA sequence"  
"hv65h08.x1 NCI\_CGAP\_Lu24 Homo sapiens cDNA clone IMAGE:3178335 3, mRNA sequence  
"K-EST0224422 L17N670205n1 Homo sapiens cDNA clone L17N670205n1-32-D06 5, mRNA s  
Homo sapiens mRNA; cDNA DKFZp779O0231 (from clone DKFZp779O0231)  
"Homo sapiens cDNA: FLJ21679 fis, clone COL09221"  
Homo sapiens cDNA clone IMAGE:5268658  
"Homo sapiens cDNA FLJ46626 fis, clone TRACH2001612"  
"Homo sapiens cDNA FLJ46527 fis, clone THYMU3034853"  
"zj27f01.s1 Soares\_fetal\_liver\_spleen\_1NFLS\_S1 Homo sapiens cDNA clone IMAGE:451513 3  
"nn54f09.s1 NCI\_CGAP\_Kid6 Homo sapiens cDNA clone IMAGE:1087721 3, mRNA sequence'  
"MGC\_EST\_41324 BD# 636643 Human Total RNA Master Panel II Homo sapiens cDNA, mRN,  
"DA236664 BRAWH3 Homo sapiens cDNA clone BRAWH3033381 5, mRNA sequence"  
"BX119024 Soares\_total\_fetus\_Nb2HF8\_9w Homo sapiens cDNA clone IMAGp998F172587, m  
"BX119270 Soares breast 2NbHBst Homo sapiens cDNA clone IMAGp998P23241, mRNA sequ  
"UI-E-EJ0-aif-j-07-0-UI.s1 UI-E-EJ0 Homo sapiens cDNA clone UI-E-EJ0-aif-j-07-0-UI 3, mRNA  
"Homo sapiens cDNA FLJ41558 fis, clone COLON2009499"  
"BX104737 Soares\_fetal\_heart\_NbHH19W Homo sapiens cDNA clone IMAGp998J084400, mR  
"DA196996 BRAMY4 Homo sapiens cDNA clone BRAMY4002841 5, mRNA sequence"  
"Homo sapiens cDNA FLJ39593 fis, clone SKNSH2001222"



"DKFZp781L12160\_r1 781 (synonym: hlcc4) Homo sapiens cDNA clone DKFZp781L12160 5, n  
"BX345339 Homo sapiens NEUROBLASTOMA COT 25-NORMALIZED Homo sapiens cDNA cl  
"ah75d05.s1 Soares\_testis\_NHT Homo sapiens cDNA clone 1321449 3, mRNA sequence"  
"17000600172763 GRN\_PRENEU Homo sapiens cDNA 5, mRNA sequence"  
Homo sapiens unknown mRNA  
"TCBAP1E4443 Pediatric pre-B cell acute lymphoblastic leukemia Baylor-HGSC project=TCBA  
"UI-E-EJ1-aji-j-06-0-UI.s1 UI-E-EJ1 Homo sapiens cDNA clone UI-E-EJ1-aji-j-06-0-UI 3, mRNA  
"RST44693 Athersys RAGE Library Homo sapiens cDNA, mRNA sequence"  
"DA608330 IMR322 Homo sapiens cDNA clone IMR322005706 5, mRNA sequence"  
"DA380299 BRTHA2 Homo sapiens cDNA clone BRTHA2013452 5, mRNA sequence"  
"DA932631 SPLEN2 Homo sapiens cDNA clone SPLEN2002314 5, mRNA sequence"  
"Homo sapiens cDNA FLJ14337 fis, clone PLACE4000494"  
"zv03e08.r1 Soares\_NhHMPu\_S1 Homo sapiens cDNA clone IMAGE:752582 5 similar to conta  
"DA863698 PLACE7 Homo sapiens cDNA clone PLACE7017209 5, mRNA sequence"  
"DA728582 NT2RM2 Homo sapiens cDNA clone NT2RM2002174 5, mRNA sequence"  
"UI-E-EJ0-aho-m-08-0-UI.s1 UI-E-EJ0 Homo sapiens cDNA clone UI-E-EJ0-aho-m-08-0-UI 3, m  
"DA433643 CTONG1 Homo sapiens cDNA clone CTONG1000417 5, mRNA sequence"  
"NISC\_gc06h03.x1 NCI\_CGAP\_Co17 Homo sapiens cDNA clone IMAGE:3218141 3, mRNA se  
"wm07h02.x1 NCI\_CGAP\_Ut4 Homo sapiens cDNA clone IMAGE:2435283 3, mRNA sequence  
"MGC9.2.1.1.1.A06.F.1 NIH\_MGC\_331 Homo sapiens cDNA clone MGC9.2.1.1.1.A06, mRNA s  
"Homo sapiens cDNA: FLJ21464 fis, clone COL04768"  
"DB344990 THYMU3 Homo sapiens cDNA clone THYMU3007063 3, mRNA sequence"  
"DA160026 BRAMY2 Homo sapiens cDNA clone BRAMY2019928 5, mRNA sequence"  
"DB376790 PLACE1 Homo sapiens cDNA clone PLACE1006665 3, mRNA sequence"  
"DA466757 D3OST3 Homo sapiens cDNA clone D3OST3000186 5, mRNA sequence"  
"DA722162 NT2RI3 Homo sapiens cDNA clone NT2RI3002862 5, mRNA sequence"  
"DA804594 OCBBF3 Homo sapiens cDNA clone OCBBF3019358 5, mRNA sequence"  
"602538216F1 NIH\_MGC\_59 Homo sapiens cDNA clone IMAGE:4659674 5, mRNA sequence"  
"NISC\_gf01f08.y1 NCI\_CGAP\_Kid12 Homo sapiens cDNA clone IMAGE:3252614 5, mRNA sec  
"AGENCOURT\_8806885 NIH\_MGC\_47 Homo sapiens cDNA clone IMAGE:6338475 5, mRNA  
"602490627F1 NIH\_MGC\_18 Homo sapiens cDNA clone IMAGE:4622599 5, mRNA sequence"  
"DB335527 TESOP2 Homo sapiens cDNA clone TESOP2008439 3, mRNA sequence"  
"BX110166 NCI\_CGAP\_Kid5 Homo sapiens cDNA clone IMAGp998E014658, mRNA sequence  
"AGENCOURT\_15595604 NIH\_MGC\_183 Homo sapiens cDNA clone IMAGE:30530228 5, mR  
"DB296040 BLADE2 Homo sapiens cDNA clone BLADE2004377 3, mRNA sequence"  
"qf64e12.x1 Soares\_testis\_NHT Homo sapiens cDNA clone IMAGE:1754830 3, mRNA sequenc  
"PM4-EN0063-151100-002-b09 EN0063 Homo sapiens cDNA, mRNA sequence"  
"DA798455 OCBBF3 Homo sapiens cDNA clone OCBBF3001853 5, mRNA sequence"  
"DA938998 SPLEN2 Homo sapiens cDNA clone SPLEN2012410 5, mRNA sequence"  
"NISC\_na09g08.y1 COGENE 8.5 EAT Homo sapiens cDNA clone IMAGE:5794742 5, mRNA se  
"CR736208 Soares\_NFL\_T\_GBC\_S1 Homo sapiens cDNA clone IMAGp971A1780 ; IMAGE:18  
"Homo sapiens cDNA FLJ40058 fis, clone TCOLN1000180"  
"qf55c06.x1 Soares\_testis\_NHT Homo sapiens cDNA clone IMAGE:1753930 3, mRNA sequenc  
"Homo sapiens, clone IMAGE:5752728, mRNA"

"th57e03.x1 NCI\_CGAP\_Kid11 Homo sapiens cDNA clone IMAGE:2122396 3, mRNA sequence"

"602658226F2 NCI\_CGAP\_Skn3 Homo sapiens cDNA clone IMAGE:4801470 5, mRNA sequence"

"DB083009 TESTI4 Homo sapiens cDNA clone TESTI4029502 5, mRNA sequence"

"DA162248 BRAMY2 Homo sapiens cDNA clone BRAMY2022619 5, mRNA sequence"

"BX447862 Homo sapiens T CELLS (JURKAT CELL LINE) Homo sapiens cDNA clone CS0DH01 5, mRNA sequence"

"wd35f06.x1 Soares\_NFL\_T\_GBC\_S1 Homo sapiens cDNA clone IMAGE:2330147 3, mRNA sequence"

"op31g11.s1 Soares\_NFL\_T\_GBC\_S1 Homo sapiens cDNA clone IMAGE:1578500 3, mRNA sequence"

"aa26b04.r1 NCI\_CGAP\_GCB1 Homo sapiens cDNA clone IMAGE:814351 5, mRNA sequence"

"DB337826 TESTI2 Homo sapiens cDNA clone TESTI2027763 3, mRNA sequence"

"DKFZp434O1935\_r1 434 (synonym: htes3) Homo sapiens cDNA clone DKFZp434O1935 5, mRNA sequence"

"DB043695 TESTI2 Homo sapiens cDNA clone TESTI2031475 5, mRNA sequence"

"DB338706 TESTI2 Homo sapiens cDNA clone TESTI2043440 3, mRNA sequence"

"AU253866 human unfavorable neuroblastoma cDNA Homo sapiens cDNA clone Nbla11379 3, mRNA sequence"

"Homo sapiens mRNA for hypothetical protein, complete cds, clone:Hsa11-digit22-05-16-R"

"EST7458 human nasopharynx Homo sapiens cDNA, mRNA sequence"

"DA554227 HCHON2 Homo sapiens cDNA clone HCHON2004197 5, mRNA sequence"

"EST96676 Testis I Homo sapiens cDNA 5 end, mRNA sequence"

"DB337954 TESTI2 Homo sapiens cDNA clone TESTI2029897 3, mRNA sequence"

"DA880232 PROST2 Homo sapiens cDNA clone PROST2019563 5, mRNA sequence"

"DB302226 BRAMY2 Homo sapiens cDNA clone BRAMY2022966 3, mRNA sequence"

"aa43c10.r1 Soares\_NhHMPu\_S1 Homo sapiens cDNA clone IMAGE:823698 5, mRNA sequence"

"oj08g11.y1 Human lacrimal gland, unamplified: oj Homo sapiens cDNA clone oj08g11 5, mRNA sequence"

"DB375714 PLACE1 Homo sapiens cDNA clone PLACE1005210 3, mRNA sequence"

"ov22f07.s1 Soares\_testis\_NHT Homo sapiens cDNA clone IMAGE:1638085 3, mRNA sequence"

"wj26e11.x1 NCI\_CGAP\_Kid12 Homo sapiens cDNA clone IMAGE:2403980 3, mRNA sequence"

"DB337475 TESTI2 Homo sapiens cDNA clone TESTI2022141 3, mRNA sequence"

"UI-H-BI0p-abm-a-01-0-UI.s1 NCI\_CGAP\_Sub2 Homo sapiens cDNA clone IMAGE:2712096 3, mRNA sequence"

"UI-1-BB0-abu-g-12-0-UI.s1 NCI\_CGAP\_PI4 Homo sapiens cDNA clone UI-1-BB0-abu-g-12-0-UI 3, mRNA sequence"

"UI-1-BC1p-ary-b-02-0-UI.s1 NCI\_CGAP\_PI3 Homo sapiens cDNA clone UI-1-BC1p-ary-b-02-0-UI 3, mRNA sequence"

"DB041946 TESTI2 Homo sapiens cDNA clone TESTI2029158 5, mRNA sequence"

"AV657446 GLC Homo sapiens cDNA clone GLCFCA04 3, mRNA sequence"

"DB304157 BRAWH2 Homo sapiens cDNA clone BRAWH2011635 3, mRNA sequence"

"DB338885 TESTI2 Homo sapiens cDNA clone TESTI2046701 3, mRNA sequence"

"UI-E-CK1-afh-b-01-0-UI.s1 UI-E-CK1 Homo sapiens cDNA clone UI-E-CK1-afh-b-01-0-UI 3, mRNA sequence"

"DA888447 PUAEN2 Homo sapiens cDNA clone PUAEN2009173 5, mRNA sequence"

"CR745865 Soares\_NFL\_T\_GBC\_S1 Homo sapiens cDNA clone IMAGE:971N1978 ; IMAGE:1801 5, mRNA sequence"

"ai60g03.s1 Soares\_testis\_NHT Homo sapiens cDNA clone 1375252 3 similar to contains L1.b3 5, mRNA sequence"

"oj99c05.s1 Soares\_NFL\_T\_GBC\_S1 Homo sapiens cDNA clone IMAGE:1506440 3, mRNA sequence"

"DB338677 TESTI2 Homo sapiens cDNA clone TESTI2042863 3, mRNA sequence"

"DB336584 TESTI2 Homo sapiens cDNA clone TESTI2008346 3, mRNA sequence"

"7d33a07.x1 NCI\_CGAP\_Pr28 Homo sapiens cDNA clone IMAGE:3249012 3 similar to contains L1.b3 5, mRNA sequence"

"DB338619 TESTI2 Homo sapiens cDNA clone TESTI2041956 3, mRNA sequence"

"K-EST0130175 S13KMS5s1 Homo sapiens cDNA clone S13KMS5s1-28-F07 5, mRNA sequence"

"AGENCOURT\_14354957 NIH\_MGC\_191 Homo sapiens cDNA clone IMAGE:30413554 5, mRNA sequence"

"AGENCOURT\_10229596 NIH\_MGC\_141 Homo sapiens cDNA clone IMAGE:6563923 5, mRNA  
"DA717721 NT2RI2 Homo sapiens cDNA clone NT2RI2025693 5, mRNA sequence"  
"ts88g10.x1 NCI\_CGAP\_GC6 Homo sapiens cDNA clone IMAGE:2238402 3, mRNA sequence"  
"DA724733 NT2RI3 Homo sapiens cDNA clone NT2RI3006220 5, mRNA sequence"  
"DB297053 BRACE2 Homo sapiens cDNA clone BRACE2010483 3, mRNA sequence"  
"UI-1-BB1p-aki-a-08-0-UI.s1 NCI\_CGAP\_PI6 Homo sapiens cDNA clone UI-1-BB1p-aki-a-08-0-l  
"DB338170 TESTI2 Homo sapiens cDNA clone TESTI2033861 3, mRNA sequence"  
"AV735490 CB Homo sapiens cDNA clone CBFBD05 5, mRNA sequence"  
"DB337400 TESTI2 Homo sapiens cDNA clone TESTI2021026 3, mRNA sequence"  
"DA652386 MESAN2 Homo sapiens cDNA clone MESAN2006778 5, mRNA sequence"  
"DB305342 BRAWH3 Homo sapiens cDNA clone BRAWH3023070 3, mRNA sequence"  
"am81e07.s1 Stratagene schizo brain S11 Homo sapiens cDNA clone IMAGE:1629540 3, mRNA  
Homo sapiens mRNA; cDNA DKFZp686N1215 (from clone DKFZp686N1215)  
"wn53g02.x1 NCI\_CGAP\_Lu19 Homo sapiens cDNA clone IMAGE:2449202 3, mRNA sequence"  
"op52h12.s1 Soares\_NFL\_T\_GBC\_S1 Homo sapiens cDNA clone IMAGE:1580519 3, mRNA sequence"  
"DB077179 TESTI4 Homo sapiens cDNA clone TESTI4021709 5, mRNA sequence"  
"602726110F1 NIH\_MGC\_15 Homo sapiens cDNA clone IMAGE:4865595 5, mRNA sequence"  
"MR1-GN0172-061100-005-h03 GN0172 Homo sapiens cDNA, mRNA sequence"  
"DA083801 BRACE2 Homo sapiens cDNA clone BRACE2037735 5, mRNA sequence"  
"DB259922 UTERU2 Homo sapiens cDNA clone UTERU2017075 5, mRNA sequence"  
"DA778026 OCBBF2 Homo sapiens cDNA clone OCBBF2012580 5, mRNA sequence"  
"CHR220091 Chromosome 22 exon Homo sapiens cDNA clone C22\_121 5, mRNA sequence"  
"DB304866 BRAWH3 Homo sapiens cDNA clone BRAWH3009977 3, mRNA sequence"  
"EST52632 Fetal heart II Homo sapiens cDNA 5 end, mRNA sequence"  
"EST96866 Testis I Homo sapiens cDNA 5 end, mRNA sequence"  
"qe12d05.x1 Soares\_testis\_NHT Homo sapiens cDNA clone IMAGE:1738761 3, mRNA sequence"  
"CR744384 Soares\_testis\_NHT Homo sapiens cDNA clone IMAGE:1048828 ; IMAGE:1048828  
"DA896354 SKMUS2 Homo sapiens cDNA clone SKMUS2004129 5, mRNA sequence"  
"17000531886861 GRN\_ES Homo sapiens cDNA 5, mRNA sequence"  
"RST27329 Athersys RAGE Library Homo sapiens cDNA, mRNA sequence"  
"DB337520 TESTI2 Homo sapiens cDNA clone TESTI2022890 3, mRNA sequence"  
"hx82f02.x1 NCI\_CGAP\_Kid11 Homo sapiens cDNA clone IMAGE:3194331 3 similar to contain  
"BX119487 NCI\_CGAP\_Kid3 Homo sapiens cDNA clone IMAGE:1866115 ; IMAGE:1866115  
"ov47h04.x1 Soares\_testis\_NHT Homo sapiens cDNA clone IMAGE:1640503 3, mRNA sequence"  
"UI-E-EJ0-ahv-k-01-0-UI.r1 UI-E-EJ0 Homo sapiens cDNA clone UI-E-EJ0-ahv-k-01-0-UI 5, mRNA  
"SM011178 Brain 3 EST Homo sapiens cDNA clone ID\_11178 3', mRNA sequence"  
"NISC\_na12a03.y1 COGENE 8.5 EAT Homo sapiens cDNA clone IMAGE:5794469 5, mRNA sequence"  
"DA331166 BRHIP3 Homo sapiens cDNA clone BRHIP3028838 5, mRNA sequence"  
"yz76c09.s1 Soares\_multiple\_sclerosis\_2NbHMSP Homo sapiens cDNA clone IMAGE:288976 ;  
"DB338438 TESTI2 Homo sapiens cDNA clone TESTI2038389 3, mRNA sequence"  
"DB341552 TESTI4 Homo sapiens cDNA clone TESTI4043001 3, mRNA sequence"  
"DA175295 BRAMY2 Homo sapiens cDNA clone BRAMY2038617 5, mRNA sequence"  
"603072689F1 NIH\_MGC\_119 Homo sapiens cDNA clone IMAGE:5164342 5, mRNA sequence"  
"601186154F1 NIH\_MGC\_8 Homo sapiens cDNA clone IMAGE:3543708 5, mRNA sequence"

"DKFZp686N20145\_r1 686 (synonym: hlcc3) Homo sapiens cDNA clone DKFZp686N20145 5, 1  
"DA162273 BRAMY2 Homo sapiens cDNA clone BRAMY2022649 5, mRNA sequence"  
"DKFZp686P0649\_s1 686 (synonym: hlcc3) Homo sapiens cDNA clone DKFZp686P0649 3, mRNA sequence"  
"DB303407 BRAMY3 Homo sapiens cDNA clone BRAMY3015426 3, mRNA sequence"  
"DB299679 BRACE3 Homo sapiens cDNA clone BRACE3024579 3, mRNA sequence"  
"DB304592 BRAWH3 Homo sapiens cDNA clone BRAWH3003753 3, mRNA sequence"  
"DB039829 TESTI2 Homo sapiens cDNA clone TESTI2026461 5, mRNA sequence"  
"DB338252 TESTI2 Homo sapiens cDNA clone TESTI2035277 3, mRNA sequence"  
"DA160895 BRAMY2 Homo sapiens cDNA clone BRAMY2020980 5, mRNA sequence"  
"qf55h11.x1 Soares\_testis\_NHT Homo sapiens cDNA clone IMAGE:1753989 3, mRNA sequence"  
"DB298926 BRACE3 Homo sapiens cDNA clone BRACE3009497 3, mRNA sequence"  
"zt61c05.r1 Soares\_testis\_NHT Homo sapiens cDNA clone IMAGE:726824 5, mRNA sequence"  
"602564836F1 NIH\_MGC\_77 Homo sapiens cDNA clone IMAGE:4689465 5, mRNA sequence"  
"yj46a12.r1 Soares placenta Nb2HP Homo sapiens cDNA clone IMAGE:151774 5, mRNA sequence"  
"Homo sapiens ovarian cancer-related protein 3 (OCR3) mRNA, partial cds"  
"Homo sapiens cDNA FLJ31059 fis, clone HSYRA2000832"  
"DB343494 THYMU2 Homo sapiens cDNA clone THYMU2018164 3, mRNA sequence"  
"17000531673470 GRN\_EB Homo sapiens cDNA 5, mRNA sequence"  
"DB337791 TESTI2 Homo sapiens cDNA clone TESTI2027243 3, mRNA sequence"  
"ty82e09.x1 NCI\_CGAP\_Kid11 Homo sapiens cDNA clone IMAGE:2285608 3, mRNA sequence"  
"17000531328115 GRN\_EB Homo sapiens cDNA 5, mRNA sequence"  
"BP432430 leukemia cell normalized cDNA library Homo sapiens cDNA clone LEU3471\_42\_B1  
"DA706768 NT2RI2 Homo sapiens cDNA clone NT2RI2010950 5, mRNA sequence"  
"zw78d11.r1 Soares\_testis\_NHT Homo sapiens cDNA clone IMAGE:782325 5 similar to contain  
"zi10a05.s1 Soares\_fetal\_liver\_spleen\_1NFLS\_S1 Homo sapiens cDNA clone IMAGE:430352 3  
"Homo sapiens cDNA FLJ13598 fis, clone PLACE1009921"  
"BX093084 Soares\_fetal\_liver\_spleen\_1NFLS\_S1 Homo sapiens cDNA clone IMAGp998F2010  
"BX111977 Soares\_fetal\_heart\_NbHH19W Homo sapiens cDNA clone IMAGp998E15839, mRNA  
"7o98h02.x1 NCI\_CGAP\_Ov18 Homo sapiens cDNA clone IMAGE:3644403 3, mRNA sequence"  
"UI-CF-DU1-adl-m-01-0-UI.s1 UI-CF-DU1 Homo sapiens cDNA clone UI-CF-DU1-adl-m-01-0-UI  
"Homo sapiens cDNA FLJ33158 fis, clone UTERU2000418"  
"BX094574 Soares melanocyte 2NbHM Homo sapiens cDNA clone IMAGp998D07579, mRNA sequence"  
"601336028F1 NIH\_MGC\_44 Homo sapiens cDNA clone IMAGE:3689911 5, mRNA sequence"  
"Homo sapiens, clone IMAGE:3901628, mRNA"  
Homo sapiens clone 23700 mRNA sequence  
"qm23d08.x1 NCI\_CGAP\_Lu5 Homo sapiens cDNA clone IMAGE:1882671 3, mRNA sequence  
Homo sapiens mRNA; cDNA DKFZp686N1989 (from clone DKFZp686N1989)  
"BX110547 Soares\_testis\_NHT Homo sapiens cDNA clone IMAGp998F172577, mRNA sequence"  
Homo sapiens mRNA full length insert cDNA clone EUROIMAGE 994183  
"RST24587 Athersys RAGE Library Homo sapiens cDNA, mRNA sequence"  
Homo sapiens mRNA full length insert cDNA clone EUROIMAGE 592473  
"Homo sapiens cDNA FLJ30340 fis, clone BRACE2007411"  
"Homo sapiens cDNA: FLJ23006 fis, clone LNG00414"  
"zr42c01.s1 Soares\_NhHMPu\_S1 Homo sapiens cDNA clone IMAGE:666048 3, mRNA sequence"

"Homo sapiens cDNA FLJ43676 fis, clone SYNOV4009129"  
Homo sapiens mRNA; cDNA DKFZp686P07116 (from clone DKFZp686P07116)  
"602507996F1 NIH\_MGC\_79 Homo sapiens cDNA clone IMAGE:4605190 5, mRNA sequence"  
"BX102253 Soares fetal liver spleen 1NFLS Homo sapiens cDNA clone IMAGp998I07110, mRNA  
"yb77g04.x5 Stratagene ovary (#937217) Homo sapiens cDNA clone IMAGE:77238 3, mRNA sequence"  
Homo sapiens cDNA clone IMAGE:3079901  
Homo sapiens mRNA; cDNA DKFZp313N0919 (from clone DKFZp313N0919)  
"tg30c07.x1 NCI\_CGAP\_Brn25 Homo sapiens cDNA clone IMAGE:2110284 3, mRNA sequence"  
"602130767F1 NIH\_MGC\_56 Homo sapiens cDNA clone IMAGE:4287377 5, mRNA sequence"  
"CR738086 Soares\_testis\_NHT Homo sapiens cDNA clone IMAGp971D1644 ; IMAGE:728562  
"zt88c07.s1 Soares\_testis\_NHT Homo sapiens cDNA clone IMAGE:729420 3, mRNA sequence"  
"UI-H-BI1-afe-c-06-0-UI.s1 NCI\_CGAP\_Sub3 Homo sapiens cDNA clone IMAGE:2721418 3, mRNA  
"PREDICTED: Homo sapiens hypothetical LOC388227 (LOC388227), mRNA"  
"BX118817 Soares\_testis\_NHT Homo sapiens cDNA clone IMAGp998L041862, mRNA sequence"  
"BX092639 Soares\_testis\_NHT Homo sapiens cDNA clone IMAGp998I031864 ; IMAGE:758090  
"zw57h03.s1 Soares\_total\_fetus\_Nb2HF8\_9w Homo sapiens cDNA clone IMAGE:774197 3, mRNA  
"zw75f06.r1 Soares\_testis\_NHT Homo sapiens cDNA clone IMAGE:782051 5, mRNA sequence"  
"zw70h03.s1 Soares\_testis\_NHT Homo sapiens cDNA clone IMAGE:781589 3, mRNA sequence"  
"BX113125 Soares\_testis\_NHT Homo sapiens cDNA clone IMAGp998A081928, mRNA sequence"  
"zw77d02.s1 Soares\_testis\_NHT Homo sapiens cDNA clone IMAGE:782211 3, mRNA sequence"  
"zt85b02.s1 Soares\_testis\_NHT Homo sapiens cDNA clone IMAGE:729099 3, mRNA sequence"  
"tj05a07.x1 NCI\_CGAP\_Gas4 Homo sapiens cDNA clone IMAGE:2140596 3, mRNA sequence"  
"BX089493 Soares\_total\_fetus\_Nb2HF8\_9w Homo sapiens cDNA clone IMAGp998P111937 ; IMAGE:  
"Homo sapiens HCLS1 binding protein 3 (HS1BP3), mRNA."  
"Homo sapiens heparan sulfate 2-O-sulfotransferase 1 (HS2ST1), mRNA."  
"Homo sapiens heat shock factor binding protein 1 (HSBP1), mRNA."  
"Homo sapiens hydroxysteroid (11-beta) dehydrogenase 1-like (HSD11B1L), transcript variant c  
"Homo sapiens hydroxysteroid (11-beta) dehydrogenase 2 (HSD11B2), mRNA."  
"Homo sapiens hydroxysteroid (17-beta) dehydrogenase 10 (HSD17B10), nuclear gene encoding  
"Homo sapiens hydroxysteroid (17-beta) dehydrogenase 11 (HSD17B11), mRNA."  
"Homo sapiens hydroxysteroid (17-beta) dehydrogenase 12 (HSD17B12), mRNA."  
"Homo sapiens hydroxysteroid (17-beta) dehydrogenase 14 (HSD17B14), mRNA."  
"Homo sapiens hydroxysteroid (17-beta) dehydrogenase 3 (HSD17B3), mRNA."  
"Homo sapiens hydroxysteroid (17-beta) dehydrogenase 4 (HSD17B4), mRNA."  
"Homo sapiens hydroxysteroid (17-beta) dehydrogenase 6 homolog (mouse) (HSD17B6), mRNA."  
"Homo sapiens hydroxysteroid (17-beta) dehydrogenase 7 (HSD17B7), mRNA."  
"Homo sapiens hydroxysteroid (17-beta) dehydrogenase 7 pseudogene 2 (HSD17B7P2), non-coding  
"Homo sapiens hydroxysteroid (17-beta) dehydrogenase 8 (HSD17B8), mRNA."  
"Homo sapiens hydroxy-delta-5-steroid dehydrogenase, 3 beta- and steroid delta-isomerase 1 (HSD17B8)  
"Homo sapiens hydroxysteroid dehydrogenase like 1 (HSDL1), mRNA."  
"Homo sapiens hydroxysteroid dehydrogenase like 2 (HSDL2), mRNA."  
"Homo sapiens heat shock transcription factor 1 (HSF1), mRNA."  
"Homo sapiens heat shock transcription factor 2 (HSF2), mRNA."  
"Homo sapiens heat shock transcription factor 2 binding protein (HSF2BP), mRNA."

"Homo sapiens hematopoietic SH2 domain containing (HSH2D), mRNA."

"Homo sapiens heat shock protein 90kDa alpha (cytosolic), class A member 1 (HSP90AA1), tra

"Homo sapiens heat shock protein 90kDa alpha (cytosolic), class B member 1 (HSP90AB1), mF

"Homo sapiens heat shock protein 90kDa beta (Grp94), member 1 (HSP90B1), mRNA."

"Homo sapiens heat shock protein 70kDa family, member 13 (HSPA13), mRNA."

"Homo sapiens heat shock 70kDa protein 14 (HSPA14), transcript variant 1, mRNA."

"Homo sapiens heat shock 70kDa protein 1A (HSPA1A), mRNA."

"Homo sapiens heat shock 70kDa protein 1B (HSPA1B), mRNA."

"Homo sapiens heat shock 70kDa protein 1-like (HSPA1L), mRNA."

"Homo sapiens heat shock 70kDa protein 2 (HSPA2), mRNA."

"Homo sapiens heat shock 70kDa protein 4 (HSPA4), transcript variant 2, mRNA."

"Homo sapiens heat shock 70kDa protein 4-like (HSPA4L), mRNA."

"Homo sapiens heat shock 70kDa protein 5 (glucose-regulated protein, 78kDa) (HSPA5), mRN/

"Homo sapiens heat shock 70kDa protein 6 (HSP70B') (HSPA6), mRNA."

"Homo sapiens heat shock 70kDa protein 7 (HSP70B) (HSPA7), non-coding RNA."

"Homo sapiens heat shock 70kDa protein 8 (HSPA8), transcript variant 2, mRNA."

"Homo sapiens heat shock 70kDa protein 9 (mortalin) (HSPA9), nuclear gene encoding mitochc

"Homo sapiens heat shock 27kDa protein 1 (HSPB1), mRNA."

"Homo sapiens heat shock 27kDa protein 2 (HSPB2), mRNA."

"Homo sapiens heat shock 27kDa protein 3 (HSPB3), mRNA."

"Homo sapiens HSPB (heat shock 27kDa) associated protein 1 (HSPBAP1), mRNA."

"Homo sapiens heat shock 27kDa protein-like 2 pseudogene (HSPBL2), non-coding RNA."

"PREDICTED: Homo sapiens hsp70-interacting protein (HSPBP1), mRNA."

"Homo sapiens HSPC047 protein (HSPC047), mRNA."

"Homo sapiens hypothetical protein HSPC111 (HSPC111), mRNA."

"Homo sapiens hypothetical LOC29092 (HSPC157), transcript variant 2, non-coding RNA."

"Homo sapiens galectin-related protein (HSPC159), mRNA."

"Homo sapiens HSPC171 protein (HSPC171), mRNA."

"Homo sapiens hypothetical protein HSPC268 (HSPC268), mRNA."

"PREDICTED: Homo sapiens heat shock 90kDa protein 1, alpha-like 3, transcript variant 3 (HSF

"Homo sapiens heat shock 60kDa protein 1 (chaperonin) (HSPD1), nuclear gene encoding mito

"Homo sapiens heat shock 10kDa protein 1 (chaperonin 10) (HSPE1), mRNA."

"Homo sapiens heat shock 105kDa/110kDa protein 1 (HSPH1), mRNA."

"Homo sapiens ZFP-36 for a zinc finger protein (HSZFP36), mRNA."

"Homo sapiens HIV-1 Tat interactive protein 2, 30kDa (HTATIP2), mRNA."

"Homo sapiens 5-hydroxytryptamine (serotonin) receptor 3A (HTR3A), transcript variant 2, mRN

"Homo sapiens 5-hydroxytryptamine (serotonin) receptor 3B (HTR3B), mRNA."

"Homo sapiens 5-hydroxytryptamine (serotonin) receptor 7 (adenylate cyclase-coupled) (HTR7)

"Homo sapiens HtrA serine peptidase 2 (HTRA2), nuclear gene encoding mitochondrial protein,

"Homo sapiens HtrA serine peptidase 4 (HTRA4), mRNA."

"Homo sapiens hormonally up-regulated Neu-associated kinase (HUNK), mRNA."

"Homo sapiens HUS1 checkpoint homolog b (S. pombe) (HUS1B), mRNA."

"Homo sapiens hydrogen voltage-gated channel 1 (HVCN1), transcript variant 2, mRNA."

"Homo sapiens hyaluronoglucosaminidase 2 (HYAL2), transcript variant 2, mRNA."

"Homo sapiens hyaluronoglucosaminidase 3 (HYAL3), mRNA."  
"Homo sapiens hyaluronoglucosaminidase 4 (HYAL4), mRNA."  
"Homo sapiens hyaluronoglucosaminidase pseudogene 1 (HYALP1), non-coding RNA."  
"Homo sapiens hydrolethalus syndrome 1 (HYLS1), mRNA."  
"Homo sapiens hypoxia up-regulated 1 (HYOU1), mRNA."  
"Homo sapiens huntingtin interacting protein B (HYPB), transcript variant 2, mRNA."  
"Homo sapiens isoamyl acetate-hydrolyzing esterase 1 homolog (*S. cerevisiae*) (IAH1), mRNA."  
"Homo sapiens isoleucine-tRNA synthetase (IARS), transcript variant long, mRNA."  
"Homo sapiens isoleucyl-tRNA synthetase 2, mitochondrial (IARS2), nuclear gene encoding mit  
"Homo sapiens integrin-binding sialoprotein (bone sialoprotein, bone sialoprotein II) (IBSP), mRN  
"Homo sapiens inhibitor of Bruton agammaglobulinemia tyrosine kinase (IBTK), mRNA."  
"Homo sapiens islet cell autoantigen 1, 69kDa (ICA1), transcript variant 3, mRNA."  
"Homo sapiens islet cell autoantigen 1,69kDa-like (ICA1L), transcript variant 2, mRNA."  
"Homo sapiens intercellular adhesion molecule 1 (CD54), human rhinovirus receptor (ICAM1), n  
"Homo sapiens intercellular adhesion molecule 2 (ICAM2), transcript variant 1, mRNA."  
"Homo sapiens intercellular adhesion molecule 3 (ICAM3), mRNA."  
"Homo sapiens intercellular adhesion molecule 4 (Landsteiner-Wiener blood group) (ICAM4), tra  
"Homo sapiens intercellular adhesion molecule 5, telencephalin (ICAM5), mRNA."  
"Homo sapiens interphase cytoplasmic foci protein 45 (ICF45), mRNA."  
"Homo sapiens intestinal cell (MAK-like) kinase (ICK), transcript variant 2, mRNA."  
"Homo sapiens isoprenylcysteine carboxyl methyltransferase (ICMT), mRNA."  
"Homo sapiens inducible T-cell co-stimulator ligand (ICOSLG), mRNA."  
"Homo sapiens immature colon carcinoma transcript 1 (ICT1), mRNA."  
"Homo sapiens inhibitor of DNA binding 1, dominant negative helix-loop-helix protein (ID1), tran  
"Homo sapiens inhibitor of DNA binding 2, dominant negative helix-loop-helix protein (ID2), mRN  
"Homo sapiens inhibitor of DNA binding 3, dominant negative helix-loop-helix protein (ID3), mRN  
"Homo sapiens inhibitor of DNA binding 4, dominant negative helix-loop-helix protein (ID4), mRN  
"Homo sapiens insulin-degrading enzyme (IDE), mRNA."  
"Homo sapiens isocitrate dehydrogenase 1 (NADP+), soluble (IDH1), mRNA."  
"Homo sapiens isocitrate dehydrogenase 2 (NADP+), mitochondrial (IDH2), nuclear gene encod  
"Homo sapiens isocitrate dehydrogenase 3 (NAD+) alpha (IDH3A), nuclear gene encoding mitoc  
"Homo sapiens isocitrate dehydrogenase 3 (NAD+) beta (IDH3B), nuclear gene encoding mitoc  
"Homo sapiens isocitrate dehydrogenase 3 (NAD+) gamma (IDH3G), nuclear gene encoding mi  
"Homo sapiens isopentenyl-diphosphate delta isomerase 1 (IDI1), mRNA."  
"Homo sapiens isopentenyl-diphosphate delta isomerase 2 (IDI2), mRNA."  
"Homo sapiens indoleamine 2,3-dioxygenase 1 (IDO1), mRNA."  
"Homo sapiens iduronate 2-sulfatase (Hunter syndrome) (IDS), transcript variant 1, mRNA."  
"Homo sapiens iduronidase, alpha-L- (IDUA), mRNA."  
"Homo sapiens immediate early response 2 (IER2), mRNA."  
"Homo sapiens immediate early response 3 (IER3), mRNA."  
"Homo sapiens immediate early response 5 (IER5), mRNA."  
"Homo sapiens immediate early response 5-like (IER5L), mRNA."  
"Homo sapiens intermediate filament family orphan 1 (IFFO1), transcript variant 2, mRNA."  
"Homo sapiens intermediate filament family orphan 2 (IFFO2), mRNA."

"Homo sapiens interferon, gamma-inducible protein 16 (IFI16), mRNA."  
"Homo sapiens interferon, alpha-inducible protein 27 (IFI27), transcript variant 2, mRNA."  
"Homo sapiens interferon, alpha-inducible protein 27-like 1 (IFI27L1), transcript variant 1, mRNA"  
"Homo sapiens interferon, alpha-inducible protein 27-like 2 (IFI27L2), mRNA."  
"Homo sapiens interferon, gamma-inducible protein 30 (IFI30), mRNA."  
"Homo sapiens interferon-induced protein 35 (IFI35), mRNA."  
"Homo sapiens interferon-induced protein 44 (IFI44), mRNA."  
"Homo sapiens interferon-induced protein 44-like (IFI44L), mRNA."  
"Homo sapiens interferon, alpha-inducible protein 6 (IFI6), transcript variant 3, mRNA."  
"Homo sapiens interferon induced with helicase C domain 1 (IFIH1), mRNA."  
"Homo sapiens interferon-induced protein with tetratricopeptide repeats 1 (IFIT1), transcript vari  
"Homo sapiens interferon-induced protein with tetratricopeptide repeats 2 (IFIT2), mRNA."  
"Homo sapiens interferon-induced protein with tetratricopeptide repeats 3 (IFIT3), mRNA."  
"Homo sapiens interferon-induced protein with tetratricopeptide repeats 5 (IFIT5), mRNA."  
"Homo sapiens interferon induced transmembrane protein 1 (9-27) (IFITM1), mRNA."  
"Homo sapiens interferon induced transmembrane protein 2 (1-8D) (IFITM2), mRNA."  
"Homo sapiens interferon induced transmembrane protein 3 (1-8U) (IFITM3), mRNA."  
"Homo sapiens interferon, alpha 1 (IFNA1), mRNA."  
"Homo sapiens interferon, alpha 16 (IFNA16), mRNA."  
"Homo sapiens interferon, alpha 21 (IFNA21), mRNA."  
"Homo sapiens interferon (alpha, beta and omega) receptor 1 (IFNAR1), mRNA."  
"Homo sapiens interferon (alpha, beta and omega) receptor 2 (IFNAR2), transcript variant 1, mF  
"Homo sapiens interferon, beta 1, fibroblast (IFNB1), mRNA."  
"Homo sapiens interferon epsilon 1 (IFNE1), mRNA."  
"Homo sapiens interferon gamma receptor 1 (IFNGR1), mRNA."  
"Homo sapiens interferon gamma receptor 2 (interferon gamma transducer 1) (IFNGR2), mRNA  
"Homo sapiens interferon, kappa (IFNK), mRNA."  
"Homo sapiens IFP38 (IFP38), mRNA."  
"Homo sapiens interferon-related developmental regulator 1 (IFRD1), transcript variant 1, mRNA/  
"Homo sapiens interferon-related developmental regulator 2 (IFRD2), mRNA."  
"Homo sapiens interferon responsive gene 15 (IFRG15), mRNA."  
"Homo sapiens intraflagellar transport 122 homolog (Chlamydomonas) (IFT122), transcript varia  
"Homo sapiens intraflagellar transport 140 homolog (Chlamydomonas) (IFT140), mRNA."  
"Homo sapiens intraflagellar transport 20 homolog (Chlamydomonas) (IFT20), mRNA."  
"Homo sapiens intraflagellar transport 52 homolog (Chlamydomonas) (IFT52), mRNA."  
"Homo sapiens intraflagellar transport 57 homolog (Chlamydomonas) (IFT57), mRNA."  
"Homo sapiens intraflagellar transport 74 homolog (Chlamydomonas) (IFT74), transcript variant  
"Homo sapiens intraflagellar transport 80 homolog (Chlamydomonas) (IFT80), mRNA."  
"Homo sapiens intraflagellar transport 81 homolog (Chlamydomonas) (IFT81), transcript variant  
"Homo sapiens intraflagellar transport 88 homolog (Chlamydomonas) (IFT88), transcript variant  
"Homo sapiens immunoglobulin (CD79A) binding protein 1 (IGBP1), mRNA."  
"Homo sapiens immunoglobulin superfamily, DCC subclass, member 3 (IGDCC3), mRNA."  
"Homo sapiens insulin-like growth factor 2 mRNA binding protein 1 (IGF2BP1), transcript varian  
"Homo sapiens insulin-like growth factor 2 mRNA binding protein 2 (IGF2BP2), transcript varian



"Homo sapiens insulin-like growth factor 2 mRNA binding protein 3 (IGF2BP3), mRNA."  
"Homo sapiens insulin-like growth factor 2 receptor (IGF2R), mRNA."  
"Homo sapiens insulin-like growth factor binding protein, acid labile subunit (IGFALS), mRNA."  
"Homo sapiens insulin-like growth factor binding protein 1 (IGFBP1), mRNA."  
"Homo sapiens insulin-like growth factor binding protein 2, 36kDa (IGFBP2), mRNA."  
"Homo sapiens insulin-like growth factor binding protein 3 (IGFBP3), transcript variant 2, mRNA"  
"Homo sapiens insulin-like growth factor binding protein 4 (IGFBP4), mRNA."  
"Homo sapiens insulin-like growth factor binding protein 6 (IGFBP6), mRNA."  
"Homo sapiens insulin-like growth factor binding protein-like 1 (IGFBPL1), mRNA."  
"Homo sapiens IGF-like family member 3 (IGFL3), mRNA."  
"Homo sapiens immunoglobulin mu binding protein 2 (IGHMBP2), mRNA."  
"Homo sapiens immunoglobulin J polypeptide, linker protein for immunoglobulin alpha and mu p  
"Homo sapiens immunoglobulin lambda-like polypeptide 1 (IGLL1), transcript variant 2, mRNA."  
"Homo sapiens immunoglobulin lambda-like polypeptide 3 (IGLL3), mRNA."  
"Homo sapiens immunoglobulin superfamily, member 10 (IGSF10), mRNA."  
"Homo sapiens immunoglobulin superfamily, member 11 (IGSF11), transcript variant 1, mRNA."  
"Homo sapiens immunoglobulin superfamily, member 3 (IGSF3), transcript variant 1, mRNA."  
"Homo sapiens immunoglobulin superfamily, member 6 (IGSF6), mRNA."  
"Homo sapiens immunoglobulin superfamily, member 8 (IGSF8), mRNA."  
"Homo sapiens immunoglobulin superfamily, member 9 (IGSF9), mRNA."  
"Homo sapiens invasion inhibitory protein 45 (IIP45), transcript variant 2, mRNA."  
"Homo sapiens IK cytokine, down-regulator of HLA II (IK), mRNA."  
"Homo sapiens IKBKB interacting protein (IKBIP), transcript variant 2, mRNA."  
"Homo sapiens inhibitor of kappa light polypeptide gene enhancer in B-cells, kinase complex-as  
"Homo sapiens inhibitor of kappa light polypeptide gene enhancer in B-cells, kinase beta (IKBKI  
"Homo sapiens inhibitor of kappa light polypeptide gene enhancer in B-cells, kinase epsilon (IKE  
"Homo sapiens inhibitor of kappa light polypeptide gene enhancer in B-cells, kinase gamma (IKI  
"Homo sapiens IKAROS family zinc finger 1 (Ikaros) (IKZF1), mRNA."  
"Homo sapiens IKAROS family zinc finger 2 (Helios) (IKZF2), transcript variant 1, mRNA."  
"Homo sapiens IKAROS family zinc finger 3 (Aiolos) (IKZF3), transcript variant 1, mRNA."  
"Homo sapiens IKAROS family zinc finger 4 (Eos) (IKZF4), mRNA."  
"Homo sapiens IKAROS family zinc finger 5 (Pegasus) (IKZF5), mRNA."  
"Homo sapiens interleukin 10 (IL10), mRNA."  
"Homo sapiens interleukin 10 receptor, alpha (IL10RA), mRNA."  
"Homo sapiens interleukin 10 receptor, beta (IL10RB), mRNA."  
"Homo sapiens interleukin 11 (IL11), mRNA."  
"Homo sapiens interleukin 11 receptor, alpha (IL11RA), transcript variant 1, mRNA."  
"Homo sapiens interleukin 12A (natural killer cell stimulatory factor 1, cytotoxic lymphocyte matu  
"Homo sapiens interleukin 12 receptor, beta 1 (IL12RB1), transcript variant 2, mRNA."  
"Homo sapiens interleukin 12 receptor, beta 2 (IL12RB2), mRNA."  
"Homo sapiens interleukin 13 receptor, alpha 1 (IL13RA1), mRNA."  
"Homo sapiens interleukin 15 (IL15), transcript variant 1, mRNA."  
"Homo sapiens interleukin 16 (lymphocyte chemoattractant factor) (IL16), transcript variant 2, m  
"Homo sapiens interleukin 17A (IL17A), mRNA."

"Homo sapiens interleukin 17D (IL17D), mRNA."  
"Homo sapiens interleukin 17 receptor A (IL17RA), mRNA."  
"Homo sapiens interleukin 17 receptor B (IL17RB), transcript variant 2, mRNA."  
"Homo sapiens interleukin 17 receptor D (IL17RD), mRNA."  
"Homo sapiens interleukin 18 (interferon-gamma-inducing factor) (IL18), mRNA."  
"Homo sapiens interleukin 18 binding protein (IL18BP), transcript variant D, mRNA."  
"Homo sapiens interleukin 18 receptor accessory protein (IL18RAP), mRNA."  
"Homo sapiens interleukin 1 receptor, type II (IL1R2), transcript variant 2, mRNA."  
"Homo sapiens interleukin 1 receptor accessory protein (IL1RAP), transcript variant 1, mRNA."  
"Homo sapiens interleukin 1 receptor-like 2 (IL1RL2), mRNA."  
"Homo sapiens interleukin 20 receptor, alpha (IL20RA), mRNA."  
"Homo sapiens interleukin 20 receptor beta (IL20RB), mRNA."  
"Homo sapiens interleukin 21 receptor (IL21R), transcript variant 1, mRNA."  
"Homo sapiens interleukin 22 receptor, alpha 1 (IL22RA1), mRNA."  
"Homo sapiens interleukin 23, alpha subunit p19 (IL23A), mRNA."  
"Homo sapiens interleukin 27 receptor, alpha (IL27RA), mRNA."  
"Homo sapiens interleukin 28A (interferon, lambda 2) (IL28A), mRNA."  
"Homo sapiens interleukin 28 receptor, alpha (interferon, lambda receptor) (IL28RA), transcript variant 1, mRNA."  
"Homo sapiens interleukin 2 receptor, alpha (IL2RA), mRNA."  
"Homo sapiens interleukin 2 receptor, beta (IL2RB), mRNA."  
"Homo sapiens interleukin 32 (IL32), transcript variant 4, mRNA."  
"Homo sapiens interleukin 34 (IL34), mRNA."  
"Homo sapiens interleukin 4 induced 1 (IL4I1), transcript variant 2, mRNA."  
"Homo sapiens interleukin 4 receptor (IL4R), transcript variant 2, mRNA."  
"Homo sapiens interleukin 5 receptor, alpha (IL5RA), transcript variant 1, mRNA."  
"Homo sapiens interleukin 6 (interferon, beta 2) (IL6), mRNA."  
"Homo sapiens interleukin 7 receptor (IL7R), mRNA."  
"Homo sapiens interleukin 8 (IL8), mRNA."  
"Homo sapiens immunoglobulin-like domain containing receptor 1 (ILDR1), mRNA."  
"Homo sapiens immunoglobulin-like domain containing receptor 2 (ILDR2), mRNA."  
"Homo sapiens interleukin enhancer binding factor 2, 45kDa (ILF2), mRNA."  
"Homo sapiens interleukin enhancer binding factor 3, 90kDa (ILF3), transcript variant 2, mRNA."  
"Homo sapiens integrin-linked kinase (ILK), transcript variant 2, mRNA."  
"Homo sapiens integrin-linked kinase-associated serine/threonine phosphatase 2C (ILKAP), transcript variant 1, mRNA."  
"Homo sapiens ilvB (bacterial acetolactate synthase)-like (ILVBL), mRNA."  
"Homo sapiens SLC7A5 pseudogene (IMAA), non-coding RNA."  
"Homo sapiens IMP1 inner mitochondrial membrane peptidase-like (S. cerevisiae) (IMMP1L), nuclear gene encoding protein, mRNA."  
"Homo sapiens IMP2 inner mitochondrial membrane peptidase-like (S. cerevisiae) (IMMP2L), nuclear gene encoding protein, mRNA."  
"Homo sapiens inner membrane protein, mitochondrial (mitofilin) (IMMT), nuclear gene encoding protein, mRNA."  
"Homo sapiens IMP3, U3 small nucleolar ribonucleoprotein, homolog (yeast) (IMP3), mRNA."  
"Homo sapiens IMP4, U3 small nucleolar ribonucleoprotein, homolog (yeast) (IMP4), mRNA."  
"Homo sapiens inositol(myo)-1(or 4)-monophosphatase 1 (IMPA1), mRNA."  
"Homo sapiens inositol(myo)-1(or 4)-monophosphatase 2 (IMPA2), mRNA."  
"Homo sapiens inositol monophosphatase domain containing 1 (IMPAD1), mRNA."

"Homo sapiens IMP (inosine monophosphate) dehydrogenase 1 (IMPDH1), transcript variant 5,  
"Homo sapiens IMP (inosine monophosphate) dehydrogenase 2 (IMPDH2), mRNA."  
"Homo sapiens interphotoreceptor matrix proteoglycan 1 (IMPG1), mRNA."  
"Homo sapiens internexin neuronal intermediate filament protein, alpha (INA), mRNA."  
"Homo sapiens inhibitor of CDK, cyclin A1 interacting protein 1 (INCA1), mRNA."  
"Homo sapiens inner centromere protein antigens 135/155kDa (INCENP), mRNA."  
"Homo sapiens indoleamine-pyrrole 2,3 dioxygenase (INDO), mRNA."  
"Homo sapiens inverted formin, FH2 and WH2 domain containing (INF2), transcript variant 2, m  
"Homo sapiens inhibitor of growth family, member 1 (ING1), transcript variant 3, mRNA."  
"Homo sapiens inhibitor of growth family, member 2 (ING2), mRNA."  
"Homo sapiens inhibitor of growth family, member 3 (ING3), transcript variant 3, mRNA."  
"PREDICTED: Homo sapiens inhibitor of growth family, member 5 (ING5), mRNA."  
"Homo sapiens inhibin, beta E (INHBE), mRNA."  
"Homo sapiens INO80 homolog (*S. cerevisiae*) (INO80), mRNA."  
"Homo sapiens INO80 complex subunit B (INO80B), mRNA."  
"Homo sapiens INO80 complex subunit C (INO80C), transcript variant 2, mRNA."  
"Homo sapiens INO80 complex subunit D (INO80D), mRNA."  
"Homo sapiens INO80 complex subunit E (INO80E), mRNA."  
"Homo sapiens inositol polyphosphate-1-phosphatase (INPP1), mRNA."  
"Homo sapiens inositol polyphosphate-4-phosphatase, type II, 105kDa (INPP4B), mRNA."  
"PREDICTED: Homo sapiens inositol polyphosphate-5-phosphatase, 40kDa (INPP5A), mRNA."  
"Homo sapiens inositol polyphosphate-5-phosphatase, 75kDa (INPP5B), nuclear gene encoding  
"Homo sapiens inositol polyphosphate-5-phosphatase, 145kDa (INPP5D), transcript variant 2, n  
"Homo sapiens inositol polyphosphate-5-phosphatase, 72 kDa (INPP5E), mRNA."  
"Homo sapiens inositol polyphosphate-5-phosphatase K (INPP5K), transcript variant 2, mRNA."  
"Homo sapiens inositol polyphosphate phosphatase-like 1 (INPPL1), mRNA."  
"Homo sapiens inscuteable homolog (*Drosophila*) (INSC), transcript variant 2, mRNA."  
"Homo sapiens insulin induced gene 1 (INSIG1), transcript variant 2, mRNA."  
"Homo sapiens insulin induced gene 2 (INSIG2), mRNA."  
"Homo sapiens insulinoma-associated 1 (INSM1), mRNA."  
"Homo sapiens insulinoma-associated 2 (INSM2), mRNA."  
"Homo sapiens insulin receptor (INSR), transcript variant 1, mRNA."  
"Homo sapiens insulin receptor-related receptor (INSRR), mRNA."  
"Homo sapiens integrator complex subunit 1 (INTS1), mRNA."  
"Homo sapiens integrator complex subunit 10 (INTS10), mRNA."  
"Homo sapiens integrator complex subunit 12 (INTS12), mRNA."  
"Homo sapiens integrator complex subunit 2 (INTS2), mRNA."  
"Homo sapiens integrator complex subunit 3 (INTS3), mRNA."  
"Homo sapiens integrator complex subunit 4 (INTS4), mRNA."  
"Homo sapiens integrator complex subunit 5 (INTS5), mRNA."  
"Homo sapiens integrator complex subunit 6 (INTS6), transcript variant 2, mRNA."  
"Homo sapiens integrator complex subunit 7 (INTS7), mRNA."  
"Homo sapiens integrator complex subunit 9 (INTS9), mRNA."  
"Homo sapiens inositol hexakisphosphate kinase 1 (IP6K1), transcript variant 1, mRNA."

"Homo sapiens inositol hexakisphosphate kinase 2 (IP6K2), transcript variant 4, mRNA."  
"Homo sapiens importin 11 (IPO11), mRNA."  
"Homo sapiens importin 13 (IPO13), mRNA."  
"Homo sapiens importin 4 (IPO4), mRNA."  
"Homo sapiens importin 5 (IPO5), mRNA."  
"Homo sapiens importin 7 (IPO7), mRNA."  
"Homo sapiens importin 8 (IPO8), mRNA."  
"Homo sapiens importin 9 (IPO9), mRNA."  
"Homo sapiens imprinted in Prader-Willi syndrome (non-protein coding) (IPW), non-coding RNA"  
"Homo sapiens IQ motif containing B1 (IQCB1), transcript variant 3, mRNA."  
"Homo sapiens IQ motif containing C (IQCC), mRNA."  
"Homo sapiens IQ motif containing D (IQCD), mRNA."  
"Homo sapiens IQ motif containing G (IQCG), mRNA."  
"Homo sapiens IQ motif containing H (IQCH), transcript variant 1, mRNA."  
"Homo sapiens IQ motif containing K (IQCK), mRNA."  
"Homo sapiens IQ motif containing GTPase activating protein 2 (IQGAP2), mRNA."  
"Homo sapiens IQ motif and Sec7 domain 1 (IQSEC1), mRNA."  
"Homo sapiens IQ motif and ubiquitin domain containing (IQUB), mRNA."  
"Homo sapiens interleukin-1 receptor-associated kinase 1 (IRAK1), transcript variant 3, mRNA."  
"Homo sapiens interleukin-1 receptor-associated kinase 1 binding protein 1 (IRAK1BP1), mRNA"  
"Homo sapiens interleukin-1 receptor-associated kinase 2 (IRAK2), mRNA."  
"Homo sapiens interleukin-1 receptor-associated kinase 3 (IRAK3), mRNA."  
"Homo sapiens iron-responsive element binding protein 2 (IREB2), mRNA."  
"Homo sapiens interferon regulatory factor 1 (IRF1), mRNA."  
"Homo sapiens interferon regulatory factor 2 (IRF2), mRNA."  
"Homo sapiens interferon regulatory factor 2 binding protein 1 (IRF2BP1), mRNA."  
"Homo sapiens interferon regulatory factor 2 binding protein 2 (IRF2BP2), transcript variant 1, r"  
"Homo sapiens interferon regulatory factor 3 (IRF3), mRNA."  
"Homo sapiens interferon regulatory factor 4 (IRF4), mRNA."  
"Homo sapiens interferon regulatory factor 5 (IRF5), transcript variant 7, mRNA."  
"Homo sapiens interferon regulatory factor 7 (IRF7), transcript variant b, mRNA."  
"Homo sapiens interferon regulatory factor 8 (IRF8), mRNA."  
"Homo sapiens interferon regulatory factor 9 (IRF9), mRNA."  
"Homo sapiens immunity-related GTPase family, cinema (IRGC), mRNA."  
"PREDICTED: Homo sapiens immunity-related GTPase family, M (IRGM), mRNA."  
"Homo sapiens insulin receptor substrate 1 (IRS1), mRNA."  
"Homo sapiens insulin receptor substrate 2 (IRS2), mRNA."  
"Homo sapiens iroquois homeobox 3 (IRX3), mRNA."  
"Homo sapiens iroquois homeobox 5 (IRX5), mRNA."  
"Homo sapiens iron-sulfur cluster assembly 1 homolog (S. cerevisiae) (ISCA1), mRNA."  
"Homo sapiens iron-sulfur cluster assembly 1 homolog (S. cerevisiae)-like (ISCA1L), mRNA."  
"Homo sapiens iron-sulfur cluster assembly 2 homolog (S. cerevisiae) (ISCA2), mRNA."  
"Homo sapiens iron-sulfur cluster scaffold homolog (E. coli) (ISCU), nuclear gene encoding mitc"  
"Homo sapiens ISG15 ubiquitin-like modifier (ISG15), mRNA."

"Homo sapiens interferon stimulated exonuclease gene 20kDa (ISG20), mRNA."  
"Homo sapiens interferon stimulated exonuclease gene 20kDa-like 1 (ISG20L1), mRNA."  
"Homo sapiens interferon stimulated exonuclease gene 20kDa-like 2 (ISG20L2), mRNA."  
"Homo sapiens ISL LIM homeobox 2 (ISL2), mRNA."  
"Homo sapiens immunoglobulin superfamily containing leucine-rich repeat 2 (ISLR2), mRNA."  
"Homo sapiens isthmin 1 homolog (zebrafish) (ISM1), mRNA."  
"Homo sapiens isochorismatase domain containing 1 (ISOC1), mRNA."  
"Homo sapiens isochorismatase domain containing 2 (ISOC2), mRNA."  
"Homo sapiens ISY1 splicing factor homolog (S. cerevisiae) (ISY1), mRNA."  
"Homo sapiens inositol-3-phosphate synthase 1 (ISYNA1), mRNA."  
"Homo sapiens itchy homolog E3 ubiquitin protein ligase (mouse) (ITCH), mRNA."  
"Homo sapiens integrin alpha FG-GAP repeat containing 1 (ITFG1), mRNA."  
"Homo sapiens integrin alpha FG-GAP repeat containing 2 (ITFG2), mRNA."  
"Homo sapiens integrin alpha FG-GAP repeat containing 3 (ITFG3), mRNA."  
"Homo sapiens integrin, alpha 3 (antigen CD49C, alpha 3 subunit of VLA-3 receptor) (ITGA3), tr"  
"Homo sapiens integrin, alpha 4 (antigen CD49D, alpha 4 subunit of VLA-4 receptor) (ITGA4), n"  
"Homo sapiens integrin, alpha 6 (ITGA6), mRNA."  
"Homo sapiens integrin, alpha 9 (ITGA9), mRNA."  
"Homo sapiens integrin, alpha E (antigen CD103, human mucosal lymphocyte antigen 1; alpha |"  
"Homo sapiens integrin, alpha L (antigen CD11A (p180), lymphocyte function-associated antigen"  
"Homo sapiens integrin, alpha M (complement component 3 receptor 3 subunit) (ITGAM), trans"  
"Homo sapiens integrin, alpha V (vitronectin receptor, alpha polypeptide, antigen CD51) (ITGAV"  
"Homo sapiens integrin, beta 1 (fibronectin receptor, beta polypeptide, antigen CD29 includes M"  
"Homo sapiens integrin beta 1 binding protein 1 (ITGB1BP1), transcript variant 1, mRNA."  
"Homo sapiens integrin, beta 2 (antigen CD18 (p95), lymphocyte function-associated antigen 1;  
"Homo sapiens integrin, beta 3 (platelet glycoprotein IIIa, antigen CD61) (ITGB3), mRNA."  
"Homo sapiens integrin beta 3 binding protein (beta3-endonexin) (ITGB3BP), mRNA."  
"Homo sapiens integrin beta 4 binding protein (ITGB4BP), transcript variant 3, mRNA."  
"PREDICTED: Homo sapiens integrin, beta 5, transcript variant 3 (ITGB5), mRNA."  
"Homo sapiens integrin, beta 7 (ITGB7), mRNA."  
"Homo sapiens integrin, beta-like 1 (with EGF-like repeat domains) (ITGBL1), mRNA."  
"Homo sapiens inter-alpha (globulin) inhibitor H4 (plasma Kallikrein-sensitive glycoprotein) (ITIH"  
"Homo sapiens inter-alpha (globulin) inhibitor H5 (ITIH5), transcript variant 1, mRNA."  
"Homo sapiens IL2-inducible T-cell kinase (ITK), mRNA."  
"Homo sapiens intelectin 2 (ITLN2), mRNA."  
"Homo sapiens integral membrane protein 2A (ITM2A), mRNA."  
"Homo sapiens integral membrane protein 2B (ITM2B), mRNA."  
"Homo sapiens integral membrane protein 2C (ITM2C), transcript variant 2, mRNA."  
"Homo sapiens inosine triphosphatase (nucleoside triphosphate pyrophosphatase) (ITPA), trans"  
"Homo sapiens inositol 1,3,4-triphosphate 5/6 kinase (ITPK1), mRNA."  
"Homo sapiens inositol 1,4,5-trisphosphate 3-kinase A (ITPKA), mRNA."  
"Homo sapiens inositol 1,4,5-trisphosphate 3-kinase B (ITPKB), mRNA."  
"Homo sapiens inositol 1,4,5-triphosphate receptor, type 1 (ITPR1), transcript variant 2, mRNA."  
"Homo sapiens inositol 1,4,5-triphosphate receptor, type 2 (ITPR2), mRNA."

"Homo sapiens inositol 1,4,5-triphosphate receptor, type 3 (ITPR3), mRNA."  
"Homo sapiens inositol 1,4,5-triphosphate receptor interacting protein (ITPRIP), mRNA."  
"Homo sapiens inositol 1,4,5-triphosphate receptor interacting protein-like 1 (ITPRIPL1), transcript variant 1, mRNA."  
"Homo sapiens inositol 1,4,5-triphosphate receptor interacting protein-like 2 (ITPRIPL2), mRNA."  
"Homo sapiens intersectin 1 (SH3 domain protein) (ITSN1), transcript variant 1, mRNA."  
"Homo sapiens isovaleryl Coenzyme A dehydrogenase (IVD), nuclear gene encoding mitochondrial protein, mRNA."  
"Homo sapiens influenza virus NS1A binding protein (IVNS1ABP), transcript variant 2, mRNA."  
"Homo sapiens IWS1 homolog (S. cerevisiae) (IWS1), mRNA."  
"Homo sapiens izumo sperm-egg fusion 1 (IZUMO1), mRNA."  
"Homo sapiens jagged 1 (Alagille syndrome) (JAG1), mRNA."  
"Homo sapiens jagged 2 (JAG2), transcript variant 2, mRNA."  
"Homo sapiens jagunal homolog 1 (Drosophila) (JAGN1), mRNA."  
"Homo sapiens Janus kinase 1 (JAK1), mRNA."  
"Homo sapiens Janus kinase 2 (a protein tyrosine kinase) (JAK2), mRNA."  
"Homo sapiens janus kinase and microtubule interacting protein 2 (JAKMIP2), mRNA."  
"Homo sapiens janus kinase and microtubule interacting protein 3 (JAKMIP3), mRNA."  
"Homo sapiens junctional adhesion molecule 2 (JAM2), mRNA."  
"Homo sapiens junctional adhesion molecule 3 (JAM3), mRNA."  
"Homo sapiens Jumonji, AT rich interactive domain 1A (RBBP2-like) (JARID1A), mRNA."  
"Homo sapiens jumonji, AT rich interactive domain 1C (JARID1C), mRNA."  
"Homo sapiens jumonji, AT rich interactive domain 1D (JARID1D), mRNA."  
"Homo sapiens jumonji, AT rich interactive domain 2 (JARID2), mRNA."  
"Homo sapiens JAZF zinc finger 1 (JAZF1), mRNA."  
"Homo sapiens Jun dimerization protein 2 (JDP2), mRNA."  
"Homo sapiens jumonji C domain containing histone demethylase 1 homolog D (S. cerevisiae) (JMJD1D), mRNA."  
"Homo sapiens jumonji domain containing 1A (JMJD1A), mRNA."  
"Homo sapiens jumonji domain containing 1C (JMJD1C), transcript variant 1, mRNA."  
"Homo sapiens jumonji domain containing 2A (JMJD2A), mRNA."  
"Homo sapiens jumonji domain containing 2B (JMJD2B), mRNA."  
"Homo sapiens jumonji domain containing 4 (JMJD4), mRNA."  
"Homo sapiens jumonji domain containing 5 (JMJD5), mRNA."  
"Homo sapiens jumonji domain containing 6 (JMJD6), transcript variant 2, mRNA."  
"Homo sapiens jumonji domain containing 7 (JMJD7), mRNA."  
"Homo sapiens jumonji domain containing 8 (JMJD8), mRNA."  
"Homo sapiens junction-mediating and regulatory protein (JMY), mRNA."  
"Homo sapiens Josephin domain containing 1 (JOSD1), mRNA."  
"Homo sapiens Josephin domain containing 2 (JOSD2), mRNA."  
"Homo sapiens junctophilin 1 (JPH1), mRNA."  
"Homo sapiens junctophilin 2 (JPH2), transcript variant 1, mRNA."  
"Homo sapiens junctophilin 3 (JPH3), mRNA."  
"Homo sapiens junctophilin 4 (JPH4), mRNA."  
"Homo sapiens jerky homolog (mouse) (JRK), transcript variant 1, mRNA."  
"Homo sapiens jerky homolog-like (mouse) (JRKL), mRNA."  
"Homo sapiens junctional sarcoplasmic reticulum protein 1 (JSRP1), mRNA."

"Homo sapiens jumping translocation breakpoint (JTB), mRNA."  
"Homo sapiens jun oncogene (JUN), mRNA."  
"Homo sapiens jun B proto-oncogene (JUNB), mRNA."  
"Homo sapiens jun D proto-oncogene (JUND), mRNA."  
"Homo sapiens junction plakoglobin (JUP), transcript variant 2, mRNA."  
"Homo sapiens KN motif and ankyrin repeat domains 2 (KANK2), mRNA."  
"Homo sapiens KN motif and ankyrin repeat domains 3 (KANK3), mRNA."  
"Homo sapiens lysyl-tRNA synthetase (KARS), mRNA."  
"Homo sapiens K(lysine) acetyltransferase 2A (KAT2A), mRNA."  
"Homo sapiens K(lysine) acetyltransferase 2B (KAT2B), mRNA."  
"Homo sapiens K(lysine) acetyltransferase 5 (KAT5), transcript variant 1, mRNA."  
"Homo sapiens katanin p60 (ATPase-containing) subunit A 1 (KATNA1), mRNA."  
"Homo sapiens katanin p60 subunit A-like 1 (KATNAL1), transcript variant 2, mRNA."  
"Homo sapiens katanin p60 subunit A-like 2 (KATNAL2), mRNA."  
"Homo sapiens katanin p80 (WD repeat containing) subunit B 1 (KATNB1), mRNA."  
"Homo sapiens kelch repeat and BTB (POZ) domain containing 11 (KBTBD11), mRNA."  
"Homo sapiens kelch repeat and BTB (POZ) domain containing 12 (KBTBD12), mRNA."  
"Homo sapiens kelch repeat and BTB (POZ) domain containing 2 (KBTBD2), mRNA."  
"Homo sapiens kelch repeat and BTB (POZ) domain containing 3 (KBTBD3), transcript variant 2  
"Homo sapiens kelch repeat and BTB (POZ) domain containing 4 (KBTBD4), transcript variant 2  
"Homo sapiens kelch repeat and BTB (POZ) domain containing 5 (KBTBD5), mRNA."  
"Homo sapiens kelch repeat and BTB (POZ) domain containing 6 (KBTBD6), mRNA."  
"Homo sapiens kelch repeat and BTB (POZ) domain containing 8 (KBTBD8), mRNA."  
"PREDICTED: Homo sapiens kelch repeat and BTB (POZ) domain containing 9 (KBTBD9), mRNA."  
"Homo sapiens potassium channel modulatory factor 1 (KCMF1), mRNA."  
"Homo sapiens potassium voltage-gated channel, shaker-related subfamily, member 7 (KCNA7), mRNA."  
"Homo sapiens potassium voltage-gated channel, shaker-related subfamily, beta member 2 (KCNA2), mRNA."  
"Homo sapiens potassium voltage-gated channel, Shaw-related subfamily, member 3 (KCNC3), mRNA."  
"Homo sapiens potassium voltage-gated channel, Shal-related subfamily, member 2 (KCND2), mRNA."  
"Homo sapiens KCNE1-like (KCNE1L), mRNA."  
"Homo sapiens potassium voltage-gated channel, Isk-related family, member 2 (KCNE2), mRNA."  
"PREDICTED: Homo sapiens potassium voltage-gated channel, subfamily G, member 2 (KCNG2), mRNA."  
"Homo sapiens potassium voltage-gated channel, subfamily H (eag-related), member 3 (KCNH3), mRNA."  
"Homo sapiens potassium voltage-gated channel, subfamily H (eag-related), member 4 (KCNH4), mRNA."  
"Homo sapiens potassium voltage-gated channel, subfamily H (eag-related), member 6 (KCNH6), mRNA."  
"Homo sapiens Kv channel interacting protein 2 (KCNIP2), transcript variant 7, mRNA."  
"Homo sapiens potassium inwardly-rectifying channel, subfamily J, member 12 (KCNJ12), mRNA."  
"Homo sapiens potassium inwardly-rectifying channel, subfamily J, member 16 (KCNJ16), transcript variant 1, mRNA."  
"Homo sapiens potassium inwardly-rectifying channel, subfamily J, member 2 (KCNJ2), mRNA."  
"Homo sapiens potassium inwardly-rectifying channel, subfamily J, member 4 (KCNJ4), transcript variant 1, mRNA."  
"Homo sapiens potassium channel, subfamily K, member 12 (KCNK12), mRNA."  
"Homo sapiens potassium channel, subfamily K, member 13 (KCNK13), mRNA."  
"Homo sapiens potassium channel, subfamily K, member 18 (KCNK18), mRNA."  
"Homo sapiens potassium channel, subfamily K, member 6 (KCNK6), mRNA."

"Homo sapiens potassium large conductance calcium-activated channel, subfamily M, beta mer  
"Homo sapiens potassium large conductance calcium-activated channel, subfamily M, beta mer  
"Homo sapiens potassium large conductance calcium-activated channel, subfamily M beta merr  
"Homo sapiens potassium large conductance calcium-activated channel, subfamily M, beta mer  
"Homo sapiens potassium intermediate/small conductance calcium-activated channel, subfamily  
"Homo sapiens potassium intermediate/small conductance calcium-activated channel, subfamily  
"Homo sapiens KCNQ1 overlapping transcript 1 (non-protein coding) (KCNQ1OT1), non-coding  
"Homo sapiens potassium voltage-gated channel, KQT-like subfamily, member 2 (KCNQ2), tran  
"Homo sapiens potassium voltage-gated channel, KQT-like subfamily, member 5 (KCNQ5), mR  
"Homo sapiens potassium voltage-gated channel, delayed-rectifier, subfamily S, member 3 (KC  
"Homo sapiens potassium channel tetramerisation domain containing 10 (KCTD10), mRNA."  
"Homo sapiens potassium channel tetramerisation domain containing 11 (KCTD11), mRNA."  
"Homo sapiens potassium channel tetramerisation domain containing 13 (KCTD13), mRNA."  
"Homo sapiens potassium channel tetramerisation domain containing 14 (KCTD14), mRNA."  
"Homo sapiens potassium channel tetramerisation domain containing 15 (KCTD15), mRNA."  
"Homo sapiens potassium channel tetramerisation domain containing 17 (KCTD17), mRNA."  
"Homo sapiens potassium channel tetramerisation domain containing 18 (KCTD18), mRNA."  
"Homo sapiens potassium channel tetramerisation domain containing 21 (KCTD21), mRNA."  
"Homo sapiens potassium channel tetramerisation domain containing 3 (KCTD3), mRNA."  
"Homo sapiens potassium channel tetramerisation domain containing 5 (KCTD5), mRNA."  
"Homo sapiens potassium channel tetramerisation domain containing 6 (KCTD6), mRNA."  
"Homo sapiens potassium channel tetramerisation domain containing 8 (KCTD8), mRNA."  
"Homo sapiens potassium channel tetramerisation domain containing 9 (KCTD9), mRNA."  
"Homo sapiens KDEL (Lys-Asp-Glu-Leu) containing 1 (KDELC1), mRNA."  
"Homo sapiens KDEL (Lys-Asp-Glu-Leu) containing 2 (KDELC2), mRNA."  
"Homo sapiens KDEL (Lys-Asp-Glu-Leu) endoplasmic reticulum protein retention receptor 1 (KI  
"Homo sapiens KDEL (Lys-Asp-Glu-Leu) endoplasmic reticulum protein retention receptor 2 (KI  
"Homo sapiens KDEL (Lys-Asp-Glu-Leu) endoplasmic reticulum protein retention receptor 3 (KI  
"Homo sapiens lysine (K)-specific demethylase 1B (KDM1B), mRNA."  
"Homo sapiens lysine (K)-specific demethylase 2B (KDM2B), transcript variant 2, mRNA."  
"Homo sapiens lysine (K)-specific demethylase 3B (KDM3B), mRNA."  
"Homo sapiens lysine (K)-specific demethylase 5B (KDM5B), mRNA."  
"Homo sapiens 3-ketodihydrosphingosine reductase (KDSR), mRNA."  
"Homo sapiens kelch-like ECH-associated protein 1 (KEAP1), transcript variant 1, mRNA."  
"Homo sapiens KH homology domain containing 1 (KHDC1), mRNA."  
"Homo sapiens KH homology domain containing 1-like (KHDC1L), mRNA."  
"Homo sapiens KH domain containing, RNA binding, signal transduction associated 1 (KHDRBS  
"Homo sapiens KH domain containing, RNA binding, signal transduction associated 2 (KHDRBS  
"Homo sapiens KH domain containing, RNA binding, signal transduction associated 3 (KHDRBS  
"Homo sapiens ketohexokinase (fructokinase) (KHK), transcript variant b, mRNA."  
"Homo sapiens KH and NYN domain containing (KHNYN), mRNA."  
"Homo sapiens KIAA0020 (KIAA0020), mRNA."  
"Homo sapiens KIAA0040 (KIAA0040), mRNA."  
"Homo sapiens KIAA0082 (KIAA0082), mRNA."



"Homo sapiens KIAA0090 (KIAA0090), mRNA."  
"Homo sapiens KIAA0100 (KIAA0100), mRNA."  
"Homo sapiens KIAA0101 (KIAA0101), transcript variant 1, mRNA."  
"Homo sapiens KIAA0114 (KIAA0114), non-coding RNA."  
"Homo sapiens KIAA0125 (KIAA0125), mRNA."  
"Homo sapiens KIAA0133 (KIAA0133), mRNA."  
"Homo sapiens KIAA0141 (KIAA0141), mRNA."  
"Homo sapiens KIAA0146 (KIAA0146), mRNA."  
"Homo sapiens KIAA0174 (KIAA0174), mRNA."  
"Homo sapiens KIAA0182 (KIAA0182), mRNA."  
"Homo sapiens KIAA0195 (KIAA0195), mRNA."  
"Homo sapiens KIAA0196 (KIAA0196), mRNA."  
"Homo sapiens KIAA0226 (KIAA0226), transcript variant 2, mRNA."  
"Homo sapiens KIAA0232 (KIAA0232), transcript variant 1, mRNA."  
"Homo sapiens KIAA0240 (KIAA0240), mRNA."  
"Homo sapiens KIAA0247 (KIAA0247), mRNA."  
"PREDICTED: Homo sapiens KIAA0251 protein, transcript variant 3 (KIAA0251), mRNA."  
"PREDICTED: Homo sapiens KIAA0258, transcript variant 3 (KIAA0258), mRNA."  
"Homo sapiens KIAA0261 (KIAA0261), mRNA."  
"Homo sapiens KIAA0284 (KIAA0284), transcript variant 2, mRNA."  
"Homo sapiens KIAA0319 (KIAA0319), transcript variant 1, mRNA."  
"Homo sapiens KIAA0319-like (KIAA0319L), transcript variant 2, mRNA."  
"Homo sapiens KIAA0355 (KIAA0355), mRNA."  
"PREDICTED: Homo sapiens KIAA0363 protein, transcript variant 1 (KIAA0363), mRNA."  
"Homo sapiens KIAA0367 (KIAA0367), mRNA."  
"Homo sapiens KIAA0368 (KIAA0368), mRNA."  
"Homo sapiens KIAA0391 (KIAA0391), mRNA."  
"Homo sapiens KIAA0406 (KIAA0406), mRNA."  
"Homo sapiens KIAA0415 (KIAA0415), mRNA."  
"Homo sapiens KIAA0427 (KIAA0427), mRNA."  
"Homo sapiens KIAA0430 (KIAA0430), mRNA."  
"Homo sapiens KIAA0460 (KIAA0460), mRNA."  
"Homo sapiens KIAA0494 (KIAA0494), mRNA."  
"Homo sapiens KIAA0495 (KIAA0495), mRNA."  
"Homo sapiens KIAA0513 (KIAA0513), mRNA."  
"Homo sapiens KIAA0528 (KIAA0528), mRNA."  
"Homo sapiens KIAA0556 (KIAA0556), mRNA."  
"Homo sapiens KIAA0562 (KIAA0562), mRNA."  
"Homo sapiens KIAA0564 (KIAA0564), transcript variant 2, mRNA."  
"Homo sapiens KIAA0586 (KIAA0586), mRNA."  
"Homo sapiens KIAA0649 (KIAA0649), mRNA."  
"Homo sapiens KIAA0664 (KIAA0664), mRNA."  
"Homo sapiens KIAA0672 gene product (KIAA0672), mRNA."  
"PREDICTED: Homo sapiens KIAA0748 gene product, transcript variant 2 (KIAA0748), mRNA."

"Homo sapiens KIAA0753 (KIAA0753), mRNA."  
"Homo sapiens KIAA0773 gene product (KIAA0773), mRNA."  
"Homo sapiens KIAA0831 (KIAA0831), mRNA."  
"PREDICTED: Homo sapiens KIAA0888 protein, transcript variant 2 (KIAA0888), mRNA."  
"Homo sapiens KIAA0889 protein (KIAA0889), mRNA."  
"Homo sapiens KIAA0892 (KIAA0892), mRNA."  
"Homo sapiens KIAA0895 (KIAA0895), transcript variant 2, mRNA."  
"Homo sapiens KIAA0895-like (KIAA0895L), mRNA. XM\_933435 XM\_933438 XM\_933442 XM\_  
"Homo sapiens KIAA0907 (KIAA0907), mRNA."  
"Homo sapiens KIAA0913 (KIAA0913), mRNA."  
"Homo sapiens KIAA0922 (KIAA0922), mRNA."  
"PREDICTED: Homo sapiens KIAA0947 protein (KIAA0947), mRNA."  
"Homo sapiens KIAA1009 (KIAA1009), mRNA."  
"Homo sapiens KIAA1012 (KIAA1012), mRNA."  
"Homo sapiens kazrin (KIAA1026), transcript variant N, mRNA."  
"Homo sapiens KIAA1033 (KIAA1033), mRNA."  
"PREDICTED: Homo sapiens KIAA1086 (KIAA1086), mRNA."  
"Homo sapiens KIAA1128 (KIAA1128), mRNA."  
"Homo sapiens KIAA1143 (KIAA1143), mRNA."  
"Homo sapiens KIAA1147 (KIAA1147), mRNA."  
"PREDICTED: Homo sapiens KIAA1160 protein (KIAA1160), mRNA."  
"Homo sapiens KIAA1161 (KIAA1161), mRNA."  
"Homo sapiens KIAA1191 (KIAA1191), transcript variant 1, mRNA."  
"Homo sapiens KIAA1199 (KIAA1199), mRNA."  
"Homo sapiens KIAA1202 protein (KIAA1202), mRNA."  
"Homo sapiens KIAA1210 (KIAA1210), mRNA."  
"PREDICTED: Homo sapiens KIAA1211 protein, transcript variant 2 (KIAA1211), mRNA."  
"PREDICTED: Homo sapiens KIAA1239 (KIAA1239), mRNA."  
"PREDICTED: Homo sapiens KIAA1245, transcript variant 3 (KIAA1245), mRNA."  
"PREDICTED: Homo sapiens KIAA1257 (KIAA1257), mRNA."  
"Homo sapiens KIAA1267 (KIAA1267), mRNA."  
"Homo sapiens KIAA1271 protein (KIAA1271), mRNA."  
"Homo sapiens KIAA1274 (KIAA1274), mRNA."  
"Homo sapiens KIAA1279 (KIAA1279), mRNA."  
"Homo sapiens KIAA1285 protein (KIAA1285), mRNA."  
"Homo sapiens KIAA1310 (KIAA1310), transcript variant 1, mRNA."  
"Homo sapiens KIAA1324 (KIAA1324), mRNA."  
"Homo sapiens KIAA1324-like (KIAA1324L), transcript variant 2, mRNA."  
"Homo sapiens KIAA1328 (KIAA1328), mRNA."  
"Homo sapiens KIAA1333 (KIAA1333), mRNA."  
"Homo sapiens KIAA1370 (KIAA1370), mRNA."  
"Homo sapiens KIAA1377 (KIAA1377), mRNA."  
"Homo sapiens KIAA1407 (KIAA1407), mRNA."  
"Homo sapiens KIAA1429 (KIAA1429), transcript variant 2, mRNA."

"Homo sapiens KIAA1430 (KIAA1430), mRNA."  
"Homo sapiens KIAA1467 (KIAA1467), mRNA."  
"Homo sapiens KIAA1468 (KIAA1468), mRNA."  
"Homo sapiens KIAA1522 (KIAA1522), mRNA."  
"Homo sapiens KIAA1524 (KIAA1524), mRNA."  
"PREDICTED: Homo sapiens KIAA1530 protein (KIAA1530), mRNA."  
"Homo sapiens KIAA1539 (KIAA1539), mRNA."  
"Homo sapiens KIAA1543 (KIAA1543), mRNA."  
"PREDICTED: Homo sapiens KIAA1545 protein (KIAA1545), mRNA."  
"Homo sapiens KIAA1549 (KIAA1549), mRNA."  
"PREDICTED: Homo sapiens KIAA1553 (KIAA1553), mRNA."  
"Homo sapiens KIAA1586 (KIAA1586), mRNA."  
"Homo sapiens KIAA1598 (KIAA1598), mRNA."  
"Homo sapiens KIAA1600 (KIAA1600), mRNA."  
"Homo sapiens KIAA1602 (KIAA1602), mRNA."  
"Homo sapiens KIAA1609 (KIAA1609), mRNA."  
"Homo sapiens KIAA1618 (KIAA1618), mRNA."  
"Homo sapiens KIAA1632 (KIAA1632), mRNA."  
"PREDICTED: Homo sapiens KIAA1641, transcript variant 7 (KIAA1641), mRNA."  
"PREDICTED: Homo sapiens KIAA1666 protein (KIAA1666), mRNA."  
"PREDICTED: Homo sapiens KIAA1671 protein (KIAA1671), mRNA."  
"Homo sapiens KIAA1683 (KIAA1683), mRNA."  
"Homo sapiens KIAA1688 protein (KIAA1688), mRNA."  
"Homo sapiens KIAA1712 (KIAA1712), mRNA."  
"Homo sapiens KIAA1715 (KIAA1715), mRNA."  
"Homo sapiens KIAA1731 (KIAA1731), mRNA."  
"Homo sapiens KIAA1737 (KIAA1737), mRNA."  
"PREDICTED: Homo sapiens KIAA1751, transcript variant 2 (KIAA1751), mRNA."  
"Homo sapiens KIAA1797 (KIAA1797), mRNA."  
"Homo sapiens mixed lineage kinase 4 (KIAA1804), mRNA."  
"Homo sapiens KIAA1826 (KIAA1826), mRNA."  
"PREDICTED: Homo sapiens KIAA1843 protein (KIAA1843), mRNA."  
"Homo sapiens KIAA1862 protein (KIAA1862), mRNA."  
"Homo sapiens KIAA1875 (KIAA1875), mRNA."  
"PREDICTED: Homo sapiens KIAA1881 (KIAA1881), mRNA."  
"Homo sapiens KIAA1908 protein (KIAA1908), non-coding RNA."  
"PREDICTED: Homo sapiens KIAA1922 protein (KIAA1922), mRNA."  
"Homo sapiens KIAA1949 (KIAA1949), mRNA."  
"Homo sapiens KIAA1958 (KIAA1958), mRNA."  
"Homo sapiens KIAA1967 (KIAA1967), transcript variant 1, mRNA."  
"PREDICTED: Homo sapiens KIAA1975 protein similar to MRIP2, transcript variant 1 (KIAA1975), mRNA."  
"Homo sapiens KIAA1984 (KIAA1984), mRNA."  
"Homo sapiens KIAA2010 (KIAA2010), transcript variant 2, mRNA."  
"Homo sapiens KIAA2013 (KIAA2013), mRNA."

"Homo sapiens KIAA2018 (KIAA2018), mRNA."  
"Homo sapiens KIAA2022 (KIAA2022), mRNA."  
"Homo sapiens KIAA2026 (KIAA2026), mRNA."  
"Homo sapiens kinase D-interacting substrate of 220 kDa (KIDINS220), mRNA."  
"Homo sapiens kinesin family member 11 (KIF11), mRNA."  
"Homo sapiens kinesin family member 13A (KIF13A), mRNA."  
"Homo sapiens kinesin family member 13B (KIF13B), mRNA."  
"Homo sapiens kinesin family member 14 (KIF14), mRNA."  
"Homo sapiens kinesin family member 15 (KIF15), mRNA."  
"Homo sapiens kinesin family member 16B (KIF16B), mRNA."  
"Homo sapiens kinesin family member 18A (KIF18A), mRNA."  
"Homo sapiens kinesin family member 18B (KIF18B), mRNA."  
"Homo sapiens kinesin family member 19 (KIF19), mRNA."  
"Homo sapiens kinesin family member 1A (KIF1A), mRNA."  
"Homo sapiens kinesin family member 1B (KIF1B), transcript variant 1, mRNA."  
"Homo sapiens kinesin family member 1C (KIF1C), mRNA."  
"Homo sapiens kinesin family member 20A (KIF20A), mRNA."  
"Homo sapiens kinesin family member 20B (KIF20B), mRNA."  
"Homo sapiens kinesin family member 21A (KIF21A), mRNA."  
"Homo sapiens kinesin family member 22 (KIF22), mRNA."  
"Homo sapiens kinesin family member 23 (KIF23), transcript variant 2, mRNA."  
"Homo sapiens kinesin family member 24 (KIF24), mRNA."  
"Homo sapiens kinesin family member 26B (KIF26B), mRNA."  
"Homo sapiens kinesin heavy chain member 2A (KIF2A), mRNA."  
"Homo sapiens kinesin family member 2C (KIF2C), mRNA."  
"Homo sapiens kinesin family member 3A (KIF3A), mRNA."  
"Homo sapiens kinesin family member 3B (KIF3B), mRNA."  
"Homo sapiens kinesin family member 3C (KIF3C), mRNA."  
"Homo sapiens kinesin family member 4A (KIF4A), mRNA."  
"Homo sapiens kinesin family member 5B (KIF5B), mRNA."  
"Homo sapiens kinesin family member 5C (KIF5C), mRNA."  
"Homo sapiens kinesin family member 7 (KIF7), mRNA."  
"Homo sapiens kinesin family member 9 (KIF9), transcript variant 2, mRNA."  
"Homo sapiens kinesin-associated protein 3 (KIFAP3), mRNA."  
"Homo sapiens kinesin family member C1 (KIFC1), mRNA."  
"Homo sapiens kinesin family member C2 (KIFC2), mRNA."  
"Homo sapiens kinesin family member C3 (KIFC3), mRNA."  
"Homo sapiens killin protein (KILLIN), mRNA."  
"Homo sapiens killer cell immunoglobulin-like receptor, two domains, long cytoplasmic tail, 5B (†  
"Homo sapiens killer cell immunoglobulin-like receptor, three domains, long cytoplasmic tail, 1 (†  
"Homo sapiens killer cell immunoglobulin-like receptor, three domains, long cytoplasmic tail, 2 (†  
"Homo sapiens kin of IRRE like 2 (Drosophila) (KIRREL2), transcript variant 1, mRNA."  
"Homo sapiens KISS1 receptor (KISS1R), mRNA."  
"Homo sapiens klotho beta (KLB), mRNA."

"Homo sapiens kinesin light chain 1 (KLC1), transcript variant 1, mRNA."  
"Homo sapiens kinesin light chain 3 (KLC3), mRNA."  
"Homo sapiens Kruppel-like factor 10 (KLF10), transcript variant 1, mRNA."  
"Homo sapiens Kruppel-like factor 12 (KLF12), mRNA."  
"Homo sapiens Kruppel-like factor 13 (KLF13), mRNA."  
"Homo sapiens Kruppel-like factor 2 (lung) (KLF2), mRNA."  
"Homo sapiens Kruppel-like factor 5 (intestinal) (KLF5), mRNA."  
"Homo sapiens Kruppel-like factor 6 (KLF6), transcript variant 2, mRNA."  
"Homo sapiens Kruppel-like factor 7 (ubiquitous) (KLF7), mRNA."  
"Homo sapiens Kruppel-like factor 9 (KLF9), mRNA."  
"Homo sapiens kelch domain containing 10 (KLHDC10), mRNA."  
"Homo sapiens kelch domain containing 2 (KLHDC2), mRNA."  
"Homo sapiens kelch domain containing 3 (KLHDC3), mRNA."  
"Homo sapiens kelch domain containing 4 (KLHDC4), mRNA."  
"Homo sapiens kelch domain containing 5 (KLHDC5), mRNA."  
"Homo sapiens kelch domain containing 7B (KLHDC7B), mRNA."  
"Homo sapiens kelch domain containing 8B (KLHDC8B), mRNA."  
"Homo sapiens kelch domain containing 9 (KLHDC9), transcript variant 2, mRNA."  
"Homo sapiens kelch-like 1 (Drosophila) (KLHL1), mRNA."  
"Homo sapiens kelch-like 12 (Drosophila) (KLHL12), mRNA."  
"Homo sapiens kelch-like 13 (Drosophila) (KLHL13), mRNA."  
"Homo sapiens kelch-like 14 (Drosophila) (KLHL14), mRNA."  
"Homo sapiens kelch-like 15 (Drosophila) (KLHL15), mRNA."  
"Homo sapiens kelch-like 17 (Drosophila) (KLHL17), mRNA."  
"Homo sapiens kelch-like 18 (Drosophila) (KLHL18), mRNA."  
"Homo sapiens kelch-like 2, Mayven (Drosophila) (KLHL2), mRNA."  
"Homo sapiens kelch-like 20 (Drosophila) (KLHL20), mRNA."  
"Homo sapiens kelch-like 21 (Drosophila) (KLHL21), mRNA."  
"Homo sapiens kelch-like 22 (Drosophila) (KLHL22), mRNA."  
"Homo sapiens kelch-like 23 (Drosophila) (KLHL23), mRNA."  
"Homo sapiens kelch-like 24 (Drosophila) (KLHL24), mRNA."  
"Homo sapiens kelch-like 25 (Drosophila) (KLHL25), mRNA."  
"Homo sapiens kelch-like 26 (Drosophila) (KLHL26), mRNA."  
"Homo sapiens kelch-like 28 (Drosophila) (KLHL28), mRNA."  
"PREDICTED: Homo sapiens kelch-like 29 (Drosophila) (KLHL29), mRNA."  
"Homo sapiens kelch-like 3 (Drosophila) (KLHL3), mRNA."  
"Homo sapiens kelch-like 30 (Drosophila) (KLHL30), mRNA."  
"Homo sapiens kelch-like 32 (Drosophila) (KLHL32), mRNA."  
"Homo sapiens kelch-like 36 (Drosophila) (KLHL36), mRNA."  
"Homo sapiens kelch-like 38 (Drosophila) (KLHL38), mRNA."  
"Homo sapiens kelch-like 4 (Drosophila) (KLHL4), transcript variant 2, mRNA."  
"Homo sapiens kelch-like 5 (Drosophila) (KLHL5), transcript variant 3, mRNA."  
"Homo sapiens kelch-like 6 (Drosophila) (KLHL6), mRNA."  
"Homo sapiens kelch-like 7 (Drosophila) (KLHL7), transcript variant 1, mRNA."

"Homo sapiens kelch-like 9 (Drosophila) (KLHL9), mRNA."  
"Homo sapiens kallikrein 1 (KLK1), mRNA."  
"Homo sapiens kallikrein-related peptidase 14 (KLK14), mRNA."  
"Homo sapiens kallikrein-related peptidase 4 (KLK4), mRNA."  
"Homo sapiens killer cell lectin-like receptor subfamily A, member 1 (KLRA1), mRNA."  
"Homo sapiens KLRAQ motif containing 1 (KLRAQ1), transcript variant 1, mRNA."  
"Homo sapiens killer cell lectin-like receptor subfamily C, member 2 (KLRC2), mRNA."  
"Homo sapiens killer cell lectin-like receptor subfamily K, member 1 (KLRK1), mRNA."  
"Homo sapiens kynurenine 3-monooxygenase (kynurenine 3-hydroxylase) (KMO), mRNA."  
"Homo sapiens kinetochore associated 1 (KNTC1), mRNA."  
"Homo sapiens karyopherin alpha 1 (importin alpha 5) (KPNA1), mRNA."  
"Homo sapiens karyopherin alpha 2 (RAG cohort 1, importin alpha 1) (KPNA2), mRNA. XM\_001  
"Homo sapiens karyopherin alpha 3 (importin alpha 4) (KPNA3), mRNA."  
"Homo sapiens karyopherin alpha 4 (importin alpha 3) (KPNA4), mRNA."  
"Homo sapiens karyopherin alpha 5 (importin alpha 6) (KPNA5), mRNA."  
"Homo sapiens karyopherin alpha 6 (importin alpha 7) (KPNA6), mRNA."  
"PREDICTED: Homo sapiens misc\_RNA (KPNA7), miscRNA."  
"Homo sapiens karyopherin (importin) beta 1 (KPNB1), mRNA."  
"Homo sapiens kaptin (actin binding protein) (KPTN), mRNA."  
"Homo sapiens KRAB-A domain containing 1 (KRBA1), mRNA."  
"Homo sapiens lysine-rich coiled-coil 1 (KRCC1), mRNA."  
"Homo sapiens kringle containing transmembrane protein 2 (KREMEN2), transcript variant 2, m  
"Homo sapiens KRI1 homolog (S. cerevisiae) (KRI1), mRNA."  
"Homo sapiens KRIT1, ankyrin repeat containing (KRIT1), transcript variant 5, mRNA."  
"Homo sapiens KRR1, small subunit (SSU) processome component, homolog (yeast) (KRR1), r  
"Homo sapiens keratin 10 (epidermolytic hyperkeratosis; keratosis palmaris et plantaris) (KRT10)  
"Homo sapiens keratin 12 (Meesmann corneal dystrophy) (KRT12), mRNA."  
"Homo sapiens keratin 18 (KRT18), transcript variant 1, mRNA."  
"PREDICTED: Homo sapiens misc\_RNA (KRT18P17), miscRNA."  
"PREDICTED: Homo sapiens misc\_RNA (KRT18P30), miscRNA."  
"PREDICTED: Homo sapiens keratin 18 pseudogene 50 (KRT18P50), mRNA."  
"Homo sapiens keratin 19 (KRT19), mRNA."  
"Homo sapiens keratin 20 (KRT20), mRNA."  
"Homo sapiens keratin 23 (histone deacetylase inducible) (KRT23), mRNA."  
"Homo sapiens keratin 25 (KRT25), mRNA."  
"Homo sapiens keratin 27 (KRT27), mRNA."  
"Homo sapiens keratin 76 (KRT76), mRNA."  
"Homo sapiens keratin 79 (KRT79), mRNA."  
"Homo sapiens keratin 8 (KRT8), mRNA."  
"Homo sapiens keratin 81 (KRT81), mRNA."  
"Homo sapiens keratin 86 (KRT86), mRNA."  
"Homo sapiens keratin 9 (epidermolytic palmoplantar keratoderma) (KRT9), mRNA."  
"Homo sapiens keratin associated protein 10-1 (KRTAP10-1), mRNA."  
"Homo sapiens keratin associated protein 10-11 (KRTAP10-11), mRNA."

"Homo sapiens keratin associated protein 10-3 (KRTAP10-3), mRNA."  
"Homo sapiens keratin associated protein 10-9 (KRTAP10-9), mRNA."  
"Homo sapiens keratin associated protein 13-3 (KRTAP13-3), mRNA."  
"Homo sapiens keratin associated protein 19-1 (KRTAP19-1), mRNA."  
"Homo sapiens keratin associated protein 19-2 (KRTAP19-2), mRNA."  
"Homo sapiens keratin associated protein 19-6 (KRTAP19-6), mRNA."  
"Homo sapiens keratin associated protein 20-1 (KRTAP20-1), mRNA."  
"Homo sapiens keratin associated protein 21-3 (KRTAP21-3), mRNA."  
"Homo sapiens keratin associated protein 4-11 (KRTAP4-11), mRNA."  
"Homo sapiens keratin associated protein 4-4 (KRTAP4-4), mRNA."  
"Homo sapiens keratin associated protein 5-11 (KRTAP5-11), mRNA."  
"Homo sapiens keratin associated protein 6-3 (KRTAP6-3), mRNA."  
"PREDICTED: Homo sapiens keratin associated protein 7-1 (KRTAP7-1), mRNA."  
"Homo sapiens keratin associated protein 9-4 (KRTAP9-4), mRNA."  
"PREDICTED: Homo sapiens keratin associated protein 9-8 (KRTAP9-8), mRNA."  
"Homo sapiens KTEL (Lys-Tyr-Glu-Leu) containing 1 (KTELC1), mRNA."  
"Homo sapiens KTI12 homolog, chromatin associated (*S. cerevisiae*) (KTI12), mRNA."  
"Homo sapiens kinectin 1 (kinesin receptor) (KTN1), transcript variant 4, mRNA."  
"Homo sapiens kyphoscoliosis peptidase (KY), mRNA."  
"Homo sapiens kynureninase (L-kynurenine hydrolase) (KYNU), transcript variant 2, mRNA."  
"Homo sapiens L-2-hydroxyglutarate dehydrogenase (L2HGDH), mRNA."  
"Homo sapiens I(3)mbt-like (*Drosophila*) (L3MBTL), transcript variant I, mRNA."  
"Homo sapiens I(3)mbt-like 2 (*Drosophila*) (L3MBTL2), mRNA."  
"Homo sapiens I(3)mbt-like 3 (*Drosophila*) (L3MBTL3), transcript variant 2, mRNA."  
"Homo sapiens lactamase, beta (LACTB), nuclear gene encoding mitochondrial protein, transcri  
"Homo sapiens lactamase, beta 2 (LACTB2), mRNA."  
"Homo sapiens lymphocyte-activation gene 3 (LAG3), mRNA."  
"Homo sapiens L antigen family, member 3 (LAGE3), mRNA."  
"Homo sapiens leukocyte-associated immunoglobulin-like receptor 1 (LAIR1), transcript variant  
"Homo sapiens leukocyte-associated immunoglobulin-like receptor 2 (LAIR2), transcript variant :  
"Homo sapiens laminin, alpha 3 (LAMA3), transcript variant 1, mRNA."  
"Homo sapiens laminin, alpha 5 (LAMA5), mRNA."  
"Homo sapiens laminin, beta 1 (LAMB1), mRNA."  
"Homo sapiens laminin, beta 2-like (LAMB2L), non-coding RNA."  
"Homo sapiens laminin, beta 4 (LAMB4), mRNA."  
"Homo sapiens laminin, gamma 1 (formerly LAMB2) (LAMC1), mRNA."  
"Homo sapiens laminin, gamma 3 (LAMC3), mRNA."  
"Homo sapiens lysosomal-associated membrane protein 1 (LAMP1), mRNA."  
"Homo sapiens lysosomal-associated membrane protein 2 (LAMP2), transcript variant LAMP2A  
"Homo sapiens lysosomal-associated membrane protein 3 (LAMP3), mRNA."  
"Homo sapiens LanC lantibiotic synthetase component C-like 1 (bacterial) (LANCL1), mRNA."  
"Homo sapiens LanC lantibiotic synthetase component C-like 2 (bacterial) (LANCL2), mRNA."  
"Homo sapiens leucine aminopeptidase 3 (LAP3), mRNA."  
"Homo sapiens lysosomal-associated protein transmembrane 4 alpha (LAPTM4A), mRNA."

"Homo sapiens lysosomal protein transmembrane 4 beta (LAPTM4B), mRNA."  
"Homo sapiens lysosomal multispinning membrane protein 5 (LAPTM5), mRNA."  
"Homo sapiens like-glycosyltransferase (LARGE), transcript variant 1, mRNA."  
"Homo sapiens La ribonucleoprotein domain family, member 1B (LARP1B), transcript variant 2,  
"Homo sapiens La ribonucleoprotein domain family, member 4 (LARP4), transcript variant 1, mF  
"Homo sapiens La ribonucleoprotein domain family, member 4B (LARP4B), mRNA."  
"Homo sapiens La ribonucleoprotein domain family, member 6 (LARP6), transcript variant 1, mF  
"Homo sapiens La ribonucleoprotein domain family, member 7 (LARP7), transcript variant 1, mF  
"Homo sapiens leucyl-tRNA synthetase (LARS), mRNA."  
"Homo sapiens leucyl-tRNA synthetase 2, mitochondrial (LARS2), nuclear gene encoding mitoc  
"Homo sapiens LAS1-like (*S. cerevisiae*) (LAS1L), mRNA."  
"Homo sapiens LIM and SH3 protein 1 (LASP1), mRNA."  
"Homo sapiens LAG1 homolog, ceramide synthase 1 (LASS1), transcript variant 2, mRNA."  
"Homo sapiens LAG1 homolog, ceramide synthase 2 (LASS2), transcript variant 1, mRNA."  
"Homo sapiens LAG1 homolog, ceramide synthase 4 (LASS4), mRNA."  
"Homo sapiens LAG1 homolog, ceramide synthase 5 (*S. cerevisiae*) (LASS5), mRNA."  
"Homo sapiens LAG1 homolog, ceramide synthase 6 (LASS6), mRNA."  
"Homo sapiens linker for activation of T cells family, member 2 (LAT2), transcript variant 1, mRN  
"Homo sapiens LATS, large tumor suppressor, homolog 2 (*Drosophila*) (LATS2), mRNA."  
"Homo sapiens lymphocyte transmembrane adaptor 1 (LAX1), mRNA."  
"Homo sapiens layilin (LAYN), mRNA."  
"Homo sapiens lupus brain antigen 1 (LBA1), mRNA."  
"PREDICTED: Homo sapiens hypothetical protein DKFZp566J091 (LBH), mRNA."  
"Homo sapiens lamin B receptor (LBR), transcript variant 1, mRNA."  
"Homo sapiens Leber congenital amaurosis 5-like (LCA5L), mRNA."  
"Homo sapiens lecithin-cholesterol acyltransferase (LCAT), mRNA."  
"Homo sapiens late cornified envelope 1C (LCE1C), mRNA."  
"Homo sapiens late cornified envelope 2B (LCE2B), mRNA."  
"Homo sapiens late cornified envelope 5A (LCE5A), mRNA."  
"Homo sapiens lymphocyte-specific protein tyrosine kinase (LCK), transcript variant 2, mRNA."  
"Homo sapiens leucine carboxyl methyltransferase 1 (LCMT1), transcript variant 2, mRNA."  
"Homo sapiens leucine carboxyl methyltransferase 2 (LCMT2), mRNA."  
"Homo sapiens lipocalin 2 (LCN2), mRNA."  
"Homo sapiens ligand dependent nuclear receptor corepressor (LCOR), mRNA."  
"Homo sapiens lymphocyte cytosolic protein 1 (L-plastin) (LCP1), mRNA."  
"Homo sapiens lactase (LCT), mRNA."  
"Homo sapiens LIM domain binding 1 (LDB1), mRNA."  
"Homo sapiens lactate dehydrogenase A (LDHA), transcript variant 1, mRNA."  
"Homo sapiens lactate dehydrogenase B (LDHB), mRNA."  
"Homo sapiens lactate dehydrogenase D (LDHD), nuclear gene encoding mitochondrial protein,  
"Homo sapiens low density lipoprotein receptor (familial hypercholesterolemia) (LDLR), mRNA."  
"Homo sapiens low density lipoprotein receptor class A domain containing 2 (LDLRAD2), mRNA  
"Homo sapiens low density lipoprotein receptor adaptor protein 1 (LDLRAP1), mRNA."  
"Homo sapiens liver expressed antimicrobial peptide 2 (LEAP2), mRNA."



"Homo sapiens liver-expressed antimicrobial peptide 2 (LEAP-2), mRNA."  
"Homo sapiens lymphoid enhancer-binding factor 1 (LEF1), mRNA."  
"Homo sapiens left-right determination factor 1 (LEFTY1), mRNA."  
"Homo sapiens LEM domain containing 1 (LEMD1), mRNA."  
"Homo sapiens LEM domain containing 2 (LEMD2), mRNA."  
"Homo sapiens LEM domain containing 3 (LEMD3), mRNA."  
"Homo sapiens leukocyte receptor cluster (LRC) member 1 (LENG1), mRNA."  
"Homo sapiens Leo1, Paf1/RNA polymerase II complex component, homolog (*S. cerevisiae*) (LEO1), mRNA."  
"Homo sapiens leptin (obesity homolog, mouse) (LEP), mRNA."  
"Homo sapiens leucine proline-enriched proteoglycan (leprecan) 1 (LEPRE1), mRNA."  
"Homo sapiens leprecan-like 1 (LEPREL1), mRNA."  
"Homo sapiens leptin receptor overlapping transcript (LEPROT), mRNA."  
"Homo sapiens leptin receptor overlapping transcript-like 1 (LEPROTL1), mRNA."  
"Homo sapiens leucine zipper-EF-hand containing transmembrane protein 1 (LETM1), nuclear gene encoding mitochondrial protein, transcript variant 1, mRNA."  
"Homo sapiens LETM1 domain containing 1 (LETMD1), transcript variant 1, mRNA."  
"Homo sapiens LFNG O-fucosylpeptide 3-beta-N-acetylglucosaminyltransferase (LFNG), transcript variant 1, mRNA."  
"Homo sapiens lectin, galactoside-binding, soluble, 1 (LGALS1), mRNA."  
"Homo sapiens lectin, galactoside-binding, soluble, 14 (LGALS14), transcript variant 1, mRNA."  
"Homo sapiens lectin, galactoside-binding, soluble, 3 (galectin 3) (LGALS3), mRNA."  
"Homo sapiens lectin, galactoside-binding, soluble, 3 binding protein (LGALS3BP), mRNA."  
"Homo sapiens lectin, galactoside-binding, soluble, 7 (galectin 7) (LGALS7), mRNA."  
"Homo sapiens lectin, galactoside-binding, soluble, 7B (LGALS7B), mRNA."  
"Homo sapiens lectin, galactoside-binding, soluble, 8 (LGALS8), transcript variant 3, mRNA."  
"Homo sapiens lectin, galactoside-binding, soluble, 9 (LGALS9), transcript variant 1, mRNA."  
"Homo sapiens leucine-rich, glioma inactivated 1 (LGI1), mRNA."  
"Homo sapiens legumain (LGMN), transcript variant 2, mRNA."  
"Homo sapiens leucine-rich repeat-containing G protein-coupled receptor 5 (LGR5), mRNA."  
"Homo sapiens leucine-rich repeat-containing G protein-coupled receptor 6 (LGR6), transcript variant 1, mRNA."  
"Homo sapiens ligatin (LGTN), mRNA."  
"Homo sapiens lipoma HMGIC fusion partner (LHFP), mRNA."  
"Homo sapiens lipoma HMGIC fusion partner-like 2 (LHFPL2), mRNA."  
"Homo sapiens phospholysine phosphohistidine inorganic pyrophosphate phosphatase (LHPP), mRNA."  
"Homo sapiens LIM homeobox 2 (LHX2), mRNA."  
"Homo sapiens LIM homeobox 4 (LHX4), mRNA."  
"Homo sapiens LIM homeobox 6 (LHX6), transcript variant 1, mRNA."  
"Homo sapiens lipoic acid synthetase (LIAS), nuclear gene encoding mitochondrial protein, transcript variant 1, mRNA."  
"Homo sapiens leukemia inhibitory factor receptor alpha (LIFR), mRNA."  
"Homo sapiens ligase I, DNA, ATP-dependent (LIG1), mRNA."  
"Homo sapiens ligase III, DNA, ATP-dependent (LIG3), nuclear gene encoding mitochondrial protein, transcript variant 1, mRNA."  
"Homo sapiens ligase IV, DNA, ATP-dependent (LIG4), transcript variant 2, mRNA."  
"Homo sapiens leukocyte immunoglobulin-like receptor, subfamily A (without TM domain), member 1, mRNA."  
"Homo sapiens leukocyte immunoglobulin-like receptor, subfamily A (with TM domain), member 1, mRNA."  
"Homo sapiens leukocyte immunoglobulin-like receptor, subfamily B (with TM and ITIM domains), member 1, mRNA."  
"Homo sapiens leukocyte immunoglobulin-like receptor, subfamily B (with TM and ITIM domains), member 2, mRNA."

"Homo sapiens leukocyte immunoglobulin-like receptor, subfamily B (with TM and ITIM domains  
"Homo sapiens leukocyte immunoglobulin-like receptor, subfamily B (with TM and ITIM domains  
"Homo sapiens LIM domain and actin binding 1 (LIMA1), mRNA."  
"Homo sapiens Lck interacting transmembrane adaptor 1 (LIME1), mRNA."  
"PREDICTED: Homo sapiens LIM and senescent cell antigen-like domains 1 (LIMS1), mRNA."  
"Homo sapiens lin-28 homolog B (C. elegans) (LIN28B), mRNA."  
"Homo sapiens lin-37 homolog (C. elegans) (LIN37), mRNA."  
"Homo sapiens lin-52 homolog (C. elegans) (LIN52), mRNA."  
"Homo sapiens lin-54 homolog (C. elegans) (LIN54), mRNA."  
"Homo sapiens lin-7 homolog A (C. elegans) (LIN7A), mRNA."  
"Homo sapiens lin-7 homolog B (C. elegans) (LIN7B), mRNA."  
"Homo sapiens lin-7 homolog C (C. elegans) (LIN7C), mRNA."  
"Homo sapiens lin-9 homolog (C. elegans) (LIN9), mRNA."  
"Homo sapiens lines homolog 1 (Drosophila) (LINS1), transcript variant 2, mRNA."  
"Homo sapiens lipase A, lysosomal acid, cholesterol esterase (LIPA), transcript variant 2, mRNA/  
"Homo sapiens lipase, hormone-sensitive (LIPE), mRNA."  
"Homo sapiens lipase, gastric (LIPF), mRNA."  
"Homo sapiens lipase, member I (LIPI), mRNA."  
"Homo sapiens lipase, family member J (LIPJ), mRNA."  
"PREDICTED: Homo sapiens lipase-like, ab-hydrolase domain containing 2 (LIPL2), mRNA."  
"Homo sapiens lipoyltransferase 1 (LIPT1), transcript variant 1, mRNA."  
"Homo sapiens lipopolysaccharide-induced TNF factor (LITAF), mRNA."  
"Homo sapiens Lix1 homolog (mouse)-like (LIX1L), mRNA."  
"Homo sapiens lethal giant larvae homolog 1 (Drosophila) (LLGL1), mRNA."  
"PREDICTED: Homo sapiens lethal giant larvae homolog 2 (Drosophila), transcript variant 10 (L  
"Homo sapiens LLP homolog, long-term synaptic facilitation (Aplysia) (LLPH), mRNA."  
"Homo sapiens lectin, mannose-binding, 1 (LMAN1), mRNA."  
"Homo sapiens lectin, mannose-binding 2 (LMAN2), mRNA."  
"Homo sapiens lectin, mannose-binding 2-like (LMAN2L), mRNA."  
"Homo sapiens limb region 1 homolog (mouse) (LMBR1), mRNA."  
"Homo sapiens limb region 1 homolog (mouse)-like (LMBR1L), mRNA."  
"Homo sapiens LMBR1 domain containing 1 (LMBRD1), mRNA."  
"Homo sapiens LMBR1 domain containing 2 (LMBRD2), mRNA."  
"Homo sapiens LIM and cysteine-rich domains 1 (LMCD1), mRNA."  
"Homo sapiens lipase maturation factor 1 (LMF1), mRNA."  
"Homo sapiens lipase maturation factor 2 (LMF2), mRNA."  
"Homo sapiens leishmanolysin-like (metallopeptidase M8 family) (LMLN), transcript variant 2, m  
"Homo sapiens lamin A/C (LMNA), transcript variant 2, mRNA."  
"Homo sapiens lamin B1 (LMNB1), mRNA."  
"Homo sapiens lamin B2 (LMNB2), mRNA."  
"Homo sapiens LIM domain only 2 (rhombotin-like 1) (LMO2), mRNA."  
"Homo sapiens LIM domain only 3 (rhombotin-like 2) (LMO3), transcript variant 2, mRNA."  
"Homo sapiens LIM domain only 4 (LMO4), mRNA."  
"Homo sapiens leiomodins 3 (fetal) (LMOD3), mRNA."

"Homo sapiens lemur tyrosine kinase 2 (LMTK2), mRNA."  
"PREDICTED: Homo sapiens lemur tyrosine kinase 3 (LMTK3), mRNA."  
"Homo sapiens LIM homeobox transcription factor 1, beta (LMX1B), mRNA."  
"Homo sapiens leucyl/cystinyl aminopeptidase (LNPEP), transcript variant 1, mRNA."  
"Homo sapiens ligand of numb-protein X 2 (LNX2), mRNA."  
"Homo sapiens 18S ribosomal RNA (LOC100008588), non-coding RNA."  
"Homo sapiens 28S ribosomal RNA (LOC100008589), non-coding RNA."  
"Homo sapiens hypothetical LOC100009676 (LOC100009676), non-coding RNA."  
"PREDICTED: Homo sapiens misc\_RNA (LOC100034248), miscRNA."  
"Homo sapiens general transcription factor II, i, pseudogene (LOC100093631), non-coding RNA"  
"Homo sapiens hepatitis A virus cellular receptor 1 pseudogene (LOC100101266), non-coding F"  
"Homo sapiens maltase-glucoamylase-like pseudogene (LOC100124692), non-coding RNA."  
"Homo sapiens family with sequence similarity 86, member A pseudogene (LOC100125556), tra"  
"PREDICTED: Homo sapiens hypothetical protein LOC100127887 (LOC100127887), mRNA."  
"PREDICTED: Homo sapiens similar to hCG2042508 (LOC100127891), mRNA."  
"PREDICTED: Homo sapiens misc\_RNA (LOC100127918), miscRNA."  
"PREDICTED: Homo sapiens misc\_RNA (LOC100127922), miscRNA."  
"PREDICTED: Homo sapiens hypothetical protein LOC100127944 (LOC100127944), mRNA."  
"PREDICTED: Homo sapiens ISPF6484 (LOC100127951), mRNA."  
"PREDICTED: Homo sapiens misc\_RNA (LOC100127952), miscRNA."  
"PREDICTED: Homo sapiens hypothetical protein LOC100127971 (LOC100127971), mRNA."  
"PREDICTED: Homo sapiens hypothetical protein LOC100127974 (LOC100127974), mRNA."  
"PREDICTED: Homo sapiens misc\_RNA (LOC100127975), partial miscRNA."  
"PREDICTED: Homo sapiens misc\_RNA (LOC100127982), miscRNA."  
"PREDICTED: Homo sapiens hypothetical protein LOC100127983 (LOC100127983), mRNA."  
"PREDICTED: Homo sapiens misc\_RNA (LOC100127999), miscRNA."  
"PREDICTED: Homo sapiens misc\_RNA (LOC100128007), miscRNA."  
"PREDICTED: Homo sapiens misc\_RNA (LOC100128016), miscRNA."  
"PREDICTED: Homo sapiens hypothetical protein LOC100128028 (LOC100128028), mRNA."  
"PREDICTED: Homo sapiens hypothetical protein LOC100128055 (LOC100128055), mRNA."  
"PREDICTED: Homo sapiens similar to hCG2013701 (LOC100128056), mRNA."  
"PREDICTED: Homo sapiens misc\_RNA (LOC100128062), miscRNA."  
"PREDICTED: Homo sapiens similar to hCG2033532 (LOC100128081), mRNA."  
"PREDICTED: Homo sapiens misc\_RNA (LOC100128083), miscRNA."  
"PREDICTED: Homo sapiens hypothetical protein LOC100128084 (LOC100128084), mRNA."  
"PREDICTED: Homo sapiens misc\_RNA (LOC100128086), miscRNA."  
"PREDICTED: Homo sapiens hypothetical LOC100128096 (LOC100128096), miscRNA."  
"PREDICTED: Homo sapiens hypothetical protein LOC100128098 (LOC100128098), mRNA."  
"PREDICTED: Homo sapiens misc\_RNA (LOC100128115), miscRNA."  
"PREDICTED: Homo sapiens hypothetical protein LOC100128126 (LOC100128126), mRNA."  
"PREDICTED: Homo sapiens hypothetical protein LOC100128163 (LOC100128163), mRNA."  
"PREDICTED: Homo sapiens similar to defensin, beta 131 (LOC100128174), mRNA."  
"PREDICTED: Homo sapiens hypothetical protein LOC100128191 (LOC100128191), mRNA."  
"PREDICTED: Homo sapiens similar to Chromosome 21 open reading frame 67 (LOC100128195)

"PREDICTED: Homo sapiens misc\_RNA (LOC100128196), miscRNA."  
"PREDICTED: Homo sapiens hypothetical protein LOC100128202 (LOC100128202), mRNA."  
"PREDICTED: Homo sapiens similar to endosulfine alpha (LOC100128203), mRNA."  
"PREDICTED: Homo sapiens similar to hCG2041787 (LOC100128221), mRNA."  
"PREDICTED: Homo sapiens hypothetical LOC100128256 (LOC100128256), mRNA."  
"PREDICTED: Homo sapiens misc\_RNA (LOC100128266), miscRNA."  
"PREDICTED: Homo sapiens misc\_RNA (LOC100128269), miscRNA."  
"PREDICTED: Homo sapiens hypothetical protein LOC100128274 (LOC100128274), mRNA."  
"PREDICTED: Homo sapiens similar to hCG1775427 (LOC100128283), mRNA."  
"Homo sapiens hypothetical protein LOC100128288 (LOC100128288), non-coding RNA."  
"PREDICTED: Homo sapiens misc\_RNA (LOC100128291), miscRNA."  
"PREDICTED: Homo sapiens similar to hCG1639947 (LOC100128295), mRNA."  
"PREDICTED: Homo sapiens hypothetical protein LOC100128300 (LOC100128300), mRNA."  
"PREDICTED: Homo sapiens hypothetical protein LOC100128304 (LOC100128304), mRNA."  
"PREDICTED: Homo sapiens hypothetical protein LOC100128309 (LOC100128309), mRNA."  
"PREDICTED: Homo sapiens misc\_RNA (LOC100128326), miscRNA."  
"PREDICTED: Homo sapiens misc\_RNA (LOC100128337), miscRNA."  
"PREDICTED: Homo sapiens misc\_RNA (LOC100128353), miscRNA."  
"PREDICTED: Homo sapiens similar to small nuclear ribonucleoprotein polypeptide G (LOC100128354), mRNA."  
"PREDICTED: Homo sapiens hypothetical protein LOC100128374 (LOC100128374), mRNA."  
"PREDICTED: Homo sapiens hypothetical protein LOC100128389 (LOC100128389), mRNA."  
"PREDICTED: Homo sapiens hypothetical protein LOC100128398 (LOC100128398), mRNA."  
"PREDICTED: Homo sapiens hypothetical protein LOC100128403 (LOC100128403), mRNA."  
"PREDICTED: Homo sapiens misc\_RNA (LOC100128410), miscRNA."  
"PREDICTED: Homo sapiens similar to hCG2036697 (LOC100128419), mRNA."  
"PREDICTED: Homo sapiens hypothetical protein LOC100128425 (LOC100128425), mRNA."  
"PREDICTED: Homo sapiens similar to hCG1656091 (LOC100128432), mRNA."  
"PREDICTED: Homo sapiens similar to hCG2045005 (LOC100128435), mRNA."  
"PREDICTED: Homo sapiens hypothetical protein LOC100128440 (LOC100128440), mRNA."  
"PREDICTED: Homo sapiens misc\_RNA (LOC100128460), miscRNA."  
"PREDICTED: Homo sapiens hypothetical protein LOC100128461 (LOC100128461), mRNA."  
"PREDICTED: Homo sapiens misc\_RNA (LOC100128469), miscRNA."  
"PREDICTED: Homo sapiens hypothetical protein LOC100128477 (LOC100128477), mRNA."  
"PREDICTED: Homo sapiens similar to hCG2021201 (LOC100128505), mRNA."  
"PREDICTED: Homo sapiens misc\_RNA (LOC100128507), miscRNA."  
"PREDICTED: Homo sapiens similar to hCG1641472 (LOC100128525), mRNA."  
"PREDICTED: Homo sapiens similar to hCG2013595 (LOC100128533), mRNA."  
"PREDICTED: Homo sapiens hypothetical protein LOC100128547 (LOC100128547), mRNA."  
"Homo sapiens hypothetical LOC100128573 (LOC100128573), non-coding RNA."  
"PREDICTED: Homo sapiens misc\_RNA (LOC100128585), miscRNA."  
"PREDICTED: Homo sapiens misc\_RNA (LOC100128627), miscRNA."  
"PREDICTED: Homo sapiens similar to Putative ubiquitin-conjugating enzyme E2 D3-like protein LOC100128628, mRNA."  
"PREDICTED: Homo sapiens hypothetical protein LOC100128653 (LOC100128653), mRNA."  
"PREDICTED: Homo sapiens hypothetical protein LOC100128666 (LOC100128666), mRNA."

"PREDICTED: Homo sapiens hypothetical protein LOC100128667 (LOC100128667), mRNA."  
"PREDICTED: Homo sapiens hypothetical protein LOC100128682 (LOC100128682), mRNA."  
"PREDICTED: Homo sapiens misc\_RNA (LOC100128689), miscRNA."  
"PREDICTED: Homo sapiens similar to hCG1810796 (LOC100128691), mRNA."  
"PREDICTED: Homo sapiens hypothetical LOC100128695 (LOC100128695), mRNA."  
"Homo sapiens dolichyl-diphosphooligosaccharide--protein glycosyltransferase subunit 4 (LOC100128700), mRNA."  
"PREDICTED: Homo sapiens hypothetical protein LOC100128737 (LOC100128737), mRNA."  
"PREDICTED: Homo sapiens hypothetical protein LOC100128746 (LOC100128746), mRNA."  
"PREDICTED: Homo sapiens misc\_RNA (LOC100128760), miscRNA."  
"PREDICTED: Homo sapiens similar to hCG2041516 (LOC100128765), mRNA."  
"PREDICTED: Homo sapiens misc\_RNA (LOC100128771), miscRNA."  
"PREDICTED: Homo sapiens misc\_RNA (LOC100128775), miscRNA."  
"PREDICTED: Homo sapiens misc\_RNA (LOC100128781), miscRNA."  
"PREDICTED: Homo sapiens hypothetical protein LOC100128805 (LOC100128805), mRNA."  
"PREDICTED: Homo sapiens ACAH3104 (LOC100128816), mRNA."  
"PREDICTED: Homo sapiens misc\_RNA (LOC100128836), miscRNA."  
"PREDICTED: Homo sapiens similar to hCG36768 (LOC100128853), mRNA."  
"PREDICTED: Homo sapiens misc\_RNA (LOC100128857), miscRNA."  
"PREDICTED: Homo sapiens hypothetical protein LOC100128862 (LOC100128862), mRNA."  
"PREDICTED: Homo sapiens hypothetical protein LOC100128869 (LOC100128869), mRNA."  
"PREDICTED: Homo sapiens similar to predicted protein (LOC100128881), mRNA."  
"PREDICTED: Homo sapiens misc\_RNA (LOC100128883), miscRNA."  
"PREDICTED: Homo sapiens hypothetical protein LOC100128895 (LOC100128895), mRNA."  
"PREDICTED: Homo sapiens misc\_RNA (LOC100128899), miscRNA."  
"PREDICTED: Homo sapiens hypothetical protein LOC100128901 (LOC100128901), mRNA."  
"PREDICTED: Homo sapiens hypothetical protein LOC100128908 (LOC100128908), mRNA."  
"PREDICTED: Homo sapiens similar to hCG1817494 (LOC100128909), mRNA."  
"PREDICTED: Homo sapiens hypothetical protein LOC100128918 (LOC100128918), mRNA."  
"PREDICTED: Homo sapiens similar to ribosomal protein L10a (LOC100128936), mRNA."  
"PREDICTED: Homo sapiens hypothetical protein LOC100128956 (LOC100128956), mRNA."  
"PREDICTED: Homo sapiens similar to zinc finger protein 626 (LOC100128975), mRNA."  
"Homo sapiens hypothetical LOC100128977 (LOC100128977), non-coding RNA."  
"PREDICTED: Homo sapiens similar to hCG2018847 (LOC100128988), mRNA."  
"PREDICTED: Homo sapiens hypothetical protein LOC100128994 (LOC100128994), mRNA."  
"PREDICTED: Homo sapiens hypothetical protein LOC100129021 (LOC100129021), mRNA."  
"PREDICTED: Homo sapiens hypothetical protein LOC100129022 (LOC100129022), mRNA."  
"PREDICTED: Homo sapiens hypothetical protein LOC100129027 (LOC100129027), mRNA."  
"PREDICTED: Homo sapiens hypothetical protein LOC100129034 (LOC100129034), mRNA."  
"PREDICTED: Homo sapiens similar to PRO2812 (LOC100129038), mRNA."  
"PREDICTED: Homo sapiens misc\_RNA (LOC100129064), miscRNA."  
"Homo sapiens hypothetical LOC100129066 (LOC100129066), non-coding RNA. XM\_001721212.1"  
"PREDICTED: Homo sapiens misc\_RNA (LOC100129067), miscRNA."  
"PREDICTED: Homo sapiens similar to FP17469 (LOC100129076), mRNA."  
"PREDICTED: Homo sapiens similar to hCG2045285 (LOC100129083), mRNA."

"PREDICTED: Homo sapiens hypothetical LOC100129101 (LOC100129101), mRNA."  
"PREDICTED: Homo sapiens similar to hydroxyproline-rich glycoprotein VSP-3 (LOC100129104), mRNA."  
"PREDICTED: Homo sapiens similar to Transmembrane protein 167 (LOC100129118), mRNA."  
"PREDICTED: Homo sapiens hypothetical protein LOC100129122 (LOC100129122), mRNA."  
"PREDICTED: Homo sapiens hypothetical protein LOC100129129 (LOC100129129), mRNA."  
"PREDICTED: Homo sapiens similar to hCG2042189 (LOC100129144), mRNA."  
"PREDICTED: Homo sapiens hypothetical protein LOC100129147 (LOC100129147), mRNA."  
"PREDICTED: Homo sapiens hypothetical protein LOC100129148 (LOC100129148), mRNA."  
"PREDICTED: Homo sapiens hypothetical protein LOC100129169 (LOC100129169), mRNA."  
"PREDICTED: Homo sapiens hypothetical LOC100129191 (LOC100129191), mRNA."  
"PREDICTED: Homo sapiens hypothetical protein LOC100129201 (LOC100129201), mRNA."  
"PREDICTED: Homo sapiens similar to mCG50504 (LOC100129203), mRNA."  
"PREDICTED: Homo sapiens hypothetical protein LOC100129206 (LOC100129206), mRNA."  
"PREDICTED: Homo sapiens hypothetical protein LOC100129211 (LOC100129211), mRNA."  
"PREDICTED: Homo sapiens hypothetical protein LOC100129213 (LOC100129213), mRNA."  
"PREDICTED: Homo sapiens hypothetical protein LOC100129214 (LOC100129214), mRNA."  
"PREDICTED: Homo sapiens hypothetical protein LOC100129218 (LOC100129218), mRNA."  
"PREDICTED: Homo sapiens hypothetical protein LOC100129226 (LOC100129226), mRNA."  
"PREDICTED: Homo sapiens similar to hCG1653500 (LOC100129236), mRNA."  
"PREDICTED: Homo sapiens misc\_RNA (LOC100129237), miscRNA."  
"PREDICTED: Homo sapiens hypothetical protein LOC100129239 (LOC100129239), mRNA."  
"PREDICTED: Homo sapiens similar to hCG1994130 (LOC100129243), mRNA."  
"PREDICTED: Homo sapiens misc\_RNA (LOC100129267), miscRNA."  
"PREDICTED: Homo sapiens hypothetical protein LOC100129268 (LOC100129268), mRNA."  
"PREDICTED: Homo sapiens hypothetical protein LOC100129269 (LOC100129269), mRNA."  
"PREDICTED: Homo sapiens hypothetical LOC100129282 (LOC100129282), mRNA."  
"PREDICTED: Homo sapiens hypothetical protein LOC100129285 (LOC100129285), mRNA."  
"PREDICTED: Homo sapiens hypothetical protein LOC100129297 (LOC100129297), mRNA."  
"PREDICTED: Homo sapiens hypothetical protein LOC100129303 (LOC100129303), mRNA."  
"PREDICTED: Homo sapiens hypothetical protein LOC100129334 (LOC100129334), mRNA."  
"PREDICTED: Homo sapiens hypothetical protein LOC100129342 (LOC100129342), mRNA."  
"PREDICTED: Homo sapiens hypothetical protein LOC100129343 (LOC100129343), mRNA."  
"Homo sapiens NRADD pseudogene (LOC100129354), non-coding RNA."  
"PREDICTED: Homo sapiens similar to mCG115122 (LOC100129361), mRNA."  
"PREDICTED: Homo sapiens hypothetical protein LOC100129362 (LOC100129362), mRNA."  
"PREDICTED: Homo sapiens hypothetical protein LOC100129365 (LOC100129365), mRNA."  
"PREDICTED: Homo sapiens misc\_RNA (LOC100129379), miscRNA."  
"PREDICTED: Homo sapiens hypothetical protein LOC100129386 (LOC100129386), mRNA."  
"PREDICTED: Homo sapiens hypothetical LOC100129390 (LOC100129390), mRNA."  
"PREDICTED: Homo sapiens misc\_RNA (LOC100129424), miscRNA."  
"PREDICTED: Homo sapiens similar to HIG1 domain family, member 1A (LOC100129426), mRNA."  
"PREDICTED: Homo sapiens hypothetical protein LOC100129441 (LOC100129441), mRNA."  
"PREDICTED: Homo sapiens hypothetical protein LOC100129455 (LOC100129455), mRNA."  
"PREDICTED: Homo sapiens hypothetical protein LOC100129461 (LOC100129461), mRNA."

"PREDICTED: Homo sapiens misc\_RNA (LOC100129466), miscRNA."  
"PREDICTED: Homo sapiens misc\_RNA (LOC100129482), miscRNA."  
"PREDICTED: Homo sapiens hypothetical protein LOC100129502 (LOC100129502), mRNA."  
"PREDICTED: Homo sapiens hypothetical protein LOC100129514 (LOC100129514), mRNA."  
"PREDICTED: Homo sapiens similar to hCG2029803 (LOC100129518), mRNA."  
"PREDICTED: Homo sapiens similar to hCG1817212 (LOC100129522), mRNA."  
"PREDICTED: Homo sapiens misc\_RNA (LOC100129539), miscRNA."  
"PREDICTED: Homo sapiens hypothetical protein LOC100129543 (LOC100129543), mRNA."  
"PREDICTED: Homo sapiens hypothetical protein LOC100129548 (LOC100129548), mRNA."  
"Homo sapiens hypothetical LOC100129550 (LOC100129550), non-coding RNA."  
"PREDICTED: Homo sapiens misc\_RNA (LOC100129552), miscRNA."  
"PREDICTED: Homo sapiens misc\_RNA (LOC100129553), miscRNA."  
"PREDICTED: Homo sapiens misc\_RNA (LOC100129559), partial miscRNA."  
"PREDICTED: Homo sapiens hypothetical protein LOC100129566 (LOC100129566), mRNA."  
"PREDICTED: Homo sapiens hypothetical protein LOC100129580 (LOC100129580), mRNA."  
"PREDICTED: Homo sapiens similar to hCG2011544 (LOC100129585), mRNA."  
"PREDICTED: Homo sapiens VLCS3029 (LOC100129588), mRNA."  
"PREDICTED: Homo sapiens similar to mCG7602 (LOC100129599), mRNA."  
"PREDICTED: Homo sapiens similar to hCG40515 (LOC100129602), mRNA."  
"PREDICTED: Homo sapiens hypothetical protein LOC100129608 (LOC100129608), mRNA."  
"PREDICTED: Homo sapiens hypothetical protein LOC100129619 (LOC100129619), mRNA."  
"Homo sapiens hypothetical LOC100129637 (LOC100129637), non-coding RNA. XR\_039552 X  
"PREDICTED: Homo sapiens hypothetical protein LOC100129638 (LOC100129638), mRNA."  
"PREDICTED: Homo sapiens hypothetical protein LOC100129652 (LOC100129652), mRNA."  
"PREDICTED: Homo sapiens hypothetical protein LOC100129656 (LOC100129656), mRNA."  
"PREDICTED: Homo sapiens similar to hCG2000002 (LOC100129660), mRNA."  
"PREDICTED: Homo sapiens misc\_RNA (LOC100129667), miscRNA."  
"PREDICTED: Homo sapiens hypothetical protein LOC100129668 (LOC100129668), mRNA."  
"PREDICTED: Homo sapiens similar to hCG2042915 (LOC100129673), mRNA."  
"PREDICTED: Homo sapiens similar to hCG2002091 (LOC100129674), mRNA."  
"PREDICTED: Homo sapiens similar to NPC-A-7 (LOC100129681), mRNA."  
"PREDICTED: Homo sapiens hypothetical protein LOC100129697 (LOC100129697), mRNA."  
"PREDICTED: Homo sapiens misc\_RNA (LOC100129707), miscRNA."  
"PREDICTED: Homo sapiens misc\_RNA (LOC100129708), miscRNA."  
"PREDICTED: Homo sapiens hypothetical protein LOC100129716 (LOC100129716), mRNA."  
"PREDICTED: Homo sapiens similar to PNAS-117 (LOC100129759), mRNA."  
"PREDICTED: Homo sapiens hypothetical LOC100129778 (LOC100129778), mRNA."  
"PREDICTED: Homo sapiens hypothetical protein LOC100129781 (LOC100129781), mRNA."  
"PREDICTED: Homo sapiens hypothetical protein LOC100129826 (LOC100129826), mRNA."  
"PREDICTED: Homo sapiens hypothetical protein LOC100129827 (LOC100129827), mRNA."  
"PREDICTED: Homo sapiens hypothetical protein LOC100129828 (LOC100129828), mRNA."  
"PREDICTED: Homo sapiens similar to ZNF124 protein (LOC100129837), mRNA."  
"PREDICTED: Homo sapiens misc\_RNA (LOC100129842), miscRNA."  
"PREDICTED: Homo sapiens misc\_RNA (LOC100129866), miscRNA."

"PREDICTED: Homo sapiens similar to mCG49427 (LOC100129882), mRNA."  
"PREDICTED: Homo sapiens similar to hCG2027326 (LOC100129905), mRNA."  
"PREDICTED: Homo sapiens hypothetical protein LOC100129906 (LOC100129906), mRNA."  
"PREDICTED: Homo sapiens hypothetical protein LOC100129907 (LOC100129907), mRNA."  
"PREDICTED: Homo sapiens hypothetical protein LOC100129912 (LOC100129912), mRNA."  
"PREDICTED: Homo sapiens hypothetical protein LOC100129916 (LOC100129916), mRNA."  
"PREDICTED: Homo sapiens similar to hCG2036949 (LOC100129924), mRNA."  
"PREDICTED: Homo sapiens similar to mCG49427 (LOC100129928), mRNA."  
"PREDICTED: Homo sapiens misc\_RNA (LOC100129933), miscRNA."  
"PREDICTED: Homo sapiens misc\_RNA (LOC100129934), miscRNA."  
"PREDICTED: Homo sapiens hypothetical protein LOC100129954 (LOC100129954), mRNA."  
"PREDICTED: Homo sapiens similar to hCG1643231 (LOC100129958), mRNA."  
"PREDICTED: Homo sapiens misc\_RNA (LOC100129960), miscRNA."  
"PREDICTED: Homo sapiens similar to ribosomal protein L10 (LOC100129975), mRNA."  
"PREDICTED: Homo sapiens hypothetical LOC100129988 (LOC100129988), mRNA."  
"PREDICTED: Homo sapiens misc\_RNA (LOC100130003), miscRNA."  
"PREDICTED: Homo sapiens similar to high mobility group protein (LOC100130009), mRNA."  
"PREDICTED: Homo sapiens hypothetical protein LOC100130053 (LOC100130053), mRNA."  
"PREDICTED: Homo sapiens similar to kinase suppressor of ras 1 (LOC100130055), mRNA."  
"PREDICTED: Homo sapiens similar to metallopanstimulin (LOC100130070), mRNA."  
"PREDICTED: Homo sapiens similar to GSQS6193 (LOC100130071), mRNA."  
"PREDICTED: Homo sapiens misc\_RNA (LOC100130079), miscRNA."  
"PREDICTED: Homo sapiens hypothetical LOC100130084 (LOC100130084), mRNA."  
"PREDICTED: Homo sapiens misc\_RNA (LOC100130092), miscRNA."  
"Homo sapiens hypothetical LOC100130093 (LOC100130093), transcript variant 2, non-coding  
"PREDICTED: Homo sapiens similar to hCG26659 (LOC100130100), mRNA."  
"PREDICTED: Homo sapiens hypothetical LOC100130131 (LOC100130131), mRNA."  
"PREDICTED: Homo sapiens misc\_RNA (LOC100130134), miscRNA."  
"PREDICTED: Homo sapiens misc\_RNA (LOC100130141), miscRNA."  
"Homo sapiens hypothetical LOC100130148 (LOC100130148), non-coding RNA."  
"PREDICTED: Homo sapiens hypothetical protein LOC100130155, transcript variant 1 (LOC100130155), mRNA."  
"PREDICTED: Homo sapiens hypothetical protein LOC100130157 (LOC100130157), mRNA."  
"PREDICTED: Homo sapiens hypothetical protein LOC100130168 (LOC100130168), mRNA."  
"PREDICTED: Homo sapiens misc\_RNA (LOC100130171), miscRNA."  
"PREDICTED: Homo sapiens misc\_RNA (LOC100130178), miscRNA."  
"PREDICTED: Homo sapiens misc\_RNA (LOC100130179), miscRNA."  
"PREDICTED: Homo sapiens hypothetical protein LOC100130187 (LOC100130187), mRNA."  
"PREDICTED: Homo sapiens misc\_RNA (LOC100130190), miscRNA."  
"PREDICTED: Homo sapiens misc\_RNA (LOC100130217), miscRNA."  
"PREDICTED: Homo sapiens hypothetical protein LOC100130224, transcript variant 3 (LOC100130224), mRNA."  
"PREDICTED: Homo sapiens hypothetical protein LOC100130229 (LOC100130229), mRNA."  
"PREDICTED: Homo sapiens hypothetical protein LOC100130230 (LOC100130230), mRNA."  
"PREDICTED: Homo sapiens misc\_RNA (LOC100130233), miscRNA."  
"Homo sapiens hypothetical LOC100130264 (LOC100130264), non-coding RNA."



"PREDICTED: Homo sapiens hypothetical protein LOC100130276 (LOC100130276), mRNA."  
"PREDICTED: Homo sapiens misc\_RNA (LOC100130285), miscRNA."  
"PREDICTED: Homo sapiens misc\_RNA (LOC100130289), miscRNA."  
"PREDICTED: Homo sapiens misc\_RNA (LOC100130291), miscRNA."  
"PREDICTED: Homo sapiens similar to hCG1816373 (LOC100130298), mRNA."  
"PREDICTED: Homo sapiens misc\_RNA (LOC100130308), miscRNA."  
"PREDICTED: Homo sapiens misc\_RNA (LOC100130320), miscRNA."  
"PREDICTED: Homo sapiens hypothetical protein LOC100130324 (LOC100130324), mRNA."  
"PREDICTED: Homo sapiens similar to PRO2474 (LOC100130332), mRNA."  
"PREDICTED: Homo sapiens hypothetical protein LOC100130351 (LOC100130351), mRNA."  
"PREDICTED: Homo sapiens hypothetical protein LOC100130354 (LOC100130354), mRNA."  
"PREDICTED: Homo sapiens misc\_RNA (LOC100130367), miscRNA."  
"PREDICTED: Homo sapiens similar to hCG2042422 (LOC100130387), mRNA."  
"PREDICTED: Homo sapiens hypothetical protein LOC100130413 (LOC100130413), mRNA."  
"PREDICTED: Homo sapiens similar to AML-associated zinc finger protein (LOC100130445), m  
"PREDICTED: Homo sapiens similar to hCG1777700 (LOC100130452), mRNA."  
"PREDICTED: Homo sapiens hypothetical LOC100130458 (LOC100130458), mRNA."  
"PREDICTED: Homo sapiens hypothetical LOC100130465 (LOC100130465), mRNA."  
"PREDICTED: Homo sapiens similar to hCG2036711 (LOC100130476), mRNA."  
"PREDICTED: Homo sapiens hypothetical protein LOC100130503 (LOC100130503), mRNA."  
"PREDICTED: Homo sapiens hypothetical protein LOC100130506 (LOC100130506), mRNA."  
"PREDICTED: Homo sapiens hypothetical protein LOC100130508 (LOC100130508), mRNA."  
"PREDICTED: Homo sapiens misc\_RNA (LOC100130511), miscRNA."  
"PREDICTED: Homo sapiens hypothetical protein LOC100130516 (LOC100130516), mRNA."  
"PREDICTED: Homo sapiens similar to hCG1996578 (LOC100130522), mRNA."  
"PREDICTED: Homo sapiens hypothetical protein LOC100130542 (LOC100130542), mRNA."  
"PREDICTED: Homo sapiens misc\_RNA (LOC100130550), miscRNA."  
"PREDICTED: Homo sapiens similar to hCG1646587 (LOC100130555), mRNA."  
"PREDICTED: Homo sapiens misc\_RNA (LOC100130556), miscRNA."  
"Homo sapiens hypothetical LOC100130557 (LOC100130557), non-coding RNA."  
"PREDICTED: Homo sapiens similar to high-mobility group (nonhistone chromosomal) protein 1  
"PREDICTED: Homo sapiens hypothetical protein LOC100130562, transcript variant 1 (LOC100  
"PREDICTED: Homo sapiens hypothetical protein LOC100130592 (LOC100130592), mRNA."  
"PREDICTED: Homo sapiens hypothetical protein LOC100130598 (LOC100130598), mRNA."  
"PREDICTED: Homo sapiens hypothetical protein LOC100130604 (LOC100130604), mRNA."  
"PREDICTED: Homo sapiens misc\_RNA (LOC100130624), miscRNA."  
"PREDICTED: Homo sapiens similar to ZMYM6 protein (LOC100130633), mRNA."  
"PREDICTED: Homo sapiens hypothetical LOC100130652 (LOC100130652), mRNA."  
"PREDICTED: Homo sapiens hypothetical LOC100130667 (LOC100130667), mRNA."  
"PREDICTED: Homo sapiens hypothetical protein LOC100130696 (LOC100130696), mRNA."  
"PREDICTED: Homo sapiens hypothetical protein LOC100130707 (LOC100130707), mRNA."  
"PREDICTED: Homo sapiens hypothetical protein LOC100130712 (LOC100130712), partial mR  
"PREDICTED: Homo sapiens misc\_RNA (LOC100130743), miscRNA."  
"PREDICTED: Homo sapiens misc\_RNA (LOC100130746), miscRNA."

"PREDICTED: Homo sapiens misc\_RNA (LOC100130769), miscRNA."  
"PREDICTED: Homo sapiens misc\_RNA (LOC100130775), miscRNA."  
"PREDICTED: Homo sapiens similar to hCG2014417 (LOC100130776), mRNA."  
"PREDICTED: Homo sapiens similar to hCG2041493 (LOC100130803), mRNA."  
"PREDICTED: Homo sapiens similar to lipoxygenase homology domains 1 (LOC100130816), m  
"PREDICTED: Homo sapiens hypothetical protein LOC100130824 (LOC100130824), mRNA."  
"PREDICTED: Homo sapiens misc\_RNA (LOC100130835), miscRNA."  
"PREDICTED: Homo sapiens hypothetical protein LOC100130837 (LOC100130837), mRNA."  
"PREDICTED: Homo sapiens hypothetical LOC100130840 (LOC100130840), mRNA."  
"PREDICTED: Homo sapiens similar to hCG2005335 (LOC100130849), mRNA."  
"PREDICTED: Homo sapiens hypothetical protein LOC100130856 (LOC100130856), mRNA."  
"PREDICTED: Homo sapiens hypothetical protein LOC100130886 (LOC100130886), mRNA."  
"PREDICTED: Homo sapiens hypothetical LOC100130905 (LOC100130905), mRNA."  
"PREDICTED: Homo sapiens hypothetical LOC100130906 (LOC100130906), mRNA."  
"PREDICTED: Homo sapiens misc\_RNA (LOC100130914), miscRNA."  
"PREDICTED: Homo sapiens hypothetical protein LOC100130919 (LOC100130919), mRNA."  
"PREDICTED: Homo sapiens hypothetical protein LOC100130921 (LOC100130921), mRNA."  
"PREDICTED: Homo sapiens similar to Sm protein G (LOC100130932), mRNA."  
"PREDICTED: Homo sapiens similar to CSAG family, member 2 (LOC100130935), mRNA."  
"PREDICTED: Homo sapiens hypothetical protein LOC100130952 (LOC100130952), mRNA."  
"PREDICTED: Homo sapiens hypothetical protein LOC100130953 (LOC100130953), mRNA."  
"PREDICTED: Homo sapiens hypothetical protein LOC100130958 (LOC100130958), mRNA."  
"PREDICTED: Homo sapiens similar to hCG2044932 (LOC100130967), mRNA."  
"PREDICTED: Homo sapiens hypothetical LOC100130982 (LOC100130982), mRNA."  
"PREDICTED: Homo sapiens hypothetical protein LOC100130996 (LOC100130996), mRNA."  
"PREDICTED: Homo sapiens similar to FLJ00287 protein (LOC100131003), partial mRNA."  
"PREDICTED: Homo sapiens hypothetical protein LOC100131009 (LOC100131009), mRNA."  
"PREDICTED: Homo sapiens similar to zinc finger protein 316 (LOC100131017), mRNA."  
"PREDICTED: Homo sapiens similar to hCG2041190 (LOC100131031), mRNA."  
"PREDICTED: Homo sapiens misc\_RNA (LOC100131046), miscRNA."  
"PREDICTED: Homo sapiens similar to golgi autoantigen, golgin subfamily a, 2 (LOC100131061  
"PREDICTED: Homo sapiens hypothetical LOC100131091 (LOC100131091), mRNA."  
"PREDICTED: Homo sapiens misc\_RNA (LOC100131093), miscRNA."  
"PREDICTED: Homo sapiens hypothetical protein LOC100131096 (LOC100131096), mRNA."  
"PREDICTED: Homo sapiens similar to translocase of inner mitochondrial membrane 8 homolog  
"PREDICTED: Homo sapiens similar to AHPA9419 (LOC100131131), mRNA."  
"PREDICTED: Homo sapiens similar to hCG2040918 (LOC100131138), mRNA."  
"PREDICTED: Homo sapiens misc\_RNA (LOC100131160), miscRNA."  
"PREDICTED: Homo sapiens misc\_RNA (LOC100131166), miscRNA."  
"PREDICTED: Homo sapiens misc\_RNA (LOC100131169), miscRNA."  
"PREDICTED: Homo sapiens hypothetical protein LOC100131174 (LOC100131174), mRNA."  
"Homo sapiens KAT protein (LOC100131187), mRNA."  
"PREDICTED: Homo sapiens misc\_RNA (LOC100131196), miscRNA."  
"PREDICTED: Homo sapiens hypothetical protein LOC100131225 (LOC100131225), mRNA."

"PREDICTED: Homo sapiens misc\_RNA (LOC100131243), miscRNA."  
"PREDICTED: Homo sapiens hypothetical protein LOC100131250 (LOC100131250), mRNA."  
"PREDICTED: Homo sapiens hypothetical protein LOC100131256 (LOC100131256), mRNA."  
"PREDICTED: Homo sapiens similar to hCG1728885 (LOC100131261), mRNA."  
"PREDICTED: Homo sapiens similar to hCG1816984 (LOC100131266), mRNA."  
"PREDICTED: Homo sapiens hypothetical LOC100131276 (LOC100131276), mRNA."  
"PREDICTED: Homo sapiens hypothetical LOC100131283 (LOC100131283), mRNA."  
"PREDICTED: Homo sapiens similar to hCG1820927 (LOC100131289), mRNA."  
"PREDICTED: Homo sapiens similar to Polio virus receptor protein (LOC100131308), mRNA."  
"PREDICTED: Homo sapiens hypothetical LOC100131311 (LOC100131311), mRNA."  
"PREDICTED: Homo sapiens misc\_RNA (LOC100131323), miscRNA."  
"PREDICTED: Homo sapiens hypothetical LOC100131326 (LOC100131326), mRNA."  
"PREDICTED: Homo sapiens similar to Family with sequence similarity 139, member A (LOC100131330), mRNA."  
"PREDICTED: Homo sapiens hypothetical protein LOC100131335 (LOC100131335), mRNA."  
"PREDICTED: Homo sapiens misc\_RNA (LOC100131336), miscRNA."  
"PREDICTED: Homo sapiens hypothetical LOC100131354 (LOC100131354), mRNA."  
"PREDICTED: Homo sapiens hypothetical LOC100131381 (LOC100131381), mRNA."  
"PREDICTED: Homo sapiens similar to hCG1791958 (LOC100131390), mRNA."  
"PREDICTED: Homo sapiens hypothetical LOC100131414 (LOC100131414), mRNA."  
"PREDICTED: Homo sapiens hypothetical protein LOC100131426 (LOC100131426), mRNA."  
"PREDICTED: Homo sapiens hypothetical protein LOC100131434 (LOC100131434), mRNA."  
"PREDICTED: Homo sapiens hypothetical LOC100131435 (LOC100131435), mRNA."  
"PREDICTED: Homo sapiens hypothetical LOC100131436 (LOC100131436), mRNA."  
"PREDICTED: Homo sapiens hypothetical protein LOC100131452 (LOC100131452), mRNA."  
"PREDICTED: Homo sapiens misc\_RNA (LOC100131460), miscRNA."  
"PREDICTED: Homo sapiens misc\_RNA (LOC100131471), miscRNA."  
"Homo sapiens hypothetical LOC100131496 (LOC100131496), non-coding RNA."  
"PREDICTED: Homo sapiens misc\_RNA (LOC100131510), miscRNA."  
"PREDICTED: Homo sapiens similar to hCG1644658 (LOC100131531), mRNA."  
"PREDICTED: Homo sapiens hypothetical protein LOC100131540 (LOC100131540), mRNA."  
"PREDICTED: Homo sapiens similar to zinc finger, NFX1-type containing 1 (LOC100131544), mRNA."  
"PREDICTED: Homo sapiens hypothetical LOC100131552 (LOC100131552), mRNA."  
"PREDICTED: Homo sapiens similar to hCG1783679 (LOC100131572), mRNA."  
"PREDICTED: Homo sapiens similar to hCG2042489 (LOC100131580), mRNA."  
"PREDICTED: Homo sapiens similar to hCG1812837 (LOC100131588), mRNA."  
"PREDICTED: Homo sapiens hypothetical protein LOC100131594 (LOC100131594), mRNA."  
"PREDICTED: Homo sapiens misc\_RNA (LOC100131609), miscRNA."  
"PREDICTED: Homo sapiens hypothetical LOC100131621 (LOC100131621), mRNA."  
"PREDICTED: Homo sapiens hypothetical protein LOC100131643 (LOC100131643), mRNA."  
"PREDICTED: Homo sapiens hypothetical LOC100131655 (LOC100131655), mRNA."  
"PREDICTED: Homo sapiens hypothetical protein LOC100131683 (LOC100131683), mRNA."  
"PREDICTED: Homo sapiens similar to hCG2041551 (LOC100131688), mRNA."  
"PREDICTED: Homo sapiens misc\_RNA (LOC100131705), partial miscRNA."  
"PREDICTED: Homo sapiens misc\_RNA (LOC100131707), miscRNA."

"PREDICTED: Homo sapiens similar to ribosomal protein L29, transcript variant 2 (LOC100131718), mRNA."  
"PREDICTED: Homo sapiens similar to spermatogenesis and centriole associated 1 (LOC100131719), mRNA."  
"PREDICTED: Homo sapiens misc\_RNA (LOC100131718), miscRNA."  
"PREDICTED: Homo sapiens hypothetical LOC100131727 (LOC100131727), mRNA."  
"PREDICTED: Homo sapiens hypothetical LOC100131733 (LOC100131733), mRNA."  
"PREDICTED: Homo sapiens misc\_RNA (LOC100131735), miscRNA."  
"PREDICTED: Homo sapiens misc\_RNA (LOC100131737), miscRNA."  
"PREDICTED: Homo sapiens hypothetical protein LOC100131744 (LOC100131744), mRNA."  
"PREDICTED: Homo sapiens similar to hCG2044955 (LOC100131768), mRNA."  
"PREDICTED: Homo sapiens similar to phosphatidylinositol-specific phospholipase C, X domain (LOC100131770), mRNA."  
"PREDICTED: Homo sapiens misc\_RNA (LOC100131785), miscRNA."  
"PREDICTED: Homo sapiens misc\_RNA (LOC100131787), miscRNA."  
"PREDICTED: Homo sapiens similar to hCG2036585 (LOC100131801), mRNA."  
"PREDICTED: Homo sapiens misc\_RNA (LOC100131810), miscRNA."  
"PREDICTED: Homo sapiens hypothetical protein LOC100131831 (LOC100131831), mRNA."  
"PREDICTED: Homo sapiens hypothetical protein LOC100131835 (LOC100131835), mRNA."  
"PREDICTED: Homo sapiens hypothetical protein LOC100131850 (LOC100131850), mRNA."  
"PREDICTED: Homo sapiens hypothetical protein LOC100131856 (LOC100131856), mRNA."  
"PREDICTED: Homo sapiens misc\_RNA (LOC100131859), miscRNA."  
"PREDICTED: Homo sapiens misc\_RNA (LOC100131866), miscRNA."  
"PREDICTED: Homo sapiens misc\_RNA (LOC100131868), miscRNA."  
"PREDICTED: Homo sapiens hypothetical protein LOC100131871 (LOC100131871), mRNA."  
"PREDICTED: Homo sapiens hypothetical protein LOC100131888 (LOC100131888), mRNA."  
"PREDICTED: Homo sapiens hypothetical protein LOC100131912 (LOC100131912), mRNA."  
"PREDICTED: Homo sapiens similar to hCG2004312, transcript variant 1 (LOC100131930), mRNA."  
"PREDICTED: Homo sapiens misc\_RNA (LOC100131940), miscRNA."  
"PREDICTED: Homo sapiens hypothetical protein LOC100131949 (LOC100131949), mRNA."  
"PREDICTED: Homo sapiens hypothetical protein LOC100131968 (LOC100131968), mRNA."  
"PREDICTED: Homo sapiens misc\_RNA (LOC100131970), miscRNA."  
"PREDICTED: Homo sapiens hypothetical protein LOC100131972 (LOC100131972), mRNA."  
"PREDICTED: Homo sapiens similar to hCG1779533 (LOC100131975), mRNA."  
"PREDICTED: Homo sapiens similar to zinc finger protein 705A (LOC100131980), mRNA."  
"PREDICTED: Homo sapiens similar to hCG1742852 (LOC100131986), mRNA."  
"PREDICTED: Homo sapiens hypothetical protein LOC100131989 (LOC100131989), mRNA."  
"PREDICTED: Homo sapiens misc\_RNA (LOC100132004), miscRNA."  
"PREDICTED: Homo sapiens similar to FLJ00287 protein (LOC100132024), mRNA."  
"PREDICTED: Homo sapiens hypothetical protein LOC100132032 (LOC100132032), mRNA."  
"PREDICTED: Homo sapiens hypothetical protein LOC100132033 (LOC100132033), mRNA."  
"PREDICTED: Homo sapiens similar to mCG7602 (LOC100132037), mRNA."  
"PREDICTED: Homo sapiens hypothetical protein LOC100132041 (LOC100132041), mRNA."  
"PREDICTED: Homo sapiens hypothetical protein LOC100132048 (LOC100132048), mRNA."  
"PREDICTED: Homo sapiens misc\_RNA (LOC100132050), miscRNA."  
"PREDICTED: Homo sapiens hypothetical protein LOC100132060 (LOC100132060), mRNA."  
"PREDICTED: Homo sapiens hypothetical protein LOC100132068 (LOC100132068), mRNA."

"PREDICTED: Homo sapiens misc\_RNA (LOC100132086), miscRNA."  
"PREDICTED: Homo sapiens hypothetical protein LOC100132096 (LOC100132096), mRNA."  
"PREDICTED: Homo sapiens similar to hCG1644176 (LOC100132108), mRNA."  
"PREDICTED: Homo sapiens misc\_RNA (LOC100132112), partial miscRNA."  
"PREDICTED: Homo sapiens hypothetical protein LOC100132113 (LOC100132113), mRNA."  
"PREDICTED: Homo sapiens misc\_RNA (LOC100132119), miscRNA."  
"PREDICTED: Homo sapiens similar to methylenetetrahydrofolate dehydrogenase (NADP+ dep  
"PREDICTED: Homo sapiens misc\_RNA (LOC100132154), miscRNA."  
"PREDICTED: Homo sapiens similar to hCG1993567 (LOC100132167), mRNA."  
"PREDICTED: Homo sapiens hypothetical protein LOC100132168 (LOC100132168), mRNA."  
"PREDICTED: Homo sapiens misc\_RNA (LOC100132199), miscRNA."  
"PREDICTED: Homo sapiens hypothetical protein LOC100132221 (LOC100132221), mRNA."  
"Homo sapiens similar to Uncharacterized protein KIAA0220 (LOC100132247), mRNA."  
"PREDICTED: Homo sapiens misc\_RNA (LOC100132266), miscRNA."  
"Homo sapiens hypothetical protein LOC100132288 (LOC100132288), mRNA."  
"PREDICTED: Homo sapiens misc\_RNA (LOC100132289), miscRNA."  
"PREDICTED: Homo sapiens similar to hCG2027326 (LOC100132291), mRNA."  
"PREDICTED: Homo sapiens hypothetical protein LOC100132292 (LOC100132292), mRNA."  
"PREDICTED: Homo sapiens similar to MSTP075 (LOC100132299), mRNA."  
"PREDICTED: Homo sapiens misc\_RNA (LOC100132302), miscRNA."  
"PREDICTED: Homo sapiens similar to solute carrier family 29 (nucleoside transporters), memb  
"PREDICTED: Homo sapiens hypothetical protein LOC100132323 (LOC100132323), mRNA."  
"PREDICTED: Homo sapiens misc\_RNA (LOC100132324), miscRNA."  
"PREDICTED: Homo sapiens hypothetical protein LOC100132336 (LOC100132336), mRNA."  
"PREDICTED: Homo sapiens similar to chaperonin 10 (LOC100132346), mRNA."  
"PREDICTED: Homo sapiens hypothetical protein LOC100132347 (LOC100132347), mRNA."  
"PREDICTED: Homo sapiens hypothetical protein LOC100132364, transcript variant 1 (LOC100  
"PREDICTED: Homo sapiens hypothetical LOC100132369 (LOC100132369), mRNA."  
"PREDICTED: Homo sapiens misc\_RNA (LOC100132373), miscRNA."  
"PREDICTED: Homo sapiens hypothetical protein LOC100132377 (LOC100132377), mRNA."  
"PREDICTED: Homo sapiens hypothetical protein LOC100132391 (LOC100132391), mRNA."  
"PREDICTED: Homo sapiens hypothetical protein LOC100132394 (LOC100132394), mRNA."  
"PREDICTED: Homo sapiens similar to hCG1810766 (LOC100132395), mRNA."  
"PREDICTED: Homo sapiens misc\_RNA (LOC100132402), miscRNA."  
"PREDICTED: Homo sapiens similar to hCG1782458 (LOC100132413), mRNA."  
"PREDICTED: Homo sapiens similar to PRO1102 (LOC100132418), mRNA."  
"PREDICTED: Homo sapiens hypothetical protein LOC100132425 (LOC100132425), mRNA."  
"PREDICTED: Homo sapiens similar to Protein FAM27E3 (LOC100132439), mRNA."  
"PREDICTED: Homo sapiens hypothetical protein LOC100132442 (LOC100132442), mRNA."  
"PREDICTED: Homo sapiens hypothetical protein LOC100132444 (LOC100132444), mRNA."  
"PREDICTED: Homo sapiens similar to Sm protein G (LOC100132457), mRNA."  
"PREDICTED: Homo sapiens hypothetical protein LOC100132485 (LOC100132485), mRNA."  
"PREDICTED: Homo sapiens misc\_RNA (LOC100132491), miscRNA."  
"PREDICTED: Homo sapiens misc\_RNA (LOC100132493), miscRNA."

"PREDICTED: Homo sapiens similar to mCG7602 (LOC100132499), mRNA."  
"PREDICTED: Homo sapiens similar to ring finger protein 208 (LOC100132503), mRNA."  
"PREDICTED: Homo sapiens similar to CYorf16 protein (LOC100132506), mRNA."  
"PREDICTED: Homo sapiens similar to hCG1979388 (LOC100132510), mRNA."  
"PREDICTED: Homo sapiens hypothetical protein LOC100132513 (LOC100132513), mRNA."  
"PREDICTED: Homo sapiens hypothetical protein LOC100132518 (LOC100132518), mRNA."  
"PREDICTED: Homo sapiens misc\_RNA (LOC100132519), miscRNA."  
"PREDICTED: Homo sapiens similar to PRO1477 (LOC100132521), mRNA."  
"PREDICTED: Homo sapiens similar to FLJ00274 protein (LOC100132526), mRNA."  
"PREDICTED: Homo sapiens misc\_RNA (LOC100132528), miscRNA."  
"PREDICTED: Homo sapiens hypothetical LOC100132529 (LOC100132529), mRNA."  
"PREDICTED: Homo sapiens hypothetical protein LOC100132532 (LOC100132532), mRNA."  
"PREDICTED: Homo sapiens misc\_RNA (LOC100132535), miscRNA."  
"PREDICTED: Homo sapiens similar to homogentisate 1,2-dioxygenase (LOC100132552), mRNA."  
"PREDICTED: Homo sapiens misc\_RNA (LOC100132553), miscRNA."  
"PREDICTED: Homo sapiens misc\_RNA (LOC100132562), miscRNA."  
"PREDICTED: Homo sapiens hypothetical protein LOC100132564 (LOC100132564), mRNA."  
"PREDICTED: Homo sapiens similar to golgi autoantigen, golgin subfamily a, 8G, transcript vari:  
"PREDICTED: Homo sapiens hypothetical protein LOC100132585 (LOC100132585), mRNA."  
"PREDICTED: Homo sapiens hypothetical protein LOC100132593 (LOC100132593), mRNA."  
"PREDICTED: Homo sapiens similar to zinc finger protein 165 (LOC100132598), mRNA."  
"PREDICTED: Homo sapiens hypothetical LOC100132628 (LOC100132628), mRNA."  
"PREDICTED: Homo sapiens similar to hCG1778310 (LOC100132635), partial mRNA."  
"PREDICTED: Homo sapiens misc\_RNA (LOC100132652), miscRNA."  
"PREDICTED: Homo sapiens hypothetical protein LOC100132655 (LOC100132655), mRNA."  
"PREDICTED: Homo sapiens misc\_RNA (LOC100132656), miscRNA."  
"PREDICTED: Homo sapiens hypothetical protein LOC100132657 (LOC100132657), mRNA."  
"PREDICTED: Homo sapiens misc\_RNA (LOC100132658), miscRNA."  
"PREDICTED: Homo sapiens hypothetical protein LOC100132663 (LOC100132663), mRNA."  
"PREDICTED: Homo sapiens hypothetical LOC100132701 (LOC100132701), mRNA."  
"PREDICTED: Homo sapiens similar to immunoglobulin superfamily, member 3 (LOC10013270:  
"PREDICTED: Homo sapiens misc\_RNA (LOC100132715), miscRNA."  
"PREDICTED: Homo sapiens hypothetical protein LOC100132716, transcript variant 2 (LOC100:  
"PREDICTED: Homo sapiens hypothetical protein LOC100132717 (LOC100132717), mRNA."  
"PREDICTED: Homo sapiens hypothetical protein LOC100132727 (LOC100132727), mRNA."  
"PREDICTED: Homo sapiens similar to cpn10 protein (LOC100132728), mRNA."  
"PREDICTED: Homo sapiens hypothetical protein LOC100132733 (LOC100132733), mRNA."  
"PREDICTED: Homo sapiens hypothetical protein LOC100132740 (LOC100132740), mRNA."  
"PREDICTED: Homo sapiens hypothetical protein LOC100132742, transcript variant 1 (LOC100:  
"PREDICTED: Homo sapiens hypothetical protein LOC100132760 (LOC100132760), mRNA."  
"PREDICTED: Homo sapiens hypothetical protein LOC100132767 (LOC100132767), mRNA."  
"PREDICTED: Homo sapiens similar to methylenetetrahydrofolate dehydrogenase (NADP+ dep  
"PREDICTED: Homo sapiens misc\_RNA (LOC100132794), miscRNA."  
"PREDICTED: Homo sapiens misc\_RNA (LOC100132795), miscRNA."

"PREDICTED: Homo sapiens misc\_RNA (LOC100132797), miscRNA."  
"PREDICTED: Homo sapiens hypothetical protein LOC100132810 (LOC100132810), mRNA."  
"PREDICTED: Homo sapiens hypothetical protein LOC100132826 (LOC100132826), mRNA."  
"PREDICTED: Homo sapiens hypothetical LOC100132839 (LOC100132839), mRNA."  
"PREDICTED: Homo sapiens misc\_RNA (LOC100132863), miscRNA."  
"PREDICTED: Homo sapiens misc\_RNA (LOC100132864), miscRNA."  
"PREDICTED: Homo sapiens misc\_RNA (LOC100132887), miscRNA."  
"PREDICTED: Homo sapiens hypothetical protein LOC100132894, transcript variant 1 (LOC100132894), mRNA."  
"PREDICTED: Homo sapiens similar to KIAA1874 protein (LOC100132901), mRNA."  
"PREDICTED: Homo sapiens misc\_RNA (LOC100132918), miscRNA."  
"PREDICTED: Homo sapiens misc\_RNA (LOC100132920), miscRNA."  
"PREDICTED: Homo sapiens similar to hCG1993470 (LOC100132923), mRNA."  
"PREDICTED: Homo sapiens hypothetical protein LOC100132941 (LOC100132941), mRNA."  
"PREDICTED: Homo sapiens misc\_RNA (LOC100132947), miscRNA."  
"PREDICTED: Homo sapiens similar to Protein FAM27A/B/C, transcript variant 1 (LOC100132949), mRNA."  
"PREDICTED: Homo sapiens hypothetical protein LOC100132955 (LOC100132955), mRNA."  
"PREDICTED: Homo sapiens misc\_RNA (LOC100132972), miscRNA."  
"PREDICTED: Homo sapiens misc\_RNA (LOC100132977), miscRNA."  
"PREDICTED: Homo sapiens misc\_RNA (LOC100132992), miscRNA."  
"PREDICTED: Homo sapiens similar to hCG2036595 (LOC100132994), mRNA."  
"PREDICTED: Homo sapiens hypothetical protein LOC100133002 (LOC100133002), mRNA."  
"PREDICTED: Homo sapiens similar to RAS p21 protein activator 4 (LOC100133005), mRNA."  
"PREDICTED: Homo sapiens hypothetical protein LOC100133008 (LOC100133008), mRNA."  
"PREDICTED: Homo sapiens hypothetical protein LOC100133012 (LOC100133012), mRNA."  
"PREDICTED: Homo sapiens hypothetical protein LOC100133018 (LOC100133018), mRNA."  
"PREDICTED: Homo sapiens similar to hCG1983765 (LOC100133019), mRNA."  
"PREDICTED: Homo sapiens misc\_RNA (LOC100133033), miscRNA."  
"PREDICTED: Homo sapiens hypothetical protein LOC100133036 (LOC100133036), mRNA."  
"PREDICTED: Homo sapiens hypothetical protein LOC100133042 (LOC100133042), mRNA."  
"PREDICTED: Homo sapiens hypothetical protein LOC100133045 (LOC100133045), mRNA."  
"PREDICTED: Homo sapiens hypothetical LOC100133047 (LOC100133047), mRNA."  
"PREDICTED: Homo sapiens hypothetical protein LOC100133053 (LOC100133053), mRNA."  
"PREDICTED: Homo sapiens hypothetical protein LOC100133055 (LOC100133055), mRNA."  
"PREDICTED: Homo sapiens misc\_RNA (LOC100133058), miscRNA."  
"PREDICTED: Homo sapiens hypothetical protein LOC100133070 (LOC100133070), mRNA."  
"PREDICTED: Homo sapiens misc\_RNA (LOC100133075), miscRNA."  
"PREDICTED: Homo sapiens misc\_RNA (LOC100133076), miscRNA."  
"PREDICTED: Homo sapiens hypothetical LOC100133086 (LOC100133086), mRNA."  
"PREDICTED: Homo sapiens hypothetical protein LOC100133095 (LOC100133095), mRNA."  
"PREDICTED: Homo sapiens hypothetical protein LOC100133111 (LOC100133111), mRNA."  
"PREDICTED: Homo sapiens similar to breakpoint cluster region (LOC100133163), mRNA."  
"PREDICTED: Homo sapiens misc\_RNA (LOC100133177), miscRNA."  
"PREDICTED: Homo sapiens hypothetical protein LOC100133179 (LOC100133179), mRNA."  
"PREDICTED: Homo sapiens misc\_RNA (LOC100133185), miscRNA."

"PREDICTED: Homo sapiens hypothetical protein LOC100133211 (LOC100133211), mRNA."  
"PREDICTED: Homo sapiens misc\_RNA (LOC100133220), miscRNA."  
"PREDICTED: Homo sapiens similar to mCG146274 (LOC100133222), mRNA."  
"PREDICTED: Homo sapiens similar to hCG2041320 (LOC100133224), mRNA."  
"PREDICTED: Homo sapiens hypothetical protein LOC100133232 (LOC100133232), mRNA."  
"PREDICTED: Homo sapiens hypothetical protein LOC100133233 (LOC100133233), mRNA."  
"PREDICTED: Homo sapiens hypothetical protein LOC100133263 (LOC100133263), mRNA."  
"PREDICTED: Homo sapiens hypothetical protein LOC100133264 (LOC100133264), mRNA."  
"PREDICTED: Homo sapiens misc\_RNA (LOC100133277), miscRNA."  
"PREDICTED: Homo sapiens misc\_RNA (LOC100133288), miscRNA."  
"PREDICTED: Homo sapiens hypothetical protein LOC100133298 (LOC100133298), mRNA."  
"Homo sapiens Ras suppressor protein 1 pseudogene (LOC100133308), non-coding RNA."  
"PREDICTED: Homo sapiens misc\_RNA (LOC100133312), miscRNA."  
"PREDICTED: Homo sapiens similar to melanoma antigen (LOC100133313), mRNA."  
"PREDICTED: Homo sapiens similar to hCG1640299 (LOC100133315), mRNA."  
"PREDICTED: Homo sapiens misc\_RNA (LOC100133328), miscRNA."  
"PREDICTED: Homo sapiens misc\_RNA (LOC100133372), miscRNA."  
"PREDICTED: Homo sapiens hypothetical protein LOC100133373 (LOC100133373), mRNA."  
"PREDICTED: Homo sapiens hypothetical protein LOC100133390, transcript variant 2 (LOC100133390), mRNA."  
"PREDICTED: Homo sapiens misc\_RNA (LOC100133398), partial miscRNA."  
"PREDICTED: Homo sapiens hypothetical protein LOC100133401 (LOC100133401), mRNA."  
"PREDICTED: Homo sapiens similar to mucin (LOC100133408), mRNA."  
"PREDICTED: Homo sapiens hypothetical protein LOC100133420 (LOC100133420), mRNA."  
"PREDICTED: Homo sapiens similar to hCG1640620 (LOC100133430), mRNA."  
"PREDICTED: Homo sapiens similar to melanoma antigen (LOC100133435), mRNA."  
"PREDICTED: Homo sapiens similar to phosphodiesterase 4D interacting protein (LOC100133440), mRNA."  
"PREDICTED: Homo sapiens similar to hCG2042704 (LOC100133447), partial mRNA."  
"PREDICTED: Homo sapiens hypothetical protein LOC100133459 (LOC100133459), partial mRNA."  
"PREDICTED: Homo sapiens misc\_RNA (LOC100133465), miscRNA."  
"PREDICTED: Homo sapiens similar to Nop10p (LOC100133477), mRNA."  
"PREDICTED: Homo sapiens misc\_RNA (LOC100133478), miscRNA."  
"PREDICTED: Homo sapiens hypothetical protein LOC100133479 (LOC100133479), mRNA."  
"PREDICTED: Homo sapiens hypothetical protein LOC100133482 (LOC100133482), mRNA."  
"PREDICTED: Homo sapiens similar to hCG1983233 (LOC100133489), mRNA."  
"PREDICTED: Homo sapiens hypothetical protein LOC100133502 (LOC100133502), mRNA."  
"PREDICTED: Homo sapiens hypothetical protein LOC100133516 (LOC100133516), mRNA."  
"PREDICTED: Homo sapiens hypothetical protein LOC100133517 (LOC100133517), mRNA."  
"PREDICTED: Homo sapiens similar to hCG2002956 (LOC100133536), partial mRNA."  
"Homo sapiens hypothetical LOC100133545 (LOC100133545), non-coding RNA."  
"PREDICTED: Homo sapiens hypothetical LOC100133554 (LOC100133554), mRNA."  
"PREDICTED: Homo sapiens misc\_RNA (LOC100133555), miscRNA."  
"PREDICTED: Homo sapiens hypothetical protein LOC100133563 (LOC100133563), mRNA."  
"PREDICTED: Homo sapiens similar to hCG23738 (LOC100133565), mRNA."  
"PREDICTED: Homo sapiens hypothetical protein LOC100133568 (LOC100133568), mRNA."



"PREDICTED: Homo sapiens hypothetical protein LOC100133576 (LOC100133576), partial mRNA  
"PREDICTED: Homo sapiens similar to acetylserotonin O-methyltransferase-like (LOC10013357  
"PREDICTED: Homo sapiens similar to major histocompatibility complex, class II, DQ beta 1, tra  
"PREDICTED: Homo sapiens similar to MAP kinase kinase 3b (LOC100133591), mRNA."  
"PREDICTED: Homo sapiens misc\_RNA (LOC100133602), miscRNA."  
"PREDICTED: Homo sapiens hypothetical protein LOC100133607, transcript variant 2 (LOC100  
"PREDICTED: Homo sapiens similar to membrane-associated ring finger (C3HC4) 3 (LOC1001:  
"PREDICTED: Homo sapiens misc\_RNA (LOC100133627), miscRNA."  
"PREDICTED: Homo sapiens similar to hCG1806822 (LOC100133636), mRNA."  
"PREDICTED: Homo sapiens hypothetical LOC100133638 (LOC100133638), mRNA."  
"PREDICTED: Homo sapiens hypothetical protein LOC100133649 (LOC100133649), mRNA."  
"PREDICTED: Homo sapiens hypothetical protein LOC100133662 (LOC100133662), mRNA."  
"PREDICTED: Homo sapiens hypothetical protein LOC100133667 (LOC100133667), mRNA."  
"PREDICTED: Homo sapiens similar to hCG1994695 (LOC100133669), mRNA."  
"PREDICTED: Homo sapiens similar to Ca ATPase SERCA1 (LOC100133672), partial mRNA."  
"PREDICTED: Homo sapiens similar to hCG2042724 (LOC100133678), partial mRNA."  
"PREDICTED: Homo sapiens hypothetical protein LOC100133686 (LOC100133686), mRNA."  
"PREDICTED: Homo sapiens similar to hCG2040254 (LOC100133697), mRNA."  
"PREDICTED: Homo sapiens similar to hCG2038920 (LOC100133739), mRNA."  
"PREDICTED: Homo sapiens similar to hypoxia-inducible protein 2 (LOC100133744), mRNA."  
"PREDICTED: Homo sapiens hypothetical protein LOC100133747 (LOC100133747), mRNA."  
"PREDICTED: Homo sapiens hypothetical LOC100133758 (LOC100133758), partial mRNA."  
"PREDICTED: Homo sapiens similar to hCG2041993 (LOC100133769), mRNA."  
"PREDICTED: Homo sapiens hypothetical protein LOC100133771 (LOC100133771), mRNA."  
"PREDICTED: Homo sapiens similar to MCT (LOC100133772), mRNA."  
"PREDICTED: Homo sapiens similar to mitochondrial ribosomal protein S18C (LOC100133779)  
"PREDICTED: Homo sapiens similar to mCG50656 (LOC100133803), mRNA."  
"PREDICTED: Homo sapiens similar to HLA class II histocompatibility antigen, DRB1-4 beta cha  
"PREDICTED: Homo sapiens similar to metalloproteinase (LOC100133812), mRNA."  
"PREDICTED: Homo sapiens hypothetical protein LOC100133836, transcript variant 1 (LOC100  
"PREDICTED: Homo sapiens hypothetical LOC100133839 (LOC100133839), mRNA."  
"PREDICTED: Homo sapiens hypothetical LOC100133844 (LOC100133844), mRNA."  
"PREDICTED: Homo sapiens hypothetical protein LOC100133859 (LOC100133859), mRNA."  
"PREDICTED: Homo sapiens similar to phosphodiesterase 4D interacting protein (myomegalin)  
"PREDICTED: Homo sapiens similar to Leukocyte immunoglobulin-like receptor, subfamily A (w  
"PREDICTED: Homo sapiens similar to GDNF family receptor alpha-2 precursor (GFR-alpha-2)  
"PREDICTED: Homo sapiens similar to SET domain containing (lysine methyltransferase) 8 (LC  
"PREDICTED: Homo sapiens hypothetical protein LOC100133892 (LOC100133892), mRNA."  
"PREDICTED: Homo sapiens similar to anaphase promoting complex subunit 1 (LOC10013389  
"PREDICTED: Homo sapiens hypothetical protein LOC100133908 (LOC100133908), mRNA."  
"PREDICTED: Homo sapiens similar to glutamate receptor, ionotropic, kainate 4 (LOC1001339  
"PREDICTED: Homo sapiens hypothetical protein LOC100133916 (LOC100133916), mRNA."  
"PREDICTED: Homo sapiens similar to vomeronasal 1 receptor, A5 (LOC100133928), mRNA."  
"PREDICTED: Homo sapiens similar to D-2-hydroxyglutarate dehydrogenase, mitochondrial (LC

"PREDICTED: Homo sapiens similar to hCG1795283 (LOC100133947), mRNA."  
"PREDICTED: Homo sapiens hypothetical protein LOC100133950 (LOC100133950), mRNA."  
"PREDICTED: Homo sapiens hypothetical LOC100133959 (LOC100133959), mRNA."  
"PREDICTED: Homo sapiens hypothetical protein LOC100133981 (LOC100133981), mRNA."  
"PREDICTED: Homo sapiens similar to hCG1733035 (LOC100133984), mRNA."  
"Homo sapiens hypothetical protein LOC100133985 (LOC100133985), non-coding RNA."  
"PREDICTED: Homo sapiens similar to mannosidase, alpha, class 1C, member 1 (LOC100134000), mRNA."  
"PREDICTED: Homo sapiens hypothetical LOC100134002 (LOC100134002), mRNA."  
"PREDICTED: Homo sapiens hypothetical protein LOC100134009 (LOC100134009), mRNA."  
"PREDICTED: Homo sapiens similar to PR domain containing 15 (LOC100134011), mRNA."  
"PREDICTED: Homo sapiens similar to hCG1774568 (LOC100134018), mRNA."  
"PREDICTED: Homo sapiens hypothetical protein LOC100134041 (LOC100134041), mRNA."  
"PREDICTED: Homo sapiens misc\_RNA (LOC100134047), miscRNA."  
"PREDICTED: Homo sapiens similar to ubiquitin associated and SH3 domain containing, A (LOC100134050), mRNA."  
"PREDICTED: Homo sapiens similar to POLR2J4 protein (LOC100134053), mRNA."  
"PREDICTED: Homo sapiens similar to LYPDC1 protein (LOC100134073), mRNA."  
"PREDICTED: Homo sapiens similar to hCG1647242 (LOC100134083), mRNA."  
"PREDICTED: Homo sapiens similar to hCG2007960 (LOC100134098), mRNA."  
"PREDICTED: Homo sapiens similar to Phosphodiesterase 4D interacting protein (myomegalin) (LOC100134100), mRNA."  
"PREDICTED: Homo sapiens misc\_RNA (LOC100134101), partial miscRNA."  
"PREDICTED: Homo sapiens similar to succinate dehydrogenase complex, subunit A, flavoprotein (LOC100134102), mRNA."  
"PREDICTED: Homo sapiens similar to peroxidase homolog (LOC100134134), mRNA."  
"PREDICTED: Homo sapiens similar to LHPE306, transcript variant 3 (LOC100134140), mRNA."  
"PREDICTED: Homo sapiens hypothetical LOC100134147 (LOC100134147), mRNA."  
"PREDICTED: Homo sapiens similar to synaptotagmin XV-b (LOC100134152), mRNA."  
"PREDICTED: Homo sapiens similar to Coiled-coil domain containing 144B (LOC100134159), non-coding RNA."  
"PREDICTED: Homo sapiens similar to hCG1793095 (LOC100134182), mRNA."  
"PREDICTED: Homo sapiens hypothetical protein LOC100134188 (LOC100134188), mRNA."  
"PREDICTED: Homo sapiens similar to LOC441089 protein, transcript variant 1 (LOC100134189), mRNA."  
"PREDICTED: Homo sapiens similar to methyl-CpG binding domain protein 3-like 2 (LOC100134190), mRNA."  
"PREDICTED: Homo sapiens similar to hCG1989348 (LOC100134201), mRNA."  
"PREDICTED: Homo sapiens similar to IQ motif and SEC7 domain-containing protein 3 (LOC100134202), mRNA."  
"PREDICTED: Homo sapiens hypothetical protein LOC100134226 (LOC100134226), mRNA."  
"PREDICTED: Homo sapiens misc\_RNA (LOC100134228), miscRNA."  
"Homo sapiens hypothetical protein LOC100134229 (LOC100134229), non-coding RNA."  
"PREDICTED: Homo sapiens similar to hCG1642820 (LOC100134235), mRNA."  
"PREDICTED: Homo sapiens hypothetical protein LOC100134239 (LOC100134239), mRNA."  
"PREDICTED: Homo sapiens hypothetical protein LOC100134241 (LOC100134241), mRNA."  
"PREDICTED: Homo sapiens similar to anaphase promoting complex subunit 1 (LOC100134260), mRNA."  
"PREDICTED: Homo sapiens similar to calbindin 2 full length protein (LOC100134265), mRNA."  
"PREDICTED: Homo sapiens misc\_RNA (LOC100134266), miscRNA."  
"PREDICTED: Homo sapiens misc\_RNA (LOC100134272), miscRNA."  
"PREDICTED: Homo sapiens hypothetical protein LOC100134282 (LOC100134282), mRNA."  
"PREDICTED: Homo sapiens similar to mitogen-activated protein kinase phosphatase x (LOC100134283), mRNA."

"PREDICTED: Homo sapiens hypothetical protein LOC100134294 (LOC100134294), mRNA."  
"PREDICTED: Homo sapiens misc\_RNA (LOC100134300), miscRNA."  
"PREDICTED: Homo sapiens hypothetical protein LOC100134301 (LOC100134301), mRNA."  
"PREDICTED: Homo sapiens similar to patatin-like phospholipase domain containing 2 (LOC100134302), mRNA."  
"PREDICTED: Homo sapiens similar to hCG1983233 (LOC100134304), mRNA."  
"PREDICTED: Homo sapiens hypothetical protein LOC100134318 (LOC100134318), mRNA."  
"PREDICTED: Homo sapiens hypothetical protein LOC100134330 (LOC100134330), mRNA."  
"PREDICTED: Homo sapiens similar to hCG1812074 (LOC100134331), mRNA."  
"PREDICTED: Homo sapiens hypothetical protein LOC100134346 (LOC100134346), mRNA."  
"PREDICTED: Homo sapiens hypothetical protein LOC100134353 (LOC100134353), mRNA."  
"PREDICTED: Homo sapiens hypothetical LOC100134357 (LOC100134357), mRNA."  
"PREDICTED: Homo sapiens hypothetical LOC100134360 (LOC100134360), mRNA."  
"PREDICTED: Homo sapiens similar to hCG1811002 (LOC100134361), mRNA."  
"PREDICTED: Homo sapiens hypothetical protein LOC100134363 (LOC100134363), mRNA."  
"PREDICTED: Homo sapiens hypothetical protein LOC100134364 (LOC100134364), mRNA."  
"PREDICTED: Homo sapiens similar to bactericidal/permeability-increasing protein (LOC100134365), mRNA."  
"PREDICTED: Homo sapiens hypothetical protein LOC100134400 (LOC100134400), partial mRNA."  
"PREDICTED: Homo sapiens similar to cartilage-associated protein (CASP) (LOC100134403), mRNA."  
"PREDICTED: Homo sapiens hypothetical protein LOC100134407 (LOC100134407), mRNA."  
"PREDICTED: Homo sapiens similar to putative DUX4 protein (LOC100134409), mRNA."  
"PREDICTED: Homo sapiens hypothetical protein LOC100134420 (LOC100134420), mRNA."  
"PREDICTED: Homo sapiens misc\_RNA (LOC100134424), miscRNA."  
"PREDICTED: Homo sapiens hypothetical protein LOC100134436 (LOC100134436), mRNA."  
"PREDICTED: Homo sapiens similar to PGBD5 protein (LOC100134440), mRNA."  
"PREDICTED: Homo sapiens similar to hkir2.2x (LOC100134444), mRNA."  
"PREDICTED: Homo sapiens hypothetical protein LOC100134468 (LOC100134468), mRNA."  
"PREDICTED: Homo sapiens hypothetical protein LOC100134516 (LOC100134516), mRNA."  
"PREDICTED: Homo sapiens similar to hCG1779533 (LOC100134524), mRNA."  
"PREDICTED: Homo sapiens misc\_RNA (LOC100134528), miscRNA."  
"PREDICTED: Homo sapiens hypothetical protein LOC100134530 (LOC100134530), mRNA."  
"PREDICTED: Homo sapiens misc\_RNA (LOC100134537), miscRNA."  
"PREDICTED: Homo sapiens hypothetical protein LOC100134539 (LOC100134539), mRNA."  
"PREDICTED: Homo sapiens similar to hCG2036731 (LOC100134557), mRNA."  
"PREDICTED: Homo sapiens misc\_RNA (LOC100134563), miscRNA."  
"PREDICTED: Homo sapiens misc\_RNA (LOC100134571), miscRNA."  
"PREDICTED: Homo sapiens hypothetical protein LOC100134601 (LOC100134601), mRNA."  
"PREDICTED: Homo sapiens hypothetical protein LOC100134634 (LOC100134634), mRNA."  
"PREDICTED: Homo sapiens similar to hCG2024106, transcript variant 2 (LOC100134648), mRNA."  
"PREDICTED: Homo sapiens hypothetical protein LOC100134660 (LOC100134660), mRNA."  
"PREDICTED: Homo sapiens similar to Williams Beuren syndrome chromosome region 19 pseudogene (LOC100134661), mRNA."  
"PREDICTED: Homo sapiens hypothetical protein LOC100134672 (LOC100134672), mRNA."  
"PREDICTED: Homo sapiens similar to Mucin-3A precursor (Intestinal mucin-3A) (LOC100134673), mRNA."  
"PREDICTED: Homo sapiens similar to LOC401435 (LOC100134675), mRNA."  
"PREDICTED: Homo sapiens hypothetical protein LOC100134687 (LOC100134687), mRNA."

"PREDICTED: Homo sapiens misc\_RNA (LOC100134688), miscRNA."  
"PREDICTED: Homo sapiens misc\_RNA (LOC100134703), partial miscRNA."  
"PREDICTED: Homo sapiens misc\_RNA (LOC100134710), miscRNA."  
"PREDICTED: Homo sapiens hypothetical protein LOC100134712 (LOC100134712), mRNA."  
"PREDICTED: Homo sapiens similar to LOC392621 (LOC100134728), mRNA."  
"PREDICTED: Homo sapiens misc\_RNA (LOC100134734), miscRNA."  
"PREDICTED: Homo sapiens misc\_RNA (LOC100134766), miscRNA."  
"PREDICTED: Homo sapiens misc\_RNA (LOC100134796), miscRNA."  
"PREDICTED: Homo sapiens hypothetical protein LOC100134815 (LOC100134815), mRNA."  
"PREDICTED: Homo sapiens misc\_RNA (LOC100134816), miscRNA."  
"PREDICTED: Homo sapiens similar to hCG2005335 (LOC100134825), mRNA."  
"Homo sapiens hypothetical LOC100134868 (LOC100134868), non-coding RNA."  
"Homo sapiens hypothetical transcript (LOC100144603), non-coding RNA."  
"Homo sapiens hypothetical LOC100144604 (LOC100144604), non-coding RNA."  
"Homo sapiens hypothetical LOC100169752 (LOC100169752), non-coding RNA."  
"Homo sapiens glucuronidase, beta pseudogene (LOC100170939), non-coding RNA."  
"Homo sapiens hypothetical LOC100188949 (LOC100188949), non-coding RNA."  
"Homo sapiens hypothetical LOC100190938 (LOC100190938), transcript variant 2, non-coding  
"Homo sapiens hypothetical LOC100190939 (LOC100190939), non-coding RNA."  
"Homo sapiens hypothetical LOC100233209 (LOC100233209), non-coding RNA."  
"PREDICTED: Homo sapiens hypothetical protein LOC113230 (LOC113230), mRNA."  
"Homo sapiens similar to envelope protein (LOC113386), mRNA."  
"PREDICTED: Homo sapiens hypothetical protein LOC121006 (LOC121006), mRNA."  
"PREDICTED: Homo sapiens similar to futsch CG3064-PB (LOC121792), mRNA."  
"PREDICTED: Homo sapiens hypothetical protein LOC121952 (LOC121952), mRNA."  
"PREDICTED: Homo sapiens similar to hCG2042536 (LOC123855), mRNA."  
"PREDICTED: Homo sapiens hypothetical LOC124216 (LOC124216), misc RNA."  
"Homo sapiens similar to common salivary protein 1 (LOC124220), mRNA."  
"PREDICTED: Homo sapiens hypothetical protein LOC124512 (LOC124512), mRNA."  
"PREDICTED: Homo sapiens similar to Myosin light polypeptide 6 (Smooth muscle and nonmus  
"PREDICTED: Homo sapiens hypothetical protein LOC126661, transcript variant 6 (LOC126661  
"PREDICTED: Homo sapiens similar to arylacetamide deacetylase, transcript variant 2 (LOC126  
"PREDICTED: Homo sapiens similar to Centaurin-gamma 2 (ARF-GAP with GTP-binding protei  
"PREDICTED: Homo sapiens similar to 60S ribosomal protein L36 (LOC127295), mRNA."  
"PREDICTED: Homo sapiens 3-beta-hydroxysteroid dehydrogenase, tissue-type heart (LOC128  
"PREDICTED: Homo sapiens similar to nuclear transport factor 2 (LOC128322), mRNA."  
"PREDICTED: Homo sapiens similar to Nucleolar transcription factor 1 (Upstream binding factor  
"PREDICTED: Homo sapiens similar to 60S acidic ribosomal protein P1 (LOC130678), mRNA."  
"PREDICTED: Homo sapiens similar to S-100 protein, alpha chain, transcript variant 3 (LOC132  
"PREDICTED: Homo sapiens hypothetical protein LOC133491 (LOC133491), mRNA."  
"PREDICTED: Homo sapiens similar to 60S acidic ribosomal protein P1 (LOC133609), mRNA."  
"PREDICTED: Homo sapiens hypothetical gene LOC133874, transcript variant 1 (LOC133874),  
"PREDICTED: Homo sapiens hypothetical LOC133993, transcript variant 1 (LOC133993), mRN  
"PREDICTED: Homo sapiens similar to odd Oz/ten-m homolog 2 (LOC134541), mRNA."

Homo sapiens peptidylprolyl isomerase A processed pseudogene (LOC134997) on chromosome  
"PREDICTED: Homo sapiens similar to ribosomal protein L18 (LOC136143), mRNA."  
"PREDICTED: Homo sapiens similar to testis expressed sequence 13A (LOC139116), mRNA."  
"PREDICTED: Homo sapiens similar to E2F transcription factor 6 isoform 1 (LOC139542), mRNA"  
"Homo sapiens RNA binding motif protein, X-linked pseudogene (LOC143543) on chromosome  
"PREDICTED: Homo sapiens hypothetical protein LOC143666 (LOC143666), mRNA."  
"PREDICTED: Homo sapiens hypothetical LOC143678 (LOC143678), mRNA."  
"PREDICTED: Homo sapiens similar to Interferon-induced transmembrane protein 3 (Interferon-  
"PREDICTED: Homo sapiens hypothetical protein LOC144481, transcript variant 1 (LOC144481  
"PREDICTED: Homo sapiens hypothetical protein LOC145783, transcript variant 2 (LOC145783  
"PREDICTED: Homo sapiens hypothetical LOC145853 (LOC145853), mRNA."  
"PREDICTED: Homo sapiens hypothetical protein LOC146177 (LOC146177), misc RNA."  
"PREDICTED: Homo sapiens hypothetical LOC146439 (LOC146439), mRNA."  
"PREDICTED: Homo sapiens hypothetical protein LOC146517 (LOC146517), mRNA."  
"PREDICTED: Homo sapiens hypothetical protein LOC147645 (LOC147645), mRNA."  
"Homo sapiens hypothetical protein LOC147650 (LOC147650), mRNA."  
"Homo sapiens hypothetical LOC147727 (LOC147727), non-coding RNA."  
"Homo sapiens hypothetical protein BC017947 (LOC148137), mRNA."  
"Homo sapiens hypothetical LOC148413 (LOC148413), non-coding RNA."  
"PREDICTED: Homo sapiens misc\_RNA (LOC148430), miscRNA."  
"Homo sapiens actin pseudogene (LOC148709), non-coding RNA."  
"PREDICTED: Homo sapiens similar to Nonhistone chromosomal protein HMG-17 (High-mobilit  
"PREDICTED: Homo sapiens hypothetical protein LOC149086 (LOC149086), mRNA."  
"PREDICTED: Homo sapiens similar to 40S ribosomal protein S7 (S8) (LOC149224), mRNA."  
"PREDICTED: Homo sapiens hypothetical protein LOC149448 (LOC149448), mRNA."  
"PREDICTED: Homo sapiens hypothetical protein LOC149837 (LOC149837), mRNA."  
"PREDICTED: Homo sapiens hypothetical LOC150051 (LOC150051), mRNA."  
"Homo sapiens hypothetical protein LOC150223 (LOC150223), transcript variant 2, mRNA."  
"PREDICTED: Homo sapiens hypothetical protein LOC150577 (LOC150577), mRNA."  
"Homo sapiens hypothetical protein LOC150763 (LOC150763), mRNA."  
"Homo sapiens hypothetical LOC151162 (LOC151162), non-coding RNA."  
"PREDICTED: Homo sapiens hypothetical protein LOC151234 (LOC151234), mRNA."  
"Homo sapiens hypothetical LOC151300 (LOC151300), transcript variant 2, non-coding RNA."  
"PREDICTED: Homo sapiens misc\_RNA (LOC151457), miscRNA."  
"PREDICTED: Homo sapiens similar to basic leucine zipper and W2 domains 1 (LOC151579), r  
"PREDICTED: Homo sapiens misc\_RNA (LOC152024), miscRNA."  
"PREDICTED: Homo sapiens hypothetical protein LOC152084 (LOC152084), mRNA."  
"Homo sapiens hypothetical protein LOC152195 (LOC152195), mRNA."  
"Homo sapiens hypothetical LOC152217 (LOC152217), non-coding RNA."  
"PREDICTED: Homo sapiens misc\_RNA (LOC152845), miscRNA."  
"PREDICTED: Homo sapiens hypothetical protein LOC153561 (LOC153561), mRNA."  
"PREDICTED: Homo sapiens misc\_RNA (LOC153684), miscRNA."  
"Homo sapiens hypothetical LOC154761 (LOC154761), non-coding RNA."  
"PREDICTED: Homo sapiens hypothetical protein LOC154860 (LOC154860), mRNA."

"Homo sapiens hypothetical protein LOC155060 (LOC155060), mRNA."  
"Homo sapiens hypothetical protein LOC158160 (LOC158160), transcript variant 1, mRNA."  
"PREDICTED: Homo sapiens hypothetical protein LOC158257 (LOC158257), mRNA."  
"Homo sapiens similar to hypothetical protein MGC42630 (LOC158318), mRNA."  
"PREDICTED: Homo sapiens hypothetical LOC158825 (LOC158825), mRNA."  
"PREDICTED: Homo sapiens hypothetical protein LOC161527, transcript variant 1 (LOC161527)  
"Homo sapiens selenophosphate synthetase pseudogene (LOC168474), non-coding RNA."  
"PREDICTED: Homo sapiens hypothetical LOC197135, transcript variant 5 (LOC197135), mRN  
"PREDICTED: Homo sapiens hypothetical protein LOC199800 (LOC199800), mRNA."  
"PREDICTED: Homo sapiens hypothetical LOC199897 (LOC199897), mRNA."  
"Homo sapiens neuroblastoma breakpoint family, member 11-like (LOC200030), mRNA."  
"PREDICTED: Homo sapiens hypothetical LOC200493 (LOC200493), mRNA."  
"PREDICTED: Homo sapiens similar to CG7601-PA (LOC201140), mRNA."  
"PREDICTED: Homo sapiens hypothetical protein LOC201229, transcript variant 3 (LOC201229)  
"Homo sapiens hypothetical protein LOC201725 (LOC201725), mRNA."  
"PREDICTED: Homo sapiens hypothetical protein LOC202051, transcript variant 3 (LOC202051)  
"PREDICTED: Homo sapiens hypothetical protein LOC202181 (LOC202181), misc RNA."  
"PREDICTED: Homo sapiens misc\_RNA (LOC202227), miscRNA."  
"PREDICTED: Homo sapiens hypothetical protein LOC202781 (LOC202781), mRNA."  
"PREDICTED: Homo sapiens similar to high-mobility group box 3 (LOC203510), mRNA."  
"Homo sapiens hypothetical protein LOC203547 (LOC203547), mRNA."  
"PREDICTED: Homo sapiens misc\_RNA (LOC205251), miscRNA."  
"PREDICTED: Homo sapiens hypothetical protein LOC219347 (LOC219347), mRNA."  
"PREDICTED: Homo sapiens misc\_RNA (LOC220077), miscRNA."  
"Homo sapiens TPTE and PTEN homologous inositol lipid phosphatase pseudogene (LOC2201  
"Homo sapiens similar to Leucine-rich repeat protein SHOC-2 (Ras-binding protein Sur-8) (LOC:  
"Homo sapiens hypothetical protein LOC220686 (LOC220686), mRNA."  
"PREDICTED: Homo sapiens similar to Protein C21orf59 (LOC220998), mRNA."  
"PREDICTED: Homo sapiens similar to CG4835-PA (LOC221136), mRNA."  
"Homo sapiens hypothetical protein LOC221442 (LOC221442), mRNA."  
"PREDICTED: Homo sapiens hypothetical protein LOC221710 (LOC221710), mRNA."  
"Homo sapiens transducer of ERBB2, 2 pseudogene (LOC222699), non-coding RNA."  
"Homo sapiens hypothetical LOC253039 (LOC253039), non-coding RNA."  
"PREDICTED: Homo sapiens similar to Oligophrenin 1 (LOC254398), mRNA."  
"Homo sapiens hypothetical LOC255167 (LOC255167), non-coding RNA."  
"PREDICTED: Homo sapiens hypothetical protein LOC255326 (LOC255326), mRNA."  
"PREDICTED: Homo sapiens hypothetical LOC255411, transcript variant 1 (LOC255411), mRN  
"PREDICTED: Homo sapiens similar to unc-93 homolog B1, transcript variant 1 (LOC255620), r  
"PREDICTED: Homo sapiens hypothetical LOC255649 (LOC255649), mRNA."  
"Homo sapiens hypothetical protein LOC255783 (LOC255783), non-coding RNA."  
"PREDICTED: Homo sapiens similar to peptidylprolyl isomerase A isoform 1 (LOC256374), mRI  
"PREDICTED: Homo sapiens similar to D-2-hydroxyglutarate dehydrogenase (LOC257054), mF  
"PREDICTED: Homo sapiens hypothetical protein LOC257396, transcript variant 2 (LOC257396)  
"Homo sapiens hypothetical LOC25845 (LOC25845), non-coding RNA."

"PREDICTED: Homo sapiens misc\_RNA (LOC282997), miscRNA."  
"PREDICTED: Homo sapiens hypothetical protein LOC283104 (LOC283104), mRNA."  
"PREDICTED: Homo sapiens similar to ring finger protein 18 (LOC283116), mRNA."  
"PREDICTED: Homo sapiens similar to zinc finger protein 75, transcript variant 2 (LOC283202),  
"Homo sapiens hypothetical LOC283267 (LOC283267), non-coding RNA."  
"PREDICTED: Homo sapiens hypothetical protein LOC283278 (LOC283278), mRNA."  
"PREDICTED: Homo sapiens misc\_RNA (LOC283314), miscRNA."  
"PREDICTED: Homo sapiens misc\_RNA (LOC283332), miscRNA."  
"PREDICTED: Homo sapiens similar to ribosomal protein L13a, transcript variant 4 (LOC283340)  
"PREDICTED: Homo sapiens similar to hCG1791842, transcript variant 1 (LOC283398), mRNA."  
"PREDICTED: Homo sapiens similar to 60S ribosomal protein L29 (Cell surface heparin-binding  
"PREDICTED: Homo sapiens hypothetical LOC283440 (LOC283440), mRNA."  
"Homo sapiens hypothetical LOC283663 (LOC283663), non-coding RNA."  
"PREDICTED: Homo sapiens hypothetical protein LOC283682 (LOC283682), mRNA."  
"PREDICTED: Homo sapiens hypothetical protein LOC283683, transcript variant 2 (LOC283683)  
"PREDICTED: Homo sapiens hypothetical LOC283710 (LOC283710), mRNA."  
"PREDICTED: Homo sapiens hypothetical protein LOC283867, transcript variant 2 (LOC283867  
"Homo sapiens hypothetical protein LOC283874 (LOC283874), mRNA."  
"Homo sapiens hypothetical protein LOC283932 (LOC283932), mRNA."  
"PREDICTED: Homo sapiens hypothetical LOC283953 (LOC283953), mRNA."  
"PREDICTED: Homo sapiens hypothetical protein LOC284023, transcript variant 3 (LOC284023)  
"PREDICTED: Homo sapiens hypothetical protein LOC284100 (LOC284100), mRNA."  
"PREDICTED: Homo sapiens misc\_RNA (LOC284167), miscRNA."  
"PREDICTED: Homo sapiens similar to mCG7611 (LOC284230), mRNA."  
"PREDICTED: Homo sapiens hypothetical gene supported by BC011527; BC021928; BC01152  
"PREDICTED: Homo sapiens hypothetical protein LOC284274 (LOC284274), mRNA."  
"PREDICTED: Homo sapiens similar to Placental thrombin inhibitor (Cytoplasmic antiproteinase  
"PREDICTED: Homo sapiens hypothetical protein LOC284371, transcript variant 4 (LOC284371  
"PREDICTED: Homo sapiens similar to QM protein, transcript variant 2 (LOC284393), mRNA."  
"PREDICTED: Homo sapiens hypothetical protein LOC284395 (LOC284395), mRNA."  
"PREDICTED: Homo sapiens similar to HSPC323 (LOC284422), mRNA."  
"PREDICTED: Homo sapiens hypothetical protein LOC284648 (LOC284648), mRNA."  
"PREDICTED: Homo sapiens misc\_RNA (LOC284688), miscRNA."  
"PREDICTED: Homo sapiens hypothetical protein LOC284801 (LOC284801), mRNA."  
"PREDICTED: Homo sapiens similar to ribosomal protein L13a (LOC284821), mRNA."  
"Homo sapiens hypothetical protein LOC284837 (LOC284837), mRNA."  
"Homo sapiens hypothetical gene supported by BC039313 (LOC284861), mRNA."  
"PREDICTED: Homo sapiens hypothetical LOC284988 (LOC284988), mRNA."  
"Homo sapiens hypothetical protein LOC285016 (LOC285016), mRNA."  
"PREDICTED: Homo sapiens hypothetical protein LOC285033 (LOC285033), mRNA."  
"PREDICTED: Homo sapiens hypothetical LOC285047 (LOC285047), mRNA."  
"PREDICTED: Homo sapiens similar to ribosomal protein L18a, transcript variant 1 (LOC285053)  
"Homo sapiens hypothetical protein LOC285074 (LOC285074), mRNA."  
"PREDICTED: Homo sapiens similar to ribosomal protein L10 (LOC285176), mRNA."

"Homo sapiens hypothetical LOC285205 (LOC285205), non-coding RNA."  
"PREDICTED: Homo sapiens hypothetical protein LOC285216 (LOC285216), mRNA."  
"PREDICTED: Homo sapiens similar to hCG2036843 (LOC285296), mRNA."  
"PREDICTED: Homo sapiens hypothetical protein LOC285346 (LOC285346), mRNA."  
"PREDICTED: Homo sapiens similar to beta-1,4-mannosyltransferase (LOC285407), mRNA."  
"PREDICTED: Homo sapiens misc\_RNA (LOC285412), miscRNA."  
"PREDICTED: Homo sapiens hypothetical protein LOC285484 (LOC285484), mRNA."  
"Homo sapiens hypothetical protein LOC285501 (LOC285501), mRNA."  
"Homo sapiens hypothetical LOC285548 (LOC285548), non-coding RNA."  
"PREDICTED: Homo sapiens hypothetical protein LOC285556 (LOC285556), mRNA."  
"PREDICTED: Homo sapiens hypothetical protein LOC285577 (LOC285577), mRNA."  
"PREDICTED: Homo sapiens hypothetical LOC285588 (LOC285588), mRNA."  
"PREDICTED: Homo sapiens hypothetical protein LOC285620 (LOC285620), mRNA."  
"PREDICTED: Homo sapiens similar to Transcription initiation factor TFIID subunit 11 (Transcrip  
"PREDICTED: Homo sapiens misc\_RNA (LOC285741), miscRNA."  
"PREDICTED: Homo sapiens hypothetical protein LOC285804 (LOC285804), mRNA."  
"PREDICTED: Homo sapiens similar to 60S ribosomal protein L6 (TAX-responsive enhancer ele  
"Homo sapiens hypothetical protein LOC285908 (LOC285908), mRNA."  
"PREDICTED: Homo sapiens similar to matrilin 2 precursor, transcript variant 1 (LOC285929), n  
"PREDICTED: Homo sapiens hypothetical protein LOC285941, transcript variant 1 (LOC285941  
"PREDICTED: Homo sapiens hypothetical protein LOC285943 (LOC285943), miscRNA."  
"Homo sapiens triosephosphate isomerase 1 pseudogene (LOC286016), non-coding RNA."  
"PREDICTED: Homo sapiens hypothetical protein LOC286208, transcript variant 1 (LOC286208  
"PREDICTED: Homo sapiens hypothetical protein LOC286260 (LOC286260), mRNA."  
"PREDICTED: Homo sapiens hypothetical protein LOC286297, transcript variant 1 (LOC286297  
"Homo sapiens FP944 (LOC286367), non-coding RNA."  
"PREDICTED: Homo sapiens misc\_RNA (LOC286456), miscRNA."  
"PREDICTED: Homo sapiens hypothetical protein LOC286467 (LOC286467), misc RNA."  
"PREDICTED: Homo sapiens misc\_RNA (LOC286512), miscRNA."  
"PREDICTED: Homo sapiens similar to Ssu72 RNA polymerase II CTD phosphatase homolog (I  
"PREDICTED: Homo sapiens hypothetical protein LOC338588 (LOC338588), mRNA."  
"PREDICTED: Homo sapiens hypothetical protein LOC338758 (LOC338758), mRNA."  
"PREDICTED: Homo sapiens hypothetical locus LOC338799, transcript variant 3 (LOC338799),  
"PREDICTED: Homo sapiens misc\_RNA (LOC338870), miscRNA."  
"PREDICTED: Homo sapiens hypothetical protein LOC339192 (LOC339192), mRNA."  
"PREDICTED: Homo sapiens similar to hCG2045603 (LOC339209), mRNA."  
"Homo sapiens hypothetical LOC339290 (LOC339290), non-coding RNA."  
"PREDICTED: Homo sapiens misc\_RNA (LOC339352), miscRNA."  
"PREDICTED: Homo sapiens misc\_RNA (LOC339483), miscRNA."  
"Homo sapiens hypothetical protein LOC339524 (LOC339524), mRNA."  
"PREDICTED: Homo sapiens hypothetical protein LOC339778 (LOC339778), mRNA."  
"Homo sapiens hypothetical LOC339788 (LOC339788), non-coding RNA."  
"PREDICTED: Homo sapiens similar to eukaryotic translation initiation factor 3, subunit 5 epsilon  
"PREDICTED: Homo sapiens hypothetical gene supported by AK075484; BC014578 (LOC3398



"PREDICTED: Homo sapiens similar to beta-1,4-mannosyltransferase (LOC339879), mRNA."  
"PREDICTED: Homo sapiens misc\_RNA (LOC339970), miscRNA."  
"PREDICTED: Homo sapiens misc\_RNA (LOC340221), miscRNA."  
"PREDICTED: Homo sapiens similar to Unc4.1 homeobox (LOC340260), mRNA."  
"PREDICTED: Homo sapiens misc\_RNA (LOC340274), miscRNA."  
"PREDICTED: Homo sapiens hypothetical protein LOC340515 (LOC340515), mRNA."  
"Homo sapiens similar to poly(A)binding protein, cytoplasmic 1 (LOC340529), mRNA."  
"PREDICTED: Homo sapiens similar to testis-specific histone 2a (LOC340549), mRNA."  
"PREDICTED: Homo sapiens similar to Tryptophanyl-tRNA synthetase (Tryptophan--tRNA ligase) (LOC340550), mRNA."  
"PREDICTED: Homo sapiens misc\_RNA (LOC341230), miscRNA."  
"PREDICTED: Homo sapiens misc\_RNA (LOC341315), miscRNA."  
"PREDICTED: Homo sapiens hypothetical LOC341346 (LOC341346), mRNA."  
"PREDICTED: Homo sapiens similar to peptidylprolyl isomerase A isoform 1 (LOC341457), mRNA."  
"PREDICTED: Homo sapiens similar to 60S ribosomal protein L35 (LOC341604), mRNA."  
"PREDICTED: Homo sapiens similar to Fumarate hydratase, mitochondrial precursor (Fumarate hydratase) (LOC341605), mRNA."  
"PREDICTED: Homo sapiens misc\_RNA (LOC341784), miscRNA."  
"PREDICTED: Homo sapiens misc\_RNA (LOC341965), miscRNA."  
"PREDICTED: Homo sapiens similar to hCG18626 (LOC342293), mRNA."  
"PREDICTED: Homo sapiens similar to peptidyl-Pro cis trans isomerase (LOC342541), mRNA."  
"PREDICTED: Homo sapiens similar to zinc finger and SCAN domain containing 5 (LOC342934), mRNA."  
"PREDICTED: Homo sapiens hypothetical LOC342979 (LOC342979), mRNA."  
"PREDICTED: Homo sapiens similar to putative neuronal cell adhesion molecule (LOC343052), mRNA."  
"PREDICTED: Homo sapiens similar to zinc finger protein 135 (clone pHZ-17) (LOC344065), mRNA."  
"PREDICTED: Homo sapiens misc\_RNA (LOC344328), miscRNA."  
"PREDICTED: Homo sapiens hypothetical LOC344405 (LOC344405), mRNA."  
"PREDICTED: Homo sapiens hypothetical LOC344423 (LOC344423), mRNA."  
"PREDICTED: Homo sapiens misc\_RNA (LOC344593), miscRNA."  
"PREDICTED: Homo sapiens hypothetical LOC344595 (LOC344595), mRNA."  
"PREDICTED: Homo sapiens misc\_RNA (LOC345041), miscRNA."  
"PREDICTED: Homo sapiens similar to fibrillarin (LOC345630), mRNA."  
"PREDICTED: Homo sapiens similar to hCG2002932 (LOC345645), mRNA."  
"PREDICTED: Homo sapiens similar to solute carrier family 16 (monocarboxylic acid transporter) (LOC345646), mRNA."  
"PREDICTED: Homo sapiens misc\_RNA (LOC347281), miscRNA."  
"PREDICTED: Homo sapiens similar to ribosomal protein L36 (LOC347292), mRNA."  
"PREDICTED: Homo sapiens similar to WW domain binding protein 11 (LOC347364), mRNA."  
"PREDICTED: Homo sapiens similar to ribosomal protein L18a (LOC347544), mRNA."  
"PREDICTED: Homo sapiens hypothetical protein LOC348021 (LOC348021), mRNA."  
"Homo sapiens hypothetical LOC348840 (LOC348840), non-coding RNA."  
"Homo sapiens similar to hypothetical testis protein from macaque (LOC352909), transcript variant 1 (LOC352910), mRNA."  
"PREDICTED: Homo sapiens misc\_RNA (LOC360030), miscRNA."  
"Homo sapiens similar to RIKEN cDNA 1810059G22 (LOC374395), mRNA."  
"Homo sapiens CLR pseudogene (LOC374443), non-coding RNA. XR\_001315"  
"Homo sapiens hypothetical protein LOC374768 (LOC374768), mRNA."  
"PREDICTED: Homo sapiens LOC374973 (LOC374973), mRNA."

"PREDICTED: Homo sapiens hypothetical gene supported by BC013438 (LOC375295), mRNA.  
"Homo sapiens RAD26L hypothetical protein (LOC375748), mRNA."  
"PREDICTED: Homo sapiens CXYorf1-related protein, transcript variant 1 (LOC376475), mRNA  
"PREDICTED: Homo sapiens hypothetical LOC387683 (LOC387683), mRNA."  
"PREDICTED: Homo sapiens hypothetical LOC387686 (LOC387686), mRNA."  
"PREDICTED: Homo sapiens hypothetical LOC387701 (LOC387701), mRNA."  
"PREDICTED: Homo sapiens misc\_RNA (LOC387703), miscRNA."  
"Homo sapiens hypothetical gene supported by AK127642 (LOC387720), mRNA."  
"PREDICTED: Homo sapiens hypothetical LOC387723 (LOC387723), mRNA."  
"PREDICTED: Homo sapiens similar to 60S ribosomal protein L21, transcript variant 1 (LOC387723), mRNA."  
"PREDICTED: Homo sapiens hypothetical LOC387762 (LOC387762), mRNA."  
"PREDICTED: Homo sapiens hypothetical LOC387763 (LOC387763), mRNA."  
"PREDICTED: Homo sapiens misc\_RNA (LOC387770), miscRNA."  
"Homo sapiens hypothetical LOC387790 (LOC387790), mRNA."  
"PREDICTED: Homo sapiens misc\_RNA (LOC387791), miscRNA."  
"PREDICTED: Homo sapiens similar to DnaJ (Hsp40) homolog, subfamily B, member 6 isoform  
"PREDICTED: Homo sapiens misc\_RNA (LOC387825), miscRNA."  
"Homo sapiens similar to expressed sequence AI836003 (LOC387856), mRNA."  
"PREDICTED: Homo sapiens similar to 40S ribosomal protein SA (p40) (34/67 kDa laminin receptor  
"PREDICTED: Homo sapiens similar to mCG112958 (LOC387876), mRNA."  
"Homo sapiens hypothetical protein (LOC387882), mRNA."  
"PREDICTED: Homo sapiens similar to hCG1652305 (LOC387885), mRNA."  
"PREDICTED: Homo sapiens misc\_RNA (LOC387924), miscRNA."  
"PREDICTED: Homo sapiens similar to Fatty acid-binding protein, epidermal (E-FABP) (Psoriasis  
"PREDICTED: Homo sapiens similar to hCG2045417 (LOC387939), mRNA."  
"PREDICTED: Homo sapiens hypothetical LOC387941 (LOC387941), mRNA."  
"PREDICTED: Homo sapiens hypothetical LOC388002 (LOC388002), mRNA."  
"PREDICTED: Homo sapiens similar to Golgi autoantigen, golgin subfamily A member 2 (Golgi autoantigen  
"PREDICTED: Homo sapiens hypothetical LOC388122 (LOC388122), mRNA."  
"PREDICTED: Homo sapiens misc\_RNA (LOC388152), miscRNA."  
"PREDICTED: Homo sapiens similar to CG15828-PA, isoform A (LOC388210), mRNA."  
"Homo sapiens coiled-coil domain containing 101 pseudogene (LOC388242), non-coding RNA."  
"PREDICTED: Homo sapiens misc\_RNA (LOC388248), miscRNA."  
"PREDICTED: Homo sapiens similar to Ig heavy chain V-III region VH26 precursor (LOC388255), mRNA."  
"PREDICTED: Homo sapiens similar to Kinase suppressor of ras-1 (Kinase suppressor of ras) (KSR1)  
"PREDICTED: Homo sapiens similar to Heterogeneous nuclear ribonucleoprotein A1 (Helix-descriptor  
"PREDICTED: Homo sapiens hypothetical LOC388276, transcript variant 1 (LOC388276), mRNA."  
"PREDICTED: Homo sapiens hypothetical LOC388279 (LOC388279), mRNA."  
"PREDICTED: Homo sapiens hypothetical LOC388312 (LOC388312), mRNA."  
"PREDICTED: Homo sapiens similar to ribosomal protein, transcript variant 4 (LOC388339), mRNA."  
"PREDICTED: Homo sapiens hypothetical LOC388381 (LOC388381), mRNA."  
"PREDICTED: Homo sapiens similar to zinc finger protein 600 (LOC388559), mRNA."  
"PREDICTED: Homo sapiens hypothetical gene supported by BC052596 (LOC388564), mRNA."  
"PREDICTED: Homo sapiens hypothetical LOC388588, transcript variant 2 (LOC388588), mRNA."

"PREDICTED: Homo sapiens similar to laminin receptor 1 (ribosomal protein SA) (LOC388654),

"PREDICTED: Homo sapiens similar to phosphodiesterase 4D interacting protein isoform 1 (LO

"Homo sapiens hypothetical gene supported by AK123662 (LOC388692), mRNA."

"PREDICTED: Homo sapiens similar to calpain 8, transcript variant 5 (LOC388743), mRNA."

"PREDICTED: Homo sapiens hypothetical LOC388755 (LOC388755), mRNA."

"PREDICTED: Homo sapiens hypothetical gene supported by AF147354 (LOC388789), mRNA.

"Homo sapiens hypothetical LOC388796 (LOC388796), non-coding RNA."

"PREDICTED: Homo sapiens hypothetical LOC388813 (LOC388813), mRNA."

"PREDICTED: Homo sapiens hypothetical gene supported by BC039496 (LOC388906), mRNA.

"Homo sapiens PX19 protein pseudogene (LOC388955), non-coding RNA."

"PREDICTED: Homo sapiens similar to short-chain dehydrogenase/reductase 1 (LOC388963),

"Homo sapiens similar to hepatitis C virus core-binding protein 6; cervical cancer oncogene 3 (L

"Homo sapiens hypothetical LOC388969 (LOC388969), mRNA."

"PREDICTED: Homo sapiens misc\_RNA (LOC389049), miscRNA."

"PREDICTED: Homo sapiens misc\_RNA (LOC389053), miscRNA."

"PREDICTED: Homo sapiens hypothetical protein LOC389072, transcript variant 3 (LOC389072

"PREDICTED: Homo sapiens similar to ribosomal protein L23a (LOC389101), mRNA."

"PREDICTED: Homo sapiens hypothetical LOC389111 (LOC389111), mRNA."

"Homo sapiens VLLR9392 (LOC389118), mRNA."

"PREDICTED: Homo sapiens similar to IQ motif containing F1 (LOC389124), mRNA."

"PREDICTED: Homo sapiens hypothetical LOC389137, transcript variant 2 (LOC389137), mRN

"PREDICTED: Homo sapiens misc\_RNA (LOC389168), miscRNA."

"PREDICTED: Homo sapiens hypothetical gene supported by BC032431 (LOC389203), mRNA.

"Homo sapiens similar to FKSG62 (LOC389286), mRNA."

"PREDICTED: Homo sapiens similar to HESB like domain containing 2, transcript variant 1 (LO

"PREDICTED: Homo sapiens misc\_RNA (LOC389322), miscRNA."

"PREDICTED: Homo sapiens hypothetical LOC389328 (LOC389328), mRNA."

"PREDICTED: Homo sapiens hypothetical LOC389333 (LOC389333), mRNA."

"PREDICTED: Homo sapiens hypothetical LOC389362 (LOC389362), misc RNA."

"PREDICTED: Homo sapiens hypothetical LOC389365 (LOC389365), mRNA."

"PREDICTED: Homo sapiens misc\_RNA (LOC389386), partial miscRNA."

"PREDICTED: Homo sapiens misc\_RNA (LOC389404), miscRNA."

"PREDICTED: Homo sapiens similar to Neurogenic locus Notch protein precursor (LOC389405)

"PREDICTED: Homo sapiens hypothetical LOC389422 (LOC389422), mRNA."

"PREDICTED: Homo sapiens hypothetical LOC389442 (LOC389442), mRNA."

"PREDICTED: Homo sapiens hypothetical protein LOC389457 (LOC389457), mRNA."

"PREDICTED: Homo sapiens misc\_RNA (LOC389465), miscRNA."

"Homo sapiens similar to Williams Beuren syndrome chromosome region 19 (LOC389517), mR

"PREDICTED: Homo sapiens similar to amyotrophic lateral sclerosis 2 (juvenile) chromosome re

"PREDICTED: Homo sapiens hypothetical LOC389607 (LOC389607), miscRNA."

"PREDICTED: Homo sapiens hypothetical LOC389633, transcript variant 1 (LOC389633), mRN

"Homo sapiens hypothetical LOC389634 (LOC389634), mRNA."

"PREDICTED: Homo sapiens hypothetical gene supported by AK124295 (LOC389641), mRNA.

"PREDICTED: Homo sapiens similar to 40S ribosomal protein SA (p40) (34/67 kDa laminin rece

"PREDICTED: Homo sapiens similar to Ribosome biogenesis protein BMS1 homolog (LOC3897  
"Homo sapiens hypothetical gene supported by AK094537 (LOC389791), mRNA."  
"PREDICTED: Homo sapiens cytokeratin associated protein (LOC389816), mRNA."  
"PREDICTED: Homo sapiens similar to Tektin-3, transcript variant 1 (LOC389830), mRNA."  
"Homo sapiens hypothetical gene supported by AK123403 (LOC389834), mRNA."  
"PREDICTED: Homo sapiens similar to Ran-specific GTPase-activating protein (Ran-binding pro  
"PREDICTED: Homo sapiens misc\_RNA (LOC389873), miscRNA."  
"PREDICTED: Homo sapiens similar to CG4768-PA (LOC389895), mRNA."  
"PREDICTED: Homo sapiens similar to ATP-dependent DNA helicase II, 70 kDa subunit (Lupus  
"PREDICTED: Homo sapiens similar to Extracellular matrix protein 2 precursor (Matrix glycoprot  
"Homo sapiens similar to proline-rich proteoglycan 2 (LOC389936), mRNA."  
"PREDICTED: Homo sapiens misc\_RNA (LOC390183), miscRNA."  
"PREDICTED: Homo sapiens hypothetical protein (LOC390259), mRNA."  
"PREDICTED: Homo sapiens similar to translocase of inner mitochondrial membrane 17 homok  
"PREDICTED: Homo sapiens misc\_RNA (LOC390345), miscRNA."  
"PREDICTED: Homo sapiens similar to small nuclear ribonucleoprotein D2 (LOC390349), mRN  
"PREDICTED: Homo sapiens similar to TBP-associated factor 15 isoform 1 (LOC390427), mRN  
"PREDICTED: Homo sapiens similar to SMT3 suppressor of mif two 3 homolog 2 (LOC390466)  
"PREDICTED: Homo sapiens similar to Ig heavy chain V-I region HG3 precursor (LOC390530),  
"PREDICTED: Homo sapiens similar to cholinergic receptor, nicotinic, beta polypeptide 4 (LOC3  
"PREDICTED: Homo sapiens similar to hect domain and RLD 2 (LOC390551), mRNA."  
"PREDICTED: Homo sapiens hypothetical LOC390557 (LOC390557), mRNA."  
"PREDICTED: Homo sapiens misc\_RNA (LOC390578), miscRNA."  
"PREDICTED: Homo sapiens similar to ATP-binding cassette, sub-family A (ABC1), member 17  
"Homo sapiens CDC37-like (LOC390688), mRNA."  
"PREDICTED: Homo sapiens similar to protein phosphatase 2A 48 kDa regulatory subunit isof  
"PREDICTED: Homo sapiens similar to Ig heavy chain V-III region VH26 precursor (LOC390712  
"PREDICTED: Homo sapiens hypothetical LOC390829 (LOC390829), mRNA."  
"PREDICTED: Homo sapiens misc\_RNA (LOC390834), miscRNA."  
"PREDICTED: Homo sapiens similar to 60S ribosomal protein L29 (P23) (LOC390856), mRNA."  
"Homo sapiens ACYL3 pseudogene (LOC390858), non-coding RNA."  
"PREDICTED: Homo sapiens similar to 60S ribosomal protein L35 (LOC390876), mRNA."  
"PREDICTED: Homo sapiens similar to adenylate kinase 5 (LOC390877), mRNA."  
"PREDICTED: Homo sapiens similar to SH3-binding kinase (LOC390975), mRNA."  
"PREDICTED: Homo sapiens similar to Butyrophilin subfamily 1 member A1 precursor (BT) (LO  
"PREDICTED: Homo sapiens misc\_RNA (LOC391044), miscRNA."  
"PREDICTED: Homo sapiens similar to Solute carrier family 2, facilitated glucose transporter me  
"PREDICTED: Homo sapiens misc\_RNA (LOC391073), miscRNA."  
"PREDICTED: Homo sapiens misc\_RNA (LOC391075), miscRNA."  
"PREDICTED: Homo sapiens similar to 60S ribosomal protein L27a (LOC391124), mRNA."  
"PREDICTED: Homo sapiens misc\_RNA (LOC391135), miscRNA."  
"PREDICTED: Homo sapiens similar to GRB2-related adapter protein (LOC391157), mRNA."  
"PREDICTED: Homo sapiens misc\_RNA (LOC391169), miscRNA."  
"PREDICTED: Homo sapiens similar to Dickkopf-like protein 1 precursor (Soggy-1 protein) (SG)

"PREDICTED: Homo sapiens similar to D-dopachrome tautomerase (Phenylpyruvate tautomera  
"PREDICTED: Homo sapiens similar to hCG1818387 (LOC391370), mRNA."  
"PREDICTED: Homo sapiens similar to Ig kappa chain V-I region Walker precursor (LOC391427)  
"PREDICTED: Homo sapiens hypothetical LOC391429 (LOC391429), mRNA."  
"PREDICTED: Homo sapiens misc\_RNA (LOC391532), miscRNA."  
"PREDICTED: Homo sapiens similar to hydrocephalus inducing (LOC391555), mRNA."  
"PREDICTED: Homo sapiens similar to abnormal embryonic PARTitioning of cytoplasm family m  
"PREDICTED: Homo sapiens misc\_RNA (LOC391578), miscRNA."  
"PREDICTED: Homo sapiens misc\_RNA (LOC391592), miscRNA."  
"PREDICTED: Homo sapiens misc\_RNA (LOC391655), miscRNA."  
"PREDICTED: Homo sapiens similar to hCG1640454 (LOC391656), mRNA."  
"PREDICTED: Homo sapiens misc\_RNA (LOC391670), miscRNA."  
"PREDICTED: Homo sapiens similar to tubulin, beta 8 (LOC391692), mRNA."  
"PREDICTED: Homo sapiens similar to Keratin, type I cytoskeletal 18 (Cytokeratin-18) (CK-18) (L  
"PREDICTED: Homo sapiens similar to TBP-associated factor 11 (LOC391746), mRNA."  
"PREDICTED: Homo sapiens similar to hCG1989915 (LOC391764), mRNA."  
"PREDICTED: Homo sapiens similar to HlStone family member (his-72) (LOC391769), mRNA."  
"PREDICTED: Homo sapiens misc\_RNA (LOC391777), miscRNA."  
"PREDICTED: Homo sapiens similar to hCG1643655 (LOC391810), mRNA."  
"PREDICTED: Homo sapiens similar to DNA polymerase delta subunit 2 (DNA polymerase delta  
"PREDICTED: Homo sapiens misc\_RNA (LOC391833), miscRNA."  
"Homo sapiens deubiquitinating enzyme 3 pseudogene (LOC392196), non-coding RNA."  
"PREDICTED: Homo sapiens similar to deubiquitinating enzyme 3 (LOC392197), mRNA."  
"PREDICTED: Homo sapiens similar to Coiled-coil-helix-coiled-coil-helix domain-containing prot  
"PREDICTED: Homo sapiens misc\_RNA (LOC392264), miscRNA."  
"PREDICTED: Homo sapiens misc\_RNA (LOC392285), miscRNA."  
"PREDICTED: Homo sapiens misc\_RNA (LOC392301), miscRNA."  
"PREDICTED: Homo sapiens similar to hCG1811022 (LOC392435), mRNA."  
"PREDICTED: Homo sapiens misc\_RNA (LOC392437), miscRNA."  
"PREDICTED: Homo sapiens similar to 60S ribosomal protein L32 (LOC392447), mRNA."  
"PREDICTED: Homo sapiens similar to hCG29146 (LOC392459), mRNA."  
"PREDICTED: Homo sapiens hypothetical LOC392583 (LOC392583), mRNA."  
"PREDICTED: Homo sapiens misc\_RNA (LOC392635), miscRNA."  
"PREDICTED: Homo sapiens similar to PMS1 protein homolog 2 (DNA mismatch repair protein  
"PREDICTED: Homo sapiens misc\_RNA (LOC392787), miscRNA."  
"PREDICTED: Homo sapiens similar to IQ motif containing with AAA domain, transcript variant 1  
"PREDICTED: Homo sapiens misc\_RNA (LOC392871), miscRNA."  
"PREDICTED: Homo sapiens similar to ribosomal protein L18 (LOC392979), mRNA."  
"PREDICTED: Homo sapiens misc\_RNA (LOC393076), miscRNA."  
"PREDICTED: Homo sapiens misc\_RNA (LOC399491), miscRNA."  
"PREDICTED: Homo sapiens FLJ46311 protein (LOC399715), mRNA."  
"PREDICTED: Homo sapiens hypothetical LOC399744 (LOC399744), mRNA."  
"PREDICTED: Homo sapiens similar to ARP3 actin-related protein 3 homolog B (LOC399746), m  
"PREDICTED: Homo sapiens misc\_RNA (LOC399748), miscRNA."

"PREDICTED: Homo sapiens misc\_RNA (LOC399804), miscRNA."  
"PREDICTED: Homo sapiens similar to chromosome 10 open reading frame 88; Em:AC073585  
"PREDICTED: Homo sapiens FLJ43861 protein (LOC399829), mRNA."  
"PREDICTED: Homo sapiens hypothetical gene supported by BC065704 (LOC399888), mRNA.  
"Homo sapiens hypothetical gene supported by AK093779 (LOC399900), mRNA."  
"PREDICTED: Homo sapiens similar to ring finger protein 18 (LOC399939), mRNA."  
"PREDICTED: Homo sapiens similar to Tubulin alpha-2 chain (Alpha-tubulin 2), transcript variar  
"PREDICTED: Homo sapiens misc\_RNA (LOC399965), miscRNA."  
"PREDICTED: Homo sapiens misc\_RNA (LOC399988), miscRNA."  
"PREDICTED: Homo sapiens misc\_RNA (LOC400013), miscRNA."  
"PREDICTED: Homo sapiens hypothetical gene supported by BC047417, transcript variant 2 (L  
"PREDICTED: Homo sapiens misc\_RNA (LOC400061), miscRNA."  
"Homo sapiens hypothetical LOC400120 (LOC400120), mRNA."  
"PREDICTED: Homo sapiens hypothetical LOC400163 (LOC400163), mRNA."  
"PREDICTED: Homo sapiens similar to single stranded DNA binding protein 3 (LOC400174), ml  
"PREDICTED: Homo sapiens hypothetical LOC400236 (LOC400236), mRNA."  
"PREDICTED: Homo sapiens hypothetical LOC400388 (LOC400388), mRNA."  
"PREDICTED: Homo sapiens misc\_RNA (LOC400403), miscRNA."  
"PREDICTED: Homo sapiens similar to ADAM metallopeptidase with thrombospondin type 1 mc  
"PREDICTED: Homo sapiens misc\_RNA (LOC400446), miscRNA."  
"PREDICTED: Homo sapiens hypothetical LOC400455 (LOC400455), mRNA."  
"PREDICTED: Homo sapiens hypothetical gene supported by BC040875 (LOC400456), mRNA.  
"Homo sapiens similar to FLJ43276 protein (LOC400464), mRNA."  
"Homo sapiens similar to TSG118.1 (LOC400506), mRNA."  
"PREDICTED: Homo sapiens FLJ44904 protein (LOC400553), mRNA."  
"PREDICTED: Homo sapiens FLJ27068 protein (LOC400558), mRNA."  
"PREDICTED: Homo sapiens GRB2-related adaptor protein-like (LOC400581), mRNA."  
"PREDICTED: Homo sapiens hypothetical LOC400590 (LOC400590), misc RNA."  
"Homo sapiens hypothetical gene supported by BC036588 (LOC400657), mRNA."  
"Homo sapiens eosinophil lysophospholipase-like (LOC400696), mRNA."  
"PREDICTED: Homo sapiens zinc finger-like, transcript variant 3 (LOC400713), misc RNA."  
"PREDICTED: Homo sapiens similar to Zinc finger protein 418 (LOC400721), mRNA."  
"PREDICTED: Homo sapiens misc\_RNA (LOC400750), miscRNA."  
Homo sapiens similar to Interferon-induced guanylate-binding protein 1 (GTP-binding protein 1)  
"PREDICTED: Homo sapiens hypothetical LOC400768 (LOC400768), mRNA."  
"PREDICTED: Homo sapiens hypothetical LOC400793, transcript variant 2 (LOC400793), mRN  
"PREDICTED: Homo sapiens misc\_RNA (LOC400836), miscRNA."  
"PREDICTED: Homo sapiens similar to PRED4 (LOC400858), mRNA."  
"PREDICTED: Homo sapiens hypothetical LOC400879, transcript variant 2 (LOC400879), mRN  
"PREDICTED: Homo sapiens hypothetical LOC400890 (LOC400890), mRNA."  
"PREDICTED: Homo sapiens similar to CG33774-PA (LOC400948), mRNA."  
"PREDICTED: Homo sapiens similar to echinoderm microtubule associated protein like 5, trans  
"PREDICTED: Homo sapiens hypothetical LOC400958 (LOC400958), mRNA."  
"PREDICTED: Homo sapiens hypothetical LOC400963 (LOC400963), mRNA."

"PREDICTED: Homo sapiens similar to Ankyrin repeat domain 36 (LOC400987), mRNA."  
"PREDICTED: Homo sapiens similar to single-stranded DNA-binding protein isoform a (LOC401001), mRNA."  
"Homo sapiens nucleolar complex associated 2 homolog (S. cerevisiae) pseudogene (LOC401002), mRNA."  
"Homo sapiens hypothetical LOC401052 (LOC401052), mRNA."  
"PREDICTED: Homo sapiens hypothetical LOC401056 (LOC401056), mRNA."  
"PREDICTED: Homo sapiens hypothetical LOC401068 (LOC401068), mRNA."  
"PREDICTED: Homo sapiens misc\_RNA (LOC401076), miscRNA."  
"PREDICTED: Homo sapiens hypothetical LOC401093 (LOC401093), mRNA."  
"PREDICTED: Homo sapiens misc\_RNA (LOC401098), miscRNA."  
"PREDICTED: Homo sapiens hypothetical LOC401101 (LOC401101), mRNA."  
"PREDICTED: Homo sapiens hypothetical gene supported by BC038466; BC062790 (LOC401102), mRNA."  
"PREDICTED: Homo sapiens misc\_RNA (LOC401127), miscRNA."  
"PREDICTED: Homo sapiens misc\_RNA (LOC401131), miscRNA."  
"Homo sapiens HCV F-transactivated protein 1 (LOC401152), mRNA."  
"PREDICTED: Homo sapiens hypothetical gene supported by AY494056 (LOC401164), mRNA."  
"PREDICTED: Homo sapiens similar to 40S ribosomal protein S25 (LOC401206), mRNA."  
"PREDICTED: Homo sapiens similar to CG31232-PA, isoform A (LOC401218), mRNA."  
"PREDICTED: Homo sapiens similar to HIV TAT specific factor 1; cofactor required for Tat activation (LOC401220), mRNA."  
"PREDICTED: Homo sapiens hypothetical LOC401237 (LOC401237), mRNA."  
"PREDICTED: Homo sapiens similar to interferon stimulated exonuclease gene 20kDa-like 2 (LOC401238), mRNA."  
"PREDICTED: Homo sapiens misc\_RNA (LOC401242), miscRNA."  
"Homo sapiens hypothetical gene supported by AK123889 (LOC401252), mRNA."  
"PREDICTED: Homo sapiens hypothetical LOC401284 (LOC401284), mRNA."  
"PREDICTED: Homo sapiens hypothetical LOC401317 (LOC401317), mRNA."  
"PREDICTED: Homo sapiens hypothetical LOC401321 (LOC401321), mRNA."  
"Homo sapiens hypothetical LOC401357 (LOC401357), mRNA."  
"PREDICTED: Homo sapiens hypothetical LOC401397 (LOC401397), mRNA."  
"PREDICTED: Homo sapiens misc\_RNA (LOC401433), miscRNA."  
"PREDICTED: Homo sapiens hypothetical LOC401442 (LOC401442), mRNA."  
"PREDICTED: Homo sapiens similar to PRO2738 (LOC401497), mRNA."  
"PREDICTED: Homo sapiens similar to CDK2-associated protein 2 (LOC401525), mRNA."  
"PREDICTED: Homo sapiens misc\_RNA (LOC401561), miscRNA."  
"PREDICTED: Homo sapiens misc\_RNA (LOC401640), miscRNA."  
"PREDICTED: Homo sapiens misc\_RNA (LOC401648), miscRNA."  
"PREDICTED: Homo sapiens similar to double homeobox, 4 (LOC401650), mRNA."  
"PREDICTED: Homo sapiens misc\_RNA (LOC401676), miscRNA."  
"PREDICTED: Homo sapiens similar to SERTA domain containing 4 (LOC401778), mRNA."  
"PREDICTED: Homo sapiens misc\_RNA (LOC401805), partial miscRNA."  
"PREDICTED: Homo sapiens similar to Ig heavy chain V-II region SESS precursor (LOC401845), mRNA."  
"PREDICTED: Homo sapiens similar to hCG1793095 (LOC401847), mRNA."  
"PREDICTED: Homo sapiens similar to insulinoma protein (rig) (LOC401895), mRNA."  
"PREDICTED: Homo sapiens misc\_RNA (LOC401980), miscRNA."  
"Homo sapiens similar to 40S ribosomal protein S17 (LOC402057), mRNA."  
"PREDICTED: Homo sapiens hypothetical LOC402066 (LOC402066), mRNA."

"PREDICTED: Homo sapiens similar to chromosome 6 open reading frame 106 isoform a (LOC402111), mRNA."  
"PREDICTED: Homo sapiens misc\_RNA (LOC402112), miscRNA."  
"PREDICTED: Homo sapiens misc\_RNA (LOC402116), miscRNA."  
"PREDICTED: Homo sapiens similar to A-kinase anchor protein 5 (A-kinase anchor protein 150 kDa) (LOC402117), mRNA."  
"PREDICTED: Homo sapiens misc\_RNA (LOC402175), miscRNA."  
"PREDICTED: Homo sapiens similar to selenophosphate synthetase 2 (LOC402198), mRNA."  
"PREDICTED: Homo sapiens similar to actin alpha 1 skeletal muscle protein (LOC402221), mRNA."  
"PREDICTED: Homo sapiens similar to eukaryotic translation elongation factor 1 alpha 2 (LOC402222), mRNA."  
"PREDICTED: Homo sapiens similar to solute carrier family 29 (nucleoside transporters), member 1 (LOC402223), mRNA."  
"PREDICTED: Homo sapiens similar to GrpE protein homolog 1, mitochondrial precursor (Mt-GrpE) (LOC402224), mRNA."  
"PREDICTED: Homo sapiens similar to UDP-Gal:betaGlcNAc beta 1,3-galactosyltransferase, placental (LOC402225), mRNA."  
"PREDICTED: Homo sapiens hypothetical LOC402483 (LOC402483), mRNA."  
"PREDICTED: Homo sapiens similar to solute carrier family 29 (nucleoside transporters), member 1 (LOC402484), mRNA."  
"PREDICTED: Homo sapiens similar to gap junction protein, epsilon 1, 29kDa (LOC402571), mRNA."  
"PREDICTED: Homo sapiens tropomyosin 3-like (LOC402643), misc RNA."  
"PREDICTED: Homo sapiens similar to opioid binding protein/cell adhesion molecule-like (LOC402644), mRNA."  
"PREDICTED: Homo sapiens similar to Serine/threonine-protein kinase MARK2 (MAP/microtubule-binding protein) (LOC402645), mRNA."  
"Homo sapiens similar to ribosomal protein L15 (LOC402694), mRNA."  
"Homo sapiens mitogen-activated protein kinase kinase 2 pseudogene (LOC407835), non-coding RNA."  
"PREDICTED: Homo sapiens hypothetical gene supported by AY007155 (LOC439949), mRNA."  
"PREDICTED: Homo sapiens misc\_RNA (LOC439950), miscRNA."  
"PREDICTED: Homo sapiens hypothetical LOC439951 protein (LOC439951), misc RNA."  
"PREDICTED: Homo sapiens misc\_RNA (LOC439953), miscRNA."  
"PREDICTED: Homo sapiens misc\_RNA (LOC439994), miscRNA."  
"PREDICTED: Homo sapiens misc\_RNA (LOC440015), miscRNA."  
"PREDICTED: Homo sapiens misc\_RNA (LOC440027), miscRNA."  
"PREDICTED: Homo sapiens misc\_RNA (LOC440031), miscRNA."  
"PREDICTED: Homo sapiens misc\_RNA (LOC440043), miscRNA."  
"PREDICTED: Homo sapiens similar to ribosomal protein S12 (LOC440055), mRNA."  
"PREDICTED: Homo sapiens misc\_RNA (LOC440061), miscRNA."  
"PREDICTED: Homo sapiens misc\_RNA (LOC440063), miscRNA."  
"PREDICTED: Homo sapiens hypothetical LOC440092 (LOC440092), mRNA."  
"Homo sapiens histone H3-like (LOC440093), mRNA."  
"PREDICTED: Homo sapiens similar to RIKEN cDNA 1110012D08 (LOC440104), mRNA."  
"Homo sapiens similar to RIKEN cDNA 2410129H14 (LOC440145), mRNA."  
"Homo sapiens hypothetical gene supported by AK096951; BC066547 (LOC440157), mRNA."  
"PREDICTED: Homo sapiens hypothetical LOC440160 (LOC440160), mRNA."  
"PREDICTED: Homo sapiens similar to breast cancer anti-estrogen resistance 1 (LOC440226), mRNA."  
"PREDICTED: Homo sapiens hypothetical LOC440277 (LOC440277), mRNA."  
"PREDICTED: Homo sapiens hypothetical LOC440291 (LOC440291), mRNA."  
"PREDICTED: Homo sapiens similar to hCG1731366 (LOC440292), mRNA."  
"Homo sapiens hypothetical gene supported by AK127131 (LOC440313), mRNA."  
"PREDICTED: Homo sapiens hypothetical LOC440334 (LOC440334), mRNA."  
"PREDICTED: Homo sapiens hypothetical gene supported by BC022385; BC035868; BC048320 (LOC440334), mRNA."



"PREDICTED: Homo sapiens similar to nuclear pore complex interacting protein, transcript vari  
"Homo sapiens similar to nuclear pore complex interacting protein (LOC440350), mRNA."  
"Homo sapiens nuclear pore complex interacting protein pseudogene (LOC440353), non-coding  
"PREDICTED: Homo sapiens hypothetical gene supported by AK131031; BC070380, transcript  
"PREDICTED: Homo sapiens similar to muscle Y-box protein YB2 (LOC440359), mRNA."  
"PREDICTED: Homo sapiens misc\_RNA (LOC440366), miscRNA."  
"PREDICTED: Homo sapiens hypothetical LOC440386 (LOC440386), miscRNA."  
"Homo sapiens similar to Heterogeneous nuclear ribonucleoprotein A1 (Helix-destabilizing prote  
"PREDICTED: Homo sapiens hypothetical LOC440402 (LOC440402), mRNA."  
"PREDICTED: Homo sapiens similar to zinc finger protein 286 (LOC440407), mRNA."  
"PREDICTED: Homo sapiens hypothetical protein FLJ11822 (LOC440434), mRNA."  
"PREDICTED: Homo sapiens similar to solute carrier family 16, member 6 (LOC440459), miscR  
"PREDICTED: Homo sapiens misc\_RNA (LOC440461), miscRNA."  
"PREDICTED: Homo sapiens hypothetical gene supported by AK001829 (LOC440498), mRNA.  
"Homo sapiens similar to RIKEN cDNA 2310076L09 (LOC440503), mRNA."  
"PREDICTED: Homo sapiens similar to liver and lymph node sinusoidal endothelial cell C-type I  
"PREDICTED: Homo sapiens similar to Golgin subfamily A member 8A/B (Golgi autoantigen gol  
"PREDICTED: Homo sapiens similar to myosin XV (LOC440551), mRNA."  
"Homo sapiens heterogeneous nuclear ribonucleoprotein C-like (LOC440563), mRNA."  
"PREDICTED: Homo sapiens similar to ribosomal protein S2, transcript variant 3 (LOC440589),  
"PREDICTED: Homo sapiens hypothetical LOC440687 (LOC440687), mRNA."  
"PREDICTED: Homo sapiens similar to titin isoform N2-A (LOC440706), mRNA."  
"PREDICTED: Homo sapiens hypothetical LOC440731, transcript variant 2 (LOC440731), mRN  
"PREDICTED: Homo sapiens similar to 40S ribosomal protein S15 (RIG protein) (LOC440733),  
"PREDICTED: Homo sapiens hypothetical LOC440748 (LOC440748), mRNA."  
"PREDICTED: Homo sapiens hypothetical LOC440776 (LOC440776), mRNA."  
"PREDICTED: Homo sapiens similar to active BCR-related gene isoform 1 (LOC440820), mRN/  
"PREDICTED: Homo sapiens transmembrane protein 46-like (LOC440829), mRNA."  
"Homo sapiens similar to MGC52679 protein (LOC440836), mRNA."  
"PREDICTED: Homo sapiens hypothetical LOC440848 (LOC440848), mRNA."  
"PREDICTED: Homo sapiens hypothetical gene supported by BC040724 (LOC440864), mRNA.  
"PREDICTED: Homo sapiens similar to Ig kappa chain V-III region VH precursor (LOC440871),  
"PREDICTED: Homo sapiens LIM and senescent cell antigen-like domains 3-like, transcript vari  
"PREDICTED: Homo sapiens hypothetical LOC440900 (LOC440900), mRNA."  
"PREDICTED: Homo sapiens similar to 14-3-3 protein epsilon (14-3-3E) (Mitochondrial import st  
"Homo sapiens H3 histone, family 3A pseudogene (LOC440926), non-coding RNA."  
"PREDICTED: Homo sapiens similar to 60S acidic ribosomal protein P1, transcript variant 4 (LO  
"PREDICTED: Homo sapiens hypothetical LOC440928 (LOC440928), mRNA."  
"PREDICTED: Homo sapiens misc\_RNA (LOC440934), miscRNA."  
"Homo sapiens similar to CG32736-PA (LOC440957), mRNA."  
"PREDICTED: Homo sapiens misc\_RNA (LOC440991), miscRNA."  
"PREDICTED: Homo sapiens similar to 40S ribosomal protein S20 (LOC440992), mRNA."  
"Homo sapiens hypothetical gene supported by AK128346 (LOC440993), mRNA."  
"PREDICTED: Homo sapiens similar to zinc finger protein 75 (LOC441007), mRNA."

"PREDICTED: Homo sapiens hypothetical LOC441009 (LOC441009), mRNA."  
"PREDICTED: Homo sapiens hypothetical LOC441019 (LOC441019), mRNA."  
"PREDICTED: Homo sapiens similar to 60S ribosomal protein L7a (LOC441034), mRNA."  
"Homo sapiens glucuronidase, beta pseudogene (LOC441046), non-coding RNA."  
"PREDICTED: Homo sapiens similar to inactive progesterone receptor, 23 kD (LOC441050), m  
"PREDICTED: Homo sapiens hypothetical protein LOC441054 (LOC441054), mRNA."  
"PREDICTED: Homo sapiens similar to double homeobox, 4 (LOC441056), mRNA."  
"PREDICTED: Homo sapiens similar to membrane-associated ring finger (C3HC4) 4 (LOC4410  
"PREDICTED: Homo sapiens misc\_RNA (LOC441073), miscRNA."  
"Homo sapiens hypothetical gene supported by AK125735 (LOC441087), mRNA."  
"Homo sapiens CRSP8 pseudogene (LOC441089), non-coding RNA."  
"PREDICTED: Homo sapiens hypothetical LOC441097 (LOC441097), mRNA."  
"PREDICTED: Homo sapiens hypothetical LOC441119 (LOC441119), mRNA."  
"PREDICTED: Homo sapiens hypothetical LOC441124 (LOC441124), mRNA."  
"PREDICTED: Homo sapiens misc\_RNA (LOC441131), miscRNA."  
"PREDICTED: Homo sapiens similar to RIKEN cDNA 2310039H08 (LOC441150), mRNA."  
"PREDICTED: Homo sapiens hypothetical gene supported by AK055887; AK125190 (LOC4411  
"PREDICTED: Homo sapiens similar to hypothetical protein FLJ10307 (LOC441191), misc RNA  
"Homo sapiens similar to zinc finger protein 469 (LOC441193), mRNA."  
"PREDICTED: Homo sapiens similar to zinc finger protein 655 isoform a (LOC441196), mRNA."  
"PREDICTED: Homo sapiens chaperonin containing TCP1, subunit 6A (zeta 1)-like (LOC44124  
"PREDICTED: Homo sapiens misc\_RNA (LOC441242), miscRNA."  
"PREDICTED: Homo sapiens nuclear envelope pore membrane LOC441253, transcript variant :  
"PREDICTED: Homo sapiens similar to aldo-keto reductase family 1, member B10, transcript va  
"PREDICTED: Homo sapiens similar to family with sequence similarity 9, member C (LOC44134  
"PREDICTED: Homo sapiens hypothetical LOC441378 (LOC441378), mRNA."  
"PREDICTED: Homo sapiens hypothetical LOC441408, transcript variant 1 (LOC441408), mRN  
"PREDICTED: Homo sapiens misc\_RNA (LOC441420), miscRNA."  
"PREDICTED: Homo sapiens similar to RIKEN cDNA 4930532L20 (LOC441436), mRNA."  
"PREDICTED: Homo sapiens misc\_RNA (LOC441453), miscRNA."  
"PREDICTED: Homo sapiens hypothetical LOC441454 (LOC441454), mRNA."  
"PREDICTED: Homo sapiens misc\_RNA (LOC441455), miscRNA."  
"Homo sapiens similar to bA255A11.3 (novel protein similar to KIAA1074) (LOC441459), mRNA  
"PREDICTED: Homo sapiens hypothetical gene supported by BC030123 (LOC441461), mRNA.  
"PREDICTED: Homo sapiens misc\_RNA (LOC441481), miscRNA."  
"PREDICTED: Homo sapiens misc\_RNA (LOC441484), miscRNA."  
"PREDICTED: Homo sapiens misc\_RNA (LOC441487), miscRNA."  
"PREDICTED: Homo sapiens misc\_RNA (LOC441505), miscRNA."  
"PREDICTED: Homo sapiens misc\_RNA (LOC441506), miscRNA."  
"PREDICTED: Homo sapiens similar to mitofusin 1 (LOC441511), mRNA."  
"PREDICTED: Homo sapiens hypothetical protein LOC441528 (LOC441528), mRNA."  
"PREDICTED: Homo sapiens misc\_RNA (LOC441533), miscRNA."  
"PREDICTED: Homo sapiens similar to dual specificity phosphatase 8 (LOC441554), mRNA."  
"PREDICTED: Homo sapiens similar to Protein C11orf2 (Another new gene 2 protein) (LOC441:

"PREDICTED: Homo sapiens similar to ribosomal protein L13a, transcript variant 3 (LOC441632), mRNA."  
"PREDICTED: Homo sapiens similar to hCG27427 (LOC441642), mRNA."  
"PREDICTED: Homo sapiens similar to CXXC finger 6 (LOC441662), mRNA."  
"Homo sapiens zinc finger protein 91 pseudogene (LOC441666), non-coding RNA."  
"PREDICTED: Homo sapiens misc\_RNA (LOC441714), miscRNA."  
"PREDICTED: Homo sapiens golgin-like (LOC441728), miscRNA."  
"PREDICTED: Homo sapiens similar to hypothetical protein DKFZp434I1020 (LOC441734), par  
"PREDICTED: Homo sapiens similar to CG7467-PA, isoform A (LOC441762), mRNA."  
"PREDICTED: Homo sapiens hypothetical LOC441763 (LOC441763), mRNA."  
"PREDICTED: Homo sapiens similar to Group X secretory phospholipase A2 precursor (Phosph  
"PREDICTED: Homo sapiens similar to 60S ribosomal protein L18 (LOC441775), mRNA."  
"PREDICTED: Homo sapiens similar to spectrin domain with coiled-coils 1 (LOC441782), mRNA/  
"PREDICTED: Homo sapiens similar to high-mobility group box 3 (LOC441795), mRNA."  
"PREDICTED: Homo sapiens similar to hCG1644617 (LOC441806), mRNA."  
"PREDICTED: Homo sapiens similar to TBC1 domain family, member 3 (LOC441811), mRNA."  
"PREDICTED: Homo sapiens similar to osteoclast-associated receptor isoform 5 (LOC441864),  
"PREDICTED: Homo sapiens similar to Tyrosine-protein phosphatase non-receptor type 11 (Pro  
"PREDICTED: Homo sapiens similar to oogenesis 2 (LOC441870), mRNA."  
"PREDICTED: Homo sapiens similar to PRAME family member 9 (LOC441873), mRNA."  
"PREDICTED: Homo sapiens similar to 40S ribosomal protein S16, transcript variant 2 (LOC441  
"PREDICTED: Homo sapiens misc\_RNA (LOC441896), partial miscRNA."  
"PREDICTED: Homo sapiens similar to cDNA sequence BC021523 (LOC441956), mRNA."  
"PREDICTED: Homo sapiens misc\_RNA (LOC441957), miscRNA."  
"PREDICTED: Homo sapiens similar to CXXC finger 6 (LOC442020), mRNA."  
"PREDICTED: Homo sapiens misc\_RNA (LOC442041), partial miscRNA."  
"PREDICTED: Homo sapiens similar to Ciliary dynein heavy chain 11 (Axonemal beta dynein he  
"PREDICTED: Homo sapiens weakly similar to serine/threonine protein kinase Kp78 (LOC44207  
"PREDICTED: Homo sapiens misc\_RNA (LOC442153), miscRNA."  
"PREDICTED: Homo sapiens misc\_RNA (LOC442181), miscRNA."  
"PREDICTED: Homo sapiens hypothetical LOC442283 (LOC442283), mRNA."  
"PREDICTED: Homo sapiens similar to capicua homolog (LOC442299), mRNA."  
"PREDICTED: Homo sapiens similar to zinc finger protein 577 (LOC442501), mRNA."  
"PREDICTED: Homo sapiens similar to ATP-binding cassette sub-family E member 1 (RNase L  
"PREDICTED: Homo sapiens hypothetical LOC442519 (LOC442519), mRNA."  
"Homo sapiens similar to T-cell receptor gamma chain V region PT-gamma-1/2 precursor (LOC4  
"PREDICTED: Homo sapiens similar to Williams Beuren syndrome chromosome region 19 (LOC  
"Homo sapiens STAG3-like (LOC442582), mRNA."  
"PREDICTED: Homo sapiens similar to hCG1815881 (LOC442609), mRNA."  
"PREDICTED: Homo sapiens similar to ADP-ribosylation factor 1 (LOC442711), mRNA."  
"PREDICTED: Homo sapiens similar to ribosomal protein S17 (LOC442726), mRNA."  
"PREDICTED: Homo sapiens misc\_RNA (LOC442727), miscRNA."  
"Homo sapiens c114 SLIT-like testicular protein (LOC474170), mRNA."  
"Homo sapiens secretory protein LOC497190 (LOC497190), mRNA."  
"PREDICTED: Homo sapiens erythrocyte transmembrane protein (LOC51145), mRNA."

"Homo sapiens hypothetical LOC51149 (LOC51149), transcript variant 3, mRNA."  
"PREDICTED: Homo sapiens hypothetical LOC541471 (LOC541471), misc RNA."  
"Homo sapiens FK506 binding protein 6, 36kDa pseudogene (LOC541473), non-coding RNA."  
"PREDICTED: Homo sapiens hypothetical LOC550112, transcript variant 8 (LOC550112), misc  
"Homo sapiens hypothetical LOC550631 (LOC550631), mRNA."  
"Homo sapiens hypothetical LOC550643 (LOC550643), non-coding RNA."  
"Homo sapiens hypothetical protein LOC552889 (LOC552889), mRNA."  
"Homo sapiens PRR5-ARHGAP8 fusion (LOC553158), mRNA."  
"PREDICTED: Homo sapiens hypothetical LOC554175 (LOC554175), misc RNA."  
"PREDICTED: Homo sapiens hypothetical LOC554203 (LOC554203), misc RNA."  
"PREDICTED: Homo sapiens hypothetical LOC554206 (LOC554206), misc RNA."  
"PREDICTED: Homo sapiens hypothetical LOC554208, transcript variant 2 (LOC554208), misc  
"Homo sapiens hepatocellular carcinoma-associated gene TD26 (LOC55908), mRNA."  
"PREDICTED: Homo sapiens uncharacterized gastric protein ZA52P (LOC57399), mRNA."  
"Homo sapiens coronin, actin binding protein, 1A pseudogene (LOC606724), non-coding RNA."  
"Homo sapiens nuclear pore complex interacting protein pseudogene (LOC613037), non-coding  
"Homo sapiens hypothetical LOC613266 (LOC613266), mRNA."  
"PREDICTED: Homo sapiens misc\_RNA (LOC641298), miscRNA."  
"PREDICTED: Homo sapiens hypothetical protein LOC641365, transcript variant 5 (LOC641365  
"PREDICTED: Homo sapiens similar to ribosomal protein S6 kinase, polypeptide 1 (LOC641697  
"PREDICTED: Homo sapiens hypothetical protein LOC641700 (LOC641700), mRNA."  
"PREDICTED: Homo sapiens similar to septin 7 (LOC641716), mRNA."  
"PREDICTED: Homo sapiens similar to stromal antigen 3 (LOC641724), mRNA."  
"PREDICTED: Homo sapiens hypothetical protein LOC641741 (LOC641741), mRNA."  
"PREDICTED: Homo sapiens misc\_RNA (LOC641746), miscRNA."  
"PREDICTED: Homo sapiens similar to sulfatase modifying factor 2 (LOC641751), mRNA."  
"PREDICTED: Homo sapiens hypothetical protein LOC641753 (LOC641753), mRNA."  
"PREDICTED: Homo sapiens hypothetical protein LOC641772, transcript variant 2 (LOC641772  
"PREDICTED: Homo sapiens misc\_RNA (LOC641784), miscRNA."  
"PREDICTED: Homo sapiens hypothetical protein LOC641785 (LOC641785), mRNA."  
"PREDICTED: Homo sapiens similar to CDC26 subunit of anaphase promoting complex (LOC6  
"PREDICTED: Homo sapiens hypothetical protein LOC641801 (LOC641801), mRNA."  
"PREDICTED: Homo sapiens similar to Serine/threonine-protein kinase tousled-like 2 (Tousled-l  
"PREDICTED: Homo sapiens similar to Ribosomal protein L6, transcript variant 7 (LOC641814)  
"PREDICTED: Homo sapiens hypothetical protein LOC641815 (LOC641815), mRNA."  
"PREDICTED: Homo sapiens hypothetical protein LOC641820 (LOC641820), mRNA."  
"PREDICTED: Homo sapiens hypothetical protein LOC641825 (LOC641825), mRNA."  
"PREDICTED: Homo sapiens hypothetical protein LOC641841 (LOC641841), mRNA."  
"PREDICTED: Homo sapiens misc\_RNA (LOC641844), miscRNA."  
"PREDICTED: Homo sapiens similar to ribosomal protein S3a (LOC641848), mRNA."  
"PREDICTED: Homo sapiens similar to 40S ribosomal protein S3a (V-fos transformation effecto  
"PREDICTED: Homo sapiens hypothetical protein LOC641852 (LOC641852), mRNA."  
"PREDICTED: Homo sapiens hypothetical protein LOC641860 (LOC641860), mRNA."  
"Homo sapiens similar to Unc4.1 homeobox (LOC641901), mRNA."

"PREDICTED: Homo sapiens similar to actin-related protein 3-beta (LOC641908), mRNA."  
"PREDICTED: Homo sapiens misc\_RNA (LOC641922), miscRNA."  
"PREDICTED: Homo sapiens hypothetical protein LOC641939 (LOC641939), mRNA."  
"PREDICTED: Homo sapiens hypothetical protein LOC641941 (LOC641941), mRNA."  
"PREDICTED: Homo sapiens hypothetical protein LOC641944 (LOC641944), mRNA."  
"PREDICTED: Homo sapiens hypothetical protein LOC641953 (LOC641953), mRNA."  
"PREDICTED: Homo sapiens similar to Ribose-phosphate pyrophosphokinase II (Phosphoribos  
"PREDICTED: Homo sapiens similar to Periphilin 1 (Gastric cancer antigen Ga50) (LOC641964  
"PREDICTED: Homo sapiens similar to single-stranded DNA-binding protein isoform a (LOC641  
"PREDICTED: Homo sapiens hypothetical protein LOC641975 (LOC641975), mRNA."  
"PREDICTED: Homo sapiens similar to general transcription factor II I (LOC641978), mRNA."  
"PREDICTED: Homo sapiens similar to capicua homolog (LOC641987), mRNA."  
"PREDICTED: Homo sapiens hypothetical protein LOC641989 (LOC641989), mRNA."  
"PREDICTED: Homo sapiens misc\_RNA (LOC641990), miscRNA."  
"PREDICTED: Homo sapiens similar to cell division cycle 42 (LOC641992), mRNA."  
"PREDICTED: Homo sapiens hypothetical protein LOC641996 (LOC641996), mRNA."  
"PREDICTED: Homo sapiens similar to septin 7 (LOC642003), mRNA."  
"PREDICTED: Homo sapiens hypothetical protein LOC642017 (LOC642017), mRNA."  
"PREDICTED: Homo sapiens hypothetical protein LOC642031 (LOC642031), mRNA."  
"PREDICTED: Homo sapiens hypothetical protein LOC642035 (LOC642035), mRNA."  
"PREDICTED: Homo sapiens similar to HLA class I histocompatibility antigen, A-11 alpha chain  
"PREDICTED: Homo sapiens similar to HLA class II histocompatibility antigen, DRB1-4 beta cha  
"PREDICTED: Homo sapiens similar to MHC class II antigen (LOC642073), mRNA."  
"PREDICTED: Homo sapiens similar to hCG1789038 (LOC642076), mRNA."  
"PREDICTED: Homo sapiens hypothetical protein LOC642077 (LOC642077), mRNA."  
"PREDICTED: Homo sapiens hypothetical protein LOC642082 (LOC642082), mRNA."  
"PREDICTED: Homo sapiens hypothetical protein LOC642083 (LOC642083), mRNA."  
"PREDICTED: Homo sapiens similar to Small inducible cytokine A4 precursor (CCL4) (Macroph  
"PREDICTED: Homo sapiens similar to Maltase-glucoamylase, intestinal (LOC642103), mRNA."  
"PREDICTED: Homo sapiens similar to E3 ubiquitin protein ligase, HECT domain containing, 1 (  
"PREDICTED: Homo sapiens similar to Syntaxin-5 (LOC642105), mRNA."  
"PREDICTED: Homo sapiens similar to FRG1 protein (FSHD region gene 1 protein) (LOC64210  
"PREDICTED: Homo sapiens similar to Ig kappa chain V-III region HAH precursor (LOC642113)  
"PREDICTED: Homo sapiens similar to Maltase-glucoamylase, intestinal (LOC642120), mRNA."  
"PREDICTED: Homo sapiens similar to nuclear RNA export factor 2 (LOC642121), mRNA."  
"PREDICTED: Homo sapiens similar to TBP-associated factor 11 (LOC642127), mRNA."  
"PREDICTED: Homo sapiens similar to hCG1812074 (LOC642131), mRNA."  
"PREDICTED: Homo sapiens similar to Polypeptide N-acetylgalactosaminyltransferase 9 (Protei  
"PREDICTED: Homo sapiens similar to T-cell receptor beta chain V region 86T1 precursor (LOC  
"PREDICTED: Homo sapiens hypothetical protein LOC642155 (LOC642155), mRNA."  
"PREDICTED: Homo sapiens similar to T-cell receptor beta chain V region CTL-L17 precursor (l  
"PREDICTED: Homo sapiens similar to T-cell receptor beta chain V region 86T1 precursor (LOC  
"PREDICTED: Homo sapiens hypothetical protein LOC642169 (LOC642169), mRNA."  
"PREDICTED: Homo sapiens hypothetical protein LOC642176 (LOC642176), mRNA."

"PREDICTED: Homo sapiens similar to scavenger receptor protein family member (LOC642181  
"PREDICTED: Homo sapiens similar to T-cell receptor beta chain V region CTL-L17 precursor (L  
"PREDICTED: Homo sapiens hypothetical protein LOC642194 (LOC642194), mRNA."  
"PREDICTED: Homo sapiens similar to Protein FAM82B (LOC642197), mRNA."  
"PREDICTED: Homo sapiens hypothetical protein LOC642198 (LOC642198), mRNA."  
"PREDICTED: Homo sapiens hCG2042718 (LOC642204), mRNA."  
"PREDICTED: Homo sapiens similar to SET domain and mariner transposase fusion gene (LOC  
"PREDICTED: Homo sapiens hypothetical protein LOC642216 (LOC642216), mRNA."  
"PREDICTED: Homo sapiens hypothetical LOC642249 (LOC642249), mRNA."  
"PREDICTED: Homo sapiens similar to 60S ribosomal protein L17 (L23), transcript variant 1 (LC  
"PREDICTED: Homo sapiens similar to Homogentisate 1,2-dioxygenase (Homogentisicase) (Ho  
"PREDICTED: Homo sapiens similar to Diacylglycerol O-acyltransferase 1 (Diglyceride acyltrans  
"PREDICTED: Homo sapiens similar to similar to RPL23AP7 protein (LOC642257), mRNA."  
"PREDICTED: Homo sapiens hypothetical LOC642263 (LOC642263), mRNA."  
"PREDICTED: Homo sapiens similar to hypothetical protein LOC284701, transcript variant 2 (LC  
"PREDICTED: Homo sapiens similar to Heat shock factor protein 1 (HSF 1) (Heat shock transcr  
"PREDICTED: Homo sapiens hypothetical LOC642277 (LOC642277), mRNA."  
"PREDICTED: Homo sapiens similar to Tektin-3, transcript variant 1 (LOC642282), mRNA."  
"PREDICTED: Homo sapiens similar to Tricarboxylate transport protein, mitochondrial precursor  
"PREDICTED: Homo sapiens hypothetical protein LOC642299 (LOC642299), mRNA."  
"PREDICTED: Homo sapiens misc\_RNA (LOC642305), miscRNA."  
"PREDICTED: Homo sapiens similar to chemokine (C-C motif) receptor-like 2, transcript variant  
"PREDICTED: Homo sapiens similar to M-phase phosphoprotein, mpp8 (LOC642333), mRNA."  
"PREDICTED: Homo sapiens hypothetical LOC642340 (LOC642340), mRNA."  
"PREDICTED: Homo sapiens hypothetical protein LOC642348 (LOC642348), mRNA."  
"PREDICTED: Homo sapiens misc\_RNA (LOC642357), miscRNA."  
"PREDICTED: Homo sapiens hypothetical LOC642361 (LOC642361), mRNA."  
"PREDICTED: Homo sapiens similar to tripartite motif protein 39 (LOC642362), mRNA."  
"PREDICTED: Homo sapiens hypothetical protein LOC642370 (LOC642370), mRNA."  
"PREDICTED: Homo sapiens similar to Contactin-associated protein-like 3 precursor (Cell recog  
"PREDICTED: Homo sapiens similar to CG9924-PC, isoform C (LOC642381), mRNA."  
"PREDICTED: Homo sapiens similar to mitochondrial ribosomal protein L20, transcript variant 2  
"PREDICTED: Homo sapiens hypothetical LOC642398, transcript variant 1 (LOC642398), mRN  
"PREDICTED: Homo sapiens similar to CG5435-PA (LOC642399), mRNA."  
"PREDICTED: Homo sapiens similar to matrix-remodelling associated 8 (LOC642412), mRNA."  
"PREDICTED: Homo sapiens hypothetical protein LOC642418 (LOC642418), mRNA."  
"PREDICTED: Homo sapiens hypothetical protein LOC642419 (LOC642419), mRNA."  
"PREDICTED: Homo sapiens hypothetical protein LOC642420 (LOC642420), mRNA."  
"PREDICTED: Homo sapiens similar to cis-Golgi matrix protein GM130 (LOC642423), mRNA."  
"PREDICTED: Homo sapiens similar to Alcohol dehydrogenase class III chi chain (Glutathione-c  
"PREDICTED: Homo sapiens similar to hCG1795201 (LOC642446), mRNA."  
"PREDICTED: Homo sapiens hypothetical protein LOC642447 (LOC642447), mRNA."  
"PREDICTED: Homo sapiens hypothetical protein LOC642449 (LOC642449), mRNA."  
"PREDICTED: Homo sapiens hypothetical LOC642450 (LOC642450), mRNA."

"PREDICTED: Homo sapiens hypothetical protein LOC642456 (LOC642456), mRNA."  
"PREDICTED: Homo sapiens misc\_RNA (LOC642458), miscRNA."  
"PREDICTED: Homo sapiens similar to ankyrin repeat domain 30A (LOC642460), mRNA."  
"PREDICTED: Homo sapiens misc\_RNA (LOC642469), miscRNA."  
"PREDICTED: Homo sapiens hypothetical LOC642486 (LOC642486), mRNA."  
"PREDICTED: Homo sapiens similar to FK506-binding protein 1A (LOC642489), mRNA."  
"PREDICTED: Homo sapiens similar to succinate dehydrogenase complex, subunit C isoform 3  
"PREDICTED: Homo sapiens hypothetical protein LOC642503 (LOC642503), mRNA."  
"PREDICTED: Homo sapiens misc\_RNA (LOC642513), miscRNA."  
"PREDICTED: Homo sapiens similar to profilin 1 (LOC642516), mRNA."  
"PREDICTED: Homo sapiens similar to nuclear DNA-binding protein (LOC642538), mRNA."  
"PREDICTED: Homo sapiens similar to glucosidase, alpha, acid (LOC642539), mRNA."  
"PREDICTED: Homo sapiens misc\_RNA (LOC642546), miscRNA."  
"PREDICTED: Homo sapiens hypothetical protein LOC642553 (LOC642553), mRNA."  
"PREDICTED: Homo sapiens similar to POU domain, class 5, transcription factor 1 (Octamer-bi  
"PREDICTED: Homo sapiens misc\_RNA (LOC642567), miscRNA."  
"PREDICTED: Homo sapiens hypothetical protein LOC642571 (LOC642571), mRNA."  
"PREDICTED: Homo sapiens hypothetical LOC642580 (LOC642580), mRNA."  
"PREDICTED: Homo sapiens misc\_RNA (LOC642585), miscRNA."  
"PREDICTED: Homo sapiens misc\_RNA (LOC642590), miscRNA."  
"PREDICTED: Homo sapiens hypothetical protein LOC642591 (LOC642591), mRNA."  
"PREDICTED: Homo sapiens similar to SET domain and mariner transposase fusion gene (LOC  
"PREDICTED: Homo sapiens hypothetical protein LOC642606 (LOC642606), mRNA."  
"PREDICTED: Homo sapiens similar to Nitric oxide synthase, inducible (NOS type II) (Inducible  
"PREDICTED: Homo sapiens hypothetical LOC642637 (LOC642637), mRNA."  
"PREDICTED: Homo sapiens hypothetical LOC642656 (LOC642656), mRNA."  
"PREDICTED: Homo sapiens misc\_RNA (LOC642661), miscRNA."  
"PREDICTED: Homo sapiens hypothetical LOC642672 (LOC642672), mRNA."  
"PREDICTED: Homo sapiens similar to ribosomal protein L36 (LOC642675), mRNA."  
"PREDICTED: Homo sapiens hypothetical LOC642677 (LOC642677), mRNA."  
"PREDICTED: Homo sapiens similar to myeloid/lymphoid or mixed-lineage leukemia 3 isoform 2  
"PREDICTED: Homo sapiens hypothetical protein LOC642680 (LOC642680), mRNA."  
"PREDICTED: Homo sapiens hypothetical LOC642681 (LOC642681), mRNA."  
"PREDICTED: Homo sapiens hypothetical LOC642702 (LOC642702), mRNA."  
"PREDICTED: Homo sapiens similar to Hornerin (LOC642707), mRNA."  
"PREDICTED: Homo sapiens hypothetical protein LOC642712 (LOC642712), mRNA."  
"PREDICTED: Homo sapiens misc\_RNA (LOC642732), miscRNA."  
"PREDICTED: Homo sapiens hypothetical protein LOC642736 (LOC642736), mRNA."  
"PREDICTED: Homo sapiens similar to ribosomal protein L9 (LOC642740), mRNA."  
"PREDICTED: Homo sapiens misc\_RNA (LOC642741), miscRNA."  
"PREDICTED: Homo sapiens hypothetical protein LOC642751 (LOC642751), mRNA."  
"PREDICTED: Homo sapiens similar to DEXI, transcript variant 1 (LOC642755), mRNA."  
"PREDICTED: Homo sapiens hypothetical LOC642757 (LOC642757), mRNA."  
"PREDICTED: Homo sapiens hypothetical LOC642759 (LOC642759), mRNA."

"PREDICTED: Homo sapiens hypothetical protein LOC642761 (LOC642761), mRNA."  
"PREDICTED: Homo sapiens similar to ATP-binding cassette sub-family D member 1 (Adrenole  
"PREDICTED: Homo sapiens hypothetical protein LOC642765 (LOC642765), mRNA."  
"PREDICTED: Homo sapiens hypothetical protein LOC642769 (LOC642769), mRNA."  
"PREDICTED: Homo sapiens similar to Golgi autoantigen, golgin subfamily A member 2 (Golgi  
"PREDICTED: Homo sapiens hypothetical protein LOC642772 (LOC642772), mRNA."  
"PREDICTED: Homo sapiens similar to Myc-associated zinc finger protein (MAZI) (Purine-bindir  
"PREDICTED: Homo sapiens hypothetical protein LOC642776 (LOC642776), mRNA."  
"PREDICTED: Homo sapiens similar to nuclear pore complex interacting protein (LOC642778),  
"PREDICTED: Homo sapiens hypothetical LOC642781 (LOC642781), mRNA."  
"PREDICTED: Homo sapiens misc\_RNA (LOC642784), miscRNA."  
"PREDICTED: Homo sapiens hypothetical LOC642799 (LOC642799), mRNA."  
"PREDICTED: Homo sapiens hypothetical protein LOC642804 (LOC642804), mRNA."  
"PREDICTED: Homo sapiens hypothetical LOC642817 (LOC642817), mRNA."  
"PREDICTED: Homo sapiens hypothetical protein LOC642820 (LOC642820), mRNA."  
"PREDICTED: Homo sapiens similar to hCG1742442 (LOC642838), mRNA."  
"PREDICTED: Homo sapiens similar to Cleavage and polyadenylation specificity factor, 30 kDa  
"PREDICTED: Homo sapiens similar to upstream binding protein 1 (LOC642851), mRNA."  
"PREDICTED: Homo sapiens hypothetical LOC642852 (LOC642852), mRNA."  
"PREDICTED: Homo sapiens hypothetical protein LOC642853 (LOC642853), mRNA."  
"PREDICTED: Homo sapiens hypothetical protein LOC642856 (LOC642856), mRNA."  
"PREDICTED: Homo sapiens similar to CG12132-PA, transcript variant 2 (LOC642859), mRNA.  
"PREDICTED: Homo sapiens hypothetical protein LOC642863 (LOC642863), mRNA."  
"PREDICTED: Homo sapiens hypothetical protein LOC642866 (LOC642866), mRNA."  
"PREDICTED: Homo sapiens similar to Protein SET (Phosphatase 2A inhibitor I2PP2A) (I-2PP2  
"PREDICTED: Homo sapiens similar to calponin 2 isoform a (LOC642888), mRNA."  
"PREDICTED: Homo sapiens misc\_RNA (LOC642897), miscRNA."  
"PREDICTED: Homo sapiens similar to TPTE and PTEN homologous inositol lipid phosphatase  
"PREDICTED: Homo sapiens misc\_RNA (LOC642909), miscRNA."  
"PREDICTED: Homo sapiens similar to zinc finger protein 135 (clone pHZ-17) (LOC642914), ml  
"PREDICTED: Homo sapiens hypothetical protein LOC642917, transcript variant 2 (LOC642918  
"PREDICTED: Homo sapiens hypothetical protein LOC642930 (LOC642930), mRNA."  
"PREDICTED: Homo sapiens hypothetical LOC642934 (LOC642934), mRNA."  
"PREDICTED: Homo sapiens hypothetical protein LOC642939 (LOC642939), mRNA."  
"PREDICTED: Homo sapiens similar to chromosome 9 open reading frame 36 (LOC642943), m  
"PREDICTED: Homo sapiens hypothetical protein LOC642945, transcript variant 2 (LOC642946  
"Homo sapiens hypothetical protein LOC642947 (LOC642947), mRNA."  
"PREDICTED: Homo sapiens hypothetical LOC642956 (LOC642956), mRNA."  
"PREDICTED: Homo sapiens hypothetical protein LOC642962 (LOC642962), mRNA."  
"PREDICTED: Homo sapiens similar to olfactory receptor 139 (LOC642966), mRNA."  
"PREDICTED: Homo sapiens similar to Phosphoglycerate mutase 1 (Phosphoglycerate mutase  
"PREDICTED: Homo sapiens misc\_RNA (LOC642975), miscRNA."  
"PREDICTED: Homo sapiens hypothetical protein LOC642978 (LOC642978), mRNA."  
"PREDICTED: Homo sapiens hypothetical protein LOC642981 (LOC642981), mRNA."



"PREDICTED: Homo sapiens hypothetical protein LOC643000 (LOC643000), mRNA."  
"PREDICTED: Homo sapiens hypothetical protein LOC643011 (LOC643011), mRNA."  
"PREDICTED: Homo sapiens hypothetical protein LOC643018 (LOC643018), mRNA."  
"PREDICTED: Homo sapiens similar to NADH dehydrogenase subunit 5 (LOC643031), mRNA."  
"PREDICTED: Homo sapiens similar to Heterogeneous nuclear ribonucleoprotein A1 (Helix-des  
"PREDICTED: Homo sapiens similar to CG33096-PB, isoform B, transcript variant 3 (LOC64303  
"PREDICTED: Homo sapiens hypothetical protein LOC643039 (LOC643039), mRNA."  
"PREDICTED: Homo sapiens hypothetical protein LOC643040 (LOC643040), mRNA."  
"PREDICTED: Homo sapiens similar to Beta-glucuronidase precursor (LOC643047), mRNA."  
"PREDICTED: Homo sapiens hypothetical protein LOC643075 (LOC643075), mRNA."  
"PREDICTED: Homo sapiens hypothetical protein LOC643089 (LOC643089), mRNA."  
"PREDICTED: Homo sapiens hypothetical protein LOC643094 (LOC643094), mRNA."  
"PREDICTED: Homo sapiens hypothetical protein LOC643100 (LOC643100), mRNA."  
"PREDICTED: Homo sapiens hypothetical protein LOC643109, transcript variant 2 (LOC643109  
"PREDICTED: Homo sapiens hypothetical protein LOC643120 (LOC643120), mRNA."  
"PREDICTED: Homo sapiens hypothetical protein LOC643131 (LOC643131), mRNA."  
"PREDICTED: Homo sapiens hypothetical protein LOC643133 (LOC643133), mRNA."  
"PREDICTED: Homo sapiens misc\_RNA (LOC643167), miscRNA."  
"PREDICTED: Homo sapiens similar to gamma-glutamyltransferase 2, transcript variant 6 (LOC  
"PREDICTED: Homo sapiens hypothetical protein LOC643176 (LOC643176), mRNA."  
"PREDICTED: Homo sapiens hypothetical protein LOC643197 (LOC643197), mRNA."  
"PREDICTED: Homo sapiens hypothetical protein LOC643200, transcript variant 2 (LOC643201  
"PREDICTED: Homo sapiens hypothetical protein LOC643203 (LOC643203), mRNA."  
"PREDICTED: Homo sapiens hypothetical protein LOC643210 (LOC643210), mRNA."  
"PREDICTED: Homo sapiens hypothetical protein LOC643216 (LOC643216), mRNA."  
"PREDICTED: Homo sapiens misc\_RNA (LOC643219), miscRNA."  
"PREDICTED: Homo sapiens similar to tubulin, beta 8, transcript variant 3 (LOC643224), mRNA  
"PREDICTED: Homo sapiens similar to glutaredoxin cysteine-rich 1 protein (LOC643226), mRN  
"PREDICTED: Homo sapiens hypothetical protein LOC643231 (LOC643231), mRNA."  
"PREDICTED: Homo sapiens similar to CG5327-PA (LOC643233), mRNA."  
"PREDICTED: Homo sapiens hypothetical protein LOC643234 (LOC643234), mRNA."  
"PREDICTED: Homo sapiens hypothetical LOC643236 (LOC643236), mRNA."  
"PREDICTED: Homo sapiens similar to microtubule-associated proteins 1A/1B light chain 3 (LO  
"PREDICTED: Homo sapiens hypothetical protein LOC643262 (LOC643262), mRNA."  
"PREDICTED: Homo sapiens hypothetical protein LOC643266 (LOC643266), mRNA."  
"PREDICTED: Homo sapiens hypothetical LOC643275, transcript variant 2 (LOC643275), mRN  
"PREDICTED: Homo sapiens hypothetical protein LOC643278 (LOC643278), mRNA."  
"PREDICTED: Homo sapiens similar to 40S ribosomal protein S29 (LOC643284), mRNA."  
"PREDICTED: Homo sapiens similar to prothymosin alpha, transcript variant 1 (LOC643287), m  
"PREDICTED: Homo sapiens hypothetical protein LOC643296 (LOC643296), mRNA."  
"PREDICTED: Homo sapiens similar to 60 kDa heat shock protein, mitochondrial precursor (Hsp  
"PREDICTED: Homo sapiens similar to heat shock 70kD protein binding protein (LOC643310), I  
"PREDICTED: Homo sapiens hypothetical protein LOC643311 (LOC643311), mRNA."  
"PREDICTED: Homo sapiens similar to Transgelin-2 (LOC643319), mRNA."

"PREDICTED: Homo sapiens similar to Kinase suppressor of ras-1 (Kinase suppressor of ras) (

"PREDICTED: Homo sapiens similar to hCG1985303 (LOC643336), mRNA."

"PREDICTED: Homo sapiens hypothetical LOC643338 (LOC643338), mRNA."

"PREDICTED: Homo sapiens hypothetical LOC643339 (LOC643339), mRNA."

"PREDICTED: Homo sapiens hypothetical protein LOC643344 (LOC643344), mRNA."

"PREDICTED: Homo sapiens similar to SMT3 suppressor of mif two 3 homolog 2 (LOC643357)

"PREDICTED: Homo sapiens misc\_RNA (LOC643358), miscRNA."

"PREDICTED: Homo sapiens hypothetical protein LOC643364, transcript variant 1 (LOC643365

"PREDICTED: Homo sapiens similar to F40G9.9 (LOC643368), mRNA."

"PREDICTED: Homo sapiens hypothetical LOC643384 (LOC643384), mRNA."

"PREDICTED: Homo sapiens misc\_RNA (LOC643387), miscRNA."

"PREDICTED: Homo sapiens hypothetical protein LOC643389 (LOC643389), mRNA."

"PREDICTED: Homo sapiens hypothetical protein LOC643396 (LOC643396), mRNA."

"PREDICTED: Homo sapiens hypothetical protein LOC643403 (LOC643403), mRNA."

"PREDICTED: Homo sapiens hypothetical protein LOC643409 (LOC643409), mRNA."

"PREDICTED: Homo sapiens similar to T-box 1 isoform C (LOC643423), mRNA."

"PREDICTED: Homo sapiens hypothetical protein LOC643429 (LOC643429), mRNA."

"PREDICTED: Homo sapiens similar to Endoplasmic precursor (94 kDa glucose-regulated prote

"PREDICTED: Homo sapiens hypothetical protein LOC643432, transcript variant 1 (LOC643432

"PREDICTED: Homo sapiens similar to 60S ribosomal protein L29 (Cell surface heparin binding

"PREDICTED: Homo sapiens hypothetical protein LOC643435 (LOC643435), mRNA."

"PREDICTED: Homo sapiens misc\_RNA (LOC643438), miscRNA."

"PREDICTED: Homo sapiens similar to ribonucleic acid binding protein S1 (LOC643446), mRNA/

"PREDICTED: Homo sapiens similar to hCG2041756 (LOC643449), mRNA."

"PREDICTED: Homo sapiens hypothetical protein LOC643451 (LOC643451), mRNA."

"PREDICTED: Homo sapiens similar to bromodomain containing 7 (LOC643452), mRNA."

"PREDICTED: Homo sapiens hypothetical LOC643461 (LOC643461), mRNA."

"PREDICTED: Homo sapiens FLJ00409 protein (LOC643475), mRNA."

"PREDICTED: Homo sapiens similar to hCG39525 (LOC643503), mRNA."

"PREDICTED: Homo sapiens similar to large subunit ribosomal protein L36a (LOC643505), mR

"PREDICTED: Homo sapiens misc\_RNA (LOC643507), miscRNA."

"PREDICTED: Homo sapiens similar to Dihydrofolate reductase, transcript variant 1 (LOC64350

"PREDICTED: Homo sapiens similar to hCG37526 (LOC643534), mRNA."

"PREDICTED: Homo sapiens hypothetical protein LOC643577 (LOC643577), mRNA."

"PREDICTED: Homo sapiens similar to Glutamate dehydrogenase 1, mitochondrial precursor (C

"PREDICTED: Homo sapiens hypothetical protein LOC643581 (LOC643581), mRNA."

"PREDICTED: Homo sapiens hypothetical protein LOC643590 (LOC643590), mRNA."

"PREDICTED: Homo sapiens similar to CG13731-PA (LOC643594), mRNA."

"PREDICTED: Homo sapiens similar to C06A5.8a (LOC643596), mRNA."

"PREDICTED: Homo sapiens hypothetical protein LOC643598 (LOC643598), mRNA."

"PREDICTED: Homo sapiens similar to zinc finger protein 300 (LOC643604), mRNA."

"PREDICTED: Homo sapiens hypothetical protein LOC643612 (LOC643612), mRNA."

"PREDICTED: Homo sapiens hypothetical LOC643624 (LOC643624), mRNA."

"PREDICTED: Homo sapiens similar to T-box 1 isoform C (LOC643626), mRNA."

"PREDICTED: Homo sapiens similar to tropomyosin 4, transcript variant 3 (LOC643634), mRNA  
"PREDICTED: Homo sapiens similar to glycine-N-acyltransferase-like 1 (LOC643637), mRNA."  
"PREDICTED: Homo sapiens hypothetical protein LOC643648 (LOC643648), mRNA."  
"PREDICTED: Homo sapiens similar to glycine-N-acyltransferase-like 1 (LOC643652), mRNA."  
"PREDICTED: Homo sapiens hypothetical protein LOC643660 (LOC643660), mRNA."  
"PREDICTED: Homo sapiens hypothetical protein LOC643662 (LOC643662), mRNA."  
"PREDICTED: Homo sapiens similar to peptidase (prosome, macropain) 26S subunit, ATPase 1  
"PREDICTED: Homo sapiens misc\_RNA (LOC643670), miscRNA."  
"PREDICTED: Homo sapiens similar to mondoA (LOC643672), mRNA."  
"PREDICTED: Homo sapiens hypothetical protein LOC643700 (LOC643700), mRNA."  
"PREDICTED: Homo sapiens similar to bromodomain containing 9 isoform 1 (LOC643702), mR  
"PREDICTED: Homo sapiens similar to Y43F4A.1a (LOC643712), mRNA."  
"PREDICTED: Homo sapiens similar to protein expressed in T-cells and eosinophils in atopic de  
"PREDICTED: Homo sapiens hypothetical LOC643733 (LOC643733), mRNA."  
"PREDICTED: Homo sapiens hypothetical protein LOC643738 (LOC643738), mRNA."  
"PREDICTED: Homo sapiens hypothetical protein LOC643747 (LOC643747), mRNA."  
"PREDICTED: Homo sapiens hypothetical LOC643750 (LOC643750), mRNA."  
"PREDICTED: Homo sapiens hypothetical protein LOC643755 (LOC643755), mRNA."  
"PREDICTED: Homo sapiens hypothetical protein LOC643757 (LOC643757), mRNA."  
"PREDICTED: Homo sapiens hypothetical protein LOC643763 (LOC643763), mRNA."  
"PREDICTED: Homo sapiens misc\_RNA (LOC643768), miscRNA."  
"PREDICTED: Homo sapiens similar to Contactin-associated protein-like 3 precursor (Cell recog  
"PREDICTED: Homo sapiens similar to Nonhistone chromosomal protein HMG-14 (High-mobilit  
"PREDICTED: Homo sapiens hypothetical protein LOC643791 (LOC643791), mRNA."  
"PREDICTED: Homo sapiens hypothetical LOC643809 (LOC643809), mRNA."  
"PREDICTED: Homo sapiens similar to FERM domain containing 6 (LOC643811), mRNA."  
"PREDICTED: Homo sapiens similar to phosducin-like 3 (LOC643831), mRNA."  
"PREDICTED: Homo sapiens similar to Zinc finger protein 62 homolog (Zfp-62) (ZT3) (LOC6438  
"PREDICTED: Homo sapiens hypothetical protein LOC643837 (LOC643837), mRNA."  
"PREDICTED: Homo sapiens similar to G1 to S phase transition protein 1 homolog (GTP-bindin  
"PREDICTED: Homo sapiens similar to hCG2026922 (LOC643856), miscRNA."  
"PREDICTED: Homo sapiens misc\_RNA (LOC643863), miscRNA."  
"PREDICTED: Homo sapiens similar to Translationally-controlled tumor protein (TCTP) (p23) (H  
"PREDICTED: Homo sapiens similar to Nonhistone chromosomal protein HMG-17 (High-mobilit  
"PREDICTED: Homo sapiens misc\_RNA (LOC643873), miscRNA."  
"PREDICTED: Homo sapiens hypothetical protein LOC643882 (LOC643882), mRNA."  
"PREDICTED: Homo sapiens hypothetical LOC643888 (LOC643888), mRNA."  
"PREDICTED: Homo sapiens similar to hCG1744064 (LOC643894), mRNA."  
"PREDICTED: Homo sapiens hypothetical protein LOC643903 (LOC643903), mRNA."  
"PREDICTED: Homo sapiens hypothetical LOC643911 (LOC643911), mRNA."  
"PREDICTED: Homo sapiens hypothetical protein LOC643912 (LOC643912), mRNA."  
"PREDICTED: Homo sapiens hypothetical protein LOC643917, transcript variant 3 (LOC643918  
"PREDICTED: Homo sapiens region containing similar to Williams Beuren syndrome chromosom  
"PREDICTED: Homo sapiens similar to NADPH dependent diflavin oxidoreductase 1 (LOC6439

"PREDICTED: Homo sapiens hypothetical LOC643933 (LOC643933), mRNA."  
"PREDICTED: Homo sapiens hypothetical protein LOC643948 (LOC643948), mRNA."  
"PREDICTED: Homo sapiens similar to 60S acidic ribosomal protein P2 (LOC643949), mRNA."  
"Homo sapiens zinc finger protein 479 pseudogene (LOC643955), non-coding RNA."  
"PREDICTED: Homo sapiens misc\_RNA (LOC643960), miscRNA."  
"PREDICTED: Homo sapiens hypothetical LOC643965 (LOC643965), mRNA."  
"PREDICTED: Homo sapiens hypothetical protein LOC643977, transcript variant 1 (LOC643977)  
"PREDICTED: Homo sapiens hypothetical protein LOC643982 (LOC643982), mRNA."  
"PREDICTED: Homo sapiens hypothetical protein LOC643985 (LOC643985), mRNA."  
"PREDICTED: Homo sapiens hypothetical LOC643988 (LOC643988), mRNA."  
"PREDICTED: Homo sapiens similar to peptidylprolyl isomerase A isoform 1 (LOC643997), mRNA."  
"PREDICTED: Homo sapiens similar to cadherin 12, type 2 preproprotein (LOC643998), mRNA."  
"PREDICTED: Homo sapiens similar to Mucin-2 precursor (Intestinal mucin 2) (LOC644003), mRNA."  
"PREDICTED: Homo sapiens hypothetical LOC644010, transcript variant 2 (LOC644010), mRNA."  
"PREDICTED: Homo sapiens similar to Glutamate dehydrogenase 1, mitochondrial precursor (LOC644011), mRNA."  
"PREDICTED: Homo sapiens similar to COBW domain containing 3, transcript variant 23 (LOC644012), mRNA."  
"PREDICTED: Homo sapiens similar to cathepsin L-like protein (LOC644021), mRNA."  
"PREDICTED: Homo sapiens similar to 60S ribosomal protein L7a (LOC644029), mRNA."  
"PREDICTED: Homo sapiens similar to similar to RPL23AP7 protein (LOC644033), mRNA."  
"PREDICTED: Homo sapiens misc\_RNA (LOC644037), miscRNA."  
"PREDICTED: Homo sapiens similar to 60S ribosomal protein L10 (QM protein) (Tumor suppressor protein 1) (LOC644038), mRNA."  
"PREDICTED: Homo sapiens hypothetical protein LOC644046 (LOC644046), mRNA."  
"PREDICTED: Homo sapiens similar to Proline-rich nuclear receptor coactivator 2 (LOC644047), mRNA."  
"PREDICTED: Homo sapiens similar to Ciliary dynein heavy chain 11 (Axonemal beta dynein heavy chain 11) (LOC644048), mRNA."  
"PREDICTED: Homo sapiens similar to heterogeneous nuclear ribonucleoprotein K (LOC64406:), mRNA."  
"PREDICTED: Homo sapiens similar to ribosomal protein S14 (LOC644068), mRNA."  
"PREDICTED: Homo sapiens germ cell-specific gene 1-like protein 2-like (LOC644070), mRNA."  
"PREDICTED: Homo sapiens similar to RIKEN cDNA 4930532L20 (LOC644074), mRNA."  
"PREDICTED: Homo sapiens hypothetical protein LOC644075 (LOC644075), mRNA."  
"PREDICTED: Homo sapiens hypothetical protein LOC644083 (LOC644083), mRNA."  
"PREDICTED: Homo sapiens similar to microtubule associated serine/threonine kinase 2 (LOC644084), mRNA."  
"PREDICTED: Homo sapiens hCG2040054 (LOC644093), mRNA."  
"PREDICTED: Homo sapiens hypothetical protein LOC644096 (LOC644096), mRNA."  
"PREDICTED: Homo sapiens hypothetical protein LOC644097 (LOC644097), mRNA."  
"PREDICTED: Homo sapiens hypothetical LOC644098 (LOC644098), mRNA."  
"PREDICTED: Homo sapiens similar to ovo-like 2 isoform A (LOC644099), mRNA."  
"PREDICTED: Homo sapiens similar to CG14464-PA.3 (LOC644100), mRNA."  
"PREDICTED: Homo sapiens misc\_RNA (LOC644101), miscRNA."  
"PREDICTED: Homo sapiens similar to splicing factor 3b, subunit 4 (LOC644112), mRNA."  
"PREDICTED: Homo sapiens misc\_RNA (LOC644124), miscRNA."  
"PREDICTED: Homo sapiens hypothetical protein LOC644128 (LOC644128), mRNA."  
"PREDICTED: Homo sapiens misc\_RNA (LOC644132), miscRNA."  
"PREDICTED: Homo sapiens similar to ADP-ribosylation factor 7 (LOC644144), mRNA."  
"PREDICTED: Homo sapiens hypothetical protein LOC644155 (LOC644155), mRNA."

"PREDICTED: Homo sapiens misc\_RNA (LOC644157), miscRNA."  
"PREDICTED: Homo sapiens similar to septin 7, transcript variant 4 (LOC644162), mRNA."  
"PREDICTED: Homo sapiens similar to paired related homeobox protein-like 1 (LOC644168), mRNA."  
"PREDICTED: Homo sapiens hypothetical LOC644173 (LOC644173), miscRNA."  
"PREDICTED: Homo sapiens hypothetical protein LOC644184 (LOC644184), mRNA."  
"PREDICTED: Homo sapiens hypothetical protein LOC644186 (LOC644186), mRNA."  
"PREDICTED: Homo sapiens similar to hCG15685, transcript variant 1 (LOC644191), mRNA."  
"PREDICTED: Homo sapiens similar to hypothetical protein LOC286467 (LOC644200), mRNA."  
"PREDICTED: Homo sapiens misc\_RNA (LOC644214), miscRNA."  
"PREDICTED: Homo sapiens hypothetical protein LOC644215 (LOC644215), mRNA."  
"PREDICTED: Homo sapiens hypothetical LOC644224 (LOC644224), mRNA."  
"PREDICTED: Homo sapiens hypothetical protein LOC644234 (LOC644234), mRNA."  
"PREDICTED: Homo sapiens hypothetical protein LOC644240, transcript variant 1 (LOC644241)  
"PREDICTED: Homo sapiens hypothetical protein LOC644246 (LOC644246), mRNA."  
"PREDICTED: Homo sapiens hypothetical protein LOC644250 (LOC644250), mRNA."  
"PREDICTED: Homo sapiens hypothetical protein LOC644254 (LOC644254), mRNA."  
"PREDICTED: Homo sapiens misc\_RNA (LOC644256), miscRNA."  
"PREDICTED: Homo sapiens similar to fetal Alzheimer antigen isoform 2 (LOC644264), mRNA."  
"PREDICTED: Homo sapiens hypothetical protein LOC644266 (LOC644266), mRNA."  
"PREDICTED: Homo sapiens similar to splicing coactivator subunit SRm300 (LOC644276), mRNA."  
"PREDICTED: Homo sapiens hypothetical protein LOC644285 (LOC644285), mRNA."  
"PREDICTED: Homo sapiens hypothetical protein LOC644286 (LOC644286), mRNA."  
"PREDICTED: Homo sapiens similar to T25G3.1 (LOC644295), mRNA."  
"PREDICTED: Homo sapiens similar to Importin-7 (Imp7) (Ran-binding protein 7) (RanBP7) (LOC644300)  
"PREDICTED: Homo sapiens similar to ubiquinol-cytochrome c reductase complex (LOC644310)  
"PREDICTED: Homo sapiens similar to methylenetetrahydrofolate dehydrogenase (NADP+ dependent) (LOC644315)  
"PREDICTED: Homo sapiens misc\_RNA (LOC644315), miscRNA."  
"PREDICTED: Homo sapiens similar to Ribosome biogenesis protein BMS1 homolog, transcript variant 1 (LOC644320)  
"PREDICTED: Homo sapiens similar to tropomyosin 3 isoform 2 (LOC644330), mRNA."  
"PREDICTED: Homo sapiens similar to Band 4.1-like protein 5 (LOC644334), mRNA."  
"PREDICTED: Homo sapiens similar to Est1p-like protein B (LOC644335), mRNA."  
"PREDICTED: Homo sapiens hypothetical LOC644350 (LOC644350), mRNA."  
"PREDICTED: Homo sapiens misc\_RNA (LOC644353), miscRNA."  
"PREDICTED: Homo sapiens similar to calcium channel, voltage-dependent, L type, alpha 1C subunit (LOC644360)  
"PREDICTED: Homo sapiens similar to retinitis pigmentosa GTPase regulator isoform C (LOC644365)  
"PREDICTED: Homo sapiens misc\_RNA (LOC644363), miscRNA."  
"PREDICTED: Homo sapiens similar to High mobility group protein 1-like 10 (HMG-1L10), transcript variant 1 (LOC644370)  
"PREDICTED: Homo sapiens hypothetical protein LOC644391 (LOC644391), mRNA."  
"PREDICTED: Homo sapiens misc\_RNA (LOC644397), miscRNA."  
"PREDICTED: Homo sapiens hypothetical protein LOC644404 (LOC644404), mRNA."  
"PREDICTED: Homo sapiens similar to Sodium/hydrogen exchanger 3 (Na(+)/H(+) exchanger 3) (LOC644410)  
"PREDICTED: Homo sapiens misc\_RNA (LOC644415), miscRNA."  
"PREDICTED: Homo sapiens hypothetical LOC644419 (LOC644419), mRNA."  
"PREDICTED: Homo sapiens hypothetical protein LOC644420 (LOC644420), mRNA."

"PREDICTED: Homo sapiens hypothetical protein LOC644421 (LOC644421), mRNA."  
"PREDICTED: Homo sapiens misc\_RNA (LOC644422), miscRNA."  
"PREDICTED: Homo sapiens hypothetical protein LOC644423 (LOC644423), mRNA."  
"PREDICTED: Homo sapiens hypothetical protein LOC644424 (LOC644424), mRNA."  
"PREDICTED: Homo sapiens similar to High mobility group protein B3 (High mobility group prot  
"PREDICTED: Homo sapiens hypothetical protein LOC644433 (LOC644433), mRNA."  
"PREDICTED: Homo sapiens similar to transmembrane protein 30A (LOC644444), mRNA."  
"PREDICTED: Homo sapiens hypothetical protein LOC644450 (LOC644450), mRNA."  
"PREDICTED: Homo sapiens misc\_RNA (LOC644464), miscRNA."  
"PREDICTED: Homo sapiens hypothetical protein LOC644472 (LOC644472), mRNA."  
"PREDICTED: Homo sapiens hypothetical protein LOC644474 (LOC644474), mRNA."  
"PREDICTED: Homo sapiens hypothetical protein LOC644480 (LOC644480), mRNA."  
"PREDICTED: Homo sapiens hypothetical LOC644500 (LOC644500), mRNA."  
"PREDICTED: Homo sapiens misc\_RNA (LOC644517), miscRNA."  
"PREDICTED: Homo sapiens hypothetical protein LOC644519 (LOC644519), mRNA."  
"PREDICTED: Homo sapiens hypothetical LOC644528 (LOC644528), mRNA."  
"PREDICTED: Homo sapiens hypothetical protein LOC644537 (LOC644537), mRNA."  
"PREDICTED: Homo sapiens hypothetical protein LOC644544 (LOC644544), mRNA."  
"PREDICTED: Homo sapiens similar to LOC531907 protein (LOC644548), mRNA."  
"PREDICTED: Homo sapiens hypothetical LOC644558 (LOC644558), mRNA."  
"PREDICTED: Homo sapiens misc\_RNA (LOC644563), miscRNA."  
"PREDICTED: Homo sapiens misc\_RNA (LOC644584), miscRNA."  
"PREDICTED: Homo sapiens similar to Kinase suppressor of ras-1 (Kinase suppressor of ras) (l  
"PREDICTED: Homo sapiens misc\_RNA (LOC644589), miscRNA."  
"PREDICTED: Homo sapiens similar to EVIN1 (LOC644590), mRNA."  
"PREDICTED: Homo sapiens similar to peptidylprolyl isomerase A (cyclophilin A)-like 4 (LOC64  
"PREDICTED: Homo sapiens hypothetical protein LOC644593 (LOC644593), mRNA."  
"PREDICTED: Homo sapiens hypothetical protein LOC644596 (LOC644596), mRNA."  
"PREDICTED: Homo sapiens hypothetical protein LOC644598 (LOC644598), mRNA."  
"PREDICTED: Homo sapiens hypothetical protein LOC644607 (LOC644607), mRNA."  
"PREDICTED: Homo sapiens similar to Ras-related protein Rab-13 (LOC644615), mRNA."  
"PREDICTED: Homo sapiens hypothetical protein LOC644617 (LOC644617), mRNA."  
"PREDICTED: Homo sapiens misc\_RNA (LOC644619), miscRNA."  
"PREDICTED: Homo sapiens similar to transmembrane phosphatase with tensin homology isofo  
"PREDICTED: Homo sapiens hypothetical protein LOC644624, transcript variant 2 (LOC644624  
"PREDICTED: Homo sapiens similar to FUN14 domain containing 2 (LOC644625), mRNA."  
"PREDICTED: Homo sapiens hypothetical protein LOC644635 (LOC644635), mRNA."  
"PREDICTED: Homo sapiens similar to N-acetylated-alpha-linked acidic dipeptidase II (NAALAE  
"PREDICTED: Homo sapiens hypothetical protein LOC644641 (LOC644641), mRNA."  
"PREDICTED: Homo sapiens hypothetical protein LOC644642 (LOC644642), mRNA."  
"PREDICTED: Homo sapiens similar to CG14446-PA (LOC644646), mRNA."  
"PREDICTED: Homo sapiens hypothetical LOC644652 (LOC644652), mRNA."  
"PREDICTED: Homo sapiens similar to poly (ADP-ribose) polymerase family, member 8 (LOC6  
"PREDICTED: Homo sapiens hypothetical protein LOC644668 (LOC644668), mRNA."

"PREDICTED: Homo sapiens similar to RIKEN cDNA 4930532L20 (LOC644669), mRNA."  
"PREDICTED: Homo sapiens hypothetical LOC644670 (LOC644670), mRNA."  
"PREDICTED: Homo sapiens similar to SET domain and mariner transposase fusion gene (LOC  
"PREDICTED: Homo sapiens similar to synovial sarcoma, X breakpoint 2 interacting protein (LC  
"PREDICTED: Homo sapiens hypothetical protein LOC644683 (LOC644683), mRNA."  
"PREDICTED: Homo sapiens hypothetical LOC644684 (LOC644684), mRNA."  
"PREDICTED: Homo sapiens hypothetical LOC644686 (LOC644686), mRNA."  
"PREDICTED: Homo sapiens hypothetical protein LOC644694 (LOC644694), mRNA."  
"PREDICTED: Homo sapiens hypothetical LOC644695 (LOC644695), mRNA."  
"PREDICTED: Homo sapiens hypothetical protein LOC644701 (LOC644701), mRNA."  
"PREDICTED: Homo sapiens hypothetical protein LOC644707 (LOC644707), mRNA."  
"PREDICTED: Homo sapiens similar to formin 2 (LOC644711), mRNA."  
"PREDICTED: Homo sapiens hypothetical protein LOC644714, transcript variant 1 (LOC644714  
"PREDICTED: Homo sapiens hypothetical protein LOC644719 (LOC644719), mRNA."  
"PREDICTED: Homo sapiens similar to ATPase, Cu<sup>++</sup> transporting, alpha polypeptide (LOC644  
"PREDICTED: Homo sapiens similar to Puromycin-sensitive aminopeptidase (PSA) (LOC64473  
"PREDICTED: Homo sapiens hypothetical protein LOC644736 (LOC644736), mRNA."  
"PREDICTED: Homo sapiens hypothetical protein LOC644738 (LOC644738), mRNA."  
"PREDICTED: Homo sapiens similar to Wiskott-Aldrich syndrome protein family member 4 (WA  
"PREDICTED: Homo sapiens hypothetical protein LOC644748 (LOC644748), mRNA."  
"PREDICTED: Homo sapiens hypothetical protein LOC644760 (LOC644760), mRNA."  
"PREDICTED: Homo sapiens misc\_RNA (LOC644761), miscRNA."  
"PREDICTED: Homo sapiens hypothetical LOC644762 (LOC644762), mRNA."  
"PREDICTED: Homo sapiens similar to erythrocyte membrane protein band 4.1 like 4B isoform  
"PREDICTED: Homo sapiens hypothetical protein LOC644769 (LOC644769), mRNA."  
"PREDICTED: Homo sapiens similar to Phosphoglycerate kinase 1 (LOC644774), mRNA."  
"PREDICTED: Homo sapiens similar to implantation-associated protein (LOC644782), mRNA."  
"PREDICTED: Homo sapiens hypothetical LOC644787 (LOC644787), mRNA."  
"PREDICTED: Homo sapiens hypothetical protein LOC644799, transcript variant 1 (LOC644799  
"PREDICTED: Homo sapiens similar to Heat shock protein HSP 90-beta (HSP 84) (Tumor-spec  
"PREDICTED: Homo sapiens hypothetical LOC644827 (LOC644827), mRNA."  
"PREDICTED: Homo sapiens hypothetical protein LOC644830 (LOC644830), mRNA."  
"PREDICTED: Homo sapiens hypothetical LOC644844 (LOC644844), mRNA."  
"PREDICTED: Homo sapiens hypothetical protein LOC644846 (LOC644846), mRNA."  
"PREDICTED: Homo sapiens hypothetical protein LOC644853 (LOC644853), mRNA."  
"PREDICTED: Homo sapiens misc\_RNA (LOC644860), miscRNA."  
"PREDICTED: Homo sapiens similar to signal recognition particle 14kDa (homologous Alu RNA  
"PREDICTED: Homo sapiens hypothetical protein LOC644865 (LOC644865), mRNA."  
"PREDICTED: Homo sapiens hypothetical protein LOC644869 (LOC644869), mRNA."  
"PREDICTED: Homo sapiens misc\_RNA (LOC644877), miscRNA."  
"PREDICTED: Homo sapiens misc\_RNA (LOC644879), miscRNA."  
"PREDICTED: Homo sapiens similar to large subunit ribosomal protein L36a (LOC644889), mR  
"PREDICTED: Homo sapiens hypothetical protein LOC644897 (LOC644897), mRNA."  
"Homo sapiens hCG18290 (LOC644907), mRNA."

"PREDICTED: Homo sapiens hypothetical protein LOC644912 (LOC644912), mRNA."  
"PREDICTED: Homo sapiens similar to H3 histone, family 3B (LOC644914), mRNA."  
"PREDICTED: Homo sapiens hypothetical protein LOC644916 (LOC644916), mRNA."  
"PREDICTED: Homo sapiens hypothetical LOC644925 (LOC644925), mRNA."  
"PREDICTED: Homo sapiens hypothetical protein LOC644929 (LOC644929), mRNA."  
"Homo sapiens cytoplasmic beta-actin pseudogene (LOC644936), non-coding RNA."  
"PREDICTED: Homo sapiens similar to ribosomal protein L10 (LOC644937), mRNA."  
"PREDICTED: Homo sapiens hypothetical protein LOC644944 (LOC644944), mRNA."  
"PREDICTED: Homo sapiens similar to H3 histone, family 3B (LOC644950), mRNA."  
"PREDICTED: Homo sapiens similar to CG6405-PA (LOC644958), mRNA."  
"PREDICTED: Homo sapiens similar to cytoplasmic beta-actin (LOC644961), mRNA."  
"PREDICTED: Homo sapiens hypothetical protein LOC644964 (LOC644964), mRNA."  
"PREDICTED: Homo sapiens hypothetical LOC644978 (LOC644978), mRNA."  
"PREDICTED: Homo sapiens hypothetical LOC644979 (LOC644979), mRNA."  
"PREDICTED: Homo sapiens misc\_RNA (LOC644988), miscRNA."  
"PREDICTED: Homo sapiens hypothetical LOC644992 (LOC644992), mRNA."  
"PREDICTED: Homo sapiens hypothetical protein LOC644994 (LOC644994), mRNA."  
"PREDICTED: Homo sapiens misc\_RNA (LOC645001), miscRNA."  
"PREDICTED: Homo sapiens hypothetical protein LOC645006 (LOC645006), mRNA."  
"PREDICTED: Homo sapiens hypothetical protein LOC645010 (LOC645010), mRNA."  
"PREDICTED: Homo sapiens similar to beta-1,4-mannosyltransferase (LOC645015), mRNA."  
"PREDICTED: Homo sapiens similar to Prolyl 4-hydroxylase alpha-2 subunit precursor (4-PH al|  
"PREDICTED: Homo sapiens hypothetical protein LOC645032 (LOC645032), mRNA."  
"PREDICTED: Homo sapiens hypothetical protein LOC645045 (LOC645045), mRNA."  
"PREDICTED: Homo sapiens similar to poly (ADP-ribose) polymerase family, member 8 (LOC64  
"PREDICTED: Homo sapiens similar to hepatitis B virus x-interacting protein (LOC645058), mRI  
"PREDICTED: Homo sapiens similar to AT rich interactive domain 1B (SWI1-like) isoform 1, trar  
"PREDICTED: Homo sapiens misc\_RNA (LOC645094), miscRNA."  
"PREDICTED: Homo sapiens hCG1820764 (LOC645100), mRNA."  
"PREDICTED: Homo sapiens similar to Usher syndrome 3A homolog isoform 1 (LOC645104), n  
"PREDICTED: Homo sapiens similar to golgi autoantigen, golgin subfamily a, 8G (LOC645137),  
"PREDICTED: Homo sapiens hypothetical LOC645139 (LOC645139), mRNA."  
"PREDICTED: Homo sapiens hypothetical protein LOC645144 (LOC645144), mRNA."  
"PREDICTED: Homo sapiens similar to T-box 1 isoform C (LOC645153), mRNA."  
"PREDICTED: Homo sapiens misc\_RNA (LOC645157), miscRNA."  
"PREDICTED: Homo sapiens similar to ALR-like protein (LOC645159), mRNA."  
"PREDICTED: Homo sapiens similar to lymphocyte-specific protein 1 (LOC645166), mRNA."  
"PREDICTED: Homo sapiens hypothetical protein LOC645168 (LOC645168), mRNA."  
"PREDICTED: Homo sapiens misc\_RNA (LOC645175), miscRNA."  
"PREDICTED: Homo sapiens hypothetical protein LOC645176 (LOC645176), mRNA."  
"PREDICTED: Homo sapiens hypothetical LOC645177 (LOC645177), mRNA."  
"PREDICTED: Homo sapiens hypothetical LOC645183 (LOC645183), mRNA."  
"PREDICTED: Homo sapiens hypothetical LOC645195 (LOC645195), miscRNA."  
"PREDICTED: Homo sapiens similar to transmembrane protein 14C (LOC645203), mRNA."



"PREDICTED: Homo sapiens similar to immunoglobulin superfamily, member 3 isoform 1, trans  
"Homo sapiens thymine-DNA glycosylase pseudogene (LOC645233), non-coding RNA."  
"PREDICTED: Homo sapiens similar to similar to RPL23AP7 protein (LOC645236), mRNA."  
"PREDICTED: Homo sapiens similar to solute carrier family 22 member 4 (LOC645246), mRNA  
"PREDICTED: Homo sapiens hypothetical protein LOC645249 (LOC645249), mRNA."  
"PREDICTED: Homo sapiens misc\_RNA (LOC645251), miscRNA."  
"PREDICTED: Homo sapiens hypothetical LOC645253 (LOC645253), mRNA."  
"PREDICTED: Homo sapiens hypothetical protein LOC645261 (LOC645261), mRNA."  
"PREDICTED: Homo sapiens hypothetical LOC645276 (LOC645276), mRNA."  
"PREDICTED: Homo sapiens hypothetical protein LOC645279 (LOC645279), mRNA."  
"PREDICTED: Homo sapiens similar to Group X secretory phospholipase A2 precursor (Phosph  
"PREDICTED: Homo sapiens similar to CG33096-PA, isoform A (LOC645289), mRNA."  
"Homo sapiens ribosomal protein L17-like (LOC645296), mRNA."  
"PREDICTED: Homo sapiens similar to Heat shock protein HSP 90-alpha (HSP 86), transcript v  
"PREDICTED: Homo sapiens similar to melanoma-associated chondroitin sulfate proteoglycan 4  
"PREDICTED: Homo sapiens hypothetical LOC645307 (LOC645307), mRNA."  
"PREDICTED: Homo sapiens similar to Glycolipid transfer protein (GLTP) (LOC645312), mRNA  
"PREDICTED: Homo sapiens misc\_RNA (LOC645313), miscRNA."  
"PREDICTED: Homo sapiens similar to hCG1642995 (LOC645314), mRNA."  
"PREDICTED: Homo sapiens hypothetical protein LOC645322 (LOC645322), mRNA."  
"Homo sapiens hypothetical LOC645323 (LOC645323), transcript variant 1, non-coding RNA."  
"PREDICTED: Homo sapiens similar to Group X secretory phospholipase A2 precursor (Phosph  
"Homo sapiens family with sequence similarity 86, member A pseudogene (LOC645332), non-c  
"PREDICTED: Homo sapiens hypothetical protein LOC645335 (LOC645335), mRNA."  
"PREDICTED: Homo sapiens similar to Neutrophil defensin 4 precursor (HNP-4) (HP-4) (Defens  
"PREDICTED: Homo sapiens hypothetical protein LOC645342 (LOC645342), mRNA."  
"PREDICTED: Homo sapiens hypothetical protein LOC645349 (LOC645349), mRNA."  
"PREDICTED: Homo sapiens similar to SMT3 suppressor of mif two 3 homolog 2 (LOC645351)  
"PREDICTED: Homo sapiens PRAME family member (LOC645359), mRNA."  
"PREDICTED: Homo sapiens hypothetical protein LOC645363 (LOC645363), mRNA."  
"PREDICTED: Homo sapiens hypothetical protein LOC645365 (LOC645365), mRNA."  
"PREDICTED: Homo sapiens hypothetical protein LOC645378 (LOC645378), mRNA."  
"PREDICTED: Homo sapiens misc\_RNA (LOC645381), miscRNA."  
"PREDICTED: Homo sapiens similar to heterogeneous nuclear ribonucleoprotein A1 (LOC6453  
"PREDICTED: Homo sapiens misc\_RNA (LOC645387), miscRNA."  
"PREDICTED: Homo sapiens hypothetical protein LOC645393 (LOC645393), mRNA."  
"PREDICTED: Homo sapiens hypothetical protein LOC645418 (LOC645418), mRNA."  
"PREDICTED: Homo sapiens hypothetical protein LOC645427 (LOC645427), mRNA."  
"PREDICTED: Homo sapiens misc\_RNA (LOC645430), miscRNA."  
"PREDICTED: Homo sapiens similar to Heterogeneous nuclear ribonucleoprotein A1 (Helix-des  
"PREDICTED: Homo sapiens similar to CG7874-PA (LOC645438), mRNA."  
"PREDICTED: Homo sapiens hypothetical protein LOC645442 (LOC645442), mRNA."  
"PREDICTED: Homo sapiens similar to hCG1782414 (LOC645452), mRNA."  
"PREDICTED: Homo sapiens hypothetical protein LOC645476 (LOC645476), mRNA."

"PREDICTED: Homo sapiens hypothetical LOC645478 (LOC645478), mRNA."  
"PREDICTED: Homo sapiens similar to zinc finger protein 248 (LOC645481), mRNA."  
"PREDICTED: Homo sapiens hypothetical LOC645485 (LOC645485), mRNA."  
"PREDICTED: Homo sapiens hypothetical protein LOC645487 (LOC645487), mRNA."  
"PREDICTED: Homo sapiens hypothetical protein LOC645489 (LOC645489), mRNA."  
"PREDICTED: Homo sapiens similar to high mobility group 1 protein (LOC645490), mRNA."  
"PREDICTED: Homo sapiens hypothetical protein LOC645492 (LOC645492), mRNA."  
"PREDICTED: Homo sapiens misc\_RNA (LOC645515), miscRNA."  
"PREDICTED: Homo sapiens misc\_RNA (LOC645534), miscRNA."  
"PREDICTED: Homo sapiens similar to Immunoglobulin-binding protein 1 (CD79a-binding prote  
"PREDICTED: Homo sapiens hypothetical protein LOC645552 (LOC645552), mRNA."  
"PREDICTED: Homo sapiens hypothetical protein LOC645557 (LOC645557), mRNA."  
"PREDICTED: Homo sapiens hypothetical LOC645558 (LOC645558), mRNA."  
"PREDICTED: Homo sapiens hypothetical protein LOC645566 (LOC645566), mRNA."  
"PREDICTED: Homo sapiens hypothetical protein LOC645574 (LOC645574), mRNA."  
"PREDICTED: Homo sapiens similar to Platelet-derived growth factor A chain precursor (PDGF  
"PREDICTED: Homo sapiens similar to Interleukin-9 receptor precursor (IL-9R) (CD129 antigen  
"PREDICTED: Homo sapiens similar to cAMP-dependent protein kinase type I-beta regulatory s  
"PREDICTED: Homo sapiens similar to Leo1, Paf1/RNA polymerase II complex component, hor  
"PREDICTED: Homo sapiens hypothetical LOC645627 (LOC645627), mRNA."  
"PREDICTED: Homo sapiens similar to transmembrane protein 16G isoform NGEF long (LOC6  
"PREDICTED: Homo sapiens similar to AIP1 (LOC645636), mRNA."  
"PREDICTED: Homo sapiens misc\_RNA (LOC645638), miscRNA."  
"PREDICTED: Homo sapiens hypothetical protein LOC645644 (LOC645644), mRNA."  
"PREDICTED: Homo sapiens hypothetical protein LOC645649 (LOC645649), mRNA."  
"PREDICTED: Homo sapiens hypothetical LOC645652 (LOC645652), mRNA."  
"PREDICTED: Homo sapiens hypothetical protein LOC645662 (LOC645662), mRNA."  
"PREDICTED: Homo sapiens hypothetical protein LOC645663 (LOC645663), mRNA."  
"PREDICTED: Homo sapiens similar to Methyl-CpG binding domain protein 3-like 2 (MBD3-like  
"PREDICTED: Homo sapiens hypothetical protein LOC645676, transcript variant 1 (LOC645676  
"PREDICTED: Homo sapiens hypothetical protein LOC645681 (LOC645681), mRNA."  
"PREDICTED: Homo sapiens hypothetical LOC645685 (LOC645685), mRNA."  
"PREDICTED: Homo sapiens similar to 60S ribosomal protein L12 (LOC645688), mRNA."  
"PREDICTED: Homo sapiens hypothetical protein LOC645689 (LOC645689), mRNA."  
"PREDICTED: Homo sapiens similar to heterogeneous nuclear ribonucleoprotein A1 (LOC6456  
"PREDICTED: Homo sapiens misc\_RNA (LOC645693), miscRNA."  
"PREDICTED: Homo sapiens hypothetical protein LOC645701 (LOC645701), mRNA."  
"PREDICTED: Homo sapiens similar to amyloid beta precursor protein-binding protein 1 isoform  
"PREDICTED: Homo sapiens hypothetical protein LOC645708 (LOC645708), mRNA."  
"PREDICTED: Homo sapiens hypothetical protein LOC645718 (LOC645718), mRNA."  
"PREDICTED: Homo sapiens similar to hCG2037003 (LOC645722), mRNA."  
"PREDICTED: Homo sapiens misc\_RNA (LOC645726), miscRNA."  
"PREDICTED: Homo sapiens hypothetical LOC645733 (LOC645733), mRNA."  
"PREDICTED: Homo sapiens hypothetical protein LOC645743 (LOC645743), mRNA."

"PREDICTED: Homo sapiens misc\_RNA (LOC645744), miscRNA."  
"PREDICTED: Homo sapiens similar to Golgin subfamily A member 6 (Golgin linked to PML) (G  
"PREDICTED: Homo sapiens similar to TRIM5/cyclophilin A V1 fusion protein (LOC645762), mF  
"PREDICTED: Homo sapiens hypothetical protein LOC645777 (LOC645777), mRNA."  
"PREDICTED: Homo sapiens similar to mCG141871 (LOC645781), mRNA."  
"PREDICTED: Homo sapiens similar to carbohydrate (N-acetylglucosamine 6-O) sulfotransferas  
"PREDICTED: Homo sapiens similar to wingless-type MMTV integration site family, member 9B  
"PREDICTED: Homo sapiens hypothetical LOC645848 (LOC645848), mRNA."  
"PREDICTED: Homo sapiens hypothetical protein LOC645850 (LOC645850), mRNA."  
"PREDICTED: Homo sapiens similar to splicing factor 3a, subunit 2, 66kDa (LOC645852), mRN  
"PREDICTED: Homo sapiens hypothetical protein LOC645885 (LOC645885), mRNA."  
"PREDICTED: Homo sapiens hypothetical protein LOC645888 (LOC645888), mRNA."  
"PREDICTED: Homo sapiens hypothetical protein LOC645895 (LOC645895), mRNA."  
"PREDICTED: Homo sapiens similar to Mitotic spindle assembly checkpoint protein MAD1 (Mito  
"PREDICTED: Homo sapiens similar to zinc finger protein 598 (LOC645937), mRNA."  
"PREDICTED: Homo sapiens hypothetical LOC645941 (LOC645941), mRNA."  
"PREDICTED: Homo sapiens hypothetical protein LOC645942 (LOC645942), mRNA."  
"PREDICTED: Homo sapiens misc\_RNA (LOC645944), miscRNA."  
"PREDICTED: Homo sapiens hypothetical protein LOC645951 (LOC645951), mRNA."  
"PREDICTED: Homo sapiens hypothetical LOC645955 (LOC645955), mRNA."  
"PREDICTED: Homo sapiens similar to ubiquitin specific protease 6 (LOC645963), mRNA."  
"PREDICTED: Homo sapiens hypothetical LOC645966 (LOC645966), mRNA."  
"PREDICTED: Homo sapiens hypothetical LOC645967 (LOC645967), mRNA."  
"PREDICTED: Homo sapiens similar to 40S ribosomal protein S3a (V-fos transformation effecto  
"PREDICTED: Homo sapiens misc\_RNA (LOC645969), miscRNA."  
"PREDICTED: Homo sapiens hypothetical LOC645971 (LOC645971), mRNA."  
"PREDICTED: Homo sapiens misc\_RNA (LOC645978), miscRNA."  
"PREDICTED: Homo sapiens similar to protein phosphatase 1, regulatory (inhibitor) subunit 9A  
"PREDICTED: Homo sapiens hypothetical protein LOC645992 (LOC645992), mRNA."  
"Homo sapiens similar to ribosomal protein L31 (LOC645993), mRNA."  
"PREDICTED: Homo sapiens similar to ribosomal protein L34 (LOC646003), mRNA."  
"PREDICTED: Homo sapiens similar to acyl-malonyl condensing enzyme (LOC646004), mRNA.  
"PREDICTED: Homo sapiens hypothetical protein LOC646008 (LOC646008), mRNA."  
"PREDICTED: Homo sapiens hypothetical protein LOC646009 (LOC646009), mRNA."  
"PREDICTED: Homo sapiens hypothetical protein LOC646010 (LOC646010), mRNA."  
"PREDICTED: Homo sapiens similar to Aurora kinase A-interacting protein (AURKA-interacting  
"PREDICTED: Homo sapiens hypothetical protein LOC646023 (LOC646023), mRNA."  
"PREDICTED: Homo sapiens similar to hypothetical protein MGC40489 (LOC646026), mRNA."  
"PREDICTED: Homo sapiens misc\_RNA (LOC646030), miscRNA."  
"PREDICTED: Homo sapiens hypothetical LOC646034 (LOC646034), mRNA."  
"PREDICTED: Homo sapiens similar to CG11835-PA (LOC646037), mRNA."  
"PREDICTED: Homo sapiens similar to ADP-ribosylation factor 7 (LOC646038), mRNA."  
"PREDICTED: Homo sapiens misc\_RNA (LOC646044), miscRNA."  
"PREDICTED: Homo sapiens hypothetical LOC646049 (LOC646049), mRNA."

"PREDICTED: Homo sapiens similar to TBP-associated factor 11 (LOC646066), mRNA."  
"PREDICTED: Homo sapiens similar to breast cancer anti-estrogen resistance 1 (LOC646079),  
"PREDICTED: Homo sapiens misc\_RNA (LOC646093), miscRNA."  
"PREDICTED: Homo sapiens similar to protein kinase CHK2 isoform b (LOC646096), mRNA."  
"PREDICTED: Homo sapiens hypothetical protein LOC646097 (LOC646097), mRNA."  
"PREDICTED: Homo sapiens similar to TBP-associated factor 11 (LOC646103), mRNA."  
"PREDICTED: Homo sapiens hypothetical protein LOC646123 (LOC646123), mRNA."  
"PREDICTED: Homo sapiens hypothetical LOC646130 (LOC646130), mRNA."  
"PREDICTED: Homo sapiens similar to proline rich protein 2 (predicted) (LOC646132), mRNA."  
"PREDICTED: Homo sapiens similar to hect domain and RLD 2 (LOC646139), mRNA."  
"PREDICTED: Homo sapiens similar to tousled-like kinase 2, transcript variant 3 (LOC646144),  
"PREDICTED: Homo sapiens hypothetical protein LOC646154 (LOC646154), mRNA."  
"PREDICTED: Homo sapiens hypothetical protein LOC646156 (LOC646156), mRNA."  
"PREDICTED: Homo sapiens hypothetical protein LOC646191 (LOC646191), mRNA."  
"PREDICTED: Homo sapiens hypothetical LOC646193 (LOC646193), mRNA."  
"PREDICTED: Homo sapiens similar to Heat shock protein HSP 90-beta (HSP 84) (Tumor-spec  
"PREDICTED: Homo sapiens hypothetical protein LOC646198 (LOC646198), mRNA."  
"PREDICTED: Homo sapiens similar to zinc finger protein 62 homolog (mouse) (LOC646210), n  
"PREDICTED: Homo sapiens misc\_RNA (LOC646214), miscRNA."  
"PREDICTED: Homo sapiens hypothetical protein LOC646215 (LOC646215), mRNA."  
"PREDICTED: Homo sapiens hypothetical protein LOC646223 (LOC646223), mRNA."  
"PREDICTED: Homo sapiens similar to nucleoporin 210 (LOC646226), mRNA."  
"PREDICTED: Homo sapiens similar to coxsackie virus and adenovirus receptor precursor (LOC  
"PREDICTED: Homo sapiens hypothetical protein LOC646246 (LOC646246), mRNA."  
"PREDICTED: Homo sapiens similar to hemicentin 1 (LOC646254), mRNA."  
"PREDICTED: Homo sapiens hypothetical protein LOC646262 (LOC646262), mRNA."  
"PREDICTED: Homo sapiens similar to programmed cell death 6 interacting protein (LOC64627  
"PREDICTED: Homo sapiens misc\_RNA (LOC646294), miscRNA."  
"PREDICTED: Homo sapiens hypothetical protein LOC646296 (LOC646296), mRNA."  
"PREDICTED: Homo sapiens misc\_RNA (LOC646301), miscRNA."  
"PREDICTED: Homo sapiens hypothetical protein LOC646307 (LOC646307), mRNA."  
"PREDICTED: Homo sapiens similar to Nicotinamide phosphoribosyltransferase (NAMPTase)  
"PREDICTED: Homo sapiens hypothetical protein LOC646312 (LOC646312), mRNA."  
"PREDICTED: Homo sapiens misc\_RNA (LOC646316), miscRNA."  
"PREDICTED: Homo sapiens hypothetical protein LOC646320 (LOC646320), mRNA."  
"PREDICTED: Homo sapiens misc\_RNA (LOC646330), miscRNA."  
"PREDICTED: Homo sapiens similar to ATP synthase, H<sup>+</sup> transporting, mitochondrial F0 compl  
"PREDICTED: Homo sapiens similar to Nuclear envelope pore membrane protein POM 121 (Pc  
"PREDICTED: Homo sapiens similar to SET domain and mariner transposase fusion gene (LOC  
"PREDICTED: Homo sapiens misc\_RNA (LOC646347), miscRNA."  
"PREDICTED: Homo sapiens similar to DnaJ (Hsp40) homolog, subfamily B, member 14 isoform  
"PREDICTED: Homo sapiens similar to Ig heavy chain V-II region ARH-77 precursor (LOC6463  
"PREDICTED: Homo sapiens hypothetical protein LOC646376 (LOC646376), mRNA."  
"PREDICTED: Homo sapiens similar to absent in melanoma 2 (LOC646381), mRNA."

"PREDICTED: Homo sapiens similar to TFIIH basal transcription factor complex helicase XPB s  
"PREDICTED: Homo sapiens hypothetical LOC646434 (LOC646434), mRNA."  
"PREDICTED: Homo sapiens hypothetical LOC646437 (LOC646437), mRNA."  
"PREDICTED: Homo sapiens similar to Sorting nexin-19 (LOC646442), mRNA."  
"PREDICTED: Homo sapiens similar to stromal antigen 3 (LOC646443), mRNA."  
"PREDICTED: Homo sapiens similar to heterogeneous nuclear ribonucleoprotein K (LOC646444)  
"PREDICTED: Homo sapiens similar to Sorting nexin-19 (LOC646448), mRNA."  
"PREDICTED: Homo sapiens similar to Sorting nexin-19 (LOC646449), mRNA."  
"PREDICTED: Homo sapiens hypothetical protein LOC646458 (LOC646458), mRNA."  
"PREDICTED: Homo sapiens similar to Ubiquitin-conjugating enzyme E2 H (Ubiquitin-protein lig  
"PREDICTED: Homo sapiens misc\_RNA (LOC646476), miscRNA."  
"PREDICTED: Homo sapiens similar to 60S ribosomal protein L6 (TAX-responsive enhancer ele  
"PREDICTED: Homo sapiens similar to Myelin P2 protein (LOC646486), mRNA."  
"PREDICTED: Homo sapiens hypothetical protein LOC646491 (LOC646491), mRNA."  
"PREDICTED: Homo sapiens hypothetical LOC646496 (LOC646496), mRNA."  
"PREDICTED: Homo sapiens hypothetical LOC646498 (LOC646498), mRNA."  
"PREDICTED: Homo sapiens similar to CG14199-PA (LOC646501), mRNA."  
"PREDICTED: Homo sapiens hypothetical LOC646508 (LOC646508), mRNA."  
"PREDICTED: Homo sapiens hypothetical protein LOC646509 (LOC646509), mRNA."  
"PREDICTED: Homo sapiens similar to ankyrin repeat domain 30A (LOC646512), mRNA."  
"PREDICTED: Homo sapiens hypothetical protein LOC646515 (LOC646515), mRNA."  
"PREDICTED: Homo sapiens hypothetical protein LOC646521 (LOC646521), mRNA."  
"PREDICTED: Homo sapiens misc\_RNA (LOC646527), miscRNA."  
"PREDICTED: Homo sapiens similar to SET domain and mariner transposase fusion gene (LOC  
"PREDICTED: Homo sapiens similar to nuclease sensitive element binding protein 1 (LOC6465:  
"PREDICTED: Homo sapiens hypothetical protein LOC646533 (LOC646533), mRNA."  
"PREDICTED: Homo sapiens misc\_RNA (LOC646547), miscRNA."  
"PREDICTED: Homo sapiens hypothetical protein LOC646549 (LOC646549), mRNA."  
"PREDICTED: Homo sapiens misc\_RNA (LOC646572), miscRNA."  
"PREDICTED: Homo sapiens similar to cytochrome P450, family 4, subfamily F, polypeptide 2 (  
"PREDICTED: Homo sapiens hypothetical LOC646576 (LOC646576), miscRNA."  
"PREDICTED: Homo sapiens hypothetical protein LOC646580 (LOC646580), mRNA."  
"PREDICTED: Homo sapiens hypothetical protein LOC646585 (LOC646585), mRNA."  
"PREDICTED: Homo sapiens similar to Cytochrome P450 4F11 (CYPIVF11) (LOC646596), mR  
"PREDICTED: Homo sapiens similar to Chloride intracellular channel protein 4 (Intracellular chl  
"PREDICTED: Homo sapiens hypothetical protein LOC646615 (LOC646615), mRNA."  
"PREDICTED: Homo sapiens hypothetical LOC646625 (LOC646625), mRNA."  
"PREDICTED: Homo sapiens similar to ret finger protein-like 1 (LOC646663), mRNA."  
"PREDICTED: Homo sapiens misc\_RNA (LOC646672), miscRNA."  
"PREDICTED: Homo sapiens misc\_RNA (LOC646674), miscRNA."  
"PREDICTED: Homo sapiens similar to aconitase 2 precursor (LOC646675), mRNA."  
"PREDICTED: Homo sapiens hypothetical protein LOC646676 (LOC646676), mRNA."  
"PREDICTED: Homo sapiens similar to aconitase 2, mitochondrial (LOC646677), mRNA."  
"PREDICTED: Homo sapiens misc\_RNA (LOC646688), miscRNA."

"PREDICTED: Homo sapiens similar to Phosphatidylinositol-glycan biosynthesis, class F protein  
"PREDICTED: Homo sapiens misc\_RNA (LOC646700), miscRNA."  
"PREDICTED: Homo sapiens misc\_RNA (LOC646709), miscRNA."  
"PREDICTED: Homo sapiens similar to Keratin, type I cytoskeletal 18 (Cytokeratin-18) (CK-18) (LOC646710), mRNA."  
"PREDICTED: Homo sapiens hypothetical LOC646730 (LOC646730), mRNA."  
"PREDICTED: Homo sapiens similar to testicular serine protease 2 (LOC646743), mRNA."  
"PREDICTED: Homo sapiens similar to piccolo (presynaptic cytomatrix protein) (LOC646746), mRNA."  
"PREDICTED: Homo sapiens hypothetical protein LOC646748 (LOC646748), mRNA."  
"PREDICTED: Homo sapiens hypothetical protein LOC646750 (LOC646750), mRNA."  
"PREDICTED: Homo sapiens hypothetical protein LOC646762 (LOC646762), mRNA."  
"PREDICTED: Homo sapiens hypothetical protein LOC646764 (LOC646764), mRNA."  
"PREDICTED: Homo sapiens similar to Phosphorylase b kinase alpha regulatory chain, skeletal muscle (LOC646770), mRNA."  
"PREDICTED: Homo sapiens hypothetical protein LOC646783 (LOC646783), mRNA."  
"PREDICTED: Homo sapiens misc\_RNA (LOC646785), miscRNA."  
"PREDICTED: Homo sapiens similar to Afadin (AF-6 protein) (LOC646786), mRNA."  
"PREDICTED: Homo sapiens misc\_RNA (LOC646791), miscRNA."  
"PREDICTED: Homo sapiens hypothetical protein LOC646796 (LOC646796), mRNA."  
"PREDICTED: Homo sapiens misc\_RNA (LOC646801), miscRNA."  
"PREDICTED: Homo sapiens similar to CG17807-PA (LOC646804), mRNA."  
"PREDICTED: Homo sapiens misc\_RNA (LOC646808), miscRNA."  
"PREDICTED: Homo sapiens similar to Protein SET (Phosphatase 2A inhibitor I2PP2A) (I-2PP2) (LOC646810), mRNA."  
"PREDICTED: Homo sapiens similar to beta-actin (LOC646821), mRNA."  
"PREDICTED: Homo sapiens hypothetical LOC646823 (LOC646823), mRNA."  
"PREDICTED: Homo sapiens uncharacterized protein LOC646836-like (LOC646836), mRNA."  
"PREDICTED: Homo sapiens hypothetical LOC646845 (LOC646845), mRNA."  
"PREDICTED: Homo sapiens hypothetical protein LOC646849 (LOC646849), mRNA."  
"PREDICTED: Homo sapiens similar to Nonhistone chromosomal protein HMG-17 (High-mobility group protein 17) (LOC646850), mRNA."  
"PREDICTED: Homo sapiens similar to protein expressed in prostate, ovary, testis, and placenta (LOC646855), mRNA."  
"PREDICTED: Homo sapiens hypothetical LOC646863 (LOC646863), mRNA."  
"PREDICTED: Homo sapiens hypothetical protein LOC646882 (LOC646882), mRNA."  
"PREDICTED: Homo sapiens misc\_RNA (LOC646891), miscRNA."  
"PREDICTED: Homo sapiens hypothetical protein LOC646897 (LOC646897), mRNA."  
"PREDICTED: Homo sapiens similar to zinc finger and BTB domain containing 8 opposite strands (LOC646900), mRNA."  
"PREDICTED: Homo sapiens similar to Zinc finger protein 254 (Bone marrow zinc finger 5) (BMZF5) (LOC646905), mRNA."  
"PREDICTED: Homo sapiens hypothetical protein LOC646914 (LOC646914), mRNA."  
"PREDICTED: Homo sapiens similar to Serine/threonine-protein kinase tousled-like 2 (Tousled-like 2) (LOC646920), mRNA."  
"PREDICTED: Homo sapiens hypothetical LOC646932 (LOC646932), mRNA."  
"PREDICTED: Homo sapiens similar to Jerky protein (LOC646933), mRNA."  
"PREDICTED: Homo sapiens misc\_RNA (LOC646942), miscRNA."  
"PREDICTED: Homo sapiens misc\_RNA (LOC646956), miscRNA."  
"PREDICTED: Homo sapiens hypothetical protein LOC646990 (LOC646990), mRNA."  
"PREDICTED: Homo sapiens similar to high-mobility group box 3 (LOC646993), mRNA."  
"PREDICTED: Homo sapiens hypothetical protein LOC646997 (LOC646997), mRNA."  
"PREDICTED: Homo sapiens similar to tubulin, beta 5 (LOC647000), mRNA."

"PREDICTED: Homo sapiens similar to CG10343-PA (LOC647009), mRNA."  
"PREDICTED: Homo sapiens misc\_RNA (LOC647012), miscRNA."  
"PREDICTED: Homo sapiens misc\_RNA (LOC647030), miscRNA."  
"PREDICTED: Homo sapiens similar to Peptidyl-prolyl cis-trans isomerase NIMA-interacting 4 (F  
"PREDICTED: Homo sapiens similar to golgi autoantigen, golgin subfamily a-like (LOC647042),  
"PREDICTED: Homo sapiens hypothetical LOC647044 (LOC647044), mRNA."  
"PREDICTED: Homo sapiens hypothetical protein LOC647050 (LOC647050), mRNA."  
"PREDICTED: Homo sapiens similar to hCG1790759 (LOC647055), mRNA."  
"PREDICTED: Homo sapiens similar to suppressor of initiator codon mutations, related sequenc  
"PREDICTED: Homo sapiens similar to ribosomal protein L10 (LOC647074), mRNA."  
"PREDICTED: Homo sapiens misc\_RNA (LOC647081), miscRNA."  
"PREDICTED: Homo sapiens misc\_RNA (LOC647086), miscRNA."  
"Homo sapiens similar to ribosomal protein L23A (LOC647099), mRNA."  
"PREDICTED: Homo sapiens hypothetical LOC647104 (LOC647104), mRNA."  
"PREDICTED: Homo sapiens similar to embigin homolog (LOC647121), mRNA."  
"PREDICTED: Homo sapiens hypothetical LOC647131 (LOC647131), mRNA."  
"PREDICTED: Homo sapiens misc\_RNA (LOC647150), miscRNA."  
"PREDICTED: Homo sapiens similar to glutathione S-transferase alpha 3 (LOC647169), mRNA  
"PREDICTED: Homo sapiens hypothetical protein LOC647171 (LOC647171), mRNA."  
"PREDICTED: Homo sapiens hypothetical protein LOC647206 (LOC647206), mRNA."  
"PREDICTED: Homo sapiens hypothetical protein LOC647213 (LOC647213), mRNA."  
"PREDICTED: Homo sapiens hypothetical protein LOC647234 (LOC647234), mRNA."  
"PREDICTED: Homo sapiens hypothetical LOC647243 (LOC647243), mRNA."  
"PREDICTED: Homo sapiens hypothetical LOC647244 (LOC647244), mRNA."  
"PREDICTED: Homo sapiens similar to PTPRF interacting protein alpha 2 (LOC647246), mRNA  
"PREDICTED: Homo sapiens hypothetical LOC647250 (LOC647250), mRNA."  
"PREDICTED: Homo sapiens hypothetical LOC647281, transcript variant 2 (LOC647281), mRN  
"PREDICTED: Homo sapiens misc\_RNA (LOC647285), miscRNA."  
"PREDICTED: Homo sapiens similar to chromosome 1 open reading frame 36 (LOC647286), m  
"PREDICTED: Homo sapiens misc\_RNA (LOC647288), miscRNA."  
"PREDICTED: Homo sapiens hypothetical protein LOC647297 (LOC647297), mRNA."  
"PREDICTED: Homo sapiens misc\_RNA (LOC647302), miscRNA."  
"PREDICTED: Homo sapiens hypothetical protein LOC647306 (LOC647306), mRNA."  
"PREDICTED: Homo sapiens misc\_RNA (LOC647307), miscRNA."  
"PREDICTED: Homo sapiens hypothetical LOC647309 (LOC647309), mRNA."  
"PREDICTED: Homo sapiens similar to testis expressed gene 22 (LOC647310), mRNA."  
"PREDICTED: Homo sapiens hypothetical protein LOC647322 (LOC647322), mRNA."  
"PREDICTED: Homo sapiens hypothetical protein LOC647326 (LOC647326), mRNA."  
"PREDICTED: Homo sapiens similar to T-box 1 isoform C (LOC647335), mRNA."  
"PREDICTED: Homo sapiens similar to T-cell receptor beta chain V region 86T1 precursor (LOC  
"PREDICTED: Homo sapiens similar to protocadherin 8 isoform 2 precursor (LOC647339), mRN  
"PREDICTED: Homo sapiens similar to ATP synthase, H+ transporting, mitochondrial F1 compl  
"PREDICTED: Homo sapiens similar to T-cell receptor beta chain V region C5 precursor (LOC6  
"PREDICTED: Homo sapiens similar to Alcohol dehydrogenase class III chi chain (Glutathione-c

"PREDICTED: Homo sapiens hypothetical protein LOC647347 (LOC647347), mRNA."  
"PREDICTED: Homo sapiens similar to AP-3 complex subunit sigma-1 (Adapter-related protein  
"PREDICTED: Homo sapiens similar to T-cell receptor beta chain V region CTL-L17 precursor (I  
"PREDICTED: Homo sapiens similar to Sodium- and chloride-dependent creatine transporter 1  
"PREDICTED: Homo sapiens hypothetical protein LOC647389 (LOC647389), mRNA."  
"PREDICTED: Homo sapiens hypothetical LOC647400 (LOC647400), mRNA."  
"PREDICTED: Homo sapiens hypothetical protein LOC647439 (LOC647439), mRNA."  
"PREDICTED: Homo sapiens similar to Ankyrin-1 (Erythrocyte ankyrin) (LOC647448), mRNA."  
"PREDICTED: Homo sapiens similar to Ig kappa chain V-I region HK101 precursor (LOC647450)  
"PREDICTED: Homo sapiens similar to heat shock protein 90Bf (LOC647451), mRNA."  
"PREDICTED: Homo sapiens similar to Ig kappa chain V-I region HK101 precursor (LOC647460)  
"PREDICTED: Homo sapiens similar to CG40449-PA.3 (LOC647461), mRNA."  
"PREDICTED: Homo sapiens similar to heterogeneous nuclear ribonucleoprotein A3, transcript  
"PREDICTED: Homo sapiens similar to poly(A) binding protein, cytoplasmic 1 (LOC647480), mF  
"PREDICTED: Homo sapiens similar to F33H2.2 (LOC647481), mRNA."  
"PREDICTED: Homo sapiens hypothetical protein LOC647485 (LOC647485), mRNA."  
"PREDICTED: Homo sapiens hypothetical protein LOC647488 (LOC647488), mRNA."  
"PREDICTED: Homo sapiens hypothetical protein LOC647493 (LOC647493), mRNA."  
"PREDICTED: Homo sapiens hypothetical LOC647506 (LOC647506), mRNA."  
"PREDICTED: Homo sapiens hypothetical protein LOC647509 (LOC647509), mRNA."  
"PREDICTED: Homo sapiens hypothetical protein LOC647519 (LOC647519), mRNA."  
"PREDICTED: Homo sapiens similar to ring finger protein 185 (LOC647535), mRNA."  
"PREDICTED: Homo sapiens hypothetical protein LOC647541 (LOC647541), mRNA."  
"PREDICTED: Homo sapiens hypothetical protein LOC647542 (LOC647542), mRNA."  
"PREDICTED: Homo sapiens hypothetical protein LOC647579 (LOC647579), mRNA."  
"PREDICTED: Homo sapiens similar to sine oculis homeobox homolog 7 (LOC647589), mRNA.  
"PREDICTED: Homo sapiens similar to DNA primase large subunit, 58kDa (LOC647592), mRN.  
"PREDICTED: Homo sapiens hypothetical LOC647597 (LOC647597), mRNA."  
"PREDICTED: Homo sapiens hypothetical protein LOC647621 (LOC647621), mRNA."  
"PREDICTED: Homo sapiens hypothetical protein LOC647645 (LOC647645), mRNA."  
"PREDICTED: Homo sapiens hypothetical protein LOC647650 (LOC647650), mRNA."  
"PREDICTED: Homo sapiens similar to Translationally-controlled tumor protein (TCTP) (p23) (H  
"PREDICTED: Homo sapiens hypothetical protein LOC647680 (LOC647680), mRNA."  
"PREDICTED: Homo sapiens similar to dicer1 (LOC647691), mRNA."  
"PREDICTED: Homo sapiens hypothetical protein LOC647710 (LOC647710), mRNA."  
"PREDICTED: Homo sapiens similar to double homeobox, 4 (LOC647713), mRNA."  
"PREDICTED: Homo sapiens hypothetical protein LOC647718 (LOC647718), mRNA."  
"PREDICTED: Homo sapiens similar to H2B histone family, member F (LOC647719), mRNA."  
"PREDICTED: Homo sapiens similar to DNA-directed RNA polymerase II largest subunit (RPB1  
"PREDICTED: Homo sapiens similar to CG5514-PB, isoform B (LOC647742), mRNA."  
"PREDICTED: Homo sapiens similar to F40G9.9 (LOC647748), mRNA."  
"PREDICTED: Homo sapiens hypothetical LOC647766 (LOC647766), mRNA."  
"PREDICTED: Homo sapiens hypothetical protein LOC647784, transcript variant 2 (LOC647784  
"PREDICTED: Homo sapiens hypothetical protein LOC647785 (LOC647785), mRNA."



"PREDICTED: Homo sapiens hypothetical protein LOC647802 (LOC647802), mRNA."  
"PREDICTED: Homo sapiens hypothetical protein LOC647810 (LOC647810), mRNA."  
"PREDICTED: Homo sapiens hypothetical protein LOC647819 (LOC647819), mRNA."  
"PREDICTED: Homo sapiens similar to cyclin fold protein 1 (LOC647832), mRNA."  
"PREDICTED: Homo sapiens hypothetical protein LOC647834 (LOC647834), mRNA."  
"PREDICTED: Homo sapiens similar to wingless-type MMTV integration site family, member 7B  
"PREDICTED: Homo sapiens hypothetical LOC647839 (LOC647839), mRNA."  
"PREDICTED: Homo sapiens hypothetical LOC647850 (LOC647850), mRNA."  
"PREDICTED: Homo sapiens hypothetical LOC647855 (LOC647855), mRNA."  
"PREDICTED: Homo sapiens similar to 40S ribosomal protein SA (p40) (34/67 kDa laminin rece  
"PREDICTED: Homo sapiens similar to Occludin (LOC647859), mRNA."  
"PREDICTED: Homo sapiens misc\_RNA (LOC647886), miscRNA."  
"PREDICTED: Homo sapiens hypothetical protein LOC647920 (LOC647920), mRNA."  
"PREDICTED: Homo sapiens similar to fibroblast growth factor receptor 2 isoform IIIb (LOC6479  
"PREDICTED: Homo sapiens hypothetical protein LOC647947 (LOC647947), mRNA."  
"PREDICTED: Homo sapiens misc\_RNA (LOC647954), miscRNA."  
"PREDICTED: Homo sapiens similar to SET domain and mariner transposase fusion gene (LOC  
"PREDICTED: Homo sapiens similar to golgin-like protein (LOC647988), mRNA."  
"PREDICTED: Homo sapiens hypothetical protein LOC647993 (LOC647993), mRNA."  
"PREDICTED: Homo sapiens similar to COMM domain containing 4 (LOC647995), mRNA."  
"PREDICTED: Homo sapiens similar to 60S ribosomal protein L7, transcript variant 1 (LOC6480  
"PREDICTED: Homo sapiens hypothetical protein LOC648003 (LOC648003), mRNA."  
"PREDICTED: Homo sapiens similar to eukaryotic translation initiation factor 4A, isoform 1 (LOC  
"PREDICTED: Homo sapiens similar to Formin-binding protein 3 (Formin-binding protein 11) (FE  
"PREDICTED: Homo sapiens hypothetical protein LOC648050 (LOC648050), mRNA."  
"PREDICTED: Homo sapiens hypothetical protein LOC648058 (LOC648058), mRNA."  
"PREDICTED: Homo sapiens hypothetical protein LOC648059 (LOC648059), mRNA."  
"PREDICTED: Homo sapiens hypothetical protein LOC648069 (LOC648069), mRNA."  
"PREDICTED: Homo sapiens hypothetical protein LOC648133 (LOC648133), mRNA."  
"PREDICTED: Homo sapiens hypothetical protein LOC648149 (LOC648149), mRNA."  
"PREDICTED: Homo sapiens similar to germinal histone H4 gene, transcript variant 1 (LOC648  
"PREDICTED: Homo sapiens hypothetical protein LOC648173 (LOC648173), mRNA."  
"PREDICTED: Homo sapiens similar to RAS and EF hand domain containing (LOC648176), mF  
"PREDICTED: Homo sapiens similar to Heterogeneous nuclear ribonucleoprotein A1 (Helix-des  
"PREDICTED: Homo sapiens hypothetical protein LOC648220 (LOC648220), mRNA."  
"PREDICTED: Homo sapiens hypothetical protein LOC648226 (LOC648226), mRNA."  
"PREDICTED: Homo sapiens similar to 60S ribosomal protein L10 (QM protein) (Tumor suppres  
"PREDICTED: Homo sapiens similar to 40S ribosomal protein SA (p40) (34/67 kDa laminin rece  
"PREDICTED: Homo sapiens hypothetical protein LOC648277 (LOC648277), mRNA."  
"PREDICTED: Homo sapiens similar to Kelch-like protein 2 (LOC648278), mRNA."  
"PREDICTED: Homo sapiens misc\_RNA (LOC648279), miscRNA."  
"PREDICTED: Homo sapiens hypothetical protein LOC648302 (LOC648302), mRNA."  
"PREDICTED: Homo sapiens hypothetical protein LOC648304 (LOC648304), mRNA."  
"PREDICTED: Homo sapiens hypothetical protein LOC648309 (LOC648309), mRNA."

"PREDICTED: Homo sapiens hypothetical protein LOC648362 (LOC648362), mRNA."  
"PREDICTED: Homo sapiens hypothetical LOC648364 (LOC648364), mRNA."  
"PREDICTED: Homo sapiens hypothetical LOC648365 (LOC648365), mRNA."  
"PREDICTED: Homo sapiens similar to SLIT-ROBO Rho GTPase-activating protein 2 (srGAP2)  
"PREDICTED: Homo sapiens hypothetical protein LOC648370 (LOC648370), mRNA."  
"PREDICTED: Homo sapiens misc\_RNA (LOC648390), miscRNA."  
"PREDICTED: Homo sapiens similar to IQ motif containing with AAA domain (LOC648398), mR  
"PREDICTED: Homo sapiens similar to Ornithine aminotransferase, mitochondrial precursor (Or  
"PREDICTED: Homo sapiens hypothetical LOC648405 (LOC648405), mRNA."  
"PREDICTED: Homo sapiens hypothetical protein LOC648432, transcript variant 1 (LOC648432  
"PREDICTED: Homo sapiens hypothetical protein LOC648456 (LOC648456), mRNA."  
"PREDICTED: Homo sapiens similar to Caspase-4 precursor (CASP-4) (ICH-2 protease) (TX pr  
"PREDICTED: Homo sapiens hypothetical protein LOC648476, transcript variant 1 (LOC648476  
"PREDICTED: Homo sapiens similar to IQ motif and WD repeats 1 isoform a (LOC648494), mR  
"PREDICTED: Homo sapiens hypothetical protein LOC648496 (LOC648496), mRNA."  
"PREDICTED: Homo sapiens similar to epiplakin 1 (LOC648526), mRNA."  
"PREDICTED: Homo sapiens similar to seizure related 6 homolog (mouse)-like 2 isoform 2 (LO  
"PREDICTED: Homo sapiens hypothetical protein LOC648568 (LOC648568), mRNA."  
"PREDICTED: Homo sapiens hypothetical protein LOC648570 (LOC648570), mRNA."  
"PREDICTED: Homo sapiens similar to alveolar soft part sarcoma chromosome region, candida  
"PREDICTED: Homo sapiens hypothetical protein LOC648590 (LOC648590), mRNA."  
"PREDICTED: Homo sapiens similar to ribosomal protein S27 (LOC648622), mRNA."  
"PREDICTED: Homo sapiens similar to membrane-spanning 4-domains, subfamily A, member 4  
"PREDICTED: Homo sapiens similar to Peptidyl-prolyl cis-trans isomerase NIMA-interacting 4 (F  
"PREDICTED: Homo sapiens similar to cDNA sequence BC048546, transcript variant 2 (LOC64  
"PREDICTED: Homo sapiens hypothetical LOC648657 (LOC648657), mRNA."  
"PREDICTED: Homo sapiens similar to ribosomal protein S3a, transcript variant 4 (LOC648659)  
"PREDICTED: Homo sapiens misc\_RNA (LOC648665), miscRNA."  
"PREDICTED: Homo sapiens similar to GRB2-related adaptor protein (LOC648667), mRNA."  
"PREDICTED: Homo sapiens similar to retinoblastoma binding protein 4, transcript variant 5 (LC  
"PREDICTED: Homo sapiens hypothetical protein LOC648733 (LOC648733), mRNA."  
"Homo sapiens ACTB pseudogene (LOC648740), non-coding RNA."  
"PREDICTED: Homo sapiens similar to growth suppressor related (LOC648742), mRNA."  
"PREDICTED: Homo sapiens similar to Pancreatic alpha-amylase precursor (PA) (1,4-alpha-D- $\alpha$   
"PREDICTED: Homo sapiens hypothetical protein LOC648757, transcript variant 1 (LOC648757  
"PREDICTED: Homo sapiens misc\_RNA (LOC648771), miscRNA."  
"PREDICTED: Homo sapiens hypothetical protein LOC648814 (LOC648814), mRNA."  
"PREDICTED: Homo sapiens similar to hydrocephalus inducing (LOC648815), mRNA."  
"PREDICTED: Homo sapiens similar to hCG2040565 (LOC648822), mRNA."  
"PREDICTED: Homo sapiens hypothetical protein LOC648827 (LOC648827), mRNA."  
"PREDICTED: Homo sapiens hypothetical protein LOC648852 (LOC648852), mRNA."  
"PREDICTED: Homo sapiens hypothetical LOC648859 (LOC648859), mRNA."  
"PREDICTED: Homo sapiens similar to T-cell receptor gamma chain V region V108B precursor  
"PREDICTED: Homo sapiens hypothetical protein LOC648876 (LOC648876), mRNA."

"PREDICTED: Homo sapiens similar to ATP-binding cassette sub-family D member 1 (Adrenole  
"PREDICTED: Homo sapiens hypothetical protein LOC648906, transcript variant 2 (LOC648907  
"PREDICTED: Homo sapiens similar to LOC283693 protein (LOC648921), mRNA."  
"PREDICTED: Homo sapiens similar to Melanoma-associated antigen 1 (MAGE-1 antigen) (Ant  
"PREDICTED: Homo sapiens misc\_RNA (LOC648927), miscRNA."  
"PREDICTED: Homo sapiens similar to retinitis pigmentosa 1-like 1 (LOC648963), mRNA."  
"PREDICTED: Homo sapiens hypothetical protein LOC648974 (LOC648974), mRNA."  
"PREDICTED: Homo sapiens hypothetical protein LOC648976 (LOC648976), mRNA."  
"PREDICTED: Homo sapiens hypothetical protein LOC648978, transcript variant 2 (LOC648979  
"PREDICTED: Homo sapiens similar to breakpoint cluster region, transcript variant 1 (LOC6489  
"PREDICTED: Homo sapiens hypothetical protein LOC648982 (LOC648982), mRNA."  
"PREDICTED: Homo sapiens similar to Baculoviral IAP repeat-containing protein 1 (Neuronal ap  
"PREDICTED: Homo sapiens hypothetical LOC648993 (LOC648993), mRNA."  
"PREDICTED: Homo sapiens similar to paraspeckle protein 1, transcript variant 2 (LOC649009)  
"PREDICTED: Homo sapiens similar to SH3-binding kinase (LOC649023), mRNA."  
"PREDICTED: Homo sapiens hypothetical protein LOC649025 (LOC649025), mRNA."  
"PREDICTED: Homo sapiens hypothetical protein LOC649037 (LOC649037), mRNA."  
"PREDICTED: Homo sapiens similar to acidic ribosomal phosphoprotein P0, transcript variant 3  
"PREDICTED: Homo sapiens similar to hydrocephalus inducing (LOC649067), mRNA."  
"PREDICTED: Homo sapiens similar to solute carrier family 25 member 24 isoform 1 (LOC6490  
"PREDICTED: Homo sapiens hypothetical protein LOC649086 (LOC649086), mRNA."  
"PREDICTED: Homo sapiens hypothetical LOC649095 (LOC649095), mRNA."  
"PREDICTED: Homo sapiens hypothetical protein LOC649107 (LOC649107), mRNA."  
"PREDICTED: Homo sapiens similar to HLA class II histocompatibility antigen, DRB1-9 beta cha  
"PREDICTED: Homo sapiens similar to eukaryotic translation elongation factor 1 alpha 2 (LOC6  
"Homo sapiens similar to CG7467-PA, isoform A (LOC649159), mRNA."  
"PREDICTED: Homo sapiens similar to CCR4-NOT transcription complex subunit 7 (CCR4-assc  
"PREDICTED: Homo sapiens similar to double homeobox 4c (LOC649167), mRNA."  
"PREDICTED: Homo sapiens similar to WD repeat domain 74, transcript variant 1 (LOC649169)  
"PREDICTED: Homo sapiens hypothetical protein LOC649174 (LOC649174), mRNA."  
"PREDICTED: Homo sapiens similar to PRAME family member DJ1198H6.2 (LOC649179), mR  
"PREDICTED: Homo sapiens similar to double homeobox 4c (LOC649192), mRNA."  
"PREDICTED: Homo sapiens similar to fructose-1,6-bisphosphatase 2 (LOC649198), mRNA."  
"PREDICTED: Homo sapiens similar to Nebulin (LOC649199), mRNA."  
"PREDICTED: Homo sapiens similar to Ig lambda chain V region 4A precursor (LOC649210), m  
"PREDICTED: Homo sapiens hypothetical protein LOC649212 (LOC649212), mRNA."  
"PREDICTED: Homo sapiens similar to High mobility group protein 1-like 10 (HMG-1L10), trans  
"PREDICTED: Homo sapiens similar to procollagen, type II, alpha 1 (LOC649217), mRNA."  
"PREDICTED: Homo sapiens similar to SET domain and mariner transposase fusion gene (LOC  
"PREDICTED: Homo sapiens similar to paraneoplastic antigen MA3 (LOC649238), mRNA."  
"PREDICTED: Homo sapiens hypothetical protein LOC649241, transcript variant 1 (LOC649242  
"PREDICTED: Homo sapiens similar to Zinc finger protein 92 (Zfp-92) (LOC649248), mRNA."  
"PREDICTED: Homo sapiens similar to aminopeptidase puromycin sensitive, transcript variant 1  
"PREDICTED: Homo sapiens hypothetical protein LOC649276 (LOC649276), mRNA."

"PREDICTED: Homo sapiens similar to wingless-type MMTV integration site family, member 7B  
"PREDICTED: Homo sapiens hypothetical protein LOC649282 (LOC649282), mRNA."  
"PREDICTED: Homo sapiens hypothetical protein LOC649318 (LOC649318), mRNA."  
"PREDICTED: Homo sapiens hypothetical protein LOC649327 (LOC649327), mRNA."  
"PREDICTED: Homo sapiens similar to heterogeneous nuclear ribonucleoprotein C-like 1 (LOC649338), mRNA."  
"PREDICTED: Homo sapiens misc\_RNA (LOC649346), miscRNA."  
"PREDICTED: Homo sapiens similar to cleavage and polyadenylation specific factor 6 (LOC649350), mRNA."  
"PREDICTED: Homo sapiens similar to voltage-gated sodium channel type V alpha isoform b (LOC649352), mRNA."  
"PREDICTED: Homo sapiens similar to double homeobox, 4 (LOC649385), mRNA."  
"PREDICTED: Homo sapiens hypothetical protein LOC649396 (LOC649396), mRNA."  
"PREDICTED: Homo sapiens similar to glucosaminyl (N-acetyl) transferase 2 isoform C (LOC649398), mRNA."  
"PREDICTED: Homo sapiens similar to double homeobox 4c (LOC649415), mRNA."  
"PREDICTED: Homo sapiens similar to absent in melanoma 2 (LOC649417), mRNA."  
"PREDICTED: Homo sapiens hypothetical protein LOC649422 (LOC649422), mRNA."  
"PREDICTED: Homo sapiens hypothetical protein LOC649431 (LOC649431), mRNA."  
"PREDICTED: Homo sapiens hypothetical protein LOC649432 (LOC649432), mRNA."  
"PREDICTED: Homo sapiens similar to Beta-defensin 128 precursor (Beta-defensin 28) (DEFB128), mRNA."  
"PREDICTED: Homo sapiens similar to high mobility group nucleosomal binding domain 2, transcript variant 1 (LOC649440), mRNA."  
"PREDICTED: Homo sapiens similar to 60S ribosomal protein L29 (Cell surface heparin binding protein L29) (LOC649442), mRNA."  
"PREDICTED: Homo sapiens similar to KARP-1-binding protein (LOC649466), mRNA."  
"PREDICTED: Homo sapiens region containing hypothetical protein LOC132241; ACA7 small non-coding RNA (LOC649470), mRNA."  
"PREDICTED: Homo sapiens hypothetical protein LOC649493 (LOC649493), mRNA."  
"PREDICTED: Homo sapiens hypothetical protein LOC649500 (LOC649500), mRNA."  
"PREDICTED: Homo sapiens hypothetical protein LOC649503 (LOC649503), mRNA."  
"PREDICTED: Homo sapiens misc\_RNA (LOC649553), miscRNA."  
"PREDICTED: Homo sapiens similar to eukaryotic translation initiation factor 4E, transcript variant 1 (LOC649555), mRNA."  
"PREDICTED: Homo sapiens similar to Transcript Y 10 protein (LOC649583), mRNA."  
"PREDICTED: Homo sapiens hypothetical protein LOC649584 (LOC649584), mRNA."  
"PREDICTED: Homo sapiens similar to zinc finger protein 329 (LOC649596), mRNA."  
"PREDICTED: Homo sapiens similar to ADP-ribosylation factor-like protein 4A, transcript variant 1 (LOC649600), mRNA."  
"PREDICTED: Homo sapiens similar to Heat shock protein HSP 90-beta (HSP 84) (LOC649613), mRNA."  
"PREDICTED: Homo sapiens similar to echinoderm microtubule associated protein like 5, transcript variant 1 (LOC649615), mRNA."  
"PREDICTED: Homo sapiens similar to Tubulin beta-4q chain, transcript variant 3 (LOC649679), mRNA."  
"PREDICTED: Homo sapiens similar to Neuronal acetylcholine receptor protein, beta-4 subunit (LOC649680), mRNA."  
"PREDICTED: Homo sapiens similar to butyrophilin related 1 (LOC649702), mRNA."  
"PREDICTED: Homo sapiens hypothetical protein LOC649753, transcript variant 1 (LOC649754), mRNA."  
"PREDICTED: Homo sapiens similar to likely ortholog of kinesin light chain 2 (LOC649762), mRNA."  
"PREDICTED: Homo sapiens similar to testis specific protein, Y-linked 1 (LOC649765), mRNA."  
"PREDICTED: Homo sapiens hypothetical protein LOC649775 (LOC649775), mRNA."  
"PREDICTED: Homo sapiens similar to cell division cycle 10 isoform 1 (LOC649801), mRNA."  
"PREDICTED: Homo sapiens hypothetical protein LOC649812 (LOC649812), mRNA."  
"PREDICTED: Homo sapiens hypothetical protein LOC649813 (LOC649813), mRNA."  
"PREDICTED: Homo sapiens hypothetical protein LOC649823 (LOC649823), mRNA."  
"PREDICTED: Homo sapiens hypothetical protein LOC649826 (LOC649826), mRNA."

"PREDICTED: Homo sapiens similar to mCG7611 (LOC649839), mRNA."  
"PREDICTED: Homo sapiens similar to HLA class I histocompatibility antigen, A-29 alpha chain  
"PREDICTED: Homo sapiens misc\_RNA (LOC649873), miscRNA."  
"PREDICTED: Homo sapiens similar to START domain containing 9 (LOC649878), mRNA."  
"PREDICTED: Homo sapiens similar to interleukin 6 signal transducer isoform 1 precursor (LOC  
"PREDICTED: Homo sapiens hypothetical protein LOC649902 (LOC649902), mRNA."  
"PREDICTED: Homo sapiens misc\_RNA (LOC649917), miscRNA."  
"PREDICTED: Homo sapiens hypothetical protein LOC649921 (LOC649921), mRNA."  
"PREDICTED: Homo sapiens similar to Ig gamma-2 chain C region (LOC649923), mRNA."  
"PREDICTED: Homo sapiens hypothetical protein LOC649951 (LOC649951), mRNA."  
"PREDICTED: Homo sapiens hypothetical protein LOC649952 (LOC649952), mRNA."  
"PREDICTED: Homo sapiens similar to creatine kinase, mitochondrial 1B precursor (LOC64997  
"PREDICTED: Homo sapiens hypothetical protein LOC649974 (LOC649974), mRNA."  
"PREDICTED: Homo sapiens similar to Meiosis expressed protein 1 (LOC649987), mRNA."  
"PREDICTED: Homo sapiens hypothetical protein LOC649991 (LOC649991), mRNA."  
"PREDICTED: Homo sapiens hypothetical protein LOC649999 (LOC649999), mRNA."  
"PREDICTED: Homo sapiens hypothetical protein LOC650003 (LOC650003), mRNA."  
"PREDICTED: Homo sapiens similar to Nucleolar GTP-binding protein 1 (Chronic renal failure g  
"PREDICTED: Homo sapiens similar to RNA-binding protein 4 (RNA-binding motif protein 4) (La  
"PREDICTED: Homo sapiens similar to Group IIC secretory phospholipase A2 precursor (Phosp  
"PREDICTED: Homo sapiens similar to uncharacterized protein family UPF0227 member RGD1  
"PREDICTED: Homo sapiens similar to beta-1,4-mannosyltransferase (LOC650037), mRNA."  
"PREDICTED: Homo sapiens hypothetical protein LOC650038 (LOC650038), mRNA."  
"PREDICTED: Homo sapiens similar to centrosome-associated protein 350 (LOC650087), mRN  
"PREDICTED: Homo sapiens misc\_RNA (LOC650095), miscRNA."  
"PREDICTED: Homo sapiens similar to SHC transforming protein 1 (SH2 domain protein C1) (S  
"PREDICTED: Homo sapiens similar to chromosome 1 open reading frame 80 (LOC650132), m  
"PREDICTED: Homo sapiens hypothetical LOC650144 (LOC650144), mRNA."  
"PREDICTED: Homo sapiens similar to tropomyosin 3 isoform 2 (LOC650152), mRNA."  
"PREDICTED: Homo sapiens similar to hCG1812818 (LOC650155), mRNA."  
"PREDICTED: Homo sapiens similar to TRIM5/CypA fusion protein (LOC650157), mRNA."  
"PREDICTED: Homo sapiens hypothetical protein LOC650159 (LOC650159), mRNA."  
"PREDICTED: Homo sapiens similar to Nuclear protein 1 (Protein p8) (Candidate of metastasis  
"PREDICTED: Homo sapiens hypothetical protein LOC650210 (LOC650210), mRNA."  
"PREDICTED: Homo sapiens similar to Exportin-T (tRNA exportin) (Exportin(tRNA)) (LOC65021  
"PREDICTED: Homo sapiens hypothetical LOC650238 (LOC650238), mRNA."  
"PREDICTED: Homo sapiens hypothetical protein LOC650243 (LOC650243), mRNA."  
"PREDICTED: Homo sapiens hypothetical protein LOC650251 (LOC650251), mRNA."  
"PREDICTED: Homo sapiens similar to RNA binding motif protein, X-linked (LOC650253), mRN  
"PREDICTED: Homo sapiens similar to hypothetical protein FLJ40722, transcript variant 1 (LOC  
"PREDICTED: Homo sapiens hypothetical protein LOC650263 (LOC650263), mRNA."  
"PREDICTED: Homo sapiens hypothetical protein LOC650268, transcript variant 2 (LOC650268  
"PREDICTED: Homo sapiens similar to unc-93 homolog B1, transcript variant 2 (LOC650274), r  
"PREDICTED: Homo sapiens similar to 60S ribosomal protein L7 (LOC650276), mRNA."

"PREDICTED: Homo sapiens hypothetical protein LOC650278 (LOC650278), mRNA."  
"PREDICTED: Homo sapiens hypothetical protein LOC650280 (LOC650280), mRNA."  
"PREDICTED: Homo sapiens similar to Kinase suppressor of ras-1 (Kinase suppressor of ras) (LOC650281), mRNA."  
"PREDICTED: Homo sapiens similar to zinc finger and BTB domain containing 8 opposite strand 1 (LOC650282), mRNA."  
"PREDICTED: Homo sapiens similar to zinc finger protein 14 (KOX 6) (LOC650330), mRNA."  
"PREDICTED: Homo sapiens similar to ataxin-1 ubiquitin-like interacting protein, transcript variant 1 (LOC650331), mRNA."  
"PREDICTED: Homo sapiens hypothetical protein LOC650342 (LOC650342), mRNA."  
"PREDICTED: Homo sapiens hypothetical protein LOC650346 (LOC650346), mRNA."  
"PREDICTED: Homo sapiens hypothetical protein LOC650361 (LOC650361), mRNA."  
"Homo sapiens asparagine-linked glycosylation 1 homolog pseudogene (LOC650368), non-coding RNA."  
"PREDICTED: Homo sapiens similar to family with sequence similarity 60, member A (LOC650369), mRNA."  
"PREDICTED: Homo sapiens similar to adiponectin receptor 1 (LOC650390), mRNA."  
"PREDICTED: Homo sapiens hypothetical protein LOC650392 (LOC650392), mRNA."  
"PREDICTED: Homo sapiens similar to hCG2042707 (LOC650405), mRNA."  
"PREDICTED: Homo sapiens hypothetical protein LOC650407 (LOC650407), mRNA."  
"PREDICTED: Homo sapiens hypothetical protein LOC650410 (LOC650410), mRNA."  
"PREDICTED: Homo sapiens hypothetical protein LOC650427 (LOC650427), mRNA."  
"PREDICTED: Homo sapiens similar to keratin, hair, basic, 6 (LOC650428), mRNA."  
"PREDICTED: Homo sapiens hypothetical protein LOC650454 (LOC650454), mRNA."  
"PREDICTED: Homo sapiens hypothetical protein LOC650455 (LOC650455), mRNA."  
"PREDICTED: Homo sapiens similar to CDC42-binding protein kinase beta (LOC650459), mRNA."  
"PREDICTED: Homo sapiens hypothetical protein LOC650482 (LOC650482), mRNA."  
"PREDICTED: Homo sapiens similar to Trafficking protein particle complex protein 2 (Sedlin) (MIM:601100) (LOC650483), mRNA."  
"PREDICTED: Homo sapiens hypothetical protein LOC650509 (LOC650509), mRNA."  
"PREDICTED: Homo sapiens similar to hCG2026922 (LOC650515), mRNA."  
"PREDICTED: Homo sapiens similar to Proteasome subunit alpha type 6 (Proteasome iota chain) (LOC650516), mRNA."  
"PREDICTED: Homo sapiens similar to Importin alpha-2 subunit (Karyopherin alpha-2 subunit) (LOC650517), mRNA."  
"PREDICTED: Homo sapiens similar to Ral guanine nucleotide dissociation stimulator (RalGEF) (LOC650518), mRNA."  
"PREDICTED: Homo sapiens similar to ubiquitin specific protease 32, transcript variant 1 (LOC650519), mRNA."  
"PREDICTED: Homo sapiens similar to Phosphorylase b kinase gamma catalytic chain, testis/liver (LOC650520), mRNA."  
"PREDICTED: Homo sapiens similar to alpha 1 type VIII collagen precursor (LOC650568), mRNA."  
"PREDICTED: Homo sapiens hypothetical protein LOC650577 (LOC650577), mRNA."  
"PREDICTED: Homo sapiens similar to anaphase-promoting complex subunit 2 (LOC650621), mRNA."  
"PREDICTED: Homo sapiens hypothetical protein LOC650631 (LOC650631), mRNA."  
"PREDICTED: Homo sapiens hypothetical protein LOC650634 (LOC650634), mRNA."  
"PREDICTED: Homo sapiens similar to signal recognition particle 54kDa (LOC650638), mRNA."  
"PREDICTED: Homo sapiens similar to 40S ribosomal protein S26 (LOC650646), mRNA."  
"PREDICTED: Homo sapiens hypothetical protein LOC650668 (LOC650668), mRNA."  
"PREDICTED: Homo sapiens hypothetical protein LOC650673 (LOC650673), mRNA."  
"PREDICTED: Homo sapiens hypothetical protein LOC650678 (LOC650678), mRNA."  
"PREDICTED: Homo sapiens hypothetical protein LOC650689 (LOC650689), mRNA."  
"PREDICTED: Homo sapiens similar to SH3/ankyrin domain gene 2 isoform a (LOC650698), mRNA."  
"PREDICTED: Homo sapiens similar to S100 calcium-binding protein A13 (LOC650706), mRNA."  
"PREDICTED: Homo sapiens similar to CG15021-PA (LOC650708), mRNA."

"PREDICTED: Homo sapiens hypothetical protein LOC650721 (LOC650721), mRNA."  
"PREDICTED: Homo sapiens hypothetical protein LOC650733 (LOC650733), mRNA."  
"PREDICTED: Homo sapiens hypothetical protein LOC650737, transcript variant 1 (LOC650737)  
"PREDICTED: Homo sapiens similar to Immunoglobulin omega chain precursor (VpreB2 protein  
"PREDICTED: Homo sapiens similar to 40S ribosomal protein S28 (LOC650788), mRNA."  
"PREDICTED: Homo sapiens similar to Ig lambda chain V-I region BL2 precursor (LOC650799).  
"PREDICTED: Homo sapiens hypothetical protein LOC650803 (LOC650803), mRNA."  
"PREDICTED: Homo sapiens hypothetical LOC650823 (LOC650823), mRNA."  
"PREDICTED: Homo sapiens similar to CG9804-PA, transcript variant 2 (LOC650826), mRNA."  
"PREDICTED: Homo sapiens similar to mitogen-activated protein kinase kinase 3 isoform A (LC  
"PREDICTED: Homo sapiens similar to T-cell receptor alpha chain V region CTL-L17 precursor  
"PREDICTED: Homo sapiens hypothetical protein LOC650850 (LOC650850), mRNA."  
"PREDICTED: Homo sapiens hypothetical protein LOC650853 (LOC650853), mRNA."  
"PREDICTED: Homo sapiens hypothetical protein LOC650862 (LOC650862), mRNA."  
"PREDICTED: Homo sapiens hypothetical protein LOC650881 (LOC650881), mRNA."  
"PREDICTED: Homo sapiens similar to CG5700-PB (LOC650889), mRNA."  
"PREDICTED: Homo sapiens similar to Hermansky-Pudlak syndrome 1 protein isoform b (LOC6  
"PREDICTED: Homo sapiens similar to activating signal cointegrator 1 complex subunit 3-like 1  
"PREDICTED: Homo sapiens similar to DEAD/H (Asp-Glu-Ala-Asp/His) box polypeptide 11 isofc  
"PREDICTED: Homo sapiens hypothetical protein LOC650938 (LOC650938), mRNA."  
"PREDICTED: Homo sapiens hypothetical LOC650961 (LOC650961), mRNA."  
"PREDICTED: Homo sapiens similar to Signal-transducing adaptor protein 2 (STAP-2) (Breast t  
"PREDICTED: Homo sapiens similar to Protein FAM38A (LOC651004), mRNA."  
"PREDICTED: Homo sapiens hypothetical protein LOC651006 (LOC651006), mRNA."  
"PREDICTED: Homo sapiens hypothetical protein LOC651022 (LOC651022), mRNA."  
"PREDICTED: Homo sapiens hypothetical protein LOC651029 (LOC651029), mRNA."  
"PREDICTED: Homo sapiens similar to EC2-V2R pheromone receptor (LOC651055), mRNA."  
"PREDICTED: Homo sapiens hypothetical protein LOC651075 (LOC651075), mRNA."  
"PREDICTED: Homo sapiens similar to Galactoside-binding soluble lectin 13 (Placental tissue p  
"PREDICTED: Homo sapiens similar to T-box 1 isoform C (LOC651115), mRNA."  
"PREDICTED: Homo sapiens similar to BCL2/adenovirus E1B 19-kDa protein-interacting proteir  
"PREDICTED: Homo sapiens similar to Claudin-22 (LOC651126), mRNA."  
"PREDICTED: Homo sapiens similar to T-complex protein 10A homolog, transcript variant 3 (LC  
"PREDICTED: Homo sapiens similar to NADPH dependent diflavin oxidoreductase 1 (LOC6511  
"PREDICTED: Homo sapiens hypothetical protein LOC651143, transcript variant 1 (LOC651143  
"PREDICTED: Homo sapiens similar to 60S ribosomal protein L3 (L4) (LOC651149), mRNA."  
"PREDICTED: Homo sapiens hypothetical protein LOC651175 (LOC651175), mRNA."  
"PREDICTED: Homo sapiens similar to Zinc finger SWIM domain containing protein 3 (LOC651  
"PREDICTED: Homo sapiens hypothetical protein LOC651197 (LOC651197), mRNA."  
"PREDICTED: Homo sapiens similar to hCG2036706 (LOC651198), mRNA."  
"PREDICTED: Homo sapiens hypothetical protein LOC651208 (LOC651208), mRNA."  
"PREDICTED: Homo sapiens hypothetical LOC651212 (LOC651212), mRNA."  
"PREDICTED: Homo sapiens similar to Golgi autoantigen, golgin subfamily a, 2 (LOC651213), r  
"PREDICTED: Homo sapiens similar to protein phosphatase 1, regulatory (inhibitor) subunit 9A

"PREDICTED: Homo sapiens hypothetical protein LOC651280 (LOC651280), mRNA."  
"PREDICTED: Homo sapiens hypothetical protein LOC651285 (LOC651285), mRNA."  
"PREDICTED: Homo sapiens similar to Zinc finger protein 192 (LD5-1) (LOC651302), mRNA."  
"PREDICTED: Homo sapiens hypothetical protein LOC651309 (LOC651309), mRNA."  
"PREDICTED: Homo sapiens similar to T25G3.1 (LOC651316), mRNA."  
"PREDICTED: Homo sapiens hypothetical protein LOC651337 (LOC651337), mRNA."  
"PREDICTED: Homo sapiens hypothetical protein LOC651341 (LOC651341), mRNA."  
"PREDICTED: Homo sapiens similar to cystatin SC (LOC651353), mRNA."  
"PREDICTED: Homo sapiens similar to cystatin 9-like precursor (LOC651373), mRNA."  
"PREDICTED: Homo sapiens hypothetical protein LOC651380 (LOC651380), mRNA."  
"PREDICTED: Homo sapiens hypothetical LOC651386 (LOC651386), mRNA."  
"PREDICTED: Homo sapiens hypothetical LOC651398 (LOC651398), mRNA."  
"PREDICTED: Homo sapiens hypothetical protein LOC651429 (LOC651429), mRNA."  
"PREDICTED: Homo sapiens hypothetical LOC651430 (LOC651430), mRNA."  
"PREDICTED: Homo sapiens similar to ribosomal protein L9 (LOC651436), mRNA."  
"PREDICTED: Homo sapiens similar to ribosomal protein L36 (LOC651453), mRNA."  
"PREDICTED: Homo sapiens hypothetical protein LOC651465 (LOC651465), mRNA."  
"PREDICTED: Homo sapiens hypothetical protein LOC651467 (LOC651467), mRNA."  
"PREDICTED: Homo sapiens hypothetical protein LOC651468 (LOC651468), mRNA."  
"PREDICTED: Homo sapiens hypothetical protein LOC651481 (LOC651481), mRNA."  
"PREDICTED: Homo sapiens hypothetical protein LOC651493 (LOC651493), mRNA."  
"PREDICTED: Homo sapiens hypothetical protein LOC651495 (LOC651495), mRNA."  
"PREDICTED: Homo sapiens hypothetical protein LOC651520 (LOC651520), mRNA."  
"PREDICTED: Homo sapiens similar to integrin alpha X precursor (LOC651524), mRNA."  
"PREDICTED: Homo sapiens similar to immunoglobulin iota chain preproprotein (LOC651536),  
"PREDICTED: Homo sapiens hypothetical protein LOC651546 (LOC651546), mRNA."  
"PREDICTED: Homo sapiens similar to fetal Alzheimer antigen isoform 2 (LOC651552), mRNA."  
"PREDICTED: Homo sapiens hypothetical protein LOC651554 (LOC651554), mRNA."  
"PREDICTED: Homo sapiens hypothetical protein LOC651565 (LOC651565), mRNA."  
"PREDICTED: Homo sapiens similar to DALR anticodon binding domain containing 3 isoform 1  
"PREDICTED: Homo sapiens similar to tubulin, alpha 8 like, transcript variant 2 (LOC651576), n  
"PREDICTED: Homo sapiens similar to calmodulin regulated spectrin-associated protein 1-like 1  
"PREDICTED: Homo sapiens hypothetical protein LOC651609 (LOC651609), mRNA."  
"PREDICTED: Homo sapiens similar to phospholipase D family, member 5 (LOC651617), mRN.  
"PREDICTED: Homo sapiens hypothetical protein LOC651619 (LOC651619), mRNA."  
"PREDICTED: Homo sapiens similar to hydroxysteroid (17-beta) dehydrogenase 7 (LOC651621  
"PREDICTED: Homo sapiens hypothetical protein LOC651624 (LOC651624), mRNA."  
"PREDICTED: Homo sapiens similar to nuclear pore membrane protein 121 (LOC651630), mRN  
"PREDICTED: Homo sapiens hypothetical protein LOC651643 (LOC651643), mRNA."  
"PREDICTED: Homo sapiens similar to maternally expressed 3 (LOC651655), mRNA."  
"PREDICTED: Homo sapiens misc\_RNA (LOC651697), miscRNA."  
"PREDICTED: Homo sapiens similar to mucin 20 (LOC651714), mRNA."  
"PREDICTED: Homo sapiens hypothetical protein LOC651729 (LOC651729), mRNA."  
"PREDICTED: Homo sapiens hypothetical LOC651731 (LOC651731), mRNA."



"PREDICTED: Homo sapiens hypothetical protein LOC651745 (LOC651745), mRNA."  
"PREDICTED: Homo sapiens hypothetical LOC651746 (LOC651746), mRNA."  
"PREDICTED: Homo sapiens hypothetical protein LOC651747 (LOC651747), mRNA."  
"PREDICTED: Homo sapiens similar to Ig kappa chain V-II region RPMI 6410 precursor (LOC651748), mRNA."  
"PREDICTED: Homo sapiens hypothetical protein LOC651772 (LOC651772), mRNA."  
"PREDICTED: Homo sapiens similar to BTG3 associated nuclear protein isoform a (LOC651809), mRNA."  
"PREDICTED: Homo sapiens similar to Ubiquitin-conjugating enzyme E2S (Ubiquitin-conjugating enzyme E2S), mRNA."  
"PREDICTED: Homo sapiens similar to Succinate dehydrogenase [ubiquinone] cytochrome b subunit (LOC651810), mRNA."  
"PREDICTED: Homo sapiens similar to HLA class II histocompatibility antigen, DRB1-1 beta chain (LOC651811), mRNA."  
"PREDICTED: Homo sapiens similar to MARCKS-related protein (MARCKS-like protein 1) (Macrophage-1, mRNA)."   
"PREDICTED: Homo sapiens similar to nuclear factor of activated T-cells, cytoplasmic, calcineurin-dependent 1 (LOC651812), mRNA."  
"PREDICTED: Homo sapiens hypothetical protein LOC651860 (LOC651860), mRNA."  
"PREDICTED: Homo sapiens similar to double homeobox, 4 (LOC651861), mRNA."  
"PREDICTED: Homo sapiens similar to C-C chemokine receptor type 11 (C-C CKR-11) (CC-CKR-11), mRNA."  
"PREDICTED: Homo sapiens hypothetical protein LOC651876 (LOC651876), mRNA."  
"PREDICTED: Homo sapiens hypothetical protein LOC651881 (LOC651881), mRNA."  
"PREDICTED: Homo sapiens similar to ribosomal protein S12 (LOC651894), mRNA."  
"PREDICTED: Homo sapiens hypothetical protein LOC651914 (LOC651914), mRNA."  
"PREDICTED: Homo sapiens similar to Ras-related C3 botulinum toxin substrate 1 (p21-Rac1) (Rac1), mRNA."  
"PREDICTED: Homo sapiens similar to ataxia telangiectasia and Rad3 related protein (ATM), mRNA."  
"PREDICTED: Homo sapiens similar to RuvB-like protein 1 (LOC651933), mRNA."  
"PREDICTED: Homo sapiens similar to zygote arrest 1 (LOC651951), mRNA."  
"PREDICTED: Homo sapiens hypothetical protein LOC651957 (LOC651957), mRNA."  
"PREDICTED: Homo sapiens similar to FSHD region gene 2 protein (LOC651959), mRNA."  
"PREDICTED: Homo sapiens similar to Ig kappa chain V-III region CLL precursor (Rheumatoid factor), mRNA."  
"PREDICTED: Homo sapiens similar to Ig heavy chain V-I region HG3 precursor (LOC651963), mRNA."  
"PREDICTED: Homo sapiens hypothetical protein LOC651979 (LOC651979), mRNA."  
"PREDICTED: Homo sapiens similar to pyruvate dehydrogenase phosphatase regulatory subunit 1 (LOC651980), mRNA."  
"PREDICTED: Homo sapiens similar to xenobiotic/medium-chain fatty acid:CoA ligase (LOC651981), mRNA."  
"PREDICTED: Homo sapiens hypothetical protein LOC652015 (LOC652015), mRNA."  
"PREDICTED: Homo sapiens similar to mindbomb homolog 2 (LOC652022), mRNA."  
"PREDICTED: Homo sapiens hypothetical protein LOC652038 (LOC652038), mRNA."  
"PREDICTED: Homo sapiens hypothetical protein LOC652044 (LOC652044), mRNA."  
"PREDICTED: Homo sapiens similar to hect (homologous to the E6-AP (UBE3A) carboxyl terminus), mRNA."  
"PREDICTED: Homo sapiens hypothetical protein LOC652048 (LOC652048), mRNA."  
"PREDICTED: Homo sapiens similar to Ig heavy chain V-III region WEA (LOC652067), mRNA."  
"PREDICTED: Homo sapiens similar to 60S ribosomal protein L23a (LOC652071), mRNA."  
"PREDICTED: Homo sapiens similar to galectin-related inter-fiber protein (LOC652078), mRNA."  
"PREDICTED: Homo sapiens similar to Ig heavy chain V-III region VH26 precursor (LOC652080), mRNA."  
"PREDICTED: Homo sapiens hypothetical protein LOC652094 (LOC652094), mRNA."  
"PREDICTED: Homo sapiens similar to Ig heavy chain V-I region HG3 precursor (LOC652102), mRNA."  
"PREDICTED: Homo sapiens similar to Ig heavy chain V-III region VH26 precursor (LOC652113), mRNA."  
"PREDICTED: Homo sapiens similar to F59A6.3 (LOC652115), mRNA."  
"PREDICTED: Homo sapiens similar to Ig heavy chain V-I region V35 precursor (LOC652126), mRNA."

"PREDICTED: Homo sapiens hypothetical protein LOC652127 (LOC652127), mRNA."  
"PREDICTED: Homo sapiens similar to Ig heavy chain V-II region ARH-77 precursor (LOC652128), mRNA."  
"PREDICTED: Homo sapiens similar to N-ethylmaleimide sensitive fusion protein (LOC652134), mRNA."  
"PREDICTED: Homo sapiens similar to DNA-directed RNA polymerase II largest subunit (LOC652135), mRNA."  
"PREDICTED: Homo sapiens similar to Ig heavy chain V-III region VH26 precursor (LOC652141), mRNA."  
"PREDICTED: Homo sapiens similar to U5 snRNP-specific protein, 200 kDa (LOC652147), mRNA."  
"PREDICTED: Homo sapiens similar to Ig heavy chain V-I region HG3 precursor (LOC652155), mRNA."  
"PREDICTED: Homo sapiens hypothetical protein LOC652160 (LOC652160), mRNA."  
"PREDICTED: Homo sapiens similar to synovial sarcoma, X breakpoint 9 (LOC652163), mRNA."  
"PREDICTED: Homo sapiens similar to phosphodiesterase 4D interacting protein isoform 1 (LOC652164), mRNA."  
"PREDICTED: Homo sapiens similar to retrotransposon gag domain containing 1 (LOC652175), mRNA."  
"PREDICTED: Homo sapiens similar to Lymphocyte antigen 75 precursor (DEC-205) (CD205) (LOC652176), mRNA."  
"PREDICTED: Homo sapiens similar to ribonuclease/angiogenin inhibitor 1 (LOC652190), mRNA."  
"PREDICTED: Homo sapiens hypothetical protein LOC652203 (LOC652203), mRNA."  
"PREDICTED: Homo sapiens hypothetical protein LOC652209 (LOC652209), mRNA."  
"PREDICTED: Homo sapiens similar to family with sequence similarity 70, member B (LOC652210), mRNA."  
"PREDICTED: Homo sapiens hypothetical protein LOC652226 (LOC652226), mRNA."  
"PREDICTED: Homo sapiens similar to stereocilin (LOC652234), mRNA."  
"PREDICTED: Homo sapiens hypothetical protein LOC652235 (LOC652235), mRNA."  
"PREDICTED: Homo sapiens similar to nuclear protein in testis (LOC652252), mRNA."  
"PREDICTED: Homo sapiens hypothetical protein LOC652255 (LOC652255), mRNA."  
"PREDICTED: Homo sapiens similar to phosphodiesterase 4D interacting protein isoform 2 (LOC652256), mRNA."  
"PREDICTED: Homo sapiens similar to ras homolog gene family, member Q (LOC652274), mRNA."  
"PREDICTED: Homo sapiens hypothetical protein LOC652287 (LOC652287), mRNA."  
"PREDICTED: Homo sapiens hypothetical protein LOC652291 (LOC652291), mRNA."  
"PREDICTED: Homo sapiens similar to PMS1 protein homolog 2 (DNA mismatch repair protein) (LOC652292), mRNA."  
"PREDICTED: Homo sapiens similar to hypothetical protein LOC285927 (LOC652305), mRNA."  
"PREDICTED: Homo sapiens similar to Kinase suppressor of ras-1 (Kinase suppressor of ras) (LOC652306), mRNA."  
"PREDICTED: Homo sapiens hypothetical protein LOC652322 (LOC652322), mRNA."  
"PREDICTED: Homo sapiens similar to anaphase promoting complex subunit 1 (LOC652324), mRNA."  
"PREDICTED: Homo sapiens similar to LIM and senescent cell antigen-like domains 1 (LOC652325), mRNA."  
"PREDICTED: Homo sapiens similar to Ig heavy chain V-III region VH26 precursor (LOC652344), mRNA."  
"PREDICTED: Homo sapiens hypothetical protein LOC652373 (LOC652373), mRNA."  
"PREDICTED: Homo sapiens similar to C1q and tumor necrosis factor related protein 4 (LOC652374), mRNA."  
"PREDICTED: Homo sapiens similar to cytochrome P450, family 2, subfamily J, polypeptide 2, E (LOC652375), mRNA."  
"PREDICTED: Homo sapiens similar to nodal modulator 2 isoform 2 (LOC652388), mRNA."  
"PREDICTED: Homo sapiens similar to double homeobox 4c (LOC652389), mRNA."  
"PREDICTED: Homo sapiens similar to TFIIH basal transcription factor complex p44 subunit (Baz1) (LOC652390), mRNA."  
"PREDICTED: Homo sapiens similar to myosin light chain kinase isoform 1 (LOC652408), mRNA."  
"PREDICTED: Homo sapiens similar to CG9682-PA (LOC652417), mRNA."  
"PREDICTED: Homo sapiens similar to Zona pellucida sperm-binding protein 3 precursor (Zona pellucida sperm-binding protein 3) (LOC652418), mRNA."  
"PREDICTED: Homo sapiens similar to Nucleolar transcription factor 1 (Upstream-binding factor) (LOC652419), mRNA."  
"PREDICTED: Homo sapiens hypothetical protein LOC652448 (LOC652448), mRNA."  
"PREDICTED: Homo sapiens similar to serine hydrolase-like 2 (LOC652456), mRNA."

"PREDICTED: Homo sapiens similar to Plectin-1 (PLTN) (PCN) (Hemidesmosomal protein 1) (H  
"PREDICTED: Homo sapiens hypothetical protein LOC652463 (LOC652463), mRNA."  
"PREDICTED: Homo sapiens hypothetical protein LOC652470 (LOC652470), mRNA."  
"PREDICTED: Homo sapiens similar to major histocompatibility complex, class II, DR beta 4 pre  
"PREDICTED: Homo sapiens similar to Nonhistone chromosomal protein HMG-17 (High-mobilit  
"PREDICTED: Homo sapiens similar to SMT3 suppressor of mif two 3 homolog 2 (LOC652489)  
"PREDICTED: Homo sapiens hypothetical LOC652491 (LOC652491), mRNA."  
"PREDICTED: Homo sapiens hypothetical protein LOC652492 (LOC652492), mRNA."  
"PREDICTED: Homo sapiens similar to Ig kappa chain V-I region HK102 precursor (LOC652493)  
"PREDICTED: Homo sapiens similar to Ig gamma-3 chain C region, membrane-bound form (LO  
"PREDICTED: Homo sapiens similar to double homeobox 4c (LOC652505), mRNA."  
"PREDICTED: Homo sapiens similar to Exocyst complex component Sec15B (LOC652508), mF  
"PREDICTED: Homo sapiens similar to CG14446-PA (LOC652512), mRNA."  
"PREDICTED: Homo sapiens similar to SEC13-like 1 (LOC652519), mRNA."  
"PREDICTED: Homo sapiens hypothetical protein LOC652529 (LOC652529), mRNA."  
"PREDICTED: Homo sapiens hypothetical protein LOC652530 (LOC652530), mRNA."  
"PREDICTED: Homo sapiens similar to N-ethylmaleimide-sensitive factor (LOC652536), mRNA.  
"PREDICTED: Homo sapiens hypothetical protein LOC652541 (LOC652541), mRNA."  
"PREDICTED: Homo sapiens hypothetical protein LOC652542 (LOC652542), mRNA."  
"PREDICTED: Homo sapiens similar to Matrix metalloproteinase-19 precursor (MMP-19) (Matrix  
"PREDICTED: Homo sapiens similar to Protein C21orf70 homolog (LOC652545), mRNA."  
"PREDICTED: Homo sapiens similar to SLIT-ROBO Rho GTPase-activating protein 2 (srGAP2)  
"PREDICTED: Homo sapiens similar to piwi-like 2 (LOC652554), mRNA."  
"PREDICTED: Homo sapiens similar to T-cell surface glycoprotein CD8 beta chain precursor (C  
"PREDICTED: Homo sapiens similar to mediator of RNA polymerase II transcription, subunit 28  
"PREDICTED: Homo sapiens similar to male sterility domain containing 1 (LOC652570), mRNA  
"PREDICTED: Homo sapiens similar to Fc fragment of IgG, low affinity IIIa, receptor for (CD16)  
"PREDICTED: Homo sapiens similar to double homeobox 4c (LOC652586), mRNA."  
"PREDICTED: Homo sapiens hypothetical protein LOC652588 (LOC652588), mRNA."  
"PREDICTED: Homo sapiens similar to solute carrier family 34 (sodium phosphate), member 3 (L  
"PREDICTED: Homo sapiens similar to polycystin 1 isoform 2 precursor (LOC652594), mRNA."  
"PREDICTED: Homo sapiens similar to U2 small nuclear ribonucleoprotein A (U2 snRNP-A) (L  
"PREDICTED: Homo sapiens hypothetical LOC652602 (LOC652602), mRNA."  
"PREDICTED: Homo sapiens similar to Polyadenylate-binding protein 1 (Poly(A)-binding protein  
"PREDICTED: Homo sapiens similar to MHC class I antigen (LOC652614), mRNA."  
"PREDICTED: Homo sapiens similar to Anaphase promoting complex subunit 1 (APC1) (Cyclos  
"PREDICTED: Homo sapiens similar to neutrophil cytosolic factor 1 (LOC652616), mRNA."  
"PREDICTED: Homo sapiens similar to Ran-binding protein 2 (RanBP2) (Nuclear pore complex  
"PREDICTED: Homo sapiens similar to Baculoviral IAP repeat-containing protein 1 (Neuronal ap  
"PREDICTED: Homo sapiens similar to hydrocephalus inducing (LOC652628), mRNA."  
"PREDICTED: Homo sapiens hypothetical LOC652629 (LOC652629), mRNA."  
"PREDICTED: Homo sapiens similar to cis-Golgi matrix protein GM130 (LOC652633), mRNA."  
"PREDICTED: Homo sapiens similar to fem-1 homolog a (LOC652634), mRNA."  
"PREDICTED: Homo sapiens similar to WAS protein homology region 2 domain containing 1 (L

"PREDICTED: Homo sapiens similar to Ig heavy chain V-III region VH26 precursor (LOC652651)

"PREDICTED: Homo sapiens similar to solute carrier family 34 (sodium phosphate), member 3 (LOC652652), mRNA."

"PREDICTED: Homo sapiens hypothetical LOC652663 (LOC652663), mRNA."

"PREDICTED: Homo sapiens similar to RAS p21 protein activator 4 (LOC652668), mRNA."

"PREDICTED: Homo sapiens similar to 40S ribosomal protein S3a (V-fos transformation effecto

"PREDICTED: Homo sapiens similar to promyelocytic leukemia protein isoform 9 (LOC652671),

"PREDICTED: Homo sapiens similar to Recombining binding protein suppressor of hairless (J k

"PREDICTED: Homo sapiens similar to sperm protein associated with the nucleus, X chromoso

"PREDICTED: Homo sapiens similar to PMS1 protein homolog 2 (DNA mismatch repair protein

"PREDICTED: Homo sapiens similar to Ig kappa chain V-I region HK102 precursor (LOC652694

"PREDICTED: Homo sapiens hypothetical protein LOC652697 (LOC652697), mRNA."

"PREDICTED: Homo sapiens similar to Tripartite motif protein 26 (Zinc finger protein 173) (Acid

"PREDICTED: Homo sapiens similar to Neutrophil cytosol factor 1 (NCF-1) (Neutrophil NADPH

"PREDICTED: Homo sapiens similar to Galectin-9 (HOM-HD-21) (Ecalectin) (LOC652703), mRN

"PREDICTED: Homo sapiens similar to DNA damage binding protein 1 (Damage-specific DNA b

"PREDICTED: Homo sapiens similar to Galectin-9 (HOM-HD-21) (Ecalectin) (LOC652712), mRN

"PREDICTED: Homo sapiens similar to LIM homeobox protein 1 (LOC652721), mRNA."

"PREDICTED: Homo sapiens hypothetical protein LOC652730 (LOC652730), mRNA."

"PREDICTED: Homo sapiens similar to hydrocephalus inducing (LOC652735), mRNA."

"PREDICTED: Homo sapiens similar to hydrocephalus inducing (LOC652736), mRNA."

"PREDICTED: Homo sapiens similar to Rab GTPase binding effector protein 2 (Rabaptin-5beta)

"PREDICTED: Homo sapiens similar to Ig kappa chain V-I region Walker precursor (LOC652745

"PREDICTED: Homo sapiens similar to hydrocephalus inducing (LOC652747), mRNA."

"PREDICTED: Homo sapiens similar to Baculoviral IAP repeat-containing protein 1 (Neuronal ap

"PREDICTED: Homo sapiens similar to Rap guanine nucleotide exchange factor 2 (PDZ domair

"PREDICTED: Homo sapiens hypothetical protein LOC652762 (LOC652762), mRNA."

"PREDICTED: Homo sapiens similar to double homeobox, 4 (LOC652764), mRNA."

"PREDICTED: Homo sapiens similar to small EDRK-rich factor 1A, telomeric (LOC652765), mRN

"PREDICTED: Homo sapiens similar to espin (LOC652768), mRNA."

"PREDICTED: Homo sapiens similar to general transcription factor II, i isoform 1 (LOC652771),

"PREDICTED: Homo sapiens similar to Shwachman-Bodian-Diamond syndrome (predicted) (LC

"PREDICTED: Homo sapiens similar to Ig kappa chain V-V region L7 precursor (LOC652775), n

"PREDICTED: Homo sapiens similar to Killer cell immunoglobulin-like receptor 2DS3 precursor

"PREDICTED: Homo sapiens similar to Arachidonate 5-lipoxygenase (5-lipoxygenase) (5-LO) (L

"PREDICTED: Homo sapiens similar to anaphase promoting complex subunit 1 (LOC652790), r

"PREDICTED: Homo sapiens similar to Pyruvate kinase, isozymes M1/M2 (Pyruvate kinase mu

"PREDICTED: Homo sapiens similar to Mast/stem cell growth factor receptor precursor (SCFR)

"PREDICTED: Homo sapiens hypothetical protein LOC652805 (LOC652805), mRNA."

"PREDICTED: Homo sapiens hypothetical LOC652806 (LOC652806), mRNA."

"PREDICTED: Homo sapiens hypothetical LOC652808 (LOC652808), mRNA."

"PREDICTED: Homo sapiens hypothetical LOC652809 (LOC652809), mRNA."

"PREDICTED: Homo sapiens similar to MEGF10 protein (LOC652819), mRNA."

"PREDICTED: Homo sapiens similar to 26S protease regulatory subunit 6B (MIP224) (MB67-int

"PREDICTED: Homo sapiens similar to Solute carrier family 26, member 11 (LOC652834), mRN

"PREDICTED: Homo sapiens similar to C-terminal binding protein 2 (LOC652837), mRNA."  
"PREDICTED: Homo sapiens similar to lethal giant larvae homolog 2 isoform a (LOC652838), mRNA."  
"PREDICTED: Homo sapiens similar to cytochrome P450 4Z1 (LOC652843), mRNA."  
"PREDICTED: Homo sapiens similar to Ig heavy chain V-II region ARH-77 precursor (LOC652844), mRNA."  
"PREDICTED: Homo sapiens hypothetical protein LOC652860 (LOC652860), mRNA."  
"PREDICTED: Homo sapiens similar to Mitochondrial import inner membrane translocase subunit TIMM22 (LOC652861), mRNA."  
"PREDICTED: Homo sapiens similar to hCG2029978 (LOC652865), mRNA."  
"PREDICTED: Homo sapiens similar to SAPS domain family member 2 (LOC652875), mRNA."  
"PREDICTED: Homo sapiens similar to melanoma antigen family B, 6 (LOC652887), mRNA."  
"PREDICTED: Homo sapiens similar to SEZ6L2 protein (LOC652900), mRNA."  
"PREDICTED: Homo sapiens similar to Bcl-XL-binding protein v68 (LOC652903), mRNA."  
"PREDICTED: Homo sapiens similar to Cks1 protein homologue (LOC652904), mRNA."  
"Homo sapiens hypothetical protein LOC652968 (LOC652968), mRNA."  
"PREDICTED: Homo sapiens similar to transmembrane protease, serine 11E (LOC653057), mRNA."  
"PREDICTED: Homo sapiens similar to golgi autoantigen, golgin subfamily a, 8A (LOC653061), mRNA."  
"PREDICTED: Homo sapiens similar to inhibitor of growth family, member 5, transcript variant 4 (LOC653062), mRNA."  
"PREDICTED: Homo sapiens similar to CG32820-PA, isoform A, transcript variant 4 (LOC653070), mRNA."  
"PREDICTED: Homo sapiens similar to golgi autoantigen, golgin subfamily a, 8A, transcript variant 1 (LOC653071), mRNA."  
"PREDICTED: Homo sapiens similar to zinc finger, DHHC domain containing 11, transcript variant 1 (LOC653072), mRNA."  
"PREDICTED: Homo sapiens similar to RAN-binding protein 2-like 1 isoform 2, transcript variant 1 (LOC653073), mRNA."  
"PREDICTED: Homo sapiens similar to CG9240-PA (LOC653093), mRNA."  
"PREDICTED: Homo sapiens similar to transmembrane protein 29, transcript variant 3 (LOC653094), mRNA."  
"PREDICTED: Homo sapiens hypothetical protein LOC653097 (LOC653097), mRNA."  
"PREDICTED: Homo sapiens similar to Ankyrin repeat domain-containing protein 11 (Ankyrin repeat domain-containing protein 11) (LOC653098), mRNA."  
"PREDICTED: Homo sapiens similar to Proline-rich nuclear receptor coactivator 2, transcript variant 1 (LOC653099), mRNA."  
"PREDICTED: Homo sapiens similar to coxsackie virus and adenovirus receptor precursor (LOC653100), mRNA."  
"PREDICTED: Homo sapiens hypothetical protein LOC653113 (LOC653113), mRNA."  
"PREDICTED: Homo sapiens hypothetical protein LOC653114 (LOC653114), mRNA."  
"PREDICTED: Homo sapiens similar to heterogeneous nuclear ribonucleoprotein A3, transcript variant 1 (LOC653115), mRNA."  
"PREDICTED: Homo sapiens similar to block of proliferation 1 (LOC653119), mRNA."  
"PREDICTED: Homo sapiens similar to Golgi autoantigen, golgin subfamily A member 2 (Golgi autoantigen, golgin subfamily A member 2) (LOC653120), mRNA."  
"PREDICTED: Homo sapiens similar to GTPase activating Rap/RanGAP domain-like 4, transcript variant 1 (LOC653121), mRNA."  
"PREDICTED: Homo sapiens similar to protein tyrosine phosphatase, non-receptor type 20, transcript variant 1 (LOC653122), mRNA."  
"PREDICTED: Homo sapiens similar to Nucleosome binding protein 1 (Nucleosome binding protein 1) (LOC653123), mRNA."  
"PREDICTED: Homo sapiens similar to Annexin A8 (Annexin VIII) (Vascular anticoagulant-beta) (LOC653124), mRNA."  
"Homo sapiens hCG1995786 (LOC653147), mRNA."  
"PREDICTED: Homo sapiens similar to hypothetical protein MGC40405, transcript variant 1 (LOC653148), mRNA."  
"PREDICTED: Homo sapiens similar to MAPK-interacting and spindle-stabilizing protein (LOC653149), mRNA."  
"PREDICTED: Homo sapiens similar to family with sequence similarity 29, member A (LOC653150), mRNA."  
"PREDICTED: Homo sapiens hypothetical protein LOC653186 (LOC653186), mRNA."  
"PREDICTED: Homo sapiens similar to basic transcription factor 3-like 4 (LOC653189), mRNA."  
"PREDICTED: Homo sapiens similar to hypothetical protein FLJ33915, transcript variant 1 (LOC653190), mRNA."  
"PREDICTED: Homo sapiens hypothetical protein LOC653199 (LOC653199), mRNA."  
"PREDICTED: Homo sapiens similar to tripartite motif-containing 62 (LOC653200), mRNA."

"PREDICTED: Homo sapiens similar to myotubularin related protein 1 (LOC653204), mRNA."  
"PREDICTED: Homo sapiens similar to THAP domain protein 4, transcript variant 2 (LOC653205), mRNA."  
"PREDICTED: Homo sapiens hypothetical protein LOC653211 (LOC653211), mRNA."  
"PREDICTED: Homo sapiens similar to Signal recognition particle 9 kDa protein (SRP9) (LOC653212), mRNA."  
"PREDICTED: Homo sapiens similar to centaurin, gamma-like family, member 1 (LOC653234), mRNA."  
"PREDICTED: Homo sapiens similar to growth factor receptor-bound protein 2 (LOC653241), mRNA."  
"PREDICTED: Homo sapiens similar to fumarylacetoacetate hydrolase domain containing 2A (LOC653242), mRNA."  
"PREDICTED: Homo sapiens similar to nuclear RNA export factor 2, transcript variant 5 (LOC653243), mRNA."  
"PREDICTED: Homo sapiens similar to Gamma-glutamyltranspeptidase 1 precursor (Gamma-glutamyltranspeptidase 1 precursor) (LOC653244), mRNA."  
"PREDICTED: Homo sapiens similar to Smooth muscle cell-expressed and macrophage conditioned medium inducible protein 1 (LOC653245), mRNA."  
"PREDICTED: Homo sapiens similar to Nucleosome-binding protein 1 (Nucleosome-binding protein 1) (LOC653246), mRNA."  
"PREDICTED: Homo sapiens hypothetical LOC653265 (LOC653265), mRNA."  
"PREDICTED: Homo sapiens hypothetical LOC653270 (LOC653270), mRNA."  
"PREDICTED: Homo sapiens hypothetical LOC653276 (LOC653276), mRNA."  
"PREDICTED: Homo sapiens similar to LOC388161, transcript variant 1 (LOC653291), mRNA."  
"PREDICTED: Homo sapiens similar to CSAG family, member 2 (LOC653297), mRNA."  
"PREDICTED: Homo sapiens similar to N-acylsphingosine amidohydrolase 2, transcript variant 1 (LOC653300), mRNA."  
"PREDICTED: Homo sapiens similar to Neutrophil cytosol factor 1 (NCF-1) (Neutrophil NADPH oxidase cytosolic factor 1) (LOC653301), mRNA."  
"PREDICTED: Homo sapiens similar to ATP synthase, H<sup>+</sup> transporting, mitochondrial F0 complex c1 (LOC653302), mRNA."  
"PREDICTED: Homo sapiens similar to dipeptidylpeptidase VI isoform 1 (LOC653338), mRNA."  
"PREDICTED: Homo sapiens similar to cis-Golgi matrix protein GM130, transcript variant 2 (LOC653339), mRNA."  
"PREDICTED: Homo sapiens similar to eukaryotic translation initiation factor 3, subunit 8, transcript variant 1 (LOC653340), mRNA."  
"PREDICTED: Homo sapiens similar to amrmdillo repeat containing, X-linked 6 (H. sapiens)-like 1 (LOC653341), mRNA."  
"PREDICTED: Homo sapiens similar to glutamate receptor, ionotropic, AMPA 4 (LOC653366), mRNA."  
"PREDICTED: Homo sapiens RCC1-like G exchanging factor-like (LOC653375), mRNA."  
"PREDICTED: Homo sapiens similar to family with sequence similarity 36, member A (LOC653376), mRNA."  
"PREDICTED: Homo sapiens similar to TBC1 domain family, member 3C, transcript variant 1 (LOC653377), mRNA."  
"PREDICTED: Homo sapiens misc\_RNA (LOC653381), miscRNA."  
"PREDICTED: Homo sapiens similar to CG33932-PA, isoform A (LOC653383), mRNA."  
"PREDICTED: Homo sapiens similar to cancer/testis antigen 1A, transcript variant 2 (LOC653384), mRNA."  
"PREDICTED: Homo sapiens similar to transcription elongation factor B polypeptide 3C (LOC653385), mRNA."  
"PREDICTED: Homo sapiens similar to sperm associated antigen 11 isoform H precursor, transcript variant 1 (LOC653386), mRNA."  
"PREDICTED: Homo sapiens similar to zinc finger protein 75, transcript variant 2 (LOC653425), mRNA."  
"PREDICTED: Homo sapiens similar to CG33096-PB, isoform B, transcript variant 1 (LOC653426), mRNA."  
"PREDICTED: Homo sapiens hypothetical LOC653450 (LOC653450), mRNA."  
"PREDICTED: Homo sapiens similar to Ribosome biogenesis protein BMS1 homolog (LOC653451), mRNA."  
"PREDICTED: Homo sapiens similar to SLIT-ROBO Rho GTPase-activating protein 2 (srGAP2) (LOC653452), mRNA."  
"PREDICTED: Homo sapiens similar to Ribosome biogenesis protein BMS1 homolog, transcript variant 1 (LOC653453), mRNA."  
"PREDICTED: Homo sapiens similar to golgi autoantigen, golgin subfamily a, 8B (LOC653472), mRNA."  
"PREDICTED: Homo sapiens similar to mitochondrial ribosomal protein L45, transcript variant 1 (LOC653473), mRNA."  
"PREDICTED: Homo sapiens similar to chromosome 6 open reading frame 123 (LOC653481), mRNA."  
"PREDICTED: Homo sapiens similar to Ran-binding protein 2 (RanBP2) (Nuclear pore complex protein 2) (LOC653482), mRNA."  
"PREDICTED: Homo sapiens similar to hypothetical gene supported by AK123662 (LOC653496), mRNA."  
"Homo sapiens similar to Galectin-7 (Gal-7) (HKL-14) (PI7) (p53-induced protein 1) (LOC653497), mRNA."

"Homo sapiens zinc finger protein 658 pseudogene (LOC653501), non-coding RNA."  
"PREDICTED: Homo sapiens similar to cyclophilin-LC (COAS2) (LOC653505), mRNA."  
"PREDICTED: Homo sapiens similar to meteorin, glial cell differentiation regulator-like (LOC653506), mRNA."  
"PREDICTED: Homo sapiens similar to phosphodiesterase 4D interacting protein isoform 2 (LOC653507), mRNA."  
"PREDICTED: Homo sapiens similar to cancer/testis antigen CT45 (LOC653515), mRNA."  
"PREDICTED: Homo sapiens similar to Notum CG13076-PB, isoform B (LOC653520), mRNA."  
"PREDICTED: Homo sapiens similar to amyotrophic lateral sclerosis 2 (juvenile) chromosome region 12q24.11 (LOC653521), mRNA."  
"Homo sapiens double homeobox, 4-like (LOC653545), mRNA."  
"PREDICTED: Homo sapiens similar to Charged multivesicular body protein 4b (Chromatin modulator) (LOC653546), mRNA."  
"PREDICTED: Homo sapiens hypothetical LOC653557 (LOC653557), mRNA."  
"PREDICTED: Homo sapiens similar to Rho-associated protein kinase 1 (Rho-associated, coiled-coil domain containing) (LOC653558), mRNA."  
"PREDICTED: Homo sapiens similar to solute carrier family 6 (neurotransmitter transporter, creatine) (LOC653559), mRNA."  
"Homo sapiens similar to Signal peptidase complex subunit 2 (Microsomal signal peptidase 25 kDa) (LOC653560), mRNA."  
"PREDICTED: Homo sapiens similar to similar to protein of unknown function (LOC653567), mRNA."  
"PREDICTED: Homo sapiens similar to polycythemia rubra vera 1 (LOC653579), mRNA."  
"PREDICTED: Homo sapiens similar to sperm protein associated with the nucleus, X chromosome (LOC653580), mRNA."  
"PREDICTED: Homo sapiens similar to TANK-binding kinase 1 (LOC653581), mRNA."  
"PREDICTED: Homo sapiens similar to PR domain containing 2, with ZNF domain, transcript variant 1 (LOC653582), mRNA."  
"PREDICTED: Homo sapiens similar to peptidylprolyl isomerase A (cyclophilin A)-like 4 (LOC653583), mRNA."  
"PREDICTED: Homo sapiens similar to Neutrophil defensin 1 precursor (HNP-1) (HP-1) (HP1) (LOC653584), mRNA."  
"PREDICTED: Homo sapiens similar to armadillo repeat containing 8 (LOC653601), mRNA."  
"PREDICTED: Homo sapiens similar to Histone H2A.o (H2A/o) (H2A.2) (H2a-615) (LOC653610), mRNA."  
"PREDICTED: Homo sapiens similar to eEF1A2 binding protein (LOC653616), mRNA."  
"PREDICTED: Homo sapiens similar to chromosome 21 open reading frame 25 (LOC653620), mRNA."  
"PREDICTED: Homo sapiens similar to caspase recruitment domain family, member 11 (LOC653621), mRNA."  
"PREDICTED: Homo sapiens similar to Golgi autoantigen, golgin subfamily A member 6 (Golgin subfamily A member 6) (LOC653622), mRNA."  
"PREDICTED: Homo sapiens similar to Williams Beuren syndrome chromosome region 19, transcript variant 1 (LOC653623), mRNA."  
"PREDICTED: Homo sapiens hypothetical LOC653630 (LOC653630), mRNA."  
"PREDICTED: Homo sapiens similar to 130kDa-Ins(1,4,5)P3 binding protein (LOC653632), mRNA."  
"PREDICTED: Homo sapiens similar to Golgin subfamily A member 6 (Golgin linked to PML) (Golgin subfamily A member 6) (LOC653633), mRNA."  
"PREDICTED: Homo sapiens similar to DEAH (Asp-Glu-Ala-His) box polypeptide 40 (LOC653634), mRNA."  
"PREDICTED: Homo sapiens similar to 3-phosphoinositide dependent protein kinase 1 (hPDK1) (LOC653635), mRNA."  
"PREDICTED: Homo sapiens hypothetical LOC653653 (LOC653653), mRNA."  
"PREDICTED: Homo sapiens similar to ribosomal protein S23 (LOC653658), mRNA."  
"PREDICTED: Homo sapiens similar to anaphase promoting complex subunit 1, transcript variant 1 (LOC653659), mRNA."  
"PREDICTED: Homo sapiens similar to TAF1 RNA polymerase II, TATA box binding protein (TAF1) (LOC653660), mRNA."  
"PREDICTED: Homo sapiens similar to defensin, beta 106A (LOC653667), mRNA."  
"PREDICTED: Homo sapiens similar to armadillo repeat containing 9 (LOC653683), mRNA."  
"PREDICTED: Homo sapiens similar to Angiotensin-converting enzyme, testis-specific isoform p (LOC653684), mRNA."  
"PREDICTED: Homo sapiens similar to tuftelin interacting protein 11 (LOC653715), mRNA."  
"PREDICTED: Homo sapiens similar to hect domain and RLD 2, transcript variant 1 (LOC653716), mRNA."  
"PREDICTED: Homo sapiens similar to actin-related protein 3-beta, transcript variant 2 (LOC653717), mRNA."  
"PREDICTED: Homo sapiens hypothetical LOC653735 (LOC653735), mRNA."  
"PREDICTED: Homo sapiens similar to ribosomal protein S6 kinase, polypeptide 1 (LOC653741), mRNA."

"PREDICTED: Homo sapiens similar to WD repeat domain 42A (LOC653750), mRNA."  
"PREDICTED: Homo sapiens similar to dexamethasone-induced transcript (LOC653752), mRNA."  
"PREDICTED: Homo sapiens similar to zinc finger protein 142 (clone pHZ-49) (LOC653759), mRNA."  
"PREDICTED: Homo sapiens similar to solute carrier family 25, member 37 (LOC653778), mRNA."  
"PREDICTED: Homo sapiens similar to Group 10 secretory phospholipase A2 precursor (Group 10 secretory phospholipase A2 precursor) (LOC653780), mRNA."  
"PREDICTED: Homo sapiens similar to methyltransferase 5 domain containing 1 (LOC653803), mRNA."  
"PREDICTED: Homo sapiens similar to golgi autoantigen, golgin subfamily a-like (LOC653806), mRNA."  
"PREDICTED: Homo sapiens similar to family with sequence similarity 72, member A, transcript variant 1 (LOC653807), mRNA."  
"PREDICTED: Homo sapiens similar to hypothetical protein FLJ36166, transcript variant 4 (LOC653808), mRNA."  
"PREDICTED: Homo sapiens similar to rho guanine nucleotide exchange factor 5 isoform 1, transcript variant 1 (LOC653809), mRNA."  
"PREDICTED: Homo sapiens similar to actin-related protein 3-beta, transcript variant 2 (LOC653810), mRNA."  
"PREDICTED: Homo sapiens similar to Dihydrofolate reductase, transcript variant 1 (LOC653870), mRNA."  
"PREDICTED: Homo sapiens similar to Temporarily Assigned Gene name family member (tag-1) (LOC653871), mRNA."  
"PREDICTED: Homo sapiens similar to Cytosolic acyl coenzyme A thioester hydrolase, inducible (LOC653872), mRNA."  
"PREDICTED: Homo sapiens similar to FUS interacting protein (serine-arginine rich) 1 (LOC653873), mRNA."  
"PREDICTED: Homo sapiens similar to hCG2014503 (LOC653885), mRNA."  
"PREDICTED: Homo sapiens similar to AF4/FMR2 family member 1 (Protein AF-4) (Proto-oncogene AF4) (LOC653886), mRNA."  
"PREDICTED: Homo sapiens similar to Actin-related protein 2/3 complex subunit 1B (ARP2/3 complex subunit 1B) (LOC653887), mRNA."  
"PREDICTED: Homo sapiens similar to kelch-like 2, Mayven; mayven; kelch (Drosophila)-like 2 (LOC653888), mRNA."  
"PREDICTED: Homo sapiens similar to protein geranylgeranyltransferase type I, beta subunit (LOC653889), mRNA."  
"PREDICTED: Homo sapiens similar to zinc finger protein 266 (LOC653905), mRNA."  
"PREDICTED: Homo sapiens similar to complement receptor related protein isoform 1 (LOC653906), mRNA."  
"PREDICTED: Homo sapiens hypothetical LOC653924 (LOC653924), mRNA."  
"PREDICTED: Homo sapiens similar to EGFR-coamplified and overexpressed protein, transcript variant 1 (LOC653925), mRNA."  
"PREDICTED: Homo sapiens similar to pleckstrin homology domain containing, family F (with F1) (LOC653926), mRNA."  
"PREDICTED: Homo sapiens similar to chromobox homolog 3 (LOC653972), mRNA."  
"PREDICTED: Homo sapiens similar to BTB and CNC homology 1, basic leucine zipper transcription factor 1 (LOC653973), mRNA."  
"PREDICTED: Homo sapiens similar to eukaryotic translation initiation factor 4H isoform 2, transcript variant 1 (LOC653974), mRNA."  
"PREDICTED: Homo sapiens similar to Glutathione S-transferase theta 1 (GST class-theta 1) (LOC653975), mRNA."  
"PREDICTED: Homo sapiens similar to DEAD/H (Asp-Glu-Ala-Asp/His) box polypeptide 26, transcript variant 1 (LOC653976), mRNA."  
"PREDICTED: Homo sapiens similar to dehydrogenase/reductase (SDR family) member 4 like 2 (LOC653977), mRNA."  
"PREDICTED: Homo sapiens similar to hypothetical LOC389634 (LOC654053), mRNA."  
"PREDICTED: Homo sapiens similar to heterogeneous nuclear ribonucleoprotein C isoform b, transcript variant 1 (LOC654054), mRNA."  
"PREDICTED: Homo sapiens similar to CG10343-PA (LOC654092), mRNA."  
"PREDICTED: Homo sapiens similar to solute carrier family 25, member 37 (LOC654103), mRNA."  
"PREDICTED: Homo sapiens similar to isocitrate dehydrogenase 3, gamma (LOC654113), mRNA."  
"PREDICTED: Homo sapiens similar to Sphingomyelin phosphodiesterase precursor (Acid sphingomyelinase) (LOC654114), mRNA."  
"PREDICTED: Homo sapiens similar to chromosome 3 open reading frame 21 (LOC654117), mRNA."  
"PREDICTED: Homo sapiens similar to leucine rich repeat containing 37B, transcript variant 1 (LOC654118), mRNA."  
"PREDICTED: Homo sapiens similar to adaptor-related protein complex 1 sigma 2 subunit (LOC654119), mRNA."  
"PREDICTED: Homo sapiens similar to SH3 and multiple ankyrin repeat domains protein 2 (Shank-2) (LOC654120), mRNA."  
"PREDICTED: Homo sapiens similar to radical S-adenosyl methionine and flavodoxin domains protein 1 (LOC654121), mRNA."  
"PREDICTED: Homo sapiens similar to HLA class II histocompatibility antigen, DR-W53 beta chain (LOC654122), mRNA."  
"PREDICTED: Homo sapiens similar to family with sequence similarity 76, member A (LOC654123), mRNA."



"PREDICTED: Homo sapiens similar to glycerophosphodiester phosphodiesterase domain cont:

"PREDICTED: Homo sapiens similar to soluble adenylyl cyclase, transcript variant 2 (LOC65417

"PREDICTED: Homo sapiens similar to lethal (2) k00619 CG4775-PA (LOC654174), mRNA."

"PREDICTED: Homo sapiens similar to CG11064-PA (LOC654187), mRNA."

"PREDICTED: Homo sapiens similar to heterogeneous nuclear ribonucleoprotein A3, transcript

"PREDICTED: Homo sapiens similar to similar to RIKEN cDNA 4933437K13 (LOC654191), mR

"PREDICTED: Homo sapiens similar to PR domain containing 2, with ZNF domain, transcript va

"PREDICTED: Homo sapiens similar to polycythemia rubra vera 1 (LOC654203), mRNA."

"PREDICTED: Homo sapiens similar to eEF1A2 binding protein (LOC654209), mRNA."

"PREDICTED: Homo sapiens similar to mitochondrial carrier protein MGC4399 (LOC654244), m

"PREDICTED: Homo sapiens similar to zinc finger protein 595 (LOC654254), mRNA."

"PREDICTED: Homo sapiens similar to beta-tubulin cofactor D isoform 1 (LOC654260), mRNA."

"PREDICTED: Homo sapiens similar to RAB4B, member RAS oncogene family (LOC654335), r

"PREDICTED: Homo sapiens similar to galectin 9 short isoform, transcript variant 2 (LOC65434

"Homo sapiens hypothetical LOC654433 (LOC654433), non-coding RNA."

"Homo sapiens hypothetical locus LOC678655 (LOC678655), non-coding RNA."

"Homo sapiens hepatopoietin PCn127 (LOC723972), non-coding RNA."

"PREDICTED: Homo sapiens homogentisate 1,2-dioxygenase like (LOC727722), mRNA."

"PREDICTED: Homo sapiens similar to poly (ADP-ribose) glycohydrolase (LOC727726), mRNA

"PREDICTED: Homo sapiens similar to APG4 autophagy 4 homolog B isoform a (LOC727737),

"PREDICTED: Homo sapiens similar to cis-Golgi matrix protein GM130 (LOC727751), mRNA."

"PREDICTED: Homo sapiens similar to killer-cell Ig-like receptor (LOC727752), mRNA."

"PREDICTED: Homo sapiens misc\_RNA (LOC727753), miscRNA."

"PREDICTED: Homo sapiens similar to Deoxythymidylate kinase (thymidylate kinase), transcript

"PREDICTED: Homo sapiens similar to NADH dehydrogenase (ubiquinone) 1 beta subcomplex,

"PREDICTED: Homo sapiens similar to inhibitor of growth family, member 5, transcript variant 2

"PREDICTED: Homo sapiens hypothetical protein LOC727775 (LOC727775), mRNA."

"PREDICTED: Homo sapiens similar to unconventional myosin Myr2 I heavy chain (LOC727791

"PREDICTED: Homo sapiens misc\_RNA (LOC727803), miscRNA."

"PREDICTED: Homo sapiens similar to Nuclear envelope pore membrane protein POM 121 (Pc

"PREDICTED: Homo sapiens hypothetical protein LOC727808 (LOC727808), miscRNA."

"PREDICTED: Homo sapiens hypothetical LOC727815 (LOC727815), mRNA."

"PREDICTED: Homo sapiens hypothetical protein LOC727820 (LOC727820), mRNA."

"PREDICTED: Homo sapiens hypothetical protein LOC727825 (LOC727825), mRNA."

"PREDICTED: Homo sapiens hypothetical LOC727826 (LOC727826), mRNA."

"PREDICTED: Homo sapiens similar to cis-Golgi matrix protein GM130 (LOC727832), mRNA."

"PREDICTED: Homo sapiens misc\_RNA (LOC727833), miscRNA."

"PREDICTED: Homo sapiens similar to synovial sarcoma, X breakpoint 2 isoform b (LOC72783

"PREDICTED: Homo sapiens similar to actin-like protein (LOC727848), mRNA."

"PREDICTED: Homo sapiens similar to cis-Golgi matrix protein GM130 (LOC727849), mRNA."

"PREDICTED: Homo sapiens similar to RAN binding protein 2, transcript variant 6 (LOC727851

"PREDICTED: Homo sapiens misc\_RNA (LOC727865), miscRNA."

"PREDICTED: Homo sapiens similar to transmembrane protein 29, transcript variant 2 (LOC727

"PREDICTED: Homo sapiens misc\_RNA (LOC727868), miscRNA."

"PREDICTED: Homo sapiens hypothetical LOC727869 (LOC727869), mRNA."  
"PREDICTED: Homo sapiens hypothetical LOC727877, transcript variant 2 (LOC727877), mRNA"  
"PREDICTED: Homo sapiens hypothetical LOC727894 (LOC727894), mRNA."  
"PREDICTED: Homo sapiens hypothetical LOC727895 (LOC727895), mRNA."  
"PREDICTED: Homo sapiens hypothetical LOC727900 (LOC727900), mRNA."  
"PREDICTED: Homo sapiens hypothetical LOC727908 (LOC727908), partial mRNA."  
"PREDICTED: Homo sapiens hypothetical LOC727918 (LOC727918), mRNA."  
"PREDICTED: Homo sapiens hypothetical LOC727934 (LOC727934), mRNA."  
"PREDICTED: Homo sapiens similar to CHRNA7 (cholinergic receptor, nicotinic, alpha 7, exons  
"PREDICTED: Homo sapiens similar to mitochondrial Ca<sup>2+</sup>-dependent solute carrier (LOC7279  
"PREDICTED: Homo sapiens similar to KIAA0454 protein (LOC727948), mRNA."  
"PREDICTED: Homo sapiens hypothetical LOC727962 (LOC727962), mRNA."  
"PREDICTED: Homo sapiens similar to elongation factor Tu GTP binding domain containing 1 (l  
"PREDICTED: Homo sapiens hypothetical LOC727967 (LOC727967), mRNA."  
"PREDICTED: Homo sapiens misc\_RNA (LOC727970), miscRNA."  
"PREDICTED: Homo sapiens misc\_RNA (LOC727980), miscRNA."  
"PREDICTED: Homo sapiens similar to Protein C21orf70 homolog (LOC727987), mRNA."  
"PREDICTED: Homo sapiens similar to hCG2036929 (LOC727992), mRNA."  
"PREDICTED: Homo sapiens similar to colon cancer-associated antigen AgSK1-2HT-ECS (LOC  
"PREDICTED: Homo sapiens hypothetical protein LOC728006 (LOC728006), mRNA."  
"PREDICTED: Homo sapiens hypothetical protein LOC728012 (LOC728012), mRNA."  
"PREDICTED: Homo sapiens similar to huntingtin interacting protein 1 related (LOC728014), m  
"PREDICTED: Homo sapiens similar to double homeobox, 4 (LOC728022), mRNA."  
"Homo sapiens hCG1640171 (LOC728024), non-coding RNA."  
"PREDICTED: Homo sapiens hypothetical LOC728026 (LOC728026), mRNA."  
"PREDICTED: Homo sapiens misc\_RNA (LOC728031), miscRNA."  
"PREDICTED: Homo sapiens similar to Cadherin EGF LAG seven-pass G-type receptor 1 precu  
"PREDICTED: Homo sapiens similar to Kinesin-like protein KIF22 (Kinesin-like DNA-binding pro  
"PREDICTED: Homo sapiens similar to hCG2031213 (LOC728052), mRNA."  
"PREDICTED: Homo sapiens misc\_RNA (LOC728059), miscRNA."  
"PREDICTED: Homo sapiens hypothetical protein LOC728066 (LOC728066), mRNA."  
"PREDICTED: Homo sapiens hypothetical LOC728069 (LOC728069), mRNA."  
"PREDICTED: Homo sapiens misc\_RNA (LOC728098), miscRNA."  
"PREDICTED: Homo sapiens misc\_RNA (LOC728105), miscRNA."  
"PREDICTED: Homo sapiens hCG1659830 (LOC728111), mRNA."  
"PREDICTED: Homo sapiens misc\_RNA (LOC728115), miscRNA."  
"PREDICTED: Homo sapiens similar to colon cancer-associated antigen AgSK1-2HT-ECS (LOC  
"PREDICTED: Homo sapiens misc\_RNA (LOC728126), miscRNA."  
"PREDICTED: Homo sapiens misc\_RNA (LOC728128), miscRNA."  
"PREDICTED: Homo sapiens similar to hCG2044133 (LOC728129), mRNA."  
"PREDICTED: Homo sapiens hypothetical LOC728138 (LOC728138), mRNA."  
"PREDICTED: Homo sapiens misc\_RNA (LOC728139), miscRNA."  
"PREDICTED: Homo sapiens hypothetical LOC728142 (LOC728142), mRNA."  
"PREDICTED: Homo sapiens hypothetical protein LOC728145 (LOC728145), mRNA."

"PREDICTED: Homo sapiens hypothetical LOC728150 (LOC728150), mRNA."  
"PREDICTED: Homo sapiens similar to FAM133B protein, transcript variant 1 (LOC728153), mRNA."  
"PREDICTED: Homo sapiens misc\_RNA (LOC728170), miscRNA."  
"PREDICTED: Homo sapiens hypothetical LOC728175 (LOC728175), mRNA."  
"PREDICTED: Homo sapiens misc\_RNA (LOC728178), miscRNA."  
"PREDICTED: Homo sapiens hypothetical protein LOC728181 (LOC728181), mRNA."  
"PREDICTED: Homo sapiens similar to Gamma-2-syntrophin (G2SYN) (Syntrophin 5) (SYN5) (LOC728181), mRNA."  
"PREDICTED: Homo sapiens similar to phosphoglycerate mutase processed protein (LOC728181), mRNA."  
"PREDICTED: Homo sapiens hypothetical LOC728190 (LOC728190), non-coding RNA."  
"PREDICTED: Homo sapiens hypothetical protein LOC728193 (LOC728193), mRNA."  
"PREDICTED: Homo sapiens misc\_RNA (LOC728205), miscRNA."  
"PREDICTED: Homo sapiens misc\_RNA (LOC728207), miscRNA."  
"PREDICTED: Homo sapiens misc\_RNA (LOC728208), miscRNA."  
"PREDICTED: Homo sapiens similar to gamma-glutamyltransferase 2, transcript variant 3 (LOC728229), mRNA."  
"PREDICTED: Homo sapiens hypothetical protein LOC728229, transcript variant 3 (LOC728229), mRNA."  
"PREDICTED: Homo sapiens hypothetical LOC728241 (LOC728241), mRNA."  
"PREDICTED: Homo sapiens misc\_RNA (LOC728244), miscRNA."  
"PREDICTED: Homo sapiens similar to potassium channel tetramerisation domain containing 5 (LOC728262), mRNA."  
"PREDICTED: Homo sapiens hypothetical LOC728262 (LOC728262), mRNA."  
"PREDICTED: Homo sapiens misc\_RNA (LOC728263), miscRNA."  
"PREDICTED: Homo sapiens hypothetical LOC728275 (LOC728275), mRNA."  
"PREDICTED: Homo sapiens hypothetical LOC728288 (LOC728288), mRNA."  
"PREDICTED: Homo sapiens misc\_RNA (LOC728291), miscRNA."  
"PREDICTED: Homo sapiens similar to FLJ36144 protein (LOC728310), mRNA."  
"PREDICTED: Homo sapiens misc\_RNA (LOC728312), miscRNA."  
"PREDICTED: Homo sapiens hypothetical LOC728318 (LOC728318), mRNA."  
"PREDICTED: Homo sapiens misc\_RNA (LOC728324), miscRNA."  
"PREDICTED: Homo sapiens similar to nuclear RNA export factor 2, transcript variant 2 (LOC728348), mRNA."  
"PREDICTED: Homo sapiens misc\_RNA (LOC728348), miscRNA."  
"PREDICTED: Homo sapiens misc\_RNA (LOC728352), miscRNA."  
"PREDICTED: Homo sapiens hypothetical LOC728362 (LOC728362), mRNA."  
"PREDICTED: Homo sapiens misc\_RNA (LOC728380), miscRNA."  
"PREDICTED: Homo sapiens similar to deubiquitinating enzyme 1 (LOC728405), mRNA."  
"PREDICTED: Homo sapiens misc\_RNA (LOC728408), miscRNA."  
"PREDICTED: Homo sapiens similar to Beta-glucuronidase precursor (LOC728411), mRNA."  
"PREDICTED: Homo sapiens hypothetical protein LOC728417 (LOC728417), mRNA."  
"PREDICTED: Homo sapiens hypothetical LOC728431 (LOC728431), mRNA."  
"PREDICTED: Homo sapiens similar to Gamma-glutamyltranspeptidase 1 precursor (Gamma-glutamyltranspeptidase 1 precursor) (LOC728448), non-coding RNA."  
"PREDICTED: Homo sapiens similar to nuclear pore membrane protein 121 (LOC728452), mRNA."  
"PREDICTED: Homo sapiens similar to 40S ribosomal protein S28 (LOC728453), mRNA."  
"PREDICTED: Homo sapiens similar to Beta-defensin 2 precursor (BD-2) (hBD-2) (Defensin, beta) (LOC728457), mRNA."  
"PREDICTED: Homo sapiens misc\_RNA (LOC728457), miscRNA."  
"PREDICTED: Homo sapiens hypothetical LOC728460 (LOC728460), mRNA."

"PREDICTED: Homo sapiens misc\_RNA (LOC728465), miscRNA."  
"PREDICTED: Homo sapiens misc\_RNA (LOC728467), miscRNA."  
"PREDICTED: Homo sapiens similar to hCG1736317 (LOC728470), mRNA."  
"PREDICTED: Homo sapiens misc\_RNA (LOC728485), miscRNA."  
"PREDICTED: Homo sapiens similar to small EDRK-rich factor 1A, telomeric, transcript variant 4  
"PREDICTED: Homo sapiens similar to Nuclear envelope pore membrane protein POM 121 (Pc  
"PREDICTED: Homo sapiens similar to CG17293-PA (LOC728505), mRNA."  
"PREDICTED: Homo sapiens hypothetical LOC728516 (LOC728516), mRNA."  
"PREDICTED: Homo sapiens misc\_RNA (LOC728517), partial miscRNA."  
"PREDICTED: Homo sapiens similar to Baculoviral IAP repeat-containing protein 1 (Neuronal ap  
"PREDICTED: Homo sapiens hypothetical LOC728530 (LOC728530), mRNA."  
"PREDICTED: Homo sapiens misc\_RNA (LOC728532), miscRNA."  
"PREDICTED: Homo sapiens misc\_RNA (LOC728533), miscRNA."  
"PREDICTED: Homo sapiens misc\_RNA (LOC728537), miscRNA."  
"PREDICTED: Homo sapiens misc\_RNA (LOC728543), miscRNA."  
"PREDICTED: Homo sapiens similar to THO complex 3 (LOC728554), mRNA."  
"PREDICTED: Homo sapiens similar to Protein C2orf4 (C21orf19-like protein) (LOC728556), mF  
"PREDICTED: Homo sapiens hypothetical LOC728558 (LOC728558), mRNA."  
"PREDICTED: Homo sapiens similar to GMP synthase [glutamine-hydrolyzing] (Glutamine amid  
"PREDICTED: Homo sapiens similar to Beta-glucuronidase precursor (LOC728565), mRNA."  
"PREDICTED: Homo sapiens similar to membrane-spanning 4-domains, subfamily A, member 8  
"PREDICTED: Homo sapiens misc\_RNA (LOC728602), partial miscRNA."  
"Homo sapiens hypothetical LOC728606 (LOC728606), non-coding RNA."  
"PREDICTED: Homo sapiens similar to mannosidase, beta A, lysosomal-like (LOC728607), mR  
"PREDICTED: Homo sapiens misc\_RNA (LOC728612), miscRNA."  
"PREDICTED: Homo sapiens misc\_RNA (LOC728620), miscRNA."  
"PREDICTED: Homo sapiens similar to S-phase kinase-associated protein 1A (p19A) (LOC7286  
"PREDICTED: Homo sapiens hypothetical LOC728626 (LOC728626), mRNA."  
"PREDICTED: Homo sapiens similar to peroxisomal short-chain alcohol dehydrogenase, transcr  
"PREDICTED: Homo sapiens misc\_RNA (LOC728640), miscRNA."  
"Homo sapiens heterogeneous nuclear ribonucleoprotein A1 pseudogene (LOC728643), non-cc  
"PREDICTED: Homo sapiens misc\_RNA (LOC728650), miscRNA."  
"PREDICTED: Homo sapiens hypothetical protein LOC728653 (LOC728653), mRNA."  
"PREDICTED: Homo sapiens similar to solute carrier family 35, member E2 (LOC728661), mRN  
"PREDICTED: Homo sapiens misc\_RNA (LOC728666), miscRNA."  
"PREDICTED: Homo sapiens misc\_RNA (LOC728672), miscRNA."  
"PREDICTED: Homo sapiens misc\_RNA (LOC728678), miscRNA."  
"PREDICTED: Homo sapiens similar to LOC442421 protein (LOC728683), mRNA."  
"PREDICTED: Homo sapiens misc\_RNA (LOC728686), miscRNA."  
"PREDICTED: Homo sapiens misc\_RNA (LOC728693), miscRNA."  
"PREDICTED: Homo sapiens hypothetical LOC728694 (LOC728694), mRNA."  
"PREDICTED: Homo sapiens misc\_RNA (LOC728698), miscRNA."  
"PREDICTED: Homo sapiens similar to hCG2041004 (LOC728711), mRNA."  
"PREDICTED: Homo sapiens similar to hCG38149 (LOC728715), mRNA."

"PREDICTED: Homo sapiens hypothetical protein LOC728723 (LOC728723), mRNA."  
"PREDICTED: Homo sapiens misc\_RNA (LOC728728), miscRNA."  
"PREDICTED: Homo sapiens misc\_RNA (LOC728729), miscRNA."  
"PREDICTED: Homo sapiens misc\_RNA (LOC728732), miscRNA."  
"PREDICTED: Homo sapiens similar to kidney-specific protein (KS), transcript variant 3 (LOC728733), mRNA."  
"PREDICTED: Homo sapiens similar to programmed cell death 2 isoform 2 (LOC728739), mRNA."  
"PREDICTED: Homo sapiens misc\_RNA (LOC728743), miscRNA."  
"PREDICTED: Homo sapiens misc\_RNA (LOC728748), miscRNA."  
"PREDICTED: Homo sapiens similar to hCG1984907 (LOC728755), mRNA."  
"Homo sapiens hCG1789710 (LOC728758), mRNA."  
"PREDICTED: Homo sapiens similar to hCG1994130 (LOC728774), mRNA."  
"PREDICTED: Homo sapiens similar to ribosomal protein L21 (LOC728782), mRNA."  
"PREDICTED: Homo sapiens misc\_RNA (LOC728787), miscRNA."  
"PREDICTED: Homo sapiens misc\_RNA (LOC728791), miscRNA."  
"PREDICTED: Homo sapiens similar to hCG1981896, transcript variant 3 (LOC728802), mRNA."  
"PREDICTED: Homo sapiens hypothetical LOC728809 (LOC728809), mRNA."  
"PREDICTED: Homo sapiens hypothetical LOC728816 (LOC728816), mRNA."  
"Homo sapiens hCG1645220 (LOC728819), mRNA."  
"PREDICTED: Homo sapiens misc\_RNA (LOC728820), miscRNA."  
"PREDICTED: Homo sapiens similar to SMT3 suppressor of mif two 3 homolog 2 (LOC728825), mRNA."  
"PREDICTED: Homo sapiens similar to C-C motif chemokine 3-like 1 precursor (Small-inducible cytokine A11), transcript variant 1 (LOC728830), mRNA."  
"PREDICTED: Homo sapiens similar to cytokine, transcript variant 3 (LOC728835), mRNA."  
"PREDICTED: Homo sapiens hypothetical LOC728844 (LOC728844), mRNA."  
"PREDICTED: Homo sapiens misc\_RNA (LOC728853), miscRNA."  
"Homo sapiens hypothetical LOC728855 (LOC728855), non-coding RNA."  
"PREDICTED: Homo sapiens misc\_RNA (LOC728873), miscRNA."  
"PREDICTED: Homo sapiens misc\_RNA (LOC728877), miscRNA."  
"PREDICTED: Homo sapiens hypothetical LOC728882, transcript variant 1 (LOC728882), mRNA."  
"PREDICTED: Homo sapiens similar to Protein KIAA0220 (LOC728888), mRNA."  
"PREDICTED: Homo sapiens misc\_RNA (LOC728889), miscRNA."  
"PREDICTED: Homo sapiens hypothetical LOC728903 (LOC728903), mRNA."  
"PREDICTED: Homo sapiens hypothetical LOC728904 (LOC728904), mRNA."  
"PREDICTED: Homo sapiens misc\_RNA (LOC728908), miscRNA."  
"PREDICTED: Homo sapiens similar to Galectin-7 (Gal-7) (HKL-14) (PI7) (p53-induced protein 1), transcript variant 1 (LOC728913), mRNA."  
"PREDICTED: Homo sapiens similar to APC11 anaphase promoting complex subunit 11 isoform 1 (LOC728918), mRNA."  
"PREDICTED: Homo sapiens hypothetical LOC728924 (LOC728924), mRNA."  
"PREDICTED: Homo sapiens similar to transcription elongation factor B polypeptide 3C (LOC728929), mRNA."  
"PREDICTED: Homo sapiens similar to hCG17429 (LOC728931), mRNA."  
"PREDICTED: Homo sapiens similar to interleukin 28B (LOC728942), mRNA."  
"PREDICTED: Homo sapiens similar to THAP domain-containing protein 4 (LOC728944), mRNA."  
"PREDICTED: Homo sapiens similar to Peptidylprolyl isomerase A (cyclophilin A)-like 4 (LOC728949), mRNA."  
"PREDICTED: Homo sapiens similar to hCG201267 (LOC728955), mRNA."  
"PREDICTED: Homo sapiens similar to heparan sulfate 6-O-sulfotransferase 1 (LOC728969), mRNA."  
"PREDICTED: Homo sapiens similar to 40S ribosomal protein S7 (S8) (LOC728973), mRNA."

"PREDICTED: Homo sapiens misc\_RNA (LOC728975), miscRNA."  
"PREDICTED: Homo sapiens similar to Sodium/hydrogen exchanger 3 (Na<sup>+</sup>)/H<sup>+</sup> exchanger 3  
"PREDICTED: Homo sapiens hypothetical protein LOC729003 (LOC729003), mRNA."  
"PREDICTED: Homo sapiens misc\_RNA (LOC729009), miscRNA."  
"PREDICTED: Homo sapiens hypothetical LOC729010 (LOC729010), mRNA."  
"PREDICTED: Homo sapiens rcRPE (LOC729020), mRNA."  
"PREDICTED: Homo sapiens hypothetical protein LOC729021 (LOC729021), mRNA."  
"PREDICTED: Homo sapiens similar to peptide/histidine transporter (LOC729025), mRNA."  
"PREDICTED: Homo sapiens hypothetical LOC729028 (LOC729028), mRNA."  
"PREDICTED: Homo sapiens misc\_RNA (LOC729057), miscRNA."  
"PREDICTED: Homo sapiens misc\_RNA (LOC729059), miscRNA."  
"PREDICTED: Homo sapiens hypothetical LOC729076 (LOC729076), mRNA."  
"PREDICTED: Homo sapiens misc\_RNA (LOC729082), miscRNA."  
"PREDICTED: Homo sapiens similar to EGFR-coamplified and overexpressed protein (LOC729  
"PREDICTED: Homo sapiens similar to Eukaryotic translation elongation factor 1 alpha 1 (LOC7  
"PREDICTED: Homo sapiens misc\_RNA (LOC729101), miscRNA."  
"PREDICTED: Homo sapiens misc\_RNA (LOC729102), miscRNA."  
"PREDICTED: Homo sapiens similar to hCG37602 (LOC729123), mRNA."  
"PREDICTED: Homo sapiens similar to lethal (2) k00619 CG4775-PA (LOC729148), mRNA."  
"PREDICTED: Homo sapiens misc\_RNA (LOC729150), miscRNA."  
"PREDICTED: Homo sapiens misc\_RNA (LOC729157), miscRNA."  
"Homo sapiens hCG1732469 (LOC729164), mRNA."  
"PREDICTED: Homo sapiens hypothetical protein LOC729173 (LOC729173), mRNA."  
"PREDICTED: Homo sapiens similar to unc-93 homolog B1 (LOC729196), mRNA."  
"PREDICTED: Homo sapiens misc\_RNA (LOC729200), miscRNA."  
"PREDICTED: Homo sapiens misc\_RNA (LOC729217), miscRNA."  
"PREDICTED: Homo sapiens hypothetical LOC729225 (LOC729225), mRNA."  
"Homo sapiens fumarylacetoacetate hydrolase domain containing 2 pseudogene (LOC729234),  
"PREDICTED: Homo sapiens similar to Pulmonary surfactant-associated protein A2 precursor (:  
"PREDICTED: Homo sapiens similar to keratin 17 (LOC729242), mRNA."  
"PREDICTED: Homo sapiens hCG2045843 (LOC729254), mRNA."  
"PREDICTED: Homo sapiens similar to hCG15392 (LOC729277), partial mRNA."  
"PREDICTED: Homo sapiens misc\_RNA (LOC729279), miscRNA."  
"PREDICTED: Homo sapiens hypothetical LOC729296 (LOC729296), mRNA."  
"PREDICTED: Homo sapiens misc\_RNA (LOC729298), miscRNA."  
"PREDICTED: Homo sapiens misc\_RNA (LOC729301), miscRNA."  
"PREDICTED: Homo sapiens misc\_RNA (LOC729314), miscRNA."  
"PREDICTED: Homo sapiens similar to voltage-dependent anion channel 2 (LOC729317), mRN  
"PREDICTED: Homo sapiens misc\_RNA (LOC729324), miscRNA."  
"PREDICTED: Homo sapiens misc\_RNA (LOC729327), miscRNA."  
"PREDICTED: Homo sapiens hypothetical LOC729335 (LOC729335), mRNA."  
"PREDICTED: Homo sapiens misc\_RNA (LOC729342), miscRNA."  
"PREDICTED: Homo sapiens similar to TP53TG3 protein, transcript variant 2 (LOC729355), mF  
"PREDICTED: Homo sapiens misc\_RNA (LOC729366), miscRNA."

"PREDICTED: Homo sapiens misc\_RNA (LOC729369), miscRNA."  
"PREDICTED: Homo sapiens hypothetical protein LOC729373 (LOC729373), mRNA."  
"Homo sapiens family with sequence similarity 86, member A pseudogene (LOC729375), non-coding RNA."  
"PREDICTED: Homo sapiens misc\_RNA (LOC729389), miscRNA."  
"PREDICTED: Homo sapiens hypothetical LOC729390 (LOC729390), mRNA."  
"PREDICTED: Homo sapiens hypothetical LOC729397 (LOC729397), mRNA."  
"PREDICTED: Homo sapiens similar to selenophosphate synthetase (LOC729399), mRNA."  
"PREDICTED: Homo sapiens misc\_RNA (LOC729406), miscRNA."  
"PREDICTED: Homo sapiens hypothetical LOC729417 (LOC729417), mRNA."  
"PREDICTED: Homo sapiens hypothetical LOC729421 (LOC729421), mRNA."  
"PREDICTED: Homo sapiens similar to Heterogeneous nuclear ribonucleoprotein A1 (Helix-desolvation domain) (LOC729422), mRNA."  
"PREDICTED: Homo sapiens hypothetical LOC729424 (LOC729424), mRNA."  
"PREDICTED: Homo sapiens similar to hCG2004878 (LOC729433), mRNA."  
"PREDICTED: Homo sapiens misc\_RNA (LOC729435), miscRNA."  
"PREDICTED: Homo sapiens similar to opposite strand transcription unit to Stag3 (LOC729438), mRNA."  
"PREDICTED: Homo sapiens similar to AT rich interactive domain 1B (SWI1-like) isoform 1 (LOC729439), mRNA."  
"PREDICTED: Homo sapiens hypothetical LOC729456 (LOC729456), mRNA."  
"PREDICTED: Homo sapiens hypothetical protein LOC729466 (LOC729466), mRNA."  
"PREDICTED: Homo sapiens similar to Interleukin-9 receptor precursor (IL-9R) (CD129 antigen) (LOC729467), mRNA."  
"PREDICTED: Homo sapiens misc\_RNA (LOC729494), miscRNA."  
"PREDICTED: Homo sapiens similar to hCG1999863 (LOC729495), mRNA."  
"PREDICTED: Homo sapiens misc\_RNA (LOC729500), partial miscRNA."  
"PREDICTED: Homo sapiens hypothetical LOC729505 (LOC729505), mRNA."  
"PREDICTED: Homo sapiens hypothetical LOC729519 (LOC729519), mRNA."  
"PREDICTED: Homo sapiens misc\_RNA (LOC729524), miscRNA."  
"PREDICTED: Homo sapiens similar to CCR4-NOT transcription complex, subunit 6-like (LOC729525), mRNA."  
"PREDICTED: Homo sapiens hypothetical LOC729535 (LOC729535), mRNA."  
"PREDICTED: Homo sapiens hypothetical protein LOC729558 (LOC729558), mRNA."  
"PREDICTED: Homo sapiens similar to ciliary rootlet coiled-coil, rootletin (LOC729559), mRNA."  
"PREDICTED: Homo sapiens hypothetical protein LOC729569 (LOC729569), mRNA."  
"PREDICTED: Homo sapiens similar to hCG1793303 (LOC729570), mRNA."  
"PREDICTED: Homo sapiens hypothetical LOC729580 (LOC729580), mRNA."  
"PREDICTED: Homo sapiens similar to hCG20004 (LOC729581), mRNA."  
"PREDICTED: Homo sapiens hypothetical LOC729587 (LOC729587), mRNA."  
"PREDICTED: Homo sapiens similar to high-mobility group box 3 (LOC729595), mRNA."  
"PREDICTED: Homo sapiens similar to nuclear pore complex interacting protein (LOC729602), mRNA."  
"Homo sapiens calcium binding protein P22 pseudogene (LOC729603), non-coding RNA."  
"PREDICTED: Homo sapiens similar to Brix domain containing 1 (LOC729608), mRNA."  
"PREDICTED: Homo sapiens similar to protein kinase, cAMP-dependent, regulatory, type I, beta (LOC729609), mRNA."  
"PREDICTED: Homo sapiens hypothetical LOC729626 (LOC729626), mRNA."  
"PREDICTED: Homo sapiens hypothetical LOC729629 (LOC729629), mRNA."  
"PREDICTED: Homo sapiens misc\_RNA (LOC729646), miscRNA."  
"PREDICTED: Homo sapiens similar to CG7889-PA (LOC729647), mRNA."  
"PREDICTED: Homo sapiens hypothetical protein LOC729652 (LOC729652), miscRNA."

"PREDICTED: Homo sapiens misc\_RNA (LOC729660), miscRNA."  
"PREDICTED: Homo sapiens misc\_RNA (LOC729666), miscRNA."  
"Homo sapiens golgi autoantigen, golgin subfamily a, 6 pseudogene (LOC729668), non-coding |  
"PREDICTED: Homo sapiens similar to hCG1820578 (LOC729675), mRNA."  
"PREDICTED: Homo sapiens misc\_RNA (LOC729679), miscRNA."  
"PREDICTED: Homo sapiens misc\_RNA (LOC729680), miscRNA."  
"PREDICTED: Homo sapiens misc\_RNA (LOC729683), miscRNA."  
"PREDICTED: Homo sapiens misc\_RNA (LOC729686), miscRNA."  
"PREDICTED: Homo sapiens hypothetical LOC729687 (LOC729687), mRNA."  
"PREDICTED: Homo sapiens hypothetical protein LOC729692 (LOC729692), mRNA."  
"PREDICTED: Homo sapiens similar to rcTPI1, transcript variant 1 (LOC729708), mRNA."  
"PREDICTED: Homo sapiens hypothetical protein LOC729732 (LOC729732), mRNA."  
"PREDICTED: Homo sapiens hypothetical LOC729737 (LOC729737), mRNA."  
"PREDICTED: Homo sapiens similar to hCG1812832 (LOC729742), mRNA."  
"PREDICTED: Homo sapiens hypothetical protein LOC729764 (LOC729764), mRNA."  
"PREDICTED: Homo sapiens hypothetical LOC729766 (LOC729766), mRNA."  
"PREDICTED: Homo sapiens misc\_RNA (LOC729768), miscRNA."  
"PREDICTED: Homo sapiens similar to Ubiquinol-cytochrome c reductase hinge protein (LOC729772), mRNA."  
"PREDICTED: Homo sapiens hypothetical protein LOC729776 (LOC729776), mRNA."  
"PREDICTED: Homo sapiens similar to Peroxisomal coenzyme A diphosphatase NUDT7 (Nucle  
"PREDICTED: Homo sapiens misc\_RNA (LOC729779), miscRNA."  
"PREDICTED: Homo sapiens misc\_RNA (LOC729780), miscRNA."  
"PREDICTED: Homo sapiens similar to golgi autoantigen, golgin subfamily a, 8A (LOC729786),  
"PREDICTED: Homo sapiens hypothetical LOC729792 (LOC729792), mRNA."  
"PREDICTED: Homo sapiens similar to ribosomal protein L23a (LOC729798), mRNA."  
"PREDICTED: Homo sapiens misc\_RNA (LOC729806), miscRNA."  
"PREDICTED: Homo sapiens misc\_RNA (LOC729810), miscRNA."  
"PREDICTED: Homo sapiens misc\_RNA (LOC729816), miscRNA."  
"PREDICTED: Homo sapiens misc\_RNA (LOC729828), miscRNA."  
"PREDICTED: Homo sapiens hypothetical LOC729832 (LOC729832), mRNA."  
"PREDICTED: Homo sapiens misc\_RNA (LOC729841), miscRNA."  
"PREDICTED: Homo sapiens similar to WW domain binding protein 1 (LOC729843), mRNA."  
"PREDICTED: Homo sapiens misc\_RNA (LOC729852), miscRNA."  
"PREDICTED: Homo sapiens misc\_RNA (LOC729858), miscRNA."  
"PREDICTED: Homo sapiens misc\_RNA (LOC729859), miscRNA."  
"PREDICTED: Homo sapiens hypothetical protein LOC729879 (LOC729879), miscRNA."  
"PREDICTED: Homo sapiens hypothetical protein LOC729887 (LOC729887), miscRNA."  
"PREDICTED: Homo sapiens similar to zinc finger and BTB domain containing 8 opposite strand  
"PREDICTED: Homo sapiens hypothetical protein LOC729905 (LOC729905), mRNA."  
"PREDICTED: Homo sapiens hypothetical LOC729907 (LOC729907), mRNA."  
"PREDICTED: Homo sapiens hypothetical LOC729915 (LOC729915), mRNA."  
"PREDICTED: Homo sapiens misc\_RNA (LOC729926), miscRNA."  
"PREDICTED: Homo sapiens similar to guanylate-binding protein 5 (LOC729933), mRNA."  
"PREDICTED: Homo sapiens hypothetical LOC729944 (LOC729944), mRNA."



"PREDICTED: Homo sapiens misc\_RNA (LOC729952), miscRNA."  
"PREDICTED: Homo sapiens misc\_RNA (LOC729954), miscRNA."  
"PREDICTED: Homo sapiens similar to Cks1 protein homologue (LOC729964), mRNA."  
"PREDICTED: Homo sapiens hypothetical protein LOC729967 (LOC729967), mRNA."  
"PREDICTED: Homo sapiens hypothetical LOC729983 (LOC729983), mRNA."  
"PREDICTED: Homo sapiens similar to CDC42-binding protein kinase beta (LOC729985), mRNA."  
"PREDICTED: Homo sapiens misc\_RNA (LOC729992), miscRNA."  
"PREDICTED: Homo sapiens misc\_RNA (LOC729995), miscRNA."  
"PREDICTED: Homo sapiens misc\_RNA (LOC730004), miscRNA."  
"PREDICTED: Homo sapiens similar to SEC14p-like protein TAP3 (LOC730005), mRNA."  
"PREDICTED: Homo sapiens similar to LOC441178 protein (LOC730015), mRNA."  
"PREDICTED: Homo sapiens misc\_RNA (LOC730020), miscRNA."  
"PREDICTED: Homo sapiens similar to male sterility domain containing 1 (LOC730024), mRNA."  
"PREDICTED: Homo sapiens similar to cis-Golgi matrix protein GM130 (LOC730027), mRNA."  
"PREDICTED: Homo sapiens similar to hCG1997137, transcript variant 3 (LOC730029), mRNA."  
"PREDICTED: Homo sapiens similar to ras homolog gene family, member Q (LOC730041), part."  
"PREDICTED: Homo sapiens similar to Zinc finger protein 418 (LOC730051), mRNA."  
"PREDICTED: Homo sapiens hypothetical protein LOC730063 (LOC730063), mRNA."  
"PREDICTED: Homo sapiens hypothetical LOC730074 (LOC730074), mRNA."  
"PREDICTED: Homo sapiens similar to NEW1 domain containing protein isoform 1 (LOC730077), mRNA."  
"PREDICTED: Homo sapiens similar to hCG2040074 (LOC730078), mRNA."  
"PREDICTED: Homo sapiens misc\_RNA (LOC730081), miscRNA."  
"PREDICTED: Homo sapiens similar to zinc finger protein 91 (LOC730087), mRNA."  
Homo sapiens RRN3 RNA polymerase I transcription factor homolog (*S. cerevisiae*) pseudogen  
"PREDICTED: Homo sapiens misc\_RNA (LOC730098), miscRNA."  
"Homo sapiens hypothetical LOC730101 (LOC730101), transcript variant 1, non-coding RNA."  
"PREDICTED: Homo sapiens similar to Glycine cleavage system H protein, mitochondrial (LOC730102), mRNA."  
"PREDICTED: Homo sapiens hypothetical LOC730132 (LOC730132), mRNA."  
"PREDICTED: Homo sapiens similar to hCG1815165 (LOC730134), mRNA."  
"PREDICTED: Homo sapiens hypothetical LOC730153 (LOC730153), mRNA."  
"PREDICTED: Homo sapiens hypothetical LOC730159 (LOC730159), mRNA."  
"PREDICTED: Homo sapiens hypothetical LOC730163 (LOC730163), mRNA."  
"PREDICTED: Homo sapiens similar to protein tyrosine phosphatase 4a1, transcript variant 1 (LOC730164), mRNA."  
"PREDICTED: Homo sapiens misc\_RNA (LOC730173), miscRNA."  
"PREDICTED: Homo sapiens misc\_RNA (LOC730176), miscRNA."  
"PREDICTED: Homo sapiens hypothetical LOC730183 (LOC730183), mRNA."  
"PREDICTED: Homo sapiens hypothetical LOC730184 (LOC730184), mRNA."  
"PREDICTED: Homo sapiens hypothetical protein LOC730194 (LOC730194), mRNA."  
"PREDICTED: Homo sapiens hypothetical protein LOC730202 (LOC730202), miscRNA."  
"PREDICTED: Homo sapiens hypothetical LOC730236 (LOC730236), mRNA."  
"PREDICTED: Homo sapiens misc\_RNA (LOC730246), miscRNA."  
"PREDICTED: Homo sapiens hypothetical protein LOC730256 (LOC730256), mRNA."  
"PREDICTED: Homo sapiens similar to anaphase promoting complex subunit 1 (LOC730268), rRNA."  
"PREDICTED: Homo sapiens similar to protein immuno-reactive with anti-PTH polyclonal antibody (LOC730269), mRNA."

"PREDICTED: Homo sapiens hypothetical protein LOC730273 (LOC730273), mRNA."  
"PREDICTED: Homo sapiens hypothetical protein LOC730274 (LOC730274), mRNA."  
"PREDICTED: Homo sapiens hypothetical LOC730278 (LOC730278), mRNA."  
"PREDICTED: Homo sapiens misc\_RNA (LOC730281), miscRNA."  
"PREDICTED: Homo sapiens misc\_RNA (LOC730284), miscRNA."  
"PREDICTED: Homo sapiens misc\_RNA (LOC730286), miscRNA."  
"PREDICTED: Homo sapiens similar to 40S ribosomal protein S28 (LOC730288), mRNA."  
"PREDICTED: Homo sapiens hypothetical protein LOC730302 (LOC730302), mRNA."  
"PREDICTED: Homo sapiens hypothetical LOC730313 (LOC730313), mRNA."  
"PREDICTED: Homo sapiens similar to Nuclear envelope pore membrane protein POM 121 (Pc  
"PREDICTED: Homo sapiens hypothetical LOC730323 (LOC730323), mRNA."  
"PREDICTED: Homo sapiens hypothetical LOC730324 (LOC730324), mRNA."  
"PREDICTED: Homo sapiens similar to Williams Beuren syndrome chromosome region 19 pseu  
"PREDICTED: Homo sapiens hypothetical protein LOC730344 (LOC730344), mRNA."  
"PREDICTED: Homo sapiens hypothetical protein LOC730358 (LOC730358), mRNA."  
"PREDICTED: Homo sapiens hypothetical LOC730376 (LOC730376), mRNA."  
"PREDICTED: Homo sapiens hypothetical LOC730385 (LOC730385), mRNA."  
"PREDICTED: Homo sapiens hypothetical LOC730389 (LOC730389), mRNA."  
"PREDICTED: Homo sapiens hypothetical protein LOC730396 (LOC730396), mRNA."  
"PREDICTED: Homo sapiens similar to cholinergic receptor, muscarinic 3 (LOC730413), mRNA  
"PREDICTED: Homo sapiens hypothetical LOC730415, transcript variant 2 (LOC730415), mRN  
"PREDICTED: Homo sapiens hypothetical protein LOC730417 (LOC730417), mRNA."  
"PREDICTED: Homo sapiens similar to TGFB-induced factor 2-like, Y-linked (LOC730419), mRI  
"PREDICTED: Homo sapiens similar to serine/threonine/tyrosine interacting protein, transcript v:  
"PREDICTED: Homo sapiens similar to N-terminal Asn amidase (LOC730455), mRNA."  
"PREDICTED: Homo sapiens similar to hCG2040587 (LOC730461), mRNA."  
"PREDICTED: Homo sapiens similar to hCG1793014 (LOC730465), mRNA."  
"PREDICTED: Homo sapiens hypothetical LOC730496 (LOC730496), mRNA."  
"PREDICTED: Homo sapiens similar to MUC19 (LOC730517), mRNA."  
"PREDICTED: Homo sapiens hypothetical protein LOC730525 (LOC730525), mRNA."  
"PREDICTED: Homo sapiens similar to D-PCa-2 protein isoform c (LOC730534), mRNA."  
"PREDICTED: Homo sapiens hypothetical protein LOC730546 (LOC730546), mRNA."  
"PREDICTED: Homo sapiens hypothetical LOC730631 (LOC730631), mRNA."  
"PREDICTED: Homo sapiens similar to KIAA1641 protein (LOC730658), mRNA."  
"PREDICTED: Homo sapiens hypothetical protein LOC730704 (LOC730704), mRNA."  
"PREDICTED: Homo sapiens similar to H3 histone, family 3B (LOC730740), mRNA."  
"PREDICTED: Homo sapiens similar to macrophage erythroblast attacher (LOC730744), mRNA  
"PREDICTED: Homo sapiens similar to Heterogeneous nuclear ribonucleoprotein A1 (Helix-des  
"PREDICTED: Homo sapiens similar to BANP homolog (LOC730809), mRNA."  
"PREDICTED: Homo sapiens similar to chromosome X open reading frame 6 (LOC730818), mF  
"PREDICTED: Homo sapiens similar to nuclear receptor binding factor 2 (LOC730820), mRNA."  
"PREDICTED: Homo sapiens similar to filaggrin (LOC730833), mRNA."  
"PREDICTED: Homo sapiens hypothetical protein LOC730841 (LOC730841), mRNA."  
"PREDICTED: Homo sapiens hypothetical protein LOC730877 (LOC730877), mRNA."

"PREDICTED: Homo sapiens hypothetical LOC730908, transcript variant 1 (LOC730908), mRNA  
"PREDICTED: Homo sapiens misc\_RNA (LOC730974), miscRNA."  
"PREDICTED: Homo sapiens hypothetical LOC730990 (LOC730990), mRNA."  
"PREDICTED: Homo sapiens similar to NACHT, leucine rich repeat and PYD (pyrin domain) cor  
"PREDICTED: Homo sapiens similar to ankyrin repeat domain 36 (LOC730995), mRNA."  
"PREDICTED: Homo sapiens similar to chromosome 1 open reading frame 80 (LOC730996), m  
"PREDICTED: Homo sapiens similar to Adenylate kinase isoenzyme 4, mitochondrial (Adenylate  
"PREDICTED: Homo sapiens similar to hCG1743199 (LOC731040), mRNA."  
"PREDICTED: Homo sapiens similar to Ubiquitin-conjugating enzyme E2S (Ubiquitin-conjugatin  
"PREDICTED: Homo sapiens hypothetical protein LOC731052 (LOC731052), mRNA."  
"PREDICTED: Homo sapiens hypothetical protein LOC731075 (LOC731075), mRNA."  
"PREDICTED: Homo sapiens similar to tousled-like kinase 2 (Arabidopsis) (predicted) (LOC731  
"PREDICTED: Homo sapiens similar to Elongation factor 1-gamma (EF-1-gamma) (eEF-1B gar  
"PREDICTED: Homo sapiens similar to surface antigen BspA-like (LOC731109), mRNA."  
"PREDICTED: Homo sapiens hypothetical LOC731139 (LOC731139), mRNA."  
"PREDICTED: Homo sapiens misc\_RNA (LOC731157), miscRNA."  
"PREDICTED: Homo sapiens similar to eukaryotic translation elongation factor 1 alpha 2 (LOC7  
"PREDICTED: Homo sapiens hypothetical protein LOC731186 (LOC731186), mRNA."  
"PREDICTED: Homo sapiens hypothetical LOC731227 (LOC731227), mRNA."  
"PREDICTED: Homo sapiens similar to sodium channel protein type V alpha subunit (LOC7312  
"PREDICTED: Homo sapiens hypothetical protein LOC731236 (LOC731236), mRNA."  
"PREDICTED: Homo sapiens similar to H2A histone family, member X (LOC731314), mRNA."  
"PREDICTED: Homo sapiens hypothetical protein LOC731338 (LOC731338), mRNA."  
"PREDICTED: Homo sapiens hypothetical protein LOC731366 (LOC731366), mRNA."  
"PREDICTED: Homo sapiens misc\_RNA (LOC731377), miscRNA."  
"PREDICTED: Homo sapiens hypothetical LOC731419 (LOC731419), mRNA."  
"PREDICTED: Homo sapiens similar to ATPase, Class II, type 9B (LOC731444), mRNA."  
"PREDICTED: Homo sapiens hypothetical protein LOC731486 (LOC731486), mRNA."  
"PREDICTED: Homo sapiens similar to Otoconin 90 precursor (Oc90) (Phospholipase A2 homo  
"PREDICTED: Homo sapiens similar to hCG2036843 (LOC731528), mRNA."  
"PREDICTED: Homo sapiens misc\_RNA (LOC731542), miscRNA."  
"PREDICTED: Homo sapiens hypothetical LOC731605 (LOC731605), mRNA."  
"PREDICTED: Homo sapiens hypothetical protein LOC731656 (LOC731656), mRNA."  
"PREDICTED: Homo sapiens hypothetical protein LOC731658 (LOC731658), mRNA."  
"PREDICTED: Homo sapiens similar to HLA class II histocompatibility antigen, DQ(1) alpha cha  
"PREDICTED: Homo sapiens hypothetical LOC731724 (LOC731724), mRNA."  
"PREDICTED: Homo sapiens hypothetical protein LOC731742 (LOC731742), mRNA."  
"PREDICTED: Homo sapiens similar to protein kinase, DNA-activated, catalytic polypeptide (LO  
"Homo sapiens hypothetical protein LOC731779 (LOC731779), non-coding RNA."  
"PREDICTED: Homo sapiens similar to amyloid beta (A4) precursor protein-binding, family B, m  
"PREDICTED: Homo sapiens hypothetical protein LOC731835 (LOC731835), mRNA."  
"PREDICTED: Homo sapiens similar to MAPK-interacting and spindle-stabilizing protein (LOC73  
"PREDICTED: Homo sapiens hypothetical LOC731881 (LOC731881), mRNA."  
"PREDICTED: Homo sapiens hypothetical LOC731915 (LOC731915), mRNA."

"PREDICTED: Homo sapiens similar to slit (Drosophila) homolog 2 (LOC731950), mRNA."  
"PREDICTED: Homo sapiens hypothetical protein LOC731985 (LOC731985), mRNA."  
"PREDICTED: Homo sapiens similar to CG1486-PA, isoform A (LOC731999), mRNA."  
"PREDICTED: Homo sapiens similar to Phosphoglycerate mutase 1 (Phosphoglycerate mutase  
"PREDICTED: Homo sapiens similar to pleckstrin homology-like domain, family B, member 1 (L  
"PREDICTED: Homo sapiens hypothetical protein LOC732138 (LOC732138), mRNA."  
"PREDICTED: Homo sapiens hypothetical protein LOC732150 (LOC732150), mRNA."  
"PREDICTED: Homo sapiens similar to Triosephosphate isomerase (TIM) (Triose-phosphate isc  
"PREDICTED: Homo sapiens hypothetical protein LOC732172 (LOC732172), mRNA."  
"PREDICTED: Homo sapiens misc\_RNA (LOC732215), miscRNA."  
"PREDICTED: Homo sapiens hypothetical protein LOC732275 (LOC732275), mRNA."  
"PREDICTED: Homo sapiens misc\_RNA (LOC732360), miscRNA."  
"PREDICTED: Homo sapiens hypothetical protein LOC732372 (LOC732372), mRNA."  
"PREDICTED: Homo sapiens hypothetical LOC732419 (LOC732419), mRNA."  
"PREDICTED: Homo sapiens hypothetical protein LOC732424 (LOC732424), mRNA."  
"PREDICTED: Homo sapiens similar to Breakpoint cluster region protein (NY-REN-26 antigen) (  
"PREDICTED: Homo sapiens hypothetical LOC732443 (LOC732443), mRNA."  
"PREDICTED: Homo sapiens similar to alpha 7 neuronal nicotinic acetylcholine receptor (LOC7:  
"PREDICTED: Homo sapiens similar to growth arrest-specific 6 (LOC732446), mRNA."  
"Homo sapiens hypothetical LOC791120 (LOC791120), non-coding RNA."  
"Homo sapiens RNA, small nucleolar (LOC85389), non-coding RNA."  
"Homo sapiens RNA, small nucleolar (LOC85390), non-coding RNA."  
"Homo sapiens CG016 (LOC88523), mRNA."  
"PREDICTED: Homo sapiens hypothetical protein BC009862 (LOC90113), mRNA."  
"PREDICTED: Homo sapiens hypothetical gene supported by AK023162, transcript variant 4 (L  
"PREDICTED: Homo sapiens similar to fer-1 like protein 3 (LOC90342), mRNA."  
"PREDICTED: Homo sapiens AOC3 pseudogene (LOC90586), misc RNA."  
"Homo sapiens hypothetical protein LOC90925 (LOC90925), mRNA."  
"Homo sapiens glucuronidase, beta/ immunoglobulin lambda-like polypeptide 1 pseudogene (LC  
"Homo sapiens prematurely terminated mRNA decay factor-like (LOC91431), mRNA."  
"Homo sapiens hCG1992539 (LOC91561), mRNA."  
"Homo sapiens hypothetical LOC92249 (LOC92249), non-coding RNA."  
"PREDICTED: Homo sapiens hypothetical protein LOC92497 (LOC92497), mRNA."  
"Homo sapiens hypothetical LOC92659 (LOC92659), non-coding RNA."  
"PREDICTED: Homo sapiens misc\_RNA (LOC92755), miscRNA."  
"Homo sapiens hypothetical LOC92973 (LOC92973), non-coding RNA."  
"Homo sapiens hypothetical protein BC004921 (LOC93349), mRNA."  
"Homo sapiens maltase-glucoamylase-like pseudogene (LOC93432), non-coding RNA."  
"PREDICTED: Homo sapiens hypothetical protein LOC93463 (LOC93463), mRNA."  
"PREDICTED: Homo sapiens hypothetical protein BC011266, transcript variant 3 (LOC93556), I  
"PREDICTED: Homo sapiens hypothetical protein BC006130 (LOC93622), misc RNA."  
"PREDICTED: Homo sapiens hypothetical protein LOC96597 (LOC96597), mRNA."  
"Homo sapiens hypothetical protein similar to KIAA0187 gene product (LOC96610), mRNA."  
"Homo sapiens loss of heterozygosity, 12, chromosomal region 2 (LOH12CR2), non-coding RN/

"Homo sapiens loss of heterozygosity, 3, chromosomal region 2, gene A (LOH3CR2A), mRNA."  
"Homo sapiens lon peptidase 1, mitochondrial (LONP1), nuclear gene encoding mitochondrial p  
"Homo sapiens lon peptidase 2, peroxisomal (LONP2), mRNA."  
"Homo sapiens LON peptidase N-terminal domain and ring finger 1 (LONRF1), mRNA."  
"Homo sapiens LON peptidase N-terminal domain and ring finger 3 (LONRF3), transcript varian  
"Homo sapiens lipoxygenase homology domains 1 (LOXHD1), mRNA."  
"Homo sapiens lipoprotein, Lp(a) (LPA), mRNA."  
"Homo sapiens lysophosphatidic acid receptor 1 (LPAR1), transcript variant 2, mRNA."  
"Homo sapiens lysophosphatidic acid receptor 2 (LPAR2), mRNA."  
"Homo sapiens lysophosphatidic acid receptor 3 (LPAR3), mRNA."  
"Homo sapiens lysophosphatidic acid receptor 4 (LPAR4), mRNA."  
"Homo sapiens lysophosphatidic acid receptor 5 (LPAR5), mRNA."  
"Homo sapiens lysophosphatidylcholine acyltransferase 1 (LPCAT1), mRNA."  
"Homo sapiens lysophosphatidylcholine acyltransferase 2 (LPCAT2), mRNA."  
"Homo sapiens lysophosphatidylcholine acyltransferase 3 (LPCAT3), mRNA."  
"Homo sapiens lysophosphatidylcholine acyltransferase 4 (LPCAT4), mRNA."  
"Homo sapiens lysophosphatidylglycerol acyltransferase 1 (LPGAT1), mRNA."  
"Homo sapiens latrophilin 1 (LPHN1), transcript variant 2, mRNA."  
"Homo sapiens latrophilin 2 (LPHN2), mRNA."  
"Homo sapiens lipin 1 (LPIN1), mRNA."  
"Homo sapiens lipin 2 (LPIN2), mRNA."  
"Homo sapiens LIM domain containing preferred translocation partner in lipoma (LPP), mRNA."  
"Homo sapiens lipid phosphate phosphatase-related protein type 2 (LPPR2), mRNA."  
"Homo sapiens leupaxin (LPXN), mRNA."  
"PREDICTED: Homo sapiens misc\_RNA (LQK1), miscRNA."  
"Homo sapiens leukocyte-derived arginine aminopeptidase (LRAP), mRNA."  
"Homo sapiens LPS-responsive vesicle trafficking, beach and anchor containing (LRBA), mRNA  
"Homo sapiens leucine-rich repeats and calponin homology (CH) domain containing 3 (LRCH3),  
"Homo sapiens leucine-rich repeats and calponin homology (CH) domain containing 4 (LRCH4),  
"Homo sapiens leucine-rich repeats and death domain containing (LRDD), transcript variant 3, n  
"Homo sapiens leucine rich repeat and fibronectin type III domain containing 1 (LRFN1), mRNA.  
"Homo sapiens leucine rich repeat and fibronectin type III domain containing 3 (LRFN3), mRNA.  
"Homo sapiens leucine rich repeat and fibronectin type III domain containing 4 (LRFN4), mRNA.  
"Homo sapiens leucine-rich repeats and guanylate kinase domain containing (LRGUK), mRNA."  
"Homo sapiens leucine-rich repeats and immunoglobulin-like domains 1 (LRIG1), mRNA."  
"Homo sapiens leucine-rich repeats and immunoglobulin-like domains 2 (LRIG2), mRNA."  
"Homo sapiens leucine-rich repeats and immunoglobulin-like domains 3 (LRIG3), transcript vari  
"Homo sapiens leucine-rich repeat, immunoglobulin-like and transmembrane domains 3 (LRIT3)  
"Homo sapiens lymphoid-restricted membrane protein (LRMP), mRNA."  
"Homo sapiens low density lipoprotein-related protein 1 (alpha-2-macroglobulin receptor) (LRP1  
"Homo sapiens low density lipoprotein receptor-related protein 10 (LRP10), mRNA."  
"Homo sapiens low density lipoprotein receptor-related protein 11 (LRP11), mRNA."  
"Homo sapiens low density lipoprotein-related protein 1B (deleted in tumors) (LRP1B), mRNA."  
"Homo sapiens low density lipoprotein receptor-related protein 3 (LRP3), mRNA."

"Homo sapiens low density lipoprotein receptor-related protein 4 (LRP4), mRNA."  
"Homo sapiens low density lipoprotein receptor-related protein 5 (LRP5), mRNA."  
"Homo sapiens low density lipoprotein receptor-related protein 8, apolipoprotein e receptor (LRP8), mRNA."  
"Homo sapiens low density lipoprotein receptor-related protein associated protein 1 (LRPAP1), mRNA."  
"Homo sapiens leucine rich repeat containing 1 (LRRC1), mRNA."  
"Homo sapiens leucine rich repeat containing 14 (LRRC14), mRNA."  
"Homo sapiens leucine rich repeat containing 15 (LRRC15), mRNA."  
"Homo sapiens leucine rich repeat containing 16 (LRRC16), mRNA."  
"Homo sapiens leucine rich repeat containing 16A (LRRC16A), mRNA."  
"Homo sapiens leucine rich repeat containing 16B (LRRC16B), mRNA."  
"Homo sapiens leucine rich repeat containing 18 (LRRC18), mRNA."  
"Homo sapiens leucine rich repeat containing 20 (LRRC20), transcript variant 1, mRNA."  
"Homo sapiens leucine rich repeat containing 23 (LRRC23), transcript variant 1, mRNA."  
"Homo sapiens leucine rich repeat containing 24 (LRRC24), mRNA."  
"Homo sapiens leucine rich repeat containing 25 (LRRC25), mRNA."  
"Homo sapiens leucine rich repeat containing 26 (LRRC26), mRNA."  
"Homo sapiens leucine rich repeat containing 28 (LRRC28), mRNA."  
"Homo sapiens leucine rich repeat containing 29 (LRRC29), transcript variant 2, mRNA."  
"Homo sapiens leucine rich repeat containing 3 (LRRC3), mRNA."  
"Homo sapiens leucine rich repeat containing 31 (LRRC31), mRNA."  
"Homo sapiens leucine rich repeat containing 32 (LRRC32), mRNA."  
"Homo sapiens leucine rich repeat containing 33 (LRRC33), mRNA."  
"Homo sapiens leucine rich repeat containing 34 (LRRC34), mRNA."  
"Homo sapiens leucine rich repeat containing 36 (LRRC36), mRNA."  
"Homo sapiens leucine rich repeat containing 37, member A2 (LRRC37A2), mRNA."  
"Homo sapiens leucine rich repeat containing 37, member A4 (pseudogene) (LRRC37A4), non-coding RNA."  
"PREDICTED: Homo sapiens leucine rich repeat containing 37B, transcript variant 4 (LRRC37B), non-coding RNA."  
"Homo sapiens leucine rich repeat containing 37, member B2 (LRRC37B2), non-coding RNA."  
"PREDICTED: Homo sapiens leucine rich repeat containing 38 (LRRC38), mRNA."  
"Homo sapiens leucine rich repeat containing 40 (LRRC40), mRNA."  
"Homo sapiens leucine rich repeat containing 41 (LRRC41), mRNA."  
"Homo sapiens leucine rich repeat containing 42 (LRRC42), mRNA."  
"Homo sapiens leucine rich repeat containing 44 (LRRC44), mRNA."  
"Homo sapiens leucine rich repeat containing 45 (LRRC45), mRNA."  
"Homo sapiens leucine rich repeat containing 46 (LRRC46), mRNA."  
"Homo sapiens leucine rich repeat containing 47 (LRRC47), mRNA."  
"PREDICTED: Homo sapiens leucine rich repeat containing 48 (LRRC48), mRNA."  
"Homo sapiens leucine rich repeat containing 49 (LRRC49), mRNA."  
"Homo sapiens leucine rich repeat containing 56 (LRRC56), mRNA."  
"Homo sapiens leucine rich repeat containing 57 (LRRC57), mRNA."  
"Homo sapiens leucine rich repeat containing 58 (LRRC58), mRNA."  
"Homo sapiens leucine rich repeat containing 59 (LRRC59), mRNA."  
"Homo sapiens leucine rich repeat containing 6 (LRRC6), mRNA."  
"Homo sapiens leucine rich repeat containing 67 (LRRC67), mRNA."

"Homo sapiens leucine rich repeat containing 69 (LRRC69), mRNA."  
"Homo sapiens leucine rich repeat containing 7 (LRRC7), mRNA."  
"Homo sapiens leucine rich repeat containing 8 family, member A (LRRC8A), mRNA."  
"Homo sapiens leucine rich repeat containing 8 family, member C (LRRC8C), mRNA."  
"Homo sapiens leucine rich repeat containing 8 family, member D (LRRC8D), mRNA."  
"Homo sapiens leucine rich repeat containing 8 family, member E (LRRC8E), mRNA."  
"Homo sapiens leucine rich repeat and coiled-coil domain containing 1 (LRRCC1), transcript var  
"Homo sapiens leucine rich repeat (in FLII) interacting protein 1 (LRRFIP1), mRNA."  
"Homo sapiens leucine rich repeat (in FLII) interacting protein 2 (LRRFIP2), transcript variant 1,  
"Homo sapiens leucine-rich repeats and IQ motif containing 3 (LRRIQ3), mRNA."  
"Homo sapiens leucine-rich repeat kinase 2 (LRRK2), mRNA."  
"Homo sapiens leucine rich repeat neuronal 1 (LRRN1), mRNA."  
"Homo sapiens leucine rich repeat neuronal 2 (LRRN2), transcript variant 2, mRNA."  
"Homo sapiens leucine rich repeat neuronal 3 (LRRN3), transcript variant 1, mRNA."  
"Homo sapiens leucine rich repeat neuronal 4 (LRRN4), mRNA."  
"Homo sapiens leucine rich transmembrane and 0-methyltransferase domain containing (LRTOI  
"Homo sapiens leucine-rich repeats and WD repeat domain containing 1 (LRWD1), mRNA."  
"Homo sapiens limbic system-associated membrane protein (LSAMP), mRNA."  
"Homo sapiens large subunit GTPase 1 homolog (*S. cerevisiae*) (LSG1), mRNA."  
"Homo sapiens LSM1 homolog, U6 small nuclear RNA associated (*S. cerevisiae*) (LSM1), mRN  
"Homo sapiens LSM10, U7 small nuclear RNA associated (LSM10), mRNA."  
"Homo sapiens LSM12 homolog (*S. cerevisiae*) (LSM12), mRNA."  
"Homo sapiens LSM14A, SCD6 homolog A (*S. cerevisiae*) (LSM14A), mRNA."  
"Homo sapiens LSM14B, SCD6 homolog B (*S. cerevisiae*) (LSM14B), mRNA."  
"Homo sapiens LSM2 homolog, U6 small nuclear RNA associated (*S. cerevisiae*) (LSM2), mRN  
"Homo sapiens LSM3 homolog, U6 small nuclear RNA associated (*S. cerevisiae*) (LSM3), mRN  
"Homo sapiens LSM4 homolog, U6 small nuclear RNA associated (*S. cerevisiae*) (LSM4), mRN  
"Homo sapiens LSM5 homolog, U6 small nuclear RNA associated (*S. cerevisiae*) (LSM5), mRN  
"Homo sapiens LSM6 homolog, U6 small nuclear RNA associated (*S. cerevisiae*) (LSM6), mRN  
"Homo sapiens LSM7 homolog, U6 small nuclear RNA associated (*S. cerevisiae*) (LSM7), mRN  
"Homo sapiens LSM8 homolog, U6 small nuclear RNA associated (*S. cerevisiae*) (LSM8), mRN  
"Homo sapiens LSM domain containing 1 (LSMD1), mRNA."  
"Homo sapiens lymphocyte-specific protein 1 (LSP1), transcript variant 3, mRNA."  
"Homo sapiens lipolysis stimulated lipoprotein receptor (LSR), transcript variant 2, mRNA."  
"Homo sapiens lanosterol synthase (2,3-oxidosqualene-lanosterol cyclase) (LSS), transcript vari  
"Homo sapiens leukocyte specific transcript 1 (LST1), transcript variant 1, mRNA."  
"Homo sapiens organic anion transporter LST-3b (LST-3TM12), mRNA."  
"Homo sapiens lymphotoxin alpha (TNF superfamily, member 1) (LTA), transcript variant 2, mRI  
"Homo sapiens leukotriene A4 hydrolase (LTA4H), mRNA."  
"Homo sapiens lymphotoxin beta (TNF superfamily, member 3) (LTB), transcript variant 1, mRN  
"Homo sapiens leukotriene B4 receptor (LTB4R), mRNA."  
"Homo sapiens latent transforming growth factor beta binding protein 1 (LTBP1), transcript varia  
"Homo sapiens latent transforming growth factor beta binding protein 3 (LTBP3), mRNA."  
"Homo sapiens latent transforming growth factor beta binding protein 4 (LTBP4), transcript varia

"Homo sapiens leukotriene C4 synthase (LTC4S), transcript variant 2, mRNA."  
"Homo sapiens lactotransferrin (LTF), mRNA."  
"Homo sapiens leukocyte tyrosine kinase (LTK), transcript variant 2, mRNA."  
"Homo sapiens LTV1 homolog (S. cerevisiae) (LTV1), mRNA."  
"Homo sapiens LUC7-like (S. cerevisiae) (LUC7L), transcript variant 1, mRNA."  
"Homo sapiens LUC7-like 2 (S. cerevisiae) (LUC7L2), mRNA."  
"Homo sapiens leucine zipper protein 1 (LUZP1), mRNA."  
"Homo sapiens latexin (LXN), mRNA."  
"Homo sapiens lymphocyte antigen 6 complex, locus E (LY6E), mRNA."  
"Homo sapiens lymphocyte antigen 6 complex, locus G6D (LY6G6D), mRNA."  
"Homo sapiens lymphocyte antigen 6 complex, locus G6F (LY6G6F), mRNA."  
"PREDICTED: Homo sapiens lymphocyte antigen 6 complex, locus H (LY6H), mRNA."  
"Homo sapiens lymphocyte antigen 75 (LY75), mRNA."  
"Homo sapiens lymphocyte antigen 86 (LY86), mRNA."  
"Homo sapiens lymphocyte antigen 9 (LY9), transcript variant 2, mRNA."  
"Homo sapiens lymphocyte antigen 96 (LY96), mRNA."  
"Homo sapiens Ly1 antibody reactive homolog (mouse) (LYAR), mRNA."  
"Homo sapiens lysozyme G-like 1 (LYG1), mRNA."  
"Homo sapiens lymphoblastic leukemia derived sequence 1 (LYL1), mRNA."  
"Homo sapiens v-yes-1 Yamaguchi sarcoma viral related oncogene homolog (LYN), mRNA."  
"Homo sapiens LY6/PLAUR domain containing 1 (LYPD1), transcript variant 2, mRNA."  
"Homo sapiens LY6/PLAUR domain containing 4 (LYPD4), mRNA."  
"Homo sapiens LY6/PLAUR domain containing 6 (LYPD6), mRNA."  
"Homo sapiens LY6/PLAUR domain containing 6B (LYPD6B), mRNA."  
"Homo sapiens lysophospholipase I (LYPLA1), mRNA."  
"Homo sapiens lysophospholipase II (LYPLA2), mRNA."  
"Homo sapiens lysophospholipase II pseudogene 1 (LYPLA2P1), non-coding RNA."  
"Homo sapiens lysophospholipase-like 1 (LYPLAL1), mRNA."  
"Homo sapiens LYR motif containing 1 (LYRM1), mRNA."  
"Homo sapiens LYR motif containing 2 (LYRM2), transcript variant 1, mRNA."  
"Homo sapiens LYR motif containing 4 (LYRM4), mRNA."  
"Homo sapiens LYR motif containing 5 (LYRM5), mRNA."  
"Homo sapiens Lyr7 homolog (mouse) (LYRM7), mRNA."  
"Homo sapiens LysM, putative peptidoglycan-binding, domain containing 1 (LYSMD1), mRNA."  
"Homo sapiens LysM, putative peptidoglycan-binding, domain containing 2 (LYSMD2), mRNA."  
"Homo sapiens LysM, putative peptidoglycan-binding, domain containing 3 (LYSMD3), mRNA."  
"Homo sapiens LysM, putative peptidoglycan-binding, domain containing 4 (LYSMD4), mRNA."  
"Homo sapiens lysosomal trafficking regulator (LYST), mRNA."  
"Homo sapiens lysozyme (renal amyloidosis) (LYZ), mRNA."  
"Homo sapiens leucine zipper and CTNNBIP1 domain containing (LZIC), mRNA."  
"Homo sapiens leucine zipper transcription factor-like 1 (LZTFL1), mRNA."  
"Homo sapiens leucine-zipper-like transcription regulator 1 (LZTR1), mRNA."  
"Homo sapiens leucine zipper, putative tumor suppressor 1 (LZTS1), mRNA."  
"Homo sapiens leucine zipper, putative tumor suppressor 2 (LZTS2), mRNA."



"Homo sapiens scavenger receptor cysteine-rich type 1 protein M160 (M160), mRNA."  
"Homo sapiens mannose-6-phosphate receptor (cation dependent) (M6PR), mRNA."  
"Homo sapiens mannose-6-phosphate receptor binding protein 1 (M6PRBP1), mRNA."  
"Homo sapiens mab-21-like 2 (C. elegans) (MAB21L2), mRNA."  
"Homo sapiens metastasis associated in colon cancer 1 (MACC1), mRNA."  
"Homo sapiens MACRO domain containing 1 (MACROD1), mRNA."  
"Homo sapiens MAD1 mitotic arrest deficient-like 1 (yeast) (MAD1L1), transcript variant 2, mRNA."  
"Homo sapiens MAD2 mitotic arrest deficient-like 1 (yeast) (MAD2L1), mRNA."  
"Homo sapiens MAD2 mitotic arrest deficient-like 2 (yeast) (MAD2L2), mRNA."  
"Homo sapiens MAP-kinase activating death domain (MADD), transcript variant 5, mRNA."  
"Homo sapiens macrophage erythroblast attacher (MAEA), transcript variant 1, mRNA."  
"Homo sapiens maelstrom homolog (Drosophila) (MAEL), mRNA."  
"Homo sapiens MAF1 homolog (S. cerevisiae) (MAF1), mRNA."  
"Homo sapiens v-maf musculoaponeurotic fibrosarcoma oncogene homolog A (avian) (MAFA), mRNA."  
"Homo sapiens v-maf musculoaponeurotic fibrosarcoma oncogene homolog B (avian) (MAFB), mRNA."  
"Homo sapiens v-maf musculoaponeurotic fibrosarcoma oncogene homolog F (avian) (MAFF), mRNA."  
"Homo sapiens myelin associated glycoprotein (MAG), transcript variant 2, mRNA."  
"Homo sapiens melanoma antigen family A, 3 (MAGEA3), mRNA."  
"Homo sapiens melanoma antigen family A, 5 (MAGEA5), mRNA."  
"PREDICTED: Homo sapiens melanoma antigen family B, 5 (MAGEB5), mRNA."  
"Homo sapiens melanoma antigen family D, 1 (MAGED1), transcript variant 2, mRNA."  
"Homo sapiens melanoma antigen family D, 2 (MAGED2), transcript variant 3, mRNA."  
"Homo sapiens melanoma antigen family E, 1 (MAGEE1), mRNA."  
"Homo sapiens melanoma antigen family F, 1 (MAGEF1), mRNA."  
"Homo sapiens melanoma antigen family H, 1 (MAGEH1), mRNA."  
"Homo sapiens MAGI family member, X-linked (MAGIX), transcript variant 4, mRNA."  
"Homo sapiens mitochondria-associated protein involved in granulocyte-macrophage colony-stimulating factor signaling (MAGOH), mRNA."  
"Homo sapiens mago-nashi homolog, proliferation-associated (Drosophila) (MAGOH), mRNA."  
"Homo sapiens mago-nashi homolog B (Drosophila) (MAGOHB), mRNA."  
"Homo sapiens magnesium transporter 1 (MAGT1), mRNA."  
"Homo sapiens male germ cell-associated kinase (MAK), mRNA."  
"Homo sapiens MAK10 homolog, amino-acid N-acetyltransferase subunit (S. cerevisiae) (MAK10), mRNA."  
"Homo sapiens MAK16 homolog (S. cerevisiae) (MAK16), mRNA."  
"Homo sapiens mal, T-cell differentiation protein (MAL), transcript variant a, mRNA."  
"Homo sapiens MAM domain containing 4 (MAMDC4), mRNA."  
"PREDICTED: Homo sapiens mastermind-like 1 (Drosophila) (MAML1), mRNA."  
"Homo sapiens mastermind-like domain containing 1 (MAMLD1), mRNA."  
"Homo sapiens mannosidase, alpha, class 1A, member 2 (MAN1A2), mRNA."  
"Homo sapiens mannosidase, alpha, class 1B, member 1 (MAN1B1), mRNA."  
"Homo sapiens mannosidase, alpha, class 2A, member 2 (MAN2A2), mRNA."  
"Homo sapiens mannosidase, alpha, class 2B, member 1 (MAN2B1), mRNA."  
"Homo sapiens mannosidase, alpha, class 2B, member 2 (MAN2B2), mRNA."  
"Homo sapiens mannosidase, alpha, class 2C, member 1 (MAN2C1), mRNA."  
"Homo sapiens mannosidase, beta A, lysosomal (MANBA), mRNA."

"Homo sapiens mannosidase, beta A, lysosomal-like (MANBAL), transcript variant 2, mRNA."  
"PREDICTED: Homo sapiens mannosidase, endo-alpha (MANEA), mRNA."  
"Homo sapiens mannosidase, endo-alpha-like (MANEAL), transcript variant 1, mRNA."  
"Homo sapiens MANSC domain containing 1 (MANSC1), mRNA."  
"Homo sapiens microtubule-associated protein 1A (MAP1A), mRNA."  
"Homo sapiens microtubule-associated protein 1B (MAP1B), mRNA."  
"Homo sapiens methionine aminopeptidase 1D (MAP1D), mRNA."  
"Homo sapiens microtubule-associated protein 1 light chain 3 alpha (MAP1LC3A), transcript var  
"Homo sapiens microtubule-associated protein 1 light chain 3 beta (MAP1LC3B), mRNA."  
"Homo sapiens microtubule-associated protein 1 light chain 3 gamma (MAP1LC3C), mRNA."  
"Homo sapiens microtubule-associated protein 1S (MAP1S), mRNA."  
"Homo sapiens microtubule-associated protein 2 (MAP2), transcript variant 1, mRNA."  
"Homo sapiens mitogen-activated protein kinase kinase 1 (MAP2K1), mRNA."  
"Homo sapiens mitogen-activated protein kinase kinase 1 interacting protein 1 (MAP2K1IP1), m  
"Homo sapiens mitogen-activated protein kinase kinase 2 (MAP2K2), mRNA."  
"Homo sapiens mitogen-activated protein kinase kinase 3 (MAP2K3), transcript variant B, mRNA/  
"Homo sapiens mitogen-activated protein kinase kinase 4 (MAP2K4), mRNA."  
"Homo sapiens mitogen-activated protein kinase kinase 6 (MAP2K6), mRNA."  
"Homo sapiens mitogen-activated protein kinase kinase 7 (MAP2K7), mRNA."  
"Homo sapiens mitogen-activated protein kinase kinase kinase 1 (MAP3K1), mRNA."  
"Homo sapiens mitogen-activated protein kinase kinase kinase 11 (MAP3K11), mRNA."  
"Homo sapiens mitogen-activated protein kinase kinase kinase 12 (MAP3K12), mRNA."  
"Homo sapiens mitogen-activated protein kinase kinase kinase 13 (MAP3K13), mRNA."  
"Homo sapiens mitogen-activated protein kinase kinase kinase 15 (MAP3K15), mRNA."  
"Homo sapiens mitogen-activated protein kinase kinase kinase 3 (MAP3K3), transcript variant 1  
"Homo sapiens mitogen-activated protein kinase kinase kinase 4 (MAP3K4), transcript variant 1  
"Homo sapiens mitogen-activated protein kinase kinase kinase 5 (MAP3K5), mRNA."  
"Homo sapiens mitogen-activated protein kinase kinase kinase 6 (MAP3K6), mRNA."  
"Homo sapiens mitogen-activated protein kinase kinase kinase 7 (MAP3K7), transcript variant D  
"Homo sapiens mitogen-activated protein kinase kinase kinase 7 interacting protein 1 (MAP3K7  
"Homo sapiens mitogen-activated protein kinase kinase kinase 7 interacting protein 2 (MAP3K7  
"Homo sapiens mitogen-activated protein kinase kinase kinase 7 interacting protein 3 (MAP3K7  
"Homo sapiens mitogen-activated protein kinase kinase kinase 8 (MAP3K8), mRNA."  
"Homo sapiens mitogen-activated protein kinase kinase kinase 9 (MAP3K9), mRNA."  
"Homo sapiens mitogen-activated protein kinase kinase kinase kinase 1 (MAP4K1), transcript va  
"Homo sapiens mitogen-activated protein kinase kinase kinase kinase 2 (MAP4K2), mRNA."  
"Homo sapiens mitogen-activated protein kinase kinase kinase kinase 3 (MAP4K3), mRNA."  
"Homo sapiens mitogen-activated protein kinase kinase kinase kinase 4 (MAP4K4), transcript va  
"Homo sapiens mitogen-activated protein kinase kinase kinase kinase 5 (MAP4K5), transcript va  
"Homo sapiens microtubule-associated protein 6 (MAP6), transcript variant 1, mRNA."  
"Homo sapiens MAP6 domain containing 1 (MAP6D1), mRNA."  
"Homo sapiens microtubule-associated protein 7 (MAP7), mRNA."  
"Homo sapiens MAP7 domain containing 1 (MAP7D1), mRNA."  
"Homo sapiens MAP7 domain containing 2 (MAP7D2), mRNA."

"Homo sapiens microtubule-associated protein 9 (MAP9), mRNA."  
"Homo sapiens mitogen-activated protein-binding protein-interacting protein (MAPBPIP), mRNA"  
"Homo sapiens mitogen-activated protein kinase 1 (MAPK1), transcript variant 1, mRNA."  
"Homo sapiens mitogen-activated protein kinase 10 (MAPK10), transcript variant 2, mRNA."  
"Homo sapiens mitogen-activated protein kinase 11 (MAPK11), mRNA."  
"Homo sapiens mitogen-activated protein kinase 12 (MAPK12), mRNA."  
"Homo sapiens mitogen-activated protein kinase 13 (MAPK13), mRNA."  
"Homo sapiens mitogen-activated protein kinase 14 (MAPK14), transcript variant 2, mRNA."  
"Homo sapiens mitogen-activated protein kinase 15 (MAPK15), mRNA."  
"Homo sapiens mitogen-activated protein kinase 3 (MAPK3), mRNA."  
"Homo sapiens mitogen-activated protein kinase 6 (MAPK6), mRNA."  
"Homo sapiens mitogen-activated protein kinase 7 (MAPK7), transcript variant 3, mRNA."  
"Homo sapiens mitogen-activated protein kinase 8 (MAPK8), transcript variant JNK1-a1, mRNA"  
"Homo sapiens mitogen-activated protein kinase 8 interacting protein 1 (MAPK8IP1), mRNA."  
"Homo sapiens mitogen-activated protein kinase 8 interacting protein 3 (MAPK8IP3), transcript v  
"Homo sapiens mitogen-activated protein kinase 9 (MAPK9), transcript variant JNK2-a2, mRNA"  
"Homo sapiens mitogen-activated protein kinase-activated protein kinase 2 (MAPKAPK2), trans  
"Homo sapiens mitogen-activated protein kinase-activated protein kinase 3 (MAPKAPK3), mRN  
"Homo sapiens mitogen-activated protein kinase-activated protein kinase 5 (MAPKAPK5), trans  
"Homo sapiens mitogen-activated protein kinase binding protein 1 (MAPKBP1), mRNA."  
"Homo sapiens MAPK scaffold protein 1 (MAPKSP1), transcript variant 2, transcribed RNA."  
"Homo sapiens microtubule-associated protein, RP/EB family, member 1 (MAPRE1), mRNA."  
"Homo sapiens microtubule-associated protein, RP/EB family, member 2 (MAPRE2), mRNA."  
"Homo sapiens microtubule-associated protein, RP/EB family, member 3 (MAPRE3), mRNA."  
"Homo sapiens microtubule-associated protein tau (MAPT), transcript variant 4, mRNA."  
"Homo sapiens myristoylated alanine-rich protein kinase C substrate (MARCKS), mRNA."  
"Homo sapiens MARCKS-like 1 (MARCKSL1), mRNA."  
"Homo sapiens MAP/microtubule affinity-regulating kinase 1 (MARK1), mRNA."  
"Homo sapiens MAP/microtubule affinity-regulating kinase 2 (MARK2), transcript variant 1, mRN  
"Homo sapiens MAP/microtubule affinity-regulating kinase 3 (MARK3), mRNA."  
"Homo sapiens MAP/microtubule affinity-regulating kinase 4 (MARK4), mRNA."  
"Homo sapiens methionyl-tRNA synthetase (MARS), mRNA."  
"Homo sapiens methionyl-tRNA synthetase 2, mitochondrial (MARS2), nuclear gene encoding n  
"Homo sapiens microtubule associated serine/threonine kinase 1 (MAST1), mRNA."  
"Homo sapiens microtubule associated serine/threonine kinase 2 (MAST2), mRNA."  
"Homo sapiens microtubule associated serine/threonine kinase 3 (MAST3), mRNA."  
"Homo sapiens microtubule associated serine/threonine kinase family member 4 (MAST4), trans  
"Homo sapiens microtubule associated serine/threonine kinase-like (MASTL), mRNA."  
"Homo sapiens methionine adenosyltransferase I, alpha (MAT1A), mRNA."  
"Homo sapiens methionine adenosyltransferase II, alpha (MAT2A), mRNA."  
"Homo sapiens methionine adenosyltransferase II, beta (MAT2B), transcript variant 2, mRNA."  
"Homo sapiens megakaryocyte-associated tyrosine kinase (MATK), transcript variant 3, mRNA."  
"Homo sapiens matrilin 1, cartilage matrix protein (MATN1), mRNA."  
"Homo sapiens matrin 3 (MATR3), transcript variant 1, mRNA."

"Homo sapiens MYC associated factor X (MAX), transcript variant 3, mRNA."

"Homo sapiens MYC-associated zinc finger protein (purine-binding transcription factor) (MAZ), transcript variant 1, mRNA."

"Homo sapiens methyl-CpG binding domain protein 1 (MBD1), transcript variant 3, mRNA."

"Homo sapiens methyl-CpG binding domain protein 2 (MBD2), transcript variant testis-specific, mRNA."

"Homo sapiens methyl-CpG binding domain protein 3 (MBD3), mRNA."

"Homo sapiens methyl-CpG binding domain protein 3-like 2 (MBD3L2), mRNA."

"Homo sapiens methyl-CpG binding domain protein 4 (MBD4), mRNA."

"Homo sapiens methyl-CpG binding domain protein 6 (MBD6), mRNA."

"Homo sapiens MAP3K12 binding inhibitory protein 1 (MBIP), mRNA."

"Homo sapiens metallo-beta-lactamase domain containing 1 (MBLAC1), mRNA."

"Homo sapiens metallo-beta-lactamase domain containing 2 (MBLAC2), mRNA."

"Homo sapiens muscleblind-like (Drosophila) (MBNL1), transcript variant 5, mRNA."

"Homo sapiens muscleblind-like 2 (Drosophila) (MBNL2), transcript variant 1, mRNA."

"Homo sapiens muscleblind-like 3 (Drosophila) (MBNL3), transcript variant R, mRNA."

"PREDICTED: Homo sapiens membrane bound O-acyltransferase domain containing 2 (MBOAT2), mRNA."

"Homo sapiens membrane bound O-acyltransferase domain containing 7 (MBOAT7), mRNA."

"Homo sapiens myelin basic protein (MBP), transcript variant 3, mRNA."

"Homo sapiens mbt domain containing 1 (MBTD1), mRNA."

"Homo sapiens membrane-bound transcription factor peptidase, site 1 (MBTPS1), mRNA."

"Homo sapiens membrane-bound transcription factor peptidase, site 2 (MBTPS2), mRNA."

"Homo sapiens melanocortin 1 receptor (alpha melanocyte stimulating hormone receptor) (MC1R), mRNA."

"Homo sapiens melanocortin 2 receptor (adrenocorticotrophic hormone) (MC2R), mRNA."

"Homo sapiens melanocortin 4 receptor (MC4R), mRNA."

"Homo sapiens melanocortin 5 receptor (MC5R), mRNA."

"Homo sapiens melanoma cell adhesion molecule (MCAM), mRNA."

"Homo sapiens mitochondrial carrier triple repeat 1 (MCART1), mRNA."

"Homo sapiens malonyl CoA:ACP acyltransferase (mitochondrial) (MCAT), nuclear gene encoding protein, mRNA."

"Homo sapiens methylcrotonoyl-Coenzyme A carboxylase 1 (alpha) (MCCC1), nuclear gene encoding protein, mRNA."

"Homo sapiens methylcrotonoyl-Coenzyme A carboxylase 2 (beta) (MCCC2), mRNA."

"Homo sapiens mitochondrial coiled-coil domain 1 (MCCD1), mRNA."

"Homo sapiens methylmalonyl CoA epimerase (MCEE), mRNA."

"Homo sapiens MCF.2 cell line derived transforming sequence-like (MCF2L), mRNA."

"Homo sapiens multiple coagulation factor deficiency 2 (MCFD2), mRNA."

"Homo sapiens melanin-concentrating hormone receptor 1 (MCHR1), mRNA."

"Homo sapiens myeloid cell leukemia sequence 1 (BCL2-related) (MCL1), transcript variant 1, mRNA."

"Homo sapiens minichromosome maintenance complex component 10 (MCM10), transcript variant 1, mRNA."

"Homo sapiens minichromosome maintenance complex component 2 (MCM2), mRNA."

"Homo sapiens minichromosome maintenance complex component 3 (MCM3), mRNA."

"Homo sapiens minichromosome maintenance complex component 3 associated protein (MCM3AP), mRNA."

"Homo sapiens MCM3 minichromosome maintenance deficient 3 (S. cerevisiae) associated protein (MCM3D3), mRNA."

"Homo sapiens minichromosome maintenance complex component 4 (MCM4), transcript variant 1, mRNA."

"Homo sapiens minichromosome maintenance complex component 5 (MCM5), mRNA."

"Homo sapiens minichromosome maintenance complex component 6 (MCM6), mRNA."

"Homo sapiens minichromosome maintenance complex component 7 (MCM7), transcript variant 1, mRNA."

"Homo sapiens mucolipin 1 (MCOLN1), mRNA."  
"Homo sapiens mucolipin 2 (MCOLN2), mRNA."  
"Homo sapiens mucolipin 3 (MCOLN3), mRNA."  
"Homo sapiens microcephalin 1 (MCPH1), mRNA."  
"Homo sapiens microspherule protein 1 (MCRS1), transcript variant 1, mRNA."  
"Homo sapiens multiple C2 domains, transmembrane 1 (MCTP1), transcript variant L, mRNA."  
"Homo sapiens malignant T cell amplified sequence 1 (MCTS1), mRNA."  
"Homo sapiens mediator of DNA damage checkpoint 1 (MDC1), mRNA."  
"Homo sapiens MyoD family inhibitor domain containing (MDFIC), mRNA."  
"Homo sapiens MAM domain containing glycosylphosphatidylinositol anchor 1 (MDGA1), mRNA"  
"Homo sapiens malate dehydrogenase 1, NAD (soluble) (MDH1), mRNA."  
"Homo sapiens malate dehydrogenase 2, NAD (mitochondrial) (MDH2), nuclear gene encoding  
"Homo sapiens Mdm4, transformed 3T3 cell double minute 1, p53 binding protein (mouse) (MDI  
"Homo sapiens Mdm2 p53 binding protein homolog (mouse) (MDM2), transcript variant MDM2,  
"Homo sapiens Mdm4 p53 binding protein homolog (mouse) (MDM4), mRNA."  
"Homo sapiens MDN1, midasin homolog (yeast) (MDN1), mRNA."  
"Homo sapiens magnesium-dependent phosphatase 1 (MDP1), mRNA."  
"Homo sapiens malic enzyme 2, NAD(+)-dependent, mitochondrial (ME2), nuclear gene encodir  
"Homo sapiens male-enhanced antigen 1 (MEA1), mRNA."  
"Homo sapiens MYST/Esa1-associated factor 6 (MEAF6), mRNA."  
"Homo sapiens mitochondrial trans-2-enoyl-CoA reductase (MECR), nuclear gene encoding mit  
"Homo sapiens mediator complex subunit 1 (MED1), mRNA."  
"Homo sapiens mediator complex subunit 10 (MED10), mRNA."  
"Homo sapiens mediator complex subunit 11 (MED11), mRNA."  
"Homo sapiens mediator of RNA polymerase II transcription, subunit 12 homolog (yeast) (MED1  
"Homo sapiens mediator complex subunit 12-like (MED12L), mRNA."  
"Homo sapiens mediator complex subunit 13 (MED13), mRNA."  
"Homo sapiens mediator complex subunit 13-like (MED13L), mRNA."  
"Homo sapiens mediator complex subunit 14 (MED14), mRNA. XM\_942921"  
"Homo sapiens mediator complex subunit 15 (MED15), transcript variant 1, mRNA."  
"Homo sapiens mediator complex subunit 16 (MED16), mRNA."  
"Homo sapiens mediator complex subunit 17 (MED17), mRNA."  
"Homo sapiens mediator complex subunit 19 (MED19), mRNA."  
"Homo sapiens mediator complex subunit 20 (MED20), mRNA."  
"Homo sapiens mediator complex subunit 21 (MED21), mRNA."  
"Homo sapiens mediator complex subunit 22 (MED22), transcript variant c, mRNA."  
"Homo sapiens mediator complex subunit 23 (MED23), transcript variant 2, mRNA."  
"Homo sapiens mediator complex subunit 24 (MED24), transcript variant 1, mRNA."  
"Homo sapiens mediator complex subunit 25 (MED25), mRNA."  
"Homo sapiens mediator complex subunit 26 (MED26), mRNA."  
"Homo sapiens mediator complex subunit 27 (MED27), mRNA."  
"Homo sapiens mediator complex subunit 28 (MED28), mRNA."  
"Homo sapiens mediator complex subunit 29 (MED29), mRNA."  
"Homo sapiens mediator complex subunit 30 (MED30), mRNA."

"Homo sapiens mediator complex subunit 31 (MED31), mRNA."  
"Homo sapiens mediator complex subunit 4 (MED4), mRNA."  
"Homo sapiens mediator complex subunit 6 (MED6), mRNA."  
"Homo sapiens mediator complex subunit 7 (MED7), transcript variant 1, mRNA."  
"Homo sapiens mediator of RNA polymerase II transcription, subunit 8 homolog (S. cerevisiae) (MED8), mRNA."  
"Homo sapiens mediator complex subunit 9 (MED9), mRNA."  
"Homo sapiens myocyte enhancer factor 2A (MEF2A), mRNA."  
"Homo sapiens myocyte enhancer factor 2B (MEF2B), mRNA."  
"Homo sapiens myocyte enhancer factor 2C (MEF2C), mRNA."  
"Homo sapiens myocyte enhancer factor 2D (MEF2D), mRNA."  
"Homo sapiens multiple EGF-like-domains 11 (MEGF11), mRNA."  
"Homo sapiens multiple EGF-like-domains 8 (MEGF8), mRNA."  
"Homo sapiens multiple EGF-like-domains 9 (MEGF9), mRNA."  
"Homo sapiens meiosis inhibitor 1 (MEI1), mRNA. XM\_934904 XM\_934906 XM\_934908 XM\_934910"  
"Homo sapiens meiosis expressed gene 1 homolog (mouse) (MEIG1), mRNA."  
"Homo sapiens Meis homeobox 2 (MEIS2), transcript variant h, mRNA."  
"Homo sapiens Meis homeobox 3 (MEIS3), transcript variant 2, mRNA."  
"Homo sapiens maternal embryonic leucine zipper kinase (MELK), mRNA."  
"Homo sapiens mediator of cell motility 1 (MEMO1), transcript variant 1, mRNA."  
"Homo sapiens multiple endocrine neoplasia I (MEN1), transcript variant e1D, mRNA."  
"Homo sapiens methylphosphate capping enzyme (MEPCE), mRNA."  
"Homo sapiens matrix extracellular phosphoglycoprotein (MEPE), mRNA."  
"Homo sapiens c-mer proto-oncogene tyrosine kinase (MERTK), mRNA."  
"Homo sapiens mesoderm development candidate 1 (MESDC1), mRNA."  
"Homo sapiens mesoderm posterior 1 homolog (mouse) (MESP1), mRNA."  
"Homo sapiens mesoderm posterior 2 homolog (mouse) (MESP2), mRNA."  
"Homo sapiens mesoderm specific transcript homolog (mouse) (MEST), transcript variant 3, mRNA."  
"Homo sapiens met proto-oncogene (hepatocyte growth factor receptor) (MET), transcript variant 1, mRNA."  
"Homo sapiens methionyl aminopeptidase 1 (METAP1), mRNA."  
"Homo sapiens methionyl aminopeptidase 2 (METAP2), mRNA."  
"Homo sapiens meteorin, glial cell differentiation regulator (METRN), mRNA."  
"PREDICTED: Homo sapiens meteorin, glial cell differentiation regulator-like (METRNL), mRNA"  
"Homo sapiens methyltransferase 10 domain containing (METT10D), mRNA."  
"Homo sapiens methyltransferase 11 domain containing 1 (METT11D1), transcript variant 2, mRNA."  
"Homo sapiens methyltransferase 5 domain containing 1 (METT5D1), mRNA."  
"Homo sapiens methyltransferase like 1 (METTL1), transcript variant 2, mRNA."  
"Homo sapiens methyltransferase like 11A (METTL11A), mRNA."  
"Homo sapiens methyltransferase like 11B (METTL11B), mRNA."  
"Homo sapiens methyltransferase like 12 (METTL12), nuclear gene encoding mitochondrial protein"  
"Homo sapiens methyltransferase like 13 (METTL13), transcript variant 3, mRNA."  
"Homo sapiens methyltransferase like 14 (METTL14), mRNA."  
"Homo sapiens methyltransferase like 2A (METTL2A), mRNA."  
"Homo sapiens methyltransferase like 3 (METTL3), mRNA."  
"Homo sapiens methyltransferase like 4 (METTL4), mRNA."

"Homo sapiens methyltransferase like 5 (METTL5), mRNA."  
"Homo sapiens methyltransferase like 7A (METTL7A), mRNA."  
"Homo sapiens methyltransferase like 7B (METTL7B), mRNA."  
"Homo sapiens methyltransferase like 9 (METTL9), transcript variant 2, mRNA."  
"Homo sapiens mex-3 homolog A (C. elegans) (MEX3A), mRNA."  
"Homo sapiens mex-3 homolog B (C. elegans) (MEX3B), mRNA."  
"Homo sapiens mex-3 homolog C (C. elegans) (MEX3C), mRNA."  
"Homo sapiens mex-3 homolog D (C. elegans) (MEX3D), transcript variant 2, mRNA."  
"Homo sapiens microfibrillar-associated protein 1 (MFAP1), mRNA."  
"Homo sapiens microfibrillar-associated protein 2 (MFAP2), transcript variant 1, mRNA."  
"Homo sapiens microfibrillar-associated protein 3 (MFAP3), mRNA."  
"Homo sapiens microfibrillar-associated protein 4 (MFAP4), mRNA."  
"Homo sapiens microfibrillar associated protein 5 (MFAP5), mRNA."  
"Homo sapiens mitochondrial fission factor (MFF), nuclear gene encoding mitochondrial protein,  
"Homo sapiens milk fat globule-EGF factor 8 protein (MFG8), mRNA."  
"Homo sapiens malignant fibrous histiocytoma amplified sequence 1 (MFHAS1), mRNA."  
"Homo sapiens antigen p97 (melanoma associated) identified by monoclonal antibodies 133.2 a  
"Homo sapiens mitofusin 2 (MFN2), nuclear gene encoding mitochondrial protein, mRNA."  
"Homo sapiens MFNG O-fucosylpeptide 3-beta-N-acetylglucosaminyltransferase (MFNG), mRN  
"Homo sapiens major facilitator superfamily domain containing 1 (MFSD1), mRNA."  
"Homo sapiens major facilitator superfamily domain containing 10 (MFSD10), mRNA."  
"Homo sapiens major facilitator superfamily domain containing 11 (MFSD11), mRNA."  
"Homo sapiens major facilitator superfamily domain containing 2 (MFSD2), mRNA."  
"Homo sapiens major facilitator superfamily domain containing 3 (MFSD3), mRNA."  
"Homo sapiens major facilitator superfamily domain containing 5 (MFSD5), mRNA."  
"Homo sapiens major facilitator superfamily domain containing 6 (MFSD6), mRNA."  
"Homo sapiens major facilitator superfamily domain containing 8 (MFSD8), mRNA."  
"Homo sapiens MAX gene associated (MGA), mRNA."  
"Homo sapiens mannosyl (alpha-1,3-)-glycoprotein beta-1,2-N-acetylglucosaminyltransferase (M  
"Homo sapiens mannosyl (alpha-1,6-)-glycoprotein beta-1,2-N-acetylglucosaminyltransferase (M  
"Homo sapiens mannosyl (alpha-1,3-)-glycoprotein beta-1,4-N-acetylglucosaminyltransferase, is  
"Homo sapiens mannosyl (alpha-1,3-)-glycoprotein beta-1,4-N-acetylglucosaminyltransferase, is  
"PREDICTED: Homo sapiens hypothetical protein MGC10646 (MGC10646), mRNA."  
"PREDICTED: Homo sapiens hypothetical protein MGC10701 (MGC10701), mRNA."  
"PREDICTED: Homo sapiens misc\_RNA (MGC10981), miscRNA."  
Homo sapiens pseudogene MGC10997 (MGC10997) on chromosome 15.  
"PREDICTED: Homo sapiens hypothetical protein MGC12760, transcript variant 2 (MGC12760)  
"Homo sapiens similar to Cytochrome c, somatic (MGC12965), mRNA."  
"Homo sapiens hypothetical protein MGC12982 (MGC12982), non-coding RNA."  
"PREDICTED: Homo sapiens hypothetical protein MGC13005 (MGC13005), mRNA."  
"Homo sapiens hypothetical protein MGC13057 (MGC13057), mRNA."  
"Homo sapiens hypothetical protein MGC13168 (MGC13168), mRNA."  
"Homo sapiens hypothetical protein BC008322 (MGC15763), mRNA."  
"PREDICTED: Homo sapiens hypothetical protein MGC16025 (MGC16025), mRNA."

"PREDICTED: Homo sapiens hypothetical protein MGC16075 (MGC16075), misc RNA."  
"PREDICTED: Homo sapiens hypothetical protein MGC16121 (MGC16121), mRNA."  
"Homo sapiens hypothetical protein MGC16169 (MGC16169), mRNA."  
"PREDICTED: Homo sapiens hypothetical protein MGC16384 (MGC16384), mRNA."  
"Homo sapiens tubulin, alpha pseudogene (MGC16703), non-coding RNA."  
"PREDICTED: Homo sapiens hypothetical protein MGC18216 (MGC18216), mRNA."  
"Homo sapiens hypothetical protein MGC20983 (MGC20983), mRNA."  
"Homo sapiens hypothetical locus MGC21881 (MGC21881), non-coding RNA."  
"Homo sapiens hypothetical LOC196872 (MGC23270), non-coding RNA."  
"Homo sapiens hypothetical LOC197187 (MGC23284), transcript variant 1, non-coding RNA."  
"PREDICTED: Homo sapiens hypothetical protein MGC24103 (MGC24103), misc RNA."  
"PREDICTED: Homo sapiens hypothetical protein MGC24125 (MGC24125), misc RNA."  
"Homo sapiens hypothetical protein MGC25181 (MGC25181), mRNA."  
"PREDICTED: Homo sapiens misc\_RNA (MGC26356), miscRNA."  
"PREDICTED: Homo sapiens hypothetical protein MGC27345 (MGC27345), misc RNA."  
"PREDICTED: Homo sapiens similar to ribosomal protein S2; 40S ribosomal protein S2 (MGC27345), mRNA."  
"PREDICTED: Homo sapiens hypothetical protein MGC27382 (MGC27382), mRNA."  
"Homo sapiens hypothetical protein MGC2752 (MGC2752), mRNA."  
"Homo sapiens hypothetical protein MGC29506 (MGC29506), mRNA."  
"Homo sapiens hypothetical protein MGC3020 (MGC3020), mRNA."  
"PREDICTED: Homo sapiens hypothetical protein MGC3032, transcript variant 3 (MGC3032), mRNA."  
"PREDICTED: Homo sapiens hypothetical protein MGC3196 (MGC3196), mRNA."  
"Homo sapiens hypothetical LOC339541 (MGC33556), mRNA."  
"Homo sapiens hypothetical protein MGC33948 (MGC33948), mRNA."  
"Homo sapiens hypothetical protein MGC35361 (MGC35361), mRNA."  
"Homo sapiens hypothetical protein MGC35440 (MGC35440), mRNA."  
"Homo sapiens hypothetical protein MGC3731 (MGC3731), mRNA."  
"PREDICTED: Homo sapiens hypothetical protein MGC39372 (MGC39372), mRNA."  
"Homo sapiens hypothetical protein LOC403312 (MGC39545), mRNA."  
"PREDICTED: Homo sapiens hypothetical protein MGC39900 (MGC39900), mRNA."  
"Homo sapiens hypothetical protein MGC40168 (MGC40168), mRNA."  
"PREDICTED: Homo sapiens hypothetical protein MGC40489 (MGC40489), misc RNA."  
"PREDICTED: Homo sapiens PRotein Associated with Tlr4, transcript variant 4 (MGC40499), mRNA."  
"PREDICTED: Homo sapiens hypothetical protein MGC40574 (MGC40574), misc RNA."  
"Homo sapiens serine/threonine-protein kinase NIM1 (MGC42105), mRNA."  
"Homo sapiens hypothetical protein MGC42630 (MGC42630), mRNA."  
"PREDICTED: Homo sapiens hypothetical protein MGC42638 (MGC42638), mRNA."  
"Homo sapiens hypothetical protein MGC45491 (MGC45491), mRNA."  
"PREDICTED: Homo sapiens hypothetical gene MGC45922 (MGC45922), misc RNA."  
"Homo sapiens hypothetical protein MGC4677 (MGC4677), mRNA."  
"PREDICTED: Homo sapiens hypothetical protein MGC48637 (MGC48637), mRNA."  
"Homo sapiens CXYorf1-related protein (MGC52000), mRNA."  
"PREDICTED: Homo sapiens similar to ankyrin-repeat protein Nrarp (MGC61598), mRNA."  
"Homo sapiens similar to RIKEN cDNA C030006K11 gene (MGC70857), mRNA."



"Homo sapiens similar to RPL23AP7 protein (MGC70863), transcript variant 1, mRNA."  
"Homo sapiens similar to DNA segment, Chr 11, Brigham & Womens Genetics 0434 expressed Homo sapiens MGC72080 pseudogene (MGC72080) on chromosome 7."  
"Homo sapiens similar to FRG1 protein (FSHD region gene 1 protein) (MGC72104), mRNA."  
"PREDICTED: Homo sapiens similar to Six transmembrane epithelial antigen of prostate (MGC87895), mRNA."  
"PREDICTED: Homo sapiens similar to ribosomal protein S14 (MGC87895), mRNA."  
"Homo sapiens meningioma expressed antigen 5 (hyaluronidase) (MGEA5), mRNA."  
"Homo sapiens monoglyceride lipase (MGLL), transcript variant 1, mRNA."  
"Homo sapiens O-6-methylguanine-DNA methyltransferase (MGMT), mRNA."  
"Homo sapiens matrix Gla protein (MGP), mRNA."  
"Homo sapiens microsomal glutathione S-transferase 1 (MGST1), transcript variant 1a, mRNA."  
"Homo sapiens microsomal glutathione S-transferase 2 (MGST2), mRNA."  
"Homo sapiens microsomal glutathione S-transferase 3 (MGST3), mRNA."  
"Homo sapiens melanoma inhibitory activity (MIA), mRNA."  
"PREDICTED: Homo sapiens melanoma inhibitory activity family, member 3, transcript variant 3  
"Homo sapiens myocardial infarction associated transcript (non-protein coding) (MIAT), non-coding  
"Homo sapiens mindbomb homolog 1 (Drosophila) (MIB1), mRNA."  
"PREDICTED: Homo sapiens mindbomb homolog 2 (Drosophila) (MIB2), mRNA."  
"Homo sapiens MHC class I polypeptide-related sequence A (MICA), mRNA."  
"Homo sapiens microtubule associated monooxygenase, calponin and LIM domain containing 1 (MICAL1), mRNA."  
"Homo sapiens microtubule associated monooxygenase, calponin and LIM domain containing 2 (MICAL2), mRNA."  
"Homo sapiens MICAL C-terminal like (MICALCL), mRNA."  
"Homo sapiens MICAL-like 1 (MICALL1), mRNA."  
"Homo sapiens MHC class I polypeptide-related sequence B (MICB), mRNA."  
"Homo sapiens MID1 interacting protein 1 (gastrulation specific G12 homolog (zebrafish)) (MID1), mRNA."  
"Homo sapiens midnolin (MIDN), mRNA."  
"Homo sapiens mesoderm induction early response 1 homolog (Xenopus laevis) (MIER1), transcript variant 1, mRNA."  
"Homo sapiens mesoderm induction early response 1, family member 3 (MIER3), mRNA."  
"Homo sapiens macrophage migration inhibitory factor (glycosylation-inhibiting factor) (MIF), mRNA."  
"Homo sapiens MIF4G domain containing (MIF4GD), mRNA."  
"Homo sapiens migration and invasion inhibitory protein (MIIP), mRNA."  
"Homo sapiens MER1 repeat containing imprinted transcript 1 (non-protein coding) (MIMT1), non-coding  
"Homo sapiens MYC induced nuclear antigen (MINA), transcript variant 3, mRNA."  
"Homo sapiens multiple inositol polyphosphate histidine phosphatase, 1 (MINPP1), mRNA."  
"Homo sapiens missing oocyte, meiosis regulator, homolog (Drosophila) (MIOS), mRNA."  
"Homo sapiens mitochondrial intermediate peptidase (MIPEP), nuclear gene encoding mitochondrial  
"Homo sapiens microRNA 100 (MIR100), microRNA."  
"Homo sapiens microRNA 106b (MIR106B), microRNA."  
"Homo sapiens microRNA 1185-1 (MIR1185-1), microRNA."  
"Homo sapiens microRNA 1204 (MIR1204), microRNA."  
"Homo sapiens microRNA 1208 (MIR1208), microRNA."  
"Homo sapiens microRNA 122 (MIR122), microRNA."  
"Homo sapiens microRNA 1224 (MIR1224), microRNA."  
"Homo sapiens microRNA 1228 (MIR1228), microRNA."

"Homo sapiens microRNA 1237 (MIR1237), microRNA."  
"Homo sapiens microRNA 1243 (MIR1243), microRNA."  
"Homo sapiens microRNA 1255b-2 (MIR1255B2), microRNA."  
"Homo sapiens microRNA 125b-2 (MIR125B2), microRNA."  
"Homo sapiens microRNA 1265 (MIR1265), microRNA."  
"Homo sapiens microRNA 1267 (MIR1267), microRNA."  
"Homo sapiens microRNA 1269 (MIR1269), microRNA."  
"Homo sapiens microRNA 1272 (MIR1272), microRNA."  
"Homo sapiens microRNA 1274a (MIR1274A), microRNA."  
"Homo sapiens microRNA 1277 (MIR1277), microRNA."  
"Homo sapiens microRNA 1281 (MIR1281), microRNA."  
"Homo sapiens microRNA 129-1 (MIR129-1), microRNA."  
"Homo sapiens microRNA 1293 (MIR1293), microRNA."  
"Homo sapiens microRNA 130a (MIR130A), microRNA."  
"Homo sapiens microRNA 1321 (MIR1321), microRNA."  
"Homo sapiens microRNA 1323 (MIR1323), microRNA."  
"Homo sapiens microRNA 138-2 (MIR138-2), microRNA."  
"Homo sapiens microRNA 1471 (MIR1471), microRNA."  
"Homo sapiens microRNA 1537 (MIR1537), microRNA."  
"Homo sapiens MIR155 host gene (non-protein coding) (MIR155HG), non-coding RNA."  
"Homo sapiens microRNA 16-2 (MIR16-2), microRNA."  
"Homo sapiens microRNA 182 (MIR182), microRNA."  
"Homo sapiens microRNA 1910 (MIR1910), microRNA."  
"Homo sapiens microRNA 1914 (MIR1914), microRNA."  
"Homo sapiens microRNA 192 (MIR192), microRNA."  
"Homo sapiens microRNA 1974 (MIR1974), microRNA."  
"Homo sapiens microRNA 1978 (MIR1978), microRNA."  
"Homo sapiens microRNA 1979 (MIR1979), microRNA."  
"Homo sapiens microRNA 199b (MIR199B), microRNA."  
"Homo sapiens microRNA 204 (MIR204), microRNA."  
"Homo sapiens microRNA 21 (MIR21), microRNA."  
"Homo sapiens microRNA 214 (MIR214), microRNA."  
"Homo sapiens microRNA 215 (MIR215), microRNA."  
"Homo sapiens microRNA 219-2 (MIR219-2), microRNA."  
"Homo sapiens microRNA 2276 (MIR2276), microRNA."  
"Homo sapiens microRNA 23a (MIR23A), microRNA."  
"Homo sapiens microRNA 25 (MIR25), microRNA."  
"Homo sapiens microRNA 298 (MIR298), microRNA."  
"Homo sapiens microRNA 300 (MIR300), microRNA."  
"Homo sapiens microRNA 30b (MIR30B), microRNA."  
"Homo sapiens microRNA 30c-2 (MIR30C2), microRNA."  
"Homo sapiens microRNA 32 (MIR32), microRNA."  
"Homo sapiens microRNA 320a (MIR320A), microRNA."  
"Homo sapiens microRNA 320c-1 (MIR320C1), microRNA."

"Homo sapiens microRNA 326 (MIR326), microRNA."  
"Homo sapiens microRNA 330 (MIR330), microRNA."  
"Homo sapiens microRNA 340 (MIR340), microRNA."  
"Homo sapiens microRNA 365-1 (MIR365-1), microRNA."  
"Homo sapiens microRNA 370 (MIR370), microRNA."  
"Homo sapiens microRNA 371 (MIR371), microRNA."  
"Homo sapiens microRNA 376c (MIR376C), microRNA."  
"Homo sapiens microRNA 377 (MIR377), microRNA."  
"Homo sapiens microRNA 382 (MIR382), microRNA."  
"Homo sapiens microRNA 425 (MIR425), microRNA."  
"Homo sapiens microRNA 429 (MIR429), microRNA."  
"Homo sapiens microRNA 448 (MIR448), microRNA."  
"Homo sapiens microRNA 451 (MIR451), microRNA."  
"Homo sapiens microRNA 453 (MIR453), microRNA."  
"Homo sapiens microRNA 455 (MIR455), microRNA."  
"Homo sapiens microRNA 489 (MIR489), microRNA."  
"Homo sapiens microRNA 498 (MIR498), microRNA."  
"Homo sapiens microRNA 505 (MIR505), microRNA."  
"Homo sapiens microRNA 507 (MIR507), microRNA."  
"Homo sapiens microRNA 511-2 (MIR511-2), microRNA."  
"Homo sapiens microRNA 517b (MIR517B), microRNA."  
"Homo sapiens microRNA 532 (MIR532), microRNA."  
"Homo sapiens microRNA 548f-4 (MIR548F4), microRNA."  
"Homo sapiens microRNA 550-2 (MIR550-2), microRNA."  
"Homo sapiens microRNA 557 (MIR557), microRNA."  
"Homo sapiens microRNA 561 (MIR561), microRNA."  
"Homo sapiens microRNA 564 (MIR564), microRNA."  
"Homo sapiens microRNA 568 (MIR568), microRNA."  
"Homo sapiens microRNA 569 (MIR569), microRNA."  
"Homo sapiens microRNA 572 (MIR572), microRNA."  
"Homo sapiens microRNA 578 (MIR578), microRNA."  
"Homo sapiens microRNA 586 (MIR586), microRNA."  
"Homo sapiens microRNA 593 (MIR593), microRNA."  
"Homo sapiens microRNA 599 (MIR599), microRNA."  
"Homo sapiens microRNA 603 (MIR603), microRNA."  
"Homo sapiens microRNA 616 (MIR616), microRNA."  
"Homo sapiens microRNA 635 (MIR635), microRNA."  
"Homo sapiens microRNA 638 (MIR638), microRNA."  
"Homo sapiens microRNA 643 (MIR643), microRNA."  
"Homo sapiens microRNA 658 (MIR658), microRNA."  
"Homo sapiens microRNA 665 (MIR665), microRNA."  
"Homo sapiens microRNA 708 (MIR708), microRNA."  
"Homo sapiens microRNA 761 (MIR761), microRNA."  
"Homo sapiens microRNA 770 (MIR770), microRNA."

"Homo sapiens microRNA 886 (MIR886), microRNA."  
"Homo sapiens microRNA 93 (MIR93), microRNA."  
"Homo sapiens microRNA 940 (MIR940), microRNA."  
"Homo sapiens microRNA 942 (MIR942), microRNA."  
"Homo sapiens microRNA 943 (MIR943), microRNA."  
"Homo sapiens microRNA 944 (MIR944), microRNA."  
"PREDICTED: Homo sapiens ncRNA (MIRH1), miscRNA."  
"Homo sapiens microRNA let-7c (MIRLET7C), microRNA."  
"Homo sapiens MIS12, MIND kinetochore complex component, homolog (S. pombe) (MIS12), r  
"Homo sapiens MIT, microtubule interacting and transport, domain containing 1 (MITD1), mRNA  
"Homo sapiens microphthalmia-associated transcription factor (MITF), transcript variant 3, mRN  
"Homo sapiens Mix1 homeobox-like 1 (Xenopus laevis) (MIXL1), mRNA."  
"Homo sapiens antigen identified by monoclonal antibody Ki-67 (MKI67), mRNA."  
"Homo sapiens MKI67 (FHA domain) interacting nucleolar phosphoprotein (MKI67IP), mRNA."  
"Homo sapiens McKusick-Kaufman syndrome (MKKS), transcript variant 2, mRNA."  
"Homo sapiens megakaryoblastic leukemia (translocation) 1 (MKL1), mRNA."  
"Homo sapiens MKL/myocardin-like 2 (MKL2), mRNA."  
"Homo sapiens muskelin 1, intracellular mediator containing kelch motifs (MKLN1), mRNA."  
"Homo sapiens MAP kinase interacting serine/threonine kinase 1 (MKNK1), transcript variant 2,  
"Homo sapiens MAP kinase interacting serine/threonine kinase 2 (MKNK2), transcript variant 1,  
"Homo sapiens makorin ring finger protein 1 (MKRN1), mRNA."  
"Homo sapiens makorin ring finger protein 2 (MKRN2), mRNA."  
"Homo sapiens Meckel syndrome, type 1 (MKS1), mRNA."  
"Homo sapiens mohawk homeobox (MKX), mRNA."  
"Homo sapiens malectin (MLEC), mRNA."  
"Homo sapiens myeloid leukemia factor 1 (MLF1), mRNA."  
"Homo sapiens MLF1 interacting protein (MLF1IP), mRNA."  
"Homo sapiens myeloid leukemia factor 2 (MLF2), mRNA."  
"Homo sapiens mutL homolog 1, colon cancer, nonpolyposis type 2 (E. coli) (MLH1), mRNA."  
"PREDICTED: Homo sapiens mixed lineage kinase domain-like (MLKL), mRNA."  
"Homo sapiens myeloid/lymphoid or mixed-lineage leukemia (trithorax homolog, Drosophila) (MI  
"Homo sapiens myeloid/lymphoid or mixed-lineage leukemia 2 (MLL2), mRNA."  
"Homo sapiens myeloid/lymphoid or mixed-lineage leukemia 3 (MLL3), transcript variant 2, mRN  
"Homo sapiens myeloid/lymphoid or mixed-lineage leukemia 4 (MLL4), mRNA."  
"Homo sapiens myeloid/lymphoid or mixed-lineage leukemia 5 (trithorax homolog, Drosophila) (I  
"Homo sapiens myeloid/lymphoid or mixed-lineage leukemia (trithorax homolog, Drosophila); tra  
"Homo sapiens myeloid/lymphoid or mixed-lineage leukemia (trithorax homolog, Drosophila); tra  
"Homo sapiens myeloid/lymphoid or mixed-lineage leukemia (trithorax homolog, Drosophila); tra  
"Homo sapiens myeloid/lymphoid or mixed-lineage leukemia (trithorax homolog, Drosophila); tra  
"Homo sapiens melanophilin (MLPH), transcript variant 2, mRNA."  
"Homo sapiens MTOR associated protein, LST8 homolog (S. cerevisiae) (MLST8), mRNA."  
"Homo sapiens MAX-like protein X (MLX), transcript variant 1, mRNA."  
"Homo sapiens malonyl-CoA decarboxylase (MLYCD), nuclear gene encoding mitochondrial prc  
"Homo sapiens methylmalonic aciduria (cobalamin deficiency) cblA type (MMAA), mRNA."

"Homo sapiens methylmalonic aciduria (cobalamin deficiency) cblC type, with homocystinuria (M

"Homo sapiens methylmalonic aciduria (cobalamin deficiency) cblD type, with homocystinuria (M

"Homo sapiens monocyte to macrophage differentiation-associated (MMD), mRNA."

"Homo sapiens membrane metallo-endopeptidase (neutral endopeptidase, enkephalinase, CAL

"Homo sapiens membrane magnesium transporter 1 (MMGT1), mRNA."

"Homo sapiens matrix metallopeptidase 1 (interstitial collagenase) (MMP1), mRNA."

"Homo sapiens matrix metallopeptidase 11 (stromelysin 3) (MMP11), mRNA."

"Homo sapiens matrix metallopeptidase 16 (membrane-inserted) (MMP16), transcript variant 1,

"Homo sapiens matrix metallopeptidase 23B (MMP23B), mRNA."

"Homo sapiens matrix metallopeptidase 24 (membrane-inserted) (MMP24), mRNA."

"Homo sapiens matrix metallopeptidase 28 (MMP28), transcript variant 1, mRNA."

"Homo sapiens matrix metallopeptidase 7 (matrilysin, uterine) (MMP7), mRNA."

"Homo sapiens matrix metallopeptidase 9 (gelatinase B, 92kDa gelatinase, 92kDa type IV colla

"Homo sapiens MMS19 nucleotide excision repair homolog (*S. cerevisiae*) (MMS19), mRNA."

"Homo sapiens MMS19-like (MET18 homolog, *S. cerevisiae*) (MMS19L), mRNA."

"Homo sapiens meningioma (disrupted in balanced translocation) 1 (MN1), mRNA."

"Homo sapiens menage a trois homolog 1, cyclin H assembly factor (*Xenopus laevis*) (MNAT1),

"Homo sapiens meiotic nuclear divisions 1 homolog (*S. cerevisiae*) (MND1), mRNA."

"Homo sapiens myeloid cell nuclear differentiation antigen (MNDA), mRNA."

"Homo sapiens meiosis-specific nuclear structural 1 (MNS1), mRNA."

"Homo sapiens MAX binding protein (MNT), mRNA."

"Homo sapiens motor neuron and pancreas homeobox 1 (MNX1), transcript variant 1, mRNA."

"Homo sapiens modulator of apoptosis 1 (MOAP1), mRNA."

"Homo sapiens MOB1, Mps One Binder kinase activator-like 1B (yeast) (MOBK1B), mRNA."

"Homo sapiens MOB1, Mps One Binder kinase activator-like 1A (yeast) (MOBKL1A), mRNA."

"Homo sapiens MOB1, Mps One Binder kinase activator-like 1B (yeast) (MOBKL1B), mRNA."

"Homo sapiens MOB1, Mps One Binder kinase activator-like 2A (yeast) (MOBKL2A), mRNA."

"Homo sapiens MOB1, Mps One Binder kinase activator-like 2B (yeast) (MOBKL2B), mRNA."

"Homo sapiens MOB1, Mps One Binder kinase activator-like 2C (yeast) (MOBKL2C), transcript v

"Homo sapiens MOB1, Mps One Binder kinase activator-like 3 (yeast) (MOBKL3), transcript vari

"Homo sapiens molybdenum cofactor sulfurase (MOCOS), mRNA."

"Homo sapiens molybdenum cofactor synthesis 2 (MOCS2), transcript variant 3, mRNA."

"Homo sapiens molybdenum cofactor synthesis 3 (MOCS3), mRNA."

"Homo sapiens mannosyl-oligosaccharide glucosidase (MOGS), transcript variant 1, mRNA."

"Homo sapiens MON1 homolog A (yeast) (MON1A), mRNA."

"Homo sapiens MON1 homolog B (yeast) (MON1B), mRNA."

"Homo sapiens MON2 homolog (yeast) (MON2), mRNA."

"Homo sapiens MORC family CW-type zinc finger 1 (MORC1), mRNA."

"Homo sapiens MORC family CW-type zinc finger 3 (MORC3), mRNA."

"Homo sapiens MORC family CW-type zinc finger 4 (MORC4), mRNA."

"Homo sapiens mortality factor 4 like 1 (MORF4L1), transcript variant 2, mRNA."

"Homo sapiens mortality factor 4 like 2 (MORF4L2), mRNA."

"Homo sapiens mitogen-activated protein kinase organizer 1 (MORG1), mRNA."

"Homo sapiens MORN repeat containing 2 (MORN2), mRNA."

"Homo sapiens MORN repeat containing 3 (MORN3), mRNA."  
"Homo sapiens MORN repeat containing 4 (MORN4), transcript variant 1, mRNA."  
"Homo sapiens MORN repeat containing 5 (MORN5), mRNA."  
"Homo sapiens v-mos Moloney murine sarcoma viral oncogene homolog (MOS), mRNA."  
"Homo sapiens motile sperm domain containing 1 (MOSPD1), mRNA."  
"Homo sapiens motile sperm domain containing 2 (MOSPD2), mRNA."  
"Homo sapiens motile sperm domain containing 3 (MOSPD3), transcript variant 2, mRNA."  
"Homo sapiens Mov10, Moloney leukemia virus 10, homolog (mouse) (MOV10), mRNA."  
"Homo sapiens monooxygenase, DBH-like 1 (MOXD1), transcript variant 2, mRNA."  
"Homo sapiens mannose-P-dolichol utilization defect 1 (MPDU1), mRNA."  
"PREDICTED: Homo sapiens macrophage expressed gene 1, transcript variant 1 (MPEG1), mRNA"  
"Homo sapiens M-phase phosphoprotein 10 (U3 small nucleolar ribonucleoprotein) (MPHOSPH10), mRNA."  
"Homo sapiens M-phase phosphoprotein 6 (MPHOSPH6), mRNA."  
"Homo sapiens M-phase phosphoprotein 8 (MPHOSPH8), mRNA."  
"Homo sapiens M-phase phosphoprotein 9 (MPHOSPH9), mRNA."  
"Homo sapiens mannose phosphate isomerase (MPI), mRNA."  
"Homo sapiens MPN domain containing (MPND), mRNA."  
"Homo sapiens myeloperoxidase (MPO), nuclear gene encoding mitochondrial protein, mRNA."  
"Homo sapiens membrane protein, palmitoylated 1, 55kDa (MPP1), mRNA."  
"Homo sapiens membrane protein, palmitoylated 2 (MAGUK p55 subfamily member 2) (MPP2), mRNA."  
"Homo sapiens membrane protein, palmitoylated 5 (MAGUK p55 subfamily member 5) (MPP5), mRNA."  
"Homo sapiens membrane protein, palmitoylated 6 (MAGUK p55 subfamily member 6) (MPP6), mRNA."  
"Homo sapiens metallophosphoesterase 1 (MPPE1), mRNA."  
"Homo sapiens metallophosphoesterase domain containing 2 (MPPED2), mRNA."  
"Homo sapiens myosin phosphatase Rho interacting protein (MPRIP), transcript variant 1, mRNA."  
"Homo sapiens mercaptopyruvate sulfurtransferase (MPST), nuclear gene encoding mitochondrial protein, mRNA."  
"Homo sapiens MpV17 mitochondrial inner membrane protein (MPV17), nuclear gene encoding mitochondrial protein, mRNA."  
"Homo sapiens MPV17 mitochondrial membrane protein-like (MPV17L), nuclear gene encoding mitochondrial protein, mRNA."  
"Homo sapiens MPV17 mitochondrial membrane protein-like 2 (MPV17L2), nuclear gene encoding mitochondrial protein, mRNA."  
"Homo sapiens myelin protein zero-like 1 (MPZL1), transcript variant 2, mRNA."  
"Homo sapiens myelin protein zero-like 2 (MPZL2), transcript variant 2, mRNA."  
"Homo sapiens major histocompatibility complex, class I-related (MR1), mRNA."  
"Homo sapiens mannose receptor, C type 2 (MRC2), mRNA."  
"Homo sapiens MRE11 meiotic recombination 11 homolog A (S. cerevisiae) (MRE11A), transcript variant 1, mRNA."  
"Homo sapiens melanoregulin (MREG), mRNA."  
"Homo sapiens Mof4 family associated protein 1 (MRFAP1), mRNA."  
"Homo sapiens Morf4 family associated protein 1-like 1 (MRFAP1L1), transcript variant 2, mRNA."  
"Homo sapiens MAS-related GPR, member D (MRGPRD), mRNA."  
"Homo sapiens MAS-related GPR, member X3 (MRGPRX3), mRNA."  
"Homo sapiens methylthioribose-1-phosphate isomerase homolog (S. cerevisiae) (MRI1), transcript variant 1, mRNA."  
"Homo sapiens myosin regulatory light chain MRLC2 (MRLC2), mRNA."  
"Homo sapiens mitochondrial rRNA methyltransferase 1 homolog (S. cerevisiae) (MRM1), nuclear gene encoding mitochondrial protein, mRNA."  
"Homo sapiens mitochondrial ribosomal protein L1 (MRPL1), nuclear gene encoding mitochondrial protein, mRNA."  
"Homo sapiens mitochondrial ribosomal protein L10 (MRPL10), nuclear gene encoding mitochondrial protein, mRNA."



"Homo sapiens mitochondrial ribosomal protein L9 (MRPL9), nuclear gene encoding mitochond

"Homo sapiens mitochondrial ribosomal protein S10 (MRPS10), nuclear gene encoding mitochc

"Homo sapiens mitochondrial ribosomal protein S11 (MRPS11), nuclear gene encoding mitochc

"Homo sapiens mitochondrial ribosomal protein S12 (MRPS12), nuclear gene encoding mitochc

"Homo sapiens mitochondrial ribosomal protein S15 (MRPS15), nuclear gene encoding mitochc

"Homo sapiens mitochondrial ribosomal protein S16 (MRPS16), nuclear gene encoding mitochc

"Homo sapiens mitochondrial ribosomal protein S17 (MRPS17), nuclear gene encoding mitochc

"Homo sapiens mitochondrial ribosomal protein S18A (MRPS18A), nuclear gene encoding mitochc

"Homo sapiens mitochondrial ribosomal protein S18B (MRPS18B), nuclear gene encoding mitochc

"Homo sapiens mitochondrial ribosomal protein S18C (MRPS18C), nuclear gene encoding mitochc

"Homo sapiens mitochondrial ribosomal protein S2 (MRPS2), nuclear gene encoding mitochond

"Homo sapiens mitochondrial ribosomal protein S21 (MRPS21), nuclear gene encoding mitochc

"Homo sapiens mitochondrial ribosomal protein S22 (MRPS22), nuclear gene encoding mitochc

"Homo sapiens mitochondrial ribosomal protein S23 (MRPS23), nuclear gene encoding mitochc

"Homo sapiens mitochondrial ribosomal protein S24 (MRPS24), nuclear gene encoding mitochc

"Homo sapiens mitochondrial ribosomal protein S25 (MRPS25), nuclear gene encoding mitochc

"Homo sapiens mitochondrial ribosomal protein S26 (MRPS26), nuclear gene encoding mitochc

"Homo sapiens mitochondrial ribosomal protein S27 (MRPS27), nuclear gene encoding mitochc

"Homo sapiens mitochondrial ribosomal protein S28 (MRPS28), nuclear gene encoding mitochc

"Homo sapiens mitochondrial ribosomal protein S30 (MRPS30), nuclear gene encoding mitochc

"Homo sapiens mitochondrial ribosomal protein S31 (MRPS31), nuclear gene encoding mitochc

"Homo sapiens mitochondrial ribosomal protein S33 (MRPS33), nuclear gene encoding mitochc

"Homo sapiens mitochondrial ribosomal protein S34 (MRPS34), nuclear gene encoding mitochc

"Homo sapiens mitochondrial ribosomal protein S35 (MRPS35), nuclear gene encoding mitochc

"Homo sapiens mitochondrial ribosomal protein S36 (MRPS36), nuclear gene encoding mitochc

"Homo sapiens mitochondrial ribosomal protein S5 (MRPS5), nuclear gene encoding mitochond

"Homo sapiens mitochondrial ribosomal protein S6 (MRPS6), nuclear gene encoding mitochond

"Homo sapiens mitochondrial ribosomal protein S7 (MRPS7), nuclear gene encoding mitochond

"Homo sapiens mitochondrial ribosomal protein S9 (MRPS9), nuclear gene encoding mitochond

"Homo sapiens mitochondrial ribosome recycling factor (MRRF), nuclear gene encoding mitochc

"Homo sapiens MRS2 magnesium homeostasis factor homolog (*S. cerevisiae*) pseudogene 2 (M

"Homo sapiens mRNA turnover 4 homolog (*S. cerevisiae*) (MRTO4), mRNA."

"Homo sapiens membrane-spanning 4-domains, subfamily A, member 1 (MS4A1), transcript va

"Homo sapiens membrane-spanning 4-domains, subfamily A, member 3 (hematopoietic cell-spe

"Homo sapiens membrane-spanning 4-domains, subfamily A, member 6E (MS4A6E), mRNA."

"Homo sapiens membrane-spanning 4-domains, subfamily A, member 7 (MS4A7), transcript va

"Homo sapiens mutS homolog 2, colon cancer, nonpolyposis type 1 (*E. coli*) (MSH2), mRNA."

"Homo sapiens mutS homolog 3 (*E. coli*) (MSH3), mRNA."

"Homo sapiens mutS homolog 5 (*E. coli*) (MSH5), transcript variant 4, mRNA."

"Homo sapiens mutS homolog 6 (*E. coli*) (MSH6), mRNA."

"Homo sapiens musashi homolog 2 (*Drosophila*) (MSI2), transcript variant 2, mRNA."

"Homo sapiens male-specific lethal 1 homolog (*Drosophila*) (MSL1), mRNA."

"Homo sapiens male-specific lethal 2 homolog (*Drosophila*) (MSL2), mRNA."

"Homo sapiens male-specific lethal 3 homolog (*Drosophila*) (MSL3), transcript variant 4, mRNA."



"Homo sapiens male-specific lethal 3-like 1 (Drosophila) (MSL3L1), transcript variant 1, mRNA."  
"Homo sapiens mesothelin (MSLN), transcript variant 2, mRNA."  
"Homo sapiens microseminoprotein, prostate associated (MSMP), mRNA."  
"Homo sapiens moesin (MSN), mRNA."  
"Homo sapiens macrophage scavenger receptor 1 (MSR1), transcript variant SR-AIII, mRNA."  
"Homo sapiens methionine sulfoxide reductase A (MSRA), mRNA."  
"Homo sapiens methionine sulfoxide reductase B2 (MSRB2), mRNA."  
"Homo sapiens methionine sulfoxide reductase B3 (MSRB3), transcript variant 1, mRNA."  
"Homo sapiens macrophage stimulating 1 (hepatocyte growth factor-like) (MST1), mRNA."  
"Homo sapiens macrophage stimulating 1 receptor (c-met-related tyrosine kinase) (MST1R), mRNA."  
"Homo sapiens serine/threonine protein kinase MST4 (MST4), transcript variant 2, mRNA."  
"Homo sapiens misato homolog 1 (Drosophila) (MSTO1), mRNA."  
"Homo sapiens msh homeobox 1 (MSX1), mRNA."  
"Homo sapiens metallothionein 1A (MT1A), mRNA."  
"Homo sapiens metallothionein 1E (functional) (MT1E), mRNA."  
"Homo sapiens metallothionein 1F (MT1F), mRNA."  
"Homo sapiens metallothionein 1G (MT1G), mRNA."  
"Homo sapiens metallothionein 1H (MT1H), mRNA."  
"Homo sapiens metallothionein 1J (pseudogene) (MT1JP), mRNA."  
Homo sapiens metallothionein 1L (gene/pseudogene) (MT1L) on chromosome 16.  
"Homo sapiens metallothionein 1X (MT1X), mRNA."  
"Homo sapiens metallothionein 2A (MT2A), mRNA."  
"Homo sapiens metallothionein 3 (MT3), mRNA."  
"Homo sapiens metastasis associated 1 (MTA1), mRNA."  
"Homo sapiens metastasis associated 1 family, member 2 (MTA2), mRNA."  
"Homo sapiens metastasis associated 1 family, member 3 (MTA3), mRNA."  
"Homo sapiens methylthioadenosine phosphorylase (MTAP), mRNA."  
"Homo sapiens Mdm2, transformed 3T3 cell double minute 2, p53 binding protein (mouse) binding protein (MTAP), mRNA."  
"Homo sapiens mitochondrial carrier homolog 1 (C. elegans) (MTCH1), nuclear gene encoding mitochondrial protein."  
"Homo sapiens mitochondrial carrier homolog 2 (C. elegans) (MTCH2), nuclear gene encoding mitochondrial protein."  
"Homo sapiens mature T-cell proliferation 1 (MTCP1), nuclear gene encoding mitochondrial protein."  
"Homo sapiens metadherin (MTDH), mRNA."  
"Homo sapiens metallothionein E (MTE), mRNA."  
"Homo sapiens mitochondrial transcription termination factor (MTERF), nuclear gene encoding mitochondrial protein."  
"Homo sapiens MTERF domain containing 1 (MTERFD1), mRNA."  
"Homo sapiens MTERF domain containing 2 (MTERFD2), mRNA."  
"Homo sapiens metal-regulatory transcription factor 1 (MTF1), mRNA."  
"Homo sapiens mitochondrial GTPase 1 homolog (S. cerevisiae) (MTG1), nuclear gene encoding mitochondrial protein."  
"Homo sapiens methylenetetrahydrofolate dehydrogenase (NADP+ dependent) 1, methylenetetrahydrofolate dehydrogenase (NADP+ dependent) 1-like (MTHFD1)."  
"Homo sapiens methylenetetrahydrofolate dehydrogenase (NADP+ dependent) 1-like (MTHFD1)."  
"Homo sapiens methylenetetrahydrofolate dehydrogenase (NADP+ dependent) 2, methylenetetrahydrofolate dehydrogenase (NADP+ dependent) 2-like (MTHFD2)."  
"Homo sapiens methylenetetrahydrofolate dehydrogenase (NADP+ dependent) 2-like (MTHFD2)."  
"Homo sapiens 5,10-methylenetetrahydrofolate reductase (NADPH) (MTHFR), mRNA."  
"Homo sapiens 5,10-methylenetetrahydrofolate synthetase (5-formyltetrahydrofolate cyclo-ligase) (MTHFR), mRNA."

"Homo sapiens methenyltetrahydrofolate synthetase domain containing (MTHFSD), transcript variant 1, mRNA."

"Homo sapiens mitochondrial translational initiation factor 2 (MTIF2), nuclear gene encoding mitochondrial protein, mRNA."

"Homo sapiens mitochondrial translational initiation factor 3 (MTIF3), nuclear gene encoding mitochondrial protein, mRNA."

"Homo sapiens myotubularin 1 (MTM1), mRNA."

"Homo sapiens myotubularin related protein 1 (MTMR1), mRNA."

"Homo sapiens myotubularin related protein 10 (MTMR10), mRNA."

"Homo sapiens myotubularin related protein 11 (MTMR11), transcript variant 1, mRNA."

"Homo sapiens myotubularin related protein 12 (MTMR12), mRNA."

"Homo sapiens myotubularin related protein 14 (MTMR14), transcript variant 2, mRNA."

"Homo sapiens myotubularin related protein 15 (MTMR15), mRNA."

"Homo sapiens myotubularin related protein 2 (MTMR2), transcript variant 1, mRNA."

"Homo sapiens myotubularin related protein 3 (MTMR3), transcript variant 3, mRNA."

"Homo sapiens myotubularin related protein 4 (MTMR4), mRNA."

"Homo sapiens myotubularin related protein 6 (MTMR6), mRNA."

"Homo sapiens myotubularin related protein 9 (MTMR9), mRNA."

"Homo sapiens melatonin receptor 1A (MTNR1A), mRNA."

"Homo sapiens mitochondrial translation optimization 1 homolog (*S. cerevisiae*) (MTO1), nuclear gene encoding mitochondrial protein, mRNA."

"Homo sapiens mitochondrial protein 18 kDa (MTP18), nuclear gene encoding mitochondrial protein, mRNA."

"Homo sapiens myotrophin (MTPN), mRNA."

"Homo sapiens 5-methyltetrahydrofolate-homocysteine methyltransferase (MTR), mRNA."

"Homo sapiens mitochondrial translational release factor 1 (MTRF1), nuclear gene encoding mitochondrial protein, mRNA."

"Homo sapiens mitochondrial translational release factor 1-like (MTRF1L), mRNA."

"Homo sapiens 5-methyltetrahydrofolate-homocysteine methyltransferase reductase (MTRR), transcript variant 1, mRNA."

"Homo sapiens metastasis suppressor 1 (MTSS1), mRNA."

"Homo sapiens microsomal triglyceride transfer protein (MTTP), mRNA."

"Homo sapiens mitochondrial tumor suppressor 1 (MTUS1), nuclear gene encoding mitochondrial protein, mRNA."

"Homo sapiens metaxin 1 (MTX1), transcript variant 1, mRNA."

"Homo sapiens metaxin 2 (MTX2), transcript variant 2, mRNA."

"Homo sapiens metaxin 3 (MTX3), mRNA."

"Homo sapiens mucin 2, oligomeric mucus/gel-forming (MUC2), mRNA."

"Homo sapiens mucin 20, cell surface associated (MUC20), transcript variant S, mRNA."

"PREDICTED: Homo sapiens mucin 5AC, oligomeric mucus/gel-forming (MUC5AC), mRNA."

"Homo sapiens mucin 6, oligomeric mucus/gel-forming (MUC6), mRNA."

"Homo sapiens mucin-like 1 (MUCL1), mRNA."

"Homo sapiens MU-2/AP1M2 domain containing, death-inducing (MUDENG), mRNA."

"Homo sapiens mitochondrial E3 ubiquitin ligase 1 (MUL1), nuclear gene encoding mitochondrial protein, mRNA."

"Homo sapiens melanoma associated antigen (mutated) 1 (MUM1), mRNA."

"Homo sapiens muscle-related coiled-coil protein (MURC), mRNA."

"Homo sapiens MUS81 endonuclease homolog (*S. cerevisiae*) (MUS81), mRNA."

"Homo sapiens methylmalonyl Coenzyme A mutase (MUT), nuclear gene encoding mitochondrial protein, mRNA."

"Homo sapiens muted homolog (mouse) (MUTED), mRNA."

"Homo sapiens mutY homolog (*E. coli*) (MUTYH), transcript variant alpha1, mRNA."

"Homo sapiens mevalonate (diphospho) decarboxylase (MVD), mRNA."

"Homo sapiens mevalonate kinase (mevalonic aciduria) (MVK), mRNA."

"Homo sapiens major vault protein (MVP), transcript variant 1, mRNA."  
"Homo sapiens myxovirus (influenza virus) resistance 1, interferon-inducible protein p78 (mouse  
"Homo sapiens myxovirus (influenza virus) resistance 2 (mouse) (MX2), mRNA."  
"Homo sapiens MAX dimerization protein 1 (MXD1), mRNA."  
"Homo sapiens MAX dimerization protein 3 (MXD3), mRNA."  
"Homo sapiens MAX dimerization protein 4 (MXD4), mRNA."  
"Homo sapiens MAX interactor 1 (MXI1), transcript variant 1, mRNA."  
"Homo sapiens matrix-remodelling associated 7 (MXRA7), transcript variant 2, mRNA."  
"Homo sapiens myeloid-associated differentiation marker (MYADM), transcript variant 4, mRNA.  
"Homo sapiens myeloid-associated differentiation marker-like (MYADML), non-coding RNA."  
"Homo sapiens v-myb myeloblastosis viral oncogene homolog (avian) (MYB), transcript variant :  
"Homo sapiens MYB binding protein (P160) 1a (MYBBP1A), mRNA."  
"Homo sapiens v-myb myeloblastosis viral oncogene homolog (avian)-like 1 (MYBL1), mRNA."  
"Homo sapiens v-myb myeloblastosis viral oncogene homolog (avian)-like 2 (MYBL2), mRNA."  
"Homo sapiens myosin binding protein C, fast type (MYBPC2), mRNA."  
"Homo sapiens myosin binding protein C, cardiac (MYBPC3), mRNA."  
"Homo sapiens myosin binding protein H (MYBPH), mRNA."  
"Homo sapiens v-myc myelocytomatosis viral oncogene homolog (avian) (MYC), mRNA."  
"Homo sapiens c-myc binding protein (MYCBP), mRNA."  
"Homo sapiens MYC binding protein 2 (MYCBP2), mRNA."  
"Homo sapiens v-myc myelocytomatosis viral related oncogene, neuroblastoma derived (avian)  
"Homo sapiens myc target 1 (MYCT1), mRNA."  
"Homo sapiens myeloid differentiation primary response gene (88) (MYD88), mRNA."  
"Homo sapiens myogenic factor 5 (MYF5), mRNA."  
"Homo sapiens myogenic factor 6 (herculin) (MYF6), mRNA."  
"Homo sapiens myosin, heavy chain 10, non-muscle (MYH10), mRNA."  
"Homo sapiens myosin, heavy chain 13, skeletal muscle (MYH13), mRNA."  
"Homo sapiens myosin, heavy chain 3, skeletal muscle, embryonic (MYH3), mRNA."  
"Homo sapiens myosin, heavy chain 6, cardiac muscle, alpha (cardiomyopathy, hypertrophic 1)  
"Homo sapiens myosin, heavy chain 9, non-muscle (MYH9), mRNA."  
"Homo sapiens myosin, light polypeptide 1, alkali; skeletal, fast (MYL1), transcript variant 3f, mR  
"Homo sapiens myosin, light chain 12A, regulatory, non-sarcomeric (MYL12A), mRNA."  
"Homo sapiens myosin, light polypeptide 2, regulatory, cardiac, slow (MYL2), mRNA."  
"Homo sapiens myosin, light polypeptide 3, alkali; ventricular, skeletal, slow (MYL3), mRNA."  
"Homo sapiens myosin, light chain 4, alkali; atrial, embryonic (MYL4), transcript variant 1, mRN/  
"Homo sapiens myosin, light chain 5, regulatory (MYL5), mRNA."  
"Homo sapiens myosin, light chain 6, alkali, smooth muscle and non-muscle (MYL6), transcript v  
"Homo sapiens myosin, light chain 6B, alkali, smooth muscle and non-muscle (MYL6B), mRNA.  
"Homo sapiens myosin regulatory light chain interacting protein (MYLIP), mRNA."  
"Homo sapiens myosin X (MYO10), mRNA."  
"Homo sapiens myosin XVA (MYO15A), mRNA."  
"Homo sapiens myosin XIX (MYO19), transcript variant 1, mRNA."  
"Homo sapiens myosin IB (MYO1B), mRNA."  
"Homo sapiens myosin IC (MYO1C), transcript variant 1, mRNA."

"Homo sapiens myosin ID (MYO1D), mRNA."  
"Homo sapiens myosin IE (MYO1E), mRNA."  
"Homo sapiens myosin IG (MYO1G), mRNA."  
"Homo sapiens myosin IH (MYO1H), mRNA."  
"Homo sapiens myosin IIIA (MYO3A), mRNA."  
"Homo sapiens myosin IIIB (MYO3B), transcript variant 1, mRNA."  
"Homo sapiens myosin VA (heavy chain 12, myosin) (MYO5A), mRNA."  
"Homo sapiens myosin VC (MYO5C), mRNA."  
"Homo sapiens myosin VI (MYO6), mRNA."  
"Homo sapiens myosin IXA (MYO9A), mRNA."  
"Homo sapiens myosin IXB (MYO9B), mRNA."  
"Homo sapiens myoferlin (MYOF), transcript variant 1, mRNA."  
"Homo sapiens myogenin (myogenic factor 4) (MYOG), mRNA."  
"Homo sapiens myomesin 1, 185kDa (MYOM1), transcript variant 1, mRNA."  
"Homo sapiens myomesin (M-protein) 2, 165kDa (MYOM2), mRNA."  
"Homo sapiens myozenin 2 (MYOZ2), mRNA."  
"Homo sapiens Myb-related transcription factor, partner of profilin (MYPOP), mRNA."  
"Homo sapiens MYST histone acetyltransferase 1 (MYST1), transcript variant 1, mRNA."  
"Homo sapiens MYST histone acetyltransferase 2 (MYST2), mRNA."  
"Homo sapiens MYST histone acetyltransferase (monocytic leukemia) 3 (MYST3), mRNA."  
"Homo sapiens MYST histone acetyltransferase (monocytic leukemia) 4 (MYST4), mRNA."  
"Homo sapiens myelin transcription factor 1 (MYT1), mRNA."  
"Homo sapiens myeloid zinc finger 1 (MZF1), transcript variant 2, mRNA."  
"Homo sapiens NEDD4 binding protein 1 (N4BP1), mRNA."  
"Homo sapiens NEDD4 binding protein 2-like 1 (N4BP2L1), transcript variant 2, mRNA."  
"Homo sapiens NEDD4 binding protein 2-like 2 (N4BP2L2), transcript variant 2, mRNA."  
"Homo sapiens Nedd4 binding protein 3 (N4BP3), mRNA."  
"Homo sapiens N-6 adenine-specific DNA methyltransferase 1 (putative) (N6AMT1), transcript v  
"Homo sapiens N-6 adenine-specific DNA methyltransferase 2 (putative) (N6AMT2), mRNA."  
"Homo sapiens N-acylethanolamine acid amidase (NAAA), transcript variant 1, mRNA."  
"Homo sapiens N-acetylated alpha-linked acidic dipeptidase 2 (NAALAD2), mRNA."  
"Homo sapiens N-acetylated alpha-linked acidic dipeptidase-like 1 (NAALADL1), mRNA."  
"Homo sapiens NGFI-A binding protein 1 (EGR1 binding protein 1) (NAB1), mRNA."  
"Homo sapiens NGFI-A binding protein 2 (EGR1 binding protein 2) (NAB2), mRNA."  
"Homo sapiens nascent-polypeptide-associated complex alpha polypeptide (NACA), mRNA."  
"PREDICTED: Homo sapiens NAC alpha domain containing (NACAD), mRNA."  
"Homo sapiens nascent-polypeptide-associated complex alpha polypeptide pseudogene 1 (NAC  
"Homo sapiens NACC family member 2, BEN and BTB (POZ) domain containing (NACC2), mRI  
"Homo sapiens NAD kinase (NADK), mRNA."  
"Homo sapiens NAD synthetase 1 (NADSYN1), mRNA."  
"Homo sapiens NEDD8 activating enzyme E1 subunit 1 (NAE1), transcript variant 2, mRNA."  
"Homo sapiens nuclear assembly factor 1 homolog (S. cerevisiae) (NAF1), mRNA."  
Homo sapiens NAG18 protein (NAG18) on chromosome 19.  
"Homo sapiens N-acetylgalactosaminidase, alpha- (NAGA), mRNA."

"Homo sapiens N-acetylglucosamine kinase (NAGK), mRNA."  
"Homo sapiens N-acetylglucosaminidase, alpha- (NAGLU), mRNA."  
"Homo sapiens N-acetylglucosamine-1-phosphodiester alpha-N-acetylglucosaminidase (NAGP/)  
"Homo sapiens nuclear apoptosis inducing factor 1 (NAIF1), mRNA."  
"Homo sapiens NLR family, apoptosis inhibitory protein (NAIP), transcript variant 1, mRNA."  
"Homo sapiens NACHT, leucine rich repeat and PYD containing 5 (NALP5), mRNA."  
"Homo sapiens nicotinamide phosphoribosyltransferase (NAMPT), mRNA."  
"Homo sapiens nanos homolog 3 (Drosophila) (NANOS3), mRNA."  
"Homo sapiens N-acetylneuraminic acid synthase (sialic acid synthase) (NANS), mRNA."  
"Homo sapiens nucleosome assembly protein 1-like 1 (NAP1L1), transcript variant 1, mRNA."  
"Homo sapiens nucleosome assembly protein 1-like 4 (NAP1L4), mRNA."  
"Homo sapiens nucleosome assembly protein 1-like 5 (NAP1L5), mRNA."  
"Homo sapiens N-ethylmaleimide-sensitive factor attachment protein, alpha (NAPA), mRNA."  
"Homo sapiens N-acyl phosphatidylethanolamine phospholipase D (NAPEPLD), mRNA."  
"Homo sapiens N-ethylmaleimide-sensitive factor attachment protein, gamma (NAPG), mRNA."  
"Homo sapiens nicotinate phosphoribosyltransferase domain containing 1 (NAPRT1), mRNA."  
"Homo sapiens napsin A aspartic peptidase (NAPSA), mRNA."  
"Homo sapiens napsin B aspartic peptidase pseudogene (NAPSB), non-coding RNA. XR\_0014.  
"Homo sapiens nuclear prelamin A recognition factor (NARF), transcript variant 3, mRNA."  
"Homo sapiens nuclear prelamin A recognition factor-like (NARFL), mRNA."  
"Homo sapiens NMDA receptor regulated 1 (NARG1), mRNA."  
"Homo sapiens NMDA receptor regulated 1-like (NARG1L), transcript variant 2, mRNA."  
"Homo sapiens NMDA receptor regulated 2 (NARG2), transcript variant 1, mRNA."  
"Homo sapiens asparaginyl-tRNA synthetase (NARS), mRNA."  
"Homo sapiens asparaginyl-tRNA synthetase 2, mitochondrial (putative) (NARS2), nuclear gene  
"Homo sapiens nuclear autoantigenic sperm protein (histone-binding) (NASP), transcript variant  
"PREDICTED: Homo sapiens N-acetyltransferase 1 (arylamine N-acetyltransferase) (NAT1), mF  
"Homo sapiens N-acetyltransferase 10 (GCN5-related) (NAT10), mRNA."  
"Homo sapiens N-acetyltransferase 12 (NAT12), mRNA."  
"Homo sapiens N-acetyltransferase 13 (GCN5-related) (NAT13), mRNA."  
"Homo sapiens N-acetyltransferase 14 (GCN5-related, putative) (NAT14), mRNA."  
"Homo sapiens N-acetyltransferase 15 (GCN5-related, putative) (NAT15), transcript variant 1, m  
"Homo sapiens N-acetyltransferase 5 (GCN5-related, putative) (NAT5), transcript variant 3, mR  
"Homo sapiens N-acetyltransferase 6 (GCN5-related) (NAT6), mRNA."  
"Homo sapiens N-acetyltransferase 8-like (GCN5-related, putative) (NAT8L), mRNA."  
"Homo sapiens neuron navigator 2 (NAV2), transcript variant 2, mRNA."  
"Homo sapiens neuron navigator 3 (NAV3), mRNA."  
"Homo sapiens neurobeachin (NBEA), mRNA."  
"Homo sapiens neurobeachin-like 2 (NBEAL2), mRNA."  
"Homo sapiens neuroblastoma, suppression of tumorigenicity 1 (NBL1), transcript variant 1, mR  
"Homo sapiens nibrin (NBN), transcript variant 2, mRNA."  
"PREDICTED: Homo sapiens neuroblastoma breakpoint family, member 1, transcript variant 11  
"PREDICTED: Homo sapiens neuroblastoma breakpoint family, member 10, transcript variant 5  
"Homo sapiens neuroblastoma breakpoint family, member 14 (NBPF14), mRNA."

"Homo sapiens neuroblastoma breakpoint family, member 15 (NBPF15), mRNA."  
"PREDICTED: Homo sapiens neuroblastoma breakpoint family, member 20, transcript variant 4  
"Homo sapiens neuroblastoma breakpoint family, member 22 (pseudogene) (NBPF22P), non-coding RNA."  
"PREDICTED: Homo sapiens neuroblastoma breakpoint family, member 3 (NBPF3), mRNA."  
"Homo sapiens neuroblastoma breakpoint family, member 4 (NBPF4), mRNA."  
"PREDICTED: Homo sapiens neuroblastoma breakpoint family, member 8 (NBPF8), mRNA."  
"Homo sapiens neighbor of BRCA1 gene 1 (NBR1), transcript variant 1, mRNA."  
"Homo sapiens neighbor of BRCA1 gene 2 (NBR2), mRNA."  
"Homo sapiens neurocalcin delta (NCALD), transcript variant 8, mRNA."  
"Homo sapiens neural cell adhesion molecule 2 (NCAM2), mRNA."  
"Homo sapiens non-SMC condensin I complex, subunit D2 (NCAPD2), mRNA."  
"Homo sapiens non-SMC condensin II complex, subunit D3 (NCAPD3), mRNA."  
"Homo sapiens non-SMC condensin I complex, subunit G (NCAPG), mRNA."  
"Homo sapiens non-SMC condensin II complex, subunit G2 (NCAPG2), mRNA."  
"Homo sapiens non-SMC condensin I complex, subunit H (NCAPH), mRNA."  
"Homo sapiens non-SMC condensin II complex, subunit H2 (NCAPH2), transcript variant 2, mRNA."  
"Homo sapiens nuclear cap binding protein subunit 1, 80kDa (NCBP1), mRNA."  
"Homo sapiens nuclear cap binding protein subunit 2, 20kDa (NCBP2), transcript variant 1, mRNA."  
"Homo sapiens non-specific cytotoxic cell receptor protein 1 homolog (zebrafish) (NCCRP1), mRNA."  
"Homo sapiens neurochondrin (NCDN), transcript variant 1, mRNA."  
"Homo sapiens neutrophil cytosolic factor 1 (NCF1), mRNA."  
"Homo sapiens neutrophil cytosolic factor 1B pseudogene (NCF1B), non-coding RNA."  
"Homo sapiens neutrophil cytosolic factor 1C pseudogene (NCF1C), non-coding RNA."  
"Homo sapiens neutrophil cytosolic factor 2 (65kDa, chronic granulomatous disease, autosomal recessive) (NCF2), mRNA."  
"Homo sapiens neutrophil cytosolic factor 4, 40kDa (NCF4), transcript variant 1, mRNA."  
"Homo sapiens NCK adaptor protein 1 (NCK1), mRNA."  
"Homo sapiens NCK adaptor protein 2 (NCK2), transcript variant 1, mRNA."  
"Homo sapiens NCK-associated protein 1 (NCKAP1), transcript variant 2, mRNA."  
"Homo sapiens NCK-associated protein 1-like (NCKAP1L), mRNA."  
"Homo sapiens NCK interacting protein with SH3 domain (NCKIPSD), transcript variant 1, mRNA."  
"Homo sapiens nucleolin (NCL), mRNA."  
"Homo sapiens nicalin homolog (zebrafish) (NCLN), mRNA."  
"Homo sapiens nuclear receptor coactivator 1 (NCOA1), transcript variant 3, mRNA."  
"Homo sapiens nuclear receptor coactivator 2 (NCOA2), mRNA."  
"Homo sapiens nuclear receptor coactivator 3 (NCOA3), transcript variant 1, mRNA."  
"Homo sapiens nuclear receptor coactivator 4 (NCOA4), mRNA."  
"Homo sapiens nuclear receptor coactivator 5 (NCOA5), mRNA."  
"Homo sapiens nuclear receptor coactivator 6 (NCOA6), mRNA."  
"Homo sapiens nuclear receptor coactivator 6 interacting protein (NCOA6IP), mRNA."  
"Homo sapiens nuclear receptor coactivator 7 (NCOA7), mRNA."  
"Homo sapiens nuclear receptor co-repressor 1 (NCOR1), mRNA."  
"Homo sapiens nuclear receptor co-repressor 2 (NCOR2), transcript variant 2, mRNA."  
"Homo sapiens natural cytotoxicity triggering receptor 3 (NCR3), mRNA."  
"Homo sapiens non-protein coding RNA 81 (NCRNA00081), non-coding RNA."

"Homo sapiens non-protein coding RNA 85 (NCRNA00085), non-coding RNA."  
"Homo sapiens non-protein coding RNA 92 (NCRNA00092), non-coding RNA."  
"Homo sapiens non-protein coding RNA 94 (NCRNA00094), non-coding RNA."  
"Homo sapiens non-protein coding RNA 115 (NCRNA00115), non-coding RNA."  
"Homo sapiens non-protein coding RNA 120 (NCRNA00120), non-coding RNA."  
"Homo sapiens non-protein coding RNA 152 (NCRNA00152), transcript variant 1, non-coding RNA."  
"Homo sapiens non-protein coding RNA 153 (NCRNA00153), mRNA."  
"Homo sapiens non-protein coding RNA 158 (NCRNA00158), non-coding RNA."  
"Homo sapiens non-protein coding RNA 160 (NCRNA00160), non-coding RNA."  
"Homo sapiens non-protein coding RNA 161 (NCRNA00161), non-coding RNA."  
"Homo sapiens non-protein coding RNA 162 (NCRNA00162), non-coding RNA."  
"Homo sapiens non-protein coding RNA 173 (NCRNA00173), transcript variant 1, non-coding RNA."  
"Homo sapiens non-protein coding RNA 181 (NCRNA00181), non-coding RNA."  
"Homo sapiens non-protein coding RNA 219 (NCRNA00219), non-coding RNA."  
"Homo sapiens nicastrin (NCSTN), mRNA."  
"Homo sapiens NDC80 homolog, kinetochore complex component (*S. cerevisiae*) (NDC80), mRNA."  
"Homo sapiens nudE nuclear distribution gene E homolog 1 (*A. nidulans*) (NDE1), mRNA."  
"Homo sapiens nudE nuclear distribution gene E homolog (*A. nidulans*)-like 1 (NDEL1), transcript variant 1, mRNA."  
"Homo sapiens Nedd4 family interacting protein 1 (NDFIP1), mRNA."  
"Homo sapiens Nedd4 family interacting protein 2 (NDFIP2), mRNA."  
"Homo sapiens Norrie disease (pseudoglioma) (NDP), mRNA."  
"Homo sapiens N-myc downstream regulated gene 1 (NDRG1), mRNA."  
"Homo sapiens NDRG family member 2 (NDRG2), transcript variant 6, mRNA."  
"Homo sapiens NDRG family member 3 (NDRG3), transcript variant 2, mRNA."  
"Homo sapiens NDRG family member 4 (NDRG4), mRNA."  
"Homo sapiens N-deacetylase/N-sulfotransferase (heparan glucosaminyl) 1 (NDST1), mRNA."  
"Homo sapiens NADH dehydrogenase (ubiquinone) 1 alpha subcomplex, 1, 7.5kDa (NDUFA1), mRNA."  
"Homo sapiens NADH dehydrogenase (ubiquinone) 1 alpha subcomplex, 10, 42kDa (NDUFA10), mRNA."  
"Homo sapiens NADH dehydrogenase (ubiquinone) 1 alpha subcomplex, 13 (NDUFA13), mRNA."  
"Homo sapiens NADH dehydrogenase (ubiquinone) 1 alpha subcomplex, 2, 8kDa (NDUFA2), mRNA."  
"Homo sapiens NADH dehydrogenase (ubiquinone) 1 alpha subcomplex, 4-like 2 (NDUFA4L2), mRNA."  
"Homo sapiens NADH dehydrogenase (ubiquinone) 1 alpha subcomplex, 5, 13kDa (NDUFA5), mRNA."  
"Homo sapiens NADH dehydrogenase (ubiquinone) 1 alpha subcomplex, 6, 14kDa (NDUFA6), mRNA."  
"Homo sapiens NADH dehydrogenase (ubiquinone) 1 alpha subcomplex, 7, 14.5kDa (NDUFA7), mRNA."  
"Homo sapiens NADH dehydrogenase (ubiquinone) 1 alpha subcomplex, 8, 19kDa (NDUFA8), mRNA."  
"Homo sapiens NADH dehydrogenase (ubiquinone) 1 alpha subcomplex, 9, 39kDa (NDUFA9), mRNA."  
"Homo sapiens NADH dehydrogenase (ubiquinone) 1, alpha/beta subcomplex, 1, 8kDa (NDUFA12), mRNA."  
"Homo sapiens NADH dehydrogenase (ubiquinone) 1 alpha subcomplex, assembly factor 1 (NDUFA11), mRNA."  
"Homo sapiens NADH dehydrogenase (ubiquinone) 1 alpha subcomplex, assembly factor 2 (NDUFA10L), mRNA."  
"Homo sapiens NADH dehydrogenase (ubiquinone) 1 beta subcomplex, 1, 7kDa (NDUFB1), mRNA."  
"Homo sapiens NADH dehydrogenase (ubiquinone) 1 beta subcomplex, 10, 22kDa (NDUFB10), mRNA."  
"Homo sapiens NADH dehydrogenase (ubiquinone) 1 beta subcomplex, 2, 8kDa (NDUFB2), mRNA."  
"Homo sapiens NADH dehydrogenase (ubiquinone) 1 beta subcomplex, 3, 12kDa (NDUFB3), mRNA."  
"Homo sapiens NADH dehydrogenase (ubiquinone) 1 beta subcomplex, 5, 16kDa (NDUFB5), mRNA."

"Homo sapiens NADH dehydrogenase (ubiquinone) 1 beta subcomplex, 6, 17kDa (NDUFB6), n  
"Homo sapiens NADH dehydrogenase (ubiquinone) 1 beta subcomplex, 7, 18kDa (NDUFB7), n  
"Homo sapiens NADH dehydrogenase (ubiquinone) 1 beta subcomplex, 8, 19kDa (NDUFB8), m  
"Homo sapiens NADH dehydrogenase (ubiquinone) 1, subcomplex unknown, 1, 6kDa (NDUFC1  
"Homo sapiens NADH dehydrogenase (ubiquinone) Fe-S protein 1, 75kDa (NADH-coenzyme Q  
"Homo sapiens NADH dehydrogenase (ubiquinone) Fe-S protein 2, 49kDa (NADH-coenzyme Q  
"Homo sapiens NADH dehydrogenase (ubiquinone) Fe-S protein 3, 30kDa (NADH-coenzyme Q  
"Homo sapiens NADH dehydrogenase (ubiquinone) Fe-S protein 4, 18kDa (NADH-coenzyme Q  
"Homo sapiens NADH dehydrogenase (ubiquinone) Fe-S protein 5, 15kDa (NADH-coenzyme Q  
"Homo sapiens NADH dehydrogenase (ubiquinone) Fe-S protein 8, 23kDa (NADH-coenzyme Q  
"Homo sapiens NADH dehydrogenase (ubiquinone) flavoprotein 1, 51kDa (NDUFV1), mRNA."  
"Homo sapiens NADH dehydrogenase (ubiquinone) flavoprotein 2, 24kDa (NDUFV2), mRNA."  
"Homo sapiens NADH dehydrogenase (ubiquinone) flavoprotein 3, 10kDa (NDUFV3), nuclear g  
"Homo sapiens nebulin (NEB), mRNA."  
"Homo sapiens nebulin (NEB), transcript variant 1, mRNA."  
"Homo sapiens N-terminal EF-hand calcium binding protein 1 (NECAB1), mRNA."  
"Homo sapiens N-terminal EF-hand calcium binding protein 3 (NECAB3), transcript variant 1, m  
"Homo sapiens NECAP endocytosis associated 1 (NECAP1), mRNA."  
"Homo sapiens NECAP endocytosis associated 2 (NECAP2), mRNA."  
"Homo sapiens neural precursor cell expressed, developmentally down-regulated 1 (NEDD1), m  
"Homo sapiens neural precursor cell expressed, developmentally down-regulated 4 (NEDD4), tr  
"Homo sapiens neural precursor cell expressed, developmentally down-regulated 4-like (NEDD4  
"Homo sapiens neural precursor cell expressed, developmentally down-regulated 8 (NEDD8), r  
"Homo sapiens neural precursor cell expressed, developmentally down-regulated 9 (NEDD9), tr  
"Homo sapiens nei endonuclease VIII-like 1 (E. coli) (NEIL1), mRNA."  
"Homo sapiens nei like 2 (E. coli) (NEIL2), mRNA."  
"Homo sapiens nei endonuclease VIII-like 3 (E. coli) (NEIL3), mRNA."  
"Homo sapiens NIMA (never in mitosis gene a)-related kinase 1 (NEK1), mRNA."  
"Homo sapiens NIMA (never in mitosis gene a)- related kinase 10 (NEK10), transcript variant 2,  
"Homo sapiens NIMA (never in mitosis gene a)-related kinase 2 (NEK2), mRNA."  
"Homo sapiens NIMA (never in mitosis gene a)-related kinase 3 (NEK3), transcript variant 2, mF  
"Homo sapiens NIMA (never in mitosis gene a)-related kinase 4 (NEK4), mRNA."  
"Homo sapiens NIMA (never in mitosis gene a)-related kinase 6 (NEK6), mRNA."  
"Homo sapiens NIMA (never in mitosis gene a)-related kinase 7 (NEK7), mRNA."  
"Homo sapiens NIMA (never in mitosis gene a)- related kinase 8 (NEK8), mRNA."  
"Homo sapiens NIMA (never in mitosis gene a)- related kinase 9 (NEK9), mRNA."  
"Homo sapiens nasal embryonic LHRH factor (NELF), mRNA."  
"Homo sapiens NEL-like 1 (chicken) (NELL1), mRNA."  
"Homo sapiens NEL-like 2 (chicken) (NELL2), mRNA."  
"Homo sapiens neuron derived neurotrophic factor (NENF), mRNA."  
"Homo sapiens neogenin homolog 1 (chicken) (NEO1), mRNA."  
"Homo sapiens neuroepithelial cell transforming 1 (NET1), transcript variant 1, mRNA."  
"Homo sapiens neuropilin (NRP) and tolloid (TLL)-like 2 (NETO2), mRNA."  
"Homo sapiens sialidase 1 (lysosomal sialidase) (NEU1), mRNA."



"Homo sapiens neuralized homolog 1B (Drosophila) (NEURL1B), mRNA."  
"Homo sapiens neuralized homolog 4 (Drosophila) (NEURL4), transcript variant 1, mRNA."  
"Homo sapiens neurogenic differentiation 2 (NEUROD2), mRNA."  
"Homo sapiens neurogenic differentiation 4 (NEUROD4), mRNA."  
"Homo sapiens neurogenin 2 (NEUROG2), mRNA."  
"Homo sapiens nexilin (F actin binding protein) (NEXN), mRNA."  
"Homo sapiens neurofibromin 1 (NF1), transcript variant 1, mRNA."  
"Homo sapiens NFAT activating protein with ITAM motif 1 (NFAM1), mRNA."  
"Homo sapiens nuclear factor of activated T-cells 5, tonicity-responsive (NFAT5), transcript variã  
"Homo sapiens nuclear factor of activated T-cells, cytoplasmic, calcineurin-dependent 1 (NFATC  
"Homo sapiens nuclear factor of activated T-cells, cytoplasmic, calcineurin-dependent 2 interact  
"Homo sapiens nuclear factor of activated T-cells, cytoplasmic, calcineurin-dependent 4 (NFATC  
"Homo sapiens nuclear factor (erythroid-derived 2)-like 1 (NFE2L1), mRNA."  
"Homo sapiens nuclear factor (erythroid-derived 2)-like 2 (NFE2L2), mRNA."  
"Homo sapiens nuclear factor (erythroid-derived 2)-like 3 (NFE2L3), mRNA."  
"Homo sapiens nuclear factor I/A (NFIA), mRNA."  
"Homo sapiens nuclear factor I/B (NFIB), mRNA."  
"Homo sapiens nuclear factor, interleukin 3 regulated (NFIL3), mRNA."  
"Homo sapiens nuclear factor I/X (CCAAT-binding transcription factor) (NFIX), mRNA."  
"Homo sapiens nuclear factor of kappa light polypeptide gene enhancer in B-cells 1 (NFKB1), m  
"Homo sapiens nuclear factor of kappa light polypeptide gene enhancer in B-cells 2 (p49/p100)  
"Homo sapiens nuclear factor of kappa light polypeptide gene enhancer in B-cells inhibitor, alph  
"Homo sapiens nuclear factor of kappa light polypeptide gene enhancer in B-cells inhibitor, beta  
"Homo sapiens nuclear factor of kappa light polypeptide gene enhancer in B-cells inhibitor, delta  
"Homo sapiens nuclear factor of kappa light polypeptide gene enhancer in B-cells inhibitor, epsi  
"Homo sapiens nuclear factor of kappa light polypeptide gene enhancer in B-cells inhibitor-like 1  
"Homo sapiens nuclear factor of kappa light polypeptide gene enhancer in B-cells inhibitor-like 2  
"Homo sapiens nuclear factor of kappa light polypeptide gene enhancer in B-cells inhibitor, zeta  
"Homo sapiens nuclear factor related to kappaB binding protein (NFRKB), mRNA."  
"Homo sapiens NFS1 nitrogen fixation 1 homolog (S. cerevisiae) (NFS1), nuclear gene encodin  
"Homo sapiens NFU1 iron-sulfur cluster scaffold homolog (S. cerevisiae) (NFU1), transcript vari  
"Homo sapiens nuclear transcription factor, X-box binding 1 (NFX1), transcript variant 3, mRNA.  
"Homo sapiens nuclear transcription factor, X-box binding-like 1 (NFXL1), mRNA."  
"Homo sapiens nuclear transcription factor Y, beta (NFYB), mRNA."  
"Homo sapiens nuclear transcription factor Y, gamma (NFYC), mRNA."  
"Homo sapiens neuroglobin (NGB), mRNA."  
"Homo sapiens neuroguidin, EIF4E binding protein (NGDN), transcript variant 1, mRNA."  
"Homo sapiens nerve growth factor receptor (TNFRSF16) associated protein 1 (NGFRAP1), trai  
"Homo sapiens N-glycanase 1 (NGLY1), mRNA."  
"Homo sapiens neugrin, neurite outgrowth associated (NGRN), transcript variant 1, mRNA."  
"Homo sapiens Na<sup>+</sup>/H<sup>+</sup> exchanger domain containing 1 (NHEDC1), transcript variant 1, mRNA.  
"Homo sapiens Na<sup>+</sup>/H<sup>+</sup> exchanger domain containing 2 (NHEDC2), mRNA."  
"Homo sapiens NHL repeat containing 2 (NHLRC2), mRNA."  
"Homo sapiens NHP2 ribonucleoprotein homolog (yeast) (NHP2), transcript variant 1, mRNA."

"Homo sapiens NHP2 non-histone chromosome protein 2-like 1 (*S. cerevisiae*) (NHP2L1), trans  
"Homo sapiens nicolin 1 (NICN1), mRNA."  
"Homo sapiens NIF3 NGG1 interacting factor 3-like 1 (*S. pombe*) (NIF3L1), mRNA."  
"Homo sapiens ninein (GSK3B interacting protein) (NIN), transcript variant 1, mRNA."  
"Homo sapiens ninjurin 1 (NINJ1), mRNA."  
"Homo sapiens ninjurin 2 (NINJ2), mRNA."  
"Homo sapiens NEFA-interacting nuclear protein NIP30 (NIP30), mRNA."  
"Homo sapiens nuclear import 7 homolog (*S. cerevisiae*) (NIP7), mRNA."  
"Homo sapiens non imprinted in Prader-Willi/Angelman syndrome 1 (NIPA1), mRNA."  
"Homo sapiens non imprinted in Prader-Willi/Angelman syndrome 2 (NIPA2), transcript variant 1  
"Homo sapiens NIPA-like domain containing 2 (NIPAL2), mRNA."  
"Homo sapiens NIPA-like domain containing 4 (NIPAL4), mRNA."  
"Homo sapiens Nipped-B homolog (*Drosophila*) (NIPBL), transcript variant B, mRNA."  
"Homo sapiens nipsnap homolog 1 (*C. elegans*) (NIPSNAP1), mRNA."  
"Homo sapiens nipsnap homolog 3A (*C. elegans*) (NIPSNAP3A), mRNA."  
"Homo sapiens nipsnap homolog 3B (*C. elegans*) (NIPSNAP3B), mRNA."  
"Homo sapiens nischarin (NISCH), mRNA."  
"Homo sapiens nitrilase 1 (NIT1), mRNA."  
"Homo sapiens nitrilase family, member 2 (NIT2), mRNA."  
"Homo sapiens Na<sup>+</sup>/K<sup>+</sup> transporting ATPase interacting 2 (NKAIN2), mRNA."  
"Homo sapiens NF-kappaB activating protein (NKAP), mRNA."  
"Homo sapiens naked cuticle homolog 2 (*Drosophila*) (NKD2), mRNA."  
"Homo sapiens natural killer cell group 7 sequence (NKG7), mRNA."  
"Homo sapiens NFkB inhibitor interacting Ras-like 1 (NKIRAS1), mRNA."  
"Homo sapiens NFkB inhibitor interacting Ras-like 2 (NKIRAS2), transcript variant 1, mRNA."  
"Homo sapiens natural killer-tumor recognition sequence (NKTR), transcript variant 2, mRNA."  
"PREDICTED: Homo sapiens NK2 transcription factor related, locus 6 (*Drosophila*) (NKX2-6), m  
"Homo sapiens NK3 homeobox 1 (NKX3-1), mRNA."  
"Homo sapiens notchless homolog 1 (*Drosophila*) (NLE1), transcript variant 1, mRNA."  
"Homo sapiens neuroligin 1 (NLGN1), mRNA."  
"Homo sapiens neuroligin 2 (NLGN2), mRNA."  
"Homo sapiens neuroligin 4, X-linked (NLGN4X), transcript variant 1, mRNA."  
"Homo sapiens nemo-like kinase (NLK), mRNA."  
"Homo sapiens neurolysin (metallopeptidase M3 family) (NLN), mRNA."  
"Homo sapiens NLR family, CARD domain containing 3 (NLRC3), mRNA."  
"Homo sapiens NLR family, CARD domain containing 4 (NLRC4), mRNA."  
"Homo sapiens NLR family, CARD domain containing 5 (NLRC5), mRNA."  
"Homo sapiens NLR family, pyrin domain containing 1 (NLRP1), transcript variant 4, mRNA."  
"Homo sapiens NLR family, pyrin domain containing 11 (NLRP11), mRNA."  
"Homo sapiens NLR family, pyrin domain containing 14 (NLRP14), mRNA."  
"Homo sapiens NLR family, pyrin domain containing 2 (NLRP2), mRNA."  
"Homo sapiens NLR family, pyrin domain containing 3 (NLRP3), transcript variant 3, mRNA."  
"Homo sapiens NLR family, pyrin domain containing 4 (NLRP4), mRNA."  
"Homo sapiens NLR family, pyrin domain containing 5 (NLRP5), mRNA."

"Homo sapiens NLR family, pyrin domain containing 7 (NLRP7), transcript variant 2, mRNA."  
"Homo sapiens NLR family, pyrin domain containing 8 (NLRP8), mRNA."  
"Homo sapiens NLR family member X1 (NLRX1), transcript variant 2, mRNA."  
"Homo sapiens neuromedin B (NMB), transcript variant 1, mRNA."  
"Homo sapiens NMD3 homolog (*S. cerevisiae*) (NMD3), mRNA."  
"Homo sapiens non-metastatic cells 1, protein (NM23A) expressed in (NME1), transcript variant  
"Homo sapiens NME1-NME2 readthrough (NME1-NME2), mRNA."  
"Homo sapiens non-metastatic cells 2, protein (NM23B) expressed in (NME2), transcript variant  
"Homo sapiens non-metastatic cells 3, protein expressed in (NME3), mRNA."  
"Homo sapiens non-metastatic cells 4, protein expressed in (NME4), nuclear gene encoding mit  
"Homo sapiens non-metastatic cells 5, protein expressed in (nucleoside-diphosphate kinase) (N  
"Homo sapiens non-metastatic cells 6, protein expressed in (nucleoside-diphosphate kinase) (N  
"Homo sapiens non-metastatic cells 7, protein expressed in (nucleoside-diphosphate kinase) (N  
"Homo sapiens N-myc (and STAT) interactor (NMI), mRNA."  
"Homo sapiens nicotinamide nucleotide adenylyltransferase 3 (NMNAT3), mRNA."  
"Homo sapiens NmrA-like family domain containing 1 (NMRAL1), mRNA."  
"Homo sapiens N-myristoyltransferase 1 (NMT1), mRNA."  
"Homo sapiens N-myristoyltransferase 2 (NMT2), mRNA."  
"Homo sapiens neuromedin U (NMU), mRNA."  
"Homo sapiens neuronatin (NNAT), transcript variant 1, mRNA."  
"Homo sapiens nicotinamide nucleotide transhydrogenase (NNT), nuclear gene encoding mitocl  
"Homo sapiens NIN1/RPN12 binding protein 1 homolog (*S. cerevisiae*) (NOB1), mRNA."  
"Homo sapiens nucleolar complex associated 2 homolog (*S. cerevisiae*) (NOC2L), mRNA."  
"Homo sapiens nucleolar complex associated 3 homolog (*S. cerevisiae*) (NOC3L), mRNA."  
"PREDICTED: Homo sapiens nucleolar complex associated 4 homolog (*S. cerevisiae*) (NOC4L)  
"Homo sapiens nucleotide-binding oligomerization domain containing 1 (NOD1), mRNA."  
"Homo sapiens nucleotide-binding oligomerization domain containing 2 (NOD2), mRNA."  
"Homo sapiens NOD3 protein (NOD3), mRNA."  
"Homo sapiens noggin (NOG), mRNA."  
"Homo sapiens nucleolar protein 11 (NOL11), mRNA."  
"Homo sapiens nucleolar protein 12 (NOL12), mRNA."  
"Homo sapiens nucleolar protein 3 (apoptosis repressor with CARD domain) (NOL3), mRNA."  
"Homo sapiens nucleolar protein 4 (NOL4), mRNA."  
"Homo sapiens nucleolar protein family 6 (RNA-associated) (NOL6), transcript variant alpha, mF  
"Homo sapiens nucleolar protein 7, 27kDa (NOL7), mRNA."  
"Homo sapiens nucleolar protein 8 (NOL8), mRNA."  
"Homo sapiens nucleolar protein 9 (NOL9), mRNA."  
"Homo sapiens nucleolar protein family A, member 1 (H/ACA small nucleolar RNPs) (NOLA1), t  
"Homo sapiens nucleolar and coiled-body phosphoprotein 1 (NOLC1), mRNA."  
"Homo sapiens nucleolar protein with MIF4G domain 1 (NOM1), mRNA."  
"Homo sapiens NODAL modulator 1 (NOMO1), mRNA."  
"Homo sapiens NODAL modulator 2 (NOMO2), transcript variant 2, mRNA."  
"Homo sapiens NODAL modulator 3 (NOMO3), mRNA."  
"Homo sapiens non-POU domain containing, octamer-binding (NONO), mRNA."

"Homo sapiens NOP10 ribonucleoprotein homolog (yeast) (NOP10), mRNA."  
"Homo sapiens NOP14 nucleolar protein homolog (yeast) (NOP14), mRNA."  
"Homo sapiens NOP16 nucleolar protein homolog (yeast) (NOP16), mRNA."  
"Homo sapiens NOP2 nucleolar protein homolog (yeast) (NOP2), transcript variant 1, mRNA."  
"Homo sapiens NOP56 ribonucleoprotein homolog (yeast) (NOP56), transcript variant 1, mRNA."  
"Homo sapiens NOP58 ribonucleoprotein homolog (yeast) (NOP58), mRNA."  
"Homo sapiens nitric oxide synthase 1 (neuronal) adaptor protein (NOS1AP), mRNA."  
"Homo sapiens nitric oxide synthase 3 (endothelial cell) (NOS3), mRNA."  
"Homo sapiens nitric oxide synthase interacting protein (NOSIP), mRNA."  
"Homo sapiens Notch homolog 1, translocation-associated (Drosophila) (NOTCH1), mRNA."  
"Homo sapiens Notch homolog 2 (Drosophila) (NOTCH2), mRNA."  
"Homo sapiens Notch homolog 2 (Drosophila) N-terminal like (NOTCH2NL), mRNA."  
"Homo sapiens Notch homolog 3 (Drosophila) (NOTCH3), mRNA."  
"Homo sapiens Notch homolog 4 (Drosophila) (NOTCH4), mRNA."  
"Homo sapiens notum pectinacetyltransferase homolog (Drosophila) (NOTUM), mRNA."  
"Homo sapiens neuro-oncological ventral antigen 1 (NOVA1), transcript variant 1, mRNA."  
"Homo sapiens NADPH oxidase activator 1 (NOXA1), mRNA."  
"Homo sapiens nucleoside phosphorylase (NP), mRNA."  
"Homo sapiens cytokine-like nuclear factor n-pac (N-PAC), mRNA."  
"Homo sapiens NIPA-like domain containing 3 (NPAL3), mRNA."  
"Homo sapiens neuronal PAS domain protein 1 (NPAS1), mRNA."  
"Homo sapiens nuclear protein, ataxia-telangiectasia locus (NPAT), mRNA."  
"Homo sapiens Niemann-Pick disease, type C1 (NPC1), mRNA."  
"Homo sapiens NPC1 (Niemann-Pick disease, type C1, gene)-like 1 (NPC1L1), mRNA."  
"Homo sapiens Niemann-Pick disease, type C2 (NPC2), mRNA."  
"Homo sapiens neural proliferation, differentiation and control, 1 (NPDC1), mRNA."  
"Homo sapiens aminopeptidase-like 1 (NPEPL1), mRNA."  
"Homo sapiens nephronophthisis 3 (adolescent) (NPHP3), mRNA."  
"Homo sapiens nephronophthisis 4 (NPHP4), mRNA."  
"Homo sapiens nuclear pore complex interacting protein (NPIP), mRNA."  
"Homo sapiens N-acetylneuraminic acid pyruvate lyase (dihydrodipicolinate synthase) (NPL), mRNA."  
"Homo sapiens nuclear protein localization 4 homolog (S. cerevisiae) (NPLOC4), mRNA."  
"Homo sapiens nucleophosmin (nucleolar phosphoprotein B23, numatrin) (NPM1), transcript va  
"Homo sapiens nucleophosmin/nucleoplasmin 2 (NPM2), mRNA."  
"Homo sapiens nucleophosmin/nucleoplasmin, 3 (NPM3), mRNA."  
"Homo sapiens natriuretic peptide precursor A (NPPA), mRNA."  
"Homo sapiens natriuretic peptide receptor B/guanylate cyclase B (atrionatriuretic peptide recep  
"Homo sapiens natriuretic peptide receptor C/guanylate cyclase C (atrionatriuretic peptide recep  
"Homo sapiens neuroplastin (NPTN), transcript variant beta, mRNA."  
"PREDICTED: Homo sapiens neuronal pentraxin I (NPTX1), mRNA."  
"Homo sapiens neuropeptide W (NPW), mRNA."  
"Homo sapiens neuropeptide Y (NPY), mRNA."  
"Homo sapiens NAD(P)H dehydrogenase, quinone 1 (NQO1), transcript variant 1, mRNA."  
"Homo sapiens NAD(P)H dehydrogenase, quinone 2 (NQO2), mRNA."

"PREDICTED: Homo sapiens nuclear receptor subfamily 1, group D, member 2 (NR1D2), mRNA.  
"Homo sapiens nuclear receptor subfamily 1, group H, member 2 (NR1H2), mRNA."  
"Homo sapiens nuclear receptor subfamily 1, group H, member 3 (NR1H3), mRNA."  
"Homo sapiens nuclear receptor subfamily 1, group H, member 4 (NR1H4), mRNA."  
"Homo sapiens nuclear receptor subfamily 2, group C, member 1 (NR2C1), transcript variant 1,  
"Homo sapiens nuclear receptor subfamily 2, group C, member 2 (NR2C2), mRNA."  
"Homo sapiens nuclear receptor 2C2-associated protein (NR2C2AP), mRNA."  
"Homo sapiens nuclear receptor subfamily 2, group E, member 1 (NR2E1), mRNA."  
"Homo sapiens nuclear receptor subfamily 2, group F, member 1 (NR2F1), mRNA."  
"Homo sapiens nuclear receptor subfamily 2, group F, member 6 (NR2F6), mRNA."  
"Homo sapiens nuclear receptor subfamily 3, group C, member 1 (glucocorticoid receptor) (NR3  
"Homo sapiens nuclear receptor subfamily 3, group C, member 2 (NR3C2), mRNA."  
"Homo sapiens nuclear receptor subfamily 4, group A, member 1 (NR4A1), transcript variant 2,  
"Homo sapiens nuclear receptor subfamily 4, group A, member 2 (NR4A2), transcript variant 1,  
"Homo sapiens nebulin-related anchoring protein (NRAP), transcript variant 1, mRNA."  
"Homo sapiens Notch-regulated ankyrin repeat protein (NRARP), mRNA."  
"Homo sapiens neuroblastoma RAS viral (v-ras) oncogene homolog (NRAS), mRNA."  
"Homo sapiens nuclear receptor binding factor 2 (NRBF2), mRNA."  
"Homo sapiens nuclear receptor binding protein 2 (NRBP2), mRNA."  
"Homo sapiens neuronal cell adhesion molecule (NRCAM), transcript variant 2, mRNA."  
"Homo sapiens nardilysin (N-arginine dibasic convertase) (NRD1), mRNA."  
"Homo sapiens nuclear respiratory factor 1 (NRF1), transcript variant 2, mRNA."  
"Homo sapiens neuregulin 3 (NRG3), mRNA."  
"Homo sapiens neuregulin 4 (NRG4), mRNA."  
"Homo sapiens neurogranin (protein kinase C substrate, RC3) (NRGN), mRNA."  
"Homo sapiens nuclear receptor interacting protein 1 (NRIP1), mRNA."  
"Homo sapiens nuclear receptor interacting protein 3 (NRIP3), mRNA."  
"Homo sapiens Nik related kinase (NRK), mRNA."  
"Homo sapiens nurim (nuclear envelope membrane protein) (NRM), mRNA."  
"Homo sapiens neuropilin 1 (NRP1), transcript variant 1, mRNA."  
"Homo sapiens neuropilin 2 (NRP2), transcript variant 6, mRNA."  
"Homo sapiens neurensin 2 (NRSN2), mRNA."  
"Homo sapiens neurturin (NRTN), mRNA."  
"Homo sapiens neurexin 2 (NRXN2), transcript variant beta, mRNA."  
"Homo sapiens neurexin 3 (NRXN3), transcript variant alpha, mRNA."  
"PREDICTED: Homo sapiens misc\_RNA (NS3BP), miscRNA."  
"Homo sapiens NSA2 ribosome biogenesis homolog (S. cerevisiae) (NSA2), mRNA."  
"Homo sapiens nucleosomal binding protein 1 (NSBP1), mRNA."  
"Homo sapiens nuclear receptor binding SET domain protein 1 (NSD1), transcript variant 2, mR  
"Homo sapiens NAD(P) dependent steroid dehydrogenase-like (NSDHL), mRNA."  
"PREDICTED: Homo sapiens N-ethylmaleimide-sensitive factor (NSF), mRNA."  
"Homo sapiens NSFL1 (p97) cofactor (p47) (NSFL1C), transcript variant 3, mRNA."  
"Homo sapiens NSL1, MIND kinetochore complex component, homolog (S. cerevisiae) (NSL1),  
"Homo sapiens neutral sphingomyelinase (N-SMase) activation associated factor (NSMAF), mR

"Homo sapiens non-SMC element 1 homolog (*S. cerevisiae*) (NSMCE1), mRNA."  
"Homo sapiens non-SMC element 2, MMS21 homolog (*S. cerevisiae*) (NSMCE2), mRNA."  
"Homo sapiens non-SMC element 4 homolog A (*S. cerevisiae*) (NSMCE4A), mRNA."  
"Homo sapiens NOP2/Sun domain family, member 2 (NSUN2), mRNA."  
"Homo sapiens NOP2/Sun domain family, member 3 (NSUN3), mRNA."  
"Homo sapiens NOP2/Sun domain family, member 4 (NSUN4), mRNA."  
"Homo sapiens NOL1/NOP2/Sun domain family, member 5 (NSUN5), transcript variant 1, mRNA."  
"Homo sapiens NOP2/Sun domain family, member 5B (NSUN5B), transcript variant 1, mRNA."  
"Homo sapiens NOP2/Sun domain family, member 5C (NSUN5C), transcript variant 1, mRNA."  
"Homo sapiens NOL1/NOP2/Sun domain family, member 6 (NSUN6), mRNA."  
"Homo sapiens 5', 3'-nucleotidase, cytosolic (NT5C), mRNA."  
"Homo sapiens 5'-nucleotidase, cytosolic II (NT5C2), mRNA."  
"Homo sapiens 5'-nucleotidase, cytosolic III (NT5C3), transcript variant 1, mRNA."  
"Homo sapiens 5'-nucleotidase, cytosolic III-like (NT5C3L), mRNA."  
"Homo sapiens 5'-nucleotidase domain containing 1 (NT5DC1), mRNA."  
"Homo sapiens 5'-nucleotidase domain containing 2 (NT5DC2), mRNA."  
"Homo sapiens 5'-nucleotidase domain containing 3 (NT5DC3), transcript variant 2, mRNA."  
"Homo sapiens 5',3'-nucleotidase, mitochondrial (NT5M), nuclear gene encoding mitochondrial protein."  
"Homo sapiens N-terminal asparagine amidase (NTAN1), mRNA."  
"Homo sapiens neurotrophin 3 (NTF3), mRNA."  
"Homo sapiens nth endonuclease III-like 1 (*E. coli*) (NTHL1), mRNA."  
"Homo sapiens netrin 4 (NTN4), mRNA."  
"Homo sapiens netrin 5 (NTN5), mRNA."  
"Homo sapiens netrin G1 (NTNG1), transcript variant 3, mRNA."  
"Homo sapiens netrin G2 (NTNG2), mRNA."  
"Homo sapiens NUAK family, SNF1-like kinase, 1 (NUAK1), mRNA."  
"Homo sapiens NUAK family, SNF1-like kinase, 2 (NUAK2), mRNA."  
"Homo sapiens negative regulator of ubiquitin-like proteins 1 (NUB1), mRNA."  
"Homo sapiens nucleotide binding protein 1 (MinD homolog, *E. coli*) (NUBP1), mRNA."  
"Homo sapiens nucleotide binding protein 2 (MinD homolog, *E. coli*) (NUBP2), mRNA."  
"Homo sapiens nucleotide binding protein-like (NUBPL), mRNA."  
"Homo sapiens nucleobindin 1 (NUCB1), mRNA."  
"Homo sapiens nucleobindin 2 (NUCB2), mRNA."  
"Homo sapiens nuclear casein kinase and cyclin-dependent kinase substrate 1 (NUCKS1), mRNA."  
"Homo sapiens nuclear distribution gene C homolog (*A. nidulans*) (NUDC), mRNA."  
"Homo sapiens NudC domain containing 1 (NUDCD1), mRNA."  
"Homo sapiens NudC domain containing 2 (NUDCD2), mRNA."  
"Homo sapiens NudC domain containing 3 (NUDCD3), mRNA."  
"Homo sapiens nudix (nucleoside diphosphate linked moiety X)-type motif 1 (NUDT1), transcript variant 1, mRNA."  
"Homo sapiens nudix (nucleoside diphosphate linked moiety X)-type motif 11 (NUDT11), mRNA."  
"Homo sapiens nudix (nucleoside diphosphate linked moiety X)-type motif 14 (NUDT14), mRNA."  
"Homo sapiens nudix (nucleoside diphosphate linked moiety X)-type motif 15 (NUDT15), mRNA."  
"Homo sapiens nudix (nucleoside diphosphate linked moiety X)-type motif 16 (NUDT16), mRNA."  
"Homo sapiens nudix (nucleoside diphosphate linked moiety X)-type motif 16-like 1 (NUDT16L1), mRNA."

"Homo sapiens nudix (nucleoside diphosphate linked moiety X)-type motif 17 (NUDT17), mRNA  
"Homo sapiens nudix (nucleoside diphosphate linked moiety X)-type motif 18 (NUDT18), mRNA  
"PREDICTED: Homo sapiens nudix (nucleoside diphosphate linked moiety X)-type motif 19 (NUDT19), mRNA  
"Homo sapiens nudix (nucleoside diphosphate linked moiety X)-type motif 2 (NUDT2), transcript  
"Homo sapiens nudix (nucleoside diphosphate linked moiety X)-type motif 21 (NUDT21), mRNA  
"Homo sapiens nudix (nucleoside diphosphate linked moiety X)-type motif 22 (NUDT22), mRNA  
"Homo sapiens nudix (nucleoside diphosphate linked moiety X)-type motif 3 (NUDT3), mRNA."  
"Homo sapiens nudix (nucleoside diphosphate linked moiety X)-type motif 5 (NUDT5), mRNA."  
"Homo sapiens nudix (nucleoside diphosphate linked moiety X)-type motif 6 (NUDT6), transcript  
"Homo sapiens nudix (nucleoside diphosphate linked moiety X)-type motif 7 (NUDT7), transcript  
"Homo sapiens nudix (nucleoside diphosphate linked moiety X)-type motif 8 (NUDT8), mRNA."  
"Homo sapiens NUF2, NDC80 kinetochore complex component, homolog (*S. cerevisiae*) (NUF2)  
"Homo sapiens nuclear fragile X mental retardation protein interacting protein 1 (NUFIP1), mRNA  
"Homo sapiens nuclear fragile X mental retardation protein interacting protein 2 (NUFIP2), mRNA  
"Homo sapiens nuclear mitotic apparatus protein 1 (NUMA1), mRNA."  
"Homo sapiens numb homolog (*Drosophila*) (NUMB), transcript variant 3, mRNA."  
"Homo sapiens numb homolog (*Drosophila*)-like (NUMBL), mRNA."  
"Homo sapiens nucleoporin 107kDa (NUP107), mRNA."  
"Homo sapiens nucleoporin 133kDa (NUP133), mRNA."  
"Homo sapiens nucleoporin 153kDa (NUP153), mRNA."  
"Homo sapiens nucleoporin 155kDa (NUP155), transcript variant 1, mRNA."  
"Homo sapiens nucleoporin 160kDa (NUP160), mRNA."  
"Homo sapiens nucleoporin 188kDa (NUP188), mRNA."  
"Homo sapiens nucleoporin 205kDa (NUP205), mRNA."  
"Homo sapiens nucleoporin 210kDa (NUP210), mRNA."  
"Homo sapiens nucleoporin 214kDa (NUP214), mRNA."  
"Homo sapiens nucleoporin 35kDa (NUP35), mRNA."  
"Homo sapiens nucleoporin 37kDa (NUP37), mRNA."  
"Homo sapiens nucleoporin 43kDa (NUP43), transcript variant 1, mRNA."  
"Homo sapiens nucleoporin 50kDa (NUP50), transcript variant 2, mRNA."  
"Homo sapiens nucleoporin 54kDa (NUP54), mRNA."  
"Homo sapiens nucleoporin 62kDa (NUP62), transcript variant 2, mRNA."  
"Homo sapiens nucleoporin 62kDa C-terminal like (NUP62CL), mRNA."  
"Homo sapiens nucleoporin 85kDa (NUP85), mRNA."  
"Homo sapiens nucleoporin 88kDa (NUP88), mRNA."  
"Homo sapiens nucleoporin 93kDa (NUP93), mRNA."  
"Homo sapiens nucleoporin 98kDa (NUP98), transcript variant 1, mRNA."  
"Homo sapiens nucleoporin like 1 (NUPL1), transcript variant 1, mRNA."  
"Homo sapiens nucleoporin like 2 (NUPL2), mRNA."  
"Homo sapiens nuclear protein, transcriptional regulator, 1 (NUPR1), transcript variant 1, mRNA  
"Homo sapiens nuclear undecaprenyl pyrophosphate synthase 1 homolog (*S. cerevisiae*) (NUSP1)  
"Homo sapiens nucleolar and spindle associated protein 1 (NUSAP1), transcript variant 2, mRNA  
"Homo sapiens nuclear transport factor 2 (NUTF2), mRNA."  
"Homo sapiens nuclear VCP-like (NVL), transcript variant 1, mRNA."

"Homo sapiens nuclear RNA export factor 1 (NXF1), transcript variant 1, mRNA."  
"Homo sapiens nuclear RNA export factor 2B (NXF2B), mRNA."  
"Homo sapiens nuclear RNA export factor 4 pseudogene (NXF4), non-coding RNA."  
"Homo sapiens nuclear RNA export factor 5 (NXF5), mRNA."  
"Homo sapiens nucleoredoxin (NXN), mRNA."  
"Homo sapiens neurexophilin 4 (NXPH4), mRNA."  
"Homo sapiens NTF2-like export factor 1 (NXT1), mRNA."  
"Homo sapiens nuclear transport factor 2-like export factor 2 (NXT2), mRNA."  
"Homo sapiens NYN domain and retroviral integrase containing (NYNRIN), mRNA."  
"Homo sapiens nyctalopin (NYX), mRNA."  
"Homo sapiens OAF homolog (Drosophila) (OAF), mRNA."  
"Homo sapiens 2',5'-oligoadenylate synthetase 1, 40/46kDa (OAS1), transcript variant 2, mRNA"  
"Homo sapiens 2'-5'-oligoadenylate synthetase 2, 69/71kDa (OAS2), transcript variant 2, mRNA"  
"Homo sapiens 2'-5'-oligoadenylate synthetase 3, 100kDa (OAS3), mRNA."  
"Homo sapiens 2'-5'-oligoadenylate synthetase-like (OASL), transcript variant 1, mRNA."  
"Homo sapiens ornithine aminotransferase (gyrate atrophy) (OAT), nuclear gene encoding mitoc  
"Homo sapiens ornithine decarboxylase antizyme 1 (OAZ1), mRNA."  
"Homo sapiens ornithine decarboxylase antizyme 2 (OAZ2), mRNA."  
"Homo sapiens oligonucleotide/oligosaccharide-binding fold containing 1 (OBFC1), mRNA."  
"Homo sapiens oligonucleotide/oligosaccharide-binding fold containing 2A (OBFC2A), mRNA."  
"Homo sapiens oligonucleotide/oligosaccharide-binding fold containing 2B (OBFC2B), mRNA."  
"Homo sapiens obscurin, cytoskeletal calmodulin and titin-interacting RhoGEF (OBSCN), transc  
"Homo sapiens oculocutaneous albinism II (pink-eye dilution homolog, mouse) (OCA2), mRNA.'  
"Homo sapiens occludin/ELL domain containing 1 (OCEL1), mRNA."  
"Homo sapiens OCIA domain containing 1 (OCIAD1), mRNA."  
"Homo sapiens OCIA domain containing 2 (OCIAD2), transcript variant 2, mRNA."  
"Homo sapiens oculocerebrorenal syndrome of Lowe (OCRL), transcript variant b, mRNA."  
"Homo sapiens ornithine decarboxylase 1 (ODC1), mRNA."  
"Homo sapiens outer dense fiber of sperm tails 1 (ODF1), mRNA."  
"Homo sapiens outer dense fiber of sperm tails 2 (ODF2), transcript variant 2, mRNA."  
"Homo sapiens outer dense fiber of sperm tails 2-like (ODF2L), transcript variant 1, mRNA."  
"Homo sapiens outer dense fiber of sperm tails 3-like 2 (ODF3L2), mRNA."  
"Homo sapiens odz, odd Oz/ten-m homolog 3 (Drosophila) (ODZ3), mRNA."  
"Homo sapiens oxoglutarate (alpha-ketoglutarate) dehydrogenase (lipoamide) (OGDH), nuclear  
"Homo sapiens oxoglutarate dehydrogenase-like (OGDHL), mRNA."  
"Homo sapiens 2-oxoglutarate and iron-dependent oxygenase domain containing 1 (OGFOD1),  
"Homo sapiens 2-oxoglutarate and iron-dependent oxygenase domain containing 2 (OGFOD2),  
"Homo sapiens opioid growth factor receptor (OGFR), mRNA."  
"Homo sapiens opioid growth factor receptor-like 1 (OGFRL1), mRNA."  
"Homo sapiens 8-oxoguanine DNA glycosylase (OGG1), nuclear gene encoding mitochondrial p  
"Homo sapiens O-linked N-acetylglucosamine (GlcNAc) transferase (UDP-N-acetylglucosamine  
"Homo sapiens Opa interacting protein 5 (OIP5), mRNA."  
"Homo sapiens oleoyl-ACP hydrolase (OLAH), transcript variant 1, mRNA."  
"Homo sapiens olfactomedin-like 2A (OLFML2A), mRNA."



"Homo sapiens oligodendrocyte lineage transcription factor 2 (OLIG2), mRNA."  
"Homo sapiens oxidized low density lipoprotein (lectin-like) receptor 1 (OLR1), mRNA."  
"Homo sapiens OMA1 homolog, zinc metallopeptidase (*S. cerevisiae*) (OMA1), mRNA."  
"Homo sapiens osteomodulin (OMD), mRNA."  
"Homo sapiens one cut homeobox 2 (ONECUT2), mRNA."  
"Homo sapiens one cut homeobox 3 (ONECUT3), mRNA."  
"Homo sapiens oocyte expressed protein homolog (dog) (OOEP), mRNA."  
"Homo sapiens optic atrophy 1 (autosomal dominant) (OPA1), nuclear gene encoding mitochondrion."  
"Homo sapiens optic atrophy 3 (autosomal recessive, with chorea and spastic paraplegia) (OPA3), mRNA."  
"Homo sapiens 5-oxoprolinase (ATP-hydrolysing) (OPLAH), mRNA."  
"Homo sapiens opsin 1 (cone pigments), long-wave-sensitive (color blindness, protan) (OPN1LW), mRNA."  
"Homo sapiens opsin 1 (cone pigments), medium-wave-sensitive 2 (OPN1MW2), mRNA."  
"Homo sapiens opsin 3 (encephalopsin, panopsin) (OPN3), transcript variant 2, mRNA."  
"Homo sapiens opsin 4 (OPN4), transcript variant 2, mRNA."  
"Homo sapiens opsin 5 (OPN5), transcript variant 1, mRNA."  
"Homo sapiens opiate receptor-like 1 (OPRL1), transcript variant 2, mRNA."  
"Homo sapiens opioid receptor, sigma 1 (OPRS1), transcript variant 5, mRNA."  
"Homo sapiens optineurin (OPTN), transcript variant 4, mRNA."  
"Homo sapiens olfactory receptor, family 10, subfamily A, member 7 (OR10A7), mRNA."  
"Homo sapiens olfactory receptor, family 10, subfamily H, member 1 (OR10H1), mRNA."  
"Homo sapiens olfactory receptor, family 10, subfamily H, member 2 (OR10H2), mRNA."  
"Homo sapiens olfactory receptor, family 10, subfamily J, member 3 (OR10J3), mRNA."  
"Homo sapiens olfactory receptor, family 13, subfamily A, member 1 (OR13A1), mRNA."  
"Homo sapiens olfactory receptor, family 14, subfamily C, member 36 (OR14C36), mRNA."  
"Homo sapiens olfactory receptor, family 14, subfamily I, member 1 (OR14I1), mRNA."  
"Homo sapiens olfactory receptor, family 1, subfamily D, member 4 (OR1D4), mRNA."  
"Homo sapiens olfactory receptor, family 1, subfamily L, member 8 (OR1L8), mRNA."  
"Homo sapiens olfactory receptor, family 2, subfamily A, member 2 (OR2A2), mRNA."  
"Homo sapiens olfactory receptor, family 2, subfamily AG, member 2 (OR2AG2), mRNA."  
"Homo sapiens olfactory receptor, family 2, subfamily AK, member 2 (OR2AK2), mRNA."  
"Homo sapiens olfactory receptor, family 2, subfamily G, member 3 (OR2G3), mRNA."  
"Homo sapiens olfactory receptor, family 2, subfamily H, member 2 (OR2H2), mRNA."  
"Homo sapiens olfactory receptor, family 2, subfamily L, member 2 (OR2L2), mRNA."  
"Homo sapiens olfactory receptor, family 2, subfamily S, member 2 (OR2S2), mRNA."  
"PREDICTED: Homo sapiens olfactory receptor, family 2, subfamily T, member 2 (OR2T2), mRNA."  
"Homo sapiens olfactory receptor, family 2, subfamily W, member 1 (OR2W1), mRNA."  
"Homo sapiens olfactory receptor, family 2, subfamily W, member 5 (OR2W5), mRNA."  
"Homo sapiens olfactory receptor, family 3, subfamily A, member 1 (OR3A1), mRNA."  
"Homo sapiens olfactory receptor, family 4, subfamily A, member 16 (OR4A16), mRNA."  
"Homo sapiens olfactory receptor, family 4, subfamily C, member 16 (OR4C16), mRNA."  
"Homo sapiens olfactory receptor, family 4, subfamily D, member 1 (OR4D1), mRNA."  
"Homo sapiens olfactory receptor, family 4, subfamily D, member 6 (OR4D6), mRNA."  
"Homo sapiens olfactory receptor, family 4, subfamily K, member 13 (OR4K13), mRNA."  
"Homo sapiens olfactory receptor, family 4, subfamily L, member 1 (OR4L1), mRNA."

"Homo sapiens olfactory receptor, family 4, subfamily N, member 4 (OR4N4), mRNA."  
"Homo sapiens olfactory receptor, family 4, subfamily S, member 1 (OR4S1), mRNA."  
"Homo sapiens olfactory receptor, family 4, subfamily X, member 1 (OR4X1), mRNA."  
"Homo sapiens olfactory receptor, family 51, subfamily E, member 2 (OR51E2), mRNA."  
"Homo sapiens olfactory receptor, family 51, subfamily G, member 1 (OR51G1), mRNA."  
"Homo sapiens olfactory receptor, family 51, subfamily I, member 2 (OR51I2), mRNA."  
"Homo sapiens olfactory receptor, family 51, subfamily T, member 1 (OR51T1), mRNA."  
"Homo sapiens olfactory receptor, family 52, subfamily J, member 3 (OR52J3), mRNA."  
"Homo sapiens olfactory receptor, family 52, subfamily K, member 2 (OR52K2), mRNA."  
"Homo sapiens olfactory receptor, family 5, subfamily A, member 1 (OR5A1), mRNA."  
"Homo sapiens olfactory receptor, family 5, subfamily AP, member 2 (OR5AP2), mRNA."  
"Homo sapiens olfactory receptor, family 5, subfamily F, member 1 (OR5F1), mRNA."  
"Homo sapiens olfactory receptor, family 5, subfamily P, member 2 (OR5P2), mRNA."  
"Homo sapiens olfactory receptor, family 6, subfamily C, member 70 (OR6C70), mRNA."  
"Homo sapiens olfactory receptor, family 6, subfamily C, member 75 (OR6C75), mRNA."  
"Homo sapiens olfactory receptor, family 6, subfamily M, member 1 (OR6M1), mRNA."  
"Homo sapiens olfactory receptor, family 7, subfamily A, member 10 (OR7A10), mRNA."  
"Homo sapiens olfactory receptor, family 7, subfamily E, member 156 pseudogene (OR7E156P)"  
"Homo sapiens olfactory receptor, family 7, subfamily E, member 24 (OR7E24), mRNA."  
"Homo sapiens olfactory receptor, family 7, subfamily E, member 37 pseudogene (OR7E37P), r"  
"Homo sapiens olfactory receptor, family 7, subfamily G, member 2 (OR7G2), mRNA."  
"Homo sapiens olfactory receptor, family 8, subfamily K, member 5 (OR8K5), mRNA."  
"Homo sapiens olfactory receptor, family 9, subfamily A, member 4 (OR9A4), mRNA."  
"Homo sapiens olfactory receptor, family 9, subfamily I, member 1 (OR9I1), mRNA."  
"Homo sapiens olfactory receptor, family 9, subfamily Q, member 2 (OR9Q2), mRNA."  
"Homo sapiens ORAI calcium release-activated calcium modulator 1 (ORAI1), mRNA."  
"Homo sapiens ORAI calcium release-activated calcium modulator 2 (ORAI2), mRNA."  
"Homo sapiens ORAI calcium release-activated calcium modulator 3 (ORAI3), mRNA."  
"Homo sapiens oral cancer overexpressed 1 (ORAOV1), mRNA."  
"Homo sapiens origin recognition complex, subunit 1-like (yeast) (ORC1L), mRNA."  
"Homo sapiens origin recognition complex, subunit 2-like (yeast) (ORC2L), mRNA."  
"Homo sapiens origin recognition complex, subunit 3-like (yeast) (ORC3L), transcript variant 1, r"  
"Homo sapiens origin recognition complex, subunit 4-like (yeast) (ORC4L), transcript variant 3, r"  
"Homo sapiens origin recognition complex, subunit 5-like (yeast) (ORC5L), transcript variant 2, r"  
"Homo sapiens origin recognition complex, subunit 6 like (yeast) (ORC6L), mRNA."  
"Homo sapiens ORM1-like 1 (*S. cerevisiae*) (ORMDL1), mRNA."  
"Homo sapiens ORM1-like 2 (*S. cerevisiae*) (ORMDL2), mRNA."  
"Homo sapiens ORM1-like 3 (*S. cerevisiae*) (ORMDL3), mRNA."  
"Homo sapiens amplified in osteosarcoma (OS9), transcript variant 1, mRNA."  
"Homo sapiens ovary-specific acidic protein (OSAP), mRNA."  
"Homo sapiens oxysterol binding protein (OSBP), mRNA."  
"Homo sapiens oxysterol binding protein 2 (OSBP2), transcript variant 1, mRNA."  
"Homo sapiens oxysterol binding protein-like 10 (OSBPL10), mRNA."  
"Homo sapiens oxysterol binding protein-like 11 (OSBPL11), mRNA."

"Homo sapiens oxysterol binding protein-like 1A (OSBPL1A), transcript variant OSBPL1A, mRNA"

"Homo sapiens oxysterol binding protein-like 2 (OSBPL2), transcript variant 2, mRNA."

"Homo sapiens oxysterol binding protein-like 3 (OSBPL3), transcript variant 4, mRNA."

"Homo sapiens oxysterol binding protein-like 5 (OSBPL5), transcript variant 2, mRNA."

"Homo sapiens oxysterol binding protein-like 6 (OSBPL6), transcript variant 1, mRNA."

"Homo sapiens oxysterol binding protein-like 7 (OSBPL7), transcript variant 1, mRNA."

"Homo sapiens oxysterol binding protein-like 8 (OSBPL8), transcript variant 1, mRNA."

"Homo sapiens oxysterol binding protein-like 9 (OSBPL9), transcript variant 7, mRNA."

"Homo sapiens osteoclast associated, immunoglobulin-like receptor (OSCAR), transcript variant"

"Homo sapiens organic solute carrier partner 1 (OSCP1), transcript variant 2, mRNA."

"Homo sapiens O-sialoglycoprotein endopeptidase (OSGEP), mRNA."

"Homo sapiens O-sialoglycoprotein endopeptidase-like 1 (OSGEPL1), mRNA."

"Homo sapiens oxidative stress induced growth inhibitor family member 2 (OSGIN2), mRNA."

"Homo sapiens oncostatin M (OSM), mRNA."

"Homo sapiens odd-skipped related 1 (Drosophila) (OSR1), mRNA."

"PREDICTED: Homo sapiens odd-skipped related 2 (Drosophila) (OSR2), mRNA."

"Homo sapiens organic solute transporter alpha (OSTalpha), mRNA."

"Homo sapiens oligosaccharyltransferase complex subunit (OSTC), mRNA."

"Homo sapiens osteoclast stimulating factor 1 (OSTF1), mRNA."

"Homo sapiens osteopetrosis associated transmembrane protein 1 (OSTM1), mRNA."

"PREDICTED: Homo sapiens otogelin (OTOG), mRNA."

"Homo sapiens orthopedia homeobox (OTP), mRNA."

"Homo sapiens OTU domain, ubiquitin aldehyde binding 1 (OTUB1), mRNA."

"PREDICTED: Homo sapiens OTU domain containing 1 (OTUD1), mRNA."

"Homo sapiens OTU domain containing 4 (OTUD4), transcript variant 1, mRNA."

"Homo sapiens OTU domain containing 5 (OTUD5), mRNA."

"Homo sapiens OTU domain containing 6B (OTUD6B), mRNA."

"Homo sapiens OTU domain containing 7A (OTUD7A), mRNA."

"Homo sapiens orthodenticle homeobox 1 (OTX1), mRNA."

"Homo sapiens oviductal glycoprotein 1, 120kDa (OVGP1), mRNA."

"Homo sapiens ovo-like 2 (Drosophila) (OVOL2), mRNA."

"PREDICTED: Homo sapiens ovostatin 2 (OVOS2), mRNA."

"Homo sapiens oxidase (cytochrome c) assembly 1-like (OXA1L), mRNA."

"Homo sapiens 3-oxoacid CoA transferase 1 (OXCT1), nuclear gene encoding mitochondrial pro"

"Homo sapiens 3-oxoacid CoA transferase 2 (OXCT2), mRNA."

"Homo sapiens oxidoreductase NAD-binding domain containing 1 (OXNAD1), mRNA."

"Homo sapiens oxidation resistance 1 (OXR1), mRNA."

"Homo sapiens 3-oxoacyl-ACP synthase, mitochondrial (OXSM), nuclear gene encoding mitoch"

"Homo sapiens oxidative-stress responsive 1 (OXSR1), mRNA."

"Homo sapiens oxytocin receptor (OXTR), mRNA."

"Homo sapiens hypothetical protein FLJ10656 (P15RS), mRNA."

"Homo sapiens purinergic receptor P2X, ligand-gated ion channel, 1 (P2RX1), mRNA."

"Homo sapiens purinergic receptor P2X, ligand-gated ion channel, 4 (P2RX4), mRNA."

"Homo sapiens purinergic receptor P2X, ligand-gated ion channel, 5 (P2RX5), transcript variant

"Homo sapiens purinergic receptor P2X, ligand-gated ion channel, 6 pseudogene (P2RX6P), no

"Homo sapiens purinergic receptor P2X, ligand-gated ion channel, 7 (P2RX7), mRNA."

"Homo sapiens purinergic receptor P2Y, G-protein coupled, 10 (P2RY10), transcript variant 2, n

"Homo sapiens purinergic receptor P2Y, G-protein coupled, 11 (P2RY11), mRNA."

"Homo sapiens purinergic receptor P2Y, G-protein coupled, 12 (P2RY12), transcript variant 1, n

"Homo sapiens purinergic receptor P2Y, G-protein coupled, 8 (P2RY8), mRNA."

"Homo sapiens procollagen-proline, 2-oxoglutarate 4-dioxygenase (proline 4-hydroxylase), alpha

"Homo sapiens prolyl 4-hydroxylase, alpha polypeptide II (P4HA2), transcript variant 3, mRNA."

"Homo sapiens prolyl 4-hydroxylase, beta polypeptide (P4HB), mRNA."

"Homo sapiens prolyl 4-hydroxylase, transmembrane (endoplasmic reticulum) (P4HTM), transcr

"PREDICTED: Homo sapiens prostate-specific P704P (P704P), mRNA."

"Homo sapiens mannose-6-phosphate protein p76 (P76), mRNA."

"Homo sapiens proliferation-associated 2G4, 38kDa (PA2G4), mRNA."

"Homo sapiens proteasomal ATPase-associated factor 1 (PAAF1), mRNA."

"Homo sapiens poly(A) binding protein, cytoplasmic 1 (PABPC1), mRNA."

"PREDICTED: Homo sapiens poly(A) binding protein, cytoplasmic 1-like (PABPC1L), mRNA."

"Homo sapiens poly(A) binding protein, cytoplasmic 4 (inducible form) (PABPC4), mRNA."

"Homo sapiens poly(A) binding protein, nuclear 1 (PABPN1), mRNA."

"Homo sapiens proapoptotic caspase adaptor protein (PACAP), mRNA."

"Homo sapiens phosphofurin acidic cluster sorting protein 1 (PACS1), mRNA."

"Homo sapiens phosphofurin acidic cluster sorting protein 2 (PACS2), mRNA."

"Homo sapiens protein kinase C and casein kinase substrate in neurons 1 (PACSIN1), mRNA."

"Homo sapiens protein kinase C and casein kinase substrate in neurons 2 (PACSIN2), mRNA."

"Homo sapiens protein kinase C and casein kinase substrate in neurons 3 (PACSIN3), mRNA."

"Homo sapiens peptidyl arginine deiminase, type III (PADI3), mRNA."

"Homo sapiens Paf1, RNA polymerase II associated factor, homolog (*S. cerevisiae*) (PAF1), mF

"Homo sapiens platelet-activating factor acetylhydrolase, isoform Ib, alpha subunit 45kDa (PAF/

"Homo sapiens platelet-activating factor acetylhydrolase, isoform Ib, subunit 2 (30kDa) (PAFAH

"Homo sapiens platelet-activating factor acetylhydrolase 2, 40kDa (PAFAH2), mRNA."

"Homo sapiens phosphoprotein associated with glycosphingolipid microdomains 1 (PAG1), mRf

"Homo sapiens P antigen family, member 4 (prostate associated) (PAGE4), mRNA."

"Homo sapiens phosphoribosylaminoimidazole carboxylase, phosphoribosylaminoimidazole suc

"Homo sapiens poly(A) binding protein interacting protein 1 (PAIP1), transcript variant 2, mRNA.

"Homo sapiens poly(A) binding protein interacting protein 2 (PAIP2), transcript variant 1, mRNA.

"Homo sapiens p21/Cdc42/Rac1-activated kinase 1 (STE20 homolog, yeast) (PAK1), mRNA."

"Homo sapiens PAK1 interacting protein 1 (PAK1IP1), mRNA."

"Homo sapiens p21 (CDKN1A)-activated kinase 2 (PAK2), mRNA."

"Homo sapiens p21 protein (Cdc42/Rac)-activated kinase 4 (PAK4), transcript variant 1, mRNA.

"Homo sapiens p21(CDKN1A)-activated kinase 6 (PAK6), mRNA."

"Homo sapiens partner and localizer of BRCA2 (PALB2), mRNA."

"Homo sapiens palladin, cytoskeletal associated protein (PALLD), transcript variant 2, mRNA."

"Homo sapiens paralemmin (PALM), transcript variant 1, mRNA."

"Homo sapiens peptidylglycine alpha-amidating monooxygenase (PAM), transcript variant 3, mF

"Homo sapiens PAN2 polyA specific ribonuclease subunit homolog (*S. cerevisiae*) (PAN2), mRf

"Homo sapiens PAN3 polyA specific ribonuclease subunit homolog (S. cerevisiae) (PAN3), mRNA"

"Homo sapiens pantothenate kinase 1 (PANK1), transcript variant alpha, mRNA."

"Homo sapiens pantothenate kinase 2 (Hallervorden-Spatz syndrome) (PANK2), transcript varia

"Homo sapiens pantothenate kinase 3 (PANK3), mRNA."

"Homo sapiens pantothenate kinase 4 (PANK4), mRNA."

"Homo sapiens pannexin 1 (PANX1), mRNA."

"Homo sapiens pannexin 2 (PANX2), mRNA."

"Homo sapiens polyamine oxidase (exo-N4-amino) (PAOX), transcript variant 5, mRNA."

"Homo sapiens PAP associated domain containing 1 (PAPD1), mRNA."

"Homo sapiens PAP associated domain containing 4 (PAPD4), mRNA."

"Homo sapiens PAP associated domain containing 5 (PAPD5), transcript variant 2, mRNA."

"Homo sapiens papilin, proteoglycan-like sulfated glycoprotein (PAPLN), mRNA."

"Homo sapiens poly(A) polymerase alpha (PAPOLA), mRNA."

"Homo sapiens poly(A) polymerase gamma (PAPOLG), mRNA."

"Homo sapiens 3'-phosphoadenosine 5'-phosphosulfate synthase 1 (PAPSS1), mRNA."

"Homo sapiens 3'-phosphoadenosine 5'-phosphosulfate synthase 2 (PAPSS2), transcript varian

"Homo sapiens progesterin and adipoQ receptor family member III (PAQR3), mRNA."

"Homo sapiens progesterin and adipoQ receptor family member IV (PAQR4), mRNA."

"Homo sapiens progesterin and adipoQ receptor family member VII (PAQR7), mRNA."

"Homo sapiens progesterin and adipoQ receptor family member VIII (PAQR8), mRNA."

"Homo sapiens progesterin and adipoQ receptor family member IX (PAQR9), mRNA."

"Homo sapiens par-3 partitioning defective 3 homolog (C. elegans) (PARD3), mRNA."

"Homo sapiens par-6 partitioning defective 6 homolog alpha (C. elegans) (PARD6A), transcript \

"Homo sapiens poly (ADP-ribose) glycohydrolase (PARG), mRNA."

"Homo sapiens Parkinson disease (autosomal recessive, early onset) 7 (PARK7), mRNA."

"Homo sapiens presenilin associated, rhomboid-like (PARL), nuclear gene encoding mitochondr

"Homo sapiens prostate androgen-regulated mucin-like protein 1 (PARM1), mRNA."

"Homo sapiens poly(A)-specific ribonuclease (deadenylation nuclease) (PARN), mRNA."

"Homo sapiens poly (ADP-ribose) polymerase family, member 1 (PARP1), mRNA."

"Homo sapiens poly (ADP-ribose) polymerase family, member 10 (PARP10), mRNA."

"Homo sapiens poly (ADP-ribose) polymerase family, member 11 (PARP11), mRNA."

"Homo sapiens poly (ADP-ribose) polymerase family, member 12 (PARP12), mRNA."

"Homo sapiens poly (ADP-ribose) polymerase family, member 14 (PARP14), mRNA."

"Homo sapiens poly (ADP-ribose) polymerase family, member 15 (PARP15), transcript variant 2

"Homo sapiens poly (ADP-ribose) polymerase family, member 16 (PARP16), mRNA."

"Homo sapiens poly (ADP-ribose) polymerase 2 (PARP2), transcript variant 2, mRNA."

"Homo sapiens poly (ADP-ribose) polymerase family, member 3 (PARP3), transcript variant 1, n

"Homo sapiens poly (ADP-ribose) polymerase family, member 4 (PARP4), mRNA."

"Homo sapiens poly (ADP-ribose) polymerase family, member 6 (PARP6), transcript variant 2, n

"PREDICTED: Homo sapiens poly (ADP-ribose) polymerase family, member 8, transcript varian

"Homo sapiens poly (ADP-ribose) polymerase family, member 9 (PARP9), mRNA."

"Homo sapiens prolyl-tRNA synthetase 2, mitochondrial (putative) (PARS2), nuclear gene encoc

"PREDICTED: Homo sapiens prostate androgen-regulated transcript 1 (PART1), misc RNA."

"Homo sapiens parvin, beta (PARVB), transcript variant 1, mRNA."

"Homo sapiens parvin, gamma (PARVG), mRNA."  
"Homo sapiens PAS domain containing serine/threonine kinase (PASK), mRNA."  
"Homo sapiens prostate and testis expressed 2 (PATE2), mRNA."  
"Homo sapiens prostate and testis expressed 3 (PATE3), mRNA."  
"Homo sapiens protein associated with topoisomerase II homolog 1 (yeast) (PATL1), mRNA."  
"PREDICTED: Homo sapiens misc\_RNA (PATL2), miscRNA."  
"Homo sapiens POZ (BTB) and AT hook containing zinc finger 1 (PATZ1), transcript variant 1, n  
"Homo sapiens PRKC, apoptosis, WT1, regulator (PAWR), mRNA."  
"Homo sapiens paired box 6 (PAX6), transcript variant 1, mRNA."  
"Homo sapiens PAX interacting (with transcription-activation domain) protein 1 (PAXIP1), mRNA  
"Homo sapiens PDZ binding kinase (PBK), mRNA."  
"Homo sapiens polybromo 1 (PBRM1), transcript variant 4, mRNA."  
"Homo sapiens pre-B-cell leukemia homeobox 2 (PBX2), mRNA."  
"Homo sapiens pre-B-cell leukemia homeobox 3 (PBX3), mRNA."  
"Homo sapiens pre-B-cell leukemia homeobox 4 (PBX4), mRNA."  
"Homo sapiens pre-B-cell leukemia homeobox interacting protein 1 (PBXIP1), mRNA."  
"Homo sapiens pterin-4 alpha-carbinolamine dehydratase/dimerization cofactor of hepatocyte n  
"Homo sapiens pterin-4 alpha-carbinolamine dehydratase/dimerization cofactor of hepatocyte n  
"Homo sapiens poly(rC) binding protein 1 (PCBP1), mRNA."  
"Homo sapiens poly(rC) binding protein 2 (PCBP2), transcript variant 6, mRNA."  
"Homo sapiens poly(rC) binding protein 4 (PCBP4), transcript variant 2, mRNA."  
"Homo sapiens propionyl Coenzyme A carboxylase, alpha polypeptide (PCCA), nuclear gene er  
"Homo sapiens propionyl Coenzyme A carboxylase, beta polypeptide (PCCB), nuclear gene enc  
"Homo sapiens protocadherin 11 X-linked (PCDH11X), transcript variant b, mRNA."  
"Homo sapiens protocadherin 21 (PCDH21), mRNA."  
"Homo sapiens protocadherin 24 (PCDH24), mRNA."  
"Homo sapiens protocadherin 9 (PCDH9), transcript variant 1, mRNA."  
"Homo sapiens protocadherin alpha 11 (PCDHA11), transcript variant 2, mRNA."  
"Homo sapiens protocadherin alpha 9 (PCDHA9), transcript variant 2, mRNA."  
"Homo sapiens protocadherin beta 17 pseudogene (PCDHB17), non-coding RNA."  
"Homo sapiens protocadherin beta 18 pseudogene (PCDHB18), non-coding RNA."  
"Homo sapiens protocadherin beta 19 pseudogene (PCDHB19P), non-coding RNA."  
"Homo sapiens protocadherin beta 3 (PCDHB3), mRNA."  
"Homo sapiens protocadherin beta 9 (PCDHB9), mRNA."  
"Homo sapiens protocadherin gamma subfamily A, 12 (PCDHGA12), transcript variant 1, mRNA  
"Homo sapiens protocadherin gamma subfamily A, 5 (PCDHGA5), transcript variant 2, mRNA."  
"Homo sapiens protocadherin gamma subfamily A, 8 (PCDHGA8), transcript variant 1, mRNA."  
"Homo sapiens protocadherin gamma subfamily A, 9 (PCDHGA9), transcript variant 1, mRNA."  
"Homo sapiens protocadherin gamma subfamily B, 5 (PCDHGB5), transcript variant 1, mRNA."  
"Homo sapiens protocadherin gamma subfamily C, 3 (PCDHGC3), transcript variant 1, mRNA."  
"Homo sapiens protocadherin gamma subfamily C, 4 (PCDHGC4), transcript variant 2, mRNA."  
"Homo sapiens primary ciliary dyskinesia protein 1 (PCDP1), mRNA."  
"Homo sapiens PCF11, cleavage and polyadenylation factor subunit, homolog (S. cerevisiae) (F  
"Homo sapiens polycomb group ring finger 1 (PCGF1), mRNA."

"Homo sapiens polycomb group ring finger 2 (PCGF2), mRNA."  
"Homo sapiens polycomb group ring finger 5 (PCGF5), mRNA."  
"Homo sapiens polycomb group ring finger 6 (PCGF6), transcript variant 1, mRNA."  
"Homo sapiens PCI domain containing 2 (PCID2), mRNA."  
"Homo sapiens PDX1 C-terminal inhibiting factor 1 (PCIF1), mRNA."  
"Homo sapiens phosphoenolpyruvate carboxykinase 2 (mitochondrial) (PCK2), nuclear gene en  
"Homo sapiens piccolo (presynaptic cytomatrix protein) (PCLO), transcript variant 1, mRNA."  
"Homo sapiens pericentriolar material 1 (PCM1), mRNA."  
"Homo sapiens protein-L-isoaspartate (D-aspartate) O-methyltransferase (PCMT1), mRNA."  
"Homo sapiens protein-L-isoaspartate (D-aspartate) O-methyltransferase domain containing 1 (l  
"Homo sapiens protein-L-isoaspartate (D-aspartate) O-methyltransferase domain containing 2 (l  
"Homo sapiens proliferating cell nuclear antigen (PCNA), transcript variant 1, mRNA."  
"Homo sapiens PEST proteolytic signal containing nuclear protein (PCNP), mRNA."  
"Homo sapiens pericentrin (PCNT), mRNA."  
"Homo sapiens pecanex homolog (Drosophila) (PCNX), mRNA."  
"Homo sapiens pecanex-like 2 (Drosophila) (PCNXL2), transcript variant 2, mRNA."  
"PREDICTED: Homo sapiens pecanex-like 3 (Drosophila), transcript variant 1 (PCNXL3), mRNA/  
"Homo sapiens procollagen C-endopeptidase enhancer (PCOLCE), mRNA."  
"Homo sapiens procollagen C-endopeptidase enhancer 2 (PCOLCE2), mRNA."  
"PREDICTED: Homo sapiens Purkinje cell protein 4 like 1 (PCP4L1), mRNA."  
"Homo sapiens proprotein convertase subtilisin/kexin type 1 inhibitor (PCSK1N), mRNA."  
"Homo sapiens proprotein convertase subtilisin/kexin type 4 (PCSK4), mRNA."  
"Homo sapiens proprotein convertase subtilisin/kexin type 7 (PCSK7), mRNA."  
"Homo sapiens PCTAIRE protein kinase 1 (PCTK1), transcript variant 1, mRNA."  
"Homo sapiens PCTAIRE protein kinase 2 (PCTK2), mRNA."  
"Homo sapiens PCTAIRE protein kinase 3 (PCTK3), transcript variant 1, mRNA."  
"Homo sapiens phosphatidylcholine transfer protein (PCTP), mRNA."  
"Homo sapiens prenylcysteine oxidase 1 (PCYOX1), mRNA."  
"Homo sapiens prenylcysteine oxidase 1 like (PCYOX1L), mRNA."  
"Homo sapiens phosphate cytidyltransferase 1, choline, alpha (PCYT1A), mRNA."  
"Homo sapiens phosphate cytidyltransferase 2, ethanolamine (PCYT2), mRNA."  
"Homo sapiens PDGFA associated protein 1 (PDAP1), mRNA."  
"Homo sapiens programmed cell death 1 (PDCD1), mRNA."  
"Homo sapiens programmed cell death 11 (PDCD11), mRNA."  
"Homo sapiens programmed cell death 2 (PDCD2), transcript variant 1, mRNA."  
"Homo sapiens programmed cell death 2-like (PDCD2L), mRNA."  
"Homo sapiens programmed cell death 4 (neoplastic transformation inhibitor) (PDCD4), transcrip  
"Homo sapiens programmed cell death 5 (PDCD5), mRNA."  
"Homo sapiens programmed cell death 6 (PDCD6), mRNA."  
"Homo sapiens programmed cell death 7 (PDCD7), mRNA."  
"Homo sapiens phosducin-like (PDCL), mRNA."  
"Homo sapiens phosducin-like 3 (PDCL3), mRNA."  
"Homo sapiens Parkinson disease 7 domain containing 1 (PDDC1), mRNA."  
"Homo sapiens phosphodiesterase 12 (PDE12), mRNA."

"Homo sapiens phosphodiesterase 3A, cGMP-inhibited (PDE3A), mRNA."  
"Homo sapiens phosphodiesterase 3B, cGMP-inhibited (PDE3B), mRNA."  
"Homo sapiens phosphodiesterase 4A, cAMP-specific (phosphodiesterase E2 duncce homolog, l  
"Homo sapiens phosphodiesterase 4B, cAMP-specific (phosphodiesterase E4 duncce homolog, l  
"Homo sapiens phosphodiesterase 4C, cAMP-specific (phosphodiesterase E1 duncce homolog,  
"Homo sapiens phosphodiesterase 6B, cGMP-specific, rod, beta (congenital stationary night blir  
"Homo sapiens phosphodiesterase 6D, cGMP-specific, rod, delta (PDE6D), mRNA."  
"Homo sapiens phosphodiesterase 6H, cGMP-specific, cone, gamma (PDE6H), mRNA."  
"Homo sapiens phosphodiesterase 7A (PDE7A), transcript variant 2, mRNA."  
"Homo sapiens phosphodiesterase 7B (PDE7B), mRNA."  
"Homo sapiens phosphodiesterase 8A (PDE8A), transcript variant 2, mRNA."  
"Homo sapiens phosphodiesterase 9A (PDE9A), transcript variant 5, mRNA."  
"Homo sapiens peptide deformylase (mitochondrial) (PDF), nuclear gene encoding mitochondria  
"Homo sapiens platelet-derived growth factor beta polypeptide (simian sarcoma viral (v-sis) onc  
"Homo sapiens platelet derived growth factor D (PDGFD), transcript variant 2, mRNA."  
"Homo sapiens platelet-derived growth factor receptor-like (PDGFRL), mRNA."  
"Homo sapiens pyruvate dehydrogenase (lipoamide) alpha 1 (PDHA1), mRNA."  
"Homo sapiens pyruvate dehydrogenase (lipoamide) alpha 2 (PDHA2), mRNA."  
"Homo sapiens pyruvate dehydrogenase (lipoamide) beta (PDHB), mRNA."  
"Homo sapiens pyruvate dehydrogenase complex, component X (PDHX), nuclear gene encodin  
"Homo sapiens protein disulfide isomerase family A, member 3 pseudogene (PDIA3P), non-cod  
"Homo sapiens protein disulfide isomerase family A, member 4 (PDIA4), mRNA."  
"Homo sapiens protein disulfide isomerase family A, member 5 (PDIA5), mRNA."  
"Homo sapiens protein disulfide isomerase family A, member 6 (PDIA6), mRNA."  
"Homo sapiens PDLIM1 interacting kinase 1 like (PDIK1L), mRNA."  
"Homo sapiens pyruvate dehydrogenase kinase, isozyme 1 (PDK1), nuclear gene encoding mitr  
"Homo sapiens pyruvate dehydrogenase kinase, isozyme 3 (PDK3), mRNA."  
"Homo sapiens pyruvate dehydrogenase kinase, isozyme 4 (PDK4), mRNA."  
"Homo sapiens PDZ and LIM domain 1 (PDLIM1), mRNA."  
"Homo sapiens PDZ and LIM domain 3 (PDLIM3), mRNA."  
"Homo sapiens PDZ and LIM domain 5 (PDLIM5), transcript variant 4, mRNA."  
"Homo sapiens PDZ and LIM domain 7 (enigma) (PDLIM7), transcript variant 1, mRNA."  
"Homo sapiens pyruvate dehydrogenase phosphatase catalytic subunit 2 (PDP2), mRNA."  
"Homo sapiens 3-phosphoinositide dependent protein kinase-1 (PDPK1), transcript variant 2, m  
"PREDICTED: Homo sapiens pyruvate dehydrogenase phosphatase regulatory subunit (PDPR)  
"Homo sapiens p53 and DNA-damage regulated 1 (PDRG1), mRNA."  
"Homo sapiens PDS5, regulator of cohesion maintenance, homolog A (S. cerevisiae) (PDS5A),  
"Homo sapiens PDS5, regulator of cohesion maintenance, homolog B (S. cerevisiae) (PDS5B),  
"Homo sapiens prenyl (decaprenyl) diphosphate synthase, subunit 1 (PDSS1), mRNA."  
"Homo sapiens prenyl (decaprenyl) diphosphate synthase, subunit 2 (PDSS2), mRNA."  
"Homo sapiens pyridoxal-dependent decarboxylase domain containing 1 (PDXDC1), mRNA."  
"Homo sapiens pyridoxal (pyridoxine, vitamin B6) kinase (PDXK), mRNA."  
"Homo sapiens pyridoxal (pyridoxine, vitamin B6) phosphatase (PDXP), mRNA."  
"Homo sapiens prodynorphin (PDYN), mRNA."



"Homo sapiens PDZ domain containing 11 (PDZD11), mRNA."  
"Homo sapiens PDZ domain containing 2 (PDZD2), mRNA."  
"Homo sapiens PDZ domain containing 3 (PDZD3), mRNA."  
"Homo sapiens PDZ domain containing 4 (PDZD4), mRNA."  
"Homo sapiens PDZ domain containing 8 (PDZD8), mRNA."  
"PREDICTED: Homo sapiens PDZ domain containing RING finger 3 (PDZRN3), mRNA."  
"Homo sapiens PDZ domain containing RING finger 4 (PDZRN4), mRNA."  
"Homo sapiens phosphoprotein enriched in astrocytes 15 (PEA15), mRNA."  
"Homo sapiens phosphatidylethanolamine binding protein 1 (PEBP1), mRNA."  
"Homo sapiens platelet/endothelial cell adhesion molecule (PECAM1), mRNA."  
"Homo sapiens peroxisomal D3,D2-enoyl-CoA isomerase (PECI), transcript variant 1, mRNA."  
"Homo sapiens peroxisomal trans-2-enoyl-CoA reductase (PECR), mRNA."  
"Homo sapiens penta-EF-hand domain containing 1 (PEF1), mRNA."  
"Homo sapiens paternally expressed 10 (PEG10), transcript variant 1, mRNA. XM\_940378"  
"Homo sapiens paternally expressed 3 (PEG3), mRNA."  
"Homo sapiens pellino homolog 1 (Drosophila) (PEL1), mRNA."  
"Homo sapiens pellino homolog 2 (Drosophila) (PEL2), mRNA."  
"Homo sapiens proline, glutamic acid and leucine rich protein 1 (PELP1), mRNA."  
"Homo sapiens phosphatidylethanolamine N-methyltransferase (PEMT), nuclear gene encoding  
"Homo sapiens peptidase D (PEPD), mRNA."  
"Homo sapiens period homolog 1 (Drosophila) (PER1), mRNA."  
"Homo sapiens period homolog 3 (Drosophila) (PER3), mRNA."  
"Homo sapiens PERP, TP53 apoptosis effector (PERP), mRNA."  
"Homo sapiens pescadillo homolog 1, containing BRCT domain (zebrafish) (PES1), mRNA."  
"Homo sapiens PET112-like (yeast) (PET112L), mRNA."  
"Homo sapiens peroxisome biogenesis factor 1 (PEX1), mRNA."  
"Homo sapiens peroxisomal biogenesis factor 11 alpha (PEX11A), mRNA."  
"Homo sapiens peroxisomal biogenesis factor 11 beta (PEX11B), mRNA."  
"Homo sapiens peroxisomal biogenesis factor 11 gamma (PEX11G), mRNA."  
"Homo sapiens peroxisome biogenesis factor 13 (PEX13), mRNA."  
"Homo sapiens peroxisomal biogenesis factor 14 (PEX14), mRNA."  
"Homo sapiens peroxisomal biogenesis factor 16 (PEX16), transcript variant 1, mRNA."  
"Homo sapiens peroxisomal biogenesis factor 19 (PEX19), mRNA."  
"Homo sapiens peroxisome biogenesis factor 26 (PEX26), mRNA."  
"Homo sapiens peroxisomal biogenesis factor 3 (PEX3), mRNA."  
"Homo sapiens peroxisomal biogenesis factor 5 (PEX5), mRNA."  
"Homo sapiens peroxisomal biogenesis factor 6 (PEX6), mRNA."  
"Homo sapiens peroxisomal biogenesis factor 7 (PEX7), mRNA."  
"Homo sapiens phosphonoformate immuno-associated protein 5 (PFAAP5), mRNA."  
"Homo sapiens phosphoribosylformylglycinamide synthase (FGAR amidotransferase) (PFAS),  
"Homo sapiens prefoldin subunit 1 (PFDN1), mRNA."  
"Homo sapiens prefoldin subunit 4 (PFDN4), mRNA."  
"Homo sapiens prefoldin subunit 5 (PFDN5), transcript variant 1, mRNA."  
"Homo sapiens prefoldin subunit 6 (PFDN6), mRNA."

"Homo sapiens 6-phosphofructo-2-kinase/fructose-2,6-biphosphatase 2 (PFKFB2), transcript va  
"Homo sapiens 6-phosphofructo-2-kinase/fructose-2,6-biphosphatase 3 (PFKFB3), mRNA."  
"Homo sapiens 6-phosphofructo-2-kinase/fructose-2,6-biphosphatase 4 (PFKFB4), mRNA."  
"Homo sapiens phosphofructokinase, liver (PFKL), transcript variant 2, mRNA."  
"Homo sapiens phosphofructokinase, muscle (PFKM), mRNA."  
"Homo sapiens phosphofructokinase, platelet (PFKP), mRNA."  
"Homo sapiens profilin 1 (PFN1), mRNA."  
"Homo sapiens profilin family, member 4 (PFN4), mRNA."  
"Homo sapiens PFTAIRE protein kinase 1 (PFTK1), mRNA."  
"Homo sapiens phosphoglycerate mutase 1 (brain) (PGAM1), mRNA."  
"Homo sapiens phosphoglycerate mutase family member 4 (PGAM4), mRNA."  
"Homo sapiens phosphoglycerate mutase family member 5 (PGAM5), mRNA."  
"Homo sapiens post-GPI attachment to proteins 1 (PGAP1), mRNA."  
"Homo sapiens piggyBac transposable element derived 1 (PGBD1), mRNA."  
"Homo sapiens piggyBac transposable element derived 2 (PGBD2), transcript variant 1, mRNA."  
"Homo sapiens piggyBac transposable element derived 3 (PGBD3), mRNA."  
"Homo sapiens piggyBac transposable element derived 4 (PGBD4), mRNA."  
"Homo sapiens piggyBac transposable element derived 5 (PGBD5), mRNA."  
"Homo sapiens placental growth factor (PGF), mRNA."  
"Homo sapiens protein geranylgeranyltransferase type I, beta subunit (PGGT1B), mRNA."  
"Homo sapiens phosphoglycerate kinase 1 (PGK1), mRNA."  
"Homo sapiens phosphoglycerate kinase 2 (PGK2), mRNA."  
"Homo sapiens 6-phosphogluconolactonase (PGLS), mRNA."  
"Homo sapiens peptidoglycan recognition protein 4 (PGLYRP4), mRNA."  
"Homo sapiens phosphoglucomutase 1 (PGM1), mRNA."  
"Homo sapiens phosphoglucomutase 2 (PGM2), mRNA."  
"Homo sapiens phosphoglucomutase 2-like 1 (PGM2L1), mRNA."  
"Homo sapiens phosphoglucomutase 3 (PGM3), mRNA."  
"Homo sapiens phosphoglycolate phosphatase (PGP), mRNA."  
"Homo sapiens pyroglutamyl-peptidase I (PGPEP1), mRNA."  
"Homo sapiens progesterone receptor membrane component 1 (PGRMC1), mRNA."  
"Homo sapiens progesterone receptor membrane component 2 (PGRMC2), mRNA."  
"Homo sapiens phosphatidylglycerophosphate synthase 1 (PGS1), mRNA."  
"Homo sapiens phosphatase and actin regulator 1 (PHACTR1), mRNA."  
"Homo sapiens phosphatase and actin regulator 3 (PHACTR3), transcript variant 3, mRNA."  
"Homo sapiens phosphorylated adaptor for RNA export (PHAX), mRNA."  
"Homo sapiens prohibitin (PHB), mRNA."  
"Homo sapiens prohibitin 2 (PHB2), transcript variant 2, mRNA."  
"Homo sapiens polyhomeotic homolog 1 (Drosophila) (PHC1), mRNA."  
"Homo sapiens polyhomeotic homolog 2 (Drosophila) (PHC2), transcript variant 2, mRNA."  
"Homo sapiens polyhomeotic homolog 3 (Drosophila) (PHC3), mRNA."  
"Homo sapiens phytoceramidase, alkaline (PHCA), mRNA."  
"Homo sapiens phosphate regulating endopeptidase homolog, X-linked (hypophosphatemia, vit  
"Homo sapiens PHD finger protein 1 (PHF1), transcript variant 2, mRNA."

"Homo sapiens PHD finger protein 10 (PHF10), transcript variant 2, mRNA."  
"Homo sapiens PHD finger protein 11 (PHF11), transcript variant 1, mRNA."  
"Homo sapiens PHD finger protein 12 (PHF12), transcript variant 2, mRNA."  
"Homo sapiens PHD finger protein 13 (PHF13), mRNA."  
"Homo sapiens PHD finger protein 14 (PHF14), transcript variant 1, mRNA."  
"Homo sapiens PHD finger protein 15 (PHF15), mRNA."  
"Homo sapiens PHD finger protein 16 (PHF16), transcript variant 1, mRNA."  
"Homo sapiens PHD finger protein 17 (PHF17), transcript variant S, mRNA."  
"Homo sapiens PHD finger protein 19 (PHF19), transcript variant 1, mRNA."  
"Homo sapiens PHD finger protein 2 (PHF2), mRNA."  
"Homo sapiens PHD finger protein 20-like 1 (PHF20L1), transcript variant 2, mRNA."  
"Homo sapiens PHD finger protein 21A (PHF21A), mRNA."  
"Homo sapiens PHD finger protein 21B (PHF21B), mRNA."  
"Homo sapiens PHD finger protein 23 (PHF23), mRNA."  
"Homo sapiens PHD finger protein 3 (PHF3), mRNA."  
"Homo sapiens PHD finger protein 5A (PHF5A), mRNA."  
"Homo sapiens PHD finger protein 7 (PHF7), transcript variant 2, mRNA."  
"Homo sapiens phosphoglycerate dehydrogenase (PHGDH), mRNA."  
"Homo sapiens pleckstrin homology domain interacting protein (PHIP), mRNA."  
"Homo sapiens phosphorylase kinase, alpha 1 (muscle) (PHKA1), mRNA."  
"Homo sapiens phosphorylase kinase, alpha 2 (liver) (PHKA2), mRNA."  
"Homo sapiens phosphorylase kinase, beta (PHKB), transcript variant 2, mRNA."  
"Homo sapiens phosphorylase kinase, gamma 1 (muscle) (PHKG1), mRNA."  
"Homo sapiens phosphorylase kinase, gamma 2 (testis) (PHKG2), mRNA."  
"Homo sapiens pleckstrin homology-like domain, family A, member 1 (PHLDA1), mRNA."  
"Homo sapiens pleckstrin homology-like domain, family B, member 1 (PHLDB1), mRNA."  
"Homo sapiens pleckstrin homology-like domain, family B, member 2 (PHLDB2), mRNA."  
"Homo sapiens PH domain and leucine rich repeat protein phosphatase 1 (PHLPP1), mRNA."  
"Homo sapiens PH domain and leucine rich repeat protein phosphatase 2 (PHLPP2), mRNA."  
"Homo sapiens phosphatase, orphan 2 (PHOSPHO2), mRNA."  
"Homo sapiens paired-like homeobox 2a (PHOX2A), mRNA."  
"Homo sapiens phosphohistidine phosphatase 1 (PHPT1), mRNA."  
"Homo sapiens PHD and ring finger domains 1 (PHRF1), mRNA."  
"Homo sapiens putative homeodomain transcription factor 1 (PHTF1), mRNA."  
"Homo sapiens phytanoyl-CoA 2-hydroxylase (PHYH), transcript variant 2, mRNA."  
"Homo sapiens phytanoyl-CoA dioxygenase domain containing 1 (PHYHD1), mRNA."  
"Homo sapiens peptidase inhibitor 16 (PI16), mRNA."  
"Homo sapiens peptidase inhibitor 3, skin-derived (SKALP) (PI3), mRNA."  
"Homo sapiens phosphatidylinositol 4-kinase type 2 alpha (PI4K2A), mRNA."  
"Homo sapiens phosphatidylinositol 4-kinase type 2 beta (PI4K2B), mRNA."  
"Homo sapiens phosphatidylinositol 4-kinase, catalytic, alpha pseudogene 1 (PI4KAP1), non-co  
"Homo sapiens phosphatidylinositol 4-kinase, catalytic, alpha polypeptide pseudogene 2 (PI4KA  
"Homo sapiens phosphatidylinositol 4-kinase, catalytic, beta (PI4KB), mRNA."  
"Homo sapiens protein inhibitor of activated STAT, 1 (PIAS1), mRNA."

"PREDICTED: Homo sapiens protein inhibitor of activated STAT, 2 (PIAS2), mRNA."  
"Homo sapiens protein inhibitor of activated STAT, 3 (PIAS3), mRNA."  
"Homo sapiens progesterone immunomodulatory binding factor 1 (PIBF1), mRNA."  
"Homo sapiens phosphatidylinositol binding clathrin assembly protein (PICALM), transcript varia  
"Homo sapiens protein interacting with PRKCA 1 (PICK1), transcript variant 1, mRNA."  
"Homo sapiens phosphotyrosine interaction domain containing 1 (PID1), mRNA."  
"Homo sapiens PIF1 5'-to-3' DNA helicase homolog (S. cerevisiae) (PIF1), mRNA."  
"Homo sapiens phosphatidylinositol glycan anchor biosynthesis, class A (PIGA), transcript varia  
"Homo sapiens phosphatidylinositol glycan anchor biosynthesis, class B (PIGB), mRNA."  
"Homo sapiens phosphatidylinositol glycan anchor biosynthesis, class C (PIGC), transcript varia  
"Homo sapiens phosphatidylinositol glycan anchor biosynthesis, class F (PIGF), transcript varia  
"Homo sapiens phosphatidylinositol glycan anchor biosynthesis, class G (PIGG), mRNA."  
"Homo sapiens phosphatidylinositol glycan anchor biosynthesis, class H (PIGH), mRNA."  
"Homo sapiens phosphatidylinositol glycan anchor biosynthesis, class K (PIGK), mRNA."  
"Homo sapiens phosphatidylinositol glycan anchor biosynthesis, class L (PIGL), mRNA."  
"Homo sapiens phosphatidylinositol glycan anchor biosynthesis, class M (PIGM), mRNA."  
"Homo sapiens phosphatidylinositol glycan anchor biosynthesis, class N (PIGN), transcript varia  
"Homo sapiens phosphatidylinositol glycan anchor biosynthesis, class O (PIGO), transcript varia  
"Homo sapiens phosphatidylinositol glycan anchor biosynthesis, class P (PIGP), transcript varia  
"Homo sapiens phosphatidylinositol glycan anchor biosynthesis, class Q (PIGQ), transcript varia  
"Homo sapiens polymeric immunoglobulin receptor (PIGR), mRNA."  
"Homo sapiens phosphatidylinositol glycan anchor biosynthesis, class S (PIGS), mRNA."  
"Homo sapiens phosphatidylinositol glycan anchor biosynthesis, class T (PIGT), mRNA."  
"Homo sapiens phosphatidylinositol glycan anchor biosynthesis, class U (PIGU), mRNA."  
"Homo sapiens phosphatidylinositol glycan anchor biosynthesis, class V (PIGV), mRNA."  
"Homo sapiens phosphatidylinositol glycan anchor biosynthesis, class W (PIGW), mRNA."  
"Homo sapiens phosphatidylinositol glycan anchor biosynthesis, class X (PIGX), mRNA."  
"Homo sapiens phosphatidylinositol glycan anchor biosynthesis, class Y (PIGY), transcript varia  
"Homo sapiens PIH1 domain containing 1 (PIH1D1), mRNA."  
"Homo sapiens PIH1 domain containing 2 (PIH1D2), transcript variant 2, mRNA."  
"Homo sapiens phosphoinositide-3-kinase adaptor protein 1 (PIK3AP1), mRNA."  
"Homo sapiens phosphoinositide-3-kinase, class 2, alpha polypeptide (PIK3C2A), mRNA."  
"Homo sapiens phosphoinositide-3-kinase, class 2, beta polypeptide (PIK3C2B), mRNA."  
"Homo sapiens phosphoinositide-3-kinase, class 3 (PIK3C3), mRNA."  
"Homo sapiens phosphoinositide-3-kinase, catalytic, alpha polypeptide (PIK3CA), mRNA."  
"Homo sapiens phosphoinositide-3-kinase, catalytic, beta polypeptide (PIK3CB), mRNA."  
"Homo sapiens phosphoinositide-3-kinase, catalytic, delta polypeptide (PIK3CD), mRNA."  
"Homo sapiens phosphoinositide-3-kinase, catalytic, gamma polypeptide (PIK3CG), mRNA."  
"Homo sapiens phosphoinositide-3-kinase interacting protein 1 (PIK3IP1), mRNA."  
"Homo sapiens phosphoinositide-3-kinase, regulatory subunit 1 (alpha) (PIK3R1), transcript vari  
"Homo sapiens phosphoinositide-3-kinase, regulatory subunit 2 (beta) (PIK3R2), mRNA."  
"Homo sapiens phosphoinositide-3-kinase, regulatory subunit 3 (p55, gamma) (PIK3R3), mRNA  
"Homo sapiens phosphoinositide-3-kinase, regulatory subunit 4, p150 (PIK3R4), mRNA."  
"Homo sapiens phosphatidylinositol 4-kinase, catalytic, alpha polypeptide (PIK4CA), transcript v

"Homo sapiens paired immunoglobulin-like type 2 receptor alpha (PILRA), transcript variant 1, mRNA"

"Homo sapiens paired immunoglobulin-like type 2 receptor beta (PILRB), transcript variant 2, mRNA"

"Homo sapiens pim-1 oncogene (PIM1), mRNA."

"Homo sapiens pim-2 oncogene (PIM2), mRNA."

"Homo sapiens pim-3 oncogene (PIM3), mRNA."

"Homo sapiens peptidylprolyl cis/trans isomerase, NIMA-interacting 1 (PIN1), mRNA."

"Homo sapiens protein (peptidylprolyl cis/trans isomerase) NIMA-interacting, 4 (parvulin) (PIN4):

"Homo sapiens PTEN induced putative kinase 1 (PINK1), nuclear gene encoding mitochondrial

"Homo sapiens PIN2-interacting protein 1 (PINX1), mRNA."

"Homo sapiens pigeon homolog (Drosophila) (PION), mRNA."

"Homo sapiens phosphoinositide-binding protein PIP3-E (PIP3-E), mRNA."

"Homo sapiens phosphatidylinositol-5-phosphate 4-kinase, type II, alpha (PIP4K2A), mRNA."

"Homo sapiens phosphatidylinositol-5-phosphate 4-kinase, type II, beta (PIP4K2B), mRNA."

"Homo sapiens phosphatidylinositol-5-phosphate 4-kinase, type II, gamma (PIP4K2C), mRNA."

"Homo sapiens phosphatidylinositol-4-phosphate 5-kinase, type I, beta (PIP5K1B), transcript va

"Homo sapiens phosphatidylinositol-4-phosphate 5-kinase, type I, gamma (PIP5K1C), mRNA."

"Homo sapiens phosphatidylinositol-4-phosphate 5-kinase, type II, alpha (PIP5K2A), mRNA."

"Homo sapiens phosphatidylinositol-4-phosphate 5-kinase, type II, beta (PIP5K2B), transcript ve

"Homo sapiens phosphatidylinositol-3-phosphate/phosphatidylinositol 5-kinase, type III (PIP5K3

"Homo sapiens phosphatidylinositol-4-phosphate 5-kinase-like 1 (PIP5KL1), transcript variant 2,

"Homo sapiens pipecolic acid oxidase (PIPOX), mRNA."

"Homo sapiens PIP5K1A and PSMD4-like (PIPSL), non-coding RNA."

"Homo sapiens pirin (iron-binding nuclear protein) (PIR), transcript variant 2, mRNA."

"Homo sapiens phosphatidylserine decarboxylase (PISD), mRNA."

"Homo sapiens phosphatidylinositol transfer protein, beta (PITPNB), mRNA."

"Homo sapiens phosphatidylinositol transfer protein, cytoplasmic 1 (PITPNC1), transcript varian

"Homo sapiens phosphatidylinositol transfer protein, membrane-associated 1 (PITPNM1), mRN.

"Homo sapiens phosphatidylinositol transfer protein, membrane-associated 2 (PITPNM2), mRN.

"Homo sapiens pitrilysin metallopeptidase 1 (PITRM1), mRNA."

"Homo sapiens paired-like homeodomain transcription factor 1 (PITX1), mRNA."

"Homo sapiens paired-like homeodomain 2 (PITX2), transcript variant 2, mRNA."

"Homo sapiens paired-like homeodomain 3 (PITX3), mRNA."

"Homo sapiens praja ring finger 1 (PJA1), transcript variant 1, mRNA."

"Homo sapiens praja 2, RING-H2 motif containing (PJA2), mRNA."

"Homo sapiens similar to olfactory receptor 873 (PJCG6), mRNA."

"Homo sapiens polycystic kidney disease 1 (autosomal dominant) (PKD1), transcript variant 1, r

"Homo sapiens polycystic kidney disease 1 like 1 (PKD1L1), mRNA."

"Homo sapiens polycystic kidney disease 2 (autosomal dominant) (PKD2), mRNA."

"Homo sapiens protein kinase domain containing, cytoplasmic homolog (mouse) (PKDCC), mRN

"Homo sapiens polycystic kidney and hepatic disease 1 (autosomal recessive)-like 1 (PKHD1L1

"Homo sapiens protein kinase (cAMP-dependent, catalytic) inhibitor alpha (PKIA), transcript vari

"Homo sapiens protein kinase (cAMP-dependent, catalytic) inhibitor beta (PKIB), transcript varia

"Homo sapiens protein kinase (cAMP-dependent, catalytic) inhibitor gamma (PKIG), transcript v

"Homo sapiens pyruvate kinase, muscle (PKM2), transcript variant 1, mRNA."

"Homo sapiens protein kinase, membrane associated tyrosine/threonine 1 (PKMYT1), transcript  
"Homo sapiens protein kinase N1 (PKN1), transcript variant 2, mRNA."  
"Homo sapiens protein kinase N2 (PKN2), mRNA."  
"Homo sapiens protein kinase N3 (PKN3), mRNA."  
"Homo sapiens PBX/knotted 1 homeobox 1 (PKNOX1), mRNA."  
"Homo sapiens plakophilin 2 (PKP2), transcript variant 2a, mRNA."  
"Homo sapiens plakophilin 4 (PKP4), transcript variant 1, mRNA."  
"Homo sapiens phospholipase A1 member A (PLA1A), mRNA."  
"Homo sapiens phospholipase A2, group X (PLA2G10), mRNA."  
"Homo sapiens phospholipase A2, group XIIA (PLA2G12A), mRNA."  
"Homo sapiens phospholipase A2, group XIIB (PLA2G12B), mRNA."  
"Homo sapiens phospholipase A2, group XV (PLA2G15), mRNA."  
"Homo sapiens phospholipase A2, group IID (PLA2G2D), mRNA."  
"Homo sapiens phospholipase A2, group IVB (cytosolic) (PLA2G4B), mRNA."  
"Homo sapiens phospholipase A2-activating protein (PLAA), transcript variant 1, mRNA."  
"Homo sapiens placenta-specific 1 (PLAC1), mRNA."  
"Homo sapiens placenta-specific 2 (PLAC2), mRNA."  
"Homo sapiens placenta-specific 8 (PLAC8), mRNA."  
"Homo sapiens PLAC8-like 1 (PLAC8L1), mRNA."  
"Homo sapiens pleiomorphic adenoma gene 1 (PLAG1), mRNA."  
"Homo sapiens pleiomorphic adenoma gene-like 1 (PLAGL1), transcript variant 4, mRNA."  
"Homo sapiens pleiomorphic adenoma gene-like 2 (PLAGL2), mRNA."  
"Homo sapiens plasminogen activator, urokinase (PLAU), mRNA."  
"Homo sapiens phospholipase B1 (PLB1), mRNA."  
"Homo sapiens phospholipase C, beta 1 (phosphoinositide-specific) (PLCB1), transcript variant  
"Homo sapiens phospholipase C, beta 2 (PLCB2), mRNA."  
"Homo sapiens phospholipase C, delta 1 (PLCD1), mRNA."  
"Homo sapiens phospholipase C, delta 3 (PLCD3), mRNA."  
"Homo sapiens phospholipase C, gamma 1 (PLCG1), transcript variant 2, mRNA."  
"Homo sapiens phospholipase C, gamma 2 (phosphatidylinositol-specific) (PLCG2), mRNA."  
"Homo sapiens phospholipase C, eta 1 (PLCH1), mRNA."  
"Homo sapiens phospholipase C, eta 2 (PLCH2), mRNA."  
"Homo sapiens phospholipase C-like 1 (PLCL1), mRNA."  
"Homo sapiens phospholipase C-like 2 (PLCL2), mRNA."  
"Homo sapiens phosphatidylinositol-specific phospholipase C, X domain containing 1 (PLCXD1)  
"Homo sapiens phospholipase D1, phosphatidylcholine-specific (PLD1), mRNA."  
"Homo sapiens phospholipase D2 (PLD2), mRNA."  
"Homo sapiens phospholipase D family, member 3 (PLD3), transcript variant 1, mRNA."  
"Homo sapiens phospholipase D family, member 4 (PLD4), mRNA."  
"Homo sapiens phospholipase D family, member 5 (PLD5), mRNA."  
"Homo sapiens phospholipase D family, member 6 (PLD6), mRNA."  
"Homo sapiens pallidin homolog (mouse) (PLDN), mRNA."  
"Homo sapiens plectin 1, intermediate filament binding protein 500kDa (PLEC1), transcript varia  
"Homo sapiens pleckstrin (PLEK), mRNA."

"Homo sapiens pleckstrin homology domain containing, family A (phosphoinositide binding spec  
"Homo sapiens pleckstrin homology domain containing, family A (phosphoinositide binding spec  
"Homo sapiens pleckstrin homology domain containing, family A (phosphoinositide binding spec  
"Homo sapiens pleckstrin homology domain containing, family A (phosphoinositide binding spec  
"Homo sapiens pleckstrin homology domain containing, family A (phosphoinositide binding spec  
"Homo sapiens pleckstrin homology domain containing, family B (evectins) member 1 (PLEKHB  
"Homo sapiens pleckstrin homology domain containing, family B (evectins) member 2 (PLEKHB  
"Homo sapiens pleckstrin homology domain containing, family F (with FYVE domain) member 1  
"Homo sapiens pleckstrin homology domain containing, family F (with FYVE domain) member 2  
"Homo sapiens pleckstrin homology domain containing, family G (with RhoGef domain) member  
"Homo sapiens pleckstrin homology domain containing, family G (with RhoGef domain) member  
"Homo sapiens pleckstrin homology domain containing, family G (with RhoGef domain) member  
"Homo sapiens pleckstrin homology domain containing, family G (with RhoGef domain) member  
"Homo sapiens pleckstrin homology domain containing, family H (with MyTH4 domain) member  
"Homo sapiens pleckstrin homology domain containing, family H (with MyTH4 domain) member  
"Homo sapiens pleckstrin homology domain containing, family J member 1 (PLEKHJ1), mRNA."  
"PREDICTED: Homo sapiens pleckstrin homology domain containing, family M (with RUN doma  
"Homo sapiens pleckstrin homology domain containing, family O member 1 (PLEKHO1), mRNA  
"Homo sapiens pleckstrin homology domain containing, family O member 2 (PLEKHO2), mRNA  
"Homo sapiens plasminogen (PLG), mRNA."  
"PREDICTED: Homo sapiens plasminogen-like A1, transcript variant 4 (PLGLA1), mRNA."  
"Homo sapiens plasminogen-like B1 (PLGLB1), mRNA."  
"Homo sapiens plasminogen-like B2 (PLGLB2), mRNA."  
"Homo sapiens perilipin 2 (PLIN2), mRNA."  
"Homo sapiens perilipin 5 (PLIN5), mRNA."  
"Homo sapiens polo-like kinase 1 (Drosophila) (PLK1), mRNA."  
"Homo sapiens polo-like kinase 3 (Drosophila) (PLK3), mRNA."  
"Homo sapiens polo-like kinase 4 (Drosophila) (PLK4), mRNA."  
"Homo sapiens plasma membrane proteolipid (plasmolipin) (PLLP), mRNA."  
"Homo sapiens procollagen-lysine 1, 2-oxoglutarate 5-dioxygenase 1 (PLOD1), mRNA."  
"Homo sapiens procollagen-lysine, 2-oxoglutarate 5-dioxygenase 3 (PLOD3), mRNA."  
"Homo sapiens proteolipid protein 2 (colonic epithelium-enriched) (PLP2), mRNA."  
"Homo sapiens pleiotropic regulator 1 (PRL1 homolog, Arabidopsis) (PLRG1), mRNA."  
"Homo sapiens plastin 1 (I isoform) (PLS1), mRNA."  
"Homo sapiens phospholipid scramblase 1 (PLSCR1), mRNA."  
"Homo sapiens phospholipid scramblase 3 (PLSCR3), mRNA."  
"PREDICTED: Homo sapiens phospholipid scramblase family, member 5 (PLSCR5), mRNA."  
"Homo sapiens phospholipid transfer protein (PLTP), transcript variant 2, mRNA."  
"Homo sapiens plexin A1 (PLXNA1), mRNA."  
"Homo sapiens plexin A3 (PLXNA3), mRNA."  
"Homo sapiens plexin B2 (PLXNB2), mRNA."  
"Homo sapiens plexin B3 (PLXNB3), mRNA."  
"Homo sapiens plexin D1 (PLXND1), mRNA."  
"Homo sapiens peptidase M20 domain containing 2 (PM20D2), mRNA."

"Homo sapiens phorbol-12-myristate-13-acetate-induced protein 1 (PMAIP1), mRNA."

"Homo sapiens prostate transmembrane protein, androgen induced 1 (PMEPA1), transcript vari

"Homo sapiens polyamine-modulated factor 1 (PMF1), mRNA."

"Homo sapiens promyelocytic leukemia (PML), transcript variant 2, mRNA."

"Homo sapiens phosphomannomutase 1 (PMM1), mRNA."

"Homo sapiens phosphomannomutase 2 (PMM2), mRNA."

"Homo sapiens peripheral myelin protein 22 (PMP22), transcript variant 2, mRNA."

"Homo sapiens peptidase (mitochondrial processing) alpha (PMPCA), nuclear gene encoding m

"Homo sapiens peptidase (mitochondrial processing) beta (PMPCB), nuclear gene encoding mit

"Homo sapiens PMS1 postmeiotic segregation increased 1 (*S. cerevisiae*) (PMS1), mRNA."

"Homo sapiens PMS2 postmeiotic segregation increased 2 (*S. cerevisiae*) (PMS2), transcript va

"PREDICTED: Homo sapiens PMS2-C terminal-like (PMS2CL), misc RNA."

"PREDICTED: Homo sapiens postmeiotic segregation increased 2-like 1, transcript variant 8 (PI

"Homo sapiens postmeiotic segregation increased 2-like 3 (PMS2L3), transcript variant 2, mRN/

"Homo sapiens postmeiotic segregation increased 2-like 4 pseudogene (PMS2L4), non-coding I

"Homo sapiens postmeiotic segregation increased 2-like 5 (PMS2L5), mRNA."

"Homo sapiens phosphomevalonate kinase (PMVK), mRNA."

"Homo sapiens pregnancy upregulated non-ubiquitously expressed CaM kinase (PNCK), mRNA

"Homo sapiens paroxysmal nonkinesiogenic dyskinesia (PNKD), transcript variant 2, mRNA."

"Homo sapiens polynucleotide kinase 3'-phosphatase (PNKP), mRNA."

"Homo sapiens paraneoplastic antigen MA1 (PNMA1), mRNA."

"Homo sapiens paraneoplastic antigen MA2 (PNMA2), mRNA."

"Homo sapiens paraneoplastic antigen MA3 (PNMA3), mRNA."

"Homo sapiens paraneoplastic antigen like 6A (PNMA6A), mRNA."

"Homo sapiens PNMA-like 1 (PNMAL1), transcript variant 1, mRNA."

"Homo sapiens pinin, desmosome associated protein (PNN), mRNA."

"Homo sapiens partner of NOB1 homolog (*S. cerevisiae*) (PNO1), mRNA."

"Homo sapiens prepronociceptin (PNOC), mRNA."

"Homo sapiens patatin-like phospholipase domain containing 2 (PNPLA2), mRNA."

"Homo sapiens patatin-like phospholipase domain containing 4 (PNPLA4), mRNA."

"Homo sapiens patatin-like phospholipase domain containing 6 (PNPLA6), mRNA."

"Homo sapiens patatin-like phospholipase domain containing 7 (PNPLA7), mRNA."

"Homo sapiens patatin-like phospholipase domain containing 8 (PNPLA8), mRNA."

"Homo sapiens pyridoxamine 5'-phosphate oxidase (PNPO), mRNA."

"Homo sapiens polyribonucleotide nucleotidyltransferase 1 (PNPT1), mRNA."

"Homo sapiens proline-rich nuclear receptor coactivator 1 (PNRC1), mRNA."

"Homo sapiens proline-rich nuclear receptor coactivator 2 (PNRC2), mRNA."

"Homo sapiens podocalyxin-like (PODXL), transcript variant 1, mRNA."

"Homo sapiens podocalyxin-like 2 (PODXL2), mRNA."

"Homo sapiens premature ovarian failure, 1B (POF1B), mRNA."

"Homo sapiens protein O-fucosyltransferase 1 (POFUT1), transcript variant 1, mRNA."

"Homo sapiens protein O-fucosyltransferase 2 (POFUT2), transcript variant 1, mRNA."

"Homo sapiens pogo transposable element with KRAB domain (POGK), mRNA."

"Homo sapiens polymerase 3 (POL3S), mRNA."



"Homo sapiens polymerase (DNA directed), alpha 1, catalytic subunit (POLA1), mRNA."  
"Homo sapiens polymerase (DNA directed), alpha 2 (70kD subunit) (POLA2), mRNA."  
"Homo sapiens polymerase (DNA directed), beta (POLB), mRNA."  
"Homo sapiens polymerase (DNA directed), delta 1, catalytic subunit 125kDa (POLD1), mRNA."  
"Homo sapiens polymerase (DNA directed), delta 2, regulatory subunit 50kDa (POLD2), transcri  
"Homo sapiens polymerase (DNA-directed), delta 3, accessory subunit (POLD3), mRNA."  
"Homo sapiens polymerase (DNA-directed), delta 4 (POLD4), mRNA."  
"Homo sapiens polymerase (DNA-directed), delta interacting protein 2 (POLDIP2), mRNA."  
"Homo sapiens polymerase (DNA-directed), delta interacting protein 3 (POLDIP3), transcript var  
"Homo sapiens polymerase (DNA directed), epsilon (POLE), mRNA."  
"Homo sapiens polymerase (DNA directed), epsilon 2 (p59 subunit) (POLE2), mRNA."  
"Homo sapiens polymerase (DNA directed), epsilon 3 (p17 subunit) (POLE3), mRNA."  
"Homo sapiens polymerase (DNA-directed), epsilon 4 (p12 subunit) (POLE4), mRNA."  
"Homo sapiens polymerase (DNA directed), gamma (POLG), mRNA."  
"Homo sapiens polymerase (DNA directed), gamma 2, accessory subunit (POLG2), mRNA."  
"Homo sapiens polymerase (DNA directed), eta (POLH), mRNA."  
"Homo sapiens polymerase (DNA directed) iota (POLI), mRNA."  
"Homo sapiens polymerase (DNA directed), lambda (POLL), mRNA."  
"Homo sapiens polymerase (DNA directed), mu (POLM), mRNA."  
"Homo sapiens polymerase (DNA directed), theta (POLQ), mRNA."  
"Homo sapiens polymerase (RNA) I polypeptide A, 194kDa (POLR1A), mRNA."  
"Homo sapiens polymerase (RNA) I polypeptide B, 128kDa (POLR1B), mRNA."  
"Homo sapiens polymerase (RNA) I polypeptide C, 30kDa (POLR1C), transcript variant 1, mRN  
"Homo sapiens polymerase (RNA) I polypeptide D, 16kDa (POLR1D), transcript variant 1, mRN  
"Homo sapiens polymerase (RNA) I polypeptide E, 53kDa (POLR1E), mRNA."  
"Homo sapiens polymerase (RNA) II (DNA directed) polypeptide A, 220kDa (POLR2A), mRNA."  
"Homo sapiens polymerase (RNA) II (DNA directed) polypeptide B, 140kDa (POLR2B), mRNA."  
"Homo sapiens polymerase (RNA) II (DNA directed) polypeptide C, 33kDa (POLR2C), mRNA."  
"Homo sapiens polymerase (RNA) II (DNA directed) polypeptide D (POLR2D), mRNA."  
"Homo sapiens polymerase (RNA) II (DNA directed) polypeptide E, 25kDa (POLR2E), mRNA."  
"Homo sapiens polymerase (RNA) II (DNA directed) polypeptide F (POLR2F), mRNA."  
"Homo sapiens polymerase (RNA) II (DNA directed) polypeptide G (POLR2G), mRNA."  
"Homo sapiens polymerase (RNA) II (DNA directed) polypeptide H (POLR2H), mRNA."  
"Homo sapiens polymerase (RNA) II (DNA directed) polypeptide I, 14.5kDa (POLR2I), mRNA."  
"Homo sapiens polymerase (RNA) II (DNA directed) polypeptide J, 13.3kDa (POLR2J), mRNA."  
"Homo sapiens polymerase (RNA) II (DNA directed) polypeptide J2 (POLR2J2), mRNA."  
"Homo sapiens polymerase (RNA) II (DNA directed) polypeptide J3 (POLR2J3), mRNA."  
"Homo sapiens polymerase (RNA) II (DNA directed) polypeptide K, 7.0kDa (POLR2K), mRNA."  
"Homo sapiens polymerase (RNA) II (DNA directed) polypeptide L, 7.6kDa (POLR2L), mRNA."  
"Homo sapiens polymerase (RNA) III (DNA directed) polypeptide B (POLR3B), mRNA."  
"Homo sapiens polymerase (RNA) III (DNA directed) polypeptide C (62kD) (POLR3C), mRNA."  
"Homo sapiens polymerase (RNA) III (DNA directed) polypeptide D, 44kDa (POLR3D), mRNA."  
"Homo sapiens polymerase (RNA) III (DNA directed) polypeptide E (80kD) (POLR3E), mRNA."  
"Homo sapiens polymerase (RNA) III (DNA directed) polypeptide F, 39 kDa (POLR3F), mRNA."

"Homo sapiens polymerase (RNA) III (DNA directed) polypeptide G (32kD) (POLR3G), mRNA."  
"Homo sapiens polymerase (RNA) III (DNA directed) polypeptide G (32kD)-like (POLR3GL), mRNA."  
"Homo sapiens polymerase (RNA) III (DNA directed) polypeptide H (22.9kD) (POLR3H), transcript variant 1, mRNA."  
"Homo sapiens polymerase (RNA) III (DNA directed) polypeptide K, 12.3 kDa (POLR3K), mRNA."  
"Homo sapiens polymerase (RNA) mitochondrial (DNA directed) (POLRMT), nuclear gene encoding mitochondrial protein, mRNA."  
"Homo sapiens polymerase (DNA directed) sigma (POLS), mRNA."  
"Homo sapiens POM121 membrane glycoprotein C (POM121C), mRNA."  
"Homo sapiens POM121 membrane glycoprotein-like 4 pseudogene (rat) (POM121L4P), non-coding RNA."  
"Homo sapiens proopiomelanocortin (POMC), transcript variant 1, mRNA."  
"Homo sapiens protein O-linked mannose beta1,2-N-acetylglucosaminyltransferase (POMGNT1), transcript variant 1, mRNA."  
"Homo sapiens proteasome maturation protein (POMP), mRNA."  
"Homo sapiens protein-O-mannosyltransferase 1 (POMT1), transcript variant 1, mRNA."  
"Homo sapiens protein-O-mannosyltransferase 2 (POMT2), mRNA."  
"Homo sapiens paraoxonase 2 (PON2), transcript variant 1, mRNA."  
"Homo sapiens processing of precursor 1, ribonuclease P/MRP subunit (S. cerevisiae) (POP1), mRNA."  
"Homo sapiens processing of precursor 4, ribonuclease P/MRP subunit (S. cerevisiae) (POP4), mRNA."  
"Homo sapiens processing of precursor 5, ribonuclease P/MRP subunit (S. cerevisiae) (POP5), mRNA."  
"Homo sapiens processing of precursor 7, ribonuclease P/MRP subunit (S. cerevisiae) (POP7), mRNA."  
"Homo sapiens popeye domain containing 2 (POPDC2), mRNA."  
"Homo sapiens P450 (cytochrome) oxidoreductase (POR), mRNA."  
"Homo sapiens porcupine homolog (Drosophila) (PORCN), transcript variant A, mRNA."  
"Homo sapiens POT1 protection of telomeres 1 homolog (S. pombe) (POT1), transcript variant 1, mRNA."  
"Homo sapiens protein expressed in prostate, ovary, testis, and placenta 2 (POTE2), transcript variant 1, mRNA."  
"Homo sapiens POTE ankyrin domain family, member E (POTEE), mRNA."  
"Homo sapiens POTE ankyrin domain family, member F (POTEF), mRNA."  
"Homo sapiens POU class 2 associating factor 1 (POU2AF1), mRNA."  
"Homo sapiens POU class 2 homeobox 1 (POU2F1), mRNA."  
"Homo sapiens POU domain, class 2, transcription factor 2 (POU2F2), mRNA."  
"Homo sapiens POU class 3 homeobox 1 (POU3F1), mRNA."  
"Homo sapiens POU class 3 homeobox 2 (POU3F2), mRNA."  
"Homo sapiens POU class 4 homeobox 1 (POU4F1), mRNA."  
"Homo sapiens POU class 5 homeobox 1 pseudogene 1 (POU5F1P1), non-coding RNA."  
"Homo sapiens pyrophosphatase (inorganic) 1 (PPA1), mRNA."  
"Homo sapiens pyrophosphatase (inorganic) 2 (PPA2), nuclear gene encoding mitochondrial protein, mRNA."  
"Homo sapiens peter pan homolog (Drosophila) (PPAN), mRNA."  
"Homo sapiens PPAN-P2RY11 readthrough (PPAN-P2RY11), mRNA."  
"Homo sapiens phosphatidic acid phosphatase type 2A (PPAP2A), transcript variant 2, mRNA."  
"Homo sapiens phosphatidic acid phosphatase type 2 domain containing 1A (PPAPDC1A), mRNA."  
"Homo sapiens phosphatidic acid phosphatase type 2 domain containing 1B (PPAPDC1B), mRNA."  
"Homo sapiens phosphatidic acid phosphatase type 2 domain containing 2 (PPAPDC2), mRNA."  
"Homo sapiens phosphatidic acid phosphatase type 2 domain containing 3 (PPAPDC3), mRNA."  
"Homo sapiens peroxisome proliferator-activated receptor alpha (PPARA), transcript variant 3, mRNA."  
"Homo sapiens peroxisome proliferative activated receptor, delta (PPARD), transcript variant 1, mRNA."  
"Homo sapiens peroxisome proliferator-activated receptor gamma, coactivator 1 beta (PPARGC1B), mRNA."

"Homo sapiens phosphoribosyl pyrophosphate amidotransferase (PPAT), mRNA."  
"Homo sapiens phosphopantothenoylcysteine synthetase (PPCS), transcript variant 2, mRNA."  
"Homo sapiens pancreatic progenitor cell differentiation and proliferation factor homolog (zebrafish)  
"Homo sapiens protein tyrosine phosphatase, receptor type, f polypeptide (PTPRF), interacting |  
"Homo sapiens protein tyrosine phosphatase, receptor type, f polypeptide (PTPRF), interacting |  
"Homo sapiens protein tyrosine phosphatase, receptor type, f polypeptide (PTPRF), interacting |  
"Homo sapiens PTPRF interacting protein, binding protein 1 (liprin beta 1) (PPFIBP1), transcript  
"Homo sapiens PTPRF interacting protein, binding protein 2 (liprin beta 2) (PPFIBP2), mRNA."  
"Homo sapiens periphilin 1 (PPHLN1), transcript variant 5, mRNA."  
"Homo sapiens peptidylprolyl isomerase A (cyclophilin A) (PPIA), mRNA."  
"Homo sapiens peptidylprolyl isomerase A (cyclophilin A)-like 4A (PPIAL4A), mRNA."  
"Homo sapiens peptidylprolyl isomerase A (cyclophilin A)-like 4C (PPIAL4C), mRNA."  
"PREDICTED: Homo sapiens peptidylprolyl isomerase A (cyclophilin A) pseudogene 19 (PPIAP)  
"Homo sapiens peptidylprolyl isomerase B (cyclophilin B) (PPIB), mRNA."  
"Homo sapiens peptidylprolyl isomerase C (cyclophilin C) (PPIC), mRNA."  
"Homo sapiens peptidylprolyl isomerase E (cyclophilin E) (PPIE), transcript variant 3, mRNA."  
"Homo sapiens peptidylprolyl isomerase F (PPIF), nuclear gene encoding mitochondrial protein,  
"Homo sapiens peptidylprolyl isomerase G (cyclophilin G) (PPIG), mRNA."  
"Homo sapiens peptidylprolyl isomerase H (cyclophilin H) (PPIH), mRNA."  
"Homo sapiens peptidylprolyl isomerase (cyclophilin)-like 1 (PPIL1), mRNA."  
"Homo sapiens peptidylprolyl isomerase (cyclophilin)-like 2 (PPIL2), transcript variant 1, mRNA."  
"Homo sapiens peptidylprolyl isomerase (cyclophilin)-like 3 (PPIL3), transcript variant PPIL3c, m  
"Homo sapiens peptidylprolyl isomerase (cyclophilin)-like 5 (PPIL5), transcript variant 2, mRNA."  
"Homo sapiens peptidylprolyl isomerase (cyclophilin)-like 6 (PPIL6), mRNA."  
"Homo sapiens periplakin (PPL), mRNA."  
"Homo sapiens protein phosphatase 1B (formerly 2C), magnesium-dependent, beta isoform (PF  
"Homo sapiens protein phosphatase 1D magnesium-dependent, delta isoform (PPM1D), mRNA  
"Homo sapiens protein phosphatase 1E (PP2C domain containing) (PPM1E), mRNA."  
"Homo sapiens protein phosphatase 1H (PP2C domain containing) (PPM1H), mRNA."  
"Homo sapiens protein phosphatase 1J (PP2C domain containing) (PPM1J), mRNA."  
"Homo sapiens protein phosphatase 1K (PP2C domain containing) (PPM1K), mRNA."  
"Homo sapiens protein phosphatase 1M (PP2C domain containing) (PPM1M), mRNA."  
"Homo sapiens protein phosphatase 2C, magnesium-dependent, catalytic subunit (PPM2C), nu  
"Homo sapiens protein phosphatase methylesterase 1 (PPME1), mRNA."  
"Homo sapiens protoporphyrinogen oxidase (PPOX), nuclear gene encoding mitochondrial prote  
"Homo sapiens protein phosphatase 1, catalytic subunit, alpha isoform (PPP1CA), transcript var  
"Homo sapiens protein phosphatase 1, catalytic subunit, beta isoform (PPP1CB), transcript vari  
"Homo sapiens protein phosphatase 1, catalytic subunit, gamma isoform (PPP1CC), mRNA."  
"Homo sapiens protein phosphatase 1, regulatory (inhibitor) subunit 10 (PPP1R10), mRNA."  
"Homo sapiens protein phosphatase 1, regulatory (inhibitor) subunit 11 (PPP1R11), mRNA."  
"Homo sapiens protein phosphatase 1, regulatory (inhibitor) subunit 12A (PPP1R12A), mRNA."  
"Homo sapiens protein phosphatase 1, regulatory (inhibitor) subunit 12B (PPP1R12B), transcrip  
"Homo sapiens protein phosphatase 1, regulatory (inhibitor) subunit 12C (PPP1R12C), mRNA."  
"Homo sapiens protein phosphatase 1, regulatory (inhibitor) subunit 13B (PPP1R13B), mRNA."

"Homo sapiens protein phosphatase 1, regulatory (inhibitor) subunit 13 like (PPP1R13L), mRNA"

"Homo sapiens protein phosphatase 1, regulatory (inhibitor) subunit 14A (PPP1R14A), mRNA."

"Homo sapiens protein phosphatase 1, regulatory (inhibitor) subunit 14B (PPP1R14B), mRNA."

"Homo sapiens protein phosphatase 1, regulatory (inhibitor) subunit 14C (PPP1R14C), mRNA."

"Homo sapiens protein phosphatase 1, regulatory (inhibitor) subunit 15A (PPP1R15A), mRNA."

"Homo sapiens protein phosphatase 1, regulatory (inhibitor) subunit 15B (PPP1R15B), mRNA."

"Homo sapiens protein phosphatase 1, regulatory (inhibitor) subunit 16A (PPP1R16A), mRNA."

"Homo sapiens protein phosphatase 1, regulatory (inhibitor) subunit 16B (PPP1R16B), mRNA."

"Homo sapiens protein phosphatase 1, regulatory (inhibitor) subunit 1B (dopamine and cAMP re"

"Homo sapiens protein phosphatase 1, regulatory (inhibitor) subunit 1C (PPP1R1C), mRNA."

"Homo sapiens protein phosphatase 1, regulatory (inhibitor) subunit 2 (PPP1R2), mRNA."

"Homo sapiens protein phosphatase 1, regulatory (inhibitor) subunit 2 pseudogene 3 (PPP1R2F"

"Homo sapiens protein phosphatase 1, regulatory (inhibitor) subunit 3B (PPP1R3B), mRNA."

"Homo sapiens protein phosphatase 1, regulatory (inhibitor) subunit 3D (PPP1R3D), mRNA."

"PREDICTED: Homo sapiens protein phosphatase 1, regulatory (inhibitor) subunit 3E (PPP1R3I"

"Homo sapiens protein phosphatase 1, regulatory (inhibitor) subunit 3F (PPP1R3F), mRNA."

"Homo sapiens protein phosphatase 1, regulatory (inhibitor) subunit 7 (PPP1R7), mRNA."

"Homo sapiens protein phosphatase 1, regulatory (inhibitor) subunit 8 (PPP1R8), transcript varia"

"Homo sapiens protein phosphatase 2 (formerly 2A), catalytic subunit, alpha isoform (PPP2CA),"

"Homo sapiens protein phosphatase 2 (formerly 2A), catalytic subunit, beta isoform (PPP2CB),"

"Homo sapiens protein phosphatase 2 (formerly 2A), regulatory subunit A , alpha isoform (PPP2"

"Homo sapiens protein phosphatase 2 (formerly 2A), regulatory subunit A, beta isoform (PPP2R"

"Homo sapiens protein phosphatase 2, regulatory subunit B, delta isoform (PPP2R2D), transcrip"

"Homo sapiens protein phosphatase 2 (formerly 2A), regulatory subunit B", beta (PPP2R3B), tra"

"Homo sapiens protein phosphatase 2 (formerly 2A), regulatory subunit B", gamma (PPP2R3C),"

"Homo sapiens protein phosphatase 2A activator, regulatory subunit 4 (PPP2R4), transcript vari"

"Homo sapiens protein phosphatase 2, regulatory subunit B', alpha isoform (PPP2R5A), mRNA."

"Homo sapiens protein phosphatase 2, regulatory subunit B', beta isoform (PPP2R5B), mRNA."

"Homo sapiens protein phosphatase 2, regulatory subunit B', gamma isoform (PPP2R5C), trans"

"Homo sapiens protein phosphatase 2, regulatory subunit B', delta isoform (PPP2R5D), transcri"

"Homo sapiens protein phosphatase 2, regulatory subunit B', epsilon isoform (PPP2R5E), mRN."

"Homo sapiens protein phosphatase 3 (formerly 2B), catalytic subunit, alpha isoform (PPP3CA),"

"Homo sapiens protein phosphatase 3 (formerly 2B), catalytic subunit, beta isoform (PPP3CB),"

"Homo sapiens protein phosphatase 3 (formerly 2B), catalytic subunit, gamma isoform (PPP3C"

"Homo sapiens protein phosphatase 3 (formerly 2B), regulatory subunit B, alpha isoform (PPP3"

"Homo sapiens protein phosphatase 4 (formerly X), catalytic subunit (PPP4C), mRNA."

"Homo sapiens protein phosphatase 4, regulatory subunit 1 (PPP4R1), transcript variant 2, mRN"

"Homo sapiens protein phosphatase 4, regulatory subunit 4 (PPP4R4), transcript variant 1, mRN"

"Homo sapiens protein phosphatase 5, catalytic subunit (PPP5C), mRNA."

"Homo sapiens protein phosphatase 6, catalytic subunit (PPP6C), mRNA."

"Homo sapiens PPPDE peptidase domain containing 1 (PPPDE1), mRNA."

"Homo sapiens PPPDE peptidase domain containing 2 (PPPDE2), mRNA."

"Homo sapiens peroxisome proliferator-activated receptor gamma, coactivator-related 1 (PPRC"

"Homo sapiens palmitoyl-protein thioesterase 1 (ceroid-lipofuscinosis, neuronal 1, infantile) (PP"

"Homo sapiens PTC7 protein phosphatase homolog (S. cerevisiae) (PPTC7), mRNA."  
"Homo sapiens peptidylprolyl isomerase domain and WD repeat containing 1 (PPWD1), mRNA."  
"Homo sapiens pancreatic polypeptide (PPY), mRNA."  
"Homo sapiens polyglutamine binding protein 1 (PQBP1), transcript variant 1, mRNA."  
"Homo sapiens PQ loop repeat containing 1 (PQLC1), mRNA."  
"Homo sapiens PQ loop repeat containing 3 (PQLC3), mRNA."  
"Homo sapiens PRA1 domain family, member 2 (PRAF2), mRNA."  
"Homo sapiens homolog of rat pragma of Rnd2 (PRAGMIN), mRNA."  
"Homo sapiens preferentially expressed antigen in melanoma (PRAME), transcript variant 4, mRNA."  
"Homo sapiens PRAME family member 4 (PRAMEF4), mRNA."  
"Homo sapiens PRAME family member 9 (PRAMEF9), mRNA."  
"Homo sapiens proline-rich protein BstNI subfamily 3 (PRB3), mRNA."  
"Homo sapiens proline-rich protein BstNI subfamily 4 (PRB4), mRNA."  
"Homo sapiens protein regulator of cytokinesis 1 (PRC1), transcript variant 2, mRNA."  
"Homo sapiens papillary renal cell carcinoma (translocation-associated) (PRCC), transcript variant 1, mRNA."  
"Homo sapiens prolylcarboxypeptidase (angiotensinase C) (PRCP), transcript variant 1, mRNA."  
"Homo sapiens PR domain containing 1, with ZNF domain (PRDM1), transcript variant 2, mRNA."  
"Homo sapiens PR domain containing 10 (PRDM10), transcript variant 1, mRNA."  
"Homo sapiens PR domain containing 15 (PRDM15), transcript variant 2, mRNA."  
"Homo sapiens PR domain containing 4 (PRDM4), mRNA."  
"Homo sapiens PR domain containing 7 (PRDM7), transcript variant 1, mRNA."  
"Homo sapiens PR domain containing 8 (PRDM8), transcript variant 1, mRNA."  
"Homo sapiens peroxiredoxin 1 (PRDX1), transcript variant 2, mRNA."  
"Homo sapiens peroxiredoxin 2 (PRDX2), nuclear gene encoding mitochondrial protein, transcript variant 1, mRNA."  
"Homo sapiens peroxiredoxin 3 (PRDX3), nuclear gene encoding mitochondrial protein, transcript variant 1, mRNA."  
"Homo sapiens peroxiredoxin 4 (PRDX4), mRNA."  
"Homo sapiens peroxiredoxin 5 (PRDX5), nuclear gene encoding mitochondrial protein, transcript variant 1, mRNA."  
"Homo sapiens peroxiredoxin 6 (PRDX6), mRNA."  
"Homo sapiens prolactin regulatory element binding (PREB), mRNA."  
"Homo sapiens preimplantation protein 3 (PREI3), transcript variant 2, mRNA."  
"Homo sapiens PRELI domain containing 1 (PRELID1), mRNA."  
"Homo sapiens proline/arginine-rich end leucine-rich repeat protein (PRELP), transcript variant 1, mRNA."  
"Homo sapiens prolyl endopeptidase (PREP), mRNA."  
"Homo sapiens prolyl endopeptidase-like (PREPL), transcript variant C, mRNA."  
"Homo sapiens phosphatidylinositol-3,4,5-trisphosphate-dependent Rac exchange factor 1 (PRF1), transcript variant 1, mRNA."  
"Homo sapiens perforin 1 (pore forming protein) (PRF1), transcript variant 1, mRNA."  
"Homo sapiens proteoglycan 2, bone marrow (natural killer cell activator, eosinophil granule major surface protein) (PRG2), transcript variant C, mRNA."  
"Homo sapiens proteoglycan 4 (PRG4), transcript variant C, mRNA."  
"Homo sapiens peroxisomal proliferator-activated receptor A interacting complex 285 (PRIC285), mRNA."  
"Homo sapiens prickle homolog 1 (Drosophila) (PRICKLE1), mRNA."  
"Homo sapiens prickle homolog 2 (Drosophila) (PRICKLE2), mRNA."  
"Homo sapiens prickle homolog 4 (Drosophila) (PRICKLE4), mRNA."  
"Homo sapiens primase, DNA, polypeptide 1 (49kDa) (PRIM1), mRNA."  
"Homo sapiens primase, DNA, polypeptide 2 (58kDa) (PRIM2), mRNA."

"PREDICTED: Homo sapiens primase, polypeptide 2A, 58kDa (PRIM2A), mRNA."  
"Homo sapiens protein kinase, AMP-activated, alpha 1 catalytic subunit (PRKAA1), transcript va  
"Homo sapiens protein kinase, AMP-activated, beta 1 non-catalytic subunit (PRKAB1), mRNA."  
"Homo sapiens protein kinase, AMP-activated, beta 2 non-catalytic subunit (PRKAB2), mRNA."  
"Homo sapiens protein kinase, cAMP-dependent, catalytic, beta (PRKACB), transcript variant 3,  
"Homo sapiens protein kinase, AMP-activated, gamma 1 non-catalytic subunit (PRKAG1), trans  
"Homo sapiens protein kinase, AMP-activated, gamma 2 non-catalytic subunit (PRKAG2), trans  
"Homo sapiens protein kinase, cAMP-dependent, regulatory, type I, alpha (tissue specific exting  
"Homo sapiens protein kinase, cAMP-dependent, regulatory, type I, beta (PRKAR1B), mRNA."  
"Homo sapiens protein kinase, cAMP-dependent, regulatory, type II, beta (PRKAR2B), mRNA."  
"Homo sapiens protein kinase C, alpha (PRKCA), mRNA."  
"Homo sapiens protein kinase C, alpha binding protein (PRKCABP), mRNA."  
"Homo sapiens protein kinase C, beta (PRKCB), transcript variant 1, mRNA."  
"Homo sapiens protein kinase C, beta 1 (PRKCB1), transcript variant 1, mRNA."  
"Homo sapiens protein kinase C, delta (PRKCD), transcript variant 1, mRNA."  
"Homo sapiens protein kinase C, epsilon (PRKCE), mRNA."  
"Homo sapiens protein kinase C, eta (PRKCH), mRNA."  
"Homo sapiens protein kinase C, iota (PRKCI), mRNA."  
"Homo sapiens protein kinase C, theta (PRKCQ), mRNA."  
"Homo sapiens protein kinase C substrate 80K-H (PRKCSH), transcript variant 2, mRNA."  
"Homo sapiens protein kinase C, zeta (PRKCZ), transcript variant 2, mRNA."  
"Homo sapiens protein kinase D1 (PRKD1), mRNA."  
"Homo sapiens protein kinase D2 (PRKD2), mRNA."  
"Homo sapiens protein kinase D3 (PRKD3), mRNA."  
"Homo sapiens protein kinase, DNA-activated, catalytic polypeptide (PRKDC), transcript variant  
"Homo sapiens protein kinase, interferon-inducible double stranded RNA dependent activator (F  
"Homo sapiens protein-kinase, interferon-inducible double stranded RNA dependent inhibitor, re  
"Homo sapiens protein kinase, X-linked (PRKX), mRNA."  
"Homo sapiens protein kinase, Y-linked (PRKY), mRNA."  
"Homo sapiens prolactin (PRL), mRNA."  
"Homo sapiens prolactin releasing hormone (PRLH), mRNA."  
"Homo sapiens protamine 1 (PRM1), mRNA."  
"Homo sapiens protein arginine methyltransferase 1 (PRMT1), transcript variant 2, mRNA."  
"Homo sapiens protein arginine methyltransferase 10 (putative) (PRMT10), mRNA."  
"Homo sapiens protein arginine methyltransferase 2 (PRMT2), transcript variant 1, mRNA."  
"Homo sapiens protein arginine methyltransferase 3 (PRMT3), mRNA."  
"Homo sapiens protein arginine methyltransferase 5 (PRMT5), transcript variant 1, mRNA."  
"Homo sapiens protein arginine methyltransferase 6 (PRMT6), mRNA."  
"Homo sapiens protein arginine methyltransferase 7 (PRMT7), mRNA."  
"Homo sapiens protein arginine methyltransferase 8 (PRMT8), mRNA."  
"Homo sapiens prion protein (PRNP), transcript variant 3, mRNA."  
"PREDICTED: Homo sapiens prion protein interacting protein, transcript variant 4 (PRNPIP), mF  
"Homo sapiens protein C (inactivator of coagulation factors Va and VIIIa) (PROC), mRNA."  
"Homo sapiens protein interacting with cyclin A1 (PROCA1), mRNA."

"Homo sapiens protein C receptor, endothelial (EPCR) (PROCR), mRNA."  
"Homo sapiens prokineticin 1 (PROK1), mRNA."  
"Homo sapiens prokineticin 2 (PROK2), mRNA."  
"Homo sapiens proline rich, lacrimal 1 (PROL1), mRNA."  
"Homo sapiens prominin 1 (PROM1), mRNA."  
"Homo sapiens protein S (alpha) (PROS1), mRNA."  
"Homo sapiens ProSAPiP1 protein (ProSAPiP1), mRNA."  
"Homo sapiens proline synthetase co-transcribed homolog (bacterial) (PROSC), mRNA."  
"Homo sapiens prospero homeobox 2 (PROX2), mRNA."  
"Homo sapiens PRP18 pre-mRNA processing factor 18 homolog (S. cerevisiae) (PRPF18), mRNA."  
"Homo sapiens PRP19/PSO4 pre-mRNA processing factor 19 homolog (S. cerevisiae) (PRPF19), mRNA."  
"Homo sapiens PRP3 pre-mRNA processing factor 3 homolog (S. cerevisiae) (PRPF3), mRNA."  
"Homo sapiens PRP31 pre-mRNA processing factor 31 homolog (S. cerevisiae) (PRPF31), mRNA."  
"Homo sapiens PRP38 pre-mRNA processing factor 38 (yeast) domain containing A (PRPF38A), mRNA."  
"Homo sapiens PRP38 pre-mRNA processing factor 38 (yeast) domain containing B (PRPF38B), mRNA."  
"Homo sapiens PRP4 pre-mRNA processing factor 4 homolog (yeast) (PRPF4), mRNA."  
"Homo sapiens PRP4 pre-mRNA processing factor 4 homolog B (yeast) (PRPF4B), transcript variant 1, mRNA."  
"Homo sapiens PRP6 pre-mRNA processing factor 6 homolog (S. cerevisiae) (PRPF6), mRNA."  
"Homo sapiens PRP8 pre-mRNA processing factor 8 homolog (S. cerevisiae) (PRPF8), mRNA."  
"Homo sapiens peripherin (PRPH), mRNA."  
"Homo sapiens phosphoribosyl pyrophosphate synthetase 1 (PRPS1), mRNA."  
"Homo sapiens phosphoribosyl pyrophosphate synthetase 2 (PRPS2), transcript variant 1, mRNA."  
"Homo sapiens phosphoribosyl pyrophosphate synthetase-associated protein 1 (PRPSAP1), mRNA."  
"Homo sapiens phosphoribosyl pyrophosphate synthetase-associated protein 2 (PRPSAP2), mRNA."  
"Homo sapiens proline rich 10 (PRR10), mRNA."  
"Homo sapiens proline rich 11 (PRR11), mRNA."  
"Homo sapiens proline rich 12 (PRR12), mRNA."  
"Homo sapiens proline rich 13 (PRR13), transcript variant 3, mRNA."  
"Homo sapiens proline rich 14 (PRR14), mRNA."  
"Homo sapiens proline rich 15-like (PRR15L), mRNA."  
"Homo sapiens proline rich 16 (PRR16), mRNA."  
"Homo sapiens proline rich 17 (PRR17), mRNA."  
"Homo sapiens proline rich 19 (PRR19), mRNA."  
"Homo sapiens proline rich 20C (PRR20C), mRNA."  
"Homo sapiens proline rich 20E (PRR20E), mRNA."  
"Homo sapiens proline rich 22 (PRR22), transcript variant 2, mRNA."  
"Homo sapiens proline rich 3 (PRR3), transcript variant 2, mRNA."  
"Homo sapiens proline rich 4 (lacrimal) (PRR4), transcript variant 1, mRNA."  
"Homo sapiens proline rich 5 (renal) (PRR5), transcript variant 4, mRNA."  
"Homo sapiens proline rich 7 (synaptic) (PRR7), mRNA."  
"Homo sapiens proline rich 8 (PRR8), mRNA."  
"Homo sapiens proline-rich coiled-coil 1 (PRRC1), mRNA."  
"Homo sapiens proline rich Gla (G-carboxyglutamic acid) 2 (PRRG2), mRNA."  
"Homo sapiens proline rich Gla (G-carboxyglutamic acid) 4 (transmembrane) (PRRG4), mRNA."

"Homo sapiens proline-rich transmembrane protein 1 (PRRT1), mRNA."  
"Homo sapiens proline-rich transmembrane protein 2 (PRRT2), mRNA."  
"Homo sapiens proline-rich transmembrane protein 3 (PRRT3), mRNA."  
"Homo sapiens paired related homeobox 2 (PRRX2), mRNA."  
"Homo sapiens protease, serine, 12 (neurotrypsin, motopsin) (PRSS12), mRNA."  
"Homo sapiens protease, serine, 21 (testisin) (PRSS21), transcript variant 2, mRNA."  
"Homo sapiens protease, serine, 35 (PRSS35), mRNA."  
"Homo sapiens protease, serine, 7 (enterokinase) (PRSS7), mRNA."  
"Homo sapiens prune homolog (Drosophila) (PRUNE), mRNA."  
"Homo sapiens PTPN13-like, Y-linked (PRY), mRNA."  
"Homo sapiens prosaposin (PSAP), transcript variant 2, mRNA."  
"Homo sapiens prosaposin-like 1 (PSAPL1), mRNA."  
"Homo sapiens prostate stem cell antigen (PSCA), mRNA."  
"Homo sapiens pleckstrin homology, Sec7 and coiled-coil domains 1 (cytohesin 1) (PSCD1), tra  
"Homo sapiens pleckstrin homology, Sec7 and coiled-coil domains 2 (cytohesin-2) (PSCD2), tra  
"Homo sapiens pleckstrin homology, Sec7 and coiled-coil domains 4 (PSCD4), mRNA."  
"Homo sapiens pleckstrin homology, Sec7 and coiled-coil domains, binding protein (PSCDBP), l  
"Homo sapiens pleckstrin and Sec7 domain containing (PSD), mRNA."  
"Homo sapiens pleckstrin and Sec7 domain containing 3 (PSD3), transcript variant 2, mRNA."  
"Homo sapiens pleckstrin and Sec7 domain containing 4 (PSD4), mRNA."  
"Homo sapiens presenilin 2 (Alzheimer disease 4) (PSEN2), transcript variant 2, mRNA."  
"Homo sapiens presenilin enhancer 2 homolog (C. elegans) (PSENE2), mRNA."  
"Homo sapiens pregnancy specific beta-1-glycoprotein 2 (PSG2), mRNA."  
"Homo sapiens pregnancy specific beta-1-glycoprotein 3 (PSG3), mRNA."  
"Homo sapiens PC4 and SFRS1 interacting protein 1 (PSIP1), transcript variant 1, mRNA."  
"Homo sapiens TPTE pseudogene (psiTPTE22), non-coding RNA."  
"Homo sapiens protein serine kinase H1 (PSKH1), mRNA."  
"Homo sapiens proteasome (prosome, macropain) subunit, alpha type, 1 (PSMA1), transcript va  
"Homo sapiens proteasome (prosome, macropain) subunit, alpha type, 2 (PSMA2), mRNA."  
"Homo sapiens proteasome (prosome, macropain) subunit, alpha type, 3 (PSMA3), transcript va  
"Homo sapiens proteasome (prosome, macropain) subunit, alpha type, 4 (PSMA4), mRNA."  
"Homo sapiens proteasome (prosome, macropain) subunit, alpha type, 5 (PSMA5), mRNA."  
"Homo sapiens proteasome (prosome, macropain) subunit, alpha type, 6 (PSMA6), mRNA."  
"Homo sapiens proteasome (prosome, macropain) subunit, alpha type, 7 (PSMA7), transcript va  
"Homo sapiens proteasome (prosome, macropain) subunit, alpha type, 8 (PSMA8), transcript va  
"Homo sapiens proteasome (prosome, macropain) subunit, beta type, 10 (PSMB10), mRNA."  
"Homo sapiens proteasome (prosome, macropain) subunit, beta type, 2 (PSMB2), mRNA."  
"Homo sapiens proteasome (prosome, macropain) subunit, beta type, 3 (PSMB3), mRNA."  
"Homo sapiens proteasome (prosome, macropain) subunit, beta type, 4 (PSMB4), mRNA."  
"Homo sapiens proteasome (prosome, macropain) subunit, beta type, 5 (PSMB5), mRNA."  
"Homo sapiens proteasome (prosome, macropain) subunit, beta type, 6 (PSMB6), mRNA."  
"Homo sapiens proteasome (prosome, macropain) subunit, beta type, 7 (PSMB7), mRNA."  
"Homo sapiens proteasome (prosome, macropain) subunit, beta type, 8 (large multifunctional pe  
"Homo sapiens proteasome (prosome, macropain) subunit, beta type, 9 (large multifunctional pe



"Homo sapiens proteasome (prosome, macropain) 26S subunit, ATPase, 1 (PSMC1), mRNA."  
"Homo sapiens proteasome (prosome, macropain) 26S subunit, ATPase, 2 (PSMC2), mRNA."  
"Homo sapiens proteasome (prosome, macropain) 26S subunit, ATPase, 3 (PSMC3), mRNA."  
"Homo sapiens PSMC3 interacting protein (PSMC3IP), transcript variant 1, mRNA."  
"Homo sapiens proteasome (prosome, macropain) 26S subunit, ATPase, 4 (PSMC4), transcript  
"Homo sapiens proteasome (prosome, macropain) 26S subunit, ATPase, 5 (PSMC5), mRNA."  
"Homo sapiens proteasome (prosome, macropain) 26S subunit, ATPase, 6 (PSMC6), mRNA."  
"Homo sapiens proteasome (prosome, macropain) 26S subunit, non-ATPase, 1 (PSMD1), mRNA  
"Homo sapiens proteasome (prosome, macropain) 26S subunit, non-ATPase, 10 (PSMD10), tra  
"Homo sapiens proteasome (prosome, macropain) 26S subunit, non-ATPase, 11 (PSMD11), ml  
"PREDICTED: Homo sapiens proteasome (prosome, macropain) 26S subunit, non-ATPase, 12  
"Homo sapiens proteasome (prosome, macropain) 26S subunit, non-ATPase, 14 (PSMD14), ml  
"Homo sapiens proteasome (prosome, macropain) 26S subunit, non-ATPase, 2 (PSMD2), mRNA  
"Homo sapiens proteasome (prosome, macropain) 26S subunit, non-ATPase, 3 (PSMD3), mRNA  
"Homo sapiens proteasome (prosome, macropain) 26S subunit, non-ATPase, 4 (PSMD4), trans  
"Homo sapiens proteasome (prosome, macropain) 26S subunit, non-ATPase, 5 (PSMD5), mRNA  
"Homo sapiens proteasome (prosome, macropain) 26S subunit, non-ATPase, 6 (PSMD6), mRNA  
"Homo sapiens proteasome (prosome, macropain) 26S subunit, non-ATPase, 7 (PSMD7), mRNA  
"Homo sapiens proteasome (prosome, macropain) 26S subunit, non-ATPase, 8 (PSMD8), mRNA  
"Homo sapiens proteasome (prosome, macropain) 26S subunit, non-ATPase, 9 (PSMD9), mRNA  
"Homo sapiens proteasome (prosome, macropain) activator subunit 1 (PA28 alpha) (PSME1), tr  
"Homo sapiens proteasome (prosome, macropain) activator subunit 2 (PA28 beta) (PSME2), ml  
"Homo sapiens proteasome (prosome, macropain) activator subunit 3 (PA28 gamma; Ki) (PSME  
"Homo sapiens proteasome (prosome, macropain) inhibitor subunit 1 (PI31) (PSMF1), transcript  
"Homo sapiens proteasome (prosome, macropain) assembly chaperone 1 (PSMG1), transcript \  
"Homo sapiens proteasome (prosome, macropain) assembly chaperone 2 (PSMG2), mRNA."  
"Homo sapiens proteasome (prosome, macropain) assembly chaperone 3 (PSMG3), mRNA."  
"Homo sapiens proteasome (prosome, macropain) assembly chaperone 4 (PSMG4), transcript \  
"Homo sapiens psoriasis susceptibility 1 candidate 1 (PSORS1C1), mRNA."  
"Homo sapiens psoriasis susceptibility 1 candidate 3 (non-protein coding) (PSORS1C3), non-co  
"Homo sapiens paraspeckle component 1 (PSPC1), transcript variant beta, transcribed RNA."  
"Homo sapiens phosphoserine phosphatase (PSPH), mRNA."  
"Homo sapiens proline/serine-rich coiled-coil 1 (PSRC1), transcript variant 4, mRNA."  
"Homo sapiens phosphoserine-tRNA kinase (PSTK), mRNA."  
"Homo sapiens proline-serine-threonine phosphatase interacting protein 1 (PSTPIP1), mRNA."  
"Homo sapiens proline-serine-threonine phosphatase interacting protein 2 (PSTPIP2), mRNA."  
"Homo sapiens platelet-activating factor receptor (PTAFR), mRNA."  
"Homo sapiens protein prenyltransferase alpha subunit repeat containing 1 (PTAR1), mRNA."  
"Homo sapiens polypyrimidine tract binding protein 1 (PTBP1), transcript variant 4, mRNA."  
"Homo sapiens polypyrimidine tract binding protein 2 (PTBP2), mRNA."  
"Homo sapiens pentatricopeptide repeat domain 1 (PTCD1), mRNA."  
"Homo sapiens pentatricopeptide repeat domain 2 (PTCD2), mRNA."  
"Homo sapiens Pentatricopeptide repeat domain 3 (PTCD3), mRNA."  
"Homo sapiens patched homolog 1 (Drosophila) (PTCH1), transcript variant 1c', mRNA."

"Homo sapiens pre T-cell antigen receptor alpha (PTCRA), mRNA."  
"Homo sapiens phosphatidylserine synthase 1 (PTDSS1), mRNA."  
"Homo sapiens phosphatidylserine synthase 2 (PTDSS2), mRNA."  
"Homo sapiens phosphatase and tensin homolog (PTEN), mRNA."  
"Homo sapiens pancreas specific transcription factor, 1a (PTF1A), mRNA."  
"Homo sapiens prostaglandin D2 synthase 21kDa (brain) (PTGDS), mRNA."  
"Homo sapiens prostaglandin E receptor 4 (subtype EP4) (PTGER4), mRNA."  
"Homo sapiens prostaglandin E synthase (PTGES), mRNA."  
"Homo sapiens prostaglandin E synthase 2 (PTGES2), transcript variant 2, mRNA."  
"Homo sapiens prostaglandin E synthase 3 (cytosolic) (PTGES3), mRNA."  
"Homo sapiens prostaglandin F receptor (FP) (PTGFR), transcript variant 2, mRNA."  
"Homo sapiens prostaglandin I2 (prostacyclin) synthase (PTGIS), mRNA."  
"Homo sapiens prostaglandin reductase 1 (PTGR1), mRNA."  
"Homo sapiens prostaglandin-endoperoxide synthase 1 (prostaglandin G/H synthase and cyclooxygenase) (PTGS1), mRNA."  
"Homo sapiens parathyroid hormone 2 (PTH2), mRNA."  
"Homo sapiens parathyroid hormone 2 receptor (PTH2R), mRNA."  
"Homo sapiens PTK2 protein tyrosine kinase 2 (PTK2), transcript variant 1, mRNA."  
"Homo sapiens PTK2B protein tyrosine kinase 2 beta (PTK2B), transcript variant 3, mRNA."  
"Homo sapiens PTK7 protein tyrosine kinase 7 (PTK7), transcript variant PTK7-2, mRNA."  
"Homo sapiens PTK9 protein tyrosine kinase 9 (PTK9), transcript variant 2, mRNA."  
"Homo sapiens prothymosin, alpha (PTMA), transcript variant 1, mRNA."  
"Homo sapiens parathymosin (PTMS), mRNA."  
"Homo sapiens prostate tumor overexpressed 1 (PTOV1), mRNA."  
"PREDICTED: Homo sapiens protein tyrosine phosphatase type IVA, member 2, transcript variant 1, mRNA."  
"PREDICTED: Homo sapiens protein tyrosine phosphatase type IVA, member 3, transcript variant 1, mRNA."  
"Homo sapiens protein tyrosine phosphatase-like (proline instead of catalytic arginine), member 1 (PTPLA1), mRNA."  
"Homo sapiens protein tyrosine phosphatase-like A domain containing 1 (PTPLAD1), mRNA."  
"Homo sapiens protein tyrosine phosphatase-like (proline instead of catalytic arginine), member 2 (PTPLA2), mRNA."  
"Homo sapiens protein tyrosine phosphatase, mitochondrial 1 (PTPMT1), nuclear gene encoding mitochondrial protein, mRNA."  
"Homo sapiens protein tyrosine phosphatase, non-receptor type 1 (PTPN1), mRNA."  
"Homo sapiens protein tyrosine phosphatase, non-receptor type 11 (PTPN11), mRNA."  
"Homo sapiens protein tyrosine phosphatase, non-receptor type 12 (PTPN12), mRNA."  
"Homo sapiens protein tyrosine phosphatase, non-receptor type 18 (brain-derived) (PTPN18), mRNA."  
"Homo sapiens protein tyrosine phosphatase, non-receptor type 2 (PTPN2), transcript variant 1, mRNA."  
"PREDICTED: Homo sapiens protein tyrosine phosphatase, non-receptor type 20 (PTPN20), mRNA."  
"Homo sapiens protein tyrosine phosphatase, non-receptor type 21 (PTPN21), mRNA."  
"Homo sapiens protein tyrosine phosphatase, non-receptor type 22 (lymphoid) (PTPN22), transcript variant 1, mRNA."  
"Homo sapiens protein tyrosine phosphatase, non-receptor type 3 (PTPN3), mRNA."  
"Homo sapiens protein tyrosine phosphatase, non-receptor type 4 (megakaryocyte) (PTPN4), mRNA."  
"Homo sapiens protein tyrosine phosphatase, non-receptor type 6 (PTPN6), transcript variant 2, mRNA."  
"Homo sapiens protein tyrosine phosphatase, non-receptor type 7 (PTPN7), transcript variant 2, mRNA."  
"PREDICTED: Homo sapiens protein tyrosine phosphatase, non-receptor type 9 (PTPN9), mRNA."  
"Homo sapiens protein tyrosine phosphatase, receptor type, A (PTPRA), transcript variant 1, mRNA."  
"Homo sapiens protein tyrosine phosphatase, receptor type, C (PTPRC), transcript variant 1, mRNA."

"Homo sapiens protein tyrosine phosphatase, receptor type, C-associated protein (PTPRCAP),  
"Homo sapiens protein tyrosine phosphatase, receptor type, E (PTPRE), transcript variant 2, mF  
"Homo sapiens protein tyrosine phosphatase, receptor type, F (PTPRF), transcript variant 2, mF  
"Homo sapiens protein tyrosine phosphatase, receptor type, G (PTPRG), mRNA."  
"Homo sapiens protein tyrosine phosphatase, receptor type, H (PTPRH), mRNA."  
"Homo sapiens protein tyrosine phosphatase, receptor type, J (PTPRJ), mRNA."  
"Homo sapiens protein tyrosine phosphatase, receptor type, O (PTPRO), transcript variant 5, mF  
"Homo sapiens protein tyrosine phosphatase, receptor type, U (PTPRU), transcript variant 3, mF  
"Homo sapiens protein tyrosine phosphatase, receptor type, V (pseudogene) (PTPRV), non-cod  
"Homo sapiens polymerase I and transcript release factor (PTRF), mRNA."  
"Homo sapiens peptidyl-tRNA hydrolase 1 homolog (*S. cerevisiae*) (PTRH1), mRNA."  
"Homo sapiens peptidyl-tRNA hydrolase 2 (PTRH2), nuclear gene encoding mitochondrial prote  
"Homo sapiens 6-pyruvoyltetrahydropterin synthase (PTS), mRNA."  
"Homo sapiens pituitary tumor-transforming 1 (PTTG1), mRNA."  
"Homo sapiens pituitary tumor-transforming 1 interacting protein (PTTG1IP), mRNA."  
"Homo sapiens pituitary tumor-transforming 3 (pseudogene) (PTTG3P), non-coding RNA."  
"Homo sapiens poly-U binding splicing factor 60kDa (PUF60), transcript variant 2, mRNA."  
"Homo sapiens pumilio homolog 1 (*Drosophila*) (PUM1), transcript variant 1, mRNA."  
"Homo sapiens pumilio homolog 2 (*Drosophila*) (PUM2), mRNA."  
"Homo sapiens purine-rich element binding protein A (PURA), mRNA."  
"Homo sapiens purine-rich element binding protein B (PURB), mRNA."  
"Homo sapiens pseudouridylate synthase 1 (PUS1), transcript variant 2, mRNA."  
"Homo sapiens pseudouridylate synthase 10 (PUS10), mRNA."  
"Homo sapiens pseudouridylate synthase 3 (PUS3), mRNA."  
"Homo sapiens pseudouridylate synthase 7 homolog (*S. cerevisiae*) (PUS7), mRNA."  
"Homo sapiens pseudouridylate synthase 7 homolog (*S. cerevisiae*)-like (PUS7L), transcript var  
"Homo sapiens pseudouridylate synthase-like 1 (PUSL1), mRNA."  
"Homo sapiens poliovirus receptor (PVR), mRNA."  
"Homo sapiens poliovirus receptor related immunoglobulin domain containing (PVRIG), mRNA."  
"Homo sapiens poliovirus receptor-related 2 (herpesvirus entry mediator B) (PVRL2), transcript  
"Homo sapiens poliovirus receptor-related 3 (PVRL3), mRNA."  
"Homo sapiens Pvt1 oncogene (non-protein coding) (PVT1), non-coding RNA."  
"Homo sapiens PWP1 homolog (*S. cerevisiae*) (PWP1), mRNA."  
"Homo sapiens PWP2 periodic tryptophan protein homolog (yeast) (PWP2), mRNA."  
"PREDICTED: Homo sapiens PWWP domain containing 2 (PWWP2), mRNA."  
"Homo sapiens PWWP domain containing 2A (PWWP2A), mRNA."  
"Homo sapiens PWWP domain containing 2B (PWWP2B), transcript variant 1, mRNA."  
"Homo sapiens peroxidasin homolog (*Drosophila*) (PXDN), mRNA. XM\_935183 XM\_935184 XM  
"Homo sapiens PX domain containing serine/threonine kinase (PXK), mRNA."  
"PREDICTED: Homo sapiens peroxisomal membrane protein 2, 22kDa (PXMP2), mRNA."  
"Homo sapiens peroxisomal membrane protein 3, 35kDa (PXMP3), transcript variant 1, mRNA."  
"Homo sapiens peroxisomal membrane protein 4, 24kDa (PXMP4), transcript variant 2, mRNA."  
"Homo sapiens paxillin (PXN), mRNA."  
"Homo sapiens PYD and CARD domain containing (PYCARD), transcript variant 1, mRNA."

"Homo sapiens pyrroline-5-carboxylate reductase 1 (PYCR1), transcript variant 1, mRNA."  
"Homo sapiens pyrroline-5-carboxylate reductase family, member 2 (PYCR2), mRNA."  
"Homo sapiens pyrroline-5-carboxylate reductase-like (PYCRL), mRNA."  
"Homo sapiens pyrin domain containing 2 (PYDC2), mRNA."  
"Homo sapiens phosphorylase, glycogen; brain (PYGB), mRNA."  
"Homo sapiens phosphorylase, glycogen, liver (PYGL), mRNA."  
"Homo sapiens pygopus homolog 1 (Drosophila) (PYGO1), mRNA."  
"Homo sapiens pygopus homolog 2 (Drosophila) (PYGO2), mRNA."  
"Homo sapiens pyrin and HIN domain family, member 1 (PYHIN1), transcript variant b2, mRNA."  
"Homo sapiens pyridine nucleotide-disulphide oxidoreductase domain 1 (PYROXD1), mRNA."  
"Homo sapiens pregnancy-zone protein (PZP), mRNA."  
"Homo sapiens glutaminyl-tRNA synthetase (QARS), mRNA."  
"Homo sapiens quinoid dihydropteridine reductase (QDPR), mRNA."  
"PREDICTED: Homo sapiens quaking homolog, KH domain RNA binding (mouse), transcript va  
"Homo sapiens glutaminyl-peptide cyclotransferase (QPCT), mRNA."  
"Homo sapiens glutaminyl-peptide cyclotransferase-like (QPCTL), mRNA."  
"Homo sapiens quinolinate phosphoribosyltransferase (QPRT), mRNA."  
"Homo sapiens pyroglutamylated RFamide peptide receptor (QRFPR), mRNA."  
"Homo sapiens glutamine-rich 1 (QRICH1), transcript variant 1, mRNA."  
"Homo sapiens glutamine rich 2 (QRICH2), mRNA."  
"Homo sapiens glutaminyl-tRNA synthase (glutamine-hydrolyzing)-like 1 (QRSL1), mRNA."  
"Homo sapiens quiescin Q6 sulfhydryl oxidase 1 (QSOX1), transcript variant 1, mRNA."  
"Homo sapiens quiescin Q6 sulfhydryl oxidase 2 (QSOX2), mRNA."  
"Homo sapiens queuine tRNA-ribosyltransferase 1 (QTRT1), mRNA."  
"Homo sapiens queuine tRNA-ribosyltransferase domain containing 1 (QTRTD1), mRNA."  
"PREDICTED: Homo sapiens R3H domain and coiled-coil containing 1 (R3HCC1), mRNA."  
"Homo sapiens R3H domain containing 1 (R3HDM1), mRNA."  
"Homo sapiens R3H domain containing 2 (R3HDM2), mRNA."  
"Homo sapiens RAB10, member RAS oncogene family (RAB10), mRNA."  
"Homo sapiens RAB11A, member RAS oncogene family (RAB11A), mRNA."  
"Homo sapiens RAB11B, member RAS oncogene family (RAB11B), mRNA."  
"Homo sapiens RAB11 family interacting protein 1 (class I) (RAB11FIP1), transcript variant 2, m  
"Homo sapiens RAB11 family interacting protein 2 (class I) (RAB11FIP2), mRNA."  
"Homo sapiens RAB11 family interacting protein 3 (class II) (RAB11FIP3), mRNA."  
"Homo sapiens RAB11 family interacting protein 4 (class II) (RAB11FIP4), mRNA."  
"Homo sapiens RAB11 family interacting protein 5 (class I) (RAB11FIP5), mRNA."  
"Homo sapiens RAB12, member RAS oncogene family (RAB12), mRNA."  
"Homo sapiens RAB13, member RAS oncogene family (RAB13), mRNA."  
"Homo sapiens RAB15, member RAS oncogene family (RAB15), mRNA."  
"Homo sapiens RAB17, member RAS oncogene family (RAB17), mRNA."  
"Homo sapiens RAB1A, member RAS oncogene family (RAB1A), mRNA."  
"Homo sapiens RAB1B, member RAS oncogene family (RAB1B), mRNA."  
"PREDICTED: Homo sapiens small GTP-binding protein, transcript variant 1 (rab1c), mRNA."  
"Homo sapiens RAB20, member RAS oncogene family (RAB20), mRNA."

"Homo sapiens RAB21, member RAS oncogene family (RAB21), mRNA."  
"Homo sapiens RAB22A, member RAS oncogene family (RAB22A), mRNA."  
"Homo sapiens RAB23, member RAS oncogene family (RAB23), transcript variant 2, mRNA."  
"Homo sapiens RAB24, member RAS oncogene family (RAB24), transcript variant 1, mRNA."  
"Homo sapiens RAB25, member RAS oncogene family (RAB25), mRNA."  
"Homo sapiens RAB26, member RAS oncogene family (RAB26), mRNA."  
"Homo sapiens RAB28, member RAS oncogene family (RAB28), transcript variant 1, mRNA."  
"Homo sapiens RAB2B, member RAS oncogene family (RAB2B), mRNA."  
"Homo sapiens RAB30, member RAS oncogene family (RAB30), mRNA."  
"Homo sapiens RAB31, member RAS oncogene family (RAB31), mRNA."  
"Homo sapiens RAB33A, member RAS oncogene family (RAB33A), mRNA."  
"Homo sapiens RAB33B, member RAS oncogene family (RAB33B), mRNA."  
"Homo sapiens RAB34, member RAS oncogene family (RAB34), mRNA."  
"Homo sapiens RAB37, member RAS oncogene family (RAB37), transcript variant 3, mRNA."  
"Homo sapiens RAB38, member RAS oncogene family (RAB38), mRNA."  
"Homo sapiens RAB39B, member RAS oncogene family (RAB39B), mRNA."  
"Homo sapiens RAB3A, member RAS oncogene family (RAB3A), mRNA."  
"Homo sapiens RAB3B, member RAS oncogene family (RAB3B), mRNA."  
"Homo sapiens RAB3C, member RAS oncogene family (RAB3C), mRNA."  
"Homo sapiens RAB3D, member RAS oncogene family (RAB3D), mRNA."  
"Homo sapiens RAB3 GTPase activating protein subunit 2 (non-catalytic) (RAB3GAP2), mRNA."  
"Homo sapiens RAB3A interacting protein (rabin3) (RAB3IP), transcript variant beta 1, mRNA."  
"Homo sapiens RAB40B, member RAS oncogene family (RAB40B), mRNA."  
"Homo sapiens RAB40C, member RAS oncogene family (RAB40C), mRNA."  
"Homo sapiens RAB42, member RAS oncogene family (RAB42), mRNA."  
"Homo sapiens RAB43, member RAS oncogene family (RAB43), mRNA."  
"Homo sapiens RAB4A, member RAS oncogene family (RAB4A), mRNA."  
"Homo sapiens RAB4B, member RAS oncogene family (RAB4B), mRNA."  
"Homo sapiens RAB5A, member RAS oncogene family (RAB5A), mRNA."  
"Homo sapiens RAB5B, member RAS oncogene family (RAB5B), mRNA."  
"Homo sapiens RAB5C, member RAS oncogene family (RAB5C), transcript variant 1, mRNA."  
"Homo sapiens RAB6A, member RAS oncogene family (RAB6A), transcript variant 1, mRNA."  
"Homo sapiens RAB6B, member RAS oncogene family (RAB6B), mRNA."  
"Homo sapiens RAB7A, member RAS oncogene family (RAB7A), mRNA."  
"Homo sapiens RAB7, member RAS oncogene family-like 1 (RAB7L1), mRNA."  
"Homo sapiens RAB8A, member RAS oncogene family (RAB8A), mRNA."  
"Homo sapiens RAB8B, member RAS oncogene family (RAB8B), mRNA."  
"Homo sapiens RAB9A, member RAS oncogene family (RAB9A), mRNA."  
"Homo sapiens Rab acceptor 1 (prenylated) (RABAC1), mRNA."  
"Homo sapiens rabaptin, RAB GTPase binding effector protein 1 (RABEP1), transcript variant 2  
"Homo sapiens rabaptin, RAB GTPase binding effector protein 2 (RABEP2), mRNA."  
"Homo sapiens Rab9 effector protein with kelch motifs (RABEPK), mRNA."  
"Homo sapiens RAB GTPase activating protein 1 (RABGAP1), mRNA."  
"Homo sapiens RAB GTPase activating protein 1-like (RABGAP1L), transcript variant 2, mRNA."

"Homo sapiens RAB guanine nucleotide exchange factor (GEF) 1 (RABGEF1), mRNA."  
"Homo sapiens Rab geranylgeranyltransferase, alpha subunit (RABGGTA), transcript variant 1,  
"Homo sapiens Rab geranylgeranyltransferase, beta subunit (RABGGTB), mRNA."  
"Homo sapiens RAB, member of RAS oncogene family-like 2A (RABL2A), transcript variant 2, n  
"Homo sapiens RAB, member of RAS oncogene family-like 2B (RABL2B), transcript variant 1, n  
"Homo sapiens RAB, member of RAS oncogene family-like 3 (RABL3), mRNA."  
"Homo sapiens RAB, member of RAS oncogene family-like 4 (RABL4), mRNA."  
"Homo sapiens RAB, member RAS oncogene family-like 5 (RABL5), mRNA."  
"Homo sapiens ras-related C3 botulinum toxin substrate 1 (rho family, small GTP binding proteir  
"Homo sapiens ras-related C3 botulinum toxin substrate 2 (rho family, small GTP binding proteir  
"Homo sapiens ras-related C3 botulinum toxin substrate 3 (rho family, small GTP binding proteir  
"Homo sapiens Rac GTPase activating protein 1 (RACGAP1), mRNA."  
"Homo sapiens RAD1 homolog (S. pombe) (RAD1), transcript variant 3, mRNA."  
"Homo sapiens RAD17 homolog (S. pombe) (RAD17), transcript variant 8, mRNA."  
"Homo sapiens RAD18 homolog (S. cerevisiae) (RAD18), mRNA."  
"Homo sapiens RAD21 homolog (S. pombe) (RAD21), mRNA."  
"Homo sapiens RAD23 homolog A (S. cerevisiae) (RAD23A), mRNA."  
"Homo sapiens RAD23 homolog B (S. cerevisiae) (RAD23B), mRNA."  
"Homo sapiens RAD51 homolog (RecA homolog, E. coli) (S. cerevisiae) (RAD51), transcript var  
"Homo sapiens RAD51 associated protein 1 (RAD51AP1), mRNA."  
"Homo sapiens RAD51 associated protein 2 (RAD51AP2), mRNA."  
"Homo sapiens RAD51 homolog C (S. cerevisiae) (RAD51C), transcript variant 1, mRNA."  
"Homo sapiens RAD51-like 3 (S. cerevisiae) (RAD51L3), transcript variant 1, mRNA."  
"Homo sapiens RAD54 homolog B (S. cerevisiae) (RAD54B), mRNA."  
"Homo sapiens RAD54-like (S. cerevisiae) (RAD54L), mRNA."  
"Homo sapiens RAD54-like 2 (S. cerevisiae) (RAD54L2), mRNA."  
"Homo sapiens RAD9 homolog A (S. pombe) (RAD9A), mRNA."  
"Homo sapiens Ras association and DIL domains (RADIL), mRNA."  
"Homo sapiens RAE1 RNA export 1 homolog (S. pombe) (RAE1), transcript variant 1, mRNA."  
"Homo sapiens retinoic acid early transcript 1E (RAET1E), mRNA."  
"Homo sapiens retinoic acid early transcript 1G (RAET1G), mRNA."  
"Homo sapiens v-raf-1 murine leukemia viral oncogene homolog 1 (RAF1), mRNA."  
"Homo sapiens recombination activating gene 1 (RAG1), mRNA."  
"Homo sapiens recombination activating gene 1 activating protein 1 (RAG1AP1), mRNA."  
"Homo sapiens renal tumor antigen (RAGE), mRNA."  
"Homo sapiens retinoic acid induced 1 (RAI1), mRNA."  
"Homo sapiens retinoic acid induced 2 (RAI2), mRNA."  
"Homo sapiens v-ral simian leukemia viral oncogene homolog A (ras related) (RALA), mRNA."  
"Homo sapiens v-ral simian leukemia viral oncogene homolog B (ras related; GTP binding prote  
"Homo sapiens ralA binding protein 1 (RALBP1), mRNA."  
"Homo sapiens Ral GTPase activating protein, alpha subunit 1 (catalytic) (RALGAPA1), transcri  
"Homo sapiens Ral GTPase activating protein, beta subunit (non-catalytic) (RALGAPB), mRNA."  
"Homo sapiens Ral GEF with PH domain and SH3 binding motif 1 (RALGPS1), mRNA."  
"Homo sapiens Ral GEF with PH domain and SH3 binding motif 2 (RALGPS2), transcript varian

"Homo sapiens RNA binding protein, autoantigenic (hnRNP-associated with lethal yellow homolog)"

"Homo sapiens receptor (G protein-coupled) activity modifying protein 1 (RAMP1), mRNA."

"Homo sapiens receptor (calcitonin) activity modifying protein 2 (RAMP2), mRNA."

"Homo sapiens receptor (G protein-coupled) activity modifying protein 3 (RAMP3), mRNA."

"Homo sapiens RAN, member RAS oncogene family (RAN), mRNA."

"Homo sapiens RAN binding protein 1 (RANBP1), mRNA."

"Homo sapiens RAN binding protein 10 (RANBP10), mRNA."

"Homo sapiens RAN binding protein 2 (RANBP2), mRNA."

"Homo sapiens RAN binding protein 3 (RANBP3), transcript variant RANBP3-c, mRNA."

"Homo sapiens RAN binding protein 3-like (RANBP3L), mRNA."

"Homo sapiens RAN binding protein 6 (RANBP6), transcript variant 1, mRNA."

"Homo sapiens Ran GTPase activating protein 1 (RANGAP1), mRNA."

"Homo sapiens RAN guanine nucleotide release factor (RANGRF), mRNA."

"Homo sapiens RAP1B, member of RAS oncogene family (RAP1B), transcript variant 1, mRNA."

"Homo sapiens hCG1757335 (RAP1BL), mRNA."

"Homo sapiens RAP1 GTPase activating protein (RAP1GAP), mRNA."

"Homo sapiens RAP2A, member of RAS oncogene family (RAP2A), mRNA."

"Homo sapiens RAP2C, member of RAS oncogene family (RAP2C), mRNA."

"Homo sapiens Rap guanine nucleotide exchange factor (GEF) 1 (RAPGEF1), transcript variant"

"Homo sapiens Rap guanine nucleotide exchange factor (GEF) 2 (RAPGEF2), mRNA. XM\_944"

"Homo sapiens Rap guanine nucleotide exchange factor (GEF) 5 (RAPGEF5), mRNA."

"Homo sapiens Rap guanine nucleotide exchange factor (GEF) 6 (RAPGEF6), mRNA."

"Homo sapiens Rap guanine nucleotide exchange factor (GEF)-like 1 (RAPGEFL1), mRNA."

"Homo sapiens retinoic acid receptor, alpha (RARA), transcript variant 2, mRNA."

"Homo sapiens retinoic acid receptor responder (tazarotene induced) 3 (RARRES3), mRNA."

"Homo sapiens arginyl-tRNA synthetase (RARS), mRNA."

"Homo sapiens arginyl-tRNA synthetase 2, mitochondrial (RARS2), nuclear gene encoding mito"

"Homo sapiens RAS p21 protein activator (GTPase activating protein) 1 (RASA1), transcript var"

"Homo sapiens RAS p21 protein activator 2 (RASA2), mRNA."

"Homo sapiens RAS p21 protein activator 4 (RASA4), transcript variant 1, mRNA."

"Homo sapiens RAS protein activator like 1 (GAP1 like) (RASAL1), mRNA."

"Homo sapiens RAS protein activator like 3 (RASAL3), mRNA."

"Homo sapiens RAS, dexamethasone-induced 1 (RASD1), mRNA."

"Homo sapiens RASD family, member 2 (RASD2), mRNA."

"Homo sapiens RasGEF domain family, member 1B (RASGEF1B), mRNA."

"Homo sapiens RAS guanyl releasing protein 1 (calcium and DAG-regulated) (RASGRP1), mRN"

"Homo sapiens RAS guanyl releasing protein 2 (calcium and DAG-regulated) (RASGRP2), trans"

"Homo sapiens RAS guanyl releasing protein 3 (calcium and DAG-regulated) (RASGRP3), mRN"

"Homo sapiens Ras interacting protein 1 (RASIP1), mRNA."

"Homo sapiens RAS-like, family 10, member A (RASL10A), transcript variant 2, mRNA."

"Homo sapiens RAS-like, family 10, member B (RASL10B), mRNA."

"Homo sapiens RAS-like, family 11, member A (RASL11A), mRNA."

"Homo sapiens RAS-like, family 11, member B (RASL11B), mRNA."

"Homo sapiens Ras association (RalGDS/AF-6) domain family 1 (RASSF1), transcript variant B,

"Homo sapiens Ras association (RalGDS/AF-6) domain family 2 (RASSF2), transcript variant 1, mRNA."

"Homo sapiens Ras association (RalGDS/AF-6) domain family member 3 (RASSF3), mRNA."

"Homo sapiens Ras association (RalGDS/AF-6) domain family member 4 (RASSF4), mRNA."

"Homo sapiens Ras association (RalGDS/AF-6) domain family member 5 (RASSF5), transcript variant 1, mRNA."

"Homo sapiens Ras association (RalGDS/AF-6) domain family member 6 (RASSF6), transcript variant 1, mRNA."

"Homo sapiens Ras association (RalGDS/AF-6) domain family (N-terminal) member 7 (RASSF7), mRNA."

"Homo sapiens RAVER1 (RAVER1), mRNA."

"Homo sapiens ribonucleoprotein, PTB-binding 2 (RAVER2), mRNA."

"Homo sapiens retina and anterior neural fold homeobox (RAX), mRNA."

"Homo sapiens retina and anterior neural fold homeobox like 1 (RAXL1), mRNA."

"Homo sapiens retinoblastoma 1 (RB1), mRNA."

"Homo sapiens RB1-inducible coiled-coil 1 (RB1CC1), transcript variant 2, mRNA."

"Homo sapiens RB-associated KRAB zinc finger (RBAK), mRNA."

"Homo sapiens retinoblastoma binding protein 4 (RBBP4), mRNA."

"Homo sapiens retinoblastoma binding protein 5 (RBBP5), mRNA."

"Homo sapiens retinoblastoma binding protein 6 (RBBP6), transcript variant 3, mRNA."

"Homo sapiens retinoblastoma binding protein 7 (RBBP7), mRNA."

"Homo sapiens retinoblastoma binding protein 8 (RBBP8), transcript variant 1, mRNA."

"Homo sapiens retinoblastoma binding protein 9 (RBBP9), mRNA."

"Homo sapiens RanBP-type and C3HC4-type zinc finger containing 1 (RBCK1), transcript variant 1, mRNA."

"Homo sapiens RNA binding motif and ELMO/CED-12 domain 1 (RBED1), mRNA."

"Homo sapiens ribokinase (RBKS), mRNA."

"Homo sapiens retinoblastoma-like 1 (p107) (RBL1), transcript variant 1, mRNA."

"Homo sapiens retinoblastoma-like 2 (p130) (RBL2), mRNA."

"PREDICTED: Homo sapiens similar to RNA binding motif protein, Y chromosome, family 2 member 1, mRNA."

"Homo sapiens RNA binding motif protein 10 (RBM10), transcript variant 1, mRNA."

"Homo sapiens RNA binding motif protein 11 (RBM11), mRNA."

"Homo sapiens RNA binding motif protein 12 (RBM12), transcript variant 1, mRNA."

"Homo sapiens RNA binding motif protein 12B (RBM12B), mRNA."

"Homo sapiens RNA binding motif protein 14 (RBM14), mRNA."

"Homo sapiens RNA binding motif protein 15 (RBM15), mRNA."

"Homo sapiens RNA binding motif protein 15B (RBM15B), mRNA."

"Homo sapiens RNA binding motif protein 16 (RBM16), mRNA."

"Homo sapiens RNA binding motif protein 17 (RBM17), mRNA."

"Homo sapiens RNA binding motif protein 18 (RBM18), mRNA."

"PREDICTED: Homo sapiens RNA binding motif protein 19, transcript variant 4 (RBM19), mRNA."

"PREDICTED: Homo sapiens RNA binding motif protein 20 (RBM20), mRNA."

"Homo sapiens RNA binding motif protein 22 (RBM22), mRNA."

"Homo sapiens RNA binding motif protein 23 (RBM23), transcript variant 2, mRNA."

"Homo sapiens RNA binding motif protein 24 (RBM24), mRNA."

"Homo sapiens RNA binding motif protein 25 (RBM25), mRNA."

"Homo sapiens RNA binding motif protein 26 (RBM26), mRNA."

"Homo sapiens RNA binding motif protein 27 (RBM27), mRNA."

"Homo sapiens RNA binding motif protein 28 (RBM28), mRNA."



"Homo sapiens RNA binding motif (RNP1, RRM) protein 3 (RBM3), transcript variant 2, mRNA."  
"Homo sapiens RNA binding motif protein 33 (RBM33), transcript variant 1, mRNA."  
"Homo sapiens RNA binding motif protein 34 (RBM34), mRNA."  
"Homo sapiens RNA binding motif protein 38 (RBM38), transcript variant 2, mRNA."  
"Homo sapiens RNA binding motif protein 39 (RBM39), transcript variant 2, mRNA."  
"Homo sapiens RNA binding motif protein 4 (RBM4), mRNA."  
"Homo sapiens RNA binding motif protein 41 (RBM41), mRNA."  
"Homo sapiens RNA binding motif protein 42 (RBM42), mRNA."  
"Homo sapiens RNA binding motif protein 45 (RBM45), mRNA."  
"Homo sapiens RNA binding motif protein 47 (RBM47), transcript variant 1, mRNA."  
"Homo sapiens RNA binding motif protein 4B (RBM4B), mRNA."  
"Homo sapiens RNA binding motif protein 5 (RBM5), mRNA."  
"Homo sapiens RNA binding motif protein 6 (RBM6), mRNA."  
"Homo sapiens RNA binding motif protein 7 (RBM7), mRNA."  
"Homo sapiens RNA binding motif protein 8A (RBM8A), mRNA."  
"Homo sapiens RNA binding motif protein 9 (RBM9), transcript variant 3, mRNA."  
"Homo sapiens RNA binding motif, single stranded interacting protein 1 (RBMS1), transcript var  
"Homo sapiens RNA binding motif, single stranded interacting protein 2 (RBMS2), mRNA."  
"PREDICTED: Homo sapiens misc\_RNA (RBMS2P), miscRNA."  
"Homo sapiens RNA binding motif protein, X-linked (RBMX), mRNA."  
"Homo sapiens RNA binding motif protein, X-linked 2 (RBMX2), mRNA."  
"Homo sapiens RNA binding motif protein, Y-linked, family 1, member E (RBM1E), mRNA."  
"Homo sapiens RNA binding motif protein, Y-linked, family 2, member F pseudogene (RBM2F)  
"Homo sapiens RNA binding motif protein, Y-linked, family 3, member A pseudogene (RBM3A)  
"Homo sapiens retinol binding protein 4, plasma (RBP4), mRNA."  
"Homo sapiens retinol binding protein 5, cellular (RBP5), mRNA."  
"Homo sapiens retinol binding protein 7, cellular (RBP7), mRNA."  
"Homo sapiens recombination signal binding protein for immunoglobulin kappa J region (RBPJ),  
"Homo sapiens RNA binding protein with multiple splicing 2 (RBPMS2), mRNA."  
"Homo sapiens ring-box 1 (RBX1), mRNA."  
"Homo sapiens ring finger and CCCH-type zinc finger domains 2 (RC3H2), mRNA."  
"PREDICTED: Homo sapiens similar to Alcohol dehydrogenase class III chi chain (Glutathione-c  
"Homo sapiens regulator of calcineurin 1 (RCAN1), transcript variant 3, mRNA."  
"Homo sapiens regulator of calcineurin 2 (RCAN2), mRNA."  
"Homo sapiens RCAN family member 3 (RCAN3), mRNA."  
"Homo sapiens regulator of chromosome condensation (RCC1) and BTB (POZ) domain contain  
"Homo sapiens regulator of chromosome condensation (RCC1) and BTB (POZ) domain contain  
"Homo sapiens regulator of chromosome condensation 1 (RCC1), transcript variant 3, mRNA."  
"Homo sapiens regulator of chromosome condensation 2 (RCC2), mRNA."  
"Homo sapiens RCC1 domain containing 1 (RCCD1), transcript variant 1, mRNA."  
"Homo sapiens RCE1 homolog, prenyl protein peptidase (*S. cerevisiae*) (RCE1), transcript varia  
"Homo sapiens ring finger and CHY zinc finger domain containing 1 (RCHY1), transcript variant  
"Homo sapiens RNA terminal phosphate cyclase-like 1 (RCL1), mRNA."  
"Homo sapiens reticulocalbin 3, EF-hand calcium binding domain (RCN3), mRNA."

"Homo sapiens REST corepressor 1 (RCOR1), mRNA."  
"Homo sapiens REST corepressor 2 (RCOR2), mRNA."  
"Homo sapiens REST corepressor 3 (RCOR3), mRNA."  
"Homo sapiens calcitonin gene-related peptide-receptor component protein (RCP9), mRNA."  
"Homo sapiens RCSD domain containing 1 (RCSD1), mRNA."  
"Homo sapiens RD RNA binding protein (RDBP), mRNA."  
"Homo sapiens retinol dehydrogenase 10 (all-trans) (RDH10), mRNA."  
"Homo sapiens retinol dehydrogenase 11 (all-trans/9-cis/11-cis) (RDH11), mRNA."  
"Homo sapiens retinol dehydrogenase 13 (all-trans/9-cis) (RDH13), mRNA."  
"Homo sapiens retinol dehydrogenase 5 (11-cis/9-cis) (RDH5), mRNA."  
"Homo sapiens retinol dehydrogenase 8 (all-trans) (RDH8), mRNA."  
"Homo sapiens RAD52 motif 1 (RDM1), transcript variant 2, mRNA."  
"Homo sapiens radixin (RDX), mRNA."  
"Homo sapiens REC8 homolog (yeast) (REC8), transcript variant 1, mRNA."  
"Homo sapiens reversion-inducing-cysteine-rich protein with kazal motifs (RECK), mRNA."  
"Homo sapiens RecQ protein-like (DNA helicase Q1-like) (RECQL), transcript variant 2, mRNA."  
"Homo sapiens RecQ protein-like 4 (RECQL4), mRNA."  
"Homo sapiens RecQ protein-like 5 (RECQL5), transcript variant 1, mRNA."  
"Homo sapiens receptor accessory protein 1 (REEP1), mRNA."  
"Homo sapiens receptor accessory protein 2 (REEP2), mRNA."  
"Homo sapiens receptor accessory protein 3 (REEP3), mRNA."  
"Homo sapiens receptor accessory protein 4 (REEP4), mRNA."  
"Homo sapiens receptor accessory protein 5 (REEP5), mRNA."  
"Homo sapiens receptor accessory protein 6 (REEP6), mRNA."  
"Homo sapiens v-rel reticuloendotheliosis viral oncogene homolog (avian) (REL), mRNA."  
"Homo sapiens v-rel reticuloendotheliosis viral oncogene homolog A (avian) (RELA), mRNA."  
"Homo sapiens v-rel reticuloendotheliosis viral oncogene homolog B (RELB), mRNA."  
"Homo sapiens RELT-like 1 (RELL1), transcript variant 1, mRNA."  
"Homo sapiens RELT-like 2 (RELL2), mRNA."  
"Homo sapiens RAS (RAD and GEM)-like GTP binding 2 (REM2), mRNA."  
"Homo sapiens renin binding protein (RENBP), mRNA."  
"Homo sapiens RAB15 effector protein (REP15), mRNA."  
"Homo sapiens replication initiator 1 (REPIN1), transcript variant 2, mRNA."  
"Homo sapiens RALBP1 associated Eps domain containing 2 (REPS2), transcript variant 2, mRNA."  
"Homo sapiens RER1 retention in endoplasmic reticulum 1 homolog (S. cerevisiae) (RER1), mRNA."  
"Homo sapiens arginine-glutamic acid dipeptide (RE) repeats (RERE), transcript variant 1, mRNA."  
"Homo sapiens RAS-like, estrogen-regulated, growth inhibitor (RERG), mRNA."  
"Homo sapiens RERG/RAS-like (RERGL), mRNA."  
"Homo sapiens retinol saturase (all-trans-retinol 13,14-reductase) (RETSAT), mRNA."  
"Homo sapiens REV1 homolog (S. cerevisiae) (REV1), transcript variant 2, mRNA."  
"Homo sapiens REV3-like, catalytic subunit of DNA polymerase zeta (yeast) (REV3L), mRNA."  
"Homo sapiens REX1, RNA exonuclease 1 homolog (S. cerevisiae) (REXO1), mRNA."  
"Homo sapiens REX2, RNA exonuclease 2 homolog (S. cerevisiae) (REXO2), mRNA."  
"Homo sapiens REX4, RNA exonuclease 4 homolog (S. cerevisiae) (REXO4), mRNA."

"Homo sapiens replication factor C (activator 1) 1, 145kDa (RFC1), mRNA."

"Homo sapiens replication factor C (activator 1) 2, 40kDa (RFC2), transcript variant 2, mRNA."

"Homo sapiens replication factor C (activator 1) 3, 38kDa (RFC3), transcript variant 1, mRNA."

"Homo sapiens replication factor C (activator 1) 4, 37kDa (RFC4), transcript variant 2, mRNA."

"Homo sapiens replication factor C (activator 1) 5, 36.5kDa (RFC5), transcript variant 2, mRNA."

"Homo sapiens Rieske (Fe-S) domain containing (RFESD), mRNA."

"Homo sapiens ring finger and FYVE-like domain containing 1 (RFFL), transcript variant 1, mRNA"

"Homo sapiens RFNG O-fucosylpeptide 3-beta-N-acetylglucosaminyltransferase (RFNG), mRNA"

"Homo sapiens ret finger protein (RFP), transcript variant beta, mRNA."

"Homo sapiens ret finger protein-like 2 (RFPL2), mRNA."

"Homo sapiens RFPL3 antisense RNA (non-protein coding) (RFPL3S), antisense RNA."

"PREDICTED: Homo sapiens ret finger protein-like 4A (RFPL4A), mRNA."

"Homo sapiens RFT1 homolog (*S. cerevisiae*) (RFT1), mRNA."

"Homo sapiens raftlin, lipid raft linker 1 (RFTN1), mRNA."

"Homo sapiens ring finger and WD repeat domain 2 (RFWD2), transcript variant 1, mRNA."

"Homo sapiens ring finger and WD repeat domain 3 (RFWD3), mRNA."

"Homo sapiens regulatory factor X, 1 (influences HLA class II expression) (RFX1), mRNA."

"Homo sapiens regulatory factor X, 2 (influences HLA class II expression) (RFX2), transcript var

"Homo sapiens regulatory factor X, 3 (influences HLA class II expression) (RFX3), transcript var

"Homo sapiens regulatory factor X, 5 (influences HLA class II expression) (RFX5), transcript var

"Homo sapiens regulatory factor X, 7 (RFX7), mRNA."

"Homo sapiens regulatory factor X-associated ankyrin-containing protein (RFXANK), transcript v

"Homo sapiens regulatory factor X domain containing 2 (RFXDC2), mRNA."

"Homo sapiens RNA (guanine-9-) methyltransferase domain containing 2 (RG9MTD2), mRNA."

"Homo sapiens RNA (guanine-9-) methyltransferase domain containing 3 (RG9MTD3), mRNA."

"Homo sapiens retrotransposon gag domain containing 4 (RGAG4), mRNA."

"Homo sapiens ral guanine nucleotide dissociation stimulator-like 1 (RGL1), mRNA."

"Homo sapiens ral guanine nucleotide dissociation stimulator-like 2 (RGL2), mRNA."

"Homo sapiens ral guanine nucleotide dissociation stimulator-like 4 (RGL4), mRNA."

"Homo sapiens RGM domain family, member A (RGMA), mRNA."

"Homo sapiens RGM domain family, member B (RGMB), transcript variant 2, mRNA."

"Homo sapiens regulator of G-protein signaling 1 (RGS1), mRNA."

"Homo sapiens regulator of G-protein signaling 10 (RGS10), transcript variant 1, mRNA."

"Homo sapiens regulator of G-protein signaling 11 (RGS11), transcript variant 1, mRNA."

"Homo sapiens regulator of G-protein signaling 13 (RGS13), transcript variant 2, mRNA."

"Homo sapiens regulator of G-protein signaling 14 (RGS14), mRNA."

"Homo sapiens regulator of G-protein signalling 16 (RGS16), mRNA."

"Homo sapiens regulator of G-protein signaling 17 (RGS17), mRNA."

"Homo sapiens regulator of G-protein signaling 18 (RGS18), mRNA."

"Homo sapiens regulator of G-protein signaling 19 (RGS19), transcript variant 1, mRNA."

"Homo sapiens regulator of G-protein signalling 2, 24kDa (RGS2), mRNA."

"Homo sapiens regulator of G-protein signalling 22 (RGS22), mRNA."

"Homo sapiens regulator of G-protein signalling 4 (RGS4), mRNA."

"Homo sapiens regulator of G protein signaling 9 binding protein (RGS9BP), mRNA."

"Homo sapiens rhomboid domain containing 1 (RHBDD1), mRNA."  
"Homo sapiens rhomboid domain containing 2 (RHBDD2), transcript variant 1, mRNA."  
"Homo sapiens rhomboid domain containing 3 (RHBDD3), mRNA."  
"Homo sapiens rhomboid 5 homolog 1 (Drosophila) (RHBDF1), mRNA."  
"Homo sapiens rhomboid 5 homolog 2 (Drosophila) (RHBDF2), transcript variant 1, mRNA."  
"Homo sapiens rhomboid, veinlet-like 1 (Drosophila) (RHBDL1), mRNA."  
"Homo sapiens rhomboid, veinlet-like 2 (Drosophila) (RHBDL2), mRNA."  
"Homo sapiens rhomboid, veinlet-like 3 (Drosophila) (RHBDL3), mRNA."  
"Homo sapiens Rh blood group, CcEe antigens (RHCE), transcript variant 4, mRNA."  
"Homo sapiens Ras homolog enriched in brain like 1 (RHEBL1), mRNA."  
"Homo sapiens ras homolog gene family, member A (RHOA), mRNA."  
"Homo sapiens ras homolog gene family, member B (RHOB), mRNA."  
"Homo sapiens Rho-related BTB domain containing 2 (RHOBTB2), mRNA."  
"Homo sapiens Rho-related BTB domain containing 3 (RHOBTB3), mRNA."  
"Homo sapiens ras homolog gene family, member C (RHOC), transcript variant 2, mRNA."  
"Homo sapiens ras homolog gene family, member D (RHOD), mRNA."  
"Homo sapiens ras homolog gene family, member F (in filopodia) (RHOF), mRNA."  
"Homo sapiens ras homolog gene family, member G (rho G) (RHOG), mRNA."  
"Homo sapiens ras homolog gene family, member H (RHOH), mRNA."  
"Homo sapiens ras homolog gene family, member Q (RHOQ), mRNA."  
"Homo sapiens ras homolog gene family, member T1 (RHOT1), transcript variant 2, mRNA."  
"Homo sapiens ras homolog gene family, member T2 (RHOT2), nuclear gene encoding mitochc  
"Homo sapiens ras homolog gene family, member V (RHOV), mRNA."  
"Homo sapiens Rhox homeobox family, member 2B (RHOF2B), mRNA."  
"Homo sapiens rophilin, Rho GTPase binding protein 1 (RHPN1), mRNA."  
"Homo sapiens rophilin, Rho GTPase binding protein 2 (RHPN2), mRNA."  
"Homo sapiens resistance to inhibitors of cholinesterase 8 homolog A (C. elegans) (RIC8A), mR  
"Homo sapiens resistance to inhibitors of cholinesterase 8 homolog B (C. elegans) (RIC8B), mR  
"Homo sapiens Rho-type GTPase-activating protein RICH2 (RICH2), mRNA."  
"Homo sapiens Rho GTPase-activating protein (RICS), mRNA."  
"Homo sapiens RAP1 interacting factor homolog (yeast) (RIF1), mRNA."  
"Homo sapiens Rab interacting lysosomal protein-like 1 (RILPL1), mRNA."  
"Homo sapiens Rab interacting lysosomal protein-like 2 (RILPL2), mRNA."  
"Homo sapiens ribosomal modification protein rimK-like family member B (RIMKLB), mRNA."  
"Homo sapiens regulating synaptic membrane exocytosis 2 (RIMS2), transcript variant 2, mRNA  
"Homo sapiens regulating synaptic membrane exocytosis 3 (RIMS3), mRNA."  
"Homo sapiens Ras and Rab interactor 2 (RIN2), mRNA."  
"Homo sapiens ring finger protein 1 (RING1), mRNA."  
"Homo sapiens Ras and Rab interactor-like (RINL), mRNA."  
"Homo sapiens RAD50 interactor 1 (RINT1), mRNA."  
"Homo sapiens RIO kinase 1 (yeast) (RIOK1), transcript variant 2, mRNA."  
"Homo sapiens RIO kinase 2 (yeast) (RIOK2), mRNA."  
"Homo sapiens RIO kinase 3 (yeast) (RIOK3), transcript variant 1, mRNA."  
"Homo sapiens receptor (TNFRSF)-interacting serine-threonine kinase 1 (RIPK1), mRNA."

"Homo sapiens receptor-interacting serine-threonine kinase 2 (RIPK2), mRNA."  
"Homo sapiens receptor-interacting serine-threonine kinase 3 (RIPK3), mRNA."  
"Homo sapiens receptor-interacting serine-threonine kinase 4 (RIPK4), mRNA."  
"Homo sapiens receptor interacting protein kinase 5 (RIPK5), transcript variant 2, mRNA."  
"Homo sapiens rearranged L-myc fusion (RLF), mRNA."  
"Homo sapiens relaxin 1 (RLN1), mRNA."  
"Homo sapiens relaxin 2 (RLN2), transcript variant 1, mRNA."  
"Homo sapiens relaxin 3 (RLN3), mRNA."  
"Homo sapiens RGD motif, leucine rich repeats, tropomodulin domain and proline-rich containin  
"Homo sapiens RMI1, RecQ mediated genome instability 1, homolog (S. cerevisiae) (RMI1), mF  
"Homo sapiens required for meiotic nuclear division 1 homolog (S. cerevisiae) (RMND1), mRNA  
"Homo sapiens required for meiotic nuclear division 5 homolog A (S. cerevisiae) (RMND5A), mF  
"Homo sapiens required for meiotic nuclear division 5 homolog B (S. cerevisiae) (RMND5B), mF  
"Homo sapiens RNA component of mitochondrial RNA processing endoribonuclease (RMRP), F  
"Homo sapiens RNA, 5S ribosomal 9 (RN5S9), ribosomal RNA."  
"Homo sapiens RNA, 7SK small nuclear (RN7SK), non-coding RNA."  
"Homo sapiens ribonuclease, RNase A family, 10 (non-active) (RNASE10), mRNA."  
"Homo sapiens ribonuclease, RNase A family, 2 (liver, eosinophil-derived neurotoxin) (RNASE2  
"Homo sapiens ribonuclease, RNase A family, 4 (RNASE4), transcript variant 3, mRNA."  
"Homo sapiens ribonuclease, RNase A family, 9 (non-active) (RNASE9), transcript variant 7, mF  
"Homo sapiens ribonuclease H1 (RNASEH1), mRNA."  
"Homo sapiens ribonuclease H2, subunit A (RNASEH2A), mRNA."  
"Homo sapiens ribonuclease H2, subunit B (RNASEH2B), mRNA."  
"Homo sapiens ribonuclease H2, subunit C (RNASEH2C), mRNA."  
"Homo sapiens ribonuclease, RNase K (RNASEK), mRNA."  
"Homo sapiens ribonuclease L (2',5'-oligoadenylate synthetase-dependent) (RNASEL), mRN  
"Homo sapiens ribonuclease III, nuclear (RNASEN), mRNA."  
"Homo sapiens ribonuclease T2 (RNASET2), mRNA."  
"Homo sapiens Rho family GTPase 1 (RND1), mRNA."  
"Homo sapiens Rho family GTPase 2 (RND2), mRNA."  
"Homo sapiens ring finger protein 10 (RNF10), mRNA."  
"Homo sapiens ring finger protein 103 (RNF103), mRNA."  
"Homo sapiens ring finger protein 11 (RNF11), mRNA."  
"Homo sapiens ring finger protein 111 (RNF111), mRNA."  
"Homo sapiens ring finger protein 114 (RNF114), mRNA."  
"Homo sapiens ring finger protein 115 (RNF115), mRNA."  
"Homo sapiens ring finger protein 121 (RNF121), transcript variant 1, mRNA."  
"Homo sapiens ring finger protein 122 (RNF122), mRNA."  
"Homo sapiens ring finger protein 123 (RNF123), mRNA."  
"Homo sapiens ring finger protein 125 (RNF125), mRNA."  
"Homo sapiens ring finger protein 126 (RNF126), mRNA."  
"Homo sapiens ring finger protein 13 (RNF13), transcript variant 4, mRNA."  
"Homo sapiens ring finger protein 130 (RNF130), mRNA."  
"Homo sapiens ring finger protein 133 (RNF133), mRNA."

"Homo sapiens ring finger protein 135 (RNF135), transcript variant 2, mRNA."  
"Homo sapiens ring finger protein 138 (RNF138), transcript variant 1, mRNA."  
"Homo sapiens ring finger protein 14 (RNF14), transcript variant 3, mRNA."  
"Homo sapiens ring finger protein 141 (RNF141), mRNA."  
"Homo sapiens ring finger protein 144B (RNF144B), mRNA."  
"Homo sapiens ring finger protein 145 (RNF145), mRNA."  
"Homo sapiens ring finger protein 146 (RNF146), mRNA."  
"Homo sapiens ring finger protein 149 (RNF149), mRNA."  
"Homo sapiens ring finger protein 150 (RNF150), mRNA."  
"Homo sapiens ring finger protein 152 (RNF152), mRNA."  
"Homo sapiens ring finger protein 160 (RNF160), mRNA."  
"Homo sapiens ring finger protein 167 (RNF167), mRNA."  
"Homo sapiens ring finger protein 170 (RNF170), mRNA."  
"Homo sapiens ring finger protein 175 (RNF175), mRNA."  
"Homo sapiens ring finger protein 180 (RNF180), mRNA."  
"Homo sapiens ring finger protein 181 (RNF181), mRNA."  
"Homo sapiens ring finger protein 182 (RNF182), mRNA."  
"Homo sapiens ring finger protein 183 (RNF183), mRNA."  
"PREDICTED: Homo sapiens ring finger protein 187 (RNF187), mRNA."  
"Homo sapiens ring finger protein 19A (RNF19A), transcript variant 2, mRNA."  
"Homo sapiens ring finger protein 19B (RNF19B), mRNA."  
"Homo sapiens ring finger protein 20 (RNF20), mRNA."  
"Homo sapiens ring finger protein 208 (RNF208), mRNA."  
"Homo sapiens ring finger protein 213 (RNF213), mRNA."  
"Homo sapiens ring finger protein 215 (RNF215), mRNA."  
"Homo sapiens ring finger protein 216 (RNF216), transcript variant 1, mRNA."  
"Homo sapiens ring finger protein 216-like (RNF216L), transcript variant 3, non-coding RNA."  
"Homo sapiens ring finger protein 220 (RNF220), mRNA."  
"Homo sapiens ring finger protein 24 (RNF24), mRNA."  
"Homo sapiens ring finger protein 25 (RNF25), mRNA."  
"Homo sapiens ring finger protein 26 (RNF26), mRNA."  
"Homo sapiens ring finger protein 31(RNF31), mRNA."  
"Homo sapiens ring finger protein 34 (RNF34), transcript variant 2, mRNA."  
"Homo sapiens ring finger protein 38 (RNF38), transcript variant 1, mRNA."  
"Homo sapiens ring finger protein 4 (RNF4), mRNA."  
"Homo sapiens ring finger protein 40 (RNF40), mRNA."  
"Homo sapiens ring finger protein 41 (RNF41), transcript variant 2, mRNA."  
"Homo sapiens ring finger protein 43 (RNF43), mRNA."  
"Homo sapiens ring finger protein 44 (RNF44), mRNA."  
"Homo sapiens ring finger protein 5 (RNF5), mRNA."  
"PREDICTED: Homo sapiens ring finger protein 5 pseudogene 1 (RNF5P1), misc RNA."  
"Homo sapiens ring finger protein 7 (RNF7), transcript variant 3, mRNA."  
"Homo sapiens ring finger protein 8 (RNF8), transcript variant 1, mRNA."  
"Homo sapiens ring finger protein, transmembrane 1 (RNFT1), mRNA."

"Homo sapiens ring finger protein, transmembrane 2 (RNFT2), transcript variant 2, mRNA."  
"Homo sapiens RNA guanylyltransferase and 5'-phosphatase (RNGTT), mRNA."  
"Homo sapiens ribonuclease/angiogenin inhibitor 1 (RNH1), transcript variant 4, mRNA."  
"Homo sapiens RNA (guanine-7-) methyltransferase (RNMT), mRNA."  
"Homo sapiens RNA methyltransferase like 1 (RNMTL1), mRNA."  
"Homo sapiens RNA-binding region (RNP1, RRM) containing 2 (RNPC2), transcript variant 3, mRNA."  
"Homo sapiens arginyl aminopeptidase (aminopeptidase B) (RNPEP), mRNA."  
"Homo sapiens arginyl aminopeptidase (aminopeptidase B)-like 1 (RNPEPL1), mRNA."  
"Homo sapiens RNA binding protein S1, serine-rich domain (RNPS1), transcript variant 2, mRNA."  
"Homo sapiens RNA, U105A small nucleolar (RNU105A), small nucleolar RNA."  
"Homo sapiens RNA, U105B small nucleolar (RNU105B), small nucleolar RNA."  
"Homo sapiens RNA, U105C small nucleolar (RNU105C), small nucleolar RNA."  
"Homo sapiens RNA, U11 small nuclear (RNU11), small nuclear RNA."  
"Homo sapiens RNA, U12 small nuclear (RNU12) on chromosome X."  
"Homo sapiens RNA, U1 small nuclear 3 (RNU1-3), small nuclear RNA."  
"Homo sapiens RNA, U1 small nuclear 5 (RNU1-5), small nuclear RNA."  
"Homo sapiens RNA, U1A3 small nuclear (RNU1A3), small nuclear RNA."  
"Homo sapiens RNA, U1F1 small nuclear (RNU1F1), small nuclear RNA."  
"Homo sapiens RNA, U1G2 small nuclear (RNU1G2), small nuclear RNA."  
"Homo sapiens RNA, U2 small nuclear 1 (RNU2-1), non-coding RNA."  
"Homo sapiens RNA, U4 small nuclear 1 (RNU4-1), small nuclear RNA."  
"Homo sapiens RNA, U4 small nuclear 2 (RNU4-2), small nuclear RNA."  
"Homo sapiens RNA, U4atac small nuclear (U12-dependent splicing) (RNU4ATAC), small nucleolar RNA."  
"Homo sapiens RNA, U5A small nuclear (RNU5A), small nuclear RNA."  
"Homo sapiens RNA, U6 small nuclear 1 (RNU6-1), small nuclear RNA."  
"Homo sapiens RNA, U6 small nuclear 15 (RNU6-15), small nuclear RNA."  
"Homo sapiens RNA, U6atac small nuclear (U12-dependent splicing) (RNU6ATAC), small nucleolar RNA."  
"Homo sapiens RNA, U86 small nucleolar (RNU86), small nucleolar RNA."  
"Homo sapiens RNA, Ro-associated Y1 (RNY1), small cytoplasmic RNA."  
"Homo sapiens RNA, Ro-associated Y4 (RNY4), small cytoplasmic RNA."  
"Homo sapiens RNA, Ro-associated Y5 (RNY5), small cytoplasmic RNA."  
"Homo sapiens roadblock domain containing 3 (ROBLD3), mRNA."  
"Homo sapiens roundabout, axon guidance receptor, homolog 3 (Drosophila) (ROBO3), mRNA."  
"Homo sapiens roundabout homolog 4, magic roundabout (Drosophila) (ROBO4), mRNA."  
"Homo sapiens Rho-associated, coiled-coil containing protein kinase 2 (ROCK2), mRNA."  
"Homo sapiens ROD1 regulator of differentiation 1 (S. pombe) (ROD1), mRNA."  
"Homo sapiens rogdi homolog (Drosophila) (ROGDI), mRNA."  
"Homo sapiens retinal outer segment membrane protein 1 (ROM1), mRNA."  
"Homo sapiens reactive oxygen species modulator 1 (ROMO1), nuclear gene encoding mitochondrial protein."  
"Homo sapiens ropporin 1-like (ROPN1L), mRNA."  
"Homo sapiens receptor tyrosine kinase-like orphan receptor 1 (ROR1), transcript variant 1, mRNA."  
"Homo sapiens retinitis pigmentosa 1 (autosomal dominant) (RP1), mRNA."  
"Homo sapiens deleted in a mouse model of primary ciliary dyskinesia (RP11-529I10.4), mRNA."  
"Homo sapiens retinitis pigmentosa 2 (X-linked recessive) (RP2), mRNA."

"Homo sapiens hypothetical protein KIAA1434 (RP5-1022P6.2), mRNA."  
"Homo sapiens replication protein A1, 70kDa (RPA1), mRNA."  
"Homo sapiens replication protein A2, 32kDa (RPA2), mRNA."  
"Homo sapiens replication protein A3, 14kDa (RPA3), mRNA."  
"Homo sapiens RPA interacting protein (RPAIN), transcript variant 2, mRNA."  
"Homo sapiens RNA polymerase II associated protein 1 (RPAP1), mRNA."  
"Homo sapiens RNA polymerase II associated protein 2 (RPAP2), mRNA."  
"Homo sapiens RNA polymerase II associated protein 3 (RPAP3), mRNA."  
"Homo sapiens ribosome production factor 1 homolog (*S. cerevisiae*) (RPF1), mRNA."  
"Homo sapiens ribosome production factor 2 homolog (*S. cerevisiae*) (RPF2), mRNA."  
"Homo sapiens retinitis pigmentosa GTPase regulator (RPGR), transcript variant B, mRNA."  
"Homo sapiens retinitis pigmentosa GTPase regulator interacting protein 1 (RPGRIP1), mRNA."  
"Homo sapiens rabphilin 3A-like (without C2 domains) (RPH3AL), mRNA."  
"Homo sapiens ribose 5-phosphate isomerase A (RPIA), mRNA."  
"Homo sapiens ribosomal protein L10-like (RPL10L), mRNA."  
"Homo sapiens ribosomal protein L12 (RPL12), mRNA."  
"Homo sapiens ribosomal protein L13 (RPL13), transcript variant 2, mRNA."  
"Homo sapiens ribosomal protein L13a (RPL13A), mRNA."  
"Homo sapiens ribosomal protein L14 (RPL14), transcript variant 1, mRNA."  
"Homo sapiens ribosomal protein L15 (RPL15), mRNA."  
"Homo sapiens ribosomal protein L17 (RPL17), transcript variant 2, mRNA."  
"Homo sapiens ribosomal protein L21 (RPL21), mRNA."  
"Homo sapiens ribosomal protein L22 (RPL22), mRNA."  
"Homo sapiens ribosomal protein L22-like 1 (RPL22L1), mRNA."  
"Homo sapiens ribosomal protein L23a (RPL23A), mRNA."  
"Homo sapiens ribosomal protein L23a pseudogene 53 (RPL23AP53), non-coding RNA."  
"Homo sapiens ribosomal protein L26-like 1 (RPL26L1), mRNA."  
"Homo sapiens ribosomal protein L28 (RPL28), mRNA."  
"Homo sapiens ribosomal protein L29 (RPL29), mRNA."  
"Homo sapiens ribosomal protein L3 (RPL3), transcript variant 2, mRNA."  
"Homo sapiens ribosomal protein L30 (RPL30), mRNA."  
"Homo sapiens ribosomal protein L31 pseudogene 11 (RPL31P11), non-coding RNA."  
"Homo sapiens ribosomal protein L32 (RPL32), transcript variant 2, mRNA."  
"Homo sapiens ribosomal protein L34 (RPL34), transcript variant 2, mRNA."  
"Homo sapiens ribosomal protein L36 (RPL36), transcript variant 2, mRNA."  
"Homo sapiens ribosomal protein L36a (RPL36A), mRNA."  
"Homo sapiens ribosomal protein L37 (RPL37), mRNA."  
"Homo sapiens ribosomal protein L37a (RPL37A), mRNA."  
"Homo sapiens ribosomal protein L39 (RPL39), mRNA."  
"Homo sapiens ribosomal protein L39-like (RPL39L), mRNA."  
"Homo sapiens ribosomal protein L3-like (RPL3L), mRNA."  
"Homo sapiens ribosomal protein L4 (RPL4), mRNA."  
"Homo sapiens ribosomal protein L5 (RPL5), mRNA."  
"Homo sapiens ribosomal protein L8 (RPL8), transcript variant 2, mRNA."



"Homo sapiens ribosomal protein L9 (RPL9), transcript variant 2, mRNA."  
"Homo sapiens ribophorin I (RPN1), mRNA."  
"Homo sapiens ribonuclease P 14kDa subunit (RPP14), mRNA."  
"Homo sapiens ribonuclease P/MRP 25kDa subunit (RPP25), mRNA."  
"Homo sapiens ribonuclease P/MRP 38kDa subunit (RPP38), transcript variant 3, mRNA."  
"Homo sapiens ribonuclease P/MRP 40kDa subunit (RPP40), mRNA."  
"Homo sapiens ribonuclease P RNA component H1 (RPPH1), RNase P RNA."  
"Homo sapiens arginine/proline rich coiled-coil 1 (RPRC1), mRNA."  
"Homo sapiens regulation of nuclear pre-mRNA domain containing 1A (RPRD1A), mRNA."  
"Homo sapiens regulation of nuclear pre-mRNA domain containing 1B (RPRD1B), mRNA."  
"Homo sapiens regulation of nuclear pre-mRNA domain containing 2 (RPRD2), mRNA."  
"Homo sapiens reprimo, TP53 dependent G2 arrest mediator candidate (RPRM), mRNA."  
"Homo sapiens reprimo-like (RPRML), mRNA."  
"PREDICTED: Homo sapiens misc\_RNA (RPS10P3), miscRNA."  
"Homo sapiens ribosomal protein S11 (RPS11), mRNA."  
"Homo sapiens ribosomal protein S12 (RPS12), mRNA."  
"Homo sapiens ribosomal protein S15a (RPS15A), transcript variant 1, mRNA."  
"Homo sapiens ribosomal protein S18 (RPS18), mRNA."  
"Homo sapiens ribosomal protein S19 binding protein 1 (RPS19BP1), mRNA."  
"Homo sapiens ribosomal protein S2 (RPS2), mRNA."  
"Homo sapiens ribosomal protein S21 (RPS21), mRNA."  
"Homo sapiens ribosomal protein S23 (RPS23), mRNA."  
"PREDICTED: Homo sapiens ribosomal protein S26 pseudogene 10 (RPS26P10), mRNA."  
"Homo sapiens ribosomal protein S29 (RPS29), transcript variant 1, mRNA."  
"Homo sapiens ribosomal protein S4, X-linked (RPS4X), mRNA."  
"Homo sapiens ribosomal protein S4, Y-linked 1 (RPS4Y1), mRNA."  
"Homo sapiens ribosomal protein S4, Y-linked 2 (RPS4Y2), mRNA."  
"Homo sapiens ribosomal protein S5 (RPS5), mRNA."  
"Homo sapiens ribosomal protein S6 kinase, 90kDa, polypeptide 1 (RPS6KA1), transcript variar  
"Homo sapiens ribosomal protein S6 kinase, 90kDa, polypeptide 4 (RPS6KA4), transcript variar  
"Homo sapiens ribosomal protein S6 kinase, 90kDa, polypeptide 5 (RPS6KA5), transcript variar  
"Homo sapiens ribosomal protein S6 kinase, 70kDa, polypeptide 1 (RPS6KB1), mRNA."  
"Homo sapiens ribosomal protein S6 kinase, 70kDa, polypeptide 2 (RPS6KB2), mRNA."  
"Homo sapiens ribosomal protein S6 kinase, 52kDa, polypeptide 1 (RPS6KC1), mRNA."  
"Homo sapiens ribosomal protein S6 kinase-like 1 (RPS6KL1), mRNA."  
"PREDICTED: Homo sapiens misc\_RNA (RPS6P1), miscRNA."  
"Homo sapiens ribosomal protein S7 (RPS7), mRNA."  
"Homo sapiens ribosomal protein SA (RPSA), transcript variant 1, mRNA."  
"Homo sapiens regulatory associated protein of MTOR, complex 1 (RPTOR), transcript variant 1  
"Homo sapiens RNA pseudouridylate synthase domain containing 1 (RPUSD1), mRNA."  
"Homo sapiens RNA pseudouridylate synthase domain containing 2 (RPUSD2), mRNA."  
"Homo sapiens RNA pseudouridylate synthase domain containing 3 (RPUSD3), mRNA."  
"Homo sapiens RNA pseudouridylate synthase domain containing 4 (RPUSD4), mRNA."  
"Homo sapiens RCD1 required for cell differentiation1 homolog (S. pombe) (RQCD1), mRNA."

"Homo sapiens Ras-related associated with diabetes (RRAD), mRNA."  
"Homo sapiens Ras-related GTP binding A (RRAGA), mRNA."  
"Homo sapiens Ras-related GTP binding B (RRAGB), transcript variant RAGBI, mRNA."  
"Homo sapiens Ras-related GTP binding C (RRAGC), mRNA."  
"Homo sapiens Ras-related GTP binding D (RRAGD), mRNA."  
"Homo sapiens related RAS viral (r-ras) oncogene homolog (RRAS), mRNA."  
"Homo sapiens related RAS viral (r-ras) oncogene homolog 2 (RRAS2), mRNA."  
"Homo sapiens ribosome binding protein 1 homolog 180kDa (dog) (RRBP1), transcript variant 1  
"Homo sapiens ras responsive element binding protein 1 (RREB1), transcript variant 1, mRNA."  
"Homo sapiens ribonucleotide reductase M1 polypeptide (RRM1), mRNA."  
"Homo sapiens ribonucleotide reductase M2 polypeptide (RRM2), mRNA."  
"Homo sapiens ribonucleotide reductase M2 B (TP53 inducible) (RRM2B), mRNA."  
"Homo sapiens RRN3 RNA polymerase I transcription factor homolog (*S. cerevisiae*) (RRN3), m  
"Homo sapiens RNA polymerase I transcription factor homolog (*S. cerevisiae*) pseudogene 2 (R  
"Homo sapiens ribosomal RNA processing 1 homolog (*S. cerevisiae*) (RRP1), mRNA."  
"Homo sapiens ribosomal RNA processing 12 homolog (*S. cerevisiae*) (RRP12), mRNA."  
"Homo sapiens ribosomal RNA processing 15 homolog (*S. cerevisiae*) (RRP15), mRNA."  
"Homo sapiens ribosomal RNA processing 1 homolog B (*S. cerevisiae*) (RRP1B), mRNA."  
"Homo sapiens ribosomal RNA processing 7 homolog A (*S. cerevisiae*) (RRP7A), mRNA."  
"Homo sapiens ribosomal RNA processing 8, methyltransferase, homolog (yeast) (RRP8), mRN  
"Homo sapiens ribosomal RNA processing 9, small subunit (SSU) processome component, hor  
"Homo sapiens RRS1 ribosome biogenesis regulator homolog (*S. cerevisiae*) (RRS1), mRNA."  
"Homo sapiens radical S-adenosyl methionine domain containing 1 (RSAD1), mRNA."  
"Homo sapiens radical S-adenosyl methionine domain containing 2 (RSAD2), mRNA."  
"Homo sapiens round spermatid basic protein 1 (RSBN1), mRNA."  
"Homo sapiens round spermatid basic protein 1-like (RSBN1L), mRNA."  
"Homo sapiens regulatory solute carrier protein, family 1, member 1 (RSC1A1), mRNA."  
"Homo sapiens remodeling and spacing factor 1 (RSF1), mRNA."  
"Homo sapiens radial spokehead-like 1 (RSHL1), mRNA."  
"Homo sapiens radial spokehead-like 3 (RSHL3), mRNA."  
"Homo sapiens ribosomal L1 domain containing 1 (RSL1D1), mRNA."  
"Homo sapiens ribosomal L24 domain containing 1 (RSL24D1), mRNA."  
"Homo sapiens radial spoke head 1 homolog (*Chlamydomonas*) (RSPH1), mRNA."  
"Homo sapiens radial spoke 3 homolog (*Chlamydomonas*) (RSPH3), mRNA."  
"Homo sapiens ring finger and SPRY domain containing 1 (RSPRY1), mRNA."  
"Homo sapiens arginine/serine-rich coiled-coil 1 (RSRC1), mRNA."  
"Homo sapiens arginine/serine-rich coiled-coil 2 (RSRC2), transcript variant 1, mRNA."  
"Homo sapiens Ras suppressor protein 1 (RSU1), transcript variant 2, mRNA."  
"Homo sapiens retbindin (RTBDN), transcript variant 1, mRNA."  
"Homo sapiens RNA terminal phosphate cyclase domain 1 (RTCD1), mRNA."  
"Homo sapiens rhabdoid tumor deletion region gene 1 (RTDR1), mRNA."  
"Homo sapiens regulator of telomere elongation helicase 1 (RTEL1), transcript variant 2, mRNA  
"Homo sapiens Rtf1, Paf1/RNA polymerase II complex component, homolog (*S. cerevisiae*) (RT  
"Homo sapiens rhotekin (RTKN), transcript variant 1, mRNA."

"Homo sapiens reticulon 2 (RTN2), transcript variant 3, mRNA."  
"Homo sapiens reticulon 3 (RTN3), transcript variant 2, mRNA."  
"Homo sapiens reticulon 4 (RTN4), transcript variant 5, mRNA."  
"Homo sapiens reticulon 4 interacting protein 1 (RTN4IP1), nuclear gene encoding mitochondria  
"Homo sapiens reticulon 4 receptor-like 2 (RTN4RL2), mRNA."  
"Homo sapiens receptor (chemosensory) transporter protein 2 (RTP2), mRNA."  
"Homo sapiens receptor (chemosensory) transporter protein 4 (RTP4), mRNA."  
"Homo sapiens rotatin (RTTN), mRNA."  
"Homo sapiens RUN and FYVE domain containing 1 (RUFY1), mRNA."  
"Homo sapiens RUN and FYVE domain containing 3 (RUFY3), transcript variant 2, mRNA."  
"Homo sapiens RUN domain containing 1 (RUNDC1), mRNA."  
"Homo sapiens RUN domain containing 2A (RUNDC2A), mRNA."  
"Homo sapiens RUN domain containing 2C (RUNDC2C), non-coding RNA."  
"Homo sapiens RUN domain containing 3A (RUNDC3A), mRNA."  
"Homo sapiens RUN domain containing 3B (RUNDC3B), mRNA."  
"Homo sapiens runt-related transcription factor 1; translocated to, 1 (cyclin D-related) (RUNX1T  
"Homo sapiens runt-related transcription factor 2 (RUNX2), transcript variant 3, mRNA."  
"Homo sapiens runt-related transcription factor 3 (RUNX3), transcript variant 2, mRNA."  
"Homo sapiens RUN and SH3 domain containing 1 (RUSC1), mRNA."  
"PREDICTED: Homo sapiens RuvB-like 1 (E. coli) (RUVBL1), mRNA."  
"Homo sapiens RuvB-like 2 (E. coli) (RUVBL2), mRNA."  
"Homo sapiens RWD domain containing 1 (RWDD1), transcript variant 2, mRNA."  
"Homo sapiens RWD domain containing 2A (RWDD2A), mRNA."  
"Homo sapiens RWD domain containing 2B (RWDD2B), mRNA."  
"Homo sapiens RWD domain containing 3 (RWDD3), transcript variant 1, mRNA."  
"Homo sapiens RWD domain containing 4A (RWDD4A), mRNA."  
"Homo sapiens relaxin/insulin-like family peptide receptor 3 (RXFP3), mRNA."  
"Homo sapiens retinoid X receptor, alpha (RXRA), mRNA."  
"Homo sapiens RING1 and YY1 binding protein (RYBP), mRNA."  
"Homo sapiens RYK receptor-like tyrosine kinase (RYK), transcript variant 1, mRNA."  
"Homo sapiens ryanodine receptor 1 (skeletal) (RYR1), transcript variant 2, mRNA."  
"Homo sapiens ryanodine receptor 2 (cardiac) (RYR2), mRNA."  
"Homo sapiens S100 calcium binding protein A10 (annexin II ligand, calpactin I, light polypeptide  
"Homo sapiens S100 calcium binding protein A11 (S100A11), mRNA."  
"Homo sapiens S100 calcium binding protein A4 (S100A4), transcript variant 2, mRNA."  
"Homo sapiens S100 calcium binding protein A6 (S100A6), mRNA."  
"Homo sapiens S100 calcium binding protein A7 (S100A7), mRNA."  
"Homo sapiens S100 calcium binding protein A7A (S100A7A), mRNA."  
"Homo sapiens S100 calcium binding protein A9 (calgranulin B) (S100A9), mRNA."  
"Homo sapiens S100P binding protein (S100PBP), transcript variant 2, mRNA."  
"Homo sapiens S100 calcium binding protein Z (S100Z), mRNA."  
"Homo sapiens sphingosine-1-phosphate receptor 1 (S1PR1), mRNA."  
"Homo sapiens sphingosine-1-phosphate receptor 2 (S1PR2), mRNA."  
"Homo sapiens sphingosine-1-phosphate receptor 4 (S1PR4), mRNA."

"Homo sapiens sphingosine-1-phosphate receptor 5 (S1PR5), mRNA."  
"Homo sapiens serum amyloid A-like 1 (SAAL1), mRNA."  
"Homo sapiens SAC3 domain containing 1 (SAC3D1), mRNA."  
"Homo sapiens SAC1 suppressor of actin mutations 1-like (yeast) (SACM1L), mRNA."  
"Homo sapiens spastic ataxia of Charlevoix-Saguenay (sacsin) (SACS), mRNA."  
"Homo sapiens SUMO1 activating enzyme subunit 1 (SAE1), mRNA."  
"Homo sapiens scaffold attachment factor B (SAFB), mRNA."  
"Homo sapiens scaffold attachment factor B2 (SAFB2), mRNA."  
"Homo sapiens sal-like 2 (Drosophila) (SALL2), mRNA."  
"Homo sapiens sal-like 3 (Drosophila) (SALL3), mRNA."  
"Homo sapiens sterile alpha motif domain containing 1 (SAMD1), mRNA."  
"Homo sapiens sterile alpha motif domain containing 10 (SAMD10), mRNA."  
"Homo sapiens sterile alpha motif domain containing 11 (SAMD11), mRNA."  
"Homo sapiens sterile alpha motif domain containing 13 (SAMD13), mRNA."  
"Homo sapiens sterile alpha motif domain containing 14 (SAMD14), mRNA."  
"Homo sapiens sterile alpha motif domain containing 4A (SAMD4A), mRNA."  
"Homo sapiens sterile alpha motif domain containing 4B (SAMD4B), mRNA."  
"PREDICTED: Homo sapiens sterile alpha motif domain containing 6, transcript variant 2 (SAM1  
"Homo sapiens sterile alpha motif domain containing 7 (SAMD7), mRNA."  
"Homo sapiens sterile alpha motif domain containing 8 (SAMD8), mRNA."  
"Homo sapiens sterile alpha motif domain containing 9 (SAMD9), mRNA."  
"Homo sapiens sterile alpha motif domain containing 9-like (SAMD9L), mRNA."  
"Homo sapiens SAM domain and HD domain 1 (SAMHD1), mRNA."  
"Homo sapiens sorting and assembly machinery component 50 homolog (S. cerevisiae) (SAMM  
"Homo sapiens SAM domain, SH3 domain and nuclear localization signals 1 (SAMSN1), mRNA  
"Homo sapiens Sin3A-associated protein, 130kDa (SAP130), mRNA."  
"Homo sapiens Sin3A-associated protein, 18kDa (SAP18), mRNA."  
"Homo sapiens Sin3A-associated protein, 30kDa (SAP30), mRNA."  
"Homo sapiens SAP30 binding protein (SAP30BP), mRNA."  
"Homo sapiens SAP30-like (SAP30L), mRNA."  
"Homo sapiens SAPS domain family, member 1 (SAPS1), mRNA."  
"Homo sapiens SAPS domain family, member 3 (SAPS3), mRNA."  
"Homo sapiens SAR1 gene homolog A (S. cerevisiae) (SAR1A), mRNA."  
"Homo sapiens SAR1 homolog B (S. cerevisiae) (SAR1B), transcript variant 1, mRNA."  
"Homo sapiens sterile alpha and TIR motif containing 1 (SARM1), mRNA."  
"Homo sapiens seryl-tRNA synthetase (SARS), mRNA."  
"Homo sapiens seryl-tRNA synthetase 2, mitochondrial (SARS2), nuclear gene encoding mitoch  
"Homo sapiens squamous cell carcinoma antigen recognized by T cells 3 (SART3), mRNA."  
"Homo sapiens SAM and SH3 domain containing 3 (SASH3), mRNA."  
"Homo sapiens spindle assembly 6 homolog (C. elegans) (SASS6), mRNA."  
"Homo sapiens spermidine/spermine N1-acetyltransferase 1 (SAT1), mRNA."  
"Homo sapiens spermidine/spermine N1-acetyltransferase family member 2 (SAT2), mRNA."  
"Homo sapiens SATB homeobox 1 (SATB1), mRNA."  
"Homo sapiens SATB homeobox 2 (SATB2), mRNA."

"Homo sapiens salvador homolog 1 (Drosophila) (SAV1), mRNA."  
"Homo sapiens Shwachman-Bodian-Diamond syndrome (SBDS), mRNA."  
Homo sapiens Shwachman-Bodian-Diamond syndrome pseudogene (SBDSP) on chromosome  
"Homo sapiens SET binding factor 1 (SBF1), transcript variant 1, mRNA."  
"Homo sapiens SET binding factor 2 (SBF2), mRNA."  
"Homo sapiens strawberry notch homolog 1 (Drosophila) (SBNO1), mRNA."  
"Homo sapiens strawberry notch homolog 2 (Drosophila) (SBNO2), transcript variant 1, mRNA."  
"Homo sapiens sterol-C4-methyl oxidase-like (SC4MOL), transcript variant 2, mRNA."  
"Homo sapiens sterol-C5-desaturase (ERG3 delta-5-desaturase homolog, *S. cerevisiae*)-like (S  
"Homo sapiens synaptonemal complex protein SC65 (SC65), mRNA."  
"Homo sapiens secretory carrier membrane protein 1 (SCAMP1), mRNA."  
"Homo sapiens secretory carrier membrane protein 5 (SCAMP5), mRNA."  
"Homo sapiens SCAN domain containing 3 (SCAND3), mRNA."  
"Homo sapiens SREBF chaperone (SCAP), mRNA."  
"Homo sapiens S phase cyclin A-associated protein in the ER (SCAPER), mRNA."  
"Homo sapiens scavenger receptor class A, member 5 (putative) (SCARA5), mRNA."  
"Homo sapiens scavenger receptor class B, member 1 (SCARB1), mRNA."  
"Homo sapiens scavenger receptor class B, member 2 (SCARB2), mRNA."  
"Homo sapiens small Cajal body-specific RNA 10 (SCARNA10), guide RNA."  
"Homo sapiens small Cajal body-specific RNA 11 (SCARNA11), guide RNA."  
"Homo sapiens small Cajal body-specific RNA 12 (SCARNA12), guide RNA."  
"Homo sapiens small Cajal body-specific RNA 13 (SCARNA13), guide RNA."  
"Homo sapiens small Cajal body-specific RNA 14 (SCARNA14), guide RNA."  
"Homo sapiens small Cajal body-specific RNA 16 (SCARNA16), guide RNA."  
"Homo sapiens small Cajal body-specific RNA 17 (SCARNA17), guide RNA."  
"Homo sapiens small Cajal body-specific RNA 18 (SCARNA18), guide RNA."  
"Homo sapiens small Cajal body-specific RNA 2 (SCARNA2), guide RNA."  
"Homo sapiens small Cajal body-specific RNA 20 (SCARNA20), guide RNA."  
"Homo sapiens small Cajal body-specific RNA 21 (SCARNA21), guide RNA."  
"Homo sapiens small Cajal body-specific RNA 22 (SCARNA22), guide RNA."  
"Homo sapiens small Cajal body-specific RNA 23 (SCARNA23), guide RNA."  
"Homo sapiens small Cajal body-specific RNA 4 (SCARNA4), guide RNA."  
"Homo sapiens small Cajal body-specific RNA 5 (SCARNA5), guide RNA."  
"Homo sapiens small Cajal body-specific RNA 6 (SCARNA6), guide RNA."  
"Homo sapiens small Cajal body-specific RNA 7 (SCARNA7), guide RNA."  
"Homo sapiens small Cajal body-specific RNA 8 (SCARNA8), guide RNA."  
"Homo sapiens small Cajal body-specific RNA 9 (SCARNA9), guide RNA."  
"Homo sapiens small Cajal body-specific RNA 9-like (retrotransposed) (SCARNA9L), guide RNA/  
"Homo sapiens saccharopine dehydrogenase (putative) (SCCPDH), mRNA."  
"Homo sapiens stearoyl-CoA desaturase (delta-9-desaturase) (SCD), mRNA."  
"Homo sapiens stearoyl-CoA desaturase 5 (SCD5), transcript variant 2, mRNA."  
"Homo sapiens sciellin (SCEL), transcript variant 2, mRNA."  
"Homo sapiens sec1 family domain containing 2 (SCFD2), mRNA."  
"Homo sapiens secretogranin II (chromogranin C) (SCG2), mRNA."

"Homo sapiens secretogranin III (SCG3), mRNA."  
"Homo sapiens secretogranin V (7B2 protein) (SCG5), mRNA."  
"Homo sapiens secretoglobin, family 1D, member 2 (SCGB1D2), mRNA."  
"Homo sapiens secretoglobin, family 1D, member 4 (SCGB1D4), mRNA."  
"Homo sapiens secretoglobin, family 2A, member 1 (SCGB2A1), mRNA."  
"Homo sapiens sodium channel and clathrin linker 1 (SCLT1), mRNA."  
"Homo sapiens selenocysteine lyase (SCLY), mRNA."  
"Homo sapiens sex comb on midleg homolog 1 (Drosophila) (SCMH1), transcript variant 2, mRNA."  
"Homo sapiens sex comb on midleg-like 1 (Drosophila) (SCML1), transcript variant 1, mRNA."  
"Homo sapiens sex comb on midleg-like 2 (Drosophila) (SCML2), mRNA."  
"Homo sapiens sodium channel, voltage-gated, type I, alpha subunit (SCN1A), transcript variant 1, mRNA."  
"Homo sapiens sodium channel, voltage-gated, type I, beta (SCN1B), transcript variant a, mRNA."  
"Homo sapiens sodium channel, voltage-gated, type II, alpha subunit (SCN2A), transcript variant 1, mRNA."  
"Homo sapiens sodium channel, voltage-gated, type II, beta (SCN2B), mRNA."  
"Homo sapiens sodium channel, voltage-gated, type III, alpha subunit (SCN3A), transcript variant 1, mRNA."  
"Homo sapiens sodium channel, voltage-gated, type IV, alpha subunit (SCN4A), mRNA."  
"PREDICTED: Homo sapiens sodium channel, voltage-gated, type V, alpha (long QT syndrome) (SCN5A), transcript variant 1, mRNA."  
"Homo sapiens sodium channel modifier 1 (SCNM1), mRNA."  
"Homo sapiens sodium channel, nonvoltage-gated 1, delta (SCNN1D), transcript variant 2, mRNA."  
"Homo sapiens sodium channel, nonvoltage-gated 1, gamma (SCNN1G), mRNA."  
"Homo sapiens SCO cytochrome oxidase deficient homolog 1 (yeast) (SCO1), nuclear gene encoding SCO1 protein, mRNA."  
"Homo sapiens SCO cytochrome oxidase deficient homolog 2 (yeast) (SCO2), nuclear gene encoding SCO2 protein, mRNA."  
"Homo sapiens short coiled-coil protein (SCOC), mRNA."  
"Homo sapiens serine carboxypeptidase 1 (SCPEP1), mRNA."  
"Homo sapiens scribbled homolog (Drosophila) (SCRIB), transcript variant 1, mRNA."  
"Homo sapiens secernin 1 (SCRN1), mRNA."  
"Homo sapiens scleraxis homolog A (mouse) (SCXA), mRNA."  
"Homo sapiens scleraxis homolog B (mouse) (SCXB), mRNA."  
"Homo sapiens SCY1-like 1 (S. cerevisiae) (SCYL1), transcript variant A, mRNA."  
"Homo sapiens SCY1-like 1 binding protein 1 (SCYL1BP1), mRNA."  
"Homo sapiens SCY1-like 2 (S. cerevisiae) (SCYL2), mRNA."  
"Homo sapiens SCY1-like 3 (S. cerevisiae) (SCYL3), transcript variant 2, mRNA."  
"Homo sapiens SDA1 domain containing 1 (SDAD1), mRNA."  
"Homo sapiens syndecan 1 (SDC1), transcript variant 2, mRNA."  
"Homo sapiens syndecan 4 (SDC4), mRNA."  
"Homo sapiens syndecan binding protein (syntenin) (SDCBP), transcript variant 2, mRNA."  
"Homo sapiens serologically defined colon cancer antigen 10 (SDCCAG10), mRNA."  
"Homo sapiens serologically defined colon cancer antigen 3 (SDCCAG3), transcript variant 3, mRNA."  
"PREDICTED: Homo sapiens serologically defined colon cancer antigen 3-like (SDCCAG3L), mRNA."  
"Homo sapiens serologically defined colon cancer antigen 8 (SDCCAG8), mRNA."  
"Homo sapiens stromal cell-derived factor 2 (SDF2), mRNA."  
"Homo sapiens stromal cell-derived factor 2-like 1 (SDF2L1), mRNA."  
"Homo sapiens stromal cell derived factor 4 (SDF4), mRNA."  
"Homo sapiens succinate dehydrogenase complex, subunit A, flavoprotein (Fp) (SDHA), nuclear gene encoding SDHA protein, mRNA."

"Homo sapiens succinate dehydrogenase complex assembly factor 1 (SDHAF1), mRNA."  
"Homo sapiens succinate dehydrogenase complex, subunit A, flavoprotein pseudogene 1 (SDH.  
"Homo sapiens succinate dehydrogenase complex, subunit A, flavoprotein pseudogene 2 (SDH.  
"Homo sapiens succinate dehydrogenase complex, subunit B, iron sulfur (Ip) (SDHB), nuclear g  
"Homo sapiens succinate dehydrogenase complex, subunit C, integral membrane protein, 15kD  
"Homo sapiens succinate dehydrogenase complex, subunit D, integral membrane protein (SDH  
"Homo sapiens short chain dehydrogenase/reductase family 42E, member 1 (SDR42E1), mRNA/  
"Homo sapiens short chain dehydrogenase/reductase family 9C, member 7 (SDR9C7), mRNA."  
"Homo sapiens serine dehydratase (SDS), mRNA."  
"Homo sapiens serine dehydratase-like (SDSL), mRNA."  
"Homo sapiens secretory blood group 1 (SEC1), non-coding RNA."  
"Homo sapiens SEC11 homolog A (*S. cerevisiae*) (SEC11A), mRNA."  
"Homo sapiens SEC11 homolog C (*S. cerevisiae*) (SEC11C), mRNA."  
"Homo sapiens SEC13 homolog (*S. cerevisiae*) (SEC13), transcript variant 2, mRNA."  
"Homo sapiens SEC14-like 1 (*S. cerevisiae*) (SEC14L1), mRNA."  
"Homo sapiens SEC14-like 5 (*S. cerevisiae*) (SEC14L5), mRNA."  
"PREDICTED: Homo sapiens SEC15-like 2 (*S. cerevisiae*), transcript variant 4 (SEC15L2), mRN  
"Homo sapiens SEC16 homolog A (*S. cerevisiae*) (SEC16A), mRNA."  
"Homo sapiens SEC22 vesicle trafficking protein homolog A (*S. cerevisiae*) (SEC22A), mRNA."  
"Homo sapiens SEC22 vesicle trafficking protein homolog B (*S. cerevisiae*) (SEC22B), mRNA."  
"Homo sapiens SEC22 vesicle trafficking protein homolog C (*S. cerevisiae*) (SEC22C), transcrip  
"Homo sapiens Sec23 homolog A (*S. cerevisiae*) (SEC23A), mRNA."  
"Homo sapiens Sec23 homolog B (*S. cerevisiae*) (SEC23B), transcript variant 2, mRNA."  
"Homo sapiens SEC23 interacting protein (SEC23IP), mRNA."  
"Homo sapiens SEC24 family, member A (*S. cerevisiae*) (SEC24A), mRNA."  
"PREDICTED: Homo sapiens SEC24 related gene family, member B (*S. cerevisiae*), transcript \  
"Homo sapiens SEC24 family, member C (*S. cerevisiae*) (SEC24C), transcript variant 1, mRNA.  
"Homo sapiens SEC24 related gene family, member D (*S. cerevisiae*) (SEC24D), mRNA."  
"Homo sapiens SEC31 homolog A (*S. cerevisiae*) (SEC31A), transcript variant 1, mRNA."  
"Homo sapiens Sec61 alpha 1 subunit (*S. cerevisiae*) (SEC61A1), mRNA."  
"Homo sapiens Sec61 alpha 2 subunit (*S. cerevisiae*) (SEC61A2), mRNA."  
"Homo sapiens Sec61 beta subunit (SEC61B), mRNA."  
"Homo sapiens Sec61 gamma subunit (SEC61G), transcript variant 1, mRNA."  
"Homo sapiens SEC62 homolog (*S. cerevisiae*) (SEC62), mRNA."  
"Homo sapiens SEC63 homolog (*S. cerevisiae*) (SEC63), mRNA."  
"Homo sapiens SECIS binding protein 2 (SECISBP2), mRNA."  
"Homo sapiens SECIS binding protein 2-like (SECISBP2L), mRNA."  
"Homo sapiens SEH1-like (*S. cerevisiae*) (SEH1L), transcript variant 1, mRNA."  
"Homo sapiens sel-1 suppressor of lin-12-like (*C. elegans*) (SEL1L), mRNA."  
"Homo sapiens sel-1 suppressor of lin-12-like 3 (*C. elegans*) (SEL1L3), mRNA."  
"Homo sapiens selectin E (endothelial adhesion molecule 1) (SELE), mRNA."  
"Homo sapiens selenoprotein I (SELI), mRNA."  
"Homo sapiens selenoprotein K (SELK), mRNA."  
"Homo sapiens selectin L (SELL), mRNA."

"Homo sapiens selenoprotein M (SELM), mRNA."  
"Homo sapiens selenoprotein O (SELO), mRNA."  
"Homo sapiens selenoprotein S (SELS), transcript variant 1, mRNA."  
"Homo sapiens selenoprotein T (SELT), mRNA."  
"Homo sapiens sema domain, immunoglobulin domain (Ig), short basic domain, secreted, (sema  
"Homo sapiens sema domain, immunoglobulin domain (Ig), short basic domain, secreted, (sema  
"Homo sapiens sema domain, immunoglobulin domain (Ig), transmembrane domain (TM) and s  
"Homo sapiens sema domain, immunoglobulin domain (Ig), transmembrane domain (TM) and s  
"Homo sapiens sema domain, immunoglobulin domain (Ig), transmembrane domain (TM) and s  
"Homo sapiens sema domain, immunoglobulin domain (Ig), transmembrane domain (TM) and s  
"Homo sapiens sema domain, immunoglobulin domain (Ig), transmembrane domain (TM) and s  
"Homo sapiens sema domain, seven thrombospondin repeats (type 1 and type 1-like), transmer  
"Homo sapiens sema domain, transmembrane domain (TM), and cytoplasmic domain, (semaph  
"Homo sapiens sema domain, transmembrane domain (TM), and cytoplasmic domain, (semaph  
"Homo sapiens sema domain, transmembrane domain (TM), and cytoplasmic domain, (semaph  
"Homo sapiens semaphorin 7A, GPI membrane anchor (John Milton Hagen blood group) (SEM/  
"Homo sapiens SUMO1/sentrin specific peptidase 1 (SEN1), mRNA."  
"Homo sapiens SUMO1/sentrin/SMT3 specific peptidase 2 (SEN2), mRNA."  
"Homo sapiens SUMO1/sentrin/SMT3 specific peptidase 3 (SEN3), mRNA."  
"Homo sapiens SUMO1/sentrin specific peptidase 5 (SEN5), mRNA."  
"Homo sapiens SUMO1/sentrin specific peptidase 6 (SEN6), mRNA."  
"Homo sapiens SUMO1/sentrin specific peptidase 7 (SEN7), transcript variant 2, mRNA."  
"Homo sapiens selenophosphate synthetase 1 (SEPHS1), mRNA."  
"Homo sapiens selenophosphate synthetase 2 (SEPHS2), mRNA."  
"Homo sapiens selenoprotein N, 1 (SEPN1), transcript variant 1, mRNA."  
"Homo sapiens selenoprotein P, plasma, 1 (SEPP1), transcript variant 1, mRNA."  
"Homo sapiens Sep (O-phosphoserine) tRNA:Sec (selenocysteine) tRNA synthase (SEPSECS)  
"Homo sapiens selenoprotein W, 1 (SEPW1), mRNA."  
"Homo sapiens selenoprotein X, 1 (SEPX1), mRNA."  
"Homo sapiens serine active site containing 1 (SERAC1), mRNA."  
"Homo sapiens SERPINE1 mRNA binding protein 1 (SERBP1), transcript variant 3, mRNA."  
"Homo sapiens small EDRK-rich factor 1A (telomeric) (SERF1A), mRNA."  
"Homo sapiens small EDRK-rich factor 1B (centromeric) (SERF1B), mRNA."  
"Homo sapiens small EDRK-rich factor 2 (SERF2), mRNA."  
"Homo sapiens secretion regulating guanine nucleotide exchange factor (SERGEF), mRNA."  
"PREDICTED: Homo sapiens serine hydrolase-like (SERHL), mRNA."  
"Homo sapiens serine hydrolase-like 2 (SERHL2), mRNA."  
"Homo sapiens serine incorporator 1 (SERINC1), mRNA."  
"Homo sapiens serine incorporator 2 (SERINC2), mRNA."  
"Homo sapiens serine incorporator 3 (SERINC3), transcript variant 2, mRNA."  
"Homo sapiens serine incorporator 4 (SERINC4), mRNA."  
"Homo sapiens stress-associated endoplasmic reticulum protein 1 (SERP1), mRNA."  
"Homo sapiens stress-associated endoplasmic reticulum protein family member 2 (SERP2), mR  
"Homo sapiens serpin peptidase inhibitor, clade A (alpha-1 antiproteinase, antitrypsin), member



"Homo sapiens serpin peptidase inhibitor, clade A (alpha-1 antiproteinase, antitrypsin), member 1 (SERPINA1), mRNA."

"Homo sapiens serpin peptidase inhibitor, clade A (alpha-1 antiproteinase, antitrypsin), member 2 (SERPINA2), mRNA."

"PREDICTED: Homo sapiens serpin peptidase inhibitor, clade A (alpha-1 antiproteinase, antitrypsin), member 3 (SERPINA3), mRNA."

"Homo sapiens serpin peptidase inhibitor, clade A (alpha-1 antiproteinase, antitrypsin), member 4 (SERPINA4), mRNA."

"Homo sapiens serpin peptidase inhibitor, clade A (alpha-1 antiproteinase, antitrypsin), member 5 (SERPINA5), mRNA."

"Homo sapiens serpin peptidase inhibitor, clade A (alpha-1 antiproteinase, antitrypsin), member 6 (SERPINA6), mRNA."

"Homo sapiens serpin peptidase inhibitor, clade B (ovalbumin), member 1 (SERPINB1), mRNA."

"Homo sapiens serpin peptidase inhibitor, clade B (ovalbumin), member 10 (SERPINB10), mRNA."

"Homo sapiens serpin peptidase inhibitor, clade B (ovalbumin), member 13 (SERPINB13), mRNA."

"Homo sapiens serpin peptidase inhibitor, clade B (ovalbumin), member 2 (SERPINB2), mRNA."

"Homo sapiens serpin peptidase inhibitor, clade B (ovalbumin), member 7 (SERPINB7), transcript variant 1, mRNA."

"Homo sapiens serpin peptidase inhibitor, clade B (ovalbumin), member 8 (SERPINB8), transcript variant 1, mRNA."

"Homo sapiens serpin peptidase inhibitor, clade B (ovalbumin), member 9 (SERPINB9), mRNA."

"Homo sapiens serpin peptidase inhibitor, clade E (nexin, plasminogen activator inhibitor type 1) (SERPINE1), mRNA."

"Homo sapiens serpin peptidase inhibitor, clade E (nexin, plasminogen activator inhibitor type 1) (SERPINE1), transcript variant 1, mRNA."

"Homo sapiens serpin peptidase inhibitor, clade F (alpha-2 antiplasmin, pigment epithelium derived factor) (SERPINF1), mRNA."

"Homo sapiens serpin peptidase inhibitor, clade I (neuroserpin), member 1 (SERPINI1), mRNA."

"Homo sapiens SERTA domain containing 1 (SERTAD1), mRNA."

"Homo sapiens SERTA domain containing 2 (SERTAD2), mRNA."

"Homo sapiens SERTA domain containing 3 (SERTAD3), transcript variant 2, mRNA."

"Homo sapiens sestrin 1 (SESN1), mRNA."

"Homo sapiens sestrin 2 (SESN2), mRNA."

"Homo sapiens sestrin 3 (SESN3), mRNA."

"Homo sapiens SEC14 and spectrin domains 1 (SESTD1), mRNA."

"Homo sapiens SET translocation (myeloid leukemia-associated) (SET), mRNA."

"Homo sapiens SET binding protein 1 (SETBP1), mRNA."

"Homo sapiens SET domain containing 1A (SETD1A), mRNA."

"PREDICTED: Homo sapiens SET domain containing 1B (SETD1B), mRNA."

"Homo sapiens SET domain containing 2 (SETD2), mRNA."

"Homo sapiens SET domain containing 3 (SETD3), transcript variant 1, mRNA."

"Homo sapiens SET domain containing 4 (SETD4), transcript variant 1, mRNA."

"Homo sapiens SET domain containing 6 (SETD6), mRNA."

"Homo sapiens SET domain containing (lysine methyltransferase) 7 (SETD7), mRNA."

"Homo sapiens SET domain containing (lysine methyltransferase) 8 (SETD8), mRNA."

"Homo sapiens SET domain, bifurcated 1 (SETDB1), mRNA."

"Homo sapiens SET domain, bifurcated 2 (SETDB2), mRNA."

"Homo sapiens SET domain and mariner transposase fusion gene (SETMAR), mRNA."

"Homo sapiens senataxin (SETX), mRNA."

"Homo sapiens seizure related 6 homolog (mouse)-like 2 (SEZ6L2), transcript variant 2, mRNA."

"Homo sapiens splicing factor 1 (SF1), transcript variant 4, mRNA."

"Homo sapiens splicing factor 3a, subunit 1, 120kDa (SF3A1), transcript variant 2, mRNA."

"Homo sapiens splicing factor 3a, subunit 3, 60kDa (SF3A3), mRNA."

"Homo sapiens splicing factor 3b, subunit 1, 155kDa (SF3B1), transcript variant 2, mRNA."

"Homo sapiens splicing factor 3B, 14 kDa subunit (SF3B14), mRNA."

"Homo sapiens splicing factor 3b, subunit 2, 145kDa (SF3B2), mRNA."

"Homo sapiens splicing factor 3b, subunit 3, 130kDa (SF3B3), mRNA."  
"Homo sapiens splicing factor 3b, subunit 4, 49kDa (SF3B4), mRNA."  
"Homo sapiens splicing factor 3b, subunit 5, 10kDa (SF3B5), mRNA."  
"Homo sapiens splicing factor 4 (SF4), transcript variant c, mRNA."  
"Homo sapiens Sfi1 homolog, spindle assembly associated (yeast) (SFI1), transcript variant 1, n  
"Homo sapiens Scm-like with four mbt domains 1 (SFMBT1), transcript variant 3, mRNA."  
"Homo sapiens stratifin (SFN), mRNA."  
"Homo sapiens splicing factor proline/glutamine-rich (polypyrimidine tract binding protein associ  
"Homo sapiens secreted frizzled-related protein 2 (SFRP2), mRNA."  
"Homo sapiens splicing factor, arginine/serine-rich 1 (SFRS1), transcript variant 2, mRNA."  
"Homo sapiens splicing factor, arginine/serine-rich 10 (transformer 2 homolog, Drosophila) (SFF  
"Homo sapiens splicing factor, arginine/serine-rich 12 (SFRS12), transcript variant 2, mRNA."  
"Homo sapiens SFRS12-interacting protein 1 (SFRS12IP1), mRNA."  
"Homo sapiens splicing factor, arginine/serine-rich 13A (SFRS13A), transcript variant 2, mRNA."  
"Homo sapiens splicing factor, arginine/serine-rich 13B (SFRS13B), mRNA."  
"Homo sapiens splicing factor, arginine/serine-rich 14 (SFRS14), transcript variant 2, mRNA."  
"Homo sapiens splicing factor, arginine/serine-rich 16 (SFRS16), mRNA."  
"Homo sapiens splicing factor, arginine/serine-rich 17A (SFRS17A), transcript variant 1, mRNA."  
"Homo sapiens splicing factor, arginine/serine-rich 18 (SFRS18), transcript variant 1, mRNA."  
"Homo sapiens splicing factor, arginine/serine-rich 2 (SFRS2), mRNA."  
"Homo sapiens splicing factor, arginine/serine-rich 2B (SFRS2B), mRNA."  
"Homo sapiens splicing factor, arginine/serine-rich 2, interacting protein (SFRS2IP), mRNA."  
"Homo sapiens splicing factor, arginine/serine-rich 3 (SFRS3), mRNA."  
"Homo sapiens splicing factor, arginine/serine-rich 4 (SFRS4), mRNA."  
"Homo sapiens splicing factor, arginine/serine-rich 5 (SFRS5), transcript variant 2, mRNA."  
"Homo sapiens splicing factor, arginine/serine-rich 6 (SFRS6), mRNA."  
"Homo sapiens splicing factor, arginine/serine-rich 7, 35kDa (SFRS7), mRNA."  
"Homo sapiens splicing factor, arginine/serine-rich 8 (suppressor-of-white-apricot homolog, Dros  
"Homo sapiens splicing factor, arginine/serine-rich 9 (SFRS9), mRNA."  
"Homo sapiens SFT2 domain containing 1 (SFT2D1), mRNA."  
"Homo sapiens SFT2 domain containing 2 (SFT2D2), mRNA."  
"Homo sapiens SFT2 domain containing 3 (SFT2D3), mRNA."  
"Homo sapiens surfactant protein A1 (SFTPA1), mRNA. XM\_934600"  
"Homo sapiens surfactant protein D (SFTPD), mRNA."  
"Homo sapiens sideroflexin 1 (SFXN1), mRNA."  
"Homo sapiens sideroflexin 2 (SFXN2), mRNA."  
"Homo sapiens sideroflexin 3 (SFXN3), mRNA."  
"Homo sapiens sideroflexin 4 (SFXN4), transcript variant 2, mRNA."  
"Homo sapiens sideroflexin 5 (SFXN5), mRNA."  
"Homo sapiens sarcoglycan, alpha (50kDa dystrophin-associated glycoprotein) (SGCA), mRNA.  
"Homo sapiens sarcoglycan, epsilon (SGCE), transcript variant 3, mRNA."  
"Homo sapiens Src homology 3 domain-containing guanine nucleotide exchange factor (SGEF)  
"Homo sapiens SH3-domain GRB2-like (endophilin) interacting protein 1 (SGIP1), mRNA."  
"Homo sapiens serum/glucocorticoid regulated kinase (SGK), mRNA."

"Homo sapiens serum/glucocorticoid regulated kinase 1 (SGK1), transcript variant 1, mRNA."  
"Homo sapiens protein kinase-like protein SgK196 (SGK196), mRNA."  
"Homo sapiens serum/glucocorticoid regulated kinase family, member 3 (SGK3), transcript variac  
"Homo sapiens sphingomyelin synthase 1 (SGMS1), mRNA."  
"Homo sapiens sphingomyelin synthase 2 (SGMS2), mRNA."  
"Homo sapiens shugoshin-like 1 (*S. pombe*) (SGOL1), transcript variant C2, mRNA."  
"Homo sapiens shugoshin-like 2 (*S. pombe*) (SGOL2), mRNA."  
"Homo sapiens sphingosine-1-phosphate lyase 1 (SGPL1), mRNA."  
"Homo sapiens sphingosine-1-phosphate phosphatase 1 (SGPP1), mRNA."  
"Homo sapiens sphingosine-1-phosphate phosphatase 2 (SGPP2), mRNA."  
"Homo sapiens N-sulfoglucosamine sulfohydrolase (sulfamidase) (SGSH), mRNA."  
"Homo sapiens small G protein signaling modulator 1 (SGSM1), transcript variant 1, mRNA."  
"Homo sapiens small glutamine-rich tetratricopeptide repeat (TPR)-containing, alpha (SGTA), m  
"Homo sapiens SH2B adaptor protein 1 (SH2B1), mRNA."  
"Homo sapiens SH2B adaptor protein 2 (SH2B2), mRNA."  
"Homo sapiens SH2B adaptor protein 3 (SH2B3), mRNA."  
"Homo sapiens SH2 domain protein 1A, Duncan's disease (lymphoproliferative syndrome) (SH2  
"Homo sapiens SH2 domain protein 2A (SH2D2A), mRNA."  
"Homo sapiens SH2 domain containing 3A (SH2D3A), mRNA."  
"Homo sapiens SH2 domain containing 3C (SH2D3C), transcript variant 2, mRNA."  
"Homo sapiens SH2 domain containing 4A (SH2D4A), mRNA."  
"PREDICTED: Homo sapiens SH2 domain containing 5 (SH2D5), mRNA."  
"Homo sapiens SH3 domain binding glutamic acid-rich protein (SH3BGR), transcript variant 1, n  
"Homo sapiens SH3 domain binding glutamic acid-rich protein like (SH3BGRL), mRNA."  
"Homo sapiens SH3 domain binding glutamic acid-rich protein like 2 (SH3BGRL2), mRNA."  
"Homo sapiens SH3 domain binding glutamic acid-rich protein like 3 (SH3BGRL3), mRNA."  
"Homo sapiens SH3-domain binding protein 1 (SH3BP1), mRNA."  
"Homo sapiens SH3-domain binding protein 4 (SH3BP4), mRNA."  
"Homo sapiens SH3-binding domain protein 5-like (SH3BP5L), mRNA."  
"Homo sapiens SH3-domain GRB2-like 1 (SH3GL1), mRNA."  
"Homo sapiens SH3-domain GRB2-like 2 (SH3GL2), mRNA."  
"Homo sapiens SH3-domain GRB2-like endophilin B1 (SH3GLB1), mRNA."  
"Homo sapiens SH3-domain GRB2-like endophilin B2 (SH3GLB2), mRNA."  
"Homo sapiens SH3-domain kinase binding protein 1 (SH3KBP1), transcript variant 1, mRNA."  
"Homo sapiens SH3 and PX domains 2A (SH3PXD2A), mRNA."  
"Homo sapiens SH3 domain and tetratricopeptide repeats 1 (SH3TC1), mRNA."  
"Homo sapiens SH3 domain containing, Ysc84-like 1 (*S. cerevisiae*) (SH3YL1), mRNA."  
"Homo sapiens SH3 and multiple ankyrin repeat domains 3 (SHANK3), mRNA."  
"Homo sapiens SHANK-associated RH domain interactor (SHARPIN), mRNA."  
"Homo sapiens Src homology 2 domain containing adaptor protein B (SHB), mRNA."  
"Homo sapiens sex hormone-binding globulin (SHBG), mRNA."  
"Homo sapiens SHC (Src homology 2 domain containing) transforming protein 1 (SHC1), transc  
"Homo sapiens SHC (Src homology 2 domain containing) family, member 4 (SHC4), mRNA."  
"Homo sapiens SHC SH2-domain binding protein 1 (SHCBP1), mRNA."

"Homo sapiens Src homology 2 domain containing transforming protein D (SHD), mRNA."  
"Homo sapiens Src homology 2 domain containing E (SHE), mRNA."  
"Homo sapiens split hand/foot malformation (ectrodactyly) type 1 (SHFM1), mRNA."  
"Homo sapiens shisa homolog 2 (Xenopus laevis) (SHISA2), mRNA."  
"Homo sapiens shisa homolog 3 (Xenopus laevis) (SHISA3), mRNA."  
"Homo sapiens shisa homolog 5 (Xenopus laevis) (SHISA5), mRNA."  
"Homo sapiens SH3KBP1 binding protein 1 (SHKBP1), mRNA."  
"Homo sapiens serine hydroxymethyltransferase 1 (soluble) (SHMT1), transcript variant 1, mRNA"  
"Homo sapiens serine hydroxymethyltransferase 2 (mitochondrial) (SHMT2), nuclear gene enco  
"Homo sapiens soc-2 suppressor of clear homolog (C. elegans) (SHOC2), mRNA."  
"Homo sapiens short stature homeobox 2 (SHOX2), transcript variant SHOX2a, mRNA."  
"Homo sapiens sedoheptulokinase (SHPK), mRNA."  
"Homo sapiens SNF2 histone linker PHD RING helicase (SHPRH), transcript variant 2, mRNA."  
"Homo sapiens SHQ1 homolog (S. cerevisiae) (SHQ1), mRNA."  
"Homo sapiens shroom (SHRM), mRNA."  
"Homo sapiens shroom family member 1 (SHROOM1), mRNA."  
"Homo sapiens shroom family member 2 (SHROOM2), mRNA."  
"Homo sapiens shroom family member 4 (SHROOM4), mRNA."  
"Homo sapiens seven in absentia homolog 1 (Drosophila) (SIAH1), transcript variant 2, mRNA."  
"Homo sapiens seven in absentia homolog 2 (Drosophila) (SIAH2), mRNA."  
"Homo sapiens SID1 transmembrane family, member 1 (SIDT1), mRNA."  
"Homo sapiens SID1 transmembrane family, member 2 (SIDT2), mRNA."  
"Homo sapiens sialic acid binding Ig-like lectin 10 (SIGLEC10), mRNA."  
"Homo sapiens sialic acid binding Ig-like lectin 14 (SIGLEC14), mRNA."  
"Homo sapiens sialic acid binding Ig-like lectin, pseudogene 3 (SIGLECP3), non-coding RNA."  
"Homo sapiens sigma non-opioid intracellular receptor 1 (SIGMAR1), transcript variant 2, mRNA"  
"Homo sapiens salt-inducible kinase 1 (SIK1), mRNA."  
"Homo sapiens salt-inducible kinase 2 (SIK2), mRNA."  
"Homo sapiens SIK family kinase 3 (SIK3), mRNA."  
"Homo sapiens suppressor of IKK epsilon (SIKE), mRNA."  
"Homo sapiens SIL1 homolog, endoplasmic reticulum chaperone (S. cerevisiae) (SIL1), transcri  
"Homo sapiens silver homolog (mouse) (SILV), mRNA."  
"Homo sapiens SIN3 homolog A, transcription regulator (yeast) (SIN3A), mRNA."  
"Homo sapiens SIN3 homolog B, transcription regulator (yeast) (SIN3B), mRNA."  
"Homo sapiens survival of motor neuron protein interacting protein 1 (SIP1), transcript variant be  
"Homo sapiens signal-induced proliferation-associated gene 1 (SIPA1), transcript variant 1, mRI  
"Homo sapiens signal-induced proliferation-associated 1 like 1 (SIPA1L1), mRNA."  
"Homo sapiens signal-induced proliferation-associated 1 like 2 (SIPA1L2), mRNA."  
"Homo sapiens signal-regulatory protein alpha (SIRPA), transcript variant 2, mRNA."  
"Homo sapiens sirtuin (silent mating type information regulation 2 homolog) 1 (S. cerevisiae) (SI  
"Homo sapiens sirtuin (silent mating type information regulation 2 homolog) 2 (S. cerevisiae) (SI  
"Homo sapiens sirtuin (silent mating type information regulation 2 homolog) 4 (S. cerevisiae) (SI  
"Homo sapiens sirtuin (silent mating type information regulation 2 homolog) 5 (S. cerevisiae) (SI  
"Homo sapiens sirtuin (silent mating type information regulation 2 homolog) 7 (S. cerevisiae) (SI

"Homo sapiens signaling threshold regulating transmembrane adaptor 1 (SIT1), mRNA."  
"Homo sapiens CD27-binding (Siva) protein (SIVA), transcript variant 1, mRNA."  
"Homo sapiens SIVA1, apoptosis-inducing factor (SIVA1), transcript variant 2, mRNA."  
"Homo sapiens SIX homeobox 1 (SIX1), mRNA."  
"Homo sapiens SIX homeobox 2 (SIX2), mRNA."  
"Homo sapiens SIX homeobox 4 (SIX4), mRNA."  
"Homo sapiens SIX homeobox 5 (SIX5), mRNA."  
"Homo sapiens SIX homeobox 6 (SIX6), mRNA."  
"Homo sapiens spindle and kinetochore associated complex subunit 1 (SKA1), transcript variant 1, mRNA."  
"Homo sapiens spindle and kinetochore associated complex subunit 2 (SKA2), transcript variant 1, mRNA."  
"Homo sapiens src kinase associated phosphoprotein 1 (SKAP1), transcript variant 1, mRNA."  
"Homo sapiens src kinase associated phosphoprotein 2 (SKAP2), mRNA."  
"PREDICTED: Homo sapiens sporadic kidney cancer gene 1 (SKCG-1), miscRNA."  
"Homo sapiens v-ski sarcoma viral oncogene homolog (avian) (SKI), mRNA."  
"Homo sapiens SKI-like oncogene (SKIL), mRNA."  
"Homo sapiens skeletal muscle and kidney enriched inositol phosphatase (SKIP), transcript variant 1, mRNA."  
"Homo sapiens superkiller viralicidic activity 2-like (*S. cerevisiae*) (SKIV2L), mRNA."  
"Homo sapiens superkiller viralicidic activity 2-like 2 (*S. cerevisiae*) (SKIV2L2), mRNA."  
"Homo sapiens S-phase kinase-associated protein 1 (SKP1), transcript variant 1, mRNA."  
"Homo sapiens S-phase kinase-associated protein 2 (p45) (SKP2), transcript variant 1, mRNA."  
"Homo sapiens Src-like-adaptor (SLA), transcript variant 1, mRNA."  
"Homo sapiens Src-like-adaptor 2 (SLA2), transcript variant 1, mRNA."  
"Homo sapiens SLAIN motif family, member 1 (SLAIN1), transcript variant 1, mRNA."  
"Homo sapiens SLAIN motif family, member 2 (SLAIN2), mRNA."  
"Homo sapiens signaling lymphocytic activation molecule family member 1 (SLAMF1), mRNA."  
"Homo sapiens SLAM family member 6 (SLAMF6), mRNA."  
"Homo sapiens SLAM family member 7 (SLAMF7), mRNA."  
"Homo sapiens SLAM family member 9 (SLAMF9), mRNA."  
"Homo sapiens stem-loop binding protein (SLBP), mRNA."  
"Homo sapiens solute carrier family 10 (sodium/bile acid cotransporter family), member 3 (SLC10A3), mRNA."  
"Homo sapiens solute carrier family 10 (sodium/bile acid cotransporter family), member 7 (SLC10A7), mRNA."  
"Homo sapiens solute carrier family 11 (proton-coupled divalent metal ion transporters), member 1 (SLC11A1), mRNA."  
"Homo sapiens solute carrier family 12 (sodium/potassium/chloride transporters), member 2 (SLC12A2), mRNA."  
"Homo sapiens solute carrier family 12 (potassium/chloride transporters), member 4 (SLC12A4), mRNA."  
"Homo sapiens solute carrier family 12 (potassium/chloride transporters), member 6 (SLC12A6), mRNA."  
"Homo sapiens solute carrier family 12 (potassium/chloride transporters), member 8 (SLC12A8), mRNA."  
"Homo sapiens solute carrier family 12 (potassium/chloride transporters), member 9 (SLC12A9), mRNA."  
"Homo sapiens solute carrier family 13 (sodium/sulfate symporters), member 1 (SLC13A1), mRNA."  
"Homo sapiens solute carrier family 13 (sodium-dependent dicarboxylate transporter), member 1 (SLC13A1), mRNA."  
"Homo sapiens solute carrier family 13 (sodium/sulfate symporters), member 4 (SLC13A4), mRNA."  
"Homo sapiens solute carrier family 15 (H<sup>+</sup>/peptide transporter), member 2 (SLC15A2), mRNA."  
"Homo sapiens solute carrier family 15, member 3 (SLC15A3), mRNA."  
"Homo sapiens solute carrier family 15, member 4 (SLC15A4), mRNA."  
"Homo sapiens solute carrier family 16, member 1 (monocarboxylic acid transporter 1) (SLC16A1), mRNA."

"Homo sapiens solute carrier family 16, member 10 (aromatic amino acid transporter) (SLC16A10), mRNA."

"Homo sapiens solute carrier family 16, member 12 (monocarboxylic acid transporter 12) (SLC16A12), mRNA."

"Homo sapiens solute carrier family 16, member 3 (monocarboxylic acid transporter 4) (SLC16A3), mRNA."

"Homo sapiens solute carrier family 16, member 6 (monocarboxylic acid transporter 7) (SLC16A6), mRNA."

"Homo sapiens solute carrier family 17 (sodium phosphate), member 4 (SLC17A4), mRNA."

"Homo sapiens solute carrier family 17 (sodium-dependent inorganic phosphate cotransporter), member 4 (SLC17A4), mRNA."

"Homo sapiens solute carrier family 17, member 9 (SLC17A9), mRNA."

"Homo sapiens solute carrier family 18 (vesicular monoamine), member 1 (SLC18A1), mRNA."

"Homo sapiens solute carrier family 19 (folate transporter), member 1 (SLC19A1), mRNA."

"Homo sapiens solute carrier family 1 (neuronal/epithelial high affinity glutamate transporter, system xAG) (SLC1A1), mRNA."

"Homo sapiens solute carrier family 1 (glutamate/neutral amino acid transporter), member 4 (SLC1A4), mRNA."

"Homo sapiens solute carrier family 1 (neutral amino acid transporter), member 5 (SLC1A5), mRNA."

"Homo sapiens solute carrier family 20 (phosphate transporter), member 1 (SLC20A1), mRNA."

"Homo sapiens solute carrier family 20 (phosphate transporter), member 2 (SLC20A2), mRNA."

"Homo sapiens solute carrier family 22 (organic cation transporter), member 1 (SLC22A1), transcript variant 1, mRNA."

"Homo sapiens solute carrier family 22, member 17 (SLC22A17), transcript variant 2, mRNA."

"Homo sapiens solute carrier family 22 (organic cation transporter), member 18 (SLC22A18), transcript variant 1, mRNA."

"Homo sapiens solute carrier family 22, member 20 (SLC22A20), mRNA."

"Homo sapiens solute carrier family 22 (organic cation/ergothioneine transporter), member 4 (SLC22A4), mRNA."

"Homo sapiens solute carrier family 22 (organic cation transporter), member 5 (SLC22A5), mRNA."

"Homo sapiens solute carrier family 22 (organic anion transporter), member 9 (SLC22A9), mRNA."

"Homo sapiens solute carrier family 23 (nucleobase transporters), member 1 (SLC23A1), transcript variant 1, mRNA."

"Homo sapiens solute carrier family 23 (nucleobase transporters), member 3 (SLC23A3), mRNA."

"Homo sapiens solute carrier family 24 (sodium/potassium/calcium exchanger), member 1 (SLC24A1), mRNA."

"Homo sapiens solute carrier family 24 (sodium/potassium/calcium exchanger), member 2 (SLC24A2), mRNA."

"Homo sapiens solute carrier family 24 (sodium/potassium/calcium exchanger), member 4 (SLC24A4), mRNA."

"Homo sapiens solute carrier family 24 (sodium/potassium/calcium exchanger), member 6 (SLC24A6), mRNA."

"Homo sapiens solute carrier family 25 (mitochondrial carrier; citrate transporter), member 1 (SLC25A1), mRNA."

"Homo sapiens solute carrier family 25 (mitochondrial carrier; dicarboxylate transporter), member 10 (SLC25A10), mRNA."

"Homo sapiens solute carrier family 25 (mitochondrial carrier; oxoglutarate carrier), member 11 (SLC25A11), mRNA."

"Homo sapiens solute carrier family 25 (mitochondrial carrier, Aralar), member 12 (SLC25A12), mRNA."

"Homo sapiens solute carrier family 25, member 13 (citrin) (SLC25A13), mRNA."

"Homo sapiens solute carrier family 25 (mitochondrial carrier, brain), member 14 (SLC25A14), nuclear gene encoding mitochondrial protein."

"Homo sapiens solute carrier family 25 (mitochondrial carrier; ornithine transporter) member 15 (SLC25A15), nuclear gene encoding mitochondrial protein."

"Homo sapiens solute carrier family 25 (mitochondrial carrier; peroxisomal membrane protein, 3) (SLC25A16), nuclear gene encoding mitochondrial protein."

"Homo sapiens solute carrier family 25 (mitochondrial carrier), member 18 (SLC25A18), nuclear gene encoding mitochondrial protein."

"Homo sapiens solute carrier family 25 (mitochondrial thiamine pyrophosphate carrier), member 19 (SLC25A19), nuclear gene encoding mitochondrial protein."

"PREDICTED: Homo sapiens solute carrier family 25 (carnitine/acylcarnitine translocase), member 20 (SLC25A20), nuclear gene encoding mitochondrial protein."

"Homo sapiens solute carrier family 25 (mitochondrial carrier: glutamate), member 22 (SLC25A22), nuclear gene encoding mitochondrial protein."

"Homo sapiens solute carrier family 25 (mitochondrial carrier; phosphate carrier), member 23 (SLC25A23), nuclear gene encoding mitochondrial protein."

"Homo sapiens solute carrier family 25 (mitochondrial carrier; phosphate carrier), member 24 (SLC25A24), nuclear gene encoding mitochondrial protein."

"Homo sapiens solute carrier family 25 (mitochondrial carrier; phosphate carrier), member 25 (SLC25A25), nuclear gene encoding mitochondrial protein."

"Homo sapiens solute carrier family 25, member 26 (SLC25A26), transcript variant 1, mRNA."

"Homo sapiens solute carrier family 25, member 27 (SLC25A27), nuclear gene encoding mitochondrial protein."

"Homo sapiens solute carrier family 25, member 28 (SLC25A28), mRNA."  
"Homo sapiens solute carrier family 25, member 29 (SLC25A29), nuclear gene encoding mitoch  
"Homo sapiens solute carrier family 25 (mitochondrial carrier; phosphate carrier), member 3 (SL  
"Homo sapiens solute carrier family 25, member 34 (SLC25A34), mRNA."  
"Homo sapiens solute carrier family 25, member 35 (SLC25A35), mRNA."  
"Homo sapiens solute carrier family 25, member 36 (SLC25A36), mRNA."  
"Homo sapiens solute carrier family 25, member 37 (SLC25A37), nuclear gene encoding mitoch  
"Homo sapiens solute carrier family 25, member 38 (SLC25A38), mRNA."  
"Homo sapiens solute carrier family 25, member 39 (SLC25A39), mRNA."  
"Homo sapiens solute carrier family 25 (mitochondrial carrier; adenine nucleotide translocator), I  
"Homo sapiens solute carrier family 25, member 40 (SLC25A40), nuclear gene encoding mitoch  
"Homo sapiens solute carrier family 25, member 41 (SLC25A41), mRNA."  
"Homo sapiens solute carrier family 25, member 42 (SLC25A42), mRNA."  
"Homo sapiens solute carrier family 25, member 43 (SLC25A43), mRNA."  
"Homo sapiens solute carrier family 25, member 44 (SLC25A44), mRNA."  
"Homo sapiens solute carrier family 25, member 46 (SLC25A46), mRNA."  
"Homo sapiens solute carrier family 25 (mitochondrial carrier; adenine nucleotide translocator), I  
"Homo sapiens solute carrier family 25 (mitochondrial carrier; adenine nucleotide translocator), I  
"Homo sapiens solute carrier family 26 (sulfate transporter), member 2 (SLC26A2), mRNA."  
"Homo sapiens solute carrier family 26, member 6 (SLC26A6), transcript variant 3, mRNA."  
"Homo sapiens solute carrier family 27 (fatty acid transporter), member 1 (SLC27A1), mRNA."  
"Homo sapiens solute carrier family 27 (fatty acid transporter), member 2 (SLC27A2), mRNA."  
"Homo sapiens solute carrier family 27 (fatty acid transporter), member 5 (SLC27A5), mRNA."  
"Homo sapiens solute carrier family 29 (nucleoside transporters), member 1 (SLC29A1), nuclea  
"Homo sapiens solute carrier family 29 (nucleoside transporters), member 2 (SLC29A2), mRNA  
"Homo sapiens solute carrier family 29 (nucleoside transporters), member 3 (SLC29A3), mRNA  
"Homo sapiens solute carrier family 29 (nucleoside transporters), member 4 (SLC29A4), transcr  
"Homo sapiens solute carrier family 2 (facilitated glucose transporter), member 1 (SLC2A1), mR  
"Homo sapiens solute carrier family 2 (facilitated glucose transporter), member 11 (SLC2A11), t  
"Homo sapiens solute carrier family 2 (facilitated glucose transporter), member 12 (SLC2A12), r  
"Homo sapiens solute carrier family 2 (facilitated glucose transporter), member 14 (SLC2A14), r  
"Homo sapiens solute carrier family 2 (facilitated glucose transporter), member 3 (SLC2A3), mR  
"Homo sapiens SLC2A4 regulator (SLC2A4RG), mRNA."  
"Homo sapiens solute carrier family 2 (facilitated glucose/fructose transporter), member 5 (SLC2  
"Homo sapiens solute carrier family 2 (facilitated glucose transporter), member 6 (SLC2A6), mR  
"Homo sapiens solute carrier family 2 (facilitated glucose transporter), member 8 (SLC2A8), mR  
"Homo sapiens solute carrier family 30 (zinc transporter), member 1 (SLC30A1), mRNA."  
"Homo sapiens solute carrier family 30 (zinc transporter), member 3 (SLC30A3), mRNA."  
"Homo sapiens solute carrier family 30 (zinc transporter), member 5 (SLC30A5), transcript varia  
"Homo sapiens solute carrier family 30 (zinc transporter), member 7 (SLC30A7), mRNA."  
"Homo sapiens solute carrier family 30 (zinc transporter), member 9 (SLC30A9), mRNA."  
"Homo sapiens solute carrier family 31 (copper transporters), member 1 (SLC31A1), mRNA."  
"Homo sapiens solute carrier family 31 (copper transporters), member 2 (SLC31A2), mRNA."  
"Homo sapiens solute carrier family 33 (acetyl-CoA transporter), member 1 (SLC33A1), mRNA."

"Homo sapiens solute carrier family 35 (CMP-sialic acid transporter), member A1 (SLC35A1), mRNA."

"Homo sapiens solute carrier family 35 (UDP-galactose transporter), member A2 (SLC35A2), transcript variant 1, mRNA."

"Homo sapiens solute carrier family 35 (UDP-N-acetylglucosamine (UDP-GlcNAc) transporter), member A3 (SLC35A3), mRNA."

"Homo sapiens solute carrier family 35, member A4 (SLC35A4), mRNA."

"Homo sapiens solute carrier family 35, member A5 (SLC35A5), mRNA."

"Homo sapiens solute carrier family 35, member B1 (SLC35B1), mRNA."

"Homo sapiens solute carrier family 35, member B2 (SLC35B2), mRNA."

"Homo sapiens solute carrier family 35, member B3 (SLC35B3), mRNA."

"Homo sapiens solute carrier family 35, member B4 (SLC35B4), mRNA."

"Homo sapiens solute carrier family 35, member C1 (SLC35C1), mRNA."

"Homo sapiens solute carrier family 35, member C2 (SLC35C2), transcript variant 2, mRNA."

"Homo sapiens solute carrier family 35 (UDP-glucuronic acid/UDP-N-acetylgalactosamine dual transporter), member D1 (SLC35D1), mRNA."

"Homo sapiens solute carrier family 35, member E1 (SLC35E1), mRNA."

"Homo sapiens solute carrier family 35, member E3 (SLC35E3), mRNA."

"Homo sapiens solute carrier family 35, member E4 (SLC35E4), mRNA."

"Homo sapiens solute carrier family 35, member F1 (SLC35F1), mRNA."

"Homo sapiens solute carrier family 35, member F2 (SLC35F2), mRNA."

"Homo sapiens solute carrier family 35, member F5 (SLC35F5), mRNA."

"Homo sapiens solute carrier family 36 (proton/amino acid symporter), member 1 (SLC36A1), mRNA."

"Homo sapiens solute carrier family 36 (proton/amino acid symporter), member 4 (SLC36A4), mRNA."

"Homo sapiens solute carrier family 37 (glycerol-3-phosphate transporter), member 1 (SLC37A1), mRNA."

"Homo sapiens solute carrier family 37 (glycerol-3-phosphate transporter), member 3 (SLC37A3), mRNA."

"Homo sapiens solute carrier family 37 (glucose-6-phosphate transporter), member 4 (SLC37A4), mRNA."

"Homo sapiens solute carrier family 38, member 1 (SLC38A1), transcript variant 1, mRNA."

"Homo sapiens solute carrier family 38, member 10 (SLC38A10), transcript variant 2, mRNA."

"Homo sapiens solute carrier family 38, member 2 (SLC38A2), mRNA."

"Homo sapiens solute carrier family 38, member 5 (SLC38A5), mRNA."

"Homo sapiens solute carrier family 38, member 6 (SLC38A6), mRNA."

"Homo sapiens solute carrier family 38, member 7 (SLC38A7), mRNA."

"Homo sapiens solute carrier family 38, member 9 (SLC38A9), mRNA."

"Homo sapiens solute carrier family 39 (zinc transporter), member 1 (SLC39A1), mRNA."

"Homo sapiens solute carrier family 39 (zinc transporter), member 10 (SLC39A10), mRNA."

"Homo sapiens solute carrier family 39 (metal ion transporter), member 11 (SLC39A11), mRNA."

"Homo sapiens solute carrier family 39 (zinc transporter), member 12 (SLC39A12), mRNA."

"Homo sapiens solute carrier family 39 (zinc transporter), member 14 (SLC39A14), mRNA."

"Homo sapiens solute carrier family 39 (zinc transporter), member 3 (SLC39A3), transcript variant 1, mRNA."

"Homo sapiens solute carrier family 39 (zinc transporter), member 4 (SLC39A4), transcript variant 2, mRNA."

"Homo sapiens solute carrier family 39 (metal ion transporter), member 5 (SLC39A5), mRNA."

"Homo sapiens solute carrier family 39 (zinc transporter), member 8 (SLC39A8), transcript variant 1, mRNA."

"Homo sapiens solute carrier family 39 (zinc transporter), member 9 (SLC39A9), mRNA."

"Homo sapiens solute carrier family 3 (activators of dibasic and neutral amino acid transport), member 1 (SLC3A1), mRNA."

"Homo sapiens solute carrier family 40 (iron-regulated transporter), member 1 (SLC40A1), mRNA."

"Homo sapiens solute carrier family 41, member 1 (SLC41A1), mRNA."

"Homo sapiens solute carrier family 41, member 2 (SLC41A2), mRNA."



"Homo sapiens solute carrier family 41, member 3 (SLC41A3), transcript variant 1, mRNA."  
"Homo sapiens solute carrier family 43, member 1 (SLC43A1), mRNA."  
"Homo sapiens solute carrier family 43, member 2 (SLC43A2), mRNA."  
"Homo sapiens solute carrier family 43, member 3 (SLC43A3), mRNA."  
"Homo sapiens solute carrier family 44, member 1 (SLC44A1), mRNA."  
"Homo sapiens solute carrier family 44, member 2 (SLC44A2), mRNA."  
"Homo sapiens solute carrier family 44, member 3 (SLC44A3), mRNA."  
"Homo sapiens solute carrier family 44, member 4 (SLC44A4), mRNA."  
"Homo sapiens solute carrier family 45, member 2 (SLC45A2), transcript variant 2, mRNA."  
"Homo sapiens solute carrier family 45, member 3 (SLC45A3), mRNA."  
"Homo sapiens solute carrier family 45, member 4 (SLC45A4), mRNA."  
"Homo sapiens solute carrier family 46 (folate transporter), member 1 (SLC46A1), mRNA."  
"Homo sapiens solute carrier family 46, member 3 (SLC46A3), mRNA."  
"Homo sapiens solute carrier family 48 (heme transporter), member 1 (SLC48A1), mRNA."  
"Homo sapiens solute carrier family 4, anion exchanger, member 1 (erythrocyte membrane prot  
"Homo sapiens solute carrier family 4, sodium borate transporter, member 11 (SLC4A11), mRN  
"Homo sapiens solute carrier family 4 (anion exchanger), member 1, adaptor protein (SLC4A1A  
"Homo sapiens solute carrier family 4, anion exchanger, member 2 (erythrocyte membrane prot  
"Homo sapiens solute carrier family 4, sodium bicarbonate cotransporter, member 5 (SLC4A5),  
"Homo sapiens solute carrier family 4, sodium bicarbonate cotransporter, member 7 (SLC4A7),  
"Homo sapiens solute carrier family 4, sodium bicarbonate cotransporter, member 8 (SLC4A8),  
"Homo sapiens solute carrier family 5 (sodium/glucose cotransporter), member 10 (SLC5A10), t  
"Homo sapiens solute carrier family 5 (sodium/myo-inositol cotransporter), member 3 (SLC5A3)  
"Homo sapiens solute carrier family 5 (sodium-dependent vitamin transporter), member 6 (SLC5  
"Homo sapiens solute carrier family 5 (sodium/glucose cotransporter), member 9 (SLC5A9), mR  
"Homo sapiens solute carrier family 6 (neurotransmitter transporter, creatine), member 10 (pseu  
"Homo sapiens solute carrier family 6 (neurotransmitter transporter, betaine/GABA), member 12  
"Homo sapiens solute carrier family 6, member 16 (SLC6A16), mRNA."  
"Homo sapiens solute carrier family 6 (neutral amino acid transporter), member 19 (SLC6A19),  
"Homo sapiens solute carrier family 6 (neurotransmitter transporter, taurine), member 6 (SLC6A  
"Homo sapiens solute carrier family 6 (neurotransmitter transporter, creatine), member 8 (SLC6  
"Homo sapiens solute carrier family 6 (neurotransmitter transporter, glycine), member 9 (SLC6A  
"Homo sapiens solute carrier family 7 (cationic amino acid transporter, y+ system), member 1 (S  
"Homo sapiens solute carrier family 7 (cationic amino acid transporter, y+ system), member 3 (S  
"Homo sapiens solute carrier family 7 (cationic amino acid transporter, y+ system), member 4 (S  
"Homo sapiens solute carrier family 7 (cationic amino acid transporter, y+ system), member 5 (S  
"Homo sapiens solute carrier family 7 (cationic amino acid transporter, y+ system), member 5 p  
"Homo sapiens solute carrier family 7 (cationic amino acid transporter, y+ system), member 6 (S  
"Homo sapiens solute carrier family 7, member 6 opposite strand (SLC7A6OS), mRNA."  
"Homo sapiens solute carrier family 7 (cationic amino acid transporter, y+ system), member 7 (S  
"Homo sapiens solute carrier family 7 (cationic amino acid transporter, y+ system), member 9 (S  
"Homo sapiens solute carrier family 8 (sodium/calcium exchanger), member 2 (SLC8A2), mRNA  
"Homo sapiens solute carrier family 9 (sodium/hydrogen exchanger), member 1 (SLC9A1), mRN  
"Homo sapiens solute carrier family 9, member 10 (SLC9A10), mRNA."



"Homo sapiens structural maintenance of chromosomes 1A (SMC1A), mRNA."

"Homo sapiens structural maintenance of chromosomes 2 (SMC2), transcript variant 1, mRNA."

"Homo sapiens structural maintenance of chromosomes 4 (SMC4), transcript variant 1, mRNA."

"Homo sapiens structural maintenance of chromosomes 6 (SMC6), mRNA."

"Homo sapiens structural maintenance of chromosomes flexible hinge domain containing 1 (SMC6L1), mRNA."

"Homo sapiens sperm mitochondria-associated cysteine-rich protein (SMCP), nuclear gene encoding SMCP, mRNA."

"Homo sapiens Smith-Magenis syndrome chromosome region, candidate 5 (non-protein coding) (SMCR5), mRNA."

"Homo sapiens Smith-Magenis syndrome chromosome region, candidate 7-like (SMCR7L), mRNA."

"Homo sapiens SMEK homolog 1, suppressor of mek1 (Dictyostelium) (SMEK1), mRNA."

"Homo sapiens SMEK homolog 2, suppressor of mek1 (Dictyostelium) (SMEK2), mRNA."

"Homo sapiens PI-3-kinase-related kinase SMG-1 (SMG1), mRNA."

"Homo sapiens Smg-5 homolog, nonsense mediated mRNA decay factor (C. elegans) (SMG5), mRNA."

"Homo sapiens Smg-6 homolog, nonsense mediated mRNA decay factor (C. elegans) (SMG6), mRNA."

"Homo sapiens Smg-7 homolog, nonsense mediated mRNA decay factor (C. elegans) (SMG7), mRNA."

"Homo sapiens survival of motor neuron 1, telomeric (SMN1), transcript variant b, mRNA."

"Homo sapiens survival of motor neuron 2, centromeric (SMN2), transcript variant a, mRNA."

"Homo sapiens survival motor neuron domain containing 1 (SMNDC1), mRNA."

"Homo sapiens smoothed homolog (Drosophila) (SMO), mRNA."

"Homo sapiens spermine oxidase (SMOX), transcript variant 2, mRNA."

"Homo sapiens sphingomyelin phosphodiesterase 1, acid lysosomal (SMPD1), transcript variant 1, mRNA."

"Homo sapiens sphingomyelin phosphodiesterase 2, neutral membrane (neutral sphingomyelinase 2) (SMPD2), mRNA."

"Homo sapiens sphingomyelin phosphodiesterase 3, neutral membrane (neutral sphingomyelinase 3) (SMPD3), mRNA."

"Homo sapiens sphingomyelin phosphodiesterase 4, neutral membrane (neutral sphingomyelinase 4) (SMPD4), mRNA."

"Homo sapiens sphingomyelin phosphodiesterase, acid-like 3A (SMPDL3A), mRNA."

"Homo sapiens sphingomyelin phosphodiesterase, acid-like 3B (SMPDL3B), transcript variant 2, mRNA."

"Homo sapiens submaxillary gland androgen regulated protein 3A (SMR3A), mRNA."

"Homo sapiens spermine synthase (SMS), mRNA."

"Homo sapiens smoothelin (SMTN), transcript variant 2, mRNA."

"Homo sapiens smoothelin-like 2 (SMTNL2), mRNA."

"Homo sapiens smu-1 suppressor of mec-8 and unc-52 homolog (C. elegans) (SMU1), mRNA."

"Homo sapiens single-strand-selective monofunctional uracil-DNA glycosylase 1 (SMUG1), mRNA."

"PREDICTED: Homo sapiens SET and MYND domain containing 2 (SMYD2), mRNA."

"Homo sapiens SET and MYND domain containing 3 (SMYD3), mRNA."

"Homo sapiens SET and MYND domain containing 4 (SMYD4), mRNA."

"Homo sapiens SMYD family member 5 (SMYD5), mRNA."

"Homo sapiens snail homolog 1 (Drosophila) (SNAI1), mRNA."

"Homo sapiens snail homolog 2 (Drosophila) (SNAI2), mRNA."

"Homo sapiens snail homolog 3 (Drosophila) (SNAI3), mRNA."

"Homo sapiens synaptosomal-associated protein, 23kDa (SNAP23), transcript variant 1, mRNA."

"Homo sapiens synaptosomal-associated protein, 29kDa (SNAP29), mRNA."

"Homo sapiens synaptosomal-associated protein, 47kDa (SNAP47), mRNA."

"Homo sapiens small nuclear RNA activating complex, polypeptide 1, 43kDa (SNAPC1), mRNA."

"Homo sapiens small nuclear RNA activating complex, polypeptide 2, 45kDa (SNAPC2), mRNA."

"Homo sapiens small nuclear RNA activating complex, polypeptide 3, 50kDa (SNAPC3), mRNA."

"Homo sapiens small nuclear RNA activating complex, polypeptide 4, 190kDa (SNAPC4), mRNA/  
"Homo sapiens small nuclear RNA activating complex, polypeptide 5, 19kDa (SNAPC5), mRNA  
"Homo sapiens SNAP-associated protein (SNAPIN), mRNA."  
"Homo sapiens synuclein, alpha interacting protein (SNCAIP), mRNA."  
"Homo sapiens synuclein, beta (SNCB), transcript variant 1, mRNA."  
"Homo sapiens staphylococcal nuclease and tudor domain containing 1 (SND1), mRNA."  
"Homo sapiens SNF8, ESCRT-II complex subunit, homolog (*S. cerevisiae*) (SNF8), mRNA."  
"Homo sapiens small nucleolar RNA host gene 1 (non-protein coding) (SNHG1), non-coding RN  
"Homo sapiens small nucleolar RNA host gene 10 (non-protein coding) (SNHG10), non-coding f  
"Homo sapiens small nucleolar RNA host gene 12 (non-protein coding) (SNHG12), non-coding f  
"Homo sapiens small nucleolar RNA host gene 3 (non-protein coding) (SNHG3), non-coding RN  
"Homo sapiens SNHG3-RCC1 readthrough transcript (SNHG3-RCC1), transcript variant 2, mRN  
Homo sapiens small nucleolar RNA host gene (non-protein coding) 4 (SNHG4) on chromosome  
Homo sapiens small nucleolar RNA host gene (non-protein coding) 5 (SNHG5) on chromosome  
"Homo sapiens small nucleolar RNA host gene 6 (non-protein coding) (SNHG6), non-coding RN  
"Homo sapiens small nucleolar RNA host gene 7 (non-protein coding) (SNHG7), transcript varia  
Homo sapiens small nucleolar RNA host gene (non-protein coding) 8 (SNHG8) on chromosome  
"Homo sapiens small nucleolar RNA host gene 9 (non-protein coding) (SNHG9), non-coding RN  
"Homo sapiens Smad nuclear interacting protein 1 (SNIP1), mRNA."  
"Homo sapiens stannin (SNN), mRNA."  
"Homo sapiens small nucleolar RNA, H/ACA box 1 (SNORA1), small nucleolar RNA."  
"Homo sapiens small nucleolar RNA, H/ACA box 10 (SNORA10), small nucleolar RNA."  
"Homo sapiens small nucleolar RNA, H/ACA box 11D (SNORA11D), small nucleolar RNA."  
"Homo sapiens small nucleolar RNA, H/ACA box 12 (SNORA12), small nucleolar RNA."  
"Homo sapiens small nucleolar RNA, H/ACA box 13 (SNORA13), small nucleolar RNA."  
"Homo sapiens small nucleolar RNA, H/ACA box 14A (SNORA14A), small nucleolar RNA."  
"Homo sapiens small nucleolar RNA, H/ACA box 14B (SNORA14B), small nucleolar RNA."  
"Homo sapiens small nucleolar RNA, H/ACA box 16A (SNORA16A), small nucleolar RNA."  
"Homo sapiens small nucleolar RNA, H/ACA box 17 (SNORA17), small nucleolar RNA."  
"Homo sapiens small nucleolar RNA, H/ACA box 18 (SNORA18), small nucleolar RNA."  
"Homo sapiens small nucleolar RNA, H/ACA box 20 (SNORA20), small nucleolar RNA."  
"Homo sapiens small nucleolar RNA, H/ACA box 21 (SNORA21), small nucleolar RNA."  
"Homo sapiens small nucleolar RNA, H/ACA box 22 (SNORA22), small nucleolar RNA."  
"Homo sapiens small nucleolar RNA, H/ACA box 23 (SNORA23), small nucleolar RNA."  
"Homo sapiens small nucleolar RNA, H/ACA box 24 (SNORA24), small nucleolar RNA."  
"Homo sapiens small nucleolar RNA, H/ACA box 25 (SNORA25), small nucleolar RNA."  
"Homo sapiens small nucleolar RNA, H/ACA box 26 (SNORA26), small nucleolar RNA."  
"Homo sapiens small nucleolar RNA, H/ACA box 27 (SNORA27), small nucleolar RNA."  
"Homo sapiens small nucleolar RNA, H/ACA box 28 (SNORA28), small nucleolar RNA."  
"Homo sapiens small nucleolar RNA, H/ACA box 2A (SNORA2A), small nucleolar RNA."  
"Homo sapiens small nucleolar RNA, H/ACA box 2B (SNORA2B), small nucleolar RNA."  
"Homo sapiens small nucleolar RNA, H/ACA box 3 (SNORA3), small nucleolar RNA."  
"Homo sapiens small nucleolar RNA, H/ACA box 30 (SNORA30), small nucleolar RNA."  
"Homo sapiens small nucleolar RNA, H/ACA box 31 (SNORA31), small nucleolar RNA."

"Homo sapiens small nucleolar RNA, H/ACA box 32 (SNORA32), small nucleolar RNA."  
"Homo sapiens small nucleolar RNA, H/ACA box 33 (SNORA33), small nucleolar RNA."  
"Homo sapiens small nucleolar RNA, H/ACA box 34 (SNORA34), small nucleolar RNA."  
"Homo sapiens small nucleolar RNA, H/ACA box 38 (SNORA38), small nucleolar RNA."  
"Homo sapiens small nucleolar RNA, H/ACA box 38B (retrotransposed) (SNORA38B), small nucleolar RNA."  
"Homo sapiens small nucleolar RNA, H/ACA box 4 (SNORA4), small nucleolar RNA."  
"Homo sapiens small nucleolar RNA, H/ACA box 40 (SNORA40), small nucleolar RNA."  
"Homo sapiens small nucleolar RNA, H/ACA box 41 (SNORA41), small nucleolar RNA."  
"Homo sapiens small nucleolar RNA, H/ACA box 42 (SNORA42), small nucleolar RNA."  
"Homo sapiens small nucleolar RNA, H/ACA box 43 (SNORA43), small nucleolar RNA."  
"Homo sapiens small nucleolar RNA, H/ACA box 45 (SNORA45), small nucleolar RNA."  
"Homo sapiens small nucleolar RNA, H/ACA box 47 (SNORA47), small nucleolar RNA."  
"Homo sapiens small nucleolar RNA, H/ACA box 48 (SNORA48), small nucleolar RNA."  
"Homo sapiens small nucleolar RNA, H/ACA box 49 (SNORA49), small nucleolar RNA."  
"Homo sapiens small nucleolar RNA, H/ACA box 51 (SNORA51), small nucleolar RNA."  
"Homo sapiens small nucleolar RNA, H/ACA box 52 (SNORA52), small nucleolar RNA."  
"Homo sapiens small nucleolar RNA, H/ACA box 54 (SNORA54), small nucleolar RNA."  
"Homo sapiens small nucleolar RNA, H/ACA box 55 (SNORA55), small nucleolar RNA."  
"Homo sapiens small nucleolar RNA, H/ACA box 56 (SNORA56), small nucleolar RNA."  
"Homo sapiens small nucleolar RNA, H/ACA box 57 (SNORA57), small nucleolar RNA."  
"Homo sapiens small nucleolar RNA, H/ACA box 58 (SNORA58), small nucleolar RNA."  
"Homo sapiens small nucleolar RNA, H/ACA box 59A (SNORA59A), small nucleolar RNA."  
"Homo sapiens small nucleolar RNA, H/ACA box 59B (SNORA59B), small nucleolar RNA."  
"Homo sapiens small nucleolar RNA, H/ACA box 5B (SNORA5B), small nucleolar RNA."  
"Homo sapiens small nucleolar RNA, H/ACA box 5C (SNORA5C), small nucleolar RNA."  
"Homo sapiens small nucleolar RNA, H/ACA box 6 (SNORA6), small nucleolar RNA."  
"Homo sapiens small nucleolar RNA, H/ACA box 60 (SNORA60), small nucleolar RNA."  
"Homo sapiens small nucleolar RNA, H/ACA box 61 (SNORA61), small nucleolar RNA."  
"Homo sapiens small nucleolar RNA, H/ACA box 62 (SNORA62), small nucleolar RNA."  
"Homo sapiens small nucleolar RNA, H/ACA box 63 (SNORA63), small nucleolar RNA."  
"Homo sapiens small nucleolar RNA, H/ACA box 64 (SNORA64), small nucleolar RNA."  
"Homo sapiens small nucleolar RNA, H/ACA box 65 (SNORA65), small nucleolar RNA."  
"Homo sapiens small nucleolar RNA, H/ACA box 66 (SNORA66), non-coding RNA."  
"Homo sapiens small nucleolar RNA, H/ACA box 67 (SNORA67), small nucleolar RNA."  
"Homo sapiens small nucleolar RNA, H/ACA box 68 (SNORA68), small nucleolar RNA."  
"Homo sapiens small nucleolar RNA, H/ACA box 70 (SNORA70), small nucleolar RNA."  
"Homo sapiens small nucleolar RNA, H/ACA box 70B (retrotransposed) (SNORA70B), small nucleolar RNA."  
"Homo sapiens small nucleolar RNA, H/ACA box 70C (retrotransposed) (SNORA70C), non-coding RNA."  
"Homo sapiens small nucleolar RNA, H/ACA box 71A (SNORA71A), small nucleolar RNA."  
"Homo sapiens small nucleolar RNA, H/ACA box 71B (SNORA71B), small nucleolar RNA."  
"Homo sapiens small nucleolar RNA, H/ACA box 72 (SNORA72), small nucleolar RNA."  
"Homo sapiens small nucleolar RNA, H/ACA box 73A (SNORA73A), small nucleolar RNA."  
"Homo sapiens small nucleolar RNA, H/ACA box 73B (SNORA73B), small nucleolar RNA."  
"Homo sapiens small nucleolar RNA, H/ACA box 74A (SNORA74A), small nucleolar RNA."

"Homo sapiens small nucleolar RNA, H/ACA box 74B (SNORA74B), small nucleolar RNA."  
"Homo sapiens small nucleolar RNA, H/ACA box 75 (SNORA75), small nucleolar RNA."  
"Homo sapiens small nucleolar RNA, H/ACA box 76 (SNORA76), small nucleolar RNA."  
"Homo sapiens small nucleolar RNA, H/ACA box 77 (SNORA77), small nucleolar RNA."  
"Homo sapiens small nucleolar RNA, H/ACA box 78 (SNORA78), small nucleolar RNA."  
"Homo sapiens small nucleolar RNA, H/ACA box 79 (SNORA79), small nucleolar RNA."  
"Homo sapiens small nucleolar RNA, H/ACA box 7A (SNORA7A), small nucleolar RNA."  
"Homo sapiens small nucleolar RNA, H/ACA box 7B (SNORA7B), small nucleolar RNA."  
"Homo sapiens small nucleolar RNA, H/ACA box 8 (SNORA8), small nucleolar RNA."  
"Homo sapiens small nucleolar RNA, H/ACA box 80 (SNORA80), small nucleolar RNA."  
"Homo sapiens small nucleolar RNA, H/ACA box 81 (SNORA81), small nucleolar RNA."  
"Homo sapiens small nucleolar RNA, H/ACA box 84 (SNORA84), small nucleolar RNA."  
"Homo sapiens small nucleolar RNA, H/ACA box 9 (SNORA9), small nucleolar RNA."  
"Homo sapiens small nucleolar RNA, C/D box 10 (SNORD10), small nucleolar RNA."  
"Homo sapiens small nucleolar RNA, C/D box 100 (SNORD100), small nucleolar RNA."  
"Homo sapiens small nucleolar RNA, C/D box 101 (SNORD101), small nucleolar RNA."  
"Homo sapiens small nucleolar RNA, C/D box 102 (SNORD102), small nucleolar RNA."  
"Homo sapiens small nucleolar RNA, C/D box 103A (SNORD103A), small nucleolar RNA."  
"Homo sapiens small nucleolar RNA, C/D box 104 (SNORD104), small nucleolar RNA."  
"Homo sapiens small nucleolar RNA, C/D box 105 (SNORD105), small nucleolar RNA."  
"Homo sapiens small nucleolar RNA, C/D box 108 (SNORD108), small nucleolar RNA."  
"Homo sapiens small nucleolar RNA, C/D box 109A (SNORD109A), small nucleolar RNA."  
"Homo sapiens small nucleolar RNA, C/D box 109B (SNORD109B), small nucleolar RNA."  
"Homo sapiens small nucleolar RNA, C/D box 11 (SNORD11), small nucleolar RNA."  
"Homo sapiens small nucleolar RNA, C/D box 110 (SNORD110), small nucleolar RNA."  
"Homo sapiens small nucleolar RNA, C/D box 111 (SNORD111), small nucleolar RNA."  
"Homo sapiens small nucleolar RNA, C/D box 113-1 (SNORD113-1), small nucleolar RNA."  
"Homo sapiens small nucleolar RNA, C/D box 113-3 (SNORD113-3), small nucleolar RNA."  
"Homo sapiens small nucleolar RNA, C/D box 114-2 (SNORD114-2), small nucleolar RNA."  
"Homo sapiens small nucleolar RNA, C/D box 114-29 (SNORD114-29), small nucleolar RNA."  
"Homo sapiens small nucleolar RNA, C/D box 114-7 (SNORD114-7), small nucleolar RNA."  
"Homo sapiens small nucleolar RNA, C/D box 117 (SNORD117), small nucleolar RNA."  
"Homo sapiens small nucleolar RNA, C/D box 119 (SNORD119), small nucleolar RNA."  
"Homo sapiens small nucleolar RNA, C/D box 12 (SNORD12), small nucleolar RNA."  
"Homo sapiens small nucleolar RNA, C/D box 121B (SNORD121B), non-coding RNA."  
"Homo sapiens small nucleolar RNA, C/D box 125 (SNORD125), small nucleolar RNA."  
"Homo sapiens small nucleolar RNA, C/D box 126 (SNORD126), small nucleolar RNA."  
"Homo sapiens small nucleolar RNA, C/D box 12B (SNORD12B), small nucleolar RNA."  
"Homo sapiens small nucleolar RNA, C/D box 12C (SNORD12C), small nucleolar RNA."  
"Homo sapiens small nucleolar RNA, C/D box 13 (SNORD13), small nucleolar RNA."  
"Homo sapiens small nucleolar RNA, C/D box 14A (SNORD14A), small nucleolar RNA."  
"Homo sapiens small nucleolar RNA, C/D box 14B (SNORD14B), small nucleolar RNA."  
"Homo sapiens small nucleolar RNA, C/D box 15B (SNORD15B), small nucleolar RNA."  
"Homo sapiens small nucleolar RNA, C/D box 16 (SNORD16), small nucleolar RNA."

"Homo sapiens small nucleolar RNA, C/D box 17 (SNORD17), small nucleolar RNA."  
"Homo sapiens small nucleolar RNA, C/D box 18A (SNORD18A), small nucleolar RNA."  
"Homo sapiens small nucleolar RNA, C/D box 18C (SNORD18C), small nucleolar RNA."  
"Homo sapiens small nucleolar RNA, C/D box 1A (SNORD1A), small nucleolar RNA."  
"Homo sapiens small nucleolar RNA, C/D box 1B (SNORD1B), small nucleolar RNA."  
"Homo sapiens small nucleolar RNA, C/D box 1C (SNORD1C), small nucleolar RNA."  
"Homo sapiens small nucleolar RNA, C/D box 2 (SNORD2), small nucleolar RNA."  
"Homo sapiens small nucleolar RNA, C/D box 21 (SNORD21), small nucleolar RNA."  
"Homo sapiens small nucleolar RNA, C/D box 24 (SNORD24), small nucleolar RNA."  
"Homo sapiens small nucleolar RNA, C/D box 25 (SNORD25), small nucleolar RNA."  
"Homo sapiens small nucleolar RNA, C/D box 27 (SNORD27), small nucleolar RNA."  
"Homo sapiens small nucleolar RNA, C/D box 30 (SNORD30), small nucleolar RNA."  
"Homo sapiens small nucleolar RNA, C/D box 31 (SNORD31), small nucleolar RNA."  
"Homo sapiens small nucleolar RNA, C/D box 32A (SNORD32A), small nucleolar RNA."  
"Homo sapiens small nucleolar RNA, C/D box 32B (SNORD32B), small nucleolar RNA."  
"Homo sapiens small nucleolar RNA, C/D box 33 (SNORD33), small nucleolar RNA."  
"Homo sapiens small nucleolar RNA, C/D box 34 (SNORD34), small nucleolar RNA."  
"Homo sapiens small nucleolar RNA, C/D box 35A (SNORD35A), small nucleolar RNA."  
"Homo sapiens small nucleolar RNA, C/D box 35B (SNORD35B), small nucleolar RNA."  
"Homo sapiens small nucleolar RNA, C/D box 36A (SNORD36A), small nucleolar RNA."  
"Homo sapiens small nucleolar RNA, C/D box 36C (SNORD36C), small nucleolar RNA."  
"Homo sapiens small nucleolar RNA, C/D box 37 (SNORD37), small nucleolar RNA."  
"Homo sapiens small nucleolar RNA, C/D box 38A (SNORD38A), small nucleolar RNA."  
"Homo sapiens small nucleolar RNA, C/D box 38B (SNORD38B), small nucleolar RNA."  
"Homo sapiens small nucleolar RNA, C/D box 3A (SNORD3A), small nucleolar RNA."  
"Homo sapiens small nucleolar RNA, C/D box 3C (SNORD3C), small nucleolar RNA."  
"Homo sapiens small nucleolar RNA, C/D box 3D (SNORD3D), small nucleolar RNA."  
"Homo sapiens small nucleolar RNA, C/D box 41 (SNORD41), small nuclear RNA."  
"Homo sapiens small nucleolar RNA, C/D box 42B (SNORD42B), small nucleolar RNA."  
"Homo sapiens small nucleolar RNA, C/D box 43 (SNORD43), small nuclear RNA."  
"Homo sapiens small nucleolar RNA, C/D box 46 (SNORD46), small nucleolar RNA."  
"Homo sapiens small nucleolar RNA, C/D box 47 (SNORD47), small nuclear RNA."  
"Homo sapiens small nucleolar RNA, C/D box 48 (SNORD48), small nuclear RNA."  
"Homo sapiens small nucleolar RNA, C/D box 49A (SNORD49A), small nucleolar RNA."  
"Homo sapiens small nucleolar RNA, C/D box 4A (SNORD4A), small nucleolar RNA."  
"Homo sapiens small nucleolar RNA, C/D box 4B (SNORD4B), small nucleolar RNA."  
"Homo sapiens small nucleolar RNA, C/D box 5 (SNORD5), small nucleolar RNA."  
"Homo sapiens small nucleolar RNA, C/D box 50B (SNORD50B), small nucleolar RNA."  
"Homo sapiens small nucleolar RNA, C/D box 51 (SNORD51), small nuclear RNA."  
"Homo sapiens small nucleolar RNA, C/D box 52 (SNORD52), non-coding RNA."  
"Homo sapiens small nucleolar RNA, C/D box 54 (SNORD54), small nuclear RNA."  
"Homo sapiens small nucleolar RNA, C/D box 55 (SNORD55), small nucleolar RNA."  
"Homo sapiens small nucleolar RNA, C/D box 56 (SNORD56), small nuclear RNA."  
"Homo sapiens small nucleolar RNA, C/D box 57 (SNORD57), small nuclear RNA."

"Homo sapiens small nucleolar RNA, C/D box 59A (SNORD59A), small nuclear RNA."

"Homo sapiens small nucleolar RNA, C/D box 59B (SNORD59B), small nucleolar RNA."

"Homo sapiens small nucleolar RNA, C/D box 6 (SNORD6), small nucleolar RNA."

"Homo sapiens small nucleolar RNA, C/D box 62B (SNORD62B), small nucleolar RNA."

"Homo sapiens small nucleolar RNA, C/D box 63 (SNORD63), small nucleolar RNA."

"Homo sapiens small nucleolar RNA, C/D box 65 (SNORD65), small nucleolar RNA."

"Homo sapiens small nucleolar RNA, C/D box 66 (SNORD66), small nucleolar RNA."

"Homo sapiens small nucleolar RNA, C/D box 68 (SNORD68), small nucleolar RNA."

"Homo sapiens small nucleolar RNA, C/D box 69 (SNORD69), small nucleolar RNA."

"Homo sapiens small nucleolar RNA, C/D box 7 (SNORD7), small nucleolar RNA."

"Homo sapiens small nucleolar RNA, C/D box 71 (SNORD71), small nucleolar RNA."

"Homo sapiens small nucleolar RNA, C/D box 73A (SNORD73A), small nucleolar RNA."

"Homo sapiens small nucleolar RNA, C/D box 74 (SNORD74), small nucleolar RNA."

"Homo sapiens small nucleolar RNA, C/D box 76 (SNORD76), small nucleolar RNA."

"Homo sapiens small nucleolar RNA, C/D box 78 (SNORD78), small nucleolar RNA."

"Homo sapiens small nucleolar RNA, C/D box 8 (SNORD8), small nucleolar RNA."

"Homo sapiens small nucleolar RNA, C/D box 80 (SNORD80), small nucleolar RNA."

"Homo sapiens small nucleolar RNA, C/D box 83A (SNORD83A), small nucleolar RNA."

"Homo sapiens small nucleolar RNA, C/D box 83B (SNORD83B), small nucleolar RNA."

"Homo sapiens small nucleolar RNA, C/D box 84 (SNORD84), small nucleolar RNA."

"Homo sapiens small nucleolar RNA, C/D box 85 (SNORD85), small nucleolar RNA."

"Homo sapiens small nucleolar RNA, C/D box 87 (SNORD87), small nucleolar RNA."

"Homo sapiens small nucleolar RNA, C/D box 88B (SNORD88B), small nucleolar RNA."

"Homo sapiens small nucleolar RNA, C/D box 88C (SNORD88C), small nucleolar RNA."

"Homo sapiens small nucleolar RNA, C/D box 89 (SNORD89), small nucleolar RNA."

"Homo sapiens small nucleolar RNA, C/D box 91A (SNORD91A), small nucleolar RNA."

"Homo sapiens small nucleolar RNA, C/D box 91B (SNORD91B), small nucleolar RNA."

"Homo sapiens small nucleolar RNA, C/D box 92 (SNORD92), small nucleolar RNA."

"Homo sapiens small nucleolar RNA, C/D box 94 (SNORD94), small nucleolar RNA."

"Homo sapiens small nucleolar RNA, C/D box 95 (SNORD95), small nucleolar RNA."

"Homo sapiens small nucleolar RNA, C/D box 96A (SNORD96A), small nucleolar RNA."

"Homo sapiens small nucleolar RNA, C/D box 96B (SNORD96B), small nucleolar RNA."

"Homo sapiens small nucleolar RNA, C/D box 99 (SNORD99), small nucleolar RNA."

"Homo sapiens syntaphilin (SNPH), mRNA."

"Homo sapiens SNF related kinase (SNRK), mRNA."

"Homo sapiens small nuclear ribonucleoprotein 200kDa (U5) (SNRNP200), mRNA."

"Homo sapiens small nuclear ribonucleoprotein 25kDa (U11/U12) (SNRNP25), mRNA."

"Homo sapiens small nuclear ribonucleoprotein 27kDa (U4/U6.U5) (SNRNP27), mRNA."

"Homo sapiens small nuclear ribonucleoprotein 35kDa (U11/U12) (SNRNP35), transcript variant"

"Homo sapiens small nuclear ribonucleoprotein 40kDa (U5) (SNRNP40), mRNA."

"Homo sapiens small nuclear ribonucleoprotein 48kDa (U11/U12) (SNRNP48), mRNA."

"Homo sapiens small nuclear ribonucleoprotein 70kDa (U1) (SNRNP70), mRNA."

"Homo sapiens small nuclear ribonucleoprotein 70kDa polypeptide (RNP antigen) (SNRNP70), tra

"Homo sapiens small nuclear ribonucleoprotein polypeptide A (SNRPA), mRNA."



"Homo sapiens small nuclear ribonucleoprotein polypeptide A' (SNRPA1), mRNA."

"Homo sapiens small nuclear ribonucleoprotein polypeptides B and B1 (SNRPB), transcript vari

"Homo sapiens small nuclear ribonucleoprotein polypeptide B" (SNRPB2), transcript variant 1, n

"Homo sapiens small nuclear ribonucleoprotein polypeptide C (SNRPC), mRNA."

"Homo sapiens small nuclear ribonucleoprotein D1 polypeptide 16kDa (SNRPD1), mRNA."

"Homo sapiens small nuclear ribonucleoprotein D2 polypeptide 16.5kDa (SNRPD2), transcript v

"Homo sapiens small nuclear ribonucleoprotein D3 polypeptide 18kDa (SNRPD3), mRNA."

"Homo sapiens small nuclear ribonucleoprotein polypeptide E (SNRPE), mRNA."

"Homo sapiens small nuclear ribonucleoprotein polypeptide F (SNRPF), mRNA."

"Homo sapiens small nuclear ribonucleoprotein polypeptide G (SNRPG), mRNA."

"Homo sapiens small nuclear ribonucleoprotein polypeptide N (SNRPN), transcript variant 3, mF

"Homo sapiens syntrophin, alpha 1 (dystrophin-associated protein A1, 59kDa, acidic componen

"Homo sapiens syntrophin, beta 1 (dystrophin-associated protein A1, 59kDa, basic componen

"Homo sapiens syntrophin, beta 2 (dystrophin-associated protein A1, 59kDa, basic componen

"Homo sapiens snurportin 1 (SNUPN), transcript variant 3, mRNA."

"Homo sapiens SNRPN upstream reading frame (SNURF), transcript variant 1, mRNA."

"Homo sapiens SNW domain containing 1 (SNW1), mRNA."

"Homo sapiens sorting nexin 1 (SNX1), transcript variant 1, mRNA."

"Homo sapiens sorting nexin 10 (SNX10), mRNA."

"Homo sapiens sorting nexin 11 (SNX11), transcript variant 1, mRNA."

"Homo sapiens sorting nexin 12 (SNX12), mRNA."

"Homo sapiens sorting nexin 13 (SNX13), mRNA."

"Homo sapiens sorting nexin 14 (SNX14), transcript variant 2, mRNA."

"Homo sapiens sorting nexin 15 (SNX15), transcript variant A, mRNA."

"Homo sapiens sorting nexin 16 (SNX16), transcript variant 1, mRNA."

"Homo sapiens sorting nexin 17 (SNX17), mRNA."

"Homo sapiens sorting nexin 19 (SNX19), mRNA."

"Homo sapiens sorting nexin 2 (SNX2), mRNA."

"Homo sapiens sorting nexin 22 (SNX22), mRNA."

"Homo sapiens sorting nexin 24 (SNX24), mRNA."

"Homo sapiens sorting nexin 25 (SNX25), mRNA."

"Homo sapiens sorting nexin 26 (SNX26), mRNA."

"Homo sapiens sorting nexin family member 27 (SNX27), mRNA."

"Homo sapiens sorting nexin 29 (SNX29), mRNA."

"Homo sapiens sorting nexin 3 (SNX3), transcript variant 3, mRNA."

"Homo sapiens sorting nexin family member 30 (SNX30), mRNA."

"Homo sapiens sorting nexin 31 (SNX31), mRNA."

"Homo sapiens sorting nexin 4 (SNX4), mRNA."

"Homo sapiens sorting nexin 5 (SNX5), transcript variant 1, mRNA."

"Homo sapiens sorting nexin 8 (SNX8), mRNA."

"Homo sapiens sine oculis binding protein homolog (Drosophila) (SOBP), mRNA."

"Homo sapiens suppressor of cytokine signaling 1 (SOCS1), mRNA."

"Homo sapiens suppressor of cytokine signaling 2 (SOCS2), mRNA."

"Homo sapiens suppressor of cytokine signaling 3 (SOCS3), mRNA."

"Homo sapiens suppressor of cytokine signaling 4 (SOCS4), transcript variant 1, mRNA."  
"Homo sapiens suppressor of cytokine signaling 5 (SOCS5), transcript variant 2, mRNA."  
"Homo sapiens superoxide dismutase 2, mitochondrial (SOD2), nuclear gene encoding mitochon  
"Homo sapiens small optic lobes homolog (Drosophila) (SOLH), mRNA."  
"Homo sapiens SON DNA binding protein (SON), transcript variant e, mRNA."  
"Homo sapiens sorbin and SH3 domain containing 2 (SORBS2), transcript variant 1, mRNA."  
"Homo sapiens sorbin and SH3 domain containing 3 (SORBS3), transcript variant 2, mRNA."  
"Homo sapiens sortilin-related VPS10 domain containing receptor 3 (SORCS3), mRNA."  
"PREDICTED: Homo sapiens sorbitol dehydrogenase (SORD), mRNA."  
"Homo sapiens sortilin-related receptor, L(DLR class) A repeats-containing (SORL1), mRNA."  
"Homo sapiens sortilin 1 (SORT1), mRNA."  
"Homo sapiens son of sevenless homolog 1 (Drosophila) (SOS1), mRNA."  
"Homo sapiens sclerostin domain containing 1 (SOSTDC1), mRNA."  
"Homo sapiens SRY (sex determining region Y)-box 12 (SOX12), mRNA."  
"Homo sapiens SRY (sex determining region Y)-box 15 (SOX15), mRNA."  
"Homo sapiens SRY (sex determining region Y)-box 18 (SOX18), mRNA."  
"Homo sapiens SRY (sex determining region Y)-box 2 (SOX2), mRNA."  
"Homo sapiens SRY (sex determining region Y)-box 4 (SOX4), mRNA."  
"Homo sapiens SRY (sex determining region Y)-box 7 (SOX7), mRNA."  
"Homo sapiens SRY (sex determining region Y)-box 8 (SOX8), mRNA."  
"Homo sapiens Sp1 transcription factor (SP1), transcript variant 1, mRNA."  
"Homo sapiens SP100 nuclear antigen (SP100), transcript variant 1, mRNA."  
"Homo sapiens SP110 nuclear body protein (SP110), transcript variant c, mRNA."  
"Homo sapiens SP140 nuclear body protein (SP140), transcript variant 1, mRNA."  
"Homo sapiens SP140 nuclear body protein-like (SP140L), mRNA."  
"Homo sapiens Sp2 transcription factor (SP2), mRNA."  
"Homo sapiens Sp3 transcription factor (SP3), transcript variant 1, mRNA."  
"Homo sapiens Sp4 transcription factor (SP4), mRNA."  
"Homo sapiens Sp6 transcription factor (SP6), mRNA."  
"Homo sapiens sperm autoantigenic protein 17 (SPA17), mRNA."  
"Homo sapiens sperm acrosome associated 1 (SPACA1), mRNA."  
"Homo sapiens sperm acrosome associated 3 (SPACA3), mRNA."  
"Homo sapiens sperm acrosome associated 4 (SPACA4), mRNA."  
"Homo sapiens sperm associated antigen 1 (SPAG1), transcript variant 2, mRNA."  
"Homo sapiens sperm associated antigen 16 (SPAG16), transcript variant 2, mRNA."  
"Homo sapiens sperm associated antigen 4 (SPAG4), mRNA."  
"Homo sapiens sperm associated antigen 5 (SPAG5), mRNA."  
"Homo sapiens sperm associated antigen 6 (SPAG6), transcript variant 2, mRNA."  
"Homo sapiens sperm associated antigen 7 (SPAG7), mRNA."  
"Homo sapiens sperm associated antigen 9 (SPAG9), transcript variant 2, mRNA."  
"Homo sapiens SPANX family, member N3 (SPANXN3), mRNA."  
"Homo sapiens SPARC-like 1 (mast9, hevin) (SPARCL1), mRNA."  
"Homo sapiens spastin (SPAST), transcript variant 1, mRNA."  
"Homo sapiens spermatogenesis associated 12 (SPATA12), mRNA."

"Homo sapiens spermatogenesis associated 18 homolog (rat) (SPATA18), mRNA."  
"Homo sapiens spermatogenesis associated 2 (SPATA2), mRNA."  
"Homo sapiens spermatogenesis associated 20 (SPATA20), mRNA."  
"Homo sapiens spermatogenesis associated 2-like (SPATA2L), mRNA."  
"PREDICTED: Homo sapiens spermatogenesis associated 3 (SPATA3), misc RNA."  
"Homo sapiens spermatogenesis associated 5-like 1 (SPATA5L1), mRNA."  
"Homo sapiens spermatogenesis associated 7 (SPATA7), transcript variant 2, mRNA."  
"Homo sapiens spermatogenesis associated, serine-rich 2 (SPATS2), mRNA."  
"Homo sapiens spermatogenesis associated, serine-rich 2-like (SPATS2L), transcript variant 2,  
"Homo sapiens SPC24, NDC80 kinetochore complex component, homolog (S. cerevisiae) (SPC  
"Homo sapiens SPC25, NDC80 kinetochore complex component, homolog (S. cerevisiae) (SPC  
"Homo sapiens signal peptidase complex subunit 1 homolog (S. cerevisiae) (SPCS1), mRNA."  
"Homo sapiens signal peptidase complex subunit 2 homolog (S. cerevisiae) (SPCS2), mRNA."  
"Homo sapiens signal peptidase complex subunit 3 homolog (S. cerevisiae) (SPCS3), mRNA."  
"Homo sapiens sperm flagellar 1 (SPEF1), mRNA."  
"Homo sapiens sperm flagellar 2 (SPEF2), transcript variant 2, mRNA."  
"Homo sapiens spen homolog, transcriptional regulator (Drosophila) (SPEN), mRNA."  
"Homo sapiens spastic paraplegia 11 (autosomal recessive) (SPG11), transcript variant 1, mRN  
"PREDICTED: Homo sapiens spastic paraplegia 21 (autosomal recessive, Mast syndrome), tra  
"Homo sapiens spastic paraplegia 3A (autosomal dominant) (SPG3A), transcript variant 1, mRN  
"Homo sapiens spastic paraplegia 7 (pure and complicated autosomal recessive) (SPG7), nucle  
"Homo sapiens S-phase response (cyclin-related) (SPHAR), mRNA."  
"Homo sapiens sphingosine kinase 2 (SPHK2), mRNA."  
"Homo sapiens spleen focus forming virus (SFFV) proviral integration oncogene spi1 (SPI1), tra  
"Homo sapiens Spi-B transcription factor (Spi-1/PU.1 related) (SPIB), mRNA."  
"Homo sapiens Spi-C transcription factor (Spi-1/PU.1 related) (SPIC), mRNA."  
"Homo sapiens spindlin 1 (SPIN1), mRNA."  
"Homo sapiens spindlin family, member 2A (SPIN2A), mRNA."  
"Homo sapiens spindlin family, member 2B (SPIN2B), transcript variant 2, mRNA."  
"Homo sapiens spindlin family, member 3 (SPIN3), mRNA."  
"Homo sapiens spindlin family, member 4 (SPIN4), mRNA."  
"Homo sapiens serine peptidase inhibitor, Kazal type 2 (acrosin-trypsin inhibitor) (SPINK2), mRN  
"Homo sapiens serine peptidase inhibitor, Kazal type 5 (SPINK5), mRNA."  
"Homo sapiens serine protease inhibitor Kazal-type 5-like 3 (SPINK5L3), mRNA."  
"Homo sapiens serine peptidase inhibitor, Kunitz type 1 (SPINT1), transcript variant 2, mRNA."  
"Homo sapiens serine peptidase inhibitor, Kunitz type, 2 (SPINT2), mRNA."  
"Homo sapiens spire homolog 1 (Drosophila) (SPIRE1), transcript variant 2, mRNA."  
"Homo sapiens spire homolog 2 (Drosophila) (SPIRE2), mRNA."  
"Homo sapiens sialophorin (SPN), transcript variant 1, mRNA."  
"Homo sapiens spinster homolog 1 (Drosophila) (SPNS1), mRNA."  
"Homo sapiens spinster homolog 2 (Drosophila) (SPNS2), mRNA."  
"Homo sapiens spinster homolog 3 (Drosophila) (SPNS3), mRNA."  
"Homo sapiens sparc/osteonectin, cwcv and kazal-like domains proteoglycan (testican) 1 (SPOC  
"Homo sapiens sparc/osteonectin, cwcv and kazal-like domains proteoglycan (testican) 2 (SPOC

"Homo sapiens spondin 1, extracellular matrix protein (SPON1), mRNA."  
"Homo sapiens speckle-type POZ protein-like (SPOPL), mRNA."  
"Homo sapiens secreted phosphoprotein 1 (SPP1), transcript variant 2, mRNA."  
"Homo sapiens secreted phosphoprotein 2, 24kDa (SPP2), mRNA."  
"Homo sapiens signal peptide peptidase-like 2A (SPPL2A), mRNA."  
"Homo sapiens signal peptide peptidase-like 2B (SPPL2B), transcript variant 3, mRNA."  
"Homo sapiens signal peptide peptidase 3 (SPPL3), mRNA."  
"Homo sapiens sepiapterin reductase (7,8-dihydrobiopterin:NADP+ oxidoreductase) (SPR), mRNA."  
"Homo sapiens sprouty-related, EVH1 domain containing 1 (SPRED1), mRNA."  
"Homo sapiens sprouty-related, EVH1 domain containing 2 (SPRED2), mRNA."  
"Homo sapiens small proline-rich protein 2A (SPRR2A), mRNA."  
"Homo sapiens small proline-rich protein 4 (SPRR4), mRNA."  
"Homo sapiens sprouty homolog 1, antagonist of FGF signaling (Drosophila) (SPRY1), transcript variant 1, mRNA."  
"Homo sapiens sprouty homolog 2 (Drosophila) (SPRY2), mRNA."  
"Homo sapiens sprouty homolog 4 (Drosophila) (SPRY4), mRNA."  
"Homo sapiens SPRY domain containing 3 (SPRYD3), mRNA."  
"Homo sapiens SPRY domain containing 4 (SPRYD4), mRNA."  
"Homo sapiens SPRY domain containing 5 (SPRYD5), mRNA."  
"Homo sapiens splanchnin/ryanodine receptor domain and SOCS box containing 1 (SPSB1), mRNA."  
"Homo sapiens splanchnin/ryanodine receptor domain and SOCS box containing 2 (SPSB2), mRNA."  
"Homo sapiens splanchnin/ryanodine receptor domain and SOCS box containing 3 (SPSB3), mRNA."  
"Homo sapiens spectrin, alpha, erythrocytic 1 (elliptocytosis 2) (SPTA1), mRNA."  
"Homo sapiens spectrin, alpha, non-erythrocytic 1 (alpha-fodrin) (SPTAN1), mRNA."  
"Homo sapiens spectrin, beta, non-erythrocytic 1 (SPTBN1), transcript variant 2, mRNA."  
"Homo sapiens spectrin, beta, non-erythrocytic 2 (SPTBN2), mRNA."  
"Homo sapiens spectrin, beta, non-erythrocytic 4 (SPTBN4), transcript variant sigma1, mRNA."  
"Homo sapiens serine palmitoyltransferase, long chain base subunit 1 (SPTLC1), transcript variant 1, mRNA."  
"Homo sapiens serine palmitoyltransferase, long chain base subunit 2 (SPTLC2), mRNA."  
"Homo sapiens serine palmitoyltransferase, long chain base subunit 3 (SPTLC3), mRNA."  
"Homo sapiens SPT2, Suppressor of Ty, domain containing 1 (*S. cerevisiae*) (SPTY2D1), mRNA."  
"Homo sapiens squalene epoxidase (SQLE), mRNA."  
"Homo sapiens sulfide quinone reductase-like (yeast) (SQRDL), nuclear gene encoding mitochondrial protein."  
"Homo sapiens sequestosome 1 (SQSTM1), mRNA."  
"Homo sapiens U2-associated SR140 protein (SR140), mRNA."  
"Homo sapiens steroid receptor RNA activator 1 (SRA1), mRNA."  
"Homo sapiens S1 RNA binding domain 1 (SRBD1), mRNA."  
"Homo sapiens v-src sarcoma (Schmidt-Ruppin A-2) viral oncogene homolog (avian) (SRC), transcript variant 1, mRNA."  
"Homo sapiens steroid-5-alpha-reductase, alpha polypeptide 1 (3-oxo-5 alpha-steroid delta 4-dehydrogenase) (SRD5A1), mRNA."  
"Homo sapiens steroid 5 alpha-reductase 3 (SRD5A3), mRNA."  
"Homo sapiens sterol regulatory element binding transcription factor 1 (SREBF1), transcript variant 1, mRNA."  
"Homo sapiens serum response factor (c-fos serum response element-binding transcription factor) (SRF), mRNA."  
"Homo sapiens serum response factor binding protein 1 (SRFBP1), mRNA."  
"Homo sapiens SLIT-ROBO Rho GTPase activating protein 1 (SRGAP1), mRNA."  
"Homo sapiens SLIT-ROBO Rho GTPase activating protein 2 (SRGAP2), mRNA."

"PREDICTED: Homo sapiens misc\_RNA (SRGAP2L), miscRNA."  
"Homo sapiens SLIT-ROBO Rho GTPase activating protein 3 (SRGAP3), transcript variant 2, m"  
"Homo sapiens serglycin (SRGN), mRNA."  
"Homo sapiens sorcin (SRI), transcript variant 1, mRNA."  
"Homo sapiens sarcalumenin (SRL), mRNA."  
"Homo sapiens spermidine synthase (SRM), mRNA."  
"Homo sapiens signal recognition particle 14kDa (homologous Alu RNA binding protein) (SRP14)  
"Homo sapiens signal recognition particle 14kDa (homologous Alu RNA binding protein) pseudo  
"Homo sapiens signal recognition particle 19kDa (SRP19), mRNA."  
"Homo sapiens signal recognition particle 54kDa (SRP54), mRNA."  
"Homo sapiens signal recognition particle 68kDa (SRP68), mRNA."  
"Homo sapiens signal recognition particle 72kDa (SRP72), mRNA."  
"Homo sapiens signal recognition particle 9kDa (SRP9), mRNA."  
"Homo sapiens SFRS protein kinase 1 (SRPK1), mRNA."  
"Homo sapiens SFRS protein kinase 2 (SRPK2), transcript variant 1, mRNA."  
"Homo sapiens signal recognition particle receptor (docking protein) (SRPR), mRNA."  
"Homo sapiens signal recognition particle receptor, B subunit (SRPRB), mRNA."  
"Homo sapiens sushi-repeat-containing protein, X-linked (SRPX), mRNA."  
"Homo sapiens serine racemase (SRR), mRNA."  
"Homo sapiens SRR1 domain containing (SRRD), mRNA."  
"Homo sapiens serine/arginine repetitive matrix 1 (SRRM1), mRNA."  
"PREDICTED: Homo sapiens serine/arginine repetitive matrix 1-like (SRRM1L), mRNA."  
"Homo sapiens serine/arginine repetitive matrix 2 (SRRM2), mRNA."  
"Homo sapiens serine/arginine repetitive matrix 5 (SRRM5), mRNA."  
"Homo sapiens sulfiredoxin 1 homolog (*S. cerevisiae*) (SRXN1), mRNA."  
"Homo sapiens synovial sarcoma translocation, chromosome 18 (SS18), transcript variant 2, mF  
"Homo sapiens synovial sarcoma translocation gene on chromosome 18-like 1 (SS18L1), mRN/  
"Homo sapiens synovial sarcoma translocation gene on chromosome 18-like 2 (SS18L2), mRN/  
"Homo sapiens Sjogren syndrome antigen B (autoantigen La) (SSB), mRNA."  
"Homo sapiens single-stranded DNA binding protein 1 (SSBP1), mRNA."  
"Homo sapiens single-stranded DNA binding protein 2 (SSBP2), mRNA."  
"Homo sapiens single stranded DNA binding protein 3 (SSBP3), transcript variant 2, mRNA."  
"Homo sapiens single stranded DNA binding protein 4 (SSBP4), transcript variant 1, mRNA."  
"Homo sapiens sperm specific antigen 2 (SSFA2), mRNA."  
"Homo sapiens slingshot homolog 2 (*Drosophila*) (SSH2), mRNA."  
"Homo sapiens slingshot homolog 3 (*Drosophila*) (SSH3), mRNA."  
"Homo sapiens Sjogren syndrome nuclear autoantigen 1 (SSNA1), mRNA."  
"Homo sapiens sarcospan (*Kras* oncogene-associated gene) (SSPN), mRNA."  
"Homo sapiens signal sequence receptor, alpha (translocon-associated protein alpha) (SSR1), r  
"Homo sapiens signal sequence receptor, beta (translocon-associated protein beta) (SSR2), mF  
"Homo sapiens signal sequence receptor, gamma (translocon-associated protein gamma) (SSR  
"Homo sapiens signal sequence receptor, delta (translocon-associated protein delta) (SSR4), m  
"Homo sapiens structure specific recognition protein 1 (SSRP1), mRNA."  
"Homo sapiens Sjogren syndrome/scleroderma autoantigen 1 (SSSCA1), mRNA."

"Homo sapiens somatostatin receptor 2 (SSTR2), mRNA."

"Homo sapiens SSU72 RNA polymerase II CTD phosphatase homolog (*S. cerevisiae*) (SSU72),

"Homo sapiens synovial sarcoma, X breakpoint 2 interacting protein (SSX2IP), mRNA."

"Homo sapiens synovial sarcoma, X breakpoint 3 (SSX3), transcript variant 1, mRNA."

"Homo sapiens suppression of tumorigenicity 13 (colon carcinoma) (Hsp70 interacting protein) (

"Homo sapiens suppression of tumorigenicity 14 (colon carcinoma, matriptase, epithin) (ST14),

"Homo sapiens suppressor of tumorigenicity 20 (ST20), transcript variant 1, mRNA."

"Homo sapiens ST3 beta-galactoside alpha-2,3-sialyltransferase 1 (ST3GAL1), transcript varian

"Homo sapiens ST3 beta-galactoside alpha-2,3-sialyltransferase 2 (ST3GAL2), mRNA."

"Homo sapiens ST3 beta-galactoside alpha-2,3-sialyltransferase 3 (ST3GAL3), transcript varian

"Homo sapiens ST3 beta-galactoside alpha-2,3-sialyltransferase 4 (ST3GAL4), mRNA."

"Homo sapiens ST3 beta-galactoside alpha-2,3-sialyltransferase 5 (ST3GAL5), transcript varian

"Homo sapiens ST3 beta-galactoside alpha-2,3-sialyltransferase 6 (ST3GAL6), mRNA."

"Homo sapiens ST6 beta-galactosamide alpha-2,6-sialyltransferase 1 (ST6GAL1), transcript vari

"Homo sapiens ST6 (alpha-N-acetyl-neuraminyl-2,3-beta-galactosyl-1, 3)-N-acetylgalactosamini

"Homo sapiens ST6 (alpha-N-acetyl-neuraminyl-2,3-beta-galactosyl-1, 3)-N-acetylgalactosamini

"Homo sapiens suppression of tumorigenicity 7 (ST7), transcript variant a, mRNA."

Homo sapiens ST7 overlapping transcript 2 (antisense non-coding RNA) (ST7OT2) on chromos

"Homo sapiens ST7 overlapping transcript 4 (non-protein coding) (ST7OT4), non-coding RNA."

"Homo sapiens ST8 alpha-N-acetyl-neuraminide alpha-2,8-sialyltransferase 1 (ST8SIA1), mRN/

"Homo sapiens ST8 alpha-N-acetyl-neuraminide alpha-2,8-sialyltransferase 2 (ST8SIA2), mRN/

"Homo sapiens ST8 alpha-N-acetyl-neuraminide alpha-2,8-sialyltransferase 3 (ST8SIA3), mRN/

"Homo sapiens ST8 alpha-N-acetyl-neuraminide alpha-2,8-sialyltransferase 4 (ST8SIA4), transc

"Homo sapiens ST8 alpha-N-acetyl-neuraminide alpha-2,8-sialyltransferase 5 (ST8SIA5), mRN/

"Homo sapiens stabilin 2 (STAB2), mRNA."

"Homo sapiens SH3 and cysteine rich domain 2 (STAC2), mRNA."

"Homo sapiens SH3 and cysteine rich domain 3 (STAC3), mRNA."

"Homo sapiens stromal antigen 1 (STAG1), mRNA."

"Homo sapiens stromal antigen 2 (STAG2), transcript variant 4, mRNA."

"Homo sapiens stromal antigen 3 (STAG3), mRNA."

"Homo sapiens stromal antigen 3-like 1 (STAG3L1), transcript variant 1, mRNA."

"Homo sapiens stromal antigen 3-like 2 (STAG3L2), mRNA."

"Homo sapiens stromal antigen 3-like 3 (STAG3L3), mRNA."

"Homo sapiens stromal antigen 3-like 4 (STAG3L4), mRNA."

"Homo sapiens signal transducing adaptor molecule (SH3 domain and ITAM motif) 1 (STAM), n

"Homo sapiens signal transducing adaptor molecule (SH3 domain and ITAM motif) 2 (STAM2),

"Homo sapiens STAM binding protein (STAMBPL1), transcript variant 1, mRNA."

"Homo sapiens STAM binding protein-like 1 (STAMBPL1), mRNA."

"Homo sapiens signal transducing adaptor family member 1 (STAP1), mRNA."

"Homo sapiens StAR-related lipid transfer (START) domain containing 10 (STARD10), mRNA."

"Homo sapiens StAR-related lipid transfer (START) domain containing 3 (STARD3), mRNA."

"Homo sapiens STARD3 N-terminal like (STARD3NL), mRNA."

"Homo sapiens StAR-related lipid transfer (START) domain containing 4 (STARD4), mRNA."

"Homo sapiens StAR-related lipid transfer (START) domain containing 5 (STARD5), mRNA."

"Homo sapiens START domain containing 7 (STARD7), transcript variant 2, mRNA."  
"Homo sapiens signal transducer and activator of transcription 1, 91kDa (STAT1), transcript vari  
"Homo sapiens signal transducer and activator of transcription 2, 113kDa (STAT2), mRNA."  
"Homo sapiens signal transducer and activator of transcription 3 (acute-phase response factor)  
"Homo sapiens signal transducer and activator of transcription 4 (STAT4), mRNA."  
"Homo sapiens signal transducer and activator of transcription 5A (STAT5A), mRNA."  
"Homo sapiens signal transducer and activator of transcription 5B (STAT5B), mRNA."  
"Homo sapiens signal transducer and activator of transcription 6, interleukin-4 induced (STAT6)  
"Homo sapiens staufer, RNA binding protein, homolog 1 (Drosophila) (STAU1), transcript variar  
"Homo sapiens staufer, RNA binding protein, homolog 2 (Drosophila) (STAU2), mRNA."  
"Homo sapiens stanniocalcin 1 (STC1), mRNA."  
"Homo sapiens stanniocalcin 2 (STC2), mRNA."  
"PREDICTED: Homo sapiens six transmembrane epithelial antigen of the prostate 1 (STEAP1),  
"PREDICTED: Homo sapiens hypothetical STGC3 (STGC3), misc RNA."  
"Homo sapiens SCL/TAL1 interrupting locus (STIL), transcript variant 2, mRNA."  
"Homo sapiens stromal interaction molecule 1 (STIM1), mRNA."  
"Homo sapiens stromal interaction molecule 2 (STIM2), mRNA."  
"Homo sapiens stress-induced-phosphoprotein 1 (Hsp70/Hsp90-organizing protein) (STIP1), mf  
"Homo sapiens serine/threonine kinase 10 (STK10), mRNA."  
"Homo sapiens serine/threonine kinase 11 (STK11), mRNA."  
"Homo sapiens serine/threonine kinase 11 interacting protein (STK11IP), mRNA."  
"Homo sapiens serine/threonine kinase 16 (STK16), transcript variant 2, mRNA."  
"Homo sapiens serine/threonine kinase 17b (STK17B), mRNA."  
"Homo sapiens serine/threonine kinase 19 (STK19), transcript variant 1, mRNA."  
"Homo sapiens serine/threonine kinase 25 (STE20 homolog, yeast) (STK25), mRNA."  
"Homo sapiens serine/threonine kinase 3 (STE20 homolog, yeast) (STK3), mRNA."  
"Homo sapiens serine/threonine kinase 32A (STK32A), mRNA."  
"Homo sapiens serine/threonine kinase 33 (STK33), mRNA."  
"Homo sapiens serine/threonine kinase 35 (STK35), mRNA."  
"Homo sapiens serine/threonine kinase 36, fused homolog (Drosophila) (STK36), mRNA."  
"Homo sapiens serine/threonine kinase 38 (STK38), mRNA."  
"Homo sapiens serine/threonine kinase 38 like (STK38L), mRNA."  
"Homo sapiens serine threonine kinase 39 (STE20/SPS1 homolog, yeast) (STK39), mRNA."  
"Homo sapiens serine/threonine kinase 4 (STK4), mRNA."  
"Homo sapiens serine/threonine kinase 40 (STK40), mRNA."  
"Homo sapiens stathmin 1 (STMN1), transcript variant 1, mRNA."  
"Homo sapiens stathmin-like 2 (STMN2), mRNA."  
"Homo sapiens stathmin-like 3 (STMN3), mRNA."  
"Homo sapiens stathmin-like 4 (STMN4), mRNA."  
"Homo sapiens stomatin (STOM), transcript variant 1, mRNA."  
"Homo sapiens stomatin (EPB72)-like 1 (STOML1), mRNA."  
"Homo sapiens stomatin (EPB72)-like 2 (STOML2), mRNA."  
"Homo sapiens storkhead box 1 (STOX1), transcript variant 1, mRNA."  
"Homo sapiens stimulated by retinoic acid 13 homolog (mouse) (STRA13), mRNA."

"Homo sapiens stimulated by retinoic acid gene 6 homolog (mouse) (STRA6), mRNA."  
"Homo sapiens STE20-related kinase adaptor alpha (STRADA), transcript variant 3, mRNA."  
"Homo sapiens STE20-related kinase adaptor beta (STRADB), mRNA."  
"Homo sapiens serine/threonine kinase receptor associated protein (STRAP), mRNA."  
"Homo sapiens spermatid perinuclear RNA binding protein (STRBP), mRNA."  
"Homo sapiens stereocilin (STRC), mRNA."  
"Homo sapiens striatin, calmodulin binding protein (STRN), mRNA."  
"Homo sapiens striatin, calmodulin binding protein 3 (STRN3), transcript variant 2, mRNA."  
"Homo sapiens striatin, calmodulin binding protein 4 (STRN4), transcript variant 2, mRNA."  
"Homo sapiens steroid sulfatase (microsomal), isozyme S (STS), mRNA."  
"Homo sapiens Cbl-interacting protein Sts-1 (STS-1), mRNA."  
"Homo sapiens STT3, subunit of the oligosaccharyltransferase complex, homolog A (S. cerevisiae)."   
"Homo sapiens STT3, subunit of the oligosaccharyltransferase complex, homolog B (S. cerevisiae)."   
"Homo sapiens STIP1 homology and U-box containing protein 1 (STUB1), mRNA."  
"Homo sapiens syntaxin 11 (STX11), mRNA."  
"Homo sapiens syntaxin 12 (STX12), mRNA."  
"Homo sapiens syntaxin 16 (STX16), transcript variant 1, mRNA."  
"Homo sapiens syntaxin 17 (STX17), mRNA."  
"Homo sapiens syntaxin 1A (brain) (STX1A), mRNA."  
"Homo sapiens syntaxin 2 (STX2), transcript variant 2, mRNA."  
"Homo sapiens syntaxin 3 (STX3), mRNA."  
"Homo sapiens syntaxin 4 (STX4), mRNA."  
"Homo sapiens syntaxin 5 (STX5), mRNA."  
"Homo sapiens syntaxin 6 (STX6), mRNA."  
"Homo sapiens syntaxin 7 (STX7), mRNA."  
"Homo sapiens syntaxin 8 (STX8), mRNA."  
"Homo sapiens syntaxin binding protein 1 (STXBP1), transcript variant 2, mRNA."  
"Homo sapiens syntaxin binding protein 2 (STXBP2), mRNA."  
"Homo sapiens syntaxin binding protein 3 (STXBP3), mRNA."  
"Homo sapiens syntaxin binding protein 4 (STXBP4), mRNA."  
"Homo sapiens syntaxin binding protein 5 (tomosyn) (STXBP5), mRNA."  
"Homo sapiens syntaxin binding protein 5-like (STXBP5L), mRNA."  
"Homo sapiens syntaxin binding protein 6 (amisyn) (STXBP6), mRNA."  
"Homo sapiens serine/threonine/tyrosine interacting-like 1 (STYXL1), mRNA."  
"Homo sapiens SUB1 homolog (S. cerevisiae) (SUB1), mRNA."  
"Homo sapiens succinate-CoA ligase, ADP-forming, beta subunit (SUCLA2), mRNA."  
"Homo sapiens succinate-CoA ligase, alpha subunit (SUCLG1), mRNA."  
"Homo sapiens succinate-CoA ligase, GDP-forming, beta subunit (SUCLG2), mRNA."  
"Homo sapiens succinate receptor 1 (SUCNR1), mRNA."  
"Homo sapiens suppressor of defective silencing 3 homolog (S. cerevisiae) (SUDDS3), mRNA."  
"Homo sapiens SGT1, suppressor of G2 allele of SKP1 (S. cerevisiae) (SUGT1), mRNA."  
"Homo sapiens sulfatase 1 (SULF1), mRNA."  
"Homo sapiens sulfatase 2 (SULF2), transcript variant 1, mRNA."  
"Homo sapiens sulfotransferase family, cytosolic, 1A, phenol-preferring, member 1 (SULT1A1),



"Homo sapiens sulfotransferase family, cytosolic, 1A, phenol-preferring, member 2 (SULT1A2),  
"Homo sapiens sulfotransferase family, cytosolic, 1A, phenol-preferring, member 3 (SULT1A3),  
"Homo sapiens sulfotransferase family, cytosolic, 1A, phenol-preferring, member 4 (SULT1A4),  
"Homo sapiens sulfotransferase family, cytosolic, 1B, member 1 (SULT1B1), mRNA."  
"Homo sapiens sulfotransferase family, cytosolic, 2A, dehydroepiandrosterone (DHEA)-preferrin  
"Homo sapiens sulfotransferase family, cytosolic, 2B, member 1 (SULT2B1), transcript variant 2  
"Homo sapiens sulfotransferase family, cytosolic, 6B, member 1 (SULT6B1), mRNA."  
"Homo sapiens sulfatase modifying factor 1 (SUMF1), mRNA."  
"Homo sapiens sulfatase modifying factor 2 (SUMF2), transcript variant 4, mRNA."  
"Homo sapiens SMT3 suppressor of mif two 3 homolog 2 (*S. cerevisiae*) (SUMO2), transcript va  
"Homo sapiens SMT3 suppressor of mif two 3 homolog 3 (*S. cerevisiae*) (SUMO3), mRNA."  
"Homo sapiens sulfite oxidase (SUOX), nuclear gene encoding mitochondrial protein, transcript  
"Homo sapiens suppressor of Ty 16 homolog (*S. cerevisiae*) (SUPT16H), mRNA."  
"Homo sapiens suppressor of Ty 3 homolog (*S. cerevisiae*) (SUPT3H), transcript variant 2, mRN  
"Homo sapiens suppressor of Ty 4 homolog 1 (*S. cerevisiae*) (SUPT4H1), mRNA."  
"Homo sapiens suppressor of Ty 5 homolog (*S. cerevisiae*) (SUPT5H), mRNA."  
"Homo sapiens suppressor of Ty 6 homolog (*S. cerevisiae*) (SUPT6H), mRNA."  
"Homo sapiens suppressor of var1, 3-like 1 (*S. cerevisiae*) (SUPV3L1), mRNA."  
"Homo sapiens surfeit 1 (SURF1), nuclear gene encoding mitochondrial protein, mRNA."  
"Homo sapiens surfeit 2 (SURF2), mRNA."  
"Homo sapiens surfeit 4 (SURF4), mRNA."  
"Homo sapiens surfeit 6 (SURF6), mRNA."  
"Homo sapiens sushi domain containing 1 (SUSD1), mRNA."  
"Homo sapiens sushi domain containing 2 (SUSD2), mRNA."  
"Homo sapiens sushi domain containing 3 (SUSD3), mRNA."  
"Homo sapiens suppressor of variegation 3-9 homolog 1 (*Drosophila*) (SUV39H1), mRNA."  
"Homo sapiens suppressor of variegation 3-9 homolog 2 (*Drosophila*) (SUV39H2), mRNA."  
"Homo sapiens suppressor of variegation 4-20 homolog 1 (*Drosophila*) (SUV420H1), transcript v  
"Homo sapiens suppressor of variegation 4-20 homolog 2 (*Drosophila*) (SUV420H2), mRNA."  
"Homo sapiens suppressor of zeste 12 homolog (*Drosophila*) (SUZ12), mRNA."  
"Homo sapiens synaptic vesicle glycoprotein 2A (SV2A), mRNA."  
"Homo sapiens synaptic vesicle glycoprotein 2B (SV2B), mRNA."  
"Homo sapiens SV2 related protein homolog (rat) (SVOP), mRNA."  
"Homo sapiens SWAP switching B-cell complex 70kDa subunit (SWAP70), mRNA."  
"Homo sapiens synapse associated protein 1, SAP47 homolog (*Drosophila*) (SYAP1), mRNA."  
"Homo sapiens synaptonemal complex central element protein 1 (SYCE1), transcript variant 1, 1  
"Homo sapiens synaptonemal complex central element protein 1-like (SYCE1L), mRNA."  
"Homo sapiens synapse defective 1, Rho GTPase, homolog 1 (*C. elegans*) (SYDE1), mRNA."  
"Homo sapiens SYF2 homolog, RNA splicing factor (*S. cerevisiae*) (SYF2), transcript variant 1, 1  
"Homo sapiens spleen tyrosine kinase (SYK), mRNA."  
"Homo sapiens symplekin (SYMPK), mRNA."  
"Homo sapiens synapsin I (SYN1), transcript variant Ia, mRNA."  
"Homo sapiens synapsin II (SYN2), transcript variant IIb, mRNA."  
"Homo sapiens syncoilin, intermediate filament 1 (SYNC1), mRNA."

"Homo sapiens synaptotagmin binding, cytoplasmic RNA interacting protein (SYNCRIP), mRNA  
"Homo sapiens spectrin repeat containing, nuclear envelope 2 (SYNE2), transcript variant 2, mRNA  
"Homo sapiens synaptogyrin 1 (SYNGR1), transcript variant 1b, mRNA."  
"Homo sapiens synaptogyrin 3 (SYNGR3), mRNA."  
"Homo sapiens synaptojanin 1 (SYNJ1), transcript variant 1, mRNA."  
"Homo sapiens synaptojanin 2 binding protein (SYNJ2BP), mRNA."  
"Homo sapiens synemin, intermediate filament protein (SYNM), transcript variant B, mRNA."  
"Homo sapiens synaptopodin (SYNPO), mRNA."  
"Homo sapiens synaptophysin (SYP), mRNA."  
"Homo sapiens synaptophysin-like 1 (SYPL1), transcript variant 1, mRNA."  
"Homo sapiens synaptophysin-like 2 (SYPL2), mRNA."  
"Homo sapiens SYS1 Golgi-localized integral membrane protein homolog (S. cerevisiae) (SYS1  
"Homo sapiens synaptotagmin XI (SYT11), mRNA."  
"Homo sapiens synaptotagmin XIII (SYT13), mRNA."  
"Homo sapiens synaptotagmin XIV (SYT14), mRNA."  
"Homo sapiens synaptotagmin XV (SYT15), transcript variant a, mRNA."  
"Homo sapiens synaptotagmin XVI (SYT16), mRNA."  
"Homo sapiens synaptotagmin XVII (SYT17), mRNA."  
"Homo sapiens synaptotagmin II (SYT2), mRNA."  
"Homo sapiens synaptotagmin III (SYT3), mRNA."  
"Homo sapiens synaptotagmin IX (SYT9), mRNA."  
"Homo sapiens synaptotagmin-like 1 (SYTL1), mRNA."  
"Homo sapiens synaptotagmin-like 2 (SYTL2), transcript variant f, mRNA."  
"Homo sapiens synaptotagmin-like 3 (SYTL3), mRNA."  
"Homo sapiens synovial apoptosis inhibitor 1, synoviolin (SYVN1), transcript variant 1, mRNA."  
"Homo sapiens trace amine associated receptor 2 (TAAR2), transcript variant 2, mRNA."  
"Homo sapiens trace amine associated receptor 5 (TAAR5), mRNA."  
"Homo sapiens tachykinin 3 (neuromedin K, neurokinin beta) (TAC3), transcript variant 1, mRNA/  
"Homo sapiens transforming, acidic coiled-coil containing protein 1 (TACC1), mRNA."  
"Homo sapiens transforming, acidic coiled-coil containing protein 2 (TACC2), transcript variant 2  
"Homo sapiens transforming, acidic coiled-coil containing protein 3 (TACC3), mRNA."  
"Homo sapiens translational activator of mitochondrially encoded cytochrome c oxidase I (TACC  
"Homo sapiens tachykinin receptor 2 (TACR2), mRNA."  
"Homo sapiens tumor-associated calcium signal transducer 1 (TACSTD1), mRNA."  
"Homo sapiens transcriptional adaptor 1 (HFI1 homolog, yeast)-like (TADA1L), mRNA."  
"Homo sapiens transcriptional adaptor 2A (TADA2A), transcript variant 2, mRNA."  
"Homo sapiens transcriptional adaptor 2B (TADA2B), mRNA."  
"Homo sapiens transcriptional adaptor 3 (TADA3), transcript variant 2, mRNA."  
"Homo sapiens TAF1 RNA polymerase II, TATA box binding protein (TBP)-associated factor, 25  
"Homo sapiens TAF10 RNA polymerase II, TATA box binding protein (TBP)-associated factor, 3  
"Homo sapiens TAF11 RNA polymerase II, TATA box binding protein (TBP)-associated factor, 2  
"Homo sapiens TAF12 RNA polymerase II, TATA box binding protein (TBP)-associated factor, 2  
"Homo sapiens TAF13 RNA polymerase II, TATA box binding protein (TBP)-associated factor, 1  
"Homo sapiens TAF15 RNA polymerase II, TATA box binding protein (TBP)-associated factor, 6

"Homo sapiens TATA box binding protein (TBP)-associated factor, RNA polymerase I, A, 48kDa  
"Homo sapiens TATA box binding protein (TBP)-associated factor, RNA polymerase I, B, 63kDa  
"Homo sapiens TATA box binding protein (TBP)-associated factor, RNA polymerase I, C, 110kDa  
"Homo sapiens TATA box binding protein (TBP)-associated factor, RNA polymerase I, D, 41kDa  
"Homo sapiens TAF1 RNA polymerase II, TATA box binding protein (TBP)-associated factor, 21  
"Homo sapiens TAF2 RNA polymerase II, TATA box binding protein (TBP)-associated factor, 15  
"Homo sapiens TAF4 RNA polymerase II, TATA box binding protein (TBP)-associated factor, 13  
"Homo sapiens TAF4b RNA polymerase II, TATA box binding protein (TBP)-associated factor, 1  
"Homo sapiens TAF5 RNA polymerase II, TATA box binding protein (TBP)-associated factor, 1C  
"Homo sapiens TAF5-like RNA polymerase II, p300/CBP-associated factor (PCAF)-associated f  
"Homo sapiens TAF6-like RNA polymerase II, p300/CBP-associated factor (PCAF)-associated f  
"Homo sapiens TAF7 RNA polymerase II, TATA box binding protein (TBP)-associated factor, 55  
"Homo sapiens TAF9 RNA polymerase II, TATA box binding protein (TBP)-associated factor, 32  
"Homo sapiens TAF9-like RNA polymerase II, TATA box binding protein (TBP)-associated facto  
"Homo sapiens T-cell activation RhoGTPase activating protein (TAGAP), transcript variant 2, ml  
"Homo sapiens transgelin (TAGLN), transcript variant 1, mRNA."  
"Homo sapiens transgelin 2 (TAGLN2), mRNA."  
"Homo sapiens transgelin 3 (TAGLN3), transcript variant 3, mRNA."  
"PREDICTED: Homo sapiens aldo-keto reductase, truncated (tAKR), mRNA."  
"PREDICTED: Homo sapiens transaldolase 1 (TALDO1), mRNA."  
"Homo sapiens tetratricopeptide repeat, ankyrin repeat and coiled-coil containing 1 (TANC1), ml  
"Homo sapiens tetratricopeptide repeat, ankyrin repeat and coiled-coil containing 2 (TANC2), ml  
"Homo sapiens TRAF family member-associated NFKB activator (TANK), transcript variant 2, m  
"Homo sapiens TAO kinase 2 (TAOK2), transcript variant 2, mRNA."  
"Homo sapiens TAO kinase 3 (TAOK3), mRNA."  
"Homo sapiens transporter 1, ATP-binding cassette, sub-family B (MDR/TAP) (TAP1), mRNA."  
"Homo sapiens transporter 2, ATP-binding cassette, sub-family B (MDR/TAP) (TAP2), transcript  
"Homo sapiens TAP binding protein (tapasin) (TAPBP), transcript variant 3, mRNA."  
"Homo sapiens TAP binding protein-like (TAPBPL), mRNA."  
"Homo sapiens transmembrane anterior posterior transformation 1 (TAPT1), mRNA."  
"Homo sapiens TAR (HIV-1) RNA binding protein 1 (TARBP1), mRNA."  
"Homo sapiens TAR (HIV-1) RNA binding protein 2 (TARBP2), transcript variant 2, mRNA."  
"Homo sapiens TAR DNA binding protein (TARDBP), mRNA."  
"Homo sapiens threonyl-tRNA synthetase (TARS), mRNA."  
"Homo sapiens threonyl-tRNA synthetase 2, mitochondrial (putative) (TARS2), nuclear gene enc  
"Homo sapiens threonyl-tRNA synthetase-like 2 (TARSL2), mRNA."  
"Homo sapiens taste receptor, type 2, member 14 (TAS2R14), mRNA."  
"Homo sapiens taste receptor, type 2, member 3 (TAS2R3), mRNA."  
"Homo sapiens taste receptor, type 2, member 4 (TAS2R4), mRNA."  
"Homo sapiens taste receptor, type 2, member 40 (TAS2R40), mRNA."  
"Homo sapiens taspase, threonine aspartase, 1 (TASP1), mRNA."  
"Homo sapiens TatD DNase domain containing 2 (TATDN2), mRNA."  
"Homo sapiens TatD DNase domain containing 3 (TATDN3), transcript variant 1, mRNA."  
"Homo sapiens Tax1 (human T-cell leukemia virus type I) binding protein 1 (TAX1BP1), transcri

"Homo sapiens Tax1 (human T-cell leukemia virus type I) binding protein 3 (TAX1BP3), mRNA."

"Homo sapiens tafazzin (cardiomyopathy, dilated 3A (X-linked); endocardial fibroelastosis 2; Baf"

"Homo sapiens TBC1 (tre-2/USP6, BUB2, cdc16) domain family, member 1 (TBC1D1), mRNA."

"Homo sapiens TBC1 domain family, member 10A (TBC1D10A), mRNA."

"Homo sapiens TBC1 domain family, member 10B (TBC1D10B), mRNA."

"Homo sapiens TBC1 domain family, member 10C (TBC1D10C), mRNA."

"Homo sapiens TBC1 domain family, member 13 (TBC1D13), mRNA."

"Homo sapiens TBC1 domain family, member 14 (TBC1D14), mRNA."

"Homo sapiens TBC1 domain family, member 15 (TBC1D15), mRNA."

"Homo sapiens TBC1 domain family, member 16 (TBC1D16), mRNA."

"Homo sapiens TBC1 domain family, member 17 (TBC1D17), mRNA."

"Homo sapiens TBC1 domain family, member 19 (TBC1D19), mRNA."

"Homo sapiens TBC1 domain family, member 2 (TBC1D2), mRNA."

"Homo sapiens TBC1 domain family, member 20 (TBC1D20), mRNA."

"Homo sapiens TBC1 domain family, member 22A (TBC1D22A), mRNA."

"Homo sapiens TBC1 domain family, member 22B (TBC1D22B), mRNA."

"Homo sapiens TBC1 domain family, member 23 (TBC1D23), mRNA."

"Homo sapiens TBC1 domain family, member 24 (TBC1D24), mRNA. XM\_945422"

"Homo sapiens TBC1 domain family, member 26 (TBC1D26), mRNA."

"Homo sapiens TBC1 domain family, member 2B (TBC1D2B), mRNA."

"PREDICTED: Homo sapiens TBC1 domain family, member 3F, transcript variant 11 (TBC1D3F"

"Homo sapiens TBC1 domain family, member 3H (TBC1D3H), mRNA."

"PREDICTED: Homo sapiens TBC1 domain family, member 3I (TBC1D3I), mRNA."

"Homo sapiens TBC1 domain family, member 4 (TBC1D4), mRNA."

"Homo sapiens TBC1 domain family, member 7 (TBC1D7), mRNA."

"Homo sapiens TBC1 domain family, member 8 (with GRAM domain) (TBC1D8), mRNA."

"Homo sapiens TBC1 domain family, member 8B (with GRAM domain) (TBC1D8B), transcript v

"Homo sapiens TBC1 domain family, member 9 (with GRAM domain) (TBC1D9), mRNA."

"Homo sapiens TBC1 domain family, member 9B (with GRAM domain) (TBC1D9B), transcript v

"Homo sapiens tubulin folding cofactor A (TBFA), mRNA."

"Homo sapiens tubulin folding cofactor B (TFCB), mRNA."

"Homo sapiens tubulin folding cofactor C (TFCC), mRNA."

"Homo sapiens TBCC domain containing 1 (TBCCD1), mRNA."

"Homo sapiens tubulin folding cofactor D (TFCD), mRNA."

"Homo sapiens tubulin folding cofactor E (TFCE), transcript variant 2, mRNA."

"Homo sapiens tubulin folding cofactor E-like (TFCEL), mRNA."

"Homo sapiens TANK-binding kinase 1 (TBK1), mRNA."

"Homo sapiens TBK1 binding protein 1 (TBKBP1), mRNA."

"Homo sapiens transducin (beta)-like 1X-linked (TBL1X), mRNA."

"Homo sapiens transducin (beta)-like 1X-linked receptor 1 (TBL1XR1), mRNA."

"Homo sapiens transducin (beta)-like 2 (TBL2), mRNA."

"Homo sapiens transducin (beta)-like 3 (TBL3), mRNA."

"Homo sapiens TATA box binding protein (TBP), mRNA."

"Homo sapiens TBP-like 1 (TBPL1), mRNA."

"Homo sapiens transforming growth factor beta regulator 4 (TBRG4), transcript variant 2, mRNA"

"Homo sapiens T-box 18 (TBX18), mRNA."

"Homo sapiens T-box 20 (TBX20), transcript variant 2, mRNA."

"Homo sapiens T-box 22 (TBX22), transcript variant 2, mRNA."

"Homo sapiens T-box 3 (TBX3), transcript variant 2, mRNA."

"Homo sapiens tandem C2 domains, nuclear (TC2N), mRNA."

"Homo sapiens testicular cell adhesion molecule 1 homolog (mouse) (TCAM1), non-coding RNA"

"Homo sapiens T-cell lymphoma breakpoint associated target 1 (TCBA1), mRNA."

"Homo sapiens transcription elongation factor A (SII), 1 (TCEA1), transcript variant 2, mRNA."

"Homo sapiens transcription elongation factor A (SII), 2 (TCEA2), transcript variant 1, mRNA."

"Homo sapiens transcription elongation factor A (SII), 3 (TCEA3), mRNA."

"Homo sapiens transcription elongation factor A (SII)-like 1 (TCEAL1), transcript variant 3, mRN"

"Homo sapiens transcription elongation factor A (SII)-like 2 (TCEAL2), mRNA."

"Homo sapiens transcription elongation factor A (SII)-like 3 (TCEAL3), transcript variant 2, mRN"

"Homo sapiens transcription elongation factor A (SII)-like 4 (TCEAL4), transcript variant 4, mRN"

"Homo sapiens transcription elongation factor A (SII)-like 7 (TCEAL7), mRNA."

"Homo sapiens transcription elongation factor A (SII)-like 8 (TCEAL8), transcript variant 1, mRN"

"Homo sapiens transcription elongation factor B (SIII), polypeptide 1 (15kDa, elongin C) (TCEB1"

"PREDICTED: Homo sapiens transcription elongation factor B (SIII), polypeptide 1 (15kDa, elon"

"Homo sapiens transcription elongation factor B (SIII), polypeptide 3 (110kDa, elongin A) (TCEE"

"Homo sapiens transcription elongation factor B polypeptide 3B (elongin A2) (TCEB3B), mRNA."

"Homo sapiens transcription elongation regulator 1 (TCERG1), transcript variant 1, mRNA."

"Homo sapiens transcription factor 12 (TCF12), transcript variant 2, mRNA."

"Homo sapiens transcription factor 19 (TCF19), transcript variant 2, mRNA."

"Homo sapiens transcription factor 25 (basic helix-loop-helix) (TCF25), mRNA."

"Homo sapiens transcription factor 3 (E2A immunoglobulin enhancer binding factors E12/E47) ("

"Homo sapiens transcription factor 4 (TCF4), transcript variant 2, mRNA."

"Homo sapiens transcription factor-like 5 (basic helix-loop-helix) (TCFL5), mRNA."

"Homo sapiens trichohyalin (TCHH), mRNA."

"Homo sapiens trichoplein, keratin filament binding (TCHP), mRNA."

"Homo sapiens T-cell, immune regulator 1, ATPase, H<sup>+</sup> transporting, lysosomal V0 subunit A3 ("

"Homo sapiens T-cell leukemia/lymphoma 1A (TCL1A), transcript variant 2, mRNA."

"Homo sapiens T-cell leukemia/lymphoma 1B (TCL1B), transcript variant 1, mRNA."

"Homo sapiens T-cell leukemia/lymphoma 6 (TCL6), transcript variant TCL6c1, mRNA."

"Homo sapiens transcobalamin II; macrocytic anemia (TCN2), mRNA."

"Homo sapiens Treacher Collins-Franceschetti syndrome 1 (TCOF1), transcript variant 2, mRN/"

"Homo sapiens t-complex 1 (TCP1), transcript variant 1, mRNA."

"Homo sapiens t-complex 10 (mouse) (TCP10), mRNA."

"Homo sapiens t-complex 11 (mouse)-like 1 (TCP11L1), mRNA."

"Homo sapiens t-complex 11 (mouse)-like 2 (TCP11L2), mRNA."

"Homo sapiens T-cell leukemia translocation altered gene (TCTA), mRNA."

"Homo sapiens Tctex1 domain containing 2 (TCTEX1D2), mRNA."

"Homo sapiens tectonic family member 1 (TCTN1), transcript variant 1, mRNA."

"Homo sapiens tectonic family member 3 (TCTN3), mRNA."

"Homo sapiens thymine-DNA glycosylase (TDG), mRNA."  
"Homo sapiens teratocarcinoma-derived growth factor 1 (TDGF1), mRNA."  
"Homo sapiens L-threonine dehydrogenase (TDH), non-coding RNA."  
"Homo sapiens tyrosyl-DNA phosphodiesterase 1 (TDP1), transcript variant 1, mRNA."  
"Homo sapiens tudor domain containing 1 (TDRD1), mRNA."  
"Homo sapiens tudor domain containing 3 (TDRD3), mRNA."  
"Homo sapiens tudor domain containing 7 (TDRD7), mRNA."  
"Homo sapiens tudor and KH domain containing (TDRKH), transcript variant 3, mRNA."  
"Homo sapiens TEA domain family member 2 (TEAD2), mRNA."  
"Homo sapiens TEA domain family member 3 (TEAD3), mRNA."  
"Homo sapiens TEA domain family member 4 (TEAD4), transcript variant 1, mRNA."  
"Homo sapiens tectonin beta-propeller repeat containing 1 (TECPR1), mRNA."  
"Homo sapiens trans-2,3-enoyl-CoA reductase (TECR), mRNA."  
"Homo sapiens transmembrane epididymal protein 1 (TEDDM1), mRNA."  
"Homo sapiens thyrotrophic embryonic factor (TEF), transcript variant 1, mRNA."  
"Homo sapiens tektin 1 (TEKT1), mRNA."  
"Homo sapiens tektin 4 (TEKT4), mRNA."  
"Homo sapiens tektin 5 (TEKT5), mRNA."  
"Homo sapiens TEL2, telomere maintenance 2, homolog (S. cerevisiae) (TELO2), mRNA."  
"Homo sapiens telomerase RNA component (TERC), telomerase RNA."  
"Homo sapiens telomeric repeat binding factor 2, interacting protein (TERF2IP), mRNA."  
"Homo sapiens telomerase reverse transcriptase (TERT), transcript variant 1, mRNA."  
"Homo sapiens testis derived transcript (3 LIM domains) (TES), transcript variant 1, mRNA."  
"Homo sapiens tescalcin (TESC), mRNA."  
"Homo sapiens testis-specific kinase 1 (TESK1), mRNA."  
"Homo sapiens testis-specific kinase 2 (TESK2), mRNA."  
"Homo sapiens testis serine protease 5 (TESSP5), mRNA."  
"Homo sapiens tet oncogene 1 (TET1), mRNA."  
"Homo sapiens testis expressed 10 (TEX10), mRNA."  
"Homo sapiens testis expressed 2 (TEX2), mRNA."  
"Homo sapiens testis expressed 261 (TEX261), mRNA."  
"Homo sapiens testis expressed 264 (TEX264), mRNA."  
"Homo sapiens transcription factor A, mitochondrial (TFAM), nuclear gene encoding mitochondr  
"Homo sapiens transcription factor A, mitochondrial pseudogene 1 (TFAMP1), non-coding RNA.  
"Homo sapiens transcription factor AP-2 alpha (activating enhancer binding protein 2 alpha) (TF  
"Homo sapiens transcription factor AP-2 delta (activating enhancer binding protein 2 delta) (TFA  
"Homo sapiens transcription factor AP-4 (activating enhancer binding protein 4) (TFAP4), mRNA/  
"Homo sapiens transcription factor B1, mitochondrial (TFB1M), mRNA."  
"Homo sapiens transcription factor B2, mitochondrial (TFB2M), nuclear gene encoding mitochor  
"Homo sapiens transcription factor CP2-like 1 (TFCP2L1), mRNA."  
"Homo sapiens transcription factor Dp-1 (TFDP1), mRNA."  
"Homo sapiens transcription factor Dp-2 (E2F dimerization partner 2) (TFDP2), mRNA."  
"Homo sapiens transcription factor EB (TFEB), mRNA."  
"Homo sapiens transcription factor EC (TFEC), transcript variant 2, mRNA."

"Homo sapiens trefoil factor 3 (intestinal) (TFF3), mRNA."  
"Homo sapiens TRK-fused gene (TFG), transcript variant 2, mRNA."  
"Homo sapiens tuftelin interacting protein 11 (TFIP11), transcript variant 2, mRNA."  
"Homo sapiens tissue factor pathway inhibitor (lipoprotein-associated coagulation inhibitor) (TFF  
"Homo sapiens tissue factor pathway inhibitor 2 (TFPI2), mRNA."  
"Homo sapiens TCF3 (E2A) fusion partner (in childhood Leukemia) (TFPT), mRNA."  
"Homo sapiens transferrin receptor 2 (TFR2), mRNA."  
"Homo sapiens transferrin receptor (p90, CD71) (TFRC), mRNA."  
"Homo sapiens TDP-glucose 4,6-dehydratase (TGDS), mRNA."  
"Homo sapiens transforming growth factor, alpha (TGFA), transcript variant 2, mRNA."  
"Homo sapiens transforming growth factor beta 1 induced transcript 1 (TGFB1I1), transcript vari  
"Homo sapiens transforming growth factor, beta-induced, 68kDa (TGFB1), mRNA."  
"Homo sapiens transforming growth factor, beta receptor II (70/80kDa) (TGFB2), transcript var  
"Homo sapiens transforming growth factor, beta receptor III (TGFB3), mRNA."  
"Homo sapiens transforming growth factor, beta receptor associated protein 1 (TGFBRAP1), mF  
"Homo sapiens TGFB-induced factor homeobox 1 (TGIF1), transcript variant 4, mRNA."  
"Homo sapiens TGFB-induced factor homeobox 2 (TGIF2), mRNA."  
"Homo sapiens transglutaminase 2 (C polypeptide, protein-glutamine-gamma-glutamyltransfera:  
"Homo sapiens transglutaminase 7 (TGM7), mRNA."  
"Homo sapiens trans-golgi network protein 2 (TGOLN2), mRNA."  
"Homo sapiens TH1-like (Drosophila) (TH1L), transcript variant 1, mRNA."  
"Homo sapiens thyroid adenoma associated (THADA), transcript variant 1, mRNA."  
"Homo sapiens THAP domain containing, apoptosis associated protein 1 (THAP1), transcript va  
"Homo sapiens THAP domain containing 10 (THAP10), mRNA."  
"Homo sapiens THAP domain containing 11 (THAP11), mRNA."  
"Homo sapiens THAP domain containing, apoptosis associated protein 3 (THAP3), mRNA."  
"Homo sapiens THAP domain containing 4 (THAP4), mRNA."  
"Homo sapiens THAP domain containing 5 (THAP5), mRNA."  
"Homo sapiens THAP domain containing 6 (THAP6), mRNA."  
"Homo sapiens THAP domain containing 7 (THAP7), transcript variant 3, mRNA."  
"Homo sapiens THAP domain containing 8 (THAP8), mRNA."  
"Homo sapiens THAP domain containing 9 (THAP9), mRNA."  
"Homo sapiens thrombospondin 4 (THBS4), mRNA."  
"Homo sapiens thioesterase superfamily member 2 (THEM2), mRNA."  
"Homo sapiens thioesterase superfamily member 4 (THEM4), mRNA."  
"Homo sapiens thioesterase superfamily member 5 (THEM5), mRNA."  
"Homo sapiens tRNA-histidine guanylyltransferase 1-like (S. cerevisiae) (THG1L), mRNA."  
"Homo sapiens threonine synthase-like 1 (S. cerevisiae) (THNSL1), mRNA."  
"Homo sapiens threonine synthase-like 2 (S. cerevisiae) (THNSL2), mRNA."  
"Homo sapiens THO complex 1 (THOC1), mRNA."  
"Homo sapiens THO complex 3 (THOC3), mRNA."  
"PREDICTED: Homo sapiens THO complex 4 (THOC4), mRNA."  
"Homo sapiens THO complex 5 (THOC5), transcript variant 1, mRNA."  
"Homo sapiens THO complex 6 homolog (Drosophila) (THOC6), mRNA."

"Homo sapiens THO complex 7 homolog (Drosophila) (THOC7), mRNA."  
"Homo sapiens thimet oligopeptidase 1 (THOP1), mRNA."  
"Homo sapiens thrombopoietin (THPO), mRNA."  
"PREDICTED: Homo sapiens thyroid hormone receptor associated protein 5 (THRAP5), mRNA."  
"Homo sapiens thrombospondin, type I, domain containing 3 (THSD3), transcript variant 2, mRNA."  
"Homo sapiens thrombospondin, type I, domain containing 7A (THSD7A), mRNA."  
"Homo sapiens thiamine triphosphatase (THTPA), mRNA."  
"Homo sapiens THUMP domain containing 1 (THUMPD1), mRNA."  
"Homo sapiens THUMP domain containing 2 (THUMPD2), mRNA."  
"Homo sapiens THUMP domain containing 3 (THUMPD3), mRNA."  
"Homo sapiens Thy-1 cell surface antigen (THY1), mRNA."  
"Homo sapiens thymocyte nuclear protein 1 (THYN1), transcript variant 1, mRNA."  
"Homo sapiens TIA1 cytotoxic granule-associated RNA binding protein (TIA1), transcript variant 1, mRNA."  
"Homo sapiens TGFB1-induced anti-apoptotic factor 1 (TIAF1), mRNA."  
"Homo sapiens TIA1 cytotoxic granule-associated RNA binding protein-like 1 (TIAL1), transcript variant 1, mRNA."  
"Homo sapiens T-cell lymphoma invasion and metastasis 1 (TIAM1), mRNA."  
"Homo sapiens T-cell lymphoma invasion and metastasis 2 (TIAM2), transcript variant 2, mRNA."  
"Homo sapiens toll-like receptor adaptor molecule 1 (TICAM1), transcript variant 2, mRNA."  
"Homo sapiens toll-like receptor adaptor molecule 2 (TICAM2), mRNA."  
"Homo sapiens TRAF-interacting protein with forkhead-associated domain (TIFA), mRNA."  
"Homo sapiens TIGA1 (TIGA1), mRNA."  
"Homo sapiens tigger transposable element derived 2 (TIGD2), mRNA."  
"Homo sapiens tigger transposable element derived 5 (TIGD5), mRNA."  
"Homo sapiens tigger transposable element derived 6 (TIGD6), mRNA."  
"Homo sapiens tigger transposable element derived 7 (TIGD7), mRNA."  
"Homo sapiens T cell immunoreceptor with Ig and ITIM domains (TIGIT), mRNA."  
"Homo sapiens T-cell immunoglobulin and mucin domain containing 4 (TIMD4), mRNA."  
"Homo sapiens timeless homolog (Drosophila) (TIMELESS), mRNA."  
"Homo sapiens translocase of inner mitochondrial membrane 10 homolog (yeast) (TIMM10), nuclear DNA."  
"Homo sapiens translocase of inner mitochondrial membrane 17 homolog A (yeast) (TIMM17A), nuclear DNA."  
"Homo sapiens translocase of inner mitochondrial membrane 17 homolog B (yeast) (TIMM17B), nuclear DNA."  
"Homo sapiens translocase of inner mitochondrial membrane 22 homolog (yeast) (TIMM22), nuclear DNA."  
"Homo sapiens translocase of inner mitochondrial membrane 23 homolog (yeast) (TIMM23), nuclear DNA."  
"Homo sapiens translocase of inner mitochondrial membrane 44 homolog (yeast) (TIMM44), nuclear DNA."  
"Homo sapiens translocase of inner mitochondrial membrane 8 homolog A (yeast) (TIMM8A), nuclear DNA."  
"Homo sapiens translocase of inner mitochondrial membrane 8 homolog B (yeast) (TIMM8B), nuclear DNA."  
"Homo sapiens translocase of inner mitochondrial membrane 9 homolog (yeast) (TIMM9), nuclear DNA."  
"Homo sapiens TIMP metalloproteinase inhibitor 1 (TIMP1), mRNA."  
"PREDICTED: Homo sapiens TIMP metalloproteinase inhibitor 2 (TIMP2), mRNA."  
"Homo sapiens TERF1 (TRF1)-interacting nuclear factor 2 (TINF2), mRNA."  
"Homo sapiens TGF beta-inducible nuclear protein 1 (TINP1), mRNA."  
"Homo sapiens TCDD-inducible poly(ADP-ribose) polymerase (TIPARP), mRNA."  
"Homo sapiens TIMELESS interacting protein (TIPIN), mRNA."  
"Homo sapiens toll-interleukin 1 receptor (TIR) domain containing adaptor protein (TIRAP), transcript variant 1, mRNA."



"Homo sapiens tight junction associated protein 1 (peripheral) (TJAP1), mRNA."  
"Homo sapiens tight junction protein 1 (zona occludens 1) (TJP1), transcript variant 1, mRNA."  
"Homo sapiens tight junction protein 2 (zona occludens 2) (TJP2), transcript variant 2, mRNA."  
"Homo sapiens tight junction protein 3 (zona occludens 3) (TJP3), mRNA."  
"Homo sapiens thymidine kinase 1, soluble (TK1), mRNA."  
"Homo sapiens thymidine kinase 2, mitochondrial (TK2), nuclear gene encoding mitochondrial p  
"Homo sapiens transketolase (Wernicke-Korsakoff syndrome) (TKT), mRNA."  
"Homo sapiens transketolase-like 1 (TKTL1), mRNA."  
"Homo sapiens TLC domain containing 1 (TLCD1), mRNA."  
"Homo sapiens transducin-like enhancer of split 1 (E(sp1) homolog, Drosophila) (TLE1), mRNA.  
"Homo sapiens transducin-like enhancer of split 2 (E(sp1) homolog, Drosophila) (TLE2), mRNA.  
"Homo sapiens transducin-like enhancer of split 3 (E(sp1) homolog, Drosophila) (TLE3), mRNA.  
"Homo sapiens transducin-like enhancer of split 4 (E(sp1) homolog, Drosophila) (TLE4), mRNA.  
"Homo sapiens transducin-like enhancer of split 6 (E(sp1) homolog, Drosophila) (TLE6), mRNA.  
"Homo sapiens tousled-like kinase 1 (TLK1), mRNA."  
"Homo sapiens tousled-like kinase 2 (TLK2), mRNA."  
"Homo sapiens talin 1 (TLN1), mRNA."  
"Homo sapiens talin 2 (TLN2), mRNA."  
"Homo sapiens toll-like receptor 1 (TLR1), mRNA."  
"Homo sapiens toll-like receptor 10 (TLR10), transcript variant 1, mRNA."  
"Homo sapiens toll-like receptor 4 (TLR4), mRNA."  
"Homo sapiens toll-like receptor 5 (TLR5), mRNA."  
"Homo sapiens toll-like receptor 6 (TLR6), mRNA."  
"Homo sapiens toll-like receptor 7 (TLR7), mRNA."  
"Homo sapiens toll-like receptor 9 (TLR9), transcript variant A, mRNA."  
"Homo sapiens T-cell leukemia homeobox 2 (TLX2), mRNA."  
"Homo sapiens TM2 domain containing 2 (TM2D2), transcript variant 1, mRNA."  
"Homo sapiens TM2 domain containing 3 (TM2D3), transcript variant 1, mRNA."  
"Homo sapiens transmembrane 4 L six family member 1 (TM4SF1), mRNA."  
"Homo sapiens transmembrane 6 superfamily member 1 (TM6SF1), mRNA."  
"Homo sapiens transmembrane 7 superfamily member 2 (TM7SF2), mRNA."  
"Homo sapiens transmembrane 7 superfamily member 3 (TM7SF3), mRNA."  
"Homo sapiens transmembrane 9 superfamily member 1 (TM9SF1), transcript variant 2, mRNA.  
"Homo sapiens transmembrane 9 superfamily member 2 (TM9SF2), mRNA."  
"Homo sapiens transmembrane 9 superfamily member 3 (TM9SF3), mRNA."  
"Homo sapiens transmembrane 9 superfamily protein member 4 (TM9SF4), mRNA."  
"Homo sapiens transmembrane BAX inhibitor motif containing 1 (TMBIM1), mRNA."  
"Homo sapiens transmembrane BAX inhibitor motif containing 4 (TMBIM4), mRNA."  
"Homo sapiens transmembrane BAX inhibitor motif containing 6 (TMBIM6), transcript variant 1,  
"Homo sapiens transmembrane channel-like 1 (TMC1), mRNA."  
"Homo sapiens transmembrane channel-like 3 (TMC3), mRNA."  
"Homo sapiens transmembrane channel-like 4 (TMC4), mRNA."  
"Homo sapiens transmembrane channel-like 6 (TMC6), mRNA."  
"Homo sapiens transmembrane channel-like 8 (TMC8), mRNA."

"Homo sapiens transmembrane and coiled-coil domain family 1 (TMCC1), transcript variant 1, mRNA."  
"Homo sapiens transmembrane and coiled-coil domain family 2 (TMCC2), mRNA."  
"Homo sapiens transmembrane and coiled-coil domain family 3 (TMCC3), mRNA."  
"Homo sapiens transmembrane and coiled-coil domains 1 (TMCO1), mRNA."  
"Homo sapiens transmembrane and coiled-coil domains 3 (TMCO3), mRNA."  
"Homo sapiens transmembrane and coiled-coil domains 4 (TMCO4), mRNA."  
"Homo sapiens transmembrane and coiled-coil domains 6 (TMCO6), mRNA."  
"Homo sapiens transmembrane and coiled-coil domains 7 (TMCO7), mRNA."  
"Homo sapiens transmembrane emp24 protein transport domain containing 1 (TMED1), mRNA."  
"Homo sapiens transmembrane emp24-like trafficking protein 10 (yeast) pseudogene (TMED10)."  
"Homo sapiens transmembrane emp24 domain trafficking protein 2 (TMED2), mRNA."  
"Homo sapiens transmembrane emp24 protein transport domain containing 3 (TMED3), mRNA."  
"Homo sapiens transmembrane emp24 protein transport domain containing 4 (TMED4), mRNA."  
"Homo sapiens transmembrane emp24 protein transport domain containing 5 (TMED5), mRNA."  
"Homo sapiens transmembrane emp24 protein transport domain containing 7 (TMED7), mRNA."  
"Homo sapiens transmembrane emp24 protein transport domain containing 9 (TMED9), mRNA."  
"Homo sapiens transmembrane protein with EGF-like and two follistatin-like domains 1 (TMEFF1)."  
"Homo sapiens transmembrane protein with EGF-like and two follistatin-like domains 2 (TMEFF2)."  
"Homo sapiens transmembrane protein 1 (TMEM1), transcript variant 2, mRNA."  
"Homo sapiens transmembrane protein 100 (TMEM100), transcript variant 2, mRNA."  
"Homo sapiens transmembrane protein 101 (TMEM101), mRNA."  
"Homo sapiens transmembrane protein 104 (TMEM104), mRNA."  
"Homo sapiens transmembrane protein 105 (TMEM105), mRNA."  
"Homo sapiens transmembrane protein 106A (TMEM106A), mRNA."  
"Homo sapiens transmembrane protein 106B (TMEM106B), mRNA."  
"Homo sapiens transmembrane protein 106C (TMEM106C), mRNA."  
"Homo sapiens transmembrane protein 107 (TMEM107), transcript variant 1, mRNA."  
"Homo sapiens transmembrane protein 109 (TMEM109), mRNA."  
"Homo sapiens transmembrane protein 11 (TMEM11), mRNA."  
"Homo sapiens transmembrane protein 111 (TMEM111), mRNA."  
"Homo sapiens transmembrane protein 115 (TMEM115), mRNA."  
"Homo sapiens transmembrane protein 116 (TMEM116), mRNA."  
"Homo sapiens transmembrane protein 117 (TMEM117), mRNA."  
"Homo sapiens transmembrane protein 118 (TMEM118), mRNA."  
"Homo sapiens transmembrane protein 119 (TMEM119), mRNA."  
"Homo sapiens transmembrane protein 120A (TMEM120A), mRNA."  
"Homo sapiens transmembrane protein 120B (TMEM120B), mRNA."  
"Homo sapiens transmembrane protein 121 (TMEM121), mRNA."  
"Homo sapiens transmembrane protein 123 (TMEM123), mRNA."  
"Homo sapiens transmembrane protein 126A (TMEM126A), mRNA."  
"Homo sapiens transmembrane protein 126B (TMEM126B), mRNA."  
"Homo sapiens transmembrane protein 127 (TMEM127), mRNA."  
"Homo sapiens transmembrane protein 128 (TMEM128), mRNA."  
"Homo sapiens transmembrane protein 129 (TMEM129), mRNA."

"Homo sapiens transmembrane protein 131 (TMEM131), mRNA."  
"Homo sapiens transmembrane protein 132A (TMEM132A), transcript variant 2, mRNA."  
"Homo sapiens transmembrane protein 133 (TMEM133), mRNA."  
"Homo sapiens transmembrane protein 134 (TMEM134), transcript variant 3, mRNA."  
"Homo sapiens transmembrane protein 135 (TMEM135), mRNA."  
"Homo sapiens transmembrane protein 136 (TMEM136), mRNA."  
"Homo sapiens transmembrane protein 138 (TMEM138), mRNA."  
"Homo sapiens transmembrane protein 140 (TMEM140), mRNA."  
"Homo sapiens transmembrane protein 141 (TMEM141), mRNA."  
"Homo sapiens transmembrane protein 143 (TMEM143), mRNA."  
"Homo sapiens transmembrane protein 145 (TMEM145), mRNA."  
"Homo sapiens transmembrane protein 147 (TMEM147), mRNA."  
"Homo sapiens transmembrane protein 149 (TMEM149), mRNA."  
"Homo sapiens transmembrane protein 14A (TMEM14A), mRNA."  
"Homo sapiens transmembrane protein 14B (TMEM14B), mRNA."  
"Homo sapiens transmembrane protein 14C (TMEM14C), mRNA."  
"PREDICTED: Homo sapiens transmembrane protein 14D (TMEM14D), mRNA."  
"Homo sapiens transmembrane protein 150A (TMEM150A), transcript variant 1, mRNA."  
"Homo sapiens transmembrane protein 150B (TMEM150B), mRNA."  
"Homo sapiens transmembrane protein 151A (TMEM151A), mRNA."  
"Homo sapiens transmembrane protein 154 (TMEM154), mRNA."  
"Homo sapiens transmembrane protein 155 (TMEM155), mRNA."  
"Homo sapiens transmembrane protein 156 (TMEM156), mRNA."  
"Homo sapiens transmembrane protein 158 (TMEM158), mRNA."  
"Homo sapiens transmembrane protein 159 (TMEM159), mRNA."  
"Homo sapiens transmembrane protein 161A (TMEM161A), mRNA."  
"Homo sapiens transmembrane protein 163 (TMEM163), mRNA."  
"Homo sapiens transmembrane protein 165 (TMEM165), mRNA."  
"Homo sapiens transmembrane protein 167A (TMEM167A), mRNA."  
"Homo sapiens transmembrane protein 167B (TMEM167B), mRNA."  
"Homo sapiens transmembrane protein 168 (TMEM168), mRNA."  
"Homo sapiens transmembrane protein 169 (TMEM169), mRNA."  
"PREDICTED: Homo sapiens transmembrane protein 16J (TMEM16J), mRNA."  
"Homo sapiens transmembrane protein 17 (TMEM17), mRNA."  
"Homo sapiens transmembrane protein 170A (TMEM170A), mRNA."  
"Homo sapiens transmembrane protein 170B (TMEM170B), mRNA."  
"Homo sapiens transmembrane protein 173 (TMEM173), nuclear gene encoding mitochondrial  $\rho$ "  
"Homo sapiens transmembrane protein 174 (TMEM174), mRNA."  
"Homo sapiens transmembrane protein 175 (TMEM175), mRNA."  
"Homo sapiens transmembrane protein 176A (TMEM176A), mRNA."  
"Homo sapiens transmembrane protein 177 (TMEM177), mRNA."  
"Homo sapiens transmembrane protein 179B (TMEM179B), mRNA."  
"Homo sapiens transmembrane protein 18 (TMEM18), mRNA."  
"Homo sapiens transmembrane protein 180 (TMEM180), mRNA."

"Homo sapiens transmembrane protein 181 (TMEM181), mRNA."  
"Homo sapiens transmembrane protein 183A (TMEM183A), mRNA."  
"Homo sapiens transmembrane protein 183B (TMEM183B), mRNA."  
"Homo sapiens transmembrane protein 184A (TMEM184A), mRNA."  
"Homo sapiens transmembrane protein 184B (TMEM184B), mRNA."  
"Homo sapiens transmembrane protein 184C (TMEM184C), mRNA."  
"Homo sapiens transmembrane protein 185A (TMEM185A), mRNA."  
"Homo sapiens transmembrane protein 185B (pseudogene) (TMEM185B), non-coding RNA."  
"Homo sapiens transmembrane protein 187 (TMEM187), mRNA."  
"Homo sapiens transmembrane protein 188 (TMEM188), mRNA."  
"Homo sapiens transmembrane protein 189 (TMEM189), mRNA."  
"Homo sapiens transmembrane protein 19 (TMEM19), mRNA."  
"PREDICTED: Homo sapiens misc\_RNA (TMEM191A), miscRNA."  
"PREDICTED: Homo sapiens transmembrane protein 191B, transcript variant 2 (TMEM191B), n  
"Homo sapiens transmembrane protein 192 (TMEM192), mRNA."  
"Homo sapiens transmembrane protein 194 (TMEM194), mRNA."  
"Homo sapiens transmembrane protein 194A (TMEM194A), transcript variant 2, mRNA."  
"Homo sapiens transmembrane protein 194B (TMEM194B), mRNA."  
"Homo sapiens transmembrane protein 198 (TMEM198), mRNA."  
"Homo sapiens transmembrane protein 199 (TMEM199), mRNA."  
"Homo sapiens transmembrane protein 2 (TMEM2), mRNA."  
"Homo sapiens transmembrane protein 20 (TMEM20), mRNA."  
"Homo sapiens transmembrane protein 200A (TMEM200A), mRNA."  
"Homo sapiens transmembrane protein 201 (TMEM201), mRNA."  
"Homo sapiens transmembrane protein 202 (TMEM202), mRNA."  
"Homo sapiens transmembrane protein 203 (TMEM203), mRNA."  
"Homo sapiens transmembrane protein 205 (TMEM205), mRNA."  
"Homo sapiens transmembrane protein 206 (TMEM206), mRNA."  
"Homo sapiens transmembrane protein 208 (TMEM208), mRNA."  
"Homo sapiens transmembrane protein 209 (TMEM209), mRNA."  
"Homo sapiens transmembrane protein 213 (TMEM213), mRNA."  
"Homo sapiens transmembrane protein 214 (TMEM214), transcript variant 1, mRNA."  
"Homo sapiens transmembrane protein 216 (TMEM216), mRNA."  
"Homo sapiens transmembrane protein 219 (TMEM219), transcript variant 1, mRNA."  
"Homo sapiens transmembrane protein 22 (TMEM22), transcript variant 2, mRNA."  
"Homo sapiens transmembrane protein 222 (TMEM222), mRNA."  
"Homo sapiens transmembrane protein 231 (TMEM231), transcript variant 3, mRNA."  
"Homo sapiens transmembrane protein 25 (TMEM25), mRNA."  
"Homo sapiens transmembrane protein 26 (TMEM26), mRNA."  
"Homo sapiens transmembrane protein 27 (TMEM27), mRNA."  
"Homo sapiens transmembrane protein 30A (TMEM30A), mRNA."  
"Homo sapiens transmembrane protein 30B (TMEM30B), mRNA."  
"Homo sapiens transmembrane protein 33 (TMEM33), mRNA."  
"Homo sapiens transmembrane protein 34 (TMEM34), mRNA."

"Homo sapiens transmembrane protein 38A (TMEM38A), mRNA."  
"Homo sapiens transmembrane protein 38B (TMEM38B), mRNA."  
"Homo sapiens transmembrane protein 39A (TMEM39A), mRNA."  
"Homo sapiens transmembrane protein 39B (TMEM39B), mRNA."  
"Homo sapiens transmembrane protein 4 (TMEM4), mRNA."  
"Homo sapiens transmembrane protein 41A (TMEM41A), mRNA."  
"Homo sapiens transmembrane protein 41B (TMEM41B), mRNA."  
"Homo sapiens transmembrane protein 42 (TMEM42), mRNA."  
"Homo sapiens transmembrane protein 43 (TMEM43), mRNA."  
"Homo sapiens transmembrane protein 44 (TMEM44), transcript variant 1, mRNA."  
"Homo sapiens transmembrane protein 45A (TMEM45A), mRNA."  
"Homo sapiens transmembrane protein 48 (TMEM48), mRNA."  
"Homo sapiens transmembrane protein 49 (TMEM49), mRNA."  
"Homo sapiens transmembrane protein 5 (TMEM5), mRNA."  
"Homo sapiens transmembrane protein 50A (TMEM50A), mRNA."  
"Homo sapiens transmembrane protein 50B (TMEM50B), mRNA."  
"Homo sapiens transmembrane protein 51 (TMEM51), mRNA."  
"Homo sapiens transmembrane protein 52 (TMEM52), mRNA."  
"Homo sapiens transmembrane protein 53 (TMEM53), mRNA."  
"Homo sapiens transmembrane protein 54 (TMEM54), mRNA."  
"Homo sapiens transmembrane protein 55A (TMEM55A), mRNA."  
"Homo sapiens transmembrane protein 55B (TMEM55B), mRNA."  
"Homo sapiens transmembrane protein 56 (TMEM56), mRNA."  
"Homo sapiens transmembrane protein 57 (TMEM57), mRNA."  
"Homo sapiens transmembrane protein 59 (TMEM59), mRNA."  
"Homo sapiens transmembrane protein 59-like (TMEM59L), mRNA."  
"Homo sapiens transmembrane protein 60 (TMEM60), mRNA."  
"Homo sapiens transmembrane protein 61 (TMEM61), mRNA."  
"Homo sapiens transmembrane protein 62 (TMEM62), mRNA."  
"Homo sapiens transmembrane protein 63A (TMEM63A), mRNA."  
"Homo sapiens transmembrane protein 63B (TMEM63B), mRNA."  
"Homo sapiens transmembrane protein 63C (TMEM63C), mRNA."  
"Homo sapiens transmembrane protein 64 (TMEM64), mRNA."  
"Homo sapiens transmembrane protein 66 (TMEM66), mRNA."  
"Homo sapiens transmembrane protein 67 (TMEM67), mRNA."  
"Homo sapiens transmembrane protein 68 (TMEM68), mRNA."  
"Homo sapiens transmembrane protein 69 (TMEM69), mRNA."  
"Homo sapiens transmembrane protein 70 (TMEM70), transcript variant 1, mRNA."  
"Homo sapiens transmembrane protein 71 (TMEM71), mRNA."  
"Homo sapiens transmembrane protein 74 (TMEM74), mRNA."  
"Homo sapiens transmembrane protein 77 (TMEM77), mRNA."  
"Homo sapiens transmembrane protein 79 (TMEM79), mRNA."  
"Homo sapiens transmembrane protein 8 (five membrane-spanning domains) (TMEM8), mRNA"  
"PREDICTED: Homo sapiens transmembrane protein 80 (TMEM80), mRNA."

"PREDICTED: Homo sapiens transmembrane protein 83 (TMEM83), misc RNA."  
"Homo sapiens transmembrane protein 85 (TMEM85), mRNA."  
"Homo sapiens transmembrane protein 86B (TMEM86B), mRNA."  
"Homo sapiens transmembrane protein 87A (TMEM87A), mRNA."  
"Homo sapiens transmembrane protein 87B (TMEM87B), mRNA."  
"Homo sapiens transmembrane protein 88 (TMEM88), mRNA."  
"Homo sapiens transmembrane protein 8B (TMEM8B), transcript variant 1, mRNA."  
"Homo sapiens transmembrane protein 9 (TMEM9), mRNA."  
"Homo sapiens transmembrane protein 91 (TMEM91), mRNA."  
"Homo sapiens transmembrane protein 93 (TMEM93), transcript variant 1, mRNA."  
"Homo sapiens transmembrane protein 95 (TMEM95), mRNA."  
"Homo sapiens transmembrane protein 97 (TMEM97), mRNA."  
"Homo sapiens transmembrane protein 98 (TMEM98), transcript variant 1, mRNA."  
"Homo sapiens transmembrane protein 99 (TMEM99), mRNA."  
"Homo sapiens TMEM9 domain family, member B (TMEM9B), mRNA."  
"Homo sapiens TATA element modulatory factor 1 (TMF1), mRNA."  
"Homo sapiens transmembrane and immunoglobulin domain containing 1 (TMIGD1), mRNA."  
"Homo sapiens trimethyllysine hydroxylase, epsilon (TMLHE), mRNA."  
"Homo sapiens tropomodulin 1 (TMOD1), mRNA."  
"Homo sapiens tropomodulin 2 (neuronal) (TMOD2), mRNA."  
"Homo sapiens tropomodulin 3 (ubiquitous) (TMOD3), mRNA."  
"Homo sapiens thymopoietin (TMPO), transcript variant 1, mRNA."  
"Homo sapiens transmembrane protease, serine 11A (TMPRSS11A), mRNA."  
"Homo sapiens transmembrane protease, serine 11B (TMPRSS11B), mRNA."  
"Homo sapiens transmembrane protease, serine 12 (TMPRSS12), mRNA."  
"Homo sapiens transmembrane protease, serine 13 (TMPRSS13), mRNA."  
"PREDICTED: Homo sapiens transmembrane protease, serine 7, transcript variant 3 (TMPRSS  
"Homo sapiens transmembrane protease, serine 9 (TMPRSS9), mRNA."  
"Homo sapiens thymosin beta 10 (TMSB10), mRNA."  
"Homo sapiens thymosin beta 15a (TMSB15A), mRNA."  
"Homo sapiens thymosin, beta 4, X-linked (TMSB4X), mRNA."  
"Homo sapiens thymosin beta 4, Y-linked (TMSB4Y), mRNA."  
"Homo sapiens thymosin-like 3 (TMSL3), mRNA."  
"Homo sapiens transmembrane and tetratricopeptide repeat containing 3 (TMTTC3), mRNA."  
"Homo sapiens transmembrane and tetratricopeptide repeat containing 4 (TMTTC4), transcript va  
"Homo sapiens transmembrane and ubiquitin-like domain containing 1 (TMUB1), mRNA."  
"Homo sapiens transmembrane and ubiquitin-like domain containing 2 (TMUB2), transcript varia  
"Homo sapiens thioredoxin-related transmembrane protein 1 (TMX1), mRNA."  
"Homo sapiens thioredoxin-related transmembrane protein 3 (TMX3), mRNA."  
"Homo sapiens thioredoxin-related transmembrane protein 4 (TMX4), mRNA."  
"Homo sapiens tumor necrosis factor (TNF superfamily, member 2) (TNF), mRNA."  
"Homo sapiens tumor necrosis factor, alpha-induced protein 1 (endothelial) (TNFAIP1), mRNA."  
"Homo sapiens tumor necrosis factor, alpha-induced protein 3 (TNFAIP3), mRNA."  
"Homo sapiens tumor necrosis factor, alpha-induced protein 8 (TNFAIP8), transcript variant 2, n

"Homo sapiens tumor necrosis factor, alpha-induced protein 8-like 1 (TNFAIP8L1), mRNA."  
"Homo sapiens tumor necrosis factor, alpha-induced protein 8-like 2 (TNFAIP8L2), mRNA."  
"Homo sapiens tumor necrosis factor, alpha-induced protein 8-like 3 (TNFAIP8L3), mRNA."  
"Homo sapiens tumor necrosis factor receptor superfamily, member 10a (TNFRSF10A), mRNA."  
"Homo sapiens tumor necrosis factor receptor superfamily, member 10b (TNFRSF10B), transcript."  
"Homo sapiens tumor necrosis factor receptor superfamily, member 10c, decoy without an intracellular domain."  
"Homo sapiens tumor necrosis factor receptor superfamily, member 10d, decoy with truncated cytoplasmic tail."  
"Homo sapiens tumor necrosis factor receptor superfamily, member 11a, NFkB activator (TNFRSF11A), mRNA."  
"Homo sapiens tumor necrosis factor receptor superfamily, member 12A (TNFRSF12A), mRNA."  
"Homo sapiens tumor necrosis factor receptor superfamily, member 13B (TNFRSF13B), mRNA."  
"Homo sapiens tumor necrosis factor receptor superfamily, member 13C (TNFRSF13C), mRNA."  
"Homo sapiens tumor necrosis factor receptor superfamily, member 14 (herpesvirus entry mediator 1), mRNA."  
"Homo sapiens tumor necrosis factor receptor superfamily, member 17 (TNFRSF17), mRNA."  
"Homo sapiens tumor necrosis factor receptor superfamily, member 18 (TNFRSF18), transcript."  
"Homo sapiens tumor necrosis factor receptor superfamily, member 1A (TNFRSF1A), mRNA."  
"Homo sapiens tumor necrosis factor receptor superfamily, member 1B (TNFRSF1B), mRNA."  
"Homo sapiens tumor necrosis factor receptor superfamily, member 21 (TNFRSF21), mRNA."  
"Homo sapiens tumor necrosis factor receptor superfamily, member 25 (TNFRSF25), transcript."  
"Homo sapiens tumor necrosis factor receptor superfamily, member 4 (TNFRSF4), mRNA."  
"Homo sapiens tumor necrosis factor receptor superfamily, member 6b, decoy (TNFRSF6B), transcript."  
"Homo sapiens tumor necrosis factor receptor superfamily, member 8 (TNFRSF8), transcript variant 1."  
"Homo sapiens tumor necrosis factor receptor superfamily, member 9 (TNFRSF9), mRNA."  
"Homo sapiens tumor necrosis factor (ligand) superfamily, member 10 (TNFSF10), mRNA."  
"Homo sapiens TNFSF12-TNFSF13 readthrough (TNFSF12-TNFSF13), mRNA."  
"Homo sapiens tumor necrosis factor (ligand) superfamily, member 13b (TNFSF13B), transcript."  
"Homo sapiens tumor necrosis factor (ligand) superfamily, member 14 (TNFSF14), transcript variant 1."  
"Homo sapiens tumor necrosis factor (ligand) superfamily, member 15 (TNFSF15), mRNA."  
"Homo sapiens tumor necrosis factor (ligand) superfamily, member 4 (tax-transcriptionally active factor 1), mRNA."  
"Homo sapiens tumor necrosis factor (ligand) superfamily, member 8 (TNFSF8), mRNA."  
"Homo sapiens tumor necrosis factor (ligand) superfamily, member 9 (TNFSF9), mRNA."  
"Homo sapiens TNFAIP3 interacting protein 1 (TNIP1), mRNA."  
"Homo sapiens TNFAIP3 interacting protein 2 (TNIP2), mRNA."  
"Homo sapiens tyrosine kinase, non-receptor, 2 (TNK2), transcript variant 1, mRNA."  
"Homo sapiens tankyrase, TRF1-interacting ankyrin-related ADP-ribose polymerase (TNKS), mRNA."  
"Homo sapiens tankyrase 1 binding protein 1, 182kDa (TNKS1BP1), mRNA."  
"Homo sapiens troponin I type 2 (skeletal, fast) (TNNI2), mRNA."  
"Homo sapiens troponin I type 3 (cardiac) (TNNI3), mRNA."  
"Homo sapiens troponin T type 1 (skeletal, slow) (TNNT1), mRNA."  
"Homo sapiens transition protein 1 (during histone to protamine replacement) (TNP1), mRNA."  
"Homo sapiens transportin 1 (TNPO1), transcript variant 1, mRNA."  
"Homo sapiens transportin 2 (importin 3, karyopherin beta 2b) (TNPO2), mRNA."  
"Homo sapiens tenascin R (restrictin, janusin) (TNR), mRNA."  
"Homo sapiens trinucleotide repeat containing 15 (TNRC15), mRNA."  
"Homo sapiens trinucleotide repeat containing 4 (TNRC4), mRNA."

"Homo sapiens trinucleotide repeat containing 6A (TNRC6A), mRNA."  
"Homo sapiens trinucleotide repeat containing 6B (TNRC6B), transcript variant 3, mRNA."  
"PREDICTED: Homo sapiens trinucleotide repeat containing 9, transcript variant 2 (TNRC9), mRNA."  
"Homo sapiens tensin 3 (TNS3), mRNA."  
"Homo sapiens transducer of ERBB2, 1 (TOB1), mRNA."  
"Homo sapiens transducer of ERBB2, 2 (TOB2), mRNA."  
"Homo sapiens target of EGR1, member 1 (nuclear) (TOE1), mRNA."  
"Homo sapiens toll interacting protein (TOLLIP), mRNA."  
"Homo sapiens target of myb1 (chicken) (TOM1), mRNA."  
"Homo sapiens target of myb1-like 2 (chicken) (TOM1L2), transcript variant 3, mRNA."  
"Homo sapiens translocase of outer mitochondrial membrane 20 homolog (yeast) (TOMM20), n  
"Homo sapiens translocase of outer mitochondrial membrane 22 homolog (yeast) (TOMM22), n  
"Homo sapiens translocase of outer mitochondrial membrane 34 (TOMM34), nuclear gene enc  
"Homo sapiens translocase of outer mitochondrial membrane 40 homolog (yeast) (TOMM40), n  
"Homo sapiens translocase of outer mitochondrial membrane 40 homolog (yeast)-like (TOMM4  
"Homo sapiens translocase of outer mitochondrial membrane 5 homolog (yeast) (TOMM5), nucl  
"Homo sapiens translocase of outer mitochondrial membrane 6 homolog (yeast) (TOMM6), nucl  
"Homo sapiens translocase of outer mitochondrial membrane 7 homolog (yeast) (TOMM7), nucl  
"Homo sapiens translocase of outer mitochondrial membrane 70 homolog A (S. cerevisiae) (TO  
"PREDICTED: Homo sapiens hypothetical LOC649159 (TOP), miscRNA."  
"PREDICTED: Homo sapiens topoisomerase (DNA) I, mitochondrial (TOP1MT), mRNA."  
"Homo sapiens topoisomerase (DNA) I pseudogene 1 (TOP1P1), non-coding RNA."  
"Homo sapiens topoisomerase (DNA) II alpha 170kDa (TOP2A), mRNA."  
"Homo sapiens topoisomerase (DNA) II beta 180kDa (TOP2B), mRNA."  
"Homo sapiens topoisomerase (DNA) III beta (TOP3B), mRNA."  
"Homo sapiens topoisomerase (DNA) II binding protein 1 (TOPBP1), mRNA."  
"Homo sapiens topoisomerase I binding, arginine/serine-rich (TOPORS), mRNA."  
"Homo sapiens torsin family 1, member A (torsin A) (TOR1A), mRNA."  
"Homo sapiens torsin A interacting protein 1 (TOR1AIP1), mRNA."  
"Homo sapiens torsin A interacting protein 2 (TOR1AIP2), mRNA."  
"Homo sapiens torsin family 1, member B (torsin B) (TOR1B), mRNA."  
"Homo sapiens torsin family 2, member A (TOR2A), mRNA."  
"Homo sapiens torsin family 3, member A (TOR3A), mRNA."  
"Homo sapiens thymocyte selection-associated high mobility group box (TOX), mRNA."  
"Homo sapiens TOX high mobility group box family member 2 (TOX2), transcript variant 4, mRN  
"Homo sapiens TOX high mobility group box family member 4 (TOX4), mRNA."  
"Homo sapiens tumor protein p53 (TP53), mRNA."  
"Homo sapiens TP53 activated protein 1 (TP53AP1), mRNA."  
"Homo sapiens tumor protein p53 binding protein 1 (TP53BP1), mRNA."  
"Homo sapiens tumor protein p53 binding protein, 2 (TP53BP2), transcript variant 1, mRNA."  
"Homo sapiens tumor protein p53 inducible protein 11 (TP53I11), mRNA."  
"Homo sapiens tumor protein p53 inducible protein 13 (TP53I13), mRNA."  
"Homo sapiens tumor protein p53 inducible nuclear protein 1 (TP53INP1), mRNA."  
"Homo sapiens tumor protein p53 inducible nuclear protein 2 (TP53INP2), mRNA."



"Homo sapiens TP53 regulating kinase (TP53RK), mRNA."  
"Homo sapiens TP53 target 1 (non-protein coding) (TP53TG1), non-coding RNA."  
"Homo sapiens TP53 target 5 (TP53TG5), mRNA."  
"Homo sapiens tumor protein p63 (TP63), transcript variant 5, mRNA."  
"Homo sapiens tumor protein p73-like (TP73L), mRNA."  
"Homo sapiens two pore segment channel 1 (TPCN1), mRNA."  
"Homo sapiens tumor protein D52 (TPD52), transcript variant 3, mRNA."  
"Homo sapiens tumor protein D52-like 1 (TPD52L1), transcript variant 2, mRNA."  
"Homo sapiens tumor protein D52-like 2 (TPD52L2), transcript variant 2, mRNA."  
"Homo sapiens triosephosphate isomerase 1 (TPI1), mRNA."  
"Homo sapiens tropomyosin 1 (alpha) (TPM1), transcript variant 3, mRNA."  
"Homo sapiens tropomyosin 2 (beta) (TPM2), transcript variant 2, mRNA."  
"Homo sapiens tropomyosin 3 (TPM3), transcript variant 1, mRNA."  
"Homo sapiens tropomyosin 4 (TPM4), mRNA."  
"Homo sapiens thiopurine S-methyltransferase (TPMT), mRNA."  
"Homo sapiens tripeptidyl peptidase I (TPP1), mRNA."  
"Homo sapiens tripeptidyl peptidase II (TPP2), mRNA."  
"Homo sapiens tubulin polymerization promoting protein (TPPP), mRNA."  
"Homo sapiens translocated promoter region (to activated MET oncogene) (TPR), mRNA."  
"Homo sapiens tumor protein p63 regulated 1-like (TPRG1L), mRNA."  
"Homo sapiens TP53RK binding protein (TPRKB), mRNA."  
"Homo sapiens tyrosylprotein sulfotransferase 1 (TPST1), mRNA."  
"Homo sapiens tyrosylprotein sulfotransferase 2 (TPST2), transcript variant 1, mRNA."  
"Homo sapiens tumor protein, translationally-controlled 1 (TPT1), mRNA."  
"Homo sapiens transmembrane phosphoinositide 3-phosphatase and tensin homolog 2 (TPTE2  
"Homo sapiens TPX2, microtubule-associated, homolog (Xenopus laevis) (TPX2), mRNA."  
"PREDICTED: Homo sapiens tumor rejection antigen (gp96) 1 pseudogene 2 (TRA1P2), misc R  
"Homo sapiens transformer 2 alpha homolog (Drosophila) (TRA2A), mRNA."  
"Homo sapiens TraB domain containing (TRABD), mRNA."  
"Homo sapiens TNFRSF1A-associated via death domain (TRADD), mRNA."  
"Homo sapiens TNF receptor-associated factor 1 (TRAF1), mRNA."  
"Homo sapiens TNF receptor-associated factor 2 (TRAF2), mRNA."  
"Homo sapiens TNF receptor-associated factor 3 (TRAF3), transcript variant 3, mRNA."  
"Homo sapiens TNF receptor-associated factor 3 interacting protein 1 (TRAF3IP1), mRNA."  
"Homo sapiens TRAF3 interacting protein 2 (TRAF3IP2), transcript variant 1, mRNA."  
"Homo sapiens TRAF3 interacting protein 3 (TRAF3IP3), mRNA."  
"Homo sapiens TNF receptor-associated factor 4 (TRAF4), mRNA."  
"Homo sapiens TNF receptor-associated factor 6 (TRAF6), transcript variant 2, mRNA."  
"Homo sapiens TNF receptor-associated factor 7 (TRAF7), mRNA."  
"Homo sapiens TRAF-type zinc finger domain containing 1 (TRAFD1), mRNA."  
"Homo sapiens TRAF interacting protein (TRAIP), mRNA."  
"Homo sapiens trafficking protein, kinesin binding 1 (TRAK1), mRNA."  
"Homo sapiens trafficking protein, kinesin binding 2 (TRAK2), mRNA."  
"Homo sapiens translocation associated membrane protein 1 (TRAM1), mRNA."

"Homo sapiens translocation associated membrane protein 2 (TRAM2), mRNA."  
"Homo sapiens TNF receptor-associated protein 1 (TRAP1), mRNA."  
"Homo sapiens trafficking protein particle complex 1 (TRAPPC1), mRNA."  
"Homo sapiens trafficking protein particle complex 2 (TRAPPC2), transcript variant 1, mRNA."  
"Homo sapiens trafficking protein particle complex 2-like (TRAPPC2L), mRNA."  
"Homo sapiens trafficking protein particle complex 2 pseudogene 1 (TRAPPC2P1), non-coding l  
"Homo sapiens trafficking protein particle complex 4 (TRAPPC4), mRNA."  
"Homo sapiens trafficking protein particle complex 5 (TRAPPC5), transcript variant 3, mRNA."  
"Homo sapiens trafficking protein particle complex 6A (TRAPPC6A), mRNA."  
"Homo sapiens trafficking protein particle complex 6B (TRAPPC6B), transcript variant 1, mRNA."  
"Homo sapiens trafficking protein particle complex 9 (TRAPPC9), mRNA."  
"Homo sapiens tRNA aspartic acid methyltransferase 1 (TRDMT1), transcript variant b, mRNA."  
"Homo sapiens triggering receptor expressed on myeloid cells-like 1 (TREM1), mRNA."  
"Homo sapiens transcriptional regulating factor 1 (TRERF1), mRNA."  
"Homo sapiens TP53 regulated inhibitor of apoptosis 1 (TRIAP1), mRNA."  
"Homo sapiens tribbles homolog 1 (Drosophila) (TRIB1), mRNA."  
"Homo sapiens tribbles homolog 2 (Drosophila) (TRIB2), mRNA."  
"Homo sapiens tribbles homolog 3 (Drosophila) (TRIB3), mRNA."  
"Homo sapiens tripartite motif-containing 11 (TRIM11), mRNA."  
"Homo sapiens tripartite motif-containing 13 (TRIM13), transcript variant 3, mRNA."  
"Homo sapiens tripartite motif-containing 14 (TRIM14), transcript variant 4, mRNA."  
"PREDICTED: Homo sapiens tripartite motif-containing 16 (TRIM16), mRNA."  
"Homo sapiens tripartite motif-containing 16-like (TRIM16L), mRNA."  
"Homo sapiens tripartite motif-containing 2 (TRIM2), mRNA."  
"Homo sapiens tripartite motif-containing 21 (TRIM21), mRNA."  
"Homo sapiens tripartite motif-containing 22 (TRIM22), mRNA."  
"Homo sapiens tripartite motif-containing 23 (TRIM23), transcript variant alpha, mRNA."  
"Homo sapiens tripartite motif-containing 24 (TRIM24), transcript variant 2, mRNA."  
"Homo sapiens tripartite motif-containing 25 (TRIM25), mRNA."  
"Homo sapiens tripartite motif-containing 26 (TRIM26), mRNA."  
"Homo sapiens tripartite motif-containing 27 (TRIM27), mRNA."  
"Homo sapiens tripartite motif-containing 28 (TRIM28), mRNA."  
"Homo sapiens tripartite motif-containing 29 (TRIM29), mRNA."  
"Homo sapiens tripartite motif-containing 3 (TRIM3), transcript variant 1, mRNA."  
"Homo sapiens tripartite motif-containing 31 (TRIM31), mRNA."  
"Homo sapiens tripartite motif-containing 32 (TRIM32), transcript variant 1, mRNA."  
"Homo sapiens tripartite motif-containing 33 (TRIM33), transcript variant b, mRNA."  
"Homo sapiens tripartite motif-containing 35 (TRIM35), transcript variant 2, mRNA."  
"Homo sapiens tripartite motif-containing 36 (TRIM36), transcript variant 2, mRNA."  
"Homo sapiens tripartite motif-containing 37 (TRIM37), transcript variant 2, mRNA."  
"Homo sapiens tripartite motif-containing 38 (TRIM38), mRNA."  
"Homo sapiens tripartite motif-containing 39 (TRIM39), transcript variant 2, mRNA."  
"Homo sapiens tripartite motif-containing 4 (TRIM4), transcript variant beta, mRNA."  
"Homo sapiens tripartite motif-containing 41 (TRIM41), transcript variant 1, mRNA."

"Homo sapiens tripartite motif-containing 44 (TRIM44), mRNA."  
"Homo sapiens tripartite motif-containing 45 (TRIM45), mRNA."  
"Homo sapiens tripartite motif-containing 46 (TRIM46), mRNA."  
"Homo sapiens tripartite motif-containing 47 (TRIM47), mRNA."  
"Homo sapiens tripartite motif-containing 5 (TRIM5), transcript variant gamma, mRNA."  
"Homo sapiens tripartite motif-containing 52 (TRIM52), mRNA."  
"PREDICTED: Homo sapiens misc\_RNA (TRIM53), miscRNA."  
"Homo sapiens tripartite motif-containing 55 (TRIM55), transcript variant 3, mRNA."  
"Homo sapiens tripartite motif-containing 56 (TRIM56), mRNA."  
"Homo sapiens tripartite motif-containing 59 (TRIM59), mRNA."  
"Homo sapiens tripartite motif-containing 61 (TRIM61), mRNA."  
"Homo sapiens tripartite motif-containing 62 (TRIM62), mRNA."  
"Homo sapiens tripartite motif-containing 65 (TRIM65), mRNA."  
"Homo sapiens tripartite motif-containing 66 (TRIM66), mRNA."  
"Homo sapiens tripartite motif-containing 68 (TRIM68), mRNA."  
"Homo sapiens tripartite motif-containing 69 (TRIM69), transcript variant b, mRNA."  
"Homo sapiens tripartite motif-containing 7 (TRIM7), transcript variant 2, mRNA."  
"Homo sapiens tripartite motif-containing 72 (TRIM72), mRNA."  
"Homo sapiens tripartite motif-containing 78, pseudogene (TRIM78P), non-coding RNA."  
"Homo sapiens tripartite motif-containing 8 (TRIM8), mRNA."  
"Homo sapiens tripartite motif-containing 9 (TRIM9), transcript variant 2, mRNA."  
"Homo sapiens tripartite motif family-like 1 (TRIML1), mRNA."  
"Homo sapiens TRIO and F-actin binding protein (TRIOBP), transcript variant 6, mRNA."  
"Homo sapiens thyroid hormone receptor interactor 10 (TRIP10), mRNA."  
"Homo sapiens thyroid hormone receptor interactor 11 (TRIP11), mRNA."  
"Homo sapiens thyroid hormone receptor interactor 12 (TRIP12), mRNA."  
"Homo sapiens thyroid hormone receptor interactor 13 (TRIP13), mRNA."  
"Homo sapiens thyroid hormone receptor interactor 4 (TRIP4), mRNA."  
"Homo sapiens thyroid hormone receptor interactor 6 (TRIP6), mRNA."  
"Homo sapiens tRNA isopentenyltransferase 1 (TRIT1), mRNA."  
Homo sapiens tRNA lysine 1 (TRK1) on chromosome 17.  
"Homo sapiens TRM1 tRNA methyltransferase 1 homolog (*S. cerevisiae*) (TRMT1), mRNA."  
"Homo sapiens tRNA methyltransferase 11 homolog (*S. cerevisiae*) (TRMT11), mRNA."  
"Homo sapiens tRNA methyltransferase 11-2 homolog (*S. cerevisiae*) (TRMT112), mRNA."  
"Homo sapiens tRNA methyltransferase 12 homolog (*S. cerevisiae*) (TRMT12), mRNA."  
"Homo sapiens TRM2 tRNA methyltransferase 2 homolog A (*S. cerevisiae*) (TRMT2A), transcript variant 1, mRNA."  
"Homo sapiens TRM2 tRNA methyltransferase 2 homolog B (*S. cerevisiae*) (TRMT2B), mRNA."  
"Homo sapiens TRM5 tRNA methyltransferase 5 homolog (*S. cerevisiae*) (TRMT5), mRNA."  
"Homo sapiens tRNA methyltransferase 6 homolog (*S. cerevisiae*) (TRMT6), mRNA."  
"Homo sapiens tRNA methyltransferase 61 homolog A (*S. cerevisiae*) (TRMT61A), mRNA."  
"Homo sapiens tRNA 5-methylaminomethyl-2-thiouridylate methyltransferase (TRMU), nuclear gene, mRNA."  
"Homo sapiens TMF1-regulated nuclear protein 1 (TRNP1), mRNA."  
"Homo sapiens tRNA nucleotidyl transferase, CCA-adding, 1 (TRNT1), mRNA."  
"Homo sapiens trophinin (TRO), transcript variant 6, mRNA."

"Homo sapiens trophinin associated protein (tastin) (TROAP), mRNA."

"Homo sapiens TROVE domain family, member 2 (TROVE2), transcript variant 3, mRNA."

"Homo sapiens transient receptor potential cation channel, subfamily A, member 1 (TRPA1), mRNA."

"Homo sapiens transient receptor potential cation channel, subfamily C, member 1 (TRPC1), mRNA."

"Homo sapiens transient receptor potential cation channel, subfamily C, member 3 (TRPC3), mRNA."

"Homo sapiens transient receptor potential cation channel, subfamily C, member 4 associated protein 1 (TRPC4A), mRNA."

"Homo sapiens transient receptor potential cation channel, subfamily C, member 5 (TRPC5), mRNA."

"Homo sapiens transient receptor potential cation channel, subfamily M, member 4 (TRPM4), mRNA."

"Homo sapiens transient receptor potential cation channel, subfamily M, member 7 (TRPM7), mRNA."

"Homo sapiens trichorhinophalangeal syndrome I (TRPS1), mRNA."

"Homo sapiens transient receptor potential cation channel, subfamily V, member 1 (TRPV1), transcript variant 1, mRNA."

"Homo sapiens transient receptor potential cation channel, subfamily V, member 2 (TRPV2), mRNA."

"Homo sapiens transformation/transcription domain-associated protein (TRRAP), mRNA."

"Homo sapiens TruB pseudouridine (psi) synthase homolog 1 (E. coli) (TRUB1), mRNA."

"Homo sapiens TruB pseudouridine (psi) synthase homolog 2 (E. coli) (TRUB2), mRNA."

"Homo sapiens tuberous sclerosis 1 (TSC1), transcript variant 1, mRNA."

"Homo sapiens tuberous sclerosis 2 (TSC2), transcript variant 1, mRNA."

"Homo sapiens TSC22 domain family, member 1 (TSC22D1), transcript variant 1, mRNA."

"Homo sapiens TSC22 domain family, member 2 (TSC22D2), mRNA."

"Homo sapiens TSC22 domain family, member 3 (TSC22D3), transcript variant 2, mRNA."

"Homo sapiens TSC22 domain family, member 4 (TSC22D4), mRNA."

"Homo sapiens tRNA splicing endonuclease 15 homolog (S. cerevisiae) (TSEN15), transcript variant 1, mRNA."

"Homo sapiens tRNA splicing endonuclease 2 homolog (S. cerevisiae) (TSEN2), mRNA."

"Homo sapiens tRNA splicing endonuclease 34 homolog (S. cerevisiae) (TSEN34), transcript variant 1, mRNA."

"Homo sapiens tRNA splicing endonuclease 54 homolog (S. cerevisiae) (TSEN54), mRNA."

"Homo sapiens Ts translation elongation factor, mitochondrial (TSFM), mRNA."

"Homo sapiens tumor susceptibility gene 101 (TSG101), mRNA."

"Homo sapiens testis specific, 10 (TSGA10), mRNA."

"Homo sapiens testis specific, 14 (TSGA14), mRNA."

"Homo sapiens thyroid stimulating hormone receptor (TSHR), transcript variant 2, mRNA."

"Homo sapiens teashirt zinc finger homeobox 1 (TSHZ1), mRNA."

"Homo sapiens teashirt zinc finger homeobox 2 (TSHZ2), mRNA."

"Homo sapiens XIST antisense RNA (non-protein coding) (TSIX), antisense RNA."

"Homo sapiens tsukushin (TSKU), mRNA."

"Homo sapiens thymic stromal lymphopoietin (TSLP), transcript variant 2, mRNA."

"Homo sapiens translin (TSN), mRNA."

"Homo sapiens translin-associated factor X (TSNAX), mRNA."

"Homo sapiens translin-associated factor X interacting protein 1 (TSNAXIP1), mRNA."

"Homo sapiens tryptophan/serine protease (T-SP1), mRNA."

"Homo sapiens testes-specific protease 50 (TSP50), mRNA."

"Homo sapiens tetraspanin 10 (TSPAN10), mRNA."

"Homo sapiens tetraspanin 13 (TSPAN13), mRNA."

"Homo sapiens tetraspanin 14 (TSPAN14), mRNA."

"Homo sapiens tetraspanin 15 (TSPAN15), mRNA."

"Homo sapiens tetraspanin 17 (TSPAN17), transcript variant 1, mRNA."  
"PREDICTED: Homo sapiens tetraspanin 19 (TSPAN19), mRNA."  
"Homo sapiens tetraspanin 3 (TSPAN3), transcript variant 1, mRNA."  
"Homo sapiens tetraspanin 31 (TSPAN31), mRNA."  
"Homo sapiens tetraspanin 32 (TSPAN32), mRNA."  
"Homo sapiens tetraspanin 33 (TSPAN33), mRNA."  
"Homo sapiens tetraspanin 5 (TSPAN5), mRNA."  
"Homo sapiens tetraspanin 7 (TSPAN7), mRNA."  
"Homo sapiens tetraspanin 8 (TSPAN8), mRNA."  
"Homo sapiens tetraspanin 9 (TSPAN9), mRNA."  
"Homo sapiens translocator protein (18kDa) (TSPO), transcript variant PBR-S, mRNA."  
"Homo sapiens TSPY-like 1 (TSPYL1), mRNA."  
"Homo sapiens TSPY-like 2 (TSPYL2), mRNA."  
"PREDICTED: Homo sapiens TSPY-like 3 (pseudogene) (TSPYL3), misc RNA."  
"Homo sapiens TSPY-like 4 (TSPYL4), mRNA."  
"Homo sapiens TSR1, 20S rRNA accumulation, homolog (S. cerevisiae) (TSR1), mRNA."  
"Homo sapiens TSR2, 20S rRNA accumulation, homolog (S. cerevisiae) (TSR2), mRNA."  
"Homo sapiens tumor suppressing subtransferable candidate 4 (TSSC4), mRNA."  
"Homo sapiens testis-specific serine kinase 4 (TSSK4), mRNA."  
"Homo sapiens testis-specific serine kinase 6 (TSSK6), mRNA."  
"Homo sapiens thiosulfate sulfurtransferase (rhodanese) (TST), nuclear gene encoding mitocho  
"Homo sapiens tissue specific transplantation antigen P35B (TSTA3), mRNA."  
"Homo sapiens thiosulfate sulfurtransferase (rhodanese)-like domain containing 1 (TSTD1), trar  
"Homo sapiens tetratricopeptide repeat domain 1 (TTC1), mRNA."  
"Homo sapiens tetratricopeptide repeat domain 13 (TTC13), mRNA."  
"Homo sapiens tetratricopeptide repeat domain 14 (TTC14), transcript variant 2, mRNA."  
"Homo sapiens tetratricopeptide repeat domain 15 (TTC15), mRNA."  
"Homo sapiens tetratricopeptide repeat domain 17 (TTC17), mRNA."  
"Homo sapiens tetratricopeptide repeat domain 18 (TTC18), mRNA."  
"Homo sapiens tetratricopeptide repeat domain 19 (TTC19), mRNA."  
"Homo sapiens tetratricopeptide repeat domain 21A (TTC21A), mRNA."  
"Homo sapiens tetratricopeptide repeat domain 22 (TTC22), mRNA."  
"Homo sapiens tetratricopeptide repeat domain 23 (TTC23), transcript variant 2, mRNA."  
"Homo sapiens tetratricopeptide repeat domain 23-like (TTC23L), mRNA."  
"Homo sapiens tetratricopeptide repeat domain 25 (TTC25), mRNA."  
"Homo sapiens tetratricopeptide repeat domain 26 (TTC26), mRNA."  
"Homo sapiens tetratricopeptide repeat domain 27 (TTC27), mRNA."  
"PREDICTED: Homo sapiens tetratricopeptide repeat domain 28 (TTC28), mRNA."  
"Homo sapiens tetratricopeptide repeat domain 29 (TTC29), mRNA."  
"Homo sapiens tetratricopeptide repeat domain 30A (TTC30A), mRNA."  
"Homo sapiens tetratricopeptide repeat domain 30B (TTC30B), mRNA."  
"Homo sapiens tetratricopeptide repeat domain 31 (TTC31), mRNA."  
"Homo sapiens tetratricopeptide repeat domain 32 (TTC32), mRNA."  
"Homo sapiens tetratricopeptide repeat domain 33 (TTC33), mRNA."

"Homo sapiens tetratricopeptide repeat domain 35 (TTC35), mRNA."  
"Homo sapiens tetratricopeptide repeat domain 37 (TTC37), mRNA."  
"Homo sapiens tetratricopeptide repeat domain 38 (TTC38), mRNA."  
"Homo sapiens tetratricopeptide repeat domain 39B (TTC39B), mRNA."  
"Homo sapiens tetratricopeptide repeat domain 39C (TTC39C), mRNA."  
"Homo sapiens tetratricopeptide repeat domain 3-like (TTC3L), non-coding RNA."  
"Homo sapiens tetratricopeptide repeat domain 4 (TTC4), mRNA."  
"Homo sapiens tetratricopeptide repeat domain 5 (TTC5), mRNA."  
"Homo sapiens tetratricopeptide repeat domain 7A (TTC7A), mRNA."  
"Homo sapiens tetratricopeptide repeat domain 8 (TTC8), transcript variant 3, mRNA."  
"Homo sapiens tetratricopeptide repeat domain 9 (TTC9), mRNA."  
"Homo sapiens tetratricopeptide repeat domain 9C (TTC9C), mRNA."  
"Homo sapiens transcription termination factor, RNA polymerase I (TTF1), mRNA."  
"Homo sapiens transcription termination factor, RNA polymerase II (TTF2), mRNA."  
"Homo sapiens TTK protein kinase (TTK), mRNA."  
"Homo sapiens tubulin tyrosine ligase-like family, member 1 (TTLL1), transcript variant 1, mRNA"  
"Homo sapiens tubulin tyrosine ligase-like family, member 10 (TTLL10), mRNA."  
"Homo sapiens tubulin tyrosine ligase-like family, member 11 (TTLL11), mRNA."  
"Homo sapiens tubulin tyrosine ligase-like family, member 12 (TTLL12), mRNA."  
"Homo sapiens tubulin tyrosine ligase-like family, member 3 (TTLL3), transcript variant 2, mRNA"  
"Homo sapiens tubulin tyrosine ligase-like family, member 4 (TTLL4), mRNA."  
"Homo sapiens tubulin tyrosine ligase-like family, member 5 (TTLL5), mRNA."  
"Homo sapiens tubulin tyrosine ligase-like family, member 6 (TTLL6), mRNA."  
"Homo sapiens tubulin tyrosine ligase-like family, member 7 (TTLL7), mRNA."  
"Homo sapiens tubulin tyrosine ligase-like family, member 8 (TTLL8), mRNA."  
"Homo sapiens tocopherol (alpha) transfer protein-like (TTPAL), transcript variant 2, mRNA."  
"Homo sapiens testis-specific transcript, Y-linked 10 (non-protein coding) (TTYTY10), non-coding  
"Homo sapiens testis-specific transcript, Y-linked 19 (non-protein coding) (TTYTY19), non-coding  
"Homo sapiens testis-specific transcript, Y-linked 3 (non-protein coding) (TTYTY3), non-coding RI  
"Homo sapiens testis-specific transcript, Y-linked 4B (non-protein coding) (TTYTY4B), non-coding  
"Homo sapiens testis-specific transcript, Y-linked 7B (non-protein coding) (TTYTY7B), non-coding  
"Homo sapiens tweety homolog 2 (Drosophila) (TTYH2), transcript variant 2, mRNA."  
"Homo sapiens tweety homolog 3 (Drosophila) (TTYH3), mRNA."  
"Homo sapiens tubulin, alpha 1a (TUBA1A), mRNA."  
"Homo sapiens tubulin, alpha 1b (TUBA1B), mRNA."  
"Homo sapiens tubulin, alpha 1c (TUBA1C), mRNA."  
"Homo sapiens tubulin, alpha 3d (TUBA3D), mRNA."  
"Homo sapiens tubulin, alpha 3e (TUBA3E), mRNA."  
"Homo sapiens tubulin, alpha 4a (TUBA4A), mRNA."  
"Homo sapiens tubulin, alpha-like 3 (TUBAL3), mRNA."  
"Homo sapiens tubulin, beta (TUBB), mRNA."  
"Homo sapiens tubulin, beta 2A (TUBB2A), mRNA."  
"Homo sapiens tubulin, beta 2B (TUBB2B), mRNA."  
"Homo sapiens tubulin, beta 2C (TUBB2C), mRNA."

"Homo sapiens tubulin, beta 3 (TUBB3), mRNA."  
"Homo sapiens tubulin, beta 4 (TUBB4), mRNA."  
"Homo sapiens tubulin, beta polypeptide 4, member Q (TUBB4Q), mRNA."  
"PREDICTED: Homo sapiens tubulin, beta 6 (TUBB6), mRNA."  
"Homo sapiens tubulin, delta 1 (TUBD1), mRNA."  
"Homo sapiens tubulin, epsilon 1 (TUBE1), mRNA."  
"Homo sapiens tubulin, gamma 1 (TUBG1), mRNA."  
"Homo sapiens tubulin, gamma 2 (TUBG2), mRNA."  
"Homo sapiens tubulin, gamma complex associated protein 2 (TUBGCP2), mRNA."  
"Homo sapiens tubulin, gamma complex associated protein 4 (TUBGCP4), mRNA."  
"Homo sapiens tubulin, gamma complex associated protein 5 (TUBGCP5), mRNA."  
"Homo sapiens tubulin, gamma complex associated protein 6 (TUBGCP6), transcript variant 2, 1  
"Homo sapiens tuftelin 1 (TUFT1), mRNA."  
"Homo sapiens taurine upregulated 1 (non-protein coding) (TUG1), non-coding RNA."  
"Homo sapiens tubby like protein 3 (TULP3), mRNA."  
"Homo sapiens tubby like protein 4 (TULP4), transcript variant 1, mRNA."  
"Homo sapiens tumor suppressor candidate 2 (TUSC2), mRNA."  
"Homo sapiens tumor suppressor candidate 4 (TUSC4), mRNA."  
"Homo sapiens terminal uridylyl transferase 1, U6 snRNA-specific (TUT1), mRNA."  
"Homo sapiens twinfilin, actin-binding protein, homolog 1 (Drosophila) (TWF1), mRNA."  
"Homo sapiens twinfilin, actin-binding protein, homolog 2 (Drosophila) (TWF2), mRNA."  
"Homo sapiens twist homolog 1 (Drosophila) (TWIST1), mRNA."  
"Homo sapiens TWIST neighbor (TWISTNB), mRNA."  
"Homo sapiens twisted gastrulation homolog 1 (Drosophila) (TWSG1), mRNA."  
"Homo sapiens taxilin alpha (TXLNA), mRNA."  
"Homo sapiens taxilin beta (TXLNB), mRNA."  
"Homo sapiens thioredoxin (TXN), mRNA."  
"Homo sapiens thioredoxin 2 (TXN2), nuclear gene encoding mitochondrial protein, mRNA."  
"Homo sapiens thioredoxin domain containing 11 (TXNDC11), mRNA."  
"Homo sapiens thioredoxin domain containing 12 (endoplasmic reticulum) (TXNDC12), mRNA."  
"Homo sapiens thioredoxin domain containing 14 (TXNDC14), mRNA."  
"Homo sapiens thioredoxin domain containing 15 (TXNDC15), mRNA."  
"Homo sapiens thioredoxin domain containing 16 (TXNDC16), mRNA."  
"Homo sapiens thioredoxin domain containing 17 (TXNDC17), mRNA."  
"Homo sapiens thioredoxin domain containing 2 (spermatozoa) (TXNDC2), transcript variant 1, 1  
"Homo sapiens thioredoxin domain containing 5 (endoplasmic reticulum) (TXNDC5), transcript v  
"Homo sapiens thioredoxin domain containing 9 (TXNDC9), mRNA."  
"Homo sapiens thioredoxin interacting protein (TXNIP), mRNA."  
"Homo sapiens thioredoxin-like 2 (TXNL2), mRNA."  
"Homo sapiens thioredoxin-like 4B (TXNL4B), mRNA."  
"Homo sapiens thioredoxin reductase 1 (TXNRD1), transcript variant 4, mRNA."  
"Homo sapiens thioredoxin reductase 2 (TXNRD2), nuclear gene encoding mitochondrial protein  
"Homo sapiens tyrosine kinase 2 (TYK2), mRNA."  
"Homo sapiens thymidine phosphorylase (TYMP), transcript variant 1, mRNA."

"Homo sapiens thymidylate synthetase (TYMS), mRNA."  
"Homo sapiens TYRO3 protein tyrosine kinase (TYRO3), mRNA."  
"Homo sapiens TYRO protein tyrosine kinase binding protein (TYROBP), transcript variant 1, mRNA."  
"Homo sapiens trypsin domain containing 1 (TYSND1), transcript variant 2, mRNA."  
"Homo sapiens tRNA-yW synthesizing protein 1 homolog (S. cerevisiae) (TYW1), mRNA."  
"PREDICTED: Homo sapiens misc\_RNA (TYW1B), miscRNA."  
"Homo sapiens tRNA-yW synthesizing protein 3 homolog (S. cerevisiae) (TYW3), mRNA."  
"Homo sapiens U11/U12 snRNP 35K (U1SNRNPBP), transcript variant 4, mRNA."  
"Homo sapiens U2 small nuclear RNA auxiliary factor 1 (U2AF1), transcript variant b, mRNA."  
"Homo sapiens U2(RNU2) small nuclear RNA auxiliary factor 1-like 2 (U2AF1L2), mRNA."  
"Homo sapiens U2 small nuclear RNA auxiliary factor 1-like 4 (U2AF1L4), transcript variant 2, mRNA."  
"Homo sapiens U2 small nuclear RNA auxiliary factor 2 (U2AF2), transcript variant 1, mRNA."  
"Homo sapiens UDP-N-acetylglucosamine pyrophosphorylase 1 (UAP1), mRNA."  
"Homo sapiens UDP-N-acetylglucosamine pyrophosphorylase 1-like 1 (UAP1L1), mRNA."  
"Homo sapiens ubiquitin-like modifier activating enzyme 1 (UBA1), transcript variant 1, mRNA."  
"Homo sapiens ubiquitin-like modifier activating enzyme 2 (UBA2), mRNA."  
"Homo sapiens ubiquitin-like modifier activating enzyme 3 (UBA3), transcript variant 2, mRNA."  
"Homo sapiens ubiquitin-like modifier activating enzyme 5 (UBA5), transcript variant 1, mRNA."  
"Homo sapiens ubiquitin A-52 residue ribosomal protein fusion product 1 (UBA52), transcript variant 1, mRNA."  
"Homo sapiens ubiquitin-like modifier activating enzyme 6 (UBA6), mRNA."  
"Homo sapiens ubiquitin-like modifier activating enzyme 7 (UBA7), mRNA."  
"Homo sapiens UBA domain containing 1 (UBAC1), mRNA."  
"Homo sapiens UBA domain containing 2 (UBAC2), mRNA."  
"Homo sapiens ubiquitin associated protein 1 (UBAP1), mRNA."  
"Homo sapiens ubiquitin associated protein 2 (UBAP2), mRNA."  
"Homo sapiens ubiquitin associated protein 2-like (UBAP2L), mRNA."  
"Homo sapiens ubiquitin associated and SH3 domain containing, B (UBASH3B), mRNA."  
"Homo sapiens ubiquitin B (UBB), mRNA."  
"Homo sapiens ubiquitin C (UBC), mRNA."  
"Homo sapiens ubiquitin D (UBD), mRNA."  
"Homo sapiens ubiquitin-activating enzyme E1 (UBE1), transcript variant 2, mRNA."  
"Homo sapiens ubiquitin-activating enzyme E1C (UBA3 homolog, yeast) (UBE1C), transcript variant 1, mRNA."  
"Homo sapiens ubiquitin-activating enzyme E1-domain containing 1 (UBE1DC1), transcript variant 1, mRNA."  
"Homo sapiens ubiquitin-conjugating enzyme E2A (RAD6 homolog) (UBE2A), transcript variant 1, mRNA."  
"Homo sapiens ubiquitin-conjugating enzyme E2B (RAD6 homolog) (UBE2B), mRNA."  
"Homo sapiens ubiquitin-conjugating enzyme E2C (UBE2C), transcript variant 3, mRNA."  
"Homo sapiens ubiquitin-conjugating enzyme E2C binding protein (UBE2CBP), mRNA."  
"Homo sapiens ubiquitin-conjugating enzyme E2D 2 (UBC4/5 homolog, yeast) (UBE2D2), transcript variant 1, mRNA."  
"Homo sapiens ubiquitin-conjugating enzyme E2D 3 (UBC4/5 homolog, yeast) (UBE2D3), transcript variant 1, mRNA."  
"Homo sapiens ubiquitin-conjugating enzyme E2D 4 (putative) (UBE2D4), mRNA."  
"Homo sapiens ubiquitin-conjugating enzyme E2E 1 (UBC4/5 homolog, yeast) (UBE2E1), transcript variant 1, mRNA."  
"Homo sapiens ubiquitin-conjugating enzyme E2E 2 (UBC4/5 homolog, yeast) (UBE2E2), transcript variant 1, mRNA."  
"Homo sapiens ubiquitin-conjugating enzyme E2E 3 (UBC4/5 homolog, yeast) (UBE2E3), transcript variant 1, mRNA."  
"Homo sapiens ubiquitin-conjugating enzyme E2F (putative) (UBE2F), mRNA."



"Homo sapiens ubiquitin-conjugating enzyme E2G 1 (UBC7 homolog, yeast) (UBE2G1), mRNA."  
"Homo sapiens ubiquitin-conjugating enzyme E2G 2 (UBC7 homolog, yeast) (UBE2G2), transcript v  
"Homo sapiens ubiquitin-conjugating enzyme E2H (UBC8 homolog, yeast) (UBE2H), transcript v  
"Homo sapiens ubiquitin-conjugating enzyme E2I (UBC9 homolog, yeast) (UBE2I), transcript va  
"Homo sapiens ubiquitin-conjugating enzyme E2, J1 (UBC6 homolog, yeast) (UBE2J1), mRNA."  
"Homo sapiens ubiquitin-conjugating enzyme E2, J2 (UBC6 homolog, yeast) (UBE2J2), transcrip  
"Homo sapiens ubiquitin-conjugating enzyme E2K (UBC1 homolog, yeast) (UBE2K), transcript v  
"Homo sapiens ubiquitin-conjugating enzyme E2L 3 (UBE2L3), transcript variant 2, mRNA."  
"Homo sapiens ubiquitin-conjugating enzyme E2L 6 (UBE2L6), transcript variant 2, mRNA."  
"Homo sapiens ubiquitin-conjugating enzyme E2M (UBC12 homolog, yeast) (UBE2M), mRNA."  
"Homo sapiens ubiquitin-conjugating enzyme E2M pseudogene 1 (UBE2MP1), non-coding RNA  
"Homo sapiens ubiquitin-conjugating enzyme E2N (UBC13 homolog, yeast) (UBE2N), mRNA."  
"Homo sapiens ubiquitin-conjugating enzyme E2O (UBE2O), mRNA."  
"Homo sapiens ubiquitin-conjugating enzyme E2Q (putative) 1 (UBE2Q1), mRNA."  
"Homo sapiens ubiquitin-conjugating enzyme E2Q family member 2 (UBE2Q2), mRNA."  
"Homo sapiens ubiquitin-conjugating enzyme E2Q family pseudogene 2 (UBE2QP2), non-codin  
"Homo sapiens ubiquitin-conjugating enzyme E2R 2 (UBE2R2), mRNA."  
"Homo sapiens ubiquitin-conjugating enzyme E2S (UBE2S), mRNA."  
"Homo sapiens ubiquitin-conjugating enzyme E2T (putative) (UBE2T), mRNA."  
"Homo sapiens ubiquitin-conjugating enzyme E2 variant 1 (UBE2V1), transcript variant 3, mRNA/  
"Homo sapiens ubiquitin-conjugating enzyme E2 variant 2 (UBE2V2), mRNA."  
"Homo sapiens ubiquitin-conjugating enzyme E2W (putative) (UBE2W), transcript variant 2, mR  
"Homo sapiens ubiquitin-conjugating enzyme E2Z (UBE2Z), mRNA."  
"Homo sapiens ubiquitin protein ligase E3A (UBE3A), transcript variant 3, mRNA."  
"Homo sapiens ubiquitin protein ligase E3B (UBE3B), transcript variant 1, mRNA."  
"Homo sapiens ubiquitination factor E4A (UFD2 homolog, yeast) (UBE4A), mRNA."  
"Homo sapiens ubiquitination factor E4B (UFD2 homolog, yeast) (UBE4B), mRNA."  
"Homo sapiens ubiquitin family domain containing 1 (UBFD1), mRNA."  
"Homo sapiens UbiA prenyltransferase domain containing 1 (UBIAD1), mRNA."  
"Homo sapiens ubiquitin-like 3 (UBL3), mRNA."  
"Homo sapiens ubiquitin-like 4A (UBL4A), mRNA."  
"Homo sapiens ubiquitin-like 5 (UBL5), transcript variant 2, mRNA."  
"Homo sapiens ubiquitin-like 7 (bone marrow stromal cell-derived) (UBL7), transcript variant 1, n  
"Homo sapiens ubiquitin-like domain containing CTD phosphatase 1 (UBLCP1), mRNA."  
"Homo sapiens ubinuclein 1 (UBN1), transcript variant 2, mRNA."  
"Homo sapiens ubinuclein 2 (UBN2), mRNA."  
"Homo sapiens upstream binding protein 1 (LBP-1a) (UBP1), mRNA."  
"Homo sapiens ubiquilin 1 (UBQLN1), transcript variant 1, mRNA."  
"Homo sapiens ubiquilin 2 (UBQLN2), mRNA."  
"Homo sapiens ubiquilin 4 (UBQLN4), mRNA."  
"Homo sapiens ubiquitin protein ligase E3 component n-recognin 1 (UBR1), mRNA."  
"Homo sapiens ubiquitin protein ligase E3 component n-recognin 2 (UBR2), mRNA."  
"Homo sapiens ubiquitin protein ligase E3 component n-recognin 3 (putative) (UBR3), mRNA."  
"Homo sapiens ubiquitin protein ligase E3 component n-recognin 4 (UBR4), mRNA."

"Homo sapiens ubiquitin protein ligase E3 component n-recognin 5 (UBR5), mRNA."  
"Homo sapiens ubiquitin protein ligase E3 component n-recognin 7 (putative) (UBR7), transcript  
"Homo sapiens ubiquitin domain containing 1 (UBTD1), mRNA."  
"Homo sapiens ubiquitin domain containing 2 (UBTD2), mRNA."  
"Homo sapiens upstream binding transcription factor, RNA polymerase I (UBTF), transcript variã  
"PREDICTED: Homo sapiens upstream binding transcription factor, RNA polymerase I-like 5 (U  
"Homo sapiens UBX domain protein 1 (UBXN1), mRNA."  
"Homo sapiens UBX domain protein 11 (UBXN11), transcript variant 2, mRNA."  
"Homo sapiens UBX domain protein 2B (UBXN2B), mRNA."  
"Homo sapiens UBX domain protein 4 (UBXN4), mRNA."  
"Homo sapiens UBX domain protein 6 (UBXN6), mRNA."  
"Homo sapiens UBX domain protein 7 (UBXN7), mRNA."  
"Homo sapiens UBX domain protein 8 (UBXN8), mRNA."  
"Homo sapiens ubiquitin carboxyl-terminal esterase L1 (ubiquitin thiolesterase) (UCHL1), mRNA  
"Homo sapiens ubiquitin carboxyl-terminal esterase L3 (ubiquitin thiolesterase) (UCHL3), mRNA  
"Homo sapiens ubiquitin carboxyl-terminal hydrolase L5 (UCHL5), mRNA."  
"Homo sapiens UCHL5 interacting protein (UCHL5IP), transcript variant 1, mRNA."  
"Homo sapiens uridine-cytidine kinase 1 (UCK1), mRNA."  
"Homo sapiens uridine-cytidine kinase 2 (UCK2), mRNA."  
"Homo sapiens uridine-cytidine kinase 1-like 1 (UCKL1), mRNA."  
"Homo sapiens uncoupling protein 2 (mitochondrial, proton carrier) (UCP2), nuclear gene encod  
"Homo sapiens ubiquinol-cytochrome c reductase complex (7.2 kD) (UCRC), transcript variant 2  
"Homo sapiens UEV and lactate/malate dehydrogenase domains (UEVLD), transcript variant 1, n  
"Homo sapiens ubiquitin-fold modifier conjugating enzyme 1 (UFC1), mRNA."  
"Homo sapiens ubiquitin fusion degradation 1 like (yeast) (UFD1L), transcript variant 2, mRNA."  
"Homo sapiens ubiquitin-fold modifier 1 (UFM1), mRNA."  
"Homo sapiens UFM1-specific peptidase 2 (UFSP2), mRNA."  
"Homo sapiens UDP-glucose ceramide glucosyltransferase (UGCG), mRNA."  
"Homo sapiens UDP-glucose ceramide glucosyltransferase-like 2 (UGCGL2), mRNA."  
"Homo sapiens UDP-glucose dehydrogenase (UGDH), mRNA."  
"Homo sapiens UDP-glucose pyrophosphorylase 2 (UGP2), transcript variant 1, mRNA."  
"Homo sapiens UDP glucuronosyltransferase 1 family, polypeptide A3 (UGT1A3), mRNA."  
"Homo sapiens UDP glucuronosyltransferase 2 family, polypeptide A3 (UGT2A3), mRNA."  
"Homo sapiens UDP glucuronosyltransferase 2 family, polypeptide B17 (UGT2B17), mRNA."  
"PREDICTED: Homo sapiens UDP glucuronosyltransferase 2 family, polypeptide B7 (UGT2B7),  
"Homo sapiens UDP glycosyltransferase 8 (UDP-galactose ceramide galactosyltransferase) (UC  
"Homo sapiens ubiquitin-like with PHD and ring finger domains 1 (UHRF1), transcript variant 2, ÷  
"Homo sapiens UHRF1 binding protein 1 (UHRF1BP1), mRNA."  
"Homo sapiens UHRF1 binding protein 1-like (UHRF1BP1L), transcript variant 1, mRNA."  
"Homo sapiens ubiquitin interaction motif containing 1 (UIMC1), mRNA."  
"Homo sapiens UL16 binding protein 1 (ULBP1), mRNA."  
"Homo sapiens UL16 binding protein 2 (ULBP2), mRNA."  
"PREDICTED: Homo sapiens unc-51-like kinase 1 (C. elegans) (ULK1), mRNA."  
"Homo sapiens unc-51-like kinase 2 (C. elegans) (ULK2), mRNA."

"Homo sapiens unc-51-like kinase 3 (C. elegans) (ULK3), mRNA."  
"Homo sapiens unc-51-like kinase 4 (C. elegans) (ULK4), mRNA."  
"Homo sapiens uromodulin (UMOD), transcript variant 2, mRNA."  
"Homo sapiens uromodulin-like 1 (UMODL1), transcript variant 2, mRNA."  
"Homo sapiens uridine monophosphate synthetase (orotate phosphoribosyl transferase and oro  
"Homo sapiens unc-119 homolog (C. elegans) (UNC119), transcript variant 2, mRNA."  
"PREDICTED: Homo sapiens unc-13 homolog A (C. elegans) (UNC13A), mRNA."  
"PREDICTED: Homo sapiens unc-13 homolog C (C. elegans), transcript variant 3 (UNC13C), m  
"Homo sapiens unc-13 homolog D (C. elegans) (UNC13D), mRNA."  
"Homo sapiens unc-45 homolog A (C. elegans) (UNC45A), transcript variant 3, mRNA."  
"Homo sapiens unc-50 homolog (C. elegans) (UNC50), mRNA."  
"Homo sapiens unc-5 homolog A (C. elegans) (UNC5A), mRNA."  
"Homo sapiens unc-5 homolog C (C. elegans)-like (UNC5CL), mRNA."  
"Homo sapiens unc-84 homolog A (C. elegans) (UNC84A), mRNA."  
"Homo sapiens unc-84 homolog B (C. elegans) (UNC84B), mRNA."  
"Homo sapiens unc-93 homolog B1 (C. elegans) (UNC93B1), mRNA."  
"Homo sapiens uracil-DNA glycosylase (UNG), transcript variant 2, mRNA."  
"Homo sapiens unkempt homolog (Drosophila)-like (UNKL), transcript variant 2, mRNA."  
"Homo sapiens HWKM1940 (UNQ1940), mRNA."  
"PREDICTED: Homo sapiens NGNL6975 (UNQ6975), mRNA."  
"Homo sapiens ureidopropionase, beta (UPB1), mRNA."  
"Homo sapiens UPF1 regulator of nonsense transcripts homolog (yeast) (UPF1), mRNA."  
"Homo sapiens UPF2 regulator of nonsense transcripts homolog (yeast) (UPF2), transcript varia  
"Homo sapiens UPF3 regulator of nonsense transcripts homolog A (yeast) (UPF3A), transcript v  
"Homo sapiens UPF3 regulator of nonsense transcripts homolog B (yeast) (UPF3B), transcript v  
"Homo sapiens uroplakin 1A (UPK1A), mRNA."  
"Homo sapiens uroplakin-like protein (UPLP), mRNA."  
"Homo sapiens uridine phosphorylase 1 (UPP1), transcript variant 1, mRNA."  
"Homo sapiens uridine phosphorylase 2 (UPP2), mRNA."  
"Homo sapiens uracil phosphoribosyltransferase (FUR1) homolog (S. cerevisiae) (UPRT), mRN  
"Homo sapiens ubiquinol-cytochrome c reductase complex chaperone (UQCC), nuclear gene er  
"Homo sapiens ubiquinol-cytochrome c reductase, 6.4kDa subunit (UQCR), mRNA."  
"Homo sapiens ubiquinol-cytochrome c reductase binding protein (UQCRB), mRNA."  
"Homo sapiens ubiquinol-cytochrome c reductase core protein I (UQCRC1), mRNA."  
"Homo sapiens ubiquinol-cytochrome c reductase, Rieske iron-sulfur polypeptide 1 (UQCRFS1)  
"Homo sapiens ubiquinol-cytochrome c reductase, complex III subunit VII, 9.5kDa (UQCRQ), nu  
"Homo sapiens URB2 ribosome biogenesis 2 homolog (S. cerevisiae) (URB2), mRNA."  
"Homo sapiens up-regulated gene 4 (URG4), nuclear gene encoding mitochondrial protein, tran  
"Homo sapiens ubiquitin related modifier 1 homolog (S. cerevisiae) (URM1), mRNA."  
"Homo sapiens uroporphyrinogen decarboxylase (UROD), mRNA."  
"Homo sapiens uroporphyrinogen III synthase (congenital erythropoietic porphyria) (UROS), mR  
"Homo sapiens unconventional SNARE in the ER 1 homolog (S. cerevisiae) (USE1), mRNA."  
"Homo sapiens upstream transcription factor 1 (USF1), transcript variant 2, mRNA."  
"Homo sapiens upstream transcription factor 2, c-fos interacting (USF2), transcript variant 2, mF

"Homo sapiens Usher syndrome 1G (autosomal recessive) (USH1G), mRNA."  
"Homo sapiens Usher syndrome 1C binding protein 1 (USHBP1), mRNA."  
"Homo sapiens up-regulated during skeletal muscle growth 5 homolog (mouse) (USMG5), mRNA."  
"Homo sapiens USO1 homolog, vesicle docking protein (yeast) (USO1), mRNA."  
"Homo sapiens ubiquitin specific peptidase 1 (USP1), transcript variant 3, mRNA."  
"Homo sapiens ubiquitin specific peptidase 10 (USP10), mRNA."  
"Homo sapiens ubiquitin specific peptidase 11 (USP11), mRNA."  
"Homo sapiens ubiquitin specific peptidase 12 (USP12), mRNA."  
"Homo sapiens ubiquitin specific peptidase 13 (isopeptidase T-3) (USP13), mRNA."  
"Homo sapiens ubiquitin specific peptidase 15 (USP15), mRNA."  
"Homo sapiens ubiquitin specific peptidase 16 (USP16), transcript variant 3, mRNA."  
"Homo sapiens ubiquitin specific peptidase 18 (USP18), mRNA."  
"Homo sapiens ubiquitin specific peptidase 2 (USP2), transcript variant 2, mRNA."  
"Homo sapiens ubiquitin specific peptidase 21 (USP21), transcript variant 1, mRNA."  
"PREDICTED: Homo sapiens ubiquitin specific peptidase 22, transcript variant 5 (USP22), mRNA."  
"Homo sapiens ubiquitin specific peptidase 24 (USP24), mRNA."  
"Homo sapiens ubiquitin specific peptidase 25 (USP25), mRNA."  
"Homo sapiens ubiquitin specific peptidase 3 (USP3), mRNA."  
"Homo sapiens ubiquitin specific peptidase 30 (USP30), mRNA."  
"Homo sapiens ubiquitin specific peptidase 33 (USP33), transcript variant 1, mRNA."  
"Homo sapiens ubiquitin specific peptidase 35 (USP35), mRNA."  
"Homo sapiens ubiquitin specific peptidase 36 (USP36), mRNA."  
"Homo sapiens ubiquitin specific peptidase 37 (USP37), mRNA."  
"Homo sapiens ubiquitin specific peptidase 38 (USP38), mRNA."  
"Homo sapiens ubiquitin specific peptidase 39 (USP39), mRNA."  
"Homo sapiens ubiquitin specific peptidase 4 (proto-oncogene) (USP4), transcript variant 1, mRNA."  
"PREDICTED: Homo sapiens ubiquitin specific peptidase 41 (USP41), mRNA."  
"Homo sapiens ubiquitin specific peptidase 42 (USP42), mRNA."  
"Homo sapiens ubiquitin specific peptidase 44 (USP44), transcript variant 2, mRNA."  
"Homo sapiens ubiquitin specific peptidase 46 (USP46), mRNA."  
"Homo sapiens ubiquitin specific peptidase 47 (USP47), mRNA."  
"Homo sapiens ubiquitin specific peptidase 48 (USP48), transcript variant 2, mRNA."  
"Homo sapiens ubiquitin specific peptidase 49 (USP49), mRNA."  
"Homo sapiens ubiquitin specific peptidase 5 (isopeptidase T) (USP5), transcript variant 2, mRNA."  
"Homo sapiens ubiquitin specific peptidase 53 (USP53), mRNA."  
"Homo sapiens ubiquitin specific peptidase 7 (herpes virus-associated) (USP7), mRNA."  
"Homo sapiens ubiquitin specific peptidase 8 (USP8), mRNA."  
"Homo sapiens ubiquitin specific peptidase 9, X-linked (USP9X), transcript variant 4, mRNA."  
"Homo sapiens ubiquitin specific peptidase like 1 (USPL1), mRNA."  
"Homo sapiens uronyl-2-sulfotransferase (UST), mRNA."  
"Homo sapiens UTP11-like, U3 small nucleolar ribonucleoprotein, (yeast) (UTP11L), mRNA."  
"Homo sapiens UTP14, U3 small nucleolar ribonucleoprotein, homolog A (yeast) (UTP14A), mRNA."  
"Homo sapiens UTP14, U3 small nucleolar ribonucleoprotein, homolog C (yeast) (UTP14C), mRNA."  
"Homo sapiens UTP15, U3 small nucleolar ribonucleoprotein, homolog (S. cerevisiae) (UTP15), mRNA."

"Homo sapiens UTP18, small subunit (SSU) processome component, homolog (yeast) (UTP18)  
"Homo sapiens UTP20, small subunit (SSU) processome component, homolog (yeast) (UTP20)  
"Homo sapiens UTP23, small subunit (SSU) processome component, homolog (yeast) (UTP23)  
"Homo sapiens UTP6, small subunit (SSU) processome component, homolog (yeast) (UTP6), r  
"Homo sapiens utrophin (UTRN), mRNA."  
"Homo sapiens urotensin 2 (UTS2), transcript variant 2, mRNA."  
"Homo sapiens urotensin 2 domain containing (UTS2D), mRNA."  
"Homo sapiens ubiquitously transcribed tetratricopeptide repeat, X chromosome (UTX), mRNA."  
"Homo sapiens ubiquitously transcribed tetratricopeptide repeat gene, Y-linked (UTY), transcript  
"Homo sapiens UV radiation resistance associated gene (UVRAG), mRNA."  
"Homo sapiens ubiquitously-expressed transcript (UXT), transcript variant 2, mRNA."  
"PREDICTED: Homo sapiens Vac14 homolog (S. cerevisiae) (VAC14), mRNA."  
"Homo sapiens vesicle-associated membrane protein 1 (synaptobrevin 1) (VAMP1), transcript v  
"Homo sapiens vesicle-associated membrane protein 2 (synaptobrevin 2) (VAMP2), mRNA."  
"Homo sapiens vesicle-associated membrane protein 3 (cellubrevin) (VAMP3), mRNA."  
"Homo sapiens vesicle-associated membrane protein 4 (VAMP4), mRNA."  
"Homo sapiens vesicle-associated membrane protein 5 (myobrevin) (VAMP5), mRNA."  
"Homo sapiens vesicle-associated membrane protein 7 (VAMP7), mRNA."  
"Homo sapiens vesicle-associated membrane protein 8 (endobrevin) (VAMP8), mRNA."  
"Homo sapiens vang-like 2 (van gogh, Drosophila) (VANGL2), mRNA."  
"Homo sapiens VAMP (vesicle-associated membrane protein)-associated protein A, 33kDa (VA  
"Homo sapiens valyl-tRNA synthetase (VARS), nuclear gene encoding mitochondrial protein, ml  
"Homo sapiens valyl-tRNA synthetase 2, mitochondrial (putative) (VARS2), nuclear gene encodi  
"Homo sapiens vasohibin 1 (VASH1), mRNA."  
"Homo sapiens vasohibin 2 (VASH2), mRNA."  
"Homo sapiens vasorin (VASN), mRNA."  
"Homo sapiens vesicle amine transport protein 1 homolog (T. californica) (VAT1), mRNA."  
"Homo sapiens vesicle amine transport protein 1 homolog (T. californica)-like (VAT1L), mRNA."  
"Homo sapiens vav 1 guanine nucleotide exchange factor (VAV1), mRNA."  
"Homo sapiens vav 2 guanine nucleotide exchange factor (VAV2), mRNA."  
"Homo sapiens vav 3 guanine nucleotide exchange factor (VAV3), transcript variant 1, mRNA."  
"Homo sapiens ventral anterior homeobox 2 (VAX2), mRNA."  
"Homo sapiens von Hippel-Lindau binding protein 1 (VBP1), mRNA."  
"Homo sapiens vascular cell adhesion molecule 1 (VCAM1), transcript variant 2, mRNA."  
"Homo sapiens vinculin (VCL), transcript variant 2, mRNA."  
"Homo sapiens valosin-containing protein (VCP), mRNA."  
"Homo sapiens valosin containing protein (p97)/p47 complex interacting protein 1 (VCPIP1), mF  
"Homo sapiens variably charged X-C (VCX-C), mRNA."  
"Homo sapiens voltage-dependent anion channel 1 (VDAC1), mRNA."  
"Homo sapiens voltage-dependent anion channel 3 (VDAC3), mRNA."  
"Homo sapiens vitamin D (1,25- dihydroxyvitamin D3) receptor (VDR), transcript variant 2, mRN  
"PREDICTED: Homo sapiens vascular endothelial growth factor B (VEGFB), mRNA."  
"Homo sapiens vascular endothelial growth factor C (VEGFC), mRNA."  
"Homo sapiens vascular endothelial zinc finger 1 (VEZF1), mRNA."

"Homo sapiens vezatin, adherens junctions transmembrane protein (VEZT), mRNA."  
"Homo sapiens VGF nerve growth factor inducible (VGF), mRNA."  
"Homo sapiens vestigial like 2 (Drosophila) (VGLL2), transcript variant 1, mRNA."  
"Homo sapiens vestigial like 4 (Drosophila) (VGLL4), mRNA."  
"Homo sapiens von Hippel-Lindau tumor suppressor (VHL), transcript variant 2, mRNA."  
"Homo sapiens villin 2 (ezrin) (VIL2), mRNA."  
"Homo sapiens villin-like (VILL), mRNA."  
"Homo sapiens vimentin (VIM), mRNA."  
"Homo sapiens vasoactive intestinal peptide receptor 1 (VIPR1), mRNA."  
"Homo sapiens vasoactive intestinal peptide receptor 2 (VIPR2), mRNA."  
"Homo sapiens virus-induced signaling adapter (VISA), mRNA."  
"Homo sapiens vitrin (VIT), mRNA."  
"Homo sapiens vitamin K epoxide reductase complex, subunit 1 (VKORC1), transcript variant 1,  
"Homo sapiens vitamin K epoxide reductase complex, subunit 1-like 1 (VKORC1L1), mRNA."  
"Homo sapiens vimentin-type IF-associated coiled-coil protein (VMAC), mRNA."  
"Homo sapiens vitelliform macular dystrophy 2-like 3 (VMD2L3), mRNA."  
"Homo sapiens vitelline membrane outer layer 1 homolog (chicken) (VMO1), mRNA."  
"Homo sapiens vomeronasal 1 receptor 2 (VN1R2), mRNA."  
"Homo sapiens vomeronasal 1 receptor 5 (gene/pseudogene) (VN1R5), mRNA."  
"Homo sapiens vanin 1 (VNN1), mRNA."  
"Homo sapiens vanin 2 (VNN2), transcript variant 1, mRNA."  
"Homo sapiens vanin 3 (VNN3), transcript variant 2, mRNA."  
"Homo sapiens vesicular, overexpressed in cancer, prosurvival protein 1 (VOPP1), mRNA."  
"Homo sapiens Vpr (HIV-1) binding protein (VPRBP), mRNA."  
"Homo sapiens pre-B lymphocyte 1 (VPREB1), mRNA."  
"Homo sapiens pre-B lymphocyte gene 3 (VPREB3), mRNA."  
"Homo sapiens vacuolar protein sorting 11 homolog (S. cerevisiae) (VPS11), mRNA."  
"Homo sapiens vacuolar protein sorting 13 homolog B (yeast) (VPS13B), transcript variant 1, ml  
"Homo sapiens vacuolar protein sorting 16 homolog (S. cerevisiae) (VPS16), transcript variant 1  
"Homo sapiens vacuolar protein sorting 18 homolog (S. cerevisiae) (VPS18), mRNA."  
"Homo sapiens vacuolar protein sorting 24 homolog (S. cerevisiae) (VPS24), transcript variant 1  
"Homo sapiens vacuolar protein sorting 25 homolog (S. cerevisiae) (VPS25), mRNA."  
"Homo sapiens vacuolar protein sorting 26 (yeast) (VPS26), mRNA."  
"Homo sapiens vacuolar protein sorting 26 homolog A (S. pombe) (VPS26A), transcript variant 2  
"Homo sapiens vacuolar protein sorting 26 homolog B (S. pombe) (VPS26B), mRNA."  
"Homo sapiens vacuolar protein sorting 28 homolog (S. cerevisiae) (VPS28), transcript variant 1  
"Homo sapiens vacuolar protein sorting 29 homolog (S. cerevisiae) (VPS29), transcript variant 1  
"Homo sapiens vacuolar protein sorting 33 homolog A (S. cerevisiae) (VPS33A), mRNA."  
"Homo sapiens vacuolar protein sorting 33 homolog B (yeast) (VPS33B), mRNA."  
"Homo sapiens vacuolar protein sorting 35 homolog (S. cerevisiae) (VPS35), mRNA."  
"Homo sapiens vacuolar protein sorting 36 homolog (S. cerevisiae) (VPS36), mRNA."  
"Homo sapiens vacuolar protein sorting 37 homolog A (S. cerevisiae) (VPS37A), mRNA."  
"Homo sapiens vacuolar protein sorting 37 homolog B (S. cerevisiae) (VPS37B), mRNA."  
"Homo sapiens vacuolar protein sorting 37 homolog C (S. cerevisiae) (VPS37C), mRNA."

"Homo sapiens vacuolar protein sorting 37 homolog D (*S. cerevisiae*) (VPS37D), mRNA."  
"Homo sapiens vacuolar protein sorting 39 homolog (*S. cerevisiae*) (VPS39), mRNA."  
"Homo sapiens vacuolar protein sorting 41 (yeast) (VPS41), transcript variant 1, mRNA."  
"Homo sapiens vacuolar protein sorting 45 homolog (*S. cerevisiae*) (VPS45), mRNA."  
"Homo sapiens vacuolar protein sorting 4 homolog A (*S. cerevisiae*) (VPS4A), mRNA."  
"Homo sapiens vacuolar protein sorting 4 homolog B (*S. cerevisiae*) (VPS4B), mRNA."  
"Homo sapiens vacuolar protein sorting 52 homolog (*S. cerevisiae*) (VPS52), mRNA."  
"Homo sapiens vacuolar protein sorting 53 homolog (*S. cerevisiae*) (VPS53), mRNA."  
"Homo sapiens vacuolar protein sorting 54 homolog (*S. cerevisiae*) (VPS54), transcript variant 1  
"Homo sapiens vacuolar protein sorting 72 homolog (*S. cerevisiae*) (VPS72), mRNA."  
"Homo sapiens vacuolar protein sorting 8 homolog (*S. cerevisiae*) (VPS8), transcript variant 2, n  
"Homo sapiens vaccinia related kinase 1 (VRK1), mRNA."  
"Homo sapiens vaccinia related kinase 2 (VRK2), mRNA."  
"Homo sapiens vaccinia related kinase 3 (VRK3), transcript variant 2, mRNA."  
"Homo sapiens V-set and immunoglobulin domain containing 4 (VSIG4), transcript variant 1, mF  
"PREDICTED: Homo sapiens V-set and immunoglobulin domain containing 6 (VSIG6), mRNA."  
"Homo sapiens Vps20-associated 1 homolog (*S. cerevisiae*) (VTA1), mRNA."  
"Homo sapiens vesicle transport through interaction with t-SNAREs homolog 1B (yeast) (VTI1B)  
"Homo sapiens vault RNA 1-1 (VTRNA1-1), non-coding RNA."  
"Homo sapiens von Willebrand factor A domain containing 1 (VWA1), transcript variant 1, mRNA/  
"Homo sapiens von Willebrand factor A domain containing 5A (VWA5A), transcript variant 1, mF  
"Homo sapiens von Willebrand factor A domain containing 5B1 (VWA5B1), mRNA."  
"Homo sapiens von Willebrand factor C domain containing 2 (VWC2), mRNA."  
"Homo sapiens von Willebrand factor C and EGF domains (VWCE), mRNA."  
"Homo sapiens WW domain containing adaptor with coiled-coil (WAC), transcript variant 3, mRf  
"Homo sapiens tryptophanyl-tRNA synthetase (WARS), transcript variant 2, mRNA."  
"Homo sapiens tryptophanyl tRNA synthetase 2, mitochondrial (WARS2), nuclear gene encodin  
"Homo sapiens Wiskott-Aldrich syndrome (eczema-thrombocytopenia) (WAS), mRNA."  
"Homo sapiens WAS protein family, member 1 (WASF1), transcript variant 4, mRNA."  
"Homo sapiens WAS protein family, member 2 (WASF2), mRNA."  
"Homo sapiens WAS protein family, member 3 (WASF3), mRNA."  
"Homo sapiens WAS protein family homolog 2 pseudogene (WASH2P), non-coding RNA."  
"Homo sapiens Wiskott-Aldrich syndrome protein interacting protein (WASPIP), mRNA."  
"Homo sapiens WW domain binding protein 1 (WBP1), mRNA."  
"Homo sapiens WW domain binding protein 11 (WBP11), mRNA."  
"Homo sapiens WW domain binding protein 11 pseudogene 1 (WBP11P1), non-coding RNA."  
"Homo sapiens WW domain binding protein 2 (WBP2), mRNA."  
"Homo sapiens WW domain binding protein 4 (formin binding protein 21) (WBP4), mRNA."  
"Homo sapiens WW domain binding protein 5 (WBP5), transcript variant 4, mRNA."  
"Homo sapiens Williams-Beuren syndrome chromosome region 16 (WBSCR16), mRNA."  
"PREDICTED: Homo sapiens Williams Beuren syndrome chromosome region 19, transcript vari  
"Homo sapiens Williams Beuren syndrome chromosome region 22 (WBSCR22), mRNA."  
"Homo sapiens Williams Beuren syndrome chromosome region 27 (WBSCR27), mRNA."  
"Homo sapiens WD repeat and FYVE domain containing 1 (WDFY1), mRNA."

"Homo sapiens WD repeat and FYVE domain containing 2 (WDFY2), mRNA."  
"Homo sapiens WDFY family member 4 (WDFY4), mRNA."  
"Homo sapiens WD repeat and HMG-box DNA binding protein 1 (WDHD1), transcript variant 2,  
"Homo sapiens WD repeat domain 1 (WDR1), transcript variant 1, mRNA."  
"Homo sapiens WD repeat domain 12 (WDR12), mRNA."  
"Homo sapiens WD repeat domain 13 (WDR13), mRNA."  
"Homo sapiens WD repeat domain 17 (WDR17), transcript variant 1, mRNA."  
"Homo sapiens WD repeat domain 18 (WDR18), mRNA."  
"Homo sapiens WD repeat domain 19 (WDR19), mRNA."  
"Homo sapiens WD repeat domain 20 (WDR20), transcript variant 2, mRNA."  
"Homo sapiens WD repeat domain 21A (WDR21A), transcript variant 1, mRNA."  
"Homo sapiens WD repeat domain 23 (WDR23), transcript variant 1, mRNA."  
"Homo sapiens WD repeat domain 24 (WDR24), mRNA."  
"Homo sapiens WD repeat domain 25 (WDR25), mRNA."  
"Homo sapiens WD repeat domain 26 (WDR26), mRNA."  
"Homo sapiens WD repeat domain 27 (WDR27), mRNA."  
"Homo sapiens WD repeat domain 3 (WDR3), mRNA."  
"Homo sapiens WD repeat domain 31 (WDR31), transcript variant 3, mRNA."  
"Homo sapiens WD repeat domain 33 (WDR33), transcript variant 3, mRNA."  
"Homo sapiens WD repeat domain 34 (WDR34), mRNA."  
"Homo sapiens WD repeat domain 35 (WDR35), transcript variant 2, mRNA."  
"Homo sapiens WD repeat domain 36 (WDR36), mRNA."  
"Homo sapiens WD repeat domain 37 (WDR37), mRNA."  
"Homo sapiens WD repeat domain 4 (WDR4), transcript variant 1, mRNA."  
"Homo sapiens WD repeat domain 40A (WDR40A), mRNA."  
"Homo sapiens WD repeat domain 41 (WDR41), mRNA."  
"Homo sapiens WD repeat domain 42A (WDR42A), mRNA."  
"PREDICTED: Homo sapiens WD repeat domain 43, transcript variant 8 (WDR43), mRNA."  
"Homo sapiens WD repeat domain 44 (WDR44), mRNA."  
"Homo sapiens WD repeat domain 45 (WDR45), transcript variant 1, mRNA."  
"Homo sapiens WDR45-like (WDR45L), mRNA."  
"Homo sapiens WD repeat domain 46 (WDR46), mRNA."  
"Homo sapiens WD repeat domain 47 (WDR47), mRNA."  
"Homo sapiens WD repeat domain 48 (WDR48), mRNA."  
"Homo sapiens WD repeat domain 49 (WDR49), mRNA."  
"Homo sapiens WD repeat domain 5 (WDR5), transcript variant 1, mRNA."  
"Homo sapiens WD repeat domain 51A (WDR51A), mRNA."  
"Homo sapiens WD repeat domain 51B (WDR51B), mRNA."  
"Homo sapiens WD repeat domain 53 (WDR53), mRNA."  
"Homo sapiens WD repeat domain 54 (WDR54), mRNA."  
"Homo sapiens WD repeat domain 55 (WDR55), mRNA."  
"Homo sapiens WD repeat domain 57 (U5 snRNP specific) (WDR57), mRNA."  
"Homo sapiens WD repeat domain 59 (WDR59), mRNA."  
"Homo sapiens WD repeat domain 5B (WDR5B), mRNA."



"Homo sapiens WD repeat domain 6 (WDR6), mRNA."  
"Homo sapiens WD repeat domain 60 (WDR60), mRNA."  
"Homo sapiens WD repeat domain 61 (WDR61), mRNA."  
"Homo sapiens WD repeat domain 62 (WDR62), transcript variant 1, mRNA."  
"Homo sapiens WD repeat domain 63 (WDR63), mRNA."  
"Homo sapiens WD repeat domain 66 (WDR66), mRNA."  
"Homo sapiens WD repeat domain 67 (WDR67), mRNA."  
"Homo sapiens WD repeat domain 68 (WDR68), transcript variant 2, mRNA."  
"Homo sapiens WD repeat domain 7 (WDR7), transcript variant 1, mRNA."  
"Homo sapiens WD repeat domain 70 (WDR70), mRNA."  
"Homo sapiens WD repeat domain 73 (WDR73), mRNA."  
"PREDICTED: Homo sapiens WD repeat domain 74 (WDR74), mRNA."  
"Homo sapiens WD repeat domain 75 (WDR75), mRNA."  
"Homo sapiens WD repeat domain 76 (WDR76), mRNA."  
"Homo sapiens WD repeat domain 77 (WDR77), mRNA."  
"Homo sapiens WD repeat domain 78 (WDR78), transcript variant 2, mRNA."  
"Homo sapiens WD repeat domain 79 (WDR79), mRNA."  
"Homo sapiens WD repeat domain 8 (WDR8), mRNA."  
"Homo sapiens WD repeat domain 81 (WDR81), mRNA."  
"Homo sapiens WD repeat domain 82 (WDR82), mRNA."  
"Homo sapiens WD repeat domain 85 (WDR85), mRNA."  
"Homo sapiens WD repeat domain 88 (WDR88), mRNA."  
"Homo sapiens WD repeat domain 89 (WDR89), transcript variant 1, mRNA."  
"Homo sapiens WD repeat domain 90 (WDR90), mRNA."  
"Homo sapiens WD repeat domain 91 (WDR91), mRNA."  
"Homo sapiens WD repeat domain 92 (WDR92), mRNA."  
"Homo sapiens WD repeats and SOF1 domain containing (WDSOF1), mRNA."  
"Homo sapiens WD repeat, sterile alpha motif and U-box domain containing 1 (WDSUB1), mRNA."  
"Homo sapiens WD and tetratricopeptide repeats 1 (WDTTC1), mRNA."  
"Homo sapiens WDYHV motif containing 1 (WDYHV1), mRNA."  
"Homo sapiens WEE1 homolog (S. pombe) (WEE1), mRNA."  
"Homo sapiens WAP four-disulfide core domain 11 (WFDC11), mRNA."  
"Homo sapiens WAP four-disulfide core domain 13 (WFDC13), mRNA."  
"Homo sapiens WAP four-disulfide core domain 3 (WFDC3), mRNA."  
"Homo sapiens WAP four-disulfide core domain 6 (WFDC6), mRNA."  
"Homo sapiens WAP four-disulfide core domain 8 (WFDC8), transcript variant a, mRNA."  
"Homo sapiens Wolfram syndrome 1 (wolframin) (WFS1), mRNA."  
"Homo sapiens WAS protein homolog associated with actin, golgi membranes and microtubules  
"PREDICTED: Homo sapiens WAS protein homology region 2 domain containing 1-like 1, transcript variant 1, mRNA."  
"PREDICTED: Homo sapiens WAS protein homology region 2 domain containing 1-like 2, transcript variant 1, mRNA."  
"Homo sapiens Wolf-Hirschhorn syndrome candidate 1 (WHSC1), transcript variant 8, mRNA."  
"Homo sapiens Wolf-Hirschhorn syndrome candidate 1-like 1 (WHSC1L1), transcript variant shc1, mRNA."  
"Homo sapiens Wolf-Hirschhorn syndrome candidate 2 (WHSC2), mRNA."  
"Homo sapiens within bgcn homolog (Drosophila) (WIBG), mRNA."

"Homo sapiens WNT inhibitory factor 1 (WIF1), mRNA."  
"Homo sapiens WD repeat domain, phosphoinositide interacting 1 (WIPI1), mRNA."  
"Homo sapiens WD repeat domain, phosphoinositide interacting 2 (WIPI2), transcript variant 2,  
"Homo sapiens WNT1 inducible signaling pathway protein 2 (WISP2), mRNA."  
"Homo sapiens WNK lysine deficient protein kinase 1 (WNK1), mRNA."  
"Homo sapiens WNK lysine deficient protein kinase 2 (WNK2), mRNA."  
"Homo sapiens WNK lysine deficient protein kinase 4 (WNK4), mRNA."  
"Homo sapiens wingless-type MMTV integration site family, member 1 (WNT1), mRNA."  
"Homo sapiens wingless-type MMTV integration site family, member 10A (WNT10A), mRNA."  
"Homo sapiens wingless-type MMTV integration site family, member 10B (WNT10B), mRNA."  
"Homo sapiens wingless-type MMTV integration site family, member 3 (WNT3), mRNA."  
"Homo sapiens wingless-type MMTV integration site family, member 5A (WNT5A), mRNA."  
"Homo sapiens wingless-type MMTV integration site family, member 7B (WNT7B), mRNA."  
"Homo sapiens wingless-type MMTV integration site family, member 8A (WNT8A), mRNA."  
"Homo sapiens tryptophan rich basic protein (WRB), mRNA."  
"Homo sapiens Werner syndrome, RecQ helicase-like (WRN), mRNA."  
"Homo sapiens Werner helicase interacting protein 1 (WRNIP1), transcript variant 1, mRNA."  
"Homo sapiens WD repeat and SOCS box-containing 1 (WSB1), transcript variant 2, mRNA."  
"Homo sapiens WD repeat and SOCS box-containing 2 (WSB2), mRNA."  
"Homo sapiens WSC domain containing 1 (WSCD1), mRNA."  
"Homo sapiens Wilms tumor 1 associated protein (WTAP), transcript variant 2, mRNA."  
"PREDICTED: Homo sapiens Wilms tumor 1 interacting protein (WTIP), mRNA."  
"Homo sapiens WW and C2 domain containing 1 (WWC1), mRNA."  
"Homo sapiens WWC family member 3 (WWC3), mRNA."  
"Homo sapiens WW domain containing oxidoreductase (WWOX), transcript variant 3, mRNA."  
"Homo sapiens WW domain containing E3 ubiquitin protein ligase 1 (WWP1), mRNA."  
"Homo sapiens WW domain containing E3 ubiquitin protein ligase 2 (WWP2), transcript variant  
"Homo sapiens XPA binding protein 2 (XAB2), mRNA."  
"Homo sapiens XIAP associated factor 1 (XAF1), transcript variant 2, mRNA."  
"Homo sapiens X antigen family, member 1B (XAGE1B), transcript variant 1, mRNA."  
"Homo sapiens X antigen family, member 1C (XAGE1C), transcript variant 2, mRNA."  
"Homo sapiens X antigen family, member 1D (XAGE1D), transcript variant 1, mRNA."  
"Homo sapiens X antigen family, member 1E (XAGE1E), transcript variant 2, mRNA."  
"PREDICTED: Homo sapiens XAGE-4 protein (XAGE-4), mRNA."  
"Homo sapiens X-box binding protein 1 (XBP1), transcript variant 1, mRNA."  
"Homo sapiens xanthine dehydrogenase (XDH), mRNA."  
"Homo sapiens X-linked inhibitor of apoptosis (XIAP), mRNA."  
"Homo sapiens xin actin-binding repeat containing 1 (XIRP1), mRNA."  
"Homo sapiens X (inactive)-specific transcript (non-protein coding) (XIST), non-coding RNA."  
"Homo sapiens X-linked Kx blood group (McLeod syndrome) (XK), mRNA."  
"Homo sapiens XK, Kell blood group complex subunit-related family, member 3 (XKR3), mRNA."  
"Homo sapiens XK, Kell blood group complex subunit-related family, member 6 (XKR6), transcri  
"Homo sapiens XK, Kell blood group complex subunit-related, X-linked (XKRX), mRNA."  
"Homo sapiens xeroderma pigmentosum, complementation group A (XPA), mRNA."

"Homo sapiens xeroderma pigmentosum, complementation group C (XPC), mRNA."  
"Homo sapiens X-prolyl aminopeptidase (aminopeptidase P) 1, soluble (XPNPEP1), mRNA."  
"Homo sapiens X-prolyl aminopeptidase (aminopeptidase P) 3, putative (XPNPEP3), mRNA."  
"Homo sapiens exportin 1 (CRM1 homolog, yeast) (XPO1), mRNA."  
"Homo sapiens exportin 4 (XPO4), mRNA."  
"Homo sapiens exportin 5 (XPO5), mRNA."  
"Homo sapiens exportin 6 (XPO6), mRNA."  
"Homo sapiens exportin 7 (XPO7), mRNA."  
"Homo sapiens exportin, tRNA (nuclear export receptor for tRNAs) (XPOT), mRNA."  
"Homo sapiens xenotropic and polytropic retrovirus receptor (XPR1), transcript variant 1, mRNA"  
"Homo sapiens X-ray repair complementing defective repair in Chinese hamster cells 1 (XRCC1)  
"Homo sapiens X-ray repair complementing defective repair in Chinese hamster cells 2 (XRCC2)  
"Homo sapiens X-ray repair complementing defective repair in Chinese hamster cells 3 (XRCC3)  
"Homo sapiens X-ray repair complementing defective repair in Chinese hamster cells 4 (XRCC4)  
"Homo sapiens X-ray repair complementing defective repair in Chinese hamster cells 5 (double-  
"Homo sapiens X-ray repair complementing defective repair in Chinese hamster cells 6 (XRCC6)  
"Homo sapiens XRCC6 binding protein 1 (XRCC6BP1), mRNA."  
"Homo sapiens 5'-3' exoribonuclease 1 (XRN1), mRNA."  
"Homo sapiens xylulokinase homolog (H. influenzae) (XYLB), mRNA."  
"Homo sapiens xylosyltransferase I (XYLT1), mRNA."  
"Homo sapiens xylosyltransferase II (XYLT2), mRNA."  
"Homo sapiens YY1 associated factor 2 (YAF2), mRNA."  
"Homo sapiens Yes-associated protein 1, 65kDa (YAP1), mRNA."  
"Homo sapiens tyrosyl-tRNA synthetase (YARS), mRNA."  
"Homo sapiens tyrosyl-tRNA synthetase 2, mitochondrial (YARS2), nuclear gene encoding mitoch  
"Homo sapiens Y box binding protein 1 (YBX1), mRNA."  
"Homo sapiens Y box binding protein 2 (YBX2), mRNA."  
"Homo sapiens YdjC homolog (bacterial) (YDJC), mRNA."  
"Homo sapiens YEATS domain containing 2 (YEATS2), mRNA."  
"Homo sapiens YEATS domain containing 4 (YEATS4), mRNA."  
"Homo sapiens v-yes-1 Yamaguchi sarcoma viral oncogene homolog 1 (YES1), mRNA."  
"Homo sapiens Yip1 interacting factor homolog A (S. cerevisiae) (YIF1A), mRNA."  
"Homo sapiens Yip1 interacting factor homolog B (S. cerevisiae) (YIF1B), transcript variant 1, m  
"Homo sapiens Yip1 domain family, member 1 (YIPF1), mRNA."  
"Homo sapiens Yip1 domain family, member 3 (YIPF3), mRNA."  
"Homo sapiens Yip1 domain family, member 4 (YIPF4), mRNA."  
"Homo sapiens Yip1 domain family, member 5 (YIPF5), transcript variant 2, mRNA."  
"Homo sapiens Yip1 domain family, member 6 (YIPF6), mRNA."  
"Homo sapiens Yip1 domain family, member 7 (YIPF7), mRNA."  
"Homo sapiens YjeF N-terminal domain containing 3 (YJEFN3), nuclear gene encoding mitoch  
"Homo sapiens YKT6 v-SNARE homolog (S. cerevisiae) (YKT6), mRNA."  
"Homo sapiens YLP motif containing 1 (YLPM1), mRNA."  
"Homo sapiens YME1-like 1 (S. cerevisiae) (YME1L1), nuclear gene encoding mitochondrial prc  
"Homo sapiens YOD1 OTU deubiquinating enzyme 1 homolog (S. cerevisiae) (YOD1), mRNA."

"Homo sapiens yippee-like 1 (Drosophila) (YPEL1), mRNA."  
"Homo sapiens yippee-like 2 (Drosophila) (YPEL2), mRNA."  
"Homo sapiens yippee-like 3 (Drosophila) (YPEL3), transcript variant 1, mRNA."  
"Homo sapiens yippee-like 4 (Drosophila) (YPEL4), mRNA."  
"Homo sapiens yippee-like 5 (Drosophila) (YPEL5), mRNA."  
"Homo sapiens yrdC domain containing (E. coli) (YRDC), nuclear gene encoding mitochondrial p  
"Homo sapiens YSK4 Sps1/Ste20-related kinase homolog (S. cerevisiae) (YSK4), transcript vari  
"Homo sapiens YTH domain containing 1 (YTHDC1), transcript variant 1, mRNA."  
"Homo sapiens YTH domain containing 2 (YTHDC2), mRNA."  
"Homo sapiens YTH domain family, member 1 (YTHDF1), mRNA."  
"Homo sapiens YTH domain family, member 2 (YTHDF2), mRNA."  
"Homo sapiens YTH domain family, member 3 (YTHDF3), mRNA."  
"Homo sapiens tyrosine 3-monooxygenase/tryptophan 5-monooxygenase activation protein, bet  
"Homo sapiens tyrosine 3-monooxygenase/tryptophan 5-monooxygenase activation protein, eps  
"Homo sapiens tyrosine 3-monooxygenase/tryptophan 5-monooxygenase activation protein, gar  
"Homo sapiens tyrosine 3-monooxygenase/tryptophan 5-monooxygenase activation protein, eta  
"Homo sapiens tyrosine 3-monooxygenase/tryptophan 5-monooxygenase activation protein, the  
"Homo sapiens tyrosine 3-monooxygenase/tryptophan 5-monooxygenase activation protein, zet  
"Homo sapiens YY1 transcription factor (YY1), mRNA."  
"Homo sapiens zinc binding alcohol dehydrogenase domain containing 2 (ZADH2), mRNA."  
"Homo sapiens sterile alpha motif and leucine zipper containing kinase AZK (ZAK), transcript va  
"Homo sapiens zinc finger, BED-type containing 1 (ZBED1), mRNA."  
"Homo sapiens zinc finger, BED-type containing 2 (ZBED2), mRNA."  
"Homo sapiens zinc finger, BED-type containing 3 (ZBED3), mRNA."  
"Homo sapiens zinc finger, BED-type containing 4 (ZBED4), mRNA."  
"Homo sapiens zinc finger, BED-type containing 5 (ZBED5), mRNA."  
"Homo sapiens Z-DNA binding protein 1 (ZBP1), mRNA."  
"Homo sapiens zinc finger and BTB domain containing 10 (ZBTB10), mRNA."  
"Homo sapiens zinc finger and BTB domain containing 11 (ZBTB11), mRNA."  
"Homo sapiens zinc finger and BTB domain containing 17 (ZBTB17), mRNA."  
"Homo sapiens zinc finger and BTB domain containing 2 (ZBTB2), mRNA."  
"Homo sapiens zinc finger and BTB domain containing 20 (ZBTB20), mRNA."  
"Homo sapiens zinc finger and BTB domain containing 22 (ZBTB22), mRNA."  
"Homo sapiens zinc finger and BTB domain containing 24 (ZBTB24), mRNA."  
"Homo sapiens zinc finger and BTB domain containing 25 (ZBTB25), mRNA."  
"Homo sapiens zinc finger and BTB domain containing 26 (ZBTB26), mRNA."  
"Homo sapiens zinc finger and BTB domain containing 3 (ZBTB3), mRNA."  
"Homo sapiens zinc finger and BTB domain containing 32 (ZBTB32), mRNA."  
"Homo sapiens zinc finger and BTB domain containing 33 (ZBTB33), mRNA."  
"Homo sapiens zinc finger and BTB domain containing 34 (ZBTB34), mRNA."  
"Homo sapiens zinc finger and BTB domain containing 38 (ZBTB38), mRNA."  
"Homo sapiens zinc finger and BTB domain containing 39 (ZBTB39), mRNA."  
"Homo sapiens zinc finger and BTB domain containing 4 (ZBTB4), mRNA."  
"Homo sapiens zinc finger and BTB domain containing 41 (ZBTB41), mRNA."

"Homo sapiens zinc finger and BTB domain containing 42 (ZBTB42), mRNA."  
"Homo sapiens zinc finger and BTB domain containing 43 (ZBTB43), mRNA."  
"Homo sapiens zinc finger and BTB domain containing 44 (ZBTB44), mRNA."  
"Homo sapiens zinc finger and BTB domain containing 45 (ZBTB45), mRNA."  
"Homo sapiens zinc finger and BTB domain containing 46 (ZBTB46), mRNA."  
"Homo sapiens zinc finger and BTB domain containing 47 (ZBTB47), mRNA."  
"Homo sapiens zinc finger and BTB domain containing 48 (ZBTB48), mRNA."  
"Homo sapiens zinc finger and BTB domain containing 5 (ZBTB5), mRNA."  
"Homo sapiens zinc finger and BTB domain containing 7C (ZBTB7C), mRNA."  
"Homo sapiens zinc finger and BTB domain containing 8A (ZBTB8A), mRNA. XM\_945039"  
"Homo sapiens zinc finger and BTB domain containing 8 opposite strand (ZBTB8OS), mRNA."  
"Homo sapiens zinc finger and BTB domain containing 9 (ZBTB9), mRNA."  
"Homo sapiens zinc finger CCCH-type containing 10 (ZC3H10), mRNA."  
"PREDICTED: Homo sapiens misc\_RNA (ZC3H11B), miscRNA."  
"Homo sapiens zinc finger CCCH-type containing 12A (ZC3H12A), mRNA."  
"Homo sapiens zinc finger CCCH-type containing 12B (ZC3H12B), mRNA."  
"Homo sapiens zinc finger CCCH-type containing 12C (ZC3H12C), mRNA."  
"Homo sapiens zinc finger CCCH-type containing 12D (ZC3H12D), mRNA."  
"Homo sapiens zinc finger CCCH-type containing 13 (ZC3H13), mRNA."  
"Homo sapiens zinc finger CCCH-type containing 14 (ZC3H14), transcript variant 1, mRNA."  
"Homo sapiens zinc finger CCCH-type containing 15 (ZC3H15), mRNA."  
"Homo sapiens zinc finger CCCH-type containing 18 (ZC3H18), mRNA."  
"Homo sapiens zinc finger CCCH-type containing 3 (ZC3H3), mRNA."  
"Homo sapiens zinc finger CCCH-type containing 4 (ZC3H4), mRNA."  
"PREDICTED: Homo sapiens zinc finger CCCH-type containing 5 (ZC3H5), mRNA."  
"Homo sapiens zinc finger CCCH-type containing 7A (ZC3H7A), mRNA."  
"Homo sapiens zinc finger CCCH-type containing 8 (ZC3H8), mRNA."  
"Homo sapiens zinc finger CCCH-type, antiviral 1 (ZC3HAV1), transcript variant 2, mRNA."  
"Homo sapiens zinc finger CCCH-type, antiviral 1-like (ZC3HAV1L), mRNA."  
"Homo sapiens zinc finger, C3HC-type containing 1 (ZC3HC1), mRNA."  
"Homo sapiens zinc finger, C4H2 domain containing (ZC4H2), mRNA."  
"Homo sapiens zinc finger, CCHC domain containing 10 (ZCCHC10), mRNA."  
"Homo sapiens zinc finger, CCHC domain containing 11 (ZCCHC11), transcript variant 3, mRNA/  
"Homo sapiens zinc finger, CCHC domain containing 12 (ZCCHC12), mRNA."  
"Homo sapiens zinc finger, CCHC domain containing 14 (ZCCHC14), mRNA."  
"Homo sapiens zinc finger, CCHC domain containing 17 (ZCCHC17), mRNA."  
"Homo sapiens zinc finger, CCHC domain containing 2 (ZCCHC2), mRNA."  
"Homo sapiens zinc finger, CCHC domain containing 24 (ZCCHC24), mRNA."  
"Homo sapiens zinc finger, CCHC domain containing 3 (ZCCHC3), mRNA."  
"Homo sapiens zinc finger, CCHC domain containing 4 (ZCCHC4), mRNA."  
"Homo sapiens zinc finger, CCHC domain containing 6 (ZCCHC6), mRNA."  
"Homo sapiens zinc finger, CCHC domain containing 7 (ZCCHC7), mRNA."  
"Homo sapiens zinc finger, CCHC domain containing 8 (ZCCHC8), mRNA."  
"Homo sapiens zinc finger, CCHC domain containing 9 (ZCCHC9), mRNA."

"Homo sapiens zinc finger CCHC-type and RNA binding motif 1 (ZCRB1), mRNA."  
"Homo sapiens zinc finger, CW type with PWWP domain 1 (ZCWPW1), mRNA."  
"Homo sapiens zinc finger, CW type with PWWP domain 2 (ZCWPW2), mRNA."  
"Homo sapiens zinc finger, DHHC-type containing 11 (ZDHHC11), mRNA."  
"Homo sapiens zinc finger, DHHC-type containing 12 (ZDHHC12), mRNA."  
"Homo sapiens zinc finger, DHHC-type containing 13 (ZDHHC13), transcript variant 2, mRNA."  
"Homo sapiens zinc finger, DHHC-type containing 14 (ZDHHC14), transcript variant 1, mRNA."  
"Homo sapiens zinc finger, DHHC-type containing 16 (ZDHHC16), transcript variant 5, mRNA."  
"Homo sapiens zinc finger, DHHC-type containing 17 (ZDHHC17), mRNA."  
"Homo sapiens zinc finger, DHHC-type containing 2 (ZDHHC2), mRNA."  
"Homo sapiens zinc finger, DHHC-type containing 23 (ZDHHC23), mRNA."  
"Homo sapiens zinc finger, DHHC-type containing 24 (ZDHHC24), mRNA."  
"Homo sapiens zinc finger, DHHC-type containing 3 (ZDHHC3), mRNA."  
"Homo sapiens zinc finger, DHHC-type containing 4 (ZDHHC4), mRNA."  
"Homo sapiens zinc finger, DHHC-type containing 5 (ZDHHC5), mRNA."  
"Homo sapiens zinc finger, DHHC-type containing 6 (ZDHHC6), mRNA."  
"Homo sapiens zinc finger, DHHC-type containing 7 (ZDHHC7), mRNA."  
"Homo sapiens zinc finger, DHHC-type containing 8 (ZDHHC8), mRNA."  
"Homo sapiens zinc finger, DHHC-type containing 8 pseudogene (ZDHHC8P), non-coding RNA."  
"Homo sapiens zinc finger, DHHC-type containing 9 (ZDHHC9), transcript variant 2, mRNA."  
"Homo sapiens zinc finger E-box binding homeobox 1 (ZEB1), mRNA."  
"Homo sapiens zinc finger E-box binding homeobox 2 (ZEB2), mRNA."  
"Homo sapiens zer-1 homolog (C. elegans) (ZER1), mRNA."  
"Homo sapiens zinc finger, AN1-type domain 1 (ZFAND1), mRNA."  
"Homo sapiens zinc finger, AN1-type domain 2A (ZFAND2A), mRNA."  
"Homo sapiens zinc finger, AN1-type domain 2B (ZFAND2B), mRNA."  
"Homo sapiens zinc finger, AN1-type domain 3 (ZFAND3), mRNA."  
"Homo sapiens zinc finger, AN1-type domain 5 (ZFAND5), mRNA."  
"Homo sapiens zinc finger, AN1-type domain 6 (ZFAND6), mRNA."  
"Homo sapiens zinc finger, C3H1-type containing (ZFC3H1), mRNA."  
"Homo sapiens zinc finger homeobox 2 (ZFHX2), mRNA."  
"Homo sapiens zinc finger homeobox 3 (ZFHX3), transcript variant A, mRNA."  
"Homo sapiens zinc finger protein 1 homolog (mouse) (ZFP1), mRNA."  
"Homo sapiens zinc finger protein 106 homolog (mouse) (ZFP106), mRNA."  
"Homo sapiens zinc finger protein 14 homolog (mouse) (ZFP14), mRNA."  
"Homo sapiens zinc finger protein 161 homolog (mouse) (ZFP161), mRNA."  
"Homo sapiens zinc finger protein 3 homolog (mouse) (ZFP3), mRNA."  
"Homo sapiens zinc finger protein 30 homolog (mouse) (ZFP30), mRNA."  
"Homo sapiens zinc finger protein 36, C3H type, homolog (mouse) (ZFP36), mRNA."  
"Homo sapiens zinc finger protein 36, C3H type-like 1 (ZFP36L1), mRNA."  
"Homo sapiens zinc finger protein 36, C3H type-like 2 (ZFP36L2), mRNA."  
"Homo sapiens zinc finger protein 37 homolog (mouse) (ZFP37), mRNA."  
"PREDICTED: Homo sapiens zinc finger protein 57 homolog (mouse) (ZFP57), mRNA."  
"Homo sapiens zinc finger protein 62 homolog (mouse) (ZFP62), mRNA."

"Homo sapiens zinc finger protein 64 homolog (mouse) (ZFP64), transcript variant 3, mRNA."  
"Homo sapiens zinc finger protein 82 homolog (mouse) (ZFP82), mRNA."  
"Homo sapiens zinc finger protein 90 homolog (mouse) (ZFP90), mRNA."  
"Homo sapiens zinc finger protein 91 homolog (mouse) (ZFP91), mRNA."  
"Homo sapiens zinc finger protein 92 homolog (mouse) (ZFP92), mRNA."  
"Homo sapiens zinc finger protein-like 1 (ZFPL1), mRNA."  
"Homo sapiens zinc finger protein, multitype 1 (ZFPM1), mRNA."  
"Homo sapiens zinc finger RNA binding protein (ZFR), mRNA."  
"Homo sapiens zinc finger protein, X-linked (ZFX), mRNA."  
"Homo sapiens zinc finger protein, Y-linked (ZFY), mRNA."  
"Homo sapiens zinc finger, FYVE domain containing 1 (ZFYVE1), transcript variant 1, mRNA."  
"Homo sapiens zinc finger, FYVE domain containing 16 (ZFYVE16), mRNA."  
"Homo sapiens zinc finger, FYVE domain containing 19 (ZFYVE19), mRNA."  
"Homo sapiens zinc finger, FYVE domain containing 20 (ZFYVE20), mRNA."  
"Homo sapiens zinc finger, FYVE domain containing 21 (ZFYVE21), mRNA."  
"Homo sapiens zinc finger, FYVE domain containing 26 (ZFYVE26), mRNA."  
"Homo sapiens zinc fingers and homeoboxes 1 (ZHX1), transcript variant 2, mRNA."  
"Homo sapiens zinc fingers and homeoboxes 2 (ZHX2), mRNA."  
"Homo sapiens zinc fingers and homeoboxes 3 (ZHX3), mRNA."  
"Homo sapiens Zic family member 1 (odd-paired homolog, Drosophila) (ZIC1), mRNA."  
"Homo sapiens Zic family member 2 (odd-paired homolog, Drosophila) (ZIC2), mRNA."  
"Homo sapiens Zic family member 5 (odd-paired homolog, Drosophila) (ZIC5), mRNA."  
"Homo sapiens zinc finger protein interacting with K protein 1 homolog (mouse) (ZIK1), mRNA."  
"Homo sapiens zinc finger, imprinted 2 (ZIM2), mRNA."  
"Homo sapiens zinc finger, imprinted 3 (ZIM3), mRNA."  
"Homo sapiens zinc finger with KRAB and SCAN domains 1 (ZKSCAN1), mRNA."  
"Homo sapiens zinc finger with KRAB and SCAN domains 2 (ZKSCAN2), mRNA."  
"Homo sapiens zinc finger with KRAB and SCAN domains 3 (ZKSCAN3), mRNA."  
"Homo sapiens zinc finger with KRAB and SCAN domains 4 (ZKSCAN4), mRNA."  
"Homo sapiens zinc finger with KRAB and SCAN domains 5 (ZKSCAN5), transcript variant 2, m  
"Homo sapiens zinc finger, matrin type 2 (ZMAT2), mRNA."  
"Homo sapiens zinc finger, matrin type 3 (ZMAT3), transcript variant 2, mRNA."  
"Homo sapiens zinc finger, matrin type 5 (ZMAT5), transcript variant 1, mRNA."  
"Homo sapiens zinc finger, MIZ-type containing 1 (ZMIZ1), mRNA."  
"Homo sapiens zinc finger, MIZ-type containing 2 (ZMIZ2), transcript variant 1, mRNA."  
"Homo sapiens zinc metallopeptidase (STE24 homolog, *S. cerevisiae*) (ZMPSTE24), mRNA."  
"Homo sapiens zinc finger, MYM-type 1 (ZMYM1), mRNA."  
"Homo sapiens zinc finger, MYM-type 3 (ZMYM3), transcript variant 2, mRNA."  
"Homo sapiens zinc finger, MYM-type 4 (ZMYM4), mRNA."  
"Homo sapiens zinc finger, MYM-type 5 (ZMYM5), transcript variant 1, mRNA."  
"Homo sapiens zinc finger, MYM-type 6 (ZMYM6), mRNA."  
"Homo sapiens zinc finger, MYND domain containing 11 (ZMYND11), transcript variant 2, mRNA/  
"Homo sapiens zinc finger, MYND-type containing 12 (ZMYND12), mRNA."  
"Homo sapiens zinc finger, MYND-type containing 19 (ZMYND19), mRNA."

"Homo sapiens zinc finger, MYND-type containing 8 (ZMYND8), transcript variant 1, mRNA."  
"Homo sapiens zinc finger protein 10 (ZNF10), mRNA."  
"Homo sapiens zinc finger protein 101 (ZNF101), mRNA."  
"Homo sapiens zinc finger protein 107 (ZNF107), transcript variant 2, mRNA."  
"Homo sapiens zinc finger protein 114 (ZNF114), mRNA."  
"Homo sapiens zinc finger protein 121 (ZNF121), mRNA."  
"Homo sapiens zinc finger protein 124 (ZNF124), mRNA."  
"Homo sapiens zinc finger protein 131 (ZNF131), mRNA."  
"Homo sapiens zinc finger protein 133 (ZNF133), mRNA."  
"Homo sapiens zinc finger protein 134 (ZNF134), mRNA."  
"PREDICTED: Homo sapiens zinc finger protein 136 (clone pHZ-20) (ZNF136), mRNA."  
"Homo sapiens zinc finger protein 137 (ZNF137), mRNA."  
"Homo sapiens zinc finger protein 138 (ZNF138), mRNA."  
"Homo sapiens zinc finger protein 14 (ZNF14), mRNA."  
"Homo sapiens zinc finger protein 140 (ZNF140), mRNA."  
"Homo sapiens zinc finger protein 142 (ZNF142), transcript variant 2, mRNA."  
"Homo sapiens zinc finger protein 143 (ZNF143), mRNA."  
"Homo sapiens zinc finger protein 146 (ZNF146), transcript variant 3, mRNA."  
"Homo sapiens zinc finger protein 148 (ZNF148), mRNA."  
"Homo sapiens zinc finger protein 154 (pHZ-92) (ZNF154), mRNA."  
"Homo sapiens zinc finger protein 16 (ZNF16), transcript variant 1, mRNA."  
"Homo sapiens zinc finger protein 160 (ZNF160), transcript variant 1, mRNA."  
"Homo sapiens zinc finger protein 165 (ZNF165), mRNA."  
"Homo sapiens zinc finger protein 17 (ZNF17), mRNA."  
"Homo sapiens zinc finger protein 174 (ZNF174), transcript variant 2, mRNA."  
"Homo sapiens zinc finger protein 175 (ZNF175), mRNA."  
"Homo sapiens zinc finger protein 177 (ZNF177), mRNA."  
"Homo sapiens zinc finger protein 18 (ZNF18), mRNA."  
"Homo sapiens zinc finger protein 181 (ZNF181), mRNA."  
"Homo sapiens zinc finger protein 184 (ZNF184), mRNA."  
"Homo sapiens zinc finger protein 185 (LIM domain) (ZNF185), mRNA."  
"Homo sapiens zinc finger protein 187 (ZNF187), transcript variant 1, mRNA."  
"Homo sapiens zinc finger protein 193 (ZNF193), mRNA."  
"Homo sapiens zinc finger protein 195 (ZNF195), mRNA."  
"Homo sapiens zinc finger protein 197 (ZNF197), transcript variant 2, mRNA."  
"Homo sapiens zinc finger protein 20 (ZNF20), mRNA."  
"Homo sapiens zinc finger protein 200 (ZNF200), transcript variant 1, mRNA."  
"Homo sapiens zinc finger protein 202 (ZNF202), mRNA."  
"Homo sapiens zinc finger protein 205 (ZNF205), transcript variant 1, mRNA."  
"Homo sapiens zinc finger protein 207 (ZNF207), transcript variant 2, mRNA."  
"Homo sapiens zinc finger protein 211 (ZNF211), transcript variant 1, mRNA."  
"Homo sapiens zinc finger protein 212 (ZNF212), mRNA."  
"Homo sapiens zinc finger protein 213 (ZNF213), mRNA."  
"Homo sapiens zinc finger protein 214 (ZNF214), mRNA."



"Homo sapiens zinc finger protein 215 (ZNF215), mRNA."  
"Homo sapiens zinc finger protein 217 (ZNF217), mRNA."  
"Homo sapiens zinc finger protein 219 (ZNF219), mRNA."  
"Homo sapiens zinc finger protein 22 (KOX 15) (ZNF22), mRNA."  
"Homo sapiens zinc finger protein 223 (ZNF223), mRNA."  
"Homo sapiens zinc finger protein 226 (ZNF226), transcript variant 4, mRNA."  
"Homo sapiens zinc finger protein 227 (ZNF227), mRNA."  
"Homo sapiens zinc finger protein 23 (KOX 16) (ZNF23), mRNA."  
"Homo sapiens zinc finger protein 232 (ZNF232), mRNA."  
"Homo sapiens zinc finger protein 234 (ZNF234), mRNA."  
"Homo sapiens zinc finger protein 235 (ZNF235), mRNA."  
"Homo sapiens zinc finger protein 236 (ZNF236), mRNA."  
"Homo sapiens zinc finger protein 238 (ZNF238), transcript variant 1, mRNA."  
"Homo sapiens zinc finger protein 239 (ZNF239), transcript variant 4, mRNA."  
"Homo sapiens zinc finger protein 24 (ZNF24), mRNA."  
"Homo sapiens zinc finger protein 248 (ZNF248), mRNA."  
"Homo sapiens zinc finger protein 25 (ZNF25), mRNA."  
"Homo sapiens zinc finger protein 250 (ZNF250), mRNA."  
"Homo sapiens zinc finger protein 252 (ZNF252), non-coding RNA."  
"Homo sapiens zinc finger protein 253 (ZNF253), mRNA."  
"Homo sapiens zinc finger protein 254 (ZNF254), mRNA."  
"Homo sapiens zinc finger protein 256 (ZNF256), mRNA."  
"Homo sapiens zinc finger protein 259 (ZNF259), mRNA."  
"Homo sapiens zinc finger protein 26 (ZNF26), mRNA."  
"Homo sapiens zinc finger protein 260 (ZNF260), mRNA."  
"Homo sapiens zinc finger protein 266 (ZNF266), mRNA."  
"Homo sapiens zinc finger protein 271 (ZNF271), mRNA."  
"Homo sapiens zinc finger protein 273 (ZNF273), transcript variant 1, mRNA."  
"Homo sapiens zinc finger protein 274 (ZNF274), transcript variant ZNF274c, mRNA."  
"Homo sapiens zinc finger protein 275 (ZNF275), mRNA."  
"Homo sapiens zinc finger protein 276 (ZNF276), mRNA."  
"Homo sapiens zinc finger protein 277 (ZNF277), mRNA."  
"Homo sapiens zinc finger protein 280A (ZNF280A), mRNA."  
"Homo sapiens zinc finger protein 280B (ZNF280B), mRNA."  
"Homo sapiens zinc finger protein 280C (ZNF280C), mRNA."  
"Homo sapiens zinc finger protein 280D (ZNF280D), transcript variant 3, mRNA."  
"Homo sapiens zinc finger protein 281 (ZNF281), mRNA."  
"Homo sapiens zinc finger protein 282 (ZNF282), mRNA."  
"Homo sapiens zinc finger protein 285A (ZNF285A), mRNA."  
"Homo sapiens zinc finger protein 286A (ZNF286A), mRNA."  
"Homo sapiens zinc finger 286C pseudogene (ZNF286C), non-coding RNA."  
"Homo sapiens zinc finger protein 292 (ZNF292), mRNA."  
"Homo sapiens zinc finger protein 295 (ZNF295), transcript variant 1, mRNA."  
"Homo sapiens zinc finger protein 296 (ZNF296), mRNA."

"Homo sapiens zinc finger protein 3 (ZNF3), transcript variant 2, mRNA."  
"Homo sapiens zinc finger protein 30 (ZNF30), transcript variant 2, mRNA."  
"Homo sapiens zinc finger protein 302 (ZNF302), transcript variant 2, mRNA."  
"Homo sapiens zinc finger protein 318 (ZNF318), mRNA."  
"Homo sapiens zinc finger protein 319 (ZNF319), mRNA."  
"Homo sapiens zinc finger protein 322A (ZNF322A), mRNA."  
"Homo sapiens zinc finger protein 323 (ZNF323), transcript variant 1, mRNA."  
"Homo sapiens zinc finger protein 324 (ZNF324), mRNA."  
"Homo sapiens zinc finger protein 326 (ZNF326), transcript variant 2, mRNA."  
"Homo sapiens zinc finger protein 329 (ZNF329), mRNA."  
"Homo sapiens zinc finger protein 330 (ZNF330), mRNA."  
"Homo sapiens zinc finger protein 331 (ZNF331), transcript variant 3, mRNA."  
"Homo sapiens zinc finger protein 333 (ZNF333), mRNA."  
"Homo sapiens zinc finger protein 335 (ZNF335), mRNA."  
"Homo sapiens zinc finger protein 337 (ZNF337), mRNA."  
"Homo sapiens zinc finger protein 33A (ZNF33A), transcript variant 2, mRNA."  
"Homo sapiens zinc finger protein 33B (ZNF33B), mRNA."  
"Homo sapiens zinc finger protein 34 (ZNF34), mRNA."  
"Homo sapiens zinc finger protein 341 (ZNF341), mRNA."  
"Homo sapiens zinc finger protein 343 (ZNF343), mRNA."  
"Homo sapiens zinc finger protein 345 (ZNF345), mRNA."  
"Homo sapiens zinc finger protein 347 (ZNF347), mRNA."  
"Homo sapiens zinc finger protein 35 (ZNF35), mRNA."  
"Homo sapiens zinc finger protein 350 (ZNF350), mRNA."  
"Homo sapiens zinc finger protein 354B (ZNF354B), mRNA."  
"Homo sapiens zinc finger protein 358 (ZNF358), mRNA."  
"Homo sapiens zinc finger protein 362 (ZNF362), mRNA."  
"Homo sapiens zinc finger protein 364 (ZNF364), mRNA."  
"Homo sapiens zinc finger protein 367 (ZNF367), mRNA."  
"Homo sapiens zinc finger protein 37A (ZNF37A), transcript variant 1, mRNA."  
"PREDICTED: Homo sapiens misc\_RNA (ZNF37B), miscRNA."  
"Homo sapiens zinc finger protein 382 (ZNF382), mRNA."  
"Homo sapiens zinc finger protein 383 (ZNF383), mRNA."  
"Homo sapiens zinc finger protein 384 (ZNF384), transcript variant 5, mRNA."  
"Homo sapiens zinc finger protein 385A (ZNF385A), transcript variant 3, mRNA."  
"Homo sapiens zinc finger protein 385B (ZNF385B), transcript variant 1, mRNA."  
"Homo sapiens zinc finger protein 385C (ZNF385C), mRNA."  
"Homo sapiens zinc finger protein 394 (ZNF394), mRNA."  
"Homo sapiens zinc finger protein 395 (ZNF395), mRNA."  
"Homo sapiens zinc finger protein 396 (ZNF396), mRNA."  
"Homo sapiens zinc finger protein 397 (ZNF397), transcript variant 2, mRNA."  
"Homo sapiens zinc finger protein 397 opposite strand (ZNF397OS), mRNA."  
"Homo sapiens zinc finger protein 398 (ZNF398), transcript variant 1, mRNA."  
"Homo sapiens zinc finger protein 404 (ZNF404), mRNA."

"Homo sapiens zinc finger protein 407 (ZNF407), transcript variant 1, mRNA."  
"Homo sapiens zinc finger protein 408 (ZNF408), mRNA."  
"Homo sapiens zinc finger protein 410 (ZNF410), mRNA."  
"Homo sapiens zinc finger protein 414 (ZNF414), mRNA."  
"Homo sapiens zinc finger protein 416 (ZNF416), mRNA."  
"Homo sapiens zinc finger protein 417 (ZNF417), mRNA."  
"Homo sapiens zinc finger protein 419 (ZNF419), transcript variant 6, mRNA."  
"Homo sapiens zinc finger protein 420 (ZNF420), mRNA."  
"Homo sapiens zinc finger protein 425 (ZNF425), mRNA."  
"Homo sapiens zinc finger protein 426 (ZNF426), mRNA."  
"Homo sapiens zinc finger protein 428 (ZNF428), mRNA."  
"Homo sapiens zinc finger protein 429 (ZNF429), mRNA."  
"Homo sapiens zinc finger protein 430 (ZNF430), mRNA."  
"Homo sapiens zinc finger protein 431 (ZNF431), mRNA."  
"Homo sapiens zinc finger protein 433 (ZNF433), mRNA."  
"Homo sapiens zinc finger protein 434 (ZNF434), mRNA."  
"Homo sapiens zinc finger protein 436 (ZNF436), mRNA."  
"Homo sapiens zinc finger protein 439 (ZNF439), mRNA."  
"Homo sapiens zinc finger protein 442 (ZNF442), mRNA."  
"Homo sapiens zinc finger protein 444 (ZNF444), mRNA."  
"Homo sapiens zinc finger protein 446 (ZNF446), mRNA."  
"Homo sapiens zinc finger protein 45 (ZNF45), mRNA."  
"Homo sapiens zinc finger protein 454 (ZNF454), mRNA."  
"Homo sapiens zinc finger protein 460 (ZNF460), mRNA."  
"Homo sapiens zinc finger protein 461 (ZNF461), mRNA."  
"Homo sapiens zinc finger protein 467 (ZNF467), mRNA."  
"Homo sapiens zinc finger protein 468 (ZNF468), transcript variant 1, mRNA."  
"PREDICTED: Homo sapiens zinc finger protein 469 (ZNF469), mRNA."  
"Homo sapiens zinc finger protein 470 (ZNF470), mRNA."  
"Homo sapiens zinc finger protein 473 (ZNF473), transcript variant 1, mRNA."  
"Homo sapiens zinc finger protein 479 (ZNF479), mRNA."  
"Homo sapiens zinc finger protein 480 (ZNF480), mRNA."  
"Homo sapiens zinc finger protein 483 (ZNF483), transcript variant 1, mRNA."  
"Homo sapiens zinc finger protein 485 (ZNF485), mRNA."  
"PREDICTED: Homo sapiens zinc finger protein 486 (ZNF486), mRNA."  
"Homo sapiens zinc finger protein 490 (ZNF490), mRNA."  
"Homo sapiens zinc finger protein 492 (ZNF492), mRNA."  
"Homo sapiens zinc finger protein 493 (ZNF493), mRNA."  
"Homo sapiens zinc finger protein 498 (ZNF498), mRNA."  
"Homo sapiens zinc finger protein 500 (ZNF500), mRNA."  
"Homo sapiens zinc finger protein 507 (ZNF507), mRNA."  
"Homo sapiens zinc finger protein 509 (ZNF509), mRNA."  
"Homo sapiens zinc finger protein 510 (ZNF510), mRNA."  
"Homo sapiens zinc finger protein 511 (ZNF511), mRNA."

"Homo sapiens zinc finger protein 512 (ZNF512), mRNA."  
"Homo sapiens zinc finger protein 513 (ZNF513), mRNA."  
"Homo sapiens zinc finger protein 514 (ZNF514), mRNA."  
"PREDICTED: Homo sapiens zinc finger protein 516 (ZNF516), mRNA."  
"Homo sapiens zinc finger protein 518A (ZNF518A), mRNA."  
"Homo sapiens zinc finger protein 518B (ZNF518B), mRNA."  
"PREDICTED: Homo sapiens zinc finger protein 519 (ZNF519), mRNA."  
"Homo sapiens zinc finger protein 521 (ZNF521), mRNA."  
"PREDICTED: Homo sapiens zinc finger protein 525 (ZNF525), mRNA."  
"Homo sapiens zinc finger protein 526 (ZNF526), mRNA."  
"Homo sapiens zinc finger protein 529 (ZNF529), mRNA."  
"Homo sapiens zinc finger protein 530 (ZNF530), mRNA."  
"Homo sapiens zinc finger protein 532 (ZNF532), mRNA."  
"Homo sapiens zinc finger protein 533 (ZNF533), mRNA."  
"Homo sapiens zinc finger protein 540 (ZNF540), mRNA."  
"Homo sapiens zinc finger protein 541 (ZNF541), mRNA."  
"Homo sapiens zinc finger protein 543 (ZNF543), mRNA."  
"Homo sapiens zinc finger protein 547 (ZNF547), mRNA."  
"Homo sapiens zinc finger protein 548 (ZNF548), mRNA."  
"Homo sapiens zinc finger protein 549 (ZNF549), mRNA."  
"Homo sapiens zinc finger protein 550 (ZNF550), mRNA."  
"Homo sapiens zinc finger protein 551 (ZNF551), mRNA."  
"Homo sapiens zinc finger protein 555 (ZNF555), mRNA."  
"Homo sapiens zinc finger protein 556 (ZNF556), mRNA."  
"Homo sapiens zinc finger protein 557 (ZNF557), transcript variant 2, mRNA."  
"Homo sapiens zinc finger protein 558 (ZNF558), mRNA."  
"Homo sapiens zinc finger protein 559 (ZNF559), mRNA."  
"Homo sapiens zinc finger protein 561 (ZNF561), mRNA."  
"Homo sapiens zinc finger protein 562 (ZNF562), mRNA."  
"Homo sapiens zinc finger protein 563 (ZNF563), mRNA."  
"Homo sapiens zinc finger protein 564 (ZNF564), mRNA."  
"Homo sapiens zinc finger protein 566 (ZNF566), mRNA."  
"Homo sapiens zinc finger protein 57 (ZNF57), mRNA."  
"Homo sapiens zinc finger protein 570 (ZNF570), mRNA."  
"Homo sapiens zinc finger protein 571 (ZNF571), mRNA."  
"Homo sapiens zinc finger protein 572 (ZNF572), mRNA."  
"Homo sapiens zinc finger protein 573 (ZNF573), mRNA."  
"Homo sapiens zinc finger protein 574 (ZNF574), mRNA."  
"Homo sapiens zinc finger protein 576 (ZNF576), mRNA."  
"Homo sapiens zinc finger protein 577 (ZNF577), mRNA."  
"Homo sapiens zinc finger protein 579 (ZNF579), mRNA."  
"Homo sapiens zinc finger protein 580 (ZNF580), transcript variant 2, mRNA."  
"Homo sapiens zinc finger protein 581 (ZNF581), mRNA."  
"Homo sapiens zinc finger protein 583 (ZNF583), mRNA."

"Homo sapiens zinc finger protein 584 (ZNF584), mRNA."  
"Homo sapiens zinc finger protein 585A (ZNF585A), transcript variant 2, mRNA."  
"Homo sapiens zinc finger protein 585B (ZNF585B), mRNA."  
"Homo sapiens zinc finger protein 586 (ZNF586), mRNA."  
"Homo sapiens zinc finger protein 587 (ZNF587), mRNA."  
"Homo sapiens zinc finger protein 589 (ZNF589), mRNA."  
"Homo sapiens zinc finger protein 592 (ZNF592), mRNA."  
"Homo sapiens zinc finger protein 593 (ZNF593), mRNA."  
"Homo sapiens zinc finger protein 594 (ZNF594), mRNA."  
"Homo sapiens zinc finger protein 595 (ZNF595), mRNA."  
"Homo sapiens zinc finger protein 596 (ZNF596), transcript variant 3, mRNA."  
"Homo sapiens zinc finger protein 597 (ZNF597), mRNA."  
"Homo sapiens zinc finger protein 598 (ZNF598), mRNA."  
"Homo sapiens zinc finger protein 599 (ZNF599), mRNA."  
"Homo sapiens zinc finger protein 605 (ZNF605), mRNA."  
"Homo sapiens zinc finger protein 607 (ZNF607), mRNA."  
"Homo sapiens zinc finger protein 608 (ZNF608), mRNA."  
"Homo sapiens zinc finger protein 609 (ZNF609), mRNA."  
"Homo sapiens zinc finger protein 611 (ZNF611), mRNA."  
"Homo sapiens zinc finger protein 613 (ZNF613), transcript variant 2, mRNA."  
"Homo sapiens zinc finger protein 614 (ZNF614), mRNA."  
"Homo sapiens zinc finger protein 615 (ZNF615), mRNA."  
"Homo sapiens zinc finger protein 616 (ZNF616), mRNA."  
"Homo sapiens zinc finger protein 618 (ZNF618), mRNA."  
"Homo sapiens zinc finger protein 619 (ZNF619), mRNA."  
"Homo sapiens zinc finger protein 620 (ZNF620), mRNA."  
"Homo sapiens zinc finger protein 621 (ZNF621), transcript variant 2, mRNA."  
"Homo sapiens zinc finger protein 622 (ZNF622), mRNA."  
"Homo sapiens zinc finger protein 626 (ZNF626), transcript variant 2, mRNA."  
"Homo sapiens zinc finger protein 627 (ZNF627), mRNA."  
"PREDICTED: Homo sapiens zinc finger protein 629 (ZNF629), mRNA."  
"PREDICTED: Homo sapiens zinc finger protein 630, transcript variant 2 (ZNF630), mRNA."  
"Homo sapiens zinc finger protein 642 (ZNF642), mRNA."  
"Homo sapiens zinc finger protein 643 (ZNF643), mRNA."  
"Homo sapiens zinc finger protein 644 (ZNF644), transcript variant 3, mRNA."  
"Homo sapiens zinc finger protein 650 (ZNF650), mRNA."  
"Homo sapiens zinc finger protein 652 (ZNF652), mRNA."  
"Homo sapiens zinc finger protein 653 (ZNF653), mRNA."  
"Homo sapiens zinc finger protein 654 (ZNF654), mRNA."  
"Homo sapiens zinc finger protein 655 (ZNF655), transcript variant 5, mRNA."  
"PREDICTED: Homo sapiens zinc finger protein 658 (ZNF658), mRNA."  
"Homo sapiens zinc finger protein 658B (ZNF658B), mRNA."  
"Homo sapiens zinc finger protein 664 (ZNF664), mRNA."  
"Homo sapiens zinc finger protein 668 (ZNF668), mRNA."

"Homo sapiens zinc finger protein 669 (ZNF669), mRNA."  
"Homo sapiens zinc finger protein 672 (ZNF672), mRNA."  
"Homo sapiens zinc finger family member 674 (ZNF674), mRNA."  
"Homo sapiens zinc finger protein 676 (ZNF676), mRNA."  
"Homo sapiens zinc finger protein 679 (ZNF679), mRNA."  
"Homo sapiens zinc finger protein 680 (ZNF680), mRNA."  
"Homo sapiens zinc finger protein 681 (ZNF681), mRNA."  
"Homo sapiens zinc finger protein 682 (ZNF682), transcript variant 1, mRNA."  
"Homo sapiens zinc finger protein 684 (ZNF684), mRNA."  
"Homo sapiens zinc finger protein 687 (ZNF687), mRNA."  
"Homo sapiens zinc finger protein 688 (ZNF688), transcript variant 1, mRNA."  
"Homo sapiens zinc finger protein 689 (ZNF689), mRNA."  
"Homo sapiens zinc finger protein 69 (ZNF69), mRNA."  
"Homo sapiens zinc finger protein 692 (ZNF692), transcript variant 2, mRNA."  
"Homo sapiens zinc finger protein 695 (ZNF695), mRNA."  
"Homo sapiens zinc finger protein 696 (ZNF696), mRNA."  
"PREDICTED: Homo sapiens zinc finger protein 699 (ZNF699), mRNA."  
"Homo sapiens zinc finger protein 7 (ZNF7), mRNA."  
"Homo sapiens zinc finger protein 700 (ZNF700), mRNA."  
"Homo sapiens zinc finger protein 701 (ZNF701), mRNA."  
"Homo sapiens zinc finger protein 705A (ZNF705A), mRNA."  
"Homo sapiens zinc finger protein 705D (ZNF705D), mRNA."  
"Homo sapiens zinc finger protein 706 (ZNF706), transcript variant 3, mRNA."  
"Homo sapiens zinc finger protein 707 (ZNF707), transcript variant 1, mRNA."  
"Homo sapiens zinc finger protein 708 (ZNF708), mRNA."  
"Homo sapiens zinc finger protein 71 (ZNF71), mRNA."  
"Homo sapiens zinc finger protein 713 (ZNF713), mRNA."  
"Homo sapiens zinc finger protein 714 (ZNF714), mRNA."  
"PREDICTED: Homo sapiens zinc finger protein 717, transcript variant 3 (ZNF717), mRNA."  
"Homo sapiens zinc finger protein 721 (ZNF721), mRNA."  
"PREDICTED: Homo sapiens misc\_RNA (ZNF738), partial miscRNA."  
"Homo sapiens zinc finger protein 740 (ZNF740), mRNA."  
"Homo sapiens zinc finger protein 746 (ZNF746), mRNA."  
"Homo sapiens zinc finger protein 747 (ZNF747), mRNA."  
"Homo sapiens zinc finger protein 749 (ZNF749), mRNA."  
"Homo sapiens zinc finger protein 75a (ZNF75A), mRNA."  
"Homo sapiens zinc finger protein 75D (ZNF75D), mRNA."  
"Homo sapiens zinc finger protein 76 (expressed in testis) (ZNF76), mRNA."  
"Homo sapiens zinc finger protein 763 (ZNF763), mRNA."  
"Homo sapiens zinc finger protein 764 (ZNF764), mRNA."  
"Homo sapiens zinc finger protein 765 (ZNF765), mRNA."  
"Homo sapiens zinc finger protein 768 (ZNF768), mRNA."  
"Homo sapiens zinc finger protein 77 (ZNF77), mRNA."  
"Homo sapiens zinc finger protein 770 (ZNF770), mRNA."

"Homo sapiens zinc finger protein 772 (ZNF772), mRNA."  
"Homo sapiens zinc finger protein 774 (ZNF774), mRNA."  
"Homo sapiens zinc finger protein 775 (ZNF775), mRNA."  
"Homo sapiens zinc finger protein 776 (ZNF776), mRNA."  
"Homo sapiens zinc finger protein 777 (ZNF777), mRNA."  
"Homo sapiens zinc finger protein 778 (ZNF778), mRNA."  
"Homo sapiens zinc finger protein 780B (ZNF780B), mRNA."  
"Homo sapiens zinc finger protein 781 (ZNF781), mRNA."  
"Homo sapiens zinc finger family member 783 (ZNF783), mRNA."  
"Homo sapiens zinc finger protein 784 (ZNF784), mRNA."  
"Homo sapiens zinc finger protein 786 (ZNF786), mRNA."  
"Homo sapiens zinc finger protein 787 (ZNF787), mRNA."  
"PREDICTED: Homo sapiens misc\_RNA (ZNF788), miscRNA."  
"Homo sapiens zinc finger protein 789 (ZNF789), transcript variant 1, mRNA."  
"Homo sapiens zinc finger protein 79 (ZNF79), mRNA."  
"Homo sapiens zinc finger protein 791 (ZNF791), mRNA."  
"Homo sapiens zinc finger protein 792 (ZNF792), mRNA."  
"Homo sapiens zinc finger protein 800 (ZNF800), mRNA."  
"Homo sapiens zinc finger protein 804A (ZNF804A), mRNA."  
"Homo sapiens zinc finger protein 805 (ZNF805), mRNA."  
"Homo sapiens zinc finger protein 813 (ZNF813), mRNA."  
"Homo sapiens zinc finger protein 816A (ZNF816A), mRNA."  
"Homo sapiens zinc finger protein 821 (ZNF821), mRNA."  
"Homo sapiens zinc finger protein 823 (ZNF823), mRNA."  
"Homo sapiens zinc finger protein 827 (ZNF827), mRNA."  
"Homo sapiens zinc finger protein 828 (ZNF828), mRNA."  
"Homo sapiens zinc finger protein 830 (ZNF830), mRNA."  
"Homo sapiens zinc finger protein 831 (ZNF831), mRNA."  
"Homo sapiens zinc finger protein 836 (ZNF836), mRNA."  
"Homo sapiens zinc finger protein 839 (ZNF839), mRNA."  
"Homo sapiens zinc finger protein 84 (ZNF84), transcript variant 1, mRNA."  
"Homo sapiens zinc finger protein 843 (ZNF843), mRNA."  
"Homo sapiens zinc finger protein 844 (ZNF844), mRNA."  
"Homo sapiens zinc finger protein 845 (ZNF845), mRNA. XM\_039908"  
"Homo sapiens zinc finger protein 846 (ZNF846), mRNA."  
"Homo sapiens zinc finger protein 860 (ZNF860), mRNA. XM\_001725699 XM\_496634"  
"Homo sapiens zinc finger protein 878 (ZNF878), mRNA."  
"Homo sapiens zinc finger protein 91 (ZNF91), mRNA."  
"Homo sapiens zinc finger protein 92 (ZNF92), transcript variant 1, mRNA."  
"Homo sapiens zinc finger protein 93 (ZNF93), mRNA."  
"Homo sapiens zinc finger protein 99 (ZNF99), mRNA."  
"Homo sapiens zinc finger, NFX1-type containing 1 (ZNFX1), mRNA."  
"Homo sapiens zinc finger, HIT type 1 (ZNHIT1), mRNA."  
"Homo sapiens zinc finger, HIT type 2 (ZNHIT2), mRNA."

"Homo sapiens zinc finger, HIT type 3 (ZNHIT3), transcript variant 1, mRNA."  
"Homo sapiens zinc finger, HIT type 6 (ZNHIT6), mRNA."  
"Homo sapiens zinc ribbon domain containing 1 (ZNRD1), transcript variant b, mRNA."  
"Homo sapiens zinc and ring finger 3 (ZNRF3), mRNA."  
"Homo sapiens zona pellucida glycoprotein 3 (sperm receptor) (ZP3), mRNA."  
"Homo sapiens zona pellucida binding protein (ZPBP), mRNA."  
"Homo sapiens zona pellucida binding protein 2 (ZPBP2), transcript variant 1, mRNA."  
"Homo sapiens zinc finger, RAN-binding domain containing 1 (ZRANB1), mRNA."  
"Homo sapiens zinc finger, RAN-binding domain containing 2 (ZRANB2), transcript variant 2, mRNA."  
"Homo sapiens zinc finger, RAN-binding domain containing 3 (ZRANB3), mRNA."  
"Homo sapiens zinc finger (CCCH type), RNA-binding motif and serine/arginine rich 2 (ZRSR2), mRNA."  
"Homo sapiens zinc finger and SCAN domain containing 12-like 1 (ZSCAN12L1), non-coding RNA."  
"Homo sapiens zinc finger and SCAN domain containing 16 (ZSCAN16), mRNA."  
"Homo sapiens zinc finger and SCAN domain containing 18 (ZSCAN18), mRNA."  
"Homo sapiens zinc finger and SCAN domain containing 2 (ZSCAN2), transcript variant 1, mRNA."  
"Homo sapiens zinc finger and SCAN domain containing 20 (ZSCAN20), mRNA."  
"Homo sapiens zinc finger and SCAN domain containing 21 (ZSCAN21), mRNA."  
"Homo sapiens zinc finger and SCAN domain containing 22 (ZSCAN22), mRNA."  
"Homo sapiens zinc finger and SCAN domain containing 29 (ZSCAN29), mRNA."  
"Homo sapiens zinc finger and SCAN domain containing 5A (ZSCAN5A), mRNA."  
"Homo sapiens zinc finger, SWIM-type containing 1 (ZSWIM1), mRNA."  
"PREDICTED: Homo sapiens zinc finger, SWIM-type containing 3 (ZSWIM3), mRNA."  
"Homo sapiens zinc finger, SWIM-type containing 4 (ZSWIM4), mRNA."  
"Homo sapiens zinc finger, SWIM-type containing 5 (ZSWIM5), mRNA."  
"PREDICTED: Homo sapiens zinc finger, SWIM-type containing 6 (ZSWIM6), mRNA."  
"Homo sapiens zinc finger, SWIM-type containing 7 (ZSWIM7), transcript variant 1, mRNA."  
"Homo sapiens zinc finger with UFM1-specific peptidase domain (ZUFSP), mRNA."  
"Homo sapiens ZW10, kinetochore associated, homolog (Drosophila) (ZW10), mRNA."  
"Homo sapiens Zwilch, kinetochore associated, homolog (Drosophila) (ZWILCH), transcript variant 1, mRNA."  
"Homo sapiens ZW10 interactor (ZWINT), transcript variant 4, mRNA."  
"Homo sapiens zinc finger, X-linked, duplicated A (ZXDA), mRNA."  
"Homo sapiens zinc finger, X-linked, duplicated B (ZXDB), mRNA."  
"Homo sapiens ZXD family zinc finger C (ZXDC), transcript variant 2, mRNA."  
"Homo sapiens zyg-11 homolog B (C. elegans) (ZYG11B), mRNA."  
"Homo sapiens zyxin (ZYX), transcript variant 1, mRNA."  
"Homo sapiens zinc finger, ZZ-type with EF-hand domain 1 (ZZEF1), mRNA."  
"Homo sapiens zinc finger, ZZ-type containing 3 (ZZZ3), mRNA."



## ONTOLOGY\_PROCESS

"The chemical reactions and pathways resulting in the breakdown of a protein or peptide by hyd  
"The chemical reactions and pathways resulting in the breakdown of a protein or peptide by hyd  
"The chemical reactions and pathways resulting in the breakdown of a protein or peptide by hyd  
"The chemical reactions and pathways resulting in the breakdown of a protein or peptide by hyd  
"The chemical reactions and pathways resulting in the breakdown of a protein or peptide by hyd  
"The progression of biochemical and morphological phases and events that occur in a cell durin  
"The progression of biochemical and morphological phases and events that occur in a cell durin  
"The progression of biochemical and morphological phases and events that occur in a cell durin  
"A cellular process resulting in the division of the cytoplasm of a cell and its separation into two c  
"A cellular process resulting in the division of the cytoplasm of a cell and its separation into two c  
"The progression of biochemical and morphological phases and events that occur in a cell durin  
"A cellular process resulting in the division of the cytoplasm of a cell and its separation into two c  
"The progression of biochemical and morphological phases and events that occur in a cell durin  
"The progression of biochemical and morphological phases and events that occur in a cell durin  
"The progression of biochemical and morphological phases and events that occur in a cell durin  
"The progression of biochemical and morphological phases and events that occur in a cell durin  
"The progression of biochemical and morphological phases and events that occur in a cell durin  
The process of assisting in the correct noncovalent folding of newly formed polypeptides or foldi

"The chemical reactions and pathways resulting in the formation of glycosphingolipid, a compou  
"The chemical reactions and pathways involving carbohydrates, any of a group of organic comp  
"Any process in an organism in which a relatively long-lasting adaptive behavioral change occur:

"The chemical reactions and pathways, including anabolism and catabolism, by which living org;  
"The chemical reactions and pathways, including anabolism and catabolism, by which living org;

The process of introducing a phosphate group on to a protein [goid 6468] [evidence IEA]

"The chemical reactions and pathways resulting in the formation of a protein. This is a ribosome  
"The chemical reactions and pathways resulting in the formation of a protein. This is a ribosome  
"The chemical reactions and pathways resulting in the formation of a protein. This is a ribosome  
"The chemical reactions and pathways involving lipids, compounds soluble in an organic solvent  
"The chemical reactions and pathways resulting in the formation of a macromolecule, any molec  
"The chemical reactions and pathways resulting in the breakdown of lysine, 2,6-diaminohexanoi  
A process which directly inhibits any of the steps required for cell death by apoptosis [goid 6916  
"The process of introducing a phosphate group on to a protein [goid 6468] [evidence IEA]; A for  
"The specific actions or reactions of an organism in response to external or internal stimuli. Patt  
"The regulated release of a peptide from a cell or group of cells [goid 2790] [evidence IEA]; The  
1) on chromosome 4."

"Any process that modulates the frequency, rate or extent of transcription from an RNA polymer  
"The directed movement of substances (such as macromolecules, small molecules, ions) into, o  
"The directed movement of substances (such as macromolecules, small molecules, ions) into, o

"The directed movement of substances (such as macromolecules, small molecules, ions) into, o

"The directed movement of substances (such as macromolecules, small molecules, ions) into, o

"The directed movement of substances (such as macromolecules, small molecules, ions) into, o

"The directed movement of substances (such as macromolecules, small molecules, ions) into, o

"The directed movement of substances (such as macromolecules, small molecules, ions) into, o

"The chemical reactions and pathways involving lipids, compounds soluble in an organic solvent

"The directed movement of substances (such as macromolecules, small molecules, ions) into, o

"The directed movement of substances (such as macromolecules, small molecules, ions) into, o

"The directed movement of oligopeptides into, out of, within or between cells. Oligopeptides are

"The directed movement of substances (such as macromolecules, small molecules, ions) into, o

"The directed movement of substances (such as macromolecules, small molecules, ions) into, o

"The directed movement of charged atoms or small charged molecules into, out of, within or bet

"The directed movement of substances (such as macromolecules, small molecules, ions) into, o

coding RNA."

"The directed movement of substances (such as macromolecules, small molecules, ions) into, o

"The directed movement of substances (such as macromolecules, small molecules, ions) into, o

"The chemical reactions and pathways resulting in the breakdown of RNA, ribonucleic acid, one

"The chemical reactions and pathways resulting in the formation of a protein. This is a ribosome

"The directed movement of substances (such as macromolecules, small molecules, ions) into, o

"The directed movement of lipids into, out of, within or between cells. Lipids are compounds solt

"The directed movement of substances (such as macromolecules, small molecules, ions) into, o

"The directed movement of substances (such as macromolecules, small molecules, ions) into, o

"Any process specifically pertinent to the functioning of integrated living units: cells, tissues, orga

"Any process specifically pertinent to the functioning of integrated living units: cells, tissues, orga

"Any process specifically pertinent to the functioning of integrated living units: cells, tissues, orga

"Any process specifically pertinent to the functioning of integrated living units: cells, tissues, orga

"The hydrolysis of a peptide bond or bonds within a protein [goid 6508] [evidence IEA]; The chei

"The hydrolysis of a peptide bond or bonds within a protein [goid 6508] [evidence IEA]; The seri

"The series of molecular signals generated as a consequence of a transmembrane receptor tyrc

"Any process involved in the controlled movement of a cell [goid 6928] [pmid 11516653] [eviden

"Any process involved in the controlled movement of a cell [goid 6928] [pmid 11956071] [eviden

"A cell cycle process that regulates transcription such that the target genes are transcribed durir

"The covalent alteration of one or more amino acids occurring in proteins, peptides and nascent

"A process that is carried out at the cellular level which results in the formation, arrangement of i

"A process that is carried out at the cellular level which results in the formation, arrangement of  
"Any series of molecular signals in which a small monomeric GTPase relays one or more of the  
"The synthesis of either RNA on a template of DNA or DNA on a template of RNA [goid 6350] [e  
The chemical reactions and pathways resulting in the formation of a protein. This is a ribosome-  
"Any process that modulates the frequency, rate or extent of cell growth [goid 1558] [evidence N  
"The chemical reactions and pathways resulting in the formation of precursor metabolites, subst  
"The chemical reactions and pathways, including anabolism and catabolism, by which living org;  
"The chemical reactions and pathways resulting in the formation of a fatty acid, any of the alipha  
"The chemical reactions and pathways resulting in the formation of a fatty acid, any of the alipha  
"The chemical reactions and pathways, including anabolism and catabolism, by which living org;  
"The chemical reactions and pathways, including anabolism and catabolism, by which living org;  
"The synthesis of either RNA on a template of DNA or DNA on a template of RNA [goid 6350] [e  
"The process of removal or addition of one or more electrons with or without the concomitant re  
"The chemical reactions and pathways involving lipids, compounds soluble in an organic solvent  
"The chemical reactions and pathways involving lipids, compounds soluble in an organic solvent  
"The chemical reactions and pathways, including anabolism and catabolism, by which living org;  
"The chemical reactions and pathways involving lipids, compounds soluble in an organic solvent

"The chemical reactions and pathways, including anabolism and catabolism, by which living org;  
"The chemical reactions and pathways involving lipids, compounds soluble in an organic solvent  
"The chemical reactions and pathways resulting in the formation of steroids, compounds with a

"The directed movement of charged atoms or small charged molecules into, out of, within or bet  
The chemical reactions and pathways resulting in the formation of substances; typically the ene  
Any process that contributes to the maintenance of proper telomeric length and structure by affe

"The chemical reactions and pathways resulting in the breakdown of acetylcholine that occurs ir  
"A form of programmed cell death induced by external or internal signals that trigger the activity  
"The chemical reactions and pathways involving citrate, 2-hydroxy-1,2,3-propanetricarboylate. |  
"The formation of glucose from noncarbohydrate precursors, such as pyruvate, amino acids and  
"Any process that modulates the frequency, rate or extent of the chemical reactions and pathwa  
"The chemical reactions and pathways resulting in the formation of precursor metabolites, subst  
"The chemical reactions and pathways involving fatty acids with a chain length of C18 or greater  
"The chemical reactions and pathways involving acetyl-CoA, a derivative of coenzyme A in whic  
"The chemical reactions and pathways involving fatty acids with a chain length of C18 or greater  
"The chemical reactions and pathways involving fatty acids with a chain length of C18 or greater  
"The chemical reactions and pathways involving lipids, compounds soluble in an organic solvent  
"The chemical reactions and pathways involving acyl-CoA, any derivative of coenzyme A in whic  
"The chemical reactions and pathways resulting in the formation of precursor metabolites, subst  
"The chemical reactions and pathways involving lipids, compounds soluble in an organic solvent

"The chemical reactions and pathways involving lipids, compounds soluble in an organic solvent  
The process of removing one or more phosphoric residues from a protein [goid 6470] [evidence  
"The process whose specific outcome is the progression of the skeleton over time, from its form  
"The chemical reactions and pathways involving lipids, compounds soluble in an organic solvent

"The proteolytic digestion of components in the acrosomal matrix that allows for their release int  
"Any process specifically pertinent to the functioning of integrated living units: cells, tissues, orga

"The chemical reactions and pathways involving lipids, compounds soluble in an organic solvent  
"The chemical reactions and pathways involving lipids, compounds soluble in an organic solvent  
"The chemical reactions and pathways, including anabolism and catabolism, by which living org;  
"The chemical reactions and pathways, including anabolism and catabolism, by which living org;  
"The chemical reactions and pathways involving lipids, compounds soluble in an organic solvent  
"The chemical reactions and pathways involving lipids, compounds soluble in an organic solvent  
"The chemical reactions and pathways involving lipids, compounds soluble in an organic solvent  
"The chemical reactions and pathways involving lipids, compounds soluble in an organic solvent  
"The chemical reactions and pathways resulting in the formation of acetyl-CoA, a derivative of c  
"The chemical reactions and pathways, including anabolism and catabolism, by which living org;  
"A process whereby force is generated within muscle tissue, resulting in a change in muscle gec

"Any process involved in the controlled movement of a cell [goid 6928] [pmid 16130169] [eviden

"Any process involved in the controlled movement of a cell [goid 6928] [pmid 16130169] [eviden  
"Any process that modulates the frequency, rate or extent of cell growth [goid 1558] [evidence IE

"Any process that modulates the occurrence or rate of cell death by apoptosis [goid 42981] [pmi  
"Any process that activates or increases the activity of a sodium:hydrogen antiporter, which cata  
"Movement of organelles, other microtubules and other particles along microtubules, mediated b  
"The directed movement of substances, either within a vesicle or in the vesicle membrane, into,  
VA."

Any process involved in the controlled movement of a cell [goid 6928] [pmid 9230079] [evidence  
"Any process involved in the controlled movement of a cell [goid 6928] [pmid 9230079] [evidenc  
"Any process that modulates the frequency, rate or extent of the assembly of actin filaments by  
"The synthesis of either RNA on a template of DNA or DNA on a template of RNA [goid 6350] [e

"Progression from G1 phase to S phase of the mitotic cell cycle [goid 82] [pmid 9884026] [evide  
"A complex and coordinated series of cellular movements that occurs at the end of cleavage du  
"The hydrolysis of a peptide bond or bonds within a protein [goid 6508] [evidence IEA]; The che  
"The chemical reactions and pathways, including anabolism and catabolism, by which living org;  
"The chemical reactions and pathways involving the phosphate group, the anion or salt of any p  
"The chemical reactions and pathways involving the phosphate group, the anion or salt of any p

"A change in state or activity of a cell or an organism (in terms of movement, secretion, enzyme  
"The chemical reactions and pathways involving a nucleotide, a nucleoside that is esterified with  
"The hydrolysis of a peptide bond or bonds within a protein [goid 6508] [evidence IEA]; The proc  
The hydrolysis of a peptide bond or bonds within a protein [goid 6508] [evidence IEA]; Any serie  
"The hydrolysis of a peptide bond or bonds within a protein [goid 6508] [evidence IEA]; The hyd  
The hydrolysis of a peptide bond or bonds within a protein [goid 6508] [evidence IEA]; The serie  
"The hydrolysis of a peptide bond or bonds within a protein [goid 6508] [evidence IEA]; Any proc  
"The hydrolysis of a peptide bond or bonds within a protein [goid 6508] [evidence IEA]; The atta  
"The hydrolysis of a peptide bond or bonds within a protein [goid 6508] [evidence IEA]; The proc  
The hydrolysis of a peptide bond or bonds within a protein [goid 6508] [evidence IEA]  
The hydrolysis of a peptide bond or bonds within a protein [goid 6508] [evidence IEA]; The hydr  
The hydrolysis of a peptide bond or bonds within a protein [goid 6508] [evidence IEA]; The attac  
"The hydrolysis of a peptide bond or bonds within a protein [goid 6508] [evidence IEA]; A series  
"The hydrolysis of a peptide bond or bonds within a protein [goid 6508] [evidence IEA]; Any proc  
The hydrolysis of a peptide bond or bonds within a protein [goid 6508] [evidence IEA]; The hydro  
  
"Any process that activates or increases the frequency, rate or extent of cell death by apoptosis

Any process involved in the conversion of a primary mRNA transcript into one or more mature r  
Any process involved in the conversion of one or more primary RNA transcripts into one or more  
"Any process involved in the conversion of one or more primary RNA transcripts into one or mor  
"The process by which a pre-tRNA molecule is converted to a mature tRNA, ready for addition o  
"The process by which a pre-tRNA molecule is converted to a mature tRNA, ready for addition o  
"The chemical reactions and pathways involving ornithine, an amino acid only rarely found in pro

"The chemical reactions and pathways involving carbohydrates, any of a group of organic comp  
"The chemical reactions and pathways resulting in the formation of the nucleotide cAMP (cyclic  
"The chemical reactions and pathways resulting in the formation of the nucleotide cAMP (cyclic  
"The chemical reactions and pathways resulting in the formation of the nucleotide cAMP (cyclic

"The process of removal or addition of one or more electrons with or without the concomitant re  
"The process of removal or addition of one or more electrons with or without the concomitant re  
"The directed movement of molecular hydrogen (H<sub>2</sub>) into, out of, within or between cells [goid 14  
"The chemical reactions and pathways resulting in the formation of amino acids, organic acids c  
"The chemical reactions and pathways involving lipids, compounds soluble in an organic solvent  
"The chemical reactions and pathways involving lipids, compounds soluble in an organic solvent  
"Any process which produces a purine nucleoside from derivatives of it, without de novo synthes  
"The chemical reactions and pathways resulting in the formation of the nucleotide cAMP (cyclic

"The synthesis of either RNA on a template of DNA or DNA on a template of RNA [goid 6350] [e

The process of removal or addition of one or more electrons with or without the concomitant rer

"The chemical reactions and pathways resulting in the formation of the nucleotide cAMP (cyclic

"The initiation of the activity of the inactive enzyme MAP kinase by phosphorylation by a MAPK

"The immediate defensive reaction (by vertebrate tissue) to infection or injury caused by chemic

"The chemical reactions and pathways involving carbohydrates, any of a group of organic comp

"The covalent alteration of one or more amino acids occurring in proteins, peptides and nascent

The process of removing one or more ADP-ribose residues from a protein [goid 51725] [evidenc

"The initiation of the activity of the inactive enzyme MAP kinase by phosphorylation by a MAPK

"The initiation of the activity of the inactive enzyme MAP kinase by phosphorylation by a MAPK

"Any process that modulates the extent of heart contraction, changing the force with which blood

"The extension of an RNA molecule after transcription initiation at an RNA polymerase II-specific

"The chemical reactions and pathways resulting in the formation of AMP, adenosine monophosp

"Any process involved in the development or functioning of the immune system, an organismal s

"Any process involved in the development or functioning of the immune system, an organismal s

"The synthesis of either RNA on a template of DNA or DNA on a template of RNA [goid 6350] [e

"The synthesis of either RNA on a template of DNA or DNA on a template of RNA [goid 6350] [e

"The synthesis of either RNA on a template of DNA or DNA on a template of RNA [goid 6350] [e

"The immediate defensive reaction (by vertebrate tissue) to infection or injury caused by chemic

"Any process that activates or increases the frequency, rate or extent of DNA-dependent transcr

"The process whose specific outcome is the progression of the brain over time, from its formatio

"The synthesis of either RNA on a template of DNA or DNA on a template of RNA [goid 6350] [e

"The synthesis of either RNA on a template of DNA or DNA on a template of RNA [goid 6350] [e

), non-coding RNA."

"The hydrolysis of a peptide bond or bonds within a protein [goid 6508] [evidence IEA]; The che

"The directed movement of substances (such as macromolecules, small molecules, ions) into, o

"The chemical reactions and pathways resulting in the breakdown of tryptophan, the chiral amin

"The directed movement of proteins into, out of, within or between cells [goid 15031] [evidence I

The removal of sugar residues from a glycosylated protein [goid 6517] [pmid 2775174] [evidenc  
ript variant 2, mRNA."

\"

The hydrolysis of a peptide bond or bonds within a protein [goid 6508] [evidence IEA]

"The directed movement of substances (such as macromolecules, small molecules, ions) into, o

"The differentiation of endothelial cells from progenitor cells during blood vessel development, a

"The initiation of the activity of the inactive enzyme protein kinase C as the result of a series of r

"The chemical reactions and pathways resulting in the formation of spermidine, N-(3-aminoprop

"The chemical reactions and pathways resulting in the formation of phosphatidic acid, any deriva

"The chemical reactions and pathways, including anabolism and catabolism, by which living org;  
"The chemical reactions and pathways, including anabolism and catabolism, by which living org;  
"The chemical reactions and pathways, including anabolism and catabolism, by which living org;  
"The developmental process, independent of morphogenetic (shape) change, that is required fo  
"The chemical reactions and pathways, including anabolism and catabolism, by which living org;

"A process that is carried out at the cellular level which results in the formation, arrangement of  
The series of molecular signals generated as a consequence of a peptide neurotransmitter bind  
The hydrolysis of a peptide bond or bonds within a protein [goid 6508] [evidence IEA]  
A."

The synthesis of either RNA on a template of DNA or DNA on a template of RNA [goid 6350] [e  
"The chemical reactions and pathways involving compounds containing a single carbon atom [g  
"The chemical reactions and pathways involving compounds containing a single carbon atom [g  
"The chemical reactions and pathways involving compounds containing a single carbon atom [g

"The process in which the cytoplasm of the outermost cells of the vertebrate epidermis is replac  
"Any process that modulates the frequency, rate or extent of DNA-dependent transcription [goid  
"The process of assisting in the covalent and noncovalent assembly of single chain polypeptides  
"A change in state or activity of a cell or an organism (in terms of movement, secretion, enzyme  
"The process of assisting in the covalent and noncovalent assembly of single chain polypeptides  
Any process involved in the conversion of a primary mRNA transcript into one or more mature m  
"The biological process whose specific outcome is the progression of a multicellular organism o  
"Any process specifically pertinent to the functioning of integrated living units: cells, tissues, orga

"The cleavage of DNA during apoptosis, which usually occurs in two stages: cleavage into fragm  
"A form of programmed cell death induced by external or internal signals that trigger the activity

"Any process specifically pertinent to the functioning of integrated living units: cells, tissues, orga

"Any immune system process that functions in the calibrated response of an organism to a pote  
2), mRNA."

"The process of assisting in the covalent and noncovalent assembly of single chain polypeptides  
"The synthesis of either RNA on a template of DNA or DNA on a template of RNA [goid 6350] [e  
"The chemical reactions and pathways involving nucleobases, nucleosides, nucleotides and nuc  
"The chemical reactions and pathways involving nucleobases, nucleosides, nucleotides and nuc  
"The chemical reactions and pathways involving nucleobases, nucleosides, nucleotides and nuc  
"The chemical reactions and pathways involving nucleobases, nucleosides, nucleotides and nuc  
al protein, transcript variant 2, mRNA."

"A series of reactions, mediated by protein kinases, which occurs as a result of a single trigger r  
"The process of targeting specific proteins to particular membrane-bounded subcellular organell  
"A series of reactions within the cell that occur as a result of a single trigger reaction or compour

"The process of targeting specific proteins to particular membrane-bounded subcellular organelle  
"Progression through mitosis, the division of the eukaryotic cell nucleus to produce two daughter nuclei  
"Any process specifically pertinent to the functioning of integrated living units: cells, tissues, organs

"The synthesis of either RNA on a template of DNA or DNA on a template of RNA [goid 6350] [evidence IEA]; The c

"The chemical reactions and pathways resulting in the formation of L-ascorbic acid; L-ascorbic acid

"The chemical reactions and pathways involving carbohydrates, any of a group of organic compounds

"The chemical reactions and pathways involving prostaglandins, any of a group of biologically active lipids

The process of removal or addition of one or more electrons with or without the concomitant removal or addition of

"The chemical reactions and pathways involving lipids, compounds soluble in an organic solvent

"The chemical reactions and pathways involving carbohydrates, any of a group of organic compounds

"The chemical reactions and pathways involving aldehydes, any organic compound with the form of a carbonyl group

"The vectorial transfer of a protein from the cytoplasm into the nucleus, through the nuclear pore complex

"Any process that modulates the occurrence or rate of cell death by apoptosis in the nervous system

"The process of introducing a phosphate group on to a protein [goid 6468] [evidence IEA]; The c

"Any process that activates or increases the frequency, rate or extent of addition of phosphate groups to a protein

"The chemical reactions and pathways resulting in the formation of heme, any compound of iron

"The chemical reactions and pathways resulting in the formation of heme, any compound of iron

"The directed movement of substances (such as macromolecules, small molecules, ions) into, out of, or within a cell

"The process by which the migration of an axon growth cone of a motor neuron is directed to a specific target

"The chemical reactions and pathways, including anabolism and catabolism, by which living organisms obtain energy

"The chemical reactions and pathways resulting in the formation of proline (pyrrolidine-2-carboxylic acid)

"The chemical reactions and pathways involving aldehydes, any organic compound with the form of a carbonyl group

"The chemical reactions and pathways involving alcohols, any of a class of compounds containing a hydroxyl group

"The chemical reactions and pathways involving carbohydrates, any of a group of organic compounds

"The chemical reactions and pathways involving compounds containing a single carbon atom [goid 6350] [evidence IEA]; The c

"The chemical reactions and pathways involving carbohydrates, any of a group of organic compounds

"The chemical reactions and pathways involving aldehydes, any organic compound with the form of a carbonyl group

"The chemical reactions and pathways involving alcohols, any of a class of compounds containing a hydroxyl group

"The chemical reactions and pathways, including anabolism and catabolism, by which living organisms obtain energy

"The chemical reactions and pathways involving glycerophospholipids, any derivative of glycerol

"The chemical reactions and pathways involving valine, 2-amino-3-methylbutanoic acid [goid 6500] [evidence IEA]; The c

"The chemical reactions and pathways involving aldehydes, any organic compound with the form of a carbonyl group

"The chemical reactions and pathways involving aldehydes, any organic compound with the form of a carbonyl group

"The chemical reactions and pathways involving fructose, the ketohexose arabino-2-hexulose. Fructose

"The chemical reactions and pathways resulting in the breakdown of a monosaccharide (general term for simple sugars)

"The addition of a sugar unit to a protein amino acid, e.g. the addition of glycan chains to protein

omb) (ALG10), mRNA."

east) (ALG10B), mRNA."

The chemical reactions and pathways resulting in the formation of substances; typically the energy

The process of assisting in the covalent and noncovalent assembly of single chain polypeptides

"The chemical reactions and pathways involving carbohydrates, any of a group of organic compounds



"The chemical reactions and pathways resulting in the formation of dolichol-linked oligosacchari  
"The addition of a sugar unit to a protein amino acid, e.g. the addition of glycan chains to protei  
"The addition of a sugar unit to a protein amino acid, e.g. the addition of glycan chains to protei  
The posttranslational glycosylation of protein via the N4 atom of peptidyl-asparagine or the N1' a  
The posttranslational glycosylation of protein via the N4 atom of peptidyl-asparagine or the N1' a  
erevisiae) (ALG9), transcript variant 4, mRNA."

"The repair of alkylation damage, e.g. the removal of the alkyl group at the O6-position of guanir  
"The process of restoring DNA after damage. Genomes are subject to damage by chemical and  
"The process of restoring DNA after damage. Genomes are subject to damage by chemical and

"  
."The chemical reactions and pathways, including anabolism and catabolism, by which living org;  
"The series of events required for an organism to receive a visual stimulus, convert it to a molec  
"The chemical reactions and pathways involving lipids, compounds soluble in an organic solvent  
"The immediate defensive reaction (by vertebrate tissue) to infection or injury caused by chemic  
"The immediate defensive reaction (by vertebrate tissue) to infection or injury caused by chemic  
"The chemical reactions and pathways, including anabolism and catabolism, by which living org;  
The process of introducing a phosphate group on to a protein [goid 6468] [evidence IEA]  
The process of introducing a phosphate group on to a protein [goid 6468] [evidence IEA]  
"The chemical reactions and pathways, including anabolism and catabolism, by which living org;  
"The chemical reactions and pathways, including anabolism and catabolism, by which living org;  
"An acute behavioral change resulting from a perceived external threat [goid 1662] [evidence IE  
Any process that modulates the rate of GTP hydrolysis by a GTPase [goid 43087] [pmid 115862  
32CR14), mRNA."  
ididate 16 (ALS2CR16), mRNA."  
2CR4), transcript variant 1, mRNA."

"Any process that modulates the frequency, rate or extent of DNA-dependent transcription [goid  
"The chemical reactions and pathways, including anabolism and catabolism, by which living org;  
"The process by which cells digest parts of their own cytoplasm; allows for both recycling of mac  
"The chemical reactions and pathways resulting in the formation of spermine, a polybasic amine  
"The chemical reactions and pathways involving histidine, 2-amino-3-(1H-imidazol-4-yl)propanoi  
"The chemical reactions and pathways involving carbohydrates, any of a group of organic comp  
"Addition of multiple ubiquitin moieties to a protein, forming a ubiquitin chain [goid 209] [pmid 17  
"The attachment of a cell, either to another cell or to an underlying substrate such as the extrac  
"The attachment of a cell, either to another cell or to an underlying substrate such as the extrac  
"Any process specifically pertinent to the functioning of integrated living units: cells, tissues, org;

"The biological process whose specific outcome is the progression of a multicellular organism ov

"The aggregation, arrangement and bonding together of a set of components to form a junction

"The chemical reactions and pathways resulting in the breakdown of AMP, adenosine monophosphate."  
"The chemical reactions and pathways resulting in the breakdown of glycine, aminoethanoic acid."  
"The chemical reactions and pathways involving carbohydrates, any of a group of organic compounds."  
"The chemical reactions and pathways involving carbohydrates, any of a group of organic compounds."

"The chemical reactions and pathways involving carbohydrates, any of a group of organic compounds."  
"The chemical reactions and pathways involving carbohydrates, any of a group of organic compounds."  
The hydrolysis of a peptide bond or bonds within a protein [goid 6508] [evidence IEA]  
"The chemical reactions and pathways resulting in the breakdown of a protein or peptide by hydrolysis."  
"Progression from G2 phase to M phase of the mitotic cell cycle [goid 86] [pmid 10318877] [evidence IEA]."  
"The chemical reactions and pathways resulting in the breakdown of a protein or peptide by hydrolysis."  
"The chemical reactions and pathways resulting in the breakdown of a protein or peptide by hydrolysis."  
"Any process that modulates the frequency, rate or extent of CDK activity [goid 79] [pmid 9469815] [evidence IEA]."  
"Progression from G2 phase to M phase of the mitotic cell cycle [goid 86] [pmid 9469815] [evidence IEA]."  
"The chemical reactions and pathways resulting in the breakdown of a protein or peptide by hydrolysis."  
"Blood vessel formation when new vessels emerge from the proliferation of pre-existing blood vessels."

"A change in state or activity of a cell or an organism (in terms of movement, secretion, enzyme production, gene expression, etc.) [goid 10318877] [evidence IEA]."  
"Blood vessel formation when new vessels emerge from the proliferation of pre-existing blood vessels."  
"A change in state or activity of a cell or an organism (in terms of movement, secretion, enzyme production, gene expression, etc.) [goid 10318877] [evidence IEA]."  
"The process by which the migration of an axon growth cone is directed to a specific target site in the nervous system."  
"The cascade of processes by which a signal interacts with a receptor, causing a change in the expression of a gene."  
"NA."

"Any process specifically pertinent to the functioning of integrated living units: cells, tissues, organs, or organisms."  
"Any process that modulates the frequency, rate or extent of transcription from an RNA polymerase II promoter."

ANKRD13D), mRNA."

"A system for the correction of errors introduced during DNA replication when an incorrect base, such as a G-C mismatch, is incorporated into the DNA sequence."

"The directed movement of substances, in membrane-bounded vesicles, from the early sorting c

RNA."

"The directed movement of substances (such as macromolecules, small molecules, ions) into, o

"The process whose specific outcome is the progression of the male gonad over time, from its fo

2, mRNA."

"A cellular process resulting in the division of the cytoplasm of a cell and its separation into two c

"The synthesis of either RNA on a template of DNA or DNA on a template of RNA [goid 6350] [e  
RNA."

RNA."

RNA."

"The covalent alteration of one or more amino acids occurring in proteins, peptides and nascent  
"The progression of biochemical and morphological phases and events that occur in a cell durin  
Any immune system process that functions in the calibrated response of an organism to a poter  
"The process whose specific outcome is the progression of the skeleton over time, from its form

"The cascade of processes by which a signal interacts with a receptor, causing a change in the  
"A process which directly inhibits any of the steps required for cell death by apoptosis [goid 6916  
"Any process that stops, prevents or reduces the frequency, rate or extent of coagulation [goid 5

"The regulation of the levels, transport, and metabolism of calcium ions within a cell or between  
"The chemical reactions and pathways involving any of a group of physiologically important biog  
"The immediate defensive reaction (by vertebrate tissue) to infection or injury caused by chemic  
"Any process that stops, prevents or reduces the frequency, rate or extent of transcription from a  
"The chemical reactions and pathways involving dioxygen (O<sub>2</sub>), or any of the reactive oxygen sp

"The directed movement of proteins in a cell, including the movement of proteins between speci  
"The directed movement of proteins in a cell, including the movement of proteins between speci  
"The directed movement of proteins in a cell, including the movement of proteins between speci  
"The directed movement of proteins in a cell, including the movement of proteins between speci  
"The directed movement of proteins in a cell, including the movement of proteins between speci  
"The directed movement of proteins in a cell, including the movement of proteins between speci  
"The directed movement of proteins in a cell, including the movement of proteins between speci  
"The directed movement of proteins in a cell, including the movement of proteins between speci  
"The directed movement of proteins in a cell, including the movement of proteins between speci  
"The directed movement of proteins in a cell, including the movement of proteins between speci  
"The process of directing proteins towards the lysosome using signals contained within the prote  
"The directed movement of proteins in a cell, including the movement of proteins between speci  
"The chemical reactions and pathways resulting in the formation of eye pigments, any general o  
"The process of directing proteins towards the lysosome using signals contained within the prote  
"The directed movement of proteins in a cell, including the movement of proteins between speci  
"The directed movement of proteins in a cell, including the movement of proteins between speci  
"The directed movement of proteins in a cell, including the movement of proteins between speci  
"The directed movement of proteins in a cell, including the movement of proteins between speci  
"The directed movement of proteins in a cell, including the movement of proteins between speci  
"The directed movement of proteins in a cell, including the movement of proteins between speci  
"The last step in the formation of the neural tube, where the paired neural folds are brought toge  
(APBA2BP), transcript variant 2, mRNA."

"The cascade of processes by which a signal interacts with a receptor, causing a change in the l  
"The process by which the cell cycle is halted during one of the normal phases (G1, S, G2, M) [c  
cript variant 3, mRNA."

"The aggregation, arrangement and bonding together of a set of components to form a protein c

The hydrolysis of a peptide bond or bonds within a protein [goid 6508] [evidence IEA]

"In base excision repair, an altered base is removed by a DNA glycosylase enzyme, followed by

"The process of restoring DNA after damage. Genomes are subject to damage by chemical and

"The series of molecular signals initiated by binding of an extracellular ligand to a Notch recepto

"A form of programmed cell death induced by external or internal signals that trigger the activity

"Any process that stops, prevents or reduces the frequency, rate or extent of cell death by apop

"The enzymatic addition of a sequence of 40-200 adenylyl residues at the 3' end of a eukaryotic

"Specific actions of a newborn or infant mammal that result in the derivation of nourishment from

"Any process specifically pertinent to the functioning of integrated living units: cells, tissues, orga

"The directed movement of lipids into, out of, within or between cells. Lipids are compounds sol

"Any process specifically pertinent to the functioning of integrated living units: cells, tissues, orga

"Any host process that results in the promotion of antiviral immune response mechanisms, there

"Any host process that results in the promotion of antiviral immune response mechanisms, there  
3H), mRNA."

"The directed movement of lipids into, out of, within or between cells. Lipids are compounds sol

"A change in state or activity of a cell or an organism (in terms of movement, secretion, enzyme

"The chemical reactions and pathways involving lipids, compounds soluble in an organic solvent

"The directed movement of lipids into, out of, within or between cells. Lipids are compounds sol

"The directed movement of lipids into, out of, within or between cells. Lipids are compounds sol

"Blood vessel formation when new vessels emerge from the proliferation of pre-existing blood ve

"The chemical reactions and pathways resulting in the formation of precursor metabolites, subst

"The directed movement of lipids into, out of, within or between cells. Lipids are compounds sol

"The directed movement of proteins in a cell, including the movement of proteins between speci

"The progression of biochemical and morphological phases and events that occur in a cell durin

"Any process which produces a purine nucleoside from derivatives of it, without de novo synthes

"The repair of single strand breaks in DNA. Repair of such breaks is mediated by the same enzy

"The directed movement of charged atoms or small charged molecules into, out of, within or bet

"Any process that activates or increases the frequency, rate, or extent of an immune system pro

Any process involved in the conversion of a primary mRNA transcript into one or more mature m  
A series of reactions within the cell that occur as a result of a single trigger reaction or compoun  
cript variant 3, mRNA."  
A."

"A type of vesicle-mediated transport in which cells take up external materials or membrane con

"The directed movement of substances (such as macromolecules, small molecules, ions) into, o

"The chemical reactions and pathways, including anabolism and catabolism, by which living org;

"The chemical reactions and pathways, including anabolism and catabolism, by which living org;

"Any series of molecular signals in which a small monomeric GTPase relays one or more of the

"Any series of molecular signals in which a small monomeric GTPase relays one or more of the

"Any series of molecular signals in which a small monomeric GTPase relays one or more of the

"The process whose specific outcome is the progression of the liver over time, from its formation to its death [goid 15031] [evidence 1]  
"The directed movement of substances from the Golgi back to the endoplasmic reticulum, mediated by vesicles [goid 15031] [evidence 1]  
"The directed movement of proteins into, out of, within or between cells [goid 15031] [evidence 1]  
"The directed movement of proteins in a cell, including the movement of proteins between specific organelles [goid 15031] [evidence 1]  
"A process of secretion by a cell that results in the release of intracellular molecules (e.g. hormones) [goid 15031] [evidence 1]  
"A process of secretion by a cell that results in the release of intracellular molecules (e.g. hormones) [goid 15031] [evidence 1]  
"The directed movement of proteins in a cell, including the movement of proteins between specific organelles [goid 15031] [evidence 1]  
"Any process involved in the controlled movement of a cell [goid 6928] [pmid 8670882] [evidence 1]  
"A cyclic metabolic pathway that converts waste nitrogen in the form of ammonium to urea [goid 15031] [evidence 1]

"The cascade of processes by which a signal interacts with a receptor, causing a change in the cell's response [goid 6916] [evidence 1]  
"A process that is carried out at the cellular level which results in the formation, arrangement or movement of organelles [goid 6916] [evidence 1]  
"The cascade of processes by which a signal interacts with a receptor, causing a change in the cell's response [goid 6916] [evidence 1]  
"The cascade of processes by which a signal interacts with a receptor, causing a change in the cell's response [goid 6916] [evidence 1]  
"The cascade of processes by which a signal interacts with a receptor, causing a change in the cell's response [goid 6916] [evidence 1]  
"The cascade of processes by which a signal interacts with a receptor, causing a change in the cell's response [goid 6916] [evidence 1]  
"The cascade of processes by which a signal interacts with a receptor, causing a change in the cell's response [goid 6916] [evidence 1]  
"The cascade of processes by which a signal interacts with a receptor, causing a change in the cell's response [goid 6916] [evidence 1]  
"The cascade of processes by which a signal interacts with a receptor, causing a change in the cell's response [goid 6916] [evidence 1]  
"The cascade of processes by which a signal interacts with a receptor, causing a change in the cell's response [goid 6916] [evidence 1]

"The cascade of processes by which a signal interacts with a receptor, causing a change in the cell's response [goid 6916] [evidence 1]  
"The cascade of processes by which a signal interacts with a receptor, causing a change in the cell's response [goid 6916] [evidence 1]  
"The uptake of external materials by cells, utilizing receptors to ensure specificity of transport. A process that is carried out at the cellular level which results in the formation, arrangement or movement of organelles [goid 6916] [evidence 1]  
"The cascade of processes by which a signal interacts with a receptor, causing a change in the cell's response [goid 6916] [evidence 1]  
"The cascade of processes by which a signal interacts with a receptor, causing a change in the cell's response [goid 6916] [evidence 1]  
"The attachment of a cell, either to another cell or to an underlying substrate such as the extracellular matrix [goid 6916] [evidence 1]  
"The cascade of processes by which a signal interacts with a receptor, causing a change in the cell's response [goid 6916] [evidence 1]  
"A process which directly inhibits any of the steps required for cell death by apoptosis [goid 6916] [evidence 1]  
"Any process involved in the controlled movement of a cell [goid 6928] [pmid 16130169] [evidence 1]  
"The multiplication or reproduction of cells, resulting in the expansion of a cell population [goid 8] [evidence 1]  
"Any process that modulates the frequency, rate or extent of Rho protein signal transduction [goid 6916] [evidence 1]  
"A cellular process resulting in the division of the cytoplasm of a cell and its separation into two daughter cells [goid 6916] [evidence 1]  
"The series of molecular signals generated as a consequence of a G-protein coupled receptor binding to a ligand [goid 6916] [evidence 1]  
"Any process that modulates the frequency, rate or extent of Rho protein signal transduction [goid 6916] [evidence 1]  
"Any process that modulates the frequency, rate or extent of Rho protein signal transduction [goid 6916] [evidence 1]  
"Any process that modulates the frequency, rate or extent of Rho protein signal transduction [goid 6916] [evidence 1]  
"The developmental process by which the size or shape of a cell is generated and organized. Morphogenesis [goid 6916] [evidence 1]  
"A series of reactions within the cell that occur as a result of a single trigger reaction or compound [goid 6916] [evidence 1]  
"A series of reactions within the cell that occur as a result of a single trigger reaction or compound [goid 6916] [evidence 1]  
"A form of programmed cell death induced by external or internal signals that trigger the activity of caspases [goid 6916] [evidence 1]

"A series of reactions within the cell that occur as a result of a single trigger reaction or compound  
"Any process that modulates the frequency, rate or extent of Rho protein signal transduction [go  
"The synthesis of either RNA on a template of DNA or DNA on a template of RNA [goid 6350] [e  
"The synthesis of either RNA on a template of DNA or DNA on a template of RNA [goid 6350] [e  
"The synthesis of either RNA on a template of DNA or DNA on a template of RNA [goid 6350] [e  
"The synthesis of either RNA on a template of DNA or DNA on a template of RNA [goid 6350] [e  
"The synthesis of either RNA on a template of DNA or DNA on a template of RNA [goid 6350] [e  
"The formation or destruction of chromatin structures [goid 6333] [evidence IEA]; The synthesis  
"The formation or destruction of chromatin structures [goid 6333] [evidence IEA]; The synthesis  
"The synthesis of either RNA on a template of DNA or DNA on a template of RNA [goid 6350] [e  
"The synthesis of either RNA on a template of DNA or DNA on a template of RNA [goid 6350] [e  
"The chemical reactions and pathways resulting in the breakdown of a protein or peptide by hyd  
Any series of molecular signals in which a small monomeric GTPase relays one or more of the s  
Any series of molecular signals in which a small monomeric GTPase relays one or more of the s  
"The establishment of an organism's body plan or part of an organism with respect to the left an

The aggregation and bonding together of alpha- and beta-tubulin to form a tubulin heterodimer [e  
"The cascade of processes by which a signal interacts with a receptor, causing a change in the  
The series of molecular signals generated as a consequence of a G-protein coupled receptor bi  
Any series of molecular signals in which a small monomeric GTPase relays one or more of the s  
Any series of molecular signals in which a small monomeric GTPase relays one or more of the s  
Any series of molecular signals in which a small monomeric GTPase relays one or more of the s  
Any series of molecular signals in which a small monomeric GTPase relays one or more of the s  
Any series of molecular signals in which a small monomeric GTPase relays one or more of the s  
"Any series of molecular signals in which a small monomeric GTPase relays one or more of the  
"The targeting of proteins to a membrane that occurs during translation. The transport of most s  
The process of removing sections of the primary RNA transcript to remove sequences not prese  
"The directed movement of L-glutamate, the L enantiomer anion of 2-aminopentanedioic acid, ir

"The process by which genetic material, in the form of chromosomes, is organized and then phy  
"The process by which genetic material, in the form of chromosomes, is organized and then phy  
Any series of molecular signals in which a small monomeric GTPase relays one or more of the s  
"Any process that modulates the frequency, rate or extent of cell growth [goid 1558] [evidence IE

"Any process specifically pertinent to the functioning of integrated living units: cells, tissues, organs"  
"The embryonically driven process whose specific outcome is the progression of the placenta ov"  
"A change in state or activity of a cell or an organism (in terms of movement, secretion, enzyme"  
"Any process that modulates the frequency, rate or extent of DNA-dependent transcription [goid"  
"Any process that modulates the frequency, rate or extent of the assembly of actin filaments by"  
"A process that is carried out at the cellular level which results in the formation, arrangement of"  
"Any process involved in the controlled movement of a cell [goid 6928] [pmid 9230079] [evidenc"  
"Any process involved in the controlled movement of a cell [goid 6928] [pmid 9230079] [evidenc"  
"Any process involved in the controlled movement of a cell [goid 6928] [pmid 9230079] [evidenc"  
"Assembly of actin filaments by the addition of actin monomers to a filament [goid 30041] [evide"  
"Any process involved in the controlled movement of a cell [goid 6928] [pmid 9230079] [evidenc"  
"Any process that modulates the frequency, rate or extent of the assembly of actin filaments by"

"Any process that activates or increases the frequency, rate or extent of gluconeogenesis [goid 6928] [pmid 9230079] [evidence IEA]; The process of gluconeogenesis from lactate to glucose in the liver." RNA."

"Any process that modulates the frequency, rate or extent of addition of phosphate groups into a"  
"Any process that modulates the frequency, rate or extent of addition of phosphate groups into a"

"The process by which the sperm binds to the zona pellucida glycoprotein layer of the egg. The"  
"The chemical reactions and pathways, including anabolism and catabolism, by which living orga"  
"The chemical reactions and pathways, including anabolism and catabolism, by which living orga"  
"The transfer, from NAD, of ADP-ribose to protein amino acids [goid 6471] [evidence IEA]; The t"  
"The chemical reactions and pathways involving lipids, compounds soluble in an organic solvent"  
"The chemical reactions and pathways, including anabolism and catabolism, by which living orga"  
"The chemical reactions and pathways involving lipids, compounds soluble in an organic solvent"

variant 1, mRNA."

"The chemical reactions and pathways resulting in the breakdown of a protein or peptide by hyd"  
"The chemical reactions and pathways resulting in the breakdown of a protein or peptide by hyd"  
"The chemical reactions and pathways resulting in the breakdown of a protein or peptide by hyd"  
"The chemical reactions and pathways resulting in the breakdown of a protein or peptide by hyd"  
"The chemical reactions and pathways resulting in the breakdown of a protein or peptide by hyd"  
"The chemical reactions and pathways resulting in the breakdown of a protein or peptide by hyd"  
"The chemical reactions and pathways resulting in the breakdown of a protein or peptide by hyd"  
"The chemical reactions and pathways resulting in the breakdown of a protein or peptide by hyd"  
"The chemical reactions and pathways resulting in the breakdown of a protein or peptide by hyd"  
"The chemical reactions and pathways resulting in the breakdown of a protein or peptide by hyd"  
"Any process that modulates the frequency, rate or extent of DNA-dependent transcription [goid"  
"Any process that modulates the frequency, rate or extent of DNA-dependent transcription [goid"  
"The process of restoring DNA after damage. Genomes are subject to damage by chemical and"



"The formation or destruction of chromatin structures [goid 6333] [evidence IEA]; The aggregation of non-coding RNA."

"The uptake of external materials by cells, utilizing receptors to ensure specificity of transport. A

"Any process by which DNA and associated proteins are formed into a compact, orderly structure"

"The synthesis of either RNA on a template of DNA or DNA on a template of RNA [goid 6350] [evidence IEA]"

"The chemical reactions and pathways resulting in the formation of precursor metabolites, substances"

"A cyclic metabolic pathway that converts waste nitrogen in the form of ammonium to urea [goid 6350]"

"The chemical reactions and pathways resulting in the formation of a protein. This is a ribosome-mediated process"

"The chemical reactions and pathways resulting in the formation of melatonin (N-acetyl-5-methoxytryptamine)"

"The chemical reactions and pathways resulting in the formation of asparagine, 2-amino-3-carboxy-L-glutamate"

"The chemical reactions and pathways resulting in the formation of asparagine, 2-amino-3-carboxy-L-glutamate"

"The chemical reactions and pathways resulting in the breakdown of aspartate, the anion derived from aspartic acid"

"Any process specifically pertinent to the functioning of integrated living units: cells, tissues, organs, or organisms"

"The alteration of an amino acid residue in a peptide [goid 18193] [evidence IEA]; The process of posttranslational modification"

"The progression of biochemical and morphological phases and events that occur in a cell during its life cycle"

"The process whose specific outcome is the progression of the skin over time, from its formation to its maintenance and repair"

"Any process specifically pertinent to the functioning of integrated living units: cells, tissues, organs, or organisms"

"The chemical reactions and pathways resulting in the breakdown of glutamate, via the interconversion of glutamate and alpha-ketoglutarate"

"A cyclic metabolic pathway that converts waste nitrogen in the form of ammonium to urea [goid 6350]"

"The process of restoring DNA after damage. Genomes are subject to damage by chemical and physical agents"

"The synthesis of either RNA on a template of DNA or DNA on a template of RNA [goid 6350] [evidence IEA]"

"The synthesis of either RNA on a template of DNA or DNA on a template of RNA [goid 6350] [evidence IEA]"

"A change in state or activity of a cell or an organism (in terms of movement, secretion, enzyme production, etc.)"

"The posttranslational conjugation of arginine to the N-terminal aspartate or glutamate of a protein"

"The synthesis of either RNA on a template of DNA or DNA on a template of RNA [goid 6350] [evidence IEA]"

"The synthesis of either RNA on a template of DNA or DNA on a template of RNA [goid 6350] [evidence IEA]"

"The formation of glucose from noncarbohydrate precursors, such as pyruvate, amino acids and glycerol"

"The formation of glucose from noncarbohydrate precursors, such as pyruvate, amino acids and glycerol"

"The synthesis of either RNA on a template of DNA or DNA on a template of RNA [goid 6350] [evidence IEA]"

"The synthesis of either RNA on a template of DNA or DNA on a template of RNA [goid 6350] [evidence IEA]"

"The synthesis of either RNA on a template of DNA or DNA on a template of RNA [goid 6350] [evidence IEA]"

"The covalent or non-covalent attachment of lipid moieties to an amino acid in a protein [goid 64000]"

"The formation of a double membrane-bounded structure, the autophagosome, that occurs when a cell engulfs its own cytoplasmic components"

"The formation of a double membrane-bounded structure, the autophagosome, that occurs when a cell engulfs its own cytoplasmic components"

"The process by which cells digest parts of their own cytoplasm; allows for both recycling of macromolecules and removal of organelles"

"The covalent alteration of one or more amino acids occurring in proteins, peptides and nascent  
"The formation of a double membrane-bounded structure, the autophagosome, that occurs whe  
"The formation of a double membrane-bounded structure, the autophagosome, that occurs whe  
"The formation of a double membrane-bounded structure, the autophagosome, that occurs whe  
"The formation of a double membrane-bounded structure, the autophagosome, that occurs whe  
"The formation of a double membrane-bounded structure, the autophagosome, that occurs whe  
"The covalent or non-covalent attachment of lipid moieties to an amino acid in a protein [goid 64  
"The formation of a double membrane-bounded structure, the autophagosome, that occurs whe  
"The chemical reactions and pathways involving carbohydrates, any of a group of organic comp  
"The chemical reactions and pathways involving nucleobases, nucleosides, nucleotides and nuc

"A signal transduction pathway, induced by DNA damage, that blocks cell cycle progression (in (

"Any process that stops, prevents or reduces the frequency, rate or extent of transcription from a  
"The characteristic movement of immature neurons from germinal zones to specific positions wh  
"Any process that modulates the frequency, rate or extent of DNA-dependent transcription [goid  
"Any process that modulates the frequency, rate or extent of DNA-dependent transcription [goid  
"The directed movement of charged atoms or small charged molecules into, out of, within or bet  
"The directed movement of substances (such as macromolecules, small molecules, ions) into, o  
"The directed movement of substances (such as macromolecules, small molecules, ions) into, o  
"The directed movement of charged atoms or small charged molecules into, out of, within or bet  
"The directed movement of substances (such as macromolecules, small molecules, ions) into, o  
"The directed movement of substances (such as macromolecules, small molecules, ions) into, o  
"The directed movement of substances (such as macromolecules, small molecules, ions) into, o  
"The directed movement of substances (such as macromolecules, small molecules, ions) into, o  
"The directed movement of substances (such as macromolecules, small molecules, ions) into, o  
"Any process that modulates the extent of heart contraction, changing the force with which bloo  
"The directed movement of potassium ions (K+) into, out of, within or between cells [goid 6813]  
"The directed movement of charged atoms or small charged molecules into, out of, within or bet  
"The directed movement of charged atoms or small charged molecules into, out of, within or bet  
"The directed movement of charged atoms or small charged molecules into, out of, within or bet  
"The directed movement of substances (such as macromolecules, small molecules, ions) into, o  
"The directed movement of cations, atoms or small molecules with a net positive charge, into, o  
, mRNA."  
"The directed movement of substances (such as macromolecules, small molecules, ions) into, o  
"The directed movement of cations, atoms or small molecules with a net positive charge, into, o  
"The directed movement of potassium ions (K+) into, out of, within or between cells [goid 6813]  
"Any process that stops, prevents, or reduces the rate or extent of endothelial cell proliferation [(  
"Blood vessel formation when new vessels emerge from the proliferation of pre-existing blood ve  
"The directed movement of charged atoms or small charged molecules into, out of, within or bet  
"The chemical reactions and pathways resulting in the breakdown of ATP, adenosine 5'-triphosp  
"The directed movement of charged atoms or small charged molecules into, out of, within or bet  
"The directed movement of charged atoms or small charged molecules into, out of, within or bet

"The transport of protons across a membrane to generate an electrochemical gradient (proton-n  
"The directed movement of charged atoms or small charged molecules into, out of, within or bet  
"The directed movement of charged atoms or small charged molecules into, out of, within or bet  
"The directed movement of charged atoms or small charged molecules into, out of, within or bet  
"The transport of protons across a membrane to generate an electrochemical gradient (proton-n  
"The directed movement of charged atoms or small charged molecules into, out of, within or bet  
"The transport of protons across a membrane to generate an electrochemical gradient (proton-n  
"The chemical reactions and pathways resulting in the formation of ATP, adenosine 5'-triphosph  
"The directed movement of charged atoms or small charged molecules into, out of, within or bet  
"The chemical reactions and pathways resulting in the breakdown of ATP, adenosine 5'-triphosph  
"The directed movement of charged atoms or small charged molecules into, out of, within or bet

"The transport of protons across a membrane to generate an electrochemical gradient (proton-n  
IA."

"The process leading to the attainment of the full functional capacity of angiotensin by conversic  
"The directed movement of charged atoms or small charged molecules into, out of, within or bet  
"The directed movement of charged atoms or small charged molecules into, out of, within or bet  
"The chemical reactions and pathways resulting in the formation of ATP, adenosine 5'-triphosph  
"The chemical reactions and pathways resulting in the formation of ATP, adenosine 5'-triphosph  
"The directed movement of charged atoms or small charged molecules into, out of, within or bet  
"The directed movement of charged atoms or small charged molecules into, out of, within or bet  
"The directed movement of charged atoms or small charged molecules into, out of, within or bet  
"The directed movement of charged atoms or small charged molecules into, out of, within or bet  
"The chemical reactions and pathways resulting in the formation of ATP, adenosine 5'-triphosph  
"The chemical reactions and pathways resulting in the formation of ATP, adenosine 5'-triphosph  
"The directed movement of charged atoms or small charged molecules into, out of, within or bet  
"The directed movement of charged atoms or small charged molecules into, out of, within or bet  
"The directed movement of charged atoms or small charged molecules into, out of, within or bet  
"The directed movement of charged atoms or small charged molecules into, out of, within or bet  
"The directed movement of charged atoms or small charged molecules into, out of, within or bet  
"The directed movement of charged atoms or small charged molecules into, out of, within or bet  
"The directed movement of charged atoms or small charged molecules into, out of, within or bet

λ."

"The directed movement of charged atoms or small charged molecules into, out of, within or bet  
"The directed movement of charged atoms or small charged molecules into, out of, within or bet  
"The directed movement of copper (Cu) ions into, out of, within or between cells [goid 6825] [evi  
"The directed movement of substances (such as macromolecules, small molecules, ions) into, c  
"The directed movement of substances (such as macromolecules, small molecules, ions) into, c  
"The directed movement of substances (such as macromolecules, small molecules, ions) into, c  
"The directed movement of substances (such as macromolecules, small molecules, ions) into, c  
"The aggregation, arrangement and bonding together of a set of components to form a protein c  
"The aggregation, arrangement and bonding together of a proton-transporting ATP synthase (al:

"Blood vessel formation when new vessels emerge from the proliferation of pre-existing blood vessels"  
"A signal transduction pathway, induced by DNA damage, that blocks cell cycle progression (in eukaryotes)"  
"The immediate defensive reaction (by vertebrate tissue) to infection or injury caused by chemicals"  
"Any process involved in the conversion of one or more primary RNA transcripts into one or more secondary transcripts"  
"The process whose specific outcome is the progression of nervous tissue over time, from its formation to its maturation"

"Any process that modulates the frequency, rate or extent of the chemical reactions and pathways"  
"Any process specifically pertinent to the functioning of integrated living units: cells, tissues, organs, or organisms"  
"In nucleotide excision repair a small region of the strand surrounding the damage is removed from the DNA template"

"The chemical reactions and pathways resulting in the breakdown of mRNA, messenger RNA, and ribosomes"

"Progression through the phases of the mitotic cell cycle, the most common eukaryotic cell cycle"  
"Any process that stops, prevents or reduces the rate or extent of mitosis. Mitosis is the division of a cell into two daughter cells"

"The process of introducing a phosphate group on to a protein [goid 6468] [evidence IEA]; The phosphorylation of a protein"  
"Any process specifically pertinent to the functioning of integrated living units: cells, tissues, organs, or organisms"  
"A form of programmed cell death induced by external or internal signals that trigger the activity of caspases"  
"A change in state or activity of a cell or an organism (in terms of movement, secretion, enzyme production, gene expression, etc.)"

"The process of renal water excretion [goid 30146] [evidence IEA]; Any process that activates or inhibits the activity of an enzyme"  
"The initiation of the activity of the inactive enzyme MAP kinase by phosphorylation by a MAP kinase"  
"A form of programmed cell death induced by external or internal signals that trigger the activity of caspases"  
"The formation of mesodermal clusters that are arranged segmentally along the anterior-posterior axis"  
"The synthesis of either RNA on a template of DNA or DNA on a template of RNA [goid 6350] [evidence IEA]"

"Any immune system process that functions in the calibrated response of an organism to a potential pathogen"  
"The biological process whose specific outcome is the progression of a multicellular organism or population through the life cycle"  
"A series of reactions initiated by the activation of the transcription factor NF-kappaB. NF-kappaB activation leads to the production of cytokines and other mediators of inflammation"  
"The chemical reactions and pathways resulting in the formation of polyamines, any organic compound"  
The process by which an antigen-presenting cell expresses a peptide antigen on its cell surface  
"The addition of a sugar unit to a protein amino acid, e.g. the addition of glycan chains to proteins"  
"The addition of a sugar unit to a protein amino acid, e.g. the addition of glycan chains to proteins"  
"The addition of a sugar unit to a protein amino acid, e.g. the addition of glycan chains to proteins"  
"The chemical reactions and pathways resulting in the formation of glycosaminoglycans, any of a group of organic compounds"  
"The chemical reactions and pathways involving carbohydrates, any of a group of organic compounds"  
"The chemical reactions and pathways resulting in the formation of glycosaminoglycans, any of a group of organic compounds"  
"The addition of a sugar unit to a protein amino acid, e.g. the addition of glycan chains to proteins"  
"The addition of a sugar unit to a protein amino acid, e.g. the addition of glycan chains to proteins"  
"The addition of a sugar unit to a protein amino acid, e.g. the addition of glycan chains to proteins"  
"The addition of a sugar unit to a protein amino acid, e.g. the addition of glycan chains to proteins"  
"The addition of a sugar unit to a protein amino acid, e.g. the addition of glycan chains to proteins"

.1), mRNA."

"The chemical reactions and pathways resulting in the formation of ceramide oligosaccharides c

"The process whose specific outcome is the progression of an epithelial cell over time, from its f

"The chemical reactions and pathways involving carbohydrates, any of a group of organic comp

"The chemical reactions and pathways involving carbohydrates, any of a group of organic comp

"The chemical reactions and pathways involving carbohydrates, any of a group of organic comp

"The chemical reactions and pathways involving carbohydrates, any of a group of organic comp

"The chemical reactions and pathways involving carbohydrates, any of a group of organic comp

"The chemical reactions and pathways involving carbohydrates, any of a group of organic comp

"The covalent alteration of one or more amino acids occurring in proteins, peptides and nascent

"Any process that modulates the frequency, rate or extent of DNA-dependent transcription [goid

"The chemical reactions and pathways resulting in the breakdown of glucose, the aldohexose gl

"The covalent alteration of one or more amino acids occurring in proteins, peptides and nascent

"A form of programmed cell death induced by external or internal signals that trigger the activity

The process of assisting in the covalent and noncovalent assembly of single chain polypeptides

"The process of assisting in the covalent and noncovalent assembly of single chain polypeptides

"The cascade of processes by which a signal interacts with a receptor, causing a change in the

"The cascade of processes by which a signal interacts with a receptor, causing a change in the

"The cascade of processes by which a signal interacts with a receptor, causing a change in the

"The cascade of processes by which a signal interacts with a receptor, causing a change in the l

"The regulated release of neurotransmitter into the synaptic cleft. A neurotransmitter is any of a mRNA."

"A change in state or activity of a cell or an organism (in terms of movement, secretion, enzyme

"The change in morphology and behavior of a mature or immature B cell resulting from exposure

"The synthesis of either RNA on a template of DNA or DNA on a template of RNA [goid 6350] [e

"The covalent alteration of one or more amino acids occurring in proteins, peptides and nascent

"A homeostatic process involved in the maintenance of an internal equilibrium within a defined ti

"Any process that modulates the frequency, rate or extent of DNA-dependent transcription [goid

"The joining together of exons from one or more primary transcripts of nuclear messenger RNA

"The covalent alteration of one or more amino acids occurring in proteins, peptides and nascent

"The synthesis of either RNA on a template of DNA or DNA on a template of RNA [goid 6350] [e

"Any process that modulates the frequency, rate or extent of DNA-dependent transcription [goid

"The synthesis of either RNA on a template of DNA or DNA on a template of RNA [goid 6350] [e  
"Any process that modulates the occurrence or rate of cell death by apoptosis [goid 42981] [evid  
"The synthesis of either RNA on a template of DNA or DNA on a template of RNA [goid 6350] [e  
"The formation or destruction of chromatin structures [goid 6333] [evidence IEA]; Dynamic struc  
"The synthesis of either RNA on a template of DNA or DNA on a template of RNA [goid 6350] [e  
"The process by which cytochrome c is enabled to move from the mitochondrial intermembrane  
"The chemical reactions and pathways resulting in the formation of carnitine (hydroxy-trimethyl ε  
"A tissue homeostatic process involved in the maintenance of an internal equilibrium within the r  
"A tissue homeostatic process involved in the maintenance of an internal equilibrium within the r  
The process of assisting in the covalent and noncovalent assembly of single chain polypeptides  
"The assembly and organization of the sperm flagellar axoneme, the bundle of microtubules and  
"A process that is carried out at the cellular level which results in the formation, arrangement of  
"The characteristic morphogenetic movements where the primitive heart tube loops asymmetric  
"The series of events required for an organism to receive a visual stimulus, convert it to a molec  
"The synthesis of either RNA on a template of DNA or DNA on a template of RNA [goid 6350] [e  
"The attachment of a cell, either to another cell or to an underlying substrate such as the extrac  
"The attachment of a cell, either to another cell or to an underlying substrate such as the extrac  
"The directed movement of proteins in a cell, including the movement of proteins between speci  
"The directed movement of proteins in a cell, including the movement of proteins between speci  
"Control of the spatial distribution of actin filaments; includes organizing filaments into meshwork  
"The cascade of processes by which a signal interacts with a receptor, causing a change in the

"Progression from G1 phase to S phase of the mitotic cell cycle [goid 82] [pmid 8692959] [evid  
"The chemical reactions and pathways, including anabolism and catabolism, by which living org;  
"Any process that modulates the frequency, rate or extent of CDK activity [goid 79] [pmid 10878

"The chemical reactions and pathways involving cocaine, an alkaloid obtained from the dried lea  
"The chemical reactions and pathways resulting in the breakdown of amino acids containing a b  
"The chemical reactions and pathways resulting in the breakdown of amino acids containing a b  
"The cascade of processes by which a signal interacts with a receptor, causing a change in the  
"The last step in the formation of the neural tube, where the paired neural folds are brought toge  
"The synthesis of either RNA on a template of DNA or DNA on a template of RNA [goid 6350] [e  
"The process by which cytochrome c is enabled to move from the mitochondrial intermembrane  
A process which directly inhibits any of the steps required for cell death by apoptosis [goid 6916  
"A change in state or activity of a cell or an organism (in terms of movement, secretion, enzyme  
"A process which directly inhibits any of the steps required for cell death by apoptosis [goid 6916  
"A process that directly activates any of the steps required for cell death by apoptosis [goid 6917  
"A form of programmed cell death induced by external or internal signals that trigger the activity  
"A process that directly activates any of the steps required for cell death by apoptosis [goid 6917  
"The vectorial transfer of a protein from the cytoplasm into the nucleus, through the nuclear pore  
"The vectorial transfer of a protein from the cytoplasm into the nucleus, through the nuclear pore  
"Any process that stops, prevents or reduces the frequency, rate or extent of transcription from a

"Any process that stops, prevents or reduces the frequency, rate or extent of transcription [goid  
"Any process specifically pertinent to the functioning of integrated living units: cells, tissues, orga  
"A form of programmed cell death induced by external or internal signals that trigger the activity  
The series of molecular signals initiated by binding of Wnt protein to a frizzled family receptor or  
"The synthesis of either RNA on a template of DNA or DNA on a template of RNA [goid 6350] [e  
"Any process that modulates the frequency, rate or extent of DNA-dependent transcription [goid  
"The synthesis of either RNA on a template of DNA or DNA on a template of RNA [goid 6350] [e  
"The synthesis of either RNA on a template of DNA or DNA on a template of RNA [goid 6350] [e  
"A series of reactions within the cell that occur as a result of a single trigger reaction or compour  
"The aggregation, arrangement and bonding together of a set of components to form a protein c  
  
"A process whereby force is generated within smooth muscle tissue, resulting in a change in mu  
  
"The process by which cells digest parts of their own cytoplasm; allows for both recycling of mac

"The directed movement of charged atoms or small charged molecules into, out of, within or bet  
"The directed movement of charged atoms or small charged molecules into, out of, within or bet  
"The directed movement of charged atoms or small charged molecules into, out of, within or bet  
"The directed movement of substances from the endoplasmic reticulum (ER) to the Golgi, media  
"The directed movement of proteins into, out of, within or between cells [goid 15031] [evidence I

"A form of programmed cell death induced by external or internal signals that trigger the activity  
"A process that is carried out at the cellular level which results in the formation, arrangement of  
"The process whose specific outcome is the progression of the skeleton over time, from its form  
"Any process specifically pertinent to the functioning of integrated living units: cells, tissues, orga  
"Any process that stops, prevents or reduces the frequency, rate or extent of DNA-dependent tr  
"Any process that modulates the frequency, rate or extent of DNA-dependent transcription [goid

The biological process whose specific outcome is the progression of a multicellular organism ov  
"Any process involved in the conversion of one or more primary RNA transcripts into one or mor

"Any process that activates or increases the frequency, rate or extent of cell death by apoptosis  
A process that directly activates any of the steps required for cell death by apoptosis [goid 6917  
"The biological process whose specific outcome is the progression of a multicellular organism ov  
"A cellular process resulting in the division of the cytoplasm of a cell and its separation into two c

"The process whose specific outcome is the progression of the placenta over time, from its form  
A process which directly inhibits any of the steps required for cell death by apoptosis [goid 6916  
"Progression from G2 phase to M phase of the mitotic cell cycle [goid 86] [pmid 9859993] [evid

"The process of introducing a phosphate group on to a protein [goid 6468] [evidence IEA]; A ser  
"Any process that modulates the frequency, rate or extent of CDK activity [goid 79] [pmid 15604  
"The hydrolysis of a peptide bond or bonds within a protein [goid 6508] [pmid 9546396] [evidenc  
"The immediate defensive reaction (by vertebrate tissue) to infection or injury caused by chemic  
"Any process specifically pertinent to the functioning of integrated living units: cells, tissues, orga  
variant 2, mRNA."

ceptor 5) (BLR1), transcript variant 1, mRNA."

"The chemical reactions and pathways resulting in the breakdown of heme, any compound of iron  
The chemical reactions and pathways by which individual cells transform chemical substances [

"Any process that modulates the frequency, rate or extent of cell growth [goid 1558] [pmid 9129  
Any process that modulates the occurrence or rate of cell death by apoptosis [goid 42981] [evid

"The synthesis of either RNA on a template of DNA or DNA on a template of RNA [goid 6350] [e  
The process of introducing a phosphate group on to a protein [goid 6468] [evidence IEA]

"The formation of bone or of a bony substance, or the conversion of fibrous tissue or of cartilage

"Blood vessel formation when new vessels emerge from the proliferation of pre-existing blood ve

"The formation of bone or of a bony substance, or the conversion of fibrous tissue or of cartilage

"The immediate defensive reaction (by vertebrate tissue) to infection or injury caused by chemic

"The increase in size or mass of an entire organism, a part of an organism or a cell [goid 40007]

"The increase in size or mass of an entire organism, a part of an organism or a cell [goid 40007]

"The process by which the Mullerian ducts, primordia of the oviducts, uterus and upper vagina, t

"The process that gives rise to the mesoderm. This process pertains to the initial formation of th

"The process of introducing a phosphate group on to a protein [goid 6468] [pmid 7970727] [evid

"A form of programmed cell death induced by external or internal signals that trigger the activity

"A form of programmed cell death induced by external or internal signals that trigger the activity

"A change in state or activity of a cell or an organism (in terms of movement, secretion, enzyme

"A process that directly activates any of the steps required for cell death by apoptosis [goid 6917

"Any process specifically pertinent to the functioning of integrated living units: cells, tissues, orga  
Any process involved in the conversion of a primary ribosomal RNA (rRNA) transcript into one o

"The chemical reactions and pathways involving carbohydrates, any of a group of organic comp

"The chemical reactions and pathways involving amino acids, organic acids containing one or m

"The chemical reactions and pathways involving nucleobases, nucleosides, nucleotides and nuc

"The process of introducing a phosphate group on to a protein [goid 6468] [pmid 2284096] [evid

"The process of restoring DNA after damage. Genomes are subject to damage by chemical and

"The error-free repair of a double-strand break in DNA in which the broken DNA molecule is rep



"The chemical reactions and pathways resulting in the breakdown of a protein or peptide by hydrolysis [goid 1558] [evidence IEA]

"Any process specifically pertinent to the functioning of integrated living units: cells, tissues, organs [goid 1558] [evidence IEA]

"The process of formation of spermatozoa, including spermatocytogenesis and spermiogenesis [goid 1558] [evidence IEA]

"Any process specifically pertinent to the functioning of integrated living units: cells, tissues, organs [goid 1558] [evidence IEA]

"Any process that modulates the frequency, rate or extent of transcription from an RNA polymerase [goid 1558] [evidence IEA]

"Any process that modulates the frequency, rate or extent of cell growth [goid 1558] [evidence IEA]

"The chemical reactions and pathways resulting in the breakdown of a protein or peptide by hydrolysis [goid 1558] [evidence IEA]

"Any process involved in the assembly of the RNA polymerase complex at the promoter region [goid 1558] [evidence IEA]

"Any process specifically pertinent to the functioning of integrated living units: cells, tissues, organs [goid 1558] [evidence IEA]

"Any process that modulates the frequency, rate or extent of cell growth [goid 1558] [evidence IEA]

"Any process specifically pertinent to the functioning of integrated living units: cells, tissues, organs [goid 1558] [evidence IEA]

"The synthesis of either RNA on a template of DNA or DNA on a template of RNA [goid 6350] [evidence IEA]

"The process of introducing a phosphate group on to a protein [goid 6468] [pmid 15150265] [evidence IEA]

Any process involved in the conversion of a primary mRNA transcript into one or more mature mRNA molecules [goid 6468] [pmid 15150265] [evidence IEA]

"The synthesis of either RNA on a template of DNA or DNA on a template of RNA [goid 6350] [evidence IEA]

The hydrolysis of a peptide bond or bonds within a protein [goid 6508] [evidence IEA]

"Any process specifically pertinent to the functioning of integrated living units: cells, tissues, organs [goid 1558] [evidence IEA]

Any series of molecular signals initiated by the binding of an extracellular ligand to a receptor on the cell surface [goid 1558] [evidence IEA]

"The process of communication from a neuron to a target (neuron, muscle, or secretory cell) across a synapse [goid 1558] [evidence IEA]

"The directed movement of charged atoms or small charged molecules into, out of, within or between cells [goid 6813] [evidence IEA]

"An immune response mediated through a body fluid [goid 6959] [pmid 7607676] [evidence TAS]

"Any process that stops, prevents or reduces the frequency, rate or extent of transcription [goid 1558] [evidence IEA]

"The directed movement of potassium ions (K+) into, out of, within or between cells [goid 6813] [evidence IEA]

"The attachment of a cell, either to another cell or to an underlying substrate such as the extracellular matrix [goid 1558] [evidence IEA]

"The chemical reactions and pathways involving various organic and inorganic nitrogenous compounds [goid 1558] [evidence IEA]

"The synthesis of either RNA on a template of DNA or DNA on a template of RNA [goid 6350] [evidence IEA]

"The addition of a methyl group to a protein amino acid. A methyl group is derived from methane

"The process of restoring DNA after damage. Genomes are subject to damage by chemical and

"Any process that stops, prevents or reduces the rate or extent of cell proliferation [goid 8285] [p

"The process of introducing a phosphate group on to a protein [goid 6468] [evidence IEA]; The p

Any immune system process that functions in the calibrated response of an organism to a poten

"The chemical reactions and pathways involving lipids, compounds soluble in an organic solvent

"The chemical reactions and pathways involving lipids, compounds soluble in an organic solvent

"Any process specifically pertinent to the functioning of integrated living units: cells, tissues, orga

"The chemical reactions and pathways resulting in the breakdown of a protein or peptide by hyd

"The process of introducing a phosphate group on to a protein [goid 6468] [evidence IEA]; The p

"A form of programmed cell death induced by external or internal signals that trigger the activity

"Progression through mitosis, the division of the eukaryotic cell nucleus to produce two daughte

"Any process that modulates the frequency, rate or extent of transcription from an RNA polymer

"The attachment of a cell, either to another cell or to an underlying substrate such as the extrac

"Any process specifically pertinent to the functioning of integrated living units: cells, tissues, orga

"The synthesis of either RNA on a template of DNA or DNA on a template of RNA [goid 6350] [e

"The biological process whose specific outcome is the progression of a multicellular organism o

"Any process specifically pertinent to the functioning of integrated living units: cells, tissues, orga

"The directed movement of carbohydrate into, out of, within or between cells. Carbohydrates are  
Jorf128), mRNA."

The series of molecular signals generated as a consequence of a G-protein coupled receptor bi  
orf18), mRNA."

"

The process of removal or addition of one or more electrons with or without the concomitant ren

"The chemical reactions and pathways involving aromatic compounds, any organic compound c

"The chemical reactions and pathways, including anabolism and catabolism, by which living orga

orf93), mRNA."  
"Any process specifically pertinent to the functioning of integrated living units: cells, tissues, orga

"Any process specifically pertinent to the functioning of integrated living units: cells, tissues, orga

"Any process specifically pertinent to the functioning of integrated living units: cells, tissues, orga

The biological process whose specific outcome is the progression of a multicellular organism ov

"Any process specifically pertinent to the functioning of integrated living units: cells, tissues, orga

"  
"The deposition or aggregation of coloring matter in an organism, tissue or cell [goid 43473] [pm

"  
"

"The chemical reactions and pathways, including anabolism and catabolism, by which living orga

"The process resulting in the release of a polypeptide chain from the ribosome, usually in respo

"

A."

A."

A."

A."

"The chemical reactions and pathways resulting in the breakdown of D-amino acids, the dextrorotatory form of amino acids, are collectively known as the dextrorotatory amino acid pathway."  
"

A."

Any process induced by intracellular signals that directly activates any of the steps required for c

oding RNA."

A."

"The synthesis of either RNA on a template of DNA or DNA on a template of RNA [goid 6350] [e

The chemical reactions and pathways resulting in the formation of a protein. This is a ribosome-

"

"Any process specifically pertinent to the functioning of integrated living units: cells, tissues, orga

"The directed movement of charged atoms or small charged molecules into, out of, within or bet

"

"

"

"Any process involved in the conversion of a primary mRNA transcript into one or more mature r

"

"A process that directly activates any of the steps required for cell death by apoptosis [goid 6917orf50), mRNA."

"Any process specifically pertinent to the functioning of integrated living units: cells, tissues, orga

The transport of protons across a membrane to generate an electrochemical gradient (proton-m

The biological process whose specific outcome is the progression of a multicellular organism ov

A."

Any process that maintains the redox environment of a cell or compartment within a cell [goid 45

"

"

"

"Any process specifically pertinent to the functioning of integrated living units: cells, tissues, orga

"

"

"Any process specifically pertinent to the functioning of integrated living units: cells, tissues, orga

Any process involved in the conversion of a primary ribosomal RNA (rRNA) transcript into one o

"

"Any process that activates or increases the frequency, rate or extent of an I-kappaB kinase/NF-

"The directed movement of proteins into, out of, within or between cells [goid 15031] [evidence I



Any process that activates or increases the rate or extent of cell proliferation [goid 8284] [eviden  
"

The process of assisting in the covalent and noncovalent assembly of single chain polypeptides  
"The biological process whose specific outcome is the progression of a multicellular organism on

"The directed movement of substances (such as macromolecules, small molecules, ions) into, o  
"Any process involved in the conversion of a primary mRNA transcript into one or more mature r  
9OS), mRNA."

"

"

"

"Blood vessel formation when new vessels emerge from the proliferation of pre-existing blood ve

"  
"

"Any process specifically pertinent to the functioning of integrated living units: cells, tissues, orga  
"The process of restoring DNA after damage. Genomes are subject to damage by chemical and

'20763"

"

The covalent alteration of one or more nucleotides within an rRNA molecule to produce an rRNA  
"The chemical reactions and pathways resulting in the breakdown of glycine, aminoethanoic acid

The synthesis of either RNA on a template of DNA or DNA on a template of RNA [goid 6350] [en

"Any process involved in the activation of any of the steps of the classical pathway of the comple  
Any immune system process that functions in the calibrated response of an organism to a potent  
The specific movement from place to place of an organism in response to external or internal sti

"The initiation of the activity of the inactive enzyme MAP kinase by phosphorylation by a MAPK  
, mRNA."  
, mRNA."

"The process of creating protein oligomers, compounds composed of a small number, usually be

A."

coding RNA."

"Any process specifically pertinent to the functioning of integrated living units: cells, tissues, orga

The chemical reactions and pathways resulting in the formation of substances; typically the ene  
"

"Any process specifically pertinent to the functioning of integrated living units: cells, tissues, orga

"

"The chemical reactions and pathways, including anabolism and catabolism, by which living orga

"Any process specifically pertinent to the functioning of integrated living units: cells, tissues, orga

ochondrial protein, transcript variant 2, mRNA."

"

"

"Any process specifically pertinent to the functioning of integrated living units: cells, tissues, orga

"

"

"

"

"

"Any process specifically pertinent to the functioning of integrated living units: cells, tissues, orga

A."

"Any process specifically pertinent to the functioning of integrated living units: cells, tissues, orga

The hydrolysis of a peptide bond or bonds within a protein [goid 6508] [evidence IEA]

"Any process specifically pertinent to the functioning of integrated living units: cells, tissues, orga

"The directed movement of proteins into, out of, within or between cells [goid 15031] [evidence I

"A form of programmed cell death induced by external or internal signals that trigger the activity

"Any process involved in the activation of any of the steps of the classical pathway of the comple

"The initiation of the activity of the inactive enzyme MAP kinase by phosphorylation by a MAPK

"The initiation of the activity of the inactive enzyme MAP kinase by phosphorylation by a MAPK

"Any process that modulates the frequency, rate or extent of activity of any TGF-beta receptor s

"The chemical reactions and pathways, including anabolism and catabolism, by which living orga

"Any process that modulates the frequency, rate or extent of DNA-dependent transcription [goid

"Any process involved in the activation of any of the steps of the classical pathway of the comple

"

"

"Any process specifically pertinent to the functioning of integrated living units: cells, tissues, orga

"Any process that mediates interactions between a cell and its surroundings. Encompasses inte

f160), mRNA."

"



Any process that modulates the activity of a GTPase of the Rab family [goid 32313] [evidence IE

"Any process specifically pertinent to the functioning of integrated living units: cells, tissues, orga  
f184), mRNA."

"The directed movement of substances (such as macromolecules, small molecules, ions) into, o

"The chemical reactions and pathways involving nucleobases, nucleosides, nucleotides and nuc

"

"The chemical reactions and pathways involving nucleobases, nucleosides, nucleotides and nuc

"Any process specifically pertinent to the functioning of integrated living units: cells, tissues, orga

"Any process specifically pertinent to the functioning of integrated living units: cells, tissues, orga

"The chemical reactions and pathways, including anabolism and catabolism, by which living orga

"The directed movement of metal ions, any metal ion with an electric charge, into, out of, within

"Any process specifically pertinent to the functioning of integrated living units: cells, tissues, orga

ochondrial protein, mRNA."

"Any process that modulates the frequency, rate or extent of Rho protein signal transduction [go

"The chemical reactions and pathways involving carbohydrates, any of a group of organic comp

"

"Any process that modulates the frequency, rate or extent of cell growth [goid 1558] [evidence IE

Any process by which an organism has an effect on an organism of a different species [goid 44

"Any process specifically pertinent to the functioning of integrated living units: cells, tissues, orga

The process of assisting in the correct noncovalent assembly of posttranslational proteins and is

"The hydrolysis of a peptide bond or bonds within a protein [goid 6508] [evidence IEA]; The hyd

"Any process specifically pertinent to the functioning of integrated living units: cells, tissues, orga

"Any process specifically pertinent to the functioning of integrated living units: cells, tissues, orga

"Any process specifically pertinent to the functioning of integrated living units: cells, tissues, orga

Any series of molecular signals in which a small monomeric GTPase relays one or more of the signals  
"Any process that stops, prevents or reduces the frequency, rate or extent of an I-kappaB kinase activation"

"The chemical reactions and pathways involving compounds containing a single carbon atom [goid 6816] [evidence IEA]; The chemical reactions and pathways involving compounds containing a single carbon atom [goid 6816] [evidence IEA]; The chemical reactions and pathways involving compounds containing a single carbon atom [goid 6816] [evidence IEA]; The process by which the anatomical structures of epithelia are generated and organized. Morphogenesis [goid 6816] [evidence IEA]; The chemical reactions and pathways involving compounds containing a single carbon atom [goid 6816] [evidence IEA]; The chemical reactions and pathways involving compounds containing a single carbon atom [goid 6816] [evidence IEA];

"The specific activation or halting of processes within a cell so that its vital functions markedly cease [goid 6816] [evidence IEA]; The process whose specific outcome is the progression of nervous tissue over time, from its formation [goid 6816] [evidence IEA]; Any process that modulates the frequency, rate or extent of the physical partitioning and separation of cells [goid 6816] [evidence IEA]; Cell motility due to movement of cilia or flagella [goid 1539] [evidence IEA]; The cascade of processes by which a signal interacts with a receptor, causing a change in the cell [goid 6816] [evidence IEA];

"The directed movement of calcium (Ca) ions into, out of, within or between cells [goid 6816] [evidence IEA]; The directed movement of charged atoms or small charged molecules into, out of, within or between cells [goid 6816] [evidence IEA]; The directed movement of charged atoms or small charged molecules into, out of, within or between cells [goid 6816] [evidence IEA]; The directed movement of charged atoms or small charged molecules into, out of, within or between cells [goid 6816] [evidence IEA]; The directed movement of charged atoms or small charged molecules into, out of, within or between cells [goid 6816] [evidence IEA]; The directed movement of calcium (Ca) ions into, out of, within or between cells [goid 6816] [evidence IEA]; The directed movement of charged atoms or small charged molecules into, out of, within or between cells [goid 6816] [evidence IEA]; The directed movement of charged atoms or small charged molecules into, out of, within or between cells [goid 6816] [evidence IEA]; The chemical reactions and pathways resulting in the breakdown of a protein or peptide by hydrolysis [goid 6816] [evidence IEA]; The chemical reactions and pathways involving various organic and inorganic nitrogenous compounds [goid 6816] [evidence IEA]; The directed killing of a target cell by a T cell through the release of granules containing cytotoxic granules [goid 6816] [evidence IEA]; The attachment of a cell, either to another cell or to an underlying substrate such as the extracellular matrix [goid 6816] [evidence IEA];

"Attachment of the blastocyst to the uterine lining [goid 7566] [pmid 17983652] [evidence IDA]; Attachment of the blastocyst to the uterine lining [goid 7566] [pmid 17983652] [evidence IDA]; The regulation of the levels, transport, and metabolism of calcium ions within a cell or between cells [goid 6816] [evidence IEA]; The synthesis of either RNA on a template of DNA or DNA on a template of RNA [goid 6350] [evidence IEA]; The process by which a virus reproduces. Usually, this is by infection of a host cell, replication and release of new virus particles [goid 6816] [evidence IEA]; The cascade of processes by which a signal interacts with a receptor, causing a change in the cell [goid 6816] [evidence IEA]; Any process involved in the controlled movement of a cell [goid 6928] [pmid 16130169] [evidence IEA];

"The progression of biochemical and morphological phases and events that occur in a cell during

"The cascade of processes by which a signal interacts with a receptor, causing a change in the

"Any process that modulates the frequency, rate or extent of DNA-dependent transcription [goid

"Any process specifically pertinent to the functioning of integrated living units: cells, tissues, organs

"The series of molecular signals generated as a consequence of a dopamine receptor binding to

"The process of introducing a phosphate group on to a protein [goid 6468] [pmid 9395448] [evid

The process of introducing a phosphate group on to a protein [goid 6468] [evidence IEA]; Any p

The process of introducing a phosphate group on to a protein [goid 6468] [evidence IEA]

"The process of introducing a phosphate group on to a protein [goid 6468] [evidence IEA]; Progi

"The process of introducing a phosphate group on to a protein [goid 6468] [evidence IEA]; The p

"The process of introducing a phosphate group on to a protein [goid 6468] [evidence IEA]; The p

"The process of introducing a phosphate group on to a protein [goid 6468] [pmid 8089075] [evid

The process of introducing a phosphate group on to a protein [goid 6468] [evidence IEA]

"Cascade of at least three protein kinase activities culminating in the phosphorylation and activa

The process of introducing a phosphate group on to a protein [goid 6468] [evidence IEA]

"The process by which receptor molecules are returned to an active state and in an active cellu

Reactions triggered in response to the presence of a bacterium that act to protect the cell or org

."

"Any process that activates or increases the frequency, rate or extent of an I-kappaB kinase/NF-

Blood vessel formation when new vessels emerge from the proliferation of pre-existing blood ve

"The developmental process by which the size or shape of a cell is generated and organized. M

"Formation of a prolongation or process extending from a cell, e.g. a flagellum or axon [goid 300

The hydrolysis of a peptide bond or bonds within a protein [goid 6508] [evidence IEA]; Any proce

"The hydrolysis of a peptide bond or bonds within a protein [goid 6508] [evidence IEA]; Dynamic

The hydrolysis of a peptide bond or bonds within a protein [goid 6508] [evidence IEA]

The hydrolysis of a peptide bond or bonds within a protein [goid 6508] [evidence IEA]

The hydrolysis of a peptide bond or bonds within a protein [goid 6508] [evidence IEA]

"The hydrolysis of a peptide bond or bonds within a protein [goid 6508] [evidence IEA]; The hydro

"The hydrolysis of a peptide bond or bonds within a protein [goid 6508] [evidence IEA]; The cas

The hydrolysis of a peptide bond or bonds within a protein [goid 6508] [evidence IEA]

The hydrolysis of a peptide bond or bonds within a protein [goid 6508] [evidence IEA]

Any process that activates or increases the rate or extent of cell proliferation [goid 8284] [pmid 8

"Any process that stops, prevents or reduces the frequency, rate or extent of cell growth [goid 30

A series of reactions within the cell that occur as a result of a single trigger reaction or compound

"A process that is carried out at the cellular level which results in the formation, arrangement of

"A process that is carried out at the cellular level which results in the formation, arrangement of

"A process that is carried out at the cellular level which results in the formation, arrangement of

"A process that is carried out at the cellular level which results in the formation, arrangement of  
"The aggregation, arrangement and bonding together of a set of components to form a protein c  
"Any process that activates or increases the frequency, rate or extent of production of a cytokine  
mRNA."

Any process that modulates the occurrence or rate of cell death by apoptosis [goid 42981] [evid  
"Any process that modulates the occurrence or rate of cell death by apoptosis [goid 42981] [evid  
"A change in state or activity of a cell or an organism (in terms of movement, secretion, enzyme  
"Any process that modulates the frequency, rate or extent of DNA-dependent transcription [goid

"The synthesis of either RNA on a template of DNA or DNA on a template of RNA [goid 6350] [e  
"The process of coupling cysteine to cysteinyl-tRNA, catalyzed by cysteinyl-tRNA synthetase. In  
"The process of coupling cysteine to cysteinyl-tRNA, catalyzed by cysteinyl-tRNA synthetase. In

The formation of the acrosome from the spermatid Golgi [goid 1675] [pmid 15579588] [evidence

"The process of introducing a phosphate group on to a protein [goid 6468] [evidence IEA]; The a  
"The hydrolysis of a peptide bond or bonds within a protein [goid 6508] [evidence IEA]; Any proc  
The hydrolysis of a peptide bond or bonds within a protein [goid 6508] [evidence IEA]; Any proc  
"The hydrolysis of a peptide bond or bonds within a protein [goid 6508] [evidence IEA]; A form o  
The hydrolysis of a peptide bond or bonds within a protein [goid 6508] [evidence IEA]; A proces  
"The hydrolysis of a peptide bond or bonds within a protein [goid 6508] [evidence IEA]; A form o  
The hydrolysis of a peptide bond or bonds within a protein [goid 6508] [pmid 7797510] [evidence  
"The hydrolysis of a peptide bond or bonds within a protein [goid 6508] [pmid 12888622] [evid  
"The hydrolysis of a peptide bond or bonds within a protein [goid 6508] [evidence IEA]; A form o  
"The hydrolysis of a peptide bond or bonds within a protein [goid 6508] [evidence IEA]; A form o

"The synthesis of either RNA on a template of DNA or DNA on a template of RNA [goid 6350] [e  
"A change in state or activity of a cell or an organism (in terms of movement, secretion, enzyme  
"Cell motility due to movement of cilia or flagella [goid 1539] [evidence IEA]; The directed mover  
RNA."

"Any process that terminates the activity of the active enzyme MAP kinase [goid 188] [evidence  
"Fusion of the membrane of a transport vesicle with its target membrane [goid 6906] [pmid 1274  
"Reactions, triggered in response to the presence of a foreign body or the occurrence of an inju  
"The process whereby a relatively unspecialized cell acquires specialized features of an epitheli  
"The synthesis of either RNA on a template of DNA or DNA on a template of RNA [goid 6350] [e  
"Any process specifically pertinent to the functioning of integrated living units: cells, tissues, orga  
"Any series of molecular signals initiated by the binding of an extracellular ligand to a receptor o  
"The chemical reactions and pathways resulting in the breakdown of a protein or peptide by hyd  
"The chemical reactions and pathways resulting in the breakdown of a protein or peptide by hyd  
"The process of communication from a neuron to a target (neuron, muscle, or secretory cell) acr

"The chemical reactions and pathways, including anabolism and catabolism, by which living org;

The process of removal or addition of one or more electrons with or without the concomitant rearrangement of other atoms  
The process of removal or addition of one or more electrons with or without the concomitant rearrangement of other atoms  
"The chemical reactions and pathways resulting in the formation of cysteine from other compounds"

The formation or destruction of chromatin structures [goid 6333] [evidence IEA]; The formation or destruction of chromatin structures [goid 6333] [evidence IEA]; The formation or destruction of chromatin structures [goid 6333] [evidence IEA]; Dynamic structural changes in chromatin [goid 6333] [evidence IEA]  
"Any process that stops, prevents or reduces the frequency, rate or extent of transcription from a DNA template"  
"The formation or destruction of chromatin structures [goid 6333] [evidence IEA]; Dynamic structural changes in chromatin [goid 6333] [evidence IEA]"  
"Any process that stops, prevents or reduces the frequency, rate or extent of transcription from a DNA template"  
"The formation or destruction of chromatin structures [goid 6333] [evidence IEA]; Any process that stops, prevents or reduces the frequency, rate or extent of transcription from a DNA template"  
"The formation or destruction of chromatin structures [goid 6333] [evidence IEA]; The formation or destruction of chromatin structures [goid 6333] [evidence IEA]; The formation or destruction of chromatin structures [goid 6333] [evidence IEA]; The formation or destruction of chromatin structures [goid 6333] [evidence IEA]; The formation or destruction of chromatin structures [goid 6333] [evidence IEA]; The synthesis of RNA from a DNA template [goid 6350] [evidence IEA]"  
"Any process by which a protein is transported to, or maintained in, a specific location [goid 8100] [evidence IEA]"

"The joining together of exons from one or more primary transcripts of nuclear messenger RNA"

"The chemical reactions and pathways resulting in the formation of substances; typically the energy is derived from the oxidation of organic compounds"  
The chemical reactions and pathways resulting in the formation of substances; typically the energy is derived from the oxidation of organic compounds  
"The directed movement of a motile cell or organism, or the directed growth of a cell guided by a signal"  
"The synthesis of either RNA on a template of DNA or DNA on a template of RNA [goid 6350] [evidence IEA]"

"Any process specifically pertinent to the functioning of integrated living units: cells, tissues, organs, or organisms"

"The process whereby new strands of DNA are synthesized. The template for replication can either be DNA or RNA"

"A change in state or activity of a cell or an organism (in terms of movement, secretion, enzyme

"Any process specifically pertinent to the functioning of integrated living units: cells, tissues, orga

"Any process specifically pertinent to the functioning of integrated living units: cells, tissues, orga

"The progression of biochemical and morphological phases and events that occur in a cell durin

"The series of events required for an organism to receive an auditory stimulus, convert it to a mc



"Any process specifically pertinent to the functioning of integrated living units: cells, tissues, orga

"The synthesis of either RNA on a template of DNA or DNA on a template of RNA [goid 6350] [e

"Any process specifically pertinent to the functioning of integrated living units: cells, tissues, orga

"The process by which a pre-tRNA molecule is converted to a mature tRNA, ready for addition o

"Any process specifically pertinent to the functioning of integrated living units: cells, tissues, orga

Any process by which an organism has an effect on an organism of a different species [goid 444

"Any process that modulates the frequency, rate or extent of addition of phosphate groups into a

"The directed movement of proteins into, out of, within or between cells [goid 15031] [evidence I

"The directed movement of a protein from the nucleus into the cytoplasm [goid 6611] [evidence

"The regulation of the levels, transport, and metabolism of calcium ions within a cell or between

"The directed movement of a motile cell or organism, or the directed growth of a cell guided by a

"The directed movement of a motile cell or organism, or the directed growth of a cell guided by a

"The directed movement of a motile cell or organism, or the directed growth of a cell guided by a

"The directed movement of a motile cell or organism, or the directed growth of a cell guided by a

"The regulation of the levels, transport, and metabolism of calcium ions within a cell or between

"The directed movement of a motile cell or organism, or the directed growth of a cell guided by a

"The directed movement of a motile cell or organism, or the directed growth of a cell guided by a



The process of assisting in the covalent and noncovalent assembly of single chain polypeptides  
The process of assisting in the covalent and noncovalent assembly of single chain polypeptides  
"A change in state or activity of an organism (in terms of movement, secretion, enzyme producti  
"The attachment of a cell, either to another cell or to an underlying substrate such as the extrac

"The immediate defensive reaction (by vertebrate tissue) to infection or injury caused by chemic  
A defense response that is mediated by cells [goid 6968] [pmid 1373518] [evidence TAS]; Any s  
Any immune system process that functions in the calibrated response of an organism to a poten  
Any immune system process that functions in the calibrated response of an organism to a poten  
Any immune system process that functions in the calibrated response of an organism to a poten  
"The series of events in which a stimulus from a bacterium is received and converted into a mol  
Any immune system process that functions in the calibrated response of an organism to a poten  
"The clustering and aggregation of membrane rafts at a single cellular pole during activation of p  
Any process by which an organism has an effect on an organism of a different species [goid 444  
Any immune system process that functions in the calibrated response of an organism to a poten  
"A change in state or activity of a cell or an organism (in terms of movement, secretion, enzyme  
"The cascade of processes by which a signal interacts with a receptor, causing a change in the  
Any series of molecular signals initiated by the binding of an extracellular ligand to a receptor on  
"Any process specifically pertinent to the functioning of integrated living units: cells, tissues, orga  
"A form of programmed cell death induced by external or internal signals that trigger the activity  
"Any immune system process that functions in the calibrated response of an organism to a pote  
"The multiplication or reproduction of cells, resulting in the expansion of a cell population [goid 8  
"Any process that activates or increases the frequency, rate, or extent of an inflammatory respo  
"The aggregation, arrangement and bonding together of a set of components to form a protein c  
"The joining together of exons from one or more primary transcripts of nuclear messenger RNA  
Any immune system process that functions in the calibrated response of an organism to a poten

"Any process that modulates the frequency, rate or extent of cell growth [goid 1558] [pmid 1072  
"The attachment of a cell, either to another cell or to an underlying substrate such as the extrac  
"The chemical reactions and pathways involving lipids, compounds soluble in an organic solvent  
The posttranslational glycosylation of protein via the N4 atom of peptidyl-asparagine or the N1' a  
"The cascade of processes by which a signal interacts with a receptor, causing a change in the  
Any series of molecular signals initiated by the binding of an extracellular ligand to a receptor on  
"The synthesis of either RNA on a template of DNA or DNA on a template of RNA [goid 6350] [e  
"Any series of molecular signals initiated by the binding of an extracellular ligand to a receptor o  
"A form of programmed cell death induced by external or internal signals that trigger the activity  
"The attachment of a cell, either to another cell or to an underlying substrate such as the extrac  
"Any process involved in the activation of any of the steps of the classical pathway of the comple  
"The attachment of a cell, either to another cell or to an underlying substrate such as the extrac  
"Reactions, triggered in response to the presence of a foreign body or the occurrence of an inju  
"Any process that increases the concentration of calcium ions in the cytosol [goid 7204] [pmid 8;  
"The cascade of processes by which a signal interacts with a receptor, causing a change in the l  
"Any process involved in the activation of any of the steps of the classical pathway of the comple  
The attachment of one cell to another cell via adhesion molecules [goid 16337] [pmid 7544493]

"Any series of molecular signals initiated by the binding of an extracellular ligand to a receptor o

"Any immune system process that functions in the calibrated response of an organism to a pote

"A process that directly activates any of the steps required for cell death by apoptosis [goid 6917

"The attachment of a cell, either to another cell or to an underlying substrate such as the extrac

"The chemical reactions and pathways resulting in the formation of prostaglandins, any of a gro

Any immune system process that functions in the calibrated response of an organism to a poter

Any immune system process that functions in the calibrated response of an organism to a poter

"A series of reactions within the cell that occur as a result of a single trigger reaction or compour

"The initiation of the activity of the inactive enzyme MAP kinase by phosphorylation by a MAPK

"Reactions, triggered in response to the presence of a foreign body or the occurrence of an injur

"Reactions, triggered in response to the presence of a foreign body or the occurrence of an injur

"Any immune system process that functions in the calibrated response of an organism to a pote

"Any process involved in the carrying out of an immune response by a T cell [goid 2456] [eviden

"Any process involved in the controlled movement of a cell [goid 6928] [pmid 8478605] [evidenc

"Any immune system process that functions in the calibrated response of an organism to a pote

"The series of molecular signals generated as a consequence of a peptide neurotransmitter binc

"The attachment of a cell, either to another cell or to an underlying substrate such as the extrac

"The attachment of a cell, either to another cell or to an underlying substrate such as the extrac

"Any series of molecular signals initiated by the binding of an extracellular ligand to a receptor o

"The progression of biochemical and morphological phases and events that occur in a cell durin

The process of removing one or more phosphoric residues from a protein [goid 6470] [pmid 936

"The process resulting in the physical partitioning and separation of a cell into daughter cells [gc

"The process of introducing a phosphate group on to a protein [goid 6468] [evidence IEA]; A pro

"The chemical reactions and pathways resulting in the breakdown of a protein or peptide by hyd

"Progression through G1 phase, one of two 'gap' phases in the mitotic cell cycle; G1 is the interv

"Any process that modulates the frequency, rate or extent of CDK activity [goid 79] [pmid 11139

"Progression through M phase, the part of the mitotic cell cycle during which mitosis takes place

"Progression through M phase, the part of the mitotic cell cycle during which mitosis takes place

"The chemical reactions and pathways resulting in the breakdown of a protein or peptide by hyd

"Any process that modulates the frequency, rate or extent of cell growth [goid 1558] [pmid 1088;

"The process of introducing a phosphate group on to a protein [goid 6468] [evidence IEA]; Any p

The process of introducing a phosphate group on to a protein [goid 6468] [evidence IEA]; The p

"Progression from G1 phase to S phase of the mitotic cell cycle [goid 82] [pmid 8248134] [evide

"Any process that modulates the frequency, rate or extent of CDK activity [goid 79] [pmid 86662

The process resulting in the physical partitioning and separation of a cell into daughter cells [goid

"The joining together of exons from one or more primary transcripts of nuclear messenger RNA

"The directed movement of the nucleus [goid 7097] [evidence IEA]; Any series of molecular sigr

"A series of reactions within the cell that occur as a result of a single trigger reaction or compour

"The process of introducing a phosphate group on to a protein [goid 6468] [evidence ISS]; A pro

"The process of introducing a phosphate group on to a protein [goid 6468] [pmid 15194684] [evi  
"Control of the spatial distribution of actin filaments; includes organizing filaments into meshworl  
"The cascade of processes by which a signal interacts with a receptor, causing a change in the  
"A series of molecular signals within the cell that are mediated by a member of the Rho family o  
"A cascade of protein kinase activities, culminating in the phosphorylation and activation of a me  
"The process whereby phagocytes engulf external particulate material. The particles are initially  
"The process whereby phagocytes engulf external particulate material. The particles are initially  
"A signal transduction based surveillance mechanism that prevents the initiation of mitosis until  
"Any process that modulates the frequency, rate or extent of DNA-dependent transcription [goid  
"A signal transduction based surveillance mechanism that prevents the initiation of mitosis until  
"The process of introducing a phosphate group on to a protein [goid 6468] [evidence IEA]; The p  
"The synthesis of either RNA on a template of DNA or DNA on a template of RNA [goid 6350] [e  
  
"The progression of biochemical and morphological phases and events that occur in a cell durin  
"The chemical reactions and pathways resulting in the breakdown of a protein or peptide by hyd

"Progression from G1 phase to S phase of the mitotic cell cycle [goid 82] [pmid 15837422] [evid  
"The synthesis of either RNA on a template of DNA or DNA on a template of RNA [goid 6350] [e  
"The synthesis of either RNA on a template of DNA or DNA on a template of RNA [goid 6350] [e  
"The progression of biochemical and morphological phases and events that occur in a cell durin

The attachment of an adhesion molecule in one cell to an identical molecule in an adjacent cell  
"The attachment of a cell, either to another cell or to an underlying substrate such as the extrac  
"The directed movement of substances (such as macromolecules, small molecules, ions) into, o  
"The attachment of a cell, either to another cell or to an underlying substrate such as the extrac  
"The attachment of a cell, either to another cell or to an underlying substrate such as the extrac  
The attachment of an adhesion molecule in one cell to an identical molecule in an adjacent cell  
"The attachment of a cell, either to another cell or to an underlying substrate such as the extrac  
The attachment of an adhesion molecule in one cell to an identical molecule in an adjacent cell  
"The chemical reactions and pathways resulting in the formation of phospholipids, any lipid cont  
"The process of introducing a phosphate group on to a protein [goid 6468] [evidence IEA]; The p  
"Progression from G2 phase to M phase of the mitotic cell cycle [goid 86] [pmid 1653904] [evid  
"Progression through S phase, the part of the mitotic cell cycle during which DNA synthesis take

"The process of introducing a phosphate group on to a protein [goid 6468] [evidence IEA]; The p  
"The process of introducing a phosphate group on to a protein [goid 6468] [evidence IEA]; Progi  
"The process of introducing a phosphate group on to a protein [goid 6468] [evidence IEA]; The p  
"Any process that modulates the frequency, rate or extent of CDK activity [goid 79] [pmid 75929  
"Any process that modulates the frequency, rate or extent of CDK activity [goid 79] [pmid 75929  
, mRNA."  
"The process whose specific outcome is the progression of the brain over time, from its formatio  
"Any process that modulates the frequency, rate or extent of CDK activity [goid 79] [evidence IS  
"Progression through G1 phase, one of two 'gap' phases in the mitotic cell cycle; G1 is the interv  
"Any process that modulates the frequency, rate or extent of CDK activity [goid 79] [pmid 75338

"The process of introducing a phosphate group on to a protein [goid 6468] [evidence IEA]; The s  
"The synthesis of either RNA on a template of DNA or DNA on a template of RNA [goid 6350] [e  
"The chemical reactions and pathways, including anabolism and catabolism, by which living org  
The process of introducing a phosphate group on to a protein [goid 6468] [pmid 1639063] [evid  
"The process of introducing a phosphate group on to a protein [goid 6468] [evidence IEA]; The c  
"The covalent alteration of one or more amino acids occurring in proteins, peptides and nascent  
"Progression from G1 phase to S phase of the mitotic cell cycle [goid 82] [pmid 10208428] [evid  
"The process by which the cell cycle is halted during one of the normal phases (G1, S, G2, M) [g  
"Any process that stops, prevents or reduces the frequency, rate or extent of transcription from a  
"The cleavage of DNA during apoptosis, which usually occurs in two stages: cleavage into fragm

"Any process that modulates the frequency, rate or extent of CDK activity [goid 79] [pmid 80785  
"Any process that modulates the frequency, rate or extent of CDK activity [goid 79] [pmid 80018  
"Any process that modulates the frequency, rate or extent of CDK activity [goid 79] [pmid 87418  
"Any process that modulates the frequency, rate or extent of CDK activity [goid 79] [pmid 82427

"The chemical reactions and pathways resulting in the formation of amino acids containing sulfu

"Any process specifically pertinent to the functioning of integrated living units: cells, tissues, orga  
"The chemical reactions and pathways resulting in the formation of phospholipids, any lipid cont  
"A signal transduction based surveillance mechanism that prevents the initiation of mitosis until  
"The multiplication or reproduction of cells, resulting in the expansion of a cell population [goid 8  
"The formation or destruction of chromatin structures [goid 6333] [evidence IEA]; The process o  
"Blood vessel formation when new vessels emerge from the proliferation of pre-existing blood ve  
script variant 1, mRNA."

"The chemical reactions and pathways resulting in the formation of precursor metabolites, subst  
"The embryonically driven process whose specific outcome is the progression of the placenta ov  
"The synthesis of either RNA on a template of DNA or DNA on a template of RNA [goid 6350] [e  
"The synthesis of either RNA on a template of DNA or DNA on a template of RNA [goid 6350] [e  
"The process whose specific outcome is the progression of the liver over time, from its formatio  
"The synthesis of either RNA on a template of DNA or DNA on a template of RNA [goid 6350] [e  
"The biological process whose specific outcome is the progression of a multicellular organism o  
"The chemical reactions and pathways, including anabolism and catabolism, by which living orga

{NA."}

"The chemical reactions and pathways resulting in the breakdown of cholesterol, cholest-5-en-3  
"Any process specifically pertinent to the functioning of integrated living units: cells, tissues, orga  
"Coordinated organization of groups of cells in the plane of an epithelium, such that they all orie  
"The attachment of an adhesion molecule in one cell to an identical molecule in an adjacent cell  
"The attachment of an adhesion molecule in one cell to an identical molecule in an adjacent cell

"The aggregation, arrangement and bonding together of a nucleosome, the beadlike structural unit of chromatin  
"Any process that modulates the frequency, rate or extent of the synthesis of either RNA on a template

"Progression through metaphase, the stage of mitosis at which chromosomes are firmly attached to the spindle  
"Progression through G2 phase, one of two 'gap' phases in the mitotic cell cycle; G2 is the interval between the end of DNA synthesis and the beginning of mitosis  
"A process that is carried out at the cellular level which results in the formation, arrangement of chromosomes  
The establishment of the sex of an organism by physical differentiation [goid 7548] [pmid 89213]  
"The 'de novo' formation of a microtubule, in which tubulin heterodimers form metastable oligomers  
"Any process that activates or increases the frequency, rate or extent of transcription from the RNA polymerase II promoter

Any series of molecular signals initiated by the binding of an extracellular ligand to a receptor on the cell surface  
Any process that modulates the activity of the GTPase ARF [goid 32312] [evidence IEA]

Any series of molecular signals in which a small monomeric GTPase relays one or more of the signals  
"The progression of biochemical and morphological phases and events that occur in a cell during mitosis

"Progression through the phases of the mitotic cell cycle, the most common eukaryotic cell cycle  
"The directed movement of proteins into, out of, within or between cells [goid 15031] [evidence IEA]

"The progression of biochemical and morphological phases and events that occur in a cell during mitosis  
"The vectorial transfer of a protein from the cytoplasm into the nucleus, through the nuclear pore

"The chemical reactions and pathways involving lipids, compounds soluble in an organic solvent  
"Any process involved in the controlled movement of a cell [goid 6928] [pmid 10608765] [evidence IEA]  
"The chemical reactions and pathways involving ceramides, any N-acylated sphingoid [goid 667]  
"The initiation of the activity of the inactive enzyme protein kinase C as the result of a series of reactions  
"The chemical reactions and pathways resulting in the breakdown of substances, including the breakdown of a cell

"The progression of biochemical and morphological phases and events that occur in a cell during its life cycle [goid 6508] [evidence IEA]; Any process involving the hydrolysis of a peptide bond or bonds within a protein [goid 6508] [evidence IEA]; Any process involving the hydrolysis of a peptide bond or bonds within a protein [goid 6508] [pmid 1374388] [evidence IEA]; A process which directly inhibits any of the steps required for cell death by apoptosis [goid 6916] [evidence IEA]; Any process involved in the activation of any of the steps of the alternative pathway of the complement system [goid 6916] [evidence IEA]; A cellular process resulting in the division of the cytoplasm of a cell and its separation into two daughter cells [goid 6916] [evidence IEA];

"The hydrolysis of a peptide bond or bonds within a protein [goid 6508] [evidence IEA]; A process involving the hydrolysis of a peptide bond or bonds within a protein [goid 6508] [evidence IEA]; A form of programmed cell death induced by external or internal signals that trigger the activity of caspases [goid 6916] [evidence IEA];

"The synthesis of either RNA on a template of DNA or DNA on a template of RNA [goid 6350] [evidence IEA];

"Any process specifically pertinent to the functioning of integrated living units: cells, tissues, organs, or organisms [goid 6350] [evidence IEA];

"A change in state or activity of a cell or an organism (in terms of movement, secretion, enzyme activity, gene expression, etc.) [goid 6350] [evidence IEA];

"The chemical reactions and pathways involving lipids, compounds soluble in an organic solvent [goid 6350] [evidence IEA];

"Any process specifically pertinent to the functioning of integrated living units: cells, tissues, organs, or organisms [goid 6350] [evidence IEA];

"Any process specifically pertinent to the functioning of integrated living units: cells, tissues, organs, or organisms [goid 6350] [evidence IEA];

"The process whereby new strands of DNA are synthesized. The template for replication can either be DNA or RNA [goid 6350] [evidence IEA];

"The process whereby new strands of DNA are synthesized. The template for replication can either be DNA or RNA [goid 6350] [evidence IEA];

"The directed movement of proteins into, out of, within or between cells [goid 15031] [evidence IEA];

int 5, mRNA."

mRNA."

"The formation or destruction of chromatin structures [goid 6333] [evidence IEA]; Any process that involves the formation or destruction of chromatin structures [goid 6333] [evidence IEA];

"The formation or destruction of chromatin structures [goid 6333] [evidence IEA]; Any process that involves the formation or destruction of chromatin structures [goid 6333] [evidence IEA];

"The formation or destruction of chromatin structures [goid 6333] [evidence IEA]; Any process that involves the formation or destruction of chromatin structures [goid 6333] [evidence IEA];

"The formation or destruction of chromatin structures [goid 6333] [evidence IEA]; Dynamic structures [goid 6333] [evidence IEA];

"The process whose specific outcome is the progression of the blood vessel over time, from its formation to its regression [goid 6333] [evidence IEA];

"The process whose specific outcome is the progression of the embryo in the uterus over time, from its formation to its regression [goid 6333] [evidence IEA];

"The formation or destruction of chromatin structures [goid 6333] [evidence IEA]; The synthesis of DNA [goid 6333] [evidence IEA];

"The formation or destruction of chromatin structures [goid 6333] [evidence IEA]; The synthesis of DNA [goid 6333] [evidence IEA];



"The chemical reactions and pathways involving alcohols, any of a class of compounds containi  
"A signal transduction pathway, induced by DNA damage, that blocks cell cycle progression (in  
"A signal transduction pathway, induced by DNA damage, that blocks cell cycle progression (in  
"Any process involved in the conversion of one or more primary RNA transcripts into one or mor

The process that modulates the force with which blood travels through the circulatory system. TI

"The chemical reactions and pathways involving carbohydrates, any of a group of organic comp  
"The chemical reactions and pathways involving carbohydrates, any of a group of organic comp  
"Any process specifically pertinent to the functioning of integrated living units: cells, tissues, orga  
"The chemical reactions and pathways involving lipids, compounds soluble in an organic solvent  
"The chemical reactions and pathways resulting in the formation of phosphatidylcholines, any of  
"The directed movement of proteins in a cell, including the movement of proteins between speci  
"The directed movement of proteins in a cell, including the movement of proteins between speci  
"The synthesis of either RNA on a template of DNA or DNA on a template of RNA [goid 6350] [e  
"The directed movement of proteins into, out of, within or between cells [goid 15031] [evidence I  
"The directed movement of proteins into, out of, within or between cells [goid 15031] [evidence I  
"The directed movement of proteins into, out of, within or between cells [goid 15031] [evidence I  
"The directed movement of proteins into, out of, within or between cells [goid 15031] [evidence I  
"The directed movement of proteins into, out of, within or between cells [goid 15031] [evidence I  
"The directed movement of proteins into, out of, within or between cells [goid 15031] [evidence I  
"Any process that modulates the frequency, rate, or extent of receptor recycling [goid 1919] [evid  
"The directed movement of proteins into, out of, within or between cells [goid 15031] [evidence I  
"The directed movement of proteins into, out of, within or between cells [goid 15031] [evidence I  
"A series of reactions within the cell that occur as a result of a single trigger reaction or compou  
"The process whose specific outcome is the progression of the muscle over time, from its forma  
"Any process specifically pertinent to the functioning of integrated living units: cells, tissues, orga  
"The directed movement of potassium ions (K+) into, out of, within or between cells [goid 6813]

"Any process that modulates the frequency, rate or extent of cell growth [goid 1558] [pmid 1089:  
Dynamic structural changes to eukaryotic chromatin occurring throughout the cell division cycle.  
"The process whose specific outcome is the progression of the skeleton over time, from its form  
"The directed movement of charged atoms or small charged molecules into, out of, within or bet  
"The directed movement of charged atoms or small charged molecules into, out of, within or bet  
"The directed movement of charged atoms or small charged molecules into, out of, within or bet  
"The directed movement of charged atoms or small charged molecules into, out of, within or bet  
"The directed movement of charged atoms or small charged molecules into, out of, within or bet  
"Any process that activates, maintains or increases the frequency, rate or extent of heart contra  
"The maintenance of membrane composition in a postsynaptic membrane, the specialized area  
"The chemical reactions and pathways involving polysaccharides, a polymer of more than 10 mc  
"The chemical reactions and pathways involving carbohydrates, any of a group of organic comp  
"The chemical reactions and pathways involving carbohydrates, any of a group of organic comp  
"The chemical reactions and pathways involving carbohydrates, any of a group of organic comp

15), mRNA."

"The chemical reactions and pathways involving carbohydrates, any of a group of organic comp

"The chemical reactions and pathways involving carbohydrates, any of a group of organic comp

"The chemical reactions and pathways involving polysaccharides, a polymer of more than 10 mc

"The chemical reactions and pathways involving carbohydrates, any of a group of organic comp

"The process whereby new strands of DNA are synthesized. The template for replication can eit

"The process whereby new strands of DNA are synthesized. The template for replication can eit

Any immune system process that functions in the calibrated response of an organism to a poten

"Any process that modulates the frequency, rate or extent of DNA-dependent transcription [goid

"Any process that modulates the frequency, rate or extent of transcription from an RNA polymer

"A form of programmed cell death induced by external or internal signals that trigger the activity

"The repair of double-strand breaks in DNA via homologous and nonhomologous mechanisms t

Any series of molecular signals generated as a consequence of an integrin binding to one of its

"The synthesis of either RNA on a template of DNA or DNA on a template of RNA [goid 6350] [e  
NA."

"A form of programmed cell death induced by external or internal signals that trigger the activity  
A."

"Any process that modulates the frequency, rate or extent of the synthesis of either RNA on a te

"Any process that stops, prevents or reduces the frequency, rate or extent of insulin-like growth

"The process whereby new strands of DNA are synthesized. The template for replication can eit

"A change in state or activity of a cell or an organism (in terms of movement, secretion, enzyme

"Any process specifically pertinent to the functioning of integrated living units: cells, tissues, orga

"Any process that modulates the frequency, rate or extent of cellular respiration, the enzymatic r

"Any process that modulates the frequency, rate or extent of cell growth [goid 1558] [pmid 9465]

"The differentiation of endothelial cells from progenitor cells during blood vessel development, a

"A change in state or activity of a cell or an organism (in terms of movement, secretion, enzyme

"Any process that modulates the frequency, rate or extent of DNA-dependent transcription [goid

"A form of programmed cell death induced by external or internal signals that trigger the activity

"Any cellular process that results in the specification, formation or maintenance of polarized mic

"The chemical reactions and pathways involving creatine (N-(aminoiminomethyl)-N-methylglycin

"The directed movement of a motile cell or organism, or the directed growth of a cell guided by a

"The chemical reactions and pathways involving creatine (N-(aminoiminomethyl)-N-methylglycin

rial protein, mRNA."

"The chemical reactions and pathways involving creatine (N-(aminoiminomethyl)-N-methylglycin

"The progression of biochemical and morphological phases and events that occur in a cell durin

"Any process that modulates the frequency, rate or extent of CDK activity [goid 79] [pmid 22274

"A process that results in a parallel arrangement of microtubules [goid 1578] [pmid 12837247] [e

"Any process that stops, prevents or reduces the frequency, rate or extent of microtubule depoly

"The biological process whose specific outcome is the progression of a multicellular organism or  
"The directed movement of charged atoms or small charged molecules into, out of, within or bet  
"The directed movement of substances (such as macromolecules, small molecules, ions) into, o

"Any process by which STAT proteins (Signal Transducers and Activators of Transcription) are a  
"The directed movement of charged atoms or small charged molecules into, out of, within or bet  
"The directed movement of chloride into, out of, within or between cells [goid 6821] [evidence IE  
"The directed movement of charged atoms or small charged molecules into, out of, within or bet  
"The directed movement of chloride into, out of, within or between cells [goid 6821] [evidence IE  
"The directed movement of charged atoms or small charged molecules into, out of, within or bet  
"The directed movement of chloride into, out of, within or between cells [goid 6821] [evidence IE  
"The directed movement of chloride into, out of, within or between cells [goid 6821] [evidence IE  
"The directed movement of chloride into, out of, within or between cells [goid 6821] [evidence IE  
"The attachment of a cell, either to another cell or to an underlying substrate such as the extrac  
The attachment of one cell to another cell via adhesion molecules that do not require the preser  
"The aggregation, arrangement and bonding together of a set of components to form a protein c  
The attachment of one cell to another cell via adhesion molecules that do not require the preser  
"The series of events required for an organism to receive a visual stimulus, convert it to a molec  
The attachment of one cell to another cell via adhesion molecules that do not require the preser  
The attachment of one cell to another cell via adhesion molecules that do not require the preser  
The attachment of one cell to another cell via adhesion molecules that do not require the preser

The set of specific processes that generate the ability of an organism to cause disease in anothe  
The attachment of one cell to another cell via adhesion molecules that do not require the preser  
The attachment of one cell to another cell via adhesion molecules that do not require the preser

A type of vesicle-mediated transport in which cells take up external materials or membrane cons  
Any process that activates or increases the rate or extent of cell proliferation [goid 8284] [pmid 1

Any series of molecular signals initiated by the binding of an extracellular ligand to a receptor on

"Any immune system process that functions in the calibrated response of an organism to a pote  
Any immune system process that functions in the calibrated response of an organism to a poter  
Any immune system process that functions in the calibrated response of an organism to a poter  
A type of vesicle-mediated transport in which cells take up external materials or membrane cons

Any immune system process that functions in the calibrated response of an organism to a poter  
"The series of events in which a stimulus from a yeast is received and converted into a molecula

The process of assisting in the covalent and noncovalent assembly of single chain polypeptides  
"The directed movement of charged atoms or small charged molecules into, out of, within or bet  
"The directed movement of charged atoms or small charged molecules into, out of, within or bet  
"The directed movement of charged atoms or small charged molecules into, out of, within or bet  
"The directed movement of charged atoms or small charged molecules into, out of, within or bet  
"The directed movement of charged atoms or small charged molecules into, out of, within or bet  
A type of vesicle-mediated transport in which cells take up external materials or membrane cons  
"Progression through mitosis, the division of the eukaryotic cell nucleus to produce two daughte  
A."

"The process of introducing a phosphate group on to a protein [goid 6468] [evidence IEA]; The p  
The process of introducing a phosphate group on to a protein [goid 6468] [evidence IEA]; The p  
The process of introducing a phosphate group on to a protein [goid 6468] [evidence IEA]; The p  
The process of introducing a phosphate group on to a protein [goid 6468] [evidence IEA]

"The fusion of an autophagic vacuole with a vacuole (yeast) or lysosome (e.g. mammals and ins  
"Any process that reduces the pH of the lysosomal lumen, measured by the concentration of the  
"The chemical reactions and pathways involving ceramide oligosaccharides carrying in addition  
"The joining together of exons from one or more primary transcripts of nuclear messenger RNA

The hydrolysis of a peptide bond or bonds within a protein [goid 6508] [evidence IEA]  
"The biological process whose specific outcome is the progression of a multicellular organism ov  
"A form of programmed cell death induced by external or internal signals that trigger the activity  
"The process of assisting in the covalent and noncovalent assembly of single chain polypeptides  
"The process whereby new strands of DNA are synthesized. The template for replication can eit  
"The attachment of a cell, either to another cell or to an underlying substrate such as the extrac  
"The attachment of a cell, either to another cell or to an underlying substrate such as the extrac  
"The attachment of a cell, either to another cell or to an underlying substrate such as the extrac  
"The directed movement of proteins in a cell, including the movement of proteins between speci  
"The directed movement of proteins in a cell, including the movement of proteins between speci  
"The directed movement of proteins in a cell, including the movement of proteins between speci  
"The directed movement of proteins in a cell, including the movement of proteins between speci

"The chemical reactions and pathways involving aromatic compounds, any organic compound c  
"Any process specifically pertinent to the functioning of integrated living units: cells, tissues, orga  
"The chemical reactions and pathways resulting in the formation of lipopolysaccharides, any of a  
gene encoding mitochondrial protein, mRNA."

"The chemical reactions and pathways involving nucleobases, nucleosides, nucleotides and nuc  
"The directed movement of a motile cell or organism, or the directed growth of a cell guided by a  
"The directed movement of a motile cell or organism, or the directed growth of a cell guided by a



"The directed movement of proteins into, out of, within or between cells [goid 15031] [evidence 1  
"The directed movement of substances within the Golgi, mediated by small transport vesicles. T  
"The directed movement of proteins into, out of, within or between cells [goid 15031] [evidence 1  
"The addition of a sugar unit to a protein amino acid, e.g. the addition of glycan chains to protei

The attachment of one cell to another cell via adhesion molecules [goid 16337] [pmid 9427527]  
"Blood vessel formation when new vessels emerge from the proliferation of pre-existing blood ve  
"The attachment of a cell, either to another cell or to an underlying substrate such as the extrac  
"The process whose specific outcome is the progression of the skeleton over time, from its form  
"The process whose specific outcome is the progression of the skeleton over time, from its form

"The attachment of a cell, either to another cell or to an underlying substrate such as the extrac  
"A process that directly activates any of the steps required for cell death by apoptosis [goid 6917  
"The attachment of a cell, either to another cell or to an underlying substrate such as the extrac  
"Any process that determines the size and arrangement of collagen fibrils within an extracellular  
"The attachment of a cell, either to another cell or to an underlying substrate such as the extrac  
"The attachment of a cell, either to another cell or to an underlying substrate such as the extrac  
"The attachment of one cell to another cell via adhesion molecules [goid 16337] [pmid 2019595]  
"The process whose specific outcome is the progression of the skeleton over time, from its form

"The chemical reactions and pathways resulting in the breakdown of acetylcholine that occurs in

"Any process that stops, prevents or reduces the frequency, rate or extent of transcription [goid

"The process whose specific outcome is the progression of the skeleton over time, from its form  
"The chemical reactions and pathways involving any of a group of physiologically important biog

"The process of assisting in the covalent and noncovalent assembly of single chain polypeptides  
"The directed movement of proteins in a cell, including the movement of proteins between speci  
"The directed movement of proteins in a cell, including the movement of proteins between speci  
"The directed movement of substances from the Golgi back to the endoplasmic reticulum, medi  
"The directed movement of proteins in a cell, including the movement of proteins between speci  
"The synthesis of RNA from a DNA template by RNA polymerase II (Pol II), originating at a Pol I  
"The process whose specific outcome is the progression of the embryo in the uterus over time, f  
) , mRNA."

"The synthesis of RNA from a DNA template by RNA polymerase II (Pol II), originating at a Pol I  
Any process by which an organism has an effect on an organism of a different species [goid 44

7A), mRNA."

7B), mRNA."

), transcript variant 1, mRNA."

"The directed movement of proteins in a cell, including the movement of proteins between speci

"The directed movement of proteins in a cell, including the movement of proteins between speci  
A."

"The chemical reactions and pathways involving glycerol, 1,2,3-propanetriol, a sweet, hygroscop

"The chemical reactions and pathways involving glycerol, 1,2,3-propanetriol, a sweet, hygroscop

"The chemical reactions and pathways resulting in the formation of ubiquinone, a lipid-soluble el

"The chemical reactions and pathways involving aromatic compounds, any organic compound c

"The chemical reactions and pathways resulting in the formation of ubiquinone, a lipid-soluble el

"The chemical reactions and pathways resulting in the formation of ubiquinone, a lipid-soluble el

"The process by which a phagosome, a vesicle formed by phagocytosis, fuses with a lysosome

"The process whereby phagocytes engulf external particulate material. The particles are initially

"The chemical reactions and pathways resulting in the formation of glutamine, 2-amino-4-carbar

"A process that is carried out at the cellular level which results in the formation, arrangement of

"The series of molecular signals generated as a consequence of a G-protein coupled receptor b

"Any process specifically pertinent to the functioning of integrated living units: cells, tissues, orga

"The division of a mitochondrion within a cell to form two or more separate mitochondrial compa

"The process of gaseous exchange between an organism and its environment. In plants, microc  
COX11P) on chromosome 6."

IA."

"The chemical reactions and pathways resulting in the formation of precursor metabolites, subst

IA."

"The chemical reactions and pathways resulting in the formation of precursor metabolites, subst

al protein, mRNA."

"The process of gaseous exchange between an organism and its environment. In plants, microc

"The chemical reactions and pathways resulting in the formation of precursor metabolites, subst

The process of removal or addition of one or more electrons with or without the concomitant rerr

"The chemical reactions and pathways resulting in the formation of precursor metabolites, subst  
encoding mitochondrial protein, mRNA."

rial protein, mRNA."

"The chemical reactions and pathways resulting in the formation of precursor metabolites, subst

"The chemical reactions and pathways resulting in the formation of precursor metabolites, subst

"The hydrolysis of a peptide bond or bonds within a protein [goid 6508] [evidence IEA]; The chei

The hydrolysis of a peptide bond or bonds within a protein [goid 6508] [pmid 2708524] [evidenc

The hydrolysis of a peptide bond or bonds within a protein [goid 6508] [evidence NAS]; The moc

The hydrolysis of a peptide bond or bonds within a protein [goid 6508] [evidence IEA]

The hydrolysis of a peptide bond or bonds within a protein [goid 6508] [evidence IEA]

"The covalent alteration of one or more amino acids occurring in proteins, peptides and nascent

"Any process involved in the conversion of a primary mRNA transcript into one or more mature r

"Any process that modulates the frequency, rate or extent of the chemical reactions and pathwa

"The directed movement of a neurotransmitter into, out of, within or between cells. Neurotransm

"The directed movement of a neurotransmitter into, out of, within or between cells. Neurotransm

The hydrolysis of a peptide bond or bonds within a protein [goid 6508] [evidence IEA]; The hydr

Any process involved in maintaining the structure and integrity of a protein and preventing it from

"The chemical reactions and pathways involving lipids, compounds soluble in an organic solvent

"The chemical reactions and pathways involving lipids, compounds soluble in an organic solvent

"The chemical reactions and pathways involving lipids, compounds soluble in an organic solvent

"The chemical reactions and pathways resulting in the formation of heme, any compound of iron  
ant 1, mRNA."

"The joining together of exons from one or more primary transcripts of nuclear messenger RNA

"The joining together of exons from one or more primary transcripts of nuclear messenger RNA

Any process involved in the conversion of a primary small nuclear RNA (snRNA) transcript into a

Any process involved in the conversion of a primary mRNA transcript into one or more mature r

Any process involved in the conversion of a primary mRNA transcript into one or more mature r

"The chemical reactions and pathways involving lipids, compounds soluble in an organic solvent

"The chemical reactions and pathways involving lipids, compounds soluble in an organic solvent

"The chemical reactions and pathways involving lipids, compounds soluble in an organic solvent

"The chemical reactions and pathways involving lipids, compounds soluble in an organic solvent

The hydrolysis of a peptide bond or bonds within a protein [goid 6508] [evidence IEA]

"The hydrolysis of a peptide bond or bonds within a protein [goid 6508] [evidence IEA]; The atta

"Any process that stops, prevents or reduces the frequency, rate or extent of complement activa

"Any process involved in the activation of any of the steps of the classical pathway of the compl

"The directed movement of substances (such as macromolecules, small molecules, ions) into, o

"The directed movement of substances (such as macromolecules, small molecules, ions) into, o

"The hydrolysis of a peptide bond or bonds within a protein [goid 6508] [evidence IEA]; The cas

"The chemical reactions and pathways involving lipids, compounds soluble in an organic solvent

The hydrolysis of a peptide bond or bonds within a protein using energy from the hydrolysis of A

"The synthesis of either RNA on a template of DNA or DNA on a template of RNA [goid 6350] [e

"Any process that modulates the frequency, rate or extent of DNA-dependent transcription [goid

"The synthesis of either RNA on a template of DNA or DNA on a template of RNA [goid 6350] [p

"Any process that modulates the frequency, rate or extent of DNA-dependent transcription [goid

"Any process that modulates the frequency, rate or extent of DNA-dependent transcription [goid



"Any process that modulates the frequency, rate or extent of DNA-dependent transcription [goid  
"A change in state or activity of a cell or an organism (in terms of movement, secretion, enzyme  
"The synthesis of either RNA on a template of DNA or DNA on a template of RNA [goid 6350] [p  
"The synthesis of either RNA on a template of DNA or DNA on a template of RNA [goid 6350] [p  
"Any process that modulates the frequency, rate or extent of DNA-dependent transcription [goid  
"Any process that modulates the frequency, rate or extent of cell growth [goid 1558] [evidence I]

"Any process that modulates the frequency, rate or extent of DNA-dependent transcription [goid  
"The cascade of processes by which a signal interacts with a receptor, causing a change in the  
"Any process that modulates the frequency, rate or extent of cell growth [goid 1558] [evidence I]  
"Any process that activates or increases the frequency, rate or extent of BMP signaling pathway  
"The multiplication or reproduction of cells, resulting in the expansion of a cell population [goid 8  
"Any process that activates or increases the rate or extent of cell proliferation [goid 8284] [eviden  
"Any process that stops, prevents or reduces the frequency, rate or extent of protein kinase activi

"Any process that modulates the frequency, rate or extent of transcription from an RNA polymer  
"The phosphorylation by a protein of one or more of its own amino acid residues, or residues on

"The chemical reactions and pathways resulting in the formation of phospholipids, any lipid cont  
"The aggregation, arrangement and bonding together of the spliceosome, a ribonucleoprotein a  
"The progression of biochemical and morphological phases and events that occur in a cell durin  
"The chemical reactions and pathways resulting in the formation of precursor metabolites, subst  
nRNA."

"The synthesis of either RNA on a template of DNA or DNA on a template of RNA [goid 6350] [e  
"The synthesis of either RNA on a template of DNA or DNA on a template of RNA [goid 6350] [e  
"Any process that modulates the frequency, rate or extent of DNA-dependent transcription [goid  
"The process of restoring DNA after damage. Genomes are subject to damage by chemical and  
"The process of assisting in the covalent and noncovalent assembly of single chain polypeptide:  
"The series of events required for an organism to receive a visual stimulus, convert it to a molec  
"The series of events required for an organism to receive a visual stimulus, convert it to a molec

"The chemical reactions and pathways involving fatty acids, aliphatic monocarboxylic acids liber  
"The series of events required for an organism to receive a visual stimulus, convert it to a molec  
"The chemical reactions and pathways, including anabolism and catabolism, by which living org;  
"The chemical reactions and pathways, including anabolism and catabolism, by which living org;  
"A nearly universal metabolic pathway in which the acetyl group of acetyl coenzyme A is effectiv  
"The chemical reactions and pathways involving carboxylic acids, any organic acid containing or

"Any process that stops, prevents or reduces the frequency, rate or extent of transcription from a

"Any process that modulates the frequency, rate or extent of DNA-dependent transcription [goid

"Any process that modulates the frequency, rate or extent of DNA-dependent transcription [goid

"The aggregation, arrangement and bonding together of the nuclear localization signal of a prote

"The process of introducing a phosphate group on to a protein [goid 6468] [evidence IEA]; The c  
) (CSF2RA), transcript variant 6, mRNA."

"The cascade of processes by which a signal interacts with a receptor, causing a change in the

The elongation of dermatan sulfate proteoglycan chains by alternate addition of N-acetylhexosa

"Any process specifically pertinent to the functioning of integrated living units: cells, tissues, orga

"The process of introducing a phosphate group on to a protein [goid 6468] [pmid 1945408] [evid

The process of introducing a phosphate group on to a protein [goid 6468] [evidence IEA]; The p

"The process of restoring DNA after damage. Genomes are subject to damage by chemical and

"The process of introducing a phosphate group on to a protein [goid 6468] [evidence IEA]; The p

The process of introducing a phosphate group on to a protein [goid 6468] [evidence IEA]; The s

"The process of introducing a phosphate group on to a protein [goid 6468] [pmid 9403068] [evid

"The covalent alteration of one or more amino acids occurring in proteins, peptides and nascent

"The process of introducing a phosphate group on to a protein [goid 6468] [evidence IEA]; The p

The process of introducing a phosphate group on to a protein [goid 6468] [evidence IEA]; The s

ion-coding RNA."

"Any process that modulates the frequency, rate or extent of cell growth [goid 1558] [evidence IE  
mRNA."

"The synthesis of either RNA on a template of DNA or DNA on a template of RNA [goid 6350] [e

"The synthesis of either RNA on a template of DNA or DNA on a template of RNA [goid 6350] [e

"The biological process whose specific outcome is the progression of a multicellular organism or

"The chemical reactions and pathways, including anabolism and catabolism, by which living orga

"The reorganization or renovation of existing blood vessels [goid 1974] [pmid 10545518] [eviden

"The process whose specific outcome is the progression of the epidermis over time, from its for

Any immune system process that functions in the calibrated response of an organism to a poten

"Any process that stops or reduces the rate of peptidase activity, the hydrolysis of peptide bonds

"Locomotory behavior in a fully developed and mature organism [goid 8344] [evidence IEA]; Any

"The joining together of exons from one or more primary transcripts of nuclear messenger RNA

"The joining together of exons from one or more primary transcripts of nuclear messenger RNA

Any process involved in the conversion of a primary mRNA transcript into one or more mature m

"Any process involved in the conversion of one or more primary RNA transcripts into one or mor

"Any process specifically pertinent to the functioning of integrated living units: cells, tissues, orga

"Any process that stops, prevents or reduces the frequency, rate or extent of transcription from a

"The chemical reactions and pathways, including anabolism and catabolism, by which living orga

"The chemical reactions and pathways involving carbohydrates, any of a group of organic comp

"Any process that stops, prevents or reduces the frequency, rate or extent of transcription from a

The process of removing one or more phosphoric residues from a protein [goid 6470] [pmid 976  
"Any process specifically pertinent to the functioning of integrated living units: cells, tissues, orga  
nataase 2 (CTDSP2), mRNA."

"Any process specifically pertinent to the functioning of integrated living units: cells, tissues, orga  
nataase like 2 (CTDSPL2), mRNA."

"The condensation of mesenchymal cells that have been committed to differentiate into chondro  
Any process that modulates the activity of the GTPase ARF [goid 32312] [evidence IEA]

Any process that modulates the activity of the GTPase ARF [goid 32312] [evidence IEA]

"The chemical reactions and pathways resulting in the formation of amino acids, organic acids c

"The attachment of a cell, either to another cell or to an underlying substrate such as the extracel

"The attachment of a cell, either to another cell or to an underlying substrate such as the extracel

"The attachment of a cell, either to another cell or to an underlying substrate such as the extracel

"Any process that stops, prevents or reduces the frequency, rate or extent of transcription from a

"Any process that stops, prevents or reduces the frequency, rate or extent of transcription from a

"A form of programmed cell death induced by external or internal signals that trigger the activity

"The chemical reactions and pathways involving amino acids, organic acids containing one or m

"The chemical reactions and pathways involving nucleobases, nucleosides, nucleotides and nuc

"The chemical reactions and pathways resulting in the formation of a pyrimidine nucleotide, a c  
(R9), mRNA."

"The hydrolysis of a peptide bond or bonds within a protein [goid 6508] [pmid 9065485] [evidenc

"The hydrolysis of a peptide bond or bonds within a protein [goid 6508] [evidence IEA]; The hyd

The hydrolysis of a peptide bond or bonds within a protein [goid 6508] [pmid 3463996] [evidenc

The hydrolysis of a peptide bond or bonds within a protein [goid 6508] [evidence IEA]; Any immu

The hydrolysis of a peptide bond or bonds within a protein [goid 6508] [evidence IEA]

The hydrolysis of a peptide bond or bonds within a protein [goid 6508] [pmid 9822672] [evidenc

The hydrolysis of a peptide bond or bonds within a protein [goid 6508] [pmid 2569462] [evidenc

The hydrolysis of a peptide bond or bonds within a protein [goid 6508] [pmid 2849458] [evidenc

The hydrolysis of a peptide bond or bonds within a protein [goid 6508] [evidence IEA]; The hydr

The hydrolysis of a peptide bond or bonds within a protein [goid 6508] [evidence IEA]; The hydr

The hydrolysis of a peptide bond or bonds within a protein [goid 6508] [evidence IEA]

The hydrolysis of a peptide bond or bonds within a protein [goid 6508] [pmid 1373132] [evidenc

The hydrolysis of a peptide bond or bonds within a protein [goid 6508] [evidence IEA]; Any immu

The hydrolysis of a peptide bond or bonds within a protein [goid 6508] [pmid 9642240] [evidenc

2, mRNA."

"A homeostatic process involved in the maintenance of an internal equilibrium within a defined ti

"The chemical reactions and pathways resulting in the breakdown of a protein or peptide by hyd

"Selection of a splice site by components of the assembling spliceosome [goid 6376] [evidence

"Selection of a splice site by components of the assembling spliceosome [goid 6376] [evidence

"Progression from G1 phase to S phase of the mitotic cell cycle [goid 82] [pmid 8681378] [evidence]

"The chemical reactions and pathways resulting in the breakdown of a protein or peptide by hydrolysis [goid 82] [pmid 8681378] [evidence]

"Progression from G1 phase to S phase of the mitotic cell cycle [goid 82] [pmid 8681378] [evidence]

"The chemical reactions and pathways resulting in the breakdown of a protein or peptide by hydrolysis [goid 82] [pmid 8681378] [evidence]

"Progression from G1 phase to S phase of the mitotic cell cycle [goid 82] [pmid 8681378] [evidence]

:NA."

"The regulation of the levels, transport, and metabolism of copper ions [goid 55070] [evidence] [1, mRNA]."

"Any process that stops, prevents or reduces the frequency, rate or extent of transcription from a promoter [goid 55070] [evidence] [1, mRNA]."

"Any process that stops, prevents or reduces the frequency, rate or extent of DNA-dependent transcription [goid 55070] [evidence] [1, mRNA]."

"The joining together of exons from one or more primary transcripts of nuclear messenger RNA [goid 55070] [evidence] [1, mRNA]."

"Any process specifically pertinent to the functioning of integrated living units: cells, tissues, organs, or organisms [goid 55070] [evidence] [1, mRNA]."

"The directed movement of a motile cell or organism, or the directed growth of a cell guided by a signal [goid 55070] [evidence] [1, mRNA]."

"A process that is carried out at the cellular level which results in the formation, arrangement of, or modification of a nucleic acid [goid 55070] [evidence] [1, mRNA]."

"Any immune system process that functions in the calibrated response of an organism to a potential pathogen [goid 55070] [evidence] [1, mRNA]."

"The uptake of external materials by cells, utilizing receptors to ensure specificity of transport. A process that is carried out at the cellular level [goid 55070] [evidence] [1, mRNA]."

"The directed movement of a motile cell or organism, or the directed growth of a cell guided by a signal [goid 55070] [evidence] [1, mRNA]."

"The directed movement of a motile cell or organism, or the directed growth of a cell guided by a signal [goid 55070] [evidence] [1, mRNA]."

"The directed movement of a motile cell or organism, or the directed growth of a cell guided by a signal [goid 55070] [evidence] [1, mRNA]."

"Any process involved in the controlled movement of a cell [goid 6928] [pmid 10741397] [evidence]

"The initiation of the activity of the inactive enzyme MAP kinase by phosphorylation by a MAP kinase [goid 6928] [pmid 10741397] [evidence]

"Any process involved in the controlled movement of a cell [goid 6928] [pmid 1425907] [evidence]

"The cascade of processes by which a signal interacts with a receptor, causing a change in the activity of a protein [goid 6928] [pmid 1425907] [evidence]

"The chemical reactions and pathways, including anabolism and catabolism, by which living organisms obtain energy [goid 6928] [pmid 1425907] [evidence]

"Any process specifically pertinent to the functioning of integrated living units: cells, tissues, organs, or organisms [goid 6928] [pmid 1425907] [evidence]

"The chemical reactions and pathways involving carbohydrates, any of a group of organic compounds [goid 6928] [pmid 1425907] [evidence]



"The chemical reactions and pathways involving vitamin D, a fat soluble vitamin that contributes  
"The chemical reactions and pathways involving lipids, compounds soluble in an organic solvent  
The process of removal or addition of one or more electrons with or without the concomitant re  
"The chemical reactions and pathways involving lipids, compounds soluble in an organic solvent  
The process of removal or addition of one or more electrons with or without the concomitant re  
"The process of removal or addition of one or more electrons with or without the concomitant re  
"The series of events required for an organism to receive a visual stimulus, convert it to a molec  
The process of removal or addition of one or more electrons with or without the concomitant re  
"Reactions, triggered in response to the presence of a foreign body or the occurrence of an inju

"The cascade of processes by which a signal interacts with a receptor, causing a change in the

56E), mRNA."

"A change in state or activity of a cell or an organism (in terms of movement, secretion, enzyme  
, transcript variant 2, mRNA."

"A process that is carried out at the cellular level which results in the formation, arrangement of  
The biological process whose specific outcome is the progression of a multicellular organism ov  
A."

"A form of programmed cell death induced by external or internal signals that trigger the activity

"The process by which the anatomical structures of an epithelial sheet are generated and organ

"The chemical reactions and pathways resulting in the breakdown of lipids, compounds soluble i

"The chemical reactions and pathways involving glycerol, 1,2,3-propanetriol, a sweet, hygroscop

"The synthesis of aminoacyl tRNA by the formation of an ester bond between the 3'-hydroxyl gro

"A form of programmed cell death induced by external or internal signals that trigger the activity

"A form of programmed cell death induced by external or internal signals that trigger the activity

"The process of introducing a phosphate group on to a protein [goid 6468] [pmid 10629061] [evi

"The process of introducing a phosphate group on to a protein [goid 6468] [pmid 10376525] [evi

"The process of introducing a phosphate group on to a protein [goid 6468] [pmid 10356987] [evi

"A form of programmed cell death induced by external or internal signals that trigger the activity

"The process of removing one or more phosphoric residues from a protein [goid 6470] [pmid 10

"The immediate defensive reaction (by vertebrate tissue) to infection or injury caused by chemic

"The process of coupling aspartate to aspartyl-tRNA, catalyzed by aspartyl-tRNA synthetase. In

"The process of coupling aspartate to aspartyl-tRNA, catalyzed by aspartyl-tRNA synthetase. In

"A cell cycle process that results in the division of the cytoplasm of a cell after mitosis, resulting

"The biological process whose specific outcome is the progression of a multicellular organism o

"Any process that modulates the frequency, rate or extent of the chemical reactions and pathwa

"The process by which the cell cycle is halted during one of the normal phases (G1, S, G2, M) [c

"Progression from G1 phase to S phase of the mitotic cell cycle [goid 82] [pmid 10373557] [evid  
"The directed movement of substances (such as macromolecules, small molecules, ions) into, o  
"Control of the spatial distribution of actin filaments; includes organizing filaments into meshwork  
cript variant 1, mRNA."

cript variant 3, mRNA."

A type of vesicle-mediated transport in which cells take up external materials or membrane cons

"The synthesis of either RNA on a template of DNA or DNA on a template of RNA [goid 6350] [e

"Splicing of RNA via a series of two transesterification reactions [goid 375] [pmid 10982890] [evi

"The chemical reactions and pathways, including anabolism and catabolism, by which living orga

"The chemical reactions and pathways resulting in the breakdown of a protein or peptide by hyd

"The attachment of a cell, either to another cell or to an underlying substrate such as the extracel

"The attachment of a cell, either to another cell or to an underlying substrate such as the extracel

A series of reactions within the cell that occur as a result of a single trigger reaction or compound

A series of reactions within the cell that occur as a result of a single trigger reaction or compound

"The chemical reactions and pathways involving lipids, compounds soluble in an organic solvent

"The chemical reactions and pathways involving nucleobases, nucleosides, nucleotides and nuc

The process of introducing a phosphate group on to a protein [goid 6468] [evidence IEA]; A seri

"In nucleotide excision repair a small region of the strand surrounding the damage is removed fr

"The process of restoring DNA after damage. Genomes are subject to damage by chemical and

"The process of restoring DNA after damage. Genomes are subject to damage by chemical and

"The nonsense-mediated decay pathway for nuclear-transcribed mRNAs degrades mRNAs in w

"The nonsense-mediated decay pathway for nuclear-transcribed mRNAs degrades mRNAs in w

"The nonsense-mediated decay pathway for nuclear-transcribed mRNAs degrades mRNAs in w

"The nonsense-mediated decay pathway for nuclear-transcribed mRNAs degrades mRNAs in w

"The chemical reactions and pathways involving a pyrimidine nucleotide, a compound consisting

"Progression through mitosis, the division of the eukaryotic cell nucleus to produce two daughter

"Any cellular process that depends upon or alters the microtubule cytoskeleton, that part of the c

"A cellular process resulting in the division of the cytoplasm of a cell and its separation into two c

"The chemical reactions and pathways resulting in the breakdown of a protein or peptide by hyd  
UN1D3), mRNA."

UN1D4), mRNA."

UN1D5), mRNA."

"The chemical reactions and pathways involving carbohydrates, any of a group of organic comp

"The chemical reactions and pathways resulting in the breakdown of a protein or peptide by hyd

"The chemical reactions and pathways resulting in the breakdown of arginine, 2-amino-5-(carba

"The chemical reactions and pathways resulting in the breakdown of arginine, 2-amino-5-(carba  
"A point in the eukaryotic cell cycle where progress through the cycle can be halted until conditic  
"Addition of multiple ubiquitin moieties to a protein, forming a ubiquitin chain [goid 209] [pmid 12  
"The chemical reactions and pathways involving amino acids, organic acids containing one or m  
Any process that modulates the activity of the GTPase ARF [goid 32312] [evidence IEA]  
"The chemical reactions and pathways resulting in the breakdown of lipids, compounds soluble i  
"The synthesis of either RNA on a template of DNA or DNA on a template of RNA [goid 6350] [e  
"A form of programmed cell death induced by external or internal signals that trigger the activity  
"Any process that stops, prevents or reduces the frequency, rate or extent of signal transduction

"The glycosylation of a nitrogen atom of a free alpha amino terminal of a peptide [goid 6496] [pn  
"The attachment of a cell, either to another cell or to an underlying substrate such as the extrac

"The chemical reactions and pathways resulting in the formation of melanin from other compour

"The aggregation, arrangement and bonding together of the spliceosome, a ribonucleoprotein a

"The cell cycle process whereby replicated homologous chromosomes are organized and then p  
Any process involved in the conversion of one or more primary RNA transcripts into one or more

"The directed movement of proteins into, out of, within or between cells [goid 15031] [evidence I

"The directed movement of mRNA from the nucleus to the cytoplasm [goid 6406] [pmid 104289]

"Any process that stops, prevents or reduces the frequency, rate or extent of transcription from :

"Assembly of a spliceosomal complex containing the intact pre-mRNA and all of the spliceosom

"The chemical reactions and pathways involving RNA, ribonucleic acid, one of the two main type

nitochondrial protein, mRNA."

JA."

"The joining together of exons from one or more primary transcripts of nuclear messenger RNA  
Any process by which an organism has an effect on an organism of a different species [goid 444

The biological process whose specific outcome is the progression of a multicellular organism ov

"Any process involved in the conversion of a primary mRNA transcript into one or more mature r  
JA."

JA."

"Any process involved in the conversion of a primary mRNA transcript into one or more mature r

JA."

"The synthesis of either RNA on a template of DNA or DNA on a template of RNA [goid 6350] [e



Any process involved in the conversion of a primary ribosomal RNA (rRNA) transcript into one of the mature forms.  
"A change in state or activity of a cell or an organism (in terms of movement, secretion, enzyme activity, etc.)."

"The synthesis of either RNA on a template of DNA or DNA on a template of RNA [goid 6350] [eukaryote]."  
The process of removal or addition of one or more electrons with or without the concomitant removal or addition of protons.  
The process of removal or addition of one or more electrons with or without the concomitant removal or addition of protons.  
"Any process that modulates the frequency, rate or extent of DNA-dependent transcription [goid 6350] [eukaryote]."  
"Any process that modulates the frequency, rate or extent of DNA-dependent transcription [goid 6350] [eukaryote]."

A series of reactions within the cell that occur as a result of a single trigger reaction or compound.

Reactions triggered in response to the presence of a bacterium that act to protect the cell or organism.

Reactions triggered in response to the presence of a bacterium that act to protect the cell or organism.  
Reactions triggered in response to the presence of a bacterium that act to protect the cell or organism.  
Reactions triggered in response to the presence of a bacterium that act to protect the cell or organism.  
Reactions triggered in response to the presence of a bacterium that act to protect the cell or organism.  
Reactions triggered in response to the presence of a bacterium that act to protect the cell or organism.  
"The directed movement of a motile cell or organism, or the directed growth of a cell guided by a signal."  
"The chemical reactions and pathways involving lipids, compounds soluble in an organic solvent."  
"The chemical reactions and pathways involving lipids, compounds soluble in an organic solvent."  
"Any process that modulates the frequency, rate or extent of transcription from an RNA polymerase."

"The synthesis of either RNA on a template of DNA or DNA on a template of RNA [goid 6350] [eukaryote]."

"The process preceding formation of the peptide bond between the first two amino acids of a protein."  
A series of reactions within the cell that occur as a result of a single trigger reaction or compound.  
A series of reactions within the cell that occur as a result of a single trigger reaction or compound.  
A series of reactions within the cell that occur as a result of a single trigger reaction or compound.  
"A series of reactions within the cell that occur as a result of a single trigger reaction or compound."  
"The chemical reactions and pathways, including anabolism and catabolism, by which living organisms obtain energy."  
"A change in state or activity of a cell or an organism (in terms of movement, secretion, enzyme activity, etc.)."

"A change in state or activity of a cell or an organism (in terms of movement, secretion, enzyme  
The chemical reactions and pathways resulting in the breakdown of unfolded or misfolded prote  
"The chemical reactions and pathways resulting in the breakdown of a protein or peptide by hyd

"The cleavage of DNA during apoptosis, which usually occurs in two stages: cleavage into fragm  
"The cleavage of DNA during apoptosis, which usually occurs in two stages: cleavage into fragm  
"The series of events required for an organism to receive an auditory stimulus, convert it to a mc

"The chemical reactions and pathways involving triacylglycerol, any triester of glycerol. The thre  
"The chemical reactions and pathways involving glycerol, 1,2,3-propanetriol, a sweet, hygroscop  
"Any process involved in the conversion of a primary mRNA transcript into one or more mature r  
"The attachment of a cell, either to another cell or to an underlying substrate such as the extrac  
"The attachment of a cell, either to another cell or to an underlying substrate such as the extrac

Any process involved in the conversion of a primary microRNA transcript into a pre-microRNA r  
The initiation of the activity of the inactive enzyme protein kinase C as the result of a series of m  
"The series of molecular signals generated as a consequence of an epidermal growth factor rec  
"The initiation of the activity of the inactive enzyme protein kinase C as the result of a series of r  
The initiation of the activity of the inactive enzyme protein kinase C as the result of a series of m  
"The chemical reactions and pathways involving nucleobases, nucleosides, nucleotides and nuc  
"The chemical reactions and pathways resulting in the formation of cholesterol, cholest-5-en-3 b  
"The process whose specific outcome is the progression of the blood vessel over time, from its f  
"The chemical reactions and pathways, including anabolism and catabolism, by which living org;  
"The chemical reactions and pathways involving carbohydrates, any of a group of organic comp  
"The chemical reactions and pathways resulting in the formation of glycine, aminoethanoic acid  
"The hydrolysis of a peptide bond or bonds within a protein [goid 6508] [evidence IEA]; Any proc  
"The chemical reactions and pathways resulting in the formation of pyrimidine bases, 1,3-diazin  
The process of removal or addition of one or more electrons with or without the concomitant rer  
The process of removal or addition of one or more electrons with or without the concomitant rer  
The process of removal or addition of one or more electrons with or without the concomitant rer  
The process of removal or addition of one or more electrons with or without the concomitant rer  
"The process of removal or addition of one or more electrons with or without the concomitant rei  
The process of removal or addition of one or more electrons with or without the concomitant rer  
The process of removal or addition of one or more electrons with or without the concomitant rer  
The process of removal or addition of one or more electrons with or without the concomitant rer  
The process of removal or addition of one or more electrons with or without the concomitant rer  
The process of removal or addition of one or more electrons with or without the concomitant rer  
The process of removal or addition of one or more electrons with or without the concomitant rer  
The process of removal or addition of one or more electrons with or without the concomitant rer  
The process of removal or addition of one or more electrons with or without the concomitant rer  
"The chemical reactions and pathways resulting in the breakdown of a monosaccharide (genera  
Any process involved in the conversion of a primary mRNA transcript into one or more mature r  
Any process involved in the conversion of a primary mRNA transcript into one or more mature r

A."

A."

Any process involved in the conversion of a primary mRNA transcript into one or more mature r

"The joining together of exons from one or more primary transcripts of nuclear messenger RNA (DHX40), mRNA."

Innate immune responses are defense responses mediated by germline encoded components t

Any process involved in the conversion of a primary mRNA transcript into one or more mature r

"The joining together of exons from one or more primary transcripts of nuclear messenger RNA

"A form of programmed cell death induced by external or internal signals that trigger the activity

"The series of events required for an organism to receive an auditory stimulus, convert it to a m

"A process that is carried out at the cellular level which results in the formation, arrangement of

"Blood vessel formation when new vessels emerge from the proliferation of pre-existing blood ve

The covalent alteration of one or more nucleotides within an rRNA molecule to produce an rRNA/

"The biological process whose specific outcome is the progression of a multicellular organism o

"The chemical reactions and pathways, including anabolism and catabolism, by which living org;

"The chemical reactions and pathways, including anabolism and catabolism, by which living org;

Any series of molecular signals in which a small monomeric GTPase relays one or more of the s

"Any process that modulates the frequency, rate or extent of CDK activity [goid 79] [pmid 98747

"The directed movement of substances (such as macromolecules, small molecules, ions) into, o

The biological process whose specific outcome is the progression of a multicellular organism ov

The biological process whose specific outcome is the progression of a multicellular organism ov

"The intramolecular conversion of uridine to pseudouridine within an RNA molecule. This posttra

,

P686C2281), mRNA."

RNA."

6O1327), mRNA."

\"

\"

4), mRNA."

\"

The process by which anatomical structures are generated and organized. Morphogenesis pertains to the

"The chemical reactions and pathways resulting in the formation of acetyl-CoA, a derivative of coenzyme A

Any process that maintains the redox environment of a cell or compartment within a cell [goid 45000]

"Any process that stops, prevents or reduces the rate or extent of progression through the cell cycle

"Any process that stops, prevents or reduces the rate or extent of progression through the cell cycle

"Any process by which a protein is transported to, or maintained in, a specific location [goid 81000]

"Any process that stops, prevents or reduces the rate or extent of cell proliferation [goid 8285] [evidence I]

"Steps required to form an initiated synaptic vesicle into a fully formed and transmissible synaptic vesicle

variant 3, mRNA."

"Progression through M phase, the part of the mitotic cell cycle during which mitosis takes place

"Process involved in cell fate commitment. Once determination has taken place, a cell becomes committed to a specific fate

"The process whose specific outcome is the progression of the skeleton over time, from its formation to its maintenance

"A nearly universal metabolic pathway in which the acetyl group of acetyl coenzyme A is effectively oxidized to carbon dioxide

"The process whereby relatively unspecialized cells, e.g. embryonic or regenerative cells, acquire specialized morphological and functional characteristics

"Any process that modulates the frequency, rate or extent of DNA-dependent transcription [goid 1558] [evidence I]

"Any process that modulates the frequency, rate or extent of cell growth [goid 1558] [evidence I]

"Any process that modulates the frequency, rate or extent of DNA-dependent transcription [goid 1558] [evidence I]

"The chemical reactions and pathways involving DNA, deoxyribonucleic acid, one of the two major types of nucleic acid

"The synthesis of either RNA on a template of DNA or DNA on a template of RNA [goid 6350] [evidence I]

"The synthesis of either RNA on a template of DNA or DNA on a template of RNA [goid 6350] [evidence I]

"Any process that modulates the frequency, rate or extent of DNA-dependent transcription [goid 1558] [evidence I]

"Any process that modulates the frequency, rate or extent of DNA-dependent transcription [goid 1558] [evidence I]

"Progression through the nuclear division phase of a meiotic cell cycle, the specialized nuclear division that produces haploid cells

The hydrolysis of a peptide bond or bonds within a protein [goid 6508] [evidence IEA]

The process whereby new strands of DNA are synthesized. The template for replication can either be the parental DNA or a newly synthesized strand

"Cell motility due to movement of cilia or flagella [goid 1539] [pmid 9256245] [evidence NAS]; Molecular function

"Cell motility due to movement of cilia or flagella [goid 1539] [pmid 9256245] [evidence NAS]; Molecular function

"A process that is carried out at the cellular level which results in the formation, arrangement or maintenance of a specific cellular structure

"The process of assisting in the covalent and noncovalent assembly of single chain polypeptides into a specific three-dimensional structure

The process of assisting in the covalent and noncovalent assembly of single chain polypeptides  
The process of assisting in the covalent and noncovalent assembly of single chain polypeptides  
The process of assisting in the covalent and noncovalent assembly of single chain polypeptides  
"The process of assisting in the covalent and noncovalent assembly of single chain polypeptides;  
The process of assisting in the covalent and noncovalent assembly of single chain polypeptides  
The process of assisting in the covalent and noncovalent assembly of single chain polypeptides  
The process of assisting in the covalent and noncovalent assembly of single chain polypeptides  
"The process of assisting in the covalent and noncovalent assembly of single chain polypeptides;  
"The process of assisting in the covalent and noncovalent assembly of single chain polypeptides;  
"The process of assisting in the covalent and noncovalent assembly of single chain polypeptides;  
"The process of assisting in the covalent and noncovalent assembly of single chain polypeptides;  
The process of assisting in the covalent and noncovalent assembly of single chain polypeptides  
"Any process that modulates the frequency, rate or extent of the chemical reactions and pathwa  
The process of assisting in the covalent and noncovalent assembly of single chain polypeptides

The process of assisting in the covalent and noncovalent assembly of single chain polypeptides  
"The process of assisting in the covalent and noncovalent assembly of single chain polypeptides;

The process of assisting in the covalent and noncovalent assembly of single chain polypeptides  
The process of assisting in the covalent and noncovalent assembly of single chain polypeptides  
The process of assisting in the covalent and noncovalent assembly of single chain polypeptides  
"The process of assisting in the covalent and noncovalent assembly of single chain polypeptides;  
mRNA."  
1, mRNA."

2, mRNA."

"A change in state or activity of a cell or an organism (in terms of movement, secretion, enzyme  
The process of assisting in the covalent and noncovalent assembly of single chain polypeptides  
"The process of assisting in the covalent and noncovalent assembly of single chain polypeptides;  
The process of assisting in the covalent and noncovalent assembly of single chain polypeptides  
The process of assisting in the covalent and noncovalent assembly of single chain polypeptides

The process of assisting in the covalent and noncovalent assembly of single chain polypeptides  
"The joining together of exons from one or more primary transcripts of nuclear messenger RNA

"Movement of organelles, other microtubules and other particles along microtubules, mediated b  
Any process involved in the controlled movement of a cell [goid 6928] [pmid 9284741] [evidence  
"The chemical reactions and pathways resulting in the breakdown of DNA, deoxyribonucleic acid  
"The chemical reactions and pathways resulting in the breakdown of DNA, deoxyribonucleic acid  
"The chemical reactions and pathways resulting in the breakdown of DNA, deoxyribonucleic acid

"The cleavage of DNA during apoptosis, which usually occurs in two stages: cleavage into fragments and nuclear fragmentation [goid 86] [pmid 7590285] [evidence IEA]; The chemical reactions and pathways resulting in the breakdown of DNA, deoxyribonucleic acid into nucleotides and nucleosides [goid 86] [pmid 7590285] [evidence IEA]

"The characteristic movement of immature neurons from germinal zones to specific positions within the brain [goid 86] [pmid 7590285] [evidence IEA]

"Movement of organelles, other microtubules and other particles along microtubules, mediated by motor proteins [goid 86] [pmid 7590285] [evidence IEA]

"Movement of organelles, other microtubules and other particles along microtubules, mediated by motor proteins [goid 86] [pmid 7590285] [evidence IEA]

"A process that is carried out at the cellular level which results in the formation, arrangement of organelles and the organization of the cytoskeleton [goid 86] [pmid 7590285] [evidence IEA]

"Progression from G2 phase to M phase of the mitotic cell cycle [goid 86] [pmid 7590285] [evidence IEA]

A type of vesicle-mediated transport in which cells take up external materials or membrane components [goid 86] [pmid 7590285] [evidence IEA]

"Any process that stops, prevents or reduces the frequency, rate or extent of transcription from a DNA template [goid 86] [pmid 7590285] [evidence IEA]

The covalent transfer of a methyl group to either N-6 of adenine or C-5 or N-4 of cytosine [goid 86] [pmid 7590285] [evidence IEA]

"The covalent transfer of a methyl group to either N-6 of adenine or C-5 or N-4 of cytosine [goid 86] [pmid 7590285] [evidence IEA]

"The process whose specific outcome is the progression of the embryo in the uterus over time, from fertilization to implantation [goid 86] [pmid 7590285] [evidence IEA]

"The hydrolysis of a peptide bond or bonds within a protein [goid 6508] [evidence IEA]; The chemical reactions and pathways resulting in the breakdown of a protein into peptides and amino acids [goid 6508] [evidence IEA]

"The process whereby new strands of DNA are synthesized. The template for replication can either be DNA or RNA [goid 6350] [evidence IEA]

"The synthesis of either RNA on a template of DNA or DNA on a template of RNA [goid 6350] [evidence IEA]

"The directed movement of substances (such as macromolecules, small molecules, ions) into, out of or within a cell [goid 6350] [evidence IEA]

"The clustering and aggregation of membrane rafts at a single cellular pole during activation of protein tyrosine kinase [goid 6350] [evidence IEA]

"A process that is carried out at the cellular level which results in the formation, arrangement of organelles and the organization of the cytoskeleton [goid 6350] [evidence IEA]

"Any process specifically pertinent to the functioning of integrated living units: cells, tissues, organs or organisms [goid 6350] [evidence IEA]

"The posttranslational modification of peptidyl-lysine to form hypusine, N6-(4-amino-2-hydroxybutyryl)-L-lysine [goid 6350] [evidence IEA]

A series of molecular signals within the cell that are mediated by a member of the Ras superfamily [goid 6350] [evidence IEA]

"Cascade of at least three protein kinase activities culminating in the phosphorylation and activation of a protein [goid 6350] [evidence IEA]

The posttranslational glycosylation of protein via the N4 atom of peptidyl-asparagine or the N1' atom of peptidyl-glucosamine [goid 6350] [evidence IEA]

"The biological process whose specific outcome is the progression of a multicellular organism or population [goid 6350] [evidence IEA]

"The directed movement of substances from the Golgi to early sorting endosomes. Clathrin vesicles [goid 6350] [evidence IEA]

"The directed movement of substances from the Golgi to early sorting endosomes. Clathrin vesicles [goid 6350] [evidence IEA]

"The alteration of DNA or protein in chromatin, which may result in changing the chromatin structure [goid 6350] [evidence IEA]

"The chemical reactions and pathways resulting in the formation of dolichols, any 2,3-dihydroxy-2,3-dimethylbutanoic acid [goid 6350] [evidence IEA]

The hydrolysis of a peptide bond or bonds within a protein [goid 6508] [evidence IEA]; The hydrolysis of a peptide bond or bonds within a protein [goid 6508] [evidence IEA]

"The synthesis of either RNA on a template of DNA or DNA on a template of RNA [goid 6350] [evidence IEA]

"The synthesis of either RNA on a template of DNA or DNA on a template of RNA [goid 6350] [evidence IEA]

"The synthesis of either RNA on a template of DNA or DNA on a template of RNA [goid 6350] [evidence IEA]

"The chemical reactions and pathways resulting in the formation of a protein. This is a ribosome [goid 6350] [evidence IEA]

"The posttranslational modification of peptidyl-histidine to 2'-(3-carboxamido-3-(trimethylammonium)propyl)-5'-phosphoriboside  
"The chemical reactions and pathways, including anabolism and catabolism, by which living organisms grow, reproduce, maintain and transform their matter  
"The chemical reactions and pathways resulting in the formation of a glycosylphosphatidylinositol anchor  
"The chemical reactions and pathways resulting in the formation of a macromolecule, any molecule  
"The chemical reactions and pathways involving carbohydrates, any of a group of organic compounds  
The hydrolysis of a peptide bond or bonds within a protein [goid 6508] [evidence IEA]; The hydrolysis of a peptide bond or bonds within a protein [goid 6508] [pmid 10387075] [evidence IEA]  
The hydrolysis of a peptide bond or bonds within a protein [goid 6508] [evidence IEA]  
The hydrolysis of a peptide bond or bonds within a protein [goid 6508] [pmid 11012666] [evidence IEA]  
The hydrolysis of a peptide bond or bonds within a protein [goid 6508] [evidence IEA]  
"

"The chemical reactions and pathways resulting in the breakdown of purine bases, one of the two purine bases  
"The chemical reactions and pathways involving nucleobases, nucleosides, nucleotides and nucleic acids  
"The process whose specific outcome is the progression of nervous tissue over time, from its formation to its maintenance and repair  
"Any process that stops, prevents or reduces the frequency, rate or extent of transcription from a DNA template

"Any process that stops, prevents or reduces the frequency, rate or extent of transcription from a DNA template

"The series of molecular signals generated as a consequence of a G-protein coupled receptor binding to a ligand  
The synthesis of either RNA on a template of DNA or DNA on a template of RNA [goid 6350] [evidence IEA]  
"The cascade of processes by which a signal interacts with a receptor, causing a change in the cell's response  
"The attachment of an adhesion molecule in one cell to an identical molecule in an adjacent cell  
"The attachment of a cell, either to another cell or to an underlying substrate such as the extracellular matrix  
"The attachment of a cell, either to another cell or to an underlying substrate such as the extracellular matrix  
"Process involved in cell fate commitment. Once determination has taken place, a cell becomes committed to a specific fate  
"The process whereby new strands of DNA are synthesized. The template for replication can either be DNA or RNA  
"The directed movement of substances into, out of or within a vacuole [goid 7034] [evidence IEA]  
"The attachment of a cell, either to another cell or to an underlying substrate such as the extracellular matrix  
"The attachment of a cell, either to another cell or to an underlying substrate such as the extracellular matrix  
"The progression of biochemical and morphological phases and events that occur in a cell during its life cycle  
"A cellular process resulting in the division of the cytoplasm of a cell and its separation into two daughter cells  
mRNA."

"The chemical reactions and pathways resulting in the breakdown of D-amino acids, the dextrorotatory isomer of amino acids  
"The process whereby new strands of DNA are synthesized. The template for replication can either be DNA or RNA  
"A process whereby force is generated within striated muscle tissue, resulting in a change in muscle length

"A process that is carried out at the cellular level which results in the formation, arrangement of organelles and structures within a cell

"The synthesis of RNA from a DNA template by RNA polymerase II (Pol II), originating at a Pol I  
The series of molecular signals initiated by binding of an extracellular ligand to a Notch receptor  
The series of molecular signals initiated by binding of an extracellular ligand to a Notch receptor

The series of molecular signals initiated by binding of an extracellular ligand to a Notch receptor

"The chemical reactions and pathways resulting in the formation of dTDP, deoxyribosylthymine diphosphate

"A process that is carried out at the cellular level which results in the formation, arrangement of

"The process by which a pre-tRNA molecule is converted to a mature tRNA, ready for addition o

"The process by which a pre-tRNA molecule is converted to a mature tRNA, ready for addition o

"The process by which a pre-tRNA molecule is converted to a mature tRNA, ready for addition o

"The process by which a pre-tRNA molecule is converted to a mature tRNA, ready for addition o

"The process of removing one or more phosphoric residues from a protein [goid 6470] [evidence

"The process of removing one or more phosphoric residues from a protein [goid 6470] [pmid 10:

Any process involved in the conversion of one or more primary RNA transcripts into one or more

"The covalent alteration of one or more amino acids occurring in proteins, peptides and nascent

The process of removing one or more phosphoric residues from a protein [goid 6470] [evidence

The process of removing one or more phosphoric residues from a protein [goid 6470] [evidence

Any process that terminates the activity of the active enzyme MAP kinase [goid 188] [pmid 1148

The process of removing one or more phosphoric residues from a protein [goid 6470] [evidence

"Any process that terminates the activity of the active enzyme MAP kinase [goid 188] [evidence

Any process that terminates the activity of the active enzyme MAP kinase [goid 188] [pmid 8107

"Any process that terminates the activity of the active enzyme MAP kinase [goid 188] [pmid 920:

The process of removing one or more phosphoric residues from a protein [goid 6470] [evidence

The process of removing one or more phosphoric residues from a protein [goid 6470] [evidence

The process of removing one or more phosphoric residues from a protein [goid 6470] [evidence

The process of removing one or more phosphoric residues from a protein [goid 6470] [evidence

The process of removing one or more phosphoric residues from a protein [goid 6470] [pmid 796

The process of removing one or more phosphoric residues from a protein [goid 6470] [evidence

Any process that terminates the activity of the active enzyme MAP kinase [goid 188] [pmid 7561

"Any process that terminates the activity of the active enzyme MAP kinase [goid 188] [pmid 903:

"The chemical reactions and pathways involving dUTP, deoxyuridine (5'-)triphosphate [goid 460

"Any process that modulates the frequency, rate or extent of DNA-dependent transcription [goid

"A series of reactions within the cell that occur as a result of a single trigger reaction or compour

"The last step in the formation of the neural tube, where the paired neural folds are brought toge

"A series of reactions within the cell that occur as a result of a single trigger reaction or compour

"Movement of organelles, other microtubules and other particles along microtubules, mediated b

"The directed movement of a vesicle along a microtubule, mediated by motor proteins [goid 474

"Movement of organelles, other microtubules and other particles along microtubules, mediated b

"Movement of organelles, other microtubules and other particles along microtubules, mediated b

"The biological process whose specific outcome is the progression of a multicellular organism o

"Any cellular process that depends upon or alters the microtubule cytoskeleton, that part of the c



"Any cellular process that depends upon or alters the microtubule cytoskeleton, that part of the c  
"Movement of organelles, other microtubules and other particles along microtubules, mediated b

"Any process specifically pertinent to the functioning of integrated living units: cells, tissues, orga  
"The process whose specific outcome is the progression of nervous tissue over time, from its fo  
"The process of introducing a phosphate group on to a protein [goid 6468] [pmid 11980910] [evi  
"The process of introducing a phosphate group on to a protein [goid 6468] [pmid 11311121] [evi  
The process of introducing a phosphate group on to a protein [goid 6468] [evidence IEA]; The p  
The process of introducing a phosphate group on to a protein [goid 6468] [evidence NAS]

"Progression through G1 phase, one of two 'gap' phases in the mitotic cell cycle; G1 is the interv  
"Any process that modulates the frequency, rate or extent of DNA-dependent transcription [goid  
"The synthesis of either RNA on a template of DNA or DNA on a template of RNA [goid 6350] [e  
"Any process that regulates transcription such that the target genes are transcribed during the G  
"The synthesis of either RNA on a template of DNA or DNA on a template of RNA [goid 6350] [e  
"Any process that regulates transcription such that the target genes are transcribed during the G  
"The synthesis of either RNA on a template of DNA or DNA on a template of RNA [goid 6350] [e  
"The synthesis of either RNA on a template of DNA or DNA on a template of RNA [goid 6350] [e  
"Any process that modulates the frequency, rate or extent of cell growth [goid 1558] [evidence IE  
"The synthesis of either RNA on a template of DNA or DNA on a template of RNA [goid 6350] [e  
"The synthesis of either RNA on a template of DNA or DNA on a template of RNA [goid 6350] [e

"The process of coupling glutamate to glutamyl-tRNA, catalyzed by glutamyl-tRNA synthetase. I  
"Any process that modulates the frequency, rate or extent of cell growth [goid 1558] [pmid 10421  
"Any process that modulates the frequency, rate or extent of DNA-dependent transcription [goid  
"Any process that modulates the frequency, rate or extent of DNA-dependent transcription [goid  
"The synthesis of either RNA on a template of DNA or DNA on a template of RNA [goid 6350] [e  
"Any immune system process that functions in the calibrated response of an organism to a pote  
"An immune response mediated through a body fluid [goid 6959] [pmid 8551575] [evidence TAS  
"The process of the formation of the constituents of the ribosome subunits, their assembly, and  
"The process whose specific outcome is the progression of the skeleton over time, from its form  
"The chemical reactions and pathways involving sterols, steroids with one or more hydroxyl grou

"Any process that modulates the frequency, rate or extent of glycolysis [goid 6110] [pmid 99289;  
"The hydrolysis of a peptide bond or bonds within a protein [goid 6508] [evidence IEA]; The hyd  
"The hydrolysis of a peptide bond or bonds within a protein [goid 6508] [evidence IEA]; Any proc

"The chemical reactions and pathways resulting in the formation of precursor metabolites, subst  
"The chemical reactions and pathways, including anabolism and catabolism, by which living org;  
"The chemical reactions and pathways, including anabolism and catabolism, by which living org;  
"The chemical reactions and pathways involving lipids, compounds soluble in an organic solvent  
"The synthesis of either RNA on a template of DNA or DNA on a template of RNA [goid 6350] [e  
"The process that gives rise to the mesoderm. This process pertains to the initial formation of th  
"A series of reactions within the cell that occur as a result of a single trigger reaction or compour

"A form of programmed cell death induced by external or internal signals that trigger the activity

"A change in state or activity of a cell or an organism (in terms of movement, secretion, enzyme

"A change in state or activity of a cell or an organism (in terms of movement, secretion, enzyme

"Any process that modulates the frequency, rate or extent of DNA-dependent transcription [goid  
iRNA."

EDG4), mRNA."

"The process by which the hormones modulates the force of heart muscle contraction. A hormo

"Fusion of the membrane of a transport vesicle with its target membrane [goid 6906] [pmid 9697

"Any process that modulates the frequency, rate or extent of DNA-dependent transcription [goid

The successive addition of amino acid residues to a nascent polypeptide chain during protein bi  
VA."

The successive addition of amino acid residues to a nascent polypeptide chain during protein bi

"The successive addition of amino acid residues to a nascent polypeptide chain during protein b

The successive addition of amino acid residues to a nascent polypeptide chain during protein bi

The successive addition of amino acid residues to a nascent polypeptide chain during protein bi

The successive addition of amino acid residues to a nascent polypeptide chain during protein bi

"The incorporation of selenocysteine into a peptide; uses a special tRNA that recognizes the UC  
nRNA."

"The sequential process by which the multiple coagulation factors of the blood interact, ultimatel

"The process whose specific outcome is the progression of the neurite over time, from its format

"The initiation of the activity of the inactive enzyme MAP kinase by phosphorylation by a MAPK

Any process that mediates the transfer of information from one cell to another [goid 7267] [pmid

Any process that mediates the transfer of information from one cell to another [goid 7267] [pmid

"The characteristic movement of cells from the dorsal ridge of the neural tube to a variety of loca

"The process whose specific outcome is the progression of the lymphatic vasculature over time,

"Any process that mediates the transfer of information from one cell to another [goid 7267] [pmid

The chemical reactions and pathways resulting in the formation of a protein. This is a ribosome-

"The joining together of exons from one or more primary transcripts of nuclear messenger RNA

"Blood vessel formation when new vessels emerge from the proliferation of pre-existing blood ve

"A change in state or activity of a cell or an organism (in terms of movement, secretion, enzyme  
j RNA."

"Any process that stops, prevents or reduces the frequency, rate or extent of transcription from a

"The synthesis of either RNA on a template of DNA or DNA on a template of RNA [goid 6350] [e

"The synthesis of either RNA on a template of DNA or DNA on a template of RNA [goid 6350] [e

"A type of vesicle-mediated transport in which cells take up external materials or membrane con

"The chemical reactions and pathways involving lipids, compounds soluble in an organic solvent

"Any process that stops, prevents or reduces the frequency, rate or extent of transcription from a

"Any process that stops, prevents or reduces the frequency, rate or extent of transcription from a

A process that directly activates any of the steps required for cell death by apoptosis [goid 6917]

"Any process that stops, prevents or reduces the frequency, rate or extent of transcription from a

"The synthesis of either RNA on a template of DNA or DNA on a template of RNA [goid 6350] [e

"The synthesis of either RNA on a template of DNA or DNA on a template of RNA [goid 6350] [e

"Any process that modulates the frequency, rate or extent of translational initiation [goid 6446] [p

"The process preceding formation of the peptide bond between the first two amino acids of a pr

"The process preceding formation of the peptide bond between the first two amino acids of a pr

"The process preceding formation of the peptide bond between the first two amino acids of a pr

"Any process that modulates the frequency, rate or extent of translational initiation [goid 6446] [p

"Any process that modulates the frequency, rate or extent of the chemical reactions and pathwa

"Any process that modulates the frequency, rate or extent of the chemical reactions and pathwa

"The process of introducing a phosphate group on to a protein [goid 6468] [evidence IEA]; The c

"The process whose specific outcome is the progression of the skeleton over time, from its form

"The synthesis of aminoacyl tRNA by the formation of an ester bond between the 3'-hydroxyl gr

"The process preceding formation of the peptide bond between the first two amino acids of a pr

"The process whose specific outcome is the progression of the ovarian follicle over time, from its

"The process preceding formation of the peptide bond between the first two amino acids of a pr

"The process whose specific outcome is the progression of the ovarian follicle over time, from its

"The process whose specific outcome is the progression of the ovarian follicle over time, from its

"The chemical reactions and pathways resulting in the formation of a protein. This is a ribosome

The chemical reactions and pathways resulting in the formation of a protein. This is a ribosome-

The chemical reactions and pathways resulting in the formation of a protein. This is a ribosome-

The chemical reactions and pathways resulting in the formation of a protein. This is a ribosome-

"Any process that modulates the frequency, rate or extent of the chemical reactions and pathwa

"The process preceding formation of the peptide bond between the first two amino acids of a pr

"The process preceding formation of the peptide bond between the first two amino acids of a pr

"The chemical reactions and pathways resulting in the formation of a protein. This is a ribosome

"The process preceding formation of the peptide bond between the first two amino acids of a pr

"Any process that modulates the frequency, rate or extent of translational initiation [goid 6446] [p

"Any process that modulates the frequency, rate or extent of translational initiation [goid 6446] [p

"The chemical reactions and pathways resulting in the formation of a protein. This is a ribosome

"The chemical reactions and pathways resulting in the formation of a protein. This is a ribosome

"The chemical reactions and pathways resulting in the formation of a protein. This is a ribosome

"The chemical reactions and pathways resulting in the formation of a protein. This is a ribosome

"The chemical reactions and pathways resulting in the formation of a protein. This is a ribosome  
"The chemical reactions and pathways resulting in the formation of a protein. This is a ribosome  
"Any process that modulates the frequency, rate or extent of translational initiation [goid 6446] [e

The chemical reactions and pathways resulting in the formation of a protein. This is a ribosome-  
The chemical reactions and pathways resulting in the formation of a protein. This is a ribosome-  
"The chemical reactions and pathways resulting in the formation of a protein. This is a ribosome  
"The nonsense-mediated decay pathway for nuclear-transcribed mRNAs degrades mRNAs in w  
"The chemical reactions and pathways resulting in the formation of a protein. This is a ribosome  
"The process preceding formation of the peptide bond between the first two amino acids of a pr  
"The process preceding formation of the peptide bond between the first two amino acids of a pr  
"The process preceding formation of the peptide bond between the first two amino acids of a pr  
"The series of molecular signals generated as a consequence of the insulin receptor binding to i  
"The series of molecular signals generated as a consequence of the insulin receptor binding to i  
"Any process that stops, prevents or reduces the frequency, rate or extent of translational initiati  
"The directed movement of proteins into, out of, within or between cells [goid 15031] [evidence I  
"The chemical reactions and pathways involving RNA, ribonucleic acid, one of the two main type  
"The chemical reactions and pathways involving RNA, ribonucleic acid, one of the two main type  
"Any process that modulates the frequency, rate or extent of translational initiation [goid 6446] [r  
"The chemical reactions and pathways resulting in the formation of a protein. This is a ribosome  
"Any process that modulates the frequency, rate or extent of translational initiation [goid 6446] [r  
"The directed movement of mRNA from the nucleus to the cytoplasm [goid 6406] [pmid 946506:  
"The process preceding formation of the peptide bond between the first two amino acids of a pr  
"The chemical reactions and pathways resulting in the formation of a protein. This is a ribosome  
"The hydrolysis of a peptide bond or bonds within a protein [goid 6508] [evidence IEA]; The hydri  
"The process by which a pre-tRNA molecule is converted to a mature tRNA, ready for addition o  
"The process by which a pre-tRNA molecule is converted to a mature tRNA, ready for addition o

"The biological process whose specific outcome is the progression of a multicellular organism or  
"Any process that modulates the frequency, rate, or extent of production of a cytokine [goid 181'  
"Any process that modulates the frequency, rate or extent of DNA-dependent transcription [goid  
"The expansion of a natural killer cell population by cell division [goid 1787] [evidence ISS]; The  
FN2), mRNA."

"The synthesis of either RNA on a template of DNA or DNA on a template of RNA [goid 6350] [e  
"Blood vessel formation when new vessels emerge from the proliferation of pre-existing blood ve  
"Any process that modulates the frequency, rate or extent of DNA-dependent transcription [goid  
"The synthesis of either RNA on a template of DNA or DNA on a template of RNA [goid 6350] [e  
"The synthesis of either RNA on a template of DNA or DNA on a template of RNA [goid 6350] [e  
"The synthesis of either RNA on a template of DNA or DNA on a template of RNA [goid 6350] [e  
"The internalization of bacteria, immune complexes and other particulate matter or of an apopto  
"The process whereby phagocytes engulf external particulate material. The particles are initially  
"The process whereby phagocytes engulf external particulate material. The particles are initially  
"The process whereby phagocytes engulf external particulate material. The particles are initially  
"The process whereby phagocytes engulf external particulate material. The particles are initially

"The developmental sequence of events leading to the formation of adult muscle that occurs in 1  
"The synthesis of either RNA on a template of DNA or DNA on a template of RNA [goid 6350] [e  
"The chemical reactions and pathways involving fatty acids with a chain length of C18 or greater  
"The chemical reactions and pathways resulting in the formation of a fatty acid, any of the alipha  
"The chemical reactions and pathways resulting in the formation of a fatty acid, any of the alipha  
"The chemical reactions and pathways resulting in the formation of a fatty acid, any of the alipha  
The elongation of a fatty acid chain by the sequential addition of two-carbon units [goid 30497] [  
"The chemical reactions and pathways resulting in the formation of a fatty acid, any of the alipha  
"The synthesis of either RNA on a template of DNA or DNA on a template of RNA [goid 6350] [e

"The synthesis of either RNA on a template of DNA or DNA on a template of RNA [goid 6350] [e  
"The synthesis of either RNA on a template of DNA or DNA on a template of RNA [goid 6350] [e

"A process whereby force is generated within muscle tissue, resulting in a change in muscle ge  
"The process of restoring DNA after damage. Genomes are subject to damage by chemical and  
Any process involved in the conversion of a primary ribosomal RNA (rRNA) transcript into one o  
"The attachment of a cell, either to another cell or to an underlying substrate such as the extrac  
iRNA."

"The hydrolysis of a peptide bond or bonds within a protein [goid 6508] [evidence IEA]; The seri

"The hydrolysis of a peptide bond or bonds within a protein [goid 6508] [evidence IEA]; Any cell  
"Any process that stops, prevents or reduces the rate or extent of cell proliferation [goid 8285] [p  
"The attachment of a cell, either to another cell or to an underlying substrate such as the extrac  
"The cascade of processes by which a signal interacts with a receptor, causing a change in the  
"

"The cascade of processes by which a signal interacts with a receptor, causing a change in the  
"The process whose specific outcome is the progression of the brain over time, from its formatio

The directed movement of substances within a cell [goid 46907] [evidence IEA]

"The deposition of calcium phosphate in bone tissue [goid 30282] [evidence NAS]; The process  
"The chemical reactions and pathways resulting in the breakdown of a protein or peptide by hyd

λ."

"Any process that stops, prevents or reduces the frequency, rate or extent of transcription from ;  
"The chemical reactions and pathways resulting in the breakdown of a monosaccharide (genera  
"The chemical reactions and pathways resulting in the breakdown of a monosaccharide (genera  
"The chemical reactions and pathways, including anabolism and catabolism, by which living org;  
"The chemical reactions and pathways, including anabolism and catabolism, by which living org;  
"The directed movement of substances (such as macromolecules, small molecules, ions) into, o  
"Any process that modulates the frequency, rate or extent of cell growth [goid 1558] [evidence IE  
"The formation of bone or of a bony substance, or the conversion of fibrous tissue or of cartilage  
"The chemical reactions and pathways, including anabolism and catabolism, by which living org;  
"The chemical reactions and pathways involving the phosphate group, the anion or salt of any p

"The chemical reactions and pathways, including anabolism and catabolism, by which living org;  
"The chemical reactions and pathways, including anabolism and catabolism, by which living org;  
"The directed movement of substances (such as macromolecules, small molecules, ions) into, o

"The chemical reactions and pathways resulting in the breakdown of ATP, adenosine 5'-triphosph  
: 2, mRNA."

"The chemical reactions and pathways resulting in the breakdown of UDP, uridine (5'-)diphosph  
) , mRNA."

"The synthesis of either RNA on a template of DNA or DNA on a template of RNA [goid 6350] [e

"The process whose specific outcome is the progression of the blastocyst over time, from its for

"The alteration of DNA or protein in chromatin, which may result in changing the chromatin struc

"Blood vessel formation when new vessels emerge from the proliferation of pre-existing blood ve

"A process that is carried out at the cellular level which results in the formation, arrangement of

"A process that is carried out at the cellular level which results in the formation, arrangement of

"A process that is carried out at the cellular level which results in the formation, arrangement of  
, mRNA."

"The process whose specific outcome is the progression of the axial mesoderm over time, from

"Any process that stops, prevents or reduces the frequency, rate or extent of transcription from a

"The process of restoring DNA after damage. Genomes are subject to damage by chemical and

The binding of a cell to the extracellular matrix via adhesion molecules [goid 7160] [evidence IE/

"The initiation of the activity of the inactive enzyme MAP kinase by phosphorylation by a MAPKk

"The process of introducing a phosphate group on to a protein [goid 6468] [evidence IEA]; The s

"The process of introducing a phosphate group on to a protein [goid 6468] [evidence IEA]; The c

"The process of introducing a phosphate group on to a protein [goid 6468] [evidence IEA]; The c

"The process of introducing a phosphate group on to a protein [goid 6468] [evidence IEA]; The s

The process of introducing a phosphate group on to a protein [goid 6468] [evidence IEA]; The s

"A change in state or activity of a cell or an organism (in terms of movement, secretion, enzyme

"The chemical reactions and pathways involving dioxygen (O2), or any of the reactive oxygen sp

"The chemical reactions and pathways involving carbohydrates, any of a group of organic comp

A type of vesicle-mediated transport in which cells take up external materials or membrane cons

A type of vesicle-mediated transport in which cells take up external materials or membrane cons

"The cascade of processes by which a signal interacts with a receptor, causing a change in the

."

"The process of coupling glutamate to glutamyl-tRNA, catalyzed by glutamyl-tRNA synthetase. I

"The series of molecular signals generated as a consequence of an epidermal growth factor rec

A type of vesicle-mediated transport in which cells take up external materials or membrane cons

"The cascade of processes by which a signal interacts with a receptor, causing a change in the

"Any process specifically pertinent to the functioning of integrated living units: cells, tissues, orga

"The hydrolysis of a peptide bond or bonds within a protein [goid 6508] [evidence IEA]; The prot



"The directed movement of substances (such as macromolecules, small molecules, ions) into, o  
"The directed movement of substances (such as macromolecules, small molecules, ions) into, o  
protein, mRNA."

"The chemical reactions and pathways resulting in the formation of phosphatidylethanolamine, a  
"Any process specifically pertinent to the functioning of integrated living units: cells, tissues, orga  
"The synthesis of either RNA on a template of DNA or DNA on a template of RNA [goid 6350] [e  
"The process whose specific outcome is the progression of the skeleton over time, from its form  
"Any process that stops, prevents or reduces the frequency, rate or extent of transcription from a  
"Any process that modulates the frequency, rate or extent of DNA-dependent transcription [goid  
"Any process that modulates the frequency, rate or extent of DNA-dependent transcription [goid  
"Any process that modulates the frequency, rate or extent of DNA-dependent transcription [goid  
"The synthesis of either RNA on a template of DNA or DNA on a template of RNA [goid 6350] [e  
"The process whose specific outcome is the progression of the embryo in the uterus over time, f

"The progression of biochemical and morphological phases and events that occur in a cell durin  
The process of introducing a phosphate group on to a protein [goid 6468] [evidence IEA]; Any p  
"Control of the spatial distribution of actin filaments; includes organizing filaments into meshworl  
"The synthesis of either RNA on a template of DNA or DNA on a template of RNA [goid 6350] [e

"A system for the correction of errors introduced during DNA replication when an incorrect base,  
"A process of secretion by a cell that results in the release of intracellular molecules (e.g. hormo  
"A process of secretion by a cell that results in the release of intracellular molecules (e.g. hormo  
"A process of secretion by a cell that results in the release of intracellular molecules (e.g. hormo  
"The initial attachment of a vesicle membrane to a target membrane, mediated by proteins protr

"A process of secretion by a cell that results in the release of intracellular molecules (e.g. hormo  
"A process of secretion by a cell that results in the release of intracellular molecules (e.g. hormo

Any process involved in the conversion of a primary ribosomal RNA (rRNA) transcript into one o  
"The nonsense-mediated decay pathway for nuclear-transcribed mRNAs degrades mRNAs in w  
Any process involved in the conversion of a primary ribosomal RNA (rRNA) transcript into one o  
Any process involved in the conversion of a primary ribosomal RNA (rRNA) transcript into one o  
Any process involved in the conversion of a primary ribosomal RNA (rRNA) transcript into one o  
Any process involved in the conversion of a primary ribosomal RNA (rRNA) transcript into one o  
Any process involved in the conversion of a primary ribosomal RNA (rRNA) transcript into one o  
"Any process involved in the conversion of a primary ribosomal RNA (rRNA) transcript into one c  
"Any process involved in the conversion of a primary ribosomal RNA (rRNA) transcript into one c  
Any process involved in the conversion of a primary ribosomal RNA (rRNA) transcript into one o  
"The process whose specific outcome is the progression of the skeleton over time, from its form  
"The formation of bone or of a bony substance, or the conversion of fibrous tissue or of cartilage  
"The chemical reactions and pathways involving N-acetylglucosamine. The D isomer is a comm  
"The synthesis of either RNA on a template of DNA or DNA on a template of RNA [goid 6350] [e



"The process of restoring DNA after damage. Genomes are subject to damage by chemical and physical agents [goid 6350] [evidence IEA]; The synthesis of either RNA on a template of DNA or DNA on a template of RNA [goid 6350] [evidence IEA]; The process by which cytoskeletal filaments are directly or indirectly linked to the plasma membrane [goid 6350] [evidence IEA]; The immediate defensive reaction (by vertebrate tissue) to infection or injury caused by chemical agents [goid 6350] [evidence IEA]; The hydrolysis of a peptide bond or bonds within a protein [goid 6508] [evidence IEA]; The sequence of events leading to growth of connective tissue when loss of tissues that are incapable of regenerating [goid 6508] [evidence IEA]; The cascade of processes by which a signal interacts with a receptor, causing a change in the cell's response [goid 6508] [evidence IEA]; The attachment of a cell, either to another cell or to an underlying substrate such as the extracellular matrix [goid 6508] [evidence IEA]; Any process specifically pertinent to the functioning of integrated living units: cells, tissues, organs [goid 6508] [evidence IEA]; The chemical reactions and pathways involving fatty acids, aliphatic monocarboxylic acids liberated from triglycerides [goid 6508] [evidence IEA]; The directed movement of substances (such as macromolecules, small molecules, ions) into, out of, or across a cell [goid 6508] [evidence IEA]; The directed movement of substances (such as macromolecules, small molecules, ions) into, out of, or across a cell [goid 6508] [evidence IEA]; The directed movement of substances (such as macromolecules, small molecules, ions) into, out of, or across a cell [goid 6508] [evidence IEA]; The directed movement of substances (such as macromolecules, small molecules, ions) into, out of, or across a cell [goid 6508] [evidence IEA]; The directed movement of substances (such as macromolecules, small molecules, ions) into, out of, or across a cell [goid 6508] [evidence IEA]; The cascade of processes by which a signal interacts with a receptor, causing a change in the cell's response [goid 6508] [evidence IEA]; The chemical reactions and pathways involving lipids, compounds soluble in an organic solvent [goid 6508] [evidence IEA]; The chemical reactions and pathways involving lipids, compounds soluble in an organic solvent [goid 6508] [evidence IEA]; The chemical reactions and pathways involving lipids, compounds soluble in an organic solvent [goid 6508] [evidence IEA]; The chemical reactions and pathways involving lipids, compounds soluble in an organic solvent [goid 6508] [evidence IEA]; The selective interaction of the transcription factor NF-kappaB with specific molecules in the cytoplasm [goid 6508] [evidence IEA]; The chemical reactions and pathways resulting in the breakdown of arginine, 2-amino-5-(carbamoyl)-L-propanoic acid [goid 6508] [evidence IEA]; The chemical reactions and pathways, including anabolism and catabolism, by which living organisms obtain energy [goid 6508] [evidence IEA]; The chemical reactions and pathways, including anabolism and catabolism, by which living organisms obtain energy [goid 6508] [evidence IEA]; The chemical reactions and pathways, including anabolism and catabolism, by which living organisms obtain energy [goid 6508] [evidence IEA]; Any process that stops, prevents or reduces the frequency, rate or extent of cell death by apoptosis [goid 6916] [evidence IEA]; A form of programmed cell death induced by external or internal signals that trigger the activity of caspases [goid 6916] [evidence IEA]; A process which directly inhibits any of the steps required for cell death by apoptosis [goid 6916] [evidence IEA];

mRNA."

RNA."

1, mRNA."

oding RNA."

oding RNA."

mRNA."

mRNA."

"Any process specifically pertinent to the functioning of integrated living units: cells, tissues, orga

A."

mRNA."

mRNA."

"The synthesis of either RNA on a template of DNA or DNA on a template of RNA [goid 6350] [e

mRNA."

"Any process specifically pertinent to the functioning of integrated living units: cells, tissues, orga

"Any process specifically pertinent to the functioning of integrated living units: cells, tissues, orga

mRNA."

mRNA."

mRNA."

RNA."  
RNA."

2, mRNA."  
1, mRNA."

XM\_934541 XM\_934544 XM\_942148 XM\_945748 XM\_945749 XM\_945750 XM\_945751 XM\_9

mRNA."  
"Any process specifically pertinent to the functioning of integrated living units: cells, tissues, orga

1, mRNA."

mRNA."

mRNA."

mRNA."

mRNA. XM\_944464 XM\_944467 XM\_944470"

mRNA."

ig RNA."

M19A5), transcript variant 1, mRNA."

,

"Any process specifically pertinent to the functioning of integrated living units: cells, tissues, orga

"Any process specifically pertinent to the functioning of integrated living units: cells, tissues, orga

The regulated release of proinsulin from secretory granules (B granules) in the B cells of the par

"Any process specifically pertinent to the functioning of integrated living units: cells, tissues, orga

"Any process specifically pertinent to the functioning of integrated living units: cells, tissues, orga

,

"The process of formation of spermatozoa, including spermatocytogenesis and spermiogenesis

"Any process specifically pertinent to the functioning of integrated living units: cells, tissues, orga

RNA."

RNA."

RNA."

, mRNA."

), mRNA."

RNA."

"The biological process whose specific outcome is the progression of a multicellular organism o

(FAM7A1), mRNA."

(FAM7A3), mRNA."

"The covalent alteration of one or more amino acids occurring in proteins, peptides and nascent

"The covalent alteration of one or more amino acids occurring in proteins, peptides and nascent

"A form of programmed cell death induced by external or internal signals that trigger the activity

"The formation of bone or of a bony substance, or the conversion of fibrous tissue or of cartilage

RNA."

mRNA."

RNA."

RNA."

RNA."

RNA."

RNA."

(90A2P), misc RNA."

(90A6P), mRNA."

"Any process specifically pertinent to the functioning of integrated living units: cells, tissues, orga

"Any process specifically pertinent to the functioning of integrated living units: cells, tissues, orga

"The process of restoring DNA after damage. Genomes are subject to damage by chemical and

"The process of restoring DNA after damage. Genomes are subject to damage by chemical and

"The process of restoring DNA after damage. Genomes are subject to damage by chemical and

"The process of restoring DNA after damage. Genomes are subject to damage by chemical and

"The process of restoring DNA after damage. Genomes are subject to damage by chemical and

"A point in the eukaryotic cell cycle where progress through the cycle can be halted until conditio

"The process of restoring DNA after damage. Genomes are subject to damage by chemical and

"The process of restoring DNA after damage. Genomes are subject to damage by chemical and

"The chemical reactions and pathways involving lipids, compounds soluble in an organic solvent

"Any process that modulates the frequency, rate or extent of Rho protein signal transduction [go

"The developmentally regulated remodeling of neuronal projections such as pruning to eliminate

"The process of coupling phenylalanine to phenylalanyl-tRNA, catalyzed by phenylalanyl-tRNA s

"The process of coupling phenylalanine to phenylalanyl-tRNA, catalyzed by phenylalanyl-tRNA s

"A form of programmed cell death induced by external or internal signals that trigger the activity

"Any immune system process that functions in the calibrated response of an organism to a pote

"The chemical reactions and pathways resulting in the formation of a fatty acid, any of the alipha

"A form of programmed cell death induced by external or internal signals that trigger the activity

"A form of programmed cell death induced by external or internal signals that trigger the activity

"A form of programmed cell death induced by external or internal signals that trigger the activity  
"A form of programmed cell death induced by external or internal signals that trigger the activity  
"A form of programmed cell death induced by external or internal signals that trigger the activity

"The chemical reactions and pathways resulting in the formation of a protein. This is a ribosome  
"Any process involved in the conversion of a primary ribosomal RNA (rRNA) transcript into one c  
Any process by which an organism has an effect on an organism of a different species [goid 44

"The attachment of a cell, either to another cell or to an underlying substrate such as the extrac  
"The attachment of a cell, either to another cell or to an underlying substrate such as the extrac  
"The chemical reactions and pathways involving carbohydrates, any of a group of organic comp  
"The chemical reactions and pathways involving carbohydrates, any of a group of organic comp

"The synthesis of either RNA on a template of DNA or DNA on a template of RNA [goid 6350] [e  
"The synthesis of either RNA on a template of DNA or DNA on a template of RNA [goid 6350] [e  
"The chemical reactions and pathways resulting in the breakdown of a protein or peptide by hyd  
"The chemical reactions and pathways resulting in the breakdown of a protein or peptide by hyd  
"The chemical reactions and pathways resulting in the breakdown of a protein or peptide by hyd  
"The chemical reactions and pathways resulting in the breakdown of a protein or peptide by hyd  
"The chemical reactions and pathways resulting in the breakdown of a protein or peptide by hyd

"The chemical reactions and pathways resulting in the breakdown of a protein or peptide by hyd  
"The covalent alteration of one or more amino acids occurring in proteins, peptides and nascent  
"The chemical reactions and pathways resulting in the breakdown of a protein or peptide by hyd  
"The chemical reactions and pathways resulting in the breakdown of a protein or peptide by hyd  
"The chemical reactions and pathways resulting in the breakdown of a protein or peptide by hyd  
"The chemical reactions and pathways resulting in the breakdown of a protein or peptide by hyd  
"The hydrolysis of a peptide bond or bonds within a protein [goid 6508] [pmid 10531035] [evider  
"The chemical reactions and pathways resulting in the breakdown of a protein or peptide by hyd  
"The chemical reactions and pathways resulting in the breakdown of a protein or peptide by hyd  
"The covalent alteration of one or more amino acids occurring in proteins, peptides and nascent  
"The chemical reactions and pathways resulting in the breakdown of a protein or peptide by hyd  
"The chemical reactions and pathways resulting in the breakdown of a protein or peptide by hyd  
"The chemical reactions and pathways resulting in the breakdown of a protein or peptide by hyd  
"The covalent alteration of one or more amino acids occurring in proteins, peptides and nascent  
"The chemical reactions and pathways resulting in the breakdown of a protein or peptide by hyd  
"The covalent alteration of one or more amino acids occurring in proteins, peptides and nascent  
"The chemical reactions and pathways resulting in the breakdown of a protein or peptide by hyd  
"The chemical reactions and pathways resulting in the breakdown of a protein or peptide by hyd  
"The hydrolysis of a peptide bond or bonds within a protein [goid 6508] [pmid 10531035] [evider  
"The chemical reactions and pathways resulting in the breakdown of a protein or peptide by hyd  
"The chemical reactions and pathways resulting in the breakdown of a protein or peptide by hyd  
"The chemical reactions and pathways resulting in the breakdown of a protein or peptide by hyd  
"The chemical reactions and pathways resulting in the breakdown of a protein or peptide by hyd  
"The chemical reactions and pathways resulting in the breakdown of a protein or peptide by hyd

"The chemical reactions and pathways resulting in the breakdown of a protein or peptide by hyd  
"The chemical reactions and pathways resulting in the breakdown of a protein or peptide by hyd  
"The chemical reactions and pathways resulting in the breakdown of a protein or peptide by hyd  
"Addition of multiple ubiquitin moieties to a protein, forming a ubiquitin chain [goid 209] [pmid 16  
"The chemical reactions and pathways resulting in the breakdown of a protein or peptide by hyd  
"The chemical reactions and pathways resulting in the breakdown of a protein or peptide by hyd  
"The chemical reactions and pathways resulting in the breakdown of a protein or peptide by hyd  
"The chemical reactions and pathways resulting in the breakdown of a protein or peptide by hyd  
"The chemical reactions and pathways resulting in the breakdown of a protein or peptide by hyd

"The chemical reactions and pathways resulting in the breakdown of a protein or peptide by hyd  
"The hydrolysis of a peptide bond or bonds within a protein [goid 6508] [pmid 10531035] [evider  
"The chemical reactions and pathways resulting in the breakdown of a protein or peptide by hyd  
"The chemical reactions and pathways resulting in the breakdown of a protein or peptide by hyd  
"The chemical reactions and pathways resulting in the breakdown of a protein or peptide by hyd  
"The covalent alteration of one or more amino acids occurring in proteins, peptides and nascent  
"The chemical reactions and pathways resulting in the breakdown of a protein or peptide by hyd  
"The chemical reactions and pathways resulting in the breakdown of a protein or peptide by hyd  
"The chemical reactions and pathways resulting in the breakdown of a protein or peptide by hyd  
"The chemical reactions and pathways resulting in the breakdown of a protein or peptide by hyd  
"The chemical reactions and pathways resulting in the breakdown of a protein or peptide by hyd  
Any immune system process that functions in the calibrated response of an organism to a poten  
"Any process that activates or increases the frequency, rate or extent of type IIa hypersensitivity  
"Any process that activates or increases the activity of the enzyme nitric-oxide synthase [goid 51  
Any process involved in the conversion of a primary ribosomal RNA (rRNA) transcript into one o  
"The attachment of a cell, either to another cell or to an underlying substrate such as the extracel

"Any immune system process that functions in the calibrated response of an organism to a pote  
Any immune system process that functions in the calibrated response of an organism to a poten  
Any immune system process that functions in the calibrated response of an organism to a poten

"The cascade of processes by which a signal interacts with a receptor, causing a change in the  
Any process that mediates the transfer of information from one cell to another [goid 7267] [pmid  
Any immune system process that functions in the calibrated response of an organism to a poten

"The process whereby relatively unspecialized cells, e.g. embryonic or regenerative cells, acquir  
"The chemical reactions and pathways resulting in the formation of cholesterol, cholest-5-en-3 b  
"The chemical reactions and pathways resulting in the formation of cholesterol, cholest-5-en-3 b



"The directed movement of substances (such as macromolecules, small molecules, ions) into, o

"The directed movement of substances (such as macromolecules, small molecules, ions) into, o

"The chemical reactions and pathways resulting in the formation of heme, any compound of iron

"The chemical reactions and pathways resulting in the breakdown of a protein or peptide by hyd

"The chemical reactions and pathways resulting in the breakdown of a protein or peptide by hyd

"The chemical reactions and pathways resulting in the breakdown of a protein or peptide by hyd

"The process whereby new strands of DNA are synthesized. The template for replication can eit

"The directed movement of a motile cell or organism, or the directed growth of a cell guided by a

"The attachment of a cell, either to another cell or to an underlying substrate such as the extrac

"The attachment of a cell, either to another cell or to an underlying substrate such as the extrac

"The process of introducing a phosphate group on to a protein [goid 6468] [pmid 6183005] [evid

"The attachment of a cell, either to another cell or to an underlying substrate such as the extrac

"The cascade of processes by which a signal interacts with a receptor, causing a change in the

"A process that is carried out at the cellular level which results in the formation, arrangement of

"A process that is carried out at the cellular level which results in the formation, arrangement of

"A process that is carried out at the cellular level which results in the formation, arrangement of

"A process that is carried out at the cellular level which results in the formation, arrangement of

"The cascade of processes by which a signal interacts with a receptor, causing a change in the

"The cascade of processes by which a signal interacts with a receptor, causing a change in the

"Blood vessel formation when new vessels emerge from the proliferation of pre-existing blood ve

"The initiation of the activity of the inactive enzyme MAP kinase kinase by phosphorylation by a

"The cascade of processes by which a signal interacts with a receptor, causing a change in the

"Blood vessel formation when new vessels emerge from the proliferation of pre-existing blood ve

"Blood vessel formation when new vessels emerge from the proliferation of pre-existing blood ve

Any process that activates or increases the rate or extent of cell proliferation [goid 8284] [pmid 9

"Cascade of at least three protein kinase activities culminating in the phosphorylation and activa

"The close range interaction of two or more cells or tissues that causes them to change their fati

"Any process that modulates the frequency, rate or extent of cell growth [goid 1558] [evidence N

"The chemical reactions and pathways involving carbohydrates, any of a group of organic comp

"The process of introducing a phosphate group on to a protein [goid 6468] [evidence IEA]; The p

"A nearly universal metabolic pathway in which the acetyl group of acetyl coenzyme A is effectiv

"A process that is carried out at the cellular level which results in the formation, arrangement of

"The chemical reactions and pathways involving a nucleotide, a nucleoside that is esterified with

"The biological process whose specific outcome is the progression of a multicellular organism o

"The synthesis of either RNA on a template of DNA or DNA on a template of RNA [goid 6350] [e

"The process whose specific outcome is the progression of the muscle over time, from its forma

"A process that is carried out at the cellular level which results in the formation, arrangement of

"A process that is carried out at the cellular level which results in the formation, arrangement of

"The cascade of processes by which a signal interacts with a receptor, causing a change in the

The series of molecular signals generated as a consequence of a fibroblast growth factor receptor

"The chemical reactions and pathways involving ATP, adenosine triphosphate, a universally important

"Any process specifically pertinent to the functioning of integrated living units: cells, tissues, organs

"The division of a mitochondrion within a cell to form two or more separate mitochondrial compartments

"The synthesis of either RNA on a template of DNA or DNA on a template of RNA [goid 6350] [e

The process of assisting in the covalent and noncovalent assembly of single chain polypeptides

The process of assisting in the covalent and noncovalent assembly of single chain polypeptides

The process of assisting in the covalent and noncovalent assembly of single chain polypeptides

"The process of assisting in the covalent and noncovalent assembly of single chain polypeptides

The process of assisting in the covalent and noncovalent assembly of single chain polypeptides

"The process of assisting in the covalent and noncovalent assembly of single chain polypeptides

The process of assisting in the covalent and noncovalent assembly of single chain polypeptides

The process of assisting in the covalent and noncovalent assembly of single chain polypeptides

The process of assisting in the covalent and noncovalent assembly of single chain polypeptides

"The process of assisting in the covalent and noncovalent assembly of single chain polypeptides

"The chemical reactions and pathways resulting in the formation of glycoproteins, any protein that

"The process whose specific outcome is the progression of nervous tissue over time, from its formation

"Any process that stops, prevents or reduces the rate or extent of progression through the cell cycle

"The synthesis of either RNA on a template of DNA or DNA on a template of RNA [goid 6350] [e

"The synthesis of either RNA on a template of DNA or DNA on a template of RNA [goid 6350] [e

RNA."

RNA."

LJ22447), mRNA."  
RNA."

RNA."

55759, transcript variant 1 (FLJ30428), mRNA."

RNA."

isc RNA."

NA."

RNA."

U\_935547 XM\_935835 XM\_935837 XM\_935840 XM\_935841 XM\_935843 XM\_935844 XM\_937

dies (FLJ40330), misc RNA."

RNA."

Calcium transport inhibitor) (FLJ41047), mRNA."

cript variant 2 (FLJ42562), mRNA."

RNA."

Any immune system process that functions in the calibrated response of an organism to a poten

3), mRNA."

7644), mRNA."

"The process whose specific outcome is the progression of nervous tissue over time, from its fo

"Process by which cytoskeletal filaments are directly or indirectly linked to the plasma membran

"The attachment of a cell, either to another cell or to an underlying substrate such as the extracellular matrix  
"The chemical reactions and pathways involving phospholipids, any lipid containing phosphoric acid  
"The cascade of processes by which a signal interacts with a receptor, causing a change in the cell's response  
"The directed movement of substances (such as macromolecules, small molecules, ions) into, out of, or within cells

"A process that is carried out at the cellular level which results in the formation, arrangement of organelles, or the synthesis of macromolecules  
"Any process specifically pertinent to the functioning of integrated living units: cells, tissues, organs, or organisms  
"Any process that modulates the frequency, rate or extent of DNA-dependent transcription [goid 6350] [evidence IEA]  
"A process that is carried out at the cellular level which results in the formation, arrangement of organelles, or the synthesis of macromolecules  
"The directed movement of substances (such as macromolecules, small molecules, ions) into, out of, or within cells  
"The chemical reactions and pathways involving a xenobiotic compound, a compound foreign to the organism  
"Any process specifically pertinent to the functioning of integrated living units: cells, tissues, organs, or organisms  
"The aggregation, arrangement and bonding together of a ligand-bound type II transforming growth factor receptor

"A type of vesicle-mediated transport in which cells take up external materials or membrane components  
A type of vesicle-mediated transport in which cells take up external materials or membrane components

"Any process that activates or increases the frequency, rate or extent of adipocyte differentiation

The covalent attachment of a prenyl moiety to a protein amino acid [goid 18346] [evidence IEA];  
"Any process that stops, prevents or reduces the rate or extent of cell proliferation [goid 8285] [evidence IEA]  
"The directed movement of folic acid (pteroylglutamic acid) into, out of, within or between cells. Includes the conversion of folic acid to tetrahydrofolic acid  
"The directed movement of folic acid (pteroylglutamic acid) into, out of, within or between cells. Includes the conversion of folic acid to tetrahydrofolic acid  
"The covalent transfer of a methyl group to either N-6 of adenine or C-5 or N-4 of cytosine [goid 18346] [evidence IEA]  
"Any process that modulates the frequency, rate or extent of DNA-dependent transcription [goid 6350] [evidence IEA]  
"A cellular homeostatic process involved in the maintenance of an internal equilibrium of glucose  
"The process whose specific outcome is the progression of the skeleton over time, from its formation to its maintenance  
"The process whose specific outcome is the progression of the skeleton over time, from its formation to its maintenance  
"The synthesis of either RNA on a template of DNA or DNA on a template of RNA [goid 6350] [evidence IEA]  
"The synthesis of either RNA on a template of DNA or DNA on a template of RNA [goid 6350] [evidence IEA]  
"The synthesis of either RNA on a template of DNA or DNA on a template of RNA [goid 6350] [evidence IEA]  
"The synthesis of either RNA on a template of DNA or DNA on a template of RNA [goid 6350] [evidence IEA]  
"The synthesis of either RNA on a template of DNA or DNA on a template of RNA [goid 6350] [evidence IEA]  
"The synthesis of either RNA on a template of DNA or DNA on a template of RNA [goid 6350] [evidence IEA]  
"Tolerance induction in the central lymphoid organs: the thymus and bone marrow [goid 2508] [evidence IEA]  
"The synthesis of either RNA on a template of DNA or DNA on a template of RNA [goid 6350] [evidence IEA]  
"The synthesis of either RNA on a template of DNA or DNA on a template of RNA [goid 6350] [evidence IEA]  
"The synthesis of either RNA on a template of DNA or DNA on a template of RNA [goid 6350] [evidence IEA]  
"The synthesis of either RNA on a template of DNA or DNA on a template of RNA [goid 6350] [evidence IEA]  
"Any process that modulates the frequency, rate or extent of DNA-dependent transcription [goid 6350] [evidence IEA]

"Any process that modulates the frequency, rate or extent of cell growth [goid 1558] [pmid 1052:  
"The synthesis of either RNA on a template of DNA or DNA on a template of RNA [goid 6350] [e  
"Any process that modulates the frequency, rate or extent of DNA-dependent transcription [goid  
"The process whose specific outcome is the progression of the blood vessel over time, from its f  
"The synthesis of either RNA on a template of DNA or DNA on a template of RNA [goid 6350] [e  
"Progression through G1 phase, one of two 'gap' phases in the mitotic cell cycle; G1 is the interv  
"Any process that stops, prevents or reduces the frequency, rate or extent of transcription from a  
"Any process that stops, prevents, or reduces the frequency, rate, or extent of T cell cytokine pr  
"The synthesis of either RNA on a template of DNA or DNA on a template of RNA [goid 6350] [e  
"The synthesis of either RNA on a template of DNA or DNA on a template of RNA [goid 6350] [e  
"Any process specifically pertinent to the functioning of integrated living units: cells, tissues, orga  
The process of removal or addition of one or more electrons with or without the concomitant rerr  
"The initiation of the activity of the inactive enzyme MAP kinase by phosphorylation by a MAPKk

"The cascade of processes by which a signal interacts with a receptor, causing a change in the  
The series of molecular signals initiated by binding of Wnt protein to a frizzled family receptor or  
"The biological process whose specific outcome is the progression of a multicellular organism or  
"Any process involved in the conversion of a primary ribosomal RNA (rRNA) transcript into one c

"The process of introducing a phosphate group on to a protein [goid 6468] [pmid 7696183] [evid

"The chemical reactions and pathways resulting in the breakdown of histidine, 2-amino-3-(1H-ir  
"The cascade of processes by which a signal interacts with a receptor, causing a change in the  
"The synthesis of either RNA on a template of DNA or DNA on a template of RNA [goid 6350] [e  
"The process whose specific outcome is the progression of the skeleton over time, from its form  
"The error-free repair of a double-strand break in DNA in which the broken DNA molecule is rep

"The multiplication or reproduction of cells, resulting in the expansion of a cell population [goid 8  
us) (FSCN3), mRNA."

"The progression of biochemical and morphological phases and events that occur in a cell durin

"Any process that stops, prevents or reduces the frequency, rate or extent of transcription from a  
"Any process that stops, prevents or reduces the frequency, rate or extent of BMP signaling patl

"The directed movement of iron (Fe) ions into, out of, within or between cells [goid 6826] [evid





"Any process that modulates the extent of heart contraction, changing the force with which blood  
"A change in state or activity of a cell or an organism (in terms of movement, secretion, enzyme

The process whereby a relatively unspecialized monocyte acquires the specialized features of a  
"A process that is carried out at the cellular level which results in the formation, arrangement of

"The directed movement of substances within the Golgi, mediated by small transport vesicles. T  
"The cascade of processes by which a signal interacts with a receptor, causing a change in the  
"The cascade of processes by which a signal interacts with a receptor, causing a change in the  
"The synthesis of either RNA on a template of DNA or DNA on a template of RNA [goid 6350] [e  
"The synthesis of either RNA on a template of DNA or DNA on a template of RNA [goid 6350] [e  
"The directed movement of charged atoms or small charged molecules into, out of, within or bet  
"The directed movement of charged atoms or small charged molecules into, out of, within or bet  
"The directed movement of charged atoms or small charged molecules into, out of, within or bet  
"The chemical reactions and pathways resulting in the formation of succinate from glutamate. Al  
"Any process that stops, prevents or reduces the frequency, rate or extent of protein kinase acti  
"Any process that initiates the activity of the inactive enzyme MAP kinase kinase kinase [goid 18  
"Any process that initiates the activity of the inactive enzyme MAP kinase kinase kinase [goid 18  
"The progression of biochemical and morphological phases and events that occur in a cell durin

"The process of introducing a phosphate group on to a protein [goid 6468] [evidence IEA]; The p  
"The chemical reactions and pathways involving the nonmetallic element sulfur or compounds th  
"The chemical reactions and pathways involving carbohydrates, any of a group of organic comp  
"The chemical reactions and pathways involving galactose, the aldohexose galacto-hexose. D-g  
"The chemical reactions and pathways involving galactose, the aldohexose galacto-hexose. D-g  
"The chemical reactions and pathways involving galactose, the aldohexose galacto-hexose. D-g  
"The chemical reactions and pathways involving carbohydrates, any of a group of organic comp  
"The chemical reactions and pathways, including anabolism and catabolism, by which living org;  
"The formation of O-glycans by addition of glycosyl groups either to the hydroxyl group of peptid  
"The formation of O-glycans by addition of glycosyl groups either to the hydroxyl group of peptid  
transferase 11 (GalNAc-T11) (GALNT11), mRNA."  
transferase 12 (GalNAc-T12) (GALNT12), mRNA."  
transferase 14 (GalNAc-T14) (GALNT14), mRNA."  
"The chemical reactions and pathways involving carbohydrates, any of a group of organic comp  
"The formation of O-glycans by addition of glycosyl groups either to the hydroxyl group of peptid  
transferase-like 1 (GALNTL1), mRNA."  
transferase-like 4 (GALNTL4), mRNA."

"A process whereby force is generated within muscle tissue, resulting in a change in muscle ge  
"The chemical reactions and pathways involving galactose, the aldohexose galacto-hexose. D-g  
"The chemical reactions and pathways resulting in the formation of creatine (N-(aminoiminometl  
"The chemical reactions and pathways resulting in the breakdown of a protein or peptide by hyd  
"The chemical reactions and pathways involving carbohydrates, any of a group of organic comp  
"The chemical reactions and pathways involving carbohydrates, any of a group of organic comp  
"Any process that modulates the frequency, rate or extent of the growth of all or part of an organ

"The chemical reactions and pathways involving glucose, the aldohexose gluco-hexose. D-glucose

"The cascade of processes by which a signal interacts with a receptor, causing a change in the

"Any process that modulates the frequency, rate or extent of small GTPase mediated signal transduction

"The process of coupling glycine to glycyl-tRNA, catalyzed by glycyl-tRNA synthetase. In tRNA  $\epsilon$

"The chemical reactions and pathways resulting in the formation of a purine nucleotide, a component of

"A form of programmed cell death induced by external or internal signals that trigger the activity of

"Any process that stops, prevents or reduces the rate or extent of cell proliferation [goid 8285] [pubmed 10511111]

"Process involved in cell fate commitment. Once determination has taken place, a cell becomes committed to a specific fate

"Any process that modulates the frequency, rate or extent of DNA-dependent transcription [goid 6350] [pubmed 10511111]

"The covalent transfer of a methyl group to either N-6 of adenine or C-5 or N-4 of cytosine [goid 6350] [pubmed 10511111]

"The synthesis of either RNA on a template of DNA or DNA on a template of RNA [goid 6350] [pubmed 10511111]

"Any process that modulates the ability of the translational apparatus to interpret the genetic code

"The chemical reactions and pathways resulting in the formation of creatine (N-(aminoiminomethyl)-N-amino-

"The chemical reactions and pathways involving carbohydrates, any of a group of organic compounds that are soluble in water

"The chemical reactions and pathways involving lipids, compounds soluble in an organic solvent

"The chemical reactions and pathways involving carbohydrates, any of a group of organic compounds that are soluble in water

"The directed movement of substances from the Golgi back to the endoplasmic reticulum, mediated by vesicles

"The chemical reactions and pathways involving carbohydrates, any of a group of organic compounds that are soluble in water

Any immune system process that functions in the calibrated response of an organism to a potential pathogen

Any immune system process that functions in the calibrated response of an organism to a potential pathogen

Any immune system process that functions in the calibrated response of an organism to a potential pathogen

Any immune system process that functions in the calibrated response of an organism to a potential pathogen

Any immune system process that functions in the calibrated response of an organism to a potential pathogen

Any immune system process that functions in the calibrated response of an organism to a potential pathogen

"The directed movement of substances (such as macromolecules, small molecules, ions) into, out of, or within a cell

The joining of two lipid bilayers to form a single membrane [goid 6944] [pubmed 1530588] [evidence 1]

"The chemical reactions and pathways involving amino acids, organic acids containing one or more amino groups

The process of removal or addition of one or more electrons with or without the concomitant removal or addition of protons

"The cascade of processes by which a signal interacts with a receptor, causing a change in the

"The chemical reactions and pathways resulting in the breakdown of GTP, guanosine triphosphate

"The chemical reactions and pathways resulting in the formation of nitric oxide, nitrogen monoxide

"The chemical reactions and pathways involving cysteine, 2-amino-3-mercaptopropanoic acid [goid 6350] [pubmed 10511111]

"The synthesis of either RNA on a template of DNA or DNA on a template of RNA [goid 6350] [pubmed 10511111]

"The synthesis of either RNA on a template of DNA or DNA on a template of RNA [goid 6350] [pubmed 10511111]

"Any process that modulates the frequency, rate or extent of the chemical reactions and pathways

"The formation of O-glycans by addition of glycosyl groups either to the hydroxyl group of peptide backbone

"The chemical reactions and pathways resulting in the formation of glycosaminoglycans, any of

"The chemical reactions and pathways resulting in the breakdown of glycine, aminoethanoic acid

"The chemical reactions and pathways involving nucleobases, nucleosides, nucleotides and nucleic acid 1, mRNA."

"The chemical reactions and pathways involving glycerol, 1,2,3-propanetriol, a sweet, hygroscopic

"The process whose specific outcome is the progression of the skeleton over time, from its form

"The cascade of processes by which a signal interacts with a receptor, causing a change in the

"The directed movement of proteins into, out of, within or between cells [goid 15031] [evidence 1

"The chemical reactions and pathways involving glycerol, 1,2,3-propanetriol, a sweet, hygroscopic

"The chemical reactions and pathways involving glycerol, 1,2,3-propanetriol, a sweet, hygroscopic

"The chemical reactions and pathways involving glycerol, 1,2,3-propanetriol, a sweet, hygroscopic

Any immune system process that functions in the calibrated response of an organism to a potent

The formation and assembly from one or more snRNA and multiple protein components of a ribosome

"The formation and assembly from one or more snRNA and multiple protein components of a ribosome

"The aggregation, arrangement and bonding together of the spliceosome, a ribonucleoprotein assembly

The formation and assembly from one or more snRNA and multiple protein components of a ribosome

"The process of restoring DNA after damage. Genomes are subject to damage by chemical and

"Any process that regulates transcription such that the target genes are transcribed during the G

The successive addition of amino acid residues to a nascent polypeptide chain during protein biosynthesis

The chemical reactions and pathways resulting in the formation of a protein. This is a ribosome-

The process of removal or addition of one or more electrons with or without the concomitant rearrangement

"The chemical reactions and pathways involving fructose 6-phosphate, also known as F6P. The

The series of molecular signals generated as a consequence of a transmembrane receptor tyrosine

"The characteristic movement of immature neurons from germinal zones to specific positions within

"The directed movement of proteins in a cell, including the movement of proteins between specific

"The directed movement of proteins in a cell, including the movement of proteins between specific

"The directed movement of proteins in a cell, including the movement of proteins between specific

"The covalent alteration of one or more amino acids occurring in proteins, peptides and nascent

"The chemical reactions and pathways involving glutamine, 2-amino-4-carbamoylbutanoic acid [

"The biological process whose specific outcome is the progression of a multicellular organism over

"The chemical reactions and pathways resulting in the formation of glutathione, the tripeptide gamma

"The chemical reactions and pathways involving carbohydrates, any of a group of organic compounds

"Any process specifically pertinent to the functioning of integrated living units: cells, tissues, organs

"Any process specifically pertinent to the functioning of integrated living units: cells, tissues, organs

The series of molecular signals generated as a consequence of the insulin-like growth factor receptor

"The process by which a segment of DNA is incorporated into another, usually larger, DNA molecule.  
The process whereby new strands of DNA are synthesized. The template for replication can either be the original DNA or a newly synthesized strand.  
The process whereby new strands of DNA are synthesized. The template for replication can either be the original DNA or a newly synthesized strand.  
"The process of targeting specific proteins to particular membrane-bounded subcellular organelles.  
"Any process that modulates the frequency, rate or extent of G-protein coupled receptor protein signaling.  
"The process of restoring DNA after damage. Genomes are subject to damage by chemical and physical agents.

"The directed movement of substances (such as macromolecules, small molecules, ions) into, out of, within or between cells [goid 15031] [evidence 1].  
"Any process that mediates interactions between a cell and its surroundings. Encompasses interactions with other cells, extracellular matrix, and the environment.  
"The differentiation of endothelial cells from progenitor cells during blood vessel development, a process that involves the expression of specific markers and the migration of cells.  
Any process that mediates the transfer of information from one cell to another [goid 7267] [evidence 1].  
"Any process that mediates interactions between a cell and its surroundings. Encompasses interactions with other cells, extracellular matrix, and the environment.  
"The chemical reactions and pathways involving carbohydrates, any of a group of organic compounds that are soluble in water and can be broken down into simple sugars.  
"The chemical reactions and pathways involving carbohydrates, any of a group of organic compounds that are soluble in water and can be broken down into simple sugars.  
"The cascade of processes by which a signal interacts with a receptor, causing a change in the cell's response.  
"The chemical reactions and pathways, including anabolism and catabolism, by which living organisms obtain energy and synthesize biomolecules.  
"The chemical reactions and pathways involving carbohydrates, any of a group of organic compounds that are soluble in water and can be broken down into simple sugars.  
"The chemical reactions and pathways involving carbohydrates, any of a group of organic compounds that are soluble in water and can be broken down into simple sugars.  
"The chemical reactions and pathways involving carbohydrates, any of a group of organic compounds that are soluble in water and can be broken down into simple sugars.

"The chemical reactions and pathways resulting in the formation of the heparan sulfate proteoglycan matrix.  
"The chemical reactions and pathways resulting in the breakdown of glycine, aminoethanoic acid, and other amino acids.  
"The directed movement of proteins into, out of, within or between cells [goid 15031] [evidence 1].

"The process whereby a relatively unspecialized cell acquires the specialized features of an osteocyte.  
"Any process specifically pertinent to the functioning of integrated living units: cells, tissues, organs, and systems.

"Any process that stops, prevents or reduces the frequency, rate or extent of transcription from a specific promoter.  
"The differentiation of endothelial cells from progenitor cells during blood vessel development, a process that involves the expression of specific markers and the migration of cells.  
"The chemical reactions and pathways involving carbohydrates, any of a group of organic compounds that are soluble in water and can be broken down into simple sugars.

"The directed movement of charged atoms or small charged molecules into, out of, within or between cells [goid 15031] [evidence 1].  
"The directed movement of charged atoms or small charged molecules into, out of, within or between cells [goid 15031] [evidence 1].  
"The directed movement of substances (such as macromolecules, small molecules, ions) into, out of, within or between cells [goid 15031] [evidence 1].  
"Oxidation of two organic sulfhydryl groups (thiols) by a disulfide compound to form a disulfide bond.  
Any process that maintains the redox environment of a cell or compartment within a cell [goid 45031] [evidence 1].  
Any process that maintains the redox environment of a cell or compartment within a cell [goid 45031] [evidence 1].  
"A process carried out by the nervous system that is required for the proper control of respiratory and circulatory functions.  
"The chemical reactions and pathways involving amino acids, organic acids containing one or more carboxyl groups.  
The chemical reactions and pathways resulting in the formation of substances; typically the energy released from the breakdown of nutrients.  
"The chemical reactions and pathways resulting in the formation of lipopolysaccharides, any of a group of complex carbohydrates.

"The chemical reactions and pathways involving carbohydrates, any of a group of organic compounds."

"The directed movement of glycolipids, compounds containing (usually) 1-4 linked monosaccharides."

"The chemical reactions and pathways involving amino acids, organic acids containing one or more amino groups."

The process of introducing a phosphate group on to a protein [goid 6468] [pmid 16753811] [evidence IEA]; The chemical reactions and pathways resulting in the breakdown of ganglioside, a ceramide oligosaccharide [goid 6468] [pmid 16753811] [evidence IEA]; The biological process whose specific outcome is the progression of a multicellular organism over time [goid 6468] [pmid 16753811] [evidence IEA]; The chemical reactions and pathways involving carbohydrates, any of a group of organic compounds [goid 6468] [pmid 16753811] [evidence IEA]; The synthesis of either RNA on a template of DNA or DNA on a template of RNA [goid 6350] [evidence IEA]; The synthesis of either RNA on a template of DNA or DNA on a template of RNA [goid 6350] [evidence IEA]; The process of introducing a phosphate group on to a protein [goid 6468] [pmid 7598724] [evidence IEA]; The process of introducing a phosphate group on to a protein [goid 6468] [pmid 7598724] [evidence IEA]; A series of reactions within the cell that occur as a result of a single trigger reaction or compound [goid 6468] [pmid 7598724] [evidence IEA]; The chemical reactions and pathways resulting in the formation of substances; typically the energy is released [goid 6468] [pmid 7598724] [evidence IEA]; The chemical reactions and pathways resulting in the formation of substances; typically the energy is released [goid 6468] [pmid 7598724] [evidence IEA]; The chemical reactions and pathways involving a nucleotide, a nucleoside that is esterified with a phosphate group [goid 6468] [pmid 7598724] [evidence IEA]; The chemical reactions and pathways involving a nucleotide, a nucleoside that is esterified with a phosphate group [goid 6468] [pmid 7598724] [evidence IEA]; The chemical reactions and pathways resulting in the formation of a purine nucleotide, a compound [goid 6468] [pmid 7598724] [evidence IEA]; The process whose specific outcome is the progression of the skeleton over time, from its formation to its maintenance [goid 6468] [pmid 7598724] [evidence IEA]; The process whose specific outcome is the progression of the embryo in the uterus over time, from fertilization to birth [goid 6468] [pmid 7598724] [evidence IEA]; The process that regulates the coordinated growth and sprouting of blood vessels giving rise to the vascular system [goid 6468] [pmid 7598724] [evidence IEA]; The transfer, from NAD, of ADP-ribose to protein amino acids [goid 6471] [evidence IEA]; The transfer, from NAD, of ADP-ribose to protein amino acids [goid 6471] [evidence IEA]; The cascade of processes by which a signal interacts with a receptor, causing a change in the cell's response [goid 6468] [pmid 7598724] [evidence IEA]; The directed movement of substances (such as macromolecules, small molecules, ions) into, out of, or within a cell [goid 6468] [pmid 7598724] [evidence IEA]; The cascade of processes by which a signal interacts with a receptor, causing a change in the cell's response [goid 6468] [pmid 7598724] [evidence IEA]; The cascade of processes by which a signal interacts with a receptor, causing a change in the cell's response [goid 6468] [pmid 7598724] [evidence IEA]; The series of molecular signals generated as a consequence of a G-protein coupled receptor binding to a ligand [goid 6468] [pmid 7598724] [evidence IEA]; The series of molecular signals generated as a consequence of a G-protein coupled receptor binding to a ligand [goid 6468] [pmid 7598724] [evidence IEA]; The cascade of processes by which a signal interacts with a receptor, causing a change in the cell's response [goid 6468] [pmid 7598724] [evidence IEA]; The cascade of processes by which a signal interacts with a receptor, causing a change in the cell's response [goid 6468] [pmid 7598724] [evidence IEA]; The cascade of processes by which a signal interacts with a receptor, causing a change in the cell's response [goid 6468] [pmid 7598724] [evidence IEA]; The cascade of processes by which a signal interacts with a receptor, causing a change in the cell's response [goid 6468] [pmid 7598724] [evidence IEA]; The cascade of processes by which a signal interacts with a receptor, causing a change in the cell's response [goid 6468] [pmid 7598724] [evidence IEA]; The chemical reactions and pathways involving UDP-N-acetylglucosamine, a substance composed of a sugar and a phosphate group [goid 6468] [pmid 7598724] [evidence IEA]; The cascade of processes by which a signal interacts with a receptor, causing a change in the cell's response [goid 6468] [pmid 7598724] [evidence IEA]; The cascade of processes by which a signal interacts with a receptor, causing a change in the cell's response [goid 6468] [pmid 7598724] [evidence IEA]; The cascade of processes by which a signal interacts with a receptor, causing a change in the cell's response [goid 6468] [pmid 7598724] [evidence IEA]; The cascade of processes by which a signal interacts with a receptor, causing a change in the cell's response [goid 6468] [pmid 7598724] [evidence IEA]; The cascade of processes by which a signal interacts with a receptor, causing a change in the cell's response [goid 6468] [pmid 7598724] [evidence IEA]; An acute behavioral change resulting from a perceived external threat [goid 1662] [evidence IEA];

"The cascade of processes by which a signal interacts with a receptor, causing a change in the  
"The cascade of processes by which a signal interacts with a receptor, causing a change in the  
"Any process involved in the carrying out of an immune response by a T cell [goid 2456] [pmid 8  
"Any process specifically pertinent to the functioning of integrated living units: cells, tissues, orga  
"Any process that modulates the frequency, rate or extent of cell proliferation [goid 42127] [evid  
"The hydrolysis of a peptide bond or bonds within a protein [goid 6508] [evidence IEA]; The proc  
"The chemical reactions and pathways involving fatty acids, aliphatic monocarboxylic acids liber  
"The chemical reactions and pathways involving carbohydrates, any of a group of organic comp  
"The chemical reactions and pathways involving carbohydrates, any of a group of organic comp  
"The chemical reactions and pathways, including anabolism and catabolism, by which living orga  
"The process whereby segments assume individual identities; exemplified in insects by the actic  
A."  
"The chemical reactions and pathways resulting in the breakdown of glycosaminoglycans, any o

ng RNA."

"The directed movement of substances within the Golgi, mediated by small transport vesicles. T  
"The directed movement of substances, either within a vesicle or in the vesicle membrane, into,  
"The process of introducing a phosphate group on to a protein [goid 6468] [evidence NAS]; A pr

LGA8F), mRNA."

"A process that is carried out at the cellular level which results in the formation, arrangement of  
"The directed movement of substances (such as macromolecules, small molecules, ions) into, o

"The directed movement of proteins into, out of, within or between cells [goid 15031] [evidence I  
"The directed movement of proteins into, out of, within or between cells [goid 15031] [evidence I  
"Any process that modulates the frequency, rate or extent of DNA-dependent transcription [goid  
"The directed movement of substances from the endoplasmic reticulum (ER) to the Golgi, medic  
"The directed movement of proteins into, out of, within or between cells [goid 15031] [evidence I

"The directed movement of proteins in a cell, including the movement of proteins between speci  
"The directed movement of proteins in a cell, including the movement of proteins between speci  
"The chemical reactions and pathways involving amino acids, organic acids containing one or m  
"The chemical reactions and pathways involving amino acids, organic acids containing one or m  
"The chemical reactions and pathways involving amino acids, organic acids containing one or m  
"The attachment of a cell, either to another cell or to an underlying substrate such as the extrac  
"The attachment of a cell, either to another cell or to an underlying substrate such as the extrac  
"The aggregation, arrangement and bonding together of a set of components to form a protein c  
"The chemical reactions and pathways, including anabolism and catabolism, by which living orga  
ncoding mitochondrial protein, mRNA."

"Any process specifically pertinent to the functioning of integrated living units: cells, tissues, orga

"The cascade of processes by which a signal interacts with a receptor, causing a change in the

"The synthesis of either RNA on a template of DNA or DNA on a template of RNA [goid 6350] [e

"The synthesis of either RNA on a template of DNA or DNA on a template of RNA [goid 6350] [e

"The multiplication or reproduction of cells, resulting in the expansion of a cell population [goid 8

"The chemical reactions and pathways involving carbohydrates, any of a group of organic comp

"The chemical reactions and pathways involving carbohydrates, any of a group of organic comp

"The cascade of processes by which a signal interacts with a receptor, causing a change in the

"The chemical reactions and pathways involving carbohydrates, any of a group of organic comp

"Any process specifically pertinent to the functioning of integrated living units: cells, tissues, orga  
[goid 6507] [evidence IEA]

"The biological process whose specific outcome is the progression of a multicellular organism or

Any series of molecular signals in which a small monomeric GTPase relays one or more of the s

"Any process specifically pertinent to the functioning of integrated living units: cells, tissues, orga

"The attachment of a cell, either to another cell or to an underlying substrate such as the extrac

"The cascade of processes by which a signal interacts with a receptor, causing a change in the

"The cascade of processes by which a signal interacts with a receptor, causing a change in the

"The cascade of processes by which a signal interacts with a receptor, causing a change in the

"The cascade of processes by which a signal interacts with a receptor, causing a change in the

"The cascade of processes by which a signal interacts with a receptor, causing a change in the

"The cascade of processes by which a signal interacts with a receptor, causing a change in the

"The cascade of processes by which a signal interacts with a receptor, causing a change in the

"Progression from G1 phase to S phase of the mitotic cell cycle [goid 82] [evidence IEA]; A char

"The cascade of processes by which a signal interacts with a receptor, causing a change in the

"The cascade of processes by which a signal interacts with a receptor, causing a change in the

"The chemical reactions and pathways resulting in the formation of eye pigments, any general o

"The cascade of processes by which a signal interacts with a receptor, causing a change in the

"The cascade of processes by which a signal interacts with a receptor, causing a change in the

"The cascade of processes by which a signal interacts with a receptor, causing a change in the

"The cascade of processes by which a signal interacts with a receptor, causing a change in the  
"A change in state or activity of a cell or an organism (in terms of movement, secretion, enzyme  
"The cascade of processes by which a signal interacts with a receptor, causing a change in the  
"The cascade of processes by which a signal interacts with a receptor, causing a change in the  
"The cascade of processes by which a signal interacts with a receptor, causing a change in the  
"The cascade of processes by which a signal interacts with a receptor, causing a change in the

"The chemical reactions and pathways involving lipids, compounds soluble in an organic solvent  
"The series of molecular signals generated as a consequence of a G-protein coupled receptor b

The series of molecular signals generated as a consequence of a G-protein coupled receptor bi

"The cascade of processes by which a signal interacts with a receptor, causing a change in the  
"The cascade of processes by which a signal interacts with a receptor, causing a change in the  
"The cascade of processes by which a signal interacts with a receptor, causing a change in the  
"The cascade of processes by which a signal interacts with a receptor, causing a change in the

"The cascade of processes by which a signal interacts with a receptor, causing a change in the  
"The cascade of processes by which a signal interacts with a receptor, causing a change in the  
"The attachment of a cell, either to another cell or to an underlying substrate such as the extrac  
"The cascade of processes by which a signal interacts with a receptor, causing a change in the  
"The cascade of processes by which a signal interacts with a receptor, causing a change in the  
"The cascade of processes by which a signal interacts with a receptor, causing a change in the  
"The cascade of processes by which a signal interacts with a receptor, causing a change in the  
"A form of programmed cell death induced by external or internal signals that trigger the activity  
"The cascade of processes by which a signal interacts with a receptor, causing a change in the  
"Any process that activates or increases the frequency, rate or extent of an I-kappaB kinase/NF-

"The cascade of processes by which a signal interacts with a receptor, causing a change in the  
"The process whose specific outcome is the progression of the neurite over time, from its format  
"Any process that terminates the activity of the active enzyme MAP kinase [goi 188] [pmid 894:  
"The cascade of processes by which a signal interacts with a receptor, causing a change in the  
"The cascade of processes by which a signal interacts with a receptor, causing a change in the  
"The cascade of processes by which a signal interacts with a receptor, causing a change in the  
The chemical reactions and pathways resulting in the formation of substances; typically the ene  
"The process by which cytochrome c is enabled to move from the mitochondrial intermembrane  
"A change in state or activity of a cell or an organism (in terms of movement, secretion, enzyme  
"Any process that results in the specification, formation or maintenance of the physical structure  
"A change in state or activity of a cell or an organism (in terms of movement, secretion, enzyme

"A form of programmed cell death induced by external or internal signals that trigger the activity



A series of molecular signals within the cell that are mediated by a member of the Ras superfamily  
"The cascade of processes by which a signal interacts with a receptor, causing a change in the  
"The cascade of processes by which a signal interacts with a receptor, causing a change in the  
Cascade of at least three protein kinase activities culminating in the phosphorylation and activation of  
mRNA."

"The synthesis of either RNA on a template of DNA or DNA on a template of RNA [goid 6350] [evidence IEA]; The process of

"The elimination by an organism of the waste products that arise as a result of metabolic activity

"The directed movement of charged atoms or small charged molecules into, out of, within or between cells, tissues, or organs

"The directed movement of charged atoms or small charged molecules into, out of, within or between cells, tissues, or organs

"The directed movement of charged atoms or small charged molecules into, out of, within or between cells, tissues, or organs

"The directed movement of charged atoms or small charged molecules into, out of, within or between cells, tissues, or organs

"The directed movement of cations, atoms or small molecules with a net positive charge, into, out of, within or between cells, tissues, or organs

"The directed movement of charged atoms or small charged molecules into, out of, within or between cells, tissues, or organs (mate binding) (GRINA), transcript variant 1, mRNA."

transcript variant 2, mRNA."

"Any process specifically pertinent to the functioning of integrated living units: cells, tissues, organs, or organisms

"The process of introducing a phosphate group on to a protein [goid 6468] [pmid 9478965] [evidence IEA]; The process of

"The process of introducing a phosphate group on to a protein [goid 6468] [evidence IEA]; The process of

"The process of introducing a phosphate group on to a protein [goid 6468] [evidence IEA]; The process of

"The process of introducing a phosphate group on to a protein [goid 6468] [evidence IEA]; The process of

"The cascade of processes by which a signal interacts with a receptor, causing a change in the

"The cascade of processes by which a signal interacts with a receptor, causing a change in the

"The hatching of the cellular blastocyst from the zona pellucida [goid 1835] [evidence IEA]; The process of

"The series of molecular signals generated as a consequence of a peptide neurotransmitter binding to a receptor

The process of assisting in the covalent and noncovalent assembly of single chain polypeptides

The process of assisting in the covalent and noncovalent assembly of single chain polypeptides

The enzymatic addition of a sequence of 40-200 adenylyl residues at the 3' end of a eukaryotic mRNA

Any process that modulates the activity of a GTPase of the Rab family [goid 32313] [evidence IEA]

"A form of programmed cell death induced by external or internal signals that trigger the activity of caspases

"Any process specifically pertinent to the functioning of integrated living units: cells, tissues, organs, or organisms

"The process of introducing a phosphate group on to a protein [goid 6468] [evidence IEA]; The process of

"The chemical reactions and pathways involving glycogen, a polydisperse, highly branched glucan

"Progression from G1 phase to S phase of the mitotic cell cycle [goid 82] [pmid 2511002] [evidence IEA]; The process of

"The chemical reactions and pathways resulting in the formation of a protein. This is a ribosome

"The chemical reactions and pathways involving glutathione, the tripeptide glutamylcysteinylglycine

"The chemical reactions and pathways involving amino acids, organic acids containing one or more amino groups

"The chemical reactions and pathways, including anabolism and catabolism, by which living organisms obtain energy

"The chemical reactions and pathways, including anabolism and catabolism, by which living organisms obtain energy

"The chemical reactions and pathways, including anabolism and catabolism, by which living organisms obtain energy

"The chemical reactions and pathways involving glutathione, the tripeptide glutamylcysteinylglycine

"The chemical reactions and pathways, including anabolism and catabolism, by which living org;  
"The chemical reactions and pathways, including anabolism and catabolism, by which living org;  
"The chemical reactions and pathways, including anabolism and catabolism, by which living org;  
"The chemical reactions and pathways, including anabolism and catabolism, by which living org;  
"The chemical reactions and pathways, including anabolism and catabolism, by which living org;  
"The chemical reactions and pathways, including anabolism and catabolism, by which living org;  
"The chemical reactions and pathways, including anabolism and catabolism, by which living org;  
"The chemical reactions and pathways involving glutathione, the tripeptide glutamylcysteinylglyc

"The chemical reactions and pathways resulting in the breakdown of phenylalanine, 2-amino-3-  
The chemical reactions and pathways resulting in the formation of substances; typically the ene  
"Any process involved in the assembly of the RNA polymerase complex at the promoter region c  
"The synthesis of either RNA on a template of DNA or DNA on a template of RNA [goid 6350] [e  
"The synthesis of either RNA on a template of DNA or DNA on a template of RNA [goid 6350] [e  
"The joining together of exons from one or more primary transcripts of nuclear messenger RNA  
"The joining together of exons from one or more primary transcripts of nuclear messenger RNA  
"Any process that modulates the frequency, rate or extent of CDK activity [goid 79] [pmid 75338  
"The removal of the oligonucleotide that contains the DNA damage. The oligonucleotide is form

"The removal of the oligonucleotide that contains the DNA damage. The oligonucleotide is form  
"The removal of the oligonucleotide that contains the DNA damage. The oligonucleotide is form  
"In nucleotide excision repair a small region of the strand surrounding the damage is removed fr  
"The synthesis of either RNA on a template of DNA or DNA on a template of RNA [goid 6350] [e

"The synthesis of either RNA on a template of DNA or DNA on a template of RNA [goid 6350] [e  
"The synthesis of either RNA on a template of DNA or DNA on a template of RNA [goid 6350] [e  
"The synthesis of either RNA on a template of DNA or DNA on a template of RNA [goid 6350] [e  
."

"The synthesis of either RNA on a template of DNA or DNA on a template of RNA [goid 6350] [e  
"The synthesis of 5S ribosomal RNA (rRNA), or an equivalent rRNA, from a DNA template [goid  
"The synthesis of RNA on a template of DNA [goid 6351] [pmid 17409385] [evidence IDA]; The  
"The synthesis of RNA on a template of DNA [goid 6351] [pmid 17409385] [evidence IC ]; The s  
"The synthesis of RNA on a template of DNA [goid 6351] [pmid 17409385] [evidence IC ]; The s  
"Any immune system process that functions in the calibrated response of an organism to a pote  
"The process of the formation of the constituents of the ribosome subunits, their assembly, and

The covalent alteration of one or more nucleotides within a tRNA molecule to produce a tRNA r  
"Any process that modulates the frequency, rate or extent of CDK activity [goid 79] [pmid 17210

(GTSCR1), mRNA."

"Progression through G2 phase, one of two 'gap' phases in the mitotic cell cycle; G2 is the interv

"The cascade of processes by which a signal interacts with a receptor, causing a change in the  
"The chemical reactions and pathways resulting in the formation of cyclic GMP, guanosine 3',5'-  
"The chemical reactions and pathways resulting in the formation of cyclic GMP, guanosine 3',5'-  
"A series of molecular signals mediated by the detection of nitric oxide (NO) [goid 7263] [pmid 9  
"The chemical reactions and pathways resulting in the formation of cyclic GMP, guanosine 3',5'-  
"The chemical reactions and pathways resulting in the formation of cyclic GMP, guanosine 3',5'-  
Any series of molecular signals in which a small monomeric GTPase relays one or more of the s  
"The chemical reactions and pathways involving a purine nucleotide, a compound consisting of 1  
"The chemical reactions and pathways involving carbohydrates, any of a group of organic comp  
"The chemical reactions and pathways involving carbohydrates, any of a group of organic comp

"The chemical reactions and pathways resulting in the formation of glycogen, a polydisperse, high  
The cellular homeostatic process by which a muscle fiber is preserved in a stable functional or s  
"The posttranslational glycosylation of protein via the N4 atom of peptidyl-asparagine or the N1'  
"The chemical reactions and pathways resulting in the formation of glycogen, a polydisperse, high  
"The synthesis of either RNA on a template of DNA or DNA on a template of RNA [goid 6350] [e  
The hydrolysis of a peptide bond or bonds within a protein [goid 6508] [evidence IEA]  
The hydrolysis of a peptide bond or bonds within a protein [goid 6508] [evidence IEA]; The ruptu  
"The aggregation, arrangement and bonding together of a nucleosome, the beadlike structural u  
"The cell cycle process whereby chromatin structure is compacted prior to mitosis in eukaryotic c  
"The aggregation, arrangement and bonding together of a nucleosome, the beadlike structural u  
"The aggregation, arrangement and bonding together of a nucleosome, the beadlike structural u  
"The aggregation, arrangement and bonding together of a nucleosome, the beadlike structural u  
"The error-free repair of a double-strand break in DNA in which the broken DNA molecule is rep  
"The aggregation, arrangement and bonding together of a nucleosome, the beadlike structural u  
"The aggregation, arrangement and bonding together of a nucleosome, the beadlike structural u  
"The aggregation, arrangement and bonding together of a nucleosome, the beadlike structural u  
"The aggregation, arrangement and bonding together of a nucleosome, the beadlike structural u  
"The aggregation, arrangement and bonding together of a nucleosome, the beadlike structural u

"The synthesis of either RNA on a template of DNA or DNA on a template of RNA [goid 6350] [e  
"The covalent alteration of one or more amino acids occurring in proteins, peptides and nascent  
"Pathway by which 3-methyl branched fatty acids are degraded. These compounds are not degr  
"The chemical reactions and pathways involving lipids, compounds soluble in an organic solvent  
mRNA."  
"The chemical reactions and pathways involving lipids, compounds soluble in an organic solvent  
"The chemical reactions and pathways involving lipids, compounds soluble in an organic solvent  
l protein, transcript variant 1, mRNA."

"The chemical reactions and pathways resulting in the breakdown of histidine, 2-amino-3-(1H-irr  
"The chemical reactions and pathways involving a xenobiotic compound, a compound foreign to  
"The attachment of a cell, either to another cell or to an underlying substrate such as the extrac





"The covalent alteration of one or more amino acids occurring in proteins, peptides and nascent  
"The covalent alteration of one or more amino acids occurring in proteins, peptides and nascent  
"Any process that stops, prevents or reduces the frequency, rate or extent of transcription from a  
"Any process that modulates the frequency, rate or extent of DNA-dependent transcription [goid  
"Any process that modulates the frequency, rate or extent of DNA-dependent transcription [goid  
"Any process that modulates the frequency, rate or extent of DNA-dependent transcription [goid  
"Any process that modulates the frequency, rate or extent of transcription from an RNA polymer  
"Any process that modulates the frequency, rate or extent of DNA-dependent transcription [goid  
"The process whose specific outcome is the progression of the skeleton over time, from its form  
"The process whose specific outcome is the progression of the skeleton over time, from its form  
"The chemical reactions and pathways involving carbohydrates, any of a group of organic comp  
"Any process that stops, prevents or reduces the frequency, rate or extent of transcription from a  
"Any process that modulates the frequency, rate or extent of DNA-dependent transcription [goid  
"Any process that modulates the frequency, rate or extent of DNA-dependent transcription [goid  
"Any process that modulates the frequency, rate or extent of DNA-dependent transcription [goid  
"Any immune system process that functions in the calibrated response of an organism to a pote

"The chemical reactions and pathways resulting in the breakdown of phenylalanine, 2-amino-3-  
"The initiation of the activity of the inactive enzyme MAP kinase by phosphorylation by a MAPK  
"The directed movement of proteins in a cell, including the movement of proteins between speci  
The biological process whose specific outcome is the progression of a multicellular organism ov  
"The process whose specific outcome is the progression of the liver over time, from its formatior

"The directed movement of substances (such as macromolecules, small molecules, ions) into, o  
"The directed movement of substances (such as macromolecules, small molecules, ions) into, o  
"The directed movement of substances (such as macromolecules, small molecules, ions) into, o  
"The process by which glucose is oxidized, coupled to NADPH synthesis. Glucose 6-P is oxidize  
"The chemical reactions and pathways, including anabolism and catabolism, by which living org  
"The synthesis of either RNA on a template of DNA or DNA on a template of RNA [goid 6350] [e  
"Any process that modulates the frequency, rate or extent of DNA-dependent transcription [goid  
"The synthesis of either RNA on a template of DNA or DNA on a template of RNA [goid 6350] [e  
"A change in state or activity of a cell or an organism (in terms of movement, secretion, enzyme

n-coding RNA."

"The cascade of processes by which a signal interacts with a receptor, causing a change in the

"A type of vesicle-mediated transport in which cells take up external materials or membrane con  
"Any process specifically pertinent to the functioning of integrated living units: cells, tissues, orga

"The synthesis of either RNA on a template of DNA or DNA on a template of RNA [goid 6350] [e  
"Any process that modulates the frequency, rate or extent of transcription from an RNA polymer  
The formation or destruction of chromatin structures [goid 6333] [pmid 9710638] [evidence TAS

"The chemical reactions and pathways involving inositol, 1,2,3,4,5,6-cyclohexanehexol, a growth  
"The aggregation, arrangement and bonding together of a nucleosome, the beadlike structural u  
"The aggregation, arrangement and bonding together of a nucleosome, the beadlike structural u  
"The aggregation, arrangement and bonding together of a nucleosome, the beadlike structural u  
"The aggregation, arrangement and bonding together of a nucleosome, the beadlike structural u  
"The aggregation, arrangement and bonding together of a nucleosome, the beadlike structural u  
"The aggregation, arrangement and bonding together of a nucleosome, the beadlike structural u

"The aggregation, arrangement and bonding together of a nucleosome, the beadlike structural u  
"The aggregation, arrangement and bonding together of a nucleosome, the beadlike structural u

"The aggregation, arrangement and bonding together of a nucleosome, the beadlike structural u  
"The aggregation, arrangement and bonding together of a nucleosome, the beadlike structural u

"The aggregation, arrangement and bonding together of a nucleosome, the beadlike structural u  
"The aggregation, arrangement and bonding together of a nucleosome, the beadlike structural u  
"The aggregation, arrangement and bonding together of a nucleosome, the beadlike structural u  
"The aggregation, arrangement and bonding together of a nucleosome, the beadlike structural u  
"The aggregation, arrangement and bonding together of a nucleosome, the beadlike structural u  
"The aggregation, arrangement and bonding together of a nucleosome, the beadlike structural u

"Any process that results in the specification, formation or maintenance of the physical structure

"The aggregation, arrangement and bonding together of a nucleosome, the beadlike structural u

"The aggregation, arrangement and bonding together of a nucleosome, the beadlike structural u  
"The aggregation, arrangement and bonding together of a nucleosome, the beadlike structural u  
"The aggregation, arrangement and bonding together of a nucleosome, the beadlike structural u  
"The aggregation, arrangement and bonding together of a nucleosome, the beadlike structural u  
"The aggregation, arrangement and bonding together of a nucleosome, the beadlike structural u

"The aggregation, arrangement and bonding together of a nucleosome, the beadlike structural u  
"The aggregation, arrangement and bonding together of a nucleosome, the beadlike structural u

"The synthesis of either RNA on a template of DNA or DNA on a template of RNA [goid 6350] [e

"The synthesis of either RNA on a template of DNA or DNA on a template of RNA [goid 6350] [e

"Any process that modulates the frequency, rate or extent of DNA-dependent transcription [goid

"The chemical reactions and pathways resulting in the breakdown of a monosaccharide (genera

"The chemical reactions and pathways involving glucose, the aldohexose gluco-hexose. D-gluc

"The chemical reactions and pathways resulting in the breakdown of a monosaccharide (genera

Any immune system process that functions in the calibrated response of an organism to a poter  
01132736 XM\_001132742 XM\_001132747 XM\_001132750 XM\_001132753 XM\_001132757 XM

"The process by which an antigen-presenting cell expresses a peptide antigen on its cell surface

The process by which an antigen-presenting cell expresses a peptide antigen on its cell surface

"The aggregation, arrangement and bonding together of a set of components to form a protein c

The process by which an antigen-presenting cell expresses antigen (peptide or polysaccharide)

"The process by which an antigen-presenting cell expresses antigen (peptide or polysaccharide)

The process by which an antigen-presenting cell expresses antigen (peptide or polysaccharide)

Any immune system process that functions in the calibrated response of an organism to a poter

The process by which an antigen-presenting cell expresses antigen (peptide or polysaccharide)

The process by which an antigen-presenting cell expresses antigen (peptide or polysaccharide)

Any immune system process that functions in the calibrated response of an organism to a poter

The process by which an antigen-presenting cell expresses antigen (peptide or polysaccharide)

The process by which an antigen-presenting cell expresses antigen (peptide or polysaccharide)

The process by which an antigen-presenting cell expresses antigen (peptide or polysaccharide)

"The process by which an antigen-presenting cell expresses antigen (peptide or polysaccharide)

"The process by which an antigen-presenting cell expresses antigen (peptide or polysaccharide)

The process by which an antigen-presenting cell expresses antigen (peptide or polysaccharide)

), non-coding RNA."

Any immune system process that functions in the calibrated response of an organism to a poter

Any immune system process that functions in the calibrated response of an organism to a poter

Any immune system process that functions in the calibrated response of an organism to a poter

The process by which an antigen-presenting cell expresses a peptide antigen on its cell surface

"The covalent alteration of one or more amino acids occurring in proteins, peptides and nascent

"Any process that modulates the frequency, rate or extent of transcription from an RNA polymer

"Any process that modulates the frequency, rate or extent of DNA-dependent transcription [goid

"Any process that modulates the frequency, rate or extent of DNA-dependent transcription [goid

"The chemical reactions and pathways resulting in the formation of heme, any compound of iron

"The synthesis of either RNA on a template of DNA or DNA on a template of RNA [goid 6350] [e

"The synthesis of either RNA on a template of DNA or DNA on a template of RNA [goid 6350] [e



"Any process that modulates the frequency, rate or extent of DNA-dependent transcription [goid  
"Any process that modulates the frequency, rate or extent of DNA-dependent transcription [goid

"The process whereby new strands of DNA are synthesized. The template for replication can eit  
"Any process that modulates the frequency, rate or extent of DNA-dependent transcription [goid  
"The chemical reactions and pathways, including anabolism and catabolism, by which living org;  
"The chemical reactions and pathways resulting in the formation of cholesterol, cholest-5-en-3 b  
"The chemical reactions and pathways involving lipids, compounds soluble in an organic solvent

"Any process that results in the specification, formation or maintenance of the physical structure  
"Any process specifically pertinent to the functioning of integrated living units: cells, tissues, orga

Any immune system process that functions in the calibrated response of an organism to a poten  
rRNA."

"[goid 6788] [evidence IEA]; A change in state or activity of a cell or an organism (in terms of mc  
"A change in state or activity of a cell or an organism (in terms of movement, secretion, enzyme  
"Any process that modulates the frequency, rate or extent of DNA-dependent transcription [goid

"The joining together of exons from one or more primary transcripts of nuclear messenger RNA  
"The joining together of exons from one or more primary transcripts of nuclear messenger RNA  
riant 1, mRNA."

"The joining together of exons from one or more primary transcripts of nuclear messenger RNA  
"The joining together of exons from one or more primary transcripts of nuclear messenger RNA  
romosome 10. XR\_000879 XR\_001292 XR\_001293 XR\_001294 XR\_001295 XR\_001296 XR\_(  
"A transition where an epithelial cell loses apical/basolateral polarity, severs intercellular adhesi  
"The joining together of exons from one or more primary transcripts of nuclear messenger RNA  
"The joining together of exons from one or more primary transcripts of nuclear messenger RNA  
"The joining together of exons from one or more primary transcripts of nuclear messenger RNA  
"The joining together of exons from one or more primary transcripts of nuclear messenger RNA  
"The joining together of exons from one or more primary transcripts of nuclear messenger RNA  
"The joining together of exons from one or more primary transcripts of nuclear messenger RNA  
"The joining together of exons from one or more primary transcripts of nuclear messenger RNA  
"The joining together of exons from one or more primary transcripts of nuclear messenger RNA  
"Any process involved in the conversion of a primary mRNA transcript into one or more mature r  
"The joining together of exons from one or more primary transcripts of nuclear messenger RNA  
"The joining together of exons from one or more primary transcripts of nuclear messenger RNA  
"The joining together of exons from one or more primary transcripts of nuclear messenger RNA  
"Any process specifically pertinent to the functioning of integrated living units: cells, tissues, orga  
oding RNA."

!PA1P4), mRNA."

: B1, mRNA."

: 1, mRNA."

"The synthesis of either RNA on a template of DNA or DNA on a template of RNA [goid 6350] [e

t 2H9A, mRNA."

A."

Any process involved in the conversion of a primary mRNA transcript into one or more mature r  
IA."

t 4, mRNA."

RNA."

"The series of molecular signals generated as a consequence of a metabotropic glutamate rece

The series of molecular signals generated as a consequence of glutamate binding to a cell surf

The process of targeting specific proteins to particular membrane-bounded subcellular organelle

"Any process that modulates the frequency, rate or extent of DNA-dependent transcription [goid

"A process that is carried out at the cellular level which results in the formation, arrangement of

"A process that is carried out at the cellular level which results in the formation, arrangement of

"Any process that stops, prevents or reduces the frequency, rate or extent of transcription from a

"The process whose specific outcome is the progression of the skeleton over time, from its form

"The process whose specific outcome is the progression of the skeleton over time, from its form

"Any process that modulates the frequency, rate or extent of DNA-dependent transcription [goid

"Any process that modulates the frequency, rate or extent of DNA-dependent transcription [goid

"Any process that modulates the frequency, rate or extent of DNA-dependent transcription [goid

"Any process that modulates the frequency, rate or extent of DNA-dependent transcription [goid

"Any process that modulates the frequency, rate or extent of DNA-dependent transcription [goid

"Any process that modulates the frequency, rate or extent of DNA-dependent transcription [goid

"Any process that modulates the frequency, rate or extent of transcription from an RNA polymer

"Any process that modulates the frequency, rate or extent of DNA-dependent transcription [goid

"The process whose specific outcome is the progression of the skeleton over time, from its form

"Any process that modulates the frequency, rate or extent of DNA-dependent transcription [goid

"Any process that modulates the frequency, rate or extent of DNA-dependent transcription [goid

"The aggregation, arrangement and bonding together of a nucleosome, the beadlike structural u

"The process whose specific outcome is the progression of the central nervous system over time

"The chemical reactions and pathways involving aromatic amino acid family, amino acids with a

"The chemical reactions and pathways involving lipids, compounds soluble in an organic solvent

"A change in state or activity of a cell or an organism (in terms of movement, secretion, enzyme

"A process that is carried out at the cellular level which results in the formation, arrangement of

"A process that is carried out at the cellular level which results in the formation, arrangement of

"The process of targeting specific proteins to particular membrane-bounded subcellular organelle

"The chemical reactions and pathways involving proteoglycans, any glycoprotein in which the ca

"A type of vesicle-mediated transport in which cells take up external materials or membrane con

"Any process specifically pertinent to the functioning of integrated living units: cells, tissues, organs"  
"The directed movement of mRNA from the nucleus to the cytoplasm [goid 6406] [pmid 763433]"  
"A process whereby force is generated within muscle tissue, resulting in a change in muscle gene expression"  
"The immediate defensive reaction (by vertebrate tissue) to infection or injury caused by chemicals"

"A process that directly activates any of the steps required for cell death by apoptosis [goid 6917]"  
"Any process that modulates the frequency, rate or extent of translational termination [goid 6449]"

ence"

ce"

mRNA sequence"

NA sequence"  
E:767706 5, mRNA sequence"

ence"  
ce"  
ce"  
\ sequence"

NA sequence"

i 3, mRNA sequence"  
mRNA sequence"  
ence"  
\ sequence"  
43, mRNA sequence"  
i11, mRNA sequence"  
93, mRNA sequence"  
172, mRNA sequence"  
"

contains TAR1.t2 TAR1 repetitive element ;, mRNA sequence"  
NA sequence"  
!"

l 3, mRNA sequence"  
nRNA sequence"

one hd27b07 5, mRNA sequence"  
equence"  
equence"

equence"  
equence"

sequence"  
;"  
1467409, mRNA sequence"  
equence"  
equence"  
e"

ce"  
65, mRNA sequence"  
;"  
l)  
;"

e"  
1579986, mRNA sequence"  
"  
l)

1560699, mRNA sequence"  
equence"  
equence"

1579737, mRNA sequence"  
equence"  
RNA sequence"  
NA sequence"  
equence"

ence"

ence"

ce"  
equence"  
,

sequence"  
NA sequence"  
"  
A sequence"  
equence"  
ce"  
e"  
e"  
uence"  
RNA sequence"  
"

29, mRNA sequence"

ce"  
sequence"

equence"  
ce"

e"  
; IMAGE:1648403, mRNA sequence"  
RNA sequence"  
NA sequence"  
568 5, mRNA sequence"  
RNA sequence"  
95, mRNA sequence"  
nce"  
ice"  
e"

, mRNA sequence"  
equence"

\ sequence"

IA sequence"

mRNA sequence"

5, mRNA sequence"

equence"

æ"

equence"

è"

893498 3, mRNA sequence"

RNA sequence"

ence"

æ"

equence"

ence"

À sequence"

NA sequence"

ce"

è"

1841893, mRNA sequence"

equence"

ence"

1847171, mRNA sequence"

ence"

è"

3, mRNA sequence"

e"

ice"

e"

è"

RNA sequence"

è"

!"

ice"

mRNA sequence"  
ce"

,

NA sequence"

equency"

e"

! hx21e11 5, mRNA sequence"  
sequence"

l 3, mRNA sequence"  
;"

NA sequence"  
:e"  
ice"

RNA sequence"

l)

NA sequence"

3"

;"

ce"

"

ce"

!"  
æ"

equence"

æquence"

æ"  
æquence"  
æ"

æquence"

æ"  
æquence"  
e"

æ"

æquence"

equence"

5 5, mRNA sequence"  
\ sequence"

RNA sequence"



3"  
NA sequence"

sequence"  
3e"

quence"  
human)  
uence"  
3quence"

contains L1.t1 L1 repetitive element ;, mRNA sequence"

II 3, mRNA sequence"  
uence"

3"

3"

sequence"

NA sequence"

4, mRNA sequence"

3"

e"

RNA sequence"

AGE:1705428, mRNA sequence"

3"

ence"

3"

3"

NA sequence"

3, mRNA sequence"

3"

2, mRNA sequence"

11 ; IMAGE:430692, mRNA sequence"

e"

sequence"

A sequence"

ence"  
quence"

ce"

mRNA sequence"

NA sequence"  
RNA sequence"

RNA sequence"

3, mRNA sequence"

)-UI 3, mRNA sequence"  
e"  
sequence"  
,

mRNA sequence"

(human)  
sapiens (human)

NA sequence"

"

e"

"

2h05 5, mRNA sequence"

\ sequence"

3, mRNA sequence"

3, mRNA sequence"

\ sequence"

JI 3, mRNA sequence"

AGE:211951, mRNA sequence"

equence"

e"

5-0-UI 3, mRNA sequence"

,

9, mRNA sequence"

sequence"

8-0-UI 3, mRNA sequence"

Homo sapiens cDNA clone cs01f05 5, mRNA sequence"

IA sequence"

2)"

uence"

quence"

"

-UI 3, mRNA sequence"

RNA sequence"

RNA sequence"

sequence"

iRNA sequence"

RNA sequence"

NA sequence"

l 3, mRNA sequence"

l 3, mRNA sequence"

one CS0DC001YP02 5-PRIME, mRNA sequence"

5, mRNA sequence"

NA sequence"

NA sequence"

nRNA sequence"

\ sequence"

3"

ce"

'

uence"

quence"

NA sequence"

equence"

RNA sequence"

G16558, mRNA sequence"

;

,

NA sequence"

UI 3, mRNA sequence"

mRNA sequence"

e"

rRNA sequence"

"

E:1732798 5, mRNA sequence"

e"

nRNA sequence"

NA sequence"

i260 5, mRNA sequence"

IA sequence"

sequence"

I 3, mRNA sequence"

7, mRNA sequence"

:5, mRNA sequence"

i-0-UI 3, mRNA sequence"

?217 5, mRNA sequence"

II 3, mRNA sequence"

NA sequence"

UI 3, mRNA sequence"

3, mRNA sequence"

o)  
ns clone 23872 mRNA sequence"  
sequence"

ə"  
I-UI 3, mRNA sequence"  
i1 ; IMAGE:284605, mRNA sequence"  
sequence"  
ce"

RNA sequence"

DI009YH24 5-PRIME, mRNA sequence"

3E:299508, mRNA sequence"  
\ sequence"

VA sequence"

3, mRNA sequence"

mRNA sequence"

"  
DNA sequence"  
quence"

3, mRNA sequence"

sequence"  
DNA sequence"

, mRNA sequence"

contains Alu repetitive element;, mRNA sequence"

ce"

"  
equence"

IA sequence"  
, mRNA sequence"  
equence"

,

540363 5, mRNA sequence"  
sequence"

II 3, mRNA sequence"

3"

3150 3, mRNA sequence"  
NA sequence"

DI011YD16 5-PRIME, mRNA sequence"  
-UI 5, mRNA sequence"  
UI 3, mRNA sequence"  
ce"

NA sequence"



ce"

sequence"  
mRNA sequence"

sequence"  
NA sequence"  
uence"

'  
-UI 3, mRNA sequence"

;, mRNA sequence"  
l14, mRNA sequence"

sequence"

sequence"  
;'"

uence"  
NA sequence"  
L1.t3 L1 repetitive element ;, mRNA sequence"  
;'"  
^ sequence"  
3', mRNA sequence"  
e"  
"

ence"  
mRNA sequence"  
3, mRNA sequence"  
ce"  
ce"  
æ"  
equence"  
æ"

"

e"  
\ sequence"  
æ"  
e"

equence"

NA sequence"  
æ"  
equence"  
quence"

NA sequence"

3, mRNA sequence"

'

e"  
3, mRNA sequence"  
"

ce"  
nRNA sequence"

ce"  
nRNA sequence"

ce"  
æ"  
nRNA sequence"

"

"

ce"

sequence"

e"

Jl 3, mRNA sequence"

sequence"

; MER18.t1 MER18 repetitive element ;, mRNA sequence"

mRNA sequence"

e"

ce"

ce"

sequence"

3, mRNA sequence"

rRNA sequence"

sequence"

3, mRNA sequence"

SE:811744 5, mRNA sequence"

sequence"

A sequence"

NA sequence"

"

sequence"

3, mRNA sequence"

sequence"

"

sequence"

sequence"

ence"

i-0-UI 3, mRNA sequence"

sequence"

SDK002YE20 3-PRIME, mRNA sequence"

ir to contains Alu repetitive element;, mRNA sequence"

-0-UI 3, mRNA sequence"

sequence"

sequence"

rNA sequence"  
rNA sequence"  
e"  
e"

3, mRNA sequence"  
sequence"

e"  
3, mRNA sequence"

mRNA sequence"  
E, mRNA sequence"  
e"  
:quence"  
equence"

e"  
3, mRNA sequence"

e"  
ce"  
e"  
:quence"  
"

e"  
equence"  
!"  
equence"  
mRNA sequence"  
rNA sequence"  
quence"  
"

NA sequence"  
equence"  
II 3, mRNA sequence"  
UI 3, mRNA sequence"  
e"  
e"  
IA sequence"  
·UI 3, mRNA sequence"  
equence"

!"  
э"  
Homo sapiens cDNA clone cs38e02 5, mRNA sequence"  
}, mRNA sequence"

e"  
:e"  
\ clone smag-58, mRNA sequence"

e"  
e"  
'

"  
:quence"  
√A sequence"  
NA sequence"  
эquence"

"  
"

equence"  
:quence"  
iRNA sequence"

equence"

"  
:"  
ice"  
e"  
"

э"  
эe"  
ce"

3598 3, mRNA sequence"  
эquence"  
ce"  
эquence"

sequence"  
NA sequence"  
IA sequence"  
VA sequence"  
NA sequence"  
A sequence"

IA sequence"  
ns Alu repetitive element;, mRNA sequence"  
e"  
i, mRNA sequence"  
ce"  
3, mRNA sequence"  
NA sequence"  
i"

UI 3, mRNA sequence"

e"  
i, mRNA sequence"  
ence"  
NA sequence"  
e"

5-0-UI 3, mRNA sequence"

e"

NA sequence"  
IA sequence"  
equence"  
A sequence"  
iRNA sequence"  
3, mRNA sequence"  
UI 3, mRNA sequence"  
equence"

ce"

mRNA sequence"

quence"  
, complete cds"  
te cds"

\ sequence"  
RNA sequence"  
JI 3, mRNA sequence"

5, mRNA sequence"  
is MER22.t1 MER22 repetitive element ;, mRNA sequence"  
, mRNA sequence"  
I-UI 3, mRNA sequence"  
mRNA sequence"

RNA sequence"

mRNA sequence"  
15 IG MU CHAIN C REGION (HUMAN);, mRNA sequence"

quence"

A sequence"  
IA sequence"  
"

RNA sequence"  
quence"  
5, mRNA sequence"

II 3, mRNA sequence"  
A sequence"

mRNA sequence"

RNA sequence"  
96 3, mRNA sequence"  
ce"  
3, mRNA sequence"  
, mRNA sequence"  
, mRNA sequence"  
sequence"  
;"  
. sequence"

IA sequence"

\ sequence"  
sequence"

√A sequence"  
A sequence"  
mRNA sequence"  
IA sequence"

'  
:nce"  
nRNA sequence"

√A sequence"

| 3, mRNA sequence"  
sequence"  
A sequence"

ə"

77126 3, mRNA sequence"

"  
:quence"  
√A sequence"

ance"

:quence"

se"  
NA sequence"  
\ sequence"

is Alu repetitive element;, mRNA sequence"

83454 5, mRNA sequence"

3, mRNA sequence"



ce"  
MAGE:1240411 5, mRNA sequence"  
IA sequence"  
equence"

equence"  
one CS0DC008YA17 5-PRIME, mRNA sequence"  
\ sequence"  
i)

ence"  
sequence"

NA sequence"  
-UI 3, mRNA sequence"  
NA sequence"  
3, mRNA sequence"

ice"  
5, mRNA sequence"  
I 3, mRNA sequence"  
sequence"  
VA sequence"

VA sequence"

nce"

NA sequence"  
NA sequence"  
ce"  
VA sequence"  
PTR5.b2 PTR5 repetitive element ;, mRNA sequence"  
!"  
cde"

sequence"  
I 3, mRNA sequence"

3, mRNA sequence"  
3"

3"  
apiens (human)  
nce"  
3e"  
JI 3, mRNA sequence"  
VA sequence"

2 5, mRNA sequence"  
sequence"

"

VA sequence"  
rRNA sequence"  
.NA sequence"  
ence"  
rRNA sequence"  
NA sequence"  
sequence"

equence"  
rNA sequence"  
rNA sequence"  
3, mRNA sequence"

rNA sequence"  
JI 3, mRNA sequence"  
rRNA sequence"

"

3"  
3"  
RFII. ;, mRNA sequence"  
contains LTR8.b1 LTR8 repetitive element ;, mRNA sequence"  
rRNA sequence"  
rRNA sequence"  
VA sequence"

one CS0DD001YM19 5-PRIME, mRNA sequence"  
IA sequence"

{NA sequence"  
iRNA sequence"

æ"  
è"  
{NA sequence"  
mRNA sequence"  
æ"  
NA sequence"  
RNA sequence"

è"  
RNA sequence"  
A sequence"  
iRNA sequence"  
!"  
3, mRNA sequence"  
.NA sequence"  
NA sequence"

!"  
, mRNA sequence"  
RNA sequence"  
nRNA sequence"  
}, mRNA sequence"  
)-UI 3, mRNA sequence"  
ance"  
mRNA sequence"  
iRNA sequence"  
-UI 3, mRNA sequence"

iRNA sequence"  
|l 3, mRNA sequence"  
iRNA sequence"

mRNA sequence"  
rRNA sequence"  
mRNA sequence"  
iRNA sequence"  
"  
nRNA sequence"

3"  
L3, mRNA sequence"  
rRNA sequence"  
L1.t3 L1 repetitive element ;, mRNA sequence"

IA sequence"  
rRNA sequence"

IA sequence"  
A sequence"  
RNA sequence"  
nRNA sequence"

nRNA sequence"  
nRNA sequence"  
ence"

3"  
NA sequence"  
JL3, mRNA sequence"  
;"  
nRNA sequence"  
}, mRNA sequence"  
contains Alu repetitive element;, mRNA sequence"  
UL3, mRNA sequence"

Homo sapiens cDNA clone cs02a11 3, mRNA sequence"  
mRNA sequence"  
, mRNA sequence"  
RNA sequence"  
A sequence"  
rRNA sequence"  
3"  
JL3, mRNA sequence"

UL3, mRNA sequence"

ence"  
tNA sequence"

3, mRNA sequence"  
NA sequence"  
rRNA sequence"

\ sequence"

sequence"

RNA sequence"

ce"

;"

mRNA sequence"

is L1.t1 L1 L1 repetitive element ;, mRNA sequence"

;"

mRNA sequence"

rRNA sequence"

;"

II 3, mRNA sequence"

II 3, mRNA sequence"

rRNA sequence"

rRNA sequence"

mRNA sequence"

UI 3, mRNA sequence"

mRNA sequence"

rRNA sequence"

RNA sequence"

IA sequence"

NA sequence"

s element MER12 repetitive element ;, mRNA sequence"

;"

ns cDNA clone CS0DJ011YK18 5-PRIME, mRNA sequence"

i)

;"

rRNA sequence"

DNA clone TC125227 5 similar to Homo sapiens LOC399828 (LOC387724), mRNA sequence"

02711 O02711 PRO-POL-DUTPASE POLYPROTEIN ;, mRNA sequence"

\ sequence"

NA sequence"

DI040YE21 5-PRIME, mRNA sequence"

rRNA sequence"

2 5, mRNA sequence"

contains L1.t1 L1 repetitive element ;, mRNA sequence"

Jl 3, mRNA sequence"

ce"

.NA sequence"

;"

equence"

mRNA sequence"

I 3, mRNA sequence"

sequence"

04, mRNA sequence"

nRNA sequence"

ns cDNA clone CS0DL003YD10 5-PRIME, mRNA sequence"

equence"

NA sequence"

sequence"

sequence"

SW:EPA6\_MOUSE Q62413 EPHRIN TYPE-A RECEPTOR 6 PRECURSOR ;, mRNA sequence"

one CS0DC015YK09 3-PRIME, mRNA sequence"

Homo sapiens cDNA clone TCBAP6464, mRNA sequence"

equence"

NA sequence"

IMAGE:1721743, mRNA sequence"

"

3"

ice"

\ sequence"

NA sequence"

5, mRNA sequence"

ce"

3e"

16 5, mRNA sequence"

\ sequence"

, mRNA sequence"

A sequence"

ance"

3"

sequence"

, mRNA sequence"

'

A sequence"

iRNA sequence"

ience"

sequence"

:NA sequence"

RNA sequence"  
one CS0DC029YE11 5-PRIME, mRNA sequence"

Homo sapiens cDNA clone TCBAP4443, mRNA sequence"  
sequence"

ins L1.t2 L1 repetitive element ;, mRNA sequence"

RNA sequence"

quence"  
;"  
sequence"

quence"  
sequence"

;"  
NA sequence"

ce"

quence"  
47729 5, mRNA sequence"

ce"



3"  
1ce"

002YG04 3-PRIME, mRNA sequence"  
sequence"  
equence"  
!"

RNA sequence"

mRNA sequence"

ice"  
\ sequence"

ce"  
e"

mRNA sequence"  
JI 3, mRNA sequence"  
-UI 3, mRNA sequence"

RNA sequence"

i41100 5, mRNA sequence"  
} L1 repetitive element ;, mRNA sequence"  
quence"

s element TAR1 repetitive element ;, mRNA sequence"

ice"  
NA sequence"

IA sequence"

,

UI 3, mRNA sequence"

A sequence"

e"

equence"

ce"

3 5, mRNA sequence"

s element MIR repetitive element ;, mRNA sequence"

5, mRNA sequence"

ce"

NA sequence"

sequence"

3, mRNA sequence"

3"

mRNA sequence"

RNA sequence"

ce"

"

ence"

3"

1, mRNA sequence"

is element TAR1 repetitive element ;, mRNA sequence"

3, mRNA sequence"

109 ; IMAGE:429715, mRNA sequence"

VA sequence"

e"

3, mRNA sequence"

sequence"

"

ce"

ce"

JA sequence"  
sequence"

e"

5, mRNA sequence"

;"

RNA sequence"

ce"

), mRNA sequence"

RNA sequence"

;"

:e"

ce"

:e"

;"

"

MAGE:786298, mRNA sequence"

"Any process that mediates interactions between a cell and its surroundings. Encompasses inte

"Any process that stops, prevents or reduces the frequency, rate or extent of transcription from a

The process of removal or addition of one or more electrons with or without the concomitant ren

"The chemical reactions and pathways resulting in the formation of glucocorticoids, hormonal C2

"The chemical reactions and pathways involving lipids, compounds soluble in an organic solvent

"The chemical reactions and pathways resulting in the formation of steroids, compounds with a

"The chemical reactions and pathways, including anabolism and catabolism, by which living org

"The chemical reactions and pathways involving lipids, compounds soluble in an organic solvent

"The chemical reactions and pathways resulting in the formation of steroids, compounds with a

"The chemical reactions and pathways involving fatty acids with a chain length of C18 or greater

"The chemical reactions and pathways involving lipids, compounds soluble in an organic solvent

"The chemical reactions and pathways, including anabolism and catabolism, by which living org

"The chemical reactions and pathways, including anabolism and catabolism, by which living org

"The chemical reactions and pathways resulting in the formation of estrogens, C18 steroid horm

"The chemical reactions and pathways resulting in the formation of C21-steroid hormones, sterc

"The chemical reactions and pathways, including anabolism and catabolism, by which living org

The process of removal or addition of one or more electrons with or without the concomitant ren

"The synthesis of either RNA on a template of DNA or DNA on a template of RNA [goid 6350] [e

"The synthesis of either RNA on a template of DNA or DNA on a template of RNA [goid 6350] [e

"The synthesis of RNA from a DNA template by RNA polymerase II (Pol II), originating at a Pol I

"Transport of substances into, out of or within a mitochondrion [goid 6839] [pmid 12526792] [evi

"The process of assisting in the covalent and noncovalent assembly of single chain polypeptides

"A change in state or activity of a cell or an organism (in terms of movement, secretion, enzyme

"A change in state or activity of a cell or an organism (in terms of movement, secretion, enzyme

"A change in state or activity of a cell or an organism (in terms of movement, secretion, enzyme

"A change in state or activity of a cell or an organism (in terms of movement, secretion, enzyme

"A change in state or activity of a cell or an organism (in terms of movement, secretion, enzyme

"A change in state or activity of a cell or an organism (in terms of movement, secretion, enzyme

"The process of assisting in the covalent and noncovalent assembly of single chain polypeptides

"A process which directly inhibits any of the steps required for cell death by apoptosis [goid 6916

"A change in state or activity of a cell or an organism (in terms of movement, secretion, enzyme

"A change in state or activity of a cell or an organism (in terms of movement, secretion, enzyme

"The process of assisting in the covalent and noncovalent assembly of single chain polypeptides

The process of assisting in the covalent and noncovalent assembly of single chain polypeptides

"Any process that modulates the frequency, rate or extent of translational initiation [goid 6446] [p

"A change in state or activity of a cell or an organism (in terms of movement, secretion, enzyme

"A change in state or activity of a cell or an organism (in terms of movement, secretion, enzyme

The process of assisting in the covalent and noncovalent assembly of single chain polypeptides

<sup>32</sup>P-CAL3), mRNA."

"The process of assisting in the covalent and noncovalent assembly of single chain polypeptides

"The process of assisting in the covalent and noncovalent assembly of single chain polypeptides

"A change in state or activity of a cell or an organism (in terms of movement, secretion, enzyme

"Any process that modulates the frequency, rate or extent of transcription from an RNA polymer

"The directed movement of charged atoms or small charged molecules into, out of, within or bet

"The directed movement of charged atoms or small charged molecules into, out of, within or bet

"The cascade of processes by which a signal interacts with a receptor, causing a change in the

"The hydrolysis of a peptide bond or bonds within a protein [goid 6508] [pmid 10873535] [eviden

"Any process that modulates the frequency, rate or extent of cell growth [goid 1558] [evidence I

"The process of introducing a phosphate group on to a protein [goid 6468] [evidence IEA]; The c

"The directed movement of charged atoms or small charged molecules into, out of, within or bet

"The chemical reactions and pathways involving carbohydrates, any of a group of organic comp

"The chemical reactions and pathways involving carbohydrates, any of a group of organic compounds

"The chemical reactions and pathways involving carbohydrates, any of a group of organic compounds

"A change in state or activity of a cell or an organism (in terms of movement, secretion, enzyme activity, etc.)

"The chemical reactions and pathways involving lipids, compounds soluble in an organic solvent

"The process of coupling isoleucine to isoleucyl-tRNA, catalyzed by isoleucyl-tRNA synthetase.

"The process of coupling isoleucine to isoleucyl-tRNA, catalyzed by isoleucyl-tRNA synthetase.

"The formation of bone or of a bony substance, or the conversion of fibrous tissue or of cartilage to bone

"The directed movement of a neurotransmitter into, out of, within or between cells. Neurotransmission

"The attachment of a leukocyte to another cell via adhesion molecules [goid 7159] [evidence IEA]

The attachment of one cell to another cell via adhesion molecules [goid 16337] [evidence IEA]

The attachment of one cell to another cell via adhesion molecules [goid 16337] [evidence IEA]

The attachment of one cell to another cell via adhesion molecules [goid 16337] [evidence IEA]

The attachment of one cell to another cell via adhesion molecules [goid 16337] [evidence IEA];

"The process of introducing a phosphate group on to a protein [goid 6468] [pmid 10699974] [evidence IEA]

"The covalent alteration of one or more amino acids occurring in proteins, peptides and nascent polypeptides

"Reactions, triggered in response to the presence of a foreign body or the occurrence of an injury

"The process resulting in the release of a polypeptide chain from the ribosome, usually in response to a signal

"The biological process whose specific outcome is the progression of a multicellular organism or a cell

"Any process that stops, prevents or reduces the frequency, rate or extent of transcription from a promoter

"Any process that stops, prevents or reduces the frequency, rate or extent of transcription from a promoter

"Progression from G1 phase to S phase of the mitotic cell cycle [goid 82] [evidence IEA]; Any process that results in the progression of a cell from G1 phase to S phase of the mitotic cell cycle

"The hydrolysis of a peptide bond or bonds within a protein [goid 6508] [evidence IEA]; The hydrolysis of a peptide bond or bonds within a protein

"The chemical reactions and pathways involving carbohydrates, any of a group of organic compounds

"The chemical reactions and pathways involving carbohydrates, any of a group of organic compounds

"The chemical reactions and pathways involving carbohydrates, any of a group of organic compounds

"A nearly universal metabolic pathway in which the acetyl group of acetyl coenzyme A is effectively oxidized to carbon dioxide

"The chemical reactions and pathways, including anabolism and catabolism, by which living organisms obtain energy

"The chemical reactions and pathways resulting in the formation of cholesterol, cholest-5-en-3 beta-hydroxy

"The chemical reactions and pathways resulting in the formation of cholesterol, cholest-5-en-3 beta-hydroxy

"The chemical reactions and pathways, including anabolism and catabolism, by which living organisms obtain energy

"The chemical reactions and pathways involving carbohydrates, any of a group of organic compounds

"A form of programmed cell death induced by external or internal signals that trigger the activity of caspases

"The synthesis of either RNA on a template of DNA or DNA on a template of RNA [goid 6350] [e  
"Any process specifically pertinent to the functioning of integrated living units: cells, tissues, orga  
\."

"The process by which an antigen-presenting cell expresses a peptide antigen of exogenous ori  
"Any immune system process that functions in the calibrated response of an organism to a pote  
"A change in state or activity of a cell or an organism (in terms of movement, secretion, enzyme  
Any immune system process that functions in the calibrated response of an organism to a poten  
"The process by which cytochrome c is enabled to move from the mitochondrial intermembrane  
"A change in state or activity of a cell or an organism (in terms of movement, secretion, enzyme  
"Any process specifically pertinent to the functioning of integrated living units: cells, tissues, orga  
"Any process specifically pertinent to the functioning of integrated living units: cells, tissues, orga  
"Any process specifically pertinent to the functioning of integrated living units: cells, tissues, orga  
"Any process specifically pertinent to the functioning of integrated living units: cells, tissues, orga  
"A change in state or activity of a cell or an organism (in terms of movement, secretion, enzyme  
"A change in state or activity of a cell or an organism (in terms of movement, secretion, enzyme  
"A change in state or activity of a cell or an organism (in terms of movement, secretion, enzyme  
"Reactions, triggered in response to the presence of a foreign body or the occurrence of an injui  
"Reactions, triggered in response to the presence of a foreign body or the occurrence of an injui  
"Reactions, triggered in response to the presence of a foreign body or the occurrence of an injui  
"Any series of molecular signals initiated by the binding of an extracellular ligand to a receptor o  
"Any series of molecular signals initiated by the binding of an extracellular ligand to a receptor o  
"A process that directly activates any of the steps required for cell death by apoptosis [goid 6917  
"Reactions, triggered in response to the presence of a foreign body or the occurrence of an injui  
"The cascade of processes by which a signal interacts with a receptor, causing a change in the  
"Any series of molecular signals initiated by the binding of an extracellular ligand to a receptor o  
"Reactions, triggered in response to the presence of a foreign body or the occurrence of an injui

"The biological process whose specific outcome is the progression of a multicellular organism o  
"The multiplication or reproduction of cells, resulting in the expansion of a cell population [goid 8

int 1, mRNA."

"A process that is carried out at the cellular level which results in the formation, arrangement of  
"The formation of a tube from the flat layer of ectodermal cells known as the neural plate. This w  
"The synthesis of either RNA on a template of DNA or DNA on a template of RNA [goid 6350] [e  
2, mRNA."

"The biological process whose specific outcome is the progression of a multicellular organism o  
"The series of molecular signals generated as a consequence of activation of the transmembran  
"A change in state or activity of a cell or an organism (in terms of movement, secretion, enzyme

"Any process that stops, prevents or reduces the frequency, rate or extent of the chemical reacti  
"The process by which anatomical structures are generated and organized. Morphogenesis pert

"The process by which anatomical structures are generated and organized. Morphogenesis pert  
"The directed movement of substances (such as macromolecules, small molecules, ions) into, o  
"The attachment of a cell, either to another cell or to an underlying substrate such as the extrac  
"Any process that modulates the frequency, rate or extent of cell growth [goid 1558] [evidence IE  
"Any process that modulates the frequency, rate or extent of cell growth [goid 1558] [evidence IE  
"Any process that modulates the frequency, rate or extent of cell growth [goid 1558] [evidence IE  
"The process whose specific outcome is the progression of the skeleton over time, from its form  
"Any process that modulates the frequency, rate or extent of cell growth [goid 1558] [evidence IE  
"Any process that modulates the frequency, rate or extent of cell growth [goid 1558] [evidence IE

"The process whereby new strands of DNA are synthesized. The template for replication can eit  
Any immune system process that functions in the calibrated response of an organism to a poten  
Any immune system process that functions in the calibrated response of an organism to a poten

"The formation of bone or of a bony substance, or the conversion of fibrous tissue or of cartilage  
"Any process that modulates the frequency, rate or extent of cell growth [goid 1558] [evidence IE

Any immune system process that functions in the calibrated response of an organism to a poten  
"Any process involved in the controlled movement of a cell [goid 6928] [pmid 11504738] [eviden  
"The biological process whose specific outcome is the progression of a multicellular organism ov

Any immune system process that functions in the calibrated response of an organism to a poten

"The synthesis of either RNA on a template of DNA or DNA on a template of RNA [goid 6350] [e  
"The process of regulating the proliferation and elimination of B cells such that the total number  
"The process of introducing a phosphate group on to a protein [goid 6468] [pmid 10882136] [evi  
"The process of regulating the proliferation and elimination of B cells such that the total number  
"Any process that modulates the frequency, rate or extent of DNA-dependent transcription [goid  
"The synthesis of either RNA on a template of DNA or DNA on a template of RNA [goid 6350] [e  
"The synthesis of either RNA on a template of DNA or DNA on a template of RNA [goid 6350] [e  
"The synthesis of either RNA on a template of DNA or DNA on a template of RNA [goid 6350] [e  
"The synthesis of either RNA on a template of DNA or DNA on a template of RNA [goid 6350] [e  
"A change in state or activity of an organism (in terms of movement, secretion, enzyme producti

"The immediate defensive reaction (by vertebrate tissue) to infection or injury caused by chemic  
"Any process that mediates the transfer of information from one cell to another [goid 7267] [pmic

"Any process that activates or increases the frequency, rate or extent of T cell mediated cytotoxi  
Any series of molecular signals initiated by the binding of an extracellular ligand to a receptor on  
Any series of molecular signals initiated by the binding of an extracellular ligand to a receptor on  
Any series of molecular signals initiated by the binding of an extracellular ligand to a receptor on  
"The expansion of a NK T cell population by cell division [goid 1866] [evidence IEA]; Any proces  
"The directed movement of a motile cell or organism, or the directed growth of a cell guided by a  
"The addition of a sugar unit to a protein amino acid, e.g. the addition of glycan chains to proteir



"The immediate defensive reaction (by vertebrate tissue) to infection or injury caused by chemical  
Any series of molecular signals initiated by the binding of an extracellular ligand to a receptor on  
"Any process that modulates the frequency, rate or extent of cell growth [goid 1558] [pmid 10814

"Blood vessel formation when new vessels emerge from the proliferation of pre-existing blood vessels  
"An immune response which is associated with resistance to intracellular bacteria, fungi, and protozoa  
"The immediate defensive reaction (by vertebrate tissue) to infection or injury caused by chemical  
Any immune system process that functions in the calibrated response of an organism to a potential  
"The aggregation, arrangement and bonding together of a set of components to form a protein complex  
"A defense response that is mediated by cells [goid 6968] [pmid 8332913] [evidence TAS]; The  
"The sequential process by which the multiple coagulation factors of the blood interact, ultimately

"The change in morphology and behavior of a natural killer cell in response to a cytokine, chemical

"The immediate defensive reaction (by vertebrate tissue) to infection or injury caused by chemical  
"Any process that activates or increases the frequency, rate, or extent of a T-helper 1 type immune  
"A change in state or activity of a cell or an organism (in terms of movement, secretion, enzyme  
"Any process that stops, prevents or reduces the rate or extent of cell proliferation [goid 8285] [p  
"The process of apoptosis in activated T cells [goid 6924] [evidence IEA]; Any process that activ  
"The aggregation, arrangement and bonding together of a set of components to form a protein complex  
"Reactions, triggered in response to the presence of a foreign body or the occurrence of an injury  
"Any process that activates or increases the frequency, rate or extent of addition of phosphate groups  
"The chemical reactions and pathways involving aromatic amino acid family, amino acids with aromatic  
"Any immune system process that functions in the calibrated response of an organism to a potential  
"The cascade of processes by which a signal interacts with a receptor, causing a change in the  
"The process of apoptosis in neutrophils [goid 1781] [pmid 7595060] [evidence IDA]; Process in  
"Any process that modulates the frequency, rate or extent of DNA recombination, a process by which  
"Blood vessel formation when new vessels emerge from the proliferation of pre-existing blood vessels

"The synthesis of either RNA on a template of DNA or DNA on a template of RNA [goid 6350] [e  
"Progression through M phase, the part of the cell cycle comprising nuclear division [goid 279] [p  
"Branching of the ureteric bud [goid 1658] [evidence IEA]; The process of introducing a phosphate  
The process of removing one or more phosphoric residues from a protein [goid 6470] [evidence  
"Any process specifically pertinent to the functioning of integrated living units: cells, tissues, organs  
"The directed movement of levorotatory isomer amino acids into, out of, within or between cells  
The hydrolysis of a peptide bond or bonds within a protein [goid 6508] [evidence IEA]  
"The hydrolysis of a peptide bond or bonds within a protein [goid 6508] [evidence IEA]; The cleavage  
"Any process specifically pertinent to the functioning of integrated living units: cells, tissues, organs  
Any process involved in the conversion of a primary ribosomal RNA (rRNA) transcript into one or  
Any process involved in the conversion of a primary ribosomal RNA (rRNA) transcript into one or  
"The chemical reactions and pathways involving carbohydrates, any of a group of organic compounds  
"The chemical reactions and pathways involving the phosphate group, the anion or salt of any phosphate



"The aggregation, arrangement and bonding together of the nuclear localization signal of a prote  
"The aggregation, arrangement and bonding together of the nuclear localization signal of a prote  
"The aggregation, arrangement and bonding together of the nuclear localization signal of a prote  
"The aggregation, arrangement and bonding together of the nuclear localization signal of a prote  
"The aggregation, arrangement and bonding together of the nuclear localization signal of a prote  
"The aggregation, arrangement and bonding together of the nuclear localization signal of a prote  
"The aggregation, arrangement and bonding together of the nuclear localization signal of a prote  
."  
"Any process preventing the degeneration of the photoreceptor, a specialized cell type that is se

"The cascade of processes by which a signal interacts with a receptor, causing a change in the

"The covalent alteration of one or more amino acids occurring in proteins, peptides and nascent  
"The process of introducing a phosphate group on to a protein [goid 6468] [evidence IEA]; The c  
"The synthesis of either RNA on a template of DNA or DNA on a template of RNA [goid 6350] [e  
"The process of introducing a phosphate group on to a protein [goid 6468] [pmid 9374458] [evid  
"The process of introducing a phosphate group on to a protein [goid 6468] [pmid 10383454] [evi  
"Any process that modulates the frequency, rate or extent of the chemical reactions and pathwa  
"Any process that activates or increases the frequency, rate or extent of the chemical reactions :  
"Any process that stops, prevents or reduces the frequency, rate or extent of transcription from :  
"The synthesis of either RNA on a template of DNA or DNA on a template of RNA [goid 6350] [e  
"The synthesis of either RNA on a template of DNA or DNA on a template of RNA [goid 6350] [e  
"Any process that modulates the frequency, rate or extent of DNA-dependent transcription [goid  
"Any process that modulates the frequency, rate or extent of DNA-dependent transcription [goid  
"The synthesis of either RNA on a template of DNA or DNA on a template of RNA [goid 6350] [e  
"Any process that stops, prevents or reduces the frequency, rate or extent of transcription from :  
"Any process that stops, prevents or reduces the frequency, rate or extent of transcription from :  
"The synthesis of either RNA on a template of DNA or DNA on a template of RNA [goid 6350] [e

"The process by which cells digest parts of their own cytoplasm; allows for both recycling of mac  
"The cascade of processes by which a signal interacts with a receptor, causing a change in the  
"The chemical reactions and pathways involving glucose, the aldohexose gluco-hexose. D-gluc  
"Any process that modulates the frequency, rate or extent of DNA-dependent transcription [goid  
"Any process that modulates the frequency, rate or extent of DNA-dependent transcription [goid  
The incorporation of iron and exogenous sulfur into a metallo-sulfur cluster [goid 16226] [eviden

The incorporation of iron and exogenous sulfur into a metallo-sulfur cluster [goid 16226] [eviden  
"The process by which nitrogen is taken from its relatively inert molecular form (N2) in the atmos  
"The covalent alteration of one or more amino acids occurring in proteins, peptides and nascent

"The hydrolysis of terminal 3',5'-phosphodiester bonds in one or two strands of deoxyribonucleo  
"A form of programmed cell death induced by external or internal signals that trigger the activity  
"The process of the formation of the constituents of the ribosome subunits, their assembly, and  
"Any process that modulates the frequency, rate or extent of DNA-dependent transcription [goid

"The chemical reactions and pathways, including anabolism and catabolism, by which living org;  
"The chemical reactions and pathways, including anabolism and catabolism, by which living org;  
Any process involved in the conversion of a primary mRNA transcript into one or more mature r

"Any process that modulates the frequency, rate or extent of cell growth [goid 1558] [pmid 9462

Any series of molecular signals generated as a consequence of an integrin binding to one of its

"The characteristic movement of immature neurons from germinal zones to specific positions wr  
"The reorganization or renovation of existing blood vessels [goid 1974] [evidence IEA]; The attac  
"The aggregation, arrangement and bonding together of a set of components to form a junction  
"The attachment of a cell, either to another cell or to an underlying substrate such as the extrac  
"The attachment of a cell, either to another cell or to an underlying substrate such as the extrac  
"Any process involved in the controlled movement of a cell [goid 6928] [pmid 10477596] [eviden  
"The attachment of a cell, either to another cell or to an underlying substrate such as the extrac  
"The process whose specific outcome is the progression of the blood vessel over time, from its f  
"Progression from G1 phase to S phase of the mitotic cell cycle [goid 82] [evidence IEA]; The pr  
"The attachment of a cell, either to another cell or to an underlying substrate such as the extrac  
"The attachment of a cell, either to another cell or to an underlying substrate such as the extrac  
"The aggregation, arrangement and bonding together of a set of components to form a junction  
"The synthesis of either RNA on a template of DNA or DNA on a template of RNA [goid 6350] [e

"The attachment of a cell, either to another cell or to an underlying substrate such as the extrac  
"The attachment of a cell, either to another cell or to an underlying substrate such as the extrac  
"The attachment of a cell, either to another cell or to an underlying substrate such as the extrac  
"The chemical reactions and pathways involving hyaluronan, the naturally occurring anionic form  
"The chemical reactions and pathways involving hyaluronan, the naturally occurring anionic form  
The process of introducing a phosphate group on to a protein [goid 6468] [evidence IEA]; A defe  
"The cascade of processes by which a signal interacts with a receptor, causing a change in the

"A form of programmed cell death induced by external or internal signals that trigger the activity

"The chemical reactions and pathways involving a nucleotide, a nucleoside that is esterified with  
"The chemical reactions and pathways involving myo-inositol phosphate, 1,2,3,4,5,6-cyclohexan  
"The chemical reactions and pathways involving inositol, 1,2,3,4,5,6-cyclohexanehexol, a growth  
"The cascade of processes by which a signal interacts with a receptor, causing a change in the  
"The directed movement of charged atoms or small charged molecules into, out of, within or bet  
"The directed movement of charged atoms or small charged molecules into, out of, within or bet

"The directed movement of charged atoms or small charged molecules into, out of, within or bet

ipt variant 1, mRNA."

"

"Any process that modulates the frequency, rate or extent of Rho protein signal transduction [go

The process of removal or addition of one or more electrons with or without the concomitant rer

"The synthesis of RNA from a DNA template by RNA polymerase III (Pol III), originating at a Pol

"The attachment of a cell, either to another cell or to an underlying substrate such as the extracel

"Blood vessel formation when new vessels emerge from the proliferation of pre-existing blood ve

"The process whose specific outcome is the progression of the skeleton over time, from its form

"Any series of molecular signals initiated by the binding of an extracellular ligand to a receptor o

"A form of programmed cell death induced by external or internal signals that trigger the activity

The attachment of one cell to another cell via adhesion molecules [goid 16337] [pmid 10779521

"The synthesis of either RNA on a template of DNA or DNA on a template of RNA [goid 6350] [e

"The synthesis of either RNA on a template of DNA or DNA on a template of RNA [goid 6350] [e

"The process of formation of spermatozoa, including spermatocytogenesis and spermiogenesis

"Any process that stops, prevents or reduces the frequency, rate or extent of transcription from :

"Any process that stops, prevents or reduces the frequency, rate or extent of transcription from :

"Any process that stops, prevents or reduces the frequency, rate or extent of transcription from :

JHDM1D), mRNA."

"Any process that modulates the frequency, rate or extent of DNA-dependent transcription [goid

"The synthesis of either RNA on a template of DNA or DNA on a template of RNA [goid 6350] [e

"The synthesis of either RNA on a template of DNA or DNA on a template of RNA [goid 6350] [e

"The synthesis of either RNA on a template of DNA or DNA on a template of RNA [goid 6350] [e

"The process whose specific outcome is the progression of the blood vessel over time, from its f

"The process of restoring DNA after damage. Genomes are subject to damage by chemical and

"The process whose specific outcome is the progression of the muscle over time, from its forma

Any process that increases the concentration of calcium ions in the cytosol [goid 7204] [evidenc

Self-propelled movement of a cell or organism from one location to another [goid 40011] [evider

"Any process specifically pertinent to the functioning of integrated living units: cells, tissues, orga

"The process whose specific outcome is the progression of the central nervous system over time

"Any process that modulates the frequency, rate or extent of DNA-dependent transcription [goid  
"Any process that modulates the frequency, rate or extent of transcription from an RNA polymer  
"Any process that modulates the frequency, rate or extent of transcription from an RNA polymer  
"The attachment of a cell, either to another cell or to an underlying substrate such as the extrac

"The process of coupling lysine to lysyl-tRNA, catalyzed by lysyl-tRNA synthetase. In tRNA amir

"The characteristic movement of immature neurons from germinal zones to specific positions wr

"The process of targeting specific proteins to particular membrane-bounded subcellular organell

}, mRNA."

}, mRNA."

"Any process specifically pertinent to the functioning of integrated living units: cells, tissues, orga

NA."

"The chemical reactions and pathways resulting in the breakdown of a protein or peptide by hyd

"The directed movement of charged atoms or small charged molecules into, out of, within or bet

"The directed movement of potassium ions (K+) into, out of, within or between cells [goid 6813]

"The directed movement of charged atoms or small charged molecules into, out of, within or bet

"Any process that modulates the frequency, rate or extent of action potential creation, propagati

"The series of events required for an organism to receive an auditory stimulus, convert it to a mc

"The directed movement of charged atoms or small charged molecules into, out of, within or bet

"The directed movement of charged atoms or small charged molecules into, out of, within or bet

}, mRNA."

"A conserved series of molecular signals found in prokaryotes and eukaryotes; involves autophc

"Any process that modulates the frequency, rate or extent of DNA-dependent transcription [goid

"The series of events in which a calcium ion stimulus is received by a cell and converted into a r

"The directed movement of charged atoms or small charged molecules into, out of, within or bet

"The directed movement of charged atoms or small charged molecules into, out of, within or bet

"The directed movement of charged atoms or small charged molecules into, out of, within or bet

"The directed movement of charged atoms or small charged molecules into, out of, within or bet

"The directed movement of charged atoms or small charged molecules into, out of, within or bet

"The directed movement of charged atoms or small charged molecules into, out of, within or bet

"The directed movement of charged atoms or small charged molecules into, out of, within or bet

"The directed movement of charged atoms or small charged molecules into, out of, within or bet

"The directed movement of potassium ions (K+) into, out of, within or between cells [goid 6813]  
"The series of events in which a calcium ion stimulus is received by a cell and converted into a r  
"The series of events in which a calcium ion stimulus is received by a cell and converted into a r  
"The series of events in which a calcium ion stimulus is received by a cell and converted into a r  
"The directed movement of potassium ions (K+) into, out of, within or between cells [goid 6813]  
"The directed movement of charged atoms or small charged molecules into, out of, within or bet  
RNA."  
"The directed movement of charged atoms or small charged molecules into, out of, within or bet  
"The aggregation, arrangement and bonding together of a set of components to form a protein c  
"The directed movement of charged atoms or small charged molecules into, out of, within or bet  
"The directed movement of potassium ions (K+) into, out of, within or between cells [goid 6813]  
"Any process that modulates the frequency, rate or extent of cell growth [goid 1558] [evidence I  
"The process whereby new strands of DNA are synthesized. The template for replication can eit  
"The directed movement of potassium ions (K+) into, out of, within or between cells [goid 6813]  
"The directed movement of potassium ions (K+) into, out of, within or between cells [goid 6813]  
"The directed movement of potassium ions (K+) into, out of, within or between cells [goid 6813]  
"The directed movement of potassium ions (K+) into, out of, within or between cells [goid 6813]  
"The directed movement of potassium ions (K+) into, out of, within or between cells [goid 6813]  
"The directed movement of potassium ions (K+) into, out of, within or between cells [goid 6813]  
"The directed movement of potassium ions (K+) into, out of, within or between cells [goid 6813]  
"The directed movement of potassium ions (K+) into, out of, within or between cells [goid 6813]  
"The directed movement of potassium ions (K+) into, out of, within or between cells [goid 6813]  
"The directed movement of potassium ions (K+) into, out of, within or between cells [goid 6813]  
"The directed movement of potassium ions (K+) into, out of, within or between cells [goid 6813]

"The retention in the endoplasmic reticulum (ER) lumen of soluble resident proteins. Sorting rec  
"The retention in the endoplasmic reticulum (ER) lumen of soluble resident proteins. Sorting rec  
"The retention in the endoplasmic reticulum (ER) lumen of soluble resident proteins. Sorting rec

The process of removal or addition of one or more electrons with or without the concomitant rer  
"The process whose specific outcome is the progression of the embryo in the uterus over time, f

§1), mRNA."

"The synthesis of either RNA on a template of DNA or DNA on a template of RNA [goid 6350] [e  
"The synthesis of either RNA on a template of DNA or DNA on a template of RNA [goid 6350] [e  
"The chemical reactions and pathways involving carbohydrates, any of a group of organic comp

"A nearly universal metabolic pathway in which the acetyl group of acetyl coenzyme A is effective

"Any process specifically pertinent to the functioning of integrated living units: cells, tissues, organs

"Any process that modulates the frequency, rate or extent of DNA-dependent transcription [gold

"The chemical reactions and pathways involving RNA, ribonucleic acid, one of the two main types

"The directed movement of substances (such as macromolecules, small molecules, ions) into, out of

The chemical reactions and pathways resulting in the formation of a protein. This is a ribosome-



\_933445 XM\_933447 XM\_941971 XM\_945589 XM\_945591 XM\_945592 XM\_945593 XM\_945594

"The progression of biochemical and morphological phases and events that occur in a cell during mitosis  
"The directed movement of substances from the endoplasmic reticulum (ER) to the Golgi, mediated by vesicles

"The chemical reactions and pathways involving carbohydrates, any of a group of organic compounds  
"Any process specifically pertinent to the functioning of integrated living units: cells, tissues, organs  
"The series of events required for an organism to receive an auditory stimulus, convert it to a mechanical signal, and transmit it to the brain

"Transport of substances into, out of or within a mitochondrion [goid 6839] [pmid 16225668] [evl 1000000000]

"The covalent alteration of one or more amino acids occurring in proteins, peptides and nascent polypeptides

Any process involved in the conversion of a primary mRNA transcript into one or more mature mRNA molecules

"Any process specifically pertinent to the functioning of integrated living units: cells, tissues, organs, or organisms"

"The biological process whose specific outcome is the progression of a multicellular organism or population"

"The cascade of processes by which a signal interacts with a receptor, causing a change in the activity of a protein"

"A form of programmed cell death induced by external or internal signals that trigger the activity of the GTPase ARF [goid 32312] [evidence IEA]"  
Any process that modulates the activity of the GTPase ARF [goid 32312] [evidence IEA]

"Any process that modulates the frequency, rate or extent of the synthesis of either RNA on a template  
"The chemical reactions and pathways involving nucleobases, nucleosides, nucleotides and nucleotides

"Movement of organelles, other microtubules and other particles along microtubules, mediated by motor proteins  
"Movement of organelles, other microtubules and other particles along microtubules, mediated by motor proteins  
"The process of targeting specific proteins to particular membrane-bounded subcellular organelles  
"Movement of organelles, other microtubules and other particles along microtubules, mediated by motor proteins  
"Movement of organelles, other microtubules and other particles along microtubules, mediated by motor proteins  
"Movement of organelles, other microtubules and other particles along microtubules, mediated by motor proteins  
"Movement of organelles, other microtubules and other particles along microtubules, mediated by motor proteins  
"Movement of organelles, other microtubules and other particles along microtubules, mediated by motor proteins  
"Movement of organelles, other microtubules and other particles along microtubules, mediated by motor proteins  
"Movement of organelles, other microtubules and other particles along microtubules, mediated by motor proteins  
"Movement of organelles, other microtubules and other particles along microtubules, mediated by motor proteins  
"The directed movement of substances from the Golgi back to the endoplasmic reticulum, mediated by motor proteins  
"Movement of organelles, other microtubules and other particles along microtubules, mediated by motor proteins

"Movement of organelles, other microtubules and other particles along microtubules, mediated by motor proteins  
"Movement of organelles, other microtubules and other particles along microtubules, mediated by motor proteins  
"Movement of organelles, other microtubules and other particles along microtubules, mediated by motor proteins  
"Movement of organelles, other microtubules and other particles along microtubules, mediated by motor proteins  
"Movement of organelles, other microtubules and other particles along microtubules, mediated by motor proteins  
"Movement of organelles, other microtubules and other particles along microtubules, mediated by motor proteins  
"Movement of organelles, other microtubules and other particles along microtubules, mediated by motor proteins  
"A process that is carried out at the cellular level which results in the formation, arrangement of organelles  
"Movement of organelles, other microtubules and other particles along microtubules, mediated by motor proteins  
"The chemical reactions and pathways resulting in the formation of a protein. This is a ribosome  
"A process that is carried out at the cellular level which results in the formation, arrangement of organelles  
"A process that is carried out at the cellular level which results in the formation, arrangement of organelles  
"A process that is carried out at the cellular level which results in the formation, arrangement of organelles  
"Movement of organelles, other microtubules and other particles along microtubules, mediated by motor proteins  
"Movement of organelles, other microtubules and other particles along microtubules, mediated by motor proteins  
"The aggregation, arrangement and bonding together of a set of components to form a protein complex  
"The cell cycle process whereby replicated homologous chromosomes are organized and then segregated  
"Movement of organelles, other microtubules and other particles along microtubules, mediated by motor proteins  
"Any cellular process that depends upon or alters the microtubule cytoskeleton, that part of the cytoskeleton

(IR2DL5B), mRNA."

Any immune system process that functions in the calibrated response of an organism to a potential pathogen  
A defense response that is mediated by cells [goid 6968] [pmid 7716543] [evidence TAS]

"The attachment of a cell, either to another cell or to an underlying substrate such as the extracellular matrix  
"The cascade of processes by which a signal interacts with a receptor, causing a change in the cell's behavior  
"The chemical reactions and pathways involving carbohydrates, any of a group of organic compounds

The directed movement of organelles or molecules along microtubules in nerve cell axons [goid

"Any process that stops, prevents or reduces the frequency, rate or extent of transcription from a

"Any process that stops, prevents or reduces the frequency, rate or extent of transcription from a

"The synthesis of either RNA on a template of DNA or DNA on a template of RNA [goid 6350] [e

"Any process that modulates the frequency, rate or extent of DNA-dependent transcription [goid

"Blood vessel formation when new vessels emerge from the proliferation of pre-existing blood ve

"The synthesis of either RNA on a template of DNA or DNA on a template of RNA [goid 6350] [e

"The synthesis of either RNA on a template of DNA or DNA on a template of RNA [goid 6350] [e

"Any process that modulates the frequency, rate or extent of transcription from an RNA polymer

"Progression through the nuclear division phase of a meiotic cell cycle, the specialized nuclear a

"The specific movement from place to place of an organism in response to external or internal s

"The chemical reactions and pathways resulting in the breakdown of a protein or peptide by hyd

"The chemical reactions and pathways resulting in the breakdown of a protein or peptide by hyd

"The directed movement of proteins in a cell, including the movement of proteins between speci

"The chemical reactions and pathways resulting in the breakdown of a protein or peptide by hyd

"The chemical reactions and pathways resulting in the breakdown of a protein or peptide by hyd

"The chemical reactions and pathways resulting in the breakdown of a protein or peptide by hyd

"The chemical reactions and pathways resulting in the breakdown of a protein or peptide by hyd

"The chemical reactions and pathways resulting in the breakdown of a protein or peptide by hydrolysis  
The hydrolysis of a peptide bond or bonds within a protein [goid 6508] [evidence IEA]  
The hydrolysis of a peptide bond or bonds within a protein [goid 6508] [evidence NAS]; The hydrolysis of a peptide bond or bonds within a protein [goid 6508] [pmid 10438493] [evidence TAS]  
Any series of molecular signals initiated by the binding of an extracellular ligand to a receptor on the cell surface

"A defense response that is mediated by cells [goid 6968] [pmid 9683661] [evidence TAS]; The hydrolysis of a peptide bond or bonds within a protein [goid 6508] [evidence NAS]; The hydrolysis of a peptide bond or bonds within a protein [goid 6508] [pmid 10438493] [evidence TAS]  
"Any series of molecular signals generated as a consequence of binding to a C-type lectin receptor  
"The chemical reactions and pathways involving nicotinamide adenine dinucleotide (NAD), a coenzyme  
"Any process that modulates the frequency, rate or extent of DNA-dependent transcription [goid 6508] [evidence TAS]  
"Any process that modulates the frequency, rate or extent of DNA recombination, a process by which genetic material is exchanged between non-homologous chromosomes  
"The directed movement of a protein from the cytoplasm to the nucleus [goid 6606] [evidence IEA]  
"The aggregation, arrangement and bonding together of a set of components to form a protein complex  
"The directed movement of a protein bearing a nuclear localization signal (NLS) from the cytoplasm to the nucleus [goid 6606] [evidence IEA]  
"The directed movement of a protein bearing a nuclear localization signal (NLS) from the cytoplasm to the nucleus [goid 6606] [evidence IEA]  
"The directed movement of a protein bearing a nuclear localization signal (NLS) from the cytoplasm to the nucleus [goid 6606] [evidence IEA]  
"The directed movement of a protein from the cytoplasm to the nucleus [goid 6606] [evidence IEA]  
"The aggregation, arrangement and bonding together of the nuclear localization signal of a protein  
"Any process involved in the controlled movement of a cell [goid 6928] [pmid 10099934] [evidence TAS]

The series of molecular signals initiated by binding of Wnt protein to a frizzled family receptor or its coreceptor

Any series of molecular signals in which a small monomeric GTPase relays one or more of the signals  
Any process involved in the conversion of a primary ribosomal RNA (rRNA) transcript into one or more mature rRNAs  
"The process whose specific outcome is the progression of the epidermis over time, from its formation to its maintenance  
"The series of events required for an organism to receive a visual stimulus, convert it to a molecular signal, and then to a neural signal  
"The progression of biochemical and morphological phases and events that occur in a cell during the cell cycle

"A change in state or activity of a cell or an organism (in terms of movement, secretion, enzyme activity, gene expression, etc.) in response to a stimulus  
"A form of programmed cell death induced by external or internal signals that trigger the activity of caspases

"A process that is carried out at the cellular level which results in the formation, arrangement or organization of a protein complex

"A process that is carried out at the cellular level which results in the formation, arrangement or organization of a protein complex

"A process that is carried out at the cellular level which results in the formation, arrangement or organization of a protein complex  
"The process of formation of spermatozoa, including spermatocytogenesis and spermiogenesis

"Reactions, triggered in response to the presence of a foreign body or the occurrence of an injury, that result in the formation of a scar



"The directed movement of substances (such as macromolecules, small molecules, ions) into, o  
"The directed movement of substances (such as macromolecules, small molecules, ions) into, o  
"The chemical reactions and pathways involving N-acetylglucosamine. The D isomer is a comm  
mRNA."  
RNA."

Any process involved in the conversion of one or more primary RNA transcripts into one or more  
RNA."

"The process of coupling leucine to leucyl-tRNA, catalyzed by leucyl-tRNA synthetase. In tRNA ;  
"The process of coupling leucine to leucyl-tRNA, catalyzed by leucyl-tRNA synthetase. In tRNA ;

"The directed movement of charged atoms or small charged molecules into, out of, within or bet  
"The chemical reactions and pathways resulting in the formation of lipids, compounds soluble in  
"Any process that modulates the frequency, rate or extent of DNA-dependent transcription [goid  
"Any process that modulates the frequency, rate or extent of DNA-dependent transcription [goid  
"Any process that modulates the frequency, rate or extent of DNA-dependent transcription [goid  
"Any process that modulates the frequency, rate or extent of DNA-dependent transcription [goid  
"Any immune system process that functions in the calibrated response of an organism to a pote  
"Progression from G1 phase to S phase of the mitotic cell cycle [goid 82] [pmid 12853976] [evid  
"Any process that terminates the activity of the active enzyme MAP kinase [goid 188] [pmid 123;

"The synthesis of either RNA on a template of DNA or DNA on a template of RNA [goid 6350] [e

"The chemical reactions and pathways involving lipids, compounds soluble in an organic solvent  
"The process in which the cytoplasm of the outermost cells of the vertebrate epidermis is replac  
"The process whose specific outcome is the progression of the epidermis over time, from its for  
"The process in which the cytoplasm of the outermost cells of the vertebrate epidermis is replac  
"The process of introducing a phosphate group on to a protein [goid 6468] [evidence IEA]; The p  
"The covalent alteration of one or more amino acids occurring in proteins, peptides and nascent  
"The process by which a pre-tRNA molecule is converted to a mature tRNA, ready for addition o  
"The directed movement of substances (such as macromolecules, small molecules, ions) into, o  
"Any process that stops, prevents or reduces the frequency, rate or extent of transcription from ;  
"The assembly of actin filament bundles; actin filaments are on the same axis but may be orient  
"The chemical reactions and pathways involving carbohydrates, any of a group of organic comp  
"The biological process whose specific outcome is the progression of a multicellular organism o  
"[goid 19642] [evidence IEA]; The chemical reactions and pathways involving carbohydrates, an  
"[goid 19642] [evidence IEA]; The chemical reactions and pathways involving carbohydrates, an  
The process of removal or addition of one or more electrons with or without the concomitant ren  
"The formation of O-glycans by addition of glycosyl groups either to the hydroxyl group of peptid  
."

"The chemical reactions and pathways involving lipids, compounds soluble in an organic solvent  
Reactions triggered in response to the presence of a bacterium that act to protect the cell or org

"The synthesis of either RNA on a template of DNA or DNA on a template of RNA [goid 6350] [e  
The series of molecular signals generated as a consequence of a transforming growth factor be

"Any process specifically pertinent to the functioning of integrated living units: cells, tissues, orga

"The synthesis of either RNA on a template of DNA or DNA on a template of RNA [goid 6350] [e

"The chemical reactions and pathways involving glucose, the aldohexose gluco-hexose. D-gluc

"Any process that stops, prevents or reduces the rate or extent of cell proliferation [goid 8285] [p

"The chemical reactions and pathways involving a specific protein, rather than of proteins in gen

"Any process specifically pertinent to the functioning of integrated living units: cells, tissues, orga

"The cascade of processes by which a signal interacts with a receptor, causing a change in the

"The biological process whose specific outcome is the progression of a multicellular organism or

"Any process that modulates the occurrence or rate of cell death by apoptosis [goid 42981] [pmi

"The process whose specific outcome is the progression of the skeleton over time, from its form

"A defense response that is mediated by cells [goid 6968] [pmid 8034587] [evidence TAS]; The

"A form of programmed cell death induced by external or internal signals that trigger the activity

"Any process that activates or increases the frequency, rate or extent of an I-kappaB kinase/NF-

"The process whose specific outcome is the progression of nervous tissue over time, from its fo

The hydrolysis of a peptide bond or bonds within a protein [goid 6508] [evidence IEA]

"The cascade of processes by which a signal interacts with a receptor, causing a change in the

"The cascade of processes by which a signal interacts with a receptor, causing a change in the

"The process preceding formation of the peptide bond between the first two amino acids of a pr

"The chemical reactions and pathways, including anabolism and catabolism, by which living orga

"Any process that modulates the frequency, rate or extent of DNA-dependent transcription [goid

"Any process that modulates the frequency, rate or extent of DNA-dependent transcription [goid

"Any process that modulates the frequency, rate or extent of DNA-dependent transcription [goid

"The chemical reactions and pathways, including anabolism and catabolism, by which living orga

Any process that activates or increases the rate or extent of cell proliferation [goid 8284] [pmid 7

"The process whereby new strands of DNA are synthesized. The template for replication can eit

"The process whereby new strands of DNA are synthesized. The template for replication can eit

"The repair of single strand breaks in DNA. Repair of such breaks is mediated by the same enzy

"Reactions, triggered in response to the presence of a foreign body or the occurrence of an inju

Any immune system process that functions in the calibrated response of an organism to a poter

"Any immune system process that functions in the calibrated response of an organism to a pote

Any immune system process that functions in the calibrated response of an organism to a poter



"Reactions, triggered in response to the presence of a foreign body or the occurrence of an injury  
"Reactions, triggered in response to the presence of a foreign body or the occurrence of an injury  
"Any process that stops, prevents or reduces the frequency, rate or extent of actin depolymerization  
Any immune system process that functions in the calibrated response of an organism to a potential pathogen  
Progression of the cell from its inception to the end of its lifespan [goid 7569] [pmid 7517666] [evidence IEA]  
"Any process that modulates the frequency, rate or extent of DNA-dependent transcription [goid 6350] [evidence IEA]

"The synthesis of either RNA on a template of DNA or DNA on a template of RNA [goid 6350] [evidence IEA]  
"The aggregation, arrangement and bonding together of a set of components to form a protein complex  
"A process of secretion by a cell that results in the release of intracellular molecules (e.g. hormones)  
"A process of secretion by a cell that results in the release of intracellular molecules (e.g. hormones)  
"The process whereby new strands of DNA are synthesized. The template for replication can either be DNA or RNA [goid 6350] [evidence IEA]

"The chemical reactions and pathways involving lipids, compounds soluble in an organic solvent  
"The process of introducing a phosphate group on to a protein [goid 6468] [pmid 3420405] [evidence IEA]  
"The chemical reactions and pathways involving triacylglycerol, any triester of glycerol. The three fatty acid chains are esterified to the glycerol backbone  
"The chemical reactions and pathways resulting in the breakdown of lipids, compounds soluble in an organic solvent  
"The chemical reactions and pathways involving lipids, compounds soluble in an organic solvent

"The covalent alteration of one or more amino acids occurring in proteins, peptides and nascent polypeptides  
"The synthesis of either RNA on a template of DNA or DNA on a template of RNA [goid 6350] [evidence IEA]

"Retaining the established polarization of a cell along its apical/basal axis [goid 35090] [evidence IEA]  
"The progression of biochemical and morphological phases and events that occur in a cell during its life cycle [goid 35090] [evidence IEA]

"The process of assisting in the covalent and noncovalent assembly of single chain polypeptides  
"The directed movement of proteins into, out of, within or between cells [goid 15031] [evidence IEA]  
"The process of assisting in the covalent and noncovalent assembly of single chain polypeptides

A type of vesicle-mediated transport in which cells take up external materials or membrane components

"Any process that stops, prevents or reduces the frequency, rate or extent of transcription from a DNA template [goid 6350] [evidence IEA]

"The hydrolysis of a peptide bond or bonds within a protein [goid 6508] [evidence IEA]; The progression of the muscle over time, from its formation to its maintenance [goid 6508] [evidence IEA]  
"The process whose specific outcome is the progression of the muscle over time, from its formation to its maintenance [goid 6508] [evidence IEA]

"Any process specifically pertinent to the functioning of integrated living units: cells, tissues, organs or organisms [goid 6350] [evidence IEA]  
The biological process whose specific outcome is the progression of a multicellular organism over its life cycle [goid 6350] [evidence IEA]  
"The synthesis of either RNA on a template of DNA or DNA on a template of RNA [goid 6350] [evidence IEA]  
"The last step in the formation of the neural tube, where the paired neural folds are brought together and fused [goid 6350] [evidence IEA]

"The phosphorylation by a protein of one or more of its own amino acid residues, or residues on  
The process of introducing a phosphate group on to a protein [goid 6468] [evidence IEA]  
"The process whose specific outcome is the progression of the embryo in the uterus over time, f  
The hydrolysis of a peptide bond or bonds within a protein [goid 6508] [pmid 8550619] [evidence  
"The process of creating protein oligomers, compounds composed of a small number, usually b

l."  
RNA."

transcript variant 2, non-coding RNA."

3), mRNA."

128354), mRNA."

1 (LOC100128647), mRNA."

00128731), mRNA."

30 XM\_001722014 XM\_001722017 XM\_001723592 XM\_001723595"

†), mRNA."  
,

NA."

.R\_039796"

RNA."

)130155), mRNA."

)130224), mRNA."

RNA."

-like 10, transcript variant 2 (LOC100130561), mRNA."  
)130562), mRNA."

RNA."



RNA."

l), partial mRNA."

g B (yeast) (LOC100131128), mRNA."

0131330), mRNA."

rRNA."

713), mRNA."  
31716), mRNA."

1 containing 1 (LOC100131769), mRNA."

NA."

endent) 1-like (LOC100132139), mRNA."

er 4 (LOC100132308), mRNA."

)132364), mRNA."

↓A."

ant 1 (LOC100132565), mRNA."

5), mRNA."

)132716), mRNA."

)132742), mRNA."

endent) 1-like (LOC100132770), mRNA."

)132894), mRNA."

48), mRNA."

0133390), mRNA."

143), mRNA."

RNA."

RNA."

78), mRNA."

transcript variant 2 (LOC100133583), mRNA."

133607), mRNA."

33609), mRNA."

, mRNA."

ain (LOC100133811), partial mRNA."

133836), mRNA."

(LOC100133866), mRNA."

without TM domain), member 3 (LOC100133875), partial mRNA."

(LOC100133881), mRNA."

LOC100133888), mRNA."

8), mRNA."

11), mRNA."

LOC100133930), mRNA."



000), mRNA."

C100134052), mRNA."

(LOC100134100), mRNA."

ein (Fp) (LOC100134108), mRNA."

."

nRNA."

9), mRNA."

4199), partial mRNA."

0134209), mRNA."

1), mRNA."

,

0134291), mRNA."

0134303), partial mRNA."

4379), mRNA."

NA."

mRNA."

NA."

idogene (LOC100134667), mRNA."

74), mRNA."

RNA."

cle myosin light chain alkali 6) (Myosin light chain alkali 3) (Myosin light chain 3) (MLC-3) (LC17  
l), mRNA."

3767), mRNA."

n-like, ankyrin repeat and pleckstrin homology domains 1) (AGAP-1) (GTP-binding and GTPase-

102), mRNA."

- 1) (UBF-1) (Autoantigen NOR-90) (LOC129870), mRNA."

203), mRNA."

mRNA."

A."

e 6.

The chemical reactions and pathways resulting in the formation of a protein. This is a ribosome-

IA."

11."

-inducible protein 1-8U) (LOC144383), mRNA."

l), mRNA."

3), mRNA."

y group nucleosome binding domain 2) (LOC148915), mRNA."

nRNA."

'), mRNA."

A."

'), mRNA."

l), mRNA."

15), non-coding RNA."

220416), mRNA."

A."

nRNA."

NA."

RNA."

'), mRNA."

mRNA."

)), mRNA."

."

| protein HIP) (LOC283412), mRNA."

}), mRNA."

'), mRNA."

}), mRNA."

7; BC021928, transcript variant 1 (LOC284260), mRNA."

) (CAP) (Protease inhibitor 6) (PI-6) (Serpine B6) (LOC284293), mRNA."

|), mRNA."

"The aggregation, arrangement and bonding together of a nucleosome, the beadlike structural u

3), mRNA."

tion initiation factor TFIID 28 kDa subunit) (TAF(II)28) (TAFII-28) (TAFII28) (TFIID subunit p30-t

ement binding protein 107) (TAXREB107) (Neoplasm-related protein C140), transcript variant 3 (

nRNA."

l), mRNA."

}), mRNA."

'), mRNA."

LOC286528), mRNA."

misc RNA."

n, 47kDa, transcript variant 3 (LOC339799), mRNA."

i04), mRNA."

e) (TrpRS) (IFP53) (hWRS) (LOC341112), mRNA."

NA."

ə) (LOC341651), mRNA."

}), mRNA."

mRNA."

RNA."

rs), member 14 (LOC346887), mRNA."

ant 2, mRNA."



"

."

'753), mRNA."

a (LOC387820), mRNA."

ptor) (Colon carcinoma laminin-binding protein) (NEM/1CHD4) (Multidrug resistance-associated

is-associated fatty acid-binding protein homolog) (PA-FABP) (LOC387934), mRNA."

matrix protein GM130), transcript variant 2 (LOC388080), mRNA."

,

); mRNA."

LOC388259), mRNA."

tabilizing protein) (Single-strand binding protein) (hnRNP core protein A1) (HDP-1) (Topoisomera  
A."

NA."

"

A."

, mRNA."  
C388681), mRNA."

"

"

mRNA."  
OC388965), mRNA."

), mRNA."

A."

"

C389293), mRNA."

), mRNA."

NA."  
egion, candidate 2 (LOC389599), mRNA."

A."

"

ptor) (Colon carcinoma laminin-binding protein) (NEM/1CHD4) (Multidrug resistance-associated

748), mRNA."

rotein 1) (RanBP1) (LOC389842), mRNA."

; Ku autoantigen protein p70) (Ku70) (70 kDa subunit of Ku antigen) (Thyroid-lupus autoantigen)  
tein SC1/ECM2) (LOC389904), mRNA."

og B (LOC390298), miscRNA."

A."

IA."

, mRNA."

mRNA."

390547), mRNA."

' (LOC390669), mRNA."

rm 1; serine/threonine protein phosphatase 2A, 48kDa regulatory subunit; PP2A, subunit B, PR4  
?), mRNA."

"

C391037), mRNA."

ember 3 (Glucose transporter type 3, brain) (LOC391045), mRNA."

γ-1) (LOC391241), mRNA."

se II) (LOC391322), mRNA."

7), mRNA."

ember (par-1) (LOC391574), mRNA."

(Keratin-18) (K18) (LOC391703), mRNA."

α subunit p50) (LOC391811), mRNA."

ein 2 (HCV NS2 trans-regulated protein) (NS2TP) (LOC392221), mRNA."

PMS2) (LOC392713), mRNA."

1 (LOC392843), mRNA."

mRNA."

.5 (LOC399815), misc RNA."

"

it 5 (LOC399942), mRNA."

OC400027), mRNA."

RNA."

otif, 7 preproprotein (LOC400406), mRNA."

"

(Guanine nucleotide-binding protein 1) (HuGBP-1) (LOC400759) on chromosome 1.

A."

A."

cript variant 3 (LOC400954), mRNA."

002), mRNA."  
110), non-coding RNA."

15), mRNA."

"

ation of HIV-1 transcription (LOC401233), miscRNA."

CC401238), mRNA."

i), mRNA."

402096), mRNA."

kDa) (AKAP 150) (cAMP-dependent protein kinase regulatory subunit II high affinity binding prot

NA."

"The directed movement of substances (such as macromolecules, small molecules, ions) into, o  
er 4 (LOC402269), mRNA."

pE#1) (HMGE) (LOC402282), mRNA."

olypeptide 4 (LOC402377), mRNA."

The hydrolysis of a peptide bond or bonds within a protein [goid 6508] [evidence IEA]

er 4 (LOC402509), mRNA."

RNA."

402665), mRNA."

ule affinity-regulating kinase 2) (ELKL motif kinase) (EMK1) (PAR1 homolog) (LOC402679), mRN

The process of introducing a phosphate group on to a protein [goid 6468] [evidence IEA]

"

mRNA."

6, transcript variant 4 (LOC440335), mRNA."

ant 4 (LOC440341), mRNA."

j RNA."

variant 2 (LOC440356), mRNA."

in) (Single-strand binding protein) (hnRNP core protein A1) (HDP-1) (Topoisomerase-inhibitor su

NA."

"

ectin; DTTR431, transcript variant 1 (LOC440508), mRNA."

lgin-67) (88 kDa Golgi protein) (Gm88 autoantigen) (LOC440518), mRNA."

mRNA."

A."

mRNA."

A."

"

mRNA."

ant 1 (LOC440895), mRNA."

tivation factor L subunit) (MSF L) (LOC440917), mRNA."

IC440927), mRNA."



"The chemical reactions and pathways involving carbohydrates, any of a group of organic compounds. RNA."

61), mRNA."

79), misc RNA."

.."

1), mRNA."

2 (LOC441253), mRNA."

variant 7 (LOC441282), mRNA."

47), mRNA."

A."

The series of molecular signals generated as a consequence of a G-protein coupled receptor binding to a ligand.

.."  
"

582), mRNA."

2), mRNA."

tial mRNA."

atidylcholine 2-acylhydrolase GX) (GX sPLA2) (sPLA2-X) (LOC441773), mRNA."

λ."

mRNA."

rotein-tyrosine phosphatase SYP) (SH-PTP2) (SHP-2) (Shp2) (LOC441868), mRNA."

1876), mRNA."

heavy chain 11) (LOC442057), mRNA."

75), mRNA."

inhibitor) (Ribonuclease 4 inhibitor) (RNS4I) (LOC442517), mRNA."

442535), mRNA."

3442572), mRNA."

RNA."

RNA."

RNA."

i), misc RNA."  
)', mRNA."

), mRNA."

41788), mRNA."

like kinase 2) (PKU-alpha) (LOC641806), mRNA."  
, mRNA."

r protein) (LOC641849), mRNA."

yl pyrophosphate synthetase II) (PRS-II) (LOC641958), mRNA."  
) , mRNA."  
972), mRNA."

precursor (MHC class I antigen A\*11), transcript variant 1 (LOC642049), mRNA."  
ain precursor (MHC class I antigen DRB1\*4) (DR-4) (DR4) (LOC642072), mRNA."

age inflammatory protein 1-beta) (MIP-1-beta) (MIP-1-beta(1-69)) (T-cell activation protein 2) (AC  
"  
(LOC642104), mRNA."

19), mRNA."  
) , mRNA."  
"

in-UDP acetylgalactosaminyltransferase 9) (UDP-GalNAc:polypeptide N-acetylgalactosaminyltra  
642153), mRNA."

LOC642161), mRNA."  
642168), mRNA."

), mRNA."  
LOC642188), mRNA."

642214), mRNA."

642250), mRNA."  
homogentisate oxygenase) (Homogentisic acid oxidase), transcript variant 6 (LOC642252), mRNA  
transferase) (ACAT-related gene product 1) (LOC642255), mRNA."

642267), mRNA."  
transcription factor 1) (HSTF 1), transcript variant 2 (LOC642269), mRNA."

1 (Citrate transport protein) (CTP) (Tricarboxylate carrier protein) (Solute carrier family 25 membe

1 (LOC642312), mRNA."

inhibitory molecule Caspr3) (LOC642373), mRNA."

(LOC642393), mRNA."  
A."

dependent formaldehyde dehydrogenase) (FDH), transcript variant 1 (LOC642443), mRNA."

precursor (LOC642502), mRNA."

nding transcription factor 3) (Oct-3) (Oct-4) (LOC642559), mRNA."

642595), mRNA."

NOS) (iNOS) (Hepatocyte NOS) (HEP-NOS) (LOC642607), mRNA."

? (LOC642678), mRNA."

alkodystrophy protein) (ALDP) (LOC642762), mRNA."

matrix protein GM130) (LOC642771), mRNA."

ing transcription factor) (Pur-1) (ZF87) (ZIF87) (LOC642773), mRNA."

mRNA."

subunit (CPSF 30 kDa subunit) (NS1 effector domain-binding protein 1) (Neb-1) (No arches hor

."

!A) (Template-activating factor I) (TAF-I) (Liver regeneration-related protein LRRGR00002) (LOC

isoform gamma (LOC642904), misc RNA."

RNA."

}), mRNA."

RNA."

}), mRNA."

isozyme B) (PGAM-B) (BPG-dependent PGAM 1), transcript variant 3 (LOC642969), mRNA."

'  
tabilizing protein) (Single-strand binding protein) (hnRNP core protein A1) (HDP) (LOC643033), 1  
35), mRNA."

}), mRNA."

643171), mRNA."

l), mRNA."

\"  
A."

C643246), mRNA."

A."

RNA."

60) (60 kDa chaperonin) (CPN60) (Heat shock protein 60) (HSP-60) (Mitochondrial matrix prote  
mRNA."



mKSR1) (Hb protein) (LOC643331), mRNA."

, mRNA."

); mRNA."

ein) (GRP94) (gp96 homolog) (Tumor rejection antigen 1) (LOC643430), mRNA."

); mRNA."

protein HIP), transcript variant 1 (LOC643433), mRNA."

A."

NA."

19), mRNA."

3DH) (Memory-related protein 2) (MRG-2) (LOC643580), mRNA."

\"

I (LOC643668), mRNA."

NA."

dermatitis (LOC643731), mRNA."

"The hydrolysis of a peptide bond or bonds within a protein [goid 6508] [evidence IEA]; A form o

gnition molecule Caspr3) (LOC643772), mRNA."

y group nucleosome-binding domain-containing protein 1) (LOC643790), mRNA."

336), mRNA."

g protein GST1-HS) (LOC643855), mRNA."

listamine-releasing factor) (HRF) (Fortilin) (LOC643870), mRNA."

y group nucleosome-binding domain-containing protein 2), transcript variant 3 (LOC643872), mR

}), mRNA."

ne region 19; hypothetical LOC441257, transcript variant 2 (LOC643920), mRNA."

27), mRNA."

'), mRNA."

NA."

."

RNA."

A."

MDH) (Memory-related protein 2) (MRG-2) (LOC644011), mRNA."

644019), mRNA."

essor QM) (Laminin receptor homolog) (LOC644039), mRNA."

), mRNA."

heavy chain 11) (LOC644056), mRNA."

3), mRNA."

"

644091), mRNA."

RNA."

), mRNA."

NA."

LOC644305), mRNA."

), mRNA."

endent) 1-like, transcript variant 2 (LOC644311), mRNA."

variant 2 (LOC644322), mRNA."

ubunit (LOC644359), mRNA."

44360), mRNA."

cript variant 1 (LOC644380), mRNA."

) (NHE-3) (Solute carrier family 9 member 3) (LOC644412), mRNA."

ein 4) (HMG-4) (High mobility group protein 2a) (HMG-2a) (LOC644429), mRNA."

LOC644586), mRNA."

4591), mRNA."

orm beta (LOC644623), mRNA."  
l), mRNA."

ase II) (LOC644640), mRNA."

44655), mRNA."



oha-2) (Procollagen-proline,2-oxoglutarate-4-dioxygenase alpha-2 subunit) (LOC645029), mRNA

45052), mRNA."

NA."

ranscript variant 2 (LOC645070), mRNA."

nRNA."

mRNA."

cript variant 2 (LOC645208), mRNA."

."

atidylcholine 2-acylhydrolase GX) (GX sPLA2) (sPLA2-X) (LOC645287), mRNA."

ariant 1 (LOC645304), mRNA."

4 (LOC645306), mRNA."

."

atidylcholine 2-acylhydrolase GX) (GX sPLA2) (sPLA2-X) (LOC645325), mRNA."  
oding RNA."

sin, alpha 4) (LOC645336), mRNA."

, mRNA."

85), mRNA."

tabilizing protein) (Single-strand binding protein) (hnRNP core protein A1) (HDP-1) (Topoisomera



in 1) (B cell signal transduction molecule alpha 4) (Alpha 4 protein) (NY-REN-16 antigen) (LOC6

A-chain) (Platelet-derived growth factor alpha polypeptide) (PDGF-1) (LOC645576), mRNA."

) (LOC645582), mRNA."

ubunit (LOC645590), mRNA."

nolog (LOC645620), mRNA."

45634), mRNA."

2) (LOC645669), mRNA."

); mRNA."

91), mRNA."

ia (LOC645705), mRNA."

olgin-like protein), transcript variant 1 (LOC645752), mRNA."  
RNA."

se 5 (LOC645799), mRNA."  
precursor (LOC645812), mRNA."

A."

otic arrest deficient-like protein 1) (MAD1-like 1) (Mitotic checkpoint MAD1 protein-homolog) (HsV

ir protein) (LOC645968), mRNA."

(LOC645983), mRNA."

."

protein) (LOC646012), mRNA."

mRNA."

mRNA."

ific transplantation 84 kDa antigen) (TSTA) (LOC646197), mRNA."

nRNA."

646243), mRNA."

'8), miscRNA."

(Nampt) (Pre-B cell enhancing factor) (Pre-B-cell colony-enhancing factor 1) (LOC646309), mR

ex, subunit f, isoform 2 (LOC646334), mRNA."

re membrane protein of 121 kDa) (P145) (LOC646335), mRNA."

646342), mRNA."

The process by which a methyl group is covalently attached to a molecule [goid 32259] [evidenc  
72), mRNA."

ubunit (Basic transcription factor 2 89 kDa subunit) (BTF2-p89) (TFIIH 89 kDa subunit) (DNA-rep

7), mRNA."

ase H) (Ubiquitin carrier protein H) (UBCH2) (E2-20K) (LOC646463), mRNA."

ement binding protein 107) (TAXREB107) (Neoplasm-related protein C140), transcript variant 1 (

646529), mRNA."

31), mRNA."

LOC646575), mRNA."

NA."

ride ion channel protein p64H1) (LOC646609), mRNA."

1 (PIG-F) (LOC646699), mRNA."

(Keratin-18) (K18) (LOC646723), mRNA."

nRNA."

muscle isoform (Phosphorylase kinase alpha M subunit) (LOC646780), mRNA."

2A) (Template-activating factor I) (TAF-I) (HLA-DR-associated protein II) (PHAPII) (Inhibitor of gra

y group nucleosome binding domain 2) (LOC646853), mRNA."

a 2 isoform a (LOC646855), mRNA."

d (LOC646900), mRNA."

ZF-5) (Hematopoietic cell derived zinc finger protein 1) (HD-ZNF1) (LOC646906), mRNA."

like kinase 2) (PKU-alpha) (LOC646920), mRNA."

Rotamase Pin4) (PPIase Pin4) (Parvulin 14) (Par14) (Peptidyl-prolyl cis/trans isomerase EPVH) ( mRNA."

se 1 (LOC647058), mRNA."

."

."

A."

RNA."

647336), mRNA."

VA."

ex, gamma subunit isoform H (heart) precursor (LOC647340), mRNA."

47343), mRNA."

dependent formaldehyde dehydrogenase) (FDH), transcript variant 2 (LOC647346), mRNA."

complex 3 sigma-1 subunit) (Sigma-adaptin 3a) (AP-3 complex sigma-3A subunit) (Sigma-3A-adaptin 3) (LOC647353), mRNA."

(CT1) (Creatine transporter 1) (CHOT1) (Solute carrier family 6 member 8) (LOC647370), mRNA"

)), mRNA."

)), mRNA."

variant 2 (LOC647474), mRNA."

RNA."

"

A."

histamine-releasing factor) (HRF) (Fortilin) (LOC647673), mRNA."

) (LOC647723), mRNA."

l), mRNA."

precursor (LOC647836), mRNA."

ceptor) (Colon carcinoma laminin-binding protein) (NEM/1CHD4) (Multidrug resistance-associated

335), mRNA."

647958), mRNA."

00), mRNA."

648024), mRNA."

3P 11), transcript variant 4 (LOC648039), mRNA."

164), mRNA."

RNA."

tabilizing protein) (Single-strand RNA-binding protein) (hnRNP core protein A1) (HDP) (LOC6482

ssor QM) (Laminin receptor homolog) (LOC648237), mRNA."

ceptor) (Colon carcinoma laminin-binding protein) (NEM/1CHD4) (Multidrug resistance-associated



(Formin-binding protein 2) (LOC648366), mRNA."

NA."

nithine--oxo-acid aminotransferase) (LOC648399), mRNA."

}), mRNA."

otase) (ICE(rel)-II) (LOC648470), mRNA."

}), mRNA."

NA."

C648541), mRNA."

te 1 (LOC648581), mRNA."

† isoform a, transcript variant 6 (LOC648625), mRNA."

Rotamase Pin4) (PPIase Pin4) (Parvulin 14) (Par14) (Peptidyl-prolyl cis/trans isomerase EPVH) (LOC648645), mRNA."

), mRNA."

LOC648695), mRNA."

glucan glucanohydrolase) (LOC648749), mRNA."

}), mRNA."

(LOC648868), mRNA."

alkodystrophy protein) (ALDP) (LOC648897), mRNA."  
)', mRNA."

igen MZ2-E) (LOC648926), mRNA."

), mRNA."  
80), mRNA."

optosis inhibitory protein) (LOC648984), mRNA."  
, mRNA."

(LOC649049), mRNA."

71), mRNA."

ain precursor (MHC class I antigen DRB1\*9) (DR-9) (DR9), transcript variant 3 (LOC649143), mF  
i49150), mRNA."

ociated factor 1) (CAF1) (LOC649160), mRNA."

), mRNA."

NA."

iRNA."

cript variant 4 (LOC649214), mRNA."

649227), mRNA."

), mRNA."

l2 (LOC649270), mRNA."

precursor (LOC649279), mRNA."

649330), mRNA."

360), mRNA."

.OC649365), mRNA."

9414), mRNA."

.28) (LOC649436), mRNA."

script variant 1 (LOC649445), mRNA."

protein HIP) (LOC649447), mRNA."

ucleolar RNA, transcript variant 2 (LOC649477), mRNA."

int 2 (LOC649555), mRNA."

t 2 (LOC649604), mRNA."

), mRNA."

cript variant 2 (LOC649652), mRNA."

, mRNA."

precursor (LOC649686), mRNA."

l), mRNA."

NA."

'

precursor (MHC class I antigen A\*29) (Aw-19), transcript variant 1 (LOC649864), mRNA."

;649891), mRNA."

0), mRNA."

ene protein) (GTP-binding protein NGB) (LOC650010), mRNA."

ark homolog) (Hlark) (RNA-binding motif protein 4a), transcript variant 1 (LOC650029), mRNA."

phatidylcholine 2-acylhydrolase GIIC) (GIIC sPLA2) (PLA2-8) (14 kDa phospholipase A2) (LOC650033) (LOC650034), mRNA."

IA."

rc homology 2 domain containing transforming protein C1) (LOC650111), mRNA."  
RNA."

1) (LOC650200), mRNA."

5), mRNA."

A."

;650254), mRNA."

}), mRNA."

nRNA."

LOC650314), mRNA."  
d (LOC650321), mRNA."

nt 1 (LOC650339), mRNA."

ng RNA. XR\_037148 XR\_037345"  
369), mRNA."

A."

IBP-1 interacting protein 2A) (MIP-2A) (LOC650491), mRNA."

n) (Macropain iota chain) (Multicatalytic endopeptidase complex iota chain) (LOC650518), mRNA/  
(SRP1-alpha) (RAG cohort protein 1), transcript variant 8 (LOC650526), mRNA."

(RalGDS) (LOC650528), mRNA."

50546), mRNA."

er isoform (PHK-gamma-T) (Phosphorylase kinase gamma subunit 2) (PSK-C3) (LOC650556), I  
JA."

nRNA."

"

RNA."

."

'), mRNA."

i) (LOC650780), mRNA."

, mRNA."

LOC650832), mRNA."

(LOC650845), mRNA."

50898), mRNA."

(LOC650909), mRNA."

orm 1, transcript variant 1 (LOC650933), mRNA."

umor kinase substrate) (BRK substrate) (LOC650975), mRNA."

rotein 13) (Placenta protein 13) (PP13) (Galectin-13), transcript variant 2 (LOC651102), mRNA."

13 (LOC651116), mRNA."

LOC651137), mRNA."

41), mRNA."

}), mRNA."

186), mRNA."

nRNA."

(LOC651268), mRNA."

mRNA."

"

(LOC651575), mRNA."

nRNA."

l (LOC651580), mRNA."

A."

), mRNA."

VA."

51751), mRNA."

3), mRNA."

g enzyme E2-24 kDa) (Ubiquitin-protein ligase) (Ubiquitin carrier protein) (E2-EPF5) (LOC651810)  
small subunit, mitochondrial precursor (CybS) (Succinate-ubiquinone reductase membrane anchor  
chain precursor (MHC class I antigen DRB1\*1) (DR-1) (DR1) (LOC651845), mRNA."

macrophage myristoylated alanine-rich C kinase substrate) (Mac-MARCKS) (MacMARCKS) (LOC651846)  
serine-dependent 2 interacting protein (LOC651850), mRNA."

R-11) (CCR-11) (CC chemokine receptor-like 1) (CCRL1) (CCX CKR) (LOC651872), mRNA."

(LOC651919), mRNA."

921), mRNA."

factor) (LOC651961), mRNA."

mRNA."

it (LOC651987), mRNA."

997), mRNA."

nus) domain and RCC1 (CHC1)-like domain (RLD) 2 (LOC652045), mRNA."

."  
)", mRNA."

mRNA."  
)", mRNA."

mRNA."



28), mRNA."  
, mRNA."  
52140), mRNA."  
l), mRNA."  
VA."  
mRNA."

."  
C652164), mRNA."  
, mRNA."  
antigen) (gp200-MR6) (LOC652184), mRNA."  
A."

211), mRNA."

C652264), mRNA."  
NA."

PMS2) (LOC652294), mRNA."

LOC652317), mRNA."

nRNA."  
2335), mRNA."  
l), mRNA."

2377), mRNA."  
3 (LOC652379), mRNA."

asic transcription factor 2 44 kDa subunit) (BTF2-p44) (General transcription factor IIH polypeptide  
A."

pellucida glycoprotein ZP3) (Zona pellucida protein C) (Sperm receptor) (ZP3A/ZP3B) (LOC652  
r 1) (UBF-1) (LOC652438), mRNA."

ID1) (LOC652460), mRNA."

precursor (LOC652479), mRNA."

group nucleosome binding domain 2) (LOC652483), mRNA."  
, mRNA."

3), mRNA."

LOC652495), mRNA."

RNA."

."

( metalloproteinase RAS1) (MMP-18) (LOC652543), mRNA."

(Formin-binding protein 2) (LOC652553), mRNA."

D8b antigen) (LOC652565), mRNA."

homolog (LOC652568), mRNA."

."

(LOC652578), mRNA."

(LOC652589), mRNA."

LOC652595), mRNA."

1) (PABP 1) (LOC652607), mRNA."

ome subunit 1) (Protein Tsg24) (Mitotic checkpoint regulator) (LOC652615), mRNA."

protein Nup358) (Nucleoporin Nup358) (358 kDa nucleoporin) (P270) (LOC652620), mRNA."  
optosis inhibitory protein) (LOC652623), mRNA."

OC652637), mRNA."

l), mRNA."  
(LOC652661), mRNA."

ir protein) (LOC652670), mRNA."  
mRNA."

appa-recombination signal-binding protein) (RBP-J kappa) (RBP-J) (RBP-JK) (CBF-1) (NY-REN-  
me, family member B1 (LOC652683), mRNA."

PMS2) (LOC652685), mRNA."

4), mRNA."

finger protein) (AFP) (RING finger protein 95) (LOC652698), mRNA."

oxidase factor 1) (47 kDa neutrophil oxidase factor) (p47-phox) (NCF-47K) (47 kDa autosomal cl  
NA."

inding protein 1) (DDB p127 subunit) (DDBa) (UV-damaged DNA-binding protein 1) (UV-DDB 1)  
NA."

) (LOC652743), mRNA."

5), mRNA."

optosis inhibitory protein) (LOC652755), mRNA."

1 containing guanine nucleotide exchange factor 1) (PDZ-GEF1) (RA-GEF) (LOC652757), mRNA

NA."

mRNA."

OC652773), mRNA."

nRNA."

(MHC class I NK cell receptor) (Natural killer associated transcript 7) (NKAT-7) (LOC652779), ml  
.OC652781), mRNA."

nRNA."

sacle isozyme) (Cytosolic thyroid hormone-binding protein) (CTHBP) (THBP1) (LOC652797), mRN  
(Proto-oncogene tyrosine-protein kinase Kit) (c-kit) (CD117 antigen) (LOC652799), mRNA."

eracting protein) (TAT-binding protein 7) (TBP-7) (LOC652826), mRNA."

NA."

rRNA."

48), mRNA."

nit Tim23 (LOC652864), mRNA."

rRNA."

mRNA."

(LOC653066), mRNA."

71), mRNA."

ant 1 (LOC653075), mRNA."

ant 2 (LOC653082), mRNA."

t 6 (LOC653086), mRNA."

3094), mRNA."

peat-containing cofactor 1) (LOC653103), mRNA."

variant 3 (LOC653105), mRNA."

653108), mRNA."

variant 1 (LOC653115), mRNA."

matrix protein GM130), transcript variant 2 (LOC653125), mRNA."

pt variant 2 (LOC653127), mRNA."

transcript variant 2 (LOC653129), mRNA."

tein 45) (NBP-45) (GARP45 protein), transcript variant 5 (LOC653135), mRNA."

(VAC-beta), transcript variant 13 (LOC653145), mRNA."

LOC653158), mRNA."

53171), mRNA."

175), mRNA."

,

653197), mRNA."

6), mRNA."

53226), mRNA."

mRNA."

mRNA."

LOC653242), mRNA."

53244), mRNA."

lutamyltransferase 1) (CD224 antigen), transcript variant 5 (LOC653257), mRNA."

oned medium-induced protein 64 (Smag-64) (LOC653260), mRNA."

tein 45) (NBP-45) (GARP45 protein), transcript variant 2 (LOC653264), mRNA."

1 (LOC653308), mRNA."

oxidase factor 1) (47 kDa neutrophil oxidase factor) (p47-phox) (NCF-47K) (47 kDa autosomal cl  
ex, subunit f isoform 2b (LOC653324), mRNA."

LOC653344), mRNA."

cript variant 4 (LOC653352), mRNA."

ie (LOC653354), mRNA."

mRNA."

377), mRNA."

.LOC653380), mRNA."

37), mRNA."

53420), mRNA."

cript variant 5 (LOC653423), mRNA."

mRNA."

38), mRNA."

158), mRNA."

(Formin-binding protein 2) (LOC653464), mRNA."

variant 7 (LOC653471), mRNA."

mRNA."

(LOC653479), mRNA."

mRNA."

protein Nup358) (Nucleoporin Nup358) (358 kDa nucleoporin) (P270), transcript variant 7 (LOC6  
5), mRNA."

3), mRNA."

506), mRNA."  
C653513), mRNA."

region, candidate 16, transcript variant 4 (LOC653539), mRNA."

lifying protein 4b) (CHMP4b) (LOC653555), mRNA."

d-coil containing protein kinase 1) (p160 ROCK-1) (p160ROCK) (LOC653559), mRNA."  
atine), member 8, transcript variant 2 (LOC653562), mRNA."  
:Da subunit) (SPase 25 kDa subunit) (LOC653566), mRNA."  
RNA."

me, family member A1 (LOC653580), mRNA."

riant 2 (LOC653591), mRNA."

3598), mRNA."

Defensin, alpha 1) (LOC653600), mRNA."

), mRNA."

mRNA."

53623), mRNA."

linked to PML) (Golgin-like protein), transcript variant 2 (LOC653625), mRNA."

cript variant 2 (LOC653629), mRNA."

NA."

olgin-like protein), transcript variant 1 (LOC653641), mRNA."

45), mRNA."

), transcript variant 1 (LOC653650), mRNA."

nt 1 (LOC653663), mRNA."

SP)-associated factor, 250kDa (LOC653664), mRNA."

orecursor (ACE-T) (Dipeptidyl carboxypeptidase I) (Kininase II) (LOC653684), mRNA."

7), mRNA."

3722), mRNA."

l), mRNA."

A."

RNA."

IA."

X secretory phospholipase A2) (Phosphatidylcholine 2-acylhydrolase GX) (GX sPLA2) (sPLA2-)

mRNA."

mRNA."

variant 2 (LOC653820), mRNA."

653832), mRNA."

transcript variant 2 (LOC653855), mRNA."

3857), mRNA."

4), mRNA."

184) (LOC653877), mRNA."

gene AF4) (Protein FEL) (LOC653886), mRNA."

complex 41 kDa subunit) (p41-ARC) (LOC653888), mRNA."

(Mayven) (LOC653894), mRNA."

.OC653895), mRNA."

907), mRNA."

t variant 3 (LOC653930), mRNA."

YVE domain) member 2 (LOC653941), mRNA."

ption factor 2, transcript variant 2 (LOC653980), mRNA."

script variant 5 (LOC653994), mRNA."

Glutathione transferase T1-1), transcript variant 2 (LOC654020), mRNA."

script variant 1 (LOC654032), mRNA."

?, transcript variant 3 (LOC654042), mRNA."

ranscript variant 1 (LOC654074), mRNA."

IA."

VA."

ngomyelinase) (aSMase) (LOC654116), mRNA."

RNA."

\_OC654126), mRNA."

654127), mRNA."

ank2) (Proline-rich synapse associated protein 1) (ProSAP1) (Cortactin-binding protein 1) (CortBF

1 (LOC654133), mRNA."

ain precursor (LOC654155), mRNA."

163), mRNA."

aining 5 (LOC654165), mRNA."  
72), mRNA."

variant 1 (LOC654189), mRNA."  
NA."  
ariant 2 (LOC654202), mRNA."

rRNA."

"  
nRNA."  
6), mRNA."

."  
mRNA."

t variant 4 (LOC727761), mRNA."  
, 4, 15kDa, transcript variant 2 (LOC727762), mRNA."  
(LOC727773), mRNA."

), mRNA."

ore membrane protein of 121 kDa) (P145) (LOC727805), mRNA."

7), mRNA."

), mRNA."

'866), mRNA."



A."

5-10) and FAM7A (family with sequence similarity 7A, exons A-E) fusion (LOC727935), mRNA."  
41), miscRNA."

LOC727963), mRNA."

727994), mRNA."

RNA."

ursor (Flamingo homolog 2) (hFmi2) (LOC728032), mRNA."  
tein) (Kinesin-like protein 4) (LOC728037), mRNA."

728125), mRNA."

RNA."

\_OC728185), mRNA."  
88), mRNA."

728226), mRNA."  
) , mRNA."

(LOC728249), mRNA."

8343), mRNA."

lutamyltransferase 1) (CD224 antigen), transcript variant 2 (LOC728441), mRNA."

VA."

ta 2) (Skin-antimicrobial peptide 1) (SAP1) (LOC728454), mRNA."

4 (LOC728492), mRNA."  
ore membrane protein of 121 kDa) (P145) (LOC728499), mRNA."

optosis inhibitory protein) (LOC728519), mRNA."

RNA."

otransferase) (GMP synthetase) (LOC728564), mRNA."

3B (LOC728588), mRNA."

NA."

322), mRNA."

ript variant 1 (LOC728635), mRNA."

oding RNA."

JA."

8734), mRNA."  
A."

."

, mRNA."  
cytokine A3-like 1) (Tonsillar lymphocyte LD78 beta protein) (LD78-beta(1-70)) (G0/G1 switch re

A."

1) (LOC728910), mRNA."  
n 2, transcript variant 1 (LOC728919), mRNA."

8929), mRNA."

A."  
8945), mRNA."

RNA."

) (NHE-3) (Solute carrier family 9 member 3) (LOC728990), mRNA."

"The chemical reactions and pathways involving carbohydrates, any of a group of organic comp

086), mRNA."

'29090), mRNA."

non-coding RNA."

SP-A2) (SP-A) (PSP-A) (PSPA) (Alveolar proteinosis protein) (35 kDa pulmonary surfactant-assc

IA."

RNA."

oding RNA."

tabilizing protein) (Single-strand RNA-binding protein) (hnRNP core protein A1) (HDP) (LOC7294

), mRNA."  
C729446), mRNA."

) (LOC729486), mRNA."

29530), mRNA."

"

mRNA."

α (LOC729623), mRNA."

RNA."

29769), mRNA."

side diphosphate-linked moiety X motif 7) (Nudix motif 7) (LOC729777), mRNA."

mRNA."

d (LOC729898), mRNA."

A."

."

."  
tial miscRNA."

7), mRNA."

e (LOC730092) on chromosome 16.

730107), mRNA."

.OC730167), mRNA."

nRNA."  
dies (LOC730272), mRNA."



ore membrane protein of 121 kDa) (P145) (LOC730316), mRNA."

idogene (LOC730329), mRNA."

.."  
A."

NA."  
ariant 1 (LOC730432), mRNA."

.."  
tabilizing protein) (Single-strand RNA-binding protein) (hnRNP core protein A1) (HDP) (LOC7307  
RNA."  
'

A."

aining 1, transcript variant 1 (LOC730994), mRNA."

RNA."

ε kinase 3-like 1) (ATP-AMP transphosphorylase) (LOC731007), mRNA."

g enzyme E2-24 kDa) (Ubiquitin-protein ligase) (Ubiquitin carrier protein) (E2-EPF5) (LOC73104

082), mRNA."

ama) (LOC731096), mRNA."

'31170), mRNA."

31), mRNA."

log) (LOC731496), mRNA."

in precursor (DC-4 alpha chain) (LOC731682), mRNA."

C731751), mRNA."

ember 1 interacting protein (LOC731789), mRNA."

31878), mRNA."

isozyme B) (PGAM-B) (BPG-dependent PGAM 1) (LOC732007), mRNA."  
OC732075), mRNA."

omerase), transcript variant 2 (LOC732165), mRNA."

LOC732425), mRNA."

32445), mRNA."

OC90120), mRNA."

OC91316), non-coding RNA. XR\_040205 XR\_040206"

mRNA."

A."

The hydrolysis of a peptide bond or bonds within a protein using energy from the hydrolysis of A  
"The hydrolysis of a peptide bond or bonds within a protein using energy from the hydrolysis of /  
The hydrolysis of a peptide bond or bonds within a protein using energy from the hydrolysis of A  
The hydrolysis of a peptide bond or bonds within a protein using energy from the hydrolysis of A

"The hydrolysis of a peptide bond or bonds within a protein [goid 6508] [evidence IEA]; The che  
"The cascade of processes by which a signal interacts with a receptor, causing a change in the  
"The cascade of processes by which a signal interacts with a receptor, causing a change in the  
"The cascade of processes by which a signal interacts with a receptor, causing a change in the  
"The cascade of processes by which a signal interacts with a receptor, causing a change in the  
"The cascade of processes by which a signal interacts with a receptor, causing a change in the  
"The chemical reactions and pathways, including anabolism and catabolism, by which living org;  
"The chemical reactions and pathways resulting in the formation of platelet activating factor, 1-C

"The chemical reactions and pathways, including anabolism and catabolism, by which living org;  
"The cascade of processes by which a signal interacts with a receptor, causing a change in the  
"The cascade of processes by which a signal interacts with a receptor, causing a change in the

"The attachment of a cell, either to another cell or to an underlying substrate such as the extrac

"The aggregation, arrangement and bonding together of a set of components to form a protein c

"Any process specifically pertinent to the functioning of integrated living units: cells, tissues, orga  
, mRNA."

"The process whose specific outcome is the progression of nervous tissue over time, from its fo

"A form of programmed cell death induced by external or internal signals that trigger the activity

."  
."  
."  
."  
."  
|

ant 2, mRNA."

), mRNA."

"The process by which vesicles are directed to specific destination membranes, mediated by mi

"Any process that stops, prevents or reduces the frequency, rate or extent of Wnt receptor signa

"The chemical reactions and pathways involving lipids, compounds soluble in an organic solvent

"The uptake of external materials by cells, utilizing receptors to ensure specificity of transport. A

"The uptake of external materials by cells, utilizing receptors to ensure specificity of transport. A

"The process whose specific outcome is the progression of the kidney over time, from its format  
"A complex and coordinated series of cellular movements that occurs at the end of cleavage du  
"The hydrolysis of a peptide bond or bonds within a protein [goid 6508] [pmid 11152697] [eviden  
"The process of assisting in the covalent and noncovalent assembly of single chain polypeptides

The hydrolysis of a peptide bond or bonds within a protein [goid 6508] [evidence IEA]

"Any process specifically pertinent to the functioning of integrated living units: cells, tissues, orga

"The chemical reactions and pathways resulting in the breakdown of a protein or peptide by hyd

coding RNA. XM\_934274 XM\_941652 XM\_945358 XM\_945361 XM\_945364"  
) , mRNA."

"The chemical reactions and pathways resulting in the breakdown of a protein or peptide by hyd

The chemical reactions and pathways resulting in the formation of a protein. This is a ribosome-

"Any process specifically pertinent to the functioning of integrated living units: cells, tissues, orga

iant 1, mRNA."

"Any process specifically pertinent to the functioning of integrated living units: cells, tissues, orga

"Any process specifically pertinent to the functioning of integrated living units: cells, tissues, orga

"Cascade of at least three protein kinase activities culminating in the phosphorylation and activa

"The attachment of a cell, either to another cell or to an underlying substrate such as the extrac

MT), mRNA."

"The attachment of a cell, either to another cell or to an underlying substrate such as the extrac

"The directed movement of proteins into, out of, within or between cells [goid 15031] [evidence I

Any process involved in the conversion of a primary mRNA transcript into one or more mature r

Any process involved in the conversion of a primary mRNA transcript into one or more mature r

"The joining together of exons from one or more primary transcripts of nuclear messenger RNA

Any process involved in the conversion of a primary mRNA transcript into one or more mature r

Any process involved in the conversion of a primary mRNA transcript into one or more mature r

Any process involved in the conversion of a primary mRNA transcript into one or more mature r

"Any process involved in the conversion of a primary ribosomal RNA (rRNA) transcript into one c

"The joining together of exons from one or more primary transcripts of nuclear messenger RNA

"The joining together of exons from one or more primary transcripts of nuclear messenger RNA

"The directed movement of a motile cell or organism, or the directed growth of a cell guided by a

"The process whose specific outcome is the progression of the liver over time, from its formatio

"The chemical reactions and pathways resulting in the formation of steroids, compounds with a

"The developmental process by which the size or shape of a cell is generated and organized. M

"A process that directly activates any of the steps required for cell death by apoptosis [goid 6917

"The hydrolysis of a peptide bond or bonds within a protein [goid 6508] [evidence IEA]; The che

"Any immune system process that functions in the calibrated response of an organism to a pote

"Any process involved in the controlled movement of a cell [goid 6928] [pmid 9177352] [evidenc

"Any process specifically pertinent to the functioning of integrated living units: cells, tissues, orga

"The process whose specific outcome is the progression of the skeleton over time, from its form

"Any process that modulates the frequency, rate or extent of cell growth [goid 1558] [pmid 9660;

"The chemical reactions and pathways resulting in the formation of leukotriene, a pharmacologic  
"The directed movement of iron (Fe) ions into, out of, within or between cells [goid 6826] [evid  
"The process of introducing a phosphate group on to a protein [goid 6468] [pmid 7685902] [evid  
"Any process that stops, prevents or reduces the frequency, rate or extent of striated muscle de

The series of events involved in the perception of pain in which a sensory temperature stimulus  
Any series of molecular signals initiated by the binding of an extracellular ligand to a receptor on

"The process whose specific outcome is the progression of nervous tissue over time, from its for  
"A type of vesicle-mediated transport in which cells take up external materials or membrane con  
"A form of programmed cell death induced by external or internal signals that trigger the activity  
"The attachment of a cell, either to another cell or to an underlying substrate such as the extrac  
"The immediate defensive reaction (by vertebrate tissue) to infection or injury caused by chemic

"The chemical reactions and pathways, including anabolism and catabolism, by which living org;  
"Any process that modulates the frequency, rate or extent of DNA-dependent transcription [goid  
"The process of introducing a phosphate group on to a protein [goid 6468] [pmid 3561390] [evid

"The chemical reactions and pathways involving lipids, compounds soluble in an organic solvent  
"The chemical reactions and pathways involving lipids, compounds soluble in an organic solvent

The chemical reactions and pathways resulting in the breakdown of a cell wall [goid 16998] [evid  
The chemical reactions and pathways resulting in the breakdown of a cell wall [goid 16998] [evid  
The chemical reactions and pathways resulting in the breakdown of a cell wall [goid 16998] [evid  
The chemical reactions and pathways resulting in the breakdown of a cell wall [goid 16998] [evid  
"A process that is carried out at the cellular level which results in the formation, arrangement of  
"The immediate defensive reaction (by vertebrate tissue) to infection or injury caused by chemic

The process by which anatomical structures are generated and organized. Morphogenesis perta  
"The synthesis of either RNA on a template of DNA or DNA on a template of RNA [goid 6350] [p  
"Any process that stops, prevents or reduces the rate or extent of progression through the cell c;

"The directed movement of substances (such as macromolecules, small molecules, ions) into, out of, within or between cells [goid 15031] [evidence I]; The directed movement of substances, either within a vesicle or in the vesicle membrane, into, out of, within or between cells [goid 15031] [evidence I]; The biological process whose specific outcome is the progression of a multicellular organism over time [goid 6350] [evidence NAS];

"Progression through metaphase, the stage of mitosis at which chromosomes are firmly attached to the spindle apparatus [goid 6350] [evidence NAS]; Progression through mitosis, the division of the eukaryotic cell nucleus to produce two daughter cells [goid 6350] [evidence NAS]; The progression of biochemical and morphological phases and events that occur in a cell during the cell cycle [goid 6350] [evidence NAS]; The initiation of the activity of the inactive enzyme MAP kinase by phosphorylation by a MAPKK [goid 6350] [evidence NAS]; The progression of biochemical and morphological phases and events that occur in a cell during the cell cycle [goid 6350] [evidence NAS];

"The synthesis of either RNA on a template of DNA or DNA on a template of RNA [goid 6350] [evidence NAS]; Any process that modulates the frequency, rate or extent of DNA-dependent transcription [goid 6350] [evidence NAS]; The process whereby segments assume individual identities; exemplified in insects by the activity of homeobox genes [goid 6350] [evidence NAS]; The process whose specific outcome is the progression of the embryo in the uterus over time, from fertilization to implantation [goid 6350] [evidence NAS]; The attachment of a cell, either to another cell or to an underlying substrate such as the extracellular matrix [goid 6350] [evidence NAS];

"Any process specifically pertinent to the functioning of integrated living units: cells, tissues, organs, or organisms [goid 6350] [evidence NAS]; Any process specifically pertinent to the functioning of integrated living units: cells, tissues, organs, or organisms [goid 6350] [evidence NAS]; Any process that modulates the frequency, rate or extent of transcription from an RNA polymerase [goid 6350] [evidence NAS];

"Any process specifically pertinent to the functioning of integrated living units: cells, tissues, organs, or organisms [goid 6350] [evidence NAS]; A form of programmed cell death induced by external or internal signals that trigger the activity of caspases [goid 6350] [evidence NAS];

modulating factor signal transduction (Magmas), nuclear gene encoding mitochondrial protein, mRNA [goid 6350] [evidence NAS]; The nonsense-mediated decay pathway for nuclear-transcribed mRNAs degrades mRNAs in the cytoplasm [goid 6350] [evidence NAS]; Any process involved in the conversion of a primary mRNA transcript into one or more mature mRNAs [goid 6350] [evidence NAS]; The posttranslational glycosylation of protein via the N4 atom of peptidyl-asparagine forming N-linked glycan structures [goid 6350] [evidence NAS]; The process of introducing a phosphate group on to a protein [goid 6468] [evidence NAS]; The process of introducing a phosphate group on to a protein [goid 6468] [evidence NAS]; The multiplication or reproduction of smooth muscle cells, resulting in the expansion of a cell population [goid 6350] [evidence NAS];

"The clustering and aggregation of membrane rafts at a single cellular pole during activation of protein kinase C [goid 6350] [evidence NAS]; The directed movement of proteins into, out of, within or between cells [goid 15031] [evidence I]; The synthesis of either RNA on a template of DNA or DNA on a template of RNA [goid 6350] [evidence NAS]; Any process specifically pertinent to the functioning of integrated living units: cells, tissues, organs, or organisms [goid 6350] [evidence NAS]; The conversion of N-linked glycan structures from the initially transferred oligosaccharide to a mature glycan structure [goid 6350] [evidence NAS]; The posttranslational glycosylation of protein via the N4 atom of peptidyl-asparagine or the N1' atom of N-linked glycan structures [goid 6350] [evidence NAS]; The chemical reactions and pathways involving carbohydrates, any of a group of organic compounds [goid 6350] [evidence NAS]; The chemical reactions and pathways involving carbohydrates, any of a group of organic compounds [goid 6350] [evidence NAS]; The chemical reactions and pathways involving carbohydrates, any of a group of organic compounds [goid 6350] [evidence NAS]; The chemical reactions and pathways involving carbohydrates, any of a group of organic compounds [goid 6350] [evidence NAS]; The chemical reactions and pathways involving carbohydrates, any of a group of organic compounds [goid 6350] [evidence NAS];



"A process that results in a parallel arrangement of microtubules [goid 1578] [evidence IEA]; The  
The hydrolysis of a peptide bond or bonds within a protein [goid 6508] [evidence IEA]; The modi  
"The formation of a double membrane-bounded structure, the autophagosome, that occurs whe  
"The chemical reactions and pathways resulting in the breakdown of a protein or peptide by hyd  
"The chemical reactions and pathways resulting in the breakdown of a protein or peptide by hyd  
"A process that results in a parallel arrangement of microtubules [goid 1578] [pmid 15528209] [e  
"A process that results in a parallel arrangement of microtubules [goid 1578] [evidence IEA]; The  
"The process of introducing a phosphate group on to a protein [goid 6468] [evidence IEA]; Any p  
The initiation of the activity of the inactive enzyme MAP kinase kinase by phosphorylation by a M  
The process of introducing a phosphate group on to a protein [goid 6468] [evidence IEA]; The p  
"The initiation of the activity of the inactive enzyme MAP kinase by phosphorylation by a MAPKk  
"The process of introducing a phosphate group on to a protein [goid 6468] [evidence IEA]; The c  
"The initiation of the activity of the inactive enzyme MAP kinase by phosphorylation by a MAPKk  
"The process of introducing a phosphate group on to a protein [goid 6468] [evidence IEA]; A cha  
"The process of introducing a phosphate group on to a protein [goid 6468] [pmid 9808624] [evid  
"Progression through G1 phase, one of two 'gap' phases in the mitotic cell cycle; G1 is the interv  
"A series of reactions, mediated by protein kinases, which occurs as a result of a single trigger r  
"The initiation of the activity of the inactive enzyme MAP kinase kinase by phosphorylation by a  
The process of introducing a phosphate group on to a protein [goid 6468] [evidence IEA]  
"Cascade of at least three protein kinase activities culminating in the phosphorylation and activa  
"The initiation of the activity of the inactive enzyme MAP kinase kinase by phosphorylation by a  
"Cascade of at least three protein kinase activities culminating in the phosphorylation and activa  
"The process of introducing a phosphate group on to a protein [goid 6468] [pmid 9875215] [evid  
"Any process that activates or increases the frequency, rate, or extent of T cell cytokine producti  
"Any process that initiates the activity of the inactive enzyme MAP kinase kinase kinase [goid 18  
"Any process that activates or increases the frequency, rate or extent of an I-kappaB kinase/NF-  
IP3), mRNA."  
The process of introducing a phosphate group on to a protein [goid 6468] [evidence IEA]; The p  
"The initiation of the activity of the inactive enzyme JUN kinase by phosphorylation by a JUN kin  
"Any process that initiates the activity of the inactive enzyme MAP kinase kinase kinase [goid 18  
"The process of introducing a phosphate group on to a protein [goid 6468] [evidence IEA]; The p  
"The process of introducing a phosphate group on to a protein [goid 6468] [pmid 9275185] [evid  
"The process of introducing a phosphate group on to a protein [goid 6468] [pmid 9890973] [evid  
"The process of introducing a phosphate group on to a protein [goid 6468] [pmid 9038372] [evid  
"Any process that stops, prevents or reduces the frequency, rate or extent of microtubule depoly  
"A process that is carried out at the cellular level which results in the formation, arrangement of



"Any process that modulates the frequency, rate or extent of the synthesis of either RNA on a template of DNA or DNA on a template of RNA [goid 6350] [evidence IEA]; The chemical reactions and pathways resulting in the formation of a fatty acid, any of the aliphatic saturated fatty acids (MCM3APAS) on chromosome 21.

"Any process that modulates the frequency, rate or extent of DNA-dependent transcription [goid 6350] [evidence IEA]; The chemical reactions and pathways resulting in the breakdown of leucine, 2-amino-4-methylpentanoate (MCM3APAS) on chromosome 21.

"Any process that stops, prevents or reduces the frequency, rate or extent of transcription from a template of DNA or RNA [goid 6350] [evidence IEA]; The chemical reactions and pathways resulting in the breakdown of leucine, 2-amino-4-methylpentanoate (MCM3APAS) on chromosome 21.

"The synthesis of either RNA on a template of DNA or DNA on a template of RNA [goid 6350] [evidence IEA]; The chemical reactions and pathways resulting in the breakdown of leucine, 2-amino-4-methylpentanoate (MCM3APAS) on chromosome 21.

"In base excision repair, an altered base is removed by a DNA glycosylase enzyme, followed by the synthesis of a new base by DNA polymerase and ligation of the DNA strand by DNA ligase." [goid 6350] [evidence IEA]; The chemical reactions and pathways resulting in the breakdown of leucine, 2-amino-4-methylpentanoate (MCM3APAS) on chromosome 21.

Any process that terminates the activity of the active enzyme MAP kinase during osmolarity sensing." [goid 6350] [evidence IEA]; The chemical reactions and pathways resulting in the breakdown of leucine, 2-amino-4-methylpentanoate (MCM3APAS) on chromosome 21.

"The process whose specific outcome is the progression of the embryo in the uterus over time, from fertilization to implantation." [goid 6350] [evidence IEA]; The chemical reactions and pathways resulting in the breakdown of leucine, 2-amino-4-methylpentanoate (MCM3APAS) on chromosome 21.

"The biological process whose specific outcome is the progression of a multicellular organism from a single cell to a mature organism." [goid 6350] [evidence IEA]; The chemical reactions and pathways resulting in the breakdown of leucine, 2-amino-4-methylpentanoate (MCM3APAS) on chromosome 21.

"Any immune system process that functions in the calibrated response of an organism to a potential pathogen." [goid 6350] [evidence IEA]; The chemical reactions and pathways resulting in the breakdown of leucine, 2-amino-4-methylpentanoate (MCM3APAS) on chromosome 21.

"Any process that modulates the frequency, rate or extent of the synthesis of either RNA on a template of DNA or DNA on a template of RNA [goid 6350] [evidence IEA]; The chemical reactions and pathways resulting in the breakdown of leucine, 2-amino-4-methylpentanoate (MCM3APAS) on chromosome 21.

"The hydrolysis of a peptide bond or bonds within a protein [goid 6508] [evidence IEA]; The chemical reactions and pathways resulting in the breakdown of leucine, 2-amino-4-methylpentanoate (MCM3APAS) on chromosome 21.

"The hydrolysis of a peptide bond or bonds within a protein [goid 6508] [evidence IEA]; The chemical reactions and pathways resulting in the breakdown of leucine, 2-amino-4-methylpentanoate (MCM3APAS) on chromosome 21.

"The cascade of processes by which a signal interacts with a receptor, causing a change in the activity of a protein [goid 6508] [evidence IEA]; The chemical reactions and pathways resulting in the breakdown of leucine, 2-amino-4-methylpentanoate (MCM3APAS) on chromosome 21.

"The cascade of processes by which a signal interacts with a receptor, causing a change in the activity of a protein [goid 6508] [evidence IEA]; The chemical reactions and pathways resulting in the breakdown of leucine, 2-amino-4-methylpentanoate (MCM3APAS) on chromosome 21.

"The cascade of processes by which a signal interacts with a receptor, causing a change in the activity of a protein [goid 6508] [evidence IEA]; The chemical reactions and pathways resulting in the breakdown of leucine, 2-amino-4-methylpentanoate (MCM3APAS) on chromosome 21.

"The cascade of processes by which a signal interacts with a receptor, causing a change in the activity of a protein [goid 6508] [evidence IEA]; The chemical reactions and pathways resulting in the breakdown of leucine, 2-amino-4-methylpentanoate (MCM3APAS) on chromosome 21.

"The attachment of a cell, either to another cell or to an underlying substrate such as the extracellular matrix." [goid 6350] [evidence IEA]; The chemical reactions and pathways resulting in the breakdown of leucine, 2-amino-4-methylpentanoate (MCM3APAS) on chromosome 21.

"The directed movement of substances (such as macromolecules, small molecules, ions) into, out of, within or between cells [goid 15031] [evidence IEA]; The chemical reactions and pathways resulting in the breakdown of leucine, 2-amino-4-methylpentanoate (MCM3APAS) on chromosome 21.

"The chemical reactions and pathways resulting in the formation of a fatty acid, any of the aliphatic saturated fatty acids (MCM3APAS) on chromosome 21.

"The chemical reactions and pathways resulting in the breakdown of leucine, 2-amino-4-methylpentanoate (MCM3APAS) on chromosome 21.

"The chemical reactions and pathways resulting in the breakdown of leucine, 2-amino-4-methylpentanoate (MCM3APAS) on chromosome 21.

"The chemical reactions and pathways involving L-methylmalonyl-CoA, the levorotatory isomer of methylmalonyl-CoA (MCM3APAS) on chromosome 21.

"A series of reactions within the cell that occur as a result of a single trigger reaction or compound [goid 6350] [evidence IEA]; The chemical reactions and pathways resulting in the breakdown of leucine, 2-amino-4-methylpentanoate (MCM3APAS) on chromosome 21.

"The directed movement of proteins into, out of, within or between cells [goid 15031] [evidence IEA]; The chemical reactions and pathways resulting in the breakdown of leucine, 2-amino-4-methylpentanoate (MCM3APAS) on chromosome 21.

"The chemical reactions and pathways resulting in the formation of precursor metabolites, such as amino acids, nucleotides, and lipids [goid 6350] [evidence IEA]; The chemical reactions and pathways resulting in the breakdown of leucine, 2-amino-4-methylpentanoate (MCM3APAS) on chromosome 21.

"A process whereby force is generated within striated muscle tissue, resulting in a change in muscle length." [goid 6350] [evidence IEA]; The chemical reactions and pathways resulting in the breakdown of leucine, 2-amino-4-methylpentanoate (MCM3APAS) on chromosome 21.

"The process whereby new strands of DNA are synthesized. The template for replication can either be sense or antisense (MCM3APAS) on chromosome 21.

"The process whereby new strands of DNA are synthesized. The template for replication can either be sense or antisense (MCM3APAS) on chromosome 21.

The process whereby new strands of DNA are synthesized. The template for replication can either be sense or antisense (MCM3APAS) on chromosome 21.

"The process by which interchain hydrogen bonds between two strands of DNA are broken or reformed." [goid 6350] [evidence IEA]; The chemical reactions and pathways resulting in the breakdown of leucine, 2-amino-4-methylpentanoate (MCM3APAS) on chromosome 21.

"The process by which DNA replication is started; this involves the separation of a stretch of the DNA double helix." [goid 6350] [evidence IEA]; The chemical reactions and pathways resulting in the breakdown of leucine, 2-amino-4-methylpentanoate (MCM3APAS) on chromosome 21.

"The process whereby new strands of DNA are synthesized. The template for replication can either be sense or antisense (MCM3APAS) on chromosome 21.

"The process by which DNA replication is started; this involves the separation of a stretch of the DNA double helix." [goid 6350] [evidence IEA]; The chemical reactions and pathways resulting in the breakdown of leucine, 2-amino-4-methylpentanoate (MCM3APAS) on chromosome 21.

"The directed movement of cations, atoms or small molecules with a net positive charge, into, or  
"The directed movement of charged atoms or small charged molecules into, out of, within or bet  
"The directed movement of charged atoms or small charged molecules into, out of, within or bet

"The covalent alteration of one or more amino acids occurring in proteins, peptides and nascent  
A series of molecular signals in which a cell uses calcium ions to convert an extracellular signal

"Any process that modulates the frequency, rate or extent of cell growth [goid 1558] [evidence 1]

"The process of restoring DNA after damage. Genomes are subject to damage by chemical and

"The synthesis of either RNA on a template of DNA or DNA on a template of RNA [goid 6350] [e

"The characteristic movement of immature neurons from germinal zones to specific positions w/

"The chemical reactions and pathways resulting in the breakdown of a monosaccharide (genera

"The chemical reactions and pathways resulting in the breakdown of a monosaccharide (genera  
M1), transcript variant 1, mRNA."

"Passage through a cell cycle control point late in G1 phase of the mitotic cell cycle just before e

"Any process that stops, prevents or reduces the frequency, rate or extent of transcription from :

"Any process that modulates the frequency, rate or extent of protein complex assembly [goid 43

"The attachment of an adhesion molecule in one cell to an identical molecule in an adjacent cell

"The biological process whose specific outcome is the progression of a multicellular organism o

"The chemical reactions and pathways resulting in the formation of a fatty acid, any of the alphas

"The synthesis of either RNA on a template of DNA or DNA on a template of RNA [goid 6350] [e

"The synthesis of either RNA on a template of DNA or DNA on a template of RNA [goid 6350] [e

"The synthesis of either RNA on a template of DNA or DNA on a template of RNA [goid 6350] [e

"The synthesis of either RNA on a template of DNA or DNA on a template of RNA [goid 6350] [e

"The synthesis of either RNA on a template of DNA or DNA on a template of RNA [goid 6350] [e

"The synthesis of either RNA on a template of DNA or DNA on a template of RNA [goid 6350] [e

"The synthesis of either RNA on a template of DNA or DNA on a template of RNA [goid 6350] [e

"The synthesis of either RNA on a template of DNA or DNA on a template of RNA [goid 6350] [e

"The synthesis of either RNA on a template of DNA or DNA on a template of RNA [goid 6350] [e

"The synthesis of either RNA on a template of DNA or DNA on a template of RNA [goid 6350] [e

"The synthesis of either RNA on a template of DNA or DNA on a template of RNA [goid 6350] [e

"The synthesis of either RNA on a template of DNA or DNA on a template of RNA [goid 6350] [e

"The synthesis of either RNA on a template of DNA or DNA on a template of RNA [goid 6350] [p

"The synthesis of either RNA on a template of DNA or DNA on a template of RNA [goid 6350] [e

"The synthesis of either RNA on a template of DNA or DNA on a template of RNA [goid 6350] [e

"The synthesis of either RNA on a template of DNA or DNA on a template of RNA [goid 6350] [e

"The synthesis of either RNA on a template of DNA or DNA on a template of RNA [goid 6350] [e

"The synthesis of either RNA on a template of DNA or DNA on a template of RNA [goid 6350] [e

"The synthesis of either RNA on a template of DNA or DNA on a template of RNA [goid 6350] [e

"The synthesis of either RNA on a template of DNA or DNA on a template of RNA [goid 6350] [e

"The synthesis of either RNA on a template of DNA or DNA on a template of RNA [goid 6350] [e

"The synthesis of either RNA on a template of DNA or DNA on a template of RNA [goid 6350] [e

"The synthesis of either RNA on a template of DNA or DNA on a template of RNA [goid 6350] [e

"Any process that modulates the frequency, rate or extent of DNA-dependent transcription [goid  
"The synthesis of either RNA on a template of DNA or DNA on a template of RNA [goid 6350] [e  
"Any process that activates or increases the frequency, rate or extent of transcription from the R  
"Any process that modulates the frequency, rate or extent of transcription from an RNA polymer  
"The synthesis of either RNA on a template of DNA or DNA on a template of RNA [goid 6350] [e  
"The synthesis of either RNA on a template of DNA or DNA on a template of RNA [goid 6350] [e  
"The synthesis of either RNA on a template of DNA or DNA on a template of RNA [goid 6350] [e  
"The synthesis of either RNA on a template of DNA or DNA on a template of RNA [goid 6350] [e  
"The process whose specific outcome is the progression of the blood vessel over time, from its f  
"The synthesis of either RNA on a template of DNA or DNA on a template of RNA [goid 6350] [e

"Any process specifically pertinent to the functioning of integrated living units: cells, tissues, orga  
"Any process specifically pertinent to the functioning of integrated living units: cells, tissues, orga  
"Progression through the nuclear division phase of a meiotic cell cycle, the specialized nuclear a

"Any process that stops, prevents or reduces the frequency, rate or extent of transcription from a  
"Any process that modulates the frequency, rate or extent of DNA-dependent transcription [goid  
The process of introducing a phosphate group on to a protein [goid 6468] [evidence IEA]

"The modification of histones by addition of methyl groups [goid 16571] [evidence IEA]; Any pro

"The process whose specific outcome is the progression of the skeleton over time, from its form  
"The process of introducing a phosphate group on to a protein [goid 6468] [evidence IEA]; The p

"The developmental process by which the heart is generated and organized. The heart is a hollow  
"The formation of mesodermal clusters that are arranged segmentally along the anterior posterior  
"The process whose specific outcome is the progression of the mesoderm over time, from its for  
"The process of introducing a phosphate group on to a protein [goid 6468] [evidence IEA]; The k  
"Any process that modulates the frequency, rate or extent of the chemical reactions and pathwa  
"The hydrolysis of a peptide bond or bonds within a protein [goid 6508] [evidence IEA]; The post  
"The biological process whose specific outcome is the progression of a multicellular organism ov  
."

RNA."

The covalent alteration of one or more nucleotides within a tRNA molecule to produce a tRNA r

tein, mRNA."

"Posttranscriptional addition of a methyl group to either a nucleotide or 2'-O ribose in a polyribor  
"The chemical reactions and pathways involving nucleobases, nucleosides, nucleotides and nuc

The addition of a methyl group to a protein amino acid. A methyl group is derived from methane  
"The chemical reactions and pathways, including anabolism and catabolism, by which living org;  
"The chemical reactions and pathways, including anabolism and catabolism, by which living org;

"The phosphorylation by a protein of one or more of its own amino acid residues, or residues on

"Any process specifically pertinent to the functioning of integrated living units: cells, tissues, orga

"The cascade of processes by which a signal interacts with a receptor, causing a change in the  
mRNA."

"The attachment of a cell, either to another cell or to an underlying substrate such as the extracel  
Any series of molecular signals in which a small monomeric GTPase relays one or more of the s

"The directed movement of charged atoms or small charged molecules into, out of, within or bet

"The process of directing proteins towards and into the mitochondrion, mediated by mitochondri

Any developmental process that results in the creation of defined areas or spaces within an orga

"The directed movement of substances (such as macromolecules, small molecules, ions) into, o

"The directed movement of substances (such as macromolecules, small molecules, ions) into, o

"Any process specifically pertinent to the functioning of integrated living units: cells, tissues, orga

"The directed movement of substances (such as macromolecules, small molecules, ions) into, o

"The directed movement of substances (such as macromolecules, small molecules, ions) into, o

"The directed movement of substances (such as macromolecules, small molecules, ions) into, o

"The directed movement of substances (such as macromolecules, small molecules, ions) into, o

"Any process that modulates the frequency, rate or extent of DNA-dependent transcription [goid

"The chemical reactions and pathways involving carbohydrates, any of a group of organic comp

"The chemical reactions and pathways resulting in the formation of oligosaccharides, molecules

"The chemical reactions and pathways involving carbohydrates, any of a group of organic comp

"The chemical reactions and pathways involving carbohydrates, any of a group of organic comp

, mRNA."

"Any process that modulates the frequency, rate or extent of the synthesis of either RNA on a te

"Any process that stops, prevents or reduces the frequency, rate or extent of transcription from a

"Movement of organelles, other microtubules and other particles along microtubules, mediated k

The chemical reactions and pathways resulting in the formation of a protein. This is a ribosome-

rRNA."

"A process that is carried out at the cellular level which results in the formation, arrangement of r

RNA."

The chemical reactions and pathways resulting in the formation of a protein. This is a ribosome- (MGC71993), mRNA."

The series of molecular signals generated as a consequence of a G-protein coupled receptor binding (37042), mRNA."

The chemical reactions and pathways resulting in the formation of a protein. This is a ribosome-

"The chemical reactions and pathways resulting in the breakdown of glycoproteins, any protein

"The chemical reactions and pathways involving lipids, compounds soluble in an organic solvent

"The re-formation of a broken phosphodiester bond in the DNA backbone, carried out by DNA ligase

"The condensation of mesenchymal cells that have been committed to differentiate into chondrocytes

"The chemical reactions and pathways involving glutathione, the tripeptide glutamylcysteinylglycine

"The cascade of processes by which a signal interacts with a receptor, causing a change in the

"The chemical reactions and pathways involving lipids, compounds soluble in an organic solvent

"The binding of a cell to the extracellular matrix via adhesion molecules [goid 7160] [evidence IEA]

"Any process that activates or increases the frequency, rate, or extent of leukocyte migration [goid 37042] [evidence IEA]; The cleavage of RNA."

"The process whose specific outcome is the progression of the blood vessel over time, from its formation

"The chemical reactions and pathways resulting in the breakdown of a protein or peptide by hydrolysis

"Any immune system process that functions in the calibrated response of an organism to a potential

"The chemical reactions and pathways involving aromatic compounds, any organic compound

"The chemical reactions and pathways involving aromatic compounds, any organic compound

"The biological process whose specific outcome is the progression of a multicellular organism or

The chemical reactions and pathways resulting in the formation of substances; typically the energy

"Any immune system process that functions in the calibrated response of an organism to a potential

"Any process that stops, prevents or reduces the frequency, rate or extent of microtubule depolymerization

"The covalent alteration of one or more amino acids occurring in proteins, peptides and nascent

"The synthesis of either RNA on a template of DNA or DNA on a template of RNA [goid 6350] [evidence IEA]

"The synthesis of either RNA on a template of DNA or DNA on a template of RNA [goid 6350] [evidence IEA]

"The chemical reactions and pathways resulting in the formation of prostaglandins, any of a group

"Any process that modulates the frequency, rate or extent of the chemical reactions and pathways

non-coding RNA."

"The process of the formation of the constituents of the ribosome subunits, their assembly, and

"The chemical reactions and pathways involving a polyphosphate, the anion or salt of polyphosphate

"The hydrolysis of a peptide bond or bonds within a protein [goid 6508] [evidence IEA]; The cleavage







"The progression of biochemical and morphological phases and events that occur in a cell during the cell cycle [goid 15031] [evidence IEA]

"The directed movement of proteins into, out of, within or between cells [goid 15031] [evidence IEA]

"Any process that modulates the frequency, rate or extent of DNA-dependent transcription [goid 6350] [evidence IEA]

"Any process that modulates the frequency, rate or extent of DNA-dependent transcription [goid 6350] [evidence IEA]

"The progression of biochemical and morphological phases and events that occur in a cell during the cell cycle [goid 15031] [evidence IEA]

"The aggregation, arrangement and bonding together of a set of components to form a protein complex [goid 6350] [evidence IEA]

"The process of assisting in the covalent and noncovalent assembly of single chain polypeptides [goid 6350] [evidence IEA]

"Any process that modulates the frequency, rate or extent of DNA-dependent transcription [goid 6350] [evidence IEA]

"The synthesis of either RNA on a template of DNA or DNA on a template of RNA [goid 6350] [evidence IEA]

"The cascade of processes by which a signal interacts with a receptor, causing a change in the cell's response [goid 6350] [evidence IEA]

"Any process that modulates the frequency, rate or extent of the chemical reactions and pathways [goid 6350] [evidence IEA]

"Any process that modulates the frequency, rate or extent of the chemical reactions and pathways [goid 6350] [evidence IEA]

"Any process specifically pertinent to the functioning of integrated living units: cells, tissues, organs [goid 6350] [evidence IEA]

"Any process specifically pertinent to the functioning of integrated living units: cells, tissues, organs [goid 6350] [evidence IEA]

"Any process that modulates the frequency, rate or extent of DNA-dependent transcription [goid 6350] [evidence IEA]

"The process whereby a precursor cell type acquires the specialized features of a myeloid progenitor cell [goid 6350] [evidence IEA]

"The synthesis of either RNA on a template of DNA or DNA on a template of RNA [goid 6350] [evidence IEA]

"Reactions, triggered in response to the presence of a foreign body or the occurrence of an injury [goid 6350] [evidence IEA]

"Progression through the third stage of prophase I in meiosis, in which crossing over occurs between homologous chromosomes [goid 6350] [evidence IEA]

The process of introducing a phosphate group on to a protein [goid 6468] [evidence IEA]

"The synthesis of either RNA on a template of DNA or DNA on a template of RNA [goid 6350] [evidence IEA]

"The process whose specific outcome is the progression of the embryo in the uterus over time, from fertilization to implantation [goid 6350] [evidence IEA]

"The synthesis of either RNA on a template of DNA or DNA on a template of RNA [goid 6350] [evidence IEA]

"The progression of biochemical and morphological phases and events that occur in a cell during the cell cycle [goid 15031] [evidence IEA]

"The synthesis of either RNA on a template of DNA or DNA on a template of RNA [goid 6350] [evidence IEA]

inslocated to, 10 (MLLT10), transcript variant 1, mRNA."

inslocated to, 11 (MLLT11), mRNA."

"Any process that modulates the frequency, rate or extent of DNA-dependent transcription [goid 6350] [evidence IEA]

"The process of targeting specific proteins to particular membrane-bounded subcellular organelles [goid 6350] [evidence IEA]

"The directed movement of molecules between the nucleus and the cytoplasm [goid 6913] [evidence IEA]

"The chemical reactions and pathways involving acetyl-CoA, a derivative of coenzyme A in which the acetyl group is transferred to various molecules [goid 6350] [evidence IEA]

"The directed movement of amino acids, organic acids containing one or more amino substituents [goid 6350] [evidence IEA]



The process of introducing a phosphate group on to a protein [goid 6468] [evidence IEA]

"The process whose specific outcome is the progression of the heart over time, from its formative

"The biological process whose specific outcome is the progression of a multicellular organism or

"The chemical reactions and pathways resulting in the breakdown of histidine, 2-amino-3-(1H-imidazol-2-yl)propanoic acid

"The process of assisting in the covalent and noncovalent assembly of single chain polypeptides; includes the assembly of the protein backbone and the assembly of the protein side chains." [goid 6468] [evidence IEA]

Any process involved in the conversion of a primary ribosomal RNA (rRNA) transcript into one or more mature rRNA molecules.

"Progression through M phase, the part of the mitotic cell cycle during which mitosis takes place

"The formation or destruction of chromatin structures [goid 6333] [evidence IEA]; The progression through M phase, the part of the mitotic cell cycle during which mitosis takes place

"Progression through M phase, the part of the mitotic cell cycle during which mitosis takes place

"The chemical reactions and pathways involving carbohydrates, any of a group of organic compounds that are soluble in water and contain the aldehyde or ketone functional group." [goid 6333] [evidence IEA]

"A change in state or activity of a cell or an organism (in terms of movement, secretion, enzyme production, gene expression, etc.) in response to a signal." [goid 6333] [evidence IEA]

"The cascade of processes by which a signal interacts with a receptor, causing a change in the activity of a protein or enzyme." [goid 6333] [evidence IEA]

"The cascade of processes by which a signal interacts with a receptor, causing a change in the expression of a gene." [goid 6333] [evidence IEA]

"The aggregation, arrangement and bonding together of a set of components to form a protein complex." [goid 6333] [evidence IEA]

"The process whose specific outcome is the progression of nervous tissue over time, from its formative stage to the mature state." [goid 6333] [evidence IEA]

"The directed movement of sulfate into, out of, within or between cells [goid 8272] [evidence IEA]

"The maintenance of the structure and integrity of the mitochondrial genome; includes replication and repair of mitochondrial DNA." [goid 8272] [evidence IEA]

ing mitochondrial protein, mRNA." [goid 8272] [evidence IEA]

The series of molecular signals generated as a consequence of a transmembrane receptor tyrosine kinase activation." [goid 8272] [evidence IEA]

"The attachment of a cell, either to another cell or to an underlying substrate such as the extracellular matrix." [goid 8272] [evidence IEA]

The process by which an antigen-presenting cell expresses a peptide antigen on its cell surface." [goid 8272] [evidence IEA]

"The directed movement of substances (such as macromolecules, small molecules, ions) into, out of, or within a cell." [goid 8272] [evidence IEA]

"Any process that modulates the frequency, rate or extent of DNA recombination during mitosis." [goid 8272] [evidence IEA]

"The process whereby a relatively unspecialized cell acquires specialized features of a melanocyte." [goid 8272] [evidence IEA]

A."

"The cascade of processes by which a signal interacts with a receptor, causing a change in the activity of a protein or enzyme." [goid 8272] [evidence IEA]

"The cascade of processes by which a signal interacts with a receptor, causing a change in the expression of a gene." [goid 8272] [evidence IEA]

Any process involved in the conversion of one or more primary RNA transcripts into one or more mature RNA molecules.

The chemical reactions and pathways resulting in the formation of a protein. This is a ribosome-mediated process." [goid 8272] [evidence IEA]

The chemical reactions and pathways resulting in the formation of a protein. This is a ribosome-mediated process." [goid 8272] [evidence IEA]



The chemical reactions and pathways resulting in the formation of a protein. This is a ribosome-  
"The chemical reactions and pathways resulting in the formation of a protein. This is a ribosome-  
The chemical reactions and pathways resulting in the formation of a protein. This is a ribosome-  
The chemical reactions and pathways resulting in the formation of a protein. This is a ribosome-  
The chemical reactions and pathways resulting in the formation of a protein. This is a ribosome-  
The chemical reactions and pathways resulting in the formation of a protein. This is a ribosome-  
The chemical reactions and pathways resulting in the formation of a protein. This is a ribosome-  
The chemical reactions and pathways resulting in the formation of a protein. This is a ribosome-  
The chemical reactions and pathways resulting in the formation of a protein. This is a ribosome-  
The chemical reactions and pathways resulting in the formation of a protein. This is a ribosome-  
"Any process specifically pertinent to the functioning of integrated living units: cells, tissues, orga  
ndrial protein, mRNA."

"The chemical reactions and pathways resulting in the formation of a protein. This is a ribosome-  
The chemical reactions and pathways resulting in the formation of a protein. This is a ribosome-  
"The series of events required to receive a stimulus indicating DNA damage has occurred and c  
ndrial protein, mRNA."

"Any process specifically pertinent to the functioning of integrated living units: cells, tissues, orga  
"The chemical reactions and pathways resulting in the formation of a protein. This is a ribosome  
ndrial protein, mRNA."

The chemical reactions and pathways resulting in the formation of a protein. This is a ribosome-  
ndrial protein, mRNA."

"The series of events required to receive a stimulus indicating DNA damage has occurred and c  
The chemical reactions and pathways resulting in the formation of a protein. This is a ribosome-  
The chemical reactions and pathways resulting in the formation of a protein. This is a ribosome-  
The chemical reactions and pathways resulting in the formation of a protein. This is a ribosome-  
The chemical reactions and pathways resulting in the formation of a protein. This is a ribosome-  
The chemical reactions and pathways resulting in the formation of a protein. This is a ribosome-  
"The chemical reactions and pathways resulting in the formation of a protein. This is a ribosome  
The chemical reactions and pathways resulting in the formation of a protein. This is a ribosome-  
MRS2P2), non-coding RNA."

"The process of the formation of the constituents of the ribosome subunits, their assembly, and

"Any immune system process that functions in the calibrated response of an organism to a pote

"The cascade of processes by which a signal interacts with a receptor, causing a change in the

"The cascade of processes by which a signal interacts with a receptor, causing a change in the

"The cascade of processes by which a signal interacts with a receptor, causing a change in the

"A system for the correction of errors introduced during DNA replication when an incorrect base,

"A system for the correction of errors introduced during DNA replication when an incorrect base,

"A system for the correction of errors introduced during DNA replication when an incorrect base,

"A system for the correction of errors introduced during DNA replication when an incorrect base,

"

"The formation or destruction of chromatin structures [goid 6333] [evidence IEA]; The synthesis  
"The attachment of a cell, either to another cell or to an underlying substrate such as the extrac

"Any process involved in the controlled movement of a cell [goid 6928] [pmid 16130169] [eviden  
"The uptake of external materials by cells, utilizing receptors to ensure specificity of transport. A  
"The covalent alteration of one or more amino acids occurring in proteins, peptides and nascent  
The process of restoring a protein to its original state after damage by such things as oxidation c

"The hydrolysis of a peptide bond or bonds within a protein [goid 6508] [evidence IEA]; The sequ  
"The process of introducing a phosphate group on to a protein [goid 6468] [evidence IEA]; Any p  
The process of introducing a phosphate group on to a protein [goid 6468] [pmid 11641781] [evic  
"Any process that establish the spatial arrangement of mitochondria between and within cells [g  
"Any process that stops, prevents or reduces the frequency, rate or extent of transcription from a  
"Any process specifically pertinent to the functioning of integrated living units: cells, tissues, orga  
"Any process specifically pertinent to the functioning of integrated living units: cells, tissues, orga  
"Any process specifically pertinent to the functioning of integrated living units: cells, tissues, orga

"Any process specifically pertinent to the functioning of integrated living units: cells, tissues, orga  
"A change in state or activity of a cell or an organism (in terms of movement, secretion, enzyme  
"The regulation of the levels, transport, and metabolism of copper ions within a cell or between a  
"A change in state or activity of a cell or an organism (in terms of movement, secretion, enzyme  
"Any process that modulates the frequency, rate or extent of DNA-dependent transcription [goid  
"Any process that stops, prevents or reduces the frequency, rate or extent of transcription from a  
"Any process that modulates the frequency, rate or extent of DNA-dependent transcription [goid  
"The chemical reactions and pathways involving nucleobases, nucleosides, nucleotides and nuc  
"The chemical reactions and pathways resulting in the breakdown of a protein or peptide by hyd  
"The directed movement of substances (such as macromolecules, small molecules, ions) into, o  
"The directed movement of substances (such as macromolecules, small molecules, ions) into, o  
"The multiplication or reproduction of cells, resulting in the expansion of a cell population [goid 8

"The synthesis of either RNA on a template of DNA or DNA on a template of RNA [goid 6350] [e

"The synthesis of either RNA on a template of DNA or DNA on a template of RNA [goid 6350] [e  
g mitochondrial protein, mRNA."

"The chemical reactions and pathways resulting in the formation of histidine, 2-amino-3-(1H-imic  
"The chemical reactions and pathways involving compounds containing a single carbon atom [g  
"The chemical reactions and pathways, including anabolism and catabolism, by which living orga  
"The chemical reactions and pathways resulting in the formation of histidine, 2-amino-3-(1H-imic  
"The chemical reactions and pathways resulting in the formation of methionine (2-amino-4-(metl  
"The chemical reactions and pathways resulting in the formation of folic acid and its derivatives |



The chemical reactions and pathways resulting in the formation of folic acid and its derivatives [goid 6446] [pmid 10711111]

"Any process that modulates the frequency, rate or extent of translational initiation [goid 6446] [pmid 10711111]

"Any process that modulates the frequency, rate or extent of translational initiation [goid 6446] [pmid 10711111]

The process of removing one or more phosphoric (ester or anhydride) residues from a molecule [goid 6470] [pmid 10711111]

The process of removing one or more phosphoric (ester or anhydride) residues from a molecule [goid 6470] [pmid 10711111]

The process of removing one or more phosphoric (ester or anhydride) residues from a molecule [goid 6470] [pmid 10711111]

The process of removing one or more phosphoric (ester or anhydride) residues from a molecule [goid 6470] [pmid 10711111]

The process of removing one or more phosphoric (ester or anhydride) residues from a molecule [goid 6470] [pmid 10711111]

The process of removing one or more phosphoric (ester or anhydride) residues from a molecule [goid 6470] [pmid 10711111]

"The process of restoring DNA after damage. Genomes are subject to damage by chemical and physical agents [goid 6470] [pmid 10711111]

"The process of removing one or more phosphoric (ester or anhydride) residues from a molecule [goid 6470] [pmid 10711111]

The process of removing one or more phosphoric residues from a protein [goid 6470] [pmid 10711111]

The process of removing one or more phosphoric residues from a protein [goid 6470] [pmid 10711111]

The process of removing one or more phosphoric residues from a protein [goid 6470] [pmid 10711111]

The process of removing one or more phosphoric (ester or anhydride) residues from a molecule [goid 6470] [pmid 10711111]

"The cascade of processes by which a signal interacts with a receptor, causing a change in the activity of a protein [goid 6470] [pmid 10711111]

"The process by which a pre-tRNA molecule is converted to a mature tRNA, ready for addition to a growing polypeptide chain [goid 6470] [pmid 10711111]

"A form of programmed cell death induced by external or internal signals that trigger the activity of caspases [goid 6470] [pmid 10711111]

"Any process that modulates the frequency, rate or extent of the chemical reactions and pathways [goid 6470] [pmid 10711111]

"The process whose specific outcome is the progression of nervous tissue over time, from its formation to its maintenance [goid 6470] [pmid 10711111]

"Any process that modulates the frequency, rate or extent of translational termination [goid 6446] [pmid 10711111]

"The process resulting in the release of a polypeptide chain from the ribosome, usually in response to a signal [goid 6446] [pmid 10711111]

"The chemical reactions and pathways resulting in the formation of amino acids, organic acids and other small molecules [goid 6446] [pmid 10711111]

"Any process involved in the controlled movement of a cell [goid 6928] [pmid 12570871] [evidence 1]

"The directed movement of lipids into, out of, within or between cells. Lipids are compounds soluble in organic solvents [goid 15031] [evidence 1]

"Any process that stops, prevents or reduces the rate or extent of progression through the cell cycle [goid 15031] [evidence 1]

"The directed movement of proteins into, out of, within or between cells [goid 15031] [evidence 1]

"Transport of substances into, out of or within a mitochondrion [goid 6839] [pmid 10381257] [evidence 1]

"The directed movement of proteins into, out of, within or between cells [goid 15031] [evidence 1]

"A form of programmed cell death induced by external or internal signals that trigger the activity of caspases [goid 6470] [pmid 10711111]

"The initiation of the activity of the inactive enzyme MAP kinase by phosphorylation by a MAP kinase [goid 6470] [pmid 10711111]

"Any process specifically pertinent to the functioning of integrated living units: cells, tissues, organs [goid 6470] [pmid 10711111]

Protection of epithelial surfaces of the gastrointestinal tract from proteolytic and caustic digestive enzymes [goid 6470] [pmid 10711111]

"The division of a mitochondrion within a cell to form two or more separate mitochondrial compartments [goid 6470] [pmid 10711111]

"The process of restoring DNA after damage. Genomes are subject to damage by chemical and physical agents [goid 6470] [pmid 10711111]

"The chemical reactions and pathways, including anabolism and catabolism, by which living organisms obtain energy and matter [goid 6470] [pmid 10711111]

"In base excision repair, an altered base is removed by a DNA glycosylase enzyme, followed by replacement of the missing base [goid 6470] [pmid 10711111]

"The chemical reactions and pathways resulting in the formation of cholesterol, cholest-5-en-3 beta-hydroxy and other sterols [goid 6470] [pmid 10711111]

"The chemical reactions and pathways resulting in the formation of cholesterol, cholest-5-en-3 beta-hydroxy and other sterols [goid 6470] [pmid 10711111]

"The directed movement of proteins into, out of, within or between cells [goid 15031] [evidence I  
"A process that directly activates any of the steps required for cell death by apoptosis [goid 6917  
"Reactions, triggered in response to the presence of a foreign body or the occurrence of an inju  
"Any process that modulates the frequency, rate or extent of DNA-dependent transcription [goid  
"Any process that modulates the frequency, rate or extent of DNA-dependent transcription [goid  
"Any process that stops, prevents or reduces the frequency, rate or extent of transcription from a  
"Any process that modulates the frequency, rate or extent of the synthesis of either RNA on a te

."

"Progression from G1 phase to S phase of the mitotic cell cycle [goid 82] [evidence IEA]; Any pr  
"The synthesis of either RNA on a template of DNA or DNA on a template of RNA [goid 6350] [e  
"Any process that modulates the frequency, rate or extent of the synthesis of either RNA on a te  
"Any process that modulates the frequency, rate or extent of the synthesis of either RNA on a te  
"A process whereby force is generated within striated muscle tissue, resulting in a change in mu  
"The developmental process by which the heart is generated and organized. The heart is a hollc  
"Any process that modulates the frequency, rate or extent of striated muscle contraction [goid 69  
"Any process that modulates the frequency, rate or extent of DNA-dependent transcription [goid  
"Any process that modulates the frequency, rate or extent of DNA-dependent transcription [goid  
"The synthesis of either RNA on a template of DNA or DNA on a template of RNA [goid 6350] [e  
"Any process that modulates the frequency, rate or extent of transcription from an RNA polymer

"A change in state or activity of an organism (in terms of movement, secretion, enzyme producti  
"The formation of mesodermal clusters that are arranged segmentally along the anterior posterio  
"The formation of mesodermal clusters that are arranged segmentally along the anterior posterio  
"A cell cycle process that results in the division of the cytoplasm of a cell after mitosis, resultin  
"A process whereby force is generated within striated muscle tissue, resulting in a change in mu  
"A process whereby force is generated within striated muscle tissue, resulting in a change in mu  
"A process whereby force is generated within striated muscle tissue, resulting in a change in mu  
"A process that is carried out at the cellular level which results in the formation, arrangement of  
"The process whose specific outcome is the progression of the muscle over time, from its forma

"Any process that modulates the frequency, rate or extent of striated muscle contraction [goid 69  
"Any process that modulates the extent of heart contraction, changing the force with which bloo  
"Any process that modulates the extent of heart contraction, changing the force with which bloo  
"Any process that modulates the frequency, rate or extent of muscle contraction [goid 6937] [pr  
"The developmental sequence of events leading to the formation of adult muscle that occurs in t  
"The developmental sequence of events leading to the formation of adult muscle that occurs in t  
"The chemical reactions and pathways resulting in the breakdown of a protein or peptide by hyd  
"The cascade of processes by which a signal interacts with a receptor, causing a change in the  
"The series of events required for an organism to receive an auditory stimulus, convert it to a mc

"The directed movement of substances (such as macromolecules, small molecules, ions) into, o



"The chemical reactions and pathways involving N-acetylglucosamine. The D isomer is a common form of this sugar in biological systems." [goid 6508] [pmid 9877162] [evidence ISS]; Any process whose specific outcome is the progression of nervous tissue over time, from its formation to its maintenance, repair, or death." [goid 6508] [pmid 10591213] [evidence ISS]; The chemical reactions and pathways involving carbohydrates, any of a group of organic compounds that are soluble in water and can be broken down into simple sugars." [goid 6508] [pmid 10591213] [evidence ISS]; A form of programmed cell death induced by external or internal signals that trigger the activity of specific genes." [goid 6508] [pmid 10591213] [evidence ISS]; A form of programmed cell death induced by external or internal signals that trigger the activity of specific genes." [goid 6508] [pmid 10591213] [evidence ISS];

"The cascade of processes by which a signal interacts with a receptor, causing a change in the activity of other proteins in the cell." [goid 6508] [pmid 10591213] [evidence ISS]; "The process of formation of spermatozoa, including spermatocytogenesis and spermiogenesis." [goid 6508] [pmid 10591213] [evidence ISS]; "The chemical reactions and pathways, including anabolism and catabolism, by which living organisms grow and reproduce." [goid 6508] [pmid 10591213] [evidence ISS]; "The aggregation, arrangement and bonding together of a nucleosome, the beadlike structural unit of chromatin." [goid 6508] [pmid 10591213] [evidence ISS]; "The aggregation, arrangement and bonding together of a nucleosome, the beadlike structural unit of chromatin." [goid 6508] [pmid 10591213] [evidence ISS]; "The aggregation, arrangement and bonding together of a nucleosome, the beadlike structural unit of chromatin." [goid 6508] [pmid 10591213] [evidence ISS]; "The directed movement of proteins in a cell, including the movement of proteins between specific organelles." [goid 6508] [pmid 10591213] [evidence ISS]; "The chemical reactions and pathways involving lipids, compounds soluble in an organic solvent." [goid 6508] [pmid 10591213] [evidence ISS]; "The aggregation, arrangement and bonding together of a set of components to form a protein complex." [goid 6508] [pmid 10591213] [evidence ISS]; "A change in state or activity of a cell or an organism (in terms of movement, secretion, enzyme production, or gene expression)." [goid 6508] [pmid 10591213] [evidence ISS]; The hydrolysis of a peptide bond or bonds within a protein [goid 6508] [pmid 9877162] [evidence ISS]; The hydrolysis of a peptide bond or bonds within a protein [goid 6508] [pmid 10591213] [evidence ISS];

"A change in state or activity of a cell or an organism (in terms of movement, secretion, enzyme production, or gene expression)." [goid 6474] [evidence ISS]; "Blood vessel formation when new vessels emerge from the proliferation of pre-existing blood vessels." [goid 6474] [evidence ISS]; "The acetylation of the N-terminal amino acid of proteins [goid 6474] [evidence ISS]; Any process whose specific outcome is the progression of the blastocyst over time, from its formation to its maintenance, repair, or death." [goid 6474] [evidence ISS];

"The process of coupling asparagine to asparaginyl-tRNA, catalyzed by asparaginyl-tRNA synthetase." [goid 6474] [evidence ISS]; "The process of coupling asparagine to asparaginyl-tRNA, catalyzed by asparaginyl-tRNA synthetase." [goid 6474] [evidence ISS]; "The process whose specific outcome is the progression of the blastocyst over time, from its formation to its maintenance, repair, or death." [goid 6474] [evidence ISS]; "The chemical reactions and pathways, including anabolism and catabolism, by which living organisms grow and reproduce." [goid 6474] [evidence ISS]; "The chemical reactions and pathways, including anabolism and catabolism, by which living organisms grow and reproduce." [goid 6474] [evidence ISS]; "The chemical reactions and pathways, including anabolism and catabolism, by which living organisms grow and reproduce." [goid 6474] [evidence ISS]; "The acetylation of the N-terminal amino acid of proteins [goid 6474] [pmid 16507339] [evidence ISS]; "The synthesis of either RNA on a template of DNA or DNA on a template of RNA [goid 6350] [evidence ISS];

"The chemical reactions and pathways, including anabolism and catabolism, by which living organisms grow and reproduce." [goid 6350] [evidence ISS]; "The chemical reactions and pathways, including anabolism and catabolism, by which living organisms grow and reproduce." [goid 6350] [evidence ISS]; "The chemical reactions and pathways, including anabolism and catabolism, by which living organisms grow and reproduce." [goid 6350] [evidence ISS];

"Any process that stops, prevents or reduces the rate or extent of progression through the cell cycle." [goid 6350] [evidence ISS]; "A signal transduction pathway, induced by DNA damage, that blocks cell cycle progression (involving p53, MDM2, and p21). (NBPF1), mRNA." [goid 6350] [evidence ISS]; (NBPF10), mRNA." [goid 6350] [evidence ISS];

(NBPF20), mRNA."  
oding RNA."

"Any process specifically pertinent to the functioning of integrated living units: cells, tissues, orga  
"The directed movement of substances, either within a vesicle or in the vesicle membrane, into,  
"The attachment of a cell, either to another cell or to an underlying substrate such as the extrac  
"The progression of biochemical and morphological phases and events that occur in a cell durin  
"The progression of biochemical and morphological phases and events that occur in a cell durin  
"The progression of biochemical and morphological phases and events that occur in a cell durin  
"The proliferation of cells in the inner cell mass [goid 1833] [evidence IEA]; The progression of b  
"Progression through the phases of the mitotic cell cycle, the most common eukaryotic cell cycle  
The cell cycle process whereby chromatin structure is compacted prior to mitosis in eukaryotic c  
"The formation and assembly from one or more snRNA and multiple protein components of a rit  
"The formation and assembly from one or more snRNA and multiple protein components of a rit  
RNA."

"The process by which specialized cells known as osteoclasts degrade the organic and inorgani  
"A defense response that is mediated by cells [goid 6968] [pmid 2848318] [evidence TAS]; Any  
"Any process that mediates interactions between a cell and its surroundings. Encompasses inte  
"Any process that mediates interactions between a cell and its surroundings. Encompasses inte  
"A defense response that is mediated by cells [goid 6968] [pmid 1692159] [evidence TAS]; The  
"Any process that mediates interactions between a cell and its surroundings. Encompasses inte  
"Any process that modulates the frequency, rate or extent of the chemical reactions and pathwa  
"Any process that modulates the frequency, rate or extent of the chemical reactions and pathwa  
"A form of programmed cell death induced by external or internal signals that trigger the activity

"The directed movement of a protein bearing a nuclear localization signal (NLS) from the cytopl  
Blood vessel formation when new vessels emerge from the proliferation of pre-existing blood ve  
"The posttranslational modification of a protein, particularly secretory proteins and proteins targe  
"The cascade of processes by which a signal interacts with a receptor, causing a change in the  
"Any process that stops, prevents or reduces the frequency, rate or extent of transcription from  
"The cascade of processes by which a signal interacts with a receptor, causing a change in the  
"The synthesis of either RNA on a template of DNA or DNA on a template of RNA [goid 6350] [e  
"The synthesis of either RNA on a template of DNA or DNA on a template of RNA [goid 6350] [e  
"The process whose specific outcome is the progression of the embryo in the uterus over time, f

"The synthesis of either RNA on a template of DNA or DNA on a template of RNA [goid 6350] [e  
"Any process that modulates the frequency, rate or extent of DNA-dependent transcription [goid  
"Any process that modulates the frequency, rate or extent of DNA-dependent transcription [goid  
"The immediate defensive reaction (by vertebrate tissue) to infection or injury caused by chemic

NA."

NA."

"The hydrolysis of a peptide bond or bonds within a protein [goid 6508] [pmid 10993067] [eviden  
"The cell cycle process whereby replicated homologous chromosomes are organized and then p  
"The progression of biochemical and morphological phases and events that occur in a cell durin  
"The directed movement of substances (such as macromolecules, small molecules, ions) into, o

"Any process that activates or increases the frequency, rate or extent of an I-kappaB kinase/NF-  
"The process whose specific outcome is the progression of the placenta over time, from its form  
"A change in state or activity of a cell or an organism (in terms of movement, secretion, enzyme  
"The biological process whose specific outcome is the progression of a multicellular organism o  
"The process of formation of spermatozoa, including spermatocytogenesis and spermiogenesis  
"A change in state or activity of a cell or an organism (in terms of movement, secretion, enzyme  
"The immediate defensive reaction (by vertebrate tissue) to infection or injury caused by chemic  
"The transfer of electrons from NADH to ubiquinone that occurs during oxidative phosphorylatio  
"The transfer of electrons from NADH to ubiquinone that occurs during oxidative phosphorylatio  
"The directed movement of a protein from the cytoplasm to the nucleus [goid 6606] [pmid 10924  
"The transfer of electrons from NADH to ubiquinone that occurs during oxidative phosphorylatio  
mRNA."

"The transfer of electrons from NADH to ubiquinone that occurs during oxidative phosphorylatio  
"The transfer of electrons from NADH to ubiquinone that occurs during oxidative phosphorylatio  
"The transfer of electrons from NADH to ubiquinone that occurs during oxidative phosphorylatio  
"The transfer of electrons from NADH to ubiquinone that occurs during oxidative phosphorylatio  
"The transfer of electrons from NADH to ubiquinone that occurs during oxidative phosphorylatio  
"The transfer of electrons from NADH to ubiquinone that occurs during oxidative phosphorylatio  
"The transfer of electrons from NADH to ubiquinone that occurs during oxidative phosphorylatio  
"The transfer of electrons from NADH to ubiquinone that occurs during oxidative phosphorylatio  
(UFAF2), mRNA."

"The transfer of electrons from NADH to ubiquinone that occurs during oxidative phosphorylatio  
"The transfer of electrons from NADH to ubiquinone that occurs during oxidative phosphorylatio  
"The transfer of electrons from NADH to ubiquinone that occurs during oxidative phosphorylatio  
"The transfer of electrons from NADH to ubiquinone that occurs during oxidative phosphorylatio  
"The transfer of electrons from NADH to ubiquinone that occurs during oxidative phosphorylatio

"The transfer of electrons from NADH to ubiquinone that occurs during oxidative phosphorylation  
"The transfer of electrons from NADH to ubiquinone that occurs during oxidative phosphorylation  
"The transfer of electrons from NADH to ubiquinone that occurs during oxidative phosphorylation  
"The transfer of electrons from NADH to ubiquinone that occurs during oxidative phosphorylation  
"The transfer of electrons from NADH to ubiquinone that occurs during oxidative phosphorylation  
"The transfer of electrons from NADH to ubiquinone that occurs during oxidative phosphorylation  
"Any process that modulates the frequency, rate or extent of addition of phosphate groups into a cell  
"The transfer of electrons from NADH to ubiquinone that occurs during oxidative phosphorylation  
"The transfer of electrons from NADH to ubiquinone that occurs during oxidative phosphorylation  
"The transfer of electrons from NADH to ubiquinone that occurs during oxidative phosphorylation  
"The transfer of electrons from NADH to ubiquinone that occurs during oxidative phosphorylation  
"The transfer of electrons from NADH to ubiquinone that occurs during oxidative phosphorylation  
"The process whose specific outcome is the progression of the somatic muscle over time, from infancy to adulthood  
Any process that controls the length of actin filaments in a cell [goid 30832] [pmid 9733644] [evidence IEA]  
"The chemical reactions and pathways resulting in the formation of an antibiotic, a substance produced by a microorganism  
"The regulated release of proteins from a cell or group of cells [goid 9306] [pmid 12780348] [evidence IEA]  
"A type of vesicle-mediated transport in which cells take up external materials or membrane components  
"A type of vesicle-mediated transport in which cells take up external materials or membrane components  
miRNA."

"The covalent alteration of one or more amino acids occurring in proteins, peptides and nascent polypeptides  
"The covalent alteration of one or more amino acids occurring in proteins, peptides and nascent polypeptides  
"The covalent alteration of one or more amino acids occurring in proteins, peptides and nascent polypeptides  
"Any process that modulates the frequency, rate or extent of cell growth [goid 1558] [evidence IEA]  
"In base excision repair, an altered base is removed by a DNA glycosylase enzyme, followed by replacement of the base  
"In base excision repair, an altered base is removed by a DNA glycosylase enzyme, followed by replacement of the base  
"In base excision repair, an altered base is removed by a DNA glycosylase enzyme, followed by replacement of the base  
"The process of introducing a phosphate group on to a protein [goid 6468] [evidence IEA]; The process of phosphorylation  
The process of introducing a phosphate group on to a protein [goid 6468] [evidence IEA]; The process of phosphorylation  
"The cell cycle process whereby replicated homologous chromosomes are organized and then separated into two daughter cells  
"The process of introducing a phosphate group on to a protein [goid 6468] [evidence IEA]; The process of phosphorylation  
"The process of introducing a phosphate group on to a protein [goid 6468] [pmid 8208544] [evidence IEA]  
"The process of introducing a phosphate group on to a protein [goid 6468] [pmid 14563848] [evidence IEA]  
The process of introducing a phosphate group on to a protein [goid 6468] [evidence IEA]; The process of phosphorylation  
The process of introducing a phosphate group on to a protein [goid 6468] [evidence IEA]  
"The process of introducing a phosphate group on to a protein [goid 6468] [evidence IEA]; The process of phosphorylation

"The attachment of a cell, either to another cell or to an underlying substrate such as the extracellular matrix  
"The attachment of a cell, either to another cell or to an underlying substrate such as the extracellular matrix  
"Any process that activates or increases the frequency, rate or extent of signal transduction mechanism  
"The attachment of a cell, either to another cell or to an underlying substrate such as the extracellular matrix  
"Any process that modulates the frequency, rate or extent of cell growth [goid 1558] [pmid 86491]

"The chemical reactions and pathways, including anabolism and catabolism, by which living organisms obtain energy and synthesize cellular components"

"An acute behavioral change resulting from a perceived external threat [goid 1662] [evidence IE

"The characteristic movement of immature neurons from germinal zones to specific positions w

"The characteristic movement of immature neurons from germinal zones to specific positions w

"Any process that modulates the frequency, rate or extent of cell migration [goid 30334] [pmid 14

"The process whereby a relatively unspecialized cell acquires the specialized features of an oste

"Any process that activates or increases the frequency, rate or extent of production of a cytokine

"The appearance of a cytokine due to biosynthesis or secretion following a cellular stimulus, res

"Any process that modulates the frequency, rate or extent of DNA-dependent transcription [goid

"The appearance of a cytokine due to biosynthesis or secretion following a cellular stimulus, res

"Any process that modulates the frequency, rate or extent of DNA-dependent transcription [goid

"Any process that modulates the frequency, rate or extent of DNA-dependent transcription [goid

"The synthesis of RNA from a DNA template by RNA polymerase II (Pol II), originating at a Pol I

"Any process that modulates the frequency, rate or extent of DNA-dependent transcription [goid

"The process whereby new strands of DNA are synthesized. The template for replication can eit

"The process whereby new strands of DNA are synthesized. The template for replication can eit

"The synthesis of either RNA on a template of DNA or DNA on a template of RNA [goid 6350] [e

"The process whereby new strands of DNA are synthesized. The template for replication can eit

"Any process that modulates the frequency, rate or extent of DNA-dependent transcription [goid

"Any process that modulates the frequency, rate or extent of DNA-dependent transcription [goid

"The vectorial transfer of a protein from the cytoplasm into the nucleus, through the nuclear pore

"The synthesis of either RNA on a template of DNA or DNA on a template of RNA [goid 6350] [p

"The immediate defensive reaction (by vertebrate tissue) to infection or injury caused by chemic

"The selective interaction of a transcription factor with specific molecules in the cytoplasm, there

"The selective interaction of a transcription factor with specific molecules in the cytoplasm, there  
! (NFKBIL2), mRNA."

"The synthesis of either RNA on a template of DNA or DNA on a template of RNA [goid 6350] [e

"The synthesis of RNA from a DNA template by RNA polymerase II (Pol II), originating at a Pol I

"The aggregation, arrangement and bonding together of a set of components to form a protein c

The incorporation of iron and exogenous sulfur into a metallo-sulfur cluster [goid 16226] [pmid 14

"Any process that stops, prevents or reduces the frequency, rate or extent of transcription from a

"Any process that modulates the frequency, rate or extent of DNA-dependent transcription [goid

"The synthesis of either RNA on a template of DNA or DNA on a template of RNA [goid 6350] [e

"The synthesis of either RNA on a template of DNA or DNA on a template of RNA [goid 6350] [e

"The directed movement of substances (such as macromolecules, small molecules, ions) into, o

"Any process involved in the conversion of a primary ribosomal RNA (rRNA) transcript into one c

"A form of programmed cell death induced by external or internal signals that trigger the activity

"The chemical reactions and pathways resulting in the breakdown of glycoproteins, any protein t

"The biological process whose specific outcome is the progression of a multicellular organism o

"The directed movement of substances (such as macromolecules, small molecules, ions) into, o

"The directed movement of charged atoms or small charged molecules into, out of, within or bet

Any process that maintains the redox environment of a cell or compartment within a cell [goid 45



"The process of the formation of the constituents of the ribosome subunits, their assembly, and

"Any process that activates or increases the frequency, rate or extent of DNA-dependent transcri

"Any process by which a centrosome is transported to, and/or maintained in, a specific location

"The attachment of a cell, either to another cell or to an underlying substrate such as the extrac

"The attachment of a cell, either to another cell or to an underlying substrate such as the extrac

"The aggregation, arrangement and bonding together of the mature ribosome and of its subunits

l, mRNA."

"The progression of biochemical and morphological phases and events that occur in a cell durin

"A form of programmed cell death induced by external or internal signals that trigger the activity

"The chemical reactions and pathways involving various organic and inorganic nitrogenous com

"The chemical reactions and pathways involving various organic and inorganic nitrogenous com

"The directed movement of substances (such as macromolecules, small molecules, ions) into, o

"A series of reactions initiated by the activation of the transcription factor NF-kappaB. NF-kappa

"A series of reactions initiated by the activation of the transcription factor NF-kappaB. NF-kappa

The process of assisting in the covalent and noncovalent assembly of single chain polypeptides

"Any process that modulates the frequency, rate or extent of DNA-dependent transcription [goid

"Any process that modulates the frequency, rate or extent of DNA-dependent transcription [goid

"The process of targeting specific proteins to particular membrane-bounded subcellular organell

The biosynthesis of a synapse [goid 7416] [pmid 10892652] [evidence NAS]; The attachment of

"The attachment of a cell, either to another cell or to an underlying substrate such as the extrac

"Any process that modulates the frequency, rate or extent of DNA-dependent transcription [goid

The hydrolysis of a peptide bond or bonds within a protein [goid 6508] [evidence IEA]

"A series of reactions initiated by the activation of the transcription factor NF-kappaB. NF-kappa

"Upregulation of the activity of a caspase, any of a group of cysteine proteases involved in apop

"A process that directly activates any of the steps required for cell death by apoptosis [goid 6917

"The process of assisting in the covalent and noncovalent assembly of single chain polypeptides

"A form of programmed cell death induced by external or internal signals that trigger the activity

"A form of programmed cell death induced by external or internal signals that trigger the activity

"Reactions, triggered in response to the presence of a foreign body or the occurrence of an injury.

"The cascade of processes by which a signal interacts with a receptor, causing a change in the

"The directed movement of proteins into, out of, within or between cells [goid 15031] [evidence 1

"The chemical reactions and pathways resulting in the formation of GTP, guanosine triphosphat

"The chemical reactions and pathways resulting in the formation of GTP, guanosine triphosphat

"The chemical reactions and pathways resulting in the formation of GTP, guanosine triphosphat

"The chemical reactions and pathways resulting in the formation of GTP, guanosine triphosphat

"The chemical reactions and pathways resulting in the formation of GTP, guanosine triphosphat

"The chemical reactions and pathways resulting in the formation of GTP, guanosine triphosphat

"The chemical reactions and pathways resulting in the formation of GTP, guanosine triphosphat

"The chemical reactions and pathways resulting in the formation of GTP, guanosine triphosphat

"The synthesis of RNA from a DNA template by RNA polymerase II (Pol II), originating at a Pol I

"The chemical reactions and pathways resulting in the formation of substances; typically the ene

"Any process that modulates the frequency, rate or extent of nitrogen utilization [goid 6808] [evid

"The covalent or non-covalent attachment of a myristoyl moiety to the N-terminal amino acid resi

The covalent or non-covalent attachment of a myristoyl moiety to the N-terminal amino acid resi

"Any process that modulates the frequency, rate or extent of smooth muscle contraction [goid 68

"The biological process whose specific outcome is the progression of a multicellular organism o

"A nearly universal metabolic pathway in which the acetyl group of acetyl coenzyme A is effectiv

"The process whereby a relatively unspecialized cell acquires specialized features of an adipocy  
, mRNA."

"The immediate defensive reaction (by vertebrate tissue) to infection or injury caused by chemic

"The appearance of a cytokine due to biosynthesis or secretion following a cellular stimulus, res

"The process whereby a relatively unspecialized cell acquires the specialized features of an oste

Any process involved in the conversion of a primary mRNA transcript into one or more mature m

rRNA."

"The process whereby new strands of DNA are synthesized. The template for replication can eit

Any process involved in the conversion of a primary ribosomal RNA (rRNA) transcript into one o

"Any process involved in the conversion of a primary ribosomal RNA (rRNA) transcript into one c

"Any process specifically pertinent to the functioning of integrated living units: cells, tissues, orga

"Any process specifically pertinent to the functioning of integrated living units: cells, tissues, orga

"The process of restoring DNA after damage. Genomes are subject to damage by chemical and

.

"The process leading to the rupture of the follicle, releasing the centrally located oocyte into the  
The process by which one or more ubiquitin moieties are added to a protein [goid 16567] [evidence  
"Any process that modulates the frequency, rate or extent of DNA-dependent transcription [goid  
"Process involved in cell fate commitment. Once determination has taken place, a cell becomes  
"The series of molecular signals initiated by binding of an extracellular ligand to a Notch recepto  
"The synthesis of either RNA on a template of DNA or DNA on a template of RNA [goid 6350] [e  
"The process that regulates the coordinated growth and sprouting of blood vessels giving rise to

"The joining together of exons from one or more primary transcripts of nuclear messenger RNA  
"The chemical reactions and pathways involving superoxide, the superoxide anion O<sub>2</sub><sup>-</sup> (superox  
"The chemical reactions and pathways involving nucleobases, nucleosides, nucleotides and nuc

"Any process that stops, prevents or reduces the frequency, rate or extent of transcription from a  
"The synthesis of either RNA on a template of DNA or DNA on a template of RNA [goid 6350] [e  
"A type of vesicle-mediated transport in which cells take up external materials or membrane con  
"The chemical reactions and pathways involving lipids, compounds soluble in an organic solvent  
"The directed movement of phospholipids into, out of, within or between cells. Phospholipids are

The hydrolysis of a peptide bond or bonds within a protein [goid 6508] [evidence IEA]  
"Any process preventing the degeneration of the photoreceptor, a specialized cell type that is se  
"The cascade of processes by which a signal interacts with a receptor, causing a change in the  
"The directed movement of proteins into, out of, within or between cells [goid 15031] [evidence I  
"The chemical reactions and pathways involving carbohydrates, any of a group of organic comp  
"The chemical reactions and pathways resulting in the breakdown of a protein or peptide by hyd  
"The directed movement of proteins in a cell, including the movement of proteins between speci  
"Dynamic structural changes to eukaryotic chromatin occurring throughout the cell division cycle  
"Any process involved in the conversion of a primary ribosomal RNA (rRNA) transcript into one c  
Any process that modulates the size of blood vessels [goid 50880] [evidence IEA]; The process  
"The process of introducing a phosphate group on to a protein [goid 6468] [evidence IEA]; A ser  
"The process whose specific outcome is the progression of the skeleton over time, from its form  
"The attachment of an adhesion molecule in one cell to an identical molecule in an adjacent cell  
"The directed movement of substances (such as macromolecules, small molecules, ions) into, o  
The series of molecular signals generated as a consequence of a peptide neurotransmitter bind  
"The directed movement of calcium (Ca) ions into, out of, within or between cells [goid 6816] [pr  
"The chemical reactions and pathways involving a xenobiotic compound, a compound foreign to  
The process of removal or addition of one or more electrons with or without the concomitant rer

"The synthesis of either RNA on a template of DNA or DNA on a template of RNA [goid 6350] [e  
"Any process that modulates the frequency, rate or extent of DNA-dependent transcription [goid  
"The synthesis of either RNA on a template of DNA or DNA on a template of RNA [goid 6350] [e  
"The synthesis of either RNA on a template of DNA or DNA on a template of RNA [goid 6350] [e  
"The synthesis of either RNA on a template of DNA or DNA on a template of RNA [goid 6350] [e  
"The synthesis of either RNA on a template of DNA or DNA on a template of RNA [goid 6350] [e

"The synthesis of either RNA on a template of DNA or DNA on a template of RNA [goid 6350] [e  
"The characteristic movement of immature neurons from germinal zones to specific positions wh  
"The synthesis of either RNA on a template of DNA or DNA on a template of RNA [goid 6350] [e  
"Any process that modulates the frequency, rate or extent of DNA-dependent transcription [goid  
"The synthesis of either RNA on a template of DNA or DNA on a template of RNA [goid 6350] [e  
"The synthesis of either RNA on a template of DNA or DNA on a template of RNA [goid 6350] [e  
"The synthesis of either RNA on a template of DNA or DNA on a template of RNA [goid 6350] [e  
"Any process specifically pertinent to the functioning of integrated living units: cells, tissues, orga  
The biological process whose specific outcome is the progression of a multicellular organism ov  
"A type of vesicle-mediated transport in which cells take up external materials or membrane con  
"The synthesis of either RNA on a template of DNA or DNA on a template of RNA [goid 6350] [e  
The process of introducing a phosphate group on to a protein [goid 6468] [evidence NAS]  
"The characteristic movement of immature neurons from germinal zones to specific positions wh  
"The hydrolysis of a peptide bond or bonds within a protein [goid 6508] [pmid 9581555] [evidenc  
"The chemical reactions and pathways resulting in the formation of precursor metabolites, subst  
"Any process that modulates the frequency, rate or extent of cell growth [goid 1558] [pmid 9275

"The cascade of processes by which a signal interacts with a receptor, causing a change in the  
"Any process that stops, prevents or reduces the frequency, rate or extent of transcription from a  
The hydrolysis of a peptide bond or bonds within a protein [goid 6508] [evidence IEA]; The hydr  
"The process of introducing a phosphate group on to a protein [goid 6468] [evidence IEA]; The i  
"Any process specifically pertinent to the functioning of integrated living units: cells, tissues, orga  
"The process that regulates the coordinated growth and sprouting of blood vessels giving rise to  
"The attachment of a cell, either to another cell or to an underlying substrate such as the extrac  
"Any process specifically pertinent to the functioning of integrated living units: cells, tissues, orga  
"Cascade of at least three protein kinase activities culminating in the phosphorylation and activa  
"The attachment of a cell, either to another cell or to an underlying substrate such as the extrac  
"The attachment of a cell, either to another cell or to an underlying substrate such as the extrac

"Any process that modulates the frequency, rate or extent of transcription from an RNA polymer  
"Any process that stops, prevents or reduces the frequency, rate or extent of transcription from a  
"The process whose specific outcome is the progression of the hair follicle over time, from its fo  
"The directed movement of proteins into, out of, within or between cells [goid 15031] [evidence I

"The progression of biochemical and morphological phases and events that occur in a cell durin  
"The chemical reactions and pathways involving ceramides, any N-acylated sphingoid [goid 667

"The process of restoring DNA after damage. Genomes are subject to damage by chemical and  
"The process of restoring DNA after damage. Genomes are subject to damage by chemical and

"The process by which a pre-tRNA molecule is converted to a mature tRNA, ready for addition o

A."

"The chemical reactions and pathways involving a nucleotide, a nucleoside that is esterified with  
"The chemical reactions and pathways involving a nucleotide, a nucleoside that is esterified with  
"The chemical reactions and pathways involving any pyrimidine nucleoside, one of a family of or  
"The chemical reactions and pathways involving a nucleotide, a nucleoside that is esterified with

"The process whereby new strands of DNA are synthesized. The template for replication can eit  
"The activities involved in the mental information processing system that receives (registers), mc  
"The cascade of processes by which a signal interacts with a receptor, causing a change in the  
"The endonucleolytic cleavage of the damaged strand of DNA 5' to the site of damage. The inci  
The developmentally regulated remodeling of neuronal projections such as pruning to eliminate

"The biological process whose specific outcome is the progression of a multicellular organism o  
"The biological process whose specific outcome is the progression of a multicellular organism o  
The process of introducing a phosphate group on to a protein [goid 6468] [evidence IEA]  
"The process of introducing a phosphate group on to a protein [goid 6468] [pmid 14976552] [evi  
"Any process specifically pertinent to the functioning of integrated living units: cells, tissues, orga  
"The aggregation, arrangement and bonding together of septins and associated proteins to form

JA."

"The progression of biochemical and morphological phases and events that occur in a cell durin  
Any immune system process that functions in the calibrated response of an organism to a poten

"The process of restoring DNA after damage. Genomes are subject to damage by chemical and

.  
.  
.  
.  
.  
.

), mRNA."

.  
.  
.  
DT19), mRNA."  
"The chemical reactions and pathways involving nucleobases, nucleosides, nucleotides and nucleotides."  
"The joining together of exons from one or more primary transcripts of nuclear messenger RNA."  
.  
"Any process that mediates the transfer of information from one cell to another [goid 7267] [pmid 1168470]."  
"The chemical reactions and pathways involving a nucleotide, a nucleoside that is esterified with a phosphate group."  
"Any process specifically pertinent to the functioning of integrated living units: cells, tissues, organs, and organisms."  
"The chemical reactions and pathways involving a nucleoside diphosphate, a glycosamine compound, or a nucleoside triphosphate."  
  
"The progression of biochemical and morphological phases and events that occur in a cell during the cell cycle."  
"Any process involved in the conversion of one or more primary RNA transcripts into one or more mature messenger RNA molecules."  
"Progression through anaphase, the stage of mitosis during which the two sets of chromosomes separate."  
The biological process whose specific outcome is the progression of a multicellular organism over time.  
"The process whose specific outcome is the progression of nervous tissue over time, from its formation to its maintenance."  
"The directed movement of substances (such as macromolecules, small molecules, ions) into, out of, within or between cells."  
"The directed movement of mRNA from the nucleus to the cytoplasm [goid 6406] [pmid 1168470]."  
"The directed movement of proteins into, out of, within or between cells [goid 15031] [evidence I]."  
"The directed movement of molecules between the nucleus and the cytoplasm [goid 6913] [evidence I]."  
"The directed movement of mRNA from the nucleus to the cytoplasm [goid 6406] [pmid 1168470]."  
"The directed movement of proteins into, out of, within or between cells [goid 15031] [evidence I]."  
"The aggregation, arrangement and bonding together of the nuclear localization signal of a protein with a nuclear localization receptor."  
"The directed movement of proteins into, out of, within or between cells [goid 15031] [evidence I]."  
"The directed movement of mRNA from the nucleus to the cytoplasm [goid 6406] [evidence IEA]."  
"The directed movement of proteins into, out of, within or between cells [goid 15031] [evidence I]."  
"The directed movement of proteins into, out of, within or between cells [goid 15031] [evidence I]."  
"The directed movement of proteins into, out of, within or between cells [goid 15031] [evidence I]."  
"The directed movement of proteins into, out of, within or between cells [goid 15031] [evidence I]."  
"The directed movement of proteins into, out of, within or between cells [goid 15031] [evidence I]."  
"The directed movement of proteins into, out of, within or between cells [goid 15031] [evidence I]."  
"The directed movement of proteins into, out of, within or between cells [goid 15031] [evidence I]."  
"The directed movement of proteins into, out of, within or between cells [goid 15031] [evidence I]."  
"The directed movement of proteins into, out of, within or between cells [goid 15031] [evidence I]."  
"The directed movement of proteins into, out of, within or between cells [goid 15031] [evidence I]."  
"The aggregation, arrangement and bonding together of the nuclear localization signal of a protein with a nuclear localization receptor."  
"The directed movement of proteins into, out of, within or between cells [goid 15031] [evidence I]."  
"The directed movement of a protein from the nucleus into the cytoplasm [goid 6611] [pmid 10311684]."  
A process that directly activates any of the steps required for cell death by apoptosis [goid 6917]."  
"Blood vessel formation when new vessels emerge from the proliferation of pre-existing blood vessels."  
"A cell cycle process that results in the division of the cytoplasm of a cell after mitosis, resulting in two daughter cells."  
"The directed movement of proteins into, out of, within or between cells [goid 15031] [evidence I]."

"The directed movement of RNA from the nucleus to the cytoplasm [goid 6405] [evidence IEA];

"The directed movement of substances (such as macromolecules, small molecules, ions) into, o

"The directed movement of mRNA from the nucleus to the cytoplasm [goid 6406] [pmid 1156609

"The biological process whose specific outcome is the progression of a multicellular organism o

The series of molecular signals generated as a consequence of a peptide neurotransmitter bind

"The directed movement of RNA from the nucleus to the cytoplasm [goid 6405] [evidence IEA];

"The directed movement of proteins into, out of, within or between cells [goid 15031] [evidence I

"The series of events required for an organism to receive a visual stimulus, convert it to a molec

"The chemical reactions and pathways involving nucleobases, nucleosides, nucleotides and nuc

"Any immune system process that functions in the calibrated response of an organism to a pote

"The chemical reactions and pathways involving nucleobases, nucleosides, nucleotides and nuc

"The covalent alteration of one or more amino acids occurring in proteins, peptides and nascent

"The series of events required for an organism to receive a visual stimulus, convert it to a molec

"The chemical reactions and pathways resulting in the formation of polyamines, any organic con

"The chemical reactions and pathways involving polyamines, any organic compound containing

"Any process specifically pertinent to the functioning of integrated living units: cells, tissues, orga

"The process of introducing a phosphate group on to a protein [goid 6468] [evidence IEA]; The k

"The chemical reactions and pathways resulting in the formation of eye pigments, any general o

"The cascade of processes by which a signal interacts with a receptor, causing a change in the

"The process whose specific outcome is the progression of the kidney over time, from its format

"The biological process whose specific outcome is the progression of a multicellular organism o

"The biological process whose specific outcome is the progression of a multicellular organism o

"The cascade of processes by which a signal interacts with a receptor, causing a change in the l

"The chemical reactions and pathways resulting in the breakdown of a monosaccharide (genera

"The chemical reactions and pathways resulting in the breakdown of a monosaccharide (genera

"The chemical reactions and pathways involving a specific protein, rather than of proteins in gen

"The chemical reactions and pathways involving a specific protein, rather than of proteins in gen

"Any process that modulates the frequency, rate or extent of cell growth [goid 1558] [pmid 1067

"In base excision repair, an altered base is removed by a DNA glycosylase enzyme, followed by

"The formation of O-glycans by addition of glycosyl groups either to the hydroxyl group of peptid

"Any process that mediates interactions between a cell and its surroundings. Encompasses inte

"The chemical reactions and pathways resulting in the formation of a fatty acid, any of the alphas





"The cascade of processes by which a signal interacts with a receptor, causing a change in the  
"The cascade of processes by which a signal interacts with a receptor, causing a change in the  
"The cascade of processes by which a signal interacts with a receptor, causing a change in the  
"The cascade of processes by which a signal interacts with a receptor, causing a change in the  
"The cascade of processes by which a signal interacts with a receptor, causing a change in the  
"The cascade of processes by which a signal interacts with a receptor, causing a change in the

"The cascade of processes by which a signal interacts with a receptor, causing a change in the  
"The cascade of processes by which a signal interacts with a receptor, causing a change in the  
"The cascade of processes by which a signal interacts with a receptor, causing a change in the  
"The cascade of processes by which a signal interacts with a receptor, causing a change in the  
"The cascade of processes by which a signal interacts with a receptor, causing a change in the  
"The cascade of processes by which a signal interacts with a receptor, causing a change in the  
"The cascade of processes by which a signal interacts with a receptor, causing a change in the  
"The cascade of processes by which a signal interacts with a receptor, causing a change in the  
"The cascade of processes by which a signal interacts with a receptor, causing a change in the  
), non-coding RNA."

ion-coding RNA."

"The cascade of processes by which a signal interacts with a receptor, causing a change in the  
"The cascade of processes by which a signal interacts with a receptor, causing a change in the  
"The cascade of processes by which a signal interacts with a receptor, causing a change in the  
"The cascade of processes by which a signal interacts with a receptor, causing a change in the  
"The directed movement of charged atoms or small charged molecules into, out of, within or bet

"Any process specifically pertinent to the functioning of integrated living units: cells, tissues, orga  
"The process whereby new strands of DNA are synthesized. The template for replication can eit  
"Any process that stops, prevents or reduces the frequency, rate or extent of transcription from a  
The process whereby new strands of DNA are synthesized. The template for replication can eit  
"The process whereby new strands of DNA are synthesized. The template for replication can eit  
"The process whereby new strands of DNA are synthesized. The template for replication can eit  
The process whereby new strands of DNA are synthesized. The template for replication can eit

"The directed movement of lipids into, out of, within or between cells. Lipids are compounds sol  
"The directed movement of lipids into, out of, within or between cells. Lipids are compounds sol  
"The directed movement of lipids into, out of, within or between cells. Lipids are compounds sol  
"The directed movement of lipids into, out of, within or between cells. Lipids are compounds sol

"The directed movement of lipids into, out of, within or between cells. Lipids are compounds sol  
"The directed movement of lipids into, out of, within or between cells. Lipids are compounds sol  
"The directed movement of lipids into, out of, within or between cells. Lipids are compounds sol  
"The directed movement of lipids into, out of, within or between cells. Lipids are compounds sol  
"The directed movement of lipids into, out of, within or between cells. Lipids are compounds sol  
"The directed movement of lipids into, out of, within or between cells. Lipids are compounds sol  
"The directed movement of lipids into, out of, within or between cells. Lipids are compounds sol  
: 3, mRNA."

"The directed movement of substances (such as macromolecules, small molecules, ions) into, o  
The hydrolysis of a peptide bond or bonds within a protein [goid 6508] [evidence IEA]  
The hydrolysis of a peptide bond or bonds within a protein [goid 6508] [evidence IEA]  
"Progression through the nuclear division phase of a meiotic cell cycle, the specialized nuclear a  
"Any process that modulates the frequency, rate or extent of cell growth [goid 1558] [evidence IE  
"The process whose specific outcome is the progression of the metanephros over time, from its  
Any process that activates or increases the rate or extent of cell proliferation [goid 8284] [eviden

"The formation of bone or of a bony substance, or the conversion of fibrous tissue or of cartilage  
The process whereby a relatively unspecialized monocyte acquires the specialized features of a  
"The series of events required for an organism to receive an auditory stimulus, convert it to a mc  
"Any process that activates or increases the rate of neuroblast proliferation [goid 2052] [evidenc  
"The chemical reactions and pathways resulting in the breakdown of a protein or peptide by hyd

"Any process specifically pertinent to the functioning of integrated living units: cells, tissues, orga  
"The chemical reactions and pathways resulting in the breakdown of a protein or peptide by hyd

"The chemical reactions and pathways resulting in the breakdown of a protein or peptide by hyd  
"Any process that modulates the frequency, rate or extent of transcription from an RNA polymer  
"The chemical reactions and pathways involving carbohydrates, any of a group of organic comp  
"The synthesis of either RNA on a template of DNA or DNA on a template of RNA [goid 6350] [e

"The aggregation, arrangement and bonding together of a set of components to form a protein c  
"The chemical reactions and pathways, including anabolism and catabolism, by which living org;  
"The chemical reactions and pathways, including anabolism and catabolism, by which living org;  
The process of removal or addition of one or more electrons with or without the concomitant ren  
"A change in state or activity of a cell or an organism (in terms of movement, secretion, enzyme  
"The chemical reactions and pathways resulting in the formation of a protein. This is a ribosome  
"The process of introducing a phosphate group on to a protein [goid 6468] [pmid 14707132] [evi  
"A process whereby force is generated within muscle tissue, resulting in a change in muscle gec

"The directed movement of charged atoms or small charged molecules into, out of, within or bet  
"A homeostatic process involved in the maintenance of an internal equilibrium within a defined ti  
"The directed movement of charged atoms or small charged molecules into, out of, within or bet

n-coding RNA."

"Any process that modulates the frequency, rate or extent of the directed movement of sodium i

"The cascade of processes by which a signal interacts with a receptor, causing a change in the

"Reactions, triggered in response to the presence of a foreign body or the occurrence of an inju

"The cascade of processes by which a signal interacts with a receptor, causing a change in the

"The cascade of processes by which a signal interacts with a receptor, causing a change in the

"The posttranslational modification of peptidyl-proline to form 4-hydroxy-L-proline; catalyzed by p

"The posttranslational modification of peptidyl-proline to form 4-hydroxy-L-proline; catalyzed by p

"The posttranslational modification of peptidyl-proline to form 4-hydroxy-L-proline; catalyzed by p  
ipt variant 3, mRNA."

"The synthesis of either RNA on a template of DNA or DNA on a template of RNA [goid 6350] [e

Any process by which an organism has an effect on an organism of a different species [goid 444

"The enzymatic addition of a sequence of 40-200 adenylyl residues at the 3' end of a eukaryotic

"Any process involved in the conversion of one or more primary RNA transcripts into one or mor

"The joining together of exons from one or more primary transcripts of nuclear messenger RNA

"A form of programmed cell death induced by external or internal signals that trigger the activity

The process of directing proteins towards the Golgi using signals contained within the protein [g

"A form of programmed cell death induced by external or internal signals that trigger the activity

"Any process that stops, prevents or reduces the frequency, rate or extent of endocytosis [goid 4

"A type of vesicle-mediated transport in which cells take up external materials or membrane con

"Any process that stops, prevents or reduces the frequency, rate or extent of endocytosis [goid 4

"The covalent alteration of one or more amino acids occurring in proteins, peptides and nascent

"The synthesis of either RNA on a template of DNA or DNA on a template of RNA [goid 6350] [e

"A cell cycle process that sets the alignment of mitotic spindle relative to other cellular structures

"The process of formation of spermatozoa, including spermatocytogenesis and spermiogenesis

"The chemical reactions and pathways resulting in the breakdown of lipids, compounds soluble i

"Any immune system process that functions in the calibrated response of an organism to a pote

"Any process specifically pertinent to the functioning of integrated living units: cells, tissues, orga

"The chemical reactions and pathways resulting in the formation of a purine nucleotide, a compo

"The process preceding formation of the peptide bond between the first two amino acids of a pr

"Any process that modulates the frequency, rate or extent of the chemical reactions and pathwa

"Cascade of at least three protein kinase activities culminating in the phosphorylation and activa

"Any process that stops, prevents or reduces the frequency, rate or extent of signal transduction

"Any process that modulates the frequency, rate or extent of cell growth [goid 1558] [evidence IE

"The process of introducing a phosphate group on to a protein [goid 6468] [evidence IEA]; Any p

The process of introducing a phosphate group on to a protein [goid 6468] [evidence IEA]

"A process that is carried out at the cellular level which results in the formation, arrangement of

"Any process involved in the controlled movement of a cell [goid 6928] [pmid 9813098] [evidenc

"The chemical reactions and pathways involving peptides, compounds of two or more amino aci

"The nonsense-mediated decay pathway for nuclear-transcribed mRNAs degrades mRNAs in w

"The nonsense-mediated decay pathway for nuclear-transcribed mRNAs degrades mRNAs in w  
"The chemical reactions and pathways resulting in the formation of coenzyme A, 3'-phosphoade  
"The chemical reactions and pathways resulting in the formation of coenzyme A, 3'-phosphoade  
"The chemical reactions and pathways resulting in the formation of coenzyme A, 3'-phosphoade  
"The chemical reactions and pathways resulting in the formation of coenzyme A, 3'-phosphoade  
"The directed movement of cations, atoms or small molecules with a net positive charge, into, or

"The process of removal or addition of one or more electrons with or without the concomitant re  
The synthesis of either RNA on a template of DNA or DNA on a template of RNA [goid 6350] [e  
Any process involved in the conversion of a primary mRNA transcript into one or more mature r  
"The process whereby new strands of DNA are synthesized. The template for replication can eit

"The synthesis of either RNA on a template of DNA or DNA on a template of RNA [goid 6350] [e  
The synthesis of either RNA on a template of DNA or DNA on a template of RNA [goid 6350] [e  
"The pathways by which inorganic sulfate is processed and incorporated into sulfated compound  
"The pathways by which inorganic sulfate is processed and incorporated into sulfated compound

"The aggregation, arrangement and bonding together of a set of components to form a protein c  
"The progression of biochemical and morphological phases and events that occur in a cell durin  
"A change in state or activity of a cell or an organism (in terms of movement, secretion, enzyme  
A series of molecular signals within the cell that are mediated by a member of the Ras superfam  
ial protein, transcript variant 1, mRNA."

"The nonsense-mediated decay pathway for nuclear-transcribed mRNAs degrades mRNAs in w  
"Any process that contributes to the maintenance of proper telomeric length and structure by aff

"The synthesis of either RNA on a template of DNA or DNA on a template of RNA [goid 6350] [e  
"The synthesis of either RNA on a template of DNA or DNA on a template of RNA [goid 6350] [e

"In base excision repair, an altered base is removed by a DNA glycosylase enzyme, followed by  
"The process of restoring DNA after damage. Genomes are subject to damage by chemical and  
"The process of restoring DNA after damage. Genomes are subject to damage by chemical and  
nRNA."

t 3 (PARP8), mRNA."

"The orderly movement of cells from one site to another, often during the development of a mult  
"The process of coupling glycine to glycyl-tRNA, catalyzed by glycyl-tRNA synthetase. In tRNA ε  
"Any process specifically pertinent to the functioning of integrated living units: cells, tissues, orga  
"The attachment of a cell, either to another cell or to an underlying substrate such as the extrac



"The synthesis of either RNA on a template of DNA or DNA on a template of RNA [goid 6350] [e  
"The synthesis of either RNA on a template of DNA or DNA on a template of RNA [goid 6350] [e  
"Any process that modulates the frequency, rate or extent of DNA-dependent transcription [goid

"The formation of glucose from noncarbohydrate precursors, such as pyruvate, amino acids and  
"The directed movement of substances (such as macromolecules, small molecules, ions) into, o  
"The assembly of a cilium, a specialized eukaryotic locomotor organelle that consists of a filiform  
"The covalent alteration of one or more amino acids occurring in proteins, peptides and nascent  
"The covalent alteration of one or more amino acids occurring in proteins, peptides and nascent  
"The covalent alteration of one or more amino acids occurring in proteins, peptides and nascent  
"Any process that modulates the frequency, rate or extent of DNA replication [goid 6275] [eviden  
"The progression of biochemical and morphological phases and events that occur in a cell durin  
"A process that is carried out at the cellular level which results in the formation, arrangement of

\"

The biological process whose specific outcome is the progression of a multicellular organism ov

The series of molecular signals generated as a consequence of a peptide neurotransmitter bind  
The hydrolysis of a peptide bond or bonds within a protein [goid 6508] [evidence IEA]  
The hydrolysis of a peptide bond or bonds within a protein [goid 6508] [evidence IEA]; The gene  
The process of introducing a phosphate group on to a protein [goid 6468] [pmid 1437147] [eviden  
The process of introducing a phosphate group on to a protein [goid 6468] [pmid 1639063] [eviden  
"The process of introducing a phosphate group on to a protein [goid 6468] [evidence IEA]; The p  
"The directed movement of lipids into, out of, within or between cells. Lipids are compounds sol  
"The chemical reactions and pathways resulting in the breakdown of prenylcysteine, 3-methyl-2-  
The process of removal or addition of one or more electrons with or without the concomitant ren  
"The chemical reactions and pathways resulting in the formation of phosphatidylcholines, any of  
"The chemical reactions and pathways resulting in the formation of phospholipids, any lipid cont  
"The cascade of processes by which a signal interacts with a receptor, causing a change in the l  
"A form of programmed cell death induced by external or internal signals that trigger the activity  
Any process involved in the conversion of a primary ribosomal RNA (rRNA) transcript into one o  
"A form of programmed cell death induced by external or internal signals that trigger the activity

"A form of programmed cell death induced by external or internal signals that trigger the activity  
"A form of programmed cell death induced by external or internal signals that trigger the activity  
"A form of programmed cell death induced by external or internal signals that trigger the activity  
"A form of programmed cell death induced by external or internal signals that trigger the activity  
"The cascade of processes by which a signal interacts with a receptor, causing a change in the  
"A form of programmed cell death induced by external or internal signals that trigger the activity

"The chemical reactions and pathways involving lipids, compounds soluble in an organic solvent  
"The cascade of processes by which a signal interacts with a receptor, causing a change in the  
"The cascade of processes by which a signal interacts with a receptor, causing a change in the  
"The cascade of processes by which a signal interacts with a receptor, causing a change in the  
"The cascade of processes by which a signal interacts with a receptor, causing a change in the  
"The series of events required for an organism to receive a visual stimulus, convert it to a molec  
"The initiation of the activity of the inactive enzyme MAP kinase by phosphorylation by a MAPK  
"The cascade of processes by which a signal interacts with a receptor, causing a change in the  
"The cascade of processes by which a signal interacts with a receptor, causing a change in the  
"A conserved series of molecular signals found in prokaryotes and eukaryotes; involves autophc  
"The cascade of processes by which a signal interacts with a receptor, causing a change in the  
The chemical reactions and pathways resulting in the formation of a protein. This is a ribosome-  
"Any process that activates or increases the rate or extent of endothelial cell proliferation [goid 1  
"The multiplication or reproduction of cells, resulting in the expansion of a cell population [goid 8  
"Any process specifically pertinent to the functioning of integrated living units: cells, tissues, orga  
"The chemical reactions and pathways, including anabolism and catabolism, by which living org  
"The chemical reactions and pathways resulting in the breakdown of a monosaccharide (genera  
"The chemical reactions and pathways resulting in the breakdown of a monosaccharide (genera  
"The chemical reactions and pathways, including anabolism and catabolism, by which living org  
ing RNA."

The regulated release of proteins from a cell or group of cells [goid 9306] [pmid 2295602] [evid  
"Any process that maintains the redox environment of a cell or compartment within a cell [goid 4  
The process of assisting in the covalent and noncovalent assembly of single chain polypeptides  
The process of introducing a phosphate group on to a protein [goid 6468] [evidence IEA]  
"The chemical reactions and pathways involving carbohydrates, any of a group of organic comp  
"The chemical reactions and pathways involving carbohydrates, any of a group of organic comp  
"The chemical reactions and pathways involving carbohydrates, any of a group of organic comp  
"A change in state or activity of a cell or an organism (in terms of movement, secretion, enzyme  
"Control of the spatial distribution of actin filaments; includes organizing filaments into meshworl

"The formation of bone or of a bony substance, or the conversion of fibrous tissue or of cartilage  
The process of removing one or more phosphoric residues from a protein [goid 6470] [evidence  
"The process of introducing a phosphate group on to a protein [goid 6468] [pmid 9368760] [evid  
"The chemical reactions and pathways resulting in the breakdown of glycine, aminoethanoic aci  
The process of assisting in the covalent and noncovalent assembly of single chain polypeptides  
"The progression of biochemical and morphological phases and events that occur in a cell durin  
"The progression of biochemical and morphological phases and events that occur in a cell durin  
"The chemical reactions and pathways resulting in the formation of ubiquinone, a lipid-soluble el  
"The chemical reactions and pathways resulting in the formation of ubiquinone, a lipid-soluble el  
"The chemical reactions and pathways involving carboxylic acids, any organic acid containing or  
"The chemical reactions and pathways resulting in the formation of pyridoxine, 2-methyl-3-hydro  
"The chemical reactions and pathways, including anabolism and catabolism, by which living org  
"The series of molecular signals generated as a consequence of a peptide neurotransmitter binc

"The attachment of a cell, either to another cell or to an underlying substrate such as the extracellular matrix [goid 15031] [evidence IEA];  
"The directed movement of charged atoms or small charged molecules into, out of, within or between cells [goid 15031] [evidence IEA];

A series of reactions within the cell that occur as a result of a single trigger reaction or compound [goid 15031] [evidence IEA];

"Any process that modulates the occurrence or rate of cell death by apoptosis [goid 42981] [evidence IEA];

"The attachment of a cell, either to another cell or to an underlying substrate such as the extracellular matrix [goid 15031] [evidence IEA];

"The chemical reactions and pathways involving fatty acids, aliphatic monocarboxylic acids liberated from triglycerides [goid 15031] [evidence IEA];

"The chemical reactions and pathways resulting in the formation of a fatty acid, any of the aliphatic monocarboxylic acids [goid 15031] [evidence IEA];

"A change in state or activity of a cell or an organism (in terms of movement, secretion, enzyme production, gene expression, etc.) [goid 15031] [evidence IEA];

"The hydrolysis of a peptide bond or bonds within a protein [goid 6508] [evidence IEA]; A form of programmed cell death [goid 15031] [evidence IEA];

"Any process that modulates the frequency, rate or extent of DNA-dependent transcription [goid 15031] [evidence IEA];

The synthesis of either RNA on a template of DNA or DNA on a template of RNA [goid 6350] [evidence IEA];

"The chemical reactions and pathways involving lipids, compounds soluble in an organic solvent [goid 15031] [evidence IEA];

"The hydrolysis of a peptide bond or bonds within a protein [goid 6508] [evidence IEA]; The hydrolysis of a peptide bond or bonds within a protein [goid 6508] [evidence IEA];

"Any process that modulates the frequency, rate or extent of DNA-dependent transcription [goid 15031] [evidence IEA];

"Any process that modulates the frequency, rate or extent of DNA-dependent transcription [goid 15031] [evidence IEA];

"A form of programmed cell death induced by external or internal signals that trigger the activity of caspases [goid 15031] [evidence IEA];

"The multiplication or reproduction of cells, resulting in the expansion of a cell population [goid 8] [evidence IEA];

The chemical reactions and pathways resulting in the formation of a protein. This is a ribosome-mediated process [goid 15031] [evidence IEA];

"The directed movement of proteins into, out of, within or between cells [goid 15031] [evidence IEA];

"The cascade of processes by which a signal interacts with a receptor, causing a change in the cell's activity [goid 15031] [evidence IEA];

"The cascade of processes by which a signal interacts with a receptor, causing a change in the cell's activity [goid 15031] [evidence IEA];

The division of a mature peroxisome within a cell to form two or more separate peroxisome compartments [goid 15031] [evidence IEA];

"Pathway by which 3-methyl branched fatty acids are degraded. These compounds are not degraded by the beta-oxidation pathway [goid 15031] [evidence IEA];

"The directed movement of proteins into, out of, within or between cells [goid 15031] [evidence IEA];

"The assembly and arrangement of the membrane of a peroxisome [goid 16557] [pmid 1222348] [evidence IEA];

"The process of directing proteins towards the peroxisome using signals contained within the protein [goid 15031] [evidence IEA];

"The directed movement of proteins into, out of, within or between cells [goid 15031] [evidence IEA];

"A process that is carried out at the cellular level which results in the formation, arrangement of organelles [goid 15031] [evidence IEA];

"The chemical reactions and pathways involving fatty acids with a chain length of C18 or greater [goid 15031] [evidence IEA];

The process of directing proteins towards the peroxisome using signals contained within the protein [goid 15031] [evidence IEA];

"The characteristic movement of immature neurons from germinal zones to specific positions within the nervous system [goid 15031] [evidence IEA];

"The chemical reactions and pathways resulting in the formation of a purine nucleotide, a component of nucleic acids [goid 15031] [evidence IEA];

"The process of assisting in the covalent and noncovalent assembly of single chain polypeptides [goid 15031] [evidence IEA];

"Partial folding of alpha- or beta-tubulin into a non-native folding intermediate, mediated by cytoskeletal proteins [goid 15031] [evidence IEA];

"Any process that modulates the frequency, rate or extent of DNA-dependent transcription [goid 15031] [evidence IEA];

The process of assisting in the covalent and noncovalent assembly of single chain polypeptides [goid 15031] [evidence IEA];



"The chemical reactions and pathways involving fructose 2,6-bisphosphate. The D enantiomer is  
"The chemical reactions and pathways involving fructose 2,6-bisphosphate. The D enantiomer is  
"The chemical reactions and pathways involving fructose 2,6-bisphosphate. The D enantiomer is  
"The chemical reactions and pathways involving fructose 6-phosphate, also known as F6P. The  
"The chemical reactions and pathways resulting in the breakdown of a monosaccharide (genera  
"The chemical reactions and pathways resulting in the breakdown of a monosaccharide (genera  
"A process that is carried out at the cellular level which results in the formation, arrangement of  
"A process that is carried out at the cellular level which results in the formation, arrangement of  
The process of introducing a phosphate group on to a protein [goid 6468] [evidence IEA]  
"The chemical reactions and pathways resulting in the breakdown of a monosaccharide (genera  
"The chemical reactions and pathways resulting in the breakdown of a monosaccharide (genera

"The chemical reactions and pathways involving glycosylphosphatidylinositol anchors, molecular  
"Any process that modulates the frequency, rate or extent of DNA-dependent transcription [goid  
"

"Blood vessel formation when new vessels emerge from the proliferation of pre-existing blood ve  
The covalent attachment of a geranylgeranyl moiety to a protein amino acid [goid 18348] [pmid  
"The chemical reactions and pathways resulting in the breakdown of a monosaccharide (genera

"The chemical reactions and pathways involving carbohydrates, any of a group of organic comp  
"The chemical reactions and pathways resulting in the breakdown of peptidoglycans, any of a cl  
"The chemical reactions and pathways involving carbohydrates, any of a group of organic comp  
"The chemical reactions and pathways involving carbohydrates, any of a group of organic comp  
"The chemical reactions and pathways involving carbohydrates, any of a group of organic comp  
"The chemical reactions and pathways involving carbohydrates, any of a group of organic comp  
"The process whose specific outcome is the progression of the skeleton over time, from its form  
The hydrolysis of a peptide bond or bonds within a protein [goid 6508] [evidence IEA]; The hydro

"The chemical reactions and pathways, including anabolism and catabolism, by which living org;

"The process whereby new strands of DNA are synthesized. The template for replication can eit  
"Any process that modulates the frequency, rate or extent of DNA-dependent transcription [goid  
The biological process whose specific outcome is the progression of a multicellular organism ov  
The biological process whose specific outcome is the progression of a multicellular organism ov  
The biological process whose specific outcome is the progression of a multicellular organism ov  
"The chemical reactions and pathways involving ceramides, any N-acylated sphingoid [goid 667  
"The process whose specific outcome is the progression of the skeleton over time, from its form  
"The synthesis of either RNA on a template of DNA or DNA on a template of RNA [goid 6350] [e

"The synthesis of either RNA on a template of DNA or DNA on a template of RNA [goid 6350] [e

"The synthesis of either RNA on a template of DNA or DNA on a template of RNA [goid 6350] [e

"The synthesis of either RNA on a template of DNA or DNA on a template of RNA [goid 6350] [e

"The synthesis of either RNA on a template of DNA or DNA on a template of RNA [goid 6350] [e

"Any process that stops, prevents or reduces the frequency, rate or extent of transcription from a

The synthesis of either RNA on a template of DNA or DNA on a template of RNA [goid 6350] [e

"The joining together of exons from one or more primary transcripts of nuclear messenger RNA

"The chemical reactions and pathways resulting in the formation of L-serine, the levorotatory iso

The series of molecular signals generated as a consequence of the insulin receptor binding to ir

"The chemical reactions and pathways involving glycogen, a polydisperse, highly branched gluc

"The chemical reactions and pathways involving carbohydrates, any of a group of organic comp

"The chemical reactions and pathways involving carbohydrates, any of a group of organic comp

"The chemical reactions and pathways involving carbohydrates, any of a group of organic comp

"The chemical reactions and pathways involving carbohydrates, any of a group of organic comp

"A form of programmed cell death induced by external or internal signals that trigger the activity

"The chemical reactions and pathways, including anabolism and catabolism, by which living org;

"Any process that modulates the frequency, rate or extent of DNA-dependent transcription [goid

The process of removing one or more phosphoric (ester or anhydride) residues from a molecule

"The synthesis of either RNA on a template of DNA or DNA on a template of RNA [goid 6350] [e

"The chemical reactions and pathways involving lipids, compounds soluble in an organic solvent

The process of removal or addition of one or more electrons with or without the concomitant ren

"The act of sexual union between male and female, involving the transfer of sperm [goid 7620] [

"The chemical reactions and pathways resulting in the formation of phosphatidylinositol, any gly

"The process of introducing one or more phosphate groups into a phosphoinositide, a class of s

"The process of introducing one or more phosphate groups into a phosphoinositide, a class of s

"The chemical reactions and pathways resulting in the formation of phosphatidylinositol, any gly

"The synthesis of either RNA on a template of DNA or DNA on a template of RNA [goid 6350] [e

"The synthesis of either RNA on a template of DNA or DNA on a template of RNA [goid 6350] [e

"The synthesis of either RNA on a template of DNA or DNA on a template of RNA [goid 6350] [e

"The process by which clathrin triskelia are assembled into the ordered structure known as a cla

"The process of introducing a phosphate group on to a protein [goid 6468] [evidence ISS]; The p

"Any process that modulates the frequency, rate or extent of a process that affects and monitors

"The chemical reactions and pathways resulting in the formation of substances; typically the ene

The stepwise addition of the components of the GPI anchor on to phosphatidylinositol lipids in th

The stepwise addition of the components of the GPI anchor on to phosphatidylinositol lipids in th

The stepwise addition of the components of the GPI anchor on to phosphatidylinositol lipids in th

"The chemical reactions and pathways, including anabolism and catabolism, by which living org;

"The covalent alteration of one or more amino acids occurring in proteins, peptides and nascent

Oxidation of two organic sulfhydryl groups (thiols) by a disulfide compound to form a disulfide bc

The stepwise addition of the components of the GPI anchor on to phosphatidylinositol lipids in th

The stepwise addition of the components of the GPI anchor on to phosphatidylinositol lipids in th

"The chemical reactions and pathways, including anabolism and catabolism, by which living org;

"The chemical reactions and pathways, including anabolism and catabolism, by which living org;

"Any process specifically pertinent to the functioning of integrated living units: cells, tissues, orga

"The chemical reactions and pathways involving carbohydrates, any of a group of organic comp

A transamidation reaction that results in the cleavage of the polypeptide chain and the concomit

A transamidation reaction that results in the cleavage of the polypeptide chain and the concomit

"A transamidation reaction that results in the cleavage of the polypeptide chain and the concomi

The stepwise addition of the components of the GPI anchor on to phosphatidylinositol lipids in th

The stepwise addition of the components of the GPI anchor on to phosphatidylinositol lipids in th

The stepwise addition of the components of the GPI anchor on to phosphatidylinositol lipids in th

"The chemical reactions and pathways resulting in the formation of a glycosylphosphatidylinosit

"The chemical reactions and pathways resulting in the formation of phosphatidylinositol, any gly

"Any process that mediates interactions between a cell and its surroundings. Encompasses inte

"The process of introducing one or more phosphate groups into a phosphoinositide, a class of s

"The cascade of processes by which a signal interacts with a receptor, causing a change in the

"The initiation of the activity of the inactive enzyme MAP kinase by phosphorylation by a MAPK

"The process of regulating the proliferation and elimination of B cells such that the total number

"The process of introducing a phosphate group on to a protein [goid 6468] [evidence IEA]; The s

"Any process that stops, prevents or reduces the rate or extent of cell adhesion to the extracellu

"The cascade of processes by which a signal interacts with a receptor, causing a change in the

The series of molecular signals generated as a consequence of the insulin receptor binding to ir

The process of introducing a phosphate group on to a protein [goid 6468] [pmid 8999962] [evid

ariant 1, mRNA."

"The cascade of processes by which a signal interacts with a receptor, causing a change in the  
Any process that initiates the activity of the inactive transmembrane receptor protein tyrosine kinase  
"The process of introducing a phosphate group on to a protein [goid 6468] [evidence IEA]; The p  
"The process of introducing a phosphate group on to a protein [goid 6468] [pmid 9804974] [evid  
The process of introducing a phosphate group on to a protein [goid 6468] [evidence IEA]; The p  
"The process of assisting in the covalent and noncovalent assembly of single chain polypeptides;  
The process of assisting in the covalent and noncovalent assembly of single chain polypeptides  
"The process of introducing a phosphate group on to a protein [goid 6468] [pmid 14607334] [evi  
"The maintenance of proper telomeric length by the addition of telomeric repeats by telomerase [

"The process of introducing a phosphate group into a molecule, usually with the formation of a p  
"Any series of molecular signals initiated by the binding of an extracellular ligand to a receptor o  
"The chemical reactions and pathways involving phosphatidylinositol, any glycopospholipid with  
"The process of introducing a phosphate group into a molecule, usually with the formation of a p  
"The chemical reactions and pathways involving phosphatidylinositol, any glycopospholipid with  
"The chemical reactions and pathways involving phosphatidylinositol, any glycopospholipid with  
variant 2, mRNA."

"The uptake of external materials by cells, utilizing receptors to ensure specificity of transport. A  
"The chemical reactions and pathways involving phosphatidylinositol, any glycopospholipid with  
"The chemical reactions and pathways involving tetrahydrofolate, 5,6,7,8-tetrahydrofolic acid, a  
"The chemical reactions and pathways involving phosphatidylinositol, any glycopospholipid with  
"The synthesis of RNA from a DNA template by RNA polymerase II (Pol II), originating at a Pol I  
"The chemical reactions and pathways resulting in the formation of phospholipids, any lipid cont  
"The directed movement of substances (such as macromolecules, small molecules, ions) into, o  
"The directed movement of lipids into, out of, within or between cells. Lipids are compounds solu  
"The chemical reactions and pathways involving lipids, compounds soluble in an organic solvent  
"The directed movement of substances (such as macromolecules, small molecules, ions) into, o  
The hydrolysis of a peptide bond or bonds within a protein [goid 6508] [evidence IEA]; The hydr  
"Any process that modulates the frequency, rate or extent of DNA-dependent transcription [goid  
"Any process that modulates the frequency, rate or extent of DNA-dependent transcription [goid  
"Any process that modulates the frequency, rate or extent of DNA-dependent transcription [goid  
"The chemical reactions and pathways resulting in the breakdown of a protein or peptide by hyd  
"The chemical reactions and pathways resulting in the breakdown of a protein or peptide by hyd

"The series of molecular signals generated as a consequence of a peptide neurotransmitter bind  
The attachment of one cell to another cell via adhesion molecules [goid 16337] [pmid 11863367  
"The directed movement of cations, atoms or small molecules with a net positive charge, into, or  
VA."  
) , mRNA."

"Any process that stops, prevents or reduces the frequency, rate or extent of protein kinase acti  
"Any process that stops, prevents or reduces the frequency, rate or extent of protein kinase acti  
"Any process that stops, prevents or reduces the frequency, rate or extent of protein kinase acti  
"The chemical reactions and pathways resulting in the breakdown of a monosaccharide (genera

"Any process that modulates the frequency, rate or extent of CDK activity [goid 79] [pmid 90012  
"The process of introducing a phosphate group on to a protein [goid 6468] [pmid 8135837] [evid  
"The cascade of processes by which a signal interacts with a receptor, causing a change in the  
"The process of introducing a phosphate group on to a protein [goid 6468] [pmid 10441506] [evi  
"Any process that modulates the frequency, rate or extent of transcription from an RNA polymer  
"The process whose specific outcome is the progression of the heart over time, from its formati  
"The attachment of a cell, either to another cell or to an underlying substrate such as the extrac  
"The chemical reactions and pathways involving phosphatidylserines, any of a class of glyceropl  
"The chemical reactions and pathways involving phospholipids, any lipid containing phosphoric  
"The chemical reactions and pathways involving phospholipids, any lipid containing phosphoric  
"The chemical reactions and pathways resulting in the breakdown of lipids, compounds soluble i

"The chemical reactions and pathways involving phospholipids, any lipid containing phosphoric  
"The chemical reactions and pathways, including anabolism and catabolism, by which living org  
"The chemical reactions and pathways involving phospholipids, any lipid containing phosphoric  
"The process whose specific outcome is the progression of the placenta over time, from its form

"The synthesis of either RNA on a template of DNA or DNA on a template of RNA [goid 6350] [e  
"The synthesis of either RNA on a template of DNA or DNA on a template of RNA [goid 6350] [e  
"The synthesis of either RNA on a template of DNA or DNA on a template of RNA [goid 6350] [e  
"The hydrolysis of a peptide bond or bonds within a protein [goid 6508] [pmid 6589620] [evidenc  
"The chemical reactions and pathways resulting in the breakdown of lipids, compounds soluble i  
2, mRNA."

"The chemical reactions and pathways involving phospholipids, any lipid containing phosphoric  
"Blood vessel formation when new vessels emerge from the proliferation of pre-existing blood ve  
"Blood vessel formation when new vessels emerge from the proliferation of pre-existing blood ve  
"A series of reactions within the cell that occur as a result of a single trigger reaction or compou  
"A series of reactions within the cell that occur as a result of a single trigger reaction or compou  
"A series of reactions within the cell that occur as a result of a single trigger reaction or compou  
"A series of reactions within the cell that occur as a result of a single trigger reaction or compou  
"The chemical reactions and pathways involving lipids, compounds soluble in an organic solvent  
"The chemical reactions and pathways involving lipids, compounds soluble in an organic solvent  
"The chemical reactions and pathways involving lipids, compounds soluble in an organic solvent  
"The directed movement of a motile cell or organism, or the directed growth of a cell guided by a  
"The process by which a G-protein coupled receptor is taken up into an endocytic vesicle [goid 2  
"The chemical reactions and pathways, including anabolism and catabolism, by which living org  
"The chemical reactions and pathways, including anabolism and catabolism, by which living org  
"The chemical reactions and pathways, including anabolism and catabolism, by which living org

"The joining of two lipid bilayers to form a single membrane [goid 6944] [evidence IEA]; The initi  
nt 3, mRNA."

A series of reactions within the cell that occur as a result of a single trigger reaction or compoun

"Any process specifically pertinent to the functioning of integrated living units: cells, tissues, orga

"Any process specifically pertinent to the functioning of integrated living units: cells, tissues, orga

"Any process specifically pertinent to the functioning of integrated living units: cells, tissues, orga

"Any process specifically pertinent to the functioning of integrated living units: cells, tissues, orga

"The directed movement of glycolipids, compounds containing (usually) 1-4 linked monosacchar

The sequence of reactions within a cell required to convert absorbed photons into a molecular s

2), transcript variant 2, mRNA."

"A form of programmed cell death induced by external or internal signals that trigger the activity (PLEKHF2), mRNA."

"Any process that modulates the frequency, rate or extent of Rho protein signal transduction [go

"Any process that modulates the frequency, rate or extent of Rho protein signal transduction [go

"The specific activation or halting of processes within a cell so that its vital functions markedly ce

"Any process that modulates the frequency, rate or extent of Rho protein signal transduction [go

2 (PLEKHH2), mRNA."

3 (PLEKHH3), mRNA."

A series of reactions within the cell that occur as a result of a single trigger reaction or compoun

"Any process that stops, prevents or reduces the rate or extent of progression through the cell c:

."

"The hydrolysis of a peptide bond or bonds within a protein [goid 6508] [evidence IEA]; A proces

"The process of introducing a phosphate group on to a protein [goid 6468] [evidence IEA]; The p

The process of introducing a phosphate group on to a protein [goid 6468] [pmid 8702627] [evid

The process of introducing a phosphate group on to a protein [goid 6468] [pmid 10607900] [evid

"The directed movement of charged atoms or small charged molecules into, out of, within or bet

"A change in state or activity of a cell or an organism (in terms of movement, secretion, enzyme

"The covalent alteration of one or more amino acids occurring in proteins, peptides and nascent

"The directed movement of charged atoms or small charged molecules into, out of, within or bet

Any process involved in the conversion of a primary mRNA transcript into one or more mature r

"A change in state or activity of a cell or an organism (in terms of movement, secretion, enzyme

"The process by which all major lipid classes are redistributed within the plasma membrane follc

"The chemical reactions and pathways involving lipids, compounds soluble in an organic solvent

"The cascade of processes by which a signal interacts with a receptor, causing a change in the

"The cascade of processes by which a signal interacts with a receptor, causing a change in the

"The cascade of processes by which a signal interacts with a receptor, causing a change in the

"The cascade of processes by which a signal interacts with a receptor, causing a change in the

"The process that regulates the coordinated growth and sprouting of blood vessels giving rise to

The hydrolysis of a peptide bond or bonds within a protein [goid 6508] [evidence IEA]

"The process by which cytochrome c is enabled to move from the mitochondrial intermembrane  
Any series of molecular signals generated as a consequence of an androgen binding to its rece  
"The synthesis of either RNA on a template of DNA or DNA on a template of RNA [goid 6350] [e  
"The process of restoring DNA after damage. Genomes are subject to damage by chemical and  
"The chemical reactions and pathways, including anabolism and catabolism, by which living org  
"The addition of a sugar unit to a protein amino acid, e.g. the addition of glycan chains to proteir  
"The process of communication from a neuron to a target (neuron, muscle, or secretory cell) acr  
The hydrolysis of a peptide bond or bonds within a protein [goid 6508] [evidence IEA]; The hydro  
The hydrolysis of a peptide bond or bonds within a protein [goid 6508] [evidence IEA]  
"A system for the correction of errors introduced during DNA replication when an incorrect base,  
"A system for the correction of errors introduced during DNA replication when an incorrect base,  
"A system for the correction of errors introduced during DNA replication when an incorrect base,  
"A system for the correction of errors introduced during DNA replication when an incorrect base,  
"Any process that modulates the frequency, rate or extent of DNA-dependent transcription [goid  
"A system for the correction of errors introduced during DNA replication when an incorrect base,  
"A system for the correction of errors introduced during DNA replication when an incorrect base,  
"The process of introducing a phosphate group on to a protein [goid 6468] [pmid 10191291] [evi  
The process of introducing a phosphate group on to a protein [goid 6468] [evidence IEA]

"The removal of the oligonucleotide that contains the DNA damage. The oligonucleotide is form  
"The process of formation of spermatozoa, including spermatocytogenesis and spermiogenesis

"The synthesis of either RNA on a template of DNA or DNA on a template of RNA [goid 6350] [e

"The cascade of processes by which a signal interacts with a receptor, causing a change in the  
"The chemical reactions and pathways, including anabolism and catabolism, by which living org  
"The chemical reactions and pathways, including anabolism and catabolism, by which living org  
"Blood vessel formation when new vessels emerge from the proliferation of pre-existing blood ve  
"The chemical reactions and pathways involving lipids, compounds soluble in an organic solvent  
"The chemical reactions and pathways involving fatty acids, aliphatic monocarboxylic acids liber  
"The chemical reactions and pathways resulting in the formation of pyridoxine, 2-methyl-3-hydro  
"The chemical reactions and pathways involving carbohydrates, any of a group of organic comp  
"The synthesis of either RNA on a template of DNA or DNA on a template of RNA [goid 6350] [e  
"The synthesis of either RNA on a template of DNA or DNA on a template of RNA [goid 6350] [e  
The movement of leukocytes within or between different tissues and organs of the body [goid 5C  
"The attachment of a cell, either to another cell or to an underlying substrate such as the extrac

"Blood vessel formation when new vessels emerge from the proliferation of pre-existing blood ve  
"The chemical reactions and pathways involving carbohydrates, any of a group of organic comp  
"Any process that modulates the frequency, rate or extent of DNA-dependent transcription [goid

"The chemical reactions and pathways involving nucleobases, nucleosides, nucleotides and nucleic acids [goid 19]  
"The vectorial transfer of a protein from the cytoplasm into the nucleus, through the nuclear pore [goid 19]  
"The process whereby new strands of DNA are synthesized, using parental DNA as a template [goid 19]  
"Progression through S phase, the part of the mitotic cell cycle during which DNA synthesis takes place [goid 19]  
The process whereby new strands of DNA are synthesized. The template for replication can either be the parental DNA or a newly synthesized strand [goid 19]  
"Synthesis of DNA that proceeds from the broken 3' single-strand DNA end uses the homologous strand as a template [goid 19]  
Any process that activates or increases the rate or extent of endothelial cell proliferation [goid 19]

variant 1, mRNA."

"Progression from G1 phase to S phase of the mitotic cell cycle [goid 82] [pmid 16762037] [evidence IEA]  
"The process whereby new strands of DNA are synthesized. The template for replication can either be the parental DNA or a newly synthesized strand [goid 82]  
The process whereby new strands of DNA are synthesized. The template for replication can either be the parental DNA or a newly synthesized strand [goid 82]

"The process whereby new strands of DNA are synthesized in the mitochondrion [goid 6264] [evidence IEA]  
"The process whereby new strands of DNA are synthesized, using parental DNA as a template [goid 6264]  
"Synthesis of DNA that proceeds from the broken 3' single-strand DNA end uses the homologous strand as a template [goid 6264]  
"The process whereby new strands of DNA are synthesized. The template for replication can either be the parental DNA or a newly synthesized strand [goid 6264]  
"The process whereby new strands of DNA are synthesized. The template for replication can either be the parental DNA or a newly synthesized strand [goid 6264]  
The process whereby new strands of DNA are synthesized. The template for replication can either be the parental DNA or a newly synthesized strand [goid 6264]  
"The process whereby new strands of DNA are synthesized. The template for replication can either be the parental DNA or a newly synthesized strand [goid 6264]  
The synthesis of either RNA on a template of DNA or DNA on a template of RNA [goid 6350] [evidence IEA]  
The synthesis of either RNA on a template of DNA or DNA on a template of RNA [goid 6350] [evidence IEA]  
"The synthesis of either RNA on a template of DNA or DNA on a template of RNA [goid 6350] [evidence IEA]  
The synthesis of either RNA on a template of DNA or DNA on a template of RNA [goid 6350] [evidence IEA]  
"The synthesis of either RNA on a template of DNA or DNA on a template of RNA [goid 6350] [evidence IEA]  
"The joining together of exons from one or more primary transcripts of nuclear messenger RNA [goid 6351] [evidence IEA]  
"The synthesis of either RNA on a template of DNA or DNA on a template of RNA [goid 6350] [evidence IEA]  
"The joining together of exons from one or more primary transcripts of nuclear messenger RNA [goid 6351] [evidence IEA]  
"The joining together of exons from one or more primary transcripts of nuclear messenger RNA [goid 6351] [evidence IEA]  
"The joining together of exons from one or more primary transcripts of nuclear messenger RNA [goid 6351] [evidence IEA]  
"The joining together of exons from one or more primary transcripts of nuclear messenger RNA [goid 6351] [evidence IEA]  
"The joining together of exons from one or more primary transcripts of nuclear messenger RNA [goid 6351] [evidence IEA]  
The synthesis of either RNA on a template of DNA or DNA on a template of RNA [goid 6350] [evidence IEA]  
The synthesis of either RNA on a template of DNA or DNA on a template of RNA [goid 6350] [evidence IEA]  
"The joining together of exons from one or more primary transcripts of nuclear messenger RNA [goid 6351] [evidence IEA]  
"The joining together of exons from one or more primary transcripts of nuclear messenger RNA [goid 6351] [evidence IEA]  
The synthesis of either RNA on a template of DNA or DNA on a template of RNA [goid 6350] [evidence IEA]  
"The synthesis of either RNA on a template of DNA or DNA on a template of RNA [goid 6350] [evidence IEA]  
"The synthesis of either RNA on a template of DNA or DNA on a template of RNA [goid 6350] [evidence IEA]  
The synthesis of either RNA on a template of DNA or DNA on a template of RNA [goid 6350] [evidence IEA]  
"The synthesis of either RNA on a template of DNA or DNA on a template of RNA [goid 6350] [evidence IEA]



"The synthesis of either RNA on a template of DNA or DNA on a template of RNA [goid 6350] [evidence 1] NA."

"The synthesis of either RNA on a template of DNA or DNA on a template of RNA [goid 6350] [evidence 1] NA."

"The synthesis of RNA from a DNA template by RNA polymerase III (Pol III), originating at a Pol III promoter [goid 6350] [evidence 1] NA."

"The synthesis of either RNA on a template of DNA or DNA on a template of RNA [goid 6350] [evidence 1] NA."

"The process whereby new strands of DNA are synthesized. The template for replication can either be DNA or RNA [goid 6350] [evidence 1] NA."

"The directed movement of proteins into, out of, within or between cells [goid 15031] [evidence 1] NA."

"The chemical reactions and pathways resulting in the formation of precursor metabolites, substrates or products [goid 6350] [evidence 1] NA."

"The posttranslational glycosylation of protein via the N4 atom of peptidyl-asparagine or the N1' atom of adenosine [goid 6350] [evidence 1] NA."

"The chemical reactions and pathways involving carbohydrates, any of a group of organic compounds that contain the element carbon [goid 6350] [evidence 1] NA."

"The formation of O-glycans by addition of glycosyl groups either to the hydroxyl group of peptide backbone or to the hydroxyl group of serine or threonine [goid 6350] [evidence 1] NA."

"Generation of the mature 5'-end of the tRNA, usually via an endonucleolytic cleavage by RNase P [goid 6350] [evidence 1] NA."

"Any process involved in the conversion of a primary ribosomal RNA (rRNA) transcript into one or more mature rRNAs [goid 6350] [evidence 1] NA."

"The process by which a pre-tRNA molecule is converted to a mature tRNA, ready for addition to a ribosome [goid 6350] [evidence 1] NA."

"The process by which a pre-tRNA molecule is converted to a mature tRNA, ready for addition to a ribosome [goid 6350] [evidence 1] NA."

"Any process specifically pertinent to the functioning of integrated living units: cells, tissues, organs or organisms [goid 6350] [evidence 1] NA."

The process of removal or addition of one or more electrons with or without the concomitant removal or addition of protons [goid 6350] [evidence 1] NA."

The series of molecular signals initiated by binding of Wnt protein to a frizzled family receptor or its coreceptor [goid 6350] [evidence 1] NA."

The maintenace of proper telomeric length by the addition of telomeric repeats by telomerase [goid 6350] [evidence 1] NA."

variant POTE-2C, mRNA."

"The synthesis of either RNA on a template of DNA or DNA on a template of RNA [goid 6350] [evidence 1] NA."

"Any process that modulates the frequency, rate or extent of DNA-dependent transcription [goid 6350] [evidence 1] NA."

"Any process that modulates the frequency, rate or extent of DNA-dependent transcription [goid 6350] [evidence 1] NA."

"Any process that modulates the frequency, rate or extent of DNA-dependent transcription [goid 6350] [evidence 1] NA."

"Any process that modulates the frequency, rate or extent of transcription from an RNA polymerase promoter [goid 6350] [evidence 1] NA."

"Specific actions of a newborn or infant mammal that result in the derivation of nourishment from the mother [goid 6350] [evidence 1] NA."

"Any process that modulates the frequency, rate or extent of DNA-dependent transcription [goid 6350] [evidence 1] NA."

"The chemical reactions and pathways involving the phosphate group, the anion or salt of any phosphate [goid 6350] [evidence 1] NA."

"The chemical reactions and pathways involving the phosphate group, the anion or salt of any phosphate [goid 6350] [evidence 1] NA."

The process of removing sections of the primary RNA transcript to remove sequences not present in the mature RNA [goid 6350] [evidence 1] NA."

"The process of removing one or more phosphoric residues from a protein [goid 6470] [evidence 1] NA."

NA."

"Any process that stops, prevents or reduces the rate or extent of progression through the cell cycle [goid 6350] [evidence 1] NA."

"Any process that stops, prevents or reduces the rate or extent of progression through the cell cycle [goid 6350] [evidence 1] NA."

"Any process that stops, prevents or reduces the rate or extent of progression through the cell cycle [goid 6350] [evidence 1] NA."

"Any process that modulates the frequency, rate or extent of DNA-dependent transcription [goid 6350] [evidence 1] NA."

"Any process that stops, prevents or reduces the frequency, rate or extent of transcription from a promoter [goid 6350] [evidence 1] NA."

"The synthesis of either RNA on a template of DNA or DNA on a template of RNA [goid 6350] [evidence 1] NA."

"The chemical reactions and pathways resulting in the formation of a purine nucleotide, a compound (PPDPF), mRNA."

"The binding of a cell to the extracellular matrix via adhesion molecules [goid 7160] [pmid 77968 protein (liprin), alpha 3 (PPFIA3), mRNA."

"Any process that mediates interactions between a cell and its surroundings. Encompasses inte

"The attachment of a cell, either to another cell or to an underlying substrate such as the extrac

"Any process that mediates interactions between a cell and its surroundings. Encompasses inte

"The process in which the cytoplasm of the outermost cells of the vertebrate epidermis is replac

"The process of assisting in the covalent and noncovalent assembly of single chain polypeptides

19), mRNA."

The process of assisting in the covalent and noncovalent assembly of single chain polypeptides

"The process of assisting in the covalent and noncovalent assembly of single chain polypeptides

"Any process involved in the conversion of a primary mRNA transcript into one or more mature r

The process of assisting in the covalent and noncovalent assembly of single chain polypeptides

The process of assisting in the covalent and noncovalent assembly of single chain polypeptides

"Any process involved in the conversion of a primary mRNA transcript into one or more mature r

Any process involved in the conversion of a primary mRNA transcript into one or more mature r

"Addition of multiple ubiquitin moieties to a protein, forming a ubiquitin chain [goid 209] [pmid 11

Any process involved in the conversion of a primary mRNA transcript into one or more mature r

"The chemical reactions and pathways resulting in the breakdown of a protein or peptide by hyd

The process of assisting in the covalent and noncovalent assembly of single chain polypeptides

"The process in which the cytoplasm of the outermost cells of the vertebrate epidermis is replac

The process of removing one or more phosphoric residues from a protein [goid 6470] [pmid 968

"The process of removing one or more phosphoric residues from a protein [goid 6470] [pmid 91

The process of removing one or more phosphoric residues from a protein [goid 6470] [evidence

The process of removing one or more phosphoric residues from a protein [goid 6470] [evidence

The process of removing one or more phosphoric residues from a protein [goid 6470] [evidence

The process of removing one or more phosphoric residues from a protein [goid 6470] [evidence

The process of removing one or more phosphoric residues from a protein [goid 6470] [evidence

"The removal of a methyl group, from a protein amino acid. A methyl group is derived from meth

"The chemical reactions and pathways resulting in the formation of heme, any compound of iron

"The chemical reactions and pathways involving carbohydrates, any of a group of organic comp

"The chemical reactions and pathways involving carbohydrates, any of a group of organic comp

"The chemical reactions and pathways involving carbohydrates, any of a group of organic comp

The synthesis of either RNA on a template of DNA or DNA on a template of RNA [goid 6350] [ev

"Any process that modulates the frequency, rate or extent of muscle contraction [goid 6937] [pr

"A form of programmed cell death induced by external or internal signals that trigger the activity

"The synthesis of either RNA on a template of DNA or DNA on a template of RNA [goid 6350] [e  
"Any process that modulates the frequency, rate or extent of addition of phosphate groups into a  
"Any process that modulates the frequency, rate or extent of addition of phosphate groups into a  
"Any process that modulates the frequency, rate or extent of addition of phosphate groups into a  
"Any process that modulates the frequency, rate or extent of the chemical reactions and pathwa  
"Any process that modulates the frequency, rate or extent of the chemical reactions and pathwa

"The cascade of processes by which a signal interacts with a receptor, causing a change in the  
"The synthesis of either RNA on a template of DNA or DNA on a template of RNA [goid 6350] [e  
"The cascade of processes by which a signal interacts with a receptor, causing a change in the  
"Any process that modulates the frequency, rate or extent of signal transduction [goid 9966] [evi  
"The chemical reactions and pathways involving carbohydrates, any of a group of organic comp  
"The chemical reactions and pathways involving carbohydrates, any of a group of organic comp  
"The chemical reactions and pathways involving carbohydrates, any of a group of organic comp  
"The chemical reactions and pathways involving carbohydrates, any of a group of organic comp

"Any process specifically pertinent to the functioning of integrated living units: cells, tissues, orga  
"The synthesis of either RNA on a template of DNA or DNA on a template of RNA [goid 6350] [e  
"The process whose specific outcome is the progression of the mesoderm over time, from its fo  
The process of removing one or more phosphoric residues from a protein [goid 6470] [pmid 284  
"Any process that terminates the activity of the active enzyme MAP kinase [goid 188] [pmid 110  
:1B), transcript variant 1, mRNA."

"The cascade of processes by which a signal interacts with a receptor, causing a change in the  
"The process of removing one or more phosphoric residues from a protein [goid 6470] [evidence  
, mRNA."

"Any process that stops or reduces the activity of a phosphoprotein phosphatase [goid 32515] [p  
"The cascade of processes by which a signal interacts with a receptor, causing a change in the  
"The cascade of processes by which a signal interacts with a receptor, causing a change in the  
"The cascade of processes by which a signal interacts with a receptor, causing a change in the  
"The cascade of processes by which a signal interacts with a receptor, causing a change in the  
"The cascade of processes by which a signal interacts with a receptor, causing a change in the  
"Progression from G1 phase to S phase of the mitotic cell cycle [goid 82] [evidence IEA]; The pr  
"The process of removing one or more phosphoric residues from a protein [goid 6470] [evidence  
The conversion of proteins that induce or sustain apoptosis to an active form [goid 8633] [pmid  
The conversion of proteins that induce or sustain apoptosis to an active form [goid 8633] [pmid  
"A process that is carried out at the cellular level which results in the formation, arrangement of  
"The cascade of processes by which a signal interacts with a receptor, causing a change in the  
JA."

"The synthesis of either RNA on a template of DNA or DNA on a template of RNA [goid 6350] [p  
"Progression from G1 phase to S phase of the mitotic cell cycle [goid 82] [pmid 9013334] [evid

"The synthesis of either RNA on a template of DNA or DNA on a template of RNA [goid 6350] [e  
"The covalent alteration of one or more amino acids occurring in proteins, peptides and nascent

Any process involved in the conversion of a primary mRNA transcript into one or more mature r  
"The whole of the physical, chemical, and biochemical processes carried out by multicellular org  
"The synthesis of either RNA on a template of DNA or DNA on a template of RNA [goid 6350] [e

"The directed movement of proteins into, out of, within or between cells [goid 15031] [evidence I

RNA."

"The series of molecular signals generated as a consequence of a G-protein coupled receptor b  
"The series of molecular signals generated as a consequence of a G-protein coupled receptor b  
"Lengthening of the distance between poles of the mitotic spindle [goid 22] [pmid 9885575] [evid  
"Any process specifically pertinent to the functioning of integrated living units: cells, tissues, orga  
The hydrolysis of a peptide bond or bonds within a protein [goid 6508] [evidence IEA]; The hydro  
"Any process that stops, prevents or reduces the frequency, rate or extent of transcription from a  
"The synthesis of either RNA on a template of DNA or DNA on a template of RNA [goid 6350] [e  
"The synthesis of either RNA on a template of DNA or DNA on a template of RNA [goid 6350] [e  
"The synthesis of either RNA on a template of DNA or DNA on a template of RNA [goid 6350] [e  
"The synthesis of either RNA on a template of DNA or DNA on a template of RNA [goid 6350] [e  
"The synthesis of either RNA on a template of DNA or DNA on a template of RNA [goid 6350] [e  
"The process whose specific outcome is the progression of the skeleton over time, from its form  
"Any process that maintains the redox environment of a cell or compartment within a cell [goid 4  
"A change in state or activity of a cell or an organism (in terms of movement, secretion, enzyme  
Any process that maintains the redox environment of a cell or compartment within a cell [goid 4  
"Any process that maintains the redox environment of a cell or compartment within a cell [goid 4  
"A change in state or activity of a cell or an organism (in terms of movement, secretion, enzyme  
"The synthesis of either RNA on a template of DNA or DNA on a template of RNA [goid 6350] [e

Any immune system process that functions in the calibrated response of an organism to a poten  
"The process whose specific outcome is the progression of the skeleton over time, from its form  
The hydrolysis of a peptide bond or bonds within a protein [goid 6508] [evidence IEA]; The hydro  
The hydrolysis of a peptide bond or bonds within a protein [goid 6508] [evidence IEA]  
"The chemical reactions and pathways involving superoxide, the superoxide anion O<sub>2</sub><sup>-</sup> (superox  
"A form of programmed cell death induced by external or internal signals that trigger the activity  
Any immune system process that functions in the calibrated response of an organism to a poten  
"The multiplication or reproduction of cells, resulting in the expansion of a cell population [goid 8  
"The synthesis of either RNA on a template of DNA or DNA on a template of RNA [goid 6350] [e

"Any cellular process that results in the specification, formation or maintenance of the apicobas

"The process whereby new strands of DNA are synthesized. The template for replication can eit  
"The process whereby new strands of DNA are synthesized. The template for replication can eit

"The chemical reactions and pathways involving glucose, the aldohexose gluco-hexose. D-glucose  
"The chemical reactions and pathways involving carbohydrates, any of a group of organic compounds  
"The chemical reactions and pathways resulting in the formation of a fatty acid, any of the aliphatic  
"The process of introducing a phosphate group on to a protein [goid 6468] [evidence IEA]; The process  
"The process of introducing a phosphate group on to a protein [goid 6468] [pmid 2342480] [evidence  
"The chemical reactions and pathways involving glycogen, a polydisperse, highly branched glucan  
"The process that gives rise to the mesoderm. This process pertains to the initial formation of the  
"Any process that modulates the frequency, rate or extent of addition of phosphate groups into a  
"Any process that modulates the frequency, rate or extent of addition of phosphate groups into a  
"A series of reactions within the cell that occur as a result of a single trigger reaction or compound

The process of introducing a phosphate group on to a protein [goid 6468] [pmid 3755548] [evidence  
"The process of introducing a phosphate group on to a protein [goid 6468] [pmid 16611985] [evidence  
"The process of introducing a phosphate group on to a protein [goid 6468] [evidence IEA]; Any process  
The process of introducing a phosphate group on to a protein [goid 6468] [pmid 1986216] [evidence  
"The process of introducing a phosphate group on to a protein [goid 6468] [pmid 8226978] [evidence  
"The process of introducing a phosphate group on to a protein [goid 6468] [evidence IEA]; A series  
"A series of reactions, mediated by protein kinases, which occurs as a result of a single trigger reaction  
"A process that is carried out at the cellular level which results in the formation, arrangement of  
"The process of introducing a phosphate group on to a protein [goid 6468] [evidence IEA]; A series  
The process of introducing a phosphate group on to a protein [goid 6468] [evidence NAS]; The process  
The process of introducing a phosphate group on to a protein [goid 6468] [pmid 10231560] [evidence  
"Any process that contributes to the maintenance of proper telomeric length and structure by affecting  
"The process of introducing a phosphate group on to a protein [goid 6468] [evidence IEA]; A process  
"A change in state or activity of a cell or an organism (in terms of movement, secretion, enzyme  
The process of introducing a phosphate group on to a protein [goid 6468] [pmid 7633447] [evidence  
The process of introducing a phosphate group on to a protein [goid 6468] [pmid 9154127] [evidence  
"Any series of molecular signals initiated by the binding of an extracellular ligand to a receptor or

"Any process by which DNA and associated proteins are formed into a compact, orderly structure  
The addition of a methyl group to a protein amino acid. A methyl group is derived from methane

"The addition of a methyl group to a protein amino acid. A methyl group is derived from methane  
"The chemical reactions and pathways, including anabolism and catabolism, by which living organisms  
"The formation and assembly from one or more snRNA and multiple protein components of a ribosome  
Any process by which an organism has an effect on an organism of a different species [goid 444  
"The modification of histones by addition of methyl groups [goid 16571] [pmid 15494416] [evidence  
"The modification of histones by addition of methyl groups [goid 16571] [pmid 16051612] [evidence  
"A change in state or activity of a cell or an organism (in terms of movement, secretion, enzyme  
RNA."  
"The hydrolysis of a peptide bond or bonds within a protein [goid 6508] [pmid 12052963] [evidence

"Any immune system process that functions in the calibrated response of an organism to a pote  
"The initiation of the activity of the inactive enzyme MAP kinase by phosphorylation by a MAPK  
"The initiation of the activity of the inactive enzyme MAP kinase by phosphorylation by a MAPK  
"Any process specifically pertinent to the functioning of integrated living units: cells, tissues, orga  
"The series of events required for an organism to receive a visual stimulus, convert it to a molec  
"The sequential process by which the multiple coagulation factors of the blood interact, ultimatel

"Any process that modulates the frequency, rate or extent of DNA-dependent transcription [goid  
Any process involved in the conversion of a primary mRNA transcript into one or more mature r  
"Addition of multiple ubiquitin moieties to a protein, forming a ubiquitin chain [goid 209] [pmid 11  
"The joining together of exons from one or more primary transcripts of nuclear messenger RNA  
"The formation of a tri-snRNP complex containing U4 and U6 (or U4atac and U6atac) snRNAs ε  
Any process involved in the conversion of a primary mRNA transcript into one or more mature r  
Any process involved in the conversion of a primary mRNA transcript into one or more mature r  
"The joining together of exons from one or more primary transcripts of nuclear messenger RNA  
Any process involved in the conversion of a primary mRNA transcript into one or more mature r  
"The aggregation, arrangement and bonding together of the spliceosome, a ribonucleoprotein a  
"The joining together of exons from one or more primary transcripts of nuclear messenger RNA  
"A process that is carried out at the cellular level which results in the formation, arrangement of  
"The chemical reactions and pathways involving a nucleoside, a nucleobase linked to either bet  
"The chemical reactions and pathways involving a nucleoside, a nucleobase linked to either bet  
"The chemical reactions and pathways involving nucleobases, nucleosides, nucleotides and nuc  
"The chemical reactions and pathways involving nucleobases, nucleosides, nucleotides and nuc

"The series of events required for an organism to receive a visual stimulus, convert it to a molec

"Any process specifically pertinent to the functioning of integrated living units: cells, tissues, orga

"A change in state or activity of a cell or an organism (in terms of movement, secretion, enzyme

"Any process that modulates the frequency, rate or extent of DNA-dependent transcription [goid

The hydrolysis of a peptide bond or bonds within a protein [goid 6508] [evidence IEA]

The hydrolysis of a peptide bond or bonds within a protein [goid 6508] [evidence IEA]

The hydrolysis of a peptide bond or bonds within a protein [goid 6508] [evidence IEA]

The hydrolysis of a peptide bond or bonds within a protein [goid 6508] [evidence IEA]

"The chemical reactions and pathways involving lipids, compounds soluble in an organic solvent

"The chemical reactions and pathways involving lipids, compounds soluble in an organic solvent

"The directed movement of substances, either within a vesicle or in the vesicle membrane, into,

"A type of vesicle-mediated transport in which cells take up external materials or membrane con

"Any process that modulates the frequency, rate or extent of ARF protein signal transduction [gc

"Any process that modulates the frequency, rate or extent of attachment of a cell to another cell

"Any process that modulates the frequency, rate or extent of ARF protein signal transduction [gc

"Any process that modulates the frequency, rate or extent of ARF protein signal transduction [gc

"Any process that modulates the frequency, rate or extent of ARF protein signal transduction [gc

"A series of reactions within the cell that occur as a result of a single trigger reaction or compour

"The proteolytic cleavage of transmembrane proteins and release of their ectodomain (extracellu

"The set of physiological processes that allow an embryo or foetus to develop within the body of

"Reactions, triggered in response to the presence of a foreign body or the occurrence of an injur

"The synthesis of either RNA on a template of DNA or DNA on a template of RNA [goid 6350] [e

The process of introducing a phosphate group on to a protein [goid 6468] [evidence NAS]

"The chemical reactions and pathways resulting in the breakdown of a protein or peptide by hyd

"The chemical reactions and pathways resulting in the breakdown of a protein or peptide by hyd

"The chemical reactions and pathways resulting in the breakdown of a protein or peptide by hyd

"The chemical reactions and pathways resulting in the breakdown of a protein or peptide by hyd

"The chemical reactions and pathways resulting in the breakdown of a protein or peptide by hyd

"The chemical reactions and pathways resulting in the breakdown of a protein or peptide by hyd

"The chemical reactions and pathways resulting in the breakdown of a protein or peptide by hyd

"The chemical reactions and pathways resulting in the breakdown of a protein or peptide by hyd

"The chemical reactions and pathways resulting in the breakdown of a protein or peptide by hyd

"The chemical reactions and pathways resulting in the breakdown of a protein or peptide by hyd

"The chemical reactions and pathways resulting in the breakdown of a protein or peptide by hyd

"The chemical reactions and pathways resulting in the breakdown of a protein or peptide by hyd

"A change in state or activity of a cell or an organism (in terms of movement, secretion, enzyme

"The chemical reactions and pathways resulting in the breakdown of a protein or peptide by hyd

"The chemical reactions and pathways resulting in the breakdown of a protein or peptide by hyd

"The chemical reactions and pathways resulting in the breakdown of a protein or peptide by hyd

"The chemical reactions and pathways resulting in the breakdown of a protein or peptide by hyd

"The chemical reactions and pathways resulting in the breakdown of a protein by the destruction of a protein or peptide by hydrolysis  
"The chemical reactions and pathways resulting in the breakdown of a protein or peptide by hydrolysis  
"The process whose specific outcome is the progression of the blastocyst over time, from its formation to implantation  
"Any process by which a new genotype is formed by reassortment of genes resulting in gene conversion  
"The process whose specific outcome is the progression of the blastocyst over time, from its formation to implantation  
"Any process that stops, prevents or reduces the frequency, rate or extent of transcription [goid 6508] [evidence IEA]  
"The chemical reactions and pathways resulting in the breakdown of a protein or peptide by hydrolysis  
"The chemical reactions and pathways resulting in the breakdown of a protein or peptide by hydrolysis  
"The chemical reactions and pathways resulting in the breakdown of a protein or peptide by hydrolysis  
"The chemical reactions and pathways resulting in the breakdown of a protein or peptide by hydrolysis  
"The chemical reactions and pathways resulting in the breakdown of a protein or peptide by hydrolysis  
"The chemical reactions and pathways resulting in the breakdown of a protein or peptide by hydrolysis  
"The chemical reactions and pathways resulting in the breakdown of a protein or peptide by hydrolysis  
"The chemical reactions and pathways resulting in the breakdown of a protein or peptide by hydrolysis  
"The chemical reactions and pathways resulting in the breakdown of a protein or peptide by hydrolysis  
"The chemical reactions and pathways resulting in the breakdown of a protein or peptide by hydrolysis  
"The hydrolysis of a peptide bond or bonds within a protein using energy from the hydrolysis of ATP  
"The chemical reactions and pathways resulting in the breakdown of a protein or peptide by hydrolysis  
"The hydrolysis of a peptide bond or bonds within a protein [goid 6508] [evidence IEA]; The chemical reactions and pathways resulting in the breakdown of a protein or peptide by hydrolysis  
"The chemical reactions and pathways resulting in the breakdown of a protein or peptide by hydrolysis  
"The process by which an antigen-presenting cell expresses antigen (peptide or lipid) of exogenous origin  
"The chemical reactions and pathways resulting in the breakdown of a protein or peptide by hydrolysis  
"The chemical reactions and pathways resulting in the breakdown of a protein or peptide by hydrolysis  
"The chemical reactions and pathways resulting in the breakdown of a protein or peptide by hydrolysis  
"The aggregation, arrangement and bonding together of a mature, active proteasome complex [goid 6508] [evidence IEA]  
"The aggregation, arrangement and bonding together of a mature, active proteasome complex [goid 6508] [evidence IEA]

variant 2, mRNA."

ding RNA. XM\_001723557"

"The synthesis of either RNA on a template of DNA or DNA on a template of RNA [goid 6350] [evidence IEA]  
"The chemical reactions and pathways resulting in the formation of L-serine, the levorotatory isomer of serine  
"A process that results in a parallel arrangement of microtubules [goid 1578] [pmid 12427559] [evidence IEA]  
"The incorporation of selenocysteine into a peptide; uses a special tRNA that recognizes the UGA codon  
"The attachment of a cell, either to another cell or to an underlying substrate such as the extracellular matrix

"The appearance of a cytokine due to biosynthesis or secretion following a cellular stimulus, resulting in a change in the activity of the cell  
The covalent attachment of a prenyl moiety to a protein amino acid [goid 18346] [evidence IEA]  
"Any process involved in the conversion of a primary mRNA transcript into one or more mature mRNA molecules  
Any process involved in the conversion of a primary mRNA transcript into one or more mature mRNA molecules

"The cascade of processes by which a signal interacts with a receptor, causing a change in the activity of the cell



"The chemical reactions and pathways resulting in the formation of phosphatidylserines, any of :  
"The chemical reactions and pathways resulting in the formation of phosphatidylserines, any of :  
"Any process that modulates the frequency, rate or extent of CDK activity [goid 79] [pmid 10918  
"Any process that modulates the frequency, rate or extent of DNA-dependent transcription [goid  
"The chemical reactions and pathways involving lipids, compounds soluble in an organic solvent  
"Any immune system process that functions in the calibrated response of an organism to a pote  
"The chemical reactions and pathways involving prostaglandins, any of a group of biologically ac  
"The chemical reactions and pathways resulting in the formation of prostaglandins, any of a gro  
"Any process that contributes to the maintenance of proper telomeric length and structure by aff  
"The series of molecular signals generated as a consequence of a G-protein coupled receptor b  
"The chemical reactions and pathways resulting in the formation of prostaglandins, any of a gro  
"The chemical reactions and pathways involving leukotriene, a pharmacologically active substar  
"A change in state or activity of a cell or an organism (in terms of movement, secretion, enzyme  
"The series of molecular signals generated as a consequence of a peptide neurotransmitter binc  
"The process whereby a chondroblast acquires specialized structural and/or functional features  
"The process of introducing a phosphate group on to a protein [goid 6468] [evidence IEA]; The a  
"The aggregation, arrangement and bonding together of a set of components to form a protein c  
"The process of introducing a phosphate group on to a protein [goid 6468] [evidence IEA]; The p

"Any process specifically pertinent to the functioning of integrated living units: cells, tissues, orga  
The process whereby new strands of DNA are synthesized. The template for replication can eith  
"The synthesis of either RNA on a template of DNA or DNA on a template of RNA [goid 6350] [e  
The process of removing one or more phosphoric residues from a protein [goid 6470] [evidence  
The process of removing one or more phosphoric residues from a protein [goid 6470] [evidence  
The biological process whose specific outcome is the progression of a multicellular organism ov  
"A series of reactions initiated by the activation of the transcription factor NF-kappaB. NF-kappa  
b (PTPLB), mRNA."

The process of removing one or more phosphoric residues from a protein [goid 6470] [evidence  
"The process of removing one or more phosphoric residues from a protein [goid 6470] [evidence  
"A signal transduction pathway, induced by DNA damage, that blocks cell cycle progression (in  
The process of removing one or more phosphoric residues from a protein [goid 6470] [pmid 845  
The process of removing one or more phosphoric residues from a protein [goid 6470] [pmid 895  
The process of removing one or more phosphoric residues from a protein [goid 6470] [evidence  
RNA."

The process of removing one or more phosphoric residues from a protein [goid 6470] [pmid 751  
"The process of removing one or more phosphoric residues from a protein [goid 6470] [evidence  
The process of removing one or more phosphoric residues from a protein [goid 6470] [pmid 164  
The process of removing one or more phosphoric residues from a protein [goid 6470] [pmid 164  
"The process of removing one or more phosphoric residues from a protein [goid 6470] [pmid 17:  
The process of removing one or more phosphoric residues from a protein [goid 6470] [pmid 153  
"The process of removing one or more phosphoric residues from a protein [goid 6470] [pmid 15:  
The process of introducing a phosphate group on to a protein [goid 6468] [evidence IEA]; The p  
"Any process that activates or increases the frequency, rate or extent of T cell mediated cytotoxi

"Reactions, triggered in response to the presence of a foreign body or the occurrence of an injury  
The process of introducing a phosphate group on to a protein [goid 6468] [evidence IEA]; The p  
"The process of removing one or more phosphoric residues from a protein [goid 6470] [evidence  
The process of removing one or more phosphoric residues from a protein [goid 6470] [evidence  
"The process of removing one or more phosphoric residues from a protein [goid 6470] [evidence  
The process of removing one or more phosphoric residues from a protein [goid 6470] [pmid 108  
The process of removing one or more phosphoric residues from a protein [goid 6470] [evidence  
"The covalent alteration of one or more amino acids occurring in proteins, peptides and nascent  
ling RNA."

"The synthesis of either RNA on a template of DNA or DNA on a template of RNA [goid 6350] [e  
The chemical reactions and pathways resulting in the formation of a protein. This is a ribosome-  
"A form of programmed cell death induced by external or internal signals that trigger the activity  
"The chemical reactions and pathways involving amino acids, organic acids containing one or m  
"The process of restoring DNA after damage. Genomes are subject to damage by chemical and  
The directed movement of a protein from the cytoplasm to the nucleus [goid 6606] [pmid 107810]

"The synthesis of either RNA on a template of DNA or DNA on a template of RNA [goid 6350] [e  
"Any process that modulates the frequency, rate or extent of the chemical reactions and pathwa  
"Any process that modulates the frequency, rate or extent of the chemical reactions and pathwa  
"The process by which interchain hydrogen bonds between two strands of DNA are broken or 'r  
"The synthesis of either RNA on a template of DNA or DNA on a template of RNA [goid 6350] [e  
"The intramolecular conversion of uridine to pseudouridine within an RNA molecule. This posttra  
"The process by which a pre-tRNA molecule is converted to a mature tRNA, ready for addition o  
"The process by which a pre-tRNA molecule is converted to a mature tRNA, ready for addition o  
"The process by which a pre-tRNA molecule is converted to a mature tRNA, ready for addition o  
"The process by which a pre-tRNA molecule is converted to a mature tRNA, ready for addition o  
"The intramolecular conversion of uridine to pseudouridine within an RNA molecule. This posttra  
"The attachment of one cell to another cell via adhesion molecules [goid 16337] [evidence IEA];

"The attachment of a cell, either to another cell or to an underlying substrate such as the extrac  
The attachment of an adhesion molecule in one cell to an identical molecule in an adjacent cell

The synthesis of either RNA on a template of DNA or DNA on a template of RNA [goid 6350] [pr  
"The hydrolysis of a peptide bond or bonds within a protein [goid 6508] [evidence IEA]; The cas

"Any immune system process that functions in the calibrated response of an organism to a pote  
"The process of introducing a phosphate group on to a protein [goid 6468] [pmid 16142408] [evi

"The characteristic movement of immature neurons from germinal zones to specific positions wr

"The attachment of a cell, either to another cell or to an underlying substrate such as the extrac  
"The hydrolysis of a peptide bond or bonds within a protein [goid 6508] [evidence IEA]; A proces

"The chemical reactions and pathways resulting in the formation of proline (pyrrolidine-2-carboxylate) [goid 6508] [evidence IEA]

"The chemical reactions and pathways resulting in the formation of proline (pyrrolidine-2-carboxylate) [goid 6508] [evidence IEA]

"The chemical reactions and pathways resulting in the formation of proline (pyrrolidine-2-carboxylate) [goid 6508] [evidence IEA]

"The chemical reactions and pathways involving carbohydrates, any of a group of organic compounds [goid 6508] [evidence IEA]

"The chemical reactions and pathways involving carbohydrates, any of a group of organic compounds [goid 6508] [evidence IEA]

"The process whose specific outcome is the progression of the kidney over time, from its formation to maintenance and repair over the life span [goid 6508] [evidence IEA]

"The series of molecular signals initiated by binding of Wnt protein to a frizzled family receptor or its antagonist [goid 6508] [evidence IEA]

"Any process that stops, prevents or reduces the rate or extent of progression through the cell cycle [goid 6508] [evidence IEA]

The process of removal or addition of one or more electrons with or without the concomitant removal or addition of one or more protons [goid 6508] [evidence IEA]

The set of physiological processes that allow an embryo or foetus to develop within the body of the mother [goid 6508] [evidence IEA]

"The process of coupling glutamate to glutamyl-tRNA, catalyzed by glutamyl-tRNA synthetase. It is a member of the class of aminoacyl-tRNA synthetases [goid 6508] [evidence IEA]

"The chemical reactions and pathways, including anabolism and catabolism, by which living organisms obtain energy [goid 6508] [evidence IEA]

"Any process involved in the conversion of a primary mRNA transcript into one or more mature mRNA molecules [goid 6508] [evidence IEA]

"The covalent alteration of one or more amino acids occurring in proteins, peptides and nascent polypeptides [goid 6508] [evidence IEA]

The hydrolysis of a peptide bond or bonds within a protein [goid 6508] [evidence IEA]

"The chemical reactions and pathways, including anabolism and catabolism, by which living organisms obtain energy [goid 6508] [evidence IEA]

The chemical reactions and pathways resulting in the formation of a protein. This is a ribosome-mediated process [goid 6508] [evidence IEA]

Any process that maintains the redox environment of a cell or compartment within a cell [goid 4508] [evidence IEA]

Any process that maintains the redox environment of a cell or compartment within a cell [goid 4508] [evidence IEA]

"The chemical reactions and pathways resulting in the formation of queuosines, any of a series of modified nucleosides [goid 6508] [evidence IEA]

"The chemical reactions and pathways resulting in the formation of queuosines, any of a series of modified nucleosides [goid 6508] [evidence IEA]

"Any process that modulates the frequency, rate or extent of DNA-dependent transcription [goid 15031] [evidence IEA]

"Any process that modulates the frequency, rate or extent of DNA-dependent transcription [goid 15031] [evidence IEA]

"Any process that modulates the frequency, rate or extent of DNA-dependent transcription [goid 15031] [evidence IEA]

"The directed movement of proteins into, out of, within or between cells [goid 15031] [evidence IEA]

"The directed movement of proteins into, out of, within or between cells [goid 15031] [evidence IEA]

"The chemical reactions and pathways, including anabolism and catabolism, by which living organisms obtain energy [goid 6508] [evidence IEA]

"Any series of molecular signals in which a small monomeric GTPase relays one or more of the signals [goid 6508] [evidence IEA]

"Any process that modulates the frequency, rate or extent of DNA-dependent transcription [goid 15031] [evidence IEA]

"Any series of molecular signals in which a small monomeric GTPase relays one or more of the signals [goid 6508] [evidence IEA]

"Any series of molecular signals in which a small monomeric GTPase relays one or more of the signals [goid 6508] [evidence IEA]

"Any series of molecular signals in which a small monomeric GTPase relays one or more of the signals [goid 6508] [evidence IEA]

"Any process that modulates the frequency, rate or extent of DNA-dependent transcription [goid 15031] [evidence IEA]

"Any series of molecular signals in which a small monomeric GTPase relays one or more of the signals [goid 6508] [evidence IEA]

"Any series of molecular signals in which a small monomeric GTPase relays one or more of the  
"A type of vesicle-mediated transport in which cells take up external materials or membrane con  
"The cascade of processes by which a signal interacts with a receptor, causing a change in the  
"The process by which cells digest parts of their own cytoplasm; allows for both recycling of mac  
"Any process that modulates the frequency, rate or extent of DNA-dependent transcription [goid  
"Any process that modulates the frequency, rate or extent of DNA-dependent transcription [goid  
Any series of molecular signals in which a small monomeric GTPase relays one or more of the s  
"Any process that modulates the frequency, rate or extent of DNA-dependent transcription [goid  
"Any series of molecular signals in which a small monomeric GTPase relays one or more of the  
"Any series of molecular signals in which a small monomeric GTPase relays one or more of the  
"Any series of molecular signals in which a small monomeric GTPase relays one or more of the  
"Any series of molecular signals in which a small monomeric GTPase relays one or more of the  
"Any series of molecular signals in which a small monomeric GTPase relays one or more of the  
"Any series of molecular signals in which a small monomeric GTPase relays one or more of the  
"Any process that modulates the frequency, rate or extent of DNA-dependent transcription [goid  
"Any series of molecular signals in which a small monomeric GTPase relays one or more of the  
"Any series of molecular signals in which a small monomeric GTPase relays one or more of the  
"A organ system process carried out by any of the organs or tissues of the respiratory system. T  
"Any series of molecular signals in which a small monomeric GTPase relays one or more of the  
"Any series of molecular signals in which a small monomeric GTPase relays one or more of the  
"Any series of molecular signals in which a small monomeric GTPase relays one or more of the  
"The directed movement of proteins in a cell, including the movement of proteins between speci  
"The directed movement of substances from the Golgi to the plasma membrane in transport ves  
"The chemical reactions and pathways resulting in the breakdown of a protein or peptide by hyd  
"The chemical reactions and pathways resulting in the breakdown of a protein or peptide by hyd  
Any series of molecular signals in which a small monomeric GTPase relays one or more of the s  
"The directed movement of proteins in a cell, including the movement of proteins between speci  
"Any series of molecular signals in which a small monomeric GTPase relays one or more of the  
"Any series of molecular signals in which a small monomeric GTPase relays one or more of the  
"A type of vesicle-mediated transport in which cells take up external materials or membrane con  
"A process that is carried out at the cellular level which results in the formation, arrangement of

"Any series of molecular signals in which a small monomeric GTPase relays one or more of the  
"The directed movement of substances from the Golgi back to the endoplasmic reticulum, medi  
"Any process that modulates the frequency, rate or extent of DNA-dependent transcription [goid  
"Any series of molecular signals in which a small monomeric GTPase relays one or more of the  
"Any series of molecular signals in which a small monomeric GTPase relays one or more of the  
"Any process that modulates the frequency, rate or extent of DNA-dependent transcription [goid  
"Any series of molecular signals in which a small monomeric GTPase relays one or more of the

"A type of vesicle-mediated transport in which cells take up external materials or membrane con  
"A type of vesicle-mediated transport in which cells take up external materials or membrane con  
"The uptake of external materials by cells, utilizing receptors to ensure specificity of transport. A  
"The progression of biochemical and morphological phases and events that occur in a cell durin  
Any process that modulates the activity of a GTPase of the Rab family [goid 32313] [evidence IE

"The chemical reactions and pathways resulting in the breakdown of a protein or peptide by hydrolysis  
"The covalent alteration of one or more amino acids occurring in proteins, peptides and nascent polypeptides  
"The covalent alteration of one or more amino acids occurring in proteins, peptides and nascent polypeptides  
Any series of molecular signals in which a small monomeric GTPase relays one or more of the signals  
Any series of molecular signals in which a small monomeric GTPase relays one or more of the signals  
"Any process that modulates the frequency, rate or extent of DNA-dependent transcription [go:0006350]  
Any series of molecular signals in which a small monomeric GTPase relays one or more of the signals

"Any series of molecular signals in which a small monomeric GTPase relays one or more of the signals  
"The directed movement of a motile cell or organism, or the directed growth of a cell guided by a signal  
"Any series of molecular signals in which a small monomeric GTPase relays one or more of the signals  
"A cellular process resulting in the division of the cytoplasm of a cell and its separation into two daughter cells  
"A point in the eukaryotic cell cycle where progress through the cycle can be halted until conditions are favorable  
"A signal transduction based surveillance mechanism that prevents the initiation of mitosis until DNA damage is repaired  
"The process of restoring DNA after damage. Genomes are subject to damage by chemical and physical agents  
"The repair of double-strand breaks in DNA via homologous and nonhomologous mechanisms to maintain genomic stability  
"In nucleotide excision repair a small region of the strand surrounding the damage is removed from the DNA molecule  
"The covalent alteration of one or more amino acids occurring in proteins, peptides and nascent polypeptides  
"The chemical reactions and pathways involving DNA, deoxyribonucleic acid, one of the two major types of nucleic acids  
"The error-free repair of a double-strand break in DNA in which the broken DNA molecule is repaired using the other strand as a template

"The process of restoring DNA after damage. Genomes are subject to damage by chemical and physical agents  
"In base excision repair, an altered base is removed by a DNA glycosylase enzyme, followed by replacement of the base  
"The error-free repair of a double-strand break in DNA in which the broken DNA molecule is repaired using the other strand as a template  
"The error-free repair of a double-strand break in DNA in which the broken DNA molecule is repaired using the other strand as a template

"A point in the eukaryotic cell cycle where progress through the cycle can be halted until conditions are favorable

The directed movement of mRNA from the nucleus to the cytoplasm [go:0006618] [pmid 1020902]  
Any immune system process that functions in the calibrated response of an organism to a potential pathogen  
Any immune system process that functions in the calibrated response of an organism to a potential pathogen  
"The process of introducing a phosphate group on to a protein [go:0006788] [pmid 8063729] [evid 12822]  
"Any process by which a new genotype is formed by reassortment of genes resulting in gene conversion  
"Any process by which a new genotype is formed by reassortment of genes resulting in gene conversion  
"The process of introducing a phosphate group on to a protein [go:0006788] [pmid 10421840] [evid 12822]  
"The process whose specific outcome is the progression of the skeleton over time, from its formation until death  
"The process whose specific outcome is the progression of an embryo from its formation until the end of the embryonic period  
"The directed movement of a motile cell or organism, or the directed growth of a cell guided by a signal  
Any series of molecular signals in which a small monomeric GTPase relays one or more of the signals  
"The directed movement of substances (such as macromolecules, small molecules, ions) into, out of, or across a membrane  
pt variant 1, mRNA."

"Any series of molecular signals in which a small monomeric GTPase relays one or more of the signals  
Any series of molecular signals in which a small monomeric GTPase relays one or more of the signals

Any process involved in the conversion of a primary mRNA transcript into one or more mature mRNAs

"The directed movement of substances (such as macromolecules, small molecules, ions) into, out of, or within a cell [goid 46907] [evidence IEA]; A process that includes the directed movement of proteins in a cell, including the movement of proteins between specific organelles

"The directed movement of proteins in a cell, including the movement of proteins between specific organelles

"The chemical reactions and pathways involving DNA, deoxyribonucleic acid, one of the two major types of nucleic acids

"The directed movement of substances within a cell [goid 46907] [evidence IEA]; A process that includes the directed movement of proteins in a cell, including the movement of proteins between specific organelles

"The process of assisting in the covalent and noncovalent assembly of single chain polypeptides

"The directed movement of proteins into, out of, within or between cells [goid 15031] [evidence IEA]; A process that includes the directed movement of substances within a cell [goid 46907] [evidence IEA]

The directed movement of substances within a cell [goid 46907] [evidence IEA]

"The directed movement of proteins into, out of, within or between cells [goid 15031] [evidence IEA]; A process that includes the directed movement of substances within a cell [goid 46907] [evidence IEA]

"The cascade of processes by which a signal interacts with a receptor, causing a change in the activity of a specific protein

"The directed movement of proteins into, out of, within or between cells [goid 15031] [evidence IEA]; A process that includes the directed movement of substances within a cell [goid 46907] [evidence IEA]

Any series of molecular signals in which a small monomeric GTPase relays one or more of the signals

"The cascade of processes by which a signal interacts with a receptor, causing a change in the activity of a specific protein

"The cascade of processes by which a signal interacts with a receptor, causing a change in the activity of a specific protein

Any series of molecular signals in which a small monomeric GTPase relays one or more of the signals

"Any series of molecular signals in which a small monomeric GTPase relays one or more of the signals

"Cascade of at least three protein kinase activities culminating in the phosphorylation and activation of a specific protein

"The process whose specific outcome is the progression of nervous tissue over time, from its formation to its maintenance

"The cascade of processes by which a signal interacts with a receptor, causing a change in the activity of a specific protein

"The cascade of processes by which a signal interacts with a receptor, causing a change in the activity of a specific protein

"The synthesis of either RNA on a template of DNA or DNA on a template of RNA [goid 6350] [evidence IEA]; A process that includes the synthesis of either RNA on a template of DNA or DNA on a template of RNA [goid 6350] [evidence IEA]

"Any process that stops, prevents or reduces the rate or extent of cell proliferation [goid 8285] [evidence IEA]; A process that includes the synthesis of either RNA on a template of DNA or DNA on a template of RNA [goid 6350] [evidence IEA]

"The process of coupling arginine to arginyl-tRNA, catalyzed by arginyl-tRNA synthetase. In tRNA, the amino acid arginine is attached to the 3' end of the acceptor stem of the tRNA molecule

"The process of coupling arginine to arginyl-tRNA, catalyzed by arginyl-tRNA synthetase. In tRNA, the amino acid arginine is attached to the 3' end of the acceptor stem of the tRNA molecule

"A cellular process resulting in the division of the cytoplasm of a cell and its separation into two daughter cells

"A series of reactions within the cell that occur as a result of a single trigger reaction or compound

"A series of reactions within the cell that occur as a result of a single trigger reaction or compound

"A series of reactions within the cell that occur as a result of a single trigger reaction or compound

"The cascade of processes by which a signal interacts with a receptor, causing a change in the activity of a specific protein

Any series of molecular signals in which a small monomeric GTPase relays one or more of the signals

"Any process that modulates the frequency, rate or extent of small GTPase mediated signal transduction

"A series of molecular signals within the cell that are mediated by a member of the Ras superfamily

"Any process that modulates the frequency, rate or extent of cell growth [goid 1558] [pmid 10911111]; A process that includes the synthesis of either RNA on a template of DNA or DNA on a template of RNA [goid 6350] [evidence IEA]

"Cascade of at least three protein kinase activities culminating in the phosphorylation and activation of a specific protein

"The cascade of processes by which a signal interacts with a receptor, causing a change in the activity of a specific protein

Any series of molecular signals in which a small monomeric GTPase relays one or more of the signals

Any series of molecular signals in which a small monomeric GTPase relays one or more of the signals

Any series of molecular signals in which a small monomeric GTPase relays one or more of the signals

Any series of molecular signals in which a small monomeric GTPase relays one or more of the signals

"The process by which the cell cycle is halted during one of the normal phases (G1, S, G2, M) [goid 1558] [pmid 10911111]; A process that includes the synthesis of either RNA on a template of DNA or DNA on a template of RNA [goid 6350] [evidence IEA]

"The cascade of processes by which a signal interacts with a receptor, causing a change in the  
"The cascade of processes by which a signal interacts with a receptor, causing a change in the  
"The cascade of processes by which a signal interacts with a receptor, causing a change in the  
"A form of programmed cell death induced by external or internal signals that trigger the activity  
"The cascade of processes by which a signal interacts with a receptor, causing a change in the  
"Any process that modulates the frequency, rate or extent of DNA-dependent transcription [goid

"Any process that modulates the frequency, rate or extent of DNA-dependent transcription [goid

"A point in the eukaryotic cell cycle where progress through the cycle can be halted until conditic  
"The process whose specific outcome is the progression of the liver over time, from its formatior  
"The synthesis of either RNA on a template of DNA or DNA on a template of RNA [goid 6350] [e  
"The process whereby new strands of DNA are synthesized. The template for replication can eit

The process by which one or more ubiquitin moieties are added to a protein [goid 16567] [eviden  
"The process whereby new strands of DNA are synthesized. The template for replication can eit  
"A point in the eukaryotic cell cycle where progress through the cycle can be halted until conditic

"The covalent alteration of one or more amino acids occurring in proteins, peptides and nascent  
"The process whereby phagocytes engulf external particulate material. The particles are initially  
"The chemical reactions and pathways involving carbohydrates, any of a group of organic comp  
"Any process that stops, prevents or reduces the frequency, rate or extent of transcription from a  
"The synthesis of either RNA on a template of DNA or DNA on a template of RNA [goid 6350] [e  
number B (RBM), mRNA."  
"Any process specifically pertinent to the functioning of integrated living units: cells, tissues, orga

"The process whereby new strands of DNA are synthesized. The template for replication can eit  
"Any process that modulates the frequency, rate or extent of the synthesis of either RNA on a te  
"Any process that modulates the frequency, rate or extent of the synthesis of either RNA on a te

Any process involved in the conversion of a primary mRNA transcript into one or more mature m  
A."

"The vectorial transfer of a protein from the cytoplasm into the nucleus, through the nuclear pore  
Any process involved in the conversion of a primary mRNA transcript into one or more mature m  
"An inflammatory response driven by antigen recognition by antibodies bound to Fc receptors or  
"The joining together of exons from one or more primary transcripts of nuclear messenger RNA

Any process involved in the conversion of a primary mRNA transcript into one or more mature m

"Any process involved in the conversion of one or more primary RNA transcripts into one or more mature RNA transcripts."

"A cascade of processes induced by the cell cycle regulator phosphoprotein p53, or an equivalent protein, that leads to the induction of apoptosis or cell cycle arrest."

"Any process involved in the conversion of a primary mRNA transcript into one or more mature mRNA transcripts."

"Any process involved in the conversion of a primary mRNA transcript into one or more mature mRNA transcripts."

"The biological process whose specific outcome is the progression of a multicellular organism over its life cycle."

"Any process involved in the conversion of a primary mRNA transcript into one or more mature mRNA transcripts."

"The joining together of exons from one or more primary transcripts of nuclear messenger RNA to form a mature mRNA transcript."

"Any process involved in the conversion of one or more primary RNA transcripts into one or more mature RNA transcripts."

"Progression through the nuclear division phase of a meiotic cell cycle, the specialized nuclear division that produces haploid gametes from diploid germ cells."

"Any process involved in the conversion of a primary mRNA transcript into one or more mature mRNA transcripts."

The process whereby new strands of DNA are synthesized. The template for replication can either be DNA or RNA.

"Any process involved in the conversion of one or more primary RNA transcripts into one or more mature RNA transcripts."

"The joining together of exons from one or more primary transcripts of nuclear messenger RNA to form a mature mRNA transcript."

"Any process involved in the conversion of a primary mRNA transcript into one or more mature mRNA transcripts (mRNAs), non-coding RNA (ncRNAs), or small RNA (sRNAs)."

"P), non-coding RNA."

"The directed movement of substances (such as macromolecules, small molecules, ions) into, out of, or within a cell or tissue."

"The directed movement of substances (such as macromolecules, small molecules, ions) into, out of, or within a cell or tissue."

"The directed movement of substances (such as macromolecules, small molecules, ions) into, out of, or within a cell or tissue."

"The formation of mesodermal clusters that are arranged segmentally along the anterior-posterior axis of the embryo."

"The process of restoring DNA after damage. Genomes are subject to damage by chemical and physical agents."

"Any process specifically pertinent to the functioning of integrated living units: cells, tissues, organs, or organisms (e.g., formaldehyde dehydrogenase) (FDH) (RCADH5), mRNA."

"The cascade of processes by which a signal interacts with a receptor, causing a change in the cell's response to the signal."

"The process whose specific outcome is the progression of the central nervous system over time."

The process by which anatomical structures are generated and organized. Morphogenesis pertains to the development of the form and structure of an organism or its parts.

"The synthesis of either RNA on a template of DNA or DNA on a template of RNA [go:0006350] (e.g., RNA polymerase II (RBP2), mRNA."

"Progression from G1 phase to S phase of the mitotic cell cycle [go:00082] [pmid 3678831] [evidence 1]."

"The progression of biochemical and morphological phases and events that occur in a cell during the cell cycle."

The hydrolysis of a peptide bond or bonds within a protein [go:0006508] [pmid 10085068] [evidence 1], mRNA."

"Any process specifically pertinent to the functioning of integrated living units: cells, tissues, organs, or organisms (e.g., formaldehyde dehydrogenase) (FDH) (RCADH5), mRNA."



"The synthesis of either RNA on a template of DNA or DNA on a template of RNA [goid 6350] [e  
"Any process that modulates the frequency, rate or extent of DNA-dependent transcription [goid  
"The synthesis of either RNA on a template of DNA or DNA on a template of RNA [goid 6350] [e

"The synthesis of either RNA on a template of DNA or DNA on a template of RNA [goid 6350] [e  
"The series of events required for an organism to receive a visual stimulus, convert it to a molec  
"The chemical reactions and pathways involving retinol, one of the three compounds that makes  
The process of removal or addition of one or more electrons with or without the concomitant rer  
"The series of events required for an organism to receive a visual stimulus, convert it to a molec  
"The chemical reactions and pathways resulting in the formation of estrogens, C18 steroid horm

"Formation of a microvillus, a thin cylindrical membrane-covered projection on the surface of a c  
"The cell cycle process by which the sister chromatids of a replicated chromosome are joined al  
"A developmental process, independent of morphogenetic (shape) change, that is required for a  
"Any process by which a new genotype is formed by reassortment of genes resulting in gene co  
"The process of restoring DNA after damage. Genomes are subject to damage by chemical and  
"The process of restoring DNA after damage. Genomes are subject to damage by chemical and  
The process by which a protein is incorporated into a biological membrane [goid 51205] [pmid 1

"Any process specifically pertinent to the functioning of integrated living units: cells, tissues, orga

"Any process that modulates the frequency, rate or extent of DNA-dependent transcription [goid  
"Any process that modulates the frequency, rate or extent of DNA-dependent transcription [goid  
"Any process that modulates the frequency, rate or extent of DNA-dependent transcription [goid

"Any process that modulates the frequency, rate or extent of DNA-dependent transcription [goid  
"The chemical reactions and pathways involving mannose, the aldohexose manno-hexose, the (

The process whereby new strands of DNA are synthesized. The template for replication can eith  
"The aggregation, arrangement and bonding together of a set of components to form a protein c  
"The directed movement of substances from the Golgi back to the endoplasmic reticulum, medi  
"Dynamic structural changes to eukaryotic chromatin occurring throughout the cell division cycle  
"Any series of molecular signals in which a small monomeric GTPase relays one or more of the s  
Any series of molecular signals in which a small monomeric GTPase relays one or more of the s  
"The chemical reactions and pathways involving retinol, one of the three compounds that makes  
"The process whereby new strands of DNA are synthesized. The template for replication can eit  
"The chemical reactions and pathways involving nucleobases, nucleosides, nucleotides and nuc

"The chemical reactions and pathways involving nucleobases, nucleosides, nucleotides and nuc  
"Any process that modulates the frequency, rate or extent of DNA-dependent transcription [goid

"The process whereby new strands of DNA are synthesized, using parental DNA as a template  
The process whereby new strands of DNA are synthesized. The template for replication can either be the parental DNA or a newly synthesized strand.  
"The process whereby new strands of DNA are synthesized. The template for replication can either be the parental DNA or a newly synthesized strand.  
"The process whereby new strands of DNA are synthesized. The template for replication can either be the parental DNA or a newly synthesized strand.  
The process of removal or addition of one or more electrons with or without the concomitant rearrangement of atoms.  
"The chemical reactions and pathways resulting in the breakdown of a protein or peptide by hydrolysis.  
"The biological process whose specific outcome is the progression of a multicellular organism or population.

"The directed movement of lipids into, out of, within or between cells. Lipids are compounds soluble in non-polar solvents.

"The chemical reactions and pathways resulting in the breakdown of a protein or peptide by hydrolysis.

"Any process that modulates the frequency, rate or extent of DNA-dependent transcription [goicd 6350] [e

"Any process that modulates the frequency, rate or extent of DNA-dependent transcription [goicd 6350] [e

"Any process that modulates the frequency, rate or extent of the synthesis of either RNA on a template of DNA or DNA on a template of RNA [goicd 6350] [e

"Any process that modulates the frequency, rate or extent of DNA-dependent transcription [goicd 6350] [e

"The synthesis of either RNA on a template of DNA or DNA on a template of RNA [goicd 6350] [e

"Any process that modulates the frequency, rate or extent of DNA-dependent transcription [goicd 6350] [e

"The cascade of processes by which a signal interacts with a receptor, causing a change in the activity of a protein or enzyme.

"The cascade of processes by which a signal interacts with a receptor, causing a change in the activity of a protein or enzyme.

Any series of molecular signals in which a small monomeric GTPase relays one or more of the signals to a larger GTPase.

"The last step in the formation of the neural tube, where the paired neural folds are brought together and fused.

"The attachment of a cell, either to another cell or to an underlying substrate such as the extracellular matrix.

"Any immune system process that functions in the calibrated response of an organism to a potential pathogen.

"Any process that stops, prevents or reduces the frequency, rate or extent of signal transduction.

"A series of reactions within the cell that occur as a result of a single trigger reaction or compound.

"Any process that stops, prevents or reduces the frequency, rate or extent of G-protein coupled receptor signaling.

"Progression through mitosis, the division of the eukaryotic cell nucleus to produce two daughter nuclei.

"The series of events required for an organism to receive a visual stimulus, convert it to a molecular signal, and transmit it to the brain.

"Any process that stops, prevents or reduces the frequency, rate or extent of signal transduction.

"Any process that modulates the frequency, rate or extent of G-protein coupled receptor protein signaling.

"The process by which cells digest parts of their own cytoplasm; allows for both recycling of macromolecules and energy production.

"The progression of biochemical and morphological phases and events that occur in a cell during the cell cycle.

"Any process that stops, prevents or reduces the frequency, rate or extent of signal transduction.

"Any process that terminates the activity of the active enzyme MAP kinase [goicd 188] [pmid 8603850].

"Any process that stops, prevents or reduces the frequency, rate or extent of signal transduction.

"The cascade of processes by which a signal interacts with a receptor, causing a change in the  
"The cascade of processes by which a signal interacts with a receptor, causing a change in the  
"The cascade of processes by which a signal interacts with a receptor, causing a change in the

Any series of molecular signals in which a small monomeric GTPase relays one or more of the s

"The developmental process by which the size or shape of a cell is generated and organized. M

"The process of apoptosis in transformed cells, cells that have undergone changes manifested b

Any series of molecular signals in which a small monomeric GTPase relays one or more of the s

"Any process by which a protein is transported to, or maintained in, a specific location [goid 810.

"The chemical reactions and pathways resulting in the breakdown of a monosaccharide (genera

Any series of molecular signals in which a small monomeric GTPase relays one or more of the s

"Control of the spatial distribution of actin filaments; includes organizing filaments into meshworl

Any series of molecular signals in which a small monomeric GTPase relays one or more of the s

"Any series of molecular signals in which a small monomeric GTPase relays one or more of the

"Any series of molecular signals in which a small monomeric GTPase relays one or more of the

"A form of programmed cell death induced by external or internal signals that trigger the activity

"A form of programmed cell death induced by external or internal signals that trigger the activity

Any series of molecular signals in which a small monomeric GTPase relays one or more of the s

"Any process that modulates the frequency, rate or extent of DNA-dependent transcription [goid

"The cascade of processes by which a signal interacts with a receptor, causing a change in the

"The cascade of processes by which a signal interacts with a receptor, causing a change in the

NA."

"Any process that modulates the frequency, rate or extent of G-protein coupled receptor protein

"The cascade of processes by which a signal interacts with a receptor, causing a change in the

"The cascade of processes by which a signal interacts with a receptor, causing a change in the

"A change in state or activity of a cell or an organism (in terms of movement, secretion, enzyme

"The directed movement of proteins in a cell, including the movement of proteins between speci

"The chemical reactions and pathways involving carbohydrates, any of a group of organic comp

"A type of vesicle-mediated transport in which cells take up external materials or membrane con

"The synthesis of either RNA on a template of DNA or DNA on a template of RNA [goid 6350] [e

"The progression of biochemical and morphological phases and events that occur in a cell durin

"The process of introducing a phosphate group on to a protein [goid 6468] [evidence IEA]; The p

"The process of introducing a phosphate group on to a protein [goid 6468] [evidence IEA]; A for

"The process of introducing a phosphate group on to a protein [goid 6468] [evidence IEA]; The i  
"The covalent alteration of one or more amino acids occurring in proteins, peptides and nascent  
The process of introducing a phosphate group on to a protein [goid 6468] [evidence IEA]  
The process of introducing a phosphate group on to a protein [goid 6468] [evidence IEA]  
"The synthesis of either RNA on a template of DNA or DNA on a template of RNA [goid 6350] [e  
"The cascade of processes by which a signal interacts with a receptor, causing a change in the  
The set of physiological processes that allow an embryo or foetus to develop within the body of .

g (RLTPR), mRNA."

{NA."

."

{NA."

{NA."

{Nase MRP RNA."

"The chemical reactions and pathways resulting in the breakdown of RNA, ribonucleic acid, one  
Any process by which a pre-mRNA or mRNA molecule is cleaved at specific sites or in a regulat  
{NA."

"The chemical reactions and pathways resulting in the breakdown of RNA, ribonucleic acid, one

"The process whereby new strands of DNA are synthesized. The template for replication can eit

"The synthesis of ribosomal RNA (rRNA), any RNA that forms part of the ribosomal structure, fr

Any process involved in the conversion of a primary mRNA transcript into one or more mature r

"Any process involved in the conversion of one or more primary RNA transcripts into one or mor

"The chemical reactions and pathways resulting in the breakdown of RNA, ribonucleic acid, one

"Control of the spatial distribution of actin filaments; includes organizing filaments into meshworl

"The cascade of processes by which a signal interacts with a receptor, causing a change in the

"Any process that activates or increases the frequency, rate or extent of transcription [goid 4594

"The process whose specific outcome is the progression of the central nervous system over tim

"The process by which a ubiquitin moiety, or multiple moieties, are covalently attached to the tar

"The chemical reactions and pathways resulting in the breakdown of a protein or peptide by hyd

"The biological process whose specific outcome is the progression of a multicellular organism o

"The chemical reactions and pathways resulting in the breakdown of a protein or peptide by hyd

"The chemical reactions and pathways resulting in the breakdown of a protein or peptide by hyd

"A form of programmed cell death induced by external or internal signals that trigger the activity

"The chemical reactions and pathways resulting in the breakdown of a protein or peptide by hyd  
"The synthesis of either RNA on a template of DNA or DNA on a template of RNA [goid 6350] [e  
"Any process that modulates the frequency, rate or extent of DNA-dependent transcription [goid  
"A form of programmed cell death induced by external or internal signals that trigger the activity

"The chemical reactions and pathways resulting in the breakdown of a protein or peptide by hyd

"The chemical reactions and pathways resulting in the breakdown of a protein or peptide by hyd

"A process that is carried out at the cellular level which results in the formation, arrangement of

"The chemical reactions and pathways resulting in the breakdown of a protein or peptide by hyd

"The chemical reactions and pathways resulting in the breakdown of a protein or peptide by hyd

"The chemical reactions and pathways resulting in the breakdown of a protein or peptide by hyd

"The chemical reactions and pathways resulting in the breakdown of a protein or peptide by hyd

"Any process specifically pertinent to the functioning of integrated living units: cells, tissues, orga

"The chemical reactions and pathways resulting in the breakdown of a protein or peptide by hyd

"The synthesis of either RNA on a template of DNA or DNA on a template of RNA [goid 6350] [e

"The chemical reactions and pathways resulting in the breakdown of a protein or peptide by hyd

"The chemical reactions and pathways resulting in the breakdown of a protein or peptide by hyd

"The chemical reactions and pathways resulting in the breakdown of a protein or peptide by hyd

"The chemical reactions and pathways resulting in the breakdown of a protein or peptide by hyd

"The chemical reactions and pathways resulting in the breakdown of a protein or peptide by hyd

Addition of the 7-methylguanosine cap to the 5' end of a nascent messenger RNA transcript [go  
"The chemical reactions and pathways resulting in the breakdown of mRNA, messenger RNA, v  
Addition of the 7-methylguanosine cap to the 5' end of a nascent messenger RNA transcript [go  
Any process involved in the conversion of one or more primary RNA transcripts into one or more  
RNA."

"The chemical reactions and pathways resulting in the formation of leukotriene, a pharmacologic  
"The hydrolysis of a peptide bond or bonds within a protein [goid 6508] [evidence IEA]; The che  
"The nonsense-mediated decay pathway for nuclear-transcribed mRNAs degrades mRNAs in w

ar RNA."

ar RNA."

"The directed movement of a motile cell or organism, or the directed growth of a cell guided by a  
"Blood vessel formation when new vessels emerge from the proliferation of pre-existing blood ve  
"A cellular process resulting in the division of the cytoplasm of a cell and its separation into two c  
Any process involved in the conversion of a primary mRNA transcript into one or more mature m

"The attachment of a cell, either to another cell or to an underlying substrate such as the extrac  
ndrial protein, mRNA."

"The cascade of processes by which a signal interacts with a receptor, causing a change in the  
The process of introducing a phosphate group on to a protein [goid 6468] [evidence IEA]; The s

"The chemical reactions and pathways resulting in the formation of GTP, guanosine triphosphat  
"

"The chemical reactions and pathways resulting in the formation of GTP, guanosine triphosphat

"The chemical reactions and pathways involving glycerol, 1,2,3-propanetriol, a sweet, hygroscopic  
"The removal of the oligonucleotide that contains the DNA damage. The oligonucleotide is formed  
"The removal of the oligonucleotide that contains the DNA damage. The oligonucleotide is formed  
The removal of the oligonucleotide that contains the DNA damage. The oligonucleotide is formed  
"The process whereby new strands of DNA are synthesized, using parental DNA as a template for  
The synthesis of either RNA on a template of DNA or DNA on a template of RNA [goid 6350] [ev

"The directed movement of proteins in a cell, including the movement of proteins between speci  
"The series of events required for an organism to receive a visual stimulus, convert it to a molec  
"The directed movement of proteins in a cell, including the movement of proteins between speci  
"The branch of the pentose-phosphate shunt which does not involve oxidation reactions. It comp  
"The chemical reactions and pathways resulting in the formation of a protein. This is a ribosome  
The successive addition of amino acid residues to a nascent polypeptide chain during protein bi  
The successive addition of amino acid residues to a nascent polypeptide chain during protein bi  
The chemical reactions and pathways resulting in the formation of a protein. This is a ribosome-  
The chemical reactions and pathways resulting in the formation of a protein. This is a ribosome-  
The successive addition of amino acid residues to a nascent polypeptide chain during protein bi  
The successive addition of amino acid residues to a nascent polypeptide chain during protein bi  
The successive addition of amino acid residues to a nascent polypeptide chain during protein bi  
The successive addition of amino acid residues to a nascent polypeptide chain during protein bi  
The chemical reactions and pathways resulting in the formation of a protein. This is a ribosome-  
The chemical reactions and pathways resulting in the formation of a protein. This is a ribosome-

The successive addition of amino acid residues to a nascent polypeptide chain during protein bi  
The successive addition of amino acid residues to a nascent polypeptide chain during protein bi  
The successive addition of amino acid residues to a nascent polypeptide chain during protein bi  
The chemical reactions and pathways resulting in the formation of a protein. This is a ribosome-  
The chemical reactions and pathways resulting in the formation of a protein. This is a ribosome-

The successive addition of amino acid residues to a nascent polypeptide chain during protein bi  
The successive addition of amino acid residues to a nascent polypeptide chain during protein bi  
The successive addition of amino acid residues to a nascent polypeptide chain during protein bi  
"The chemical reactions and pathways resulting in the formation of a protein. This is a ribosome  
The chemical reactions and pathways resulting in the formation of a protein. This is a ribosome-  
The chemical reactions and pathways resulting in the formation of a protein. This is a ribosome-  
The successive addition of amino acid residues to a nascent polypeptide chain during protein bi  
"The chemical reactions and pathways resulting in the formation of a protein. This is a ribosome  
The successive addition of amino acid residues to a nascent polypeptide chain during protein bi  
"The successive addition of amino acid residues to a nascent polypeptide chain during protein b  
The chemical reactions and pathways resulting in the formation of a protein. This is a ribosome-  
The successive addition of amino acid residues to a nascent polypeptide chain during protein bi

The successive addition of amino acid residues to a nascent polypeptide chain during protein bi  
"The addition of a sugar unit to a protein amino acid, e.g. the addition of glycan chains to proteir  
"The process by which a pre-tRNA molecule is converted to a mature tRNA, ready for addition o  
"The process by which a pre-tRNA molecule is converted to a mature tRNA, ready for addition o  
"The process by which a pre-tRNA molecule is converted to a mature tRNA, ready for addition o  
"The process by which a pre-tRNA molecule is converted to a mature tRNA, ready for addition o

"The process by which the cell cycle is halted during one of the normal phases (G1, S, G2, M) [c

The successive addition of amino acid residues to a nascent polypeptide chain during protein bi  
The chemical reactions and pathways resulting in the formation of a protein. This is a ribosome-  
"The successive addition of amino acid residues to a nascent polypeptide chain during protein b  
The chemical reactions and pathways resulting in the formation of a protein. This is a ribosome-

The successive addition of amino acid residues to a nascent polypeptide chain during protein bi  
The chemical reactions and pathways resulting in the formation of a protein. This is a ribosome-  
The successive addition of amino acid residues to a nascent polypeptide chain during protein bi

The chemical reactions and pathways resulting in the formation of a protein. This is a ribosome-  
"The chemical reactions and pathways resulting in the formation of a protein. This is a ribosome  
The chemical reactions and pathways resulting in the formation of a protein. This is a ribosome-  
The chemical reactions and pathways resulting in the formation of a protein. This is a ribosome-  
"The process preceding formation of the peptide bond between the first two amino acids of a pr  
"The process of introducing a phosphate group on to a protein [goid 6468] [evidence IEA]; A ser  
"Any process that modulates the frequency, rate or extent of DNA-dependent transcription [goid  
"Any process that modulates the frequency, rate or extent of DNA-dependent transcription [goid  
"The process of introducing a phosphate group on to a protein [goid 6468] [evidence IEA]; The p  
"The chemical reactions and pathways resulting in the formation of a protein. This is a ribosome  
"The process of introducing a phosphate group on to a protein [goid 6468] [evidence IEA]; The c  
The process of introducing a phosphate group on to a protein [goid 6468] [evidence IEA]

The successive addition of amino acid residues to a nascent polypeptide chain during protein bi  
"The successive addition of amino acid residues to a nascent polypeptide chain during protein b  
l, mRNA."

"The intramolecular conversion of uridine to pseudouridine within an RNA molecule. This posttra  
"The intramolecular conversion of uridine to pseudouridine within an RNA molecule. This posttra  
"The intramolecular conversion of uridine to pseudouridine within an RNA molecule. This posttra  
"The intramolecular conversion of uridine to pseudouridine within an RNA molecule. This posttra  
"The synthesis of either RNA on a template of DNA or DNA on a template of RNA [goid 6350] [e



Any series of molecular signals in which a small monomeric GTPase relays one or more of the s  
"A form of programmed cell death induced by external or internal signals that trigger the activity  
"The cascade of processes by which a signal interacts with a receptor, causing a change in the  
"The synthesis of either RNA on a template of DNA or DNA on a template of RNA [goid 6350] [p

"A series of molecular signals within the cell that are mediated by a member of the Ras superfar  
"A series of molecular signals within the cell that are mediated by a member of the Ras superfar  
"The chemical reactions and pathways resulting in the formation of a protein. This is a ribosome  
"The synthesis of either RNA on a template of DNA or DNA on a template of RNA [goid 6350] [e  
The process whereby new strands of DNA are synthesized. The template for replication can eit  
"The process whereby new strands of DNA are synthesized. The template for replication can eit  
"The process whereby new strands of DNA are synthesized. The template for replication can eit  
rRNA."

RN3P2), non-coding RNA."

Any process involved in the conversion of a primary ribosomal RNA (rRNA) transcript into one o

Any process involved in the conversion of a primary ribosomal RNA (rRNA) transcript into one o

A."

Any process involved in the conversion of a primary ribosomal RNA (rRNA) transcript into one o  
"The process of the formation of the constituents of the ribosome subunits, their assembly, and  
The chemical reactions and pathways resulting in the formation of any member of a large group  
Reactions triggered in response to the presence of a virus that act to protect the cell or organism

"The synthesis of either RNA on a template of DNA or DNA on a template of RNA [goid 6350] [e  
"The aggregation, arrangement and bonding together of a nucleosome, the beadlike structural u  
"The directed movement of iron (Fe) ions into, out of, within or between cells [goid 6826] [evider

The chemical reactions and pathways resulting in the formation of a protein. This is a ribosome-

"Progression through the nuclear division phase of a meiotic cell cycle, the specialized nuclear a

"A series of molecular signals within the cell that are mediated by a member of the Ras superfar

Any process involved in the conversion of one or more primary RNA transcripts into one or more  
"Any process specifically pertinent to the functioning of integrated living units: cells, tissues, orga  
"Any process that contributes to the maintenance of proper telomeric length and structure by aff  
"The synthesis of either RNA on a template of DNA or DNA on a template of RNA [goid 6350] [e  
"A form of programmed cell death induced by external or internal signals that trigger the activity

"The cascade of processes by which a signal interacts with a receptor, causing a change in the  
"A form of programmed cell death induced by external or internal signals that trigger the activity  
"Any process that stops, prevents or reduces the frequency, rate or extent of anti-apoptosis [goid  
"The chemical reactions and pathways, including anabolism and catabolism, by which living org;  
The regrowth of axons following their loss or damage [goid 31103] [pmid 14664809] [evidence T  
The process by which a protein is incorporated into a biological membrane [goid 51205] [pmid 1  
The series of events required for a bitter taste stimulus to be received and converted to a molec  
"The biological process whose specific outcome is the progression of a multicellular organism o  
"The directed movement of proteins into, out of, within or between cells [goid 15031] [evidence I  
"The biological process whose specific outcome is the progression of a multicellular organism o

Any series of molecular signals in which a small monomeric GTPase relays one or more of the s

"Any process that modulates the frequency, rate or extent of DNA-dependent transcription [goid  
"The process whose specific outcome is the progression of the skeleton over time, from its form  
"Any process that modulates the frequency, rate or extent of DNA-dependent transcription [goid

"Any process that modulates the frequency, rate or extent of cell growth [goid 1558] [evidence I  
"Any process that modulates the frequency, rate or extent of cell growth [goid 1558] [evidence I

"Any process specifically pertinent to the functioning of integrated living units: cells, tissues, orga

"The cascade of processes by which a signal interacts with a receptor, causing a change in the  
"The synthesis of either RNA on a template of DNA or DNA on a template of RNA [goid 6350] [e  
"Any process that stops, prevents or reduces the frequency, rate or extent of transcription from a  
"The process of introducing a phosphate group on to a protein [goid 6468] [pmid 8726462] [evid  
"The directed movement of charged atoms or small charged molecules into, out of, within or bet  
"The directed movement of charged atoms or small charged molecules into, out of, within or bet  
"The cascade of processes by which a signal interacts with a receptor, causing a change in the  
"The cascade of processes by which a signal interacts with a receptor, causing a change in the  
"A transition where an epithelial cell loses apical/basolateral polarity, severs intercellular adhesiv  
"The progression of biochemical and morphological phases and events that occur in a cell durin  
"A change in state or activity of a cell or an organism (in terms of movement, secretion, enzyme

"The immediate defensive reaction (by vertebrate tissue) to infection or injury caused by chemic

"Blood vessel formation when new vessels emerge from the proliferation of pre-existing blood ve  
"The initiation of the activity of the inactive enzyme MAP kinase by phosphorylation by a MAPK  
"Any immune system process that functions in the calibrated response of an organism to a pote

"The cascade of processes by which a signal interacts with a receptor, causing a change in the  
Process involving non-antibody proteins whose concentrations in the plasma increase in respon  
"The progression of biochemical and morphological phases and events that occur in a cell durin  
"Any process specifically pertinent to the functioning of integrated living units: cells, tissues, orga  
"The process of assisting in the covalent and noncovalent assembly of single chain polypeptides  
"The covalent alteration of one or more amino acids occurring in proteins, peptides and nascent  
"Any process that results in the specification, formation or maintenance of the physical structure  
"The synthesis of either RNA on a template of DNA or DNA on a template of RNA [goid 6350] [e  
"The synthesis of either RNA on a template of DNA or DNA on a template of RNA [goid 6350] [e  
"The synthesis of either RNA on a template of DNA or DNA on a template of RNA [goid 6350] [e

"Any process that activates or increases the frequency, rate or extent of the chemical reactions :  
D6), mRNA."

"The chemical reactions and pathways involving lipids, compounds soluble in an organic solvent

Any immune system process that functions in the calibrated response of an organism to a poten  
"Any process specifically pertinent to the functioning of integrated living units: cells, tissues, orga  
."

"The synthesis of either RNA on a template of DNA or DNA on a template of RNA [goid 6350] [e  
"The synthesis of either RNA on a template of DNA or DNA on a template of RNA [goid 6350] [e  
"Any process that stops, prevents or reduces the frequency, rate or extent of transcription from :  
"The synthesis of either RNA on a template of DNA or DNA on a template of RNA [goid 6350] [e  
"The synthesis of either RNA on a template of DNA or DNA on a template of RNA [goid 6350] [e

"Any process that modulates the frequency, rate or extent of phosphoprotein phosphatase activi  
"The directed movement of proteins in a cell, including the movement of proteins between speci  
"The directed movement of proteins in a cell, including the movement of proteins between speci  
"The cascade of processes by which a signal interacts with a receptor, causing a change in the  
"The process of coupling serine to seryl-tRNA, catalyzed by seryl-tRNA synthetase. In tRNA am  
"The process of coupling serine to seryl-tRNA, catalyzed by seryl-tRNA synthetase. In tRNA am  
Any process involved in the conversion of one or more primary RNA transcripts into one or more

"The progression of biochemical and morphological phases and events that occur in a cell durin  
"The chemical reactions and pathways, including anabolism and catabolism, by which living orga  
"The chemical reactions and pathways, including anabolism and catabolism, by which living orga  
"Any process that stops, prevents or reduces the frequency, rate or extent of transcription from :  
"Any process that modulates the frequency, rate or extent of DNA-dependent transcription [goid

"The cascade of processes by which a signal interacts with a receptor, causing a change in the  
"The proliferation of cells in the inner cell mass [goid 1833] [evidence ISS]; Any process involved  
7.

The process of removing one or more phosphoric (ester or anhydride) residues from a molecule

"The process of removing one or more phosphoric (ester or anhydride) residues from a molecule

"Any process specifically pertinent to the functioning of integrated living units: cells, tissues, organs

"A change in morphology and behavior of a macrophage resulting from exposure to a cytokine, or

"The chemical reactions and pathways, including anabolism and catabolism, by which living organisms

"The chemical reactions and pathways involving lipids, compounds soluble in an organic solvent

The cell cycle process whereby the synaptonemal complex is formed. This is a structure that holds

"A process of secretion by a cell that results in the release of intracellular molecules (e.g. hormones)

"The directed movement of proteins into, out of, within or between cells [goid 15031] [evidence I

"Any process that modulates the frequency, rate or extent of DNA-dependent transcription [goid

"The chemical reactions and pathways involving lipids, compounds soluble in an organic solvent

"The multiplication or reproduction of endothelial cells, resulting in the expansion of a cell population

"The attachment of a cell, either to another cell or to an underlying substrate such as the extracellular

A."

The process of removal or addition of one or more electrons with or without the concomitant re

"The chemical reactions and pathways involving lipids, compounds soluble in an organic solvent

"The chemical reactions and pathways involving lipids, compounds soluble in an organic solvent

"The process whose specific outcome is the progression of the epidermis over time, from its formation

"The initial attachment of a vesicle membrane to a target membrane, mediated by proteins protruding

"Cascade of at least three protein kinase activities culminating in the phosphorylation and activation

"The directed movement of substances (such as macromolecules, small molecules, ions) into, o

"Any process specifically pertinent to the functioning of integrated living units: cells, tissues, orga

"The chemical reactions and pathways, including anabolism and catabolism, by which living orga

"Any process that modulates the frequency, rate or extent of DNA-dependent transcription [goid

"The synthesis of either RNA on a template of DNA or DNA on a template of RNA [goid 6350] [e

"Any process that modulates the frequency, rate or extent of DNA-dependent transcription [goid

"The directed movement of charged atoms or small charged molecules into, out of, within or bet

"The directed movement of charged atoms or small charged molecules into, out of, within or bet

"The directed movement of charged atoms or small charged molecules into, out of, within or bet

"The directed movement of charged atoms or small charged molecules into, out of, within or bet

"The directed movement of charged atoms or small charged molecules into, out of, within or bet

"The directed movement of charged atoms or small charged molecules into, out of, within or bet

"The directed movement of charged atoms or small charged molecules into, out of, within or bet

"The directed movement of charged atoms or small charged molecules into, out of, within or bet

Any process involved in the conversion of a primary mRNA transcript into one or more mature r

"The directed movement of sodium ions (Na<sup>+</sup>) into, out of, within or between cells [goid 6814] [e

"The directed movement of charged atoms or small charged molecules into, out of, within or bet

"The chemical reactions and pathways resulting in the formation of precursor metabolites, subst

"The directed movement of copper (Cu) ions into, out of, within or between cells [goid 6825] [evi

The hydrolysis of a peptide bond or bonds within a protein [goid 6508] [evidence IEA]

"The hydrolysis of a peptide bond or bonds within a protein [goid 6508] [evidence IEA]; A proces

"Any process that modulates the frequency, rate or extent of DNA-dependent transcription [goid

"The synthesis of either RNA on a template of DNA or DNA on a template of RNA [goid 6350] [e

The process of introducing a phosphate group on to a protein [goid 6468] [evidence IEA]

"The process of introducing a phosphate group on to a protein [goid 6468] [evidence IEA]; The c

"The directed movement of proteins into, out of, within or between cells [goid 15031] [evidence I

"Any process specifically pertinent to the functioning of integrated living units: cells, tissues, orga

"The process of directing proteins towards a membrane using signals contained within the prote

The process of assisting in the covalent and noncovalent assembly of single chain polypeptides

RNA."

RNA."

"The addition of a sugar unit to a protein amino acid, e.g. the addition of glycan chains to proteir

"A nearly universal metabolic pathway in which the acetyl group of acetyl coenzyme A is effectiv

ALP1) on chromosome 3."

AP2), non-coding RNA."

"A nearly universal metabolic pathway in which the acetyl group of acetyl coenzyme A is effective"

"A nearly universal metabolic pathway in which the acetyl group of acetyl coenzyme A is effective"

"A nearly universal metabolic pathway in which the acetyl group of acetyl coenzyme A is effective  
λ."

"The chemical reactions and pathways involving amino acids, organic acids containing one or more"

"The chemical reactions and pathways involving amino acids, organic acids containing one or more"

The proteolytic removal of a signal peptide from a protein during or after transport to a specific location

The proteolytic removal of a signal peptide from a protein during or after transport to a specific location

"The directed movement of proteins in a cell, including the movement of proteins between specific organelles"

"The directed movement of substances (such as macromolecules, small molecules, ions) into, out of, within or between cells"

"The directed movement of substances (such as macromolecules, small molecules, ions) into, out of, within or between cells  
JA."

"The directed movement of proteins into, out of, within or between cells [goid 15031] [evidence level 1]"

"The directed movement of substances from the endoplasmic reticulum (ER) to the Golgi, mitochondria, or other organelles"

"The directed movement of substances from the endoplasmic reticulum (ER) to the Golgi, mitochondria, or other organelles"

"The directed movement of substances from the endoplasmic reticulum (ER) to the Golgi, mitochondria, or other organelles"

"The directed movement of proteins in a cell, including the movement of proteins between specific organelles"

"The directed movement of proteins in a cell, including the movement of proteins between specific organelles"

"The directed movement of proteins in a cell, including the movement of proteins between specific organelles"

"The directed movement of proteins in a cell, including the movement of proteins between specific organelles"

"The directed movement of proteins in a cell, including the movement of proteins between specific organelles"

"The chemical reactions and pathways involving carbohydrates, any of a group of organic compounds"

"The directed movement of proteins in a cell, including the movement of proteins between specific organelles"

"The directed movement of substances from the endoplasmic reticulum (ER) to the Golgi, mitochondria, or other organelles"

"The directed movement of proteins into, out of, within or between cells [goid 15031] [evidence level 1]"

"The directed movement of proteins into, out of, within or between cells [goid 15031] [evidence level 1]"

"The directed movement of proteins into, out of, within or between cells [goid 15031] [evidence level 1]"

"The process of targeting specific proteins to particular membrane-bounded subcellular organelles"

"The targeting of proteins to a membrane that occurs during translation. The transport of most secretory proteins"

"The process of assisting in the covalent and noncovalent assembly of single chain polypeptides"

The chemical reactions and pathways resulting in the formation of a protein. This is a ribosome-mediated process"

"The directed movement of proteins into, out of, within or between cells [goid 15031] [evidence level 1]"

The series of molecular signals initiated by binding of an extracellular ligand to a Notch receptor"

"The attachment of a cell, either to another cell or to an underlying substrate such as the extracellular matrix"

"The chemical reactions and pathways resulting in the formation of phospholipids, any lipid containing a phosphate group"

"A change in state or activity of a cell or an organism (in terms of movement, secretion, enzyme production, etc.)"

"The attachment of a cell, either to another cell or to an underlying substrate such as the extracellular matrix"

"A process which directly inhibits any of the steps required for cell death by apoptosis [goid 6916]  
"Any process that maintains the redox environment of a cell or compartment within a cell [goid 4  
"The biological process whose specific outcome is the progression of a multicellular organism ov  
The biological process whose specific outcome is the progression of a multicellular organism ov  
"The biological process whose specific outcome is the progression of a multicellular organism ov  
"The biological process whose specific outcome is the progression of a multicellular organism ov  
"The biological process whose specific outcome is the progression of a multicellular organism ov  
"A process which directly inhibits any of the steps required for cell death by apoptosis [goid 6916]  
"Any process that mediates the transfer of information from one cell to another [goid 7267] [pmid  
"The biological process whose specific outcome is the progression of a multicellular organism ov  
"A form of programmed cell death induced by external or internal signals that trigger the activity  
"The biological process whose specific outcome is the progression of a multicellular organism ov  
"The biological process whose specific outcome is the progression of a multicellular organism ov  
"Any immune system process that functions in the calibrated response of an organism to a pote  
"The hydrolysis of a peptide bond or bonds within a protein [goid 6508] [pmid 10652325] [eviden  
"The hydrolysis of a peptide bond or bonds within a protein [goid 6508] [evidence IEA]; The che  
"The hydrolysis of a peptide bond or bonds within a protein [goid 6508] [evidence IEA]; The che  
"The hydrolysis of a peptide bond or bonds within a protein [goid 6508] [evidence IEA]; The che  
"The hydrolysis of a peptide bond or bonds within a protein [goid 6508] [evidence IEA]; The che  
"The hydrolysis of a peptide bond or bonds within a protein [goid 6508] [evidence IEA]; The che  
"The covalent alteration of one or more amino acids occurring in proteins, peptides and nascent  
"The chemical reactions and pathways resulting in the formation of selenocysteine, an essential  
"Any process specifically pertinent to the functioning of integrated living units: cells, tissues, orga  
"The chemical reactions and pathways involving the nonmetallic element selenium or compound  
"The incorporation of selenocysteine into a peptide; uses a special tRNA that recognizes the UC  
Any process that maintains the redox environment of a cell or compartment within a cell [goid 4  
The process of restoring a protein to its original state after damage by such things as oxidation c

Any process that modulates the propensity of mRNA molecules to degradation. Includes proces  
"The process whose specific outcome is the progression of nervous tissue over time, from its fo

"The cascade of processes by which a signal interacts with a receptor, causing a change in the

"The chemical reactions and pathways involving lipids, compounds soluble in an organic solvent  
"The chemical reactions and pathways involving phosphatidylserines, any of a class of glyceropl  
A process that directly activates any of the steps required for cell death by apoptosis [goid 6917]  
"The chemical reactions and pathways involving lipids, compounds soluble in an organic solvent

"The directed movement of proteins into, out of, within or between cells [goid 15031] [evidence I  
"Process involving non-antibody proteins whose concentrations in the plasma increase in respon

10 (SERPINA10), transcript variant 1, mRNA."

11 (SERPINA11), mRNA."

psin), member 2 (SERPINA2), mRNA."

4 (SERPINA4), mRNA."

9 (SERPINA9), mRNA."

"

IA."

"A change in state or activity of a cell or an organism (in terms of movement, secretion, enzyme

A process which directly inhibits any of the steps required for cell death by apoptosis [goid 6916

pt variant 1, mRNA."

pt variant 1, mRNA."

"A process which directly inhibits any of the steps required for cell death by apoptosis [goid 6916

"The sequential process by which the multiple coagulation factors of the blood interact, ultimate

"The biological process whose specific outcome is the progression of a multicellular organism o

"The biological process whose specific outcome is the progression of a multicellular organism o

"

"Any process that modulates the frequency, rate or extent of CDK activity [goid 79] [pmid 64348

"Any process that stops, prevents or reduces the frequency, rate or extent of cell growth [goid 30

"Any process that modulates the frequency, rate or extent of DNA-dependent transcription [goid

"A change in state or activity of a cell or an organism (in terms of movement, secretion, enzyme

"The process by which the cell cycle is halted during one of the normal phases (G1, S, G2, M) [c

"The process by which the cell cycle is halted during one of the normal phases (G1, S, G2, M) [c

"The aggregation, arrangement and bonding together of a nucleosome, the beadlike structural u

"The synthesis of either RNA on a template of DNA or DNA on a template of RNA [goid 6350] [e

"The synthesis of either RNA on a template of DNA or DNA on a template of RNA [goid 6350] [e

"The synthesis of either RNA on a template of DNA or DNA on a template of RNA [goid 6350] [e

"The synthesis of either RNA on a template of DNA or DNA on a template of RNA [goid 6350] [e

"The synthesis of either RNA on a template of DNA or DNA on a template of RNA [goid 6350] [e

"The synthesis of either RNA on a template of DNA or DNA on a template of RNA [goid 6350] [e

"The alteration of DNA or protein in chromatin, which may result in changing the chromatin struc

"The process of restoring DNA after damage. Genomes are subject to damage by chemical and

"The repair of double-strand breaks in DNA via homologous and nonhomologous mechanisms t

"

"Any process specifically pertinent to the functioning of integrated living units: cells, tissues, orga

"Recognition of the intron 3'-splice site by components of the assembling U2- or U12-type splice

"Recognition of the intron 3'-splice site by components of the assembling U2- or U12-type splice

"The joining together of exons from one or more primary transcripts of nuclear messenger RNA

"The joining together of exons from one or more primary transcripts of nuclear messenger RNA

"The joining together of exons from one or more primary transcripts of nuclear messenger RNA



"The joining together of exons from one or more primary transcripts of nuclear messenger RNA  
"The joining together of exons from one or more primary transcripts of nuclear messenger RNA  
"The joining together of exons from one or more primary transcripts of nuclear messenger RNA  
"The joining together of exons from one or more primary transcripts of nuclear messenger RNA  
nRNA."

"Any process that modulates the frequency, rate or extent of the synthesis of either RNA on a te  
"Any process that modulates the frequency, rate or extent of CDK activity [goid 79] [evidence IE.  
"The process of restoring DNA after damage. Genomes are subject to damage by chemical and  
"The formation of mesodermal clusters that are arranged segmentally along the anterior posterio

"The joining together of exons from one or more primary transcripts of nuclear messenger RNA  
Any process involved in the conversion of a primary mRNA transcript into one or more mature r  
Any process involved in the conversion of a primary mRNA transcript into one or more mature r  
"

Any process involved in the conversion of a primary mRNA transcript into one or more mature r  
Any process involved in the conversion of a primary mRNA transcript into one or more mature r  
"Any process that modulates the frequency, rate or extent of DNA-dependent transcription [goid

"The joining together of exons from one or more primary transcripts of nuclear messenger RNA  
Any process involved in the conversion of a primary mRNA transcript into one or more mature r  
"The aggregation, arrangement and bonding together of the spliceosome, a ribonucleoprotein a  
"The joining together of exons from one or more primary transcripts of nuclear messenger RNA  
"The joining together of exons from one or more primary transcripts of nuclear messenger RNA  
"The joining together of exons from one or more primary transcripts of nuclear messenger RNA  
"The joining together of exons from one or more primary transcripts of nuclear messenger RNA  
"The joining together of exons from one or more primary transcripts of nuclear messenger RNA  
"The joining together of exons from one or more primary transcripts of nuclear messenger RNA  
"The synthesis of either RNA on a template of DNA or DNA on a template of RNA [goid 6350] [e  
"The joining together of exons from one or more primary transcripts of nuclear messenger RNA  
"The directed movement of proteins into, out of, within or between cells [goid 15031] [evidence I  
"The directed movement of proteins into, out of, within or between cells [goid 15031] [evidence I  
"The directed movement of proteins into, out of, within or between cells [goid 15031] [evidence I  
"The process of gaseous exchange between an organism and its environment. In plants, microc  
"Any process that modulates the frequency, rate, or extent of production of a cytokine [goid 181  
"The directed movement of cations, atoms or small molecules with a net positive charge, into, or  
"The directed movement of cations, atoms or small molecules with a net positive charge, into, or  
"The directed movement of cations, atoms or small molecules with a net positive charge, into, or  
"The directed movement of cations, atoms or small molecules with a net positive charge, into, or  
"The directed movement of cations, atoms or small molecules with a net positive charge, into, or  
"A process whereby force is generated within muscle tissue, resulting in a change in muscle ge  
"The binding of a cell to the extracellular matrix via adhesion molecules [goid 7160] [pmid 94054  
"Any process that modulates the frequency, rate or extent of Rho protein signal transduction [go

"The process of introducing a phosphate group on to a protein [goid 6468] [evidence IEA]; The p  
The process of introducing a phosphate group on to a protein [goid 6468] [evidence IEA]

"The process of introducing a phosphate group on to a protein [goid 6468] [pmid 10548550] [evi

"The chemical reactions and pathways involving lipids, compounds soluble in an organic solvent

"The chemical reactions and pathways involving lipids, compounds soluble in an organic solvent

"The progression of biochemical and morphological phases and events that occur in a cell durin

"The progression of biochemical and morphological phases and events that occur in a cell durin

"The chemical reactions and pathways involving lipids, compounds soluble in an organic solvent

"The chemical reactions and pathways involving sphingolipids, any of a class of lipids containing

"The chemical reactions and pathways involving proteoglycans, any glycoprotein in which the ca

Any process that modulates the activity of a GTPase of the Rab family [goid 32313] [evidence IE

"Any process specifically pertinent to the functioning of integrated living units: cells, tissues, orga

"Any process involved in the controlled movement of a cell [goid 6928] [evidence IEA]; A series

A series of reactions within the cell that occur as a result of a single trigger reaction or compoun

"A series of reactions within the cell that occur as a result of a single trigger reaction or compour

A defense response that is mediated by cells [goid 6968] [pmid 9774102] [evidence NAS]; Any p

"Blood vessel formation when new vessels emerge from the proliferation of pre-existing blood ve

"A cascade of protein kinase activities, culminating in the phosphorylation and activation of a me

"A cascade of protein kinase activities, culminating in the phosphorylation and activation of a me

"The aggregation, arrangement and bonding together of a set of components to form a protein c

Any process that maintains the redox environment of a cell or compartment within a cell [goid 45

"The cascade of processes by which a signal interacts with a receptor, causing a change in the

"A type of vesicle-mediated transport in which cells take up external materials or membrane con

"A type of vesicle-mediated transport in which cells take up external materials or membrane con

"The process by which a protein is incorporated into a mitochondrial membrane as an early step

"A type of vesicle-mediated transport in which cells take up external materials or membrane con

"Any process that mediates interactions between a cell and its surroundings. Encompasses inte

"Any process specifically pertinent to the functioning of integrated living units: cells, tissues, orga

Cascade of at least three protein kinase activities culminating in the phosphorylation and activat

"Blood vessel formation when new vessels emerge from the proliferation of pre-existing blood ve

"The directed movement of hormones into, out of, within or between cells [goid 9914] [evidence

"A series of reactions within the cell that occur as a result of a single trigger reaction or compour

A series of reactions within the cell that occur as a result of a single trigger reaction or compoun

The hydrolysis of a peptide bond or bonds within a protein [goid 6508] [pmid 10373512] [evidenc  
The biological process whose specific outcome is the progression of a multicellular organism ov  
The biological process whose specific outcome is the progression of a multicellular organism ov  
"A form of programmed cell death induced by external or internal signals that trigger the activity  
"The directed movement of potassium ions (K+) into, out of, within or between cells [goid 6813]  
"The chemical reactions and pathways involving glycine, aminoethanoic acid [goid 6544] [evidenc  
"The chemical reactions and pathways involving glycine, aminoethanoic acid [goid 6544] [evidenc  
A series of molecular signals within the cell that are mediated by a member of the Ras superfam  
"The process whose specific outcome is the progression of the skeleton over time, from its form  
"The chemical reactions and pathways involving carbohydrates, any of a group of organic comp  
"The aggregation, arrangement and bonding together of a nucleosome, the beadlike structural u

The developmental process by which the size or shape of a cell is generated and organized. Mc  
"The developmental process by which the size or shape of a cell is generated and organized. M  
"The biological process whose specific outcome is the progression of a multicellular organism o  
"The hydrolysis of a peptide bond or bonds within a protein [goid 6508] [pmid 9334332] [evidenc  
"The chemical reactions and pathways resulting in the breakdown of a protein or peptide by hyd

"The attachment of a cell, either to another cell or to an underlying substrate such as the extrac  
"The attachment of a cell, either to another cell or to an underlying substrate such as the extrac

\"

"The process of assisting in the covalent and noncovalent assembly of single chain polypeptides  
"The chemical reactions and pathways resulting in the formation of melanin from other compour  
"The synthesis of either RNA on a template of DNA or DNA on a template of RNA [goid 6350] [e  
"The synthesis of either RNA on a template of DNA or DNA on a template of RNA [goid 6350] [e  
"The aggregation, arrangement and bonding together of the spliceosome, a ribonucleoprotein a  
"A process that is carried out at the cellular level which results in the formation, arrangement of  
"Any process specifically pertinent to the functioning of integrated living units: cells, tissues, orga  
"Any process that modulates the frequency, rate or extent of small GTPase mediated signal tran  
"The attachment of a cell, either to another cell or to an underlying substrate such as the extrac  
"The process leading to the rupture of the follicle, releasing the centrally located oocyte into the  
"Repression of transcription of ribosomal DNA by the formation of heterochromatin [goid 183] [p  
"Repression of transcription by altering the structure of chromatin, e.g. by conversion of large re  
"Repression of transcription by altering the structure of chromatin, e.g. by conversion of large re  
"Repression of transcription by altering the structure of chromatin, e.g. by conversion of large re

"Any immune system process that functions in the calibrated response of an organism to a pote

"A process that directly activates any of the steps required for cell death by apoptosis [goid 6917

"The process whose specific outcome is the progression of the ureteric bud over time, from its fi

"Any process that modulates the frequency, rate or extent of DNA-dependent transcription [goid

"Any process that modulates the frequency, rate or extent of DNA-dependent transcription [goid

"Any process that modulates the frequency, rate or extent of DNA-dependent transcription [goid

"Any process that modulates the frequency, rate or extent of DNA-dependent transcription [goid

"The progression of biochemical and morphological phases and events that occur in a cell durin  
t 1, mRNA."

"Any immune system process that functions in the calibrated response of an organism to a pote

"The aggregation, arrangement and bonding together of a set of components to form a protein c

"The process whereby relatively unspecialized cells, e.g. embryonic or regenerative cells, acquir

"The synthesis of RNA from a DNA template by RNA polymerase II (Pol II), originating at a Pol I

"A process that is carried out at the cellular level which results in the formation, arrangement of

Any process involved in the conversion of a primary mRNA transcript into one or more mature m

"The chemical reactions and pathways resulting in the breakdown of a protein or peptide by hyd

"Progression from G1 phase to S phase of the mitotic cell cycle [goid 82] [pmid 7553852] [evid

"Any process that stops, prevents or reduces the frequency, rate or extent of transcription from :

"A change in morphology and behavior of a lymphocyte resulting from exposure to a specific an

"The attachment of a cell, either to another cell or to an underlying substrate such as the extrac

Any process involved in the conversion of a primary mRNA transcript into one or more mature m

"The directed movement of sodium ions (Na+) into, out of, within or between cells [goid 6814] [e

"The directed movement of charged atoms or small charged molecules into, out of, within or bet

"The directed movement of substances (such as macromolecules, small molecules, ions) into, o

"The directed movement of charged atoms or small charged molecules into, out of, within or bet

"The directed movement of charged atoms or small charged molecules into, out of, within or bet

"The directed movement of charged atoms or small charged molecules into, out of, within or bet

"The directed movement of charged atoms or small charged molecules into, out of, within or bet

"The directed movement of substances (such as macromolecules, small molecules, ions) into, o

"The directed movement of charged atoms or small charged molecules into, out of, within or bet

"The directed movement of sodium ions (Na+) into, out of, within or between cells [goid 6814] [e

"The directed movement of charged atoms or small charged molecules into, out of, within or bet

"The directed movement of oligopeptides into, out of, within or between cells. Oligopeptides are

"The directed movement of oligopeptides into, out of, within or between cells. Oligopeptides are

"The directed movement of oligopeptides into, out of, within or between cells. Oligopeptides are

"The directed movement of substances (such as macromolecules, small molecules, ions) into, o

"The directed movement of substances (such as macromolecules, small molecules, ions) into, c  
"The directed movement of substances (such as macromolecules, small molecules, ions) into, c  
"The directed movement of substances (such as macromolecules, small molecules, ions) into, c  
"The directed movement of substances (such as macromolecules, small molecules, ions) into, c  
"The chemical reactions and pathways involving the phosphate group, the anion or salt of any p  
"The directed movement of charged atoms or small charged molecules into, out of, within or bet

"The directed movement of monoamines, organic compounds that contain one amino group tha  
"The directed movement of substances (such as macromolecules, small molecules, ions) into, c  
"The directed movement of dicarboxylic acids into, out of, within or between cells [goid 6835] [ev  
"The directed movement of substances (such as macromolecules, small molecules, ions) into, c  
"The directed movement of substances (such as macromolecules, small molecules, ions) into, c  
"The chemical reactions and pathways involving the phosphate group, the anion or salt of any p  
"The directed movement of charged atoms or small charged molecules into, out of, within or bet  
"The directed movement of charged atoms or small charged molecules into, out of, within or bet  
"The directed movement of charged atoms or small charged molecules into, out of, within or bet  
"The directed movement of charged atoms or small charged molecules into, out of, within or bet  
"The directed movement of charged atoms or small charged molecules into, out of, within or bet  
"The chemical reactions and pathways involving triacylglycerol, any triester of glycerol. The thre  
"The directed movement of charged atoms or small charged molecules into, out of, within or bet  
"The directed movement of substances (such as macromolecules, small molecules, ions) into, c  
"The chemical reactions and pathways involving nucleobases, nucleosides, nucleotides and nuc

\"

"The directed movement of charged atoms or small charged molecules into, out of, within or bet  
"The directed movement of charged atoms or small charged molecules into, out of, within or bet  
"The directed movement of charged atoms or small charged molecules into, out of, within or bet  
"The directed movement of charged atoms or small charged molecules into, out of, within or bet  
"The directed movement of substances (such as macromolecules, small molecules, ions) into, c  
"The formation of glucose from noncarbohydrate precursors, such as pyruvate, amino acids and  
"The directed movement of substances (such as macromolecules, small molecules, ions) into, c  
"The directed movement of substances (such as macromolecules, small molecules, ions) into, c  
"The chemical reactions and pathways resulting in the formation of ATP, adenosine 5'-triphosph  
"The directed movement of substances (such as macromolecules, small molecules, ions) into, c  
"A cyclic metabolic pathway that converts waste nitrogen in the form of ammonium to urea [goid  
"The directed movement of substances (such as macromolecules, small molecules, ions) into, c  
"The directed movement of substances (such as macromolecules, small molecules, ions) into, c  
"The directed movement of substances (such as macromolecules, small molecules, ions) into, c  
"The directed movement of substances (such as macromolecules, small molecules, ions) into, c  
"The directed movement of substances (such as macromolecules, small molecules, ions) into, c  
"The directed movement of substances (such as macromolecules, small molecules, ions) into, c  
"The directed movement of substances (such as macromolecules, small molecules, ions) into, c  
"The directed movement of substances (such as macromolecules, small molecules, ions) into, c  
"The directed movement of substances (such as macromolecules, small molecules, ions) into, c  
"The chemical reactions and pathways resulting in the formation of precursor metabolites, subst

"The directed movement of charged atoms or small charged molecules into, out of, within or bet

"The directed movement of substances (such as macromolecules, small molecules, ions) into, c

"The chemical reactions and pathways resulting in the formation of precursor metabolites, subst

"The directed movement of substances (such as macromolecules, small molecules, ions) into, c

"The directed movement of substances (such as macromolecules, small molecules, ions) into, c

"The directed movement of substances (such as macromolecules, small molecules, ions) into, c

"The directed movement of substances (such as macromolecules, small molecules, ions) into, c

"The directed movement of charged atoms or small charged molecules into, out of, within or bet

"The directed movement of substances (such as macromolecules, small molecules, ions) into, c

"The directed movement of substances (such as macromolecules, small molecules, ions) into, c

"The directed movement of substances (such as macromolecules, small molecules, ions) into, c

"The maintenance of the structure and integrity of the mitochondrial genome; includes replicatio

"The directed movement of substances (such as macromolecules, small molecules, ions) into, c

"The directed movement of substances (such as macromolecules, small molecules, ions) into, c

"The directed movement of substances (such as macromolecules, small molecules, ions) into, c

"The directed movement of substances (such as macromolecules, small molecules, ions) into, c

"The directed movement of substances (such as macromolecules, small molecules, ions) into, c

"The directed movement of substances (such as macromolecules, small molecules, ions) into, c

"The directed movement of substances (such as macromolecules, small molecules, ions) into, c

"The directed movement of substances (such as macromolecules, small molecules, ions) into, c

"The directed movement of substances (such as macromolecules, small molecules, ions) into, c

"The directed movement of substances (such as macromolecules, small molecules, ions) into, c

"The directed movement of substances (such as macromolecules, small molecules, ions) into, c

"The directed movement of substances (such as macromolecules, small molecules, ions) into, c

"The directed movement of substances (such as macromolecules, small molecules, ions) into, c

"The directed movement of substances (such as macromolecules, small molecules, ions) into, c

"The directed movement of substances (such as macromolecules, small molecules, ions) into, c

"The chemical reactions and pathways involving lipids, compounds soluble in an organic solvent

"The chemical reactions and pathways involving fatty acids with a chain length of C18 or greater

"The chemical reactions and pathways involving fatty acids with a chain length of C18 or greater

"The chemical reactions and pathways involving nucleobases, nucleosides, nucleotides and nuc

"The chemical reactions and pathways involving nucleobases, nucleosides, nucleotides and nuc

"The directed movement of substances (such as macromolecules, small molecules, ions) into, c

"The directed movement of substances (such as macromolecules, small molecules, ions) into, c

"The process whereby a solute is transported from one side of a membrane to the other. This pr

"The directed movement of carbohydrate into, out of, within or between cells. Carbohydrates are

"The directed movement of carbohydrate into, out of, within or between cells. Carbohydrates are

"The biological process whose specific outcome is the progression of a multicellular organism o

"The chemical reactions and pathways involving carbohydrates, any of a group of organic comp

"The synthesis of either RNA on a template of DNA or DNA on a template of RNA [goid 6350] [e

"The process whereby a solute is transported from one side of a membrane to the other. This pr

"The directed movement of carbohydrate into, out of, within or between cells. Carbohydrates are

"A change in state or activity of a cell or an organism (in terms of movement, secretion, enzyme

"The process whose specific outcome is the progression of the embryo in the uterus over time, f

"The directed movement of cations, atoms or small molecules with a net positive charge, into, o

"The directed movement of cations, atoms or small molecules with a net positive charge, into, o

"The directed movement of cations, atoms or small molecules with a net positive charge, into, o

"The synthesis of either RNA on a template of DNA or DNA on a template of RNA [goid 6350] [e

"The directed movement of charged atoms or small charged molecules into, out of, within or bet

"The directed movement of charged atoms or small charged molecules into, out of, within or bet

"The directed movement of substances (such as macromolecules, small molecules, ions) into, c

"The directed movement of carbohydrate into, out of, within or between cells. Carbohydrates are

"The directed movement of carbohydrate into, out of, within or between cells. Carbohydrates are

"The chemical reactions and pathways involving UDP-N-acetylglucosamine, a substance compc

"The directed movement of carbohydrate into, out of, within or between cells. Carbohydrates are

"The directed movement of nucleotide-sugars into, out of, within or between cells. Nucleotide-su

"The directed movement of carbohydrate into, out of, within or between cells. Carbohydrates are

"The directed movement of substances (such as macromolecules, small molecules, ions) into, o

"The directed movement of substances (such as macromolecules, small molecules, ions) into, o

"The directed movement of nucleotide-sugars into, out of, within or between cells. Nucleotide-su

"The directed movement of carbohydrate into, out of, within or between cells. Carbohydrates are

"The directed movement of substances (such as macromolecules, small molecules, ions) into, o

"The directed movement of carbohydrate into, out of, within or between cells. Carbohydrates are

"The directed movement of substances (such as macromolecules, small molecules, ions) into, o

"The directed movement of substances (such as macromolecules, small molecules, ions) into, o

"The directed movement of substances (such as macromolecules, small molecules, ions) into, o

"The directed movement of substances (such as macromolecules, small molecules, ions) into, o

"The directed movement of substances (such as macromolecules, small molecules, ions) into, o

"The directed movement of substances (such as macromolecules, small molecules, ions) into, o

"The directed movement of carbohydrate into, out of, within or between cells. Carbohydrates are

"The directed movement of carbohydrate into, out of, within or between cells. Carbohydrates are

"The process of regulating the proliferation and elimination of neutrophils such that the total nun

"The directed movement of charged atoms or small charged molecules into, out of, within or bet

"The directed movement of charged atoms or small charged molecules into, out of, within or bet

"The directed movement of charged atoms or small charged molecules into, out of, within or bet

"The directed movement of charged atoms or small charged molecules into, out of, within or bet

"The directed movement of charged atoms or small charged molecules into, out of, within or bet

"The directed movement of charged atoms or small charged molecules into, out of, within or bet

"The directed movement of charged atoms or small charged molecules into, out of, within or bet

"The directed movement of charged atoms or small charged molecules into, out of, within or bet

"The directed movement of charged atoms or small charged molecules into, out of, within or bet

"The directed movement of charged atoms or small charged molecules into, out of, within or bet

"The directed movement of charged atoms or small charged molecules into, out of, within or bet

"The directed movement of charged atoms or small charged molecules into, out of, within or bet

"The directed movement of charged atoms or small charged molecules into, out of, within or bet

"The directed movement of charged atoms or small charged molecules into, out of, within or bet

"The directed movement of charged atoms or small charged molecules into, out of, within or bet

"The directed movement of charged atoms or small charged molecules into, out of, within or bet

"The directed movement of charged atoms or small charged molecules into, out of, within or bet

"The directed movement of charged atoms or small charged molecules into, out of, within or bet

"The directed movement of charged atoms or small charged molecules into, out of, within or bet

"The chemical reactions and pathways involving carbohydrates, any of a group of organic comp

"The directed movement of charged atoms or small charged molecules into, out of, within or bet

"The directed movement of cations, atoms or small molecules with a net positive charge, into, o

"The directed movement of cations, atoms or small molecules with a net positive charge, into, o

"The directed movement of cations, atoms or small molecules with a net positive charge, into, o  
"The directed movement of substances (such as macromolecules, small molecules, ions) into, o  
"The directed movement of substances (such as macromolecules, small molecules, ions) into, c

"The directed movement of substances (such as macromolecules, small molecules, ions) into, c  
"The directed movement of substances (such as macromolecules, small molecules, ions) into, c

"The chemical reactions and pathways resulting in the formation of melanin from other compour  
"The directed movement of substances (such as macromolecules, small molecules, ions) into, o  
"The directed movement of substances (such as macromolecules, small molecules, ions) into, o  
"The directed movement of substances (such as macromolecules, small molecules, ions) into, c

"The directed movement of anions, atoms or small molecules with a net negative charge, into, o  
"The directed movement of sodium ions (Na+) into, out of, within or between cells [goid 6814] [p  
P), mRNA."

"The directed movement of anions, atoms or small molecules with a net negative charge, into, o  
"The directed movement of sodium ions (Na+) into, out of, within or between cells [goid 6814] [e  
"The directed movement of sodium ions (Na+) into, out of, within or between cells [goid 6814] [e  
"The directed movement of sodium ions (Na+) into, out of, within or between cells [goid 6814] [e  
"The directed movement of charged atoms or small charged molecules into, out of, within or bet  
"The directed movement of charged atoms or small charged molecules into, out of, within or bet  
"The directed movement of charged atoms or small charged molecules into, out of, within or bet  
"The directed movement of charged atoms or small charged molecules into, out of, within or bet  
dogene) (SLC6A10P) on chromosome 16."

"The directed movement of a neurotransmitter into, out of, within or between cells. Neurotransm  
"The directed movement of a neurotransmitter into, out of, within or between cells. Neurotransm  
"The directed movement of a neurotransmitter into, out of, within or between cells. Neurotransm  
"The directed movement of beta-alanine, 3-aminopropanoic acid, into, out of, within or between  
"The directed movement of charged atoms or small charged molecules into, out of, within or bet  
"The directed movement of a neurotransmitter into, out of, within or between cells. Neurotransm  
"The directed movement of substances (such as macromolecules, small molecules, ions) into, c  
"The directed movement of substances (such as macromolecules, small molecules, ions) into, c  
"The chemical reactions and pathways involving amino acids, organic acids containing one or m  
"The chemical reactions and pathways involving amino acids, organic acids containing one or m  
"The directed movement of levorotatory isomer amino acids into, out of, within or between cells  
"The aggregation, arrangement and bonding together of a set of components to form a protein c

"The aggregation, arrangement and bonding together of a set of components to form a protein c  
"The aggregation, arrangement and bonding together of a set of components to form a protein c  
"The directed movement of charged atoms or small charged molecules into, out of, within or bet  
"The directed movement of sodium ions (Na+) into, out of, within or between cells [goid 6814] [e  
"The directed movement of charged atoms or small charged molecules into, out of, within or bet



"The aggregation, arrangement and bonding together of a set of components to form a protein c  
"The directed movement of charged atoms or small charged molecules into, out of, within or bet  
"The directed movement of charged atoms or small charged molecules into, out of, within or bet  
"The directed movement of charged atoms or small charged molecules into, out of, within or bet  
"The directed movement of charged atoms or small charged molecules into, out of, within or bet  
"The directed movement of charged atoms or small charged molecules into, out of, within or bet  
"The directed movement of charged atoms or small charged molecules into, out of, within or bet  
"The directed movement of charged atoms or small charged molecules into, out of, within or bet  
"The directed movement of charged atoms or small charged molecules into, out of, within or bet  
"The directed movement of charged atoms or small charged molecules into, out of, within or bet

"The process whereby relatively unspecialized cells, e.g. embryonic or regenerative cells, acquir  
"In nucleotide excision repair a small region of the strand surrounding the damage is removed fr  
"The process of assisting in the covalent and noncovalent assembly of single chain polypeptides

"The directed movement of substances (such as macromolecules, small molecules, ions) into, o  
"The synthesis of either RNA on a template of DNA or DNA on a template of RNA [goid 6350] [e  
The process of generating multiple mRNA molecules from a given set of exons by differential us  
"The chemical reactions and pathways involving carbohydrates, any of a group of organic comp  
"The chemical reactions and pathways involving carbohydrates, any of a group of organic comp  
"The process that gives rise to the mesoderm. This process pertains to the initial formation of th  
"Any process that stops, prevents or reduces the frequency, rate or extent of transcription from a  
"Branching of the ureteric bud [goid 1658] [evidence IEA]; A change in state or activity of a cell c  
"The synthesis of either RNA on a template of DNA or DNA on a template of RNA [goid 6350] [e  
"The synthesis of either RNA on a template of DNA or DNA on a template of RNA [goid 6350] [e  
"The synthesis of either RNA on a template of DNA or DNA on a template of RNA [goid 6350] [e

"Any process that modulates the activity of the GTPase ARF [goid 32312] [evidence IEA]; Any p  
Any process that modulates the activity of the GTPase ARF [goid 32312] [evidence IEA]  
"Dynamic structural changes to eukaryotic chromatin that require energy from the hydrolysis of A  
"Any process that stops, prevents or reduces the rate or extent of cell proliferation [goid 8285] [e  
"Any process that stops, prevents or reduces the frequency, rate or extent of transcription from a  
"The formation or destruction of chromatin structures [goid 6333] [evidence IEA]; The aggregati  
"Any process that modulates the frequency, rate or extent of DNA recombination, a process by v  
"The chemical reactions and pathways involving DNA, deoxyribonucleic acid, one of the two ma  
"The hatching of the cellular blastocyst from the zona pellucida [goid 1835] [evidence IEA]; Dyna  
"The formation or destruction of chromatin structures [goid 6333] [evidence IEA]; Dynamic struc  
"The formation or destruction of chromatin structures [goid 6333] [evidence IEA]; Dynamic struc  
"Any process that modulates the frequency, rate or extent of transcription from an RNA polymer  
"The synthesis of either RNA on a template of DNA or DNA on a template of RNA [goid 6350] [e  
"The developmental process by which the heart is generated and organized. The heart is a holk  
"The controlled breakdown of nucleosomes, the beadlike structural units of eukaryotic chromatin

"A point in the eukaryotic cell cycle where progress through the cycle can be halted until conditions are favorable." "The progression of biochemical and morphological phases and events that occur in a cell during the cell cycle." "The progression of biochemical and morphological phases and events that occur in a cell during the cell cycle." "The process of restoring DNA after damage. Genomes are subject to damage by chemical and physical agents." "A process that is carried out at the cellular level that results in the formation, arrangement of components of a cell." "The process by which the sperm binds to the zona pellucida glycoprotein layer of the egg. The process is mediated by the sperm surface protein (SMCR5), non-coding RNA." NA."

"The nonsense-mediated decay pathway for nuclear-transcribed mRNAs degrades mRNAs in which a premature stop codon is present." "The nonsense-mediated decay pathway for nuclear-transcribed mRNAs degrades mRNAs in which a premature stop codon is present." "The nonsense-mediated decay pathway for nuclear-transcribed mRNAs degrades mRNAs in which a premature stop codon is present." "The nonsense-mediated decay pathway for nuclear-transcribed mRNAs degrades mRNAs in which a premature stop codon is present." "The aggregation, arrangement and bonding together of the spliceosome, a ribonucleoprotein assembly." NA.

"The aggregation, arrangement and bonding together of the spliceosome, a ribonucleoprotein assembly." "The differentiation of endothelial cells from progenitor cells during blood vessel development, a process involving the expression of specific genes." "The chemical reactions and pathways resulting in the breakdown of spermine, a polybasic amine." "The chemical reactions and pathways involving sphingomyelin, N-acyl-4-sphingeny-1-O-phosphocholine." "The chemical reactions and pathways involving sphingomyelin, N-acyl-4-sphingeny-1-O-phosphocholine." "The chemical reactions and pathways resulting in the breakdown of sphingomyelin, N-acyl-4-sphingeny-1-O-phosphocholine." "The chemical reactions and pathways resulting in the breakdown of sphingomyelin, N-acyl-4-sphingeny-1-O-phosphocholine." "The chemical reactions and pathways resulting in the breakdown of sphingomyelin, N-acyl-4-sphingeny-1-O-phosphocholine." "The chemical reactions and pathways resulting in the breakdown of sphingomyelin, N-acyl-4-sphingeny-1-O-phosphocholine." NA.

"The chemical reactions and pathways involving methionine (2-amino-4-(methylthio)butanoic acid)." "A process whereby force is generated within smooth muscle tissue, resulting in a change in muscle length." NA.

"In base excision repair, an altered base is removed by a DNA glycosylase enzyme, followed by replacement of the base." NA.

"The alteration of DNA or protein in chromatin, which may result in changing the chromatin structure." NA.

"Any process specifically pertinent to the functioning of integrated living units: cells, tissues, organs, or organisms." "The biological process whose specific outcome is the progression of a multicellular organism over its life cycle." "Any process that stops, prevents or reduces the frequency, rate or extent of transcription from a DNA template." "The synthesis of either RNA on a template of DNA or DNA on a template of RNA [goid 6350] [evidence]." "The directed movement of substances from the Golgi to other parts of the cell, including organelles." "A process of secretion by a cell that results in the release of intracellular molecules (e.g. hormones)." NA.

"The synthesis of either RNA on a template of DNA or DNA on a template of RNA [goid 6350] [evidence]." "The synthesis of either RNA on a template of DNA or DNA on a template of RNA [goid 6350] [evidence]." "The synthesis of either RNA on a template of DNA or DNA on a template of RNA [goid 6350] [evidence]." NA.

"Any process that modulates the frequency, rate or extent of DNA-dependent transcription [goid  
"The synthesis of either RNA on a template of DNA or DNA on a template of RNA [goid 6350] [e  
"The directed movement of proteins in a cell, including the movement of proteins between speci  
"The chemical reactions and pathways involving dopamine, a catecholamine neurotransmitter a  
"The chemical reactions and pathways involving dopamine, a catecholamine neurotransmitter a  
"The synthesis of either RNA on a template of DNA or DNA on a template of RNA [goid 6350] [e  
"The synthesis of either RNA on a template of DNA or DNA on a template of RNA [goid 6350] [e

|A."

RNA."

RNA."

|A."

↓A."

5.

6.

|A."

nt 2, non-coding RNA."

3.

|A."

"Any process that modulates the frequency, rate or extent of DNA-dependent transcription [goid

"A change in state or activity of a cell or an organism (in terms of movement, secretion, enzyme

cleolar RNA."

cleolar RNA."  
ng RNA."





"The regulated release of neurotransmitter into the synaptic cleft. A neurotransmitter is any of a  
"The process of introducing a phosphate group on to a protein [goid 6468] [pmid 12234663] [evi

4, mRNA."

"The joining together of exons from one or more primary transcripts of nuclear messenger RNA  
"The joining together of exons from one or more primary transcripts of nuclear messenger RNA

"The joining together of exons from one or more primary transcripts of nuclear messenger RNA

"The joining together of exons from one or more primary transcripts of nuclear messenger RNA

"The joining together of exons from one or more primary transcripts of nuclear messenger RNA

The process of removing sections of the primary RNA transcript to remove sequences not prese

"The aggregation, arrangement and bonding together of the spliceosome, a ribonucleoprotein a

"The aggregation, arrangement and bonding together of the spliceosome, a ribonucleoprotein a

The formation and assembly from one or more snRNA and multiple protein components of a rib

"The aggregation, arrangement and bonding together of the spliceosome, a ribonucleoprotein a

The formation and assembly from one or more snRNA and multiple protein components of a rib

"The aggregation, arrangement and bonding together of the spliceosome, a ribonucleoprotein a

The process of removing sections of the primary RNA transcript to remove sequences not prese

"A process whereby force is generated within muscle tissue, resulting in a change in muscle gec

"A process whereby force is generated within muscle tissue, resulting in a change in muscle gec

2) (SNTB2), transcript variant 1, mRNA."

"The formation and assembly from one or more snRNA and multiple protein components of a rit

"Any process specifically pertinent to the functioning of integrated living units: cells, tissues, orga

"The joining together of exons from one or more primary transcripts of nuclear messenger RNA

"Any process that mediates interactions between a cell and its surroundings. Encompasses inte

"Any process that mediates interactions between a cell and its surroundings. Encompasses inte

"Any process that mediates interactions between a cell and its surroundings. Encompasses inte

"Any process that mediates interactions between a cell and its surroundings. Encompasses inte

"Any process that mediates interactions between a cell and its surroundings. Encompasses inte

"Any process that mediates interactions between a cell and its surroundings. Encompasses inte

"The directed movement of proteins in a cell, including the movement of proteins between speci

"Any process that mediates interactions between a cell and its surroundings. Encompasses inte

"The chemical reactions and pathways resulting in the breakdown of cholesterol, cholest-5-en-3

"Any process that mediates interactions between a cell and its surroundings. Encompasses inte

"The directed movement of proteins in a cell, including the movement of proteins between speci

"Any process that mediates interactions between a cell and its surroundings. Encompasses inte

"Any process that mediates interactions between a cell and its surroundings. Encompasses inte

"Any process that mediates interactions between a cell and its surroundings. Encompasses inte

"The cascade of processes by which a signal interacts with a receptor, causing a change in the

"The cascade of processes by which a signal interacts with a receptor, causing a change in the

"Any process that mediates interactions between a cell and its surroundings. Encompasses inte

"A type of vesicle-mediated transport in which cells take up external materials or membrane con

"Any process that mediates interactions between a cell and its surroundings. Encompasses inte

"Any process that mediates interactions between a cell and its surroundings. Encompasses inte

"A type of vesicle-mediated transport in which cells take up external materials or membrane con

"Any process that mediates interactions between a cell and its surroundings. Encompasses inte

"Any process that mediates interactions between a cell and its surroundings. Encompasses inte

"Any process that modulates the frequency, rate or extent of cell growth [goid 1558] [evidence II

"Any process that modulates the frequency, rate or extent of cell growth [goid 1558] [pmid 97271

"Any process that modulates the frequency, rate or extent of cell growth [goid 1558] [evidence II



"Any process that modulates the frequency, rate or extent of cell growth [goid 1558] [evidence IE]

"Any process that modulates the frequency, rate or extent of cell growth [goid 1558] [evidence IE]

"A change in state or activity of a cell or an organism (in terms of movement, secretion, enzyme

The hydrolysis of a peptide bond or bonds within a protein [goid 6508] [evidence IEA]

A process which directly inhibits any of the steps required for cell death by apoptosis [goid 6916]

"Any process specifically pertinent to the functioning of integrated living units: cells, tissues, orga

"Any process that stops, prevents or reduces the frequency, rate or extent of transcription from a

The series of molecular signals generated as a consequence of a peptide neurotransmitter bind

"The series of events required for an organism to receive a visual stimulus, convert it to a molec

"The chemical reactions and pathways involving lipids, compounds soluble in an organic solvent

"The formation of bone or of a bony substance, or the conversion of fibrous tissue or of cartilage

"Any process that modulates the frequency, rate or extent of Rho protein signal transduction [go

"Any developmental process that results in the creation of defined areas or spaces within an org

"Any process that modulates the frequency, rate or extent of transcription from an RNA polymer

"Any process that stops, prevents or reduces the frequency, rate or extent of transcription from a

"Blood vessel formation when new vessels emerge from the proliferation of pre-existing blood ve

"The process involved in the specification of cell identity. Once specification has taken place, a c

"The synthesis of either RNA on a template of DNA or DNA on a template of RNA [goid 6350] [e

"The synthesis of either RNA on a template of DNA or DNA on a template of RNA [goid 6350] [e

"The process whose specific outcome is the progression of the embryo in the uterus over time, f

"The set of physiological processes that allow an embryo or foetus to develop within the body of

"Any process that modulates the frequency, rate or extent of DNA-dependent transcription [goid

"The synthesis of either RNA on a template of DNA or DNA on a template of RNA [goid 6350] [e

"Reactions, triggered in response to the presence of a foreign body or the occurrence of an inju

"The synthesis of either RNA on a template of DNA or DNA on a template of RNA [goid 6350] [e

"The process whereby a relatively unspecialized cell acquires the specialized features of a natu

"The synthesis of either RNA on a template of DNA or DNA on a template of RNA [goid 6350] [e

"The synthesis of either RNA on a template of DNA or DNA on a template of RNA [goid 6350] [e

"The cascade of processes by which a signal interacts with a receptor, causing a change in the

"The chemical reactions and pathways resulting in the breakdown of peptidoglycans, any of a cl

"The attachment of a cell, either to another cell or to an underlying substrate such as the extrac

The union of male and female gametes to form a zygote [goid 7338] [pmid 1299558] [evidence I

"The process of formation of spermatozoa, including spermatocytogenesis and spermiogenesis

"The process of formation of spermatozoa, including spermatocytogenesis and spermiogenesis

"The progression of biochemical and morphological phases and events that occur in a cell durin

"The process whose specific outcome is the progression of a male gamete over time, from initia

"The initiation of the activity of the inactive enzyme MAP kinase by phosphorylation by a MAPK

"The biological process whose specific outcome is the progression of a multicellular organism or  
"The biological process whose specific outcome is the progression of a multicellular organism or  
"The biological process whose specific outcome is the progression of a multicellular organism or

"A form of programmed cell death induced by external or internal signals that trigger the activity

mRNA."

"The progression of biochemical and morphological phases and events that occur in a cell durin

"The progression of biochemical and morphological phases and events that occur in a cell durin

The proteolytic removal of a signal peptide from a protein during or after transport to a specific lo

The proteolytic removal of a signal peptide from a protein during or after transport to a specific lo

The proteolytic removal of a signal peptide from a protein during or after transport to a specific lo

"Any process specifically pertinent to the functioning of integrated living units: cells, tissues, orga

"Any process that modulates the frequency, rate or extent of transcription from an RNA polymer  
A."

A series of molecular signals initiated by the cross-linking of an antigen receptor on a B or T cell  
IA."

"The hydrolysis of a peptide bond or bonds within a protein [goid 6508] [pmid 9635427] [evidenc

The process whereby new strands of DNA are synthesized. The template for replication can eith

"The chemical reactions and pathways resulting in the formation of sphinganine-1-phosphate, th

"Any process that stops, prevents or reduces the frequency, rate or extent of transcription from :

"The synthesis of either RNA on a template of DNA or DNA on a template of RNA [goid 6350] [e

"The synthesis of either RNA on a template of DNA or DNA on a template of RNA [goid 6350] [e

"The progression of biochemical and morphological phases and events that occur in a cell durin

"The progression of biochemical and morphological phases and events that occur in a cell durin

"A form of programmed cell death induced by external or internal signals that trigger the activity

The generation and maintenance of gametes. A gamete is a haploid reproductive cell [goid 7276

The generation and maintenance of gametes. A gamete is a haploid reproductive cell [goid 7276

VA."

"Any process that stops, prevents or reduces the frequency, rate or extent of angiogenesis [goid

"The process by which the anatomical structures of branches are generated and organized. Mor

Any process involved in the controlled movement of a cell [goid 6928] [pmid 9434156] [evidence

"The directed movement of substances (such as macromolecules, small molecules, ions) into, o

"The directed movement of substances (such as macromolecules, small molecules, ions) into, o

"A change in state or activity of a cell or an organism (in terms of movement, secretion, enzyme

"The directed movement of substances (such as macromolecules, small molecules, ions) into, o

"The directed movement of substances (such as macromolecules, small molecules, ions) into, o

"The directed movement of substances (such as macromolecules, small molecules, ions) into, o

"Any process involved in the controlled movement of a cell [goid 6928] [pmid 8389704] [evidenc

"The biosynthesis of a synapse [goid 7416] [pmid 10386950] [evidence NAS]; A process that is

"The attachment of a cell, either to another cell or to an underlying substrate such as the extracellular matrix  
"The chemical reactions and pathways resulting in the breakdown of a protein or peptide by hydrolysis  
"The formation of bone or of a bony substance, or the conversion of fibrous tissue or of cartilage into bone  
"The process whose specific outcome is the progression of the skeleton over time, from its formation to its maintenance and repair

Any process that modulates the occurrence or rate of cell death by apoptosis in neurons [goid 4]  
"The chemical reactions and pathways resulting in the formation of tetrahydrobiopterin, the reduced form of tetrahydrobiopterin  
"Any process that terminates the activity of the active enzyme MAP kinase [goid 188] [evidence IEA]  
"Any process that terminates the activity of the active enzyme MAP kinase [goid 188] [evidence IEA]  
"The process whose specific outcome is the progression of the epidermis over time, from its formation to its maintenance and repair  
"The process in which the cytoplasm of the outermost cells of the vertebrate epidermis is replaced by new cells  
"The process whose specific outcome is the progression of the ureteric bud over time, from its formation to its maintenance and repair  
"Any process that mediates the transfer of information from one cell to another [goid 7267] [pmid 12511111]  
"The biological process whose specific outcome is the progression of a multicellular organism over time, from its formation to its maintenance and repair

"The chemical reactions and pathways resulting in the breakdown of a protein or peptide by hydrolysis  
"The chemical reactions and pathways resulting in the breakdown of a protein or peptide by hydrolysis  
A series of reactions within the cell that occur as a result of a single trigger reaction or compound  
"Control of the spatial distribution of actin filaments; includes organizing filaments into meshwork, bundles, or other structures  
"The binding of a protein or protein complex to the barbed (or plus) end of an actin filament, thus stabilizing the filament  
"[goid 7182] [evidence IEA]; [goid 7184] [evidence IEA]; The binding of a protein or protein complex to the barbed (or plus) end of an actin filament, thus stabilizing the filament  
"The specific activation or halting of processes within a cell so that its vital functions markedly change  
"Process by which cytoskeletal filaments are directly or indirectly linked to the plasma membrane  
"The chemical reactions and pathways involving sphingolipids, any of a class of lipids containing a long-chain fatty acid  
The chemical reactions and pathways resulting in the formation of substances; typically the energy is derived from the breakdown of organic compounds  
The chemical reactions and pathways resulting in the formation of substances; typically the energy is derived from the breakdown of organic compounds  
A."

"The chemical reactions and pathways resulting in the formation of sterols, steroids with one or more hydroxyl groups  
The process of removal or addition of one or more electrons with or without the concomitant removal or addition of protons  
"The chemical reactions and pathways resulting in the breakdown of a protein or peptide by hydrolysis  
Any process involved in the conversion of one or more primary RNA transcripts into one or more secondary RNA transcripts  
"The synthesis of either RNA on a template of DNA or DNA on a template of RNA [goid 6350] [evidence IEA]  
"The chemical reactions and pathways involving nucleobases, nucleosides, nucleotides and nucleic acids  
"The process of introducing a phosphate group on to a protein [goid 6468] [evidence IEA]; The phosphorylation of a protein  
"The chemical reactions and pathways involving lipids, compounds soluble in an organic solvent  
"The chemical reactions and pathways involving lipids, compounds soluble in an organic solvent  
"Any process that modulates the frequency, rate or extent of transcription from an RNA polymerase  
"The process whereby a relatively unspecialized cell acquires the specialized features of a trophic level  
"The synthesis of either RNA on a template of DNA or DNA on a template of RNA [goid 6350] [evidence IEA]  
"The cascade of processes by which a signal interacts with a receptor, causing a change in the activity of a protein  
"The cascade of processes by which a signal interacts with a receptor, causing a change in the activity of a protein

"The cascade of processes by which a signal interacts with a receptor, causing a change in the  
"The formation of bone or of a bony substance, or the conversion of fibrous tissue or of cartilage  
"The directed movement of calcium (Ca) ions into, out of, within or between cells [goid 6816] [ev

"The chemical reactions and pathways resulting in the formation of spermidine, N-(3-aminopropyl)  
"The targeting of proteins to a membrane that occurs during translation and is dependent upon 1  
gene 1 (SRP14P1), non-coding RNA."

"The targeting of proteins to a membrane that occurs during translation and is dependent upon 1  
"The targeting of proteins to a membrane that occurs during translation and is dependent upon 1

"The targeting of proteins to a membrane that occurs during translation and is dependent upon 1  
"The targeting of proteins to a membrane that occurs during translation and is dependent upon 1  
"The process of introducing a phosphate group on to a protein [goid 6468] [pmid 11509566] [evi  
"The aggregation, arrangement and bonding together of the spliceosome, a ribonucleoprotein as  
"The targeting of proteins to a membrane that occurs during translation and is dependent upon 1

"The attachment of a cell, either to another cell or to an underlying substrate such as the extracel  
"The chemical reactions and pathways involving L-serine, the levorotatory isomer of 2-amino-3-hydroxy  
Any process pertinent to the generation and maintenance of rhythms in the physiology of an org  
"The joining together of exons from one or more primary transcripts of nuclear messenger RNA

Any process involved in the conversion of a primary mRNA transcript into one or more mature m

"A change in state or activity of a cell or an organism (in terms of movement, secretion, enzyme  
RNA."

"The process whose specific outcome is the progression of the dendrite over time, from its form  
A."

Any process involved in the conversion of one or more primary RNA transcripts into one or more  
The process whereby new strands of DNA are synthesized. The template for replication can eit  
"Any process that modulates the frequency, rate or extent of the synthesis of either RNA on a te  
"The synthesis of either RNA on a template of DNA or DNA on a template of RNA [goid 6350] [e

"The process of removing one or more phosphoric residues from a protein [goid 6470] [pmid 111  
The process of removing one or more phosphoric residues from a protein [goid 6470] [evidence

"A process whereby force is generated within muscle tissue, resulting in a change in muscle ge  
"The targeting of proteins to a membrane that occurs during translation. The transport of most s  
"The targeting of proteins to a membrane that occurs during translation. The transport of most s  
"The targeting of proteins to a membrane that occurs during translation. The transport of most s  
"The directed movement of proteins in a cell, including the movement of proteins between speci  
"The process whereby new strands of DNA are synthesized. The template for replication can eit  
"The progression of biochemical and morphological phases and events that occur in a cell durin

"The cascade of processes by which a signal interacts with a receptor, causing a change in the  
Any process involved in the conversion of a primary mRNA transcript into one or more mature r  
"The attachment of a cell, either to another cell or to an underlying substrate such as the extrac  
"The synthesis of either RNA on a template of DNA or DNA on a template of RNA [goid 6350] [e  
The process of assisting in the covalent and noncovalent assembly of single chain polypeptides  
The hydrolysis of a peptide bond or bonds within a protein [goid 6508] [pmid 10373424] [eviden  
"Any process that stops, prevents or reduces the rate or extent of progression through the cell c  
"The addition of a sugar unit to a protein amino acid, e.g. the addition of glycan chains to protei  
"The chemical reactions and pathways involving any amino sugar, sugars containing an amino g  
"The addition of a sugar unit to a protein amino acid, e.g. the addition of glycan chains to protei  
"The addition of a sugar unit to a protein amino acid, e.g. the addition of glycan chains to protei  
"The chemical reactions and pathways resulting in the formation of ceramide oligosaccharides c  
"The chemical reactions and pathways involving any amino sugar, sugars containing an amino g  
"The addition of a sugar unit to a protein amino acid, e.g. the addition of glycan chains to protei  
"The addition of a sugar unit to a protein amino acid, e.g. the addition of glycan chains to protei  
"The chemical reactions and pathways involving carbohydrates, any of a group of organic comp

ome 7.

"The chemical reactions and pathways involving carbohydrates, any of a group of organic comp  
"The chemical reactions and pathways involving carbohydrates, any of a group of organic comp  
"The addition of a sugar unit to a protein amino acid, e.g. the addition of glycan chains to protei  
"The addition of a sugar unit to a protein amino acid, e.g. the addition of glycan chains to protei  
"The chemical reactions and pathways involving carbohydrates, any of a group of organic comp  
"Blood vessel formation when new vessels emerge from the proliferation of pre-existing blood ve  
A series of reactions within the cell that occur as a result of a single trigger reaction or compound  
A series of reactions within the cell that occur as a result of a single trigger reaction or compound  
"The progression of biochemical and morphological phases and events that occur in a cell durin  
"The progression of biochemical and morphological phases and events that occur in a cell durin  
"The progression of biochemical and morphological phases and events that occur in a cell durin

"The directed movement of proteins in a cell, including the movement of proteins between speci  
"The directed movement of proteins in a cell, including the movement of proteins between speci  
"The chemical reactions and pathways resulting in the breakdown of a protein or peptide by hyd  
"The chemical reactions and pathways resulting in the breakdown of a protein or peptide by hyd  
"The directed movement of proteins in a cell, including the movement of proteins between speci

"The chemical reactions and pathways resulting in the formation of steroids, compounds with a

"The chemical reactions and pathways resulting in the formation of steroids, compounds with a

"The chemical reactions and pathways resulting in the formation of steroids, compounds with a

"Any process that modulates the frequency, rate or extent of DNA-dependent transcription [goid  
"Any process that modulates the frequency, rate or extent of transcription from an RNA polymer  
"Any process that stops, prevents or reduces the frequency, rate or extent of transcription from a  
"Any process that modulates the frequency, rate or extent of DNA-dependent transcription [goid  
"The set of processes resulting in differentiation of theca and granulosa cells into luteal cells and  
"The set of processes resulting in differentiation of theca and granulosa cells into luteal cells and  
"Any process that stops, prevents, or reduces the frequency, rate, or extent of a T-helper 2 type  
"Any process by which mRNA is transported to, or maintained in, a specific location within the cell  
"The directed movement of substances (such as macromolecules, small molecules, ions) into, out of,  
"The process of introducing a phosphate group on to a protein [goid 6468] [evidence IEA]; The r  
"Any series of molecular signals initiated by the binding of an extracellular ligand to a receptor o  
"The directed movement of charged atoms or small charged molecules into, out of, within or bet

"The biological process whose specific outcome is the progression of a multicellular organism ov  
"The series of events in which a calcium ion stimulus is received by a cell and converted into a r  
"The directed movement of charged atoms or small charged molecules into, out of, within or bet  
"A change in state or activity of a cell or an organism (in terms of movement, secretion, enzyme  
The process of introducing a phosphate group on to a protein [goid 6468] [pmid 9278426] [evid  
"The process of introducing a phosphate group on to a protein [goid 6468] [pmid 12805220] [evi

"The aggregation, arrangement and bonding together of a set of components to form a protein c  
"The process of introducing a phosphate group on to a protein [goid 6468] [pmid 9786912] [evid

"The process of introducing a phosphate group on to a protein [goid 6468] [evidence IEA]; A cha  
"The process of introducing a phosphate group on to a protein [goid 6468] [pmid 8566796] [evid  
The process of introducing a phosphate group on to a protein [goid 6468] [evidence IEA]  
The process of introducing a phosphate group on to a protein [goid 6468] [evidence IEA]; The p  
The process of introducing a phosphate group on to a protein [goid 6468] [evidence IEA]  
"The process of introducing a phosphate group on to a protein [goid 6468] [pmid 10806483] [evi  
"The covalent alteration of one or more amino acids occurring in proteins, peptides and nascent  
"The process of introducing a phosphate group on to a protein [goid 6468] [pmid 15067004] [evi

"The developmental process by which the size or shape of a cell is generated and organized. M  
The process of introducing a phosphate group on to a protein [goid 6468] [evidence IEA]  
"A series of reactions within the cell that occur as a result of a single trigger reaction or compou  
A series of reactions within the cell that occur as a result of a single trigger reaction or compou  
"A series of reactions within the cell that occur as a result of a single trigger reaction or compou  
A series of reactions within the cell that occur as a result of a single trigger reaction or compou  
"The process of creating protein oligomers, compounds composed of a small number, usually by  
"Any process specifically pertinent to the functioning of integrated living units: cells, tissues, orga

"The directed movement of substances (such as macromolecules, small molecules, ions) into, o

Any process involved in the conversion of a primary mRNA transcript into one or more mature r

"Any process involved in the controlled movement of a cell [goid 6928] [evidence IEA]; The biolc

"The series of events required for an organism to receive an auditory stimulus, convert it to a mc

"Any process specifically pertinent to the functioning of integrated living units: cells, tissues, orga

"The progression of biochemical and morphological phases and events that occur in a cell durin

"The cascade of processes by which a signal interacts with a receptor, causing a change in the

"The chemical reactions and pathways involving lipids, compounds soluble in an organic solvent

"The addition of a sugar unit to a protein amino acid, e.g. the addition of glycan chains to proteir

"The addition of a sugar unit to a protein amino acid, e.g. the addition of glycan chains to proteir

"Addition of multiple ubiquitin moieties to a protein, forming a ubiquitin chain [goid 209] [pmid 15

"The directed movement of proteins in a cell, including the movement of proteins between speci

"The directed movement of proteins in a cell, including the movement of proteins between speci

"The directed movement of proteins in a cell, including the movement of proteins between speci

"The directed movement of proteins in a cell, including the movement of proteins between speci

"The process of communication from a neuron to a target (neuron, muscle, or secretory cell) acr

"The directed movement of proteins in a cell, including the movement of proteins between speci

"The directed movement of a neurotransmitter into, out of, within or between cells. Neurotransm

"The directed movement of proteins in a cell, including the movement of proteins between speci

"The directed movement of proteins in a cell, including the movement of proteins between speci

"The directed movement of proteins in a cell, including the movement of proteins between speci

"The directed movement of proteins in a cell, including the movement of proteins between speci

"The directed movement of substances (such as macromolecules, small molecules, ions) into, o

"The initial attachment of a vesicle membrane to a target membrane, mediated by proteins protr

"The directed movement of proteins in a cell, including the movement of proteins between speci

"The initial attachment of a vesicle membrane to a target membrane, mediated by proteins protr

"The process of targeting specific proteins to particular membrane-bounded subcellular organell

"A process of secretion by a cell that results in the release of intracellular molecules (e.g. hormo

"The directed movement of proteins into, out of, within or between cells [goid 15031] [evidence I

"The directed movement of substances, either within a vesicle or in the vesicle membrane, into,

The process of removing one or more phosphoric residues from a protein [goid 6470] [evidence

"The synthesis of either RNA on a template of DNA or DNA on a template of RNA [goid 6350] [e

"A nearly universal metabolic pathway in which the acetyl group of acetyl coenzyme A is effectiv

"A nearly universal metabolic pathway in which the acetyl group of acetyl coenzyme A is effectiv

"A nearly universal metabolic pathway in which the acetyl group of acetyl coenzyme A is effectiv

"The cascade of processes by which a signal interacts with a receptor, causing a change in the

"Any process that modulates the frequency, rate or extent of DNA-dependent transcription [goid

"The chemical reactions and pathways resulting in the breakdown of a protein or peptide by hyd

"A form of programmed cell death induced by external or internal signals that trigger the activity

"The chemical reactions and pathways, including anabolism and catabolism, by which living orga

"The chemical reactions and pathways involving any of a group of physiologically important biog

"The chemical reactions and pathways involving any of a group of physiologically important biog  
"The chemical reactions and pathways involving any of a group of physiologically important biog  
transcript variant 3, mRNA."

"The chemical reactions and pathways involving lipids, compounds soluble in an organic solvent

"The chemical reactions and pathways involving lipids, compounds soluble in an organic solvent

"The chemical reactions and pathways involving lipids, compounds soluble in an organic solvent

"The process by which one or more ubiquitin moieties are added to a protein [goid 16567] [evid

"The covalent alteration of one or more amino acids occurring in proteins, peptides and nascent

"The covalent alteration of one or more amino acids occurring in proteins, peptides and nascent

The process of removal or addition of one or more electrons with or without the concomitant ren

"The process whereby new strands of DNA are synthesized. The template for replication can eit

"The synthesis of either RNA on a template of DNA or DNA on a template of RNA [goid 6350] [e

"Any process that stops, prevents or reduces the frequency, rate or extent of transcription from a

"Any process that stops, prevents or reduces the frequency, rate or extent of transcription from a

"Dynamic structural changes to eukaryotic chromatin occurring throughout the cell division cycle

"The process by which interchain hydrogen bonds between two strands of DNA are broken or 'r

"The aggregation, arrangement and bonding together of a set of components to form respiratory

"Any process specifically pertinent to the functioning of integrated living units: cells, tissues, orga

"Any process specifically pertinent to the functioning of integrated living units: cells, tissues, orga

"The formation or destruction of chromatin structures [goid 6333] [evidence IEA]; The synthesis

"The formation or destruction of chromatin structures [goid 6333] [evidence ISS]; The formation

"The synthesis of either RNA on a template of DNA or DNA on a template of RNA [goid 6350] [e

"The synthesis of either RNA on a template of DNA or DNA on a template of RNA [goid 6350] [e

"Any process that stops, prevents or reduces the frequency, rate or extent of transcription from a

"The directed movement of a neurotransmitter into, out of, within or between cells. Neurotransm

"The directed movement of a neurotransmitter into, out of, within or between cells. Neurotransm

"The directed movement of charged atoms or small charged molecules into, out of, within or bet

"Recombination occurring within or between DNA molecules in somatic cells [goid 16444] [evid

"The progression of biochemical and morphological phases and events that occur in a cell durin

"The cascade of processes by which a signal interacts with a receptor, causing a change in the

"Any process involved in the conversion of a primary mRNA transcript into one or more mature r

"The regulated release of serotonin by a cell or group of cells. Serotonin (5-hydroxytryptamine, c

"The attachment of a cell, either to another cell or to an underlying substrate such as the extrac

"The process of communication from a neuron to a target (neuron, muscle, or secretory cell) acr

"The process of communication from a neuron to a target (neuron, muscle, or secretory cell) acr

"Any cellular process that depends upon or alters the intermediate filament cytoskeleton, that pa



Any process involved in the conversion of a primary mRNA transcript into one or more mature rRNA." [goid 15031] [evidence 1]

"The chemical reactions and pathways involving the phosphate group, the anion or salt of any phosphate, mRNA." [goid 15031] [evidence 1]

"Any process that activates or increases the frequency, rate or extent of the assembly of actin filaments, mRNA." [goid 15031] [evidence 1]

"The directed movement of substances (such as macromolecules, small molecules, ions) into, out of, within or between cells [goid 15031] [evidence 1]

"The directed movement of substances (such as macromolecules, small molecules, ions) into, out of, within or between cells [goid 15031] [evidence 1]

"The directed movement of substances (such as macromolecules, small molecules, ions) into, out of, within or between cells [goid 15031] [evidence 1]

"The directed movement of proteins into, out of, within or between cells [goid 15031] [evidence 1]

"The directed movement of substances (such as macromolecules, small molecules, ions) into, out of, within or between cells [goid 15031] [evidence 1]

"The directed movement of substances, either within a vesicle or in the vesicle membrane, into, out of, within or between cells [goid 15031] [evidence 1]

"The directed movement of substances (such as macromolecules, small molecules, ions) into, out of, within or between cells [goid 15031] [evidence 1]

"The directed movement of substances (such as macromolecules, small molecules, ions) into, out of, within or between cells [goid 15031] [evidence 1]

"The directed movement of substances (such as macromolecules, small molecules, ions) into, out of, within or between cells [goid 15031] [evidence 1]

"The directed movement of substances (such as macromolecules, small molecules, ions) into, out of, within or between cells [goid 15031] [evidence 1]

"The directed movement of substances (such as macromolecules, small molecules, ions) into, out of, within or between cells [goid 15031] [evidence 1]

"The directed movement of proteins in a cell, including the movement of proteins between specific organelles, mRNA." [goid 15031] [evidence 1]

"The directed movement of proteins in a cell, including the movement of proteins between specific organelles, mRNA." [goid 15031] [evidence 1]

"The directed movement of proteins in a cell, including the movement of proteins between specific organelles, mRNA." [goid 15031] [evidence 1]

"The chemical reactions and pathways resulting in the breakdown of a protein or peptide by hydrolysis, mRNA." [goid 15031] [evidence 1]

"The cascade of processes by which a signal interacts with a receptor, causing a change in the activity of a protein, mRNA." [goid 15031] [evidence 1]

"The cascade of processes by which a signal interacts with a receptor, causing a change in the activity of a protein, mRNA." [goid 15031] [evidence 1]

"The series of molecular signals generated as a consequence of a tachykinin, i.e. a short peptide, mRNA." [goid 15031] [evidence 1]

"The progression of biochemical and morphological phases and events that occur in a cell during the cell cycle, mRNA." [goid 15031] [evidence 1]

"A change in state or activity of a cell or an organism (in terms of movement, secretion, enzyme activity, gene expression), nuclear gene encoding mitochondrial protein, mRNA." [goid 15031] [evidence 1]

"The series of molecular signals generated as a consequence of a G-protein coupled receptor binding to a ligand, mRNA." [goid 15031] [evidence 1]

"The synthesis of either RNA on a template of DNA or DNA on a template of RNA [goid 6350] [evidence 1]

"The synthesis of either RNA on a template of DNA or DNA on a template of RNA [goid 6350] [evidence 1]

"Progression through G1 phase, one of two 'gap' phases in the mitotic cell cycle; G1 is the interval between the end of mitosis and the start of DNA synthesis, mRNA." [goid 6350] [evidence 1]

"The synthesis of either RNA on a template of DNA or DNA on a template of RNA [goid 6350] [evidence 1]

"Any process that modulates the frequency, rate or extent of DNA-dependent transcription [goid 6350] [evidence 1]

"The synthesis of either RNA on a template of DNA or DNA on a template of RNA [goid 6350] [evidence 1]

"The synthesis of either RNA on a template of DNA or DNA on a template of RNA [goid 6350] [evidence 1]

18kDa (TAF15), transcript variant 1, mRNA." [goid 6350] [evidence 1]

"The synthesis of either RNA on a template of DNA or DNA on a template of RNA [goid 6350] [e  
"Any process that modulates the frequency, rate or extent of DNA-dependent transcription [goid  
"The synthesis of either RNA on a template of DNA or DNA on a template of RNA [goid 6350] [e  
" (TAF1D), mRNA."

"The synthesis of either RNA on a template of DNA or DNA on a template of RNA [goid 6350] [e  
"The synthesis of either RNA on a template of DNA or DNA on a template of RNA [goid 6350] [e  
"Any process involved in the assembly of the RNA polymerase complex at the promoter region c  
"The synthesis of either RNA on a template of DNA or DNA on a template of RNA [goid 6350] [e  
"Any process that modulates the frequency, rate or extent of DNA-dependent transcription [goid  
"Any process that modulates the frequency, rate or extent of DNA-dependent transcription [goid  
"Dynamic structural changes to eukaryotic chromatin occurring throughout the cell division cycle  
"Any process that modulates the frequency, rate or extent of DNA-dependent transcription [goid  
"The synthesis of either RNA on a template of DNA or DNA on a template of RNA [goid 6350] [e  
r, 31kDa (TAF9L), mRNA."

"The cascade of processes by which a signal interacts with a receptor, causing a change in the  
"The process whose specific outcome is the progression of the muscle over time, from its forma  
"The process whose specific outcome is the progression of the muscle over time, from its forma  
"The process whose specific outcome is the progression of the central nervous system over time"

"The chemical reactions and pathways involving carbohydrates, any of a group of organic comp  
RNA."  
RNA."

"The cascade of processes by which a signal interacts with a receptor, causing a change in the  
"The initiation of the activity of the inactive enzyme MAP kinase kinase by phosphorylation by a  
"The hydrolysis of a peptide bond or bonds within a protein [goid 6508] [evidence IEA]; Any proc  
"The directed movement of oligopeptides into, out of, within or between cells. Oligopeptides are  
"The directed movement of substances (such as macromolecules, small molecules, ions) into, c  
"The aggregation, arrangement and bonding together of a set of components to form a protein c  
"The process by which an antigen-presenting cell expresses a peptide antigen of endogenous o

"Any process that modulates the frequency, rate or extent of transcription from an RNA polymer  
"Any process that stops, prevents or reduces the frequency, rate or extent of protein kinase acti  
"The synthesis of either RNA on a template of DNA or DNA on a template of RNA [goid 6350] [e  
"The process of coupling threonine to threonyl-tRNA, catalyzed by threonyl-tRNA synthetase. In  
"The process of coupling threonine to threonyl-tRNA, catalyzed by threonyl-tRNA synthetase. In  
"The process of coupling threonine to threonyl-tRNA, catalyzed by threonyl-tRNA synthetase. In  
"The series of events required for a bitter taste stimulus to be received and converted to a molec  
"The cascade of processes by which a signal interacts with a receptor, causing a change in the  
"The cascade of processes by which a signal interacts with a receptor, causing a change in the  
"The cascade of processes by which a signal interacts with a receptor, causing a change in the

"A form of programmed cell death induced by external or internal signals that trigger the activity



"Progression through G1 phase, one of two 'gap' phases in the mitotic cell cycle; G1 is the interval between the end of mitosis and the beginning of the S phase  
"The formation of mesodermal clusters that are arranged segmentally along the anterior-posterior axis  
"Any process that modulates the frequency, rate or extent of DNA-dependent transcription [goid 6350] [e  
"Any process that modulates the frequency, rate or extent of DNA-dependent transcription [goid 6350] [e  
"The process whose specific outcome is the progression of the skeleton over time, from its formation to its maintenance and repair."

\"

"The extension of an RNA molecule after transcription initiation by the addition of ribonucleotide  
"The synthesis of either RNA on a template of DNA or DNA on a template of RNA [goid 6350] [e  
"The extension of an RNA molecule after transcription initiation by the addition of ribonucleotide  
"Any process that stops, prevents or reduces the frequency, rate or extent of transcription from an RNA polymerase  
"The synthesis of either RNA on a template of DNA or DNA on a template of RNA [goid 6350] [e  
"The synthesis of either RNA on a template of DNA or DNA on a template of RNA [goid 6350] [e  
"The synthesis of either RNA on a template of DNA or DNA on a template of RNA [goid 6350] [e  
"The synthesis of either RNA on a template of DNA or DNA on a template of RNA [goid 6350] [e  
"The synthesis of either RNA on a template of DNA or DNA on a template of RNA [goid 6350] [e  
"The synthesis of either RNA on a template of DNA or DNA on a template of RNA [goid 6350] [e  
gin C) pseudogene 3 (TCEB1P3), mRNA."

"Any process that modulates the frequency, rate or extent of transcription from an RNA polymerase  
"Any process that modulates the frequency, rate or extent of DNA-dependent transcription [goid 6350] [e  
"The synthesis of either RNA on a template of DNA or DNA on a template of RNA [goid 6350] [e  
"Any process that modulates the frequency, rate or extent of transcription from an RNA polymerase  
"The synthesis of either RNA on a template of DNA or DNA on a template of RNA [goid 6350] [e  
"Any process that stops, prevents or reduces the frequency, rate or extent of transcription from an RNA polymerase  
"Any process that modulates the frequency, rate or extent of DNA-dependent transcription [goid 6350] [e  
"Any process that activates or increases the frequency, rate or extent of DNA-dependent transcription [goid 6350] [e  
"Any process that modulates the frequency, rate or extent of DNA-dependent transcription [goid 6350] [e  
"Any process specifically pertinent to the functioning of integrated living units: cells, tissues, organs, or organisms."

"The directed movement of protons (hydrogen ions) into, out of, within or between cells [goid 15000] [e  
The biological process whose specific outcome is the progression of a multicellular organism over its life cycle."

"Any process specifically pertinent to the functioning of integrated living units: cells, tissues, organs, or organisms."  
"The directed movement of charged atoms or small charged molecules into, out of, within or between cells [goid 15000] [e  
"The process whose specific outcome is the progression of the skeleton over time, from its formation to its maintenance and repair."

The biological process whose specific outcome is the progression of a multicellular organism over its life cycle."  
"A form of programmed cell death induced by external or internal signals that trigger the activity of caspases and other proteases, leading to the characteristic morphological and biochemical changes of apoptosis."

"In base excision repair, an altered base is removed by a DNA glycosylase enzyme, followed by  
"The initiation of the activity of the inactive enzyme MAP kinase by phosphorylation by a MAPK  
The chemical reactions and pathways by which individual cells transform chemical substances [  
"The process of restoring DNA after damage. Genomes are subject to damage by chemical and

"Any process that modulates the frequency, rate or extent of DNA-dependent transcription [goid  
"The synthesis of either RNA on a template of DNA or DNA on a template of RNA [goid 6350] [e  
"The process whose specific outcome is the progression of the skeleton over time, from its form

"Any process that modulates the frequency, rate or extent of DNA-dependent transcription [goid  
"A process that is carried out at the cellular level which results in the formation, arrangement of  
"A process that is carried out at the cellular level which results in the formation, arrangement of  
"A process that is carried out at the cellular level which results in the formation, arrangement of

"The maintenance of proper telomeric length by the addition of telomeric repeats by telomerase [  
"Any process that contributes to the maintenance of proper telomeric length and structure by aff

"The process of introducing a phosphate group on to a protein [goid 6468] [evidence IEA]; The p  
"The process of introducing a phosphate group on to a protein [goid 6468] [evidence ISS]; The p  
The hydrolysis of a peptide bond or bonds within a protein [goid 6508] [evidence IEA]

"The chemical reactions and pathways involving sphingolipids, any of a class of lipids containing

"Any process that modulates the frequency, rate or extent of DNA-dependent transcription [goid  
"

"Any process that modulates the frequency, rate or extent of DNA-dependent transcription [goid  
"The synthesis of either RNA on a template of DNA or DNA on a template of RNA [goid 6350] [e  
"Any process that modulates the frequency, rate or extent of transcription from an RNA polymer  
"The covalent alteration of one or more nucleotides within an rRNA molecule to produce an rRN  
"The covalent alteration of one or more nucleotides within an rRNA molecule to produce an rRN  
"Any process that stops, prevents or reduces the frequency, rate or extent of transcription from a  
"The synthesis of either RNA on a template of DNA or DNA on a template of RNA [goid 6350] [e  
"The synthesis of either RNA on a template of DNA or DNA on a template of RNA [goid 6350] [e  
"Any process that modulates the frequency, rate or extent of the synthesis of either RNA on a te  
"Any process that modulates the frequency, rate or extent of DNA-dependent transcription [goid

"Reactions, triggered in response to the presence of a foreign body or the occurrence of an injury  
"Any process that activates or increases the frequency, rate or extent of an I-kappaB kinase/NF-  
"The formation of bone or of a bony substance, or the conversion of fibrous tissue or of cartilage  
A pathway of blood coagulation in which the earlier stages of the cascade are bypassed and the  
"The sequential process by which the multiple coagulation factors of the blood interact, ultimately

"The hydrolysis of a peptide bond or bonds within a protein [goid 6508] [evidence IEA]; The direction  
"The regulation of the levels, transport, and metabolism of iron ions within a cell or between a cell  
The chemical reactions and pathways by which individual cells transform chemical substances [goid  
"The initiation of the activity of the inactive enzyme MAP kinase by phosphorylation by a MAPK  
"The synthesis of RNA from a DNA template by RNA polymerase II (Pol II), originating at a Pol I  
"Any process that stops, prevents or reduces the frequency, rate or extent of cell adhesion [goid  
"The process whose specific outcome is the progression of the blood vessel over time, from its formation  
"A transition where an epithelial cell loses apical/basolateral polarity, severs intercellular adhesion  
RNA."

"Any process that modulates the frequency, rate or extent of DNA-dependent transcription [goid  
"Any process that modulates the frequency, rate or extent of DNA-dependent transcription [goid  
"The formation of a covalent cross-link between or within protein chains [goid 18149] [evidence  
"A change in state or activity of a cell or an organism (in terms of movement, secretion, enzyme

"Any process that modulates the frequency, rate or extent of DNA-dependent transcription [goid  
riant 2, mRNA."

"The synthesis of either RNA on a template of DNA or DNA on a template of RNA [goid 6350] [evidence IEA]

"The formation of a cell surface protrusion, such as a lamellipodium or filopodium, at the leading edge of a cell

The covalent alteration of one or more nucleotides within a tRNA molecule to produce a tRNA molecule  
"The chemical reactions and pathways, including anabolism and catabolism, by which living organisms  
"The chemical reactions and pathways, including anabolism and catabolism, by which living organisms  
"Any process involved in the conversion of a primary mRNA transcript into one or more mature mRNA molecules  
"Any process involved in the conversion of a primary mRNA transcript into one or more mature mRNA molecules  
"The joining together of exons from one or more primary transcripts of nuclear messenger RNA  
"The process whereby relatively unspecialized cells, e.g. embryonic or regenerative cells, acquire specialized

"The hydrolysis of a peptide bond or bonds within a protein [goid 6508] [evidence IEA]; The chemi  
"The multiplication or reproduction of cells, resulting in the expansion of a cell population [goid 8  
."  
JA."

"The chemical reactions and pathways resulting in the formation of precursor metabolites, subst

"Blood vessel formation when new vessels emerge from the proliferation of pre-existing blood ve

"A form of programmed cell death induced by external or internal signals that trigger the activity

"A form of programmed cell death induced by external or internal signals that trigger the activity

"The process whose specific outcome is the progression of the immature germ cell over time, fro

"Any series of molecular signals in which a small monomeric GTPase relays one or more of the

"A series of reactions within the cell that occur as a result of a single trigger reaction or compou

"A change in morphology and behavior of a macrophage resulting from exposure to a cytokine, c

"A series of reactions initiated by the activation of the transcription factor NF-kappaB. NF-kappa

"Any process that modulates the frequency, rate or extent of the synthesis of either RNA on a te

"Any process that modulates the frequency, rate or extent of the synthesis of either RNA on a te

"Any process that modulates the frequency, rate or extent of the synthesis of either RNA on a te

"Any process that modulates the frequency, rate or extent of the synthesis of either RNA on a te

"The process by which the anatomical structures of epithelia are generated and organized. Morp

"The process of directing proteins towards and into the mitochondrion, mediated by mitochontri

"The process of directing proteins towards and into the mitochondrion, mediated by mitochontri

"The process of directing proteins towards and into the mitochondrion, mediated by mitochontri

"The directed movement of proteins into, out of, within or between cells [goid 15031] [evidence I

"The process of directing proteins towards and into the mitochondrion, mediated by mitochontri

"The process of directing proteins towards and into the mitochondrion, mediated by mitochontri

"The process of directing proteins towards and into the mitochondrion, mediated by mitochontri

"The process of directing proteins towards and into the mitochondrion, mediated by mitochontri

"The process of directing proteins towards and into the mitochondrion, mediated by mitochontri

"Any process that activates or increases the rate or extent of cell proliferation [goid 8284] [pmid

"Any process that stops, prevents or reduces the rate or extent of cell proliferation [goid 8285] [e

Any process that contributes to the maintenance of proper telomeric length and structure by affe

Any process involved in the conversion of a primary ribosomal RNA (rRNA) transcript into one o

"The transfer, from NAD, of ADP-ribose to protein amino acids [goid 6471] [evidence IEA]"

"A signal transduction based surveillance mechanism that prevents the initiation of mitosis until

"The immediate defensive reaction (by vertebrate tissue) to infection or injury caused by chemic

"The aggregation, arrangement and bonding together of a set of components to form a junction

"The chemical reactions and pathways involving nucleobases, nucleosides, nucleotides and nuc

"The chemical reactions and pathways involving nucleobases, nucleosides, nucleotides and nuc

"The chemical reactions and pathways, including anabolism and catabolism, by which living org;

"The chemical reactions and pathways, including anabolism and catabolism, by which living org;

"Any process that modulates the frequency, rate or extent of the synthesis of either RNA on a te

"Any process that modulates the frequency, rate or extent of the synthesis of either RNA on a te

"Any process that modulates the frequency, rate or extent of DNA-dependent transcription [goid

"Any process that stops, prevents or reduces the frequency, rate or extent of transcription from ;

"Any process that modulates the frequency, rate or extent of DNA-dependent transcription [goid

"Any process that modulates the frequency, rate or extent of chromatin assembly or disassembl

"Any process that modulates the frequency, rate or extent of chromatin assembly or disassembl

"Any process involved in the controlled movement of a cell [goid 6928] [pmid 10610730] [eviden

"Process by which cytoskeletal filaments are directly or indirectly linked to the plasma membran

"The immediate defensive reaction (by vertebrate tissue) to infection or injury caused by chemic

"The immediate defensive reaction (by vertebrate tissue) to infection or injury caused by chemic

"The cascade of processes by which a signal interacts with a receptor, causing a change in the

"The immediate defensive reaction (by vertebrate tissue) to infection or injury caused by chemic

"The immediate defensive reaction (by vertebrate tissue) to infection or injury caused by chemic

"The immediate defensive reaction (by vertebrate tissue) to infection or injury caused by chemic

"The immediate defensive reaction (by vertebrate tissue) to infection or injury caused by chemic

"Any process that modulates the frequency, rate or extent of DNA-dependent transcription [goid

"Any process specifically pertinent to the functioning of integrated living units: cells, tissues, orga

"Any process specifically pertinent to the functioning of integrated living units: cells, tissues, orga

"The chemical reactions and pathways resulting in the formation of cholesterol, cholest-5-en-3 b

"

"The directed movement of substances (such as macromolecules, small molecules, ions) into, o

mRNA."

"The series of events required for an organism to receive an auditory stimulus, convert it to a mc



rRNA."

"The directed movement of charged atoms or small charged molecules into, out of, within or bet

"The directed movement of a protein from the cytoplasm to the nucleus [goid 6606] [evidence IE

"The directed movement of substances (such as macromolecules, small molecules, ions) into, o  
P), non-coding RNA."

"The directed movement of proteins into, out of, within or between cells [goid 15031] [evidence I

"The directed movement of proteins into, out of, within or between cells [goid 15031] [evidence I

"The directed movement of substances (such as macromolecules, small molecules, ions) into, o

"The directed movement of substances (such as macromolecules, small molecules, ions) into, o

"The directed movement of substances (such as macromolecules, small molecules, ions) into, o

"The directed movement of substances (such as macromolecules, small molecules, ions) into, o

The biological process whose specific outcome is the progression of a multicellular organism ov  
2), mRNA."

"Any process that activates or increases the frequency, rate or extent of an I-kappaB kinase/NF-

"The cascade of processes by which a signal interacts with a receptor, causing a change in the

"Any process specifically pertinent to the functioning of integrated living units: cells, tissues, orga

rotein, mRNA."

"Any process specifically pertinent to the functioning of integrated living units: cells, tissues, orga

"The covalent alteration of one or more amino acids occurring in a protein after the protein has b

nRNA."

"Any process specifically pertinent to the functioning of integrated living units: cells, tissues, orga

"Any process that modulates the frequency, rate or extent of exocytosis [goid 17157] [evidence

The hydrolysis of a peptide bond or bonds within a protein [goid 6508] [evidence IEA]

"Any process specifically pertinent to the functioning of integrated living units: cells, tissues, orga

"The directed movement of charged atoms or small charged molecules into, out of, within or bet  
"The directed movement of charged atoms or small charged molecules into, out of, within or bet

"The directed movement of proteins into, out of, within or between cells [goid 15031] [pmid 1660

"Any process specifically pertinent to the functioning of integrated living units: cells, tissues, orga

"Any process specifically pertinent to the functioning of integrated living units: cells, tissues, orga

"The chemical reactions and pathways, including anabolism and catabolism, by which living orga

"The attachment of a cell, either to another cell or to an underlying substrate such as the extrac

"The directed movement of substances (such as macromolecules, small molecules, ions) into, o

"Any process that modulates the frequency, rate or extent of cell growth [goid 1558] [pmid 7694]

"Any process that activates or increases the frequency, rate or extent of an I-kappaB kinase/NF-

"The synthesis of either RNA on a template of DNA or DNA on a template of RNA [goid 6350] [e

"The chemical reactions and pathways resulting in the formation of carnitine (hydroxy-trimethyl ε

"A change in state or activity of a cell or an organism (in terms of movement, secretion, enzyme

"The process of communication from a neuron to another neuron across a synapse [goid 7270]

"Any process that modulates the frequency, rate or extent of the synthesis of either RNA on a te

"The hydrolysis of a peptide bond or bonds within a protein [goid 6508] [evidence IEA]; The pro

The hydrolysis of a peptide bond or bonds within a protein [goid 6508] [evidence IEA]

The hydrolysis of a peptide bond or bonds within a protein [goid 6508] [evidence IEA]; The hydr

The hydrolysis of a peptide bond or bonds within a protein [goid 6508] [evidence NAS]; The hyd

The hydrolysis of a peptide bond or bonds within a protein [goid 6508] [evidence IEA]

The hydrolysis of a peptide bond or bonds within a protein [goid 6508] [evidence IEA]

"A process that is carried out at the cellular level which results in the formation, arrangement of

"A process that is carried out at the cellular level which results in the formation, arrangement of

"A process that is carried out at the cellular level which results in the formation, arrangement of

"A process that is carried out at the cellular level which results in the formation, arrangement of

variant 1, mRNA."

"The covalent alteration of one or more amino acids occurring in proteins, peptides and nascent

"The covalent alteration of one or more amino acids occurring in proteins, peptides and nascent

"Any process that stops, prevents or reduces the frequency, rate or extent of transcription from :

"The directed movement of potassium ions (K+) into, out of, within or between cells [goid 6813]

"The chemical reactions and pathways resulting in the breakdown of a protein or peptide by hyd

"A form of programmed cell death induced by external or internal signals that trigger the activity

"A form of programmed cell death induced by external or internal signals that trigger the activity

"Upregulation of the activity of a caspase, any of a group of cysteine proteases involved in apoptosis

"A form of programmed cell death induced by external or internal signals that trigger the activity

"A form of programmed cell death induced by external or internal signals that trigger the activity

"The cascade of processes by which a signal interacts with a receptor, causing a change in the

"Blood vessel formation when new vessels emerge from the proliferation of pre-existing blood vessels

"The process of regulating the proliferation and elimination of B cells such that the total number

Any immune system process that functions in the calibrated response of an organism to a potential

"A form of programmed cell death induced by external or internal signals that trigger the activity

"Any immune system process that functions in the calibrated response of an organism to a potential

"A form of programmed cell death induced by external or internal signals that trigger the activity

"The chemical reactions and pathways involving prostaglandins, any of a group of biologically active

"Any series of molecular signals initiated by the binding of an extracellular ligand to a receptor or

"A form of programmed cell death induced by external or internal signals that trigger the activity

"Any series of molecular signals initiated by the binding of an extracellular ligand to a receptor or

"The immediate defensive reaction (by vertebrate tissue) to infection or injury caused by chemical

"A form of programmed cell death induced by external or internal signals that trigger the activity

"The cascade of processes by which a signal interacts with a receptor, causing a change in the

"A process that directly activates any of the steps required for cell death by apoptosis [goid 6917

"Any immune system process that functions in the calibrated response of an organism to a potential

"The process of regulating the proliferation and elimination of B cells such that the total number

"A process that directly activates any of the steps required for cell death by apoptosis [goid 6917

"Any process that stops, prevents, or reduces the rate or extent of endothelial cell proliferation [g

"The immediate defensive reaction (by vertebrate tissue) to infection or injury caused by chemical

"A process that directly activates any of the steps required for cell death by apoptosis [goid 6917

"A form of programmed cell death induced by external or internal signals that trigger the activity

"The chemical reactions and pathways resulting in the formation of a protein. This is a ribosome

"The process of introducing a phosphate group on to a protein [goid 6468] [evidence IEA]; Any s

"The maintenance of proper telomeric length by the addition of telomeric repeats by telomerase [g

The maintenance of proper telomeric length by the addition of telomeric repeats by telomerase [g

"A process whereby force is generated within skeletal muscle tissue, resulting in a change in mu

"The differentiation of endothelial cells from progenitor cells during blood vessel development, a

"A process whereby force is generated within skeletal muscle tissue, resulting in a change in mu

"The repair of single strand breaks in DNA. Repair of such breaks is mediated by the same enzy

"The aggregation, arrangement and bonding together of the nuclear localization signal of a prote

"The aggregation, arrangement and bonding together of the nuclear localization signal of a prote

"The attachment of a cell, either to another cell or to an underlying substrate such as the extrac

"The joining together of exons from one or more primary transcripts of nuclear messenger RNA



The process of introducing a phosphate group on to a protein [goid 6468] [pmid 11546806] [evid

"A series of reactions within the cell that occur as a result of a single trigger reaction or compour

"A change in state or activity of a cell or an organism (in terms of movement, secretion, enzyme

"The directed movement of charged atoms or small charged molecules into, out of, within or bet

"The process by which anatomical structures are generated and organized. Morphogenesis pert

Progression from G2 phase to M phase of the mitotic cell cycle [goid 86] [pmid 16112108] [evid

"Any process that modulates the frequency, rate or extent of cell proliferation [goid 42127] [pmic

"The formation of glucose from noncarbohydrate precursors, such as pyruvate, amino acids and

"The process whose specific outcome is the progression of the embryo in the uterus over time, f

Any process that modulates the rate of ATP hydrolysis by an ATPase [goid 43462] [pmid 17194

"Any process involved in the controlled movement of a cell [goid 6928] [pmid 16130169] [eviden

Any process involved in the controlled movement of a cell [goid 6928] [pmid 16130169] [evidenc

"The chemical reactions and pathways involving nucleobases, nucleosides, nucleotides and nuc

"The hydrolysis of a peptide bond or bonds within a protein [goid 6508] [pmid 10965052] [eviden

The hydrolysis of a peptide bond or bonds within a protein [goid 6508] [evidence IEA]; The hydr

"A process that results in a parallel arrangement of microtubules [goid 1578] [evidence ISS]; Any

"The chemical reactions and pathways resulting in the formation of a protein. This is a ribosome

"The chemical reactions and pathways resulting in the breakdown of a protein by the destructio

"The posttranslational sulfation of peptidyl-tyrosine residues to form peptidyl-O4'-sulfo-L-tyrosine

The posttranslational sulfation of peptidyl-tyrosine residues to form peptidyl-O4'-sulfo-L-tyrosine

"The directed movement of calcium (Ca) ions into, out of, within or between cells [goid 6816] [pr

The process of removing one or more phosphoric (ester or anhydride) residues from a molecule

"Progression through mitosis, the division of the eukaryotic cell nucleus to produce two daughter  
:NA."

"The joining together of exons from one or more primary transcripts of nuclear messenger RNA

"A form of programmed cell death induced by external or internal signals that trigger the activity

"The aggregation, arrangement and bonding together of a set of components to form a protein c

"The cascade of processes by which a signal interacts with a receptor, causing a change in the

"The cascade of processes by which a signal interacts with a receptor, causing a change in the

"A series of reactions within the cell that occur as a result of a single trigger reaction or compour

"The cascade of processes by which a signal interacts with a receptor, causing a change in the

"Addition of multiple ubiquitin moieties to a protein, forming a ubiquitin chain [goid 209] [pmid 15

"Any process that initiates the activity of the inactive enzyme MAP kinase kinase kinase [goid 18

"Any process that modulates the frequency, rate or extent of transcription from an RNA polymer

"The targeting of proteins to a membrane that occurs during translation. The transport of most s



"The directed movement of proteins into, out of, within or between cells [goid 15031] [evidence I

"The process of assisting in the covalent and noncovalent assembly of single chain polypeptides

"The directed movement of substances from the endoplasmic reticulum (ER) to the Golgi, media

"The directed movement of substances (such as macromolecules, small molecules, ions) into, o

"The directed movement of substances (such as macromolecules, small molecules, ions) into, o

RNA."

"The directed movement of substances from the endoplasmic reticulum (ER) to the Golgi, media

"The directed movement of substances, either within a vesicle or in the vesicle membrane, into,

"The directed movement of substances, either within a vesicle or in the vesicle membrane, into,

"The directed movement of substances, either within a vesicle or in the vesicle membrane, into,

"The directed movement of substances, either within a vesicle or in the vesicle membrane, into,

"The covalent transfer of a methyl group to either N-6 of adenine or C-5 or N-4 of cytosine [goid

"A series of molecular signals in which a cell uses calcium ions to convert an extracellular signal

"The synthesis of either RNA on a template of DNA or DNA on a template of RNA [goid 6350] [e

"A form of programmed cell death induced by external or internal signals that trigger the activity

"The process of introducing a phosphate group on to a protein [goid 6468] [evidence IEA]; Any p

"The process of introducing a phosphate group on to a protein [goid 6468] [evidence ISS]; Any p

"The synthesis of either RNA on a template of DNA or DNA on a template of RNA [goid 6350] [e

"The chemical reactions and pathways resulting in the breakdown of a protein or peptide by hyd

"The process by which anatomical structures are generated and organized. Morphogenesis pert

The regionalization process by which embryonic segments are divided into compartments that w

"Any process specifically pertinent to the functioning of integrated living units: cells, tissues, orga

"Any process that modulates the frequency, rate or extent of DNA-dependent transcription [goid

Any series of molecular signals in which a small monomeric GTPase relays one or more of the s

"The synthesis of either RNA on a template of DNA or DNA on a template of RNA [goid 6350] [e

"Any process that stops, prevents or reduces the frequency, rate or extent of transcription from a

"Any process that stops, prevents or reduces the frequency, rate or extent of transcription from a

"The synthesis of RNA from a DNA template by RNA polymerase II (Pol II), originating at a Pol I

"The process whose specific outcome is the progression of nervous tissue over time, from its fo

"The chemical reactions and pathways resulting in the breakdown of a protein or peptide by hyd

"Any process that modulates the frequency, rate or extent of DNA-dependent transcription [goid

"A form of programmed cell death induced by external or internal signals that trigger the activity

"The discharge, by sperm, of a single, anterior secretory granule following their attachment to th

"Any process that activates or increases the frequency, rate or extent of an I-kappaB kinase/NF-

"Any process specifically pertinent to the functioning of integrated living units: cells, tissues, orga

"The chemical reactions and pathways resulting in the breakdown of a protein or peptide by hyd

"The cascade of processes by which a signal interacts with a receptor, causing a change in the

"Any process that stops, prevents or reduces the frequency, rate or extent of DNA-dependent tr

"A form of programmed cell death induced by external or internal signals that trigger the activity

"Any process specifically pertinent to the functioning of integrated living units: cells, tissues, orga

"The series of events required for an organism to receive an auditory stimulus, convert it to a me

"A type of vesicle-mediated transport in which cells take up external materials or membrane con

"The synthesis of RNA from a DNA template by RNA polymerase II (Pol II), originating at a Pol I

"The covalent alteration of one or more amino acids occurring in proteins, peptides and nascent

"The synthesis of RNA from a DNA template by RNA polymerase II (Pol II), originating at a Pol I

"Any process that modulates the frequency, rate or extent of DNA-dependent transcription [goid

"The release of NF-kappaB from specific molecules in the cytoplasm to which it was bound, then

"The process by which a pre-tRNA molecule is converted to a mature tRNA, ready for addition o

"The process by which a pre-tRNA molecule is converted to a mature tRNA, ready for addition o

"The process by which a pre-tRNA molecule is converted to a mature tRNA, ready for addition o

"The process by which a pre-tRNA molecule is converted to a mature tRNA, ready for addition o  
t variant 1, mRNA."

"The process by which a pre-tRNA molecule is converted to a mature tRNA, ready for addition o

"Any process that modulates the frequency, rate or extent of translational initiation [goid 6446] [e

"The process by which a pre-tRNA molecule is converted to a mature tRNA, ready for addition o

"Any process involved in the conversion of one or more primary RNA transcripts into one or mor

"Any process that stops, prevents or reduces the frequency, rate or extent of cell growth [goid 36

"The attachment of a cell, either to another cell or to an underlying substrate such as the extracellular matrix

"The chemical reactions and pathways resulting in the breakdown of a monosaccharide (generalized glycolysis)

"The directed movement of charged atoms or small charged molecules into, out of, within or between cells

"The directed movement of charged atoms or small charged molecules into, out of, within or between cells

"The directed movement of charged atoms or small charged molecules into, out of, within or between cells

"The aggregation, arrangement and bonding together of a set of components to form a protein complex

"The chemical reactions and pathways resulting in the formation of a protein. This is a ribosome-mediated process

"The directed movement of charged atoms or small charged molecules into, out of, within or between cells

"The directed movement of charged atoms or small charged molecules into, out of, within or between cells

"The process whose specific outcome is the progression of the skeleton over time, from its formation to its maintenance

"The directed movement of charged atoms or small charged molecules into, out of, within or between cells

"The directed movement of charged atoms or small charged molecules into, out of, within or between cells

"Any process that modulates the frequency, rate or extent of DNA-dependent transcription [goid 6350] [evidence IEA]

"The process by which a pre-tRNA molecule is converted to a mature tRNA, ready for addition to a growing polypeptide chain

"The intramolecular conversion of uridine to pseudouridine within an RNA molecule. This posttranscriptional modification is essential for the function of tRNA

"The process whose specific outcome is the progression of the kidney over time, from its formation to its maintenance

"The last step in the formation of the neural tube, where the paired neural folds are brought together and fused

"The synthesis of either RNA on a template of DNA or DNA on a template of RNA [goid 6350] [evidence IEA]

"Any process that modulates the frequency, rate or extent of DNA-dependent transcription [goid 6350] [evidence IEA]

"Any process that modulates the frequency, rate or extent of DNA-dependent transcription [goid 6350] [evidence IEA]

"The synthesis of either RNA on a template of DNA or DNA on a template of RNA [goid 6350] [evidence IEA]

"Any process involved in the conversion of a primary mRNA transcript into one or more mature mRNA molecules

"Splicing of tRNA substrates via recognition of the folded RNA structure that brings the 5' and 3' ends of the tRNA into proximity

"Splicing of tRNA substrates via recognition of the folded RNA structure that brings the 5' and 3' ends of the tRNA into proximity

"Any process involved in the conversion of a primary mRNA transcript into one or more mature mRNA molecules

The successive addition of amino acid residues to a nascent polypeptide chain during protein biosynthesis

"Any process that modulates the frequency, rate or extent of cell growth [goid 1558] [evidence IEA]

"The process of formation of spermatozoa, including spermatocytogenesis and spermiogenesis

"The series of molecular signals generated as a consequence of a G-protein coupled receptor binding to its ligand

"The synthesis of either RNA on a template of DNA or DNA on a template of RNA [goid 6350] [evidence IEA]

"The synthesis of either RNA on a template of DNA or DNA on a template of RNA [goid 6350] [evidence IEA]

"Any process by which a new genotype is formed by reassortment of genes resulting in gene conversion

"The biological process whose specific outcome is the progression of a multicellular organism over time, from its formation to its maintenance

"The biological process whose specific outcome is the progression of a multicellular organism over time, from its formation to its maintenance

The hydrolysis of a peptide bond or bonds within a protein [goid 6508] [evidence IEA]

The process by which one or more ubiquitin moieties are added to a protein [goid 16567] [pmid

Any process that activates or increases the rate or extent of cell proliferation [goid 8284] [pmid 8

Any process that mediates the transfer of information from one cell to another [goid 7267] [pmid

The posttranslational glycosylation of protein via the N4 atom of peptidyl-asparagine or the N1' ε

"The addition of a sugar unit to a protein amino acid, e.g. the addition of glycan chains to proteir

"The process of directing proteins towards and into the mitochondrion, mediated by mitochondri

"The aggregation, arrangement and bonding together of a nucleosome, the beadlike structural u

"The aggregation, arrangement and bonding together of a nucleosome, the beadlike structural u

"The aggregation, arrangement and bonding together of a nucleosome, the beadlike structural u

"The aggregation, arrangement and bonding together of a nucleosome, the beadlike structural u

"The aggregation, arrangement and bonding together of the mature ribosome and of its subunits

Any process involved in the conversion of a primary ribosomal RNA (rRNA) transcript into one o

"The process of introducing a phosphate group on to a protein [goid 6468] [pmid 15964553] [evi

"The process of introducing a phosphate group on to a protein [goid 6468] [pmid 15870294] [evi

"The directed movement of sulfate into, out of, within or between cells [goid 8272] [evidence IEA

"The attachment of a leukocyte to another cell via adhesion molecules [goid 7159] [pmid 116984  
cript variant 3, mRNA."

The process of assisting in the covalent and noncovalent assembly of single chain polypeptides

"Any process specifically pertinent to the functioning of integrated living units: cells, tissues, orga

"A process that is carried out at the cellular level which results in the formation, arrangement of

"A process that is carried out at the cellular level which results in the formation, arrangement of

"The process of restoring DNA after damage. Genomes are subject to damage by chemical and biological agents. The process of restoring DNA after damage. Genomes are subject to damage by chemical and biological agents.

"The regulation of the levels, transport, and metabolism of iron ions within a cell or between a cell and its environment.

"The series of events required for an organism to receive a visual stimulus, convert it to a molecular signal, and respond to it.

The process of assisting in the covalent and noncovalent assembly of single chain polypeptides

The process of assisting in the covalent and noncovalent assembly of single chain polypeptides

"Dynamic structural changes to eukaryotic chromatin occurring throughout the cell division cycle

"The synthesis of either RNA on a template of DNA or DNA on a template of RNA [goid 6350] [evidence IEA]; A process of synthesizing a nucleic acid on a template of another nucleic acid.

"The process of introducing a phosphate group on to a protein [goid 6468] [evidence IEA]; A process of adding a phosphate group to a protein.

"The covalent alteration of one or more amino acids occurring in proteins, peptides and nascent polypeptides

"The covalent alteration of one or more amino acids occurring in proteins, peptides and nascent polypeptides

"The covalent alteration of one or more amino acids occurring in proteins, peptides and nascent polypeptides

"The covalent alteration of one or more amino acids occurring in proteins, peptides and nascent polypeptides

"The covalent alteration of one or more amino acids occurring in proteins, peptides and nascent polypeptides

"The covalent alteration of one or more amino acids occurring in proteins, peptides and nascent polypeptides

"The covalent alteration of one or more amino acids occurring in proteins, peptides and nascent polypeptides

"The covalent alteration of one or more amino acids occurring in proteins, peptides and nascent polypeptides

"The covalent alteration of one or more amino acids occurring in proteins, peptides and nascent polypeptides

"The covalent alteration of one or more amino acids occurring in proteins, peptides and nascent polypeptides

"The covalent alteration of one or more amino acids occurring in proteins, peptides and nascent polypeptides

"The directed movement of substances (such as macromolecules, small molecules, ions) into, out of, within or between cells, organelles, or membranes.

RNA."

RNA."

NA."

} RNA."

} RNA."

"The directed movement of charged atoms or small charged molecules into, out of, within or between cells, organelles, or membranes.

"The directed movement of charged atoms or small charged molecules into, out of, within or between cells, organelles, or membranes.

"Movement of organelles, other microtubules and other particles along microtubules, mediated by motor proteins.

"Movement of organelles, other microtubules and other particles along microtubules, mediated by motor proteins.

"Movement of organelles, other microtubules and other particles along microtubules, mediated by motor proteins.

"Movement of organelles, other microtubules and other particles along microtubules, mediated by motor proteins.

"Movement of organelles, other microtubules and other particles along microtubules, mediated by motor proteins.

"Movement of organelles, other microtubules and other particles along microtubules, mediated by motor proteins.

"Any process involved in the controlled movement of a cell [goid 6928] [pmid 16130169] [evidence IEA]; A process of moving a cell.

"Movement of organelles, other microtubules and other particles along microtubules, mediated k  
"Movement of organelles, other microtubules and other particles along microtubules, mediated k  
"Movement of organelles, other microtubules and other particles along microtubules, mediated k  
"Movement of organelles, other microtubules and other particles along microtubules, mediated k  
"Movement of organelles, other microtubules and other particles along microtubules, mediated k  
"Movement of organelles, other microtubules and other particles along microtubules, mediated k  
"A process that is carried out at the cellular level which results in the formation, arrangement of  
"Any cellular process that depends upon or alters the microtubule cytoskeleton, that part of the c  
"The aggregation, arrangement and bonding together of a set of components to form a protein c  
"The aggregation, arrangement and bonding together of a set of components to form a protein c  
"The 'de novo' formation of a microtubule, in which tubulin heterodimers form metastable oligom  
"The 'de novo' formation of a microtubule, in which tubulin heterodimers form metastable oligom  
"The deposition of calcium phosphate in bone tissue [goid 30282] [pmid 12489194] [evidence N

"Any process that modulates the frequency, rate or extent of DNA-dependent transcription [goid  
"Any process that modulates the frequency, rate or extent of DNA-dependent transcription [goid  
"Any process that mediates the transfer of information from one cell to another [goid 7267] [pmic  
"Any process that stops, prevents or reduces the rate or extent of progression through the cell c

The process of introducing a phosphate group on to a protein [goid 6468] [pmid 7507208] [evid

"Any process that modulates the frequency, rate or extent of the synthesis of either RNA on a te  
The synthesis of either RNA on a template of DNA or DNA on a template of RNA [goid 6350] [e  
"The formation of bone or of a bony substance, or the conversion of fibrous tissue or of cartilage  
"A process of secretion by a cell that results in the release of intracellular molecules (e.g. hormo

"Any process that maintains the redox environment of a cell or compartment within a cell [goid 4  
"The chemical reactions and pathways involving glycerol ethers, any anhydride formed between  
Any process that maintains the redox environment of a cell or compartment within a cell [goid 45  
Any process that maintains the redox environment of a cell or compartment within a cell [goid 45  
Any process that maintains the redox environment of a cell or compartment within a cell [goid 45  
Any process that maintains the redox environment of a cell or compartment within a cell [goid 45  
Any process that maintains the redox environment of a cell or compartment within a cell [goid 45  
A series of molecular signals generated as a consequence of tumor necrosis factor binding to a  
"Oxidation of two organic sulfhydryl groups (thiols) by a disulfide compound to form a disulfide b  
A process which directly inhibits any of the steps required for cell death by apoptosis [goid 6916  
"Any process specifically pertinent to the functioning of integrated living units: cells, tissues, orga  
"The synthesis of either RNA on a template of DNA or DNA on a template of RNA [goid 6350] [e

"Any process involved in the conversion of a primary mRNA transcript into one or more mature r  
"The directed movement of substances (such as macromolecules, small molecules, ions) into, o  
"A change in state or activity of a cell or an organism (in terms of movement, secretion, enzyme  
The process of introducing a phosphate group on to a protein [goid 6468] [pmid 2216457] [evid  
"The maintenance of the structure and integrity of the mitochondrial genome; includes replicatio

"The chemical reactions and pathways involving nucleobases, nucleosides, nucleotides and nucleic acids [goid 6468] [evidence IEA]; The process of introducing a phosphate group on to a protein [goid 6468] [evidence IEA]; The process of introducing a phosphate group on to a protein [goid 6468] [evidence IEA]; The process of introducing a phosphate group on to a protein [goid 6468] [evidence IEA]; The process of introducing a phosphate group on to a protein [goid 6468] [evidence IEA]; The process of introducing a phosphate group on to a protein [goid 6468] [evidence IEA]; A defense response that is mediated by cells [goid 6968] [pmid 9490415] [evidence TAS]; A serine protease [goid 6968] [pmid 9490415] [evidence TAS]; A serine protease [goid 6968] [pmid 9490415] [evidence TAS]; A serine protease [goid 6968] [pmid 9490415] [evidence TAS]; The hydrolysis of a peptide bond or bonds within a protein [goid 6508] [evidence IEA]";

"The process by which a pre-tRNA molecule is converted to a mature tRNA, ready for addition to a growing polypeptide chain during protein biosynthesis [goid 6508] [evidence IEA]";

"The process by which a pre-tRNA molecule is converted to a mature tRNA, ready for addition to a growing polypeptide chain during protein biosynthesis [goid 6508] [evidence IEA]";

"The process by which a pre-tRNA molecule is converted to a mature tRNA, ready for addition to a growing polypeptide chain during protein biosynthesis [goid 6508] [evidence IEA]";

Any process involved in the conversion of a primary mRNA transcript into one or more mature mRNA transcripts [goid 6508] [evidence IEA]";

"The joining together of exons from one or more primary transcripts of nuclear messenger RNA [goid 6508] [evidence IEA]";

Any process involved in the conversion of a primary mRNA transcript into one or more mature mRNA transcripts [goid 6508] [evidence IEA]";

"Any process involved in the conversion of a primary mRNA transcript into one or more mature mRNA transcripts [goid 6508] [evidence IEA]";

"The chemical reactions and pathways, including anabolism and catabolism, by which living organisms grow, develop and reproduce [goid 6508] [evidence IEA]";

"The chemical reactions and pathways, including anabolism and catabolism, by which living organisms grow, develop and reproduce [goid 6508] [evidence IEA]";

"The covalent alteration of one or more amino acids occurring in proteins, peptides and nascent polypeptide chains [goid 6508] [evidence IEA]";

"The covalent alteration of one or more amino acids occurring in proteins, peptides and nascent polypeptide chains [goid 6508] [evidence IEA]";

"Progression through the phases of the mitotic cell cycle, the most common eukaryotic cell cycle [goid 6508] [evidence IEA]";

"The chemical reactions and pathways resulting in the breakdown of a protein or peptide by hydrolysis [goid 6508] [evidence IEA]";

"The successive addition of amino acid residues to a nascent polypeptide chain during protein biosynthesis [goid 6508] [evidence IEA]";

"The covalent alteration of one or more amino acids occurring in proteins, peptides and nascent polypeptide chains [goid 6508] [evidence IEA]";

"The covalent alteration of one or more amino acids occurring in proteins, peptides and nascent polypeptide chains [goid 6508] [evidence IEA]";

"The chemical reactions and pathways resulting in the breakdown of a protein or peptide by hydrolysis [goid 6508] [evidence IEA]";

"The covalent alteration of one or more amino acids occurring in proteins, peptides and nascent polypeptide chains [goid 6508] [evidence IEA]";

"The covalent alteration of one or more amino acids occurring in proteins, peptides and nascent polypeptide chains [goid 6508] [evidence IEA]";

"The covalent alteration of one or more amino acids occurring in proteins, peptides and nascent polypeptide chains [goid 6508] [evidence IEA]";

variant 3, mRNA."

variant 1, mRNA."

"The chemical reactions and pathways resulting in the breakdown of a protein or peptide by hydrolysis [goid 6508] [evidence IEA]";

"Pathways for DNA repair which occur after DNA has replicated, e.g. mismatch repair, and which are essential for maintaining genomic stability [goid 6508] [evidence IEA]";

"The covalent alteration of one or more amino acids occurring in a protein after the protein has been synthesized [goid 6508] [evidence IEA]";

"The chemical reactions and pathways resulting in the breakdown of a protein or peptide by hydrolysis [goid 6508] [evidence IEA]";

"The chemical reactions and pathways resulting in the breakdown of a protein or peptide by hydrolysis [goid 6508] [evidence IEA]";

"The covalent alteration of one or more amino acids occurring in a protein after the protein has been synthesized [goid 6508] [evidence IEA]";

"The chemical reactions and pathways resulting in the breakdown of a protein or peptide by hydrolysis [goid 6508] [evidence IEA]";

"The chemical reactions and pathways resulting in the breakdown of a protein or peptide by hydrolysis [goid 6508] [evidence IEA]";

"The chemical reactions and pathways resulting in the breakdown of a protein or peptide by hydrolysis [goid 6508] [evidence IEA]";

"Any process that modulates the frequency, rate or extent of cell growth [goid 1558] [evidence IEA]";

"The chemical reactions and pathways resulting in the breakdown of a protein or peptide by hydrolysis [goid 6508] [evidence IEA]";

"The chemical reactions and pathways resulting in the breakdown of a protein or peptide by hyd  
"The chemical reactions and pathways resulting in the breakdown of a protein or peptide by hyd  
"The process by which one or more ubiquitin moieties are added to a protein [goid 16567] [evid  
"The chemical reactions and pathways resulting in the breakdown of a protein or peptide by hyd  
"The chemical reactions and pathways resulting in the breakdown of a protein or peptide by hyd  
"The chemical reactions and pathways resulting in the breakdown of a protein or peptide by hyd  
"The chemical reactions and pathways resulting in the breakdown of a protein or peptide by hyd  
"The chemical reactions and pathways resulting in the breakdown of a protein or peptide by hyd  
"The chemical reactions and pathways resulting in the breakdown of a protein or peptide by hyd  
"The chemical reactions and pathways resulting in the breakdown of a protein or peptide by hyd  
"The chemical reactions and pathways resulting in the breakdown of a protein or peptide by hyd  
"

"The chemical reactions and pathways resulting in the breakdown of a protein or peptide by hyd  
"The chemical reactions and pathways resulting in the breakdown of a protein or peptide by hyd  
"The chemical reactions and pathways resulting in the breakdown of a protein or peptide by hyd  
"The chemical reactions and pathways resulting in the breakdown of a protein or peptide by hyd  
g RNA."

"The chemical reactions and pathways resulting in the breakdown of a protein or peptide by hyd  
"The chemical reactions and pathways resulting in the breakdown of a protein or peptide by hyd  
"The chemical reactions and pathways resulting in the breakdown of a protein or peptide by hyd  
"The covalent alteration of one or more amino acids occurring in a protein after the protein has k  
"Addition of multiple ubiquitin moieties to a protein, forming a ubiquitin chain [goid 209] [pmid 10  
"The chemical reactions and pathways resulting in the breakdown of a protein or peptide by hyd  
"The chemical reactions and pathways resulting in the breakdown of a protein or peptide by hyd  
"The covalent alteration of one or more amino acids occurring in proteins, peptides and nascent  
"The covalent alteration of one or more amino acids occurring in proteins, peptides and nascent  
"The chemical reactions and pathways resulting in the breakdown of a protein or peptide by hyd  
"A form of programmed cell death induced by external or internal signals that trigger the activity  
"The covalent alteration of one or more amino acids occurring in proteins, peptides and nascent

"The covalent alteration of one or more amino acids occurring in proteins, peptides and nascent  
"The covalent alteration of one or more amino acids occurring in proteins, peptides and nascent  
"The chemical reactions and pathways resulting in the breakdown of a protein or peptide by hyd  
"The covalent alteration of one or more amino acids occurring in proteins, peptides and nascent  
"The covalent alteration of one or more amino acids occurring in proteins, peptides and nascent  
"Any process that modulates the frequency, rate or extent of transcription from an RNA polymer

"Any process that modulates the frequency, rate or extent of transcription from an RNA polymer  
"The covalent alteration of one or more amino acids occurring in proteins, peptides and nascent  
"The covalent alteration of one or more amino acids occurring in proteins, peptides and nascent  
"The covalent alteration of one or more amino acids occurring in proteins, peptides and nascent  
"The chemical reactions and pathways resulting in the breakdown of a protein or peptide by hyd  
"The chemical reactions and pathways resulting in the breakdown of a protein or peptide by hyd  
"The process whose specific outcome is the progression of the embryo in the uterus over time, f  
"The chemical reactions and pathways, including anabolism and catabolism, by which living org;



"The covalent alteration of one or more amino acids occurring in proteins, peptides and nascent  
"The chemical reactions and pathways resulting in the breakdown of a protein or peptide by hyd  
"The covalent alteration of one or more amino acids occurring in proteins, peptides and nascent  
"The covalent alteration of one or more amino acids occurring in proteins, peptides and nascent  
"Any process that modulates the frequency, rate or extent of DNA-dependent transcription [goid  
BTFL5), mRNA."

"The chemical reactions and pathways resulting in the breakdown of a protein or peptide by hyd  
"The chemical reactions and pathways resulting in the breakdown of a protein or peptide by hyd  
"The chemical reactions and pathways resulting in the breakdown of a protein or peptide by hyd  
"Any process that stops, prevents or reduces the frequency, rate or extent of the chemical reacti  
"The chemical reactions and pathways, including anabolism and catabolism, by which living org;  
"The chemical reactions and pathways, including anabolism and catabolism, by which living org;  
"The chemical reactions and pathways, including anabolism and catabolism, by which living org;  
"The directed movement of substances (such as macromolecules, small molecules, ions) into, o  
, mRNA."

"The chemical reactions and pathways resulting in the breakdown of a monosaccharide (genera  
"The chemical reactions and pathways resulting in the breakdown of a protein or peptide by hyd  
"The process whose specific outcome is the progression of the skeleton over time, from its form  
"The chemical reactions and pathways resulting in the breakdown of a protein or peptide by hyd  
"The chemical reactions and pathways resulting in the breakdown of a protein or peptide by hyd  
"The chemical reactions and pathways resulting in the formation of glucosylceramides, any com  
"The addition of a sugar unit to a protein amino acid, e.g. the addition of glycan chains to proteir  
"A complex and coordinated series of cellular movements that occurs at the end of cleavage dur  
"The chemical reactions and pathways involving UDP-glucose, uridinediphosphoglucose, a subse  
"The chemical reactions and pathways, including anabolism and catabolism, by which living org;  
"The chemical reactions and pathways, including anabolism and catabolism, by which living org;  
"The chemical reactions and pathways, including anabolism and catabolism, by which living org;  
"The chemical reactions and pathways involving lipids, compounds soluble in an organic solvent  
"The process whose specific outcome is the progression of the central nervous system over time  
"The process of restoring DNA after damage. Genomes are subject to damage by chemical and

"Any process that modulates the frequency, rate or extent of DNA-dependent transcription [goid  
"Any immune system process that functions in the calibrated response of an organism to a pote  
"Any immune system process that functions in the calibrated response of an organism to a pote  
"The cascade of processes by which a signal interacts with a receptor, causing a change in the  
"The process of introducing a phosphate group on to a protein [goid 6468] [evidence IEA]; The c

The process of introducing a phosphate group on to a protein [goid 6468] [evidence IEA]

The process of introducing a phosphate group on to a protein [goid 6468] [evidence IEA]

"A defense response that is mediated by cells [goid 6968] [pmid 2409603] [evidence TAS]; Any

"The chemical reactions and pathways resulting in the formation of pyrimidine bases, 1,3-diazin

"The process of communication from a neuron to a target (neuron, muscle, or secretory cell) acr

"A process of secretion by a cell that results in the release of intracellular molecules (e.g. hormo

"A process of secretion by a cell that results in the release of intracellular molecules (e.g. hormo

"A process of secretion by a cell that results in the release of intracellular molecules (e.g. hormo

"The biological process whose specific outcome is the progression of a multicellular organism or

"The directed movement of proteins into, out of, within or between cells [goid 15031] [evidence I

"A form of programmed cell death induced by external or internal signals that trigger the activity

"The cascade of processes by which a signal interacts with a receptor, causing a change in the

"A process that is carried out at the cellular level which results in the formation, arrangement of

"In base excision repair, an altered base is removed by a DNA glycosylase enzyme, followed by

"The chemical reactions and pathways involving various organic and inorganic nitrogenous com

"The nonsense-mediated decay pathway for nuclear-transcribed mRNAs degrades mRNAs in w

"The nonsense-mediated decay pathway for nuclear-transcribed mRNAs degrades mRNAs in w

"The nonsense-mediated decay pathway for nuclear-transcribed mRNAs degrades mRNAs in w

"The nonsense-mediated decay pathway for nuclear-transcribed mRNAs degrades mRNAs in w

"The process whereby a relatively unspecialized cell acquires specialized features of an epitheli

"The chemical reactions and pathways involving nucleobases, nucleosides, nucleotides and nuc

"The chemical reactions and pathways involving a nucleoside, a nucleobase linked to either beta: A."

ncoding mitochondrial protein, transcript variant 1, mRNA."

"The transfer of electrons from ubiquinol to cytochrome c that occurs during oxidative phosphory

"The transfer of electrons from ubiquinol to cytochrome c that occurs during oxidative phosphory

"The phosphorylation of ADP to ATP that accompanies the oxidation of a metabolite through the

"The directed movement of substances (such as macromolecules, small molecules, ions) into, o

"The directed movement of substances (such as macromolecules, small molecules, ions) into, o

"The progression of biochemical and morphological phases and events that occur in a cell durin

"The chemical reactions and pathways resulting in the breakdown of a protein or peptide by hyd

"The chemical reactions and pathways resulting in the formation of any member of a large group

"The chemical reactions and pathways resulting in the formation of any member of a large group

"The directed movement of substances from the endoplasmic reticulum (ER) to the Golgi, media

"Any process that modulates the frequency, rate or extent of the synthesis of either RNA on a te

"Any process that modulates the frequency, rate or extent of the synthesis of either RNA on a te

"The series of events required for an organism to receive an auditory stimulus, convert it to a me

A."

"The directed movement of proteins in a cell, including the movement of proteins between speci

"The process of restoring DNA after damage. Genomes are subject to damage by chemical and

"The chemical reactions and pathways resulting in the breakdown of a protein or peptide by hyd

"The chemical reactions and pathways resulting in the breakdown of a protein or peptide by hyd

"The covalent alteration of one or more amino acids occurring in proteins, peptides and nascent

"The chemical reactions and pathways resulting in the breakdown of a protein or peptide by hyd

"The chemical reactions and pathways resulting in the breakdown of a protein or peptide by hyd

"The chemical reactions and pathways resulting in the breakdown of a protein or peptide by hyd

"The chemical reactions and pathways resulting in the breakdown of a protein or peptide by hyd

"The chemical reactions and pathways resulting in the breakdown of a protein or peptide by hyd

"The covalent alteration of one or more amino acids occurring in proteins, peptides and nascent

"The chemical reactions and pathways resulting in the breakdown of a protein or peptide by hyd

"The chemical reactions and pathways resulting in the breakdown of a protein or peptide by hyd

"The covalent alteration of one or more amino acids occurring in proteins, peptides and nascent

"The chemical reactions and pathways resulting in the breakdown of a protein or peptide by hyd

"The chemical reactions and pathways resulting in the breakdown of a protein or peptide by hyd

"The chemical reactions and pathways resulting in the breakdown of a protein or peptide by hyd

"The chemical reactions and pathways resulting in the breakdown of a protein or peptide by hyd

"The chemical reactions and pathways resulting in the breakdown of a protein or peptide by hyd

"The chemical reactions and pathways resulting in the breakdown of a protein or peptide by hyd

"The chemical reactions and pathways resulting in the breakdown of a protein or peptide by hyd

"The aggregation, arrangement and bonding together of the spliceosome, a ribonucleoprotein a

"The chemical reactions and pathways resulting in the breakdown of a protein or peptide by hyd

"The chemical reactions and pathways resulting in the breakdown of a protein or peptide by hyd

"The chemical reactions and pathways resulting in the breakdown of a protein or peptide by hyd

"The chemical reactions and pathways resulting in the breakdown of a protein or peptide by hyd

"The chemical reactions and pathways resulting in the breakdown of a protein or peptide by hyd

"The chemical reactions and pathways resulting in the breakdown of a protein or peptide by hyd

"The covalent alteration of one or more amino acids occurring in proteins, peptides and nascent

"The chemical reactions and pathways resulting in the breakdown of a protein or peptide by hyd

"The chemical reactions and pathways resulting in the breakdown of a protein or peptide by hyd

"The chemical reactions and pathways resulting in the breakdown of a protein or peptide by hyd

"The chemical reactions and pathways resulting in the breakdown of a protein or peptide by hyd

"The chemical reactions and pathways resulting in the breakdown of a protein or peptide by hyd

"The chemical reactions and pathways resulting in the breakdown of a protein or peptide by hyd

"The chemical reactions and pathways resulting in the breakdown of a protein or peptide by hyd

"The chemical reactions and pathways resulting in the breakdown of a protein or peptide by hyd

The addition of a sulfate group as an ester to a protein amino acid [goid 6477] [pmid 10187838]

"Any process involved in the conversion of a primary ribosomal RNA (rRNA) transcript into one c

Any process involved in the conversion of a primary ribosomal RNA (rRNA) transcript into one o

"Any process involved in the conversion of a primary ribosomal RNA (rRNA) transcript into one c

Any process involved in the conversion of a primary ribosomal RNA (rRNA) transcript into one o

Any process involved in the conversion of a primary ribosomal RNA (rRNA) transcript into one o  
"Any process that stops, prevents or reduces the rate or extent of cell proliferation [goid 8285] [p  
Any process involved in the conversion of a primary ribosomal RNA (rRNA) transcript into one o  
Any process involved in the conversion of a primary ribosomal RNA (rRNA) transcript into one o  
"A process whereby force is generated within muscle tissue, resulting in a change in muscle ge  
"A process whereby force is generated within muscle tissue, resulting in a change in muscle ge

"The alteration of DNA or protein in chromatin, which may result in changing the chromatin struc  
"Any process specifically pertinent to the functioning of integrated living units: cells, tissues, orga  
"The process of restoring DNA after damage. Genomes are subject to damage by chemical and  
"A process that is carried out at the cellular level which results in the formation, arrangement of  
"The cascade of processes by which a signal interacts with a receptor, causing a change in the  
"The directed movement of substances, either within a vesicle or in the vesicle membrane, into,  
"The directed movement of substances, either within a vesicle or in the vesicle membrane, into,  
"The directed movement of substances, either within a vesicle or in the vesicle membrane, into,  
"The directed movement of substances, either within a vesicle or in the vesicle membrane, into,  
"The biological process whose specific outcome is the progression of a multicellular organism ov  
"The directed movement of substances from the endoplasmic reticulum (ER) to the Golgi, media  
"The directed movement of substances, either within a vesicle or in the vesicle membrane, into,  
"Coordinated organization of groups of cells in the plane of an epithelium, such that they all orie  
"The joining of two lipid bilayers to form a single membrane [goid 6944] [pmid 9657962] [evidenc  
"The process of coupling valine to valyl-tRNA, catalyzed by valyl-tRNA synthetase. In tRNA amir  
"The process of coupling valine to valyl-tRNA, catalyzed by valyl-tRNA synthetase. In tRNA amir  
"The progression of biochemical and morphological phases and events that occur in a cell durin

The process of removal or addition of one or more electrons with or without the concomitant ren

"The process whereby phagocytes engulf external particulate material. The particles are initially  
"A series of reactions within the cell that occur as a result of a single trigger reaction or compour  
"Fusion of the membrane of a transport vesicle with its target membrane [goid 6906] [evidence I  
"Any process that stops, prevents or reduces the frequency, rate or extent of transcription from a  
The process of assisting in the covalent and noncovalent assembly of single chain polypeptides  
"The attachment of an adhesion molecule in one cell to a nonidentical adhesion molecule in an  
"Any process involved in the controlled movement of a cell [goid 6928] [pmid 16130169] [eviden  
"Upregulation of the activity of a caspase, any of a group of cysteine proteases involved in apop  
"The chemical reactions and pathways resulting in the breakdown of a protein or peptide by hyd

"The directed movement of anions, atoms or small molecules with a net negative charge, into, o  
"An acute behavioral change resulting from a perceived external threat [goid 1662] [evidence IE  
"The process whose specific outcome is the progression of the skeleton over time, from its form  
"Any process that modulates the frequency, rate or extent of cell growth [goid 1558] [pmid 8919  
"Blood vessel formation when new vessels emerge from the proliferation of pre-existing blood ve  
"Blood vessel formation when new vessels emerge from the proliferation of pre-existing blood ve

"The attachment of one cell to another cell via adhesion molecules [goid 16337] [evidence IEA];  
"The process whose specific outcome is the progression of the ovarian follicle over time, from its  
"Any process that modulates the frequency, rate or extent of DNA-dependent transcription [goid  
"The synthesis of either RNA on a template of DNA or DNA on a template of RNA [goid 6350] [e  
"Any process that stops, prevents or reduces the frequency, rate or extent of transcription from a

"A process that is carried out at the cellular level which results in the formation, arrangement of  
"Any process involved in the controlled movement of a cell [goid 6928] [pmid 16130169] [eviden  
"The cascade of processes by which a signal interacts with a receptor, causing a change in the  
"The cascade of processes by which a signal interacts with a receptor, causing a change in the

"The chemical reactions and pathways involving any of the forms of vitamin K, quinone-derived

"Construction of the vitelline membrane portion of the egg shell, a rigid structure required to mai  
"The cascade of processes by which a signal interacts with a receptor, causing a change in the  
"The cascade of processes by which a signal interacts with a receptor, causing a change in the  
"Inflammation which comprises a rapid, short-lived, relatively uniform response to acute injury or  
"The chemical reactions and pathways involving various organic and inorganic nitrogenous com  
"The chemical reactions and pathways involving various organic and inorganic nitrogenous com

"The chemical reactions and pathways resulting in the breakdown of a protein or peptide by hyd  
Any immune system process that functions in the calibrated response of an organism to a poten

"The directed movement of proteins into, out of, within or between cells [goid 15031] [evidence I  
"The directed movement of proteins into, out of, within or between cells [goid 15031] [evidence I  
"The directed movement of proteins in a cell, including the movement of proteins between speci  
"A process that is carried out at the cellular level which results in the formation, arrangement of  
"The directed movement of proteins into, out of, within or between cells [goid 15031] [evidence I  
"The synthesis of either RNA on a template of DNA or DNA on a template of RNA [goid 6350] [e

"The directed movement of substances into, out of or within a vacuole [goid 7034] [evidence IEA  
"The directed movement of substances into, out of or within a vacuole [goid 7034] [evidence IEA  
"The directed movement of proteins into, out of, within or between cells [goid 15031] [evidence I  
"The directed movement of proteins into, out of, within or between cells [goid 15031] [eviden I  
"The initial attachment of a vesicle membrane to a target membrane, mediated by proteins protr  
"The initial attachment of a vesicle membrane to a target membrane, mediated by proteins protr  
"The directed movement of proteins into, out of, within or between cells [goid 15031] [evidence I  
"The synthesis of either RNA on a template of DNA or DNA on a template of RNA [goid 6350] [e  
"The directed movement of proteins into, out of, within or between cells [goid 15031] [evidence I  
"The directed movement of proteins into, out of, within or between cells [goid 15031] [evidence I  
"The directed movement of proteins into, out of, within or between cells [goid 15031] [evidence I

"The directed movement of proteins into, out of, within or between cells [goid 15031] [evidence I  
"The directed movement of proteins into, out of, within or between cells [goid 15031] [evidence I  
"The directed movement of proteins in a cell, including the movement of proteins between speci  
"The directed movement of proteins in a cell, including the movement of proteins between speci  
"The directed movement of proteins into, out of, within or between cells [goid 15031] [evidence I  
"The directed movement of substances into, out of or mediated by an endosome, a membrane-l  
"The directed movement of proteins into, out of, within or between cells [goid 15031] [evidence I  
"The directed movement of proteins into, out of, within or between cells [goid 15031] [evidence I  
"The directed movement of proteins into, out of, within or between cells [goid 15031] [evidence I  
"Any process that modulates the frequency, rate or extent of the synthesis of either RNA on a t  
nRNA."

The process of introducing a phosphate group on to a protein [goid 6468] [pmid 9344656] [evid  
The process of introducing a phosphate group on to a protein [goid 6468] [pmid 9344656] [evid  
The process of introducing a phosphate group on to a protein [goid 6468] [evidence IEA]; The p  
"Any process that stops, prevents, or reduces the frequency, rate, or extent of interleukin-2 prod

"The directed movement of proteins in a cell, including the movement of proteins between speci

A."  
rRNA."

"Any process that stops, prevents or reduces the frequency, rate or extent of BMP signaling path

VA."

"The process of coupling tryptophan to tryptophanyl-tRNA, catalyzed by tryptophanyl-tRNA syntl  
"The process of coupling tryptophan to tryptophanyl-tRNA, catalyzed by tryptophanyl-tRNA syntl  
"The aggregation, arrangement and bonding together of a set of components to form a protein c  
"The aggregation, arrangement and bonding together of a set of components to form a protein c  
"The series of molecular signals generated as a consequence of a G-protein coupled receptor b  
"The aggregation, arrangement and bonding together of a set of components to form a protein c

"Any process specifically pertinent to the functioning of integrated living units: cells, tissues, orga  
Any process involved in the conversion of a primary ribosomal RNA (rRNA) transcript into one o

"Any process specifically pertinent to the functioning of integrated living units: cells, tissues, orga  
Any process involved in the conversion of a primary mRNA transcript into one or more mature r

"Any process specifically pertinent to the functioning of integrated living units: cells, tissues, orga  
ant 4 (WBSCR19), mRNA."

"The chemical reactions and pathways, including anabolism and catabolism, by which living orga  
"The chemical reactions and pathways, including anabolism and catabolism, by which living orga  
"Any process specifically pertinent to the functioning of integrated living units: cells, tissues, orga

"Any process that modulates the frequency, rate or extent of DNA-dependent transcription [goid  
"The series of events required for an organism to receive an auditory stimulus, convert it to a me  
The series of molecular signals initiated by binding of an extracellular ligand to a Notch receptor

"The directed movement of proteins in a cell, including the movement of proteins between speci

Any process involved in the conversion of a primary ribosomal RNA (rRNA) transcript into one o

"Pathways for DNA repair which occur after DNA has replicated, e.g. mismatch repair, and whic

"Any process involved in the conversion of a primary ribosomal RNA (rRNA) transcript into one c

"The process by which a pre-tRNA molecule is converted to a mature tRNA, ready for addition o

"The synthesis of aminoacyl tRNA by the formation of an ester bond between the 3'-hydroxyl gr

Any process by which an organism has an effect on an organism of a different species [goid 444

"The process whose specific outcome is the progression of the skeleton over time, from its form

"The joining together of exons from one or more primary transcripts of nuclear messenger RNA

"The chemical reactions and pathways resulting in the breakdown of a protein or peptide by hyd

"The process by which the cell cycle is halted during one of the normal phases (G1, S, G2, M) [goid 32313] [evidence IEA]

Any process that modulates the activity of a GTPase of the Rab family [goid 32313] [evidence IEA]

The hydrolysis of a peptide bond or bonds within a protein [goid 6508] [evidence IEA]

The formation and assembly from one or more snRNA and multiple protein components of a ribosome [goid 6508] [evidence IEA]

"The synthesis of aminoacyl tRNA by the formation of an ester bond between the 3'-hydroxyl group of tRNA and the amino acid [goid 16567] [evidence IEA]; Any process involved in the conversion of a primary ribosomal RNA (rRNA) transcript into one or more mature rRNAs [goid 16567] [evidence IEA]; The process by which one or more ubiquitin moieties are added to a protein [goid 16567] [evidence IEA]

"The process of introducing a phosphate group on to a protein [goid 6468] [evidence IEA]; The process of introducing a phosphate group on to a nucleic acid [goid 6468] [evidence IEA]

"The process whose specific outcome is the progression of the kidney over time, from its formation to its maintenance and repair [goid 6350] [evidence IEA]; (WHAMM), mRNA." [goid 6350] [evidence IEA];  
cript variant 3 (WHDC1L1), mRNA." [goid 6350] [evidence IEA];  
cript variant 3 (WHDC1L2), mRNA." [goid 6350] [evidence IEA]

"The synthesis of either RNA on a template of DNA or DNA on a template of RNA [goid 6350] [evidence IEA]

"The synthesis of either RNA on a template of DNA or DNA on a template of RNA [goid 6350] [evidence IEA]

"The synthesis of either RNA on a template of DNA or DNA on a template of RNA [goid 6350] [evidence IEA]



"The cascade of processes by which a signal interacts with a receptor, causing a change in the  
The process by which cells digest parts of their own cytoplasm; allows for both recycling of macr  
mRNA."

"Any process that modulates the frequency, rate or extent of cell growth [goid 1558] [evidence IE

"The process of introducing a phosphate group on to a protein [goid 6468] [evidence IEA]; The p

"The process of introducing a phosphate group on to a protein [goid 6468] [evidence ISS]; A ser

"The process of introducing a phosphate group on to a protein [goid 6468] [evidence ISS]; The c

"The series of molecular signals initiated by binding of a Wnt protein to a receptor on the surface

The series of molecular signals initiated by binding of a Wnt protein to a receptor on the surface

"The series of molecular signals initiated by binding of a Wnt protein to a receptor on the surface

The series of molecular signals initiated by binding of a Wnt protein to a receptor on the surface

"The cascade of processes by which a signal interacts with a receptor, causing a change in the

"The series of molecular signals initiated by binding of a Wnt protein to a receptor on the surface

The series of molecular signals initiated by binding of a Wnt protein to a receptor on the surface

"Any process that contributes to the maintenance of proper telomeric length and structure by aff

"Synthesis of DNA that proceeds from the broken 3' single-strand DNA end uses the homologou

"The chemical reactions and pathways resulting in the breakdown of a protein or peptide by hyd

"The chemical reactions and pathways resulting in the breakdown of a protein or peptide by hyd

"Any process involved in the conversion of a primary mRNA transcript into one or more mature r

"The synthesis of either RNA on a template of DNA or DNA on a template of RNA [goid 6350] [e

"The chemical reactions and pathways involving steroids, compounds with a 1,2,cyclopentanop

"The covalent alteration of one or more amino acids occurring in proteins, peptides and nascent

"The covalent alteration of one or more amino acids occurring in proteins, peptides and nascent

"The process whose specific outcome is the progression of the blastocyst over time, from its for

"A form of programmed cell death induced by external or internal signals that trigger the activity

"Any process that modulates the frequency, rate or extent of DNA-dependent transcription [goid

"The secretion of milk by the mammary gland [goid 7595] [evidence IEA]; Any process that mod

"A process that is carried out at the cellular level which results in the formation, arrangement of

"The directed movement of substances (such as macromolecules, small molecules, ions) into, o

"

pt variant 2, mRNA."

"The removal of the oligonucleotide that contains the DNA damage. The oligonucleotide is form

"A point in the eukaryotic cell cycle where progress through the cycle can be halted until conditions are favorable." [goid 15031] [evidence IEA]  
The hydrolysis of a peptide bond or bonds within a protein [goid 6508] [pmid 11106490] [evidence IEA]  
The hydrolysis of a peptide bond or bonds within a protein [goid 6508] [evidence IEA]

"The aggregation, arrangement and bonding together of the nuclear localization signal of a protein." [goid 15031] [evidence IEA]

"The directed movement of proteins into, out of, within or between cells [goid 15031] [evidence IEA]

"The directed movement of proteins into, out of, within or between cells [goid 15031] [evidence IEA]

"The aggregation, arrangement and bonding together of the nuclear localization signal of a protein." [goid 15031] [evidence IEA]

"The aggregation, arrangement and bonding together of the nuclear localization signal of a protein." [goid 15031] [evidence IEA]

"The directed movement of substances (such as macromolecules, small molecules, ions) into, out of, within or between cells [goid 15031] [evidence IEA]

The series of molecular signals generated as a consequence of a G-protein coupled receptor binding to a ligand." [goid 15031] [evidence IEA]

The repair of single strand breaks in DNA. Repair of such breaks is mediated by the same enzymes as double strand breaks." [goid 15031] [evidence IEA]

"The process of restoring DNA after damage. Genomes are subject to damage by chemical and physical agents." [goid 15031] [evidence IEA]

"The process of restoring DNA after damage. Genomes are subject to damage by chemical and physical agents." [goid 15031] [evidence IEA]

"The process whose specific outcome is the progression of the embryo in the uterus over time, from fertilization to implantation." [goid 15031] [evidence IEA]

The repair of a double-strand break in DNA in which the two broken ends are rejoined with little or no loss of genetic information." [goid 15031] [evidence IEA]

"The repair of a double-strand break in DNA in which the two broken ends are rejoined with little or no loss of genetic information." [goid 15031] [evidence IEA]

The repair of a double-strand break in DNA in which the two broken ends are rejoined with little or no loss of genetic information." [goid 15031] [evidence IEA]

"The chemical reactions and pathways involving nucleobases, nucleosides, nucleotides and nucleic acids." [goid 15031] [evidence IEA]

"The chemical reactions and pathways involving carbohydrates, any of a group of organic compounds that are soluble in water and can be broken down into simple sugars." [goid 15031] [evidence IEA]

"The chemical reactions and pathways resulting in the formation of glycosaminoglycans, any of a group of polysaccharides that are highly hydrated and give biological tissues a turgid, resilient quality." [goid 15031] [evidence IEA]

"The chemical reactions and pathways resulting in the formation of glycosaminoglycans, any of a group of polysaccharides that are highly hydrated and give biological tissues a turgid, resilient quality." [goid 15031] [evidence IEA]

"Any process that modulates the frequency, rate or extent of DNA-dependent transcription [goid 15031] [evidence IEA]

"Any process that activates or increases the frequency, rate or extent of transcription from the RNA polymerase II promoter." [goid 15031] [evidence IEA]

"The process of coupling tyrosine to tyrosyl-tRNA, catalyzed by tyrosyl-tRNA synthetase. In tRNA, tyrosine is attached to the 3' terminal adenosine of the acceptor stem." [goid 15031] [evidence IEA]

"The process of coupling tyrosine to tyrosyl-tRNA, catalyzed by tyrosyl-tRNA synthetase. In tRNA, tyrosine is attached to the 3' terminal adenosine of the acceptor stem." [goid 15031] [evidence IEA]

"The joining together of exons from one or more primary transcripts of nuclear messenger RNA to form a mature messenger RNA transcript." [goid 15031] [evidence IEA]

"Any process that modulates the frequency, rate or extent of DNA-dependent transcription [goid 15031] [evidence IEA]

"Any process that modulates the frequency, rate or extent of DNA-dependent transcription [goid 15031] [evidence IEA]

"Any process that modulates the frequency, rate or extent of cell growth [goid 1558] [evidence IEA]

"The covalent alteration of one or more amino acids occurring in proteins, peptides and nascent polypeptides." [goid 15031] [evidence IEA]

"The directed movement of proteins into, out of, within or between cells [goid 15031] [evidence IEA]

"The directed movement of proteins into, out of, within or between cells [goid 15031] [evidence IEA]

"The process whereby relatively unspecialized cells, e.g. embryonic or regenerative cells, acquire specialized morphological and functional characteristics through a progressive series of changes in gene expression." [goid 15031] [evidence IEA]

"The directed movement of proteins into, out of, within or between cells [goid 15031] [evidence IEA]

ndrial protein, mRNA."

"The directed movement of substances from the endoplasmic reticulum (ER) to the Golgi, mitochondria, lysosomes, peroxisomes, and other organelles." [goid 15031] [evidence IEA]

"Any process specifically pertinent to the functioning of integrated living units: cells, tissues, organs, or organisms." [goid 15031] [evidence IEA]

"The hydrolysis of a peptide bond or bonds within a protein [goid 6508] [evidence IEA]; The chemical reactions and pathways resulting in the breakdown of a protein or peptide by hydrolysis." [goid 15031] [evidence IEA]

"The chemical reactions and pathways resulting in the breakdown of a protein or peptide by hydrolysis." [goid 15031] [evidence IEA]

protein, mRNA."

The process of introducing a phosphate group on to a protein [goid 6468] [evidence IEA]

Any process involved in the conversion of a primary mRNA transcript into one or more mature m

An immune response mediated through a body fluid [goid 6959] [pmid 10508479] [evidence TA9

The process of targeting specific proteins to particular membrane-bounded subcellular organelle

The process of targeting specific proteins to particular membrane-bounded subcellular organelle

"Any process that stops, prevents or reduces the frequency, rate or extent of protein kinase activi

"The directed movement of proteins in a cell, including the movement of proteins between speci

"Any process that stops, prevents or reduces the frequency, rate or extent of DNA-dependent tr

"A process which directly inhibits any of the steps required for cell death by apoptosis [goid 6916

"The synthesis of either RNA on a template of DNA or DNA on a template of RNA [goid 6350] [e

The process of removal or addition of one or more electrons with or without the concomitant rerr

riant 1, mRNA."

"Any process specifically pertinent to the functioning of integrated living units: cells, tissues, orga

"The synthesis of either RNA on a template of DNA or DNA on a template of RNA [goid 6350] [e

"The synthesis of either RNA on a template of DNA or DNA on a template of RNA [goid 6350] [e

"A complex and coordinated series of cellular movements that occurs at the end of cleavage dur

"The synthesis of either RNA on a template of DNA or DNA on a template of RNA [goid 6350] [e

"The synthesis of either RNA on a template of DNA or DNA on a template of RNA [goid 6350] [e

"The synthesis of either RNA on a template of DNA or DNA on a template of RNA [goid 6350] [e

"The synthesis of either RNA on a template of DNA or DNA on a template of RNA [goid 6350] [e

"The synthesis of either RNA on a template of DNA or DNA on a template of RNA [goid 6350] [e

"The synthesis of either RNA on a template of DNA or DNA on a template of RNA [goid 6350] [e

"The synthesis of either RNA on a template of DNA or DNA on a template of RNA [goid 6350] [e

"Any process that stops, prevents or reduces the frequency, rate or extent of transcription from :

"The synthesis of either RNA on a template of DNA or DNA on a template of RNA [goid 6350] [e

"The synthesis of either RNA on a template of DNA or DNA on a template of RNA [goid 6350] [e

"The synthesis of either RNA on a template of DNA or DNA on a template of RNA [goid 6350] [e

"The synthesis of either RNA on a template of DNA or DNA on a template of RNA [goid 6350] [e

"The synthesis of either RNA on a template of DNA or DNA on a template of RNA [goid 6350] [e

"The synthesis of either RNA on a template of DNA or DNA on a template of RNA [goid 6350] [e

"The synthesis of either RNA on a template of DNA or DNA on a template of RNA [goid 6350] [e

"The synthesis of either RNA on a template of DNA or DNA on a template of RNA [goid 6350] [e  
"The synthesis of either RNA on a template of DNA or DNA on a template of RNA [goid 6350] [e  
"The synthesis of either RNA on a template of DNA or DNA on a template of RNA [goid 6350] [e  
"The synthesis of either RNA on a template of DNA or DNA on a template of RNA [goid 6350] [e  
"The synthesis of either RNA on a template of DNA or DNA on a template of RNA [goid 6350] [e  
"The synthesis of either RNA on a template of DNA or DNA on a template of RNA [goid 6350] [e  
"The synthesis of either RNA on a template of DNA or DNA on a template of RNA [goid 6350] [e  
"Any process that stops, prevents or reduces the rate or extent of progression through the cell c

"The synthesis of either RNA on a template of DNA or DNA on a template of RNA [goid 6350] [e

"Blood vessel formation when new vessels emerge from the proliferation of pre-existing blood ve

Any series of molecular signals generated as a consequence of a cytokine or chemokine binding

"A change in state or activity of a cell or an organism (in terms of movement, secretion, enzyme

"The chemical reactions and pathways resulting in the breakdown of a protein or peptide by hyd

"The appearance of a cytokine due to biosynthesis or secretion following a cellular stimulus, res

"The synthesis of either RNA on a template of DNA or DNA on a template of RNA [goid 6350] [e

"Any process that mediates interactions between a cell and its surroundings. Encompasses inte

"Any process that mediates interactions between a cell and its surroundings. Encompasses inte

The process by which a methyl group is covalently attached to a molecule [goid 32259] [evidenc

Any process involved in the conversion of a primary mRNA transcript into one or more mature r

Any process involved in the conversion of a primary mRNA transcript into one or more mature m

"Any process that activates or increases the frequency, rate or extent of an I-kappaB kinase/NF-

"A form of programmed cell death induced by external or internal signals that trigger the activity

"The covalent or non-covalent attachment of a palmitoyl moiety to a protein [goid 18345] [eviden

The covalent or non-covalent attachment of a palmitoyl moiety to a protein [goid 18345] [eviden

The covalent or non-covalent attachment of a palmitoyl moiety to a protein [goid 18345] [eviden

The specific actions or reactions of an organism in response to external or internal stimuli. Patte

."

"Any process that stops, prevents or reduces the frequency, rate or extent of transcription from :

"Any process that modulates the frequency, rate or extent of DNA-dependent transcription [goid

"The chemical reactions and pathways resulting in the breakdown of a protein or peptide by hyd

"Any process specifically pertinent to the functioning of integrated living units: cells, tissues, orga

"The cascade of processes by which a signal interacts with a receptor, causing a change in the

"Any process that modulates the frequency, rate or extent of DNA-dependent transcription [goid

"Any process that stops, prevents or reduces the frequency, rate or extent of transcription from :

"The synthesis of either RNA on a template of DNA or DNA on a template of RNA [goid 6350] [e

The series of molecular signals generated as a consequence of the insulin receptor binding to ir

"The synthesis of either RNA on a template of DNA or DNA on a template of RNA [goid 6350] [e

"Any process that stops, prevents or reduces the frequency, rate or extent of transcription from :

"The synthesis of either RNA on a template of DNA or DNA on a template of RNA [goid 6350] [e

"The synthesis of either RNA on a template of DNA or DNA on a template of RNA [goid 6350] [e

"Shortening of the poly(A) tail of a nuclear-transcribed mRNA from full length to an oligo(A) leng

"A major pathway of degradation of nuclear-transcribed mRNAs that proceeds through a series

"A major pathway of degradation of nuclear-transcribed mRNAs that proceeds through a series

"The synthesis of either RNA on a template of DNA or DNA on a template of RNA [goid 6350] [e

"Any process that stops, prevents or reduces the frequency, rate or extent of transcription from :

"The synthesis of either RNA on a template of DNA or DNA on a template of RNA [goid 6350] [e

"The synthesis of either RNA on a template of DNA or DNA on a template of RNA [goid 6350] [e  
"The synthesis of either RNA on a template of DNA or DNA on a template of RNA [goid 6350] [e  
"The synthesis of either RNA on a template of DNA or DNA on a template of RNA [goid 6350] [e  
"The synthesis of either RNA on a template of DNA or DNA on a template of RNA [goid 6350] [e  
"The synthesis of either RNA on a template of DNA or DNA on a template of RNA [goid 6350] [e  
"Any process that modulates the frequency, rate or extent of the synthesis of either RNA on a te  
"The synthesis of either RNA on a template of DNA or DNA on a template of RNA [goid 6350] [e  
The biological process whose specific outcome is the progression of a multicellular organism ov  
"Any process that modulates the frequency, rate or extent of the synthesis of either RNA on a te  
"Any process that modulates the frequency, rate or extent of the synthesis of either RNA on a te

"The process of directing proteins towards the lysosome using signals contained within the prote

"The directed movement of proteins into, out of, within or between cells [goid 15031] [evidence I

"Any process that stops, prevents or reduces the frequency, rate or extent of DNA-dependent tra

"The chemical reactions and pathways resulting in the breakdown of mRNA, messenger RNA, v

"Any process that stops, prevents or reduces the frequency, rate or extent of DNA-dependent tra

"Any developmental process that results in the creation of defined areas or spaces within an org

"The directed movement of potassium ions (K+) into, out of, within or between cells [goid 6813]

"The last step in the formation of the neural tube, where the paired neural folds are brought toge

"Any process that modulates the frequency, rate or extent of DNA-dependent transcription [goid

"The synthesis of either RNA on a template of DNA or DNA on a template of RNA [goid 6350] [e

"The synthesis of either RNA on a template of DNA or DNA on a template of RNA [goid 6350] [e

"The synthesis of either RNA on a template of DNA or DNA on a template of RNA [goid 6350] [e

"The synthesis of either RNA on a template of DNA or DNA on a template of RNA [goid 6350] [e

"The synthesis of either RNA on a template of DNA or DNA on a template of RNA [goid 6350] [e

"The synthesis of either RNA on a template of DNA or DNA on a template of RNA [goid 6350] [e

"The synthesis of either RNA on a template of DNA or DNA on a template of RNA [goid 6350] [e

"Any process that modulates the frequency, rate or extent of cell growth [goid 1558] [evidence II

Any process involved in the conversion of a primary mRNA transcript into one or more mature m

"The synthesis of either RNA on a template of DNA or DNA on a template of RNA [goid 6350] [e

"The synthesis of either RNA on a template of DNA or DNA on a template of RNA [goid 6350] [e

The hydrolysis of a peptide bond or bonds within a protein [goid 6508] [pmid 10373325] [eviden

The biological process whose specific outcome is the progression of a multicellular organism ov

The biological process whose specific outcome is the progression of a multicellular organism ov

The biological process whose specific outcome is the progression of a multicellular organism ov

"Any process that stops, prevents or reduces the frequency, rate or extent of transcription from a



















"Any process that modulates the frequency, rate or extent of DNA-dependent transcription [goid

"Any process that modulates the frequency, rate or extent of the synthesis of either RNA on a te

The process by which the sperm binds to the zona pellucida glycoprotein layer of the egg. The p

The process by which the sperm binds to the zona pellucida glycoprotein layer of the egg. The p

The process by which the sperm binds to the zona pellucida glycoprotein layer of the egg. The p

Any process involved in the conversion of a primary mRNA transcript into one or more mature r

The process of removing sections of the primary RNA transcript to remove sequences not prese  
VA."

"The synthesis of either RNA on a template of DNA or DNA on a template of RNA [goid 6350] [e

"The synthesis of either RNA on a template of DNA or DNA on a template of RNA [goid 6350] [e

"The synthesis of either RNA on a template of DNA or DNA on a template of RNA [goid 6350] [e

"The synthesis of either RNA on a template of DNA or DNA on a template of RNA [goid 6350] [e

"The synthesis of either RNA on a template of DNA or DNA on a template of RNA [goid 6350] [e

"The synthesis of either RNA on a template of DNA or DNA on a template of RNA [goid 6350] [e

"The synthesis of either RNA on a template of DNA or DNA on a template of RNA [goid 6350] [e

"The synthesis of either RNA on a template of DNA or DNA on a template of RNA [goid 6350] [e

"The process of restoring DNA after damage. Genomes are subject to damage by chemical and

"The cell cycle process whereby replicated homologous chromosomes are organized and then p

"The progression of biochemical and morphological phases and events that occur in a cell durin

"The cell cycle process whereby replicated homologous chromosomes are organized and then p

"The synthesis of either RNA on a template of DNA or DNA on a template of RNA [goid 6350] [e

"The synthesis of either RNA on a template of DNA or DNA on a template of RNA [goid 6350] [e

"The synthesis of either RNA on a template of DNA or DNA on a template of RNA [goid 6350] [e

"The chemical reactions and pathways resulting in the breakdown of a protein or peptide by hyd

"The attachment of a cell, either to another cell or to an underlying substrate such as the extrac

"Any process that modulates the frequency, rate or extent of the onset of anaphase (chromoson

"The synthesis of either RNA on a template of DNA or DNA on a template of RNA [goid 6350] [e

## ONTOLOGY\_FUNCTION

- "Interacting selectively with zinc (Zn) ions [goid 8270] [evidence IEA]; Catalysis of the ligation of
- "Interacting selectively with zinc (Zn) ions [goid 8270] [evidence IEA]; Catalysis of the ligation of
- "Interacting selectively with zinc (Zn) ions [goid 8270] [evidence IEA]; Catalysis of the ligation of
- "Interacting selectively with zinc (Zn) ions [goid 8270] [evidence IEA]; Catalysis of the ligation of
- "Interacting selectively with zinc (Zn) ions [goid 8270] [evidence IEA]; Catalysis of the ligation of
- "Interacting selectively with a nucleotide, any compound consisting of a nucleoside that is esterified
- "Interacting selectively with a nucleotide, any compound consisting of a nucleoside that is esterified
- "Interacting selectively with a nucleotide, any compound consisting of a nucleoside that is esterified
- "Interacting selectively with a nucleotide, any compound consisting of a nucleoside that is esterified
- "Interacting selectively with a nucleotide, any compound consisting of a nucleoside that is esterified
- "Interacting selectively with a nucleotide, any compound consisting of a nucleoside that is esterified
- "Interacting selectively with a nucleotide, any compound consisting of a nucleoside that is esterified
- "Interacting selectively with a nucleotide, any compound consisting of a nucleoside that is esterified
- "Interacting selectively with a nucleotide, any compound consisting of a nucleoside that is esterified
- "Interacting selectively with a nucleotide, any compound consisting of a nucleoside that is esterified
- "Interacting selectively with a nucleotide, any compound consisting of a nucleoside that is esterified
- "Interacting selectively with a nucleotide, any compound consisting of a nucleoside that is esterified
- "Interacting selectively with any protein or protein complex (a complex of two or more proteins that
- "Catalysis of the transfer of a galactosyl group to an acceptor molecule, typically another carbohydrate
- "Catalysis of the transfer of an N-acetylglucosaminyl residue from UDP-N-acetyl-glucosamine to
- "Elemental activities, such as catalysis or binding, describing the actions of a gene product at the
- "Catalysis of the hydrolysis of various bonds, e.g. C-O, C-N, C-C, phosphoric anhydride bonds, and
- "Catalysis of the hydrolysis of various bonds, e.g. C-O, C-N, C-C, phosphoric anhydride bonds, and
- "Interacting selectively with a nucleotide, any compound consisting of a nucleoside that is esterified
- "Interacting selectively with heparin, any member of a group of glycosaminoglycans found mainly in
- "Interacting selectively with transfer RNA [goid 49] [pmid 7654687] [evidence TAS]; Interacting selectively
- "Interacting selectively with a nucleotide, any compound consisting of a nucleoside that is esterified
- "Catalysis of the reaction: ATP + L-alanine + tRNA(Ala) = AMP + diphosphate + L-alanyl-tRNA(Ala)
- "Enables the directed movement of acyl groups into, out of, within or between cells [goid 36] [evidence
- "Interacting selectively with magnesium (Mg) ions [goid 287] [evidence IEA]; Catalysis of the reaction
- "The selective, often stoichiometric, interaction of a molecule with one or more specific sites on a
- The function of binding to a specific DNA sequence in order to modulate transcription. The transcription
- "Interacting selectively with a nucleotide, any compound consisting of a nucleoside that is esterified
- "Catalysis of the reaction: 4-aminobutanoate + amino group acceptor = succinate semialdehyde +
- "Interacting selectively with a nucleotide, any compound consisting of a nucleoside that is esterified
- "Interacting selectively with a nucleotide, any compound consisting of a nucleoside that is esterified
- "Interacting selectively with a nucleotide, any compound consisting of a nucleoside that is esterified
- "Interacting selectively with a nucleotide, any compound consisting of a nucleoside that is esterified





"Interacting selectively with monomeric or multimeric forms of actin, including actin filaments [go  
"Stimulates the exchange of guanyl nucleotides by a GTPase. Under normal cellular physiologic  
"Interacting selectively with DNA (deoxyribonucleic acid) [goid 3677] [evidence IEA]; The functio  
Functions in chain elongation during polypeptide synthesis at the ribosome [goid 3746] [evidenc  
"Elemental activities, such as catalysis or binding, describing the actions of a gene product at th  
"Catalysis of the reaction: acyl-CoA + acetyl-CoA = CoA + 3-oxoacyl-CoA [goid 3988] [evidence  
"Catalysis of a biochemical reaction at physiological temperatures. In biologically catalyzed reac  
"Interacting selectively with a nucleotide, any compound consisting of a nucleoside that is esteril  
"Catalysis of the reaction: ATP + acetyl-CoA + HCO<sub>3</sub><sup>-</sup> = ADP + phosphate + malonyl-CoA [goid  
"Catalysis of the reaction: acyl-CoA + acceptor = 2,3-dehydroacyl-CoA + reduced acceptor [goic  
"Catalysis of the reaction: acyl-CoA + acceptor = 2,3-dehydroacyl-CoA + reduced acceptor [goic  
"Catalysis of the reaction: acyl-CoA + acceptor = 2,3-dehydroacyl-CoA + reduced acceptor [goic  
"Catalysis of the reaction: acyl-CoA + acceptor = 2,3-dehydroacyl-CoA + reduced acceptor [goic  
"Catalysis of the reaction: acyl-CoA + acceptor = 2,3-dehydroacyl-CoA + reduced acceptor [goic  
"Catalysis of the reaction: butanoyl-CoA + ETF = 2-butenoyl-CoA + reduced ETF [goid 4085] [ev  
"Catalysis of the reaction: acyl-CoA + acceptor = 2,3-dehydroacyl-CoA + reduced acceptor [goic  
"Catalysis of the reaction: acyl-CoA + ETF = 2,3-dehydroacyl-CoA + reduced ETF [goid 4466] [p

"Catalysis of a biochemical reaction at physiological temperatures. In biologically catalyzed reac  
"Catalysis of the reaction: 2 acetyl-CoA = CoA + acetoacetyl-CoA [goid 3985] [evidence IEA]; In  
"Interacting selectively with acyl-CoA, any derivative of coenzyme A in which the sulfhydryl grou  
"Interacting selectively with acyl-CoA, any derivative of coenzyme A in which the sulfhydryl grou  
"Interacting selectively with acyl-CoA, any derivative of coenzyme A in which the sulfhydryl grou  
"Interacting selectively with acyl-CoA, any derivative of coenzyme A in which the sulfhydryl grou  
[goid 15280] [evidence IEA]; Interacting selectively with sodium ions (Na<sup>+</sup>) [goid 31402] [evidenc  
"Catalysis of a biochemical reaction at physiological temperatures. In biologically catalyzed reac  
Interacting selectively with DNA (deoxyribonucleic acid) [goid 3677] [evidence IEA]

"Interacting selectively with beta-amyloid peptide/protein and/or its precursor [goid 1540] [pmid 1  
"Interacting selectively with a nucleotide, any compound consisting of a nucleoside that is esteril  
"Interacting selectively with a nucleotide, any compound consisting of a nucleoside that is esteril  
l glycerol [goid 6094] [pmid 10103055] [evidence ISS]"  
"Catalysis of the reaction: citrate = cis-aconitate + H<sub>2</sub>O = isocitrate; i.e. the interconversion of cit  
"Catalysis of the reaction: citrate = cis-aconitate + H<sub>2</sub>O = isocitrate; i.e. the interconversion of cit  
"Catalysis of the reaction: a carboxylic ester + H<sub>2</sub>O = an alcohol + a carboxylic anion [goid 4091  
"Catalysis of the reaction: acetyl-CoA + H<sub>2</sub>O = CoA + acetate [goid 3986] [evidence ISS]; Cataly  
"Catalysis of the reaction: a carboxylic ester + H<sub>2</sub>O = an alcohol + a carboxylic anion [goid 4091  
"Catalysis of the reaction: a carboxylic ester + H<sub>2</sub>O = an alcohol + a carboxylic anion [goid 4091  
"Catalysis of the reaction: a carboxylic ester + H<sub>2</sub>O = an alcohol + a carboxylic anion [goid 4091  
"Catalysis of the reaction: acetyl-CoA + H<sub>2</sub>O = CoA + acetate [goid 3986] [evidence ISS]; Cataly  
"Catalysis of the reaction: acyl-CoA + acceptor = 2,3-dehydroacyl-CoA + reduced acceptor [goic  
"Catalysis of the reaction: acyl-CoA + acceptor = 2,3-dehydroacyl-CoA + reduced acceptor [goic

"Catalysis of the reaction: acyl-CoA + acceptor = 2,3-dehydroacyl-CoA + reduced acceptor [goic  
"Catalysis of the reaction: protein tyrosine phosphate + H2O = protein tyrosine + phosphate [goi  
"Catalysis of the reaction: an orthophosphoric monoester + H2O = an alcohol + phosphate, with  
"Catalysis of the reaction: an orthophosphoric monoester + H2O = an alcohol + phosphate, with  
"Catalysis of the reaction: an orthophosphoric monoester + H2O = an alcohol + phosphate, with  
"Catalysis of the reaction: an orthophosphoric monoester + H2O = an alcohol + phosphate, with  
"Interacting selectively with DNA (deoxyribonucleic acid) [goid 3677] [pmid 1937464] [evidence I  
"Elemental activities, such as catalysis or binding, describing the actions of a gene product at th

"Catalysis of the reaction: ATP + a long-chain carboxylic acid + CoA = AMP + diphosphate + an  
"Catalysis of the ligation of two substances with concomitant breaking of a diphosphate linkage,  
"Catalysis of a biochemical reaction at physiological temperatures. In biologically catalyzed reac  
"Catalysis of a biochemical reaction at physiological temperatures. In biologically catalyzed reac  
"Interacting selectively with magnesium (Mg) ions [goid 287] [evidence IEA]; Catalysis of the rea  
"Interacting selectively with magnesium (Mg) ions [goid 287] [evidence IEA]; Catalysis of the rea  
"Interacting selectively with magnesium (Mg) ions [goid 287] [evidence IEA]; Catalysis of the rea  
"Interacting selectively with a nucleotide, any compound consisting of a nucleoside that is esteril  
"Catalysis of the reaction: ATP + acetate + CoA = AMP + diphosphate + acetyl-CoA [goid 3987]  
"Catalysis of the reaction: ATP + acetate + CoA = AMP + diphosphate + acetyl-CoA [goid 3987]  
"Interacting selectively with any protein or protein complex (a complex of two or more proteins th  
"Interacting selectively with any protein or protein complex (a complex of two or more proteins th  
"Interacting selectively with any protein or protein complex (a complex of two or more proteins th  
"Interacting selectively with a nucleotide, any compound consisting of a nucleoside that is esteril  
"Interacting selectively with a nucleotide, any compound consisting of a nucleoside that is esteril  
"Interacting selectively with chromatin, the network of fibers of DNA and protein that make up th  
The action of a molecule that contributes to the structural integrity of a complex or assembly with  
"Interacting selectively with monomeric or multimeric forms of actin, including actin filaments [go  
"Interacting selectively with a nucleoside, a compound consisting of a purine or pyrimidine nitrog  
The action of a molecule that contributes to the structural integrity of a complex or assembly with  
"Interacting selectively with a nucleotide, any compound consisting of a nucleoside that is esteril  
"Interacting selectively with a nucleotide, any compound consisting of a nucleoside that is esteril  
"Interacting selectively with a nucleotide, any compound consisting of a nucleoside that is esteril  
"Interacting selectively with a nucleotide, any compound consisting of a nucleoside that is esteril  
"Interacting selectively with a nucleotide, any compound consisting of a nucleoside that is esteril  
"Interacting selectively with any protein or protein complex (a complex of two or more proteins th  
The action of a molecule that contributes to the structural integrity of a complex or assembly with  
The action of a molecule that contributes to the structural integrity of a complex or assembly with  
The action of a molecule that contributes to the structural integrity of a complex or assembly with  
"Interacting selectively with a nucleotide, any compound consisting of a nucleoside that is esteril  
"Interacting selectively with a nucleotide, any compound consisting of a nucleoside that is esteril  
"Catalysis of the reaction: an N-acyl-L-amino acid + H2O = a carboxylate + an L-amino acid [goi  
Catalysis of the reaction: an N-acyl-L-amino acid + H2O = a carboxylate + an L-amino acid [goic  
"Catalysis of the reaction: an acyl phosphate + H2O = a carboxylate + phosphate [goid 3998] [e  
"Catalysis of the reaction: an acyl phosphate + H2O = a carboxylate + phosphate [goid 3998] [e



"The action characteristic of a hormone, any substance formed in very small amounts in one spot  
"The function of binding to a specific DNA sequence in order to modulate transcription. The tran

"Interacting selectively with iron (Fe) ions [goid 5506] [evidence IEA]; Catalysis of an oxidation-re  
Combining with adenosine and transmitting the signal to a heterotrimeric G-protein complex to ir  
Combining with adenosine and transmitting the signal to a heterotrimeric G-protein complex to ir  
Combining with an extracellular or intracellular messenger to initiate a change in cell activity [goid

"Interacting selectively with magnesium (Mg) ions [goid 287] [evidence IEA]; Catalysis of the tran

"Interacting selectively with magnesium (Mg) ions [goid 287] [evidence IEA]; Catalysis of the rea

"Interacting selectively with magnesium (Mg) ions [goid 287] [evidence IEA]; Catalysis of the rea

"Interacting selectively with magnesium (Mg) ions [goid 287] [evidence IEA]; Catalysis of the hyc

Combining with an extracellular or intracellular messenger to initiate a change in cell activity [goid

"Combining with an extracellular or intracellular messenger to initiate a change in cell activity [gc

"Interacting selectively with a nucleotide, any compound consisting of a nucleoside that is esteril

"Catalysis of the activation of the proteasome, a large multisubunit complex which performs regu

"Catalysis of the cleavage of C-C, C-O, C-N and other bonds by other means than by hydrolysis

"Interacting selectively with a nucleotide, any compound consisting of a nucleoside that is esteril

"Interacting selectively with a nucleotide, any compound consisting of a nucleoside that is esteril

"Interacting selectively with DNA (deoxyribonucleic acid) [goid 3677] [evidence IEA]; The functio

Interacting selectively with DNA (deoxyribonucleic acid) [goid 3677] [evidence IEA]; Interacting s

Interacting selectively with any protein or protein complex (a complex of two or more proteins th

"Interacting selectively with a SH3 domain (Src homology 3) of a protein, small protein modules

Any transcription regulator activity required for initiation or upregulation of transcription [goid 165

n to the mature structure. The brain is one of the two components of the central nervous system

Interacting selectively with DNA (deoxyribonucleic acid) [goid 3677] [evidence IEA]

The function of binding to a specific DNA sequence in order to modulate transcription. The trans

"Interacting selectively with ATP, adenosine 5'-triphosphate, a universally important coenzyme a

"Interacting selectively with a nucleotide, any compound consisting of a nucleoside that is esteril

out of, within or between cells, or within a multicellular organism [goid 6810] [evidence IEA]"

"Catalysis of the reaction: N-formyl-L-kynurenine + H<sub>2</sub>O = formate + L-kynurenine [goid 4061] [e

"Interacting selectively with a clathrin heavy or light chain, the main components of the coat of c

"Catalysis of the reaction: N(4)-(beta-N-acetyl-D-glucosaminy)-L-asparagine + H<sub>2</sub>O = N-acetyl-t

"Catalysis of the hydrolysis of C-terminal amino acid residues from a polypeptide chain by a me

"Combining with an extracellular or intracellular messenger to initiate a change in cell activity [gc

Interacting selectively with any nucleic acid [goid 3676] [evidence IEA]; Interacting selectively wi

"Interacting selectively with a nucleotide, any compound consisting of a nucleoside that is esteril

"Catalysis of the reaction: agmatine + H<sub>2</sub>O = putrescine + urea [goid 8783] [evidence IEA]; Cata

"Catalysis of the reaction: acyl-CoA + 1-acyl-sn-glycerol 3-phosphate = CoA + 1,2-diacyl-sn-glyc

"Catalysis of the reaction: acyl-CoA + 1-acyl-sn-glycerol 3-phosphate = CoA + 1,2-diacyl-sn-glyc  
"Catalysis of the reaction: acyl-CoA + 1-acyl-sn-glycerol 3-phosphate = CoA + 1,2-diacyl-sn-glyc  
"Catalysis of the reaction: acyl-CoA + 1-acyl-sn-glycerol 3-phosphate = CoA + 1,2-diacyl-sn-glyc  
"Catalysis of the reaction: acyl-CoA + 1-acyl-sn-glycerol 3-phosphate = CoA + 1,2-diacyl-sn-glyc  
"Catalysis of the reaction: acyl-CoA + 1-acyl-sn-glycerol 3-phosphate = CoA + 1,2-diacyl-sn-glyc

"The action of a molecule that contributes to the structural integrity of a cytoskeletal structure [go  
"Interacting selectively with one or more specific sites on a receptor molecule, a macromolecule  
"Catalysis of the hydrolysis of C-terminal amino acid residues from a polypeptide chain by a me  
Combining with an extracellular or intracellular messenger to initiate a change in cell activity [goi  
"Catalysis of the transfer of an amino group to an acceptor, usually a 2-oxo acid [goid 8483] [evi  
Interacting selectively with DNA (deoxyribonucleic acid) [goid 3677] [evidence IEA]  
"Catalysis of the reaction: S-adenosyl-L-homocysteine + H2O = adenosine + L-homocysteine [g  
"Catalysis of the reaction: S-adenosyl-L-homocysteine + H2O = adenosine + L-homocysteine [g  
"Catalysis of the reaction: S-adenosyl-L-homocysteine + H2O = adenosine + L-homocysteine [g  
Interacting selectively with DNA (deoxyribonucleic acid) [goid 3677] [evidence IEA]

Interacting selectively with any protein or protein complex (a complex of two or more proteins th  
"The function of binding to a specific DNA sequence in order to modulate transcription. The tran  
"Functions to increase the rate of ATP hydrolysis [goid 1671] [evidence ISS]; Increases the activ  
"Functions to increase the rate of ATP hydrolysis [goid 1671] [evidence IEA]; Increases the activ  
"Interacting selectively with hemoglobin, an oxygen carrying, conjugated protein containing four  
"Catalysis of the reaction: cytidine + H2O = uridine + NH3 [goid 4126] [pmid 10950930] [evidenc  
Interacting selectively with any protein or protein complex (a complex of two or more proteins th  
"Elemental activities, such as catalysis or binding, describing the actions of a gene product at th

"Interacting selectively with DNA (deoxyribonucleic acid) [goid 3677] [evidence IEA]; Interacting  
"Interacting selectively with DNA (deoxyribonucleic acid) [goid 3677] [pmid 15958387] [evidence

"Elemental activities, such as catalysis or binding, describing the actions of a gene product at th  
"Interacting selectively with any mono-, di- or trisaccharide carbohydrate [goid 5529] [evidence I  
Interacting selectively with any protein or protein complex (a complex of two or more proteins th

The function that links a sequence-specific transcription factor to the core RNA polymerase II cc  
"The function of binding to a specific DNA sequence in order to modulate transcription. The tran  
"Interacting selectively with a nucleotide, any compound consisting of a nucleoside that is esteril  
"Interacting selectively with a nucleotide, any compound consisting of a nucleoside that is esteril  
"Interacting selectively with a nucleotide, any compound consisting of a nucleoside that is esteril  
"Interacting selectively with a nucleotide, any compound consisting of a nucleoside that is esteril  
Interacting selectively with an RNA molecule or a portion thereof [goid 3723] [pmid 8769136] [ev  
Interacting selectively with the enzyme protein phosphatase 1 [goid 8157] [pmid 10209101] [evic  
Interacting selectively with any subunit of protein kinase A [goid 51018] [pmid 10858453] [evid  
"Stimulates the exchange of guanyl nucleotides by a GTPase of the Rho family. Under normal c

"Interacting selectively with any protein or protein complex (a complex of two or more proteins th  
Interacting selectively with DNA (deoxyribonucleic acid) [goid 3677] [evidence IEA]; Interacting s  
"Interacting selectively with DNA (deoxyribonucleic acid) [goid 3677] [evidence IEA]; Interacting

Interacting selectively with DNA (deoxyribonucleic acid) [goid 3677] [evidence IEA]

"Catalysis of the reaction: an alditol + NADP+ = an aldose + NADPH + H+ [goid 4032] [evidence

"Catalysis of the reaction: an alditol + NADP+ = an aldose + NADPH + H+ [goid 4032] [pmid 864

"Catalysis of the NADPH-dependent reduction of carbonyl compounds [goid 4033] [pmid 97929

"Catalysis of an oxidation-reduction (redox) reaction, a reversible chemical reaction in which the

"Catalysis of the NADPH-dependent reduction of carbonyl compounds [goid 4033] [pmid 75083

"Catalysis of the reaction: an alditol + NADP+ = an aldose + NADPH + H+ [goid 4032] [pmid 957

"Catalysis of the NADPH-dependent reduction of carbonyl compounds [goid 4033] [pmid 10383

"Interacting selectively with a nucleotide, any compound consisting of a nucleoside that is esterifi  
stem. It may stop or prevent or reduce the rate of cell death by apoptosis and it is activated by st

"Interacting selectively with a nucleotide, any compound consisting of a nucleoside that is esterifi

"Interacting selectively with any protein or protein complex (a complex of two or more proteins th

"Catalysis of the reaction: 2 5-aminolevulinate = porphobilinogen + 2 H2O [goid 4655] [pmid 346

"Catalysis of the reaction: succinyl-CoA + glycine = 5-aminolevulinate + CoA + CO2 [goid 3870]

"Interacting selectively with DNA (deoxyribonucleic acid) [goid 3677] [pmid 16405401] [evidence

"Interacting selectively with any protein or protein complex (a complex of two or more proteins th

"Interacting selectively with any protein or protein complex (a complex of two or more proteins th

"Catalysis of the reaction: ATP + L-glutamate = ADP + L-glutamate 5-phosphate [goid 4349] [ev

"Catalysis of the reaction: retinal + NAD+ + H2O = retinoate + NADH. Acts on both 11-trans and

"Catalysis of the reaction: 3-chloroallyl aldehyde + H2O = 2 H+ + 2 e- + 3-chloroacrylic acid [goid

"Catalysis of the reaction: an aldehyde + NAD+ + H2O = an acid + NADH + H+ [goid 4029] [evic

"Catalysis of the transfer of a methyl group to an acceptor molecule [goid 8168] [evidence IEA];

"Catalysis of the reaction: an aldehyde + NAD+ + H2O = an acid + NADH + H+ [goid 4029] [pmi

"Catalysis of the reaction: 3-chloroallyl aldehyde + H2O = 2 H+ + 2 e- + 3-chloroacrylic acid [goid

"Catalysis of the reaction: 3-chloroallyl aldehyde + H2O = 2 H+ + 2 e- + 3-chloroacrylic acid [goid

"Catalysis of an oxidation-reduction (redox) reaction, a reversible chemical reaction in which the

"Catalysis of the reaction: succinate semialdehyde + NAD+ + H2O = succinate + NADH + H+ [goid

"Interacting selectively with acyl-CoA, any derivative of coenzyme A in which the sulfhydryl group

"Catalysis of the reaction: an aldehyde + NAD+ + H2O = an acid + NADH + H+ [goid 4029] [evic

"Catalysis of the reaction: an aldehyde + NAD+ + H2O = an acid + NADH + H+ [goid 4029] [pmi

"Catalysis of the reaction: D-fructose 1,6-bisphosphate = glycerone phosphate + D-glyceraldehy

"Catalysis of the reaction: D-fructose 1,6-bisphosphate = glycerone phosphate + D-glyceraldehy

Catalysis of the reaction: GDP-mannose + chitobiosyldiphosphodolichol = GDP + beta-D-mannoc

Catalysis of the transfer of a glycosyl group from one compound (donor) to another (acceptor) [g

Catalysis of the transfer of a glycosyl group from one compound (donor) to another (acceptor) [g

Interacting selectively with any protein or protein complex (a complex of two or more proteins th

"Catalysis of the transfer of a mannose residue from GDP-mannose to an oligosaccharide, form

"Catalysis of the reaction: UDP-N-acetyl-D-glucosamine + N-acetyl-D-glucosaminyl-diphosphod

"Catalysis of the transfer of a mannose residue from GDP-mannose to an oligosaccharide, form  
"Catalysis of the transfer of a mannose residue from GDP-mannose to an oligosaccharide, form  
"Catalysis of the transfer of a oligosaccharyl group to an acceptor molecule, typically another ca  
"Catalysis of the transfer of a glycosyl group from one compound (donor) to another (acceptor) [  
"Catalysis of the transfer of a mannose residue from GDP-mannose to an oligosaccharide, form  
Catalysis of the transfer of a glycosyl group from one compound (donor) to another (acceptor) [c  
ie by O6-alkylguanine-DNA alkyltransferase (AGT) [goid 6307] [pmid 8600462] [evidence TAS]"  
"Interacting selectively with damaged DNA [goid 3684] [pmid 12486230] [evidence EXP]; Interac  
"Interacting selectively with damaged DNA [goid 3684] [pmid 12486230] [evidence EXP]; Interac

"Catalysis of an oxidation-reduction (redox) reaction, a reversible chemical reaction in which the  
"Interacting selectively with monomeric or multimeric forms of actin, including actin filaments [go

"Interacting selectively with an RNA molecule or a portion thereof [goid 3723] [evidence IEA]; Ca  
"Elemental activities, such as catalysis or binding, describing the actions of a gene product at th  
"Catalysis of the reaction: arachidonate + O<sub>2</sub> = (5Z,8Z,10E,14Z)-(12S)-12-hydroperoxycosa-5,8  
"Catalysis of the reaction: arachidonate + O<sub>2</sub> = (6E,8Z,11Z,14Z)-(5S)-5-hydroperoxycosa-6,8,11  
"The selective, often stoichiometric, interaction of a molecule with one or more specific sites on  
"Interacting selectively with magnesium (Mg) ions [goid 287] [evidence IEA]; Catalysis of the rea  
"Catalysis of the reaction: ATP + a protein serine/threonine = ADP + protein serine/threonine ph  
"Catalysis of the reaction: ATP + a protein serine/threonine = ADP + protein serine/threonine ph  
"Catalysis of a biochemical reaction at physiological temperatures. In biologically catalyzed reac  
"Interacting selectively with magnesium (Mg) ions [goid 287] [evidence IEA]; Catalysis of the rea  
"Stimulates the exchange of guanyl nucleotides by a GTPase. Under normal cellular physiologic  
"Elemental activities, such as catalysis or binding, describing the actions of a gene product at th

The function of binding to a specific DNA sequence in order to modulate transcription. The trans  
"Catalysis of the reaction: (2S)-2-methylacyl-CoA = (2R)-2-methylacyl-CoA [goid 8111] [evidenc  
romolecular constituents under conditions of cellular stress and remodeling the intracellular struc  
"Catalysis of the reaction: S-adenosyl-L-methionine = (5-deoxy-5-adenosyl)(3-aminopropyl) met  
"Interacting selectively with iron (Fe) ions [goid 5506] [evidence IEA]; Interacting selectively with  
"Catalysis of the reaction: N-acetyl-D-glucosamine 6-phosphate + H<sub>2</sub>O = D-glucosamine 6-phos  
"Catalysis of the reaction: ATP + ubiquitin + protein lysine = AMP + diphosphate + protein N-ubi  
Interacting selectively with any protein or protein complex (a complex of two or more proteins th  
Interacting selectively with any protein or protein complex (a complex of two or more proteins th  
"Elemental activities, such as catalysis or binding, describing the actions of a gene product at th

ver time from an initial condition (e.g. a zygote or a young adult) to a later condition (e.g. a multic

"Interacting selectively with any protein or protein complex (a complex of two or more proteins th  
Interacting selectively with an identical protein or proteins [goid 42802] [evidence IEA]





"Stimulates the exchange of guanyl nucleotides by a GTPase. Under normal cellular physiologic  
Interacting selectively with any protein or protein complex (a complex of two or more proteins th

Interacting selectively with calcium ions (Ca<sup>2+</sup>) [goid 5509] [evidence IEA]

"Enables the directed movement of substances (such as macromolecules, small molecules, ions

Interacting selectively with any protein or protein complex (a complex of two or more proteins th  
ormation to the mature structure [goid 8584] [pmid 8812458] [evidence TAS]"

Interacting selectively with any protein or protein complex (a complex of two or more proteins th

Interacting selectively with zinc (Zn) ions [goid 8270] [evidence IEA]; Interacting selectively with

"Interacting selectively with monomeric or multimeric forms of actin, including actin filaments [go

Interacting selectively with any protein or protein complex (a complex of two or more proteins th

Interacting selectively with any protein or protein complex (a complex of two or more proteins th

Interacting selectively with any protein or protein complex (a complex of two or more proteins th

"Interacting selectively with any protein or protein complex (a complex of two or more proteins th

Combining with an extracellular or intracellular messenger to initiate a change in cell activity [goid  
Combining with an extracellular or intracellular messenger to initiate a change in cell activity [goid  
Interacting selectively with zinc (Zn) ions [goid 8270] [evidence IEA]; Interacting selectively with  
"Stops, prevents or reduces the activity of a phospholipase, an enzyme that catalyzes of the hyc  
"Interacting selectively with calcium ions (Ca<sup>2+</sup>) [goid 5509] [evidence IEA]; Interacting selective  
"Stops, prevents or reduces the activity of a phospholipase, an enzyme that catalyzes of the hyc

"Stops, prevents or reduces the activity of a phospholipase, an enzyme that catalyzes of the hyc  
"Stops, prevents or reduces the activity of a phospholipase, an enzyme that catalyzes of the hyc  
"Interacting selectively with calcium ions (Ca<sup>2+</sup>) [goid 5509] [evidence IEA]; Interacting selective  
"Interacting selectively with calcium ions (Ca<sup>2+</sup>) [goid 5509] [evidence IEA]; Interacting selective  
"Interacting selectively with calcium ions (Ca<sup>2+</sup>) [goid 5509] [evidence IEA]; Interacting selective  
"Interacting selectively with calcium ions (Ca<sup>2+</sup>) [goid 5509] [evidence IEA]; Interacting selective  
"Interacting selectively with copper (Cu) ions [goid 5507] [evidence IEA]; Interacting selectively v  
"Interacting selectively with copper (Cu) ions [goid 5507] [pmid 8972912] [evidence TAS]; Intera  
"The function of binding to a specific DNA sequence in order to modulate transcription. The tran  
"Catalysis of the reaction: an aldehyde + H<sub>2</sub>O + O<sub>2</sub> = a carboxylic acid + H<sub>2</sub>O<sub>2</sub> [goid 4031] [pmi

"Enables the directed movement of substances (such as macromolecules, small molecules, ions  
"Enables the directed movement of substances (such as macromolecules, small molecules, ions  
"Interacting selectively with any protein or protein complex (a complex of two or more proteins th  
Interacting selectively with calcium ions (Ca<sup>2+</sup>) [goid 5509] [evidence IEA]; Interacting selectivel  
"Interacting selectively with any protein or protein complex (a complex of two or more proteins th  
"Interacting selectively with any protein or protein complex (a complex of two or more proteins th  
"Interacting selectively with any protein or protein complex (a complex of two or more proteins th  
"Interacting selectively with any protein or protein complex (a complex of two or more proteins th  
"Enables the directed movement of substances (such as macromolecules, small molecules, ions  
"Enables the directed movement of substances (such as macromolecules, small molecules, ions  
"Interacting selectively with any protein or protein complex (a complex of two or more proteins th  
"Enables the directed movement of substances (such as macromolecules, small molecules, ions  
"Enables the directed movement of substances (such as macromolecules, small molecules, ions  
Interacting selectively with any protein or protein complex (a complex of two or more proteins th  
Interacting selectively with any protein or protein complex (a complex of two or more proteins th  
"Enables the directed movement of substances (such as macromolecules, small molecules, ions  
"Interacting selectively with any protein or protein complex (a complex of two or more proteins th  
"Enables the directed movement of substances (such as macromolecules, small molecules, ions  
The action of a molecule that contributes to the structural integrity of a complex or assembly with  
"Interacting selectively with a nucleotide, any compound consisting of a nucleoside that is esterifi  
Interacting selectively with calcium ions (Ca<sup>2+</sup>) [goid 5509] [evidence IEA]  
level or activity of a second messenger or other downstream target, and ultimately effecting a ch  
"Interacting selectively with beta-amyloid peptide/protein and/or its precursor [goid 1540] [eviden  
Interacting selectively with any protein or protein complex (a complex of two or more proteins th  
"Interacting selectively with the beta subunit of the catenin complex [goid 8013] [pmid 11533658

"Catalysis of the hydrolysis of internal, alpha-peptide bonds in a polypeptide chain by a catalytic  
"Interacting selectively with magnesium (Mg) ions [goid 287] [evidence IEA]; Interacting selective  
"Interacting selectively with DNA (deoxyribonucleic acid) [goid 3677] [evidence IEA]; Catalysis of  
Interacting selectively with any protein or protein complex (a complex of two or more proteins tha  
"The selective, often stoichiometric, interaction of a molecule with one or more specific sites on  
Interacting selectively with zinc (Zn) ions [goid 8270] [evidence IEA]; Interacting selectively with  
Interacting selectively with DNA (deoxyribonucleic acid) [goid 3677] [evidence IEA]; Interacting s  
"Interacting selectively with copper (Cu) ions [goid 5507] [evidence IEA]; Interacting selectively v  
"Interacting selectively with DNA (deoxyribonucleic acid) [goid 3677] [pmid 7702756] [evidence I

Interacting selectively with any protein or protein complex (a complex of two or more proteins tha  
"Interacting selectively with a lipid [goid 8289] [evidence IEA]; Enables the directed movement o  
"Interacting selectively with an RNA molecule or a portion thereof [goid 3723] [evidence IEA]; Int  
"Interacting selectively with an RNA molecule or a portion thereof [goid 3723] [pmid 11863358] [  
"Interacting selectively with an RNA molecule or a portion thereof [goid 3723] [pmid 11863358] [  
"Interacting selectively with zinc (Zn) ions [goid 8270] [evidence IEA]; Catalysis of the hydrolysis  
"Interacting selectively with a lipid [goid 8289] [evidence IEA]; Enables the directed movement o  
"Interacting selectively with beta-amyloid peptide/protein and/or its precursor [goid 1540] [pmid 1  
"Interacting selectively with one or more specific sites on a receptor molecule, a macromolecule  
"Mediates the transfer of a signal from the outside to the inside of a cell by means other than the  
"Enables the directed movement of lipids into, out of, within or between cells [goid 5319] [eviden  
Interacting selectively with a lipid [goid 8289] [evidence IEA]  
"Enables the directed movement of lipids into, out of, within or between cells [goid 5319] [pmid 1  
"Enables the directed movement of lipids into, out of, within or between cells [goid 5319] [eviden

"Catalysis of movement along a microtubule, coupled to the hydrolysis of a nucleoside triphosph  
Interacting selectively with any protein or protein complex (a complex of two or more proteins tha  
"Interacting selectively with adenine, a purine base [goid 2055] [evidence IEA]; Catalysis of the r  
"Interacting selectively with chromatin, the network of fibers of DNA and protein that make up the  
"Enables the directed movement of substances (such as macromolecules, small molecules, ions  
"Enables the directed movement of substances (such as macromolecules, small molecules, ions

Interacting selectively with an RNA molecule or a portion thereof [goid 3723] [evidence IEA]  
"[goid 5057] [evidence IEA]; Interacting selectively with zinc (Zn) ions [goid 8270] [evidence IEA]

stituents by the invagination of small region of the plasma membrane to form a new membrane-l  
Interacting selectively with any protein or protein complex (a complex of two or more proteins tha  
"Catalysis of the transfer of an acetyl group to a nitrogen atom on the acceptor molecule [goid 8  
"Catalysis of the acetylation of the N-terminal amino acid residue of a peptide or protein, accord  
"Interacting selectively with a nucleotide, any compound consisting of a nucleoside that is esteril  
"Interacting selectively with a nucleotide, any compound consisting of a nucleoside that is esteril  
"Interacting selectively with a nucleotide, any compound consisting of a nucleoside that is esteril



"Stimulates the exchange of guanyl nucleotides by a GTPase. Under normal cellular physiologic  
"Stimulates the exchange of guanyl nucleotides by a GTPase. Under normal cellular physiologic  
Interacting selectively with DNA (deoxyribonucleic acid) [goid 3677] [evidence IEA]; The function  
Interacting selectively with zinc (Zn) ions [goid 8270] [evidence IEA]; Interacting selectively with  
The function of binding to a specific DNA sequence in order to modulate transcription. The trans  
Interacting selectively with DNA (deoxyribonucleic acid) [goid 3677] [pmid 10446990] [evidence  
Interacting selectively with DNA (deoxyribonucleic acid) [goid 3677] [evidence IEA]  
"Interacting selectively with DNA (deoxyribonucleic acid) [goid 3677] [evidence IEA]; Interacting  
"Elemental activities, such as catalysis or binding, describing the actions of a gene product at th  
Interacting selectively with DNA (deoxyribonucleic acid) [goid 3677] [evidence IEA]  
Interacting selectively with DNA (deoxyribonucleic acid) [goid 3677] [evidence IEA]  
"Interacting selectively with any protein or protein complex (a complex of two or more proteins th  
"Interacting selectively with a nucleotide, any compound consisting of a nucleoside that is esteril  
"Interacting selectively with a nucleotide, any compound consisting of a nucleoside that is esteril  
"Interacting selectively with a nucleotide, any compound consisting of a nucleoside that is esteril  
"Interacting selectively with a nucleotide, any compound consisting of a nucleoside that is esteril  
"Interacting selectively with a nucleotide, any compound consisting of a nucleoside that is esteril

"Interacting selectively with a nucleotide, any compound consisting of a nucleoside that is esteril  
Modulates the rate of GTP hydrolysis by a small monomeric GTPase [goid 5083] [pmid 1048809  
"Interacting selectively with a nucleotide, any compound consisting of a nucleoside that is esteril  
"Interacting selectively with a nucleotide, any compound consisting of a nucleoside that is esteril  
"Interacting selectively with a nucleotide, any compound consisting of a nucleoside that is esteril  
"Interacting selectively with a nucleotide, any compound consisting of a nucleoside that is esteril  
"Interacting selectively with a nucleotide, any compound consisting of a nucleoside that is esteril  
"Interacting selectively with a nucleotide, any compound consisting of a nucleoside that is esteril  
"Interacting selectively with a nucleotide, any compound consisting of a nucleoside that is esteril  
Interacting selectively with any protein or protein complex (a complex of two or more proteins tha  
nt in the mature form of the RNA and joining the remaining sections to form the mature form of t  
Interacting selectively with any protein or protein complex (a complex of two or more proteins tha  
Interacting selectively with any protein or protein complex (a complex of two or more proteins tha  
"Interacting selectively with a nucleotide, any compound consisting of a nucleoside that is esteril  
"Interacting selectively with a nucleotide, any compound consisting of a nucleoside that is esteril  
"Interacting selectively with a nucleotide, any compound consisting of a nucleoside that is esteril  
"The selective, often stoichiometric, interaction of a molecule with one or more specific sites on  
Interacting selectively with any protein or protein complex (a complex of two or more proteins tha  
Interacting selectively with any protein or protein complex (a complex of two or more proteins tha  
"The selective, often stoichiometric, interaction of a molecule with one or more specific sites on  
"The selective, often stoichiometric, interaction of a molecule with one or more specific sites on  
"The selective, often stoichiometric, interaction of a molecule with one or more specific sites on  
"The selective, often stoichiometric, interaction of a molecule with one or more specific sites on  
"The selective, often stoichiometric, interaction of a molecule with one or more specific sites on



"Interacting selectively with a histone, any of a group of water-soluble proteins found in associat

"Combining with an extracellular or intracellular messenger to initiate a change in cell activity [gc

"Interacting selectively with DNA (deoxyribonucleic acid) [goid 3677] [evidence IEA]; Functions t

Interacting selectively with DNA (deoxyribonucleic acid) [goid 3677] [pmid 10393421] [evidence

"Interacting selectively with one or more specific sites on a receptor molecule, a macromolecule

"Catalysis of the reaction: N-(L-arginino)succinate = fumarate + L-arginine [goid 4056] [pmid 282

"The action characteristic of a neuropeptide hormone, any peptide hormone that acts in the cen

Catalysis of the reaction: S-adenosyl-L-methionine + N-acetylserotonin = S-adenosyl-L-homocys

"Catalysis of the reaction: ATP + L-aspartate + L-glutamine = AMP + diphosphate + L-asparagin

Catalysis of the reaction: ATP + L-aspartate + L-glutamine = AMP + diphosphate + L-asparagin

Catalysis of the reaction: an N-acyl-L-amino acid + H<sub>2</sub>O = a carboxylate + an L-amino acid [goid

"Catalysis of the reaction: peptide L-aspartate + 2-oxoglutarate + O<sub>2</sub> = peptide 3-hydroxy-L-asp

"Catalysis of the reaction: peptide L-aspartate + 2-oxoglutarate + O<sub>2</sub> = peptide 3-hydroxy-L-asp

"Interacting selectively with calmodulin, a calcium-binding protein with many roles, both in the ca

"Catalysis of the hydrolysis of internal, alpha-peptide bonds in a polypeptide chain by a mechani

"Elemental activities, such as catalysis or binding, describing the actions of a gene product at th

"Catalysis of the reaction: N(4)-(beta-N-acetyl-D-glucosaminy)-L-asparagine + H<sub>2</sub>O = N-acetyl-t

"Interacting selectively with a nucleotide, any compound consisting of a nucleoside that is esteril

Catalysis of the hydrolysis of ester linkages within nucleic acids [goid 4518] [evidence IEA]

Interacting selectively with zinc (Zn) ions [goid 8270] [evidence IEA]; Interacting selectively with

Interacting selectively with zinc (Zn) ions [goid 8270] [evidence IEA]; Interacting selectively with

"Interacting selectively with a nucleotide, any compound consisting of a nucleoside that is esteril

"Interacting selectively with a nucleotide, any compound consisting of a nucleoside that is esteril

"Interacting selectively with a nucleotide, any compound consisting of a nucleoside that is esteril

"Interacting selectively with a nucleotide, any compound consisting of a nucleoside that is esteril

"Interacting selectively with a nucleotide, any compound consisting of a nucleoside that is esteril

"Catalysis of the reaction: L-arginyl-tRNA + protein = tRNA + L-arginyl-protein [goid 4057] [pmid

"The function of binding to a specific DNA sequence in order to modulate transcription. The tran

"Interacting selectively with zinc (Zn) ions [goid 8270] [evidence IEA]; Interacting selectively with

"The function of binding to a specific DNA sequence in order to modulate transcription. The tran

"The function of binding to a specific DNA sequence in order to modulate transcription. The tran

"The function of binding to a specific DNA sequence in order to modulate transcription. The tran

"The function of binding to a specific DNA sequence in order to modulate transcription. The tran

"The function of binding to a specific DNA sequence in order to modulate transcription. The tran

[evidence IEA]; Any process that modulates the frequency, rate or extent of DNA-dependent trans

Interacting selectively with any protein or protein complex (a complex of two or more proteins th

Interacting selectively with any protein or protein complex (a complex of two or more proteins th

Interacting selectively with any protein or protein complex (a complex of two or more proteins th

romolecular constituents under conditions of cellular stress and remodeling the intracellular stru



"Catalysis of ATP-dependent isopeptide bond formation between the carboxy-terminal residues  
"Interacting selectively with any protein or protein complex (a complex of two or more proteins th  
Interacting selectively with any protein or protein complex (a complex of two or more proteins th  
"Catalysis of the hydrolysis of internal, alpha-peptide bonds in a polypeptide chain by a mechani  
"Catalysis of the hydrolysis of internal, alpha-peptide bonds in a polypeptide chain by a mechani  
Interacting selectively with any protein or protein complex (a complex of two or more proteins th  
"Catalysis of a biochemical reaction at physiological temperatures. In biologically catalyzed reac  
n a specialized membrane sac, called the isolation membrane, starts to enclose a portion of the  
Catalysis of the hydrolysis of any glycosyl bond [goid 16798] [evidence IEA]  
"Catalysis of the reaction:  $\text{IMP} + \text{H}_2\text{O} = 5\text{-formamido-1-(5-phosphoribosyl)imidazole-4-carboxan}$

"Interacting selectively with a nucleotide, any compound consisting of a nucleoside that is esteril  
"Interacting selectively with DNA (deoxyribonucleic acid) [goid 3677] [evidence IEA]; Catalysis of  
Interacting selectively with zinc (Zn) ions [goid 8270] [evidence IEA]  
"The function of a transcription cofactor that represses transcription from a RNA polymerase II p  
The function of binding to a specific DNA sequence in order to modulate transcription. The trans  
Interacting selectively with DNA (deoxyribonucleic acid) [goid 3677] [evidence IEA]; Plays a role  
Interacting selectively with DNA (deoxyribonucleic acid) [goid 3677] [evidence IEA]; Plays a role  
"Catalysis of the transfer of copper (Cu) ions from one side of a membrane to the other [goid 53  
"Interacting selectively with a nucleotide, any compound consisting of a nucleoside that is esteril  
"Interacting selectively with a nucleotide, any compound consisting of a nucleoside that is esteril  
"Interacting selectively with a nucleotide, any compound consisting of a nucleoside that is esteril  
"Interacting selectively with a nucleotide, any compound consisting of a nucleoside that is esteril  
"Interacting selectively with a nucleotide, any compound consisting of a nucleoside that is esteril  
"Interacting selectively with a nucleotide, any compound consisting of a nucleoside that is esteril  
"Catalysis of the reaction:  $4\text{-nitrophenyl phosphate} + \text{H}_2\text{O} = 4\text{-nitrophenol} + \text{phosphate}$  [goid 38  
"Interacting selectively with a nucleotide, any compound consisting of a nucleoside that is esteril  
Catalysis of the transfer of a solute or solutes from one side of a membrane to the other accordi  
Catalysis of the transfer of a solute or solutes from one side of a membrane to the other accordi  
Catalysis of the transfer of a solute or solutes from one side of a membrane to the other accordi  
"Interacting selectively with a nucleotide, any compound consisting of a nucleoside that is esteril  
"Interacting selectively with a nucleotide, any compound consisting of a nucleoside that is esteril

"Interacting selectively with a nucleotide, any compound consisting of a nucleoside that is esteril  
"Interacting selectively with a nucleotide, any compound consisting of a nucleoside that is esteril  
"Interacting selectively with a nucleotide, any compound consisting of a nucleoside that is esteril  
"Interacting selectively with a nucleotide, any compound consisting of a nucleoside that is esteril  
"Interacting selectively with a nucleotide, any compound consisting of a nucleoside that is esteril  
"Catalysis of the reaction:  $\text{ATP} + \text{H}_2\text{O} = \text{ADP} + \text{phosphate}$ . May or may not be coupled to anothe  
"Enables the directed movement of substances (such as macromolecules, small molecules, ions)  
"Catalysis of the hydrolysis of various bonds, e.g. C-O, C-N, C-C, phosphoric anhydride bonds, c  
"Catalysis of the hydrolysis of various bonds, e.g. C-O, C-N, C-C, phosphoric anhydride bonds, c



"Interacting selectively with calmodulin, a calcium-binding protein with many roles, both in the ca  
Catalysis of the reaction: ATP + a protein serine/threonine = ADP + protein serine/threonine phc  
"Combining with an extracellular or intracellular messenger to initiate a change in cell activity [gc  
"Interacting selectively with an RNA molecule or a portion thereof [goid 3723] [evidence IEA]; Int  
Interacting selectively with any protein or protein complex (a complex of two or more proteins th  
"The selective, often stoichiometric, interaction of a molecule with one or more specific sites on .  
"Interacting selectively with an RNA molecule or a portion thereof [goid 3723] [pmid 10814712] [  
"Elemental activities, such as catalysis or binding, describing the actions of a gene product at th  
"Interacting selectively with any protein or protein complex (a complex of two or more proteins th

"Interacting selectively with an RNA molecule or a portion thereof [goid 3723] [evidence IEA]; Int

"Interacting selectively with a nucleotide, any compound consisting of a nucleoside that is esteril  
Interacting selectively with any protein or protein complex (a complex of two or more proteins th

"Interacting selectively with a nucleotide, any compound consisting of a nucleoside that is esteril

"Elemental activities, such as catalysis or binding, describing the actions of a gene product at th  
Interacting selectively with any protein or protein complex (a complex of two or more proteins th

"Interacting selectively with monomeric or multimeric forms of actin, including actin filaments [go

[goid 5185] [evidence IEA]; [goid 5185] [evidence IEA]

∠ [goid 187] [evidence IEA]; The progression of biochemical and morphological phases and even  
Mediates the transfer of a signal from the outside to the inside of a cell by means other than the  
Mediates the transfer of a signal from the outside to the inside of a cell by means other than the  
"Elemental activities, such as catalysis or binding, describing the actions of a gene product at th

"Catalysis of the hydrolysis of phosphodiester bonds in chains of RNA [goid 4540] [pmid 104627

"Elemental activities, such as catalysis or binding, describing the actions of a gene product at th  
B is sequestered by the inhibitor I-kappaB, and is released when I-kappaB is phosphorylated by

"Catalysis of a biochemical reaction at physiological temperatures. In biologically catalyzed reac  
Interacting selectively with any protein or protein complex (a complex of two or more proteins th

"Interacting selectively with magnesium (Mg) ions [goid 287] [evidence IEA]; Catalysis of the tra

"Catalysis of the transfer of a galactosyl group to an acceptor molecule, typically another carboh

"Catalysis of the transfer of a galactosyl group to an acceptor molecule, typically another carboh

"Catalysis of the reaction: UDP-galactose + N-acetylglucosamine = galactose-beta-1,3-N-acetyl

Catalysis of the transfer of a glycosyl group from one compound (donor) to another (acceptor) [c

"Catalysis of the reaction: UDP-glucuronate + 3-beta-D-galactosyl-4-beta-D-galactosyl-O-beta-D

"Catalysis of the transfer of a galactosyl group to an acceptor molecule, typically another carboh

"Catalysis of the transfer of a galactosyl group to an acceptor molecule, typically another carboh

"Catalysis of the transfer of a galactosyl group to an acceptor molecule, typically another carboh

"Catalysis of the transfer of a galactosyl group to an acceptor molecule, typically another carboh

"Catalysis of the transfer of a galactosyl group to an acceptor molecule, typically another carboh

Catalysis of the transfer of a glycosyl group from one compound (donor) to another (acceptor) [c  
Catalysis of the reaction: UDP-N-acetyl-D-galactosamine + (N-acetylneuraminy)-D-galactosyl-D  
"Catalysis of the transfer of a group, e.g. a methyl group, glycosyl group, acyl group, phosphoru  
"Catalysis of the transfer of a group, e.g. a methyl group, glycosyl group, acyl group, phosphoru  
"Catalysis of the reaction: UDP-galactose + N-acetyl-beta-D-glucosaminyglycopeptide = UDP +  
"Catalysis of the reaction: UDP-galactose + N-acetyl-beta-D-glucosaminyglycopeptide = UDP +  
"Catalysis of the reaction: UDP-galactose + N-acetyl-beta-D-glucosaminyglycopeptide = UDP +  
"Catalysis of the reaction: UDP-galactose + N-acetyl-D-glucosamine = UDP + N-acetylactosami  
"Catalysis of the transfer of a galactosyl group to an acceptor molecule, typically another carboh  
"Interacting selectively with magnesium (Mg) ions [goid 287] [evidence IEA]; Interacting selective  
"Catalysis of the transfer of a galactosyl group to an acceptor molecule, typically another carboh  
Interacting selectively with any protein or protein complex (a complex of two or more proteins th

"Catalysis of the hydrolysis of internal, alpha-peptide bonds in a polypeptide chain by a mechani  
"The function of binding to a specific DNA sequence in order to modulate transcription. The tran  
Interacting selectively with any protein or protein complex (a complex of two or more proteins th  
Interacting selectively with any protein or protein complex (a complex of two or more proteins th  
Interacting selectively with any protein or protein complex (a complex of two or more proteins th  
Interacting selectively with any protein or protein complex (a complex of two or more proteins th  
Interacting selectively with any protein or protein complex (a complex of two or more proteins th

Combining with an extracellular or intracellular messenger to initiate a change in cell activity [goid  
"Interacting selectively with a protein C-terminus, the end of any peptide chain at which the 1-ca  
"Elemental activities, such as catalysis or binding, describing the actions of a gene product at th  
level or activity of a second messenger or other downstream target, and ultimately effecting a ch  
"Interacting selectively with a protein C-terminus, the end of any peptide chain at which the 1-ca

Interacting selectively with DNA (deoxyribonucleic acid) [goid 3677] [evidence IEA]  
Interacting selectively with DNA (deoxyribonucleic acid) [goid 3677] [evidence IEA]  
æ to a mitogen, cytokine, chemokine, cellular ligand, or an antigen for which it is specific [goid 42  
Interacting selectively with DNA (deoxyribonucleic acid) [goid 3677] [evidence IEA]  
"Catalysis of the reaction: ubiquitin C-terminal thiolester + H<sub>2</sub>O = ubiquitin + a thiol. Hydrolysis o

"Interacting selectively with an RNA molecule or a portion thereof [goid 3723] [pmid 12419249] [  
"The function of binding to a specific DNA sequence in order to modulate transcription. The tran

"Interacting selectively with any nucleic acid [goid 3676] [evidence IEA]; Catalysis of the reactor

Interacting selectively with any protein or protein complex (a complex of two or more proteins th  
Interacting selectively with any protein or protein complex (a complex of two or more proteins th  
Interacting selectively with any protein or protein complex (a complex of two or more proteins th  
"The function of binding to a specific DNA sequence in order to modulate transcription. The tran  
"The function of binding to a specific DNA sequence in order to modulate transcription. The tran

"The function of binding to a specific DNA sequence in order to modulate transcription. The tran  
Interacting selectively with any protein or protein complex (a complex of two or more proteins th  
Interacting selectively with any protein or protein complex (a complex of two or more proteins th  
The function of binding to a specific DNA sequence in order to modulate transcription. The trans  
Interacting selectively with DNA (deoxyribonucleic acid) [goid 3677] [evidence IEA]; Interacting s  
Interacting selectively with any protein or protein complex (a complex of two or more proteins th  
"Interacting selectively with iron (Fe) ions [goid 5506] [evidence IEA]; Catalysis of the reaction: 4  
Interacting selectively with any protein or protein complex (a complex of two or more proteins th  
"Interacting selectively with a nucleotide, any compound consisting of a nucleoside that is esteril  
"Interacting selectively with ATP, adenosine 5'-triphosphate, a universally important coenzyme a  
Interacting selectively with any protein or protein complex (a complex of two or more proteins th  
"Catalysis of movement along a microtubule, coupled to the hydrolysis of a nucleoside triphosph  
Interacting selectively with any protein or protein complex (a complex of two or more proteins th  
ular signal, and recognize and characterize the signal. Visual stimuli are detected in the form of p  
Interacting selectively with DNA (deoxyribonucleic acid) [goid 3677] [evidence IEA]; Interacting s  
"Combining with a laminin, a glycoprotein that constitutes the majority of proteins in the baseme  
"The selective, often stoichiometric, interaction of a molecule with one or more specific sites on .  
Combining with an extracellular or intracellular messenger to initiate a change in cell activity [goid  
"Interacting selectively with one or more specific sites on a receptor molecule, a macromolecule  
"Interacting selectively with any protein or protein complex (a complex of two or more proteins th  
"Stimulates the exchange of guanyl nucleotides by a GTPase. Under normal cellular physiologic

Interacting selectively with any protein or protein complex (a complex of two or more proteins th

"Catalysis of the reaction: a branched-chain amino acid + 2-oxoglutarate = L-glutamate + a 2-ox  
"Catalysis of the reaction: a branched-chain amino acid + 2-oxoglutarate = L-glutamate + a 2-ox  
Interacting selectively with any protein or protein complex (a complex of two or more proteins th  
"Catalysis of the transfer of a methyl group to an acceptor molecule [goid 8168] [evidence IEA];  
"Interacting selectively with beta-amyloid peptide/protein and/or its precursor [goid 1540] [pmid 1  
[goid 3826] [pmid 7883996] [evidence IDA]; Catalysis of the reaction: 3-methyl-2-oxobutanoate .  
"[goid 3826] [evidence IEA]; Catalysis of the reaction: 3-methyl-2-oxobutanoate + lipoamide = S  
"Catalysis of the phosphorylation of a specific transcription regulator in response to the presenc  
"The function of a transcription cofactor that activates transcription from a RNA polymerase II pr  
Interacting selectively with any nucleic acid [goid 3676] [evidence IEA]; Interacting selectively wi  
Interacting selectively with any protease or peptidase [goid 2020] [pmid 10620603] [evidence ID  
Interacting selectively with any protein or protein complex (a complex of two or more proteins th  
Interacting selectively with an identical protein or proteins [goid 42802] [pmid 15131699] [eviden  
Interacting selectively with any protein or protein complex (a complex of two or more proteins th  
"Interacting selectively with any protein or protein complex (a complex of two or more proteins th  
of proteolytic caspases, whose actions dismantle the cell and result in cell death. Apoptosis begi  
Increases the rate of proteolysis catalyzed by a caspase [goid 8656] [pmid 11262395] [evidence  
"Interacting selectively with a transcription factor, any protein required to initiate or regulate trans  
"Interacting selectively with chromatin, the network of fibers of DNA and protein that make up th  
Interacting selectively with DNA (deoxyribonucleic acid) [goid 3677] [evidence IEA]; Interacting s

"Elemental activities, such as catalysis or binding, describing the actions of a gene product at th  
"Interacting selectively with monomeric or multimeric forms of actin, including actin filaments [go  
of proteolytic caspases, whose actions dismantle the cell and result in cell death. Apoptosis begi  
Interacting selectively with any protein or protein complex (a complex of two or more proteins th  
evidence IEA]; Any process that modulates the frequency, rate or extent of DNA-dependent trans  
Interacting selectively with DNA (deoxyribonucleic acid) [goid 3677] [pmid 10330179] [evidence  
"The function of a transcription cofactor that represses transcription from a RNA polymerase II p  
evidence IEA]; Any process that modulates the frequency, rate or extent of DNA-dependent trans  
"Catalysis of the reaction: ATP + a protein serine/threonine = ADP + protein serine/threonine ph  
"Interacting selectively with a nucleotide, any compound consisting of a nucleoside that is esteril

"Interacting selectively with any protease or peptidase [goid 2020] [pmid 17077303] [evidence IF  
Interacting selectively with any protein or protein complex (a complex of two or more proteins th  
Interacting selectively with any protein or protein complex (a complex of two or more proteins th  
Interacting selectively with any protein or protein complex (a complex of two or more proteins th

Catalysis of facilitated diffusion of an ion (by an energy-independent process) by passage throug  
"Elemental activities, such as catalysis or binding, describing the actions of a gene product at th  
"Elemental activities, such as catalysis or binding, describing the actions of a gene product at th  
Interacting selectively with any protein or protein complex (a complex of two or more proteins th  
Acting as a marker to identify a membrane and interacting selectively with one or more SNAREs

The action of a molecule that contributes to the structural integrity of a complex or assembly with  
The action of a molecule that contributes to the structural integrity of a cytoskeletal structure [go  
"Interacting selectively with calcium ions (Ca<sup>2+</sup>) [goid 5509] [evidence IEA]; The action of a mol  
Interacting selectively with any protein or protein complex (a complex of two or more proteins th  
The function of binding to a specific DNA sequence in order to modulate transcription. The trans  
The function of binding to a specific DNA sequence in order to modulate transcription. The trans  
"The selective, often stoichiometric, interaction of a molecule with one or more specific sites on

Interacting selectively with an RNA molecule or a portion thereof [goid 3723] [evidence IEA]  
"The action of a molecule that contributes to the structural integrity of a cytoskeletal structure [go

Interacting selectively with a death receptor [goid 5123] [pmid 8918887] [evidence TAS]; Interac  
Interacting selectively with any protein or protein complex (a complex of two or more proteins th  
Interacting selectively with any protein or protein complex (a complex of two or more proteins th  
"Interacting selectively with any protein or protein complex (a complex of two or more proteins th

Interacting selectively with any protein or protein complex (a complex of two or more proteins that catalyze the reaction: ATP + ubiquitin + protein lysine = AMP + diphosphate + protein N-ubiquitin) [goid 4869] [evidence IEA]; Interacting selectively with any protein or protein complex (a complex of two or more proteins that catalyze the reaction: ATP + ubiquitin + protein lysine = AMP + diphosphate + protein N-ubiquitin) [goid 4869] [evidence IEA];

"Interacting selectively with a nucleotide, any compound consisting of a nucleoside that is esterified to a phosphate group [goid 42802] [evidence IEA];

"Interacting selectively with a nucleotide, any compound consisting of a nucleoside that is esterified to a phosphate group [goid 42802] [evidence IEA];

"Catalysis of the hydrolysis of N-terminal amino acid residues from in a polypeptide chain [goid 42802] [evidence IEA];

"The binding activity of a molecule that brings together a transmembrane receptor protein kinase and a protein [goid 42802] [evidence IEA];

"Elemental activities, such as catalysis or binding, describing the actions of a gene product at the molecular level [goid 42802] [evidence IEA];

Interacting selectively with an identical protein or proteins [goid 42802] [pmid 15102850] [evidence IEA];

"Catalysis of the reaction: bilirubin + NAD(P)<sup>+</sup> = biliverdin + NAD(P)H + H<sup>+</sup> [goid 4074] [pmid 10811111] [evidence IEA];

"Catalysis of the reaction: bilirubin + NAD(P)<sup>+</sup> = biliverdin + NAD(P)H + H<sup>+</sup> [goid 4074] [pmid 8111111] [evidence IEA];

The function of binding to a specific DNA sequence in order to modulate transcription. The transcription factor binds to the DNA sequence and recruits the transcription machinery [goid 4074] [evidence IEA];

Interacting selectively with any protein or protein complex (a complex of two or more proteins that catalyze the reaction: ATP + ubiquitin + protein lysine = AMP + diphosphate + protein N-ubiquitin) [goid 4074] [evidence IEA];

Interacting selectively with any protein or protein complex (a complex of two or more proteins that catalyze the reaction: ATP + ubiquitin + protein lysine = AMP + diphosphate + protein N-ubiquitin) [goid 4074] [evidence IEA];

"Interacting selectively with a nucleotide, any compound consisting of a nucleoside that is esterified to a phosphate group [goid 4074] [evidence IEA];

"The function that stimulates a cell to grow or proliferate. Most growth factors have other actions [goid 4074] [evidence IEA];

"Mediates the transfer of a signal from the outside to the inside of a cell by means other than the cell membrane [goid 4074] [evidence IEA];

"Functions to control the survival, growth, differentiation and effector function of tissues and cells [goid 4074] [evidence IEA];

"Functions to control the survival, growth, differentiation and effector function of tissues and cells [goid 4074] [evidence IEA];

"The function that stimulates a cell to grow or proliferate. Most growth factors have other actions [goid 4074] [evidence IEA];

"The function that stimulates a cell to grow or proliferate. Most growth factors have other actions [goid 4074] [evidence IEA];

"Interacting selectively with a nucleotide, any compound consisting of a nucleoside that is esterified to a phosphate group [goid 4074] [evidence IEA];

"Interacting selectively with a nucleotide, any compound consisting of a nucleoside that is esterified to a phosphate group [goid 4074] [evidence IEA];

"Interacting selectively with a nucleotide, any compound consisting of a nucleoside that is esterified to a phosphate group [goid 4074] [evidence IEA];

Interacting selectively with any protein or protein complex (a complex of two or more proteins that catalyze the reaction: ATP + ubiquitin + protein lysine = AMP + diphosphate + protein N-ubiquitin) [goid 4074] [evidence IEA];

"Increases the activity of a GTPase, an enzyme that catalyzes the hydrolysis of GTP [goid 5096] [evidence IEA];

Interacting selectively with an identical protein to form a homodimer [goid 42803] [pmid 9396766] [evidence IEA];

Interacting selectively with lamin; any of a group of intermediate-filament proteins that form the nuclear lamina [goid 42803] [evidence IEA];

"Elemental activities, such as catalysis or binding, describing the actions of a gene product at the molecular level [goid 42803] [evidence IEA];

Interacting selectively with any protein or protein complex (a complex of two or more proteins that catalyze the reaction: ATP + ubiquitin + protein lysine = AMP + diphosphate + protein N-ubiquitin) [goid 42803] [evidence IEA];

"Catalysis of the reaction: 3-phospho-D-glyceroyl phosphate = 2,3-bisphospho-D-glycerate [goid 8289] [evidence IEA];

"Catalysis of the hydrolysis of various bonds, e.g. C-O, C-N, C-C, phosphoric anhydride bonds, phosphoanhydride bonds [goid 8289] [evidence IEA];

Interacting selectively with a lipid [goid 8289] [evidence IEA];

"Interacting selectively with magnesium (Mg) ions [goid 287] [evidence IEA]; Catalysis of the reaction: ATP + ubiquitin + protein lysine = AMP + diphosphate + protein N-ubiquitin [goid 287] [evidence IEA];

"Interacting selectively with a nucleotide, any compound consisting of a nucleoside that is esterified to a phosphate group [goid 3677] [evidence IEA];

"Interacting selectively with DNA (deoxyribonucleic acid) [goid 3677] [evidence IEA]; Interacting selectively with DNA (deoxyribonucleic acid) [goid 3677] [evidence IEA];

Interacting selectively with single-stranded DNA [goid 3697] [evidence IEA]; Catalysis of the reaction: ATP + ubiquitin + protein lysine = AMP + diphosphate + protein N-ubiquitin [goid 3697] [evidence IEA];

Interacting selectively with any protein or protein complex (a complex of two or more proteins that are associated with each other)

"Elemental activities, such as catalysis or binding, describing the actions of a gene product at the molecular level

Catalysis of the reaction: ATP + a protein serine/threonine = ADP + protein serine/threonine phosphorylated

"Elemental activities, such as catalysis or binding, describing the actions of a gene product at the molecular level

Interacting selectively with any protein or protein complex (a complex of two or more proteins that are associated with each other)

"Interacting selectively with a transcription factor, any protein required to initiate or regulate transcription

The function of binding to a specific DNA sequence in order to modulate transcription. The transcription factor binds to the DNA sequence and recruits the RNA polymerase II to initiate transcription.

"Interacting selectively with a peroxisomal targeting sequence, any of several sequences of amino acids that are found in proteins that are targeted to peroxisomes

Interacting selectively with any protein or protein complex (a complex of two or more proteins that are associated with each other)

"Elemental activities, such as catalysis or binding, describing the actions of a gene product at the molecular level

Transcription; The synthesis of either RNA on a template of DNA or DNA on a template of RNA [goid 6350]

"Elemental activities, such as catalysis or binding, describing the actions of a gene product at the molecular level

Interacting selectively with any protein or protein complex (a complex of two or more proteins that are associated with each other)

Interacting selectively with any protein or protein complex (a complex of two or more proteins that are associated with each other)

"Interacting selectively with a nucleotide, any compound consisting of a nucleoside that is esterified to a phosphate group

"Interacting selectively with a nucleotide, any compound consisting of a nucleoside that is esterified to a phosphate group

Interacting selectively with any protein or protein complex (a complex of two or more proteins that are associated with each other)

"Catalysis of the hydrolysis of internal, alpha-peptide bonds in a polypeptide chain by a catalytic protein

"Elemental activities, such as catalysis or binding, describing the actions of a gene product at the molecular level

"Interacting selectively with any protein or protein complex (a complex of two or more proteins that are associated with each other)

Interacting selectively with zinc (Zn) ions [goid 8270] [evidence IEA]; Interacting selectively with zinc (Zn) ions [goid 8270] [evidence IEA]

Catalysis of facilitated diffusion of a chloride (by an energy-independent process) involving passage through a channel

Interacting selectively with calcium ions (Ca<sup>2+</sup>) [goid 5509] [evidence IEA]; Interacting selectively with calcium ions (Ca<sup>2+</sup>) [goid 5509] [evidence IEA]

Mediates the transfer of a signal from the outside to the inside of a cell by means other than the cell membrane

"Interacting selectively with a nucleotide, any compound consisting of a nucleoside that is esterified to a phosphate group

Catalysis of the transmembrane transfer of a potassium ion by a voltage-gated channel [goid 5200]

Interacting selectively with any protein or protein complex (a complex of two or more proteins that are associated with each other)

Interacting selectively with any protein or protein complex (a complex of two or more proteins that are associated with each other)

Interacting selectively with any protein or protein complex (a complex of two or more proteins that are associated with each other)

Interacting selectively with any protein or protein complex (a complex of two or more proteins that are associated with each other)

Interacting selectively with any protein or protein complex (a complex of two or more proteins that are associated with each other)

Catalysis of the hydrolysis of any non-peptide carbon-nitrogen bond in a linear amide [goid 1681]

Functions to initiate or regulate RNA polymerase II transcription [goid 3702] [pmid 1386332] [evidence IEA]



"The function that links a sequence-specific transcription factor to the core RNA polymerase II complex  
Interacting selectively with any protein or protein complex (a complex of two or more proteins that  
[pmid 9632145] [evidence TAS]; Any process that stops, prevents or reduces the rate or extent of  
"Interacting selectively with a nucleotide, any compound consisting of a nucleoside that is esterified  
Combining with an extracellular or intracellular messenger to initiate a change in cell activity [goi  
Combining with an extracellular or intracellular messenger to initiate a change in cell activity [goi  
"Elemental activities, such as catalysis or binding, describing the actions of a gene product at th

but not, or sparingly, in an aqueous solvent. Includes fatty acids; neutral fats, other fatty-acid esters  
and organisms. A process is a collection of molecular events with a defined beginning and end

"Interacting selectively with any protein or protein complex (a complex of two or more proteins that  
"Interacting selectively with a nucleotide, any compound consisting of a nucleoside that is esterified  
"Interacting selectively with a nucleotide, any compound consisting of a nucleoside that is esterified  
Interacting selectively with any protein or protein complex (a complex of two or more proteins that

The function of binding to a specific DNA sequence in order to modulate transcription. The trans  
cellular matrix, via cell adhesion molecules [goid 7155] [pmid 9560222] [evidence TAS]; The set of  
Interacting selectively with the peripheral benzodiazepine receptor (PBR) [goid 30156] [pmid 99  
Combining with an extracellular or intracellular messenger to initiate a change in cell activity [goi  
"The selective, often stoichiometric, interaction of a molecule with one or more specific sites on a  
"Interacting selectively with any protein or protein complex (a complex of two or more proteins that

"Elemental activities, such as catalysis or binding, describing the actions of a gene product at th  
any of a group of organic compounds based of the general formula  $C_x(H_2O)_y$  [goid 8643] [evid

"Interacting selectively with a nucleotide, any compound consisting of a nucleoside that is esterified

"Catalysis of an oxidation-reduction (redox) reaction, a reversible chemical reaction in which the

Combining with an extracellular or intracellular messenger to initiate a change in cell activity [goid 8270] [evidence IEA];

Catalysis of the incorporation of one atom from molecular oxygen into a compound and the reduction of the other oxygen atom to water [goid 8270] [evidence IEA];

"The selective, often stoichiometric, interaction of a molecule with one or more specific sites on a protein or nucleic acid [goid 8270] [evidence IEA];

"Catalysis of the cleavage of C-C, C-O, C-N and other bonds by other means than by hydrolysis [goid 8270] [evidence IEA];

"Interacting selectively with ATP, adenosine 5'-triphosphate, a universally important coenzyme and energy source [goid 8270] [evidence IEA];

"Elemental activities, such as catalysis or binding, describing the actions of a gene product at the molecular level [goid 8270] [evidence IEA];

"Elemental activities, such as catalysis or binding, describing the actions of a gene product at the cellular level [goid 8270] [evidence IEA];

"Catalysis of an oxidation-reduction (redox) reaction, a reversible chemical reaction in which the oxidation state of a molecule or ion changes [goid 8270] [evidence IEA];

"Interacting selectively with zinc (Zn) ions [goid 8270] [evidence IEA]; Catalysis of the hydrolysis of a peptide bond [goid 8270] [evidence IEA];

"Elemental activities, such as catalysis or binding, describing the actions of a gene product at the molecular level [goid 8270] [evidence IEA];

er time from an initial condition (e.g. a zygote or a young adult) to a later condition (e.g. a multicellular organism) [goid 8270] [evidence IEA];

"Elemental activities, such as catalysis or binding, describing the actions of a gene product at th

"Elemental activities, such as catalysis or binding, describing the actions of a gene product at th

Interacting selectively with any protein or protein complex (a complex of two or more proteins th

Interacting selectively with DNA (deoxyribonucleic acid) [goid 3677] [evidence IEA]

Catalysis of the geometric or structural changes within one molecule. Isomerase is the systemat

Involved in catalyzing the release of a nascent polypeptide chain from a ribosome [goid 3747] [e

Interacting selectively with any protein or protein complex (a complex of two or more proteins that are physically associated with each other)

Interacting selectively with DNA (deoxyribonucleic acid) [goid 3677] [evidence IEA]

Catalysis of the hydrolysis of any ester bond [goid 16788] [evidence IEA]

Interacting selectively with any protein or protein complex (a complex of two or more proteins that are physically associated with each other)

Interacting selectively with calcium ions ( $\text{Ca}^{2+}$ ) [goid 5509] [evidence IEA]

Catalysis of the geometric or structural changes within one molecule. Isomerase is the systematic name for this class of enzymes.

Induction of programmed cell death by apoptosis [goid 8629] [evidence IEA]

Interacting selectively with an identical protein or proteins [goid 42802] [pmid 15147888] [evidence IEA]

"Interacting selectively with an RNA molecule or a portion thereof [goid 3723] [evidence IEA]; Tr

Interacting selectively with DNA (deoxyribonucleic acid) [goid 3677] [evidence IEA]; Interacting s

The action of a molecule that contributes to the structural integrity of the ribosome [goid 3735] [e

"Interacting selectively with purine nucleotides, any compound consisting of a purine nucleoside

Catalysis of facilitated diffusion of an ion (by an energy-independent process) by passage throug

"The selective, often stoichiometric, interaction of a molecule with one or more specific sites on

Interacting selectively with any protein or protein complex (a complex of two or more proteins th

mRNA(s) prior to translation into polypeptide [goid 6397] [evidence IEA]; The covalent alteration o

"Elemental activities, such as catalysis or binding, describing the actions of a gene product at th

"Elemental activities, such as catalysis or binding, describing the actions of a gene product at th

"Enables the directed movement of substances (such as macromolecules, small molecules, ions;  
Interacting selectively with any protein or protein complex (a complex of two or more proteins th

Interacting selectively with DNA (deoxyribonucleic acid) [goid 3677] [evidence IEA]

er time from an initial condition (e.g. a zygote or a young adult) to a later condition (e.g. a multice

Interacting selectively with selenium (Se) [goid 8430] [evidence IEA]

Interacting selectively with any nucleic acid [goid 3676] [evidence IEA]

"Catalysis of the hydrolysis of various bonds, e.g. C-O, C-N, C-C, phosphoric anhydride bonds, ...  
Interacting selectively with DNA (deoxyribonucleic acid) [goid 3677] [evidence IEA]

Interacting selectively with any protein or protein complex (a complex of two or more proteins that ...  
Interacting selectively with any protein or protein complex (a complex of two or more proteins that ...

"Elemental activities, such as catalysis or binding, describing the actions of a gene product at the ...

"Elemental activities, such as catalysis or binding, describing the actions of a gene product at the ...

... more mature rRNA molecules [goid 6364] [evidence IEA]

Mediates the transfer of a signal from the outside to the inside of a cell by means other than the ...

EA]; The directed movement of proteins in a cell, from one side of a membrane to another [goid ...

Interacting selectively with any protein or protein complex (a complex of two or more proteins that

Interacting selectively with an unfolded protein [goid 51082] [evidence IEA]

over time from an initial condition (e.g. a zygote or a young adult) to a later condition (e.g. a multicellular

Interacting selectively with any nucleic acid [goid 3676] [evidence IEA]

Interacting selectively with any protein or protein complex (a complex of two or more proteins that

occur out of, within or between cells, or within a multicellular organism [goid 6810] [evidence IEA]"

Interacting selectively with any protein or protein complex (a complex of two or more proteins that

Interacting selectively with any protein or protein complex (a complex of two or more proteins that

Interacting selectively with any protein or protein complex (a complex of two or more proteins that

Interacting selectively with magnesium (Mg) ions [goid 287] [evidence IEA]; Catalysis of the addition



Interacting selectively with any protein or protein complex (a complex of two or more proteins th

"Elemental activities, such as catalysis or binding, describing the actions of a gene product at th  
Interacting selectively with DNA (deoxyribonucleic acid) [goid 3677] [evidence IEA]; Interacting s

"The selective, often stoichiometric, interaction of a molecule with one or more specific sites on .

"Interacting selectively with any mono-, di- or trisaccharide carbohydrate [goid 5529] [evidence I  
Catalysis of the transfer of a solute or solutes from one side of a membrane to the other accordi

"Interacting selectively with a nucleotide, any compound consisting of a nucleoside that is esterifi

"Catalysis of the dimethylation two adjacent A residues in the loop closing the 3'-terminal stem c

"Catalysis of the reaction: (6S)-tetrahydrofolate + S-aminomethyldihydrofoloylprotein = (6R)-5,10

Interacting selectively with any protein or protein complex (a complex of two or more proteins th

Interacting selectively with DNA (deoxyribonucleic acid) [goid 3677] [evidence IEA]; Interacting s

ement cascade which allows for the direct killing of microbes, the disposal of immune complexes

Interacting selectively with any protein or protein complex (a complex of two or more proteins th

"Elemental activities, such as catalysis or binding, describing the actions of a gene product at th

"Interacting selectively with one or more specific sites on a receptor molecule, a macromolecule

etween three and ten, of identical component monomers. Oligomers may be formed by the polyr

Interacting selectively with any protein or protein complex (a complex of two or more proteins that

Interacting selectively with zinc (Zn) ions [goid 8270] [evidence IEA]; Interacting selectively with :

The action of a molecule that contributes to the structural integrity of a complex or assembly with

"Elemental activities, such as catalysis or binding, describing the actions of a gene product at th

Catalysis of the reaction: 3-alpha(S)-strictosidine = tryptamine + secologanin [goid 16844] [evid

Interacting selectively with any protein or protein complex (a complex of two or more proteins th

"Elemental activities, such as catalysis or binding, describing the actions of a gene product at th

"Catalysis of the transfer of a methyl group to an acceptor molecule [goid 8168] [evidence IEA];

"Elemental activities, such as catalysis or binding, describing the actions of a gene product at th

"Elemental activities, such as catalysis or binding, describing the actions of a gene product at th  
"Catalysis of the hydrolysis of a peptide bond. A peptide bond is a covalent bond formed when t

"Interacting selectively with any mono-, di- or trisaccharide carbohydrate [goid 5529] [evidence II

"Elemental activities, such as catalysis or binding, describing the actions of a gene product at th

Interacting selectively with any protein or protein complex (a complex of two or more proteins th

Interacting selectively with any protein or protein complex (a complex of two or more proteins th

"Elemental activities, such as catalysis or binding, describing the actions of a gene product at th

Interacting selectively with any protein or protein complex (a complex of two or more proteins th

"Catalysis of the hydrolysis of internal, alpha-peptide bonds in a polypeptide chain by a mechani

"Catalysis of a biochemical reaction at physiological temperatures. In biologically catalyzed reac

Interacting selectively with any protein or protein complex (a complex of two or more proteins th

"Elemental activities, such as catalysis or binding, describing the actions of a gene product at th

"The selective, often stoichiometric, interaction of a molecule with one or more specific sites on .

Interacting selectively with any protein or protein complex (a complex of two or more proteins th

Interacting selectively with calcium ions (Ca<sup>2+</sup>) [goid 5509] [evidence IEA]

EA]; The import of proteins across the outer and inner mitochondrial membranes into the matrix.

of proteolytic caspases, whose actions dismantle the cell and result in cell death. Apoptosis begi

ement cascade which allows for the direct killing of microbes, the disposal of immune complexes

"Interacting selectively with GTP, guanosine triphosphate [goid 5525] [evidence IEA]"

"Catalysis of the transfer of a methyl group to an acceptor molecule [goid 8168] [evidence IEA];

Interacting selectively with any protein or protein complex (a complex of two or more proteins th

"Stops, prevents or reduces the activity of an endopeptidase, any enzyme that hydrolyzes nonte  
Combining with an extracellular or intracellular messenger to initiate a change in cell activity [goid  
Interacting selectively with any protein or protein complex (a complex of two or more proteins th

Catalysis of the reaction:  $ATP + NAD^+ = ADP + NADP^+$  [goid 3951] [evidence IEA]

Interacting selectively with an identical protein or proteins [goid 42802] [evidence IEA]

"The function of binding to a specific DNA sequence in order to modulate transcription. The tran

ement cascade which allows for the direct killing of microbes, the disposal of immune complexes

"Elemental activities, such as catalysis or binding, describing the actions of a gene product at th

Combining with the hedgehog protein to initiate a change in cell activity [goid 8158] [evidence IEA]

Interacting selectively with any protein or protein complex (a complex of two or more proteins th

Increases the rate of GTP hydrolysis by a GTPase of the Rab family [goid 5097] [evidence IEA]

"Elemental activities, such as catalysis or binding, describing the actions of a gene product at th

"Enables the directed movement of substances (such as macromolecules, small molecules, ions

"Interacting selectively with ATP, adenosine 5'-triphosphate, a universally important coenzyme a

Interacting selectively with any protein or protein complex (a complex of two or more proteins th

"Interacting selectively with ATP, adenosine 5'-triphosphate, a universally important coenzyme a

"Elemental activities, such as catalysis or binding, describing the actions of a gene product at th

"Elemental activities, such as catalysis or binding, describing the actions of a gene product at th

"The selective, often stoichiometric, interaction of a molecule with one or more specific sites on

"Catalysis of the transfer of a group, e.g. a methyl group, glycosyl group, acyl group, phosphoru

Interacting selectively with any metal ion [goid 46872] [evidence IEA]

"Elemental activities, such as catalysis or binding, describing the actions of a gene product at th

"The selective, often stoichiometric, interaction of a molecule with one or more specific sites on



"The selective, often stoichiometric, interaction of a molecule with one or more specific sites on .

"Stimulates the exchange of guanyl nucleotides by a GTPase. Under normal cellular physiologic

"Catalysis of the reaction:  $\text{ATP} + \text{shikimate} = \text{ADP} + \text{shikimate 3-phosphate}$  [goid 4765] [evidenc

Interacting selectively with any protein or protein complex (a complex of two or more proteins that

Interacting selectively with calcium ions (Ca<sup>2+</sup>) [goid 5509] [evidence IEA]

"Catalysis of the hydrolysis of various bonds, e.g. C-O, C-N, C-C, phosphoric anhydride bonds, or

"Elemental activities, such as catalysis or binding, describing the actions of a gene product at the

"Interacting selectively with a nucleotide, any compound consisting of a nucleoside that is esterified

Interacting selectively with any nucleic acid [goid 3676] [evidence IEA]

"The selective, often stoichiometric, interaction of a molecule with one or more specific sites on a

"Elemental activities, such as catalysis or binding, describing the actions of a gene product at the

"Elemental activities, such as catalysis or binding, describing the actions of a gene product at the

"Elemental activities, such as catalysis or binding, describing the actions of a gene product at the

"Interacting selectively with GTP, guanosine triphosphate [goid 5525] [evidence IEA]"

"Interacting selectively with a CARD (N-terminal caspase recruitment) domain, a protein-protein

"Elemental activities, such as catalysis or binding, describing the actions of a gene product at th

Catalysis of the reaction:  $H_2CO_3 = CO_2 + H_2O$  [goid 4089] [pmid 9878252] [evidence TAS]; Inte

"Catalysis of the reaction:  $H_2CO_3 = CO_2 + H_2O$  [goid 4089] [evidence IEA]; Interacting selective

"Catalysis of the reaction:  $H_2CO_3 = CO_2 + H_2O$  [goid 4089] [pmid 1928091] [evidence TAS]; In

"Catalysis of the reaction:  $H_2CO_3 = CO_2 + H_2O$  [goid 4089] [pmid 10409679] [evidence TAS]; I

Catalysis of the reaction:  $H_2CO_3 = CO_2 + H_2O$  [goid 4089] [pmid 8977131] [evidence TAS]; Inte

Interacting selectively with any protein or protein complex (a complex of two or more proteins th

"Interacting selectively with any protein or protein complex (a complex of two or more proteins th

"Interacting selectively with a nucleotide, any compound consisting of a nucleoside that is esterifi

"Interacting selectively with any protein or protein complex (a complex of two or more proteins th

"Modulates the activity of a cyclin-dependent protein kinase, enzymes of the protein kinase fami

Interacting selectively with calcium ions ( $Ca^{2+}$ ) [goid 5509] [pmid 15452577] [evidence TAS]; Int

Interacting selectively with calcium ions ( $Ca^{2+}$ ) [goid 5509] [evidence IEA]

"Catalysis of the transmembrane transfer of a calcium ion by a voltage-gated channel [goid 5245

"Catalysis of the transmembrane transfer of an ion by a voltage-gated channel. An ion is an atom

"Catalysis of facilitated diffusion of an ion (by an energy-independent process) by passage throu

Catalysis of the transmembrane transfer of an ion by a voltage-gated channel. An ion is an atom

Catalysis of the transmembrane transfer of an ion by a voltage-gated channel. An ion is an atom

Catalysis of the transmembrane transfer of a calcium ion by a voltage-gated channel [goid 5245

Catalysis of the transmembrane transfer of an ion by a voltage-gated channel. An ion is an atom

The action of a molecule that contributes to the structural integrity of a complex or assembly with

Interacting selectively with any protein or protein complex (a complex of two or more proteins th

"Catalysis of a reaction that results in the formation of carbamoyl phosphate [goid 4086] [eviden

"Interacting selectively with one or more specific sites on a receptor molecule, a macromolecule

Interacting selectively with any protein or protein complex (a complex of two or more proteins th

Interacting selectively with calcium ions ( $Ca^{2+}$ ) [goid 5509] [evidence IEA]; Interacting selectivel

"The action characteristic of a hormone, any substance formed in very small amounts in one sp

"The action characteristic of a neuropeptide hormone, any peptide hormone that acts in the cen

"Interacting selectively with chromatin, the network of fibers of DNA and protein that make up th

Interacting selectively with any protein or protein complex (a complex of two or more proteins th

[goid 1635] [evidence IEA]; Combining with an extracellular or intracellular messenger to initiate

"Interacting selectively with monomeric or multimeric forms of actin, including actin filaments [go

"Interacting selectively with calcium ions (Ca<sup>2+</sup>) [goid 5509] [pmid 9681195] [evidence TAS]; Int

Interacting selectively with calcium ions (Ca<sup>2+</sup>) [goid 5509] [evidence IEA]

Interacting selectively with calcium ions (Ca<sup>2+</sup>) [goid 5509] [pmid 10777582] [evidence TAS]; Int

"Interacting selectively with DNA (deoxyribonucleic acid) [goid 3677] [pmid 11149926] [evidence

Interacting selectively with calcium ions (Ca<sup>2+</sup>) [goid 5509] [evidence IEA]; Interacting selectivel

Interacting selectively with a clathrin light chain [goid 32051] [pmid 16595675] [evidence IDA]; In

"Interacting selectively with a nucleotide, any compound consisting of a nucleoside that is esteril

"Interacting selectively with a nucleotide, any compound consisting of a nucleoside that is esteril

"Interacting selectively with a nucleotide, any compound consisting of a nucleoside that is esteril

"Interacting selectively with a nucleotide, any compound consisting of a nucleoside that is esteril

"Interacting selectively with a nucleotide, any compound consisting of a nucleoside that is esteril

"Catalysis of the reaction: ATP + a protein serine/threonine = ADP + protein serine/threonine ph

"Stops, prevents or reduces the activity of a protein kinase, an enzyme which phosphorylates a

"Stops, prevents or reduces the activity of a protein kinase, an enzyme which phosphorylates a

"Interacting selectively with a nucleotide, any compound consisting of a nucleoside that is esteril

"Interacting selectively with a nucleotide, any compound consisting of a nucleoside that is esteril

"Interacting selectively with a nucleotide, any compound consisting of a nucleoside that is esteril

"Catalysis of the reaction: ATP + a protein serine/threonine = ADP + protein serine/threonine ph

Interacting selectively with any protein or protein complex (a complex of two or more proteins th  
anism [goid 42742] [pmid 8681941] [evidence TAS]

"Mediates the transfer of a signal from the outside to the inside of a cell by means other than the

"Interacting selectively with calcium ions (Ca<sup>2+</sup>) [goid 5509] [pmid 8136357] [evidence TAS]; Int

"Interacting selectively with monomeric or multimeric forms of actin, including actin filaments [go

"Interacting selectively with monomeric or multimeric forms of actin, including actin filaments [go

"Catalysis of the hydrolysis of nonterminal peptide bonds in a polypeptide chain by a mechanis

"Interacting selectively with a SNARE (soluble N-ethylmaleimide-sensitive factor attached protei

"Catalysis of the hydrolysis of nonterminal peptide bonds in a polypeptide chain by a mechanis

"Catalysis of the hydrolysis of nonterminal peptide bonds in a polypeptide chain by a mechanis

"Catalysis of the hydrolysis of nonterminal peptide bonds in a polypeptide chain by a mechanis

"Interacting selectively with calcium ions (Ca<sup>2+</sup>) [goid 5509] [evidence IEA]; Catalysis of the hyd

"Catalysis of the hydrolysis of nonterminal peptide bonds in a polypeptide chain by a mechanis

"Catalysis of the hydrolysis of nonterminal peptide bonds in a polypeptide chain by a mechanis

"Catalysis of the hydrolysis of nonterminal peptide bonds in a polypeptide chain by a mechanis

"Catalysis of the hydrolysis of nonterminal peptide bonds in a polypeptide chain by a mechanis

]308] [pmid 14593112] [evidence IDA]"

Interacting selectively with calcium ions (Ca<sup>2+</sup>) [goid 5509] [pmid 2540953] [evidence TAS]

Interacting selectively with calcium ions (Ca<sup>2+</sup>) [goid 5509] [evidence IEA]

"Interacting selectively with monomeric or multimeric forms of actin, including actin filaments [go

"Interacting selectively with monomeric or multimeric forms of actin, including actin filaments [go

"Interacting selectively with monomeric or multimeric forms of actin, including actin filaments [go

"Interacting selectively with monomeric or multimeric forms of actin, including actin filaments [go  
Interacting selectively with any protein or protein complex (a complex of two or more proteins th  
"Catalysis of the reaction:  $ATP + GMP = ADP + GDP$  [goid 4385] [pmid 11278692] [evidence NA

Interacting selectively with any protein or protein complex (a complex of two or more proteins th  
"Interacting selectively with any protein or protein complex (a complex of two or more proteins th  
"Interacting selectively with any protein or protein complex (a complex of two or more proteins th  
Interacting selectively with DNA (deoxyribonucleic acid) [goid 3677] [evidence IEA]; Interacting s

"The function of a transcription cofactor that activates transcription from a RNA polymerase II pr  
"Interacting selectively with a nucleotide, any compound consisting of a nucleoside that is esteril  
"Interacting selectively with a nucleotide, any compound consisting of a nucleoside that is esteril

Interacting selectively with any protein or protein complex (a complex of two or more proteins th

"Interacting selectively with a nucleotide, any compound consisting of a nucleoside that is esteril  
"Catalysis of the hydrolysis of internal, alpha-peptide bonds in a polypeptide chain by a mechani  
"Catalysis of the hydrolysis of internal, alpha-peptide bonds in a polypeptide chain by a mechani  
"Catalysis of the hydrolysis of internal, alpha-peptide bonds in a polypeptide chain by a mechani  
"Catalysis of the hydrolysis of internal, alpha-peptide bonds in a polypeptide chain by a mechani  
"Catalysis of the hydrolysis of internal, alpha-peptide bonds in a polypeptide chain by a mechani  
"Catalysis of the hydrolysis of internal, alpha-peptide bonds in a polypeptide chain by a mechani  
"Catalysis of the hydrolysis of internal, alpha-peptide bonds in a polypeptide chain by a mechani  
"Catalysis of the hydrolysis of internal, alpha-peptide bonds in a polypeptide chain by a mechani  
"Catalysis of the hydrolysis of internal, alpha-peptide bonds in a polypeptide chain by a mechani

"Stops, prevents or reduces the activity of the enzyme calpain, which catalyzes of the preferenti  
Interacting selectively with DNA (deoxyribonucleic acid) [goid 3677] [evidence IEA]; Interacting s  
"Catalysis of the reaction:  $2 H_2O_2 = O_2 + 2 H_2O$  [goid 4096] [pmid 18379038] [evidence IDA]; C  
Catalysis of the transmembrane transfer of an ion by a voltage-gated channel. An ion is an atom

"The action of a molecule that contributes to the structural integrity of a complex or assembly wi  
Interacting selectively with any protein or protein complex (a complex of two or more proteins th  
Interacting selectively with calcium ions ( $Ca^{2+}$ ) [goid 5509] [evidence IEA]; Interacting selectivel  
The function of binding to a specific DNA sequence in order to modulate transcription. The trans  
The function of binding to a specific DNA sequence in order to modulate transcription. The trans  
"Elemental activities, such as catalysis or binding, describing the actions of a gene product at th  
"Mediates the transfer of a signal from the outside to the inside of a cell by means other than the  
"Mediates the transfer of a signal from the outside to the inside of a cell by means other than the  
"Interacting selectively with any protein or protein complex (a complex of two or more proteins th  
ross a synapse [goid 7268] [pmid 1704129] [evidence TAS]; The process whose specific outcom

"The selective, often stoichiometric, interaction of a molecule with one or more specific sites on

"Catalysis of the reaction: R-CHOH-R' + NADP+ = R-CO-R' + NADPH + H+ [goid 4090] [pmid 97

"The selective, often stoichiometric, interaction of a molecule with one or more specific sites on a

"Catalysis of the reaction: L-serine + L-homocysteine = cystathionine + H2O [goid 4122] [pmid 9

"Interacting selectively with chromatin, the network of fibers of DNA and protein that make up the

"Interacting selectively with DNA (deoxyribonucleic acid) [goid 3677] [evidence IEA]; Interacting

"Interacting selectively with chromatin, the network of fibers of DNA and protein that make up the

"Interacting selectively with chromatin, the network of fibers of DNA and protein that make up the

"Interacting selectively with chromatin, the network of fibers of DNA and protein that make up the

"Interacting selectively with chromatin, the network of fibers of DNA and protein that make up the

"Interacting selectively with chromatin, the network of fibers of DNA and protein that make up the

"Interacting selectively with chromatin, the network of fibers of DNA and protein that make up the

Interacting selectively with the beta subunit of the catenin complex [goid 8013] [pmid 12712206]

Interacting selectively with any nucleic acid [goid 3676] [evidence IEA]

Interacting selectively with calcium ions (Ca2+) [goid 5509] [evidence IEA]

"Catalysis of the transfer of a nitrogenous group from one compound (donor) to another (acceptor)

"Catalysis of the reaction: L-kynurenine + 2-oxoglutarate = 4-(2-aminophenyl)-2,4-dioxobutanoate

Combining with an extracellular or intracellular messenger to initiate a change in cell activity [goid 3676] [evidence IEA]; Any process that modulates the frequency, rate or extent of DNA-dependent transcription

"Elemental activities, such as catalysis or binding, describing the actions of a gene product at the

"Catalysis of the synthesis of a short RNA primer on a DNA template, providing a free 3'-OH that

Interacting selectively with any protein or protein complex (a complex of two or more proteins that

Interacting selectively with any protein or protein complex (a complex of two or more proteins th

Interacting selectively with any protein or protein complex (a complex of two or more proteins th

"Elemental activities, such as catalysis or binding, describing the actions of a gene product at th

Interacting selectively with any protein or protein complex (a complex of two or more proteins th

Interacting selectively with any protein or protein complex (a complex of two or more proteins th

g successive cell replication or nuclear replication events. Canonically, the cell cycle comprises t  
Interacting selectively with any protein or protein complex (a complex of two or more proteins th

"Elemental activities, such as catalysis or binding, describing the actions of a gene product at th

Interacting selectively with any protein or protein complex (a complex of two or more proteins th  
"The action of a molecule that contributes to the structural integrity of a cytoskeletal structure [g

"Catalysis of the transfer of a methyl group to an acceptor molecule [goid 8168] [evidence IEA];

"Elemental activities, such as catalysis or binding, describing the actions of a gene product at th  
419] [evidence IEA]

"Interacting selectively with a PDZ domain of a protein, a domain found in diverse signaling prot

EA]"

Interacting selectively with any protein or protein complex (a complex of two or more proteins th  
The function of a family of chemotactic pro-inflammatory activation-inducible cytokines acting pr  
The function of a family of chemotactic pro-inflammatory activation-inducible cytokines acting pr  
"Functions to control the survival, growth, differentiation and effector function of tissues and cell  
The function of a family of chemotactic pro-inflammatory activation-inducible cytokines acting pr  
The function of a family of chemotactic pro-inflammatory activation-inducible cytokines acting pr  
Mediates the transfer of a signal from the outside to the inside of a cell by means other than the  
The function of a family of chemotactic pro-inflammatory activation-inducible cytokines acting pr

The function of a family of chemotactic pro-inflammatory activation-inducible cytokines acting pr





"Interacting selectively with a nucleotide, any compound consisting of a nucleoside that is esterified to a phosphate group [goid 1847] [pmid 2402637] [evidence TAS];

"Interacting selectively with a nucleotide, any compound consisting of a nucleoside that is esterified to a phosphate group [goid 1847] [pmid 2402637] [evidence TAS];

Combining with an opsonin to initiate a change in cell activity [goid 1847] [pmid 2402637] [evidence TAS];

Interacting selectively with any protein or protein complex (a complex of two or more proteins that is not a protein complex) [goid 6955] [pmid 2447586] [evidence NAS];

"Combining with acetylated low-density lipoproteins, advanced glycation end products, or other proteins [goid 5057] [pmid 1373518] [evidence TAS];

Combining with an extracellular or intracellular messenger to initiate a change in cell activity [goid 6955] [pmid 2447586] [evidence NAS];

The process by which an antigen-presenting cell internalizes and presents an antigen to a T cell [goid 6955] [pmid 2447586] [evidence NAS];

Interacting selectively with any protein or protein complex (a complex of two or more proteins that is not a protein complex) [goid 6955] [evidence IEA];

The process by which an antigen-presenting cell internalizes and presents an antigen to a T cell [goid 6955] [evidence IEA];

Combining with an extracellular or intracellular messenger to initiate a change in cell activity [goid 6955] [evidence IEA];

The process by which an antigen-presenting cell internalizes and presents an antigen to a T cell [goid 6955] [evidence IEA];

Combining with an extracellular or intracellular messenger to initiate a change in cell activity [goid 6955] [evidence IEA];

Combining with an extracellular or intracellular messenger to initiate a change in cell activity [goid 6955] [evidence IEA];

"Interacting selectively with any protein or protein complex (a complex of two or more proteins that is not a protein complex) [goid 6955] [evidence IEA];

"Mediates the transfer of a signal from the outside to the inside of a cell by means other than the cell membrane [goid 6955] [evidence IEA];

Combining with an extracellular or intracellular messenger to initiate a change in cell activity [goid 6955] [evidence IEA];

"Combining with an extracellular or intracellular messenger to initiate a change in cell activity, and in cooperation with a nearby protein [goid 6955] [evidence IEA];

"The selective, often stoichiometric, interaction of a molecule with one or more specific sites on a receptor molecule, a macromolecule, or a cell surface [goid 6955] [evidence IEA];

"Combining with an extracellular or intracellular messenger to initiate a change in cell activity, and in cooperation with a nearby protein [goid 6955] [evidence IEA];

Combining with an extracellular or intracellular messenger to initiate a change in cell activity [goid 6955] [evidence IEA];

"Interacting selectively with one or more specific sites on a receptor molecule, a macromolecule, or a cell surface [goid 6955] [evidence IEA];

"Combining with an extracellular or intracellular messenger, and in cooperation with a nearby protein [goid 6955] [evidence IEA];

"The action of a molecule that contributes to the structural integrity of a cytoskeletal structure [goid 6955] [evidence IEA];

Interacting selectively with any protein or protein complex (a complex of two or more proteins that is not a protein complex) [goid 6955] [evidence IEA];

"Combining with an extracellular or intracellular messenger to initiate a change in cell activity, and in cooperation with a nearby protein [goid 6955] [evidence IEA];

"The selective, often stoichiometric, interaction of a molecule with one or more specific sites on a receptor molecule, a macromolecule, or a cell surface [goid 6955] [evidence IEA];

"Elemental activities, such as catalysis or binding, describing the actions of a gene product at the molecular level [goid 6955] [evidence IEA];

"Combining with an extracellular or intracellular messenger to initiate a change in cell activity [goid 6955] [evidence IEA];

"Combining with an extracellular or intracellular messenger to initiate a change in cell activity [goid 6955] [evidence IEA];

atom peptidyl-tryptophan [goid 6487] [pmid 2466944] [evidence TAS]

"Catalysis of the reaction:  $\text{NAD}^+ + \text{H}_2\text{O} = \text{nicotinamide} + \text{ADP-ribose}$  [goid 3953] [evidence IEA];

"Combining with an extracellular or intracellular messenger to initiate a change in cell activity, and in cooperation with a nearby protein [goid 6955] [evidence IEA];

"Catalysis of the reaction:  $\text{nucleoside triphosphate} + \text{RNA}(n) = \text{diphosphate} + \text{RNA}(n+1)$ . Utilizes the energy of the reaction to synthesize RNA [goid 3953] [evidence IEA];

"Combining with an extracellular or intracellular messenger to initiate a change in cell activity, and in cooperation with a nearby protein [goid 6955] [evidence IEA];

"Combining with an extracellular or intracellular messenger to initiate a change in cell activity, and in cooperation with a nearby protein [goid 6955] [evidence IEA];

"The selective, often stoichiometric, interaction of a molecule with one or more specific sites on a receptor molecule, a macromolecule, or a cell surface [goid 6955] [evidence IEA];

Combining with an extracellular or intracellular messenger to initiate a change in cell activity [goid 6955] [evidence IEA];

Interacting selectively with any protein or protein complex (a complex of two or more proteins that is not a protein complex) [goid 6955] [evidence IEA];

Interacting selectively with any protein or protein complex (a complex of two or more proteins that is not a protein complex) [goid 223854] [evidence IDA];

A phase of elevated metabolic activity, during which oxygen consumption is increased, and the level or activity of a second messenger or other downstream target, and ultimately effecting a change in cell activity [goid 223854] [evidence IDA];

A phase of elevated metabolic activity, during which oxygen consumption is increased, and the level or activity of a second messenger or other downstream target, and ultimately effecting a change in cell activity [goid 223854] [evidence IDA];

Interacting selectively with any protein or protein complex (a complex of two or more proteins that is not a protein complex) [goid 6955] [evidence IEA];

Interacting selectively with any protein or protein complex (a complex of two or more proteins th

"Combining with an extracellular or intracellular messenger to initiate a change in cell activity, ar

Combining with an extracellular or intracellular messenger to initiate a change in cell activity [goi

"Functions to control the survival, growth, differentiation and effector function of tissues and cell:

"The selective, often stoichiometric, interaction of a molecule with one or more specific sites on .

"Interacting selectively with a cytokine, any of a group of proteins that function to control the sun

"Combining with an extracellular or intracellular messenger to initiate a change in cell activity, ar

"Combining with an extracellular or intracellular messenger to initiate a change in cell activity, ar

"Interacting selectively with any protein or protein complex (a complex of two or more proteins th

Interacting selectively with any protein or protein complex (a complex of two or more proteins th

Interacting selectively with any protein or protein complex (a complex of two or more proteins th

y, which result in restriction of damage to the organism attacked or prevention/recovery from the

Combining with an extracellular or intracellular messenger to initiate a change in cell activity [goi

"Interacting selectively with any protein or protein complex (a complex of two or more proteins th

"Interacting selectively with any protein or protein complex (a complex of two or more proteins th

Interacting selectively with any protein or protein complex (a complex of two or more proteins th

Interacting selectively with any protein or protein complex (a complex of two or more proteins th

A receptor that binds an extracellular ligand and transmits the signal to a heterotrimeric G-protei

Interacting selectively with any protein or protein complex (a complex of two or more proteins th

Interacting selectively with any protein or protein complex (a complex of two or more proteins th

"Interacting selectively with a nucleoside, a compound consisting of a purine or pyrimidine nitrog

Interacting selectively with any protein or protein complex (a complex of two or more proteins th

g successive cell replication or nuclear replication events. Canonically, the cell cycle comprises t

"Catalysis of the reaction: protein serine/threonine phosphate + H<sub>2</sub>O = protein serine/threonine .

Interacting selectively with any protein or protein complex (a complex of two or more proteins th

"Interacting selectively with a nucleotide, any compound consisting of a nucleoside that is esteril

Interacting selectively with any protein or protein complex (a complex of two or more proteins th

"Catalysis of the reaction: ATP + ubiquitin + protein lysine = AMP + diphosphate + protein N-ubi

"Catalysis of the reaction: protein tyrosine phosphate + H<sub>2</sub>O = protein tyrosine + phosphate [goi

"Catalysis of the reaction: protein tyrosine phosphate + H<sub>2</sub>O = protein tyrosine + phosphate [goi

"Catalysis of the reaction: protein tyrosine phosphate + H<sub>2</sub>O = protein tyrosine + phosphate [goi

rolysis of its peptide bonds, initiated by the covalent attachment of a ubiquitin moiety, or multiple

"Interacting selectively with a nucleotide, any compound consisting of a nucleoside that is esteril

"Interacting selectively with a nucleotide, any compound consisting of a nucleoside that is esteril

"Interacting selectively with a nucleotide, any compound consisting of a nucleoside that is esteril

"Catalysis of the reaction: ATP + ubiquitin + protein lysine = AMP + diphosphate + protein N-ubi

"Interacting selectively with an unfolded protein [goid 51082] [pmid 8666233] [evidence TAS]; In

Interacting selectively with any protein or protein complex (a complex of two or more proteins th

(mRNA) and the excision of intron sequences, via a spliceosomal mechanism, so that mRNA co

"Interacting selectively with a nucleotide, any compound consisting of a nucleoside that is esteril

"Modulates the rate of GTP hydrolysis by a small monomeric GTPase [goid 5083] [evidence IEA

"Interacting selectively with a nucleotide, any compound consisting of a nucleoside that is esteril

"Interacting selectively with a nucleotide, any compound consisting of a nucleoside that is esterified to a phosphate group [goid 3677] [pmid 8917598] [evidence IEA]; Naturally occurring peptide that is an opioid (any non-alkaloid having an opiate-like effect that can interact with and activate opioid receptors) [goid 3677] [pmid 8917598] [evidence IEA]; Interacting selectively with any protein or protein complex (a complex of two or more proteins that are associated with each other, often in a specific, ordered manner) [goid 3677] [pmid 8917598] [evidence IEA]; Interacting selectively with any protein or protein complex (a complex of two or more proteins that are associated with each other, often in a specific, ordered manner) [goid 3677] [pmid 8917598] [evidence IEA]; Stops, prevents or reduces the activity of any enzyme that catalyzes the hydrolysis of GTP to GDP [goid 3677] [pmid 8917598] [evidence IEA]; The action of a molecule that contributes to the structural integrity of a complex or assembly with other molecules [goid 3677] [pmid 8917598] [evidence IEA]; Interacting selectively with any protein or protein complex (a complex of two or more proteins that are associated with each other, often in a specific, ordered manner) [goid 3677] [pmid 8917598] [evidence IEA]; Interacting selectively with DNA (deoxyribonucleic acid) [goid 3677] [pmid 8917598] [evidence IEA]; Interacting selectively with a nucleotide, any compound consisting of a nucleoside that is esterified to a phosphate group [goid 3677] [pmid 8917598] [evidence IEA]; Interacting selectively with a nucleotide, any compound consisting of a nucleoside that is esterified to a phosphate group [goid 3677] [pmid 8917598] [evidence IEA]; Interacting selectively with any protein or protein complex (a complex of two or more proteins that are associated with each other, often in a specific, ordered manner) [goid 3677] [pmid 8917598] [evidence IEA];

g successive cell replication or nuclear replication events. Canonically, the cell cycle comprises two main phases: interphase and mitosis. Interphase is the period of cell growth and DNA replication, while mitosis is the process of cell division. "Elemental activities, such as catalysis or binding, describing the actions of a gene product at the molecular level [goid 3677] [pmid 8917598] [evidence IEA];

"Interacting selectively with chromatin, the network of fibers of DNA and protein that make up the nucleus [goid 3677] [pmid 8917598] [evidence IEA]; Any process that modulates the frequency, rate or extent of DNA-dependent transcription [goid 3677] [pmid 8917598] [evidence IEA]; Any process that modulates the frequency, rate or extent of DNA-dependent transcription [goid 3677] [pmid 8917598] [evidence IEA]; Interacting selectively with any protein or protein complex (a complex of two or more proteins that are associated with each other, often in a specific, ordered manner) [goid 3677] [pmid 8917598] [evidence IEA];

Interacting selectively with calcium ions (Ca<sup>2+</sup>) [goid 5509] [evidence IEA]; Interacting selectively with calcium ions (Ca<sup>2+</sup>) [goid 5509] [evidence IEA]; Interacting selectively with calcium ions (Ca<sup>2+</sup>) [goid 5509] [evidence IEA]; Enables the directed movement of substances (such as macromolecules, small molecules, ions, and water) across a membrane [goid 5509] [evidence IEA]; Interacting selectively with calcium ions (Ca<sup>2+</sup>) [goid 5509] [evidence IEA]; Interacting selectively with calcium ions (Ca<sup>2+</sup>) [goid 5509] [evidence IEA]; Interacting selectively with calcium ions (Ca<sup>2+</sup>) [goid 5509] [pmid 12734196] [evidence IDA]; Interacting selectively with calcium ions (Ca<sup>2+</sup>) [goid 5509] [evidence IEA]; Interacting selectively with calcium ions (Ca<sup>2+</sup>) [goid 5509] [evidence IEA]; Interacting selectively with calcium ions (Ca<sup>2+</sup>) [goid 5509] [evidence IEA]; Elemental activities, such as catalysis or binding, describing the actions of a gene product at the molecular level [goid 3677] [pmid 8917598] [evidence IEA]; Interacting selectively with magnesium (Mg) ions [goid 287] [evidence IEA]; Catalysis of the reaction of a substrate with an enzyme [goid 3677] [pmid 8917598] [evidence IEA]; Interacting selectively with a nucleotide, any compound consisting of a nucleoside that is esterified to a phosphate group [goid 3677] [pmid 8917598] [evidence IEA]; Interacting selectively with a nucleotide, any compound consisting of a nucleoside that is esterified to a phosphate group [goid 3677] [pmid 8917598] [evidence IEA]; Interacting selectively with DNA (deoxyribonucleic acid) [goid 3677] [pmid 9506968] [evidence IEA];

"Interacting selectively with a nucleotide, any compound consisting of a nucleoside that is esterified to a phosphate group [goid 3677] [pmid 8917598] [evidence IEA]; Interacting selectively with a nucleotide, any compound consisting of a nucleoside that is esterified to a phosphate group [goid 3677] [pmid 8917598] [evidence IEA]; Interacting selectively with a nucleotide, any compound consisting of a nucleoside that is esterified to a phosphate group [goid 3677] [pmid 8917598] [evidence IEA]; Catalysis of the phosphorylation of an amino acid residue in a protein, usually according to the Michaelis-Menten mechanism [goid 16534] [evidence IEA]; Catalysis of a biochemical reaction at physiological temperatures. In biologically catalyzed reactions, the enzyme is a protein [goid 3677] [pmid 8917598] [evidence IEA]; Interacting selectively with microtubules, filaments composed of tubulin monomers [goid 8017] [evidence IEA]; Interacting selectively with any protein or protein complex (a complex of two or more proteins that are associated with each other, often in a specific, ordered manner) [goid 3677] [pmid 8917598] [evidence IEA]; Interacting selectively with a nucleotide, any compound consisting of a nucleoside that is esterified to a phosphate group [goid 3677] [pmid 8917598] [evidence IEA]; Interacting selectively with a nucleotide, any compound consisting of a nucleoside that is esterified to a phosphate group [goid 3677] [pmid 8917598] [evidence IEA];

"Interacting selectively with a nucleotide, any compound consisting of a nucleoside that is esterified to a phosphate group [goid 3677] [evidence IEA]; Interacting selectively with a nucleotide, any compound consisting of a nucleoside that is esterified to a phosphate group [goid 3677] [evidence IEA]; Catalysis of a biochemical reaction at physiological temperatures. In biologically catalyzed reactions, the reaction is not coupled to the hydrolysis of a nucleoside triphosphate [goid 3677] [evidence IEA]; Interacting selectively with a nucleotide, any compound consisting of a nucleoside that is esterified to a phosphate group [goid 3677] [evidence IEA]; Interacting selectively with a nucleotide, any compound consisting of a nucleoside that is esterified to a phosphate group [goid 3677] [evidence IEA]; Interacting selectively with a nucleotide, any compound consisting of a nucleoside that is esterified to a phosphate group [goid 3677] [evidence IEA]; Stops, prevents or reduces the activity of a protein kinase, an enzyme which phosphorylates a substrate [goid 4861] [evidence IEA]; Stops, prevents or reduces the activity of a cyclin-dependent protein kinase [goid 4861] [evidence IEA]; Stops, prevents or reduces the activity of a cyclin-dependent protein kinase [goid 4861] [evidence IEA]; Interacting selectively with DNA (deoxyribonucleic acid) [goid 3677] [evidence IEA]; Interacting selectively with double-stranded RNA [goid 3725] [evidence IEA]

"Stops, prevents or reduces the activity of a cyclin-dependent protein kinase [goid 4861] [pmid 9552552]; Stops, prevents or reduces the activity of a cyclin-dependent protein kinase [goid 4861] [pmid 8552552]; Stops, prevents or reduces the activity of a cyclin-dependent protein kinase [goid 4861] [pmid 8552552]; Catalysis of the reaction: protein serine/threonine phosphate + H2O = protein serine/threonine + phosphate [goid 4861] [evidence IEA]

"Interacting selectively with iron (Fe) ions [goid 5506] [evidence IEA]; Catalysis of an oxidation-reduction reaction [goid 5506] [evidence IEA]; Elemental activities, such as catalysis or binding, describing the actions of a gene product at the molecular level [goid 5506] [evidence IEA]

"Elemental activities, such as catalysis or binding, describing the actions of a gene product at the molecular level [goid 4605] [evidence IEA]; Catalysis of the reaction: CTP + phosphatidate = diphosphate + CDP-diacylglycerol [goid 4605] [evidence IEA]; Interacting selectively with DNA (deoxyribonucleic acid) [goid 3677] [evidence ISS]; Interacting selectively with DNA (deoxyribonucleic acid) [goid 3677] [evidence IEA]; Elemental activities, such as catalysis or binding, describing the actions of a gene product at the molecular level [goid 3677] [evidence IEA]; Interacting selectively with chromatin, the network of fibers of DNA and protein that make up the nucleus [goid 3677] [evidence IEA]; Elemental activities, such as catalysis or binding, describing the actions of a gene product at the molecular level [goid 3677] [evidence IEA]

"Functions to initiate or regulate RNA polymerase II transcription by binding an enhancer region [goid 2247079] [evidence IEA]; The function of binding to a specific DNA sequence in order to modulate transcription. The transcription factor binds to the DNA sequence and recruits RNA polymerase II to the promoter [goid 2247079] [evidence IEA]; The function of binding to a specific DNA sequence in order to modulate transcription. The transcription factor binds to the DNA sequence and recruits RNA polymerase II to the promoter [goid 2247079] [evidence IEA]; The function of binding to a specific DNA sequence in order to modulate transcription. The transcription factor binds to the DNA sequence and recruits RNA polymerase II to the promoter [goid 2247079] [evidence IEA]; The function of binding to a specific DNA sequence in order to modulate transcription. The transcription factor binds to the DNA sequence and recruits RNA polymerase II to the promoter [goid 2247079] [evidence IEA]; Interacting selectively with DNA (deoxyribonucleic acid) [goid 3677] [pmid 2247079] [evidence IEA]; The function that stimulates a cell to grow or proliferate. Most growth factors have other actions [goid 2247079] [evidence IEA]; Catalysis of the hydrolysis of various bonds, e.g. C-O, C-N, C-C, phosphoric anhydride bonds, phosphoric anhydride bonds, phosphoric anhydride bonds [goid 2247079] [evidence IEA]

"Catalysis of the hydrolysis of various bonds, e.g. C-O, C-N, C-C, phosphoric anhydride bonds, phosphoric anhydride bonds, phosphoric anhydride bonds [goid 2247079] [evidence IEA]; Elemental activities, such as catalysis or binding, describing the actions of a gene product at the molecular level [goid 2247079] [evidence IEA]; A receptor that binds an extracellular ligand and transmits the signal to a heterotrimeric G-protein coupled receptor [goid 2247079] [evidence IEA]; Combining with an extracellular or intracellular messenger to initiate a change in cell activity [goid 2247079] [evidence IEA]; Combining with an extracellular or intracellular messenger to initiate a change in cell activity [goid 2247079] [evidence IEA]

"Interacting selectively with DNA (deoxyribonucleic acid) [goid 3677] [evidence IEA]; Interacting  
"Interacting selectively with DNA (deoxyribonucleic acid) [goid 3677] [evidence IEA]; Interacting

Interacting selectively with DNA (deoxyribonucleic acid) [goid 3677] [pmid 1339310] [evidence T  
"Interacting selectively with a nucleotide, any compound consisting of a nucleoside that is esterif  
"Interacting selectively with chromatin, the network of fibers of DNA and protein that make up th  
"Interacting selectively with any protein or protein complex (a complex of two or more proteins th  
78] [evidence TAS]

"Interacting selectively with monomeric or multimeric forms of tubulin, including microtubules [gc  
Interacting selectively with any protein or protein complex (a complex of two or more proteins th

"Interacting selectively with DNA of a specific nucleotide composition, e.g. GC-rich DNA binding

"Interacting selectively with any protein or protein complex (a complex of two or more proteins th  
Increases the rate of GTP hydrolysis by the GTPase ARF [goid 8060] [evidence IEA]; Interacting

"Interacting selectively with a nucleotide, any compound consisting of a nucleoside that is esterif  
Interacting selectively with any protein or protein complex (a complex of two or more proteins th  
Interacting selectively with any protein or protein complex (a complex of two or more proteins th

Interacting selectively with any protein or protein complex (a complex of two or more proteins th

"Interacting selectively with a protein kinase, any enzyme that catalyzes the transfer of a phosph  
Interacting selectively with any protein or protein complex (a complex of two or more proteins th

g successive cell replication or nuclear replication events. Canonically, the cell cycle comprises t  
Interacting selectively with any protein or protein complex (a complex of two or more proteins th

Interacting selectively with an identical protein or proteins [goid 42802] [evidence IEA]

Interacting selectively with any protein or protein complex (a complex of two or more proteins th

"Interacting selectively with magnesium (Mg) ions [goid 287] [evidence IEA]; Catalysis of the rea  
Interacting selectively with any protein or protein complex (a complex of two or more proteins th

"Interacting selectively with magnesium (Mg) ions [goid 287] [pmid 10947957] [evidence IDA]; C

"Catalysis of the reaction: NTP + 1,2-diacylglycerol = NDP + 1,2-diacylglycerol 3-phosphate [goid

"Catalysis of the reaction: a carboxylic ester + H<sub>2</sub>O = an alcohol + a carboxylic anion [goid 4091

"Catalysis of the reaction: a carboxylic ester + H<sub>2</sub>O = an alcohol + a carboxylic anion [goid 4091

"Interacting selectively with any nucleic acid [goid 3676] [evidence IEA]; Interacting selectively with calcium ions (Ca<sup>2+</sup>) [goid 5509] [evidence IEA]

"Enables the directed movement of phospholipids into, out of, within or between cells. Phospholipid transport

"Catalysis of a biochemical reaction at physiological temperatures. In biologically catalyzed reactions, the reaction is catalyzed by an enzyme

"Elemental activities, such as catalysis or binding, describing the actions of a gene product at the molecular level

"Catalysis of the hydrolysis of internal, alpha-peptide bonds in a polypeptide chain by a catalytic activity

"Elemental activities, such as catalysis or binding, describing the actions of a gene product at the molecular level. This activity is involved in the complement cascade which allows for the direct killing of microbes and the regulation of other immune responses

"Interacting selectively with monomeric or multimeric forms of actin, including actin filaments [goid 3677] [evidence IEA]

"Interacting selectively with monomeric or multimeric forms of actin, including actin filaments [goid 3677] [evidence IEA]

"Catalysis of the hydrolysis of internal, alpha-peptide bonds in a polypeptide chain by a mechanical activity

"The action characteristic of a hormone, any substance formed in very small amounts in one species that acts on other individuals of the same species

"The action characteristic of a hormone, any substance formed in very small amounts in one species that acts on other individuals of the same species

"The action characteristic of a hormone, any substance formed in very small amounts in one species that acts on other individuals of the same species

Interacting selectively with DNA (deoxyribonucleic acid) [goid 3677] [evidence IEA]; Interacting selectively with an RNA molecule or a portion thereof [goid 3723] [evidence IEA]

Interacting selectively with an RNA molecule or a portion thereof [goid 3723] [evidence IEA]

"Catalysis of movement along a polymeric molecule such as a microfilament or microtubule, coupled to the hydrolysis of ATP

"Catalysis of movement along a polymeric molecule such as a microfilament or microtubule, coupled to the hydrolysis of ATP

Interacting selectively with any protein or protein complex (a complex of two or more proteins that function together)

Catalysis of the reaction: cholesterol + AH<sub>2</sub> + O<sub>2</sub> = 25-hydroxycholesterol + A + H<sub>2</sub>O [goid 1567] [evidence IEA]

Interacting selectively with any protein or protein complex (a complex of two or more proteins that function together)

"Elemental activities, such as catalysis or binding, describing the actions of a gene product at the molecular level

"Interacting selectively with chromatin, the network of fibers of DNA and protein that make up the chromosomes

"Interacting selectively with chromatin, the network of fibers of DNA and protein that make up the chromosomes

Interacting selectively with any protein or protein complex (a complex of two or more proteins that function together) [evidence IEA]; The directed movement of proteins in a cell, from one side of a membrane to another [goid 3677] [evidence IEA]

"Interacting selectively with a nucleotide, any compound consisting of a nucleoside that is esterified to a phosphate group

"Interacting selectively with a nucleotide, any compound consisting of a nucleoside that is esterified to a phosphate group

"Interacting selectively with a nucleotide, any compound consisting of a nucleoside that is esterified to a phosphate group

"Interacting selectively with a nucleotide, any compound consisting of a nucleoside that is esterified to a phosphate group

"Interacting selectively with a nucleotide, any compound consisting of a nucleoside that is esterified to a phosphate group

"Interacting selectively with a nucleotide, any compound consisting of a nucleoside that is esterified to a phosphate group

"Interacting selectively with a nucleotide, any compound consisting of a nucleoside that is esterified to a phosphate group

"Interacting selectively with a nucleotide, any compound consisting of a nucleoside that is esterified to a phosphate group

"Interacting selectively with a nucleotide, any compound consisting of a nucleoside that is esterified to a phosphate group

"Catalysis of the reaction: choline + acceptor = betaine aldehyde + reduced acceptor [goid 8812  
"Interacting selectively with a nucleotide, any compound consisting of a nucleoside that is esterified  
"Interacting selectively with a nucleotide, any compound consisting of a nucleoside that is esterified  
"Elemental activities, such as catalysis or binding, describing the actions of a gene product at the

Interacting selectively with calcium ions (Ca<sup>2+</sup>) [goid 5509] [evidence IEA]

"The action characteristic of a hormone, any substance formed in very small amounts in one species

"Catalysis of a biochemical reaction at physiological temperatures. In biologically catalyzed reactions

"Catalysis of the random hydrolysis of N-acetyl-beta-D-glucosaminide 1,4-beta-linkages in chitin

"Elemental activities, such as catalysis or binding, describing the actions of a gene product at the

"Catalysis of the reaction: ATP + choline = ADP + O-phosphocholine [goid 4103] [pmid 1036358]

"Catalysis of the reaction: ATP + choline = ADP + O-phosphocholine [goid 4103] [evidence IEA]

"Catalysis of the reaction: 2 geranylgeranyl diphosphate + protein-cysteine = 2 S-geranylgeranyl

"Catalysis of the reaction: 2 geranylgeranyl diphosphate + protein-cysteine = 2 S-geranylgeranyl

"Catalysis of the hydrolysis of peptide bonds by a mechanism in which water acts as a nucleophile

Interacting selectively with a specific domain of a protein [goid 19904] [pmid 17928862] [evidence

Interacting selectively with a specific domain of a protein [goid 19904] [pmid 17928862] [evidence

Interacting selectively with a specific domain of a protein [goid 19904] [pmid 17928862] [evidence

Interacting selectively with any protein or protein complex (a complex of two or more proteins that

EA]"

EA]"

Interacting selectively with any protein or protein complex (a complex of two or more proteins that

Interacting selectively with any protein or protein complex (a complex of two or more proteins that

"Enables the directed movement of proteins into, out of, within or between cells [goid 8565] [pmid

"Interacting selectively with any protein or protein complex (a complex of two or more proteins that

"The selective, often stoichiometric, interaction of a molecule with one or more specific sites on a

"Elemental activities, such as catalysis or binding, describing the actions of a gene product at the

Interacting selectively with calcium ions (Ca<sup>2+</sup>) [goid 5509] [evidence IEA]; [goid 15459] [pmid 8

"Interacting selectively with any protein or protein complex (a complex of two or more proteins that

"Interacting selectively with magnesium (Mg) ions [goid 287] [evidence IEA]; Catalysis of the reaction

"Catalysis of the reaction: deoxynucleoside triphosphate + DNA(n) = diphosphate + DNA(n+1); t

"Interacting selectively with a cytokine, any of a group of proteins that function to control the survival

"[goid 4889] [evidence IEA]; [goid 4889] [pmid 9221765] [evidence IMP]; Catalysis of facilitated

"[goid 4889] [evidence IEA]; Interacting selectively with one or more specific sites on a receptor

Catalysis of the transmembrane transfer of an ion by a channel that opens when a specific extracellular

[goid 4889] [evidence IEA]; Catalysis of facilitated diffusion of an ion (by an energy-independent

[goid 4889] [pmid 8906617] [evidence TAS]; Catalysis of facilitated diffusion of an ion (by an energy-

"[goid 4889] [evidence IEA]; Catalysis of the transmembrane transfer of an ion by a channel that

"[goid 4889] [evidence ISS]; Catalysis of facilitated diffusion of an ion (by an energy-independent

"Catalysis of the transfer of a group, e.g. a methyl group, glycosyl group, acyl group, phosphorus

"Catalysis of the transfer of a sulfate group from 3'-phosphoadenosine 5'-phosphosulfate to the

"Interacting selectively with any protein or protein complex (a complex of two or more proteins that

"Catalysis of the reaction: 3'-phosphoadenosine 5'-phosphosulfate + N-acetyl-D-galactosamine :



"Catalysis of the reaction: 3'-phosphoadenosine 5'-phosphosulfate + N-acetyl-D-glucosamine =

"Catalysis of the transfer of a sulfate group from 3'-phosphoadenosine 5'-phosphosulfate to the

"Catalysis of the reaction: 3'-phosphoadenosine 5'-phosphosulfate + N-acetyl-D-glucosamine =

"Catalysis of the reaction: 3'-phosphoadenosine 5'-phosphosulfate + N-acetyl-D-galactosamine =

"Catalysis of the transfer of a group, e.g. a methyl group, glycosyl group, acyl group, phosphorus

"Interacting selectively with a nucleotide, any compound consisting of a nucleoside that is esterified

Interacting selectively with DNA (deoxyribonucleic acid) [goid 3677] [evidence IEA]

"Interacting selectively with a nucleotide, any compound consisting of a nucleoside that is esterified

Interacting selectively with zinc (Zn) ions [goid 8270] [evidence IEA]; Any transcription regulator

Interacting selectively with any protein or protein complex (a complex of two or more proteins that

of proteolytic caspases, whose actions dismantle the cell and result in cell death. Apoptosis begins

Interacting selectively with calcium ions (Ca<sup>2+</sup>) [goid 5509] [pmid 15475008] [evidence IMP]; Interacting

Interacting selectively with calcium ions (Ca<sup>2+</sup>) [goid 5509] [evidence IEA]; Interacting selectively

"Interacting selectively with DNA (deoxyribonucleic acid) [goid 3677] [evidence IEA]; Enables the

Interacting selectively with any protein or protein complex (a complex of two or more proteins that

"Interacting selectively with a nucleotide, any compound consisting of a nucleoside that is esterified

"Catalysis of the reaction: an orthophosphoric monoester + H<sub>2</sub>O = an alcohol + phosphate, where the

"Interacting selectively with a nucleotide, any compound consisting of a nucleoside that is esterified

"Elemental activities, such as catalysis or binding, describing the actions of a gene product at the

"Interacting selectively with iron (Fe) ions [goid 5506] [evidence IEA]; Interacting selectively with

"Interacting selectively with iron (Fe) ions [goid 5506] [evidence IEA]; Interacting selectively with

"Elemental activities, such as catalysis or binding, describing the actions of a gene product at the

The function of binding to a specific DNA sequence in order to modulate transcription. The transcription

The function of binding to a specific DNA sequence in order to modulate transcription. The transcription

The function of a transcription cofactor that activates transcription from a RNA polymerase II promoter

of proteolytic caspases, whose actions dismantle the cell and result in cell death. Apoptosis begins

"The selective, often stoichiometric, interaction of a molecule with one or more specific sites on a

"Interacting selectively with a nucleotide, any compound consisting of a nucleoside that is esterified

The function of a family of chemotactic pro-inflammatory activation-inducible cytokines acting primarily

"Interacting selectively with a nucleotide, any compound consisting of a nucleoside that is esterified

"Interacting selectively with a nucleotide, any compound consisting of a nucleoside that is esterified

"Catalysis of the transfer of a phosphate group, usually from ATP, to a substrate molecule [goid

"Modulates the activity of a cyclin-dependent protein kinase, enzymes of the protein kinase family

"Interacting selectively with any protein or protein complex (a complex of two or more proteins that

"Interacting selectively with any protein or protein complex (a complex of two or more proteins that

"Interacting selectively with any mono-, di- or trisaccharide carbohydrate [goid 5529] [evidence IEA]  
"Catalysis of facilitated diffusion of a chloride (by an energy-independent process) involving passage through a channel [goid 31404] [evidence IEA]  
Interacting selectively with chloride ions (Cl-) [goid 31404] [evidence IEA]

"Functions to control the survival, growth, differentiation and effector function of tissues and cells [goid 5247] [evidence IEA]  
Catalysis of the transmembrane transfer of an ion by a voltage-gated channel. An ion is an atom or molecule [goid 5247] [evidence IEA]  
Catalysis of facilitated diffusion of an ion (by an energy-independent process) by passage through a channel [goid 5247] [evidence IEA]  
"Catalysis of the transmembrane transfer of an ion by a voltage-gated channel. An ion is an atom or molecule [goid 5247] [evidence IEA]  
Catalysis of the transmembrane transfer of a chloride ion by a voltage-gated channel [goid 5247] [evidence IEA]  
Catalysis of the transmembrane transfer of an ion by a voltage-gated channel. An ion is an atom or molecule [goid 5247] [evidence IEA]  
Catalysis of the transmembrane transfer of a chloride ion by a voltage-gated channel [goid 5247] [evidence IEA]  
Catalysis of facilitated diffusion of an ion (by an energy-independent process) by passage through a channel [goid 5247] [evidence IEA]  
Catalysis of facilitated diffusion of an ion (by an energy-independent process) by passage through a channel [goid 5247] [evidence IEA]  
The action of a molecule that contributes to the structural integrity of a complex or assembly with one or more specific sites on a protein [goid 287] [evidence IEA]  
The action of a molecule that contributes to the structural integrity of a complex or assembly with one or more specific sites on a protein [goid 287] [evidence IEA]  
The action of a molecule that contributes to the structural integrity of a complex or assembly with one or more specific sites on a protein [goid 287] [evidence IEA]  
The action of a molecule that contributes to the structural integrity of a complex or assembly with one or more specific sites on a protein [goid 287] [evidence IEA]  
Interacting selectively with magnesium (Mg) ions [goid 287] [evidence IEA]; The action of a molecule that contributes to the structural integrity of a complex or assembly with one or more specific sites on a protein [goid 287] [evidence IEA]  
The action of a molecule that contributes to the structural integrity of a complex or assembly with one or more specific sites on a protein [goid 287] [evidence IEA]  
The action of a molecule that contributes to the structural integrity of a complex or assembly with one or more specific sites on a protein [goid 287] [evidence IEA]  
The action of a molecule that contributes to the structural integrity of a complex or assembly with one or more specific sites on a protein [goid 287] [evidence IEA]  
The action of a molecule that contributes to the structural integrity of a complex or assembly with one or more specific sites on a protein [goid 287] [evidence IEA]  
The action of a molecule that contributes to the structural integrity of a complex or assembly with one or more specific sites on a protein [goid 287] [evidence IEA]  
"Combining with an extracellular or intracellular messenger to initiate a change in cell activity, and in turn initiating a change in cell activity [goid 5247] [evidence IEA]  
The action of a molecule that contributes to the structural integrity of a complex or assembly with one or more specific sites on a protein [goid 5247] [evidence IEA]  
The action of a molecule that contributes to the structural integrity of a complex or assembly with one or more specific sites on a protein [goid 5247] [evidence IEA]

"The selective, often stoichiometric, interaction of a molecule with one or more specific sites on a protein [goid 5247] [evidence IEA]  
"The selective, often stoichiometric, interaction of a molecule with one or more specific sites on a protein [goid 5247] [evidence IEA]  
"The selective, often stoichiometric, interaction of a molecule with one or more specific sites on a protein [goid 5247] [evidence IEA]

"The selective, often stoichiometric, interaction of a molecule with one or more specific sites on a protein [goid 5247] [evidence IEA]  
"Combining with an extracellular or intracellular messenger to initiate a change in cell activity, and in turn initiating a change in cell activity [goid 5247] [evidence IEA]  
"The selective, often stoichiometric, interaction of a molecule with one or more specific sites on a protein [goid 5247] [evidence IEA]  
"Combining with an extracellular or intracellular messenger to initiate a change in cell activity, and in turn initiating a change in cell activity [goid 5247] [evidence IEA]  
"The selective, often stoichiometric, interaction of a molecule with one or more specific sites on a protein [goid 5247] [evidence IEA]  
"The selective, often stoichiometric, interaction of a molecule with one or more specific sites on a protein [goid 5247] [evidence IEA]  
"Combining with an extracellular or intracellular messenger to initiate a change in cell activity [goid 5247] [evidence IEA]  
"The selective, often stoichiometric, interaction of a molecule with one or more specific sites on a protein [goid 5247] [evidence IEA]  
"The selective, often stoichiometric, interaction of a molecule with one or more specific sites on a protein [goid 5247] [evidence IEA]  
"Interacting selectively with an opsonin, such as a complement component or antibody, depositing it on a surface [goid 5247] [evidence IEA]  
"Combining with an extracellular or intracellular messenger to initiate a change in cell activity [goid 5247] [evidence IEA]

"The selective, often stoichiometric, interaction of a molecule with one or more specific sites on  
Interacting selectively with calcium ions (Ca<sup>2+</sup>) [goid 5509] [evidence IEA]; Interacting selectively  
Catalysis of the transmembrane transfer of an ion by a voltage-gated channel. An ion is an atom  
Catalysis of the transmembrane transfer of an ion by a voltage-gated channel. An ion is an atom  
Catalysis of the transmembrane transfer of an ion by a voltage-gated channel. An ion is an atom  
Catalysis of the transmembrane transfer of an ion by a voltage-gated channel. An ion is an atom  
Catalysis of the transmembrane transfer of an ion by a voltage-gated channel. An ion is an atom  
Interacting selectively with any protein or protein complex (a complex of two or more proteins that  
"Interacting selectively with any nucleic acid [goid 3676] [evidence IEA]; Interacting selectively with

"Interacting selectively with a nucleotide, any compound consisting of a nucleoside that is esterified  
"Interacting selectively with a nucleotide, any compound consisting of a nucleoside that is esterified  
"Catalysis of the reaction: ATP + a protein serine/threonine = ADP + protein serine/threonine phosphorylated  
"Interacting selectively with a nucleotide, any compound consisting of a nucleoside that is esterified  
"Interacting selectively with monomeric or multimeric forms of actin, including actin filaments [goid 3677] [evidence IEA];  
"Interacting selectively with any protein or protein complex (a complex of two or more proteins that  
Interacting selectively with any protein or protein complex (a complex of two or more proteins that  
Interacting selectively with an identical protein to form a homodimer [goid 42803] [pmid 1501045]  
"Interacting selectively with a nucleotide, any compound consisting of a nucleoside that is esterified  
"Interacting selectively with a nucleotide, any compound consisting of a nucleoside that is esterified  
"Catalysis of the hydrolysis of internal, alpha-peptide bonds in a polypeptide chain by a catalytic  
over time from an initial condition (e.g. a zygote or a young adult) to a later condition (e.g. a multicellular  
of proteolytic caspases, whose actions dismantle the cell and result in cell death. Apoptosis begins  
"Interacting selectively with a nucleotide, any compound consisting of a nucleoside that is esterified  
Interacting selectively with DNA (deoxyribonucleic acid) [goid 3677] [evidence IEA]; Interacting selectively  
Interacting selectively with calcium ions (Ca<sup>2+</sup>) [goid 5509] [evidence IEA]; Interacting selectively  
Interacting selectively with calcium ions (Ca<sup>2+</sup>) [goid 5509] [evidence IEA]; Interacting selectively  
Interacting selectively with calcium ions (Ca<sup>2+</sup>) [goid 5509] [evidence IEA]; Interacting selectively  
The action of a molecule that contributes to the structural integrity of a complex or assembly with  
The action of a molecule that contributes to the structural integrity of a complex or assembly with  
The action of a molecule that contributes to the structural integrity of a complex or assembly with  
Mediates the transfer of a signal from the outside to the inside of a cell by means other than the  
Interacting selectively with any protein or protein complex (a complex of two or more proteins that

"Interacting selectively with magnesium (Mg) ions [goid 287] [evidence IEA]; Catalysis of the reaction  
"Catalysis of the reaction: CMP-N-acetylneuraminic acid + NADPH + H<sup>+</sup> + O<sub>2</sub> = CMP-N-glycolylneuraminic acid  
"Catalysis of the reaction: CTP + N-acetylneuraminic acid = diphosphate + CMP-N-acetylneuraminic acid [goid 3677] [evidence IEA]  
"Interacting selectively with any protein or protein complex (a complex of two or more proteins that

"Interacting selectively with ATP, adenosine 5'-triphosphate, a universally important coenzyme and  
"Functions to control the survival, growth, differentiation and effector function of tissues and cells  
"Functions to control the survival, growth, differentiation and effector function of tissues and cells

"Functions to control the survival, growth, differentiation and effector function of tissues and cells"

"Functions to control the survival, growth, differentiation and effector function of tissues and cells"

"Functions to control the survival, growth, differentiation and effector function of tissues and cells"

"Functions to control the survival, growth, differentiation and effector function of tissues and cells"

The function of binding to a specific DNA sequence in order to modulate transcription. The trans

"Catalysis of the hydrolysis of the terminal or penultimate peptide bond at the C-terminal end of

ed by keratin. Keratinization occurs in the stratum corneum, feathers, hair, claws, nails, hooves, ;

"Elemental activities, such as catalysis or binding, describing the actions of a gene product at th

Interacting selectively with any protein or protein complex (a complex of two or more proteins th

Interacting selectively with any protein or protein complex (a complex of two or more proteins th

"Interacting selectively with monomeric or multimeric forms of actin, including actin filaments [go

"Interacting selectively with monomeric or multimeric forms of actin, including actin filaments [go

ween cells [goid 6811] [evidence IEA]"

Interacting selectively with any protein or protein complex (a complex of two or more proteins th  
ween cells [goid 6811] [evidence IEA]"

Interacting selectively with any protein or protein complex (a complex of two or more proteins th  
vidence IEA]; Any process that modulates the frequency, rate or extent of DNA-dependent trans

"The selective, often stoichiometric, interaction of a molecule with one or more specific sites on

Functions to mediate the interaction of transcriptional activators with the RNA polymerase II-gen

Interacting selectively with any protein or protein complex (a complex of two or more proteins th

"Interacting selectively with a nucleotide, any compound consisting of a nucleoside that is esterif

"Interacting selectively with magnesium (Mg) ions [goid 287] [evidence IEA]; Interacting selective

"Catalysis of the hydrolysis of ester linkages within nucleic acids by removing nucleotide residue

Interacting selectively with any nucleic acid [goid 3676] [evidence IEA]; The function of binding t

Interacting selectively with any nucleic acid [goid 3676] [evidence IEA]; The function of binding t

"Catalysis of the reaction: nucleoside 2',3'-cyclic phosphate + H<sub>2</sub>O = nucleoside 2'-phosphate [g

Interacting selectively with any protein or protein complex (a complex of two or more proteins th

"Interacting selectively with one or more specific sites on a receptor molecule, a macromolecule

Combining with an extracellular or intracellular messenger to initiate a change in cell activity [goid

Combining with an extracellular or intracellular messenger to initiate a change in cell activity [goid

Catalysis of the phosphorylation of a specific transcription regulator in response to the presence

Interacting selectively with any protein or protein complex (a complex of two or more proteins th

"Interacting selectively with any protein or protein complex (a complex of two or more proteins th

"Combining with an extracellular or intracellular messenger to initiate a change in cell activity [gc

"Interacting selectively with one or more specific sites on a receptor molecule, a macromolecule

"Interacting selectively with a nucleotide, any compound consisting of a nucleoside that is esterif

Interacting selectively with any protein or protein complex (a complex of two or more proteins th  
molecular signal, and recognize and characterize the signal. Sonic stimuli are detected in the form

Interacting selectively with any protein or protein complex (a complex of two or more proteins th

"Enables the directed movement of proteins into, out of, within or between cells [goid 8565] [pmi

Interacting selectively with any protein or protein complex (a complex of two or more proteins that are functionally related)  
"Elemental activities, such as catalysis or binding, describing the actions of a gene product at the cellular level [EA]"

Interacting selectively with any protein or protein complex (a complex of two or more proteins that are functionally related)

"The action of a molecule that contributes to the structural integrity of the extracellular matrix [GO:0005578]"

The action of a molecule that contributes to the structural integrity of the extracellular matrix [GO:0005578]

The action of a molecule that contributes to the structural integrity of a complex or assembly with other molecules [GO:0008008]

The action of a molecule that contributes to the structural integrity of the extracellular matrix [GO:0005578]

The action of a molecule that contributes to the structural integrity of the extracellular matrix [GO:0005578]

The action of a molecule that contributes to the structural integrity of a complex or assembly with other molecules [GO:0008008]

The action of a molecule that contributes to the structural integrity of the extracellular matrix [GO:0005578]

"Interacting selectively with an integrin [GO:0005578] [PMID:12682293] [evidence:IDA]; Interacting selectively with any protein or protein complex (a complex of two or more proteins that are functionally related)"

"The action of a molecule that contributes to the structural integrity of the extracellular matrix [GO:0005578]"

The action of a molecule that contributes to the structural integrity of the extracellular matrix [GO:0005578]

"Stops, prevents or reduces the activity of serine-type endopeptidases, enzymes that catalyze the hydrolysis of peptide bonds"

"Stops, prevents or reduces the activity of serine-type endopeptidases, enzymes that catalyze the hydrolysis of peptide bonds"

"The action of a molecule that contributes to the structural integrity of the extracellular matrix [GO:0005578]"

The action of a molecule that contributes to the structural integrity of a complex or assembly with other molecules [GO:0008008]

The action of a molecule that contributes to the structural integrity of a complex or assembly with other molecules [GO:0008008]

the synaptic cleft during synaptic transmission [GO:0005578] [PMID:9689136] [evidence:TAS]; Any molecule that contributes to the structural integrity of the extracellular matrix [GO:0005578]"

Interacting selectively with an identical protein or proteins [GO:0005578] [PMID:15799966] [evidence:IEA]; Interacting selectively with any protein or protein complex (a complex of two or more proteins that are functionally related)"

Interacting selectively with any protein or protein complex (a complex of two or more proteins that are functionally related)

Interacting selectively with any protein or protein complex (a complex of two or more proteins that are functionally related)

Interacting selectively with any protein or protein complex (a complex of two or more proteins that are functionally related)

Interacting selectively with any protein or protein complex (a complex of two or more proteins that are functionally related)

Interacting selectively with any protein or protein complex (a complex of two or more proteins that are functionally related)

Interacting selectively with any protein or protein complex (a complex of two or more proteins that are functionally related)

"Interacting selectively with any protein or protein complex (a complex of two or more proteins that are functionally related)"

Interacting selectively with any protein or protein complex (a complex of two or more proteins that are functionally related)

The action of a molecule that contributes to the structural integrity of the extracellular matrix [GO:0005578]

"Interacting selectively with magnesium (Mg) ions [GO:0005578] [evidence:IEA]; Interacting selectively with any protein or protein complex (a complex of two or more proteins that are functionally related)"

"Catalysis of the transfer of a methyl group to the oxygen atom of an acceptor molecule [GO:0005578]"

"The action characteristic of a hormone, any substance formed in very small amounts in one species that acts on other individuals of the same species"

The action of a molecule that contributes to the structural integrity of a complex or assembly with other molecules [GO:0008008]

The action of a molecule that contributes to the structural integrity of a complex or assembly with other molecules [GO:0008008]

The action of a molecule that contributes to the structural integrity of a complex or assembly with other molecules [GO:0008008]

The action of a molecule that contributes to the structural integrity of a complex or assembly with other molecules [GO:0008008]

Mediates the transfer of a signal from the outside to the inside of a cell by means other than the cell membrane [GO:0005578]"

Interacting selectively with any protein or protein complex (a complex of two or more proteins that are functionally related)

Interacting selectively with any protein or protein complex (a complex of two or more proteins that are functionally related)

"The function of a transcription cofactor that activates transcription from a RNA polymerase II promoter [GO:0005578]"

Interacting selectively with any protein or protein complex (a complex of two or more proteins that are functionally related)

Interacting selectively with any protein or protein complex (a complex of two or more proteins that interact with each other)  
Interacting selectively with any protein or protein complex (a complex of two or more proteins that interact with each other)

"Catalysis of the transfer of a prenyl group from one compound (donor) to another (acceptor) [goid 5506] [evidence IEA]"

"Catalysis of the reaction: S-adenosyl-L-methionine + 3-hexaprenyl-4,5-dihydroxybenzoate = S-adenosyl-L-homocysteine + 3-hexaprenyl-4,5-dihydroxybenzoate [goid 5506] [evidence IEA]"

"Catalysis of the transfer of a methyl group to an acceptor molecule [goid 8168] [evidence IEA];

"Catalysis of an oxidation-reduction (redox) reaction in which hydrogen or electrons are transferred from one molecule to another [goid 5506] [evidence IEA]"

"Interacting selectively with iron (Fe) ions [goid 5506] [evidence IEA]; Catalysis of an oxidation-reduction reaction in which hydrogen or electrons are transferred from one molecule to another [goid 6744] [evidence IEA]"

"Interacting selectively with a protein C-terminus, the end of any peptide chain at which the 1-carboxyl group is located [goid 5506] [evidence IEA]"

"Interacting selectively with monomeric or multimeric forms of actin, including actin filaments [goid 5506] [evidence IEA]"

"Interacting selectively with monomeric or multimeric forms of actin, including actin filaments [goid 5506] [evidence IEA]"

"Interacting selectively with monomeric or multimeric forms of actin, including actin filaments [goid 5506] [evidence IEA]"

"Interacting selectively with monomeric or multimeric forms of actin, including actin filaments [goid 5506] [evidence IEA]"

"Interacting selectively with a G-protein-coupled receptor [goid 1664] [pmid 12915402] [evidence IEA]"

"Interacting selectively with monomeric or multimeric forms of actin, including actin filaments [goid 5506] [evidence IEA]"

"Catalysis of the transfer of a solute or solutes from one side of a membrane to the other according to a concentration gradient [goid 16531] [evidence IEA]"

Catalysis of the transfer of a solute or solutes from one side of a membrane to the other according to a concentration gradient [goid 16531] [evidence IEA]"

Assists in the delivery of copper ions to target proteins or compartments [goid 16531] [evidence IEA]"

Catalysis of the transfer of a solute or solutes from one side of a membrane to the other according to a concentration gradient [goid 16531] [evidence IEA]"

Catalysis of the transfer of a solute or solutes from one side of a membrane to the other according to a concentration gradient [goid 16531] [evidence IEA]"

Catalysis of the transfer of a solute or solutes from one side of a membrane to the other according to a concentration gradient [goid 16531] [evidence IEA]"

Catalysis of the transfer of a solute or solutes from one side of a membrane to the other according to a concentration gradient [goid 16531] [evidence IEA]"

Catalysis of the transfer of a solute or solutes from one side of a membrane to the other according to a concentration gradient [goid 16531] [evidence IEA]"

Catalysis of the transfer of a solute or solutes from one side of a membrane to the other according to a concentration gradient [goid 16531] [evidence IEA]"

Catalysis of the transfer of a solute or solutes from one side of a membrane to the other according to a concentration gradient [goid 16531] [evidence IEA]"

Catalysis of the transfer of a solute or solutes from one side of a membrane to the other according to a concentration gradient [goid 16531] [evidence IEA]"

Catalysis of the transfer of a solute or solutes from one side of a membrane to the other according to a concentration gradient [goid 16531] [evidence IEA]"

Catalysis of the transfer of a solute or solutes from one side of a membrane to the other according to a concentration gradient [goid 16531] [evidence IEA]"

"Catalysis of the hydrolysis of C-terminal amino acid residues from a polypeptide chain by a metalloprotease [goid 16531] [evidence IEA]"

"Catalysis of the hydrolysis of C-terminal amino acid residues from a polypeptide chain by a metalloprotease [goid 16531] [evidence IEA]"

"Catalysis of the hydrolysis of C-terminal amino acid residues from a polypeptide chain by a metalloprotease [goid 16531] [evidence IEA]"

"Catalysis of the hydrolysis of C-terminal amino acid residues from a polypeptide chain by a metalloprotease [goid 16531] [evidence IEA]"

"Catalysis of the hydrolysis of C-terminal amino acid residues from a polypeptide chain by a mechanism  
"Catalysis of the hydrolysis of C-terminal amino acid residues from a polypeptide chain by a mechanism  
Interacting selectively with an RNA molecule or a portion thereof [goid 3723] [evidence IEA]

"Interacting selectively with a nucleotide, any compound consisting of a nucleoside that is esterified

"Interacting selectively with a nucleotide, any compound consisting of a nucleoside that is esterified

"Interacting selectively with a nucleotide, any compound consisting of a nucleoside that is esterified

"Interacting selectively with a syntaxin, a SNAP receptor involved in the docking of synaptic vesicles

"Enables the directed movement of a neurotransmitter into, out of, within or between cells. Neurotransmission

"Catalysis of the hydrolysis of C-terminal amino acid residues from a polypeptide chain by a mechanism

Interacting selectively with any protein or protein complex (a complex of two or more proteins that

"Interacting selectively with phosphatidylserine, a class of glycerophospholipids in which a phosphate

"Catalysis of the reaction: ATP + a protein serine/threonine = ADP + protein serine/threonine phosphorylated

"Enables the directed movement of substances (such as macromolecules, small molecules, ions, or

"Catalysis of the reaction: coproporphyrinogen-III + O<sub>2</sub> + 2 H<sup>+</sup> = protoporphyrinogen-IX + 2 CO<sub>2</sub>

Interacting selectively with an RNA molecule or a portion thereof [goid 3723] [evidence IEA]; Interacting

"Interacting selectively with an RNA molecule or a portion thereof [goid 3723] [evidence IEA]; Interacting

"Interacting selectively with any protein or protein complex (a complex of two or more proteins that

Interacting selectively with an RNA molecule or a portion thereof [goid 3723] [evidence IEA]; Interacting

"Interacting selectively with a nucleotide, any compound consisting of a nucleoside that is esterified

"Catalysis of the reaction: palmitoyl-CoA + L-carnitine = CoA + L-palmitoylcarnitine [goid 4095] [

"Catalysis of the reaction: palmitoyl-CoA + L-carnitine = CoA + L-palmitoylcarnitine [goid 4095] [

"Catalysis of the reaction: palmitoyl-CoA + L-carnitine = CoA + L-palmitoylcarnitine [goid 4095] [

"Catalysis of the reaction: palmitoyl-CoA + L-carnitine = CoA + L-palmitoylcarnitine [goid 4095] [

Catalysis of the hydrolysis of a peptide bond not more than three residues from the C-terminus of a

"Catalysis of the hydrolysis of C-terminal amino acid residues from a polypeptide chain by a mechanism  
[goid 45916] [evidence IEA]"

Combining with an extracellular or intracellular messenger to initiate a change in cell activity [goid

"Enables the directed movement of substances (such as macromolecules, small molecules, ions, or

"Interacting selectively with retinoic acid, 3,7-dimethyl-9-(2,6,8-trimethyl-1-cyclohexen-1-yl)-2,4,6,8-tetra-

"Catalysis of the hydrolysis of internal, alpha-peptide bonds in a polypeptide chain by a mechanism

Interacting selectively with DNA (deoxyribonucleic acid) [goid 3677] [evidence IEA]; Interacting s

"Catalysis of the generalized reaction: acyl-carrier + reactant = acyl-reactant + carrier [goid 8415]

Catalysis of the reaction: ATP + H<sub>2</sub>O = ADP + phosphate to drive the hydrolysis of peptide bonds

"Interacting selectively with a nucleotide, any compound consisting of a nucleoside that is esterified

Interacting selectively with any protein or protein complex (a complex of two or more proteins that

"The function of binding to a specific DNA sequence in order to modulate transcription. The transcrip

"The function of binding to a specific DNA sequence in order to modulate transcription. The transcrip

"The function of binding to a specific DNA sequence in order to modulate transcription. The transcrip

"The function of binding to a specific DNA sequence in order to modulate transcription. The transcrip

"The function of binding to a specific DNA sequence in order to modulate transcription. The tran  
"The function of binding to a specific DNA sequence in order to modulate transcription. The tran  
"The function of binding to a specific DNA sequence in order to modulate transcription. The tran  
"The function of binding to a specific DNA sequence in order to modulate transcription. The tran  
"The function of binding to a specific DNA sequence in order to modulate transcription. The tran  
Functions to initiate or regulate RNA polymerase II transcription [goid 3702] [pmid 9710587] [evi  
Interacting selectively with calcium ions (Ca<sup>2+</sup>) [goid 5509] [evidence IEA]; Interacting selectivel  
Interacting selectively with calcium ions (Ca<sup>2+</sup>) [goid 5509] [evidence IEA]; Interacting selectivel  
"The function of binding to a specific DNA sequence in order to modulate transcription. The tran  
Interacting selectively with any protein or protein complex (a complex of two or more proteins th  
"Catalysis of the hydrolysis of internal, alpha-peptide bonds in a polypeptide chain by a mechan  
Interacting selectively with any protein or protein complex (a complex of two or more proteins th  
Interacting selectively with zinc (Zn) ions [goid 8270] [pmid 9126610] [evidence TAS]; Interacting  
Interacting selectively with zinc (Zn) ions [goid 8270] [pmid 8824798] [evidence TAS]; Interacting  
Interacting selectively with any protein or protein complex (a complex of two or more proteins th

"Interacting selectively with any protein or protein complex (a complex of two or more proteins th  
"Interacting selectively with a nucleotide, any compound consisting of a nucleoside that is esterif  
"Combining with an extracellular or intracellular messenger to initiate a change in cell activity [gc

"Catalysis of the transfer of a group, e.g. a methyl group, glycosyl group, acyl group, phosphorus  
"Interacting selectively with an RNA molecule or a portion thereof [goid 3723] [pmid 12084575] [  
"The action of a molecule that contributes to the structural integrity of a complex or assembly wi  
"Catalysis of the generalized reaction: acyl-carrier + reactant = acyl-reactant + carrier [goid 8415

Interacting selectively with any protein or protein complex (a complex of two or more proteins th  
[evidence IEA]; Any process that modulates the frequency, rate or extent of DNA-dependent trans  
"Interacting selectively with chromatin, the network of fibers of DNA and protein that make up th  
"Interacting selectively with a nucleotide, any compound consisting of a nucleoside that is esterif  
The action of a molecule that contributes to the structural integrity of the lens of an eye [goid 52  
The action of a molecule that contributes to the structural integrity of the lens of an eye [goid 52  
The action of a molecule that contributes to the structural integrity of the lens of an eye [goid 52

The action of a molecule that contributes to the structural integrity of the lens of an eye [goid 52  
"The selective, often stoichiometric, interaction of a molecule with one or more specific sites on  
"Catalysis of a biochemical reaction at physiological temperatures. In biologically catalyzed reac  
"The selective, often stoichiometric, interaction of a molecule with one or more specific sites on  
"The selective, often stoichiometric, interaction of a molecule with one or more specific sites on  
"Catalysis of the reaction: acetyl-CoA + H<sub>2</sub>O + oxaloacetate = citrate + CoA [goid 4108] [pmid 9  
"Catalysis of the reaction: 3-sulfino-L-alanine = hypotaurine + CO<sub>2</sub> [goid 4782] [evidence IEA]; C



Interacting selectively with DNA (deoxyribonucleic acid) [goid 3677] [evidence IEA]; Interacting s  
Interacting selectively with DNA (deoxyribonucleic acid) [goid 3677] [evidence IEA]; Interacting s  
Interacting selectively with DNA (deoxyribonucleic acid) [goid 3677] [evidence IEA]; Interacting s  
Interacting selectively with any protein or protein complex (a complex of two or more proteins th  
"Interacting selectively with a nucleotide, any compound consisting of a nucleoside that is esteril  
Combining with an extracellular or intracellular messenger to initiate a change in cell activity [goid  
Combining with an extracellular or intracellular messenger to initiate a change in cell activity [goid  
"Interacting selectively with any protein or protein complex (a complex of two or more proteins th  
"The action characteristic of a hormone, any substance formed in very small amounts in one spe  
"Interacting selectively with a nucleotide, any compound consisting of a nucleoside that is esteril  
"Interacting selectively with a nucleotide, any compound consisting of a nucleoside that is esteril  
"Interacting selectively with a nucleotide, any compound consisting of a nucleoside that is esteril  
"Catalysis of the transfer of a phosphate group, usually from ATP, to a substrate molecule [goid  
"Interacting selectively with a nucleotide, any compound consisting of a nucleoside that is esteril  
"Interacting selectively with a nucleotide, any compound consisting of a nucleoside that is esteril  
"Interacting selectively with a nucleotide, any compound consisting of a nucleoside that is esteril  
"Interacting selectively with a nucleotide, any compound consisting of a nucleoside that is esteril  
"Interacting selectively with a nucleotide, any compound consisting of a nucleoside that is esteril

Interacting selectively with any protein or protein complex (a complex of two or more proteins th

The function of binding to a specific DNA sequence in order to modulate transcription. The trans  
The function of binding to a specific DNA sequence in order to modulate transcription. The trans  
Interacting selectively with any protein or protein complex (a complex of two or more proteins th  
"Elemental activities, such as catalysis or binding, describing the actions of a gene product at th  
"Catalysis of the transfer of an acetyl group to a nitrogen atom on the acceptor molecule [goid 8  
Interacting selectively with beta-amyloid peptide/protein and/or its precursor [goid 1540] [pmid 11  
[goid 4869] [pmid 8995380] [evidence TAS]  
[goid 4869] [pmid 9733783] [evidence TAS]  
[goid 4869] [evidence IEA]  
"Interacting selectively with any protease or peptidase [goid 2020] [pmid 6203523] [evidence IPI]  
Interacting selectively with any protease or peptidase [goid 2020] [pmid 6203523] [evidence IPI]  
Interacting selectively with an RNA molecule or a portion thereof [goid 3723] [pmid 1741396] [ev  
"Interacting selectively with a nucleotide, any compound consisting of a nucleoside that is esteril  
"Interacting selectively with a nucleotide, any compound consisting of a nucleoside that is esteril  
Interacting selectively with an RNA molecule or a portion thereof [goid 3723] [pmid 1741396] [ev

ans, and organisms. A process is a collection of molecular events with a defined beginning and e  
"The function of binding to a specific DNA sequence in order to modulate transcription. The tran  
"The function of a transcription cofactor that represses transcription from a RNA polymerase II p  
"Catalysis of a biochemical reaction at physiological temperatures. In biologically catalyzed reac  
The function of binding to a specific DNA sequence in order to modulate transcription. The trans

"Catalysis of the reaction: nucleoside triphosphate + RNA(n) = diphosphate + RNA(n+1). Utilizes:  
"Elemental activities, such as catalysis or binding, describing the actions of a gene product at th  
"Catalysis of the reaction: a phosphoprotein + H<sub>2</sub>O = a protein + phosphate. Together with prote  
"Elemental activities, such as catalysis or binding, describing the actions of a gene product at th  
"Catalysis of the reaction: a phosphoprotein + H<sub>2</sub>O = a protein + phosphate. Together with prote  
"Interacting selectively with an integrin [goid 5178] [evidence IEA]; Interacting selectively with an  
Increases the rate of GTP hydrolysis by the GTPase ARF [goid 8060] [evidence IEA]; Interacting  
Increases the rate of GTP hydrolysis by the GTPase ARF [goid 8060] [evidence IEA]; Interacting  
"Catalysis of the reaction: L-cystathionine + H<sub>2</sub>O = L-cysteine + NH<sub>3</sub> + 2-oxobutanoate [goid 41  
The action of a molecule that contributes to the structural integrity of a complex or assembly with  
"The action of a molecule that contributes to the structural integrity of a complex or assembly with  
"The action of a molecule that contributes to the structural integrity of a cytoskeletal structure [gc  
"The action of a molecule that contributes to the structural integrity of a complex or assembly with  
"Interacting selectively with chromatin, the network of fibers of DNA and protein that make up the  
Interacting selectively with the beta subunit of the catenin complex [goid 8013] [evidence IEA]; In  
"The selective, often stoichiometric, interaction of a molecule with one or more specific sites on  
Catalysis of the transfer of L-cystine from one side of a membrane to the other [goid 15184] [pm  
"Catalysis of the reaction: ATP + UTP + NH<sub>3</sub> = ADP + phosphate + CTP [goid 3883] [pmid 1617  
"Catalysis of the reaction: ATP + UTP + NH<sub>3</sub> = ADP + phosphate + CTP [goid 3883] [pmid 1089  
"The selective, often stoichiometric, interaction of a molecule with one or more specific sites on  
"Catalysis of the hydrolysis of internal, alpha-peptide bonds in a polypeptide chain by a catalytic  
Catalysis of the hydrolysis of a peptide bond not more than three residues from the C-terminus of  
"Catalysis of the hydrolysis of internal, alpha-peptide bonds in a polypeptide chain by a mechani  
"Catalysis of the hydrolysis of peptide bonds in a polypeptide chain by a mechanism in which the  
"Catalysis of the hydrolysis of internal, alpha-peptide bonds in a polypeptide chain by a mechani  
"Catalysis of the hydrolysis of internal, alpha-peptide bonds in a polypeptide chain by a mechani  
"Catalysis of the hydrolysis of internal, alpha-peptide bonds in a polypeptide chain by a catalytic  
"Catalysis of the hydrolysis of internal, alpha-peptide bonds in a polypeptide chain by a mechani  
"Catalysis of the hydrolysis of internal, alpha-peptide bonds in a polypeptide chain by a mechani  
"Catalysis of the hydrolysis of internal, alpha-peptide bonds in a polypeptide chain by a mechani  
"Catalysis of the hydrolysis of internal, alpha-peptide bonds in a polypeptide chain by a mechani  
"Catalysis of the hydrolysis of internal, alpha-peptide bonds in a polypeptide chain by a mechani  
"Catalysis of the hydrolysis of internal, alpha-peptide bonds in a polypeptide chain by a mechani  
Interacting selectively with any protein or protein complex (a complex of two or more proteins that

"Combining with an extracellular or intracellular messenger to initiate a change in cell activity [gc

Interacting selectively with any protein or protein complex (a complex of two or more proteins that  
"Interacting selectively with a nucleotide, any compound consisting of a nucleoside that is esterified  
"Interacting selectively with a nucleotide, any compound consisting of a nucleoside that is esterified

"Interacting selectively with any protein or protein complex (a complex of two or more proteins th  
"Interacting selectively with a ubiquitin protein ligase enzyme, any of the E3 proteins [goid 3162f  
"Interacting selectively with any protein or protein complex (a complex of two or more proteins th  
"Interacting selectively with a ubiquitin protein ligase enzyme, any of the E3 proteins [goid 3162f  
"Combining with an extracellular or intracellular messenger to initiate a change in cell activity [gc

Interacting selectively with copper (Cu) ions [goid 5507] [evidence IEA]; Interacting selectively w

"The function of binding to a specific DNA sequence in order to modulate transcription. The tran  
"Interacting selectively with DNA (deoxyribonucleic acid) [goid 3677] [evidence IEA]; Any transcr  
"Elemental activities, such as catalysis or binding, describing the actions of a gene product at th

"Catalysis of a biochemical reaction at physiological temperatures. In biologically catalyzed reac

Combining with an extracellular or intracellular messenger to initiate a change in cell activity [goi  
Combining with an extracellular or intracellular messenger to initiate a change in cell activity [goi

The function of a family of chemotactic pro-inflammatory activation-inducible cytokines acting pr  
"Combining with a low-density lipoprotein to initiate a change in cell activity [goid 5041] [evidenc  
The function of a family of chemotactic pro-inflammatory activation-inducible cytokines acting pr  
The function of a family of chemotactic pro-inflammatory activation-inducible cytokines acting pr  
The function of a family of chemotactic pro-inflammatory activation-inducible cytokines acting pr  
Combining with an extracellular or intracellular messenger to initiate a change in cell activity [goi  
"Interacting selectively with monomeric or multimeric forms of actin, including actin filaments [go  
Combining with an extracellular or intracellular messenger to initiate a change in cell activity [goi  
Combining with an extracellular or intracellular messenger to initiate a change in cell activity [goi

"Catalysis of an oxidation-reduction (redox) reaction, a reversible chemical reaction in which the

"Elemental activities, such as catalysis or binding, describing the actions of a gene product at th  
Interacting selectively with DNA (deoxyribonucleic acid) [goid 3677] [evidence IEA]

Interacting selectively with any protein or protein complex (a complex of two or more proteins th

Interacting selectively with any nucleic acid [goid 3676] [evidence IEA]; Catalysis of the transfer

Interacting selectively with any protein or protein complex (a complex of two or more proteins th

Interacting selectively with DNA (deoxyribonucleic acid) [goid 3677] [evidence IEA]; Interacting s  
"Interacting selectively with DNA (deoxyribonucleic acid) [goid 3677] [evidence IEA]; Interacting  
Interacting selectively with DNA (deoxyribonucleic acid) [goid 3677] [evidence IEA]; Interacting s

Catalysis of the reaction:  $2 \text{Fe}^{2+} + \text{NAD}^+ = 2 \text{Fe}^{3+} + \text{NADH} + \text{H}^+$  [goid 293] [pmid 14499595] [e  
Interacting selectively with iron (Fe) ions [goid 5506] [evidence IEA]; Interacting selectively with ;  
Interacting selectively with iron (Fe) ions [goid 5506] [evidence IEA]; Interacting selectively with ;  
"Interacting selectively with heme, any compound of iron complexed in a porphyrin (tetrapyrrole)  
"Interacting selectively with iron (Fe) ions [goid 5506] [evidence IEA]; Interacting selectively with  
"Interacting selectively with iron (Fe) ions [goid 5506] [evidence IEA]; Interacting selectively with  
"Interacting selectively with heme, any compound of iron complexed in a porphyrin (tetrapyrrole)  
"Catalysis of the reaction:  $\text{NADH} + \text{H}^+ + 2 \text{ ferricytochrome b(5)} = \text{NAD}^+ + 2 \text{ ferrocyclochrome b(5)}$   
"Catalysis of the reaction:  $\text{NADH} + \text{H}^+ + 2 \text{ ferricytochrome b(5)} = \text{NAD}^+ + 2 \text{ ferrocyclochrome b(5)}$   
"Any molecular entity that serves as an electron acceptor and electron donor in an electron trans  
"Catalysis of the reaction:  $\text{NADH} + \text{H}^+ + 2 \text{ ferricytochrome b(5)} = \text{NAD}^+ + 2 \text{ ferrocyclochrome b(5)}$

"Interacting selectively with iron (Fe) ions [goid 5506] [evidence IEA]; Interacting selectively with  
"Interacting selectively with iron (Fe) ions [goid 5506] [evidence IEA]; Catalysis of an oxidation-re  
"Catalysis of the transmembrane transfer of an ion by a voltage-gated channel. An ion is an atom  
"Catalysis of the reaction:  $2 \text{Fe}^{2+} + \text{NAD}^+ = 2 \text{Fe}^{3+} + \text{NADH} + \text{H}^+$  [goid 293] [pmid 14499595] [  
"Interacting selectively with iron (Fe) ions [goid 5506] [evidence IEA]; Interacting selectively with  
"Catalysis of the reaction:  $\text{protein serine/threonine phosphate} + \text{H}_2\text{O} = \text{protein serine/threonine}$

Interacting selectively with any protein or protein complex (a complex of two or more proteins tha  
Interacting selectively with any protein or protein complex (a complex of two or more proteins tha  
"The action of a molecule that contributes to the structural integrity of the ribosome [goid 3735] [  
"

"Catalysis of the incorporation of one atom from molecular oxygen into a compound and the red  
"Catalysis of the incorporation of one atom from molecular oxygen into a compound and the red  
"Interacting selectively with iron (Fe) ions [goid 5506] [evidence IEA]; Any molecular entity that s  
"Catalysis of the incorporation of one atom from molecular oxygen into a compound and the red  
"Catalysis of the incorporation of one atom from molecular oxygen into a compound and the red  
"Interacting selectively with retinoic acid, 3,7-dimethyl-9-(2,6,-trimethyl-1-cyclohexen-1-yl)-2,4,6,  
"Interacting selectively with retinoic acid, 3,7-dimethyl-9-(2,6,-trimethyl-1-cyclohexen-1-yl)-2,4,6,  
"Interacting selectively with iron (Fe) ions [goid 5506] [evidence IEA]; Catalysis of the formation  
"Catalysis of the incorporation of one atom from molecular oxygen into a compound and the red  
"Interacting selectively with iron (Fe) ions [goid 5506] [evidence IEA]; Any molecular entity that s  
"Catalysis of the incorporation of one atom from molecular oxygen into a compound and the red  
"Interacting selectively with iron (Fe) ions [goid 5506] [evidence IEA]; Any molecular entity that s  
"Catalysis of the incorporation of one atom from molecular oxygen into a compound and the red  
"Catalysis of the incorporation of one atom from molecular oxygen into a compound and the red  
"Catalysis of the incorporation of one atom from molecular oxygen into a compound and the red

"Catalysis of the incorporation of one atom from molecular oxygen into a compound and the red  
"Catalysis of the incorporation of one atom from molecular oxygen into a compound and the red  
"Interacting selectively with iron (Fe) ions [goid 5506] [evidence IEA]; Any molecular entity that s  
"Interacting selectively with iron (Fe) ions [goid 5506] [evidence IEA]; Catalysis of the formation  
"Catalysis of the incorporation of one atom from molecular oxygen into a compound and the red  
"Catalysis of the incorporation of one atom from molecular oxygen into a compound and the red  
"Catalysis of the incorporation of one atom from molecular oxygen into a compound and the red  
"Catalysis of the incorporation of one atom from molecular oxygen into a compound and the red  
Combining with an extracellular or intracellular messenger to initiate a change in cell activity [goid

"Interacting selectively with one or more specific sites on a receptor molecule, a macromolecule

"Interacting selectively with any protein or protein complex (a complex of two or more proteins th

"Interacting selectively with monomeric or multimeric forms of actin, including actin filaments [go  
Interacting selectively with any protein or protein complex (a complex of two or more proteins th

"Catalysis of the reaction: dolichyl diphosphooligosaccharide + protein L-asparagine = dolichyl d

Interacting selectively with calcium ions (Ca<sup>2+</sup>) [goid 5509] [evidence IEA]; Interacting selectivel

"Catalysis of the reaction: triacylglycerol + H<sub>2</sub>O = diacylglycerol + a fatty acid anion [goid 4806] |

"Catalysis of the reaction: ATP + glycerone = ADP + glycerone phosphate [goid 4371] [evidence

"Interacting selectively with a nucleotide, any compound consisting of a nucleoside that is esteril  
of proteolytic caspases, whose actions dismantle the cell and result in cell death. Apoptosis begi  
of proteolytic caspases, whose actions dismantle the cell and result in cell death. Apoptosis begi

"Interacting selectively with a nucleotide, any compound consisting of a nucleoside that is esteril

"Interacting selectively with a nucleotide, any compound consisting of a nucleoside that is esteril

"Interacting selectively with a nucleotide, any compound consisting of a nucleoside that is esteril  
of proteolytic caspases, whose actions dismantle the cell and result in cell death. Apoptosis begi

"Catalysis of the reaction: protein tyrosine phosphate + H<sub>2</sub>O = protein tyrosine + phosphate [goid

"Combining with an extracellular or intracellular messenger to initiate a change in cell activity [gc

"Interacting selectively with a nucleotide, any compound consisting of a nucleoside that is esteril

"Interacting selectively with a nucleotide, any compound consisting of a nucleoside that is esteril

"[goid 5057] [pmid 9215629] [evidence TAS]; Interacting selectively with any protein or protein c

"Interacting selectively with a nucleotide, any compound consisting of a nucleoside that is esteril

Interacting selectively with any protein or protein complex (a complex of two or more proteins th

"Interacting selectively with a nucleotide, any compound consisting of a nucleoside that is esteril

Interacting selectively with any protein or protein complex (a complex of two or more proteins th



"Catalysis of the hydrolysis of various bonds, e.g. C-O, C-N, C-C, phosphoric anhydride bonds, ...  
Interacting selectively with damaged DNA [goid 3684] [pmid 8407967] [evidence TAS]; Interacti  
Interacting selectively with damaged DNA [goid 3684] [pmid 8407967] [evidence TAS]; Catalysis  
"Catalysis of the cleavage of C-C, C-O, C-N and other bonds by other means than by hydrolysis  
Interacting selectively with any protein or protein complex (a complex of two or more proteins th  
"Catalysis of the hydrolysis of various bonds, e.g. C-O, C-N, C-C, phosphoric anhydride bonds, ...  
"The function of binding to a specific DNA sequence in order to modulate transcription. The tran  
of proteolytic caspases, whose actions dismantle the cell and result in cell death. Apoptosis begi  
[goid 9968] [evidence IEA]"

"Catalysis of the reaction: dolichyl diphosphooligosaccharide + protein L-asparagine = dolichyl d  
"Combining with an extracellular or intracellular messenger to initiate a change in cell activity [gc

"Catalysis of the reaction: L-dopachrome = 5,6-dihydroxyindole-2-carboxylate [goid 4167] [pmid  
"Catalysis of the cleavage of C-C, C-O, C-N and other bonds by other means than by hydrolysis  
"Interacting selectively with a nucleotide, any compound consisting of a nucleoside that is esteril  
"Interacting selectively with a nucleotide, any compound consisting of a nucleoside that is esteril  
"Interacting selectively with a nucleotide, any compound consisting of a nucleoside that is esteril  
"Interacting selectively with a nucleotide, any compound consisting of a nucleoside that is esteril  
"Interacting selectively with a nucleotide, any compound consisting of a nucleoside that is esteril  
"Interacting selectively with a nucleotide, any compound consisting of a nucleoside that is esteril  
"Interacting selectively with a nucleotide, any compound consisting of a nucleoside that is esteril

"Interacting selectively with a nucleotide, any compound consisting of a nucleoside that is esteril  
"Interacting selectively with a nucleotide, any compound consisting of a nucleoside that is esteril  
"Interacting selectively with a nucleotide, any compound consisting of a nucleoside that is esteril  
"Interacting selectively with a nucleotide, any compound consisting of a nucleoside that is esteril

"Interacting selectively with a nucleotide, any compound consisting of a nucleoside that is esteril  
"Interacting selectively with a nucleotide, any compound consisting of a nucleoside that is esteril  
"Interacting selectively with a nucleotide, any compound consisting of a nucleoside that is esteril  
"Interacting selectively with any nucleic acid [goid 3676] [evidence IEA]; Interacting selectively w  
"Interacting selectively with a nucleotide, any compound consisting of a nucleoside that is esteril  
"Interacting selectively with a nucleotide, any compound consisting of a nucleoside that is esteril  
"Interacting selectively with a nucleotide, any compound consisting of a nucleoside that is esteril  
"Interacting selectively with a nucleotide, any compound consisting of a nucleoside that is esteril  
"Interacting selectively with a nucleotide, any compound consisting of a nucleoside that is esteril

"Interacting selectively with a nucleotide, any compound consisting of a nucleoside that is esteril  
"Interacting selectively with a nucleotide, any compound consisting of a nucleoside that is esteril  
"Interacting selectively with a nucleotide, any compound consisting of a nucleoside that is esteril  
"Interacting selectively with a nucleotide, any compound consisting of a nucleoside that is esteril  
"Interacting selectively with a nucleotide, any compound consisting of a nucleoside that is esteril

"Interacting selectively with a nucleotide, any compound consisting of a nucleoside that is esterified  
"Interacting selectively with a nucleotide, any compound consisting of a nucleoside that is esterified  
"Interacting selectively with a nucleotide, any compound consisting of a nucleoside that is esterified  
"Interacting selectively with any nucleic acid [goid 3676] [evidence IEA]; Catalysis of the reaction  
"Interacting selectively with a nucleotide, any compound consisting of a nucleoside that is esterified  
"Interacting selectively with a nucleotide, any compound consisting of a nucleoside that is esterified

"Interacting selectively with DNA (deoxyribonucleic acid) [goid 3677] [evidence IEA]; Functions that  
"The selective, often stoichiometric, interaction of a molecule with one or more specific sites on  
"The selective, often stoichiometric, interaction of a molecule with one or more specific sites on  
Interacting selectively with DNA (deoxyribonucleic acid) [goid 3677] [evidence IEA]; Interacting s  
Interacting selectively with DNA (deoxyribonucleic acid) [goid 3677] [evidence IEA]; Interacting s

"Interacting selectively with any protein or protein complex (a complex of two or more proteins that  
anionism [goid 42742] [evidence IEA]

anionism [goid 42742] [evidence IEA]; Movement may be towards a higher concentration (positive)

"Interacting selectively with any protein or protein complex (a complex of two or more proteins that

"Catalysis of the hydroxylation of sphingolipid long chain bases [goid 170] [evidence IEA]; Cataly

"Interacting selectively with DNA (deoxyribonucleic acid) [goid 3677] [evidence IEA]; Functions that

Interacting selectively with DNA (deoxyribonucleic acid) [goid 3677] [pmid 8056341] [evidence N

"Elemental activities, such as catalysis or binding, describing the actions of a gene product at the

"Increases the activity of a GTPase, an enzyme that catalyzes the hydrolysis of GTP [goid 5096]  
d [goid 7242] [evidence IEA]

Interacting selectively with any protein or protein complex (a complex of two or more proteins that

"Elemental activities, such as catalysis or binding, describing the actions of a gene product at the

"Catalysis of the reaction: 2-deoxy-D-ribose 5-phosphate = D-glyceraldehyde 3-phosphate + ac

Combining with an extracellular or intracellular messenger to initiate a change in cell activity [goid



Interacting selectively with any protein or protein complex (a complex of two or more proteins that undergo the hydrolysis of its peptide bonds, initiated by the covalent attachment of a ubiquitin moiety, or multiple

[goid 4537] [pmid 9108473] [evidence TAS]; Interacting selectively with an identical protein or protein complex (a complex of two or more proteins that undergo the hydrolysis of its peptide bonds, initiated by the covalent attachment of a ubiquitin moiety, or multiple  
"Interacting selectively with DNA (deoxyribonucleic acid) [goid 3677] [evidence IEA]; Catalysis of the hydrolysis of a molecular signal, and recognize and characterize the signal. Sonic stimuli are detected in the form of a molecular signal.  
Interacting selectively with any protein or protein complex (a complex of two or more proteins that undergo the hydrolysis of its peptide bonds, initiated by the covalent attachment of a ubiquitin moiety, or multiple

"Catalysis of the reaction: acyl-CoA + 1,2-diacylglycerol = CoA + triacylglycerol [goid 4144] [pmid 10511111]

"Catalysis of the reaction: acyl-CoA + 2-acylglycerol = CoA + diacylglycerol [goid 3846] [evidence IEA]

"Elemental activities, such as catalysis or binding, describing the actions of a gene product at the molecular level

"Combining with an extracellular or intracellular messenger to initiate a change in cell activity [goid 3677] [evidence IEA]

"Elemental activities, such as catalysis or binding, describing the actions of a gene product at the molecular level

Interacting selectively with double-stranded RNA [goid 3725] [evidence IEA]; Interacting selectively with any protein or protein complex (a complex of two or more proteins that undergo the hydrolysis of its peptide bonds, initiated by the covalent attachment of a ubiquitin moiety, or multiple

"Catalysis of the reaction: NTP + 1,2-diacylglycerol = NDP + 1,2-diacylglycerol 3-phosphate [goid 3725] [evidence IEA]

"Catalysis of the reaction: NTP + 1,2-diacylglycerol = NDP + 1,2-diacylglycerol 3-phosphate [goid 3725] [evidence IEA]

"Catalysis of the reaction: NTP + 1,2-diacylglycerol = NDP + 1,2-diacylglycerol 3-phosphate [goid 3725] [evidence IEA]

"Catalysis of the reaction: NTP + 1,2-diacylglycerol = NDP + 1,2-diacylglycerol 3-phosphate [goid 3725] [evidence IEA]

"Interacting selectively with ATP, adenosine 5'-triphosphate, a universally important coenzyme and energy source

"Catalysis of an oxidation-reduction (redox) reaction, a reversible chemical reaction in which the oxidation state of a molecule is changed

"Interacting selectively with any protein or protein complex (a complex of two or more proteins that undergo the hydrolysis of its peptide bonds, initiated by the covalent attachment of a ubiquitin moiety, or multiple

"Interacting selectively with any protein or protein complex (a complex of two or more proteins that undergo the hydrolysis of its peptide bonds, initiated by the covalent attachment of a ubiquitin moiety, or multiple

"The selective, often stoichiometric, interaction of a molecule with one or more specific sites on a protein or protein complex (a complex of two or more proteins that undergo the hydrolysis of its peptide bonds, initiated by the covalent attachment of a ubiquitin moiety, or multiple

"Catalysis of the reaction: 5,6,7,8-tetrahydrofolate + NADP+ = 7,8-dihydrofolate + NADPH + H+ [goid 3725] [evidence IEA]

Interacting selectively with any protein or protein complex (a complex of two or more proteins that undergo the hydrolysis of its peptide bonds, initiated by the covalent attachment of a ubiquitin moiety, or multiple

"Catalysis of the reaction: (S)-dihydroorotate + acceptor = orotate + reduced acceptor [goid 415] [evidence IEA]

"The selective, often stoichiometric, interaction of a molecule with one or more specific sites on a protein or protein complex (a complex of two or more proteins that undergo the hydrolysis of its peptide bonds, initiated by the covalent attachment of a ubiquitin moiety, or multiple

"The selective, often stoichiometric, interaction of a molecule with one or more specific sites on a protein or protein complex (a complex of two or more proteins that undergo the hydrolysis of its peptide bonds, initiated by the covalent attachment of a ubiquitin moiety, or multiple

"The selective, often stoichiometric, interaction of a molecule with one or more specific sites on a protein or protein complex (a complex of two or more proteins that undergo the hydrolysis of its peptide bonds, initiated by the covalent attachment of a ubiquitin moiety, or multiple

"The selective, often stoichiometric, interaction of a molecule with one or more specific sites on a protein or protein complex (a complex of two or more proteins that undergo the hydrolysis of its peptide bonds, initiated by the covalent attachment of a ubiquitin moiety, or multiple

"The selective, often stoichiometric, interaction of a molecule with one or more specific sites on a protein or protein complex (a complex of two or more proteins that undergo the hydrolysis of its peptide bonds, initiated by the covalent attachment of a ubiquitin moiety, or multiple

"Catalysis of the reaction: R-CHOH-R' + NADP+ = R-CO-R' + NADPH + H+ [goid 4090] [evidence IEA]

"The selective, often stoichiometric, interaction of a molecule with one or more specific sites on a protein or protein complex (a complex of two or more proteins that undergo the hydrolysis of its peptide bonds, initiated by the covalent attachment of a ubiquitin moiety, or multiple

"The selective, often stoichiometric, interaction of a molecule with one or more specific sites on a protein or protein complex (a complex of two or more proteins that undergo the hydrolysis of its peptide bonds, initiated by the covalent attachment of a ubiquitin moiety, or multiple

"The selective, often stoichiometric, interaction of a molecule with one or more specific sites on a protein or protein complex (a complex of two or more proteins that undergo the hydrolysis of its peptide bonds, initiated by the covalent attachment of a ubiquitin moiety, or multiple

"The selective, often stoichiometric, interaction of a molecule with one or more specific sites on a protein or protein complex (a complex of two or more proteins that undergo the hydrolysis of its peptide bonds, initiated by the covalent attachment of a ubiquitin moiety, or multiple

"The selective, often stoichiometric, interaction of a molecule with one or more specific sites on a protein or protein complex (a complex of two or more proteins that undergo the hydrolysis of its peptide bonds, initiated by the covalent attachment of a ubiquitin moiety, or multiple

"Catalysis of the reaction: 2-oxoglutarate + lipoamide = S-succinylidihydrolipoamide + CO2 [goid 415] [evidence IEA]

"Interacting selectively with a nucleotide, any compound consisting of a nucleoside that is esterified to a phosphate group

"Interacting selectively with a nucleotide, any compound consisting of a nucleoside that is esterified to a phosphate group

"Interacting selectively with a nucleotide, any compound consisting of a nucleoside that is esterified to a phosphate group

"Interacting selectively with a nucleotide, any compound consisting of a nucleoside that is esterified to a phosphate group

"Interacting selectively with a nucleotide, any compound consisting of a nucleoside that is esterified to a phosphate group" [goid 6810] [evidence IEA]  
"Interacting selectively with a nucleotide, any compound consisting of a nucleoside that is esterified to a phosphate group" [goid 6810] [evidence IEA]  
"Interacting selectively with a nucleotide, any compound consisting of a nucleoside that is esterified to a phosphate group" [goid 6810] [evidence IEA]  
"Interacting selectively with a nucleotide, any compound consisting of a nucleoside that is esterified to a phosphate group" [goid 6810] [evidence IEA]  
"Interacting selectively with a nucleotide, any compound consisting of a nucleoside that is esterified to a phosphate group" [goid 6810] [evidence IEA]  
"Interacting selectively with a nucleotide, any compound consisting of a nucleoside that is esterified to a phosphate group" [goid 6810] [evidence IEA]  
"Interacting selectively with a nucleotide, any compound consisting of a nucleoside that is esterified to a phosphate group" [goid 6810] [evidence IEA]  
"Interacting selectively with a nucleotide, any compound consisting of a nucleoside that is esterified to a phosphate group" [goid 6810] [evidence IEA]  
"Interacting selectively with a nucleotide, any compound consisting of a nucleoside that is esterified to a phosphate group" [goid 6810] [evidence IEA]  
"Interacting selectively with a nucleotide, any compound consisting of a nucleoside that is esterified to a phosphate group" [goid 6810] [evidence IEA]  
"Interacting selectively with any protein or protein complex (a complex of two or more proteins that interact with each other)" [goid 6810] [evidence IEA]  
"Interacting selectively with monomeric or multimeric forms of actin, including actin filaments [goid 6810] [evidence IEA]  
"Interacting selectively with monomeric or multimeric forms of actin, including actin filaments [goid 6810] [evidence IEA]  
"Interacting selectively with a nucleotide, any compound consisting of a nucleoside that is esterified to a phosphate group" [goid 6810] [evidence IEA]

"Catalysis of the dimethylation two adjacent A residues in the loop closing the 3'-terminal stem of an RNA molecule" [goid 6810] [evidence IEA]  
"Catalysis of a biochemical reaction at physiological temperatures. In biologically catalyzed reactions, the reaction is catalyzed by a protein or enzyme" [goid 6810] [evidence IEA]  
"Catalysis of a biochemical reaction at physiological temperatures. In biologically catalyzed reactions, the reaction is catalyzed by a protein or enzyme" [goid 6810] [evidence IEA]  
"Catalysis of a biochemical reaction at physiological temperatures. In biologically catalyzed reactions, the reaction is catalyzed by a protein or enzyme" [goid 6810] [evidence IEA]  
"Interacting selectively with a nucleotide, any compound consisting of a nucleoside that is esterified to a phosphate group" [goid 6810] [evidence IEA]  
"Interacting selectively with a nucleotide, any compound consisting of a nucleoside that is esterified to a phosphate group" [goid 6810] [evidence IEA]

"Interacting selectively with any protein or protein complex (a complex of two or more proteins that interact with each other)" [goid 6810] [evidence IEA]  
"Interacting selectively with an RNA molecule or a portion thereof [goid 3723] [evidence IEA]; Catalysis of a biochemical reaction at physiological temperatures. In biologically catalyzed reactions, the reaction is catalyzed by a protein or enzyme" [goid 3723] [evidence IEA]; Catalysis of a biochemical reaction at physiological temperatures. In biologically catalyzed reactions, the reaction is catalyzed by a protein or enzyme" [goid 3723] [evidence IEA]  
"Combining with the hedgehog protein to initiate a change in cell activity [goid 8158] [evidence IEA]" [goid 8158] [evidence IEA]

"Interacting selectively with monomeric or multimeric forms of actin, including actin filaments [goid 6810] [evidence IEA]" [goid 6810] [evidence IEA]

Catalysis of the reaction: deoxynucleoside triphosphate + DNA(n) = diphosphate + DNA(n+1). Catalyzed by DNA polymerase" [goid 6810] [evidence IEA]

Mediates the transfer of a signal from the outside to the inside of a cell by means other than the  
"Interacting selectively with a nucleotide, any compound consisting of a nucleoside that is esterified to a phosphate group [goid 45786] [evidence IEA]"  
"Catalysis of the reaction: protein N6-(dihydrolipoyl)lysine + NAD+ = protein N6-(lipoyl)lysine + NADH + H+ [goid 45786] [evidence IEA]"  
Interacting selectively with any protein or protein complex (a complex of two or more proteins that function together in a biological cycle [goid 45786] [evidence IEA]"

"Interacting selectively with any protein or protein complex (a complex of two or more proteins that function together in a biological cycle [goid 45786] [evidence IEA]"  
Catalysis of the reaction: ATP + GMP = ADP + GDP [goid 4385] [pmid 8755482] [evidence TAS];  
Catalysis of the reaction: ATP + GMP = ADP + GDP [goid 4385] [evidence NAS]; Interacting selectively with any protein or protein complex (a complex of two or more proteins that function together in a biological cycle [goid 45786] [evidence IEA]"

"Catalysis of the reaction: a phosphoprotein + H2O = a protein + phosphate. Together with protein phosphatase, it is involved in the regulation of protein function [goid 5509] [evidence IEA]"  
Interacting selectively with calcium ions (Ca2+) [goid 5509] [evidence IEA]"

"Interacting selectively with the Notch (N) protein, a surface receptor [goid 5112] [pmid 1182342]"  
"Interacting selectively with the Notch (N) protein, a surface receptor [goid 5112] [pmid 1074211]"  
"Catalysis of the reaction: succinyl-CoA + dihydrolipoamide = CoA + S-succinyl-dihydrolipoamide [goid 5112] [pmid 1074211]"  
"Interacting selectively with DNA (deoxyribonucleic acid) [goid 3677] [evidence IEA]; Interacting selectively with chromatin, the network of fibers of DNA and protein that make up the nucleus [goid 3677] [evidence IEA]"

"Interacting selectively with DNA (deoxyribonucleic acid) [goid 3677] [evidence IEA]; Interacting selectively with chromatin, the network of fibers of DNA and protein that make up the nucleus [goid 3677] [evidence IEA]"  
"The function of binding to a specific DNA sequence in order to modulate transcription. The transcription factor binds to the DNA sequence and recruits the transcription machinery [goid 3677] [evidence IEA]"  
"Interacting selectively with a nucleotide, any compound consisting of a nucleoside that is esterified to a phosphate group [goid 45786] [evidence IEA]"

The function of binding to a specific DNA sequence in order to modulate transcription. The transcription factor binds to the DNA sequence and recruits the transcription machinery [goid 3677] [evidence IEA]"  
The function of binding to a specific DNA sequence in order to modulate transcription. The transcription factor binds to the DNA sequence and recruits the transcription machinery [goid 3677] [evidence IEA]"  
The function of binding to a specific DNA sequence in order to modulate transcription. The transcription factor binds to the DNA sequence and recruits the transcription machinery [goid 3677] [evidence IEA]"  
The function of binding to a specific DNA sequence in order to modulate transcription. The transcription factor binds to the DNA sequence and recruits the transcription machinery [goid 3677] [evidence IEA]"  
"Elemental activities, such as catalysis or binding, describing the actions of a gene product at the molecular level [goid 3677] [evidence IEA]"  
"Catalysis of the hydrolysis of internal, alpha-peptide bonds in a polypeptide chain by a catalytic protein [goid 3677] [evidence IEA]"  
"Interacting selectively with Rab protein, any member of the Rab subfamily of the Ras superfamily [goid 3677] [evidence IEA]"  
"Interacting selectively with a nucleotide, any compound consisting of a nucleoside that is esterified to a phosphate group [goid 45786] [evidence IEA]"  
"Interacting selectively with a nucleotide, any compound consisting of a nucleoside that is esterified to a phosphate group [goid 45786] [evidence IEA]"  
"Interacting selectively with a nucleotide, any compound consisting of a nucleoside that is esterified to a phosphate group [goid 45786] [evidence IEA]"  
"Catalysis of movement along a polymeric molecule such as a microfilament or microtubule, coupled to the hydrolysis of ATP [goid 3677] [evidence IEA]"  
"Interacting selectively with zinc (Zn) ions [goid 8270] [evidence IEA]; Interacting selectively with zinc (Zn) ions [goid 8270] [evidence IEA]"

"Interacting selectively with zinc (Zn) ions [goid 8270] [evidence IEA]; Interacting selectively with  
"Interacting selectively with zinc (Zn) ions [goid 8270] [evidence IEA]; Interacting selectively with  
"Interacting selectively with zinc (Zn) ions [goid 8270] [evidence IEA]; Interacting selectively with  
"Interacting selectively with a heat shock protein, any protein synthesized or activated in respons  
"Interacting selectively with a heat shock protein, any protein synthesized or activated in respons  
"Interacting selectively with a heat shock protein, any protein synthesized or activated in respons  
"Interacting selectively with a heat shock protein, any protein synthesized or activated in respons  
"Interacting selectively with a heat shock protein, any protein synthesized or activated in respons  
"Interacting selectively with a heat shock protein, any protein synthesized or activated in respons  
"Interacting selectively with a heat shock protein, any protein synthesized or activated in respons  
"Functions to increase the rate of ATP hydrolysis [goid 1671] [pmid 11896048] [evidence IDA]; I  
"Modulates the activity of a molecular chaperone [goid 30188] [evidence ISS]; Interacting select  
"Functions to increase the rate of ATP hydrolysis [goid 1671] [pmid 14668352] [evidence TAS];  
"Interacting selectively with a heat shock protein, any protein synthesized or activated in respons  
"Interacting selectively with a heat shock protein, any protein synthesized or activated in respons  
"Interacting selectively with a heat shock protein, any protein synthesized or activated in respons  
"Interacting selectively with a heat shock protein, any protein synthesized or activated in respons  
"Interacting selectively with a heat shock protein, any protein synthesized or activated in respons  
"Interacting selectively with a heat shock protein, any protein synthesized or activated in respons  
"Interacting selectively with an RNA molecule or a portion thereof [goid 3723] [evidence IEA]; Int  
"Interacting selectively with any nucleic acid [goid 3676] [evidence IEA]; Catalysis of the transfer  
"Interacting selectively with a heat shock protein, any protein synthesized or activated in respons  
"Interacting selectively with a heat shock protein, any protein synthesized or activated in respons  
"Interacting selectively with any nucleic acid [goid 3676] [evidence IEA]; Interacting selectively w  
"Interacting selectively with a heat shock protein, any protein synthesized or activated in respons  
"Interacting selectively with zinc (Zn) ions [goid 8270] [evidence IEA]; Interacting selectively with  
"Interacting selectively with a heat shock protein, any protein synthesized or activated in respons  
  
"Interacting selectively with a heat shock protein, any protein synthesized or activated in respons  
"Stops, prevents or reduces the activity of a protein kinase, an enzyme which phosphorylates a  
"Interacting selectively with a heat shock protein, any protein synthesized or activated in respons  
"Interacting selectively with a heat shock protein, any protein synthesized or activated in respons  
"Interacting selectively with a heat shock protein, any protein synthesized or activated in respons  
"Interacting selectively with a heat shock protein, any protein synthesized or activated in respons  
"Catalysis of the reaction: protein tyrosine phosphate + H2O = protein tyrosine + phosphate [goi  
"Interacting selectively with a heat shock protein, any protein synthesized or activated in respons  
"Interacting selectively with a heat shock protein, any protein synthesized or activated in respons  
"Interacting selectively with a heat shock protein, any protein synthesized or activated in respons  
Interacting selectively with any protein or protein complex (a complex of two or more proteins th  
"Catalysis of movement along a microtubule, coupled to the hydrolysis of a nucleoside triphosph  
"Catalysis of movement along a microtubule, coupled to the hydrolysis of a nucleoside triphosph  
"Interacting selectively with monomeric or multimeric forms of actin, including actin filaments [go  
"Catalysis of the hydrolysis of ester linkages within deoxyribonucleic acid [goid 4536] [evidence  
"Interacting selectively with DNA (deoxyribonucleic acid) [goid 3677] [pmid 9205125] [evidence "

"Interacting selectively with DNA (deoxyribonucleic acid) [goid 3677] [pmid 9070308] [evidence IEA];

"Interacting selectively with DNA (deoxyribonucleic acid) [goid 3677] [pmid 9714827] [evidence IEA];

"Combining with an extracellular or intracellular messenger to initiate a change in cell activity, and

"Catalysis of movement along a microtubule, coupled to the hydrolysis of a nucleoside triphosphate

"Catalysis of movement along a microtubule, coupled to the hydrolysis of a nucleoside triphosphate

Interacting selectively with zinc (Zn) ions [goid 8270] [evidence IEA]; Interacting selectively with

"Interacting selectively with a nucleotide, any compound consisting of a nucleoside that is esterified

"Interacting selectively with a nucleotide, any compound consisting of a nucleoside that is esterified

"Interacting selectively with a nucleotide, any compound consisting of a nucleoside that is esterified

"Interacting selectively with DNA (deoxyribonucleic acid) [goid 3677] [evidence IEA]; Catalysis of

"Interacting selectively with DNA (deoxyribonucleic acid) [goid 3677] [pmid 10433969] [evidence IEA];

"Interacting selectively with DNA (deoxyribonucleic acid) [goid 3677] [evidence IEA]; Catalysis of

Increases the activity of an enzyme [goid 8047] [pmid 16543361] [evidence IDA]; Interacting selectively

"Catalysis of the hydrolysis of N-terminal amino acid residues from in a polypeptide chain [goid 4

"Catalysis of the transfer of a group, e.g. a methyl group, glycosyl group, acyl group, phosphorus

"Catalysis of the transfer of a group, e.g. a methyl group, glycosyl group, acyl group, phosphorus

[evidence IEA]; Any process that modulates the frequency, rate or extent of DNA-dependent trans

"Enables the directed movement of substances (such as macromolecules, small molecules, ions)

"Stimulates the exchange of guanyl nucleotides by a GTPase. Under normal cellular physiologic

"Stimulates the exchange of guanyl nucleotides by a GTPase. Under normal cellular physiologic

"Stimulates the exchange of guanyl nucleotides by a GTPase. Under normal cellular physiologic

"Stimulates the exchange of guanyl nucleotides by a GTPase. Under normal cellular physiologic

"Stimulates the exchange of guanyl nucleotides by a GTPase. Under normal cellular physiologic

"Stimulates the exchange of guanyl nucleotides by a GTPase. Under normal cellular physiologic

Interacting selectively with iron (Fe) ions [goid 5506] [evidence IEA]; Interacting selectively with

Interacting selectively with the insulin receptor [goid 5158] [evidence IEA]; Interacting selectively

[goid 5066] [evidence IEA]; Interacting selectively with the insulin receptor [goid 5158] [evidence

Interacting selectively with the insulin receptor [goid 5158] [evidence IEA]

"Catalysis of the hydrolysis of various bonds, e.g. C-O, C-N, C-C, phosphoric anhydride bonds, and

Interacting selectively with an identical protein or proteins [goid 42802] [pmid 15231747] [evidence

"Elemental activities, such as catalysis or binding, describing the actions of a gene product at the

cles transport substances from the trans-Golgi to endosomes [goid 6895] [pmid 16301316] [evidence

"Elemental activities, such as catalysis or binding, describing the actions of a gene product at the

"Interacting selectively with DNA (deoxyribonucleic acid) [goid 3677] [evidence IEA]; Catalysis of

Catalysis of the reaction: UDP-N-acetyl-D-glucosamine + dolichyl phosphate = UMP + N-acetyl-

"Catalysis of the hydrolysis of a peptide bond. A peptide bond is a covalent bond formed when t

Interacting selectively with any protein or protein complex (a complex of two or more proteins that

Interacting selectively with any protein or protein complex (a complex of two or more proteins that

Interacting selectively with zinc (Zn) ions [goid 8270] [pmid 8812431] [evidence NAS]; Interacting

-mediated process in which the information in messenger RNA (mRNA) is used to specify the se

Interacting selectively with any protein or protein complex (a complex of two or more proteins that interact with each other)  
"Catalysis of the reaction: S-adenosyl-L-methionine + 2-(3-carboxy-3-aminopropyl)-L-histidine = S-adenosyl-L-homocysteine + 2-aminopropyl-L-histidine  
Catalysis of the reaction: dolichyl phosphate D-mannose + protein = dolichyl phosphate + O-D-mannosyl protein  
Catalysis of the reaction: GDP-mannose + dolichyl phosphate = GDP + dolichyl D-mannosyl phosphate  
Catalysis of the reaction: GDP-mannose + dolichyl phosphate = GDP + dolichyl D-mannosyl phosphate  
Catalysis of the hydrolysis of peptide bonds in a polypeptide chain by a catalytic mechanism that involves the formation of a covalent intermediate  
"Catalysis of the hydrolysis of N-terminal amino acid residues from in a polypeptide chain [goid 42802] [pmid 16189514] [evidence IEA]  
"Catalysis of the hydrolysis of N-terminal amino acid residues from in a polypeptide chain [goid 42802] [pmid 16189514] [evidence IEA]  
"Catalysis of the hydrolysis of N-terminal amino acid residues from in a polypeptide chain [goid 42802] [pmid 16189514] [evidence IEA]  
"Catalysis of the hydrolysis of N-terminal amino acid residues from in a polypeptide chain [goid 42802] [pmid 16189514] [evidence IEA]

Interacting selectively with an identical protein or proteins [goid 42802] [pmid 16189514] [evidence IEA]  
"Catalysis of an oxidation-reduction (redox) reaction, a reversible chemical reaction in which the oxidation state of a molecule or atom is changed  
"Catalysis of the hydrolysis of any carbon-nitrogen bond, C-N, with the exception of peptide bonds  
"Catalysis of the hydrolysis of any carbon-nitrogen bond, C-N, with the exception of peptide bonds  
"The function of a transcription cofactor that represses transcription from a RNA polymerase II promoter

"The function of binding to a specific DNA sequence in order to modulate transcription. The transcription factor binds to the DNA sequence and interacts with the RNA polymerase II complex to regulate the rate of transcription.

"Combining with an extracellular or intracellular messenger to initiate a change in cell activity [goid 42802] [pmid 16189514] [evidence IEA]  
"Interacting selectively with a nucleotide, any compound consisting of a nucleoside that is esterified to a phosphate group  
"Interacting selectively with GTP, guanosine triphosphate [goid 5525] [evidence IEA]; Interacting selectively with GTP, guanosine triphosphate [goid 5525] [evidence IEA]  
Interacting selectively with calcium ions (Ca<sup>2+</sup>) [goid 5509] [evidence IEA]; Interacting selectively with calcium ions (Ca<sup>2+</sup>) [goid 5509] [evidence IEA]  
Interacting selectively with calcium ions (Ca<sup>2+</sup>) [goid 5509] [evidence IEA]; Interacting selectively with calcium ions (Ca<sup>2+</sup>) [goid 5509] [evidence IEA]  
Interacting selectively with calcium ions (Ca<sup>2+</sup>) [goid 5509] [evidence IEA]; Interacting selectively with calcium ions (Ca<sup>2+</sup>) [goid 5509] [evidence IEA]  
Interacting selectively with any protein or protein complex (a complex of two or more proteins that interact with each other)  
Interacting selectively with DNA (deoxyribonucleic acid) [goid 3677] [evidence IEA]  
"Elemental activities, such as catalysis or binding, describing the actions of a gene product at the molecular level  
Interacting selectively with calcium ions (Ca<sup>2+</sup>) [goid 5509] [evidence IEA]; Interacting selectively with calcium ions (Ca<sup>2+</sup>) [goid 5509] [evidence IEA]  
Interacting selectively with calcium ions (Ca<sup>2+</sup>) [goid 5509] [evidence IEA]; Interacting selectively with calcium ions (Ca<sup>2+</sup>) [goid 5509] [evidence IEA]  
Interacting selectively with any protein or protein complex (a complex of two or more proteins that interact with each other)  
"Interacting selectively with monomeric or multimeric forms of actin, including actin filaments [goid 42802] [pmid 16189514] [evidence IEA]

Catalysis of the hydrolysis of any ester bond [goid 16788] [evidence IEA]  
Interacting selectively with any protein or protein complex (a complex of two or more proteins that interact with each other)  
Interacting selectively with calcium ions (Ca<sup>2+</sup>) [goid 5509] [evidence IEA]; Interacting selectively with calcium ions (Ca<sup>2+</sup>) [goid 5509] [evidence IEA]  
Interacting selectively with calcium ions (Ca<sup>2+</sup>) [goid 5509] [evidence IEA]; Interacting selectively with calcium ions (Ca<sup>2+</sup>) [goid 5509] [evidence IEA]  
Interacting selectively with an identical protein or proteins [goid 42802] [pmid 15102850] [evidence IEA]







"Combining with an extracellular or intracellular messenger to initiate a change in cell activity, ar  
Interacting selectively with any protein or protein complex (a complex of two or more proteins th  
"Catalysis of the hydrolysis of the terminal 1,2-linked alpha-D-mannose residues in the oligo-ma  
"Catalysis of the hydrolysis of the terminal 1,2-linked alpha-D-mannose residues in the oligo-ma  
"Catalysis of the hydrolysis of the terminal 1,2-linked alpha-D-mannose residues in the oligo-ma  
"The function of binding to a specific DNA sequence in order to modulate transcription. The tran

"The action characteristic of a hormone, any substance formed in very small amounts in one sp  
"Interacting selectively with calmodulin, a calcium-binding protein with many roles, both in the ca  
Any transcription regulator activity that prevents or downregulates transcription [goid 16564] [pm  
"Interacting selectively with a nucleotide, any compound consisting of a nucleoside that is esteril

Functions in chain elongation during polypeptide synthesis at the ribosome [goid 3746] [pmid 18  
Functions in chain elongation during polypeptide synthesis at the ribosome [goid 3746] [evidenc  
Functions in chain elongation during polypeptide synthesis at the ribosome [goid 3746] [evidenc  
"Interacting selectively with a nucleotide, any compound consisting of a nucleoside that is esteril  
"Interacting selectively with a nucleotide, any compound consisting of a nucleoside that is esteril  
"Interacting selectively with transfer RNA [goid 49] [evidence IEA]; Interacting selectively with a r  
"Interacting selectively with DNA of a specific nucleotide composition, e.g. GC-rich DNA binding  
Interacting selectively with calcium ions (Ca<sup>2+</sup>) [goid 5509] [evidence IEA]  
Interacting selectively with calcium ions (Ca<sup>2+</sup>) [goid 5509] [evidence IEA]  
Interacting selectively with calcium ions (Ca<sup>2+</sup>) [goid 5509] [evidence IEA]  
"Combining with an extracellular or intracellular messenger to initiate a change in cell activity, ar  
Interacting selectively with calcium ions (Ca<sup>2+</sup>) [goid 5509] [evidence IEA]  
"Interacting selectively with calcium ions (Ca<sup>2+</sup>) [goid 5509] [evidence IEA]; Interacting selective  
Interacting selectively with calcium ions (Ca<sup>2+</sup>) [goid 5509] [evidence IEA]; Interacting selectivel  
Interacting selectively with calcium ions (Ca<sup>2+</sup>) [goid 5509] [evidence IEA]; Interacting selectivel  
Interacting selectively with an ephrin receptor [goid 46875] [pmid 2233719] [evidence TAS]  
Interacting selectively with any protein or protein complex (a complex of two or more proteins th  
[goid 5005] [pmid 8660976] [evidence TAS]  
Interacting selectively with any protein or protein complex (a complex of two or more proteins th  
Interacting selectively with any protein or protein complex (a complex of two or more proteins th  
[goid 5005] [pmid 9126477] [evidence TAS]; Interacting selectively with an ephrin receptor [goid  
"The selective, often stoichiometric, interaction of a molecule with one or more specific sites on .  
"The selective, often stoichiometric, interaction of a molecule with one or more specific sites on .  
"Interacting selectively with a nucleotide, any compound consisting of a nucleoside that is esteril  
"Interacting selectively with a nucleotide, any compound consisting of a nucleoside that is esteril  
Interacting selectively with calcium ions (Ca<sup>2+</sup>) [goid 5509] [evidence IEA]  
"Interacting selectively with iron (Fe) ions [goid 5506] [evidence IEA]; Interacting selectively with

The function of binding to a specific DNA sequence in order to modulate transcription. The trans  
The function of binding to a specific DNA sequence in order to modulate transcription. The trans

The function of binding to a specific DNA sequence in order to modulate transcription. The trans  
Interacting selectively with any protein or protein complex (a complex of two or more proteins th

"Interacting selectively with a nucleotide, any compound consisting of a nucleoside that is esteril

"Interacting selectively with a nucleotide, any compound consisting of a nucleoside that is esteril

"Interacting selectively with a nucleotide, any compound consisting of a nucleoside that is esteril

"Catalysis of the reaction: (S)-3-hydroxyacyl-CoA + NAD+ = 3-oxoacyl-CoA + NADH + H+ [goid

"Catalysis of the transfer of a methyl group to an acceptor molecule [goid 8168] [pmid 12004135

"Interacting selectively with any protein or protein complex (a complex of two or more proteins th  
] [pmid 9305847] [evidence TAS]

The function of a transcription cofactor that represses transcription from a RNA polymerase II pr  
[evidence IEA]; Any process that modulates the frequency, rate or extent of DNA-dependent trans

[evidence IEA]; Any process that modulates the frequency, rate or extent of DNA-dependent trans

Functions in the initiation of ribosome-mediated translation of mRNA into a polypeptide [goid 37

Interacting selectively with an RNA molecule or a portion thereof [goid 3723] [evidence IEA]; Fur

Interacting selectively with an RNA molecule or a portion thereof [goid 3723] [evidence IEA]; Fur

Interacting selectively with an RNA molecule or a portion thereof [goid 3723] [evidence IEA]; Fur

Functions in the initiation of ribosome-mediated translation of mRNA into a polypeptide [goid 37

Interacting selectively with transfer RNA [goid 49] [pmid 12133843] [evidence IMP]; Functions in

"Interacting selectively with a nucleotide, any compound consisting of a nucleoside that is esteril

"Interacting selectively with a nucleotide, any compound consisting of a nucleoside that is esteril

"Interacting selectively with a nucleotide, any compound consisting of a nucleoside that is esteril

"Interacting selectively with a nucleotide, any compound consisting of a nucleoside that is esteril

"Functions in the initiation of ribosome-mediated translation of mRNA into a polypeptide [goid 37

"Functions in the initiation of ribosome-mediated translation of mRNA into a polypeptide [goid 37

"Functions in the initiation of ribosome-mediated translation of mRNA into a polypeptide [goid 37

"Functions in the initiation of ribosome-mediated translation of mRNA into a polypeptide [goid 37

"Functions in the initiation of ribosome-mediated translation of mRNA into a polypeptide [goid 37

Interacting selectively with any nucleic acid [goid 3676] [evidence IEA]; Functions in the initiatio

Interacting selectively with any nucleic acid [goid 3676] [evidence IEA]; Functions in the initiatio

Interacting selectively with any nucleic acid [goid 3676] [evidence IEA]; Functions in the initiatio

Interacting selectively with any nucleic acid [goid 3676] [evidence IEA]; Functions in the initiatio

Interacting selectively with any nucleic acid [goid 3676] [evidence IEA]; Functions in the initiatio

Interacting selectively with an RNA molecule or a portion thereof [goid 3723] [evidence IEA]; Fur

Interacting selectively with an RNA molecule or a portion thereof [goid 3723] [pmid 3044606] [ev

"Interacting selectively with a nucleotide, any compound consisting of a nucleoside that is esteril

The action of a molecule that contributes to the structural integrity of the ribosome [goid 3735] [e

"Interacting selectively with a nucleotide, any compound consisting of a nucleoside that is esteril

Functions in the initiation of ribosome-mediated translation of mRNA into a polypeptide [goid 37

Functions in the initiation of ribosome-mediated translation of mRNA into a polypeptide [goid 37

Functions in the initiation of ribosome-mediated translation of mRNA into a polypeptide [goid 37

Functions in the initiation of ribosome-mediated translation of mRNA into a polypeptide [goid 37

"Interacting selectively with a nucleotide, any compound consisting of a nucleoside that is esteril

Functions in the initiation of ribosome-mediated translation of mRNA into a polypeptide [goid 37

Functions in the initiation of ribosome-mediated translation of mRNA into a polypeptide [goid 37.  
Functions in the initiation of ribosome-mediated translation of mRNA into a polypeptide [goid 37.  
Functions in the initiation of ribosome-mediated translation of mRNA into a polypeptide [goid 37.

Functions in the initiation of ribosome-mediated translation of mRNA into a polypeptide [goid 37.

"Functions in the initiation of ribosome-mediated translation of mRNA into a polypeptide [goid 37

"Interacting selectively with a nucleotide, any compound consisting of a nucleoside that is esterif

"Interacting selectively with a nucleotide, any compound consisting of a nucleoside that is esterif

"Interacting selectively with a nucleotide, any compound consisting of a nucleoside that is esterif

Interacting selectively with an RNA molecule or a portion thereof [goid 3723] [evidence IEA]; Fur

Interacting selectively with a 7-methylguanosine (m7G) moiety or derivative located at the 5' enc

Interacting selectively with an RNA molecule or a portion thereof [goid 3723] [evidence IEA]; Fur

"Interacting selectively with any protein or protein complex (a complex of two or more proteins th

"Interacting selectively with any protein or protein complex (a complex of two or more proteins th

"Interacting selectively with any protein or protein complex (a complex of two or more proteins th

"Interacting selectively with any protein or protein complex (a complex of two or more proteins th

Interacting selectively with any protein or protein complex (a complex of two or more proteins th

Functions in the initiation of ribosome-mediated translation of mRNA into a polypeptide [goid 37.

Interacting selectively with a 7-methylguanosine (m7G) moiety or derivative located at the 5' enc

"Interacting selectively with a nucleotide, any compound consisting of a nucleoside that is esterif

"Interacting selectively with a nucleotide, any compound consisting of a nucleoside that is esterif

"Interacting selectively with an RNA molecule or a portion thereof [goid 3723] [pmid 15303967] [

Functions in the initiation of ribosome-mediated translation of mRNA into a polypeptide [goid 37.

Functions in the initiation of ribosome-mediated translation of mRNA into a polypeptide [goid 37.

"Catalysis of a biochemical reaction at physiological temperatures. In biologically catalyzed reac

"Catalysis of the hydrolysis of ester linkages within nucleic acids by creating internal breaks [goid

"Catalysis of the hydrolysis of ester linkages within nucleic acids by creating internal breaks [goid

"Interacting selectively with a nucleotide, any compound consisting of a nucleoside that is esterif

"The function of binding to a specific DNA sequence in order to modulate transcription. The tran

"The function of binding to a specific DNA sequence in order to modulate transcription. The tran

"The function of binding to a specific DNA sequence in order to modulate transcription. The tran

Interacting selectively with any protein or protein complex (a complex of two or more proteins th

"The function of binding to a specific DNA sequence in order to modulate transcription. The tran

"The function of binding to a specific DNA sequence in order to modulate transcription. The tran

"The function of binding to a specific DNA sequence in order to modulate transcription. The tran

"Interacting selectively with any protein or protein complex (a complex of two or more proteins th

Functions to initiate or regulate RNA polymerase II transcription [goid 3702] [pmid 9108030] [evi

"Interacting selectively with any protein or protein complex (a complex of two or more proteins th

"Interacting selectively with any protein or protein complex (a complex of two or more proteins th

"The selective, often stoichiometric, interaction of a molecule with one or more specific sites on .

"Interacting selectively with any protein or protein complex (a complex of two or more proteins th

contained within phagocytic vacuoles (phagosomes), which then fuse with primary lysosomes to

contained within phagocytic vacuoles (phagosomes), which then fuse with primary lysosomes to

The action of a molecule that contributes to the structural integrity of the extracellular matrix [goid 8270] [evidence IEA]; Interacting selectively with zinc (Zn) ions [goid 8270] [evidence IEA]; Interacting selectively with  
"Catalysis of the transfer of an acyl group, other than amino-acyl, from one compound (donor) to  
atic monocarboxylic acids that can be liberated by hydrolysis from naturally occurring fats and oils  
"A G-protein coupled receptor that responds to incidental electromagnetic radiation, particularly  
atic monocarboxylic acids that can be liberated by hydrolysis from naturally occurring fats and oils  
"Catalysis of the transfer of an acyl group, other than amino-acyl, from one compound (donor) to  
atic monocarboxylic acids that can be liberated by hydrolysis from naturally occurring fats and oils  
"Interacting selectively with DNA (deoxyribonucleic acid) [goid 3677] [pmid 11714725] [evidence

"Interacting selectively with DNA (deoxyribonucleic acid) [goid 3677] [pmid 11714725] [evidence  
"Catalysis of the addition of an acetyl group to a histone, specific for histones H3 and H4 [goid 4

Interacting selectively with any protein or protein complex (a complex of two or more proteins th  
"Interacting selectively with magnesium (Mg) ions [goid 287] [evidence IEA]; Catalysis of the hyc  
Interacting selectively with any protein or protein complex (a complex of two or more proteins th  
Interacting selectively with any protein or protein complex (a complex of two or more proteins th  
Interacting selectively with calcium ions (Ca<sup>2+</sup>) [goid 5509] [pmid 9226380] [evidence NAS]

"Catalysis of the hydrolysis of internal, alpha-peptide bonds in a polypeptide chain by a catalytic  
Interacting selectively with any protein or protein complex (a complex of two or more proteins th  
"Elemental activities, such as catalysis or binding, describing the actions of a gene product at th  
mid 8996089] [evidence TAS]; The process by which a cell irreversibly increases in size over tim  
Combining with an extracellular or intracellular messenger to initiate a change in cell activity [goid  
Combining with an extracellular or intracellular messenger to initiate a change in cell activity [goid

Combining with an extracellular or intracellular messenger to initiate a change in cell activity [goid  
"The function of binding to a specific DNA sequence in order to modulate transcription. The tran

"Interacting selectively with monomeric or multimeric forms of actin, including actin filaments [goid  
The action of a molecule that contributes to the structural integrity of tooth enamel [goid 30345]  
"Interacting selectively with monomeric or multimeric forms of actin, including actin filaments [goid  
"Interacting selectively with any nucleic acid [goid 3676] [evidence IEA]; Catalysis of the hydroly:  
"Interacting selectively with magnesium (Mg) ions [goid 287] [evidence IEA]; Interacting selective

"Interacting selectively with magnesium (Mg) ions [goid 287] [evidence IEA]; The function of binc  
"Interacting selectively with magnesium (Mg) ions [goid 287] [evidence IEA]; Catalysis of the rea  
"Interacting selectively with magnesium (Mg) ions [goid 287] [evidence IEA]; Catalysis of the rea  
"Interacting selectively with magnesium (Mg) ions [goid 287] [evidence IEA]; Catalysis of the rea  
Interacting selectively with magnesium (Mg) ions [goid 287] [evidence IEA]; Catalysis of the geo  
"Interacting selectively with a nucleotide, any compound consisting of a nucleoside that is esteril  
"Interacting selectively with a nucleotide, any compound consisting of a nucleoside that is esteril  
"Interacting selectively with any nucleic acid [goid 3676] [evidence IEA]; Catalysis of the hydroly:  
"Interacting selectively with any nucleic acid [goid 3676] [evidence IEA]; Catalysis of a biochemi  
"Interacting selectively with any nucleic acid [goid 3676] [evidence IEA]; Catalysis of the hydroly:

"Catalysis of the hydrolysis of various bonds, e.g. C-O, C-N, C-C, phosphoric anhydride bonds, ...  
"Catalysis of the hydrolysis of various bonds, e.g. C-O, C-N, C-C, phosphoric anhydride bonds, ...  
"Interacting selectively with one or more specific sites on a receptor molecule, a macromolecule

"Interacting selectively with magnesium (Mg) ions [goid 287] [evidence IEA]; Interacting selective

"Interacting selectively with magnesium (Mg) ions [goid 287] [evidence IEA]; Interacting selective

"Interacting selectively with magnesium (Mg) ions [goid 287] [evidence IEA]; Interacting selective

"Interacting selectively with magnesium (Mg) ions [goid 287] [evidence IEA]; Interacting selective

[evidence IEA]; Any process that modulates the frequency, rate or extent of DNA-dependent trans

The function of binding to a specific DNA sequence in order to modulate transcription. The trans

"Interacting selectively with a nucleotide, any compound consisting of a nucleoside that is esteril

"Functions to initiate or regulate RNA polymerase II transcription by binding an enhancer region

"Interacting selectively with monomeric or multimeric forms of actin, including actin filaments [go

"Interacting selectively with monomeric or multimeric forms of actin, including actin filaments [go

"Interacting selectively with monomeric or multimeric forms of actin, including actin filaments [go

"The action of a molecule that contributes to the structural integrity of a cytoskeletal structure [go

"The selective, often stoichiometric, interaction of a molecule with one or more specific sites on

Any transcription regulator activity required for initiation or upregulation of transcription [goid 165

physical agents in the environment (e.g. UV and ionizing radiations, chemical mutagens, fungal

Interacting selectively with calcium ions (Ca<sup>2+</sup>) [goid 5509] [evidence IEA]

"Catalysis of the concomitant phosphorylation of threonine (T) and tyrosine (Y) residues in a Thr

"Interacting selectively with a nucleotide, any compound consisting of a nucleoside that is esteril

"Interacting selectively with a nucleotide, any compound consisting of a nucleoside that is esteril

"Interacting selectively with a nucleotide, any compound consisting of a nucleoside that is esteril

"Interacting selectively with a nucleotide, any compound consisting of a nucleoside that is esteril

"Interacting selectively with a nucleotide, any compound consisting of a nucleoside that is esteril

"Catalysis of the reaction: an epoxide + H<sub>2</sub>O = a glycol [goid 4301] [evidence IEA]; Catalysis of t

"Interacting selectively with magnesium (Mg) ions [goid 287] [evidence IEA]; Catalysis of the rea

"Catalysis of the reaction: protein serine/threonine phosphate + H<sub>2</sub>O = protein serine/threonine

Interacting selectively with a lipid [goid 8289] [evidence IEA]

Interacting selectively with a lipid [goid 8289] [evidence IEA]

Combining with erythropoietin to initiate a change in cell activity [goid 4900] [pmid 2163696] [evi

"Interacting selectively with a nucleotide, any compound consisting of a nucleoside that is esteril

"Interacting selectively with calcium ions (Ca<sup>2+</sup>) [goid 5509] [evidence IEA]; Interacting selective

Interacting selectively with calcium ions (Ca<sup>2+</sup>) [goid 5509] [evidence IEA]; Combining with an e

"Interacting selectively and simultaneously with one or more signal transduction molecules, usuæ

"Interacting selectively with a nucleotide, any compound consisting of a nucleoside that is esteril

"Catalysis of the hydrolysis of N-terminal amino acid residues from in a polypeptide chain [goid 4

"Catalysis of the hydrolysis of N-terminal amino acid residues from in a polypeptide chain [goid 4  
"Catalysis of the reaction: ATP + a protein tyrosine = ADP + protein tyrosine phosphate [goid 47  
"Catalysis of the reaction: ATP + a protein-L-tyrosine = ADP + a protein-L-tyrosine phosphate, to  
"Catalysis of the hydrolysis of ester linkages within a single-stranded deoxyribonucleic acid mole  
"Interacting selectively with DNA (deoxyribonucleic acid) [goid 3677] [evidence IEA]; Catalysis of  
"Interacting selectively with a nucleotide, any compound consisting of a nucleoside that is esterif  
"Interacting selectively with single-stranded DNA [goid 3697] [evidence IEA]; Catalysis of the hy  
"Interacting selectively with a nucleotide, any compound consisting of a nucleoside that is esterif  
"Interacting selectively with a nucleotide, any compound consisting of a nucleoside that is esterif  
Catalysis of the reaction: NTP + H<sub>2</sub>O = NDP + phosphate to drive the unwinding of a DNA helix  
Interacting selectively with any protein or protein complex (a complex of two or more proteins th  
Interacting selectively with any protein or protein complex (a complex of two or more proteins th  
Interacting selectively with any protein or protein complex (a complex of two or more proteins th

"Elemental activities, such as catalysis or binding, describing the actions of a gene product at th

"Catalysis of the hydrolysis of a peptide bond. A peptide bond is a covalent bond formed when t  
"Interacting selectively with a nucleotide, any compound consisting of a nucleoside that is esterif  
"Interacting selectively with calcium ions (Ca<sup>2+</sup>) [goid 5509] [evidence IEA]; Interacting selective  
"Any molecular entity that serves as an electron acceptor and electron donor in an electron tran

Catalysis of the rearrangement of both intrachain and interchain disulfide bonds in proteins [goic

Increases the rate of GTP hydrolysis by a GTPase of the Rho family [goid 5100] [pmid 1074988  
The action of a molecule that contributes to the structural integrity of a complex or assembly with  
Interacting selectively with any protein or protein complex (a complex of two or more proteins th  
"Interacting selectively with zinc (Zn) ions [goid 8270] [evidence IEA]; Catalysis of the generalize  
"Interacting selectively with zinc (Zn) ions [goid 8270] [evidence IEA]; Catalysis of the generalize  
Catalysis of the reaction: a carboxylic ester + H<sub>2</sub>O = an alcohol + a carboxylic anion [goid 4091]  
"Interacting selectively with any protein or protein complex (a complex of two or more proteins th  
Interacting selectively with any protein or protein complex (a complex of two or more proteins th  
"Interacting selectively with monomeric or multimeric forms of actin, including actin filaments [go

"The function of binding to a specific DNA sequence in order to modulate transcription. The tran  
"The function of binding to a specific DNA sequence in order to modulate transcription. The tran

"The function of binding to a specific DNA sequence in order to modulate transcription. The tran

Interacting selectively with an RNA molecule or a portion thereof [goid 3723] [pmid 7990965] [ev  
"Any molecular entity that serves as an electron acceptor and electron donor in an electron tran

Any molecular entity that serves as an electron acceptor and electron donor in an electron trans  
"Catalysis of the reaction: reduced ETF + ubiquinone = ETF + ubiquinol [goid 4174] [pmid 86174  
"Interacting selectively with zinc (Zn) ions [goid 8270] [evidence IEA]; Catalysis of the hydrolysis  
"Catalysis of the reaction: ATP + ethanolamine = ADP + O-phosphoethanolamine [goid 4305] [p  
"Catalysis of the reaction: ATP + choline = ADP + O-phosphocholine [goid 4103] [evidence NAS  
"The function of binding to a specific DNA sequence in order to modulate transcription. The tran  
"The function of binding to a specific DNA sequence in order to modulate transcription. The tran  
"Elemental activities, such as catalysis or binding, describing the actions of a gene product at th  
"The function of binding to a specific DNA sequence in order to modulate transcription. The tran  
"The function of binding to a specific DNA sequence in order to modulate transcription. The tran  
"The function of binding to a specific DNA sequence in order to modulate transcription. The tran  
"The function of binding to a specific DNA sequence in order to modulate transcription. The tran  
"Interacting selectively with any nucleic acid [goid 3676] [evidence IEA]; Interacting selectively w  
"Combining with an extracellular or intracellular messenger to initiate a change in cell activity, ar

Increases the rate of GTP hydrolysis by a GTPase of the Rab family [goid 5097] [evidence IEA];  
"Catalysis of the phosphorylation of an amino acid residue in a protein, usually according to the  
"Interacting selectively with monomeric or multimeric forms of actin, including actin filaments [go  
"Interacting selectively with a nucleotide, any compound consisting of a nucleoside that is esteril

"Interacting selectively with DNA (deoxyribonucleic acid) [goid 3677] [pmid 11842105] [evidence  
nes, matrix proteins) contained within a membrane-bounded vesicle by fusion of the vesicle with  
"Interacting selectively with any protein or protein complex (a complex of two or more proteins th  
nes, matrix proteins) contained within a membrane-bounded vesicle by fusion of the vesicle with  
"Interacting selectively with any nucleic acid [goid 3676] [evidence IEA]; Interacting selectively w

nes, matrix proteins) contained within a membrane-bounded vesicle by fusion of the vesicle with  
Interacting selectively with any protein or protein complex (a complex of two or more proteins th  
"Interacting selectively with any nucleic acid [goid 3676] [evidence IEA]; Catalysis of the hydroly:

"Interacting selectively with an RNA molecule or a portion thereof [goid 3723] [pmid 11812149] [  
"Interacting selectively with an RNA molecule or a portion thereof [goid 3723] [evidence IEA]; Ca  
"Interacting selectively with an RNA molecule or a portion thereof [goid 3723] [evidence IEA]; Int  
"Catalysis of the sequential cleavage of mononucleotides from a free 3' terminus of an RNA mol  
"Catalysis of the sequential cleavage of mononucleotides from a free 3' terminus of an RNA mol  
"Catalysis of the sequential cleavage of mononucleotides from a free 3' terminus of an RNA mol  
"Catalysis of the sequential cleavage of mononucleotides from a free 3' terminus of an RNA mol  
"Catalysis of the sequential cleavage of mononucleotides from a free 3' terminus of an RNA mol  
"Catalysis of the sequential cleavage of mononucleotides from a free 3' terminus of an RNA mol  
"Catalysis of the sequential cleavage of mononucleotides from a free 3' terminus of an RNA mol  
"Interacting selectively with any protein or protein complex (a complex of two or more proteins th  
"Interacting selectively with any protein or protein complex (a complex of two or more proteins th  
"Catalysis of the reaction: UDP-N-acetyl-D-glucosamine + beta-D-glucuronosyl-(1,3)-beta-D-gal  
"Interacting selectively with magnesium (Mg) ions [goid 287] [evidence IEA]; Catalysis of the rea

"Interacting selectively with DNA (deoxyribonucleic acid) [goid 3677] [evidence IEA]; Interacting  
"Interacting selectively with DNA (deoxyribonucleic acid) [goid 3677] [evidence IEA]; Interacting  
"The action of a molecule that contributes to the structural integrity of a complex or assembly wi  
Interacting selectively with any protein or protein complex (a complex of two or more proteins th  
"Catalysis of the hydrolysis of internal, alpha-peptide bonds in a polypeptide chain by a catalytic  
"Combining with an extracellular or intracellular messenger to initiate a change in cell activity [gc  
Combining with an extracellular or intracellular messenger to initiate a change in cell activity [goid  
"Interacting selectively with copper (Cu) ions [goid 5507] [evidence IEA]; Catalysis of an oxidatio  
"Elemental activities, such as catalysis or binding, describing the actions of a gene product at th

"Catalysis of the reaction: a monocarboxylic acid amide + H<sub>2</sub>O = a monocarboxylate + NH<sub>3</sub> [goid  
"Enables the directed movement of substances (such as macromolecules, small molecules, ions  
"Enables the directed movement of substances (such as macromolecules, small molecules, ions

"Enables the directed movement of substances (such as macromolecules, small molecules, ions

"Enables the directed movement of substances (such as macromolecules, small molecules, ions

"Enables the directed movement of substances (such as macromolecules, small molecules, ions

Interacting selectively with a death receptor [goid 5123] [pmid 7538907] [evidence TAS]; Interac

"Catalysis of the reaction: 5,7,24(28)-ergostatrienol + O<sub>2</sub> + NADPH = 5,7,22,24(28)-ergostatetra

"Catalysis of the reaction: stearyl-CoA + 2 ferrocytochrome b5 + O<sub>2</sub> + 2 H<sup>+</sup> = oleoyl-CoA + 2 fe

"Elemental activities, such as catalysis or binding, describing the actions of a gene product at th

"Catalysis of an oxidation-reduction (redox) reaction, a reversible chemical reaction in which the

"Modulation of the activity of the enzyme protein kinase CK2 [goid 8605] [pmid 11713579] [evid

"Interacting selectively with magnesium (Mg) ions [goid 287] [evidence IEA]; Catalysis of the rea

"Interacting selectively with magnesium (Mg) ions [goid 287] [evidence IEA]; Interacting selectiv

"Interacting selectively with magnesium (Mg) ions [goid 287] [evidence IEA]; Interacting selectiv

"Interacting selectively with magnesium (Mg) ions [goid 287] [evidence IEA]; Interacting selectiv

tolysis [goid 43066] [evidence IEA]; Any process that stops, prevents or reduces the frequency, rat

Interacting selectively with any protein or protein complex (a complex of two or more proteins th

] [pmid 9586636] [evidence TAS]; Any immune system process that functions in the calibrated re



"Catalysis of the hydrolysis of various bonds, e.g. C-O, C-N, C-C, phosphoric anhydride bonds, "

"Catalysis of the hydrolysis of various bonds, e.g. C-O, C-N, C-C, phosphoric anhydride bonds, "

"Catalysis of the hydrolysis of various bonds, e.g. C-O, C-N, C-C, phosphoric anhydride bonds, "

"The selective, often stoichiometric, interaction of a molecule with one or more specific sites on "

"Catalysis of a biochemical reaction at physiological temperatures. In biologically catalyzed reac

"Catalysis of a biochemical reaction at physiological temperatures. In biologically catalyzed reac

Interacting selectively with any protein or protein complex (a complex of two or more proteins th

"Interacting selectively with purine nucleotides, any compound consisting of a purine nucleoside

vidence IEA]; Any process that modulates the frequency, rate or extent of DNA-dependent trans

"Interacting selectively with a SH3 domain (Src homology 3) of a protein, small protein modules

Mediates the transfer of a signal from the outside to the inside of a cell by means other than the

"Elemental activities, such as catalysis or binding, describing the actions of a gene product at th

Interacting selectively with any protein or protein complex (a complex of two or more proteins th

"Catalysis of the reaction: an orthophosphoric monoester + H<sub>2</sub>O = an alcohol + phosphate, with

945752 XM\_945754 XM\_945756"

"Elemental activities, such as catalysis or binding, describing the actions of a gene product at th

Interacting selectively with zinc (Zn) ions [goid 8270] [evidence IEA]; Interacting selectively with :

Interacting selectively with any protein or protein complex (a complex of two or more proteins th

Interacting selectively with any protein or protein complex (a complex of two or more proteins th

"Elemental activities, such as catalysis or binding, describing the actions of a gene product at th

"Elemental activities, such as catalysis or binding, describing the actions of a gene product at th  
"Functions to control the survival, growth, differentiation and effector function of tissues and cell:  
"Functions to control the survival, growth, differentiation and effector function of tissues and cell:  
"Elemental activities, such as catalysis or binding, describing the actions of a gene product at th

"Elemental activities, such as catalysis or binding, describing the actions of a gene product at th

"Elemental activities, such as catalysis or binding, describing the actions of a gene product at th

"The selective, often stoichiometric, interaction of a molecule with one or more specific sites on .

Interacting selectively with any protein or protein complex (a complex of two or more proteins th

"Interacting selectively with a nucleotide, any compound consisting of a nucleoside that is esteril

"Interacting selectively with a nucleotide, any compound consisting of a nucleoside that is esteril

Interacting selectively with any protein or protein complex (a complex of two or more proteins th

into bone or a bony substance [goid 1503] [evidence IEA]"

Interacting selectively with any protein or protein complex (a complex of two or more proteins th

Interacting selectively with any nucleic acid [goid 3676] [evidence IEA]; Interacting selectively wi  
Interacting selectively with any nucleic acid [goid 3676] [evidence IEA]; Interacting selectively wi

Interacting selectively with any nucleic acid [goid 3676] [evidence IEA]; Interacting selectively wi

Interacting selectively with any nucleic acid [goid 3676] [evidence IEA]; Interacting selectively wi  
Interacting selectively with oxygen (O2) [goid 19825] [evidence IEA]; Interacting selectively with

"Elemental activities, such as catalysis or binding, describing the actions of a gene product at th

"Elemental activities, such as catalysis or binding, describing the actions of a gene product at th

Interacting selectively with any protein or protein complex (a complex of two or more proteins th

Interacting selectively with any protein or protein complex (a complex of two or more proteins th  
physical agents in the environment (e.g. UV and ionizing radiations, chemical mutagens, fungal

"Elemental activities, such as catalysis or binding, describing the actions of a gene product at th

"Elemental activities, such as catalysis or binding, describing the actions of a gene product at th

"Elemental activities, such as catalysis or binding, describing the actions of a gene product at th

"Interacting selectively with damaged DNA [goid 3684] [pmid 9806548] [evidence TAS]; The sel

Interacting selectively with any protein or protein complex (a complex of two or more proteins th

"Interacting selectively with any protein or protein complex (a complex of two or more proteins th

"Interacting selectively with any protein or protein complex (a complex of two or more proteins th

"Stimulates the exchange of guanyl nucleotides by a GTPase of the Rho family. Under normal c

"Stimulates the exchange of guanyl nucleotides by a GTPase. Under normal cellular physiologic

"Interacting selectively with transfer RNA [goid 49] [pmid 10329163] [evidence IDA]; Interacting :

"Interacting selectively with a nucleotide, any compound consisting of a nucleoside that is esterif

"Combining with an extracellular or intracellular messenger to initiate a change in cell activity, ar

"Functions to control the survival, growth, differentiation and effector function of tissues and cell:

"Enables the directed movement of acyl groups into, out of, within or between cells [goid 36] [ev

"Catalysis of the phosphorylation of an amino acid residue in a protein, usually according to the

"Catalysis of the phosphorylation of an amino acid residue in a protein, usually according to the

"Catalysis of the phosphorylation of an amino acid residue in a protein, usually according to the  
"Catalysis of the phosphorylation of an amino acid residue in a protein, usually according to the  
"Catalysis of the phosphorylation of an amino acid residue in a protein, usually according to the

"Elemental activities, such as catalysis or binding, describing the actions of a gene product at th  
"Interacting selectively with an RNA molecule or a portion thereof [goid 3723] [pmid 1846968] [e  
Interacting selectively with calcium ions (Ca<sup>2+</sup>) [goid 5509] [evidence IEA]; Interacting selectivel  
Interacting selectively with calcium ions (Ca<sup>2+</sup>) [goid 5509] [evidence IEA]; The action of a mole  
Interacting selectively with an integrin [goid 5178] [pmid 10428823] [evidence TAS]; Interacting s  
"Interacting selectively with calcium ions (Ca<sup>2+</sup>) [goid 5509] [evidence IEA]; Interacting selective  
"Catalysis of the hydrolysis of various bonds, e.g. C-O, C-N, C-C, phosphoric anhydride bonds, i  
"Catalysis of the reaction: D-fructose 2,6-bisphosphate + H<sub>2</sub>O = D-fructose 6-phosphate + phos

"Interacting selectively with DNA (deoxyribonucleic acid) [goid 3677] [pmid 10799292] [evidence  
"Interacting selectively with DNA (deoxyribonucleic acid) [goid 3677] [evidence IEA]; Interacting  
rolysis of its peptide bonds, initiated by the covalent attachment of a ubiquitin moiety, or multiple  
Interacting selectively with any protein or protein complex (a complex of two or more proteins th  
Interacting selectively with any protein or protein complex (a complex of two or more proteins th  
rolysis of its peptide bonds, initiated by the covalent attachment of a ubiquitin moiety, or multiple  
Interacting selectively with any protein or protein complex (a complex of two or more proteins th

Interacting selectively with DNA (deoxyribonucleic acid) [goid 3677] [evidence IEA]; Interacting s  
Catalysis of the reaction: ATP + ubiquitin + protein lysine = AMP + diphosphate + protein N-ubi  
Interacting selectively with any protein or protein complex (a complex of two or more proteins th  
Catalysis of the reaction: ATP + ubiquitin + protein lysine = AMP + diphosphate + protein N-ubi  
rolysis of its peptide bonds, initiated by the covalent attachment of a ubiquitin moiety, or multiple  
Catalysis of the reaction: ATP + ubiquitin + protein lysine = AMP + diphosphate + protein N-ubi  
Catalysis of the reaction: ATP + ubiquitin + protein lysine = AMP + diphosphate + protein N-ubi  
rolysis of its peptide bonds, initiated by the covalent attachment of a ubiquitin moiety, or multiple  
Catalysis of the reaction: ATP + ubiquitin + protein lysine = AMP + diphosphate + protein N-ubi  
Catalysis of the reaction: ATP + ubiquitin + protein lysine = AMP + diphosphate + protein N-ubi  
Interacting selectively with any protein or protein complex (a complex of two or more proteins th  
rolysis of its peptide bonds, initiated by the covalent attachment of a ubiquitin moiety, or multiple  
Interacting selectively with any protein or protein complex (a complex of two or more proteins th  
"Catalysis of the reaction: ATP + ubiquitin + protein lysine = AMP + diphosphate + protein N-ubi  
Catalysis of the reaction: ATP + ubiquitin + protein lysine = AMP + diphosphate + protein N-ubi  
Catalysis of the reaction: ATP + ubiquitin + protein lysine = AMP + diphosphate + protein N-ubi  
Catalysis of the reaction: ATP + ubiquitin + protein lysine = AMP + diphosphate + protein N-ubi  
rolysis of its peptide bonds, initiated by the covalent attachment of a ubiquitin moiety, or multiple  
Catalysis of the reaction: ATP + ubiquitin + protein lysine = AMP + diphosphate + protein N-ubi  
Interacting selectively with zinc (Zn) ions [goid 8270] [evidence IEA]; Interacting selectively with  
rolysis of its peptide bonds, initiated by the covalent attachment of a ubiquitin moiety, or multiple  
Interacting selectively with any protein or protein complex (a complex of two or more proteins th  
rolysis of its peptide bonds, initiated by the covalent attachment of a ubiquitin moiety, or multiple

rolysis of its peptide bonds, initiated by the covalent attachment of a ubiquitin moiety, or multiple  
rolysis of its peptide bonds, initiated by the covalent attachment of a ubiquitin moiety, or multiple  
rolysis of its peptide bonds, initiated by the covalent attachment of a ubiquitin moiety, or multiple  
Catalysis of the reaction: ATP + ubiquitin + protein lysine = AMP + diphosphate + protein N-ubiq  
Interacting selectively with any protein or protein complex (a complex of two or more proteins th  
rolysis of its peptide bonds, initiated by the covalent attachment of a ubiquitin moiety, or multiple  
Interacting selectively with any protein or protein complex (a complex of two or more proteins th  
rolysis of its peptide bonds, initiated by the covalent attachment of a ubiquitin moiety, or multiple  
rolysis of its peptide bonds, initiated by the covalent attachment of a ubiquitin moiety, or multiple

Interacting selectively with any protein or protein complex (a complex of two or more proteins th  
"Interacting selectively with a glycoprotein, a protein that contains covalently bound glucose (mo  
Catalysis of the reaction: ATP + ubiquitin + protein lysine = AMP + diphosphate + protein N-ubiq  
"Stimulates the exchange of guanyl nucleotides by the GTPase ARF. Under normal cellular phy:  
Catalysis of the reaction: ATP + ubiquitin + protein lysine = AMP + diphosphate + protein N-ubiq  
Catalysis of the reaction: ATP + ubiquitin + protein lysine = AMP + diphosphate + protein N-ubiq  
"Elemental activities, such as catalysis or binding, describing the actions of a gene product at th  
Interacting selectively with any protein or protein complex (a complex of two or more proteins th  
The function of binding to a specific DNA sequence in order to modulate transcription. The trans  
Interacting selectively with any protein or protein complex (a complex of two or more proteins th  
rolysis of its peptide bonds, initiated by the covalent attachment of a ubiquitin moiety, or multiple  
Combining with an extracellular or intracellular messenger to initiate a change in cell activity [goi  
"Combining with an extracellular or intracellular messenger to initiate a change in cell activity, ar  
"Combining with an extracellular or intracellular messenger to initiate a change in cell activity [gc  
r more mature rRNA molecules [goid 6364] [evidence IEA]  
ellular matrix, via cell adhesion molecules [goid 7155] [evidence IEA]; The process by which the s  
Combining with an extracellular or intracellular messenger to initiate a change in cell activity [goi  
Combining with an extracellular or intracellular messenger to initiate a change in cell activity [goi  
"Combining with an extracellular or intracellular messenger to initiate a change in cell activity, ar  
Combining with an extracellular or intracellular messenger to initiate a change in cell activity [goi

Interacting selectively with any protein or protein complex (a complex of two or more proteins th  
"Interacting selectively with one or more specific sites on a receptor molecule, a macromolecule  
Combining with an extracellular or intracellular messenger to initiate a change in cell activity [goi  
"Combining with an extracellular or intracellular messenger to initiate a change in cell activity [gc  
Combining with an extracellular or intracellular messenger to initiate a change in cell activity [goi  
Combining with an extracellular or intracellular messenger to initiate a change in cell activity [goi

Combining with an extracellular or intracellular messenger to initiate a change in cell activity [goi

"Interacting selectively with magnesium (Mg) ions [goid 287] [evidence IEA]; Catalysis of the rea  
"Catalysis of the reaction: dimethylallyl diphosphate + isopentenyl diphosphate = diphosphate +

"Interacting selectively with iron (Fe) ions [goid 5506] [pmid 2969697] [evidence TAS]; Any mole  
"Interacting selectively with iron (Fe) ions [goid 5506] [evidence IEA]; Any molecular entity that s

"Catalysis of the reaction: protoporphyrin + Fe<sup>2+</sup> = protoheme + 2 H<sup>+</sup> [goid 4325] [evidence IEA]  
Catalysis of the reaction: ATP + ubiquitin + protein lysine = AMP + diphosphate + protein N-ubiq  
Catalysis of the reaction: ATP + ubiquitin + protein lysine = AMP + diphosphate + protein N-ubiq  
olysis of its peptide bonds, initiated by the covalent attachment of a ubiquitin moiety, or multiple  
"Interacting selectively with magnesium (Mg) ions [goid 287] [evidence IEA]; Interacting selective  
"Interacting selectively with a nucleotide, any compound consisting of a nucleoside that is esteril

Interacting selectively with any protein or protein complex (a complex of two or more proteins th  
Interacting selectively with any protein or protein complex (a complex of two or more proteins th  
"Catalysis of the phosphorylation of an amino acid residue in a protein, usually according to the  
Interacting selectively with any protein or protein complex (a complex of two or more proteins th  
Interacting selectively with any protein or protein complex (a complex of two or more proteins th  
"Stimulates the exchange of guanyl nucleotides by a GTPase. Under normal cellular physiologic  
"Stimulates the exchange of guanyl nucleotides by a GTPase. Under normal cellular physiologic  
"Stimulates the exchange of guanyl nucleotides by a GTPase. Under normal cellular physiologic  
"Stimulates the exchange of guanyl nucleotides by a GTPase. Under normal cellular physiologic  
The function that stimulates a cell to grow or proliferate. Most growth factors have other actions  
The function that stimulates a cell to grow or proliferate. Most growth factors have other actions  
The function that stimulates a cell to grow or proliferate. Most growth factors have other actions  
"Interacting selectively with any protein or protein complex (a complex of two or more proteins th  
The function that stimulates a cell to grow or proliferate. Most growth factors have other actions  
The function that stimulates a cell to grow or proliferate. Most growth factors have other actions  
"The function that stimulates a cell to grow or proliferate. Most growth factors have other actions  
"Interacting selectively with any growth factor, proteins or polypeptides that stimulate a cell or or  
1949182] [evidence TAS]

"Combining with an extracellular or intracellular messenger to initiate a change in cell activity [gc  
"Interacting selectively with a nucleotide, any compound consisting of a nucleoside that is esteril  
Combining with an extracellular or intracellular messenger to initiate a change in cell activity [goid  
"Catalysis of the transfer of a phosphate group, usually from ATP, to a substrate molecule [goid  
"Interacting selectively with a nucleotide, any compound consisting of a nucleoside that is esteril  
"Catalysis of the reaction: (S)-malate = fumarate + H<sub>2</sub>O [goid 4333] [pmid 8200987] [evidence E  
"Interacting selectively with monomeric or multimeric forms of actin, including actin filaments [go  
"Interacting selectively with magnesium (Mg) ions [goid 287] [evidence IEA]; Interacting selective  
"Interacting selectively with zinc (Zn) ions [goid 8270] [evidence IEA]; Interacting selectively with  
The function of a transcription cofactor that activates transcription from a RNA polymerase II prc  
"Interacting selectively with monomeric or multimeric forms of actin, including actin filaments [go  
"Interacting selectively with monomeric or multimeric forms of actin, including actin filaments [go  
"Interacting selectively with monomeric or multimeric forms of actin, including actin filaments [go  
"Interacting selectively with one or more specific sites on a receptor molecule, a macromolecule



Interacting selectively with any protein or protein complex (a complex of two or more proteins that interact with each other)  
Interacting selectively with any protein or protein complex (a complex of two or more proteins that interact with each other)  
Interacting selectively with any protein or protein complex (a complex of two or more proteins that interact with each other)  
"Interacting selectively with a nucleotide, any compound consisting of a nucleoside that is esterified to a phosphate group  
"Interacting selectively with a nucleotide, any compound consisting of a nucleoside that is esterified to a phosphate group

"Elemental activities, such as catalysis or binding, describing the actions of a gene product at the molecular level

Interacting selectively with any protein or protein complex (a complex of two or more proteins that interact with each other)

"Interacting selectively with any nucleic acid [goid 3676] [evidence IEA]; Interacting selectively with any nucleic acid [goid 3676] [evidence IEA]

Catalysis of the reaction: peptidyl-proline (omega=180) = peptidyl-proline (omega=0) [goid 3755]

Catalysis of the reaction: peptidyl-proline (omega=180) = peptidyl-proline (omega=0) [goid 3755]  
or multisubunit complexes into the correct tertiary structure [goid 6457] [evidence IEA]

Catalysis of the reaction: peptidyl-proline (omega=180) = peptidyl-proline (omega=0) [goid 3755]

Catalysis of the reaction: peptidyl-proline (omega=180) = peptidyl-proline (omega=0) [goid 3755]

"Catalysis of the reaction: peptidyl-proline (omega=180) = peptidyl-proline (omega=0) [goid 3755]

Catalysis of the reaction: peptidyl-proline (omega=180) = peptidyl-proline (omega=0) [goid 3755]

Catalysis of the reaction: peptidyl-proline (omega=180) = peptidyl-proline (omega=0) [goid 3755]

Interacting selectively with calcium ions (Ca<sup>2+</sup>) [goid 5509] [evidence IEA]

"The selective, often stoichiometric, interaction of a molecule with one or more specific sites on a protein or nucleic acid

"Catalysis of the transfer of a group, e.g. a methyl group, glycosyl group, acyl group, phosphorus group, or a phosphate group

"Interacting selectively with a nucleotide, any compound consisting of a nucleoside that is esterified to a phosphate group

"Catalysis of the transfer of a group, e.g. a methyl group, glycosyl group, acyl group, phosphorus group, or a phosphate group

Interacting selectively with any protein or protein complex (a complex of two or more proteins that interact with each other)

"The function of binding to a specific DNA sequence in order to modulate transcription. The transcription factor binds to the DNA sequence and recruits the transcription machinery

"Interacting selectively with monomeric or multimeric forms of actin, including actin filaments [goid 5509] [evidence IEA]

Interacting selectively with any protein or protein complex (a complex of two or more proteins that interact with each other)



179 XM\_943199 XM\_943200 XM\_943203 XM\_943207 XM\_943210 XM\_943212"

Interacting selectively with any nucleic acid [goid 3676] [evidence IEA]

The action of a molecule that contributes to the structural integrity of a complex or assembly with

tial internal or invasive threat [goid 6955] [evidence IEA]; The process by which an antigen-present

"Interacting selectively with monomeric or multimeric forms of actin, including actin filaments [go  
"Interacting selectively with monomeric or multimeric forms of actin, including actin filaments [go  
"Interacting selectively with monomeric or multimeric forms of actin, including actin filaments [go  
Interacting selectively with any protein or protein complex (a complex of two or more proteins th



"The function of binding to a specific DNA sequence in order to modulate transcription. The tran  
"The function of binding to a specific DNA sequence in order to modulate transcription. The tran  
"The function of binding to a specific DNA sequence in order to modulate transcription. The tran  
"The function of binding to a specific DNA sequence in order to modulate transcription. The tran  
"The function of binding to a specific DNA sequence in order to modulate transcription. The tran  
"The function of binding to a specific DNA sequence in order to modulate transcription. The tran  
"Functions to initiate or regulate RNA polymerase II transcription by binding an enhancer region  
"The function of binding to a specific DNA sequence in order to modulate transcription. The tran  
"The function of binding to a specific DNA sequence in order to modulate transcription. The tran  
"The function of binding to a specific DNA sequence in order to modulate transcription. The tran  
"Elemental activities, such as catalysis or binding, describing the actions of a gene product at th  
"Any molecular entity that serves as an electron acceptor and electron donor in an electron tran  
Combining with an extracellular or intracellular messenger to initiate a change in cell activity [goid  
Combining with an extracellular or intracellular messenger to initiate a change in cell activity [goid  
"Catalysis of the transfer of a phosphorus-containing group from one compound (donor) to an al  
"Catalysis of the transfer of a phosphorus-containing group from one compound (donor) to an al  
the surface of the target cell and ending with a change in cell state [goid 16055] [evidence IEA]  
"Elemental activities, such as catalysis or binding, describing the actions of a gene product at th  
"Enables the directed movement of substances (such as macromolecules, small molecules, ions

"Interacting selectively with a nucleotide, any compound consisting of a nucleoside that is esterifi  
"The selective, often stoichiometric, interaction of a molecule with one or more specific sites on  
"The selective, often stoichiometric, interaction of a molecule with one or more specific sites on  
"The selective, often stoichiometric, interaction of a molecule with one or more specific sites on  
"The selective, often stoichiometric, interaction of a molecule with one or more specific sites on  
"Catalysis of the reaction:  $2 \text{Fe}^{2+} + \text{NAD}^{+} = 2 \text{Fe}^{3+} + \text{NADH} + \text{H}^{+}$  [goid 293] [pmid 14499595] [  
Interacting selectively with the insulin receptor [goid 5158] [evidence IEA]; Combining with an ex  
"The selective, often stoichiometric, interaction of a molecule with one or more specific sites on  
"Interacting selectively with Wnt-protein, a secreted growth factor involved in signaling [goid 171  
Interacting selectively with any protein or protein complex (a complex of two or more proteins th  
Interacting selectively with calcium ions ( $\text{Ca}^{2+}$ ) [goid 5509] [evidence IEA]  
"Interacting selectively with two or more protein molecules, or a protein and another macromolec  
"Interacting selectively with two or more protein molecules, or a protein and another macromolec  
g successive cell replication or nuclear replication events. Canonically, the cell cycle comprises t

"Interacting selectively with any protein or protein complex (a complex of two or more proteins th  
"Acts to negatively regulate the activity of activin, a nonsteroidal regulator synthesized in the pitu  
Interacting selectively with calcium ions ( $\text{Ca}^{2+}$ ) [goid 5509] [evidence IEA]  
"Catalysis of the reaction:  $4 \text{Fe}^{2+} + 4 \text{H}^{+} + \text{O}_2 = 4 \text{Fe}^{3+} + 2 \text{H}_2\text{O}$  [goid 4322] [evidence IEA]; Int

"Interacting selectively with ferric iron, Fe(III) [goid 8199] [evidence IEA]; Catalysis of an oxidatic  
d right halves. The pattern can either be symmetric, such that the halves are mirror images, or as  
"Catalysis of the transfer of a methyl group to an acceptor molecule [goid 8168] [evidence IEA];  
"Catalysis of the transfer of a methyl group from a donor to a nucleoside residue in an RNA mol  
"Catalysis of the transfer of a methyl group to an acceptor molecule [goid 8168] [evidence IEA];

Interacting selectively with single-stranded DNA [goid 3697] [pmid 8125259] [evidence TAS]; Th  
Interacting selectively with DNA (deoxyribonucleic acid) [goid 3677] [evidence IEA]; Interacting s  
Catalysis of the reaction: an alpha-L-fucoside + H2O = an alcohol + L-fucose [goid 4560] [pmid  
"Interacting selectively with a nucleotide, any compound consisting of a nucleoside that is esteril

"Interacting selectively with any protease or peptidase [goid 2020] [pmid 14744861] [evidence IF  
Interacting selectively with any nucleic acid [goid 3676] [evidence IEA]; Interacting selectively wi  
"Catalysis of the transfer of a fucosyl group to an acceptor molecule, typically another carbohyd  
"Catalysis of the transfer of a glycosyl group from one compound (donor) to another (acceptor) [  
"Catalysis of the transfer of a glycosyl group from one compound (donor) to another (acceptor) [

Interacting selectively with zinc (Zn) ions [goid 8270] [evidence IEA]; Interacting selectively with :  
"Catalysis of the phosphorylation of myo-inositol (1,2,3,5/4,6-cyclohexanehexol) or a phosphatid  
Interacting selectively with an RNA molecule or a portion thereof [goid 3723] [pmid 7781595] [ev  
Interacting selectively with an RNA molecule or a portion thereof [goid 3723] [pmid 7489725] [ev  
Catalysis of facilitated diffusion of an ion (by an energy-independent process) by passage throug  
Catalysis of facilitated diffusion of an ion (by an energy-independent process) by passage throug  
"Interacting selectively with monomeric or multimeric forms of actin, including actin filaments [go  
"Elemental activities, such as catalysis or binding, describing the actions of a gene product at th  
Catalysis of facilitated diffusion of an ion (by an energy-independent process) by passage throug  
Interacting selectively with zinc (Zn) ions [goid 8270] [evidence IEA]; Interacting selectively with :  
"Interacting selectively with a nucleotide, any compound consisting of a nucleoside that is esteril

[goid 4926] [evidence IEA]; A receptor that binds an extracellular ligand and transmits the signal  
Combining with an extracellular or intracellular messenger to initiate a change in cell activity [goid  
Combining with an extracellular or intracellular messenger to initiate a change in cell activity [goid  
Combining with an extracellular or intracellular messenger to initiate a change in cell activity [goid  
Combining with an extracellular or intracellular messenger to initiate a change in cell activity [goid  
Combining with an extracellular or intracellular messenger to initiate a change in cell activity [goid  
Interacting selectively with any protein or protein complex (a complex of two or more proteins th  
"Interacting selectively with a nucleotide, any compound consisting of a nucleoside that is esteril  
"Interacting selectively with a nucleotide, any compound consisting of a nucleoside that is esteril  
"Catalysis of the reaction: D-glucose 6-phosphate + H2O = D-glucose + phosphate [goid 4346] [  
"Catalysis of a biochemical reaction at physiological temperatures. In biologically catalyzed reac

"Catalysis of the hydrolysis of any O-glycosyl bond [goid 4553] [evidence IEA]; Catalysis of the f  
"Mediates the transfer of a signal from the outside to the inside of a cell by means other than the

Interacting selectively with any protein or protein complex (a complex of two or more proteins th

"Interacting selectively with any protein or protein complex (a complex of two or more proteins th

"Interacting selectively with any protein or protein complex (a complex of two or more proteins th

"Interacting selectively with a SNARE (soluble N-ethylmaleimide-sensitive factor attached protei

"Combining with an extracellular or intracellular messenger to initiate a change in cell activity [gc

"Combining with an extracellular or intracellular messenger to initiate a change in cell activity [gc

The function of binding to a specific DNA sequence in order to modulate transcription. The trans  
[evidence IEA]; Any process that modulates the frequency, rate or extent of DNA-dependent trans

"Combining with the amino acid gamma-aminobutyric acid (GABA, 4-aminobutyrate) to initiate a

"Catalysis of the transmembrane transfer of an ion by a channel that opens when a specific extr

"Combining with the amino acid gamma-aminobutyric acid (GABA, 4-aminobutyrate) to initiate a

"Catalysis of the reaction: L-glutamate = 4-aminobutanoate + CO2 [goid 4351] [pmid 10671565]

Interacting selectively with any protein or protein complex (a complex of two or more proteins th

Interacting selectively with any protein or protein complex (a complex of two or more proteins th

Interacting selectively with any protein or protein complex (a complex of two or more proteins th

Interacting selectively with any protein or protein complex (a complex of two or more proteins th

"Interacting selectively with a nucleotide, any compound consisting of a nucleoside that is esteril

"Catalysis of the reaction: 3'-phosphoadenosine 5'-phosphosulfate + a galactosylceramide = ad

"Catalysis of the reaction: D-galactosyl-N-acylsphingosine + H2O = D-galactose + N-acylsphing

"Catalysis of a biochemical reaction at physiological temperatures. In biologically catalyzed reac

"Interacting selectively with a nucleotide, any compound consisting of a nucleoside that is esteril

"Interacting selectively with a nucleotide, any compound consisting of a nucleoside that is esteril

"Catalysis of the reaction: alpha-D-glucose = beta-D-glucose. Also acts on L-arabinose, D-xylos

"Catalysis of a biochemical reaction at physiological temperatures. In biologically catalyzed reac

"Catalysis of the reaction: UDP-N-acetyl-D-galactosamine + polypeptide = UDP + N-acetyl-D-ga

"Catalysis of the reaction: UDP-N-acetyl-D-galactosamine + polypeptide = UDP + N-acetyl-D-ga

"Catalysis of the reaction: UDP-N-acetyl-D-galactosamine + polypeptide = UDP + N-acetyl-D-ga

"Catalysis of the reaction: UDP-N-acetyl-D-galactosamine + polypeptide = UDP + N-acetyl-D-ga

"Catalysis of the reaction: UDP-N-acetyl-D-galactosamine + polypeptide = UDP + N-acetyl-D-ga

"Catalysis of the reaction: UDP-N-acetyl-D-galactosamine + polypeptide = UDP + N-acetyl-D-ga

"Catalysis of the reaction: UDP-N-acetyl-D-galactosamine + polypeptide = UDP + N-acetyl-D-ga

"Catalysis of the reaction: UDP-N-acetyl-D-galactosamine + polypeptide = UDP + N-acetyl-D-ga

"Catalysis of the reaction: UDP-N-acetyl-D-galactosamine + polypeptide = UDP + N-acetyl-D-ga

Combining with an extracellular or intracellular messenger to initiate a change in cell activity [goid

"Catalysis of the reaction: UDP-glucose + alpha-D-galactose 1-phosphate = alpha-D-glucose 1- $\beta$

"Catalysis of the transfer of a methyl group to an acceptor molecule [goid 8168] [evidence IEA];

"Elemental activities, such as catalysis or binding, describing the actions of a gene product at th

"Catalysis of the hydrolysis of any O-glycosyl bond [goid 4553] [evidence IEA]; Interacting select

"Catalysis of the hydrolysis of any O-glycosyl bond [goid 4553] [evidence IEA]; Catalysis of the f

"Interacting selectively with calmodulin, a calcium-binding protein with many roles, both in the ca



"Catalysis of a biochemical reaction at physiological temperatures. In biologically catalyzed reactions, the reaction is catalyzed by an enzyme at physiological temperatures.

"Increases the activity of a GTPase, an enzyme that catalyzes the hydrolysis of GTP [goid 5096]

"Increases the activity of a GTPase, an enzyme that catalyzes the hydrolysis of GTP [goid 5096]

"Interacting selectively with a nucleotide, any compound consisting of a nucleoside that is esterified to a phosphate group.

"Interacting selectively with a nucleotide, any compound consisting of a nucleoside that is esterified to a phosphate group.

"Elemental activities, such as catalysis or binding, describing the actions of a gene product at the cellular level.

"The function of binding to a specific DNA sequence in order to modulate transcription. The transcription factor binds to the DNA sequence and modulates the rate of transcription.

"The function of binding to a specific DNA sequence in order to modulate transcription. The transcription factor binds to the DNA sequence and modulates the rate of transcription.

"The function of binding to a specific DNA sequence in order to modulate transcription. The transcription factor binds to the DNA sequence and modulates the rate of transcription.

"The function of binding to a specific DNA sequence in order to modulate transcription. The transcription factor binds to the DNA sequence and modulates the rate of transcription.

"Elemental activities, such as catalysis or binding, describing the actions of a gene product at the cellular level.

"Catalysis of the reaction: L-arginine + glycine = L-ornithine + guanidinoacetate [goid 15068] [pmid 15068]

"Catalysis of the reaction: D-glucosyl-N-acylsphingosine + H<sub>2</sub>O = D-glucose + N-acylsphingosine

"Catalysis of the reaction: D-glucosyl-N-acylsphingosine + H<sub>2</sub>O = D-glucose + N-acylsphingosine

"Catalysis of the transfer of a segment of a 1,4-alpha-D-glucan chain to a primary hydroxyl group of another sugar.

"Stimulates the exchange of guanyl nucleotides by the GTPase ARF. Under normal cellular physiology, ARF binds to GTP and activates the GTPase, which then hydrolyzes GTP to GDP and phosphate.

"Catalysis of the transfer of a hexosyl group from one compound (donor) to another (acceptor) [goid 5096]

"Interacting selectively with a nucleotide, any compound consisting of a nucleoside that is esterified to a phosphate group.

"Catalysis of the reaction: GTP + H<sub>2</sub>O = GDP + phosphate [goid 3924] [evidence IEA]; Interacting selectively with a nucleotide, any compound consisting of a nucleoside that is esterified to a phosphate group.

"Interacting selectively with a nucleotide, any compound consisting of a nucleoside that is esterified to a phosphate group.

"Interacting selectively with a nucleotide, any compound consisting of a nucleoside that is esterified to a phosphate group.

"Interacting selectively with a nucleotide, any compound consisting of a nucleoside that is esterified to a phosphate group.

"Interacting selectively with vitamin D, a fat soluble vitamin that contributes to the maintenance of bone health.

Interacting selectively with calcium ions (Ca<sup>2+</sup>) [goid 5509] [pmid 1530588] [evidence TAS]

"Catalysis of the generalized reaction: acyl-carrier + reactant = acyl-reactant + carrier [goid 8415]

Interacting selectively with any protein or protein complex (a complex of two or more proteins that are bound together).

"Interacting selectively with any protein or protein complex (a complex of two or more proteins that are bound together).

"Catalysis of the reaction: glutaryl-CoA + acceptor = crotonoyl-CoA + CO<sub>2</sub> + reduced acceptor [goid 5096]

"The action characteristic of a hormone, any substance formed in very small amounts in one species that acts on other individuals of the same species to elicit a response.

"Catalysis of the reaction: GTP + 2 H<sub>2</sub>O = formate + 2-amino-4-hydroxy-6-(erythro-1,2,3-trihydroxypropyl)-5-oxohexanoate

Interacting selectively with any protein or protein complex (a complex of two or more proteins that are bound together).

"Interacting selectively with magnesium (Mg) ions [goid 287] [pmid 24639] [evidence IDA]; Catalysis of the reaction: GTP + H<sub>2</sub>O = GDP + phosphate [goid 3924] [evidence IEA]; Interacting selectively with a nucleotide, any compound consisting of a nucleoside that is esterified to a phosphate group.

"The function of binding to a specific DNA sequence in order to modulate transcription. The transcription factor binds to the DNA sequence and modulates the rate of transcription.

"Interacting selectively with zinc (Zn) ions [goid 8270] [evidence IEA]; Interacting selectively with any protein or protein complex (a complex of two or more proteins that are bound together).

Interacting selectively with any protein or protein complex (a complex of two or more proteins that are bound together).

"Catalysis of the reaction: UDP-N-acetyl-D-glucosamine + beta-D-galactosyl-1,3-N-acetyl-D-galactosyl-6-phosphate = UDP + N-acetyl-D-glucosamine + beta-D-galactosyl-1,3-N-acetyl-D-galactosyl-6-phosphate

"Catalysis of the transfer of an N-acetylglucosaminyl residue from UDP-N-acetyl-glucosamine to  
Catalysis of the transfer of an N-acetylglucosaminyl residue from UDP-N-acetyl-glucosamine to

"Catalysis of the reaction: (6S)-tetrahydrofolate + S-aminomethyldihydrolipoylprotein = (6R)-5,10

"Interacting selectively with zinc (Zn) ions [goid 8270] [pmid 10075721] [evidence TAS]; Catalysi

"Interacting selectively with magnesium (Mg) ions [goid 287] [evidence IEA]; Catalysis of the rea

"Functions to control the survival, growth, differentiation and effector function of tissues and cell:

"Prevents the dissociation of GDP from the small GTPase Rab, thereby preventing GTP from bi

"Prevents the dissociation of GDP from the small GTPase Rab, thereby preventing GTP from bi

"Catalysis of the reaction: a glycerophosphodiester + H<sub>2</sub>O = an alcohol + sn-glycerol 3-phospha

"Catalysis of the reaction: a glycerophosphodiester + H<sub>2</sub>O = an alcohol + sn-glycerol 3-phospha

"Catalysis of the reaction: a glycerophosphodiester + H<sub>2</sub>O = an alcohol + sn-glycerol 3-phospha

"Interacting selectively with a nucleotide, any compound consisting of a nucleoside that is esterifi

Interacting selectively with any protein or protein complex (a complex of two or more proteins th

Interacting selectively with any protein or protein complex (a complex of two or more proteins th

Interacting selectively with any protein or protein complex (a complex of two or more proteins th

Interacting selectively with any protein or protein complex (a complex of two or more proteins th

"Interacting selectively with magnesium (Mg) ions [goid 287] [evidence IEA]; Interacting selective

Interacting selectively with DNA (deoxyribonucleic acid) [goid 3677] [evidence IEA]; Interacting s

"Interacting selectively with a nucleotide, any compound consisting of a nucleoside that is esterifi

"Interacting selectively with a nucleotide, any compound consisting of a nucleoside that is esterifi

"The selective, often stoichiometric, interaction of a molecule with one or more specific sites on

"Catalysis of the reaction: L-glutamine + D-fructose 6-phosphate = L-glutamate + D-glucosamine

Combining with an extracellular or intracellular messenger to initiate a change in cell activity [goid

"Combining with an extracellular or intracellular messenger to initiate a change in cell activity [goid

"Elemental activities, such as catalysis or binding, describing the actions of a gene product at th

"Interacting selectively with any protein or protein complex (a complex of two or more proteins th

"Interacting selectively with any protein or protein complex (a complex of two or more proteins th

"[goid 8488] [pmid 1749935] [evidence TAS]; Catalysis of the ligation of two substances with con

"Catalysis of the removal of terminal peptide residues that are substituted, cyclized or linked by i

ver time from an initial condition (e.g. a zygote or a young adult) to a later condition (e.g. a multic

"Catalysis of the reaction: (5-L-glutamyl)-peptide + an amino acid = peptide + 5-L-glutamyl-amin

Catalysis of the transfer of a hexosyl group from one compound (donor) to another (acceptor) [goid

"Elemental activities, such as catalysis or binding, describing the actions of a gene product at th

"Elemental activities, such as catalysis or binding, describing the actions of a gene product at th

Interacting selectively with any protein or protein complex (a complex of two or more proteins th

"Interacting selectively with a nucleotide, any compound consisting of a nucleoside that is esterifi

"Interacting selectively with a nucleotide, any compound consisting of a nucleoside that is esterifi

"Interacting selectively with a nucleotide, any compound consisting of a nucleoside that is esterified to a phosphate group [goid 3677] [evidence IEA]

Interacting selectively with any protein or protein complex (a complex of two or more proteins that may or may not be an existing DNA molecule or RNA [goid 6260] [evidence IEA]

Interacting selectively with any protein or protein complex (a complex of two or more proteins that may or may not be an existing DNA molecule or RNA [goid 6260] [evidence IEA]

"Interacting selectively with monomeric or multimeric forms of actin, including actin filaments [goid 6260] [evidence IEA]

Interacting selectively with any protein or protein complex (a complex of two or more proteins that may or may not be an existing DNA molecule or RNA [goid 6260] [evidence IEA]

"A wide pore channel activity that enables a direct cytoplasmic connection from one cell to another cell [goid 1570] [evidence IEA]

Interacting selectively with any protein or protein complex (a complex of two or more proteins that may or may not be an existing DNA molecule or RNA [goid 6260] [evidence IEA]; The directed movement of poly(A)<sup>+</sup> mRNA out of the nucleus into the cytoplasm [goid 1697] [evidence IEA]

"A wide pore channel activity that enables a direct cytoplasmic connection from one cell to another cell [goid 1570] [evidence IEA]; The directed movement of poly(A)<sup>+</sup> mRNA out of the nucleus into the cytoplasm [goid 1697] [evidence IEA]

"Catalysis of the reaction: ATP + glycerol = ADP + glycerol 3-phosphate [goid 4370] [evidence IEA]

"Interacting selectively with a nucleotide, any compound consisting of a nucleoside that is esterified to a phosphate group [goid 3677] [evidence IEA]

"Interacting selectively with any protein or protein complex (a complex of two or more proteins that may or may not be an existing DNA molecule or RNA [goid 6260] [evidence IEA]

"Catalysis of the hydrolysis of any O-glycosyl bond [goid 4553] [evidence IEA]; Catalysis of the hydrolysis of terminal, non-reducing beta-D-galactose residues in beta-D-galactosyl oligosaccharides [goid 4553] [evidence IEA]

"Catalysis of the hydrolysis of terminal, non-reducing beta-D-galactose residues in beta-D-galactosyl oligosaccharides [goid 4553] [evidence IEA]

"Catalysis of the hydrolysis of terminal, non-reducing beta-D-galactose residues in beta-D-galactosyl oligosaccharides [goid 4553] [evidence IEA]

Interacting selectively with any protein or protein complex (a complex of two or more proteins that may or may not be an existing DNA molecule or RNA [goid 6260] [evidence IEA]

Catalysis of the geometric or structural changes within one molecule. Isomerase is the systematic name for this activity [goid 4553] [evidence IEA]

"Catalysis of the reaction: glycine + lipoylprotein = S-aminomethyldihydrolipoylprotein + CO<sub>2</sub> [goid 4370] [evidence IEA]; The directed movement of poly(A)<sup>+</sup> mRNA out of the nucleus into the cytoplasm [goid 1697] [evidence IEA]

"Interacting selectively with one or more specific sites on a receptor molecule, a macromolecule or a protein complex [goid 6260] [evidence IEA]

"Interacting selectively with DNA (deoxyribonucleic acid) [goid 3677] [pmid 9118802] [evidence IEA]

"Elemental activities, such as catalysis or binding, describing the actions of a gene product at the molecular level [goid 6260] [evidence IEA]

"Interacting selectively with DNA (deoxyribonucleic acid) [goid 3677] [evidence IEA]; Functions that are not directly related to the catalysis of a chemical reaction [goid 6260] [evidence IEA]

Interacting selectively with the hepatocyte growth factor receptor [goid 5171] [pmid 11571281] [evidence IEA]

"Catalysis of the reaction: (R)-S-lactoylglutathione = glutathione + methylglyoxal [goid 4462] [pmid 10620514] [evidence IEA]

"Combining with the amino acid gamma-aminobutyric acid (GABA, 4-aminobutyrate) to initiate a signal transduction pathway [goid 5171] [pmid 11571281] [evidence IEA]

"Combining with the amino acid gamma-aminobutyric acid (GABA, 4-aminobutyrate) to initiate a signal transduction pathway [goid 5171] [pmid 11571281] [evidence IEA]

"Any molecular entity that serves as an electron acceptor and electron donor in an electron transport chain [goid 6260] [evidence IEA]

"Interacting selectively with iron (Fe) ions [goid 5506] [evidence IEA]; Catalysis of the reaction: a substrate + Fe<sup>2+</sup> = a product + Fe<sup>3+</sup> [goid 5506] [evidence IEA]

Interacting selectively with any protein or protein complex (a complex of two or more proteins that may or may not be an existing DNA molecule or RNA [goid 6260] [evidence IEA]

Any molecular entity that serves as an electron acceptor and electron donor in an electron transport chain [goid 6260] [evidence IEA]

"Catalysis of the reaction: L-glutamine + H<sub>2</sub>O = L-glutamate + NH<sub>3</sub> [goid 4359] [evidence IEA]; Catalysis of the reaction: L-glutamine + H<sub>2</sub>O = L-glutamate + NH<sub>3</sub> [goid 4359] [pmid 10620514] [evidence IEA]

"Catalysis of the reaction: L-glutamine + H<sub>2</sub>O = L-glutamate + NH<sub>3</sub> [goid 4359] [pmid 10620514] [evidence IEA]

Catalysis of the transfer of a glycosyl group from one compound (donor) to another (acceptor) [goid 4553] [evidence IEA]

Catalysis of the transfer of a glycosyl group from one compound (donor) to another (acceptor) [goid 4553] [evidence IEA]

Catalysis of the transfer of a hexosyl group from one compound (donor) to another (acceptor) [g  
Catalysis of the transfer of a glycosyl group from one compound (donor) to another (acceptor) [g  
Catalysis of the transfer of a glycosyl group from one compound (donor) to another (acceptor) [g  
"Enables the directed movement of glycolipids, compounds containing (usually) 1-4 linked monc  
"Enables the directed movement of glycolipids, compounds containing (usually) 1-4 linked monc

"Interacting selectively with a nucleotide, any compound consisting of a nucleoside that is esteril

"Catalysis of the generalized reaction: acyl-carrier + reactant = acyl-reactant + carrier [goid 8415

"Catalysis of the reaction: ATP + (R)-glycerate = ADP + 3-phospho-(R)-glycerate [goid 8887] [pr

"Catalysis of the hydrolysis of terminal non-reducing N-acetyl-D-hexosamine residues in N-acety

Interacting selectively with any protein or protein complex (a complex of two or more proteins th

"The selective, often stoichiometric, interaction of a molecule with one or more specific sites on .

"The function of binding to a specific DNA sequence in order to modulate transcription. The tran

"Interacting selectively with DNA (deoxyribonucleic acid) [goid 3677] [evidence IEA]; Functions t

"Interacting selectively with monomeric or multimeric forms of actin, including actin filaments [go

"Interacting selectively with monomeric or multimeric forms of actin, including actin filaments [go

"Increases the activity of a GTPase, an enzyme that catalyzes the hydrolysis of GTP [goid 5096

"Catalysis of the reaction: GTP + alpha-D-mannose 1-phosphate = diphosphate + GDP-mannos

"Catalysis of the reaction: GTP + alpha-D-mannose 1-phosphate = diphosphate + GDP-mannos

"Catalysis of the reaction: inosine 5'-phosphate + NH3 + NADP+ = guanosine 5'-phosphate + N/

"Catalysis of the reaction: inosine 5'-phosphate + NH3 + NADP+ = guanosine 5'-phosphate + N/

"Interacting selectively with a nucleotide, any compound consisting of a nucleoside that is esteril

"Interacting selectively with a nucleotide, any compound consisting of a nucleoside that is esteril

"Interacting selectively with a nucleotide, any compound consisting of a nucleoside that is esteril

"Interacting selectively with a nucleotide, any compound consisting of a nucleoside that is esteril

"Interacting selectively with a nucleotide, any compound consisting of a nucleoside that is esteril

"Interacting selectively with a nucleotide, any compound consisting of a nucleoside that is esteril

"Interacting selectively with a nucleotide, any compound consisting of a nucleoside that is esteril

"Interacting selectively with a nucleotide, any compound consisting of a nucleoside that is esteril

"Interacting selectively with a nucleotide, any compound consisting of a nucleoside that is esteril

"Interacting selectively with a nucleotide, any compound consisting of a nucleoside that is esteril

Catalysis of the reaction: GTP + H2O = GDP + phosphate [goid 3924] [pmid 3095147] [evidence

"Elemental activities, such as catalysis or binding, describing the actions of a gene product at th

Catalysis of the reaction: GTP + H2O = GDP + phosphate [goid 3924] [pmid 2902634] [evidence

"Catalysis of the reaction: GTP + H2O = GDP + phosphate [goid 3924] [pmid 9425898] [evidenc

Mediates the transfer of a signal from the outside to the inside of a cell by means other than the

Catalysis of the reaction: GTP + H2O = GDP + phosphate [goid 3924] [pmid 9606987] [evidence

"Interacting selectively with a nucleotide, any compound consisting of a nucleoside that is esteril

Catalysis of the reaction: GTP + H2O = GDP + phosphate [goid 3924] [pmid 7665596] [evidence

Catalysis of the reaction: GTP + H2O = GDP + phosphate [goid 3924] [pmid 7665596] [evidence

Mediates the transfer of a signal from the outside to the inside of a cell by means other than the

Mediates the transfer of a signal from the outside to the inside of a cell by means other than the

Mediates the transfer of a signal from the outside to the inside of a cell by means other than the

Mediates the transfer of a signal from the outside to the inside of a cell by means other than the

Mediates the transfer of a signal from the outside to the inside of a cell by means other than the

Catalysis of the reaction:  $GTP + H_2O = GDP + \text{phosphate}$  [goid 3924] [pmid 10819326] [evidence IEA]; Catalysis of the reaction:  $GTP + H_2O = GDP + \text{phosphate}$  [goid 3924] [pmid 9286705] [evidence IEA]; "Interacting selectively with a nucleotide, any compound consisting of a nucleoside that is esterified to a phosphate group" [goid 3677] [evidence IEA]; "Interacting selectively with a nucleotide, any compound consisting of a nucleoside that is esterified to a phosphate group" [goid 3677] [evidence IEA]; "Interacting selectively with a nucleotide, any compound consisting of a nucleoside that is esterified to a phosphate group" [goid 3677] [evidence IEA]; "Interacting selectively with a nucleotide, any compound consisting of a nucleoside that is esterified to a phosphate group" [goid 3677] [evidence IEA]; "Catalysis of the generalized reaction: acyl-carrier + reactant = acyl-reactant + carrier" [goid 8415] [evidence IEA]; "Catalysis of the reaction:  $D\text{-glucosamine 6-phosphate} + H_2O = D\text{-fructose 6-phosphate} + NH_3$ " [goid 4069] [evidence IEA]; "Catalysis of the reaction:  $D\text{-glucosamine 6-phosphate} + H_2O = D\text{-fructose 6-phosphate} + NH_3$ " [goid 4069] [evidence IEA]; "Catalysis of the reaction:  $\text{acetyl-CoA} + D\text{-glucosamine 6-phosphate} = \text{CoA} + N\text{-acetyl-D-glucosamine 6-phosphate}$ " [goid 4069] [evidence IEA]; "Interacting selectively with DNA (deoxyribonucleic acid) [goid 3677] [evidence IEA]; Catalysis of the reaction:  $\text{ATP} + \text{protein tyrosine} = \text{ADP} + \text{protein tyrosine phosphate}$ " [goid 47] [evidence IEA]; "Enables the directed movement of substances (such as macromolecules, small molecules, ions, or molecules) out of or within a cell [goid 16192] [pmid 8626529] [evidence TAS]"; "Catalysis of the reaction:  $\text{ATP} + \text{a protein tyrosine} = \text{ADP} + \text{protein tyrosine phosphate}$  [goid 47] [evidence IEA];

Interacting selectively with any protein or protein complex (a complex of two or more proteins that interact with each other) out of, within or between cells, or within a multicellular organism [goid 6810] [evidence IEA]"

EA]; The directed movement of substances, either within a vesicle or in the vesicle membrane, in the direction of the membrane; Mediates the transfer of a signal from the outside to the inside of a cell by means other than the membrane; Interacting selectively with DNA (deoxyribonucleic acid) [goid 3677] [evidence IEA]; Interacting selectively with the Cystic Fibrosis Transmembrane conductance Regulator (CFTR) [goid 6810] [evidence IEA]; Interacting selectively with any protein or protein complex (a complex of two or more proteins that interact with each other) out of, within or between cells, or within a multicellular organism [goid 6810] [evidence IEA]; Interacting selectively with any protein or protein complex (a complex of two or more proteins that interact with each other) out of, within or between cells, or within a multicellular organism [goid 6810] [evidence IEA]; Acting as a marker to identify a membrane and interacting selectively with one or more SNAREs [goid 6810] [evidence IEA]; "Combining with an extracellular or intracellular messenger to initiate a change in cell activity [goid 6810] [evidence IEA]; "Catalysis of the reaction:  $L\text{-aspartate} + 2\text{-oxoglutarate} = \text{oxaloacetate} + L\text{-glutamate}$  [goid 4069] [evidence IEA]; "Catalysis of the reaction:  $L\text{-aspartate} + 2\text{-oxoglutarate} = \text{oxaloacetate} + L\text{-glutamate}$  [goid 4069] [evidence IEA]; "Catalysis of the reaction:  $L\text{-aspartate} + 2\text{-oxoglutarate} = \text{oxaloacetate} + L\text{-glutamate}$  [goid 4069] [evidence IEA]; Interacting selectively with any protein or protein complex (a complex of two or more proteins that interact with each other) out of, within or between cells, or within a multicellular organism [goid 6810] [evidence IEA]; Interacting selectively with any protein or protein complex (a complex of two or more proteins that interact with each other) out of, within or between cells, or within a multicellular organism [goid 6810] [evidence IEA]; "Catalysis of the formation of the linkage between a protein and a glycosylphosphatidylinositol anchor" [goid 6810] [evidence IEA]; "Catalysis of the reaction:  $\text{acyl-CoA} + \text{sn-glycerol 3-phosphate} = \text{CoA} + 1\text{-acyl-sn-glycerol 3-phosphate}$ " [goid 6810] [evidence IEA];

Interacting selectively with any nucleic acid [goid 3676] [evidence IEA]  
Interacting selectively with any nucleic acid [goid 3676] [evidence IEA]  
Interacting selectively with any nucleic acid [goid 3676] [evidence IEA]; Interacting selectively wi  
Interacting selectively with any nucleic acid [goid 3676] [evidence IEA]; Interacting selectively wi  
Combining with an extracellular or intracellular messenger to initiate a change in cell activity [goid 3676] [evidence IEA]  
The function of binding to a specific DNA sequence in order to modulate transcription. The trans  
Interacting selectively with DNA (deoxyribonucleic acid) [goid 3677] [evidence IEA]

283] [pmid 9787072] [evidence TAS]; The process by which anatomical structures are generated

"Catalysis of the reaction: sn-glycerol 3-phosphate + NAD+ = glycerone phosphate + NADH + H  
"Catalysis of the reaction: sn-glycerol 3-phosphate + NAD+ = glycerone phosphate + NADH + H  
Combining with an extracellular or intracellular messenger to initiate a change in cell activity [goid 3676] [evidence IEA]  
"The action characteristic of a hormone, any substance formed in very small amounts in one sp  
"Catalysis of the reaction: D-glucose 6-phosphate = D-fructose 6-phosphate [goid 4347] [evidence IEA]  
"Elemental activities, such as catalysis or binding, describing the actions of a gene product at th  
"Catalysis of the reaction: glycoprotein phosphatidylinositol + H2O = phosphatidate + glycoprote

"Elemental activities, such as catalysis or binding, describing the actions of a gene product at th  
"Interacting selectively with a nucleotide, any compound consisting of a nucleoside that is esterified  
"Interacting selectively with a nucleotide, any compound consisting of a nucleoside that is esterified  
"Interacting selectively with a nucleotide, any compound consisting of a nucleoside that is esterified  
"Interacting selectively with an integrin [goid 5178] [evidence IEA]; Interacting selectively with he  
Combining with an extracellular or intracellular messenger to initiate a change in cell activity [goid 3676] [evidence IEA]  
Combining with an extracellular or intracellular messenger to initiate a change in cell activity [goid 3676] [evidence IEA]  
Combining with an extracellular or intracellular messenger to initiate a change in cell activity [goid 3676] [evidence IEA]

Combining with an extracellular or intracellular messenger to initiate a change in cell activity [goid 3676] [evidence IEA]  
Combining with an extracellular or intracellular messenger to initiate a change in cell activity [goid 3676] [evidence IEA]  
Combining with an extracellular or intracellular messenger to initiate a change in cell activity [goid 3676] [evidence IEA]  
Combining with an extracellular or intracellular messenger to initiate a change in cell activity [goid 3676] [evidence IEA]  
Combining with an extracellular or intracellular messenger to initiate a change in cell activity [goid 3676] [evidence IEA]  
Combining with an extracellular or intracellular messenger to initiate a change in cell activity [goid 3676] [evidence IEA]

Combining with an extracellular or intracellular messenger to initiate a change in cell activity [goid 3676] [evidence IEA]

"Combining with an extracellular or intracellular messenger to initiate a change in cell activity [goid 3676] [evidence IEA]  
Combining with an extracellular or intracellular messenger to initiate a change in cell activity [goid 3676] [evidence IEA]  
Combining with an extracellular or intracellular messenger to initiate a change in cell activity [goid 3676] [evidence IEA]  
Combining with an extracellular or intracellular messenger to initiate a change in cell activity [goid 3676] [evidence IEA]  
Combining with an extracellular or intracellular messenger to initiate a change in cell activity [goid 3676] [evidence IEA]

Combining with an extracellular or intracellular messenger to initiate a change in cell activity [goid 4601] [evidence IEA]; (

Combining with an extracellular or intracellular messenger to initiate a change in cell activity [goid 4601] [evidence IEA]; (

Combining with an extracellular or intracellular messenger to initiate a change in cell activity [goid 4601] [evidence IEA]; (

Combining with an extracellular or intracellular messenger to initiate a change in cell activity [goid 4601] [evidence IEA]; (

Combining with an extracellular or intracellular messenger to initiate a change in cell activity [goid 4601] [evidence IEA]; (

Combining with an extracellular or intracellular messenger to initiate a change in cell activity [goid 4601] [evidence IEA]; (

A receptor that binds an extracellular ligand and transmits the signal to a heterotrimeric G-protein [goid 4601] [evidence IEA]; (

Combining with an extracellular or intracellular messenger to initiate a change in cell activity [goid 4601] [evidence IEA]; (

binding to its physiological ligand [goid 7186] [evidence IEA]

Combining with an extracellular or intracellular messenger to initiate a change in cell activity [goid 4601] [evidence IEA]; (

Combining with an extracellular or intracellular messenger to initiate a change in cell activity [goid 4601] [evidence IEA]; (

Combining with an extracellular or intracellular messenger to initiate a change in cell activity [goid 4601] [evidence IEA]; (

Combining with an extracellular or intracellular messenger to initiate a change in cell activity [goid 4601] [evidence IEA]; (

Combining with an extracellular or intracellular messenger to initiate a change in cell activity [goid 4601] [evidence IEA]; (

Combining with an extracellular or intracellular messenger to initiate a change in cell activity [goid 4601] [evidence IEA]; (

Combining with an extracellular or intracellular messenger to initiate a change in cell activity [goid 4601] [evidence IEA]; (

Combining with lysosphingolipid or lysophosphatidic acid to initiate a change in cell activity [goid 4601] [evidence IEA]; (

Combining with an extracellular or intracellular messenger to initiate a change in cell activity [goid 4601] [evidence IEA]; (

"Elemental activities, such as catalysis or binding, describing the actions of a gene product at the time of transcription [goid 4601] [evidence IEA]; (

Combining with an extracellular or intracellular messenger to initiate a change in cell activity [goid 4601] [evidence IEA]; (

Combining with an extracellular or intracellular messenger to initiate a change in cell activity [goid 4601] [evidence IEA]; (

Mediates the transfer of a signal from the outside to the inside of a cell by means other than the binding of a ligand [goid 4601] [evidence IEA]; (

Combining with an extracellular or intracellular messenger to initiate a change in cell activity [goid 4601] [evidence IEA]; (

Interacting selectively with a phosphorylated protein [goid 51219] [evidence IEA]

"Stops, prevents or reduces the activity of any enzyme that catalyzes the hydrolysis of GTP to GDP [goid 5096] [evidence IEA]; (

"Increases the activity of a GTPase, an enzyme that catalyzes the hydrolysis of GTP to GDP [goid 5096] [evidence IEA]; (

"Increases the activity of a GTPase, an enzyme that catalyzes the hydrolysis of GTP to GDP [goid 5096] [evidence IEA]; (

"Elemental activities, such as catalysis or binding, describing the actions of a gene product at the time of transcription [goid 4601] [evidence IEA]; (

"Catalysis of the reaction: L-alanine + 2-oxoglutarate = pyruvate + L-glutamate [goid 4021] [evidence IEA]; (

"Catalysis of the reaction: 2 glutathione + H<sub>2</sub>O<sub>2</sub> = oxidized glutathione + 2 H<sub>2</sub>O [goid 4602] [evidence IEA]; (

"Catalysis of the reaction: 2 glutathione + H<sub>2</sub>O<sub>2</sub> = oxidized glutathione + 2 H<sub>2</sub>O [goid 4602] [evidence IEA]; (

"Catalysis of the reaction: 2 glutathione + H<sub>2</sub>O<sub>2</sub> = oxidized glutathione + 2 H<sub>2</sub>O [goid 4602] [evidence IEA]; (

"Catalysis of the reaction: 2 glutathione + H<sub>2</sub>O<sub>2</sub> = oxidized glutathione + 2 H<sub>2</sub>O [goid 4602] [evidence IEA]; (

of proteolytic caspases, whose actions dismantle the cell and result in cell death. Apoptosis begins

"Interacting selectively with any protein or protein complex (a complex of two or more proteins that interact with each other)  
"Interacting selectively with any protein or protein complex (a complex of two or more proteins that interact with each other)  
"Interacting selectively and simultaneously with one or more signal transduction molecules, usually by binding to them  
"Interacting selectively and simultaneously with one or more signal transduction molecules, usually by binding to them

Interacting selectively with DNA (deoxyribonucleic acid) [goid 3677] [evidence IEA]

"Interacting selectively with any protein or protein complex (a complex of two or more proteins that interact with each other)  
Combining with an extracellular or intracellular messenger to initiate a change in cell activity [goid 5096]  
Combining with an extracellular or intracellular messenger to initiate a change in cell activity [goid 5096]  
Combining with an extracellular or intracellular messenger to initiate a change in cell activity [goid 5096]  
Combining with an extracellular or intracellular messenger to initiate a change in cell activity [goid 5096]  
"Combining with an extracellular or intracellular messenger to initiate a change in cell activity [goid 5096]  
Interacting selectively with magnesium (Mg) ions [goid 287] [evidence IEA]; Combining with an enzyme

"Elemental activities, such as catalysis or binding, describing the actions of a gene product at the molecular level  
"Combining with an extracellular or intracellular messenger to initiate a change in cell activity [goid 5096]  
"Interacting selectively with a nucleotide, any compound consisting of a nucleoside that is esterified to a phosphate group  
"Combining with an extracellular or intracellular messenger to initiate a change in cell activity [goid 5096]  
"Interacting selectively with a nucleotide, any compound consisting of a nucleoside that is esterified to a phosphate group  
Combining with an extracellular or intracellular messenger to initiate a change in cell activity [goid 5096]  
A G-protein coupled receptor that is activated by L-AP-4 and inhibits adenylate cyclase activity [goid 5096]  
"Functions to control the survival, growth, differentiation and effector function of tissues and cells  
"Interacting selectively with one or more specific sites on a receptor molecule, a macromolecule  
"Stimulates the hydrolysis and exchange of adenylylated nucleotides by other proteins [goid 774] [evidence IEA]  
"Stimulates the hydrolysis and exchange of adenylylated nucleotides by other proteins [goid 774] [evidence IEA]

"Interacting selectively with a nucleotide, any compound consisting of a nucleoside that is esterified to a phosphate group  
"Increases the activity of a GTPase, an enzyme that catalyzes the hydrolysis of GTP [goid 5096]

of proteolytic caspases, whose actions dismantle the cell and result in cell death. Apoptosis begins with the activation of

"Elemental activities, such as catalysis or binding, describing the actions of a gene product at the molecular level

"Interacting selectively with a nucleotide, any compound consisting of a nucleoside that is esterified to a phosphate group  
"Interacting selectively with a nucleotide, any compound consisting of a nucleoside that is esterified to a phosphate group  
"Interacting selectively with a nucleotide, any compound consisting of a nucleoside that is esterified to a phosphate group  
"Interacting selectively with a nucleotide, any compound consisting of a nucleoside that is esterified to a phosphate group  
"Catalysis of the reaction: 2 glutathione + NADP+ = glutathione disulfide + NADPH + H+ [goid 4184]  
"Interacting selectively with a nucleotide, any compound consisting of a nucleoside that is esterified to a phosphate group  
"Catalysis of the reaction: R-X + glutathione = H-X + R-S-glutathione. R may be an aliphatic, aromatic, or heterocyclic group  
"Catalysis of the reaction: R-X + glutathione = H-X + R-S-glutathione. R may be an aliphatic, aromatic, or heterocyclic group  
"Catalysis of the reaction: R-X + glutathione = H-X + R-S-glutathione. R may be an aliphatic, aromatic, or heterocyclic group  
"Catalysis of the reaction: R-X + glutathione = H-X + R-S-glutathione. R may be an aliphatic, aromatic, or heterocyclic group



"Catalysis of the reaction: R-X + glutathione = H-X + R-S-glutathione. R may be an aliphatic, arc  
"Catalysis of the reaction: R-X + glutathione = H-X + R-S-glutathione. R may be an aliphatic, arc  
"Catalysis of the reaction: R-X + glutathione = H-X + R-S-glutathione. R may be an aliphatic, arc  
"Catalysis of the reaction: R-X + glutathione = H-X + R-S-glutathione. R may be an aliphatic, arc  
"Catalysis of the transfer of a group, e.g. a methyl group, glycosyl group, acyl group, phosphoru:  
"Catalysis of the reaction: R-X + glutathione = H-X + R-S-glutathione. R may be an aliphatic, arc  
"Catalysis of the reaction: R-X + glutathione = H-X + R-S-glutathione. R may be an aliphatic, arc  
"Catalysis of the transfer of a group, e.g. a methyl group, glycosyl group, acyl group, phosphoru:  
"Catalysis of the reaction: R-X + glutathione = H-X + R-S-glutathione. R may be an aliphatic, arc

"Catalysis of the reaction: R-X + glutathione = H-X + R-S-glutathione. R may be an aliphatic, arc  
Catalysis of the transfer of a glycosyl group from one compound (donor) to another (acceptor) [c  
"Functions in the initiation of ribosome-mediated translation of mRNA into a polypeptide [goid 37  
Functions to initiate or regulate RNA polymerase II transcription [goid 3702] [evidence IEA]; Inte  
Interacting selectively with DNA (deoxyribonucleic acid) [goid 3677] [evidence IEA]; Functions to  
"Interacting selectively with DNA (deoxyribonucleic acid) [goid 3677] [evidence IEA]; The functio  
"Interacting selectively with a nucleotide, any compound consisting of a nucleoside that is esteril  
"Interacting selectively with any protein or protein complex (a complex of two or more proteins th  
"The function of binding to a specific DNA sequence in order to modulate transcription. The tran

"Interacting selectively with damaged DNA [goid 3684] [evidence NAS]; The function of binding t  
The function of binding to a specific DNA sequence in order to modulate transcription. The trans  
Interacting selectively with DNA (deoxyribonucleic acid) [goid 3677] [evidence IEA]; Interacting s  
"The function of binding to a specific DNA sequence in order to modulate transcription. The tran

The function of binding to a specific DNA sequence in order to modulate transcription. The trans  
Interacting selectively with DNA (deoxyribonucleic acid) [goid 3677] [evidence IEA]; Interacting s  
Interacting selectively with DNA (deoxyribonucleic acid) [goid 3677] [evidence IEA]; Interacting s

Interacting selectively with DNA (deoxyribonucleic acid) [goid 3677] [evidence IEA]; Functions to  
Interacting selectively with DNA (deoxyribonucleic acid) [goid 3677] [pmid 17409385] [evidence  
Interacting selectively with DNA (deoxyribonucleic acid) [goid 3677] [pmid 17409385] [evidence  
"Interacting selectively with DNA (deoxyribonucleic acid) [goid 3677] [pmid 17409385] [evidence  
Interacting selectively with DNA (deoxyribonucleic acid) [goid 3677] [pmid 17409385] [evidence  
"Interacting selectively with GTP, guanosine triphosphate [goid 5525] [evidence IEA]; Interacting  
"Interacting selectively with a nucleotide, any compound consisting of a nucleoside that is esteril  
"Interacting selectively with a nucleotide, any compound consisting of a nucleoside that is esteril  
"Interacting selectively with a nucleotide, any compound consisting of a nucleoside that is esteril  
"Interacting selectively with a nucleotide, any compound consisting of a nucleoside that is esteril  
"Interacting selectively with a nucleotide, any compound consisting of a nucleoside that is esteril

"Elemental activities, such as catalysis or binding, describing the actions of a gene product at th

Interacting selectively with calcium ions (Ca<sup>2+</sup>) [goid 5509] [evidence IEA]; Interacting selectively  
Increases the activity of an enzyme [goid 8047] [evidence IEA]; [goid 8048] [pmid 8605041] [evi  
"Catalysis of the reaction: GTP = 3',5'-cyclic GMP + diphosphate [goid 4383] [pmid 1683630] [ev  
"Catalysis of the reaction: GTP = 3',5'-cyclic GMP + diphosphate [goid 4383] [pmid 9742212] [ev  
"Catalysis of the reaction: GTP = 3',5'-cyclic GMP + diphosphate [goid 4383] [evidence IEA]; Inte  
"Catalysis of the reaction: GTP = 3',5'-cyclic GMP + diphosphate [goid 4383] [pmid 1680854] [ev  
"Interacting selectively with a nucleotide, any compound consisting of a nucleoside that is esterifi  
"Catalysis of the transfer of a phosphate group, usually from ATP, to a substrate molecule [goid  
"Catalysis of the reaction: a beta-D-glucuronoside + H<sub>2</sub>O = an alcohol + D-glucuronate [goid 45  
Catalysis of the hydrolysis of any O-glycosyl bond [goid 4553] [evidence IEA]

Interacting selectively with any protein or protein complex (a complex of two or more proteins th  
Catalysis of the transfer of a glycosyl group from one compound (donor) to another (acceptor) [g  
Interacting selectively with any protein or protein complex (a complex of two or more proteins th  
"Catalysis of the reaction: UDP-glucose + (1,4)-alpha-D-glucosyl(n) = UDP + (1,4)-alpha-D-gluc  
Interacting selectively with DNA (deoxyribonucleic acid) [goid 3677] [evidence IEA]; Interacting s  
"Catalysis of the hydrolysis of internal, alpha-peptide bonds in a polypeptide chain by a catalytic  
"Catalysis of the hydrolysis of internal, alpha-peptide bonds in a polypeptide chain by a catalytic  
Interacting selectively with DNA (deoxyribonucleic acid) [goid 3677] [evidence IEA]  
"Interacting selectively with a nucleotide, any compound consisting of a nucleoside that is esterifi  
Interacting selectively with DNA (deoxyribonucleic acid) [goid 3677] [evidence NAS]  
Interacting selectively with DNA (deoxyribonucleic acid) [goid 3677] [evidence IEA]  
Interacting selectively with DNA (deoxyribonucleic acid) [goid 3677] [evidence IEA]  
Interacting selectively with damaged DNA [goid 3684] [evidence IEA]; Interacting selectively with  
Interacting selectively with DNA (deoxyribonucleic acid) [goid 3677] [pmid 9714746] [evidence N  
Interacting selectively with DNA (deoxyribonucleic acid) [goid 3677] [evidence IEA]; Interacting s  
Interacting selectively with DNA (deoxyribonucleic acid) [goid 3677] [evidence IEA]  
Interacting selectively with DNA (deoxyribonucleic acid) [goid 3677] [evidence IEA]  
Interacting selectively with DNA (deoxyribonucleic acid) [goid 3677] [evidence IEA]

[evidence IEA]; Any process that modulates the frequency, rate or extent of DNA-dependent trans  
"Catalysis of the ligation of two substances with concomitant breaking of a diphosphate linkage,  
"Interacting selectively with magnesium (Mg) ions [goid 287] [evidence IEA]; Catalysis of the cle  
"Catalysis of the reaction: (S)-3-hydroxyacyl-CoA + NAD<sup>+</sup> = 3-oxoacyl-CoA + NADH + H<sup>+</sup> [goid

"Catalysis of the reaction: (S)-3-hydroxyacyl-CoA + NAD<sup>+</sup> = 3-oxoacyl-CoA + NADH + H<sup>+</sup> [goid  
"Catalysis of the reaction: (S)-3-hydroxyacyl-CoA + NAD<sup>+</sup> = 3-oxoacyl-CoA + NADH + H<sup>+</sup> [goid  
"Catalysis of the reaction: (S)-(2-hydroxyacyl)glutathione + H<sub>2</sub>O = glutathione + a 2-hydroxy carl  
"Interacting selectively with zinc (Zn) ions [goid 8270] [evidence IEA]; Catalysis of the hydrolysis  
"Catalysis of the reaction: L-histidine = urocanate + NH<sub>3</sub> [goid 4397] [evidence IEA]; Catalysis o  
"The action characteristic of a hormone, any substance formed in very small amounts in one spe  
"The selective, often stoichiometric, interaction of a molecule with one or more specific sites on .

"The selective, often stoichiometric, interaction of a molecule with one or more specific sites on  
"The selective, often stoichiometric, interaction of a molecule with one or more specific sites on  
"Catalysis of the hydrolysis of ester linkages within nucleic acids [goid 4518] [evidence IEA]; Cat  
"Interacting selectively with a nucleotide, any compound consisting of a nucleoside that is esteril  
"Catalysis of the reaction: acetyl-CoA + histone = CoA + acetyl-histone [goid 4402] [pmid 94276

"Interacting selectively with interleukin-1 [goid 19966] [pmid 11554782] [evidence IDA]; Interacti  
"Enables the directed movement of oxygen into, out of, within or between cells [goid 5344] [evid

"Enables the directed movement of oxygen into, out of, within or between cells [goid 5344] [evid  
"Enables the directed movement of oxygen into, out of, within or between cells [goid 5344] [evid  
"Combining with an extracellular or intracellular messenger to initiate a change in cell activity [gc  
"Enables the directed movement of oxygen into, out of, within or between cells [goid 5344] [evid  
"Interacting selectively with DNA (deoxyribonucleic acid) [goid 3677] [evidence IEA]; The selecti  
"Enables the directed movement of oxygen into, out of, within or between cells [goid 5344] [evid  
"Interacting selectively with a nucleotide, any compound consisting of a nucleoside that is esteril  
Interacting selectively with any protein or protein complex (a complex of two or more proteins th

"Catalysis of the reaction: holocytochrome c = apocytochrome c + heme [goid 4408] [pmid 8661  
The function of binding to a specific DNA sequence in order to modulate transcription. The trans

Functions to initiate or regulate RNA polymerase II transcription [goid 3702] [pmid 10196288] [e'

"Interacting selectively with a nucleotide, any compound consisting of a nucleoside that is esteril  
"The function of binding to a specific DNA sequence in order to modulate transcription. The tran  
"Interacting selectively with a nucleotide, any compound consisting of a nucleoside that is esteril

Interacting selectively with any protein or protein complex (a complex of two or more proteins th  
"Catalysis of the hydrolysis of acetyl groups from histones, proteins complexed to DNA in chrom  
"Catalysis of the hydrolysis of acetyl groups from histones, proteins complexed to DNA in chrom  
"Catalysis of the hydrolysis of acetyl groups from histones, proteins complexed to DNA in chrom  
"The function of binding to a specific DNA sequence in order to modulate transcription. The tran  
"Catalysis of the hydrolysis of acetyl groups from histones, proteins complexed to DNA in chrom

"Interacting selectively with DNA (deoxyribonucleic acid) [goid 3677] [evidence IEA]; Catalysis of  
"Interacting selectively with monomeric or multimeric forms of actin, including actin filaments [go  
"Catalysis of the hydrolysis of acetyl groups from histones, proteins complexed to DNA in chrom

"Catalysis of the hydrolysis of acetyl groups from histones, proteins complexed to DNA in chrom  
"Catalysis of the hydrolysis of acetyl groups from histones, proteins complexed to DNA in chrom  
"Catalysis of a biochemical reaction at physiological temperatures. In biologically catalyzed reac  
"Catalysis of a biochemical reaction at physiological temperatures. In biologically catalyzed reac  
"Interacting selectively with a nucleotide, any compound consisting of a nucleoside that is esterifi

The function that stimulates a cell to grow or proliferate. Most growth factors have other actions

"Catalysis of a biochemical reaction at physiological temperatures. In biologically catalyzed reac  
"Catalysis of the hydrolysis of various bonds, e.g. C-O, C-N, C-C, phosphoric anhydride bonds, (i  
"Catalysis of the reaction: 2-phosphoglycolate + H<sub>2</sub>O = glycolate + phosphate [goid 8967] [eviden  
"Interacting selectively with an RNA molecule or a portion thereof [goid 3723] [evidence IEA]; Er  
"Interacting selectively with any protein or protein complex (a complex of two or more proteins th  
Interacting selectively with any protein or protein complex (a complex of two or more proteins th  
"The selective, often stoichiometric, interaction of a molecule with one or more specific sites on  
"The selective, often stoichiometric, interaction of a molecule with one or more specific sites on  
"The selective, often stoichiometric, interaction of a molecule with one or more specific sites on  
"The selective, often stoichiometric, interaction of a molecule with one or more specific sites on

"The selective, often stoichiometric, interaction of a molecule with one or more specific sites on

"Elemental activities, such as catalysis or binding, describing the actions of a gene product at th  
"The selective, often stoichiometric, interaction of a molecule with one or more specific sites on  
"Catalysis of the ligation of two substances with concomitant breaking of a diphosphate linkage,  
"Interacting selectively with any protein or protein complex (a complex of two or more proteins th  
"Interacting selectively with any protein or protein complex (a complex of two or more proteins th  
Interacting selectively with calcium ions (Ca<sup>2+</sup>) [goid 5509] [evidence IEA]  
"Interacting selectively with a nucleotide, any compound consisting of a nucleoside that is esterifi  
"Interacting selectively with a nucleotide, any compound consisting of a nucleoside that is esterifi

"Interacting selectively with a nucleotide, any compound consisting of a nucleoside that is esterifi  
"Interacting selectively with DNA (deoxyribonucleic acid) [goid 3677] [evidence IEA]; Catalysis of

"Stimulates the exchange of guanyl nucleotides by the GTPase ARF. Under normal cellular phy:  
"Catalysis of the phosphorylation of an amino acid residue in a protein, usually according to the

"Catalysis of the ligation of two substances with concomitant breaking of a diphosphate linkage,  
"Catalysis of the ligation of two substances with concomitant breaking of a diphosphate linkage,  
"Catalysis of the ligation of two substances with concomitant breaking of a diphosphate linkage,  
"Catalysis of the ligation of two substances with concomitant breaking of a diphosphate linkage,

"Elemental activities, such as catalysis or binding, describing the actions of a gene product at the polypeptides (co-translational, post-translational modifications). Includes the modification of chromatin. Interacting selectively with DNA (deoxyribonucleic acid) [goid 3677] [pmid 7906273] [evidence TAS]; Interacting selectively with DNA (deoxyribonucleic acid) [goid 3677] [evidence IEA]; Plays a role in transcription. Interacting selectively with DNA (deoxyribonucleic acid) [goid 3677] [evidence IEA]; Plays a role in transcription. Interacting selectively with DNA (deoxyribonucleic acid) [goid 3677] [evidence IEA]; Plays a role in transcription. The function of binding to a specific DNA sequence in order to modulate transcription. The transcription factor. Interacting selectively with chromatin, the network of fibers of DNA and protein that make up the nucleus. "Catalysis of the hydrolysis of terminal non-reducing N-acetyl-D-hexosamine residues in N-acetylglucosaminylglycosylated proteins. "Catalysis of the hydrolysis of terminal non-reducing N-acetyl-D-hexosamine residues in N-acetylglucosaminylglycosylated proteins. "Catalysis of the hydrolysis of any glycosyl bond [goid 16798] [evidence IEA]; Interacting selectively with DNA (deoxyribonucleic acid) [goid 3677] [evidence IEA]; Plays a role in transcription. "Stops, prevents or reduces the activity of a cyclin-dependent protein kinase [goid 4861] [pmid 11111111] [evidence TAS]; The function of binding to a specific DNA sequence in order to modulate transcription. The transcription factor. The function of binding to a specific DNA sequence in order to modulate transcription. The transcription factor. The function of binding to a specific DNA sequence in order to modulate transcription. The transcription factor. Interacting selectively with iron (Fe) ions [goid 5506] [evidence IEA] "Interacting selectively with any nucleic acid [goid 3676] [evidence IEA]; Interacting selectively with DNA (deoxyribonucleic acid) [goid 3677] [evidence IEA]; Plays a role in transcription. "Catalysis of the reaction: homogentisate + O2 = 4-maleylacetoacetate [goid 4411] [pmid 87828] [evidence TAS]; "Catalysis of a biochemical reaction at physiological temperatures. In biologically catalyzed reactions. Interacting selectively with zinc (Zn) ions [goid 8270] [evidence IEA]; Interacting selectively with DNA (deoxyribonucleic acid) [goid 3677] [evidence IEA]; Plays a role in transcription. "Interacting selectively with a nucleotide, any compound consisting of a nucleoside that is esterified to a phosphate group. "The function of binding to a specific DNA sequence in order to modulate transcription. The transcription factor. Interacting selectively with any protein or protein complex (a complex of two or more proteins that function together). "Enables the directed movement of substances (such as macromolecules, small molecules, ions, and water) across a membrane. "Enables the directed movement of substances (such as macromolecules, small molecules, ions, and water) across a membrane. "Enables the directed movement of substances (such as macromolecules, small molecules, ions, and water) across a membrane. "Catalysis of the reaction: 6-phospho-D-gluconate + NADP+ = D-ribulose 5-phosphate + CO2 + NADPH [goid 16798] [evidence TAS]; "Catalysis of a biochemical reaction at physiological temperatures. In biologically catalyzed reactions. Interacting selectively with DNA (deoxyribonucleic acid) [goid 3677] [pmid 11554746] [evidence TAS]; "The function of binding to a specific DNA sequence in order to modulate transcription. The transcription factor. "Catalysis of the reaction: peptide L-aspartate + 2-oxoglutarate + O2 = peptide 3-hydroxy-L-aspartate + 2-oxoglutarate [goid 16798] [evidence TAS]; Interacting selectively with any protein or protein complex (a complex of two or more proteins that function together).

"Interacting selectively with protein kinase C [goid 5080] [pmid 9770345] [evidence TAS]; Catalysis of the hydrolysis of various bonds, e.g. C-O, C-N, C-C, phosphoric anhydride bonds, and glycosyl bonds [goid 16798] [evidence TAS]; "Catalysis of the hydrolysis of various bonds, e.g. C-O, C-N, C-C, phosphoric anhydride bonds, and glycosyl bonds [goid 16798] [evidence TAS]; "Interacting selectively with monomeric or multimeric forms of actin, including actin filaments [goid 16798] [evidence TAS]; "Interacting selectively with monomeric or multimeric forms of actin, including actin filaments [goid 16798] [evidence TAS];

"Interacting selectively with a nucleotide, any compound consisting of a nucleoside that is esterified to a phosphate group. The function of binding to a specific DNA sequence in order to modulate transcription. The transcription factor.

]

"Catalysis of the reaction: ATP + 1D-myo-inositol 1,3,4,5,6-pentakisphosphate = ADP + diphosp  
Interacting selectively with DNA (deoxyribonucleic acid) [goid 3677] [evidence IEA]  
Interacting selectively with DNA (deoxyribonucleic acid) [goid 3677] [evidence NAS]; Interacting  
Interacting selectively with DNA (deoxyribonucleic acid) [goid 3677] [evidence NAS]; Interacting  
Interacting selectively with DNA (deoxyribonucleic acid) [goid 3677] [evidence NAS]; Interacting  
Interacting selectively with DNA (deoxyribonucleic acid) [goid 3677] [pmid 6647026] [evidence N  
Interacting selectively with DNA (deoxyribonucleic acid) [goid 3677] [evidence NAS]

Interacting selectively with DNA (deoxyribonucleic acid) [goid 3677] [evidence IEA]  
Interacting selectively with DNA (deoxyribonucleic acid) [goid 3677] [evidence IEA]

Interacting selectively with DNA (deoxyribonucleic acid) [goid 3677] [evidence IEA]; Interacting s  
Interacting selectively with DNA (deoxyribonucleic acid) [goid 3677] [evidence IEA]

Interacting selectively with DNA (deoxyribonucleic acid) [goid 3677] [pmid 9119399] [evidence N  
Interacting selectively with DNA (deoxyribonucleic acid) [goid 3677] [pmid 6647026] [evidence N  
Interacting selectively with DNA (deoxyribonucleic acid) [goid 3677] [evidence IEA]  
Interacting selectively with DNA (deoxyribonucleic acid) [goid 3677] [pmid 9439656] [evidence N  
Interacting selectively with DNA (deoxyribonucleic acid) [goid 3677] [pmid 9439656] [evidence N  
Interacting selectively with DNA (deoxyribonucleic acid) [goid 3677] [evidence IEA]; Interacting s

Interacting selectively with DNA (deoxyribonucleic acid) [goid 3677] [pmid 3035717] [evidence T

Interacting selectively with DNA (deoxyribonucleic acid) [goid 3677] [evidence IEA]

Interacting selectively with DNA (deoxyribonucleic acid) [goid 3677] [evidence IEA]  
Interacting selectively with DNA (deoxyribonucleic acid) [goid 3677] [evidence NAS]  
Interacting selectively with DNA (deoxyribonucleic acid) [goid 3677] [pmid 1469070] [evidence N  
Interacting selectively with DNA (deoxyribonucleic acid) [goid 3677] [evidence IEA]  
Interacting selectively with DNA (deoxyribonucleic acid) [goid 3677] [evidence IEA]; Interacting s

Interacting selectively with DNA (deoxyribonucleic acid) [goid 3677] [evidence IEA]  
Interacting selectively with DNA (deoxyribonucleic acid) [goid 3677] [evidence IEA]

Interacting selectively with DNA (deoxyribonucleic acid) [goid 3677] [pmid 2106471] [evidence T  
Interacting selectively with DNA (deoxyribonucleic acid) [goid 3677] [pmid 2247438] [evidence T  
Interacting selectively with DNA (deoxyribonucleic acid) [goid 3677] [evidence IEA]; Interacting s  
Interacting selectively with DNA (deoxyribonucleic acid) [goid 3677] [evidence IEA]

"Interacting selectively with a nucleotide, any compound consisting of a nucleoside that is esterif

"Interacting selectively with a nucleotide, any compound consisting of a nucleoside that is esterif

"Interacting selectively with a nucleotide, any compound consisting of a nucleoside that is esterif

Interacting selectively with any protein or protein complex (a complex of two or more proteins tha

A\_001132760 XM\_001132769 XM\_001132772 XM\_001132776 XM\_001132779 XM\_001132781

"Combining with an MHC class I protein complex to initiate a change in cellular activity. Class I h

Combining with an MHC class II protein complex to initiate a change in cellular activity [goid 323

Interacting selectively with any protein or protein complex (a complex of two or more proteins tha

on its cell surface in association with an MHC class II protein complex [goid 2504] [evidence IEA

Combining with an MHC class II protein complex to initiate a change in cellular activity [goid 323

Combining with an MHC class II protein complex to initiate a change in cellular activity [goid 323

Combining with an MHC class II protein complex to initiate a change in cellular activity [goid 323

Combining with an MHC class II protein complex to initiate a change in cellular activity [goid 323

on its cell surface in association with an MHC class II protein complex [goid 2504] [evidence IEA

Combining with an MHC class II protein complex to initiate a change in cellular activity [goid 323

Combining with an MHC class II protein complex to initiate a change in cellular activity [goid 323

Combining with an MHC class II protein complex to initiate a change in cellular activity [goid 323

Combining with an MHC class II protein complex to initiate a change in cellular activity [goid 323

Combining with an MHC class II protein complex to initiate a change in cellular activity [goid 323

Combining with an MHC class II protein complex to initiate a change in cellular activity [goid 323

on its cell surface in association with an MHC class II protein complex [goid 2504] [evidence IEA

Combining with an MHC class I protein complex to initiate a change in cellular activity. Class I h

Combining with an MHC class I protein complex to initiate a change in cellular activity. Class I h

Combining with an MHC class I protein complex to initiate a change in cellular activity. Class I h

Combining with an MHC class I protein complex to initiate a change in cellular activity. Class I h

"Catalysis of the reaction: ATP + biotin + apo-(acetyl-CoA:carbon-dioxide ligase (ADP forming))

"Interacting selectively with DNA (deoxyribonucleic acid) [goid 3677] [evidence IEA]; Functions t

"The function of binding to a specific DNA sequence in order to modulate transcription. The tran

"Interacting selectively with DNA (deoxyribonucleic acid) [goid 3677] [evidence IEA]; The functio

"Catalysis of the reaction: 4 porphobilinogen + H<sub>2</sub>O = hydroxymethylbilane + 4 NH<sub>3</sub> [goid 4418]

The function of binding to a specific DNA sequence in order to modulate transcription. The trans

"Interacting selectively with a nucleotide, any compound consisting of a nucleoside that is esterif

"Interacting selectively with DNA (deoxyribonucleic acid) [goid 3677] [evidence IEA]; Interacting  
"Interacting selectively with DNA (deoxyribonucleic acid) [goid 3677] [evidence IEA]; Interacting

Interacting selectively with double-stranded DNA [goid 3690] [pmid 11909973] [evidence TAS]; I

The function of causing local conformational micropolymerism of DNA in which the original B-

"Catalysis of a biochemical reaction at physiological temperatures. In biologically catalyzed reac

"Catalysis of the reaction: (R)-mevalonate + CoA + 2 NADP+ = (S)-3-hydroxy-3-methylglutaryl-C

"Catalysis of the reaction: acetyl-CoA + H2O + acetoacetyl-CoA = (S)-3-hydroxy-3-methylglutary

"Interacting selectively with DNA (deoxyribonucleic acid) [goid 3677] [evidence IEA]; Interacting

Interacting selectively with DNA (deoxyribonucleic acid) [goid 3677] [evidence NAS]

Interacting selectively with DNA (deoxyribonucleic acid) [goid 3677] [evidence IEA]; Interacting s

Interacting selectively with DNA (deoxyribonucleic acid) [goid 3677] [evidence IEA]

atial internal or invasive threat [goid 6955] [evidence IEA]

"Interacting selectively with hyaluronic acid, a polymer composed of repeating dimeric units of gl

"Catalysis of the reaction: heme + 3 donor-H2 + 3 O2 = biliverdin + Fe2+ + CO + 3 acceptor + 3

"Catalysis of the reaction: heme + 3 donor-H2 + 3 O2 = biliverdin + Fe2+ + CO + 3 acceptor + 3

"The function of binding to a specific DNA sequence in order to modulate transcription. The tran

"Interacting selectively with a nucleotide, any compound consisting of a nucleoside that is esteril

"Interacting selectively with a nucleotide, any compound consisting of a nucleoside that is esteril

"Interacting selectively with a nucleotide, any compound consisting of a nucleoside that is esteril

"Interacting selectively with a nucleotide, any compound consisting of a nucleoside that is esteril

001297

"Interacting selectively with a nucleotide, any compound consisting of a nucleoside that is esteril

"Interacting selectively with a nucleotide, any compound consisting of a nucleoside that is esteril

"Interacting selectively with a nucleotide, any compound consisting of a nucleoside that is esteril

"Interacting selectively with a nucleotide, any compound consisting of a nucleoside that is esteril

"Interacting selectively with a nucleotide, any compound consisting of a nucleoside that is esteril

"Interacting selectively with a nucleotide, any compound consisting of a nucleoside that is esteril

"Interacting selectively with a nucleotide, any compound consisting of a nucleoside that is esteril

Interacting selectively with DNA (deoxyribonucleic acid) [goid 3677] [evidence IEA]; Interacting s

"Interacting selectively with an RNA molecule or a portion thereof [goid 3723] [evidence IEA]; Int

"Interacting selectively with a nucleotide, any compound consisting of a nucleoside that is esteril

"Interacting selectively with a nucleotide, any compound consisting of a nucleoside that is esteril

Interacting selectively with an RNA molecule or a portion thereof [goid 3723] [pmid 9733834] [ev

Interacting selectively with any nucleic acid [goid 3676] [evidence IEA]; Interacting selectively wi

"Interacting selectively with a nucleotide, any compound consisting of a nucleoside that is esteril



Interacting selectively with an RNA molecule or a portion thereof [goid 3723] [evidence IEA]; Interacting selectively with a nucleotide, any compound consisting of a nucleoside that is esterified

Interacting selectively with a nucleotide, any compound consisting of a nucleoside that is esterified  
Interacting selectively with any nucleic acid [goid 3676] [evidence IEA]

Interacting selectively with any protein or protein complex (a complex of two or more proteins that

Interacting selectively with monomeric or multimeric forms of actin, including actin filaments [goid

Interacting selectively with any protein or protein complex (a complex of two or more proteins that

The function of binding to a specific DNA sequence in order to modulate transcription. The transcrip

Interacting selectively with any protein or protein complex (a complex of two or more proteins that

Interacting selectively with any protein or protein complex (a complex of two or more proteins that

The function of binding to a specific DNA sequence in order to modulate transcription. The transcrip

The function of binding to a specific DNA sequence in order to modulate transcription. The transcrip

The function of binding to a specific DNA sequence in order to modulate transcription. The transcrip

The function of binding to a specific DNA sequence in order to modulate transcription. The transcrip

The function of binding to a specific DNA sequence in order to modulate transcription. The transcrip

The function of binding to a specific DNA sequence in order to modulate transcription. The transcrip

The function of binding to a specific DNA sequence in order to modulate transcription. The transcrip

The function of binding to a specific DNA sequence in order to modulate transcription. The transcrip

The function of binding to a specific DNA sequence in order to modulate transcription. The transcrip

The function of binding to a specific DNA sequence in order to modulate transcription. The transcrip

The function of binding to a specific DNA sequence in order to modulate transcription. The transcrip

The function of binding to a specific DNA sequence in order to modulate transcription. The transcrip

The function of binding to a specific DNA sequence in order to modulate transcription. The transcrip

The function of binding to a specific DNA sequence in order to modulate transcription. The transcrip

Interacting selectively with DNA (deoxyribonucleic acid) [goid 3677] [evidence IEA]; Interacting s

Interacting selectively with monomeric or multimeric forms of actin, including actin filaments [goid

Interacting selectively with calcium ions (Ca<sup>2+</sup>) [goid 5509] [pmid 8038222] [evidence TAS]

Interacting selectively with calcium ions (Ca<sup>2+</sup>) [goid 5509] [pmid 10520747] [evidence TAS]

Catalysis of the reaction: 4-hydroxyphenylpyruvate + O<sub>2</sub> = homogentisate + CO<sub>2</sub> [goid 3868] [ev

Combining with prostaglandin E (PGE(2)) to initiate a change in cell activity [goid 4957] [pmid 1

Catalysis of the reaction: IMP + diphosphate = hypoxanthine + 5-phospho-alpha-D-ribose 1-dip

The formation of a protein dimer, a macromolecular structure consists of two noncovalently ass  
constituent parts, or disassembly of an organelle within a cell. An organelle is an organized struc

Interacting selectively with an identical protein to form a homodimer [goid 42803] [pmid 1266365

Interacting selectively with magnesium (Mg) ions [goid 287] [evidence IEA]; Catalysis of the rea

Interacting selectively with a nucleotide, any compound consisting of a nucleoside that is esterified

"Elemental activities, such as catalysis or binding, describing the actions of a gene product at th  
Interacting selectively with DNA (deoxyribonucleic acid) [goid 3677] [evidence IEA]; Interacting s  
Interacting selectively with calcium ions (Ca<sup>2+</sup>) [goid 5509] [pmid 2037293] [evidence TAS]  
"Combining with an extracellular or intracellular messenger to initiate a change in cell activity [gc

Interacting selectively with any protein or protein complex (a complex of two or more proteins th  
"Catalysis of the hydrolysis of ester linkages within nucleic acids by creating internal breaks [goid









































































Interacting selectively with any protein or protein complex (a complex of two or more proteins that

"Catalysis of the transfer of a group, e.g. a methyl group, glycosyl group, acyl group, phosphorus

The function of a transcription cofactor that represses transcription from a RNA polymerase II pr

"The selective, often stoichiometric, interaction of a molecule with one or more specific sites on

"The selective, often stoichiometric, interaction of a molecule with one or more specific sites on

"Catalysis of the reaction: (S)-3-hydroxyacyl-CoA + NAD+ = 3-oxoacyl-CoA + NADH + H+ [goid

"Catalysis of the reaction: estradiol-17-beta + NADP+ = estrone + NADPH + H+ [goid 4303] [evi

"The selective, often stoichiometric, interaction of a molecule with one or more specific sites on

"Catalysis of the reaction: estradiol-17-beta + NADP+ = estrone + NADPH + H+ [goid 4303] [pm

"The selective, often stoichiometric, interaction of a molecule with one or more specific sites on

"Catalysis of the reaction: (S)-3-hydroxyacyl-CoA + NAD+ = 3-oxoacyl-CoA + NADH + H+ [goid

"Catalysis of the reaction: estradiol-17-beta + NADP+ = estrone + NADPH + H+ [goid 4303] [evi

"The selective, often stoichiometric, interaction of a molecule with one or more specific sites on

"The selective, often stoichiometric, interaction of a molecule with one or more specific sites on

"Catalysis of the reaction: estradiol-17-beta + NADP+ = estrone + NADPH + H+ [goid 4303] [pm

"Catalysis of the reaction: 3-beta-hydroxy-delta(5)-steroid + NAD+ = 3-oxo-delta(5)-steroid + NA

"The selective, often stoichiometric, interaction of a molecule with one or more specific sites on

"The selective, often stoichiometric, interaction of a molecule with one or more specific sites on

"The function of binding to a specific DNA sequence in order to modulate transcription. The tran

"The function of binding to a specific DNA sequence in order to modulate transcription. The tran

"The selective, often stoichiometric, interaction of a molecule with one or more specific sites on

Interacting selectively with any protein or protein complex (a complex of two or more proteins that  
"Interacting selectively with a nucleotide, any compound consisting of a nucleoside that is esterified  
"Interacting selectively with an unfolded protein [goid 51082] [evidence IEA]; Interacting selectively  
"Interacting selectively with a nucleotide, any compound consisting of a nucleoside that is esterified  
"Interacting selectively with a nucleotide, any compound consisting of a nucleoside that is esterified  
"Interacting selectively with a nucleotide, any compound consisting of a nucleoside that is esterified  
"Interacting selectively with a nucleotide, any compound consisting of a nucleoside that is esterified

"Interacting selectively with a nucleotide, any compound consisting of a nucleoside that is esterified  
"Interacting selectively with a nucleotide, any compound consisting of a nucleoside that is esterified  
"Interacting selectively with a nucleotide, any compound consisting of a nucleoside that is esterified  
"Interacting selectively with a nucleotide, any compound consisting of a nucleoside that is esterified  
"Interacting selectively with a nucleotide, any compound consisting of a nucleoside that is esterified  
"Interacting selectively with a nucleotide, any compound consisting of a nucleoside that is esterified  
"Interacting selectively with a nucleotide, any compound consisting of a nucleoside that is esterified  
"Interacting selectively with a nucleotide, any compound consisting of a nucleoside that is esterified  
Interacting selectively with an identical protein or proteins [goid 42802] [pmid 11003656] [evidence IEA]  
Interacting selectively with any protein or protein complex (a complex of two or more proteins that  
production, gene expression, etc.) as a result of an unfolded protein stimulus [goid 6986] [pmid 11003656]

"Stops, prevents or reduces the activity of an enzyme [goid 4857] [pmid 9830037] [evidence TA]

"Interacting selectively with ATP, adenosine 5'-triphosphate, a universally important coenzyme and  
"Interacting selectively with ATP, adenosine 5'-triphosphate, a universally important coenzyme and  
"Interacting selectively with a nucleotide, any compound consisting of a nucleoside that is esterified

"Functions to initiate or regulate RNA polymerase II transcription [goid 3702] [pmid 9482853] [evidence IEA]  
"Catalysis of facilitated diffusion of an ion (by an energy-independent process) by passage through  
"Combining with the biogenic amine serotonin, a neurotransmitter and hormone found in vertebrates  
"Combining with an extracellular or intracellular messenger to initiate a change in cell activity [goid  
"Catalysis of the hydrolysis of internal, alpha-peptide bonds in a polypeptide chain by a catalytic  
"Catalysis of the hydrolysis of internal, alpha-peptide bonds in a polypeptide chain by a catalytic  
"Interacting selectively with a nucleotide, any compound consisting of a nucleoside that is esterified

Catalysis of the transmembrane transfer of an ion by a voltage-gated channel. An ion is an atom or  
"Catalysis of the random hydrolysis of 1,4-linkages between N-acetyl-beta-D-glucosamine and D

"Catalysis of the random hydrolysis of 1,4-linkages between N-acetyl-beta-D-glucosamine and E

"Catalysis of the random hydrolysis of 1,4-linkages between N-acetyl-beta-D-glucosamine and E

"Interacting selectively with a nucleotide, any compound consisting of a nucleoside that is esterifi

Catalysis of the hydrolysis of any ester bond [goid 16788] [evidence IEA]; Catalysis of the hydro

"Interacting selectively with a nucleotide, any compound consisting of a nucleoside that is esterifi

"Interacting selectively with a nucleotide, any compound consisting of a nucleoside that is esterifi

Interacting selectively with any protein or protein complex (a complex of two or more proteins tha

Interacting selectively with any protein or protein complex (a complex of two or more proteins tha

"Elemental activities, such as catalysis or binding, describing the actions of a gene product at th

"Combining with an extracellular or intracellular messenger to initiate a change in cell activity, ar

Interacting selectively with an integrin [goid 5178] [pmid 2497351] [evidence TAS]; Interacting se

Interacting selectively with an integrin [goid 5178] [pmid 1448174] [evidence TAS]

Interacting selectively with an integrin [goid 5178] [pmid 8566017] [evidence TAS]; Interacting se

Interacting selectively with any protein or protein complex (a complex of two or more proteins tha

"Interacting selectively with a nucleotide, any compound consisting of a nucleoside that is esterifi

"Catalysis of the reaction: S-adenosyl-L-methionine + protein C-terminal S-farnesyl-L-cysteine =

"Interacting selectively with one or more specific sites on a receptor molecule, a macromolecule

"Elemental activities, such as catalysis or binding, describing the actions of a gene product at th

Interacting selectively with any protein or protein complex (a complex of two or more proteins tha

Interacting selectively with any protein or protein complex (a complex of two or more proteins tha

"The function of a transcription cofactor that represses transcription from a RNA polymerase II p

The function of a transcription cofactor that represses transcription from a RNA polymerase II pr

"Catalysis of a biochemical reaction at physiological temperatures. In biologically catalyzed reac

"Interacting selectively with magnesium (Mg) ions [goid 287] [evidence IEA]; Catalysis of the rea

"Interacting selectively with magnesium (Mg) ions [goid 287] [evidence IEA]; Catalysis of the rea

"Interacting selectively with magnesium (Mg) ions [goid 287] [evidence IEA]; Catalysis of the rea

"Interacting selectively with magnesium (Mg) ions [goid 287] [evidence IEA]; Catalysis of the rea

"Catalysis of an oxidation-reduction (redox) reaction in which a CH-OH group acts as a hydroge

"Interacting selectively with magnesium (Mg) ions [goid 287] [evidence IEA]; Catalysis of the iso

"Interacting selectively with magnesium (Mg) ions [goid 287] [evidence IEA]; Catalysis of the iso

"Catalysis of a biochemical reaction at physiological temperatures. In biologically catalyzed reac

"Catalysis of the hydrolysis of alpha-L-iduronosidic linkages in desulfated dermatan [goid 3940]

Interacting selectively with any protein or protein complex (a complex of two or more proteins tha

Interacting selectively with DNA (deoxyribonucleic acid) [goid 3677] [evidence IEA]; Interacting s  
"Elemental activities, such as catalysis or binding, describing the actions of a gene product at th

"Catalysis of an oxidation-reduction (redox) reaction, a reversible chemical reaction in which the  
Interacting selectively with any protein or protein complex (a complex of two or more proteins th  
production, gene expression, etc.) as a result of a stimulus from a virus [goid 9615] [pmid 79254  
tial internal or invasive threat [goid 6955] [evidence IEA]

Interacting selectively with any protein or protein complex (a complex of two or more proteins th

"Interacting selectively with a nucleotide, any compound consisting of a nucleoside that is esteril

"The selective, often stoichiometric, interaction of a molecule with one or more specific sites on .

"The selective, often stoichiometric, interaction of a molecule with one or more specific sites on .

"The selective, often stoichiometric, interaction of a molecule with one or more specific sites on .

"The selective, often stoichiometric, interaction of a molecule with one or more specific sites on .

[goid 5057] [pmid 7559564] [evidence TAS]; Interacting selectively with any protein or protein cc

Interacting selectively with any protein or protein complex (a complex of two or more proteins th

production, gene expression, etc.) as a result of a biotic stimulus, a stimulus caused or produce

Interacting selectively with the interferon-alpha/beta receptor [goid 5132] [pmid 4057246] [eviden

Interacting selectively with the interferon-alpha/beta receptor [goid 5132] [pmid 6548765] [eviden

[goid 5126] [pmid 6163083] [evidence TAS]

"Combining with an extracellular or intracellular messenger to initiate a change in cell activity [gc

"Combining with an extracellular or intracellular messenger to initiate a change in cell activity [gc

Interacting selectively with the interferon-alpha/beta receptor [goid 5132] [pmid 2414376] [eviden

[goid 5126] [evidence IEA]

"Combining with an extracellular or intracellular messenger to initiate a change in cell activity [gc

Combining with an extracellular or intracellular messenger to initiate a change in cell activity [go

Interacting selectively with the interferon-alpha/beta receptor [goid 5132] [pmid 11514542] [eviden

"The selective, often stoichiometric, interaction of a molecule with one or more specific sites on .

"The selective, often stoichiometric, interaction of a molecule with one or more specific sites on .

Interacting selectively with any protein or protein complex (a complex of two or more proteins th

will give rise to the central nervous system [goid 1841] [evidence IEA]; The characteristic morpho

Interacting selectively with DNA (deoxyribonucleic acid) [goid 3677] [evidence IEA]; Interacting s

ver time from an initial condition (e.g. a zygote or a young adult) to a later condition (e.g. a multic

"The selective, often stoichiometric, interaction of a molecule with one or more specific sites on .

Modulation of the activity of the enzyme protein phosphatase type 2A [goid 8601] [pmid 964777

"Interacting selectively with a nucleotide, any compound consisting of a nucleoside that is esteril

"Interacting selectively with a nucleotide, any compound consisting of a nucleoside that is esteril

"Interacting selectively with a nucleotide, any compound consisting of a nucleoside that is esterified to a phosphate group [goid 6955] [pmid 2501791] [evidence NAS];  
"Combining with an extracellular or intracellular messenger to initiate a change in cell activity [goid 5021] [evidence TAS];  
"Interacting selectively with any protein or protein complex (a complex of two or more proteins that are associated with each other for a specific function) [goid 3677] [evidence IEA];  
"Interacting selectively with an insulin-like growth factor, any member of a group of polypeptides that are secreted by the pituitary gland and stimulate growth [goid 4896] [evidence IEA];  
"Interacting selectively with an insulin-like growth factor, any member of a group of polypeptides that are secreted by the pituitary gland and stimulate growth [goid 4896] [evidence IEA];  
"Increases the activity of a phosphatase, an enzyme which catalyzes the removal of a phosphate group from a substrate [goid 4896] [evidence IEA];  
"Interacting selectively with an insulin-like growth factor, any member of a group of polypeptides that are secreted by the pituitary gland and stimulate growth [goid 4896] [evidence IEA];  
"Interacting selectively with an insulin-like growth factor, any member of a group of polypeptides that are secreted by the pituitary gland and stimulate growth [goid 4896] [evidence IEA];  
"Interacting selectively with an insulin-like growth factor, any member of a group of polypeptides that are secreted by the pituitary gland and stimulate growth [goid 4896] [evidence IEA];

"Interacting selectively with a nucleotide, any compound consisting of a nucleoside that is esterified to a phosphate group [goid 6955] [pmid 2501791] [evidence NAS];  
"Interacting selectively with an antigen, any substance which is capable of inducing a specific immune response [goid 6955] [pmid 2501791] [evidence NAS];

"Combining with vascular endothelial growth factor to initiate a change in cell activity [goid 5021] [evidence TAS];  
Combining with an extracellular or intracellular messenger to initiate a change in cell activity [goid 5021] [evidence TAS];

"Combining with an extracellular or intracellular messenger to initiate a change in cell activity, at any time from an initial condition (e.g. a zygote or a young adult) to a later condition (e.g. a multicellular organism) [goid 5021] [evidence TAS];  
Interacting selectively with any protein or protein complex (a complex of two or more proteins that are associated with each other for a specific function) [goid 3677] [evidence IEA];

Mediates the transfer of a signal from the outside to the inside of a cell by means other than the binding of a ligand to a receptor [goid 6955] [pmid 7970704] [evidence TAS]; Any process that mediates the transfer of a signal from the outside to the inside of a cell by means other than the binding of a ligand to a receptor [goid 6955] [pmid 7970704] [evidence TAS];

"Interacting selectively with DNA (deoxyribonucleic acid) [goid 3677] [pmid 11714725] [evidence IEA];

"Interacting selectively with a nucleotide, any compound consisting of a nucleoside that is esterified to a phosphate group [goid 6955] [pmid 2501791] [evidence NAS];

"Interacting selectively with a nucleotide, any compound consisting of a nucleoside that is esterified to a phosphate group [goid 6955] [pmid 2501791] [evidence NAS];

"Mediates the transfer of a signal from the outside to the inside of a cell by means other than the binding of a ligand to a receptor [goid 6955] [pmid 7970704] [evidence TAS];  
The function of binding to a specific DNA sequence in order to modulate transcription. The transcription factor binds to the DNA sequence and initiates the transcription of the gene [goid 3677] [evidence IEA];

"Elemental activities, such as catalysis or binding, describing the actions of a gene product at the molecular level [goid 3677] [evidence IEA];  
The function of binding to a specific DNA sequence in order to modulate transcription. The transcription factor binds to the DNA sequence and initiates the transcription of the gene [goid 3677] [evidence IEA];

The function of binding to a specific DNA sequence in order to modulate transcription. The transcription factor binds to the DNA sequence and initiates the transcription of the gene [goid 3677] [evidence IEA];  
Interacting selectively with DNA (deoxyribonucleic acid) [goid 3677] [evidence IEA];

"Functions to control the survival, growth, differentiation and effector function of tissues and cells [goid 4896] [evidence IEA];

Combining with an extracellular or intracellular messenger to initiate a change in cell activity [goid 5021] [evidence TAS];

Combining with an extracellular or intracellular messenger to initiate a change in cell activity [goid 5021] [evidence TAS];

"Functions to control the survival, growth, differentiation and effector function of tissues and cells [goid 4896] [evidence IEA];  
[goid 4896] [evidence IEA]

"Functions to control the survival, growth, differentiation and effector function of tissues and cells [goid 4896] [evidence IEA];  
Combining with an extracellular or intracellular messenger to initiate a change in cell activity [goid 5021] [evidence TAS];

Combining with an extracellular or intracellular messenger to initiate a change in cell activity [goid 5021] [evidence TAS];  
Combining with an extracellular or intracellular messenger to initiate a change in cell activity [goid 5021] [evidence TAS];

Combining with an extracellular or intracellular messenger to initiate a change in cell activity [goid 5021] [evidence TAS];  
[goid 5126] [evidence IEA]; Mediates the transfer of a signal from the outside to the inside of a cell by means other than the binding of a ligand to a receptor [goid 6955] [pmid 7970704] [evidence TAS];

"Interacting selectively with any protein or protein complex (a complex of two or more proteins that are associated with each other for a specific function) [goid 3677] [evidence IEA];

"Functions to control the survival, growth, differentiation and effector function of tissues and cells [goid 4896] [evidence IEA];

"Functions to control the survival, growth, differentiation and effector function of tissues and cells  
Combining with an extracellular or intracellular messenger to initiate a change in cell activity [goi  
Combining with an extracellular or intracellular messenger to initiate a change in cell activity [goi  
Combining with an extracellular or intracellular messenger to initiate a change in cell activity [goi  
Mediates the transfer of a signal from the outside to the inside of a cell by means other than the  
"Interacting selectively with interleukin-18 [goid 42007] [pmid 10023777] [evidence IDA]; Interact  
"Combining with an extracellular or intracellular messenger to initiate a change in cell activity, ar  
Combining with an extracellular or intracellular messenger to initiate a change in cell activity [goi  
"Mediates the transfer of a signal from the outside to the inside of a cell by means other than the  
"Combining with an extracellular or intracellular messenger to initiate a change in cell activity, ar  
Combining with an extracellular or intracellular messenger to initiate a change in cell activity [goi  
Combining with an extracellular or intracellular messenger to initiate a change in cell activity [goi  
Combining with interleukin-21 to initiate a change in cell activity [goid 1532] [pmid 11081504] [ev  
Combining with an extracellular or intracellular messenger to initiate a change in cell activity [goi  
"Functions to control the survival, growth, differentiation and effector function of tissues and cells  
"Combining with an extracellular or intracellular messenger to initiate a change in cell activity, ar  
"Functions to control the survival, growth, differentiation and effector function of tissues and cells  
Combining with an extracellular or intracellular messenger to initiate a change in cell activity [goi  
Combining with interleukin-2 to initiate a change in cell activity [goid 4911] [evidence IEA]; Comb  
Combining with an extracellular or intracellular messenger to initiate a change in cell activity [goi  
"Functions to control the survival, growth, differentiation and effector function of tissues and cells  
Interacting selectively with the macrophage colony stimulating factor receptor [goid 5157] [pmid  
"Catalysis of the reaction: a L-amino acid + H<sub>2</sub>O + O<sub>2</sub> = a 2-oxo acid + NH<sub>3</sub> + H<sub>2</sub>O<sub>2</sub> [goid 1716  
Combining with an extracellular or intracellular messenger to initiate a change in cell activity [goi  
Combining with an extracellular or intracellular messenger to initiate a change in cell activity [goi  
"Functions to control the survival, growth, differentiation and effector function of tissues and cells  
"Interacting selectively with an antigen, any substance which is capable of inducing a specific im  
Interacting selectively with the interleukin-8 receptor [goid 5153] [pmid 1840701] [evidence IPI];  
Combining with an extracellular or intracellular messenger to initiate a change in cell activity [goi

"Interacting selectively with DNA (deoxyribonucleic acid) [goid 3677] [pmid 7519613] [evidence I  
Interacting selectively with DNA (deoxyribonucleic acid) [goid 3677] [pmid 10574923] [evidence  
"Interacting selectively with a nucleotide, any compound consisting of a nucleoside that is esterifi  
"Interacting selectively with magnesium (Mg) ions [goid 287] [evidence IEA]; Catalysis of the rea  
"Interacting selectively with magnesium (Mg) ions [goid 287] [evidence IEA]; Catalysis of the tra  
Catalysis of the transfer of an L-amino acid from one side of a membrane to the other. L-amino  
Catalysis of the hydrolysis of a peptide bond. A peptide bond is a covalent bond formed when th  
Catalysis of the hydrolysis of a peptide bond. A peptide bond is a covalent bond formed when th  
"Elemental activities, such as catalysis or binding, describing the actions of a gene product at th  
Interacting selectively with any protein or protein complex (a complex of two or more proteins th  
Interacting selectively with any protein or protein complex (a complex of two or more proteins th  
"Interacting selectively with magnesium (Mg) ions [goid 287] [evidence IEA]; Catalysis of the rea  
"Interacting selectively with magnesium (Mg) ions [goid 287] [evidence IEA]; Catalysis of the rea  
"Interacting selectively with magnesium (Mg) ions [goid 287] [evidence IEA]; Catalysis of the rea



"Catalysis of a biochemical reaction at physiological temperatures. In biologically catalyzed reac  
"Catalysis of a biochemical reaction at physiological temperatures. In biologically catalyzed reac  
Combining with an extracellular or intracellular messenger to initiate a change in cell activity [goi  
The action of a molecule that contributes to the structural integrity of a cytoskeletal structure [go

Interacting selectively with any protein or protein complex (a complex of two or more proteins th  
"Catalysis of the reaction: L-tryptophan + O<sub>2</sub> = N-formyl-L-kynurenine [goid 4833] [evidence IEA  
"Interacting selectively with monomeric or multimeric forms of actin, including actin filaments [go  
"Elemental activities, such as catalysis or binding, describing the actions of a gene product at th  
"Interacting selectively with DNA (deoxyribonucleic acid) [goid 3677] [pmid 15243141] [evidence  
Interacting selectively with any protein or protein complex (a complex of two or more proteins th  
Interacting selectively with any protein or protein complex (a complex of two or more proteins th  
"The action characteristic of a hormone, any substance formed in very small amounts in one sp

"Interacting selectively with magnesium (Mg) ions [goid 287] [evidence IEA]; Catalysis of the ren  
"Catalysis of the reaction: 1-phosphatidyl-myo-inositol 3,4-bisphosphate + H<sub>2</sub>O = 1-phosphatidy  
"Catalysis of the removal of a phosphate group from phosphorylated myo-inositol (1,2,3,5/4,6-cy  
"Catalysis of the removal of a phosphate group from phosphorylated myo-inositol (1,2,3,5/4,6-cy  
"Catalysis of the removal of a phosphate group from phosphorylated myo-inositol (1,2,3,5/4,6-cy  
"Catalysis of the removal of a phosphate group from phosphorylated myo-inositol (1,2,3,5/4,6-cy

"Interacting selectively with monomeric or multimeric forms of actin, including actin filaments [go  
"The selective, often stoichiometric, interaction of a molecule with one or more specific sites on .  
Interacting selectively with any protein or protein complex (a complex of two or more proteins th  
Interacting selectively with any protein or protein complex (a complex of two or more proteins th  
Interacting selectively with DNA (deoxyribonucleic acid) [goid 3677] [evidence IEA]; Interacting s  
Interacting selectively with DNA (deoxyribonucleic acid) [goid 3677] [evidence IEA]; Interacting s  
"Interacting selectively with a nucleotide, any compound consisting of a nucleoside that is esteril  
"Interacting selectively with a nucleotide, any compound consisting of a nucleoside that is esteril  
"Interacting selectively with monomeric or multimeric forms of actin, including actin filaments [go  
Interacting selectively with any protein or protein complex (a complex of two or more proteins th  
Interacting selectively with any protein or protein complex (a complex of two or more proteins th  
Interacting selectively with any protein or protein complex (a complex of two or more proteins th  
Interacting selectively with any protein or protein complex (a complex of two or more proteins th  
Interacting selectively with any protein or protein complex (a complex of two or more proteins th  
Interacting selectively with any protein or protein complex (a complex of two or more proteins th  
"Combining with an extracellular or intracellular messenger to initiate a change in cell activity, ar  
Interacting selectively with any protein or protein complex (a complex of two or more proteins th  
Interacting selectively with any protein or protein complex (a complex of two or more proteins th

"Interacting selectively with any protein or protein complex (a complex of two or more proteins th  
"Interacting selectively with any protein or protein complex (a complex of two or more proteins th  
"Interacting selectively with any protein or protein complex (a complex of two or more proteins th  
"Stops, prevents or reduces the activity of any enzyme that catalyzes the hydrolysis of GTP to G  
"Modulates the rate of GTP hydrolysis by a small monomeric GTPase [goid 5083] [pmid 921438  
"The selective, often stoichiometric, interaction of a molecule with one or more specific sites on  
"Interacting selectively with Ran, a conserved Ras-like GTP-binding protein, implicated in nuclec  
  
"Interacting selectively with calmodulin, a calcium-binding protein with many roles, both in the ca

"Interacting selectively with monomeric or multimeric forms of actin, including actin filaments [go

polypeptides (co-translational, post-translational modifications). Includes the modification of cha

"Interacting selectively with a nucleotide, any compound consisting of a nucleoside that is esteril

Interacting selectively with any protein or protein complex (a complex of two or more proteins th

"Catalysis of the phosphorylation of an amino acid residue in a protein, usually according to the

"Interacting selectively with a nucleotide, any compound consisting of a nucleoside that is esteril

"Interacting selectively with the iron-responsive element, a regulatory sequence found in the 5'- ;

"The function of binding to a specific DNA sequence in order to modulate transcription. The tran

The function of binding to a specific DNA sequence in order to modulate transcription. The trans

evidence IEA]; Any process that modulates the frequency, rate or extent of DNA-dependent trans

evidence IEA]; Any process that modulates the frequency, rate or extent of DNA-dependent trans

The function of binding to a specific DNA sequence in order to modulate transcription. The tran

"The function of binding to a specific DNA sequence in order to modulate transcription. The tran

The function of binding to a specific DNA sequence in order to modulate transcription. The trans

"The function of binding to a specific DNA sequence in order to modulate transcription. The tran

Functions to initiate or regulate RNA polymerase II transcription by binding an enhancer region (

The function of binding to a specific DNA sequence in order to modulate transcription. The trans

"Interacting selectively with a nucleotide, any compound consisting of a nucleoside that is esteril

"Interacting selectively with a nucleotide, any compound consisting of a nucleoside that is esteril

"Mediates the transfer of a signal from the outside to the inside of a cell by means other than the

"Mediates the transfer of a signal from the outside to the inside of a cell by means other than the

"The function of binding to a specific DNA sequence in order to modulate transcription. The tran

"The function of binding to a specific DNA sequence in order to modulate transcription. The tran

"The action of a molecule that contributes to the structural integrity of a complex or assembly wi

"The action of a molecule that contributes to the structural integrity of a complex or assembly wi

"Interacting selectively with iron (Fe) ions [goid 5506] [pmid 11060020] [evidence TAS]; Functior

"Interacting selectively with any protein or protein complex (a complex of two or more proteins th

"Catalysis of the sequential cleavage of mononucleotides from a free 3' terminus of an RNA molecule  
"Interacting selectively with any nucleic acid [goid 3676] [evidence IEA]; Catalysis of the hydrolysis of  
"Interacting selectively with any nucleic acid [goid 3676] [evidence IEA]; Catalysis of the hydrolysis of  
"The function of binding to a specific DNA sequence in order to modulate transcription. The transcription factor  
Interacting selectively with any protein or protein complex (a complex of two or more proteins that

"Catalysis of a biochemical reaction at physiological temperatures. In biologically catalyzed reactions  
"Catalysis of a biochemical reaction at physiological temperatures. In biologically catalyzed reactions  
"RNA(s) prior to translation into polypeptide [goid 6397] [evidence IEA]; The process of removing

"Catalysis of the reaction: ATP + ubiquitin + protein lysine = AMP + diphosphate + protein N-ubiquitinated  
Interacting selectively with any protein or protein complex (a complex of two or more proteins that  
physiological ligands [goid 7229] [evidence IEA]

Combining with an extracellular or intracellular messenger to initiate a change in cell activity [goid  
"Interacting selectively with a fibronectin, a group of related adhesive glycoproteins of high molecular weight  
Combining with an extracellular or intracellular messenger to initiate a change in cell activity [goid  
Combining with an extracellular or intracellular messenger to initiate a change in cell activity [goid  
Combining with an extracellular or intracellular messenger to initiate a change in cell activity [goid  
Interacting selectively with magnesium (Mg) ions [goid 287] [evidence IEA]; Combining with an enzyme  
"Combining with an extracellular or intracellular messenger to initiate a change in cell activity [goid  
Combining with an extracellular or intracellular messenger to initiate a change in cell activity [goid  
"Combining with an extracellular or intracellular messenger to initiate a change in cell activity [goid  
"Interacting selectively with a protein C-terminus, the end of any peptide chain at which the 1-carboxylate  
"Combining with an extracellular or intracellular messenger to initiate a change in cell activity [goid  
Combining with an extracellular or intracellular messenger to initiate a change in cell activity [goid  
"Mediates the transfer of a signal from the outside to the inside of a cell by means other than the

Combining with an extracellular or intracellular messenger to initiate a change in cell activity [goid  
Interacting selectively with magnesium (Mg) ions [goid 287] [evidence IEA]; Combining with an enzyme  
"Combining with an extracellular or intracellular messenger to initiate a change in cell activity [goid  
"Stops, prevents or reduces the activity of serine-type endopeptidases, enzymes that catalyze the  
"Stops, prevents or reduces the activity of serine-type endopeptidases, enzymes that catalyze the  
"Interacting selectively with a nucleotide, any compound consisting of a nucleoside that is esterified  
"Interacting selectively with one or more specific sites on a receptor molecule, a macromolecule

"Interacting selectively with any protein or protein complex (a complex of two or more proteins that  
"Interacting selectively with ATP, adenosine 5'-triphosphate, a universally important coenzyme  
"Interacting selectively with magnesium (Mg) ions [goid 287] [evidence IEA]; Catalysis of the hydrolysis of  
"Interacting selectively with magnesium (Mg) ions [goid 287] [evidence IEA]; Catalysis of a biochemical  
"Interacting selectively with a nucleotide, any compound consisting of a nucleoside that is esterified  
"Interacting selectively with a nucleotide, any compound consisting of a nucleoside that is esterified  
"Catalysis of facilitated diffusion of an ion (by an energy-independent process) by passage through  
"Catalysis of facilitated diffusion of an ion (by an energy-independent process) by passage through

"Catalysis of facilitated diffusion of an ion (by an energy-independent process) by passage through

"Stimulates the exchange of guanyl nucleotides by a GTPase of the Rho family. Under normal conditions

"Catalysis of the reaction: 3-methylbutanoyl-CoA + ETF = 3-methylbut-2-enoyl-CoA + reduced E

Interacting selectively with any protein or protein complex (a complex of two or more proteins that

cellular matrix, via cell adhesion molecules [goid 7155] [pmid 15759005] [evidence IC ]; The binding

"Interacting selectively with the Notch (N) protein, a surface receptor [goid 5112] [pmid 9268641

"Interacting selectively with the Notch (N) protein, a surface receptor [goid 5112] [pmid 9315665

"Interacting selectively with a nucleotide, any compound consisting of a nucleoside that is esterified

"Interacting selectively with a nucleotide, any compound consisting of a nucleoside that is esterified

] [evidence NAS]

"Interacting selectively with DNA (deoxyribonucleic acid) [goid 3677] [evidence IEA]; Interacting

"Interacting selectively with DNA (deoxyribonucleic acid) [goid 3677] [evidence IEA]; Interacting

"Elemental activities, such as catalysis or binding, describing the actions of a gene product at the

Interacting selectively with DNA (deoxyribonucleic acid) [goid 3677] [evidence IEA]; Interacting s

Interacting selectively with any nucleic acid [goid 3676] [evidence IEA]; The function of a transcr

"The function of binding to a specific DNA sequence in order to modulate transcription. The tran

Interacting selectively with any protein or protein complex (a complex of two or more proteins that

"Interacting selectively with iron (Fe) ions [goid 5506] [pmid 16603237] [evidence IMP]; Interacti

"Interacting selectively with iron (Fe) ions [goid 5506] [evidence IEA]; Interacting selectively with

"Interacting selectively with any nucleic acid [goid 3676] [evidence IEA]; Interacting selectively w

"Interacting selectively with any nucleic acid [goid 3676] [evidence IEA]; Interacting selectively w

"Combining with an extracellular or intracellular messenger to initiate a change in cell activity [gc

"The function of a transcription cofactor that activates transcription from a RNA polymerase II pr

"Elemental activities, such as catalysis or binding, describing the actions of a gene product at th

Interacting selectively with any protein or protein complex (a complex of two or more proteins that

"Elemental activities, such as catalysis or binding, describing the actions of a gene product at th

"Elemental activities, such as catalysis or binding, describing the actions of a gene product at th

Interacting selectively with DNA (deoxyribonucleic acid) [goid 3677] [evidence IEA]

"The function of binding to a specific DNA sequence in order to modulate transcription. The tran  
"The function of binding to a specific DNA sequence in order to modulate transcription. The tran  
"The function of binding to a specific DNA sequence in order to modulate transcription. The tran  
"The action of a molecule that contributes to the structural integrity of a complex or assembly wi

"Interacting selectively with a nucleotide, any compound consisting of a nucleoside that is esterifi

"Interacting selectively with a nucleotide, any compound consisting of a nucleoside that is esterifi  
"Interacting selectively with a nucleotide, any compound consisting of a nucleoside that is esterifi  
"Interacting selectively with a nucleotide, any compound consisting of a nucleoside that is esterifi  
"Interacting selectively with microtubules, filaments composed of tubulin monomers [goid 8017]  
Interacting selectively with any protein or protein complex (a complex of two or more proteins tha

Interacting selectively with any protein or protein complex (a complex of two or more proteins tha

Interacting selectively with any protein or protein complex (a complex of two or more proteins tha  
Interacting selectively with any protein or protein complex (a complex of two or more proteins tha  
"Elemental activities, such as catalysis or binding, describing the actions of a gene product at th  
Interacting selectively with any protein or protein complex (a complex of two or more proteins tha

"Interacting selectively with zinc (Zn) ions [goid 8270] [evidence IEA]; Catalysis of the ligation of  
Catalysis of the transmembrane transfer of an ion by a voltage-gated channel. An ion is an atom  
"Catalysis of the transmembrane transfer of a potassium ion by a voltage-gated channel [goid 5:  
Catalysis of the transmembrane transfer of an ion by a voltage-gated channel. An ion is an atom  
Catalysis of the transmembrane transfer of an ion by a voltage-gated channel. An ion is an atom  
molecular signal, and recognize and characterize the signal. Sonic stimuli are detected in the form  
Catalysis of the transmembrane transfer of an ion by a voltage-gated channel. An ion is an atom  
Catalysis of the transmembrane transfer of an ion by a voltage-gated channel. An ion is an atom

Catalysis of the phosphorylation of a specific transcription regulator in response to the presence  
Catalysis of the transmembrane transfer of an ion by a voltage-gated channel. An ion is an atom  
"Catalysis of the transmembrane transfer of an ion by a voltage-gated channel. An ion is an atom  
[goid 5242] [pmid 7859381] [evidence TAS]; Catalysis of the transmembrane transfer of an ion b  
[goid 5242] [evidence IEA]; Catalysis of the transmembrane transfer of an ion by a voltage-gate  
[goid 5242] [pmid 7696590] [evidence TAS]; Catalysis of the transmembrane transfer of an ion b  
[goid 5242] [pmid 8016146] [evidence TAS]; Catalysis of the transmembrane transfer of an ion b  
Catalysis of the transmembrane transfer of an ion by a voltage-gated channel. An ion is an atom  
Catalysis of the transmembrane transfer of an ion by a voltage-gated channel. An ion is an atom  
Catalysis of facilitated diffusion of an ion (by an energy-independent process) by passage throug  
[goid 5242] [pmid 10075682] [evidence TAS]; Catalysis of the transmembrane transfer of an ion



Interacting selectively with any protein or protein complex (a complex of two or more proteins that interact with each other)  
Catalysis of the reaction: (S)-malate + acceptor = oxaloacetate + reduced acceptor [goid 8924] [evidence IEA]

"The selective, often stoichiometric, interaction of a molecule with one or more specific sites on a protein or protein complex (a complex of two or more proteins that interact with each other)

Interacting selectively with any protein or protein complex (a complex of two or more proteins that interact with each other)

"Interacting selectively with ATP, adenosine 5'-triphosphate, a universally important coenzyme and energy source

"Interacting selectively with a nucleotide, any compound consisting of a nucleoside that is esterified to a phosphate group

"Elemental activities, such as catalysis or binding, describing the actions of a gene product at the molecular level

"Catalysis of an oxidation-reduction (redox) reaction, a reversible chemical reaction in which the oxidation state of a molecule is changed

"The selective, often stoichiometric, interaction of a molecule with one or more specific sites on a protein or protein complex (a complex of two or more proteins that interact with each other)

"The selective, often stoichiometric, interaction of a molecule with one or more specific sites on a protein or protein complex (a complex of two or more proteins that interact with each other)

"The function of binding to a specific DNA sequence in order to modulate transcription. The transcription factor binds to the DNA sequence and recruits the RNA polymerase and other transcription factors to initiate transcription

Interacting selectively with any protein or protein complex (a complex of two or more proteins that interact with each other)

"Interacting selectively with a nucleotide, any compound consisting of a nucleoside that is esterified to a phosphate group

Interacting selectively with any protein or protein complex (a complex of two or more proteins that interact with each other)

Interacting selectively with calcium ions (Ca<sup>2+</sup>) [goid 5509] [evidence IEA]

"Enables the directed movement of substances (such as macromolecules, small molecules, ions, or water) across a membrane

"The action characteristic of a hormone, any substance formed in very small amounts in one species that acts on other individuals of the same species

"The selective, often stoichiometric, interaction of a molecule with one or more specific sites on a protein or protein complex (a complex of two or more proteins that interact with each other)

"Interacting selectively with a nucleotide, any compound consisting of a nucleoside that is esterified to a phosphate group

"Functions in the initiation of ribosome-mediated translation of mRNA into a polypeptide [goid 37] [evidence IEA]

"The selective, often stoichiometric, interaction of a molecule with one or more specific sites on

XM\_945596 XM\_945598 XM\_945599 XM\_945600"

Interacting selectively with zinc (Zn) ions [goid 8270] [evidence IEA]; Interacting selectively with

g successive cell replication or nuclear replication events. Canonically, the cell cycle comprises t  
ated by COP II vesicles. Small COP II coated vesicles form from the ER and then fuse directly wi

Catalysis of the hydrolysis of any O-glycosyl bond [goid 4553] [evidence IEA]

"Elemental activities, such as catalysis or binding, describing the actions of a gene product at th  
molecular signal, and recognize and characterize the signal. Sonic stimuli are detected in the form

Interacting selectively with any protein or protein complex (a complex of two or more proteins th

"Interacting selectively with any protein or protein complex (a complex of two or more proteins th

Interacting selectively with any protein or protein complex (a complex of two or more proteins th

Interacting selectively with any protein or protein complex (a complex of two or more proteins th

"Interacting selectively with any protein or protein complex (a complex of two or more proteins th

Interacting selectively with any protein or protein complex (a complex of two or more proteins th

RNA(s) prior to translation into polypeptide [goid 6397] [evidence IEA]; The process of removing



"The selective, often stoichiometric, interaction of a molecule with one or more specific sites on  
Interacting selectively with any protein or protein complex (a complex of two or more proteins th

"Elemental activities, such as catalysis or binding, describing the actions of a gene product at th

"Interacting selectively with monomeric or multimeric forms of actin, including actin filaments [go

Interacting selectively with any protein or protein complex (a complex of two or more proteins th

"The selective, often stoichiometric, interaction of a molecule with one or more specific sites on

"Interacting selectively with monomeric or multimeric forms of actin, including actin filaments [go

"Elemental activities, such as catalysis or binding, describing the actions of a gene product at th  
Increases the rate of GTP hydrolysis by the GTPase ARF [goid 8060] [evidence IEA]; Interacting

"Interacting selectively with DNA (deoxyribonucleic acid) [goid 3677] [evidence IEA]; Catalysis of  
"Interacting selectively with a nucleotide, any compound consisting of a nucleoside that is esterif

"Interacting selectively with a nucleotide, any compound consisting of a nucleoside that is esterif  
"Interacting selectively with a nucleotide, any compound consisting of a nucleoside that is esterif  
"Interacting selectively with a nucleotide, any compound consisting of a nucleoside that is esterif  
"Interacting selectively with a nucleotide, any compound consisting of a nucleoside that is esterif  
"Interacting selectively with a nucleotide, any compound consisting of a nucleoside that is esterif  
"Interacting selectively with a nucleotide, any compound consisting of a nucleoside that is esterif  
"Interacting selectively with a nucleotide, any compound consisting of a nucleoside that is esterif  
"Interacting selectively with a nucleotide, any compound consisting of a nucleoside that is esterif  
"Interacting selectively with a nucleotide, any compound consisting of a nucleoside that is esterif  
"Interacting selectively with a nucleotide, any compound consisting of a nucleoside that is esterif  
"Interacting selectively with a nucleotide, any compound consisting of a nucleoside that is esterif  
"Interacting selectively with a nucleotide, any compound consisting of a nucleoside that is esterif  
"Interacting selectively with a nucleotide, any compound consisting of a nucleoside that is esterif  
"Interacting selectively with a nucleotide, any compound consisting of a nucleoside that is esterif

"Interacting selectively with a nucleotide, any compound consisting of a nucleoside that is esterif  
"Interacting selectively with a nucleotide, any compound consisting of a nucleoside that is esterif  
"Interacting selectively with a nucleotide, any compound consisting of a nucleoside that is esterif  
"Interacting selectively with a nucleotide, any compound consisting of a nucleoside that is esterif  
"Interacting selectively with a nucleotide, any compound consisting of a nucleoside that is esterif  
"Interacting selectively with a nucleotide, any compound consisting of a nucleoside that is esterif  
"Interacting selectively with a nucleotide, any compound consisting of a nucleoside that is esterif  
"Interacting selectively with a nucleotide, any compound consisting of a nucleoside that is esterif  
"Interacting selectively with a nucleotide, any compound consisting of a nucleoside that is esterif  
"Interacting selectively with a nucleotide, any compound consisting of a nucleoside that is esterif  
"Interacting selectively with a nucleotide, any compound consisting of a nucleoside that is esterif  
"Interacting selectively with a nucleotide, any compound consisting of a nucleoside that is esterif  
"Interacting selectively with a nucleotide, any compound consisting of a nucleoside that is esterif  
"Interacting selectively with a nucleotide, any compound consisting of a nucleoside that is esterif  
"Interacting selectively with a nucleotide, any compound consisting of a nucleoside that is esterif  
"Interacting selectively with any protein or protein complex (a complex of two or more proteins th  
"Interacting selectively with a nucleotide, any compound consisting of a nucleoside that is esterif  
"Interacting selectively with a nucleotide, any compound consisting of a nucleoside that is esterif  
"Interacting selectively with a nucleotide, any compound consisting of a nucleoside that is esterif

Combining with an extracellular or intracellular messenger to initiate a change in cell activity [goi  
Combining with an extracellular or intracellular messenger to initiate a change in cell activity [goi  
Combining with an extracellular or intracellular messenger to initiate a change in cell activity [goi  
ellular matrix, via cell adhesion molecules [goid 7155] [pmid 12837264] [evidence NAS]"  
Combining with an extracellular or intracellular messenger to initiate a change in cell activity [goi  
"Catalysis of a biochemical reaction at physiological temperatures. In biologically catalyzed reac

"Catalysis of movement along a microtubule, coupled to the hydrolysis of a nucleoside triphosphate  
"Catalysis of movement along a microtubule, coupled to the hydrolysis of a nucleoside triphosphate  
The function of binding to a specific DNA sequence in order to modulate transcription. The transcription factor  
The function of binding to a specific DNA sequence in order to modulate transcription. The transcription factor  
Interacting selectively with DNA (deoxyribonucleic acid) [GO:0030246] [evidence IEA]; Functions to  
The function of binding to a specific DNA sequence in order to modulate transcription. The transcription factor  
The function of binding to a specific DNA sequence in order to modulate transcription. The transcription factor  
Interacting selectively with DNA (deoxyribonucleic acid) [GO:0030246] [evidence IEA]; Interacting s  
The function of binding to a specific DNA sequence in order to modulate transcription. The transcription factor  
The function of binding to a specific DNA sequence in order to modulate transcription. The transcription factor

Interacting selectively with any protein or protein complex (a complex of two or more proteins that  
"Interacting selectively with chromatin, the network of fibers of DNA and protein that make up the

Interacting selectively with any protein or protein complex (a complex of two or more proteins that

"Interacting selectively with monomeric or multimeric forms of actin, including actin filaments [GO:0030246]  
Interacting selectively with any protein or protein complex (a complex of two or more proteins that

Interacting selectively with any protein or protein complex (a complex of two or more proteins that  
Interacting selectively with any protein or protein complex (a complex of two or more proteins that  
"Interacting selectively with monomeric or multimeric forms of actin, including actin filaments [GO:0030246]  
Interacting selectively with any protein or protein complex (a complex of two or more proteins that  
"Interacting selectively with monomeric or multimeric forms of actin, including actin filaments [GO:0030246]  
"Interacting selectively with monomeric or multimeric forms of actin, including actin filaments [GO:0030246]  
Interacting selectively with any protein or protein complex (a complex of two or more proteins that  
Interacting selectively with any protein or protein complex (a complex of two or more proteins that  
Interacting selectively with any protein or protein complex (a complex of two or more proteins that  
Interacting selectively with any protein or protein complex (a complex of two or more proteins that  
Interacting selectively with any protein or protein complex (a complex of two or more proteins that  
Interacting selectively with any protein or protein complex (a complex of two or more proteins that  
Interacting selectively with any protein or protein complex (a complex of two or more proteins that  
Interacting selectively with any protein or protein complex (a complex of two or more proteins that  
"Interacting selectively with monomeric or multimeric forms of actin, including actin filaments [GO:0030246]  
Interacting selectively with any protein or protein complex (a complex of two or more proteins that  
Interacting selectively with any protein or protein complex (a complex of two or more proteins that  
Interacting selectively with any protein or protein complex (a complex of two or more proteins that  
Interacting selectively with any protein or protein complex (a complex of two or more proteins that  
"Interacting selectively with monomeric or multimeric forms of actin, including actin filaments [GO:0030246]  
"Interacting selectively with monomeric or multimeric forms of actin, including actin filaments [GO:0030246]  
Interacting selectively with any protein or protein complex (a complex of two or more proteins that  
Interacting selectively with any protein or protein complex (a complex of two or more proteins that

Interacting selectively with any protein or protein complex (a complex of two or more proteins that  
"Catalysis of the hydrolysis of internal, alpha-peptide bonds in a polypeptide chain by a catalytic  
"Catalysis of the hydrolysis of internal, alpha-peptide bonds in a polypeptide chain by a catalytic  
"Catalysis of the hydrolysis of internal, alpha-peptide bonds in a polypeptide chain by a catalytic  
"Combining with an extracellular or intracellular messenger to initiate a change in cell activity, and

"The selective, often stoichiometric, interaction of a molecule with one or more specific sites on a  
"Interacting selectively with any protein or protein complex (a complex of two or more proteins that  
Catalysis of the incorporation of one atom from molecular oxygen into a compound and the reduction  
"The function of binding to a specific DNA sequence in order to modulate transcription. The transcription  
"Interacting selectively with any protein or protein complex (a complex of two or more proteins that  
"The selective, often stoichiometric, interaction of a molecule with one or more specific sites on a  
"The selective, often stoichiometric, interaction of a molecule with one or more specific sites on a  
"Interacting selectively with any protein or protein complex (a complex of two or more proteins that  
"Interacting selectively with any protein or protein complex (a complex of two or more proteins that  
"Interacting selectively with any protein or protein complex (a complex of two or more proteins that  
"The selective, often stoichiometric, interaction of a molecule with one or more specific sites on a  
"Interacting selectively with a nuclear localization sequence, a specific peptide sequence that acts  
"Interacting selectively with monomeric or multimeric forms of actin, including actin filaments [go

Interacting selectively with any protein or protein complex (a complex of two or more proteins that

Modulates the rate of GTP hydrolysis by a small monomeric GTPase [goid 5083] [pmid 9285558]  
Interacting selectively with an RNA molecule or a portion thereof [goid 3723] [evidence IEA]; Interacting  
Interacting selectively with any protein or protein complex (a complex of two or more proteins that  
The action of a molecule that contributes to the structural integrity of a complex or assembly with  
The action of a molecule that contributes to the structural integrity of a complex or assembly with

The action of a molecule that contributes to the structural integrity of a cytoskeletal structure [go  
The action of a molecule that contributes to the structural integrity of a cytoskeletal structure [go  
The action of a molecule that contributes to the structural integrity of a complex or assembly with  
The action of a molecule that contributes to the structural integrity of a complex or assembly with  
The action of a molecule that contributes to the structural integrity of a complex or assembly with  
The action of a molecule that contributes to the structural integrity of a complex or assembly with  
The action of a molecule that contributes to the structural integrity of a complex or assembly with  
The action of a molecule that contributes to the structural integrity of a complex or assembly with  
The action of a molecule that contributes to the structural integrity of a complex or assembly with  
The action of a molecule that contributes to the structural integrity of a complex or assembly with  
The action of a molecule that contributes to the structural integrity of a cytoskeletal structure [go

y, which result in restriction of damage to the organism attacked or prevention/recovery from the

Combining with an extracellular or intracellular messenger to initiate a change in cell activity [goi  
"Any molecular entity that serves as an electron acceptor and electron donor in an electron trans

"Interacting selectively with a nucleotide, any compound consisting of a nucleoside that is esterified  
"Elemental activities, such as catalysis or binding, describing the actions of a gene product at the  
Catalysis of the hydrolysis of a peptide bond. A peptide bond is a covalent bond formed when the  
"Catalysis of the hydrolysis of various bonds, e.g. C-O, C-N, C-C, phosphoric anhydride bonds, etc.  
"Catalysis of an oxidation-reduction (redox) reaction, a reversible chemical reaction in which the  
The function of binding to a specific DNA sequence in order to modulate transcription. The trans  
The function of a transcription cofactor that represses transcription from a RNA polymerase II promoter  
"Elemental activities, such as catalysis or binding, describing the actions of a gene product at the  
"Catalysis of the hydrolysis of various bonds, e.g. C-O, C-N, C-C, phosphoric anhydride bonds, etc.  
"Interacting selectively with zinc (Zn) ions [goid 8270] [evidence IEA]; Catalysis of the hydrolysis  
"Interacting selectively with an antigen, any substance which is capable of inducing a specific immune  
"Elemental activities, such as catalysis or binding, describing the actions of a gene product at the  
Combining with an extracellular or intracellular messenger to initiate a change in cell activity [goi  
Combining with an extracellular or intracellular messenger to initiate a change in cell activity [goi  
"Interacting selectively with one or more specific sites on a receptor molecule, a macromolecule  
Combining with an extracellular or intracellular messenger to initiate a change in cell activity [goi  
The action of a molecule that contributes to the structural integrity of the extracellular matrix [goi

Interacting selectively with any protein or protein complex (a complex of two or more proteins that  
The action of a molecule that contributes to the structural integrity of the extracellular matrix [goi  
The action of a molecule that contributes to the structural integrity of a complex or assembly with

an composed of chains of D-glucose residues in alpha(1->4) glycosidic linkage, joined together by  
283] [pmid 9721848] [evidence TAS]"

"Catalysis of a biochemical reaction at physiological temperatures. In biologically catalyzed reactions  
"Catalysis of a biochemical reaction at physiological temperatures. In biologically catalyzed reactions  
"Interacting selectively with magnesium (Mg) ions [goid 287] [evidence NAS]; Catalysis of the hydrolysis  
out of, within or between cells, or within a multicellular organism [goid 6810] [evidence IEA]"

out of, within or between cells, or within a multicellular organism [goid 6810] [evidence IEA]"

out of, within or between cells, or within a multicellular organism [goid 6810] [evidence IEA]"

"Catalysis of the transfer of a glycosyl group from one compound (donor) to another (acceptor) [goid 16] [pmid 12222222] [evidence IEA]"

Interacting selectively with an RNA molecule or a portion thereof [goid 3723] [evidence IEA]"

Interacting selectively with an RNA molecule or a portion thereof [goid 3723] [evidence IEA]; Interacting selectively with a nucleotide, any compound consisting of a nucleoside that is esterified by keratin. Keratinization occurs in the stratum corneum, feathers, hair, claws, nails, hooves, and horns [goid 42742] [evidence IEA]"

"Interacting selectively with a nucleotide, any compound consisting of a nucleoside that is esterified by keratin. Keratinization occurs in the stratum corneum, feathers, hair, claws, nails, hooves, and horns [goid 42742] [evidence IEA]"

Interacting selectively with any protein or protein complex (a complex of two or more proteins that are associated with each other) [goid 1784] [pmid 12222222] [evidence IEA]"

"Interacting selectively with monomeric or multimeric forms of actin, including actin filaments [goid 1784] [pmid 12222222] [evidence IEA]"

"Elemental activities, such as catalysis or binding, describing the actions of a gene product at the molecular level [goid 16] [pmid 12222222] [evidence IEA]"

"The function of binding to a specific DNA sequence in order to modulate transcription. The transcription factor binds to the DNA sequence and recruits the RNA polymerase II complex [goid 16] [pmid 12222222] [evidence IEA]"

"The function of binding to a specific DNA sequence in order to modulate transcription. The transcription factor binds to the DNA sequence and recruits the RNA polymerase II complex [goid 16] [pmid 12222222] [evidence IEA]"

"The function of binding to a specific DNA sequence in order to modulate transcription. The transcription factor binds to the DNA sequence and recruits the RNA polymerase II complex [goid 16] [pmid 12222222] [evidence IEA]"

"The function of binding to a specific DNA sequence in order to modulate transcription. The transcription factor binds to the DNA sequence and recruits the RNA polymerase II complex [goid 16] [pmid 12222222] [evidence IEA]"

"Interacting selectively with any protein or protein complex (a complex of two or more proteins that are associated with each other) [goid 1784] [pmid 12222222] [evidence IEA]"

"Interacting selectively with a nucleotide, any compound consisting of a nucleoside that is esterified by keratin. Keratinization occurs in the stratum corneum, feathers, hair, claws, nails, hooves, and horns [goid 42742] [evidence IEA]"

"Interacting selectively with any protein or protein complex (a complex of two or more proteins that are associated with each other) [goid 1784] [pmid 12222222] [evidence IEA]"

"Interacting selectively with any protein or protein complex (a complex of two or more proteins that are associated with each other) [goid 1784] [pmid 12222222] [evidence IEA]"

"The selective, often stoichiometric, interaction of a molecule with one or more specific sites on a protein [goid 1784] [pmid 12222222] [evidence IEA]; Any process that modulates the frequency, rate or extent of DNA-dependent transcription [goid 16] [pmid 12222222] [evidence IEA]"

"Interacting selectively with DNA (deoxyribonucleic acid) [goid 3677] [pmid 8157662] [evidence IEA]"

"Catalysis of the reaction: phosphatidylcholine + a sterol = a sterol ester + 1-acylglycerophosphate [goid 16] [pmid 12222222] [evidence IEA]"

ed by keratin. Keratinization occurs in the stratum corneum, feathers, hair, claws, nails, hooves, and horns [goid 42742] [evidence IEA]"

"Elemental activities, such as catalysis or binding, describing the actions of a gene product at the molecular level [goid 16] [pmid 12222222] [evidence IEA]"

ed by keratin. Keratinization occurs in the stratum corneum, feathers, hair, claws, nails, hooves, and horns [goid 42742] [evidence IEA]"

"Interacting selectively with a nucleotide, any compound consisting of a nucleoside that is esterified by keratin. Keratinization occurs in the stratum corneum, feathers, hair, claws, nails, hooves, and horns [goid 42742] [evidence IEA]"

"Catalysis of the transfer of a methyl group to the carbon atom of the C-terminal residue of a protein [goid 16] [pmid 12222222] [evidence IEA]"

"Interacting selectively with any protein or protein complex (a complex of two or more proteins that are associated with each other) [goid 1784] [pmid 12222222] [evidence IEA]"

"Enables the directed movement of substances (such as macromolecules, small molecules, ions, and water) across a membrane [goid 16] [pmid 12222222] [evidence IEA]"

"The function of binding to a specific DNA sequence in order to modulate transcription. The transcription factor binds to the DNA sequence and recruits the RNA polymerase II complex [goid 16] [pmid 12222222] [evidence IEA]"

"Interacting selectively with calcium ions (Ca<sup>2+</sup>) [goid 5509] [evidence IEA]; Interacting selectively with a phosphorylated tyrosine residue within a protein [goid 1784] [pmid 12222222] [evidence IEA]"

"Catalysis of the reaction: lactose + H<sub>2</sub>O = D-glucose + D-galactose [goid 16] [pmid 7487100] [evidence IEA]"

"The function of a transcription cofactor that represses transcription from a RNA polymerase II promoter [goid 16] [pmid 12222222] [evidence IEA]"

"Catalysis of the reaction: (S)-lactate + NAD<sup>+</sup> = pyruvate + NADH + H<sup>+</sup> [goid 4459] [evidence IEA]"

"Catalysis of the reaction: (S)-lactate + NAD<sup>+</sup> = pyruvate + NADH + H<sup>+</sup> [goid 4459] [evidence IEA]"

"Catalysis of the reaction: (R)-lactate + 2 ferricytochrome c = pyruvate + 2 ferrocycytochrome c [goid 16] [pmid 12222222] [evidence IEA]"

"Combining with an extracellular or intracellular messenger to initiate a change in cell activity, and then being released [goid 16] [pmid 12222222] [evidence IEA]"

Combining with an extracellular or intracellular messenger to initiate a change in cell activity [goid 16] [pmid 12222222] [evidence IEA]"

"Interacting selectively with a phosphorylated tyrosine residue within a protein [goid 1784] [pmid 12222222] [evidence IEA]"

anism [goid 42742] [evidence IEA]"

"Interacting selectively with any protein or protein complex (a complex of two or more proteins th  
"Functions to control the survival, growth, differentiation and effector function of tissues and cell:

"Interacting selectively with a nucleotide, any compound consisting of a nucleoside that is esteril  
"Elemental activities, such as catalysis or binding, describing the actions of a gene product at th  
Interacting selectively with any protein or protein complex (a complex of two or more proteins th  
"The action characteristic of a hormone, any substance formed in very small amounts in one sp  
"Elemental activities, such as catalysis or binding, describing the actions of a gene product at th  
"Interacting selectively with iron (Fe) ions [goid 5506] [evidence IEA]; Catalysis of an oxidation-re  
"Elemental activities, such as catalysis or binding, describing the actions of a gene product at th

Interacting selectively with calcium ions (Ca<sup>2+</sup>) [goid 5509] [pmid 10486213] [evidence TAS]

"Elemental activities, such as catalysis or binding, describing the actions of a gene product at th  
"Mediates the transfer of a signal from the outside to the inside of a cell by means other than the  
"Interacting selectively with any mono-, di- or trisaccharide carbohydrate [goid 5529] [evidence I  
"Interacting selectively with any protein or protein complex (a complex of two or more proteins th  
"Combining with acetylated low-density lipoproteins, advanced glycation end products, or other p  
"Interacting selectively with any mono-, di- or trisaccharide carbohydrate [goid 5529] [pmid 7534

"Interacting selectively with any mono-, di- or trisaccharide carbohydrate [goid 5529] [evidence I  
"Interacting selectively with any mono-, di- or trisaccharide carbohydrate [goid 5529] [evidence I  
Interacting selectively with any protein or protein complex (a complex of two or more proteins th  
"Catalysis of the hydrolysis of internal, alpha-peptide bonds in a polypeptide chain by a mechani  
Combining with an extracellular or intracellular messenger to initiate a change in cell activity [goid  
Combining with an extracellular or intracellular messenger to initiate a change in cell activity [goid  
Interacting selectively with an RNA molecule or a portion thereof [goid 3723] [evidence IEA]; Inte

"Catalysis of the reaction: diphosphate + H<sub>2</sub>O = 2 phosphate [goid 4427] [evidence IEA]; Cataly  
"The function of binding to a specific DNA sequence in order to modulate transcription. The tran  
"The function of binding to a specific DNA sequence in order to modulate transcription. The tran  
"The function of binding to a specific DNA sequence in order to modulate transcription. The tran  
"Interacting selectively with iron (Fe) ions [goid 5506] [evidence IEA]; Catalysis of the transfer of  
Combining with an extracellular or intracellular messenger to initiate a change in cell activity [goid  
"Interacting selectively with a nucleotide, any compound consisting of a nucleoside that is esteril  
"Interacting selectively with a nucleotide, any compound consisting of a nucleoside that is esteril  
"Interacting selectively with a nucleotide, any compound consisting of a nucleoside that is esteril  
"Interacting selectively with an antigen, any substance which is capable of inducing a specific im  
Combining with an extracellular or intracellular messenger to initiate a change in cell activity [goid  
Combining with an extracellular or intracellular messenger to initiate a change in cell activity [goid  
Combining with an extracellular or intracellular messenger to initiate a change in cell activity [goid

"Combining with an extracellular or intracellular messenger to initiate a change in cell activity, ar  
"Combining with an extracellular or intracellular messenger to initiate a change in cell activity, ar  
"Interacting selectively with monomeric actin, also known as G-actin [goid 3785] [pmid 12566430]  
"Potential internal or invasive threat [goid 6955] [evidence IEA]

Interacting selectively with zinc (Zn) ions [goid 8270] [evidence IEA]; Interacting selectively with :  
Interacting selectively with DNA (deoxyribonucleic acid) [goid 3677] [evidence IEA]; Interacting s  
Interacting selectively with any protein or protein complex (a complex of two or more proteins tha

[evidence IEA]; Any process that modulates the frequency, rate or extent of DNA-dependent trans  
Interacting selectively with any protein or protein complex (a complex of two or more proteins tha  
Interacting selectively with any protein or protein complex (a complex of two or more proteins tha  
Interacting selectively with any protein or protein complex (a complex of two or more proteins tha  
her be an existing DNA molecule or RNA [goid 6260] [evidence IEA]; Any process that stops, pre

"Catalysis of the reaction: a steryl ester + H<sub>2</sub>O = a sterol + a fatty acid [goid 4771] [evidence IEA]  
"Catalysis of the reaction: triacylglycerol + H<sub>2</sub>O = diacylglycerol + a fatty acid anion [goid 4806] |  
"Catalysis of the reaction: triacylglycerol + H<sub>2</sub>O = diacylglycerol + a fatty acid anion [goid 4806] |  
"Catalysis of the hydrolysis of various bonds, e.g. C-O, C-N, C-C, phosphoric anhydride bonds, |  
"Catalysis of a biochemical reaction at physiological temperatures. In biologically catalyzed reac

"Catalysis of the generalized reaction: acyl-carrier + reactant = acyl-reactant + carrier [goid 8415  
"Functions to initiate or regulate RNA polymerase II transcription [goid 3702] [pmid 10200294] [e

"The action of a molecule that contributes to the structural integrity of a complex or assembly wi  
g successive cell replication or nuclear replication events. Canonically, the cell cycle comprises t

"Interacting selectively with any mono-, di- or trisaccharide carbohydrate [goid 5529] [evidence IEA]  
"Interacting selectively with calcium ions (Ca<sup>2+</sup>) [goid 5509] [evidence IEA]; Interacting selective  
"Interacting selectively with any mono-, di- or trisaccharide carbohydrate [goid 5529] [evidence IEA]  
Combining with an extracellular or intracellular messenger to initiate a change in cell activity [goid  
Combining with an extracellular or intracellular messenger to initiate a change in cell activity [goid

"Elemental activities, such as catalysis or binding, describing the actions of a gene product at th

"Catalysis of the hydrolysis of internal, alpha-peptide bonds in a polypeptide chain by a mechan  
The action of a molecule that contributes to the structural integrity of a complex or assembly with  
The action of a molecule that contributes to the structural integrity of a complex or assembly with  
The action of a molecule that contributes to the structural integrity of a complex or assembly with  
Interacting selectively with any protein or protein complex (a complex of two or more proteins tha  
Interacting selectively with zinc (Zn) ions [goid 8270] [evidence IEA]; Interacting selectively with :  
"Interacting selectively with zinc (Zn) ions [goid 8270] [evidence IEA]; Interacting selectively with  
"Interacting selectively with tropomyosin, a protein associated with actin filaments both in cytoplasm



"Interacting selectively with a nucleotide, any compound consisting of a nucleoside that is esterified to a phosphate group"

"Interacting selectively with a nucleotide, any compound consisting of a nucleoside that is esterified to a phosphate group"

"The function of binding to a specific DNA sequence in order to modulate transcription. The transcription factor binds to the DNA sequence and recruits the RNA polymerase and other transcription factors to initiate transcription"

"Catalysis of the hydrolysis of N-terminal amino acid residues from in a polypeptide chain [gold standard]"

"Interacting selectively with any protein or protein complex (a complex of two or more proteins that interact with each other)"





































(LOC124685), mRNA."

·activating protein 1) (GGAP1) (LOC126860), mRNA."

The action of a molecule that contributes to the structural integrity of the ribosome [goid 3735] [€



Interacting selectively with a specific domain of a protein [goid 19904] [evidence IEA]

Interacting selectively with DNA (deoxyribonucleic acid) [goid 3677] [evidence IEA]

beta) (LOC285697), mRNA."

LOC285900), mRNA."



protein MGr1-Ag) (LOC387867), mRNA."

ase-inhibitor suppressed) (LOC388275), mRNA."



protein MGr1-Ag), transcript variant 3 (LOC389672), mRNA."

(TLAA) (CTC box binding factor 75 kDa subunit) (CTCBF) (CTC75), transcript variant 2 (LOC38

48 isoform; PP2A B subunit PR48; NY-REN-8 antigen (LOC390705), misc RNA."



Interacting selectively with any protein or protein complex (a complex of two or more proteins that



tein) (P150) (LOC402145), mRNA."

"Interacting selectively with ATP, adenosine 5'-triphosphate, a universally important coenzyme a

"Catalysis of the hydrolysis of C-terminal amino acid residues from a polypeptide chain by a me

NA."

"Catalysis of the phosphorylation of an amino acid residue in a protein, usually according to the

ppressed) (LOC440396), non-coding RNA."

"Interacting selectively with a nucleotide, any compound consisting of a nucleoside that is esteril

Catalysis of the hydrolysis of any O-glycosyl bond [goid 4553] [evidence IEA]

Combining with airborne compounds to initiate a change in cell activity. These receptors are use







CT-2) (PAT 744) (H400) (SIS-gamma) (Lymphocyte activation gene-1 protein) (LAG-1) (HC21....,

nsferase 9) (Polypeptide GalNAc transferase 9) (GalNAc-T9) (pp-GaNTase 9) (LOC642141), mF

."

er 1) (LOC642290), mRNA."



olog) (LOC642843), mRNA."

642869), mRNA."

mRNA."

in P1) (P60 lymphocyte protein) (HuCHA60) (LOC643300), mRNA."





"Catalysis of the hydrolysis of internal, alpha-peptide bonds in a polypeptide chain by a mechani

{NA."









Interacting selectively with any protein or protein complex (a complex of two or more proteins that

1."

ase-inhibitor suppressed) (LOC645436), mRNA."

45545), mRNA."



1AD1) (hMAD1) (Tax-binding protein 181) (LOC645904), mRNA."

NA."

Interacting selectively with any nucleic acid [goid 3676] [evidence IEA]; Catalysis of the transfer

hair protein complementing XP-B cells) (Xeroderma pigmentosum group B complementing prot...

LOC646483), mRNA."

enzyme A-activated DNase) (IGAAD) (LOC646817), mRNA."

hPar14) (LOC647037), mRNA."

laptin) (LOC647349), mRNA."

\"

protein MGr1-Ag) (LOC647856), mRNA."

210), mRNA."

protein MGr1-Ag), transcript variant 3 (LOC648249), mRNA."

hPar14) (LOC648638), mRNA."



RNA."



50030), mRNA."

A."

mRNA."





6), mRNA."

r subunit) (QPs3) (CII-4) (Succinate dehydrogenase complex subunit D) (Succinate-ubiquinone c

1849), mRNA."

le 2) (LOC652400), mRNA."

437), mRNA."





·30 antigen) (LOC652675), mRNA."

hronic granulomatous disease protein) (NOXO2) (LOC652699), mRNA."

) (Xeroderma pigmentosum group E complementing protein) (XPCe) (X-associated protein 1) (X/

A."

RNA."

VA."



hronic granulomatous disease protein) (NOXO2), transcript variant 3 (LOC653321), mRNA."

53489), mRNA."



κ) (LOC653800), mRNA."

LOC653878), mRNA."

ρ1) (GKAP/SAPAP interacting protein) (SPANK-3) (LOC654128), mRNA."

Catalysis of the reaction:  $\text{NADH} + \text{H}^+ + \text{ubiquinone} = \text{NAD}^+ + \text{ubiquinol}$  [goid 8137] [evidence IE









regulatory protein 19-2) (GOS19-2 protein) (PAT 464.2) (LOC728830), mRNA."

"Catalysis of a biochemical reaction at physiological temperatures. In biologically catalyzed reac

ociated protein), transcript variant 4 (LOC729238), mRNA."

123), mRNA."





746), mRNA."



9), mRNA."







Interacting selectively with any protein or protein complex (a complex of two or more proteins that interact with each other)  
Interacting selectively with any protein or protein complex (a complex of two or more proteins that interact with each other)  
Interacting selectively with any protein or protein complex (a complex of two or more proteins that interact with each other)  
Interacting selectively with any protein or protein complex (a complex of two or more proteins that interact with each other)  
Interacting selectively with any protein or protein complex (a complex of two or more proteins that interact with each other)  
Interacting selectively with any protein or protein complex (a complex of two or more proteins that interact with each other)  
"Elemental activities, such as catalysis or binding, describing the actions of a gene product at the molecular level  
Interacting selectively with any protein or protein complex (a complex of two or more proteins that interact with each other)  
Interacting selectively with any protein or protein complex (a complex of two or more proteins that interact with each other)  
"Interacting selectively with a nucleotide, any compound consisting of a nucleoside that is esterified to a phosphate group  
Interacting selectively with any protein or protein complex (a complex of two or more proteins that interact with each other)  
Combining with an extracellular or intracellular messenger to initiate a change in cell activity [goicd 3723] [evidence IEA];  
Interacting selectively with any protein or protein complex (a complex of two or more proteins that interact with each other)  
Interacting selectively with any protein or protein complex (a complex of two or more proteins that interact with each other)

Interacting selectively with any protein or protein complex (a complex of two or more proteins that interact with each other)  
Interacting selectively with any protein or protein complex (a complex of two or more proteins that interact with each other)  
"Interacting selectively with a nucleotide, any compound consisting of a nucleoside that is esterified to a phosphate group  
Interacting selectively with an RNA molecule or a portion thereof [goicd 3723] [evidence IEA];  
Interacting selectively with an RNA molecule or a portion thereof [goicd 3723] [evidence IEA];  
Interacting selectively with an RNA molecule or a portion thereof [goicd 3723] [evidence IEA];

"Interacting selectively with an RNA molecule or a portion thereof [goicd 3723] [evidence IEA];  
Interacting selectively with an RNA molecule or a portion thereof [goicd 3723] [evidence IEA];  
Interacting selectively with an RNA molecule or a portion thereof [goicd 3723] [evidence IEA];  
Interacting selectively with an RNA molecule or a portion thereof [goicd 3723] [pmid 10369684] [evidence IEA];  
Interacting selectively with an RNA molecule or a portion thereof [goicd 3723] [evidence IEA];  
Interacting selectively with an RNA molecule or a portion thereof [goicd 3723] [evidence IEA];  
Interacting selectively with an RNA molecule or a portion thereof [goicd 3723] [evidence IEA];  
Interacting selectively with an RNA molecule or a portion thereof [goicd 3723] [evidence IEA];

"Mediates the transfer of a signal from the outside to the inside of a cell by means other than the cell membrane  
"Combining with an extracellular or intracellular messenger to initiate a change in cell activity [goicd 3723] [evidence IEA];  
"Catalysis of the reaction: (S)-2,3-epoxysqualene = lanosterol. This is a cyclization reaction that converts squalene to lanosterol  
"Elemental activities, such as catalysis or binding, describing the actions of a gene product at the molecular level

"Functions to control the survival, growth, differentiation and effector function of tissues and cells  
"The selective, often stoichiometric, interaction of a molecule with one or more specific sites on a protein or protein complex  
"Functions to control the survival, growth, differentiation and effector function of tissues and cells  
"Interacting selectively with a nucleotide, any compound consisting of a nucleoside that is esterified to a phosphate group  
"Interacting selectively with calcium ions (Ca<sup>2+</sup>) [goicd 5509] [evidence IEA]; The selective, often stoichiometric, interaction of a molecule with one or more specific sites on a protein or protein complex  
"The selective, often stoichiometric, interaction of a molecule with one or more specific sites on a protein or protein complex  
"Combining with transforming growth factor beta to initiate a change in cell activity [goicd 5024] [evidence IEA];

"Catalysis of the reaction: R-X + glutathione = H-X + R-S-glutathione. R may be an aliphatic, aromatic or heterocyclic group [goid 8199] [evidence IEA]; Catalysis of the hydrolysis of various bonds, e.g. C-O, C-N, C-C, phosphoric anhydride bonds, phosphoric ester bonds, phosphoric diester bonds, phosphoric triester bonds, phosphoric diester bonds, phosphoric triester bonds [goid 8199] [evidence IEA]; Interacting selectively with a nucleotide, any compound consisting of a nucleoside that is esterified to a phosphate group [goid 8199] [evidence IEA]

Interacting selectively with any protein or protein complex (a complex of two or more proteins that are associated with each other)

"Stops, prevents or reduces the activity of an enzyme [goid 4857] [evidence IEA]; Interacting selectively with the surface of the target cell [goid 7166] [pmid 8650192] [evidence TAS]

Maturation to its mature state [goid 7399] [pmid 9799603] [evidence TAS]; Morphogenesis of an organism [goid 7399] [pmid 9799603] [evidence TAS]

"Combining with an extracellular or intracellular messenger to initiate a change in cell activity [goid 7399] [pmid 9799603] [evidence TAS]

Interacting selectively with any protein or protein complex (a complex of two or more proteins that are associated with each other)

"Elemental activities, such as catalysis or binding, describing the actions of a gene product at the molecular level [goid 7399] [pmid 9799603] [evidence TAS]

"Interacting selectively with any protein or protein complex (a complex of two or more proteins that are associated with each other)

Interacting selectively with any protein or protein complex (a complex of two or more proteins that are associated with each other)

"Catalysis of the hydrolysis of the 1,4-beta-linkages between N-acetyl-D-glucosamine and N-acetyl-D-glucosamine [goid 3677] [pmid 2752424] [evidence TAS]

Interacting selectively with DNA (deoxyribonucleic acid) [goid 3677] [pmid 2752424] [evidence TAS]

"Interacting selectively with a nucleotide, any compound consisting of a nucleoside that is esterified to a phosphate group [goid 3677] [pmid 2752424] [evidence TAS]

"Catalysis of the reaction: 2-lysophosphatidylcholine + H<sub>2</sub>O = glycerophosphocholine + a carbonyl compound [goid 8199] [evidence IEA]

"Catalysis of the hydrolysis of various bonds, e.g. C-O, C-N, C-C, phosphoric anhydride bonds, phosphoric ester bonds, phosphoric diester bonds, phosphoric triester bonds [goid 8199] [evidence IEA]

"Catalysis of the hydrolysis of various bonds, e.g. C-O, C-N, C-C, phosphoric anhydride bonds, phosphoric ester bonds, phosphoric diester bonds, phosphoric triester bonds [goid 8199] [evidence IEA]

[evidence IEA]

[evidence IEA]

[evidence IEA]

[evidence IEA]

Interacting selectively with any protein or protein complex (a complex of two or more proteins that are associated with each other)

"Catalysis of the hydrolysis of the 1,4-beta-linkages between N-acetyl-D-glucosamine and N-acetyl-D-glucosamine [goid 8013] [evidence IEA]

Interacting selectively with the beta subunit of the catenin complex [goid 8013] [evidence IEA]

The function of binding to a specific DNA sequence in order to modulate transcription. The transcription cycle [goid 45786] [evidence IEA]"

"Combining with an extracellular or intracellular messenger to initiate a change in cell activity, ar out of or within a cell [goid 16192] [pmid 9590177] [evidence TAS]"

ver time from an initial condition (e.g. a zygote or a young adult) to a later condition (e.g. a multic

"Elemental activities, such as catalysis or binding, describing the actions of a gene product at th Interacting selectively with any protein or protein complex (a complex of two or more proteins th

Interacting selectively with any protein or protein complex (a complex of two or more proteins th

"Stimulates the exchange of guanyl nucleotides by a GTPase. Under normal cellular physiologic

"Interacting selectively with monomeric or multimeric forms of actin, including actin filaments [go

Interacting selectively with DNA (deoxyribonucleic acid) [goid 3677] [evidence IEA]; Interacting s

Plays a role in regulating transcription; may bind a promoter or enhancer DNA sequence or inter

"The function of binding to a specific DNA sequence in order to modulate transcription. The tran

"The function of binding to a specific DNA sequence in order to modulate transcription. The tran

"The function of binding to a specific DNA sequence in order to modulate transcription. The tran

"Interacting selectively with any protein or protein complex (a complex of two or more proteins th

"Elemental activities, such as catalysis or binding, describing the actions of a gene product at th

"Elemental activities, such as catalysis or binding, describing the actions of a gene product at th

The function of a transcription cofactor that activates transcription from a RNA polymerase II prc

Interacting selectively with any protein or protein complex (a complex of two or more proteins th

of proteolytic caspases, whose actions dismantle the cell and result in cell death. Apoptosis begi

Interacting selectively with any protein or protein complex (a complex of two or more proteins th

JA."

Interacting selectively with an RNA molecule or a portion thereof [goid 3723] [evidence IEA]; Inte

Interacting selectively with an RNA molecule or a portion thereof [goid 3723] [evidence IEA]

Catalysis of the reaction: dolichyl diphosphooligosaccharide + protein L-asparagine = dolichyl di

"Interacting selectively with a nucleotide, any compound consisting of a nucleoside that is esterif

"Catalysis of the transfer of a group, e.g. a methyl group, glycosyl group, acyl group, phosphoru

"Interacting selectively with a lipid [goid 8289] [pmid 10739088] [evidence TAS]; Catalysis of ene  
EA]"

The function of a transcription cofactor that activates transcription from a RNA polymerase II prc

"Elemental activities, such as catalysis or binding, describing the actions of a gene product at th

"Catalysis of the hydrolysis of the terminal 1,2-linked alpha-D-mannose residues in the oligo-ma

"Catalysis of the hydrolysis of the terminal 1,2-linked alpha-D-mannose residues in the oligo-ma

"Catalysis of the hydrolysis of terminal, non-reducing alpha-D-mannose residues in alpha-D-ma

"Catalysis of the hydrolysis of terminal, non-reducing alpha-D-mannose residues in alpha-D-ma

"Catalysis of the hydrolysis of terminal, non-reducing alpha-D-mannose residues in alpha-D-ma

"Catalysis of the hydrolysis of terminal, non-reducing alpha-D-mannose residues in alpha-D-ma

"Catalysis of the hydrolysis of any O-glycosyl bond [goid 4553] [evidence IEA]; Catalysis of the f

"Catalysis of the hydrolysis of the terminal alpha-glucosyl-(1,3)-mannosyl unit from Glc-Man(9)-(

"Catalysis of the hydrolysis of various bonds, e.g. C-O, C-N, C-C, phosphoric anhydride bonds, (

"Catalysis of the random hydrolysis of N-acetyl-beta-D-glucosaminide 1,4-beta-linkages in chitin

The action of a molecule that contributes to the structural integrity of a complex or assembly with

The action of a molecule that contributes to the structural integrity of a complex or assembly with

"Catalysis of the hydrolysis of N-terminal amino acid residues from in a polypeptide chain [goid 4

"Interacting selectively with any protein or protein complex (a complex of two or more proteins th

Interacting selectively with any protein or protein complex (a complex of two or more proteins th

rolysis of its peptide bonds, initiated by the covalent attachment of a ubiquitin moiety, or multiple

"Interacting selectively with DNA (deoxyribonucleic acid) [goid 3677] [pmid 15907802] [evidence

"The action of a molecule that contributes to the structural integrity of a complex or assembly wi

"Interacting selectively with a nucleotide, any compound consisting of a nucleoside that is esterif

"Interacting selectively with any protein or protein complex (a complex of two or more proteins th

"Catalysis of the phosphorylation of an amino acid residue in a protein, usually according to the

"Interacting selectively with a nucleotide, any compound consisting of a nucleoside that is esterif

"Interacting selectively with a nucleotide, any compound consisting of a nucleoside that is esterif

"Interacting selectively with a nucleotide, any compound consisting of a nucleoside that is esterif

"Interacting selectively with a nucleotide, any compound consisting of a nucleoside that is esterif

"Interacting selectively with a nucleotide, any compound consisting of a nucleoside that is esterif

"Interacting selectively with a nucleotide, any compound consisting of a nucleoside that is esterif

"Interacting selectively with a nucleotide, any compound consisting of a nucleoside that is esterif

"Interacting selectively with a nucleotide, any compound consisting of a nucleoside that is esterif

"Interacting selectively with a nucleotide, any compound consisting of a nucleoside that is esterif

"Interacting selectively with a nucleotide, any compound consisting of a nucleoside that is esterif

"Interacting selectively with a nucleotide, any compound consisting of a nucleoside that is esterif

"Interacting selectively with a nucleotide, any compound consisting of a nucleoside that is esterif

"Interacting selectively with a nucleotide, any compound consisting of a nucleoside that is esterif

"Interacting selectively with a nucleotide, any compound consisting of a nucleoside that is esterif

"Interacting selectively with a nucleotide, any compound consisting of a nucleoside that is esterif

"Interacting selectively with a nucleotide, any compound consisting of a nucleoside that is esterif

"Catalysis of a biochemical reaction at physiological temperatures. In biologically catalyzed reac

Interacting selectively with any protein or protein complex (a complex of two or more proteins th

Interacting selectively with any protein or protein complex (a complex of two or more proteins th

"Catalysis of the phosphorylation of an amino acid residue in a protein, usually according to the

"Interacting selectively with a nucleotide, any compound consisting of a nucleoside that is esterif

"Interacting selectively with a nucleotide, any compound consisting of a nucleoside that is esterif

"Interacting selectively with a nucleotide, any compound consisting of a nucleoside that is esterif

"Interacting selectively with a nucleotide, any compound consisting of a nucleoside that is esterif

"Interacting selectively with a nucleotide, any compound consisting of a nucleoside that is esterif

"Interacting selectively with a nucleotide, any compound consisting of a nucleoside that is esterif

"Interacting selectively with a nucleotide, any compound consisting of a nucleoside that is esterif

"Interacting selectively with calmodulin, a calcium-binding protein with many roles, both in the ca

"Interacting selectively with calmodulin, a calcium-binding protein with many roles, both in the ca

The action of a molecule that contributes to the structural integrity of a complex or assembly with



g successive cell replication or nuclear replication events. Canonically, the cell cycle comprises t

- "Interacting selectively with a nucleotide, any compound consisting of a nucleoside that is esteril
- "Interacting selectively with a nucleotide, any compound consisting of a nucleoside that is esteril
- "Interacting selectively with a nucleotide, any compound consisting of a nucleoside that is esteril
- "Interacting selectively with a nucleotide, any compound consisting of a nucleoside that is esteril
- "Interacting selectively with a nucleotide, any compound consisting of a nucleoside that is esteril
- "Interacting selectively with a nucleotide, any compound consisting of a nucleoside that is esteril
- "Interacting selectively with a nucleotide, any compound consisting of a nucleoside that is esteril
- "Interacting selectively with a nucleotide, any compound consisting of a nucleoside that is esteril
- "Catalysis of the reaction: ATP + shikimate = ADP + shikimate 3-phosphate [goid 4765] [evidenc
- "Interacting selectively with a nucleotide, any compound consisting of a nucleoside that is esteril
- "Stops, prevents or reduces the activity of a protein kinase, an enzyme which phosphorylates a
- "Functions as a physical support for the assembly of a multiprotein mitogen-activated protein kir
- "Interacting selectively with a nucleotide, any compound consisting of a nucleoside that is esteril
- "Interacting selectively with a nucleotide, any compound consisting of a nucleoside that is esteril
- "Interacting selectively with a nucleotide, any compound consisting of a nucleoside that is esteril
- "Interacting selectively with a nucleotide, any compound consisting of a nucleoside that is esteril

- "Interacting selectively with a protein C-terminus, the end of any peptide chain at which the 1-ca
- "Interacting selectively with microtubules, filaments composed of tubulin monomers [goid 8017]
- "Modulates the rate of GTP hydrolysis by a small monomeric GTPase [goid 5083] [evidence NA
- "The action of a molecule that contributes to the structural integrity of a cytoskeletal structure [g
- "Interacting selectively with any nucleic acid [goid 3676] [evidence IEA]; Interacting selectively w
- "Interacting selectively with calmodulin, a calcium-binding protein with many roles, both in the ca
- "Interacting selectively with a nucleotide, any compound consisting of a nucleoside that is esteril
- "Interacting selectively with a nucleotide, any compound consisting of a nucleoside that is esteril
- "Interacting selectively with a nucleotide, any compound consisting of a nucleoside that is esteril
- "Interacting selectively with transfer RNA [goid 49] [evidence IEA]; Interacting selectively with a r
- "Interacting selectively with a nucleotide, any compound consisting of a nucleoside that is esteril
- "Interacting selectively with a nucleotide, any compound consisting of a nucleoside that is esteril
- "Interacting selectively with a nucleotide, any compound consisting of a nucleoside that is esteril
- "Interacting selectively with a nucleotide, any compound consisting of a nucleoside that is esteril
- "Interacting selectively with a nucleotide, any compound consisting of a nucleoside that is esteril
- "Interacting selectively with a nucleotide, any compound consisting of a nucleoside that is esteril
- "Catalysis of the reaction: ATP + L-methionine + H2O = phosphate + diphosphate + S-adenosyl
- "Interacting selectively with a nucleotide, any compound consisting of a nucleoside that is esteril
- "Catalysis of a biochemical reaction at physiological temperatures. In biologically catalyzed reac
- "Interacting selectively with a nucleotide, any compound consisting of a nucleoside that is esteril
- The action of a molecule that contributes to the structural integrity of the extracellular matrix [goid
- "Interacting selectively with a nucleotide, any compound consisting of a nucleoside that is esteril

Plays a role in regulating transcription; may bind a promoter or enhancer DNA sequence or inter  
Interacting selectively with DNA (deoxyribonucleic acid) [goid 3677] [evidence IEA]; Interacting s  
The function of binding to a specific DNA sequence in order to modulate transcription. The trans  
"Interacting selectively with DNA (deoxyribonucleic acid) [goid 3677] [evidence IEA]; Interacting  
Interacting selectively with DNA (deoxyribonucleic acid) [goid 3677] [pmid 9774669] [evidence T

"Interacting selectively with DNA (deoxyribonucleic acid) [goid 3677] [evidence IEA]; Interacting  
Interacting selectively with DNA (deoxyribonucleic acid) [goid 3677] [evidence IEA]  
"Stops, prevents or reduces the activity of a protein kinase, an enzyme which phosphorylates a

Interacting selectively with double-stranded RNA [goid 3725] [pmid 10970838] [evidence IDA]; Ir  
Interacting selectively with an RNA molecule or a portion thereof [goid 3723] [evidence IEA]; Inte  
Interacting selectively with any nucleic acid [goid 3676] [evidence IEA]; Interacting selectively wi  
"Catalysis of the generalized reaction: acyl-carrier + reactant = acyl-reactant + carrier [goid 8415  
"Catalysis of the generalized reaction: acyl-carrier + reactant = acyl-reactant + carrier [goid 8415  
The action of a molecule that contributes to the structural integrity of the myelin sheath of a nerv  
Interacting selectively with zinc (Zn) ions [goid 8270] [evidence IEA]; Interacting selectively with :  
"Catalysis of the hydrolysis of internal, alpha-peptide bonds in a polypeptide chain by a catalytic  
"Catalysis of the hydrolysis of internal, alpha-peptide bonds in a polypeptide chain by a mechani  
Combining with an extracellular or intracellular messenger to initiate a change in cell activity [goid  
Combining with an extracellular or intracellular messenger to initiate a change in cell activity [goid  
Combining with an extracellular or intracellular messenger to initiate a change in cell activity [goid  
Combining with an extracellular or intracellular messenger to initiate a change in cell activity [goid  
Interacting selectively with any protein or protein complex (a complex of two or more proteins th  
"The selective, often stoichiometric, interaction of a molecule with one or more specific sites on  
"Catalysis of the reaction: malonyl-CoA + [acyl-carrier protein] = CoA + malonyl-[acyl-carrier prot  
"Interacting selectively with a nucleotide, any compound consisting of a nucleoside that is esteril  
"Catalysis of the reaction: ATP + 3-methylcrotonyl-CoA + HCO<sub>3</sub><sup>-</sup> = ADP + phosphate + 3-methy

Catalysis of the reaction: (R)-2-methyl-3-oxopropanoyl-CoA = (S)-2-methyl-3-oxopropanoyl-CoA  
"Stimulates the exchange of guanyl nucleotides by a GTPase. Under normal cellular physiologic  
Interacting selectively with calcium ions (Ca<sup>2+</sup>) [goid 5509] [evidence IEA]  
Combining with an extracellular or intracellular messenger to initiate a change in cell activity [goid  
Interacting selectively with calcium ions (Ca<sup>2+</sup>) [goid 5509] [evidence IEA]; The action of a mole

"Interacting selectively with a nucleotide, any compound consisting of a nucleoside that is esteril  
"Interacting selectively with a nucleotide, any compound consisting of a nucleoside that is esteril  
Interacting selectively with DNA (deoxyribonucleic acid) [goid 3677] [pmid 9712829] [evidence T

"Catalysis of the reaction: NTP + H<sub>2</sub>O = NDP + phosphate to drive the unwinding of a DNA helix  
"Interacting selectively with DNA (deoxyribonucleic acid) [goid 3677] [evidence IEA]; Interacting  
"Interacting selectively with a nucleotide, any compound consisting of a nucleoside that is esteril  
"Interacting selectively with a nucleotide, any compound consisting of a nucleoside that is esteril

Catalysis of the energy-independent passage of cations across a lipid bilayer down a concentration gradient  
Catalysis of facilitated diffusion of an ion (by an energy-independent process) by passage through a channel  
Catalysis of facilitated diffusion of an ion (by an energy-independent process) by passage through a carrier

Interacting selectively with any protein or protein complex (a complex of two or more proteins that function together)  
"Interacting selectively with calcium ions (Ca<sup>2+</sup>) [goid 5509] [pmid 15528213] [evidence IDA]; Interacting selectively with a nucleotide, any compound consisting of a nucleoside that is esterified to a phosphate group  
Interacting selectively with an RNA molecule or a portion thereof [goid 3723] [evidence IEA]  
Interacting selectively with any protein or protein complex (a complex of two or more proteins that function together)  
"Interacting selectively with cyclins, proteins whose levels in a cell varies markedly during the cell cycle  
"Elemental activities, such as catalysis or binding, describing the actions of a gene product at the molecular level  
"Catalysis of the oxidative decarboxylation of malate with the concomitant production of pyruvate and NADH  
"The selective, often stoichiometric, interaction of a molecule with one or more specific sites on a protein or protein complex

"Interacting selectively with one of the p53 family of proteins [goid 2039] [evidence IEA]; Catalysis of the energy-independent passage of cations across a lipid bilayer down a concentration gradient  
Interacting selectively with any protein or protein complex (a complex of two or more proteins that function together)  
"Interacting selectively with a nucleotide, any compound consisting of a nucleoside that is esterified to a phosphate group  
"Interacting selectively with magnesium (Mg) ions [goid 287] [evidence IEA]; Catalysis of the reaction: nucleoside triphosphate + RNA(n) = diphosphate + RNA(n+1). Utilizes energy from the hydrolysis of nucleoside triphosphate  
"Interacting selectively with calcium ions (Ca<sup>2+</sup>) [goid 5509] [evidence IEA]; Catalysis of the oxidative decarboxylation of malate with the concomitant production of pyruvate and NADH  
Interacting selectively with any protein or protein complex (a complex of two or more proteins that function together)

"The selective, often stoichiometric, interaction of a molecule with one or more specific sites on a protein or protein complex  
"Interacting selectively with DNA (deoxyribonucleic acid) [goid 3677] [evidence IEA]; Combining with an extracellular or intracellular messenger to initiate a change in cell activity [goid 3702] [pmid 8598913] [evidence IEA]; Any process that modulates the frequency, rate or extent of DNA-dependent transcription  
Interacting selectively with any protein or protein complex (a complex of two or more proteins that function together)  
"Combining with an extracellular or intracellular messenger to initiate a change in cell activity [goid 3702] [pmid 8598913] [evidence IEA]; Any process that modulates the frequency, rate or extent of DNA-dependent transcription  
"Combining with an extracellular or intracellular messenger to initiate a change in cell activity [goid 3702] [pmid 8598913] [evidence IEA]; Any process that modulates the frequency, rate or extent of DNA-dependent transcription  
"Combining with an extracellular or intracellular messenger to initiate a change in cell activity [goid 3702] [pmid 8598913] [evidence IEA]; Any process that modulates the frequency, rate or extent of DNA-dependent transcription  
Interacting selectively with any protein or protein complex (a complex of two or more proteins that function together)  
"The function of a transcription cofactor that activates transcription from a RNA polymerase II promoter  
"Combining with an extracellular or intracellular messenger to initiate a change in cell activity [goid 3702] [pmid 8598913] [evidence IEA]; Any process that modulates the frequency, rate or extent of DNA-dependent transcription  
Interacting selectively with any protein or protein complex (a complex of two or more proteins that function together)  
"Catalysis of the reaction: nucleoside triphosphate + RNA(n) = diphosphate + RNA(n+1). Utilizes energy from the hydrolysis of nucleoside triphosphate  
"Functions to initiate or regulate RNA polymerase II transcription [goid 3702] [pmid 8598913] [evidence IEA]; Any process that modulates the frequency, rate or extent of DNA-dependent transcription  
Interacting selectively with any protein or protein complex (a complex of two or more proteins that function together)  
The function of a transcription cofactor that activates transcription from a RNA polymerase II promoter  
"The function that links a sequence-specific transcription factor to the core RNA polymerase II complex  
"Interacting selectively with DNA (deoxyribonucleic acid) [goid 3677] [evidence IEA]; The function of a transcription cofactor that activates transcription from a RNA polymerase II promoter  
The function of a transcription cofactor that activates transcription from a RNA polymerase II promoter  
"Interacting selectively with monomeric or multimeric forms of actin, including actin filaments [goid 3702] [pmid 8598913] [evidence IEA]; Any process that modulates the frequency, rate or extent of DNA-dependent transcription  
Interacting selectively with any protein or protein complex (a complex of two or more proteins that function together)  
"The function that links a sequence-specific transcription factor to the core RNA polymerase II complex

Interacting selectively with any protein or protein complex (a complex of two or more proteins that  
"The function that links a sequence-specific transcription factor to the core RNA polymerase II complex  
Functions to initiate or regulate RNA polymerase II transcription [goid 3702] [pmid 10024883] [evidence IEA];  
The function of a transcription cofactor that activates transcription from a RNA polymerase II promoter  
[evidence IEA]; Any process that modulates the frequency, rate or extent of DNA-dependent transcription  
Interacting selectively with any protein or protein complex (a complex of two or more proteins that  
"The function of binding to a specific DNA sequence in order to modulate transcription. The transcription  
"The function of binding to a specific DNA sequence in order to modulate transcription. The transcription  
"The function of binding to a specific DNA sequence in order to modulate transcription. The transcription  
"The function of binding to a specific DNA sequence in order to modulate transcription. The transcription

The action of a molecule that contributes to the structural integrity of a complex or assembly with  
Combining with an extracellular or intracellular messenger to initiate a change in cell activity [goid  
"The selective, often stoichiometric, interaction of a molecule with one or more specific sites on a  
Interacting selectively with any protein or protein complex (a complex of two or more proteins that  
"The function of binding to a specific DNA sequence in order to modulate transcription. The transcription  
"The function of binding to a specific DNA sequence in order to modulate transcription. The transcription  
"Interacting selectively with a nucleotide, any compound consisting of a nucleoside that is esterified

"Interacting selectively with DNA (deoxyribonucleic acid) [goid 3677] [evidence IEA]; Interacting  
"Catalysis of the transfer of a methyl group to an acceptor molecule [goid 8168] [evidence IEA];  
The action of a molecule that contributes to the structural integrity of the extracellular matrix [goid  
"Interacting selectively with a nucleotide, any compound consisting of a nucleoside that is esterified

Interacting selectively with DNA (deoxyribonucleic acid) [goid 3677] [evidence IEA]; Plays a role  
The function of binding to a specific DNA sequence in order to modulate transcription. The transcription  
"Catalysis of a biochemical reaction at physiological temperatures. In biologically catalyzed reactions  
"Interacting selectively with a nucleotide, any compound consisting of a nucleoside that is esterified  
"Catalysis of the hydrolysis of N-terminal amino acid residues from in a polypeptide chain [goid 4  
"Catalysis of the hydrolysis of N-terminal amino acid residues from in a polypeptide chain [goid 4  
"Change in the frequency, rate or extent of DNA-dependent transcription over time from an initial condition (e.g. a zygote or a young adult) to a later condition (e.g. a multicellular

"Catalysis of the transfer of a methyl group to an acceptor molecule [goid 8168] [evidence IEA];  
"Interacting selectively with copper (Cu) ions [goid 5507] [evidence IEA]; Catalysis of the transfer  
"Catalysis of the transfer of a methyl group to an acceptor molecule [goid 8168] [evidence IEA];  
"Catalysis of the transfer of a methyl group to an acceptor molecule [goid 8168] [pmid 10329009  
"Interacting selectively with any protein or protein complex (a complex of two or more proteins that  
"Catalysis of the transfer of a methyl group to an acceptor molecule [goid 8168] [evidence IEA];

"Catalysis of the transfer of a methyl group to an acceptor molecule [goid 8168] [evidence IEA];  
"Interacting selectively with an RNA molecule or a portion thereof [goid 3723] [evidence IEA]; Catalysis  
"Interacting selectively with any nucleic acid [goid 3676] [evidence IEA]; Catalysis of the transfer



"Interacting selectively with a nucleotide, any compound consisting of a nucleoside that is esterified to a phosphate group" [goid 3723] [evidence IEA]; The

Interacting selectively with an RNA molecule or a portion thereof [goid 3723] [evidence IEA]; The

"Interacting selectively with monomeric or multimeric forms of actin, including actin filaments [goid 3723] [evidence IEA]; The

"Interacting selectively with a nucleotide, any compound consisting of a nucleoside that is esterified to a phosphate group  
Combining with airborne compounds to initiate a change in cell activity. These receptors are used by plants to detect herbivores and pathogens.

The action of a molecule that contributes to the structural integrity of the ribosome [goid 3735] [evidence IEA];  
"Catalysis of the reaction: acetyl-CoA + histone = CoA + acetyl-histone [goid 4402] [evidence IEA];  
"Catalysis of the reaction: 2-lysophosphatidylcholine + H<sub>2</sub>O = glycerophosphocholine + a carboxylate [goid 4402] [evidence IEA];  
"Interacting selectively with DNA (deoxyribonucleic acid) [goid 3677] [pmid 2188979] [evidence IEA];  
The action of a molecule that contributes to the structural integrity of the extracellular matrix [goid 3735] [evidence IEA];  
"Catalysis of the reaction: R-X + glutathione = H-X + R-S-glutathione. R may be an aliphatic, aromatic, or heterocyclic group [goid 4402] [evidence IEA];  
"Catalysis of the reaction: R-X + glutathione = H-X + R-S-glutathione. R may be an aliphatic, aromatic, or heterocyclic group [goid 4402] [evidence IEA];  
"Catalysis of the reaction: R-X + glutathione = H-X + R-S-glutathione. R may be an aliphatic, aromatic, or heterocyclic group [goid 4402] [evidence IEA];  
The function that stimulates a cell to grow or proliferate. Most growth factors have other actions.  
Interacting selectively with any protein or protein complex (a complex of two or more proteins that function together).

"Interacting selectively with any protein or protein complex (a complex of two or more proteins that function together) [goid 3677] [evidence IEA];  
"Interacting selectively with monomeric or multimeric forms of actin, including actin filaments [goid 3677] [evidence IEA];  
Interacting selectively with beta-2-microglobulin [goid 30881] [pmid 8901601] [evidence IDA];  
"Interacting selectively with beta-2-microglobulin [goid 30881] [pmid 8901601] [evidence IDA];  
"Catalysis of the incorporation of one atom from molecular oxygen into a compound and the reduction of the other oxygen atom to water [goid 4402] [evidence IEA];  
Catalysis of the incorporation of one atom from molecular oxygen into a compound and the reduction of the other oxygen atom to water [goid 4402] [evidence IEA];  
Interacting selectively with a mitogen-activated protein kinase [goid 51019] [evidence ISS];  
"Catalysis of a biochemical reaction at physiological temperatures. In biologically catalyzed reactions, the reaction is catalyzed by an enzyme [goid 4402] [evidence IEA];  
Interacting selectively with a lectin-like natural killer cell receptor [goid 46703] [pmid 11491531] [evidence IEA];  
"Interacting selectively with a protein C-terminus, the end of any peptide chain at which the 1-carboxylate group is located [goid 4402] [evidence IEA];  
polypeptides (co-translational, post-translational modifications). Includes the modification of charged amino acids (lysine, arginine, histidine, aspartate, glutamate, asparagine, glutamine) and the modification of serine, threonine, and tyrosine.  
Interacting selectively with DNA (deoxyribonucleic acid) [goid 3677] [evidence IEA]; Mediates the transport of DNA to the sites of protein synthesis [goid 42254] [evidence IEA];  
Interacting selectively with DNA (deoxyribonucleic acid) [goid 3677] [evidence IEA];  
"Functions to control the survival, growth, differentiation and effector function of tissues and cells [goid 4402] [evidence IEA];  
Interacting selectively with any protein or protein complex (a complex of two or more proteins that function together) [goid 3677] [evidence IEA];

their transport to the sites of protein synthesis [goid 42254] [evidence IEA]"

"Catalysis of the reaction: an orthophosphoric monoester + H<sub>2</sub>O = an alcohol + phosphate, with the release of a proton [goid 4402] [evidence IEA];

"Interacting selectively with magnesium (Mg) ions [goid 287] [evidence IEA]; Catalysis of the hydrolysis of a phosphoric monoester [goid 4402] [evidence IEA];









"Interacting selectively with cobalamin (vitamin B12), a water-soluble vitamin characterized by pr

Combining with an extracellular or intracellular messenger to initiate a change in cell activity [goi

"Catalysis of the hydrolysis of internal, alpha-peptide bonds in a polypeptide chain by a mechani

"Catalysis of the hydrolysis of internal, alpha-peptide bonds in a polypeptide chain by a mechani

"Catalysis of a biochemical reaction at physiological temperatures. In biologically catalyzed reac

"Catalysis of the hydrolysis of internal, alpha-peptide bonds in a polypeptide chain by a mechani

"Catalysis of the hydrolysis of internal, alpha-peptide bonds in a polypeptide chain by a mechani

"Catalysis of the hydrolysis of internal, alpha-peptide bonds in a polypeptide chain by a mechani

"Catalysis of the hydrolysis of internal, alpha-peptide bonds in a polypeptide chain by a mechani

"Catalysis of the hydrolysis of internal, alpha-peptide bonds in a polypeptide chain by a mechani

"The function of a transcription cofactor that activates transcription from a RNA polymerase II pr

"Elemental activities, such as catalysis or binding, describing the actions of a gene product at th

"Interacting selectively with zinc (Zn) ions [goid 8270] [pmid 8521818] [evidence TAS]; Interactin

Interacting selectively with DNA (deoxyribonucleic acid) [goid 3677] [evidence IEA]; Interacting s

Interacting selectively with DNA (deoxyribonucleic acid) [goid 3677] [evidence IEA]; Interacting s

and cell division in which a single diploid cell undergoes two nuclear divisions following a single re

The function of binding to a specific DNA sequence in order to modulate transcription. The tran

"The function of binding to a specific DNA sequence in order to modulate transcription. The tran

Interacting selectively with any protein or protein complex (a complex of two or more proteins th

"Interacting selectively with any protein or protein complex (a complex of two or more proteins th

Interacting selectively with any protein or protein complex (a complex of two or more proteins th

Interacting selectively with any protein or protein complex (a complex of two or more proteins th

Interacting selectively with any protein or protein complex (a complex of two or more proteins th

"Interacting selectively with any protein or protein complex (a complex of two or more proteins th

Interacting selectively with any protein or protein complex (a complex of two or more proteins th

"[goid 8265] [pmid 11302742] [evidence IMP]; Catalysis of the cleavage of C-C, C-O, C-N and o

"Elemental activities, such as catalysis or binding, describing the actions of a gene product at th

"Interacting selectively with any protein or protein complex (a complex of two or more proteins th

all and its external environment [goid 6879] [evidence IEA]; The regulated release of proteins from

"The selective, often stoichiometric, interaction of a molecule with one or more specific sites on

"Interacting selectively with ATP, adenosine 5'-triphosphate, a universally important coenzyme a

"Catalysis of the transfer of a solute or solutes from one side of a membrane to the other accord

"Interacting selectively with ATP, adenosine 5'-triphosphate, a universally important coenzyme a

"Interacting selectively with chromatin, the network of fibers of DNA and protein that make up th

"Elemental activities, such as catalysis or binding, describing the actions of a gene product at th

An activity which assists splicing of substrate RNA(s) by facilitating the formation and stabilizati



"The action of a molecule that contributes to the structural integrity of the ribosome [goid 3735] [Interacting selectively with an RNA molecule or a portion thereof [goid 3723] [pmid 8626705] [ev  
The action of a molecule that contributes to the structural integrity of the ribosome [goid 3735] [r  
The action of a molecule that contributes to the structural integrity of the ribosome [goid 3735] [e  
The action of a molecule that contributes to the structural integrity of the ribosome [goid 3735] [e  
The action of a molecule that contributes to the structural integrity of the ribosome [goid 3735] [e  
The action of a molecule that contributes to the structural integrity of the ribosome [goid 3735] [e  
"The action of a molecule that contributes to the structural integrity of the ribosome [goid 3735] [r  
The action of a molecule that contributes to the structural integrity of the ribosome [goid 3735] [e  
The action of a molecule that contributes to the structural integrity of the ribosome [goid 3735] [e  
Interacting selectively with an RNA molecule or a portion thereof [goid 3723] [evidence IEA]; The  
Interacting selectively with an RNA molecule or a portion thereof [goid 3723] [evidence IEA]; The  
The action of a molecule that contributes to the structural integrity of the ribosome [goid 3735] [e  
"Interacting selectively with a nucleotide, any compound consisting of a nucleoside that is esterifi  
The action of a molecule that contributes to the structural integrity of the ribosome [goid 3735] [e  
The action of a molecule that contributes to the structural integrity of the ribosome [goid 3735] [r  
"The function of binding to a specific DNA sequence in order to modulate transcription. The tran  
Interacting selectively with an RNA molecule or a portion thereof [goid 3723] [pmid 2891103] [ev  
"The action of a molecule that contributes to the structural integrity of the ribosome [goid 3735] [r  
The action of a molecule that contributes to the structural integrity of the ribosome [goid 3735] [e  
"The action of a molecule that contributes to the structural integrity of the ribosome [goid 3735] [r  
"The action of a molecule that contributes to the structural integrity of the ribosome [goid 3735] [r  
The action of a molecule that contributes to the structural integrity of the ribosome [goid 3735] [e  
"The action of a molecule that contributes to the structural integrity of the ribosome [goid 3735] [r

"Elemental activities, such as catalysis or binding, describing the actions of a gene product at th  
The action of a molecule that contributes to the structural integrity of the ribosome [goid 3735] [e  
"Elemental activities, such as catalysis or binding, describing the actions of a gene product at th  
The action of a molecule that contributes to the structural integrity of the ribosome [goid 3735] [r

"The action of a molecule that contributes to the structural integrity of the ribosome [goid 3735] [r  
"Elemental activities, such as catalysis or binding, describing the actions of a gene product at th  
"The action of a molecule that contributes to the structural integrity of the ribosome [goid 3735] [r  
"Elemental activities, such as catalysis or binding, describing the actions of a gene product at th  
"Elemental activities, such as catalysis or binding, describing the actions of a gene product at th  
The action of a molecule that contributes to the structural integrity of the ribosome [goid 3735] [e  
"Elemental activities, such as catalysis or binding, describing the actions of a gene product at th

The action of a molecule that contributes to the structural integrity of the ribosome [goid 3735] [e  
The action of a molecule that contributes to the structural integrity of the ribosome [goid 3735] [e

The action of a molecule that contributes to the structural integrity of the ribosome [goid 3735] [e

"The action of a molecule that contributes to the structural integrity of the ribosome [goid 3735] ["Elemental activities, such as catalysis or binding, describing the actions of a gene product at th  
The action of a molecule that contributes to the structural integrity of the ribosome [goid 3735] [e  
The action of a molecule that contributes to the structural integrity of the ribosome [goid 3735] [r  
The action of a molecule that contributes to the structural integrity of the ribosome [goid 3735] [r  
The action of a molecule that contributes to the structural integrity of the ribosome [goid 3735] [r  
"The action of a molecule that contributes to the structural integrity of the ribosome [goid 3735] [  
The action of a molecule that contributes to the structural integrity of the ribosome [goid 3735] [r  
The action of a molecule that contributes to the structural integrity of the ribosome [goid 3735] [r  
The action of a molecule that contributes to the structural integrity of the ribosome [goid 3735] [r  
The action of a molecule that contributes to the structural integrity of the ribosome [goid 3735] [e  
The action of a molecule that contributes to the structural integrity of the ribosome [goid 3735] [r  
"Elemental activities, such as catalysis or binding, describing the actions of a gene product at th

"Elemental activities, such as catalysis or binding, describing the actions of a gene product at th  
The action of a molecule that contributes to the structural integrity of the ribosome [goid 3735] [e  
onvert it to a molecular signal [goid 42769] [pmid 15300802] [evidence NAS]; The chemical reac

"Elemental activities, such as catalysis or binding, describing the actions of a gene product at th  
The action of a molecule that contributes to the structural integrity of the ribosome [goid 3735] [e  
Interacting selectively with a specific domain of a protein [goid 19904] [pmid 11984006] [evidenc  
The action of a molecule that contributes to the structural integrity of the ribosome [goid 3735] [r  
Interacting selectively with any protein or protein complex (a complex of two or more proteins th  
onvert it to a molecular signal [goid 42769] [pmid 15300802] [evidence NAS]; The chemical reac  
The action of a molecule that contributes to the structural integrity of the ribosome [goid 3735] [r  
Interacting selectively with an RNA molecule or a portion thereof [goid 3723] [evidence IEA]; Th  
The action of a molecule that contributes to the structural integrity of the ribosome [goid 3735] [e  
Interacting selectively with an RNA molecule or a portion thereof [goid 3723] [evidence ISS]; Th  
The action of a molecule that contributes to the structural integrity of the ribosome [goid 3735] [e  
mediated process in which the information in messenger RNA (mRNA) is used to specify the sec

their transport to the sites of protein synthesis [goid 42254] [evidence IEA]"

Combining with an extracellular or intracellular messenger to initiate a change in cell activity [goid  
Combining with an extracellular or intracellular messenger to initiate a change in cell activity [goid  
Combining with an extracellular or intracellular messenger to initiate a change in cell activity [goid  
Combining with an extracellular or intracellular messenger to initiate a change in cell activity [goid  
"Interacting selectively with ATP, adenosine 5'-triphosphate, a universally important coenzyme a  
"Interacting selectively with damaged DNA [goid 3684] [evidence IEA]; Interacting selectively wit  
"Interacting selectively with a nucleotide, any compound consisting of a nucleoside that is esteril  
"Interacting selectively with chromatin, the network of fibers of DNA and protein that make up th  
"Interacting selectively with a nucleotide, any compound consisting of a nucleoside that is esteril



"Interacting selectively with a nucleotide, any compound consisting of a nucleoside that is esterified to a phosphate group [goid 3677] [evidence IEA]; Functions in the initiation of ribosome-mediated translation of mRNA into a polypeptide [goid 3700] [evidence IEA]; Catalysis of the reaction: protein tyrosine phosphate + H<sub>2</sub>O = protein tyrosine + phosphate [goid 1679] [evidence IEA]; Catalysis of the reaction: 1-phosphatidyl-1D-myo-inositol 3-phosphate + H<sub>2</sub>O = 1-phosphatidyl-3-phosphate + myo-inositol [goid 1679] [evidence IEA]; Catalysis of the hydrolysis of phosphoric monoesters, releasing inorganic phosphate [goid 1679] [evidence IEA]; Catalysis of the hydrolysis of phosphoric monoesters, releasing inorganic phosphate [goid 1679] [evidence IEA]; Catalysis of the reaction: 1-phosphatidyl-1D-myo-inositol 3-phosphate + H<sub>2</sub>O = 1-phosphatidyl-3-phosphate + myo-inositol [goid 1679] [evidence IEA]; Interacting selectively with DNA (deoxyribonucleic acid) [goid 3677] [evidence IEA]; Catalysis of the removal of a phosphate group from phosphorylated myo-inositol (1,2,3,5/4,6-cyclic) [goid 1679] [evidence IEA]; Catalysis of the reaction: protein serine/threonine phosphate + H<sub>2</sub>O = protein serine/threonine + phosphate [goid 1679] [evidence IEA]; Catalysis of the reaction: protein tyrosine phosphate + H<sub>2</sub>O = protein tyrosine + phosphate [goid 1679] [evidence IEA]; Catalysis of the reaction: protein serine/threonine phosphate + H<sub>2</sub>O = protein serine/threonine + phosphate [goid 1679] [evidence IEA]; Interacting selectively with any protein or protein complex (a complex of two or more proteins that interact with each other) [goid 15031] [evidence TAS]; Combining with an extracellular or intracellular messenger to initiate a change in cell activity [goid 15031] [evidence TAS]; Any molecular entity that serves as an electron acceptor and electron donor in an electron transport chain [goid 4089] [evidence IEA]; Catalysis of the reaction: H<sub>2</sub>CO<sub>3</sub> = CO<sub>2</sub> + H<sub>2</sub>O [goid 4089] [evidence IEA]; Interacting selectively with any protein or protein complex (a complex of two or more proteins that interact with each other) [goid 15031] [evidence TAS]; Catalysis of the reaction: 2-amino-4-hydroxy-6-hydroxymethyl-7,8-dihydropteridine diphosphate + H<sub>2</sub>O = 2-amino-4-hydroxy-6-hydroxymethyl-7,8-dihydropteridine + phosphate + phosphate [goid 1679] [evidence IEA]; A translation release factor that is specific for one or more particular termination codons; acts at the ribosome to release the nascent polypeptide chain [goid 15031] [evidence TAS]; A translation release factor that is specific for one or more particular termination codons; acts at the ribosome to release the nascent polypeptide chain [goid 15031] [evidence TAS]; Interacting selectively with iron (Fe) ions [goid 5506] [evidence IEA]; Any molecular entity that serves as a cofactor for a protein [goid 15031] [evidence TAS]; Interacting selectively with monomeric actin, also known as G-actin [goid 3785] [pmid 1257087] [evidence IEA]; Enables the directed movement of lipids into, out of, within or between cells [goid 5319] [evidence IEA]; Enables the directed movement of lipids into, out of, within or between cells [goid 5319] [evidence IEA]; Interacting selectively with any protein or protein complex (a complex of two or more proteins that interact with each other) [goid 15031] [evidence TAS]; The directed movement of proteins into, out of, within or between cells [goid 15031] [evidence IEA]; Interacting selectively with any protein or protein complex (a complex of two or more proteins that interact with each other) [goid 15031] [evidence TAS]; Interacting selectively with any protein or protein complex (a complex of two or more proteins that interact with each other) [goid 15031] [evidence TAS]; Elemental activities, such as catalysis or binding, describing the actions of a gene product at the molecular level [goid 15031] [evidence TAS]; The action of a molecule that contributes to the structural integrity of the extracellular matrix [goid 15031] [evidence TAS]; Catalysis of the reaction: ATP + ubiquitin + protein lysine = AMP + diphosphate + protein N-ubiquitinated [goid 15031] [evidence TAS]; Interacting selectively with magnesium (Mg) ions [goid 287] [evidence IEA]; Catalysis of the hydrolysis of succinyl-CoA to succinate and CoA [goid 4494] [pmid 2000000] [evidence IEA]; Interacting selectively with any protein or protein complex (a complex of two or more proteins that interact with each other) [goid 15031] [evidence TAS]; Interacting selectively with DNA (deoxyribonucleic acid) [goid 3677] [evidence IEA]; Catalysis of the reaction: ATP + (R)-5-diphosphomevalonate = ADP + phosphate + isopentenyl pyrophosphate [goid 1679] [evidence IEA]; Interacting selectively with a nucleotide, any compound consisting of a nucleoside that is esterified to a phosphate group [goid 3677] [evidence IEA];



Interacting selectively with a specific domain of a protein [goid 19904] [evidence IEA]; Interacting  
"Interacting selectively with a nucleotide, any compound consisting of a nucleoside that is esterified  
"Catalysis of the reaction: GTP + H2O = GDP + phosphate [goid 3924] [evidence IEA]; Interacting  
The function of binding to a specific DNA sequence in order to modulate transcription. The trans  
Interacting selectively with DNA (deoxyribonucleic acid) [goid 3677] [evidence IEA]; Interacting s  
Interacting selectively with DNA (deoxyribonucleic acid) [goid 3677] [evidence IEA]; The function  
Plays a role in regulating transcription; may bind a promoter or enhancer DNA sequence or inter

The function of binding to a specific DNA sequence in order to modulate transcription. The trans  
"Interacting selectively with DNA (deoxyribonucleic acid) [goid 3677] [evidence IEA]; Catalysis of  
Interacting selectively with DNA (deoxyribonucleic acid) [goid 3677] [evidence IEA]; Plays a role  
Interacting selectively with DNA (deoxyribonucleic acid) [goid 3677] [evidence IEA]; The function  
"Interacting selectively with monomeric or multimeric forms of actin, including actin filaments [go  
"Functions to increase the rate of ATP hydrolysis [goid 1671] [evidence ISS]; Interacting selectiv  
Interacting selectively with any protein or protein complex (a complex of two or more proteins th  
The function of binding to a specific DNA sequence in order to modulate transcription. The trans  
The function of a transcription cofactor that activates transcription from a RNA polymerase II pr  
"Interacting selectively with any protein or protein complex (a complex of two or more proteins th  
The function of binding to a specific DNA sequence in order to modulate transcription. The trans

"Combining with an extracellular or intracellular messenger to initiate a change in cell activity, ar  
Interacting selectively with DNA (deoxyribonucleic acid) [goid 3677] [evidence IEA]; Functions to  
The function of binding to a specific DNA sequence in order to modulate transcription. The trans  
"Catalysis of movement along a microfilament, coupled to the hydrolysis of a nucleoside triphosph  
"Catalysis of movement along a microfilament, coupled to the hydrolysis of a nucleoside triphosph  
"Catalysis of movement along a microfilament, coupled to the hydrolysis of a nucleoside triphosph  
"Interacting selectively with a nucleotide, any compound consisting of a nucleoside that is esterified  
"Catalysis of movement along a polymeric molecule such as a microfilament or microtubule, coupled  
"Catalysis of movement along a polymeric molecule such as a microfilament or microtubule, coupled

"Catalysis of movement along a polymeric molecule such as a microfilament or microtubule, coupled  
"Catalysis of movement along a polymeric molecule such as a microfilament or microtubule, coupled  
"Catalysis of movement along a polymeric molecule such as a microfilament or microtubule, coupled  
"Catalysis of movement along a polymeric molecule such as a microfilament or microtubule, coupled  
"Catalysis of movement along a polymeric molecule such as a microfilament or microtubule, coupled  
"Catalysis of movement along a polymeric molecule such as a microfilament or microtubule, coupled  
"Catalysis of the reaction: ATP + ubiquitin + protein lysine = AMP + diphosphate + protein N-ubiquitin  
"Interacting selectively with a nucleotide, any compound consisting of a nucleoside that is esterified  
"Interacting selectively with a nucleotide, any compound consisting of a nucleoside that is esterified  
"Interacting selectively with a nucleotide, any compound consisting of a nucleoside that is esterified  
"Interacting selectively with a nucleotide, any compound consisting of a nucleoside that is esterified  
"Interacting selectively with a nucleotide, any compound consisting of a nucleoside that is esterified

"Interacting selectively with a nucleotide, any compound consisting of a nucleoside that is esterified to a phosphate group [goid 8307] |  
"Catalysis of movement along a microfilament, coupled to the hydrolysis of a nucleoside triphosphate [goid 8307] |  
"Interacting selectively with a nucleotide, any compound consisting of a nucleoside that is esterified to a phosphate group [goid 8307] |  
"Interacting selectively with a nucleotide, any compound consisting of a nucleoside that is esterified to a phosphate group [goid 8307] |  
"Interacting selectively with a nucleotide, any compound consisting of a nucleoside that is esterified to a phosphate group [goid 8307] |  
"Catalysis of movement along a microfilament, coupled to the hydrolysis of a nucleoside triphosphate [goid 8307] |  
"Interacting selectively with a nucleotide, any compound consisting of a nucleoside that is esterified to a phosphate group [goid 8307] |  
"Interacting selectively with a nucleotide, any compound consisting of a nucleoside that is esterified to a phosphate group [goid 8307] |  
"Interacting selectively with a nucleotide, any compound consisting of a nucleoside that is esterified to a phosphate group [goid 8307] |  
"Catalysis of movement along a microfilament, coupled to the hydrolysis of a nucleoside triphosphate [goid 8307] |

The function of binding to a specific DNA sequence in order to modulate transcription. The transcription factor binds to the DNA sequence and recruits the transcription machinery to the promoter region. The action of a molecule that contributes to the structural integrity of a muscle fiber [goid 8307] |  
The action of a molecule that contributes to the structural integrity of a muscle fiber [goid 8307] |  
The action of a molecule that contributes to the structural integrity of a complex or assembly with a specific DNA sequence [goid 8307] |

"Interacting selectively with chromatin, the network of fibers of DNA and protein that make up the nucleus [goid 3677] [evidence IEA];  
"The function of binding to a specific DNA sequence in order to modulate transcription. The transcription factor binds to the DNA sequence and recruits the transcription machinery to the promoter region. [goid 3677] [evidence IEA];  
"Interacting selectively with DNA (deoxyribonucleic acid) [goid 3677] [evidence IEA]; Catalysis of the hydrolysis of the terminal or penultimate peptide bond at the C-terminal end of a protein [goid 3677] [evidence IEA];  
"Interacting selectively with DNA (deoxyribonucleic acid) [goid 3677] [evidence IEA]; Catalysis of the hydrolysis of the terminal or penultimate peptide bond at the C-terminal end of a protein [goid 3677] [evidence IEA];  
The function of binding to a specific DNA sequence in order to modulate transcription. The transcription factor binds to the DNA sequence and recruits the transcription machinery to the promoter region. [goid 3677] [evidence IEA];  
The function of binding to a specific DNA sequence in order to modulate transcription. The transcription factor binds to the DNA sequence and recruits the transcription machinery to the promoter region. [goid 3677] [evidence IEA];

"Elemental activities, such as catalysis or binding, describing the actions of a gene product at the transcription start site [goid 3677] [evidence IEA];

"Interacting selectively with any nucleic acid [goid 3676] [evidence IEA]; Catalysis of the transfer of a phosphate group from a nucleoside to another nucleoside [goid 3676] [evidence IEA];  
"Interacting selectively with any nucleic acid [goid 3676] [evidence IEA]; Catalysis of the transfer of a phosphate group from a nucleoside to another nucleoside [goid 3676] [evidence IEA];  
"Elemental activities, such as catalysis or binding, describing the actions of a gene product at the transcription start site [goid 3677] [evidence IEA];  
"Catalysis of the hydrolysis of the terminal or penultimate peptide bond at the C-terminal end of a protein [goid 3677] [evidence IEA];  
"Catalysis of the hydrolysis of the terminal or penultimate peptide bond at the C-terminal end of a protein [goid 3677] [evidence IEA];  
Any transcription regulator activity that prevents or downregulates transcription [goid 16564] [pmid 16564] |

Interacting selectively with DNA (deoxyribonucleic acid) [goid 3677] [evidence IEA]  
EA]"

Interacting selectively with any protein or protein complex (a complex of two or more proteins that interact with each other) [goid 3677] [evidence IEA];

"Catalysis of the reaction: ATP + NAD+ = ADP + NADP+ [goid 3951] [evidence IEA]; Catalysis of the hydrolysis of the terminal or penultimate peptide bond at the C-terminal end of a protein [goid 3951] [evidence IEA];  
"Interacting selectively with a nucleotide, any compound consisting of a nucleoside that is esterified to a phosphate group [goid 3951] [evidence IEA];  
"Catalysis of a biochemical reaction at physiological temperatures. In biologically catalyzed reactions, the reaction is catalyzed by an enzyme. Interacting selectively with an RNA molecule or a portion thereof [goid 3723] [pmid 16618814] [evidence IEA];

"Catalysis of the hydrolysis of any O-glycosyl bond [goid 4553] [evidence IEA]; Catalysis of the hydrolysis of any N-glycosyl bond [goid 4553] [evidence IEA];

"Interacting selectively with a nucleotide, any compound consisting of a nucleoside that is esterified to a phosphate group [goid 3723] [evidence IEA]; Catalysis of the hydrolysis of terminal non-reducing N-acetyl-D-glucosamine residues in N-acetylglucosaminyl-phospho-D-mannose + H<sub>2</sub>O = N-acetylglucosamine + D-mannose-6-phosphate [goid 3723] [evidence IEA]; Catalysis of the reaction: glycoprotein N-acetyl-D-glucosaminyl-phospho-D-mannose + H<sub>2</sub>O = N-acetylglucosamine + D-mannose-6-phosphate [goid 3723] [evidence IEA]; Elemental activities, such as catalysis or binding, describing the actions of a gene product at the molecular level [goid 3723] [evidence IEA]; Interacting selectively with a nucleotide, any compound consisting of a nucleoside that is esterified to a phosphate group [goid 3723] [evidence IEA];

"Functions to control the survival, growth, differentiation and effector function of tissues and cells [goid 3723] [evidence IEA]; Interacting selectively with an RNA molecule or a portion thereof [goid 3723] [evidence IEA]; Interacting selectively with a nucleotide, any compound consisting of a nucleoside that is esterified to a phosphate group [goid 3723] [evidence IEA]; Catalysis of the reaction: CTP + N-acylneuraminate = diphosphate + CMP-N-acylneuraminate [goid 3723] [evidence IEA]; Interacting selectively with any protein or protein complex (a complex of two or more proteins that are covalently associated) [goid 51082] [pmid 9325046] [evidence TAS]; Interacting selectively with an unfolded protein [goid 51082] [pmid 9325046] [evidence TAS]; Interacting selectively with any protein or protein complex (a complex of two or more proteins that are covalently associated) [goid 51082] [pmid 9325046] [evidence TAS]; Interacting selectively with any protein or protein complex (a complex of two or more proteins that are covalently associated) [goid 51082] [pmid 9325046] [evidence TAS]; Interacting selectively with zinc (Zn) ions [goid 8270] [evidence IEA]; Catalysis of the hydrolysis of terminal non-reducing N-acetyl-D-glucosamine residues in N-acetylglucosaminyl-phospho-D-mannose + H<sub>2</sub>O = N-acetylglucosamine + D-mannose-6-phosphate [goid 8270] [evidence IEA]; Interacting selectively with any protein or protein complex (a complex of two or more proteins that are covalently associated) [goid 8270] [evidence IEA]; Catalysis of the reaction: nicotinate D-ribonucleotide + diphosphate = nicotinate + 5-phospho-alpha-D-ribose-5-phosphate [goid 8270] [evidence IEA]; Catalysis of the hydrolysis of internal, alpha-peptide bonds in a polypeptide chain by a mechanical force [goid 8270] [evidence IEA]; Catalysis of the hydrolysis of internal, alpha-peptide bonds in a polypeptide chain by a mechanical force [goid 8270] [evidence IEA]; Interacting selectively with iron (Fe) ions [goid 5506] [evidence IEA]; Interacting selectively with any protein or protein complex (a complex of two or more proteins that are covalently associated) as a result of a stimulus indicating lowered oxygen tension. Hydroxyl radical production, gene expression, etc.) [goid 5506] [evidence IEA]; Interacting selectively with any protein or protein complex (a complex of two or more proteins that are covalently associated) [goid 5506] [evidence IEA]; Interacting selectively with any protein or protein complex (a complex of two or more proteins that are covalently associated) [goid 5506] [evidence IEA];

"Interacting selectively with a nucleotide, any compound consisting of a nucleoside that is esterified to a phosphate group [goid 3723] [evidence IEA]; Interacting selectively with a nucleotide, any compound consisting of a nucleoside that is esterified to a phosphate group [goid 3723] [evidence IEA]; The selective, often stoichiometric, interaction of a molecule with one or more specific sites on a nucleic acid [goid 3723] [evidence IEA]; Catalysis of the reaction: acetyl-CoA + an arylamine = CoA + an N-acetylarlyamine [goid 4060] [evidence IEA]; Interacting selectively with a nucleotide, any compound consisting of a nucleoside that is esterified to a phosphate group [goid 3723] [evidence IEA]; Catalysis of the transfer of an acetyl group to a nitrogen atom on the acceptor molecule [goid 8270] [evidence IEA]; Interacting selectively with any protein or protein complex (a complex of two or more proteins that are covalently associated) [goid 51082] [pmid 9325046] [evidence TAS]; Interacting selectively with DNA (deoxyribonucleic acid) [goid 3677] [evidence IEA]; Catalysis of the transfer of an acetyl group to a nitrogen atom on the acceptor molecule [goid 8270] [evidence IEA];

"Catalysis of the transfer of an acetyl group to a nitrogen atom on the acceptor molecule [goid 8270] [evidence IEA]; Catalysis of the transfer of an acetyl group to a nitrogen atom on the acceptor molecule [goid 8270] [evidence IEA]; Catalysis of the transfer of an acetyl group to a nitrogen atom on the acceptor molecule [goid 8270] [evidence IEA]; Interacting selectively with a nucleotide, any compound consisting of a nucleoside that is esterified to a phosphate group [goid 3723] [evidence IEA]; Interacting selectively with a nucleotide, any compound consisting of a nucleoside that is esterified to a phosphate group [goid 3723] [evidence IEA]; The selective, often stoichiometric, interaction of a molecule with one or more specific sites on a nucleic acid [goid 3723] [evidence IEA]; The selective, often stoichiometric, interaction of a molecule with one or more specific sites on a nucleic acid [goid 3723] [evidence IEA]; Interacting selectively with damaged DNA [goid 3684] [pmid 9590180] [evidence IC]; Interacting selectively with damaged DNA [goid 3684] [pmid 9590180] [evidence IC];

Interacting selectively with zinc (Zn) ions [goid 8270] [evidence IEA]; Interacting selectively with

"Elemental activities, such as catalysis or binding, describing the actions of a gene product at th

"Interacting selectively with monomeric or multimeric forms of actin, including actin filaments [go

Interacting selectively with any protein or protein complex (a complex of two or more proteins th

"The selective, often stoichiometric, interaction of a molecule with one or more specific sites on

"The selective, often stoichiometric, interaction of a molecule with one or more specific sites on

Interacting selectively with any protein or protein complex (a complex of two or more proteins th

Interacting selectively with any protein or protein complex (a complex of two or more proteins th

, which canonically comprises four successive phases called G1, S, G2, and M and includes repells [goid 7076] [evidence IEA]

Interacting selectively with a 7-methylguanosine (m7G) moiety or derivative located at the 5' enc

"Interacting selectively with a nucleotide, any compound consisting of a nucleoside that is esteril

c portions of bone, and endocytose and transport the degradation products [goid 45453] [eviden

"Catalysis of the reaction: GTP + H2O = GDP + phosphate [goid 3924] [pmid 2547247] [evidenc

Interacting selectively with any protein or protein complex (a complex of two or more proteins th

Interacting selectively with any protein or protein complex (a complex of two or more proteins th

"Interacting selectively with a protein C-terminus, the end of any peptide chain at which the 1-ca

"Interacting selectively with any protein or protein complex (a complex of two or more proteins th

"Interacting selectively with one or more specific sites on a receptor molecule, a macromolecule

"Interacting selectively with any protein or protein complex (a complex of two or more proteins th

Interacting selectively with any protein or protein complex (a complex of two or more proteins th

"Interacting selectively with any protein component of any cytoskeleton (actin, microtubule, or in

"Interacting selectively with a nucleotide, any compound consisting of a nucleoside that is esteril

sted for membranes or specific cellular locations [goid 16485] [evidence IEA]"

"The function of a transcription cofactor that activates transcription from a RNA polymerase II pr

"The function of a transcription cofactor that activates transcription from a RNA polymerase II pr

"The function of a transcription cofactor that activates transcription from a RNA polymerase II pr

Combining with an extracellular or intracellular messenger to initiate a change in cell activity [goi

"Catalysis of the formation of aminoacyl-tRNA from ATP, amino acid, and tRNA with the release

"Interacting selectively with chromatin, the network of fibers of DNA and protein that make up th

Interacting selectively with any protein or protein complex (a complex of two or more proteins th

Interacting selectively with DNA (deoxyribonucleic acid) [goid 3677] [evidence IEA]; The functio

"Interacting selectively with DNA (deoxyribonucleic acid) [goid 3677] [evidence IEA]; The functio

Combining with an extracellular or intracellular messenger to initiate a change in cell activity [goi

Interacting selectively with any protein or protein complex (a complex of two or more proteins that interact with each other)  
Interacting selectively with any protein or protein complex (a complex of two or more proteins that interact with each other)  
"Interacting selectively with any protein or protein complex (a complex of two or more proteins that interact with each other)  
Interacting selectively with any protein or protein complex (a complex of two or more proteins that interact with each other)

Mediates the transfer of a signal from the outside to the inside of a cell by means other than the cell membrane  
The function that stimulates a cell to grow or proliferate. Most growth factors have other actions  
"Interacting selectively with any protein or protein complex (a complex of two or more proteins that interact with each other)  
"Elemental activities, such as catalysis or binding, describing the actions of a gene product at the time of transcription, translation, or protein processing  
"Elemental activities, such as catalysis or binding, describing the actions of a gene product at the time of transcription, translation, or protein processing  
"Catalysis of the transfer of a sulfate group from 3'-phosphoadenosine 5'-phosphosulfate to the 5'-phospho-3'-phosphoadenosine 5'-phosphosulfate  
Catalysis of the reaction:  $\text{NADH} + \text{H}^+ + \text{ubiquinone} = \text{NAD}^+ + \text{ubiquinol}$  [goid 8137] [pmid 98785]  
"Interacting selectively with ATP, adenosine 5'-triphosphate, a universally important coenzyme and energy source  
"Catalysis of the reaction:  $\text{NADH} + \text{H}^+ + \text{acceptor} = \text{NAD}^+ + \text{reduced acceptor}$  [goid 3954] [pmid 98785]  
Catalysis of the reaction:  $\text{NADH} + \text{H}^+ + \text{ubiquinone} = \text{NAD}^+ + \text{ubiquinol}$  [goid 8137] [pmid 98785]

Catalysis of the reaction:  $\text{NADH} + \text{H}^+ + \text{ubiquinone} = \text{NAD}^+ + \text{ubiquinol}$  [goid 8137] [pmid 98785]  
Catalysis of the reaction:  $\text{NADH} + \text{H}^+ + \text{ubiquinone} = \text{NAD}^+ + \text{ubiquinol}$  [goid 8137] [pmid 98785]  
Catalysis of the reaction:  $\text{NADH} + \text{H}^+ + \text{ubiquinone} = \text{NAD}^+ + \text{ubiquinol}$  [goid 8137] [pmid 98785]  
Catalysis of the reaction:  $\text{NADH} + \text{H}^+ + \text{ubiquinone} = \text{NAD}^+ + \text{ubiquinol}$  [goid 8137] [pmid 98785]  
"Catalysis of a biochemical reaction at physiological temperatures. In biologically catalyzed reactions, the reaction is catalyzed by an enzyme  
"Enables the directed movement of acyl groups into, out of, within or between cells [goid 36] [pmid 11935339]  
Interacting selectively with an unfolded protein [goid 51082] [pmid 11935339] [evidence NAS]  
Catalysis of the reaction:  $\text{NADH} + \text{H}^+ + \text{ubiquinone} = \text{NAD}^+ + \text{ubiquinol}$  [goid 8137] [evidence IE]  
Catalysis of the reaction:  $\text{NADH} + \text{H}^+ + \text{acceptor} = \text{NAD}^+ + \text{reduced acceptor}$  [goid 3954] [evidence IE]  
Interacting selectively with any protein or protein complex (a complex of two or more proteins that interact with each other)  
Catalysis of the reaction:  $\text{NADH} + \text{H}^+ + \text{ubiquinone} = \text{NAD}^+ + \text{ubiquinol}$  [goid 8137] [pmid 98785]  
Catalysis of the reaction:  $\text{NADH} + \text{H}^+ + \text{acceptor} = \text{NAD}^+ + \text{reduced acceptor}$  [goid 3954] [evidence IE]  
Catalysis of the reaction:  $\text{NADH} + \text{H}^+ + \text{ubiquinone} = \text{NAD}^+ + \text{ubiquinol}$  [goid 8137] [pmid 98785]

Catalysis of the reaction: NADH + H+ + ubiquinone = NAD+ + ubiquinol [goid 8137] [pmid 98785  
Catalysis of the reaction: NADH + H+ + acceptor = NAD+ + reduced acceptor [goid 3954] [evid  
Catalysis of the reaction: NADH + H+ + acceptor = NAD+ + reduced acceptor [goid 3954] [evid  
Catalysis of the reaction: NADH + H+ + ubiquinone = NAD+ + ubiquinol [goid 8137] [pmid 98785  
"Catalysis of the reaction: NADH + H+ + acceptor = NAD+ + reduced acceptor [goid 3954] [evid  
"Catalysis of the reaction: NADH + H+ + acceptor = NAD+ + reduced acceptor [goid 3954] [pmic  
Catalysis of the reaction: NADH + H+ + acceptor = NAD+ + reduced acceptor [goid 3954] [pmid  
Catalysis of the reaction: NADH + H+ + ubiquinone = NAD+ + ubiquinol [goid 8137] [pmid 16478  
Catalysis of the reaction: NADH + H+ + ubiquinone = NAD+ + ubiquinol [goid 8137] [pmid 98785  
"Catalysis of the reaction: NADH + H+ + acceptor = NAD+ + reduced acceptor [goid 3954] [pmic  
"Catalysis of the reaction: NADH + H+ + acceptor = NAD+ + reduced acceptor [goid 3954] [evid  
"Catalysis of the reaction: NADH + H+ + acceptor = NAD+ + reduced acceptor [goid 3954] [evid  
Catalysis of the reaction: NADH + H+ + ubiquinone = NAD+ + ubiquinol [goid 8137] [pmid 98785  
"Interacting selectively with monomeric or multimeric forms of actin, including actin filaments [go  
"Interacting selectively with monomeric or multimeric forms of actin, including actin filaments [go  
"Interacting selectively with calcium ions (Ca2+) [goid 5509] [evidence IEA]; Catalysis of an oxid  
"Interacting selectively with calcium ions (Ca2+) [goid 5509] [evidence IEA]; Interacting selective  
Interacting selectively with any protein or protein complex (a complex of two or more proteins th  
Interacting selectively with any protein or protein complex (a complex of two or more proteins th

"Interacting selectively with any protein or protein complex (a complex of two or more proteins th  
"Catalysis of the reaction: ATP + ubiquitin + protein lysine = AMP + diphosphate + protein N-ubi  
Interacting selectively with any protein or protein complex (a complex of two or more proteins th  
Interacting selectively with any protein or protein complex (a complex of two or more proteins th  
"Interacting selectively with damaged DNA [goid 3684] [evidence IEA]; Catalysis of the cleavage  
"Interacting selectively with damaged DNA [goid 3684] [evidence IEA]; Catalysis of the cleavage  
"Interacting selectively with damaged DNA [goid 3684] [evidence IEA]; Catalysis of the cleavage  
"Interacting selectively with a nucleotide, any compound consisting of a nucleoside that is esteril  
"Interacting selectively with a nucleotide, any compound consisting of a nucleoside that is esteril  
"Interacting selectively with a nucleotide, any compound consisting of a nucleoside that is esteril  
"Catalysis of the phosphorylation of an amino acid residue in a protein, usually according to the  
"Interacting selectively with a nucleotide, any compound consisting of a nucleoside that is esteril  
"Interacting selectively with a nucleotide, any compound consisting of a nucleoside that is esteril  
"Interacting selectively with a nucleotide, any compound consisting of a nucleoside that is esteril  
"Interacting selectively with a nucleotide, any compound consisting of a nucleoside that is esteril  
"Interacting selectively with a nucleotide, any compound consisting of a nucleoside that is esteril

The action of a molecule that contributes to the structural integrity of a complex or assembly with  
The action of a molecule that contributes to the structural integrity of a complex or assembly with  
"The function that stimulates a cell to grow or proliferate. Most growth factors have other actions  
Interacting selectively with any protein or protein complex (a complex of two or more proteins th  
"Stimulates the exchange of guanyl nucleotides by a GTPase. Under normal cellular physiologic  
Combining with an extracellular or intracellular messenger to initiate a change in cell activity [goid  
"Catalysis of the hydrolysis of alpha-(2->3)-, alpha-(2->6)-, alpha-(2->8)-glycosidic linkages of te

The function of binding to a specific DNA sequence in order to modulate transcription. The trans  
Interacting selectively with DNA (deoxyribonucleic acid) [goid 3677] [evidence IEA]; Plays a role  
Interacting selectively with DNA (deoxyribonucleic acid) [goid 3677] [evidence IEA]; Interacting s  
"Interacting selectively with an actin filament, also known as F-actin, a helical filamentous polym  
Increases the rate of GTP hydrolysis by a GTPase of the Ras superfamily [goid 5099] [pmid 157  
"Combining with an extracellular or intracellular messenger to initiate a change in cell activity, ar  
The function of binding to a specific DNA sequence in order to modulate transcription. The trans  
The function of binding to a specific DNA sequence in order to modulate transcription. The trans  
Interacting selectively with any protein or protein complex (a complex of two or more proteins th  
The function of binding to a specific DNA sequence in order to modulate transcription. The trans  
"The function of binding to a specific DNA sequence in order to modulate transcription. The tran  
"The function of binding to a specific DNA sequence in order to modulate transcription. The tran  
"The function of binding to a specific DNA sequence in order to modulate transcription. The tran  
"The function of binding to a specific DNA sequence in order to modulate transcription. The tran  
The function of binding to a specific DNA sequence in order to modulate transcription. The trans  
"The function of binding to a specific DNA sequence in order to modulate transcription. The tran  
Functions to initiate or regulate RNA polymerase II transcription by binding an enhancer region (c  
The function of binding to a specific DNA sequence in order to modulate transcription. The trans  
The function of binding to a specific DNA sequence in order to modulate transcription. The trans  
"Interacting selectively with a nuclear localization sequence, a specific peptide sequence that ac  
The function of a transcription cofactor that activates transcription from a RNA polymerase II pro  
or physical agents. The process is characterized by local vasodilation, extravasation of plasma  
Interacting selectively with any protein or protein complex (a complex of two or more proteins th  
Interacting selectively with any protein or protein complex (a complex of two or more proteins th  
Interacting selectively with any protein or protein complex (a complex of two or more proteins th  
[evidence IEA]; Any process that modulates the frequency, rate or extent of DNA-dependent trans  
"Interacting selectively with DNA (deoxyribonucleic acid) [goid 3677] [evidence IEA]; Functions t  
"Interacting selectively with any protein or protein complex (a complex of two or more proteins th  
"Interacting selectively with iron (Fe) ions [goid 5506] [pmid 12886008] [evidence IDA]; Interactir  
"The function of binding to a specific DNA sequence in order to modulate transcription. The tran  
The function of binding to a specific DNA sequence in order to modulate transcription. The trans  
"The function of binding to a specific DNA sequence in order to modulate transcription. The tran  
"Interacting selectively with DNA of a specific nucleotide composition, e.g. GC-rich DNA binding  
"Enables the directed movement of oxygen into, out of, within or between cells [goid 5344] [pmid  
or more mature rRNA molecules [goid 6364] [evidence IEA]; Any process that modulates the frec  
Interacting selectively with a death receptor [goid 5123] [evidence IEA]; Interacting selectively wi  
"Catalysis of the hydrolysis of an N4-(acetyl-beta-D-glucosaminy)l)asparagine residue in which th  
"Elemental activities, such as catalysis or binding, describing the actions of a gene product at th  
Catalysis of the transfer of a solute or solutes from one side of a membrane to the other accordi  
Catalysis of the transfer of hydrogen ions from one side of a membrane to the other [goid 15078  
5454] [evidence IEA]

Interacting selectively with an RNA molecule or a portion thereof [goid 3723] [pmid 10593953] [e

"Interacting selectively with a transcription factor, any protein required to initiate or regulate trans

"Interacting selectively with a nucleotide, any compound consisting of a nucleoside that is esteril

Interacting selectively with any protein or protein complex (a complex of two or more proteins th

Interacting selectively with any protein or protein complex (a complex of two or more proteins th

Interacting selectively with an RNA molecule or a portion thereof [goid 3723] [evidence IEA]; Inte

Interacting selectively with any protein or protein complex (a complex of two or more proteins th

"The selective, often stoichiometric, interaction of a molecule with one or more specific sites on .

Combining with an extracellular or intracellular messenger to initiate a change in cell activity [goi

"Catalysis of the reaction: a nitrile + H<sub>2</sub>O = a carboxylate + NH<sub>3</sub>. Acts on a wide range of aroma

"Elemental activities, such as catalysis or binding, describing the actions of a gene product at th

Interacting selectively with calcium ions (Ca<sup>2+</sup>) [goid 5509] [evidence IEA]; Interacting selectivel

"Interacting selectively with a nucleotide, any compound consisting of a nucleoside that is esteril

"Interacting selectively with a nucleotide, any compound consisting of a nucleoside that is esteril

"Catalysis of the reaction: peptidyl-proline (omega=180) = peptidyl-proline (omega=0) [goid 3756

"The function of binding to a specific DNA sequence in order to modulate transcription. The tran

"The function of binding to a specific DNA sequence in order to modulate transcription. The tran

"Interacting selectively with neurexins, synaptic cell surface proteins related to latrotoxin recepto

"Interacting selectively with neurexins, synaptic cell surface proteins related to latrotoxin recepto

"Interacting selectively with chloride ions (Cl<sup>-</sup>) [goid 31404] [pmid 18093521] [evidence IDA]; Inte

"Interacting selectively with a nucleotide, any compound consisting of a nucleoside that is esteril

"Catalysis of the hydrolysis of internal, alpha-peptide bonds in a polypeptide chain by a mechani

"Interacting selectively with a nucleotide, any compound consisting of a nucleoside that is esteril

"Interacting selectively with a nucleotide, any compound consisting of a nucleoside that is esteril

"Interacting selectively with a nucleotide, any compound consisting of a nucleoside that is esteril

"Interacting selectively with a nucleotide, any compound consisting of a nucleoside that is esteril

"Interacting selectively with a nucleotide, any compound consisting of a nucleoside that is esteril

"Interacting selectively with a nucleotide, any compound consisting of a nucleoside that is esteril

"Interacting selectively with a nucleotide, any compound consisting of a nucleoside that is esteril

"Interacting selectively with a nucleotide, any compound consisting of a nucleoside that is esteril

"Interacting selectively with a nucleotide, any compound consisting of a nucleoside that is esteril

"Interacting selectively with any protein or protein complex (a complex of two or more proteins th



"Interacting selectively with a nucleotide, any compound consisting of a nucleoside that is esterified to a phosphate group [evidence IEA]"  
"Interacting selectively with a nucleotide, any compound consisting of a nucleoside that is esterified to a phosphate group [evidence IEA]"  
"Interacting selectively with a nucleotide, any compound consisting of a nucleoside that is esterified to a phosphate group [evidence IEA]"  
"The action characteristic of a hormone, any substance formed in very small amounts in one species [evidence IEA]"

"Interacting selectively with a nucleotide, any compound consisting of a nucleoside that is esterified to a phosphate group [evidence IEA]"  
"Interacting selectively with a nucleotide, any compound consisting of a nucleoside that is esterified to a phosphate group [evidence IEA]"  
"Interacting selectively with a nucleotide, any compound consisting of a nucleoside that is esterified to a phosphate group [evidence IEA]"  
"Interacting selectively with a nucleotide, any compound consisting of a nucleoside that is esterified to a phosphate group [evidence IEA]"  
"Catalysis of the reaction: ATP + nucleoside diphosphate = ADP + nucleoside triphosphate [goid 309] [evidence IEA]"  
"Catalysis of the reaction: ATP + nucleoside diphosphate = ADP + nucleoside triphosphate [goid 309] [evidence IEA]"

"Interacting selectively with a nucleotide, any compound consisting of a nucleoside that is esterified to a phosphate group [evidence IEA]"  
"Interacting selectively with a nucleotide, any compound consisting of a nucleoside that is esterified to a phosphate group [evidence IEA]"  
The function that links a sequence-specific transcription factor to the core RNA polymerase II complex [evidence IEA]

"Catalysis of the reaction: ATP + nicotinamide nucleotide = diphosphate + NAD+ [goid 309] [evidence IEA]"  
"The selective, often stoichiometric, interaction of a molecule with one or more specific sites on a receptor molecule, a macromolecule, or a complex of macromolecules [evidence IEA]"

"Catalysis of the reaction: tetradecanoyl-CoA + glycyl-peptide = CoA + N-tetradecanoylglycyl-peptide [goid 309] [evidence IEA]"  
"Catalysis of the reaction: tetradecanoyl-CoA + glycyl-peptide = CoA + N-tetradecanoylglycyl-peptide [goid 309] [evidence IEA]"

"Interacting selectively with one or more specific sites on a receptor molecule, a macromolecule, or a complex of macromolecules [evidence IEA]"  
"Facilitates transport across one or more biological membranes but do not themselves participate in the transport [evidence IEA]"

"Catalysis of the transfer of a solute or solutes from one side of a membrane to the other according to a concentration gradient [evidence IEA]"  
Interacting selectively with any protein or protein complex (a complex of two or more proteins that function together) [evidence IEA]

Interacting selectively with any protein or protein complex (a complex of two or more proteins that function together) [evidence IEA]"  
Interacting selectively with any protein or protein complex (a complex of two or more proteins that function together) [evidence IEA]"

Interacting selectively with any protein or protein complex (a complex of two or more proteins that function together) [evidence IEA]"  
"Interacting selectively with a nucleotide, any compound consisting of a nucleoside that is esterified to a phosphate group [evidence IEA]"

"Interacting selectively with a nucleotide, any compound consisting of a nucleoside that is esterified to a phosphate group [evidence IEA]"  
"Interacting selectively with a nucleotide, any compound consisting of a nucleoside that is esterified to a phosphate group [evidence IEA]"

"Interacting selectively with a cytokine, any of a group of proteins that function to control the immune response [evidence IEA]"  
"Interacting selectively with a cytokine, any of a group of proteins that function to control the immune response [evidence IEA]"

Interacting selectively with ribosomal RNA [goid 19843] [evidence IEA]"  
Interacting selectively with an RNA molecule or a portion thereof [goid 3723] [pmid 10196175] [evidence IEA]"

Interacting selectively with an RNA molecule or a portion thereof [goid 3723] [pmid 9813152] [evidence IEA]"  
Interacting selectively with an RNA molecule or a portion thereof [goid 3723] [pmid 11895476] [evidence IEA]"

"Interacting selectively with a nucleotide, any compound consisting of a nucleoside that is esterified to a phosphate group [evidence IEA]"  
"Interacting selectively with a nucleotide, any compound consisting of a nucleoside that is esterified to a phosphate group [evidence IEA]"

Catalysis of the energy-independent passage of cations across a lipid bilayer down a concentration gradient [evidence IEA]"  
"Interacting selectively with a nucleotide, any compound consisting of a nucleoside that is esterified to a phosphate group [evidence IEA]"

Interacting selectively with any protein or protein complex (a complex of two or more proteins that function together) [evidence IEA]"  
"Elemental activities, such as catalysis or binding, describing the actions of a gene product at the molecular level [evidence IEA]"

Interacting selectively with any carbohydrate [goid 30246] [evidence IEA]"  
Interacting selectively with any carbohydrate [goid 30246] [evidence IEA]"

Interacting selectively with any carbohydrate [goid 30246] [evidence IEA]"  
"Interacting selectively with a nucleotide, any compound consisting of a nucleoside that is esterified to a phosphate group [evidence IEA]"

"Interacting selectively with any protein or protein complex (a complex of two or more proteins th  
"Interacting selectively with monomeric actin, also known as G-actin [goid 3785] [pmid 17502619  
Catalysis of the reaction: ATP + ubiquitin + protein lysine = AMP + diphosphate + protein N-ubiq  
Combining with an extracellular or intracellular messenger to initiate a change in cell activity [goid  
[goid 3706] [pmid 9244302] [evidence TAS]; Combining with an extracellular or intracellular mes  
Interacting selectively with calcium ions (Ca<sup>2+</sup>) [goid 5509] [evidence IEA]  
Combining with an extracellular or intracellular messenger to initiate a change in cell activity [goid  
Combining with an extracellular or intracellular messenger to initiate a change in cell activity [goid  
"Catalysis of the hydrolysis of various bonds, e.g. C-O, C-N, C-C, phosphoric anhydride bonds, p  
Interacting selectively with pre-messenger RNA (pre-mRNA) or messenger RNA (mRNA) [goid 3  
"Increases the activity of the enzyme superoxide-generating NADPH oxidase [goid 16176] [evid  
Catalysis of the reaction: purine nucleoside + phosphate = purine + alpha-D-ribose 1-phosphate

The function of binding to a specific DNA sequence in order to modulate transcription. The trans  
[evidence IEA]; Any process that modulates the frequency, rate or extent of DNA-dependent trans  
"Interacting selectively with any protein or protein complex (a complex of two or more proteins th  
Combining with the hedgehog protein to initiate a change in cell activity [goid 8158] [evidence IE  
"Interacting selectively with cholesterol (cholest-5-en-3-beta-ol); the principal sterol of vertebrate

Catalysis of the hydrolysis of N-terminal amino acid residues from in a polypeptide chain [goid 4  
"Interacting selectively with any protein or protein complex (a complex of two or more proteins th  
The action of a molecule that contributes to the structural integrity of a complex or assembly with  
[evidence IEA]; The directed movement of mRNA, messenger ribonucleic acid, into, out of, within or betwe  
"Catalysis of the reaction: N-acetylneuraminate = N-acetyl-D-mannosamine + pyruvate [goid 874  
Interacting selectively with any protein or protein complex (a complex of two or more proteins th  
"The function of a transcription cofactor that activates transcription from a RNA polymerase II pr  
"Interacting selectively with any nucleic acid [goid 3676] [evidence IEA]; Interacting selectively w  
Interacting selectively with any nucleic acid [goid 3676] [evidence IEA]; Interacting selectively wi  
"The action characteristic of a hormone, any substance formed in very small amounts in one sp  
"Catalysis of the phosphorylation of an amino acid residue in a protein, usually according to the  
Combining with an extracellular or intracellular messenger to initiate a change in cell activity [goid  
Interacting selectively with a cell adhesion molecule [goid 50839] [evidence ISS]  
Interacting selectively with calcium ions (Ca<sup>2+</sup>) [goid 5509] [evidence IEA]  
Interacting selectively with any protein or protein complex (a complex of two or more proteins th  
"Interacting selectively with a G-protein-coupled receptor [goid 1664] [evidence IEA]; A receptor  
"Any molecular entity that serves as an electron acceptor and electron donor in an electron tran  
"Any molecular entity that serves as an electron acceptor and electron donor in an electron tran

"The function of binding to a specific DNA sequence in order to modulate transcription. The tran  
"The function of binding to a specific DNA sequence in order to modulate transcription. The tran  
"The function of binding to a specific DNA sequence in order to modulate transcription. The tran  
"The function of binding to a specific DNA sequence in order to modulate transcription. The tran  
"The function of binding to a specific DNA sequence in order to modulate transcription. The tran  
"The function of binding to a specific DNA sequence in order to modulate transcription. The tran

"The function of binding to a specific DNA sequence in order to modulate transcription. The tran  
"The function of binding to a specific DNA sequence in order to modulate transcription. The tran  
"The function of binding to a specific DNA sequence in order to modulate transcription. The tran  
"The function of binding to a specific DNA sequence in order to modulate transcription. The tran  
"The function of binding to a specific DNA sequence in order to modulate transcription. The tran  
"The function of binding to a specific DNA sequence in order to modulate transcription. The tran  
"The function of binding to a specific DNA sequence in order to modulate transcription. The tran

"Interacting selectively with monomeric or multimeric forms of actin, including actin filaments [go  
er time from an initial condition (e.g. a zygote or a young adult) to a later condition (e.g. a multice  
"Interacting selectively with a nucleotide, any compound consisting of a nucleoside that is esteril  
vidence IEA]; Any process that modulates the frequency, rate or extent of DNA-dependent trans  
"Interacting selectively with a nucleotide, any compound consisting of a nucleoside that is esteril  
"Interacting selectively with any protein or protein complex (a complex of two or more proteins th  
"Catalysis of the hydrolysis of internal, alpha-peptide bonds in a polypeptide chain by a mechani  
Interacting selectively with DNA (deoxyribonucleic acid) [goid 3677] [evidence IEA]

The function that stimulates a cell to grow or proliferate. Most growth factors have other actions  
The function that stimulates a cell to grow or proliferate. Most growth factors have other actions  
"Interacting selectively with calmodulin, a calcium-binding protein with many roles, both in the ce  
"The function of a transcription cofactor that activates transcription from a RNA polymerase II pr  
"Catalysis of the hydrolysis of internal, alpha-peptide bonds in a polypeptide chain by a mechani  
"Interacting selectively with a nucleotide, any compound consisting of a nucleoside that is esteril  
"Elemental activities, such as catalysis or binding, describing the actions of a gene product at th  
Combining with an extracellular or intracellular messenger to initiate a change in cell activity [goi  
Combining with an extracellular or intracellular messenger to initiate a change in cell activity [goi  
"Elemental activities, such as catalysis or binding, describing the actions of a gene product at th  
The function that stimulates a cell to grow or proliferate. Most growth factors have other actions  
Interacting selectively with calcium ions (Ca<sup>2+</sup>) [goid 5509] [evidence IEA]; Interacting selectivel  
Interacting selectively with any protein or protein complex (a complex of two or more proteins th

"Interacting selectively with DNA (deoxyribonucleic acid) [goid 3677] [evidence IEA]; Interacting  
"Interacting selectively with chromatin, the network of fibers of DNA and protein that make up th  
"Catalysis of the reaction: 3-beta-hydroxy-4-beta-methyl-5-alpha-cholesta-8,24-dien-4-alpha-car  
"Interacting selectively with a nucleotide, any compound consisting of a nucleoside that is esteril  
Interacting selectively with a lipid [goid 8289] [evidence IEA]  
Interacting selectively with any nucleic acid [goid 3676] [evidence IEA]; Interacting selectively wi  
[goid 5057] [pmid 8808629] [evidence TAS]

Interacting selectively with any protein or protein complex (a complex of two or more proteins that  
"Interacting selectively with zinc (Zn) ions [goid 8270] [evidence IEA]; Catalysis of the ligation of

"Interacting selectively with transfer RNA [goid 49] [evidence IEA]; Catalysis of the transfer of a  
"Catalysis of the transfer of a methyl group to an acceptor molecule [goid 8168] [evidence IEA];  
"Catalysis of the transfer of a methyl group to an acceptor molecule [goid 8168] [evidence IEA];  
"Catalysis of the transfer of a methyl group to an acceptor molecule [goid 8168] [evidence IEA];

"Catalysis of the transfer of a methyl group to an acceptor molecule [goid 8168] [evidence IEA];  
"Interacting selectively with an RNA molecule or a portion thereof [goid 3723] [evidence IEA]; Ca  
"Interacting selectively with magnesium (Mg) ions [goid 287] [evidence IEA]; Catalysis of the rea  
"Interacting selectively with a nucleotide, any compound consisting of a nucleoside that is esterif  
"Interacting selectively with a nucleotide, any compound consisting of a nucleoside that is esterif  
"Interacting selectively with a nucleotide, any compound consisting of a nucleoside that is esterif  
"Interacting selectively with magnesium (Mg) ions [goid 287] [evidence IEA]; Catalysis of the hyc  
"Interacting selectively with magnesium (Mg) ions [goid 287] [evidence IEA]; Catalysis of the hyc  
"Interacting selectively with magnesium (Mg) ions [goid 287] [evidence IEA]; Catalysis of the hyc  
"Interacting selectively with a nucleotide, any compound consisting of a nucleoside that is esterif  
"[goid 8418] [evidence IEA]; Catalysis of the hydrolysis of various bonds, e.g. C-O, C-N, C-C, ph  
Interacting selectively with a neurotrophin receptor [goid 5165] [evidence IEA]; The function that  
"Catalysis of the formation of a covalent enzyme-pyrimidine base intermediate. Release of the e  
Interacting selectively with any protein or protein complex (a complex of two or more proteins that

Interacting selectively with any protein or protein complex (a complex of two or more proteins that  
"Elemental activities, such as catalysis or binding, describing the actions of a gene product at th  
"Interacting selectively with a nucleotide, any compound consisting of a nucleoside that is esterif  
"Interacting selectively with a nucleotide, any compound consisting of a nucleoside that is esterif  
"Elemental activities, such as catalysis or binding, describing the actions of a gene product at th  
"Interacting selectively with ATP, adenosine 5'-triphosphate, a universally important coenzyme a  
"Interacting selectively with a nucleotide, any compound consisting of a nucleoside that is esterif  
"Interacting selectively with a nucleotide, any compound consisting of a nucleoside that is esterif  
Interacting selectively with DNA (deoxyribonucleic acid) [goid 3677] [pmid 1520323] [evidence T  
Interacting selectively with DNA (deoxyribonucleic acid) [goid 3677] [pmid 7811391] [evidence T

Interacting selectively with any protein or protein complex (a complex of two or more proteins that  
ential internal or invasive threat [goid 6955] [evidence IEA]

"Catalysis of the reaction: 8-oxo-7,8-dihydroguanine triphosphate = 8-oxo-7,8-dihydroguanine pl  
"Interacting selectively with magnesium (Mg) ions [goid 287] [evidence IEA]; Catalysis of the rea  
"Interacting selectively with magnesium (Mg) ions [goid 287] [evidence IEA]; Interacting selectiv  
"Interacting selectively with magnesium (Mg) ions [goid 287] [evidence IEA]; Catalysis of the hyc  
"Interacting selectively with magnesium (Mg) ions [goid 287] [evidence IEA]; Interacting selectiv

"Interacting selectively with magnesium (Mg) ions [goid 287] [evidence IEA]; Catalysis of the hyc  
"Interacting selectively with magnesium (Mg) ions [goid 287] [evidence IEA]; Catalysis of the hyc  
"Interacting selectively with magnesium (Mg) ions [goid 287] [evidence IEA]; Catalysis of the hyc  
"Catalysis of the reaction: P(1),P(4)-bis(5'-nucleosyl)tetrphosphate + H2O = NTP + NMP. Acts  
"Interacting selectively with an RNA molecule or a portion thereof [goid 3723] [pmid 8626397] [e

"Interacting selectively with magnesium (Mg) ions [goid 287] [evidence IEA]; Catalysis of the rea  
"Interacting selectively with magnesium (Mg) ions [goid 287] [evidence IEA]; Interacting selective  
"The function that stimulates a cell to grow or proliferate. Most growth factors have other actions  
"Interacting selectively with magnesium (Mg) ions [goid 287] [evidence IEA]; Catalysis of the hyc  
"Interacting selectively with magnesium (Mg) ions [goid 287] [evidence IEA]; Catalysis of the hyc  
"Elemental activities, such as catalysis or binding, describing the actions of a gene product at th  
Interacting selectively with DNA (deoxyribonucleic acid) [goid 3677] [pmid 15107825] [evidence  
Interacting selectively with an RNA molecule or a portion thereof [goid 3723] [pmid 12837692] [e  
The action of a molecule that contributes to the structural integrity of a complex or assembly with  
Interacting selectively with any protein or protein complex (a complex of two or more proteins th  
Interacting selectively with any protein or protein complex (a complex of two or more proteins th  
Enables the directed movement of substances between the nucleus and the cytoplasm of a cell  
Enables the directed movement of substances between the nucleus and the cytoplasm of a cell  
"Interacting selectively with DNA (deoxyribonucleic acid) [goid 3677] [evidence IEA]; Enables the  
"Enables the directed movement of substances (such as macromolecules, small molecules, ions  
Enables the directed movement of substances between the nucleus and the cytoplasm of a cell  
Interacting selectively with any protein or protein complex (a complex of two or more proteins th  
Interacting selectively with any protein or protein complex (a complex of two or more proteins th  
Interacting selectively with any protein or protein complex (a complex of two or more proteins th  
Enables the directed movement of substances between the nucleus and the cytoplasm of a cell  
EA]; The directed movement of mRNA, messenger ribonucleic acid, into, out of, within or betwe  
EA]; The directed movement of mRNA, messenger ribonucleic acid, into, out of, within or betwe  
EA]; The directed movement of mRNA, messenger ribonucleic acid, into, out of, within or betwe  
EA]; The directed movement of substances within a cell [goid 46907] [evidence IEA]; The directe  
EA]; The directed movement of mRNA, messenger ribonucleic acid, into, out of, within or betwe  
"Interacting selectively with chromatin, the network of fibers of DNA and protein that make up th  
The action of a molecule that contributes to the structural integrity of the nuclear pore complex [e  
EA]; The directed movement of mRNA, messenger ribonucleic acid, into, out of, within or betwe  
"Enables the directed movement of substances (such as macromolecules, small molecules, ions  
Interacting selectively with any protein or protein complex (a complex of two or more proteins th  
"Enables the directed movement of substances (such as macromolecules, small molecules, ions  
Interacting selectively with any protein or protein complex (a complex of two or more proteins th  
Interacting selectively with any nucleic acid [goid 3676] [evidence IEA]; Combining with a nuclea  
"Elemental activities, such as catalysis or binding, describing the actions of a gene product at th  
"Elemental activities, such as catalysis or binding, describing the actions of a gene product at th  
Interacting selectively with DNA (deoxyribonucleic acid) [goid 3677] [evidence IEA]  
"Enables the directed movement of substances (such as macromolecules, small molecules, ions  
"Interacting selectively with a nucleotide, any compound consisting of a nucleoside that is esteril











"Interacting selectively with lipopolysaccharide [goid 1530] [evidence ISS]; Combining with a pur  
Combining with an extracellular or intracellular messenger to initiate a change in cell activity [goi  
Combining with an extracellular or intracellular messenger to initiate a change in cell activity [goi  
Combining with adenosine and transmitting the signal to a heterotrimeric G-protein complex to ir  
Combining with an extracellular or intracellular messenger to initiate a change in cell activity [goi  
"Catalysis of the reaction: procollagen L-proline + 2-oxoglutarate + O<sub>2</sub> = procollagen trans-4-hyc  
"Catalysis of the reaction: procollagen L-proline + 2-oxoglutarate + O<sub>2</sub> = procollagen trans-4-hyc  
Catalysis of the rearrangement of both intrachain and interchain disulfide bonds in proteins [goic

"The function of binding to a specific DNA sequence in order to modulate transcription. The tran  
Interacting selectively with any protein or protein complex (a complex of two or more proteins tha  
"Interacting selectively with a nucleotide, any compound consisting of a nucleoside that is esteril  
"Interacting selectively with a nucleotide, any compound consisting of a nucleoside that is esteril  
"Interacting selectively with a nucleotide, any compound consisting of a nucleoside that is esteril  
"Interacting selectively with a nucleotide, any compound consisting of a nucleoside that is esteril  
of proteolytic caspases, whose actions dismantle the cell and result in cell death. Apoptosis begi  
Interacting selectively with any protein or protein complex (a complex of two or more proteins tha  
of proteolytic caspases, whose actions dismantle the cell and result in cell death. Apoptosis begi  
"Catalysis of the phosphorylation of an amino acid residue in a protein, usually according to the  
"Enables the directed movement of substances (such as macromolecules, small molecules, ions  
"Interacting selectively with any protein component of any cytoskeleton (actin, microtubule, or in  
"Catalysis of the reaction: protein L-arginine + H<sub>2</sub>O = protein L-citrulline + NH<sub>3</sub> [goid 4668] [pmid  
evidence IEA]; Any process that modulates the frequency, rate or extent of DNA-dependent trans  
"Interacting selectively with microtubules, filaments composed of tubulin monomers [goid 8017]  
"Catalysis of the hydrolysis of various bonds, e.g. C-O, C-N, C-C, phosphoric anhydride bonds, r  
"Catalysis of the reaction: 2-acetyl-1-alkyl-sn-glycero-3-phosphocholine + H<sub>2</sub>O = 1-alkyl-sn-glyce  
"Interacting selectively and simultaneously with one or more signal transduction molecules, usua  
"Elemental activities, such as catalysis or binding, describing the actions of a gene product at th  
"Catalysis of the reaction: 5-amino-1-(5-phospho-D-ribosyl)imidazole-4-carboxylate = 5-amino-1  
Interacting selectively with an RNA molecule or a portion thereof [goid 3723] [pmid 9548260] [ev  
Interacting selectively with any protein or protein complex (a complex of two or more proteins tha  
"Interacting selectively with a nucleotide, any compound consisting of a nucleoside that is esteril  
" [goid 9968] [evidence IEA]"  
"Interacting selectively with a nucleotide, any compound consisting of a nucleoside that is esteril  
"Interacting selectively with a nucleotide, any compound consisting of a nucleoside that is esteril  
"Interacting selectively with a nucleotide, any compound consisting of a nucleoside that is esteril  
"Interacting selectively with monomeric or multimeric forms of actin, including actin filaments [go  
Interacting selectively with a D3 dopamine receptor [goid 31750] [evidence IEA]  
"Catalysis of the reaction: peptidyl-glycine + ascorbate + O<sub>2</sub> = peptidyl(2-hydroxyglycine) + dehy  
"Interacting selectively with any nucleic acid [goid 3676] [evidence IEA]; Catalysis of the reactor

"Catalysis of the phosphorylation of an amino acid residue in a protein, usually according to the  
"Interacting selectively with a nucleotide, any compound consisting of a nucleoside that is esterified  
"Interacting selectively with a nucleotide, any compound consisting of a nucleoside that is esterified  
"Interacting selectively with a nucleotide, any compound consisting of a nucleoside that is esterified  
"Interacting selectively with a nucleotide, any compound consisting of a nucleoside that is esterified  
at of, within or between cells [goid 6812] [pmid 17036048] [evidence IDA]; Any process that activates

"Any molecular entity that serves as an electron acceptor and electron donor in an electron transport  
"Interacting selectively with an RNA molecule or a portion thereof [goid 3723] [evidence IEA]; Catalyzing  
"Catalysis of the template-independent extension of the 3'- end of an RNA or DNA strand by addition  
"Elemental activities, such as catalysis or binding, describing the actions of a gene product at the  
"Catalysis of the hydrolysis of internal, alpha-peptide bonds in a polypeptide chain by a mechanical  
"Interacting selectively with an RNA molecule or a portion thereof [goid 3723] [evidence IEA]; Catalyzing  
"Interacting selectively with an RNA molecule or a portion thereof [goid 3723] [evidence IEA]; Catalyzing  
"Interacting selectively with a nucleotide, any compound consisting of a nucleoside that is esterified  
"Interacting selectively with a nucleotide, any compound consisting of a nucleoside that is esterified  
Combining with an extracellular or intracellular messenger to initiate a change in cell activity [goid  
Combining with an extracellular or intracellular messenger to initiate a change in cell activity [goid  
"Combining with an extracellular or intracellular messenger to initiate a change in cell activity [goid

Combining with an extracellular or intracellular messenger to initiate a change in cell activity [goid  
Interacting selectively with any protein or protein complex (a complex of two or more proteins that  
"Interacting selectively with a transcription factor, any protein required to initiate or regulate transcription  
"Catalysis of the hydrolysis of poly(ADP-ribose) at glycosidic (1''-2') linkage of ribose-ribose bonds  
Interacting selectively with any protein or protein complex (a complex of two or more proteins that  
"Catalysis of the hydrolysis of internal, alpha-peptide bonds in a polypeptide chain by a catalytic

"Interacting selectively with a nucleotide, any compound consisting of a nucleoside that is esterified  
"Interacting selectively with DNA (deoxyribonucleic acid) [goid 3677] [evidence IEA]; Interacting  
Catalysis of the reaction:  $\text{NAD}^+ + (\text{ADP-D-ribosyl})(n)\text{-acceptor} = \text{nicotinamide} + (\text{ADP-D-ribosyl})$   
Catalysis of the reaction:  $\text{NAD}^+ + (\text{ADP-D-ribosyl})(n)\text{-acceptor} = \text{nicotinamide} + (\text{ADP-D-ribosyl})$   
"Interacting selectively with any nucleic acid [goid 3676] [evidence IEA]; Catalysis of the reaction  
Catalysis of the reaction:  $\text{NAD}^+ + (\text{ADP-D-ribosyl})(n)\text{-acceptor} = \text{nicotinamide} + (\text{ADP-D-ribosyl})$   
Catalysis of the reaction:  $\text{NAD}^+ + (\text{ADP-D-ribosyl})(n)\text{-acceptor} = \text{nicotinamide} + (\text{ADP-D-ribosyl})$   
Catalysis of the reaction:  $\text{NAD}^+ + (\text{ADP-D-ribosyl})(n)\text{-acceptor} = \text{nicotinamide} + (\text{ADP-D-ribosyl})$   
Interacting selectively with DNA (deoxyribonucleic acid) [goid 3677] [evidence IEA]; Catalysis of  
Catalysis of the reaction:  $\text{NAD}^+ + (\text{ADP-D-ribosyl})(n)\text{-acceptor} = \text{nicotinamide} + (\text{ADP-D-ribosyl})$   
Interacting selectively with DNA (deoxyribonucleic acid) [goid 3677] [pmid 10100603] [evidence  
Catalysis of the reaction:  $\text{NAD}^+ + (\text{ADP-D-ribosyl})(n)\text{-acceptor} = \text{nicotinamide} + (\text{ADP-D-ribosyl})$   
Catalysis of the reaction:  $\text{NAD}^+ + (\text{ADP-D-ribosyl})(n)\text{-acceptor} = \text{nicotinamide} + (\text{ADP-D-ribosyl})$   
"Elemental activities, such as catalysis or binding, describing the actions of a gene product at the  
"Interacting selectively with a nucleotide, any compound consisting of a nucleoside that is esterified  
"Elemental activities, such as catalysis or binding, describing the actions of a gene product at the  
"Interacting selectively with monomeric or multimeric forms of actin, including actin filaments [goid

"Interacting selectively with monomeric or multimeric forms of actin, including actin filaments [go  
"Interacting selectively with a nucleotide, any compound consisting of a nucleoside that is esteril

Interacting selectively with DNA (deoxyribonucleic acid) [goid 3677] [pmid 20404868] [evidence  
The function of a transcription cofactor that represses transcription from a RNA polymerase II pr  
"Interacting selectively with DNA (deoxyribonucleic acid) [goid 3677] [evidence IEA]; Interacting  
Interacting selectively with any protein or protein complex (a complex of two or more proteins th  
"Interacting selectively with a nucleotide, any compound consisting of a nucleoside that is esteril  
"Interacting selectively with DNA (deoxyribonucleic acid) [goid 3677] [evidence IEA]; Interacting  
"The function of binding to a specific DNA sequence in order to modulate transcription. The tran  
"The function of binding to a specific DNA sequence in order to modulate transcription. The tran  
"The function of binding to a specific DNA sequence in order to modulate transcription. The tran  
The function of a transcription cofactor that represses transcription from a RNA polymerase II pr  
"The function of a transcription cofactor that activates transcription from a RNA polymerase II pr  
"Catalysis of the reaction: L-phenylalanine + tetrahydrobiopterin + O2 = L-tyrosine + 4-alpha-hyc  
Interacting selectively with DNA (deoxyribonucleic acid) [goid 3677] [evidence IEA]; Interacting s  
Interacting selectively with an RNA molecule or a portion thereof [goid 3723] [evidence IEA]; Inte  
Interacting selectively with an RNA molecule or a portion thereof [goid 3723] [pmid 10891498] [e  
"Catalysis of the reaction: ATP + propanoyl-CoA + HCO3- = ADP + phosphate + (S)-methylmalc  
"Catalysis of the reaction: ATP + propanoyl-CoA + HCO3- = ADP + phosphate + (S)-methylmalc  
Interacting selectively with calcium ions (Ca2+) [goid 5509] [evidence IEA]; Interacting selectivel  
Combining with an extracellular or intracellular messenger to initiate a change in cell activity [goi  
Interacting selectively with calcium ions (Ca2+) [goid 5509] [evidence IEA]; Interacting selectivel  
Interacting selectively with calcium ions (Ca2+) [goid 5509] [evidence IEA]; Interacting selectivel  
Interacting selectively with calcium ions (Ca2+) [goid 5509] [evidence IEA]; Interacting selectivel  
Interacting selectively with calcium ions (Ca2+) [goid 5509] [evidence IEA]; Interacting selectivel  
Interacting selectively with calcium ions (Ca2+) [goid 5509] [evidence IEA]; Interacting selectivel

Interacting selectively with calcium ions (Ca2+) [goid 5509] [evidence IEA]; Interacting selectivel

Interacting selectively with calcium ions (Ca2+) [goid 5509] [evidence IEA]; Interacting selectivel  
Interacting selectively with calcium ions (Ca2+) [goid 5509] [evidence IEA]; Interacting selectivel  
Interacting selectively with calcium ions (Ca2+) [goid 5509] [evidence IEA]; Interacting selectivel  
Interacting selectively with calcium ions (Ca2+) [goid 5509] [evidence IEA]; Interacting selectivel  
Interacting selectively with calcium ions (Ca2+) [goid 5509] [evidence IEA]; Interacting selectivel  
Interacting selectively with calcium ions (Ca2+) [goid 5509] [evidence IEA]; Interacting selectivel  
Interacting selectively with calcium ions (Ca2+) [goid 5509] [evidence IEA]; Interacting selectivel  
Interacting selectively with calcium ions (Ca2+) [goid 5509] [evidence IEA]; Interacting selectivel  
Interacting selectively with calcium ions (Ca2+) [goid 5509] [evidence IEA]; Interacting selectivel  
Interacting selectively with calcium ions (Ca2+) [goid 5509] [evidence IEA]; Interacting selectivel  
Interacting selectively with calcium ions (Ca2+) [goid 5509] [evidence IEA]; Interacting selectivel

(mRNA) and the excision of intron sequences, via a spliceosomal mechanism, so that mRNA co  
Interacting selectively with any protein or protein complex (a complex of two or more proteins th

"Interacting selectively with chromatin, the network of fibers of DNA and protein that make up the nucleus  
Interacting selectively with any protein or protein complex (a complex of two or more proteins that function together)  
The function of binding to a specific DNA sequence in order to modulate transcription. The transcription factor binds to the DNA sequence and recruits the transcription machinery.  
Interacting selectively with any protein or protein complex (a complex of two or more proteins that function together)  
Interacting selectively with any protein or protein complex (a complex of two or more proteins that function together)  
"Catalysis of the reaction: source of phosphate + oxaloacetate = phosphoenolpyruvate + CO2 [goid 3677] [evidence IEA];  
"Enables the directed movement of substances (such as macromolecules, small molecules, ions, and water) across a membrane.  
Interacting selectively with any protein or protein complex (a complex of two or more proteins that function together)  
"Catalysis of the reaction: S-adenosyl-L-methionine + protein L-beta-aspartate = S-adenosyl-L-homocysteine + L-aspartate  
Catalysis of the reaction: S-adenosyl-L-methionine + protein L-beta-aspartate = S-adenosyl-L-homocysteine + L-aspartate  
Catalysis of the reaction: S-adenosyl-L-methionine + protein L-beta-aspartate = S-adenosyl-L-homocysteine + L-aspartate  
Interacting selectively with DNA (deoxyribonucleic acid) [goid 3677] [evidence IEA]; Interacting selectively with any protein or protein complex (a complex of two or more proteins that function together)  
Interacting selectively with any protein or protein complex (a complex of two or more proteins that function together)  
"Interacting selectively with calmodulin, a calcium-binding protein with many roles, both in the cytoplasm and in the nucleus.

Interacting selectively with any protein or protein complex (a complex of two or more proteins that function together)  
"Interacting selectively with any protein or protein complex (a complex of two or more proteins that function together)

"Stops, prevents or reduces the activity of serine-type endopeptidases, enzymes that catalyze the hydrolysis of internal, alpha-peptide bonds in a polypeptide chain by a catalytic mechanism.  
"Catalysis of the hydrolysis of internal, alpha-peptide bonds in a polypeptide chain by a catalytic mechanism.  
"Catalysis of the hydrolysis of internal, alpha-peptide bonds in a polypeptide chain by a catalytic mechanism.  
"Interacting selectively with a nucleotide, any compound consisting of a nucleoside that is esterified to a phosphate group.  
"Interacting selectively with a nucleotide, any compound consisting of a nucleoside that is esterified to a phosphate group.  
"Interacting selectively with a nucleotide, any compound consisting of a nucleoside that is esterified to a phosphate group.  
"Interacting selectively with a lipid [goid 8289] [evidence IEA]; Enables the directed movement of substances across a membrane.  
"Catalysis of the reaction: S-prenyl-L-cysteine + O2 + H2O = a prenyl + L-cysteine + H2O2 [goid 4105] [evidence IEA];  
"Catalysis of an oxidation-reduction (redox) reaction, a reversible chemical reaction in which the oxidation state of a molecule or atom is changed.  
"Catalysis of the reaction: CTP + choline phosphate = diphosphate + CDP-choline [goid 4105] [evidence IEA];  
"Catalysis of the reaction: CTP + ethanolamine phosphate = diphosphate + CDP-ethanolamine [goid 4105] [evidence IEA];  
level or activity of a second messenger or other downstream target, and ultimately effecting a change in the cell's response to the signal.  
Mediates the transfer of a signal from the outside to the inside of a cell by means other than the cell membrane.  
"Interacting selectively with an RNA molecule or a portion thereof [goid 3723] [evidence IEA]; Interacting selectively with any protein or protein complex (a complex of two or more proteins that function together)  
Interacting selectively with zinc (Zn) ions [goid 8270] [evidence IEA]; Interacting selectively with any protein or protein complex (a complex of two or more proteins that function together)  
"Interacting selectively with a heat shock protein, any protein synthesized or activated in response to heat shock.  
Interacting selectively with an RNA molecule or a portion thereof [goid 3723] [evidence IEA]; Interacting selectively with any protein or protein complex (a complex of two or more proteins that function together)  
Interacting selectively with DNA (deoxyribonucleic acid) [goid 3677] [evidence IEA]; Interacting selectively with any protein or protein complex (a complex of two or more proteins that function together)  
"Interacting selectively with calcium ions (Ca2+) [goid 5509] [evidence ISS]; Interacting selectively with any protein or protein complex (a complex of two or more proteins that function together)  
of proteolytic caspases, whose actions dismantle the cell and result in cell death. Apoptosis begins with the activation of these enzymes.  
"Inhibits signal transduction the GTPase activity of G-protein alpha subunits, thereby driving the cycle back to the inactive state.  
Interacting selectively with any protein or protein complex (a complex of two or more proteins that function together)

"Catalysis of the hydrolysis of various bonds, e.g. C-O, C-N, C-C, phosphoric anhydride bonds, and

"Catalysis of the reaction: nucleoside 3',5'-cyclic phosphate + H2O = nucleoside 5'-phosphate; c  
"Catalysis of the reaction: nucleoside 3',5'-cyclic phosphate + H2O = nucleoside 5'-phosphate; c  
"Catalysis of the reaction: adenosine 3',5'-cyclic phosphate + H2O = adenosine 5'-phosphate [g  
"Catalysis of a biochemical reaction at physiological temperatures. In biologically catalyzed reac  
"Catalysis of a biochemical reaction at physiological temperatures. In biologically catalyzed reac  
"Catalysis of the hydrolysis of various bonds, e.g. C-O, C-N, C-C, phosphoric anhydride bonds, r  
"Catalysis of the reaction: nucleoside 3',5'-cyclic phosphate + H2O = nucleoside 5'-phosphate [g  
"Catalysis of the reaction: nucleoside 3',5'-cyclic phosphate + H2O = nucleoside 5'-phosphate [g  
"Catalysis of the reaction: adenosine 3',5'-cyclic phosphate + H2O = adenosine 5'-phosphate [g  
"Catalysis of the reaction: adenosine 3',5'-cyclic phosphate + H2O = adenosine 5'-phosphate [g  
"Alters the level of transcription of target genes, usually by binding to a transcription factor, wher  
"Catalysis of the hydrolysis of various bonds, e.g. C-O, C-N, C-C, phosphoric anhydride bonds, r  
"Interacting selectively with iron (Fe) ions [goid 5506] [evidence IEA]; Catalysis of the hydrolysis  
The function that stimulates a cell to grow or proliferate. Most growth factors have other actions  
The function that stimulates a cell to grow or proliferate. Most growth factors have other actions  
Combining with platelet activating factor to initiate a change in cell activity [goid 4992] [pmid 789  
"Catalysis of the oxidative decarboxylation of pyruvate [goid 4738] [evidence IEA]; Catalysis of a  
"Catalysis of the reaction: pyruvate + lipoamide = S-acetyldihydrolipoamide + CO2 [goid 4739] [I  
"Catalysis of the reaction: pyruvate + lipoamide = S-acetyldihydrolipoamide + CO2 [goid 4739] [I  
"Interacting selectively with any protein or protein complex (a complex of two or more proteins th

Catalysis of the rearrangement of both intrachain and interchain disulfide bonds in proteins [goid  
"Catalysis of the geometric or structural changes within one molecule. Isomerase is the systema  
Catalysis of the rearrangement of both intrachain and interchain disulfide bonds in proteins [goid  
"Interacting selectively with a nucleotide, any compound consisting of a nucleoside that is esterifi  
"Catalysis of the phosphorylation of a specific transcription regulator in response to the presence  
"Catalysis of the phosphorylation of a specific transcription regulator in response to the presence  
"Catalysis of the phosphorylation of a specific transcription regulator in response to the presence  
The function of a transcription cofactor that activates transcription from a RNA polymerase II pro  
"Interacting selectively with any protein component of any cytoskeleton (actin, microtubule, or in  
"Interacting selectively with monomeric or multimeric forms of actin, including actin filaments [go  
Interacting selectively with any protein or protein complex (a complex of two or more proteins th  
"Interacting selectively with magnesium (Mg) ions [goid 287] [evidence IEA]; Catalysis of the rea  
"Interacting selectively with a nucleotide, any compound consisting of a nucleoside that is esterifi  
"Catalysis of the reaction: (6S)-tetrahydrofolate + S-aminomethyldihydrolipoamide = (6R)-5,10  
Interacting selectively with an unfolded protein [goid 51082] [evidence IEA]  
Interacting selectively with an identical protein or proteins [goid 42802] [pmid 15855230] [eviden  
"Interacting selectively with DNA (deoxyribonucleic acid) [goid 3677] [pmid 10215036] [evidence  
"Catalysis of the reaction: all-trans-hexaprenyl diphosphate + isopentenyl diphosphate = diphos  
"Catalysis of the reaction: all-trans-hexaprenyl diphosphate + isopentenyl diphosphate = diphos  
"Interacting selectively with any protein or protein complex (a complex of two or more proteins th  
"Catalysis of the reaction: ATP + pyridoxal = ADP + pyridoxal 5'-phosphate [goid 8478] [evidenc  
"Interacting selectively with magnesium (Mg) ions [goid 287] [evidence IEA]; Catalysis of the hyc  
"Naturally occurring peptide that is an opioid (any non-alkaloid having an opiate-like effect that c

"Interacting selectively with any protein or protein complex (a complex of two or more proteins th  
The action of a molecule that contributes to the structural integrity of a complex or assembly with  
"Interacting selectively with a protein C-terminus, the end of any peptide chain at which the 1-ca  
Interacting selectively with any protein or protein complex (a complex of two or more proteins th  
"Interacting selectively with any protein or protein complex (a complex of two or more proteins th  
Interacting selectively with any protein or protein complex (a complex of two or more proteins th  
Interacting selectively with any protein or protein complex (a complex of two or more proteins th  
Interacting selectively with any protein or protein complex (a complex of two or more proteins th  
"Interacting selectively with a nucleotide, any compound consisting of a nucleoside that is esteril  
Interacting selectively with any protein or protein complex (a complex of two or more proteins th  
"Interacting selectively with acyl-CoA, any derivative of coenzyme A in which the sulfhydryl group  
"The selective, often stoichiometric, interaction of a molecule with one or more specific sites on  
Interacting selectively with calcium ions (Ca<sup>2+</sup>) [goid 5509] [pmid 10486255] [evidence TAS]; Int  
"Interacting selectively with DNA (deoxyribonucleic acid) [goid 3677] [evidence IEA]; Catalysis of  
Interacting selectively with any nucleic acid [goid 3676] [evidence IEA]; The function of binding to

Interacting selectively with any protein or protein complex (a complex of two or more proteins th  
vidence IEA]

"Catalysis of the reaction: S-adenosyl-L-methionine + phosphatidylethanolamine = S-adenosyl-L

"Catalysis of the hydrolysis of N-terminal amino acid residues from in a polypeptide chain [goid 4

Mediates the transfer of a signal from the outside to the inside of a cell by means other than the

Mediates the transfer of a signal from the outside to the inside of a cell by means other than the

The action of a molecule that contributes to the structural integrity of a complex or assembly with

Interacting selectively with any protein or protein complex (a complex of two or more proteins th

"Functions during translation by binding nucleic acids during polypeptide synthesis at the ribosom

"Interacting selectively with a nucleotide, any compound consisting of a nucleoside that is esteril

level or activity of a second messenger or other downstream target, and ultimately effecting a ch

Interacting selectively with any protein or protein complex (a complex of two or more proteins th

partments [goid 16559] [evidence IEA]

Interacting selectively with any protein or protein complex (a complex of two or more proteins th

"The function of a transcription cofactor that represses transcription from a RNA polymerase II p

"Interacting selectively with a protein C-terminus, the end of any peptide chain at which the 1-ca

Interacting selectively with any protein or protein complex (a complex of two or more proteins th

"Interacting selectively with a protein C-terminus, the end of any peptide chain at which the 1-ca

Interacting selectively with any protein or protein complex (a complex of two or more proteins th

"Interacting selectively with a type 1 peroxisome targeting signal, a tripeptide with the consensus

"Interacting selectively with a nucleotide, any compound consisting of a nucleoside that is esteril

"Interacting selectively with a type 2 peroxisome targeting signal, a nonapeptide with a broad co

"Interacting selectively with a nucleotide, any compound consisting of a nucleoside that is esteril

The function of binding to a specific DNA sequence in order to modulate transcription. The trans

"Interacting selectively with an unfolded protein [goid 51082] [evidence IEA]; Interacting selectiv

The function of a transcription cofactor that represses transcription from a RNA polymerase II pr

Interacting selectively with an unfolded protein [goid 51082] [pmid 9630229] [evidence NAS]; Int

"Interacting selectively with a nucleotide, any compound consisting of a nucleoside that is esterified to a phosphate group [goid 3676] [evidence IEA];  
"Catalysis of a biochemical reaction at physiological temperatures. In biologically catalyzed reactions, the reaction is catalyzed by an enzyme [goid 4518] [evidence ISS];  
"Interacting selectively with a nucleotide, any compound consisting of a nucleoside that is esterified to a phosphate group [goid 3676] [evidence IEA];  
"Interacting selectively with a nucleotide, any compound consisting of a nucleoside that is esterified to a phosphate group [goid 3676] [evidence IEA];  
"Catalysis of the reaction: ATP + D-fructose 6-phosphate = ADP + D-fructose 1,6-bisphosphate [goid 8967] [evidence ISS];  
"Interacting selectively with a nucleotide, any compound consisting of a nucleoside that is esterified to a phosphate group [goid 3676] [evidence IEA];  
"Interacting selectively with monomeric or multimeric forms of actin, including actin filaments [goid 4518] [evidence ISS];  
"Interacting selectively with monomeric or multimeric forms of actin, including actin filaments [goid 4518] [evidence ISS];  
"Interacting selectively with a nucleotide, any compound consisting of a nucleoside that is esterified to a phosphate group [goid 3676] [evidence IEA];  
"Catalysis of the reaction: 3-phospho-D-glyceroyl phosphate = 2,3-bisphospho-D-glycerate [goid 8967] [evidence ISS];  
"Catalysis of the reaction: 3-phospho-D-glyceroyl phosphate = 2,3-bisphospho-D-glycerate [goid 8967] [evidence ISS];  
  
"Catalysis of the hydrolysis of ester linkages within nucleic acids [goid 4518] [evidence ISS];  
"The function of binding to a specific DNA sequence in order to modulate transcription. The transcription factor binds to the DNA sequence and initiates transcription [goid 4518] [evidence ISS];

"Interacting selectively with any protein or protein complex (a complex of two or more proteins that are bound together) [goid 4518] [evidence ISS];  
"Catalysis of the transfer of a prenyl group from one compound (donor) to another (acceptor) [goid 8967] [evidence ISS];  
"Interacting selectively with a nucleotide, any compound consisting of a nucleoside that is esterified to a phosphate group [goid 3676] [evidence IEA];

"Catalysis of the hydrolysis of various bonds, e.g. C-O, C-N, C-C, phosphoric anhydride bonds, phosphodiester bonds, phosphotriester bonds, phosphoglycolate bonds, phosphoserine bonds, phosphothreonine bonds, phosphotyrosine bonds, phosphotyrosine phosphatase [goid 8967] [evidence ISS];  
Interacting selectively with any protein or protein complex (a complex of two or more proteins that are bound together) [goid 4518] [evidence ISS];  
Interacting selectively with magnesium (Mg) ions [goid 287] [evidence IEA]; Catalysis of the reaction: ATP + H<sub>2</sub>O = ADP + phosphate [goid 8967] [evidence ISS];  
"Interacting selectively with magnesium (Mg) ions [goid 287] [evidence IEA]; Catalysis of the reaction: ATP + H<sub>2</sub>O = ADP + phosphate [goid 8967] [evidence ISS];  
"Catalysis of the transfer of a group, e.g. a methyl group, glycosyl group, acyl group, phosphorus group, phosphorus group, phosphorus group [goid 8967] [evidence ISS];  
Interacting selectively with magnesium (Mg) ions [goid 287] [evidence IEA]; Catalysis of the reaction: ATP + H<sub>2</sub>O = ADP + phosphate [goid 8967] [evidence ISS];  
"Catalysis of the reaction: 2-phosphoglycolate + H<sub>2</sub>O = glycolate + phosphate [goid 8967] [evidence ISS];  
Catalysis of the hydrolysis of a peptide bond. A peptide bond is a covalent bond formed when the amino group of one amino acid reacts with the carboxyl group of another amino acid [goid 8967] [evidence ISS];  
"Combining with an extracellular or intracellular messenger to initiate a change in cell activity [goid 3707] [pmid 9705155];  
"Combining with a steroid hormone to initiate a change in cell activity [goid 3707] [pmid 9705155];  
"Interacting selectively with a nucleotide, any compound consisting of a nucleoside that is esterified to a phosphate group [goid 3676] [evidence IEA];  
"Interacting selectively with monomeric or multimeric forms of actin, including actin filaments [goid 4518] [evidence ISS];  
"Interacting selectively with monomeric or multimeric forms of actin, including actin filaments [goid 4518] [evidence ISS];

Interacting selectively with any protein or protein complex (a complex of two or more proteins that are bound together) [goid 4518] [evidence ISS];  
Combining with an extracellular or intracellular messenger to initiate a change in cell activity [goid 3707] [pmid 9705155];  
Interacting selectively with zinc (Zn) ions [goid 8270] [evidence IEA]; Interacting selectively with zinc (Zn) ions [goid 8270] [evidence IEA];  
Interacting selectively with DNA (deoxyribonucleic acid) [goid 3677] [evidence IEA]; Interacting selectively with DNA (deoxyribonucleic acid) [goid 3677] [evidence IEA];  
Interacting selectively with DNA (deoxyribonucleic acid) [goid 3677] [evidence IEA]; Interacting selectively with DNA (deoxyribonucleic acid) [goid 3677] [evidence IEA];  
"Catalysis of the hydrolysis of various bonds, e.g. C-O, C-N, C-C, phosphoric anhydride bonds, phosphodiester bonds, phosphotriester bonds, phosphoglycolate bonds, phosphoserine bonds, phosphothreonine bonds, phosphotyrosine bonds, phosphotyrosine phosphatase [goid 8967] [evidence ISS];  
"Catalysis of the hydrolysis of N-terminal amino acid residues from in a polypeptide chain [goid 8967] [evidence ISS];  
Interacting selectively with any nucleic acid [goid 3676] [evidence IEA]; The function of binding to a specific DNA sequence in order to modulate transcription. The transcription factor binds to the DNA sequence and initiates transcription [goid 4518] [evidence ISS];



Interacting selectively with any protein or protein complex (a complex of two or more proteins that interact with each other)  
Interacting selectively with any protein or protein complex (a complex of two or more proteins that interact with each other)  
Interacting selectively with any protein or protein complex (a complex of two or more proteins that interact with each other)  
Interacting selectively with any protein or protein complex (a complex of two or more proteins that interact with each other)  
Interacting selectively with any protein or protein complex (a complex of two or more proteins that interact with each other)  
Interacting selectively with any protein or protein complex (a complex of two or more proteins that interact with each other)  
Interacting selectively with any protein or protein complex (a complex of two or more proteins that interact with each other)  
Interacting selectively with any protein or protein complex (a complex of two or more proteins that interact with each other)  
Interacting selectively with any protein or protein complex (a complex of two or more proteins that interact with each other)  
Interacting selectively with any protein or protein complex (a complex of two or more proteins that interact with each other)  
Interacting selectively with any protein or protein complex (a complex of two or more proteins that interact with each other)  
Interacting selectively with any protein or protein complex (a complex of two or more proteins that interact with each other)  
Interacting selectively with any protein or protein complex (a complex of two or more proteins that interact with each other)  
Interacting selectively with any protein or protein complex (a complex of two or more proteins that interact with each other)  
"Elemental activities, such as catalysis or binding, describing the actions of a gene product at the cellular level.  
The function of binding to a specific DNA sequence in order to modulate transcription. The transcription factor binds to the DNA sequence and initiates transcription.  
Interacting selectively with any protein or protein complex (a complex of two or more proteins that interact with each other)  
"Catalysis of the reaction: 3-phosphoglycerate + NAD<sup>+</sup> = 3-phosphohydroxypyruvate + NADH + H<sup>+</sup>  
Interacting selectively with the insulin receptor [goid 5158] [pmid 11018022] [evidence NAS]; Interacting selectively with the insulin receptor  
"Catalysis of a biochemical reaction at physiological temperatures. In biologically catalyzed reactions, the reaction is catalyzed by a biological catalyst, such as an enzyme, cofactor, or prosthetic group, usually at mild conditions of temperature and pressure.  
"Catalysis of a biochemical reaction at physiological temperatures. In biologically catalyzed reactions, the reaction is catalyzed by a biological catalyst, such as an enzyme, cofactor, or prosthetic group, usually at mild conditions of temperature and pressure.  
"Catalysis of a biochemical reaction at physiological temperatures. In biologically catalyzed reactions, the reaction is catalyzed by a biological catalyst, such as an enzyme, cofactor, or prosthetic group, usually at mild conditions of temperature and pressure.  
"Interacting selectively with a nucleotide, any compound consisting of a nucleoside that is esterified to a phosphate group.  
"Interacting selectively with a nucleotide, any compound consisting of a nucleoside that is esterified to a phosphate group.  
Interacting selectively with any protein or protein complex (a complex of two or more proteins that interact with each other)

"Interacting selectively with magnesium (Mg) ions [goid 287] [evidence IEA]; Catalysis of the hydrolysis of ATP to ADP and phosphate  
"The function of binding to a specific DNA sequence in order to modulate transcription. The transcription factor binds to the DNA sequence and initiates transcription.  
"Catalysis of the reaction: a phosphoprotein + H<sub>2</sub>O = a protein + phosphate. Together with protein phosphatase, it is involved in the regulation of protein function.

The function of binding to a specific DNA sequence in order to modulate transcription. The transcription factor binds to the DNA sequence and initiates transcription.  
"Interacting selectively with iron (Fe) ions [goid 5506] [evidence IEA]; Interacting selectively with iron (Fe) ions  
"Catalysis of an oxidation-reduction (redox) reaction, a reversible chemical reaction in which the oxidation state of a molecule or atom is changed.  
"Stops, prevents or reduces the activity of an endopeptidase, any enzyme that hydrolyzes nonterminal peptide bonds.  
"Stops, prevents or reduces the activity of serine-type endopeptidases, enzymes that catalyze the hydrolysis of peptide bonds.  
"Interacting selectively with magnesium (Mg) ions [goid 287] [pmid 11279162] [evidence NAS]; Catalysis of the hydrolysis of ATP to ADP and phosphate  
"Catalysis of the reaction: ATP + 1-phosphatidyl-1D-myo-inositol = ADP + 1-phosphatidyl-1D-myo-inositol-4-phosphate  
"Catalysis of the phosphorylation of myo-inositol (1,2,3,5/4,6-cyclohexanehexol) or a phosphatidyl-inositol  
"Catalysis of the phosphorylation of myo-inositol (1,2,3,5/4,6-cyclohexanehexol) or a phosphatidyl-inositol  
"Catalysis of the reaction: ATP + 1-phosphatidyl-1D-myo-inositol = ADP + 1-phosphatidyl-1D-myo-inositol-4-phosphate  
Interacting selectively with DNA (deoxyribonucleic acid) [goid 3677] [evidence IEA]; The function of binding to a specific DNA sequence in order to modulate transcription.

Interacting selectively with DNA (deoxyribonucleic acid) [goid 3677] [evidence IEA]; The function  
"Interacting selectively with any nucleic acid [goid 3676] [evidence IEA]; Interacting selectively with

"Interacting selectively with phospholipids, a class of lipids containing phosphoric acid as a monophosphate  
"Interacting selectively with protein kinase C [goid 5080] [evidence ISS]; Interacting selectively with

"Interacting selectively with a nucleotide, any compound consisting of a nucleoside that is esterified to a phosphate group  
Interacting selectively with any protein or protein complex (a complex of two or more proteins that are

"Catalysis of the transfer of an alpha-D-mannosyl residue from GDP-mannose into lipid-linked oligosaccharides  
Catalysis of the transfer of a glycosyl group from one compound (donor) to another (acceptor) [goid 837]

"Catalysis of the reaction: CDP-ethanolamine + 1,2-diacylglycerol = CMP + a phosphatidylethanolamine  
"Interacting selectively with any protein or protein complex (a complex of two or more proteins that are

Catalysis of the transfer of a glycosyl group from one compound (donor) to another (acceptor) [goid 837]  
"Catalysis of the formation of the linkage between a protein and a glycosylphosphatidylinositol anchor

"Catalysis of the reaction: N-acetyl-D-glucosaminylphosphatidylinositol + H<sub>2</sub>O = D-glucosaminylphosphatidylethanolamine + N-acetyl-D-glucosamine  
Catalysis of the transfer of a glycosyl group from one compound (donor) to another (acceptor) [goid 837]

"Catalysis of the transfer of a group, e.g. a methyl group, glycosyl group, acyl group, phosphorus-containing group  
"Interacting selectively with any protein or protein complex (a complex of two or more proteins that are

"Elemental activities, such as catalysis or binding, describing the actions of a gene product at the cellular level  
Catalysis of the transfer of a glycosyl group from one compound (donor) to another (acceptor) [goid 837]

Interacting selectively with any protein or protein complex (a complex of two or more proteins that are  
"Catalysis of the formation of the linkage between a protein and a glycosylphosphatidylinositol anchor

"Catalysis of the formation of the linkage between a protein and a glycosylphosphatidylinositol anchor  
"Catalysis of the formation of the linkage between a protein and a glycosylphosphatidylinositol anchor

"Catalysis of the transfer of a mannosyl group to an acceptor molecule, typically another carbohydrate  
Catalysis of the transfer of an acyl group to an oxygen atom on the acceptor molecule [goid 837]

the endoplasmic reticulum membrane [goid 16254] [pmid 11102867] [evidence EXP]  
ol (GPI) anchor that attaches some membrane proteins to the lipid bilayer of the cell membrane.

[goid 5066] [evidence IEA]; Interacting selectively with any protein or protein complex (a complex of two or more proteins that are

"Catalysis of the phosphorylation of myo-inositol (1,2,3,5/4,6-cyclohexanehexol) or a phosphatidylethanolamine  
"Catalysis of the transfer of a phosphate group, usually from ATP, to a substrate molecule [goid 837]

"Interacting selectively with a nucleotide, any compound consisting of a nucleoside that is esterified to a phosphate group  
"Catalysis of the phosphorylation of myo-inositol (1,2,3,5/4,6-cyclohexanehexol) or a phosphatidylethanolamine

"Catalysis of the phosphorylation of myo-inositol (1,2,3,5/4,6-cyclohexanehexol) or a phosphatidylethanolamine  
"Catalysis of the phosphorylation of myo-inositol (1,2,3,5/4,6-cyclohexanehexol) or a phosphatidylethanolamine

"Catalysis of the phosphorylation of myo-inositol (1,2,3,5/4,6-cyclohexanehexol) or a phosphatidylethanolamine  
"Catalysis of the phosphorylation of myo-inositol (1,2,3,5/4,6-cyclohexanehexol) or a phosphatidylethanolamine

"Interacting selectively with the insulin receptor [goid 5158] [pmid 7537849] [evidence IPI]; Interacting selectively with any protein or protein complex (a complex of two or more proteins that are

Interacting selectively with any protein or protein complex (a complex of two or more proteins that are  
"Interacting selectively with any protein or protein complex (a complex of two or more proteins that are

"Interacting selectively with a nucleotide, any compound consisting of a nucleoside that is esterified to a phosphate group  
"Interacting selectively with a nucleotide, any compound consisting of a nucleoside that is esterified to a phosphate group

Combining with an extracellular or intracellular messenger to initiate a change in cell activity [goid  
Combining with an extracellular or intracellular messenger to initiate a change in cell activity [goid  
"Interacting selectively with a nucleotide, any compound consisting of a nucleoside that is esterified  
"Interacting selectively with a nucleotide, any compound consisting of a nucleoside that is esterified  
"Interacting selectively with a nucleotide, any compound consisting of a nucleoside that is esterified  
Catalysis of the reaction: peptidyl-proline (omega=180) = peptidyl-proline (omega=0) [goid 3755  
Catalysis of the reaction: peptidyl-proline (omega=180) = peptidyl-proline (omega=0) [goid 3755  
"Interacting selectively with a nucleotide, any compound consisting of a nucleoside that is esterified  
"Elemental activities, such as catalysis or binding, describing the actions of a gene product at the

"Interacting selectively with a nucleotide, any compound consisting of a nucleoside that is esterified  
"Interacting selectively with a nucleotide, any compound consisting of a nucleoside that is esterified  
"Interacting selectively with a nucleotide, any compound consisting of a nucleoside that is esterified  
"Interacting selectively with any protein or protein complex (a complex of two or more proteins that  
"Catalysis of the transfer of a phosphate group, usually from ATP, to a substrate molecule [goid  
"Catalysis of the transfer of a phosphate group, usually from ATP, to a substrate molecule [goid

"Interacting selectively with any protein or protein complex (a complex of two or more proteins that  
"Interacting selectively with a nucleotide, any compound consisting of a nucleoside that is esterified  
"Catalysis of the reaction: sarcosine + H<sub>2</sub>O + O<sub>2</sub> = glycine + formaldehyde + H<sub>2</sub>O<sub>2</sub> [goid 8115]  
Catalysis of the phosphorylation of phosphatidylinositol phosphate to produce phosphatidylinositol  
The function that links a sequence-specific transcription factor to the core RNA polymerase II complex  
"Catalysis of the reaction: phosphatidyl-L-serine = phosphatidylethanolamine + CO<sub>2</sub> [goid 4609]  
Interacting selectively with a lipid [goid 8289] [evidence IEA]

"Interacting selectively with a lipid [goid 8289] [evidence IEA]; Enables the directed movement of  
"Interacting selectively with calcium ions (Ca<sup>2+</sup>) [goid 5509] [evidence IEA]; Enables the directed  
Interacting selectively with calcium ions (Ca<sup>2+</sup>) [goid 5509] [pmid 10022914] [evidence NAS]; In  
"Catalysis of a biochemical reaction at physiological temperatures. In biologically catalyzed reactions  
"The function of binding to a specific DNA sequence in order to modulate transcription. The transcription  
"The function of binding to a specific DNA sequence in order to modulate transcription. The transcription  
"The function of binding to a specific DNA sequence in order to modulate transcription. The transcription  
"Interacting selectively with any protein or protein complex (a complex of two or more proteins that  
"Interacting selectively with any protein or protein complex (a complex of two or more proteins that

"Interacting selectively with any protein or protein complex (a complex of two or more proteins that  
"Elemental activities, such as catalysis or binding, describing the actions of a gene product at the  
"Interacting selectively with calcium ions (Ca<sup>2+</sup>) [goid 5509] [evidence IEA]; Catalysis of facilitated

Combining with an extracellular or intracellular messenger to initiate a change in cell activity [goid  
"Stops, prevents or reduces the activity of a protein kinase, an enzyme which phosphorylates a  
"Stops, prevents or reduces the activity of a protein kinase, an enzyme which phosphorylates a  
"Stops, prevents or reduces the activity of a protein kinase, an enzyme which phosphorylates a  
"Interacting selectively with magnesium (Mg) ions [goid 287] [evidence IEA]; Catalysis of the reaction

"Interacting selectively with a nucleotide, any compound consisting of a nucleoside that is esterified with a phosphate group

"Interacting selectively with a nucleotide, any compound consisting of a nucleoside that is esterified with a phosphate group

"Catalysis of the transfer of a phosphate group, usually from ATP, to a substrate molecule [goid 3677]

"Interacting selectively with a nucleotide, any compound consisting of a nucleoside that is esterified with a phosphate group

"Functions to enable the transcription of specific, or specific sets, of genes by RNA polymerase

"The action of a molecule that contributes to the structural integrity of a complex or assembly with a specific DNA sequence

"The action of a molecule that contributes to the structural integrity of a complex or assembly with a specific DNA sequence

"Catalysis of the reaction: phosphatidylcholine + H<sub>2</sub>O = 2-acylglycerophosphocholine + a carboxylate

"Catalysis of the reaction: phosphatidylcholine + H<sub>2</sub>O = 1-acylglycerophosphocholine + a carboxylate

"Interacting selectively with calcium ions (Ca<sup>2+</sup>) [goid 5509] [evidence IEA]; Catalysis of the hydrolysis of internal, alpha-peptide bonds in a polypeptide chain by a catalytic agent

Catalysis of the reaction: phosphatidylcholine + H<sub>2</sub>O = 1-acylglycerophosphocholine + a carboxylate

"Catalysis of the reaction: phosphatidylcholine + H<sub>2</sub>O = 1-acylglycerophosphocholine + a carboxylate

"Catalysis of the reaction: phosphatidylcholine + H<sub>2</sub>O = 1-acylglycerophosphocholine + a carboxylate

"The selective, often stoichiometric, interaction of a molecule with one or more specific sites on a protein

"Elemental activities, such as catalysis or binding, describing the actions of a gene product at the molecular level

The function of binding to a specific DNA sequence in order to modulate transcription. The transcription factor binds to a specific DNA sequence in order to modulate transcription. The transcription factor binds to a specific DNA sequence in order to modulate transcription. The transcription factor binds to a specific DNA sequence in order to modulate transcription.

Interacting selectively with DNA (deoxyribonucleic acid) [goid 3677] [pmid 15888725] [evidence IEA]

The function of binding to a specific DNA sequence in order to modulate transcription. The transcription factor binds to a specific DNA sequence in order to modulate transcription. The transcription factor binds to a specific DNA sequence in order to modulate transcription. The transcription factor binds to a specific DNA sequence in order to modulate transcription.

"Catalysis of the hydrolysis of internal, alpha-peptide bonds in a polypeptide chain by a catalytic agent

Catalysis of the reaction: 2-lysophosphatidylcholine + H<sub>2</sub>O = glycerophosphocholine + a carboxylate

"Catalysis of the reaction: 1-phosphatidyl-1D-myo-inositol 4,5-bisphosphate + H<sub>2</sub>O = D-myo-inositol 1,3-bisphosphate + 1-lysophosphatidylcholine

"Catalysis of the reaction: 1-phosphatidyl-1D-myo-inositol 4,5-bisphosphate + H<sub>2</sub>O = D-myo-inositol 1,3-bisphosphate + 1-lysophosphatidylcholine

"Catalysis of the reaction: 1-phosphatidyl-1D-myo-inositol 4,5-bisphosphate + H<sub>2</sub>O = D-myo-inositol 1,3-bisphosphate + 1-lysophosphatidylcholine

"Catalysis of the reaction: 1-phosphatidyl-1D-myo-inositol 4,5-bisphosphate + H<sub>2</sub>O = D-myo-inositol 1,3-bisphosphate + 1-lysophosphatidylcholine

"Catalysis of the reaction: 1-phosphatidyl-1D-myo-inositol 4,5-bisphosphate + H<sub>2</sub>O = D-myo-inositol 1,3-bisphosphate + 1-lysophosphatidylcholine

"Catalysis of the reaction: 1-phosphatidyl-1D-myo-inositol 4,5-bisphosphate + H<sub>2</sub>O = D-myo-inositol 1,3-bisphosphate + 1-lysophosphatidylcholine

"Elemental activities, such as catalysis or binding, describing the actions of a gene product at the molecular level

"Catalysis of the reaction: 1-phosphatidyl-1D-myo-inositol 4,5-bisphosphate + H<sub>2</sub>O = D-myo-inositol 1,3-bisphosphate + 1-lysophosphatidylcholine

"Catalysis of the reaction: 1-phosphatidyl-1D-myo-inositol 4,5-bisphosphate + H<sub>2</sub>O = D-myo-inositol 1,3-bisphosphate + 1-lysophosphatidylcholine

"Catalysis of the reaction: a phospholipid + H<sub>2</sub>O = 1,2-diacylglycerol + a phosphatidate [goid 4630]

"Catalysis of the reaction: a phosphatidylcholine + H<sub>2</sub>O = choline + a phosphatidate [goid 4630]

"Catalysis of the reaction: a phosphatidylcholine + H<sub>2</sub>O = choline + a phosphatidate [goid 4630]

"Catalysis of the reaction: a phosphatidylcholine + H<sub>2</sub>O = choline + a phosphatidate [goid 4630]

"Catalysis of the reaction: a phosphatidylcholine + H<sub>2</sub>O = choline + a phosphatidate [goid 4630]

"Catalysis of a biochemical reaction at physiological temperatures. In biologically catalyzed reactions, the reaction is catalyzed by a protein or enzyme.

Interacting selectively with the SNAP receptor syntaxin-13 [goid 30349] [pmid 10610180] [evidence IEA]

"Interacting selectively with monomeric or multimeric forms of actin, including actin filaments [goid 30349] [pmid 10610180] [evidence IEA]

Interacting selectively with calcium ions (Ca<sup>2+</sup>) [goid 5509] [pmid 2897630] [evidence TAS]

"Interacting selectively with phospholipids, a class of lipids containing phosphoric acid as a monophosphate group"  
"Interacting selectively with phospholipids, a class of lipids containing phosphoric acid as a monophosphate group"  
"Interacting selectively with phospholipids, a class of lipids containing phosphoric acid as a monophosphate group"  
"Interacting selectively with phosphatidylinositol, any glycerophospholipid with its sn-glycerol 3-phosphate group"  
"Enables the directed movement of glycolipids, compounds containing (usually) 1-4 linked monosaccharides"  
"Mediates the transfer of a signal from the outside to the inside of a cell by means other than the transfer of a signal through a membrane channel"  
"Interacting selectively with any protein or protein complex (a complex of two or more proteins that function together)"  
"Interacting selectively with zinc (Zn) ions [goid 8270] [evidence IEA]; Interacting selectively with zinc (Zn) ions [goid 8270] [evidence IEA]; Interacting selectively with zinc (Zn) ions [goid 8270] [evidence IEA]; Interacting selectively with zinc (Zn) ions [goid 8270] [evidence IEA]"  
"Stimulates the exchange of guanyl nucleotides by a GTPase. Under normal cellular physiological conditions, the exchange of guanyl nucleotides by a GTPase of the Rho family.""  
"Stimulates the exchange of guanyl nucleotides by a GTPase. Under normal cellular physiological conditions, the exchange of guanyl nucleotides by a GTPase of the Rho family.""  
"Stimulates the exchange of guanyl nucleotides by a GTPase. Under normal cellular physiological conditions, the exchange of guanyl nucleotides by a GTPase of the Rho family.""  
"Stimulates the exchange of guanyl nucleotides by a GTPase of the Rho family. Under normal cellular physiological conditions, the exchange of guanyl nucleotides by a GTPase of the Rho family.""  
"The selective, often stoichiometric, interaction of a molecule with one or more specific sites on a protein or protein complex"

Interacting selectively with any protein or protein complex (a complex of two or more proteins that function together)  
"Interacting selectively with zinc (Zn) ions [goid 8270] [evidence IEA]; Interacting selectively with zinc (Zn) ions [goid 8270] [evidence IEA]; Interacting selectively with zinc (Zn) ions [goid 8270] [evidence IEA]; Interacting selectively with zinc (Zn) ions [goid 8270] [evidence IEA]"  
"Catalysis of the hydrolysis of internal, alpha-peptide bonds in a polypeptide chain by a catalytic mechanism in which water acts as a nucleophile [goid 45786] [evidence IEA]"

"Catalysis of the hydrolysis of internal, alpha-peptide bonds in a polypeptide chain by a catalytic mechanism in which water acts as a nucleophile [goid 45786] [evidence IEA]"

"Interacting selectively with a nucleotide, any compound consisting of a nucleoside that is esterified to a phosphate group"  
"Interacting selectively with a nucleotide, any compound consisting of a nucleoside that is esterified to a phosphate group"  
"Interacting selectively with a nucleotide, any compound consisting of a nucleoside that is esterified to a phosphate group"  
"Catalysis of facilitated diffusion of an ion (by an energy-independent process) by passage through a membrane channel"  
"Catalysis of an oxidation-reduction (redox) reaction in which hydrogen or electrons are transferred from one molecule to another"  
"Interacting selectively with iron (Fe) ions [goid 5506] [evidence IEA]; Interacting selectively with iron (Fe) ions [goid 5506] [evidence IEA]; Interacting selectively with iron (Fe) ions [goid 5506] [evidence IEA]; Interacting selectively with iron (Fe) ions [goid 5506] [evidence IEA]"  
"Interacting selectively with any protein or protein complex (a complex of two or more proteins that function together)"  
"The function of a transcription cofactor that represses transcription from a RNA polymerase II promoter"  
"Interacting selectively with monomeric or multimeric forms of actin, including actin filaments [goid 5509] [evidence IEA]; Interacting selectively with monomeric or multimeric forms of actin, including actin filaments [goid 5509] [evidence IEA]; Interacting selectively with monomeric or multimeric forms of actin, including actin filaments [goid 5509] [evidence IEA]; Interacting selectively with monomeric or multimeric forms of actin, including actin filaments [goid 5509] [evidence IEA]"  
"Interacting selectively with calcium ions (Ca<sup>2+</sup>) [goid 5509] [pmid 9218461] [evidence NAS]; Interacting selectively with calcium ions (Ca<sup>2+</sup>) [goid 5509] [pmid 9218461] [evidence NAS]; Interacting selectively with calcium ions (Ca<sup>2+</sup>) [goid 5509] [pmid 9218461] [evidence NAS]; Interacting selectively with calcium ions (Ca<sup>2+</sup>) [goid 5509] [pmid 9218461] [evidence NAS]"  
"Interacting selectively with calcium ions (Ca<sup>2+</sup>) [goid 5509] [pmid 10930526] [evidence NAS]; Interacting selectively with calcium ions (Ca<sup>2+</sup>) [goid 5509] [pmid 10930526] [evidence NAS]; Interacting selectively with calcium ions (Ca<sup>2+</sup>) [goid 5509] [pmid 10930526] [evidence NAS]; Interacting selectively with calcium ions (Ca<sup>2+</sup>) [goid 5509] [pmid 10930526] [evidence NAS]"

Interacting selectively with a lipid [goid 8289] [evidence IEA]

Combining with an extracellular or intracellular messenger to initiate a change in cell activity [goid 8289] [evidence IEA]  
"Combining with an extracellular or intracellular messenger to initiate a change in cell activity, as part of a signal transduction pathway [goid 8289] [evidence IEA]; Combining with an extracellular or intracellular messenger to initiate a change in cell activity, as part of a signal transduction pathway [goid 8289] [evidence IEA]; Combining with an extracellular or intracellular messenger to initiate a change in cell activity, as part of a signal transduction pathway [goid 8289] [evidence IEA]; Combining with an extracellular or intracellular messenger to initiate a change in cell activity, as part of a signal transduction pathway [goid 8289] [evidence IEA]"  
Combining with an extracellular or intracellular messenger to initiate a change in cell activity [goid 8289] [evidence IEA]  
Combining with an extracellular or intracellular messenger to initiate a change in cell activity [goid 8289] [evidence IEA]  
Combining with an extracellular or intracellular messenger to initiate a change in cell activity [goid 8289] [evidence IEA]  
"Catalysis of the hydrolysis of peptide bonds by a mechanism in which water acts as a nucleophile [goid 8289] [evidence IEA]"

Interacting selectively with any protein or protein complex (a complex of two or more proteins that  
"Elemental activities, such as catalysis or binding, describing the actions of a gene product at the  
The function of a transcription cofactor that activates transcription from a RNA polymerase II promoter  
Interacting selectively with any nucleic acid [goid 3676] [pmid 1652369] [evidence NAS]; Interacting  
Catalysis of the reaction: D-mannose 1-phosphate = D-mannose 6-phosphate [goid 4615] [pmid  
Catalysis of the reaction: D-mannose 1-phosphate = D-mannose 6-phosphate [goid 4615] [pmid  
cross a synapse [goid 7268] [pmid 8275092] [evidence TAS]; The process whose specific outcome is  
"Catalysis of a biochemical reaction at physiological temperatures. In biologically catalyzed reactions  
"Catalysis of the hydrolysis of internal, alpha-peptide bonds in a polypeptide chain by a mechanical  
"Interacting selectively with DNA (deoxyribonucleic acid) [goid 3677] [evidence IEA]; Interacting  
"Interacting selectively with ATP, adenosine 5'-triphosphate, a universally important coenzyme and  
"Interacting selectively with ATP, adenosine 5'-triphosphate, a universally important coenzyme and  
"Elemental activities, such as catalysis or binding, describing the actions of a gene product at the  
"Interacting selectively with any nucleic acid [goid 3676] [evidence IEA]; Interacting selectively with  
"Interacting selectively with damaged DNA [goid 3684] [pmid 7980603] [evidence NAS]; Interacting  
"Interacting selectively with damaged DNA [goid 3684] [pmid 7980603] [evidence NAS]; Interacting  
"Catalysis of the reaction: ATP + (R)-5-phosphomevalonate = ADP + (R)-5-diphosphomevalonate  
"Interacting selectively with a nucleotide, any compound consisting of a nucleoside that is esterified  
"Interacting selectively with zinc (Zn) ions [goid 8270] [evidence IEA]; Catalysis of the hydrolysis  
"Interacting selectively with damaged DNA [goid 3684] [pmid 10446193] [evidence NAS]; Interacting  
Interacting selectively with any protein or protein complex (a complex of two or more proteins that  
Interacting selectively with any protein or protein complex (a complex of two or more proteins that  
Interacting selectively with any nucleic acid [goid 3676] [evidence IEA]; Interacting selectively with

Interacting selectively with DNA (deoxyribonucleic acid) [goid 3677] [evidence IEA]; The action of  
Interacting selectively with an RNA molecule or a portion thereof [goid 3723] [evidence IEA]  
"Naturally occurring peptide that is an opioid (any non-alkaloid having an opiate-like effect that can  
"Catalysis of the reaction: triacylglycerol + H<sub>2</sub>O = diacylglycerol + a fatty acid anion [goid 4806] [evidence  
"Elemental activities, such as catalysis or binding, describing the actions of a gene product at the  
"Catalysis of the reaction: 2-lysophosphatidylcholine + H<sub>2</sub>O = glycerophosphocholine + a carboxylate  
"Catalysis of the hydrolysis of various bonds, e.g. C-O, C-N, C-C, phosphoric anhydride bonds, phospho  
"Catalysis of the reaction: 2-lysophosphatidylcholine + H<sub>2</sub>O = glycerophosphocholine + a carboxylate  
"Catalysis of the reaction: pyridoxamine 5'-phosphate + H<sub>2</sub>O + O<sub>2</sub> = pyridoxal 5'-phosphate + NADPH  
"Catalysis of the sequential cleavage of mononucleotides from a free 3' terminus of an RNA molecule  
Interacting selectively with any protein or protein complex (a complex of two or more proteins that  
[evidence IEA]; Any process that modulates the frequency, rate or extent of DNA-dependent transcription  
[goid 1900] [evidence IEA]

Interacting selectively with any protein or protein complex (a complex of two or more proteins that  
"Interacting selectively with monomeric or multimeric forms of actin, including actin filaments [goid 3676]  
Catalysis of the transfer of a glycosyl group from one compound (donor) to another (acceptor) [goid 3676]  
Catalysis of the transfer of a glycosyl group from one compound (donor) to another (acceptor) [goid 3676]  
Interacting selectively with DNA (deoxyribonucleic acid) [goid 3677] [evidence IEA]; Interacting selectively



"Catalysis of the reaction: nucleoside triphosphate + RNA(n) = diphosphate + RNA(n+1). Utilizes

"Catalysis of the reaction: nucleoside triphosphate + RNA(n) = diphosphate + RNA(n+1). Utilizes

"Interacting selectively with DNA (deoxyribonucleic acid) [goid 3677] [evidence IEA]; Catalysis of

"Interacting selectively with DNA (deoxyribonucleic acid) [goid 3677] [evidence IEA]; Catalysis of

"Interacting selectively with DNA (deoxyribonucleic acid) [goid 3677] [evidence IEA]; Catalysis of

EA]; The directed movement of mRNA, messenger ribonucleic acid, into, out of, within or between

"The action characteristic of a hormone, any substance formed in very small amounts in one spe

"Catalysis of the reaction: UDP-N-acetyl-D-glucosamine + alpha-D-mannosyl-1,3-(R1)-beta-D-m

"Interacting selectively with magnesium (Mg) ions [goid 287] [evidence IEA]; Catalysis of the rea

Interacting selectively with magnesium (Mg) ions [goid 287] [evidence IEA]; Catalysis of the rea

"Catalysis of the reaction: a phenyl acetate + H2O = a phenol + acetate [goid 4064] [evidence IE

"Catalysis of the site-specific cleavage of RNA by a catalytic RNA-mediated mechanism; substr

"Interacting selectively with an RNA molecule or a portion thereof [goid 3723] [evidence IEA]; Ca

"Catalysis of the endonucleolytic cleavage of RNA, removing 5' extra nucleotides from tRNA pre

"Interacting selectively with any nucleic acid [goid 3676] [evidence IEA]; Catalysis of the endonu

"Elemental activities, such as catalysis or binding, describing the actions of a gene product at th

"Catalysis of the reaction: NADPH + H+ + n oxidized hemoprotein = NADP+ + n reduced hemop

"Catalysis of the generalized reaction: acyl-carrier + reactant = acyl-reactant + carrier [goid 8415

Interacting selectively with DNA (deoxyribonucleic acid) [goid 3677] [evidence IEA]; Interacting s

The function of a transcription cofactor that activates transcription from a RNA polymerase II pro

"Interacting selectively with DNA (deoxyribonucleic acid) [goid 3677] [evidence IEA]; The functio

"The function of binding to a specific DNA sequence in order to modulate transcription. The tran

"The function of binding to a specific DNA sequence in order to modulate transcription. The tran

"Interacting selectively with DNA (deoxyribonucleic acid) [goid 3677] [evidence IEA]; The functio

"The function of binding to a specific DNA sequence in order to modulate transcription. The tran

"The function of binding to a specific DNA sequence in order to modulate transcription. The tran

"Interacting selectively with magnesium (Mg) ions [goid 287] [evidence IEA]; Catalysis of the rea

"Interacting selectively with magnesium (Mg) ions [goid 287] [evidence IEA]; Catalysis of the rea

Interacting selectively with any protein or protein complex (a complex of two or more proteins th

"Catalysis of the reaction: a 3-sn-phosphatidate + H2O = a 1,2-diacyl-sn-glycerol + phosphate [g

"Catalysis of the hydrolysis of various bonds, e.g. C-O, C-N, C-C, phosphoric anhydride bonds, i

"Catalysis of the hydrolysis of various bonds, e.g. C-O, C-N, C-C, phosphoric anhydride bonds, i

"Catalysis of the hydrolysis of various bonds, e.g. C-O, C-N, C-C, phosphoric anhydride bonds, i

"Catalysis of the hydrolysis of various bonds, e.g. C-O, C-N, C-C, phosphoric anhydride bonds, i

"The function of binding to a specific DNA sequence in order to modulate transcription. The tran

"The function of binding to a specific DNA sequence in order to modulate transcription. The tran

"Interacting selectively with a nucleotide, any compound consisting of a nucleoside that is esteril



"Interacting selectively with magnesium (Mg) ions [goid 287] [evidence IEA]; Catalysis of the reaction: CTP + (R)-4'-phosphopantothenate + L-cysteine = CMP + diphosphat

Mediates the transfer of a signal from the outside to the inside of a cell by means other than the  
Interacting selectively with any protein or protein complex (a complex of two or more proteins th  
Interacting selectively with any protein or protein complex (a complex of two or more proteins th  
Interacting selectively with any protein or protein complex (a complex of two or more proteins th  
"Elemental activities, such as catalysis or binding, describing the actions of a gene product at th  
ed by keratin. Keratinization occurs in the stratum corneum, feathers, hair, claws, nails, hooves, ;  
"Catalysis of the reaction: peptidyl-proline (omega=180) = peptidyl-proline (omega=0) [goid 375

"Catalysis of the reaction: peptidyl-proline (omega=180) = peptidyl-proline (omega=0) [goid 375

"Catalysis of the reaction: peptidyl-proline (omega=180) = peptidyl-proline (omega=0) [goid 375

"Interacting selectively with a nucleotide, any compound consisting of a nucleoside that is esterif

"Catalysis of the reaction: peptidyl-proline (omega=180) = peptidyl-proline (omega=0) [goid 375

"Catalysis of the reaction: peptidyl-proline (omega=180) = peptidyl-proline (omega=0) [goid 375

"Catalysis of the reaction: peptidyl-proline (omega=180) = peptidyl-proline (omega=0) [goid 375

Catalysis of the reaction: peptidyl-proline (omega=180) = peptidyl-proline (omega=0) [goid 3755

"Elemental activities, such as catalysis or binding, describing the actions of a gene product at th

Catalysis of the reaction: peptidyl-proline (omega=180) = peptidyl-proline (omega=0) [goid 3755

Interacting selectively with any protein or protein complex (a complex of two or more proteins th

Catalysis of the reaction: peptidyl-proline (omega=180) = peptidyl-proline (omega=0) [goid 3755

The action of a molecule that contributes to the structural integrity of a cytoskeletal structure [go

"Interacting selectively with magnesium (Mg) ions [goid 287] [evidence IEA]; Catalysis of the rea

"Interacting selectively with magnesium (Mg) ions [goid 287] [evidence IEA]; Catalysis of the rea

"Interacting selectively with magnesium (Mg) ions [goid 287] [evidence IEA]; Catalysis of the rea

"Catalysis of the reaction: a phosphoprotein + H2O = a protein + phosphate. Together with prote

"Catalysis of the reaction: a phosphoprotein + H2O = a protein + phosphate. Together with prote

"Interacting selectively with magnesium (Mg) ions [goid 287] [evidence IEA]; Catalysis of the rea

"Interacting selectively with magnesium (Mg) ions [goid 287] [evidence IEA]; Catalysis of the rea

"Interacting selectively with magnesium (Mg) ions [goid 287] [evidence IEA]; Catalysis of a bioch

"Catalysis of the reaction: a carboxylic ester + H2O = an alcohol + a carboxylic anion [goid 4091

"Catalysis of the reaction: protoporphyrinogen-IX + O2 = protoporphyrin-IX + H2O2 [goid 4729] [

"Catalysis of the reaction: a phosphoprotein + H2O = a protein + phosphate. Together with prote

"Catalysis of the reaction: a phosphoprotein + H2O = a protein + phosphate. Together with prote

"Catalysis of the reaction: a phosphoprotein + H2O = a protein + phosphate. Together with prote

"Interacting selectively with DNA (deoxyribonucleic acid) [goid 3677] [evidence IEA]; Interacting

"Stops, prevents or reduces the activity of a protein phosphatase, an enzyme that hydrolyzes ph

Mediates the transfer of a signal from the outside to the inside of a cell by means other than the

Increases the activity of an enzyme [goid 8047] [pmid 9570949] [evidence TAS]

Interacting selectively with any protein or protein complex (a complex of two or more proteins th

"The function of a transcription cofactor that represses transcription from a RNA polymerase II p  
"Stops, prevents or reduces the activity of a protein phosphatase, an enzyme that hydrolyzes ph  
"Stops, prevents or reduces the activity of a protein phosphatase, an enzyme that hydrolyzes ph  
[goid 4865] [evidence IEA]; Interacting selectively with any protein or protein complex (a comple  
Interacting selectively with any protein or protein complex (a complex of two or more proteins th  
Catalysis of the reaction: protein serine/threonine phosphate + H2O = protein serine/threonine +  
Interacting selectively with any protein or protein complex (a complex of two or more proteins th  
Interacting selectively with any protein phosphatase [goid 19903] [pmid 12055102] [evidence NA/  
"Stops, prevents or reduces the activity of a protein kinase, an enzyme which phosphorylates a  
"Stops, prevents or reduces the activity of a protein phosphatase, an enzyme that hydrolyzes ph  
"Stops, prevents or reduces the activity of a protein phosphatase, an enzyme that hydrolyzes ph  
"Stops, prevents or reduces the activity of a protein phosphatase, an enzyme that hydrolyzes ph  
ounds based of the general formula Cx(H2O)y. Includes the formation of carbohydrate derivative  
Catalysis of the reaction: protein serine/threonine phosphate + H2O = protein serine/threonine +  
ounds based of the general formula Cx(H2O)y. Includes the formation of carbohydrate derivative

Interacting selectively with any protein or protein complex (a complex of two or more proteins th  
"Interacting selectively with magnesium (Mg) ions [goid 287] [evidence IEA]; Interacting selectiv  
"Catalysis of the reaction: a phosphoprotein + H2O = a protein + phosphate. Together with prote  
"Catalysis of the reaction: protein serine/threonine phosphate + H2O = protein serine/threonine +  
"Interacting selectively with an antigen, any substance which is capable of inducing a specific im  
"The selective, often stoichiometric, interaction of a molecule with one or more specific sites on  
Modulation of the activity of the enzyme protein phosphatase type 2A [goid 8601] [evidence IEA  
Catalysis of the reaction: protein serine/threonine phosphate + H2O = protein serine/threonine +  
Interacting selectively with calcium ions (Ca2+) [goid 5509] [evidence IEA]  
"Increases the activity of a phosphatase, an enzyme which catalyzes of the removal of a phosph  
Interacting selectively with any protein or protein complex (a complex of two or more proteins th  
Interacting selectively with any protein or protein complex (a complex of two or more proteins th  
"The selective, often stoichiometric, interaction of a molecule with one or more specific sites on  
Interacting selectively with any protein or protein complex (a complex of two or more proteins th  
Interacting selectively with any protein or protein complex (a complex of two or more proteins th  
"Catalysis of the hydrolysis of various bonds, e.g. C-O, C-N, C-C, phosphoric anhydride bonds, +  
"Catalysis of the reaction: a phosphoprotein + H2O = a protein + phosphate. Together with prote  
"Catalysis of the reaction: a phosphoprotein + H2O = a protein + phosphate. Together with prote  
"Catalysis of the reaction: protein serine/threonine phosphate + H2O = protein serine/threonine +  
"[goid 4704] [pmid 9837938] [evidence NAS]; Catalysis of the reaction: protein serine/threonine  
Interacting selectively with any protein or protein complex (a complex of two or more proteins th

"Catalysis of the reaction: a phosphoprotein + H2O = a protein + phosphate. Together with prote  
"Catalysis of the reaction: a phosphoprotein + H2O = a protein + phosphate. Together with prote

"Interacting selectively with a nucleotide, any compound consisting of a nucleoside that is esteril  
"Catalysis of the reaction: palmitoyl-protein + H2O = palmitate + protein [goid 8474] [evidence IE

"Interacting selectively with magnesium (Mg) ions [goid 287] [evidence IEA]; Catalysis of the reaction: peptidyl-proline (omega=180) = peptidyl-proline (omega=0) [goid 3755]  
"Interacting selectively with a G-protein-coupled receptor [goid 1664] [evidence IEA]; The action of a G-protein-coupled receptor [goid 1664] [evidence IEA]  
Interacting selectively with DNA (deoxyribonucleic acid) [goid 3677] [pmid 9875212] [evidence IEA]

Interacting selectively with any protein or protein complex (a complex of two or more proteins that interact with each other)

Interacting selectively with any protein or protein complex (a complex of two or more proteins that interact with each other)

"Elemental activities, such as catalysis or binding, describing the actions of a gene product at the molecular level

"Elemental activities, such as catalysis or binding, describing the actions of a gene product at the molecular level

Interacting selectively with any protein or protein complex (a complex of two or more proteins that interact with each other)

"Elemental activities, such as catalysis or binding, describing the actions of a gene product at the molecular level

Catalysis of the hydrolysis of the terminal or penultimate peptide bond at the C-terminal end of a polypeptide chain

The function of binding to a specific DNA sequence in order to modulate transcription. The transcription factor binds to the DNA sequence

Interacting selectively with DNA (deoxyribonucleic acid) [goid 3677] [evidence IEA]; Interacting selectively with DNA (deoxyribonucleic acid) [goid 3677] [evidence IEA]

"Interacting selectively with DNA (deoxyribonucleic acid) [goid 3677] [evidence NAS]; Interacting selectively with DNA (deoxyribonucleic acid) [goid 3677] [evidence IEA]

Interacting selectively with DNA (deoxyribonucleic acid) [goid 3677] [evidence IEA]; Functions to bind to a specific DNA sequence in order to modulate transcription

Interacting selectively with DNA (deoxyribonucleic acid) [goid 3677] [evidence IEA]; Interacting selectively with DNA (deoxyribonucleic acid) [goid 3677] [evidence IEA]

"Interacting selectively with DNA (deoxyribonucleic acid) [goid 3677] [evidence IEA]; Interacting selectively with DNA (deoxyribonucleic acid) [goid 3677] [evidence IEA]

"Interacting selectively with any protein or protein complex (a complex of two or more proteins that interact with each other)

"Inhibition of the reactions brought about by dioxygen (O2) or peroxides. Usually the antioxidant function of a molecule is to inhibit these reactions

"Catalysis of the reaction: octane hydroperoxide + NADH + H+ = H2O + NAD+ + 1-octanol [goid 3677] [evidence IEA]

"Inhibition of the reactions brought about by dioxygen (O2) or peroxides. Usually the antioxidant function of a molecule is to inhibit these reactions

"Catalysis of an oxidation-reduction (redox) reaction, a reversible chemical reaction in which the oxidation state of a molecule is changed

"Catalysis of the reaction: phosphatidylcholine + H2O = 1-acylglycerophosphocholine + a carbonyl compound [goid 3677] [evidence IEA]

Interacting selectively with DNA (deoxyribonucleic acid) [goid 3677] [evidence IEA]

Interacting selectively with any protein or protein complex (a complex of two or more proteins that interact with each other)

The biological process of a molecule that contributes to the structural integrity of the extracellular matrix [goid 6955] [pmid 10784606] [evidence TAS]; The biological process of a molecule that contributes to the structural integrity of the extracellular matrix [goid 6955] [pmid 10784606] [evidence TAS]

"Catalysis of the hydrolysis of internal, alpha-peptide bonds in a polypeptide chain by a catalytic activity [goid 3677] [evidence IEA]

"Catalysis of the hydrolysis of internal, alpha-peptide bonds in a polypeptide chain by a catalytic activity [goid 3677] [evidence IEA]

"Stimulates the exchange of guanyl nucleotides by a GTPase. Under normal cellular physiological conditions, GTPase activity is stimulated by a G-protein

Interacting selectively with calcium ions (Ca2+) [goid 5509] [evidence IEA]

"The selective, often stoichiometric, interaction of a molecule with one or more specific sites on a protein or protein complex

"Catalysis of a biochemical reaction at physiological temperatures. In biologically catalyzed reactions, the reaction is catalyzed by a protein or protein complex

"Interacting selectively with a nucleotide, any compound consisting of a nucleoside that is esterified to a phosphate group [goid 3677] [evidence IEA]

Interacting selectively with zinc (Zn) ions [goid 8270] [evidence IEA]; Interacting selectively with zinc (Zn) ions [goid 8270] [evidence IEA]

Interacting selectively with zinc (Zn) ions [goid 8270] [evidence IEA]; Interacting selectively with zinc (Zn) ions [goid 8270] [evidence IEA]

Interacting selectively with zinc (Zn) ions [goid 8270] [evidence IEA]; Interacting selectively with zinc (Zn) ions [goid 8270] [evidence IEA]

"Catalysis of the synthesis of a short RNA primer on a DNA template, providing a free 3'-OH that is available for the next step in the synthesis of a longer RNA strand

"Interacting selectively with DNA (deoxyribonucleic acid) [goid 3677] [evidence IEA]; Catalysis of the synthesis of a short RNA primer on a DNA template, providing a free 3'-OH that is available for the next step in the synthesis of a longer RNA strand

"Interacting selectively with a nucleotide, any compound consisting of a nucleoside that is esterified to a phosphate group [goid 4553] [evidence IEA]; Catalysis of the hydrolysis of any O-glycosyl bond [goid 4553] [evidence IEA]; Interacting selectively with any protein or protein complex (a complex of two or more proteins that interact with each other) [goid 4553] [evidence IEA]; Interacting selectively with a nucleotide, any compound consisting of a nucleoside that is esterified to a phosphate group [goid 4553] [evidence IEA]; Catalysis of the reaction: ATP + a protein = ADP + a phosphoprotein; dependent on the presence of a specific protein [goid 4553] [evidence IEA]; Elemental activities, such as catalysis or binding, describing the actions of a gene product at the molecular level [goid 4553] [evidence IEA]; Interacting selectively with any protein or protein complex (a complex of two or more proteins that interact with each other) [goid 4553] [evidence IEA]; Interacting selectively with a nucleotide, any compound consisting of a nucleoside that is esterified to a phosphate group [goid 4553] [evidence IEA]; Modulation of the activity of the enzyme cAMP-dependent protein kinase [goid 8603] [evidence IEA]; Interacting selectively with zinc (Zn) ions [goid 8270] [evidence IEA]; Catalysis of the transfer of

"Interacting selectively with a nucleotide, any compound consisting of a nucleoside that is esterified to a phosphate group [goid 4553] [evidence IEA]; Interacting selectively with a nucleotide, any compound consisting of a nucleoside that is esterified to a phosphate group [goid 4553] [evidence IEA]; Interacting selectively with a nucleotide, any compound consisting of a nucleoside that is esterified to a phosphate group [goid 4553] [evidence IEA]; Interacting selectively with a nucleotide, any compound consisting of a nucleoside that is esterified to a phosphate group [goid 4553] [evidence IEA]; Interacting selectively with a nucleotide, any compound consisting of a nucleoside that is esterified to a phosphate group [goid 4553] [evidence IEA]; Interacting selectively with a nucleotide, any compound consisting of a nucleoside that is esterified to a phosphate group [goid 4553] [evidence IEA]; Catalysis of the hydrolysis of terminal, non-reducing 1,4-linked alpha-D-glucose residues with retention of configuration [goid 4553] [evidence IEA]; Catalysis of the phosphorylation of an amino acid residue in a protein, usually according to the sequence of amino acids [goid 4553] [evidence IEA]; Interacting selectively with a nucleotide, any compound consisting of a nucleoside that is esterified to a phosphate group [goid 4553] [evidence IEA]; Interacting selectively with a nucleotide, any compound consisting of a nucleoside that is esterified to a phosphate group [goid 4553] [evidence IEA]; Interacting selectively with a nucleotide, any compound consisting of a nucleoside that is esterified to a phosphate group [goid 4553] [evidence IEA]; Interacting selectively with DNA (deoxyribonucleic acid) [goid 3677] [evidence IEA]; Catalysis of the phosphorylation of DNA [goid 3677] [evidence IEA]; Interacting selectively with double-stranded RNA [goid 3725] [evidence IEA]; Interacting selectively with DNA (deoxyribonucleic acid) [goid 3677] [evidence IEA]; Interacting selectively with DNA (deoxyribonucleic acid) [goid 3677] [evidence IEA]; Interacting selectively with a nucleotide, any compound consisting of a nucleoside that is esterified to a phosphate group [goid 4553] [evidence IEA]; Interacting selectively with a nucleotide, any compound consisting of a nucleoside that is esterified to a phosphate group [goid 4553] [evidence IEA]; Interacting selectively with the prolactin receptor [goid 5148] [pmid 10854700] [evidence TAS]; The action characteristic of a hormone, any substance formed in very small amounts in one species that acts on another species [goid 4553] [evidence IEA]; Interacting selectively with DNA (deoxyribonucleic acid) [goid 3677] [pmid 2081589] [evidence TAS]; Interacting selectively with any protein or protein complex (a complex of two or more proteins that interact with each other) [goid 4553] [evidence IEA];

"Catalysis of the transfer of a methyl group to an acceptor molecule [goid 8168] [evidence IEA]; Catalysis of the transfer of a methyl group to an acceptor molecule [goid 8168] [evidence IEA]; Catalysis of the transfer of a methyl group to an acceptor molecule [goid 8168] [pmid 15369763]; Interacting selectively with any protein or protein complex (a complex of two or more proteins that interact with each other) [goid 4553] [evidence IEA]; Catalysis of the reaction: S-adenosyl-L-methionine + histone-arginine = S-adenosyl-L-homocysteine + histone-arginine [goid 4553] [evidence IEA]; Interacting selectively with any protein or protein complex (a complex of two or more proteins that interact with each other) [goid 4553] [evidence IEA]; Interacting selectively with copper (Cu) ions [goid 5507] [evidence IEA]; Interacting selectively with any nucleic acid [goid 3676] [evidence IEA]; Catalysis of the hydrolysis of internal, alpha-peptide bonds in a polypeptide chain by a catalytic

Combining with an extracellular or intracellular messenger to initiate a change in cell activity [goid 1664] [pmid 12728244] [evidence IEA]; The function that stimulates a cell to grow or proliferate. Most growth factors have other actions [goid 1664] [pmid 12728244] [evidence IEA]; Interacting selectively with a G-protein-coupled receptor [goid 1664] [pmid 12728244] [evidence IEA]; "Elemental activities, such as catalysis or binding, describing the actions of a gene product at the cellular level [goid 1664] [pmid 12728244] [evidence IEA]; Visual stimuli are detected in the form of photons [goid 1664] [pmid 12728244] [evidence IEA]; "Stops, prevents or reduces the activity of an endopeptidase, any enzyme that hydrolyzes nonterminal peptide bonds [goid 1664] [pmid 12728244] [evidence IEA];

Interacting selectively with DNA (deoxyribonucleic acid) [goid 3677] [evidence IEA]; Plays a role in the processing of primary transcripts [goid 3677] [evidence IEA]; Plays a role in the processing of primary transcripts [goid 3677] [evidence IEA]; The process of removing introns from primary transcripts [goid 3677] [evidence IEA]; The process of removing introns from primary transcripts [goid 3677] [evidence IEA]; The process of removing introns from primary transcripts [goid 3677] [evidence IEA]; An activity which assists splicing of substrate RNA(s) by facilitating the formation and stabilization of a spliceosome [goid 3677] [evidence IEA]; "Interacting selectively with a nucleotide, any compound consisting of a nucleoside that is esterified to a phosphate group [goid 3677] [evidence IEA]; The function of a transcription cofactor that activates transcription from a RNA polymerase II promoter [goid 3677] [evidence IEA]; Interacting selectively with an RNA molecule or a portion thereof [goid 3723] [evidence IEA]; Interacting selectively with an RNA molecule or a portion thereof [goid 3723] [evidence IEA]; The action of a molecule that contributes to the structural integrity of a complex or assembly with RNA [goid 3723] [evidence IEA]; "Interacting selectively with magnesium (Mg) ions [goid 287] [evidence IEA]; Catalysis of the reaction of a nucleoside with a phosphate group [goid 287] [evidence IEA]; "Interacting selectively with magnesium (Mg) ions [goid 287] [evidence IEA]; Catalysis of the reaction of a nucleoside with a phosphate group [goid 287] [evidence IEA]; "Interacting selectively with magnesium (Mg) ions [goid 287] [evidence IEA]; Catalysis of the reaction of a nucleoside with a phosphate group [goid 287] [evidence IEA]; "Interacting selectively with magnesium (Mg) ions [goid 287] [evidence IEA]; Catalysis of the reaction of a nucleoside with a phosphate group [goid 287] [evidence IEA];

Interacting selectively with any nucleic acid [goid 3676] [evidence IEA]; Interacting selectively with any nucleic acid [goid 3676] [evidence IEA]; Interacting selectively with any nucleic acid [goid 3676] [evidence IEA]; Visual stimuli are detected in the form of photons [goid 3676] [evidence IEA];

Interacting selectively with an identical protein or proteins [goid 42802] [evidence IEA]; "The action characteristic of a hormone, any substance formed in very small amounts in one species that acts on other individuals of the same species [goid 42802] [evidence IEA]; "Elemental activities, such as catalysis or binding, describing the actions of a gene product at the cellular level [goid 42802] [evidence IEA];

production, gene expression, etc.) as a result of a biotic stimulus, a stimulus caused or produced

"The function of binding to a specific DNA sequence in order to modulate transcription. The tran

"Catalysis of the hydrolysis of internal, alpha-peptide bonds in a polypeptide chain by a catalytic

"Catalysis of the hydrolysis of internal, alpha-peptide bonds in a polypeptide chain by a catalytic

"Catalysis of a biochemical reaction at physiological temperatures. In biologically catalyzed reac

"Catalysis of the hydrolysis of various bonds, e.g. C-O, C-N, C-C, phosphoric anhydride bonds, p

"Catalysis of the reaction: diphosphate + H<sub>2</sub>O = 2 phosphate [goid 4427] [evidence IEA]; Cataly

Increases the activity of an enzyme [goid 8047] [pmid 2717620] [evidence TAS]; Interacting sele  
: but not, or sparingly, in an aqueous solvent. Includes fatty acids; neutral fats, other fatty-acid es

"Stimulates the exchange of guanyl nucleotides by the GTPase ARF. Under normal cellular phy:

"Stimulates the exchange of guanyl nucleotides by the GTPase ARF. Under normal cellular phy:

"Stimulates the exchange of guanyl nucleotides by the GTPase ARF. Under normal cellular phy:

Interacting selectively with any protein or protein complex (a complex of two or more proteins th

"Stimulates the exchange of guanyl nucleotides by the GTPase ARF. Under normal cellular phy:

"Stimulates the exchange of guanyl nucleotides by the GTPase ARF. Under normal cellular phy:

"Stimulates the exchange of guanyl nucleotides by the GTPase ARF. Under normal cellular phy:

Interacting selectively with any protein or protein complex (a complex of two or more proteins th

Interacting selectively with any protein or protein complex (a complex of two or more proteins th

"Elemental activities, such as catalysis or binding, describing the actions of a gene product at th

y, which result in restriction of damage to the organism attacked or prevention/recovery from the

Interacting selectively with DNA (deoxyribonucleic acid) [goid 3677] [evidence IEA]

"Interacting selectively with a nucleotide, any compound consisting of a nucleoside that is esterif

Interacting selectively with an RNA molecule or a portion thereof [goid 3723] [pmid 7681138] [ev

Catalysis of the hydrolysis of internal peptide bonds in a polypeptide chain by a mechanism in w

Catalysis of the hydrolysis of internal peptide bonds in a polypeptide chain by a mechanism in w

Catalysis of the hydrolysis of internal peptide bonds in a polypeptide chain by a mechanism in w

Catalysis of the hydrolysis of internal peptide bonds in a polypeptide chain by a mechanism in w

Catalysis of the hydrolysis of internal peptide bonds in a polypeptide chain by a mechanism in w

Catalysis of the hydrolysis of internal peptide bonds in a polypeptide chain by a mechanism in w

Catalysis of the hydrolysis of internal peptide bonds in a polypeptide chain by a mechanism in w

Catalysis of the hydrolysis of internal peptide bonds in a polypeptide chain by a mechanism in w

Catalysis of the hydrolysis of internal peptide bonds in a polypeptide chain by a mechanism in w

Catalysis of the hydrolysis of internal peptide bonds in a polypeptide chain by a mechanism in w

Catalysis of the hydrolysis of internal peptide bonds in a polypeptide chain by a mechanism in w

Catalysis of the hydrolysis of internal peptide bonds in a polypeptide chain by a mechanism in w

Catalysis of the hydrolysis of internal peptide bonds in a polypeptide chain by a mechanism in w

Catalysis of the hydrolysis of internal peptide bonds in a polypeptide chain by a mechanism in w

Catalysis of the hydrolysis of internal peptide bonds in a polypeptide chain by a mechanism in w

Catalysis of the hydrolysis of internal peptide bonds in a polypeptide chain by a mechanism in w

"Interacting selectively with a nucleotide, any compound consisting of a nucleoside that is esterified to a phosphate group [goid 287] [evidence IEA];

"Interacting selectively with a nucleotide, any compound consisting of a nucleoside that is esterified to a phosphate group [goid 287] [evidence IEA];

"Interacting selectively with a nucleotide, any compound consisting of a nucleoside that is esterified to a phosphate group [goid 287] [evidence IEA];

"Elemental activities, such as catalysis or binding, describing the actions of a gene product at the molecular level [goid 287] [evidence IEA];

"Interacting selectively with a nucleotide, any compound consisting of a nucleoside that is esterified to a phosphate group [goid 287] [evidence IEA];

"Interacting selectively with a nucleotide, any compound consisting of a nucleoside that is esterified to a phosphate group [goid 287] [evidence IEA];

"Interacting selectively with a nucleotide, any compound consisting of a nucleoside that is esterified to a phosphate group [goid 287] [evidence IEA];

Interacting selectively with any protein or protein complex (a complex of two or more proteins that are associated with each other) [goid 287] [evidence IEA];

Interacting selectively with any protein or protein complex (a complex of two or more proteins that are associated with each other) [goid 287] [evidence IEA];

Interacting selectively with any protein or protein complex (a complex of two or more proteins that are associated with each other) [goid 287] [evidence IEA];

Interacting selectively with any protein or protein complex (a complex of two or more proteins that are associated with each other) [goid 287] [evidence IEA];

Interacting selectively with any protein or protein complex (a complex of two or more proteins that are associated with each other) [goid 287] [evidence IEA];

Interacting selectively with any protein or protein complex (a complex of two or more proteins that are associated with each other) [goid 287] [evidence IEA];

Interacting selectively with any protein or protein complex (a complex of two or more proteins that are associated with each other) [goid 287] [evidence IEA];

"The selective, often stoichiometric, interaction of a molecule with one or more specific sites on a protein or protein complex [goid 287] [evidence IEA];

Interacting selectively with any protein or protein complex (a complex of two or more proteins that are associated with each other) [goid 287] [evidence IEA];

Interacting selectively with any protein or protein complex (a complex of two or more proteins that are associated with each other) [goid 287] [evidence IEA];

Interacting selectively with any protein or protein complex (a complex of two or more proteins that are associated with each other) [goid 287] [evidence IEA];

"The function of a transcription cofactor that activates transcription from a RNA polymerase II promoter [goid 287] [evidence IEA];

"Catalysis of the activation of the proteasome, a large multisubunit complex which performs regulated intraproteolytic degradation [goid 287] [evidence IEA];

"Catalysis of the activation of the proteasome, a large multisubunit complex which performs regulated intraproteolytic degradation [goid 287] [evidence IEA];

"Catalysis of the activation of the proteasome, a large multisubunit complex which performs regulated intraproteolytic degradation [goid 287] [evidence IEA];

Interacting selectively with any protein or protein complex (a complex of two or more proteins that are associated with each other) [goid 287] [evidence IEA];

Interacting selectively with any protein or protein complex (a complex of two or more proteins that are associated with each other) [goid 287] [evidence IEA];

Interacting selectively with any protein or protein complex (a complex of two or more proteins that are associated with each other) [goid 287] [evidence IEA];

"Interacting selectively with a nucleotide, any compound consisting of a nucleoside that is esterified to a phosphate group [goid 287] [evidence IEA];

"Interacting selectively with magnesium (Mg) ions [goid 287] [evidence IEA]; Catalysis of the reaction of a substrate with a nucleotide [goid 287] [evidence IEA];

"Interacting selectively with microtubules, filaments composed of tubulin monomers [goid 8017] [evidence IEA];

"Interacting selectively with transfer RNA [goid 49] [evidence IEA]; Interacting selectively with a ribosome [goid 287] [evidence IEA];

"Interacting selectively with monomeric or multimeric forms of actin, including actin filaments [goid 287] [evidence IEA];

"Combining with an extracellular or intracellular messenger to initiate a change in cell activity [goid 287] [evidence IEA];

"Catalysis of the covalent addition of an isoprenoid group such as a farnesyl or geranylgeranyl group to a protein [goid 287] [evidence IEA];

"Interacting selectively with a nucleotide, any compound consisting of a nucleoside that is esterified to a phosphate group [goid 287] [evidence IEA];

"Interacting selectively with a nucleotide, any compound consisting of a nucleoside that is esterified to a phosphate group [goid 287] [evidence IEA];

Interacting selectively with any protein or protein complex (a complex of two or more proteins that are associated with each other) [goid 287] [evidence IEA];

Combining with an extracellular or intracellular messenger to initiate a change in cell activity [goid 287] [evidence IEA];

Combining with an extracellular or intracellular messenger to initiate a change in cell activity [goi  
"Catalysis of the transfer of a group, e.g. a methyl group, glycosyl group, acyl group, phosphorus  
"Catalysis of the reaction: CDP-diacylglycerol + L-serine = CMP + O-sn-phosphatidyl-L-serine [g  
"Catalysis of the reaction: 1-phosphatidyl-1D-myo-inositol 3-phosphate + H<sub>2</sub>O = 1-phosphatidyl-  
Interacting selectively with DNA (deoxyribonucleic acid) [goid 3677] [evidence ISS]; Interacting s  
"Enables the directed movement of substances (such as macromolecules, small molecules, ions  
Combining with an extracellular or intracellular messenger to initiate a change in cell activity [goi  
"Catalysis of the geometric or structural changes within one molecule. Isomerase is the systema  
"Interacting selectively with DNA (deoxyribonucleic acid) [goid 3677] [evidence IEA]; Interacting  
"Catalysis of the reaction: (5Z,13E)-(15S)-9-alpha,11-alpha-epidioxy-15-hydroxyprosta-5,13-dier  
Combining with an extracellular or intracellular messenger to initiate a change in cell activity [goi  
"Catalysis of the incorporation of one atom from molecular oxygen into a compound and the red  
"Catalysis of the reaction: an alcohol + NAD<sup>+</sup> = an aldehyde or ketone + NADH + H<sup>+</sup> [goid 4022  
"Catalysis of the reaction: donor + H<sub>2</sub>O<sub>2</sub> = oxidized donor + 2 H<sub>2</sub>O [goid 4601] [evidence IEA]; I  
"Catalysis of the reaction: protein tyrosine phosphate + H<sub>2</sub>O = protein tyrosine + phosphate [goi  
Combining with an extracellular or intracellular messenger to initiate a change in cell activity [goi  
"Interacting selectively with a nucleotide, any compound consisting of a nucleoside that is esteril  
"Interacting selectively with a nucleotide, any compound consisting of a nucleoside that is esteril  
"Combining with an extracellular or intracellular messenger to initiate a change in cell activity [gc

"Elemental activities, such as catalysis or binding, describing the actions of a gene product at th  
er be an existing DNA molecule or RNA [goid 6260] [pmid 10854063] [evidence TAS]; Any immu  
[evidence IEA]; Any process that modulates the frequency, rate or extent of DNA-dependent trans  
"Catalysis of the reaction: prenylated-protein tyrosine phosphate + H<sub>2</sub>O = prenylated-protein tyro  
"Catalysis of the reaction: prenylated-protein tyrosine phosphate + H<sub>2</sub>O = prenylated-protein tyro  
er time from an initial condition (e.g. a zygote or a young adult) to a later condition (e.g. a multice  
"Elemental activities, such as catalysis or binding, describing the actions of a gene product at th  
Interacting selectively with any protein or protein complex (a complex of two or more proteins th  
"Catalysis of the reaction: 1-phosphatidyl-1D-myo-inositol 4,5-bisphosphate + H<sub>2</sub>O = 1-phospha  
"Catalysis of the reaction: protein tyrosine phosphate + H<sub>2</sub>O = protein tyrosine + phosphate [goi  
"Interacting selectively with any protein or protein complex (a complex of two or more proteins th  
"[goid 4726] [pmid 8454633] [evidence TAS]; Catalysis of the hydrolysis of various bonds, e.g. C  
"[goid 4726] [pmid 8950995] [evidence TAS]; Catalysis of the hydrolysis of various bonds, e.g. C  
"Catalysis of the reaction: protein tyrosine phosphate + H<sub>2</sub>O = protein tyrosine + phosphate [goi  
Combining with an extracellular or intracellular messenger to initiate a change in cell activity [goi  
"Catalysis of the reaction: protein tyrosine phosphate + H<sub>2</sub>O = protein tyrosine + phosphate [goi  
"Catalysis of the reaction: protein tyrosine phosphate + H<sub>2</sub>O = protein tyrosine + phosphate [goi  
"Catalysis of the reaction: protein tyrosine phosphate + H<sub>2</sub>O = protein tyrosine + phosphate [goi  
"[goid 4726] [pmid 1648233] [evidence TAS]; The action of a molecule that contributes to the str  
"Interacting selectively with a phosphorylated tyrosine residue within a protein [goid 1784] [evide  
"Combining with an extracellular or intracellular messenger to initiate a change in cell activity [gc  
"[goid 4726] [pmid 1557404] [evidence TAS]; Enables the directed movement of substances (su  
"Combining with an extracellular or intracellular messenger to initiate a change in cell activity [gc  
"Catalysis of the reaction: protein tyrosine phosphate + H<sub>2</sub>O = protein tyrosine + phosphate [goi



y, which result in restriction of damage to the organism attacked or prevention/recovery from the  
"Combining with an extracellular or intracellular messenger to initiate a change in cell activity [gc  
"Catalysis of the reaction: protein tyrosine phosphate + H<sub>2</sub>O = protein tyrosine + phosphate [goi  
"Catalysis of the reaction: protein tyrosine phosphate + H<sub>2</sub>O = protein tyrosine + phosphate [goi  
"Catalysis of the reaction: protein tyrosine phosphate + H<sub>2</sub>O = protein tyrosine + phosphate [goi  
"[goid 5001] [pmid 10821867] [evidence TAS]; Catalysis of the hydrolysis of various bonds, e.g.  
"Catalysis of the reaction: protein tyrosine phosphate + H<sub>2</sub>O = protein tyrosine + phosphate [goi  
"Combining with an extracellular or intracellular messenger to initiate a change in cell activity [gc

Any activity that brings about termination of transcription by RNA polymerase I [goid 3716] [evid  
"Catalysis of the reaction: N-substituted aminoacyl-tRNA + H<sub>2</sub>O = N-substituted amino acid + tR  
"Catalysis of the reaction: N-substituted aminoacyl-tRNA + H<sub>2</sub>O = N-substituted amino acid + tR  
"Catalysis of the reaction: 6-[(1S,2R)-1,2-dihydroxy-3-triphosphooxypropyl]-7,8-dihydropterin = 6  
"The function of binding to a specific DNA sequence in order to modulate transcription. The tran  
"Elemental activities, such as catalysis or binding, describing the actions of a gene product at th

"Interacting selectively with a nucleotide, any compound consisting of a nucleoside that is esteril  
"Interacting selectively with an RNA molecule or a portion thereof [goid 3723] [evidence IEA]; Th  
Interacting selectively with an RNA molecule or a portion thereof [goid 3723] [evidence IEA]; Inte  
"Interacting selectively with double-stranded telomere-associated DNA [goid 3691] [pmid 15777;  
"Interacting selectively with double-stranded DNA [goid 3690] [evidence IEA]; Interacting selecti  
Catalysis of the reaction: uracil + D-ribose 5-phosphate = pseudouridine 5'-phosphate + H<sub>2</sub>O [gc  
Catalysis of the geometric or structural changes within one molecule. Isomerase is the systemat  
Catalysis of the reaction: RNA uridine = RNA pseudouridine. Conversion of uridine in an RNA m  
Interacting selectively with an RNA molecule or a portion thereof [goid 3723] [evidence IEA]; Ca  
Interacting selectively with an RNA molecule or a portion thereof [goid 3723] [evidence IEA]; Ca  
Catalysis of the reaction: RNA uridine = RNA pseudouridine. Conversion of uridine in an RNA m  
Combining with an extracellular or intracellular messenger to initiate a change in cell activity [goi

"Interacting selectively with any protein or protein complex (a complex of two or more proteins th  
Interacting selectively with any protein or protein complex (a complex of two or more proteins th

mid 7828893] [evidence TAS]

"Catalysis of the hydrolysis of internal, alpha-peptide bonds in a polypeptide chain by a catalytic

"Catalysis of the reaction: donor + H<sub>2</sub>O<sub>2</sub> = oxidized donor + 2 H<sub>2</sub>O [goid 4601] [evidence IEA]; I  
"Interacting selectively with a nucleotide, any compound consisting of a nucleoside that is esteril  
Interacting selectively with any protein or protein complex (a complex of two or more proteins th  
Interacting selectively with any protein or protein complex (a complex of two or more proteins th

"Interacting selectively with zinc (Zn) ions [goid 8270] [evidence IEA]; Interacting selectively with  
"Catalysis of the hydrolysis of internal, alpha-peptide bonds in a polypeptide chain by a mechani





Interacting selectively with DNA (deoxyribonucleic acid) [goid 3677] [evidence IEA]; Interacting s  
"Catalysis of the reaction: 2 geranylgeranyl diphosphate + protein-cysteine = 2 S-geranylgeranyl  
"Catalysis of the transfer of a group, e.g. a methyl group, glycosyl group, acyl group, phosphoru  
"Interacting selectively with a nucleotide, any compound consisting of a nucleoside that is esteril  
"Interacting selectively with a nucleotide, any compound consisting of a nucleoside that is esteril  
"Interacting selectively with a nucleotide, any compound consisting of a nucleoside that is esteril  
"Interacting selectively with a nucleotide, any compound consisting of a nucleoside that is esteril  
"Interacting selectively with a nucleotide, any compound consisting of a nucleoside that is esteril  
"Interacting selectively with a nucleotide, any compound consisting of a nucleoside that is esteril  
"Interacting selectively with a nucleotide, any compound consisting of a nucleoside that is esteril  
"Increases the activity of a GTPase, an enzyme that catalyzes the hydrolysis of GTP [goid 5096  
"Interacting selectively with damaged DNA [goid 3684] [pmid 9660799] [evidence NAS]; Interact  
"Interacting selectively with a nucleotide, any compound consisting of a nucleoside that is esteril  
"Interacting selectively with damaged DNA [goid 3684] [pmid 10884424] [evidence NAS]; Interac  
Interacting selectively with any protein or protein complex (a complex of two or more proteins th  
Interacting selectively with damaged DNA [goid 3684] [evidence IEA]; Interacting selectively with  
Interacting selectively with damaged DNA [goid 3684] [evidence IEA]; Interacting selectively with  
"Interacting selectively with a nucleotide, any compound consisting of a nucleoside that is esteril  
Interacting selectively with DNA (deoxyribonucleic acid) [goid 3677] [evidence IEA]; Interacting s

"Interacting selectively with a nucleotide, any compound consisting of a nucleoside that is esteril  
"Interacting selectively with a nucleotide, any compound consisting of a nucleoside that is esteril  
"Interacting selectively with a nucleotide, any compound consisting of a nucleoside that is esteril  
"Interacting selectively with a nucleotide, any compound consisting of a nucleoside that is esteril  
"Interacting selectively with a nucleotide, any compound consisting of a nucleoside that is esteril  
"Interacting selectively with any protein or protein complex (a complex of two or more proteins th

"Interacting selectively with an RNA molecule or a portion thereof [goid 3723] [pmid 9256445] [e  
Interacting selectively with any protein or protein complex (a complex of two or more proteins th  
Interacting selectively with any protein or protein complex (a complex of two or more proteins th  
"Interacting selectively with a nucleotide, any compound consisting of a nucleoside that is esteril  
"Interacting selectively with DNA (deoxyribonucleic acid) [goid 3677] [pmid 9630231] [evidence -  
mbinations different from those that were present in the parents. In eukaryotes genetic recombina  
"Interacting selectively with a nucleotide, any compound consisting of a nucleoside that is esteril  
Interacting selectively with any protein or protein complex (a complex of two or more proteins th  
"Elemental activities, such as catalysis or binding, describing the actions of a gene product at th  
"Interacting selectively with a nucleotide, any compound consisting of a nucleoside that is esteril  
"Interacting selectively with a nucleotide, any compound consisting of a nucleoside that is esteril  
"Increases the activity of a GTPase, an enzyme that catalyzes the hydrolysis of GTP [goid 5096

"Stimulates the exchange of guanyl nucleotides by a GTPase. Under normal cellular physiologic  
"Stimulates the exchange of guanyl nucleotides by a GTPase. Under normal cellular physiologic

"Interacting selectively with a nucleotide, any compound consisting of a nucleoside that is esterified to a phosphate group [goid 5096]  
"Combining with an extracellular or intracellular messenger to initiate a change in cell activity [goid 3754]  
"Combining with an extracellular or intracellular messenger to initiate a change in cell activity [goid 3754]  
"Combining with an extracellular or intracellular messenger to initiate a change in cell activity [goid 3754]  
"Interacting selectively with a nucleotide, any compound consisting of a nucleoside that is esterified to a phosphate group [goid 5096]  
"Prevents the dissociation of GDP from a GTPase, thereby preventing GTP from binding [goid 5096]

"Catalysis of the reaction: peptidyl-proline (omega=180) = peptidyl-proline (omega=0) [goid 3754]  
"Interacting selectively with any protein or protein complex (a complex of two or more proteins that interact with each other) [goid 5096]

"The selective, often stoichiometric, interaction of a molecule with one or more specific sites on a protein or protein complex [goid 5096]  
"Interacting selectively with any protein or protein complex (a complex of two or more proteins that interact with each other) [goid 5096]  
"Stimulates the exchange of guanyl nucleotides by a GTPase. Under normal cellular physiological conditions, this activity is inhibited by the presence of a specific inhibitor [goid 5096]  
"Interacting selectively with a nucleotide, any compound consisting of a nucleoside that is esterified to a phosphate group [goid 5096]

"Increases the activity of a GTPase, an enzyme that catalyzes the hydrolysis of GTP [goid 5096]  
"Interacting selectively with a nucleotide, any compound consisting of a nucleoside that is esterified to a phosphate group [goid 5096]  
"Interacting selectively with a nucleotide, any compound consisting of a nucleoside that is esterified to a phosphate group [goid 5096]  
"Stimulates the exchange of guanyl nucleotides by a GTPase. Under normal cellular physiological conditions, this activity is inhibited by the presence of a specific inhibitor [goid 5096]  
"Mediates the transfer of a signal from the outside to the inside of a cell by means other than the binding of a ligand to a receptor [goid 5096]  
"Stimulates the exchange of guanyl nucleotides by a GTPase of the Rap family. Under normal cellular physiological conditions, this activity is inhibited by the presence of a specific inhibitor [goid 5096]  
"Stimulates the exchange of guanyl nucleotides by a GTPase. Under normal cellular physiological conditions, this activity is inhibited by the presence of a specific inhibitor [goid 5096]  
"Stimulates the exchange of guanyl nucleotides by a GTPase. Under normal cellular physiological conditions, this activity is inhibited by the presence of a specific inhibitor [goid 5096]  
"The function of binding to a specific DNA sequence in order to modulate transcription. The transcription factor binds to the DNA sequence and recruits the transcription machinery [goid 5096] [evidence TAS]"

"Interacting selectively with a nucleotide, any compound consisting of a nucleoside that is esterified to a phosphate group [goid 5096]  
"Interacting selectively with a nucleotide, any compound consisting of a nucleoside that is esterified to a phosphate group [goid 5096]  
"Increases the rate of GTP hydrolysis by a GTPase of the Ras superfamily [goid 5099] [pmid 21492981]  
Increases the rate of GTP hydrolysis by a GTPase of the Ras superfamily [goid 5099] [pmid 88110000]  
"Increases the activity of a GTPase, an enzyme that catalyzes the hydrolysis of GTP [goid 5096]  
"Increases the rate of GTP hydrolysis by a GTPase of the Ras superfamily [goid 5099] [pmid 97110000]

"Interacting selectively with a nucleotide, any compound consisting of a nucleoside that is esterified to a phosphate group [goid 5096]  
"Interacting selectively with a nucleotide, any compound consisting of a nucleoside that is esterified to a phosphate group [goid 5096]  
"Stimulates the exchange of guanyl nucleotides by a GTPase. Under normal cellular physiological conditions, this activity is inhibited by the presence of a specific inhibitor [goid 5096]  
"Stimulates the exchange of guanyl nucleotides by a GTPase. Under normal cellular physiological conditions, this activity is inhibited by the presence of a specific inhibitor [goid 5096]  
"Stimulates the exchange of guanyl nucleotides by a GTPase. Under normal cellular physiological conditions, this activity is inhibited by the presence of a specific inhibitor [goid 5096]  
"Mediates the transfer of a signal from the outside to the inside of a cell by means other than the binding of a ligand to a receptor [goid 5096]  
"Interacting selectively with a nucleotide, any compound consisting of a nucleoside that is esterified to a phosphate group [goid 5096]  
"Interacting selectively with a nucleotide, any compound consisting of a nucleoside that is esterified to a phosphate group [goid 5096]  
"Interacting selectively with a nucleotide, any compound consisting of a nucleoside that is esterified to a phosphate group [goid 5096]  
"Interacting selectively with a nucleotide, any compound consisting of a nucleoside that is esterified to a phosphate group [goid 5096]  
"Interacting selectively with any protein or protein complex (a complex of two or more proteins that interact with each other) [goid 5096]

Interacting selectively with any protein or protein complex (a complex of two or more proteins that  
Interacting selectively with any protein or protein complex (a complex of two or more proteins that  
Interacting selectively with any protein or protein complex (a complex of two or more proteins that  
"Interacting selectively with any protein or protein complex (a complex of two or more proteins that  
Interacting selectively with any protein or protein complex (a complex of two or more proteins that  
Interacting selectively with DNA (deoxyribonucleic acid) [goid 3677] [evidence NAS]; Interacting  
"Interacting selectively with a nucleotide, any compound consisting of a nucleoside that is esterified  
"Interacting selectively with a nucleotide, any compound consisting of a nucleoside that is esterified  
"The function of binding to a specific DNA sequence in order to modulate transcription. The transcrip

"The function of binding to a specific DNA sequence in order to modulate transcription. The transcrip  
Interacting selectively with any protein or protein complex (a complex of two or more proteins that  
Interacting selectively with any nucleic acid [goid 3676] [evidence IEA]; Interacting selectively with  
Interacting selectively with any protein or protein complex (a complex of two or more proteins that  
Interacting selectively with any protein or protein complex (a complex of two or more proteins that  
Interacting selectively with any nucleic acid [goid 3676] [evidence IEA]; Catalysis of the reaction:  
Interacting selectively with any protein or protein complex (a complex of two or more proteins that  
Interacting selectively with any protein or protein complex (a complex of two or more proteins that

The function of binding to a specific DNA sequence in order to modulate transcription. The transcrip  
contained within phagocytic vacuoles (phagosomes), which then fuse with primary lysosomes to form  
"Catalysis of the reaction: ATP + D-ribose = ADP + D-ribose 5-phosphate [goid 4747] [evidence  
Interacting selectively with any protein or protein complex (a complex of two or more proteins that  
Interacting selectively with DNA (deoxyribonucleic acid) [goid 3677] [evidence IEA]; Interacting s  
Interacting selectively with any nucleic acid [goid 3676] [evidence IEA]

"Interacting selectively with a nucleotide, any compound consisting of a nucleoside that is esterified  
"Interacting selectively with a nucleotide, any compound consisting of a nucleoside that is esterified  
"Interacting selectively with a nucleotide, any compound consisting of a nucleoside that is esterified  
"Interacting selectively with a nucleotide, any compound consisting of a nucleoside that is esterified  
"Interacting selectively with a nucleotide, any compound consisting of a nucleoside that is esterified  
"Interacting selectively with a nucleotide, any compound consisting of a nucleoside that is esterified  
"Interacting selectively with a nucleotide, any compound consisting of a nucleoside that is esterified  
"Interacting selectively with a nucleotide, any compound consisting of a nucleoside that is esterified  
"Interacting selectively with a nucleotide, any compound consisting of a nucleoside that is esterified  
Interacting selectively with an RNA molecule or a portion thereof [goid 3723] [evidence IEA]; Inte  
"Interacting selectively with a nucleotide, any compound consisting of a nucleoside that is esterified  
"Interacting selectively with a nucleotide, any compound consisting of a nucleoside that is esterified  
"Interacting selectively with a nucleotide, any compound consisting of a nucleoside that is esterified  
"Interacting selectively with a nucleotide, any compound consisting of a nucleoside that is esterified

"Interacting selectively with a nucleotide, any compound consisting of a nucleoside that is esterified  
"Interacting selectively with a nucleotide, any compound consisting of a nucleoside that is esterified

"Interacting selectively with any nucleic acid [goid 3676] [evidence IEA]; Interacting selectively with an RNA molecule or a portion thereof [goid 3723] [evidence IEA]

"Interacting selectively with a nucleotide, any compound consisting of a nucleoside that is esterified

"Interacting selectively with a nucleotide, any compound consisting of a nucleoside that is esterified

"Interacting selectively with any protein or protein complex (a complex of two or more proteins that

"Interacting selectively with a nucleotide, any compound consisting of a nucleoside that is esterified

"Interacting selectively with a nucleotide, any compound consisting of a nucleoside that is esterified

"Interacting selectively with a nucleotide, any compound consisting of a nucleoside that is esterified

"Interacting selectively with a nucleotide, any compound consisting of a nucleoside that is esterified

Interacting selectively with an RNA molecule or a portion thereof [goid 3723] [evidence IEA]

"Interacting selectively with a nucleotide, any compound consisting of a nucleoside that is esterified

"Interacting selectively with a nucleotide, any compound consisting of a nucleoside that is esterified

Interacting selectively with DNA (deoxyribonucleic acid) [goid 3677] [pmid 10352938] [evidence

"Interacting selectively with a nucleotide, any compound consisting of a nucleoside that is esterified

"Interacting selectively with a nucleotide, any compound consisting of a nucleoside that is esterified

Interacting selectively with DNA (deoxyribonucleic acid) [goid 3677] [evidence IEA]; Interacting selectively

"Interacting selectively with a nucleotide, any compound consisting of a nucleoside that is esterified

"Interacting selectively with a nucleotide, any compound consisting of a nucleoside that is esterified

"Interacting selectively with a nucleotide, any compound consisting of a nucleoside that is esterified

"Interacting selectively with a nucleotide, any compound consisting of a nucleoside that is esterified

"Interacting selectively with a nucleotide, any compound consisting of a nucleoside that is esterified

"Enables the directed movement of substances (such as macromolecules, small molecules, ions)

"Enables the directed movement of substances (such as macromolecules, small molecules, ions)

"Enables the directed movement of substances (such as macromolecules, small molecules, ions)

Catalysis of the identification and base-pairing of homologous sequences between single-stranded

"Interacting selectively with a nucleotide, any compound consisting of a nucleoside that is esterified

Interacting selectively with any protein or protein complex (a complex of two or more proteins that

Interacting selectively with DNA (deoxyribonucleic acid) [goid 3677] [pmid 10938276] [evidence

The function of binding to a specific DNA sequence in order to modulate transcription. The transcription

Interacting selectively with the enzyme protein phosphatase 2B [goid 30346] [evidence NAS]

"Interacting selectively with an RNA molecule or a portion thereof [goid 3723] [pmid 10756093] [

Interacting selectively with any protein or protein complex (a complex of two or more proteins that

"Stimulates the exchange of guanyl nucleotides by a GTPase of the Ran family. Under normal conditions

"Interacting selectively with any protein or protein complex (a complex of two or more proteins that

g successive cell replication or nuclear replication events. Canonically, the cell cycle comprises two

"Catalysis of the hydrolysis of internal, alpha-peptide bonds in a polypeptide chain by a mechanical

Interacting selectively with any protein or protein complex (a complex of two or more proteins that

"Catalysis of a biochemical reaction at physiological temperatures. In biologically catalyzed reactions

Interacting selectively with calcium ions (Ca<sup>2+</sup>) [goid 5509] [evidence IEA]; Interacting selectively

Interacting selectively with DNA (deoxyribonucleic acid) [goid 3677] [evidence IEA]; Interacting s  
The function of binding to a specific DNA sequence in order to modulate transcription. The trans  
Interacting selectively with DNA (deoxyribonucleic acid) [goid 3677] [evidence IEA]; Interacting s

"Interacting selectively with a nucleotide, any compound consisting of a nucleoside that is esteril  
"Catalysis of the reaction: retinol + NAD+ = retinal + NADH + H+ [goid 4745] [pmid 12407145] [e  
"Catalysis of the reaction: retinol + NAD+ = retinal + NADH + H+ [goid 4745] [evidence ISS]; The  
"The selective, often stoichiometric, interaction of a molecule with one or more specific sites on .  
"Catalysis of the reaction: retinol + NAD+ = retinal + NADH + H+ [goid 4745] [pmid 9115228] [ev  
"Catalysis of the reaction: estradiol-17-beta + NADP+ = estrone + NADPH + H+ [goid 4303] [evid  
"Interacting selectively with a nucleotide, any compound consisting of a nucleoside that is esteril  
"The selective, often stoichiometric, interaction of a molecule with one or more specific sites on .  
Interacting selectively with any protein or protein complex (a complex of two or more proteins tha  
"Stops, prevents or reduces the activity of serine-type endopeptidases, enzymes that catalyze th  
"Interacting selectively with any nucleic acid [goid 3676] [evidence IEA]; Interacting selectively w  
"Interacting selectively with a nucleotide, any compound consisting of a nucleoside that is esteril  
"Interacting selectively with a nucleotide, any compound consisting of a nucleoside that is esteril  
Interacting selectively with an olfactory receptor [goid 31849] [pmid 15550249] [evidence IMP]

"Elemental activities, such as catalysis or binding, describing the actions of a gene product at th  
Combining with an extracellular or intracellular messenger to initiate a change in cell activity [goid  
The function of binding to a specific DNA sequence in order to modulate transcription. The trans  
"The function of binding to a specific DNA sequence in order to modulate transcription. The tran  
The function of binding to a specific DNA sequence in order to modulate transcription. The trans

"Interacting selectively with a nucleotide, any compound consisting of a nucleoside that is esteril  
"Catalysis of a biochemical reaction at physiological temperatures. In biologically catalyzed reac

Interacting selectively with DNA (deoxyribonucleic acid) [goid 3677] [pmid 10606657] [evidence  
Interacting selectively with calcium ions (Ca2+) [goid 5509] [pmid 9928989] [evidence TAS]; Inte  
"Elemental activities, such as catalysis or binding, describing the actions of a gene product at th  
"The function of binding to a specific DNA sequence in order to modulate transcription. The tran  
"Interacting selectively with a nucleotide, any compound consisting of a nucleoside that is esteril  
"Interacting selectively with a nucleotide, any compound consisting of a nucleoside that is esteril  
"Any molecular entity that serves as an electron acceptor and electron donor in an electron trans  
"Interacting selectively with magnesium (Mg) ions [goid 287] [evidence IEA]; Interacting selective  
"Interacting selectively with a nucleotide, any compound consisting of a nucleoside that is esteril  
"Interacting selectively with any nucleic acid [goid 3676] [evidence IEA]; Catalysis of the hydroly:  
"Interacting selectively with any nucleic acid [goid 3676] [evidence IEA]; Catalysis of the hydroly:  
"Interacting selectively with any nucleic acid [goid 3676] [evidence IEA]; The function of binding





"Catalysis of the hydrolysis of internal, alpha-peptide bonds in a polypeptide chain by a catalytic

"Catalysis of the hydrolysis of internal, alpha-peptide bonds in a polypeptide chain by a catalytic

"Catalysis of the hydrolysis of internal, alpha-peptide bonds in a polypeptide chain by a catalytic

"Interacting selectively with calcium ions (Ca<sup>2+</sup>) [goid 5509] [evidence IEA]; Catalysis of the hyd

"Interacting selectively with a nucleotide, any compound consisting of a nucleoside that is esteril

"Interacting selectively with a nucleotide, any compound consisting of a nucleoside that is esteril

"Interacting selectively with a nucleotide, any compound consisting of a nucleoside that is esteril

"Interacting selectively with a nucleotide, any compound consisting of a nucleoside that is esteril

Catalysis of the reaction: GTP + H<sub>2</sub>O = GDP + phosphate [goid 3924] [pmid 12426103] [evidenc

"Interacting selectively with a nucleotide, any compound consisting of a nucleoside that is esteril

"Interacting selectively with a nucleotide, any compound consisting of a nucleoside that is esteril

"Interacting selectively with a nucleotide, any compound consisting of a nucleoside that is esteril

"Interacting selectively with a nucleotide, any compound consisting of a nucleoside that is esteril

"Interacting selectively with a nucleotide, any compound consisting of a nucleoside that is esteril

"Interacting selectively with a nucleotide, any compound consisting of a nucleoside that is esteril

"Interacting selectively with a nucleotide, any compound consisting of a nucleoside that is esteril

"Interacting selectively with a nucleotide, any compound consisting of a nucleoside that is esteril

"Interacting selectively with a nucleotide, any compound consisting of a nucleoside that is esteril

"The function of binding to a specific DNA sequence in order to modulate transcription. The tran

Modulates the rate of GTP hydrolysis by a small monomeric GTPase [goid 5083] [evidence IEA]

Interacting selectively with any protein or protein complex (a complex of two or more proteins th

"Stimulates the exchange of guanyl nucleotides by a GTPase. Under normal cellular physiologic

"Interacting selectively with a G-protein alpha subunit. The alpha subunit binds a guanine nuclec

"Increases the activity of a GTPase, an enzyme that catalyzes the hydrolysis of GTP [goid 5096]

"Increases the activity of a GTPase, an enzyme that catalyzes the hydrolysis of GTP [goid 5096]

"The selective, often stoichiometric, interaction of a molecule with one or more specific sites on

Interacting selectively with an identical protein or proteins [goid 42802] [pmid 16189514] [eviden

"Interacting selectively with any protein or protein complex (a complex of two or more proteins th

Catalysis of the hydrolysis of any O-glycosyl bond [goid 4553] [evidence IEA]

"Modulates the rate of GTP hydrolysis by a small monomeric GTPase [goid 5083] [pmid 184928

"Interacting selectively with chromatin, the network of fibers of DNA and protein that make up th

Interacting selectively with any protein or protein complex (a complex of two or more proteins th

"Interacting selectively with a nucleotide, any compound consisting of a nucleoside that is esteril

"Interacting selectively with a nucleotide, any compound consisting of a nucleoside that is esteril

"Interacting selectively with a nucleotide, any compound consisting of a nucleoside that is esteril

"Interacting selectively with a nucleotide, any compound consisting of a nucleoside that is esteril

"Interacting selectively with a nucleotide, any compound consisting of a nucleoside that is esterified to a phosphate group [goid 3676] [evidence IEA];  
"Interacting selectively with a nucleotide, any compound consisting of a nucleoside that is esterified to a phosphate group [goid 3676] [evidence IEA];  
"Interacting selectively with a nucleotide, any compound consisting of a nucleoside that is esterified to a phosphate group [goid 3676] [evidence IEA];  
"Interacting selectively with a nucleotide, any compound consisting of a nucleoside that is esterified to a phosphate group [goid 3676] [evidence IEA];  
The function of binding to a specific DNA sequence in order to modulate transcription. The transcription factor binds to the DNA sequence and recruits the RNA polymerase and other transcription factors to initiate transcription.  
"The action characteristic of a hormone, any substance formed in very small amounts in one species that acts on another species to regulate its growth, development, or behavior [goid 3676] [evidence IEA];  
"The action characteristic of a hormone, any substance formed in very small amounts in one species that acts on another species to regulate its growth, development, or behavior [goid 3676] [evidence IEA];  
"The action characteristic of a hormone, any substance formed in very small amounts in one species that acts on another species to regulate its growth, development, or behavior [goid 3676] [evidence IEA];

Interacting selectively with any nucleic acid [goid 3676] [evidence IEA]; Interacting selectively with any nucleic acid [goid 3676] [evidence IEA];

"Interacting selectively with any nucleic acid [goid 3676] [evidence IEA]; Catalysis of the endonucleolytic cleavage of nucleic acid [goid 3676] [evidence IEA];  
"Interacting selectively with any nucleic acid [goid 3676] [evidence IEA]; Catalysis of the hydrolysis of ester linkages within ribonucleic acid by creating internal breaks [goid 3676] [evidence IEA];  
"Interacting selectively with any nucleic acid [goid 3676] [evidence IEA]; Catalysis of the hydrolysis of ester linkages within ribonucleic acid by creating internal breaks [goid 3676] [evidence IEA];  
"Interacting selectively with any nucleic acid [goid 3676] [evidence IEA]; Catalysis of the endonucleolytic cleavage of nucleic acid [goid 3676] [evidence IEA];  
"Interacting selectively with magnesium (Mg) ions [goid 287] [evidence IEA]; Interacting selectively with magnesium (Mg) ions [goid 287] [evidence IEA];  
"Interacting selectively with an RNA molecule or a portion thereof [goid 3723] [evidence IEA]; Catalysis of the hydrolysis of ester linkages within ribonucleic acid by creating internal breaks [goid 3723] [evidence IEA];

"Catalysis of the hydrolysis of ester linkages within ribonucleic acid by creating internal breaks [goid 3676] [evidence IEA];  
"Interacting selectively with a nucleotide, any compound consisting of a nucleoside that is esterified to a phosphate group [goid 3676] [evidence IEA];  
"Interacting selectively with double-stranded RNA [goid 3725] [evidence IEA]; Catalysis of the hydrolysis of ester linkages within ribonucleic acid by creating internal breaks [goid 3725] [evidence IEA];  
"Interacting selectively with an RNA molecule or a portion thereof [goid 3723] [evidence IEA]; Catalysis of the hydrolysis of ester linkages within ribonucleic acid by creating internal breaks [goid 3723] [evidence IEA];  
"Interacting selectively with a nucleotide, any compound consisting of a nucleoside that is esterified to a phosphate group [goid 3676] [evidence IEA];  
"Interacting selectively with a nucleotide, any compound consisting of a nucleoside that is esterified to a phosphate group [goid 3676] [evidence IEA];  
Interacting selectively with any protein or protein complex (a complex of two or more proteins that interact with each other) [goid 3676] [evidence IEA];  
Interacting selectively with any protein or protein complex (a complex of two or more proteins that interact with each other) [goid 3676] [evidence IEA];  
Interacting selectively with DNA (deoxyribonucleic acid) [goid 3677] [pmid 10673045] [evidence IEA];  
"Interacting selectively with any protein or protein complex (a complex of two or more proteins that interact with each other) [goid 3676] [evidence IEA];  
Interacting selectively with any protein or protein complex (a complex of two or more proteins that interact with each other) [goid 3676] [evidence IEA];  
Interacting selectively with any protein or protein complex (a complex of two or more proteins that interact with each other) [goid 3676] [evidence IEA];  
Interacting selectively with any protein or protein complex (a complex of two or more proteins that interact with each other) [goid 3676] [evidence IEA];  
Interacting selectively with any protein or protein complex (a complex of two or more proteins that interact with each other) [goid 3676] [evidence IEA];  
Interacting selectively with any protein or protein complex (a complex of two or more proteins that interact with each other) [goid 3676] [evidence IEA];  
"Interacting selectively with any protein or protein complex (a complex of two or more proteins that interact with each other) [goid 3676] [evidence IEA];  
"Interacting selectively with any protein or protein complex (a complex of two or more proteins that interact with each other) [goid 3676] [evidence IEA];  
Interacting selectively with any protein or protein complex (a complex of two or more proteins that interact with each other) [goid 3676] [evidence IEA];  
Interacting selectively with any protein or protein complex (a complex of two or more proteins that interact with each other) [goid 3676] [evidence IEA];  
"Elemental activities, such as catalysis or binding, describing the actions of a gene product at the molecular level [goid 3676] [evidence IEA];  
Interacting selectively with any protein or protein complex (a complex of two or more proteins that interact with each other) [goid 3676] [evidence IEA];

Interacting selectively with any protein or protein complex (a complex of two or more proteins th  
"Interacting selectively with any protein or protein complex (a complex of two or more proteins th  
"The function of a transcription cofactor that activates transcription from a RNA polymerase II pr  
Interacting selectively with DNA (deoxyribonucleic acid) [goid 3677] [evidence IEA]; Interacting s  
"Catalysis of the reaction: ATP + ubiquitin + protein lysine = AMP + diphosphate + protein N-ubi  
Interacting selectively with any protein or protein complex (a complex of two or more proteins th  
Interacting selectively with any protein or protein complex (a complex of two or more proteins th  
"Interacting selectively with any protein or protein complex (a complex of two or more proteins th  
Interacting selectively with any protein or protein complex (a complex of two or more proteins th  
Interacting selectively with any protein or protein complex (a complex of two or more proteins th

"Interacting selectively with any protein or protein complex (a complex of two or more proteins th  
Interacting selectively with any protein or protein complex (a complex of two or more proteins th  
Interacting selectively with any protein or protein complex (a complex of two or more proteins th  
Interacting selectively with any protein or protein complex (a complex of two or more proteins th  
Interacting selectively with any protein or protein complex (a complex of two or more proteins th  
Interacting selectively with any protein or protein complex (a complex of two or more proteins th  
Interacting selectively with any protein or protein complex (a complex of two or more proteins th

"Interacting selectively with a transcription factor, any protein required to initiate or regulate trans  
"Interacting selectively with any protein or protein complex (a complex of two or more proteins th  
"Interacting selectively with any protein or protein complex (a complex of two or more proteins th  
Interacting selectively with any protein or protein complex (a complex of two or more proteins th  
"Interacting selectively with a nucleotide, any compound consisting of a nucleoside that is esterifi  
Interacting selectively with any protein or protein complex (a complex of two or more proteins th  
"Interacting selectively with any protein or protein complex (a complex of two or more proteins th

Interacting selectively with any protein or protein complex (a complex of two or more proteins th  
Interacting selectively with any protein or protein complex (a complex of two or more proteins th  
"Interacting selectively with any protein or protein complex (a complex of two or more proteins th  
Interacting selectively with any protein or protein complex (a complex of two or more proteins th  
Interacting selectively with any protein or protein complex (a complex of two or more proteins th  
"Interacting selectively with any protein or protein complex (a complex of two or more proteins th  
Interacting selectively with any protein or protein complex (a complex of two or more proteins th  
The function of binding to a specific DNA sequence in order to modulate transcription. The trans  
"Interacting selectively with any protein or protein complex (a complex of two or more proteins th  
"Interacting selectively with any protein or protein complex (a complex of two or more proteins th  
Interacting selectively with any protein or protein complex (a complex of two or more proteins th  
Interacting selectively with any protein or protein complex (a complex of two or more proteins th  
"Interacting selectively with any protein or protein complex (a complex of two or more proteins th

Interacting selectively with copper (Cu) ions [goid 5507] [pmid 10082581] [evidence TAS]; Intera  
"Interacting selectively with any protein or protein complex (a complex of two or more proteins th  
Interacting selectively with any protein or protein complex (a complex of two or more proteins th



Catalysis of the reaction: a glycerophosphodiester + H<sub>2</sub>O = an alcohol + sn-glycerol 3-phosphat  
"Interacting selectively with DNA (deoxyribonucleic acid) [goid 3677] [evidence IEA]; Interacting  
Interacting selectively with any nucleic acid [goid 3676] [evidence IEA]; Interacting selectively wi  
Interacting selectively with single-stranded DNA [goid 3697] [pmid 8454588] [evidence TAS]  
Interacting selectively with zinc (Zn) ions [goid 8270] [evidence IEA]; Interacting selectively with  
"Interacting selectively with DNA (deoxyribonucleic acid) [goid 3677] [evidence IEA]; Catalysis of

"The selective, often stoichiometric, interaction of a molecule with one or more specific sites on

"Stimulates the exchange of guanyl nucleotides by a GTPase. Under normal cellular physiologic  
ular signal, and recognize and characterize the signal. Visual stimuli are detected in the form of p

"Interacting selectively with any protein component of any cytoskeleton (actin, microtubule, or in

Catalysis of the reaction: D-ribose 5-phosphate = D-ribulose 5-phosphate [goid 4751] [evidence

The action of a molecule that contributes to the structural integrity of the ribosome [goid 3735] [e

Interacting selectively with an RNA molecule or a portion thereof [goid 3723] [evidence IEA]; The

Interacting selectively with an RNA molecule or a portion thereof [goid 3723] [pmid 9582194] [ev

The action of a molecule that contributes to the structural integrity of the ribosome [goid 3735] [e

The action of a molecule that contributes to the structural integrity of the ribosome [goid 3735] [e

Interacting selectively with an RNA molecule or a portion thereof [goid 3723] [pmid 9582194] [ev

The action of a molecule that contributes to the structural integrity of the ribosome [goid 3735] [e

Interacting selectively with an RNA molecule or a portion thereof [goid 3723] [pmid 7772601] [ev

"Interacting selectively with an RNA molecule or a portion thereof [goid 3723] [pmid 8135813] [e

The action of a molecule that contributes to the structural integrity of the ribosome [goid 3735] [e

"Interacting selectively with a nucleotide, any compound consisting of a nucleoside that is esteril

The action of a molecule that contributes to the structural integrity of the ribosome [goid 3735] [e

Interacting selectively with an RNA molecule or a portion thereof [goid 3723] [pmid 7772601] [ev

"Interacting selectively with an RNA molecule or a portion thereof [goid 3723] [pmid 8597591] [e

The action of a molecule that contributes to the structural integrity of the ribosome [goid 3735] [e

The action of a molecule that contributes to the structural integrity of the ribosome [goid 3735] [e

The action of a molecule that contributes to the structural integrity of the ribosome [goid 3735] [e

Interacting selectively with an RNA molecule or a portion thereof [goid 3723] [pmid 7490091] [ev

The action of a molecule that contributes to the structural integrity of the ribosome [goid 3735] [e

"The action of a molecule that contributes to the structural integrity of the ribosome [goid 3735] [

The action of a molecule that contributes to the structural integrity of the ribosome [goid 3735] [e

The action of a molecule that contributes to the structural integrity of the ribosome [goid 3735] [e

Interacting selectively with an RNA molecule or a portion thereof [goid 3723] [pmid 8764829] [ev

The action of a molecule that contributes to the structural integrity of the ribosome [goid 3735] [e

Interacting selectively with an RNA molecule or a portion thereof [goid 3723] [pmid 8921388] [ev

"Interacting selectively with an RNA molecule or a portion thereof [goid 3723] [pmid 8268230] [e

"The action of a molecule that contributes to the structural integrity of the ribosome [goid 3735] [

The action of a molecule that contributes to the structural integrity of the ribosome [goid 3735] [p

Interacting selectively with an RNA molecule or a portion thereof [goid 3723] [pmid 8597601] [ev  
"Catalysis of the reaction: dolichyl diphosphooligosaccharide + protein L-asparagine = dolichyl d  
"Interacting selectively with an RNA molecule or a portion thereof [goid 3723] [pmid 10024167] [  
"Interacting selectively with an RNA molecule or a portion thereof [goid 3723] [evidence IEA]; Ca  
"Catalysis of the endonucleolytic cleavage of RNA, removing 5' extra nucleotides from tRNA pre  
"Catalysis of the endonucleolytic cleavage of RNA, removing 5' extra nucleotides from tRNA pre

Interacting selectively with any protein or protein complex (a complex of two or more proteins th

The action of a molecule that contributes to the structural integrity of the ribosome [goid 3735] [e  
"The action of a molecule that contributes to the structural integrity of the ribosome [goid 3735] [  
Interacting selectively with an RNA molecule or a portion thereof [goid 3723] [pmid 9582194] [ev  
Interacting selectively with an RNA molecule or a portion thereof [goid 3723] [evidence IEA]; The  
Interacting selectively with any protein or protein complex (a complex of two or more proteins th  
Interacting selectively with an RNA molecule or a portion thereof [goid 3723] [evidence IEA]; The  
"The action of a molecule that contributes to the structural integrity of the ribosome [goid 3735] [  
"Elemental activities, such as catalysis or binding, describing the actions of a gene product at th

The action of a molecule that contributes to the structural integrity of the ribosome [goid 3735] [e  
Interacting selectively with an RNA molecule or a portion thereof [goid 3723] [evidence IEA]; The  
Interacting selectively with an RNA molecule or a portion thereof [goid 3723] [evidence IEA]; The  
The action of a molecule that contributes to the structural integrity of the ribosome [goid 3735] [e  
Interacting selectively with pre-messenger RNA (pre-mRNA) or messenger RNA (mRNA) [goid 3  
"Interacting selectively with a nucleotide, any compound consisting of a nucleoside that is esteril  
"Interacting selectively with a nucleotide, any compound consisting of a nucleoside that is esteril  
"Interacting selectively with a nucleotide, any compound consisting of a nucleoside that is esteril  
"Interacting selectively with a nucleotide, any compound consisting of a nucleoside that is esteril  
"Interacting selectively with a nucleotide, any compound consisting of a nucleoside that is esteril  
"Interacting selectively with a nucleotide, any compound consisting of a nucleoside that is esteril  
"Interacting selectively with a nucleotide, any compound consisting of a nucleoside that is esteril

Interacting selectively with an RNA molecule or a portion thereof [goid 3723] [pmid 8522193] [ev  
The action of a molecule that contributes to the structural integrity of the ribosome [goid 3735] [e

Interacting selectively with an RNA molecule or a portion thereof [goid 3723] [evidence IEA]; Ca  
Interacting selectively with an RNA molecule or a portion thereof [goid 3723] [evidence IEA]; Ca  
Interacting selectively with an RNA molecule or a portion thereof [goid 3723] [evidence IEA]; Ca  
Interacting selectively with an RNA molecule or a portion thereof [goid 3723] [evidence IEA]; Ca  
"The selective, often stoichiometric, interaction of a molecule with one or more specific sites on





Mediates the transfer of a signal from the outside to the inside of a cell by means other than the of proteolytic caspases, whose actions dismantle the cell and result in cell death. Apoptosis begi  
Interacting selectively with any protein or protein complex (a complex of two or more proteins th  
"The selective, often stoichiometric, interaction of a molecule with one or more specific sites on  
Combining with an extracellular or intracellular messenger to initiate a change in cell activity [goid  
Interacting selectively with an olfactory receptor [goid 31849] [pmid 15550249] [evidence IMP]  
Interacting selectively with any protein or protein complex (a complex of two or more proteins th  
"The selective, often stoichiometric, interaction of a molecule with one or more specific sites on  
"Interacting selectively with any protein or protein complex (a complex of two or more proteins th  
Interacting selectively with any protein or protein complex (a complex of two or more proteins th

Modulates the rate of GTP hydrolysis by a small monomeric GTPase [goid 5083] [pmid 9523700]

The function of binding to a specific DNA sequence in order to modulate transcription. The trans  
"Interacting selectively with chromatin, the network of fibers of DNA and protein that make up th  
"Interacting selectively with DNA (deoxyribonucleic acid) [goid 3677] [evidence IEA]; The functio  
"Interacting selectively and simultaneously with one or more signal transduction molecules, usua  
"Interacting selectively with a nucleotide, any compound consisting of a nucleoside that is esteril  
"Interacting selectively with a nucleotide, any compound consisting of a nucleoside that is esteril  
Interacting selectively with any protein or protein complex (a complex of two or more proteins th

"Elemental activities, such as catalysis or binding, describing the actions of a gene product at th  
Interacting selectively with any protein or protein complex (a complex of two or more proteins th

Combining with an extracellular or intracellular messenger to initiate a change in cell activity [goid  
"The function of binding to a specific DNA sequence in order to modulate transcription. The tran  
Interacting selectively with DNA (deoxyribonucleic acid) [goid 3677] [evidence IEA]; The functio  
"Interacting selectively with a nucleotide, any compound consisting of a nucleoside that is esteril  
Combining with an extracellular or intracellular messenger to initiate a change in cell activity [goid  
"Combining with an extracellular or intracellular messenger to initiate a change in cell activity [gc  
"Interacting selectively with one or more specific sites on a receptor molecule, a macromolecule  
"Interacting selectively with calcium ions (Ca<sup>2+</sup>) [goid 5509] [evidence IEA]; Interacting selective  
Interacting selectively with calcium ions (Ca<sup>2+</sup>) [goid 5509] [pmid 8204608] [evidence TAS]; Inte  
"Interacting selectively with calcium ions (Ca<sup>2+</sup>) [goid 5509] [pmid 12577318] [evidence NAS]; T  
Interacting selectively with calcium ions (Ca<sup>2+</sup>) [goid 5509] [pmid 8077703] [evidence IDA]; Inte  
Interacting selectively with calcium ions (Ca<sup>2+</sup>) [goid 5509] [evidence IEA]; Interacting selectivel  
Mediates the transfer of a signal from the outside to the inside of a cell by means other than the  
"Interacting selectively with any protein or protein complex (a complex of two or more proteins th  
Interacting selectively with calcium ions (Ca<sup>2+</sup>) [goid 5509] [evidence IEA]  
Combining with lysosphingolipid or lysophosphatidic acid to initiate a change in cell activity [goid  
Combining with lysosphingolipid or lysophosphatidic acid to initiate a change in cell activity [goid  
Combining with lysosphingolipid or lysophosphatidic acid to initiate a change in cell activity [goid

Combining with lysosphingolipid or lysophosphatidic acid to initiate a change in cell activity [goid  
"The selective, often stoichiometric, interaction of a molecule with one or more specific sites on  
g successive cell replication or nuclear replication events. Canonically, the cell cycle comprises t  
"Catalysis of the hydrolysis of various bonds, e.g. C-O, C-N, C-C, phosphoric anhydride bonds, r  
"Elemental activities, such as catalysis or binding, describing the actions of a gene product at th  
"Catalysis of the activation of the C-terminal carboxyl group of ubiquitin by the formation of a hig  
"Interacting selectively with any nucleic acid [goid 3676] [evidence IEA]; Interacting selectively w  
"Interacting selectively with a nucleotide, any compound consisting of a nucleoside that is esteril  
The function of binding to a specific DNA sequence in order to modulate transcription. The tran  
Interacting selectively with DNA (deoxyribonucleic acid) [goid 3677] [evidence IEA]; Interacting s

Antagonizes ribosome-mediated translation of mRNA into a polypeptide [goid 30371] [pmid 162:  
Interacting selectively with any protein or protein complex (a complex of two or more proteins th

"Elemental activities, such as catalysis or binding, describing the actions of a gene product at th

"Catalysis of a biochemical reaction at physiological temperatures. In biologically catalyzed reac  
"Elemental activities, such as catalysis or binding, describing the actions of a gene product at th  
Interacting selectively with a phosphorylated tyrosine residue within a protein [goid 1784] [pmid  
"Catalysis of the hydrolysis of terminal 1,4-linked alpha-D-glucose residues successively from ne  
The function of a transcription cofactor that represses transcription from a RNA polymerase II pr  
The function of a transcription cofactor that represses transcription from a RNA polymerase II pr  
Interacting selectively with any protein or protein complex (a complex of two or more proteins th  
[evidence IEA]; Any process that modulates the frequency, rate or extent of DNA-dependent trans

Interacting selectively with any protein phosphatase [goid 19903] [pmid 16716191] [evidence IPI  
"Interacting selectively with a nucleotide, any compound consisting of a nucleoside that is esteril  
"Interacting selectively with a nucleotide, any compound consisting of a nucleoside that is esteril  
"Combining with an extracellular or intracellular messenger to initiate a change in cell activity, ar  
"Interacting selectively with a nucleotide, any compound consisting of a nucleoside that is esteril  
"Interacting selectively with a nucleotide, any compound consisting of a nucleoside that is esteril  
"Interacting selectively with a nucleotide, any compound consisting of a nucleoside that is esteril

g successive cell replication or nuclear replication events. Canonically, the cell cycle comprises t  
"Catalysis of the reaction: acetyl-CoA + an alkane-alpha,omega-diamine = CoA + an N-acetyldia  
"Catalysis of the reaction: acetyl-CoA + an alkane-alpha,omega-diamine = CoA + an N-acetyldia  
"Interacting selectively with double-stranded DNA [goid 3690] [pmid 1505028] [evidence TAS]; T  
"The function of binding to a specific DNA sequence in order to modulate transcription. The tran

Interacting selectively with an identical protein or proteins [goid 42802] [pmid 16930133] [eviden  
"Interacting selectively with any protein or protein complex (a complex of two or more proteins th

"Catalysis of the hydrolysis of phosphoric monoesters, releasing inorganic phosphate [goid 1679

"Interacting selectively with any protein or protein complex (a complex of two or more proteins th

"Elemental activities, such as catalysis or binding, describing the actions of a gene product at th

Any transcription regulator activity that prevents or downregulates transcription [goid 16564] [pm

"Catalysis of a biochemical reaction at physiological temperatures. In biologically catalyzed reac

"Catalysis of the reaction: 5,7,24(28)-ergostatrienol + O<sub>2</sub> + NADPH = 5,7,22,24(28)-ergostatetra  
lds paired chromosomes together during prophase I of meiosis and that promotes genetic recom  
nes, matrix proteins) contained within a membrane-bounded vesicle by fusion of the vesicle with  
EA]"

"The function of binding to a specific DNA sequence in order to modulate transcription. The tran

Interacting selectively with any protein or protein complex (a complex of two or more proteins th

Interacting selectively with zinc (Zn) ions [goid 8270] [evidence IEA]; Interacting selectively with

"Combining with acetylated low-density lipoproteins, advanced glycation end products, or other p

"Combining with an extracellular or intracellular messenger to initiate a change in cell activity [gc

Combining with an extracellular or intracellular messenger to initiate a change in cell activity [goid

"The selective, often stoichiometric, interaction of a molecule with one or more specific sites on

"Catalysis of the reaction: stearoyl-CoA + 2 ferrocyclochrome b5 + O<sub>2</sub> + 2 H<sup>+</sup> = oleoyl-CoA + 2 fe

"Catalysis of the reaction: stearoyl-CoA + 2 ferrocyclochrome b5 + O<sub>2</sub> + 2 H<sup>+</sup> = oleoyl-CoA + 2 fe

Interacting selectively with any protein or protein complex (a complex of two or more proteins th  
uding from the membrane of the vesicle and the target membrane, during exocytosis [goid 6904]

"Functions to control the survival, growth, differentiation and effector function of tissues and cell:

"Stops, prevents or reduces the activity of an enzyme [goid 4857] [evidence IEA]; Stops, preven  
"The selective, often stoichiometric, interaction of a molecule with one or more specific sites on  
"The selective, often stoichiometric, interaction of a molecule with one or more specific sites on  
"The selective, often stoichiometric, interaction of a molecule with one or more specific sites on

"Catalysis of the reaction: L-selenocysteine + reduced acceptor = hydrogen selenide + L-alanine  
The function of binding to a specific DNA sequence in order to modulate transcription. The trans  
The function of binding to a specific DNA sequence in order to modulate transcription. The trans  
The function of binding to a specific DNA sequence in order to modulate transcription. The trans  
Catalysis of the transmembrane transfer of an ion by a voltage-gated channel. An ion is an atom  
Catalysis of the transmembrane transfer of an ion by a voltage-gated channel. An ion is an atom  
Catalysis of the transmembrane transfer of an ion by a voltage-gated channel. An ion is an atom  
Catalysis of the transmembrane transfer of an ion by a voltage-gated channel. An ion is an atom  
Catalysis of the transmembrane transfer of an ion by a voltage-gated channel. An ion is an atom  
Catalysis of the transmembrane transfer of an ion by a voltage-gated channel. An ion is an atom  
Catalysis of the transmembrane transfer of an ion by a voltage-gated channel. An ion is an atom  
Catalysis of facilitated diffusion of an ion (by an energy-independent process) by passage throug  
Interacting selectively with zinc (Zn) ions [goid 8270] [evidence IEA]; Interacting selectively with  
Catalysis of facilitated diffusion of a sodium ion (by an energy-independent process) involving pa  
Catalysis of facilitated diffusion of an ion (by an energy-independent process) by passage throug  
Interacting selectively with copper (Cu) ions [goid 5507] [evidence IEA]; Interacting selectively w  
Interacting selectively with copper (Cu) ions [goid 5507] [pmid 10545952] [evidence NAS]; Intera

Catalysis of the hydrolysis of a peptide bond not more than three residues from the C-terminus  
Interacting selectively with any protein or protein complex (a complex of two or more proteins th  
"Elemental activities, such as catalysis or binding, describing the actions of a gene product at th  
Interacting selectively with DNA (deoxyribonucleic acid) [goid 3677] [evidence IEA]; Plays a role

"Interacting selectively with DNA (deoxyribonucleic acid) [goid 3677] [evidence IEA]; Catalysis of  
Interacting selectively with any protein or protein complex (a complex of two or more proteins th  
"Catalysis of the phosphorylation of an amino acid residue in a protein, usually according to the  
"Catalysis of the phosphorylation of an amino acid residue in a protein, usually according to the  
Interacting selectively with any protein or protein complex (a complex of two or more proteins th  
"Interacting selectively with any protein component of any cytoskeleton (actin, microtubule, or in  
"Elemental activities, such as catalysis or binding, describing the actions of a gene product at th  
"Interacting selectively with the interleukin-5 receptor [goid 5137] [pmid 11498591] [evidence IS  
Catalysis of the reaction: peptidyl-proline (omega=180) = peptidyl-proline (omega=0) [goid 3755

Catalysis of the reaction: dolichyl phosphate D-mannose + protein = dolichyl phosphate + O-D-n

Interacting selectively with calcium ions (Ca<sup>2+</sup>) [goid 5509] [evidence IEA]; Interacting selectivel  
"Catalysis of the reaction: succinate + acceptor = fumarate + reduced acceptor. No reaction with

"Interacting selectively with iron (Fe) ions [goid 5506] [evidence IEA]; Catalysis of the reaction: succinate + acceptor = fumarate + reduced acceptor. No reaction with  
"Catalysis of the reaction: succinate + acceptor = fumarate + reduced acceptor. No reaction with

"Catalysis of a biochemical reaction at physiological temperatures. In biologically catalyzed reactions  
"Catalysis of the cleavage of C-C, C-O, C-N and other bonds by other means than by hydrolysis

Interacting selectively with any protein or protein complex (a complex of two or more proteins that  
Catalysis of the hydrolysis of a peptide bond. A peptide bond is a covalent bond formed when the  
"Elemental activities, such as catalysis or binding, describing the actions of a gene product at the  
"Enables the directed movement of substances (such as macromolecules, small molecules, ions  
"Enables the directed movement of substances (such as macromolecules, small molecules, ions

EA]; The directed movement of substances, either within a vesicle or in the vesicle membrane, is  
"Enables the directed movement of substances (such as macromolecules, small molecules, ions  
Interacting selectively with any protein or protein complex (a complex of two or more proteins that  
ated by COP II vesicles. Small COP II coated vesicles form from the ER and then fuse directly with  
Interacting selectively with any protein or protein complex (a complex of two or more proteins that  
Interacting selectively with any protein or protein complex (a complex of two or more proteins that  
Interacting selectively with any protein or protein complex (a complex of two or more proteins that  
"Elemental activities, such as catalysis or binding, describing the actions of a gene product at the  
"Enables the directed movement of substances (such as macromolecules, small molecules, ions  
"Elemental activities, such as catalysis or binding, describing the actions of a gene product at the  
"Elemental activities, such as catalysis or binding, describing the actions of a gene product at the  
"Elemental activities, such as catalysis or binding, describing the actions of a gene product at the  
"Interacting selectively with any protein or protein complex (a complex of two or more proteins that  
"Primary active carrier-mediated transport of a protein across a membrane, driven by the hydrolysis  
"Interacting selectively with any protein or protein complex (a complex of two or more proteins that  
"Primary active carrier-mediated transport of a protein across a membrane, driven by the hydrolysis  
"Combining with an extracellular or intracellular messenger to initiate a change in cell activity [gc  
"Combining with an extracellular or intracellular messenger to initiate a change in cell activity [gc  
Interacting selectively with an RNA molecule or a portion thereof [goid 3723] [evidence IEA]; Inte

EA]; The directed movement of mRNA, messenger ribonucleic acid, into, out of, within or between  
"The selective, often stoichiometric, interaction of a molecule with one or more specific sites on

"The selective, often stoichiometric, interaction of a molecule with one or more specific sites on  
"Interacting selectively with magnesium (Mg) ions [goid 287] [evidence IEA]; Catalysis of the reaction  
Interacting selectively with selenium (Se) [goid 8430] [evidence IEA]  
"Interacting selectively with any protein or protein complex (a complex of two or more proteins that

Interacting selectively with selenium (Se) [goid 8430] [evidence IEA]

Interacting selectively with selenium (Se) [goid 8430] [evidence IEA]

"Combining with an extracellular or intracellular messenger to initiate a change in cell activity [gc

Interacting selectively with selenium (Se) [goid 8430] [evidence IEA]; Interacting selectively with

Combining with an extracellular or intracellular messenger to initiate a change in cell activity [goid

Combining with an extracellular or intracellular messenger to initiate a change in cell activity [goid

"Combining with an extracellular or intracellular messenger to initiate a change in cell activity [gc

Combining with an extracellular or intracellular messenger to initiate a change in cell activity [goid

Combining with an extracellular or intracellular messenger to initiate a change in cell activity [goid

"Combining with an extracellular or intracellular messenger to initiate a change in cell activity [gc

Combining with an extracellular or intracellular messenger to initiate a change in cell activity [goid

Combining with an extracellular or intracellular messenger to initiate a change in cell activity [goid

Combining with an extracellular or intracellular messenger to initiate a change in cell activity [goid

Combining with an extracellular or intracellular messenger to initiate a change in cell activity [goid

Combining with an extracellular or intracellular messenger to initiate a change in cell activity [goid

Combining with an extracellular or intracellular messenger to initiate a change in cell activity [goid

"Catalysis of the hydrolysis of internal, alpha-peptide bonds in a polypeptide chain [goid 4175] [p

"Interacting selectively with any protein or protein complex (a complex of two or more proteins th

Catalysis of the hydrolysis of various forms of polymeric ubiquitin sequences. Will remove ubiqu

Catalysis of the hydrolysis of a peptide bond. A peptide bond is a covalent bond formed when th

Catalysis of the hydrolysis of a peptide bond. A peptide bond is a covalent bond formed when th

Catalysis of the hydrolysis of a peptide bond. A peptide bond is a covalent bond formed when th

"Catalysis of a biochemical reaction at physiological temperatures. In biologically catalyzed reac

"Interacting selectively with a nucleotide, any compound consisting of a nucleoside that is esterif

"Elemental activities, such as catalysis or binding, describing the actions of a gene product at th

Interacting selectively with selenium (Se) [goid 8430] [pmid 8421687] [evidence TAS]

"Interacting selectively with transfer RNA [goid 49] [evidence ISS]; Catalysis of the reaction: don

Interacting selectively with selenium (Se) [goid 8430] [evidence IEA]; Interacting selectively with

"Catalysis of the reaction: L-methionine R-oxide + thioredoxin = L-methionine + thioredoxin disul

"The selective, often stoichiometric, interaction of a molecule with one or more specific sites on

Interacting selectively with an RNA molecule or a portion thereof [goid 3723] [evidence IEA]; Inte

"Elemental activities, such as catalysis or binding, describing the actions of a gene product at th

"Stimulates the exchange of guanyl nucleotides by a GTPase. Under normal cellular physiologic

"Catalysis of the hydrolysis of various bonds, e.g. C-O, C-N, C-C, phosphoric anhydride bonds, c

"Catalysis of the hydrolysis of various bonds, e.g. C-O, C-N, C-C, phosphoric anhydride bonds, c

Interacting selectively with any protein or protein complex (a complex of two or more proteins th  
phospholipids in which the phosphatidyl group is esterified to the hydroxyl group of L-serine. They

Interacting selectively with any protein or protein complex (a complex of two or more proteins th  
; but not, or sparingly, in an aqueous solvent. Includes fatty acids; neutral fats, other fatty-acid es

EA]; The directed movement of proteins in a cell, from one side of a membrane to another [goid

"Stops, prevents or reduces the activity of serine-type endopeptidases, enzymes that catalyze th









Interacting selectively with any protein or protein complex (a complex of two or more proteins that  
Interacting selectively with any protein or protein complex (a complex of two or more proteins that  
Interacting selectively with any protein or protein complex (a complex of two or more proteins that  
er time from an initial condition (e.g. a zygote or a young adult) to a later condition (e.g. a multicel  
er time from an initial condition (e.g. a zygote or a young adult) to a later condition (e.g. a multicel  
"Mediates the transfer of a signal from the outside to the inside of a cell by means other than the  
Catalysis of the transmembrane transfer of a potassium ion by a voltage-gated channel [goid 52  
"Catalysis of a biochemical reaction at physiological temperatures. In biologically catalyzed reac  
"Catalysis of the reaction: 5,10-methylenetetrahydrofolate + glycine + H2O = tetrahydrofolate + I  
"Elemental activities, such as catalysis or binding, describing the actions of a gene product at th  
"The function of binding to a specific DNA sequence in order to modulate transcription. The tran  
"Interacting selectively with a nucleotide, any compound consisting of a nucleoside that is esterif  
"Interacting selectively with DNA (deoxyribonucleic acid) [goid 3677] [evidence IEA]; Interacting

"Interacting selectively with an actin filament, also known as F-actin, a helical filamentous polym  
"Interacting selectively with the beta subunit of the catenin complex [goid 8013] [pmid 16684770  
"Interacting selectively with monomeric or multimeric forms of actin, including actin filaments [go  
"Interacting selectively with a protein C-terminus, the end of any peptide chain at which the 1-ca  
"The function of a transcription cofactor that represses transcription from a RNA polymerase II p

"Interacting selectively with any protein or protein complex (a complex of two or more proteins th  
"Interacting selectively with any protein or protein complex (a complex of two or more proteins th

"The selective, often stoichiometric, interaction of a molecule with one or more specific sites on  
ids, including tyrosine [goid 6583] [evidence IEA]"

Interacting selectively with any protein or protein complex (a complex of two or more proteins th  
Interacting selectively with any protein or protein complex (a complex of two or more proteins th  
Interacting selectively with any protein or protein complex (a complex of two or more proteins th  
"Increases the activity of a GTPase, an enzyme that catalyzes the hydrolysis of GTP [goid 5096  
"Elemental activities, such as catalysis or binding, describing the actions of a gene product at th  
"Increases the activity of a GTPase, an enzyme that catalyzes the hydrolysis of GTP [goid 5096  
"Interacting selectively with a SH3 domain (Src homology 3) of a protein, small protein modules  
"Interacting selectively with DNA (deoxyribonucleic acid) [goid 3677] [evidence IEA]; Catalysis of  
"Interacting selectively with DNA (deoxyribonucleic acid) [goid 3677] [evidence IEA]; Interacting  
"Interacting selectively with DNA (deoxyribonucleic acid) [goid 3677] [evidence IEA]; Catalysis of  
"Interacting selectively with DNA (deoxyribonucleic acid) [goid 3677] [evidence IEA]; Catalysis of  
"Interacting selectively with DNA (deoxyribonucleic acid) [goid 3677] [evidence IEA]; Interacting

"Interacting selectively with any protein or protein complex (a complex of two or more proteins th

"Combining with a virus component to initiate a change in cell activity [goid 1618] [evidence ISS]

"The function of binding to a specific DNA sequence in order to modulate transcription. The tran

"The function of binding to a specific DNA sequence in order to modulate transcription. The tran

"The function of binding to a specific DNA sequence in order to modulate transcription. The tran

"Interacting selectively with DNA (deoxyribonucleic acid) [goid 3677] [evidence IEA]; The functio

"The function of binding to a specific DNA sequence in order to modulate transcription. The tran  
g successive cell replication or nuclear replication events. Canonically, the cell cycle comprises t

"Catalysis of the reaction: ATP + a protein tyrosine = ADP + protein tyrosine phosphate [goid 47

"Interacting selectively and simultaneously with one or more signal transduction molecules, usua

"Interacting selectively with a nucleotide, any compound consisting of a nucleoside that is esteril

"Interacting selectively with a nucleotide, any compound consisting of a nucleoside that is esteril

"Catalysis of the reactions: D-myo-inositol 1,4,5-trisphosphate + H<sub>2</sub>O = myo-inositol 1,4-bisphos

"Interacting selectively with any nucleic acid [goid 3676] [evidence IEA]; Interacting selectively w

"Interacting selectively with a nucleotide, any compound consisting of a nucleoside that is esteril

Interacting selectively with any protein or protein complex (a complex of two or more proteins th

Interacting selectively with any protein or protein complex (a complex of two or more proteins th

"Interacting selectively and simultaneously with one or more signal transduction molecules, usua

"Interacting selectively and simultaneously with one or more signal transduction molecules, usua

"Combining with an extracellular or intracellular messenger to initiate a change in cell activity [gc

Combining with an extracellular or intracellular messenger to initiate a change in cell activity [goid

Combining with an extracellular or intracellular messenger to initiate a change in cell activity [goid

Interacting selectively with pre-messenger RNA (pre-mRNA) or messenger RNA (mRNA) [goid 6810] [evidence IEA]

Catalysis of the transfer of a solute or solutes from one side of a membrane to the other accordi

Catalysis of the transfer of a solute or solutes from one side of a membrane to the other accordi

"Enables the directed movement of substances (such as macromolecules, small molecules, ions

"Enables the directed movement of substances (such as macromolecules, small molecules, ions

"Enables the directed movement of substances (such as macromolecules, small molecules, ions

"Enables the directed movement of substances (such as macromolecules, small molecules, ions

Enables the active transport of a solute across a membrane by a mechanism whereby two or mo  
out of, within or between cells, or within a multicellular organism [goid 6810] [evidence IEA]"

"Enables the directed movement of substances (such as macromolecules, small molecules, ions

"Enables the directed movement of substances (such as macromolecules, small molecules, ions

"Enables the directed movement of substances (such as macromolecules, small molecules, ions

"Enables the directed movement of substances (such as macromolecules, small molecules, ions

"Enables the directed movement of substances (such as macromolecules, small molecules, ions

"Enables the directed movement of substances (such as macromolecules, small molecules, ions

"Enables the directed movement of substances (such as macromolecules, small molecules, ions

"Enables the directed movement of substances (such as macromolecules, small molecules, ions  
"Enables the directed movement of substances (such as macromolecules, small molecules, ions  
"Enables the directed movement of substances (such as macromolecules, small molecules, ions  
"Enables the directed movement of substances (such as macromolecules, small molecules, ions  
"Enables the directed movement of substances (such as macromolecules, small molecules, ions  
"Enables the directed movement of substances (such as macromolecules, small molecules, ions

"Catalysis of the transfer of monoamines, organic compounds that contain one amino group tha  
"Interacting selectively with folic acid, pteroylglutamic acid. Folic acid is widely distributed as a m  
Catalysis of the transfer of a solute or solutes from one side of a membrane to the other accordi  
"Catalysis of facilitated diffusion of a chloride (by an energy-independent process) involving pas  
Combining with an extracellular or intracellular messenger to initiate a change in cell activity [goid  
"Combining with an extracellular or intracellular messenger to initiate a change in cell activity [goid  
"Combining with an extracellular or intracellular messenger to initiate a change in cell activity [goid  
"Enables the directed movement of substances (such as macromolecules, small molecules, ions  
"Enables the directed movement of substances (such as macromolecules, small molecules, ions  
"Enables the directed movement of substances (such as macromolecules, small molecules, ions  
"Enables the directed movement of substances (such as macromolecules, small molecules, ions  
"Interacting selectively with a nucleotide, any compound consisting of a nucleoside that is esteril  
"Interacting selectively with a nucleotide, any compound consisting of a nucleoside that is esteril  
"Enables the directed movement of substances (such as macromolecules, small molecules, ions  
"Enables the directed movement of substances (such as macromolecules, small molecules, ions

Interacting selectively with calcium ions (Ca<sup>2+</sup>) [goid 5509] [evidence IEA]; Catalysis of the trans  
Interacting selectively with calcium ions (Ca<sup>2+</sup>) [goid 5509] [evidence IEA]; Enables the active tr  
Interacting selectively with calcium ions (Ca<sup>2+</sup>) [goid 5509] [evidence IEA]; Enables the active tr  
Interacting selectively with calcium ions (Ca<sup>2+</sup>) [goid 5509] [evidence IEA]; Enables the active tr  
"Enables the directed movement of substances (such as macromolecules, small molecules, ions  
"Catalysis of the transfer of dicarboxylic acids from one side of the membrane to the other. A dic  
"Enables the directed movement of substances (such as macromolecules, small molecules, ions  
"Enables the directed movement of substances (such as macromolecules, small molecules, ions  
"Enables the directed movement of substances (such as macromolecules, small molecules, ions  
"Enables the directed movement of substances (such as macromolecules, small molecules, ions  
"Catalysis of the transfer of L-ornithine from one side of a membrane to the other. L-ornithine is  
"Enables the directed movement of substances (such as macromolecules, small molecules, ions  
"The selective, often stoichiometric, interaction of a molecule with one or more specific sites on  
"Enables the directed movement of substances (such as macromolecules, small molecules, ions  
"Enables the directed movement of substances (such as macromolecules, small molecules, ions  
"Enables the directed movement of substances (such as macromolecules, small molecules, ions  
"Enables the directed movement of substances (such as macromolecules, small molecules, ions  
"The selective, often stoichiometric, interaction of a molecule with one or more specific sites on  
"The selective, often stoichiometric, interaction of a molecule with one or more specific sites on  
"Catalysis of the transfer of S-adenosylmethionine from one side of a membrane to the other. S-  
"Enables the directed movement of substances (such as macromolecules, small molecules, ions



Catalysis of the transfer of a solute or solutes from one side of a membrane to the other accordi  
Catalysis of the transfer of a solute or solutes from one side of a membrane to the other accordi  
"Catalysis of the transfer of a nucleotide-sugar from one side of the membrane to the other. A n  
Catalysis of the transfer of a solute or solutes from one side of a membrane to the other accordi  
Catalysis of the transfer of a nucleotide-sugar from one side of the membrane to the other. A nu  
Catalysis of the transfer of a solute or solutes from one side of a membrane to the other accordi  
"Mediates the transfer of a signal from the outside to the inside of a cell by means other than the  
out of, within or between cells, or within a multicellular organism [goid 6810] [evidence IEA]"  
"Catalysis of the transfer of a nucleotide-sugar from one side of the membrane to the other. A n  
Catalysis of the transfer of a solute or solutes from one side of a membrane to the other accordi  
out of, within or between cells, or within a multicellular organism [goid 6810] [evidence IEA]"  
"Catalysis of the transfer of a solute or solutes from one side of a membrane to the other accorc  
out of, within or between cells, or within a multicellular organism [goid 6810] [evidence IEA]"

out of, within or between cells, or within a multicellular organism [goid 6810] [evidence IEA]"  
"Elemental activities, such as catalysis or binding, describing the actions of a gene product at th  
out of, within or between cells, or within a multicellular organism [goid 6810] [evidence IEA]"  
"Catalysis of the transfer of a solute or solutes from one side of a membrane to the other accorc  
Enables the active transport of a solute across a membrane by a mechanism whereby two or m  
"Enables the directed movement of substances (such as macromolecules, small molecules, ions  
"Enables the directed movement of substances (such as macromolecules, small molecules, ions  
"Enables the directed movement of substances (such as macromolecules, small molecules, ions  
Catalysis of the transfer of a solute or solutes from one side of a membrane to the other accordi  
Interacting selectively with sodium ions (Na+) [goid 31402] [evidence IEA]  
Catalysis of the transfer of amino acids from one side of a membrane to the other. Amino acids

Interacting selectively with sodium ions (Na+) [goid 31402] [evidence IEA]  
Interacting selectively with sodium ions (Na+) [goid 31402] [evidence IEA]  
Interacting selectively with sodium ions (Na+) [goid 31402] [evidence IEA]  
Catalysis of the transfer of zinc (Zn) ions from one side of a membrane to the other [goid 5385] |  
Interacting selectively with zinc (Zn) ions [goid 8270] [evidence IEA]; Catalysis of the transfer of  
Interacting selectively with zinc (Zn) ions [goid 8270] [evidence IEA]; Catalysis of the transfer of  
Interacting selectively with zinc (Zn) ions [goid 8270] [evidence IEA]; Catalysis of the transfer of  
Interacting selectively with zinc (Zn) ions [goid 8270] [evidence IEA]; Catalysis of the transfer of  
Catalysis of the transfer of zinc (Zn) ions from one side of a membrane to the other [goid 5385] |  
Catalysis of the transfer of zinc (Zn) ions from one side of a membrane to the other [goid 5385] |  
Interacting selectively with zinc (Zn) ions [goid 8270] [evidence IEA]; Catalysis of the transfer of  
Interacting selectively with zinc (Zn) ions [goid 8270] [evidence IEA]; Catalysis of the transfer of  
Interacting selectively with zinc (Zn) ions [goid 8270] [evidence IEA]; Catalysis of the transfer of  
"Catalysis of a biochemical reaction at physiological temperatures. In biologically catalyzed reac  
Catalysis of the transfer of iron (Fe) ions from one side of a membrane to the other [goid 5381] |  
Interacting selectively with magnesium (Mg) ions [goid 287] [evidence IEA]; Catalysis of the tran  
Interacting selectively with magnesium (Mg) ions [goid 287] [evidence IEA]; Catalysis of the tran

"Catalysis of the transfer of cation from one side of the membrane to the other [goid 8324] [evidence IEA]"  
Catalysis of the transfer of neutral amino acids from one side of a membrane to the other. Neutral amino acids  
Catalysis of the transfer of an L-amino acid from one side of a membrane to the other. L-amino acids

Catalysis of the transfer of choline from one side of the membrane to the other. Choline (2-hydroxyethyl)trimethylammonium  
Mediates the transfer of a signal from the outside to the inside of a cell by means other than the cell membrane

Enables the directed movement of substances (such as macromolecules, small molecules, ions) out of, within or between cells, or within a multicellular organism [goid 6810] [evidence IEA]"

Enables the directed movement of substances (such as macromolecules, small molecules, ions) out of, within or between cells, or within a multicellular organism [goid 6810] [evidence IEA]"

"Enables the directed movement of substances (such as macromolecules, small molecules, ions) out of, within or between cells, or within a multicellular organism [goid 6810] [evidence IEA]"

"Enables the directed movement of substances (such as macromolecules, small molecules, ions) out of, within or between cells, or within a multicellular organism [goid 6810] [evidence IEA]"

"Enables the directed movement of substances (such as macromolecules, small molecules, ions) out of, within or between cells, or within a multicellular organism [goid 6810] [evidence IEA]"

Interacting selectively with double-stranded RNA [goid 3725] [evidence IEA]

"Enables the directed movement of substances (such as macromolecules, small molecules, ions) out of, within or between cells, or within a multicellular organism [goid 6810] [evidence IEA]"

"Enables the directed movement of substances (such as macromolecules, small molecules, ions) out of, within or between cells, or within a multicellular organism [goid 6810] [evidence IEA]"

"Enables the directed movement of substances (such as macromolecules, small molecules, ions) out of, within or between cells, or within a multicellular organism [goid 6810] [evidence IEA]"

"Enables the directed movement of substances (such as macromolecules, small molecules, ions) out of, within or between cells, or within a multicellular organism [goid 6810] [evidence IEA]"

"Enables the directed movement of substances (such as macromolecules, small molecules, ions) out of, within or between cells, or within a multicellular organism [goid 6810] [evidence IEA]"

"Enables the directed movement of substances (such as macromolecules, small molecules, ions) out of, within or between cells, or within a multicellular organism [goid 6810] [evidence IEA]"

"Enables the directed movement of substances (such as macromolecules, small molecules, ions) out of, within or between cells, or within a multicellular organism [goid 6810] [evidence IEA]"

"Enables the directed movement of substances (such as macromolecules, small molecules, ions) out of, within or between cells, or within a multicellular organism [goid 6810] [evidence IEA]"

Catalysis of the transfer of a solute or solutes from one side of a membrane to the other according to a concentration gradient

Catalysis of the transfer of a solute or solutes from one side of a membrane to the other according to a concentration gradient

Catalysis of the transfer of a solute or solutes from one side of a membrane to the other according to a concentration gradient

Catalysis of the transfer of beta-alanine from one side of a membrane to the other. Beta-alanine

Catalysis of the transfer of a solute or solutes from one side of a membrane to the other according to a concentration gradient

Catalysis of the transfer of a solute or solutes from one side of a membrane to the other according to a concentration gradient

"Catalysis of the transfer of amino acids from one side of a membrane to the other. Amino acids

"Catalysis of the transfer of amino acids from one side of a membrane to the other. Amino acids

Catalysis of the transfer of basic amino acids from one side of a membrane to the other. Acidic amino acids

"Catalysis of the transfer of neutral amino acids from one side of a membrane to the other. Neutral amino acids

Catalysis of the transfer of an L-amino acid from one side of a membrane to the other. L-amino acids

Catalysis of the transfer of amino acids from one side of a membrane to the other. Amino acids

Catalysis of the transfer of amino acids from one side of a membrane to the other. Amino acids

"Catalysis of the transfer of neutral amino acids from one side of a membrane to the other. Neutral amino acids

"Catalysis of the transfer of a solute or solutes from one side of a membrane to the other according to a concentration gradient

Catalysis of the transfer of a solute or solutes from one side of a membrane to the other according to a concentration gradient

Catalysis of facilitated diffusion of an ion (by an energy-independent process) by passage through a channel





"Interacting selectively with ATP, adenosine 5'-triphosphate, a universally important coenzyme a  
"Interacting selectively with a nucleotide, any compound consisting of a nucleoside that is esteril  
"Interacting selectively with a nucleotide, any compound consisting of a nucleoside that is esteril  
"Interacting selectively with a nucleotide, any compound consisting of a nucleoside that is esteril  
"Interacting selectively with any protein or protein complex (a complex of two or more proteins th  
"Elemental activities, such as catalysis or binding, describing the actions of a gene product at th

Interacting selectively with any protein or protein complex (a complex of two or more proteins th  
Interacting selectively with any protein or protein complex (a complex of two or more proteins th  
"Catalysis of the phosphorylation of myo-inositol (1,2,3,5/4,6-cyclohexanehexol) or a phosphatid  
Interacting selectively with any protein or protein complex (a complex of two or more proteins th  
"Interacting selectively with DNA (deoxyribonucleic acid) [goid 3677] [evidence IEA]; Catalysis of  
Interacting selectively with any protein or protein complex (a complex of two or more proteins th  
Interacting selectively with an RNA molecule or a portion thereof [goid 3723] [evidence IEA]; Inte

Interacting selectively with an RNA molecule or a portion thereof [goid 3723] [evidence IEA]; Inte  
Combining with an extracellular or intracellular messenger to initiate a change in cell activity [goid  
"Any molecular entity that serves as an electron acceptor and electron donor in an electron trans  
Catalysis of the reaction: sphingomyelin + H<sub>2</sub>O = N-acylsphingosine + choline phosphate [goid 4  
"Interacting selectively with magnesium (Mg) ions [goid 287] [evidence IEA]; Catalysis of the rea  
"Interacting selectively with magnesium (Mg) ions [goid 287] [evidence IEA]; Catalysis of the rea  
"Interacting selectively with magnesium (Mg) ions [goid 287] [evidence IEA]; Catalysis of the rea  
Catalysis of the reaction: sphingomyelin + H<sub>2</sub>O = N-acylsphingosine + choline phosphate [goid 4  
"Catalysis of the reaction: sphingomyelin + H<sub>2</sub>O = N-acylsphingosine + choline phosphate [goid

"Catalysis of the reaction: S-adenosylmethioninamine + putrescine = 5'-methylthioadenosine + s  
"Interacting selectively with monomeric or multimeric forms of actin, including actin filaments [go

"Interacting selectively with DNA (deoxyribonucleic acid) [goid 3677] [evidence IEA]; Interacting  
Interacting selectively with any protein or protein complex (a complex of two or more proteins th  
"Interacting selectively with any protein or protein complex (a complex of two or more proteins th  
"The selective, often stoichiometric, interaction of a molecule with one or more specific sites on  
"Elemental activities, such as catalysis or binding, describing the actions of a gene product at th  
Interacting selectively with DNA (deoxyribonucleic acid) [goid 3677] [evidence IEA]; Interacting s  
Interacting selectively with DNA (deoxyribonucleic acid) [goid 3677] [evidence IEA]; Interacting s  
The function of binding to a specific DNA sequence in order to modulate transcription. The trans  
Interacting selectively with any protein or protein complex (a complex of two or more proteins th  
Acting as a marker to identify a membrane and interacting selectively with one or more SNAREs

Interacting selectively with DNA (deoxyribonucleic acid) [goid 3677] [evidence IEA]  
The function of binding to a specific DNA sequence in order to modulate transcription. The trans  
Interacting selectively with DNA (deoxyribonucleic acid) [goid 3677] [pmid 9003788] [evidence T

The function of binding to a specific DNA sequence in order to modulate transcription. The trans  
The function of binding to a specific DNA sequence in order to modulate transcription. The trans  
Interacting selectively with a SNARE (soluble N-ethylmaleimide-sensitive factor attached protein  
Interacting selectively with any protein or protein complex (a complex of two or more proteins th  
"Stops, prevents or reduces the activity of a phospholipase, an enzyme that catalyzes of the hyc  
Interacting selectively with any nucleic acid [goid 3676] [evidence IEA]; The function that links a  
Functions to initiate or regulate RNA polymerase II transcription [goid 3702] [pmid 10419521] [e

Interacting selectively with any protein or protein complex (a complex of two or more proteins th  
production, gene expression, etc.) as a result of a disturbance in organismal or cellular homeost







Interacting selectively with the SNAP receptor syntaxin-1 [goid 17075] [pmid 10707983] [evidence 1]  
"Interacting selectively with a nucleotide, any compound consisting of a nucleoside that is esterified to a phosphate group" [goid 17075] [pmid 10707983] [evidence 1]

"Interacting selectively with a nucleotide, any compound consisting of a nucleoside that is esterified to a phosphate group" [goid 17075] [pmid 10707983] [evidence 1]  
"Interacting selectively with a nucleotide, any compound consisting of a nucleoside that is esterified to a phosphate group" [goid 17075] [pmid 10707983] [evidence 1]

Interacting selectively with any nucleic acid [goid 3676] [evidence IEA]; Interacting selectively with any protein or protein complex (a complex of two or more proteins that interact with each other)

"Interacting selectively with a nucleotide, any compound consisting of a nucleoside that is esterified to a phosphate group

Interacting selectively with any nucleic acid [goid 3676] [evidence IEA]; Interacting selectively with any protein or protein complex (a complex of two or more proteins that interact with each other)

Interacting selectively with an RNA molecule or a portion thereof [goid 3723] [pmid 3260384] [evidence IEA]; Interacting selectively with any protein or protein complex (a complex of two or more proteins that interact with each other)

Interacting selectively with any protein or protein complex (a complex of two or more proteins that interact with each other)

Interacting selectively with an RNA molecule or a portion thereof [goid 3723] [evidence IEA]; Interacting selectively with any protein or protein complex (a complex of two or more proteins that interact with each other)

Interacting selectively with an RNA molecule or a portion thereof [goid 3723] [pmid 7744013] [evidence IEA]; Interacting selectively with any protein or protein complex (a complex of two or more proteins that interact with each other)

Interacting selectively with an RNA molecule or a portion thereof [goid 3723] [evidence IEA]; Interacting selectively with any protein or protein complex (a complex of two or more proteins that interact with each other)

"Interacting selectively with monomeric or multimeric forms of actin, including actin filaments [goid 3723] [evidence IEA]; Interacting selectively with any protein or protein complex (a complex of two or more proteins that interact with each other)

"Interacting selectively with monomeric or multimeric forms of actin, including actin filaments [goid 3723] [evidence IEA]; Interacting selectively with any protein or protein complex (a complex of two or more proteins that interact with each other)

"Interacting selectively with monomeric or multimeric forms of actin, including actin filaments [goid 3723] [evidence IEA]; Interacting selectively with any protein or protein complex (a complex of two or more proteins that interact with each other)

"Interacting selectively with a 7-methylguanosine (m7G) moiety or derivative located at the 5' end of an RNA molecule

"Elemental activities, such as catalysis or binding, describing the actions of a gene product at the molecular level

"The function of a transcription cofactor that activates transcription from a RNA polymerase II promoter

"Interacting selectively with any protein or protein complex (a complex of two or more proteins that interact with each other)

Interacting selectively with any protein or protein complex (a complex of two or more proteins that interact with each other)

Interacting selectively with any protein or protein complex (a complex of two or more proteins that interact with each other)

Interacting selectively with any protein or protein complex (a complex of two or more proteins that interact with each other)

Mediates the transfer of a signal from the outside to the inside of a cell by means other than the cell membrane

Mediates the transfer of a signal from the outside to the inside of a cell by means other than the cell membrane

"Interacting selectively with any protein or protein complex (a complex of two or more proteins that interact with each other)

Interacting selectively with any protein or protein complex (a complex of two or more proteins that interact with each other)

"Interacting selectively with a protein C-terminus, the end of any peptide chain at which the 1-carboxyl group is located

Interacting selectively with any protein or protein complex (a complex of two or more proteins that interact with each other)

"Interacting selectively with any protein or protein complex (a complex of two or more proteins that interact with each other)

Interacting selectively with any protein or protein complex (a complex of two or more proteins that interact with each other)

Interacting selectively with any protein or protein complex (a complex of two or more proteins that interact with each other)

Interacting selectively with any protein or protein complex (a complex of two or more proteins that interact with each other)

Mediates the transfer of a signal from the outside to the inside of a cell by means other than the cell membrane

"Increases the activity of a GTPase, an enzyme that catalyzes the hydrolysis of GTP [goid 5096] [evidence IEA]; Interacting selectively with any protein or protein complex (a complex of two or more proteins that interact with each other)

Interacting selectively with any protein or protein complex (a complex of two or more proteins that interact with each other)

Interacting selectively with any protein or protein complex (a complex of two or more proteins that interact with each other)

Interacting selectively with any protein or protein complex (a complex of two or more proteins that interact with each other)

Interacting selectively with any protein or protein complex (a complex of two or more proteins that interact with each other)

Interacting selectively with any protein or protein complex (a complex of two or more proteins that interact with each other)

Interacting selectively with any protein or protein complex (a complex of two or more proteins that interact with each other)

Interacting selectively with any protein or protein complex (a complex of two or more proteins that interact with each other)

Interacting selectively with any protein or protein complex (a complex of two or more proteins that interact with each other)

Interacting selectively with any protein or protein complex (a complex of two or more proteins that interact with each other)

Interacting selectively with zinc (Zn) ions [goid 8270] [evidence IEA]; Interacting selectively with any protein or protein complex (a complex of two or more proteins that interact with each other)

"Stops, prevents or reduces the activity of a protein kinase, an enzyme which phosphorylates a protein

"Interacting selectively and simultaneously with one or more signal transduction molecules, usually in the cytoplasm

"Stops, prevents or reduces the activity of a protein kinase, an enzyme which phosphorylates a protein

Interacting selectively with any protein or protein complex (a complex of two or more proteins th  
Interacting selectively with the epidermal growth factor receptor [goid 5154] [evidence IEA]; Inter  
"Catalysis of the reaction: 2 peroxide radical + 2 H+ = O2 + H2O2 [goid 4784] [pmid 14980699]  
"The function of binding to a specific DNA sequence in order to modulate transcription. The tran  
Interacting selectively with DNA (deoxyribonucleic acid) [goid 3677] [pmid 8031013] [evidence T  
"The action of a molecule that contributes to the structural integrity of a cytoskeletal structure [g  
"The action of a molecule that contributes to the structural integrity of a cytoskeletal structure [gc  
Combining with a neuropeptide to initiate a change in cell activity [goid 8188] [pmid 11499680] [f  
"Catalysis of the reaction: L-idoitol + NAD+ = L-sorbose + NADH + H+ [goid 3939] [evidence IEA]  
"Combining with an extracellular or intracellular messenger to initiate a change in cell activity, ar  
"Combining with an extracellular or intracellular messenger to initiate a change in cell activity [gc  
"Interacting selectively with DNA (deoxyribonucleic acid) [goid 3677] [evidence IEA]; Stimulates  
Interacting selectively with any protein or protein complex (a complex of two or more proteins th  
Interacting selectively with DNA (deoxyribonucleic acid) [goid 3677] [evidence IEA]; Functions to  
"Interacting selectively with chromatin, the network of fibers of DNA and protein that make up th  
The function of binding to a specific DNA sequence in order to modulate transcription. The trans  
The function of binding to a specific DNA sequence in order to modulate transcription. The trans  
The function of binding to a specific DNA sequence in order to modulate transcription. The trans  
The function of binding to a specific DNA sequence in order to modulate transcription. The trans  
The function of binding to a specific DNA sequence in order to modulate transcription. The trans  
"Elemental activities, such as catalysis or binding, describing the actions of a gene product at th  
Interacting selectively with DNA (deoxyribonucleic acid) [goid 3677] [evidence IEA]; Interacting s  
Interacting selectively with DNA (deoxyribonucleic acid) [goid 3677] [pmid 7693701] [evidence T  
Interacting selectively with DNA (deoxyribonucleic acid) [goid 3677] [evidence IEA]; Interacting s

Interacting selectively with DNA (deoxyribonucleic acid) [goid 3677] [evidence IEA]; Functions to  
"Interacting selectively with DNA (deoxyribonucleic acid) [goid 3677] [evidence IEA]; Interacting  
Interacting selectively with DNA (deoxyribonucleic acid) [goid 3677] [evidence IEA]; Functions to  
Interacting selectively with DNA (deoxyribonucleic acid) [goid 3677] [evidence IEA]; Interacting s  
Modulation of the activity of the enzyme cAMP-dependent protein kinase [goid 8603] [evidence

"Catalysis of the hydrolysis of the 1,4-beta-linkages between N-acetyl-D-glucosamine and N-ace  
Interacting selectively with any protein or protein complex (a complex of two or more proteins th  
"Interacting selectively with a nucleotide, any compound consisting of a nucleoside that is esteril  
Interacting selectively with any protein or protein complex (a complex of two or more proteins th  
The action of a molecule that contributes to the structural integrity of a complex or assembly with  
g successive cell replication or nuclear replication events. Canonically, the cell cycle comprises t  
"The selective, often stoichiometric, interaction of a molecule with one or more specific sites on  
Interacting selectively with any nucleic acid [goid 3676] [evidence IEA]; Interacting selectively wi  
"Interacting selectively with any protein or protein complex (a complex of two or more proteins th

Interacting selectively with calcium ions (Ca<sup>2+</sup>) [goid 5509] [evidence IEA]

"Interacting selectively with a nucleotide, any compound consisting of a nucleoside that is esteril



ver time from an initial condition (e.g. a zygote or a young adult) to a later condition (e.g. a multicellular organism).  
"Elemental activities, such as catalysis or binding, describing the actions of a gene product at the molecular level.  
"Catalysis of a biochemical reaction at physiological temperatures. In biologically catalyzed reactions, the enzyme is a protein or protein complex.

"Elemental activities, such as catalysis or binding, describing the actions of a gene product at the molecular level.  
"Interacting selectively with a nucleotide, any compound consisting of a nucleoside that is esterified to a phosphate group.

Interacting selectively with any protein or protein complex (a complex of two or more proteins that function together).  
Interacting selectively with any protein or protein complex (a complex of two or more proteins that function together).  
"Elemental activities, such as catalysis or binding, describing the actions of a gene product at the molecular level.  
Catalysis of the hydrolysis of a peptide bond. A peptide bond is a covalent bond formed when the amino group of one amino acid reacts with the carboxyl group of another amino acid.  
Catalysis of the hydrolysis of a peptide bond. A peptide bond is a covalent bond formed when the amino group of one amino acid reacts with the carboxyl group of another amino acid.  
"Elemental activities, such as catalysis or binding, describing the actions of a gene product at the molecular level.  
"The formation of a protein dimer, a macromolecular structure consists of two noncovalently associated polypeptide chains.  
"Interacting selectively with a nucleotide, any compound consisting of a nucleoside that is esterified to a phosphate group.

"Interacting selectively with a CD4, a receptor found on the surface of T cells, monocytes and macrophages.  
"Interacting selectively with a nucleotide, any compound consisting of a nucleoside that is esterified to a phosphate group.  
"Interacting selectively with a nucleotide, any compound consisting of a nucleoside that is esterified to a phosphate group.  
ver be an existing DNA molecule or RNA [goid 6260] [pmid 7799938] [evidence TAS]  
"Interacting selectively with a nucleotide, any compound consisting of a nucleoside that is esterified to a phosphate group.  
"The function of binding to a specific DNA sequence in order to modulate transcription. The transcription factor binds to the DNA sequence and recruits the transcription machinery.  
"The function of binding to a specific DNA sequence in order to modulate transcription. The transcription factor binds to the DNA sequence and recruits the transcription machinery.  
"The function of binding to a specific DNA sequence in order to modulate transcription. The transcription factor binds to the DNA sequence and recruits the transcription machinery.  
g successive cell replication or nuclear replication events. Canonically, the cell cycle comprises two successive phases: mitosis and cytokinesis.  
"Elemental activities, such as catalysis or binding, describing the actions of a gene product at the molecular level.  
of proteolytic caspases, whose actions dismantle the cell and result in cell death. Apoptosis begins with the activation of caspases.  
3] [evidence IEA]  
3] [evidence IEA]

"Stops, prevents or reduces the activity of serine-type endopeptidases, enzymes that catalyze the hydrolysis of peptide bonds.  
"Stops, prevents or reduces the activity of serine-type endopeptidases, enzymes that catalyze the hydrolysis of peptide bonds.  
"Stops, prevents or reduces the activity of serine-type endopeptidases, enzymes that catalyze the hydrolysis of peptide bonds.  
"Stops, prevents or reduces the activity of serine-type endopeptidases, enzymes that catalyze the hydrolysis of peptide bonds.  
"Stops, prevents or reduces the activity of serine-type endopeptidases, enzymes that catalyze the hydrolysis of peptide bonds.  
"Interacting selectively with monomeric or multimeric forms of actin, including actin filaments [goid 5509] [pmid 10386950] [evidence IDA]  
"Interacting selectively with monomeric or multimeric forms of actin, including actin filaments [goid 5509] [pmid 10386950] [evidence IDA]  
"Combining with an extracellular or intracellular messenger to initiate a change in cell activity, such as the activation of a protein.  
"Enables the directed movement of substances (such as macromolecules, small molecules, ions) through a membrane.  
"Enables the directed movement of substances (such as macromolecules, small molecules, ions) through a membrane.  
"Enables the directed movement of substances (such as macromolecules, small molecules, ions) through a membrane.  
Interacting selectively with calcium ions (Ca<sup>2+</sup>) [goid 5509] [evidence IEA]  
Interacting selectively with calcium ions (Ca<sup>2+</sup>) [goid 5509] [pmid 10386950] [evidence IDA]

Interacting selectively with any protein or protein complex (a complex of two or more proteins that  
Interacting selectively with any protein or protein complex (a complex of two or more proteins that  
"Functions to control the survival, growth, differentiation and effector function of tissues and cells  
"Stops, prevents or reduces the activity of an endopeptidase, any enzyme that hydrolyzes nonterminal  
"Catalysis of the hydrolysis of internal, alpha-peptide bonds in a polypeptide chain by a mechanism  
"Catalysis of the hydrolysis of internal, alpha-peptide bonds in a polypeptide chain by a mechanism  
"Catalysis of the hydrolysis of internal, alpha-peptide bonds in a polypeptide chain by a mechanism  
"Catalysis of the NADPH-dependent reduction of carbonyl compounds [goid 4033] [pmid 188334  
"Interacting selectively with the stem cell factor receptor (SCFR), a type III transmembrane kinase  
"Interacting selectively with the stem cell factor receptor (SCFR), a type III transmembrane kinase  
"The action of a molecule that contributes to the structural integrity of a complex or assembly with  
The action of a molecule that contributes to the structural integrity of a complex or assembly with  
Interacting selectively with any protein or protein complex (a complex of two or more proteins that  
Interacting selectively with any protein or protein complex (a complex of two or more proteins that  
Interacting selectively with any protein or protein complex (a complex of two or more proteins that

Combining with an extracellular or intracellular messenger to initiate a change in cell activity [goid  
"Elemental activities, such as catalysis or binding, describing the actions of a gene product at the  
Combining with an extracellular or intracellular messenger to initiate a change in cell activity [goid  
"The action of a molecule that contributes to the structural integrity of a cytoskeletal structure [goid  
"Interacting selectively with calcium ions (Ca<sup>2+</sup>) [goid 5509] [evidence IEA]; Interacting selectively  
"Interacting selectively with monomeric or multimeric forms of actin, including actin filaments [goid  
"Interacting selectively with monomeric or multimeric forms of actin, including actin filaments [goid  
"Interacting selectively with monomeric or multimeric forms of actin, including actin filaments [goid  
"Catalysis of the reaction: palmitoyl-CoA + L-serine = CoA + 3-dehydro-D-sphinganine + CO<sub>2</sub> [goid  
"Catalysis of the reaction: palmitoyl-CoA + L-serine = CoA + 3-dehydro-D-sphinganine + CO<sub>2</sub> [goid  
"Catalysis of the reaction: palmitoyl-CoA + L-serine = CoA + 3-dehydro-D-sphinganine + CO<sub>2</sub> [goid

"Catalysis of the formation of a 2,3-epoxide in squalene [goid 4506] [pmid 9286711] [evidence IEA]  
"Catalysis of an oxidation-reduction (redox) reaction, a reversible chemical reaction in which the  
"Interacting selectively with any protein or protein complex (a complex of two or more proteins that  
"Interacting selectively with a nucleotide, any compound consisting of a nucleoside that is esterified  
Interacting selectively with DNA (deoxyribonucleic acid) [goid 3677] [evidence IEA]; Combining with  
Interacting selectively with an RNA molecule or a portion thereof [goid 3723] [evidence IEA]; Cataly  
"Interacting selectively with a nucleotide, any compound consisting of a nucleoside that is esterified  
Catalysis of the reaction: a 3-oxo-5-alpha-steroid + acceptor = a 3-oxo-delta(4)-steroid + reduced  
Catalysis of the reaction: a 3-oxo-5-alpha-steroid + acceptor = a 3-oxo-delta(4)-steroid + reduced  
"The function of binding to a specific DNA sequence in order to modulate transcription. The transcri  
"The function of binding to a specific DNA sequence in order to modulate transcription. The transcri  
[evidence IEA]; Any process that modulates the frequency, rate or extent of DNA-dependent transcri  
"Increases the activity of a GTPase, an enzyme that catalyzes the hydrolysis of GTP [goid 5096]  
"Increases the activity of a GTPase, an enzyme that catalyzes the hydrolysis of GTP [goid 5096]

"Increases the activity of a GTPase, an enzyme that catalyzes the hydrolysis of GTP [goid 5096]  
Interacting selectively with any protein or protein complex (a complex of two or more proteins th  
"Interacting selectively with calcium ions (Ca<sup>2+</sup>) [goid 5509] [evidence IEA]; Interacting selective  
Interacting selectively with calcium ions (Ca<sup>2+</sup>) [goid 5509] [evidence IEA]  
"Catalysis of the reaction: S-adenosylmethioninamine + putrescine = 5'-methylthioadenosine + s  
"Interacting selectively with any protein or protein complex (a complex of two or more proteins th

"Interacting selectively with 7S RNA, the RNA component of the signal recognition particle (SRP  
"Interacting selectively with a nucleotide, any compound consisting of a nucleoside that is esteril  
Interacting selectively with an RNA molecule or a portion thereof [goid 3723] [evidence IEA]  
"The selective, often stoichiometric, interaction of a molecule with one or more specific sites on  
"Interacting selectively with any protein or protein complex (a complex of two or more proteins th  
"Interacting selectively with a nucleotide, any compound consisting of a nucleoside that is esteril  
"Interacting selectively with a nucleotide, any compound consisting of a nucleoside that is esteril  
"Interacting selectively with a nucleotide, any compound consisting of a nucleoside that is esteril  
"Interacting selectively with a nucleotide, any compound consisting of a nucleoside that is esteril  
Interacting selectively with any protein or protein complex (a complex of two or more proteins th  
"Catalysis of the geometric or structural changes within one molecule. Isomerase is the systema  
anism [goid 48511] [evidence IEA]

Interacting selectively with DNA (deoxyribonucleic acid) [goid 3677] [evidence IEA]; Interacting s  
Interacting selectively with an RNA molecule or a portion thereof [goid 3723] [evidence IEA]; Inte

"Interacting selectively with a nucleotide, any compound consisting of a nucleoside that is esteril

"The action characteristic of a hormone, any substance formed in very small amounts in one spe

"Interacting selectively with transfer RNA [goid 49] [pmid 10983981] [evidence TAS]; Interacting  
Interacting selectively with DNA (deoxyribonucleic acid) [goid 3677] [evidence IEA]; Interacting s  
Interacting selectively with DNA (deoxyribonucleic acid) [goid 3677] [evidence IEA]; Interacting s  
Interacting selectively with DNA (deoxyribonucleic acid) [goid 3677] [evidence IEA]; Interacting s  
Interacting selectively with DNA (deoxyribonucleic acid) [goid 3677] [evidence IEA]; Interacting s

"Interacting selectively with monomeric or multimeric forms of actin, including actin filaments [go

"Interacting selectively with monomeric or multimeric forms of actin, including actin filaments [go

"Catalysis of the reaction: protein tyrosine phosphate + H<sub>2</sub>O = protein tyrosine + phosphate [goid

Interacting selectively with an identical protein or proteins [goid 42802] [evidence IEA]

ometry. Force generation involves a chemo-mechanical energy conversion step. The chemo-mec

"Interacting selectively with a signal sequence, a specific peptide sequence found on protein pre

"Interacting selectively with a signal sequence, a specific peptide sequence found on protein pre

"Interacting selectively with a signal sequence, a specific peptide sequence found on protein pre

Interacting selectively with calcium ions (Ca<sup>2+</sup>) [goid 5509] [evidence NAS]; Interacting selective

Interacting selectively with DNA (deoxyribonucleic acid) [goid 3677] [pmid 1372440] [evidence T

Interacting selectively with an identical protein or proteins [goid 42802] [evidence IEA]

"Combining with an extracellular or intracellular messenger to initiate a change in cell activity [goid 45786] [evidence IEA]"  
"Catalysis of the reaction: a phosphoprotein + H<sub>2</sub>O = a protein + phosphate. Together with protein phosphatase  
Interacting selectively with any protein or protein complex (a complex of two or more proteins that interact with each other)  
Interacting selectively with any nucleic acid [goid 3676] [evidence IEA]; Interacting selectively with any nucleic acid complex  
"The selective, often stoichiometric, interaction of a molecule with one or more specific sites on a macromolecule  
"Catalysis of the hydrolysis of internal, alpha-peptide bonds in a polypeptide chain by a catalytic cycle [goid 45786] [evidence IEA]"  
"Catalysis of the reaction: CMP-N-acetylneuraminate + beta-D-galactosyl-1,3-N-acetyl-alpha-D-glucosamine-6-phosphate = CMP + N-acetyl-beta-D-galactosyl-1,3-N-acetyl-alpha-D-glucosamine-6-phosphate  
"Catalysis of the reaction: CMP-N-acetylneuraminate + beta-D-galactosyl-1,3-N-acetyl-alpha-D-glucosamine-6-phosphate = CMP + N-acetyl-beta-D-galactosyl-1,3-N-acetyl-alpha-D-glucosamine-6-phosphate  
"Catalysis of the reaction: CMP-N-acetylneuraminate + beta-D-galactosyl-1,4-N-acetyl-D-glucosamine-6-phosphate = CMP + N-acetyl-beta-D-galactosyl-1,4-N-acetyl-D-glucosamine-6-phosphate  
"Catalysis of the reaction: CMP-N-acetylneuraminate + beta-D-galactosyl-1,3-N-acetyl-alpha-D-glucosamine-6-phosphate = CMP + N-acetyl-beta-D-galactosyl-1,3-N-acetyl-alpha-D-glucosamine-6-phosphate  
"Catalysis of the reaction: CMP-N-acetylneuraminate + beta-D-galactosyl-1,4-N-acetyl-beta-D-glucosamine-6-phosphate = CMP + N-acetyl-beta-D-galactosyl-1,4-N-acetyl-beta-D-glucosamine-6-phosphate  
Catalysis of the formation of sialylglycoconjugates via transfer of the sialic acid group from CMP-N-acetylneuraminate  
"Catalysis of the formation of sialylglycoconjugates via transfer of the sialic acid group from CMP-N-acetylneuraminate  
"Catalysis of the reaction: alpha-N-acetylneuraminy-2,3-beta-D-galactosyl-1,3-N-acetyl-D-glucosamine-6-phosphate + H<sub>2</sub>O = alpha-N-acetylneuraminy-2,3-beta-D-galactosyl-1,3-N-acetyl-D-glucosamine-6-phosphate + H<sub>2</sub>O  
Catalysis of the formation of sialylglycoconjugates via transfer of the sialic acid group from CMP-N-acetylneuraminate

"Catalysis of the reaction: CMP-N-acetylneuraminate + alpha-N-acetylneuraminy-2,3-beta-D-galactosyl-1,3-N-acetyl-D-glucosamine-6-phosphate = CMP + N-acetyl-beta-D-galactosyl-1,3-N-acetyl-alpha-D-glucosamine-6-phosphate  
"Catalysis of the reaction: CMP-N-acetylneuraminate + alpha-N-acetylneuraminy-2,3-beta-D-galactosyl-1,3-N-acetyl-D-glucosamine-6-phosphate = CMP + N-acetyl-beta-D-galactosyl-1,3-N-acetyl-alpha-D-glucosamine-6-phosphate  
"Catalysis of the reaction: CMP-N-acetylneuraminate + alpha-N-acetylneuraminy-2,3-beta-D-galactosyl-1,3-N-acetyl-D-glucosamine-6-phosphate = CMP + N-acetyl-beta-D-galactosyl-1,3-N-acetyl-alpha-D-glucosamine-6-phosphate  
"Catalysis of the reaction: CMP-N-acetylneuraminate + alpha-N-acetylneuraminy-2,3-beta-D-galactosyl-1,3-N-acetyl-D-glucosamine-6-phosphate = CMP + N-acetyl-beta-D-galactosyl-1,3-N-acetyl-alpha-D-glucosamine-6-phosphate  
"Catalysis of the reaction: CMP-N-acetylneuraminate + alpha-N-acetylneuraminy-2,3-beta-D-galactosyl-1,3-N-acetyl-D-glucosamine-6-phosphate = CMP + N-acetyl-beta-D-galactosyl-1,3-N-acetyl-alpha-D-glucosamine-6-phosphate  
"Combining with an extracellular or intracellular messenger to initiate a change in cell activity [goid 45786] [evidence IEA]"  
"Interacting selectively with zinc (Zn) ions [goid 8270] [evidence IEA]; Interacting selectively with zinc (Zn) ions  
"Interacting selectively with zinc (Zn) ions [goid 8270] [evidence IEA]; Interacting selectively with zinc (Zn) ions  
"Interacting selectively with any protein or protein complex (a complex of two or more proteins that interact with each other)  
"Interacting selectively with any protein or protein complex (a complex of two or more proteins that interact with each other)  
"The selective, often stoichiometric, interaction of a molecule with one or more specific sites on a macromolecule  
"The selective, often stoichiometric, interaction of a molecule with one or more specific sites on a macromolecule

"Interacting selectively and simultaneously with one or more signal transduction molecules, usually by forming a complex with them  
Interacting selectively with any protein or protein complex (a complex of two or more proteins that interact with each other)  
"Catalysis of the reaction: ubiquitin C-terminal thiolester + H<sub>2</sub>O = ubiquitin + a thiol. Hydrolysis of ubiquitin C-terminal thiolester  
"Catalysis of the reaction: ubiquitin C-terminal thiolester + H<sub>2</sub>O = ubiquitin + a thiol. Hydrolysis of ubiquitin C-terminal thiolester  
Interacting selectively with any protein or protein complex (a complex of two or more proteins that interact with each other)

"Interacting selectively with cholesterol (cholest-5-en-3-beta-ol); the principal sterol of vertebrate cell membranes

"Interacting selectively with a lipid [goid 8289] [evidence IEA]; Interacting selectively with cholesterol  
"Interacting selectively with a lipid [goid 8289] [evidence IEA]; Interacting selectively with cholesterol

The function of binding to a specific DNA sequence in order to modulate transcription. The trans  
The function of binding to a specific DNA sequence in order to modulate transcription. The trans  
"The function of binding to a specific DNA sequence in order to modulate transcription. The tran  
The function of binding to a specific DNA sequence in order to modulate transcription. The trans  
The function of binding to a specific DNA sequence in order to modulate transcription. The trans  
The function of binding to a specific DNA sequence in order to modulate transcription. The trans  
"The function of binding to a specific DNA sequence in order to modulate transcription. The tran  
Interacting selectively with double-stranded RNA [goid 3725] [pmid 10022909] [evidence TAS]; I  
Interacting selectively with double-stranded RNA [goid 3725] [pmid 10585778] [evidence TAS]  
"Catalysis of the phosphorylation of an amino acid residue in a protein, usually according to the  
"The action characteristic of a hormone, any substance formed in very small amounts in one spe  
"Enables the directed movement of substances (such as macromolecules, small molecules, ions

ver time from an initial condition (e.g. a zygote or a young adult) to a later condition (e.g. a multic  
Interacting selectively with calcium ions (Ca<sup>2+</sup>) [goid 5509] [pmid 16005298] [evidence IDA]; Int  
Interacting selectively with calcium ions (Ca<sup>2+</sup>) [goid 5509] [evidence IEA]; Interacting selectivel  
"The selective, often stoichiometric, interaction of a molecule with one or more specific sites on .  
"Interacting selectively with a nucleotide, any compound consisting of a nucleoside that is esteril  
"Interacting selectively with a nucleotide, any compound consisting of a nucleoside that is esteril  
Interacting selectively with any protein or protein complex (a complex of two or more proteins th  
"Interacting selectively with a nucleotide, any compound consisting of a nucleoside that is esteril  
"Interacting selectively with a nucleotide, any compound consisting of a nucleoside that is esteril  
"Catalysis of the transfer of a phosphate group, usually from ATP, to a substrate molecule [goid  
"Interacting selectively with a nucleotide, any compound consisting of a nucleoside that is esteril  
"Interacting selectively with a nucleotide, any compound consisting of a nucleoside that is esteril  
"Interacting selectively with a nucleotide, any compound consisting of a nucleoside that is esteril  
"Interacting selectively with a nucleotide, any compound consisting of a nucleoside that is esteril  
"Interacting selectively with a nucleotide, any compound consisting of a nucleoside that is esteril  
"Interacting selectively with a nucleotide, any compound consisting of a nucleoside that is esteril  
"Interacting selectively with a nucleotide, any compound consisting of a nucleoside that is esteril  
"Interacting selectively with a nucleotide, any compound consisting of a nucleoside that is esteril

"Interacting selectively with a nucleotide, any compound consisting of a nucleoside that is esteril  
"Interacting selectively with a nucleotide, any compound consisting of a nucleoside that is esteril  
"Interacting selectively with any protein or protein complex (a complex of two or more proteins th  
Interacting selectively with any protein or protein complex (a complex of two or more proteins th  
Interacting selectively with a specific domain of a protein [goid 19904] [evidence ISS]  
d [goid 7242] [evidence IEA]  
Interacting selectively with any protein or protein complex (a complex of two or more proteins th  
"Elemental activities, such as catalysis or binding, describing the actions of a gene product at th  
"Interacting selectively with one or more specific sites on a receptor molecule, a macromolecule  
Interacting selectively with DNA (deoxyribonucleic acid) [goid 3677] [evidence IEA]  
Interacting selectively with DNA (deoxyribonucleic acid) [goid 3677] [evidence IEA]

Combining with an extracellular or intracellular messenger to initiate a change in cell activity [goid

Interacting selectively with any protein or protein complex (a complex of two or more proteins that  
Interacting selectively with DNA (deoxyribonucleic acid) [goid 3677] [evidence IEA]; Interacting s  
molecular signal, and recognize and characterize the signal. Sonic stimuli are detected in the form  
"Interacting selectively with calmodulin, a calcium-binding protein with many roles, both in the ca  
"Interacting selectively with calmodulin, a calcium-binding protein with many roles, both in the ca  
"The action of a molecule that contributes to the structural integrity of a complex or assembly wi  
"Catalysis of the reaction: 3-beta-hydroxyandrost-5-en-17-one 3-sulfate + H<sub>2</sub>O = 3-beta-hydroxy

"Catalysis of the reaction: dolichyl diphosphooligosaccharide + protein L-asparagine = dolichyl d

"Catalysis of the reaction: dolichyl diphosphooligosaccharide + protein L-asparagine = dolichyl d

"Catalysis of the reaction: ATP + ubiquitin + protein lysine = AMP + diphosphate + protein N-ubi

Acting as a marker to identify a membrane and interacting selectively with one or more SNAREs

Acting as a marker to identify a membrane and interacting selectively with one or more SNAREs

Acting as a marker to identify a membrane and interacting selectively with one or more SNAREs

Acting as a marker to identify a membrane and interacting selectively with one or more SNAREs

Interacting selectively with any protein or protein complex (a complex of two or more proteins that

"Acting as a marker to identify a membrane and interacting selectively with one or more SNARE

"Acting as a marker to identify a membrane and interacting selectively with one or more SNARE

Acting as a marker to identify a membrane and interacting selectively with one or more SNAREs

Acting as a marker to identify a membrane and interacting selectively with one or more SNAREs

Acting as a marker to identify a membrane and interacting selectively with one or more SNAREs

Acting as a marker to identify a membrane and interacting selectively with one or more SNAREs

out of, within or between cells, or within a multicellular organism [goid 6810] [pmid 10198254] [evi

uding from the membrane of the vesicle and the target membrane, during exocytosis [goid 6904]

Interacting selectively with the SNAP receptor syntaxin-2 [goid 30347] [evidence NAS]; Interacti

"Elemental activities, such as catalysis or binding, describing the actions of a gene product at th

Interacting selectively with any protein or protein complex (a complex of two or more proteins that

Interacting selectively with any protein or protein complex (a complex of two or more proteins that

EA]; The directed movement of substances, either within a vesicle or in the vesicle membrane, in

out of or within a cell [goid 16192] [evidence IEA]"

"Interacting selectively with any protein or protein complex (a complex of two or more proteins th

Interacting selectively with DNA (deoxyribonucleic acid) [goid 3677] [evidence IEA]; Interacting s

"Catalysis of the reaction: ATP + succinate + CoA = ADP + succinyl-CoA + phosphate [goid 477

"Interacting selectively with a nucleotide, any compound consisting of a nucleoside that is esterif

"Catalysis of the reaction: GTP + succinate + CoA = GDP + succinyl-CoA + phosphate [goid 477

Combining with an extracellular or intracellular messenger to initiate a change in cell activity [goid

Interacting selectively with an identical protein or proteins [goid 42802] [evidence IEA]; Interacti

"The selective, often stoichiometric, interaction of a molecule with one or more specific sites on

"Catalysis of the reaction: a phenol sulfate + H<sub>2</sub>O = a phenol + SO<sub>4</sub>(2-) (sulfate) [goid 4065] [pn

"Catalysis of the reaction: a phenol sulfate + H<sub>2</sub>O = a phenol + SO<sub>4</sub>(2-) (sulfate) [goid 4065] [pn

"Catalysis of the reaction: 3'-phosphoadenosine 5'-phosphosulfate + a phenol = adenosine 3',5'-

"Catalysis of the transfer of a sulfate group from 3'-phosphoadenosine 5'-phosphosulfate to the  
"Catalysis of the reaction: 3'-phosphoadenosine 5'-phosphosulfate + a phenol = adenosine 3',5'-

"Catalysis of the reaction: 3'-phosphoadenosine 5'-phosphosulfate + a phenol = adenosine 3',5'-  
"Catalysis of the transfer of a group, e.g. a methyl group, glycosyl group, acyl group, phosphorus  
"Catalysis of the reaction: 3'-phosphoadenosine 5'-phosphosulfate + an alcohol = adenosine 3',5'-  
"Catalysis of the transfer of a sulfate group from 3'-phosphoadenosine 5'-phosphosulfate to the  
"Interacting selectively with calcium ions (Ca<sup>2+</sup>) [goid 5509] [evidence IEA]; Interacting selective  
"The selective, often stoichiometric, interaction of a molecule with one or more specific sites on  
Interacting selectively with any protein or protein complex (a complex of two or more proteins th  
Interacting selectively with any protein or protein complex (a complex of two or more proteins th  
"Interacting selectively with iron (Fe) ions [goid 5506] [evidence IEA]; Catalysis of the reaction: S  
"Any activity that increases the rate of transcription elongation, the addition of ribonucleotides to  
Interacting selectively with DNA (deoxyribonucleic acid) [goid 3677] [evidence IEA]; Functions to  
"The function of binding to a specific DNA sequence in order to modulate transcription. The tran  
"Any activity that decreases the rate of transcription elongation, the addition of ribonucleotides to  
"The function of binding to a specific DNA sequence in order to modulate transcription. The tran  
"Interacting selectively with a nucleotide, any compound consisting of a nucleoside that is esterifi  
Catalysis of the transfer of a solute or solutes from one side of a membrane to the other accordi  
"Elemental activities, such as catalysis or binding, describing the actions of a gene product at th  
"Elemental activities, such as catalysis or binding, describing the actions of a gene product at th  
Interacting selectively with DNA (deoxyribonucleic acid) [goid 3677] [evidence ISS]; Interacting s  
Interacting selectively with calcium ions (Ca<sup>2+</sup>) [goid 5509] [evidence IEA]  
Interacting selectively with any protein or protein complex (a complex of two or more proteins th

"Interacting selectively with chromatin, the network of fibers of DNA and protein that make up th  
"Interacting selectively with chromatin, the network of fibers of DNA and protein that make up th  
"Interacting selectively with any protein or protein complex (a complex of two or more proteins th  
"Catalysis of the transfer of a methyl group to an acceptor molecule [goid 8168] [evidence IEA];  
"Interacting selectively with chromatin, the network of fibers of DNA and protein that make up th  
"Enables the directed movement of substances (such as macromolecules, small molecules, ions  
"Enables the directed movement of substances (such as macromolecules, small molecules, ions  
"Enables the directed movement of substances (such as macromolecules, small molecules, ions  
"Interacting selectively with DNA (deoxyribonucleic acid) [goid 3677] [evidence IEA]; Interacting

Interacting selectively with any protein or protein complex (a complex of two or more proteins th

"Increases the activity of a GTPase, an enzyme that catalyzes the hydrolysis of GTP [goid 5096]  
Interacting selectively with any protein or protein complex (a complex of two or more proteins th  
"Interacting selectively with a nucleotide, any compound consisting of a nucleoside that is esterifi  
Interacting selectively with any protein or protein complex (a complex of two or more proteins th  
"Interacting selectively with monomeric or multimeric forms of actin, including actin filaments [go  
"Catalysis of a biochemical reaction at physiological temperatures. In biologically catalyzed reac  
The action of a molecule that contributes to the structural integrity of a complex or assembly with

"Interacting selectively with a nucleotide, any compound consisting of a nucleoside that is esterified to a phosphate group [goid 3677] [evidence IEA];

"Interacting selectively with monomeric or multimeric forms of actin, including actin filaments [goid 3723] [evidence IEA]; Ca

"Interacting selectively with an RNA molecule or a portion thereof [goid 3723] [evidence IEA]; Ca

Interacting selectively with any protein or protein complex (a complex of two or more proteins that are not covalently bonded to each other)

"Interacting selectively with monomeric or multimeric forms of actin, including actin filaments [goid 3723] [evidence IEA];

"Enables the directed movement of substances (such as macromolecules, small molecules, ions, and metabolites) into or out of or within a cell [goid 16192] [evidence IEA]"

"Enables the directed movement of substances (such as macromolecules, small molecules, ions, and metabolites) into or out of or within a cell [goid 16192] [evidence IEA]"

"Enables the directed movement of substances (such as macromolecules, small molecules, ions, and metabolites) into or out of or within a cell [goid 16192] [evidence IEA]"

"Enables the directed movement of substances (such as macromolecules, small molecules, ions, and metabolites) into or out of or within a cell [goid 16192] [evidence IEA]"

"Enables the directed movement of substances (such as macromolecules, small molecules, ions, and metabolites) into or out of or within a cell [goid 16192] [evidence IEA]"

"Enables the directed movement of substances (such as macromolecules, small molecules, ions, and metabolites) into or out of or within a cell [goid 16192] [evidence IEA]"

"Enables the directed movement of substances (such as macromolecules, small molecules, ions, and metabolites) into or out of or within a cell [goid 16192] [evidence IEA]"

"Enables the directed movement of substances (such as macromolecules, small molecules, ions, and metabolites) into or out of or within a cell [goid 16192] [evidence IEA]"

"Enables the directed movement of substances (such as macromolecules, small molecules, ions, and metabolites) into or out of or within a cell [goid 16192] [evidence IEA]"

"Enables the directed movement of substances (such as macromolecules, small molecules, ions, and metabolites) into or out of or within a cell [goid 16192] [evidence IEA]"

"Enables the directed movement of substances (such as macromolecules, small molecules, ions, and metabolites) into or out of or within a cell [goid 16192] [evidence IEA]"

"Interacting selectively with Rab protein, any member of the Rab subfamily of the Ras superfamily [goid 3723] [evidence IEA];

"Interacting selectively with any protein or protein complex (a complex of two or more proteins that are not covalently bonded to each other)

"Interacting selectively with any protein or protein complex (a complex of two or more proteins that are not covalently bonded to each other)

Combining with an extracellular or intracellular messenger to initiate a change in cell activity [goid 4995] [evidence IEA];

"Combining with an extracellular or intracellular messenger to initiate a change in cell activity [goid 4995] [evidence IEA];

"Interacting selectively with one or more specific sites on a receptor molecule, a macromolecule, or a complex of two or more macromolecules

Interacting selectively with any protein or protein complex (a complex of two or more proteins that are not covalently bonded to each other)

"Interacting selectively with any protein or protein complex (a complex of two or more proteins that are not covalently bonded to each other) as a result of a disturbance in organismal or cellular homeostasis [goid 3723] [evidence IEA];

Combining with tachykinin to initiate a change in cell activity [goid 4995] [evidence IEA];

Combining with tachykinin to initiate a change in cell activity [goid 4995] [evidence IEA];

Combining with tachykinin to initiate a change in cell activity [goid 4995] [evidence IEA];

Combining with tachykinin to initiate a change in cell activity [goid 4995] [evidence IEA];

Combining with tachykinin to initiate a change in cell activity [goid 4995] [evidence IEA];

Combining with tachykinin to initiate a change in cell activity [goid 4995] [evidence IEA];

Combining with tachykinin to initiate a change in cell activity [goid 4995] [evidence IEA];

Combining with tachykinin to initiate a change in cell activity [goid 4995] [evidence IEA];

Combining with tachykinin to initiate a change in cell activity [goid 4995] [evidence IEA];

Combining with tachykinin to initiate a change in cell activity [goid 4995] [evidence IEA];

Combining with tachykinin to initiate a change in cell activity [goid 4995] [evidence IEA];



"Interacting selectively with DNA (deoxyribonucleic acid) [goid 3677] [evidence IEA]; Functions to  
Interacting selectively with any protein or protein complex (a complex of two or more proteins that  
"Interacting selectively with DNA (deoxyribonucleic acid) [goid 3677] [evidence IEA]; Functions to

"Interacting selectively with DNA (deoxyribonucleic acid) [goid 3677] [evidence IEA]; Catalysis of  
"Functions to initiate or regulate RNA polymerase II transcription [goid 3702] [pmid 9418870] [ev  
"The function of binding to a specific DNA sequence in order to modulate transcription. The tran  
"The function of binding to a specific DNA sequence in order to modulate transcription. The tran  
"The function of binding to a specific DNA sequence in order to modulate transcription. The tran  
The function of binding to a specific DNA sequence in order to modulate transcription. The trans  
Interacting selectively with DNA (deoxyribonucleic acid) [goid 3677] [pmid 9674425] [evidence T  
"The function of a transcription cofactor that activates transcription from a RNA polymerase II pr  
"Interacting selectively with DNA (deoxyribonucleic acid) [goid 3677] [evidence IEA]; The functio

"Stimulates the exchange of guanyl nucleotides by a GTPase. Under normal cellular physiologic  
"Interacting selectively with monomeric or multimeric forms of actin, including actin filaments [go  
Interacting selectively with any protein or protein complex (a complex of two or more proteins that  
æ, from its formation to the mature structure. The central nervous system is the core nervous sys

"Catalysis of the reaction: sedoheptulose 7-phosphate + D-glyceraldehyde 3-phosphate = D-ery  
"The selective, often stoichiometric, interaction of a molecule with one or more specific sites on  
"The selective, often stoichiometric, interaction of a molecule with one or more specific sites on  
Interacting selectively with any protein or protein complex (a complex of two or more proteins that  
"Interacting selectively with a nucleotide, any compound consisting of a nucleoside that is esterif  
"Interacting selectively with a nucleotide, any compound consisting of a nucleoside that is esterif  
"Interacting selectively with a nucleotide, any compound consisting of a nucleoside that is esterif  
"Interacting selectively with a nucleotide, any compound consisting of a nucleoside that is esterif  
"Catalysis of the reaction: peptide antigen(in) + ATP = peptide antigen(out) + ADP + phosphate  
rigin on its cell surface in association with an MHC class I protein complex. The peptide antigen i

"Interacting selectively with an RNA molecule or a portion thereof [goid 3723] [pmid 8846792] [e  
Interacting selectively with double-stranded RNA [goid 3725] [pmid 11641396] [evidence TAS]; I  
"Interacting selectively with a nucleotide, any compound consisting of a nucleoside that is esterif  
"Interacting selectively with a nucleotide, any compound consisting of a nucleoside that is esterif  
"Interacting selectively with a nucleotide, any compound consisting of a nucleoside that is esterif  
"Interacting selectively with a nucleotide, any compound consisting of a nucleoside that is esterif  
Combining with an extracellular or intracellular messenger to initiate a change in cell activity [goi  
Combining with an extracellular or intracellular messenger to initiate a change in cell activity [goi  
Combining with an extracellular or intracellular messenger to initiate a change in cell activity [goi  
Combining with an extracellular or intracellular messenger to initiate a change in cell activity [goi  
"Catalysis of the hydrolysis of internal peptide bonds in a polypeptide chain by a mechanism in v  
"Catalysis of the hydrolysis of ester linkages within nucleic acids [goid 4518] [evidence IEA]; Cat  
"Catalysis of the hydrolysis of ester linkages within nucleic acids [goid 4518] [evidence IEA]; Cat  
Interacting selectively with zinc (Zn) ions [goid 8270] [evidence IEA]; Interacting selectively with :



"Catalysis of the phosphorylation of an amino acid residue in a protein, usually according to the  
The function of binding to a specific DNA sequence in order to modulate transcription. The trans  
The function of binding to a specific DNA sequence in order to modulate transcription. The trans  
The function of binding to a specific DNA sequence in order to modulate transcription. The trans  
"The function of binding to a specific DNA sequence in order to modulate transcription. The tran

"Interacting selectively with DNA (deoxyribonucleic acid) [goid 3677] [evidence IEA]; Any activity  
"Interacting selectively with DNA (deoxyribonucleic acid) [goid 3677] [evidence IEA]; Functions t  
"Interacting selectively with DNA (deoxyribonucleic acid) [goid 3677] [evidence IEA]; Functions t  
The function of binding to a specific DNA sequence in order to modulate transcription. The trans  
[evidence IEA]; Any process that modulates the frequency, rate or extent of DNA-dependent trans  
[evidence IEA]; Any process that modulates the frequency, rate or extent of DNA-dependent trans  
Functions in chain elongation during polypeptide synthesis at the ribosome [goid 3746] [evidenc  
"Elemental activities, such as catalysis or binding, describing the actions of a gene product at th  
Functions in chain elongation during polypeptide synthesis at the ribosome [goid 3746] [evidenc  
Interacting selectively with any protein or protein complex (a complex of two or more proteins th

Interacting selectively with DNA (deoxyribonucleic acid) [goid 3677] [evidence IEA]; Interacting s  
"Interacting selectively with DNA (deoxyribonucleic acid) [goid 3677] [evidence IEA]; Any activity  
Functions to initiate or regulate RNA polymerase II transcription [goid 3702] [pmid 9315662] [evi  
Interacting selectively with DNA (deoxyribonucleic acid) [goid 3677] [evidence IEA]; Functions to  
The function of binding to a specific DNA sequence in order to modulate transcription. The trans  
The function of binding to a specific DNA sequence in order to modulate transcription. The trans  
"Plays a role in regulating transcription; may bind a promoter or enhancer DNA sequence or inte  
The function of binding to a specific DNA sequence in order to modulate transcription. The trans  
Interacting selectively with DNA (deoxyribonucleic acid) [goid 3677] [evidence IEA]; The functio  
Interacting selectively with calcium ions (Ca<sup>2+</sup>) [goid 5509] [evidence IEA]; Interacting selectivel  
Interacting selectively with any protein or protein complex (a complex of two or more proteins th  
"Enables the directed movement of substances (such as macromolecules, small molecules, ions  
er time from an initial condition (e.g. a zygote or a young adult) to a later condition (e.g. a multice

"Elemental activities, such as catalysis or binding, describing the actions of a gene product at th  
"Catalysis of the transfer of cobalt (Co) ions from one side of a membrane to the other [goid 15C  
"Enables the directed movement of substances (such as macromolecules, small molecules, ions

er time from an initial condition (e.g. a zygote or a young adult) to a later condition (e.g. a multice  
of proteolytic caspases, whose actions dismantle the cell and result in cell death. Apoptosis begi

Interacting selectively with damaged DNA [goid 3684] [pmid 9489705] [evidence TAS]; Interactir  
The function that stimulates a cell to grow or proliferate. Most growth factors have other actions  
"Catalysis of a biochemical reaction at physiological temperatures. In biologically catalyzed reac  
"Catalysis of the hydrolysis of ester linkages within nucleic acids by removing nucleotide residue  
Interacting selectively with any nucleic acid [goid 3676] [evidence IEA]; Interacting selectively wi  
Interacting selectively with any nucleic acid [goid 3676] [evidence IEA]  
Interacting selectively with any nucleic acid [goid 3676] [evidence IEA]; Interacting selectively wi  
Interacting selectively with an RNA molecule or a portion thereof [goid 3723] [evidence IEA]; Inte  
The function of binding to a specific DNA sequence in order to modulate transcription. The trans  
The function of binding to a specific DNA sequence in order to modulate transcription. The trans  
The function of binding to a specific DNA sequence in order to modulate transcription. The trans

"Interacting selectively with double-stranded DNA [goid 3690] [evidence IEA]; The function of bir  
The action of a molecule that contributes to the structural integrity of a complex or assembly with  
The action of a molecule that contributes to the structural integrity of a complex or assembly with  
The action of a molecule that contributes to the structural integrity of a complex or assembly with  
Interacting selectively with any protein or protein complex (a complex of two or more proteins tha

Interacting selectively with DNA (deoxyribonucleic acid) [goid 3677] [evidence IEA]; Interacting s  
"Interacting selectively with DNA (deoxyribonucleic acid) [goid 3677] [evidence IEA]; Catalysis of  
Interacting selectively with zinc (Zn) ions [goid 8270] [evidence IEA]; Interacting selectively with  
"Interacting selectively with magnesium (Mg) ions [goid 287] [evidence ISS]; Interacting selectiv  
"Interacting selectively with a nucleotide, any compound consisting of a nucleoside that is esteril  
"Interacting selectively with a nucleotide, any compound consisting of a nucleoside that is esteril  
"Catalysis of the hydrolysis of internal, alpha-peptide bonds in a polypeptide chain by a catalytic  
Interacting selectively with DNA (deoxyribonucleic acid) [goid 3677] [evidence IEA]; Interacting s  
"The selective, often stoichiometric, interaction of a molecule with one or more specific sites on  
"Elemental activities, such as catalysis or binding, describing the actions of a gene product at th

Interacting selectively with DNA (deoxyribonucleic acid) [goid 3677] [evidence IEA]; The function

"The function of binding to a specific DNA sequence in order to modulate transcription. The tran  
The function of binding to a specific DNA sequence in order to modulate transcription. The trans  
Functions to initiate or regulate RNA polymerase II transcription by binding an enhancer region c  
"Catalysis of the dimethylation two adjacent A residues in the loop closing the 3'-terminal stem c  
"Catalysis of the dimethylation two adjacent A residues in the loop closing the 3'-terminal stem c  
"The function of binding to a specific DNA sequence in order to modulate transcription. The tran  
The function of binding to a specific DNA sequence in order to modulate transcription. The trans  
The function of binding to a specific DNA sequence in order to modulate transcription. The trans  
The function of binding to a specific DNA sequence in order to modulate transcription. The trans  
The function of binding to a specific DNA sequence in order to modulate transcription. The trans

y, which result in restriction of damage to the organism attacked or prevention/recovery from the  
Mediates the transfer of a signal from the outside to the inside of a cell by means other than the  
Interacting selectively with any nucleic acid [goid 3676] [evidence IEA]; Interacting selectively wi  
"Stops, prevents or reduces the activity of serine-type endopeptidases, enzymes that catalyze th  
"Stops, prevents or reduces the activity of serine-type endopeptidases, enzymes that catalyze th

Combining with an extracellular or intracellular messenger to initiate a change in cell activity [goid  
Combining with an extracellular or intracellular messenger to initiate a change in cell activity [goid  
"The selective, often stoichiometric, interaction of a molecule with one or more specific sites on .  
"Interacting selectively with a glycoprotein, a protein that contains covalently bound glucose (mo  
The function of a transcription cofactor that activates transcription from a RNA polymerase II pro  
Interacting selectively with an integrin [goid 5178] [pmid 1388724] [evidence TAS]; Interacting se  
"Interacting selectively with a nucleotide, any compound consisting of a nucleoside that is esteril  
"Combining with transforming growth factor beta to initiate a change in cell activity [goid 5024] [p

"The function of binding to a specific DNA sequence in order to modulate transcription. The tran  
"The function of binding to a specific DNA sequence in order to modulate transcription. The tran  
"Catalysis of the transfer of a group, e.g. a methyl group, glycosyl group, acyl group, phosphoru  
"Catalysis of the reaction: protein glutamine + alkylamine = protein N5-alkylglutamine + NH3. Th

Interacting selectively with any protein or protein complex (a complex of two or more proteins th  
"The selective, often stoichiometric, interaction of a molecule with one or more specific sites on .  
Interacting selectively with DNA (deoxyribonucleic acid) [goid 3677] [evidence IEA]; Interacting s  
Interacting selectively with DNA (deoxyribonucleic acid) [goid 3677] [evidence IEA]; Interacting s

Interacting selectively with DNA (deoxyribonucleic acid) [goid 3677] [evidence IEA]; Interacting s  
Interacting selectively with DNA (deoxyribonucleic acid) [goid 3677] [evidence IEA]; Interacting s  
Interacting selectively with DNA (deoxyribonucleic acid) [goid 3677] [evidence IEA]; Interacting s  
Interacting selectively with DNA (deoxyribonucleic acid) [goid 3677] [evidence IEA]; Interacting s  
Interacting selectively with DNA (deoxyribonucleic acid) [goid 3677] [evidence IEA]; Interacting s  
Interacting selectively with DNA (deoxyribonucleic acid) [goid 3677] [evidence IEA]; Interacting s  
Interacting selectively with DNA (deoxyribonucleic acid) [goid 3677] [evidence IEA]; Interacting s  
Interacting selectively with DNA (deoxyribonucleic acid) [goid 3677] [evidence IEA]; Interacting s  
"The action of a molecule that contributes to the structural integrity of a complex or assembly wi  
"Catalysis of the hydrolysis of various bonds, e.g. C-O, C-N, C-C, phosphoric anhydride bonds, (

"Catalysis of the hydrolysis of various bonds, e.g. C-O, C-N, C-C, phosphoric anhydride bonds, (  
"Catalysis of the posttranscriptional addition of a guanyl residue to the 5' end of a tRNA molecu  
"Catalysis of a biochemical reaction at physiological temperatures. In biologically catalyzed reac  
"Catalysis of the cleavage of C-C, C-O, C-N and other bonds by other means than by hydrolysis  
Interacting selectively with DNA (deoxyribonucleic acid) [goid 3677] [evidence IEA]; Interacting s  
Interacting selectively with an RNA molecule or a portion thereof [goid 3723] [evidence IEA]  
"Interacting selectively with a nucleotide, any compound consisting of a nucleoside that is esteril  
Interacting selectively with any protein or protein complex (a complex of two or more proteins th

"Catalysis of the hydrolysis of internal, alpha-peptide bonds in a polypeptide chain by a mechanism  
"Functions to control the survival, growth, differentiation and effector function of tissues and cells

"Catalysis of the reaction: ATP = 3',5'-cyclic AMP + diphosphate [goid 4016] [evidence IEA]; Cat

"Catalysis of the transfer of a methyl group to an acceptor molecule [goid 8168] [evidence IEA];  
"Interacting selectively with an RNA molecule or a portion thereof [goid 3723] [evidence IEA]; Int  
"Increases the rate of GTP hydrolysis by a GTPase of the Rho family [goid 5100] [evidence ISS]

"Interacting selectively with a nucleotide, any compound consisting of a nucleoside that is esterified  
"Elemental activities, such as catalysis or binding, describing the actions of a gene product at the  
"Interacting selectively with any nucleic acid [goid 3676] [evidence IEA]; Interacting selectively with  
"[goid 5057] [evidence IEA]; Stimulates the exchange of guanyl nucleotides by a GTPase. Under  
"[goid 5057] [evidence IEA]; Stimulates the exchange of guanyl nucleotides by a GTPase. Under  
Mediates the transfer of a signal from the outside to the inside of a cell by means other than the

Interacting selectively with any protein or protein complex (a complex of two or more proteins that

Interacting selectively with DNA (deoxyribonucleic acid) [goid 3677] [evidence IEA]  
Interacting selectively with DNA (deoxyribonucleic acid) [goid 3677] [evidence IEA]  
Interacting selectively with DNA (deoxyribonucleic acid) [goid 3677] [evidence IEA]  
Interacting selectively with DNA (deoxyribonucleic acid) [goid 3677] [evidence IEA]

Interacting selectively with any protein or protein complex (a complex of two or more proteins that  
Interacting selectively with any protein or protein complex (a complex of two or more proteins that  
"Enables the directed movement of proteins into, out of, within or between cells [goid 8565] [evidence IEA]  
"Enables the directed movement of proteins into, out of, within or between cells [goid 8565] [evidence IEA]  
"Interacting selectively with any protein or protein complex (a complex of two or more proteins that  
"Interacting selectively with any protein or protein complex (a complex of two or more proteins that  
"Interacting selectively with a nucleotide, any compound consisting of a nucleoside that is esterified  
Interacting selectively with any protein or protein complex (a complex of two or more proteins that  
Interacting selectively with any protein or protein complex (a complex of two or more proteins that  
Interacting selectively with any protein or protein complex (a complex of two or more proteins that  
"Stops, prevents or reduces the activity of an enzyme [goid 4857] [evidence IEA]; Interacting sel  
"Stops, prevents or reduces the activity of an enzyme [goid 4857] [evidence IEA]; Interacting sel  
"Interacting selectively with DNA (deoxyribonucleic acid) [goid 3677] [pmid 10581025] [evidence IEA]  
r more mature rRNA molecules [goid 6364] [evidence IEA]  
Interacting selectively with any nucleic acid [goid 3676] [evidence IEA]; Catalysis of the reaction:  
Interacting selectively with any protein or protein complex (a complex of two or more proteins that  
"Combining with an extracellular or intracellular messenger to initiate a change in cell activity, ar

Interacting selectively with any protein or protein complex (a complex of two or more proteins that interact with each other and with one or more other molecules)  
Interacting selectively with any protein or protein complex (a complex of two or more proteins that interact with each other and with one or more other molecules)  
Catalysis of the reaction: ATP + GMP = ADP + GDP [goid 4385] [pmid 8824195] [evidence TAS]  
Interacting selectively with any protein or protein complex (a complex of two or more proteins that interact with each other and with one or more other molecules)  
"Interacting selectively with a nucleotide, any compound consisting of a nucleoside that is esterified to a phosphate group  
"Interacting selectively with ATP, adenosine 5'-triphosphate, a universally important coenzyme and energy source  
"Catalysis of the reaction: sedoheptulose 7-phosphate + D-glyceraldehyde 3-phosphate = D-ribulose 5-phosphate + D-xylulose 5-phosphate  
"Catalysis of a biochemical reaction at physiological temperatures. In biologically catalyzed reactions, the reaction is reversible and the equilibrium constant is near 1.

"Interacting selectively with a transcription factor, any protein required to initiate or regulate transcription  
Interacting selectively with any protein or protein complex (a complex of two or more proteins that interact with each other and with one or more other molecules)  
Interacting selectively with any protein or protein complex (a complex of two or more proteins that interact with each other and with one or more other molecules)  
"Interacting selectively with chromatin, the network of fibers of DNA and protein that make up the nucleus  
6355] [evidence IEA]; The series of molecular signals initiated by binding of Wnt protein to a frizzled receptor  
"Interacting selectively with a nucleotide, any compound consisting of a nucleoside that is esterified to a phosphate group  
"Interacting selectively with a nucleotide, any compound consisting of a nucleoside that is esterified to a phosphate group  
"Interacting selectively with monomeric or multimeric forms of actin, including actin filaments [goid 3725] [pmid 16111635] [evidence IDA]; |  
"Interacting selectively with monomeric or multimeric forms of actin, including actin filaments [goid 3725] [pmid 16111635] [evidence IDA]; |  
"Combining with an extracellular or intracellular messenger to initiate a change in cell activity, and to regulate gene expression  
"Combining with an extracellular or intracellular messenger to initiate a change in cell activity, and to regulate gene expression  
"Combining with an extracellular or intracellular messenger to initiate a change in cell activity, and to regulate gene expression  
"Combining with an extracellular or intracellular messenger to initiate a change in cell activity, and to regulate gene expression  
"Combining with an extracellular or intracellular messenger to initiate a change in cell activity, and to regulate gene expression  
"Interacting selectively with double-stranded RNA [goid 3725] [pmid 16111635] [evidence IDA]; |  
"Combining with an extracellular or intracellular messenger to initiate a change in cell activity, and to regulate gene expression  
"Elemental activities, such as catalysis or binding, describing the actions of a gene product at the molecular level.

"Elemental activities, such as catalysis or binding, describing the actions of a gene product at the molecular level.  
"Elemental activities, such as catalysis or binding, describing the actions of a gene product at the molecular level.  
"Catalysis of an oxidation-reduction (redox) reaction, a reversible chemical reaction in which the oxidation state of a molecule is changed.

out of, within or between cells, or within a multicellular organism [goid 6810] [pmid 9729438] [evidence TAS]  
"The selective, often stoichiometric, interaction of a molecule with one or more specific sites on a protein or protein complex.

Interacting selectively with any protein or protein complex (a complex of two or more proteins that interact with each other and with one or more other molecules)  
Molecular signal, and recognize and characterize the signal. Sonic stimuli are detected in the form of a molecular signal, and recognize and characterize the signal. Sonic stimuli are detected in the form of a molecular signal, and recognize and characterize the signal.

Enables the active transport of a solute across a membrane by a mechanism whereby two or more

"The selective, often stoichiometric, interaction of a molecule with one or more specific sites on a

"The selective, often stoichiometric, interaction of a molecule with one or more specific sites on a

"Interacting selectively with one or more specific sites on a receptor molecule, a macromolecule

Interacting selectively with any protein or protein complex (a complex of two or more proteins that  
EA]"

Mediates the transfer of a signal from the outside to the inside of a cell by means other than the  
out of, within or between cells, or within a multicellular organism [goid 6810] [evidence IEA]; The c

out of, within or between cells, or within a multicellular organism [goid 6810] [evidence IEA]"

out of, within or between cells, or within a multicellular organism [goid 6810] [evidence IEA]"

er time from an initial condition (e.g. a zygote or a young adult) to a later condition (e.g. a multicel

"Elemental activities, such as catalysis or binding, describing the actions of a gene product at th

Mediates the transfer of a signal from the outside to the inside of a cell by means other than the

A receptor that binds an extracellular ligand and transmits the signal to a heterotrimeric G-protein

"Elemental activities, such as catalysis or binding, describing the actions of a gene product at th

Combining with an extracellular or intracellular messenger to initiate a change in cell activity [goid



Interacting selectively with any protein or protein complex (a complex of two or more proteins that

"Elemental activities, such as catalysis or binding, describing the actions of a gene product at th

"Catalysis of ATP-dependent isopeptide bond formation between the carboxy-terminal residues

"Elemental activities, such as catalysis or binding, describing the actions of a gene product at th

Interacting selectively with any protein or protein complex (a complex of two or more proteins th

Interacting selectively with any protein or protein complex (a complex of two or more proteins th

"Catalysis of the hydrolysis of peptide bonds by a mechanism in which water acts as a nucleoph

Interacting selectively with any protein or protein complex (a complex of two or more proteins th

Catalysis of facilitated diffusion of a potassium ion (by an energy-independent process) involving  
Catalysis of facilitated diffusion of a potassium ion (by an energy-independent process) involving

The action of a molecule that contributes to the structural integrity of the nuclear pore complex [

"Elemental activities, such as catalysis or binding, describing the actions of a gene product at th

"Elemental activities, such as catalysis or binding, describing the actions of a gene product at th

"Catalysis of the hydrolysis of various bonds, e.g. C-O, C-N, C-C, phosphoric anhydride bonds, [

"Catalysis of the hydrolysis of various bonds, e.g. C-O, C-N, C-C, phosphoric anhydride bonds, [

Catalysis of the generalized reaction: acyl-carrier + reactant = acyl-reactant + carrier [goid 8415]

"Elemental activities, such as catalysis or binding, describing the actions of a gene product at th

"Elemental activities, such as catalysis or binding, describing the actions of a gene product at th

"Elemental activities, such as catalysis or binding, describing the actions of a gene product at th

Mediates the transfer of a signal from the outside to the inside of a cell by means other than the  
Interacting selectively with DNA (deoxyribonucleic acid) [goid 3677] [evidence IEA]; Functions to

"Interacting selectively with iron (Fe) ions [goid 5506] [evidence IEA]; Any molecular entity that s

"Interacting selectively with tropomyosin, a protein associated with actin filaments both in cytoplasm

"Interacting selectively with monomeric or multimeric forms of actin, including actin filaments [go

"Interacting selectively with monomeric or multimeric forms of actin, including actin filaments [go

Interacting selectively with DNA (deoxyribonucleic acid) [goid 3677] [evidence IEA]; Interacting s

"Catalysis of the hydrolysis of internal, alpha-peptide bonds in a polypeptide chain by a catalytic

"Catalysis of the hydrolysis of internal, alpha-peptide bonds in a polypeptide chain by a catalytic

"Catalysis of the hydrolysis of internal, alpha-peptide bonds in a polypeptide chain by a catalytic

"Catalysis of the hydrolysis of internal, alpha-peptide bonds in a polypeptide chain by a catalytic

"Catalysis of the hydrolysis of internal, alpha-peptide bonds in a polypeptide chain by a catalytic

"Catalysis of the hydrolysis of internal, alpha-peptide bonds in a polypeptide chain by a catalytic

"Interacting selectively with monomeric or multimeric forms of actin, including actin filaments [go

"Interacting selectively with monomeric or multimeric forms of actin, including actin filaments [go

"Interacting selectively with monomeric or multimeric forms of actin, including actin filaments [go

"Interacting selectively with monomeric or multimeric forms of actin, including actin filaments [go

"The selective, often stoichiometric, interaction of a molecule with one or more specific sites on

"The selective, often stoichiometric, interaction of a molecule with one or more specific sites on

polypeptides (co-translational, post-translational modifications). Includes the modification of cha

polypeptides (co-translational, post-translational modifications). Includes the modification of cha

"Functions to control the survival, growth, differentiation and effector function of tissues and cells

"Elemental activities, such as catalysis or binding, describing the actions of a gene product at th

Interacting selectively with any protein or protein complex (a complex of two or more proteins th

"Interacting selectively with any protein or protein complex (a complex of two or more proteins th

"Combining with an extracellular or intracellular messenger to initiate a change in cell activity [gc  
"Combining with an extracellular or intracellular messenger to initiate a change in cell activity [gc  
"Combining with an extracellular or intracellular messenger to initiate a change in cell activity, ar  
"Combining with an extracellular or intracellular messenger to initiate a change in cell activity, ar  
Combining with an extracellular or intracellular messenger to initiate a change in cell activity [goi  
Combining with an extracellular or intracellular messenger to initiate a change in cell activity [goi  
Combining with an extracellular or intracellular messenger to initiate a change in cell activity [goi  
Combining with an extracellular or intracellular messenger to initiate a change in cell activity [goi  
"Combining with an extracellular or intracellular messenger to initiate a change in cell activity, ar  
Combining with an extracellular or intracellular messenger to initiate a change in cell activity [goi  
"Combining with an extracellular or intracellular messenger to initiate a change in cell activity [gc  
"Combining with an extracellular or intracellular messenger to initiate a change in cell activity [gc  
"Combining with an extracellular or intracellular messenger to initiate a change in cell activity [gc  
Combining with an extracellular or intracellular messenger to initiate a change in cell activity [goi  
"Combining with an extracellular or intracellular messenger to initiate a change in cell activity [gc  
"Combining with an extracellular or intracellular messenger to initiate a change in cell activity [gc  
Combining with an extracellular or intracellular messenger to initiate a change in cell activity [goi  
"Combining with an extracellular or intracellular messenger to initiate a change in cell activity [gc  
Combining with an extracellular or intracellular messenger to initiate a change in cell activity [goi  
"Functions to control the survival, growth, differentiation and effector function of tissues and cell:

"Functions to control the survival, growth, differentiation and effector function of tissues and cell:  
"Functions to control the survival, growth, differentiation and effector function of tissues and cell:  
"Functions to control the survival, growth, differentiation and effector function of tissues and cell:  
"Interacting selectively with the tumor necrosis factor receptor [goid 5164] [evidence IEA]; Intera  
"Functions to control the survival, growth, differentiation and effector function of tissues and cell:  
"Functions to control the survival, growth, differentiation and effector function of tissues and cell:  
Interacting selectively with any protein or protein complex (a complex of two or more proteins th  
Interacting selectively with any protein or protein complex (a complex of two or more proteins th  
"Interacting selectively with a nucleotide, any compound consisting of a nucleoside that is esteril  
Catalysis of the reaction:  $\text{NAD}^+ + (\text{ADP-D-ribose})(n)\text{-acceptor} = \text{nicotinamide} + (\text{ADP-D-ribose})(n)$   
"Interacting selectively with any enzyme [goid 19899] [pmid 11854288] [evidence NAS]; Interact  
"Interacting selectively with monomeric or multimeric forms of actin, including actin filaments [go  
"Interacting selectively with monomeric or multimeric forms of actin, including actin filaments [go  
"Interacting selectively with any protein or protein complex (a complex of two or more proteins th  
Interacting selectively with DNA (deoxyribonucleic acid) [goid 3677] [pmid 12743712] [evidence  
"Interacting selectively with any protein or protein complex (a complex of two or more proteins th  
"Interacting selectively with any protein or protein complex (a complex of two or more proteins th  
"Interacting selectively with one or more specific sites on a receptor molecule, a macromolecule

"Interacting selectively with a nucleotide, any compound consisting of a nucleoside that is esteril

"Interacting selectively with a nucleotide, any compound consisting of a nucleoside that is esterified to a phosphate group [goid 3676] [evidence IEA]; Interacting selectively with a nucleotide, any compound consisting of a nucleoside that is esterified to a phosphate group [goid 3676] [evidence IEA];

Interacting selectively with any protein or protein complex (a complex of two or more proteins that function together) [goid 3677] [evidence IEA]; The function of a transcription cofactor that represses transcription from a RNA polymerase II promoter [goid 7292] [pmid 10602502] [evidence TAS]; A male gamete takes part in sexual reproduction [goid 7292] [pmid 10602502] [evidence TAS]; Interacting selectively with any nucleic acid [goid 3676] [evidence IEA]; Interacting selectively with a signal sequence, a specific peptide sequence found on protein precursors [goid 3677] [evidence IEA]; Mediates the transfer of a signal from the outside to the inside of a cell by means other than the cell membrane [goid 6886] [evidence TAS]; Interacting selectively with any protein or protein complex (a complex of two or more proteins that function together) [goid 3677] [evidence IEA]; Primary active carrier-mediated transport of a protein across a membrane, driven by the hydrolysis of ATP [goid 3677] [evidence IEA]; Combining with an extracellular or intracellular messenger to initiate a change in cell activity [goid 3677] [evidence IEA]; Interacting selectively with a signal sequence, a specific peptide sequence found on protein precursors [goid 3677] [evidence IEA]; Elemental activities, such as catalysis or binding, describing the actions of a gene product at the time of transcription [goid 3677] [evidence IEA]; Interacting selectively with DNA (deoxyribonucleic acid) [goid 3677] [evidence IEA]; Interacting selectively with DNA (deoxyribonucleic acid) [goid 3677] [evidence IEA];

Primary active carrier-mediated transport of a protein across a membrane, driven by the hydrolysis of ATP [goid 3677] [evidence IEA]; Interacting selectively with any protein or protein complex (a complex of two or more proteins that function together) [goid 3677] [evidence IEA];

Catalysis of a DNA topological transformation by transiently cleaving one DNA strand at a time [goid 3677] [evidence IEA];

"Interacting selectively with a nucleotide, any compound consisting of a nucleoside that is esterified to a phosphate group [goid 3676] [evidence IEA]; Interacting selectively with a nucleotide, any compound consisting of a nucleoside that is esterified to a phosphate group [goid 3676] [evidence IEA]; Catalysis of a DNA topological transformation by transiently cleaving one DNA strand at a time [goid 3677] [evidence IEA]; Interacting selectively with DNA (deoxyribonucleic acid) [goid 3677] [evidence IEA]; Interacting selectively with DNA (deoxyribonucleic acid) [goid 3677] [pmid 11278651] [evidence IEA]; Interacting selectively with a nucleotide, any compound consisting of a nucleoside that is esterified to a phosphate group [goid 3676] [evidence IEA]; Interacting selectively with any protein or protein complex (a complex of two or more proteins that function together) [goid 3677] [evidence IEA]; Interacting selectively with any protein or protein complex (a complex of two or more proteins that function together) [goid 3677] [evidence IEA]; Interacting selectively with ATP, adenosine 5'-triphosphate, a universally important coenzyme [goid 3677] [evidence IEA]; Interacting selectively with a nucleotide, any compound consisting of a nucleoside that is esterified to a phosphate group [goid 3676] [evidence IEA]; Interacting selectively with a nucleotide, any compound consisting of a nucleoside that is esterified to a phosphate group [goid 3676] [evidence IEA]; Interacting selectively with DNA (deoxyribonucleic acid) [goid 3677] [evidence IEA]; Interacting selectively with DNA (deoxyribonucleic acid) [goid 3677] [evidence IEA]; Interacting selectively with DNA (deoxyribonucleic acid) [goid 3677] [evidence IEA]; The function of binding to a specific DNA sequence in order to modulate transcription. The transcription factor binds to the DNA sequence [goid 3677] [evidence IEA]; Mediates the transfer of a signal from the outside to the inside of a cell by means other than the cell membrane [goid 6886] [evidence TAS]; Interacting selectively with DNA (deoxyribonucleic acid) [goid 3677] [evidence IEA]; Interacting selectively and simultaneously with one or more signal transduction molecules, usually as a result of a disturbance in organismal or cellular homeostasis [goid 3677] [evidence IEA];

of proteolytic caspases, whose actions dismantle the cell and result in cell death. Apoptosis begins with the activation of proteolytic caspases, whose actions dismantle the cell and result in cell death. Apoptosis begins with the activation of proteolytic caspases, whose actions dismantle the cell and result in cell death. Apoptosis begins with the activation of proteolytic caspases, whose actions dismantle the cell and result in cell death. Apoptosis begins with the activation of proteolytic caspases, whose actions dismantle the cell and result in cell death.

"Interacting selectively with a nucleotide, any compound consisting of a nucleoside that is esterified

"Elemental activities, such as catalysis or binding, describing the actions of a gene product at the cell level. The function of binding to a specific DNA sequence in order to modulate transcription. The trans

"Catalysis of the transmembrane transfer of an ion by a voltage-gated channel. An ion is an atom or molecule. Interacting selectively with calcium ions (Ca<sup>2+</sup>) [goid 5509] [pmid 15576473] [evidence IDA]; Interacting selectively with an identical protein to form a homodimer [goid 42803] [pmid 9484778]; Interacting selectively with any protein or protein complex (a complex of two or more proteins that interact with each other) [goid 7242] [pmid 10962033] [evidence NAS]; Catalysis of the reaction: D-glyceraldehyde 3-phosphate + H<sub>2</sub>O = glyceraldehyde phosphate [goid 4807] [pmid 15576473]

"Interacting selectively with monomeric or multimeric forms of actin, including actin filaments [goid 5509] [pmid 15576473]

"Interacting selectively with monomeric or multimeric forms of actin, including actin filaments [goid 5509] [pmid 15576473]

"Elemental activities, such as catalysis or binding, describing the actions of a gene product at the cell level. The function of binding to a specific DNA sequence in order to modulate transcription. The trans

"Interacting selectively with monomeric or multimeric forms of actin, including actin filaments [goid 5509] [pmid 15576473]

"Catalysis of the reaction: S-adenosyl-L-methionine + a thiopurine = S-adenosyl-L-homocysteine + a thiopurine [goid 4807] [pmid 15576473]

"Catalysis of the hydrolysis of internal, alpha-peptide bonds in a polypeptide chain by a catalytic activity [goid 4807] [pmid 15576473]

"Catalysis of the hydrolysis of internal, alpha-peptide bonds in a polypeptide chain by a catalytic activity [goid 4807] [pmid 15576473]

"Interacting selectively with any protein or protein complex (a complex of two or more proteins that interact with each other) [goid 7242] [pmid 10962033] [evidence NAS];

"Interacting selectively with a nucleotide, any compound consisting of a nucleoside that is esterified

"Interacting selectively with a protein kinase, any enzyme that catalyzes the transfer of a phosphate group from a protein to another protein, lipid, or small molecule [goid 5509] [pmid 15576473]

"Catalysis of the reaction: 3'-phosphoadenosine 5'-phosphosulfate + protein tyrosine = adenosine 3'-phosphate + protein tyrosine phosphate [goid 4807] [pmid 15576473]

"Catalysis of the reaction: 3'-phosphoadenosine 5'-phosphosulfate + protein tyrosine = adenosine 3'-phosphate + protein tyrosine phosphate [goid 4807] [pmid 15576473]

Interacting selectively with calcium ions (Ca<sup>2+</sup>) [goid 5509] [pmid 15162379] [evidence IDA]; Interacting selectively with any protein or protein complex (a complex of two or more proteins that interact with each other) [goid 7242] [pmid 10962033] [evidence NAS];

"Catalysis of the reaction: protein tyrosine phosphate + H<sub>2</sub>O = protein tyrosine + phosphate [goid 4807] [pmid 15576473]

"Interacting selectively with any protein or protein complex (a complex of two or more proteins that interact with each other) [goid 7242] [pmid 10962033] [evidence NAS];

"Interacting selectively with a nucleotide, any compound consisting of a nucleoside that is esterified

"Mediates the transfer of a signal from the outside to the inside of a cell by means other than the cell membrane [goid 5509] [pmid 15576473]

Interacting selectively with any protein or protein complex (a complex of two or more proteins that interact with each other) [goid 7242] [pmid 10962033] [evidence NAS];

Combining with an extracellular or intracellular messenger to initiate a change in cell activity [goid 5509] [pmid 15576473]

Interacting selectively with any protein or protein complex (a complex of two or more proteins that interact with each other) [goid 7242] [pmid 10962033] [evidence NAS];

id [goid 7242] [pmid 10962033] [evidence NAS]; Any process that activates or increases the frequency of a specific biological process [goid 5509] [pmid 15576473]

Interacting selectively with DNA (deoxyribonucleic acid) [goid 3677] [pmid 7592751] [evidence IDA];

Catalysis of the reaction: ATP + ubiquitin + protein lysine = AMP + diphosphate + protein N-ubiquitin [goid 4807] [pmid 15576473]

"Catalysis of the reaction: ATP + ubiquitin + protein lysine = AMP + diphosphate + protein N-ubiquitin [goid 4807] [pmid 15576473]

Interacting selectively with any protein or protein complex (a complex of two or more proteins that interact with each other) [goid 7242] [pmid 10962033] [evidence NAS];

"Interacting selectively with any protein or protein complex (a complex of two or more proteins that interact with each other) [goid 7242] [pmid 10962033] [evidence NAS];

"Interacting selectively with the gamma-aminobutyric acid (GABA, 4-aminobutyrate) receptor [goid 5509] [pmid 15576473]

Combining with an extracellular or intracellular messenger to initiate a change in cell activity [goid 5509] [pmid 15576473]

EA]; The directed movement of proteins in a cell, from one side of a membrane to another [goid  
"Interacting selectively with a nucleotide, any compound consisting of a nucleoside that is esteril  
ated by COP II vesicles. Small COP II coated vesicles form from the ER and then fuse directly wi  
"Interacting selectively with a transcription factor, any protein required to initiate or regulate trans  
out of, within or between cells, or within a multicellular organism [goid 6810] [evidence IEA]; The c

Interacting selectively with any protein or protein complex (a complex of two or more proteins th  
Interacting selectively with any protein or protein complex (a complex of two or more proteins th  
out of or within a cell [goid 16192] [evidence IEA]"  
out of or within a cell [goid 16192] [evidence IEA]"

"Interacting selectively with DNA (deoxyribonucleic acid) [goid 3677] [evidence IEA]; Interacting  
Combining with an extracellular or intracellular messenger to initiate a change in cell activity [goid  
"The function of binding to a specific DNA sequence in order to modulate transcription. The tran  
"Interacting selectively with any protein or protein complex (a complex of two or more proteins th  
"Catalysis of the phosphorylation of an amino acid residue in a protein, usually according to the  
"Interacting selectively with a nucleotide, any compound consisting of a nucleoside that is esteril  
"The function of a transcription cofactor that represses transcription from a RNA polymerase II p  
"Interacting selectively with any protein or protein complex (a complex of two or more proteins th  
Mediates the transfer of a signal from the outside to the inside of a cell by means other than the  
Interacting selectively with zinc (Zn) ions [goid 8270] [evidence IEA]; Interacting selectively with  
Interacting selectively with zinc (Zn) ions [goid 8270] [evidence IEA]; Interacting selectively with

Interacting selectively with any protein or protein complex (a complex of two or more proteins th  
Interacting selectively with DNA (deoxyribonucleic acid) [goid 3677] [evidence IEA]; Interacting s  
The function of binding to a specific DNA sequence in order to modulate transcription. The trans  
"Interacting selectively with a nucleotide, any compound consisting of a nucleoside that is esteril  
"Interacting selectively with DNA (deoxyribonucleic acid) [goid 3677] [evidence IEA]; The functio  
The function of binding to a specific DNA sequence in order to modulate transcription. The trans  
Interacting selectively with any protein or protein complex (a complex of two or more proteins th  
"Interacting selectively with any protein or protein complex (a complex of two or more proteins th  
"The function of binding to a specific DNA sequence in order to modulate transcription. The tran  
The function of binding to a specific DNA sequence in order to modulate transcription. The trans  
"Interacting selectively with a protein C-terminus, the end of any peptide chain at which the 1-ca  
Interacting selectively with any protein or protein complex (a complex of two or more proteins th  
"Interacting selectively with any protein or protein complex (a complex of two or more proteins th  
"Interacting selectively with DNA (deoxyribonucleic acid) [goid 3677] [evidence IEA]; Interacting  
Interacting selectively with any protein or protein complex (a complex of two or more proteins th  
Interacting selectively with any protein or protein complex (a complex of two or more proteins th  
Interacting selectively with any protein or protein complex (a complex of two or more proteins th  
Mediates the transfer of a signal from the outside to the inside of a cell by means other than the  
"Elemental activities, such as catalysis or binding, describing the actions of a gene product at th  
Interacting selectively with any protein or protein complex (a complex of two or more proteins th  
Interacting selectively with any protein or protein complex (a complex of two or more proteins th



Interacting selectively with any protein or protein complex (a complex of two or more proteins that interact with each other)  
Interacting selectively with any protein or protein complex (a complex of two or more proteins that interact with each other)  
Interacting selectively with any protein or protein complex (a complex of two or more proteins that interact with each other)  
"Interacting selectively with any protein or protein complex (a complex of two or more proteins that interact with each other)  
Interacting selectively with any protein or protein complex (a complex of two or more proteins that interact with each other)

Mediates the transfer of a signal from the outside to the inside of a cell by means other than the cell membrane  
Interacting selectively with any protein or protein complex (a complex of two or more proteins that interact with each other)  
Interacting selectively with any protein or protein complex (a complex of two or more proteins that interact with each other)  
Interacting selectively with any protein or protein complex (a complex of two or more proteins that interact with each other)  
Interacting selectively with any protein or protein complex (a complex of two or more proteins that interact with each other)  
Interacting selectively with any protein or protein complex (a complex of two or more proteins that interact with each other)  
Interacting selectively with any protein or protein complex (a complex of two or more proteins that interact with each other)  
Interacting selectively with any protein or protein complex (a complex of two or more proteins that interact with each other)  
Interacting selectively with any protein or protein complex (a complex of two or more proteins that interact with each other)  
Interacting selectively with any protein or protein complex (a complex of two or more proteins that interact with each other)

Interacting selectively with any protein or protein complex (a complex of two or more proteins that interact with each other)  
Interacting selectively with any protein or protein complex (a complex of two or more proteins that interact with each other)  
Interacting selectively with any protein or protein complex (a complex of two or more proteins that interact with each other)  
"Interacting selectively with monomeric or multimeric forms of actin, including actin filaments [go  
Interacting selectively with a lipid [goid 8289] [evidence IEA]; Interacting selectively with an identical  
The function of a transcription cofactor that activates transcription from a RNA polymerase II promoter  
"The selective, often stoichiometric, interaction of a molecule with one or more specific sites on a  
"Interacting selectively with a nucleotide, any compound consisting of a nucleoside that is esterified  
"The function of a transcription cofactor that activates transcription from a RNA polymerase II promoter  
"Interacting selectively with the interleukin-1 receptor [goid 5149] [pmid 15657077] [evidence IDA]  
"Interacting selectively with a nucleotide, any compound consisting of a nucleoside that is esterified

"Interacting selectively with an RNA molecule or a portion thereof [goid 3723] [evidence IEA]; Catalysis of the transfer  
"Interacting selectively with any nucleic acid [goid 3676] [evidence IEA]; Catalysis of the transfer

"Catalysis of the transfer of a methyl group to an acceptor molecule [goid 8168] [evidence IEA];

"Interacting selectively with DNA (deoxyribonucleic acid) [goid 3677] [evidence IEA]; Catalysis of the transfer  
Functions in the initiation of ribosome-mediated translation of mRNA into a polypeptide [goid 3723]

"Interacting selectively with transfer RNA [goid 49] [evidence IEA]; Interacting selectively with a ribosome

"Interacting selectively with transfer RNA [goid 49] [pmid 11504732] [evidence IDA]; Interacting selectively with a ribosome  
Interacting selectively with any protein or protein complex (a complex of two or more proteins that interact with each other)

Interacting selectively with any protein or protein complex (a complex of two or more proteins that interact with each other and with one or more other molecules) [goid 3723] [evidence IEA]; Catalysis of facilitated diffusion of an ion (by an energy-independent process) by passage through a membrane [goid 3723] [evidence IEA]; Catalysis of facilitated diffusion of an ion (by an energy-independent process) by passage through a membrane [goid 3723] [evidence IEA]; Catalysis of facilitated diffusion of an ion (by an energy-independent process) by passage through a membrane [goid 3723] [evidence IEA]; Interacting selectively with ATP, adenosine 5'-triphosphate, a universally important coenzyme and energy source [goid 3723] [evidence IEA]; The action of a molecule that contributes to the structural integrity of the ribosome [goid 3735] [evidence IEA]; Interacting selectively with a nucleotide, any compound consisting of a nucleoside that is esterified to a phosphate group [goid 3735] [evidence IEA]; Interacting selectively with a nucleotide, any compound consisting of a nucleoside that is esterified to a phosphate group [goid 3735] [evidence IEA]; The function of binding to a specific DNA sequence in order to modulate transcription. The transcription factor binds to the DNA sequence and recruits the RNA polymerase II complex [goid 3735] [evidence IEA]; Interacting selectively with a nucleotide, any compound consisting of a nucleoside that is esterified to a phosphate group [goid 3735] [evidence IEA]; Catalysis of facilitated diffusion of a calcium (by an energy-independent process) involving passage through a membrane [goid 3735] [evidence IEA]; The function of a transcription cofactor that activates transcription from a RNA polymerase II promoter [goid 3735] [evidence IEA]; Catalysis of the reaction: RNA uridine = RNA pseudouridine. Conversion of uridine in an RNA molecule to pseudouridine [goid 3735] [evidence IEA]; Catalysis of the reaction: RNA uridine = RNA pseudouridine. Conversion of uridine in an RNA molecule to pseudouridine [goid 3735] [evidence IEA]; Interacting selectively with a protein N-terminus, the end of any peptide chain at which the 2-amino acid is attached to the alpha-carbon [goid 3735] [evidence IEA]; Increases the activity of a GTPase, an enzyme that catalyzes the hydrolysis of GTP [goid 5096] [evidence IEA]; The function of binding to a specific DNA sequence in order to modulate transcription. The transcription factor binds to the DNA sequence and recruits the RNA polymerase II complex [goid 5096] [evidence IEA]; The function of binding to a specific DNA sequence in order to modulate transcription. The transcription factor binds to the DNA sequence and recruits the RNA polymerase II complex [goid 5096] [evidence IEA]; The function of binding to a specific DNA sequence in order to modulate transcription. The transcription factor binds to the DNA sequence and recruits the RNA polymerase II complex [goid 5096] [evidence IEA]; The function of binding to a specific DNA sequence in order to modulate transcription. The transcription factor binds to the DNA sequence and recruits the RNA polymerase II complex [goid 5096] [evidence IEA]; Interacting selectively with any protein or protein complex (a complex of two or more proteins that interact with each other and with one or more other molecules) [goid 5096] [evidence IEA]; Catalysis of the endonucleolytic cleavage of pre-tRNA, producing 5'-hydroxyl and 2',3'-cyclic phosphate ends [goid 5096] [evidence IEA]; Catalysis of the endonucleolytic cleavage of pre-tRNA, producing 5'-hydroxyl and 2',3'-cyclic phosphate ends [goid 5096] [evidence IEA]; nRNA(s) prior to translation into polypeptide [goid 6397] [evidence IEA]; The process by which a transcription factor binds to a specific DNA sequence and recruits the RNA polymerase II complex [goid 6397] [evidence IEA]; Any activity that modulates the rate of transcription elongation, the addition of ribonucleotides to the 3' end of the nascent RNA transcript [goid 6397] [evidence IEA]; Interacting selectively with DNA (deoxyribonucleic acid) [goid 3677] [pmid 10888872] [evidence IEA]; Elemental activities, such as catalysis or binding, describing the actions of a gene product at the molecular level [goid 3677] [pmid 10888872] [evidence IEA]

Interacting selectively with any protein or protein complex (a complex of two or more proteins that interact with each other and with one or more other molecules) [goid 3723] [evidence IEA]; The function of binding to a specific DNA sequence in order to modulate transcription. The transcription factor binds to the DNA sequence and recruits the RNA polymerase II complex [goid 3723] [evidence IEA]; The function of binding to a specific DNA sequence in order to modulate transcription. The transcription factor binds to the DNA sequence and recruits the RNA polymerase II complex [goid 3723] [evidence IEA]

Interacting selectively with any protein or protein complex (a complex of two or more proteins that interact with each other and with one or more other molecules) [goid 3723] [evidence IEA]; Functions to control the survival, growth, differentiation and effector function of tissues and cells [goid 3723] [evidence IEA]; Interacting selectively with an RNA molecule or a portion thereof [goid 3723] [evidence IEA]; Interacting selectively with an RNA molecule or a portion thereof [goid 3723] [evidence IEA]; Enables the directed movement of proteins into, out of, within or between cells [goid 8565] [pmid 10888872] [evidence IEA]; Interacting selectively with any protein or protein complex (a complex of two or more proteins that interact with each other and with one or more other molecules) [goid 8565] [pmid 10888872] [evidence IEA]

Catalysis of a biochemical reaction at physiological temperatures. In biologically catalyzed reactions, the enzyme is a protein or protein complex [goid 3723] [evidence IEA]

Catalysis of the reaction: ATP + ubiquitin + protein lysine = AMP + diphosphate + protein N-ubiq

134123] [evidence TAS]

"Elemental activities, such as catalysis or binding, describing the actions of a gene product at th

atom peptidyl-tryptophan [goid 6487] [pmid 8420826] [evidence TAS]

Mediates the transfer of a signal from the outside to the inside of a cell by means other than the

"Combining with an extracellular or intracellular messenger to initiate a change in cell activity [gc

"Elemental activities, such as catalysis or binding, describing the actions of a gene product at th

Interacting selectively with DNA sequences encoding ribosomal RNA [goid 182] [pmid 11395479

units of eukaryotic chromatin composed of histones and DNA [goid 6334] [evidence IEA]"

units of eukaryotic chromatin composed of histones and DNA [goid 6334] [evidence IEA]"

Interacting selectively with any protein or protein complex (a complex of two or more proteins th  
r more mature rRNA molecules [goid 6364] [evidence IEA]

"Interacting selectively with a nucleotide, any compound consisting of a nucleoside that is esterif

"Interacting selectively with a nucleotide, any compound consisting of a nucleoside that is esterif

"Catalysis of the reaction: thiosulfate + cyanide = SO<sub>3</sub>(2-) (sulfite) + thiocyanate [goid 4792] [evi

"The selective, often stoichiometric, interaction of a molecule with one or more specific sites on .

Interacting selectively with an unfolded protein [goid 51082] [pmid 8836031] [evidence TAS]

"The selective, often stoichiometric, interaction of a molecule with one or more specific sites on .

"Interacting selectively with an RNA molecule or a portion thereof [goid 3723] [evidence IEA]; Th

"The selective, often stoichiometric, interaction of a molecule with one or more specific sites on .

"The selective, often stoichiometric, interaction of a molecule with one or more specific sites on .

"The selective, often stoichiometric, interaction of a molecule with one or more specific sites on .

"The selective, often stoichiometric, interaction of a molecule with one or more specific sites on .

"The selective, often stoichiometric, interaction of a molecule with one or more specific sites on .

"The selective, often stoichiometric, interaction of a molecule with one or more specific sites on .

"The selective, often stoichiometric, interaction of a molecule with one or more specific sites on .

Interacting selectively with any protein or protein complex (a complex of two or more proteins th

"The selective, often stoichiometric, interaction of a molecule with one or more specific sites on .

Interacting selectively with any protein or protein complex (a complex of two or more proteins th

"The selective, often stoichiometric, interaction of a molecule with one or more specific sites on .

"The selective, often stoichiometric, interaction of a molecule with one or more specific sites on .

"The selective, often stoichiometric, interaction of a molecule with one or more specific sites on .

"The selective, often stoichiometric, interaction of a molecule with one or more specific sites on .

"The selective, often stoichiometric, interaction of a molecule with one or more specific sites on .

"The selective, often stoichiometric, interaction of a molecule with one or more specific sites on .

"The selective, often stoichiometric, interaction of a molecule with one or more specific sites on .



"Interacting selectively with a nucleotide, any compound consisting of a nucleoside that is esterified to a phosphate group [goid 6461] [pmid 9566967] [evidence TAS]; The 'de novo' formation of a microtubule, in the presence of a microtubule-associated protein [goid 8017] [evidence TAS]; The action of a molecule that contributes to the structural integrity of a cytoskeletal structure [goid 8017] [evidence TAS]; Interacting selectively with microtubules, filaments composed of tubulin monomers [goid 8017] [evidence TAS]; Interacting selectively with microtubules, filaments composed of tubulin monomers [goid 8017] [evidence TAS]; The action of a molecule that contributes to the structural integrity of tooth enamel [goid 30345] [evidence TAS]

"Interacting selectively with phosphatidylinositol-4,5-bisphosphate, a diphosphorylated derivative of phosphatidylinositol [goid 30345] [evidence TAS]; The function of binding to a specific DNA sequence in order to modulate transcription. The transcription factor binds to the DNA sequence and recruits the transcription machinery [goid 30345] [evidence TAS]; Interacting selectively with any protein or protein complex (a complex of two or more proteins that function together) [goid 30345] [evidence TAS]; Interacting selectively with any protein or protein complex (a complex of two or more proteins that function together) [goid 30345] [evidence TAS]; "Interacting selectively with a nucleotide, any compound consisting of a nucleoside that is esterified to a phosphate group [goid 6461] [pmid 9566967] [evidence TAS]; "Interacting selectively with monomeric or multimeric forms of actin, including actin filaments [goid 8017] [evidence TAS]; "Interacting selectively with monomeric or multimeric forms of actin, including actin filaments [goid 8017] [evidence TAS]; "Plays a role in regulating transcription; may bind a promoter or enhancer DNA sequence or interact with the transcription machinery [goid 30345] [evidence TAS]; "Catalysis of the reaction: nucleoside triphosphate + RNA(n) = diphosphate + RNA(n+1). Utilizes the energy of the hydrolysis of the nucleoside triphosphate to drive the polymerization of the RNA [goid 30345] [evidence TAS]; Interacting selectively with any protein or protein complex (a complex of two or more proteins that function together) [goid 30345] [evidence TAS]; Interacting selectively with any protein or protein complex (a complex of two or more proteins that function together) [goid 30345] [evidence TAS]

Interacting selectively with any protein or protein complex (a complex of two or more proteins that function together) [goid 30345] [evidence TAS]; Any molecular entity that serves as an electron acceptor and electron donor in an electron transport chain [goid 30345] [evidence IEA]; Any process that maintains the redox environment of a cell or compartment [goid 30345] [evidence IEA]; "Catalysis of an oxidation-reduction (redox) reaction, a reversible chemical reaction in which the oxidation state of a molecule is changed [goid 30345] [evidence IEA]

[goid 30345] [evidence IEA]

[goid 30345] [evidence IEA]

Catalysis of the reaction: donor + H<sub>2</sub>O<sub>2</sub> = oxidized donor + 2 H<sub>2</sub>O [goid 4601] [pmid 14607844]

Catalysis of the reaction: thioredoxin + NADP<sup>+</sup> = thioredoxin disulfide + NADPH + H<sup>+</sup> [goid 479] [evidence IEA]

Catalysis of the geometric or structural changes within one molecule. Isomerase is the systematic name for this class of enzymes [goid 30345] [evidence IEA]

Interacting selectively with any protein or protein complex (a complex of two or more proteins that function together) [goid 30345] [evidence TAS]

"Stops, prevents or reduces the activity of an enzyme [goid 4857] [evidence IEA]; Interacting selectively with any protein or protein complex (a complex of two or more proteins that function together) [goid 30345] [evidence TAS]

mRNA(s) prior to translation into polypeptide [goid 6397] [evidence IEA]; The progression of biological processes [goid 30345] [evidence IEA]

"Catalysis of the reaction: thioredoxin + NADP<sup>+</sup> = thioredoxin disulfide + NADPH + H<sup>+</sup> [goid 479] [evidence IEA]

"Catalysis of the reaction: thioredoxin + NADP<sup>+</sup> = thioredoxin disulfide + NADPH + H<sup>+</sup> [goid 479] [evidence IEA]

"Interacting selectively with a nucleotide, any compound consisting of a nucleoside that is esterified to a phosphate group [goid 6461] [pmid 9566967] [evidence TAS]

Interacting selectively with the platelet-derived growth factor receptor [goid 5161] [pmid 2005900] [evidence TAS]

"Catalysis of the reaction: 5,10-methylenetetrahydrofolate + dUMP = dihydrofolate + dTMP [goid  
"Interacting selectively with a nucleotide, any compound consisting of a nucleoside that is esterified  
[goid 5057] [pmid 9490415] [evidence TAS]; Interacting selectively with any protein or protein complex  
"Catalysis of the hydrolysis of internal, alpha-peptide bonds in a polypeptide chain by a catalytic  
"Interacting selectively with iron (Fe) ions [goid 5506] [evidence IEA]; Any molecular entity that  
"Interacting selectively with iron (Fe) ions [goid 5506] [evidence IEA]; Any molecular entity that  
"Catalysis of the transfer of a methyl group to an acceptor molecule [goid 8168] [evidence IEA];  
"Interacting selectively with a nucleotide, any compound consisting of a nucleoside that is esterified  
"Interacting selectively with a nucleotide, any compound consisting of a nucleoside that is esterified

"Interacting selectively with a nucleotide, any compound consisting of a nucleoside that is esterified  
"Interacting selectively with a nucleotide, any compound consisting of a nucleoside that is esterified  
"Catalysis of the transfer of a nucleotidyl group to a reactant [goid 16779] [evidence IEA]; Cataly  
"Catalysis of the transfer of a nucleotidyl group to a reactant [goid 16779] [evidence IEA]; Cataly  
"Interacting selectively with ATP, adenosine 5'-triphosphate, a universally important coenzyme a  
"Interacting selectively with a nucleotide, any compound consisting of a nucleoside that is esterified  
"Interacting selectively with a nucleotide, any compound consisting of a nucleoside that is esterified  
"Catalysis of a biochemical reaction at physiological temperatures. In biologically catalyzed reac  
The action of a molecule that contributes to the structural integrity of the ribosome [goid 3735] [e  
"Interacting selectively with a nucleotide, any compound consisting of a nucleoside that is esterified  
"Interacting selectively with a nucleotide, any compound consisting of a nucleoside that is esterified  
Interacting selectively with any protein or protein complex (a complex of two or more proteins that

Interacting selectively with any protein or protein complex (a complex of two or more proteins that

Interacting selectively with any protein or protein complex (a complex of two or more proteins that  
Interacting selectively with any protein or protein complex (a complex of two or more proteins that  
polypeptides (co-translational, post-translational modifications). Includes the modification of cha

"Interacting selectively with any protein or protein complex (a complex of two or more proteins that  
"Catalysis of the reaction: ATP + ubiquitin + protein lysine = AMP + diphosphate + protein N-ubi  
"Catalysis of ATP-dependent isopeptide bond formation between the carboxy-terminal residues  
"Catalysis of the ligation of two substances with concomitant breaking of a diphosphate linkage,  
"Catalysis of the reaction: ATP + ubiquitin + protein lysine = AMP + diphosphate + protein N-ubi  
"Catalysis of ATP-dependent isopeptide bond formation between the carboxy-terminal residues  
"Catalysis of the reaction: ATP + ubiquitin + protein lysine = AMP + diphosphate + protein N-ubi  
"Catalysis of the ligation of two substances with concomitant breaking of a diphosphate linkage,  
"Catalysis of the reaction: ATP + ubiquitin + protein lysine = AMP + diphosphate + protein N-ubi  
"Catalysis of the ligation of two substances with concomitant breaking of a diphosphate linkage,

"Catalysis of the reaction: ATP + ubiquitin + protein lysine = AMP + diphosphate + protein N-ubi  
"Interacting selectively with any protein or protein complex (a complex of two or more proteins th  
"Catalysis of the reaction: ATP + ubiquitin + protein lysine = AMP + diphosphate + protein N-ubi  
"Catalysis of the ligation of two substances with concomitant breaking of a diphosphate linkage,  
"Catalysis of the reaction: ATP + ubiquitin + protein lysine = AMP + diphosphate + protein N-ubi  
"Catalysis of the reaction: ATP + ubiquitin + protein lysine = AMP + diphosphate + protein N-ubi  
"Catalysis of the reaction: ATP + ubiquitin + protein lysine = AMP + diphosphate + protein N-ubi  
"Catalysis of the reaction: ATP + ubiquitin + protein lysine = AMP + diphosphate + protein N-ubi  
"Catalysis of the reaction: ATP + ubiquitin + protein lysine = AMP + diphosphate + protein N-ubi  
"Catalysis of the reaction: ATP + ubiquitin + protein lysine = AMP + diphosphate + protein N-ubi

"Catalysis of the ligation of two substances with concomitant breaking of a diphosphate linkage,  
"Catalysis of the reaction: ATP + ubiquitin + protein lysine = AMP + diphosphate + protein N-ubi  
"Interacting selectively with a nucleotide, any compound consisting of a nucleoside that is esteril  
"Interacting selectively with a nucleotide, any compound consisting of a nucleoside that is esteril

"Catalysis of the reaction: ATP + ubiquitin + protein lysine = AMP + diphosphate + protein N-ubi  
"Catalysis of the reaction: ATP + ubiquitin + protein lysine = AMP + diphosphate + protein N-ubi  
"Catalysis of the reaction: ATP + ubiquitin + protein lysine = AMP + diphosphate + protein N-ubi  
"Catalysis of ATP-dependent isopeptide bond formation between the carboxy-terminal residues  
"Interacting selectively with any protein or protein complex (a complex of two or more proteins th  
"Catalysis of the reaction: ATP + ubiquitin + protein lysine = AMP + diphosphate + protein N-ubi  
"Catalysis of the reaction: ATP + ubiquitin + protein lysine = AMP + diphosphate + protein N-ubi  
"Catalysis of the reaction: ATP + ubiquitin + protein lysine = AMP + diphosphate + protein N-ubi  
"Catalysis of the ligation of two substances with concomitant breaking of a diphosphate linkage,  
Catalysis of the reaction: ATP + ubiquitin + protein lysine = AMP + diphosphate + protein N-ubi  
Catalysis of the reaction: ATP + ubiquitin + protein lysine = AMP + diphosphate + protein N-ubi  
polypeptides (co-translational, post-translational modifications). Includes the modification of cha  
Catalysis of the transfer of a prenyl group from one compound (donor) to another (acceptor) [go  
polypeptides (co-translational, post-translational modifications). Includes the modification of cha  
"Catalysis of ATP-dependent isopeptide bond formation between the carboxy-terminal residues  
"Elemental activities, such as catalysis or binding, describing the actions of a gene product at th  
Interacting selectively with any protein or protein complex (a complex of two or more proteins th  
"Catalysis of the reaction: a phosphoprotein + H<sub>2</sub>O = a protein + phosphate. Together with prote  
The function of binding to a specific DNA sequence in order to modulate transcription. The trans

The function of binding to a specific DNA sequence in order to modulate transcription. The trans  
"Interacting selectively with a kinase, any enzyme that catalyzes the transfer of a phosphate gro  
"The selective, often stoichiometric, interaction of a molecule with one or more specific sites on  
Interacting selectively with an identical protein or proteins [goid 42802] [pmid 16713569] [eviden  
"Catalysis of the reaction: ATP + ubiquitin + protein lysine = AMP + diphosphate + protein N-ubi  
"Catalysis of the reaction: ATP + ubiquitin + protein lysine = AMP + diphosphate + protein N-ubi  
"Catalysis of the reaction: ATP + ubiquitin + protein lysine = AMP + diphosphate + protein N-ubi  
"Catalysis of a reaction that alters the configuration of one or more chiral centers in an amino ac

"Interacting selectively with an RNA molecule or a portion thereof [goid 3723] [evidence IEA]; Ca  
"Catalysis of the reaction: ATP + ubiquitin + protein lysine = AMP + diphosphate + protein N-ubi  
polypeptides (co-translational, post-translational modifications). Includes the modification of cha  
polypeptides (co-translational, post-translational modifications). Includes the modification of cha  
Interacting selectively with DNA (deoxyribonucleic acid) [goid 3677] [evidence IEA]; Interacting s

"Catalysis of the reaction: ubiquitin C-terminal thiolester + H<sub>2</sub>O = ubiquitin + a thiol. Hydrolysis o  
"Catalysis of the reaction: ubiquitin C-terminal thiolester + H<sub>2</sub>O = ubiquitin + a thiol. Hydrolysis o  
"Catalysis of the reaction: ubiquitin C-terminal thiolester + H<sub>2</sub>O = ubiquitin + a thiol. Hydrolysis o  
Interacting selectively with any thioesterase enzyme [goid 31996] [pmid 11163772] [evidence IP  
"Interacting selectively with a nucleotide, any compound consisting of a nucleoside that is esterif  
"Interacting selectively with a nucleotide, any compound consisting of a nucleoside that is esterif  
"Interacting selectively with a nucleotide, any compound consisting of a nucleoside that is esterif  
"Enables the directed movement of substances (such as macromolecules, small molecules, ions

"The selective, often stoichiometric, interaction of a molecule with one or more specific sites on  
Interacting selectively with any protein or protein complex (a complex of two or more proteins th  
Catalysis of the hydrolysis of various forms of polymeric ubiquitin sequences. Will remove ubiq  
Interacting selectively with any protein or protein complex (a complex of two or more proteins th  
"Catalysis of the hydrolysis of a peptide bond. A peptide bond is a covalent bond formed when t  
Catalysis of the reaction: UDP-glucose + N-acylsphingosine = UDP + D-glucosyl-N-acylsphingos  
Catalysis of the addition of UDP-glucose on to asparagine-linked (N-linked) oligosaccharides of  
"Catalysis of the reaction: UDP-glucose + 2 NAD<sup>+</sup> + H<sub>2</sub>O = UDP-glucuronate + 2 NADH + H<sup>+</sup> [c  
"Catalysis of the reaction: UTP + alpha-D-glucose 1-phosphate = diphosphate + UDP-glucose [c  
Catalysis of the reaction: UDP-glucuronate + acceptor = UDP + acceptor beta-D-glucuronoside |  
Catalysis of the reaction: UDP-glucuronate + acceptor = UDP + acceptor beta-D-glucuronoside |  
Catalysis of the reaction: UDP-glucuronate + acceptor = UDP + acceptor beta-D-glucuronoside |  
Catalysis of the reaction: UDP-glucuronate + acceptor = UDP + acceptor beta-D-glucuronoside |  
"Catalysis of the reaction: UDP-galactose + 2-(2-hydroxyacyl)sphingosine = UDP + 1-(beta-D-ga  
"The function of binding to a specific DNA sequence in order to modulate transcription. The tran

Interacting selectively with any protein or protein complex (a complex of two or more proteins th  
Combining with an MHC class I protein complex to initiate a change in cellular activity. Class I h  
Combining with an MHC class I protein complex to initiate a change in cellular activity. Class I h  
"Interacting selectively with a nucleotide, any compound consisting of a nucleoside that is esterif  
"Interacting selectively with a nucleotide, any compound consisting of a nucleoside that is esterif



"Interacting selectively with a nucleotide, any compound consisting of a nucleoside that is esterified to a phosphate group [goid 5509] [evidence IEA]  
"Interacting selectively with a nucleotide, any compound consisting of a nucleoside that is esterified to a phosphate group [goid 5509] [evidence IEA]  
Interacting selectively with calcium ions (Ca<sup>2+</sup>) [goid 5509] [evidence IEA]

"Interacting selectively with calcium ions (Ca<sup>2+</sup>) [goid 5509] [evidence IEA]; Interacting selectively with calcium ions (Ca<sup>2+</sup>) [goid 5509] [evidence IEA]  
"Catalysis of the reaction: orotidine 5'-phosphate + diphosphate = orotate + 5-phospho-alpha-D-ribose 1-phosphate [goid 7268] [pmid 9538874] [evidence TAS]; The series of events required for an action potential to propagate along a synapse [goid 7268] [pmid 9538874] [evidence TAS]

"Interacting selectively with zinc (Zn) ions [goid 8270] [evidence IEA]; Interacting selectively with zinc (Zn) ions [goid 8270] [evidence IEA]  
"Interacting selectively with zinc (Zn) ions [goid 8270] [evidence IEA]; Interacting selectively with zinc (Zn) ions [goid 8270] [evidence IEA]  
nes, matrix proteins) contained within a membrane-bounded vesicle by fusion of the vesicle with the plasma membrane [goid 8270] [evidence IEA]  
Interacting selectively with any protein or protein complex (a complex of two or more proteins that interact with each other) [goid 8270] [evidence IEA]  
Interacting selectively with an RNA molecule or a portion thereof [goid 3723] [evidence IEA]

Combining with an extracellular or intracellular messenger to initiate a change in cell activity [goid 8270] [evidence IEA]  
Interacting selectively with any protein or protein complex (a complex of two or more proteins that interact with each other) [goid 8270] [evidence IEA]

"Interacting selectively with any protein or protein complex (a complex of two or more proteins that interact with each other) [goid 8270] [evidence IEA]

"Catalysis of the cleavage of the N-C1' glycosidic bond between the damaged DNA base and the sugar-phosphate backbone [goid 8270] [evidence IEA]  
"Interacting selectively with any protein or protein complex (a complex of two or more proteins that interact with each other) [goid 8270] [evidence IEA]

"Catalysis of the reaction: N-carbamoyl-beta-alanine + H<sub>2</sub>O = beta-alanine + CO<sub>2</sub> + NH<sub>3</sub> [goid 8270] [evidence IEA]

"Interacting selectively with a nucleotide, any compound consisting of a nucleoside that is esterified to a phosphate group [goid 8270] [evidence IEA]  
Interacting selectively with an RNA molecule or a portion thereof [goid 3723] [evidence IEA]; Interacting selectively with an RNA molecule or a portion thereof [goid 3723] [evidence IEA]

"Interacting selectively with a nucleotide, any compound consisting of a nucleoside that is esterified to a phosphate group [goid 8270] [evidence IEA]  
"Interacting selectively with a nucleotide, any compound consisting of a nucleoside that is esterified to a phosphate group [goid 8270] [evidence IEA]

Interacting selectively with any protein or protein complex (a complex of two or more proteins that interact with each other) [goid 8270] [evidence IEA]

Catalysis of the reaction: uridine + phosphate = uracil + alpha-D-ribose 1-phosphate [goid 4850]

Catalysis of the reaction: uridine + phosphate = uracil + alpha-D-ribose 1-phosphate [goid 4850]

Catalysis of the reaction: UMP + diphosphate = uracil + 5-phospho-alpha-D-ribose 1-diphosphate [goid 4850]

Catalysis of the transfer of a solute or solutes from one side of a membrane to the other according to a concentration gradient [goid 4850]

Catalysis of the transfer of a solute or solutes from one side of a membrane to the other according to a concentration gradient [goid 4850]

"Catalysis of a biochemical reaction at physiological temperatures. In biologically catalyzed reactions, the reaction is catalyzed by an enzyme [goid 4850]

"Interacting selectively with iron (Fe) ions [goid 5506] [evidence IEA]; Catalysis of the transfer of a solute or solutes from one side of a membrane to the other according to a concentration gradient [goid 4850]

Catalysis of the transfer of a solute or solutes from one side of a membrane to the other according to a concentration gradient [goid 4850]

"Interacting selectively with GTP, guanosine triphosphate [goid 5525] [evidence IEA]"

olysis of its peptide bonds, initiated by the covalent attachment of a ubiquitin moiety, or multiple ubiquitin moieties [goid 5525] [evidence IEA]

"Catalysis of the reaction: uroporphyrinogen-III = coproporphyrinogen + 4 CO<sub>2</sub> [goid 4853] [evidence IEA]

"Catalysis of the reaction: hydroxymethylbilane = uroporphyrinogen-III + H<sub>2</sub>O [goid 4852] [evidence IEA]

Interacting selectively with any protein or protein complex (a complex of two or more proteins that interact with each other) [goid 5525] [evidence IEA]

"The function of binding to a specific DNA sequence in order to modulate transcription. The transcription factor binds to the DNA sequence and recruits the transcription machinery [goid 5525] [evidence IEA]

"Plays a role in regulating transcription; may bind a promoter or enhancer DNA sequence or interact with the transcription machinery [goid 5525] [evidence IEA]



Interacting selectively with any protein or protein complex (a complex of two or more proteins that interact with each other) [goid 6364] [evidence IEA]

Interacting selectively with any protein or protein complex (a complex of two or more proteins that interact with each other) [goid 6364] [evidence IEA]; Interacting selectively with calcium ions (Ca<sup>2+</sup>) [goid 5509] [evidence IEA];

"The action characteristic of a hormone, any substance formed in very small amounts in one species that acts on another species [goid 5509] [evidence IEA];

"The action characteristic of a hormone, any substance formed in very small amounts in one species that acts on another species [goid 5509] [evidence IEA];

"The selective, often stoichiometric, interaction of a molecule with one or more specific sites on a macromolecule [goid 5509] [evidence IEA];

"Elemental activities, such as catalysis or binding, describing the actions of a gene product at the cellular level [goid 5509] [evidence IEA];

Physical agents in the environment (e.g. UV and ionizing radiations, chemical mutagens, fungal toxins) [goid 5509] [evidence IEA];

"Interacting selectively with microtubules, filaments composed of tubulin monomers [goid 8017] [evidence IEA];

"Combining with an extracellular or intracellular messenger to initiate a change in cell activity [goid 8017] [evidence IEA];

Interacting selectively with any protein or protein complex (a complex of two or more proteins that interact with each other) [goid 8017] [evidence IEA];

Interacting selectively with any protein or protein complex (a complex of two or more proteins that interact with each other) [goid 8017] [evidence IEA];

Interacting selectively with any protein or protein complex (a complex of two or more proteins that interact with each other) [goid 8017] [evidence IEA];

Mediates the transfer of a signal from the outside to the inside of a cell by means other than the release of a messenger [goid 8017] [evidence IEA];

"Catalysis of the formation of aminoacyl-tRNA from ATP, amino acid, and tRNA with the release of pyrophosphate [goid 8017] [evidence IEA];

"Interacting selectively with a nucleotide, any compound consisting of a nucleoside that is esterified to a phosphate group [goid 8017] [evidence IEA];

g successive cell replication or nuclear replication events. Canonically, the cell cycle comprises two main phases: mitosis and cytokinesis [goid 8017] [evidence IEA];

Interacting selectively with any protein or protein complex (a complex of two or more proteins that interact with each other) [goid 8017] [evidence IEA];

"The selective, often stoichiometric, interaction of a molecule with one or more specific sites on a macromolecule [goid 8017] [evidence IEA];

"The function of binding to a specific DNA sequence in order to modulate transcription. The transcription factor binds to the DNA sequence and recruits the RNA polymerase [goid 8017] [evidence IEA];

"Stimulates the exchange of guanyl nucleotides by a GTPase. Under normal cellular physiological conditions, the GTPase is bound to GDP and the exchange of GDP for GTP is stimulated [goid 8017] [evidence IEA];

"Interacting selectively and simultaneously with one or more signal transduction molecules, usually G-proteins [goid 8017] [evidence IEA];

"The function of binding to a specific DNA sequence in order to modulate transcription. The transcription factor binds to the DNA sequence and recruits the RNA polymerase [goid 8017] [evidence IEA];

Interacting selectively with any protein or protein complex (a complex of two or more proteins that interact with each other) [goid 8017] [evidence IEA];

Interacting selectively with any protein or protein complex (a complex of two or more proteins that interact with each other) [goid 8017] [evidence IEA];

The process whose specific outcome is the progression of the embryo over time, from zygote to

"Elemental activities, such as catalysis or binding, describing the actions of a gene product at th

The function of a transcription cofactor that activates transcription from a RNA polymerase II prc

[evidence IEA]; Any process that modulates the frequency, rate or extent of DNA-dependent trans

"Interacting selectively with any protein or protein complex (a complex of two or more proteins th

"Interacting selectively with any protein component of any cytoskeleton (actin, microtubule, or in

"Interacting selectively with monomeric or multimeric forms of actin, including actin filaments [go

The action of a molecule that contributes to the structural integrity of a complex or assembly with

Combining with an extracellular or intracellular messenger to initiate a change in cell activity [goi

Combining with an extracellular or intracellular messenger to initiate a change in cell activity [goi

"Catalysis of an oxidation-reduction (redox) reaction, a reversible chemical reaction in which the

The action of a molecule that contributes to the structural integrity of the vitelline membrane of a

Combining with an extracellular or intracellular messenger to initiate a change in cell activity [goi

Combining with an extracellular or intracellular messenger to initiate a change in cell activity [goi

Catalysis of the reaction: (R)-pantetheine + H<sub>2</sub>O = (R)-pantothenate + 2-aminoethanethiol [goid

Catalysis of the hydrolysis of any non-peptide carbon-nitrogen bond in a linear amide [goid 1681

Catalysis of the reaction: (R)-pantetheine + H<sub>2</sub>O = (R)-pantothenate + 2-aminoethanethiol [goid

"The selective, often stoichiometric, interaction of a molecule with one or more specific sites on

"Interacting selectively with an antigen, any substance which is capable of inducing a specific im

"Interacting selectively with a nucleotide, any compound consisting of a nucleoside that is esterifi

EA]"

"Interacting selectively with monomeric or multimeric forms of actin, including actin filaments [go

"Interacting selectively with monomeric or multimeric forms of actin, including actin filaments [go

EA]; The directed movement of proteins into, out of, within or between cells [goid 15031] [eviden

[evidence IEA]; Any process that modulates the frequency, rate or extent of DNA-dependent trans

"Interacting selectively with any protein or protein complex (a complex of two or more proteins th

Interacting selectively with any protein or protein complex (a complex of two or more proteins th

Interacting selectively with any protein or protein complex (a complex of two or more proteins th

"Catalysis of the reaction: L(or D)-O-phosphoserine + H<sub>2</sub>O = L(or D)-serine + phosphate [goid 4

uding from the membrane of the vesicle and the target membrane, during exocytosis [goid 6904]

uding from the membrane of the vesicle and the target membrane, during exocytosis [goid 6904]

Interacting selectively with any protein or protein complex (a complex of two or more proteins th

"Interacting selectively with a lipid [goid 8289] [evidence IEA]; Interacting selectively and non-co

EA]"

EA]"

EA]"

EA]"

Modulates the rate of GTP hydrolysis by a small monomeric GTPase [goid 5083] [evidence IEA]

"Elemental activities, such as catalysis or binding, describing the actions of a gene product at th

Interacting selectively with any protein or protein complex (a complex of two or more proteins th

"Interacting selectively with a nucleotide, any compound consisting of a nucleoside that is esteril

"Interacting selectively with a nucleotide, any compound consisting of a nucleoside that is esteril

EA]"

EA]"

Interacting selectively with any protein or protein complex (a complex of two or more proteins th

The function of binding to a specific DNA sequence in order to modulate transcription. The trans

Interacting selectively with any protein or protein complex (a complex of two or more proteins th

"Interacting selectively with a nucleotide, any compound consisting of a nucleoside that is esteril

"Interacting selectively with a nucleotide, any compound consisting of a nucleoside that is esteril

"Interacting selectively with a nucleotide, any compound consisting of a nucleoside that is esteril

Interacting selectively with any protein or protein complex (a complex of two or more proteins th

Interacting selectively with any protein or protein complex (a complex of two or more proteins th

ray activity [goid 30514] [pmid 17400546] [evidence ISS]; Any process that activates or increas

Interacting selectively with calcium ions (Ca<sup>2+</sup>) [goid 5509] [evidence IEA]; Interacting selectivel

Interacting selectively with any protein or protein complex (a complex of two or more proteins th

"Interacting selectively with a nucleotide, any compound consisting of a nucleoside that is esteril

"Interacting selectively with a nucleotide, any compound consisting of a nucleoside that is esteril

Modulates the rate of GTP hydrolysis by a small monomeric GTPase [goid 5083] [pmid 8625410]

"Interacting selectively with monomeric or multimeric forms of actin, including actin filaments [go

"Interacting selectively with monomeric or multimeric forms of actin, including actin filaments [go

"Interacting selectively with monomeric or multimeric forms of actin, including actin filaments [go

"Interacting selectively with monomeric or multimeric forms of actin, including actin filaments [go

"Interacting selectively with any protein or protein complex (a complex of two or more proteins th

Interacting selectively with single-stranded DNA [goid 3697] [pmid 10593949] [evidence TAS]; Ir

Interacting selectively with any protein or protein complex (a complex of two or more proteins th

Interacting selectively with any nucleic acid [goid 3676] [evidence IEA]; Interacting selectively wi

"Interacting selectively with any protein or protein complex (a complex of two or more proteins th  
ans, and organisms. A process is a collection of molecular events with a defined beginning and e

"Catalysis of the transfer of a methyl group to an acceptor molecule [goid 8168] [pmid 11124703]

Catalysis of the transfer of a methyl group to an acceptor molecule [goid 8168] [evidence IEA]

"Interacting selectively with phosphatidylinositol, any glycopospholipid with its sn-glycerol 3-ph

Interacting selectively with zinc (Zn) ions [goid 8270] [evidence IEA]; Interacting selectively with

Interacting selectively with DNA (deoxyribonucleic acid) [goid 3677] [pmid 9175701] [evidence T

"Interacting selectively with monomeric or multimeric forms of actin, including actin filaments [go

Interacting selectively with any protein or protein complex (a complex of two or more proteins th

Interacting selectively with any protein or protein complex (a complex of two or more proteins th

r more mature rRNA molecules [goid 6364] [evidence IEA]

"Enables the directed movement of substances (such as macromolecules, small molecules, ions

"Elemental activities, such as catalysis or binding, describing the actions of a gene product at th

"Elemental activities, such as catalysis or binding, describing the actions of a gene product at th

"Interacting selectively with a nucleotide, any compound consisting of a nucleoside that is esteril

†19] [evidence IEA]

Interacting selectively with any protein or protein complex (a complex of two or more proteins th

Interacting selectively with any protein or protein complex (a complex of two or more proteins th

rolysis of its peptide bonds, initiated by the covalent attachment of a ubiquitin moiety, or multiple

Interacting selectively with any protein or protein complex (a complex of two or more proteins th

Increases the rate of GTP hydrolysis by a GTPase of the Rab family [goid 5097] [evidence IEA]  
Interacting selectively with any protein or protein complex (a complex of two or more proteins th  
"Catalysis of the hydrolysis of internal, alpha-peptide bonds in a polypeptide chain by a catalytic

onucleoprotein complex that is involved in formation of the spliceosome [goid 387] [pmid 151305

Interacting selectively with any protein or protein complex (a complex of two or more proteins th

"Interacting selectively with a nucleotide, any compound consisting of a nucleoside that is esterifi  
r more mature rRNA molecules [goid 6364] [evidence IEA]

Catalysis of the reaction: ATP + ubiquitin + protein lysine = AMP + diphosphate + protein N-ubiq

"Interacting selectively with a nucleotide, any compound consisting of a nucleoside that is esterifi

"Stops, prevents or reduces the activity of a protease, any enzyme catalyzes the hydrolysis pept

"Stops, prevents or reduces the activity of serine-type endopeptidases, enzymes that catalyze th

"Stops, prevents or reduces the activity of serine-type endopeptidases, enzymes that catalyze th

"Stops, prevents or reduces the activity of serine-type endopeptidases, enzymes that catalyze th

"Interacting selectively with an ATPase, any enzyme that catalyzes the hydrolysis of ATP [goid 5

"Interacting selectively with any protein or protein complex (a complex of two or more proteins th

"Interacting selectively with any protein or protein complex (a complex of two or more proteins th  
[evidence IEA]; Any process that modulates the frequency, rate or extent of DNA-dependent trans

Catalysis of the reaction: ATP + a protein tyrosine = ADP + protein tyrosine phosphate [goid 471  
"Interacting selectively with one or more specific sites on a receptor molecule, a macromolecule

"Interacting selectively with DNA (deoxyribonucleic acid) [goid 3677] [evidence IEA]; Interacting

"Interacting selectively with a nucleotide, any compound consisting of a nucleoside that is esteril

"Interacting selectively with a nucleotide, any compound consisting of a nucleoside that is esteril

"Interacting selectively with a nucleotide, any compound consisting of a nucleoside that is esteril

"Mediates the transfer of a signal from the outside to the inside of a cell by means other than the

Mediates the transfer of a signal from the outside to the inside of a cell by means other than the

Mediates the transfer of a signal from the outside to the inside of a cell by means other than the

Mediates the transfer of a signal from the outside to the inside of a cell by means other than the

"Mediates the transfer of a signal from the outside to the inside of a cell by means other than the

Mediates the transfer of a signal from the outside to the inside of a cell by means other than the

Mediates the transfer of a signal from the outside to the inside of a cell by means other than the

"Interacting selectively with a nucleotide, any compound consisting of a nucleoside that is esteril

"Interacting selectively with a nucleotide, any compound consisting of a nucleoside that is esteril

"Elemental activities, such as catalysis or binding, describing the actions of a gene product at th  
rolysis of its peptide bonds, initiated by the covalent attachment of a ubiquitin moiety, or multiple

nRNA(s) prior to translation into polypeptide [goid 6397] [evidence IEA]; The progression of bioc

Interacting selectively with zinc (Zn) ions [goid 8270] [evidence IEA]; Interacting selectively with :

Interacting selectively with any protein or protein complex (a complex of two or more proteins th

"Catalysis of an oxidation-reduction (redox) reaction, a reversible chemical reaction in which the

"Catalysis of the reaction: ATP + ubiquitin + protein lysine = AMP + diphosphate + protein N-ubi

"Catalysis of the reaction: ATP + ubiquitin + protein lysine = AMP + diphosphate + protein N-ubi

Interacting selectively with any protein or protein complex (a complex of two or more proteins th

Interacting selectively with zinc (Zn) ions [goid 8270] [evidence IEA]; Interacting selectively with :

"The function of binding to a specific DNA sequence in order to modulate transcription. The tran

"Catalysis of the reaction: xanthine + NAD<sup>+</sup> + H<sub>2</sub>O = urate + NADH + H<sup>+</sup> [goid 4854] [pmid 822

"Interacting selectively with monomeric or multimeric forms of actin, including actin filaments [go

"Enables the directed movement of substances (such as macromolecules, small molecules, ions

"Interacting selectively with a nucleotide, any compound consisting of a nucleoside that is esteril



Interacting selectively with damaged DNA [goid 3684] [pmid 10873465] [evidence TAS]; Interact  
"Catalysis of the hydrolysis of N-terminal amino acid residues from in a polypeptide chain [goid 4  
"Catalysis of the hydrolysis of N-terminal amino acid residues from in a polypeptide chain [goid 4  
"Interacting selectively with an RNA molecule or a portion thereof [goid 3723] [evidence IEA]; Int  
Interacting selectively with any protein or protein complex (a complex of two or more proteins th  
"Interacting selectively with transfer RNA [goid 49] [evidence IEA]; Interacting selectively with an  
"Interacting selectively with any protein or protein complex (a complex of two or more proteins th  
"Combining with a nuclear export signal to initiate a change in cell activity [goid 5049] [pmid 110  
"Interacting selectively with transfer RNA [goid 49] [pmid 9512417] [evidence TAS]; The selectiv  
A receptor that binds an extracellular ligand and transmits the signal to a heterotrimeric G-protei  
Interacting selectively with damaged DNA [goid 3684] [evidence IEA]; Interacting selectively with  
"Interacting selectively with DNA (deoxyribonucleic acid) [goid 3677] [evidence IEA]; Interacting  
"Interacting selectively with a nucleotide, any compound consisting of a nucleoside that is esteril  
"Interacting selectively with DNA (deoxyribonucleic acid) [goid 3677] [pmid 9259561] [evidence I  
"Interacting selectively with DNA (deoxyribonucleic acid) [goid 3677] [evidence IEA]; Catalysis of  
"Interacting selectively with DNA (deoxyribonucleic acid) [goid 3677] [evidence IEA]; Catalysis of  
"Catalysis of the reaction: ATP + a protein = ADP + a phosphoprotein, requiring the presence of  
"Interacting selectively with DNA (deoxyribonucleic acid) [goid 3677] [evidence IEA]; Interacting  
"Catalysis of the reaction: ATP + D-xylulose = ADP + D-xylulose 5-phosphate [goid 4856] [pmid  
Catalysis of the transfer of an N-acetylglucosaminyl residue from UDP-N-acetyl-glucosamine to  
Catalysis of the transfer of an N-acetylglucosaminyl residue from UDP-N-acetyl-glucosamine to  
The function of a transcription cofactor that activates transcription from a RNA polymerase II pro  
Interacting selectively with any protein or protein complex (a complex of two or more proteins th  
"Interacting selectively with transfer RNA [goid 49] [evidence IEA]; Interacting selectively with a r  
"Interacting selectively with a nucleotide, any compound consisting of a nucleoside that is esteril  
Interacting selectively with double-stranded DNA [goid 3690] [pmid 1738588] [evidence TAS]; In  
Interacting selectively with DNA (deoxyribonucleic acid) [goid 3677] [evidence IEA]; Interacting s

6355] [evidence IEA]; Any process that modulates the frequency, rate or extent of DNA-depend  
"The function of binding to a specific DNA sequence in order to modulate transcription. The tran  
"Interacting selectively with a nucleotide, any compound consisting of a nucleoside that is esteril  
EA]; The directed movement of substances, either within a vesicle or in the vesicle membrane, in

e specialized structural and/or functional features that characterize the cells, tissues, or organs c

EA]; The directed movement of substances, either within a vesicle or in the vesicle membrane, in

"Acting as a marker to identify a membrane and interacting selectively with one or more SNARE  
"Elemental activities, such as catalysis or binding, describing the actions of a gene product at th  
"Interacting selectively with a nucleotide, any compound consisting of a nucleoside that is esteril  
Catalysis of the hydrolysis of a peptide bond. A peptide bond is a covalent bond formed when th

Interacting selectively with any protein or protein complex (a complex of two or more proteins that  
"Interacting selectively with a nucleotide, any compound consisting of a nucleoside that is esterified  
rRNA(s) prior to translation into polypeptide [goid 6397] [evidence IEA]; The process of removing  
"Interacting selectively with any nucleic acid [goid 3676] [evidence IEA]; Interacting selectively w

3]

Catalysis of the incorporation of one atom from molecular oxygen into a compound and the red  
Interacting selectively with any enzyme [goid 19899] [pmid 10788521] [evidence IPI]; Interacting  
"Interacting selectively with protein kinase C [goid 5080] [pmid 10433554] [evidence IPI]; Interac  
"Catalysis of the incorporation of one atom from molecular oxygen into a compound and the red  
"Interacting selectively with a specific domain of a protein [goid 19904] [evidence IEA]; Interactir  
"Interacting selectively with a transcription factor, any protein required to initiate or regulate trans  
The function of binding to a specific DNA sequence in order to modulate transcription. The trans  
"The selective, often stoichiometric, interaction of a molecule with one or more specific sites on .

"Interacting selectively with DNA (deoxyribonucleic acid) [goid 3677] [evidence IEA]; Catalysis of  
Interacting selectively with DNA (deoxyribonucleic acid) [goid 3677] [evidence IEA]; Interacting s  
Interacting selectively with DNA (deoxyribonucleic acid) [goid 3677] [evidence IEA]; Interacting s  
"Interacting selectively with DNA (deoxyribonucleic acid) [goid 3677] [evidence IEA]; Interacting  
Interacting selectively with DNA (deoxyribonucleic acid) [goid 3677] [evidence IEA]; Interacting s  
"Interacting selectively with DNA (deoxyribonucleic acid) [goid 3677] [evidence IEA]; Interacting  
Interacting selectively with DNA (deoxyribonucleic acid) [goid 3677] [evidence IEA]; Interacting s  
Interacting selectively with DNA (deoxyribonucleic acid) [goid 3677] [evidence IEA]; Interacting s  
Interacting selectively with any nucleic acid [goid 3676] [evidence IEA]; Interacting selectively wi  
Interacting selectively with DNA (deoxyribonucleic acid) [goid 3677] [evidence IEA]; Interacting s  
Interacting selectively with DNA (deoxyribonucleic acid) [goid 3677] [evidence IEA]; Interacting s  
Interacting selectively with DNA (deoxyribonucleic acid) [goid 3677] [pmid 9545376] [evidence T  
Interacting selectively with DNA (deoxyribonucleic acid) [goid 3677] [evidence IEA]; Interacting s  
The function of binding to a specific DNA sequence in order to modulate transcription. The trans  
"Elemental activities, such as catalysis or binding, describing the actions of a gene product at th  
Interacting selectively with DNA (deoxyribonucleic acid) [goid 3677] [evidence IEA]; Interacting s  
"Interacting selectively with DNA (deoxyribonucleic acid) [goid 3677] [evidence IEA]; Functions t  
Interacting selectively with DNA (deoxyribonucleic acid) [goid 3677] [evidence IEA]; Interacting s  
Interacting selectively with DNA (deoxyribonucleic acid) [goid 3677] [evidence IEA]; Interacting s  
The function of binding to a specific DNA sequence in order to modulate transcription. The trans  
Interacting selectively with DNA (deoxyribonucleic acid) [goid 3677] [evidence IEA]; Interacting s  
Interacting selectively with DNA (deoxyribonucleic acid) [goid 3677] [evidence IEA]; Interacting s  
Interacting selectively with DNA (deoxyribonucleic acid) [goid 3677] [evidence IEA]; Interacting s

Interacting selectively with any nucleic acid [goid 3676] [evidence IEA]; Interacting selectively with DNA (deoxyribonucleic acid) [goid 3677] [evidence IEA]; Interacting selectively with any nucleic acid [goid 3676] [evidence IEA]; Interacting selectively with DNA (deoxyribonucleic acid) [goid 3677] [evidence IEA]; Interacting selectively with any nucleic acid [goid 3676] [evidence IEA]; Interacting selectively with DNA (deoxyribonucleic acid) [goid 3677] [evidence IEA]; Interacting selectively with any protein or protein complex (a complex of two or more proteins that are physically associated with each other) [goid 3678] [evidence IEA]; Interacting selectively with DNA (deoxyribonucleic acid) [goid 3677] [evidence IEA]; Interacting selectively with any nucleic acid [goid 3676] [evidence IEA]; Interacting selectively with DNA (deoxyribonucleic acid) [goid 3677] [evidence IEA];

Interacting selectively with DNA (deoxyribonucleic acid) [goid 3677] [evidence IEA]; Interacting selectively with any nucleic acid [goid 3676] [evidence IEA];

Interacting selectively with zinc (Zn) ions [goid 8270] [evidence IEA]; Interacting selectively with zinc (Zn) ions [goid 8270] [evidence IEA]; Interacting selectively with zinc (Zn) ions [goid 8270] [evidence IEA]; Interacting selectively with zinc (Zn) ions [goid 8270] [evidence IEA]; Interacting selectively with any nucleic acid [goid 3676] [evidence IEA]; Interacting selectively with an RNA molecule or a portion thereof [goid 3723] [evidence IEA]; Interacting selectively with any nucleic acid [goid 3676] [evidence IEA]; Interacting selectively with any nucleic acid [goid 3676] [evidence IEA]; Interacting selectively with any nucleic acid [goid 3676] [evidence IEA]; Interacting selectively with any nucleic acid [goid 3676] [evidence IEA];

Interacting selectively with any nucleic acid [goid 3676] [evidence IEA]; Interacting selectively with any nucleic acid [goid 3676] [evidence IEA]; Interacting selectively with an RNA molecule or a portion thereof [goid 3723] [evidence IEA];

"Interacting selectively with zinc (Zn) ions [goid 8270] [evidence IEA];

Interacting selectively with any nucleic acid [goid 3676] [evidence IEA]; Interacting selectively with any nucleic acid [goid 3676] [evidence IEA]; Interacting selectively with any nucleic acid [goid 3676] [evidence IEA]; Interacting selectively with any nucleic acid [goid 3676] [evidence IEA]; Interacting selectively with any nucleic acid [goid 3676] [evidence IEA]; Interacting selectively with an RNA molecule or a portion thereof [goid 3723] [evidence IEA]; Interacting selectively with any nucleic acid [goid 3676] [evidence IEA]; Interacting selectively with any nucleic acid [goid 3676] [evidence IEA]; Interacting selectively with any nucleic acid [goid 3676] [evidence IEA]; Interacting selectively with any nucleic acid [goid 3676] [evidence IEA]; Interacting selectively with any nucleic acid [goid 3676] [evidence IEA]; Catalysis of the transfer of a chemical group [goid 3679] [evidence IEA]; Interacting selectively with any nucleic acid [goid 3676] [evidence IEA]; Interacting selectively with any nucleic acid [goid 3676] [evidence IEA]; Interacting selectively with any nucleic acid [goid 3676] [evidence IEA]; Interacting selectively with any nucleic acid [goid 3676] [evidence IEA]; Interacting selectively with any nucleic acid [goid 3676] [evidence IEA];



Interacting selectively with DNA (deoxyribonucleic acid) [goid 3677] [evidence IEA]; Interacting s  
Interacting selectively with DNA (deoxyribonucleic acid) [goid 3677] [evidence IEA]; Interacting s  
Interacting selectively with DNA (deoxyribonucleic acid) [goid 3677] [evidence IEA]; Interacting s  
Interacting selectively with DNA (deoxyribonucleic acid) [goid 3677] [evidence IEA]; Interacting s  
Interacting selectively with DNA (deoxyribonucleic acid) [goid 3677] [evidence IEA]; Interacting s  
Interacting selectively with DNA (deoxyribonucleic acid) [goid 3677] [pmid 9653652] [evidence N  
Interacting selectively with DNA (deoxyribonucleic acid) [goid 3677] [evidence IEA]; Interacting s  
Interacting selectively with DNA (deoxyribonucleic acid) [goid 3677] [evidence IEA]; Interacting s  
Interacting selectively with DNA (deoxyribonucleic acid) [goid 3677] [evidence IEA]; Plays a role  
Interacting selectively with DNA (deoxyribonucleic acid) [goid 3677] [evidence IEA]; Interacting s  
"Interacting selectively with phosphatidylinositol, any glycopospholipid with its sn-glycerol 3-phc  
"Interacting selectively with any protein or protein complex (a complex of two or more proteins th  
Interacting selectively with any protein or protein complex (a complex of two or more proteins th  
Interacting selectively with zinc (Zn) ions [goid 8270] [pmid 11062261] [evidence NAS]; Interacti  
Interacting selectively with zinc (Zn) ions [goid 8270] [evidence IEA]; Interacting selectively with :  
Interacting selectively with zinc (Zn) ions [goid 8270] [evidence IEA]; Interacting selectively with :  
"The function of binding to a specific DNA sequence in order to modulate transcription. The tran  
"The function of binding to a specific DNA sequence in order to modulate transcription. The tran  
"The function of binding to a specific DNA sequence in order to modulate transcription. The tran  
The function of binding to a specific DNA sequence in order to modulate transcription. The trans  
Interacting selectively with any nucleic acid [goid 3676] [evidence IEA]; Interacting selectively wi  
Interacting selectively with DNA (deoxyribonucleic acid) [goid 3677] [evidence IEA]; Interacting s  
Interacting selectively with any nucleic acid [goid 3676] [evidence IEA]; Interacting selectively wi  
Interacting selectively with DNA (deoxyribonucleic acid) [goid 3677] [evidence NAS]; Interacting  
Interacting selectively with DNA (deoxyribonucleic acid) [goid 3677] [evidence IEA]; Interacting s  
The function of binding to a specific DNA sequence in order to modulate transcription. The trans  
The function of binding to a specific DNA sequence in order to modulate transcription. The trans  
The function of binding to a specific DNA sequence in order to modulate transcription. The trans  
The function of binding to a specific DNA sequence in order to modulate transcription. The trans  
The function of binding to a specific DNA sequence in order to modulate transcription. The trans  
Interacting selectively with DNA (deoxyribonucleic acid) [goid 3677] [evidence IEA]; Interacting s  
Interacting selectively with an RNA molecule or a portion thereof [goid 3723] [evidence IEA]; Inte  
Interacting selectively with any nucleic acid [goid 3676] [evidence IEA]; Interacting selectively wi  
Interacting selectively with zinc (Zn) ions [goid 8270] [evidence IEA]; Interacting selectively with :  
Interacting selectively with any protein or protein complex (a complex of two or more proteins th  
"Catalysis of the hydrolysis of internal, alpha-peptide bonds in a polypeptide chain by a mechani  
"Interacting selectively with zinc (Zn) ions [goid 8270] [evidence IEA]; Interacting selectively with  
Interacting selectively with zinc (Zn) ions [goid 8270] [evidence IEA]; Interacting selectively with :  
Interacting selectively with DNA (deoxyribonucleic acid) [goid 3677] [pmid 10486218] [evidence  
Interacting selectively with zinc (Zn) ions [goid 8270] [evidence IEA]; Interacting selectively with :  
Interacting selectively with DNA (deoxyribonucleic acid) [goid 3677] [pmid 10486218] [evidence  
Interacting selectively with any protein or protein complex (a complex of two or more proteins th  
"The selective, often stoichiometric, interaction of a molecule with one or more specific sites on :  
Interacting selectively with zinc (Zn) ions [goid 8270] [evidence IEA]; Interacting selectively with :

Interacting selectively with any protein or protein complex (a complex of two or more proteins that  
Interacting selectively with DNA (deoxyribonucleic acid) [goid 3677] [evidence IEA]; Interacting s  
Interacting selectively with DNA (deoxyribonucleic acid) [goid 3677] [evidence IEA]; Interacting s  
"Elemental activities, such as catalysis or binding, describing the actions of a gene product at th  
Interacting selectively with DNA (deoxyribonucleic acid) [goid 3677] [evidence IEA]; Interacting s  
Interacting selectively with DNA (deoxyribonucleic acid) [goid 3677] [evidence IEA]; Interacting s  
Interacting selectively with DNA (deoxyribonucleic acid) [goid 3677] [pmid 7916577] [evidence T  
The function of binding to a specific DNA sequence in order to modulate transcription. The trans  
Interacting selectively with any nucleic acid [goid 3676] [evidence IEA]; Interacting selectively wi  
The function of binding to a specific DNA sequence in order to modulate transcription. The trans  
"Interacting selectively with any nucleic acid [goid 3676] [evidence IEA]; Interacting selectively w  
Interacting selectively with any nucleic acid [goid 3676] [evidence IEA]; Interacting selectively wi  
The function of binding to a specific DNA sequence in order to modulate transcription. The trans  
Interacting selectively with DNA (deoxyribonucleic acid) [goid 3677] [evidence IEA]; Interacting s  
Interacting selectively with any nucleic acid [goid 3676] [evidence IEA]; Interacting selectively wi  
Interacting selectively with zinc (Zn) ions [goid 8270] [evidence IEA]; The function of binding to a  
"Interacting selectively with DNA (deoxyribonucleic acid) [goid 3677] [evidence IEA]; Interacting  
"Interacting selectively with DNA (deoxyribonucleic acid) [goid 3677] [pmid 8665923] [evidence -  
"Interacting selectively with DNA (deoxyribonucleic acid) [goid 3677] [evidence IEA]; Functions t  
Interacting selectively with any nucleic acid [goid 3676] [evidence IEA]; Interacting selectively wi  
Interacting selectively with DNA (deoxyribonucleic acid) [goid 3677] [evidence IEA]; Interacting s  
Interacting selectively with DNA (deoxyribonucleic acid) [goid 3677] [evidence IEA]; Interacting s  
The function of binding to a specific DNA sequence in order to modulate transcription. The trans  
Interacting selectively with DNA (deoxyribonucleic acid) [goid 3677] [evidence IEA]; Interacting s  
The function of binding to a specific DNA sequence in order to modulate transcription. The trans  
The function of binding to a specific DNA sequence in order to modulate transcription. The trans  
Interacting selectively with DNA (deoxyribonucleic acid) [goid 3677] [evidence IEA]; Interacting s  
The function of binding to a specific DNA sequence in order to modulate transcription. The trans  
Interacting selectively with DNA (deoxyribonucleic acid) [goid 3677] [evidence IEA]; Interacting s  
Interacting selectively with DNA (deoxyribonucleic acid) [goid 3677] [evidence NAS]; Interacting  
Interacting selectively with zinc (Zn) ions [goid 8270] [pmid 9268636] [evidence TAS]; Interacting  
Interacting selectively with any nucleic acid [goid 3676] [evidence IEA]; The function of binding to  
The function of binding to a specific DNA sequence in order to modulate transcription. The trans  
Interacting selectively with any nucleic acid [goid 3676] [evidence IEA]; Interacting selectively wi  
The function of binding to a specific DNA sequence in order to modulate transcription. The trans  
Interacting selectively with any nucleic acid [goid 3676] [evidence IEA]; Interacting selectively wi  
"Interacting selectively with any nucleic acid [goid 3676] [evidence IEA]; Interacting selectively w  
"The function of binding to a specific DNA sequence in order to modulate transcription. The tran  
Interacting selectively with DNA (deoxyribonucleic acid) [goid 3677] [evidence NAS]; Interacting  
The function of binding to a specific DNA sequence in order to modulate transcription. The trans  
Interacting selectively with any nucleic acid [goid 3676] [evidence IEA]; Interacting selectively wi  
Interacting selectively with DNA (deoxyribonucleic acid) [goid 3677] [evidence NAS]; Interacting  
The function of binding to a specific DNA sequence in order to modulate transcription. The trans  
Interacting selectively with DNA (deoxyribonucleic acid) [goid 3677] [evidence NAS]; Interacting















Interacting selectively with any nucleic acid [goid 3676] [evidence IEA]; Interacting selectively wi  
 Interacting selectively with DNA (deoxyribonucleic acid) [goid 3677] [evidence IEA]; Interacting s  
 Interacting selectively with DNA (deoxyribonucleic acid) [goid 3677] [evidence IEA]; Interacting s  
 Interacting selectively with any nucleic acid [goid 3676] [evidence IEA]; Interacting selectively wi  
 Interacting selectively with DNA (deoxyribonucleic acid) [goid 3677] [evidence IEA]; Interacting s  
 Interacting selectively with DNA (deoxyribonucleic acid) [goid 3677] [evidence IEA]; Interacting s  
 Interacting selectively with DNA (deoxyribonucleic acid) [goid 3677] [evidence IEA]; Interacting s  
 Interacting selectively with DNA (deoxyribonucleic acid) [goid 3677] [evidence IEA]; Interacting s  
 Interacting selectively with DNA (deoxyribonucleic acid) [goid 3677] [evidence IEA]; Interacting s  
 Interacting selectively with DNA (deoxyribonucleic acid) [goid 3677] [evidence IEA]; Interacting s  
 Interacting selectively with DNA (deoxyribonucleic acid) [goid 3677] [evidence IEA]; Interacting s  
 Interacting selectively with DNA (deoxyribonucleic acid) [goid 3677] [evidence IEA]; Interacting s  
 "Interacting selectively with DNA (deoxyribonucleic acid) [goid 3677] [evidence IEA]; Catalysis of  
 Interacting selectively with any nucleic acid [goid 3676] [evidence IEA]; Interacting selectively wi  
 "Elemental activities, such as catalysis or binding, describing the actions of a gene product at the  
 Interacting selectively with any nucleic acid [goid 3676] [evidence IEA]; Interacting selectively wi  
 Interacting selectively with any nucleic acid [goid 3676] [evidence IEA]; Interacting selectively wi  
 Interacting selectively with DNA (deoxyribonucleic acid) [goid 3677] [evidence IEA]; Interacting s  
 Interacting selectively with zinc (Zn) ions [goid 8270] [evidence IEA]; Interacting selectively with :  
 Interacting selectively with DNA (deoxyribonucleic acid) [goid 3677] [evidence IEA]; Interacting s  
 Interacting selectively with DNA (deoxyribonucleic acid) [goid 3677] [evidence IEA]; Interacting s  
 Interacting selectively with DNA (deoxyribonucleic acid) [goid 3677] [evidence IEA]; Interacting s  
 Interacting selectively with DNA (deoxyribonucleic acid) [goid 3677] [evidence IEA]; Interacting s  
 Interacting selectively with DNA (deoxyribonucleic acid) [goid 3677] [evidence IEA]; Interacting s  
 Interacting selectively with DNA (deoxyribonucleic acid) [goid 3677] [evidence IEA]; Interacting s  
 Interacting selectively with DNA (deoxyribonucleic acid) [goid 3677] [evidence IEA]; Interacting s  
 Interacting selectively with zinc (Zn) ions [goid 8270] [evidence IEA]; Interacting selectively with :  
 Interacting selectively with zinc (Zn) ions [goid 8270] [evidence IEA]; Interacting selectively with :  
 Interacting selectively with any nucleic acid [goid 3676] [evidence IEA]; Interacting selectively wi  
 Interacting selectively with DNA (deoxyribonucleic acid) [goid 3677] [evidence IEA]; Interacting s  
 Interacting selectively with zinc (Zn) ions [goid 8270] [evidence IEA]; Interacting selectively with :  
 Interacting selectively with DNA (deoxyribonucleic acid) [goid 3677] [pmid 2505992] [evidence N  
 Interacting selectively with any nucleic acid [goid 3676] [evidence IEA]; Interacting selectively wi  
 Interacting selectively with DNA (deoxyribonucleic acid) [goid 3677] [evidence IEA]; Interacting s  
 Interacting selectively with DNA (deoxyribonucleic acid) [goid 3677] [evidence IEA]; Interacting s  
 Interacting selectively with DNA (deoxyribonucleic acid) [goid 3677] [evidence IEA]; Interacting s

Interacting selectively with any nucleic acid [goid 3676] [evidence IEA]; Interacting selectively wi  
 The function of binding to a specific DNA sequence in order to modulate transcription. The trans  
 Interacting selectively with any nucleic acid [goid 3676] [evidence IEA]; The function of binding to  
 Interacting selectively with DNA (deoxyribonucleic acid) [goid 3677] [evidence IEA]; Interacting s  
 "Interacting selectively with a nucleotide, any compound consisting of a nucleoside that is esterifi  
 Interacting selectively with any protein or protein complex (a complex of two or more proteins th

Interacting selectively with zinc (Zn) ions [goid 8270] [evidence IEA]; Interacting selectively with  
Interacting selectively with zinc (Zn) ions [goid 8270] [evidence IEA]; Interacting selectively with  
"Interacting selectively with DNA (deoxyribonucleic acid) [goid 3677] [evidence IEA]; Catalysis of  
Interacting selectively with any protein or protein complex (a complex of two or more proteins th  
"Combining with an extracellular or intracellular messenger to initiate a change in cell activity [gc  
rocess begins with the attachment of the sperm plasma membrane to the zona pellucida and inc  
rocess begins with the attachment of the sperm plasma membrane to the zona pellucida and inc  
Interacting selectively with any protein or protein complex (a complex of two or more proteins th  
The function of binding to a specific DNA sequence in order to modulate transcription. The trans  
"Interacting selectively with a nucleotide, any compound consisting of a nucleoside that is esteril  
"Interacting selectively with a nucleotide, any compound consisting of a nucleoside that is esteril

The function of binding to a specific DNA sequence in order to modulate transcription. The trans  
The function of binding to a specific DNA sequence in order to modulate transcription. The trans  
The function of binding to a specific DNA sequence in order to modulate transcription. The trans  
The function of binding to a specific DNA sequence in order to modulate transcription. The trans  
The function of binding to a specific DNA sequence in order to modulate transcription. The trans  
"Elemental activities, such as catalysis or binding, describing the actions of a gene product at th  
The function of binding to a specific DNA sequence in order to modulate transcription. The trans  
The function of binding to a specific DNA sequence in order to modulate transcription. The trans  
Interacting selectively with zinc (Zn) ions [goid 8270] [evidence IEA]; Interacting selectively with  
Interacting selectively with zinc (Zn) ions [goid 8270] [evidence IEA]; Interacting selectively with  
Interacting selectively with zinc (Zn) ions [goid 8270] [evidence IEA]; Interacting selectively with  
Interacting selectively with zinc (Zn) ions [goid 8270] [evidence IEA]; Interacting selectively with  
Interacting selectively with zinc (Zn) ions [goid 8270] [evidence IEA]; Interacting selectively with  
Interacting selectively with zinc (Zn) ions [goid 8270] [evidence IEA]; Interacting selectively with  
Interacting selectively with zinc (Zn) ions [goid 8270] [evidence IEA]; Interacting selectively with  
"Interacting selectively with any protein or protein complex (a complex of two or more proteins th  
Interacting selectively with any protein or protein complex (a complex of two or more proteins th  
"Interacting selectively with a protein N-terminus, the end of any peptide chain at which the 2-am  
"Elemental activities, such as catalysis or binding, describing the actions of a gene product at th  
"Elemental activities, such as catalysis or binding, describing the actions of a gene product at th  
Interacting selectively with any nucleic acid [goid 3676] [evidence IEA]; Interacting selectively wi  
"The selective, often stoichiometric, interaction of a molecule with one or more specific sites on  
Interacting selectively with zinc (Zn) ions [goid 8270] [evidence IEA]; Interacting selectively with  
Interacting selectively with calcium ions (Ca<sup>2+</sup>) [goid 5509] [evidence IEA]; Interacting selectivel  
Interacting selectively with DNA (deoxyribonucleic acid) [goid 3677] [evidence IEA]; Interacting s

| Entinostat RL |            | Entinostat RL 4RH |             | Entinostat U2932 |             |
|---------------|------------|-------------------|-------------|------------------|-------------|
| Fold change   | P Value    | Fold change       | P Value     | Fold change      | P Value     |
| 0.870100995   | 0.00134736 | -1.8631663        | 1.43615E-05 | 0.940177576      | 0.139592071 |
| 0.925080574   | 0.15411851 | -1.0288509        | 0.600437372 | 0.862124804      | 0.008022969 |
| 0.819583547   | 0.00020027 | 0.92317537        | 0.190121261 | 0.842207317      | 0.00111336  |
| -1.00591599   | 0.89954717 | 0.7548328         | 0.001575656 | -1.13174121      | 0.010253877 |
| 0.874689391   | 0.0488362  | -1.0887407        | 0.367473794 | 0.933873913      | 0.307600237 |
| -1.19525092   | 0.0095806  | -1.0285923        | 0.551338466 | 0.907281098      | 0.148520465 |
| 0.906716055   | 0.02321651 | -1.0134319        | 0.822959714 | 0.99542384       | 0.91325427  |
| 0.931678519   | 0.10427937 | -1.1996866        | 0.001091363 | 0.333078247      | 8.35E-32    |
| 0.964361161   | 0.33859433 | -1.1487096        | 0.154146602 | 0.953570876      | 0.211355004 |
| 0.999929408   | 0.9982714  | -1.019617         | 0.660774416 | 0.874631305      | 0.00012762  |
| 0.794866097   | 0.0133782  | -1.5493926        | 3.65795E-07 | 0.819076861      | 0.030386414 |
| 0.794763651   | 0.21694231 | 0.7379056         | 0.00102873  | -1.0294579       | 0.875122377 |
| -1.03868504   | 0.48996495 | 0.85083596        | 0.000610627 | 0.924811434      | 0.158065718 |
| -1.30841      | 0.00288248 | 0.66911499        | 1.21471E-10 | 0.97050942       | 0.729355921 |
| 0.830979579   | 0.08251145 | 0.93915318        | 0.191725012 | -1.19417643      | 0.095706112 |
| -1.12614789   | 0.04804215 | -1.1105971        | 0.070122017 | 0.97474467       | 0.664851925 |
| 0.941978216   | 0.34824768 | -1.1484988        | 0.064381166 | -1.06985843      | 0.28984522  |
| 0.82682733    | 0.01252093 | -1.0606045        | 0.472639236 | -1.02287629      | 0.759757185 |
| 0.777273046   | 0.00057191 | 0.70642374        | 6.82015E-06 | 0.595750193      | 5.92E-10    |
| 0.884078171   | 0.09343744 | -1.0022929        | 0.955807901 | 0.619143376      | 1.59E-08    |
| -1.12112331   | 0.11704236 | 0.94233838        | 0.275186415 | -1.01699268      | 0.815281472 |
| -0.99994528   | 0.99932996 | 0.83496372        | 0.000654795 | -1.04935664      | 0.460883019 |
| 0.967419852   | 0.68535545 | -1.1983211        | 0.000278458 | 0.877322961      | 0.113337462 |
| 0.954641734   | 0.37955879 | 0.91926521        | 0.210465743 | 0.83123233       | 0.000866703 |
| -1.02572973   | 0.66289429 | 0.87134913        | 0.042831815 | 0.973560971      | 0.645706301 |
| 0.81063761    | 0.0022785  | -1.090752         | 0.04300227  | -1.23106786      | 0.002495331 |
| 0.990782756   | 0.84124881 | -1.0102056        | 0.813480811 | 0.961159315      | 0.39304209  |
| -1.20500515   | 0.04045653 | -1.00217          | 0.954220609 | -1.44606067      | 0.000118183 |
| -1.31506066   | 0.03692391 | 0.91685849        | 0.009852321 | 0.62733297       | 0.000607847 |
| -1.10376197   | 0.12919935 | 0.90758307        | 0.284733667 | -1.09434596      | 0.165119522 |
| -1.17664072   | 0.15880704 | -1.0738414        | 0.699927443 | -1.09538393      | 0.427039992 |
| 0.959815658   | 0.49849669 | -1.0271356        | 0.625880357 | 0.878866269      | 0.036458366 |
| -1.04734881   | 0.57370546 | -1.127191         | 0.169943421 | -1.05217412      | 0.536370015 |
| 0.980265917   | 0.66257697 | 0.92362656        | 0.451029442 | 0.972272214      | 0.538504795 |
| -1.11315158   | 0.19051399 | -1.0218547        | 0.714184047 | -1.16113555      | 0.070145654 |
| -1.05277935   | 0.15586139 | -1.0868051        | 0.193161357 | -1.01603127      | 0.658059484 |
| 0.950830946   | 0.2107951  | -1.0040153        | 0.956774776 | 0.910162423      | 0.021698084 |
| 0.924393692   | 0.32408221 | 0.92960446        | 0.293379953 | 0.513832143      | 2.12E-11    |
| -1.00022773   | 0.99700124 | -1.0440729        | 0.552458489 | -1.12379248      | 0.058227966 |
| 0.932920429   | 0.19465928 | -1.0246093        | 0.736135539 | 0.893710526      | 0.038167353 |
| 0.98282869    | 0.76239829 | -1.1278703        | 0.069079448 | 0.997058729      | 0.958976701 |
| 0.978448983   | 0.5997094  | 0.79085816        | 0.005613777 | 0.94661806       | 0.189340483 |

|             |            |            |             |             |             |
|-------------|------------|------------|-------------|-------------|-------------|
| -1.02754435 | 0.68678523 | 0.90851347 | 0.072602465 | 0.878452642 | 0.058448586 |
| -1.04727085 | 0.31409265 | -1.0700267 | 0.248022665 | -1.06306581 | 0.184104806 |
| 0.937228805 | 0.08405179 | -1.180505  | 0.014264113 | 0.976030305 | 0.512842021 |
| 0.957023406 | 0.42257466 | -1.0161097 | 0.729679621 | 0.714877204 | 9.13E-08    |
| -1.20963932 | 0.09058918 | -1.3065855 | 0.003961833 | -1.10227637 | 0.381854773 |
| 0.933656963 | 0.34972475 | 0.90684314 | 0.448190951 | 0.859879199 | 0.042836347 |
| 0.95929656  | 0.54571148 | -1.0805781 | 0.2317226   | 0.953451544 | 0.488506144 |
| 0.968454014 | 0.77390157 | -1.0813608 | 0.494944027 | -1.33166654 | 0.012651714 |
| -1.00450899 | 0.93275982 | 0.86116465 | 0.016164849 | 0.281383424 | 2.90E-30    |
| -1.02533493 | 0.66045432 | -1.0161513 | 0.845310749 | 0.978361358 | 0.700844133 |
| -1.06364139 | 0.12572673 | -1.0357268 | 0.443032719 | -1.04117492 | 0.313613575 |
| 0.868191216 | 0.10733583 | -1.1678768 | 0.06025755  | 0.964305474 | 0.675331506 |
| 0.95694026  | 0.30210286 | 0.92400151 | 0.031250333 | 0.860026115 | 0.000763023 |
| 0.963223062 | 0.45486663 | 0.89103205 | 0.005424897 | -1.00002763 | 0.999559187 |
| 0.964530286 | 0.64336391 | 0.89536449 | 0.16751519  | 0.940269201 | 0.430641431 |
| 0.868283764 | 0.12454616 | -1.0380643 | 0.538217693 | 0.823445481 | 0.036399718 |
| -1.06774572 | 0.4879491  | 0.91346608 | 0.092684809 | -1.30152105 | 0.006941415 |
| -1.06052604 | 0.46927984 | -1.1418032 | 0.023798081 | 0.955142373 | 0.571594079 |
| -1.18698776 | 0.00776532 | 0.83170108 | 4.14659E-05 | -1.31482482 | 4.90E-05    |
| -1.01525385 | 0.80664443 | 0.96540485 | 0.60152989  | -1.17393307 | 0.011848441 |
| 0.811810603 | 1.10E-05   | -1.0352681 | 0.449049436 | 0.852022955 | 0.000471078 |
| -1.00853498 | 0.88216427 | -1.0057589 | 0.876674811 | 0.924542281 | 0.174882831 |
| -1.10130881 | 0.05041064 | 0.63623121 | 3.17557E-11 | -1.00446727 | 0.926686154 |
| -1.02429711 | 0.5657981  | -1.0707837 | 0.53836279  | 0.963873524 | 0.379763404 |
| 0.944717762 | 0.31875859 | 0.74740275 | 0.000194634 | 0.896954542 | 0.059608272 |
| -1.18328887 | 7.53E-05   | -1.1934572 | 0.012399468 | -1.14444329 | 0.001139276 |
| -1.11248998 | 0.11442644 | -1.0107377 | 0.923716727 | -1.13603582 | 0.060180907 |
| -1.00296042 | 0.93661768 | 0.85765577 | 0.005498557 | 0.974947246 | 0.495825284 |
| -1.04045427 | 0.2810343  | 0.99565004 | 0.938933805 | 0.968419891 | 0.382161482 |
| -1.53454853 | 1.19E-05   | -1.0733988 | 0.079812119 | -1.26659092 | 0.010154654 |
| 0.991877616 | 0.89879866 | -1.0308123 | 0.726497068 | 0.772186547 | 0.000165597 |
| 0.916117113 | 0.2944457  | 0.99160264 | 0.842523156 | -1.57569973 | 1.10E-06    |
| -1.00942191 | 0.81888988 | -1.005954  | 0.905511834 | -1.0254472  | 0.540122733 |
| 0.980864106 | 0.85169888 | 0.92031629 | 0.289125616 | -1.14654732 | 0.189268362 |
| -1.02994578 | 0.64814069 | 0.97902072 | 0.815684529 | 0.956099762 | 0.488038014 |
| 0.977196499 | 0.77654473 | -1.2119425 | 0.045465036 | -1.12295785 | 0.157357861 |
| -1.01278182 | 0.86842896 | -1.0256911 | 0.754281987 | 0.849624761 | 0.037289069 |
| 0.640644812 | 8.05E-08   | -1.2163646 | 0.002588743 | 0.627742657 | 2.81E-08    |
| 0.838557211 | 0.00402858 | -1.0641805 | 0.316701276 | -1.05016012 | 0.407209303 |
| 0.875543847 | 0.00288084 | 0.84964903 | 0.000383809 | 0.912983919 | 0.03697101  |
| -1.01816629 | 0.82781201 | -1.0164551 | 0.775967638 | 0.820127717 | 0.019535004 |
| -1.17270882 | 0.00537733 | 0.89307816 | 0.022736145 | -1.117686   | 0.047724148 |
| -1.0887165  | 0.01916339 | 0.98828142 | 0.777712485 | 0.993349506 | 0.850335535 |
| 0.738249525 | 1.30E-07   | -1.0004412 | 0.993801466 | 0.77423851  | 4.14E-06    |



|             |            |            |             |             |             |
|-------------|------------|------------|-------------|-------------|-------------|
| 0.992109108 | 0.90201032 | -1.0560392 | 0.170407308 | 0.755780362 | 5.69E-05    |
| -1.14117023 | 0.23681777 | -1.1102431 | 0.121300268 | 0.962492464 | 0.73044216  |
| 0.949816427 | 0.38994787 | -1.0738372 | 0.059485371 | -1.06532136 | 0.291552633 |
| 0.968426187 | 0.48082749 | -1.0592207 | 0.12002273  | -1.02593087 | 0.573432861 |
| 0.770119976 | 0.00114548 | -1.434662  | 0.000155593 | -1.04017687 | 0.606426636 |
| -1.17806811 | 0.11662575 | 0.97017495 | 0.637129313 | -1.334757   | 0.006898433 |
| -1.05702898 | 0.50941743 | -1.1262185 | 0.156670697 | -1.08911074 | 0.31125403  |
| -1.17776701 | 0.03501063 | 0.99756346 | 0.952491642 | 0.990645708 | 0.901584343 |
| -1.31730023 | 0.00115109 | -1.1313134 | 0.235575627 | 0.90164719  | 0.202436583 |
| -1.07141846 | 0.46826887 | 0.95962725 | 0.524271582 | 0.900327996 | 0.271164334 |
| 0.896778903 | 0.23051556 | 0.91539809 | 0.27922221  | 0.814500212 | 0.026348544 |
| -1.04144338 | 0.43554794 | 0.84170825 | 0.028014357 | -1.15955731 | 0.005958048 |
| -1.14259462 | 0.24073217 | 0.8271117  | 0.010643669 | -1.20997376 | 0.095643874 |
| 0.934999577 | 0.37691296 | 0.96410667 | 0.535329576 | -1.00412562 | 0.95667527  |
| 0.936183224 | 0.29759812 | 0.91921762 | 0.052902284 | 0.835565158 | 0.005935859 |
| -1.04200504 | 0.47613995 | 0.78828316 | 0.005575551 | 0.940455129 | 0.289138226 |
| -1.166883   | 0.10456388 | -1.0694755 | 0.226580553 | 0.929503486 | 0.437609287 |
| -1.21427573 | 0.05507414 | -1.0564262 | 0.124703381 | 0.758128572 | 0.007147802 |
| -1.00118142 | 0.98845807 | 0.75274444 | 5.41634E-07 | -1.0018181  | 0.982244548 |
| -1.17199818 | 0.03533318 | 0.5285     | 8.53898E-14 | 0.956676475 | 0.549364065 |
| -1.08565735 | 0.27288621 | 0.89102372 | 0.300555964 | 0.797044018 | 0.003474578 |
| -1.38954529 | 2.34E-05   | -1.0068759 | 0.908595731 | -1.41357155 | 1.01E-05    |
| 0.977799597 | 0.81613146 | 0.89905378 | 0.022230425 | -1.12894872 | 0.212275059 |
| -1.02895896 | 0.7260558  | -1.0698976 | 0.378040487 | 0.888148579 | 0.149173312 |
| -1.00556644 | 0.93268017 | -1.1747985 | 0.122812433 | -1.03042621 | 0.64861894  |
| 0.970997161 | 0.64203378 | -1.0363092 | 0.671007941 | 0.908402505 | 0.132892445 |
| -1.01791321 | 0.69185285 | -1.1436058 | 0.081746227 | 0.968144134 | 0.470622729 |
| -1.11271755 | 0.04899894 | 0.93950624 | 0.440123033 | 0.792974703 | 5.64E-05    |
| -1.33895317 | 0.01273013 | 0.89254316 | 0.233951103 | -1.3685616  | 0.007668254 |
| 0.896098829 | 0.04957599 | 0.65210906 | 1.50865E-05 | 0.937687315 | 0.243897099 |
| -1.00330193 | 0.92780537 | 0.98533652 | 0.776140863 | -1.0142722  | 0.697093522 |
| -1.37447328 | 0.00261589 | 0.92363337 | 0.482647927 | -1.23526284 | 0.040717147 |
| -1.10188836 | 0.18693443 | 0.96761746 | 0.664298484 | -1.31298857 | 0.000432651 |
| 0.836845184 | 0.03587672 | -1.080732  | 0.220979063 | -1.0430096  | 0.612915779 |
| 0.89049094  | 0.05397931 | -1.0435855 | 0.460126729 | 0.734870829 | 2.83E-06    |
| -1.38235355 | 7.38E-05   | 0.8750075  | 0.158965756 | -1.44022582 | 1.14E-05    |
| -1.03218099 | 0.48174211 | 0.93745051 | 0.516914606 | -1.08143035 | 0.085671809 |
| -1.03820397 | 0.48613506 | -1.0626345 | 0.457848408 | 0.925493236 | 0.153338217 |
| 0.963115441 | 0.49568824 | 0.92762594 | 0.311354627 | -1.13623736 | 0.023528085 |
| 0.992151058 | 0.89541388 | 0.985768   | 0.84751903  | 0.520596236 | 2.81E-15    |
| 0.975083333 | 0.77229898 | -1.3684039 | 4.89673E-05 | -1.17298418 | 0.071448447 |
| 0.92026874  | 0.17216468 | -1.1443156 | 0.166351749 | 0.799841477 | 0.000478909 |
| -1.06195021 | 0.13465285 | 0.9359833  | 0.417969758 | -1.05290466 | 0.198222885 |
| 0.957567773 | 0.359158   | -1.0034929 | 0.957682478 | -1.09297684 | 0.06328861  |

|             |            |            |             |             |             |
|-------------|------------|------------|-------------|-------------|-------------|
| -1.23119787 | 0.00519095 | 0.84899662 | 0.012009365 | -1.40138143 | 1.68E-05    |
| 0.927130675 | 0.29215892 | -1.0000749 | 0.998665572 | 0.820491066 | 0.007441172 |
| 0.944353164 | 0.48602775 | -1.1278485 | 0.027309713 | -1.05399142 | 0.522148101 |
| 0.847478494 | 0.02148423 | -1.1878116 | 0.134408087 | 0.705436686 | 6.62E-06    |
| 0.960167489 | 0.34507363 | 0.95003622 | 0.352118622 | 0.723046044 | 4.56E-10    |
| 0.874107704 | 0.06964585 | 0.99482515 | 0.886609455 | -1.04388952 | 0.557018527 |
| -1.06917239 | 0.1697891  | -1.2048269 | 0.069905741 | -1.02118502 | 0.664465379 |
| 0.875064767 | 0.01283195 | -1.2219607 | 0.007854062 | 0.948409222 | 0.31144927  |
| -1.03423251 | 0.52570222 | 0.89778707 | 0.198140801 | 0.989777925 | 0.846144746 |
| -1.02238192 | 0.76604289 | 0.591733   | 3.609E-12   | 0.888671323 | 0.116659026 |
| 0.870613469 | 0.0488503  | -1.4585515 | 6.33615E-06 | 0.849848787 | 0.021577193 |
| -1.01791738 | 0.76938941 | -1.0051338 | 0.909244379 | -1.27648346 | 0.000165766 |
| 0.726513014 | 0.0014068  | 0.88415466 | 0.025178028 | 0.776775147 | 0.010204206 |
| 0.841671579 | 0.00287403 | -1.0874093 | 0.132009763 | 0.88597499  | 0.03255535  |
| 0.941841287 | 0.36540614 | -1.0417862 | 0.495558063 | 0.88499671  | 0.068190545 |
| -1.06526704 | 0.27644107 | -1.0682336 | 0.45010269  | -1.08219664 | 0.17523257  |
| 0.827237664 | 0.00015192 | 0.83553463 | 0.004176897 | 0.760182776 | 2.57E-07    |
| 0.972528843 | 0.73967446 | -1.013756  | 0.731257229 | 0.695384456 | 6.01E-05    |
| 0.996921258 | 0.93500954 | -1.023374  | 0.624121329 | 0.850356533 | 7.09E-05    |
| -1.0378444  | 0.45827764 | -1.029163  | 0.688714467 | -1.05873699 | 0.256091498 |
| 0.905411339 | 0.14520363 | 0.88064825 | 0.079572427 | 0.746338179 | 6.08E-05    |
| 0.981241846 | 0.7028774  | 0.99203151 | 0.922280576 | 0.908231816 | 0.056497514 |
| -1.02234295 | 0.68005394 | 0.96877988 | 0.651674077 | -1.02912922 | 0.592256928 |
| 0.999083526 | 0.98927602 | 0.86261525 | 0.001055967 | 0.999307909 | 0.991902396 |
| -1.01270284 | 0.85595218 | -1.0369865 | 0.619335742 | 0.942558264 | 0.396435012 |
| 0.90861432  | 0.14481624 | 0.97103364 | 0.543405623 | -1.02436    | 0.711653697 |
| -1.0446411  | 0.38903638 | -1.0229099 | 0.663889589 | 0.785169516 | 1.27E-05    |
| -1.20350584 | 0.02672549 | -1.0759245 | 0.170654901 | 0.870325689 | 0.09339652  |
| 0.946689627 | 0.45839533 | -1.0806771 | 0.29920328  | -1.04791033 | 0.52618242  |
| -1.01072036 | 0.92906281 | 0.79401647 | 0.001460789 | -1.44542709 | 0.003168526 |
| -1.12748905 | 0.12230353 | -1.0809021 | 0.202299006 | 0.930696477 | 0.351580703 |
| 0.917080538 | 0.35233747 | 0.97698808 | 0.807065232 | -1.05360336 | 0.573776435 |
| 0.82766989  | 0.27743401 | 0.94213607 | 0.284798628 | -1.1142664  | 0.532882722 |
| -1.03595867 | 0.52438594 | 0.8222156  | 0.004297189 | 0.91864235  | 0.129627923 |
| -1.06834292 | 0.26710034 | -1.2747767 | 9.4134E-05  | 0.981484406 | 0.752450324 |
| -1.10097778 | 0.25075631 | 0.65168309 | 1.25701E-12 | -1.45571426 | 3.31E-05    |
| -1.17975024 | 0.00676029 | 0.90045553 | 0.214096154 | -1.18622474 | 0.005239474 |
| -1.05325339 | 0.42151899 | 0.91305656 | 0.019094177 | -1.06170004 | 0.354131312 |
| 0.987694178 | 0.83984813 | -1.0016919 | 0.973003785 | 0.863679679 | 0.019725665 |
| -1.00623084 | 0.8901787  | 0.8877018  | 0.082065043 | 0.941712098 | 0.185455914 |
| 0.921777588 | 0.36175211 | 0.9832212  | 0.733183266 | 0.815256855 | 0.024958788 |
| 0.862831176 | 0.09031337 | 0.94358392 | 0.280727671 | 0.794360557 | 0.009466924 |
| -1.0271915  | 0.75042596 | 0.99375204 | 0.926798304 | 0.997585703 | 0.977126129 |
| -1.05470867 | 0.52169822 | -1.0416193 | 0.558174876 | 0.938792883 | 0.447747219 |

|             |            |            |             |             |             |
|-------------|------------|------------|-------------|-------------|-------------|
| 0.831515491 | 0.0209013  | 0.95414152 | 0.471732967 | 0.421507608 | 1.41E-15    |
| 0.956213405 | 0.47846699 | 0.91468279 | 0.081866125 | 0.892910518 | 0.076582584 |
| 0.933571192 | 0.32272763 | -1.200448  | 0.028785514 | 0.947090663 | 0.433407744 |
| -1.08183293 | 0.15784063 | 0.97146691 | 0.694661596 | 0.927371963 | 0.175443132 |
| -1.27602196 | 0.00793904 | -1.2598613 | 0.057940832 | 0.799494555 | 0.014309293 |
| 0.88507709  | 0.08049243 | 0.87398398 | 0.083715761 | 0.929368289 | 0.289889331 |
| -1.05128467 | 0.22326561 | 0.83087843 | 0.049674201 | 0.971186473 | 0.47446872  |
| 0.91810424  | 0.0919989  | -1.0167836 | 0.923437964 | 0.961073695 | 0.428836439 |
| 0.999350328 | 0.98617923 | 0.87141554 | 0.015645558 | 0.891779229 | 0.003382079 |
| -1.08374263 | 0.17692917 | -1.0005482 | 0.992616718 | -1.02602121 | 0.663819353 |
| -1.01735842 | 0.57045926 | 0.99647492 | 0.966161977 | 0.984953328 | 0.617068808 |
| -1.00018992 | 0.99775988 | -1.0853164 | 0.168617345 | 0.907648947 | 0.155878412 |
| -1.01451484 | 0.81845018 | 0.9885222  | 0.857654743 | 0.941946528 | 0.342699209 |
| -1.15785354 | 0.01820929 | 0.74883296 | 1.59451E-05 | 0.971285903 | 0.630217778 |
| 0.993324718 | 0.89626501 | 0.93039902 | 0.112982953 | 0.922043519 | 0.118282738 |
| 0.975582216 | 0.5841694  | 0.82839289 | 0.038102784 | 0.929732499 | 0.110482876 |
| 0.993538203 | 0.82724067 | 0.73077976 | 0.000564793 | 0.841672179 | 3.24E-07    |
| -1.04116527 | 0.48719159 | 0.97780169 | 0.790095486 | 0.851246156 | 0.007221743 |
| -1.00418742 | 0.94940921 | 0.91799767 | 0.304837329 | -1.0009993  | 0.987899717 |
| -1.01063267 | 0.86323217 | 0.71452004 | 6.43109E-05 | 0.498351131 | 6.00E-16    |
| 0.97945187  | 0.79909976 | -1.055507  | 0.392974265 | 0.931993414 | 0.389448601 |
| 0.851072476 | 0.00330177 | 0.9128199  | 0.190967559 | 0.959982938 | 0.439436466 |
| 0.978762961 | 0.73388277 | 0.92318777 | 0.151380867 | 0.961076144 | 0.530034926 |
| -1.03121269 | 0.64753302 | 0.85474722 | 0.08144529  | -1.00192667 | 0.97713588  |
| 0.955389379 | 0.5949079  | 0.9512898  | 0.469345731 | 0.763493261 | 0.002570006 |
| -1.05996853 | 0.26585907 | 0.95405297 | 0.251664856 | 0.921914947 | 0.122379817 |
| -1.06597172 | 0.26054713 | 0.97217935 | 0.573396282 | 0.988157602 | 0.832880646 |
| -1.06325612 | 0.62336566 | 0.84388984 | 3.15932E-05 | 0.899390524 | 0.396944386 |
| -1.1011568  | 0.33534327 | -1.0227076 | 0.703950697 | 0.80480675  | 0.032835088 |
| -1.1443887  | 0.10149836 | 0.97439096 | 0.393292464 | 0.944921922 | 0.487011046 |
| -1.28100881 | 0.00132286 | 0.96085318 | 0.555564366 | 0.863511221 | 0.049688577 |
| 0.82363016  | 0.00246058 | 0.92715705 | 0.231340222 | 0.946469796 | 0.371549363 |
| 0.932701737 | 0.27722577 | 0.9803636  | 0.742992155 | 0.929231133 | 0.252614305 |
| -1.0047219  | 0.94106153 | 0.90603514 | 0.058896642 | 0.90834063  | 0.135406284 |
| 0.707876746 | 7.98E-05   | 0.8959878  | 0.017741688 | 0.801963924 | 0.008583039 |
| 0.752518283 | 0.00363566 | 0.97277459 | 0.354591964 | 0.85189543  | 0.092158522 |
| -1.01211513 | 0.83730082 | 0.93638656 | 0.259399971 | -1.22490291 | 0.001016176 |
| -1.19855215 | 0.00231255 | 0.97864505 | 0.743210017 | -1.14329148 | 0.02164372  |
| 0.876965937 | 0.00179245 | 0.91181592 | 0.136704862 | 0.923304309 | 0.050848465 |
| -1.26578616 | 0.04468575 | -1.0441148 | 0.597042925 | -1.29387236 | 0.02876446  |
| 0.935943675 | 0.45385903 | 0.82967961 | 0.000783232 | -1.04438494 | 0.622655638 |
| 0.859124762 | 0.03189239 | -1.0895618 | 0.177776026 | 0.76620425  | 0.000302705 |
| -1.02870901 | 0.6944964  | -1.0411451 | 0.54893553  | 0.894158758 | 0.124466453 |
| 0.839755178 | 0.08131186 | 0.94821103 | 0.535706076 | 0.854298875 | 0.115052848 |

|             |            |            |             |             |             |
|-------------|------------|------------|-------------|-------------|-------------|
| -1.13525722 | 0.05441953 | 0.8697338  | 0.009391055 | 0.924950059 | 0.231821752 |
| -1.14738654 | 0.07761616 | 0.94610341 | 0.328504336 | -1.2408496  | 0.00664442  |
| 0.911959595 | 0.35895144 | 0.9093494  | 0.447480136 | 0.906091025 | 0.326558865 |
| 0.777206695 | 0.00035274 | 0.9248546  | 0.434105937 | 0.796634634 | 0.001125341 |
| -1.07218991 | 0.51029579 | 0.84159401 | 0.037725502 | -1.75383441 | 1.92E-06    |
| 0.963639928 | 0.55797017 | -1.1985966 | 0.016360751 | 0.641752737 | 3.40E-09    |
| -1.00643697 | 0.89192757 | 0.96875525 | 0.605249977 | 0.965359918 | 0.456496305 |
| -1.06325286 | 0.38282769 | 0.94465764 | 0.37370523  | -1.28541423 | 0.000690394 |
| -1.04446716 | 0.45191099 | -1.1253142 | 0.068129267 | -1.04293844 | 0.467204131 |
| -1.02711592 | 0.59414172 | 0.91951982 | 0.304227933 | 0.903779852 | 0.047646133 |
| -1.21082013 | 0.12946195 | 0.87961398 | 0.17570039  | -1.17095318 | 0.209424367 |
| 0.951277681 | 0.43485875 | -1.1290665 | 0.042312756 | -1.0494314  | 0.450573858 |
| 0.984469717 | 0.77717366 | -1.0171788 | 0.76465535  | 0.591653274 | 3.80E-13    |
| -1.43866182 | 0.00443526 | -1.0539053 | 0.194337927 | -1.43070321 | 0.005030112 |
| -1.14362971 | 0.04558809 | -1.351375  | 0.011222009 | -1.30346658 | 0.000170367 |
| -1.02494177 | 0.74516965 | -1.1215715 | 0.196588991 | -1.11334255 | 0.160298141 |
| -1.3046064  | 0.00527515 | 0.8292378  | 0.008849267 | -1.15218258 | 0.127156557 |
| -1.0350745  | 0.32992813 | 0.80610965 | 0.004009851 | 0.961602889 | 0.269111229 |
| -1.04454184 | 0.6209884  | 0.59973702 | 3.17977E-06 | -1.42862353 | 0.000154998 |
| 0.909355822 | 0.21079647 | 0.98896863 | 0.864119611 | -1.18817394 | 0.025476516 |
| -1.3161095  | 0.00137204 | -1.1235673 | 0.133219142 | -1.30933826 | 0.001657107 |
| -1.13936573 | 0.17066324 | 0.71171765 | 0.001224367 | 0.91904557  | 0.372915657 |
| 0.997031558 | 0.94852243 | 0.88183394 | 0.062283487 | 0.97564729  | 0.592848454 |
| -1.09563896 | 0.07210137 | 0.64290552 | 0.000101057 | -1.00139179 | 0.977815938 |
| 0.872718229 | 0.00828684 | -1.0521825 | 0.421707345 | 0.94800357  | 0.287032426 |
| 0.889419038 | 0.02487061 | 0.91902001 | 0.078018223 | -1.06705973 | 0.206587393 |
| -1.02804056 | 0.71550474 | -1.2404713 | 0.003155769 | -1.12109701 | 0.135770701 |
| 0.901453624 | 0.20519036 | 0.93433718 | 0.242054495 | 0.941649277 | 0.460597749 |
| -1.16737103 | 0.00016538 | 0.96661202 | 0.499196858 | -1.12169956 | 0.004016608 |
| -1.41439067 | 0.00039095 | -1.2238498 | 0.1097966   | -1.21455145 | 0.038528016 |
| 0.976099771 | 0.59404314 | -1.1638423 | 0.02039118  | 0.918965611 | 0.066504912 |
| 0.958746134 | 0.70927755 | -1.0331729 | 0.555646302 | 0.748218251 | 0.012632897 |
| 0.893466532 | 0.03566255 | -1.282393  | 0.047150369 | 0.970323979 | 0.566797941 |
| 0.968397939 | 0.61672446 | -1.4897688 | 1.29976E-07 | 0.965284709 | 0.581943168 |
| -1.01381821 | 0.82988164 | -1.0964701 | 0.227318524 | 0.936335321 | 0.30536089  |
| -1.20457952 | 0.03931118 | -1.1547619 | 0.121391338 | 0.993740549 | 0.943450583 |
| -1.01026986 | 0.87888912 | 0.97548161 | 0.482019516 | 0.887569081 | 0.079553839 |
| 0.982583496 | 0.65988391 | 0.88699814 | 0.176866386 | -1.00017334 | 0.996533099 |
| 0.716479866 | 6.22E-06   | 0.99085875 | 0.90303488  | 0.967852761 | 0.625279799 |
| 0.976998927 | 0.69443372 | -1.3799141 | 0.000223533 | 0.987496578 | 0.831696991 |
| 0.964900911 | 0.57928803 | -1.0616705 | 0.526862377 | 0.938501642 | 0.326176735 |
| 0.950519898 | 0.33648815 | 0.70143809 | 2.72986E-10 | 0.817777541 | 0.00032233  |
| 0.993322602 | 0.91712533 | -1.0058508 | 0.907153697 | 0.95395952  | 0.465237254 |
| -1.07578417 | 0.18647288 | 0.93251804 | 0.165187207 | 0.797825217 | 0.000124463 |

|             |            |            |             |             |             |
|-------------|------------|------------|-------------|-------------|-------------|
| -1.1023211  | 0.06812969 | 0.90853269 | 0.064245323 | 0.991548298 | 0.871757134 |
| 0.861914751 | 0.00023725 | 0.92171553 | 0.284945842 | 0.984274917 | 0.675980664 |
| -1.03998806 | 0.6371597  | 0.81687586 | 0.015496132 | 0.953485362 | 0.566845774 |
| -1.12960999 | 0.12195906 | -1.1005609 | 0.015187368 | 0.935493113 | 0.393723041 |
| -1.08075373 | 0.24739196 | -1.3083309 | 0.004926992 | 0.926728847 | 0.256925744 |
| -1.01757401 | 0.70754384 | 0.87570509 | 0.004808155 | 0.96566368  | 0.45270969  |
| 0.858153392 | 0.00145932 | 0.94010982 | 0.584974611 | -1.13586341 | 0.007191129 |
| -1.00584194 | 0.92598522 | -1.0433491 | 0.42046294  | 0.890069286 | 0.06751144  |
| -1.06218064 | 0.18455657 | -1.1187914 | 0.084152454 | -1.01848297 | 0.684838062 |
| 0.851226996 | 0.10384585 | 0.92811847 | 0.245754179 | 0.878081957 | 0.187340212 |
| -1.00791709 | 0.89283315 | -1.0527195 | 0.562259005 | 0.853823398 | 0.008953643 |
| -1.04494854 | 0.44532025 | -1.0019208 | 0.977167153 | 0.947851165 | 0.353151356 |
| -1.14845516 | 0.0465797  | -1.0333652 | 0.4120986   | -1.18508991 | 0.015536869 |
| -1.05272308 | 0.43738234 | -1.0137121 | 0.838553552 | 0.902306892 | 0.12333719  |
| 0.890258573 | 0.14456408 | -1.0774654 | 0.210837887 | 0.801436077 | 0.006727899 |
| -1.08250414 | 0.09602982 | 0.91802203 | 0.187395123 | 0.983885305 | 0.72981247  |
| -1.03061554 | 0.66851711 | -1.0255076 | 0.632213512 | 0.970616967 | 0.671955548 |
| -1.07069337 | 0.27874332 | 0.97391586 | 0.681666244 | 0.919833862 | 0.186340782 |
| -1.00514508 | 0.93304352 | -1.0748101 | 0.191905379 | 0.979325321 | 0.732467516 |
| 0.952313417 | 0.66203605 | -1.0487306 | 0.367271642 | 0.745193428 | 0.010672714 |
| -1.31189627 | 0.02604758 | 0.9524875  | 0.202354617 | -1.64523473 | 0.000101977 |
| -1.22601013 | 0.03806581 | -1.0912367 | 0.295547629 | -1.01477087 | 0.878946346 |
| 0.859271759 | 0.07766454 | -1.0924999 | 0.259048898 | -1.0498595  | 0.566294513 |
| 0.466536176 | 1.04E-05   | 0.86195542 | 0.029463053 | 0.717377928 | 0.038664358 |
| 0.864518827 | 0.07977016 | 0.8874623  | 0.012501408 | 0.907555892 | 0.239316941 |
| 0.843371273 | 0.00201672 | -1.0051518 | 0.910666736 | 0.818383005 | 0.000348953 |
| 0.99499976  | 0.91920938 | 0.8851877  | 0.055907514 | 0.742024136 | 1.37E-07    |
| -1.12224169 | 0.0636999  | -1.1254855 | 0.011001811 | -1.15999941 | 0.018171142 |
| -1.00290302 | 0.95852772 | 0.91816631 | 0.384396196 | 0.964873721 | 0.522022642 |
| 0.760643087 | 0.00013059 | 0.87278951 | 0.023289344 | 0.751441773 | 7.10E-05    |
| 0.842819062 | 0.01222159 | 0.88185767 | 0.032234403 | -1.0377433  | 0.576534332 |
| 0.996730243 | 0.91229233 | -1.1710372 | 0.023958086 | 0.995432219 | 0.877636769 |
| 0.961903044 | 0.66094225 | 0.89068201 | 0.083593575 | 0.735393132 | 0.000973829 |
| -1.21600354 | 0.01446722 | 0.88333129 | 0.119964626 | -1.05909748 | 0.461292899 |
| -1.12533741 | 0.19726182 | 0.87455449 | 0.005950343 | -1.37819845 | 0.000819026 |
| 0.939960976 | 0.67307212 | 0.90591077 | 0.164070736 | 0.861069937 | 0.309994068 |
| -1.02621011 | 0.73761064 | 0.90507346 | 0.115970101 | 0.822565658 | 0.013929616 |
| 0.970866619 | 0.60529238 | -1.0232843 | 0.706479521 | -1.2195765  | 0.00097299  |
| 0.900405409 | 0.11377265 | 0.83915598 | 0.120565896 | 0.895538167 | 0.096686287 |
| 0.883524569 | 0.09243086 | -1.3565286 | 0.012948079 | 0.950486911 | 0.485363514 |
| -1.01907316 | 0.88830768 | 0.97762008 | 0.814155359 | -1.01363727 | 0.919794409 |
| 0.937794641 | 0.25221621 | -1.0554555 | 0.524806941 | -1.02965648 | 0.600574971 |
| -1.02442747 | 0.55576295 | 0.66643999 | 0.012335224 | 0.932785647 | 0.093180217 |
| 0.958987328 | 0.59086341 | 0.94284135 | 0.473421024 | 0.831608635 | 0.020827836 |

|             |            |            |             |             |             |
|-------------|------------|------------|-------------|-------------|-------------|
| -1.15368163 | 0.00942505 | 0.74047613 | 4.75858E-07 | -1.12930798 | 0.025925806 |
| -1.3386369  | 0.00014532 | -1.0234287 | 0.639688778 | -1.55692367 | 8.05E-08    |
| -1.06341884 | 0.59458693 | -1.1213469 | 0.065496851 | -1.18070869 | 0.153883504 |
| 0.888693532 | 0.13092576 | -1.1661364 | 0.00768337  | -1.02152623 | 0.782958368 |
| 0.866766202 | 0.0294378  | 0.89914893 | 0.115014212 | 0.660730737 | 2.90E-08    |
| -1.27777058 | 0.00760652 | -1.1145802 | 0.105776601 | -1.14270756 | 0.137017307 |
| 0.762412506 | 6.97E-05   | 0.97154458 | 0.33370372  | 0.671817977 | 5.29E-08    |
| -1.16380018 | 0.07521996 | 0.8712302  | 0.123388031 | 0.875370322 | 0.117244081 |
| 0.88782749  | 0.05682788 | -1.1340226 | 0.109928345 | 0.615940116 | 1.34E-10    |
| -1.11966562 | 0.00347862 | -1.2816625 | 0.008241706 | -1.00764065 | 0.837660455 |
| 0.877890316 | 0.27324832 | 0.8536008  | 0.282936099 | 0.772860731 | 0.032889617 |
| -1.00520863 | 0.9375926  | 0.82145228 | 0.013316774 | 0.710644662 | 3.52E-06    |
| 0.894470569 | 0.07367276 | -1.146917  | 0.019399687 | 0.851700796 | 0.011239849 |
| -1.24670898 | 0.01132192 | 0.95249566 | 0.459020494 | -1.13381154 | 0.141062678 |
| 0.976140323 | 0.77501836 | 0.8963688  | 0.135991447 | -1.19231464 | 0.041152676 |
| -1.12693836 | 0.22335819 | -1.0193485 | 0.886721562 | -1.04353595 | 0.662214296 |
| -1.03773794 | 0.56148743 | 0.91652545 | 0.122087151 | -1.00896327 | 0.888598811 |
| -1.00228041 | 0.96307078 | 0.99223604 | 0.848879531 | -1.03674479 | 0.464369725 |
| -1.02405733 | 0.56250427 | -1.0838765 | 0.302916134 | 0.948967805 | 0.204649973 |
| -1.01100098 | 0.8863657  | -1.0389372 | 0.474889236 | -1.02816599 | 0.716893082 |
| 0.971202346 | 0.78043933 | -1.4102139 | 1.21695E-05 | 0.629520847 | 4.57E-05    |
| -1.11775652 | 0.14259912 | 0.97969106 | 0.858881746 | -1.23622699 | 0.006455444 |
| -1.06584326 | 0.50752894 | 0.97818517 | 0.775438356 | -1.04597492 | 0.640056022 |
| 0.942427513 | 0.28768016 | 0.70148329 | 9.10214E-07 | 0.844312942 | 0.003404788 |
| -1.06313494 | 0.08839541 | -1.1017255 | 0.277851057 | 0.859486445 | 7.44E-05    |
| 0.899278656 | 0.2019009  | 0.8414855  | 0.008253681 | 0.877812728 | 0.118615974 |
| 0.941161998 | 0.23612438 | 0.95730595 | 0.60390582  | 0.863249285 | 0.005317174 |
| 0.946421534 | 0.42693003 | 0.73914801 | 7.87439E-06 | 0.532881826 | 1.53E-12    |
| 0.979463735 | 0.75087427 | -1.0005997 | 0.987122756 | 0.852056936 | 0.017051472 |
| -1.01728924 | 0.69722    | 0.84368271 | 0.154332439 | 0.96087694  | 0.366512919 |
| 0.935241712 | 0.05342477 | 0.77466452 | 0.000300823 | 0.98632102  | 0.686133082 |
| -1.05804897 | 0.60295246 | 0.86940389 | 0.026023879 | 0.851229526 | 0.141123099 |
| -1.09115388 | 0.2430536  | -1.1754426 | 0.059815821 | -1.10323268 | 0.1893585   |
| 0.993899076 | 0.89783107 | -1.1880889 | 0.045252561 | 0.662754459 | 8.70E-12    |
| 0.840510554 | 0.00062386 | -1.0216703 | 0.825930703 | 0.750330441 | 1.68E-07    |
| -1.08861324 | 0.46044322 | 0.8961954  | 0.089627461 | -1.37188148 | 0.007711927 |
| 0.958914459 | 0.82865643 | 0.98389064 | 0.741436567 | 0.801069671 | 0.255312251 |
| -1.12660131 | 0.12924397 | -1.0666274 | 0.119719406 | -1.28388395 | 0.00211608  |
| -1.09150349 | 0.11569519 | -1.0899008 | 0.26359629  | -1.17446805 | 0.004875559 |
| 0.996827746 | 0.95429191 | 0.73663963 | 0.004963025 | -1.21486753 | 0.000868302 |
| 0.96801136  | 0.63390969 | -1.2087614 | 0.014221125 | -1.04834863 | 0.489682624 |
| -1.03754659 | 0.53343849 | -1.1455452 | 0.160911535 | 0.927211046 | 0.204243641 |
| 0.956527801 | 0.43318203 | 0.63658523 | 5.31609E-11 | -1.13775818 | 0.025788742 |
| -1.05897121 | 0.3280313  | 0.99469609 | 0.880736076 | -1.33482904 | 7.08E-06    |

|             |            |            |             |             |             |
|-------------|------------|------------|-------------|-------------|-------------|
| 0.915908979 | 0.04208892 | 0.9364055  | 0.427444092 | 0.919440218 | 0.051564163 |
| 0.9353554   | 0.12200254 | -1.0359799 | 0.48793369  | -1.00188109 | 0.964920103 |
| -1.12240049 | 0.17040206 | 0.94128089 | 0.382936838 | 0.994853704 | 0.950721522 |
| -1.13430266 | 0.26103429 | 0.80443248 | 0.001499105 | -1.28687578 | 0.0270241   |
| 0.999136469 | 0.99214379 | 0.93935004 | 0.159148135 | 0.937269577 | 0.461421579 |
| -1.04251379 | 0.5138676  | -1.0005332 | 0.987511164 | -1.13619991 | 0.048871069 |
| -1.10354657 | 0.09416522 | 0.89423816 | 0.30457983  | -1.16288288 | 0.011717581 |
| 0.986752939 | 0.82108796 | -1.0101533 | 0.891785755 | -1.05028411 | 0.406828688 |
| -1.16533198 | 0.19567726 | 0.95848795 | 0.37540783  | 0.884594755 | 0.298365761 |
| -1.05455472 | 0.31582141 | 0.81142855 | 5.70418E-05 | -1.35866044 | 3.11E-07    |
| 0.931964777 | 0.20720492 | 0.8612142  | 0.196341497 | -1.0959659  | 0.102668522 |
| -1.11361937 | 0.16894137 | 0.56126029 | 0.004157281 | 0.932900957 | 0.372158349 |
| -1.04478962 | 0.72783111 | -1.1605494 | 0.059598144 | -1.06724999 | 0.605438153 |
| 0.980587096 | 0.84135544 | -1.1483535 | 0.014514044 | -1.33908897 | 0.00413765  |
| -1.10362442 | 0.12980578 | -1.0732323 | 0.205724685 | -1.13080345 | 0.060426969 |
| -1.13888667 | 0.08862491 | -1.0115937 | 0.865791729 | -1.15549571 | 0.059248424 |
| -1.05157699 | 0.27270598 | 0.8865678  | 0.045523128 | 0.937815208 | 0.162909048 |
| -1.01781889 | 0.8594569  | 0.8984861  | 0.062555249 | 0.971896873 | 0.775102176 |
| 0.81396785  | 0.02244249 | -1.1166958 | 0.062620224 | 0.444026282 | 9.86E-13    |
| -1.00210779 | 0.97122264 | 0.92315453 | 0.063405426 | -1.02175819 | 0.712459899 |
| 0.86665885  | 0.02170527 | -1.0172991 | 0.688363801 | 0.864678624 | 0.019786011 |
| -1.05864254 | 0.2749112  | -1.0774722 | 0.373224136 | 0.919944045 | 0.112140107 |
| 0.998532363 | 0.9893927  | -1.228235  | 0.06937302  | 0.525049266 | 2.92E-07    |
| -1.05349395 | 0.77501237 | -1.0119598 | 0.892222257 | 0.933290506 | 0.705019252 |
| 0.926841928 | 0.30837469 | 0.98534974 | 0.816679409 | 0.87569524  | 0.077997315 |
| -1.09127992 | 0.12748627 | -1.1527432 | 0.017219557 | -1.02480484 | 0.665858854 |
| -1.0980034  | 0.12704561 | -1.0599624 | 0.325468566 | -1.13866819 | 0.035853296 |
| -1.04870157 | 0.30191726 | 0.96223297 | 0.742916711 | 0.939681395 | 0.178341744 |
| 0.827743714 | 0.00382769 | -1.0268631 | 0.615412054 | 0.699139893 | 4.80E-07    |
| 0.9880157   | 0.78584335 | -1.1600802 | 0.009489922 | 0.961859908 | 0.382380932 |
| -1.00107997 | 0.97977851 | 0.88201812 | 0.109660844 | -1.02877875 | 0.506130961 |
| -1.0395639  | 0.53606725 | -1.2395274 | 0.092215149 | -1.01417134 | 0.822168144 |
| 0.969857312 | 0.74506428 | -1.1412368 | 0.180951041 | 0.96170199  | 0.678335317 |
| 0.968094113 | 0.51882321 | -1.0286478 | 0.661185138 | 0.657769757 | 2.45E-11    |
| -1.23058642 | 0.03557503 | 0.95843786 | 0.573706486 | -1.23554876 | 0.032288115 |
| 0.91455797  | 0.36420423 | 0.98629862 | 0.762291195 | 0.953614236 | 0.628476719 |
| 0.935432949 | 0.29520089 | 0.76651694 | 0.00979467  | -1.08317464 | 0.211204515 |
| 0.977591614 | 0.68850584 | 0.90408711 | 0.254619708 | -1.03038188 | 0.596724412 |
| 0.962473207 | 0.42196457 | -1.0536052 | 0.372756827 | 0.914003734 | 0.062491727 |
| 0.830800989 | 0.00780056 | 0.78736512 | 0.000229828 | -1.10409395 | 0.145581347 |
| -1.01644002 | 0.78214264 | 0.79108315 | 3.25906E-05 | -1.0413918  | 0.492384935 |
| 0.900259831 | 0.15921724 | -1.0285488 | 0.798936792 | 0.840305239 | 0.02173567  |
| 0.930352838 | 0.14791616 | 0.6590197  | 0.025443492 | 0.993752008 | 0.899053435 |
| -1.05253574 | 0.42511575 | 0.90721439 | 0.193056496 | -1.09422157 | 0.163322228 |

|             |            |            |             |             |             |
|-------------|------------|------------|-------------|-------------|-------------|
| 0.978567918 | 0.49154758 | -1.0665211 | 0.258792688 | -1.00486901 | 0.877185491 |
| -1.00655266 | 0.91662497 | 0.96152718 | 0.518221755 | 0.897970946 | 0.088826574 |
| 0.6704347   | 0.00188194 | -1.029594  | 0.525354151 | -1.02681938 | 0.829457537 |
| 0.880765801 | 0.07094855 | 0.81597537 | 0.001981062 | 0.981153545 | 0.783537139 |
| 0.809570062 | 0.06262708 | 0.94294231 | 0.188932419 | 0.821600609 | 0.082641652 |
| -1.00733727 | 0.85145578 | -1.0340406 | 0.433163916 | 0.951848473 | 0.209488103 |
| -1.03115216 | 0.41278532 | -1.0732557 | 0.261538114 | -1.03196347 | 0.400985308 |
| 0.795064383 | 0.0009242  | -1.0049511 | 0.958134448 | 0.742385334 | 3.05E-05    |
| -1.19683805 | 0.01209127 | 0.76027027 | 1.12544E-06 | -1.07015656 | 0.331369336 |
| 0.987188513 | 0.86823112 | -1.2244093 | 0.040095313 | -1.08302189 | 0.307117174 |
| -1.10420995 | 0.29566606 | 0.99707826 | 0.976193153 | 0.948509772 | 0.575662135 |
| -1.28938758 | 2.11E-05   | -1.1530857 | 0.028173565 | -1.05372781 | 0.341386521 |
| -1.07743482 | 0.17847249 | 0.9579883  | 0.448619194 | -1.08527663 | 0.140542232 |
| -1.4018789  | 1.52E-05   | 0.87741164 | 0.007749634 | -1.22182681 | 0.006681428 |
| -1.04188889 | 0.64423975 | -1.2168261 | 0.005015817 | -1.1064557  | 0.257349723 |
| 0.896989756 | 0.02024597 | 0.98449362 | 0.790986709 | 0.910478652 | 0.043832062 |
| -1.089529   | 0.19603066 | 0.98974456 | 0.889141785 | -1.01167574 | 0.859984093 |
| 0.979555543 | 0.77230745 | -1.02717   | 0.587900603 | 0.917617457 | 0.23141232  |
| -1.0314529  | 0.49609957 | -1.0448257 | 0.49423045  | -1.03149648 | 0.495514593 |
| 0.978243309 | 0.78664136 | 0.99639095 | 0.908413386 | 0.666987511 | 6.30E-06    |
| 0.948374959 | 0.35436286 | 0.95435072 | 0.455070816 | -1.07776432 | 0.19245508  |
| 0.942261052 | 0.09485068 | 0.8956884  | 0.37163816  | -1.01433569 | 0.685656912 |
| 0.994834728 | 0.91805608 | -1.0249209 | 0.722345152 | 0.821806768 | 0.000255299 |
| -1.14816293 | 0.01343281 | -1.0861233 | 0.460373262 | -1.08850143 | 0.122476799 |
| -1.02321416 | 0.68044852 | -1.0130231 | 0.740400567 | -1.08335591 | 0.154351747 |
| -1.04591469 | 0.51996522 | -1.0055197 | 0.88281013  | -1.05378416 | 0.453070982 |
| 0.988614964 | 0.86759281 | 0.82776227 | 0.005535817 | 0.904427232 | 0.147504395 |
| -1.45566881 | 6.08E-06   | -1.0194259 | 0.781972305 | -1.16627891 | 0.044673495 |
| 0.994136503 | 0.93061327 | -1.0893138 | 0.273662461 | -1.17345015 | 0.020927456 |
| 0.812202178 | 0.01846249 | 0.94705876 | 0.564687755 | 0.71521263  | 0.000256218 |
| 0.950071521 | 0.45868375 | -1.197914  | 0.0016606   | -1.00576015 | 0.933604969 |
| 0.933467556 | 0.22627512 | -1.1151714 | 0.051403685 | 0.995532792 | 0.93685117  |
| -1.09242337 | 0.1403889  | -1.2070393 | 0.01054382  | -1.04557404 | 0.453877874 |
| 0.976596008 | 0.79697194 | -1.1021433 | 0.275956855 | -1.05523599 | 0.559684984 |
| -1.00474237 | 0.95009436 | 0.81939637 | 5.46034E-05 | 0.877244844 | 0.087468217 |
| 0.931130787 | 0.3825999  | 0.94411671 | 0.383831543 | 0.908666116 | 0.242556819 |
| 0.998862358 | 0.98991278 | 0.96549665 | 0.623072779 | 0.896156154 | 0.226507435 |
| -1.05105504 | 0.43602967 | -1.0289993 | 0.529677753 | -1.02920376 | 0.651892849 |
| -1.03473247 | 0.21172767 | 0.86684005 | 0.082876818 | -1.0231667  | 0.400312807 |
| -1.11008783 | 0.0521216  | -1.0251162 | 0.66370756  | -1.04993714 | 0.358192052 |
| -1.13228763 | 0.07995626 | 0.94117065 | 0.088754202 | -1.0215978  | 0.760064118 |
| 0.99780699  | 0.95608033 | 0.80811295 | 8.49965E-05 | -1.04619147 | 0.260147205 |
| 0.993432919 | 0.87441522 | -1.1294453 | 0.028405427 | -1.02806078 | 0.507606616 |
| 0.982653452 | 0.72408242 | 0.96493069 | 0.522204734 | 0.914160383 | 0.074330844 |



|             |            |            |             |             |             |
|-------------|------------|------------|-------------|-------------|-------------|
| -1.04947875 | 0.21317155 | -1.1572447 | 0.039811643 | 0.900605639 | 0.008525641 |
| 0.947573663 | 0.35373623 | 0.96312656 | 0.584839047 | 0.979278514 | 0.717475543 |
| 0.962194863 | 0.34101042 | -1.3192774 | 0.000503663 | -1.04107098 | 0.320184204 |
| -1.08994446 | 0.04797459 | -1.2499424 | 0.001629043 | -1.01235695 | 0.77400279  |
| 0.896904076 | 0.01419362 | 0.76476304 | 0.002798996 | 0.993772276 | 0.884821483 |
| -1.08829562 | 0.16161712 | 0.95746678 | 0.529160126 | -1.03455618 | 0.571172768 |
| -1.01919762 | 0.85573889 | -1.0799972 | 0.176939114 | 0.903933067 | 0.336261611 |
| 0.915733748 | 0.15797777 | -1.0418647 | 0.490498564 | 0.93425668  | 0.273597353 |
| 0.936947399 | 0.265636   | -1.0458595 | 0.62646291  | -1.14822365 | 0.020527166 |
| -1.01494737 | 0.82472727 | 0.98205057 | 0.810679975 | 0.996043502 | 0.952801848 |
| -1.0163797  | 0.81470032 | -1.0268613 | 0.744920335 | 0.57972056  | 1.47E-10    |
| 0.959613005 | 0.45526338 | -1.148769  | 0.127595415 | -1.01002308 | 0.856304819 |
| -1.0057781  | 0.91153985 | -1.1485829 | 0.033409363 | 0.926190808 | 0.143267965 |
| 0.990619408 | 0.87925799 | -1.0004568 | 0.986573644 | -1.05701611 | 0.373191313 |
| -1.18766321 | 0.09637187 | -1.1058475 | 0.061027647 | 0.97460811  | 0.801167071 |
| -1.3308339  | 0.00840376 | -1.0896503 | 0.222816577 | -1.26330373 | 0.029403978 |
| -1.05822921 | 0.38169288 | -1.0345895 | 0.395246622 | -1.16870314 | 0.018497224 |
| -1.41878549 | 3.07E-05   | -1.0230945 | 0.584384245 | -1.18313204 | 0.032952312 |
| -1.05640269 | 0.32896258 | 0.88135735 | 0.013279817 | 0.991192948 | 0.874399598 |
| 0.838094878 | 0.02479241 | -1.0649576 | 0.106476917 | 0.954038921 | 0.540999716 |
| -1.02634622 | 0.66675979 | 0.91107038 | 0.111547451 | 0.949031453 | 0.387624136 |
| 0.984135776 | 0.85598146 | 0.96221304 | 0.341245183 | -1.16019521 | 0.095965723 |
| 0.95179705  | 0.17331533 | -1.0243482 | 0.574224237 | -1.03329278 | 0.364378956 |
| -1.06175834 | 0.28876748 | 0.9332092  | 0.113150544 | 0.852606177 | 0.006173806 |
| -1.00829484 | 0.89102604 | -1.0360962 | 0.554492365 | -1.07483977 | 0.234376515 |
| -1.03609531 | 0.49676838 | -1.1248326 | 0.263469825 | 0.969207255 | 0.548695592 |
| -1.17508166 | 0.04178024 | -1.0552775 | 0.385383265 | -1.10303293 | 0.210378906 |
| 0.874803697 | 0.03507191 | 0.98233662 | 0.759416823 | -1.01356239 | 0.828427984 |
| 0.965848968 | 0.53901363 | 0.98295256 | 0.797455307 | -1.06412389 | 0.273717125 |
| -1.05599142 | 0.20293825 | 0.9928392  | 0.917415947 | 0.602929612 | 8.96E-17    |
| 0.899612545 | 0.00725175 | -1.0737377 | 0.199839368 | 0.984689658 | 0.685534677 |
| -1.0259697  | 0.75674928 | 0.97007786 | 0.558628939 | 0.855309692 | 0.063090686 |
| 0.941940524 | 0.37318574 | 0.97022466 | 0.626457254 | 0.884243626 | 0.070259797 |
| -1.02775211 | 0.68097643 | 0.96523711 | 0.729081433 | -1.15076232 | 0.038597828 |
| 0.984147991 | 0.74223226 | -1.1400862 | 0.214823146 | 0.959863431 | 0.400457607 |
| -1.09697268 | 0.06309773 | -1.0484899 | 0.463766531 | 0.972409249 | 0.568556203 |
| -1.18593534 | 0.0903352  | -1.4304404 | 2.12788E-05 | -1.19910222 | 0.071843099 |
| 0.8827818   | 0.04921233 | -1.0709534 | 0.223770384 | 0.954718247 | 0.4577598   |
| 0.895110734 | 0.06080619 | 0.9277207  | 0.330985918 | 0.998422812 | 0.978336473 |
| -1.14550071 | 0.0373995  | 0.95476751 | 0.44427259  | 0.895197302 | 0.087679645 |
| 0.814171004 | 0.20144095 | -1.0114371 | 0.897296675 | -1.3161943  | 0.089668677 |
| -1.40733801 | 8.91E-05   | -1.0667201 | 0.076822941 | -1.40283267 | 0.000101687 |
| 0.998594474 | 0.98052008 | 0.91606162 | 0.122876308 | -1.07404752 | 0.218221052 |
| 0.957396068 | 0.45307879 | -1.1599327 | 0.016625735 | -1.04952677 | 0.405114316 |

|             |            |            |             |             |             |
|-------------|------------|------------|-------------|-------------|-------------|
| -1.02780513 | 0.40642643 | -1.1175203 | 0.036575421 | 0.962637449 | 0.250454695 |
| -1.01876541 | 0.73401598 | -1.0567038 | 0.478935042 | 0.72565184  | 2.60E-07    |
| -1.01622577 | 0.80145643 | -1.0967089 | 0.141462774 | 0.907328876 | 0.132660199 |
| 0.955836749 | 0.40096753 | 0.9928213  | 0.898476505 | 0.266082576 | 4.48E-31    |
| -1.01361404 | 0.72583642 | 0.96802104 | 0.445283783 | -1.15130309 | 0.000553999 |
| 0.785172602 | 0.00319816 | -1.0166383 | 0.664995999 | -1.09462411 | 0.253628762 |
| 0.833239457 | 0.15535888 | 0.96187078 | 0.638782081 | -1.15009469 | 0.274221565 |
| -1.08305819 | 0.43554864 | 0.89158351 | 0.090662201 | 0.964785441 | 0.725485086 |
| 0.952814696 | 0.41497986 | -1.1546248 | 0.034361017 | 0.889370752 | 0.051391679 |
| 0.771994504 | 0.00020535 | 0.95199344 | 0.313303517 | 0.892270375 | 0.084945647 |
| 0.872062159 | 0.14932917 | 0.92525569 | 0.117039545 | 0.858992252 | 0.110179643 |
| 0.829203455 | 0.00125472 | -1.0058717 | 0.953003661 | 0.853027101 | 0.005532015 |
| 0.934140143 | 0.22338199 | -1.0090574 | 0.884833684 | -1.15749404 | 0.010707745 |
| 0.979873639 | 0.57895372 | -1.119067  | 0.057104339 | 0.99539225  | 0.899555068 |
| 0.940013754 | 0.30219817 | -1.0108481 | 0.866018279 | -1.03465207 | 0.568589682 |
| 0.945111397 | 0.40452899 | -1.0441251 | 0.786942171 | 0.876917587 | 0.055827167 |
| 0.987567377 | 0.77029993 | -1.3308218 | 0.000823093 | 0.981300994 | 0.659704434 |
| -1.11498528 | 0.03846306 | -1.1200447 | 0.053160839 | -1.04289339 | 0.416485842 |
| 0.867822247 | 0.17485513 | -1.0277333 | 0.636802032 | -1.09417925 | 0.386591481 |
| 0.969021727 | 0.62204341 | 0.96347624 | 0.261322223 | 0.99132933  | 0.891375469 |
| -1.01254389 | 0.87713615 | -1.0222931 | 0.687039354 | -1.02043735 | 0.801921653 |
| 0.998468828 | 0.97511177 | -1.0552778 | 0.401994086 | -1.08331817 | 0.107491897 |
| 0.967508637 | 0.77245053 | 0.86004587 | 0.006607909 | 0.66710581  | 0.000781788 |
| 0.797077319 | 0.00240414 | -1.0635861 | 0.113912282 | 0.838380615 | 0.016457191 |
| 0.845404312 | 0.02961485 | 0.81713625 | 0.012731023 | 0.802943811 | 0.005100911 |
| -1.04418225 | 0.63311527 | 0.84637203 | 0.193236451 | -1.13685108 | 0.160156806 |
| -1.28727416 | 0.00432405 | 0.83255873 | 0.07679445  | -1.20635962 | 0.031105867 |
| -1.09978506 | 0.09338733 | -1.0099022 | 0.867624314 | -1.05262421 | 0.361148245 |
| 0.876399853 | 0.06627235 | 0.87712508 | 0.048524955 | -1.08892852 | 0.231349589 |
| 0.898274016 | 0.0406168  | 0.85198012 | 0.092697719 | 0.907662837 | 0.063514604 |
| -1.06032877 | 0.45882537 | 0.93975187 | 0.263443387 | -1.10200887 | 0.221372727 |
| 0.926871724 | 0.37426194 | -1.2471684 | 0.000199405 | -1.16209951 | 0.081992243 |
| -1.10388636 | 0.11588974 | -1.0672611 | 0.079499353 | 0.847884386 | 0.010066382 |
| 0.833405595 | 0.07164844 | -1.0381387 | 0.531159342 | 0.764592427 | 0.009093516 |
| 0.989437155 | 0.85581227 | 0.92727166 | 0.266097111 | -1.13999    | 0.028387673 |
| -1.19748345 | 0.04348161 | 0.9638696  | 0.391864238 | -1.05280528 | 0.557364899 |
| 0.881438002 | 0.03142532 | -1.0184378 | 0.723077239 | -1.03155345 | 0.588756161 |
| 0.802173916 | 0.00064692 | -1.1973337 | 0.086410391 | 0.782986954 | 0.000182388 |
| -1.00708692 | 0.87758894 | -1.0732391 | 0.270382505 | 0.963474124 | 0.418418148 |
| -1.01795416 | 0.86233138 | -1.1292156 | 0.135812444 | -1.25342493 | 0.031265381 |
| -1.05783047 | 0.21366625 | -1.0344365 | 0.491590339 | -1.019799   | 0.662518613 |
| -1.03028356 | 0.75011598 | -1.0425437 | 0.715363801 | 0.637100105 | 1.15E-05    |
| 0.959104967 | 0.49060185 | 0.72087162 | 2.63909E-05 | -1.02674195 | 0.662632762 |
| 0.989516382 | 0.83528614 | 0.96292678 | 0.617216493 | 0.994687097 | 0.916284199 |

|             |            |            |             |             |             |
|-------------|------------|------------|-------------|-------------|-------------|
| 0.878521558 | 0.16469448 | 0.96935249 | 0.730959316 | 0.911681103 | 0.319066599 |
| -1.08794308 | 0.23276178 | -1.1877823 | 0.047246    | 0.974954229 | 0.717889034 |
| -1.14905439 | 0.02359062 | -1.0388209 | 0.496924525 | -1.06499356 | 0.295677834 |
| -1.10966064 | 0.2225915  | 0.95857867 | 0.550279858 | -1.09290424 | 0.29681931  |
| -1.0806298  | 0.26530742 | -1.0293656 | 0.573717937 | 0.892215823 | 0.103642047 |
| 0.903332572 | 0.17848491 | -1.0654089 | 0.423203337 | 0.970620131 | 0.690833159 |
| 0.873156374 | 0.04640679 | -1.0861001 | 0.334188042 | -1.16385205 | 0.026560425 |
| -1.10895805 | 0.12901785 | 0.81661491 | 0.001850486 | 0.942566814 | 0.381847438 |
| -1.03826114 | 0.38747658 | 0.77226252 | 0.011830618 | 0.855166516 | 0.000632027 |
| 0.876393983 | 0.1120169  | 0.98943691 | 0.855809006 | 0.860958762 | 0.072302317 |
| 0.977490313 | 0.72117762 | -1.0869404 | 0.343067167 | 0.766856814 | 0.000107101 |
| 0.842685819 | 0.04759419 | -1.1141725 | 0.063777184 | 0.773048892 | 0.003559893 |
| 0.974606729 | 0.6063449  | 0.95615966 | 0.464413458 | -1.06759033 | 0.193082775 |
| 0.860020919 | 0.01019442 | 0.9206985  | 0.075791085 | 0.868563932 | 0.015957183 |
| 0.850736319 | 0.00159882 | 0.91846627 | 0.408659618 | 0.91436898  | 0.071092234 |
| 0.899497907 | 0.15941988 | -1.0244525 | 0.590895673 | 0.773993403 | 0.001095758 |
| 0.622883219 | 2.53E-11   | 0.70796458 | 0.000499918 | 0.967396098 | 0.559760628 |
| -1.02350251 | 0.67268776 | -1.0971347 | 0.129182418 | 0.909391976 | 0.088166826 |
| 0.932428106 | 0.21905061 | 0.92756492 | 0.141889428 | -1.05455075 | 0.349337951 |
| 0.997208091 | 0.94436482 | -1.0988857 | 0.309664117 | -1.06044497 | 0.146924755 |
| 0.748998524 | 3.69E-06   | -1.0406088 | 0.571076734 | 0.834950108 | 0.002179835 |
| 0.995904872 | 0.93584157 | 0.98349608 | 0.781243399 | -1.00977536 | 0.848681057 |
| 0.993565283 | 0.9144889  | 0.9959886  | 0.962158937 | 0.875790321 | 0.030917878 |
| -1.00202763 | 0.97720487 | 0.75959745 | 0.000200719 | -1.02509327 | 0.72678561  |
| -1.20691463 | 0.00144478 | -1.0960327 | 0.224200925 | 0.824958861 | 0.001143917 |
| 0.979810147 | 0.72144214 | -1.083434  | 0.23367045  | 0.969378844 | 0.586993251 |
| 0.885325489 | 0.03615001 | 0.99101715 | 0.89349833  | 0.871215984 | 0.018354939 |
| -1.06110835 | 0.3025772  | 0.98951207 | 0.807653224 | 0.984022102 | 0.778519126 |
| -1.2214273  | 0.07168967 | 0.86921244 | 0.09183957  | 0.878035131 | 0.237408439 |
| 0.978257911 | 0.74720259 | -1.081664  | 0.221462941 | 0.978215577 | 0.746722424 |
| -1.02784695 | 0.62170278 | 0.76346824 | 0.002330243 | 0.917782572 | 0.126950648 |
| -1.06739025 | 0.25455702 | 0.98112411 | 0.70247052  | 0.928188829 | 0.193776931 |
| 0.921234407 | 0.19909633 | 0.90604247 | 0.087131249 | 0.939215312 | 0.324763329 |
| -1.1205342  | 0.06528413 | 0.91836141 | 0.085523443 | -1.10257277 | 0.112251428 |
| -1.11589602 | 0.34741638 | 0.81855134 | 0.00932562  | -1.14873828 | 0.235923294 |
| -1.03359005 | 0.70031789 | 0.94728538 | 0.341966303 | 0.83591382  | 0.040518919 |
| 0.968000309 | 0.33893896 | 0.98276972 | 0.751857859 | -1.04465193 | 0.200528619 |
| -1.00019154 | 0.99719287 | -1.0632479 | 0.280532067 | 0.986651513 | 0.805069774 |
| 0.982870305 | 0.80394053 | -1.0111845 | 0.781375423 | 0.954782155 | 0.506913631 |
| -1.1089182  | 0.39106795 | 0.83046332 | 0.001642855 | -1.25870467 | 0.059624556 |
| 0.981696947 | 0.74778608 | 0.95447338 | 0.3625495   | -1.05110993 | 0.386999262 |
| 0.899086008 | 0.38442645 | 0.82401784 | 0.002086071 | 0.70707033  | 0.006065164 |
| 0.865037317 | 0.05473471 | 0.97601022 | 0.732092177 | -1.03971861 | 0.599949081 |
| 0.824301625 | 0.04539529 | 0.955573   | 0.420547055 | 0.939193116 | 0.508786514 |

|             |            |            |             |             |             |
|-------------|------------|------------|-------------|-------------|-------------|
| 0.939346708 | 0.3425004  | -1.0389262 | 0.505072388 | -1.08333778 | 0.225846942 |
| -1.15412844 | 0.05113916 | -1.0003373 | 0.995274219 | -1.18368343 | 0.022655808 |
| -1.00122658 | 0.99109882 | 0.93705565 | 0.258964048 | -1.19693963 | 0.106086361 |
| 0.831274592 | 0.00898639 | 0.92812221 | 0.496159624 | 0.767103481 | 0.00027876  |
| 0.831957237 | 0.01203017 | -1.1531031 | 0.040476315 | -1.05477332 | 0.454440895 |
| 0.911429226 | 0.15868255 | -1.0607449 | 0.29137591  | -1.06200417 | 0.357970758 |
| 0.858724126 | 0.01671321 | 0.93802624 | 0.263586534 | 0.975759407 | 0.692210001 |
| 0.933834364 | 0.18183067 | -1.0305761 | 0.635079461 | -1.02552165 | 0.620536076 |
| 0.875211228 | 0.04231104 | -1.0896304 | 0.16156445  | 0.651911834 | 1.42E-08    |
| 0.968393066 | 0.52506486 | -1.2349679 | 0.073668434 | 0.976684529 | 0.640318235 |
| 0.997330182 | 0.95116615 | 0.98851658 | 0.892899119 | -1.0380884  | 0.393428505 |
| -1.16555145 | 0.08318862 | -1.0273641 | 0.42671403  | 0.903437323 | 0.247078931 |
| -1.21432177 | 0.006385   | 0.9520376  | 0.368404345 | -1.29683314 | 0.00037183  |
| 0.956104458 | 0.38101489 | 0.93246103 | 0.317169753 | 0.939398086 | 0.223997552 |
| -1.0323013  | 0.43939422 | -1.2886102 | 0.038585267 | -1.04324403 | 0.304201381 |
| -1.11504989 | 0.24856904 | -1.0285712 | 0.62409019  | -1.17201525 | 0.094879396 |
| 0.890154213 | 0.04236346 | -1.1540835 | 0.242659605 | 0.957409796 | 0.440085932 |
| 0.879524811 | 0.08859655 | 0.93107368 | 0.337691151 | 0.934240364 | 0.362213283 |
| 0.88528279  | 0.0587644  | 0.91840722 | 0.370837434 | 0.795651409 | 0.000647597 |
| 0.823785413 | 0.0014687  | 0.95195266 | 0.454337886 | 0.942997082 | 0.314462681 |
| -1.2220088  | 0.00874378 | -1.1929722 | 0.017335189 | -1.21525709 | 0.010656218 |
| 0.957341539 | 0.52677568 | -1.3202573 | 0.014004701 | -1.08744485 | 0.225894435 |
| -1.00995289 | 0.83432347 | 0.77150247 | 0.000364384 | 0.937607974 | 0.17725909  |
| 0.854039604 | 0.00012582 | -1.0066808 | 0.925390257 | 0.896812292 | 0.0061264   |
| 0.868992698 | 0.00028783 | 0.93587915 | 0.311649671 | 0.823860547 | 1.84E-06    |
| 0.927437117 | 0.16564086 | -1.0014254 | 0.981654115 | 0.906493034 | 0.072556462 |
| 0.984990602 | 0.803265   | -1.0448549 | 0.389790896 | -1.05012717 | 0.421681949 |
| -1.11590821 | 0.15025206 | 0.6561947  | 2.0746E-08  | -1.04119072 | 0.593352347 |
| -1.47555902 | 0.00246217 | -1.0357016 | 0.487735517 | -1.07204508 | 0.572217479 |
| -1.00544631 | 0.91232993 | -1.0938865 | 0.043736493 | -1.00106668 | 0.982757568 |
| -1.15636597 | 0.03138008 | 0.9168528  | 0.321622214 | -1.03543574 | 0.598470026 |
| -1.13192634 | 0.29072632 | -1.2379464 | 0.002906876 | -1.22812152 | 0.082513099 |
| -1.00233799 | 0.97429104 | 0.78744631 | 1.8407E-05  | -1.04125127 | 0.577503017 |
| 0.925217345 | 0.49159695 | -1.0424238 | 0.313186329 | 0.82239841  | 0.08721906  |
| 0.865049995 | 0.01198637 | 0.9976149  | 0.979687855 | -1.048407   | 0.40012399  |
| 0.998577252 | 0.97086084 | 0.93093793 | 0.206428428 | -1.03348726 | 0.399629749 |
| 0.911148398 | 0.05957676 | 0.76670947 | 0.000719093 | 0.920609453 | 0.092853373 |
| -1.03229225 | 0.5509281  | 0.68460641 | 1.70968E-07 | 0.997514359 | 0.962690549 |
| -1.314898   | 0.00245475 | 0.75358243 | 9.40575E-06 | -1.01985178 | 0.820308162 |
| -1.06692495 | 0.30998863 | -1.0800703 | 0.300455124 | -1.02945625 | 0.647861416 |
| 0.886968091 | 0.20182329 | 0.72943606 | 2.52726E-05 | 0.884777594 | 0.192822066 |
| 0.752134267 | 3.21E-05   | 0.95645756 | 0.34899881  | 0.895443459 | 0.084026191 |
| 0.962525322 | 0.40992544 | 0.95254095 | 0.20812551  | -1.00626777 | 0.8924382   |
| -1.02256425 | 0.74024956 | 0.9216169  | 0.028213117 | -1.00237533 | 0.971866215 |

|             |            |            |             |             |             |
|-------------|------------|------------|-------------|-------------|-------------|
| 0.952509111 | 0.43649587 | 0.98947774 | 0.844290607 | -1.01930614 | 0.759188208 |
| -1.06675978 | 0.22861915 | -1.1185329 | 0.069178456 | -1.00237491 | 0.964512113 |
| 0.974710536 | 0.52495432 | 0.92730175 | 0.319658577 | 0.997528074 | 0.950927663 |
| -1.01128457 | 0.86209779 | 0.9561259  | 0.715439366 | -1.28823615 | 0.000237625 |
| 0.761108343 | 0.00064678 | -1.0029565 | 0.952279948 | 0.774685036 | 0.001323311 |
| 0.830562929 | 0.03791037 | -1.0458167 | 0.49847888  | 0.853786683 | 0.075542068 |
| 0.868312331 | 0.01037074 | -1.2827191 | 0.03658906  | 0.936786319 | 0.224580009 |
| -1.06231725 | 0.29558315 | 0.99626995 | 0.958870426 | -1.18345767 | 0.004792691 |
| 0.926011258 | 0.53766271 | -1.2045834 | 0.103074017 | -1.10552272 | 0.421761262 |
| 0.993352989 | 0.86043144 | 0.92940607 | 0.194598177 | -1.02878181 | 0.455526277 |
| 0.772986217 | 0.0030765  | 0.95096875 | 0.200562718 | 0.698338846 | 6.71E-05    |
| 0.990026781 | 0.89190643 | 0.99340038 | 0.891572167 | -1.11137315 | 0.156115297 |
| 0.923155806 | 0.27711672 | 0.92363305 | 0.139444423 | 0.901051043 | 0.158289157 |
| 0.998488846 | 0.97862533 | -1.2125994 | 0.029364254 | 0.979247255 | 0.710419982 |
| -1.01390885 | 0.81492883 | 0.91796985 | 0.181350335 | -1.05471532 | 0.368375547 |
| 0.878785558 | 0.05086065 | 0.84795064 | 0.081261245 | 0.987198481 | 0.842884837 |
| -1.10590089 | 0.59497199 | 0.87565278 | 0.038935178 | 0.961907246 | 0.837295728 |
| 0.926722446 | 0.1812912  | 0.89813857 | 0.023259118 | 0.953444158 | 0.399946707 |
| 0.997204443 | 0.96258246 | 0.99502372 | 0.940886112 | 0.82596244  | 0.002183702 |
| 0.953583924 | 0.69164831 | -1.0181951 | 0.772521459 | 0.645680436 | 0.000558692 |
| -1.02721664 | 0.75670176 | 0.89371431 | 0.038868063 | 0.895561269 | 0.206346077 |
| -1.0408652  | 0.45447425 | -1.0813242 | 0.056012995 | 0.908246942 | 0.075834121 |
| -1.0118998  | 0.76181146 | -1.1099244 | 0.110626992 | 0.945019757 | 0.151128544 |
| -1.09392585 | 0.10403835 | 0.55975078 | 3.11798E-10 | -1.02388994 | 0.665387557 |
| 0.975717678 | 0.6639637  | 0.73459246 | 0.000845907 | 0.778508578 | 4.38E-05    |
| -1.08431193 | 0.12096649 | -1.0549101 | 0.319046662 | -1.41302452 | 1.16E-08    |
| 0.958204038 | 0.42978625 | -1.0958477 | 0.115643686 | -1.0160593  | 0.767709992 |
| -1.00716101 | 0.87535727 | -1.0615256 | 0.63187946  | 0.955618532 | 0.320500682 |
| 0.99339833  | 0.92615218 | 0.98119508 | 0.617093704 | -1.11518464 | 0.131211074 |
| 0.98744903  | 0.91088738 | 0.89113453 | 0.170922932 | -1.31434547 | 0.01831475  |
| 0.663599018 | 4.27E-07   | -1.0588057 | 0.439757872 | 0.708992746 | 1.19E-05    |
| 0.981979644 | 0.86233018 | -1.0043427 | 0.952771059 | 0.687237593 | 0.000708211 |
| -1.02148676 | 0.68891352 | 0.91393277 | 0.115052348 | 0.980081916 | 0.704768468 |
| 0.814129854 | 0.02840649 | -1.0945585 | 0.129776088 | -1.14636106 | 0.140461465 |
| 0.948133369 | 0.32042218 | -1.0709514 | 0.294062506 | 0.89616511  | 0.043836938 |
| 0.910912143 | 0.20418924 | 0.68955265 | 0.053422141 | -1.03878962 | 0.602274052 |
| -1.04767002 | 0.55405899 | -1.0615246 | 0.292723055 | -1.4498622  | 1.56E-05    |
| -1.07073504 | 0.3901621  | -1.0280288 | 0.643522475 | -1.1711497  | 0.050283873 |
| 0.941690243 | 0.32132509 | 0.84887218 | 0.174939943 | 0.94350164  | 0.336907296 |
| 0.984164371 | 0.76162418 | 0.95595132 | 0.603537203 | -1.12777268 | 0.025561951 |
| -1.00229035 | 0.95884648 | 0.83244604 | 0.001100375 | 0.914679668 | 0.048287312 |
| -1.1291734  | 0.0703871  | 0.89563401 | 0.00638525  | 0.284051185 | 1.28E-25    |
| -1.00187364 | 0.96726    | 0.91722682 | 0.117365724 | 0.999431024 | 0.990042975 |
| 0.990291306 | 0.86046653 | -1.001882  | 0.973468082 | -1.00057143 | 0.991786488 |

|             |            |            |             |             |             |
|-------------|------------|------------|-------------|-------------|-------------|
| -1.71862264 | 3.66E-07   | -1.2141332 | 0.000399325 | -1.33029524 | 0.003494015 |
| -1.04119232 | 0.35419054 | -1.0592101 | 0.288564981 | -1.03770405 | 0.395319106 |
| 0.998572137 | 0.9758178  | -1.0155891 | 0.733930857 | 0.824335524 | 0.000133119 |
| -1.0224778  | 0.64720795 | -1.0745506 | 0.316596826 | 0.961747039 | 0.42291705  |
| -1.05334411 | 0.37341373 | -1.0051209 | 0.963897481 | -1.04798205 | 0.421833443 |
| 0.993789094 | 0.92513823 | 0.64326636 | 8.56397E-08 | -1.1612871  | 0.027524404 |
| -1.14066994 | 0.37018479 | 0.92836544 | 0.479415981 | -1.04975699 | 0.74011635  |
| 0.948209075 | 0.43221271 | 0.94628666 | 0.300574972 | -1.12516117 | 0.084994821 |
| -1.02655428 | 0.67117935 | -1.0905272 | 0.346742073 | -1.01045616 | 0.866098792 |
| 0.980351898 | 0.8137734  | -1.0213876 | 0.691859518 | -1.21392915 | 0.024607105 |
| 0.782887443 | 0.00180432 | 0.94670644 | 0.453895474 | 0.957178449 | 0.559503319 |
| -1.12264021 | 0.1892131  | 0.93786378 | 0.415712026 | -1.16961259 | 0.077329633 |
| 0.961768051 | 0.44413224 | -1.2144027 | 0.017048206 | 0.754586552 | 8.44E-07    |
| 0.872054606 | 0.09320129 | -1.0322936 | 0.598610164 | 0.846185714 | 0.041833433 |
| 0.989134136 | 0.77259968 | -1.04356   | 0.418999985 | -1.21895236 | 2.54E-06    |
| -1.0687625  | 0.26134449 | -1.0247156 | 0.582373095 | 0.893658498 | 0.060283334 |
| -1.1113552  | 0.10038825 | 0.9976418  | 0.971511972 | 0.964388562 | 0.568252004 |
| -1.08819501 | 0.2333695  | 0.96456585 | 0.430251462 | 0.970939286 | 0.675750818 |
| -1.03501522 | 0.50758552 | -1.0076371 | 0.890963433 | -1.00379096 | 0.941808701 |
| 0.984570837 | 0.77890613 | -1.0249754 | 0.792695829 | -1.12924932 | 0.031709708 |
| 0.964066688 | 0.43929076 | -1.0034399 | 0.936925542 | -1.01007246 | 0.831828601 |
| 0.983418251 | 0.75394004 | -1.0820061 | 0.098802359 | -1.03590434 | 0.509116103 |
| 0.951976208 | 0.39751099 | 0.90003872 | 0.033624391 | -1.01169239 | 0.841107092 |
| -1.1290566  | 0.00420841 | -1.0433828 | 0.466458059 | -1.10119715 | 0.021188879 |
| 0.943656224 | 0.33215448 | -1.1129212 | 0.110844455 | -1.02117674 | 0.725006407 |
| -1.01451716 | 0.77385955 | -1.1104263 | 0.475133902 | 0.937443782 | 0.201093169 |
| 0.903618712 | 0.18077031 | 0.96232398 | 0.570055417 | 0.942819244 | 0.434268123 |
| 0.98113736  | 0.7006965  | 0.90120634 | 0.096007741 | 0.999880545 | 0.998074679 |
| 0.98383542  | 0.71644693 | -1.0267207 | 0.754303539 | -1.02491911 | 0.583593643 |
| 0.884464164 | 0.17848448 | 0.96176559 | 0.603062876 | 0.80077208  | 0.016845534 |
| -1.01390312 | 0.75265703 | -1.0841864 | 0.356974016 | 0.966498212 | 0.437803842 |
| 0.864243362 | 0.14523531 | -1.0334468 | 0.518056666 | 0.555900545 | 2.11E-07    |
| 0.978715742 | 0.79570435 | -1.1469877 | 0.092653363 | -1.1975533  | 0.033634121 |
| -1.07049711 | 0.51989598 | 0.79119224 | 7.55301E-08 | 0.631851197 | 5.82E-05    |
| -1.00556428 | 0.92755049 | -1.0842078 | 0.173278041 | -1.06328927 | 0.316868688 |
| -1.0814231  | 0.04313295 | 0.91156112 | 0.148428506 | -1.06688063 | 0.092442277 |
| 0.853432868 | 0.00451398 | 0.92047362 | 0.242520405 | 0.916416493 | 0.108387026 |
| -1.04966679 | 0.42020423 | -1.0939684 | 0.087455688 | -1.04651057 | 0.449489623 |
| -1.08176595 | 0.10297234 | 0.92474153 | 0.161461926 | -1.13254384 | 0.011202962 |
| 0.943648175 | 0.09411691 | 0.87746593 | 0.007415121 | -1.19402128 | 3.07E-06    |
| 0.981616554 | 0.78511999 | -1.1353895 | 0.020266131 | -1.16825633 | 0.025568935 |
| 0.781249363 | 6.98E-05   | 0.9350898  | 0.249955622 | 0.891409844 | 0.049738227 |
| -1.11989373 | 0.01904979 | -1.0433965 | 0.300095967 | 0.974765603 | 0.587539613 |
| 0.865992761 | 0.10555537 | 0.93303239 | 0.247296424 | 0.989623155 | 0.905441645 |

|             |            |            |             |             |             |
|-------------|------------|------------|-------------|-------------|-------------|
| -1.10680198 | 0.32845734 | 0.92955158 | 0.149101286 | -1.15075864 | 0.178037159 |
| -1.03681806 | 0.52149903 | 0.93664258 | 0.385061738 | -1.12187058 | 0.045030592 |
| 0.9427357   | 0.2089045  | 0.97464373 | 0.604371236 | 0.923204048 | 0.090572262 |
| 0.992603732 | 0.90881574 | -1.1036336 | 0.031440077 | -1.05868538 | 0.380651261 |
| -1.19844803 | 0.02281235 | -1.0522796 | 0.573851445 | -1.07269141 | 0.367625413 |
| 0.996459113 | 0.93359273 | -1.0043551 | 0.920958466 | 0.882333259 | 0.004642736 |
| -1.08558088 | 0.04493744 | 0.71455462 | 0.001260018 | 0.986722692 | 0.739518658 |
| 0.972045719 | 0.63916735 | -1.1309322 | 0.142570664 | -1.00482431 | 0.936501759 |
| 0.603622567 | 1.30E-09   | 0.93431296 | 0.520990987 | 0.821673566 | 0.006231302 |
| 0.828539608 | 0.02293001 | -1.0351553 | 0.571832265 | 0.656472879 | 2.76E-06    |
| -1.00050049 | 0.99526236 | 0.95635992 | 0.242875196 | 0.875997418 | 0.120344434 |
| 0.922563134 | 0.16584868 | -1.1453224 | 0.01408345  | -1.01038034 | 0.857839369 |
| -1.03168461 | 0.55541059 | 0.95097587 | 0.403320686 | 0.980317615 | 0.706805209 |
| 0.953415345 | 0.27788486 | -1.1323779 | 0.011293295 | -1.00488128 | 0.911324831 |
| 0.935208635 | 0.33720716 | -1.0128787 | 0.708399519 | 0.729427853 | 3.00E-05    |
| -1.26208146 | 0.01926068 | -1.0668646 | 0.343422756 | -1.25571576 | 0.021902476 |
| 0.967290045 | 0.51378999 | 0.73586867 | 1.81928E-06 | -1.0357581  | 0.490423909 |
| -1.33805832 | 0.00206672 | -1.0234061 | 0.623335255 | -1.1954933  | 0.052224352 |
| -1.01867676 | 0.77003119 | 0.87735748 | 0.140231536 | 0.944594911 | 0.369490348 |
| 0.990907114 | 0.87717743 | -1.0849965 | 0.431371521 | 0.908608265 | 0.10910529  |
| -1.25862084 | 0.00064769 | -1.0885841 | 0.135695108 | -1.43082047 | 6.46E-07    |
| 0.968201809 | 0.38292979 | 0.92699852 | 0.10791377  | 0.838460671 | 1.33E-05    |
| -1.11006042 | 0.16865027 | 0.94880546 | 0.41890727  | 0.990998113 | 0.904265312 |
| -1.10020954 | 0.09710344 | -1.0857249 | 0.291655832 | 0.889670054 | 0.043569933 |
| 0.915502328 | 0.34347053 | 0.93969928 | 0.147975119 | -1.06022416 | 0.529337361 |
| -1.21518157 | 0.02967571 | -1.0398983 | 0.332340576 | -1.27254995 | 0.007835346 |
| -1.09190383 | 0.26209749 | 0.62909549 | 3.04469E-10 | -1.12457356 | 0.136047772 |
| -1.65729182 | 0.000292   | 0.73479891 | 4.11842E-05 | -1.89866983 | 8.65E-06    |
| -1.5740318  | 1.51E-05   | 0.80632578 | 0.009750264 | -1.36759084 | 0.001805585 |
| 0.819770194 | 0.00050327 | 0.8025354  | 0.011332152 | -1.00226635 | 0.966504475 |
| -1.08864269 | 0.05821002 | -1.0412434 | 0.484222157 | -1.12596055 | 0.009169708 |
| -1.22627653 | 0.07045068 | 0.98390881 | 0.758822864 | -1.14861316 | 0.215378224 |
| 0.976566737 | 0.76636974 | -1.0101429 | 0.81749772  | -1.01011688 | 0.899592624 |
| 0.973579181 | 0.78158006 | 0.84529565 | 0.018491865 | 0.793665116 | 0.019655086 |
| -1.13288377 | 0.06111044 | -1.1436971 | 0.16966155  | 0.904339622 | 0.129051862 |
| -1.61386287 | 0.00189754 | -1.0829244 | 0.121238143 | -1.16512062 | 0.301538441 |
| 0.933348739 | 0.24125201 | -1.1609568 | 0.10286366  | 0.949671757 | 0.378972295 |
| -1.09727408 | 0.09672514 | 0.98290818 | 0.785341209 | -1.11749257 | 0.048061879 |
| 0.962134631 | 0.64571862 | -1.0398409 | 0.509434612 | 0.83826635  | 0.039271718 |
| 0.998694371 | 0.98315613 | -1.260508  | 0.000601905 | 0.832780568 | 0.004437167 |
| -1.01752039 | 0.80319861 | 0.90953469 | 0.012606622 | -1.2169563  | 0.006513387 |
| -1.10195934 | 0.06303939 | -1.0817368 | 0.298437635 | -1.23359444 | 0.000138759 |
| -1.09440114 | 0.25667393 | -1.0165411 | 0.772874257 | 0.828942265 | 0.020673749 |
| -1.08777104 | 0.36856886 | -1.2462625 | 0.020723195 | -1.25402843 | 0.018031379 |

|             |            |            |             |             |             |
|-------------|------------|------------|-------------|-------------|-------------|
| 0.970127483 | 0.65290067 | -1.0423142 | 0.636683261 | -1.05925393 | 0.394468266 |
| 0.887800221 | 0.05508408 | -1.0474285 | 0.55280434  | -1.00426247 | 0.94438627  |
| 0.991749248 | 0.93340386 | -1.4548859 | 0.00024254  | -1.05187369 | 0.610416413 |
| 0.865720521 | 0.04142799 | -1.0264082 | 0.629106991 | 0.746308689 | 8.86E-05    |
| 0.98947796  | 0.86492389 | -1.1042493 | 0.027914595 | -1.22417389 | 0.001890443 |
| 0.89463808  | 0.06859038 | -1.1192225 | 0.312693175 | 0.939472017 | 0.301975256 |
| -1.12179542 | 0.26135004 | 0.91302523 | 0.256890957 | -1.5186399  | 0.000129012 |
| -1.00074817 | 0.98893643 | 0.83785456 | 0.07114105  | -1.09319857 | 0.102780174 |
| -1.27208539 | 0.04473747 | 0.98906603 | 0.86677835  | 0.749125102 | 0.01685801  |
| -1.14070158 | 0.13067435 | -1.219911  | 0.180504755 | -1.00594794 | 0.945129898 |
| -1.02127363 | 0.71588988 | 0.99495858 | 0.931131949 | 0.855798735 | 0.009096174 |
| 0.927569817 | 0.40939049 | -1.1071917 | 0.069179572 | -1.04011585 | 0.665333646 |
| -1.05638768 | 0.49099582 | 0.83325781 | 0.03329598  | -1.14903899 | 0.084741362 |
| 0.963412833 | 0.6077518  | 0.86791456 | 0.025372567 | 0.856522307 | 0.036467288 |
| 0.940379381 | 0.41004026 | 0.83782658 | 0.013612793 | -1.14962414 | 0.065074444 |
| 0.940504141 | 0.25220037 | -1.0495187 | 0.348900402 | 0.983378946 | 0.753017333 |
| 0.985922511 | 0.77624877 | 0.86410512 | 0.068893912 | 0.853170267 | 0.002313288 |
| -1.02910867 | 0.44491011 | 0.90875105 | 0.307015462 | -1.01036696 | 0.783126595 |
| -1.10866382 | 0.05582702 | -1.0602525 | 0.386828371 | 0.913357586 | 0.09167576  |
| 0.915751881 | 0.39229048 | 0.94837559 | 0.386347118 | 0.956507071 | 0.66477106  |
| 0.984014927 | 0.81449993 | -1.048347  | 0.634273281 | -1.11245319 | 0.124808979 |
| -1.10219383 | 0.08666898 | 0.89432519 | 0.111447708 | -1.03307742 | 0.561879574 |
| 0.951363812 | 0.54052745 | -1.0992945 | 0.131952744 | 0.996094975 | 0.961626917 |
| 0.951091255 | 0.53388842 | -1.081701  | 0.195459542 | -1.21199742 | 0.019861553 |
| -1.21143587 | 0.0144449  | -1.1754115 | 0.11629487  | -1.16145964 | 0.053676427 |
| -1.0101608  | 0.89684364 | -1.0676097 | 0.22831015  | 0.863815674 | 0.064662902 |
| -1.06467222 | 0.2527599  | 0.7877471  | 0.046546437 | 0.957657936 | 0.428294076 |
| -1.1210216  | 0.12835507 | -1.1646111 | 0.081268878 | -1.0895126  | 0.251578676 |
| -1.04364297 | 0.59794817 | 0.82778199 | 0.001799622 | 0.892588193 | 0.16396698  |
| 0.739621648 | 1.09E-05   | -1.0780562 | 0.409561143 | 0.71463733  | 1.53E-06    |
| 0.948614641 | 0.34464816 | 0.88400908 | 0.124966551 | 0.903136422 | 0.071099343 |
| 0.980123771 | 0.76683482 | 0.93096684 | 0.326193071 | -1.11153062 | 0.122380695 |
| -1.29484131 | 2.08E-05   | -1.0955285 | 0.223189192 | -1.17413374 | 0.005404208 |
| -1.06225093 | 0.26548687 | -1.0146616 | 0.784631896 | 0.957243689 | 0.419118004 |
| 0.87226202  | 0.02600532 | -1.0447458 | 0.381741908 | 0.952418382 | 0.417688204 |
| 0.930861581 | 0.15534668 | -1.0029583 | 0.937144783 | 0.870383963 | 0.0072342   |
| -1.01419012 | 0.78125655 | -1.0425317 | 0.433407872 | 0.880927307 | 0.015083034 |
| 0.997449411 | 0.96208863 | 0.82948134 | 0.072503491 | -1.02241831 | 0.680104203 |
| -1.12075285 | 0.0841289  | -1.1107987 | 0.130046395 | -1.1075195  | 0.120785764 |
| -1.0493675  | 0.44726712 | -1.1618091 | 0.009502606 | 0.97093512  | 0.641235324 |
| -1.0435147  | 0.72174901 | -1.135795  | 0.121581235 | -1.1546029  | 0.23225236  |
| -1.12685811 | 0.18741828 | -1.1460758 | 0.094466047 | -1.02080821 | 0.818770251 |
| 0.849664923 | 0.0863765  | -1.1734269 | 0.039723136 | 0.801216914 | 0.02107949  |
| 0.953591963 | 0.42829592 | -1.0210411 | 0.789489009 | 0.956659847 | 0.459996516 |



|             |            |            |             |             |             |
|-------------|------------|------------|-------------|-------------|-------------|
| 0.988086195 | 0.84569683 | -1.0188523 | 0.731773538 | 0.973527185 | 0.663320136 |
| -1.28019075 | 0.04388183 | -1.199481  | 0.017188897 | -1.18110861 | 0.170031404 |
| -1.01402957 | 0.91032126 | -1.200861  | 0.027045632 | -1.05607012 | 0.659452749 |
| 0.984572894 | 0.86231125 | 0.91431205 | 0.155414795 | -1.02047455 | 0.821148948 |
| -1.1984328  | 0.00441574 | -1.0208527 | 0.710612063 | -1.03380207 | 0.587395849 |
| -1.11662282 | 0.14946204 | -1.0507594 | 0.465540007 | 0.999307974 | 0.992711411 |
| -1.05900974 | 0.3731887  | -1.1345943 | 0.026553528 | -1.05750161 | 0.38509901  |
| -1.0825674  | 0.43123151 | 0.85062697 | 0.003925621 | -1.0560838  | 0.587685245 |
| 0.968760154 | 0.6763621  | 0.98680559 | 0.824752305 | -1.08356662 | 0.293271809 |
| -1.10420201 | 0.17046354 | 0.9011753  | 0.041080539 | -1.0505705  | 0.492243936 |
| 0.89870511  | 0.19808049 | -1.0378045 | 0.465562409 | 0.884109926 | 0.138712361 |
| -1.06951114 | 0.35136873 | 0.89824766 | 0.049842502 | 0.988634111 | 0.873549041 |
| -1.0756978  | 0.62727557 | -1.0603445 | 0.369752851 | 0.953458389 | 0.750982321 |
| 0.968029794 | 0.54236261 | 0.95302265 | 0.44793304  | 0.97132998  | 0.585328505 |
| 0.904762331 | 0.1412371  | -1.0149703 | 0.901077277 | 0.929738443 | 0.281922382 |
| 0.799048975 | 0.03232896 | 0.99719773 | 0.975087655 | 0.582302514 | 2.25E-06    |
| -1.15004918 | 0.04910908 | 0.89113397 | 0.22186857  | -1.52335754 | 1.39E-07    |
| -1.0294739  | 0.76605048 | 0.93129031 | 0.237092374 | -1.22967268 | 0.037901395 |
| -1.0447382  | 0.61005465 | -1.1427952 | 0.033834401 | -1.11014503 | 0.226009203 |
| 0.876158951 | 0.20234426 | -1.1957521 | 0.141101176 | -1.17038115 | 0.130428298 |
| -1.00434931 | 0.93974826 | 0.92725041 | 0.542124317 | 0.986121365 | 0.807732966 |
| 0.959616217 | 0.54570623 | -1.1988964 | 0.046982874 | -1.00328548 | 0.961588896 |
| 0.904811135 | 0.49043097 | -1.0373676 | 0.549418461 | 0.652605593 | 0.004538349 |
| 0.820397926 | 0.00218833 | -1.0173104 | 0.820878279 | 0.811247354 | 0.001275449 |
| 0.834503345 | 0.00156077 | 0.97744277 | 0.722226972 | 0.902712952 | 0.064752958 |
| -1.02920181 | 0.6745983  | -1.1749466 | 0.11290782  | -1.22709521 | 0.004071672 |
| 0.937815122 | 0.1479755  | -1.0393955 | 0.611455213 | 0.853196878 | 0.000633536 |
| 0.909451243 | 0.19608464 | 0.92496704 | 0.279168933 | -1.15148305 | 0.056972476 |
| -1.00861143 | 0.93274556 | 0.95076795 | 0.540486086 | -1.21021232 | 0.064624801 |
| 0.966791502 | 0.58926898 | 0.92184521 | 0.259994357 | 0.869696011 | 0.028888292 |
| -1.13797957 | 0.25137209 | 0.91892369 | 0.57382515  | 0.950118564 | 0.648066129 |
| 0.965871444 | 0.65635546 | 0.90962782 | 0.079516315 | -1.04943632 | 0.536727419 |
| 0.831880362 | 0.00035493 | 0.79139603 | 0.000972228 | 0.777561813 | 3.04E-06    |
| 0.856231135 | 0.04426541 | 0.60143949 | 6.95998E-06 | -1.09856615 | 0.217585644 |
| -1.02112935 | 0.73853309 | -1.327321  | 0.000151521 | 0.949289705 | 0.407360737 |
| 0.940682622 | 0.17691062 | -1.3108432 | 0.007348214 | 0.9238855   | 0.082155095 |
| -1.00135011 | 0.98189826 | -1.1050643 | 0.246769134 | 0.977867392 | 0.706821213 |
| 0.891226983 | 0.02801835 | -1.2153009 | 0.062328737 | 0.929475612 | 0.157313296 |
| -1.01288549 | 0.82977223 | 0.87815484 | 0.027016242 | 0.935690522 | 0.267009781 |
| 0.944748287 | 0.35972668 | -1.0173105 | 0.801108168 | 0.921654388 | 0.190442365 |
| -1.14032399 | 0.08830941 | -1.130008  | 0.399943263 | -1.2408965  | 0.006133973 |
| -1.12683465 | 0.17317653 | 0.72336387 | 2.52725E-06 | -1.0363535  | 0.681400236 |
| -1.07711453 | 0.26948996 | 0.92627085 | 0.163996217 | -1.02207988 | 0.744163022 |
| 0.984485854 | 0.67858346 | -1.0918894 | 0.20281447  | 0.999717931 | 0.994029637 |

|             |            |            |             |             |             |
|-------------|------------|------------|-------------|-------------|-------------|
| 0.950706278 | 0.20055233 | 0.98035793 | 0.651980454 | -1.06120026 | 0.133679977 |
| -1.18922954 | 0.02103701 | 0.9113621  | 0.20600445  | -1.00026263 | 0.997139357 |
| -1.32615336 | 0.00158373 | 0.95658253 | 0.662478877 | -1.28770668 | 0.004306822 |
| -1.00514897 | 0.89868019 | 0.97621328 | 0.700151379 | 0.974755505 | 0.52688487  |
| 0.880557416 | 0.0238601  | 0.91323555 | 0.419119374 | 0.914128353 | 0.106560766 |
| 0.922648116 | 0.12655355 | 0.9838727  | 0.834849113 | -1.02696963 | 0.610049742 |
| 0.90522512  | 0.04291071 | 0.77879609 | 3.41662E-06 | -1.03193238 | 0.51547519  |
| -1.03511151 | 0.69845529 | -1.0029225 | 0.969249367 | 0.889396662 | 0.191472976 |
| -1.03061889 | 0.55397668 | 0.90935003 | 0.133165234 | -1.01484466 | 0.772187783 |
| -1.00570141 | 0.90567249 | 0.84497331 | 0.000409191 | -1.15409753 | 0.00407311  |
| -1.22531907 | 0.00564432 | 0.99411887 | 0.920988443 | -1.28053734 | 0.00091824  |
| -1.14395383 | 0.13846149 | 0.86901536 | 0.008036672 | -1.03055608 | 0.737748656 |
| -1.24273222 | 0.00812085 | -1.2157659 | 0.001738798 | 0.969968169 | 0.701192875 |
| -1.11465773 | 0.21742135 | -1.1361356 | 0.042846854 | -1.22912283 | 0.021307566 |
| -1.0897095  | 0.35455241 | -1.0625243 | 0.42622241  | -1.62671019 | 2.32E-06    |
| -1.04947126 | 0.48877037 | 0.91415058 | 0.304088177 | -1.29675796 | 0.000433035 |
| 0.888726861 | 0.05687779 | 0.99725486 | 0.967218796 | -1.0926421  | 0.149656593 |
| -1.42578659 | 0.00370345 | 0.98712558 | 0.731211048 | -1.37003657 | 0.009406624 |
| 0.94824551  | 0.63915514 | -1.0032303 | 0.93441489  | -1.17712546 | 0.153699065 |
| -1.4018     | 0.00161472 | -1.0265796 | 0.720380292 | -1.59031102 | 2.98E-05    |
| 0.931432543 | 0.28801916 | -1.1903847 | 0.044776268 | -1.04202586 | 0.536618398 |
| -1.00024273 | 0.99654116 | -1.0295974 | 0.470641676 | -1.18438227 | 0.003688008 |
| -1.03921408 | 0.36385544 | 0.85443646 | 0.00576659  | -1.0296123  | 0.490167672 |
| -1.06769516 | 0.40829464 | 0.95473572 | 0.375881668 | 0.773500018 | 0.001893771 |
| -1.53738129 | 1.00E-05   | -1.002981  | 0.950796892 | -1.27937738 | 0.007215836 |
| -1.09723498 | 0.11589555 | -1.0471146 | 0.605468475 | 0.790687564 | 0.000168892 |
| 0.699240807 | 0.00029339 | -1.0936362 | 0.082831458 | 0.747303945 | 0.002637565 |
| 0.972769385 | 0.79312019 | 0.97277938 | 0.565711189 | -1.12664928 | 0.259995552 |
| 0.869493369 | 0.00927218 | -1.2559875 | 0.002087507 | 0.899999537 | 0.04693688  |
| -1.13779505 | 0.14313149 | -1.3567743 | 0.001233718 | -1.06498669 | 0.471741831 |
| 0.922923198 | 0.26016408 | 0.94524526 | 0.479294187 | 0.96800112  | 0.646354068 |
| 0.894758031 | 0.03813178 | -1.1453614 | 0.124518694 | -1.02178229 | 0.682016591 |
| 0.821645932 | 0.00370978 | -1.1676984 | 0.097746838 | 0.770482292 | 0.000178475 |
| 0.994809174 | 0.88770161 | -1.3989141 | 1.1151E-05  | -1.04594392 | 0.226059351 |
| -1.09710515 | 0.17402646 | -1.0547668 | 0.382962612 | -1.12383518 | 0.088391737 |
| 0.880085475 | 0.0285786  | -1.0156835 | 0.894569694 | 0.938559258 | 0.269022351 |
| -1.15680717 | 0.05450135 | -1.0123885 | 0.913408067 | 0.981707314 | 0.804188404 |
| -1.07578851 | 0.2223409  | -1.3150472 | 0.009416239 | -1.09751059 | 0.121713594 |
| -1.26814166 | 0.01571715 | 0.97207298 | 0.670424536 | 0.991448196 | 0.928467513 |
| 0.70277795  | 1.83E-05   | -1.0083568 | 0.881845582 | 0.814466121 | 0.008403874 |
| -1.04218792 | 0.51329167 | -1.0617794 | 0.159290889 | 0.971219835 | 0.643759915 |
| 0.955652364 | 0.39721852 | 0.8878646  | 0.13606967  | 0.858256689 | 0.005769887 |
| -1.26263605 | 0.01104532 | -1.3064645 | 0.003747911 | 0.986469849 | 0.878358997 |
| 0.966929368 | 0.5875725  | 0.85506651 | 0.009340621 | -1.0225973  | 0.718358035 |

|             |            |            |             |             |             |
|-------------|------------|------------|-------------|-------------|-------------|
| 0.96476459  | 0.59335692 | 0.77266746 | 0.007229921 | 0.960302381 | 0.546664228 |
| 0.949995104 | 0.36714908 | -1.0361118 | 0.736176886 | 0.848742783 | 0.00528573  |
| 0.996528445 | 0.95820349 | 0.95526678 | 0.380975813 | 0.944724223 | 0.393102868 |
| 0.915009891 | 0.18007403 | 0.98754986 | 0.885870593 | -1.07253757 | 0.289029354 |
| 0.964857219 | 0.70513689 | 0.8867643  | 0.093962395 | -1.07646426 | 0.436777416 |
| -1.09680981 | 0.06247557 | -1.0025511 | 0.961331825 | -1.03247163 | 0.513397223 |
| 0.87473783  | 0.17524382 | 0.89538594 | 0.093614817 | -1.3550313  | 0.002920862 |
| -1.00600493 | 0.92430739 | -1.0051903 | 0.888290054 | 0.914616156 | 0.160517818 |
| 0.790495509 | 0.00364943 | -1.0016999 | 0.979950062 | 0.679243085 | 6.44E-06    |
| -1.01989502 | 0.81426346 | 0.96016624 | 0.47710711  | 0.978536998 | 0.795843371 |
| -1.15171869 | 0.16976427 | 0.96310622 | 0.614004048 | -1.10454259 | 0.331672122 |
| -1.02717943 | 0.6969973  | 0.94388516 | 0.333435074 | 0.8968841   | 0.118004988 |
| -1.20717699 | 0.0076496  | -1.0996347 | 0.323027515 | -1.48394701 | 3.50E-07    |
| 0.952733062 | 0.43019304 | 0.92760411 | 0.320811344 | 0.858874757 | 0.015612417 |
| -1.04197165 | 0.65340151 | 0.98722781 | 0.838566555 | 0.842660503 | 0.065514339 |
| -1.06725654 | 0.28998716 | -1.0292197 | 0.590157018 | -1.21774837 | 0.002088174 |
| -1.07566988 | 0.21578459 | -1.0961123 | 0.304864932 | -1.05863465 | 0.332234022 |
| -1.01467646 | 0.87300527 | -1.0020074 | 0.974164837 | -1.5409839  | 1.47E-05    |
| 0.945136488 | 0.47609633 | -1.0190582 | 0.778478126 | 0.646855285 | 9.35E-07    |
| -1.20063516 | 0.00159213 | 0.92022181 | 0.146308973 | -1.28895514 | 2.46E-05    |
| 0.990192763 | 0.85888102 | -1.0663531 | 0.335061646 | 0.978624915 | 0.696851689 |
| 0.962492757 | 0.4209159  | 0.98628962 | 0.83360235  | -1.03992246 | 0.409924534 |
| -1.07956302 | 0.23479696 | 0.77887145 | 0.010351687 | 0.982024193 | 0.776963989 |
| -1.04348799 | 0.15415691 | -1.1767573 | 0.001480062 | -1.02954227 | 0.327311409 |
| -1.04701625 | 0.35248173 | -1.0419929 | 0.674541787 | 0.606252692 | 3.44E-14    |
| -1.01324861 | 0.80812923 | 0.99065604 | 0.881576936 | -1.01948594 | 0.721872969 |
| 0.981512483 | 0.71448578 | 0.87433136 | 0.088163942 | -1.01484106 | 0.772667043 |
| 0.895669564 | 0.17531802 | 0.92487637 | 0.353508912 | 0.881492479 | 0.121747265 |
| -1.22381483 | 0.04532811 | 0.96957225 | 0.761973518 | -1.2106537  | 0.057685401 |
| -1.00463193 | 0.93556558 | 0.78425979 | 0.000816831 | -1.03012397 | 0.604059276 |
| 0.789849383 | 0.0004667  | -1.3178164 | 0.000159289 | 0.625475107 | 9.07E-10    |
| -1.22286275 | 0.0508492  | 0.96165639 | 0.523715813 | -1.30106771 | 0.011620265 |
| -1.08620429 | 0.42124176 | -1.0446884 | 0.633061631 | -1.23249952 | 0.045370669 |
| 0.902361713 | 0.05544838 | -1.0723948 | 0.256240846 | 0.843263421 | 0.002002738 |
| -1.13485917 | 0.11376612 | -1.0860288 | 0.162212388 | -1.10156984 | 0.224299709 |
| -1.01792465 | 0.69966685 | -1.1891064 | 0.061582262 | 0.806246091 | 1.84E-05    |
| 0.887606353 | 0.29393137 | 0.76431684 | 0.001210176 | 0.45947681  | 5.88E-09    |
| -1.2181192  | 0.02074215 | -1.2789362 | 4.00441E-05 | -1.07543946 | 0.383637829 |
| -1.18676534 | 0.00546604 | 0.92288775 | 0.151587547 | -1.01897604 | 0.751814775 |
| 0.997723358 | 0.97326986 | -1.0889553 | 0.076214406 | 0.997102465 | 0.965973409 |
| -1.01111002 | 0.88487189 | -1.0647122 | 0.329442126 | -1.13361467 | 0.104504168 |
| -1.15678007 | 0.0206707  | -1.0003167 | 0.991462486 | -1.08713371 | 0.177073964 |
| 0.889147224 | 0.10706395 | -1.0985623 | 0.060309443 | 0.893111795 | 0.120687392 |
| -1.02030706 | 0.66172513 | 0.98423031 | 0.769337027 | 0.974715619 | 0.57749262  |

|             |            |            |             |             |             |
|-------------|------------|------------|-------------|-------------|-------------|
| -1.03865629 | 0.5635165  | 0.96213631 | 0.450140348 | 0.509108781 | 2.19E-14    |
| -1.27403398 | 0.02463552 | 0.84122469 | 0.035651674 | -1.1617087  | 0.158224111 |
| -1.18599602 | 0.01862646 | -1.2808684 | 0.015057542 | -1.46185774 | 1.55E-06    |
| -1.30158531 | 0.00392422 | 0.95778159 | 0.451668962 | -1.17264437 | 0.074109398 |
| -1.05044065 | 0.48774301 | 0.85140648 | 0.013949228 | -1.12145893 | 0.109464605 |
| -1.02358601 | 0.765641   | -1.0367059 | 0.721822042 | 0.886750185 | 0.128307953 |
| -1.02779117 | 0.60921476 | -1.1575939 | 0.157262663 | 0.916923898 | 0.109606972 |
| -1.14471193 | 0.03727189 | -1.0652414 | 0.233707351 | -1.03977202 | 0.540268473 |
| 0.831545447 | 0.01270774 | -1.1405202 | 0.100554441 | 0.988912414 | 0.876747532 |
| 0.90372482  | 0.059775   | 0.97499539 | 0.582689608 | -1.03485154 | 0.517935647 |
| -1.00261635 | 0.9601808  | 0.56530909 | 5.05416E-06 | 0.750559992 | 1.05E-06    |
| 0.909112709 | 0.24766551 | 0.91319736 | 0.277669359 | 0.937918002 | 0.435237364 |
| -1.00450636 | 0.92118092 | -1.0295775 | 0.624098613 | 0.949219536 | 0.254315262 |
| 0.951453999 | 0.32518942 | -1.1116957 | 0.123713052 | 0.965072594 | 0.481160924 |
| 0.860264386 | 0.46124477 | -1.062106  | 0.431038244 | 0.7530067   | 0.167652812 |
| 0.997321436 | 0.94046036 | -1.2089737 | 0.003019801 | -1.01882884 | 0.603888415 |
| 0.950330589 | 0.20373832 | 0.86322139 | 0.045083131 | -1.02226925 | 0.580350521 |
| 0.90552559  | 0.02853626 | 0.97996546 | 0.659610676 | 0.983518949 | 0.707756261 |
| -1.08611772 | 0.19480984 | -1.0249375 | 0.70731076  | -1.19313856 | 0.006966705 |
| 0.997973766 | 0.97122855 | -1.1220324 | 0.276563579 | 0.941082643 | 0.282833877 |
| 0.651112991 | 2.75E-06   | -1.17603   | 0.024962923 | 0.443003317 | 8.89E-14    |
| 0.996337677 | 0.95442739 | -1.154704  | 0.105783459 | -1.17542184 | 0.014403759 |
| 0.936806993 | 0.15434261 | 0.91051845 | 0.188812131 | 0.718330581 | 1.28E-09    |
| -1.12433484 | 0.3372504  | 0.94073245 | 0.435797276 | 0.781446356 | 0.046538336 |
| -1.1008155  | 0.40331604 | -1.0214437 | 0.692206638 | 0.921935133 | 0.479036034 |
| -1.23182813 | 0.02547508 | -1.2617786 | 0.000551165 | -1.05662026 | 0.546360898 |
| -1.05801677 | 0.27854225 | 0.89162879 | 0.114757396 | -1.3698986  | 1.16E-07    |
| 0.939310757 | 0.33638338 | 0.98367265 | 0.755687191 | 0.833046208 | 0.006533848 |
| 0.995929965 | 0.95150521 | 0.86364062 | 0.006821276 | 0.852697452 | 0.020522546 |
| -1.16027422 | 0.18302733 | 0.87101857 | 0.096099962 | -1.42942939 | 0.002043172 |
| 0.801546956 | 2.26E-05   | 0.94807446 | 0.243613509 | 0.982815252 | 0.71739718  |
| -1.02074135 | 0.85797791 | 0.98831054 | 0.815398813 | 0.899419208 | 0.357312921 |
| -1.02389507 | 0.69202569 | 0.86598263 | 0.48110776  | -1.07339429 | 0.237545667 |
| -1.00087679 | 0.98940212 | 0.98102566 | 0.594194808 | -1.06346129 | 0.353014125 |
| 0.764018757 | 0.00030279 | 0.98931361 | 0.787167763 | 0.905279795 | 0.158923576 |
| 0.522053061 | 7.13E-09   | -1.0287947 | 0.522460907 | -1.22076244 | 0.039926644 |
| 0.801529141 | 0.00267276 | -1.3000715 | 0.000111653 | -1.08908287 | 0.229743964 |
| 0.98035565  | 0.72074012 | 0.94130314 | 0.284675142 | 0.947539589 | 0.333427985 |
| -1.02272586 | 0.73716486 | 0.8429303  | 0.041610656 | -1.35763854 | 2.71E-05    |
| -1.15938032 | 0.09087876 | -1.0114652 | 0.859085123 | -1.39952488 | 0.000258482 |
| 0.999378435 | 0.99235607 | 0.72408739 | 2.47547E-09 | 0.960405628 | 0.534356315 |
| 0.674207934 | 1.03E-07   | -1.0217382 | 0.859639787 | -1.13723171 | 0.050195364 |
| -1.01736284 | 0.82614907 | -1.0061218 | 0.957512149 | 0.674971944 | 5.63E-06    |
| -1.06494805 | 0.22787455 | 0.98969824 | 0.909551624 | -1.10932939 | 0.049332245 |

|             |            |            |             |             |             |
|-------------|------------|------------|-------------|-------------|-------------|
| -1.15646054 | 0.01469753 | -1.0545656 | 0.307040292 | -1.48333055 | 7.76E-09    |
| -1.21886624 | 0.0047264  | 0.92458061 | 0.229714893 | -1.18046316 | 0.016672547 |
| -1.06526848 | 0.24862077 | 0.86598992 | 0.035616015 | -1.26561065 | 6.23E-05    |
| 0.946691355 | 0.36529618 | -1.1182094 | 0.315209974 | 0.84390502  | 0.00656013  |
| 0.924248019 | 0.23001288 | 0.92740006 | 0.119512762 | 0.804597198 | 0.001480739 |
| -1.26717102 | 0.00095548 | 0.78093991 | 0.034800386 | -1.27613018 | 0.000694297 |
| -1.00780266 | 0.90618133 | 0.96908851 | 0.598608813 | -1.00233209 | 0.971821663 |
| 0.949514112 | 0.36120322 | 0.74014551 | 2.78775E-05 | 0.846648013 | 0.004580601 |
| -1.00504377 | 0.87108103 | 0.95424749 | 0.504265921 | -1.08082268 | 0.014780139 |
| -1.23504156 | 0.0185102  | -1.0797306 | 0.421642371 | -1.33487703 | 0.001605328 |
| 0.764266966 | 0.06956365 | 0.95031067 | 0.471261592 | 0.781617727 | 0.095462582 |
| -1.17935382 | 0.00405269 | 0.97219837 | 0.61165836  | -1.02838675 | 0.612439569 |
| -1.00663453 | 0.88467477 | -1.0600414 | 0.385282507 | 0.974768952 | 0.575638094 |
| 0.999074641 | 0.98730129 | -1.0319483 | 0.715702926 | -1.03826199 | 0.519399547 |
| 0.945244725 | 0.48839582 | 0.8805148  | 0.054025299 | 0.923600602 | 0.329209765 |
| -1.17598946 | 0.00041779 | 0.92784756 | 0.248500261 | -1.1391237  | 0.003827388 |
| 0.972066167 | 0.46186864 | 0.8781877  | 0.101635625 | 0.994906963 | 0.89424699  |
| 0.615943002 | 2.54E-11   | -1.0501751 | 0.346867997 | 0.867196926 | 0.016981639 |
| 0.998054378 | 0.96471675 | -1.4355278 | 6.41092E-08 | 0.901008988 | 0.020960948 |
| -1.04325367 | 0.3481638  | -1.2747189 | 0.000662515 | 0.921379893 | 0.072780994 |
| 0.992096747 | 0.88264961 | -1.1000847 | 0.0841679   | 0.957370459 | 0.419060865 |
| 0.994333678 | 0.9246723  | -1.0762861 | 0.225813326 | -1.03127697 | 0.608766311 |
| 0.954805046 | 0.41699223 | 0.87783997 | 0.04967458  | 0.860467804 | 0.01033845  |
| 0.792019057 | 0.02678077 | -1.238395  | 0.002614596 | 0.886482275 | 0.244459365 |
| -1.11561598 | 0.15031381 | 0.91225636 | 0.167531359 | -1.06406418 | 0.411197741 |
| 0.933928523 | 0.25050968 | 0.82989479 | 0.001649315 | 0.431368629 | 6.27E-20    |
| -1.01738988 | 0.75395361 | 0.9809046  | 0.534692523 | 0.713724252 | 9.55E-08    |
| 0.996828838 | 0.9557239  | -1.2857678 | 0.005511822 | 0.852275845 | 0.006952461 |
| 0.943275125 | 0.27787613 | 0.55139721 | 0.000140665 | 0.702051704 | 1.62E-08    |
| -1.15843077 | 0.19696066 | 0.97469782 | 0.642713156 | -1.32865106 | 0.014581385 |
| 0.460644426 | 2.22E-13   | -1.0422435 | 0.365906861 | 0.565243556 | 2.62E-09    |
| -1.17383386 | 0.01344974 | 0.85987277 | 0.011783268 | -1.05287689 | 0.414845497 |
| 0.951318852 | 0.31332536 | 0.84034113 | 0.035658732 | 0.99022295  | 0.841937649 |
| 0.923736594 | 0.35251914 | -1.3164642 | 4.24318E-08 | 0.745039163 | 0.001005354 |
| 0.967868971 | 0.47078234 | -1.052395  | 0.187237719 | 0.844451212 | 0.000421264 |
| -1.11705723 | 0.08956943 | 0.99746908 | 0.965210851 | -1.08416781 | 0.212341344 |
| 0.981956324 | 0.75654377 | -1.0158302 | 0.72143839  | 0.981971127 | 0.756738785 |
| -1.04270249 | 0.50652448 | 0.94120437 | 0.181295333 | 0.962680918 | 0.545586595 |
| -1.03550271 | 0.35000352 | 0.86525783 | 0.009128404 | -1.0633354  | 0.102829802 |
| -1.07196731 | 0.47215952 | -1.1603715 | 0.016044212 | -1.14313619 | 0.16911705  |
| -1.14836669 | 0.00188085 | 0.90914495 | 0.097864428 | -1.29337105 | 1.29E-07    |
| -1.130971   | 0.28738675 | 0.92631225 | 0.457977904 | -1.09893596 | 0.413769562 |
| -1.03060949 | 0.54692838 | 0.96395418 | 0.626364255 | 0.899103341 | 0.037050663 |
| 0.985136946 | 0.76364858 | -1.0720355 | 0.24236591  | -1.11039422 | 0.039232726 |

|             |            |            |             |             |             |
|-------------|------------|------------|-------------|-------------|-------------|
| 0.788582138 | 0.001307   | 0.96817623 | 0.557015057 | 0.919046896 | 0.233179247 |
| 0.762755512 | 0.00141807 | 0.9603973  | 0.480994532 | 0.660088282 | 3.65E-06    |
| -1.05714417 | 0.57186733 | -1.0245407 | 0.650864156 | -1.13122133 | 0.21240327  |
| 0.99030174  | 0.8799927  | 0.98950967 | 0.925708551 | 0.653910414 | 1.80E-08    |
| 0.845832806 | 0.13862323 | 0.52035198 | 5.61293E-11 | -1.10831351 | 0.359959002 |
| 0.97862256  | 0.81263997 | -1.0556661 | 0.391454743 | -1.15763249 | 0.112511571 |
| -1.18257089 | 0.03029252 | 0.90146306 | 0.039028972 | 0.901954599 | 0.176603952 |
| 0.879396745 | 0.20837318 | 0.59861514 | 1.36305E-07 | 0.818659989 | 0.052557609 |
| -1.06060003 | 0.40223933 | 0.98774362 | 0.784927004 | -1.13779102 | 0.069457091 |
| -1.01620824 | 0.91243378 | -1.0144584 | 0.82345062  | -1.74687636 | 0.000333981 |
| -1.03685079 | 0.40685611 | -1.0532814 | 0.378306371 | -1.03745038 | 0.399451068 |
| 0.705383214 | 7.90E-05   | -1.0480558 | 0.456147061 | 0.754351405 | 0.001091787 |
| 0.977246731 | 0.67946379 | -1.0241167 | 0.522311397 | 0.350319635 | 2.06E-25    |
| 0.770996097 | 0.01586295 | -1.0207443 | 0.831415394 | 0.780443006 | 0.021184793 |
| 0.827670327 | 0.33351889 | -1.1385064 | 0.003390909 | 0.878701846 | 0.507529804 |
| 0.91283839  | 0.21502228 | -1.0409535 | 0.727390775 | 0.706175116 | 1.37E-05    |
| -1.06325379 | 0.37534082 | 0.91886834 | 0.094686069 | 0.78182731  | 0.00072291  |
| 0.693077908 | 4.69E-09   | 0.95109393 | 0.316080006 | 0.755946768 | 2.06E-06    |
| 0.949436786 | 0.59780588 | 0.86299017 | 0.04001279  | -1.49717777 | 0.000128487 |
| 0.950737836 | 0.12769622 | 0.69418331 | 3.26152E-05 | 0.964889741 | 0.278555523 |
| -1.11905935 | 0.05385575 | -1.0516014 | 0.608675857 | 0.9919231   | 0.887518374 |
| -1.02800801 | 0.66142994 | 0.99083435 | 0.886566278 | 0.540044675 | 1.38E-13    |
| 0.959435242 | 0.62981431 | -1.2287442 | 0.069895534 | -1.17445098 | 0.065210124 |
| 0.996631954 | 0.95434989 | -1.1493558 | 0.13081513  | 0.865234393 | 0.0168208   |
| 0.999143749 | 0.98671399 | -1.1790851 | 0.033196192 | -1.01982928 | 0.70287595  |
| 0.903396643 | 0.23837388 | -1.3416565 | 0.005222387 | 0.864370959 | 0.092929149 |
| 0.871926917 | 0.50012362 | -1.1673417 | 0.030632075 | 0.830190326 | 0.360722529 |
| 0.988987602 | 0.76082569 | -1.4725987 | 0.010292149 | 0.967666853 | 0.367886743 |
| 0.968910888 | 0.68611023 | -1.0141124 | 0.747390906 | -1.26567287 | 0.003744781 |
| 0.970758833 | 0.69256215 | 0.64288414 | 1.49648E-06 | -1.03854129 | 0.614545497 |
| 0.937435118 | 0.55687876 | 0.98144756 | 0.736659424 | -1.10636073 | 0.359167752 |
| 0.898754237 | 0.25212853 | 0.7694716  | 0.015122475 | 0.899096733 | 0.253804672 |
| -1.23654941 | 0.01366172 | 0.74857709 | 0.141018286 | -1.24721999 | 0.010466217 |
| -1.24211591 | 0.00039938 | 0.80774271 | 0.004866499 | 0.935266903 | 0.24883448  |
| -1.15013599 | 0.25683739 | 0.93744874 | 0.350690632 | 0.946052666 | 0.651383481 |
| -1.05842678 | 0.49738613 | 0.93437561 | 0.202191609 | -1.16634563 | 0.069601996 |
| 0.961305031 | 0.42971996 | -1.0258322 | 0.795193288 | -1.02574258 | 0.610425602 |
| 0.764681448 | 0.00051426 | 0.99307497 | 0.832264429 | 0.534166925 | 9.78E-12    |
| 0.989614142 | 0.83896536 | 0.96159563 | 0.495489154 | -1.09706108 | 0.075600148 |
| -1.00209437 | 0.97846928 | -1.0128579 | 0.839372399 | -1.09002511 | 0.268911409 |
| 0.995941007 | 0.93832431 | 0.58489762 | 6.23037E-08 | -1.02430761 | 0.648054013 |
| 0.95016509  | 0.43627846 | 0.95627016 | 0.449236019 | 0.980745361 | 0.766612939 |
| -1.35649031 | 3.39E-06   | -1.0618546 | 0.246313186 | -1.34848793 | 4.84E-06    |
| -1.03738452 | 0.45908269 | 0.85578798 | 0.07315197  | -1.04187356 | 0.408276569 |

|             |            |            |             |             |             |
|-------------|------------|------------|-------------|-------------|-------------|
| -1.11988595 | 0.18278709 | 0.656226   | 0.041681439 | -1.35832572 | 0.000594086 |
| -1.12945725 | 0.04809536 | 0.98762719 | 0.73220339  | -1.16659768 | 0.013306426 |
| 0.99506863  | 0.96040405 | -1.0408775 | 0.608348939 | 0.679273013 | 0.000268122 |
| -1.27921501 | 0.00963047 | -1.066954  | 0.389214826 | -1.02411002 | 0.796038243 |
| -1.0464649  | 0.30360358 | 0.49918291 | 4.64616E-08 | 0.950829074 | 0.253971932 |
| -1.05422517 | 0.34968119 | 0.74545782 | 0.002406352 | -1.16461921 | 0.008716416 |
| -1.05631802 | 0.32944964 | -1.0670069 | 0.43943746  | -1.18689559 | 0.003282314 |
| -1.23774835 | 0.00158169 | -1.0739623 | 0.219256468 | -1.35292719 | 1.75E-05    |
| -1.14440315 | 0.16117893 | -1.0521555 | 0.678658454 | -1.10537699 | 0.296028902 |
| 0.500244544 | 3.58E-07   | -1.2529394 | 0.008937666 | 0.512932426 | 7.70E-07    |
| 0.81261614  | 0.00051784 | 0.85675856 | 0.002933403 | 0.754135052 | 5.95E-06    |
| -1.01210746 | 0.8668803  | 0.63103756 | 4.89251E-08 | -1.29565106 | 0.000643403 |
| 0.995338555 | 0.95444853 | -1.0085037 | 0.86907323  | -1.02863955 | 0.730077299 |
| -1.34863596 | 0.00014195 | -1.0273251 | 0.728175146 | -1.02718251 | 0.714735169 |
| 0.867682935 | 0.07689733 | -1.0016972 | 0.974264295 | -1.06803714 | 0.406586318 |
| -1.39725645 | 6.37E-07   | 0.99346497 | 0.920242728 | -1.3482208  | 5.57E-06    |
| -1.26209119 | 0.03235808 | -1.2400062 | 0.000582525 | -1.5540071  | 0.00011527  |
| -1.02274956 | 0.7053343  | 0.9686983  | 0.520928226 | 0.983470237 | 0.77927165  |
| -1.03777082 | 0.62490485 | -1.1382049 | 0.128688073 | -1.19106075 | 0.024230777 |
| -1.15472187 | 0.00352042 | -1.019677  | 0.747368359 | 0.884660069 | 0.011989703 |
| -1.24176818 | 0.07464774 | 0.98362875 | 0.868352121 | -1.36362738 | 0.011894942 |
| -1.12991157 | 0.09330553 | -1.079373  | 0.408639575 | -1.08932138 | 0.23663783  |
| 0.974409423 | 0.69796584 | -1.0559809 | 0.218278221 | 0.726428066 | 1.26E-05    |
| 0.954517297 | 0.33842473 | -1.1990637 | 0.002034197 | -1.09819954 | 0.057184644 |
| 0.975805683 | 0.53187381 | -1.2056089 | 0.00144657  | -1.04850683 | 0.228963456 |
| 0.945042557 | 0.37493547 | -1.166287  | 0.019863755 | -1.09902868 | 0.140867142 |
| -1.00445852 | 0.95116733 | -1.1093096 | 0.279415883 | 0.991843943 | 0.910241119 |
| -1.28831356 | 0.06349612 | 0.67827988 | 0.001979263 | -1.2325313  | 0.12373615  |
| -1.04567014 | 0.58962625 | 0.790482   | 0.000105982 | -1.17938844 | 0.05003535  |
| 0.891837965 | 0.30344764 | -1.0555623 | 0.452501616 | -1.13128095 | 0.267855863 |
| -1.08586741 | 0.19530706 | 0.84443776 | 0.042623281 | 0.97607919  | 0.70144537  |
| -1.04265421 | 0.42345156 | -1.1845325 | 0.024167033 | -1.05143679 | 0.337095106 |
| -1.00265081 | 0.96225026 | -1.1102894 | 0.189290097 | 0.511686229 | 7.24E-17    |
| 0.873646087 | 0.1935547  | -1.258778  | 0.000283682 | 0.598042475 | 6.24E-06    |
| -1.21000734 | 0.03976379 | -1.4184008 | 0.001727094 | -1.1204808  | 0.213958139 |
| 0.819538419 | 0.00826898 | 0.95367223 | 0.426299308 | -1.11614535 | 0.135836759 |
| -1.15708684 | 0.21680846 | 0.88277054 | 0.104002213 | 0.929580282 | 0.534308394 |
| -1.19534471 | 0.29790681 | 0.79855869 | 1.43443E-05 | 0.446042656 | 1.53E-05    |
| -1.0253143  | 0.50417381 | -1.2095997 | 0.115995825 | -1.02510661 | 0.507620918 |
| -1.46589063 | 0.00053813 | -1.0416666 | 0.570346491 | -1.39454206 | 0.002296656 |
| 0.942509984 | 0.31259295 | 0.62075777 | 2.20651E-09 | 0.972684831 | 0.63542369  |
| 0.949167648 | 0.41871778 | -1.0298885 | 0.543713103 | 0.952017314 | 0.445796432 |
| -1.00643756 | 0.89531382 | -1.0238884 | 0.546737044 | -1.05038483 | 0.315712323 |
| 0.894972471 | 0.07398525 | -1.0363512 | 0.57430878  | 0.980507935 | 0.747744816 |

|             |            |            |             |             |             |
|-------------|------------|------------|-------------|-------------|-------------|
| 0.70315529  | 0.00037698 | 0.84898823 | 0.027625064 | 0.667252247 | 5.93E-05    |
| 0.543879768 | 3.14E-06   | -1.0055022 | 0.967413479 | 0.479455575 | 6.14E-08    |
| 0.931236288 | 0.25201936 | -1.163593  | 0.071150357 | -1.06173503 | 0.334597065 |
| -1.16582053 | 0.10200785 | -1.1153244 | 0.326280392 | -1.26595693 | 0.013412845 |
| 0.873151119 | 0.00155653 | -1.0148144 | 0.815796342 | 0.791953778 | 4.63E-07    |
| 0.930534578 | 0.17725704 | -1.0159474 | 0.761144743 | 0.949867206 | 0.333087977 |
| -1.08837618 | 0.13783287 | -1.0065769 | 0.906706263 | -1.16948296 | 0.007383185 |
| 0.995586817 | 0.91819517 | 0.93284634 | 0.50095482  | 0.943035375 | 0.176890026 |
| -1.05966291 | 0.37193788 | -1.0850483 | 0.370870954 | -1.1092838  | 0.112956145 |
| 0.946195187 | 0.23268598 | 0.94943677 | 0.477692004 | -1.01876245 | 0.686567835 |
| 0.864570306 | 0.01343088 | -1.0758371 | 0.533879181 | 0.901051719 | 0.072721748 |
| 0.980166042 | 0.78438456 | -1.0170599 | 0.920993065 | -1.01620584 | 0.826191681 |
| 0.983350909 | 0.77981018 | 0.92703155 | 0.046482364 | 0.951692087 | 0.410983311 |
| -1.02129019 | 0.66768754 | -1.1990217 | 0.086272131 | 0.992514362 | 0.878208053 |
| -1.03174608 | 0.7253276  | -1.0541492 | 0.367983228 | -1.17017474 | 0.081400373 |
| 0.999332429 | 0.99571144 | 0.96870121 | 0.621414722 | -1.2069555  | 0.134118717 |
| -1.11991389 | 0.01029306 | 0.95802363 | 0.380898064 | -1.04840044 | 0.271956013 |
| -1.23238752 | 0.00115546 | -1.00025   | 0.996739496 | -1.47442022 | 4.27E-08    |
| -1.12072481 | 0.06749815 | 0.70513569 | 0.000414948 | -1.40977335 | 6.93E-07    |
| -1.10894097 | 0.16720604 | 0.74347957 | 0.014262031 | -1.32866375 | 0.000318751 |
| 0.970008671 | 0.58706521 | 0.87625286 | 0.036323341 | 0.987089066 | 0.816511349 |
| -1.07782814 | 0.15686295 | -1.1552571 | 0.123467973 | -1.04714794 | 0.381398668 |
| 0.970043737 | 0.71461326 | 0.92230597 | 0.051928367 | -1.10432738 | 0.235627778 |
| 0.897722888 | 0.12630495 | -1.103628  | 0.06659265  | 0.961457224 | 0.573923801 |
| 0.944189508 | 0.4769318  | -1.0807406 | 0.172955792 | -1.14008526 | 0.107869052 |
| 0.761034266 | 0.00046122 | 0.90941409 | 0.030998732 | 0.920961533 | 0.265558575 |
| 0.938405072 | 0.29615718 | -1.041365  | 0.531527177 | 0.866622252 | 0.021124544 |
| -1.01097374 | 0.85128328 | 0.99158932 | 0.854436728 | -1.13501188 | 0.033198961 |
| 0.963654962 | 0.55222595 | 0.89290667 | 0.051685614 | 0.939007726 | 0.313793302 |
| 0.915689252 | 0.1162355  | 0.99730797 | 0.970621015 | -1.00995191 | 0.858217925 |
| 0.967308556 | 0.61683408 | 0.9450865  | 0.348795979 | 0.976904136 | 0.724868997 |
| -1.12511479 | 0.03700116 | 0.96818004 | 0.510385755 | -1.15497871 | 0.011578538 |
| 0.997594586 | 0.96731961 | -1.0570443 | 0.533347988 | 0.962837376 | 0.520215887 |
| 0.929726786 | 0.17147587 | -1.2625446 | 0.064827958 | -1.07739554 | 0.161969436 |
| 0.857612486 | 0.02346781 | -1.1797101 | 0.00028666  | 0.951533497 | 0.45393797  |
| -1.0511837  | 0.34737113 | -1.2485365 | 0.000599666 | -1.12391588 | 0.030765534 |
| -1.19011145 | 0.01824362 | -1.0717324 | 0.261733157 | -1.11370981 | 0.137730113 |
| -1.02107967 | 0.68687874 | -1.2722017 | 0.001937976 | 0.84613869  | 0.002019541 |
| 0.983079953 | 0.74290255 | 0.91756607 | 0.128540439 | -1.059218   | 0.271285114 |
| -1.30452237 | 0.00198635 | 0.9489312  | 0.319785642 | -1.20893385 | 0.02412976  |
| -1.01512819 | 0.8172375  | -1.0647596 | 0.451513796 | 0.980426534 | 0.760980533 |
| -1.08717768 | 0.25482324 | -1.044774  | 0.531074269 | -1.14794867 | 0.062807428 |
| 0.936785868 | 0.33192241 | 0.9162255  | 0.280042727 | -1.06627148 | 0.340303929 |
| 0.966364614 | 0.42646012 | 0.89598655 | 0.139278797 | 0.93655869  | 0.130626623 |



|             |            |            |             |             |             |
|-------------|------------|------------|-------------|-------------|-------------|
| 0.966184846 | 0.4175171  | -1.0209587 | 0.732032593 | 0.653656178 | 5.21E-14    |
| -1.04175909 | 0.39087026 | 0.95972918 | 0.481082573 | 0.832862236 | 0.000299916 |
| -1.09511433 | 0.08505587 | -1.0132304 | 0.832621025 | -1.03112533 | 0.556423054 |
| 0.915260802 | 0.426281   | 0.98799721 | 0.827567795 | 0.734739338 | 0.007268643 |
| 0.99809968  | 0.95033653 | -1.0367723 | 0.586785955 | -1.06488853 | 0.043447117 |
| -1.11840955 | 0.18193862 | -1.2524277 | 0.000148396 | -1.01850677 | 0.825466415 |
| 0.890493619 | 0.02756623 | -1.014868  | 0.801813232 | -1.01332074 | 0.797053001 |
| -1.00445615 | 0.93550833 | 0.88000991 | 0.018411525 | -1.0456328  | 0.418170377 |
| 0.988461519 | 0.84114323 | 0.85548679 | 0.021414832 | 0.973809534 | 0.646966587 |
| 0.953205782 | 0.42248065 | -1.0642616 | 0.242087306 | 0.911204493 | 0.1226751   |
| 0.992601606 | 0.91105758 | -1.0166246 | 0.818437264 | 0.927253963 | 0.258729402 |
| 0.729969486 | 0.000113   | 0.82921589 | 0.000616944 | 0.862870794 | 0.056096485 |
| 0.880747323 | 0.118191   | -1.0473392 | 0.375498212 | 0.853197596 | 0.052237357 |
| -1.07701738 | 0.14317523 | -1.2179997 | 0.019308912 | -1.08945642 | 0.091968664 |
| 0.879487838 | 0.08617794 | 0.90662872 | 0.13535983  | -1.28870305 | 0.001091113 |
| -1.00740847 | 0.8449549  | -1.2209362 | 0.008130081 | -1.02812779 | 0.463425668 |
| 0.972878386 | 0.78561306 | 0.91206598 | 0.173287469 | 0.896690681 | 0.283143388 |
| -1.19811349 | 0.01571868 | 0.96825585 | 0.453215471 | -1.00158023 | 0.982693728 |
| 0.947202282 | 0.27642477 | 0.91778174 | 0.046519655 | 0.81032386  | 8.20E-05    |
| -1.16833412 | 0.33724295 | 0.85195193 | 0.001325964 | -1.13035313 | 0.449039684 |
| -1.1101148  | 0.24497641 | -1.0375625 | 0.479520938 | -1.07393748 | 0.425693591 |
| 0.992857144 | 0.89177193 | 0.87882134 | 0.247373455 | -1.09296259 | 0.095825163 |
| -1.01357086 | 0.80182327 | 0.98943258 | 0.728084377 | -1.11910448 | 0.039929277 |
| -1.06316388 | 0.28369988 | -1.2364965 | 0.013138263 | 0.948337207 | 0.352528739 |
| -1.00441747 | 0.9372573  | -1.0423828 | 0.421119603 | 0.959889853 | 0.465829529 |
| 0.941405418 | 0.27349649 | -1.0503566 | 0.373035621 | 0.943305276 | 0.289657938 |
| -1.00478999 | 0.96306109 | 0.9756788  | 0.670876208 | 0.954128138 | 0.649352646 |
| -1.07869951 | 0.0815775  | 0.82587791 | 0.00213654  | -1.03775027 | 0.389151431 |
| -1.37545761 | 0.0266703  | -1.0125884 | 0.850750894 | -1.44541021 | 0.011013422 |
| -1.02674263 | 0.50125404 | 0.79003216 | 0.002908413 | -1.05847036 | 0.150697752 |
| -1.14485499 | 0.14721439 | 0.89278252 | 0.16192585  | -1.37861979 | 0.000971916 |
| 0.920563657 | 0.20472123 | -1.140166  | 0.011209391 | -1.01902449 | 0.771173183 |
| 0.991392266 | 0.90097307 | -1.0737055 | 0.337360269 | -1.00904565 | 0.896872706 |
| 0.934724617 | 0.242909   | -1.0462966 | 0.23354145  | -1.26105958 | 0.000162074 |
| 0.934632773 | 0.38619726 | 0.91884441 | 0.403800029 | -1.17048138 | 0.046869714 |
| 0.882671618 | 0.1070523  | 0.92686688 | 0.299245224 | 0.853860198 | 0.042806845 |
| 0.968323374 | 0.50719342 | -1.0083517 | 0.866746005 | -1.00015049 | 0.997521133 |
| 0.951027894 | 0.30446343 | -1.0895843 | 0.595561374 | 0.979367278 | 0.66855209  |
| 0.880423577 | 0.05585589 | -1.0808298 | 0.385645919 | 0.98405993  | 0.80614865  |
| 0.663157368 | 2.46E-06   | -1.1078132 | 0.056089259 | 0.772302115 | 0.001640862 |
| -1.13818175 | 0.03729113 | -1.0596106 | 0.283444664 | -1.19570626 | 0.004712236 |
| -1.0530523  | 0.19166841 | 0.89660192 | 0.05894445  | -1.03946047 | 0.326612848 |
| 0.883447994 | 0.02363341 | -1.1090194 | 0.068854801 | -1.004358   | 0.935157374 |
| 0.752817503 | 0.00287924 | -1.1018832 | 0.081115316 | 0.96598716  | 0.704931377 |

|             |            |            |             |             |             |
|-------------|------------|------------|-------------|-------------|-------------|
| 0.965481362 | 0.47073369 | 0.96310103 | 0.71574041  | 0.757651426 | 4.54E-07    |
| 0.880224199 | 0.19444869 | -1.0093503 | 0.828209976 | 0.684143872 | 0.000261761 |
| 0.994385947 | 0.93988718 | -1.150936  | 0.319415213 | -1.04580131 | 0.549255785 |
| -1.12147804 | 0.16194568 | 0.96717176 | 0.395597693 | -1.31492311 | 0.001331812 |
| -1.02050856 | 0.83940103 | -1.0172794 | 0.852949623 | -1.17250402 | 0.1162764   |
| -1.15436451 | 0.07052499 | 0.85311654 | 0.016974979 | -1.26208818 | 0.004180746 |
| 0.98327888  | 0.67506998 | -1.045354  | 0.523953079 | -1.02726652 | 0.504186701 |
| -1.08748313 | 0.17003138 | -1.0810334 | 0.178602793 | -1.1596451  | 0.01730884  |
| -1.01874751 | 0.67444635 | 0.97234358 | 0.718433707 | -1.12431724 | 0.010160913 |
| -1.14376733 | 0.25611357 | 0.81100683 | 0.00808138  | -1.43587973 | 0.003156269 |
| 0.90244425  | 0.25609172 | 0.95100154 | 0.302036805 | -1.00829659 | 0.926725257 |
| -1.26164775 | 0.00415055 | 0.94454369 | 0.243953908 | 0.928114168 | 0.340757942 |
| -1.15804216 | 0.0096976  | 0.88478262 | 0.065716044 | -1.07880178 | 0.171299058 |
| 0.903342476 | 0.04791063 | 0.64799458 | 8.43545E-07 | 0.934798657 | 0.184993962 |
| 0.970694053 | 0.74046834 | -1.2227937 | 0.001629221 | -1.03827364 | 0.675845455 |
| -1.13008249 | 0.07599524 | -1.0326981 | 0.414123307 | -1.34135602 | 6.23E-05    |
| 0.785164988 | 0.01730307 | -1.040355  | 0.460329048 | 0.99238109  | 0.938375476 |
| -1.29148899 | 7.81E-05   | 0.95878683 | 0.645232602 | -1.45297871 | 6.96E-08    |
| -1.06875418 | 0.32490601 | 0.91910215 | 0.086807053 | -1.06027851 | 0.385704104 |
| 0.911293393 | 0.23392194 | -1.0712333 | 0.481579491 | 0.857102691 | 0.050749143 |
| -1.08278555 | 0.1067506  | 0.95484131 | 0.536649424 | -1.00775768 | 0.873959684 |
| 0.950717649 | 0.37364945 | -1.2421417 | 0.009703406 | 0.976703605 | 0.677290255 |
| 0.790566859 | 0.00754426 | -1.2977146 | 0.011584508 | -1.10427076 | 0.24638152  |
| -1.32521623 | 2.55E-06   | -1.3435155 | 0.000376413 | -1.21268615 | 0.000685877 |
| -1.00596952 | 0.91729591 | 0.86646832 | 0.000733025 | -1.05997404 | 0.311842532 |
| 0.964840436 | 0.51459129 | -1.0649606 | 0.301291331 | -1.0575777  | 0.309448026 |
| -1.02827537 | 0.77775488 | -1.0569819 | 0.213059558 | -1.20522316 | 0.062941121 |
| -1.11354564 | 0.24095554 | -1.2155295 | 0.101167727 | -1.06505401 | 0.490144891 |
| 0.917075336 | 0.20296305 | 0.88172152 | 0.16498293  | -1.05944744 | 0.393714931 |
| -1.11150254 | 0.12605197 | 0.86092813 | 0.058974724 | -1.5672891  | 1.85E-08    |
| -1.02817541 | 0.74777867 | -1.0213477 | 0.700919242 | -1.42514829 | 0.000131381 |
| 0.854891963 | 0.08370187 | 0.69480812 | 1.66517E-09 | -1.20403825 | 0.041630573 |
| -1.08148363 | 0.28541419 | 0.93566483 | 0.459898721 | 0.947724774 | 0.4627886   |
| 0.996534024 | 0.97669703 | -1.2506418 | 0.001676298 | 0.927797217 | 0.529138322 |
| 0.923808941 | 0.2487655  | 0.79896491 | 0.026644975 | -1.08150067 | 0.254116089 |
| 0.57363973  | 1.47E-06   | -1.3192731 | 2.33053E-05 | 0.756733156 | 0.008876965 |
| 0.925997424 | 0.15981728 | -1.1021133 | 0.152105224 | 0.994138743 | 0.913617052 |
| 0.904831537 | 0.25471138 | -1.1206575 | 0.145691233 | 0.832927958 | 0.040031911 |
| 0.989296974 | 0.91847501 | 0.93252366 | 0.155415881 | -1.29462381 | 0.01681828  |
| -1.1610791  | 0.07591541 | 0.95731826 | 0.442137885 | -1.29809589 | 0.002580362 |
| 0.926441466 | 0.16129918 | 0.98970408 | 0.903127346 | -1.01055563 | 0.845976677 |
| -1.15996653 | 0.00864604 | -1.3907473 | 9.47808E-08 | -1.09952637 | 0.087093888 |
| 0.947672108 | 0.39906706 | 0.94862234 | 0.359325788 | 0.988733388 | 0.858451372 |
| 0.992898367 | 0.91115897 | -1.0469837 | 0.403767038 | 0.956187268 | 0.484038902 |

|             |            |            |             |             |             |
|-------------|------------|------------|-------------|-------------|-------------|
| -1.12977192 | 0.01967572 | 0.98013362 | 0.839010976 | -1.04902951 | 0.349769241 |
| -1.15667026 | 0.00722729 | 0.93203919 | 0.44119035  | -1.02922123 | 0.582778001 |
| -1.03268558 | 0.43420517 | 0.91370238 | 0.184681013 | -1.09950998 | 0.023943017 |
| -1.03342324 | 0.57218041 | -1.3492344 | 5.12171E-05 | -1.12045336 | 0.05447392  |
| 0.778458952 | 0.00189927 | -1.208905  | 0.03161907  | 0.858978814 | 0.052507935 |
| 0.939779386 | 0.30800689 | -1.1058026 | 0.26328111  | 0.883013908 | 0.044105303 |
| -1.16741836 | 0.11386477 | 0.93079908 | 0.327690677 | 0.719453302 | 0.001208228 |
| 0.919009167 | 0.28682907 | 0.8494319  | 0.173518619 | -1.31776559 | 0.000903141 |
| -1.10135732 | 0.15748788 | -1.0214414 | 0.756147405 | -1.07590584 | 0.282149881 |
| -1.1603904  | 0.11822925 | 0.51212555 | 2.5423E-08  | -1.25589818 | 0.018389239 |
| -1.20032708 | 0.0157811  | 0.89336963 | 0.041324366 | -1.27779225 | 0.001498086 |
| -1.05097749 | 0.39830082 | 0.78932391 | 0.008696783 | 0.981206753 | 0.746525582 |
| -1.07008342 | 0.41608412 | -1.1845605 | 0.111387538 | -1.20214429 | 0.030124033 |
| -1.07933694 | 0.45139105 | -1.0985449 | 0.259774255 | -1.26220377 | 0.024536581 |
| -1.01069334 | 0.92343001 | 0.85608994 | 0.005572722 | -1.06159194 | 0.589628034 |
| -1.03320607 | 0.60499628 | -1.0451889 | 0.42045992  | 0.994866836 | 0.934976367 |
| -1.22179757 | 0.02357608 | -1.0277973 | 0.666284426 | -1.07498269 | 0.404004833 |
| 0.780496661 | 0.02181655 | 0.96577549 | 0.586124382 | 0.827494539 | 0.076689262 |
| -1.09781815 | 0.15560964 | 0.97015574 | 0.552959405 | -1.22494558 | 0.002817141 |
| 0.969109823 | 0.68025841 | 0.97215849 | 0.590186231 | 0.88940704  | 0.127566078 |
| 0.826421664 | 0.04265621 | 0.97656456 | 0.563699604 | -1.01134577 | 0.90266379  |
| -1.02461535 | 0.62924787 | -1.132228  | 0.036348871 | -1.06493427 | 0.214465029 |
| -1.11360039 | 0.05744049 | 0.80698814 | 0.007139742 | 0.974138946 | 0.638266691 |
| 0.979667451 | 0.86592284 | 0.88429544 | 0.04653817  | -1.01556565 | 0.898972847 |
| 0.956082117 | 0.39574013 | 0.6181407  | 6.61223E-06 | -1.0136405  | 0.797192347 |
| 0.774734662 | 0.01617042 | 0.78427965 | 0.003124158 | 0.931438776 | 0.492500812 |
| -1.16348436 | 0.06824343 | -1.0620593 | 0.375275196 | 0.810637098 | 0.012651631 |
| -1.05511537 | 0.40309302 | -1.0911656 | 0.355921661 | 0.68928805  | 3.08E-07    |
| 0.944915631 | 0.30552536 | -1.1308804 | 0.098893424 | -1.12362814 | 0.037922674 |
| 0.812737965 | 0.00201435 | -1.038582  | 0.51956774  | -1.03215336 | 0.622228583 |
| 0.927293253 | 0.16847443 | -1.0441853 | 0.603028562 | -1.19588531 | 0.001681205 |
| -1.12331864 | 0.06419267 | -1.0180269 | 0.859758729 | -1.29612827 | 9.63E-05    |
| 0.99693621  | 0.96253817 | 0.97540006 | 0.821959213 | 0.98497914  | 0.81684163  |
| 0.770794356 | 0.00022314 | 0.95230886 | 0.439804848 | 0.909830775 | 0.156515436 |
| -1.02458903 | 0.57233303 | -1.0958244 | 0.291859627 | 0.985384587 | 0.731942332 |
| 0.929744543 | 0.66883788 | 0.84707201 | 0.119506336 | -1.00242823 | 0.988627851 |
| -1.12454443 | 0.03754161 | 0.94218781 | 0.362198202 | -1.02773284 | 0.621194979 |
| -1.1142612  | 0.14107909 | 0.97652517 | 0.754963291 | -1.00686535 | 0.925089488 |
| -1.14575238 | 0.03888479 | 0.94430757 | 0.535193689 | 0.948029005 | 0.40992451  |
| -1.02903971 | 0.65895531 | 0.92928491 | 0.148903041 | -1.23494901 | 0.001871605 |
| -1.01059032 | 0.89316662 | 0.91953333 | 0.135946784 | 0.834128121 | 0.023994229 |
| -1.00795259 | 0.9098248  | 0.95199768 | 0.686162431 | 0.99847955  | 0.982641151 |
| -1.15329348 | 0.31306588 | 0.98790923 | 0.817510913 | 0.622238438 | 0.00132684  |
| 0.994895062 | 0.94135757 | -1.0188254 | 0.856684155 | -1.11685223 | 0.116378595 |

|             |            |            |             |             |             |
|-------------|------------|------------|-------------|-------------|-------------|
| 0.872035557 | 0.08723087 | -1.047174  | 0.573420649 | -1.00958215 | 0.903882935 |
| -1.03947413 | 0.41214654 | 0.86997869 | 0.033043618 | -1.05245088 | 0.279955334 |
| 0.991575823 | 0.87140015 | 0.99956554 | 0.993698762 | 0.989467872 | 0.839457109 |
| -1.04431896 | 0.45400503 | -1.0268017 | 0.680408861 | -1.05396528 | 0.364725631 |
| 0.775548178 | 0.01561254 | -1.0848933 | 0.137713288 | -1.06162783 | 0.559284099 |
| -1.11923189 | 0.20345939 | -1.2374569 | 0.001059042 | -1.20652938 | 0.03642427  |
| -1.11860858 | 0.02206206 | 0.95699776 | 0.50197841  | -1.11648429 | 0.024304596 |
| 0.954749966 | 0.42830576 | 0.88596517 | 0.071116028 | -1.12954276 | 0.040482472 |
| 0.981303444 | 0.75508419 | 0.96820961 | 0.453220857 | 0.94442596  | 0.346429378 |
| 0.983316618 | 0.8348154  | 0.83524851 | 0.292565734 | 0.870775821 | 0.090571893 |
| 0.950677671 | 0.31277917 | -1.0679794 | 0.237347214 | 0.941756612 | 0.231988942 |
| 0.967642357 | 0.50648239 | 0.94102296 | 0.405018592 | -1.03735132 | 0.45914511  |
| -1.12608493 | 0.23131852 | -1.0810469 | 0.230554358 | 0.691330692 | 0.000416789 |
| -1.02289566 | 0.76909171 | -1.0918372 | 0.178819511 | -1.00057529 | 0.994046807 |
| -1.06709455 | 0.21576591 | 0.92789939 | 0.342103183 | -1.00499365 | 0.923810885 |
| 0.991641248 | 0.87583889 | -1.0314309 | 0.658407025 | -1.08331987 | 0.140296574 |
| 0.884967591 | 0.01116414 | 0.83693899 | 0.209201401 | 0.912858761 | 0.055075915 |
| -1.06334582 | 0.12756219 | -1.0687504 | 0.341270848 | 0.939508796 | 0.121740588 |
| -1.08794348 | 0.18086419 | 0.8629233  | 0.066143485 | 0.921237416 | 0.192600577 |
| -1.34468369 | 0.07291102 | -1.1259441 | 0.014282706 | -1.25167134 | 0.171306913 |
| 0.920590499 | 0.33669899 | 0.91926315 | 0.111405242 | -1.01111402 | 0.897450017 |
| 0.828647612 | 0.32550127 | -1.0822782 | 0.174780666 | 0.78471314  | 0.206083477 |
| 0.789712223 | 0.00104974 | 0.97536992 | 0.807373976 | 0.669058126 | 2.53E-07    |
| -1.25011596 | 0.00017909 | -1.149328  | 0.117543014 | -1.17832421 | 0.00457408  |
| -1.01595132 | 0.67853323 | 0.95182493 | 0.303643932 | -1.04296735 | 0.272872234 |
| -1.18716925 | 0.07431775 | -1.0681233 | 0.261033788 | -1.46513654 | 0.000164908 |
| -1.27851561 | 0.00071069 | 0.89267897 | 0.064710638 | -1.4626211  | 8.71E-07    |
| 0.891515463 | 0.03482517 | -1.0179328 | 0.825639729 | 0.982050218 | 0.734023549 |
| -1.00285675 | 0.94960523 | 0.99609259 | 0.937426767 | 0.982688143 | 0.699017176 |
| -1.02678103 | 0.68905227 | -1.0088634 | 0.858278904 | 0.864493106 | 0.030912307 |
| 0.872440439 | 0.05492884 | -1.0861056 | 0.403447371 | -1.00765591 | 0.913080371 |
| 0.881496256 | 0.02026007 | 0.98481089 | 0.842632438 | -1.01066837 | 0.841228494 |
| 0.798909302 | 0.0190336  | -1.0324032 | 0.541070499 | 0.687298367 | 0.000172222 |
| 0.888793526 | 0.19528476 | 0.92615076 | 0.157122846 | 0.896374657 | 0.228937493 |
| 0.963638742 | 0.50633246 | 0.80815223 | 2.79194E-05 | -1.0349573  | 0.537448147 |
| -1.09633044 | 0.22070761 | -1.0340178 | 0.402989302 | -1.22781622 | 0.00778473  |
| -1.06340676 | 0.26145637 | 0.94617999 | 0.377533696 | -1.14825604 | 0.013590646 |
| -1.02642226 | 0.53358919 | -1.2396119 | 0.190203245 | 0.858969101 | 0.000590507 |
| -1.04023816 | 0.43649615 | 0.99680143 | 0.970197735 | 0.83215692  | 0.000592633 |
| -1.1013804  | 0.05567608 | 0.72060721 | 0.089409245 | 0.991011651 | 0.85557026  |
| 0.88286312  | 0.07168071 | 0.81863992 | 0.004870213 | -1.02290875 | 0.739633732 |
| 0.846220029 | 0.36044868 | -1.1031699 | 0.082227012 | 0.863547779 | 0.421274525 |
| -1.14780156 | 0.05431881 | -1.0069928 | 0.855094891 | -1.12904671 | 0.088974533 |
| -1.62980223 | 1.47E-06   | -1.204422  | 0.053633456 | -1.48121924 | 6.01E-05    |

|             |            |            |             |             |             |
|-------------|------------|------------|-------------|-------------|-------------|
| -1.15446976 | 0.12044942 | -1.2055489 | 0.00847066  | -1.16594456 | 0.097482064 |
| -1.06968271 | 0.06966905 | -1.0017591 | 0.973683704 | -1.00480794 | 0.895633812 |
| -1.37369949 | 0.0026252  | 0.99661696 | 0.940151393 | -1.59143286 | 2.46E-05    |
| -1.17068675 | 0.00268686 | -1.006914  | 0.916856493 | -1.01748554 | 0.730521083 |
| -1.16002158 | 0.11591878 | -1.0196505 | 0.780687164 | -1.15811972 | 0.119910486 |
| 0.959225597 | 0.51185585 | 0.97402809 | 0.619700329 | -1.05123753 | 0.43148558  |
| 0.958769574 | 0.38281309 | 0.88003784 | 0.174439185 | -1.00701952 | 0.884319876 |
| 0.964777881 | 0.53773722 | -1.1747737 | 0.078792552 | 0.950870374 | 0.387431711 |
| -1.22272485 | 0.00320075 | 0.97097269 | 0.596856782 | -1.03164247 | 0.634460863 |
| -1.04501849 | 0.44150208 | -1.1509009 | 0.063683049 | -1.04109803 | 0.48125648  |
| -1.22667722 | 0.03014314 | -1.1667628 | 0.00623726  | -1.17308241 | 0.08754109  |
| -1.04627442 | 0.61963982 | -1.0363847 | 0.394349458 | -1.08941963 | 0.348770878 |
| 0.923590244 | 0.57409653 | 0.88089741 | 0.0147387   | 0.67340356  | 0.006843136 |
| -1.76006426 | 0.00018579 | 0.97061742 | 0.548321238 | -1.63244236 | 0.001001719 |
| -1.02657374 | 0.6323838  | 0.93177956 | 0.302023531 | -1.13934773 | 0.020232663 |
| 0.982377117 | 0.76138045 | 0.76401919 | 0.142896238 | -1.03919494 | 0.512087097 |
| -1.11467188 | 0.16279142 | -1.1798249 | 0.021936753 | -1.5327215  | 8.50E-07    |
| -1.12397529 | 0.18292826 | -1.3268493 | 0.002780659 | -1.27940507 | 0.006283344 |
| 0.95774265  | 0.53688686 | -1.1995883 | 0.050670445 | -0.99993676 | 0.999277054 |
| 0.89322154  | 0.04463297 | 0.96824964 | 0.379236102 | 0.931473335 | 0.201657553 |
| -1.11392029 | 0.02172757 | -1.3284248 | 0.006668202 | -1.12689647 | 0.011475574 |
| 0.934324286 | 0.33593657 | -1.0314914 | 0.538339849 | 0.902992205 | 0.150543472 |
| 0.991662397 | 0.85982671 | -1.1670171 | 0.102201588 | 0.992839013 | 0.879510723 |
| 0.917048105 | 0.30901037 | 0.93655506 | 0.303118774 | 0.977621652 | 0.789400155 |
| -1.03471094 | 0.75284557 | -1.0983751 | 0.055079058 | 0.741854069 | 0.007689107 |
| -1.07226831 | 0.39177075 | 0.98109752 | 0.742621758 | -1.10466552 | 0.223433946 |
| -1.14861289 | 0.09363666 | 0.98707932 | 0.842528683 | -1.20061081 | 0.028421994 |
| -1.02705957 | 0.63387347 | 0.94754344 | 0.346965415 | 0.878242088 | 0.023639375 |
| -1.00666144 | 0.92067152 | -1.0672283 | 0.481197002 | 0.987678103 | 0.852483531 |
| 0.90616274  | 0.23779335 | -1.1359463 | 0.165249306 | 0.775636331 | 0.003277745 |
| -1.1214661  | 0.07852537 | 0.73973974 | 0.036528025 | -1.11795275 | 0.08680965  |
| -1.11840469 | 0.20373716 | -1.4978844 | 0.005864878 | -1.37746583 | 0.000538311 |
| -1.16730628 | 0.05334029 | -1.0933979 | 0.107272575 | -1.15941323 | 0.064293445 |
| 0.920107033 | 0.22505202 | -1.0214233 | 0.717380437 | 0.972440977 | 0.682033942 |
| -1.23427085 | 5.89E-05   | -1.1785985 | 0.036737859 | -1.21652424 | 0.000159671 |
| -1.00485223 | 0.9399835  | 0.81708235 | 0.023475147 | -1.20269771 | 0.00563649  |
| 0.920450748 | 0.13283356 | -1.0725287 | 0.318012625 | 0.956991631 | 0.421858213 |
| 0.956615707 | 0.40395825 | 0.99162417 | 0.878841239 | 0.963382296 | 0.482295921 |
| -1.10223307 | 0.22229072 | -1.0537127 | 0.256691919 | -1.0217041  | 0.786373139 |
| -1.00283058 | 0.95554571 | 0.81121804 | 0.004201276 | 0.954761939 | 0.363120263 |
| -1.07810542 | 0.16374389 | -1.0818456 | 0.101287976 | -1.06704998 | 0.228396458 |
| 0.863990853 | 0.0225441  | 0.69766354 | 8.02381E-05 | -1.12688532 | 0.060268961 |
| 0.922742459 | 0.2159867  | 0.83044174 | 0.090574793 | 0.72630746  | 6.98E-06    |
| 0.863524385 | 0.08904349 | -1.0105338 | 0.897320889 | 0.922469101 | 0.345111166 |

|             |            |            |             |             |             |
|-------------|------------|------------|-------------|-------------|-------------|
| 0.850083259 | 0.01716768 | 0.95848727 | 0.603608549 | -1.0649967  | 0.344575438 |
| -1.25260714 | 0.04645883 | 0.99947629 | 0.992536338 | -1.12572958 | 0.288598874 |
| -1.2382219  | 0.06448452 | 0.95175037 | 0.459362208 | -1.35121248 | 0.010305843 |
| -1.17704376 | 0.00863387 | 0.90364613 | 0.224981291 | -1.27979865 | 0.000129277 |
| -1.08760917 | 0.23198586 | -1.0126515 | 0.844809168 | 0.784320464 | 0.000953007 |
| 0.964188588 | 0.55379415 | -1.3686026 | 0.00067813  | -1.08602188 | 0.183241196 |
| 0.744791972 | 6.91E-06   | -1.229053  | 0.011003431 | 0.635771783 | 3.66E-10    |
| 0.751648259 | 0.00789372 | 0.88574075 | 0.079352858 | 0.670622229 | 0.000304178 |
| -1.04890125 | 0.58387162 | -1.1764514 | 0.001408603 | 0.951940043 | 0.572066065 |
| 0.92449891  | 0.27522434 | -1.0668733 | 0.316273059 | -1.02004975 | 0.781501962 |
| -1.05769938 | 0.33250648 | -1.0297579 | 0.591493433 | 0.959319711 | 0.472211196 |
| -1.11310884 | 0.19935073 | 0.87872117 | 0.017488574 | -1.00613732 | 0.941129812 |
| 0.98648689  | 0.8081529  | -1.0618213 | 0.450018682 | -1.0052079  | 0.92612216  |
| -1.09254045 | 0.11878159 | -1.0734506 | 0.165973325 | 0.971541212 | 0.607187043 |
| -1.52610428 | 0.00076017 | -1.1467921 | 0.012931557 | -1.24199649 | 0.072691818 |
| -1.05187311 | 0.46543733 | 0.92854813 | 0.238858519 | -1.13640012 | 0.068548364 |
| 0.923681181 | 0.18071235 | 0.99248857 | 0.906976088 | 0.983527269 | 0.777692633 |
| -1.32608457 | 0.00347899 | 0.96900678 | 0.711655892 | -1.19314624 | 0.061096962 |
| -1.03642246 | 0.58785662 | 0.86859779 | 0.037494838 | -1.17097629 | 0.019627655 |
| -1.1519436  | 0.0130598  | -1.0951034 | 0.414605638 | -1.22592549 | 0.000513017 |
| 0.993568041 | 0.89850712 | -1.2382904 | 0.064417599 | -1.01368065 | 0.78830372  |
| -1.14800831 | 0.00778386 | -1.1708585 | 0.010884911 | -1.21419195 | 0.000280392 |
| -1.01657684 | 0.73578336 | 0.99970104 | 0.99658162  | -1.0459608  | 0.358031545 |
| 0.917632354 | 0.07443128 | 0.99922005 | 0.989876107 | -1.01568098 | 0.743187943 |
| -1.00206437 | 0.96533041 | 0.64876873 | 1.30762E-09 | -1.02036281 | 0.671188672 |
| -1.51010351 | 2.82E-06   | 0.65010173 | 0.000114441 | -1.55267608 | 7.90E-07    |
| 0.923081337 | 0.35580111 | 0.98752013 | 0.885289944 | 0.724290653 | 0.000429857 |
| 0.942006161 | 0.50201283 | 0.97599327 | 0.734270155 | -1.10091726 | 0.281592165 |
| 0.80633781  | 0.01183519 | 0.93460725 | 0.243616069 | 0.822994621 | 0.02202986  |
| 0.892115133 | 0.18361873 | -1.1776214 | 0.052538748 | 0.674283036 | 2.20E-05    |
| -1.25347327 | 0.00048317 | 0.9405053  | 0.276199798 | -1.11990362 | 0.067942005 |
| 0.969652194 | 0.53132136 | 0.917648   | 0.129598212 | 0.924273227 | 0.113267398 |
| 0.861640878 | 0.02470594 | -1.3983642 | 0.006491967 | 0.925262688 | 0.233319009 |
| -1.07331523 | 0.44062906 | -1.0421665 | 0.550766804 | -1.04373928 | 0.640205665 |
| -1.03543777 | 0.58190571 | -1.0033989 | 0.953991793 | 0.935099592 | 0.290562014 |
| 0.996776647 | 0.96737597 | -1.3836725 | 0.000894883 | -1.19354891 | 0.028448311 |
| -1.24026762 | 0.00783339 | -1.1296005 | 0.068765575 | -1.21441796 | 0.015803098 |
| 0.999820532 | 0.99769118 | -1.2166178 | 0.000788167 | -1.04996716 | 0.433137581 |
| -1.06466165 | 0.34235934 | 0.97083115 | 0.559054499 | -1.10257962 | 0.141277494 |
| 0.834478718 | 0.23377058 | -1.1839615 | 0.001345642 | 0.984205482 | 0.916011576 |
| 0.922543358 | 0.18737974 | 0.98090034 | 0.692308679 | 0.77951525  | 0.000129409 |
| 0.929953399 | 0.18522944 | -1.0816584 | 0.102457534 | 0.967919372 | 0.549326759 |
| -1.44812964 | 2.35E-09   | -1.0225698 | 0.638406708 | -1.47559978 | 6.08E-10    |
| 0.83678873  | 0.09528436 | -1.2577385 | 0.005223931 | 0.626552093 | 4.29E-05    |

|             |            |            |             |             |             |
|-------------|------------|------------|-------------|-------------|-------------|
| 0.995288013 | 0.92987684 | 0.91289153 | 0.293616939 | 0.982375047 | 0.740529326 |
| -1.0226815  | 0.72230909 | 0.96269592 | 0.668843616 | -1.1755612  | 0.012771251 |
| -1.12343377 | 0.36895726 | 0.77557214 | 0.003290691 | -1.29918047 | 0.046544396 |
| 0.980567017 | 0.61642715 | 0.78999708 | 0.007449894 | -1.13737283 | 0.001697609 |
| -1.10892957 | 0.02570919 | -1.0546134 | 0.385588438 | 0.907335444 | 0.035433153 |
| -1.05448385 | 0.3140103  | 0.95340572 | 0.33367523  | -1.17271865 | 0.003527388 |
| 0.936100174 | 0.37672026 | 0.99422195 | 0.928679589 | 0.765684513 | 0.000686611 |
| -1.08718876 | 0.09177827 | 0.93488562 | 0.462926022 | -1.00485494 | 0.921138168 |
| -1.31094995 | 0.01197067 | 0.99153261 | 0.892906619 | -1.42716179 | 0.00121267  |
| -1.21383051 | 0.01005747 | 0.98658623 | 0.864181224 | 0.978823141 | 0.769325187 |
| 0.947149308 | 0.52246346 | -1.1058419 | 0.202285771 | 0.963943773 | 0.665027303 |
| -1.08767625 | 0.18531796 | -1.085489  | 0.189574391 | -1.13715711 | 0.045058923 |
| -1.12050259 | 0.08236624 | 0.96363903 | 0.573548271 | -1.25604792 | 0.000818315 |
| 0.925868425 | 0.11645917 | 0.91324545 | 0.548404297 | -1.0436586  | 0.379986485 |
| 0.903811697 | 0.36494815 | 0.87248132 | 0.02793281  | -1.11688843 | 0.322391288 |
| 0.998747255 | 0.99068392 | -1.0817057 | 0.152482706 | 0.904055126 | 0.349445383 |
| -1.14391582 | 0.03696196 | -1.1919885 | 0.001295788 | -1.00068108 | 0.991396315 |
| -1.12633076 | 0.03799936 | 0.72820679 | 0.003836838 | 0.994753472 | 0.925404762 |
| 0.906809141 | 0.14493809 | -1.0238522 | 0.660799782 | 0.692901792 | 9.12E-07    |
| -1.13206556 | 0.06445324 | -1.2144513 | 0.00312694  | -1.14801097 | 0.040375959 |
| 0.994005508 | 0.93394935 | -1.0616376 | 0.643370921 | -1.19772566 | 0.015561991 |
| -1.0818529  | 0.33428145 | -1.0936465 | 0.025466124 | -1.33570512 | 0.000728864 |
| -1.02451078 | 0.74963576 | 0.99359271 | 0.887109793 | 0.992672744 | 0.922758384 |
| 0.961422529 | 0.53347087 | -1.0959351 | 0.084958281 | -1.01537453 | 0.808873859 |
| -1.07828142 | 0.30250557 | 0.82135142 | 0.010374545 | -1.06173997 | 0.411597602 |
| -1.13209554 | 0.09872727 | -1.051292  | 0.308896691 | -1.01748436 | 0.815306402 |
| -1.13118529 | 0.05062802 | -1.2108023 | 0.071611703 | 0.892411963 | 0.070352261 |
| 0.787118555 | 0.00217682 | -1.1795673 | 0.026982001 | 0.80188866  | 0.004444608 |
| -1.18412004 | 0.03456528 | -1.0291517 | 0.734669266 | -1.3078263  | 0.001120915 |
| 0.932809797 | 0.35925861 | -1.0765024 | 0.244422269 | -1.02901358 | 0.705267873 |
| 0.932164449 | 0.47957807 | -1.2237295 | 0.00273579  | -1.04523525 | 0.655671068 |
| 0.990108859 | 0.85469433 | 0.97606132 | 0.617767717 | -1.03209499 | 0.561128876 |
| 0.989851285 | 0.89675622 | 0.94870874 | 0.636209805 | 0.975609034 | 0.753520696 |
| 0.945163922 | 0.24032253 | 0.82037637 | 0.069408273 | 0.948262576 | 0.268364235 |
| -1.32617411 | 0.00566982 | 0.98762213 | 0.843647159 | -1.17587338 | 0.103954401 |
| -1.00115211 | 0.98950284 | 0.9800232  | 0.719624561 | 0.91851537  | 0.333580507 |
| -1.1542262  | 0.09429524 | 0.91669506 | 0.194025255 | -1.11136883 | 0.215287551 |
| -1.03528771 | 0.67046934 | -1.1017362 | 0.146168397 | -1.30787857 | 0.001665079 |
| -1.00775693 | 0.91778297 | -1.1836297 | 0.023331628 | 0.948942591 | 0.484834257 |
| 0.754779612 | 0.00044759 | -1.0944312 | 0.268781778 | 0.606485489 | 1.57E-08    |
| -1.17485684 | 0.02589895 | 0.96430771 | 0.632163928 | -1.08020294 | 0.27755327  |
| -1.06808166 | 0.25990785 | -1.0673921 | 0.303453001 | -1.16230016 | 0.012013996 |
| -1.0933688  | 0.10966666 | -1.1067939 | 0.166795339 | -1.01963832 | 0.724423828 |
| 0.794405572 | 0.04539177 | 0.92917066 | 0.324262934 | 0.862609395 | 0.1939144   |

|             |            |            |             |             |             |
|-------------|------------|------------|-------------|-------------|-------------|
| 0.890099917 | 0.06485262 | -1.0027949 | 0.964057134 | 0.962215117 | 0.535509341 |
| 0.826122196 | 0.00207948 | 0.76570962 | 0.000714061 | 0.949141081 | 0.380489519 |
| -1.01448996 | 0.78302007 | -1.1902684 | 0.029598584 | -1.00678453 | 0.896984934 |
| -1.0006968  | 0.98873854 | -1.001631  | 0.982794791 | 0.926710136 | 0.127132588 |
| 0.976086883 | 0.63536956 | -1.0054584 | 0.956207084 | -1.03120401 | 0.547442495 |
| 0.966600553 | 0.5179095  | -1.0424676 | 0.444721572 | -1.00909865 | 0.862877759 |
| 0.988320378 | 0.85832309 | -1.1799955 | 0.039052335 | -1.2627073  | 0.000783115 |
| -1.07407077 | 0.39676395 | 0.94243024 | 0.217332715 | -1.405667   | 0.000155048 |
| 0.914243983 | 0.18718836 | -1.1034419 | 0.319421255 | -1.05846328 | 0.400948732 |
| 0.933402617 | 0.41408728 | 0.92681784 | 0.386863777 | 0.925050205 | 0.356297477 |
| -1.07819786 | 0.19566461 | -1.1444602 | 0.114936645 | 0.960994754 | 0.491655746 |
| 0.971253053 | 0.62732663 | -1.0051556 | 0.949648964 | -1.16563308 | 0.01312281  |
| 0.911084856 | 0.14134595 | 0.97895682 | 0.776389305 | -1.11375804 | 0.08988728  |
| -1.14693406 | 0.0076071  | 0.72707094 | 8.91511E-05 | -1.04235471 | 0.405024395 |
| -1.26041383 | 0.00551789 | -1.0435586 | 0.546909093 | 0.838883497 | 0.03248779  |
| -1.30236432 | 1.87E-05   | -1.0045831 | 0.937285784 | -1.26449847 | 0.000110576 |
| 0.952150157 | 0.48985217 | 0.91952743 | 0.13217734  | -1.13773928 | 0.072816174 |
| -1.05392056 | 0.28994814 | 0.94846545 | 0.639570049 | -1.00714847 | 0.885282885 |
| -1.12575558 | 0.08239736 | 0.93985107 | 0.319697041 | -1.06420915 | 0.356569138 |
| -1.12909534 | 0.23550285 | 0.95330402 | 0.421437638 | -1.36059832 | 0.003625449 |
| -1.0738232  | 0.24280398 | -1.0204777 | 0.698089668 | -1.22485588 | 0.001427982 |
| 0.920572447 | 0.13066776 | 0.94920459 | 0.293316893 | -1.07088453 | 0.209489204 |
| 0.9651323   | 0.60260949 | -1.0756363 | 0.156626825 | -1.16363911 | 0.029495344 |
| -1.15288055 | 0.05835723 | -1.003926  | 0.940433736 | -1.09785667 | 0.209785125 |
| 0.992362308 | 0.8923108  | -1.1726984 | 0.018373502 | 0.995402775 | 0.935149694 |
| -1.03009446 | 0.67771085 | -1.1975285 | 0.035668909 | 0.748134835 | 0.000145862 |
| -1.18648276 | 0.03184141 | 0.85301375 | 0.02146821  | -1.14522995 | 0.086217359 |
| 0.650748593 | 1.69E-11   | -1.027127  | 0.750461216 | 0.959404716 | 0.416380113 |
| 0.930396691 | 0.39016637 | 0.93097523 | 0.218632909 | -1.29624821 | 0.002944136 |
| 0.967586879 | 0.50431833 | -1.0873651 | 0.166624663 | 0.929294567 | 0.140502544 |
| -1.28204902 | 0.00717654 | 0.88720218 | 0.06035721  | -1.21937733 | 0.029845453 |
| 0.844192981 | 0.00143902 | 0.98407147 | 0.746540878 | -1.01704086 | 0.738739001 |
| 0.937530742 | 0.25976898 | 0.96381891 | 0.647021501 | -1.15859888 | 0.012038129 |
| -1.05849419 | 0.20004103 | -1.1561967 | 0.012617012 | 0.927464511 | 0.091459531 |
| -1.01109505 | 0.84196139 | -1.1745935 | 0.026480724 | 0.883845364 | 0.029117683 |
| 0.862638515 | 0.03390607 | -1.070837  | 0.16940821  | 0.943685006 | 0.396922848 |
| 0.937439468 | 0.24812814 | -1.0372044 | 0.587426844 | 0.90518693  | 0.077424529 |
| 0.974177468 | 0.68959803 | -1.1406934 | 0.198904516 | -1.02316682 | 0.726560563 |
| -1.03312901 | 0.40061313 | -1.2233525 | 0.001517355 | -1.00747311 | 0.84726055  |
| 0.92796505  | 0.17920831 | -1.0525218 | 0.346663403 | 0.882550057 | 0.026962385 |
| -1.03657047 | 0.44358655 | -1.0439439 | 0.528345288 | 0.907061413 | 0.04079633  |
| 0.976600603 | 0.61594758 | -1.1540772 | 0.056604867 | 0.983251782 | 0.720329052 |
| 0.975453594 | 0.73260531 | -1.0718302 | 0.223807356 | 0.993055133 | 0.923634994 |
| 0.988546883 | 0.7427806  | 0.96159479 | 0.583296768 | -1.04255957 | 0.237907089 |



|             |            |            |             |             |             |
|-------------|------------|------------|-------------|-------------|-------------|
| -1.01453113 | 0.85843968 | -1.1094802 | 0.186198244 | 0.8834805   | 0.129675085 |
| -1.04913651 | 0.51786534 | 0.91303873 | 0.077798682 | 0.840104708 | 0.021711681 |
| 0.984880349 | 0.82043749 | -1.1452196 | 0.109323694 | -1.05654411 | 0.413869517 |
| 0.922848302 | 0.29853415 | -1.0538132 | 0.289696436 | 0.899875287 | 0.173509213 |
| 0.913261845 | 0.11033138 | -1.3375554 | 0.001869056 | 0.987746755 | 0.82623105  |
| 0.996246178 | 0.9487465  | 0.97636277 | 0.63698828  | 0.923131407 | 0.175312883 |
| -1.08282014 | 0.3712585  | 0.99742022 | 0.96379016  | -1.31089854 | 0.003377376 |
| -1.1901007  | 0.00360688 | -1.0343772 | 0.443855458 | -1.19283698 | 0.003218109 |
| 0.905553293 | 0.10214278 | 0.99924816 | 0.98915429  | 0.967696182 | 0.584303898 |
| 0.980196993 | 0.82173609 | 0.90150997 | 0.132494104 | -1.06794367 | 0.460051803 |
| 0.930454045 | 0.41491584 | -1.0420212 | 0.460153553 | -1.04365824 | 0.628180052 |
| -1.09753274 | 0.14037541 | -1.1092251 | 0.117454287 | -1.01534255 | 0.80751162  |
| -1.17956522 | 0.05232658 | 0.99446571 | 0.885828771 | -1.27254533 | 0.005454872 |
| -1.03920987 | 0.61304504 | 0.92660018 | 0.170941253 | -1.2271759  | 0.009070254 |
| 0.914598272 | 0.26049547 | -1.0327588 | 0.491492355 | 0.681549735 | 9.76E-06    |
| 0.957696212 | 0.52325926 | -1.0629045 | 0.199175613 | 0.765457603 | 0.000213105 |
| 0.894369886 | 0.2055594  | -1.1432618 | 0.069795825 | -1.04560538 | 0.610824176 |
| -1.02498387 | 0.6867289  | -1.0106071 | 0.763702641 | -1.07201663 | 0.258233466 |
| 0.885911245 | 0.20277915 | -1.1358686 | 0.119378674 | 0.883425138 | 0.192656822 |
| -1.03932951 | 0.59815912 | -1.0621251 | 0.417025699 | -1.07183544 | 0.344620271 |
| 0.944297535 | 0.34179116 | -1.0023315 | 0.972316388 | 0.616732293 | 7.44E-11    |
| 0.977811406 | 0.68428729 | 0.9826963  | 0.820344074 | 0.767250463 | 1.19E-05    |
| -1.15582378 | 0.28850981 | 0.9075817  | 0.088446671 | -1.04285456 | 0.757283063 |
| -1.08365231 | 0.14391389 | 0.88261114 | 0.036558059 | -1.04398569 | 0.430325938 |
| 0.890961152 | 0.12919582 | -1.2515895 | 0.013906193 | 0.798793521 | 0.004106229 |
| -1.08304945 | 0.16051844 | -1.2564613 | 0.000199342 | -1.14994173 | 0.015826071 |
| 0.908509709 | 0.13524619 | 0.94759756 | 0.370953372 | 0.803275974 | 0.001059223 |
| -1.26507644 | 0.07586065 | -1.0047882 | 0.957078234 | -1.33994567 | 0.028378361 |
| -1.06019964 | 0.35397343 | 0.97994504 | 0.818252968 | -1.14173924 | 0.038635421 |
| -1.02663103 | 0.74642238 | -1.1705973 | 0.014270171 | -1.20550682 | 0.024684748 |
| -1.19774824 | 0.02606474 | 0.9907641  | 0.911636261 | 0.929033228 | 0.354671848 |
| 0.895270134 | 0.01502925 | -1.1001737 | 0.212151515 | -1.01662196 | 0.709588337 |
| -1.0090777  | 0.80568245 | 0.84514741 | 0.036642104 | -1.0477201  | 0.207701796 |
| -1.10010928 | 0.1409461  | 0.64821298 | 3.36375E-08 | -1.00917106 | 0.886836928 |
| 0.681443439 | 4.53E-08   | -1.0000798 | 0.999273013 | 0.671721358 | 1.87E-08    |
| 0.963052299 | 0.47452174 | -1.0025916 | 0.966233294 | 0.969094023 | 0.550654622 |
| -1.28803001 | 0.00571086 | 0.77936971 | 0.010464115 | -1.21894082 | 0.028417328 |
| -1.05115445 | 0.36123991 | 0.94040076 | 0.402093895 | 0.749570684 | 2.07E-06    |
| 0.978596791 | 0.69058195 | 0.95008614 | 0.395329624 | -1.00834876 | 0.878346789 |
| -1.03029737 | 0.56319188 | 0.98290551 | 0.75461778  | 0.826782267 | 0.000497699 |
| 0.954134812 | 0.4147262  | 0.93968546 | 0.64699905  | 0.991247242 | 0.8782557   |
| 0.997568093 | 0.94968491 | 0.98949418 | 0.846155796 | -1.00630177 | 0.870685306 |
| -1.02485831 | 0.48540943 | 0.87735884 | 0.086475747 | -1.0383296  | 0.286697135 |
| 0.907020545 | 0.11192358 | -1.1071537 | 0.075015649 | 0.986825349 | 0.826990596 |

|             |            |            |             |             |             |
|-------------|------------|------------|-------------|-------------|-------------|
| -1.00643834 | 0.91464302 | 0.86981979 | 0.031803927 | -1.00127355 | 0.983040191 |
| 0.993745167 | 0.94942449 | -1.0727379 | 0.591043976 | 0.256465273 | 2.57E-19    |
| -1.05808046 | 0.40744577 | -1.0550547 | 0.395147174 | 0.919302491 | 0.218769118 |
| -1.00760805 | 0.84909527 | -1.112727  | 0.192129021 | 0.983645748 | 0.679096601 |
| -1.08241851 | 0.07258579 | -1.0693464 | 0.398883431 | 0.927799933 | 0.088844028 |
| 0.992639865 | 0.93991857 | -1.0073886 | 0.867855424 | 0.772027642 | 0.010493198 |
| -1.05287662 | 0.54278373 | -1.0478842 | 0.206201056 | -1.00190332 | 0.982049866 |
| 0.994194952 | 0.93277006 | 0.9882479  | 0.853804839 | -1.1451442  | 0.053649136 |
| -1.24779437 | 0.00430309 | 0.79130426 | 0.000284088 | -1.03983297 | 0.600982172 |
| -1.12760657 | 0.01230922 | 0.95840014 | 0.419898982 | 0.912180583 | 0.0525196   |
| -1.01102245 | 0.86146016 | -1.1571599 | 0.102630076 | 0.986873621 | 0.833402275 |
| 0.962647097 | 0.49378674 | -1.0486202 | 0.38476484  | 0.865449486 | 0.011546737 |
| 0.905659329 | 0.08240029 | 0.90121178 | 0.059653493 | 0.918214439 | 0.133350714 |
| 0.967481633 | 0.61685118 | -1.0104505 | 0.840198344 | -1.01821297 | 0.784558332 |
| 0.910289901 | 0.04683456 | -1.1638375 | 0.010382952 | 0.713200144 | 1.31E-09    |
| -1.01744067 | 0.75855529 | 0.94433561 | 0.141746988 | 0.940148964 | 0.275043133 |
| -1.55072924 | 8.92E-05   | -1.003861  | 0.912623528 | -1.19663516 | 0.08865003  |
| -1.04853589 | 0.65463345 | -1.0571544 | 0.361451936 | -1.10001925 | 0.369616713 |
| 0.954200804 | 0.45055266 | -1.1171865 | 0.068448049 | -1.12959216 | 0.053357465 |
| 0.859073582 | 0.06716904 | 0.66109804 | 0.00010016  | 0.64186277  | 1.28E-06    |
| -1.20853814 | 0.0177705  | 0.99408328 | 0.930390579 | 0.89689051  | 0.165755123 |
| -1.09868239 | 0.11388559 | -1.0060249 | 0.880127601 | -1.28706463 | 7.02E-05    |
| -1.38668132 | 0.00031472 | 0.99925255 | 0.986268315 | -1.41924301 | 0.000129567 |
| 0.85875145  | 0.09599666 | 0.76677292 | 0.008727322 | 0.793718794 | 0.01296155  |
| -1.02994113 | 0.68743904 | -1.3001413 | 0.002908081 | 0.861981638 | 0.046650446 |
| 0.919838203 | 0.24106925 | 0.9717629  | 0.67834561  | -1.14734033 | 0.056414831 |
| -1.0041303  | 0.95259264 | 0.92319515 | 0.28657271  | -1.14347857 | 0.057282414 |
| 0.997654423 | 0.96435483 | 0.94113005 | 0.196168894 | 0.885309275 | 0.023651599 |
| -1.01029068 | 0.84880519 | -1.1148605 | 0.087720014 | 0.926633311 | 0.159737206 |
| -1.20777779 | 0.03132953 | 0.98902859 | 0.842492309 | -1.13229737 | 0.151468679 |
| -1.05086219 | 0.51783298 | -1.0199909 | 0.725046314 | 0.730698898 | 0.000133216 |
| -1.13284784 | 0.08913958 | 0.99045742 | 0.884498631 | -1.36055182 | 7.93E-05    |
| 0.694879558 | 1.83E-05   | 0.45570395 | 2.85463E-23 | 0.890336919 | 0.139171239 |
| -1.00020851 | 0.99648515 | -1.0130306 | 0.817936203 | -1.03070512 | 0.523613444 |
| 0.959901592 | 0.45838459 | -1.1645355 | 0.147023962 | -1.04442573 | 0.431094126 |
| -1.05773379 | 0.3357297  | 0.98126445 | 0.858209617 | -1.05717285 | 0.340277523 |
| 0.973674583 | 0.76984799 | -1.0858569 | 0.187386199 | -1.02740047 | 0.766887156 |
| 0.84426241  | 0.0038248  | 0.86065804 | 0.070449781 | 0.726895458 | 5.29E-07    |
| -1.0914011  | 0.12306966 | -1.0796746 | 0.326700352 | -1.00694517 | 0.901797277 |
| -1.02398737 | 0.56816399 | -1.1843702 | 0.005553788 | -1.02763904 | 0.511728972 |
| -1.13168236 | 0.10807553 | -1.1976101 | 0.038228646 | -1.13217935 | 0.106859705 |
| -1.0114186  | 0.95724317 | -1.0478624 | 0.605059367 | 0.94296102  | 0.781603656 |
| -1.06943963 | 0.35751528 | 0.99765806 | 0.974471923 | -1.06144576 | 0.413378259 |
| -1.05408623 | 0.37654914 | 0.98737924 | 0.857681336 | 0.891905394 | 0.058082701 |

|             |            |            |             |             |             |
|-------------|------------|------------|-------------|-------------|-------------|
| -1.00453202 | 0.94370384 | 0.94188538 | 0.389468935 | -1.07129677 | 0.284722265 |
| 0.988455318 | 0.8527345  | 0.97506909 | 0.631268739 | 0.934814744 | 0.28374197  |
| 0.660203311 | 5.56E-08   | 0.93057753 | 0.183878999 | 0.85679667  | 0.022562789 |
| -1.35587979 | 0.00084764 | -1.146933  | 0.114254486 | -1.32193097 | 0.002048685 |
| 0.999282796 | 0.98940768 | 0.77942901 | 0.001882418 | -1.05511819 | 0.323034712 |
| 0.962024894 | 0.45168044 | -1.278172  | 0.001253437 | -1.06946787 | 0.194035162 |
| 0.911090908 | 0.56697045 | 0.82146785 | 0.013956489 | 0.885399378 | 0.454712479 |
| -1.01045773 | 0.90289012 | -1.0424888 | 0.381015304 | -1.15030549 | 0.104781538 |
| 0.892650618 | 0.06371431 | 0.98363623 | 0.764486533 | 0.998545115 | 0.980724013 |
| 0.951028931 | 0.56939235 | -1.0414194 | 0.485495259 | 0.974866652 | 0.772768129 |
| -1.18894537 | 0.01046887 | 0.94241985 | 0.516110302 | -1.36590035 | 1.40E-05    |
| 0.926361851 | 0.22129834 | 0.93646237 | 0.246171191 | -1.03914933 | 0.537043947 |
| -1.09810453 | 0.08853763 | -1.0436258 | 0.447689753 | -1.11345797 | 0.051464139 |
| 0.902463375 | 0.08099186 | 0.94221377 | 0.155082578 | 0.986897863 | 0.820084056 |
| 0.883089888 | 0.02553881 | -1.1490317 | 0.072026841 | 0.914482436 | 0.104426233 |
| 0.783622355 | 0.00015165 | 0.6911135  | 0.085362047 | 0.855383412 | 0.011642929 |
| 0.922143231 | 0.22722013 | -1.0085227 | 0.907043789 | -1.1651037  | 0.025187739 |
| -1.07448624 | 0.17532299 | 0.88067605 | 0.036000804 | -1.04975944 | 0.357373988 |
| 0.862552722 | 0.01399324 | 0.77210633 | 0.000161705 | -1.0269671  | 0.649351336 |
| 0.974283677 | 0.52800556 | -1.015715  | 0.803176082 | -1.14291722 | 0.001955684 |
| 0.957896565 | 0.4056838  | 0.93713907 | 0.328291283 | 0.936125999 | 0.203948799 |
| 0.961979056 | 0.33397325 | -1.2025411 | 0.036766559 | -1.08904484 | 0.036463605 |
| -1.36323154 | 0.00891923 | -1.0045479 | 0.933087261 | -1.7586363  | 7.89E-06    |
| 0.925414045 | 0.17429425 | 0.93401177 | 0.186915213 | -1.01779487 | 0.755274126 |
| -1.10714991 | 0.10457574 | 0.83255643 | 0.261928965 | 0.953045408 | 0.438778412 |
| -1.10162553 | 0.22870688 | 0.94897125 | 0.539722792 | -1.0727805  | 0.380744982 |
| -1.04292729 | 0.48072329 | 0.81488961 | 0.001230034 | 0.998783596 | 0.983670736 |
| -1.10333343 | 0.22990061 | 0.95717404 | 0.619791249 | -1.30549514 | 0.00176233  |
| -1.13357672 | 0.03279821 | -1.1676922 | 0.021071436 | 0.843757301 | 0.004457043 |
| 0.896926912 | 0.06358647 | -1.0906285 | 0.16622136  | 0.932579635 | 0.229505141 |
| 0.936855581 | 0.25530996 | -1.1038423 | 0.072611791 | -1.21634569 | 0.00109123  |
| 0.996545585 | 0.944834   | 0.96996468 | 0.599349079 | -1.06995217 | 0.180027883 |
| -1.07099695 | 0.20898139 | 0.9935685  | 0.905549098 | -1.02558606 | 0.641397926 |
| 0.963673891 | 0.52353173 | 0.48525515 | 6.0166E-17  | 0.877476141 | 0.027367639 |
| -1.09686133 | 0.1518858  | -1.0536114 | 0.434719148 | -1.1224456  | 0.074944173 |
| -1.07728662 | 0.22845403 | -1.0450387 | 0.403412148 | -1.03443803 | 0.581829613 |
| -1.03197999 | 0.44371253 | 0.97560332 | 0.672971254 | -1.01787534 | 0.665810705 |
| -1.01836791 | 0.71408914 | 0.95191709 | 0.234864565 | 0.88872294  | 0.020532861 |
| -1.01856006 | 0.80623743 | -1.1354805 | 0.016492541 | -1.06156431 | 0.426778951 |
| -1.02995129 | 0.54644675 | 0.95097475 | 0.211590377 | -1.07465386 | 0.144521851 |
| 0.990409881 | 0.88391851 | -1.5776112 | 0.000199623 | 0.920973227 | 0.21554304  |
| 0.810066038 | 0.00221723 | 0.96687932 | 0.552191219 | 0.85120785  | 0.017230105 |
| 0.936653602 | 0.34632651 | 0.85749555 | 0.015759513 | -1.19415726 | 0.012779774 |
| 0.914926925 | 0.03321617 | -1.0738542 | 0.374049388 | -1.00555795 | 0.892127041 |

|             |            |            |             |             |             |
|-------------|------------|------------|-------------|-------------|-------------|
| -1.21829167 | 0.02633915 | 0.97778693 | 0.705811431 | -1.27256616 | 0.007311692 |
| -1.03419762 | 0.74335704 | -1.0503384 | 0.546720371 | -1.2421471  | 0.038447386 |
| 0.919960669 | 0.15003589 | 0.96448963 | 0.530133822 | -1.00820595 | 0.886781805 |
| 0.920511013 | 0.14322116 | 0.86846056 | 0.017324268 | 0.934414177 | 0.229016731 |
| -1.0815386  | 0.32952656 | -1.1238901 | 0.0443693   | -1.10358744 | 0.221340799 |
| -1.00051153 | 0.9936167  | 0.95333974 | 0.341366248 | -1.04239602 | 0.516795385 |
| -1.07051804 | 0.21290463 | 0.91095824 | 0.08956014  | 0.950159031 | 0.348487408 |
| 0.83114007  | 0.00637188 | 0.89580523 | 0.061560149 | 0.928705386 | 0.261229335 |
| -1.04972445 | 0.51385452 | -1.2325752 | 0.001786356 | 0.995660635 | 0.953253766 |
| -1.03038472 | 0.72207596 | -1.0339753 | 0.586815107 | -1.30946122 | 0.002173987 |
| -1.0644228  | 0.25749352 | 0.97616642 | 0.556802991 | -1.02104533 | 0.704119956 |
| 0.968208048 | 0.69451487 | -1.0155894 | 0.755474508 | -1.21189458 | 0.02254966  |
| 0.892495221 | 0.00815166 | 0.99100083 | 0.904008535 | 0.992526185 | 0.856853288 |
| 0.984456392 | 0.82754636 | 0.93046617 | 0.144134435 | -1.05353851 | 0.46928214  |
| 0.976045071 | 0.69188564 | 0.87475452 | 0.046587684 | 0.917168608 | 0.161144604 |
| 0.855687131 | 0.03224135 | 0.71017095 | 2.94638E-06 | 0.829527225 | 0.010930139 |
| 0.997330479 | 0.9596024  | -1.0760557 | 0.292000027 | -1.02311376 | 0.665288274 |
| -1.0969949  | 0.09196932 | -1.0668189 | 0.11768412  | -1.09856412 | 0.087187799 |
| 0.900921622 | 0.61324557 | -1.1348932 | 0.149054744 | 0.938662923 | 0.758938596 |
| 0.860509742 | 0.11103673 | -1.0724516 | 0.496548036 | 0.990272798 | 0.916432276 |
| 0.93676536  | 0.23668008 | 0.95306997 | 0.403861522 | 0.981867103 | 0.738747395 |
| 0.901864213 | 0.22501473 | 0.99992265 | 0.99889808  | -1.11549825 | 0.19954681  |
| 0.926077261 | 0.11925887 | -1.0699182 | 0.399983352 | 0.941358521 | 0.218256099 |
| 0.898055687 | 0.24624687 | -1.0334341 | 0.6073523   | -1.16021767 | 0.111039312 |
| 0.905631428 | 0.06370134 | -1.0327579 | 0.553487309 | 0.950735936 | 0.338875859 |
| -1.01987541 | 0.78856548 | 0.83461001 | 0.007573126 | 0.859176673 | 0.042453306 |
| 0.920108904 | 0.11977224 | -1.0024488 | 0.97369849  | 0.891457116 | 0.033541956 |
| -1.05385375 | 0.36088988 | -1.3248768 | 0.00143898  | 0.682106877 | 1.20E-08    |
| 0.968206697 | 0.54011255 | -1.1074427 | 0.0668271   | 0.952041178 | 0.352494205 |
| 0.861275073 | 0.10736829 | -1.060971  | 0.47262317  | 0.994037986 | 0.947963749 |
| 0.97057189  | 0.5620299  | -1.0649042 | 0.134547278 | 0.947329413 | 0.295284618 |
| 0.995354667 | 0.93977666 | -1.08229   | 0.274060756 | 0.975992732 | 0.693569165 |
| -1.03975436 | 0.33170691 | -1.0048226 | 0.937280212 | 0.979144914 | 0.598603008 |
| -1.13877444 | 0.00697575 | 0.76855754 | 0.000487951 | 0.989012552 | 0.812358692 |
| -1.03609151 | 0.56307055 | -1.0252638 | 0.636720683 | -1.23063128 | 0.001255887 |
| -1.14682824 | 0.14206088 | -1.0647961 | 0.249718642 | 0.953551983 | 0.607073843 |
| 0.985598795 | 0.74228499 | 0.86728077 | 0.490766996 | -1.02804938 | 0.53115111  |
| -1.10392762 | 0.05068199 | 0.89680172 | 0.245286982 | -1.06466034 | 0.210710065 |
| 0.979261415 | 0.76906818 | 0.94999117 | 0.35149769  | 0.990089805 | 0.888996586 |
| -1.08440524 | 0.17906823 | 0.7519183  | 0.001324449 | -1.34240241 | 7.82E-06    |
| 0.936148653 | 0.17665215 | 0.84374398 | 0.000937306 | -1.00427981 | 0.929713465 |
| 0.840415195 | 0.29765234 | -1.1276966 | 0.195680661 | 0.686572857 | 0.026944623 |
| 0.9845048   | 0.88823462 | 0.99123787 | 0.86712937  | 0.84861847  | 0.143597675 |
| 0.895817673 | 0.16910991 | 0.9736386  | 0.715912607 | 0.937292478 | 0.415584692 |

|             |            |            |             |             |             |
|-------------|------------|------------|-------------|-------------|-------------|
| -1.01364785 | 0.79402892 | 0.98799269 | 0.819457689 | 0.950254148 | 0.327746987 |
| -1.00867667 | 0.83370796 | 0.97870229 | 0.70676145  | 0.991228604 | 0.83047025  |
| 0.98753345  | 0.83592266 | 0.97547859 | 0.637569219 | 0.950654489 | 0.404895726 |
| -1.08965857 | 0.1663405  | 0.97799413 | 0.808167052 | 0.670145238 | 2.35E-08    |
| -1.10182107 | 0.24162305 | 0.96789024 | 0.526508887 | 0.863802044 | 0.079453525 |
| 0.992336968 | 0.86748991 | -1.0246078 | 0.693452333 | 0.99002536  | 0.82788757  |
| -1.06681814 | 0.56949298 | 0.92526703 | 0.056208714 | -1.01696185 | 0.882247394 |
| 0.954914875 | 0.37847949 | 0.94362854 | 0.215698756 | 0.872276007 | 0.011105836 |
| 0.984328877 | 0.70596622 | -1.1074483 | 0.099754564 | -1.10989295 | 0.015365665 |
| -1.11993691 | 0.06399534 | -1.0708536 | 0.459786899 | 0.949590363 | 0.391641449 |
| 0.960820776 | 0.38619125 | 0.94717427 | 0.22160414  | 0.935561311 | 0.151209995 |
| -1.07994891 | 0.09627909 | -1.0213475 | 0.671045173 | -1.1225451  | 0.013861534 |
| 0.968818469 | 0.57698092 | 0.99049435 | 0.893521101 | 0.631533541 | 6.09E-11    |
| 0.983554045 | 0.77778514 | -1.2104921 | 0.002246383 | 0.896455904 | 0.067005053 |
| -1.03150297 | 0.5655582  | 0.79990348 | 2.3386E-05  | -1.06982786 | 0.213760066 |
| -1.18261331 | 0.04582183 | 0.72043903 | 0.052442441 | -1.24288595 | 0.010541685 |
| -1.07605148 | 0.04822916 | 0.69726167 | 0.001934637 | 0.882580943 | 0.001117299 |
| -1.18575348 | 0.00323382 | 0.95811956 | 0.590045407 | -1.07442956 | 0.199486408 |
| 0.903843248 | 0.14798215 | -1.0957529 | 0.082414277 | 0.961695465 | 0.573029411 |
| 0.917669727 | 0.32129266 | 0.94937655 | 0.210051578 | -1.04952384 | 0.575653941 |
| -1.04434854 | 0.33847799 | -1.04286   | 0.489287665 | 0.884399801 | 0.008455261 |
| -1.01513911 | 0.80531943 | 0.90076597 | 0.093452233 | 0.824732663 | 0.002472249 |
| -1.0262738  | 0.62724974 | 0.86452334 | 0.081133244 | -1.13213506 | 0.023192072 |
| 0.956617947 | 0.38057185 | 0.99546709 | 0.921496636 | 0.690735026 | 1.05E-09    |
| 0.993737224 | 0.93513248 | 0.96094524 | 0.725841022 | 0.954847734 | 0.550121526 |
| -1.05631419 | 0.29316795 | -1.0298008 | 0.574243834 | 0.973692795 | 0.607562392 |
| 0.76662388  | 0.01151071 | 0.98390722 | 0.698386853 | 0.856918137 | 0.134296323 |
| 0.679191709 | 8.25E-06   | 0.96122253 | 0.511863652 | -1.0567638  | 0.484529815 |
| 0.659753485 | 3.08E-08   | 0.97008709 | 0.509620338 | 0.352770822 | 2.56E-22    |
| 0.954387737 | 0.41170111 | -1.0875094 | 0.070349554 | -1.02442258 | 0.670642528 |
| -1.06265068 | 0.29387105 | -1.001204  | 0.983070711 | -1.01360751 | 0.814502679 |
| 0.861831812 | 0.16871799 | 0.94667716 | 0.352829722 | -1.08752571 | 0.434597612 |
| -1.00278363 | 0.97203892 | -1.0431911 | 0.434036879 | -1.0711276  | 0.3879225   |
| -1.06077096 | 0.17163168 | -1.1964523 | 0.033173035 | 0.916257696 | 0.044870688 |
| 0.921783189 | 0.06667834 | 0.98376514 | 0.653508589 | 0.258851761 | 5.72E-36    |
| 0.360658046 | 7.28E-25   | -1.0089558 | 0.872436211 | 0.543955175 | 2.28E-15    |
| 0.901069292 | 0.06255954 | 0.87658078 | 0.061153645 | -1.08518994 | 0.141397188 |
| 0.768613509 | 0.00152632 | -1.1027406 | 0.259563108 | -1.05961935 | 0.465460236 |
| 0.863303394 | 0.03082625 | 0.7768716  | 7.02011E-07 | 0.967599741 | 0.621253743 |
| -1.00799754 | 0.86525525 | -1.0194629 | 0.751905047 | -1.00447435 | 0.924227342 |
| -1.03777485 | 0.55506684 | -1.0090785 | 0.865494836 | -1.01440948 | 0.819617883 |
| -1.0143224  | 0.82338469 | 0.84960783 | 0.002001639 | -1.25873457 | 0.000634873 |
| -1.0851202  | 0.25740763 | 0.91675113 | 0.262948673 | -1.08244658 | 0.27188611  |
| -1.20884347 | 0.00047616 | 0.98744161 | 0.807474561 | 0.955249501 | 0.373048982 |

|             |            |            |             |             |             |
|-------------|------------|------------|-------------|-------------|-------------|
| -1.08170886 | 0.17347571 | 0.87329308 | 0.18784794  | -1.02906741 | 0.616853819 |
| 0.74427489  | 0.08768109 | 0.77677115 | 0.002174522 | 0.841406053 | 0.313696066 |
| -1.11164954 | 0.03915389 | 0.64869928 | 1.15889E-08 | -1.04701874 | 0.362827456 |
| 0.793950232 | 0.01073777 | 0.98906887 | 0.846294884 | 0.803770971 | 0.015410024 |
| 0.86014457  | 0.06327505 | -1.0543947 | 0.359629201 | -1.05843139 | 0.477773494 |
| -1.18817743 | 0.00077232 | -1.1685569 | 0.149702424 | -1.38589334 | 1.08E-08    |
| -1.02240579 | 0.79897253 | -1.0515464 | 0.527004394 | 0.89144444  | 0.19002786  |
| -1.04774516 | 0.22436809 | 0.97522964 | 0.558298819 | 0.970204487 | 0.428860499 |
| 0.907953082 | 0.13037329 | 0.93585873 | 0.133486105 | -1.34496642 | 1.76E-05    |
| 0.919381826 | 0.10406877 | 0.7989615  | 0.000162955 | 0.801952365 | 6.31E-05    |
| -1.01031904 | 0.91607201 | -1.001387  | 0.979905791 | -1.04036516 | 0.684806    |
| 0.991161244 | 0.83519406 | 0.55994738 | 1.10516E-09 | 0.911225306 | 0.032959385 |
| -1.07036664 | 0.31186133 | 0.97240388 | 0.674548486 | -1.34164068 | 4.97E-05    |
| -1.08663046 | 0.05930753 | -1.0264725 | 0.578308027 | 0.935584553 | 0.128420251 |
| 0.881352265 | 0.11333009 | -1.0993769 | 0.134997081 | 0.981951451 | 0.817315067 |
| 0.967035742 | 0.63864181 | -1.1827946 | 0.01061601  | -1.12484942 | 0.103229666 |
| 0.993076578 | 0.8942698  | 0.95171399 | 0.49098472  | 0.839908794 | 0.001470536 |
| 0.786384222 | 1.04E-05   | -1.0119252 | 0.816961051 | 0.980153391 | 0.686423431 |
| 0.98454511  | 0.77983987 | -1.0037049 | 0.948455002 | 0.918845679 | 0.132735779 |
| 0.978238111 | 0.68852444 | 0.89003216 | 0.495578399 | -1.02533912 | 0.648532788 |
| 0.995131205 | 0.9443576  | -1.0039491 | 0.937540932 | -1.88201769 | 1.94E-12    |
| -1.16820479 | 0.00522107 | 0.67918139 | 4.64693E-05 | -1.05345434 | 0.333725691 |
| -1.01347651 | 0.80231108 | -1.0370332 | 0.648959332 | -1.02612891 | 0.629799669 |
| -1.20177839 | 0.04947426 | -1.2647375 | 1.0727E-05  | 0.869550271 | 0.132249706 |
| -1.13630973 | 0.17109677 | 0.99169992 | 0.923663791 | -1.06883823 | 0.472990099 |
| 0.818840962 | 0.01160182 | 0.96944112 | 0.417018374 | 0.982173451 | 0.814934636 |
| 0.800632984 | 0.01461058 | -1.0325825 | 0.61209017  | 0.811334229 | 0.021261734 |
| 0.850984722 | 0.00624567 | 0.72133491 | 3.60515E-08 | 0.941151281 | 0.289403314 |
| 0.974427584 | 0.74145761 | -1.0163995 | 0.867398689 | -1.01227083 | 0.876513497 |
| 0.980012684 | 0.74152235 | -1.0255896 | 0.554346108 | 0.958267616 | 0.486937978 |
| -1.04378128 | 0.67439258 | -1.2741683 | 0.000618333 | -1.10094885 | 0.347318696 |
| -1.02376528 | 0.80905466 | -1.0206564 | 0.637298084 | -1.08641039 | 0.395307932 |
| -1.07397456 | 0.35284005 | -1.0198878 | 0.802781134 | -1.04695458 | 0.549313371 |
| -1.38684718 | 0.00550744 | -1.0468704 | 0.52143384  | -1.15666185 | 0.203501691 |
| 0.962974169 | 0.61246308 | 0.88712491 | 0.02524247  | -1.08438497 | 0.278794512 |
| -1.00833223 | 0.86496449 | -1.0501625 | 0.326099738 | 0.973647258 | 0.584627005 |
| 0.868245802 | 0.0314046  | 0.9085624  | 0.089452916 | 0.979151074 | 0.743018316 |
| 0.785337487 | 0.00226423 | -1.0851322 | 0.140355497 | 0.843507744 | 0.028004197 |
| 0.954370519 | 0.4891189  | -1.0620499 | 0.390935798 | 0.955558315 | 0.500712946 |
| 0.941278679 | 0.17885258 | -1.025002  | 0.645548159 | 0.993196509 | 0.878455112 |
| 0.928943085 | 0.26830047 | -1.1373719 | 0.018971698 | -1.00951614 | 0.886249214 |
| 0.869156536 | 0.30365661 | -1.0348222 | 0.709642491 | 0.801222378 | 0.106578696 |
| 0.949874546 | 0.47134024 | -1.0501772 | 0.597261538 | 0.991482563 | 0.904406579 |
| 0.98378439  | 0.8054253  | 0.94424837 | 0.456430467 | 0.967339876 | 0.617160662 |

|             |            |            |             |             |             |
|-------------|------------|------------|-------------|-------------|-------------|
| 0.961115526 | 0.53801796 | 0.7501737  | 0.001923902 | -1.02929174 | 0.653680143 |
| -1.09208488 | 0.29894428 | 0.97403681 | 0.644457232 | -1.64320456 | 2.39E-07    |
| -1.02346752 | 0.68359148 | -1.0071168 | 0.928001075 | 0.972181142 | 0.620227637 |
| -1.04906218 | 0.15393895 | -1.083673  | 0.192580876 | -1.03307878 | 0.330203803 |
| -1.00182493 | 0.97514007 | 0.9966754  | 0.973931695 | 0.922539668 | 0.171956167 |
| 0.607120319 | 4.30E-12   | -1.0663323 | 0.50950964  | 0.627555488 | 3.71E-11    |
| 0.980963219 | 0.74748278 | 0.96425415 | 0.634567728 | 0.991476128 | 0.885933432 |
| 0.862182212 | 0.10082322 | -1.1687444 | 0.173537261 | 0.926043417 | 0.390841958 |
| 0.92785819  | 0.42441842 | -1.0744389 | 0.33656412  | 0.910311633 | 0.316953832 |
| 0.801141928 | 0.00520814 | -1.0319733 | 0.519670832 | -1.03080136 | 0.691787238 |
| 0.960163758 | 0.45727632 | -1.0238287 | 0.714064341 | 0.980348223 | 0.716125344 |
| 0.910955835 | 0.12101853 | -1.0657985 | 0.4014931   | -1.07893083 | 0.204863227 |
| 0.923535887 | 0.18753143 | -1.0119362 | 0.860209322 | 0.851331773 | 0.009228518 |
| -1.0384683  | 0.45141015 | -1.0095254 | 0.831834625 | -1.00098811 | 0.984237925 |
| 0.9163791   | 0.0723332  | -1.0717092 | 0.297966572 | 0.987748039 | 0.796792843 |
| -1.09333849 | 0.19311109 | 0.87547957 | 0.329094372 | 0.879663969 | 0.063664193 |
| -1.15682711 | 0.15820675 | 0.84890736 | 0.024722129 | -1.08652133 | 0.418586941 |
| -1.00964424 | 0.87304798 | 0.96017726 | 0.540931916 | 0.937323674 | 0.283770172 |
| 0.774114961 | 0.00010012 | 0.96459204 | 0.575531671 | 0.837664396 | 0.005278647 |
| 0.993881529 | 0.9305227  | -1.225023  | 0.019098183 | 0.948518133 | 0.453911824 |
| 0.697623866 | 9.74E-07   | -1.0104351 | 0.855180663 | 0.954954309 | 0.482147774 |
| 0.973933671 | 0.52058618 | 0.97321801 | 0.416021517 | -1.01058562 | 0.797528284 |
| -1.04440909 | 0.48740812 | 0.97038042 | 0.607771551 | -1.21970416 | 0.002334818 |
| 0.961453553 | 0.7193348  | 0.66412166 | 1.55036E-09 | 0.966206231 | 0.75328177  |
| -1.0620117  | 0.48663853 | 0.90294799 | 0.091391184 | -1.08354569 | 0.35437318  |
| 0.846219238 | 0.04102232 | -1.0533151 | 0.561114544 | -1.08643375 | 0.303229206 |
| -1.00331542 | 0.96206345 | 0.87011719 | 0.140613193 | -1.00169026 | 0.980638014 |
| -1.00770431 | 0.90865173 | 0.95577514 | 0.554816987 | 0.87551629  | 0.05092     |
| 0.846237102 | 0.00202823 | -1.0184992 | 0.73696682  | 0.820995351 | 0.000334436 |
| 0.769763317 | 0.00947967 | -1.0479133 | 0.432639428 | -1.02814249 | 0.776427556 |
| 0.943411405 | 0.38077982 | 0.74061338 | 5.64852E-06 | -1.01721121 | 0.796714048 |
| -1.12396294 | 0.19502864 | 0.93085288 | 0.155666852 | -1.24745308 | 0.016196705 |
| 0.97723513  | 0.77852793 | 0.91627622 | 0.07197806  | -1.0203048  | 0.806055689 |
| -1.08477988 | 0.21611878 | 0.97096245 | 0.665146161 | -1.01975379 | 0.764673279 |
| -1.19924158 | 0.02529425 | 0.96573262 | 0.733294317 | -1.04827321 | 0.552948597 |
| -1.43991702 | 0.02688806 | 0.92285021 | 0.184912279 | -1.11577156 | 0.497076108 |
| 0.995115885 | 0.94835729 | 0.93181341 | 0.251408997 | -1.22938013 | 0.008221271 |
| -1.01561453 | 0.84856303 | 0.85043029 | 0.024621146 | -1.25741785 | 0.006418682 |
| -1.13190187 | 0.06648554 | 0.98935432 | 0.870073805 | -1.07123004 | 0.302859792 |
| -1.09074995 | 0.2055689  | 0.95211279 | 0.234829142 | -1.08826494 | 0.217544882 |
| -1.06471845 | 0.1914738  | -1.1395463 | 0.040242121 | 0.870721544 | 0.0051041   |
| 0.800917295 | 0.00408891 | 0.87532448 | 0.226401684 | -1.07078167 | 0.359528233 |
| 0.960440666 | 0.62583851 | -1.1131849 | 0.217293987 | 0.983133605 | 0.837044457 |
| 0.878746168 | 0.0645854  | 0.93720927 | 0.419723445 | 0.789174023 | 0.001078747 |

|             |            |            |             |             |             |
|-------------|------------|------------|-------------|-------------|-------------|
| 0.755673633 | 0.00068561 | 0.81094926 | 0.003807549 | 0.478935064 | 4.81E-13    |
| -1.11637341 | 0.19558329 | 0.89047749 | 0.087171327 | -1.18507954 | 0.048217857 |
| 0.964993622 | 0.60661103 | 0.90151898 | 0.048959318 | -1.09795011 | 0.180053795 |
| 0.792701483 | 0.00199977 | 0.98509933 | 0.877883584 | 0.957855636 | 0.54954266  |
| 0.964873426 | 0.73033902 | -1.0343631 | 0.610364479 | -1.08246759 | 0.445960049 |
| -1.02656106 | 0.75045984 | -1.0831426 | 0.373819225 | -1.24600942 | 0.009702973 |
| -1.09183302 | 0.37856658 | 0.88112078 | 0.126192702 | -1.30801832 | 0.008930311 |
| 0.97039871  | 0.56182448 | -1.0670093 | 0.322943261 | 0.984061675 | 0.756145833 |
| 0.983881461 | 0.75651698 | -1.2149739 | 0.016881385 | 0.8728506   | 0.011768896 |
| 0.862139973 | 0.04926471 | -1.130876  | 0.446044506 | 0.920157955 | 0.264099786 |
| -1.43860175 | 0.00084596 | -1.2213    | 0.010361479 | -1.30417301 | 0.012579506 |
| 0.954998085 | 0.48155262 | -1.1494082 | 0.090386094 | -1.04600191 | 0.49175854  |
| 0.990255079 | 0.80405257 | -1.1501606 | 0.039073774 | 0.892929602 | 0.005649688 |
| -1.03461459 | 0.83002259 | -1.139241  | 0.059792117 | 0.891863684 | 0.471305305 |
| 0.966418625 | 0.54556691 | 0.94020899 | 0.198949877 | -1.03112237 | 0.587485036 |
| 0.994094771 | 0.92858878 | 0.90078201 | 0.163703962 | -1.13044749 | 0.067787161 |
| 0.67606294  | 0.00382206 | 0.93397446 | 0.41025629  | -1.07519049 | 0.577790699 |
| -1.03245494 | 0.62965912 | 0.8098708  | 0.003275971 | 0.708055032 | 2.74E-06    |
| 0.94451778  | 0.23360545 | 0.73256335 | 0.000192799 | -2.45410741 | 1.99E-25    |
| -1.00778299 | 0.91679171 | -1.0312868 | 0.715236837 | 0.516429879 | 3.19E-12    |
| 0.976155991 | 0.66871147 | -1.0168431 | 0.809094582 | -1.03863029 | 0.502069509 |
| -1.07388734 | 0.07784635 | 0.86446181 | 0.046579274 | -1.073088   | 0.080911449 |
| -1.12265443 | 0.14486255 | 0.94493035 | 0.585386835 | -1.21692318 | 0.015102993 |
| -1.26266866 | 0.00201117 | -1.1280913 | 0.147467663 | -1.31365798 | 0.000373084 |
| 0.850538809 | 0.40752768 | 0.83672581 | 0.077250403 | 0.843486444 | 0.383996097 |
| 0.835324743 | 0.0443656  | -1.0126038 | 0.808676852 | -1.05335146 | 0.554499102 |
| -1.0047639  | 0.95714153 | 0.91865647 | 0.1095644   | 0.854261532 | 0.079177564 |
| -1.05754391 | 0.41364544 | 0.96289024 | 0.610130351 | -1.18055377 | 0.017834033 |
| 0.949592498 | 0.3576975  | -1.3789595 | 0.002872537 | 0.980244351 | 0.721820185 |
| 0.776244635 | 0.27239873 | 0.87757971 | 0.049470172 | 0.866691027 | 0.533706104 |
| 0.758805307 | 7.69E-09   | 0.96104496 | 0.316229072 | 0.953060848 | 0.238661932 |
| -1.11693229 | 0.05223913 | 0.82475747 | 0.227283426 | 0.956185873 | 0.424768855 |
| -1.22371836 | 0.17300502 | -1.0381611 | 0.507681403 | 0.69867778  | 0.017463985 |
| 0.982903885 | 0.70732135 | 0.92223476 | 0.223783881 | -1.05826346 | 0.220525716 |
| 0.900692159 | 0.40390858 | 0.97926211 | 0.872008675 | 0.960255285 | 0.745524454 |
| -1.01234993 | 0.83986663 | 0.79190735 | 0.000829044 | -1.01411847 | 0.817482064 |
| -1.04697904 | 0.46873312 | 0.96140684 | 0.409851622 | 0.906620574 | 0.125063866 |
| -1.07464589 | 0.27375509 | -1.051381  | 0.500442857 | 0.987194852 | 0.843827021 |
| -1.09539898 | 0.02320864 | -1.0266577 | 0.640914035 | 0.99903281  | 0.980292711 |
| 0.997107864 | 0.93498113 | -1.0732848 | 0.080147259 | -1.02497465 | 0.488144765 |
| -1.11904171 | 0.02837825 | -1.1525348 | 0.075057507 | -1.14800954 | 0.007791445 |
| 0.904585973 | 0.0681914  | -1.4022976 | 1.80597E-05 | -1.00031789 | 0.995314914 |
| -1.09455756 | 0.03825636 | 0.7695548  | 0.182434274 | -1.00736176 | 0.863718398 |
| -1.06526045 | 0.47904251 | -1.0058104 | 0.947388889 | 0.975961567 | 0.784865482 |



|             |            |            |             |             |             |
|-------------|------------|------------|-------------|-------------|-------------|
| -1.42712825 | 0.00342644 | 0.78280542 | 0.007442528 | -1.46729793 | 0.001713933 |
| -1.12742002 | 0.01948505 | -1.0255973 | 0.71121125  | -1.06590484 | 0.205451147 |
| -1.17174107 | 0.04446    | 0.96031367 | 0.470774251 | -1.259464   | 0.004140869 |
| 0.922712126 | 0.2054302  | 0.70563064 | 0.132753828 | 0.866082166 | 0.025914324 |
| -1.00406675 | 0.93914326 | -1.036721  | 0.375400933 | 0.89178193  | 0.034881329 |
| 0.925019837 | 0.29689318 | 0.97693386 | 0.676934939 | 0.812852957 | 0.007081214 |
| -1.04674711 | 0.47659909 | 0.7558282  | 0.060849165 | 0.983602985 | 0.79632428  |
| -1.16979295 | 0.01160045 | -1.0873849 | 0.07223369  | -1.05328617 | 0.390775996 |
| -1.57570487 | 0.00023634 | 0.78139848 | 0.052365006 | 0.985802459 | 0.901825718 |
| -1.6833073  | 2.28E-05   | 0.90808245 | 0.116582159 | 0.91175306  | 0.413998807 |
| 0.984447625 | 0.73260881 | -1.0314784 | 0.624279099 | -1.07401706 | 0.12356826  |
| -1.05112355 | 0.57480739 | -1.0559363 | 0.406857502 | 0.925277519 | 0.383228433 |
| 0.982970655 | 0.73311815 | 0.99846101 | 0.968637793 | 0.995663833 | 0.931217213 |
| -1.02652802 | 0.60398348 | 0.96877782 | 0.373387031 | -1.07635731 | 0.148388706 |
| -1.04487365 | 0.64579087 | 0.93605754 | 0.191251968 | -1.02372647 | 0.80591194  |
| -1.09635832 | 0.19251421 | 0.93290406 | 0.202889716 | 0.945314592 | 0.42334337  |
| 0.986651463 | 0.88301914 | -1.0194445 | 0.652501915 | 0.923124831 | 0.382766743 |
| 0.998778713 | 0.98115764 | -1.0472171 | 0.605059593 | 0.974253289 | 0.614604242 |
| -1.00258608 | 0.962078   | -1.2639076 | 0.048735566 | 0.920498776 | 0.131363512 |
| 0.948797213 | 0.44295841 | -1.0199769 | 0.692777992 | 0.844650363 | 0.016197101 |
| -1.02483342 | 0.7603607  | 0.97270001 | 0.720689061 | 0.848400831 | 0.044800514 |
| -1.01425066 | 0.71949182 | 0.89166785 | 0.07324368  | 0.972122002 | 0.473795932 |
| -1.00955149 | 0.87369139 | 0.94657298 | 0.304045187 | -1.13381126 | 0.039519921 |
| 0.943505208 | 0.18293689 | 0.85732177 | 0.042266332 | 0.959708356 | 0.344284685 |
| 0.908249445 | 0.30303638 | 0.97078713 | 0.643696921 | 0.930976719 | 0.442998479 |
| -1.12260063 | 0.04497432 | -1.0347161 | 0.571892658 | -1.0701376  | 0.234142061 |
| -1.07192797 | 0.44421431 | -1.0009354 | 0.993564237 | -1.08641406 | 0.361821094 |
| -1.15253173 | 0.03981791 | -1.1512936 | 0.214751305 | -1.01669403 | 0.806837982 |
| -1.0413527  | 0.59558    | -1.0941646 | 0.053802163 | 0.976616142 | 0.756403552 |
| 0.963568515 | 0.47748325 | 0.94504897 | 0.525011363 | 0.93603862  | 0.208112272 |
| 0.784921249 | 0.02485837 | 0.90142932 | 0.043195914 | 0.678451235 | 0.000512387 |
| -1.01819455 | 0.85090293 | 0.9559904  | 0.373773622 | 0.693524672 | 0.000333806 |
| 0.95248423  | 0.63707212 | -1.0543349 | 0.579747917 | -1.06154581 | 0.562907764 |
| -1.06040902 | 0.2606236  | 0.97625524 | 0.731623037 | 0.964537106 | 0.487030508 |
| -1.27003143 | 2.67E-05   | 0.97126338 | 0.74962141  | -1.36388991 | 1.98E-07    |
| -1.02012378 | 0.72505707 | -1.0241734 | 0.64467728  | 0.874430465 | 0.02084113  |
| -1.00798032 | 0.88769275 | 0.85099674 | 0.004274406 | 0.857285738 | 0.008130444 |
| -1.62364089 | 6.38E-07   | -1.0461313 | 0.510039887 | -1.08166092 | 0.364593573 |
| 0.993025525 | 0.91450437 | 0.98986995 | 0.899221196 | -1.15166876 | 0.033952979 |
| -1.0452965  | 0.31432813 | 0.88408149 | 0.002718935 | -1.04212934 | 0.348323184 |
| 0.903072968 | 0.01862903 | -1.0537976 | 0.382522565 | 0.951312081 | 0.240051255 |
| 0.988909896 | 0.89260056 | 0.96632158 | 0.430214975 | -1.18000837 | 0.04909643  |
| -1.33023084 | 0.00018336 | -1.0263675 | 0.779610745 | -1.22668256 | 0.005735513 |
| 0.88029411  | 0.44173993 | -1.0625599 | 0.286229046 | 0.8955058   | 0.505185684 |

|             |            |            |             |             |             |
|-------------|------------|------------|-------------|-------------|-------------|
| 0.897993294 | 0.18182406 | -1.0644915 | 0.490966759 | -1.10789651 | 0.203200025 |
| 0.830240044 | 0.06498521 | -1.0720795 | 0.306253393 | -1.03362596 | 0.738984131 |
| -1.35532564 | 0.00093381 | -1.0433541 | 0.578315868 | -1.32046156 | 0.002285826 |
| -1.05763112 | 0.48895292 | 0.90934237 | 0.072523947 | -1.311166   | 0.001403279 |
| 0.971318915 | 0.7381655  | 0.99275056 | 0.944965111 | 0.945728255 | 0.522113357 |
| -1.10612064 | 0.24853976 | 0.85980418 | 0.119468362 | -1.23071978 | 0.019838841 |
| -1.20062295 | 0.00728697 | -1.0090082 | 0.930672035 | -1.05370603 | 0.428276532 |
| 0.799761005 | 0.0073669  | -1.0189544 | 0.717317996 | 0.625656294 | 3.06E-07    |
| 0.986987429 | 0.82589481 | -1.3524445 | 3.59226E-07 | -1.06042818 | 0.326527814 |
| 0.98580773  | 0.81595512 | -1.0575665 | 0.325065791 | 0.998849096 | 0.985035845 |
| 0.656426547 | 1.05E-08   | 0.92071492 | 0.14615441  | 0.834287312 | 0.005266364 |
| 0.879975798 | 0.05935317 | -1.1578623 | 0.093523173 | 0.865658582 | 0.034168421 |
| -1.06523582 | 0.40642238 | -1.0815154 | 0.232452248 | 0.49562637  | 9.09E-13    |
| -1.07051635 | 0.2948193  | -1.1001229 | 0.033061388 | -1.05322321 | 0.424317974 |
| -1.00366472 | 0.95760321 | 0.93794009 | 0.133137324 | 0.72777939  | 2.29E-05    |
| 0.826017562 | 0.01181802 | -1.1905302 | 0.038522589 | 0.877556717 | 0.080554905 |
| -1.15510947 | 0.00388565 | -1.3310577 | 0.000178202 | 0.949331432 | 0.281303546 |
| -1.07812338 | 0.36571642 | 0.80731943 | 0.198813122 | 0.868646629 | 0.093458708 |
| -1.0572935  | 0.43344027 | -1.1085211 | 0.200763149 | -1.60627474 | 1.24E-08    |
| -1.15650279 | 0.03064783 | 0.90339249 | 0.308151067 | -1.16711423 | 0.021958029 |
| 0.966446957 | 0.55198122 | -1.4220049 | 0.000162057 | -1.00394847 | 0.945156129 |
| 0.987375896 | 0.77858593 | 0.76209133 | 0.001363558 | -1.00329107 | 0.942012901 |
| -1.03906743 | 0.38637257 | 0.82794381 | 0.033651582 | 0.943729487 | 0.192503229 |
| -1.12799501 | 0.03460124 | -1.1133989 | 0.219478766 | -1.05075674 | 0.376759537 |
| -1.04397383 | 0.23430554 | -1.119556  | 0.090629028 | 0.986634231 | 0.708316194 |
| 0.950630172 | 0.37467797 | 0.70676978 | 6.63193E-05 | 0.995352872 | 0.934668264 |
| -1.0312511  | 0.33811463 | -1.0906769 | 0.14879836  | -1.00527761 | 0.869307791 |
| -1.01372392 | 0.63388799 | 0.96692576 | 0.58435801  | 0.969055932 | 0.274265938 |
| -1.01775716 | 0.75648312 | 0.81532082 | 0.001836743 | 0.612648128 | 8.56E-12    |
| -1.03278286 | 0.52791083 | 0.78752174 | 0.000697353 | -1.05278069 | 0.315576572 |
| -1.12963793 | 0.27286751 | 0.72264942 | 7.22731E-05 | -1.07278818 | 0.525824416 |
| -1.45596772 | 7.60E-06   | 0.9771272  | 0.720822469 | -1.11763334 | 0.148232948 |
| 0.995028782 | 0.93761288 | 0.89268189 | 0.103241589 | 0.918031033 | 0.182839193 |
| -1.01494002 | 0.71320385 | 0.95717539 | 0.553116078 | -1.03950476 | 0.338678456 |
| 0.879653718 | 0.02505697 | -1.0221877 | 0.647849976 | 0.986819389 | 0.812385617 |
| 0.936900081 | 0.06916845 | 0.68078822 | 2.10766E-05 | -1.00919685 | 0.795492601 |
| 0.893822916 | 0.04008148 | -1.0042585 | 0.95222047  | 0.948636905 | 0.327408144 |
| 0.913464441 | 0.2469358  | -1.0121927 | 0.853883546 | -1.08471228 | 0.297669914 |
| 0.891669756 | 0.05392952 | -1.0315994 | 0.58758372  | 0.971790401 | 0.624855246 |
| -1.02340728 | 0.72858469 | -1.0205528 | 0.652723956 | 0.973989397 | 0.692699114 |
| -1.05339247 | 0.0876283  | 0.96617878 | 0.436448277 | 0.973337252 | 0.370085132 |
| -1.00163711 | 0.9745825  | 0.99448967 | 0.921135861 | -1.05139175 | 0.331145126 |
| -1.02858185 | 0.67796785 | 0.97873669 | 0.550534944 | -1.06314547 | 0.368368318 |
| 0.830188626 | 0.00150696 | 0.99804767 | 0.972564226 | 0.99697495  | 0.956774592 |

|             |            |            |             |             |             |
|-------------|------------|------------|-------------|-------------|-------------|
| -1.05625094 | 0.5109345  | 0.93412655 | 0.036894977 | 0.954286009 | 0.573853948 |
| -1.0213269  | 0.73702775 | 0.94471881 | 0.050751564 | -1.36259537 | 7.78E-06    |
| 0.96714921  | 0.77800502 | 0.69857828 | 4.73997E-08 | 0.854710607 | 0.188585263 |
| -1.13487846 | 0.00055587 | -1.0185772 | 0.718373001 | 0.919792705 | 0.018643631 |
| 0.905536236 | 0.04160162 | -1.0111018 | 0.920446765 | -1.09549671 | 0.06033216  |
| -1.20322031 | 0.06245007 | -1.2332468 | 0.007780626 | -1.08066904 | 0.428443161 |
| -1.03605799 | 0.68363182 | 0.96801885 | 0.610135068 | 0.873247592 | 0.122824537 |
| -1.06882724 | 0.20487146 | 0.98458991 | 0.700314159 | -1.00816173 | 0.876046879 |
| -1.06255936 | 0.33237596 | -1.0421434 | 0.461278275 | 0.910656922 | 0.137250187 |
| 0.976416276 | 0.64321655 | -1.0764141 | 0.040898095 | 0.975632144 | 0.632105217 |
| -1.01455323 | 0.82682427 | -1.0607862 | 0.27361625  | -1.11602137 | 0.100691217 |
| 0.940558978 | 0.07629755 | 0.94953552 | 0.505914294 | 0.853179196 | 1.96E-05    |
| -1.04505442 | 0.39461971 | 0.91369428 | 0.126707024 | -1.19071297 | 0.001282113 |
| -1.08090132 | 0.16868625 | 0.88990494 | 0.084365969 | 0.972128054 | 0.614243834 |
| -1.10934759 | 0.17083205 | -1.0074862 | 0.803954796 | 0.593888806 | 4.75E-09    |
| -1.01898429 | 0.70174101 | -1.0838323 | 0.121051649 | 0.87076914  | 0.006482649 |
| 0.983314528 | 0.71265225 | -1.0271699 | 0.692822003 | -1.10236128 | 0.036546457 |
| -1.00974412 | 0.80627147 | 0.62727395 | 2.51356E-11 | 0.986974765 | 0.740267802 |
| -1.24373881 | 0.00375389 | 0.82742269 | 0.025926095 | -1.04060453 | 0.582580462 |
| -1.02620933 | 0.71094209 | -1.0810236 | 0.218123461 | 0.351097589 | 6.26E-21    |
| 0.895995736 | 0.11923974 | 0.83685841 | 0.136716589 | 0.609158089 | 2.47E-09    |
| 0.660226409 | 7.36E-07   | 0.98546379 | 0.672571575 | 0.554897504 | 1.23E-10    |
| 0.79921375  | 0.01032271 | 0.97978642 | 0.669198654 | 0.802464265 | 0.011699993 |
| 0.857511746 | 0.09737906 | -1.1210961 | 0.244932514 | -1.07672872 | 0.42072483  |
| -1.09785498 | 0.22992402 | -1.0643104 | 0.474082725 | 0.913594775 | 0.244993933 |
| 0.839995874 | 0.0042044  | 0.97057343 | 0.567095376 | 0.869691692 | 0.020178643 |
| 0.956511324 | 0.44653996 | -1.1328126 | 0.049445099 | 0.744148574 | 4.61E-06    |
| 0.935277731 | 0.57471347 | 0.94215627 | 0.249974579 | 0.963003056 | 0.751652479 |
| -1.04336422 | 0.2046113  | 0.98266638 | 0.791210756 | -1.03753193 | 0.270003478 |
| 0.989927613 | 0.84318537 | 0.99725066 | 0.935582692 | 0.949412586 | 0.312623959 |
| 0.986150805 | 0.74616474 | -1.0233563 | 0.654816337 | 0.927454031 | 0.084607252 |
| 0.883065611 | 0.0476624  | 0.92639777 | 0.176032857 | 0.971985109 | 0.645149519 |
| -1.03278531 | 0.30109492 | 0.8382153  | 0.021903297 | 0.972994877 | 0.379512963 |
| 0.85487358  | 0.01822545 | 0.94548505 | 0.256198114 | 0.958202368 | 0.510057093 |
| 0.957806703 | 0.5623627  | 0.95708243 | 0.338754776 | -1.04256789 | 0.575291033 |
| 0.842610189 | 0.00689615 | 0.96192422 | 0.328256522 | -1.12784403 | 0.0535126   |
| -1.11423312 | 0.36715505 | -1.0263131 | 0.719633649 | -1.12996276 | 0.308856766 |
| 0.987796998 | 0.84395571 | 0.98985279 | 0.883785306 | -1.13505137 | 0.046215332 |
| -1.06244609 | 0.32483553 | 0.82704214 | 0.008374679 | 0.857694501 | 0.014812157 |
| -1.17747835 | 0.00225535 | 0.82884833 | 0.014198653 | -1.04904471 | 0.351331364 |
| 0.926061558 | 0.02864871 | 0.85835333 | 0.075626345 | 0.978668834 | 0.530546455 |
| 0.704740661 | 0.02555986 | -1.0357059 | 0.70171717  | -1.16937053 | 0.309027378 |
| 0.838246776 | 0.05466166 | 0.94358961 | 0.453386398 | -1.11806731 | 0.219433378 |
| -1.10199059 | 0.10484738 | 0.87737813 | 0.029024261 | 0.977106103 | 0.695575963 |

|             |            |            |             |             |             |
|-------------|------------|------------|-------------|-------------|-------------|
| 0.78223415  | 0.00104911 | 0.94669963 | 0.349065594 | -1.05433696 | 0.458554987 |
| 0.938296571 | 0.25861654 | -1.1196051 | 0.344737232 | 0.847766965 | 0.004563677 |
| -1.08637934 | 0.51261494 | -1.0029398 | 0.9295723   | 0.889534548 | 0.355869576 |
| -1.0058288  | 0.89436357 | 0.9221208  | 0.117251199 | 0.952036064 | 0.264201564 |
| 0.957112973 | 0.44280893 | 0.81451108 | 1.37221E-05 | -1.01381872 | 0.809642567 |
| -1.07891548 | 0.24723546 | 0.86816528 | 0.025112562 | -1.08390247 | 0.220053703 |
| -1.11369028 | 0.12938747 | 0.97259628 | 0.372473473 | 0.975749639 | 0.726854499 |
| -1.05026281 | 0.63343355 | 0.90060023 | 0.109779111 | -1.07719226 | 0.470230797 |
| 0.913988697 | 0.15235703 | 0.91956184 | 0.261837485 | -1.00203024 | 0.974002099 |
| -1.33052448 | 0.02153111 | -1.0765746 | 0.231281341 | -1.13154179 | 0.310126563 |
| -1.18084005 | 0.02723529 | -1.148033  | 0.250874598 | -1.25117942 | 0.003447835 |
| -1.0811698  | 0.38690259 | -1.091877  | 0.162561265 | -1.26924162 | 0.010148645 |
| 0.901284266 | 0.07247584 | 0.89963764 | 0.088483224 | 0.720417544 | 3.90E-07    |
| -1.01400615 | 0.86548287 | -1.0278756 | 0.591507846 | 0.912104675 | 0.265232475 |
| -1.04317339 | 0.41048466 | 0.9542987  | 0.176539683 | -1.15530218 | 0.006480079 |
| -1.06697094 | 0.28631613 | -1.0611404 | 0.69843244  | -1.08566291 | 0.177796457 |
| -1.04856218 | 0.40358237 | -1.0365081 | 0.691306067 | -1.13500321 | 0.028688629 |
| 0.642108487 | 5.22E-08   | 0.99473119 | 0.928831378 | 0.668955359 | 4.50E-07    |
| 0.998829824 | 0.97383131 | 0.91025832 | 0.190206461 | 0.997778914 | 0.950327524 |
| -1.10510963 | 0.0792617  | 0.91043549 | 0.098349889 | -1.04400391 | 0.444190553 |
| -1.11157688 | 0.10702291 | -1.0230315 | 0.856924671 | -1.06704659 | 0.319106082 |
| 0.893969139 | 0.09744284 | 0.90836445 | 0.031668013 | -1.06490601 | 0.348175107 |
| 0.922079369 | 0.07039469 | -1.0048266 | 0.932632703 | -1.04119624 | 0.362364792 |
| 0.864685391 | 0.00922603 | -1.0913326 | 0.183935959 | 0.923326546 | 0.144159248 |
| 0.924224548 | 0.10687007 | -1.2199479 | 0.00629766  | 0.990815914 | 0.848454524 |
| -1.08120734 | 0.25499035 | 0.89137578 | 0.265744344 | -1.13521829 | 0.067087581 |
| -1.00664825 | 0.8740337  | 0.94330831 | 0.350334216 | -1.03961657 | 0.354484904 |
| 0.960466491 | 0.42650549 | -1.5167936 | 0.001085999 | 0.902187923 | 0.045799299 |
| 0.956982905 | 0.27421808 | -1.0019397 | 0.978983791 | 0.884317633 | 0.003181335 |
| 0.683501166 | 1.09E-06   | -1.1935544 | 0.053103969 | 0.981748177 | 0.791149062 |
| 0.838849798 | 0.4257092  | 0.87204934 | 0.019246508 | 0.808474621 | 0.335838404 |
| 0.942847108 | 0.17278884 | 0.99200669 | 0.922129762 | 0.906906717 | 0.02572306  |
| 0.875901607 | 0.02946298 | -1.0149526 | 0.77195925  | 0.423799947 | 3.41E-20    |
| -1.02455497 | 0.51298591 | 0.96995491 | 0.61436297  | 0.952832776 | 0.195208607 |
| -1.00542598 | 0.94544269 | 0.88664074 | 0.037252301 | 0.984846895 | 0.846910821 |
| -1.07715985 | 0.05477987 | 0.65120506 | 1.09689E-07 | 0.978150784 | 0.561944375 |
| -1.02019718 | 0.7054479  | 0.93880778 | 0.081178019 | -1.11953448 | 0.036434642 |
| -1.13307643 | 0.1807093  | -1.0199354 | 0.725223966 | -1.2529493  | 0.017673849 |
| 0.843868451 | 0.05763797 | -1.0258401 | 0.694158065 | 0.729356282 | 0.000680783 |
| 0.7565221   | 0.00169101 | -1.0162962 | 0.808718554 | 0.763556022 | 0.002332423 |
| -1.02331573 | 0.65357869 | 0.95048148 | 0.252908059 | -1.28279211 | 1.00E-05    |
| -1.01642316 | 0.76320453 | -1.0389213 | 0.481138204 | 0.960722611 | 0.459609493 |
| -1.19371198 | 0.02885144 | 0.94065095 | 0.208400846 | -1.08507469 | 0.305023206 |
| 0.88816199  | 0.09493841 | -1.1130356 | 0.120404213 | 0.760471186 | 0.000249286 |

|             |            |            |             |             |             |
|-------------|------------|------------|-------------|-------------|-------------|
| 0.898469267 | 0.12445453 | -1.0958276 | 0.032141505 | 0.666116684 | 2.31E-07    |
| 0.810178177 | 0.00115644 | 0.99759492 | 0.96202574  | 0.825877082 | 0.002906539 |
| -1.13590689 | 0.22497192 | -1.0178714 | 0.658082057 | 0.717219939 | 0.002297346 |
| -1.22888911 | 0.03508593 | 0.81321201 | 0.004236212 | -1.23850797 | 0.028986206 |
| -1.11653446 | 0.31803443 | 0.66083495 | 0.063865485 | 0.867267616 | 0.198443978 |
| 0.914267011 | 0.18993233 | 0.97232414 | 0.512755824 | 0.995107918 | 0.942364918 |
| 0.888963079 | 0.43203545 | 0.93128825 | 0.234704767 | -1.16425296 | 0.310933471 |
| -1.11919053 | 0.07334039 | 0.97154268 | 0.43661875  | -1.03429291 | 0.586701973 |
| -1.09284285 | 0.22688091 | 0.95575509 | 0.567724072 | -1.13895733 | 0.078848526 |
| -1.04402967 | 0.66140697 | 0.9866525  | 0.724001561 | 0.783234082 | 0.015615938 |
| -1.12582179 | 0.14468843 | 0.96950241 | 0.558606806 | -1.10536108 | 0.216340421 |
| 0.961483534 | 0.70587307 | -1.2820106 | 0.009335448 | 0.926857479 | 0.466311575 |
| -1.14258295 | 0.10878896 | 0.84820874 | 0.065345387 | 0.795049442 | 0.006973401 |
| -1.15380954 | 0.04460608 | 0.90465917 | 0.240354502 | -1.04668308 | 0.514717815 |
| -1.09446491 | 0.09743021 | -1.1432416 | 0.011371614 | -1.01636125 | 0.76284358  |
| 0.928740673 | 0.3038299  | -1.0737095 | 0.191762926 | 0.96451337  | 0.613932898 |
| -1.04616093 | 0.36495532 | -1.0315671 | 0.694993031 | -1.09293697 | 0.077585984 |
| 0.901679562 | 0.41835593 | 0.83385031 | 0.011883621 | -1.05565589 | 0.67122824  |
| 0.84382261  | 0.45555692 | -1.0488771 | 0.489634486 | 0.836282242 | 0.432217139 |
| -1.25450542 | 0.00940526 | 0.85337018 | 0.012452215 | 0.977787879 | 0.790583819 |
| 0.999756469 | 0.99493644 | -1.1928338 | 0.09518391  | -1.11088504 | 0.008045981 |
| 0.885843147 | 0.05162127 | 0.90984409 | 0.326068349 | -1.03581126 | 0.565796436 |
| -1.03866248 | 0.52229398 | 0.78586436 | 0.031887069 | -1.02882844 | 0.631395172 |
| -1.11479921 | 0.15690777 | -1.0219413 | 0.749103018 | 0.747037155 | 0.00031397  |
| 0.953206736 | 0.30445516 | -1.0961464 | 0.539533655 | -1.07375108 | 0.129548088 |
| 0.984518899 | 0.86138363 | -1.0060613 | 0.922281786 | -1.33008397 | 0.002258258 |
| -1.12544042 | 0.49857119 | -1.040304  | 0.588656579 | 0.865423456 | 0.408335861 |
| -1.09895834 | 0.16022128 | 0.94305141 | 0.551482466 | -1.10887025 | 0.124744513 |
| 0.891651816 | 0.0659938  | 0.88918921 | 0.148271555 | 0.955005684 | 0.45448838  |
| -1.1160738  | 0.07994954 | 0.89662346 | 0.296569049 | -1.11054891 | 0.094141422 |
| 0.955873487 | 0.29815392 | 0.95393533 | 0.566359259 | 0.971522798 | 0.504115953 |
| 0.783179678 | 0.00250198 | -1.0719922 | 0.322132903 | 0.873983291 | 0.086114403 |
| 0.868915266 | 0.03714636 | 0.93742649 | 0.23250859  | 0.956448212 | 0.501101299 |
| 0.953524025 | 0.52061795 | -1.0681083 | 0.358931219 | -2.14986494 | 1.81E-14    |
| 0.961528465 | 0.54255621 | -1.140279  | 0.010337622 | 0.944625827 | 0.377481707 |
| 0.990011351 | 0.87619886 | -1.0921788 | 0.490161208 | -1.09972255 | 0.144130581 |
| 0.970397131 | 0.68507623 | 0.84740156 | 0.466810372 | 0.943487484 | 0.433379976 |
| -1.14529285 | 0.17641602 | 0.99235011 | 0.92764243  | -1.15919959 | 0.14160731  |
| 0.99353747  | 0.91673018 | -1.1401311 | 0.001157486 | 0.945342694 | 0.366532357 |
| 0.982088612 | 0.71119582 | 0.9462387  | 0.36818921  | -1.0238299  | 0.629644971 |
| -1.11670605 | 0.06946435 | -1.1489211 | 0.022107276 | -1.1149811  | 0.073338308 |
| -1.18081498 | 0.17390955 | 0.96922371 | 0.681281737 | -1.18889996 | 0.157198466 |
| 0.936309844 | 0.63717713 | -1.0010709 | 0.981610423 | 0.872004084 | 0.327970978 |
| 0.825196682 | 0.03005554 | -1.1062367 | 0.261261195 | 0.839477157 | 0.047375547 |

|             |            |            |             |             |             |
|-------------|------------|------------|-------------|-------------|-------------|
| -1.21801097 | 0.00665856 | 0.91605861 | 0.615269583 | -1.07232688 | 0.321981266 |
| 0.739282455 | 6.41E-06   | -1.0362082 | 0.593646328 | 0.917650466 | 0.160386684 |
| -1.16193838 | 0.17045427 | 0.79647469 | 0.00047203  | 0.974979825 | 0.815442892 |
| 0.907346743 | 0.11722989 | 0.9282538  | 0.231585353 | -1.15151818 | 0.024753657 |
| 0.888681114 | 0.26932081 | 0.9752396  | 0.561891466 | 0.670944859 | 0.00040289  |
| -1.13016557 | 0.11595437 | 0.65987183 | 1.57664E-06 | -1.14213871 | 0.088403892 |
| 0.992847677 | 0.9141841  | 0.9388245  | 0.3412422   | -1.12691369 | 0.077125764 |
| 0.884049699 | 0.10125324 | -1.0206796 | 0.781988169 | 0.88235884  | 0.096188441 |
| 0.974256229 | 0.61215869 | 0.99356383 | 0.920029728 | -1.04278365 | 0.416310593 |
| -1.07613827 | 0.19677202 | 0.90440989 | 0.123075014 | 0.987568366 | 0.824518944 |
| -1.01088085 | 0.85684989 | -1.0566536 | 0.457869397 | 0.966407047 | 0.569505477 |
| 0.888780843 | 0.00823589 | -1.2195644 | 0.05008281  | 0.938127886 | 0.143013396 |
| 0.976482901 | 0.62634346 | -1.0391587 | 0.536348194 | 0.944707914 | 0.247003247 |
| -1.02982818 | 0.57689938 | -1.0007243 | 0.988158424 | -1.03177222 | 0.552777016 |
| -1.02455535 | 0.61816765 | -1.1306182 | 0.044239561 | -1.00002789 | 0.999542296 |
| 0.931065319 | 0.18813794 | -1.1543678 | 0.239194968 | 0.472878099 | 1.60E-19    |
| -1.03915831 | 0.51553692 | 0.78477941 | 0.086383586 | -1.09950895 | 0.111829743 |
| -1.07472507 | 0.18706373 | 0.86900677 | 0.109267069 | 0.992134371 | 0.884123995 |
| -1.11721432 | 0.05822567 | -1.0533038 | 0.460484762 | -1.25220462 | 0.000247324 |
| -1.26710427 | 0.00174704 | 0.83788221 | 0.004972482 | -1.14267507 | 0.068883073 |
| -1.04242747 | 0.43918269 | -1.0090153 | 0.934096408 | 0.9753674   | 0.641815515 |
| -1.26827407 | 0.00017301 | -1.0052754 | 0.931661996 | -1.09898308 | 0.114718256 |
| -1.00768858 | 0.91593407 | 0.67250851 | 0.000431913 | -1.01675119 | 0.81894356  |
| 0.861678051 | 0.06689412 | 0.95598461 | 0.559141507 | 0.788741904 | 0.004306358 |
| 0.89559666  | 0.09480432 | -1.0771262 | 0.26741929  | 0.879602478 | 0.053011059 |
| 0.941446755 | 0.33270243 | 0.73243968 | 9.70345E-05 | -1.07380083 | 0.253790893 |
| -1.07212145 | 0.26728444 | 0.91604215 | 0.092169454 | -1.08362868 | 0.201605497 |
| 0.850305541 | 0.05226053 | 0.94775932 | 0.343504688 | -1.07105061 | 0.404496077 |
| 0.955497424 | 0.25593882 | 0.95353654 | 0.429043918 | -1.00764886 | 0.848307451 |
| -1.51286802 | 6.69E-05   | 0.94109183 | 0.163420666 | -2.21536352 | 3.31E-11    |
| -1.02626765 | 0.61663841 | 0.87213954 | 0.006805758 | -1.13016239 | 0.021085417 |
| 0.937792019 | 0.29448107 | -1.0486888 | 0.367960633 | 0.992022553 | 0.895458453 |
| 0.95130359  | 0.2032556  | -1.1160566 | 0.027295379 | -1.01299503 | 0.740335356 |
| -1.03330874 | 0.59392421 | 0.80822592 | 0.000212673 | 0.784366017 | 0.000211284 |
| -1.11878849 | 0.17730149 | -1.0715646 | 0.244037389 | -1.13668166 | 0.124563227 |
| -1.07661732 | 0.37033847 | 0.86167953 | 0.007877571 | -1.01371321 | 0.868251487 |
| -1.00606349 | 0.86167063 | -1.0933034 | 0.125210919 | 0.971446544 | 0.405175497 |
| -1.01370863 | 0.8957317  | -1.1023495 | 0.180665469 | 0.854709094 | 0.134806908 |
| -1.03233274 | 0.65138113 | 0.89599967 | 0.044287705 | -1.03977063 | 0.579908492 |
| -1.2505543  | 0.0120762  | -1.2715882 | 0.000149654 | -1.49136744 | 2.25E-05    |
| 0.999493735 | 0.99547481 | 0.74466507 | 0.000149301 | -1.01029494 | 0.908678821 |
| 0.749176835 | 4.62E-06   | 0.63418448 | 4.83729E-07 | 0.856647527 | 0.008542017 |
| -1.18617837 | 0.07635604 | 0.88084524 | 0.055587366 | -1.04718791 | 0.627526202 |
| -1.03625776 | 0.46684164 | -1.11457   | 0.084576383 | -1.04766796 | 0.342272905 |

|             |            |            |             |             |             |
|-------------|------------|------------|-------------|-------------|-------------|
| 0.761045586 | 0.0164167  | 0.98606254 | 0.822113652 | 0.954154324 | 0.67197153  |
| 0.88847007  | 0.01012914 | 0.78638379 | 0.004810489 | 0.923940525 | 0.080199304 |
| -1.13986266 | 0.13904511 | 0.99402502 | 0.880410028 | -1.09834187 | 0.286733379 |
| 0.956886249 | 0.58351214 | -1.4342224 | 0.000412945 | -1.10893938 | 0.201129315 |
| 0.982471938 | 0.69787191 | -1.0759971 | 0.160663644 | 0.973475871 | 0.555470213 |
| 0.915912262 | 0.44148781 | 0.91451096 | 0.146573949 | -1.28772082 | 0.029781385 |
| -1.22031658 | 0.00572708 | -1.0092467 | 0.813187808 | -1.23179548 | 0.003933115 |
| 0.806824543 | 0.00529883 | 0.86695536 | 0.023201082 | 0.800788932 | 0.00399304  |
| -1.07341185 | 0.19844052 | -1.1880795 | 0.04054295  | -1.08839984 | 0.125354653 |
| 0.960388931 | 0.47310667 | 0.98098135 | 0.815115881 | 0.952417968 | 0.38735245  |
| -1.12269311 | 0.05359398 | 0.9716595  | 0.408715797 | -1.09205239 | 0.13904761  |
| 0.999910588 | 0.99834423 | 0.98418875 | 0.87808169  | 0.983663834 | 0.7024567   |
| -1.01135007 | 0.91208051 | -1.08055   | 0.273558785 | 0.862762447 | 0.152606769 |
| 0.892457728 | 0.38077561 | -1.1630042 | 0.085018004 | 0.913191235 | 0.483637697 |
| -1.19256163 | 0.10323889 | -1.0002114 | 0.998111351 | -1.07835166 | 0.480764933 |
| -1.41523764 | 5.56E-05   | 0.82593697 | 0.001379966 | 0.93515038  | 0.401641093 |
| -1.39870659 | 1.24E-06   | -1.2511779 | 0.021323339 | 0.982825827 | 0.779010397 |
| 0.895235314 | 0.14102295 | -1.1238273 | 0.019794711 | -1.09031864 | 0.248227981 |
| -1.30642794 | 0.00137829 | 0.86507846 | 0.194120077 | -1.0676385  | 0.412249611 |
| -1.02288856 | 0.62938    | 0.97978233 | 0.647071772 | -1.14674966 | 0.00487504  |
| -1.08949331 | 0.23422026 | 0.87336281 | 0.126242865 | -1.07404584 | 0.320526443 |
| 0.571284713 | 1.25E-12   | -1.1170545 | 0.171636194 | -1.0449432  | 0.472909864 |
| -1.18159626 | 0.14843697 | -1.0749539 | 0.116541041 | -1.14491293 | 0.239648024 |
| -1.27732524 | 0.00344119 | -1.1436394 | 0.241279361 | -1.44452235 | 2.62E-05    |
| -1.06965406 | 0.39646463 | -1.1245198 | 0.095571564 | 0.917936834 | 0.28189663  |
| -1.15217298 | 0.3134419  | 0.92066384 | 0.267963871 | -1.19092554 | 0.214833975 |
| 0.9549379   | 0.3702095  | 0.94974042 | 0.347471931 | -1.01896327 | 0.714192299 |
| -1.01821489 | 0.80417817 | 0.98555631 | 0.795788736 | -1.04401001 | 0.554663668 |
| 0.858530461 | 0.05216747 | -1.1638876 | 0.012393176 | 0.967677204 | 0.670529157 |
| 0.924052663 | 0.34670453 | -1.0006253 | 0.988424484 | -1.20198292 | 0.031306375 |
| 0.841257157 | 0.12202502 | 0.95449301 | 0.648939932 | 0.676669924 | 0.000810692 |
| -1.06693178 | 0.29413492 | -1.1228266 | 0.372221206 | -1.19081949 | 0.006091338 |
| -1.17158884 | 0.07356991 | -1.0402262 | 0.711940305 | -1.14821507 | 0.117088641 |
| -1.05330209 | 0.48271896 | 0.97123843 | 0.714343449 | -1.22583826 | 0.007650165 |
| 0.839945874 | 0.0113721  | -1.0291812 | 0.64148885  | 0.960526277 | 0.547545679 |
| 0.937793454 | 0.28226408 | -1.0412816 | 0.587252377 | 0.98963303  | 0.860770584 |
| 0.839277938 | 0.13810805 | -1.1065109 | 0.206778058 | -1.00291196 | 0.980162535 |
| 0.91848484  | 0.14954847 | -1.024972  | 0.598969079 | -1.01737829 | 0.768179441 |
| 0.501149328 | 1.34E-09   | -1.0165314 | 0.818854496 | 0.821374656 | 0.042134857 |
| -1.0804203  | 0.22449091 | 0.8131012  | 0.001271182 | 0.957709185 | 0.495361158 |
| 0.29217811  | 7.20E-13   | 0.94074858 | 0.593709332 | 0.725273097 | 0.017874855 |
| 0.275440843 | 1.73E-15   | -1.5232391 | 2.54386E-06 | 0.687106531 | 0.002141076 |
| 0.319334739 | 9.98E-11   | -1.0417488 | 0.605741854 | 0.520014063 | 2.73E-05    |
| 0.299087103 | 4.33E-12   | 0.9377271  | 0.646025405 | 0.452367185 | 3.31E-07    |

|             |            |            |             |             |             |
|-------------|------------|------------|-------------|-------------|-------------|
| 0.41773118  | 1.38E-10   | 0.99421122 | 0.909835479 | 0.529750011 | 4.12E-07    |
| 0.746594606 | 8.44E-05   | -1.0115506 | 0.874635554 | 0.902751496 | 0.142212874 |
| 0.859012192 | 0.10880761 | 0.79089274 | 0.003509103 | -1.03323606 | 0.727084406 |
| 0.951291799 | 0.29498027 | 0.9965724  | 0.967235985 | 0.871048685 | 0.005052682 |
| -1.61656493 | 0.00015683 | 0.82565399 | 0.087358285 | -2.1579283  | 2.61E-08    |
| -1.09334613 | 0.37508558 | -1.1580643 | 0.019906206 | -1.73357574 | 1.03E-06    |
| 0.832871969 | 0.00256473 | -1.2317974 | 0.019773098 | 0.873597553 | 0.023153633 |
| -1.0730768  | 0.48219681 | -1.0264603 | 0.723621217 | -1.29050595 | 0.013351973 |
| -1.03129023 | 0.44023048 | 0.92397177 | 0.239909116 | 0.963043453 | 0.346191043 |
| 0.803555965 | 0.02032744 | -1.0906169 | 0.148220351 | -1.03241125 | 0.728640381 |
| 0.923519446 | 0.12578135 | 0.95216236 | 0.675331497 | 0.55570286  | 4.49E-16    |
| 0.969930939 | 0.50013907 | -1.0062439 | 0.915163898 | 0.651729558 | 4.05E-13    |
| -1.1354958  | 0.24401356 | 0.9838784  | 0.864116482 | 0.944194101 | 0.596698021 |
| 0.98461272  | 0.81335126 | -1.2081469 | 0.004043165 | -1.02819666 | 0.67220015  |
| -1.05191689 | 0.39646466 | 0.84798631 | 0.215179411 | -1.13927413 | 0.031976659 |
| 0.901268208 | 0.1882738  | 0.87797559 | 0.268247607 | -1.53957986 | 9.65E-07    |
| -1.09848574 | 0.49080119 | 0.63725601 | 0.002583229 | -1.39258532 | 0.01775606  |
| 0.869284505 | 0.13375012 | 0.53656036 | 2.88607E-05 | -1.2146677  | 0.039213901 |
| 0.796378453 | 0.00717474 | 0.88856155 | 0.28842852  | -1.06008427 | 0.476839984 |
| 0.854024646 | 0.17143319 | 0.95194216 | 0.476458046 | 0.848928157 | 0.156033715 |
| -1.09175108 | 0.2088463  | 0.94963415 | 0.581520788 | -1.24120357 | 0.002817478 |
| 0.973159919 | 0.84825297 | 0.90144127 | 0.032314868 | 0.964201316 | 0.79767512  |
| -1.06978649 | 0.40482974 | -1.4676307 | 0.002002483 | -1.00337042 | 0.966749373 |
| -1.03596099 | 0.52937752 | -1.2877672 | 0.014202746 | -1.05082193 | 0.378348527 |
| 0.993007824 | 0.89741614 | 0.80057867 | 0.000318812 | 0.588971082 | 1.64E-13    |
| -1.06508564 | 0.20885313 | -1.0982245 | 0.351364351 | -1.06543507 | 0.206529437 |
| 0.881096353 | 0.05455087 | 0.90366446 | 0.013438454 | 0.906981876 | 0.135425009 |
| -1.02434947 | 0.63368968 | 0.94289972 | 0.523060317 | 0.922474764 | 0.113792213 |
| 0.875926285 | 0.00593632 | 0.98641441 | 0.790208218 | 0.84915922  | 0.000844667 |
| 0.957381519 | 0.08843927 | -1.0212201 | 0.642454982 | 0.907405163 | 0.000295882 |
| 0.906192795 | 0.42383289 | -1.2948055 | 0.020140524 | 0.916739356 | 0.479997712 |
| 0.488494015 | 6.26E-10   | 0.93893416 | 0.339316951 | 0.26031725  | 1.05E-19    |
| -1.0200908  | 0.71174532 | -1.1417154 | 0.029376496 | -1.01964925 | 0.717740265 |
| -1.03265775 | 0.37816431 | -1.0822748 | 0.31531681  | -1.02386886 | 0.517004292 |
| 0.944123982 | 0.30263226 | 0.97948909 | 0.878915998 | 0.927442727 | 0.178420329 |
| -1.02614971 | 0.7206391  | -1.0680789 | 0.47720385  | 0.819585379 | 0.007668773 |
| 0.965640756 | 0.50629281 | -1.0773952 | 0.364129573 | 0.939268066 | 0.235778447 |
| -1.2017849  | 0.00917962 | 0.83691349 | 0.123709284 | -1.17446418 | 0.021679049 |
| -1.04364115 | 0.56699419 | -1.2316589 | 0.003872904 | -1.16840883 | 0.040545611 |
| 0.953447956 | 0.50661282 | -1.0338899 | 0.814689953 | -1.23622821 | 0.004393309 |
| 0.895232493 | 0.18884582 | 0.97121035 | 0.717586031 | -1.13814343 | 0.125560665 |
| -1.02692894 | 0.7878941  | -1.0310971 | 0.585460073 | -1.03533185 | 0.725234016 |
| 0.736222742 | 0.00012465 | 0.93924687 | 0.252357905 | 0.743936779 | 0.000197647 |
| -1.04482752 | 0.72634961 | -1.0638887 | 0.21696591  | -1.13585493 | 0.311361785 |



|             |            |            |             |             |             |
|-------------|------------|------------|-------------|-------------|-------------|
| -1.13913153 | 0.03617626 | 0.86070115 | 0.023653857 | -1.13589022 | 0.040276955 |
| -1.00095073 | 0.98832979 | 0.9911544  | 0.860170685 | -1.07672359 | 0.258048439 |
| -1.07563133 | 0.07840339 | 0.85414974 | 0.001241125 | 0.868127288 | 0.001003114 |
| -1.2427848  | 0.01672038 | 0.99144464 | 0.733441344 | 0.697603472 | 0.000144476 |
| -1.03125228 | 0.58237541 | 0.76881764 | 0.035995744 | 0.854199106 | 0.006478622 |
| 0.99197968  | 0.89212697 | 0.63363162 | 1.37681E-05 | -1.0129206  | 0.828854502 |
| -1.06010561 | 0.57376474 | 0.95102352 | 0.352553147 | 0.504222311 | 1.63E-08    |
| 0.972575769 | 0.65576761 | -1.0156909 | 0.668537493 | 0.986834457 | 0.831635216 |
| -1.13938811 | 0.01021536 | 0.99657352 | 0.950688772 | 0.961168813 | 0.422606934 |
| -1.06945607 | 0.26186476 | -1.0102038 | 0.888097866 | 0.730560535 | 2.22E-06    |
| 0.934820003 | 0.23694889 | 0.88982819 | 0.029682876 | 0.566193703 | 5.30E-14    |
| 0.989832503 | 0.79584732 | 0.99773408 | 0.973510172 | -1.01463145 | 0.713157604 |
| 0.992594241 | 0.91101279 | -1.097767  | 0.213874005 | -1.01411805 | 0.833081479 |
| 0.978136152 | 0.60349742 | -1.1095975 | 0.150498554 | -1.03857301 | 0.375052451 |
| 0.739870156 | 0.00737314 | -1.2561224 | 0.008275787 | 0.659030151 | 0.000311593 |
| 0.870885637 | 0.07583983 | -1.0710459 | 0.487936153 | 0.738000333 | 0.000209428 |
| 0.972670671 | 0.51973314 | 0.83717447 | 0.019842227 | -1.03994163 | 0.363813117 |
| -1.14346874 | 0.03480318 | -1.1205487 | 0.365242409 | 0.650986592 | 5.44E-09    |
| -1.05169721 | 0.36099988 | -1.0565756 | 0.36803218  | -1.06355561 | 0.265059111 |
| -1.30476867 | 0.00848699 | -1.0145372 | 0.824236919 | -2.39209545 | 3.05E-12    |
| 0.98464601  | 0.76160942 | -1.0004992 | 0.990246569 | 0.96829672  | 0.528211038 |
| -1.04628712 | 0.13973072 | 0.88058937 | 0.154237354 | -1.00381397 | 0.900113762 |
| -1.05201976 | 0.39786809 | 0.88718931 | 0.035917124 | 0.947650627 | 0.370233898 |
| 0.818043668 | 0.09832902 | -1.0819044 | 0.18847086  | 0.872469021 | 0.258217326 |
| 0.958738083 | 0.5976234  | 0.99622065 | 0.970847124 | -1.15217258 | 0.079923829 |
| -1.03813422 | 0.52061909 | 0.67971805 | 7.62756E-08 | -1.05717581 | 0.341015663 |
| -1.0356834  | 0.38987503 | 0.97751955 | 0.644583659 | 0.933215993 | 0.093249088 |
| -1.59028903 | 0.00038713 | 0.88711406 | 0.048101563 | -1.14334201 | 0.279074183 |
| 0.910765415 | 0.04993615 | 0.98550363 | 0.796536519 | 0.974855268 | 0.587002665 |
| -1.05579856 | 0.22193597 | -1.0056708 | 0.886139404 | 0.869790904 | 0.002483551 |
| -1.04203274 | 0.6912748  | -1.1543849 | 0.034552763 | -1.05307984 | 0.618041526 |
| 0.886412801 | 0.09427479 | 0.94161264 | 0.160855528 | 0.926560609 | 0.286027963 |
| -1.01085473 | 0.75683552 | 0.88695843 | 0.272365956 | 0.997445692 | 0.941501239 |
| -1.17989631 | 0.07581884 | 0.39520496 | 4.86726E-17 | -1.11688054 | 0.231660233 |
| -1.10334651 | 0.06297631 | 0.98841162 | 0.78621458  | -1.04117655 | 0.439368185 |
| 0.704100848 | 0.00033038 | 0.87620333 | 0.03736244  | -1.08084703 | 0.398975066 |
| -1.04786155 | 0.3966626  | -1.0699723 | 0.221758265 | 0.614411128 | 3.76E-12    |
| 0.970728702 | 0.70287531 | -1.1197611 | 0.250385795 | -1.10085618 | 0.220246024 |
| 0.92968135  | 0.40830342 | 0.93472438 | 0.189065942 | -1.03018826 | 0.735218514 |
| 0.732609404 | 0.00371235 | -1.0222856 | 0.468447782 | 0.859583614 | 0.145901777 |
| -1.01761044 | 0.87595315 | 0.85532789 | 0.011228979 | -1.15297633 | 0.206419796 |
| 0.784671881 | 0.00305525 | 0.86968703 | 0.247372168 | 0.987387379 | 0.871586881 |
| -1.0046433  | 0.97139586 | -1.073311  | 0.376635223 | 0.99511488  | 0.969763218 |
| 0.883176388 | 0.10363673 | -1.0122778 | 0.833804291 | 0.971248902 | 0.698974634 |

|             |            |            |             |             |             |
|-------------|------------|------------|-------------|-------------|-------------|
| -1.01440784 | 0.84389363 | -1.02779   | 0.500866937 | 0.732434088 | 7.08E-05    |
| 0.828480793 | 0.07121582 | -1.0749571 | 0.557652955 | 0.957179184 | 0.670289206 |
| 0.876358641 | 0.05121536 | 0.87864466 | 0.007556603 | 0.833984915 | 0.008255705 |
| 0.424132574 | 2.58E-06   | -1.0124727 | 0.778945053 | 0.35426267  | 4.55E-08    |
| -1.02835586 | 0.60877188 | 0.96538444 | 0.733964063 | 0.923885037 | 0.150749072 |
| 0.943793722 | 0.62371811 | 0.82435664 | 0.008576292 | 0.633123458 | 0.000270767 |
| -1.06921159 | 0.53163472 | 0.89954647 | 0.003533682 | 0.923675184 | 0.458362477 |
| 0.958444354 | 0.61499866 | -1.0615284 | 0.516229751 | 0.614876706 | 3.67E-07    |
| -1.16417413 | 0.16538154 | 0.85619922 | 0.004118469 | -1.04517651 | 0.684318638 |
| 0.920039525 | 0.23338917 | 0.98073003 | 0.832292348 | -1.28152774 | 0.000722568 |
| 0.769761761 | 5.17E-06   | -1.0102073 | 0.853454868 | -1.01147485 | 0.826079168 |
| -1.31654905 | 0.02109487 | 0.87683854 | 0.095572256 | -1.73398111 | 1.53E-05    |
| 0.840792408 | 0.08398694 | 0.83083593 | 0.038799414 | 0.997366206 | 0.978736689 |
| 0.431547522 | 5.37E-18   | -1.1566535 | 0.16161046  | 0.507361278 | 2.02E-14    |
| 0.947792527 | 0.35095313 | 0.95275553 | 0.665426832 | -1.03418976 | 0.557702292 |
| 0.585399861 | 1.10E-12   | 0.64775283 | 8.82048E-07 | 0.476706755 | 6.43E-18    |
| 0.987910946 | 0.80010876 | -1.0803946 | 0.550150621 | 0.403032647 | 1.70E-25    |
| 0.882621913 | 0.22556757 | 0.71507243 | 4.09287E-05 | 0.854893343 | 0.129589711 |
| 0.964214739 | 0.38490586 | 0.88850942 | 0.107880244 | 0.779242624 | 1.77E-07    |
| 0.848275349 | 0.01116879 | 0.9596631  | 0.68873091  | 0.629934737 | 1.03E-09    |
| -1.01871352 | 0.83918951 | 0.90001382 | 0.117303562 | 0.859883305 | 0.102687182 |
| -1.05692205 | 0.49335421 | 0.8229553  | 0.237420866 | 0.849081112 | 0.046474996 |
| -1.00692237 | 0.91209387 | 0.72315596 | 1.95822E-07 | 0.956701269 | 0.479726057 |
| -1.002201   | 0.98547807 | -1.1105491 | 0.375102038 | 0.98235997  | 0.882874353 |
| -1.1031413  | 0.28171618 | -1.0631188 | 0.567139429 | -1.20175164 | 0.046714545 |
| 0.940763083 | 0.11140233 | 0.91711254 | 0.307017949 | 0.795759127 | 1.42E-07    |
| -1.10266032 | 0.08659396 | -1.2361918 | 0.054997037 | -1.07551261 | 0.199031379 |
| 0.979054951 | 0.8583455  | -1.0469417 | 0.509893852 | -1.14364048 | 0.260531149 |
| -1.37806337 | 0.07296618 | 0.91134891 | 0.078040721 | -1.65436763 | 0.005842383 |
| -1.15016164 | 0.06653709 | -1.3668401 | 0.009255082 | -1.33239329 | 0.000325134 |
| -1.31823463 | 0.00038656 | 0.93046302 | 0.467482821 | -1.72691829 | 6.88E-10    |
| -1.26282368 | 0.00262142 | 0.68679994 | 4.4917E-07  | -1.71910727 | 1.25E-09    |
| -1.00690658 | 0.92298392 | -1.0491948 | 0.403122381 | -1.33285066 | 0.000163441 |
| 0.927654878 | 0.29763894 | 0.70764673 | 1.95718E-07 | -1.25285878 | 0.002614348 |
| -1.33271187 | 0.0010962  | -1.0246405 | 0.612649242 | -1.10157497 | 0.250218989 |
| 0.992947886 | 0.89568081 | 0.94440642 | 0.576711226 | -1.11968325 | 0.040046638 |
| 0.69461724  | 5.10E-05   | 0.9402022  | 0.144104371 | 0.889011111 | 0.160822454 |
| -1.08306447 | 0.40752482 | 0.82927185 | 0.004203052 | -1.17948284 | 0.089916269 |
| 0.983140924 | 0.86998098 | 0.90516119 | 0.278013809 | 0.991720223 | 0.936199682 |
| -1.00010663 | 0.99868961 | 0.74635056 | 0.000604876 | 0.922920913 | 0.21989569  |
| -1.01400669 | 0.83154186 | -1.089971  | 0.171723239 | -1.26942651 | 0.000565659 |
| 0.785157736 | 0.00172207 | 0.84675437 | 0.172222725 | 0.941071708 | 0.410957801 |
| -1.01918375 | 0.60623697 | -1.0916947 | 0.335479273 | 0.93446828  | 0.069907313 |
| -1.04315464 | 0.37084174 | 0.9647885  | 0.346293636 | 0.88188218  | 0.009630964 |

|             |            |            |             |             |             |
|-------------|------------|------------|-------------|-------------|-------------|
| -1.00815797 | 0.8758681  | -1.0291487 | 0.6098923   | 0.97430436  | 0.617108006 |
| -1.00904668 | 0.894105   | -1.0109514 | 0.926818772 | 0.900149705 | 0.124122472 |
| 0.910773354 | 0.0996483  | -1.1897612 | 0.326143447 | 0.891922316 | 0.045215388 |
| 0.970790054 | 0.709228   | -1.1766578 | 0.033838694 | 0.827132098 | 0.019895849 |
| 0.54977854  | 7.23E-13   | -1.4203338 | 1.26545E-05 | 0.789194933 | 0.000503826 |
| -1.02114268 | 0.80559702 | 0.97133125 | 0.695559479 | -1.11269865 | 0.212271395 |
| 0.726818684 | 4.03E-05   | -1.1007888 | 0.181050501 | 0.821280597 | 0.007876805 |
| -1.5950793  | 3.73E-05   | -1.132801  | 0.086473628 | -1.84162153 | 2.70E-07    |
| 0.964999088 | 0.78125832 | -1.1817586 | 0.04983921  | -1.14323097 | 0.299099019 |
| -1.14480013 | 0.02257504 | 0.97395356 | 0.625225827 | -1.1566826  | 0.014462712 |
| -1.20424567 | 0.0261363  | 0.7617735  | 0.001779724 | 0.958884548 | 0.607453428 |
| 0.913650055 | 0.20334352 | -1.2657264 | 0.016920169 | 0.959390215 | 0.556877217 |
| -1.12173683 | 0.07869152 | 0.99214536 | 0.939481861 | -1.33320705 | 3.85E-05    |
| -1.22273939 | 0.02857196 | 0.99667288 | 0.95905968  | -1.44867791 | 0.000120609 |
| -1.13589019 | 0.16984287 | 0.94526519 | 0.390852252 | -1.9106504  | 3.27E-09    |
| -1.06243916 | 0.31830415 | 0.94246385 | 0.422367957 | -1.18260963 | 0.007292761 |
| -1.42859766 | 0.00357805 | 0.98679913 | 0.718321636 | -1.53209791 | 0.000604605 |
| -1.50862085 | 1.07E-05   | 0.93553829 | 0.160433653 | -1.25329654 | 0.0100847   |
| 0.884867931 | 0.18261347 | 0.97301118 | 0.599307122 | 0.769367742 | 0.00548524  |
| -1.44505906 | 7.25E-05   | 0.96004038 | 0.54732989  | -1.50207029 | 1.55E-05    |
| 0.939302612 | 0.04214133 | 0.94821369 | 0.34470867  | -1.09488684 | 0.0039325   |
| 0.967536731 | 0.5630918  | 0.90107483 | 0.193352404 | 0.950560096 | 0.375325501 |
| 0.99311269  | 0.91133117 | 0.87750246 | 0.04586198  | 0.840850012 | 0.006969773 |
| -1.01625581 | 0.7522075  | 0.94154622 | 0.479535944 | 0.963830299 | 0.4715798   |
| -1.04647443 | 0.42291972 | 0.91640188 | 0.22626243  | 0.99022787  | 0.862073474 |
| 0.999133012 | 0.98722985 | -1.7414396 | 1.91493E-06 | -1.10483859 | 0.07006405  |
| 0.974737217 | 0.45705272 | -1.0253912 | 0.845032704 | 0.949433482 | 0.134586919 |
| -1.10125179 | 0.07755603 | -1.1129106 | 0.068699778 | -1.03518546 | 0.521535673 |
| 0.983950813 | 0.74782769 | -1.0068602 | 0.933252041 | 0.921320818 | 0.107527963 |
| 0.975245949 | 0.72222617 | 0.89748698 | 0.12887266  | -1.10507881 | 0.160093051 |
| -1.23070678 | 0.01450627 | -1.115685  | 0.093399969 | -1.16033377 | 0.075923281 |
| -1.25219484 | 0.00510063 | -1.0691761 | 0.457481497 | -1.26892876 | 0.003143074 |
| -1.2479046  | 0.00347229 | -1.162573  | 0.105823601 | -1.43378807 | 7.08E-06    |
| -1.23620947 | 0.08633068 | -1.2852009 | 0.000110726 | 0.948873714 | 0.667182459 |
| 0.950959055 | 0.43091069 | -1.2584246 | 0.054746036 | 0.981049782 | 0.763852505 |
| -1.19064013 | 0.07321073 | -1.3192948 | 0.001861237 | -1.23692512 | 0.030183672 |
| -1.03817169 | 0.69378656 | 0.78858954 | 0.011358259 | -1.16505018 | 0.112341974 |
| -1.02954136 | 0.49942195 | -1.3456271 | 0.001042629 | -1.03111363 | 0.477308847 |
| -1.00935359 | 0.89594424 | 0.98223369 | 0.553688664 | 0.972663209 | 0.697185849 |
| -1.15222611 | 0.05023957 | 0.99422945 | 0.919107224 | -1.33226346 | 0.0001631   |
| -1.14859389 | 0.08170452 | 0.80509219 | 0.000916943 | -1.18373802 | 0.035245455 |
| -1.29235318 | 0.00272152 | -1.1648072 | 0.004061504 | -1.02919696 | 0.725685561 |
| 0.996716385 | 0.96667392 | 0.95017932 | 0.367690555 | 0.651507175 | 1.22E-06    |
| -1.0523921  | 0.4783525  | -1.0641222 | 0.25433489  | -1.5078539  | 4.49E-07    |

|             |            |            |             |             |             |
|-------------|------------|------------|-------------|-------------|-------------|
| 0.902636259 | 0.21596723 | -1.01403   | 0.684967175 | -1.08040663 | 0.348737172 |
| 0.97896541  | 0.83941637 | -1.1312541 | 0.025300717 | 0.836727404 | 0.093528826 |
| -1.0475319  | 0.44567162 | -1.1222972 | 0.02509228  | -1.11203648 | 0.084625141 |
| 0.997241203 | 0.95531861 | -1.0456991 | 0.526782574 | -1.05953236 | 0.243873208 |
| 0.984007866 | 0.71959657 | -1.1802487 | 0.048716827 | 0.888126974 | 0.010393677 |
| -1.01033446 | 0.84637349 | -1.0587312 | 0.461838626 | 0.972828142 | 0.604068183 |
| 0.777881415 | 0.07412889 | -1.3089018 | 0.000482796 | 0.436618173 | 1.68E-07    |
| 0.713717555 | 0.00036823 | -1.0553586 | 0.658867517 | -1.33173562 | 0.002115396 |
| -1.10553434 | 0.23774112 | -1.0707795 | 0.28526804  | -1.05396821 | 0.534279537 |
| 0.97611745  | 0.74560998 | -1.2617166 | 0.018267766 | 0.800419927 | 0.004050638 |
| -1.12298336 | 0.19722665 | 0.95605564 | 0.636808598 | -1.14770881 | 0.126814117 |
| 0.86322886  | 0.49669919 | -1.0404156 | 0.358891578 | 0.797260808 | 0.29648891  |
| -1.05750269 | 0.18878827 | 0.95778978 | 0.545281557 | 0.653254914 | 4.55E-14    |
| 0.948851518 | 0.56945194 | -1.3365994 | 0.000140305 | 0.824705713 | 0.040344368 |
| 0.847242629 | 0.03190086 | -1.1760254 | 0.042656559 | -1.08304522 | 0.293772907 |
| 0.950517478 | 0.63273325 | 0.91858809 | 0.302660846 | -1.08810509 | 0.427415957 |
| 0.957086374 | 0.47434865 | 0.8172767  | 0.012810855 | 0.909347903 | 0.124411109 |
| 0.939227041 | 0.14252192 | -1.2343078 | 0.004791807 | 0.670679881 | 4.63E-13    |
| -1.0068478  | 0.93646512 | 0.92925244 | 0.373791517 | -1.05078365 | 0.563452722 |
| 0.977547394 | 0.75636352 | 0.763905   | 0.012666886 | 0.62478953  | 3.19E-08    |
| 0.997407223 | 0.94000235 | -1.0539331 | 0.388660449 | -1.01455973 | 0.675409441 |
| 0.972470087 | 0.65290635 | 0.98339579 | 0.73430678  | -1.06001186 | 0.34931145  |
| -1.39548424 | 0.04715005 | -1.0185917 | 0.681710825 | -1.75207838 | 0.001207294 |
| 0.925980922 | 0.42104206 | -1.0257004 | 0.632819932 | 0.943632511 | 0.543296185 |
| -1.0010928  | 0.97432119 | 0.3863981  | 6.29061E-09 | 0.929674919 | 0.035329843 |
| 0.628133693 | 3.90E-16   | 0.91243055 | 0.306111176 | 0.821303027 | 9.91E-06    |
| -1.03991683 | 0.40618491 | -1.0134274 | 0.874477117 | 0.945726996 | 0.237891878 |
| -1.0671849  | 0.32079363 | -1.1061711 | 0.179107865 | 0.714052606 | 3.30E-06    |
| -1.31405975 | 0.01165445 | -1.0158377 | 0.860261375 | 0.896700233 | 0.301767072 |
| 0.983844272 | 0.8065563  | 0.67943381 | 0.077743137 | 0.87036363  | 0.040654488 |
| -1.03638051 | 0.48959831 | 0.92181533 | 0.057870006 | -1.00257569 | 0.960242144 |
| -1.17873307 | 0.03787576 | 0.68997746 | 0.000168328 | -1.11253358 | 0.173139441 |
| -1.08386988 | 0.41151412 | 0.83136388 | 0.017380895 | 0.962784797 | 0.698257717 |
| 0.898202777 | 0.14686871 | 0.83126545 | 0.085791239 | 0.444953481 | 1.62E-15    |
| -1.27445955 | 0.01212647 | 0.87130464 | 0.027708488 | 0.918999783 | 0.369853533 |
| -1.13992004 | 0.0071346  | 0.99323517 | 0.872597379 | 0.938430786 | 0.180301119 |
| -1.12485789 | 0.09479464 | -1.0597253 | 0.498944943 | 0.987428378 | 0.855589867 |
| -1.06134919 | 0.44421753 | 0.81490524 | 0.006884044 | 0.924881847 | 0.316602944 |
| 0.951631078 | 0.38949153 | -1.0484889 | 0.173553585 | 0.956132564 | 0.43591042  |
| 0.998429085 | 0.97752072 | 0.97184205 | 0.645433411 | 0.981243664 | 0.734476821 |
| 0.976848265 | 0.74564733 | -1.3584419 | 0.067274236 | 0.970164879 | 0.674983598 |
| 0.976108807 | 0.70405861 | 0.94791776 | 0.575129664 | 0.757745887 | 5.53E-05    |
| -1.16120791 | 0.04443462 | 0.95093914 | 0.142207192 | -1.13555802 | 0.085718564 |
| 0.946123214 | 0.42230972 | 0.85393136 | 0.000257898 | 0.534022312 | 1.48E-12    |

|             |            |            |             |             |             |
|-------------|------------|------------|-------------|-------------|-------------|
| -1.01350958 | 0.88055584 | -1.0891304 | 0.073378121 | -1.36839149 | 0.000865213 |
| 0.950375103 | 0.70152961 | 0.98142684 | 0.773751495 | 0.764279671 | 0.046801739 |
| 0.874736621 | 0.04354821 | 0.88843137 | 0.262966714 | 0.938758595 | 0.33335554  |
| -1.04733592 | 0.63167308 | 0.93922187 | 0.347701383 | -1.10218561 | 0.315012569 |
| -1.09908574 | 0.38879073 | 0.97923707 | 0.684531279 | -1.08657042 | 0.448482884 |
| -1.23688635 | 0.02130998 | -1.1544477 | 0.068468259 | -1.24424977 | 0.018102703 |
| -1.18939508 | 0.0342245  | -1.1577129 | 0.138181913 | -1.23510899 | 0.010682754 |
| -1.13189214 | 0.01268505 | 0.66137489 | 5.87079E-07 | -1.1552396  | 0.004043056 |
| -1.12948632 | 0.11100788 | -1.073617  | 0.450285606 | -1.42770357 | 1.62E-05    |
| -1.1714389  | 0.16589053 | 0.9466027  | 0.246259125 | -1.60570044 | 1.00E-04    |
| 0.979131754 | 0.80965193 | -1.0368579 | 0.603002473 | -1.35586959 | 0.000960819 |
| -1.24160682 | 0.01735101 | -1.0482225 | 0.544649976 | -1.41681463 | 0.000227516 |
| -1.18783623 | 0.03444683 | -1.0621354 | 0.296208739 | -1.45820073 | 1.53E-05    |
| -1.04299655 | 0.50659087 | 0.97034794 | 0.590057283 | -1.19032433 | 0.007741267 |
| -1.19257626 | 0.04977458 | 0.92808836 | 0.303546905 | -1.37857194 | 0.00057859  |
| -1.08142464 | 0.36904888 | 0.92461779 | 0.221206401 | -1.39881594 | 0.000284059 |
| -1.16484054 | 0.10269144 | 0.94321318 | 0.424306432 | -1.20636252 | 0.046142391 |
| -1.3811808  | 0.02124149 | 0.87320975 | 0.052897705 | -1.25204428 | 0.104392448 |
| 0.914732261 | 0.2785199  | 0.96977351 | 0.731194863 | 0.80430854  | 0.00988651  |
| 0.954793178 | 0.44293342 | 0.81234417 | 0.121523739 | -1.02723427 | 0.655260253 |
| -1.3634263  | 5.67E-05   | 0.82302123 | 0.003991394 | -1.07537424 | 0.309868781 |
| -1.49962828 | 5.85E-07   | -1.0462891 | 0.639047909 | -1.03427045 | 0.63923102  |
| 0.976238047 | 0.77063438 | 0.94164824 | 0.582613893 | -1.59563609 | 5.36E-07    |
| -1.33687513 | 0.00077979 | -1.1125536 | 0.2392816   | -1.34575676 | 0.000606491 |
| -1.15865604 | 0.01922703 | -1.1210168 | 0.158190993 | -1.00046708 | 0.993920962 |
| -1.31456383 | 0.00161778 | -1.0409354 | 0.40733004  | -1.15836115 | 0.079899775 |
| -1.08515259 | 0.08958248 | -1.1963877 | 0.02058247  | 0.967289726 | 0.484731296 |
| -1.20296318 | 0.04813484 | -1.131206  | 0.278666856 | -1.02154097 | 0.816455848 |
| 0.993522881 | 0.95902545 | -1.0950609 | 0.301927995 | -1.05680407 | 0.662523228 |
| 0.998962858 | 0.9904794  | -1.0965361 | 0.300447001 | -1.12032357 | 0.19489783  |
| 0.987067344 | 0.91629764 | -1.1698007 | 0.053166529 | -1.1662428  | 0.217620854 |
| 0.934580423 | 0.24194169 | -1.025805  | 0.687334387 | 0.862141966 | 0.01220093  |
| 0.932531577 | 0.37609809 | -1.0536778 | 0.553732041 | 0.757731917 | 0.000823941 |
| -1.0526485  | 0.40040416 | -1.1820631 | 0.058192097 | -1.07282489 | 0.250664878 |
| 0.990734792 | 0.86648396 | 0.98787841 | 0.894925071 | -1.15866166 | 0.009947068 |
| -1.05435313 | 0.36626616 | -1.3495847 | 0.03189202  | 0.924806418 | 0.184030121 |
| -1.0433819  | 0.42299194 | 0.94830563 | 0.517195576 | -1.06081306 | 0.266679843 |
| -1.00299786 | 0.9669748  | -1.0302286 | 0.620794477 | 0.876901028 | 0.073507542 |
| -1.04714102 | 0.39029645 | -1.1497789 | 0.054124332 | 0.907262523 | 0.072826072 |
| 0.787342184 | 1.20E-05   | -1.1466951 | 0.060809451 | 0.93216456  | 0.162160299 |
| 0.956446785 | 0.14950369 | -1.2332848 | 0.013493997 | 0.940280281 | 0.048170656 |
| -1.04102581 | 0.63269293 | -1.1020982 | 0.238146608 | 0.975879441 | 0.771483592 |
| 0.997936563 | 0.96195927 | 0.92677262 | 0.217974075 | -1.03024199 | 0.49243705  |
| 0.930663058 | 0.24313718 | -1.2168872 | 0.020712857 | 0.969447295 | 0.612411604 |

|             |             |            |             |             |             |
|-------------|-------------|------------|-------------|-------------|-------------|
| 0.954059741 | 0.47238204  | -1.0243006 | 0.613566188 | -1.46644671 | 2.60E-07    |
| 0.935242703 | 0.39434326  | -1.035428  | 0.704688504 | 0.75440876  | 0.000664423 |
| -1.00616661 | 0.89294222  | -1.0756314 | 0.564925465 | 0.996656371 | 0.941548075 |
| 0.890819704 | 0.02317301  | 0.98191997 | 0.833849713 | -1.00596801 | 0.904689875 |
| -1.02475144 | 0.50182861  | -1.1328272 | 0.316219262 | -1.02266365 | 0.538024947 |
| -1.03158961 | 0.53656409  | 0.92957444 | 0.20705328  | 0.320022126 | 2.94E-29    |
| -1.1290014  | 0.24036259  | 0.77552531 | 0.002006282 | 0.877185278 | 0.205289001 |
| 0.980477774 | 0.58340318  | -1.042657  | 0.493114878 | 0.822235143 | 1.17E-06    |
| -1.02899792 | 0.69196361  | -1.0791352 | 0.172640632 | 0.92978963  | 0.3149362   |
| -1.01641011 | 0.73386866  | -1.0703655 | 0.246896347 | 0.965535754 | 0.46470143  |
| 0.926404208 | 0.34574574  | -1.0000854 | 0.998710972 | -1.10196552 | 0.232263405 |
| -1.03597379 | 0.55239197  | -1.0866299 | 0.253409075 | -1.00842073 | 0.887711654 |
| -1.03260741 | 0.4748828   | 0.97154912 | 0.589588421 | 0.996690686 | 0.941015282 |
| -1.0869029  | 0.17977311  | 0.86741683 | 0.005863173 | -1.01594791 | 0.797343493 |
| 0.968049429 | 0.45301433  | 0.99273427 | 0.811661501 | -1.03185624 | 0.468566901 |
| -1.03418267 | 0.43675143  | 0.94249676 | 0.481988445 | 0.890626246 | 0.009250814 |
| -1.02433476 | 0.76580104  | 0.95286085 | 0.267628215 | -1.48092868 | 9.58E-06    |
| 0.734298137 | 1.75E-08    | -1.0710723 | 0.264483136 | 0.850875344 | 0.001060345 |
| 0.95479285  | 0.41197299  | -1.2220399 | 0.003208258 | -1.00245995 | 0.965134893 |
| 0.817078535 | 0.00783245  | 0.9191168  | 0.284204596 | -1.02977421 | 0.689827806 |
| 0.944975449 | 0.32953224  | 0.96024349 | 0.376201846 | 0.798893508 | 0.000266657 |
| -1.18829398 | 0.12756468  | -1.0283251 | 0.574609267 | 0.863051598 | 0.192002637 |
| 0.95051347  | 0.68728971  | -1.0417239 | 0.263302912 | -1.1948695  | 0.161469844 |
| -1.48629231 | 0.00014534  | -1.0094524 | 0.851460541 | -1.41348    | 0.000757646 |
| -1.20653647 | 0.01879114  | 0.8873489  | 0.247385004 | -1.02372238 | 0.763373258 |
| 0.98166578  | 0.76875745  | 0.95380555 | 0.191238695 | -1.34030004 | 2.01E-05    |
| -1.14196473 | 0.17407099  | -1.0892942 | 0.238564971 | 0.794282971 | 0.020394782 |
| 0.882892026 | 0.111177507 | 0.98182743 | 0.701709034 | 0.969575181 | 0.689948184 |
| -1.03701689 | 0.64114645  | -1.1612545 | 0.068324793 | -1.4832311  | 4.82E-06    |
| -1.36872919 | 1.18E-07    | 0.93150381 | 0.235226445 | -1.55016481 | 1.48E-11    |
| 0.977439438 | 0.82775089  | 0.98247799 | 0.693344812 | -1.039503   | 0.711925353 |
| -1.11012874 | 0.23578442  | -1.0471299 | 0.455846627 | 0.970496147 | 0.732414691 |
| 0.988935199 | 0.86521562  | 0.99370976 | 0.883769603 | -1.04596043 | 0.493914746 |
| -1.11578049 | 0.18033615  | 0.8924786  | 0.010505302 | -1.14191133 | 0.105977195 |
| 0.993351756 | 0.9316576   | -1.0801711 | 0.341217732 | -1.03416042 | 0.666111524 |
| -1.01697073 | 0.86314389  | 0.81266747 | 4.41856E-05 | 0.915244862 | 0.366096319 |
| -1.08057423 | 0.23114789  | 0.96550805 | 0.533061285 | 0.899076013 | 0.102194651 |
| 0.961227816 | 0.38215503  | 0.95063423 | 0.491692167 | -1.05506949 | 0.237521459 |
| -1.1448632  | 0.00443087  | -1.1177107 | 0.058296224 | -1.0496227  | 0.292232241 |
| 0.960005983 | 0.65362867  | 0.77424723 | 0.025643269 | 0.88698634  | 0.190501021 |
| 0.900638468 | 0.06798747  | -1.1560977 | 0.252524966 | -1.01277513 | 0.82210437  |
| 0.851043918 | 0.06323166  | -1.3053821 | 0.008088517 | 0.756990995 | 0.001858621 |
| -1.14739255 | 0.28158453  | -1.2813132 | 0.002314374 | -1.02770779 | 0.829638326 |
| 0.954025574 | 0.64649461  | 0.87139151 | 0.032260085 | 0.990531511 | 0.926065548 |

|             |            |            |             |             |             |
|-------------|------------|------------|-------------|-------------|-------------|
| 0.995012414 | 0.93457725 | 0.97245387 | 0.773047248 | -1.27051441 | 0.000230343 |
| -1.43730589 | 3.38E-05   | -1.0645442 | 0.420413515 | -1.27017783 | 0.004281251 |
| 0.941244302 | 0.44155953 | -1.0907331 | 0.267690678 | 0.897714371 | 0.172825096 |
| -1.16266402 | 0.09719003 | -1.3325745 | 7.97748E-07 | 0.979546397 | 0.817825856 |
| 0.838908549 | 0.01790338 | 0.99126157 | 0.933290056 | 0.721204609 | 3.16E-05    |
| -1.10635652 | 0.04422754 | 0.93345333 | 0.432814186 | -1.14314326 | 0.008614403 |
| -1.06262065 | 0.23732886 | 0.9334451  | 0.295819974 | 0.791359464 | 2.58E-05    |
| 0.951699957 | 0.26635602 | -1.0253291 | 0.75781791  | 0.982344699 | 0.687711048 |
| -1.21541654 | 0.00339054 | 0.96273325 | 0.625725078 | 0.726720746 | 6.10E-06    |
| 0.916421814 | 0.3072743  | -1.2831439 | 0.013114836 | -1.22212605 | 0.02146634  |
| -1.10834084 | 0.03411271 | -1.0160057 | 0.804945949 | -1.20208399 | 0.000278182 |
| -1.25672626 | 0.00033624 | 0.96937698 | 0.491265681 | -1.06619244 | 0.287357479 |
| -1.04382422 | 0.37389978 | -1.0465708 | 0.321924784 | -1.13135446 | 0.012649362 |
| 0.996878522 | 0.96252387 | -1.0219284 | 0.811387167 | -1.042146   | 0.535702434 |
| 0.966888359 | 0.73111867 | -1.0999319 | 0.095813706 | -1.2208709  | 0.045541924 |
| -1.10610109 | 0.19526804 | 0.72769133 | 0.000451167 | -1.16052382 | 0.058120945 |
| 0.888766649 | 0.13098382 | -1.1374228 | 0.312930459 | 0.903503963 | 0.192509378 |
| 0.804699586 | 0.00768927 | -1.0316891 | 0.760990509 | 0.872843678 | 0.088737567 |
| -1.05848261 | 0.49412851 | 0.99827044 | 0.977327143 | -1.27778744 | 0.004455908 |
| 0.887983057 | 0.05300793 | -1.3218137 | 0.001001929 | -1.10962402 | 0.088948203 |
| -1.08723208 | 0.20563986 | 0.98240393 | 0.821050493 | 0.886165472 | 0.069635415 |
| 0.798699323 | 0.01009156 | -1.30759   | 0.004043967 | -1.0683192  | 0.436376882 |
| -1.13573668 | 0.09451555 | 0.78208336 | 0.001210972 | -1.01632831 | 0.82934363  |
| 0.943258513 | 0.38759134 | -1.0079104 | 0.872996721 | -1.12519039 | 0.08429737  |
| 0.96900175  | 0.37998843 | -1.0124624 | 0.808403995 | 0.892565066 | 0.002342301 |
| 0.849670985 | 0.00657812 | -1.1336404 | 0.006260221 | -1.00588524 | 0.919252267 |
| -1.11099078 | 0.37470926 | -1.0293195 | 0.651506672 | -1.33710833 | 0.01669452  |
| 0.882606538 | 0.18766287 | 0.87209796 | 0.111905809 | -1.10531664 | 0.289362868 |
| 0.993021466 | 0.94203568 | -1.1141772 | 0.026272765 | 0.983299462 | 0.861202425 |
| -1.02047779 | 0.74156878 | 0.96886995 | 0.598139737 | -1.21934204 | 0.002037314 |
| -1.00852388 | 0.91175438 | -1.0070292 | 0.88412517  | 0.646651039 | 4.88E-07    |
| -1.15899768 | 0.01659434 | 0.97643648 | 0.720217983 | -1.14957283 | 0.02324493  |
| 0.978430385 | 0.62771264 | -1.2407869 | 0.03115308  | 0.918416986 | 0.062330919 |
| 0.852213458 | 3.87E-05   | 0.94250516 | 0.444605426 | 0.871326984 | 0.000302881 |
| -1.15856696 | 0.01709724 | 0.84439986 | 0.032156737 | -1.02618828 | 0.667271501 |
| 0.912283201 | 0.01818475 | 0.89890034 | 0.179953868 | -1.05724083 | 0.14546133  |
| 0.857608058 | 0.26877779 | 0.96750264 | 0.690612804 | 0.825776698 | 0.169483223 |
| 0.968086668 | 0.59682931 | -1.1291134 | 0.04813528  | 0.884656655 | 0.049389081 |
| -1.02619614 | 0.64446513 | 0.76134973 | 0.000109348 | -1.0066212  | 0.90616331  |
| -1.05759984 | 0.54044522 | 0.90845529 | 0.25965576  | 0.982517754 | 0.846889466 |
| -1.03868982 | 0.48148178 | -1.0275472 | 0.717726725 | 0.944150461 | 0.28799617  |
| -1.1019137  | 0.2188242  | 0.90684549 | 0.150632047 | -1.01235162 | 0.875531052 |
| -1.10387757 | 0.25630883 | 0.88624724 | 0.001298716 | 0.941666786 | 0.48831548  |
| -1.15538088 | 0.07157593 | 0.94984116 | 0.37572391  | -1.21036028 | 0.018483758 |

|             |            |            |             |             |             |
|-------------|------------|------------|-------------|-------------|-------------|
| 0.925563976 | 0.21763422 | -1.2028684 | 0.122085305 | 0.974277447 | 0.67596712  |
| 0.665735738 | 0.00010126 | -1.092407  | 0.349122619 | 0.734456698 | 0.002405628 |
| -1.08499454 | 0.18767003 | -1.052582  | 0.595147071 | -1.00101953 | 0.986761297 |
| 0.713664189 | 2.26E-07   | 0.99218718 | 0.898420415 | 0.65864718  | 1.20E-09    |
| 0.929573797 | 0.20239391 | 0.74005555 | 0.000230308 | 0.902744423 | 0.07619825  |
| -1.02056025 | 0.76264631 | -1.1404768 | 0.031902269 | 0.706013951 | 3.28E-06    |
| -1.59408202 | 7.76E-06   | 0.97454796 | 0.566563448 | -1.18177892 | 0.081942863 |
| -1.0736207  | 0.18055926 | 0.92133876 | 0.025468492 | -1.07099475 | 0.195802107 |
| -1.06447663 | 0.392291   | -1.0166011 | 0.78412791  | -1.15343022 | 0.053989063 |
| 0.813399704 | 0.02478133 | 0.96692058 | 0.375981483 | 0.903853811 | 0.263296502 |
| -1.11207699 | 0.27248858 | 0.83119554 | 0.184275006 | -1.04646865 | 0.637372411 |
| 0.920350397 | 0.2449254  | 0.92886869 | 0.23134449  | -1.22362398 | 0.006046974 |
| -1.1486967  | 0.09967516 | -1.1157475 | 0.054528914 | -1.11948212 | 0.178245561 |
| 0.962450869 | 0.5448783  | 0.97334186 | 0.76742497  | 0.649932197 | 7.17E-09    |
| -1.0782123  | 0.33616221 | 0.95616587 | 0.406289093 | 0.978410044 | 0.779572461 |
| -1.17128554 | 0.04668614 | -1.0510895 | 0.525657808 | -1.26308002 | 0.003999724 |
| -1.01790401 | 0.78737071 | 0.86067246 | 0.08724562  | -1.19432277 | 0.008951674 |
| -1.16060567 | 0.01036103 | -1.0454339 | 0.574097339 | -1.06426107 | 0.271491968 |
| 0.808993494 | 0.00793581 | 0.69002067 | 1.84871E-07 | 0.948172051 | 0.491636013 |
| 0.989026772 | 0.82119966 | 0.90672218 | 0.316641065 | 0.988216711 | 0.80817863  |
| -1.03450238 | 0.66415289 | 0.93860757 | 0.304619069 | -1.20860996 | 0.018080025 |
| -1.07795597 | 0.24351203 | 0.94129374 | 0.292361979 | -1.06476512 | 0.328652134 |
| 0.883376215 | 0.1020545  | -1.016136  | 0.778361456 | -1.25056598 | 0.004095522 |
| 0.921388681 | 0.46334716 | 0.77987593 | 0.000496181 | 0.580619877 | 9.08E-06    |
| -1.04961438 | 0.52427577 | -1.0634466 | 0.516589909 | -1.19424252 | 0.022500347 |
| -1.08102447 | 0.41031435 | 0.99818899 | 0.972512043 | 0.808641672 | 0.027752403 |
| -1.12479686 | 0.13479054 | -1.3192529 | 0.00034387  | 0.966567991 | 0.662406392 |
| 0.938839809 | 0.21573439 | 0.78965304 | 0.010803347 | -1.07514641 | 0.156167657 |
| -1.01343628 | 0.78216814 | 0.99233559 | 0.936294924 | 0.851750571 | 0.001525831 |
| 0.903604898 | 0.2928945  | -1.1918845 | 0.016052373 | 0.560195704 | 1.33E-07    |
| -1.05140099 | 0.28669941 | 0.99744989 | 0.975496468 | 0.852775701 | 0.001207217 |
| 0.913325005 | 0.28655873 | -1.017592  | 0.782351876 | -1.21467342 | 0.024828191 |
| -1.15913382 | 0.09851146 | -1.0007903 | 0.99191509  | -1.51383823 | 1.72E-05    |
| 0.907406324 | 0.27207677 | -1.129047  | 0.123901053 | 0.722404411 | 0.000487671 |
| -1.24539586 | 0.00069566 | -1.2540644 | 0.001072478 | -1.19034058 | 0.006056005 |
| -1.01621203 | 0.83179521 | -1.2385393 | 0.000352404 | 0.546307547 | 9.45E-11    |
| 0.701354347 | 0.00121897 | 0.90142839 | 0.182603446 | 0.549002833 | 3.99E-07    |
| -1.0595739  | 0.46356817 | -1.0118317 | 0.809621799 | 0.478421637 | 6.09E-13    |
| 0.991953257 | 0.87930817 | 0.98635117 | 0.860262453 | 0.578246879 | 2.21E-14    |
| -1.03758287 | 0.50067119 | -1.0295261 | 0.649436459 | -1.18872015 | 0.002468072 |
| -1.2841333  | 0.02881469 | 0.97539165 | 0.739503261 | -1.25792259 | 0.044145046 |
| -1.08551824 | 0.23848398 | 0.92844579 | 0.505857742 | -1.15221496 | 0.044433503 |
| -1.06182001 | 0.42607138 | -1.2196132 | 0.011178545 | -1.05265577 | 0.495582493 |
| 0.96435029  | 0.70800345 | 0.91755905 | 0.363552175 | 0.944886125 | 0.558974521 |



|             |            |            |             |             |             |
|-------------|------------|------------|-------------|-------------|-------------|
| 0.783633997 | 0.00026158 | 0.98316865 | 0.827356074 | -1.06068915 | 0.34899896  |
| 0.921475067 | 0.14805683 | 0.96220978 | 0.447815615 | 0.994470048 | 0.921101404 |
| 0.895298042 | 0.05481245 | 0.99242613 | 0.874821752 | -1.08351464 | 0.160293364 |
| 0.898483009 | 0.10693983 | 0.65087724 | 3.68679E-05 | 0.979783656 | 0.755631495 |
| -1.20333362 | 0.00464329 | -1.0479899 | 0.318773402 | -1.00844568 | 0.893712743 |
| -1.03179136 | 0.57338298 | -1.104202  | 0.244450685 | 0.979254429 | 0.705814444 |
| -1.06520023 | 0.26630768 | -1.0746801 | 0.415833059 | 0.959885917 | 0.469714311 |
| 0.911182001 | 0.08029589 | 0.92334587 | 0.366461587 | 0.860565628 | 0.005733305 |
| 0.980268742 | 0.71962932 | -1.066894  | 0.292937549 | 0.922139293 | 0.148011575 |
| -1.09481803 | 0.07655466 | 0.90605307 | 0.195993499 | 0.971555392 | 0.567524248 |
| -1.0514059  | 0.36772633 | 0.75107758 | 0.007970372 | 0.968218449 | 0.560809898 |
| -1.26039542 | 0.05006471 | 0.87302972 | 0.088955398 | 0.956076755 | 0.698764467 |
| 0.93477028  | 0.13890133 | 0.971453   | 0.586691201 | 0.964066258 | 0.418682798 |
| -1.00497048 | 0.9341822  | -1.0282656 | 0.610578196 | 0.78086138  | 0.000123749 |
| 0.850978468 | 0.01634818 | -1.106913  | 0.365627149 | 0.737672545 | 2.03E-05    |
| 0.828569721 | 0.00131541 | -1.2153867 | 0.006471117 | 0.779409552 | 3.77E-05    |
| -1.14365031 | 0.11439517 | 0.97499105 | 0.736202725 | -1.16227267 | 0.077807232 |
| 0.945135199 | 0.28276742 | -1.0885717 | 0.382626457 | 0.97950715  | 0.692106236 |
| 0.957618303 | 0.40856009 | 0.88384083 | 0.052838373 | 0.993277073 | 0.897251525 |
| -1.06329981 | 0.28308418 | 0.98079543 | 0.729209816 | -1.07384406 | 0.213619053 |
| 0.889379565 | 0.0952312  | 0.99591638 | 0.942365405 | 0.420683476 | 1.39E-17    |
| -1.07667659 | 0.04376315 | 0.87628813 | 0.048099623 | 0.978141006 | 0.539333127 |
| 0.937077541 | 0.33039996 | 0.9444306  | 0.365540647 | -1.07743704 | 0.264653929 |
| 0.987697903 | 0.77154946 | -1.0050669 | 0.927441884 | 0.818634573 | 1.74E-05    |
| 0.980991145 | 0.70997063 | 0.99608527 | 0.944645866 | 0.841946525 | 0.001478389 |
| 0.917491725 | 0.18462137 | 0.8544791  | 0.003929909 | 0.746649076 | 3.01E-05    |
| -1.08496527 | 0.21513697 | -1.0019697 | 0.971709609 | -1.0523929  | 0.435604528 |
| 0.970573035 | 0.43575339 | 0.95623677 | 0.376339078 | -1.02679075 | 0.490008292 |
| -1.01341093 | 0.85930592 | 0.95998525 | 0.462501663 | -1.0696336  | 0.372135071 |
| -1.01103243 | 0.83847096 | -1.1143363 | 0.352583608 | -1.02372057 | 0.663375629 |
| -1.09554817 | 0.46006078 | 0.86860167 | 0.002768866 | 0.794874516 | 0.066669419 |
| 0.961205742 | 0.50095037 | 0.97523684 | 0.676441245 | 0.918205699 | 0.149756158 |
| -1.04790074 | 0.45079833 | 0.79628144 | 0.000945687 | -1.13991438 | 0.03811644  |
| 0.962730989 | 0.64141665 | 0.94395952 | 0.303094646 | 0.993823243 | 0.939380508 |
| -1.00741913 | 0.95100317 | -1.1356512 | 0.134146928 | -1.04715361 | 0.701892474 |
| -1.09880121 | 0.27198925 | 0.98985655 | 0.845319808 | -1.04170375 | 0.632259258 |
| -1.18155711 | 0.00088271 | 0.92774445 | 0.154960352 | 0.942011855 | 0.212692157 |
| -1.02214129 | 0.57267154 | -1.05244   | 0.370596514 | -1.05267731 | 0.188961577 |
| 0.95703978  | 0.58796082 | 0.86054156 | 0.033986467 | -1.10940572 | 0.202993827 |
| 0.998735451 | 0.98611147 | 0.97366435 | 0.458921923 | -1.01083532 | 0.882148675 |
| -1.02999977 | 0.55882853 | 0.97240128 | 0.67400059  | -1.06547313 | 0.212363567 |
| 0.899142497 | 0.05814148 | -1.0533454 | 0.225845226 | 0.965986702 | 0.531253476 |
| 0.926435028 | 0.04997519 | -1.0601854 | 0.259953749 | 0.967594435 | 0.391126232 |
| 0.99100486  | 0.8369308  | 0.82932838 | 0.005099211 | -1.00860443 | 0.845267991 |

|             |            |            |             |             |             |
|-------------|------------|------------|-------------|-------------|-------------|
| -1.04172003 | 0.66063075 | 0.91545923 | 0.179924876 | -1.00137209 | 0.988238315 |
| 0.938964465 | 0.35354306 | -1.0530188 | 0.180085316 | 0.731594549 | 2.25E-05    |
| -1.11171845 | 0.22097551 | 0.87063239 | 0.069501003 | -1.18986768 | 0.047043725 |
| 0.863700548 | 0.01289049 | 0.92572106 | 0.155409943 | 0.944013441 | 0.316272058 |
| 0.96204442  | 0.4991972  | -1.0005937 | 0.996156755 | -1.01391117 | 0.808998084 |
| 0.824155084 | 0.01421378 | 0.96881421 | 0.589679919 | 0.934064891 | 0.375374391 |
| 0.937035227 | 0.18892866 | -1.0450906 | 0.477073667 | 0.803443339 | 3.98E-05    |
| 0.928676026 | 0.42926728 | -1.0392366 | 0.636997695 | 0.867661934 | 0.132397725 |
| -1.12841251 | 0.07233971 | 0.96010061 | 0.735134457 | -1.02416848 | 0.718513316 |
| 0.888489937 | 0.07962703 | 0.93771755 | 0.452047213 | 0.888907109 | 0.08079518  |
| -1.03208377 | 0.72562751 | 0.9894588  | 0.82381542  | 0.340599421 | 7.32E-17    |
| -1.06879761 | 0.41950723 | -1.0541116 | 0.177684785 | -1.05738384 | 0.498011786 |
| -1.08176356 | 0.15008195 | -1.1235184 | 0.154071374 | 0.926646707 | 0.162737548 |
| -1.12330196 | 0.21668524 | -1.0496519 | 0.505879805 | -1.17696288 | 0.085518345 |
| -1.1788729  | 0.01795324 | 0.91169724 | 0.071328983 | -1.19689526 | 0.010104225 |
| -1.02683097 | 0.57269561 | 0.92123267 | 0.141025321 | 0.942325388 | 0.208366811 |
| -1.14421868 | 0.02956284 | -1.004655  | 0.903444203 | -1.03663888 | 0.552943018 |
| 0.936798267 | 0.2648592  | -1.0262664 | 0.555369117 | 0.874379819 | 0.024363792 |
| 0.887093148 | 0.17783921 | 0.80222414 | 0.020882267 | -1.00923257 | 0.916975922 |
| 0.872028739 | 0.04379798 | 0.86417164 | 0.034508102 | -1.06531929 | 0.344325194 |
| -1.08722878 | 0.07343109 | -1.1485424 | 0.111228333 | 0.952191032 | 0.289599306 |
| -1.31487105 | 0.00603795 | -1.0060258 | 0.91638536  | -1.19302915 | 0.070788218 |
| -1.2240811  | 0.07847996 | -1.0276752 | 0.633177789 | -1.41409725 | 0.003317377 |
| -1.28379601 | 0.0066437  | -1.0142311 | 0.853782625 | -1.12452635 | 0.19023923  |
| -1.33172034 | 0.00083511 | 0.90962089 | 0.057868155 | -1.49310595 | 7.63E-06    |
| -1.13212651 | 0.0631314  | 0.99097102 | 0.922591548 | -1.05079429 | 0.451984098 |
| -1.22679894 | 0.00415665 | -1.0981396 | 0.161256653 | 0.815363409 | 0.004205868 |
| 0.959002653 | 0.3882136  | 0.88312306 | 0.065776231 | -1.01567347 | 0.747809446 |
| 0.968887812 | 0.6242454  | 0.88486174 | 0.177473682 | 0.934132665 | 0.292937015 |
| 0.930913709 | 0.30250238 | -1.0940153 | 0.276813643 | -1.25218282 | 0.001879126 |
| 0.764841227 | 0.0032586  | 0.98549501 | 0.787081447 | 0.861406136 | 0.092268181 |
| 0.649587198 | 0.00322919 | -1.0807749 | 0.407330184 | -1.16504523 | 0.27978705  |
| 0.956752081 | 0.31080247 | 0.86938461 | 0.042630387 | -1.01029071 | 0.81359946  |
| -1.12190702 | 0.44849668 | -1.0329339 | 0.490306706 | -1.11942101 | 0.457249503 |
| 0.994000768 | 0.92370702 | -1.1634568 | 0.015037138 | -1.10011277 | 0.132971863 |
| -1.015288   | 0.7440348  | 0.96385388 | 0.527881164 | 0.698289038 | 2.43E-10    |
| 0.939137427 | 0.20980703 | -1.0357523 | 0.690498937 | 0.931742957 | 0.158770833 |
| -1.00308266 | 0.95963355 | -1.0272322 | 0.686996387 | 0.855408227 | 0.01264621  |
| -1.00970595 | 0.8633485  | 0.9521791  | 0.289477239 | 0.612553389 | 5.97E-12    |
| 0.929596199 | 0.32613698 | -1.2828703 | 0.0119616   | 0.925787276 | 0.299918128 |
| 0.85531791  | 0.04475668 | -1.2658756 | 0.041217032 | 0.868377644 | 0.068979793 |
| 0.970095689 | 0.79628493 | -1.2051581 | 0.039587615 | -1.15976573 | 0.210773515 |
| -1.0107299  | 0.76788275 | -1.1875215 | 0.03829403  | 0.962875368 | 0.297738975 |
| -1.00297505 | 0.95610604 | -1.0895121 | 0.195463185 | 0.713453169 | 6.08E-08    |

|             |            |            |             |             |             |
|-------------|------------|------------|-------------|-------------|-------------|
| -1.01469665 | 0.64265944 | 0.93437717 | 0.324577164 | 0.9137819   | 0.005645817 |
| 0.773253703 | 0.02579383 | -1.0012649 | 0.979139977 | 0.742625809 | 0.01046121  |
| -1.02020585 | 0.72468799 | -1.0199122 | 0.759771594 | 0.667738011 | 2.45E-09    |
| 0.949024608 | 0.6119455  | -1.0745462 | 0.300436362 | 0.536088767 | 1.29E-07    |
| -1.06423377 | 0.39189222 | 0.96651393 | 0.697092763 | -1.02881474 | 0.69524148  |
| -1.20521523 | 0.03082945 | -1.1069984 | 0.470662831 | -1.10328742 | 0.248027719 |
| 0.762789065 | 0.00033963 | 0.86865809 | 0.00194494  | 0.665333846 | 4.19E-07    |
| 0.991794695 | 0.82125523 | 0.89768973 | 0.476850818 | 0.792182746 | 3.69E-08    |
| 0.904645036 | 0.30478426 | -1.0655475 | 0.314574607 | -1.06714366 | 0.504521853 |
| 0.8865742   | 0.05191414 | 0.87227043 | 0.004622318 | 0.914565622 | 0.146117161 |
| 0.756586384 | 0.0090787  | 0.9790601  | 0.670525495 | 0.631830987 | 4.28E-05    |
| -1.0183109  | 0.71834081 | 0.81365237 | 0.001252005 | 0.68829406  | 7.55E-10    |
| -1.01954391 | 0.60494675 | 0.9707011  | 0.596635618 | 0.973627226 | 0.475536222 |
| -1.06049936 | 0.35476707 | 0.83731707 | 0.019405131 | -1.09297594 | 0.163488196 |
| -1.13969189 | 0.04581832 | 0.84320741 | 0.029079367 | 0.877034024 | 0.045101538 |
| 0.770961441 | 0.00225939 | -1.1751034 | 0.173659903 | 0.773877525 | 0.002585906 |
| -1.16039239 | 0.1054118  | 0.91581387 | 0.017830748 | -1.17551855 | 0.07904122  |
| 0.964039515 | 0.6722066  | -1.0304865 | 0.578467885 | 0.940592615 | 0.479859912 |
| -1.0531343  | 0.53519144 | 0.98546916 | 0.641574145 | -1.12735591 | 0.154230639 |
| -1.10110684 | 0.40032899 | -1.0061406 | 0.956668451 | -1.15631646 | 0.206610434 |
| 0.980362363 | 0.63680508 | 0.66627886 | 2.12297E-09 | -1.05127201 | 0.23649282  |
| 0.97649243  | 0.67118126 | 0.70282723 | 0.001135711 | -1.05102845 | 0.375798928 |
| -1.03208105 | 0.52491684 | -1.1589811 | 0.045708287 | -1.06775202 | 0.189604094 |
| 0.943821922 | 0.46592012 | -1.1354763 | 0.137028794 | -1.15414197 | 0.074209144 |
| 0.889178101 | 0.11012693 | 0.83020902 | 0.011098791 | -1.17592973 | 0.029161092 |
| -1.00044661 | 0.9934155  | -1.0145932 | 0.69130964  | 0.973080146 | 0.614429112 |
| -1.28555999 | 0.0030761  | -1.100054  | 0.32857875  | 0.971601958 | 0.723538865 |
| -1.15685531 | 0.02111922 | -1.0947515 | 0.140787737 | -1.25104785 | 0.000591536 |
| -1.04710532 | 0.34036332 | 0.88854488 | 0.256494716 | -1.03542942 | 0.469991567 |
| 0.914839813 | 0.33736691 | 0.84967774 | 0.001966161 | 0.90264254  | 0.270234227 |
| 0.918398469 | 0.1407519  | 0.92379563 | 0.03768721  | 0.940333366 | 0.28474027  |
| -1.08116019 | 0.02932776 | -1.1517989 | 0.028855757 | 0.901256737 | 0.004288735 |
| -1.00260189 | 0.96355459 | 0.86747298 | 0.030449283 | -1.02869712 | 0.619227191 |
| -1.06057382 | 0.32203588 | 0.72732601 | 0.00024823  | 0.951755048 | 0.404421373 |
| 0.935939307 | 0.30743819 | -1.1345928 | 0.167857989 | -1.02640898 | 0.686577822 |
| 0.913362728 | 0.13581227 | 0.99440653 | 0.948286669 | 0.864519399 | 0.018351943 |
| -1.01017459 | 0.87033173 | -1.1012912 | 0.249913834 | -1.039599   | 0.531873867 |
| -1.03915255 | 0.65951927 | -1.0683302 | 0.563146366 | -1.11984849 | 0.197200601 |
| -1.04717699 | 0.45662785 | -1.0339793 | 0.427199626 | -1.03361887 | 0.592898139 |
| 0.868137899 | 0.09032555 | -1.170836  | 0.006533071 | 0.472823224 | 1.61E-12    |
| -1.09021662 | 0.33250875 | 0.98397317 | 0.744606878 | -1.12585159 | 0.185234    |
| 0.896373691 | 0.09186983 | 0.99588104 | 0.958384773 | 0.793004913 | 0.000616484 |
| -1.08854766 | 0.16491957 | -1.1132664 | 0.143658786 | -1.11046298 | 0.087823878 |
| 0.923763551 | 0.1111527  | 0.98966909 | 0.847820719 | -1.07465257 | 0.147241512 |

|             |            |            |             |             |             |
|-------------|------------|------------|-------------|-------------|-------------|
| 0.930477768 | 0.35960166 | -1.2931248 | 0.002497789 | 0.878351514 | 0.102074658 |
| 0.992715853 | 0.89955768 | -1.0586375 | 0.357005445 | -1.15191804 | 0.017435205 |
| 0.93167581  | 0.33900292 | -1.0606041 | 0.224170725 | 0.914220078 | 0.226835551 |
| 0.975758251 | 0.72096659 | 0.86346717 | 0.116227893 | -1.13104661 | 0.077211813 |
| -1.22504327 | 0.00016961 | 0.95160223 | 0.387473078 | -1.1012655  | 0.059985894 |
| -1.00720789 | 0.8928811  | -1.0569566 | 0.117857327 | -1.0487502  | 0.373882952 |
| 0.928199478 | 0.18496847 | -1.0073075 | 0.898131393 | 0.953622288 | 0.395876269 |
| 0.896397941 | 0.07595989 | -1.0563946 | 0.355304743 | -1.00229123 | 0.969934694 |
| -1.21716252 | 0.00293149 | 0.96070429 | 0.535308832 | 0.87995164  | 0.047471504 |
| -1.05797875 | 0.17477273 | 0.93677604 | 0.279986835 | 0.973924244 | 0.521859227 |
| 0.954535348 | 0.39741316 | 0.85828469 | 0.016472786 | 0.926126169 | 0.165193945 |
| 0.970742907 | 0.57521887 | -1.0737889 | 0.4151255   | 0.977916794 | 0.673245639 |
| -1.0471503  | 0.26231077 | 0.99244138 | 0.902238118 | 0.972322723 | 0.493079547 |
| 0.969211258 | 0.6692545  | 0.94682845 | 0.507987946 | 0.949095685 | 0.476116343 |
| 0.966683361 | 0.43415807 | -1.1573121 | 0.103953695 | 0.985179546 | 0.729766922 |
| 0.958139349 | 0.30868888 | -1.0596076 | 0.367745246 | -1.04186584 | 0.328706426 |
| -1.00427785 | 0.95721751 | -1.3211537 | 2.43178E-05 | -1.01802353 | 0.822417273 |
| -1.11901594 | 0.01272204 | -1.017995  | 0.71707125  | 0.609867028 | 7.37E-16    |
| 0.703839607 | 0.00023763 | 0.86105965 | 0.060398576 | 0.503030727 | 3.05E-10    |
| -1.00594527 | 0.9293856  | -1.0638374 | 0.287867554 | -1.09241075 | 0.189933979 |
| 0.987861422 | 0.71881494 | 0.97417638 | 0.722750635 | 0.99438501  | 0.868094193 |
| 0.928815199 | 0.45116599 | -1.1790365 | 0.019427669 | -1.15120333 | 0.153637212 |
| 0.935321921 | 0.45458339 | -1.0963603 | 0.072415753 | 0.913399732 | 0.312093794 |
| 0.851511418 | 0.03774489 | -1.0412787 | 0.449389008 | -1.19283602 | 0.023203733 |
| 0.811658218 | 0.00035647 | 0.98793372 | 0.827641152 | 0.638979338 | 5.23E-11    |
| 0.9517593   | 0.60693118 | 0.94652707 | 0.367270383 | -1.26161868 | 0.018366227 |
| -1.00978972 | 0.88590859 | -1.1114142 | 0.099633293 | -1.20942901 | 0.006828058 |
| 0.82137531  | 0.01596718 | -1.0010979 | 0.978738017 | 0.664270748 | 3.51E-06    |
| -1.10349033 | 0.25914078 | -1.0222197 | 0.688618033 | 0.888949854 | 0.178485654 |
| 0.819877685 | 0.02331685 | 0.840061   | 0.001675756 | 0.721895915 | 0.000336115 |
| -1.23799691 | 0.04787739 | 0.9340355  | 0.099174337 | -1.52184769 | 0.000206685 |
| 0.931371044 | 0.15993585 | 0.65879152 | 4.65071E-07 | -1.00160089 | 0.974541648 |
| -1.29941379 | 0.02701708 | 0.92798579 | 0.087926552 | -1.24560858 | 0.061947095 |
| -1.38052909 | 0.00120571 | -1.0545073 | 0.207608743 | -1.47227701 | 0.000140041 |
| 0.933014853 | 0.37426764 | -1.0371596 | 0.646897456 | 0.990995959 | 0.907389515 |
| 0.972633845 | 0.72575167 | -1.1119449 | 0.018359747 | -1.05824329 | 0.475004794 |
| 0.966221941 | 0.65259887 | 0.68717516 | 9.85296E-05 | -1.17235404 | 0.040919314 |
| -1.08294118 | 0.32377984 | 0.88110492 | 0.062647516 | -1.10476818 | 0.218440059 |
| 0.842593181 | 0.15306314 | -1.0878819 | 0.015653403 | 0.746972411 | 0.016779746 |
| 0.8339224   | 0.15516484 | 0.88492193 | 0.214344175 | -1.12998692 | 0.336309556 |
| -1.17142066 | 0.01195919 | 0.93584337 | 0.458332971 | -1.2111722  | 0.002663738 |
| 0.796663023 | 0.00811009 | -1.0105545 | 0.889854485 | 0.96715967  | 0.687875047 |
| -1.06090642 | 0.31405369 | 0.63739134 | 4.42488E-11 | -1.3077934  | 2.51E-05    |
| -1.05712247 | 0.58309108 | -1.1584316 | 0.129608936 | -1.03817296 | 0.711056165 |

|             |            |            |             |             |             |
|-------------|------------|------------|-------------|-------------|-------------|
| 0.99074939  | 0.91667958 | -1.157756  | 0.03463718  | 0.801475234 | 0.015396542 |
| -1.05123402 | 0.55855002 | 0.80959674 | 0.009987134 | -1.16716652 | 0.074151963 |
| 0.88064398  | 0.05996651 | -1.002427  | 0.977707287 | -1.20812965 | 0.006046599 |
| -1.03051998 | 0.7109916  | 0.87336998 | 0.117288118 | -1.20161774 | 0.026882321 |
| -1.06215979 | 0.27733031 | -1.1840643 | 0.114947891 | 0.974029375 | 0.633964022 |
| -1.00787629 | 0.90996501 | 0.98465429 | 0.757786833 | 0.728564609 | 2.75E-05    |
| 0.953447292 | 0.46165054 | -1.1792224 | 0.15821028  | -1.24739163 | 0.001139711 |
| 0.949904244 | 0.44376093 | -1.2130838 | 0.0454298   | 0.985139848 | 0.823016944 |
| -1.17983356 | 0.00199787 | 0.97703718 | 0.765185273 | -1.11819615 | 0.032492607 |
| 0.802131476 | 0.00129447 | -1.0891777 | 0.282519126 | 0.760592224 | 9.64E-05    |
| -1.22023583 | 0.00052045 | -1.0480291 | 0.539177543 | -1.09942566 | 0.084341217 |
| -1.15172378 | 0.01891587 | -1.0779109 | 0.35260717  | -1.144335   | 0.024751822 |
| -1.17926529 | 0.02534083 | 0.87663067 | 0.270150599 | 0.992567147 | 0.917490971 |
| -1.19436849 | 0.06441137 | -1.1608971 | 0.241464121 | -1.15128395 | 0.140089632 |
| 0.988246341 | 0.87270126 | -1.24815   | 0.000604033 | 0.812050353 | 0.006449421 |
| 0.741419594 | 0.00011482 | 0.88908243 | 0.160776949 | 0.780176944 | 0.001088943 |
| 0.948193042 | 0.17624965 | -1.2208041 | 0.001170299 | 0.774458826 | 2.00E-08    |
| 0.984975262 | 0.72413798 | -1.0281373 | 0.783726146 | 0.955962238 | 0.295937113 |
| 0.986905449 | 0.83701169 | 0.98922443 | 0.902934855 | 0.7389918   | 1.59E-05    |
| 0.925172515 | 0.57094446 | -1.2074242 | 0.030612536 | 0.979413385 | 0.879368466 |
| -1.13694468 | 0.01424863 | -1.1262316 | 0.077914516 | -1.02818116 | 0.585556196 |
| 0.950228352 | 0.6329306  | -1.1019366 | 0.234368618 | 0.669005597 | 0.000393166 |
| -1.21401225 | 0.02099508 | 0.89752669 | 0.054299253 | -1.30659126 | 0.001831024 |
| 0.985570253 | 0.80959446 | 0.92488501 | 0.263152539 | 0.83076498  | 0.003181063 |
| -1.00515591 | 0.92505977 | -1.1232376 | 0.076283246 | -1.08988097 | 0.11960622  |
| -1.08757072 | 0.13170039 | 0.88805299 | 0.080351142 | -1.01539306 | 0.781656062 |
| 0.95574363  | 0.51478848 | -1.0561589 | 0.287781652 | 0.959419861 | 0.550944408 |
| -1.08476279 | 0.30988523 | 0.79777188 | 0.001004588 | -1.03061215 | 0.705495696 |
| -1.00185373 | 0.97647154 | -1.0064678 | 0.905235874 | -1.06397833 | 0.325558671 |
| 0.899743364 | 0.0575447  | -1.088528  | 0.151908414 | -1.25994041 | 8.72E-05    |
| -1.08067498 | 0.17199455 | -1.0595315 | 0.423374036 | -1.12354265 | 0.04247136  |
| -1.2358444  | 0.02994592 | -1.0547503 | 0.573307406 | -1.56128694 | 1.91E-05    |
| -1.05882949 | 0.48180318 | 0.82861724 | 0.01332061  | -1.00678086 | 0.933574831 |
| -1.22431155 | 0.00911288 | 0.6271247  | 2.82946E-08 | -1.38490351 | 6.05E-05    |
| -1.03817396 | 0.49860986 | 0.95690066 | 0.261436921 | 0.998385732 | 0.976670083 |
| 0.84909877  | 0.01631552 | 0.94361004 | 0.179432915 | -1.11866681 | 0.094921322 |
| 0.884522332 | 0.31936062 | 0.95530916 | 0.476463341 | 0.946976997 | 0.657211927 |
| -1.04410126 | 0.66219982 | -1.2696163 | 0.08583438  | 0.907658749 | 0.328432548 |
| -1.20690423 | 0.04366115 | 0.93226985 | 0.171962168 | -1.2408642  | 0.021363258 |
| -1.25042341 | 0.0040238  | 0.84997273 | 0.132035416 | -1.3934837  | 4.19E-05    |
| 0.877759919 | 0.01687486 | -1.1021517 | 0.238230042 | -1.02461422 | 0.647386286 |
| 0.996885609 | 0.95623928 | -1.0309607 | 0.613563263 | 0.910024427 | 0.101463294 |
| -1.00993566 | 0.82716694 | -1.0288429 | 0.603446079 | -1.11679786 | 0.017516481 |
| -1.01237176 | 0.84667441 | -1.0387639 | 0.490981847 | -1.17247483 | 0.014956835 |

|             |            |            |             |             |             |
|-------------|------------|------------|-------------|-------------|-------------|
| 0.991993824 | 0.91390919 | 0.88000766 | 0.069567693 | -1.06455931 | 0.401663024 |
| -1.19899652 | 0.00147989 | 0.85686417 | 0.056849494 | 0.877365995 | 0.01913648  |
| -1.02398945 | 0.52151384 | -1.1340521 | 0.049182445 | 0.903440493 | 0.007810212 |
| -1.06872318 | 0.20398483 | -1.1477262 | 0.014332965 | -1.03483069 | 0.510533168 |
| 0.815428522 | 1.76E-05   | -1.1182304 | 0.051264591 | 0.915032606 | 0.045036392 |
| 0.855270156 | 0.06259077 | -1.202295  | 0.057612012 | -1.03459654 | 0.680735294 |
| 0.956054452 | 0.54262855 | -1.0142306 | 0.861666184 | 0.924290463 | 0.287873349 |
| 0.966844977 | 0.60281918 | -1.1187533 | 0.139379686 | 0.905969067 | 0.131137646 |
| -1.05371598 | 0.38877281 | -1.0023691 | 0.965835172 | -1.02144549 | 0.725942075 |
| -1.05269468 | 0.36042553 | 0.98045259 | 0.765887627 | -1.00102422 | 0.98539722  |
| -1.08029924 | 0.17717904 | -1.060356  | 0.633155584 | -1.00865587 | 0.879294209 |
| -1.01857923 | 0.75569826 | 0.89433546 | 0.260678187 | 0.963904476 | 0.534923013 |
| 0.843646974 | 0.07035697 | -1.1306363 | 0.183024816 | 0.560815775 | 6.17E-08    |
| 0.689161093 | 8.24E-05   | -1.0013288 | 0.985817157 | 0.649734183 | 8.13E-06    |
| -1.026323   | 0.37032388 | -1.0373384 | 0.491014694 | -1.00670158 | 0.817229374 |
| 0.989843346 | 0.82810227 | 0.95633488 | 0.433523756 | 0.984763673 | 0.744061979 |
| 0.893964457 | 0.2468585  | 0.95858728 | 0.352138695 | 0.685368903 | 0.00023257  |
| -1.1380522  | 0.04541564 | -1.1197653 | 0.079502862 | -1.03870464 | 0.550007495 |
| -1.5827967  | 0.00662181 | -1.0040051 | 0.957126928 | -1.25262232 | 0.171543405 |
| -1.05052611 | 0.48650022 | -1.0235964 | 0.668448497 | -1.15092574 | 0.050762166 |
| -1.04892312 | 0.50571731 | 0.97853588 | 0.557277537 | -1.05000631 | 0.49660539  |
| -1.11288673 | 0.20376849 | -1.0279156 | 0.596437316 | -1.08637664 | 0.323450163 |
| -1.07462392 | 0.44523722 | -1.0184264 | 0.674711332 | -1.20213358 | 0.054341931 |
| -1.00725127 | 0.83603496 | 0.81724234 | 0.017367157 | 0.9285971   | 0.037567205 |
| -1.30934041 | 5.67E-06   | -1.0142635 | 0.847604826 | 0.982433371 | 0.741718234 |
| -1.07665918 | 0.14915852 | 0.95458877 | 0.473733217 | 0.799880244 | 4.77E-05    |
| 0.765306513 | 0.00196355 | 0.84669025 | 0.007815803 | 0.944854818 | 0.49292163  |
| -1.05320284 | 0.31370092 | -1.0441412 | 0.441216563 | 0.727598704 | 7.20E-08    |
| 0.928030033 | 0.3865602  | 0.96056618 | 0.479364828 | -1.0666983  | 0.453746582 |
| -1.05374185 | 0.35069426 | 0.97885517 | 0.717984327 | 0.99773808  | 0.967665605 |
| 0.505289111 | 2.01E-13   | 0.87223228 | 0.1435244   | 0.750915641 | 0.000151698 |
| 0.976762928 | 0.69260146 | 0.67153059 | 3.02023E-05 | 0.741144327 | 5.17E-06    |
| 0.957242444 | 0.53682702 | 0.98338508 | 0.562616087 | 0.884232944 | 0.085805234 |
| 0.955922348 | 0.45249677 | 0.85724948 | 0.001762806 | 0.910169396 | 0.119951695 |
| -1.34248207 | 1.16E-05   | 0.89647385 | 0.258727979 | -1.42243213 | 3.84E-07    |
| -1.08459553 | 0.05267861 | 0.96617145 | 0.587910109 | -1.00550374 | 0.893966055 |
| 0.975075381 | 0.42764579 | -1.3326734 | 0.082928001 | 0.968675    | 0.318055849 |
| 0.951192036 | 0.39694505 | -1.2488831 | 0.002596536 | -1.09506516 | 0.127083603 |
| 0.881578809 | 0.46403146 | -1.0780565 | 0.296459882 | 0.877031914 | 0.445997244 |
| -1.05344739 | 0.39035337 | -1.0775472 | 0.372986026 | 0.990228312 | 0.87087969  |
| 0.825508742 | 0.26454618 | -1.0647753 | 0.505309664 | 0.836904428 | 0.299843113 |
| 0.917358328 | 0.33386881 | 0.94928827 | 0.139978541 | -1.07767831 | 0.401467292 |
| -1.01328447 | 0.83065787 | -1.0400824 | 0.465767593 | 0.931735042 | 0.25467189  |
| -1.1334169  | 0.15577579 | -1.0555017 | 0.289284246 | -1.195998   | 0.044516066 |

|             |            |            |             |             |             |
|-------------|------------|------------|-------------|-------------|-------------|
| 0.853230916 | 0.03588688 | 0.86947114 | 0.094473216 | 0.892630222 | 0.129386897 |
| -1.04819781 | 0.45306338 | -1.0327506 | 0.529889756 | -1.22322658 | 0.00208357  |
| -1.08772669 | 0.17544118 | -1.2255683 | 0.021031559 | -1.14450099 | 0.031846839 |
| 0.859605559 | 0.04261921 | -1.0900691 | 0.126778452 | 0.923778098 | 0.281269453 |
| -1.31656138 | 0.00022816 | -1.0020377 | 0.976992314 | -1.14276494 | 0.060481645 |
| 0.699115372 | 0.00056829 | 0.95215995 | 0.410926686 | 0.724631726 | 0.001733767 |
| -1.13516441 | 0.00618178 | 0.99135434 | 0.90215698  | 0.942351082 | 0.187493085 |
| -1.822213   | 2.70E-05   | -1.0089156 | 0.882104381 | 0.877797231 | 0.323130406 |
| 0.891522509 | 0.13722956 | -1.2300657 | 0.001280959 | -1.13859515 | 0.093893398 |
| -1.01377373 | 0.71669601 | -1.0192862 | 0.643032936 | 0.973986093 | 0.485158893 |
| 0.972306669 | 0.62465542 | 0.92273867 | 0.013791485 | 0.945994851 | 0.335011371 |
| 0.84992902  | 0.00255658 | -1.0541916 | 0.371829576 | 0.979555881 | 0.689245158 |
| -1.16826562 | 0.08836511 | 0.87054539 | 0.420838275 | 0.612061885 | 1.17E-06    |
| 0.953268462 | 0.47851887 | -1.1870962 | 0.006147929 | 0.574171887 | 3.75E-11    |
| -1.12746743 | 0.07083359 | 0.75957529 | 0.111754447 | -1.03303821 | 0.619566396 |
| 0.849269413 | 0.04838388 | 0.99644084 | 0.967997125 | -1.12353639 | 0.155621413 |
| 0.962814143 | 0.62224705 | -1.120934  | 0.068509934 | 0.979081548 | 0.783270393 |
| 0.998036315 | 0.97435407 | 0.6743317  | 3.33471E-05 | -1.1757855  | 0.010258866 |
| -1.09178943 | 0.19036377 | 0.8764217  | 0.079309381 | -1.42874198 | 1.62E-06    |
| -1.00376664 | 0.95518801 | -1.1188109 | 0.077067806 | -1.08027116 | 0.251398445 |
| 0.959469305 | 0.57014134 | -1.1539029 | 0.023178167 | 0.855268981 | 0.035346277 |
| -1.11129103 | 0.15731384 | 0.96473572 | 0.624119875 | -1.13610999 | 0.088586008 |
| 0.930454612 | 0.23138789 | -1.0106609 | 0.879453606 | -1.26089993 | 0.000275822 |
| 0.897153751 | 0.05041547 | 0.64042303 | 2.97819E-05 | 0.951896648 | 0.367338372 |
| 0.938855935 | 0.3162259  | 0.99595923 | 0.927801067 | -1.03819405 | 0.550350057 |
| 0.93518993  | 0.37496012 | 0.73695222 | 0.023297167 | -1.0307631  | 0.687407592 |
| -1.11678158 | 0.03789682 | 0.96430654 | 0.634893682 | -1.01560881 | 0.766483788 |
| -1.05701456 | 0.48739847 | -1.0197804 | 0.603587537 | -1.02595594 | 0.74782812  |
| 0.911890884 | 0.20019348 | 0.95970149 | 0.474191534 | 0.842771893 | 0.019636291 |
| 0.899729615 | 0.0544367  | -1.0224285 | 0.667670821 | -1.00455049 | 0.932977919 |
| 0.89554823  | 0.09134934 | 0.81355757 | 0.025195836 | 0.947222091 | 0.401880548 |
| 0.954194073 | 0.46897849 | 0.89603867 | 0.107497067 | -1.0393738  | 0.550577332 |
| 0.974903639 | 0.65569693 | -1.0131126 | 0.842127867 | 0.921891714 | 0.15718849  |
| 0.925436399 | 0.40404896 | -1.0550227 | 0.51064149  | -1.04036885 | 0.669249358 |
| 0.942870711 | 0.21692177 | -1.1139932 | 0.163834284 | 0.920904103 | 0.085810334 |
| -1.13998591 | 0.0165149  | -1.10148   | 0.118119968 | 0.964036908 | 0.491985311 |
| 0.934230422 | 0.15958303 | -1.3193811 | 0.000106116 | 0.794273746 | 1.19E-05    |
| 0.988828413 | 0.82709048 | 0.93833861 | 0.343495511 | 0.47201675  | 2.04E-20    |
| 0.77214795  | 0.00020773 | -1.0997646 | 0.194700306 | -1.2632534  | 0.000699625 |
| 0.948250686 | 0.30158496 | 0.99398263 | 0.934925981 | 0.937024248 | 0.207143361 |
| -1.2482247  | 0.00385657 | 0.92161917 | 0.176162375 | -1.22896999 | 0.006918474 |
| -1.01894306 | 0.83850443 | 0.94079697 | 0.265407755 | 0.937254705 | 0.482510643 |
| 0.993904755 | 0.87224767 | 0.93589408 | 0.292831427 | -1.00527661 | 0.889907007 |
| 0.970125296 | 0.46324504 | 0.93443322 | 0.369260901 | -1.063886   | 0.137293365 |

|             |            |            |             |             |             |
|-------------|------------|------------|-------------|-------------|-------------|
| -1.06579657 | 0.11471356 | -1.0846745 | 0.123130911 | -1.00895298 | 0.823393093 |
| -1.00668569 | 0.87698124 | -1.1198283 | 0.159290883 | 0.999625208 | 0.993051045 |
| -1.12491246 | 0.13200698 | 0.92992661 | 0.311571156 | 0.977112507 | 0.76467554  |
| -1.07827097 | 0.13491479 | -1.0109549 | 0.840084564 | 0.955144881 | 0.359434514 |
| 0.966713694 | 0.51932088 | -1.0999038 | 0.143684052 | -1.16280214 | 0.005546589 |
| -1.2324736  | 0.00183688 | -1.0455571 | 0.491331155 | -1.22421585 | 0.002499072 |
| 0.601282232 | 8.14E-10   | 0.78034596 | 5.6346E-05  | 0.575158627 | 7.29E-11    |
| 0.880015716 | 0.28948973 | 0.85829564 | 0.103047357 | 0.834317847 | 0.135350744 |
| -1.15079106 | 0.01037647 | -1.0563077 | 0.24977225  | -1.08841956 | 0.114905708 |
| -1.10482544 | 0.16024494 | 0.85921367 | 0.005918248 | 0.784790339 | 0.001061564 |
| -1.00585266 | 0.87214569 | 0.99848849 | 0.974819083 | 0.965174488 | 0.330399953 |
| -1.04566097 | 0.61705248 | 0.97028686 | 0.558101205 | -1.14316836 | 0.137612719 |
| -1.03453774 | 0.49452999 | 0.90574701 | 0.133353704 | -1.1971582  | 0.000604011 |
| -1.01878692 | 0.81079007 | 0.9271802  | 0.143607429 | -1.15834845 | 0.062802656 |
| -1.03264595 | 0.62923747 | -1.1929359 | 0.019722837 | -1.22732418 | 0.003113715 |
| 0.977917039 | 0.65566769 | 0.97170659 | 0.755321684 | -1.18104132 | 0.00152386  |
| -1.15021364 | 0.1433768  | 0.94924165 | 0.17433735  | 0.994485902 | 0.953428501 |
| 0.792531501 | 6.51E-06   | 0.9709727  | 0.476155284 | 0.828256985 | 0.000165292 |
| -1.04385267 | 0.52587567 | 0.9463984  | 0.171405836 | -1.10116181 | 0.157488408 |
| 0.864503499 | 0.062251   | 0.96990774 | 0.478814966 | 0.913769005 | 0.243451575 |
| 0.9808624   | 0.70018565 | 0.89549995 | 0.157302024 | -1.00109714 | 0.982554063 |
| 0.97539424  | 0.6787153  | -1.0057703 | 0.908170764 | 0.914988287 | 0.143335715 |
| -1.20095419 | 0.00403267 | -1.1986553 | 0.001028669 | -1.07866111 | 0.219429385 |
| -1.0447232  | 0.38593814 | -1.2759603 | 0.000346255 | -1.01389784 | 0.783792162 |
| -1.04523819 | 0.27574477 | 0.76391703 | 0.000236679 | 0.979383304 | 0.606263773 |
| 0.997290686 | 0.97339111 | 0.86412822 | 0.226933125 | 0.607757962 | 9.98E-08    |
| 0.956167691 | 0.4805564  | -1.0520654 | 0.34135984  | 0.764915518 | 8.65E-05    |
| -1.21967604 | 0.00015541 | 0.91977032 | 0.237489519 | -1.18903362 | 0.000814292 |
| -1.03764551 | 0.62887828 | 0.95597988 | 0.217646157 | 0.787858689 | 0.002775502 |
| 0.968983726 | 0.26835001 | -1.3954308 | 0.000430371 | 0.906746393 | 0.001019334 |
| 0.973949318 | 0.64496235 | -1.1151817 | 0.031513582 | -1.05059617 | 0.390084335 |
| 0.879980112 | 0.01738008 | -1.0186186 | 0.812437509 | -1.02828342 | 0.59454951  |
| 0.950099227 | 0.2765887  | 0.91664929 | 0.193924822 | -1.01956699 | 0.678987176 |
| 0.94976295  | 0.49924404 | -1.2134265 | 0.000283606 | 0.576488358 | 1.56E-09    |
| -1.04293544 | 0.34601855 | 0.99153993 | 0.928498068 | -1.068283   | 0.141097756 |
| -1.10421371 | 0.10891962 | 0.91905362 | 0.075144738 | -1.43962912 | 1.79E-07    |
| 0.892656815 | 0.08950764 | 0.92793518 | 0.27080794  | -1.05672108 | 0.404528968 |
| -1.06872064 | 0.21637918 | -1.0418423 | 0.594111123 | -1.05270042 | 0.338044256 |
| -1.01268269 | 0.72802495 | -1.0378772 | 0.459612758 | 0.915035261 | 0.017023514 |
| -1.05320474 | 0.19043709 | 0.93173029 | 0.242374853 | 0.981733984 | 0.639135307 |
| -1.19804281 | 0.0034396  | -1.0553829 | 0.380342797 | -1.13571973 | 0.035570895 |
| -1.04493448 | 0.4222838  | 0.79110214 | 1.97587E-05 | 0.954087436 | 0.391057339 |
| 0.906793608 | 0.1292512  | 0.88540399 | 0.003767283 | 0.957762527 | 0.499677992 |
| -1.51518944 | 5.52E-05   | 0.89992402 | 0.198317124 | -1.22852995 | 0.034441719 |



|             |            |            |             |             |             |
|-------------|------------|------------|-------------|-------------|-------------|
| -1.04241467 | 0.54829148 | -1.0355961 | 0.581652171 | -1.03816804 | 0.588163724 |
| -1.15683446 | 0.01918728 | -1.1382611 | 0.010439821 | 0.989599821 | 0.863080965 |
| 0.835809668 | 0.06214209 | 0.94170263 | 0.432944452 | 0.824750782 | 0.045619724 |
| 0.944382242 | 0.24310736 | -1.0125946 | 0.658614406 | 0.86943292  | 0.005614401 |
| 0.908494863 | 0.29213217 | -1.1399536 | 0.025396458 | -1.07843372 | 0.406233424 |
| 0.984048307 | 0.73453559 | 0.92439741 | 0.137107866 | -1.10072201 | 0.046881078 |
| -1.37000019 | 0.00163739 | 0.88266844 | 0.009756879 | 0.986284666 | 0.884848534 |
| 0.686414855 | 2.16E-07   | 0.88184933 | 0.102848076 | 0.657131324 | 1.69E-08    |
| -1.07172564 | 0.49615409 | 0.99222735 | 0.860595003 | 0.928126444 | 0.463839128 |
| -1.03980987 | 0.33887917 | -1.1393576 | 0.036464364 | 0.938460394 | 0.122285837 |
| 0.786755097 | 0.00025812 | 0.84186903 | 0.011370957 | 0.626139865 | 3.92E-10    |
| -1.00891611 | 0.87803234 | -1.0350107 | 0.519941225 | -1.02975759 | 0.612571118 |
| 0.915945956 | 0.35942409 | -1.0269318 | 0.464246627 | -1.03010128 | 0.756062851 |
| 0.836791867 | 0.06428713 | 0.98519747 | 0.704342351 | -1.08837737 | 0.373258708 |
| 0.961480316 | 0.366923   | -1.1696258 | 0.010428896 | 0.956487818 | 0.307380561 |
| -1.07780787 | 0.35324751 | -1.0759841 | 0.183524055 | -1.2551404  | 0.006360643 |
| -1.10236329 | 0.08266755 | 0.87474047 | 0.039764529 | -1.18642616 | 0.003062884 |
| -1.39346401 | 9.99E-06   | -1.146877  | 0.154277924 | -1.51861081 | 1.03E-07    |
| 0.898410484 | 0.02706547 | -1.3150227 | 0.000206498 | -1.11951709 | 0.020130177 |
| 0.806898398 | 0.01590443 | -1.0717494 | 0.255856186 | -1.09555534 | 0.294287782 |
| -1.18434326 | 0.00896983 | 0.7550586  | 0.004273321 | -1.03710186 | 0.561711563 |
| -1.15370717 | 0.22308845 | -1.0631784 | 0.211856119 | -1.36611639 | 0.009516213 |
| 0.974954791 | 0.65659548 | -1.1381106 | 0.157307629 | 0.66381965  | 1.85E-09    |
| -1.00217988 | 0.97019136 | -1.064003  | 0.194079429 | 0.700896985 | 1.09E-07    |
| -1.07400691 | 0.54756103 | -1.0002542 | 0.997873473 | 0.927566944 | 0.52656376  |
| -1.03338954 | 0.56957487 | 0.65576884 | 1.495E-08   | 0.830548002 | 0.002087156 |
| -1.06119094 | 0.25793868 | -1.0751487 | 0.476627078 | -1.07200926 | 0.186314258 |
| 0.807279401 | 0.00082793 | -1.0077107 | 0.850125159 | 0.532630032 | 1.66E-14    |
| -1.02647472 | 0.64213892 | 0.75780523 | 3.38024E-05 | 0.984785732 | 0.784979025 |
| 0.984874498 | 0.73789079 | 0.92116144 | 0.159510126 | -1.04593598 | 0.32600743  |
| 0.773907055 | 0.00074061 | 0.91029345 | 0.326830255 | 0.651608089 | 1.86E-07    |
| 0.9042524   | 0.08334664 | 0.98995542 | 0.915161308 | -1.00331648 | 0.953927676 |
| 0.991618995 | 0.87032699 | 0.97340283 | 0.534971448 | -1.01085285 | 0.834174097 |
| -1.10199302 | 0.31816453 | -1.0751464 | 0.369232005 | 0.94831523  | 0.584209299 |
| 0.819769234 | 0.00023015 | -1.1378348 | 0.022858395 | 0.910981745 | 0.069415558 |
| 0.900917295 | 0.09188818 | -1.4484587 | 1.31476E-06 | 0.879651221 | 0.039614785 |
| -1.09058905 | 0.09028529 | -1.0261117 | 0.586727266 | -1.16856424 | 0.003092164 |
| 0.93487437  | 0.52727374 | -1.0012322 | 0.988650654 | -1.03912419 | 0.718303908 |
| -1.04824692 | 0.26485618 | 0.97373257 | 0.671329758 | -1.43531156 | 9.72E-12    |
| -1.02182816 | 0.70473904 | -1.2007075 | 0.120704635 | 0.982753637 | 0.760091513 |
| -1.02256232 | 0.78213809 | 0.91706205 | 0.13283441  | 0.662408877 | 4.09E-06    |
| -1.0335214  | 0.68044139 | -1.0668505 | 0.269524504 | -1.13378127 | 0.120682345 |
| -1.00076416 | 0.99072337 | -1.1241891 | 0.325466992 | -1.16377389 | 0.024215706 |
| 0.994482201 | 0.90020265 | 0.98103674 | 0.740022927 | 0.901109756 | 0.021350542 |

|             |            |            |             |             |             |
|-------------|------------|------------|-------------|-------------|-------------|
| -1.176485   | 0.03797854 | -1.1754113 | 0.002980938 | -1.07513797 | 0.347172049 |
| 0.993987008 | 0.94092052 | 0.95475005 | 0.446813401 | -1.19621639 | 0.03124866  |
| -1.21616721 | 0.00086409 | 0.95288992 | 0.391934612 | -1.24200477 | 0.000262715 |
| -1.01592939 | 0.77413851 | 0.99255531 | 0.869620862 | -1.01120371 | 0.839647208 |
| -1.11188582 | 0.14307792 | 0.95636988 | 0.535916737 | -1.28184676 | 0.00100559  |
| -1.09854279 | 0.16101671 | -1.0430212 | 0.463463516 | 0.880385764 | 0.059339515 |
| 0.964611998 | 0.67630615 | 0.97762557 | 0.660978915 | -1.01748537 | 0.840701445 |
| -1.21502636 | 0.02189844 | 0.59119713 | 1.28361E-06 | -1.02450238 | 0.770330576 |
| -1.2682778  | 0.05406515 | 0.92288641 | 0.116636141 | -1.08554764 | 0.499270757 |
| -1.09257872 | 0.04714507 | 0.84647481 | 0.008291763 | -1.00216016 | 0.960692211 |
| 0.988292491 | 0.85781352 | -1.2027677 | 0.000554697 | 0.920279668 | 0.209579297 |
| -1.12890121 | 0.10035759 | -1.1029814 | 0.358514208 | -1.26859511 | 0.001823128 |
| 0.930723819 | 0.47466556 | -1.0414038 | 0.336327708 | -1.2065119  | 0.065170158 |
| -1.23213791 | 0.00629762 | -1.1548029 | 0.014041799 | -1.24735027 | 0.003966183 |
| -1.20971161 | 0.00043987 | 0.93875384 | 0.434582922 | -1.46653239 | 5.80E-10    |
| 0.971718836 | 0.49031547 | 0.91917118 | 0.294541783 | -1.01679305 | 0.688404735 |
| 0.814029387 | 0.00509831 | -1.1500572 | 0.037089354 | 0.657369361 | 2.06E-07    |
| 0.845727222 | 0.00171674 | 0.89092857 | 0.011111954 | -1.00378716 | 0.940912476 |
| 0.211835841 | 8.46E-32   | -1.0902112 | 0.263224381 | 0.536848128 | 2.69E-14    |
| 0.964864329 | 0.4065836  | -1.1207713 | 0.164998707 | 0.65827359  | 1.61E-13    |
| 0.967816525 | 0.63447228 | -1.3065221 | 1.21507E-05 | -1.1716099  | 0.024465272 |
| -1.00245659 | 0.95357133 | 0.91962307 | 0.132095811 | -1.02949405 | 0.491303399 |
| 0.539861721 | 8.88E-14   | -1.010573  | 0.883381412 | 0.946838275 | 0.381999696 |
| 0.984574758 | 0.80039472 | 0.94521717 | 0.397989519 | 0.98876759  | 0.85421162  |
| 0.792454633 | 0.00482886 | 0.95463244 | 0.590764097 | 0.732817173 | 0.000245547 |
| 0.732484276 | 0.00243168 | 0.90173477 | 0.215359253 | 0.736961219 | 0.002909984 |
| 0.845150027 | 0.00554927 | -1.1304449 | 0.31414115  | 0.995300983 | 0.935816074 |
| 0.996479555 | 0.94488667 | -1.0111138 | 0.800756654 | 0.83308179  | 0.000702419 |
| -1.13773799 | 0.11291997 | -1.0211938 | 0.749764722 | -1.07291704 | 0.383331623 |
| 0.916400927 | 0.27043973 | -1.0385927 | 0.60369648  | 0.898217559 | 0.176649026 |
| 0.961570985 | 0.53086169 | -1.285378  | 0.01483212  | -1.04893177 | 0.445278629 |
| -1.00537756 | 0.93362922 | -1.3585936 | 0.000110162 | 0.97417444  | 0.684750213 |
| -1.36968895 | 5.18E-05   | -1.2115109 | 0.000401054 | -1.4385251  | 4.79E-06    |
| 0.999651598 | 0.99454015 | 0.96080259 | 0.337337006 | 0.975014839 | 0.619678055 |
| -1.02614202 | 0.53347742 | 0.62627808 | 1.61031E-08 | -1.06466445 | 0.133927538 |
| 0.980133968 | 0.83352839 | -1.0307539 | 0.553175503 | -1.24961086 | 0.022735268 |
| 0.970331776 | 0.70900964 | 0.84073194 | 0.005879305 | -1.17325104 | 0.051654407 |
| -1.06508563 | 0.24574743 | 0.91210166 | 0.035941355 | -1.22234255 | 0.000453655 |
| -1.01421865 | 0.82863028 | -1.093033  | 0.199058693 | -1.23172311 | 0.002236908 |
| -1.14094106 | 0.03903475 | -1.0894702 | 0.045983062 | -1.19493784 | 0.006063751 |
| 0.961125146 | 0.42052267 | -1.0293509 | 0.642540001 | -1.06612713 | 0.195472638 |
| -1.01717977 | 0.76330419 | 0.95916647 | 0.498523356 | -1.02102453 | 0.713047858 |
| -1.02031933 | 0.74278334 | 0.73553842 | 0.000285463 | 0.726757661 | 2.83E-06    |
| 0.911430799 | 0.07316211 | 0.47419576 | 4.11835E-10 | -1.00143634 | 0.97753866  |

|             |            |            |             |             |             |
|-------------|------------|------------|-------------|-------------|-------------|
| 0.982780478 | 0.89233302 | 0.90846281 | 0.104977295 | -1.1303269  | 0.341770249 |
| -1.20717679 | 0.16109429 | 0.8569513  | 0.003650983 | -1.0747332  | 0.588729344 |
| -1.00585647 | 0.92536614 | -1.0649985 | 0.435054845 | 0.576624    | 4.17E-12    |
| 0.874330823 | 0.08744713 | 0.99451329 | 0.944313961 | -1.1630395  | 0.055460684 |
| 0.976862375 | 0.72189145 | 0.94127514 | 0.334343733 | 0.989599477 | 0.87363768  |
| 0.982692054 | 0.60477698 | 0.96938066 | 0.629536546 | 0.953658484 | 0.162883391 |
| -1.01044627 | 0.88156994 | 0.98772483 | 0.863500556 | -1.04853899 | 0.497714026 |
| -1.18958222 | 0.03972938 | 0.958247   | 0.403832135 | -1.48158167 | 1.44E-05    |
| 0.686286897 | 8.10E-10   | -1.0003523 | 0.993206299 | -1.00893338 | 0.861045438 |
| 0.820915747 | 0.0012475  | 0.90047505 | 0.274773061 | -1.06617432 | 0.273369505 |
| -1.39932906 | 1.33E-06   | -1.0674396 | 0.419817448 | -1.77404343 | 9.32E-13    |
| 0.962397816 | 0.53107774 | -1.0599852 | 0.283108089 | 0.811612681 | 0.001156167 |
| 0.778601604 | 0.00226956 | 0.99148162 | 0.895634785 | 0.763446865 | 0.001074155 |
| -1.00739148 | 0.90079156 | -1.1052417 | 0.114241023 | -1.36723096 | 2.07E-06    |
| 0.925223577 | 0.30536352 | 0.96732509 | 0.499358671 | 0.68709496  | 6.56E-06    |
| 0.853503086 | 0.1322875  | -1.0935693 | 0.117844983 | 0.98070345  | 0.851581645 |
| -1.02901261 | 0.54963762 | 0.80346362 | 0.00072037  | -1.06764807 | 0.173896563 |
| -1.15189264 | 0.21636656 | -1.0611442 | 0.247331612 | -1.05349157 | 0.646658512 |
| 0.888300757 | 0.28899285 | 0.98046416 | 0.877817221 | 0.935426553 | 0.548684198 |
| 0.748447969 | 0.00062117 | 0.9269391  | 0.569313165 | 0.989358806 | 0.893702101 |
| -1.00630855 | 0.91439994 | 0.98443013 | 0.801292412 | -1.07001598 | 0.250307604 |
| -1.39543799 | 0.00176684 | 0.85454208 | 0.046537193 | -1.81782307 | 2.49E-07    |
| 0.749136673 | 0.00025463 | -1.1750577 | 0.016905632 | 0.777810271 | 0.001246267 |
| 0.928905159 | 0.37788115 | -1.0189522 | 0.577921304 | -1.0494246  | 0.563243134 |
| -1.1031191  | 0.42031859 | -1.0084345 | 0.90415635  | -1.34036031 | 0.018751745 |
| -1.02334182 | 0.67303603 | -1.2647415 | 0.006160613 | 0.969595447 | 0.572539645 |
| 0.894396034 | 0.04851245 | 0.78724916 | 1.66731E-05 | 0.983076441 | 0.758706799 |
| 0.782710689 | 0.00180059 | -1.0956003 | 0.120698213 | 0.83935652  | 0.022587834 |
| 0.823447287 | 0.00359744 | -1.2819438 | 0.000180617 | -1.17756281 | 0.013234905 |
| 0.943562551 | 0.37929256 | 0.94983663 | 0.401004394 | 0.9568018   | 0.503274969 |
| -1.00626709 | 0.87372164 | 0.74325116 | 0.000369943 | -1.03453586 | 0.389328527 |
| 0.961417382 | 0.58362269 | 0.99706425 | 0.960304089 | 0.670909889 | 7.71E-07    |
| -1.09084674 | 0.17279543 | 0.80038315 | 0.004510279 | 0.749876767 | 2.87E-05    |
| -1.08531592 | 0.06796992 | 0.89470543 | 0.287844877 | -1.07182001 | 0.120423378 |
| -1.03978336 | 0.3327683  | 0.9859618  | 0.7671272   | -1.01041657 | 0.796152816 |
| -1.08470942 | 0.17659862 | 0.94318109 | 0.606927847 | -1.0774544  | 0.214441773 |
| -1.14058575 | 0.01883149 | 0.82978466 | 0.09739722  | -1.0027638  | 0.959654223 |
| -1.07332518 | 0.29188459 | 0.86281727 | 0.069576273 | 0.941258708 | 0.366545933 |
| 0.906185012 | 0.01802109 | -1.1146023 | 0.06790372  | -1.00121023 | 0.976211502 |
| 0.986576073 | 0.77143459 | -1.2143023 | 0.060443155 | 0.909972288 | 0.046481056 |
| -1.07455278 | 0.2137798  | 0.82706044 | 0.012793067 | 0.873244815 | 0.021329436 |
| 0.960251635 | 0.26075837 | 0.97951042 | 0.803846654 | -1.01234476 | 0.732328939 |
| 0.796605361 | 0.00236004 | 0.9158395  | 0.470097067 | -1.06189783 | 0.402872901 |
| -1.00294474 | 0.94279691 | -1.0458712 | 0.413153771 | -1.03631502 | 0.385706227 |

|             |            |            |             |             |             |
|-------------|------------|------------|-------------|-------------|-------------|
| 0.788361334 | 0.01382145 | -1.00802   | 0.885650519 | 0.59392652  | 8.19E-07    |
| 0.912910477 | 0.02011555 | 0.77251885 | 0.001064618 | 0.975775074 | 0.521846858 |
| 0.859848757 | 0.01247817 | 0.80654818 | 0.001396579 | 0.9776229   | 0.69992469  |
| -1.03489179 | 0.56336769 | -1.1033458 | 0.139263139 | -1.08192862 | 0.187508436 |
| 0.974611383 | 0.60670557 | -1.0759993 | 0.066613274 | 0.969537855 | 0.535971892 |
| 0.986263614 | 0.74879889 | 0.81573227 | 0.006116743 | -1.02001144 | 0.646600574 |
| -1.00253177 | 0.96971228 | -1.0658055 | 0.315762641 | 0.863463238 | 0.031047314 |
| 0.729153214 | 0.02575557 | 0.9843239  | 0.720631756 | -1.00906709 | 0.947985821 |
| 0.892272948 | 0.06722705 | -1.7526846 | 1.25182E-19 | 0.787714982 | 0.000260814 |
| 0.701914987 | 3.01E-05   | -1.0153926 | 0.797973143 | 0.92725976  | 0.334940636 |
| -1.25291538 | 0.00659282 | 0.94611991 | 0.312345587 | -1.1675922  | 0.05732407  |
| 0.975177264 | 0.62756799 | -1.2351902 | 0.002465312 | -1.00417719 | 0.935805442 |
| 0.791329302 | 0.00395826 | -1.0627701 | 0.137443518 | 0.630123183 | 2.15E-07    |
| 0.872392855 | 0.03357794 | 0.97448362 | 0.578891437 | 0.832676184 | 0.005030753 |
| 0.993793044 | 0.91236201 | 0.96810443 | 0.572947438 | -1.12409707 | 0.042549132 |
| 0.988462641 | 0.86700989 | -1.0125108 | 0.728894351 | 0.861798295 | 0.035536357 |
| 0.930866205 | 0.03448986 | 0.99676054 | 0.963834772 | -1.02397251 | 0.476223834 |
| -1.09569798 | 0.12650586 | -1.0022311 | 0.956628366 | -1.01624807 | 0.785341695 |
| -1.23050191 | 0.06410509 | 0.60596142 | 1.78186E-06 | 0.773021861 | 0.022681629 |
| -1.02686881 | 0.663491   | 0.91782797 | 0.028283415 | 0.83600113  | 0.004626183 |
| 0.909656008 | 0.29443874 | -1.0175887 | 0.766447337 | -1.02456073 | 0.787189951 |
| -1.02324122 | 0.57559204 | 0.95974872 | 0.489110351 | 0.91827538  | 0.041350249 |
| 0.61581825  | 8.08E-06   | 0.87801259 | 0.011423421 | 0.647547655 | 4.74E-05    |
| 0.945892232 | 0.41297831 | -1.0346641 | 0.431271196 | 0.943101295 | 0.388765946 |
| -1.00585789 | 0.92189509 | 0.97095488 | 0.658344893 | -1.09088039 | 0.14819728  |
| -1.07413636 | 0.23890525 | 0.80366517 | 0.118361964 | -1.01864859 | 0.759504662 |
| -1.1407916  | 0.2330637  | 0.79295823 | 0.000369181 | -1.14152537 | 0.230820661 |
| 0.806903198 | 0.00061947 | 0.7655903  | 0.001129367 | 0.798348493 | 0.00035095  |
| -1.06139684 | 0.35231781 | -1.0127837 | 0.874063614 | -1.15844725 | 0.02441133  |
| 0.866293119 | 0.06206529 | 0.89836211 | 0.042252086 | 0.88587537  | 0.11352054  |
| -1.05461842 | 0.39370298 | 0.71073793 | 5.29293E-05 | -1.11108609 | 0.094320499 |
| 0.973989366 | 0.5855943  | 0.93777364 | 0.309272938 | -1.05854768 | 0.241532118 |
| 0.977719791 | 0.63625043 | 0.99262184 | 0.89585358  | 0.907263528 | 0.044814195 |
| 0.95478059  | 0.62129259 | 0.99431366 | 0.934408818 | 0.908100198 | 0.305234583 |
| 0.980196197 | 0.65166751 | 0.93993624 | 0.0661136   | -1.02153777 | 0.630606256 |
| 0.84966019  | 0.18869315 | 0.96746866 | 0.576670444 | 0.851890145 | 0.195790088 |
| 0.995122339 | 0.92710549 | 0.93354065 | 0.533463341 | 0.978661659 | 0.686741025 |
| 0.94124729  | 0.42884075 | 0.98244783 | 0.771256025 | 0.872571995 | 0.078335432 |
| 0.93238043  | 0.27732623 | 0.99413573 | 0.947808432 | 0.951815364 | 0.442262409 |
| -1.07544635 | 0.3962344  | 0.99367946 | 0.877049194 | -1.32117786 | 0.001855153 |
| -1.18420552 | 0.0204014  | 0.35316264 | 9.0262E-15  | -1.18677342 | 0.01891944  |
| -1.28781441 | 0.00016004 | 0.84192609 | 0.01358877  | -1.13727515 | 0.043743452 |
| -1.01354389 | 0.76258292 | 0.96152711 | 0.511006151 | 0.7668281   | 1.79E-07    |
| 0.96676203  | 0.58609438 | -1.0718805 | 0.252816711 | 0.958602681 | 0.496188307 |

|             |            |            |             |             |             |
|-------------|------------|------------|-------------|-------------|-------------|
| -1.05013658 | 0.45392124 | -1.0034648 | 0.974852303 | -1.00727079 | 0.911467028 |
| 0.994692672 | 0.93740211 | 0.81311284 | 0.000924375 | -1.06448832 | 0.35826361  |
| 0.954258317 | 0.64930002 | -1.0508903 | 0.437879741 | 0.993987378 | 0.953248258 |
| -1.00487117 | 0.94106722 | 0.86602622 | 0.06152463  | 0.44453581  | 2.27E-17    |
| -1.0024433  | 0.96449998 | -1.0314699 | 0.618428279 | 0.429684244 | 1.96E-21    |
| 0.958587147 | 0.6215419  | 0.97161405 | 0.551452286 | -1.18327277 | 0.053347966 |
| 0.960063292 | 0.62347059 | 0.95910228 | 0.381976399 | 0.835466743 | 0.033823738 |
| 0.995321872 | 0.94727202 | -1.0880055 | 0.369130883 | -1.02865594 | 0.690498374 |
| 0.986155461 | 0.8936391  | 0.86259456 | 0.001463822 | -1.03787776 | 0.721566937 |
| -1.04108869 | 0.4462336  | 0.75832794 | 0.02785755  | 0.941787977 | 0.258143223 |
| -1.06869558 | 0.27008736 | -1.1361342 | 0.019930796 | -1.14621289 | 0.026050142 |
| -1.07995744 | 0.29918158 | 0.98841716 | 0.87866313  | -1.12922447 | 0.103497688 |
| -1.10304004 | 0.12014563 | 0.92103626 | 0.20279571  | -1.17952913 | 0.010309668 |
| 0.755386373 | 1.04E-05   | -1.2454957 | 0.012612219 | 0.825094252 | 0.001553319 |
| 0.980283259 | 0.80509657 | -1.3547552 | 7.46123E-05 | -1.09966264 | 0.242005117 |
| -1.21066201 | 0.02345038 | -1.0160111 | 0.799678243 | -1.04640972 | 0.582191222 |
| 0.997063222 | 0.9556436  | 0.9481578  | 0.234838887 | 0.882888944 | 0.021593158 |
| 0.973980656 | 0.6460884  | -1.0011295 | 0.985471645 | 0.995112641 | 0.931929121 |
| -1.11042734 | 0.11522994 | -1.0420056 | 0.528441781 | -1.02992478 | 0.65401615  |
| 0.965283157 | 0.57790617 | 0.87717819 | 0.05726131  | 0.876726976 | 0.041886707 |
| -1.23022992 | 0.01602422 | -1.1469343 | 0.186219661 | -1.21071598 | 0.025664254 |
| -1.01668198 | 0.88258894 | 0.87507372 | 0.046312187 | -1.19295007 | 0.119421991 |
| 0.972323268 | 0.44543272 | 0.91633788 | 0.115262944 | 0.924971604 | 0.037251548 |
| 0.943762787 | 0.30818569 | -1.0375772 | 0.666701023 | 0.806197748 | 0.00033851  |
| -1.04686305 | 0.42325287 | 0.81325705 | 0.015338191 | -1.14031495 | 0.024552649 |
| -1.09969986 | 0.11455313 | -1.0898299 | 0.228215376 | -1.12744793 | 0.047881253 |
| -1.18824626 | 0.01098633 | 0.89995031 | 0.314296015 | -1.09368778 | 0.17702708  |
| -1.02016336 | 0.68577529 | 0.91988586 | 0.117408449 | 0.977756656 | 0.648525562 |
| 0.886047573 | 0.10094993 | -1.0760509 | 0.224280889 | 0.89428142  | 0.129105536 |
| -1.3073956  | 0.0145505  | -1.171282  | 0.035695019 | -1.2352799  | 0.051619265 |
| -1.09539261 | 0.08348352 | 0.97195554 | 0.648747234 | -1.12455702 | 0.027101935 |
| 0.986842055 | 0.86148041 | 0.82726394 | 0.001777684 | 0.983400059 | 0.825481737 |
| 0.864197345 | 0.02502166 | -1.0588752 | 0.479313132 | 0.933815654 | 0.284202438 |
| -1.0813519  | 0.49070954 | -1.1021606 | 0.240489964 | -1.46508156 | 0.001323286 |
| -1.02344623 | 0.80353255 | -1.0580303 | 0.288613479 | -1.2559754  | 0.017204836 |
| -1.07668255 | 0.24121405 | 0.88925364 | 0.044665147 | -1.29896963 | 0.000102806 |
| -1.07327531 | 0.48657462 | -1.0097641 | 0.882484371 | -1.0535548  | 0.607368458 |
| 0.870791275 | 0.04613007 | 0.95612719 | 0.480245064 | -1.02826889 | 0.682457242 |
| 0.921101761 | 0.22444049 | -1.1267272 | 0.157896533 | 0.917274717 | 0.202154177 |
| 0.947648954 | 0.36317401 | -1.21098   | 0.091746197 | 0.949792754 | 0.383537391 |
| 0.964236683 | 0.62404526 | 0.94287776 | 0.113056631 | -1.22032519 | 0.009371806 |
| -1.36325955 | 0.00013996 | 0.93978178 | 0.274543876 | 0.824745075 | 0.013641285 |
| 0.933967897 | 0.32869645 | -1.1943046 | 0.002837863 | -1.23423959 | 0.003687232 |
| 0.964451084 | 0.6004071  | -1.0258868 | 0.667915413 | 0.672072677 | 3.83E-07    |

|             |            |            |             |             |             |
|-------------|------------|------------|-------------|-------------|-------------|
| 0.899658042 | 0.13865868 | -1.0295809 | 0.657897642 | 0.864781344 | 0.043747345 |
| 0.982102508 | 0.83533792 | 0.97119079 | 0.553886695 | 0.97367815  | 0.7588878   |
| -1.16923836 | 0.05232442 | 0.91118048 | 0.204964781 | -1.14761755 | 0.086254071 |
| 0.959619813 | 0.45097039 | -1.274125  | 0.026456979 | 0.6257554   | 9.91E-12    |
| -1.15737934 | 0.02837074 | 0.99295214 | 0.891616212 | 0.928299158 | 0.256518291 |
| -1.00706826 | 0.87474043 | 0.95073711 | 0.506547063 | 0.844096837 | 0.000358038 |
| -1.41494899 | 0.00031099 | -1.0177374 | 0.782272507 | -1.19241016 | 0.055819711 |
| 0.704633752 | 0.00479288 | -1.0681241 | 0.561172771 | 0.534957152 | 2.58E-06    |
| -1.02356831 | 0.68124622 | -1.1116911 | 0.258430043 | 0.662846647 | 1.44E-09    |
| -1.4541538  | 0.00052134 | -1.1393524 | 0.041139527 | -1.06142864 | 0.559062448 |
| -1.21703688 | 0.00660776 | -1.1573564 | 0.153473893 | -1.09212007 | 0.210328489 |
| 0.928575639 | 0.11714413 | -1.0688384 | 0.33034346  | 0.922021173 | 0.086755236 |
| -1.19876647 | 0.03154562 | 0.94616199 | 0.411578018 | -1.19259024 | 0.036497503 |
| -1.30846795 | 0.0003681  | -1.0102285 | 0.862852414 | -1.45953981 | 1.87E-06    |
| -1.26029349 | 0.0006416  | 0.90726095 | 0.193297331 | -1.27680477 | 0.000337784 |
| -1.17336357 | 0.00698912 | 0.85544542 | 0.043592666 | -1.08966775 | 0.137734714 |
| -1.09560695 | 0.19775129 | -1.1649763 | 0.03188255  | 0.984807596 | 0.827747369 |
| -1.21578362 | 0.00011191 | 0.9417785  | 0.386414266 | 0.99257123  | 0.874163011 |
| 0.93684677  | 0.59219958 | 0.96037313 | 0.567837021 | -1.16425439 | 0.214463004 |
| -1.23020265 | 0.00484635 | -1.0373289 | 0.673351357 | -1.13867847 | 0.070956933 |
| -1.35371197 | 2.82E-05   | -1.0192268 | 0.809918554 | -1.24346612 | 0.001753095 |
| 0.926449212 | 0.22676598 | 0.7462694  | 1.60209E-06 | -1.07125157 | 0.275544239 |
| -1.01431667 | 0.8348119  | -1.0220487 | 0.738042268 | -1.09490647 | 0.186999558 |
| 0.995011189 | 0.94121923 | 0.90741307 | 0.033283343 | -1.11820592 | 0.103768008 |
| -1.30911533 | 0.09697074 | 0.95893532 | 0.643242775 | -1.25966978 | 0.153490031 |
| -1.0944293  | 0.35474123 | 0.45819494 | 2.18026E-08 | -1.15431421 | 0.143490246 |
| -1.14479964 | 0.09549896 | -1.0515332 | 0.376960768 | 0.967554979 | 0.680600088 |
| 0.960917805 | 0.35772701 | -1.3608946 | 0.00366615  | -1.0238747  | 0.585261925 |
| -1.42384668 | 1.22E-05   | -1.0283008 | 0.68962907  | -1.33620526 | 0.000227557 |
| -1.14402436 | 0.10782981 | 0.97081773 | 0.527173819 | -1.20723222 | 0.026044584 |
| -1.08262855 | 0.08964563 | -1.1392652 | 0.118184091 | -1.00041708 | 0.992789878 |
| -1.25219035 | 0.00197473 | -1.1185046 | 0.119058986 | -1.59714664 | 9.88E-09    |
| 0.987647969 | 0.88149354 | -1.1347882 | 0.052639665 | -1.16773296 | 0.067120028 |
| 0.894461409 | 0.17385653 | -1.112183  | 0.067564299 | -1.04959063 | 0.552301821 |
| 0.96497617  | 0.56010341 | 0.96306348 | 0.593110917 | 0.994700791 | 0.930691213 |
| -1.33527674 | 0.00240996 | -1.079062  | 0.110258766 | -1.34676186 | 0.001829046 |
| -1.18940794 | 0.01563116 | -1.0251741 | 0.83805539  | -1.00047717 | 0.994546213 |
| -1.20452027 | 0.01383952 | -1.1494854 | 0.053268979 | -1.32345092 | 0.000334628 |
| 0.951677649 | 0.32329395 | -1.2936448 | 0.000276807 | -1.1050984  | 0.049316663 |
| -1.16320672 | 0.22935927 | 0.92571267 | 0.222032446 | -1.64742948 | 0.000186077 |
| -1.13258367 | 0.10785646 | -1.2126004 | 0.006332759 | -1.26914394 | 0.002823452 |
| -1.01949757 | 0.76546552 | -1.0820256 | 0.248062145 | 0.906805994 | 0.134639757 |
| -1.10742496 | 0.11941181 | -1.2890574 | 0.117161272 | -1.34014931 | 3.21E-05    |
| -1.11468131 | 0.22048393 | -1.0965523 | 0.344585575 | -1.29901985 | 0.004238155 |

|             |            |            |             |             |             |
|-------------|------------|------------|-------------|-------------|-------------|
| -1.33462938 | 0.00356873 | -1.0125541 | 0.876180621 | -1.05982788 | 0.542055022 |
| -1.07511181 | 0.5057692  | 0.98008913 | 0.641682678 | -1.36112251 | 0.006158232 |
| 0.996022455 | 0.95186266 | -1.1806188 | 0.027607215 | 0.922902346 | 0.227438482 |
| -1.18173957 | 0.00058063 | -1.1101657 | 0.209491163 | -1.1422153  | 0.00521213  |
| 0.958156186 | 0.40788348 | -1.0827981 | 0.089031531 | -1.15798027 | 0.00598377  |
| -1.08853345 | 0.14708914 | -1.1265935 | 0.090382155 | -1.02238892 | 0.70250305  |
| -1.1137162  | 0.02777646 | -1.0689548 | 0.425166713 | -1.00815519 | 0.865196395 |
| -1.26754469 | 2.50E-05   | -1.2021371 | 0.026931716 | 0.927904025 | 0.15116868  |
| 0.732293577 | 1.19E-05   | -1.0929362 | 0.149696881 | 0.903257047 | 0.1207828   |
| -1.34761495 | 0.00485358 | -1.1596142 | 0.108661941 | 0.79596162  | 0.028726283 |
| 0.957432866 | 0.47507309 | -1.2030747 | 0.010245466 | 0.967231107 | 0.58396109  |
| -1.02303743 | 0.85135684 | -1.2309881 | 0.006322806 | -1.1936864  | 0.14911888  |
| 0.980083082 | 0.84930084 | -1.0776529 | 0.138128712 | 0.932656568 | 0.511018113 |
| -1.13697255 | 0.06690983 | -1.4790094 | 0.002687426 | -1.13060546 | 0.079354412 |
| -1.01635078 | 0.70663406 | -1.0980158 | 0.22476696  | -1.01142528 | 0.791987709 |
| 0.954817418 | 0.28771995 | 0.94235444 | 0.360702324 | 0.989051062 | 0.79916945  |
| -1.08365754 | 0.09785979 | -1.2006765 | 0.006424081 | 0.952346572 | 0.310508407 |
| -1.06766793 | 0.28341859 | -1.1594734 | 0.096917362 | 0.993685598 | 0.91690627  |
| 0.889985729 | 0.08753874 | -1.0386275 | 0.690569321 | -1.10750322 | 0.133216323 |
| 0.972823018 | 0.59835795 | -1.2628753 | 0.035348942 | -1.01622346 | 0.758130229 |
| 0.902114314 | 0.12696165 | 0.92526589 | 0.242402197 | 0.96630935  | 0.608151274 |
| -1.0161544  | 0.77216786 | -1.2009379 | 0.00018851  | -1.01370311 | 0.805736731 |
| 0.982340023 | 0.81007316 | 0.98019293 | 0.697771697 | 0.921589093 | 0.273300346 |
| 0.875382695 | 0.04251838 | 0.95960764 | 0.477688901 | 0.810889635 | 0.001866871 |
| 0.979039544 | 0.66525832 | 0.90213212 | 0.035011326 | 0.856611122 | 0.002456248 |
| -1.1581448  | 0.21159646 | -1.0343445 | 0.513894792 | -1.05565967 | 0.642798029 |
| 0.79105846  | 0.15581051 | 0.85530701 | 0.018859639 | 0.859096127 | 0.35511346  |
| 0.94541312  | 0.37749263 | 0.99694975 | 0.976106918 | -1.00902102 | 0.887319297 |
| 0.993950756 | 0.9252221  | 0.97890063 | 0.725746623 | 0.953327877 | 0.46082543  |
| -1.03040101 | 0.53100162 | -1.0351078 | 0.776540821 | -1.00741021 | 0.877050685 |
| 0.806636433 | 0.00029275 | -1.0624836 | 0.567550822 | 0.760314731 | 7.99E-06    |
| 0.965422133 | 0.51245466 | -1.0560168 | 0.430643607 | 0.894387822 | 0.041231161 |
| 0.787977785 | 0.00431183 | -1.0670242 | 0.136010632 | -1.05443169 | 0.510121567 |
| -1.14825553 | 0.18230184 | -1.0632414 | 0.160183069 | 0.984635672 | 0.880277249 |
| -1.00620237 | 0.92284853 | 0.99222682 | 0.870635656 | 0.946951483 | 0.3948402   |
| -1.00096149 | 0.98660936 | -1.1182854 | 0.069817846 | 0.740951195 | 2.57E-06    |
| 0.857712882 | 0.18088186 | -1.0116751 | 0.863050741 | 0.79794168  | 0.051280973 |
| 0.920245456 | 0.1467892  | 0.99689094 | 0.952467279 | -1.11268238 | 0.063980323 |
| -1.00179065 | 0.98398368 | -1.0008872 | 0.989401591 | -1.01513952 | 0.866123718 |
| -1.17352904 | 0.00070082 | -1.0545254 | 0.339327292 | -1.05199248 | 0.25956878  |
| 0.99065286  | 0.89094298 | -1.0672569 | 0.381541876 | 0.916130282 | 0.204310128 |
| 0.984932195 | 0.7324312  | 0.87993551 | 0.050918459 | 0.847001099 | 0.000423029 |
| 0.917213111 | 0.14098691 | 0.98623697 | 0.777021465 | 0.838339865 | 0.003562605 |
| 0.91810805  | 0.26858046 | -1.1498836 | 0.234400085 | 0.96534473  | 0.646317598 |

|             |            |            |             |             |             |
|-------------|------------|------------|-------------|-------------|-------------|
| -1.02175273 | 0.79978826 | 0.84548144 | 0.307217251 | -1.26894232 | 0.006695837 |
| -1.17469681 | 0.00224767 | 0.85356459 | 0.015118668 | 0.928605627 | 0.145681861 |
| -1.01948477 | 0.71094094 | 0.96506512 | 0.582796894 | 0.88804621  | 0.025839402 |
| -1.24833886 | 0.01267978 | 0.87989427 | 0.009401622 | -1.11521836 | 0.210275761 |
| 0.993753569 | 0.94893074 | 0.93727784 | 0.247976604 | 0.832947919 | 0.06594244  |
| -1.08011247 | 0.11940714 | 0.82352113 | 0.000617021 | 0.809101123 | 6.13E-05    |
| 0.845190156 | 0.0098474  | -1.0407467 | 0.6193675   | 0.536774149 | 1.04E-13    |
| 0.97508812  | 0.72394188 | -1.2026183 | 0.076954781 | 0.946949433 | 0.446342168 |
| 0.986686198 | 0.76039775 | 0.88625184 | 0.062779146 | 0.998470401 | 0.97220409  |
| -1.07642173 | 0.35450934 | 0.7900812  | 0.000125938 | -1.00875592 | 0.912375824 |
| 0.891726256 | 0.18150843 | 0.85110476 | 0.160240301 | 0.869088683 | 0.10326534  |
| -1.05320533 | 0.45311115 | -1.0774722 | 0.191856853 | -1.07740892 | 0.281904911 |
| 0.999758034 | 0.99808516 | 0.92485728 | 0.382447462 | -1.13896823 | 0.200362809 |
| -1.10501131 | 0.35635039 | -1.012092  | 0.788034713 | 0.934613017 | 0.531337947 |
| -1.23938526 | 0.05606905 | -1.2235775 | 0.004572327 | 0.852337093 | 0.151831191 |
| -1.1138188  | 0.25438722 | -1.0378541 | 0.404044804 | -1.16220297 | 0.114016349 |
| 0.983796545 | 0.72956373 | 0.82472223 | 0.001566294 | -1.0722575  | 0.143629126 |
| -1.02377871 | 0.66388356 | 0.92101119 | 0.286469501 | -1.04131584 | 0.454863841 |
| -1.0219852  | 0.64595504 | -1.0708514 | 0.421070649 | 0.974246013 | 0.581687433 |
| -1.11011836 | 0.17513102 | -1.0264778 | 0.604582981 | -1.05411791 | 0.491152464 |
| 0.816731176 | 0.01011934 | 0.8866774  | 0.024055754 | 0.838148725 | 0.023874172 |
| 0.792410915 | 0.01932257 | -1.1058632 | 0.247155664 | 0.796647982 | 0.022125123 |
| -1.03564718 | 0.66727836 | 0.89521401 | 0.26068489  | 0.767039083 | 0.001864682 |
| -1.15370613 | 0.02923768 | -1.2740585 | 7.12202E-06 | -1.16233942 | 0.022099313 |
| 0.917905744 | 0.1547708  | 0.53687155 | 1.05561E-13 | 0.732915606 | 2.81E-06    |
| -1.11182227 | 0.37842936 | 0.88563919 | 0.093187008 | -1.33553392 | 0.018743066 |
| -1.13899137 | 0.07742866 | 0.99079127 | 0.833245018 | 0.934249603 | 0.3510003   |
| -1.24657536 | 0.00015579 | 0.84828823 | 0.041683751 | -1.11195348 | 0.05528131  |
| 0.902294099 | 0.19734919 | -1.0231967 | 0.787516658 | -1.09085002 | 0.274516573 |
| -1.22117298 | 0.00291821 | -1.1100624 | 0.133816427 | -1.20475267 | 0.005286368 |
| 0.955622743 | 0.18270257 | 0.90953957 | 0.349046897 | 0.993409185 | 0.844838741 |
| 0.969828144 | 0.74477323 | -1.0891739 | 0.429619795 | 0.851909062 | 0.092695901 |
| 0.889024184 | 0.20022726 | 0.96302282 | 0.733061416 | -1.00902463 | 0.921468257 |
| -1.17317602 | 0.01675363 | -1.2137262 | 0.043261584 | -1.07724078 | 0.255114195 |
| -1.05521096 | 0.36163751 | 0.97367104 | 0.572677582 | -1.11396648 | 0.070142372 |
| 0.904120361 | 0.14242235 | 0.91504973 | 0.104633331 | 0.715521073 | 7.90E-06    |
| 0.933957716 | 0.28464189 | 0.9996137  | 0.993481305 | 0.981894654 | 0.773683614 |
| 0.967454682 | 0.50962602 | -1.0150422 | 0.845054166 | -1.06485948 | 0.212806245 |
| -1.12420551 | 0.07719701 | 0.85987695 | 0.051908378 | -1.07473374 | 0.272292185 |
| 0.984802353 | 0.89537758 | -1.130253  | 0.209843162 | 0.761090283 | 0.022190367 |
| -1.05897288 | 0.29538369 | 0.90109032 | 0.204197515 | -1.01821302 | 0.740539116 |
| -1.15826628 | 0.08853475 | -1.1051418 | 0.123126814 | -1.29060207 | 0.003953108 |
| -1.03678437 | 0.61607619 | -1.0035077 | 0.953175114 | -1.15481554 | 0.049507351 |
| -1.20187247 | 0.02342251 | -1.1009738 | 0.423808892 | -1.25271723 | 0.006043083 |



|             |            |            |             |             |             |
|-------------|------------|------------|-------------|-------------|-------------|
| 0.86409732  | 0.01365282 | -1.1512243 | 0.056639077 | 0.7518199   | 6.96E-06    |
| -1.18095155 | 0.03040553 | -1.0412916 | 0.458284689 | -1.20547529 | 0.015571788 |
| -1.06446213 | 0.41451662 | 0.95787063 | 0.587009604 | -1.11932922 | 0.143667484 |
| -1.18268118 | 0.00595961 | -1.0575173 | 0.386587223 | -1.22561071 | 0.001027112 |
| -1.00777817 | 0.90399559 | -1.0142076 | 0.67648491  | -1.0238706  | 0.713600726 |
| -1.16544228 | 0.07468076 | 0.96041534 | 0.667911372 | -1.03669381 | 0.670457519 |
| -1.32632771 | 0.00578333 | 0.77062494 | 0.005820472 | -1.25395059 | 0.025143752 |
| 0.871578773 | 0.00681502 | -1.1380148 | 0.050703729 | -1.07462525 | 0.146381235 |
| -1.11419077 | 0.05096965 | 0.99021578 | 0.866947056 | 0.893893042 | 0.043177755 |
| -1.00001244 | 0.99981976 | 0.76946026 | 0.000296452 | -1.13712398 | 0.022766242 |
| -1.10252421 | 0.08855351 | 0.99127707 | 0.890297073 | 0.993959198 | 0.914648131 |
| 0.93979272  | 0.26036802 | -1.0424511 | 0.407889313 | -1.10390198 | 0.075763617 |
| -1.03594805 | 0.65596224 | -1.0411166 | 0.537804852 | 0.961853562 | 0.623775329 |
| -1.09384502 | 0.13772636 | 0.86438962 | 0.214079631 | -1.25420403 | 0.000365674 |
| -1.03256757 | 0.45253062 | -1.043778  | 0.432908125 | -1.14234976 | 0.002727967 |
| -1.06381638 | 0.21659531 | -1.229348  | 0.018116539 | -1.11960401 | 0.026391954 |
| -1.13093192 | 0.04760433 | -1.0284489 | 0.696865763 | -1.11941946 | 0.068546362 |
| -1.05593931 | 0.07735349 | -1.1860973 | 0.034817319 | -1.0481515  | 0.125609989 |
| 0.939083051 | 0.1957734  | 0.89666389 | 0.062231271 | -1.2683113  | 7.63E-06    |
| -1.07008386 | 0.1916732  | -1.2078795 | 0.01455756  | 0.94982992  | 0.319500089 |
| -1.07857142 | 0.22775459 | -1.1035459 | 0.200170851 | 0.849503709 | 0.011088773 |
| -1.06289656 | 0.13805788 | -1.402066  | 4.07512E-07 | -1.03077732 | 0.45762277  |
| -1.01190449 | 0.83337024 | 0.96441655 | 0.573280144 | -1.03253275 | 0.569767504 |
| 0.797958091 | 0.00366999 | -1.1140107 | 0.205385074 | 0.999795951 | 0.997818224 |
| -1.33076981 | 0.00048645 | -1.1712162 | 0.113521268 | -1.27361663 | 0.002716242 |
| -1.00817811 | 0.86370633 | 0.94188937 | 0.225581143 | -1.05024662 | 0.303831934 |
| 0.964021987 | 0.5441303  | 0.88718883 | 0.031387852 | -1.03584571 | 0.559826728 |
| 0.984108552 | 0.79523581 | -1.0755071 | 0.189709174 | 0.944811356 | 0.359472945 |
| -1.0021896  | 0.95473614 | -1.2580846 | 0.000150286 | 0.838984914 | 2.83E-05    |
| -1.05434642 | 0.50887039 | -1.0957435 | 0.099760892 | -1.29259489 | 0.002145315 |
| -1.06086186 | 0.30956808 | 0.93760698 | 0.417418436 | 0.795354352 | 0.000211433 |
| -1.23448111 | 0.00216132 | -1.199186  | 0.003538182 | -1.15599937 | 0.030823695 |
| -1.00928862 | 0.8729121  | -1.1403606 | 0.003069706 | 0.955673249 | 0.434065074 |
| 0.974177497 | 0.58285747 | -1.0212507 | 0.67252541  | -1.06308107 | 0.201894721 |
| 0.937957164 | 0.26716531 | -1.0927016 | 0.149916312 | -1.03304227 | 0.571672906 |
| -1.09248065 | 0.10384882 | -1.0497225 | 0.114263719 | -1.04881447 | 0.376616616 |
| -1.03259274 | 0.52536231 | 0.96674955 | 0.483968385 | 0.986229925 | 0.783323373 |
| -1.018008   | 0.69166012 | 0.87506866 | 0.011857847 | -1.00726127 | 0.872194117 |
| -1.008008   | 0.88268818 | 0.95040559 | 0.415540618 | -1.0967628  | 0.091762859 |
| -1.00782891 | 0.84071582 | -1.1048135 | 0.017140571 | 0.920692866 | 0.036934862 |
| 0.94979805  | 0.35453909 | -1.0540108 | 0.35158269  | 0.989847431 | 0.853905828 |
| -1.10254577 | 0.09535507 | 0.87778322 | 0.084991918 | -1.22154769 | 0.001003416 |
| 0.946038374 | 0.31475134 | -1.3075762 | 0.000986062 | 0.930319128 | 0.191997531 |
| 0.941898507 | 0.37247743 | -1.0309169 | 0.52179815  | -1.06948094 | 0.317369407 |

|             |            |            |             |             |             |
|-------------|------------|------------|-------------|-------------|-------------|
| -1.03312231 | 0.57976817 | 0.9261496  | 0.206682396 | -1.04309998 | 0.473773084 |
| -1.02410313 | 0.65754479 | 0.94371245 | 0.349786555 | -1.0457892  | 0.405751991 |
| -1.05035764 | 0.3706239  | 0.90498778 | 0.011926968 | -1.06160097 | 0.276869214 |
| -1.06052999 | 0.34263741 | 0.91105447 | 0.246923615 | -1.02460428 | 0.693679389 |
| -1.269323   | 0.01115708 | -1.0117674 | 0.839804953 | 0.722774254 | 0.000742611 |
| -1.11486753 | 0.03533184 | -1.1921058 | 0.009545176 | -1.05035937 | 0.333641068 |
| -1.05102174 | 0.58724927 | -1.0499249 | 0.400802403 | 0.628896051 | 4.72E-06    |
| -1.0263278  | 0.61567402 | -1.0677257 | 0.172065327 | 0.948440383 | 0.308303409 |
| -1.08601106 | 0.22920101 | -1.0575498 | 0.331709652 | 0.997656258 | 0.972535669 |
| -1.13082812 | 0.00936026 | -1.0173118 | 0.749406883 | 0.963619452 | 0.420072037 |
| -1.24986695 | 0.01116771 | -1.0568896 | 0.27501687  | -1.20612496 | 0.031502203 |
| 0.948944474 | 0.59299282 | -1.0508219 | 0.27300248  | -1.06855392 | 0.499201598 |
| 0.805123106 | 0.05139727 | 0.94117186 | 0.264744336 | 0.730474628 | 0.005592773 |
| 0.799060801 | 0.00270915 | -1.0523437 | 0.19202524  | -1.1707494  | 0.031387338 |
| 0.934026737 | 0.22594636 | 0.97446995 | 0.641026084 | 0.984980343 | 0.786959602 |
| -1.00844546 | 0.93218564 | -1.0786253 | 0.193682416 | -1.25513959 | 0.024754    |
| -1.00709015 | 0.88089966 | 0.87350255 | 0.016550603 | 0.911697658 | 0.054026138 |
| 0.975246466 | 0.5769686  | 0.8477937  | 0.016273275 | 0.958683156 | 0.348996948 |
| 0.92842014  | 0.36589637 | 0.8120387  | 0.000786991 | 0.883510991 | 0.134216215 |
| 0.924347715 | 0.18264031 | -1.0934731 | 0.100242667 | 0.859427462 | 0.012018646 |
| -1.06904425 | 0.47925773 | -1.1637537 | 0.007343118 | -1.39668857 | 0.000773405 |
| -1.03318575 | 0.32927267 | -1.272177  | 0.00025149  | 0.873569144 | 0.000152305 |
| 0.959047712 | 0.45859256 | -1.0194348 | 0.832782435 | 0.794809128 | 0.000140789 |
| 0.875811714 | 0.014298   | 0.96932184 | 0.53873011  | 0.455148107 | 7.07E-21    |
| 0.891850479 | 0.23326154 | 0.95859759 | 0.644495741 | -1.01065671 | 0.911512852 |
| -1.00119    | 0.97625152 | -1.0032571 | 0.949855011 | 0.920409964 | 0.041782958 |
| 0.999412293 | 0.99284095 | 0.97066819 | 0.662537859 | -1.0967055  | 0.162703281 |
| -1.00500503 | 0.92577196 | 0.92972442 | 0.115992348 | 0.963129864 | 0.484267586 |
| -1.05189166 | 0.61017354 | -1.3723853 | 0.000462891 | -1.23957508 | 0.033891829 |
| 0.954792484 | 0.49621143 | -1.1843821 | 0.088240556 | -1.09468385 | 0.185959213 |
| 0.854022018 | 0.47573978 | 0.72667164 | 0.004899615 | 0.873961894 | 0.542355099 |
| 0.952476555 | 0.18586326 | 0.93807523 | 0.374153874 | 0.97957104  | 0.572343034 |
| 0.970105073 | 0.64743281 | 0.92825805 | 0.187143735 | 0.614138296 | 1.00E-09    |
| 0.973734398 | 0.58679899 | -1.0929085 | 0.370474108 | 0.859312007 | 0.002953526 |
| -1.00710654 | 0.88745664 | 0.64384371 | 6.63924E-13 | 0.886745308 | 0.019240461 |
| -1.20112667 | 0.0079299  | 0.90332823 | 0.026830034 | -1.0141297  | 0.833549374 |
| -1.36727702 | 0.00157844 | 0.69016991 | 3.07846E-05 | -1.1847744  | 0.076750829 |
| 0.810133334 | 0.00965379 | 0.85576217 | 0.009929913 | 0.973985968 | 0.738180632 |
| 0.877433673 | 0.04064705 | 0.97560638 | 0.793142869 | 0.999726038 | 0.99650876  |
| -1.13265746 | 0.01503057 | 0.97202122 | 0.395923811 | -1.31559043 | 9.64E-07    |
| -1.12857608 | 0.03586624 | -1.0915227 | 0.123807028 | 0.998571384 | 0.979796401 |
| 0.994875925 | 0.92695103 | 0.5540132  | 8.9951E-16  | 0.964960298 | 0.525186535 |
| 0.97144931  | 0.60489572 | -1.0170538 | 0.859301354 | 0.919315733 | 0.136527696 |
| -1.26854762 | 0.00152798 | 0.93383555 | 0.090927546 | -1.17693063 | 0.026123526 |

|             |            |            |             |             |             |
|-------------|------------|------------|-------------|-------------|-------------|
| 0.951215719 | 0.29751611 | -1.0342495 | 0.607705067 | -1.34430467 | 7.64E-08    |
| -1.25215927 | 0.00135802 | -1.1681001 | 0.005206078 | 0.997782523 | 0.973505857 |
| -1.01125313 | 0.87613059 | -1.0755662 | 0.463457233 | 0.919514748 | 0.2454159   |
| -1.02130492 | 0.81254779 | 0.9838216  | 0.810040542 | -1.29787332 | 0.004735832 |
| -1.14209681 | 0.08924785 | 0.79818526 | 0.309509068 | -1.06542916 | 0.412704396 |
| -1.13797296 | 0.00526587 | 0.96860342 | 0.383865623 | -1.13535329 | 0.006070816 |
| 0.985807545 | 0.82687185 | 0.88784938 | 0.077078708 | -1.12622625 | 0.073146419 |
| 0.973071321 | 0.71082636 | 0.93502564 | 0.173286295 | -1.07983705 | 0.298996836 |
| 0.844276074 | 0.05242764 | 0.98331236 | 0.736740888 | 0.989491787 | 0.901944994 |
| 0.923830747 | 0.02955128 | 0.94374806 | 0.387424337 | 0.971524903 | 0.418549316 |
| 0.951090274 | 0.53358898 | -1.0536741 | 0.580204301 | 0.853078992 | 0.052209048 |
| 0.905885583 | 0.23195733 | 0.89277206 | 0.154033281 | -1.07088803 | 0.405896615 |
| 0.81048863  | 0.01954451 | 0.98783465 | 0.845055828 | 0.970138923 | 0.729709128 |
| 0.907874241 | 0.24624311 | -1.1398234 | 0.010843687 | 0.902708427 | 0.219804242 |
| -1.29480386 | 0.00639009 | 0.95045675 | 0.369887165 | -1.34033497 | 0.002191246 |
| -1.0644314  | 0.41477282 | 0.90213036 | 0.07029906  | -1.02599912 | 0.736795207 |
| -1.03413517 | 0.53747745 | 0.86869612 | 0.014408885 | 0.822177026 | 0.000652685 |
| 0.885903054 | 0.05413551 | -1.443186  | 3.78926E-06 | 0.802863091 | 0.000765839 |
| 0.903482966 | 0.14657981 | -1.1245644 | 0.016753829 | 0.982599713 | 0.799885761 |
| -1.18226772 | 0.04617827 | -1.1669824 | 0.024115626 | -1.22282493 | 0.017483407 |
| 0.856673943 | 0.02074894 | 0.95858517 | 0.556338688 | 0.902447575 | 0.119732916 |
| 0.988448636 | 0.88877192 | -1.1317891 | 0.167422885 | -1.02189109 | 0.79439258  |
| -1.08583693 | 0.62778436 | -1.130219  | 0.116687254 | -1.32588237 | 0.100674466 |
| -1.07355455 | 0.07500982 | -1.1871225 | 0.000306052 | -1.03568118 | 0.373786671 |
| -1.07246771 | 0.19939468 | -1.0714607 | 0.293310982 | 0.836303629 | 0.001623821 |
| -1.07436074 | 0.42347014 | 0.95010624 | 0.487683855 | -1.01293465 | 0.885630184 |
| -1.14353177 | 0.05279686 | 0.94378949 | 0.500733878 | -1.18377073 | 0.015863638 |
| -1.19454551 | 0.00206892 | 0.97638811 | 0.503006933 | -1.21864909 | 0.000691739 |
| 0.950589714 | 0.13246122 | 0.88063341 | 0.118094877 | 0.979003843 | 0.525063343 |
| -1.19601779 | 0.00223433 | 0.93973353 | 0.450394648 | -1.18652234 | 0.003371575 |
| 0.953142724 | 0.21026563 | 0.95777986 | 0.62317495  | -1.09152199 | 0.024534638 |
| 0.913480866 | 0.23486851 | -1.0116317 | 0.888967491 | -1.02301045 | 0.763795021 |
| 0.95402752  | 0.46437716 | -1.1099679 | 0.256806622 | -1.06139138 | 0.355032103 |
| 0.746311729 | 0.00015686 | 0.67672488 | 3.95026E-06 | -1.05761715 | 0.439609427 |
| -1.03225154 | 0.4546162  | 0.87508828 | 0.016845692 | -1.06242428 | 0.156564204 |
| -1.03769516 | 0.6761394  | -1.0859678 | 0.185778406 | -1.11092776 | 0.237678377 |
| -1.16065701 | 0.08096306 | 0.92783094 | 0.281845286 | -1.11334627 | 0.205416031 |
| -1.3813075  | 0.00015288 | -1.1273805 | 0.149694036 | -1.41619404 | 5.36E-05    |
| 0.932403585 | 0.134915   | 0.87030764 | 0.036945589 | -1.16275277 | 0.001880461 |
| -1.04161201 | 0.45175705 | -1.0484001 | 0.569937802 | -1.13155199 | 0.025495376 |
| -1.02557542 | 0.64187722 | -1.3771077 | 0.063510301 | -1.017161   | 0.753877811 |
| 0.988490235 | 0.84837263 | -1.0242832 | 0.541948766 | -1.00342388 | 0.954975045 |
| -1.0695314  | 0.05927608 | 0.82392171 | 0.000701639 | 0.938758245 | 0.07562931  |
| -1.10511539 | 0.0584449  | 0.87847604 | 0.150940474 | -1.06156147 | 0.252909826 |

|             |            |            |             |             |             |
|-------------|------------|------------|-------------|-------------|-------------|
| 0.962151567 | 0.4201643  | -1.0443923 | 0.524024697 | 0.979140878 | 0.658944249 |
| -1.06046064 | 0.47797601 | -1.0475062 | 0.401688841 | 0.616334571 | 2.60E-07    |
| -1.15533278 | 0.07270296 | 0.98990044 | 0.760763061 | -1.0643953  | 0.432280087 |
| -1.03339199 | 0.57485326 | 0.962896   | 0.500475111 | -1.0172712  | 0.76972427  |
| 0.966121514 | 0.60758604 | -1.0173628 | 0.651067283 | 0.954802102 | 0.491175695 |
| 0.975795582 | 0.60221197 | -1.0637162 | 0.415810272 | -1.09093389 | 0.068019138 |
| -1.68775953 | 0.00018068 | -1.0267323 | 0.681188087 | -1.99610218 | 2.12E-06    |
| -1.02807147 | 0.80288742 | -1.0629462 | 0.399925354 | -1.08023011 | 0.487401153 |
| -1.21044119 | 0.04253883 | -1.0605385 | 0.168852979 | -1.11522832 | 0.240678151 |
| 0.939070148 | 0.32975369 | -1.2020145 | 0.041497106 | 0.840037408 | 0.008615135 |
| -1.24567137 | 0.04507145 | -1.139996  | 0.123645453 | 0.867622078 | 0.190334175 |
| 0.999649952 | 0.99162203 | -1.2933495 | 0.002024599 | -1.01364228 | 0.684685946 |
| 0.966666526 | 0.40121893 | -1.0688214 | 0.154713225 | 0.879318505 | 0.002243176 |
| -1.06761843 | 0.10314766 | 0.99288069 | 0.894815954 | -1.05116165 | 0.211558475 |
| -1.14314763 | 0.08428135 | -1.1168628 | 0.045570715 | -1.25985751 | 0.003683074 |
| 0.973748795 | 0.45335562 | 0.91267226 | 0.135265305 | 0.817923063 | 5.11E-07    |
| -1.02651974 | 0.78171432 | 0.84343853 | 9.86233E-06 | -1.42540128 | 0.000406857 |
| 0.84072829  | 0.13609253 | -1.0101827 | 0.845352807 | -1.14423824 | 0.245084325 |
| 0.959293796 | 0.35969389 | 0.91768333 | 0.076102839 | 0.899649542 | 0.022434009 |
| 0.609424519 | 1.40E-09   | 0.97764722 | 0.784238465 | 0.776402296 | 0.000463404 |
| 0.974391263 | 0.7615722  | 0.95153255 | 0.531428219 | 0.990756735 | 0.913479165 |
| -1.30003658 | 0.02602792 | -1.0254175 | 0.66800198  | 0.920501413 | 0.472997199 |
| 0.921881828 | 0.26318709 | -1.0510111 | 0.459117644 | 0.886514597 | 0.09983514  |
| -1.03975869 | 0.44260476 | 0.97930423 | 0.656302158 | -1.03267167 | 0.526292946 |
| 0.9876945   | 0.90918939 | -1.7026948 | 0.000144784 | 0.978378389 | 0.840435616 |
| -1.01264705 | 0.86357241 | -1.0460097 | 0.685198206 | 0.833868147 | 0.015670836 |
| -1.09124763 | 0.26482299 | -1.1875011 | 0.067010022 | -1.27094404 | 0.003134035 |
| -1.23716942 | 0.00378657 | 0.94876908 | 0.414271796 | -1.01343868 | 0.850116803 |
| 0.852157531 | 0.01712305 | -1.0033286 | 0.975352688 | 0.813986262 | 0.002552822 |
| 0.995263841 | 0.93627071 | -1.0091127 | 0.785640541 | -1.01995476 | 0.739425331 |
| -1.08005556 | 0.27068844 | 0.81746755 | 5.8288E-06  | -1.447139   | 1.92E-06    |
| -1.25059066 | 0.01256056 | 0.96072884 | 0.314560195 | -1.45269542 | 6.94E-05    |
| -1.3023079  | 0.00031388 | -1.1697693 | 0.044098514 | -1.30447196 | 0.000290476 |
| -1.00239803 | 0.98043077 | 0.96514379 | 0.3182847   | -1.03824939 | 0.700873888 |
| -1.00284839 | 0.96074334 | -1.2362173 | 0.028159307 | -1.06226136 | 0.298378049 |
| 0.858457027 | 0.03090868 | -1.1177715 | 0.335843044 | -1.10576405 | 0.150068194 |
| -1.08360172 | 0.26795203 | -1.0419224 | 0.365347176 | -1.0623275  | 0.402990211 |
| -1.08301869 | 0.41918224 | 0.75368367 | 0.00011273  | 0.954612446 | 0.637311278 |
| 0.928562864 | 0.19644704 | -1.0969721 | 0.281451744 | -1.01862313 | 0.745966692 |
| 0.838510185 | 0.00698422 | -1.0279056 | 0.811146537 | 0.924155717 | 0.214422895 |
| -1.03105593 | 0.73110002 | 0.95894512 | 0.56247739  | 0.815940033 | 0.025506977 |
| -1.12367281 | 0.1997633  | 0.95470887 | 0.361922439 | -1.08795567 | 0.352152549 |
| -1.01337554 | 0.74845673 | -1.0587125 | 0.599633613 | 0.964022428 | 0.378040103 |
| -1.01649004 | 0.83966867 | 0.83852063 | 0.018964002 | -1.11498146 | 0.181773207 |

|             |            |            |             |             |             |
|-------------|------------|------------|-------------|-------------|-------------|
| -1.21176035 | 0.0078694  | -1.1890948 | 0.029605797 | -1.30839293 | 0.000302822 |
| 0.930295931 | 0.32400788 | -1.0414197 | 0.566154998 | -1.35880292 | 9.35E-05    |
| 0.793893478 | 0.00147304 | 0.94300132 | 0.370761383 | 0.973848823 | 0.701812533 |
| 0.887784079 | 0.15537777 | -1.107178  | 0.090673913 | 0.987647313 | 0.880945221 |
| -1.10118256 | 0.14793734 | -1.1804311 | 0.020032383 | -1.08676655 | 0.210517365 |
| -1.03169391 | 0.77693528 | -1.2559273 | 0.011060685 | 0.93759287  | 0.558955292 |
| -1.06367124 | 0.16283131 | -1.2189211 | 0.005585424 | 0.996849547 | 0.942602681 |
| -1.24028046 | 0.00924481 | 0.99626944 | 0.969467665 | -1.14795654 | 0.089307517 |
| -1.30439605 | 0.02282839 | 0.93736708 | 0.265798761 | -1.0290805  | 0.801373388 |
| -1.08203636 | 0.12610381 | 0.70567662 | 5.19225E-06 | -1.28156237 | 9.59E-06    |
| -1.27894802 | 0.00157621 | -1.0794453 | 0.291273791 | -1.26516232 | 0.002424227 |
| 0.97571755  | 0.55536733 | -1.0238689 | 0.810635579 | -1.07011671 | 0.107685145 |
| -1.0395036  | 0.55143383 | 0.87820358 | 0.025853904 | 0.930005857 | 0.266591725 |
| -1.10735184 | 0.12989107 | 0.98778703 | 0.845556814 | 0.969669486 | 0.644105191 |
| -1.03195959 | 0.55826678 | 0.94850926 | 0.552933294 | -1.05678807 | 0.305637816 |
| -1.05138495 | 0.47927362 | -1.074971  | 0.42442961  | 0.944275291 | 0.418541636 |
| 0.915301835 | 0.2563444  | -1.0229147 | 0.584862787 | 0.910085287 | 0.227273015 |
| 0.984096559 | 0.85424529 | -1.0301303 | 0.713586404 | 0.843938314 | 0.055956018 |
| 0.975545646 | 0.66806667 | -1.2694451 | 0.001169542 | 0.950822532 | 0.383738356 |
| -1.13738556 | 0.20475684 | -1.1689191 | 0.036059429 | -1.60938455 | 1.59E-05    |
| -1.04006228 | 0.48329295 | 0.96881594 | 0.647237009 | 0.64872711  | 2.36E-10    |
| -1.24519021 | 0.00868718 | -1.0445165 | 0.600149714 | -1.11583846 | 0.179040596 |
| 0.940902953 | 0.23867833 | -1.052799  | 0.436683301 | 0.974230205 | 0.61166269  |
| -1.07682632 | 0.27803077 | -1.0605888 | 0.593609494 | 0.979851803 | 0.76431331  |
| 0.974372826 | 0.7590766  | 0.93701276 | 0.141703352 | -1.30907654 | 0.002323357 |
| -1.23083206 | 0.01021117 | -1.0327168 | 0.688022213 | 0.969099301 | 0.688983612 |
| 0.953919635 | 0.20990944 | -1.0926716 | 0.437859981 | -1.01247047 | 0.740146302 |
| 0.896038567 | 0.00991961 | -1.1022125 | 0.060450124 | -1.03895087 | 0.356170605 |
| -1.10432666 | 0.05006759 | -1.3817681 | 5.60937E-05 | -1.06286884 | 0.223457691 |
| -1.11096668 | 0.09375274 | 0.95180943 | 0.23835991  | -1.00973296 | 0.875796968 |
| -1.22162882 | 0.02264598 | 0.89563804 | 0.093945272 | -1.60398095 | 9.38E-07    |
| 0.981147597 | 0.82461019 | 0.97292102 | 0.680456163 | 0.762182691 | 0.002463344 |
| -1.00137254 | 0.98054465 | 0.97484977 | 0.63531503  | 0.515300504 | 1.36E-16    |
| -1.0020195  | 0.96818992 | -1.0071122 | 0.920112863 | -1.01070871 | 0.833271451 |
| -1.21092376 | 0.01646336 | -1.0336856 | 0.669280859 | 0.971023505 | 0.705105858 |
| 0.763420952 | 0.00181718 | 0.86289805 | 0.095318938 | 0.874906347 | 0.11008658  |
| 0.994305807 | 0.91813806 | -1.0079392 | 0.890977966 | 0.983741983 | 0.768056839 |
| 0.973603161 | 0.76150664 | -1.1981918 | 0.076993851 | 0.83408277  | 0.043398805 |
| -1.1170145  | 0.36748963 | 0.97294728 | 0.624118198 | -1.37225957 | 0.012045068 |
| 0.986983548 | 0.69768251 | -1.0625309 | 0.454481574 | 0.990030163 | 0.766343949 |
| -1.00926905 | 0.83419561 | -1.0907731 | 0.095000831 | 0.949156943 | 0.239427791 |
| 0.911231258 | 0.05820472 | -1.2028333 | 0.008453175 | -1.05989509 | 0.231136811 |
| -1.22576495 | 0.0179361  | -1.0502255 | 0.563084702 | -1.04721428 | 0.582278299 |
| 0.883528378 | 0.37948533 | -1.1474393 | 0.0835597   | -1.0008572  | 0.995130445 |

|             |            |            |             |             |             |
|-------------|------------|------------|-------------|-------------|-------------|
| -1.26703117 | 0.04389914 | 0.9195745  | 0.028210375 | -1.36564531 | 0.008844404 |
| -1.05233387 | 0.45129111 | 0.95527647 | 0.270058094 | -1.03338585 | 0.627172807 |
| -1.08354814 | 0.21175376 | -1.0665711 | 0.198522094 | 0.880151962 | 0.049393151 |
| -1.00068092 | 0.99142353 | -1.106752  | 0.105904204 | -1.01149506 | 0.856788253 |
| 0.831841094 | 0.00673173 | -1.4746032 | 3.0717E-05  | -1.00980382 | 0.881810661 |
| 0.863217287 | 0.02333727 | 0.93448367 | 0.431327995 | 0.951161763 | 0.430267716 |
| -1.18915231 | 0.04634623 | -1.0215554 | 0.704752392 | -1.17978207 | 0.056864819 |
| -1.38153087 | 0.00410146 | -1.1066192 | 0.049262278 | -1.29941953 | 0.018460559 |
| 0.885371789 | 0.02330852 | -1.0959484 | 0.241062475 | -1.1202049  | 0.03388784  |
| -1.47630399 | 9.29E-05   | -1.0112651 | 0.89218069  | -1.86323342 | 1.08E-08    |
| -1.03604113 | 0.48292333 | 0.8640582  | 0.010770059 | -1.11119389 | 0.040092593 |
| -1.10754294 | 0.47542797 | 0.92413957 | 0.372341783 | -1.03016954 | 0.835126367 |
| 0.813544812 | 6.41E-05   | -1.278409  | 0.048682528 | 0.878909558 | 0.00895203  |
| 0.927061048 | 0.2241243  | 0.9844238  | 0.641716292 | -1.17799597 | 0.010279581 |
| -1.05335718 | 0.46554282 | 0.98166178 | 0.674740463 | 0.89797209  | 0.133976875 |
| -1.10301118 | 0.21894665 | 0.92468983 | 0.108907925 | 0.804254597 | 0.007813746 |
| -1.03196271 | 0.42524246 | -1.0720299 | 0.4077758   | 0.92268976  | 0.044780356 |
| 0.969672762 | 0.61021305 | 0.86930699 | 0.320705091 | 0.869969119 | 0.024213192 |
| -1.12986594 | 0.04114135 | -1.1088913 | 0.37148388  | -1.04140236 | 0.489903565 |
| 0.892824352 | 0.58145148 | -1.0359852 | 0.601132255 | 0.808935241 | 0.304215744 |
| 0.583574258 | 0.00043463 | 0.94227451 | 0.353211324 | -1.38758015 | 0.026552094 |
| 0.682096928 | 1.20E-07   | -1.0292823 | 0.648868745 | 0.764904109 | 7.94E-05    |
| -1.05475635 | 0.44884303 | -1.0504415 | 0.45443983  | 0.810687298 | 0.004048173 |
| -1.01390468 | 0.83309006 | 0.96160234 | 0.53692628  | 0.949592227 | 0.431155219 |
| 0.960744413 | 0.51515498 | -1.0796093 | 0.371224305 | -1.07753638 | 0.227149332 |
| -1.03045723 | 0.73525879 | -1.1811073 | 0.12834257  | 0.71486438  | 0.00036818  |
| 0.626084329 | 1.94E-06   | -1.0825588 | 0.134005159 | 0.618474825 | 1.18E-06    |
| -1.21349521 | 0.00139725 | -1.5398872 | 1.96503E-05 | -1.05423815 | 0.361707195 |
| -1.11924527 | 0.14981346 | -1.1394501 | 0.011864914 | 0.952218966 | 0.528118756 |
| 0.877424372 | 0.03107657 | 0.877671   | 0.362657645 | 0.885768163 | 0.044856929 |
| -1.18564576 | 0.0062608  | 0.9302359  | 0.134423053 | -1.31073611 | 3.42E-05    |
| 0.966837223 | 0.59970067 | -1.1588532 | 0.020189559 | -1.01150986 | 0.858489231 |
| 0.809697035 | 0.29768605 | -1.0131152 | 0.854524026 | 0.807255858 | 0.290899391 |
| -1.22081258 | 2.05E-05   | 0.82771515 | 0.01994783  | -1.04056073 | 0.356122051 |
| -1.15342588 | 0.04760989 | 0.92356186 | 0.04725524  | -1.05973105 | 0.413584611 |
| -1.08894878 | 0.37411819 | 0.94953814 | 0.392442349 | 0.930927792 | 0.45485866  |
| 0.797146229 | 0.00393656 | 0.97643522 | 0.684402256 | 0.757138444 | 0.000512374 |
| -1.35676718 | 0.00658659 | 0.73636052 | 0.140187957 | -1.03837816 | 0.728479638 |
| 0.932306304 | 0.18147492 | 0.90713387 | 0.500260821 | 0.919150597 | 0.109323632 |
| 0.878255722 | 0.06864187 | 0.79523822 | 0.000589537 | -1.13559355 | 0.074336122 |
| 0.986794902 | 0.86001685 | -1.0405018 | 0.572265357 | -1.02529562 | 0.740426679 |
| 0.867471321 | 0.02841351 | 0.90022695 | 0.112850956 | 0.901888256 | 0.107699994 |
| 0.942776618 | 0.20526948 | 0.97406762 | 0.669021399 | 0.997874205 | 0.963237316 |
| 0.951133467 | 0.62210964 | 0.84869577 | 0.06857722  | -1.03334838 | 0.746755582 |

|             |            |            |             |             |             |
|-------------|------------|------------|-------------|-------------|-------------|
| -1.00276592 | 0.97984782 | 0.78632035 | 0.008318019 | -1.08970147 | 0.433429154 |
| 0.965056439 | 0.65809637 | -1.0214099 | 0.713600248 | 0.971048716 | 0.714638528 |
| 0.940549828 | 0.56750142 | 0.89205338 | 0.144310167 | 0.988466333 | 0.913698485 |
| 0.796867076 | 0.00722924 | -1.0375937 | 0.534668216 | 0.766085295 | 0.001842119 |
| -1.04772325 | 0.51683977 | -1.2606842 | 0.000295756 | -1.2229884  | 0.006759969 |
| -1.02597493 | 0.67756736 | -1.048751  | 0.459418316 | -1.17749814 | 0.010180665 |
| 0.942395728 | 0.31609143 | 0.72832838 | 0.120161835 | -1.01926342 | 0.746108752 |
| 0.858732084 | 0.00147192 | -1.0312961 | 0.473772511 | 0.796365627 | 6.20E-06    |
| 0.89356384  | 0.12587697 | -1.1460601 | 0.058102524 | 0.670538226 | 1.00E-06    |
| -1.05180882 | 0.17815341 | -1.0945687 | 0.346170193 | 0.995441071 | 0.902234305 |
| 0.94417271  | 0.62164068 | 0.84940427 | 0.034493092 | -1.19685759 | 0.126350286 |
| -1.31969699 | 0.04032084 | 0.99286743 | 0.947362381 | -2.13557038 | 4.40E-07    |
| 0.984951254 | 0.86158802 | 0.99440677 | 0.914136628 | -1.22451191 | 0.023027485 |
| -1.15072095 | 0.11663381 | 0.99906714 | 0.989391246 | -1.34114093 | 0.00155571  |
| -1.03031982 | 0.79505849 | -1.0062782 | 0.93382025  | -1.37174687 | 0.007841342 |
| 0.965101909 | 0.52226251 | 0.93573752 | 0.297395088 | 0.917367204 | 0.123729817 |
| -1.02241862 | 0.70056055 | 0.97803978 | 0.630929223 | -1.08356045 | 0.167426059 |
| -1.20893446 | 0.0014614  | 0.90307852 | 0.317638964 | -1.24293514 | 0.000320955 |
| -1.50837705 | 0.01498526 | -1.0160528 | 0.884218101 | -1.43343655 | 0.03198582  |
| 0.818394637 | 0.07590749 | 0.89615333 | 0.17583214  | -1.30128718 | 0.020979649 |
| 0.830261472 | 0.0427515  | -1.0394821 | 0.717689969 | 0.904420775 | 0.267323408 |
| 0.806256056 | 0.06517041 | 0.98871797 | 0.889540153 | -1.23845283 | 0.066993891 |
| -1.26220007 | 3.34E-05   | -1.172172  | 0.03041056  | 0.990601188 | 0.854962721 |
| 0.882874171 | 0.02771131 | -1.0025702 | 0.96677463  | 0.719412033 | 1.86E-07    |
| 0.897284061 | 0.23937055 | 0.99202796 | 0.891919617 | 0.927950235 | 0.415350624 |
| 0.986778722 | 0.79324667 | 0.86689074 | 0.002709449 | 0.942717864 | 0.248199685 |
| 0.910703864 | 0.03548348 | 0.84091221 | 0.020201101 | 0.982829135 | 0.691145999 |
| 0.636693363 | 2.47E-09   | 0.96765095 | 0.378388427 | 0.887242294 | 0.063671403 |
| 0.666899399 | 2.76E-07   | 0.95473038 | 0.69051704  | 0.708800947 | 6.70E-06    |
| -1.38552054 | 0.0001987  | -1.2957132 | 0.054906783 | -1.52737984 | 3.32E-06    |
| -1.05099502 | 0.67659471 | -1.0131699 | 0.880409304 | -1.30426254 | 0.029259164 |
| -1.25962306 | 0.01031515 | -1.5212553 | 1.47569E-05 | -1.09951969 | 0.279334215 |
| -1.17765698 | 0.01863807 | -1.0253449 | 0.827681201 | 0.985601979 | 0.830429921 |
| 0.900648043 | 0.09532799 | 0.97590219 | 0.660050274 | -1.24097316 | 0.000936044 |
| 0.952865339 | 0.4031021  | -1.0774038 | 0.199121226 | -1.03366901 | 0.565668541 |
| -1.14491067 | 0.06733195 | -1.1368061 | 0.027412884 | -1.03007742 | 0.68424319  |
| -1.26856662 | 0.00060622 | -1.3338922 | 0.083792761 | 0.765160826 | 0.000140757 |
| -1.15779452 | 0.15718242 | -1.146088  | 0.223528771 | -1.07064514 | 0.506737867 |
| 0.842811854 | 0.09824371 | 0.8084871  | 0.02131024  | 0.989109425 | 0.914597326 |
| 0.86933065  | 0.00301904 | 0.91805326 | 0.458046474 | 0.683355903 | 1.98E-11    |
| -1.20884233 | 0.12893795 | -1.0987638 | 0.072516809 | -1.08174612 | 0.525627222 |
| -1.07066188 | 0.44935794 | 0.8415882  | 0.002803432 | -1.0983061  | 0.299980201 |
| -1.14181077 | 0.10447977 | 0.85650724 | 0.094856707 | -1.19669181 | 0.029525243 |
| 0.893224257 | 0.21598107 | -1.036092  | 0.48589627  | -1.35464842 | 0.001416789 |

|             |            |            |             |             |             |
|-------------|------------|------------|-------------|-------------|-------------|
| -1.09290995 | 0.16051154 | 0.94975676 | 0.239720655 | 0.867542067 | 0.026867623 |
| -1.00520271 | 0.92580107 | 0.9988747  | 0.985847437 | 0.967636936 | 0.555542721 |
| -1.00714777 | 0.92327804 | -1.0821397 | 0.25738796  | -1.06752981 | 0.378629897 |
| -1.14863518 | 0.10008458 | -1.2993477 | 0.002255678 | 0.933294656 | 0.408196254 |
| 0.994545449 | 0.94144569 | -1.1551263 | 0.229296126 | 0.876595643 | 0.081219646 |
| 0.969443481 | 0.68083044 | -1.0733417 | 0.418507675 | -1.0362332  | 0.637182973 |
| 0.995284616 | 0.94982839 | 0.93908384 | 0.355204006 | -1.06650914 | 0.392946606 |
| -1.0346222  | 0.68954585 | -1.0909433 | 0.163629643 | -1.056002   | 0.522964309 |
| -1.33778794 | 0.00104135 | 0.95063607 | 0.38082865  | -1.06711877 | 0.442243929 |
| -1.00460239 | 0.92891784 | -1.1146408 | 0.140110521 | -1.18627397 | 0.001556749 |
| -1.01708232 | 0.77003909 | -1.2715904 | 0.000541056 | -1.04983309 | 0.402663934 |
| 0.882547361 | 0.21307416 | 0.96214018 | 0.706981083 | -1.13910399 | 0.19457706  |
| 0.958923343 | 0.65756966 | -1.0737202 | 0.487016368 | 0.115609584 | 2.17E-29    |
| 0.955252546 | 0.52637582 | 0.96736404 | 0.464804771 | -1.05099242 | 0.491419079 |
| -1.00880914 | 0.90979771 | -1.0847482 | 0.511186409 | -1.09076657 | 0.26451091  |
| -1.00127264 | 0.98958748 | 0.92981416 | 0.420254993 | 0.888213269 | 0.227019313 |
| 0.973995929 | 0.74541734 | -1.4529953 | 2.18313E-05 | 0.868043981 | 0.085337158 |
| 0.947123066 | 0.57146392 | -1.1339389 | 0.169137283 | 0.742747183 | 0.002933961 |
| -1.13696059 | 0.17077557 | 0.94083215 | 0.33299779  | -1.09091964 | 0.350810677 |
| -1.01422964 | 0.77380804 | -1.0217233 | 0.699916656 | 0.988486939 | 0.813766775 |
| -1.05593294 | 0.41821222 | -1.1047691 | 0.181542348 | -1.11122109 | 0.119797847 |
| 0.96792004  | 0.4836403  | 0.99950361 | 0.99523855  | 0.998194914 | 0.968968165 |
| 0.975142822 | 0.70039145 | 0.88509647 | 0.105425952 | 0.641438689 | 8.18E-09    |
| -1.0240452  | 0.63729105 | -1.0206881 | 0.785979312 | -1.11531187 | 0.033824794 |
| -1.06466024 | 0.31340738 | 0.96607054 | 0.646175115 | -1.07184947 | 0.264772028 |
| 0.980867646 | 0.76843238 | -1.0720251 | 0.415447379 | -1.04660079 | 0.488361157 |
| 0.976074714 | 0.67479325 | -1.0945796 | 0.28633149  | -1.1042955  | 0.089675042 |
| -1.00558024 | 0.92133068 | -1.071574  | 0.182908555 | 0.907096705 | 0.087839954 |
| -1.08959754 | 0.31611399 | 0.96405922 | 0.528187927 | -1.21545571 | 0.025304397 |
| -1.00530059 | 0.88805239 | -1.0903992 | 0.386631699 | 0.626127753 | 1.47E-17    |
| -1.17383835 | 0.00578894 | 0.77746634 | 0.009884836 | 0.962710463 | 0.498445624 |
| 0.957152206 | 0.35245134 | -1.0719524 | 0.337448223 | 0.832037048 | 0.000238412 |
| 0.99453307  | 0.92437002 | -1.0292629 | 0.709626387 | -1.05855093 | 0.326620138 |
| 0.992344042 | 0.90337582 | -1.0011846 | 0.990307447 | 0.756132321 | 4.58E-05    |
| -1.02623956 | 0.61613622 | 0.91896321 | 0.299891358 | 0.849724511 | 0.002516331 |
| 0.753381941 | 5.68E-05   | 0.91196346 | 0.338436043 | 0.67191272  | 1.04E-07    |
| -1.08593664 | 0.20739176 | 0.95417616 | 0.613990908 | 0.994105739 | 0.927428102 |
| -1.00983665 | 0.80181644 | 0.89643616 | 0.02960081  | 0.94186697  | 0.12862531  |
| -1.16714861 | 0.02732346 | -1.0249195 | 0.713608761 | -1.11408223 | 0.118661352 |
| 0.988432057 | 0.75121385 | 0.94263726 | 0.206775522 | 0.982036784 | 0.621604963 |
| -1.0576767  | 0.50344125 | 0.86937093 | 0.035962789 | -1.10745502 | 0.225515121 |
| 0.994367682 | 0.9397053  | -1.0949727 | 0.07579371  | -1.20743838 | 0.014150403 |
| 0.660277672 | 0.00651431 | 0.91456361 | 0.152726885 | 0.660403877 | 0.006537393 |
| 0.824741362 | 0.00979528 | -1.0004658 | 0.994335064 | 0.442636205 | 7.55E-16    |



|             |            |            |             |             |             |
|-------------|------------|------------|-------------|-------------|-------------|
| -1.01198285 | 0.78423474 | 0.90234163 | 0.079050813 | 0.95016629  | 0.242841783 |
| -1.07459789 | 0.25613088 | 0.95045755 | 0.368980057 | 0.843815915 | 0.009031401 |
| -1.0692334  | 0.40195897 | -1.1455472 | 0.114929226 | -1.08688007 | 0.297781828 |
| 0.990946446 | 0.9271193  | -1.0689759 | 0.079989808 | -1.41122843 | 0.001001991 |
| -1.02178907 | 0.74764855 | 0.95768693 | 0.44151045  | 0.815459077 | 0.003444741 |
| 0.731926592 | 0.00011862 | 0.81055666 | 3.70568E-05 | 0.671521047 | 2.24E-06    |
| 0.951995157 | 0.41610864 | -1.0687284 | 0.252610072 | 0.715130943 | 7.94E-07    |
| -1.10024788 | 0.03843059 | 0.91516147 | 0.165189448 | -1.01999644 | 0.661797914 |
| -1.1007695  | 0.05199788 | -1.0285417 | 0.586035723 | -1.1382855  | 0.00972928  |
| 0.826400305 | 0.00539253 | 0.71091014 | 2.48999E-06 | -1.02907482 | 0.664618899 |
| 0.959937247 | 0.47855833 | 0.94378053 | 0.374431284 | -1.0296615  | 0.612032855 |
| 0.856591296 | 0.45531838 | -1.1041226 | 0.013577125 | 0.793498862 | 0.266129946 |
| -1.02129465 | 0.7099491  | -1.1272628 | 0.084374232 | -1.0708803  | 0.229615293 |
| -1.10185545 | 0.21694405 | -1.0080601 | 0.826809354 | 0.911862738 | 0.239881872 |
| 0.972337727 | 0.75006447 | 0.99819435 | 0.982759114 | -1.13778145 | 0.146497851 |
| 0.985301185 | 0.90814601 | 0.97563117 | 0.741229894 | -1.312336   | 0.037961941 |
| -1.02845086 | 0.66240026 | -1.1852933 | 0.251404805 | -1.01513928 | 0.814986773 |
| 0.938538703 | 0.50561129 | 0.86498547 | 0.048794984 | -1.05075761 | 0.603045168 |
| 0.996434235 | 0.95459848 | -1.0030138 | 0.944834198 | 0.967703993 | 0.601273857 |
| -1.15401199 | 0.04279548 | 0.963186   | 0.552082626 | 0.951274587 | 0.472451496 |
| 0.969592624 | 0.70765228 | 0.89842005 | 0.182093828 | 0.743225801 | 0.000646942 |
| -1.02181376 | 0.8549319  | -1.0170324 | 0.865133823 | -1.10491914 | 0.399434894 |
| 0.977086858 | 0.82523593 | 0.96213108 | 0.564876246 | 0.941138905 | 0.563849351 |
| -1.1800157  | 0.03265094 | 0.85941153 | 0.048837799 | -1.17363759 | 0.038529051 |
| 0.933209802 | 0.23158949 | 0.99951098 | 0.99352878  | -1.04550229 | 0.439464483 |
| -1.05246351 | 0.57520182 | -1.0073166 | 0.871946689 | -1.22751493 | 0.027874049 |
| -1.22066616 | 0.03189148 | -1.0468297 | 0.347710745 | -1.38431616 | 0.000709327 |
| -1.30544763 | 0.03500761 | 0.99279788 | 0.912860076 | -1.20386121 | 0.138017167 |
| 0.820922299 | 0.00417231 | -1.0403403 | 0.493020942 | -1.01653589 | 0.804508499 |
| -1.17805198 | 0.31349294 | 0.72007695 | 0.116488688 | -1.17434998 | 0.322791143 |
| 0.951401321 | 0.34391597 | 0.92386236 | 0.165709636 | -1.07385631 | 0.177709109 |
| -1.06523998 | 0.25327028 | 0.95728734 | 0.576269947 | -1.02377776 | 0.669349098 |
| 0.918368845 | 0.42922531 | -1.256125  | 0.011930292 | -1.26227918 | 0.033766313 |
| -1.03474647 | 0.56580314 | -1.1604858 | 0.249100602 | -1.0545221  | 0.373157488 |
| 0.955472268 | 0.44561759 | 0.98081173 | 0.762901857 | 0.834335027 | 0.003497352 |
| 0.905610981 | 0.36418857 | 0.92933788 | 0.442164374 | -1.13145754 | 0.259325827 |
| -1.18113496 | 0.10156615 | 0.87006498 | 0.030040263 | -1.10045238 | 0.342429658 |
| -1.03084981 | 0.56721078 | 0.98697971 | 0.850144045 | -1.21091284 | 0.000640737 |
| -1.13702121 | 0.35525156 | 0.99704819 | 0.971342468 | 0.878050021 | 0.349190633 |
| -1.17536751 | 0.03471167 | -1.1145954 | 0.359815628 | -1.0593074  | 0.443139859 |
| 0.915284765 | 0.24605043 | 0.8818014  | 0.233812771 | -1.1278166  | 0.116888348 |
| 0.967468937 | 0.65686735 | -1.0673356 | 0.391754932 | -1.14707394 | 0.069317671 |
| -1.03575979 | 0.73453205 | -1.0492301 | 0.403972451 | -1.21559707 | 0.063607314 |
| 0.840489959 | 0.02708472 | -1.240828  | 0.020927395 | 0.947929525 | 0.487358094 |

|             |            |            |             |             |             |
|-------------|------------|------------|-------------|-------------|-------------|
| -1.01453836 | 0.88592304 | -1.219652  | 0.032581917 | -1.15287514 | 0.161180145 |
| -1.09593452 | 0.18343702 | 0.96010036 | 0.742357345 | -1.10606632 | 0.143920179 |
| -1.03000024 | 0.66535515 | 0.98980259 | 0.877045913 | -1.08258679 | 0.248127226 |
| -1.01011668 | 0.87278075 | -1.1849681 | 0.296686083 | 0.985767363 | 0.819637666 |
| 0.98995405  | 0.89890883 | -1.0195323 | 0.712270377 | -1.07590935 | 0.359126037 |
| -1.15304188 | 0.01791921 | 0.91178268 | 0.097300856 | -1.21140816 | 0.0017781   |
| -1.03906754 | 0.5978268  | -1.1724366 | 0.142588796 | 0.854783873 | 0.034235705 |
| -1.1326753  | 0.0778611  | -1.0724495 | 0.241925116 | -1.37581802 | 2.59E-05    |
| -1.05055943 | 0.44288575 | 0.86188294 | 0.015222118 | 0.797508828 | 0.000820113 |
| 0.945940013 | 0.48809363 | -1.0548681 | 0.623977196 | -1.08660776 | 0.30143101  |
| -1.00265576 | 0.96781726 | -1.0895786 | 0.394441022 | -1.11973188 | 0.089674993 |
| 0.987806429 | 0.77506485 | -1.0779331 | 0.16081609  | 0.625138745 | 2.32E-15    |
| -1.00940598 | 0.89626698 | 0.9201764  | 0.54831459  | -1.04270035 | 0.560947369 |
| -1.10719177 | 0.15805035 | 0.94261425 | 0.431558927 | -1.04706675 | 0.520627071 |
| -1.03828024 | 0.42212862 | -1.0581307 | 0.457349968 | 0.987043281 | 0.779921266 |
| -1.08442732 | 0.28722593 | 0.87199225 | 0.069790403 | 0.98350578  | 0.826264458 |
| -1.21699608 | 0.05645946 | -1.0731348 | 0.49642797  | -1.03065419 | 0.765529458 |
| -1.16359384 | 0.03663275 | 0.8288075  | 0.017336402 | -1.63566911 | 4.92E-09    |
| -1.11926693 | 0.29122895 | -1.0203838 | 0.841049655 | 0.832456574 | 0.088523125 |
| -1.045178   | 0.56011276 | -1.2873511 | 0.000484446 | 0.986614496 | 0.858756726 |
| -1.19544287 | 0.0467568  | -1.0566763 | 0.420856379 | -1.16184304 | 0.092970017 |
| -1.15414468 | 0.30000379 | -1.0304746 | 0.633293971 | -1.11740547 | 0.421301121 |
| -1.00047221 | 0.99219408 | 0.98137848 | 0.813071467 | 0.952510065 | 0.315613061 |
| -1.03166793 | 0.79895694 | -1.0144337 | 0.806790207 | -1.17506983 | 0.190947529 |
| -1.01361156 | 0.73168472 | 0.9272053  | 0.299979972 | 0.992070921 | 0.839940167 |
| 0.868844241 | 0.01598791 | -1.1206081 | 0.106211539 | 0.87325687  | 0.019980139 |
| -1.14368118 | 0.22071491 | 0.87920758 | 0.048638128 | -1.44647757 | 0.001252548 |
| -1.03583627 | 0.49401107 | -1.1661174 | 0.058831168 | 0.944345593 | 0.267702751 |
| -1.02399604 | 0.72236638 | -1.0152047 | 0.818481098 | -1.11337304 | 0.111612075 |
| -1.0177084  | 0.84405202 | -1.0034203 | 0.936588656 | 0.893882049 | 0.211956453 |
| -1.10015035 | 0.17379719 | -1.1313405 | 0.089973765 | -1.11069967 | 0.135330799 |
| 0.951182764 | 0.66922045 | 0.98616319 | 0.845431295 | 0.917684601 | 0.464145955 |
| 0.99389159  | 0.90675409 | -1.0442071 | 0.355766855 | 0.908901902 | 0.072100327 |
| -1.01457533 | 0.86424882 | -1.2476711 | 0.004906801 | -1.13573247 | 0.136644581 |
| 0.895033134 | 0.04029366 | -1.1037602 | 0.331455249 | 0.906770955 | 0.069131974 |
| -1.06823561 | 0.09416443 | -1.2520578 | 0.002447268 | -1.12317402 | 0.004104355 |
| -1.0590537  | 0.39290592 | -1.0040453 | 0.969675773 | -1.4132799  | 3.27E-06    |
| -1.05271895 | 0.42197758 | 0.9035427  | 0.183988034 | 0.802937278 | 0.001077105 |
| -1.11859138 | 0.27166205 | -1.1133874 | 0.226051713 | -1.3563037  | 0.003861513 |
| 0.927574417 | 0.22085186 | -1.3564074 | 0.030282238 | 0.922435302 | 0.189070271 |
| 0.993053898 | 0.87330001 | 0.94101304 | 0.211047717 | -1.09589755 | 0.039984411 |
| -1.33371725 | 1.09E-06   | -1.1382644 | 0.292433645 | -1.20974093 | 0.000622967 |
| -1.00440521 | 0.94253348 | -1.0507355 | 0.212506308 | 0.76787068  | 6.09E-05    |
| -1.00634572 | 0.91671307 | -1.0012936 | 0.98183366  | 0.991665831 | 0.889962902 |

|             |            |            |             |             |             |
|-------------|------------|------------|-------------|-------------|-------------|
| -1.00613446 | 0.88920046 | -1.1819945 | 0.128665066 | 0.980756398 | 0.658290206 |
| 0.753834954 | 0.01893043 | -1.0332088 | 0.525558826 | 0.953430337 | 0.68458036  |
| 0.975042047 | 0.69856753 | -1.1622184 | 0.027619202 | 0.717140714 | 4.22E-06    |
| -1.04994008 | 0.38326163 | 0.98885932 | 0.900078211 | -1.03403419 | 0.548562954 |
| -1.02886679 | 0.64207225 | 0.96887989 | 0.649824117 | 0.529454415 | 1.55E-14    |
| 0.695933145 | 0.00495098 | 0.97215419 | 0.809396629 | 0.732909519 | 0.015019433 |
| -1.10399456 | 0.1576887  | 0.9240202  | 0.134931772 | 0.888215404 | 0.091774509 |
| 0.942696599 | 0.27415104 | -1.0793831 | 0.368513753 | 0.94502152  | 0.294461571 |
| 0.923355827 | 0.20271964 | -1.0198123 | 0.711496928 | -1.05960417 | 0.353307235 |
| 0.963421817 | 0.67180819 | -1.0108148 | 0.782320253 | 0.81986549  | 0.027211862 |
| 0.867230325 | 0.07959566 | -1.059813  | 0.387062552 | 0.939227623 | 0.435035532 |
| -1.23593316 | 0.02040689 | 0.85907778 | 0.020271278 | -1.270046   | 0.009333648 |
| -1.00548984 | 0.95357431 | -1.2451649 | 0.034211522 | 0.986618359 | 0.886094079 |
| -1.17203706 | 0.25792497 | -1.0033425 | 0.956359771 | -1.12474674 | 0.400872421 |
| -1.15359842 | 0.06037251 | -1.0423496 | 0.344628915 | -1.07477951 | 0.337243458 |
| -1.18587783 | 0.02760796 | -1.0264889 | 0.619711246 | -1.21619547 | 0.012022953 |
| 0.981200072 | 0.81787461 | 0.97354511 | 0.660436859 | 0.618327182 | 2.90E-07    |
| 0.996027769 | 0.92632778 | -1.0531165 | 0.393819882 | 0.952142206 | 0.257424492 |
| -1.12788921 | 0.12400499 | -1.0264146 | 0.553189657 | 0.982049391 | 0.814946905 |
| 0.977241612 | 0.86307932 | 0.94452443 | 0.626967628 | 0.717617736 | 0.015602348 |
| 0.750940513 | 0.00015504 | 0.959375   | 0.525629425 | 0.69173187  | 2.78E-06    |
| -1.04426898 | 0.72937187 | -1.0792829 | 0.174433831 | 0.537036855 | 6.69E-06    |
| -1.03013139 | 0.55861252 | -1.0414622 | 0.507431566 | 0.941651158 | 0.23851335  |
| -1.15147417 | 0.00355518 | 0.84485289 | 0.178476674 | -1.01992226 | 0.671432047 |
| -1.0404026  | 0.22428695 | 0.9619236  | 0.576292191 | 0.975369464 | 0.442276168 |
| 0.957716439 | 0.42849299 | 0.98576318 | 0.789365718 | -1.05461813 | 0.330495217 |
| 0.952719179 | 0.18169334 | 0.93633665 | 0.292170262 | 0.864105651 | 0.000150229 |
| 0.879041315 | 0.03430673 | 0.96127585 | 0.653450468 | -1.05669201 | 0.357075605 |
| 0.947685131 | 0.13908087 | 0.95935472 | 0.604842263 | 0.878377126 | 0.000645619 |
| 0.928812511 | 0.1630698  | -1.1254192 | 0.188178658 | -1.02089988 | 0.693587971 |
| -1.21293472 | 0.00148109 | -1.1946621 | 0.062780846 | 0.946124823 | 0.340710653 |
| 0.934008118 | 0.30911089 | -1.0479167 | 0.737327189 | 0.70876003  | 3.45E-06    |
| -1.20055909 | 0.05195913 | -1.0173162 | 0.818569427 | -1.60351457 | 4.02E-06    |
| -1.0483127  | 0.25778985 | -1.197563  | 0.020155187 | 0.910271841 | 0.026669277 |
| -1.13232274 | 0.12550397 | -1.0221776 | 0.790140744 | -1.07342478 | 0.378840489 |
| 0.759998232 | 9.48E-05   | 0.93670702 | 0.132843993 | 0.662904115 | 5.31E-08    |
| 0.969692213 | 0.66040254 | -1.0604032 | 0.449664168 | 0.876932536 | 0.064820345 |
| 0.850039952 | 0.01217985 | -1.0128409 | 0.92384637  | 0.893505815 | 0.07775013  |
| -1.04034755 | 0.60720914 | 0.86391828 | 0.042419416 | -1.24582126 | 0.00580736  |
| -1.02425253 | 0.63842448 | 0.73085633 | 0.014848613 | 0.915933559 | 0.089062045 |
| -1.0002324  | 0.99626949 | -1.0094141 | 0.853320901 | -1.0745428  | 0.151961286 |
| 0.816010911 | 0.00093243 | 0.96676431 | 0.468059064 | 0.941372409 | 0.30242109  |
| -1.00483122 | 0.91660263 | 0.92722334 | 0.02273799  | 0.646063281 | 3.82E-13    |
| 0.746586547 | 6.59E-07   | 0.85420335 | 0.005250931 | 0.963352312 | 0.474552401 |

|             |            |            |             |             |             |
|-------------|------------|------------|-------------|-------------|-------------|
| 0.791882146 | 0.00084991 | -1.030204  | 0.409484494 | 0.574813701 | 2.47E-11    |
| 0.860675115 | 0.00808471 | -1.0406283 | 0.505168218 | 0.824292952 | 0.000828594 |
| -1.04023646 | 0.6135908  | 0.99444185 | 0.876812671 | 0.878761141 | 0.101927564 |
| 0.854414486 | 0.02034782 | -1.0703723 | 0.198356254 | -1.0207061  | 0.756680081 |
| -1.07667184 | 0.30284102 | -1.0312253 | 0.595737603 | 0.869167943 | 0.053463458 |
| -1.04770397 | 0.2330139  | 0.76413842 | 0.000168141 | -1.01094762 | 0.779154466 |
| -1.22441345 | 0.00070775 | -1.1175843 | 0.232001711 | -1.10469485 | 0.08282149  |
| -1.05928704 | 0.50836346 | 0.94268935 | 0.15830693  | 0.95937716  | 0.633582039 |
| -1.07268993 | 0.42339799 | 0.95409756 | 0.558673588 | -1.01388826 | 0.874604324 |
| -1.0991695  | 0.08671053 | 0.72208208 | 6.33721E-06 | 0.916128713 | 0.111825917 |
| -1.19656614 | 0.04461734 | 0.75908298 | 0.000224571 | 0.929852382 | 0.408295855 |
| -1.01973845 | 0.67631111 | -1.0042397 | 0.946381063 | 0.910346141 | 0.048673908 |
| -1.0285189  | 0.62001685 | 0.94018021 | 0.423574729 | -1.0362826  | 0.530012753 |
| 0.962683747 | 0.35801179 | 0.99630988 | 0.942149488 | 0.973045626 | 0.508181941 |
| -1.05024045 | 0.41934176 | 0.98420137 | 0.748772836 | 0.861720105 | 0.016689752 |
| 0.973547944 | 0.46375687 | -1.0219813 | 0.709331027 | 0.998101292 | 0.958471294 |
| 0.977392595 | 0.65174619 | -1.0442    | 0.349329751 | 0.839899366 | 0.001057007 |
| -1.08612349 | 0.25077671 | 0.84973947 | 0.002741594 | -1.27427213 | 0.001255129 |
| -1.06104605 | 0.35820626 | 0.81118998 | 0.002521169 | -1.03329234 | 0.61060496  |
| 0.963182979 | 0.64071623 | 0.93161534 | 0.199572297 | 0.882671224 | 0.124272862 |
| 0.924022603 | 0.12273657 | -1.0479389 | 0.549110326 | 0.630818997 | 1.57E-12    |
| -1.0250825  | 0.64528358 | 0.9680642  | 0.62388024  | 0.967927387 | 0.544987849 |
| -1.03342339 | 0.36903936 | 0.95477182 | 0.517320265 | 0.962986058 | 0.303351785 |
| 0.982913845 | 0.74988811 | 0.95240088 | 0.212275134 | 0.811222869 | 0.000278752 |
| 0.932688278 | 0.14678662 | 0.96524156 | 0.5326588   | 0.962534385 | 0.42335462  |
| -1.06868897 | 0.30561067 | 0.99031305 | 0.910821001 | 0.900174054 | 0.107389925 |
| 0.943501195 | 0.33927363 | 0.89180555 | 0.193624691 | 0.832512499 | 0.003663221 |
| -1.02118022 | 0.71100705 | 0.92208854 | 0.140266088 | 0.804767139 | 0.000306743 |
| -1.05024076 | 0.29400463 | -1.1040776 | 0.261589748 | 0.838909414 | 0.000374406 |
| 0.969665843 | 0.54158509 | 0.93923119 | 0.183809961 | -1.01703085 | 0.737581949 |
| 0.849545419 | 0.09274185 | 0.91996791 | 0.14487424  | 0.911404707 | 0.334517867 |
| -1.02415029 | 0.8117143  | -1.0197043 | 0.636224518 | 0.809206958 | 0.038320476 |
| 0.997933244 | 0.9638201  | 0.91204645 | 0.132270611 | -1.00000006 | 0.999998958 |
| 0.970924188 | 0.68130688 | 0.93853057 | 0.086478877 | 0.802058011 | 0.003199327 |
| -1.00356946 | 0.95382431 | 0.90420004 | 0.050700671 | 0.721374872 | 1.98E-06    |
| -1.06160493 | 0.45125578 | 0.98709434 | 0.855840897 | -1.19233411 | 0.029742228 |
| -1.2518832  | 0.03095728 | 0.99943601 | 0.992992836 | -1.00639616 | 0.950086459 |
| 0.790722067 | 0.00080633 | 0.99950163 | 0.995046556 | 0.979735086 | 0.758002397 |
| -1.3705194  | 5.72E-05   | -1.0324942 | 0.528397112 | -1.12150691 | 0.117674786 |
| 0.990835679 | 0.8738166  | -1.016801  | 0.75674028  | 0.818248742 | 0.001014178 |
| 0.989653565 | 0.75339417 | 0.98426559 | 0.663867414 | 0.994810878 | 0.875077252 |
| 0.463755967 | 4.84E-20   | 0.96580078 | 0.520394282 | 0.40302058  | 2.95E-23    |
| -1.10108095 | 0.24427786 | -1.029913  | 0.536097964 | -1.08426463 | 0.327044075 |
| 0.995027468 | 0.90226575 | 0.81316076 | 0.002176803 | -1.04788709 | 0.252096215 |

|             |            |            |             |             |             |
|-------------|------------|------------|-------------|-------------|-------------|
| -1.02196994 | 0.71363143 | 0.91112995 | 0.128708551 | 0.908792545 | 0.110326259 |
| -1.01629367 | 0.6868784  | 0.95169687 | 0.382867059 | 0.93460442  | 0.095694768 |
| 0.978754122 | 0.58524284 | 0.99619302 | 0.934587526 | 0.946395811 | 0.164714259 |
| 0.79910946  | 0.00198849 | 0.8962001  | 0.033225297 | 0.856266926 | 0.028596982 |
| -1.07068875 | 0.42006365 | 0.98589765 | 0.882041159 | -1.00010971 | 0.998963512 |
| -1.11692315 | 0.14054411 | 0.98635669 | 0.890907288 | -1.13384654 | 0.095051793 |
| -1.12689201 | 0.16366761 | 0.92422971 | 0.088367118 | -1.1098906  | 0.223140439 |
| -1.00937523 | 0.86855866 | -1.0238413 | 0.742891314 | 0.97113691  | 0.603891488 |
| -1.16179391 | 0.02782967 | 0.77597314 | 0.000123    | -1.19047136 | 0.011153991 |
| -1.01225536 | 0.82103008 | -1.0208682 | 0.79419317  | -1.09354225 | 0.100967056 |
| 0.993328905 | 0.90932599 | 0.98626258 | 0.891978506 | -1.08380402 | 0.174602685 |
| -1.09542787 | 0.39813241 | -1.1376076 | 0.056386353 | -1.21099858 | 0.079248177 |
| 0.789026765 | 0.00954451 | -1.0249024 | 0.734368374 | 0.979832599 | 0.818078972 |
| -1.22365956 | 0.00947227 | -1.0827646 | 0.173850376 | -1.01972026 | 0.795570561 |
| 0.933789121 | 0.26062166 | 0.96788561 | 0.326097948 | -1.16181492 | 0.015938562 |
| -1.1486124  | 0.00834341 | -1.0196936 | 0.716655208 | -1.20022368 | 0.000677776 |
| -1.26143194 | 0.00108872 | -1.1237924 | 0.159402238 | 0.99979431  | 0.997570817 |
| -1.09430386 | 0.02504633 | 0.97326241 | 0.505232699 | -1.11944208 | 0.0056059   |
| -1.03487902 | 0.45215183 | -1.0319119 | 0.596041273 | -1.0112471  | 0.805801477 |
| -1.02834749 | 0.69531814 | 0.91810956 | 0.036712785 | 0.774303195 | 0.00068817  |
| 0.975625434 | 0.61461425 | -1.0152175 | 0.700917271 | -1.02369598 | 0.632715964 |
| -1.09973424 | 0.18672329 | 0.93733011 | 0.352301561 | 0.893083366 | 0.117540469 |
| 0.872224487 | 0.00934832 | 0.963895   | 0.663527352 | -1.0222264  | 0.66634383  |
| 0.705015315 | 2.37E-06   | -1.1124499 | 0.155228718 | 0.9375935   | 0.334499377 |
| -1.22788719 | 0.02220064 | 0.8262892  | 0.028197506 | -1.06710832 | 0.459430348 |
| 0.921657593 | 0.13014798 | 0.99512924 | 0.930990097 | 0.997416994 | 0.961315477 |
| -1.00015325 | 0.99755206 | -1.1754047 | 0.018169353 | 0.68092875  | 2.80E-10    |
| -1.00503014 | 0.92359917 | -1.0895985 | 0.115148763 | 0.945083148 | 0.282928344 |
| 0.693614611 | 1.62E-12   | 0.97104382 | 0.61749254  | 0.85672192  | 0.000305746 |
| -1.0215289  | 0.80964596 | 0.97525869 | 0.815783644 | 0.978182426 | 0.80300686  |
| -1.00053024 | 0.99434422 | -1.1899691 | 0.053623396 | -1.19770263 | 0.018767593 |
| 0.806259952 | 0.01148077 | -1.1049062 | 0.18910302  | 0.789058581 | 0.005706346 |
| -1.15040472 | 0.00116809 | -1.0891378 | 0.162234819 | -1.05341335 | 0.208206614 |
| -1.24060347 | 0.00210876 | 0.84955284 | 0.002157428 | -1.39478467 | 6.80E-06    |
| 0.940200644 | 0.25013437 | -1.1347621 | 0.065570229 | 0.913786919 | 0.094944517 |
| 0.965967865 | 0.63389405 | -1.0528722 | 0.193115374 | 0.745823252 | 0.000162235 |
| -1.00149721 | 0.97620215 | 0.97620259 | 0.596890258 | -1.34273083 | 2.48E-07    |
| -1.03132083 | 0.79515809 | 0.89967099 | 0.14226226  | -1.18179183 | 0.16339908  |
| 0.945766081 | 0.57073306 | 0.87819097 | 0.010126443 | -1.31703294 | 0.00676284  |
| 0.984712332 | 0.69032986 | -1.0346571 | 0.633671402 | 0.95545394  | 0.241303516 |
| -1.24696144 | 0.00685903 | 0.964267   | 0.476086446 | -1.21093399 | 0.018083845 |
| 0.981636773 | 0.84320103 | 0.88813526 | 0.078634424 | -1.06211529 | 0.520862817 |
| 0.970918446 | 0.73571316 | -1.021607  | 0.807204227 | -1.24258169 | 0.015630307 |
| 0.903739739 | 0.16047398 | 0.99226401 | 0.884215515 | 0.880252006 | 0.078538026 |

|             |            |            |             |             |             |
|-------------|------------|------------|-------------|-------------|-------------|
| -1.09655918 | 0.41797469 | 0.97265349 | 0.579338982 | -1.0512517  | 0.659841469 |
| 0.836631534 | 0.01240102 | 0.91992439 | 0.114855881 | -1.01853772 | 0.790889183 |
| 0.924242507 | 0.12131308 | 0.59125547 | 2.23805E-18 | 0.97306027  | 0.587529783 |
| 0.888366151 | 0.05732248 | 0.8902944  | 0.192235314 | -1.03601342 | 0.56392565  |
| 0.941251904 | 0.27175228 | -1.0443129 | 0.562660438 | 0.885966969 | 0.030617066 |
| 0.915081957 | 0.28158771 | 0.83802523 | 0.036251919 | -1.20971099 | 0.023400356 |
| -1.05813058 | 0.29429333 | -1.0928892 | 0.034100398 | 0.997297339 | 0.959730943 |
| 0.935184857 | 0.24004471 | -1.1278173 | 0.077054685 | -1.05479304 | 0.348511782 |
| 0.99156316  | 0.8132924  | 0.98521163 | 0.779859784 | 0.863184901 | 0.000131277 |
| 0.776543468 | 4.74E-05   | 0.75329525 | 0.000253807 | 0.756856511 | 1.00E-05    |
| -1.00387806 | 0.96614769 | -1.2614998 | 2.17838E-05 | -1.01336554 | 0.884262623 |
| 0.942458167 | 0.16406102 | -1.0410445 | 0.73495584  | -1.0242055  | 0.571474164 |
| 0.994485527 | 0.91934199 | -1.1146705 | 0.271665464 | 0.778911052 | 2.65E-05    |
| 0.944563771 | 0.45858081 | -1.0301542 | 0.443234435 | -1.40881782 | 3.86E-05    |
| -1.00333298 | 0.96195938 | -1.1138932 | 0.175053305 | 0.905369454 | 0.158051006 |
| 0.855782615 | 0.02525013 | 0.96515567 | 0.705193238 | -1.06425051 | 0.361484064 |
| 0.875103931 | 0.12871834 | -1.1644257 | 0.085821279 | 0.752878359 | 0.001811921 |
| -1.24253647 | 0.05680547 | 0.89201371 | 0.113965475 | 0.646165294 | 0.000257154 |
| -1.20159012 | 0.00516544 | 0.96680089 | 0.766117037 | -1.38710503 | 3.24E-06    |
| 0.951638215 | 0.38946704 | 0.79287798 | 0.001411056 | 0.679503054 | 1.03E-08    |
| -1.15159485 | 0.06162628 | 0.91143624 | 0.069379372 | -1.29706293 | 0.00089505  |
| 0.955938007 | 0.50349155 | 0.84247263 | 0.006842916 | -1.23566863 | 0.002570865 |
| 0.998657032 | 0.97810276 | -1.0643563 | 0.25772382  | 0.988122568 | 0.807252093 |
| -1.2388893  | 0.02310827 | -1.1712107 | 0.058010379 | -1.18233537 | 0.073022889 |
| 0.896635494 | 0.11255734 | 0.98328568 | 0.753271405 | 0.989394595 | 0.875324126 |
| -1.02183513 | 0.65209552 | -1.0296737 | 0.606283981 | 0.952232526 | 0.308848843 |
| -1.28862251 | 0.00615069 | 0.98816542 | 0.740055034 | -1.37302627 | 0.00077182  |
| 0.99669542  | 0.95891005 | 0.97567155 | 0.668139895 | 0.993166613 | 0.91500853  |
| -1.08854867 | 0.10922548 | 0.91272749 | 0.318942971 | -1.00792236 | 0.880162186 |
| -1.00921314 | 0.85003578 | -1.0071743 | 0.865506216 | -1.15616656 | 0.004019201 |
| -1.1244387  | 0.09371358 | 0.97643405 | 0.662586048 | -1.16977092 | 0.026515474 |
| -1.26234789 | 0.00305153 | -1.3403205 | 0.000333001 | -1.20613891 | 0.015643809 |
| -1.23311288 | 0.00958234 | -1.0273128 | 0.699511676 | -1.10060443 | 0.224372739 |
| -1.17345124 | 0.02063241 | -1.0516453 | 0.459948642 | -1.18881465 | 0.012679101 |
| -1.21567457 | 0.0772649  | 0.80960321 | 0.0179014   | -1.27720263 | 0.028118798 |
| -1.41878894 | 0.00140047 | 0.86680391 | 0.205539909 | -1.28142853 | 0.020455837 |
| -1.22894565 | 0.0210844  | -1.2964863 | 0.000130638 | -1.41357944 | 0.000201935 |
| -1.26431852 | 0.01523146 | 0.73773018 | 2.04482E-06 | -1.1898624  | 0.068611116 |
| -1.36767603 | 0.00876053 | -1.1976518 | 0.018055038 | -1.37669372 | 0.007522635 |
| -1.11292993 | 0.17186281 | 0.96896112 | 0.639343451 | -1.29879628 | 0.001343356 |
| -1.09338414 | 0.21715334 | -1.0579311 | 0.252977241 | -1.07755796 | 0.30076848  |
| 0.942993634 | 0.15429957 | 0.97606888 | 0.792450254 | 0.945459215 | 0.173118576 |
| 0.76662648  | 0.00030017 | 0.94319943 | 0.39107714  | 0.775147448 | 0.000499665 |
| -1.10984378 | 0.02783073 | 0.98169738 | 0.699746475 | -1.12494952 | 0.013509298 |

|             |            |            |             |             |             |
|-------------|------------|------------|-------------|-------------|-------------|
| -1.05467216 | 0.31617197 | -1.1956449 | 0.049474185 | -1.00659905 | 0.900971723 |
| 0.893061873 | 0.11305348 | 0.96156489 | 0.542529013 | 0.998186225 | 0.979465974 |
| 0.919411082 | 0.19601672 | -1.1615087 | 0.005795824 | 0.808305347 | 0.001641618 |
| 0.856106161 | 0.10334706 | 0.97953337 | 0.670082028 | 0.814857512 | 0.033374509 |
| 0.813152504 | 0.00527674 | -1.132386  | 0.076073531 | 0.854631455 | 0.031485713 |
| 0.873094046 | 0.04964638 | -1.2121067 | 0.013238733 | 0.42606898  | 1.07E-17    |
| 0.997696408 | 0.9835716  | -1.1115237 | 0.180856537 | 0.881279882 | 0.261978505 |
| 0.967095743 | 0.39391799 | -1.2167134 | 0.005037402 | -1.03961312 | 0.322795568 |
| -1.05521265 | 0.32493769 | -1.0321801 | 0.771303614 | 0.797909814 | 0.000110609 |
| -1.00201222 | 0.98462751 | -1.3380362 | 0.006991525 | 0.775576347 | 0.017694809 |
| 0.998881155 | 0.98347649 | -1.2456393 | 0.014307581 | 0.866193146 | 0.010018029 |
| -1.11398263 | 0.03871944 | -1.1852611 | 0.074817058 | -1.02860159 | 0.582119068 |
| 0.845469872 | 0.00558551 | -1.496615  | 0.000934239 | -1.07589933 | 0.213674966 |
| -1.1090865  | 0.13107534 | -1.2443049 | 0.006557197 | 0.966140095 | 0.612052642 |
| -1.18020092 | 0.02489859 | -1.0834813 | 0.2670483   | 0.965909521 | 0.630979725 |
| -1.08648748 | 0.18421813 | -1.0672014 | 0.115232914 | 0.980957776 | 0.756410837 |
| 0.924857923 | 0.19583712 | 0.72344538 | 1.78961E-05 | -1.14577782 | 0.026492697 |
| 0.921188981 | 0.23090153 | -1.0590365 | 0.218739458 | -1.04022199 | 0.562925742 |
| -1.01561416 | 0.79896619 | 0.88613537 | 0.025499166 | -1.06392593 | 0.310583406 |
| 0.947787807 | 0.49301538 | -1.0172857 | 0.808074618 | -1.20950677 | 0.017651654 |
| 0.979581419 | 0.82441514 | 0.80148325 | 0.001105347 | -1.06055622 | 0.52786201  |
| -1.02548771 | 0.71727682 | 0.96313476 | 0.690284398 | -1.04009094 | 0.57205139  |
| -1.00556096 | 0.94154374 | 0.94781068 | 0.454345338 | 0.977367488 | 0.762202724 |
| 0.97112754  | 0.67041885 | 0.76251554 | 0.000187564 | 0.960686775 | 0.560460399 |
| 0.881259607 | 0.07110625 | 0.88980675 | 0.299664278 | 0.924803694 | 0.259861267 |
| -1.00892647 | 0.88492895 | -1.0041367 | 0.915943797 | 0.95055307  | 0.410341015 |
| 0.828664923 | 0.00686946 | 0.97829486 | 0.686606974 | 0.902741747 | 0.131712813 |
| 0.954167893 | 0.30529239 | -1.061759  | 0.566296899 | 0.945178188 | 0.218950534 |
| 0.939592024 | 0.33474651 | -1.0709744 | 0.207987702 | -1.14196764 | 0.042916635 |
| -1.07915092 | 0.45793067 | -1.005821  | 0.909701193 | 0.868049945 | 0.170604841 |
| 0.996826601 | 0.95653145 | -1.0079445 | 0.892233046 | -1.18368881 | 0.005318016 |
| 0.845249727 | 0.00434334 | -1.1090584 | 0.131167694 | -1.03476458 | 0.547453242 |
| 0.472172782 | 4.46E-14   | -1.1346812 | 0.084125435 | 0.518823588 | 4.24E-12    |
| -1.12210815 | 0.02961432 | -1.0812886 | 0.210479423 | -1.00235625 | 0.963756241 |
| 0.789299198 | 0.00185356 | -1.0241482 | 0.690670487 | -1.30575671 | 0.000520737 |
| 0.815128118 | 0.00804249 | 0.68179307 | 6.18538E-07 | -1.01458102 | 0.846163245 |
| 0.920214301 | 0.09793727 | 0.70910657 | 5.65583E-07 | 0.932049036 | 0.159825094 |
| 0.805044232 | 2.72E-05   | -1.032306  | 0.683978119 | 0.917822942 | 0.075201281 |
| -1.04407046 | 0.58914216 | -1.0678085 | 0.481355839 | 0.732121443 | 0.000246279 |
| 0.805278796 | 0.01847274 | 0.89054695 | 0.099444969 | -1.12965272 | 0.177032831 |
| 0.850996323 | 0.01493561 | 0.91346066 | 0.234445191 | -1.132897   | 0.057033209 |
| 0.905350181 | 0.06161435 | -1.0463625 | 0.51083643  | 0.869561464 | 0.009670921 |
| 0.932762046 | 0.29484106 | -1.017872  | 0.797360396 | 0.935676532 | 0.316798636 |
| 0.847976437 | 0.01009105 | 0.99298289 | 0.908697406 | -1.19101714 | 0.006582906 |

|             |            |            |             |             |             |
|-------------|------------|------------|-------------|-------------|-------------|
| 0.891967507 | 0.24590489 | -1.0486155 | 0.480667943 | 0.498296185 | 2.45E-09    |
| -1.01399726 | 0.88173482 | 0.8952911  | 0.018015563 | 0.931681905 | 0.449998775 |
| -1.05242489 | 0.53460856 | -1.2202194 | 0.003001518 | 0.97270509  | 0.73629796  |
| 0.958784569 | 0.57389578 | 0.95030603 | 0.618919533 | -1.04171562 | 0.585016795 |
| 0.878897833 | 0.09618176 | -1.2434391 | 0.000429699 | 0.842383625 | 0.028571315 |
| -1.119848   | 0.0442139  | -1.0044841 | 0.937118522 | -1.02394342 | 0.668399395 |
| 0.907881875 | 0.27665004 | 0.58396252 | 1.55274E-09 | -1.29255737 | 0.005130577 |
| 0.936133045 | 0.43407135 | -1.0191022 | 0.715024019 | -1.16676041 | 0.071025503 |
| -1.00986388 | 0.86633612 | 0.87234012 | 0.064101794 | 0.898425174 | 0.070480086 |
| 0.779583244 | 1.56E-05   | -1.0204047 | 0.786634657 | 0.948497489 | 0.317624364 |
| 0.982909343 | 0.89316838 | 0.99673272 | 0.947392296 | -1.00758183 | 0.953073414 |
| -1.10398014 | 0.18161657 | 0.97791638 | 0.638473666 | 0.774422439 | 0.00095231  |
| 0.693256799 | 0.0003681  | 0.88052305 | 0.114795008 | 0.603117229 | 2.68E-06    |
| 0.900509357 | 0.07217305 | 0.87826224 | 0.151059077 | 0.925360293 | 0.180233643 |
| 0.926411542 | 0.68538321 | 0.89272194 | 0.082607624 | 0.813630417 | 0.276628522 |
| -1.02756833 | 0.7934762  | 0.81585576 | 0.00026356  | 0.947926461 | 0.607010604 |
| 0.841179449 | 0.14048683 | 0.9462062  | 0.404412476 | 0.652451765 | 0.000518893 |
| 0.843104334 | 0.07015601 | 0.97034314 | 0.628288189 | 0.967800295 | 0.724462087 |
| 0.849432068 | 0.01921743 | 0.82425548 | 0.05245805  | 0.82435168  | 0.00606575  |
| -1.06078127 | 0.35864285 | 0.83847756 | 0.063557414 | -1.11416405 | 0.095616274 |
| 0.933724429 | 0.6535488  | -1.0310001 | 0.710296733 | 0.912901879 | 0.551160131 |
| -1.04900022 | 0.21937983 | 0.98837968 | 0.875737243 | 0.930693349 | 0.067532811 |
| -1.19340755 | 0.05951152 | 0.76108375 | 0.000736037 | -1.26705871 | 0.012741559 |
| -1.02989965 | 0.67253591 | 0.97624309 | 0.663376653 | -1.07013534 | 0.332538873 |
| 0.924788867 | 0.36747368 | -1.0689234 | 0.451763871 | 0.810325587 | 0.01781045  |
| 0.913698212 | 0.06763337 | -1.1021756 | 0.250453745 | -1.03537069 | 0.475677585 |
| -1.07899406 | 0.42283138 | 0.73990381 | 3.301E-06   | -1.28118651 | 0.011050868 |
| -1.03287532 | 0.499002   | 0.80826532 | 0.000160137 | -1.11295516 | 0.028436397 |
| 0.8785056   | 0.01732309 | -1.0387672 | 0.767067498 | -1.05797972 | 0.290036894 |
| 0.884803173 | 0.2732524  | 0.82072189 | 0.009183833 | 0.684902054 | 0.001192606 |
| 0.935536291 | 0.07274632 | 0.90610246 | 0.310662094 | 0.962845745 | 0.302988373 |
| 0.965487496 | 0.43546774 | 0.94192161 | 0.299680348 | 0.974743264 | 0.569506724 |
| -1.05072405 | 0.54824799 | 0.78676141 | 0.206729102 | -1.14957472 | 0.094512067 |
| -1.13592687 | 0.05980401 | 0.85769772 | 0.143367804 | 0.860780128 | 0.027778368 |
| 0.97036716  | 0.73295731 | 0.57922274 | 1.70823E-05 | -1.34888079 | 0.00123229  |
| -1.09534063 | 0.13764777 | 0.97468158 | 0.782350958 | 0.96025356  | 0.50495656  |
| 0.965941573 | 0.44692695 | 0.87765141 | 0.058822164 | 0.89124791  | 0.013814404 |
| -1.11166603 | 0.05311606 | -1.0238589 | 0.712845662 | 0.840016486 | 0.001955862 |
| -1.00042063 | 0.99667263 | 0.836659   | 0.245642575 | 0.731235592 | 0.002921746 |
| -1.08697326 | 0.01870022 | 0.95192935 | 0.206130767 | 0.903911082 | 0.004864392 |
| 0.959975343 | 0.62905723 | -1.1797346 | 0.077525925 | -1.05228041 | 0.546995048 |
| -1.02021018 | 0.63553177 | -1.0613979 | 0.393845213 | 0.922244857 | 0.059109641 |
| 0.966905729 | 0.7277752  | 0.76864817 | 0.00346635  | 0.923294459 | 0.410344565 |
| -1.1127156  | 0.05774291 | 0.99459015 | 0.911162395 | -1.02906257 | 0.605091307 |



|             |            |            |             |             |             |
|-------------|------------|------------|-------------|-------------|-------------|
| -1.43548748 | 0.00016169 | -1.0017891 | 0.984919726 | -1.40937893 | 0.000314764 |
| -1.27310748 | 0.00042219 | 0.97828859 | 0.646010727 | -1.5015611  | 5.16E-08    |
| -1.04100785 | 0.16204043 | -1.0466101 | 0.391575766 | 0.972241167 | 0.325117286 |
| 0.952179181 | 0.49013119 | 0.90189137 | 0.354517416 | 0.96720259  | 0.638214438 |
| 0.816724546 | 0.0004248  | 0.94818116 | 0.149678734 | 0.961966607 | 0.474847908 |
| 0.965483513 | 0.65063249 | -1.0213498 | 0.638407674 | -1.07111094 | 0.377068222 |
| -1.03757727 | 0.49991369 | -1.0998665 | 0.250222571 | 0.891913125 | 0.039881747 |
| -1.01531648 | 0.70361434 | 0.97756104 | 0.733378558 | -1.01149636 | 0.774738358 |
| 0.97869225  | 0.73985667 | -1.0788042 | 0.390964565 | -1.11780066 | 0.090148836 |
| 0.949033326 | 0.42720066 | 0.92234035 | 0.186572024 | 0.959006478 | 0.52477949  |
| -1.33924965 | 9.60E-06   | 0.97280717 | 0.544712916 | -1.2750615  | 0.000157103 |
| -1.43841978 | 7.73E-06   | 0.86045938 | 0.00694388  | -1.41067049 | 1.95E-05    |
| -1.03417918 | 0.71076303 | 0.94172252 | 0.552220101 | -1.09038632 | 0.341424693 |
| -1.00380699 | 0.93885117 | -1.0231702 | 0.508208663 | 0.909225646 | 0.058868507 |
| -1.11694541 | 0.09258049 | -1.0715527 | 0.41472711  | -1.15739718 | 0.027683439 |
| -1.04498297 | 0.27617383 | -1.0157093 | 0.711849015 | -1.04930471 | 0.234122368 |
| -1.04697278 | 0.36777901 | -1.1283396 | 0.214761397 | 0.886325166 | 0.020502542 |
| 0.977889559 | 0.82437629 | -1.0230843 | 0.680253713 | 0.91590982  | 0.384879206 |
| -1.03243443 | 0.57177437 | -1.3527905 | 0.00130995  | 0.900251355 | 0.066525464 |
| 0.990498214 | 0.86882101 | -1.2641337 | 0.000596332 | -1.00184747 | 0.974524911 |
| -1.01936701 | 0.71825853 | -1.01899   | 0.509765523 | 0.890439511 | 0.032579557 |
| 0.9964647   | 0.93800779 | -1.0415698 | 0.565976967 | 0.872093311 | 0.00386988  |
| -1.04428282 | 0.59206817 | 0.77211427 | 1.30994E-05 | 0.842251532 | 0.037275795 |
| -1.00993424 | 0.88458169 | -1.0156321 | 0.841369762 | 0.563044952 | 1.79E-11    |
| 0.945002478 | 0.23942903 | 0.96090819 | 0.465996511 | -1.08843049 | 0.080403759 |
| 0.929749805 | 0.10378926 | 0.99653227 | 0.930671658 | 0.982861801 | 0.696063853 |
| 0.986354725 | 0.75183662 | 0.88307523 | 0.059292774 | -1.03236738 | 0.464377219 |
| 0.944880153 | 0.38453561 | -1.0295588 | 0.657729834 | 0.637740453 | 5.01E-09    |
| -1.00538682 | 0.92585932 | -1.1972598 | 0.003941271 | -1.06195426 | 0.300206924 |
| -1.03850168 | 0.70910353 | -1.1674596 | 0.039693125 | 0.573036242 | 9.80E-07    |
| 0.939190999 | 0.28425481 | -1.0786763 | 0.40457963  | -1.26253905 | 0.000183464 |
| 0.817552932 | 0.39645471 | 0.97789612 | 0.652101167 | 0.747861118 | 0.22298598  |
| 0.931516288 | 0.17820185 | 0.99411536 | 0.927525352 | -1.14170959 | 0.013716158 |
| -1.02915214 | 0.80939476 | -1.2822232 | 7.85653E-08 | 0.904553259 | 0.401194336 |
| -1.06215733 | 0.25252056 | 0.9003362  | 0.042563501 | 0.922377073 | 0.127043887 |
| -1.10081964 | 0.04595758 | 0.80187686 | 0.031963071 | -1.02436402 | 0.610725064 |
| -1.00558969 | 0.95102375 | -1.106348  | 0.077264734 | -1.13161394 | 0.176757551 |
| -1.07969244 | 0.19173636 | -1.0008117 | 0.988800167 | 0.794509926 | 0.000217835 |
| 0.932781778 | 0.20503092 | 0.95652297 | 0.404371299 | -1.03754184 | 0.499749201 |
| 0.929001222 | 0.10687301 | 0.9089678  | 0.039911817 | 0.99463616  | 0.905118384 |
| 0.927288635 | 0.22992075 | 0.89366518 | 0.167669185 | -1.32870016 | 2.89E-05    |
| -1.12631366 | 0.22210775 | -1.0463167 | 0.506967446 | 0.766006678 | 0.00772041  |
| -1.04480606 | 0.51975344 | 0.90463482 | 0.039743039 | -1.06215488 | 0.376663916 |
| 0.984374863 | 0.80925659 | -1.0285767 | 0.524804783 | -1.04815164 | 0.471973283 |

|             |            |            |             |             |             |
|-------------|------------|------------|-------------|-------------|-------------|
| -1.00476279 | 0.9512377  | 0.95616932 | 0.304444575 | -1.06444361 | 0.422921044 |
| -1.05081329 | 0.31731749 | -1.0387978 | 0.55859425  | -1.01703235 | 0.73223013  |
| -1.34116165 | 0.00155027 | -1.0473013 | 0.424773709 | -1.29718852 | 0.004614537 |
| -1.48862494 | 0.00050193 | 0.8068386  | 0.037712027 | -1.02611886 | 0.811184441 |
| 0.892429882 | 0.03073497 | -1.0628416 | 0.29807731  | -1.02397674 | 0.64595827  |
| -1.06271365 | 0.16290725 | 0.58421868 | 0.026557181 | -1.0711272  | 0.115868517 |
| -1.35830007 | 4.60E-05   | -1.1601647 | 0.006076376 | -1.26558631 | 0.001235838 |
| -1.1456736  | 0.06377723 | 0.81851511 | 0.096958448 | -1.14500405 | 0.064889941 |
| -1.06211025 | 0.1036647  | -1.0923809 | 0.095894277 | -1.06050602 | 0.112403456 |
| -1.13592057 | 0.3123095  | -1.1103417 | 0.030207928 | -1.33966283 | 0.02301486  |
| 0.991151029 | 0.86150941 | -1.0353669 | 0.701929272 | 0.956338729 | 0.382551008 |
| -1.15788637 | 0.01425782 | 0.97204263 | 0.626880739 | -1.0294051  | 0.618555107 |
| 0.978220558 | 0.65362306 | -1.0731275 | 0.198735613 | -1.03656032 | 0.465022525 |
| -1.09028866 | 0.16749263 | 0.90440676 | 0.029437348 | -1.04223775 | 0.505945284 |
| -1.04740805 | 0.36755891 | -1.041412  | 0.516703209 | -1.03958584 | 0.449599236 |
| 0.773101121 | 8.21E-05   | 0.81109813 | 0.034117747 | 0.98138708  | 0.756817726 |
| 0.842175126 | 0.00419118 | 0.95469267 | 0.496003568 | -1.01085052 | 0.85163637  |
| 0.988785432 | 0.85948868 | 0.97480849 | 0.695873987 | 0.812527317 | 0.001857536 |
| -1.0143066  | 0.83013574 | -1.116558  | 0.159776683 | 0.957630459 | 0.513982269 |
| 0.952410086 | 0.45285564 | 0.96478254 | 0.468476935 | 0.964165349 | 0.573801381 |
| 0.62690075  | 3.31E-11   | -1.3389137 | 0.001640516 | -1.04735032 | 0.414110467 |
| -1.05434901 | 0.66208854 | -1.0735913 | 0.511320956 | -1.34123079 | 0.018117814 |
| -1.0388139  | 0.64983665 | -1.0488791 | 0.356282686 | -1.01651828 | 0.845018621 |
| 0.796439132 | 0.02456318 | -1.0037503 | 0.930942063 | 0.858406706 | 0.126583391 |
| -1.2852131  | 0.03082201 | -1.2134614 | 0.007047315 | 0.747998748 | 0.013103841 |
| 0.837957761 | 0.00367831 | -1.0475689 | 0.52049529  | -1.1154832  | 0.06584921  |
| -1.18210407 | 0.02303518 | -1.0666965 | 0.081761062 | -1.35498613 | 8.60E-05    |
| 0.981970347 | 0.70015372 | -1.4790581 | 0.002805873 | -1.1998131  | 0.000290907 |
| 0.716619908 | 2.27E-05   | 0.94394519 | 0.260307747 | 0.665309342 | 5.71E-07    |
| -1.10650245 | 0.26415812 | -1.0240548 | 0.682885656 | -1.11528468 | 0.229089055 |
| 0.977770876 | 0.66850323 | 0.91322506 | 0.068342498 | 0.972097789 | 0.590043282 |
| 0.894639984 | 0.19970069 | 0.87150303 | 0.030215054 | 0.71737775  | 0.000293636 |
| -1.00674458 | 0.89681704 | 0.99793009 | 0.967724485 | 0.922798314 | 0.125253083 |
| -1.09973433 | 0.24569743 | 0.74369223 | 9.04986E-06 | -1.29538952 | 0.002341337 |
| 0.760694982 | 0.00084201 | -1.0618916 | 0.300363751 | 0.775511427 | 0.00178361  |
| 0.990570166 | 0.8813288  | -1.0923017 | 0.169520993 | -1.1238549  | 0.070034189 |
| 0.929036405 | 0.21134856 | 0.89090929 | 0.085315281 | 0.637893698 | 2.85E-10    |
| -1.00928772 | 0.87674648 | -1.0026656 | 0.967222706 | 0.925457271 | 0.197180549 |
| 0.935986149 | 0.40788894 | -1.0870714 | 0.143312288 | 0.326286679 | 1.03E-19    |
| 0.68687694  | 6.74E-09   | -1.052698  | 0.671483487 | 0.751456879 | 2.85E-06    |
| 0.879774761 | 0.37922695 | -1.1957833 | 0.036606193 | -1.01159867 | 0.936673416 |
| -1.08185237 | 0.4557924  | 0.8841183  | 0.216052987 | 0.632446622 | 5.64E-05    |
| -1.03134719 | 0.58359087 | -1.0023224 | 0.983717946 | 0.85793076  | 0.008373734 |
| -1.02380821 | 0.6645287  | 0.99664178 | 0.954123817 | 0.870354723 | 0.012866704 |

|             |            |            |             |             |             |
|-------------|------------|------------|-------------|-------------|-------------|
| -1.40635937 | 0.00320128 | 0.9696246  | 0.667867501 | -1.21520557 | 0.083387221 |
| -1.01461797 | 0.90848648 | 0.94578256 | 0.24075833  | -1.00047055 | 0.99702672  |
| -1.12625351 | 0.01053937 | 0.7519841  | 0.00021506  | -1.17387424 | 0.000753617 |
| 0.843156014 | 0.0350377  | -1.2484639 | 0.016542638 | 0.998134754 | 0.981205374 |
| 0.90293308  | 0.1833546  | 0.93896126 | 0.232986961 | 0.937248321 | 0.396073283 |
| -1.33773827 | 7.83E-05   | 0.59829407 | 1.80328E-07 | -1.10578774 | 0.145222473 |
| 0.992216852 | 0.87614871 | -1.0367477 | 0.487231942 | 0.92634383  | 0.131054542 |
| -1.33923647 | 0.00122759 | -1.1337889 | 0.126971015 | -1.27209801 | 0.006853594 |
| 0.880030198 | 0.0746801  | 0.68038437 | 6.94721E-06 | 0.978196795 | 0.755072587 |
| -1.06235006 | 0.32099965 | -1.0661024 | 0.315431289 | 0.930471201 | 0.237941173 |
| 0.934377131 | 0.19624521 | 0.98359544 | 0.777307526 | -1.01829254 | 0.728091724 |
| 0.999859364 | 0.99728763 | 0.99178272 | 0.889901582 | -1.02679848 | 0.523487325 |
| 0.72761748  | 0.00871507 | 0.38801478 | 9.99282E-17 | 0.89214942  | 0.332859518 |
| -1.10529565 | 0.22442879 | 0.64663953 | 1.10347E-10 | 0.819947754 | 0.018156724 |
| 0.926544467 | 0.24343426 | -1.0617996 | 0.67973549  | 0.944415643 | 0.380594222 |
| 0.897051476 | 0.45140005 | 0.66078727 | 0.000225118 | -1.01644336 | 0.90975326  |
| 0.866835071 | 0.03009804 | 0.8997897  | 0.064622358 | 0.973754308 | 0.68005557  |
| -1.03546961 | 0.71742932 | -1.0065585 | 0.904020157 | 0.741165101 | 0.002855928 |
| 0.983027356 | 0.75973361 | -1.2774006 | 0.030953839 | 0.92876677  | 0.190135865 |
| 0.849239304 | 0.00509974 | -1.0612533 | 0.638044055 | 0.776451493 | 3.42E-05    |
| 0.996719139 | 0.95264148 | -1.1647761 | 0.001277405 | 0.724431778 | 2.99E-07    |
| -1.0013534  | 0.97055688 | 0.91113562 | 0.243297968 | 0.893481931 | 0.003187371 |
| 0.9771549   | 0.46577113 | 0.96467428 | 0.636879888 | 0.988058123 | 0.704051178 |
| 0.976589016 | 0.60751854 | -1.2552209 | 0.001523868 | 0.945526998 | 0.227191969 |
| 0.996058276 | 0.97221279 | 0.92018895 | 0.101341762 | -1.30240357 | 0.022972011 |
| -1.16293179 | 0.21943335 | -1.2431142 | 0.01390315  | -1.3136382  | 0.02886731  |
| -1.08089675 | 0.60453281 | -1.0278592 | 0.697457453 | -1.47257112 | 0.012273868 |
| 0.915209749 | 0.60341693 | 0.99472951 | 0.930587439 | 0.898483882 | 0.530480517 |
| -1.25877585 | 0.00310638 | 0.96377764 | 0.479969283 | -1.4264448  | 1.41E-05    |
| -1.06401936 | 0.25453148 | -1.0702904 | 0.104877776 | 0.90140643  | 0.059338436 |
| 0.968055238 | 0.57116948 | 0.99576722 | 0.971161125 | 0.965927577 | 0.545455522 |
| 0.909913611 | 0.0150117  | 0.83235064 | 0.028390047 | -1.00960564 | 0.800107444 |
| -1.00178322 | 0.98197298 | 0.96709194 | 0.607082274 | -1.11553028 | 0.169351836 |
| 0.997817757 | 0.96045954 | 0.89362231 | 0.435694932 | -1.05672554 | 0.213847848 |
| 0.897830846 | 0.22335385 | 0.97347238 | 0.67677359  | -1.10280785 | 0.268298914 |
| -1.13278265 | 0.06790263 | -1.0560306 | 0.571703436 | 0.97161303  | 0.668647458 |
| -1.00775562 | 0.8775832  | 0.9535239  | 0.396579515 | -1.03814423 | 0.45656909  |
| -1.0737738  | 0.19618369 | 0.83311404 | 0.001919327 | 0.844017652 | 0.002924843 |
| 0.986793236 | 0.65679469 | 0.91803602 | 0.126361391 | 0.996752411 | 0.91335017  |
| 0.985750979 | 0.79839863 | -1.0225853 | 0.542888421 | 0.804242408 | 0.000272854 |
| -1.01966852 | 0.78187123 | 0.95051559 | 0.112557852 | 0.961676589 | 0.57896862  |
| 0.854317746 | 0.10374381 | -1.0523775 | 0.270490268 | 0.8080346   | 0.029216058 |
| -1.04492913 | 0.50721651 | -1.0451905 | 0.696874368 | -1.13526811 | 0.059240746 |
| -1.05620181 | 0.61883366 | 0.99974141 | 0.998309246 | -1.30643453 | 0.017744564 |

|             |            |            |             |             |             |
|-------------|------------|------------|-------------|-------------|-------------|
| -1.02815524 | 0.64536615 | -1.3700813 | 0.039656705 | 0.862378446 | 0.016810257 |
| -1.01854911 | 0.67155271 | 0.6570449  | 0.01642478  | 0.774376871 | 2.24E-07    |
| -1.16393603 | 0.00104738 | -1.2699494 | 0.002204004 | -1.07898212 | 0.088365068 |
| -1.23066613 | 0.00064591 | -1.1954357 | 0.001656193 | 0.932262896 | 0.226089938 |
| -1.05392234 | 0.36793344 | -1.0214041 | 0.711571116 | 0.830924835 | 0.002294227 |
| -1.16546546 | 0.01007807 | -1.0483019 | 0.214689057 | 0.964121443 | 0.527114778 |
| 0.980985927 | 0.74417721 | -1.0466958 | 0.563332451 | -1.0891945  | 0.150161833 |
| 0.949314267 | 0.25811083 | 0.96357926 | 0.401374716 | 0.949823793 | 0.262995734 |
| -1.14147249 | 0.15061299 | -1.0871177 | 0.34396437  | -1.69925909 | 3.10E-07    |
| 0.958161946 | 0.61765174 | 0.99980037 | 0.997630367 | 0.876182359 | 0.126329939 |
| 0.995132411 | 0.91392739 | 0.97974396 | 0.683468314 | 0.970285957 | 0.504887278 |
| 0.91478362  | 0.11725869 | 0.99559576 | 0.935616077 | 0.995577313 | 0.93714676  |
| 0.93395634  | 0.18270897 | -1.0080431 | 0.788774727 | 0.931932353 | 0.169429935 |
| -1.00676465 | 0.90693034 | 0.76754413 | 1.66053E-05 | 0.950337693 | 0.378771233 |
| -1.03791018 | 0.21417253 | -1.2019652 | 0.011171522 | 0.98759797  | 0.674995025 |
| 0.980860356 | 0.55366257 | 0.72029864 | 0.001103728 | -1.00607753 | 0.852462531 |
| -1.10589363 | 0.1616877  | -1.0899942 | 0.196083434 | 0.822792303 | 0.008111084 |
| 0.860811074 | 0.01154232 | -1.1833276 | 0.129314083 | -1.08166965 | 0.176385388 |
| 0.986026285 | 0.82122417 | 0.98251859 | 0.769918952 | -1.04240462 | 0.505629169 |
| -1.05145434 | 0.50706553 | -1.0375756 | 0.395971209 | -1.13204816 | 0.104581935 |
| -1.03433225 | 0.74484096 | -1.0857852 | 0.065658518 | 0.943960298 | 0.578558901 |
| 0.945101123 | 0.5827369  | -1.1107085 | 0.072333863 | -1.03023646 | 0.771710008 |
| 0.964223377 | 0.35136304 | -1.0450804 | 0.449189708 | 0.943356362 | 0.138262331 |
| -1.18269268 | 0.00934166 | -1.0756448 | 0.209417985 | -1.03975632 | 0.533624365 |
| 0.972149705 | 0.43849566 | -1.1044098 | 0.095513051 | -1.03039418 | 0.411663928 |
| -1.00415711 | 0.91795602 | 0.92163915 | 0.078587891 | -1.0574473  | 0.169209743 |
| -1.15896258 | 0.02896134 | -1.234629  | 0.024014596 | -1.25448067 | 0.001102693 |
| -1.26410273 | 0.00428567 | -1.107692  | 0.234800732 | -1.35274072 | 0.000320926 |
| -1.18379577 | 0.09434562 | -1.0114066 | 0.801676144 | -1.05193153 | 0.611433835 |
| -1.01600154 | 0.82540351 | -1.0359801 | 0.530191606 | -1.04703607 | 0.523705941 |
| -1.1804594  | 0.15095457 | -1.1089931 | 0.045882882 | -1.31579641 | 0.019405486 |
| -1.13255936 | 0.19191387 | 0.93703135 | 0.262178321 | -1.6386462  | 2.73E-06    |
| -1.01254423 | 0.86791818 | -1.0141705 | 0.636449132 | 0.847189361 | 0.030460642 |
| 0.957492098 | 0.64208192 | 0.95712861 | 0.182231622 | 0.971051953 | 0.753147064 |
| 0.972478479 | 0.37757857 | -1.04869   | 0.505587044 | 0.935617858 | 0.03850046  |
| 0.911249975 | 0.13959954 | 0.97987427 | 0.724128801 | -1.00100232 | 0.987163491 |
| -1.09787474 | 0.17446137 | -1.0158397 | 0.800775555 | -1.31201185 | 0.000193763 |
| -1.17216551 | 0.12384627 | -1.0730756 | 0.352019856 | -1.25666428 | 0.028680337 |
| 0.963072143 | 0.7742801  | -1.0953551 | 0.381364235 | 0.921531044 | 0.533978531 |
| 0.868587375 | 0.04066294 | -1.0904702 | 0.400289941 | -1.0811229  | 0.250646485 |
| 0.967040381 | 0.54199709 | -1.000383  | 0.992151774 | -1.06411633 | 0.260189009 |
| -1.30579497 | 0.1102262  | -1.0576298 | 0.371913396 | -1.13909034 | 0.431446851 |
| -1.23101414 | 0.00187895 | 0.84028911 | 1.27106E-05 | -1.18846574 | 0.008849578 |
| -1.0977205  | 0.17848483 | -1.0854363 | 0.04574782  | -1.34923643 | 5.55E-05    |

|             |            |            |              |             |             |
|-------------|------------|------------|--------------|-------------|-------------|
| -1.01954561 | 0.78328669 | -1.1190955 | 0.092714433  | -1.34477913 | 9.16E-05    |
| -1.09238516 | 0.21301517 | -1.2055828 | 0.020904251  | -1.1005222  | 0.177592019 |
| -1.10228565 | 0.35165534 | -1.1166484 | 0.270396288  | -1.26833101 | 0.02577681  |
| 0.904961501 | 0.00991281 | 0.85268036 | 0.030272723  | -1.02105361 | 0.579241505 |
| -1.01919542 | 0.7893285  | -1.0948099 | 0.429839866  | -1.13132706 | 0.087132397 |
| -1.05543893 | 0.54347102 | -1.2065404 | 0.051314378  | 0.927591291 | 0.398109375 |
| 0.988926538 | 0.70266122 | 0.95875939 | 0.574748074  | 0.931623399 | 0.017976744 |
| 0.989750921 | 0.84307618 | -1.0887373 | 0.364345605  | 0.785138028 | 2.05E-05    |
| 0.901989688 | 0.12209404 | 0.99748337 | 0.936268794  | -1.00070834 | 0.991436411 |
| -1.08872997 | 0.07333815 | 0.97449146 | 0.67840566   | 0.872265526 | 0.004884459 |
| -1.00150974 | 0.98425315 | -1.0357954 | 0.606339916  | -1.60257024 | 8.36E-08    |
| 0.892128713 | 0.03613692 | -1.0773605 | 0.466544224  | -1.09552413 | 0.091581621 |
| -1.26045789 | 0.0243064  | 0.93041007 | 0.582878659  | -1.27170567 | 0.019570325 |
| -1.00894559 | 0.8777988  | 0.90223238 | 0.131444426  | -1.09827685 | 0.109764581 |
| -1.31770484 | 4.44E-05   | 0.89624988 | 0.049933867  | -1.16798101 | 0.015437493 |
| -1.06008904 | 0.48410274 | -1.1808964 | 0.316037919  | -1.03432714 | 0.68523169  |
| -1.10343512 | 0.10045923 | -1.180771  | 0.01156672   | 0.985914718 | 0.810560809 |
| -1.04558477 | 0.4513474  | 0.96598758 | 0.614940841  | 0.928966    | 0.21523588  |
| -1.08250037 | 0.27574074 | -1.1292368 | 0.088369863  | 0.841961508 | 0.020416978 |
| -1.0128091  | 0.87432732 | -1.1604715 | 0.038414182  | 0.641718132 | 9.40E-07    |
| 0.939228175 | 0.43586082 | -1.0371274 | 0.726434814  | 0.829899422 | 0.023332613 |
| 0.914689009 | 0.18463609 | -1.0503245 | 0.194203234  | -1.08341485 | 0.23255095  |
| 0.997806394 | 0.9671942  | -1.1375188 | 0.074388     | 0.816806038 | 0.000362684 |
| -1.03605385 | 0.6067661  | -1.0029576 | 0.973425858  | -1.16185571 | 0.032670315 |
| -1.00357559 | 0.95269661 | 0.83272989 | 5.56848E-08  | 0.992486037 | 0.900248644 |
| -1.02456601 | 0.63779151 | -1.0112212 | 0.830222763  | -1.06333631 | 0.236140212 |
| 0.987334579 | 0.86840826 | 0.63470287 | 5.6711E-09   | -1.14287644 | 0.086845777 |
| -1.28316503 | 0.00036992 | 0.87504352 | 0.005895029  | -1.00016453 | 0.998008083 |
| 0.996525847 | 0.95688027 | 0.9328449  | 0.364945327  | 0.881094705 | 0.053315055 |
| -1.0184829  | 0.65282356 | 0.948874   | 0.327501142  | 0.928284389 | 0.071578382 |
| 0.972787401 | 0.58408812 | -1.2124847 | 0.058999868  | -1.13462706 | 0.014696336 |
| -1.07075912 | 0.303579   | -1.1117683 | 0.07159928   | -1.51947952 | 4.66E-08    |
| 0.937395676 | 0.37501914 | -1.1462716 | 0.032167984  | 0.879210622 | 0.080534004 |
| -1.00794214 | 0.7964981  | -1.0780961 | 0.367942661  | -1.06702554 | 0.038176236 |
| 0.945111983 | 0.28173122 | -1.0557471 | 0.361063461  | 0.96757066  | 0.528122062 |
| -1.30097541 | 0.00010314 | -1.0888556 | 0.153185026  | -1.0601461  | 0.355971771 |
| 0.988744616 | 0.85014448 | 0.9772306  | 0.750256767  | -1.10036093 | 0.114571461 |
| 0.977978281 | 0.63500247 | -1.0791138 | 0.34601877   | -1.01046864 | 0.824165631 |
| -1.05004862 | 0.37675031 | 0.96981456 | 0.702644281  | -1.44559677 | 1.18E-08    |
| 0.860576403 | 0.00682147 | 0.97611251 | 0.717007008  | -1.00381992 | 0.943298651 |
| 0.87683102  | 0.0884902  | -1.0194819 | 0.717997852  | -1.00932292 | 0.902970031 |
| -1.29417589 | 0.0026512  | -1.1171933 | 0.1111114465 | -1.06144638 | 0.469195917 |
| -1.01153705 | 0.74192049 | -1.0415469 | 0.499600649  | 0.929180317 | 0.038682786 |
| -1.10884324 | 0.12966205 | -1.0319313 | 0.542316839  | -1.35153426 | 3.85E-05    |

|             |            |            |             |             |             |
|-------------|------------|------------|-------------|-------------|-------------|
| 0.892399016 | 0.09732358 | -1.147452  | 0.078059346 | 0.840203483 | 0.012626378 |
| 0.983957186 | 0.77911229 | -1.0168581 | 0.799795329 | 0.989048663 | 0.848519773 |
| -1.00197276 | 0.96077984 | -1.0123951 | 0.848245021 | -1.17817168 | 0.000136197 |
| 0.947414049 | 0.31237724 | -1.0072876 | 0.858333049 | -1.05893829 | 0.2844602   |
| -1.01090404 | 0.8563705  | -1.0343619 | 0.502939886 | -1.01815955 | 0.763970389 |
| 0.824965718 | 0.00713738 | 0.62531954 | 2.58876E-09 | -1.20898224 | 0.007910218 |
| -1.00090132 | 0.98145531 | 0.914153   | 0.219649713 | 0.97410091  | 0.499307848 |
| 0.999442215 | 0.99257337 | -1.0320749 | 0.30562891  | -1.08989462 | 0.154895266 |
| 0.886171551 | 0.06111816 | 0.90777976 | 0.067845327 | 0.774401933 | 0.00016771  |
| 0.968721739 | 0.44799323 | -1.1397252 | 0.041846308 | 0.942496384 | 0.160083292 |
| -1.29608827 | 0.00925525 | -1.0951589 | 0.133236578 | -1.36429019 | 0.002091614 |
| 0.972342189 | 0.54558084 | -1.0450011 | 0.349533109 | 0.889124232 | 0.013711626 |
| -1.01741749 | 0.81592744 | -1.1236678 | 0.037949759 | -1.1016992  | 0.195063098 |
| 0.81199991  | 0.00368446 | 0.99306875 | 0.896768176 | 0.813491079 | 0.003972954 |
| 0.738134408 | 1.58E-07   | -1.021891  | 0.776105687 | -1.04192236 | 0.418566399 |
| -1.12715688 | 0.0166951  | -1.0308355 | 0.711916991 | -1.08107813 | 0.113454047 |
| 0.939753259 | 0.47418325 | 0.94683037 | 0.120765526 | -1.12040214 | 0.192867212 |
| -1.12438655 | 0.03579496 | 0.92733332 | 0.266085895 | -1.15859862 | 0.009158381 |
| 0.985062073 | 0.79238589 | 0.88936701 | 0.087966594 | -1.17524802 | 0.006393316 |
| 0.987807572 | 0.72402264 | -1.0210006 | 0.718591819 | 0.930810198 | 0.042839094 |
| -1.28654316 | 0.00836066 | -1.0587342 | 0.158300408 | -1.21501296 | 0.038941991 |
| 0.878332739 | 0.33448508 | -1.0520406 | 0.342467418 | -1.04265069 | 0.755086404 |
| 0.988643631 | 0.85991008 | 0.99796683 | 0.972899576 | 0.975819252 | 0.705395781 |
| 0.790288087 | 0.00226838 | 0.99377539 | 0.928004351 | 0.592335411 | 2.58E-09    |
| -1.02915791 | 0.77414154 | 0.8120149  | 1.56719E-06 | -1.0601208  | 0.560420138 |
| 0.928088923 | 0.0904825  | -1.1560724 | 0.018440169 | 0.769092294 | 1.37E-07    |
| 0.881934356 | 4.87E-05   | 0.96607977 | 0.58717455  | 0.834795834 | 4.77E-08    |
| 0.855799996 | 0.00485592 | 0.98040483 | 0.635996527 | 0.52801272  | 6.89E-17    |
| 0.944411832 | 0.22574066 | -1.0423136 | 0.667867845 | 0.857102607 | 0.001701895 |
| 0.756397819 | 0.000355   | -1.1523238 | 0.003310426 | 0.740728618 | 0.000140805 |
| -1.11637949 | 0.15425619 | -1.0312627 | 0.678307553 | 0.761685427 | 0.000754924 |
| 0.882786494 | 0.07677605 | 0.95642025 | 0.518599392 | 0.990683048 | 0.892738072 |
| -1.27093543 | 0.01183282 | 0.8728766  | 0.009284805 | -1.34328779 | 0.002257419 |
| -1.07316433 | 0.25644162 | -1.065433  | 0.196365815 | 0.893997757 | 0.074299223 |
| 0.897262452 | 0.06349568 | -1.0630158 | 0.481492385 | -1.06494953 | 0.276260535 |
| 0.649152064 | 9.85E-13   | -1.0736021 | 0.197627623 | 0.843431652 | 0.000587768 |
| 0.452568099 | 1.08E-14   | -1.0877717 | 0.145071857 | 0.497081484 | 8.90E-13    |
| 0.613310461 | 2.90E-07   | 0.99358352 | 0.852948918 | 0.879125136 | 0.128329281 |
| 0.876506906 | 0.00788263 | -1.2067943 | 0.045987289 | 0.635229594 | 4.30E-13    |
| -1.05533492 | 0.32066121 | 0.93177468 | 0.597969622 | 0.978245954 | 0.683917912 |
| -1.12693478 | 0.2268173  | 0.91029677 | 0.150314917 | 0.83297887  | 0.066988956 |
| 0.53714095  | 3.39E-12   | 0.72643009 | 6.05326E-05 | 0.616431368 | 5.09E-09    |
| 0.824636426 | 0.00893761 | -1.0149164 | 0.882441897 | 0.881470228 | 0.081507884 |
| -1.01273186 | 0.91102789 | 0.89633705 | 0.014447418 | -1.07527146 | 0.522305518 |

|             |            |            |             |             |             |
|-------------|------------|------------|-------------|-------------|-------------|
| 0.963893978 | 0.48345361 | 0.98534691 | 0.605795721 | -1.03797292 | 0.477604439 |
| -1.02122034 | 0.71420003 | 0.80844888 | 0.000187618 | -1.03294084 | 0.572240923 |
| 0.981848233 | 0.85960417 | 0.9913621  | 0.853230358 | -1.22790959 | 0.051472539 |
| 0.951320704 | 0.42025708 | 0.71471801 | 2.72467E-05 | -1.06786502 | 0.290001343 |
| 0.892168545 | 0.05188453 | 0.89932634 | 0.169425312 | 0.587664092 | 1.02E-12    |
| -1.32608784 | 0.01214662 | 0.96295947 | 0.587131453 | -1.39047788 | 0.003737386 |
| -1.11305099 | 0.10147526 | -1.1264    | 0.201291287 | -1.17781719 | 0.013793371 |
| -1.02377241 | 0.68430336 | 0.99852085 | 0.980904859 | -1.34367157 | 3.95E-06    |
| -1.43329886 | 4.12E-05   | -1.0831913 | 0.168212928 | -1.17633938 | 0.048860741 |
| 0.965908518 | 0.62647283 | 0.96656825 | 0.468755284 | 0.85822828  | 0.035454024 |
| -1.01203103 | 0.80615299 | 0.83941514 | 0.023651786 | 0.934360816 | 0.167272396 |
| -1.06161834 | 0.31637827 | -1.034794  | 0.683390132 | 0.803342785 | 0.000503143 |
| -1.47131906 | 3.11E-10   | -1.0506863 | 0.305089206 | -1.14121599 | 0.010982922 |
| 0.918887715 | 0.29664241 | 0.98455376 | 0.773147274 | 0.707427408 | 6.96E-05    |
| 0.982847811 | 0.61003303 | -1.1044422 | 0.314023027 | 0.856509012 | 2.68E-05    |
| -1.06117753 | 0.51491947 | 0.54630637 | 8.23222E-12 | 0.971090414 | 0.747299608 |
| -1.0334887  | 0.52358549 | 0.88381057 | 0.0879363   | 0.891913852 | 0.029990597 |
| 0.743856325 | 0.00188381 | -1.052896  | 0.649222816 | 0.615479246 | 1.78E-06    |
| 0.963832287 | 0.75436197 | 0.96551302 | 0.503549738 | 0.938071288 | 0.587474433 |
| -1.00349649 | 0.95811126 | 0.9966452  | 0.953235878 | 0.952273295 | 0.462918343 |
| 0.986036647 | 0.81905381 | -1.3705291 | 0.003470878 | 0.897029552 | 0.08131787  |
| -1.03885097 | 0.47225026 | -1.1672877 | 0.014837355 | -1.13991003 | 0.016019429 |
| -1.12193691 | 0.03758698 | 0.8922915  | 0.052158419 | 0.993965053 | 0.911102188 |
| 0.978815421 | 0.60289773 | -1.3486196 | 0.008088498 | 0.962622523 | 0.355999363 |
| -1.01320688 | 0.75265792 | -1.0409532 | 0.534979213 | 0.965064315 | 0.394430815 |
| 0.965065487 | 0.49183283 | -1.1392256 | 0.027370271 | -1.02369253 | 0.650384967 |
| 0.964823674 | 0.68418006 | -1.1658527 | 0.062214963 | 0.735255106 | 0.00090979  |
| -1.04625134 | 0.50702342 | 0.96756731 | 0.643600282 | -1.18856746 | 0.013590205 |
| -1.05441559 | 0.32942465 | 0.98535366 | 0.762113445 | -1.12914434 | 0.028163434 |
| 0.743505429 | 0.00830978 | -1.0423243 | 0.486243056 | -1.02236204 | 0.838729303 |
| -1.03542956 | 0.53618904 | -1.3663781 | 7.55272E-08 | 0.752060333 | 4.63E-06    |
| 0.996386721 | 0.93451868 | 0.63455195 | 5.90757E-07 | 0.715026224 | 3.79E-10    |
| -1.04603542 | 0.37348333 | 0.90146451 | 0.003298011 | 0.943753394 | 0.253471088 |
| 0.835262353 | 0.00019931 | 0.92693875 | 0.405984424 | -1.04786488 | 0.304235617 |
| -1.03530078 | 0.65311226 | 0.95720893 | 0.397777625 | 0.350060894 | 4.02E-19    |
| 0.97708896  | 0.7622121  | 0.53581431 | 6.3035E-09  | 0.996351162 | 0.961922052 |
| -1.09352835 | 0.07984023 | 0.83537397 | 0.130498469 | 0.881996842 | 0.015219167 |
| 0.874824049 | 0.01960824 | -1.0725305 | 0.294517601 | 0.999291008 | 0.989866795 |
| -1.01098638 | 0.86522703 | 0.96769991 | 0.593645243 | 0.49233619  | 1.88E-15    |
| -1.02501583 | 0.47653284 | -1.0378296 | 0.483703885 | 0.927030698 | 0.032249418 |
| -1.0495826  | 0.50986445 | 0.91643136 | 0.111696155 | 0.684471638 | 3.21E-06    |
| 0.979379019 | 0.83203022 | 0.99565323 | 0.915606295 | 0.778727859 | 0.013380642 |
| -1.18235513 | 0.0026119  | -1.05516   | 0.200437196 | 0.895947531 | 0.043176074 |
| -1.07007004 | 0.28657496 | -1.0175508 | 0.736193115 | 0.973028147 | 0.665620022 |

|             |            |            |             |             |             |
|-------------|------------|------------|-------------|-------------|-------------|
| 0.905816167 | 0.33118647 | 0.91511172 | 0.31553994  | 0.924755441 | 0.441463533 |
| -1.14128653 | 0.1150519  | -1.0254406 | 0.711992641 | -1.1628049  | 0.073066143 |
| 0.880895867 | 0.23739025 | -1.1123963 | 0.053013148 | 0.964514093 | 0.734861804 |
| -1.0258548  | 0.75377451 | -1.0030157 | 0.977889242 | 0.974358999 | 0.749588963 |
| 0.981697138 | 0.78488594 | 0.97331158 | 0.630544574 | -1.05693963 | 0.414492592 |
| 0.979727946 | 0.7149757  | 0.85624503 | 0.000838121 | 0.997143704 | 0.959298135 |
| -1.03054725 | 0.42079552 | 0.84041573 | 0.001045145 | 0.885335399 | 0.001807884 |
| -1.13704305 | 0.05034733 | 0.91382264 | 0.050637327 | -1.10762698 | 0.116934957 |
| -1.16467499 | 0.17461317 | 0.58521596 | 4.58196E-09 | -1.26402948 | 0.039131284 |
| -1.00564031 | 0.92891062 | 0.96643867 | 0.656007927 | 0.945165323 | 0.372797465 |
| -1.17899389 | 0.00475336 | 0.92051655 | 0.103993042 | -1.20133923 | 0.0018166   |
| -1.02038322 | 0.74504753 | 0.88040329 | 0.025884058 | -1.16213638 | 0.018294495 |
| -1.35678277 | 0.0007805  | -1.0367453 | 0.575622698 | -1.07017808 | 0.431911409 |
| 0.924276705 | 0.70068845 | -1.0219702 | 0.530993658 | 0.838124292 | 0.389991518 |
| -1.0114983  | 0.88883717 | 0.73408099 | 8.91388E-05 | -1.11363635 | 0.191726358 |
| 0.829573345 | 0.02960222 | 0.88971989 | 0.237255619 | 0.814274572 | 0.017247211 |
| 0.968257622 | 0.63761366 | -1.0003492 | 0.994772877 | 0.7807475   | 0.000623833 |
| -1.16579117 | 0.01786484 | -1.1056376 | 0.116348586 | -1.3121581  | 6.61E-05    |
| -1.29793521 | 0.02311729 | 0.92311393 | 0.431219933 | -1.16428779 | 0.178243375 |
| 0.916223205 | 0.28161811 | 0.97090974 | 0.721867116 | 0.844719808 | 0.040658346 |
| 0.95611338  | 0.34031166 | 0.86317995 | 0.171389905 | 0.900884488 | 0.029418859 |
| -1.00925255 | 0.84182303 | -1.0040664 | 0.960210636 | 0.894117055 | 0.018165769 |
| 0.976252703 | 0.73845321 | -1.1649765 | 0.02739853  | -1.08334937 | 0.268539721 |
| -1.16822229 | 0.00012528 | 0.89411144 | 0.04987815  | -1.08999951 | 0.025843423 |
| 0.850240351 | 0.17897344 | 0.97663761 | 0.526602023 | 0.761669192 | 0.02628823  |
| 0.946340984 | 0.70243011 | 0.98594473 | 0.826199167 | 0.679259693 | 0.00941897  |
| 0.967424336 | 0.29120144 | 0.95360306 | 0.669823005 | 0.973530596 | 0.391725243 |
| 0.701678948 | 0.00165925 | -1.008217  | 0.896724337 | -1.13202835 | 0.251368694 |
| -1.2886771  | 0.00452408 | -1.3315601 | 4.19225E-06 | -1.41021199 | 0.000184809 |
| -1.21111422 | 0.00998967 | 0.97346241 | 0.664819996 | -1.01256951 | 0.862372687 |
| -1.04595514 | 0.45645811 | -1.0192903 | 0.824320728 | 0.997319415 | 0.964422782 |
| 0.952182865 | 0.44902171 | 0.85322277 | 0.439385312 | -1.07153406 | 0.287019498 |
| -1.02883028 | 0.70506254 | -1.0271222 | 0.743634887 | 0.98456152  | 0.835782158 |
| -1.33590196 | 0.02057102 | 0.88564136 | 0.152131878 | -1.40004227 | 0.007625428 |
| -1.03608238 | 0.45496246 | -1.0388344 | 0.578127782 | 0.905368682 | 0.039466011 |
| 0.857043806 | 0.03221406 | -1.1090363 | 0.105085945 | 0.900898328 | 0.142708003 |
| 0.942509569 | 0.24546101 | -1.3400302 | 0.011271491 | 0.881266615 | 0.015246047 |
| 0.802917853 | 0.00020033 | 0.87094551 | 0.091631128 | 0.953037789 | 0.385561817 |
| -1.06643428 | 0.3261271  | 0.91757935 | 0.070707225 | 0.981451653 | 0.774101722 |
| -1.28484216 | 0.01788577 | 0.97678829 | 0.611202625 | -1.16798254 | 0.136002864 |
| 0.92928657  | 0.47103993 | -1.0598695 | 0.420369612 | 0.83934885  | 0.08875461  |
| 0.936655568 | 0.23547068 | -1.05117   | 0.190002318 | 0.998582855 | 0.979352192 |
| 0.9447897   | 0.24932323 | 0.98299293 | 0.886057957 | 0.985480972 | 0.765398926 |
| -1.08714655 | 0.1240758  | 0.79948101 | 0.124988993 | -1.02408093 | 0.658149356 |



|             |            |            |             |             |             |
|-------------|------------|------------|-------------|-------------|-------------|
| -1.07885437 | 0.14439694 | 0.95986687 | 0.192962192 | -1.0986093  | 0.072001266 |
| 0.967199296 | 0.53970085 | 0.75438034 | 0.010961881 | -1.07041192 | 0.213381822 |
| -1.15961004 | 0.01663224 | -1.3565006 | 0.000778462 | -1.04378919 | 0.477408798 |
| -1.01402387 | 0.80962518 | -1.1079758 | 0.1585607   | -1.06828935 | 0.255906984 |
| 0.669711977 | 1.94E-06   | 0.92914158 | 0.225180948 | 0.403713634 | 6.32E-17    |
| -1.03785277 | 0.66816214 | -1.0909934 | 0.180939346 | -1.16151684 | 0.088113633 |
| -1.04618607 | 0.45979758 | 0.98222226 | 0.811130365 | 0.747987294 | 1.37E-05    |
| -1.01113946 | 0.80362052 | -1.2585764 | 0.063473199 | 0.922880009 | 0.075829578 |
| 0.803812392 | 0.00037682 | 0.9750804  | 0.594300512 | 0.808070328 | 0.000503381 |
| 0.869822004 | 0.04430475 | -1.0526339 | 0.467852506 | -1.24895949 | 0.001811101 |
| -1.04936403 | 0.25761463 | -1.0351046 | 0.496737192 | 0.990300074 | 0.817834175 |
| 0.921224231 | 0.21962767 | 0.71901611 | 1.74469E-07 | 0.755063837 | 8.49E-05    |
| -1.24416338 | 0.02255    | -1.0074607 | 0.90925071  | 0.878986827 | 0.17124781  |
| 0.943680628 | 0.34225276 | -1.1256979 | 0.253558746 | -1.13692298 | 0.038538587 |
| 0.932441157 | 0.1680398  | 0.79311783 | 0.025716923 | 0.917001927 | 0.089204356 |
| -1.01052153 | 0.82810914 | -1.0394872 | 0.480732738 | -1.02927873 | 0.549980833 |
| -1.02049126 | 0.59300144 | 0.94541112 | 0.254778399 | 0.918011536 | 0.02739884  |
| -1.04772334 | 0.43324939 | -1.0269237 | 0.621374289 | 0.890043308 | 0.053673203 |
| -1.02642475 | 0.69691154 | 0.89820688 | 0.040899708 | 0.944888301 | 0.398483367 |
| -1.05824373 | 0.40085236 | -1.0064751 | 0.905366183 | 0.563626249 | 1.23E-11    |
| -1.01319419 | 0.74074833 | 0.96209717 | 0.521626546 | 0.80538986  | 1.12E-06    |
| -1.12637406 | 0.05781081 | -1.108052  | 0.080131971 | -1.03289776 | 0.600155985 |
| -1.0707838  | 0.04198762 | 0.73176181 | 0.000116287 | -1.02361332 | 0.480164221 |
| 0.880016417 | 0.00666622 | -1.1210012 | 0.190734041 | 0.960065512 | 0.372125161 |
| -1.14366951 | 0.0436369  | 0.81877517 | 0.001737289 | -1.13841957 | 0.051073057 |
| -1.14303999 | 0.02690191 | 0.94873998 | 0.240445816 | 0.998870051 | 0.984719125 |
| -1.07121158 | 0.44420498 | 0.90556135 | 0.090464207 | 0.872127248 | 0.131132293 |
| -1.1424215  | 0.03271795 | -1.1190711 | 0.102479153 | -1.01060398 | 0.86277616  |
| 0.878808546 | 0.06854904 | -1.0048298 | 0.909336465 | -1.05855692 | 0.416535959 |
| -1.04409999 | 0.52551027 | 0.97151811 | 0.663581539 | 0.997529679 | 0.970919059 |
| 0.989307637 | 0.91323999 | -1.0060677 | 0.948384896 | -1.01778639 | 0.858198952 |
| 0.776454662 | 0.00015719 | -1.0866757 | 0.175141655 | 0.727370127 | 4.30E-06    |
| -1.12715884 | 0.03131551 | 0.97188253 | 0.571212333 | 0.952945521 | 0.377287372 |
| 0.99983327  | 0.99755392 | 0.95514034 | 0.342967814 | 0.959639532 | 0.44999777  |
| -1.05188744 | 0.43008395 | 0.99185041 | 0.829092446 | -1.08138117 | 0.224184395 |
| 0.978220304 | 0.64651283 | -1.1404761 | 0.030219119 | -1.00088894 | 0.985221039 |
| 0.855346385 | 0.01584568 | 0.91013015 | 0.163186913 | 0.903584205 | 0.111815084 |
| -1.01326234 | 0.7204098  | 0.70302127 | 2.47291E-06 | -1.02159086 | 0.562103787 |
| -1.04388722 | 0.45966659 | 0.97716405 | 0.560252726 | 0.916193819 | 0.134964603 |
| -1.00744675 | 0.85298191 | -1.1175255 | 0.075869827 | 0.974293028 | 0.516130744 |
| 0.947816981 | 0.33944256 | 0.99934524 | 0.984154771 | -1.06162333 | 0.28698366  |
| -1.0227662  | 0.76801645 | 0.96275052 | 0.405551044 | -1.08171754 | 0.305540682 |
| 0.97584272  | 0.50699865 | -1.0198041 | 0.76392504  | 0.977630024 | 0.539182335 |
| 0.999278677 | 0.98650631 | 0.98046076 | 0.738296884 | -1.05024984 | 0.253412342 |

|             |            |            |             |             |             |
|-------------|------------|------------|-------------|-------------|-------------|
| -1.13749966 | 0.00683567 | 0.77887389 | 0.007084526 | -1.00003574 | 0.999380233 |
| -1.01230763 | 0.77405824 | -1.054902  | 0.382780813 | -1.01781254 | 0.678750101 |
| 0.872412463 | 0.0166764  | 0.75594053 | 0.000179676 | -1.0237221  | 0.672925733 |
| -1.05310652 | 0.11703934 | 0.95847148 | 0.532607015 | -1.01936901 | 0.557277178 |
| -1.027992   | 0.51812273 | 0.86923898 | 0.159365974 | 0.912251787 | 0.03492914  |
| -1.05469912 | 0.37112032 | -1.0209666 | 0.740054918 | -1.04237306 | 0.485190637 |
| -1.06299215 | 0.2441569  | -1.0262327 | 0.634370315 | 0.892912216 | 0.033396525 |
| -1.04770694 | 0.38146815 | -1.0349264 | 0.528686859 | -1.06211854 | 0.258880081 |
| 0.989359494 | 0.86024655 | 0.95723609 | 0.495097719 | 0.899542939 | 0.085700523 |
| 0.937013637 | 0.23664306 | 0.98439448 | 0.743113674 | 0.90372602  | 0.068051595 |
| -1.03273061 | 0.57391963 | -1.0680486 | 0.298535054 | -1.1479314  | 0.018775737 |
| 0.989390303 | 0.79222346 | -1.0452961 | 0.23166441  | 0.967043972 | 0.409234202 |
| -1.05368607 | 0.15151078 | 0.85840945 | 0.010629154 | -1.02658933 | 0.468500337 |
| 0.897869352 | 0.06842888 | 0.91594686 | 0.031867438 | -1.04924392 | 0.410350255 |
| 0.978418404 | 0.7782944  | -1.116271  | 0.053054447 | 0.955298724 | 0.555605457 |
| -1.01325926 | 0.77401241 | -1.0961979 | 0.231722439 | 0.941394427 | 0.191404445 |
| 0.87756646  | 0.30912094 | 0.96658089 | 0.357306316 | 0.79487189  | 0.076700674 |
| 0.385005494 | 1.86E-16   | 0.98120145 | 0.656762833 | 0.548937181 | 1.02E-09    |
| -1.02528739 | 0.484894   | 0.96999849 | 0.508767228 | 0.955270275 | 0.203001655 |
| -1.05327237 | 0.53223878 | 0.90653586 | 0.024502471 | 0.914143062 | 0.281758252 |
| 0.986928878 | 0.80460493 | -1.088333  | 0.13127647  | -1.00229204 | 0.965654501 |
| -1.02508938 | 0.40749902 | 0.94135848 | 0.068312043 | 0.986049698 | 0.637911762 |
| 0.957687943 | 0.49627455 | 0.98388877 | 0.703429391 | -1.01086342 | 0.864708914 |
| 0.792344921 | 0.32570327 | -1.1138665 | 0.073365728 | 0.860558733 | 0.524923293 |
| 0.886077657 | 0.04142575 | -1.0578953 | 0.282799379 | 0.999372907 | 0.99139407  |
| -1.00872122 | 0.90293936 | -1.0033329 | 0.949997173 | -1.03304887 | 0.648234464 |
| 0.903927923 | 0.04356078 | 0.94635838 | 0.365970076 | 0.920561543 | 0.096071361 |
| -1.02159485 | 0.68242956 | 0.89862385 | 0.054437683 | 0.970900399 | 0.571980613 |
| -1.03757145 | 0.50479512 | -1.0364366 | 0.532226496 | 0.9576119   | 0.433850522 |
| 0.955895236 | 0.48806766 | -1.0597027 | 0.155880994 | 0.959016894 | 0.519919864 |
| -1.13884526 | 0.02737619 | -1.0795016 | 0.037915923 | -1.05304663 | 0.371263758 |
| 0.884560642 | 0.03147745 | -1.0590251 | 0.326651834 | -1.04604803 | 0.421133874 |
| -1.1423991  | 0.12045833 | 0.80867544 | 0.008017375 | -1.26900407 | 0.006649513 |
| 0.972403065 | 0.59019457 | 0.93158556 | 0.126397999 | -1.01108971 | 0.831728479 |
| 0.975868152 | 0.69809215 | 0.78286495 | 0.059591465 | -1.07723557 | 0.240164506 |
| -1.01074038 | 0.81177378 | 0.2842029  | 1.9156E-21  | -1.03434358 | 0.452706181 |
| -1.06191966 | 0.21662836 | -1.023677  | 0.512678584 | -1.06768657 | 0.178583783 |
| -1.01417017 | 0.78444777 | 0.95202107 | 0.553981174 | 0.969439401 | 0.546819454 |
| -1.00667844 | 0.85495145 | 0.97452281 | 0.627782759 | 0.988461325 | 0.750003965 |
| 0.874522498 | 0.05750047 | 0.96197636 | 0.197108064 | 0.914257321 | 0.199893007 |
| 0.893525534 | 0.14379308 | 0.92874863 | 0.246688822 | -1.09163553 | 0.253069634 |
| 0.896508286 | 0.07506904 | 0.72766285 | 0.181161622 | 0.952829767 | 0.425582674 |
| 0.918642024 | 0.01455148 | -1.0292419 | 0.620579667 | -1.00832217 | 0.806138645 |
| -1.01801267 | 0.7174412  | -1.1397124 | 0.07051468  | 0.983937875 | 0.74270735  |

|             |            |            |             |             |             |
|-------------|------------|------------|-------------|-------------|-------------|
| -1.01765337 | 0.75801781 | -1.0187384 | 0.705487471 | 0.975527871 | 0.662830741 |
| 0.942124288 | 0.55068624 | 0.98816604 | 0.819567309 | 0.930660714 | 0.472309169 |
| 0.932798743 | 0.21188595 | 0.87781174 | 0.021277254 | -1.11602455 | 0.051278718 |
| 0.974922694 | 0.45295679 | 0.98507732 | 0.816860232 | -1.03631467 | 0.293074926 |
| 0.978605886 | 0.77522597 | -1.0370843 | 0.527989563 | 0.971545315 | 0.703173135 |
| -1.10879153 | 0.0648047  | 0.99346804 | 0.906501443 | 0.977367572 | 0.677665213 |
| 0.978874031 | 0.66042359 | 0.97620545 | 0.776408729 | 0.973613947 | 0.582383289 |
| 0.897078624 | 0.00933282 | 0.97409895 | 0.613486082 | -1.0334926  | 0.416967187 |
| 0.844968375 | 0.00718631 | 0.97247067 | 0.657634268 | -1.00709188 | 0.907100292 |
| 0.99478018  | 0.93801811 | 0.89049439 | 0.012077963 | -1.14524353 | 0.047907586 |
| -1.05815969 | 0.36527694 | -1.046931  | 0.344142809 | -1.15999114 | 0.020035872 |
| -1.10581738 | 0.12724056 | 0.98034381 | 0.699661439 | -1.03305535 | 0.618527889 |
| 0.87945822  | 0.10092042 | 0.99840231 | 0.964968317 | -1.00506306 | 0.947919981 |
| 0.884485544 | 0.01840605 | 0.91925018 | 0.228178911 | -1.13774035 | 0.013447063 |
| -1.13773687 | 0.03795026 | -1.0563238 | 0.473402148 | 0.889355362 | 0.058436446 |
| -1.02318239 | 0.52618292 | 0.97749871 | 0.706803351 | 0.996662901 | 0.926205055 |
| 0.953175553 | 0.41270703 | -1.0379023 | 0.273213075 | 0.958446545 | 0.468184238 |
| 0.944257206 | 0.25657737 | -1.0318298 | 0.525853834 | 0.996654468 | 0.946830828 |
| 0.895924988 | 0.05181379 | -1.0756189 | 0.202603536 | -1.06959268 | 0.228698128 |
| 0.983020288 | 0.72330316 | 0.93231646 | 0.483283349 | 0.966884562 | 0.487029786 |
| 0.862552563 | 0.47165869 | 0.88153151 | 0.025971866 | 0.896582219 | 0.59472077  |
| -1.03604071 | 0.66140152 | -1.0567804 | 0.106036065 | -1.06106543 | 0.464149911 |
| 0.998866689 | 0.98234424 | 0.92781368 | 0.324552413 | 0.987845192 | 0.81141504  |
| 0.953364552 | 0.47409175 | -1.0169304 | 0.760411328 | 0.980002006 | 0.761597128 |
| -1.04158433 | 0.53942459 | 0.96945864 | 0.523766065 | 0.904494904 | 0.133960772 |
| 0.880850395 | 0.04656188 | -1.0151631 | 0.710113667 | 0.79354424  | 0.000487932 |
| -1.09466267 | 0.14685003 | -1.0662288 | 0.292105311 | 0.946915541 | 0.378638821 |
| 0.989691031 | 0.78180806 | -1.0161655 | 0.811713744 | -1.00511036 | 0.891602349 |
| -1.02028524 | 0.70719014 | 0.91076999 | 0.137000326 | -1.02969737 | 0.584388485 |
| 0.991771702 | 0.8860601  | -1.024402  | 0.711877827 | -1.03045895 | 0.603240823 |
| 0.877458269 | 0.03535994 | -1.0066491 | 0.931695689 | -1.0006293  | 0.991749551 |
| 0.903323569 | 0.05685771 | 0.94541956 | 0.271178542 | 0.979281666 | 0.69017565  |
| -1.03697331 | 0.49328022 | -1.1063811 | 0.101318596 | -1.0082654  | 0.876306418 |
| -1.02311842 | 0.65985966 | 0.96118002 | 0.275275849 | -1.00656487 | 0.899647085 |
| 0.868065124 | 0.50038199 | -1.0885677 | 0.1498724   | 0.805961535 | 0.305569985 |
| 0.965000877 | 0.23122956 | 0.88087901 | 0.014164767 | 0.931958306 | 0.020134495 |
| 0.964529198 | 0.36641859 | -1.0789447 | 0.174793618 | 0.924941148 | 0.054249158 |
| -1.07465431 | 0.154722   | 0.96631392 | 0.479461725 | 0.861788988 | 0.004300766 |
| -1.01701501 | 0.77455878 | 0.80193017 | 0.284009068 | -1.09201401 | 0.13900039  |
| -1.0849784  | 0.20813248 | -1.0443745 | 0.591377415 | 0.995411259 | 0.942991208 |
| 0.852557564 | 0.13682651 | -1.0337516 | 0.517925206 | -1.06966922 | 0.526390531 |
| 0.946544818 | 0.48883499 | 0.94593104 | 0.405150438 | 0.567490678 | 2.12E-09    |
| -1.03513733 | 0.62138586 | -1.0226384 | 0.73566426  | 0.725323285 | 2.45E-05    |
| 0.756348081 | 0.03646639 | 0.88281975 | 0.050409887 | 0.946520266 | 0.674525026 |

|             |            |            |             |             |             |
|-------------|------------|------------|-------------|-------------|-------------|
| 0.772140594 | 0.07281573 | 0.92363617 | 0.201596155 | 0.673700826 | 0.007183552 |
| 0.925343213 | 0.20425236 | -1.0438408 | 0.254197181 | -1.00196567 | 0.97417295  |
| 0.850321752 | 0.00414707 | -1.1206244 | 0.036787224 | 0.767320716 | 9.49E-06    |
| 0.895806507 | 0.17217348 | -1.0118129 | 0.838629221 | -1.00766537 | 0.923854127 |
| -1.10354623 | 0.19189471 | -1.0239064 | 0.697978226 | -1.16692715 | 0.043209512 |
| 0.933179483 | 0.19601333 | -1.0411166 | 0.443886751 | -1.00791037 | 0.881978379 |
| -1.00232807 | 0.97802108 | 0.99976717 | 0.996486326 | -1.12127202 | 0.178746289 |
| 0.997180266 | 0.96101227 | -1.0837659 | 0.125193718 | 0.924324009 | 0.176803728 |
| 0.866647819 | 0.00046698 | 0.73232017 | 0.141055189 | 0.933169066 | 0.077254228 |
| 0.97178223  | 0.59212854 | 0.97585183 | 0.409732296 | 0.864856101 | 0.008459716 |
| 0.79826239  | 0.00047281 | 0.99355738 | 0.871112525 | 0.832648663 | 0.003794288 |
| 0.982936572 | 0.73785948 | -1.0242981 | 0.632265421 | 0.883848189 | 0.019243232 |
| 0.976343509 | 0.65389766 | 0.90825375 | 0.106463675 | 0.801829013 | 0.000115835 |
| -1.45305073 | 0.00034825 | 0.96082797 | 0.535128127 | -1.94139227 | 9.57E-09    |
| -1.03528447 | 0.68063811 | -1.2688757 | 0.028257447 | 0.911607657 | 0.274311556 |
| 0.944765435 | 0.25562725 | 0.67226683 | 5.67742E-06 | 0.872200527 | 0.007782282 |
| -1.30376923 | 0.00043888 | 0.96286678 | 0.58847646  | -1.15889741 | 0.042010628 |
| 0.981134104 | 0.62741475 | 0.87672604 | 0.316684902 | 0.780573994 | 4.79E-08    |
| 0.880473263 | 0.07910022 | 0.99967902 | 0.998195773 | -1.082735   | 0.268648184 |
| 0.970499575 | 0.61811303 | 0.97362855 | 0.659785927 | 0.91300572  | 0.133362082 |
| -1.03777225 | 0.42979449 | 0.75355463 | 2.89978E-06 | -1.15261562 | 0.003575073 |
| 0.889625026 | 0.02406165 | 0.86956749 | 0.08452348  | -1.09896328 | 0.06644923  |
| 0.828494652 | 0.0255922  | 0.92372814 | 0.291997118 | -1.07048084 | 0.40951457  |
| 0.939683322 | 0.46200173 | 0.95333853 | 0.369683403 | -1.060486   | 0.487342703 |
| -1.18322667 | 0.0340094  | -1.0870258 | 0.32504866  | -1.12759866 | 0.126323467 |
| -1.04267837 | 0.52125852 | 0.78361563 | 8.83638E-05 | 0.850450307 | 0.015410811 |
| -1.06404881 | 0.15706125 | 0.95038143 | 0.190644298 | -1.0075175  | 0.863201506 |
| 0.829328312 | 0.23202618 | -1.1390487 | 0.017512808 | 0.789276597 | 0.132243613 |
| -1.01039926 | 0.92540978 | 0.77995841 | 0.000137728 | 0.88003419  | 0.250411984 |
| 0.99982765  | 0.99674748 | -1.0693505 | 0.195541897 | 0.587793707 | 1.07E-17    |
| -1.07357151 | 0.63433431 | 0.9372809  | 0.227858751 | 0.870318635 | 0.353500983 |
| -1.01995415 | 0.6886192  | -1.3293978 | 0.005238184 | -1.0680564  | 0.185041961 |
| 0.980017205 | 0.73644216 | 0.73692019 | 0.000607658 | 0.598793507 | 1.15E-11    |
| -1.08865609 | 0.16361043 | 0.95789537 | 0.388207346 | 0.826481099 | 0.002527908 |
| -1.08530119 | 0.18476262 | -1.1547237 | 0.047090633 | -1.05547456 | 0.379500334 |
| -1.15585693 | 0.02566527 | 0.98342377 | 0.670053375 | 0.969771439 | 0.628679566 |
| -1.04705393 | 0.41204791 | 0.89038661 | 0.108420105 | -1.07115466 | 0.221877147 |
| -1.02917245 | 0.57672978 | -1.0368033 | 0.547578361 | -1.01172095 | 0.820835282 |
| 0.99179732  | 0.87472005 | 0.99060401 | 0.840240536 | 0.820733253 | 0.000371606 |
| -1.08888746 | 0.42789284 | 0.94368161 | 0.254904582 | 0.932636467 | 0.515754278 |
| 0.925398267 | 0.24626171 | 0.88631292 | 0.146606019 | 0.785754121 | 0.000603252 |
| -1.11942552 | 0.0128439  | 0.8770572  | 0.124115072 | 0.990843209 | 0.834543614 |
| -1.04005308 | 0.44384686 | -1.0827817 | 0.308345961 | -1.0314255  | 0.545892054 |
| 0.997670675 | 0.94439962 | -1.0243069 | 0.712082589 | 0.930887555 | 0.035932776 |

|             |            |            |             |             |             |
|-------------|------------|------------|-------------|-------------|-------------|
| -1.17605126 | 0.02831261 | 0.91293852 | 0.039934797 | -1.46908651 | 1.89E-06    |
| 0.872928112 | 0.00633708 | 0.87421171 | 0.389056047 | -1.01865015 | 0.700772633 |
| 0.971066319 | 0.67263124 | 0.81167127 | 0.063196336 | -1.11386313 | 0.12453548  |
| 0.734282104 | 8.91E-05   | 0.93061105 | 0.093285583 | 0.651296683 | 2.67E-07    |
| 0.833021457 | 0.00093897 | 0.99360505 | 0.965678628 | 0.813177624 | 0.000219401 |
| 0.898506323 | 0.0612561  | 0.95043051 | 0.304502909 | 0.864641444 | 0.012078615 |
| 0.978430199 | 0.66300298 | 0.93965351 | 0.301504652 | -1.02435648 | 0.630646653 |
| -1.02841616 | 0.66776482 | 0.99420708 | 0.923403468 | 0.983066871 | 0.793513864 |
| 0.999817964 | 0.99600669 | 0.92951141 | 0.235522994 | 0.997091228 | 0.936173373 |
| 0.967917475 | 0.4043955  | -1.0256867 | 0.689368102 | 0.933153749 | 0.08022048  |
| -1.07534213 | 0.39660568 | 0.95241369 | 0.38459149  | -1.29254511 | 0.003877909 |
| -1.11491066 | 0.0417462  | -1.1026636 | 0.061660204 | 0.800270076 | 7.94E-05    |
| 0.971594296 | 0.65353904 | 0.93901703 | 0.231494846 | -1.13294864 | 0.055780784 |
| -1.06206015 | 0.31910608 | 0.86196215 | 0.169213442 | 0.904789974 | 0.100532268 |
| -1.39481605 | 0.0007209  | 0.80753546 | 0.002102217 | -1.24808012 | 0.020413041 |
| 0.926320182 | 0.0963794  | -1.0348912 | 0.437330771 | 0.95452998  | 0.308090847 |
| -1.00534927 | 0.95161484 | -1.0465605 | 0.375351002 | -1.17255422 | 0.074493716 |
| 0.927689645 | 0.41185825 | 0.99718973 | 0.932929007 | -1.20380287 | 0.045887251 |
| -1.00061219 | 0.98980251 | -1.3529426 | 0.000100804 | -1.08823322 | 0.081724269 |
| 0.879269528 | 0.0222193  | 0.95956447 | 0.391989075 | 0.963356647 | 0.497383492 |
| 0.977145124 | 0.64164063 | -1.1289788 | 0.084882687 | -1.11513955 | 0.031670067 |
| 0.942899431 | 0.15061203 | 0.75338909 | 0.000282261 | 0.965460506 | 0.387218533 |
| 0.951520402 | 0.1498166  | 0.80239626 | 9.47502E-05 | 0.955782242 | 0.189237747 |
| 0.805103884 | 0.07343819 | 0.76981983 | 2.03661E-05 | 0.795887894 | 0.059816394 |
| 0.945620597 | 0.25999807 | 0.87184595 | 0.007978828 | 0.964762485 | 0.468324168 |
| 0.997823771 | 0.9855132  | 0.97769733 | 0.729634555 | 0.896303466 | 0.363407534 |
| 0.861916619 | 0.00745905 | 0.97409243 | 0.471606143 | 0.98039384  | 0.712404545 |
| -1.0220887  | 0.66303376 | 0.9763178  | 0.53937548  | -1.03648088 | 0.475521996 |
| -1.03061153 | 0.65360885 | -1.0918669 | 0.305799729 | 0.956175945 | 0.505287939 |
| -1.00827756 | 0.82498374 | 0.92993639 | 0.169352596 | -1.01843114 | 0.624492508 |
| 0.511843387 | 2.14E-10   | -1.016392  | 0.799948733 | 0.231897282 | 2.74E-23    |
| -1.08929799 | 0.11912532 | -1.0892671 | 0.159058652 | 0.996841643 | 0.953509253 |
| 0.921699515 | 0.01264945 | -1.2164424 | 0.039295767 | 0.799799877 | 3.29E-09    |
| -1.00471037 | 0.89973489 | 0.97013782 | 0.505494413 | 0.890832637 | 0.002958973 |
| 0.86671536  | 0.03062796 | -1.1204426 | 0.199320273 | -1.00356618 | 0.956136177 |
| -1.01073221 | 0.79913284 | 0.99097112 | 0.920762585 | 0.855297165 | 0.000442587 |
| -1.15274907 | 0.01234443 | 0.98093886 | 0.687973154 | 0.911753186 | 0.098182012 |
| -1.01096935 | 0.82488465 | 0.937115   | 0.239781498 | 0.982390832 | 0.71870447  |
| 0.787992089 | 0.00058082 | -1.0340906 | 0.500279115 | 0.959109952 | 0.524296469 |
| 0.649903619 | 0.00017751 | -1.0130097 | 0.749775926 | 0.829309174 | 0.085827575 |
| 0.712552344 | 0.01154327 | 0.91897771 | 0.016135542 | 0.784716678 | 0.066797794 |
| 0.891841643 | 0.15495102 | -1.0113444 | 0.92466028  | 0.693635435 | 2.53E-05    |
| 0.660789795 | 0.00122361 | -1.011103  | 0.822976362 | 0.760509016 | 0.028153118 |
| 0.753526932 | 0.02315251 | 0.97632813 | 0.841771261 | 0.964040013 | 0.763399767 |

|             |            |            |             |             |             |
|-------------|------------|------------|-------------|-------------|-------------|
| 0.836863868 | 0.11939708 | 0.84883949 | 0.003382296 | 0.738543994 | 0.009424581 |
| 0.592052832 | 0.00091821 | -1.0093734 | 0.852285688 | 0.811535533 | 0.167825053 |
| -1.19914226 | 0.02197238 | -1.0104164 | 0.877331074 | 0.990496497 | 0.901730532 |
| 0.9000731   | 0.05541135 | -1.0454788 | 0.235823594 | -1.03498682 | 0.525126967 |
| -1.00232535 | 0.97144508 | -1.1091917 | 0.232542261 | 0.99407195  | 0.926992077 |
| -1.07755129 | 0.14838923 | -1.0345838 | 0.531667514 | -1.02865991 | 0.58137345  |
| -1.2767495  | 0.00849592 | -1.0015137 | 0.96200433  | -1.29622681 | 0.005373451 |
| 0.950390375 | 0.57679819 | 0.73344155 | 2.8218E-11  | -1.24993598 | 0.017068229 |
| -1.04399444 | 0.57609061 | 0.97480043 | 0.693532948 | 0.905567321 | 0.200505443 |
| -1.12656803 | 0.09074586 | 0.91967104 | 0.049899672 | -1.31135213 | 0.000254952 |
| -1.06438733 | 0.41492491 | -1.0064983 | 0.906509726 | -1.05445954 | 0.488043964 |
| -1.01856713 | 0.77387142 | 0.91676162 | 0.082193806 | 0.814684803 | 0.002197226 |
| 0.925110649 | 0.22994964 | -1.0108624 | 0.868891903 | 0.860502208 | 0.02283114  |
| 0.811790707 | 0.00538879 | 0.8556166  | 0.150658687 | -1.10536944 | 0.169180787 |
| -1.02730721 | 0.66920883 | 0.80888904 | 0.107507225 | 0.910625661 | 0.141320528 |
| -1.10768846 | 0.24349498 | 0.72757091 | 0.0001902   | -1.06529174 | 0.469003616 |
| -1.27906093 | 0.00696075 | 0.75154244 | 0.022265304 | -1.0732284  | 0.423848614 |
| -1.03614553 | 0.49305638 | 0.72760496 | 0.011202913 | 0.858592958 | 0.004528804 |
| 0.935539534 | 0.32764347 | 0.68752886 | 0.0015796   | -1.01303122 | 0.84850353  |
| -1.21421531 | 0.01166469 | 0.69578606 | 0.018547827 | 0.987583684 | 0.867134007 |
| -1.02402285 | 0.69267164 | 0.9197692  | 0.282087851 | 0.687797518 | 6.55E-08    |
| 0.997178191 | 0.97040227 | -1.0149471 | 0.783635864 | -1.07736274 | 0.330019889 |
| 0.986337574 | 0.76810756 | 0.9408643  | 0.34948692  | 0.915370227 | 0.062158218 |
| 0.967665365 | 0.54586629 | -1.122195  | 0.027684794 | -1.03203381 | 0.562273378 |
| -1.07482933 | 0.43366447 | -1.1949956 | 0.051438895 | -1.04405421 | 0.639346236 |
| 0.869381268 | 0.00493365 | -1.000088  | 0.99922913  | 0.885145785 | 0.013451086 |
| -1.08667741 | 0.09429316 | -1.0271496 | 0.72770663  | 0.968417827 | 0.513607448 |
| 0.838513956 | 0.0599271  | -1.2647879 | 0.001297518 | 0.514476545 | 1.66E-09    |
| -1.00897949 | 0.83583394 | 0.96014035 | 0.594456144 | 0.960036825 | 0.346364649 |
| -1.01783439 | 0.765653   | 0.70525084 | 1.15913E-06 | 0.912450224 | 0.126363353 |
| -1.20142795 | 0.0029371  | 0.93782525 | 0.321145399 | -1.0364874  | 0.545323686 |
| 0.888050072 | 0.00594989 | 0.97855431 | 0.76413808  | 0.880681679 | 0.00339829  |
| 0.727600516 | 0.0005389  | 0.9075308  | 0.127696914 | 0.77330095  | 0.004366421 |
| 0.945115106 | 0.19680391 | -1.1760399 | 0.066990962 | 0.965955115 | 0.426108191 |
| 0.853666571 | 0.02731793 | 0.97236284 | 0.750509691 | 0.719190465 | 1.69E-05    |
| -1.09104372 | 0.12984177 | -1.0206288 | 0.693020927 | 0.903550144 | 0.078998395 |
| -1.07393713 | 0.21203246 | 0.93039325 | 0.289558641 | 0.889548219 | 0.043045441 |
| 0.952353018 | 0.31252414 | -1.1817486 | 0.028786004 | 0.988876343 | 0.816179956 |
| 0.979649257 | 0.70410544 | -1.0176136 | 0.771206143 | 0.949648011 | 0.341655945 |
| 0.961946824 | 0.40104387 | -1.1830594 | 0.030840004 | -1.01784303 | 0.701111424 |
| 0.87494987  | 0.34256301 | 0.97880256 | 0.646269219 | -1.02272425 | 0.872643687 |
| 0.9840441   | 0.82934821 | 0.9287054  | 0.177086622 | -1.01165795 | 0.876559274 |
| -1.12495876 | 0.28208882 | -1.1029192 | 0.289013327 | 0.745407651 | 0.008981677 |
| -1.02640599 | 0.72762767 | 0.86125429 | 0.002831936 | 0.871048298 | 0.069163444 |

|             |            |            |             |             |             |
|-------------|------------|------------|-------------|-------------|-------------|
| 0.978957438 | 0.65377161 | 0.87216781 | 0.007038112 | 0.917710087 | 0.074142959 |
| -1.01231083 | 0.78368587 | 0.83295494 | 0.051182669 | -1.03354518 | 0.460128259 |
| 0.986803089 | 0.72699217 | 0.95894943 | 0.333241441 | 0.941153507 | 0.114974466 |
| -1.06105027 | 0.34450073 | 0.97985428 | 0.731515524 | -1.1585196  | 0.021512326 |
| 0.871194519 | 0.19504005 | 0.99987567 | 0.998322908 | -1.25597269 | 0.034545885 |
| 0.845356929 | 0.01987473 | 0.73014121 | 4.75291E-10 | 0.700327986 | 4.72E-06    |
| 0.711914058 | 8.97E-05   | 0.93395906 | 0.432405936 | 0.866680575 | 0.0801003   |
| 0.927622033 | 0.03940993 | 0.97247592 | 0.520905488 | 0.958786021 | 0.242104595 |
| 0.919419145 | 0.094087   | 0.76242125 | 0.000278587 | -1.00503958 | 0.91914919  |
| -1.05573904 | 0.36581396 | -1.0148891 | 0.795147797 | -1.32703691 | 1.52E-05    |
| 0.853674533 | 0.27891359 | 0.95751529 | 0.445432727 | 0.850165082 | 0.266724749 |
| -1.09209208 | 0.03241203 | 0.96311697 | 0.436010121 | -1.03032131 | 0.459695528 |
| -1.09977794 | 0.03977413 | 0.99007615 | 0.853763556 | -1.09612441 | 0.046945064 |
| 0.916697616 | 0.10066765 | 0.98665961 | 0.77062996  | -1.05836919 | 0.280814464 |
| -1.02971561 | 0.4570774  | -1.0790789 | 0.587630731 | 0.899729966 | 0.009185208 |
| 0.896455559 | 0.24577892 | 0.97494776 | 0.733951978 | 0.888984076 | 0.211925204 |
| 0.843081801 | 0.04826942 | 0.78689579 | 0.031277568 | 0.642857874 | 2.85E-06    |
| 0.969299699 | 0.71658784 | 0.9324236  | 0.351491675 | 0.896365056 | 0.205880421 |
| 0.960243365 | 0.69681102 | 0.83539145 | 0.000354657 | -1.38338359 | 0.002797373 |
| -1.21209597 | 0.0041756  | 0.97656987 | 0.595130267 | 0.9861904   | 0.829542221 |
| -1.02795687 | 0.76742714 | 0.89066756 | 0.00346389  | -1.04651078 | 0.626071544 |
| 0.943271564 | 0.36521123 | 0.91056154 | 0.137442566 | 0.981892857 | 0.77617913  |
| -1.00826481 | 0.87742061 | -1.092373  | 0.404200091 | 0.995888433 | 0.938454077 |
| -1.104232   | 0.06694851 | 0.72794383 | 3.24995E-05 | 0.977299826 | 0.666707116 |
| 0.978811259 | 0.78562213 | 0.82123752 | 0.017348037 | 0.588199127 | 9.88E-09    |
| 0.989305839 | 0.78624345 | 0.96218734 | 0.283530188 | -1.03496192 | 0.387565188 |
| -1.01024024 | 0.8621633  | -1.0458493 | 0.367164358 | 0.80883602  | 0.00062766  |
| 0.9508276   | 0.46621158 | -1.1528719 | 0.020289484 | -1.20731925 | 0.008277477 |
| 0.742996433 | 0.00248012 | 0.77046714 | 0.077023214 | 0.781037222 | 0.010786608 |
| -1.00574408 | 0.86190472 | -1.0231017 | 0.57146007  | 0.915780816 | 0.009635207 |
| -1.09752247 | 0.03899888 | 0.94562694 | 0.220820247 | 0.852813074 | 0.000652311 |
| 0.99713706  | 0.95998583 | 0.97741159 | 0.662582189 | 0.695404215 | 4.17E-08    |
| -1.00118907 | 0.98640173 | 0.90860574 | 0.017501564 | -1.02404055 | 0.73345684  |
| 0.905300722 | 0.13830424 | 0.60976517 | 2.14353E-06 | 0.981474222 | 0.778424459 |
| 0.867282413 | 0.02586855 | 0.67268839 | 1.89016E-05 | -1.03814575 | 0.549350013 |
| 0.969644355 | 0.44767152 | 0.97887728 | 0.80364494  | 0.867467023 | 0.000867289 |
| -1.08577592 | 0.21052918 | -1.166801  | 0.142190053 | 0.909104688 | 0.148086458 |
| -1.06232664 | 0.22709446 | -1.0393782 | 0.550453906 | -1.3601675  | 7.83E-08    |
| -1.05095724 | 0.51062584 | -1.0822503 | 0.397948913 | -1.0256316  | 0.737249885 |
| -1.07925445 | 0.35482729 | 0.97610204 | 0.706750378 | 0.508602989 | 3.76E-11    |
| -1.02096684 | 0.63338161 | 0.94614067 | 0.301881563 | 0.966834107 | 0.438962903 |
| -1.04121311 | 0.70833391 | -1.0134387 | 0.802183626 | -1.19637185 | 0.1008196   |
| -1.02988861 | 0.65635439 | 0.83317936 | 0.023624603 | -1.04098929 | 0.544220764 |
| 0.96741359  | 0.61495091 | 0.97681218 | 0.554528172 | 0.970357698 | 0.647688075 |

|             |            |            |             |             |             |
|-------------|------------|------------|-------------|-------------|-------------|
| -1.10526485 | 0.06063076 | -1.0172845 | 0.770316217 | -1.08924085 | 0.107508695 |
| 0.678140169 | 3.67E-07   | -1.037051  | 0.598629657 | 0.894899975 | 0.103294288 |
| -1.00952953 | 0.90431475 | 0.96489278 | 0.70395826  | -1.15448259 | 0.072901889 |
| -1.20263646 | 0.00079428 | 0.95037163 | 0.12621919  | -1.21093674 | 0.000526487 |
| -1.02007623 | 0.67207944 | 0.98877863 | 0.798459934 | 0.975568136 | 0.598537802 |
| -1.22793316 | 0.03853889 | 0.90937475 | 0.100708476 | 0.99380542  | 0.949054404 |
| -1.0103525  | 0.8548287  | 0.9618449  | 0.577438467 | 0.948612593 | 0.350575659 |
| -1.04948695 | 0.23810623 | 0.92285806 | 0.2300395   | -1.07601208 | 0.075970369 |
| -1.22182348 | 0.00586619 | 0.98454594 | 0.80301979  | -1.05626346 | 0.436455046 |
| 0.961408662 | 0.48163774 | 0.91184597 | 0.025983753 | 0.898421806 | 0.059075618 |
| -1.06517887 | 0.20857157 | 0.86275783 | 0.027039628 | -1.04254651 | 0.404692096 |
| 0.909492085 | 0.12458001 | -1.0001799 | 0.997113274 | 0.927644512 | 0.222124909 |
| -1.23807624 | 0.06188619 | 0.93240589 | 0.355208958 | -1.04014361 | 0.726624997 |
| 0.881682811 | 0.09386164 | 0.9871982  | 0.875308923 | 0.860232617 | 0.04636578  |
| -1.00085052 | 0.99110357 | -1.0099067 | 0.820588891 | -1.15599612 | 0.061467659 |
| 0.906355515 | 0.18034918 | -1.1629471 | 0.165563315 | 0.632482934 | 5.26E-08    |
| 0.928547852 | 0.22060528 | -1.024119  | 0.718705233 | 0.982191131 | 0.765023617 |
| -1.18609766 | 0.01761959 | -1.0727487 | 0.288292821 | 0.988852135 | 0.872799146 |
| -1.0026198  | 0.9641224  | -1.0000562 | 0.999145696 | -1.23370976 | 0.000637883 |
| 0.956847828 | 0.60970909 | 0.84686032 | 0.016277094 | -1.22286841 | 0.022913525 |
| 0.804274963 | 0.07251175 | -1.0683612 | 0.403469822 | 0.934680829 | 0.572309664 |
| 0.949011821 | 0.5453134  | -1.2975663 | 6.02293E-06 | -1.00463131 | 0.957342029 |
| 0.974848404 | 0.63962114 | 0.85576944 | 0.001552042 | 0.878570648 | 0.020233032 |
| 0.763492288 | 3.64E-06   | -1.0795639 | 0.432487451 | 0.946676723 | 0.299171575 |
| 0.99122752  | 0.87251629 | -1.0556272 | 0.338219152 | 0.912386003 | 0.099197184 |
| 0.947827893 | 0.32254239 | 0.94254003 | 0.149669375 | 0.987430209 | 0.814555308 |
| 0.952738724 | 0.43520278 | -1.0662923 | 0.361993906 | 0.986355765 | 0.824307885 |
| 0.976762694 | 0.75963676 | 0.99156507 | 0.879352028 | 0.910002537 | 0.222762721 |
| -1.01986271 | 0.68928995 | 0.98484028 | 0.75933075  | 0.991084719 | 0.855461664 |
| -1.02278755 | 0.68312327 | 0.90745817 | 0.116123224 | 0.944712309 | 0.304842579 |
| 0.723736416 | 2.19E-05   | -1.1740755 | 0.157657199 | 0.950105344 | 0.464751234 |
| -1.17282782 | 0.05399632 | -1.0870557 | 0.263235212 | 0.552211175 | 1.20E-09    |
| -1.07197325 | 0.3120578  | -1.0970247 | 0.227728688 | -1.1171721  | 0.109606928 |
| -1.01834017 | 0.71187992 | 0.9358756  | 0.364339086 | -1.02361688 | 0.635381859 |
| -1.2210096  | 0.01070097 | -1.0346244 | 0.571693058 | -1.40215014 | 3.99E-05    |
| 0.766058502 | 8.25E-06   | -1.0848327 | 0.247785296 | 0.841329643 | 0.002325753 |
| 0.939796498 | 0.24809041 | 0.99741934 | 0.964566091 | 0.927902982 | 0.165129971 |
| 0.783038075 | 0.00059833 | -1.1735172 | 0.067992006 | 0.926503518 | 0.259879944 |
| 0.964556249 | 0.70799384 | 0.67494263 | 0.001689863 | 0.603291698 | 2.45E-06    |
| 0.862579468 | 0.10418584 | 0.98066915 | 0.821265056 | 0.839144726 | 0.05508922  |
| 0.927620899 | 0.16379885 | 0.99441951 | 0.917991582 | 0.957525122 | 0.418360156 |
| -1.08255976 | 0.1850423  | 0.93617127 | 0.212459367 | 0.980327842 | 0.737977665 |
| -1.05052034 | 0.62229812 | 0.90702258 | 0.079797864 | 0.917033979 | 0.387805475 |
| 0.889247994 | 0.04154393 | -1.0634987 | 0.256395461 | 0.817413021 | 0.000724247 |



|             |            |            |             |             |             |
|-------------|------------|------------|-------------|-------------|-------------|
| 0.961204553 | 0.27441208 | -1.0715319 | 0.266879957 | -1.04307122 | 0.244450033 |
| 0.966998487 | 0.43337842 | -1.0342422 | 0.661433146 | -1.07708803 | 0.086401841 |
| -1.0250813  | 0.39354081 | -1.0438912 | 0.383887404 | -1.02354592 | 0.422606863 |
| -1.0321669  | 0.62940922 | -1.0676071 | 0.238637005 | -1.20509263 | 0.00602648  |
| -1.00099285 | 0.9831037  | 0.64327002 | 4.83216E-08 | 0.980696099 | 0.67766105  |
| 0.856312105 | 0.01731588 | 0.82109049 | 0.018199912 | -1.03052236 | 0.635975527 |
| 0.985853255 | 0.79751707 | -1.0672197 | 0.343725345 | -1.08316802 | 0.154061847 |
| -1.05800822 | 0.52379366 | -1.0122025 | 0.805243587 | -1.11193615 | 0.232545915 |
| 0.913920708 | 0.22205849 | -1.1761481 | 0.036171243 | 0.853454534 | 0.034064359 |
| 0.975555345 | 0.53654326 | 0.8305588  | 0.001147205 | -1.01559594 | 0.69883146  |
| 0.922779605 | 0.46526879 | -1.0434644 | 0.427165924 | 0.919382421 | 0.44514652  |
| 0.825281785 | 0.01913959 | 0.94042835 | 0.363665271 | 0.950993149 | 0.529990035 |
| 0.985520994 | 0.79391344 | 0.76594498 | 0.007434877 | 0.998325755 | 0.976049212 |
| 0.91120931  | 0.11529072 | 0.91594065 | 0.33061813  | -1.12282806 | 0.051187721 |
| 0.857072947 | 0.02204116 | -1.0422675 | 0.440051973 | 0.830198801 | 0.006270768 |
| -1.03748974 | 0.47731422 | 0.97779082 | 0.705350088 | 0.917910286 | 0.101633581 |
| -1.43389075 | 0.00131045 | 0.99765131 | 0.981228417 | -1.27454697 | 0.026410645 |
| -1.1668992  | 0.02270849 | 0.77391591 | 3.01068E-05 | -1.03827452 | 0.570477606 |
| 0.955600486 | 0.5712318  | 0.99483003 | 0.885524443 | -1.1116524  | 0.189843928 |
| 0.877169112 | 0.00756078 | -1.0093855 | 0.826910397 | 0.924907722 | 0.104068945 |
| -1.07877795 | 0.09314379 | 0.99924491 | 0.979172514 | -1.05748243 | 0.213125397 |
| -1.06835581 | 0.2299474  | -1.185531  | 0.011742225 | 0.829540852 | 0.001160815 |
| -1.06526856 | 0.44507446 | -1.0975783 | 0.050991275 | -1.15205801 | 0.090770599 |
| 0.958472439 | 0.57585266 | -1.0392975 | 0.544240133 | -1.18478979 | 0.028550425 |
| 0.886511527 | 0.14697278 | -1.0718904 | 0.214431813 | 0.797183151 | 0.007702929 |
| -1.00936122 | 0.88131245 | 0.95754711 | 0.623547921 | 0.868244446 | 0.026946772 |
| 0.844972322 | 9.04E-05   | 0.76895334 | 0.000682392 | -1.0998549  | 0.020275236 |
| -1.04610459 | 0.36801963 | -1.070532  | 0.092469551 | 0.819294669 | 0.000186378 |
| -1.02967296 | 0.82633346 | 0.88848732 | 0.284086423 | 0.887154101 | 0.370656205 |
| -1.05023293 | 0.62235507 | -1.0143276 | 0.858641634 | 0.973451224 | 0.786694088 |
| -1.06552228 | 0.08376124 | 0.90933397 | 0.092890114 | -1.10527207 | 0.007502463 |
| -1.06322627 | 0.51949961 | -1.0066355 | 0.909772225 | 0.896475184 | 0.252890175 |
| 0.99787261  | 0.97180549 | 0.84616022 | 0.013520608 | 0.944822132 | 0.348200991 |
| 0.927397131 | 0.43316357 | 0.95639889 | 0.389885501 | 0.977660294 | 0.813776138 |
| -1.02614153 | 0.70897259 | -1.232936  | 0.053922772 | -1.11335688 | 0.124323374 |
| -1.03111256 | 0.51964087 | -1.2317307 | 0.002536095 | 0.875781048 | 0.00697429  |
| -1.04857527 | 0.34293594 | 0.98436906 | 0.844073182 | 0.959249392 | 0.405038104 |
| 0.988869916 | 0.83281876 | 0.91284758 | 0.058708669 | 0.996278062 | 0.943923879 |
| 0.960457875 | 0.3341507  | -1.0030813 | 0.944963362 | 0.860038159 | 0.000609857 |
| 0.953771457 | 0.65572262 | 0.94053782 | 0.265245079 | 0.743061293 | 0.006844347 |
| -1.12554947 | 0.08817531 | -1.2733736 | 0.004826301 | -1.51568157 | 1.18E-07    |
| 0.925551654 | 0.18564635 | -1.1634189 | 0.049605433 | 0.887786738 | 0.043994912 |
| 0.890638931 | 0.00881688 | 0.89658571 | 0.187985313 | -1.00098631 | 0.981625371 |
| 0.963831263 | 0.63552241 | 0.9401327  | 0.324710229 | -1.04742123 | 0.55135652  |

|             |            |            |             |             |             |
|-------------|------------|------------|-------------|-------------|-------------|
| 0.970598053 | 0.62822337 | -1.0117472 | 0.770235016 | 0.95428028  | 0.44837545  |
| -1.07789258 | 0.23847984 | 0.96886786 | 0.526822751 | 0.909990224 | 0.139731802 |
| -1.39074855 | 0.0070853  | 0.8322458  | 0.171918078 | -1.08693903 | 0.482176753 |
| -1.2512775  | 0.00628773 | -1.095784  | 0.359357095 | -1.32252153 | 0.000818553 |
| -1.19923154 | 0.07851845 | -1.047703  | 0.201277988 | -1.33251279 | 0.006466651 |
| 0.998982089 | 0.9876566  | 0.91151573 | 0.331572274 | 0.395476027 | 9.28E-20    |
| -1.07424131 | 0.3412539  | 0.88666428 | 0.049947847 | -1.12672734 | 0.115512428 |
| -1.14687141 | 0.00853309 | 0.85445957 | 0.105204217 | 0.919137889 | 0.098731185 |
| -1.11607613 | 0.03918719 | 0.93090296 | 0.302500231 | 0.958024905 | 0.412781137 |
| 0.934127714 | 0.301693   | 0.9614483  | 0.409256643 | 0.540404756 | 5.82E-13    |
| 0.950027009 | 0.25050157 | 0.97152046 | 0.562432955 | 0.946656822 | 0.219555978 |
| 0.875473726 | 0.42139131 | -1.0260766 | 0.627633302 | 0.792327623 | 0.161921233 |
| -1.08373139 | 0.08314694 | -1.0542074 | 0.207747771 | 0.974332367 | 0.570405128 |
| 0.927525037 | 0.18402534 | 0.8137394  | 0.056124081 | 0.94754159  | 0.339430603 |
| -1.01161002 | 0.86849415 | -1.200679  | 0.009615431 | 0.820068628 | 0.006040776 |
| -1.05089925 | 0.47627358 | 0.96905607 | 0.588189161 | 0.983727815 | 0.813518726 |
| 0.915117918 | 0.23574178 | -1.0278733 | 0.521495617 | 0.925542791 | 0.30024597  |
| -1.37658029 | 3.55E-05   | 0.90774254 | 0.215824662 | -1.64205261 | 4.25E-09    |
| 0.943954763 | 0.35024075 | -1.0974147 | 0.135129567 | 0.798471344 | 0.000547029 |
| 0.97851902  | 0.68769253 | 0.95641542 | 0.481873213 | 0.969136692 | 0.562004411 |
| 0.929462048 | 0.15708566 | -1.136378  | 0.282621971 | -1.07348441 | 0.169941582 |
| 0.861845309 | 0.1036019  | -1.2571346 | 0.005346335 | 0.869725624 | 0.12596195  |
| 0.722252299 | 1.25E-06   | -1.0692734 | 0.511295987 | 0.819980364 | 0.001573297 |
| -1.03396734 | 0.51956982 | 0.5545238  | 2.64431E-12 | 0.497329936 | 5.78E-19    |
| -1.31006082 | 0.00018444 | -1.1081859 | 0.174127353 | -1.20669858 | 0.007184044 |
| -1.06136784 | 0.47811004 | 0.89107395 | 0.025481043 | 0.95230593  | 0.560242632 |
| 0.846713386 | 0.00724964 | 0.95927551 | 0.427054282 | 0.919446838 | 0.164595703 |
| -1.10626177 | 0.18732228 | 0.95452743 | 0.479404883 | 0.980415171 | 0.794640874 |
| 0.797080878 | 0.00018777 | 0.93527787 | 0.135324157 | 0.945101551 | 0.322353911 |
| 0.973161031 | 0.62729087 | 0.84016165 | 0.293420418 | 0.307537088 | 1.04E-27    |
| 0.997121785 | 0.92854894 | -1.028562  | 0.538944972 | 0.998144834 | 0.953932407 |
| -1.12282967 | 0.10075538 | 0.99235293 | 0.891295141 | -1.12013483 | 0.107838805 |
| 0.943474113 | 0.28324069 | 0.98701303 | 0.851272785 | 0.750398553 | 1.87E-06    |
| -1.25930808 | 0.00023344 | -1.0028687 | 0.96713782  | -1.11641058 | 0.064966722 |
| -1.07290203 | 0.2017787  | 0.89999607 | 0.160122012 | -1.09859596 | 0.089926343 |
| -1.00014316 | 0.99748005 | -1.3476948 | 9.73816E-05 | 0.978199702 | 0.627131443 |
| 0.970809231 | 0.78887686 | 0.93877942 | 0.306624551 | 0.619079849 | 6.01E-05    |
| 0.937054303 | 0.45409868 | -1.0085541 | 0.874629232 | -1.04148021 | 0.639261924 |
| 0.989821082 | 0.9181175  | 0.93500329 | 0.192966907 | -1.20500071 | 0.065174368 |
| -1.15338311 | 0.02750864 | 0.69645432 | 0.000177898 | -1.33493623 | 2.74E-05    |
| 0.792069761 | 0.00903518 | 0.89175105 | 0.059853622 | 0.590793882 | 1.13E-07    |
| 0.940841597 | 0.18841657 | 0.94308093 | 0.260445652 | 0.763227837 | 2.49E-07    |
| -1.03349338 | 0.59641126 | -1.3363292 | 6.9458E-05  | 0.958367608 | 0.494638107 |
| -1.38324473 | 0.00014439 | -1.0297164 | 0.726794387 | -1.30473016 | 0.001461267 |

|             |            |            |             |             |             |
|-------------|------------|------------|-------------|-------------|-------------|
| -1.14709754 | 0.02872575 | 0.84683254 | 0.007295845 | -1.03413458 | 0.58476803  |
| -1.0804616  | 0.08184067 | -1.075064  | 0.342730786 | -1.09059322 | 0.052008508 |
| 0.963563123 | 0.45058974 | -1.02045   | 0.721660543 | -1.02589958 | 0.60274765  |
| -1.00271064 | 0.968009   | 0.93998012 | 0.271495725 | 0.80074701  | 0.001684214 |
| -1.18634751 | 0.06292498 | 0.94518573 | 0.083757794 | -1.34087339 | 0.001937877 |
| -1.04143766 | 0.69381763 | -1.1243791 | 0.09686551  | -1.0693419  | 0.516182528 |
| -1.20796281 | 0.00276271 | 0.8001189  | 0.000117888 | -1.42397292 | 2.80E-07    |
| 0.92411224  | 0.16544853 | -1.1265504 | 0.046404092 | 0.856503133 | 0.007897026 |
| -1.17551645 | 0.00747754 | -1.1119676 | 0.056512408 | -1.21930309 | 0.001244795 |
| 0.99655558  | 0.97074028 | -1.0988383 | 0.041442906 | 0.841355227 | 0.070568122 |
| -1.07558069 | 0.43996405 | 0.68310992 | 0.00106101  | 0.909276494 | 0.31438573  |
| 0.919474602 | 0.42760958 | 0.93112075 | 0.411474871 | 0.84161888  | 0.106488241 |
| -1.21398176 | 0.00196834 | -1.0985242 | 0.347039853 | -1.16301313 | 0.014203441 |
| -1.36559057 | 7.28E-05   | -1.055801  | 0.392380479 | -1.38846069 | 3.35E-05    |
| 0.790526285 | 0.00693323 | 0.69746715 | 0.000105587 | 0.872156201 | 0.108073585 |
| 0.793756235 | 0.01634786 | 0.96218976 | 0.403495314 | 0.829235069 | 0.049497871 |
| -1.12674219 | 0.27835043 | 0.99770425 | 0.970489962 | -1.27429331 | 0.030343272 |
| -1.01737451 | 0.85132958 | -1.4423699 | 2.44104E-05 | -1.02122064 | 0.819288625 |
| -1.31592021 | 0.00366341 | -1.0944605 | 0.14515282  | -1.56635829 | 7.28E-06    |
| 0.977480513 | 0.67995002 | -1.0087423 | 0.842653937 | 0.598470952 | 7.47E-13    |
| 0.822913187 | 0.00063616 | -1.001768  | 0.971282096 | -1.06620595 | 0.237932987 |
| -1.15427197 | 0.14578996 | 0.64178053 | 1.87641E-08 | -1.21072185 | 0.054339165 |
| -1.08331152 | 0.32281843 | -1.0630504 | 0.499714624 | 0.939190101 | 0.437458919 |
| 0.988971231 | 0.77632119 | -1.0039576 | 0.969428662 | 0.76690962  | 7.92E-09    |
| -1.08189535 | 0.42043729 | -1.3103954 | 3.81893E-05 | -1.18626603 | 0.083796802 |
| 0.917148454 | 0.12673001 | 0.83435232 | 0.002136841 | -1.01391676 | 0.805165149 |
| 0.955633617 | 0.38783377 | 0.95282688 | 0.409781322 | 0.874105893 | 0.012606293 |
| -1.12305198 | 0.18290904 | 0.9860132  | 0.880981988 | -1.22454529 | 0.022198367 |
| 0.952433615 | 0.52420478 | 0.99342061 | 0.94406593  | -1.14424971 | 0.081985035 |
| 0.937749054 | 0.2872722  | 0.86302409 | 0.166486918 | 0.877625414 | 0.033441128 |
| -1.05759843 | 0.31496476 | -1.0236329 | 0.696565293 | 0.92614446  | 0.170346937 |
| -1.02969682 | 0.62759005 | -1.3195767 | 0.000341771 | 0.948532478 | 0.382252752 |
| 0.982799001 | 0.8445532  | -1.0085127 | 0.919713171 | -1.0822458  | 0.373455107 |
| -1.04040637 | 0.64983452 | -1.1141023 | 0.251313544 | -1.16348245 | 0.086673684 |
| -1.01310947 | 0.78390036 | -1.0417046 | 0.709160516 | 0.950060001 | 0.283158051 |
| 0.961508837 | 0.63830224 | 0.86953123 | 0.13226888  | 0.771808099 | 0.00291163  |
| 0.850654757 | 0.01416162 | -1.0619663 | 0.508560018 | 0.900459229 | 0.106054351 |
| -1.02982514 | 0.74158293 | -1.0071161 | 0.897735888 | -1.08421818 | 0.365860085 |
| 0.756382217 | 0.00046625 | 0.95691391 | 0.415882388 | 0.814782302 | 0.008437684 |
| -1.06218037 | 0.51329683 | -1.1027171 | 0.318969764 | 0.459838203 | 1.79E-11    |
| 0.607762673 | 4.09E-09   | 0.86512755 | 0.076430857 | 0.552319653 | 2.76E-11    |
| -1.02383391 | 0.69508744 | 0.90859803 | 0.016805717 | 0.745776277 | 8.99E-06    |
| -1.086814   | 0.40258908 | -1.2460282 | 0.027328728 | -1.0268269  | 0.789504636 |
| -1.05579633 | 0.58063667 | -1.0846537 | 0.150808746 | 0.810472229 | 0.035980093 |

|             |            |            |             |             |             |
|-------------|------------|------------|-------------|-------------|-------------|
| 0.968602773 | 0.67289852 | 0.95440795 | 0.374650076 | 0.97580088  | 0.745710346 |
| 0.939945875 | 0.42716022 | -1.1941215 | 0.043993839 | -1.04390657 | 0.581101682 |
| 0.839928602 | 0.11389328 | -1.0337977 | 0.663694851 | -1.0655269  | 0.561160454 |
| -1.16006212 | 0.11714815 | 0.89900721 | 0.080681954 | 0.959084156 | 0.655894792 |
| -1.13114966 | 0.01743752 | 0.9355793  | 0.233050447 | -1.02383752 | 0.640987573 |
| -1.20814171 | 0.10756597 | -1.019809  | 0.744905011 | -1.25070311 | 0.058108787 |
| -1.00002178 | 0.99981217 | -1.0408845 | 0.6509296   | -1.17492139 | 0.08571149  |
| 0.842100856 | 0.1255455  | -1.241223  | 0.015877616 | -1.026504   | 0.813657432 |
| 0.961658695 | 0.48890674 | 0.85263964 | 0.001383959 | 0.986856729 | 0.814469524 |
| 0.965318388 | 0.7023748  | 0.95302008 | 0.564632799 | 0.937400812 | 0.484743912 |
| 0.947803028 | 0.42274091 | 0.88439286 | 0.059395623 | 0.982487649 | 0.791074033 |
| -1.24563275 | 0.08400886 | -1.0692384 | 0.45351256  | -1.2791616  | 0.053600605 |
| 0.878508844 | 0.08889656 | 0.82800204 | 0.014743384 | 0.81584684  | 0.008719898 |
| 0.927192959 | 0.33544733 | -1.0800897 | 0.40436268  | -1.135861   | 0.107294737 |
| -1.04840254 | 0.25983008 | 0.77147462 | 0.000590313 | 0.99255578  | 0.857808963 |
| -1.09166099 | 0.37007027 | 0.94033176 | 0.307956255 | -1.25589054 | 0.022569728 |
| -1.04198322 | 0.57671005 | 0.99373203 | 0.949428612 | -1.09162046 | 0.236510451 |
| 0.983632067 | 0.80737919 | 0.66219782 | 9.48589E-05 | -1.10513762 | 0.143610403 |
| -1.02045287 | 0.72022979 | 0.82055374 | 0.011067466 | -1.01137507 | 0.84135009  |
| -1.07854163 | 0.20811797 | 0.96157046 | 0.614735521 | 0.910675146 | 0.120735161 |
| 0.876066599 | 0.0402086  | -1.006279  | 0.954226382 | -1.0875788  | 0.187799481 |
| 0.886216203 | 0.03184318 | -1.0994534 | 0.313742011 | 0.973501311 | 0.626136622 |
| -1.00512757 | 0.95457195 | 0.95701185 | 0.385625187 | -1.09222658 | 0.327973854 |
| 0.925152166 | 0.32213909 | -1.1504287 | 0.230468922 | -1.00311881 | 0.968242937 |
| -1.01232385 | 0.78585349 | -1.0253329 | 0.786895504 | 0.812681248 | 2.41E-05    |
| 0.868042944 | 0.13265781 | 0.77550466 | 0.025232943 | 0.795617895 | 0.016852451 |
| -1.01500077 | 0.84012035 | 0.91132586 | 0.103752392 | 0.807994979 | 0.005358034 |
| 0.945545552 | 0.35599989 | 0.84765958 | 0.077674762 | 0.745154684 | 9.52E-06    |
| 0.921416706 | 0.10530882 | 0.90612983 | 0.143279331 | -1.09435929 | 0.075105878 |
| 0.885493539 | 0.22750996 | -1.1781016 | 0.194505199 | -1.276722   | 0.017478001 |
| -1.13796232 | 0.02407848 | 0.92786036 | 0.321044232 | -1.09261051 | 0.117467596 |
| 0.862000667 | 0.19226749 | -1.0124376 | 0.87432225  | 0.979683545 | 0.85586     |
| 0.802271802 | 0.00868859 | -1.023545  | 0.577333611 | 0.944741221 | 0.485199293 |
| 0.930116866 | 0.21877611 | -1.1012585 | 0.324609311 | 0.916082064 | 0.138056491 |
| -1.00525801 | 0.91354875 | 0.9591142  | 0.571001435 | -1.04331707 | 0.381713151 |
| 0.98821713  | 0.83682426 | 0.88191063 | 0.067560338 | -1.24617007 | 0.000324201 |
| -1.05063116 | 0.38203166 | 0.99128295 | 0.876858788 | -1.30168384 | 1.82E-05    |
| -1.01638114 | 0.77721937 | -1.0118985 | 0.842767052 | -1.16746789 | 0.009017583 |
| -1.25035507 | 0.00599273 | -1.0204722 | 0.748673435 | -1.18291743 | 0.035939238 |
| -1.05213862 | 0.30755821 | 0.88347169 | 0.027871864 | -1.01493891 | 0.764916319 |
| -1.01503028 | 0.78794092 | 0.88341274 | 0.171116811 | 0.920327732 | 0.138322066 |
| 0.995762697 | 0.96940615 | 0.93711803 | 0.407854576 | -1.03119301 | 0.781522434 |
| -1.01122678 | 0.84116398 | 0.9395698  | 0.170383552 | -1.07754717 | 0.183579144 |
| -1.40146205 | 1.45E-06   | -1.0782027 | 0.420138397 | 0.984031865 | 0.797016858 |

|             |            |            |             |             |             |
|-------------|------------|------------|-------------|-------------|-------------|
| -1.04010536 | 0.51782443 | 0.86839946 | 0.060034743 | -1.08759685 | 0.170213864 |
| -1.01914    | 0.72676581 | 0.66912351 | 1.39722E-08 | -1.05658347 | 0.312418689 |
| -1.1404508  | 0.03526329 | 0.99043208 | 0.847278141 | -1.15230854 | 0.023601748 |
| -1.10256338 | 0.17426368 | -1.2055411 | 0.066035108 | -1.22916523 | 0.005255416 |
| -1.27350989 | 0.00160348 | -1.0651428 | 0.261962254 | -1.279425   | 0.001325984 |
| -1.01111247 | 0.78703618 | 0.9560024  | 0.690661174 | -1.00986374 | 0.810354626 |
| 0.812879325 | 0.03458893 | 0.84775441 | 0.046068942 | 0.930664455 | 0.455297522 |
| 0.92610305  | 0.3591244  | 0.97963168 | 0.725120582 | -1.22654559 | 0.017132677 |
| -1.04367856 | 0.61121396 | -1.0804638 | 0.113340237 | 0.853281903 | 0.063117514 |
| 0.945335128 | 0.24406479 | -1.0666272 | 0.265072438 | 0.910449899 | 0.054527158 |
| 0.925671114 | 0.18878349 | -1.2549823 | 0.000164311 | 0.928876752 | 0.209026443 |
| 0.949729707 | 0.46597238 | -1.0041975 | 0.941833152 | -1.1517619  | 0.049307201 |
| 0.94367187  | 0.26668916 | -1.1415911 | 0.095641099 | 0.940709388 | 0.241917301 |
| -1.01979076 | 0.82355668 | -1.0913664 | 0.082055486 | 0.964814571 | 0.683775255 |
| -1.25423667 | 0.00546996 | 0.95920068 | 0.453658155 | -1.62356627 | 8.52E-08    |
| 0.960304259 | 0.4656523  | 0.89072264 | 0.298377777 | -1.07153818 | 0.215468284 |
| -1.01644182 | 0.90063993 | -1.1344059 | 0.026944411 | -1.38725456 | 0.014825661 |
| -1.0125363  | 0.93155171 | -1.0088094 | 0.888520045 | -1.28953162 | 0.083878717 |
| -1.04975478 | 0.28175363 | 0.9683429  | 0.596524303 | 0.987633288 | 0.781581484 |
| 0.953710214 | 0.40439338 | -1.0802155 | 0.158633223 | 0.84363936  | 0.003919633 |
| -1.00531    | 0.87874967 | -1.0600411 | 0.342214749 | 0.761447512 | 1.56E-10    |
| -1.08623921 | 0.20906111 | -1.1963736 | 0.014433684 | -1.42743954 | 1.21E-06    |
| -1.11998075 | 0.29149668 | -1.1918161 | 0.019286989 | -1.35092574 | 0.006572462 |
| -1.111982   | 0.22112164 | -1.0290983 | 0.4840386   | -1.06956355 | 0.43628689  |
| 0.930804095 | 0.21847551 | 0.95218435 | 0.610188913 | 0.861786899 | 0.012555396 |
| 0.887183222 | 0.37405322 | -1.1345876 | 0.134040597 | 0.975460186 | 0.853103417 |
| -1.11867042 | 0.06257336 | 0.83981883 | 0.041564793 | -1.00463527 | 0.937779365 |
| -1.00740081 | 0.88889336 | 0.74874705 | 1.3836E-07  | -1.06517786 | 0.234632322 |
| 0.959396923 | 0.45003759 | 0.91486923 | 0.131054341 | -1.04611253 | 0.41158295  |
| 0.991728184 | 0.93891059 | 0.95403774 | 0.505824153 | 0.966022348 | 0.749871491 |
| 0.801839463 | 0.00042551 | -1.0141206 | 0.787082266 | 0.67522663  | 1.40E-08    |
| -1.00756363 | 0.84982241 | 0.87570757 | 0.135016907 | 0.863919259 | 0.000519675 |
| 0.99085097  | 0.87184265 | 0.72979991 | 0.000179613 | -1.07663722 | 0.198391274 |
| 0.935430383 | 0.11200109 | 0.95335061 | 0.389990574 | 0.999266119 | 0.985886724 |
| -1.09144334 | 0.10281975 | 0.88059238 | 0.332393915 | 0.937892131 | 0.22923809  |
| -1.02630684 | 0.56240247 | -1.0864158 | 0.56828457  | 0.995899415 | 0.926851755 |
| -1.28551783 | 0.05368071 | -1.0445093 | 0.333861785 | -1.22708378 | 0.113838652 |
| -1.01557791 | 0.84554495 | 0.99936742 | 0.991088934 | 0.871677771 | 0.087744205 |
| 0.929073291 | 0.18754428 | -1.0097321 | 0.780310387 | 0.943905263 | 0.299556867 |
| 0.958161494 | 0.47929506 | -1.208245  | 0.005287805 | -1.12878761 | 0.048459432 |
| -1.06874732 | 0.27535376 | -1.1590249 | 0.171023479 | 0.992420362 | 0.900112014 |
| -1.05263311 | 0.3708236  | 0.96489676 | 0.678510708 | -1.07401394 | 0.214451551 |
| 0.974440412 | 0.68750138 | 0.78364529 | 9.05728E-05 | 0.963123856 | 0.559734008 |
| -1.08399822 | 0.15708611 | 0.72154457 | 0.017849274 | -1.04084621 | 0.479379003 |

|             |            |            |             |             |             |
|-------------|------------|------------|-------------|-------------|-------------|
| -1.03105619 | 0.50021576 | -1.078357  | 0.206274844 | 0.995166646 | 0.91477189  |
| -1.0235415  | 0.70177475 | -1.1543901 | 0.008477718 | -1.04147312 | 0.504262907 |
| 0.648264807 | 5.56E-06   | -1.1251235 | 0.03492012  | 0.513968837 | 2.66E-10    |
| 0.964972501 | 0.36488388 | -1.0313966 | 0.775543041 | 0.973594316 | 0.495747865 |
| 0.977520569 | 0.5024752  | 0.82038899 | 0.00140745  | -1.00313841 | 0.926209549 |
| -1.06095555 | 0.29930811 | 0.94647467 | 0.170567158 | 0.994952022 | 0.928906999 |
| -1.4172295  | 0.01002853 | -1.1264904 | 0.040398814 | -1.56444551 | 0.001181934 |
| -1.09672052 | 0.1372739  | -1.0223162 | 0.595355998 | -1.07807355 | 0.224670121 |
| 0.58323685  | 9.58E-09   | 0.86618026 | 0.00866661  | -1.05294252 | 0.519149102 |
| 0.974327519 | 0.75765442 | -1.0481178 | 0.296170799 | 0.82050363  | 0.02198587  |
| 0.877276887 | 0.01960323 | -1.0445647 | 0.733336766 | -1.06866148 | 0.227687029 |
| 0.857141255 | 0.00781292 | 0.9433601  | 0.463504752 | -1.01361927 | 0.809293282 |
| 0.956473497 | 0.33664985 | -1.064292  | 0.263240138 | 0.865529382 | 0.002699088 |
| 0.899240565 | 0.0351827  | -1.0037386 | 0.950632415 | 0.981249498 | 0.701656844 |
| 0.987679192 | 0.8102394  | -1.1089793 | 0.092195337 | -1.00604631 | 0.907035073 |
| 0.994000572 | 0.91066867 | -1.0394885 | 0.498541997 | 0.938107637 | 0.236622569 |
| 0.981847952 | 0.75983883 | 0.9790215  | 0.741804435 | -1.07280267 | 0.243723453 |
| 0.913715432 | 0.02757092 | 0.89279074 | 0.048642629 | 0.982740138 | 0.663841432 |
| 0.945316408 | 0.2891001  | 0.99092688 | 0.84046326  | -1.03181758 | 0.553448236 |
| 0.996630528 | 0.93568426 | -1.1543919 | 0.021132874 | 0.989635908 | 0.803346246 |
| -1.13617144 | 0.01530207 | 0.71722336 | 0.000299462 | 0.993860916 | 0.90426286  |
| -1.07668316 | 0.1955086  | 0.9820599  | 0.644541016 | -1.00133496 | 0.981205437 |
| -1.01485872 | 0.73695133 | 0.99055819 | 0.779247968 | 0.86164744  | 0.001245253 |
| 0.635771002 | 4.57E-05   | -1.0276312 | 0.631212565 | 0.72989075  | 0.003221289 |
| 0.974094782 | 0.62234469 | -1.4013933 | 0.01253865  | -1.01419946 | 0.79116402  |
| -1.01494243 | 0.87360432 | 0.92260462 | 0.193683571 | 0.988440825 | 0.900754995 |
| -1.11751027 | 0.27122146 | 0.78173411 | 0.00310311  | 0.978472264 | 0.828441752 |
| 0.857404886 | 0.11130062 | 0.93560086 | 0.430807863 | -1.04547507 | 0.64167045  |
| 0.974129609 | 0.43649384 | -1.0125524 | 0.819562015 | -1.01809493 | 0.593902387 |
| 0.889744997 | 0.06994978 | -1.004791  | 0.932029371 | 0.840908558 | 0.008264982 |
| 0.966122483 | 0.80107205 | 0.96978282 | 0.506718148 | 0.890787602 | 0.399281207 |
| -1.01899011 | 0.7094538  | 0.95996234 | 0.409430218 | 0.934305943 | 0.181728717 |
| 0.808953661 | 0.00538801 | -1.0419646 | 0.427163441 | 0.833994802 | 0.016162936 |
| 0.80835475  | 0.0037544  | -1.016439  | 0.761206363 | 0.731561147 | 4.34E-05    |
| -1.30731836 | 0.00352341 | -1.1640843 | 0.01372047  | 0.951933412 | 0.577016672 |
| 0.954114887 | 0.73406779 | -1.0251607 | 0.535428137 | -1.06335071 | 0.656980521 |
| -1.0013091  | 0.98500528 | -1.0754978 | 0.171554112 | 0.995884061 | 0.952752541 |
| -1.10053401 | 0.19123652 | 0.91593405 | 0.039601545 | 0.860742987 | 0.043083821 |
| 0.979491427 | 0.77436515 | 0.9460553  | 0.281343446 | 0.750085758 | 0.000196358 |
| -1.18201843 | 0.26495248 | -1.1078902 | 0.07469557  | -1.2956279  | 0.086750376 |
| 0.938458434 | 0.23312067 | -1.0442478 | 0.326065597 | -1.11689302 | 0.04053973  |
| 0.907580118 | 0.10311507 | 0.700663   | 0.000989842 | 0.710725042 | 3.15E-07    |
| -1.1261385  | 0.10693966 | 0.97411302 | 0.622592452 | 0.891993459 | 0.120555002 |
| -1.27905796 | 0.01120416 | -1.1345526 | 0.179368709 | -1.16852066 | 0.102282694 |

|             |            |            |              |             |             |
|-------------|------------|------------|--------------|-------------|-------------|
| -1.08144951 | 0.29859052 | -1.1491311 | 0.16999679   | -1.08021812 | 0.305605881 |
| 0.913220994 | 0.16271377 | -1.1402356 | 0.172972501  | 0.797836984 | 0.000884467 |
| -1.04804716 | 0.16482458 | 0.96633028 | 0.310227879  | 0.977135244 | 0.490612624 |
| 0.927252691 | 0.33325446 | 0.86303443 | 0.02350724   | -1.03568434 | 0.652187773 |
| 0.986929822 | 0.67943617 | 0.81731169 | 0.144152107  | 0.973826186 | 0.405962648 |
| 0.910965809 | 0.01201813 | -1.0730155 | 0.166315067  | 0.998439635 | 0.965432871 |
| -1.11694454 | 0.13472336 | 0.6799511  | 2.41599E-06  | 0.971801916 | 0.696051155 |
| 0.972689507 | 0.37180855 | 0.90057628 | 0.14166835   | 0.994298373 | 0.8531641   |
| 0.984463723 | 0.80650035 | -1.1052994 | 0.259134286  | -0.99999791 | 0.999973927 |
| -1.0165677  | 0.61408003 | -1.1621422 | 0.279512451  | 0.980453003 | 0.544865477 |
| -1.06594407 | 0.23878094 | 0.98385047 | 0.815111093  | 0.966398872 | 0.526453964 |
| -1.02875464 | 0.47863658 | -1.070891  | 0.348207211  | -1.03950048 | 0.333928501 |
| 0.946501962 | 0.27439982 | -1.0056142 | 0.938243086  | 0.832138615 | 0.000524276 |
| 0.96236348  | 0.70399194 | -1.0872354 | 0.575478679  | 0.58387462  | 1.81E-06    |
| -1.01154996 | 0.81182851 | 0.97780436 | 0.671690007  | -1.04727349 | 0.340223293 |
| 0.754246795 | 0.07832879 | 0.60437469 | 1.0891E-11   | 0.912113344 | 0.560740169 |
| -1.01752599 | 0.7158796  | -1.0072882 | 0.920537882  | -1.07104594 | 0.154145399 |
| 0.975944019 | 0.40568582 | 0.74730507 | 0.003001848  | 0.960111963 | 0.166956846 |
| 0.892058749 | 0.03347119 | 0.93644283 | 0.382645075  | 0.781838547 | 1.84E-05    |
| -1.08471766 | 0.23895214 | 0.95602018 | 0.486148023  | 0.911610268 | 0.181030194 |
| 0.961869222 | 0.54702462 | 0.96444166 | 0.28212212   | -1.17851877 | 0.013294207 |
| 0.8380259   | 0.00143788 | 0.95086914 | 0.517657115  | 0.913197441 | 0.089923463 |
| 0.906210545 | 0.19997092 | -1.009886  | 0.757248053  | 0.697121813 | 1.54E-05    |
| 0.870128777 | 0.00838987 | 0.93804171 | 0.08018766   | 0.659956117 | 5.37E-11    |
| -1.16988066 | 0.00858985 | -1.0181279 | 0.806088608  | -1.20538271 | 0.002007019 |
| -1.09901112 | 0.20639501 | -1.0253453 | 0.419193532  | -1.12581015 | 0.114276046 |
| -1.01122521 | 0.80232155 | -1.1294613 | 0.060982678  | 0.956952812 | 0.325791332 |
| 0.905655365 | 0.17431488 | -1.0718639 | 0.036734438  | 0.779198067 | 0.001047314 |
| 0.976415037 | 0.5765752  | -1.0398882 | 0.468784123  | 0.917276648 | 0.047063357 |
| -1.28828287 | 0.00448635 | 0.97109196 | 0.463561071  | -1.34536346 | 0.001020699 |
| 0.965544902 | 0.50189845 | -1.0721126 | 0.167719899  | 0.997425832 | 0.960547037 |
| -1.00714902 | 0.89927062 | 0.73143069 | 0.002959823  | -1.02512146 | 0.659565641 |
| -1.02395214 | 0.70288915 | 0.94995636 | 0.289606817  | 0.963413874 | 0.548498312 |
| -1.13895375 | 0.28980989 | 0.91667591 | 0.58212732   | -1.09313804 | 0.467513536 |
| -1.13016408 | 0.16077202 | -1.0117343 | 0.806864037  | -1.56043571 | 3.53E-06    |
| -1.06417547 | 0.61793124 | -1.034695  | 0.245608544  | -1.15010096 | 0.264334969 |
| -1.16974498 | 0.033198   | 0.66299957 | 1.78042E-10  | -1.16369491 | 0.039205304 |
| 0.937770354 | 0.33350368 | 0.9354154  | 0.332606387  | 0.900968085 | 0.11907948  |
| -1.08151112 | 0.17623317 | -1.049078  | 0.458373359  | -1.1990148  | 0.002486782 |
| 0.97651851  | 0.77616764 | 0.94765552 | 0.3111111339 | 0.771056392 | 0.002854386 |
| 0.971324521 | 0.37999334 | 0.64089365 | 2.89414E-07  | 0.957564219 | 0.19266796  |
| 0.987850052 | 0.74351797 | 0.90201152 | 0.047427213  | -1.08243804 | 0.037665788 |
| 0.813697069 | 0.00126187 | -1.2644344 | 0.000150599  | 0.712204038 | 7.42E-07    |
| 0.935331936 | 0.42567725 | -1.0477937 | 0.529757767  | 0.797537841 | 0.008865401 |

|             |            |            |             |             |             |
|-------------|------------|------------|-------------|-------------|-------------|
| 0.994250947 | 0.94219755 | -1.0481813 | 0.293635933 | 0.792874613 | 0.004936063 |
| -1.03476526 | 0.62085033 | 0.86283663 | 0.045305581 | 0.778256859 | 0.000595576 |
| 0.969961608 | 0.58349857 | 0.98114374 | 0.655884805 | 0.985781839 | 0.796622895 |
| 0.989244013 | 0.84546631 | -1.2192148 | 0.024091612 | 0.94998179  | 0.356899276 |
| 0.878862439 | 0.20425499 | 0.81116496 | 0.000174083 | 0.85712937  | 0.130813694 |
| 0.818744384 | 0.00034267 | 0.99923276 | 0.989117361 | 0.869410635 | 0.009839849 |
| -1.00761987 | 0.9213803  | -1.0061932 | 0.920697092 | 0.750285807 | 0.000430943 |
| 0.864845922 | 0.05053498 | 0.96358457 | 0.761692648 | 0.656227898 | 3.59E-07    |
| -1.01458391 | 0.72614583 | -1.2702521 | 0.007475708 | 0.943782944 | 0.165183435 |
| 0.963451579 | 0.44347381 | 0.90167382 | 0.40751122  | 0.952050238 | 0.312826935 |
| 0.999600516 | 0.99425571 | -1.1511762 | 0.054849881 | -1.06588851 | 0.253170876 |
| -1.02226894 | 0.62617351 | -1.0296649 | 0.658814375 | 0.963545288 | 0.412411292 |
| 0.942316008 | 0.33172549 | -1.0065891 | 0.90897921  | 0.972609572 | 0.648903592 |
| 0.864675384 | 0.15571314 | 0.99170919 | 0.920622504 | -1.22903099 | 0.046059516 |
| -1.01380973 | 0.8540291  | 0.96877398 | 0.338771736 | -1.05108313 | 0.504756174 |
| 0.994712309 | 0.94950047 | -1.0152017 | 0.686417937 | -1.21121824 | 0.025372588 |
| -1.11976429 | 0.06255985 | -1.0211607 | 0.730863265 | -1.19276791 | 0.004524331 |
| -1.05554225 | 0.44873552 | 0.80928779 | 0.01398985  | -1.17424875 | 0.027400578 |
| 0.947252955 | 0.64891219 | 0.7419945  | 0.000407849 | -1.16178447 | 0.210630575 |
| -1.10988627 | 0.04971276 | 0.89780297 | 0.122420475 | 0.973835263 | 0.611732099 |
| -1.00359849 | 0.96874721 | -1.0154894 | 0.782078054 | 0.979651052 | 0.822608557 |
| 0.98036968  | 0.86791341 | 0.85699642 | 0.007188111 | -1.07123633 | 0.564327643 |
| 0.852756742 | 0.05071076 | 0.97920151 | 0.835096055 | 0.653481014 | 1.94E-06    |
| -1.17761515 | 0.04048485 | 0.63579217 | 8.99814E-12 | -1.20559287 | 0.019841815 |
| -1.16227758 | 0.09388492 | 0.87972246 | 0.099952053 | -1.28083907 | 0.006953971 |
| -1.01952833 | 0.59710219 | 0.92661003 | 0.298400906 | 0.92200771  | 0.029773611 |
| -1.05811617 | 0.41696739 | -1.0007163 | 0.986171363 | -1.03750757 | 0.596099613 |
| -1.23619929 | 0.00014142 | -1.0243887 | 0.619368756 | -1.40701072 | 1.88E-08    |
| -1.09494034 | 0.01687504 | -1.0228638 | 0.68399928  | 0.994747293 | 0.886657886 |
| -1.21626278 | 0.01100456 | 0.97215259 | 0.532500178 | -1.06706577 | 0.386387873 |
| -1.21668339 | 0.04670843 | 0.90562281 | 0.108052495 | -1.22618604 | 0.038941214 |
| -1.16382951 | 0.00252712 | -1.0048734 | 0.961781043 | -1.23595126 | 4.76E-05    |
| 0.974562932 | 0.72458322 | 0.94474385 | 0.446933581 | -1.0726647  | 0.339245464 |
| -1.1198762  | 0.27839903 | -1.0349308 | 0.681920637 | -1.02855409 | 0.786436816 |
| -1.04124342 | 0.48147759 | -1.0646409 | 0.296993531 | 0.973981335 | 0.645669215 |
| 0.953588059 | 0.32269197 | -1.1717313 | 0.029437776 | -1.10101123 | 0.048270998 |
| -1.06710798 | 0.26808299 | -1.0323145 | 0.789185208 | -1.01930241 | 0.743132818 |
| -1.52073436 | 1.73E-07   | -1.0325377 | 0.540084345 | -1.07001425 | 0.336928681 |
| -1.03901734 | 0.5407594  | 0.99569926 | 0.962504683 | -1.02462052 | 0.697207287 |
| -1.46439629 | 0.00830811 | 0.88860126 | 0.323957037 | -1.47904372 | 0.006857636 |
| 0.790293171 | 0.00562465 | 0.85484078 | 0.054229071 | 0.849922788 | 0.051318209 |
| -1.028559   | 0.58771991 | -1.1226921 | 0.143074509 | -1.01373421 | 0.79262466  |
| -1.29041858 | 0.00391268 | -1.0656811 | 0.473759044 | -1.62126045 | 4.95E-07    |
| 0.953294489 | 0.44633221 | 0.99857356 | 0.968839306 | -1.0244359  | 0.700120594 |



|             |            |            |             |             |             |
|-------------|------------|------------|-------------|-------------|-------------|
| 0.974110435 | 0.80564985 | -1.0598144 | 0.403949765 | 0.922123236 | 0.44805967  |
| 0.908776564 | 0.04609786 | -1.1259642 | 0.02577321  | -1.09364028 | 0.061395577 |
| 0.996698142 | 0.94550062 | 0.95604353 | 0.226907864 | 0.970331412 | 0.534351665 |
| 0.993864295 | 0.8738404  | -1.0933695 | 0.235056477 | 0.976550158 | 0.541076533 |
| -1.08190465 | 0.13907306 | -1.1149322 | 0.263778701 | -1.06406695 | 0.241450365 |
| 0.7772558   | 4.96E-05   | -1.2441958 | 2.96796E-05 | -1.13569512 | 0.030060639 |
| 0.986478834 | 0.86386309 | 0.94632121 | 0.451511046 | -1.16732895 | 0.055437042 |
| -1.06935763 | 0.47004046 | -1.0498218 | 0.640085105 | -1.39117801 | 0.000734558 |
| -1.49648591 | 9.02E-06   | 0.90916675 | 0.100701631 | -1.07887309 | 0.359593853 |
| -1.12362519 | 0.07029457 | -1.0615355 | 0.215195742 | 0.951978983 | 0.438976353 |
| 0.947838719 | 0.35092783 | -1.022926  | 0.6976792   | -1.0995597  | 0.101318835 |
| 0.847024935 | 0.01593352 | -1.2880691 | 0.000644179 | 0.792660896 | 0.00099228  |
| -1.01119851 | 0.81392164 | -1.060878  | 0.346128574 | -1.03880265 | 0.422335313 |
| 0.923924789 | 0.3348618  | -1.2763129 | 0.085310192 | 0.676315858 | 1.27E-05    |
| 0.983375969 | 0.79563892 | 0.91453375 | 0.278326333 | 0.842025474 | 0.010023235 |
| -1.02128652 | 0.75505616 | -1.0489566 | 0.358698699 | 0.740425124 | 4.03E-05    |
| 0.982353894 | 0.77254412 | -1.1843204 | 0.050475094 | -1.05911463 | 0.35286978  |
| 0.913494782 | 0.04996337 | 0.94971052 | 0.411560989 | -1.04509661 | 0.332600197 |
| -1.01526178 | 0.81473415 | -1.058192  | 0.596113058 | -1.02056173 | 0.75290764  |
| 0.990799567 | 0.89124012 | -1.054585  | 0.261644341 | -1.11614583 | 0.108272734 |
| -1.03202144 | 0.67683993 | 0.99559797 | 0.927346759 | 0.16575395  | 2.88E-30    |
| -1.06312729 | 0.27649913 | -1.0392401 | 0.322879867 | 0.908195756 | 0.08947977  |
| 0.468711616 | 5.22E-09   | 0.93879898 | 0.233645672 | 0.410807405 | 5.85E-11    |
| -1.01069794 | 0.79220143 | 0.80391987 | 0.000345863 | -1.00915512 | 0.821472959 |
| 0.975750193 | 0.81389402 | -1.1171303 | 0.166748602 | 0.910421962 | 0.369842881 |
| -1.11636421 | 0.3949656  | -1.1093185 | 0.26533476  | -1.00752746 | 0.953630015 |
| -1.12951673 | 0.01894206 | -1.1358583 | 0.12688561  | -1.1210139  | 0.027263098 |
| 0.959894477 | 0.49702433 | 0.92209403 | 0.204280736 | -1.11527518 | 0.073922962 |
| -1.23532077 | 0.01160839 | -1.1099119 | 0.072547383 | -1.04583767 | 0.581718437 |
| 0.901755016 | 0.03991606 | 0.86682738 | 0.036683203 | -1.07759976 | 0.133912986 |
| 0.931650617 | 0.20511027 | -1.0494563 | 0.30982915  | -1.04681204 | 0.410841904 |
| 0.846833559 | 0.04817842 | 0.92156515 | 0.319614444 | 0.757291316 | 0.001352886 |
| -1.05890038 | 0.28896548 | -1.0362324 | 0.582819158 | 0.814572476 | 0.000329083 |
| -1.03425662 | 0.59335623 | 0.81298897 | 0.003240279 | 0.949463249 | 0.411864452 |
| 0.945922055 | 0.42537433 | -1.075274  | 0.241531722 | -1.35968234 | 4.54E-05    |
| -1.06605972 | 0.38776462 | 0.95042198 | 0.264709035 | 0.959912067 | 0.579896489 |
| -1.08633726 | 0.47315321 | 0.87205474 | 0.037914775 | -1.40637558 | 0.00438476  |
| -1.08180018 | 0.43131638 | -1.0287122 | 0.675612078 | -1.17161153 | 0.116093375 |
| 0.909651595 | 0.18519471 | -1.005796  | 0.939037901 | 0.992892211 | 0.919844757 |
| -1.05849517 | 0.39896561 | -1.0917648 | 0.1207228   | 0.987536233 | 0.851909358 |
| -1.51040294 | 5.04E-07   | 0.37629375 | 3.07269E-12 | 0.87470613  | 0.06928977  |
| -1.10670333 | 0.01903787 | -1.0118172 | 0.771178783 | 0.937669766 | 0.130702675 |
| 0.867943286 | 0.01341854 | 0.78742564 | 0.025183132 | -1.03202243 | 0.571669673 |
| -1.13124917 | 0.05462228 | -1.1146477 | 0.401562396 | -1.0384834  | 0.54995374  |

|             |            |            |             |             |             |
|-------------|------------|------------|-------------|-------------|-------------|
| 0.910720043 | 0.09064919 | -1.1200166 | 0.028431238 | 0.850424443 | 0.004263956 |
| -1.03685977 | 0.451713   | -1.044624  | 0.468954099 | 0.743216168 | 7.87E-08    |
| -1.01458157 | 0.75178211 | -1.1785151 | 0.047197639 | -1.01507618 | 0.743721815 |
| -1.16187199 | 0.0314019  | -1.027441  | 0.583743303 | -1.21364979 | 0.006155643 |
| 0.90546687  | 0.13106941 | 0.97693348 | 0.674121199 | 0.950805269 | 0.439446482 |
| -1.05996769 | 0.70164187 | 0.87789727 | 0.119111092 | -1.3191068  | 0.072559845 |
| 0.991887278 | 0.94065792 | 0.72272492 | 1.31256E-07 | 0.869576055 | 0.204958332 |
| -1.27766633 | 6.08E-05   | 0.91334909 | 0.154127359 | -1.03629173 | 0.52925371  |
| -1.04383203 | 0.48747639 | 0.96425484 | 0.601117468 | -1.06881889 | 0.282910371 |
| -1.41152211 | 3.27E-07   | 0.87164643 | 0.066955958 | -1.66346083 | 1.11E-11    |
| 0.739238186 | 0.00232499 | -1.1569136 | 0.209007575 | 0.685983243 | 0.000202464 |
| 0.988117023 | 0.88072116 | -1.0562537 | 0.583297013 | -1.30706432 | 0.001368151 |
| 0.888892883 | 0.09555181 | 0.86356256 | 0.042400431 | 0.798135483 | 0.002006391 |
| -1.06491389 | 0.39900182 | 0.84455386 | 0.014491846 | 0.810490288 | 0.006356266 |
| 0.86763491  | 0.00588065 | -1.034065  | 0.644637498 | -1.01938595 | 0.699589796 |
| 0.861738272 | 0.02449546 | -1.0068267 | 0.871716246 | 0.946767848 | 0.398637506 |
| -1.04409738 | 0.52961375 | 0.90893717 | 0.090494699 | -2.36333129 | 1.13E-17    |
| 0.951584726 | 0.25488852 | 0.95046663 | 0.421858417 | 0.830394661 | 7.01E-05    |
| 0.891107659 | 0.04224684 | -1.0360576 | 0.516785136 | -1.13865195 | 0.022844325 |
| 0.958947164 | 0.43756215 | 0.98861737 | 0.811428843 | 0.674420706 | 1.16E-09    |
| -1.05380267 | 0.20848145 | 0.99855164 | 0.974725083 | 0.934783562 | 0.107208383 |
| -1.03127181 | 0.66556324 | -1.2989112 | 0.000314599 | -1.03755788 | 0.604910327 |
| -1.03358799 | 0.69932004 | 0.9015378  | 0.115364225 | -1.20200349 | 0.035044868 |
| 0.942275305 | 0.26580205 | -1.2903328 | 0.097646705 | -1.09002185 | 0.108909225 |
| -1.54566902 | 0.00099645 | 0.89199569 | 0.298691451 | -1.29635479 | 0.042723271 |
| -1.17935881 | 0.03751133 | -1.2301191 | 0.000543501 | -1.04405307 | 0.579562152 |
| 0.803942475 | 0.00285678 | -1.1520722 | 0.024934508 | -1.02319992 | 0.743761286 |
| -1.18408506 | 0.01189441 | -1.2758413 | 0.000132239 | -1.14153566 | 0.04628616  |
| 0.934972028 | 0.21475149 | 0.82449301 | 0.046031354 | 0.975345133 | 0.643016887 |
| -1.00244719 | 0.96106238 | -1.021929  | 0.785449567 | 0.966925864 | 0.502613414 |
| -1.02929791 | 0.68108101 | -1.0132968 | 0.849801482 | 0.93249983  | 0.321757002 |
| 0.991445733 | 0.96764986 | 0.93036356 | 0.333588913 | 0.898824861 | 0.61499871  |
| 0.929694666 | 0.44477255 | 0.99019249 | 0.842905665 | 0.974283237 | 0.784272719 |
| -1.018586   | 0.79045922 | 0.96075048 | 0.536051176 | 0.735432652 | 4.28E-05    |
| 0.939108341 | 0.46987045 | 0.75044287 | 9.81769E-05 | 0.951620826 | 0.568026197 |
| -1.11376185 | 0.06763947 | 0.93330326 | 0.115308236 | 0.938633565 | 0.277850075 |
| 0.628312087 | 5.34E-10   | 0.9619045  | 0.486342441 | 0.308154398 | 1.23E-25    |
| 0.945938188 | 0.15046645 | -1.0514097 | 0.353779022 | 0.987797131 | 0.748511237 |
| 0.550763022 | 2.36E-08   | 0.99236853 | 0.853067143 | 0.564241468 | 6.32E-08    |
| 0.918210406 | 0.38096009 | 0.9444243  | 0.42317219  | 0.913865068 | 0.355248981 |
| -1.02435237 | 0.72673873 | -1.198708  | 0.03774282  | 0.994812249 | 0.939747862 |
| 0.843071097 | 0.00837265 | -1.1229733 | 0.032625291 | 0.998197519 | 0.977023422 |
| 0.924365283 | 0.45926679 | -1.5184349 | 0.001528205 | 0.869021824 | 0.188951641 |
| 0.871685504 | 0.04784935 | 0.88050609 | 0.105725059 | 0.826118393 | 0.006774235 |

|             |            |            |             |             |             |
|-------------|------------|------------|-------------|-------------|-------------|
| 0.982497498 | 0.81212967 | 0.94468899 | 0.418591119 | 0.916297255 | 0.242239258 |
| -1.12373278 | 0.08373093 | -1.1438555 | 0.043155644 | 0.956309923 | 0.502678237 |
| -1.01854525 | 0.77086294 | 0.9730941  | 0.61265648  | 0.971523401 | 0.647217111 |
| 0.958077067 | 0.47749462 | 0.94644887 | 0.274314183 | -1.00686163 | 0.909489792 |
| -1.05310093 | 0.42029009 | 0.91895338 | 0.231774338 | -1.04909603 | 0.455129896 |
| 0.930883618 | 0.12859316 | 0.81391494 | 0.333179979 | -1.00592404 | 0.899186368 |
| -1.18896577 | 0.00590469 | 0.89759922 | 0.259000038 | -1.21058973 | 0.002549171 |
| 0.88047794  | 0.06873414 | 0.91312183 | 0.193121289 | 0.62848084  | 9.75E-09    |
| -1.38423047 | 0.00178322 | 0.97161575 | 0.739980444 | -1.67318812 | 3.13E-06    |
| -1.14635041 | 0.15419713 | -1.0549726 | 0.358398421 | -1.22717291 | 0.034758802 |
| -1.04767611 | 0.26474082 | 0.56544628 | 9.8703E-13  | -1.07411925 | 0.089338705 |
| 0.988321653 | 0.92281991 | -1.0702773 | 0.080307137 | -1.29532942 | 0.03656706  |
| 0.912198887 | 0.28395052 | 0.5215639  | 2.55298E-09 | -1.02785556 | 0.747511465 |
| 0.813153906 | 0.00528979 | -1.0657177 | 0.512746875 | 0.737612095 | 7.81E-05    |
| 0.988461814 | 0.87441604 | -1.0260507 | 0.70877868  | 0.817374299 | 0.007902614 |
| -1.08114224 | 0.11455712 | -1.0121394 | 0.847276994 | -1.08155057 | 0.112853313 |
| -1.14106319 | 0.13154076 | 0.85266588 | 0.136738617 | -1.14497785 | 0.122023097 |
| -1.26591398 | 0.0001927  | 0.950748   | 0.459653127 | -1.4150582  | 2.56E-07    |
| -1.17654829 | 0.00561678 | 0.86285092 | 0.051086965 | 0.994577679 | 0.923484813 |
| -1.07001133 | 0.33631469 | -1.064325  | 0.350556416 | -1.05765035 | 0.425183375 |
| 0.886425131 | 0.02338863 | 0.94579863 | 0.378655003 | 0.835442726 | 0.001003025 |
| -1.03184139 | 0.67861919 | -1.0784861 | 0.212383993 | 0.792502942 | 0.003160535 |
| -1.09196066 | 0.05066547 | 0.94565092 | 0.384296407 | -1.053803   | 0.238940511 |
| 0.822385691 | 0.00470691 | 0.89996581 | 0.027158777 | 0.484648698 | 2.96E-15    |
| -1.0904416  | 0.33581173 | -1.1462589 | 0.027816986 | -1.20547319 | 0.0408035   |
| 0.812299431 | 0.07077436 | 0.76790824 | 0.000313031 | 0.941486503 | 0.595063064 |
| -1.20262121 | 0.01628682 | -1.3902058 | 0.001567441 | -1.48011179 | 2.47E-06    |
| 0.965227342 | 0.40086015 | -1.0586342 | 0.549090611 | 0.968513754 | 0.447336632 |
| 0.896168571 | 0.29629744 | 0.99215179 | 0.849507137 | -1.16094043 | 0.15689443  |
| 0.746316784 | 2.92E-06   | -1.0194569 | 0.873736194 | 0.855709674 | 0.007437797 |
| 0.987681164 | 0.86380284 | -1.097242  | 0.279298694 | 0.944656761 | 0.432036064 |
| -1.02768803 | 0.53461258 | 0.89796731 | 0.136202283 | -1.037748   | 0.400240282 |
| -1.16251052 | 0.0139804  | 0.89061536 | 0.118796409 | -1.14626165 | 0.025156837 |
| 0.951321927 | 0.3722103  | -1.0173319 | 0.725241512 | 0.999731737 | 0.996157709 |
| 0.958442281 | 0.59113572 | -1.0374139 | 0.671616979 | 0.955465541 | 0.564317529 |
| -1.04508702 | 0.41378134 | -1.264515  | 0.000204814 | -1.00457608 | 0.932362366 |
| 0.986695739 | 0.73868496 | 0.98842163 | 0.837032098 | 0.793088085 | 3.58E-07    |
| 0.947353644 | 0.53044654 | -1.0189805 | 0.788523579 | 0.86173684  | 0.088070684 |
| -1.32240723 | 0.00028748 | 0.9408478  | 0.243087485 | -1.03101274 | 0.673205315 |
| 0.972711304 | 0.39530341 | -1.0794115 | 0.314342062 | -1.00495463 | 0.878914982 |
| 0.925003626 | 0.17442247 | -1.0014523 | 0.973813097 | -1.01720799 | 0.764402849 |
| 0.99931952  | 0.98980967 | 0.9766687  | 0.723164965 | -1.05330779 | 0.331971544 |
| -1.01216241 | 0.80774917 | 0.99183555 | 0.927075681 | 0.879128213 | 0.011837524 |
| 0.945637738 | 0.29806722 | 0.9853509  | 0.896367036 | 0.674254896 | 9.25E-10    |

|             |            |            |             |             |             |
|-------------|------------|------------|-------------|-------------|-------------|
| 0.848427994 | 0.0392656  | -1.2439734 | 0.004899975 | 0.659436147 | 1.84E-06    |
| 0.871618344 | 0.03865288 | 0.99769432 | 0.956158999 | 0.974495273 | 0.691763946 |
| 0.983844959 | 0.82802765 | 0.97449512 | 0.804652157 | 0.971986813 | 0.704839704 |
| 0.935563116 | 0.07855953 | 0.95494036 | 0.414037751 | -1.00759011 | 0.839448193 |
| -1.07883879 | 0.38702741 | 0.93006634 | 0.317921753 | 0.529880276 | 1.40E-09    |
| 0.960729618 | 0.43315458 | -1.0705527 | 0.124605234 | 0.972736076 | 0.588071284 |
| -1.01354455 | 0.88007952 | -1.1569782 | 0.017126701 | -1.21793563 | 0.030560076 |
| 0.986977952 | 0.84206121 | 0.94791637 | 0.339102954 | 0.849726528 | 0.016006604 |
| -1.05243648 | 0.4234445  | -1.0271499 | 0.73438314  | -1.03478378 | 0.591669888 |
| 0.902919879 | 0.03682209 | 0.93928077 | 0.247196621 | 0.671844858 | 2.95E-11    |
| 0.972312299 | 0.77903974 | 0.87089214 | 0.001063756 | 0.862454836 | 0.14311587  |
| -1.03462927 | 0.55969829 | 0.9206757  | 0.338917138 | -1.0741251  | 0.222999456 |
| 0.694462593 | 6.74E-10   | -1.0443862 | 0.54903189  | 0.878890536 | 0.010461219 |
| -1.05553325 | 0.41119549 | 0.98400065 | 0.619449051 | 0.885351201 | 0.067493181 |
| 0.972476771 | 0.63181563 | 0.93208059 | 0.219706488 | 0.834950662 | 0.002952816 |
| -1.03143425 | 0.31569417 | 0.92778861 | 0.163471397 | -1.01826712 | 0.556085866 |
| 0.974930992 | 0.49815781 | -1.0001708 | 0.997256373 | -1.02075753 | 0.583302074 |
| -1.06027101 | 0.27777853 | 0.94786054 | 0.318622224 | -1.02937069 | 0.58983589  |
| -1.01653349 | 0.66949001 | 0.53771163 | 1.12782E-10 | 0.935701103 | 0.087682057 |
| -1.41708273 | 0.02410015 | 0.94348627 | 0.373442704 | -1.42228321 | 0.022719622 |
| 0.863256664 | 0.00331498 | -1.0448652 | 0.55884534  | -1.01816238 | 0.708162613 |
| -1.06859489 | 0.40661494 | 0.95248163 | 0.195515111 | 0.582688858 | 8.66E-09    |
| 0.934943795 | 0.14714753 | -1.1392902 | 0.139811959 | 0.78032971  | 1.43E-06    |
| 0.956462481 | 0.51296246 | 0.97030055 | 0.554788165 | -1.06227807 | 0.375372495 |
| -1.04189563 | 0.51456329 | -1.1777117 | 0.070847228 | -1.19955345 | 0.005271083 |
| 0.883274437 | 0.54963841 | 0.86999237 | 0.037997539 | 0.838185937 | 0.39564958  |
| 0.801792277 | 0.01119592 | 0.9685101  | 0.615633269 | 0.546068822 | 2.05E-09    |
| 0.827439236 | 0.01088462 | 0.84527256 | 0.000876851 | 0.811391842 | 0.00523794  |
| -1.10278999 | 0.2671784  | 0.96339156 | 0.709470669 | -1.20917717 | 0.033929475 |
| 0.699871765 | 0.00048154 | -1.0793958 | 0.193348227 | 0.947442044 | 0.576145055 |
| 0.954659826 | 0.47794403 | 0.61618099 | 8.70507E-14 | -1.01953755 | 0.766854828 |
| 0.984272816 | 0.85530531 | 0.58591438 | 5.06574E-11 | -1.30756095 | 0.003083564 |
| -1.13606615 | 0.02380255 | 0.96341789 | 0.522615958 | -1.14897261 | 0.014286682 |
| 0.976311949 | 0.55001435 | -1.0083777 | 0.785894631 | 0.9656784   | 0.384756802 |
| -1.10920575 | 0.08438626 | 0.98467404 | 0.679873209 | -1.21662058 | 0.001592141 |
| 0.998803    | 0.98802883 | -1.0254174 | 0.640088998 | -1.07823798 | 0.34734549  |
| -1.02550525 | 0.82741743 | 0.94309557 | 0.131036611 | 0.914713918 | 0.441483286 |
| -1.15436204 | 0.01114208 | -1.1597397 | 0.328159834 | -1.11932183 | 0.043807685 |
| 0.852494264 | 0.00572157 | -1.009933  | 0.837066476 | 0.852382182 | 0.005684504 |
| -1.02056322 | 0.69282323 | 0.55960301 | 1.29536E-09 | 0.932902095 | 0.181028102 |
| 0.955935983 | 0.52886128 | 0.83768161 | 0.000294298 | -1.14662313 | 0.059602591 |
| -1.03149833 | 0.71804506 | -1.1562314 | 0.036262396 | 0.942543269 | 0.491555039 |
| -1.30543613 | 0.00042332 | -1.2555825 | 0.000616926 | -1.09203679 | 0.219790161 |
| -1.08111018 | 0.51682209 | 0.72788688 | 0.129259132 | 0.931233196 | 0.553584913 |

|             |            |            |             |             |             |
|-------------|------------|------------|-------------|-------------|-------------|
| -1.04242843 | 0.38088833 | 0.75566864 | 0.001566606 | 0.876308712 | 0.00694711  |
| 0.868311587 | 0.02568804 | 0.73525653 | 7.67243E-05 | 0.920465128 | 0.183696346 |
| 0.764849089 | 0.01962815 | -1.0730474 | 0.422698747 | -1.17014146 | 0.164334921 |
| -1.02025302 | 0.65301373 | 0.88500292 | 0.208611767 | 0.974465871 | 0.562182677 |
| -1.02092994 | 0.72585522 | -1.0540859 | 0.420812661 | 0.989010221 | 0.851549595 |
| 0.971024264 | 0.61277501 | -1.3620704 | 0.000758279 | -1.08449536 | 0.165961544 |
| 0.835068251 | 0.12373495 | -1.14774   | 0.015013492 | 0.954361352 | 0.686870098 |
| 0.966881222 | 0.7649499  | -1.0043603 | 0.913474038 | 0.942657262 | 0.600433883 |
| 0.943871203 | 0.32654589 | -1.0829904 | 0.181858243 | -1.01652735 | 0.779808732 |
| 0.899766202 | 0.20352948 | 0.95387425 | 0.554778377 | 0.969386203 | 0.706227899 |
| 0.984420516 | 0.89765147 | 0.92526047 | 0.502120786 | -1.09400704 | 0.4628241   |
| 0.97864107  | 0.78443396 | -1.027186  | 0.625227353 | -1.17550533 | 0.044365698 |
| 0.768740238 | 0.00314656 | 0.96014996 | 0.466402837 | 0.914907728 | 0.300372127 |
| -1.02200497 | 0.735502   | 0.94700666 | 0.29280494  | -1.03699725 | 0.573233617 |
| -1.00296909 | 0.97843129 | -1.1225209 | 0.109878118 | -1.24959545 | 0.04613892  |
| 0.956441582 | 0.75206008 | 0.94243724 | 0.49073549  | 0.856973863 | 0.276013181 |
| 0.664069816 | 2.54E-08   | -1.0863693 | 0.247887123 | 0.832816631 | 0.005193967 |
| -1.1109508  | 0.32104082 | -1.1196179 | 0.348683276 | -1.28043644 | 0.022310336 |
| -1.23751402 | 0.06913164 | 0.93297502 | 0.146016902 | -1.07725325 | 0.519964082 |
| -1.16373325 | 0.01692744 | 0.95382637 | 0.445706603 | -1.03584507 | 0.569342207 |
| -1.12942845 | 0.07363212 | 0.99371226 | 0.955074407 | -1.03433513 | 0.614870668 |
| -1.07823884 | 0.50197355 | -1.0273089 | 0.546075196 | 0.961167172 | 0.723678226 |
| 0.948964938 | 0.48068987 | 0.95730366 | 0.461008965 | -1.03992288 | 0.597818832 |
| 0.919356971 | 0.17228131 | 0.95850716 | 0.466308401 | -1.05861896 | 0.352834754 |
| 0.922720885 | 0.4528602  | 0.93032344 | 0.533557535 | 0.928198372 | 0.4866323   |
| -1.02443376 | 0.74329039 | 0.90051924 | 0.354007289 | 0.895546485 | 0.138334573 |
| 0.937384245 | 0.53430501 | 0.99503843 | 0.932374291 | -1.00798191 | 0.938986311 |
| 0.867375342 | 0.04482493 | 0.91746358 | 0.29848374  | -1.04711862 | 0.509034955 |
| 0.992092657 | 0.91222899 | 0.98120002 | 0.876453764 | -1.00622236 | 0.931363209 |
| -1.02645025 | 0.75439298 | -1.0878964 | 0.288188829 | -1.00341384 | 0.967408163 |
| -1.02079511 | 0.93193814 | 0.86528242 | 0.094640422 | 0.963060014 | 0.875893598 |
| 0.897696851 | 0.0972075  | 0.98293706 | 0.789347951 | -1.05977441 | 0.367901717 |
| 0.941014853 | 0.51699151 | 0.98061346 | 0.858330256 | 0.988033764 | 0.897711158 |
| 0.946161982 | 0.44397765 | 0.9612956  | 0.779445271 | -1.02717547 | 0.710145274 |
| 0.713917876 | 3.43E-06   | 0.97495239 | 0.687777146 | -1.01130935 | 0.863413652 |
| 0.616126446 | 0.00036303 | -1.0785067 | 0.474990307 | 0.84552758  | 0.192754359 |
| -1.00145795 | 0.99078901 | -1.1346856 | 0.276359479 | 0.965623662 | 0.781708636 |
| 0.971932996 | 0.86736861 | 0.96691602 | 0.586674162 | -1.13794326 | 0.449582427 |
| 0.978989634 | 0.83767529 | -1.0555165 | 0.421531866 | -1.01590344 | 0.878995565 |
| -1.07327444 | 0.650243   | 0.91315728 | 0.418560192 | -1.13934471 | 0.403972788 |
| 0.849045644 | 0.10690102 | -1.0323276 | 0.667964287 | -1.0274599  | 0.787084102 |
| 0.959870316 | 0.41803871 | -1.0116182 | 0.849986394 | -1.05306205 | 0.307523339 |
| 0.936225026 | 0.44349818 | 0.98000415 | 0.850104826 | 0.967777935 | 0.702721349 |
| -1.00919549 | 0.92321966 | 0.94535234 | 0.446821768 | -1.0853801  | 0.38995119  |

|             |            |            |             |             |             |
|-------------|------------|------------|-------------|-------------|-------------|
| 0.954977397 | 0.54780049 | -1.0013242 | 0.989834468 | 0.995111061 | 0.948929248 |
| 0.884986038 | 0.3338345  | -1.0168726 | 0.810022988 | 0.795724923 | 0.073756971 |
| 0.941820094 | 0.54489069 | 0.94782818 | 0.458033199 | 0.989814681 | 0.917504769 |
| 0.800285861 | 0.05278519 | -1.0915676 | 0.296000224 | 0.911262877 | 0.412425877 |
| 0.991587414 | 0.85430648 | 0.93833101 | 0.791737101 | 0.99663189  | 0.941534454 |
| 0.896347153 | 0.09040242 | 0.92365122 | 0.219550275 | -1.00608436 | 0.924205018 |
| -1.05482714 | 0.4420868  | 0.99823798 | 0.984973555 | 0.936190506 | 0.343046083 |
| 0.999743178 | 0.99724764 | 0.91286622 | 0.209421579 | -1.05487166 | 0.47417878  |
| -1.05197251 | 0.39024325 | 0.99518577 | 0.941145321 | -1.01998998 | 0.736402849 |
| -1.33270904 | 0.00118701 | 0.90653211 | 0.443852859 | -1.68349249 | 8.00E-08    |
| 0.95352182  | 0.44618388 | -1.0639018 | 0.623930347 | 0.793395362 | 0.000460585 |
| 0.950978735 | 0.58765718 | -1.0032668 | 0.984733602 | -1.33754019 | 0.002619702 |
| -1.02514106 | 0.67943489 | -1.0716113 | 0.505391664 | -1.0451604  | 0.463051879 |
| 0.904745051 | 0.17493016 | 0.92947067 | 0.639107033 | 0.615395087 | 1.47E-08    |
| 0.946939084 | 0.43729758 | 0.94655275 | 0.584319138 | -1.05556853 | 0.440993452 |
| 0.886083653 | 0.25043797 | -1.0345002 | 0.502027101 | 0.610862449 | 1.64E-05    |
| 0.868482906 | 0.02808334 | -1.0260842 | 0.764079459 | 0.965148026 | 0.572485014 |
| 0.677952986 | 0.00165168 | 0.98865589 | 0.904384624 | 0.490638582 | 1.34E-07    |
| 0.741586565 | 0.0005776  | 0.87282706 | 0.079753791 | 0.481285849 | 3.14E-12    |
| 0.719664026 | 0.00022048 | 0.87692702 | 0.299235649 | 0.404800344 | 3.31E-15    |
| 0.715873632 | 0.00064702 | -1.0208492 | 0.834652101 | 0.485960124 | 1.99E-10    |
| 0.829839358 | 0.03715721 | 0.90063486 | 0.356355296 | 0.46874572  | 8.40E-12    |
| 0.777009454 | 0.00033081 | 0.95322068 | 0.30008726  | 0.754361855 | 7.60E-05    |
| 0.813578847 | 8.69E-06   | 0.97362591 | 0.675305626 | 0.915168385 | 0.039288316 |
| 0.742653159 | 0.01536598 | 0.97218981 | 0.6840239   | 0.334285516 | 1.19E-12    |
| 0.578837882 | 2.31E-07   | 0.84424075 | 0.026320507 | 0.400138343 | 9.67E-14    |
| -1.06471361 | 0.31378778 | -1.0095507 | 0.871521373 | -1.03615384 | 0.567071087 |
| 0.766848175 | 0.00050473 | -1.0318241 | 0.710207654 | 0.512827575 | 8.45E-13    |
| 0.560191362 | 1.02E-07   | 0.72165598 | 2.57144E-06 | 0.936910366 | 0.492481458 |
| 0.64156757  | 1.94E-06   | -1.0350823 | 0.709709967 | 0.542847078 | 1.16E-09    |
| 0.823977649 | 0.04816992 | -1.0337542 | 0.580859101 | 0.420230717 | 2.16E-12    |
| 0.668549563 | 0.00021082 | 0.81029601 | 0.005566133 | 0.413908492 | 7.53E-12    |
| 0.738888318 | 0.00114056 | 0.81859022 | 0.005808223 | 0.383188742 | 3.26E-15    |
| 0.730841568 | 0.00034895 | 0.35095706 | 5.98264E-14 | 0.665745173 | 7.58E-06    |
| 0.752267362 | 0.016368   | 0.9932798  | 0.914443435 | 0.803952958 | 0.062812034 |
| 0.884424773 | 0.17645    | 0.61719858 | 0.000134227 | 0.551987934 | 1.70E-08    |
| -1.06946027 | 0.12050159 | 0.69538202 | 4.41718E-05 | 0.991247813 | 0.837155949 |
| 0.891004467 | 0.18427193 | 0.60644136 | 1.59118E-07 | 0.631574482 | 1.82E-06    |
| 0.988299121 | 0.78536231 | 0.65577466 | 2.86822E-05 | 0.861407982 | 0.001037254 |
| 0.994113311 | 0.91616146 | 0.63406437 | 2.9645E-06  | 0.908707765 | 0.092124088 |
| 0.95620209  | 0.57277905 | 0.76673281 | 0.000172145 | -1.12532228 | 0.140525416 |
| -1.24143694 | 0.00748234 | 0.92865751 | 0.083415589 | -1.0322195  | 0.685177131 |
| 0.919858187 | 0.17794473 | 0.47763419 | 7.79128E-08 | -1.00748325 | 0.903492736 |
| -1.21351925 | 0.1115817  | 0.57188525 | 1.42862E-07 | -1.24809787 | 0.069441787 |

|             |            |            |              |             |             |
|-------------|------------|------------|--------------|-------------|-------------|
| 0.988240604 | 0.93885012 | -1.0408778 | 0.518662915  | 0.914472295 | 0.562628246 |
| -1.03264609 | 0.78693895 | 0.71846985 | 2.51635E-05  | -1.41003508 | 0.005316142 |
| -1.13996694 | 0.42287677 | -1.0168957 | 0.859642392  | -1.31847422 | 0.094076373 |
| -1.27156133 | 0.04075983 | 0.66400971 | 8.46794E-06  | -1.63590791 | 7.37E-05    |
| 0.956254036 | 0.4641121  | 0.65478029 | 4.8011E-05   | -1.4449018  | 1.36E-07    |
| 0.691071221 | 9.52E-07   | 0.6296723  | 2.92199E-05  | 0.758333368 | 0.000121782 |
| 0.996347173 | 0.96667406 | 0.41018102 | 4.75239E-14  | 0.870143109 | 0.116479655 |
| 0.866204157 | 0.12217017 | 0.80881353 | 0.012499122  | 0.837143427 | 0.057188756 |
| -1.19133999 | 0.02784394 | 0.90481343 | 0.387667764  | -1.08581137 | 0.292473484 |
| -1.26909643 | 0.0016891  | 0.68361492 | 8.79903E-05  | -1.56134631 | 8.89E-08    |
| -1.02693235 | 0.65239847 | 0.97611544 | 0.572427263  | -1.06420443 | 0.293615127 |
| 0.849652979 | 0.02055676 | 0.75101486 | 0.001542897  | 0.816741085 | 0.004503862 |
| -1.18746007 | 0.00040171 | 0.93820522 | 0.143836324  | -1.33850271 | 3.88E-08    |
| 0.918645779 | 0.09343143 | 0.90073031 | 0.066532284  | 0.833878421 | 0.000583137 |
| 0.863874055 | 0.17708377 | -1.0035426 | 0.964428043  | -1.0818462  | 0.465331499 |
| -1.07383405 | 0.23479914 | -1.1071548 | 0.196298905  | 0.375673507 | 1.10E-22    |
| 0.997241185 | 0.97009987 | -1.026741  | 0.668034925  | -1.07895948 | 0.304875828 |
| 0.916796776 | 0.18455088 | 0.99246688 | 0.949833515  | 0.623064402 | 1.29E-09    |
| 0.724874378 | 0.00081688 | -1.1347689 | 0.413710596  | 0.79446482  | 0.014128602 |
| 0.991530533 | 0.9242551  | -1.3855751 | 0.007943118  | -1.09735647 | 0.301451717 |
| -1.07666882 | 0.33766911 | -1.2539641 | 0.168700891  | -1.15456219 | 0.065239811 |
| -1.22444703 | 0.07170589 | -1.1560554 | 0.2111153419 | -1.25672273 | 0.042953238 |
| 0.95673655  | 0.29436097 | -1.0444448 | 0.47659159   | -1.12769618 | 0.005742821 |
| 0.954173551 | 0.64790531 | 0.7308462  | 1.87189E-05  | 0.869762063 | 0.177611941 |
| -1.1768401  | 0.26240281 | 0.86185651 | 0.093934916  | -1.40230448 | 0.022380588 |
| -1.0041002  | 0.97547225 | 0.75005262 | 0.002709039  | -1.47732136 | 0.004755435 |
| -1.37860899 | 2.73E-05   | -1.1105396 | 0.181427452  | -1.31498672 | 0.000258802 |
| -1.09615243 | 0.28960671 | -1.2924772 | 0.000786451  | -1.22565808 | 0.021385731 |
| -1.19071759 | 0.01407443 | -1.0755518 | 0.219860443  | -1.22683448 | 0.004411375 |
| -1.08489733 | 0.14675556 | 0.91462523 | 0.196691687  | -1.2871513  | 2.99E-05    |
| -1.19164696 | 0.06974745 | -1.1904944 | 0.000336188  | -1.05901802 | 0.547599359 |
| 0.937678637 | 0.33520208 | 0.89039024 | 0.023218415  | 0.957523399 | 0.514666909 |
| -1.14729453 | 0.1808937  | -1.0968972 | 0.391166404  | -1.28831892 | 0.015533164 |
| -1.0884455  | 0.29105233 | 0.61699689 | 6.02751E-11  | -1.10805758 | 0.202234957 |
| -1.0756553  | 0.41898763 | 0.9744609  | 0.72572885   | -1.15081078 | 0.122605232 |
| -1.10139914 | 0.20164236 | 0.98219232 | 0.782058854  | -1.21009243 | 0.013577002 |
| -1.24066084 | 0.01176851 | 0.96904319 | 0.73016429   | -1.16286916 | 0.073580247 |
| 0.995070876 | 0.91186588 | -1.2698916 | 0.009670967  | -1.016104   | 0.720596877 |
| -1.12159846 | 0.20316707 | -1.1274425 | 0.122086088  | -1.11738998 | 0.218139875 |
| 0.97682356  | 0.77880048 | 0.96637521 | 0.75750057   | -1.36233397 | 0.000474586 |
| -1.24783093 | 0.16968308 | -1.1313763 | 0.004630257  | -1.24060524 | 0.180958324 |
| -1.15415167 | 0.06167094 | -1.1175199 | 0.28154216   | -1.10799776 | 0.177861031 |
| 0.848014689 | 0.15237905 | -1.1353705 | 0.381119305  | -1.08338277 | 0.483678845 |
| 0.974594234 | 0.69974071 | -1.1887593 | 0.197356077  | 0.764112771 | 0.000163973 |

|             |            |            |             |             |             |
|-------------|------------|------------|-------------|-------------|-------------|
| -1.11925134 | 0.36339202 | -1.2287207 | 0.004788723 | -1.22302446 | 0.107231541 |
| -1.03822144 | 0.69621337 | -1.2250541 | 0.021687465 | -1.36464561 | 0.001974725 |
| 0.989267129 | 0.90186782 | -1.2049746 | 0.008981037 | -1.15602374 | 0.101834881 |
| 0.756757946 | 0.00028879 | 0.97049048 | 0.59057668  | 0.665833446 | 6.05E-07    |
| -1.04250392 | 0.67300031 | -1.1657207 | 0.111448419 | -1.2380273  | 0.0339188   |
| -1.16409736 | 0.08551466 | 0.98388157 | 0.806954938 | -1.22412421 | 0.023511449 |
| -1.23236538 | 0.00070166 | -1.3318876 | 0.006580148 | -1.09379736 | 0.128597767 |
| -1.13993935 | 0.04498818 | -1.0427741 | 0.600374095 | -1.09434104 | 0.163448069 |
| 0.928437757 | 0.43827816 | -1.1241278 | 0.196893083 | 0.995958849 | 0.966188124 |
| -1.04815012 | 0.36434193 | -1.1127458 | 0.158537691 | 0.508950315 | 2.11E-18    |
| 0.939592263 | 0.34591598 | -1.047299  | 0.578528936 | 0.859080278 | 0.024289574 |
| -1.03946469 | 0.45738213 | 0.98309371 | 0.702684549 | 0.950976542 | 0.335339661 |
| 0.889809931 | 0.0762094  | -1.2588009 | 0.012525909 | 0.628124777 | 2.01E-09    |
| -1.01640382 | 0.73532385 | -1.0377873 | 0.65701451  | -1.15381429 | 0.004227853 |
| 0.722193796 | 1.96E-10   | 0.95464571 | 0.771562584 | 0.965500557 | 0.402269313 |
| -1.0592625  | 0.28723833 | -1.0168127 | 0.82518578  | 0.95988024  | 0.447935136 |
| -1.04103151 | 0.40172925 | -1.1453571 | 0.237273954 | 0.887904727 | 0.01554757  |
| -1.03652316 | 0.50968124 | 0.84357145 | 0.013212766 | 0.939204265 | 0.250943201 |
| -1.05746723 | 0.40555026 | -1.2898227 | 0.043192351 | 0.662962976 | 9.41E-08    |
| 0.965761236 | 0.5683249  | -1.2794544 | 0.012685576 | 0.959750497 | 0.501354281 |
| 0.979830809 | 0.70708688 | -1.2404698 | 0.016558405 | 0.960396866 | 0.457002281 |
| 0.941669915 | 0.37606601 | 0.99035135 | 0.893169453 | -1.08719926 | 0.219762907 |
| 0.826473732 | 0.02498349 | -1.2488717 | 0.027531156 | 0.624006195 | 5.10E-07    |
| 0.98963601  | 0.81065727 | -1.210816  | 0.031723779 | 0.938639645 | 0.149189891 |
| 0.953197677 | 0.50291331 | -1.1345744 | 0.034169932 | 0.717494535 | 2.05E-05    |
| 0.919166798 | 0.0354951  | -1.1906516 | 0.00843841  | 0.792960028 | 2.20E-07    |
| 0.95310487  | 0.38986997 | 0.89254498 | 0.237117056 | 0.774033068 | 2.42E-05    |
| -1.0364053  | 0.52488236 | 0.96540239 | 0.496289474 | -1.10168518 | 0.088784911 |
| -1.0611679  | 0.27050922 | 0.74162627 | 2.98763E-05 | -1.03495566 | 0.522104471 |
| -1.0135725  | 0.80868427 | -1.0857955 | 0.117274109 | -1.01395284 | 0.803470595 |
| -1.06974688 | 0.4134253  | 0.75478448 | 5.99538E-05 | -1.18148894 | 0.046394061 |
| 0.97156319  | 0.6132958  | -1.1068633 | 0.038608758 | 0.996372846 | 0.94918442  |
| 0.932345777 | 0.50253312 | 0.91029894 | 0.027903577 | 0.781613464 | 0.021183917 |
| 0.887382973 | 0.07654622 | -1.0614096 | 0.270804168 | 0.872366245 | 0.043881894 |
| 0.99789751  | 0.97032674 | 0.99692522 | 0.948629276 | -1.20412244 | 0.00173106  |
| -1.02186924 | 0.61563027 | 0.90764697 | 0.078609238 | 0.396617502 | 4.04E-28    |
| -1.03713526 | 0.55861589 | -1.140089  | 0.054355078 | 0.961456582 | 0.528466742 |
| -1.04455749 | 0.40193538 | -1.1249915 | 0.057560676 | -1.20940235 | 0.000533935 |
| 0.960709358 | 0.66679814 | -1.0550497 | 0.324895293 | 0.64829615  | 1.98E-05    |
| -1.0217688  | 0.54918621 | -1.0565659 | 0.417434018 | -1.04118585 | 0.26361833  |
| -1.02709545 | 0.67651707 | -1.1028261 | 0.241467631 | -1.22165481 | 0.002734665 |
| 0.97231651  | 0.53154911 | 0.9821749  | 0.679320772 | 0.811576862 | 1.97E-05    |
| -1.21767134 | 0.04080027 | 0.8584982  | 0.036346933 | -1.38741818 | 0.000988326 |
| 0.692167165 | 3.11E-06   | 0.9740543  | 0.503976795 | 0.865219305 | 0.045398338 |



|             |            |            |             |             |             |
|-------------|------------|------------|-------------|-------------|-------------|
| 0.980650057 | 0.74024804 | -1.0357509 | 0.528785046 | 0.426775059 | 3.13E-20    |
| 0.912654021 | 0.12375026 | -1.1818833 | 0.004193227 | 0.974506148 | 0.660379016 |
| -1.03052427 | 0.52793148 | 0.94802947 | 0.321391037 | -1.01365419 | 0.775561547 |
| -1.00844358 | 0.89036304 | -1.0283227 | 0.616262889 | -1.00927556 | 0.879690095 |
| -1.10764621 | 0.07367907 | -1.0582985 | 0.491458464 | 0.997662928 | 0.966852246 |
| 0.894290424 | 0.26982668 | -1.0034367 | 0.952018782 | 0.925390962 | 0.442433779 |
| 0.855836541 | 0.06946897 | 0.77542    | 0.017532398 | 0.962036612 | 0.646993168 |
| -1.07766338 | 0.32788267 | 0.98765035 | 0.851722558 | 0.921048071 | 0.282460045 |
| -1.08617852 | 0.1979909  | -1.2315133 | 0.000512767 | -1.04431116 | 0.497141719 |
| -1.00388715 | 0.95112026 | 0.98103128 | 0.656643081 | 0.976291631 | 0.704785704 |
| -1.06854356 | 0.34965056 | 0.97950955 | 0.73953695  | -1.08295241 | 0.261780908 |
| 0.971022709 | 0.75639962 | -1.1213299 | 0.030709895 | -1.23259428 | 0.03085168  |
| 0.954924359 | 0.48331748 | 0.86015882 | 0.109593169 | 0.943961539 | 0.381394287 |
| -1.13422184 | 0.04300769 | -1.125803  | 0.001638717 | -1.00250859 | 0.967262069 |
| 0.966609812 | 0.60860215 | -1.1012291 | 0.136126399 | 0.975026104 | 0.702788674 |
| 0.962702185 | 0.64056659 | 0.92553546 | 0.088346651 | -1.11670383 | 0.178392582 |
| -1.05528823 | 0.41733858 | -1.2321954 | 0.03049615  | 0.902810989 | 0.126323747 |
| 0.867598927 | 0.03599698 | 0.96995734 | 0.667722294 | 0.867575236 | 0.03596274  |
| 0.966729283 | 0.51043402 | 0.99407731 | 0.919681314 | -1.0815979  | 0.13042026  |
| 0.995332039 | 0.96165994 | -1.0380123 | 0.525985505 | 0.828878796 | 0.057987498 |
| 0.867321825 | 0.05240388 | 0.94125116 | 0.206308801 | 0.898894649 | 0.143264914 |
| -1.00090135 | 0.98579286 | 0.99235856 | 0.899923076 | -1.13290625 | 0.016397034 |
| -1.1714165  | 0.01008301 | -1.0578525 | 0.320101345 | -1.09623854 | 0.127219384 |
| -1.13988825 | 0.01353323 | 0.55077396 | 2.07676E-07 | 0.975668312 | 0.632862873 |
| -1.01434632 | 0.76901485 | 0.78656671 | 0.006077546 | 0.985976684 | 0.770933244 |
| -1.02364929 | 0.63135121 | 0.9349579  | 0.378591876 | -1.01814487 | 0.711900068 |
| 0.987580439 | 0.82959072 | 0.86567223 | 0.026962082 | -1.05185804 | 0.385496438 |
| 0.962520978 | 0.49356241 | 0.99044394 | 0.879421037 | 0.905644945 | 0.079333393 |
| 0.976159991 | 0.68457672 | -1.0423845 | 0.557156788 | -1.04970599 | 0.415192778 |
| -1.02716436 | 0.68616563 | -1.3067938 | 0.006408776 | -1.09254042 | 0.18538912  |
| -1.05144079 | 0.39374458 | -1.074901  | 0.273918364 | -1.1427963  | 0.026117234 |
| -1.00889625 | 0.89992995 | -1.0361558 | 0.561304518 | 0.970841424 | 0.674609311 |
| -1.0333586  | 0.570475   | 0.92886007 | 0.267989435 | -1.03980093 | 0.500065572 |
| 0.940354692 | 0.28188012 | 0.90974546 | 0.247765495 | -1.07207267 | 0.224012944 |
| -1.00522033 | 0.92811441 | 0.94156242 | 0.364506428 | -1.09100491 | 0.135320688 |
| 0.970197347 | 0.59013136 | 0.85935676 | 0.025635762 | 0.986382033 | 0.806942721 |
| 0.960725302 | 0.46624043 | 0.95578626 | 0.37983589  | -1.02696513 | 0.628004553 |
| 0.971877957 | 0.63368507 | 0.8195352  | 0.044835628 | 0.98948142  | 0.859650251 |
| -1.03720953 | 0.49548754 | -1.0393429 | 0.592940911 | -1.05514627 | 0.317806976 |
| -1.01046482 | 0.84890946 | -1.0477013 | 0.358948873 | 0.924602701 | 0.155256986 |
| -1.00729993 | 0.91266444 | -1.0184984 | 0.75849391  | 0.905302232 | 0.137604838 |
| 0.979088939 | 0.78163179 | 0.99810155 | 0.970571935 | -1.06442984 | 0.414082981 |
| 0.930499992 | 0.24407642 | -1.0254718 | 0.60438231  | -1.04476871 | 0.477041703 |
| -1.0199236  | 0.73780235 | -1.0475776 | 0.34153485  | 0.94320314  | 0.323041828 |

|             |            |            |             |             |             |
|-------------|------------|------------|-------------|-------------|-------------|
| -1.09131234 | 0.16964731 | -1.096402  | 0.117094941 | -1.05089655 | 0.432500962 |
| 0.941592098 | 0.27069717 | -1.1789685 | 0.004432169 | -1.09098392 | 0.113195375 |
| -1.08628143 | 0.20100659 | -1.0593791 | 0.333235235 | -1.23377991 | 0.001793851 |
| 0.951154819 | 0.47057764 | -1.0392422 | 0.562030885 | 0.874109512 | 0.05611262  |
| -1.07806229 | 0.33252211 | -1.0630792 | 0.29913426  | -1.00373007 | 0.961547774 |
| 0.723755431 | 0.00017279 | -1.0779752 | 0.288918939 | 0.988917167 | 0.889825578 |
| -1.0814485  | 0.28572425 | 0.94826343 | 0.359535633 | -1.11018871 | 0.155818977 |
| -1.15277876 | 0.04319456 | 0.91002193 | 0.101422155 | 0.92113325  | 0.236728935 |
| -1.02214419 | 0.74733553 | 0.9848029  | 0.790805901 | -1.11477678 | 0.114059165 |
| 0.992004385 | 0.89124071 | -1.1115916 | 0.063511908 | -1.13069768 | 0.040248694 |
| -1.08225094 | 0.20916207 | 0.96717842 | 0.543629076 | 0.872300267 | 0.032353081 |
| -1.13012927 | 0.04821527 | -1.096606  | 0.127142215 | 0.989477515 | 0.861884231 |
| 0.959143614 | 0.36015144 | 0.9611466  | 0.459874102 | -1.02825561 | 0.540161143 |
| 0.985707517 | 0.81798204 | 0.94273196 | 0.283023521 | 0.993693049 | 0.919416901 |
| -1.01650994 | 0.78042838 | -1.0288394 | 0.668373187 | 0.92871684  | 0.211251068 |
| 0.901873207 | 0.07499445 | 0.9906122  | 0.901509573 | -1.00216831 | 0.969765491 |
| 0.9097009   | 0.07143621 | -1.1158452 | 0.078734537 | -1.12308679 | 0.028185334 |
| -1.03698181 | 0.52857305 | 0.91674559 | 0.143998192 | -1.14466851 | 0.021938575 |
| -1.03515011 | 0.58407367 | 0.97182028 | 0.650675371 | -1.05917605 | 0.363461293 |
| -1.15293654 | 0.00662536 | -1.0321465 | 0.560923889 | 0.993029068 | 0.890078103 |
| 0.818392021 | 0.00341633 | 0.94681182 | 0.396382528 | 0.761928367 | 0.000116948 |
| -1.0912789  | 0.1235321  | 0.85975151 | 0.032680613 | -1.04356412 | 0.448306099 |
| 0.969928562 | 0.48537496 | -1.1906667 | 0.027225498 | -1.03067291 | 0.489953487 |
| -1.03479236 | 0.55924833 | 0.98568019 | 0.857728685 | -1.01210618 | 0.836983639 |
| 0.925516443 | 0.24973634 | -1.1216588 | 0.119745705 | -1.00634661 | 0.924584513 |
| 0.90231491  | 0.22300279 | -1.0016186 | 0.981292814 | -1.11147237 | 0.210425913 |
| -1.01276563 | 0.85294498 | 0.99985138 | 0.998254869 | -1.00828862 | 0.903981928 |
| -1.06710861 | 0.20654264 | 0.95928317 | 0.479917219 | -1.03566882 | 0.493224453 |
| -1.02691986 | 0.69696902 | -1.0129324 | 0.837073019 | -1.0747642  | 0.292693366 |
| -1.03065922 | 0.73452435 | 0.99095049 | 0.881145891 | 0.998674276 | 0.98810794  |
| -1.11871029 | 0.08180458 | 0.96006937 | 0.371282486 | -1.12398283 | 0.070125976 |
| -1.07417148 | 0.31131209 | 0.92777398 | 0.233725967 | -1.04361776 | 0.544507608 |
| -1.08705679 | 0.17496687 | 0.88010674 | 0.033273382 | 0.946770721 | 0.371747808 |
| -1.03367634 | 0.5479296  | -1.1170683 | 0.056859093 | 0.936336442 | 0.235050012 |
| -1.02758317 | 0.63123498 | -1.0677507 | 0.20818902  | 0.962698981 | 0.502918853 |
| -1.07912346 | 0.19846316 | -1.0369976 | 0.528401194 | 0.916085569 | 0.139834081 |
| -1.03107636 | 0.62373031 | 0.97722327 | 0.714817878 | -1.12458514 | 0.063747062 |
| 0.939360226 | 0.39096372 | -1.0322434 | 0.531397197 | -1.22693181 | 0.006580437 |
| 0.995966636 | 0.94395417 | 0.96418267 | 0.579450854 | -1.02400458 | 0.680120216 |
| -1.00796947 | 0.91023402 | -1.1153411 | 0.055754835 | 0.967134318 | 0.635379878 |
| -1.03101653 | 0.60390193 | -1.0807516 | 0.079613048 | -1.05734772 | 0.344990874 |
| 0.989074218 | 0.863851   | -1.1060466 | 0.089061003 | 0.974420521 | 0.686066175 |
| 0.874469836 | 0.01654972 | 0.98686491 | 0.843196404 | -1.05245071 | 0.349937205 |
| -1.14945716 | 0.02601822 | -1.0440986 | 0.606879743 | 0.97361163  | 0.662027915 |

|             |            |            |             |             |             |
|-------------|------------|------------|-------------|-------------|-------------|
| 0.992704621 | 0.89240852 | -1.0741924 | 0.298022154 | -1.03918871 | 0.478651722 |
| 0.829332522 | 0.01077376 | -1.1723994 | 0.002819283 | -1.03389777 | 0.639787553 |
| -1.07925965 | 0.22243231 | 0.98271337 | 0.798156157 | -1.14323728 | 0.034743319 |
| -1.02900613 | 0.58037796 | -1.0291505 | 0.746937953 | 0.937585473 | 0.215401286 |
| -1.06557561 | 0.24631543 | -1.046163  | 0.478609528 | -1.03900766 | 0.483126585 |
| 0.997518596 | 0.96249888 | 0.94943305 | 0.461759059 | 0.943998916 | 0.278089037 |
| -1.0631363  | 0.31176031 | 0.92943499 | 0.23346499  | 0.97230624  | 0.641375089 |
| 0.948780464 | 0.32709451 | -1.0013692 | 0.980163236 | 0.99077936  | 0.862325015 |
| 0.913423543 | 0.10597698 | -1.0087847 | 0.877263049 | -1.12817198 | 0.032913412 |
| -1.06094472 | 0.28263587 | 0.91730295 | 0.145813154 | -1.00758386 | 0.890281562 |
| -1.08322401 | 0.14973068 | -1.0437165 | 0.49324786  | 0.911564585 | 0.096312237 |
| 0.920493862 | 0.25159545 | -1.0415927 | 0.575510738 | -1.07347603 | 0.325696633 |
| 0.902948354 | 0.07506188 | -1.0363587 | 0.535182933 | -1.08749517 | 0.141690531 |
| -1.04845793 | 0.48905552 | -1.0408524 | 0.570124072 | 0.98979634  | 0.880557349 |
| -1.06265149 | 0.28337844 | -1.0030611 | 0.958547452 | -1.0623476  | 0.285626335 |
| 0.97636116  | 0.73526189 | -1.0866072 | 0.198247474 | 0.958767854 | 0.552190491 |
| -1.03610224 | 0.59273949 | 0.96739898 | 0.543549023 | -1.17417975 | 0.018195033 |
| -1.17957435 | 0.01393679 | 0.95087476 | 0.411371848 | -1.00445714 | 0.945676938 |
| 0.972722346 | 0.57362739 | -1.0314674 | 0.567666227 | -1.08953787 | 0.084873574 |
| -1.03393919 | 0.57569195 | 0.96256988 | 0.592380028 | 0.942905628 | 0.32569475  |
| -1.02513027 | 0.60034059 | -1.0072318 | 0.907600832 | 0.9815484   | 0.694062265 |
| -1.14666143 | 0.00661851 | 0.99840056 | 0.97527498  | 0.99606601  | 0.93544391  |
| 0.877318546 | 0.03211813 | -1.0967098 | 0.094236166 | 0.910975061 | 0.12290329  |
| -1.09517538 | 0.13658149 | -1.0220783 | 0.679642896 | 0.98625322  | 0.81888776  |
| 0.921962249 | 0.19833047 | -1.0133234 | 0.826119249 | 0.343853913 | 2.19E-23    |
| 0.98311664  | 0.80655422 | -1.0040146 | 0.940203916 | -1.15141959 | 0.046523716 |
| -1.07636224 | 0.29440236 | -1.0397576 | 0.48206965  | 0.97390686  | 0.705113801 |
| -1.01831521 | 0.75911047 | 0.93905462 | 0.253780702 | 0.984853564 | 0.796483154 |
| -1.1469773  | 0.04692065 | -1.0201958 | 0.716157231 | -1.14294824 | 0.052647105 |
| -1.07544612 | 0.17357201 | -1.0138572 | 0.848055258 | -1.02854105 | 0.595828059 |
| -1.09037893 | 0.08148409 | -1.0775785 | 0.189605611 | 0.986847082 | 0.786901269 |
| 0.958812489 | 0.46702696 | -1.029805  | 0.667219384 | -1.0697128  | 0.245694508 |
| 0.879933601 | 0.0214131  | -1.0090525 | 0.8729321   | -1.01356764 | 0.803768834 |
| -1.03050634 | 0.63185841 | -1.0284709 | 0.691575913 | -1.01119708 | 0.858961627 |
| -1.02186031 | 0.69454576 | -1.0004601 | 0.994456933 | -1.00826584 | 0.881097196 |
| -1.06266237 | 0.24904825 | 0.95753717 | 0.507052135 | -1.13568851 | 0.018040826 |
| 0.984333457 | 0.80002489 | -1.1085531 | 0.039560461 | 0.924027557 | 0.208208018 |
| -1.08808404 | 0.1389666  | -1.1341738 | 0.038270859 | 0.9953603   | 0.93436462  |
| -1.07098679 | 0.22523877 | 0.95025903 | 0.283474264 | -1.03311691 | 0.562447265 |
| 0.957711281 | 0.48764049 | -1.002152  | 0.964766074 | -1.00451219 | 0.942221067 |
| 0.949277003 | 0.70637727 | 0.88620052 | 0.047234542 | -1.24557539 | 0.115974669 |
| -1.04049648 | 0.590948   | -1.018784  | 0.758249033 | 0.97335446  | 0.714433633 |
| -1.06851843 | 0.20621035 | 0.96708103 | 0.593785554 | -1.10998766 | 0.048961833 |
| 0.942484256 | 0.52041529 | 0.96198907 | 0.577770915 | -1.0287736  | 0.757896579 |

|             |            |            |             |             |             |
|-------------|------------|------------|-------------|-------------|-------------|
| -1.00293382 | 0.95206083 | 0.93778462 | 0.359468167 | -1.06986354 | 0.169559954 |
| -1.22497971 | 0.00544566 | -1.0423108 | 0.484636877 | -1.22826784 | 0.004899812 |
| 0.920060744 | 0.15181629 | -1.0516904 | 0.458021187 | -1.07319619 | 0.223071378 |
| 0.866680594 | 0.02461889 | -1.1305269 | 0.023815704 | 0.921921068 | 0.194485898 |
| -1.00295678 | 0.96109654 | 0.89402611 | 0.025446153 | -1.03716669 | 0.547250433 |
| 0.965048571 | 0.52647501 | 0.96519694 | 0.539875321 | -1.01271488 | 0.821734726 |
| -1.02556078 | 0.65964586 | 0.93675973 | 0.231403209 | 0.993232732 | 0.905605899 |
| -1.09932351 | 0.30016527 | -1.0905736 | 0.170169074 | 0.986350088 | 0.879880645 |
| 0.974020308 | 0.61214203 | -1.0354825 | 0.527098386 | 0.934936105 | 0.197980426 |
| -1.05394188 | 0.44896424 | -1.0292523 | 0.58268311  | 0.89757307  | 0.122571253 |
| 0.857148888 | 0.00397394 | -1.0778649 | 0.2320187   | -1.09075464 | 0.095603218 |
| 0.979082016 | 0.7260676  | -1.0365852 | 0.525346908 | -1.07877533 | 0.21194221  |
| 0.874505331 | 0.03598666 | -1.0781524 | 0.18391992  | 0.944763782 | 0.366111286 |
| -1.08359211 | 0.17791915 | -1.010048  | 0.872140274 | -1.01965591 | 0.741944959 |
| -1.03507269 | 0.59262556 | -1.1298293 | 0.378436057 | -1.00743148 | 0.908393517 |
| -1.22260681 | 0.0059081  | -1.1947833 | 0.018754218 | -1.02529237 | 0.723001908 |
| 0.994803833 | 0.91691076 | -1.076274  | 0.161631288 | -1.01699587 | 0.735872981 |
| 0.954737227 | 0.3568268  | 0.93835935 | 0.490137238 | 0.970083788 | 0.544793119 |
| 0.943653026 | 0.3504321  | -1.0299946 | 0.544874925 | -1.10043181 | 0.125975069 |
| -1.11278348 | 0.09337865 | -1.1177947 | 0.117782851 | 0.994646164 | 0.931936894 |
| 0.955824488 | 0.45586416 | 0.90031701 | 0.072448706 | -1.13208028 | 0.04402633  |
| 0.985515505 | 0.78789815 | -1.0079631 | 0.898481859 | -1.05191639 | 0.352463107 |
| -1.02014754 | 0.6943807  | -1.0871567 | 0.171155489 | -1.10335633 | 0.056671311 |
| -1.01061411 | 0.82924151 | 0.97682194 | 0.675979844 | -1.06784921 | 0.183471827 |
| 0.980458803 | 0.72132863 | -1.0242995 | 0.675241122 | -1.10688399 | 0.070551113 |
| -1.1337409  | 0.01964084 | -1.0540459 | 0.563324858 | -1.0976669  | 0.079810224 |
| 0.982060906 | 0.7572185  | 0.93645316 | 0.208838933 | -1.09790583 | 0.11474463  |
| 0.860261646 | 0.0083511  | -1.0478504 | 0.50032117  | -1.04852241 | 0.392437039 |
| -1.01875343 | 0.71485487 | -1.0270411 | 0.604474241 | 0.916331235 | 0.089876167 |
| -1.00954801 | 0.84124246 | -1.0449161 | 0.467351477 | 0.990965809 | 0.848292724 |
| -1.11778771 | 0.11007208 | 0.95246651 | 0.438096619 | -1.10094579 | 0.166303826 |
| -1.13981371 | 0.04654893 | -1.1025111 | 0.102867246 | -1.03834754 | 0.560413411 |
| -1.10909023 | 0.13793428 | -1.1900509 | 0.008852843 | -1.03089394 | 0.659868478 |
| 0.835491034 | 0.0049891  | -1.0445849 | 0.536416615 | -1.04084613 | 0.516988456 |
| 0.965059417 | 0.55615209 | -1.0266412 | 0.598987432 | -1.06287763 | 0.314422238 |
| 0.941502484 | 0.57786661 | -1.0056712 | 0.910076111 | 0.970958407 | 0.785321696 |
| -1.09880561 | 0.19611287 | 0.80609796 | 0.000942191 | 0.859962388 | 0.040823371 |
| -1.05469533 | 0.45705611 | 0.9870512  | 0.835755496 | -1.03502108 | 0.630194596 |
| -1.13432882 | 0.04913001 | -1.0773709 | 0.220764666 | -1.06583756 | 0.313061843 |
| 0.878083669 | 0.04347696 | 0.9284522  | 0.174617022 | -1.05802975 | 0.373602983 |
| 0.991994532 | 0.89102345 | 0.99471731 | 0.916849138 | -1.02441454 | 0.68116185  |
| 0.963993563 | 0.5636812  | -1.0311959 | 0.530993579 | 0.988503422 | 0.855331583 |
| -1.04497958 | 0.44650338 | -1.0581284 | 0.309218892 | -1.00767746 | 0.894445863 |
| -1.22911667 | 0.00261358 | 0.8865542  | 0.024922983 | 0.894560194 | 0.093926949 |

|             |            |            |             |             |             |
|-------------|------------|------------|-------------|-------------|-------------|
| -1.05215358 | 0.3875113  | -1.0973132 | 0.116808235 | -1.11248683 | 0.073300765 |
| -1.01415684 | 0.7968301  | -1.002194  | 0.968338907 | -1.04434154 | 0.42807479  |
| 0.935207703 | 0.24994722 | -1.0152897 | 0.765370466 | 0.859680898 | 0.011260133 |
| -1.07488102 | 0.35770581 | 0.90718629 | 0.043947865 | -1.47619279 | 6.41E-06    |
| 0.814261417 | 0.31773184 | -1.212861  | 0.006791224 | 0.979984872 | 0.921320676 |
| -1.01604671 | 0.78400333 | 0.9847515  | 0.811833881 | -1.37825459 | 8.98E-07    |
| 0.91021809  | 0.18203247 | -1.0463067 | 0.51309388  | -1.04661514 | 0.515371367 |
| -1.03000117 | 0.64230683 | 0.99867334 | 0.982822756 | 0.938395359 | 0.319513797 |
| -1.13765135 | 0.00727611 | -1.0595402 | 0.339801248 | -1.09340317 | 0.058648826 |
| 0.928367884 | 0.30475745 | -1.2742512 | 0.028490134 | 0.987675303 | 0.863390958 |
| 0.940558927 | 0.21783406 | 0.96131192 | 0.585864634 | -1.10294001 | 0.051281441 |
| -1.15632426 | 0.03629658 | -1.08189   | 0.273127956 | 0.930174472 | 0.289338285 |
| 0.982873342 | 0.76507674 | 0.9302993  | 0.253630009 | 0.982770398 | 0.763695768 |
| -1.06944407 | 0.28151223 | -1.0117318 | 0.853520628 | -1.25269733 | 0.000594025 |
| -1.14787602 | 0.0461363  | 0.96382968 | 0.530739319 | -1.0642193  | 0.361002546 |
| 0.866982702 | 0.06890312 | -1.0045348 | 0.943119486 | 0.867003106 | 0.068947488 |
| -1.06291288 | 0.24573927 | -1.0341014 | 0.561335816 | -1.03987099 | 0.455318386 |
| -1.05171786 | 0.46757377 | -1.022212  | 0.738012609 | -1.00848312 | 0.902908474 |
| 0.937317168 | 0.17018524 | -1.1345343 | 0.035011056 | 0.9386287   | 0.179439467 |
| 0.995375131 | 0.92622222 | -1.0048728 | 0.92904373  | -1.05414591 | 0.294663699 |
| 0.933509965 | 0.19410404 | 0.90048496 | 0.074340675 | -1.04227945 | 0.432170418 |
| -1.03305686 | 0.51395609 | -1.1037653 | 0.210129067 | -1.15204999 | 0.006030257 |
| 0.919174988 | 0.19056451 | 0.77383572 | 0.213675306 | 0.972303695 | 0.660409372 |
| 0.979849047 | 0.69303649 | 0.99326734 | 0.907373914 | -1.06265458 | 0.24133347  |
| -1.11941939 | 0.03909103 | -1.0150271 | 0.831069614 | -1.12094239 | 0.03687831  |
| -1.04698167 | 0.44425944 | -1.0859975 | 0.197909088 | 0.985321314 | 0.804899426 |
| -1.02550074 | 0.6613831  | -1.0445876 | 0.349495753 | -1.05870583 | 0.322843258 |
| -1.03738286 | 0.67506784 | -1.060963  | 0.413030688 | 0.94682121  | 0.532932705 |
| 0.963484532 | 0.50211606 | 0.95538624 | 0.35721742  | -1.06969457 | 0.226355901 |
| -1.00927386 | 0.88546477 | 0.96677172 | 0.619387746 | 0.977655116 | 0.724493598 |
| 0.93537911  | 0.33295652 | -1.0924461 | 0.130109388 | -1.14582379 | 0.05160693  |
| -1.01236703 | 0.85529196 | -1.1415437 | 0.036496575 | 0.501110728 | 2.56E-14    |
| -1.01236318 | 0.81805081 | 0.97290831 | 0.685950169 | 0.96132563  | 0.461266667 |
| 0.732372111 | 1.38E-05   | -1.0366806 | 0.641324682 | 0.783801659 | 0.000445035 |
| 0.90256018  | 0.07934795 | -1.0145649 | 0.781975458 | 0.907242117 | 0.095262488 |
| -1.04611078 | 0.38424195 | -1.0600886 | 0.400944327 | 0.983459246 | 0.746752269 |
| 0.93933827  | 0.35250707 | 0.97366174 | 0.568871348 | -1.01767754 | 0.793849379 |
| 0.94893647  | 0.35076714 | -1.0547643 | 0.289382083 | 0.921403186 | 0.1473752   |
| -1.09445125 | 0.07371282 | 0.89507468 | 0.038775033 | 0.975808518 | 0.622665575 |
| 0.868793811 | 0.02281083 | -1.045264  | 0.375111456 | -1.01278251 | 0.833157852 |
| -1.08938558 | 0.08369719 | -1.1087976 | 0.110131102 | 0.928152716 | 0.13070109  |
| -1.03000068 | 0.56125939 | 0.90644843 | 0.060843731 | 0.982758171 | 0.732210425 |
| -1.12447202 | 0.06678848 | -1.1137446 | 0.048419637 | -1.15309423 | 0.027120254 |
| -1.07971236 | 0.137912   | -1.0237594 | 0.69500846  | -1.00827323 | 0.872074062 |

|             |            |            |             |             |             |
|-------------|------------|------------|-------------|-------------|-------------|
| 0.92606303  | 0.26618638 | -1.0569047 | 0.337366461 | 0.984109376 | 0.815636039 |
| 0.988183072 | 0.82671193 | 0.94736025 | 0.537192252 | 0.95628519  | 0.411774462 |
| 0.957672876 | 0.52446303 | -1.0673127 | 0.24188422  | -1.06163968 | 0.379536206 |
| -1.00364449 | 0.94995132 | 0.96400764 | 0.567883211 | -1.0355314  | 0.547568519 |
| 0.92344464  | 0.08076872 | -1.018634  | 0.788185451 | -1.10130902 | 0.035546531 |
| -1.07076059 | 0.11429869 | -1.0102345 | 0.879904574 | 0.94521248  | 0.191451242 |
| -1.05730044 | 0.33835499 | 0.9802255  | 0.708561533 | 0.980149504 | 0.729480068 |
| -1.05102629 | 0.4320816  | 0.79170279 | 0.00071974  | -1.12171944 | 0.073263622 |
| 0.983177023 | 0.75567342 | 0.87589582 | 0.024668665 | -1.12541821 | 0.033811763 |
| 0.971959908 | 0.67706901 | 0.91299147 | 0.082155846 | -1.10653168 | 0.141953398 |
| -1.09448804 | 0.12859528 | 0.85563249 | 0.023220288 | -1.03301152 | 0.581048647 |
| 0.936843322 | 0.25395638 | 0.95824453 | 0.447031263 | -1.05345383 | 0.361454824 |
| -1.11811707 | 0.03001087 | -1.0800186 | 0.125640541 | 0.989724499 | 0.837393213 |
| 0.922169616 | 0.17742758 | -1.0596101 | 0.338890094 | 0.936547666 | 0.273781421 |
| 0.912601051 | 0.12655776 | 0.92703568 | 0.124728624 | 0.98276949  | 0.769181867 |
| -1.00435699 | 0.93011109 | 0.92250535 | 0.116521863 | 0.999744212 | 0.995882137 |
| 0.966779453 | 0.60672625 | -1.1611896 | 0.020714705 | -1.06234527 | 0.358117139 |
| -1.03368416 | 0.55934612 | -1.0281651 | 0.587709337 | 0.988392094 | 0.836757405 |
| 0.9067794   | 0.07633071 | -1.0024438 | 0.971651381 | -1.08520747 | 0.136861863 |
| 0.969580293 | 0.65503647 | -1.1706353 | 0.005170824 | -1.01616894 | 0.816435197 |
| 0.890720666 | 0.04779785 | -1.0650746 | 0.354530336 | -1.06154417 | 0.300537486 |
| -1.02901904 | 0.65153025 | 0.92677053 | 0.193001403 | -1.04239599 | 0.512555059 |
| 0.978086479 | 0.77616073 | -1.081821  | 0.084536339 | 0.984056836 | 0.836578749 |
| 0.986166053 | 0.87635886 | 0.98212496 | 0.673623086 | 0.955758127 | 0.613669035 |
| -1.05515294 | 0.34281956 | -1.0418024 | 0.48076276  | -1.00834975 | 0.882711421 |
| -1.26150403 | 0.00639652 | -1.0339295 | 0.59779607  | -1.22421963 | 0.016663279 |
| 0.855012265 | 0.0467348  | -1.0282119 | 0.610144906 | 0.935856916 | 0.392777717 |
| 0.959962658 | 0.55361516 | -1.1007033 | 0.163511603 | 0.974463243 | 0.707377801 |
| 0.905797624 | 0.03777503 | 0.97118517 | 0.619236799 | 0.889717022 | 0.014909473 |
| -1.01968887 | 0.75793711 | -1.0287717 | 0.618150084 | -1.02233021 | 0.727060413 |
| -1.00039901 | 0.99486411 | -1.1253793 | 0.022025645 | 0.923224497 | 0.200878991 |
| -1.15051154 | 0.04523178 | 0.95244453 | 0.414815058 | -1.02741268 | 0.69405839  |
| -1.01836657 | 0.74820495 | -1.0362564 | 0.548158774 | -1.02342778 | 0.683033972 |
| 0.895813153 | 0.1426195  | -1.0042038 | 0.932557349 | -1.04480211 | 0.555858882 |
| -1.01339456 | 0.8587061  | -1.0222746 | 0.736950051 | -1.05637743 | 0.464130236 |
| 0.98893381  | 0.8443583  | 0.99939351 | 0.991456334 | 0.95543603  | 0.422560758 |
| 0.978858331 | 0.7322541  | 0.89298432 | 0.041337292 | -1.05454992 | 0.396435505 |
| 0.913622542 | 0.12535111 | 0.97003521 | 0.659933593 | -1.01491417 | 0.799581015 |
| -1.06864703 | 0.30629219 | -1.0846455 | 0.160758433 | -1.07517914 | 0.264470586 |
| 0.986902774 | 0.83327299 | -1.0766301 | 0.246254218 | 0.970375815 | 0.631412436 |
| -1.02958773 | 0.67852401 | 0.99068578 | 0.904388349 | -1.17893292 | 0.022336326 |
| -1.14003712 | 0.02502131 | -1.1086798 | 0.252077336 | -1.04867608 | 0.406777968 |
| 0.88840646  | 0.0304764  | -1.0116866 | 0.836688414 | -1.04562239 | 0.405748417 |
| 0.948647797 | 0.30799098 | -1.1730273 | 0.056457541 | 0.97733603  | 0.656266537 |

|             |            |            |             |             |             |
|-------------|------------|------------|-------------|-------------|-------------|
| 0.861184491 | 0.10002975 | 0.94279423 | 0.447296435 | -1.04816253 | 0.600523094 |
| -1.12913956 | 0.07109681 | -1.13238   | 0.075323764 | 0.997661393 | 0.97181515  |
| -1.08447447 | 0.10053042 | -1.0256688 | 0.587578558 | 0.974802565 | 0.601138557 |
| 0.967284248 | 0.53325491 | -1.086826  | 0.191506043 | -1.05020035 | 0.359919369 |
| -1.00462808 | 0.93361971 | 0.89400375 | 0.074907487 | -1.03757863 | 0.50663686  |
| 0.970595592 | 0.65666509 | 0.89618668 | 0.114840281 | 0.994487673 | 0.934326652 |
| 0.902325572 | 0.12180654 | -1.1237389 | 0.043450889 | 0.907623673 | 0.144043771 |
| -1.22276585 | 0.00047276 | -1.0516535 | 0.498728118 | 0.917243515 | 0.115618447 |
| -1.09036803 | 0.34603191 | -1.1063401 | 0.179957958 | -1.06471878 | 0.493730392 |
| 0.922688514 | 0.16111172 | -1.0083952 | 0.882733607 | -1.03496115 | 0.546503363 |
| 0.954492062 | 0.38062636 | 0.97539418 | 0.690031057 | -1.15192921 | 0.009641261 |
| 0.995130416 | 0.95113116 | 0.97541494 | 0.669621569 | 0.944086135 | 0.471135817 |
| -1.04072641 | 0.4931691  | 0.91539144 | 0.174756004 | -1.05382068 | 0.368924564 |
| 0.996658986 | 0.95057963 | -1.0482072 | 0.453302319 | -1.0554142  | 0.320113465 |
| -1.06144585 | 0.33378637 | -1.0649815 | 0.372235044 | 0.919742855 | 0.17691825  |
| -1.13531676 | 0.04943543 | 0.99887749 | 0.984308923 | -1.08759519 | 0.189112069 |
| -1.0299118  | 0.67552691 | -1.0492257 | 0.370761589 | -1.10338659 | 0.165808598 |
| 0.964425742 | 0.66676825 | -1.0313714 | 0.549006256 | 0.90185262  | 0.222278972 |
| -1.15526143 | 0.04047273 | -1.0695039 | 0.455042242 | -1.02493368 | 0.721527503 |
| -1.09015178 | 0.20844856 | -1.0414114 | 0.541033653 | 0.950664197 | 0.458766683 |
| 0.970400963 | 0.61195888 | -1.0257098 | 0.603065885 | -1.06579044 | 0.284052452 |
| -1.00886587 | 0.89419235 | 0.9501296  | 0.339148118 | -1.0790492  | 0.254502929 |
| -1.12189557 | 0.03571868 | -1.1295787 | 0.031522067 | -1.03385292 | 0.535539092 |
| 0.85642248  | 0.00981991 | -1.0399504 | 0.559853377 | 0.915380714 | 0.13253222  |
| -1.06733136 | 0.35939994 | 0.95508433 | 0.485138799 | 0.983849582 | 0.818198523 |
| 0.956993626 | 0.34079643 | -1.0124093 | 0.820249312 | -1.04497169 | 0.340456204 |
| -1.0630525  | 0.48646109 | 0.85824018 | 0.098805383 | 0.902684972 | 0.245810251 |
| -1.07190348 | 0.20823085 | -1.113462  | 0.063085919 | -1.06985186 | 0.220871594 |
| 0.899642177 | 0.05558927 | -1.0908436 | 0.104712045 | -1.05461135 | 0.329627642 |
| -1.02377819 | 0.6344888  | -1.0580084 | 0.480000409 | -1.01782211 | 0.720685474 |
| 0.979289985 | 0.65254959 | 0.93138235 | 0.22454314  | -1.06670634 | 0.16814582  |
| 0.95580094  | 0.46562194 | -0.9999496 | 0.999255675 | 0.812164452 | 0.001349087 |
| -1.01479991 | 0.77964737 | 0.97424359 | 0.671249822 | 0.99210676  | 0.88001392  |
| -1.00678186 | 0.90215193 | -1.0510837 | 0.433471595 | 0.942648633 | 0.285235637 |
| 0.771191521 | 0.00110879 | -1.1433368 | 0.061116267 | 0.763396661 | 0.00073457  |
| 0.882860646 | 0.05199706 | 0.86449879 | 0.087512848 | 0.90104759  | 0.10232458  |
| 0.911899424 | 0.27972397 | -1.0333006 | 0.63559812  | 0.685400978 | 4.05E-05    |
| 0.975505322 | 0.64386157 | 0.98253253 | 0.795920127 | -1.05419989 | 0.326844599 |
| 0.986332218 | 0.79814716 | 0.94611658 | 0.351090379 | 0.946468041 | 0.308789202 |
| 0.910804415 | 0.2399023  | -1.2531382 | 0.001217667 | -1.09715648 | 0.243423655 |
| 0.976183296 | 0.6639364  | -1.020513  | 0.705199433 | 0.929145506 | 0.188490245 |
| -1.14280539 | 0.03828286 | 0.81796545 | 0.001031112 | 0.945909447 | 0.380160969 |
| 0.950775761 | 0.43066946 | -1.0912963 | 0.220574138 | 0.896466841 | 0.091329949 |
| -1.09130289 | 0.34326934 | -1.1233733 | 0.013886134 | -1.2696883  | 0.011618549 |

|             |            |            |             |             |             |
|-------------|------------|------------|-------------|-------------|-------------|
| 0.979013296 | 0.70389284 | 0.80266067 | 0.014766166 | 0.935712368 | 0.236544749 |
| -1.0181822  | 0.78227184 | -1.0247755 | 0.655268187 | -1.07597521 | 0.264023393 |
| 0.891402475 | 0.06636856 | -1.0319094 | 0.563559472 | -1.00204973 | 0.973494757 |
| 0.882627437 | 0.11237811 | -1.0171181 | 0.731181689 | 0.773102982 | 0.001590474 |
| 0.815675609 | 0.00768672 | -1.1101568 | 0.027849334 | 0.584964171 | 1.44E-09    |
| -1.09639866 | 0.13420318 | 0.86279051 | 0.019939708 | 0.981094935 | 0.753698062 |
| -1.0655148  | 0.40674595 | -1.0400197 | 0.455915587 | 0.952376359 | 0.522969823 |
| 0.889133395 | 0.04710437 | -1.0702538 | 0.220056883 | 0.940445507 | 0.29305927  |
| 0.951305806 | 0.45311005 | 0.82536329 | 0.013783122 | -1.14538553 | 0.044761937 |
| -1.07512782 | 0.20097919 | 0.85666449 | 0.016814431 | -1.01653449 | 0.770580356 |
| 0.910698619 | 0.07096367 | 0.93611891 | 0.437880625 | -1.05227438 | 0.320120504 |
| 0.971717052 | 0.66055444 | -1.0822221 | 0.144360288 | -1.02855617 | 0.666483021 |
| -1.12614881 | 0.03790489 | -1.0220652 | 0.685183136 | 0.957027709 | 0.43478494  |
| 0.950131903 | 0.30833409 | -1.0614067 | 0.451727888 | 0.95361081  | 0.343857118 |
| -1.1288636  | 0.02002724 | 0.98975267 | 0.852607109 | 0.894981993 | 0.03255556  |
| -1.04043429 | 0.56434764 | 0.9818763  | 0.772136819 | 0.960759698 | 0.560506879 |
| 0.94339835  | 0.29923541 | 0.98274665 | 0.785307343 | 0.933885709 | 0.223861537 |
| -1.12919978 | 0.10400917 | -1.0300794 | 0.746950589 | -1.14138427 | 0.077504937 |
| 0.84215091  | 0.00447923 | -1.031222  | 0.581968702 | -1.01717819 | 0.769743532 |
| 0.945908558 | 0.41769361 | -1.1071934 | 0.122383511 | -1.02773547 | 0.689425357 |
| -1.07563515 | 0.19192265 | 0.94398242 | 0.351540124 | 0.961692665 | 0.482014579 |
| -1.0969618  | 0.12974154 | -1.0191253 | 0.807455607 | -1.1009338  | 0.115726732 |
| -1.00460021 | 0.93408823 | 0.75273107 | 0.000305108 | 0.917131487 | 0.123211323 |
| 0.944945864 | 0.32919542 | 0.995739   | 0.944010924 | 0.930609347 | 0.216531284 |
| -1.02023949 | 0.74222954 | -1.0785477 | 0.323523211 | -1.02898864 | 0.639198685 |
| -1.00615386 | 0.91990191 | -1.0377522 | 0.524348825 | 0.990610189 | 0.877118398 |
| 0.990658398 | 0.92359636 | -1.0978337 | 0.163411257 | 0.703263879 | 0.000665432 |
| -1.12195057 | 0.06196332 | 0.88948485 | 0.041085367 | -1.0388329  | 0.530602431 |
| 0.929336458 | 0.32400286 | -1.0682105 | 0.199317532 | -1.08107816 | 0.294386395 |
| 0.959986764 | 0.5098243  | -1.0495842 | 0.45960102  | -1.04716022 | 0.457255326 |
| -1.17417106 | 0.00200285 | -1.0991195 | 0.096208764 | -1.01247346 | 0.802909435 |
| 0.973979698 | 0.65380282 | 0.9811571  | 0.703629436 | 0.967743821 | 0.577213693 |
| -1.00856887 | 0.88523166 | -1.0142192 | 0.781126954 | -1.06932324 | 0.25965128  |
| 0.952583457 | 0.4221264  | -1.1061008 | 0.145918089 | -1.09747633 | 0.127286608 |
| 0.976475474 | 0.69627199 | 0.94183541 | 0.285834086 | -1.04913226 | 0.432584237 |
| 0.954439423 | 0.46151594 | -1.0299608 | 0.689433819 | 0.907632071 | 0.129079412 |
| -1.02638292 | 0.63583399 | 0.98831621 | 0.839902992 | -1.02259409 | 0.684452825 |
| 0.9618833   | 0.48788707 | 0.84141017 | 0.014155733 | -1.07307347 | 0.210408436 |
| -1.02191688 | 0.74811513 | -1.002779  | 0.96006876  | 0.997681553 | 0.972560496 |
| 0.961887653 | 0.49759575 | -1.034383  | 0.57639789  | -1.05085338 | 0.387222837 |
| 0.853155704 | 0.0057788  | -1.029604  | 0.599558581 | 0.829294059 | 0.001322452 |
| -1.18559507 | 0.01127633 | 0.92357883 | 0.172576718 | -1.09013167 | 0.18900556  |
| -1.02141682 | 0.69287285 | -1.1465946 | 0.028099601 | -1.0803671  | 0.153283541 |
| 0.88096763  | 0.07728149 | -1.0614971 | 0.330107815 | -1.00399873 | 0.954978533 |



|             |            |            |             |             |             |
|-------------|------------|------------|-------------|-------------|-------------|
| 0.948882565 | 0.37834169 | 0.87400588 | 0.172523996 | 0.984457366 | 0.791872697 |
| 0.899334408 | 0.05515278 | 0.9722925  | 0.643443942 | -1.03594732 | 0.516846043 |
| 0.98144961  | 0.73896921 | 0.97688242 | 0.751952991 | 0.866558825 | 0.013248766 |
| -1.2449324  | 0.00016934 | 0.99204619 | 0.89724268  | -1.10443881 | 0.072265517 |
| -1.0387087  | 0.49806894 | -1.0283051 | 0.574590618 | -1.04793347 | 0.404091033 |
| 0.960352549 | 0.56284884 | 0.94541273 | 0.341240915 | -1.05200388 | 0.468785881 |
| -1.04956761 | 0.39224486 | 0.97363171 | 0.651510478 | 0.959115133 | 0.459981179 |
| -1.09900269 | 0.40395181 | 0.8913331  | 0.06074685  | -1.21908952 | 0.083201407 |
| -1.01523775 | 0.77788303 | 0.96868412 | 0.602068767 | -1.0513381  | 0.352179909 |
| -1.02368251 | 0.68573596 | 0.94834365 | 0.402645111 | -1.07197092 | 0.232333553 |
| -1.1855404  | 0.02357353 | -1.016194  | 0.770053073 | -1.07181104 | 0.346586321 |
| -1.04059577 | 0.42019585 | 0.96217659 | 0.491291619 | -1.06018326 | 0.238117931 |
| 0.956005645 | 0.46482678 | -1.0779483 | 0.268755279 | 0.893876295 | 0.071947783 |
| 0.996250886 | 0.95880229 | -1.067179  | 0.258237569 | 0.63882883  | 8.59E-08    |
| 0.877991912 | 0.09281608 | 0.69035188 | 1.26005E-08 | 0.884053049 | 0.110935082 |
| -1.09247919 | 0.12603397 | 0.98524004 | 0.819550827 | -1.05204458 | 0.376662018 |
| 0.989106389 | 0.84375138 | 0.96074397 | 0.456261813 | 0.981766596 | 0.740634272 |
| 0.882288399 | 0.02348885 | -1.0331957 | 0.644420019 | 0.986824053 | 0.805872972 |
| -1.11246444 | 0.05521307 | -1.0231093 | 0.700447946 | 0.913628645 | 0.102523582 |
| 0.902770343 | 0.09568519 | -1.0680099 | 0.229416963 | 0.935766281 | 0.275906347 |
| 0.91886387  | 0.191614   | 0.93787075 | 0.256305596 | -1.03010669 | 0.644811623 |
| -1.0160942  | 0.7762893  | 0.96405421 | 0.502125308 | -1.00252457 | 0.964193982 |
| -1.11195621 | 0.06652841 | -1.016129  | 0.774915886 | -1.01502599 | 0.793385787 |
| -1.10157806 | 0.08461499 | 0.91851039 | 0.226538752 | -1.00423813 | 0.939060526 |
| -1.01175425 | 0.85241906 | -1.0328933 | 0.566352441 | -1.10877505 | 0.104428772 |
| 0.860119725 | 0.02322594 | -1.2291821 | 0.071484266 | -1.00495962 | 0.939134082 |
| 0.975995727 | 0.76354902 | 0.94320717 | 0.277929507 | -1.04931222 | 0.551694399 |
| 0.844483765 | 0.00647021 | -1.0899213 | 0.140335603 | 0.990723155 | 0.876422193 |
| -1.08999169 | 0.09918771 | -1.2371774 | 0.005191092 | 0.961977217 | 0.45366214  |
| 0.822346393 | 0.00038219 | -1.0804677 | 0.120012331 | 0.976832152 | 0.651432661 |
| 0.879312214 | 0.01576011 | 0.90116003 | 0.094373694 | 0.937159358 | 0.213714812 |
| 0.841397209 | 0.14625473 | -1.0068974 | 0.924689953 | 0.536727542 | 2.13E-06    |
| -1.03101497 | 0.60408183 | 0.92669816 | 0.321234794 | -1.06466728 | 0.289349652 |
| 0.945649567 | 0.39370301 | -1.0048551 | 0.932498103 | -1.03212038 | 0.628632686 |
| 0.891189624 | 0.05405041 | 0.86138196 | 0.009303548 | -1.06366527 | 0.296016466 |
| -1.0318468  | 0.57848122 | -1.0055326 | 0.918555963 | 0.970523601 | 0.59589125  |
| 0.869391862 | 0.03494368 | 0.99117743 | 0.871161959 | -1.00225605 | 0.972335902 |
| -1.010243   | 0.8947303  | 0.85986038 | 0.015376293 | 0.966605758 | 0.65947464  |
| 0.920481093 | 0.28249247 | -1.0295449 | 0.650894425 | -1.05914273 | 0.45482764  |
| -1.0102168  | 0.87856659 | 0.99310897 | 0.902022833 | -1.04653306 | 0.495099483 |
| -1.0636958  | 0.28204957 | -1.1189229 | 0.052476349 | -1.11481821 | 0.061128502 |
| -1.09883544 | 0.19469758 | 0.83718292 | 0.00213078  | -1.0570682  | 0.44274774  |
| -1.01751301 | 0.80591296 | -1.0885339 | 0.180456643 | 0.90190273  | 0.147826262 |
| -1.03086162 | 0.66465912 | 0.98142999 | 0.772427688 | -1.08346856 | 0.255369622 |

|             |            |            |             |             |             |
|-------------|------------|------------|-------------|-------------|-------------|
| -1.02434753 | 0.68100166 | -1.0824244 | 0.328744034 | 0.976890372 | 0.689466762 |
| 0.931967588 | 0.11342253 | 0.68750285 | 6.15646E-08 | 0.987446287 | 0.774037441 |
| -1.09035081 | 0.15488962 | 0.99317915 | 0.894479268 | -1.02174992 | 0.721080153 |
| -1.04457078 | 0.49382113 | 0.9119802  | 0.079787534 | -1.12228497 | 0.073918312 |
| -1.01803069 | 0.75961601 | -1.0825061 | 0.130148144 | -1.00920437 | 0.875296656 |
| 0.96390051  | 0.63647537 | 0.85618895 | 0.190626183 | -1.20348315 | 0.020163397 |
| -1.13207604 | 0.04163408 | -1.0503624 | 0.405124619 | -1.01345102 | 0.822982846 |
| 0.958142567 | 0.43649104 | 0.990497   | 0.883748999 | 0.921725055 | 0.140909179 |
| -1.05984389 | 0.27561481 | -1.0047966 | 0.935097365 | -1.049659   | 0.362487753 |
| 0.941792877 | 0.29628664 | 0.98367247 | 0.7702409   | 0.915296512 | 0.125446115 |
| 0.981437842 | 0.76839263 | 0.93599198 | 0.311038528 | -1.07294644 | 0.271005902 |
| -1.081444   | 0.24070666 | -1.1093582 | 0.181434766 | -1.30304052 | 0.000188626 |
| 0.958834855 | 0.38385774 | -1.0958368 | 0.235759107 | -1.00648107 | 0.893171099 |
| -1.11510006 | 0.05677113 | -1.119465  | 0.094104191 | 0.995173841 | 0.93142078  |
| -1.02455336 | 0.69413257 | 0.90588436 | 0.087695594 | -1.01018202 | 0.869466915 |
| 0.98857967  | 0.87605453 | -1.1350556 | 0.083241028 | 0.996070716 | 0.957359408 |
| -1.12309759 | 0.05040705 | 0.94045902 | 0.38651745  | -1.05786503 | 0.336475016 |
| 0.921276188 | 0.36954859 | -1.0277124 | 0.696595941 | -1.12937582 | 0.185010755 |
| -1.05532645 | 0.38698487 | -1.0806196 | 0.188408941 | -1.0691677  | 0.283540977 |
| 0.761885666 | 4.34E-05   | -1.0036093 | 0.934721815 | 0.771284724 | 8.54E-05    |
| -1.13359501 | 0.09373482 | 0.9268105  | 0.210353031 | -1.06139781 | 0.42104601  |
| 0.966155128 | 0.54432581 | -1.145717  | 0.036146857 | 0.987274513 | 0.821315233 |
| 0.863299203 | 0.02624948 | 0.95120145 | 0.393058187 | 0.936433906 | 0.311723917 |
| -1.16346048 | 0.04377446 | -1.0541009 | 0.498693919 | -1.02492957 | 0.738293517 |
| -1.00471937 | 0.93224393 | -1.0604723 | 0.327645243 | 0.99175911  | 0.881222145 |
| -1.04605136 | 0.50813064 | 0.8824458  | 0.025796526 | 0.832258652 | 0.008850394 |
| -1.00331871 | 0.96214159 | -1.0371523 | 0.492354337 | 0.982341874 | 0.798598643 |
| -1.15546905 | 0.00743231 | 0.9962635  | 0.947751568 | 0.859423634 | 0.005152107 |
| -1.18253505 | 0.00211478 | 0.91297275 | 0.156167437 | -1.01831698 | 0.72792834  |
| -1.06816125 | 0.30609764 | -1.0941377 | 0.178520775 | 0.973225047 | 0.672318454 |
| -1.07572111 | 0.22634406 | -1.0528298 | 0.287061861 | 0.971841106 | 0.633934043 |
| 0.92268525  | 0.15485425 | 0.9411173  | 0.282943888 | 0.944623115 | 0.311570166 |
| 0.954306007 | 0.69518612 | 0.94263616 | 0.339917915 | 0.891740593 | 0.338834262 |
| -1.04858783 | 0.35702052 | -1.0107681 | 0.884360002 | -1.04337179 | 0.409428937 |
| 0.969832868 | 0.71894505 | 0.90348812 | 0.085868286 | 0.914272226 | 0.294558139 |
| 0.92518678  | 0.24799893 | 0.98575112 | 0.874746768 | -1.079592   | 0.255137895 |
| 0.943758536 | 0.32929218 | -1.0646464 | 0.314844092 | -1.06330495 | 0.301180857 |
| -1.18665134 | 0.0088731  | -1.0646419 | 0.309775314 | -1.06996408 | 0.287966929 |
| -1.04414549 | 0.43909112 | -1.2384446 | 0.005250973 | -1.0375239  | 0.509069008 |
| -1.01016746 | 0.8552119  | 0.8424336  | 0.003668424 | -1.07168522 | 0.21498037  |
| 0.859362707 | 0.01735063 | -1.0221127 | 0.73511146  | 0.939133034 | 0.313574366 |
| 0.83113322  | 0.0078386  | -1.1241965 | 0.116202333 | 0.868626904 | 0.040122231 |
| -1.11010404 | 0.03308247 | -1.1055111 | 0.074358707 | 0.965304817 | 0.462821999 |
| -1.4305701  | 0.01454904 | -1.0690891 | 0.327314289 | -1.27126217 | 0.096320844 |

|             |            |            |             |             |             |
|-------------|------------|------------|-------------|-------------|-------------|
| 0.942444387 | 0.37929403 | -1.0122837 | 0.861169924 | -1.04675162 | 0.497339832 |
| -1.03293471 | 0.52421455 | -1.1121797 | 0.045550853 | -1.11939486 | 0.029860953 |
| 0.972732351 | 0.67007021 | -1.0054209 | 0.917432813 | 0.970651558 | 0.646241608 |
| 0.950611302 | 0.31868446 | 0.81878245 | 0.0028016   | -1.03525602 | 0.49407882  |
| 0.936269416 | 0.27658365 | 0.9950094  | 0.933456425 | 0.995263729 | 0.937131408 |
| 0.8481579   | 0.02647086 | 0.920599   | 0.143787958 | -1.07463611 | 0.323002284 |
| 0.871466951 | 0.0234749  | 0.89338072 | 0.346571695 | 0.988665756 | 0.847505785 |
| -1.03964043 | 0.54574783 | 0.97363812 | 0.603026426 | -1.01465092 | 0.820915563 |
| -1.01165104 | 0.84567191 | 0.84819809 | 0.057089782 | -1.07212217 | 0.244845518 |
| 0.946912122 | 0.32661304 | -1.0725859 | 0.297300814 | -1.07027695 | 0.22308639  |
| -1.1778226  | 0.01509953 | -1.0499325 | 0.410935452 | 0.994816668 | 0.936758094 |
| 0.96447038  | 0.5313438  | 0.97741546 | 0.718375371 | -1.01149565 | 0.842964745 |
| 0.935586503 | 0.28111166 | -1.1339128 | 0.027391358 | -1.04588495 | 0.46636214  |
| 0.977237392 | 0.70375097 | -1.110332  | 0.063225945 | 0.950834368 | 0.406276941 |
| 0.909277075 | 0.17614254 | -1.0739223 | 0.253079933 | 0.855145521 | 0.028204762 |
| 0.963090983 | 0.46186726 | 0.95684778 | 0.512826707 | -1.02715231 | 0.599723981 |
| -1.12763974 | 0.02211141 | -1.059177  | 0.233863271 | -1.02332911 | 0.652765423 |
| 0.940134872 | 0.24289385 | -1.2927755 | 0.07574026  | -1.02796078 | 0.60003072  |
| -1.14574119 | 0.02716464 | 0.96786056 | 0.627154433 | 0.986358711 | 0.819505867 |
| -1.05082847 | 0.46216834 | -1.0085592 | 0.866739177 | -1.06290861 | 0.36619505  |
| 0.862198094 | 0.05089924 | 0.99330778 | 0.917516834 | 0.984302607 | 0.832049526 |
| -1.05122994 | 0.50738162 | -1.0090903 | 0.85796585  | -1.15809391 | 0.055118259 |
| -1.01729061 | 0.81676828 | -1.0526273 | 0.39573433  | -1.13142738 | 0.099325569 |
| 0.93968558  | 0.24697904 | 0.95800082 | 0.554623118 | -1.05950928 | 0.281624338 |
| 0.910640458 | 0.35292816 | -1.0543201 | 0.373892699 | 0.961593743 | 0.696577952 |
| 0.960352352 | 0.51904922 | -1.0216598 | 0.738822382 | -1.06990342 | 0.283161275 |
| -1.10241675 | 0.10000618 | -1.0842436 | 0.177737799 | -1.08232625 | 0.18014339  |
| -1.01246117 | 0.78567425 | 0.90834362 | 0.086761927 | -1.0100476  | 0.8262207   |
| 0.862770463 | 0.01327865 | 0.97246319 | 0.670122662 | -1.06405471 | 0.286173477 |
| 0.968543844 | 0.58728577 | -1.1018251 | 0.097067061 | 0.973176841 | 0.644145667 |
| 0.988540796 | 0.87029586 | -1.224769  | 0.001644926 | -1.06026231 | 0.408542804 |
| 0.908989223 | 0.09232323 | 0.87867365 | 0.036292052 | -1.00480737 | 0.931676754 |
| -1.03969879 | 0.5116845  | 0.90027278 | 0.135831391 | -1.00501403 | 0.932680642 |
| 0.947865106 | 0.55316802 | -1.0604364 | 0.252655645 | -1.21471311 | 0.034620451 |
| -1.20320136 | 0.00801608 | 0.99019959 | 0.847508031 | -1.03167308 | 0.644343127 |
| -1.02200389 | 0.68632075 | 0.88797044 | 0.027075582 | 0.976671629 | 0.661440197 |
| -1.00787912 | 0.87501219 | 0.94637269 | 0.361596907 | 0.931528335 | 0.158983833 |
| -1.02279237 | 0.6596833  | 0.94754921 | 0.424493126 | -1.06068541 | 0.25215453  |
| 0.94358655  | 0.22905433 | 0.91259854 | 0.223363789 | -1.0252344  | 0.603700196 |
| 0.945046994 | 0.47962257 | 0.82156084 | 0.011247777 | -1.06646498 | 0.42124197  |
| 0.973020577 | 0.6160134  | 0.85526051 | 0.038329741 | 0.941728962 | 0.273086979 |
| 0.955213443 | 0.4041126  | -1.1285262 | 0.026928928 | 0.955408498 | 0.406196708 |
| -1.02096466 | 0.75704714 | 0.97968044 | 0.837955498 | 0.942707504 | 0.380528423 |
| 0.924218459 | 0.21821135 | -1.0034037 | 0.956723864 | 0.810055123 | 0.001574286 |

|             |            |            |             |             |             |
|-------------|------------|------------|-------------|-------------|-------------|
| -1.05039588 | 0.49917341 | -1.0441206 | 0.461850361 | 0.950063503 | 0.481453218 |
| -1.09389593 | 0.15019946 | 0.96655663 | 0.456136932 | -1.24306052 | 0.00083888  |
| 0.936869613 | 0.25725292 | -1.042966  | 0.4685998   | -1.09274081 | 0.125265193 |
| -1.04518586 | 0.54866703 | 0.98298288 | 0.77046979  | -1.08741642 | 0.257479869 |
| 0.896331381 | 0.06955866 | 0.9109173  | 0.189739112 | 0.931945453 | 0.23829656  |
| -1.07549498 | 0.26136029 | 0.97489917 | 0.649806511 | 0.993564208 | 0.920162562 |
| 0.9997255   | 0.99668409 | -1.0215372 | 0.719084168 | -1.00910483 | 0.890879736 |
| 0.963436384 | 0.58813596 | -1.0450508 | 0.625330079 | 0.995552656 | 0.948261845 |
| -1.05898051 | 0.33271807 | -1.0595512 | 0.392938948 | 0.996188125 | 0.948301842 |
| 0.985491456 | 0.78807781 | 0.9945172  | 0.918688439 | 0.952081625 | 0.368098573 |
| 0.910798952 | 0.0860446  | -1.052928  | 0.303642336 | -1.07640791 | 0.17388174  |
| 0.920580378 | 0.3026633  | 0.99778528 | 0.965413471 | 0.960540815 | 0.614701886 |
| 0.953467452 | 0.43304976 | -1.0250274 | 0.606629192 | -1.09397035 | 0.142370187 |
| 0.895731356 | 0.03855198 | -1.0388341 | 0.633277959 | -1.10445382 | 0.060993133 |
| -1.04302914 | 0.49309473 | 0.97930245 | 0.701204955 | 0.918642619 | 0.170251111 |
| -1.1440966  | 0.02300502 | 0.9187496  | 0.125763729 | -1.14683646 | 0.020788751 |
| 0.890289245 | 0.10321714 | 0.97745276 | 0.733852414 | -1.01832765 | 0.796570662 |
| -1.0945412  | 0.16343069 | 0.89474444 | 0.08439931  | -1.03606493 | 0.581754934 |
| 0.922057122 | 0.19259707 | -1.0260822 | 0.723001551 | -1.09533784 | 0.144523678 |
| -1.04396088 | 0.60728235 | -1.0750881 | 0.244141179 | -1.03091038 | 0.715932903 |
| 0.927336402 | 0.14142088 | -1.0037964 | 0.947196616 | 0.974207871 | 0.607294637 |
| 0.895440536 | 0.04186189 | 0.94629657 | 0.454222799 | -1.05656863 | 0.303577943 |
| -1.04523393 | 0.50614452 | -1.0173206 | 0.772510787 | -1.03271159 | 0.62824717  |
| 0.941419943 | 0.30198696 | 0.96897006 | 0.624983745 | -1.02630883 | 0.65570794  |
| -1.12018142 | 0.03705048 | 0.96034815 | 0.540941075 | 0.974400826 | 0.627089742 |
| -1.03506255 | 0.53746459 | 0.90803201 | 0.163989147 | -1.03581001 | 0.529007861 |
| -1.02747416 | 0.66533372 | -1.1912916 | 0.004256867 | 0.911603708 | 0.14332764  |
| 0.960456156 | 0.45954914 | -1.0159084 | 0.77160137  | 0.962526348 | 0.483735141 |
| -1.05294434 | 0.45361913 | -1.0353524 | 0.518292854 | -1.0591485  | 0.404165039 |
| 0.863873393 | 0.04215214 | 0.94370938 | 0.469377521 | 0.953568225 | 0.501700993 |
| -1.08301583 | 0.16909242 | -1.1228679 | 0.060037805 | -1.06840272 | 0.252614774 |
| -1.08987534 | 0.20809221 | -1.1273341 | 0.024840345 | -1.00364212 | 0.9572752   |
| 0.947295824 | 0.42882534 | 0.84185941 | 0.006718391 | -1.19613836 | 0.010914677 |
| -1.07822383 | 0.17442324 | 0.9843189  | 0.784520608 | -1.01221395 | 0.825267768 |
| 0.985235748 | 0.79474535 | -1.0674705 | 0.355833328 | -1.07031554 | 0.237558842 |
| -1.07326119 | 0.30616164 | -1.0974878 | 0.151480718 | 0.980688162 | 0.776768683 |
| 0.817545276 | 0.00195613 | 0.98920478 | 0.860571613 | -1.04306426 | 0.498397012 |
| 0.952428799 | 0.36203762 | -1.3413768 | 0.000863718 | 0.977166008 | 0.664811425 |
| -1.13426354 | 0.07314675 | -1.0723092 | 0.172930465 | -1.1718238  | 0.025341008 |
| 0.966041011 | 0.58063365 | 0.94808341 | 0.318738943 | 0.977612412 | 0.717086526 |
| 0.892362631 | 0.0833375  | -1.0065638 | 0.921520157 | 0.801602509 | 0.001180907 |
| -1.0316324  | 0.69731312 | -1.1391094 | 0.028661791 | -1.08193588 | 0.327170705 |
| -1.0371185  | 0.48815283 | 0.8995623  | 0.051196785 | -1.0215097  | 0.685180474 |
| -1.11952362 | 0.0419843  | -1.0485776 | 0.396753407 | 0.919951907 | 0.129515611 |

|             |            |            |             |             |             |
|-------------|------------|------------|-------------|-------------|-------------|
| 0.994136468 | 0.94018904 | 0.96191583 | 0.535842052 | 0.727181023 | 0.000148578 |
| 0.864068645 | 0.01083635 | 0.96547736 | 0.519311963 | 0.973626332 | 0.631106051 |
| -1.29768951 | 0.00047984 | -1.0189871 | 0.784204165 | -1.19631886 | 0.013383119 |
| 0.812502258 | 0.00231866 | 0.9926782  | 0.917125561 | -1.19389661 | 0.008547755 |
| -1.09060865 | 0.19143024 | 0.95491781 | 0.423637277 | 0.987266442 | 0.845753942 |
| 0.896278699 | 0.07182406 | -1.0139677 | 0.838065355 | 0.939717529 | 0.301730848 |
| 0.95448863  | 0.45572968 | -1.1557818 | 0.037623104 | -1.08441257 | 0.196728359 |
| -1.02643843 | 0.73419043 | -1.0547457 | 0.334404449 | 0.786807202 | 0.002776585 |
| -1.04388185 | 0.42424248 | -1.1500883 | 0.017233432 | 0.870783364 | 0.012197339 |
| 0.927291528 | 0.24454038 | -1.0070941 | 0.918110271 | 0.762416046 | 9.22E-05    |
| 0.740213538 | 3.43E-05   | -1.0307699 | 0.62616316  | 0.811920721 | 0.002814395 |
| 0.992226383 | 0.895572   | 0.96551134 | 0.510800606 | 0.939868404 | 0.29933415  |
| 0.925267416 | 0.10538456 | -1.1041027 | 0.156588648 | 0.982451224 | 0.708815529 |
| 0.944977877 | 0.39206124 | -1.0452836 | 0.479227686 | -1.05511479 | 0.416997615 |
| -1.07974249 | 0.18075082 | 0.82169949 | 0.003625057 | -1.09211406 | 0.125241528 |
| 0.954945621 | 0.37469619 | -1.1587298 | 0.069839294 | 0.958634109 | 0.415668328 |
| 0.952261585 | 0.41343827 | -1.0310713 | 0.560294421 | -1.02695656 | 0.655795574 |
| -1.05464069 | 0.40913645 | 0.94099701 | 0.266740186 | -1.01014452 | 0.875176956 |
| 0.911737543 | 0.06310657 | 0.82818906 | 0.019102761 | -1.15152362 | 0.005432909 |
| -1.03976424 | 0.53142298 | 0.9446094  | 0.307805698 | -1.07302289 | 0.259952219 |
| -1.04758051 | 0.48741738 | -1.2749348 | 0.00104643  | -1.02448707 | 0.717346509 |
| 0.98190623  | 0.81025329 | -1.0433748 | 0.51584466  | -1.09493165 | 0.236017269 |
| -1.06315549 | 0.47956815 | -1.0161634 | 0.807713001 | -1.12106978 | 0.189598444 |
| 0.718333074 | 2.97E-05   | -1.0009193 | 0.987761941 | 0.823287326 | 0.009699882 |
| -1.03509203 | 0.61238479 | 0.97064432 | 0.632750745 | -1.05291087 | 0.449476985 |
| 0.975409471 | 0.70419617 | -1.011554  | 0.881121541 | -1.01873119 | 0.777123045 |
| -1.03668797 | 0.57660881 | -1.0509662 | 0.355489438 | -1.04559232 | 0.489979098 |
| 0.859170348 | 0.02484526 | -1.0106002 | 0.870068416 | 0.945591155 | 0.398603859 |
| 0.747909933 | 0.00067547 | 0.95812926 | 0.523042826 | 0.747419446 | 0.000658632 |
| 0.981085267 | 0.70397566 | -1.0470635 | 0.440463942 | -1.03110052 | 0.542693685 |
| 0.991348079 | 0.88186789 | -1.1054421 | 0.038142836 | -1.00112687 | 0.984632168 |
| -1.12629042 | 0.28853263 | 0.97140854 | 0.660072268 | 0.822639425 | 0.084148261 |
| 0.960273822 | 0.4479037  | -1.0589369 | 0.315994361 | -1.03147564 | 0.561346551 |
| 0.965794177 | 0.51333209 | -1.141633  | 0.012913532 | 0.983236363 | 0.750491798 |
| 0.880094648 | 0.02068434 | -1.0638663 | 0.301520975 | 0.950058131 | 0.343199602 |
| -1.03781235 | 0.56109931 | -1.0524724 | 0.427384708 | -1.08505702 | 0.203844577 |
| 0.972691736 | 0.57773953 | 0.96010095 | 0.406716834 | -1.04257414 | 0.402745577 |
| 0.839696664 | 0.02210655 | -1.0017896 | 0.977064781 | -1.11166223 | 0.159077982 |
| 0.996753807 | 0.96332991 | -1.1731747 | 0.019771116 | 0.845983579 | 0.021101337 |
| 0.880776516 | 0.02969715 | 0.89249721 | 0.138732703 | -1.0382182  | 0.512139369 |
| -1.09677299 | 0.2750787  | 0.89398137 | 0.198177624 | 0.960212373 | 0.629879181 |
| 0.969056444 | 0.56304049 | 0.81775731 | 0.007577682 | 0.958117643 | 0.431776727 |
| -1.11013142 | 0.08111002 | -1.1516204 | 0.041746766 | 0.694728867 | 8.40E-08    |
| -1.14331061 | 0.06286967 | -1.0836445 | 0.223513143 | -1.08791025 | 0.237307884 |

|             |            |            |             |             |             |
|-------------|------------|------------|-------------|-------------|-------------|
| -1.03974651 | 0.49851096 | 0.99092808 | 0.887541279 | 0.930973463 | 0.216539277 |
| -1.03687988 | 0.55322673 | 0.91026662 | 0.158521393 | -1.02484055 | 0.687624662 |
| 0.834025153 | 0.01656573 | 0.63577596 | 6.81568E-07 | 0.97679706  | 0.750217465 |
| -1.0235047  | 0.74083017 | 0.96079817 | 0.427253687 | -1.06347688 | 0.382401059 |
| 0.930393984 | 0.19287174 | -1.038816  | 0.515682405 | 0.951858215 | 0.37118492  |
| 0.972406648 | 0.6669633  | 0.86786102 | 0.20695304  | -1.06262581 | 0.351766943 |
| 0.986362524 | 0.82914888 | 0.83335969 | 0.001140369 | 0.988689188 | 0.85811108  |
| 0.96014464  | 0.3953627  | -1.0194606 | 0.716994215 | 0.92211526  | 0.093382881 |
| 0.979418846 | 0.70850013 | -1.0490306 | 0.375581777 | -1.03757201 | 0.507866415 |
| 0.883464147 | 0.04238402 | -1.0012477 | 0.984395919 | -1.04989781 | 0.417462073 |
| 0.926870137 | 0.20977459 | -1.0614208 | 0.233177264 | 0.999074611 | 0.98771019  |
| -1.0165526  | 0.76375409 | 0.98997575 | 0.892399078 | -1.01272226 | 0.816939898 |
| 0.940830415 | 0.3360569  | 0.88197663 | 0.080058648 | 0.944335577 | 0.366103804 |
| 0.936667032 | 0.20903285 | -1.0074345 | 0.896797427 | 0.899608759 | 0.044660975 |
| -1.20666077 | 0.01123423 | -1.0168161 | 0.84295725  | -1.13089322 | 0.091286341 |
| 0.921182815 | 0.18830667 | -1.0103136 | 0.850049697 | 0.942954801 | 0.344664623 |
| 0.975993802 | 0.6495269  | 0.97676639 | 0.690744357 | -1.03185162 | 0.557879263 |
| 0.938329294 | 0.23172311 | -1.077334  | 0.29546101  | 0.805020707 | 0.000131252 |
| 0.969611959 | 0.54824248 | -1.0117103 | 0.839475761 | -1.06522216 | 0.221429161 |
| 0.967867827 | 0.68718662 | 0.95504177 | 0.451835426 | 0.9521156   | 0.54556908  |
| 0.985372149 | 0.84627032 | 0.87191097 | 0.067187383 | -1.17787585 | 0.034903561 |
| -1.07204936 | 0.12215053 | -1.071543  | 0.327178199 | -1.03923274 | 0.388845993 |
| -1.05231866 | 0.46466481 | -1.0118161 | 0.830809516 | -1.07013406 | 0.332027615 |
| -1.02689261 | 0.70680261 | -1.0765574 | 0.259035198 | -1.00930198 | 0.89552366  |
| -1.03805958 | 0.59455279 | -1.0294828 | 0.648181884 | 0.981296682 | 0.78770169  |
| 0.952324662 | 0.41644412 | 0.86221422 | 0.002883108 | -1.05321211 | 0.388634002 |
| -1.02139909 | 0.67049034 | -1.0391189 | 0.490953749 | 0.966833353 | 0.498470012 |
| 0.935935828 | 0.26979159 | 0.89772646 | 0.07581109  | 0.946678747 | 0.360215056 |
| 0.912826921 | 0.09441268 | -1.021983  | 0.717676079 | 0.93971796  | 0.250903411 |
| 0.977019109 | 0.7126062  | -1.0818783 | 0.153405132 | 0.974268862 | 0.679640862 |
| 0.869327434 | 0.0226439  | -1.146676  | 0.033802973 | 0.967815011 | 0.585753885 |
| 0.893770455 | 0.07863674 | -1.0295912 | 0.573262074 | 0.985845    | 0.820835326 |
| -1.03577353 | 0.63623781 | -1.0393811 | 0.591471665 | -1.05120825 | 0.502036469 |
| -1.00681544 | 0.89294544 | 0.73767995 | 8.06593E-06 | -1.00727762 | 0.885761368 |
| 0.996414981 | 0.95397125 | -1.0405518 | 0.457972808 | 0.900623153 | 0.096818387 |
| 0.998869935 | 0.9848289  | 0.82186828 | 0.000466329 | -1.00830863 | 0.88934079  |
| 0.850428142 | 0.02255623 | -1.0417811 | 0.426411691 | -1.15252631 | 0.044474769 |
| 0.816734094 | 0.00067791 | -1.0384734 | 0.641689229 | 0.929164985 | 0.195974323 |
| 0.974420729 | 0.65400729 | -1.0021932 | 0.977000628 | -1.01416659 | 0.807631901 |
| 0.889445114 | 0.07559083 | -1.0202448 | 0.652753378 | 0.992891388 | 0.91255561  |
| 0.96567749  | 0.51637027 | -1.0825849 | 0.256904628 | -1.09783975 | 0.086537326 |
| 0.942291728 | 0.46571039 | -1.0108015 | 0.878895753 | -1.11724175 | 0.176290626 |
| 0.923086049 | 0.16608298 | -1.1736202 | 0.02567852  | 0.992509109 | 0.895552434 |
| -1.09407724 | 0.11248656 | -1.0418826 | 0.494517206 | 0.866427277 | 0.012878923 |

|             |            |            |             |             |             |
|-------------|------------|------------|-------------|-------------|-------------|
| -1.07319755 | 0.23491907 | 0.93116294 | 0.155367579 | -1.07790246 | 0.20756896  |
| 0.991451508 | 0.86264344 | -1.0743646 | 0.23232556  | -1.06572734 | 0.202928279 |
| 0.921063626 | 0.21431695 | 0.96663466 | 0.529101297 | -1.15063172 | 0.036549976 |
| 0.994282882 | 0.93391809 | -1.0599934 | 0.357555738 | 0.97505254  | 0.715005822 |
| 0.920484637 | 0.21344865 | -1.0285157 | 0.639371747 | -1.02652129 | 0.692374748 |
| -1.00744538 | 0.92312963 | -1.1036277 | 0.121348661 | 0.95917541  | 0.588179276 |
| -1.07659464 | 0.14207811 | -1.029573  | 0.694838248 | -1.04809355 | 0.347210807 |
| -1.08519762 | 0.22996999 | -1.042894  | 0.406804134 | -1.10883482 | 0.13084381  |
| 0.945103977 | 0.33387703 | -1.1416526 | 0.036997222 | -1.05800486 | 0.334517349 |
| 0.988266873 | 0.83018573 | -1.09782   | 0.120715637 | -1.01552041 | 0.779621111 |
| -1.002957   | 0.96093163 | 0.95347832 | 0.492796455 | 0.830557521 | 0.003129493 |
| -1.00538565 | 0.92695721 | -1.0195769 | 0.731038142 | -1.08973017 | 0.146451328 |
| -1.09368245 | 0.19024603 | -1.0645604 | 0.281364721 | 0.975762798 | 0.717670904 |
| 0.846002559 | 0.04131665 | 0.9884041  | 0.857525543 | 0.598607111 | 3.75E-08    |
| 0.92084841  | 0.10568087 | -1.0508938 | 0.35729332  | -1.02573708 | 0.614135137 |
| 0.964649944 | 0.52336315 | 0.97376005 | 0.743682478 | 0.972484432 | 0.620516963 |
| 0.882892558 | 0.45929773 | 0.98526573 | 0.795549883 | 0.878493544 | 0.441585209 |
| 0.982376971 | 0.76798975 | 0.96733079 | 0.55362616  | 0.934165117 | 0.261139241 |
| 0.989253309 | 0.85278544 | 0.94787165 | 0.366691324 | 0.885704634 | 0.040949996 |
| -1.1074133  | 0.05456448 | 0.95509352 | 0.356351794 | 0.98413464  | 0.759229503 |
| 0.759532127 | 3.53E-05   | -1.0108813 | 0.869249711 | 0.84133082  | 0.006449078 |
| 0.887701338 | 0.02790949 | -1.0655771 | 0.360204602 | -1.07646618 | 0.167891591 |
| 0.957615343 | 0.42240806 | 0.96587443 | 0.599925851 | 0.980822181 | 0.719171794 |
| 0.962120955 | 0.4453473  | 0.86611597 | 0.065742162 | 0.981744778 | 0.715183866 |
| -1.00960614 | 0.87445274 | -1.1793637 | 0.001572736 | -1.15927287 | 0.017392934 |
| 0.938167098 | 0.26576563 | -1.1808939 | 0.016753212 | -1.15120506 | 0.016270169 |
| -1.0658     | 0.43326726 | 0.93466323 | 0.248380732 | 0.993668169 | 0.937564397 |
| -1.15349911 | 0.00814068 | -1.0731258 | 0.203032564 | -1.05428059 | 0.313554682 |
| -1.0898401  | 0.15733778 | 0.98148927 | 0.75668576  | -1.10281021 | 0.108673974 |
| 0.959720446 | 0.50717086 | -1.0191974 | 0.745634479 | 0.989900874 | 0.869677514 |
| 0.929003929 | 0.28768565 | 0.97079064 | 0.662303696 | -1.07966017 | 0.268684141 |
| -1.01378352 | 0.84356997 | 0.65407242 | 2.1716E-06  | 0.973648166 | 0.700420708 |
| 0.915374803 | 0.13586317 | -1.0662277 | 0.2061264   | 0.953058064 | 0.413976388 |
| -1.00329332 | 0.95723138 | -1.0548077 | 0.345172896 | -1.01507969 | 0.807184762 |
| 0.915150732 | 0.3154067  | 0.96941162 | 0.853213885 | -1.066606   | 0.464333104 |
| -1.04033289 | 0.47227515 | 0.77631878 | 9.40472E-05 | -1.03539329 | 0.526987774 |
| 0.934984536 | 0.23172121 | 0.95528475 | 0.433325317 | 0.978434762 | 0.69640105  |
| 0.869823203 | 0.03451191 | -1.0564847 | 0.294601958 | -1.03491152 | 0.595712425 |
| 0.951919017 | 0.39934426 | 0.82498512 | 0.002616429 | 0.909690894 | 0.108562262 |
| -1.14788414 | 0.01830946 | -1.0311531 | 0.562995068 | 0.898347337 | 0.063953956 |
| 0.931713284 | 0.17324125 | -1.0906468 | 0.111154762 | 0.942894825 | 0.256293924 |
| 0.877273193 | 0.03076571 | 0.9728836  | 0.58639647  | -1.04661377 | 0.443516033 |
| -1.06047429 | 0.45508867 | -1.0311255 | 0.612839026 | -1.05104325 | 0.526222529 |
| -1.00135971 | 0.98188842 | 0.9961013  | 0.945383075 | 0.964469414 | 0.546252601 |

|             |            |            |             |             |             |
|-------------|------------|------------|-------------|-------------|-------------|
| -1.06604525 | 0.22019914 | 0.91898021 | 0.299875017 | -1.11944961 | 0.033002607 |
| 0.991108012 | 0.87081371 | -1.0512956 | 0.339979699 | -1.00621227 | 0.910214981 |
| 0.984358675 | 0.75759213 | -1.087425  | 0.168120212 | -1.02461877 | 0.634179174 |
| -1.02379274 | 0.70375803 | 0.88925632 | 0.061985141 | -1.04033955 | 0.522994986 |
| 0.971697636 | 0.63075931 | -1.0793926 | 0.27021743  | -1.15475707 | 0.018807948 |
| -1.11822404 | 0.03515212 | -1.1545498 | 0.042165121 | -1.03289002 | 0.534017104 |
| 0.979334109 | 0.77235162 | 0.98324171 | 0.773390746 | -1.04563881 | 0.536969504 |
| 0.983691683 | 0.77298702 | 0.94344465 | 0.344353548 | 0.985846916 | 0.802511362 |
| -1.02323334 | 0.67615588 | -1.1726473 | 0.074290102 | -1.06311368 | 0.268038284 |
| -1.15793771 | 0.02757408 | 0.84629727 | 0.003499082 | -1.04980794 | 0.456058461 |
| 0.985028817 | 0.79250736 | -1.1467705 | 0.016966512 | 0.994646662 | 0.925399859 |
| 0.840169222 | 0.01551344 | -1.0646408 | 0.334290222 | 0.82925033  | 0.009561672 |
| -1.04859998 | 0.38776609 | -1.0572804 | 0.341197647 | 0.951919246 | 0.36996485  |
| -1.03305937 | 0.59537946 | -1.0201733 | 0.72590174  | -1.08304556 | 0.195642311 |
| -1.07241692 | 0.26712325 | 0.95139283 | 0.335241312 | -1.14668841 | 0.03248105  |
| -1.04339656 | 0.4924056  | -1.0861103 | 0.167378697 | -1.07885995 | 0.222188046 |
| 0.898362325 | 0.10082638 | -1.059605  | 0.46137823  | -1.02502231 | 0.701773777 |
| -1.02821653 | 0.71933395 | 0.96678682 | 0.573107115 | 0.986488728 | 0.860483608 |
| 0.924282932 | 0.17839504 | 0.8964974  | 0.038720927 | 0.986238765 | 0.811264935 |
| -1.07179774 | 0.27747519 | -1.0801315 | 0.164248204 | -1.18288386 | 0.010346518 |
| 0.926874773 | 0.16472047 | -1.0317609 | 0.540974205 | 0.951863895 | 0.36422408  |
| -1.11748524 | 0.07228877 | -1.1332511 | 0.046940822 | -1.01927958 | 0.753841209 |
| 0.924963962 | 0.15337919 | 0.87969927 | 0.035406078 | -1.07315177 | 0.195508518 |
| 0.959546554 | 0.47345406 | -1.0009938 | 0.9847431   | -1.04598829 | 0.435276693 |
| -1.0888131  | 0.16434577 | 0.94417144 | 0.427298814 | -1.01795396 | 0.769244812 |
| 0.960565959 | 0.47263365 | -1.0077999 | 0.891543993 | 0.955934741 | 0.42140777  |
| 0.930677283 | 0.42378913 | -1.059613  | 0.294393962 | 0.974564079 | 0.77364639  |
| 0.941326336 | 0.29426228 | 0.9624166  | 0.556532093 | 0.930716474 | 0.21393209  |
| 0.958972587 | 0.63637403 | -1.0356603 | 0.541744549 | 0.73369482  | 0.000903475 |
| 0.964369119 | 0.49764804 | 0.82348995 | 0.007326477 | 0.890498875 | 0.033455154 |
| -1.03205563 | 0.5019311  | -1.0258275 | 0.641760995 | -1.04698816 | 0.329632174 |
| -1.03752823 | 0.57344485 | -1.0270809 | 0.662490007 | -1.0405138  | 0.5440171   |
| -1.05330049 | 0.32517827 | 0.97321719 | 0.664996951 | -1.03876129 | 0.470271322 |
| 0.888067551 | 0.08940644 | -1.0071689 | 0.907904002 | -1.03625881 | 0.605877797 |
| 0.9806376   | 0.73894727 | 0.98810146 | 0.852789334 | -1.13014061 | 0.040813687 |
| 0.988303504 | 0.84307745 | -1.1371761 | 0.100970512 | -1.01599396 | 0.789518644 |
| 0.960969047 | 0.5443565  | -1.0818473 | 0.178758528 | 0.939755261 | 0.345260699 |
| 0.987830209 | 0.79769436 | -1.038392  | 0.553601573 | -1.03371515 | 0.488420126 |
| 0.869423776 | 0.05995645 | -1.1540997 | 0.010321211 | 0.974259005 | 0.721628363 |
| -1.22737357 | 0.00027004 | -1.0745412 | 0.240599966 | -1.12475836 | 0.029402721 |
| 0.809093602 | 0.00307215 | -1.1405696 | 0.017932739 | -1.02430638 | 0.726554564 |
| 0.903860601 | 0.09596121 | -0.9999946 | 0.999925533 | 0.994079478 | 0.921073776 |
| -1.0194844  | 0.77462841 | -1.0744026 | 0.23962991  | -1.02045781 | 0.763814985 |
| 0.895496306 | 0.09884744 | -1.0514247 | 0.371335636 | -1.01805019 | 0.786496548 |



|             |            |            |             |             |             |
|-------------|------------|------------|-------------|-------------|-------------|
| -1.03037533 | 0.61965543 | -1.0056409 | 0.949914253 | -1.074063   | 0.238491571 |
| -1.02094587 | 0.72474116 | -1.1351952 | 0.030575608 | 0.992567899 | 0.89911115  |
| 0.98298568  | 0.75389126 | 0.98001648 | 0.819655226 | -1.03558419 | 0.523558845 |
| -1.01865411 | 0.78678558 | -1.0334162 | 0.538773897 | 0.868727935 | 0.043297354 |
| -1.09907219 | 0.1610779  | -1.0131007 | 0.781421663 | 0.938486282 | 0.343832759 |
| 0.931675588 | 0.30185311 | -1.1681861 | 0.020382572 | -1.13094973 | 0.075470057 |
| 0.888496482 | 0.03725717 | -1.035156  | 0.511628295 | -1.08351267 | 0.153110336 |
| 0.888714077 | 0.04696622 | -1.064931  | 0.36337614  | -1.00453308 | 0.938154711 |
| -1.05607278 | 0.38825248 | 0.93301611 | 0.240128875 | -1.10929603 | 0.104008163 |
| -1.1946928  | 0.02571814 | -1.0446738 | 0.463175634 | 0.963578715 | 0.634241604 |
| 0.89850691  | 0.06900322 | -1.0353115 | 0.597058855 | -1.03120584 | 0.596367465 |
| -1.26012903 | 0.00086138 | 0.98897059 | 0.816389351 | -1.041972   | 0.532824903 |
| 0.971073886 | 0.55577619 | -1.0986696 | 0.201763064 | -1.01743529 | 0.728373041 |
| -1.04404393 | 0.52394951 | -1.1151762 | 0.042794606 | -1.1334848  | 0.067689918 |
| 0.962714353 | 0.52858327 | 0.92533072 | 0.261011223 | 0.991489962 | 0.887090831 |
| 0.926168051 | 0.19473962 | -1.0082842 | 0.890515709 | -1.01737165 | 0.769247188 |
| -1.02527903 | 0.66893749 | -1.0974542 | 0.17123987  | 0.977153703 | 0.692172779 |
| -1.01439603 | 0.79654854 | -1.0327848 | 0.625509982 | 0.945836472 | 0.317298454 |
| -1.0300736  | 0.65208257 | -1.063093  | 0.31194806  | 0.957304465 | 0.50719045  |
| -1.08263837 | 0.1933784  | -1.0563034 | 0.353798012 | 0.942694637 | 0.331994534 |
| -1.00243611 | 0.96986593 | -1.2462359 | 0.000170249 | -1.02483504 | 0.703488271 |
| 0.987774767 | 0.84435634 | -1.0611266 | 0.386735075 | -1.09555666 | 0.149119048 |
| 0.965597456 | 0.57376036 | 0.96579277 | 0.602714209 | -1.08764218 | 0.180068072 |
| 0.908629138 | 0.12179258 | -1.0938183 | 0.192117188 | -1.06296262 | 0.320910102 |
| 0.847019127 | 0.01016329 | -1.0182974 | 0.744487539 | -1.0267546  | 0.673471284 |
| 0.944617227 | 0.3371759  | -1.1527026 | 0.01760924  | -1.02023933 | 0.734750595 |
| 0.908374743 | 0.06992305 | -1.0510015 | 0.431206439 | 0.973753306 | 0.61086194  |
| -1.07655144 | 0.23708549 | -1.0807381 | 0.321136785 | -1.01188975 | 0.848785595 |
| 0.981427957 | 0.75788725 | 0.86818151 | 0.017539268 | -1.01247841 | 0.838379015 |
| -1.03449888 | 0.53443482 | -1.0094755 | 0.886045132 | -1.0499958  | 0.372456121 |
| 0.988322183 | 0.85970883 | -1.1131302 | 0.034882555 | 0.985526859 | 0.826381555 |
| 0.994196062 | 0.92911165 | 0.97523226 | 0.710430957 | -1.11318889 | 0.105499381 |
| 0.896937319 | 0.17817277 | 0.85415822 | 0.011078451 | 0.99117119  | 0.911848071 |
| -1.14274591 | 0.01986369 | -1.0566321 | 0.349866466 | -1.04160417 | 0.466526265 |
| -1.00592836 | 0.91144154 | -1.0193481 | 0.742645642 | 0.961349294 | 0.459404059 |
| -1.06002275 | 0.24164365 | 0.92643695 | 0.171755331 | -1.06475389 | 0.208005383 |
| -1.05489419 | 0.34655219 | -1.0389676 | 0.561022138 | 0.973112165 | 0.630115398 |
| -1.07349646 | 0.29685104 | 0.89347321 | 0.067149297 | -1.0558049  | 0.42344487  |
| 0.981716191 | 0.79621608 | 0.96283465 | 0.557157952 | -1.01507843 | 0.834083151 |
| 0.917047665 | 0.13251815 | -1.0780938 | 0.233120604 | 0.97947615  | 0.715960507 |
| -1.0858672  | 0.26245404 | -1.1427564 | 0.035470249 | -1.06538688 | 0.3877714   |
| -1.09332611 | 0.10888555 | -1.0657254 | 0.300962056 | -1.00845127 | 0.878362846 |
| -1.05445258 | 0.35585992 | -1.0764214 | 0.242499787 | 0.96454494  | 0.528728127 |
| -1.08810356 | 0.16536471 | -1.0265549 | 0.657770215 | -1.05251021 | 0.397752641 |

|             |            |            |             |             |             |
|-------------|------------|------------|-------------|-------------|-------------|
| 0.953751609 | 0.424255   | 0.97784722 | 0.668119715 | 0.962054058 | 0.513466346 |
| -1.09809917 | 0.11951962 | -1.0753404 | 0.244224623 | -1.06631221 | 0.282578753 |
| 0.978443103 | 0.68457695 | 0.95848113 | 0.486423923 | -1.09527107 | 0.093874077 |
| -1.00596266 | 0.91540282 | -1.0037542 | 0.945181613 | -1.06377514 | 0.271988562 |
| 0.867473385 | 0.00859556 | -1.0855356 | 0.220052277 | -1.04657933 | 0.386242046 |
| 0.992331836 | 0.90972924 | 0.98234238 | 0.785471503 | -1.01262347 | 0.853425489 |
| -1.03335681 | 0.61060518 | -1.1528076 | 0.080143526 | 0.994325884 | 0.929550503 |
| -1.11095542 | 0.05409956 | -1.0099969 | 0.858638995 | 0.980740374 | 0.717312369 |
| -1.07966054 | 0.12349266 | -1.0652614 | 0.23726721  | -1.06346459 | 0.214456365 |
| -1.06514927 | 0.39271217 | -1.0222384 | 0.656854492 | -1.06921452 | 0.364982891 |
| 0.954173747 | 0.35795557 | -1.0536428 | 0.357281334 | 0.966383341 | 0.502000641 |
| -1.05137637 | 0.36122101 | -1.0111116 | 0.870186058 | 0.997925058 | 0.969685983 |
| -1.03649461 | 0.47362457 | 0.89177562 | 0.113055088 | -1.00372414 | 0.940619263 |
| 0.972335123 | 0.59907649 | -1.0926176 | 0.124072499 | -1.0355905  | 0.512544715 |
| -1.11958717 | 0.12407025 | -1.00276   | 0.969914596 | 0.923629692 | 0.276745718 |
| 0.932126588 | 0.1843646  | 0.96462383 | 0.513275101 | 0.910354885 | 0.077978039 |
| -1.09503048 | 0.20027706 | -1.0498502 | 0.396634599 | -1.02126207 | 0.764941203 |
| -1.11447596 | 0.1065795  | -1.0504132 | 0.416278332 | -1.05074812 | 0.456742937 |
| -1.01785873 | 0.76944086 | -1.0078423 | 0.894820811 | -1.03491061 | 0.570320535 |
| -1.04424997 | 0.3679703  | -1.1458492 | 0.025267333 | 0.942102794 | 0.216501324 |
| 0.993267168 | 0.92111035 | 0.9984788  | 0.977343553 | 0.871176625 | 0.047195518 |
| 0.984865499 | 0.76749948 | 0.99808216 | 0.972635403 | -1.0108981  | 0.833530945 |
| 0.955552187 | 0.51545778 | -1.0021139 | 0.967829098 | -1.05467126 | 0.446744864 |
| -1.12914101 | 0.07270431 | 0.99464173 | 0.936923678 | -1.0060462  | 0.927943729 |
| 0.975787622 | 0.55587748 | -1.0131312 | 0.839400227 | -1.12429276 | 0.006484391 |
| 0.98573618  | 0.79490897 | -1.0421925 | 0.442653255 | -1.06843245 | 0.234015642 |
| 0.974872362 | 0.64743659 | -1.114258  | 0.031476612 | -1.05407404 | 0.345502777 |
| 0.924631183 | 0.12533856 | 0.93254289 | 0.344629035 | -1.06173596 | 0.239152782 |
| 0.917748996 | 0.12333461 | 0.89134564 | 0.027017084 | 0.974466504 | 0.638999985 |
| 0.898364749 | 0.08348195 | -1.0296524 | 0.593400984 | -1.03106739 | 0.616712747 |
| 0.967346841 | 0.54734109 | 0.97946801 | 0.677842714 | -1.09810599 | 0.093571494 |
| -1.03632814 | 0.53581913 | -1.1107054 | 0.052923598 | -1.01488027 | 0.797435846 |
| 0.99159418  | 0.89470941 | -1.0131731 | 0.857037367 | -1.11758085 | 0.08562691  |
| 0.92170701  | 0.59363634 | -1.0633274 | 0.245268897 | 0.845391322 | 0.273735522 |
| 0.95838419  | 0.54954414 | -1.0533988 | 0.460678406 | 0.945557917 | 0.431184027 |
| -1.0746443  | 0.31335623 | 0.98628613 | 0.835150512 | -1.01593192 | 0.824022242 |
| -1.01335635 | 0.8620499  | 0.95939755 | 0.493271768 | -1.02837983 | 0.71412272  |
| -1.17866381 | 0.01227869 | -1.115375  | 0.026003652 | 0.91287348  | 0.156465892 |
| 0.936783225 | 0.38803563 | 0.8802796  | 0.065798988 | 0.988980112 | 0.883156126 |
| 0.999809024 | 0.99810894 | -1.0175904 | 0.735356325 | 0.970193935 | 0.707477311 |
| 0.920127718 | 0.12751928 | -1.1139447 | 0.126101107 | -1.03292285 | 0.549478888 |
| 0.970597903 | 0.63120048 | -1.0631076 | 0.360453461 | -1.03574947 | 0.572229702 |
| -1.02907403 | 0.59133573 | -1.0009989 | 0.980828324 | -1.125569   | 0.029998276 |
| -1.04812636 | 0.40337027 | -1.0394676 | 0.484556423 | -1.15608322 | 0.012049382 |

|             |            |            |             |             |             |
|-------------|------------|------------|-------------|-------------|-------------|
| -1.09015126 | 0.3723143  | -1.1332602 | 0.027851749 | -1.2664868  | 0.017045259 |
| -1.01548433 | 0.79325999 | 0.96840844 | 0.526273593 | -1.06302964 | 0.299459926 |
| -1.11145225 | 0.11419616 | 0.89324944 | 0.044354959 | -1.04413718 | 0.51440626  |
| -1.0288391  | 0.7165258  | -1.0159182 | 0.795953447 | -1.08296527 | 0.310754427 |
| -1.01271346 | 0.82501499 | 0.90081906 | 0.062099684 | -1.0892546  | 0.138553881 |
| -1.14943056 | 0.01018262 | -1.0163734 | 0.777793745 | -1.13744615 | 0.017008589 |
| -1.0119119  | 0.84318283 | -1.1549049 | 0.027333272 | -1.09688298 | 0.126460548 |
| 0.983783521 | 0.74430326 | 0.81256749 | 0.177463656 | -1.09916779 | 0.063347151 |
| 0.886451271 | 0.10987126 | -1.0066343 | 0.92570673  | -1.03910368 | 0.607013799 |
| -1.08876752 | 0.19093759 | 0.93388891 | 0.337889948 | 0.983013774 | 0.790628654 |
| 0.946754154 | 0.32818822 | 0.90392017 | 0.189370278 | -1.06410079 | 0.267502357 |
| 0.985943983 | 0.81764982 | -1.0310454 | 0.631750869 | -1.0550599  | 0.384239184 |
| 0.985525871 | 0.79702109 | -1.0178375 | 0.814628571 | 0.95806592  | 0.45088787  |
| 0.944840817 | 0.33936321 | -1.0348604 | 0.670938082 | -1.09477255 | 0.129822775 |
| -1.02037535 | 0.72955289 | -1.2348349 | 0.000251048 | -1.06687847 | 0.269654118 |
| -1.0324483  | 0.59421229 | 0.94050224 | 0.325465877 | -1.01846687 | 0.759948475 |
| -1.02162779 | 0.68646105 | -1.0187367 | 0.727812876 | 0.724573275 | 1.16E-07    |
| 0.997317295 | 0.96391179 | -1.0927344 | 0.117906165 | 0.973957549 | 0.657016312 |
| -1.04340937 | 0.34864173 | -1.070158  | 0.482784342 | -1.06845328 | 0.146527548 |
| -1.0542034  | 0.43677286 | -1.0319501 | 0.592046802 | -1.02596871 | 0.705045828 |
| -1.10401477 | 0.12368047 | -1.123056  | 0.083494051 | -1.14338274 | 0.038834874 |
| 0.978612743 | 0.67164786 | -1.1787664 | 0.03939372  | 0.954875553 | 0.366719931 |
| -1.03561085 | 0.59952222 | 0.97649738 | 0.677414209 | -1.04664437 | 0.494288393 |
| -1.01895108 | 0.69569903 | -1.0409803 | 0.445744373 | -1.00110418 | 0.981643605 |
| -1.00843579 | 0.88649593 | -1.0687507 | 0.269320006 | -1.00192553 | 0.973921696 |
| 0.928319068 | 0.29332617 | -1.0272494 | 0.592043137 | 0.965077519 | 0.614102164 |
| -1.12778806 | 0.07850176 | -1.1139797 | 0.151248702 | -1.15122462 | 0.040405407 |
| 0.991691154 | 0.8879951  | -1.1615169 | 0.023491182 | 0.986075193 | 0.81291568  |
| -1.23331402 | 0.00723307 | 0.95472533 | 0.407108648 | -1.03039515 | 0.691677602 |
| 0.887448847 | 0.03920176 | -1.1324892 | 0.046649822 | -1.02426796 | 0.672916956 |
| 0.947001491 | 0.33429954 | -1.0476435 | 0.412933343 | -1.02406672 | 0.672185757 |
| 0.959514937 | 0.45002712 | 0.99900334 | 0.986545685 | 0.939168918 | 0.252982081 |
| 0.961824182 | 0.53396974 | 0.96393303 | 0.529486396 | -1.09857063 | 0.136418346 |
| 0.944616248 | 0.3359232  | -1.0766595 | 0.220491033 | -1.00941129 | 0.873770038 |
| 0.956604286 | 0.39441761 | 0.9236528  | 0.137829997 | -1.06513516 | 0.227385578 |
| 0.771251653 | 0.23893963 | 0.98467129 | 0.794787131 | 0.926984991 | 0.729486403 |
| -1.03848364 | 0.56267333 | -1.0026675 | 0.952954383 | 0.989621272 | 0.872749322 |
| -1.0427464  | 0.56795915 | -1.0854089 | 0.229116132 | -1.00960774 | 0.896059899 |
| 0.831768362 | 0.00826942 | -1.120078  | 0.078709362 | -1.02693548 | 0.693874164 |
| 0.962189667 | 0.51113247 | 0.89957274 | 0.041696519 | -1.16277225 | 0.012390416 |
| -1.02301471 | 0.64203012 | 0.87457776 | 0.048063828 | -1.04926535 | 0.327550965 |
| -1.00094837 | 0.98725627 | 0.93925009 | 0.194844471 | -1.15428539 | 0.01852304  |
| -1.06926869 | 0.25106118 | -1.1653341 | 0.011641553 | -1.03644692 | 0.537758012 |
| -1.14732657 | 0.04626546 | -1.1789037 | 0.02257531  | 0.964039194 | 0.588919525 |

|             |            |            |             |             |              |
|-------------|------------|------------|-------------|-------------|--------------|
| -1.14430438 | 0.04527592 | -1.132674  | 0.068637925 | 0.979974037 | 0.759553537  |
| 0.985859622 | 0.82574194 | -1.1348631 | 0.036437596 | -1.0667437  | 0.320003156  |
| -1.01848946 | 0.73739339 | -1.0768526 | 0.328567582 | 0.986176825 | 0.798865226  |
| 0.873362094 | 0.05253996 | 0.92086441 | 0.150274699 | -1.04754421 | 0.499359082  |
| 0.984956714 | 0.7905023  | 0.97104438 | 0.601262449 | 0.9760081   | 0.670546459  |
| 0.983326281 | 0.74327647 | 0.9852417  | 0.78531983  | 0.964336158 | 0.480145169  |
| 0.871360767 | 0.06306632 | 0.92374774 | 0.207584344 | 0.986204659 | 0.848867526  |
| 0.977020758 | 0.72514458 | 0.92468908 | 0.187738626 | 0.955808226 | 0.494940425  |
| 0.835648819 | 0.00107003 | 0.9376448  | 0.218207068 | -1.09074797 | 0.100058378  |
| 0.876169932 | 0.06189809 | 0.80081995 | 0.313059525 | -1.10071064 | 0.172048108  |
| 0.927364502 | 0.19142765 | -1.1563737 | 0.029176034 | -1.1189498  | 0.053784997  |
| -1.00937269 | 0.87286705 | -1.180536  | 0.026714395 | -1.04376737 | 0.46356036   |
| 0.968521052 | 0.57640623 | 0.99261415 | 0.912524614 | -1.08419494 | 0.161230111  |
| -1.07069853 | 0.24036763 | 0.97784979 | 0.702191007 | 0.95008503  | 0.377489348  |
| 0.975368177 | 0.66532415 | -1.0707798 | 0.165755543 | 0.942888887 | 0.309666378  |
| 0.946946231 | 0.35556349 | 0.94493892 | 0.341977815 | 0.984598058 | 0.791760584  |
| -1.11195168 | 0.04135155 | -1.0365378 | 0.536766325 | -1.03753434 | 0.471119055  |
| 0.843812423 | 0.0142688  | -1.0366906 | 0.594918005 | 0.981838084 | 0.785613409  |
| -1.07115072 | 0.20099175 | -1.005564  | 0.933068756 | -1.03195343 | 0.556041883  |
| -1.03461293 | 0.47783029 | 0.91206587 | 0.158536632 | -1.03786071 | 0.43844436   |
| 0.996269591 | 0.94993381 | -1.1185426 | 0.044165407 | 0.907270471 | 0.106315426  |
| -1.04726972 | 0.38610484 | 0.83232325 | 0.009570275 | -1.11471252 | 0.044801909  |
| 0.953388302 | 0.45164286 | -1.0102285 | 0.858416386 | 0.913609176 | 0.157036649  |
| 0.943791387 | 0.27543286 | 0.95601084 | 0.382356449 | -1.02279997 | 0.66935328   |
| 0.96730458  | 0.54916137 | -1.0381194 | 0.608188816 | 0.978488323 | 0.694875239  |
| -1.04111165 | 0.55895383 | -1.029565  | 0.659567147 | -1.01585718 | 0.819245379  |
| 0.878289109 | 0.02284182 | 0.94767186 | 0.305100647 | 0.912105257 | 0.102491355  |
| -1.0037032  | 0.93861348 | -1.0134314 | 0.848112588 | -1.04928358 | 0.318447042  |
| -1.09635564 | 0.1127471  | -1.0366031 | 0.530891651 | -1.02521067 | 0.664296592  |
| -1.15133685 | 0.01891901 | -1.0748079 | 0.219143941 | 0.93807753  | 0.277150539  |
| 0.948154256 | 0.71104014 | 0.98118884 | 0.7398934   | -1.0112069  | 0.938147991  |
| -1.02692072 | 0.66874316 | -1.0362993 | 0.538084949 | -1.10136363 | 0.123767165  |
| 0.875152164 | 0.01405519 | -1.0066592 | 0.908277327 | 0.929750852 | 0.171264183  |
| 0.928335522 | 0.16723776 | -1.1091916 | 0.082144146 | -1.05260371 | 0.33874303   |
| -1.09269881 | 0.12629824 | 0.94371805 | 0.258924307 | 0.96642812  | 0.552206136  |
| 0.996234622 | 0.93409693 | -1.0070615 | 0.916804459 | -1.02557643 | 0.580400789  |
| 0.998090946 | 0.97576437 | -1.0186909 | 0.728602469 | -1.10112411 | 0.129766008  |
| 0.959628703 | 0.49767797 | -1.1214316 | 0.019533085 | 0.957146083 | 0.4711170744 |
| -1.06583789 | 0.28067183 | -1.062224  | 0.312816756 | 0.958677373 | 0.473862739  |
| 0.937973548 | 0.18822129 | -1.0555739 | 0.310777018 | 0.961307336 | 0.415073559  |
| -1.01635987 | 0.73836547 | -1.1632794 | 0.019779234 | 0.988956717 | 0.819150567  |
| -1.11386374 | 0.10015793 | -1.0261038 | 0.625552058 | 0.953443863 | 0.462748535  |
| 0.952764984 | 0.39032039 | -1.0524709 | 0.357863169 | -1.04133713 | 0.471612359  |
| 0.970884583 | 0.62580274 | -1.1576284 | 0.037217602 | 0.919050293 | 0.166909317  |

|             |            |            |             |             |             |
|-------------|------------|------------|-------------|-------------|-------------|
| -1.09295671 | 0.16619462 | -1.0383554 | 0.499649706 | -1.07276755 | 0.272292861 |
| 0.769785091 | 0.00062174 | -1.0552157 | 0.265585951 | 0.58549792  | 8.30E-10    |
| 0.973846193 | 0.72614738 | -1.0390475 | 0.504858797 | -1.01907488 | 0.802746429 |
| -1.05591738 | 0.27358827 | 0.93399797 | 0.246073835 | 0.976103169 | 0.624916727 |
| -1.10870342 | 0.06368318 | 0.9970249  | 0.983447823 | 0.90733772  | 0.080021593 |
| -1.04773689 | 0.44603919 | -1.1309036 | 0.051428785 | -1.17377995 | 0.010896577 |
| -1.08964636 | 0.280266   | -1.0822907 | 0.138051913 | -1.05018688 | 0.536497435 |
| 0.984465423 | 0.74211042 | -1.0186307 | 0.729533184 | 0.995297234 | 0.921043654 |
| -1.00267605 | 0.96330946 | -1.0147209 | 0.798924508 | 0.987713817 | 0.831524306 |
| 0.926819213 | 0.29536619 | 0.95933471 | 0.364662212 | 0.710421231 | 1.54E-05    |
| 0.947153807 | 0.37030325 | -1.130615  | 0.055101549 | -1.02168984 | 0.722433978 |
| 0.911421062 | 0.09543779 | 0.96697127 | 0.580186696 | -1.08818733 | 0.127850563 |
| -1.01972706 | 0.67869704 | -1.0246459 | 0.678968623 | -1.1491655  | 0.004516425 |
| 0.967035291 | 0.56042905 | -1.0244449 | 0.617239764 | 0.936158799 | 0.254020712 |
| -1.14407531 | 0.03689321 | -1.017063  | 0.72766194  | -1.07600468 | 0.249222532 |
| 0.908793877 | 0.17497535 | -1.0827135 | 0.222984137 | 0.966351314 | 0.624758426 |
| 0.953014436 | 0.36803493 | 0.96779366 | 0.560381161 | -1.01613024 | 0.76393552  |
| -1.06632764 | 0.24870797 | 0.93596163 | 0.276870909 | -1.04981666 | 0.381286939 |
| -1.12442783 | 0.05343582 | 0.96527663 | 0.579120068 | -1.06569069 | 0.288780236 |
| 0.984913259 | 0.86466214 | 0.58910879 | 1.14028E-09 | 0.982454    | 0.842682339 |
| -1.09218093 | 0.08686936 | 0.90294831 | 0.180676657 | 0.959938607 | 0.422254036 |
| 0.957628219 | 0.44669335 | 0.89300391 | 0.025325849 | 0.886863165 | 0.038138535 |
| -1.03086202 | 0.48398666 | -1.04368   | 0.436190399 | -1.03175268 | 0.471712137 |
| -1.0506407  | 0.45389886 | -1.0006633 | 0.991330688 | -1.0435207  | 0.518100306 |
| 0.927939601 | 0.2757865  | -1.1971756 | 0.026206263 | -1.03907062 | 0.574931092 |
| 0.954064312 | 0.44122674 | 0.98551201 | 0.759034865 | 0.987238238 | 0.83297319  |
| 0.997843035 | 0.97528718 | -1.0934789 | 0.128125762 | 0.991212497 | 0.899244071 |
| -1.12764611 | 0.02251045 | 0.91959408 | 0.248947642 | 0.914549258 | 0.086366803 |
| -1.15036128 | 0.01818359 | 0.92851994 | 0.222529774 | 0.982963999 | 0.766192688 |
| 0.928750449 | 0.31601648 | 0.98067215 | 0.722378176 | 0.989643671 | 0.887179    |
| 0.967687418 | 0.56103265 | -1.1588967 | 0.002713731 | -1.0515645  | 0.374567664 |
| 0.943949444 | 0.30382356 | -1.0190434 | 0.742907211 | -1.12354683 | 0.040751083 |
| -1.10292373 | 0.17473726 | -1.0506397 | 0.435596955 | 0.859148874 | 0.037658979 |
| 0.977270741 | 0.68469237 | 0.91176008 | 0.189883265 | -1.06655996 | 0.257583455 |
| -1.05269681 | 0.48303564 | -1.0076887 | 0.885661626 | -1.03068375 | 0.67930467  |
| 0.996776042 | 0.95547961 | 0.94039799 | 0.269443796 | -1.00494273 | 0.932070868 |
| -1.01674902 | 0.76302424 | 0.97972462 | 0.731483435 | 0.970976595 | 0.593241831 |
| 0.961627988 | 0.60309252 | -1.0235863 | 0.793836273 | -1.18988005 | 0.02394211  |
| 0.928202033 | 0.18387429 | -1.1741261 | 0.002482188 | -1.08387768 | 0.151385172 |
| 0.993204995 | 0.89973321 | 0.96697219 | 0.554575079 | 0.995820385 | 0.93830249  |
| 0.928846304 | 0.26797973 | -1.0495742 | 0.266893028 | 0.961595914 | 0.555095812 |
| -1.06055487 | 0.33049444 | -1.0021073 | 0.974473222 | 0.919140751 | 0.164793812 |
| 0.917782273 | 0.14819847 | -1.1735933 | 0.022125499 | -1.12581285 | 0.04770919  |
| -1.00896144 | 0.84913427 | -1.0708956 | 0.263442617 | 0.943120534 | 0.215035506 |

|             |            |            |             |             |             |
|-------------|------------|------------|-------------|-------------|-------------|
| -1.04765764 | 0.35029086 | -1.104929  | 0.156191381 | -1.0407393  | 0.422571007 |
| -1.08410198 | 0.1446458  | -1.1254745 | 0.024657583 | 0.951660684 | 0.367805254 |
| -1.06821673 | 0.26907162 | -1.0712493 | 0.236519692 | -1.02220616 | 0.711591384 |
| -1.10514655 | 0.06221911 | 0.87898226 | 0.083036311 | 0.945174378 | 0.287594108 |
| 0.865704369 | 0.00438823 | 0.9878938  | 0.829098979 | 0.980791516 | 0.690684965 |
| 0.896568691 | 0.02274104 | -1.087001  | 0.139087055 | 0.989997498 | 0.829849001 |
| 0.968223601 | 0.57407129 | 0.97787947 | 0.754705752 | -1.039924   | 0.495925277 |
| -1.00617402 | 0.92747084 | -1.1513191 | 0.01542302  | 0.982686681 | 0.796237425 |
| 0.951819001 | 0.5026656  | -1.0042881 | 0.953288556 | -1.16257378 | 0.044396451 |
| -1.06790986 | 0.39544685 | -1.0619848 | 0.300897969 | -1.02351563 | 0.763022105 |
| 0.945937967 | 0.30363284 | -1.0458426 | 0.417101397 | 0.934232607 | 0.209096709 |
| 0.97815958  | 0.70718173 | -1.0783766 | 0.317649991 | 0.983568763 | 0.778008977 |
| 0.963675512 | 0.50187114 | 0.98783544 | 0.825811719 | 0.978176817 | 0.688408722 |
| 0.94690584  | 0.25663125 | -1.0032522 | 0.952150917 | -1.02965238 | 0.541711274 |
| 0.971854889 | 0.75668911 | -1.0261922 | 0.696546599 | 0.773588741 | 0.00708264  |
| -1.02606193 | 0.71029162 | -1.0634649 | 0.30865708  | -1.0087741  | 0.899572834 |
| -1.16412244 | 0.02325352 | -1.0750926 | 0.221060587 | 0.988736076 | 0.862413827 |
| 0.716268972 | 8.03E-05   | -1.0495627 | 0.30466225  | 0.585225717 | 7.30E-09    |
| 0.947301873 | 0.31486628 | 0.95210828 | 0.325052001 | -1.26828359 | 4.32E-05    |
| 0.990207007 | 0.86712347 | -1.0572975 | 0.311673192 | -1.07865885 | 0.201384293 |
| 0.989608485 | 0.898242   | -1.0512738 | 0.401201068 | 0.84513203  | 0.043309682 |
| 0.889137618 | 0.05177837 | 0.97971986 | 0.697872855 | -1.04157814 | 0.493377713 |
| 0.941931116 | 0.35293802 | -1.0228096 | 0.643654734 | -1.03243726 | 0.619109902 |
| 0.852865335 | 0.03207516 | -1.1189687 | 0.019192362 | -1.01939744 | 0.791517531 |
| -1.00840253 | 0.87495126 | -1.0617208 | 0.29894379  | -1.08136473 | 0.145186549 |
| -1.08660479 | 0.1609134  | -1.0148845 | 0.827066259 | -1.04224209 | 0.481898746 |
| 0.893898784 | 0.16325465 | -1.0125055 | 0.865769393 | -1.04252345 | 0.601850731 |
| -1.09737661 | 0.0658145  | 0.95805798 | 0.578726558 | -1.10031253 | 0.058642082 |
| -1.03451783 | 0.61230339 | -1.0235462 | 0.665360812 | -1.00589977 | 0.929916032 |
| -1.10851741 | 0.08818178 | -1.1016862 | 0.10352705  | -1.09599593 | 0.128179222 |
| 0.951812003 | 0.39413129 | -1.0312722 | 0.57599216  | 0.993761179 | 0.913720573 |
| 0.989302504 | 0.85728151 | 0.96093587 | 0.406033864 | -1.03695847 | 0.544594319 |
| -1.09842742 | 0.34667289 | 0.91786941 | 0.354057883 | -1.00135002 | 0.989164937 |
| -1.08137798 | 0.25016297 | 0.90203412 | 0.140376276 | -1.13137863 | 0.072174582 |
| -1.16439107 | 0.00682459 | -1.0763298 | 0.263191596 | -1.04327017 | 0.436942765 |
| -1.01920215 | 0.77262099 | 0.73347046 | 0.000218099 | 0.916701858 | 0.189814003 |
| -1.04100325 | 0.55933239 | -1.0338225 | 0.535683645 | -1.15401794 | 0.040972844 |
| 0.904389116 | 0.21244005 | -1.0950076 | 0.126910435 | 0.981767987 | 0.818154931 |
| 0.958927827 | 0.47985835 | -1.2086427 | 0.023547094 | 0.999290145 | 0.990432907 |
| -1.17624538 | 0.03902384 | -1.0562049 | 0.358720522 | -1.07689756 | 0.3385737   |
| -1.04047786 | 0.42950139 | -1.1800711 | 0.012221379 | 0.905882073 | 0.052489948 |
| -1.08286382 | 0.1975626  | -1.0275173 | 0.708863817 | -1.02254615 | 0.716247946 |
| -1.21972159 | 0.06883916 | -1.0260658 | 0.628752273 | -1.09114844 | 0.41841995  |
| 0.929336107 | 0.30170403 | 0.91260645 | 0.123390927 | 0.937027823 | 0.358829937 |

|             |            |            |             |             |             |
|-------------|------------|------------|-------------|-------------|-------------|
| -1.11871337 | 0.03096055 | -1.1886956 | 0.033779773 | -1.00328616 | 0.948569024 |
| 0.935896891 | 0.25459427 | 0.98426427 | 0.749787139 | 0.992967565 | 0.902823905 |
| -1.05944271 | 0.38406343 | -1.1040104 | 0.143029203 | -1.09357546 | 0.179655244 |
| 0.942198561 | 0.29837285 | 0.92581537 | 0.199376041 | -1.01121948 | 0.844743018 |
| -1.0333738  | 0.53838808 | -1.0550938 | 0.355080706 | -1.00352627 | 0.947309264 |
| -1.11799475 | 0.05221723 | -1.0405994 | 0.506585678 | -1.02196312 | 0.700485928 |
| 0.935458709 | 0.20988866 | -1.2478082 | 0.029332473 | -1.04487823 | 0.407390649 |
| 0.935062028 | 0.26208202 | -1.0039913 | 0.953020513 | -1.12361976 | 0.054301222 |
| -1.25117757 | 0.0065277  | -1.0633298 | 0.261274589 | 0.937267602 | 0.416784389 |
| -1.13392599 | 0.2731338  | 0.9552666  | 0.487715911 | -2.14844565 | 1.13E-08    |
| -1.00820006 | 0.86402669 | -1.0522952 | 0.459384246 | -1.02715345 | 0.574763475 |
| 0.998731902 | 0.98170313 | -1.057706  | 0.484186344 | 0.979868961 | 0.713378956 |
| 0.969959342 | 0.6617765  | -1.0013003 | 0.982493535 | 0.971543509 | 0.678804523 |
| 0.938253827 | 0.31157948 | 0.9377214  | 0.405686992 | -1.12092005 | 0.072868246 |
| -1.01882746 | 0.76984711 | 0.99096147 | 0.856146248 | -1.01178483 | 0.854157435 |
| -1.2410283  | 0.00095455 | -1.0089665 | 0.88423631  | 0.973509572 | 0.665500751 |
| -1.10201747 | 0.20536301 | 0.98870421 | 0.915822682 | -1.059195   | 0.451209256 |
| -1.02740422 | 0.66894398 | -1.0575986 | 0.429032244 | 0.965394782 | 0.577742973 |
| -1.11696593 | 0.06494752 | -1.0391458 | 0.451464199 | -1.03402487 | 0.571084847 |
| -1.03786092 | 0.48217908 | 0.90643089 | 0.093479109 | -1.01839528 | 0.729840693 |
| 0.953984637 | 0.34638931 | 0.93651333 | 0.323285025 | -1.05180281 | 0.313016902 |
| 0.968925076 | 0.60032752 | -1.0842481 | 0.159481212 | -1.01757817 | 0.772223768 |
| 0.796251775 | 0.08507271 | -1.059932  | 0.277165399 | -1.00708    | 0.956878085 |
| 0.879474932 | 0.04446226 | -1.0300829 | 0.59994989  | -1.00532207 | 0.932533233 |
| 0.931251773 | 0.16286193 | -1.0077307 | 0.884087924 | 0.95863433  | 0.405058808 |
| 0.963391337 | 0.5061711  | 0.88343403 | 0.041170853 | -1.06423698 | 0.268852816 |
| -1.04937292 | 0.58690161 | -1.1103647 | 0.191660672 | 0.972928848 | 0.756788482 |
| -1.05326249 | 0.33661039 | 0.91208018 | 0.421110635 | -1.06409604 | 0.250873754 |
| 0.978450214 | 0.73925175 | 0.98481    | 0.748315852 | -1.10065967 | 0.146607765 |
| -1.29478024 | 0.01521871 | -1.0090236 | 0.871039913 | -1.23802005 | 0.043047842 |
| -1.30997043 | 0.00285185 | -1.0034793 | 0.960234242 | -1.07325156 | 0.416577893 |
| 0.988993965 | 0.8498902  | -1.0028477 | 0.963815915 | 0.991056065 | 0.877887386 |
| -1.06710826 | 0.3275831  | -1.1259351 | 0.066948596 | -1.08309269 | 0.229999564 |
| 0.949190786 | 0.43671438 | -1.0189736 | 0.762036896 | -1.05977122 | 0.386885234 |
| 0.941676123 | 0.285531   | -1.0052152 | 0.94552651  | -1.01703823 | 0.762853316 |
| -1.0895614  | 0.15505501 | -1.1065811 | 0.113125015 | -1.02512717 | 0.678149934 |
| -1.00829196 | 0.89262217 | 0.97261342 | 0.638112538 | -1.05959236 | 0.346012546 |
| 0.975687218 | 0.64856729 | 0.94520335 | 0.28796155  | -1.03127305 | 0.568754228 |
| 0.942610611 | 0.22474033 | -1.093505  | 0.077071798 | 0.927417885 | 0.12326497  |
| 0.961850445 | 0.64376384 | -1.147912  | 0.025177885 | -1.08313062 | 0.343958977 |
| 0.955623106 | 0.48443547 | 0.99043461 | 0.941278137 | -1.00866612 | 0.894029469 |
| 0.973709207 | 0.6710399  | -1.0079761 | 0.899175466 | 0.96272287  | 0.545124463 |
| -1.03171977 | 0.54037119 | -1.0471508 | 0.364143537 | 0.980568196 | 0.700127397 |
| 0.887841925 | 0.02027545 | 0.94117975 | 0.281500677 | 0.947284326 | 0.280985928 |

|             |             |            |             |             |             |
|-------------|-------------|------------|-------------|-------------|-------------|
| 0.940230524 | 0.27981696  | -1.0476642 | 0.599578364 | -1.12916905 | 0.035914457 |
| 0.944135045 | 0.37052155  | -1.0136877 | 0.800459256 | -1.04091599 | 0.531389129 |
| -1.01495985 | 0.81227421  | -1.2016863 | 0.006686862 | 0.980284715 | 0.750177543 |
| -1.00987249 | 0.88126432  | -1.1430235 | 0.200011838 | 0.929632589 | 0.269956094 |
| 0.971896783 | 0.64772434  | -1.1626119 | 0.086725882 | -1.06782619 | 0.294854014 |
| 0.896057226 | 0.09547007  | -1.0090257 | 0.877873876 | 0.990303748 | 0.880802623 |
| 0.955914236 | 0.382112    | -1.1409206 | 0.049977603 | 0.991370131 | 0.86611298  |
| 0.980238972 | 0.74355666  | -1.0429189 | 0.530393228 | -0.99999393 | 0.999920558 |
| 0.93661324  | 0.1937181   | -1.0373055 | 0.513684438 | 0.929139652 | 0.145476185 |
| -1.07865866 | 0.18237388  | -1.1888054 | 0.005281712 | 0.995056492 | 0.929870908 |
| 0.886588768 | 0.01776757  | 0.93721076 | 0.291612002 | -1.02169733 | 0.664492555 |
| 0.890150669 | 0.04765676  | -1.1539922 | 0.010093717 | -1.09228845 | 0.130022042 |
| -1.06033768 | 0.29262685  | -1.0085356 | 0.860469935 | -1.0819349  | 0.158917293 |
| 0.973945337 | 0.69330504  | -1.1578307 | 0.085449441 | 0.94186402  | 0.372375443 |
| -1.07030277 | 0.31337104  | 0.97181767 | 0.65925038  | -1.05991685 | 0.387273181 |
| 0.99610355  | 0.93964444  | -1.1416509 | 0.038340133 | 0.925882172 | 0.139337148 |
| 0.95069276  | 0.37679513  | -1.0022192 | 0.965271982 | -1.13681701 | 0.027896039 |
| 0.860069076 | 0.04238296  | 0.94164655 | 0.231916761 | 0.968838588 | 0.664099109 |
| -1.00212621 | 0.97120941  | 0.92604598 | 0.179189294 | -1.0977829  | 0.117103449 |
| 0.89356219  | 0.01827041  | -1.0122894 | 0.848557757 | 0.99954329  | 0.992152033 |
| 0.94999652  | 0.41811121  | 0.90485543 | 0.113934535 | -1.13523819 | 0.048634595 |
| 0.978696025 | 0.74936251  | -1.0430962 | 0.521947172 | -1.03386045 | 0.62151416  |
| -1.06303991 | 0.22593185  | 0.96048067 | 0.518478864 | -1.03462454 | 0.498128148 |
| -1.08261737 | 0.33230449  | 0.95699501 | 0.499602112 | -1.08637101 | 0.31184486  |
| -1.0217326  | 0.66310249  | 0.96534454 | 0.493557299 | -1.03366775 | 0.502772778 |
| 0.994809765 | 0.93375903  | 0.87003277 | 0.025743123 | -1.03846205 | 0.547303656 |
| 0.976182501 | 0.711175219 | -1.1434903 | 0.009381082 | -1.08440788 | 0.217185542 |
| 0.972677068 | 0.65452663  | -1.0206045 | 0.717368213 | -1.00337715 | 0.956529702 |
| -1.02231312 | 0.63836076  | 0.96002874 | 0.410884711 | -1.09825561 | 0.049747173 |
| 0.941164968 | 0.25474749  | -1.089732  | 0.14030741  | 0.978786202 | 0.685563576 |
| -1.02174638 | 0.7529426   | 0.98895763 | 0.841123959 | 0.997396564 | 0.96956163  |
| 0.972291735 | 0.61852042  | -1.1157738 | 0.105752931 | -1.06283859 | 0.282211176 |
| -1.02255911 | 0.71508003  | -1.0191017 | 0.777932809 | -1.02319663 | 0.707491297 |
| 0.962916478 | 0.54117085  | 0.8866342  | 0.022782993 | -1.07347786 | 0.25365862  |
| -1.03150011 | 0.555499    | -1.0167903 | 0.770289354 | 0.92967134  | 0.16878106  |
| 0.831382471 | 0.01126589  | -1.0561014 | 0.454785506 | 0.943389347 | 0.41112853  |
| 0.912354018 | 0.16659218  | -1.1268916 | 0.046340343 | 0.972682008 | 0.673671158 |
| 0.906812332 | 0.22540101  | -1.0127538 | 0.785019827 | -1.04502239 | 0.583154042 |
| 0.991109859 | 0.88399941  | -1.0172412 | 0.786724769 | -1.21412923 | 0.002410408 |
| 0.986596249 | 0.83074209  | -1.0951906 | 0.18079267  | 0.956782388 | 0.484962363 |
| 0.997156241 | 0.95756679  | -1.0431627 | 0.400892648 | -1.08703264 | 0.123117595 |
| 0.99091977  | 0.87290127  | -1.0181186 | 0.825698362 | 0.95965602  | 0.471193806 |
| 0.926118642 | 0.19450975  | 0.90290886 | 0.042225363 | 0.901100193 | 0.080318868 |
| 0.745424281 | 0.00424078  | -1.0443393 | 0.489301772 | 0.864727961 | 0.145354954 |



|             |            |            |             |             |             |
|-------------|------------|------------|-------------|-------------|-------------|
| 0.96364593  | 0.62448253 | -1.0055192 | 0.932722291 | -1.05012925 | 0.518259225 |
| 0.921370338 | 0.20013459 | 0.9751206  | 0.683992493 | 0.96778969  | 0.606179734 |
| -1.09497295 | 0.1288056  | -1.0446167 | 0.354001784 | 0.997871677 | 0.971237584 |
| 0.941586545 | 0.3096182  | -1.0242612 | 0.65086574  | -1.11520887 | 0.06861961  |
| 0.974643715 | 0.70482258 | -1.0927663 | 0.197590874 | 0.952542079 | 0.474054567 |
| -1.08400682 | 0.28099556 | -1.1564322 | 0.012312149 | -1.0929424  | 0.235452341 |
| -1.03936578 | 0.81396406 | -1.0703436 | 0.268431978 | 0.91365698  | 0.582524257 |
| -1.02239938 | 0.77587805 | 0.88795736 | 0.058411615 | -1.12531915 | 0.133125613 |
| 0.997030358 | 0.95120758 | -1.026167  | 0.6232499   | -1.0698387  | 0.168625358 |
| 0.951567012 | 0.44098571 | 0.96100891 | 0.574200242 | 0.961211309 | 0.538792381 |
| 0.984504667 | 0.76475614 | 0.97452157 | 0.694739548 | -1.00962934 | 0.854264692 |
| -1.01047401 | 0.8489286  | -1.1940023 | 0.03044918  | -1.01761328 | 0.749652653 |
| 0.937656123 | 0.39368378 | 0.98552456 | 0.811729144 | 0.924563678 | 0.299471417 |
| 0.927923719 | 0.37508563 | -1.0263137 | 0.680941404 | -1.01239882 | 0.88341756  |
| 0.921056729 | 0.17623583 | -1.0864255 | 0.125591142 | -1.02420587 | 0.691762012 |
| 0.949518167 | 0.3942907  | -1.0261527 | 0.650992261 | -1.04814348 | 0.439099272 |
| 0.995883078 | 0.94987887 | 0.92286111 | 0.175125559 | 0.962015239 | 0.555793669 |
| -1.12807703 | 0.10459586 | 0.78790353 | 0.018774731 | -1.01002829 | 0.891784599 |
| -1.1384212  | 0.02312063 | -1.0313694 | 0.682955782 | 0.903985724 | 0.074220561 |
| 0.952807621 | 0.434901   | -1.0094012 | 0.882729227 | -1.0765243  | 0.235404475 |
| -1.10066514 | 0.18969786 | -1.1193287 | 0.060616698 | -1.05224448 | 0.483697762 |
| -1.00152541 | 0.98003401 | -1.0502522 | 0.407101468 | -1.23023228 | 0.001211584 |
| 0.951409895 | 0.43587074 | 0.98518241 | 0.825647404 | 0.977126293 | 0.716768765 |
| 0.915201106 | 0.16149342 | -1.1465572 | 0.070343975 | 0.944589589 | 0.365181597 |
| -1.1015541  | 0.10793679 | 0.98468035 | 0.925022079 | -1.10136399 | 0.108551946 |
| -1.05698749 | 0.3927687  | 0.84541091 | 0.034523881 | -1.03128071 | 0.634019287 |
| 0.989836624 | 0.85399328 | -1.0720555 | 0.15617052  | -1.10523225 | 0.075716064 |
| 0.977286732 | 0.703494   | 0.96521871 | 0.582185362 | -1.10827703 | 0.092632277 |
| 0.974425078 | 0.59479889 | -1.0300608 | 0.570776228 | -1.05282761 | 0.292433931 |
| 0.975995173 | 0.65325024 | 0.90685058 | 0.078097487 | -1.08322813 | 0.143009626 |
| -1.03918289 | 0.54370526 | -1.0403962 | 0.598991268 | -1.0145416  | 0.81931671  |
| 0.968183877 | 0.54928518 | -1.1885498 | 0.043737516 | -1.06395732 | 0.253007055 |
| -1.08385642 | 0.21328543 | -1.000489  | 0.993529768 | 0.967769879 | 0.610450811 |
| 0.957470931 | 0.42803292 | -1.0542127 | 0.385346512 | -1.02913858 | 0.599816278 |
| -1.0511989  | 0.42412378 | 0.92250071 | 0.222254546 | 0.966093235 | 0.58022823  |
| 0.950304927 | 0.33147313 | -1.1594388 | 0.047688871 | -1.02787308 | 0.59928272  |
| -1.0796478  | 0.23109604 | 0.98370487 | 0.768106312 | -1.07479555 | 0.259315021 |
| -1.11586916 | 0.05749642 | -1.0496363 | 0.433943175 | -1.0747197  | 0.207486298 |
| 0.978348349 | 0.70904855 | -1.0379659 | 0.607938712 | -1.02583849 | 0.663740908 |
| -1.06372187 | 0.28857422 | -1.1496872 | 0.025308578 | -1.05593544 | 0.349201702 |
| 0.988284999 | 0.8283659  | -1.0036787 | 0.954064511 | -1.10975225 | 0.059510938 |
| -1.02197766 | 0.76030245 | -1.0392581 | 0.539892669 | -1.10410545 | 0.168190435 |
| 0.964263115 | 0.5485112  | 0.90862932 | 0.111190152 | 0.938907323 | 0.300269579 |
| -1.04485824 | 0.41726302 | -1.0292097 | 0.656271723 | -1.08935238 | 0.116724339 |

|             |            |            |             |             |             |
|-------------|------------|------------|-------------|-------------|-------------|
| 0.859731718 | 0.00898566 | 0.98097352 | 0.729404925 | -1.06066791 | 0.295430905 |
| -1.02609007 | 0.69909374 | -1.078166  | 0.21547359  | -1.04197346 | 0.537620126 |
| 0.912777901 | 0.13830391 | -1.0047239 | 0.922822721 | -1.0849244  | 0.184676688 |
| -1.1174696  | 0.04388649 | 0.9548844  | 0.394508164 | -1.13308713 | 0.024075976 |
| -1.06660956 | 0.31279738 | 0.99391209 | 0.923013628 | -1.34300459 | 2.13E-05    |
| -1.05707011 | 0.27025119 | -1.0184796 | 0.734220465 | -1.013215   | 0.793169294 |
| 0.70145349  | 0.00070007 | 0.98672987 | 0.835274184 | 0.988607399 | 0.907889279 |
| -1.06100825 | 0.25358376 | -1.0345835 | 0.534774363 | -1.03986008 | 0.449565919 |
| 0.995562237 | 0.9487813  | -1.055961  | 0.383672568 | -1.03601917 | 0.609729499 |
| 0.968573618 | 0.57691407 | -1.0921576 | 0.095888333 | -1.07228697 | 0.22520596  |
| -1.1085049  | 0.14494708 | -1.064198  | 0.32979291  | 0.988827598 | 0.872441101 |
| -1.06717818 | 0.22741496 | 0.98658165 | 0.81186513  | -1.09484279 | 0.094609318 |
| -1.09838378 | 0.09220778 | 0.91467761 | 0.132301744 | -1.02862797 | 0.60818044  |
| -1.00847404 | 0.87991703 | -1.0728077 | 0.228005624 | -1.00286958 | 0.959081478 |
| 0.931101854 | 0.28996752 | -1.1179423 | 0.044149503 | 0.92924734  | 0.276848956 |
| 0.940041669 | 0.3533081  | -1.0440451 | 0.545770399 | 0.978192889 | 0.739771157 |
| 0.983404737 | 0.73791691 | -1.1258015 | 0.054468863 | -1.02632381 | 0.603647832 |
| -1.16188299 | 0.03491437 | 0.90996997 | 0.084522367 | 0.975149018 | 0.718038545 |
| -1.0332474  | 0.56380497 | -1.0954418 | 0.107842269 | -1.02268785 | 0.691925708 |
| -1.01328473 | 0.85056619 | -1.1017393 | 0.14958492  | -1.0931263  | 0.207012588 |
| -1.0236655  | 0.69170797 | -1.0415005 | 0.50550393  | -1.11260131 | 0.074535197 |
| 0.842925673 | 0.00135967 | 0.98465218 | 0.774912489 | -1.00971824 | 0.849032805 |
| 0.859395918 | 0.07979821 | -1.1272989 | 0.063703781 | 0.885397559 | 0.157250011 |
| -1.2170411  | 0.0006448  | 0.94594155 | 0.269624829 | 0.964670951 | 0.509754005 |
| 0.864614002 | 0.02893154 | 0.86207806 | 0.138006956 | -1.01664097 | 0.799952838 |
| 0.950858635 | 0.43395368 | 0.9761738  | 0.640296689 | -1.00211185 | 0.973792573 |
| -1.03195382 | 0.59880305 | -1.0742268 | 0.30347142  | -1.0720978  | 0.246601255 |
| -1.13520209 | 0.01306735 | -1.1089707 | 0.07460688  | -1.09280952 | 0.077984518 |
| -1.11334654 | 0.04945613 | -1.1061773 | 0.153165387 | -1.05080004 | 0.3577247   |
| 0.982377983 | 0.80887619 | 0.96918974 | 0.559190503 | 0.859557981 | 0.043374401 |
| 0.952089796 | 0.4084446  | -1.1058243 | 0.071623641 | -1.04854498 | 0.424690181 |
| 0.912899836 | 0.08342278 | 0.89703002 | 0.055829008 | -1.07542804 | 0.165005377 |
| -1.01668444 | 0.76151398 | 0.92634321 | 0.257102255 | 0.927259503 | 0.169589528 |
| -1.0355892  | 0.71191118 | 0.96812224 | 0.625717717 | 0.988473918 | 0.90250885  |
| -1.11000048 | 0.08037645 | 0.95565645 | 0.366035495 | -1.17844571 | 0.007012022 |
| 0.969719047 | 0.56731797 | -1.0393104 | 0.580408034 | 0.952427749 | 0.365671207 |
| 0.967339727 | 0.59423792 | 0.97435602 | 0.646430165 | 0.959642791 | 0.509003269 |
| -1.12121483 | 0.12866958 | -1.0200832 | 0.776567945 | -1.02225329 | 0.767723507 |
| -1.16138973 | 0.00504823 | -1.031799  | 0.595834614 | -1.0576228  | 0.278406782 |
| 0.902741648 | 0.09017884 | -1.0885466 | 0.099167175 | 0.879911578 | 0.035457639 |
| -1.12718524 | 0.05768603 | -1.0392386 | 0.651958981 | 0.951911726 | 0.428133463 |
| -1.01295512 | 0.81675745 | 0.97506781 | 0.643202631 | 0.981275345 | 0.733725581 |
| 0.984076823 | 0.77596101 | -1.0295108 | 0.65539622  | 0.886270224 | 0.035966277 |
| -1.08131273 | 0.229881   | 0.99276589 | 0.909985905 | -1.09026502 | 0.18506328  |

|             |            |             |             |             |             |
|-------------|------------|-------------|-------------|-------------|-------------|
| -1.15931269 | 0.03178821 | -1.049129   | 0.423220406 | 0.944389962 | 0.397285789 |
| 0.988278446 | 0.82077508 | 0.98657683  | 0.785436418 | 0.982836329 | 0.739471757 |
| 0.964207099 | 0.51457523 | 0.9544701   | 0.386875103 | 0.960183438 | 0.467745688 |
| 0.984494133 | 0.80375549 | -1.0363996  | 0.626972687 | 0.95095794  | 0.425200554 |
| 0.891248075 | 0.03930786 | -1.1126827  | 0.075588961 | 0.972001388 | 0.604456561 |
| 0.953183992 | 0.42619089 | -1.0118636  | 0.820284444 | 0.971288864 | 0.628125509 |
| -1.06348941 | 0.26181919 | -1.1195707  | 0.04211207  | -1.07786994 | 0.172855242 |
| -1.00166756 | 0.97526146 | -1.2318516  | 0.031124754 | -1.0482608  | 0.382079894 |
| 0.978167806 | 0.6995855  | -1.02111114 | 0.722660458 | 0.967768783 | 0.567160071 |
| 0.984661301 | 0.78394065 | 0.98108484  | 0.722158964 | -1.01704921 | 0.764291247 |
| -1.03731643 | 0.47219283 | -1.1141117  | 0.08688297  | -1.06786286 | 0.199985147 |
| 0.952156965 | 0.47236312 | -1.1781882  | 0.031269348 | -1.12906141 | 0.078772903 |
| 0.975463917 | 0.6445732  | -1.0141774  | 0.78425229  | 0.931392856 | 0.190022212 |
| -1.05673501 | 0.47455615 | -1.0299396  | 0.620860115 | -1.08116329 | 0.313061172 |
| -1.22277261 | 0.01099782 | -1.0381566  | 0.546621265 | 0.982203025 | 0.814950248 |
| -1.03693324 | 0.51239419 | 0.99394555  | 0.912929992 | 0.967043455 | 0.544836828 |
| -1.00538342 | 0.93241845 | -1.0331556  | 0.563520197 | -1.18387586 | 0.009792616 |
| 0.931786978 | 0.28134976 | -1.0007539  | 0.990702108 | -1.08610173 | 0.208781087 |
| 0.927701935 | 0.24277161 | -1.02582    | 0.705310514 | -1.04155786 | 0.524355491 |
| -1.10483864 | 0.16833904 | -1.1142456  | 0.041491972 | -1.08832189 | 0.241062819 |
| -1.01101652 | 0.84677021 | -1.1154413  | 0.054424518 | -1.09795727 | 0.10351297  |
| -1.17851637 | 0.00825875 | -1.0366648  | 0.567417748 | -1.02344958 | 0.700230553 |
| 0.982635429 | 0.78391831 | 0.9733776   | 0.622539371 | -1.04649532 | 0.477703812 |
| 0.865309864 | 0.01852843 | -1.0247295  | 0.684515659 | -1.19834656 | 0.003675228 |
| 0.909964768 | 0.10494053 | -1.0331296  | 0.550729419 | -1.10501271 | 0.086619373 |
| -1.05856481 | 0.40446752 | -1.0168151  | 0.756396832 | 0.99429354  | 0.932978164 |
| -1.05061257 | 0.3777398  | -1.0041491  | 0.942259859 | -1.00023807 | 0.996594362 |
| 0.941821777 | 0.23763733 | 0.97642171  | 0.672268436 | 0.982110879 | 0.720518296 |
| -1.01343324 | 0.80546293 | -1.0160379  | 0.75441401  | -1.07701181 | 0.174508598 |
| -1.0919156  | 0.07820002 | -1.0840627  | 0.238667949 | 0.944181614 | 0.246049177 |
| -1.07567192 | 0.2818784  | -1.0180927  | 0.739032577 | 0.985357964 | 0.826853026 |
| -1.07018375 | 0.26152597 | -1.0080098  | 0.917469043 | -1.00300438 | 0.960160949 |
| -1.02844175 | 0.63926139 | 0.90542313  | 0.198719539 | -1.0273136  | 0.652405306 |
| 0.929142923 | 0.13411486 | 0.98332503  | 0.760955043 | 0.986906596 | 0.78606748  |
| 0.850795804 | 0.00764856 | 0.91792406  | 0.179818454 | -1.00774077 | 0.895264945 |
| -1.1234277  | 0.02377467 | 0.99581134  | 0.94868968  | 0.878635487 | 0.012431171 |
| 0.915039953 | 0.18555806 | -1.0179051  | 0.781081385 | -1.09827973 | 0.162579615 |
| 0.987205478 | 0.79650987 | 0.92262854  | 0.264377211 | 0.985131792 | 0.76422138  |
| -1.06042272 | 0.28326467 | 0.97565221  | 0.663970057 | 0.998665288 | 0.980405579 |
| 0.972483082 | 0.63000558 | -1.0517856  | 0.402888624 | 0.927198528 | 0.194942108 |
| 0.936496745 | 0.58700853 | -1.0360355  | 0.579866766 | 0.76629744  | 0.030875465 |
| 0.891789632 | 0.07381022 | -1.0047301  | 0.937146654 | -1.06217893 | 0.341143281 |
| -1.09744402 | 0.07372033 | -1.170291   | 0.00813193  | -1.00538583 | 0.916476673 |
| 0.99483331  | 0.92523258 | -1.0569401  | 0.417187598 | -1.02893609 | 0.605748076 |

|             |            |            |             |             |             |
|-------------|------------|------------|-------------|-------------|-------------|
| 0.742123279 | 9.67E-05   | 0.9924238  | 0.891542795 | -1.0398757  | 0.582917218 |
| 0.995057048 | 0.93216267 | 0.92244315 | 0.113601973 | 0.887618797 | 0.044506624 |
| -1.04637412 | 0.47171002 | -1.0100476 | 0.85358674  | -1.02800676 | 0.660510145 |
| 0.942538069 | 0.32125383 | -1.0122055 | 0.80529683  | 0.919113628 | 0.159407544 |
| -1.13575062 | 0.15318387 | 0.92095657 | 0.225152239 | 0.892501961 | 0.201043917 |
| 0.944248333 | 0.33961906 | -1.08508   | 0.17763794  | -1.09177922 | 0.146110048 |
| -1.14378925 | 0.01631829 | 0.95161772 | 0.408206052 | 0.969171865 | 0.565689897 |
| 0.993329938 | 0.91710498 | 0.95014797 | 0.294620686 | -1.02230466 | 0.731673158 |
| -1.13238455 | 0.03242163 | 0.96023322 | 0.489385153 | 0.988141384 | 0.833894361 |
| 0.993434845 | 0.92501613 | 0.96149249 | 0.435838619 | -1.08673844 | 0.237672159 |
| -1.02724532 | 0.70412448 | 0.9881542  | 0.857841552 | -1.00175658 | 0.980205668 |
| 0.876153072 | 0.02728461 | -1.1677358 | 0.002903287 | 0.984619178 | 0.791209959 |
| 0.889459031 | 0.04781307 | -1.0525231 | 0.348522899 | 0.965202433 | 0.542876408 |
| 0.943738754 | 0.41444338 | 0.96275468 | 0.512667539 | -1.01530853 | 0.829968727 |
| 0.990433417 | 0.85489503 | 0.75994521 | 0.026203542 | 0.964737266 | 0.495498361 |
| 0.975962589 | 0.67885635 | 0.98971907 | 0.869926128 | 0.922668047 | 0.174208389 |
| -1.06613674 | 0.28630343 | 0.93029923 | 0.162183472 | -1.05955764 | 0.334973241 |
| -1.00013782 | 0.99848153 | -1.0497321 | 0.380948834 | -1.15350139 | 0.052701825 |
| -1.08579633 | 0.21167894 | 0.95719883 | 0.539139384 | -1.0547629  | 0.416554682 |
| 0.929586656 | 0.13741354 | 0.99468234 | 0.927020737 | -1.03663984 | 0.460595235 |
| 0.924730381 | 0.18867173 | -1.0313518 | 0.623600517 | 0.999890849 | 0.998525002 |
| -1.02092999 | 0.73902619 | 0.87168824 | 0.023994595 | -1.03861168 | 0.542815196 |
| 0.983398967 | 0.74328468 | 0.92185495 | 0.358512835 | -1.06536488 | 0.218489907 |
| -1.03884758 | 0.59605911 | -1.1466871 | 0.025430822 | 0.913033519 | 0.208503226 |
| -1.02946193 | 0.60584133 | -1.0604464 | 0.283514425 | -1.02761179 | 0.628298133 |
| -1.20055233 | 0.00978922 | -1.0074039 | 0.908666427 | -1.02767951 | 0.690639906 |
| 0.964431693 | 0.53685804 | -1.1022911 | 0.091125457 | -1.07084843 | 0.245260129 |
| -1.05749556 | 0.32443707 | -1.1384064 | 0.068232513 | -1.07488548 | 0.204423978 |
| 0.996336937 | 0.95543805 | 0.94468261 | 0.422518092 | -1.11299285 | 0.10733606  |
| 0.837809767 | 0.00409345 | -1.0470728 | 0.43325785  | -1.00069029 | 0.990711046 |
| -1.03199825 | 0.59821381 | -1.0245863 | 0.676190508 | -1.09995014 | 0.114719594 |
| -1.03579272 | 0.59092164 | 0.96598221 | 0.625014074 | -1.01539727 | 0.815140868 |
| 0.821728999 | 0.00406335 | 0.98943793 | 0.839916235 | 0.622649789 | 1.71E-09    |
| -1.00559245 | 0.91258565 | -1.0761119 | 0.214896276 | -1.14688543 | 0.009002997 |
| 0.936595473 | 0.31527506 | 0.97452726 | 0.666081402 | 0.898882327 | 0.104841566 |
| 0.737776619 | 5.72E-05   | -1.0103153 | 0.887312752 | 0.872398061 | 0.054983878 |
| -1.00811507 | 0.88146763 | 0.39818776 | 9.77392E-20 | -1.13039082 | 0.027124186 |
| 0.958767904 | 0.42919129 | 0.95128168 | 0.306911994 | -1.00062178 | 0.990660887 |
| 0.91737087  | 0.10654206 | -1.0839049 | 0.17612306  | 0.886131416 | 0.025308365 |
| 0.92163776  | 0.21869849 | -1.0963014 | 0.143030278 | -1.00300278 | 0.963696472 |
| 0.91540621  | 0.10263342 | -1.1832995 | 0.00167334  | 0.940601395 | 0.255054156 |
| -1.03092053 | 0.60281664 | 0.92006527 | 0.248906143 | 0.942768885 | 0.315590821 |
| 0.882278292 | 0.06763109 | -1.0377885 | 0.510112305 | -1.00368052 | 0.956573481 |
| 0.924559616 | 0.12484389 | 0.9342824  | 0.323612312 | -1.00675225 | 0.894087952 |

|             |            |            |             |             |             |
|-------------|------------|------------|-------------|-------------|-------------|
| 0.922677515 | 0.11235938 | -1.0180328 | 0.760233567 | -1.16199773 | 0.003959032 |
| 0.948965762 | 0.31512786 | -1.1122696 | 0.063773065 | -1.00846387 | 0.871011168 |
| 0.864279273 | 0.04230546 | -1.0944643 | 0.173039568 | 0.965481626 | 0.618440585 |
| 0.991033837 | 0.88207979 | -1.0211982 | 0.723562574 | -1.02984765 | 0.628459277 |
| -1.19159781 | 0.00067743 | -1.1987035 | 0.00354703  | 0.994493162 | 0.909926497 |
| -1.01013232 | 0.86537503 | -1.1458572 | 0.041042236 | -1.05024635 | 0.411112569 |
| 0.97200547  | 0.59639608 | 0.85465491 | 0.019822933 | -1.12264122 | 0.03440467  |
| 0.964655845 | 0.58859395 | -1.0110301 | 0.8290678   | -1.12808109 | 0.073958797 |
| -1.12246743 | 0.0136404  | 0.95851417 | 0.514812919 | -1.03621756 | 0.435635037 |
| 0.880711144 | 0.03084214 | 0.94381188 | 0.409623077 | -1.10393396 | 0.090066083 |
| 0.977815259 | 0.71932244 | -1.019161  | 0.726347439 | -1.09923856 | 0.133476567 |
| 0.737690614 | 0.00011407 | 0.97469319 | 0.629692809 | 0.851265257 | 0.031831307 |
| 0.966223487 | 0.52724488 | 0.91926523 | 0.114973695 | -1.03540913 | 0.522030469 |
| 0.962346531 | 0.42342372 | -1.0305021 | 0.648623257 | 0.978726656 | 0.653138455 |
| -1.06108673 | 0.3242893  | 0.99749245 | 0.962553154 | -1.03800257 | 0.534108655 |
| 0.972480952 | 0.68889456 | 0.97022323 | 0.605468288 | -1.00452848 | 0.948276031 |
| -1.00761329 | 0.89984909 | -1.1109127 | 0.123146769 | -1.06888229 | 0.271697951 |
| -1.07209597 | 0.22575257 | -1.1157631 | 0.033873647 | 0.967146586 | 0.558970742 |
| -1.02223876 | 0.72390892 | 0.97976545 | 0.683421279 | 0.871825448 | 0.031066715 |
| 0.970342217 | 0.52372964 | -1.0740778 | 0.172285156 | 0.976966202 | 0.621375124 |
| -1.04675408 | 0.46981773 | 0.93410488 | 0.335344527 | 0.950482706 | 0.422063362 |
| -1.16239999 | 0.02487563 | 0.83460585 | 0.004183882 | 0.83402606  | 0.007407371 |
| -1.1137482  | 0.05237342 | 0.95559489 | 0.354001682 | -1.10674692 | 0.067236573 |
| -1.04977261 | 0.27416311 | 0.88791529 | 0.049605577 | -1.06074181 | 0.185484087 |
| -1.02183324 | 0.65393118 | -1.0291901 | 0.591524441 | 0.978807014 | 0.65658739  |
| 0.813717611 | 0.04223833 | -1.030071  | 0.655935009 | -1.0384576  | 0.704766734 |
| 0.916728686 | 0.21332948 | 0.98428663 | 0.727953579 | -1.05816643 | 0.416423355 |
| -1.06168009 | 0.23540567 | -1.0059536 | 0.917851663 | -1.11632361 | 0.031668315 |
| 0.947848529 | 0.4259248  | -1.0315435 | 0.619052408 | 0.811218714 | 0.002795555 |
| -1.07526605 | 0.14234259 | 0.7706808  | 0.000773652 | 0.87855365  | 0.010370902 |
| 0.984323441 | 0.79654174 | -1.0216666 | 0.692950756 | 0.909817632 | 0.127057071 |
| 0.923388642 | 0.28341434 | 0.9891902  | 0.820180037 | -1.0525581  | 0.489214781 |
| -1.01226436 | 0.85879545 | 0.942689   | 0.32651608  | -1.26809608 | 0.000994291 |
| 0.951016816 | 0.36333616 | 0.93370015 | 0.326832356 | -1.04498201 | 0.425396873 |
| 0.904543821 | 0.11879831 | 0.9883065  | 0.845269282 | -1.04785423 | 0.463370396 |
| 0.941720618 | 0.33702145 | -1.0294357 | 0.611665704 | -1.0258529  | 0.682135028 |
| -1.02793287 | 0.65279163 | 0.92417852 | 0.208512365 | -1.00644512 | 0.916371865 |
| 0.967647318 | 0.54753897 | 0.98090072 | 0.682638961 | 0.977397864 | 0.67561068  |
| -1.07881667 | 0.17387751 | -1.0641627 | 0.326279237 | -1.12423946 | 0.038005241 |
| -1.00528616 | 0.94909704 | 0.80875846 | 0.001963504 | -1.1309784  | 0.1401548   |
| -1.10044281 | 0.0744737  | -1.1385933 | 0.020371499 | 0.99970088  | 0.995484353 |
| 0.903457812 | 0.1450236  | -1.037247  | 0.409205123 | 0.931046907 | 0.302678943 |
| 0.998872027 | 0.98593968 | 0.93348617 | 0.156613552 | -1.07380113 | 0.268956943 |
| -1.14065024 | 0.0668327  | -1.0167798 | 0.867235739 | 0.966057013 | 0.625492089 |

|             |            |            |             |             |             |
|-------------|------------|------------|-------------|-------------|-------------|
| -1.06999252 | 0.30696234 | -1.0628922 | 0.380895357 | 0.994820468 | 0.937188706 |
| 0.964167613 | 0.45806512 | -1.0436571 | 0.395402194 | 0.984541203 | 0.75087583  |
| 0.906828782 | 0.12446678 | -1.1314965 | 0.06974598  | -1.04417235 | 0.49330238  |
| -1.18009852 | 0.01293724 | 0.88154788 | 0.012429717 | -1.05083671 | 0.444700234 |
| 0.983058619 | 0.80826922 | 0.97775263 | 0.713620281 | -1.08260249 | 0.262359257 |
| -1.02059115 | 0.68291208 | -1.0202082 | 0.786681798 | -1.15083252 | 0.006519501 |
| 0.941582628 | 0.28401259 | 0.97936963 | 0.761006402 | 0.980488076 | 0.724531139 |
| 0.952283618 | 0.46563653 | -1.1270673 | 0.033382556 | 0.947737697 | 0.423366762 |
| -1.13442693 | 0.07178023 | -1.0424714 | 0.513849137 | -1.07908079 | 0.272636445 |
| 0.985598683 | 0.78906329 | 0.99939924 | 0.992300523 | 0.952241799 | 0.368448857 |
| 0.922126872 | 0.14205685 | 0.89860998 | 0.084866671 | 0.991369906 | 0.874024942 |
| 0.900438676 | 0.05168376 | -1.0028713 | 0.958110774 | 0.949049381 | 0.325474381 |
| 0.929977432 | 0.17653972 | -1.0265362 | 0.636170162 | 0.917810308 | 0.111532737 |
| 0.950045548 | 0.33460815 | 0.98356832 | 0.841021159 | -1.06130343 | 0.263325503 |
| 0.965971232 | 0.53264952 | -1.0677873 | 0.21796332  | -1.1172643  | 0.049316841 |
| -1.09260288 | 0.14121846 | 0.88733914 | 0.087399503 | -1.10368066 | 0.102066315 |
| 0.967568258 | 0.63290091 | -1.0000162 | 0.999798187 | 0.981261512 | 0.783892937 |
| 0.993804556 | 0.92808953 | 0.92843624 | 0.295889628 | -1.17675791 | 0.021168111 |
| -1.16888243 | 0.00694922 | 0.83979601 | 0.010230004 | 0.89347562  | 0.047710766 |
| -1.1246516  | 0.0542419  | 0.96878893 | 0.518791954 | -1.1207056  | 0.061597438 |
| -1.04022041 | 0.5764021  | -1.0527287 | 0.415833212 | -1.19453508 | 0.01423872  |
| -1.01673779 | 0.76137322 | -1.0505571 | 0.447134925 | -1.02624352 | 0.63576332  |
| 0.945193987 | 0.42220566 | 0.98777171 | 0.861270108 | 0.928627369 | 0.29275649  |
| 0.997338581 | 0.96079813 | 0.93487058 | 0.180423868 | -1.06086057 | 0.278509553 |
| 0.957030428 | 0.39802138 | 0.9785244  | 0.697856817 | -1.00930945 | 0.858026184 |
| 0.934111735 | 0.29091955 | 0.85341369 | 0.020776079 | -1.09238566 | 0.172453857 |
| 0.87616985  | 0.01998966 | -1.0047915 | 0.944760324 | -1.05448215 | 0.340188322 |
| -1.00397154 | 0.95709559 | -1.1293377 | 0.028276333 | -1.16931159 | 0.037521032 |
| -1.22242227 | 0.00801306 | -1.1596008 | 0.00874241  | -1.04790471 | 0.523777759 |
| -1.05482161 | 0.41483471 | -1.0923074 | 0.099660376 | 0.883088992 | 0.060914936 |
| -1.04633652 | 0.55934291 | -1.0549831 | 0.317141641 | -1.02796055 | 0.721989236 |
| -1.05834129 | 0.41311078 | -1.0701863 | 0.203003016 | 0.982061924 | 0.793319448 |
| -1.14414506 | 0.0518014  | -1.0162897 | 0.770566302 | -1.04955254 | 0.478073515 |
| -1.04173233 | 0.49592948 | -1.2380761 | 0.000693081 | -1.15329998 | 0.020309384 |
| 0.988097751 | 0.83904701 | -1.1441143 | 0.054996153 | -1.04668211 | 0.440150129 |
| -1.02168413 | 0.7447901  | -1.0473785 | 0.502332515 | 0.958648318 | 0.522240067 |
| -1.06836556 | 0.28330388 | 0.91798775 | 0.129569547 | -1.07368289 | 0.249109767 |
| 0.835255653 | 0.00072063 | -1.1817509 | 0.007132688 | -1.02492243 | 0.625647524 |
| 0.988993128 | 0.82779745 | 0.8835534  | 0.083303294 | 0.971682442 | 0.572846118 |
| 0.97577167  | 0.66886997 | -1.055448  | 0.325496832 | -1.1106204  | 0.071346248 |
| -1.03447329 | 0.60334248 | -1.0712315 | 0.327901734 | -1.08396846 | 0.21910547  |
| 0.874801282 | 0.03910609 | 0.99327588 | 0.900975419 | 0.69684746  | 5.03E-07    |
| -1.05664113 | 0.36577352 | -1.0081578 | 0.875360373 | 0.958547538 | 0.486389056 |
| -1.03565268 | 0.59829439 | -1.0595262 | 0.369589676 | -1.04733641 | 0.487117991 |

|             |            |            |             |             |             |
|-------------|------------|------------|-------------|-------------|-------------|
| 0.95490209  | 0.47284446 | 0.9856869  | 0.794689275 | -1.2256689  | 0.00239149  |
| -1.0341107  | 0.46343752 | -1.1036386 | 0.184370678 | 0.984146773 | 0.726340333 |
| 0.995887724 | 0.93731066 | -1.0174017 | 0.813867146 | 0.890256607 | 0.030014823 |
| 0.852023599 | 0.03487089 | 0.95190719 | 0.45123013  | 0.945320263 | 0.450496018 |
| -1.02830293 | 0.63980866 | -1.0133011 | 0.864569103 | -1.19746996 | 0.003665292 |
| -1.28412828 | 0.00156349 | -1.1208788 | 0.1027529   | -1.05948014 | 0.444690265 |
| 0.952299088 | 0.44184195 | -1.0279163 | 0.68583619  | 0.997537852 | 0.968971344 |
| 0.941807274 | 0.28495256 | -1.0187312 | 0.756863644 | -1.01800841 | 0.749062074 |
| -1.0004746  | 0.99359319 | 0.98739802 | 0.829670255 | -1.11166311 | 0.077516351 |
| -1.1726402  | 0.00727199 | -1.0439089 | 0.514992389 | -1.03321914 | 0.569300785 |
| -1.09262033 | 0.14443268 | 0.9885305  | 0.850760852 | 0.974899899 | 0.672503433 |
| 0.92596664  | 0.23791201 | 0.94232634 | 0.2415967   | 0.907121071 | 0.136250302 |
| 0.992598576 | 0.88519598 | 0.98482761 | 0.763855755 | 0.955461497 | 0.377588035 |
| 0.974993894 | 0.66757046 | 0.98844978 | 0.839352572 | -1.04108766 | 0.495243645 |
| -1.09838892 | 0.07153642 | -1.0810791 | 0.234529132 | 0.978206552 | 0.667717628 |
| 0.991632176 | 0.87899499 | 0.69299879 | 3.65412E-07 | 0.921800483 | 0.144108981 |
| -1.00107034 | 0.98101298 | -1.108383  | 0.094237767 | -1.06983182 | 0.137240503 |
| -1.00273292 | 0.9584568  | -1.0098664 | 0.882473591 | -1.11659967 | 0.039105042 |
| 0.909246905 | 0.10158748 | -1.0112764 | 0.861210741 | -1.15706003 | 0.013515386 |
| -1.09755859 | 0.10679343 | 0.86521242 | 0.002393893 | -1.1507858  | 0.016525305 |
| 0.870581469 | 0.02723128 | 0.94095359 | 0.248337121 | 0.930540909 | 0.243503884 |
| 0.944458974 | 0.30668564 | -1.1938192 | 0.020150858 | 0.987840866 | 0.825972455 |
| -1.01830537 | 0.77092644 | -1.042336  | 0.487446171 | 0.906741604 | 0.120139948 |
| -1.11241443 | 0.04154807 | 0.94631217 | 0.465305961 | -1.1547749  | 0.00670375  |
| 0.864772355 | 0.10635107 | -1.1400232 | 0.04255678  | 0.984396024 | 0.859559893 |
| 0.866737604 | 0.02953087 | -1.036448  | 0.521735635 | -1.01441343 | 0.823809866 |
| 0.836262319 | 0.01054689 | -1.1362915 | 0.034266509 | 0.905011268 | 0.144907081 |
| -1.1028738  | 0.10876526 | 0.93389832 | 0.236068861 | 0.989546066 | 0.861711344 |
| 0.947350779 | 0.42270545 | -1.0491564 | 0.425883799 | -1.12294938 | 0.088992711 |
| 0.967189109 | 0.62532014 | -1.0657366 | 0.327627472 | 0.98039155  | 0.771755186 |
| 0.907602972 | 0.04867607 | 0.99707071 | 0.954528858 | 0.962708383 | 0.432533372 |
| -1.06973632 | 0.25765205 | -1.0004718 | 0.993611801 | -1.01479107 | 0.804160443 |
| -1.10206621 | 0.09419148 | 0.96751751 | 0.520451246 | -1.06826967 | 0.252068901 |
| -1.00666092 | 0.90163035 | -1.0299902 | 0.592854668 | 0.99647703  | 0.947608689 |
| 0.91402374  | 0.14016613 | 0.92508306 | 0.08750615  | 0.989259412 | 0.857939105 |
| 0.975999603 | 0.69012966 | -1.034957  | 0.512794557 | 0.857004397 | 0.013796583 |
| 0.970783136 | 0.61406036 | 0.99076633 | 0.871582867 | 0.972508003 | 0.635384805 |
| 0.778826182 | 0.00025022 | -1.0523157 | 0.372908634 | -1.09169857 | 0.174206363 |
| 0.939111443 | 0.3065015  | -1.0342508 | 0.583469959 | -1.01106409 | 0.857179184 |
| -1.09318189 | 0.11931479 | -1.1266251 | 0.035808755 | -1.04296665 | 0.458052276 |
| 0.906047375 | 0.17707005 | -1.028153  | 0.656029073 | 0.953740233 | 0.514225712 |
| -1.13307523 | 0.0479364  | -1.0654913 | 0.219126554 | -1.05926464 | 0.35507727  |
| -1.01645578 | 0.77336236 | -1.0958797 | 0.30530408  | -1.12229639 | 0.04567267  |
| 0.794946148 | 0.02406482 | -1.0143437 | 0.824641601 | 0.702369369 | 0.000751514 |

|             |            |            |             |             |             |
|-------------|------------|------------|-------------|-------------|-------------|
| 0.525051754 | 0.00158608 | 0.97627745 | 0.723354032 | 0.30779967  | 1.27E-07    |
| -1.06373869 | 0.35959024 | -1.0380034 | 0.537069959 | -1.04482331 | 0.514791902 |
| -1.02181483 | 0.63653026 | -1.1116341 | 0.119785584 | -1.05032658 | 0.284378504 |
| -1.02787893 | 0.66315548 | -1.0864201 | 0.227687041 | -1.13763792 | 0.044861482 |
| -1.04048897 | 0.47900685 | 0.98904055 | 0.819502189 | 0.936004862 | 0.240128692 |
| 0.93556159  | 0.30127538 | 0.98856724 | 0.846008744 | -1.17656774 | 0.013732834 |
| -1.00922482 | 0.86212507 | 0.97534718 | 0.663412106 | -1.05052041 | 0.353147441 |
| 0.865574171 | 0.08493157 | -1.1189409 | 0.040239577 | -1.01503033 | 0.856748649 |
| -1.05636315 | 0.33046741 | 0.99280877 | 0.904766767 | -1.06416713 | 0.270282085 |
| 0.979889717 | 0.76226581 | 0.95242639 | 0.424797227 | 0.907831949 | 0.153656804 |
| 0.96674731  | 0.62560884 | -1.1101518 | 0.07949292  | -1.12497126 | 0.09326642  |
| 0.934138995 | 0.32207831 | -1.0875556 | 0.193302591 | 0.941824827 | 0.383204148 |
| -1.04910391 | 0.39835364 | -1.0253331 | 0.682600334 | 0.997395859 | 0.963234793 |
| 0.976355774 | 0.66924301 | -1.1472841 | 0.017970518 | -1.08370267 | 0.154830486 |
| 0.99196176  | 0.90983133 | -1.0774708 | 0.30556909  | -1.10525625 | 0.164028603 |
| -1.03016782 | 0.54950296 | -1.0348745 | 0.580916357 | -1.06622398 | 0.199340507 |
| -1.09184552 | 0.16892232 | 0.98664148 | 0.812413726 | 0.97101118  | 0.642498554 |
| 0.783852109 | 0.07025067 | 0.65686948 | 8.50845E-05 | 0.963555565 | 0.779350964 |
| -1.02151249 | 0.6885048  | 0.91081354 | 0.631389034 | -1.14352152 | 0.014026614 |
| 0.970640903 | 0.57774979 | -1.1597801 | 0.030898181 | -1.06906448 | 0.214826573 |
| -1.06385771 | 0.44391884 | -1.0102354 | 0.823401653 | -1.03540257 | 0.666400588 |
| -1.19691191 | 0.00149061 | -1.0100435 | 0.874127192 | -1.11016501 | 0.056773908 |
| -1.06695446 | 0.22417739 | -1.1457612 | 0.017847969 | -1.09383512 | 0.094580852 |
| -1.15930856 | 0.03448416 | -1.0331832 | 0.611068004 | 0.953552942 | 0.488160677 |
| 0.883677526 | 0.03501856 | -1.0724077 | 0.189635717 | -1.01534553 | 0.790976632 |
| -1.12837907 | 0.03488276 | -1.0221005 | 0.791426788 | 0.990506924 | 0.86490795  |
| 0.924890956 | 0.12369408 | 0.9970052  | 0.957358133 | 0.962344693 | 0.445356635 |
| -1.03549963 | 0.64522504 | 0.95691342 | 0.512609698 | -1.01266811 | 0.867928902 |
| -1.02972118 | 0.6299452  | -1.0496402 | 0.485074658 | -1.0837777  | 0.188778248 |
| -1.01895116 | 0.7731556  | 0.96189259 | 0.57109846  | -1.13260618 | 0.05998125  |
| 0.937143966 | 0.30622695 | -1.0406046 | 0.482694639 | -1.02065042 | 0.746251991 |
| 0.983598715 | 0.8104254  | -1.1281594 | 0.034876365 | -1.02762364 | 0.69279087  |
| 0.984818364 | 0.75375032 | 0.96848349 | 0.653451889 | 0.964193337 | 0.45560636  |
| 0.875020972 | 0.03811207 | -1.0344775 | 0.495094452 | -1.03629983 | 0.572516166 |
| 0.969398999 | 0.57034987 | 0.91413881 | 0.160040636 | 0.961311003 | 0.471605556 |
| -1.03012026 | 0.70970401 | -1.1083426 | 0.438707821 | 0.99393981  | 0.939181545 |
| -1.00519055 | 0.91457147 | -1.0189366 | 0.723795579 | -1.15607262 | 0.003873004 |
| -1.05538559 | 0.37092368 | 0.95796333 | 0.423116358 | -1.0218203  | 0.719284158 |
| -1.1036909  | 0.07120177 | 0.98150336 | 0.816937823 | -1.02741922 | 0.615858467 |
| 0.889043292 | 0.03537742 | -1.0082904 | 0.878331129 | -1.08468329 | 0.141575067 |
| 0.985844331 | 0.81612123 | -1.0216274 | 0.686363283 | -1.04417247 | 0.481707538 |
| -1.02509336 | 0.67881079 | -1.0407832 | 0.559867624 | 0.994788855 | 0.93038314  |
| 0.954745847 | 0.504419   | -1.0655751 | 0.271553712 | -1.05577468 | 0.434359301 |
| 0.979843003 | 0.74163052 | -1.0278683 | 0.624288653 | -1.05763738 | 0.365847077 |



|             |            |            |             |             |             |
|-------------|------------|------------|-------------|-------------|-------------|
| 0.924896971 | 0.09297031 | -1.1681907 | 0.002960143 | -1.07360357 | 0.125611524 |
| -1.02385293 | 0.66812634 | -1.0624545 | 0.424885555 | 0.92774546  | 0.175915566 |
| -1.01294768 | 0.82620328 | -1.004733  | 0.938019546 | -1.10652814 | 0.088265944 |
| 0.937180575 | 0.2074875  | -1.0078311 | 0.904635344 | -1.0255599  | 0.621683172 |
| 0.909135938 | 0.20240131 | -1.0729076 | 0.267782325 | -1.00247138 | 0.973448269 |
| 0.992007386 | 0.88294185 | -1.0200437 | 0.773477526 | -1.10015566 | 0.084152497 |
| -1.10932283 | 0.03800394 | -1.0871475 | 0.090794475 | 0.953649862 | 0.334856208 |
| -1.0894542  | 0.25887039 | 0.98131445 | 0.765044401 | -1.10448911 | 0.19120941  |
| 0.93083991  | 0.19512444 | -1.0653466 | 0.24994092  | -1.13240351 | 0.026850784 |
| -1.02818503 | 0.697289   | -1.065801  | 0.425145138 | -1.05992302 | 0.416511305 |
| 0.894980144 | 0.0444875  | -1.0922683 | 0.071694201 | 0.945861633 | 0.30658462  |
| -1.06653205 | 0.3102767  | -1.091299  | 0.149457566 | 0.963230161 | 0.55384018  |
| 0.956150676 | 0.47654883 | 0.97832361 | 0.684269625 | 0.976918883 | 0.710363343 |
| -1.03338822 | 0.62696048 | -1.0142895 | 0.795546371 | 0.980863646 | 0.77477734  |
| -1.04658864 | 0.49513923 | -1.0268392 | 0.665943143 | -1.06669587 | 0.334485502 |
| -1.21708613 | 0.00739078 | -1.0443255 | 0.469403815 | -1.03773862 | 0.601718738 |
| -1.01492749 | 0.79346759 | 0.91127444 | 0.183203002 | 0.956312783 | 0.431133854 |
| -1.10904466 | 0.04485019 | 0.95162259 | 0.423219677 | 0.986238058 | 0.784351447 |
| -1.00713871 | 0.90415145 | -1.0243371 | 0.600514184 | -1.15103914 | 0.02026489  |
| -1.04230724 | 0.4299894  | -1.0854444 | 0.1396315   | -1.12513963 | 0.027721502 |
| 0.997709407 | 0.96444046 | -1.2001223 | 0.002836231 | -1.12782942 | 0.022506655 |
| 0.992441239 | 0.89842229 | -1.0694285 | 0.19242305  | -1.02277509 | 0.704945841 |
| 0.974298856 | 0.64419527 | 0.95300545 | 0.51712255  | 0.989243868 | 0.84775619  |
| 0.868735289 | 0.02380843 | 0.94123677 | 0.26918709  | 0.936567838 | 0.28347383  |
| -1.05479521 | 0.33057134 | -1.0022512 | 0.963394749 | -1.05045263 | 0.369019362 |
| 0.98237253  | 0.7071119  | -1.0628848 | 0.420206042 | 0.913616476 | 0.060324674 |
| -1.04580518 | 0.47671729 | 0.97141855 | 0.597725866 | -1.03851535 | 0.5479301   |
| 0.98447016  | 0.78522615 | -1.0207313 | 0.773918924 | -1.06986821 | 0.242505945 |
| 0.960528375 | 0.60841332 | 0.9901545  | 0.85509756  | -1.054574   | 0.499424618 |
| 0.935755021 | 0.20525208 | -1.0634524 | 0.332296026 | -1.07180441 | 0.186181096 |
| 0.952098636 | 0.31127464 | -1.1584134 | 0.022426391 | 0.983572071 | 0.731486314 |
| -1.07881054 | 0.17319845 | 0.9481335  | 0.431444031 | -1.11716922 | 0.048805564 |
| -1.00865113 | 0.88011363 | 0.99414034 | 0.929694574 | 0.943802895 | 0.313459575 |
| 0.976339542 | 0.71415018 | -1.1091851 | 0.147746135 | -1.17520151 | 0.016201578 |
| 0.99702515  | 0.96235541 | 0.99823879 | 0.975144529 | 0.921491525 | 0.198704371 |
| -1.1454898  | 0.01943959 | -1.044478  | 0.391609764 | -1.11873767 | 0.051668788 |
| -1.00911805 | 0.85827041 | -1.0284623 | 0.635054105 | 0.977206172 | 0.650356137 |
| -1.02069205 | 0.74474015 | 0.98218906 | 0.731522624 | -1.08015114 | 0.223320228 |
| 0.988535219 | 0.83148708 | 0.98737677 | 0.804986143 | 0.967247392 | 0.539489732 |
| 0.891946772 | 0.04832475 | -1.0302458 | 0.616532551 | -1.0072058  | 0.899514574 |
| 0.972720155 | 0.62633452 | -1.061146  | 0.294478659 | 0.973035919 | 0.630380431 |
| 0.944523663 | 0.37865861 | 0.90448275 | 0.10281143  | -1.19788067 | 0.006932709 |
| 0.976419116 | 0.67016124 | -1.0229458 | 0.677938502 | -1.02902917 | 0.609658692 |
| -1.00241702 | 0.96073856 | 0.94486001 | 0.233611225 | -1.11381698 | 0.031515842 |

|             |            |            |             |             |             |
|-------------|------------|------------|-------------|-------------|-------------|
| 0.899372884 | 0.06782957 | 0.99272624 | 0.907446993 | 0.865251778 | 0.013892288 |
| -1.07126561 | 0.31884868 | -1.1294635 | 0.037747167 | 0.960936085 | 0.562731758 |
| -1.13432676 | 0.01057308 | -1.0816234 | 0.319832799 | -1.03545202 | 0.467177278 |
| -1.00396177 | 0.94487679 | 0.99197184 | 0.876885647 | 0.935669746 | 0.247892    |
| 0.996761612 | 0.95632477 | -1.0421621 | 0.393619425 | 0.994262139 | 0.922603321 |
| 0.883843856 | 0.15550229 | -1.0293481 | 0.600817572 | 0.747400436 | 0.001290206 |
| 0.946617567 | 0.35282933 | 0.96470676 | 0.529980414 | 0.958534763 | 0.47250654  |
| 0.994106808 | 0.91598065 | -1.0273258 | 0.680099487 | -1.03135946 | 0.582059636 |
| -1.12318778 | 0.06579628 | -1.1197488 | 0.077453685 | -1.03200318 | 0.612629689 |
| -1.03469397 | 0.59604758 | -1.039333  | 0.49671265  | -1.05125825 | 0.437884309 |
| 0.948878786 | 0.37172382 | -1.0561741 | 0.284783269 | -1.11149876 | 0.075170576 |
| -1.05312259 | 0.39543065 | -1.1141938 | 0.089770658 | 0.944939595 | 0.352772291 |
| -1.04741401 | 0.36655552 | 0.98677093 | 0.805881327 | 0.869083787 | 0.007927753 |
| -1.03878859 | 0.57273095 | 0.98029895 | 0.72651293  | -1.03562055 | 0.603842617 |
| 0.839745295 | 0.02200753 | -1.0178102 | 0.755825534 | -1.04555131 | 0.549983525 |
| 0.925689875 | 0.16732864 | -1.0556882 | 0.403031155 | -1.04527343 | 0.425690387 |
| -1.07169512 | 0.25661098 | -1.151365  | 0.014389922 | 0.913035728 | 0.137764891 |
| -1.02029984 | 0.71677518 | 0.97936752 | 0.671004959 | -1.10891414 | 0.066092522 |
| 0.909048362 | 0.19202658 | -1.0001051 | 0.998533285 | -1.0493501  | 0.507346794 |
| 0.965567523 | 0.56784611 | 0.97478826 | 0.710456332 | -1.09259984 | 0.152127116 |
| 0.928047642 | 0.22114134 | -1.1559917 | 0.003581649 | -1.03342293 | 0.587996596 |
| -1.01971723 | 0.76530829 | 0.97782282 | 0.695133494 | 0.970393885 | 0.646081993 |
| -1.12472332 | 0.03682975 | 0.99034005 | 0.869829905 | -1.02981717 | 0.594714274 |
| 0.971917242 | 0.68865673 | 0.86836159 | 0.105443233 | 0.745528055 | 0.000118232 |
| 0.923923439 | 0.36112801 | -1.1055029 | 0.092381447 | -1.11031878 | 0.228488678 |
| 0.849978079 | 0.0115936  | 0.95125224 | 0.374134868 | 0.89419486  | 0.07774615  |
| 0.911343432 | 0.10622133 | -1.043105  | 0.497988622 | 0.894644445 | 0.053967776 |
| 0.976452441 | 0.65376625 | 0.92150986 | 0.206715542 | 0.800260833 | 9.55E-05    |
| -1.14424362 | 0.24174449 | -1.154195  | 0.017074092 | -1.27710299 | 0.036186159 |
| -1.02962702 | 0.67934487 | -1.0339849 | 0.582463028 | -1.12504428 | 0.099315549 |
| 0.908406637 | 0.36635686 | 0.9119951  | 0.075755199 | 0.711546769 | 0.002131991 |
| 0.865228338 | 0.0086696  | -1.0978093 | 0.169779086 | 0.922865514 | 0.136683039 |
| -1.00142987 | 0.97721937 | 0.96495346 | 0.631901684 | 0.951270564 | 0.320346086 |
| 0.887401071 | 0.06347594 | 0.93261966 | 0.211481603 | 0.65778158  | 1.60E-08    |
| 0.907523848 | 0.18458832 | -1.0835609 | 0.189470477 | 0.811754259 | 0.005567851 |
| 0.896325443 | 0.50266441 | -1.0495513 | 0.384053647 | 0.844874747 | 0.303303853 |
| -1.07148174 | 0.22852931 | -1.178849  | 0.026620549 | -1.07362472 | 0.215526139 |
| 0.98910886  | 0.91785555 | 0.94207722 | 0.332082423 | 0.622332889 | 3.85E-05    |
| 0.922026387 | 0.15962687 | 0.9742964  | 0.667701832 | -1.08384011 | 0.163041887 |
| -1.05942794 | 0.37392015 | -1.0240295 | 0.716633147 | 0.929525686 | 0.261390423 |
| 0.806456789 | 0.0339223  | -1.0764677 | 0.185166235 | 0.679864146 | 0.000265823 |
| -1.06791014 | 0.38788852 | 0.68533529 | 1.90369E-06 | -1.07129841 | 0.365586467 |
| 0.925020112 | 0.38874649 | 0.98439993 | 0.855465841 | -1.02474126 | 0.786297066 |
| -1.052999   | 0.29994437 | -1.0204843 | 0.745631399 | 0.986149955 | 0.778516874 |

|             |            |            |             |             |             |
|-------------|------------|------------|-------------|-------------|-------------|
| -1.10532136 | 0.24269515 | -1.0621198 | 0.290914041 | 0.766725447 | 0.002798144 |
| -1.37093179 | 2.91E-05   | 0.95860912 | 0.42715118  | -1.31591571 | 0.000211012 |
| 0.991321315 | 0.92244273 | -1.1665146 | 0.181711916 | -1.00887337 | 0.921399253 |
| -1.04104809 | 0.75511897 | -1.0158551 | 0.823662013 | -1.11744206 | 0.390699041 |
| -1.00033289 | 0.99502234 | 0.83952288 | 0.102974363 | -1.12880281 | 0.026507354 |
| -1.28953583 | 0.00267859 | 0.83561382 | 0.001356551 | -1.17802151 | 0.047458257 |
| -1.05412184 | 0.6162452  | 0.95840777 | 0.39747546  | 0.473175602 | 2.37E-09    |
| -1.1968331  | 0.19978096 | 0.81308826 | 0.001813757 | 0.785553193 | 0.086910259 |
| 0.940163135 | 0.29446868 | 0.73002162 | 5.95635E-05 | 0.908624599 | 0.105982411 |
| 0.869608695 | 0.01244913 | 0.79845183 | 0.170934804 | 0.433599178 | 2.01E-21    |
| 0.882174168 | 0.03234232 | 0.96028054 | 0.477686205 | -1.17972074 | 0.005446756 |
| -1.03485848 | 0.60763317 | 0.83265255 | 0.08885161  | 0.718901766 | 7.10E-06    |
| -1.0368984  | 0.7396701  | 0.94974542 | 0.369101272 | 0.866066113 | 0.190610815 |
| 0.882721854 | 0.16988593 | 0.94875591 | 0.417525783 | 0.660813694 | 2.44E-05    |
| 0.856368964 | 0.03042924 | 0.72428823 | 0.001914361 | 0.822444866 | 0.00703403  |
| -1.10592578 | 0.24374914 | -1.2615527 | 0.003276404 | -1.49959705 | 1.60E-05    |
| -1.20236739 | 0.00130164 | 0.94572225 | 0.536456917 | -1.07674924 | 0.178936826 |
| -1.04273766 | 0.61862216 | -1.0418699 | 0.409476473 | 0.430122406 | 5.28E-14    |
| -1.02494358 | 0.64079082 | 0.86352201 | 0.0891948   | 0.988482201 | 0.826207538 |
| -1.05351509 | 0.35296695 | -1.1786803 | 0.020844742 | 0.895432971 | 0.052256723 |
| 0.956361485 | 0.52986463 | 0.98272578 | 0.845706516 | -1.04463883 | 0.538613063 |
| -1.00605303 | 0.95809662 | 0.73703445 | 0.021010087 | 0.785265744 | 0.039134021 |
| -1.18102172 | 0.0128844  | 0.98617854 | 0.794250619 | -1.05982921 | 0.372887193 |
| 0.884742765 | 0.02239206 | -1.2640312 | 0.005378018 | -1.08121425 | 0.139598932 |
| -1.18389732 | 0.10086415 | -1.0828974 | 0.44957395  | -1.26014553 | 0.026190657 |
| 0.806178129 | 0.00172058 | -1.2567767 | 0.1045268   | 0.72599879  | 9.07E-06    |
| 0.949956933 | 0.43403792 | 0.92648957 | 0.195740352 | 0.866643455 | 0.032324027 |
| -1.02466379 | 0.74337703 | 0.95142636 | 0.360784303 | -1.2623562  | 0.002694136 |
| 0.861607394 | 0.44580217 | -1.2267042 | 0.00073647  | 0.89362565  | 0.56438111  |
| -1.06702943 | 0.40158218 | 0.98365246 | 0.804732766 | -1.0993554  | 0.222411746 |
| -1.22306235 | 0.00384512 | 0.68500496 | 0.0009813   | -1.21358581 | 0.005322687 |
| -1.03552239 | 0.73046524 | -1.0662525 | 0.477426098 | -1.25490978 | 0.028389147 |
| -1.31911756 | 0.00382527 | -1.0247311 | 0.72748323  | -1.64288901 | 1.45E-06    |
| -1.15399209 | 0.02433643 | -1.0589003 | 0.505755075 | -1.27464232 | 0.000248156 |
| 0.920419797 | 0.22684833 | -1.1424825 | 0.017442257 | 0.760599603 | 0.000174702 |
| 0.891750283 | 0.00149855 | 0.69245877 | 5.23318E-05 | 0.98226573  | 0.603318749 |
| 0.992593527 | 0.88673627 | -1.0416256 | 0.440715695 | 0.939664465 | 0.23616474  |
| -1.07332841 | 0.07642789 | -1.0275436 | 0.627291938 | 0.991229218 | 0.822904299 |
| 0.953229796 | 0.59515889 | 0.85439075 | 0.029946532 | -1.14025533 | 0.148811621 |
| 0.968193115 | 0.44181626 | 0.81647719 | 0.081809128 | -1.00523288 | 0.900898562 |
| -1.04476593 | 0.44983593 | -1.1208797 | 0.083310781 | -1.01140301 | 0.84449497  |
| 0.911941134 | 0.1966984  | -1.0760812 | 0.164858051 | 0.994438691 | 0.937256237 |
| 0.67758435  | 4.15E-07   | -1.3979973 | 0.001656173 | 0.721279125 | 1.15E-05    |
| -1.0237937  | 0.63803338 | 0.83523334 | 0.007934961 | 0.968045337 | 0.516259071 |

|             |            |            |             |             |             |
|-------------|------------|------------|-------------|-------------|-------------|
| -1.09122446 | 0.23868295 | 0.80542843 | 0.001613018 | 0.985590957 | 0.843717597 |
| 0.996586283 | 0.94691547 | -1.2128252 | 0.011829355 | 0.969300256 | 0.544465133 |
| 0.799851023 | 0.02031256 | 0.73216488 | 0.113807535 | -1.01027502 | 0.913237185 |
| -1.20040565 | 0.00349774 | -1.053893  | 0.496874554 | -1.10499632 | 0.100729347 |
| -1.23132681 | 0.07447586 | -1.1788761 | 0.016738664 | -1.093937   | 0.435978991 |
| 0.974434163 | 0.61494763 | -1.1649823 | 0.1356375   | 0.947174031 | 0.2937507   |
| -1.03985887 | 0.60788605 | -1.3817708 | 0.000861241 | 0.67148248  | 2.58E-06    |
| -1.11262487 | 0.21069167 | -1.1792755 | 0.010072053 | 0.950689681 | 0.550865448 |
| -1.05211396 | 0.57972333 | -1.0378141 | 0.586512486 | 0.967112679 | 0.715237232 |
| 0.918566956 | 0.15837364 | 0.93382617 | 0.05056531  | -1.0073781  | 0.901936533 |
| -1.03824788 | 0.69602112 | 0.88557537 | 0.023071106 | -1.13626163 | 0.18691313  |
| 0.768942265 | 2.63E-05   | 0.99117337 | 0.821791133 | 0.898399354 | 0.066190747 |
| -1.08890167 | 0.02350918 | -1.0053902 | 0.952382958 | -1.05096783 | 0.179237757 |
| 0.800750455 | 0.01203224 | -1.0494119 | 0.252729619 | -1.00025376 | 0.997642654 |
| 0.929271287 | 0.49414725 | 0.85791234 | 0.01017458  | 0.529126364 | 1.92E-07    |
| 0.935227096 | 0.55515039 | -1.0931043 | 0.212238344 | 0.772603148 | 0.026130712 |
| 0.999329609 | 0.98694473 | 0.832506   | 0.008908812 | 0.960726252 | 0.330422544 |
| 0.987744938 | 0.85813994 | -1.0201517 | 0.689694985 | 0.92196637  | 0.24186909  |
| -1.02367077 | 0.70586053 | -1.0835827 | 0.278134626 | -1.13919014 | 0.03921692  |
| -1.01124624 | 0.82558133 | 0.99578692 | 0.934484901 | -1.10484511 | 0.053501937 |
| -1.29588139 | 0.00012927 | 0.87003842 | 0.141857887 | -1.05177719 | 0.425156383 |
| -1.1172454  | 0.11252371 | 0.93755438 | 0.285600914 | -1.07590535 | 0.291773473 |
| -1.22501765 | 0.01152428 | -1.1322362 | 0.282467736 | -1.20585992 | 0.0192686   |
| 0.944899667 | 0.6158294  | 0.95599834 | 0.383243528 | 0.701611406 | 0.002625047 |
| 0.724288483 | 0.00091578 | 0.93031531 | 0.344443606 | 0.612263807 | 1.94E-06    |
| 0.622625782 | 5.85E-06   | 0.98062773 | 0.817257526 | 0.462343241 | 5.14E-11    |
| -1.04971891 | 0.43246572 | -1.0449574 | 0.631541246 | 0.897250352 | 0.082867343 |
| -1.02053527 | 0.73286278 | -1.0639481 | 0.30120041  | -1.12005803 | 0.060995876 |
| -1.06909448 | 0.40454046 | -1.177974  | 0.092275587 | 0.951394981 | 0.533598141 |
| -1.03596798 | 0.68094652 | 0.87872833 | 0.027715506 | 0.802271674 | 0.012733518 |
| -1.06591465 | 0.58882715 | 0.96455298 | 0.327584345 | -1.09994843 | 0.420627486 |
| -1.15586051 | 0.04429099 | 0.84328934 | 0.051247192 | -1.17667547 | 0.024555384 |
| -1.13478124 | 0.2004942  | 0.62669163 | 5.43937E-05 | -1.25035005 | 0.02596675  |
| 0.835023463 | 0.23350364 | 0.93882336 | 0.577976027 | -1.10872244 | 0.493309663 |
| 0.957533701 | 0.42504796 | 0.98471106 | 0.707152    | 0.9638666   | 0.49835277  |
| 0.929864279 | 0.28985578 | -1.0367527 | 0.601249374 | -1.06198411 | 0.380588587 |
| 0.994163116 | 0.90589009 | -1.0113105 | 0.855946157 | 0.873430335 | 0.008194532 |
| 0.911959263 | 0.18961269 | -1.0258873 | 0.614867302 | 0.902108259 | 0.143359167 |
| 0.776280591 | 0.03715931 | -1.296031  | 0.00012849  | 0.8405853   | 0.148608925 |
| 0.573682909 | 1.69E-05   | -1.1355197 | 0.069895739 | 0.572278432 | 1.57E-05    |
| 0.842619402 | 0.02547023 | 0.91470548 | 0.255557866 | 0.60465696  | 1.07E-08    |
| 0.956210324 | 0.4110833  | 0.69669063 | 0.002188639 | 0.966971868 | 0.536971984 |
| -1.03281572 | 0.69672625 | 0.64482155 | 1.42993E-05 | -1.35157099 | 0.000584028 |
| 0.905284121 | 0.10910356 | 0.54179905 | 2.68528E-08 | 0.899748052 | 0.089423204 |

|             |            |            |             |             |             |
|-------------|------------|------------|-------------|-------------|-------------|
| -1.04178202 | 0.71796347 | -1.004324  | 0.944191581 | -1.26953827 | 0.03891745  |
| -1.00355288 | 0.95723201 | -1.1663659 | 0.01209398  | -1.03299217 | 0.623942466 |
| 0.977333173 | 0.8095468  | 0.96773489 | 0.681668201 | 0.976826655 | 0.805328514 |
| 0.737911029 | 0.00091638 | 0.82735854 | 0.030862423 | 0.764291338 | 0.003042643 |
| -1.02567769 | 0.8147931  | -1.3299037 | 0.018527821 | 0.594014616 | 1.16E-05    |
| -1.02185284 | 0.78872946 | 0.99376627 | 0.929474628 | -1.24376517 | 0.008836631 |
| 0.940428078 | 0.37287102 | -1.175074  | 0.104020544 | -1.01682495 | 0.808074467 |
| -1.02934431 | 0.68026528 | 0.89026594 | 0.440668194 | -1.04355334 | 0.543931894 |
| 0.631056622 | 0.00197299 | -1.0298376 | 0.588274773 | 0.408645074 | 5.24E-08    |
| -1.03639061 | 0.610385   | 0.98187853 | 0.789079644 | 0.816925559 | 0.005407221 |
| 0.972601948 | 0.65311406 | 0.91337324 | 0.071513501 | 0.941048372 | 0.327327838 |
| 0.68844818  | 1.24E-07   | 0.88245548 | 0.077058509 | 0.861787426 | 0.018575504 |
| 0.888881771 | 0.00809732 | 0.84500149 | 0.161009821 | 0.931238883 | 0.102057356 |
| -1.02413494 | 0.59384188 | 0.57584477 | 1.88313E-05 | 0.871803765 | 0.003204418 |
| -1.13709164 | 0.05380597 | 0.71840195 | 4.54254E-05 | 0.447835634 | 2.79E-17    |
| 0.975903902 | 0.85355472 | 0.84637401 | 0.003206634 | 0.471438508 | 4.90E-07    |
| -1.05349808 | 0.30808939 | -1.2836602 | 0.003753338 | 0.935149556 | 0.191164232 |
| 0.928098956 | 0.1171668  | 0.90751661 | 0.11793884  | -1.12248183 | 0.01690019  |
| 0.943452288 | 0.29366952 | -1.2125827 | 0.093082087 | 0.99241623  | 0.890212364 |
| 0.996878754 | 0.95373155 | 0.81814768 | 0.003559929 | -1.01529511 | 0.778227081 |
| 0.94978654  | 0.48063412 | 0.92568409 | 0.418246175 | -1.04061493 | 0.585384043 |
| 0.909638001 | 0.04326778 | 0.61828833 | 8.95043E-07 | -1.01679189 | 0.717296009 |
| 0.966580861 | 0.56335034 | -1.1308196 | 0.2587343   | 0.952014731 | 0.403943253 |
| -1.03361404 | 0.43728233 | 0.98062856 | 0.808399862 | -1.00324153 | 0.939218801 |
| 0.652309634 | 1.20E-09   | 0.58498238 | 1.83491E-10 | 0.675100778 | 1.08E-08    |
| 0.859648236 | 0.06322143 | 0.8690035  | 0.049299117 | -1.05415389 | 0.511109856 |
| 0.937396478 | 0.22472593 | 0.4149986  | 7.83994E-08 | 0.897190168 | 0.044157383 |
| 0.856164881 | 0.26655244 | 0.89693268 | 0.124711917 | -1.36240219 | 0.029547435 |
| -1.02180761 | 0.7726581  | 0.83491039 | 0.004894621 | -1.17252488 | 0.036735    |
| -1.40107701 | 0.00163771 | 0.81365808 | 0.0014164   | -1.59390432 | 2.75E-05    |
| -1.02378829 | 0.68497819 | 0.92243034 | 0.064802884 | 0.935266852 | 0.250739274 |
| -1.01236779 | 0.7802211  | -1.0791936 | 0.092211629 | -1.09036513 | 0.053569126 |
| 0.988068725 | 0.80126184 | -1.1159125 | 0.098151138 | 0.901409257 | 0.033083405 |
| 0.794979562 | 0.04897691 | 0.83474932 | 0.175307287 | -1.12093293 | 0.320663008 |
| 0.931730162 | 0.22458316 | 0.94868562 | 0.302955567 | -1.12340077 | 0.048204252 |
| 0.969660655 | 0.62822676 | 0.99494909 | 0.914346609 | -1.04889642 | 0.453766035 |
| -1.1295815  | 0.25058191 | -1.0674178 | 0.239820636 | -1.03308672 | 0.757542222 |
| -1.00591176 | 0.89313775 | 0.99698947 | 0.955373502 | -1.0599381  | 0.188181471 |
| 0.946168395 | 0.2555548  | 0.90417326 | 0.170651348 | 0.962708692 | 0.433405722 |
| -1.02846278 | 0.57157309 | 0.95439857 | 0.312212813 | -1.14600017 | 0.007807413 |
| 0.796317624 | 0.02112448 | -1.0608305 | 0.31692348  | 0.908038812 | 0.318838416 |
| 0.94997276  | 0.21115404 | -1.119487  | 0.009967096 | 0.960309636 | 0.32244526  |
| -1.05850374 | 0.40827458 | 0.6476657  | 7.60346E-10 | 0.979660889 | 0.764403582 |
| 0.951117811 | 0.58623098 | -1.0680519 | 0.41256759  | 0.773934716 | 0.007086501 |

|             |            |            |             |             |             |
|-------------|------------|------------|-------------|-------------|-------------|
| 0.79155856  | 0.02159172 | -1.0824903 | 0.137962815 | -1.11188396 | 0.28773352  |
| 0.797014868 | 0.06981998 | -1.1051747 | 0.472818653 | -1.02128253 | 0.86430346  |
| 0.987935739 | 0.84876302 | -1.1338623 | 0.096658484 | -1.02933385 | 0.649916241 |
| -1.03796438 | 0.48565998 | -1.3277981 | 0.00730846  | -1.08596013 | 0.126110065 |
| 0.95482314  | 0.51300678 | 0.85484324 | 0.008754126 | 0.808235878 | 0.003728334 |
| -1.06090868 | 0.19463799 | -1.0581781 | 0.202536143 | 0.941291686 | 0.18461288  |
| -1.0503921  | 0.46226798 | 0.91381488 | 0.062888492 | 0.653809331 | 3.97E-08    |
| 0.932257542 | 0.26842456 | -1.0588897 | 0.617429232 | 0.887964406 | 0.063578233 |
| -1.10313268 | 0.09290162 | 0.98911916 | 0.849957721 | -1.09138111 | 0.133358211 |
| -1.02240428 | 0.74493476 | -1.038094  | 0.55700647  | -1.0490251  | 0.483016038 |
| -1.05648762 | 0.36898503 | -1.0779406 | 0.477445789 | -1.13399697 | 0.042959484 |
| 0.949748959 | 0.7318824  | 0.94085306 | 0.168434997 | -1.07702124 | 0.622157564 |
| -1.17720558 | 0.15895861 | 0.93298298 | 0.155480027 | -1.3451723  | 0.012133094 |
| 0.966705232 | 0.75499528 | -1.0445293 | 0.380836392 | -1.46322739 | 0.000872916 |
| -1.13047739 | 0.03341614 | 0.84785202 | 0.0909194   | -1.02446102 | 0.668767561 |
| -1.01169374 | 0.75131938 | 0.94971742 | 0.208807259 | 0.952762305 | 0.190523412 |
| 0.944206569 | 0.15952484 | -1.0125048 | 0.856132724 | 0.774309132 | 4.68E-08    |
| 0.917188967 | 0.12552421 | -1.1148015 | 0.240278154 | -1.05239518 | 0.361989062 |
| 0.955117119 | 0.40654029 | 0.89710379 | 0.276520219 | -1.06989544 | 0.223766059 |
| 0.947339538 | 0.30926409 | 0.85319071 | 0.200984403 | 0.982210156 | 0.734736064 |
| -1.32316676 | 0.0001399  | 0.8886537  | 0.067847633 | 0.906465336 | 0.156080845 |
| -1.03998969 | 0.61129274 | -1.1349039 | 0.020671668 | -1.13235044 | 0.110980436 |
| -1.11287842 | 0.01498251 | 0.90823294 | 0.176034492 | -1.0817566  | 0.070257307 |
| -1.03457985 | 0.37491796 | -1.0425829 | 0.358420312 | -1.02935738 | 0.44966158  |
| -1.06689067 | 0.18714982 | 0.93143221 | 0.289509029 | -1.12104453 | 0.022059015 |
| -1.07499607 | 0.38823389 | 0.85308001 | 0.014257481 | -1.31230601 | 0.00188573  |
| -1.19097989 | 0.11953265 | 0.93079867 | 0.216759944 | -1.46708954 | 0.001037429 |
| -1.03145909 | 0.7659557  | -1.1247569 | 0.088460223 | -1.18333198 | 0.109821082 |
| 0.924075139 | 0.10648473 | -1.0337429 | 0.586532452 | -1.01679503 | 0.730468399 |
| -1.06303214 | 0.57586788 | 0.89537267 | 0.463574485 | -1.23007873 | 0.061898697 |
| -1.03418864 | 0.49050569 | 0.89726536 | 0.346795332 | 0.995550005 | 0.926955292 |
| -1.02208868 | 0.72502264 | -1.0210848 | 0.847471485 | -1.13445193 | 0.046115645 |
| 0.86096586  | 0.37589786 | -1.0077724 | 0.890892626 | -1.01809811 | 0.915201856 |
| 0.863585194 | 0.04727248 | -1.0249434 | 0.502559892 | -1.00372958 | 0.959086952 |
| 0.56453581  | 7.79E-13   | 0.98601232 | 0.727704356 | 0.746345417 | 1.41E-05    |
| -1.00498555 | 0.93307966 | 0.98789693 | 0.827303267 | -1.04361403 | 0.472090959 |
| -1.09550151 | 0.08703669 | -1.0961953 | 0.100108727 | 0.984187191 | 0.761839906 |
| 0.927253885 | 0.11681881 | -1.0350845 | 0.515706127 | 0.839181499 | 0.000508791 |
| -1.06520741 | 0.10301917 | 0.98893201 | 0.871099999 | 0.932583071 | 0.072401119 |
| -1.00797934 | 0.88573851 | -1.0612087 | 0.44200204  | -1.03212129 | 0.568121579 |
| 0.948477954 | 0.2462256  | -1.0360515 | 0.40886049  | 0.86778501  | 0.002723013 |
| 0.99540268  | 0.8997638  | -1.0266638 | 0.491554132 | -1.00208272 | 0.954643776 |
| 0.962416672 | 0.44163364 | -1.1923059 | 0.000634173 | 0.972014391 | 0.568108641 |
| -1.01629896 | 0.82146468 | 0.98231587 | 0.830874206 | -1.08279526 | 0.269511662 |

|             |            |            |             |             |             |
|-------------|------------|------------|-------------|-------------|-------------|
| 0.975457881 | 0.61548664 | -1.2449748 | 0.052461613 | -1.02373515 | 0.635347836 |
| 0.885359751 | 0.11050468 | -1.2352798 | 0.046190556 | 0.978392968 | 0.772081143 |
| 0.9960069   | 0.9200771  | -1.0310124 | 0.528116783 | 0.964392619 | 0.365060989 |
| 0.878559672 | 0.37401547 | -1.1476226 | 0.210296182 | -1.01206118 | 0.934151407 |
| 0.965524181 | 0.80519158 | 0.89967618 | 0.033402859 | 0.784328094 | 0.091896435 |
| -1.05106307 | 0.11180106 | -1.0361144 | 0.56824181  | -1.03111934 | 0.324282853 |
| 0.890021046 | 0.03386069 | 0.94274517 | 0.726464888 | 0.971742674 | 0.594367155 |
| 0.506528628 | 2.33E-15   | 0.87141462 | 0.062070344 | -1.00995099 | 0.873423484 |
| 0.992013174 | 0.836614   | 0.83933545 | 0.006018128 | 0.932749645 | 0.077622678 |
| -0.99994605 | 0.99921913 | -1.1592027 | 0.015270683 | -1.05639138 | 0.321943425 |
| -1.0730259  | 0.21930775 | 0.95385852 | 0.370668373 | -1.01907739 | 0.740247279 |
| 0.858566309 | 0.00785898 | 0.96343226 | 0.4352075   | -1.07937752 | 0.172299424 |
| 0.826239146 | 0.00176372 | -1.0712209 | 0.076453315 | 0.906294632 | 0.095499145 |
| -1.00228927 | 0.9642477  | -1.0771941 | 0.182406108 | 0.920555227 | 0.108908037 |
| -1.02483584 | 0.68329973 | 0.98212113 | 0.690859228 | 0.973476504 | 0.654904105 |
| 0.848481246 | 0.02793346 | 0.97042327 | 0.413258003 | 0.526798222 | 5.18E-12    |
| 0.982493456 | 0.76098371 | 0.95175921 | 0.321551273 | -1.0003986  | 0.994521198 |
| 0.991174605 | 0.89497025 | -1.0432764 | 0.554851645 | -1.09455572 | 0.182069633 |
| 0.820468726 | 1.39E-05   | -1.0692894 | 0.178861656 | 0.929299275 | 0.082060981 |
| 0.813882777 | 0.00354076 | 0.91820105 | 0.260449864 | 0.548208859 | 3.71E-12    |
| -1.01064464 | 0.88189636 | -1.0958718 | 0.024964062 | -1.01668633 | 0.816414243 |
| -1.01362509 | 0.81840189 | 0.83594792 | 0.220116839 | -1.17625102 | 0.007732516 |
| 0.877569513 | 0.02708182 | 0.63132941 | 0.002000182 | 0.959096914 | 0.47054725  |
| -1.04508583 | 0.55747799 | -1.0313182 | 0.321275464 | 0.80825858  | 0.006200564 |
| 0.953631634 | 0.31636557 | 0.95027879 | 0.34478473  | 0.886660747 | 0.013231732 |
| 0.95937885  | 0.43141289 | 0.98812099 | 0.847541089 | 0.979564479 | 0.694624412 |
| 0.899755543 | 0.13973665 | 0.96249209 | 0.327608594 | 0.994890597 | 0.942321547 |
| 0.933865967 | 0.61890861 | 0.87171357 | 0.015434384 | 0.788025388 | 0.08725875  |
| 0.547433392 | 6.55E-16   | -1.0093181 | 0.870695005 | 0.693171506 | 5.81E-09    |
| 0.99595702  | 0.92654514 | -1.1096081 | 0.065051403 | -1.04828531 | 0.285778731 |
| -1.14217302 | 0.0842079  | 0.7844307  | 0.000105532 | -1.1546235  | 0.06242403  |
| -1.3146933  | 4.87E-06   | -1.0605315 | 0.25222549  | -1.07712315 | 0.17340204  |
| 0.717197077 | 1.04E-05   | 0.86364315 | 0.01753126  | 0.840087966 | 0.013648176 |
| -1.07989318 | 0.29808491 | 0.99409752 | 0.935417336 | -1.21451945 | 0.010367479 |
| -1.35681304 | 0.00023222 | -1.0196464 | 0.737578226 | -1.36978108 | 0.000155638 |
| -1.11136848 | 0.39188839 | -1.0725754 | 0.299161662 | -1.01347375 | 0.913288468 |
| -1.03092704 | 0.63463364 | 0.80483146 | 2.69197E-06 | -1.1155855  | 0.091870517 |
| 0.951439064 | 0.44108379 | 0.96538924 | 0.603918057 | 0.801765064 | 0.001117449 |
| -1.03185575 | 0.74066793 | -1.1128724 | 0.137498036 | 0.901053208 | 0.273936341 |
| -1.11964788 | 0.1502881  | 0.96546876 | 0.551601474 | -1.07655335 | 0.345090976 |
| -1.30718713 | 0.01968875 | 0.92672712 | 0.191059108 | -1.0328435  | 0.772902542 |
| 0.865874013 | 0.07583802 | 0.89758161 | 0.153906986 | 0.906862019 | 0.224443498 |
| -1.27861537 | 0.01261379 | -1.1217043 | 0.017730736 | 0.938764932 | 0.509767105 |
| -1.01642694 | 0.80601239 | -1.0344744 | 0.519792583 | -1.15792877 | 0.030595229 |

|             |            |            |             |             |             |
|-------------|------------|------------|-------------|-------------|-------------|
| -1.20485829 | 0.13391461 | 0.9545307  | 0.511840703 | -1.16879688 | 0.208252275 |
| -1.05335807 | 0.4430121  | -1.0025752 | 0.985066145 | 0.665734333 | 1.46E-07    |
| 0.903797789 | 0.02943677 | 0.82201391 | 0.000510504 | -1.00226785 | 0.96022302  |
| -1.06383293 | 0.24852393 | -1.0171752 | 0.698549122 | 0.463946868 | 3.56E-20    |
| 0.867264044 | 0.01961745 | -1.1025698 | 0.201772889 | -1.07709491 | 0.215065827 |
| -1.10954469 | 0.0858796  | -1.235531  | 0.000246786 | -1.29648244 | 5.72E-05    |
| 0.951816607 | 0.27597172 | 0.94283005 | 0.392715835 | -1.05730793 | 0.219637908 |
| -1.07032273 | 0.26234875 | -1.1532226 | 0.056547874 | 0.766853575 | 4.77E-05    |
| -1.1159706  | 0.03309615 | -1.1334784 | 0.110990056 | -1.16797393 | 0.003122346 |
| -1.47910525 | 3.83E-07   | 0.85939168 | 0.220852527 | -1.17125881 | 0.023231811 |
| -1.18622883 | 0.00174773 | -1.0516974 | 0.432461111 | -1.28148002 | 1.38E-05    |
| -1.06069121 | 0.18307417 | 0.8124667  | 0.002067076 | -1.18076107 | 0.000367139 |
| -1.15699858 | 0.12301697 | -1.0021035 | 0.982297175 | -1.03661407 | 0.700743371 |
| -1.2449316  | 0.00017381 | 0.96825417 | 0.678637842 | -1.11623609 | 0.047781111 |
| 0.970784183 | 0.68527466 | -1.0725699 | 0.532158319 | -1.20823245 | 0.012032091 |
| 0.872488186 | 0.04895791 | -1.0065288 | 0.93510576  | 0.91989484  | 0.222863583 |
| -1.01648276 | 0.81079978 | 0.81980075 | 0.041681714 | -1.33377002 | 8.92E-05    |
| -1.33593378 | 0.01933821 | -1.1133492 | 0.109740632 | 0.880893963 | 0.29573304  |
| 0.866734308 | 0.02878313 | -1.2081213 | 0.128477927 | 0.637145221 | 3.14E-09    |
| 0.738430506 | 2.22E-05   | 0.85936181 | 0.028350048 | -1.03705477 | 0.579330232 |
| -1.24244948 | 7.63E-05   | 0.97975954 | 0.652872603 | -1.1752891  | 0.002390604 |
| -1.10859127 | 0.13069453 | -1.1044953 | 0.066407146 | 0.9058155   | 0.146655898 |
| -1.1383623  | 0.18166376 | 0.95207908 | 0.410463066 | -1.27024494 | 0.01559344  |
| -1.29831643 | 0.00193253 | -1.1608112 | 0.015120656 | -1.20242258 | 0.025213033 |
| 0.998230693 | 0.98009224 | 0.98523452 | 0.741526711 | 0.946931061 | 0.443528337 |
| -1.20384008 | 0.20888179 | 0.89641183 | 0.07391662  | -1.21454556 | 0.188283463 |
| -1.04111685 | 0.35009613 | -1.0813304 | 0.124935778 | -1.02445338 | 0.574310903 |
| 0.81319495  | 0.02707731 | -1.0119472 | 0.861317165 | -1.2200905  | 0.033177245 |
| 0.806993692 | 0.00981221 | -1.0181062 | 0.730529923 | 0.89224321  | 0.160293782 |
| 0.918624173 | 0.24880756 | -1.0391654 | 0.383084779 | 0.795957739 | 0.002788711 |
| 0.961943991 | 0.43634753 | -1.0821145 | 0.400234507 | 0.904133198 | 0.046594442 |
| -1.09211711 | 0.22575869 | -1.1874989 | 0.002550076 | -1.15759748 | 0.04678127  |
| -1.05042127 | 0.40514805 | -1.0662891 | 0.381679072 | -1.17070825 | 0.009543599 |
| -1.17066963 | 0.21008378 | 0.87469021 | 0.053133677 | -1.14167922 | 0.290898555 |
| -1.32648529 | 6.58E-06   | -1.0812549 | 0.255399872 | -1.09425848 | 0.117074777 |
| 0.844228432 | 0.01638132 | -1.1467696 | 0.259234365 | 0.970227043 | 0.660005918 |
| -1.05464194 | 0.49710008 | 0.95768586 | 0.499908386 | -1.16795552 | 0.051106418 |
| -1.28765078 | 0.00147703 | -1.0343731 | 0.606542361 | -1.17065287 | 0.041477032 |
| -1.02216359 | 0.7217298  | 0.97137834 | 0.568905956 | -1.05908805 | 0.352654392 |
| -1.16012447 | 0.07549931 | -1.086976  | 0.219748842 | 0.982112496 | 0.826500511 |
| -1.07739911 | 0.17904564 | -1.0982509 | 0.332155652 | -1.3712101  | 4.12E-07    |
| 0.839851504 | 0.02857843 | -1.068102  | 0.414189756 | -1.14503608 | 0.086543764 |
| -1.00893391 | 0.91426463 | -1.1145123 | 0.130701874 | -1.13069599 | 0.1410684   |
| -1.0899928  | 0.28538895 | -1.3194407 | 0.06273469  | -1.2384598  | 0.009805301 |



|             |            |            |             |             |             |
|-------------|------------|------------|-------------|-------------|-------------|
| 0.868330189 | 0.03703371 | 0.90553895 | 0.024103247 | 0.949803075 | 0.438738233 |
| -1.16525252 | 0.04825623 | 0.78093031 | 0.008834964 | -1.50737702 | 1.43E-06    |
| 0.995641713 | 0.95304644 | 0.65296632 | 2.05455E-06 | -1.21342375 | 0.011410728 |
| -1.36137486 | 0.00025995 | -1.0451486 | 0.546686254 | -1.22757831 | 0.012020788 |
| 0.926659794 | 0.24611199 | 0.96308684 | 0.450438483 | -1.19013693 | 0.009760059 |
| 0.940808316 | 0.49294543 | 0.87293654 | 0.064187556 | -1.05012322 | 0.582316576 |
| -1.01717256 | 0.79904656 | -1.0160216 | 0.787337706 | -1.12488724 | 0.08269225  |
| -1.10411332 | 0.17255284 | -1.1530165 | 0.256792757 | -1.00522269 | 0.942306489 |
| -1.07465634 | 0.22307489 | -1.2185289 | 0.000959478 | 0.973599257 | 0.6487605   |
| 0.930658053 | 0.28490312 | 0.77934829 | 0.000597754 | 0.964568902 | 0.589912532 |
| -1.06407779 | 0.40378647 | -1.1332611 | 0.113770957 | -1.01395431 | 0.851769203 |
| 0.868592931 | 0.07328217 | -1.2339244 | 0.007346333 | 0.878355906 | 0.098392507 |
| 0.904051029 | 0.1662007  | -1.0827827 | 0.199512851 | -1.17435317 | 0.029507088 |
| 0.981151569 | 0.64447455 | -1.0023668 | 0.977091918 | 0.968157805 | 0.433461199 |
| -1.06168465 | 0.16972087 | -1.0352027 | 0.530168995 | -1.20911656 | 4.92E-05    |
| 0.995109793 | 0.94251478 | -1.044244  | 0.579092412 | -1.15617543 | 0.036528808 |
| -1.03522783 | 0.63592937 | 0.96122502 | 0.632501819 | -1.35793721 | 9.87E-05    |
| 0.88416571  | 0.0333784  | -1.2261821 | 0.013545977 | 0.981243562 | 0.738290832 |
| -1.59888351 | 3.14E-05   | 0.96323707 | 0.572819923 | -1.60517357 | 2.76E-05    |
| -1.07605553 | 0.17674478 | -1.2848813 | 0.001658235 | -1.039105   | 0.476885572 |
| 0.9142919   | 0.15814805 | -1.0557592 | 0.465602091 | 0.831098243 | 0.004634461 |
| -1.08610184 | 0.12780771 | -1.2560457 | 0.005540194 | 0.945053684 | 0.294655446 |
| 0.957734754 | 0.66423561 | -1.1202858 | 0.086065048 | -1.11283212 | 0.284720516 |
| 0.744287364 | 0.12192912 | 0.94294947 | 0.50912982  | 0.821287095 | 0.299473387 |
| 0.899853687 | 0.15614757 | -1.1435265 | 0.048898948 | 0.98222217  | 0.807775445 |
| -1.04659251 | 0.56918836 | 0.99480587 | 0.942322373 | -1.1947272  | 0.029410821 |
| -1.0333931  | 0.51533744 | -1.0186765 | 0.752628261 | 0.996923985 | 0.951251763 |
| -1.24228084 | 0.04472064 | -1.069011  | 0.320334219 | -1.35185912 | 0.006085301 |
| -1.12757258 | 0.28498213 | -1.2578674 | 0.003007069 | -1.04806384 | 0.674524991 |
| -1.01996311 | 0.65698857 | 0.65126167 | 8.6788E-07  | 0.977116805 | 0.603140123 |
| -1.12102709 | 0.14161676 | -1.0971495 | 0.202537268 | -1.0080977  | 0.916521908 |
| 0.775503349 | 0.00622177 | -1.0147654 | 0.722140828 | 0.828146766 | 0.039324245 |
| -1.13865797 | 0.19342212 | -1.0940138 | 0.041438008 | 0.997651265 | 0.98106016  |
| 0.891946481 | 0.04429528 | 0.80925423 | 0.002845035 | -1.11611803 | 0.052986276 |
| -1.03063971 | 0.74877052 | 0.75272104 | 0.000264394 | 0.836515952 | 0.062269907 |
| -1.13336117 | 0.06360352 | 0.9635043  | 0.512424759 | -1.16185856 | 0.027258076 |
| -1.00760169 | 0.89122199 | -1.7732873 | 9.03689E-07 | 0.810546856 | 0.000358368 |
| -1.01788157 | 0.69071412 | -1.0514924 | 0.352627012 | -1.05202803 | 0.257372205 |
| -1.0247048  | 0.57410401 | 0.5971763  | 4.33178E-11 | -1.02745146 | 0.532988923 |
| 0.961983211 | 0.71382123 | 0.94440664 | 0.288902903 | -1.16921165 | 0.142860956 |
| -1.00185506 | 0.98635439 | -1.0116395 | 0.907323031 | -1.12528421 | 0.278691413 |
| 0.90768336  | 0.19843157 | 0.91246629 | 0.627913091 | -1.11132686 | 0.161673963 |
| -1.15953002 | 0.02473468 | 0.99046866 | 0.896627224 | -1.06184382 | 0.353108364 |
| -1.31962933 | 0.03461498 | -1.217311  | 0.016586364 | 0.882248591 | 0.331828284 |

|             |            |            |             |             |             |
|-------------|------------|------------|-------------|-------------|-------------|
| 0.99428575  | 0.94325454 | 0.94237904 | 0.241937351 | 0.490641949 | 3.99E-12    |
| -1.31834029 | 0.0107987  | -1.0803901 | 0.467012115 | -1.25487218 | 0.034478079 |
| -1.04818724 | 0.72598772 | 0.94979264 | 0.644997105 | -1.0231068  | 0.864859876 |
| -1.12528864 | 0.0807708  | 0.9703739  | 0.499789577 | 0.9456331   | 0.403039892 |
| 0.904301403 | 0.04357137 | -1.0253571 | 0.744959118 | 0.886546431 | 0.016537079 |
| -1.05438135 | 0.2066925  | 0.86004765 | 0.097030747 | 0.985932233 | 0.733710572 |
| 0.903880448 | 0.20330959 | 0.81635055 | 0.04445415  | 0.893514951 | 0.157123473 |
| -1.49312727 | 2.61E-05   | -1.0498004 | 0.385260894 | -1.32004422 | 0.0023998   |
| 0.951001086 | 0.44973469 | 0.95818343 | 0.650494242 | -1.15975398 | 0.028830636 |
| -1.0049647  | 0.93599808 | 0.90531426 | 0.138172453 | 0.739799806 | 8.93E-06    |
| 0.781431832 | 0.00032377 | 0.87860281 | 0.022574544 | -1.06253379 | 0.348800692 |
| -1.06631925 | 0.4810833  | 0.99190527 | 0.85513572  | -1.26719975 | 0.011513197 |
| -1.54375992 | 6.57E-13   | -1.0170404 | 0.696965407 | -1.40882438 | 9.31E-10    |
| -1.08529795 | 0.39872774 | 0.9826395  | 0.868322128 | 0.589293533 | 1.10E-06    |
| -1.01599546 | 0.70678705 | 0.98011475 | 0.852974062 | 0.977355747 | 0.587428075 |
| -1.28010478 | 0.00269244 | 0.98598624 | 0.850238598 | -1.08770387 | 0.288808206 |
| 0.988087567 | 0.73112362 | -1.0775776 | 0.248649074 | -1.00529906 | 0.879491977 |
| -1.07188929 | 0.25462632 | 0.79716091 | 0.082064388 | 0.924450955 | 0.198141213 |
| 0.960374223 | 0.69438402 | 0.65233283 | 1.99264E-06 | -1.05981056 | 0.572703532 |
| -1.18872676 | 0.0244455  | -1.3874209 | 0.002832482 | 0.998074267 | 0.979499942 |
| 0.782445696 | 1.26E-05   | -1.0582664 | 0.673299089 | 0.968672783 | 0.535242555 |
| 0.844635009 | 0.02589547 | 0.90675002 | 0.145796881 | 0.827119029 | 0.012791146 |
| 0.726888564 | 9.81E-07   | -1.0720804 | 0.158458683 | 0.656602204 | 1.45E-09    |
| -1.11548569 | 0.09445465 | -1.0514403 | 0.231298972 | -1.37225143 | 8.32E-06    |
| -1.15089746 | 0.10085926 | -1.0907552 | 0.273196207 | 0.719569884 | 0.000261964 |
| 0.950374214 | 0.23978074 | -1.5468586 | 6.3421E-06  | -1.0518172  | 0.243263826 |
| -1.05091888 | 0.66590569 | -1.2070364 | 0.006159486 | -1.18559218 | 0.142537947 |
| -1.10500178 | 0.38154775 | 0.87842898 | 0.039395149 | -1.10062679 | 0.40061969  |
| 0.925983596 | 0.01274983 | -1.1533197 | 0.030466606 | 0.931213505 | 0.02047792  |
| -1.02614075 | 0.82045043 | 0.97088582 | 0.745341362 | 0.256387497 | 7.37E-17    |
| 0.939877711 | 0.25497036 | -1.1978069 | 0.000269055 | 0.999273658 | 0.989291632 |
| -1.01761736 | 0.71871178 | 0.88804086 | 0.22258542  | -1.02809982 | 0.567988238 |
| 0.997372153 | 0.98170254 | 0.87822268 | 0.003127975 | 0.903719557 | 0.379305937 |
| -1.03440275 | 0.42136483 | -1.1202733 | 0.15362121  | -1.00819567 | 0.845716875 |
| -1.06619464 | 0.20029286 | 0.99857103 | 0.96727479  | 0.982471748 | 0.721937542 |
| 0.998434802 | 0.96547545 | -1.0241282 | 0.694070163 | 0.874627734 | 0.000479885 |
| 0.583198681 | 8.87E-08   | -1.0975086 | 0.367388492 | 0.591358907 | 1.60E-07    |
| 0.995327254 | 0.93779112 | -1.0502471 | 0.514250672 | 0.619079987 | 9.30E-11    |
| -1.19512879 | 0.02075679 | -1.0701795 | 0.189197136 | -1.17211482 | 0.0383985   |
| -1.24365245 | 0.06248284 | 0.99226263 | 0.916445267 | -1.13772875 | 0.265260832 |
| -1.00379378 | 0.96714265 | 0.74181091 | 3.48451E-06 | 0.59035269  | 4.20E-07    |
| -1.17753381 | 0.04055814 | -1.1443497 | 0.040407368 | -1.16544829 | 0.054447685 |
| 0.866457294 | 0.24121033 | 0.60873497 | 2.55211E-07 | 0.824280365 | 0.115997468 |
| 0.900672768 | 0.11955709 | 0.93102876 | 0.100937653 | 0.910541917 | 0.16224007  |

|             |            |            |             |             |             |
|-------------|------------|------------|-------------|-------------|-------------|
| -1.35596449 | 0.0462017  | 0.9318006  | 0.539514833 | 0.930139054 | 0.629395337 |
| -1.1020531  | 0.23082041 | -1.0670121 | 0.568930354 | 0.972942848 | 0.733598457 |
| -1.09953129 | 0.03121315 | 0.92910303 | 0.016963616 | -1.00817984 | 0.850059461 |
| 0.993513884 | 0.8985478  | 0.6552314  | 0.000453674 | -1.09444455 | 0.081305146 |
| -1.0024199  | 0.95973843 | 0.95575366 | 0.404733742 | -1.01634129 | 0.735081973 |
| -1.1344878  | 0.12407344 | 0.9492636  | 0.285172096 | -1.11870038 | 0.170607314 |
| 0.928702376 | 0.23977849 | 0.82945892 | 0.107411267 | 0.842377236 | 0.007963571 |
| -1.02076762 | 0.74191272 | 0.89394905 | 0.009615788 | -1.12818274 | 0.057353448 |
| -1.1261407  | 0.03935815 | 0.99876991 | 0.980226914 | -1.03490432 | 0.544463691 |
| 0.987869108 | 0.8145929  | 0.95825569 | 0.241725276 | 0.945313609 | 0.282387654 |
| 0.957437845 | 0.57713325 | 0.56309726 | 1.99567E-08 | 0.814983694 | 0.010867316 |
| 0.975647459 | 0.74133991 | 0.48601904 | 6.27588E-17 | -1.04410249 | 0.563799373 |
| 0.644710794 | 4.39E-06   | -1.0795649 | 0.31072597  | 0.710575592 | 0.00020989  |
| 0.906727368 | 0.16167306 | -1.0051032 | 0.964741419 | -1.00525252 | 0.939761787 |
| 0.906952671 | 0.07799749 | -1.0451407 | 0.631381137 | 0.907174176 | 0.078723    |
| 0.926967049 | 0.18207956 | 0.99253628 | 0.923708971 | -1.0388668  | 0.499599619 |
| 0.998234061 | 0.97800727 | 0.83324988 | 0.137380076 | 0.895296277 | 0.088828038 |
| -1.0040568  | 0.9265613  | 0.91979513 | 0.211625846 | 0.587695018 | 4.85E-17    |
| -1.0997537  | 0.3185265  | -1.0757058 | 0.626773383 | -1.31199012 | 0.005776551 |
| -1.04988481 | 0.6961672  | 0.83898396 | 0.032914824 | -1.07805258 | 0.546984708 |
| 0.955197648 | 0.51479896 | 0.96784377 | 0.449325041 | 0.999494204 | 0.994252117 |
| 0.81127671  | 0.00421294 | -1.125859  | 0.023389515 | 0.693192674 | 2.79E-06    |
| 0.762083924 | 0.00075587 | 0.94625482 | 0.251494256 | 0.883226382 | 0.108352881 |
| 0.908828334 | 0.18706778 | -1.0984547 | 0.250079392 | -1.14525444 | 0.063362508 |
| 0.805608262 | 0.00039326 | -1.0803966 | 0.219362257 | 0.845794477 | 0.00496619  |
| 0.97405339  | 0.84188971 | -1.0832842 | 0.203162389 | -1.12273984 | 0.381324763 |
| 0.942096912 | 0.37951463 | 0.87812696 | 0.02473162  | 0.985157582 | 0.825041316 |
| -1.02163292 | 0.80167475 | 0.86152016 | 0.005733736 | -1.02736263 | 0.751424335 |
| -1.05258287 | 0.23145336 | -1.0804706 | 0.322626366 | -1.09962822 | 0.029047869 |
| -1.15634791 | 0.04230955 | -1.0500377 | 0.513927739 | -1.40251596 | 1.12E-05    |
| -1.04630161 | 0.47076402 | 0.82507349 | 0.029355425 | -1.13263709 | 0.050706872 |
| -1.03700142 | 0.53974866 | 0.96427945 | 0.600254713 | -1.19183498 | 0.004313683 |
| 0.948787437 | 0.27435461 | 0.88433665 | 0.027813029 | -1.00584591 | 0.902998796 |
| -1.27594518 | 0.053297   | -1.0062358 | 0.912175804 | -1.18898083 | 0.166182414 |
| 0.931360378 | 0.27885221 | 0.99670291 | 0.95892036  | 0.949728228 | 0.430967719 |
| -1.10464244 | 0.24312888 | 0.98758721 | 0.776205439 | 0.826196008 | 0.027634774 |
| 0.962730966 | 0.63381982 | -1.1197031 | 0.236488595 | 0.906336043 | 0.220182359 |
| -1.03241661 | 0.59029462 | -1.1013887 | 0.439492813 | 0.898647141 | 0.075204803 |
| 0.925399872 | 0.06604166 | 0.97469745 | 0.715337219 | 0.934677499 | 0.107907422 |
| 0.962226994 | 0.54590822 | 0.74752807 | 0.00011598  | 0.702049014 | 8.00E-07    |
| -1.02436202 | 0.61641357 | 0.97900502 | 0.781301433 | 0.976006581 | 0.613261604 |
| -1.05448416 | 0.15065558 | 0.95941779 | 0.564925883 | -1.03620044 | 0.332790106 |
| 0.972098124 | 0.606918   | 0.98886505 | 0.845418925 | -1.03211105 | 0.565671931 |
| 0.725150234 | 0.00014005 | -1.0164451 | 0.90148827  | 0.362888687 | 3.98E-18    |

|             |            |            |             |             |             |
|-------------|------------|------------|-------------|-------------|-------------|
| -1.2625714  | 0.00185345 | 0.87000766 | 0.04340608  | -1.20234781 | 0.012375914 |
| 0.746483886 | 0.0773425  | -1.0952128 | 0.288211574 | 0.595066994 | 0.002327976 |
| 0.711519548 | 0.01296735 | -1.0786515 | 0.079401086 | -1.00811183 | 0.951573663 |
| 0.978413774 | 0.75921499 | -1.0662561 | 0.362405598 | 0.844961937 | 0.020985984 |
| 0.852739716 | 0.02232238 | -1.0045635 | 0.942021316 | 0.594227522 | 3.28E-10    |
| -1.15675757 | 0.06533637 | 0.9821465  | 0.760793569 | 0.632629673 | 2.37E-07    |
| -1.10963818 | 0.03318489 | 0.97904126 | 0.658128114 | 0.918089163 | 0.078144408 |
| 0.946188715 | 0.49033424 | -1.2722452 | 0.056100627 | -1.10287331 | 0.224236642 |
| -1.53320048 | 0.00074353 | 0.9626726  | 0.560828644 | -1.1740665  | 0.184733869 |
| -1.13331096 | 0.09220313 | -1.0402576 | 0.641649581 | -1.25208113 | 0.003261709 |
| -1.15624795 | 0.0026559  | 0.81218169 | 0.011291125 | -1.0637888  | 0.185117229 |
| -1.06415212 | 0.35085334 | 0.95622296 | 0.450558028 | -1.21732651 | 0.004365466 |
| -1.02200873 | 0.65174516 | 0.91947774 | 0.047138747 | 0.97227901  | 0.560256923 |
| 0.993777498 | 0.89382099 | -1.0141669 | 0.825124275 | 0.868393041 | 0.003739987 |
| -1.26256956 | 0.09985941 | -1.0450716 | 0.36020803  | -1.67908944 | 0.000475028 |
| -1.11003278 | 0.04095611 | 0.99179272 | 0.821675882 | 0.70102144  | 2.65E-09    |
| 0.998748729 | 0.97988024 | 0.99807561 | 0.972029269 | 0.99571306  | 0.931044355 |
| -1.25081701 | 0.00561414 | 0.63154972 | 2.8535E-07  | -1.20765265 | 0.018343258 |
| 0.91589324  | 0.09119647 | -1.217118  | 0.007890243 | 0.942651179 | 0.252707648 |
| -1.01962402 | 0.68646089 | 0.86545396 | 0.377419082 | -1.14508815 | 0.006547114 |
| 0.950737174 | 0.36516412 | 0.93806339 | 0.6311499   | 0.865379955 | 0.011590385 |
| -1.02589938 | 0.6938958  | 0.9238517  | 0.268483947 | -1.10636314 | 0.123646448 |
| 0.773250605 | 0.00269717 | 0.86908435 | 0.043036371 | 0.908062094 | 0.243203105 |
| -1.00369516 | 0.93052267 | 0.83495384 | 0.023566511 | 0.842056801 | 0.000149084 |
| -1.09522796 | 0.02254907 | -1.037636  | 0.440939291 | -1.04501258 | 0.260634088 |
| 0.895548418 | 0.04995979 | -1.0574564 | 0.486025626 | -1.04478273 | 0.429294382 |
| 0.956906373 | 0.36986592 | -1.3117738 | 0.027108218 | 0.943888096 | 0.241029037 |
| 0.963525663 | 0.44872412 | 0.93389763 | 0.352978052 | 0.979058952 | 0.665546534 |
| 0.996314813 | 0.94670682 | -1.2308528 | 3.57659E-05 | 0.98859586  | 0.835526959 |
| 0.855233293 | 0.0324128  | -1.0293527 | 0.663224122 | 0.988177341 | 0.867971355 |
| -1.01546033 | 0.76403492 | -1.1091597 | 0.035259797 | -1.0093758  | 0.855077718 |
| -1.01721451 | 0.65260223 | 0.87624874 | 0.006392025 | 0.971000823 | 0.438528636 |
| 0.989182858 | 0.87852218 | -1.3280424 | 0.046538335 | 0.722882174 | 2.78E-05    |
| -1.02891892 | 0.62870992 | 0.77244481 | 3.41937E-06 | 0.925456916 | 0.191930199 |
| 0.977968623 | 0.89638095 | -1.0599347 | 0.244035928 | 0.712583236 | 0.051656946 |
| 0.911318732 | 0.04749841 | -1.1699509 | 0.047968899 | -1.06574481 | 0.170022431 |
| -1.2107978  | 0.00539874 | 0.93687381 | 0.20724421  | 0.958315466 | 0.521336304 |
| 0.992092742 | 0.86035101 | -1.0924425 | 0.07034254  | -1.09411933 | 0.05024608  |
| -1.01285865 | 0.82396103 | 0.99076128 | 0.867368249 | -1.01832805 | 0.751893524 |
| -1.00376379 | 0.92719302 | -1.0886956 | 0.194070184 | 0.787422831 | 3.13E-07    |
| -1.09086061 | 0.50923508 | 0.97059834 | 0.716446745 | 0.664596679 | 0.002895043 |
| -1.07317316 | 0.25158713 | 0.99084002 | 0.827829708 | 0.938482476 | 0.302080571 |
| -1.07986203 | 0.2381471  | -1.1121473 | 0.008222798 | 0.993284513 | 0.917069388 |
| -1.01841422 | 0.68560223 | -1.0538241 | 0.344827516 | 0.850890133 | 0.000690735 |

|             |            |            |             |             |             |
|-------------|------------|------------|-------------|-------------|-------------|
| -1.03924514 | 0.45668199 | -1.0215865 | 0.662822458 | -1.03112868 | 0.552993039 |
| -1.06836864 | 0.0571282  | -1.0854508 | 0.097977901 | -1.01082207 | 0.752899526 |
| 0.992067665 | 0.84372958 | 0.98945817 | 0.847866124 | 0.855344927 | 0.000281978 |
| -1.03694701 | 0.62149356 | 0.9524137  | 0.496446002 | 0.77305299  | 0.000879706 |
| -1.06978522 | 0.2227337  | 0.95197709 | 0.337463874 | -1.00985817 | 0.858306022 |
| 0.967397315 | 0.56913007 | 0.99678926 | 0.932345762 | 0.879210762 | 0.030318234 |
| 0.898925839 | 0.15385358 | 0.97712239 | 0.745097153 | -1.08031122 | 0.299029207 |
| -1.0156136  | 0.68025743 | 0.91469211 | 0.13409943  | 0.988601222 | 0.760321784 |
| -1.03318054 | 0.41255057 | 0.82590263 | 0.266220636 | -1.0118462  | 0.76689348  |
| 0.96946759  | 0.52645688 | 0.97426294 | 0.571372254 | 0.642292764 | 1.82E-12    |
| 0.960765914 | 0.589945   | -1.0189383 | 0.777169567 | -1.12056278 | 0.128963086 |
| -1.09404294 | 0.13161388 | 0.9982721  | 0.969424567 | -1.08368004 | 0.176704391 |
| -1.11965231 | 0.11565868 | -1.024223  | 0.677063339 | -1.101444   | 0.177276114 |
| 0.980594827 | 0.69993581 | -1.0092422 | 0.822968823 | -1.03789426 | 0.465269495 |
| -1.53797721 | 2.60E-10   | 0.83604677 | 0.176956255 | -1.35339203 | 1.30E-06    |
| -1.10178822 | 0.22783166 | -1.1152635 | 0.079035891 | -1.00842052 | 0.916350135 |
| 0.867893164 | 0.07248183 | -1.0744282 | 0.269989248 | 0.8791978   | 0.101781158 |
| -1.09323494 | 0.09681025 | -1.0223101 | 0.624581422 | 0.941291477 | 0.25642073  |
| -1.18459358 | 0.01080336 | 0.97034065 | 0.560062183 | 0.884847578 | 0.06183262  |
| -1.03266021 | 0.71209791 | 0.89316581 | 0.001616427 | -1.11406863 | 0.217829209 |
| 0.89021225  | 0.0327138  | 0.9100441  | 0.022784549 | 0.899430048 | 0.050781211 |
| 0.95546288  | 0.33157874 | 0.97282637 | 0.70758864  | -1.00374092 | 0.936295262 |
| 0.997340133 | 0.96593159 | -1.015379  | 0.781246553 | -1.452197   | 1.67E-07    |
| 0.968314185 | 0.61914194 | 0.9182555  | 0.146355028 | 0.758270942 | 7.34E-05    |
| 0.940285846 | 0.30636574 | 0.94804409 | 0.472030664 | 0.805148578 | 0.000623286 |
| -1.06296376 | 0.41288204 | -1.0910992 | 0.0234956   | -1.1468189  | 0.069608338 |
| -1.00691478 | 0.93827997 | -1.0939482 | 0.027135045 | -1.02949662 | 0.744049172 |
| -1.00071962 | 0.9852627  | 0.95181479 | 0.314455207 | 0.82689396  | 9.12E-06    |
| 0.835357302 | 0.0213468  | 0.99594351 | 0.956294378 | -1.04735802 | 0.544489682 |
| 0.931829417 | 0.18400208 | 0.96841085 | 0.586774844 | -1.01726403 | 0.745483539 |
| -1.26673173 | 0.00082272 | -1.0670301 | 0.362720898 | -1.32120884 | 0.000109436 |
| 0.825631857 | 0.00475888 | 0.93440291 | 0.185385815 | 0.667735722 | 8.06E-08    |
| 0.976432907 | 0.81902638 | -1.1868822 | 0.003215432 | 0.570938518 | 1.54E-06    |
| -1.31516888 | 0.0007498  | 0.95134942 | 0.532888295 | -1.54166362 | 6.30E-07    |
| 0.894435479 | 0.07824775 | 0.83161822 | 0.020681258 | 0.668806829 | 3.03E-08    |
| 0.932993926 | 0.18702824 | 0.87287932 | 0.012725674 | -1.12649439 | 0.025656612 |
| -1.00639023 | 0.92277855 | -1.0553721 | 0.404503576 | 0.963156222 | 0.568396932 |
| -1.07211781 | 0.29232277 | -1.0895974 | 0.32634577  | 0.935891408 | 0.316142422 |
| 0.885190336 | 0.06436299 | 0.80117117 | 0.000108566 | 0.905310728 | 0.129316477 |
| -1.1065568  | 0.01085916 | 0.94928467 | 0.267988966 | -1.02170161 | 0.578090301 |
| -1.18107018 | 0.01821661 | -1.0823881 | 0.207615741 | -1.15809644 | 0.036230671 |
| -1.29762707 | 0.0028704  | 0.94798837 | 0.410566467 | -1.3352212  | 0.001043823 |
| 0.892475808 | 0.09148232 | -1.0069549 | 0.907888603 | 0.99815929  | 0.977899248 |
| -1.07090588 | 0.29339262 | -1.0791896 | 0.307631019 | 0.970401141 | 0.643531516 |

|             |            |            |             |             |             |
|-------------|------------|------------|-------------|-------------|-------------|
| -1.11253292 | 0.05986995 | -1.067758  | 0.462434967 | -1.04608375 | 0.420270892 |
| -1.10685805 | 0.21392504 | 0.99969468 | 0.993743721 | -1.05820663 | 0.486397123 |
| -1.00755062 | 0.94448525 | -1.0330938 | 0.669522539 | 0.959854372 | 0.704653006 |
| 0.92052068  | 0.39393263 | -1.0350998 | 0.513609295 | 0.906723504 | 0.314123461 |
| 0.598089707 | 5.29E-14   | -1.3030221 | 0.000216168 | -1.0541381  | 0.305142476 |
| -1.02631404 | 0.75207986 | -1.0512524 | 0.445622349 | 0.993520312 | 0.936954372 |
| -1.03985056 | 0.55259262 | 0.87008365 | 0.185360848 | 0.910382965 | 0.156822365 |
| -1.11351678 | 0.25866988 | -1.3257994 | 0.000541157 | 0.985070529 | 0.873707809 |
| 0.807772405 | 0.0002674  | 0.94804399 | 0.394396531 | 0.859682207 | 0.007805102 |
| 0.878765788 | 0.10553269 | -1.0441202 | 0.409113378 | 0.827926809 | 0.019626507 |
| -1.08907461 | 0.31769826 | 0.9232029  | 0.227158797 | 0.962953152 | 0.657237279 |
| -1.15178567 | 0.09755515 | 0.99585188 | 0.949618216 | 0.932422679 | 0.407464908 |
| 0.949922638 | 0.45539132 | 0.85225481 | 0.016485238 | -1.06069242 | 0.392322964 |
| -1.01114583 | 0.84320419 | 0.82102754 | 3.95201E-06 | 0.997165969 | 0.959601474 |
| -1.02913389 | 0.68574846 | -1.032895  | 0.63763859  | -1.0288732  | 0.688370631 |
| 0.874172188 | 0.10317758 | -1.2670103 | 0.006390217 | -1.01284922 | 0.87552035  |
| -1.09266092 | 0.07317933 | 0.89053217 | 0.085596128 | -1.00892996 | 0.85521549  |
| -1.01423835 | 0.74957433 | 0.9450102  | 0.384890354 | 0.960120868 | 0.359854388 |
| 0.936894323 | 0.39623712 | -1.0759924 | 0.192313591 | -1.03876755 | 0.61981134  |
| 0.996860672 | 0.95234944 | -1.2528304 | 0.00723417  | 0.997752295 | 0.965888084 |
| 0.884957577 | 0.00634503 | 0.85760168 | 0.158888874 | 0.895492637 | 0.013120344 |
| -1.04831743 | 0.46148638 | -1.1392147 | 0.181859535 | -1.01865273 | 0.772551009 |
| 0.903882177 | 0.14661633 | -1.0341785 | 0.512096229 | 0.915393294 | 0.203110876 |
| -1.01211272 | 0.80513392 | -1.1589219 | 0.07700199  | 0.94524885  | 0.251388217 |
| -1.00396476 | 0.93351809 | 0.96139224 | 0.549599898 | 0.847874003 | 0.000958236 |
| -1.12674001 | 0.17058225 | -1.0275038 | 0.774392581 | -1.33759218 | 0.001334672 |
| 0.93067251  | 0.19824094 | 0.94428517 | 0.29930151  | -1.26871079 | 6.89E-05    |
| -1.27133948 | 0.00069247 | 0.75549522 | 0.000758096 | 0.915504436 | 0.191035672 |
| -1.0695697  | 0.33801197 | -1.0284647 | 0.741365195 | -1.17757511 | 0.02250916  |
| -1.05910993 | 0.30751921 | 0.90064336 | 0.217192855 | 0.79158972  | 0.000103763 |
| 0.866261916 | 0.04220391 | -1.1305442 | 0.078159209 | 0.938555763 | 0.362078933 |
| -1.05695804 | 0.56702182 | 0.95605841 | 0.423927403 | 0.938979115 | 0.515467334 |
| 0.983753336 | 0.84234331 | 0.99047516 | 0.892658705 | -1.19123565 | 0.03733137  |
| -1.02973985 | 0.64627511 | 0.857142   | 0.06275611  | -1.25280299 | 0.000811877 |
| 0.897375633 | 0.05205735 | 0.95826191 | 0.383180951 | 0.810194276 | 0.000304692 |
| -1.18352226 | 0.00906656 | -1.0071216 | 0.872662739 | 0.972729755 | 0.658583399 |
| -1.18395044 | 0.06418765 | -1.1066163 | 0.189430939 | -1.16612029 | 0.091195498 |
| -1.25659801 | 0.00152508 | 0.96579111 | 0.509140459 | -1.33512069 | 9.24E-05    |
| 0.900595679 | 0.01580555 | 0.92784991 | 0.087463854 | -1.06026972 | 0.169295862 |
| -1.23278692 | 0.00136528 | -1.0069857 | 0.913272335 | -1.15131145 | 0.026965156 |
| 0.994407583 | 0.92257531 | 0.93521284 | 0.333314434 | 0.942591052 | 0.30788939  |
| -1.55327425 | 0.000128   | -1.0064841 | 0.89461873  | -1.29716399 | 0.018039934 |
| 0.87693291  | 0.12015994 | 0.71271187 | 2.22785E-09 | 0.701149073 | 8.04E-05    |
| 0.813104129 | 0.0005372  | -1.3106105 | 0.002680483 | 0.985288051 | 0.792926263 |

|             |            |            |             |             |             |
|-------------|------------|------------|-------------|-------------|-------------|
| -1.16325864 | 0.0196741  | 0.96949015 | 0.576591076 | -1.36402495 | 8.13E-06    |
| 0.98117211  | 0.71450344 | -1.171671  | 0.021074858 | -1.02592494 | 0.622479151 |
| -1.0553057  | 0.45860549 | -1.1385743 | 0.067597279 | -1.18363826 | 0.023142745 |
| -1.01246274 | 0.76147001 | 0.94946077 | 0.35635334  | -1.01056544 | 0.796706188 |
| -1.0640256  | 0.29070303 | 0.89990883 | 0.13218917  | 0.957747822 | 0.461133399 |
| -1.20866424 | 0.00982819 | -1.0360852 | 0.713872213 | -1.25876367 | 0.001989871 |
| -1.01988935 | 0.74099724 | 0.99862956 | 0.986711681 | 0.91715249  | 0.150403073 |
| -1.12219221 | 0.02569151 | -1.058876  | 0.371632331 | 0.964206185 | 0.471283306 |
| -1.08075733 | 0.45110312 | 0.87422692 | 0.016876067 | 0.956936396 | 0.668726566 |
| -1.06054197 | 0.45275812 | 0.98569096 | 0.817715346 | -1.24377137 | 0.006957173 |
| 0.94450875  | 0.39679271 | -1.1008969 | 0.286816788 | -1.1084847  | 0.129190357 |
| -1.14072096 | 0.01941045 | -1.2688743 | 0.000994239 | -1.27984364 | 3.49E-05    |
| -1.01807026 | 0.76850421 | -1.0184677 | 0.664846184 | -1.1308173  | 0.047246005 |
| -1.04755895 | 0.59097801 | -1.0885351 | 0.176592517 | -1.16102173 | 0.088067115 |
| 0.999050894 | 0.97541824 | 0.91721981 | 0.138308039 | -1.01303493 | 0.67455106  |
| 0.834663927 | 0.13103269 | -1.281049  | 0.024035744 | 0.952512071 | 0.68138104  |
| 0.91725107  | 0.25285202 | 0.72425092 | 0.000288086 | 0.924927009 | 0.301002965 |
| -1.01036671 | 0.85364803 | 0.87418835 | 0.020220644 | -1.04079387 | 0.475499584 |
| -1.13164715 | 0.04254264 | -1.1882635 | 0.008264574 | -1.18589083 | 0.00595527  |
| 0.911788767 | 0.15976145 | -1.0941628 | 0.087396709 | 0.827385109 | 0.005034992 |
| -1.05865916 | 0.47007893 | -1.0562418 | 0.451276653 | -1.232474   | 0.010077833 |
| 0.995859526 | 0.94723116 | -1.0183592 | 0.655851975 | 0.997330075 | 0.965982926 |
| 0.909971799 | 0.06781902 | -1.0596506 | 0.323597147 | -1.04851688 | 0.353471106 |
| -1.00526857 | 0.91831672 | -1.1277112 | 0.095322721 | -1.30605248 | 2.81E-06    |
| 0.907419899 | 0.06771369 | 0.96371635 | 0.53559854  | -1.04545008 | 0.397409619 |
| 0.923350472 | 0.21264144 | -1.0103094 | 0.83900618  | 0.982077313 | 0.775938533 |
| -1.02654477 | 0.53844689 | 0.96300307 | 0.713956445 | -1.04344816 | 0.319357863 |
| 0.963882249 | 0.35656696 | -1.1224093 | 0.143167422 | -1.04465489 | 0.274356023 |
| -1.00242084 | 0.94073196 | 0.96819759 | 0.630661532 | 0.998799164 | 0.97052633  |
| -1.03786061 | 0.36112827 | -1.1642643 | 0.007400854 | -1.09761395 | 0.024851537 |
| 0.992111051 | 0.90283318 | -1.0140371 | 0.818766667 | -1.02949493 | 0.654390453 |
| -1.03885945 | 0.58753784 | -1.0495538 | 0.575914961 | -1.06730677 | 0.3553153   |
| 0.772307781 | 0.01224736 | 0.97367089 | 0.38823698  | 0.753249298 | 0.006302975 |
| 0.982842621 | 0.78529308 | 0.89213571 | 0.337156056 | -1.09487328 | 0.157387995 |
| 0.999090572 | 0.99110785 | 0.93341463 | 0.360596959 | -1.04753527 | 0.570038692 |
| -1.13034364 | 0.08130994 | 0.96596897 | 0.536397837 | 0.871872715 | 0.051911018 |
| 0.899426071 | 0.03703043 | -1.1166259 | 0.069361813 | 0.869614596 | 0.006737957 |
| 0.929813598 | 0.20623067 | 0.66174242 | 4.3703E-08  | 0.646916484 | 3.67E-10    |
| -1.03075222 | 0.52211614 | -1.2105643 | 0.018079182 | -1.05588586 | 0.252481956 |
| 0.959964469 | 0.54206506 | 0.85871036 | 0.017969648 | -1.18824973 | 0.012322174 |
| 0.990389977 | 0.9253089  | 0.95494686 | 0.366494631 | -1.39834467 | 0.00187935  |
| 0.898800978 | 0.00985777 | -1.0114677 | 0.823927389 | -1.01377483 | 0.732832233 |
| -1.10117913 | 0.02918136 | -1.0553361 | 0.305906723 | -1.44333995 | 1.45E-11    |
| 0.951923205 | 0.34671545 | 0.96615354 | 0.588272943 | -1.04252706 | 0.425839756 |

|             |            |            |             |             |             |
|-------------|------------|------------|-------------|-------------|-------------|
| -1.12941962 | 0.04039197 | 0.99381224 | 0.883929474 | -1.01277663 | 0.827382682 |
| 0.922352358 | 0.18599898 | -1.0731877 | 0.079819081 | 0.787711605 | 0.000225989 |
| -1.05829345 | 0.39277843 | -1.0678203 | 0.047617992 | -1.00973901 | 0.883388797 |
| -1.04416612 | 0.55882327 | 0.9449167  | 0.165980413 | 0.857730343 | 0.041478624 |
| -1.13773971 | 0.08370089 | -1.0620935 | 0.355011958 | -1.40837827 | 2.01E-05    |
| -1.09366915 | 0.02651845 | -1.0540639 | 0.454342657 | -1.02970496 | 0.459010399 |
| 0.839801759 | 0.03634399 | 0.80142561 | 0.030573835 | 0.945089883 | 0.490395558 |
| -1.01895755 | 0.68714026 | -1.0279754 | 0.664218533 | 0.894938611 | 0.020225262 |
| -1.11025227 | 0.14569489 | -1.1804924 | 0.046077856 | 0.983632407 | 0.816681339 |
| -1.01353646 | 0.83560662 | -1.1147122 | 0.121217332 | 0.944367063 | 0.378645749 |
| -1.16990882 | 0.00404231 | 0.97723397 | 0.644059945 | 0.979353408 | 0.691196914 |
| 0.955651402 | 0.47732133 | 0.7766998  | 4.47738E-05 | -1.15749917 | 0.024918193 |
| -1.0143612  | 0.79393677 | -1.0211985 | 0.6572272   | 0.816926737 | 0.00047429  |
| -1.28771541 | 0.00120386 | 0.92458659 | 0.244184627 | -1.15885363 | 0.051246901 |
| 0.949622257 | 0.59682681 | -1.1895377 | 0.096262749 | 0.832368609 | 0.064322572 |
| -1.00871177 | 0.81420668 | -1.0447536 | 0.277057375 | 0.97460207  | 0.486690065 |
| 0.83421792  | 2.13E-05   | -1.0639995 | 0.154987577 | 0.902256492 | 0.010721847 |
| -1.01015149 | 0.7734581  | -1.0695219 | 0.200869361 | 0.993299249 | 0.848014159 |
| 0.967298797 | 0.49322692 | -1.0942523 | 0.1259161   | -1.11836081 | 0.024104579 |
| 0.886771896 | 0.11155549 | 0.66581858 | 1.11507E-08 | 0.947492348 | 0.470889559 |
| 0.963520511 | 0.51790617 | -1.0127974 | 0.847405111 | 0.98078248  | 0.735284515 |
| -1.04375437 | 0.44694952 | -1.0938558 | 0.227402324 | -1.01470562 | 0.794958267 |
| -1.16800188 | 0.09646563 | -1.2496182 | 0.003618824 | -1.04635764 | 0.623532249 |
| -1.05380395 | 0.34015231 | -1.0289674 | 0.47002392  | -1.16099419 | 0.008293672 |
| 0.970846446 | 0.67554399 | 0.92327862 | 0.330720738 | -1.08884295 | 0.231315216 |
| -1.04046624 | 0.76745851 | 0.97937791 | 0.655029807 | -1.19751806 | 0.182537793 |
| 0.916220728 | 0.14211221 | -1.0794446 | 0.285361297 | 0.85516115  | 0.010169254 |
| 0.785395331 | 0.16656685 | 0.98391764 | 0.802428942 | 0.869277286 | 0.419654284 |
| 0.904519654 | 0.16205783 | 0.97036128 | 0.567048709 | 0.863316538 | 0.042665572 |
| -1.02691607 | 0.69839649 | -1.1058066 | 0.118464336 | 0.973991594 | 0.7006364   |
| 0.874395536 | 0.08957533 | 0.94384729 | 0.29213157  | 0.818734696 | 0.012778734 |
| 0.903593814 | 0.09270854 | -1.2517547 | 0.003684868 | 0.915984281 | 0.144234945 |
| 0.997893398 | 0.96389795 | 0.87347641 | 0.169487657 | 0.96856902  | 0.494007791 |
| -1.02259293 | 0.67090919 | -1.0038342 | 0.917406957 | -1.01434817 | 0.786331644 |
| -1.0208217  | 0.77236986 | 0.8557351  | 0.00019233  | 0.938521886 | 0.374701936 |
| 0.892359945 | 0.02823359 | -1.0219599 | 0.536440149 | 0.86299054  | 0.005141212 |
| 0.867737291 | 0.01515783 | -1.0018502 | 0.969545406 | 0.934963242 | 0.239529752 |
| 0.786997405 | 0.04175294 | 0.9254248  | 0.301418115 | 0.922675428 | 0.486429383 |
| -1.1590609  | 0.00484755 | -1.0210277 | 0.716935215 | 0.982703293 | 0.729651934 |
| -1.06915043 | 0.30249118 | 0.80238289 | 0.000238064 | -1.32014099 | 6.68E-05    |
| -1.06419142 | 0.19402967 | -1.0533869 | 0.573317352 | -1.03584039 | 0.459883578 |
| 0.945601878 | 0.23313764 | 0.98133475 | 0.73067993  | 0.982096168 | 0.698445938 |
| -1.02518568 | 0.62197463 | -1.110439  | 0.142063147 | -1.17138531 | 0.002639322 |
| -1.15797678 | 0.07738961 | 0.88805335 | 0.377711545 | -1.61579502 | 2.61E-07    |



|             |            |            |             |             |             |
|-------------|------------|------------|-------------|-------------|-------------|
| -1.14057375 | 0.01970719 | 0.77500818 | 6.34278E-05 | -1.12533456 | 0.035418382 |
| 0.992636111 | 0.89951468 | 0.73768081 | 0.083049644 | -1.07783886 | 0.203722811 |
| -1.0084489  | 0.8700517  | 0.89114127 | 0.109336772 | 0.993154356 | 0.89374103  |
| 0.958498722 | 0.7111638  | 0.96917671 | 0.647936446 | 0.956252753 | 0.695975178 |
| -1.10498967 | 0.2893364  | 0.87951059 | 0.104011491 | -1.22487129 | 0.034117895 |
| 0.913475072 | 0.16110911 | 0.97794773 | 0.708001908 | -1.0349178  | 0.592178125 |
| 0.926319272 | 0.3011131  | -1.0864582 | 0.07940086  | -1.039973   | 0.595066756 |
| -1.02795978 | 0.80128969 | -1.0295573 | 0.579813022 | -1.16454602 | 0.168108681 |
| -1.26273765 | 0.01027266 | -1.0416085 | 0.567601059 | -1.55790207 | 5.33E-06    |
| 0.990480451 | 0.85385113 | 0.97080046 | 0.559804997 | 0.919848059 | 0.111803504 |
| -1.04738144 | 0.47699829 | -1.029345  | 0.611073106 | -1.28613804 | 0.000276023 |
| -1.03788069 | 0.4191788  | 0.8734768  | 0.243981657 | -1.06892011 | 0.150300554 |
| -1.08033334 | 0.04790994 | -1.0951517 | 0.075944064 | -1.03357665 | 0.390740492 |
| 0.922432195 | 0.15796668 | -1.2471359 | 0.001137761 | 0.725179056 | 5.26E-07    |
| 0.953036049 | 0.21498841 | -1.123073  | 0.017420307 | 0.808661685 | 9.37E-07    |
| -1.03106446 | 0.69962141 | 0.98594593 | 0.761429259 | 0.964946344 | 0.65276229  |
| -1.37827823 | 0.00338552 | -1.2439338 | 6.09315E-05 | -1.66795988 | 9.55E-06    |
| -1.10433011 | 0.307447   | -1.0898083 | 0.295804317 | -1.25698311 | 0.021168096 |
| 0.980285507 | 0.77293137 | -1.0310431 | 0.578676692 | 0.681018024 | 7.67E-07    |
| -1.47740541 | 0.00101115 | -1.1327639 | 0.036930326 | -1.67134044 | 2.84E-05    |
| -1.20984603 | 0.0140443  | -1.0498467 | 0.346177236 | -1.37942079 | 7.56E-05    |
| -1.12081351 | 0.01460245 | 0.90884566 | 0.404954642 | -1.13924905 | 0.00562775  |
| 0.982947792 | 0.6697513  | -1.0928289 | 0.345596688 | -1.0839657  | 0.049434556 |
| -1.12682867 | 0.24759822 | 0.95394421 | 0.462326674 | -1.05901685 | 0.576904351 |
| -1.2046621  | 0.12258491 | 0.92223037 | 0.274318871 | -1.44744825 | 0.002945896 |
| 0.992054073 | 0.9043308  | -1.0849297 | 0.457928933 | 0.938090791 | 0.337677731 |
| 0.810942145 | 0.01087419 | -1.2038026 | 0.039065968 | 0.887212743 | 0.137734483 |
| 0.938811704 | 0.24635077 | -1.0029933 | 0.954093619 | 0.843653694 | 0.002623722 |
| -1.18853625 | 0.01817859 | -1.1662935 | 0.020908899 | -1.4298493  | 5.55E-06    |
| -1.17850886 | 0.06350007 | -1.0138612 | 0.764258785 | -1.20526605 | 0.035758792 |
| -1.01488359 | 0.76475861 | -1.0236153 | 0.543425542 | 0.806204554 | 5.44E-05    |
| -1.01529704 | 0.79866687 | -1.0284065 | 0.62138895  | 0.953146865 | 0.42136357  |
| -1.01986008 | 0.62044203 | 0.90150415 | 0.009137921 | -1.04668862 | 0.25288053  |
| 0.864515897 | 0.05280145 | -1.1890143 | 0.032494417 | -1.03146803 | 0.675107228 |
| -1.38650649 | 0.00527833 | 0.99645645 | 0.973056353 | -1.49766852 | 0.000706912 |
| -1.43995344 | 0.00248109 | -1.2690232 | 0.016569    | 0.67347922  | 0.00112493  |
| -1.00834909 | 0.90238594 | -1.0353101 | 0.615341938 | 0.86511723  | 0.036294728 |
| 0.92659093  | 0.2711965  | -1.361124  | 0.008166234 | 0.956044471 | 0.514968264 |
| -1.00603849 | 0.87273212 | -1.1617355 | 0.050763602 | -1.03317368 | 0.386812632 |
| -1.05858396 | 0.1254852  | -1.0846788 | 0.077695948 | -1.0061023  | 0.868530156 |
| 0.897839448 | 0.05743724 | 0.96831681 | 0.425646604 | -1.09801152 | 0.097861164 |
| -1.01224161 | 0.69189654 | 0.98076328 | 0.84990742  | 0.989473289 | 0.730298141 |
| -1.11151269 | 0.22541112 | -1.0952365 | 0.446774521 | 0.602515935 | 2.74E-07    |
| -1.00385791 | 0.93467028 | 0.93847709 | 0.340772588 | 0.956740085 | 0.348454995 |

|             |            |            |             |             |             |
|-------------|------------|------------|-------------|-------------|-------------|
| -1.00304906 | 0.97163946 | 0.87529658 | 0.099354562 | 0.910432315 | 0.275847769 |
| -1.02309355 | 0.49570753 | 0.86412671 | 0.008995131 | 0.976212803 | 0.472635665 |
| 0.93467686  | 0.2753353  | -1.1387903 | 0.072293732 | 0.942719062 | 0.3401995   |
| 0.983214663 | 0.7026457  | -1.3318661 | 0.001691158 | -1.0003424  | 0.99383591  |
| -1.00821253 | 0.92453392 | 0.9797149  | 0.678195174 | 0.92442561  | 0.364605197 |
| 0.965552327 | 0.75184423 | 0.98717165 | 0.828244909 | 0.950050707 | 0.644112712 |
| 0.999010213 | 0.98785545 | -1.0475462 | 0.244567948 | 0.957893699 | 0.509327762 |
| 0.906973913 | 0.4642195  | 0.79554339 | 0.002982315 | -1.10077403 | 0.47166486  |
| -1.10186338 | 0.14271531 | -1.1138876 | 0.341439627 | 0.97223664  | 0.66762668  |
| -1.04030494 | 0.45812827 | 0.8414649  | 0.138650476 | 0.69702646  | 8.13E-09    |
| 0.991193964 | 0.85452937 | 0.95275332 | 0.47628056  | -1.08262804 | 0.104050874 |
| -1.1417057  | 0.09613954 | -1.0330764 | 0.637061753 | -1.37132134 | 0.000174012 |
| -1.03376902 | 0.72490796 | -1.0391477 | 0.309184984 | -1.05452484 | 0.574091451 |
| -1.03257399 | 0.73162702 | 0.98928702 | 0.769545587 | -1.16285919 | 0.110503394 |
| -1.28836477 | 0.00014681 | -1.019175  | 0.733521938 | -1.08268384 | 0.205499409 |
| 0.991252032 | 0.87473022 | -1.0286007 | 0.359928865 | 0.955751001 | 0.418144105 |
| -1.06426644 | 0.12510591 | 0.95737169 | 0.615389521 | 0.849331457 | 0.000148012 |
| 0.998253707 | 0.96671084 | -1.0976477 | 0.051387105 | 0.894005685 | 0.009557765 |
| -1.00855594 | 0.88223254 | -1.0128327 | 0.881641031 | -1.01077888 | 0.852122171 |
| 0.898997487 | 0.05122382 | -1.0089409 | 0.790165755 | 0.989564028 | 0.844973019 |
| 0.81094333  | 4.31E-06   | 0.94164325 | 0.331014597 | 0.964001722 | 0.374827135 |
| 0.826498363 | 0.03547996 | 0.95384033 | 0.28874906  | -1.47603138 | 5.04E-05    |
| -1.10444376 | 0.13557426 | 0.83575928 | 0.041592267 | -1.03219437 | 0.630831705 |
| -1.05900825 | 0.31149071 | -1.0688457 | 0.548615588 | -1.03794732 | 0.50969322  |
| -1.07007565 | 0.41761348 | 0.91501253 | 0.175900971 | -1.3639892  | 0.000443553 |
| 0.777871259 | 0.00556997 | 0.94724156 | 0.684010497 | -1.01515879 | 0.863293518 |
| -1.13590337 | 0.11509536 | -1.1909766 | 0.009750934 | -1.11888269 | 0.16374534  |
| -1.34445063 | 0.00050213 | 0.68608218 | 2.66342E-09 | -1.36614124 | 0.000265801 |
| -1.05200922 | 0.52462944 | -1.0049308 | 0.918783332 | 0.987040152 | 0.869747796 |
| -1.08288722 | 0.36989618 | -1.1244174 | 0.139836466 | -1.10055906 | 0.281420137 |
| 0.81687773  | 0.10531263 | 0.92518947 | 0.411204949 | 0.8540515   | 0.204320501 |
| -1.08778465 | 0.21083039 | -1.142764  | 0.157013145 | -1.00603693 | 0.928157289 |
| 0.984033902 | 0.7826681  | 0.9533897  | 0.444669987 | 0.933795967 | 0.243265998 |
| 0.823535165 | 0.11624029 | 0.9869363  | 0.813503332 | 0.95761923  | 0.723153355 |
| 0.904536369 | 0.11420351 | -1.0140346 | 0.728735212 | 0.796461557 | 0.000609858 |
| -1.01681512 | 0.77178014 | -1.0637431 | 0.144085168 | 0.920290003 | 0.152280269 |
| 0.970287637 | 0.53357227 | -1.1337163 | 0.03268971  | 0.968391058 | 0.507468363 |
| 0.948092782 | 0.34782737 | 0.99655903 | 0.948765948 | 0.998729503 | 0.982061758 |
| 0.962078973 | 0.65768349 | 0.95042304 | 0.21993312  | 0.816748463 | 0.02341702  |
| -1.14310905 | 0.02126678 | 0.89240714 | 0.203031194 | -1.08265759 | 0.164624224 |
| -1.02167707 | 0.65652199 | 0.91429845 | 0.177435337 | 0.882915187 | 0.012117024 |
| 0.805955514 | 0.00097934 | -1.0044432 | 0.93731997  | 0.658171195 | 1.03E-08    |
| -1.17866826 | 0.02406526 | -1.1847855 | 0.04576796  | -1.02425701 | 0.736281434 |
| 0.968617778 | 0.6452359  | 0.85636404 | 0.080225036 | -1.16698164 | 0.029096523 |

|             |            |            |             |             |             |
|-------------|------------|------------|-------------|-------------|-------------|
| 0.879431419 | 0.08750982 | -1.0527894 | 0.520640943 | 0.987075398 | 0.860779334 |
| 0.919785486 | 0.13422255 | 0.99206762 | 0.920975116 | 0.972097971 | 0.608913015 |
| -1.04903381 | 0.3931799  | -1.0343583 | 0.671312912 | 0.932687682 | 0.215609033 |
| -1.0363615  | 0.46046159 | -1.1353662 | 0.15520732  | -1.05678608 | 0.255379374 |
| -1.16990708 | 0.03746038 | -1.0559825 | 0.659066288 | 0.969377473 | 0.674076252 |
| 0.815923598 | 0.00806408 | -1.0162284 | 0.809478305 | 0.806388502 | 0.005237841 |
| -1.00805774 | 0.88908653 | 0.90867973 | 0.104892494 | 0.71794726  | 3.83E-07    |
| -1.03395383 | 0.60885553 | 0.77202174 | 0.037972614 | -1.00271038 | 0.966872172 |
| 0.878931352 | 0.0467122  | 0.97092795 | 0.638721134 | -1.06461529 | 0.327683677 |
| -1.34712309 | 0.00218205 | 0.91327764 | 0.11864408  | 0.863601324 | 0.118974112 |
| 0.962585986 | 0.67498721 | 0.97476733 | 0.597666472 | 0.932716423 | 0.444585176 |
| 0.870934672 | 0.28173607 | 0.87997087 | 0.027120688 | -1.07370421 | 0.578093828 |
| -1.01677998 | 0.91032095 | 0.82994253 | 0.03620666  | -1.08548994 | 0.579260443 |
| -1.03764702 | 0.59387669 | 0.93248024 | 0.220299424 | -1.14660768 | 0.052171342 |
| 0.952820849 | 0.36679581 | 0.98466255 | 0.748465063 | -1.04058971 | 0.456929124 |
| -1.07577279 | 0.40635143 | 0.75671595 | 3.59543E-05 | -1.27953312 | 0.006635368 |
| 0.947517088 | 0.32790623 | 0.97903929 | 0.765934341 | 0.964754383 | 0.513888376 |
| -1.27952712 | 0.00253898 | -1.1265442 | 0.089338406 | -1.20388533 | 0.020679389 |
| -1.16843168 | 0.00732003 | 0.88332477 | 0.098648933 | -1.18063783 | 0.004394774 |
| -1.26388008 | 0.01713355 | 0.86310096 | 0.009822709 | 0.982146876 | 0.850605851 |
| 0.803562255 | 0.04999424 | -1.040361  | 0.47984831  | 0.965023692 | 0.745364751 |
| -1.31959446 | 1.87E-05   | -1.0287469 | 0.557712597 | -1.09112592 | 0.145426506 |
| -1.25878087 | 0.00133652 | 0.96606171 | 0.640641103 | -1.11889236 | 0.104290039 |
| -1.02815349 | 0.62608102 | 0.89569301 | 0.142040863 | -1.05200868 | 0.374820962 |
| -1.07148643 | 0.38425579 | 0.56699004 | 1.02216E-13 | -1.04999588 | 0.537983859 |
| 0.784506115 | 0.02919559 | -1.0028779 | 0.964829171 | -1.05879098 | 0.600044473 |
| -1.02708971 | 0.57636191 | -1.1631169 | 0.020702147 | -1.02315784 | 0.632136452 |
| 0.948354888 | 0.17092305 | -1.1215556 | 0.220567796 | -1.003522   | 0.92702656  |
| 0.967605866 | 0.36399671 | -1.0773103 | 0.413938302 | 0.967053622 | 0.355804516 |
| -1.02456214 | 0.55725137 | -1.0304801 | 0.81413254  | 0.917739184 | 0.041427669 |
| 0.972316742 | 0.61814431 | -1.1510119 | 0.343139547 | -1.05992885 | 0.303242627 |
| 0.91258707  | 0.12168568 | -1.1083419 | 0.141257116 | 0.899259281 | 0.073484948 |
| -1.03422235 | 0.38236877 | 0.8946935  | 0.040846329 | -1.04600065 | 0.244319199 |
| -1.05961477 | 0.09890683 | -1.154819  | 0.104915817 | 0.945096474 | 0.107351126 |
| 0.990794959 | 0.84184022 | -1.0687513 | 0.228647087 | -1.09195789 | 0.061824763 |
| 0.958614524 | 0.4042322  | -1.0417051 | 0.601733626 | 0.787693842 | 1.58E-05    |
| -1.00590712 | 0.90765722 | -1.0898089 | 0.129342299 | -1.05126867 | 0.326943411 |
| -1.05808063 | 0.38058532 | 0.96714935 | 0.727022764 | -1.01195202 | 0.853101105 |
| -1.04700121 | 0.36741531 | 0.86082068 | 0.175115787 | 0.934869969 | 0.188204966 |
| 0.970187363 | 0.46566424 | -1.1248519 | 0.051354011 | -1.05427905 | 0.204917704 |
| 0.951073508 | 0.27745479 | -1.1136147 | 0.119327622 | 0.987483167 | 0.783990784 |
| 0.937234646 | 0.30351045 | -1.0636452 | 0.280977091 | 0.949835313 | 0.413103359 |
| 0.966008739 | 0.56549547 | -1.0485034 | 0.549860666 | -1.09119761 | 0.150284658 |
| 0.956322835 | 0.38197324 | 0.83534627 | 0.10252364  | -1.15012756 | 0.007874294 |

|             |            |            |             |             |             |
|-------------|------------|------------|-------------|-------------|-------------|
| -1.01557752 | 0.78102374 | 0.94567101 | 0.245264803 | -1.07623559 | 0.189827234 |
| 0.873860165 | 0.00194003 | -1.0000222 | 0.999539286 | -1.02357682 | 0.575541685 |
| -1.08382909 | 0.16213104 | -1.0048892 | 0.892644273 | 0.957628733 | 0.449192162 |
| 0.946891744 | 0.30817708 | -1.0358931 | 0.394526027 | 0.97576369  | 0.645550492 |
| 0.928002998 | 0.12781066 | 0.92019623 | 0.143295111 | 0.98022816  | 0.680976239 |
| -1.1099041  | 0.06548253 | -1.1033616 | 0.096625041 | -1.05836432 | 0.310921072 |
| 0.988261656 | 0.83068878 | -1.052771  | 0.183945449 | -1.01966771 | 0.724417934 |
| 0.939236864 | 0.18392928 | -1.087568  | 0.01827305  | 0.884748736 | 0.011135453 |
| 0.987843546 | 0.84119829 | -1.0639679 | 0.184473782 | -1.0450109  | 0.471762398 |
| 0.92240456  | 0.13602906 | -1.0024379 | 0.961549636 | 0.991913027 | 0.87964111  |
| -1.02825203 | 0.62599777 | 0.97257289 | 0.584400848 | -1.13025563 | 0.035722325 |
| -1.03890332 | 0.50901825 | 0.95506052 | 0.474619025 | -1.02699271 | 0.644556555 |
| -1.12046279 | 0.03287526 | -1.0286652 | 0.578262056 | -1.02343727 | 0.657317974 |
| 0.99382862  | 0.87627483 | 0.9843785  | 0.703786055 | 0.995681362 | 0.913316097 |
| -1.03901417 | 0.23026004 | -1.0114157 | 0.804870882 | -1.02713369 | 0.399735682 |
| 0.995990639 | 0.95549824 | 0.60449948 | 8.04284E-11 | 0.951480646 | 0.490620924 |
| -1.07284936 | 0.33934686 | -1.1335032 | 0.040865833 | -1.15327931 | 0.055783553 |
| 0.995007889 | 0.9615805  | -1.1324353 | 0.017368228 | -1.17191347 | 0.130890461 |
| 0.993101383 | 0.90466643 | -1.0321653 | 0.569566048 | -1.07199081 | 0.232177417 |
| 0.594299268 | 1.39E-11   | 0.95569469 | 0.27817836  | 0.840256638 | 0.006056673 |
| 0.985680372 | 0.86089846 | 0.92841319 | 0.19648286  | 0.86175361  | 0.074907064 |
| -1.0050127  | 0.88741408 | -1.0617453 | 0.263682446 | 0.920070714 | 0.02141662  |
| -1.49513951 | 5.24E-05   | -1.0774993 | 0.128197637 | -1.64293804 | 1.41E-06    |
| 0.935283123 | 0.08592187 | -1.0773483 | 0.184747541 | 0.960731772 | 0.299556083 |
| 0.798144606 | 8.23E-07   | -1.0168678 | 0.76201646  | 0.853134765 | 0.000246569 |
| -1.00292394 | 0.95672107 | 0.98351119 | 0.722477305 | 0.692797598 | 7.34E-09    |
| -1.00296761 | 0.95003051 | -1.1921666 | 0.005497341 | 0.859012022 | 0.002121473 |
| -1.26068403 | 0.00782422 | 0.94459675 | 0.290303434 | 0.773087994 | 0.00335655  |
| -1.13468623 | 0.3803685  | 0.96169191 | 0.494876361 | -1.15560662 | 0.315893093 |
| 0.81728966  | 0.00017798 | -1.1169415 | 0.059353016 | 0.985314676 | 0.768830911 |
| -1.02195675 | 0.47228792 | -1.0125453 | 0.811189994 | 0.95996277  | 0.178939947 |
| -1.02364094 | 0.78639379 | -1.0288423 | 0.475535308 | 0.579457949 | 4.60E-08    |
| 0.964215412 | 0.44184184 | -1.0881674 | 0.009781529 | 0.949750263 | 0.277874018 |
| -1.10053431 | 0.13485165 | -1.1238245 | 0.109144555 | 0.839365397 | 0.007580478 |
| 0.954055926 | 0.36156368 | -1.0121888 | 0.868705095 | 0.913577645 | 0.082661701 |
| 0.701905204 | 3.63E-06   | -1.055651  | 0.602632129 | 0.665199975 | 2.11E-07    |
| 0.878724403 | 0.03445461 | -1.0482024 | 0.416779143 | -1.03016295 | 0.619964426 |
| -1.05259432 | 0.51889526 | 0.59196052 | 1.09278E-11 | -1.1858177  | 0.035339448 |
| 0.820605269 | 0.00027129 | -1.0936237 | 0.279471832 | 0.907179274 | 0.060084489 |
| 0.835664908 | 0.0039804  | 0.95219149 | 0.169153409 | 0.949289679 | 0.386870218 |
| 0.898855823 | 0.12615414 | -1.7368459 | 1.53516E-07 | 0.760092488 | 0.000197417 |
| -1.25461821 | 0.01238565 | 0.93397911 | 0.079752804 | -1.36482732 | 0.000813198 |
| -1.21072695 | 0.06287147 | 0.88406213 | 0.003577634 | -1.17862741 | 0.108401108 |
| 0.768456127 | 0.01006231 | -1.0635612 | 0.254931341 | 0.981750502 | 0.852680737 |

|             |            |            |             |             |             |
|-------------|------------|------------|-------------|-------------|-------------|
| -1.00417535 | 0.93375542 | 0.94236248 | 0.212625603 | 0.80112896  | 4.46E-05    |
| 0.776831757 | 0.01143412 | 0.74023963 | 0.000721668 | 0.789456261 | 0.017491634 |
| -1.07034449 | 0.06923792 | -1.0741341 | 0.618691254 | -1.11945537 | 0.003284635 |
| -1.20970088 | 3.20E-05   | 0.87506384 | 0.010154818 | -1.31071072 | 3.23E-08    |
| 0.885354819 | 0.31853991 | 0.93888423 | 0.040280643 | -1.09672295 | 0.44857044  |
| -1.17379999 | 0.06049336 | 0.68291196 | 4.44038E-05 | 0.945872512 | 0.508323129 |
| -1.01842567 | 0.607072   | -1.0452224 | 0.351203109 | 0.924299976 | 0.029930938 |
| -1.14011125 | 0.13833387 | 0.92770355 | 0.239576678 | -1.18162734 | 0.060857182 |
| -1.28773238 | 0.00063117 | 0.88693198 | 0.022611301 | -1.01336467 | 0.849534968 |
| -1.34431561 | 0.00122619 | 0.91022214 | 0.175667404 | -1.27907231 | 0.006362782 |
| -1.25463496 | 0.0857865  | 0.93087106 | 0.234501141 | -1.43679572 | 0.007159445 |
| 0.829472708 | 0.08790373 | -1.254749  | 0.005785144 | 0.881371288 | 0.245574068 |
| -1.07336587 | 0.15040369 | 0.96293957 | 0.459755513 | 0.955946732 | 0.357351006 |
| -1.31430577 | 0.00301456 | 0.92468206 | 0.194871599 | -1.32901547 | 0.00209045  |
| 0.899518905 | 0.13963469 | 0.93916192 | 0.364539207 | 0.963354816 | 0.599254668 |
| -1.10497032 | 0.21531846 | -1.1048114 | 0.260445744 | -1.22990651 | 0.012033084 |
| -1.07706531 | 0.34152032 | 0.98697951 | 0.896900078 | 0.674135284 | 4.60E-06    |
| 0.95363588  | 0.40041869 | 0.9901579  | 0.920554425 | 0.814050268 | 0.000553504 |
| -1.02669302 | 0.57221218 | -1.0138973 | 0.783131608 | -1.00765516 | 0.869945867 |
| -1.10264765 | 0.20157807 | 0.7396147  | 0.002839724 | 0.889642964 | 0.12768329  |
| -1.0504582  | 0.35721383 | 0.98380942 | 0.657983816 | 0.847610418 | 0.002916742 |
| 0.992609408 | 0.92351147 | -1.1021598 | 0.024134375 | 0.626133888 | 1.26E-07    |
| 0.911953874 | 0.03515422 | -1.1823114 | 0.171868033 | 0.625955138 | 2.41E-15    |
| -1.06264216 | 0.56368828 | 0.97141532 | 0.729915996 | 0.996134174 | 0.97059294  |
| 0.988315856 | 0.81642809 | 0.96997954 | 0.391654816 | -1.09939869 | 0.065409244 |
| -1.09071669 | 0.08938883 | -1.1388491 | 0.141627739 | -1.01768472 | 0.72827515  |
| 0.986972239 | 0.80398212 | -1.1273233 | 0.091041871 | 0.891454971 | 0.033237739 |
| -1.01904048 | 0.70929672 | -1.1971773 | 0.042657191 | 0.984307025 | 0.754512537 |
| 0.872990041 | 0.01831814 | -1.2560838 | 0.084247268 | -1.07272232 | 0.213964772 |
| 0.795896453 | 3.54E-06   | 0.98991736 | 0.925288483 | 0.916143636 | 0.052428389 |
| 0.960148109 | 0.5024674  | -1.063723  | 0.208505495 | -1.00927601 | 0.878743526 |
| 0.953589061 | 0.44979994 | -1.3991299 | 0.00034994  | 0.847290784 | 0.010425108 |
| 0.960936335 | 0.4131339  | -1.1125733 | 0.136799322 | 0.926888358 | 0.121938917 |
| 0.877192421 | 0.0981382  | -1.071674  | 0.38842304  | 0.993511343 | 0.933663794 |
| 0.911969179 | 0.23949393 | -1.0645483 | 0.422330354 | 0.875526117 | 0.09195585  |
| 0.97677739  | 0.60140477 | 0.56911687 | 5.87605E-14 | 0.975256621 | 0.577578775 |
| -1.05084595 | 0.37640763 | 0.95839776 | 0.363418213 | 0.966415787 | 0.541571363 |
| -1.10538588 | 0.11891882 | -1.0294893 | 0.702090329 | -1.45656267 | 2.11E-07    |
| 0.976523932 | 0.77382279 | 0.90717736 | 0.071628347 | -1.03167049 | 0.706119571 |
| 0.962739449 | 0.34958806 | 0.91463422 | 0.251040523 | -1.00432499 | 0.914993782 |
| -1.15082462 | 0.16713759 | 0.82532868 | 3.66656E-05 | 0.896580765 | 0.2813301   |
| -1.00101066 | 0.98576421 | -1.036965  | 0.729883817 | 0.892730037 | 0.049072855 |
| 0.982883308 | 0.75502006 | 0.9060504  | 0.055401796 | 0.85573102  | 0.006532978 |
| -1.09141575 | 0.19321682 | 0.90289282 | 0.04679561  | -1.11622913 | 0.103502125 |

|             |            |            |             |             |             |
|-------------|------------|------------|-------------|-------------|-------------|
| -1.07693891 | 0.14920252 | -1.0680902 | 0.215658008 | -1.00009741 | 0.99847273  |
| -1.01359555 | 0.8567916  | 0.92338308 | 0.119095365 | -1.06167756 | 0.425136689 |
| -1.00463546 | 0.92663277 | 0.93520435 | 0.235352581 | -1.13604011 | 0.013608883 |
| -1.1139248  | 0.05110445 | 0.97055772 | 0.501418028 | -1.0500931  | 0.370067878 |
| -1.07721507 | 0.29171586 | 0.94692957 | 0.369342661 | -1.23175612 | 0.004274747 |
| 0.871748992 | 0.14125279 | 0.89419243 | 0.078837072 | -1.3020841  | 0.005835197 |
| 0.972628463 | 0.70607649 | -1.0314831 | 0.523845773 | -1.21019492 | 0.011822474 |
| -1.19946567 | 0.00476198 | -1.011305  | 0.885714329 | -1.08461726 | 0.19395873  |
| 0.896979331 | 0.44866226 | 0.88551337 | 0.122420345 | 0.987148685 | 0.927987908 |
| -1.17572066 | 0.06778303 | -1.0070902 | 0.875040694 | -1.21286214 | 0.030504576 |
| 0.93593047  | 0.15653062 | -1.0271508 | 0.631923266 | 0.94301667  | 0.208406068 |
| 0.903485522 | 0.35594668 | 0.94897371 | 0.411143396 | -1.19020889 | 0.116024877 |
| 0.823118616 | 0.00521514 | -1.0519155 | 0.540915548 | 0.790911776 | 0.000917076 |
| -1.35868833 | 0.00066984 | -1.024634  | 0.547896934 | -1.40839534 | 0.000174114 |
| 0.989499755 | 0.84682419 | 0.85569084 | 0.126149618 | -1.08646421 | 0.13314322  |
| 0.962390653 | 0.29986681 | -1.0108559 | 0.848769638 | 0.806120727 | 2.65E-07    |
| 0.869901157 | 0.31301104 | 0.78645355 | 5.85514E-05 | 0.262809358 | 1.69E-13    |
| 0.887154063 | 0.00784525 | 0.99356914 | 0.922944038 | 0.950294315 | 0.244724573 |
| -1.05343245 | 0.31952807 | -1.0384102 | 0.460055409 | 0.90441592  | 0.057743547 |
| 0.925054836 | 0.25469714 | -1.0165085 | 0.826810752 | 0.877209631 | 0.058116003 |
| 0.954257144 | 0.43583831 | -1.0382234 | 0.456298811 | 0.84044817  | 0.005185223 |
| -1.06759295 | 0.2261409  | 0.86052887 | 0.007523545 | 0.945506227 | 0.298887349 |
| 0.975043707 | 0.512514   | -1.0370059 | 0.605046199 | 0.945265406 | 0.147817327 |
| 0.97056275  | 0.51962926 | 0.86686482 | 0.125996374 | -1.01578127 | 0.735424953 |
| -1.0963799  | 0.02705467 | -1.0842204 | 0.274231178 | 0.961192682 | 0.332582981 |
| 0.662792748 | 1.17E-11   | -1.0526411 | 0.409760208 | -1.01395787 | 0.773315172 |
| 0.899011791 | 0.03215379 | 0.90529874 | 0.487923882 | -1.01361245 | 0.781031307 |
| -1.00554732 | 0.88993536 | 0.92101758 | 0.347667318 | 0.942060409 | 0.139429352 |
| 0.972668395 | 0.68037777 | -1.0125394 | 0.787860401 | -1.09499522 | 0.180651531 |
| -1.01857214 | 0.81322714 | -1.1206321 | 0.300758058 | 0.904508961 | 0.200885559 |
| 0.98182372  | 0.80635833 | 0.89815139 | 0.113874118 | -1.23706357 | 0.006074087 |
| 0.971932344 | 0.74764781 | -1.2131135 | 0.026832425 | 0.909063338 | 0.28363177  |
| 0.636472123 | 3.27E-10   | -1.0998708 | 0.085752216 | 0.564246197 | 1.86E-13    |
| 0.99101977  | 0.84284103 | 0.90185302 | 0.006697801 | 0.84122189  | 0.000350202 |
| 0.96292545  | 0.32903572 | 0.44444057 | 2.28691E-07 | 0.888158577 | 0.003148378 |
| 0.960042133 | 0.64171048 | 0.99968318 | 0.994194617 | -1.13974219 | 0.139207051 |
| 0.995875102 | 0.93946269 | 0.86928957 | 0.009163517 | -1.04034804 | 0.468456721 |
| -1.68049526 | 1.62E-08   | 0.86679616 | 0.039294514 | -1.41254028 | 4.87E-05    |
| -1.06635159 | 0.1553778  | 0.93982891 | 0.302735362 | -1.17561623 | 0.000634824 |
| 0.902895832 | 0.02398544 | -1.0411516 | 0.453587042 | -1.07556018 | 0.103413035 |
| 0.947297562 | 0.30741293 | 0.99259746 | 0.847038028 | -1.01129332 | 0.831561505 |
| 0.905678949 | 0.02448078 | 0.79113388 | 4.84534E-06 | 0.982600521 | 0.683351187 |
| 0.829555821 | 0.15532004 | -1.0466832 | 0.264712198 | 0.930232199 | 0.579297356 |
| 0.866932754 | 0.00272585 | 0.76793795 | 1.02697E-06 | -1.02415245 | 0.601579963 |

|             |            |            |             |             |             |
|-------------|------------|------------|-------------|-------------|-------------|
| 0.918161567 | 0.50367091 | -1.0045201 | 0.926101982 | 0.772782478 | 0.047066546 |
| 0.973203094 | 0.47485365 | 0.97437019 | 0.516803462 | -1.03942449 | 0.310204973 |
| 0.704516891 | 0.00058775 | -1.0695866 | 0.31917359  | 0.85092192  | 0.097950029 |
| -1.60582928 | 0.00084642 | 0.75874917 | 0.000780953 | -1.21269136 | 0.155771591 |
| 0.800654692 | 0.00896371 | 0.96935767 | 0.677657097 | 0.823765878 | 0.021676629 |
| 0.917461643 | 0.14234299 | 0.8146951  | 0.023708742 | -1.02063878 | 0.725390997 |
| 0.989566455 | 0.88120521 | 0.92905661 | 0.215897205 | -1.09192077 | 0.213496344 |
| -1.0943287  | 0.24462141 | 0.97848798 | 0.632983908 | -1.16001895 | 0.057991476 |
| -1.16484289 | 0.02062823 | -1.0198074 | 0.611176079 | -1.2970048  | 0.000157849 |
| 0.998474272 | 0.97183941 | 0.95292391 | 0.582315092 | 0.950235876 | 0.240979014 |
| -1.08487342 | 0.2393373  | -1.0626897 | 0.266686725 | 0.973358011 | 0.694837687 |
| 0.937820708 | 0.47379313 | -1.3118321 | 0.001028084 | -1.13183142 | 0.169783829 |
| -1.06891101 | 0.32368852 | -1.0445517 | 0.332592623 | -1.33990022 | 5.67E-05    |
| 0.973567039 | 0.5387813  | 0.97972013 | 0.643108227 | -1.1986816  | 0.000106454 |
| 0.635538176 | 6.27E-06   | -1.0053779 | 0.919071941 | 0.502203122 | 4.34E-10    |
| -1.12626823 | 0.13841112 | -1.0258926 | 0.552830418 | -1.04778101 | 0.55739731  |
| 0.967943721 | 0.55545516 | 0.7576873  | 0.036902211 | -1.01665412 | 0.764741209 |
| 0.950861578 | 0.26092407 | 0.98861286 | 0.80196457  | -1.01480211 | 0.741682786 |
| -1.118674   | 0.04564846 | 0.82295287 | 0.130293456 | 0.92860851  | 0.182214042 |
| 0.934918666 | 0.26146846 | -1.0210505 | 0.583280688 | 0.940572296 | 0.30613993  |
| -1.06572755 | 0.20341958 | 0.70463586 | 0.000590987 | -1.04863039 | 0.34113349  |
| 0.560609217 | 1.03E-07   | -1.2363895 | 0.119037649 | 0.532424497 | 1.35E-08    |
| -1.02842753 | 0.74909938 | 0.80989507 | 0.012909296 | 0.675283623 | 3.65E-05    |
| -1.13676163 | 0.24621525 | -1.1111235 | 0.07413337  | 0.784909585 | 0.03101965  |
| 0.985183508 | 0.56719516 | 0.98758754 | 0.858757623 | -1.01452983 | 0.580264651 |
| 0.812424559 | 0.05891492 | -1.0457599 | 0.561704978 | -1.00003776 | 0.999721409 |
| -1.00732442 | 0.9319991  | 0.98280918 | 0.787376436 | 0.81477035  | 0.019580875 |
| -1.17367599 | 0.09962467 | 0.98582406 | 0.741458362 | 0.91184351  | 0.33854732  |
| -1.01433788 | 0.8702726  | 0.99622376 | 0.956135902 | -1.13171014 | 0.159603746 |
| 0.9097351   | 0.14590885 | -1.1692543 | 0.084597229 | 0.909872314 | 0.146539913 |
| 0.943557606 | 0.28833828 | -1.336004  | 6.56298E-05 | -1.01027474 | 0.851047882 |
| 0.805233311 | 0.00821393 | 0.97103577 | 0.500217456 | 0.708616554 | 5.84E-05    |
| 0.977106745 | 0.59750925 | 0.68397428 | 0.000101882 | 0.966558044 | 0.438766369 |
| 0.998692502 | 0.98256726 | -1.1462146 | 0.090067406 | 0.554959906 | 1.12E-13    |
| -1.13410416 | 0.00860696 | -1.0754656 | 0.190822997 | -1.03516682 | 0.457070117 |
| -1.23927417 | 0.03164422 | -1.0366543 | 0.420522727 | -1.176458   | 0.100438767 |
| 0.96146078  | 0.44745576 | -1.0477464 | 0.398528405 | 0.989395685 | 0.836333973 |
| 0.940107138 | 0.44841742 | 0.91069303 | 0.120529545 | 0.738199642 | 0.000430713 |
| -1.50487561 | 4.91E-05   | -1.0087317 | 0.861076712 | -1.379343   | 0.001019756 |
| -1.38731288 | 0.00303902 | 0.32952227 | 1.6636E-16  | -1.03958108 | 0.714210991 |
| 0.784330028 | 0.00956087 | 0.91518534 | 0.313980021 | 0.935485768 | 0.463820725 |
| 0.964079608 | 0.2881223  | 0.85858936 | 0.168919848 | 0.950488306 | 0.142263472 |
| -1.07289949 | 0.31665101 | -1.0425317 | 0.114033063 | 0.940394732 | 0.381275026 |
| 0.827402267 | 0.33325867 | 0.85653582 | 0.156048097 | 0.852149917 | 0.413305058 |

|             |            |            |             |             |             |
|-------------|------------|------------|-------------|-------------|-------------|
| 0.955886516 | 0.48579631 | 0.954051   | 0.582839771 | -1.02560391 | 0.695653832 |
| 0.765249635 | 0.00806132 | -1.2353899 | 0.031255028 | 0.353331356 | 6.40E-15    |
| -1.11751598 | 0.05391069 | -1.0193695 | 0.825828823 | -1.14530196 | 0.019581314 |
| 0.994525021 | 0.89495184 | -1.0334769 | 0.609635427 | -1.04748873 | 0.26720996  |
| 0.90383519  | 0.21187606 | 0.99236262 | 0.887991902 | 0.923561268 | 0.324833724 |
| 0.980432047 | 0.89484133 | 0.75059752 | 0.000622764 | 0.74546511  | 0.053528066 |
| 0.857065267 | 0.41948098 | 0.96966791 | 0.482985429 | 0.984080776 | 0.932858486 |
| 0.865085883 | 0.01291689 | 0.45996025 | 2.96923E-18 | -1.02801847 | 0.625855517 |
| 0.954684984 | 0.3646     | 0.94109299 | 0.19380989  | 0.96705314  | 0.511703777 |
| 0.969687625 | 0.6274334  | -1.3573966 | 0.002722931 | 0.943026556 | 0.356393305 |
| -1.00110428 | 0.97607643 | 0.98102494 | 0.7105918   | 0.994346564 | 0.877584919 |
| -1.00825758 | 0.87355176 | 0.97003296 | 0.708254505 | 0.992485861 | 0.883945721 |
| -1.02153855 | 0.67212319 | -1.1468299 | 0.144649155 | 0.936316709 | 0.194406164 |
| -1.03210973 | 0.46868018 | -1.2440259 | 0.043197956 | 0.952314689 | 0.264233928 |
| 0.982945744 | 0.77685277 | -1.054692  | 0.55823742  | -1.0858792  | 0.178145945 |
| 0.893723949 | 0.33064162 | 0.97006144 | 0.376654454 | -1.12074923 | 0.323698657 |
| 0.807272352 | 0.05527177 | 0.81343871 | 0.004494568 | -1.17076904 | 0.154858122 |
| -1.01902639 | 0.75500741 | 0.90286311 | 0.600646196 | -1.08349131 | 0.187703068 |
| -1.03563361 | 0.49884525 | -1.032222  | 0.623766681 | 0.886401846 | 0.022752798 |
| 0.878863077 | 0.01565471 | 0.69195028 | 0.000386069 | -1.01377543 | 0.792412552 |
| 0.966456803 | 0.39131367 | 0.90831684 | 0.093843417 | 0.944356226 | 0.152829702 |
| -1.03067824 | 0.53262204 | 0.99047381 | 0.817955756 | -1.0271728  | 0.57966899  |
| 0.807721737 | 0.12369234 | 0.77930797 | 0.002943128 | 0.878297453 | 0.346130627 |
| 0.841034027 | 0.06859151 | -1.0106923 | 0.94328487  | 0.826574312 | 0.045810019 |
| 0.955039885 | 0.36375138 | -1.0071778 | 0.970046184 | 0.777945379 | 6.49E-06    |
| 0.770478939 | 0.0104548  | 0.98104822 | 0.735516041 | 0.964051745 | 0.710920351 |
| -1.02139803 | 0.75331828 | -1.0176856 | 0.730937743 | -1.22557072 | 0.00370815  |
| -1.14261508 | 0.05434491 | 0.95087635 | 0.427917781 | -1.10018071 | 0.164678743 |
| -1.01113936 | 0.82902622 | 0.99608965 | 0.915222893 | -1.01376677 | 0.789847257 |
| -1.03842871 | 0.43360029 | -1.0344506 | 0.512957724 | -1.00972078 | 0.840366282 |
| 0.814480547 | 0.03858215 | -1.0028553 | 0.954804458 | -1.0437654  | 0.659770225 |
| 0.810324777 | 0.19157222 | 0.99438673 | 0.897064543 | 0.841742818 | 0.283473453 |
| 0.969765683 | 0.54347381 | 0.9629033  | 0.533966214 | -1.00314475 | 0.950368863 |
| 0.845205406 | 0.03061522 | -1.1247158 | 0.309067775 | 0.940725341 | 0.423309753 |
| 0.902134331 | 0.66648017 | -1.0179149 | 0.871517738 | 0.79855401  | 0.348103242 |
| 0.928417186 | 0.31553724 | 0.92288471 | 0.187365154 | -1.04489296 | 0.551679204 |
| 0.962931921 | 0.31680709 | 0.99723863 | 0.957313019 | 0.929596166 | 0.056046657 |
| 0.766300738 | 0.27223365 | -1.0349833 | 0.509058047 | 0.928295368 | 0.757692348 |
| -1.02768786 | 0.7154306  | 0.98066603 | 0.622955637 | -1.13020265 | 0.106337517 |
| -1.00078043 | 0.99082058 | 0.99696037 | 0.949782058 | -1.06061369 | 0.387140359 |
| -1.01272127 | 0.80105682 | 0.70991252 | 0.015145575 | 0.694205579 | 1.33E-09    |
| 0.877075129 | 0.01344247 | -1.0041071 | 0.965068277 | -1.0936523  | 0.086745717 |
| -1.11226988 | 0.04475265 | 0.98218713 | 0.721822519 | -1.0883968  | 0.107686993 |
| -1.00507063 | 0.90716696 | 0.98167584 | 0.851415062 | 0.946202658 | 0.205706061 |



|             |            |            |             |             |             |
|-------------|------------|------------|-------------|-------------|-------------|
| -1.05878565 | 0.4884649  | -1.1315415 | 0.070742898 | -1.21169053 | 0.022767178 |
| -1.024817   | 0.6887081  | -1.0108658 | 0.873903304 | 0.961400357 | 0.520529335 |
| 0.937909291 | 0.23821312 | 0.97940224 | 0.685108545 | -1.01243965 | 0.818936392 |
| 0.980499774 | 0.60076921 | 0.96835468 | 0.503954071 | -1.04124587 | 0.284786932 |
| -1.01263924 | 0.84867763 | -1.0168436 | 0.863595516 | -1.15519838 | 0.031961077 |
| -1.04054995 | 0.68111749 | 0.8121936  | 0.196405128 | -1.17432059 | 0.100678942 |
| -1.11799907 | 0.02649038 | 0.88861545 | 0.022374147 | -1.0811803  | 0.116185998 |
| -1.0005542  | 0.99385312 | -1.0167117 | 0.82759764  | 0.99433737  | 0.937064395 |
| -1.09097893 | 0.04321705 | 0.69875893 | 0.137344334 | -1.07495884 | 0.091402041 |
| 0.823564379 | 0.3297267  | -1.0290498 | 0.697630592 | 0.774401222 | 0.200697288 |
| 0.800610102 | 0.07640389 | -1.0321041 | 0.401680165 | 0.840941897 | 0.165054324 |
| -1.00009074 | 0.99844008 | 0.80538235 | 0.371073682 | -1.08499741 | 0.083091776 |
| 0.958257901 | 0.46193127 | -1.1372659 | 0.090085838 | 0.971557039 | 0.618098292 |
| -1.04313716 | 0.51174056 | -1.0090994 | 0.893737445 | 0.984852113 | 0.812224977 |
| -1.01598982 | 0.78227453 | 0.79038393 | 1.77698E-05 | 0.877732049 | 0.026395114 |
| -1.0069322  | 0.92298815 | -1.0260791 | 0.617883253 | 0.966126177 | 0.630004604 |
| 0.880410726 | 0.44054474 | -1.0327595 | 0.536195373 | -1.0749904  | 0.660867661 |
| -1.13302358 | 0.11559107 | 0.97952335 | 0.633696725 | -1.03106458 | 0.696765288 |
| -1.01651116 | 0.79178582 | 0.94738671 | 0.512069802 | -1.14280324 | 0.035051406 |
| 0.96800431  | 0.42867193 | 0.9030692  | 0.099713295 | -1.02930543 | 0.481780113 |
| -1.01705552 | 0.75898315 | -1.0702523 | 0.211935865 | 0.918800574 | 0.128405679 |
| 0.863199449 | 0.04020866 | -1.0580616 | 0.137249546 | 0.926392448 | 0.279369634 |
| 0.990045993 | 0.86730514 | 0.98097749 | 0.770517421 | -1.08132717 | 0.195050497 |
| -1.10323845 | 0.23240014 | -1.0317488 | 0.746527069 | -1.09506536 | 0.269208223 |
| 0.861031867 | 0.02214325 | -1.0489828 | 0.332312637 | -1.00464099 | 0.942143272 |
| -1.06361991 | 0.33105263 | 0.91170784 | 0.202130577 | -1.27098043 | 0.000355872 |
| 0.946709455 | 0.30349771 | -1.0167805 | 0.693871983 | 0.969552628 | 0.559929819 |
| 0.983425221 | 0.64659662 | 0.7582685  | 0.166624981 | -1.01737558 | 0.636548477 |
| -1.03021877 | 0.52989425 | 0.89940616 | 0.392855489 | -1.02712076 | 0.57219469  |
| 0.959497497 | 0.43476217 | -1.0269614 | 0.567076247 | -1.06171082 | 0.259439825 |
| 0.943313904 | 0.40996924 | 0.98228303 | 0.757267336 | -1.00585821 | 0.934063477 |
| 0.927513945 | 0.07592389 | -1.0125547 | 0.846023566 | -1.10279138 | 0.022301413 |
| 0.97384256  | 0.61581484 | 0.92699236 | 0.190019554 | -1.00851663 | 0.872313785 |
| 0.954659687 | 0.81638985 | 0.99395293 | 0.932359211 | 0.872362275 | 0.495245785 |
| 0.891929812 | 0.06982187 | -1.002112  | 0.989778052 | -1.07710145 | 0.23485286  |
| 0.855009322 | 0.2049396  | 0.90894473 | 0.226788314 | -1.3223316  | 0.026057142 |
| 0.994507316 | 0.90583872 | -1.0001133 | 0.998541716 | -1.0023957  | 0.95901279  |
| 0.942595519 | 0.19251296 | -1.0923623 | 0.03472956  | -1.00286555 | 0.949302733 |
| -1.09507817 | 0.21540089 | 0.95683131 | 0.42455684  | 0.974794459 | 0.725941102 |
| -1.06278931 | 0.23174007 | -1.1027087 | 0.168045809 | -1.17989146 | 0.001796357 |
| 0.921051729 | 0.22927013 | 0.9845674  | 0.795085154 | -1.17457673 | 0.020927808 |
| -1.10058155 | 0.12202876 | 0.96043953 | 0.621761152 | -1.07877252 | 0.219262461 |
| -1.07479891 | 0.05775184 | 0.99714364 | 0.964237711 | -1.06943657 | 0.076738863 |
| 0.989558606 | 0.83064308 | -1.1394725 | 0.042660956 | 0.961251368 | 0.421975929 |

|             |            |            |             |             |             |
|-------------|------------|------------|-------------|-------------|-------------|
| 0.969132739 | 0.45750969 | -1.0623728 | 0.256119358 | -1.09674619 | 0.031821839 |
| 0.990996251 | 0.90484037 | -1.023727  | 0.520436583 | -1.09702475 | 0.224140677 |
| 0.725029367 | 0.01254753 | -1.031108  | 0.518084583 | 0.875866794 | 0.291725275 |
| -1.01546464 | 0.74658121 | -1.0295513 | 0.581658497 | 0.993468441 | 0.890206253 |
| 0.914573059 | 0.04081203 | -1.0842806 | 0.254636168 | -1.06100768 | 0.170265749 |
| 0.93538494  | 0.43528434 | -1.06639   | 0.12797637  | -1.09077178 | 0.311146612 |
| -1.05409851 | 0.34535617 | -1.0358679 | 0.505069608 | -1.04239893 | 0.456327667 |
| 0.920747275 | 0.15002606 | 0.75642021 | 0.166138849 | 0.971697031 | 0.613678822 |
| -1.13870724 | 0.01220698 | -1.07014   | 0.277728998 | -1.27703679 | 9.78E-06    |
| -1.01883942 | 0.68239573 | -1.224917  | 0.102365171 | -1.07509204 | 0.116337829 |
| 0.842309727 | 0.04064001 | -1.0367875 | 0.439076735 | 0.931515203 | 0.389654115 |
| 0.911360085 | 0.42962554 | -1.0033534 | 0.940700762 | -1.10473793 | 0.39685824  |
| -1.00862952 | 0.87829017 | 0.97662375 | 0.74532241  | -1.05726962 | 0.323116371 |
| -1.23984655 | 0.05361933 | -1.0571848 | 0.274276931 | -1.25772704 | 0.040012901 |
| -1.15522129 | 0.00186608 | 0.96233051 | 0.572541761 | -1.077993   | 0.094271478 |
| 0.811358862 | 0.15010978 | -1.0215107 | 0.728530107 | -1.2435278  | 0.133817937 |
| -1.05335979 | 0.17256264 | 0.93103945 | 0.060070836 | -1.01479883 | 0.697591088 |
| -1.00579821 | 0.89897645 | -1.0238859 | 0.630822895 | -1.07031854 | 0.139651686 |
| -1.14961464 | 0.01909975 | 0.98729837 | 0.761463245 | -1.08363177 | 0.16963758  |
| -1.06273725 | 0.10746489 | -1.0614764 | 0.431662568 | -1.03294392 | 0.387062734 |
| -1.2477758  | 0.00318067 | -1.0072143 | 0.954161912 | -1.16948905 | 0.033301911 |
| 0.965144824 | 0.57327777 | 0.94512679 | 0.237526502 | -1.10244578 | 0.125126658 |
| 0.98935895  | 0.82784697 | -1.1034238 | 0.024758526 | -1.09289427 | 0.075193143 |
| 0.867512632 | 0.14656377 | 0.91644477 | 0.309121494 | -1.08521347 | 0.400421939 |
| -1.01576382 | 0.7364161  | 0.92258924 | 0.151248004 | 0.952793233 | 0.300203862 |
| -1.01222366 | 0.76909157 | 0.96742759 | 0.560549243 | 0.985601278 | 0.726055327 |
| -1.09040945 | 0.1108678  | -1.12703   | 0.02048739  | -1.05502418 | 0.320268395 |
| -1.02789552 | 0.53940525 | 0.98336318 | 0.712968557 | -1.06550848 | 0.160098441 |
| 0.872429752 | 0.11971163 | 0.98634825 | 0.867181873 | 0.933015018 | 0.425338457 |
| -1.11709672 | 0.03209371 | -1.1128321 | 0.363416029 | 0.973899133 | 0.601345405 |
| 0.752869769 | 0.00097419 | -1.1030622 | 0.084703652 | -1.03783761 | 0.649796351 |
| 0.978155371 | 0.70440997 | -1.1299073 | 0.267256427 | -1.02666408 | 0.651363206 |
| 0.976467784 | 0.66860142 | -1.0684048 | 0.139270276 | 0.920432914 | 0.1398268   |
| -1.01470671 | 0.87698544 | -1.0424547 | 0.772631713 | -1.02317885 | 0.808076699 |
| -1.00921177 | 0.85932799 | -1.0180919 | 0.635424705 | 0.972115038 | 0.585112428 |
| 0.890820175 | 0.11759866 | 0.9665403  | 0.456019752 | -1.07223133 | 0.341637257 |
| 0.879516832 | 0.0497671  | -1.0084152 | 0.885062456 | -1.02203737 | 0.734570579 |
| 0.881292614 | 0.07651481 | 0.95999813 | 0.276954759 | 0.864275693 | 0.041865001 |
| -1.00996312 | 0.87068203 | -1.1605438 | 0.042553424 | -1.00447268 | 0.941576676 |
| -1.02195177 | 0.75634313 | -1.1051866 | 0.116004182 | -1.03212213 | 0.651584026 |
| 0.748524509 | 5.47E-06   | 0.96566443 | 0.478511535 | -1.09131497 | 0.133631442 |
| 0.811092167 | 0.25126034 | 0.9162516  | 0.368693897 | -1.09214664 | 0.627344392 |
| 0.991723528 | 0.83323655 | 0.97142056 | 0.533150083 | 0.78787918  | 1.35E-07    |
| 0.976609366 | 0.48325669 | 0.94118388 | 0.146840201 | -1.04671575 | 0.178935667 |

|             |            |            |             |             |             |
|-------------|------------|------------|-------------|-------------|-------------|
| -1.06732918 | 0.1767937  | 0.93380828 | 0.205130807 | -1.0083945  | 0.861272814 |
| 0.99416553  | 0.91753915 | -1.0674295 | 0.148779171 | 0.892492884 | 0.048187384 |
| 0.949729515 | 0.59514153 | 0.88401692 | 0.158993678 | -1.3678149  | 0.002016939 |
| -1.06194995 | 0.31618088 | 0.98960916 | 0.836348313 | 0.951428407 | 0.405671799 |
| 0.986491408 | 0.73449623 | 0.9441123  | 0.482591804 | 0.93175307  | 0.082094813 |
| 0.983266204 | 0.8220612  | 0.89875535 | 0.070811196 | -1.02346577 | 0.757287069 |
| -1.02320799 | 0.70330423 | 0.99786512 | 0.969328759 | -1.11265    | 0.080489887 |
| 0.989992143 | 0.87771734 | 0.98399495 | 0.864175527 | -1.24429141 | 0.001443685 |
| -1.07259146 | 0.45224966 | 0.97677758 | 0.649998815 | -1.04814987 | 0.613450682 |
| 0.968966844 | 0.64605832 | -1.1203459 | 0.123856233 | 0.955117113 | 0.503988703 |
| 0.803917118 | 0.0415484  | -1.0346215 | 0.596814015 | -1.03222689 | 0.762714659 |
| 0.892261212 | 0.0513846  | 0.85261177 | 0.026673964 | -1.0195818  | 0.735932259 |
| 0.983962351 | 0.76117432 | -1.0125288 | 0.838010724 | 0.842036292 | 0.002003258 |
| 0.909123166 | 0.67553645 | -1.0511685 | 0.476646589 | 0.865849007 | 0.527287881 |
| -1.03486862 | 0.62764685 | 0.95758654 | 0.453337831 | -1.00885425 | 0.90061864  |
| 0.656914375 | 1.78E-11   | 0.97950793 | 0.909115801 | -1.04775667 | 0.350852083 |
| 0.997980191 | 0.96390651 | 0.95517727 | 0.248185728 | -1.05653482 | 0.221616344 |
| 0.964215635 | 0.50268509 | -1.0074544 | 0.825525378 | -1.10481824 | 0.070420184 |
| 0.973030634 | 0.65893173 | 0.89318502 | 0.021267485 | 0.995419984 | 0.940868524 |
| 0.83473622  | 0.30853496 | 0.98159989 | 0.742576461 | -1.03794594 | 0.832939725 |
| -1.0233976  | 0.65814348 | -1.0034553 | 0.971613356 | -1.03659436 | 0.492263558 |
| 0.724701338 | 0.02331281 | -1.0163904 | 0.785392013 | 0.92745605  | 0.587238111 |
| -1.11819211 | 0.32943452 | -1.0017575 | 0.965055385 | -1.13651682 | 0.264587013 |
| -1.00913518 | 0.86079986 | -1.0224382 | 0.767479822 | -1.08708482 | 0.11155052  |
| 0.983413988 | 0.89915693 | -1.0020447 | 0.972932315 | 0.928931493 | 0.576976828 |
| -1.11836954 | 0.09369476 | -1.0068345 | 0.917011549 | 0.990955425 | 0.890288453 |
| -1.03790043 | 0.5385709  | 0.74539878 | 0.00248373  | 0.980628033 | 0.746082489 |
| 0.93539172  | 0.50189936 | -1.1231044 | 0.094763043 | -1.2256002  | 0.044343474 |
| 0.904007473 | 0.00956946 | -1.0454212 | 0.67255502  | 0.964727418 | 0.343232522 |
| 0.967022768 | 0.52844509 | -1.031698  | 0.587662155 | -1.04006515 | 0.460535738 |
| -1.19059405 | 0.05427882 | 0.92284767 | 0.135108431 | -1.03797914 | 0.67583702  |
| 0.996858605 | 0.94148775 | 0.75827618 | 0.226930977 | -1.00576828 | 0.89326651  |
| -1.18847965 | 0.00736054 | 0.84536701 | 0.020341379 | -1.02168102 | 0.730639727 |
| -1.03414639 | 0.56360381 | -1.045032  | 0.378179665 | -1.04532539 | 0.446334182 |
| 0.873304183 | 0.45888352 | 0.9506922  | 0.260586749 | 0.781878546 | 0.181071567 |
| 0.989830637 | 0.88104764 | 0.93881751 | 0.247508819 | -1.05093014 | 0.468127955 |
| 0.867805341 | 0.18538403 | 0.91709349 | 0.165768421 | 0.933831577 | 0.519907472 |
| 0.793528481 | 4.19E-05   | -1.0444703 | 0.805370315 | -1.09295307 | 0.09208845  |
| -1.07522557 | 0.14203473 | -1.0103788 | 0.843291512 | -1.0776733  | 0.130197144 |
| -1.15497527 | 0.19368596 | 0.99591824 | 0.976447642 | -1.16562899 | 0.167230178 |
| 0.961767817 | 0.53350926 | -1.0255288 | 0.825088862 | 0.973282024 | 0.6650329   |
| -1.16367726 | 0.03452515 | -1.0527494 | 0.323705682 | -1.23229902 | 0.004216869 |
| 0.982409121 | 0.68396582 | -1.0408299 | 0.76180462  | -1.06316456 | 0.163579539 |
| 0.997103243 | 0.93424542 | -1.0392888 | 0.559101877 | 0.96406704  | 0.300408236 |

|             |            |            |             |             |             |
|-------------|------------|------------|-------------|-------------|-------------|
| -1.00853234 | 0.85273018 | -1.0532993 | 0.391439661 | -1.03331579 | 0.474937843 |
| 0.97009266  | 0.52348315 | -1.0325671 | 0.746895086 | -1.00747013 | 0.875515631 |
| 0.862627759 | 0.40320942 | -1.0418908 | 0.27936646  | 0.920792121 | 0.639890572 |
| 0.966069337 | 0.46817032 | 0.96539545 | 0.508025121 | 0.968503444 | 0.501069845 |
| -1.01546864 | 0.79229112 | 0.98496011 | 0.864921715 | -1.0247605  | 0.67493207  |
| -1.03614212 | 0.60395638 | 0.91364505 | 0.038932968 | -1.05615225 | 0.425562269 |
| 0.972343095 | 0.67804971 | 0.92305603 | 0.201958001 | -1.09972551 | 0.162923797 |
| 0.939941557 | 0.62123986 | -1.0557685 | 0.351822207 | -1.12661091 | 0.343089378 |
| -1.09030939 | 0.09076987 | 0.67683232 | 0.036112191 | 0.982330311 | 0.723882946 |
| 0.986949645 | 0.79965853 | 0.9461748  | 0.419318499 | 0.937266391 | 0.213872943 |
| 0.803719504 | 0.01236663 | -1.0765346 | 0.488323867 | -1.07182541 | 0.414811968 |
| -1.03742929 | 0.36872025 | -1.0441773 | 0.407876091 | -1.00815615 | 0.841930305 |
| -1.04520521 | 0.27050061 | -1.0559866 | 0.268029685 | 0.954799948 | 0.249262603 |
| 0.986903882 | 0.90793762 | 0.96124676 | 0.719459193 | -1.29536823 | 0.026549131 |
| -1.01774714 | 0.65903901 | -1.1442181 | 0.034784256 | -1.00835903 | 0.83449285  |
| 0.926080864 | 0.22565816 | -1.0589984 | 0.415689168 | -1.38702088 | 2.95E-06    |
| -1.01061534 | 0.82369027 | 0.94367405 | 0.18687786  | -1.0877203  | 0.080267904 |
| 0.682820773 | 0.03562852 | 0.98029809 | 0.572009615 | 0.781519563 | 0.169445007 |
| -1.01381794 | 0.78731433 | 0.91528891 | 0.057227127 | 0.880344693 | 0.01481835  |
| 0.976681685 | 0.82001729 | 0.99222408 | 0.869482996 | -1.14351464 | 0.19931187  |
| 0.983040151 | 0.72831364 | 0.87772626 | 0.460341623 | -1.07348157 | 0.153574045 |
| -1.05963677 | 0.33576766 | -1.0455326 | 0.350183021 | -1.3059036  | 4.01E-05    |
| 0.943329717 | 0.25471159 | 0.98245408 | 0.761399229 | 0.964411147 | 0.477626234 |
| -1.00616141 | 0.90167648 | 0.98941099 | 0.876261742 | -1.16108814 | 0.003884368 |
| 0.963083001 | 0.55561002 | -1.0108148 | 0.873414087 | -1.02430617 | 0.706436838 |
| -1.09046095 | 0.038512   | -1.1826432 | 0.183963955 | -1.01748806 | 0.672738009 |
| 0.918527697 | 0.175147   | 0.87833129 | 0.012513943 | 0.972926836 | 0.659001027 |
| 0.974410939 | 0.72086348 | 0.99813631 | 0.971242275 | 0.921368063 | 0.261511036 |
| 0.824456547 | 0.09733465 | 0.98815533 | 0.888259843 | 0.726847149 | 0.007303871 |
| -1.05964875 | 0.32210285 | -1.0006203 | 0.987852029 | -1.00906966 | 0.876823987 |
| 0.868627649 | 0.27965589 | -1.0123399 | 0.758632946 | 0.590854544 | 0.00015033  |
| 0.996022953 | 0.94250318 | -1.120094  | 0.321999174 | -1.15300893 | 0.012364977 |
| -1.1177469  | 0.07039099 | -1.0057915 | 0.884737641 | -1.11392537 | 0.07920439  |
| 0.960670351 | 0.5142094  | 0.96784412 | 0.604040665 | -1.04623553 | 0.462704209 |
| -1.01682214 | 0.75946531 | -1.0560251 | 0.252871029 | -1.00192736 | 0.971796042 |
| 0.873155384 | 0.21035932 | 0.86680101 | 0.422886492 | 0.937129625 | 0.54648101  |
| -1.04354117 | 0.43156073 | -1.0389832 | 0.453184898 | -1.02137389 | 0.695692876 |
| -1.0457415  | 0.50187174 | 0.92157322 | 0.432168209 | 0.932059715 | 0.292278044 |
| -1.02970889 | 0.51419395 | 0.8837064  | 0.014604079 | -1.02056559 | 0.649788855 |
| -1.05480029 | 0.24536254 | -1.1383353 | 0.034254256 | -1.07982103 | 0.096702411 |
| -1.10787694 | 0.26746052 | -1.0275416 | 0.594055456 | -1.06249928 | 0.510093126 |
| -1.03646743 | 0.47993364 | -1.0026629 | 0.957341691 | -1.03723336 | 0.470966128 |
| 0.932183969 | 0.24483244 | 0.96797318 | 0.609892665 | -1.04008213 | 0.513316989 |
| 0.820594968 | 0.00972676 | 0.9768855  | 0.569099542 | -1.07918729 | 0.306055925 |

|             |             |            |             |             |             |
|-------------|-------------|------------|-------------|-------------|-------------|
| -1.02373339 | 0.93468426  | 0.91353182 | 0.14951841  | -1.58273663 | 0.112879691 |
| 0.958056983 | 0.25858904  | 0.86040431 | 0.041998895 | -1.04711627 | 0.225214652 |
| 0.925565864 | 0.24373659  | 0.81825619 | 0.085248599 | -1.1600203  | 0.027780304 |
| 0.852139614 | 0.02444339  | 0.94146402 | 0.302797598 | 0.77743364  | 0.000607928 |
| 0.947111384 | 0.35722739  | 0.91643248 | 0.501503766 | -1.02955553 | 0.620667467 |
| 0.992678981 | 0.86877355  | 0.92097643 | 0.140275294 | -1.07841678 | 0.093865767 |
| 0.963140104 | 0.50872483  | 0.96780235 | 0.58952828  | 0.969203202 | 0.581804541 |
| 0.877087435 | 0.0334008   | 0.92805557 | 0.227079623 | -1.04122969 | 0.504068512 |
| -1.09568636 | 0.16569749  | 0.94548322 | 0.305699998 | -1.03727011 | 0.575960063 |
| 0.897905278 | 0.29967241  | -1.0655381 | 0.55546876  | -1.12847044 | 0.245039043 |
| -1.10406306 | 0.05714386  | -1.002363  | 0.965156907 | -1.05049492 | 0.337704518 |
| -1.0809761  | 0.24582854  | 0.90341439 | 0.13054608  | -1.20186961 | 0.007664605 |
| 0.849017646 | 0.05707609  | 0.92478421 | 0.085149972 | -1.05160176 | 0.552506292 |
| -1.06695293 | 0.40925042  | 0.9748138  | 0.576737737 | -1.15442037 | 0.070867455 |
| 0.97667196  | 0.70616516  | 0.9463895  | 0.54924153  | -1.0128886  | 0.837854589 |
| 0.963272095 | 0.711174488 | -1.0527773 | 0.311616101 | -1.09713532 | 0.361537592 |
| 0.931387343 | 0.71398089  | 0.93443499 | 0.261213364 | 0.920632914 | 0.66988542  |
| 0.875945106 | 0.36322277  | -1.0684804 | 0.373098698 | 0.924436936 | 0.588700813 |
| 0.912799277 | 0.09457848  | 0.83641964 | 0.533300822 | -1.06618375 | 0.237209954 |
| 0.727673557 | 0.02509404  | 0.97607021 | 0.521384806 | 0.784936822 | 0.084903829 |
| 0.901894252 | 0.17592936  | 0.99985311 | 0.998222292 | -1.16123994 | 0.052206104 |
| -1.02487664 | 0.55966916  | 0.99733032 | 0.969285436 | -1.11355924 | 0.012998689 |
| -1.15454222 | 0.01546432  | -1.0014259 | 0.980662553 | 0.994638324 | 0.92579833  |
| 0.973262417 | 0.67006563  | -1.0077436 | 0.862305125 | -1.05727076 | 0.382599793 |
| -1.01123553 | 0.79749885  | 0.93873892 | 0.267769376 | -1.10056847 | 0.031273676 |
| 0.897406306 | 0.03721968  | -1.028362  | 0.643381669 | 0.955055615 | 0.368134936 |
| -1.04160632 | 0.6424489   | -1.0617017 | 0.361300793 | -1.20426574 | 0.037863367 |
| 0.973117102 | 0.48966815  | -1.1184377 | 0.281231771 | -1.05186068 | 0.202362604 |
| 0.964641905 | 0.33727025  | 0.94685273 | 0.288329176 | 0.985445662 | 0.694892254 |
| 0.942936445 | 0.3145792   | -1.174933  | 0.018505184 | -1.12775929 | 0.042572165 |
| -1.02452462 | 0.55325415  | 0.93055555 | 0.396299463 | -1.02461776 | 0.551771195 |
| -1.084826   | 0.16545744  | -1.1905799 | 0.029342589 | -1.09480172 | 0.123652707 |
| 0.86284486  | 0.36087124  | 0.99565462 | 0.944511429 | 0.811674387 | 0.197967443 |
| 0.93089668  | 0.28025585  | -1.2399921 | 0.037308458 | -1.15693832 | 0.030626272 |
| -1.01204356 | 0.88862061  | -1.0374057 | 0.849743832 | -1.42243416 | 0.000122765 |
| -1.03603425 | 0.68507712  | 0.75753383 | 0.059846813 | -1.36044402 | 0.000822077 |
| 0.96300598  | 0.51293144  | 0.92881533 | 0.174113415 | -1.02225033 | 0.702113271 |
| 0.999447239 | 0.9926619   | 0.91367537 | 0.515620621 | -1.06154285 | 0.322726708 |
| 0.99695727  | 0.94511458  | -1.1348682 | 0.098689841 | -1.05341356 | 0.242789428 |
| -1.01886419 | 0.69700891  | 0.97865496 | 0.60837528  | -1.05387503 | 0.276612977 |
| 0.955595032 | 0.56847282  | 0.9612591  | 0.494607181 | 0.963247791 | 0.638083412 |
| -1.14538472 | 0.00821551  | 0.96981159 | 0.629960476 | 0.950130928 | 0.305553505 |
| 0.96899985  | 0.67880563  | -1.0714556 | 0.117059107 | -1.00309622 | 0.967548034 |
| 0.890798695 | 0.03197744  | 0.95479118 | 0.36527976  | -1.01198562 | 0.821372538 |

|             |            |            |             |             |             |
|-------------|------------|------------|-------------|-------------|-------------|
| 0.932276936 | 0.52895853 | 0.96796644 | 0.710674909 | -1.03513187 | 0.756224303 |
| 0.873663644 | 0.0249948  | -1.0616708 | 0.132484103 | 0.927317665 | 0.203113186 |
| 0.771764438 | 0.16481266 | -1.0509281 | 0.187169826 | -1.1371903  | 0.487673564 |
| -1.17773595 | 0.00454833 | 0.92668083 | 0.193893858 | -1.03308504 | 0.558122796 |
| 0.98687181  | 0.75519321 | 0.96663523 | 0.407061593 | 0.918384239 | 0.048487103 |
| 0.907175421 | 0.50109689 | -1.0693194 | 0.252207408 | -1.2551342  | 0.119987868 |
| -1.05116892 | 0.3661025  | 0.8077679  | 0.187954015 | -1.04306284 | 0.444611718 |
| -1.16859008 | 0.02966039 | -1.0634262 | 0.353091352 | 0.991804811 | 0.90650405  |
| -1.01738256 | 0.73475106 | -1.1017583 | 0.259735176 | -1.19651143 | 0.000821637 |
| -1.07288212 | 0.25551987 | -1.0945707 | 0.302623295 | -1.07679127 | 0.232061496 |
| 0.930959546 | 0.16873521 | -1.0040335 | 0.944188144 | 0.968706954 | 0.537881323 |
| -1.04249233 | 0.43606408 | -1.1256221 | 0.053124501 | -1.01892565 | 0.725062063 |
| -1.08141333 | 0.13233043 | -1.0106156 | 0.81149713  | -1.00556253 | 0.914154076 |
| -1.0307574  | 0.56421907 | 0.9703605  | 0.531218625 | -1.02283364 | 0.667191563 |
| -1.01484727 | 0.9201717  | 0.91513848 | 0.267548365 | 0.792724801 | 0.118408217 |
| 0.93260691  | 0.24308927 | 0.96595239 | 0.486634056 | 0.992529093 | 0.899527913 |
| 0.890330757 | 0.08231789 | -1.0047595 | 0.950175332 | -1.04208982 | 0.532408037 |
| -1.14576743 | 0.01384722 | 0.99191562 | 0.877733275 | 0.897816617 | 0.048844081 |
| -1.03691013 | 0.61150748 | 0.84855066 | 0.143637206 | -1.05648141 | 0.442040497 |
| 0.98892056  | 0.82074499 | 0.9878465  | 0.835400711 | 0.938412169 | 0.199454683 |
| 0.978427453 | 0.68711464 | -1.1826251 | 0.36595828  | 0.899961363 | 0.055532386 |
| 0.924302805 | 0.12635429 | -1.0238949 | 0.670701574 | -1.02833633 | 0.583781489 |
| 0.876373062 | 0.27518941 | 0.94030294 | 0.150192784 | -1.09547347 | 0.449521817 |
| 0.769907678 | 0.20902914 | -1.1229237 | 0.423751171 | 0.582500004 | 0.011179173 |
| -1.05649509 | 0.22364095 | -1.1299465 | 0.029845871 | -1.30278092 | 2.29E-07    |
| 0.956978226 | 0.4755273  | 0.98171225 | 0.792271059 | 0.97988703  | 0.7411793   |
| -1.03785482 | 0.49669122 | 0.9835541  | 0.744398015 | -1.08435821 | 0.141635409 |
| -1.03691663 | 0.48760783 | -1.1417197 | 0.034830168 | 0.929341737 | 0.163479145 |
| -1.0003876  | 0.99671501 | -1.1288771 | 0.021730827 | -1.00764702 | 0.935495813 |
| -1.08689305 | 0.23056046 | -1.0019144 | 0.971363436 | -1.02912437 | 0.677743831 |
| -1.46024865 | 0.00077659 | -1.102859  | 0.061268485 | -1.3804525  | 0.003705143 |
| 0.887565766 | 0.37092772 | 0.94905406 | 0.321108644 | 0.976734825 | 0.859328969 |
| 0.927801605 | 0.25006536 | 0.64182986 | 0.003763263 | -1.01442615 | 0.82496559  |
| 0.938370712 | 0.29713766 | 0.97132998 | 0.624664821 | 0.918771372 | 0.166618279 |
| -1.06359112 | 0.28003345 | 0.93961614 | 0.346708978 | 0.995562091 | 0.937541238 |
| 0.702502399 | 0.00591375 | 0.92115769 | 0.130463374 | 0.988924753 | 0.928291705 |
| -1.06306823 | 0.35985387 | -1.0320478 | 0.65835497  | 0.928788082 | 0.269579856 |
| -1.06616676 | 0.28505031 | 0.921241   | 0.099446882 | 0.929339672 | 0.222185743 |
| -1.11365126 | 0.08043691 | -1.066342  | 0.238212375 | -1.01796858 | 0.769289212 |
| -1.15068615 | 0.01876935 | 0.98432664 | 0.756529482 | -1.01366996 | 0.815529879 |
| 0.728680806 | 0.00565182 | 0.99772018 | 0.984857816 | 0.961643836 | 0.723028527 |
| -1.16679831 | 0.05700059 | 0.53192722 | 0.003359777 | 0.94931067  | 0.51466682  |
| -1.07223877 | 0.30283625 | 0.94989568 | 0.254621533 | -1.0154092  | 0.820444022 |
| -1.00315027 | 0.9633972  | -1.0094089 | 0.878951026 | -1.00389861 | 0.954727798 |

|             |            |            |             |             |             |
|-------------|------------|------------|-------------|-------------|-------------|
| -1.00304138 | 0.9656833  | 0.94272239 | 0.282160137 | -1.0616014  | 0.398625443 |
| 0.819673958 | 0.19723315 | -1.042613  | 0.424619532 | 0.880091631 | 0.405361514 |
| 0.958007208 | 0.49916531 | 0.97866436 | 0.818813178 | -1.02989336 | 0.642264526 |
| -1.02860725 | 0.58309076 | -1.0957477 | 0.188889913 | -1.11074318 | 0.044632626 |
| 0.903962356 | 0.06214375 | -1.2462221 | 0.043080558 | -1.0480733  | 0.379623223 |
| 0.892064949 | 0.04350044 | 0.98978673 | 0.938386329 | 0.937586349 | 0.248480462 |
| 0.749329999 | 0.09267165 | -1.026607  | 0.685294489 | 0.848253953 | 0.333268629 |
| 0.951598556 | 0.46278434 | 0.94184229 | 0.325790641 | 0.954529212 | 0.490843297 |
| 0.868428959 | 0.01721216 | 0.97964618 | 0.717293563 | 0.994461793 | 0.923257372 |
| -1.07079216 | 0.20818284 | 0.894533   | 0.36958754  | 0.958932349 | 0.438216672 |
| -1.12673262 | 0.07627021 | -1.0076366 | 0.908968857 | -1.16447088 | 0.02495979  |
| 0.96237972  | 0.67756371 | 0.92808268 | 0.213881795 | 0.917025579 | 0.349210522 |
| -1.04011404 | 0.39175978 | 0.98822753 | 0.845330289 | -1.05493435 | 0.245583932 |
| 0.891007768 | 0.09817709 | 0.99754388 | 0.966287046 | 0.959859326 | 0.552690821 |
| 0.92448635  | 0.41267221 | 0.94194855 | 0.588158828 | -1.02164743 | 0.822679499 |
| -1.28261796 | 0.02561553 | -1.1107784 | 0.190861944 | -1.3730292  | 0.005049503 |
| 0.97805362  | 0.58224109 | 0.86733574 | 0.038387755 | -1.03639885 | 0.37653189  |
| 0.934249169 | 0.67098418 | 0.97340876 | 0.694361504 | -1.00948438 | 0.952945335 |
| -1.02320919 | 0.67599569 | -1.1157271 | 0.124954034 | -1.13663258 | 0.022721028 |
| -1.0835217  | 0.31223923 | 0.85828368 | 0.32014817  | -1.03182519 | 0.69189777  |
| 0.979776505 | 0.65455288 | -1.0902184 | 0.176391574 | -1.04693546 | 0.31695247  |
| 0.878688755 | 0.01483715 | -1.0189267 | 0.714995656 | 0.998516922 | 0.977057578 |
| 0.915315178 | 0.01443712 | 0.98605068 | 0.791991069 | -1.03271014 | 0.361863432 |
| -1.03776832 | 0.23841342 | -1.0801397 | 0.168575083 | 0.933988662 | 0.032419678 |
| 0.972087825 | 0.56292557 | 0.6518213  | 0.014048814 | 0.99027102  | 0.841430878 |
| 0.9965345   | 0.95514368 | 0.96313041 | 0.577805826 | 0.958850197 | 0.496892223 |
| -1.07190021 | 0.11795881 | 0.94023696 | 0.287655319 | -1.04614659 | 0.306526891 |
| -1.04639106 | 0.29390056 | 0.91874457 | 0.120350687 | -1.05673757 | 0.202592155 |
| 0.943421263 | 0.18245238 | -1.0265159 | 0.693335654 | -1.05202612 | 0.244697627 |
| -1.02186074 | 0.66899935 | 0.9371377  | 0.482103314 | 0.920422096 | 0.105111149 |
| 0.996538461 | 0.95469374 | 0.96664527 | 0.459695559 | -1.09080191 | 0.158318935 |
| -1.00794585 | 0.88109453 | 0.93314409 | 0.317425509 | 0.975920005 | 0.645324195 |
| 0.894833002 | 0.03891472 | 0.99953992 | 0.996157046 | -1.03037845 | 0.570960068 |
| 0.910327685 | 0.07131801 | -1.3272496 | 0.011667448 | 0.974512418 | 0.6151997   |
| 0.990764265 | 0.89419172 | -1.0555769 | 0.18299842  | -1.02173519 | 0.758000692 |
| -1.00915168 | 0.85707419 | -1.1979238 | 0.261762782 | 0.996699907 | 0.947889622 |
| 0.97010689  | 0.61404768 | -1.022462  | 0.685735986 | -1.04259336 | 0.488701994 |
| 0.695649791 | 0.02498652 | 0.8870743  | 0.133413398 | 0.98896799  | 0.944059355 |
| 0.956112878 | 0.48177057 | 0.99318457 | 0.880845116 | -1.03329522 | 0.607293122 |
| 0.941697761 | 0.1946594  | 0.99265317 | 0.886394851 | 0.896131201 | 0.020010004 |
| 0.978756201 | 0.5517537  | 0.95155839 | 0.161749558 | -1.02604487 | 0.476400587 |
| 0.93734525  | 0.34280989 | -1.0338432 | 0.289242498 | 0.765475099 | 0.000227253 |
| 0.949427091 | 0.48966436 | 0.99289501 | 0.883980889 | 0.967668582 | 0.661319568 |
| 0.979007025 | 0.73801029 | -1.0595619 | 0.350507051 | -1.07251514 | 0.272193803 |

|             |            |            |             |             |             |
|-------------|------------|------------|-------------|-------------|-------------|
| -1.07080329 | 0.03360748 | -1.0414109 | 0.357280764 | -1.04584071 | 0.158857248 |
| -1.12810464 | 0.02115118 | 0.98816396 | 0.781839263 | 0.994782915 | 0.918295504 |
| -1.01737428 | 0.7882723  | -1.0121544 | 0.780417179 | -1.03611338 | 0.580601136 |
| 0.905135126 | 0.3307438  | 0.9860752  | 0.781503578 | -1.03260923 | 0.753231021 |
| 0.994349968 | 0.91102113 | -1.0072143 | 0.906248603 | 0.971726773 | 0.572176707 |
| 0.900054584 | 0.05383076 | 0.95952071 | 0.436082157 | 0.977783553 | 0.675692426 |
| -1.04947286 | 0.46891872 | -1.0016122 | 0.97562976  | -1.14457705 | 0.046309336 |
| -1.00693428 | 0.89276093 | 0.92425305 | 0.128807561 | 0.900079143 | 0.043918734 |
| -1.0194595  | 0.60274805 | 0.97724351 | 0.741532965 | -1.03486177 | 0.356073875 |
| -1.03009828 | 0.49408937 | -1.0198203 | 0.698173585 | -1.02791443 | 0.525381615 |
| 0.785174804 | 0.01024077 | -1.0615332 | 0.322717796 | 0.947028561 | 0.551720816 |
| 0.991080781 | 0.86439846 | -1.0262408 | 0.86986973  | -1.04697322 | 0.383213571 |
| 0.981934078 | 0.72458769 | -1.1078738 | 0.111747151 | 0.932335731 | 0.179159732 |
| 0.938727155 | 0.11066169 | 0.94080439 | 0.187811249 | -1.01953118 | 0.62178358  |
| -1.05765833 | 0.33469199 | 0.99236048 | 0.831438053 | -1.13481562 | 0.032419672 |
| 0.982449265 | 0.6808805  | -1.006687  | 0.921835025 | 0.956475926 | 0.303361795 |
| 0.84016231  | 0.0346379  | -1.0743617 | 0.340647415 | 0.953884355 | 0.559238864 |
| -1.05763014 | 0.42062718 | -1.0685934 | 0.297799214 | -1.11786962 | 0.112414593 |
| -1.07428835 | 0.1516378  | -1.0927002 | 0.006606914 | -1.00154916 | 0.975051434 |
| -1.01799449 | 0.67761481 | 0.9825304  | 0.729755547 | -1.00069348 | 0.987096784 |
| -1.07122167 | 0.22697745 | -1.0142625 | 0.825233175 | 0.921145082 | 0.15035861  |
| 0.95575735  | 0.31966095 | -1.0769386 | 0.4686113   | -1.0433446  | 0.350476144 |
| -1.17564718 | 0.02467697 | -1.1235164 | 0.024892861 | -1.06475419 | 0.374119833 |
| 0.983394794 | 0.76990349 | 0.94708348 | 0.313279683 | 0.884485311 | 0.035659657 |
| -1.07182515 | 0.26211935 | 0.94493372 | 0.396031242 | 0.874840808 | 0.033297133 |
| 0.844680087 | 0.00174794 | 0.9723807  | 0.585287026 | 0.852797338 | 0.003008188 |
| -1.07641555 | 0.16356692 | -1.009228  | 0.803901476 | -1.00361511 | 0.945070235 |
| 0.985186954 | 0.81890997 | 0.96844481 | 0.459840462 | -1.12378199 | 0.07762928  |
| -1.08800598 | 0.21132879 | -1.0100987 | 0.912363191 | -1.28885677 | 0.000364582 |
| -1.04401665 | 0.41643767 | -1.1644299 | 0.005169395 | -1.12334473 | 0.03129768  |
| -1.01906508 | 0.68980257 | 0.90446254 | 0.056311815 | -1.06778552 | 0.169182492 |
| -1.0382304  | 0.49617783 | 0.98447727 | 0.689777874 | -1.11762875 | 0.047222477 |
| 0.59865793  | 0.01660545 | -1.0537154 | 0.367623178 | 0.949173817 | 0.802454355 |
| 0.980449214 | 0.70243902 | 0.96090567 | 0.355862358 | -1.00805774 | 0.876528512 |
| 0.961714823 | 0.45539801 | -1.0585696 | 0.481736145 | -1.03382741 | 0.524397857 |
| -1.02635608 | 0.59118206 | 0.9600366  | 0.55718451  | -1.02898398 | 0.555353826 |
| -1.11445806 | 0.14947769 | 0.9961396  | 0.937716034 | -1.16450665 | 0.044747208 |
| 0.956406184 | 0.59320279 | 0.99873201 | 0.976386517 | -1.20314249 | 0.029968064 |
| -1.08046056 | 0.30293611 | 0.93092645 | 0.209037833 | -1.04126866 | 0.58900699  |
| 0.94868512  | 0.40993188 | -1.0449157 | 0.333797754 | 0.978644543 | 0.734936988 |
| 0.909270786 | 0.09018196 | -1.1422917 | 0.062768215 | -1.0296953  | 0.597678804 |
| -1.05995279 | 0.16244114 | 0.95402505 | 0.412278878 | -1.11246205 | 0.012248728 |
| -1.06192447 | 0.13935793 | -1.0019165 | 0.975159062 | 0.977269374 | 0.568226731 |
| 0.846471643 | 0.00465752 | -1.1024832 | 0.062209143 | 0.98243958  | 0.754800959 |



|             |            |            |             |             |             |
|-------------|------------|------------|-------------|-------------|-------------|
| 0.889913495 | 0.15416801 | -1.1226868 | 0.030673379 | -1.01764214 | 0.829241924 |
| -1.09486454 | 0.09216635 | 0.98091208 | 0.767527616 | -1.00020791 | 0.996876241 |
| 0.850687317 | 0.38377427 | -1.1405937 | 0.053661773 | -1.02828387 | 0.880179785 |
| 0.633910242 | 1.43E-07   | 0.9000733  | 0.050400101 | 0.844694412 | 0.029152513 |
| -1.01228942 | 0.80062721 | -1.0084458 | 0.858842876 | -1.02863895 | 0.55987081  |
| -1.06376255 | 0.44731737 | 0.97264441 | 0.614543303 | -1.36438878 | 0.000318779 |
| -1.13840511 | 0.22507428 | 0.96739311 | 0.873657272 | -1.3036547  | 0.015101618 |
| 0.976500787 | 0.71306581 | -1.0492869 | 0.353532591 | -1.04959788 | 0.45500006  |
| 0.900758294 | 0.06860337 | 0.96479167 | 0.492934491 | 0.988641948 | 0.839818737 |
| -1.14936917 | 0.05454811 | 0.9745419  | 0.594414303 | -1.00180019 | 0.979835929 |
| -1.03341361 | 0.76792468 | -1.0671141 | 0.38463259  | -1.43487548 | 0.001947606 |
| 0.735429975 | 0.18896676 | -1.0771261 | 0.374361966 | 0.847269057 | 0.476112616 |
| -1.22061663 | 0.04322212 | -1.1432673 | 0.077550123 | -1.32050255 | 0.005586051 |
| 0.954847626 | 0.56098307 | 0.97679535 | 0.71272944  | -1.05021167 | 0.537666818 |
| 0.944548802 | 0.15965118 | 0.89291691 | 0.044778265 | -1.0347797  | 0.396563346 |
| -1.04125842 | 0.36938878 | 0.93499    | 0.107859704 | 0.991783111 | 0.854131444 |
| 0.941934338 | 0.20391934 | -1.0845281 | 0.047702677 | -1.00687036 | 0.88351894  |
| 0.896243688 | 0.04925275 | 0.93407697 | 0.232203429 | -1.02921421 | 0.599057999 |
| 0.930068648 | 0.64926249 | 0.97818614 | 0.785652081 | -1.03731231 | 0.81811312  |
| 0.779100087 | 0.02043885 | 0.98541657 | 0.782118721 | 0.934214663 | 0.517637337 |
| -1.10337926 | 0.04001319 | 0.99298245 | 0.969636199 | -1.0404334  | 0.400190588 |
| 0.971204948 | 0.5228316  | 0.90402633 | 0.185902245 | 0.984899807 | 0.738966548 |
| 0.983206192 | 0.76511843 | -1.0095663 | 0.843932395 | 0.983737653 | 0.772396915 |
| -1.05870836 | 0.30357759 | -1.0021106 | 0.979265128 | 0.942533137 | 0.286024471 |
| 0.993343376 | 0.91295265 | -1.07942   | 0.472479121 | -1.07579556 | 0.234853366 |
| 0.920490981 | 0.23063322 | -1.0690862 | 0.303658542 | -1.10805878 | 0.13903406  |
| -1.07849715 | 0.07994675 | -1.0491492 | 0.397394905 | 0.968965987 | 0.459769201 |
| 0.903581715 | 0.06616828 | -1.0042145 | 0.952873169 | -1.0732877  | 0.19634288  |
| 0.933315726 | 0.39227337 | -1.0253787 | 0.821940258 | -1.14915723 | 0.088040229 |
| -1.00027981 | 0.99566841 | 0.94115687 | 0.793878121 | -1.01562371 | 0.763645615 |
| 0.934676268 | 0.16977003 | -1.1091004 | 0.28695843  | 0.963417151 | 0.446001924 |
| 0.939693136 | 0.38347428 | -1.0410432 | 0.612627249 | -1.17735648 | 0.024973176 |
| 0.996244444 | 0.9390166  | 0.96005147 | 0.312731995 | -1.01758612 | 0.723133832 |
| 0.762989973 | 0.17499043 | 0.97860992 | 0.63026837  | 0.913092504 | 0.645964263 |
| -1.01118426 | 0.84437803 | 0.9319351  | 0.135492851 | -1.30701368 | 1.57E-05    |
| 0.966392392 | 0.6279154  | -1.0006977 | 0.989827223 | -1.04832509 | 0.503863177 |
| 0.930328938 | 0.42037929 | -1.0594967 | 0.716843007 | 0.947384211 | 0.545924669 |
| 0.959906773 | 0.42382767 | 0.93985053 | 0.555189346 | 0.962779643 | 0.458269038 |
| 0.835074771 | 0.06280591 | -1.002582  | 0.956208142 | 0.82221     | 0.04389523  |
| 0.878168971 | 0.01902618 | -1.0611785 | 0.196719476 | 0.998101737 | 0.971919003 |
| -1.00163639 | 0.97245754 | 0.93048467 | 0.20694071  | 0.994044058 | 0.8996257   |
| -1.0065103  | 0.91045989 | -1.1058118 | 0.072603931 | 0.97925537  | 0.716541733 |
| -1.01302939 | 0.78667025 | 0.98955184 | 0.863521416 | 0.970357566 | 0.529915721 |
| -1.03173707 | 0.43972552 | 0.90586156 | 0.153724208 | -1.07082663 | 0.09398554  |

|             |            |            |             |             |             |
|-------------|------------|------------|-------------|-------------|-------------|
| 0.966023776 | 0.73793071 | -1.0331845 | 0.44406464  | -1.16102537 | 0.152126217 |
| -1.04113208 | 0.46398925 | 0.90693486 | 0.07637203  | 0.997712033 | 0.966723363 |
| -1.04323562 | 0.39104596 | -1.0194789 | 0.810402405 | -1.01155221 | 0.815372623 |
| 0.952801268 | 0.60339856 | -1.029884  | 0.568331059 | 0.910459489 | 0.315154927 |
| 0.993410659 | 0.8939552  | -1.0954305 | 0.065867455 | -1.05005858 | 0.326827822 |
| -1.02253185 | 0.70121992 | -1.0621993 | 0.397762457 | 0.956345234 | 0.443075867 |
| -1.3285449  | 0.00033156 | -1.0273034 | 0.584403014 | -1.40568846 | 2.64E-05    |
| 0.934396604 | 0.31253711 | 0.94029225 | 0.755625698 | -1.08341781 | 0.233947625 |
| 0.968183362 | 0.59140667 | 0.97546402 | 0.661296832 | 0.883915965 | 0.044174317 |
| 0.999663864 | 0.99516247 | 0.95639435 | 0.527637468 | -1.12048301 | 0.044149258 |
| 0.709074624 | 0.04431354 | 0.98111957 | 0.831110508 | 0.654386974 | 0.014004347 |
| 0.952852435 | 0.2859547  | 0.9004734  | 0.043785008 | -1.00824868 | 0.855233009 |
| -1.16738629 | 0.25672701 | 0.93322325 | 0.469427946 | 0.792905387 | 0.091412385 |
| -1.01626287 | 0.75001375 | -0.9999364 | 0.999059676 | 0.928665063 | 0.147611019 |
| -1.03330645 | 0.5142862  | -1.040408  | 0.404422287 | 0.919470485 | 0.098309286 |
| -1.14818272 | 0.04572484 | 0.94233519 | 0.305693079 | 0.987703975 | 0.855373816 |
| 0.811358513 | 0.10024253 | 0.9443445  | 0.234186534 | 0.878061451 | 0.302813202 |
| -1.08257422 | 0.19414291 | -1.0293072 | 0.474833585 | -1.00316033 | 0.958490524 |
| -1.07262914 | 0.43916259 | -1.2368907 | 0.043418067 | 0.906851683 | 0.281925639 |
| -1.03623421 | 0.48554213 | -1.0161148 | 0.771017764 | -1.11819015 | 0.031825837 |
| -1.12911388 | 0.07917582 | -1.0018766 | 0.969589204 | -1.04033863 | 0.562481822 |
| -1.16388333 | 0.02344567 | 0.9385961  | 0.496310117 | -1.01382079 | 0.833700629 |
| -1.04135258 | 0.50739369 | 0.90957575 | 0.060171237 | -1.00018525 | 0.997577116 |
| -1.0200684  | 0.7093212  | 0.95670502 | 0.446907186 | -1.00869279 | 0.870940949 |
| 0.99248581  | 0.91752306 | -1.250825  | 0.003846459 | 0.979999601 | 0.7815583   |
| -1.17424451 | 0.03293075 | -1.0240957 | 0.721938163 | -1.17485111 | 0.032395332 |
| 0.857563297 | 0.00590497 | 0.98335699 | 0.780318127 | -1.02815626 | 0.606493809 |
| 0.979340464 | 0.69020477 | 0.95024462 | 0.359266519 | -1.1643485  | 0.005095949 |
| 0.981535155 | 0.75514303 | 0.86779267 | 0.399396075 | -1.09396667 | 0.136777729 |
| 0.921507453 | 0.19019098 | 0.99453328 | 0.903092649 | -1.07202488 | 0.263975475 |
| 0.83947542  | 0.47449903 | 0.94770748 | 0.692333563 | 0.78385594  | 0.320639842 |
| 0.770140018 | 0.29365298 | -1.0954084 | 0.076039309 | 0.894354058 | 0.652111004 |
| 0.993397272 | 0.90369822 | 0.96807641 | 0.518381474 | 0.977904195 | 0.683429024 |
| 0.998097744 | 0.96916521 | -1.0430809 | 0.535030398 | -1.00770033 | 0.876259799 |
| 0.976638339 | 0.67700147 | 0.93761594 | 0.608410711 | -1.01679106 | 0.769100468 |
| -1.10921286 | 0.06185055 | 0.95568037 | 0.45578187  | -1.16062597 | 0.008304214 |
| 0.667993912 | 0.06994189 | -1.0259115 | 0.777216068 | -1.10203924 | 0.657886166 |
| -1.10643857 | 0.19711655 | -1.0240315 | 0.641289194 | 0.886962849 | 0.127297579 |
| -1.01087746 | 0.83727155 | -1.0119293 | 0.86192689  | 0.935502022 | 0.208903249 |
| 0.818222893 | 0.00893844 | 0.86636719 | 0.031770474 | -1.07569171 | 0.32818201  |
| 0.891694268 | 0.40934666 | -1.0150027 | 0.807190523 | 0.99943045  | 0.996717872 |
| -1.06511623 | 0.30442873 | -1.1294155 | 0.025651451 | 0.958650481 | 0.490605642 |
| 0.853672131 | 0.0258807  | -1.0311474 | 0.673916559 | 0.91767567  | 0.218758426 |
| -1.08139268 | 0.06258574 | -1.0830412 | 0.281723068 | 0.992842143 | 0.862064347 |

|             |            |            |             |             |             |
|-------------|------------|------------|-------------|-------------|-------------|
| 0.733158819 | 0.042406   | -1.0410771 | 0.455829785 | 0.762688684 | 0.075181111 |
| 0.908523639 | 0.23123006 | -1.0256575 | 0.628725769 | 0.902128268 | 0.199125817 |
| 0.882985651 | 0.07720648 | 0.91714599 | 0.151590223 | -1.02440244 | 0.728411739 |
| 0.847875038 | 0.04449825 | 0.85685411 | 0.015218364 | 0.886269668 | 0.138081615 |
| -1.00301569 | 0.96554707 | 0.71518057 | 0.173360428 | -1.19533795 | 0.012932631 |
| 0.910332091 | 0.07180565 | -1.0517488 | 0.838449147 | -1.0299032  | 0.566998121 |
| 0.929361133 | 0.3099299  | 0.8834485  | 0.026990489 | 0.942744364 | 0.413020789 |
| 0.919968646 | 0.25084715 | 0.99926505 | 0.988091098 | 0.994790642 | 0.942327455 |
| -1.00602902 | 0.8671735  | -1.2025883 | 0.001889319 | 0.969346248 | 0.387945636 |
| -1.11990021 | 0.27012101 | -1.0234554 | 0.671370746 | -1.10659628 | 0.323386435 |
| -1.01942771 | 0.71110043 | -1.3220438 | 0.206218589 | 0.964814188 | 0.491197616 |
| 0.987079089 | 0.82001783 | 0.98128715 | 0.808227703 | -1.03109574 | 0.592555114 |
| -1.03004146 | 0.54306177 | -1.0319432 | 0.551138658 | 0.833081929 | 0.000400029 |
| -1.0107344  | 0.8592326  | -1.1739978 | 0.034496308 | -1.07859293 | 0.212142168 |
| 0.998684332 | 0.97795167 | -1.2500467 | 0.111316296 | 0.994661877 | 0.910543461 |
| -1.01645199 | 0.77532656 | -1.1963778 | 0.004739099 | 0.952728923 | 0.398406787 |
| 0.794809801 | 0.2212028  | -1.0199174 | 0.776235394 | -1.0917622  | 0.638010595 |
| 0.98387353  | 0.81739825 | -1.0015234 | 0.970627118 | -1.07439392 | 0.310386627 |
| 0.817758089 | 0.46415241 | 0.95336215 | 0.750279192 | 0.794988615 | 0.404199073 |
| -1.02033972 | 0.8348497  | -1.0700026 | 0.396874699 | 0.947555712 | 0.577479488 |
| -1.03629616 | 0.57429027 | 0.94733105 | 0.436860405 | -1.07813995 | 0.238222482 |
| 0.984431275 | 0.75220646 | 0.83708788 | 0.03086088  | 0.959342534 | 0.4049248   |
| 0.962937674 | 0.33568049 | 0.99772791 | 0.973970041 | 0.964525875 | 0.357016004 |
| -1.00164025 | 0.97218667 | -1.114192  | 0.039186456 | -1.02157589 | 0.650055441 |
| -1.00479529 | 0.91158936 | 0.87194624 | 0.060521801 | 0.982178847 | 0.676643707 |
| 0.942168518 | 0.22270269 | -1.0506099 | 0.495003983 | 0.928729532 | 0.131597747 |
| -1.04506358 | 0.4719171  | 0.95306414 | 0.184597082 | 0.966562464 | 0.57849159  |
| 0.99257086  | 0.95669298 | 0.96984524 | 0.764355901 | -1.27912027 | 0.07730491  |
| -1.00062475 | 0.98885519 | -1.0132439 | 0.800001669 | -1.00127131 | 0.977331015 |
| -1.00084608 | 0.98627855 | 0.92475363 | 0.174751948 | 0.99827841  | 0.972048315 |
| 0.994714298 | 0.92911423 | 0.85315037 | 0.001804147 | 0.997673547 | 0.968812472 |
| -1.01569463 | 0.84851959 | -1.0463749 | 0.452598856 | -1.25814297 | 0.006531912 |
| -1.07466471 | 0.19771087 | 0.99930924 | 0.988426574 | 0.963199568 | 0.499977087 |
| 0.824556435 | 0.09182534 | 0.97757542 | 0.691703881 | 0.909121796 | 0.400314427 |
| 0.897744559 | 0.47185694 | 0.92193733 | 0.663103255 | 0.853368951 | 0.291600854 |
| -1.03001599 | 0.80512048 | -1.0735241 | 0.315827106 | -1.04578964 | 0.70886751  |
| -1.07737792 | 0.19837508 | 0.66605614 | 0.142271431 | 0.955238245 | 0.427128838 |
| -1.06887252 | 0.5013158  | 0.96951501 | 0.74861515  | -1.05402122 | 0.595012073 |
| -1.04272474 | 0.45594399 | 0.94384299 | 0.363647146 | -1.04112874 | 0.472522922 |
| 0.980226156 | 0.70056237 | -1.1085521 | 0.041911186 | -1.05826507 | 0.277851337 |
| -1.06735024 | 0.25781811 | 0.8966121  | 0.006953135 | -1.02877179 | 0.620700668 |
| -1.16677509 | 0.00737587 | -1.0290871 | 0.542584814 | 0.977690632 | 0.68532541  |
| -1.00700025 | 0.91437773 | 0.99083596 | 0.830822174 | 0.923705278 | 0.22444175  |
| 0.935823317 | 0.27089562 | 0.99913841 | 0.985824288 | 0.801263899 | 0.000483996 |

|             |            |            |             |             |             |
|-------------|------------|------------|-------------|-------------|-------------|
| 0.882918975 | 0.05778439 | -1.0095692 | 0.876197527 | 0.957475712 | 0.501554832 |
| 0.980724082 | 0.71988918 | -1.1601777 | 0.281879985 | -1.20058782 | 0.00133391  |
| 0.982325762 | 0.7331347  | 0.99531196 | 0.916303659 | -1.00965767 | 0.854136864 |
| -1.04235432 | 0.32806568 | 0.91589232 | 0.078296026 | -1.05162993 | 0.236254958 |
| -1.22279638 | 0.19987303 | -1.0831451 | 0.183654526 | -1.51083845 | 0.010206957 |
| -1.04659751 | 0.54537615 | -1.2241505 | 0.015798811 | -1.0414196  | 0.589857057 |
| 0.947700107 | 0.29865518 | 0.90344967 | 0.071443313 | -1.01050695 | 0.838963767 |
| -1.05816802 | 0.4198909  | 0.89685526 | 0.337050132 | -1.02341121 | 0.740655553 |
| -1.01855858 | 0.81841477 | 0.84543432 | 0.264402629 | 0.963725879 | 0.644825257 |
| 0.864018565 | 0.26777556 | -1.1333535 | 0.298649853 | -1.08183331 | 0.549287263 |
| 0.806946828 | 0.02587877 | -1.0076123 | 0.895077052 | 0.935875226 | 0.481980171 |
| -1.11156584 | 0.05530895 | 0.96789295 | 0.741404094 | -1.04085131 | 0.461558549 |
| 0.9195217   | 0.05364019 | 0.86136298 | 0.009786252 | -1.04191156 | 0.338598796 |
| 0.970536683 | 0.48723084 | -1.0256845 | 0.625475046 | -1.03945869 | 0.369377902 |
| 0.986883941 | 0.85157381 | -1.0092229 | 0.872624047 | 0.879731199 | 0.073606726 |
| 0.948718391 | 0.3160618  | -1.040311  | 0.478550514 | -1.02524877 | 0.633625006 |
| -1.04169423 | 0.26585043 | -1.0076323 | 0.906711473 | 0.968824461 | 0.387201767 |
| 0.897631193 | 0.0613833  | 0.94766362 | 0.371300777 | 0.931512973 | 0.214833074 |
| -1.13634224 | 0.32751842 | 0.86867325 | 0.032727871 | -1.0492965  | 0.711344346 |
| -1.09381307 | 0.18572771 | 0.93973673 | 0.254756554 | -1.09336143 | 0.187728859 |
| 0.906835481 | 0.0983534  | 0.89902034 | 0.045674927 | -1.10644099 | 0.087621301 |
| -1.18482699 | 0.14022973 | -1.0440603 | 0.309529529 | 0.88623644  | 0.291155034 |
| 0.657968476 | 0.00105786 | -1.2592434 | 0.142757057 | -1.00698473 | 0.954297304 |
| 0.801708807 | 0.01129497 | -1.0232552 | 0.759894571 | 0.841282797 | 0.045073231 |
| -1.11073525 | 0.07348199 | 0.96384326 | 0.474957435 | -1.07416284 | 0.219055909 |
| 0.962255493 | 0.56571927 | -1.0180415 | 0.798108564 | 0.936095021 | 0.325663176 |
| 0.984610407 | 0.76914752 | 0.97858244 | 0.786942946 | 0.93596726  | 0.213617445 |
| -1.11219567 | 0.03704491 | -1.1121222 | 0.419130214 | -1.01143845 | 0.819945746 |
| 0.978287507 | 0.65911012 | 0.8606935  | 0.114862611 | -1.01631657 | 0.744887525 |
| -1.01835488 | 0.60488673 | 0.99895663 | 0.984645057 | -1.04410063 | 0.222252727 |
| 0.936796483 | 0.25105362 | 0.97909433 | 0.621318057 | -1.01056518 | 0.852537275 |
| -1.00455652 | 0.92294998 | -1.0011004 | 0.979570654 | -1.00649328 | 0.890485562 |
| -1.02816369 | 0.7666163  | 0.87549961 | 0.063699456 | -1.17130598 | 0.095245936 |
| -1.11649046 | 0.03382037 | 0.97814062 | 0.672611345 | -1.0370849  | 0.474799321 |
| -1.04939889 | 0.32965539 | 0.92184967 | 0.029264746 | -1.08392837 | 0.105971364 |
| 0.953791859 | 0.43648347 | -1.0299151 | 0.604146373 | 0.914522996 | 0.144527553 |
| 0.779370114 | 0.01006184 | -1.0832455 | 0.539066489 | -1.20947461 | 0.046718774 |
| -1.00844499 | 0.86541239 | -1.0610738 | 0.379451884 | -1.10662719 | 0.045085206 |
| 0.971567899 | 0.66465081 | -1.087133  | 0.15651687  | -1.06059958 | 0.377896499 |
| -1.0246351  | 0.72520408 | -1.0967116 | 0.418726618 | -1.01070725 | 0.877685875 |
| -1.14397561 | 0.18823437 | 0.95772747 | 0.722267263 | 0.950413112 | 0.616372327 |
| 0.900083602 | 0.43813468 | -1.0318991 | 0.710758729 | 0.779113296 | 0.0694987   |
| 0.931737651 | 0.19554422 | 0.97342684 | 0.64156327  | -1.08480523 | 0.137170404 |
| 0.876044675 | 0.15613548 | -1.124287  | 0.084156884 | -1.22004913 | 0.03511872  |

|             |            |            |             |             |             |
|-------------|------------|------------|-------------|-------------|-------------|
| 0.692345568 | 0.00455821 | -1.0622871 | 0.255552346 | -1.02735113 | 0.828782782 |
| 0.957924166 | 0.58222551 | 0.9587096  | 0.400192735 | 0.988436403 | 0.881515948 |
| -1.04386557 | 0.47808774 | -1.0883459 | 0.092891915 | -1.02725641 | 0.656326308 |
| -1.0459362  | 0.31047091 | 0.98038936 | 0.573263209 | 0.924279167 | 0.078265048 |
| 0.963373486 | 0.56024675 | 0.94806929 | 0.347508962 | 0.992678424 | 0.908535064 |
| 0.937722199 | 0.65760405 | 0.91853234 | 0.074897107 | 0.825049517 | 0.188163684 |
| 0.942111763 | 0.37124407 | -1.1523697 | 0.133573486 | 0.956447352 | 0.503618063 |
| 0.995313883 | 0.91605107 | -1.0293121 | 0.570347183 | -1.02282565 | 0.612931042 |
| 0.764383654 | 0.20119226 | 0.95803073 | 0.385605476 | -1.08426216 | 0.698352027 |
| 0.990879162 | 0.88679554 | -1.0975542 | 0.128813658 | -1.04617066 | 0.484091091 |
| -1.04373691 | 0.58436402 | 0.96515967 | 0.705742988 | -1.05342888 | 0.506249783 |
| 0.959838903 | 0.39192101 | -1.0337134 | 0.50479558  | -1.07266714 | 0.145500174 |
| -1.04397745 | 0.44254513 | 0.87268294 | 0.044454687 | 0.939530157 | 0.267182995 |
| -1.05737207 | 0.354002   | 0.99621154 | 0.956254212 | 0.914000524 | 0.137657296 |
| 0.94809466  | 0.23786241 | 0.87991755 | 0.210427525 | -1.05748583 | 0.216096035 |
| -1.37818761 | 0.00200307 | 0.76555642 | 0.052556014 | -1.72981895 | 9.03E-07    |
| -1.17827825 | 0.1559424  | 0.9329925  | 0.204054157 | -1.12244493 | 0.315497402 |
| -1.06316894 | 0.25592956 | -1.0568001 | 0.550727037 | -1.01259649 | 0.815357854 |
| 0.789431919 | 0.03119091 | -1.0338452 | 0.789673863 | 0.91532345  | 0.411324028 |
| 0.839112093 | 0.03951745 | -1.0144969 | 0.853676481 | -1.18612219 | 0.04491942  |
| -1.03212328 | 0.56151319 | 0.953559   | 0.432244943 | 0.997707895 | 0.966336003 |
| -1.1143975  | 0.0387433  | 0.9543108  | 0.291121508 | 0.99575125  | 0.933927276 |
| -1.16162362 | 0.02348902 | -1.0428187 | 0.512973371 | 0.936138541 | 0.308950638 |
| 0.887285353 | 0.03184748 | 0.88206564 | 0.388272499 | 0.900009635 | 0.057464389 |
| 0.990028646 | 0.86051201 | 0.93541955 | 0.317265832 | 0.993630815 | 0.910784804 |
| 0.931599764 | 0.17434854 | -1.0129476 | 0.772889678 | 0.926693056 | 0.144928932 |
| -1.10752214 | 0.06180707 | 0.97055997 | 0.886103927 | 0.956908206 | 0.414289418 |
| 0.913435094 | 0.07381439 | -1.1392706 | 0.046754317 | -1.07967269 | 0.128519006 |
| 0.988932183 | 0.93082031 | 0.89833269 | 0.173802951 | 0.863871866 | 0.256559632 |
| 0.956340994 | 0.5949895  | -1.0089714 | 0.851534954 | 0.831553659 | 0.031400966 |
| 0.983535841 | 0.70937777 | 0.97519603 | 0.653457566 | -1.04612625 | 0.313369747 |
| 0.990014893 | 0.79919325 | -1.0540451 | 0.381638079 | -1.0505832  | 0.21415798  |
| 0.956401588 | 0.56466419 | -1.0312226 | 0.494086343 | -1.24928619 | 0.005495733 |
| 0.905218319 | 0.26288178 | -1.2112732 | 0.057490353 | 0.897332533 | 0.223726333 |
| -1.17444711 | 0.00489271 | 0.96289687 | 0.741441687 | 0.922486674 | 0.14659659  |
| 0.784532157 | 0.24658699 | 0.96283329 | 0.480754601 | 0.933114481 | 0.73953706  |
| -1.07111283 | 0.45568506 | -1.0382172 | 0.726967607 | -1.2033287  | 0.047906837 |
| -1.08366224 | 0.1369381  | -1.05445   | 0.526293894 | 0.962797708 | 0.479270296 |
| -1.01598135 | 0.76261237 | -1.0205452 | 0.708561296 | -1.14287123 | 0.013417061 |
| 0.995436732 | 0.92120627 | 0.96985654 | 0.551851724 | 0.992162977 | 0.864898943 |
| 0.935018736 | 0.27130587 | -1.0330729 | 0.614613275 | -1.04466114 | 0.472935895 |
| -1.04605883 | 0.36720337 | 0.85091244 | 0.004382518 | 0.881112188 | 0.013448807 |
| 0.804337501 | 0.23335086 | -1.009204  | 0.872365377 | 0.849546071 | 0.370747987 |
| 0.86620847  | 0.15157598 | 0.93333941 | 0.185773916 | -1.08328486 | 0.4213843   |

|             |            |            |             |             |             |
|-------------|------------|------------|-------------|-------------|-------------|
| -1.16070921 | 0.00421807 | -1.0808263 | 0.15237611  | -1.03881758 | 0.448345481 |
| 0.65623308  | 0.00015739 | -1.1250769 | 0.021239169 | 0.929595783 | 0.484031084 |
| 0.687598919 | 0.00478462 | 0.87017353 | 0.280661652 | 0.271438794 | 3.08E-14    |
| -1.00978566 | 0.83638156 | 0.7463108  | 0.000928764 | -1.13271624 | 0.010396859 |
| -1.14401988 | 0.02609569 | -1.0201166 | 0.654874781 | -1.01620757 | 0.785580567 |
| -1.04418495 | 0.77868946 | 0.97738085 | 0.562430909 | 0.822202185 | 0.206448806 |
| 0.854130765 | 0.01609345 | -1.1474161 | 0.07947262  | 0.888463931 | 0.067780474 |
| 0.989774261 | 0.86724185 | -1.0361096 | 0.688499177 | -1.08998848 | 0.164866747 |
| 0.888488198 | 0.04902619 | 0.95315578 | 0.384989463 | -1.01135068 | 0.848258442 |
| -1.11020957 | 0.06518125 | 0.82666897 | 0.362254781 | -1.07769262 | 0.183539163 |
| 0.984142214 | 0.91732707 | -1.1031472 | 0.287741369 | 0.807764826 | 0.169410201 |
| 0.774714381 | 0.00138348 | 0.91089909 | 0.085183084 | -1.05362836 | 0.49289597  |
| 0.942379032 | 0.20511471 | -1.0943844 | 0.089921487 | -1.03112715 | 0.510488367 |
| 0.924722218 | 0.22366029 | -1.0994536 | 0.044247052 | -1.00918121 | 0.886224855 |
| -1.13732156 | 0.02972054 | -1.0094753 | 0.876608365 | -1.07288822 | 0.227394554 |
| 0.839170248 | 0.09589028 | 0.94487018 | 0.257187196 | 0.313365331 | 1.10E-15    |
| -1.00991236 | 0.86394018 | 0.84891449 | 0.368586106 | 0.985577662 | 0.800774763 |
| 0.976168798 | 0.81549456 | -1.2635143 | 0.021469273 | -1.37413051 | 0.003171091 |
| 0.894197866 | 0.05651979 | -1.0183622 | 0.716602795 | 0.807000397 | 0.000452631 |
| 0.913136551 | 0.15917362 | 0.79978661 | 0.035538855 | -1.04426945 | 0.499061845 |
| 0.823079554 | 0.00469659 | 0.45238984 | 7.34104E-08 | 0.935041183 | 0.31335858  |
| -1.11754233 | 0.12348986 | -1.0190671 | 0.68890205  | -1.0245932  | 0.733600486 |
| -1.0173781  | 0.70612681 | 0.99752313 | 0.966516152 | 0.900630295 | 0.025197217 |
| -1.19193034 | 0.0107467  | 0.8624029  | 0.337869469 | -1.11502272 | 0.107066083 |
| 0.767672273 | 0.24975145 | 0.82330973 | 0.003407131 | 0.959723224 | 0.857110599 |
| 0.940286909 | 0.26612425 | 0.99573873 | 0.944624224 | -1.01805966 | 0.745185386 |
| 0.946393059 | 0.70677299 | -1.0735464 | 0.231994914 | -1.34509892 | 0.046802216 |
| -1.05499175 | 0.36653411 | 0.97849029 | 0.696940489 | -1.04789249 | 0.429641247 |
| 0.956730352 | 0.58575463 | 0.83602646 | 0.247778234 | 0.954909888 | 0.569766615 |
| -1.03948049 | 0.7039379  | 0.80164867 | 0.005080651 | -1.11692496 | 0.280132083 |
| -1.05822641 | 0.33027647 | -1.1355896 | 0.008146194 | -1.0601851  | 0.314861911 |
| -1.06071099 | 0.2543715  | -1.076478  | 0.251491332 | 0.954160402 | 0.363114273 |
| 0.990287293 | 0.84711256 | 0.96800132 | 0.574797074 | 0.999648238 | 0.994453793 |
| -1.00665267 | 0.91888948 | 0.5243489  | 7.16631E-08 | 0.775406885 | 0.000249006 |
| -1.01488128 | 0.82503021 | -1.0135116 | 0.815653775 | 0.962422372 | 0.566986986 |
| -1.06108541 | 0.33120946 | -1.0497163 | 0.639044658 | -1.10977482 | 0.090735294 |
| -1.34444579 | 0.00367903 | 0.96644303 | 0.554398563 | -1.24559073 | 0.028320819 |
| 0.962869172 | 0.48743559 | 0.98654582 | 0.832273749 | 0.977171388 | 0.671269601 |
| -1.05629673 | 0.36162452 | 0.92066351 | 0.215792497 | -1.03699536 | 0.544235865 |
| -1.03709485 | 0.55771371 | -1.0357291 | 0.623087695 | 0.908651431 | 0.126657007 |
| -1.01135886 | 0.82631438 | -1.0266085 | 0.565817399 | -1.15209355 | 0.007807798 |
| 0.983467277 | 0.78977762 | -1.0737089 | 0.28913228  | -1.0041594  | 0.947059784 |
| -1.06858773 | 0.29259028 | -1.0282179 | 0.902989084 | -1.03699013 | 0.563021602 |
| -1.1842424  | 0.01722701 | 0.99771075 | 0.966789462 | 0.980054171 | 0.770750908 |

|             |            |            |             |             |             |
|-------------|------------|------------|-------------|-------------|-------------|
| 0.919592477 | 0.07637473 | -1.2230689 | 0.172636052 | -1.10007361 | 0.044661058 |
| 0.949916081 | 0.45235978 | -1.1074986 | 0.088133103 | 0.976217934 | 0.724269075 |
| 0.946437195 | 0.27079665 | 0.99040326 | 0.905299551 | 0.929687417 | 0.14642789  |
| -1.07587587 | 0.28383801 | -1.0261204 | 0.800151077 | -1.22085401 | 0.00465161  |
| -1.0780873  | 0.2470755  | -1.0119176 | 0.837830974 | 0.951291769 | 0.440462051 |
| -1.00352531 | 0.95080102 | 0.88462493 | 0.020073395 | 0.913045617 | 0.114927677 |
| -1.05706842 | 0.43408041 | -1.0337747 | 0.512492164 | -1.02506717 | 0.726523252 |
| 0.903590504 | 0.14630376 | 0.90517222 | 0.130090423 | -1.05861499 | 0.411205566 |
| 0.85306891  | 0.01340783 | 0.95020207 | 0.445710071 | -1.03636368 | 0.567827803 |
| -1.18286057 | 0.04207214 | 0.96408591 | 0.547817274 | -1.34632581 | 0.000528881 |
| 0.971606744 | 0.64876561 | -1.1707417 | 0.111579706 | 0.740384912 | 1.40E-05    |
| -1.01380889 | 0.78054953 | -1.1204315 | 0.040321876 | 0.995045046 | 0.919598014 |
| -1.03287687 | 0.59363738 | 0.96630714 | 0.56715787  | 0.876603799 | 0.03324384  |
| 0.977917438 | 0.70049601 | -1.0699105 | 0.278635518 | -1.01497063 | 0.797898535 |
| 0.810739877 | 0.12772221 | 0.97332393 | 0.59977231  | 0.953429765 | 0.726475346 |
| 0.894148643 | 0.05128618 | 0.88920612 | 0.064539944 | -1.01272832 | 0.822544477 |
| 0.893421047 | 0.06180936 | 0.96165286 | 0.533639891 | -1.02202829 | 0.713720909 |
| 0.997422836 | 0.96787887 | 0.94486733 | 0.413380515 | 0.976345504 | 0.70890702  |
| -1.06860145 | 0.34284745 | 0.97210138 | 0.544469905 | 0.921829726 | 0.245574084 |
| -1.02808615 | 0.69989152 | 0.93829693 | 0.352283086 | 0.978769736 | 0.765160449 |
| 0.993840233 | 0.94981326 | -1.0452056 | 0.375494696 | -1.15071873 | 0.156589621 |
| 0.923137197 | 0.12897502 | -1.0739114 | 0.295915884 | -1.01852373 | 0.724832988 |
| -1.0198513  | 0.61870378 | 0.78953234 | 0.000545326 | 0.947006366 | 0.171284516 |
| 0.910748167 | 0.20250777 | -1.0464454 | 0.427400056 | -1.05059926 | 0.498663945 |
| -1.01892091 | 0.79193425 | -1.1399853 | 0.068293534 | -1.18047437 | 0.022662419 |
| 0.879103333 | 0.45811765 | 0.9878706  | 0.859828171 | 0.936413464 | 0.70467138  |
| 0.992593883 | 0.93546785 | 0.98545494 | 0.814494442 | -1.06868841 | 0.470399565 |
| -1.03092286 | 0.61711109 | -1.2588041 | 0.00611903  | -1.05192384 | 0.406936734 |
| -1.06449637 | 0.38313645 | 0.86162161 | 0.021494827 | -1.32246753 | 0.000243199 |
| -1.06004285 | 0.37272607 | -1.049378  | 0.329510292 | -1.07618115 | 0.262743714 |
| -1.04402716 | 0.33042645 | 0.92760004 | 0.21777283  | -1.05126728 | 0.259472359 |
| 0.92889387  | 0.32963983 | -1.0871166 | 0.153835408 | -1.09461297 | 0.233218219 |
| 0.952603006 | 0.39853697 | 0.99836061 | 0.990391925 | -1.01307102 | 0.820820186 |
| -1.00117393 | 0.98394861 | 0.69340612 | 2.50207E-08 | 0.980926466 | 0.741351349 |
| 0.825610291 | 0.00515962 | -1.0535534 | 0.381164309 | -1.18089136 | 0.014360605 |
| -1.01782212 | 0.71816985 | -1.0303014 | 0.641672111 | 0.983889817 | 0.740003752 |
| 0.910635266 | 0.09554889 | 0.97179461 | 0.681489524 | 0.99683769  | 0.954434528 |
| -1.02502908 | 0.68204654 | -1.0666022 | 0.3710282   | 0.917699897 | 0.158217479 |
| -1.23933776 | 0.00550568 | -1.4604833 | 0.000291027 | -1.11558904 | 0.14615007  |
| -1.08129832 | 0.17031013 | 0.92696478 | 0.149538063 | 0.907245189 | 0.089214267 |
| 0.958803037 | 0.39829613 | 0.98419604 | 0.686584421 | -1.00979745 | 0.844315246 |
| -1.03275652 | 0.47566093 | -1.1824908 | 0.024567042 | 0.921051062 | 0.072371277 |
| 0.956810321 | 0.4143168  | -1.0196594 | 0.784093081 | -1.11054779 | 0.055939046 |
| 0.659673651 | 0.00406227 | 0.8717982  | 0.429687528 | 0.844084257 | 0.226563625 |

|             |            |            |             |             |             |
|-------------|------------|------------|-------------|-------------|-------------|
| 0.997311679 | 0.96692575 | -1.1987916 | 0.05236515  | 0.997020711 | 0.963343116 |
| 0.976368535 | 0.6473804  | -1.0582179 | 0.354297803 | 0.950375047 | 0.331973927 |
| -1.21276084 | 0.01196712 | -1.2767259 | 0.001143574 | 0.931060789 | 0.339678072 |
| 0.964889289 | 0.43700311 | 0.97339064 | 0.679240245 | 0.99926056  | 0.987129112 |
| 0.872119172 | 0.08791417 | -1.0590872 | 0.196233003 | 0.816497113 | 0.012803593 |
| -1.00496015 | 0.91299726 | 0.95876739 | 0.576729365 | -1.03236752 | 0.482788135 |
| -1.05733619 | 0.38733453 | 0.89050744 | 0.047074341 | -1.14489339 | 0.039068272 |
| 0.777475832 | 0.0001532  | 0.98055967 | 0.736518193 | 0.948859683 | 0.399236269 |
| -1.03603867 | 0.54071844 | 0.99506747 | 0.940293224 | 0.924205701 | 0.176192133 |
| 0.972453256 | 0.63332714 | 0.89185628 | 0.022449559 | -1.02572135 | 0.664433975 |
| -1.07118942 | 0.43400692 | 0.92587774 | 0.16851396  | -1.06499725 | 0.473540059 |
| 0.914410303 | 0.08462032 | 0.98558693 | 0.809777337 | 0.940600061 | 0.23444899  |
| 0.724581759 | 5.17E-08   | -1.1578182 | 0.053358322 | 0.649658209 | 1.80E-11    |
| 0.896101892 | 0.05644821 | 0.95101649 | 0.375808644 | -1.05475684 | 0.347647715 |
| 0.668150596 | 0.12744657 | 0.89765335 | 0.033255654 | 0.957301585 | 0.867573685 |
| 0.977099038 | 0.66868952 | -1.0118919 | 0.793195519 | 0.966304368 | 0.527053092 |
| 0.927619697 | 0.10491727 | -1.0671686 | 0.23105283  | -1.09443981 | 0.05272203  |
| -1.03555196 | 0.50287331 | 0.95034017 | 0.714618837 | -1.0067798  | 0.896686953 |
| -1.07468323 | 0.4778189  | 0.81783107 | 0.002976344 | 0.915312225 | 0.383741489 |
| -1.12331323 | 0.04122644 | 0.87281786 | 0.011517972 | -1.09037314 | 0.125532996 |
| -1.10279233 | 0.0416418  | -1.0573533 | 0.455246915 | -1.04774922 | 0.324218784 |
| -1.07760254 | 0.17512877 | 0.98082619 | 0.673128389 | 0.982812416 | 0.751157825 |
| 0.741089505 | 4.02E-05   | -1.011501  | 0.885043851 | -1.03338187 | 0.625842164 |
| -1.10536319 | 0.05726979 | 0.9150936  | 0.054179731 | -1.07757822 | 0.153095247 |
| 0.94768726  | 0.48723628 | -1.1333091 | 0.055646959 | -1.09373996 | 0.248541743 |
| -1.08889391 | 0.12364258 | 0.98650695 | 0.826778099 | -1.1483925  | 0.013965153 |
| -1.07944785 | 0.13551085 | 0.90526352 | 0.089243294 | 0.983630784 | 0.744800974 |
| 0.885095967 | 0.02163824 | 0.87510449 | 0.025886534 | -1.00247471 | 0.96196945  |
| 0.938037078 | 0.36210366 | -1.0422452 | 0.637220467 | -1.09052466 | 0.218430208 |
| 0.894644969 | 0.13673921 | 0.8843346  | 0.019233788 | 0.880687405 | 0.090458245 |
| 0.885219727 | 0.18559779 | 0.50795723 | 1.25156E-18 | -1.25699293 | 0.014911645 |
| -1.12496051 | 0.18889008 | -1.0777042 | 0.1891491   | -1.07237092 | 0.433185576 |
| -1.11607724 | 0.05480539 | -1.1627154 | 0.565126344 | -1.03009974 | 0.598185754 |
| 0.945396357 | 0.31746833 | 0.96934075 | 0.565423087 | -1.09437961 | 0.110937806 |
| -1.11526871 | 0.05594622 | 0.96007652 | 0.375106097 | -1.01135541 | 0.840509334 |
| 0.971064141 | 0.55239128 | 0.98465734 | 0.766447111 | -1.00225608 | 0.963567291 |
| 0.992480973 | 0.93377883 | -1.0679869 | 0.516680378 | -1.06809977 | 0.469347312 |
| -1.10398752 | 0.31465417 | -1.0022247 | 0.968263876 | 0.839275152 | 0.077847449 |
| -1.11106349 | 0.03420785 | -1.0479679 | 0.322078648 | -1.02354744 | 0.633008054 |
| 0.987923308 | 0.83108184 | 0.94791973 | 0.32985351  | 0.932609765 | 0.223741667 |
| -1.04877658 | 0.41460188 | -1.0581755 | 0.402136168 | -1.01548126 | 0.791852201 |
| 0.95269883  | 0.31757302 | -1.0361807 | 0.493555137 | 0.951049212 | 0.300738178 |
| -1.06167659 | 0.32377096 | 0.91170298 | 0.234057379 | -1.00131628 | 0.982618026 |
| 0.949992902 | 0.41260491 | -1.0735006 | 0.198232974 | 0.978298572 | 0.725355168 |



|             |            |            |             |             |             |
|-------------|------------|------------|-------------|-------------|-------------|
| 0.889810589 | 0.06121027 | 0.99352609 | 0.89803317  | -1.01139251 | 0.853510051 |
| -1.08987646 | 0.13617075 | 0.98988974 | 0.844607943 | 0.907707099 | 0.094502147 |
| 0.862075214 | 0.02135153 | 0.9620922  | 0.58097209  | -1.04377185 | 0.496621713 |
| 0.949752637 | 0.38002547 | 0.91594656 | 0.238752457 | -1.07503787 | 0.219524212 |
| -1.00695777 | 0.88411316 | 0.87112474 | 0.135024879 | 0.995165449 | 0.918850522 |
| -1.09345397 | 0.16372742 | -1.1740019 | 0.075422317 | 0.958814539 | 0.509091926 |
| 0.941088284 | 0.26261437 | 0.91911696 | 0.137470399 | -1.12413026 | 0.033531661 |
| 0.996420518 | 0.93936616 | -1.0255084 | 0.652621963 | 0.944450585 | 0.228539415 |
| -1.06739391 | 0.21490541 | -1.0806155 | 0.170719054 | -1.09147348 | 0.097930094 |
| 0.891168136 | 0.0416647  | 0.95799974 | 0.386133073 | 0.979786017 | 0.712939003 |
| 0.843542474 | 0.00266544 | -1.0441491 | 0.634690714 | 0.976405409 | 0.660179008 |
| 0.89202254  | 0.30766795 | 0.91720712 | 0.379200064 | 0.982674983 | 0.875419912 |
| 0.945990602 | 0.22386002 | 0.95868466 | 0.387849038 | 0.939620678 | 0.173222105 |
| 0.883656352 | 0.03790865 | -1.0123721 | 0.829083819 | -1.03569792 | 0.54865605  |
| 0.981674806 | 0.71439799 | 0.89461869 | 0.059857829 | 0.991410795 | 0.86440551  |
| -1.00196579 | 0.97020307 | 0.8966534  | 0.027175555 | 0.93346574  | 0.193869114 |
| 0.8583675   | 0.08136564 | 0.97123395 | 0.629165574 | 0.802532385 | 0.013369401 |
| 0.936568769 | 0.74265578 | 0.87640335 | 0.038336563 | 0.726276702 | 0.113109207 |
| 0.978514639 | 0.75876898 | -1.13464   | 0.043396715 | 0.949961938 | 0.468852235 |
| -1.03046922 | 0.54604443 | -1.0274679 | 0.635764227 | -1.04416848 | 0.385534415 |
| -1.05306699 | 0.45756306 | 0.93760656 | 0.307946016 | 0.844207384 | 0.017543557 |
| 0.986979904 | 0.88965815 | -1.0388024 | 0.5161505   | -1.15097698 | 0.140616514 |
| -1.03152034 | 0.41515976 | 0.941082   | 0.205137005 | -1.03000115 | 0.437529265 |
| -1.00305427 | 0.95931664 | 0.88701898 | 0.063517344 | -1.01977445 | 0.743380866 |
| -1.12919788 | 0.04516059 | 0.98213431 | 0.738084897 | -1.02522711 | 0.675763763 |
| 0.964707426 | 0.59572119 | -1.0383137 | 0.426493604 | 0.97286328  | 0.684395964 |
| -1.07729984 | 0.1725368  | 0.95319727 | 0.36045656  | -1.02582244 | 0.637858657 |
| 0.952297897 | 0.32151458 | -1.0691704 | 0.231058644 | 0.988952264 | 0.820959459 |
| 0.791051592 | 0.00286008 | -1.1560688 | 0.009621316 | 0.741820059 | 0.000206487 |
| 0.964664046 | 0.52363464 | 0.83336988 | 0.106239301 | 0.885821678 | 0.034980976 |
| -1.07982272 | 0.16395351 | -1.0154322 | 0.735624399 | -1.03714853 | 0.505562537 |
| 0.970358585 | 0.52819931 | 0.98456123 | 0.78991864  | 0.965998201 | 0.468616235 |
| -1.24992164 | 0.00013629 | 0.93940096 | 0.21910025  | 0.975160052 | 0.644926211 |
| 0.973119655 | 0.71842439 | 0.88600411 | 0.024593639 | 0.8460383   | 0.030375159 |
| -1.11312893 | 0.07657942 | 0.61606747 | 6.66299E-07 | 0.99933652  | 0.991119675 |
| 0.973077414 | 0.61240469 | 0.73954349 | 0.13449483  | 0.992868157 | 0.894177791 |
| 0.965983446 | 0.54734071 | 0.93952916 | 0.379322597 | 0.939965438 | 0.283496152 |
| 0.893298823 | 0.03318646 | 0.96955064 | 0.53400606  | 0.995842323 | 0.935962318 |
| -1.05523764 | 0.24732512 | 0.8855939  | 0.084411456 | -1.11489509 | 0.021626957 |
| -1.06078879 | 0.34085873 | -1.2435904 | 0.024247065 | -1.11275822 | 0.087612131 |
| -1.05087585 | 0.34739632 | -1.0006118 | 0.987147065 | 0.942305823 | 0.261335628 |
| 0.927499891 | 0.19287311 | -1.0901985 | 0.152516727 | -1.02902655 | 0.618182701 |
| -1.03856943 | 0.28382933 | -1.0432363 | 0.478022153 | -1.00398964 | 0.90973962  |
| -1.01502545 | 0.79335348 | -1.0391749 | 0.570495396 | -1.03540512 | 0.541688234 |

|             |            |            |             |             |             |
|-------------|------------|------------|-------------|-------------|-------------|
| 0.994040832 | 0.95345658 | 0.98349988 | 0.758571011 | 0.897667247 | 0.294276065 |
| 0.784366688 | 0.02025613 | -1.0106424 | 0.829251881 | 0.914356148 | 0.381682495 |
| -1.03715417 | 0.49523675 | 0.76406252 | 0.000719254 | -1.11809486 | 0.04033866  |
| 0.942473319 | 0.31645976 | 0.96535155 | 0.531859635 | 0.993564534 | 0.912668846 |
| 0.829022527 | 0.16300883 | 0.89136956 | 0.039254767 | -1.44605557 | 0.007434646 |
| 0.85529397  | 0.03997807 | -1.0533092 | 0.278033249 | -1.00344591 | 0.963220232 |
| 0.95306781  | 0.36133454 | 0.90238154 | 0.063826374 | -1.05226699 | 0.33354048  |
| 0.883962985 | 0.04632315 | 0.98370497 | 0.827829172 | 0.948997149 | 0.390513542 |
| -1.01186236 | 0.80854791 | 0.97199048 | 0.634139251 | -1.02190802 | 0.656327488 |
| 0.872920383 | 0.01169808 | -1.1242383 | 0.033142136 | 0.843934889 | 0.001943484 |
| -1.02876429 | 0.74181444 | -1.0314096 | 0.59063912  | -1.18927549 | 0.047935755 |
| -1.05928759 | 0.39042971 | -1.1028097 | 0.063342215 | -1.12003642 | 0.09413884  |
| 0.999128995 | 0.98870165 | -1.0700215 | 0.146789968 | 0.983960783 | 0.792796461 |
| 0.92424969  | 0.23279759 | 0.97245867 | 0.651090583 | 0.999178154 | 0.989996827 |
| 0.848769705 | 0.01094651 | -1.0631807 | 0.24703342  | -1.00171517 | 0.97812315  |
| -1.02229863 | 0.69875335 | -1.0405586 | 0.489057458 | 0.956771074 | 0.439023751 |
| 0.996447424 | 0.96693039 | -1.0832036 | 0.026209743 | 0.970196524 | 0.724640286 |
| -1.00078103 | 0.9900462  | -1.0159412 | 0.781175309 | -1.10841713 | 0.104276055 |
| -1.20969986 | 0.09176001 | -1.0932712 | 0.385535171 | 0.974482399 | 0.816550462 |
| -1.18797087 | 0.02999609 | 0.9375289  | 0.527805826 | -1.14850405 | 0.07875689  |
| 0.992046255 | 0.89449777 | -1.0210184 | 0.696951607 | 0.950685013 | 0.402503615 |
| -1.44987792 | 0.00010231 | -1.0530814 | 0.381319672 | -1.45989633 | 7.90E-05    |
| -1.04044363 | 0.52047549 | -1.1529148 | 0.287907495 | 0.92250274  | 0.193737522 |
| 0.924078013 | 0.17692245 | 0.87785846 | 0.085066132 | 0.978343143 | 0.705872808 |
| -1.10400627 | 0.13236668 | 0.86786638 | 0.008911362 | -1.03691959 | 0.577877065 |
| -1.03142462 | 0.45384523 | 0.5665126  | 6.28656E-13 | -1.0496756  | 0.242328846 |
| 0.934981601 | 0.33554138 | -1.1126326 | 0.031851894 | -1.01472023 | 0.833516119 |
| -1.28285993 | 0.00042385 | -1.0056161 | 0.914741379 | -1.27565488 | 0.000553485 |
| -1.05157968 | 0.37163685 | -1.1058214 | 0.245328189 | 0.922341716 | 0.153391591 |
| 0.941310368 | 0.26029327 | 0.95488663 | 0.490700615 | -1.05703805 | 0.301420688 |
| 0.741688454 | 0.00013117 | -1.0390273 | 0.5345714   | 0.655030213 | 3.19E-07    |
| -1.05473926 | 0.38083916 | -1.0460439 | 0.493391331 | 0.990135659 | 0.870060068 |
| 0.995893303 | 0.93065157 | 0.92167383 | 0.195355396 | -1.04987192 | 0.305750719 |
| 0.996385446 | 0.936386   | -1.0566728 | 0.335140277 | 0.963786926 | 0.41765114  |
| 0.971310244 | 0.81059655 | -1.007786  | 0.928011551 | -1.29015328 | 0.039736682 |
| 0.887838994 | 0.04167203 | -1.0685933 | 0.291611552 | -1.02473725 | 0.669896052 |
| 0.858573973 | 0.00402874 | -1.0463375 | 0.684520417 | 0.911738715 | 0.074162336 |
| -1.04835062 | 0.28168602 | 0.99375443 | 0.935671807 | 0.867867742 | 0.001916027 |
| -1.04441442 | 0.59197603 | 0.9956172  | 0.941846819 | -1.17283889 | 0.053055446 |
| -1.03894567 | 0.36291496 | -1.3621052 | 0.000969874 | 0.977071762 | 0.579775792 |
| -1.00743937 | 0.89807155 | 0.90872753 | 0.124270813 | -1.06762208 | 0.260900745 |
| 0.952121978 | 0.37775257 | -1.0410314 | 0.488908635 | -1.02503488 | 0.655776702 |
| -1.15058278 | 0.01485819 | 0.97738943 | 0.725323391 | -1.00469955 | 0.933264789 |
| 0.93195468  | 0.17992006 | 0.98830684 | 0.775353698 | -1.09310039 | 0.091873641 |

|             |            |            |             |             |             |
|-------------|------------|------------|-------------|-------------|-------------|
| 0.966149467 | 0.61389479 | -1.0494046 | 0.488794256 | 0.949817457 | 0.451336478 |
| 0.956140466 | 0.62198697 | -1.0894231 | 0.201810558 | -1.01061982 | 0.90745251  |
| 0.999717182 | 0.99573834 | 0.96481037 | 0.523769954 | -1.04124869 | 0.446543016 |
| -1.12417815 | 0.05530667 | -1.0331948 | 0.541626846 | 0.947580628 | 0.3715231   |
| -1.03472894 | 0.56693056 | 0.73013437 | 6.37944E-05 | -1.03964643 | 0.514531329 |
| -1.1402726  | 0.00648244 | -1.1743181 | 0.010168244 | -1.00481464 | 0.917824333 |
| -1.27615488 | 0.00566846 | -1.0208544 | 0.662757817 | -1.4318384  | 8.78E-05    |
| 0.885654686 | 0.03290248 | 0.99746297 | 0.955349167 | 0.796277109 | 0.000137074 |
| -1.2916805  | 0.00095041 | -1.1595334 | 0.226058762 | -1.12239608 | 0.120421864 |
| 0.919681587 | 0.15710814 | 0.95850884 | 0.460515498 | -1.06649294 | 0.274829226 |
| 0.962739167 | 0.67973273 | -1.0583383 | 0.26875837  | 0.76588183  | 0.005170613 |
| -1.14072067 | 0.03766912 | 0.95466249 | 0.290043695 | -1.01008307 | 0.871600081 |
| 0.915552813 | 0.116015   | -1.0495931 | 0.550650535 | 0.967859825 | 0.556648951 |
| -1.01264497 | 0.82313332 | -1.0101143 | 0.809930549 | 0.900125668 | 0.065426763 |
| 0.963113857 | 0.6862663  | 0.91737638 | 0.140122533 | -1.24050774 | 0.023662586 |
| 0.759726021 | 2.93E-05   | -1.0303248 | 0.590359305 | 0.80187415  | 0.000559161 |
| -1.03967441 | 0.39416564 | 0.89083971 | 0.042877118 | -1.00313716 | 0.945124794 |
| 0.790425286 | 0.10475693 | -1.0439512 | 0.410602956 | 0.926303228 | 0.593398008 |
| 0.996310241 | 0.98075737 | -1.0058598 | 0.931705929 | 0.945102096 | 0.71274592  |
| 0.932507121 | 0.25543082 | -1.1546132 | 0.117803279 | 0.948553894 | 0.388790572 |
| 0.988841487 | 0.86696697 | -1.0088662 | 0.867636007 | 0.906562022 | 0.14701922  |
| 0.961126157 | 0.65356341 | -1.1261993 | 0.051792335 | 0.997897803 | 0.980977397 |
| 0.950189093 | 0.254705   | 0.88325183 | 0.040901285 | 0.977641291 | 0.612467972 |
| 0.989334819 | 0.8344256  | -1.0774579 | 0.113237136 | -1.06707537 | 0.208935158 |
| -1.05659171 | 0.11361563 | -1.1188177 | 0.19012289  | -1.0266579  | 0.445446448 |
| -1.00573735 | 0.92424399 | 0.85817886 | 0.007930391 | 0.925445407 | 0.201248486 |
| -1.10887862 | 0.22426725 | -1.3144517 | 0.000453381 | -1.04640964 | 0.591660711 |
| -1.00987896 | 0.86430366 | 0.98937452 | 0.855428576 | 0.962649084 | 0.508932628 |
| -1.16685629 | 0.01387099 | 0.92497739 | 0.397737085 | -1.09607969 | 0.136286325 |
| 0.994114144 | 0.92843539 | -1.0118408 | 0.849600306 | 0.997781469 | 0.973043092 |
| -1.04098521 | 0.62056022 | -1.0145446 | 0.794733411 | -1.06364197 | 0.447708807 |
| -1.003627   | 0.94869062 | 0.99986645 | 0.99810394  | 0.953859527 | 0.402649792 |
| 0.888746961 | 0.03394014 | -1.1364073 | 0.172770194 | 0.74418666  | 1.29E-06    |
| -1.01035278 | 0.85092169 | 0.93311685 | 0.25500122  | 0.954811637 | 0.400275426 |
| 0.815799322 | 0.3146951  | -1.0702499 | 0.139758975 | 0.813457683 | 0.307976065 |
| 0.959085322 | 0.42597639 | -1.0535614 | 0.71573803  | -1.08976205 | 0.104651799 |
| 0.991144469 | 0.87437668 | 0.91437119 | 0.559786499 | -1.00163026 | 0.976899382 |
| -1.15599982 | 0.01222761 | -1.063391  | 0.316506465 | 0.945553094 | 0.321073787 |
| -1.05096838 | 0.19821645 | -1.0714648 | 0.305131984 | -1.02295931 | 0.554425377 |
| -1.1040467  | 0.43139769 | -1.1845806 | 0.059131456 | 0.889357333 | 0.351866942 |
| 0.902036022 | 0.09042781 | 0.88457873 | 0.007817585 | -1.07859548 | 0.211231653 |
| 0.866689226 | 0.02094404 | -1.1409744 | 0.012538588 | -1.01414939 | 0.816160304 |
| 0.983817437 | 0.78342771 | -1.0566615 | 0.113192777 | 0.964071126 | 0.538191049 |
| -1.33741452 | 0.00080033 | -1.0862362 | 0.172893232 | -1.26846871 | 0.005292672 |

|             |            |            |             |             |             |
|-------------|------------|------------|-------------|-------------|-------------|
| 0.948253282 | 0.40168587 | -1.0159638 | 0.851268266 | 0.961174011 | 0.531364188 |
| 0.959787941 | 0.37015544 | -1.1016919 | 0.096498268 | -1.07881936 | 0.100622884 |
| -1.05998936 | 0.12524127 | -1.0462811 | 0.458996568 | -1.04333267 | 0.261821474 |
| -1.06671857 | 0.12387143 | -1.0436483 | 0.516511054 | 0.95053578  | 0.224862918 |
| 0.911422698 | 0.14112403 | -1.087893  | 0.30101814  | 0.801494443 | 0.000777749 |
| 0.978025643 | 0.63267986 | 0.91414832 | 0.114816828 | -1.00100392 | 0.98276099  |
| 0.996856488 | 0.96278638 | 0.80451579 | 0.000186653 | 0.931531575 | 0.295716896 |
| -1.14909138 | 0.04836032 | 0.94473844 | 0.301927029 | -1.06329987 | 0.376238549 |
| 0.724397152 | 6.17E-05   | 0.731541   | 0.125019966 | 0.87295475  | 0.072432144 |
| 0.945986565 | 0.26768743 | -1.0504581 | 0.348752646 | 0.953383449 | 0.339903982 |
| -1.01100675 | 0.89678064 | -1.0732648 | 0.212140327 | 0.815181828 | 0.018330142 |
| -1.13624993 | 0.02104348 | 0.99537274 | 0.934185201 | 0.991791058 | 0.878657251 |
| 0.958252832 | 0.49985854 | -1.0060354 | 0.87529225  | 0.72546707  | 4.35E-06    |
| -1.03030206 | 0.67019594 | 0.89082345 | 0.358618883 | -1.03695359 | 0.604824628 |
| 0.986544345 | 0.73040008 | 0.95592868 | 0.454286056 | 0.747053484 | 7.76E-10    |
| 0.742151299 | 0.00016019 | -1.0474877 | 0.443816632 | 0.591675609 | 2.46E-09    |
| -1.01146718 | 0.83747882 | 0.89715778 | 0.071682029 | -1.13628463 | 0.024785723 |
| 0.997697105 | 0.96823301 | -1.3303662 | 0.000975114 | 0.958961969 | 0.47026183  |
| -1.19812005 | 0.00942093 | 0.84603577 | 0.010284015 | -1.24283601 | 0.002059092 |
| 0.893561253 | 0.08044784 | 0.95562782 | 0.322074675 | 0.991808417 | 0.896875201 |
| -1.07060237 | 0.34875643 | -1.0393708 | 0.306550851 | 0.865473887 | 0.050364681 |
| -1.04604129 | 0.40656704 | 0.99314499 | 0.868397697 | -1.0548109  | 0.325803217 |
| -1.22481367 | 0.008429   | 0.7300856  | 5.13214E-06 | -1.24291162 | 0.004925841 |
| -1.10308043 | 0.17407973 | 0.99920603 | 0.986353576 | -1.12971366 | 0.092585047 |
| 0.998225326 | 0.97547817 | -1.0060275 | 0.929040827 | 0.930568407 | 0.21632703  |
| -1.11090335 | 0.01459116 | -1.0278917 | 0.690803739 | -1.04068829 | 0.342774443 |
| 0.708782278 | 9.09E-07   | 0.57895195 | 1.06717E-09 | -1.18141917 | 0.00957247  |
| 0.948379585 | 0.3191511  | 0.98935288 | 0.829872612 | 0.992888787 | 0.892803948 |
| 0.970805276 | 0.55966383 | 0.93810874 | 0.450134408 | -1.00306836 | 0.951826952 |
| -1.01753523 | 0.79784069 | -1.0255403 | 0.640725954 | 0.961114126 | 0.559444379 |
| -1.04457846 | 0.53546373 | 0.97715803 | 0.714251347 | 0.923662618 | 0.261171191 |
| 0.827819504 | 0.01149141 | -1.1686278 | 0.02957468  | 0.952249547 | 0.500868502 |
| -1.00437763 | 0.93616402 | 0.94783946 | 0.176460641 | -1.06991357 | 0.218573461 |
| -1.05806086 | 0.34232028 | 0.74446308 | 0.000183934 | -1.02449403 | 0.68285821  |
| 0.909554618 | 0.21354326 | -1.0495036 | 0.386308831 | 0.92650412  | 0.315296947 |
| 0.885292788 | 0.03813886 | 0.9970935  | 0.959901034 | -1.02524158 | 0.66534355  |
| 0.924458118 | 0.22085149 | -1.1390283 | 0.057684213 | -1.06597483 | 0.318197997 |
| 0.617664669 | 0.00016664 | -1.0295492 | 0.646625104 | -1.01079303 | 0.92845594  |
| -1.08836831 | 0.06048323 | 0.89396158 | 0.126267151 | 0.857042981 | 0.000963487 |
| -1.10050223 | 0.01618662 | -1.0416484 | 0.451577632 | 0.966715558 | 0.384028066 |
| 0.898562451 | 0.08811919 | -1.385471  | 5.21925E-05 | 0.919760797 | 0.180034471 |
| 0.948554712 | 0.50345569 | -1.0827249 | 0.269407341 | 0.880748388 | 0.111199998 |
| -1.16844641 | 0.06045504 | -1.0100487 | 0.862648797 | -1.20617912 | 0.024797674 |
| -1.11337082 | 0.43151851 | -1.0241612 | 0.569057424 | -1.09255574 | 0.51635996  |

|             |            |            |             |             |             |
|-------------|------------|------------|-------------|-------------|-------------|
| 0.889930341 | 0.01100518 | 0.90498992 | 0.113451073 | -1.12787042 | 0.008826919 |
| 0.966939777 | 0.71725241 | -1.0623795 | 0.256047642 | -1.01464652 | 0.875480002 |
| -1.19179193 | 0.02296572 | -1.0786633 | 0.139430381 | 0.978321922 | 0.771073611 |
| 0.934157446 | 0.2574216  | -1.0890345 | 0.212040153 | 0.950042404 | 0.392905137 |
| 0.967102023 | 0.39917275 | 0.52017607 | 7.53186E-13 | -1.04285305 | 0.291173361 |
| -1.00092269 | 0.98881948 | -1.0629651 | 0.401431812 | -1.09940311 | 0.153812655 |
| 0.981790348 | 0.72389268 | 0.98789408 | 0.823317412 | -1.044044   | 0.408605969 |
| -1.06696602 | 0.41492669 | -1.0475582 | 0.43374171  | -1.12545672 | 0.139963008 |
| 0.94356842  | 0.27945064 | -1.0846345 | 0.285501441 | 0.930307178 | 0.179883467 |
| 0.923403017 | 0.08220906 | 0.94831609 | 0.358632952 | -1.05008127 | 0.282273425 |
| 0.980040605 | 0.68861203 | 0.97201703 | 0.656256006 | 0.997622828 | 0.962240852 |
| -1.01232985 | 0.82304503 | -1.003325  | 0.977849622 | -1.0587464  | 0.299858206 |
| 0.992082593 | 0.87808969 | -1.0374435 | 0.408837391 | -1.06634807 | 0.218334786 |
| -1.02469602 | 0.6554442  | -1.0529232 | 0.186828423 | -1.07292676 | 0.200973581 |
| 0.810176325 | 0.22699324 | -1.04341   | 0.493095891 | 0.735509188 | 0.080160232 |
| 0.981037841 | 0.67689833 | 0.98659776 | 0.864017878 | -1.08249396 | 0.08851283  |
| 0.931458081 | 0.44781843 | 0.94313388 | 0.473863094 | 0.960415102 | 0.665327398 |
| -1.0349399  | 0.58609923 | 0.99056857 | 0.944504792 | 0.958196752 | 0.498717524 |
| 0.947500876 | 0.29063561 | -1.1375389 | 0.005240747 | -1.10659278 | 0.050074874 |
| -1.03699111 | 0.54808169 | -1.0383132 | 0.685532826 | -1.04842386 | 0.434784983 |
| 0.922665324 | 0.14309535 | -1.0526728 | 0.496316868 | 0.981111958 | 0.726154409 |
| -1.02949474 | 0.76239665 | 0.85625877 | 0.011770088 | -1.03679226 | 0.707129933 |
| -1.06237397 | 0.46640996 | -1.084211  | 0.044846513 | -1.09433701 | 0.27930269  |
| -1.03964673 | 0.45202076 | 0.87535757 | 0.047101887 | 0.99504019  | 0.923182997 |
| -1.00258919 | 0.94819111 | -1.1129815 | 0.043433167 | -1.04328382 | 0.289511468 |
| 0.973383953 | 0.66596642 | 0.87105636 | 0.08586135  | 0.85638226  | 0.015716546 |
| 0.91767609  | 0.02843815 | 0.98859456 | 0.829986304 | 0.976667885 | 0.538627035 |
| -1.00749383 | 0.87065237 | -1.054909  | 0.240031409 | -1.00473534 | 0.917930472 |
| 0.781508899 | 0.11454887 | 0.9329172  | 0.170963889 | 0.73344076  | 0.048687027 |
| -1.08968944 | 0.07814981 | 0.96959816 | 0.573637175 | 0.98485422  | 0.750895209 |
| 0.9455732   | 0.33828336 | -1.0093497 | 0.857484313 | 0.92378766  | 0.176824588 |
| 0.611191126 | 0.00025558 | 0.98760724 | 0.819458107 | 0.317558471 | 1.67E-12    |
| 0.994593205 | 0.8937796  | 0.86067633 | 0.387585784 | -1.01117537 | 0.784365749 |
| 0.929595862 | 0.57286989 | 0.94279571 | 0.202860735 | 0.838830661 | 0.177735104 |
| -1.00575612 | 0.94195744 | -1.0618778 | 0.520659565 | -1.00670942 | 0.932398669 |
| 0.981655582 | 0.72686867 | 0.96442553 | 0.565830384 | 0.993976647 | 0.909208669 |
| 0.880133091 | 0.01748585 | -1.0408824 | 0.431279127 | 0.897250111 | 0.042104449 |
| 0.876122634 | 0.02673973 | 0.95670201 | 0.464576373 | 0.786531787 | 0.000125144 |
| -1.07817689 | 0.27087323 | 0.9757495  | 0.652175533 | -1.09917003 | 0.16800368  |
| -1.05328128 | 0.46967347 | -1.0852968 | 0.395972825 | -1.12367064 | 0.107773783 |
| -1.1307335  | 0.02337702 | -1.0665045 | 0.438464211 | 0.984215634 | 0.763649683 |
| -1.15053789 | 0.02853721 | -1.0531744 | 0.31728241  | 0.989473141 | 0.865774188 |
| 0.835616803 | 0.0215611  | -1.0761412 | 0.069440985 | 0.949240703 | 0.495251952 |
| 0.884211096 | 0.07424548 | 0.93224245 | 0.263923259 | 0.788465117 | 0.000899255 |

|             |            |            |             |             |             |
|-------------|------------|------------|-------------|-------------|-------------|
| 0.833325055 | 0.00247937 | -1.0990488 | 0.016486227 | -1.0036611  | 0.949488888 |
| -1.0590334  | 0.40148669 | 0.99740473 | 0.954798303 | -1.22855637 | 0.003705817 |
| 0.941506442 | 0.14292342 | 0.8622349  | 0.339112993 | 0.979483336 | 0.611202194 |
| -1.07526139 | 0.30374482 | 0.89578667 | 0.025305335 | -1.15742987 | 0.041171753 |
| -1.01548732 | 0.82169364 | -1.0163973 | 0.779946691 | -1.00136955 | 0.983984169 |
| -1.02482919 | 0.60672672 | 0.54197504 | 1.0147E-05  | -1.02595016 | 0.590829042 |
| -1.02371675 | 0.66875981 | 0.93682326 | 0.112194871 | -1.0374271  | 0.502953417 |
| -1.1920326  | 0.00499146 | 0.96280641 | 0.769485022 | -1.00863506 | 0.886561428 |
| 0.8570102   | 0.00395458 | 0.97488821 | 0.747093628 | 0.956356501 | 0.387619704 |
| 0.970488355 | 0.44996505 | -1.0547006 | 0.317028909 | 0.934256307 | 0.089799307 |
| 0.866728159 | 0.5094857  | 0.78856637 | 2.98457E-05 | 0.813370881 | 0.341821719 |
| 0.966686319 | 0.49252057 | -1.0447398 | 0.454214696 | -1.0306541  | 0.540612468 |
| 0.965978226 | 0.60616854 | 0.97112952 | 0.666757221 | 0.936831627 | 0.3326425   |
| 0.945241417 | 0.29082044 | 0.96388452 | 0.607984282 | -1.00900438 | 0.86579222  |
| 0.918726066 | 0.13156762 | -1.0421444 | 0.436402595 | 0.982944951 | 0.75719017  |
| -1.02246277 | 0.78201722 | -1.1050568 | 0.114754247 | -1.30751497 | 0.001456395 |
| 0.913762352 | 0.4069759  | 0.93311403 | 0.365572815 | -1.10277788 | 0.368634503 |
| -1.01785382 | 0.72224038 | 0.97611212 | 0.72197057  | 0.944596122 | 0.254858549 |
| -1.00082434 | 0.98943902 | -1.1063743 | 0.084012204 | 0.92028434  | 0.185667118 |
| 0.930138304 | 0.19409208 | 0.98120084 | 0.780692814 | 0.930753932 | 0.198133277 |
| 0.966157023 | 0.5014999  | -1.0630224 | 0.137532552 | 0.914488177 | 0.084625761 |
| -1.10563854 | 0.13094372 | -1.1126347 | 0.132555129 | 0.931932388 | 0.286418097 |
| -1.07974919 | 0.17843815 | -1.0185806 | 0.787206849 | -1.08463867 | 0.154630706 |
| -1.04437543 | 0.45961311 | -1.1258504 | 0.015407667 | -1.14625415 | 0.022944268 |
| -1.05736713 | 0.24584652 | -1.0236957 | 0.669032115 | -1.08745126 | 0.08352132  |
| 0.879563731 | 0.04970281 | -1.0027507 | 0.963644886 | 0.987375901 | 0.843187215 |
| -1.02318247 | 0.60260458 | 0.9333166  | 0.183634865 | 0.970017667 | 0.489626468 |
| 0.884420412 | 0.0036323  | -1.0184891 | 0.643504376 | 0.936883827 | 0.11222954  |
| -1.05711096 | 0.5065452  | -1.0402416 | 0.855349662 | -1.38548901 | 0.000248373 |
| -1.012675   | 0.8589602  | -1.0264332 | 0.596834541 | 0.965186861 | 0.617502527 |
| -1.02693764 | 0.79452279 | 0.95237495 | 0.467902475 | -1.2684221  | 0.022961409 |
| -1.03938397 | 0.49487152 | 0.98162272 | 0.72667793  | 0.645522832 | 2.27E-10    |
| 0.940589036 | 0.14409355 | 0.93463261 | 0.227342001 | -1.00015352 | 0.997049467 |
| 0.856529316 | 0.25322625 | -1.1319196 | 0.126733528 | 0.792667968 | 0.088874303 |
| -1.08101524 | 0.18705724 | 0.98537802 | 0.891927963 | 0.942927484 | 0.317910394 |
| 0.885866811 | 0.14409882 | 0.90131175 | 0.040620244 | 0.845637947 | 0.045182749 |
| -1.05691068 | 0.37406809 | -1.0118465 | 0.849974621 | 0.999223402 | 0.990008504 |
| -1.13617347 | 0.04245987 | 0.98521921 | 0.7878961   | 0.955106581 | 0.457834676 |
| -1.01844857 | 0.76979915 | -1.0676107 | 0.203999464 | -1.05152539 | 0.422451181 |
| -1.03491989 | 0.37474353 | -1.0898736 | 0.194271742 | 0.983897799 | 0.673754182 |
| 0.933114825 | 0.34444538 | -1.0212965 | 0.709539927 | -1.00743823 | 0.919052158 |
| 0.713686536 | 0.0002563  | -1.0095886 | 0.870575595 | -1.15105585 | 0.108278285 |
| -1.01012572 | 0.84222704 | -1.1005568 | 0.048882651 | 0.882245793 | 0.016016199 |
| 0.90531001  | 0.04759705 | 0.96721122 | 0.604078504 | -1.02398831 | 0.630967904 |

|             |            |            |             |             |             |
|-------------|------------|------------|-------------|-------------|-------------|
| -1.02225421 | 0.56344481 | -1.0561164 | 0.217532917 | 0.881122388 | 0.001517471 |
| -1.0514069  | 0.30444674 | 0.96623702 | 0.398729262 | 0.918671503 | 0.085045904 |
| 0.988366709 | 0.8342619  | -1.1976675 | 0.034313136 | 0.954306689 | 0.40441759  |
| 0.950819434 | 0.34510644 | -1.082773  | 0.264604379 | -1.06110477 | 0.267606158 |
| 0.917670984 | 0.09313273 | -1.2042367 | 0.072808334 | -1.01582948 | 0.75587092  |
| 0.996311366 | 0.94215057 | -1.0596212 | 0.307464324 | 0.937870373 | 0.211163828 |
| -1.23518632 | 0.00679633 | -1.0337365 | 0.425500167 | -1.35851449 | 0.000148375 |
| 0.976860484 | 0.6614473  | 0.9183762  | 0.528118279 | -1.06780003 | 0.222614017 |
| -1.04586812 | 0.50151999 | -1.0597629 | 0.323826945 | 0.997373035 | 0.968488486 |
| 0.841873247 | 0.18821379 | 0.90255461 | 0.215253059 | -1.03857021 | 0.770613231 |
| 0.923471147 | 0.0648613  | 0.94309612 | 0.346990503 | 0.942383539 | 0.165796588 |
| 0.965503233 | 0.45477899 | 0.96466863 | 0.560577121 | 0.963976334 | 0.434812989 |
| -1.01447435 | 0.71759608 | 0.95033773 | 0.416091905 | 0.939580554 | 0.120725121 |
| 0.950517988 | 0.49565696 | -1.0221575 | 0.570047525 | -1.01962251 | 0.793796423 |
| 0.840446049 | 0.25798399 | 0.96034049 | 0.579454265 | -1.01014516 | 0.947311357 |
| 0.896413529 | 0.16683308 | -1.0913566 | 0.314698673 | -1.07246633 | 0.373929348 |
| 0.732253357 | 0.00517513 | -1.0861519 | 0.106720719 | 0.822693636 | 0.073439488 |
| 0.958963759 | 0.24428459 | 0.98343424 | 0.734844732 | 0.884490147 | 0.001104437 |
| -1.00104619 | 0.99250966 | -1.0055065 | 0.88522173  | 0.884515122 | 0.273276524 |
| 0.94532923  | 0.24937939 | 0.94903247 | 0.284080418 | 0.940598608 | 0.210133633 |
| 0.858857519 | 0.09012134 | -1.0135413 | 0.809945699 | -1.08570184 | 0.355144564 |
| -1.07021887 | 0.31665216 | -1.000176  | 0.997360178 | -1.03810151 | 0.579869473 |
| 0.881847898 | 0.00114124 | -1.1259336 | 0.021937676 | 0.971228286 | 0.428281129 |
| 0.820464986 | 0.35917519 | -1.1086213 | 0.046867164 | -1.07960544 | 0.721753549 |
| -1.0087198  | 0.8664528  | -1.2680846 | 0.002548503 | 0.969050451 | 0.543205376 |
| -1.021272   | 0.71221039 | 0.96751059 | 0.5370611   | -1.12663244 | 0.040382926 |
| 0.907076031 | 0.14865659 | -1.1981045 | 0.008615875 | -1.02593373 | 0.701990214 |
| 0.960381494 | 0.33414091 | -1.015333  | 0.906642576 | -1.00365287 | 0.930279266 |
| 0.856914829 | 0.03406193 | 0.98738185 | 0.764851322 | -1.05096364 | 0.486872767 |
| -1.0424696  | 0.40163128 | 0.97996485 | 0.665978495 | 0.966098295 | 0.486303868 |
| 0.976171952 | 0.74903384 | 0.9804887  | 0.620149163 | 0.949027072 | 0.488445242 |
| 0.873050117 | 0.00154325 | -1.0046045 | 0.950713715 | -1.04434119 | 0.291001213 |
| -1.06301646 | 0.3384361  | -1.0191688 | 0.901078003 | -1.03192407 | 0.621436957 |
| -1.03491201 | 0.54918876 | 0.9177945  | 0.276513578 | -1.061745   | 0.297323116 |
| -1.04492831 | 0.4677517  | 0.90905075 | 0.376347247 | 0.949942469 | 0.396583938 |
| 0.962975352 | 0.78973816 | 0.99552236 | 0.900135635 | -1.18044284 | 0.243859113 |
| -1.08706438 | 0.18436999 | 0.82712741 | 0.092678369 | 0.995189296 | 0.938372262 |
| -1.0191465  | 0.7271212  | 0.97729734 | 0.636259261 | -1.01888827 | 0.730620603 |
| 0.870774076 | 0.03235277 | 0.89938919 | 0.23432303  | 0.941888307 | 0.34606919  |
| 0.885649383 | 0.19408578 | 0.9613955  | 0.560071824 | 0.89349916  | 0.227992082 |
| -1.02666326 | 0.6248908  | 0.97862934 | 0.557248393 | -1.05706918 | 0.304291431 |
| 0.968368328 | 0.58940689 | -1.1889034 | 0.422251746 | -1.12439891 | 0.052776796 |
| -1.23135947 | 0.04081961 | -1.0765464 | 0.156944701 | -1.07389802 | 0.475867069 |
| 0.97177716  | 0.52852977 | -1.0998874 | 0.099279975 | 0.82477989  | 8.06E-05    |

|             |            |            |             |             |             |
|-------------|------------|------------|-------------|-------------|-------------|
| 0.841049823 | 0.04041743 | -1.0553551 | 0.421800564 | 0.907183501 | 0.242454507 |
| 0.978061561 | 0.69653435 | 0.98512722 | 0.719327111 | 0.969338331 | 0.584286281 |
| 0.997403779 | 0.96442209 | -1.0061439 | 0.931571126 | 0.97617333  | 0.679276989 |
| -1.07187767 | 0.09137931 | 0.88828259 | 0.019510747 | -1.02308506 | 0.574287503 |
| 0.992263445 | 0.89336544 | -1.003147  | 0.966738245 | 0.992250269 | 0.89318425  |
| 0.966656182 | 0.75794441 | 0.94601741 | 0.178245674 | -1.18072821 | 0.135022603 |
| -1.30596925 | 0.01123146 | -1.0338714 | 0.600719046 | -1.13171309 | 0.228839518 |
| 0.834842173 | 0.00040891 | 0.94732344 | 0.346091584 | 0.984566818 | 0.74659465  |
| -1.04773204 | 0.30586974 | 0.98344617 | 0.782250446 | 0.983010383 | 0.705507168 |
| -1.09632053 | 0.22804945 | -1.1310096 | 0.385755612 | -1.08402611 | 0.289497371 |
| -1.09195584 | 0.0834789  | -1.1615701 | 0.01928962  | 0.98563895  | 0.77292877  |
| 0.979797184 | 0.71591104 | -1.0441541 | 0.427720921 | 0.919986233 | 0.140791134 |
| -1.096564   | 0.15021661 | 0.88132643 | 0.049927422 | -1.17524782 | 0.013422546 |
| -1.331445   | 0.00767894 | 0.98454451 | 0.866682812 | -1.43928682 | 0.000878178 |
| 0.911714063 | 0.16627687 | -1.0274159 | 0.615305302 | -1.00090251 | 0.989122825 |
| -1.07585805 | 0.14854699 | 0.94714464 | 0.363091131 | -1.05283174 | 0.306671954 |
| -1.20975719 | 0.19440813 | -1.1007803 | 0.337880419 | -1.15980333 | 0.310862511 |
| -1.050764   | 0.34972152 | 0.8507218  | 0.000733811 | 0.921269128 | 0.124107808 |
| -1.0647976  | 0.29060929 | 0.89301806 | 0.175507362 | -1.08436607 | 0.174264923 |
| 0.952513635 | 0.38248258 | 0.98430259 | 0.780805384 | 0.987538285 | 0.821310027 |
| 0.987307608 | 0.85270098 | 0.96816438 | 0.579347235 | -1.13830925 | 0.063878691 |
| -1.25811525 | 0.00443878 | -1.0908104 | 0.035864646 | -1.32665907 | 0.000582359 |
| 0.846898253 | 0.01622851 | 0.92103982 | 0.159557092 | 0.875613703 | 0.052386565 |
| -1.01604738 | 0.90194579 | 0.96119131 | 0.719113098 | -1.40937887 | 0.010063949 |
| 0.969702913 | 0.826226   | -1.0431862 | 0.679116967 | -1.24433431 | 0.122858231 |
| 0.927435026 | 0.48943387 | -1.1015673 | 0.048381405 | -1.11010519 | 0.338845205 |
| -1.01600091 | 0.68406222 | 0.89679833 | 0.019175576 | 0.869395919 | 0.000679585 |
| 0.950402374 | 0.39378769 | -1.1293814 | 0.112550435 | 0.94740246  | 0.365268306 |
| -1.00629328 | 0.92587919 | -1.0458707 | 0.372577013 | 0.917366426 | 0.204312114 |
| 0.975378254 | 0.62584686 | -1.0550808 | 0.340801648 | -1.06718618 | 0.206353776 |
| -1.04940037 | 0.52047142 | -1.1026697 | 0.127603846 | -1.14767213 | 0.070151695 |
| 0.998190164 | 0.98271044 | -1.4872496 | 0.000325776 | 0.853866799 | 0.062979083 |
| -1.05611326 | 0.37781325 | -1.0802049 | 0.246624682 | -1.00626443 | 0.919356353 |
| 0.967409954 | 0.51878705 | 0.99867614 | 0.978911994 | -1.00083097 | 0.987069379 |
| 0.643540232 | 1.40E-09   | 0.95441682 | 0.748730308 | 0.826050155 | 0.002563811 |
| -1.1486492  | 0.01809467 | -1.0140143 | 0.79192101  | 0.975559798 | 0.665045049 |
| -1.01158397 | 0.87180912 | -1.0362648 | 0.547353098 | -1.06509945 | 0.378594053 |
| 0.900038588 | 0.30406672 | -1.136922  | 0.024023211 | 0.894514635 | 0.276955154 |
| 0.745921449 | 0.00037227 | -1.2148397 | 0.006318338 | 0.603965722 | 2.40E-08    |
| 0.971295512 | 0.47617626 | -1.2247376 | 0.011329357 | -1.01897132 | 0.645241233 |
| 0.942297137 | 0.26488845 | 0.92888973 | 0.275482619 | -1.05938912 | 0.278989197 |
| 0.956414055 | 0.42154015 | -1.0153314 | 0.90626669  | -1.00615375 | 0.911634013 |
| 0.890071074 | 0.19414097 | 0.88523787 | 0.385940016 | 0.747202839 | 0.001771875 |
| 0.745685543 | 0.0054244  | -1.1278047 | 0.271435605 | 0.91979066  | 0.412595689 |



|             |            |            |             |             |             |
|-------------|------------|------------|-------------|-------------|-------------|
| 0.942490027 | 0.23450432 | -1.0363237 | 0.361893727 | 0.993303442 | 0.892018372 |
| 0.994342374 | 0.93758067 | -1.0384193 | 0.526760519 | -1.16068019 | 0.043640955 |
| 0.947371793 | 0.46613092 | -1.1564276 | 0.034828218 | 0.826752018 | 0.012554406 |
| -1.01528479 | 0.78654135 | -1.0502986 | 0.338695048 | 0.989018423 | 0.843700062 |
| 0.958256616 | 0.39901335 | -1.0961917 | 0.223286664 | 0.965083012 | 0.481622101 |
| -1.01855432 | 0.74589646 | 0.93405744 | 0.415897225 | -1.07152598 | 0.22629621  |
| -1.49975778 | 1.58E-06   | -1.0281864 | 0.652537533 | -1.56550769 | 1.97E-07    |
| -1.0770162  | 0.14716067 | -1.0729684 | 0.173125323 | -1.04569281 | 0.379695033 |
| 0.976916027 | 0.81199582 | 0.94851679 | 0.385419879 | -1.30073771 | 0.009478309 |
| 0.9867165   | 0.78148801 | -1.0349914 | 0.547635922 | 0.984065263 | 0.739031626 |
| -1.04696145 | 0.42473767 | 0.99626361 | 0.958169057 | -1.08127432 | 0.176522745 |
| 0.676107    | 0.04731937 | 0.87051505 | 0.177539156 | 0.859028967 | 0.434089984 |
| 0.940326606 | 0.2673384  | 0.89699076 | 0.164618201 | -1.01212301 | 0.82707918  |
| -1.05314923 | 0.50073149 | -1.0387085 | 0.353662049 | -1.23602074 | 0.007602442 |
| 0.891012219 | 0.41340482 | -1.1147474 | 0.044339974 | 0.904238275 | 0.475218833 |
| -1.07588934 | 0.1530337  | -1.0869602 | 0.135508499 | -1.05900463 | 0.261004177 |
| 0.967298222 | 0.39903648 | 0.89131785 | 0.199471336 | -1.08631644 | 0.038922579 |
| 0.823248246 | 0.08565692 | 0.76274506 | 0.009889784 | 0.834205092 | 0.108536625 |
| 0.722853266 | 0.00026671 | -1.147219  | 0.007321675 | 0.905362416 | 0.237028176 |
| 0.904651338 | 0.07506763 | -1.0286453 | 0.696867536 | 0.990742003 | 0.86682537  |
| -1.07182709 | 0.2059863  | -1.0581714 | 0.446045411 | -1.02422607 | 0.660420834 |
| -1.01784835 | 0.87558905 | -1.0585277 | 0.312064167 | 0.926603013 | 0.500774851 |
| 0.630433761 | 0.04672573 | 0.93368974 | 0.177019133 | 0.943970128 | 0.800130862 |
| -1.05937562 | 0.27267531 | 0.88237647 | 0.030872209 | -1.04586499 | 0.39270261  |
| -1.06028957 | 0.25422123 | -1.1538805 | 0.062090021 | -1.04113197 | 0.430953458 |
| -1.09431427 | 0.10370486 | 0.96324137 | 0.461042855 | -1.33983442 | 1.71E-06    |
| -1.00799046 | 0.89286942 | -1.3977376 | 0.001178387 | -1.07836846 | 0.205078338 |
| 0.976738023 | 0.67933645 | -1.1652036 | 0.002395219 | 0.91515651  | 0.123314309 |
| -1.03542694 | 0.53025477 | -1.0985835 | 0.105210523 | 0.97933501  | 0.706252717 |
| -1.04911517 | 0.39450072 | -1.0067955 | 0.972109149 | 0.895080833 | 0.052341891 |
| 0.892688155 | 0.0758198  | -1.0258579 | 0.643763478 | 0.967809811 | 0.603924285 |
| 0.854703367 | 0.08452738 | -1.1734514 | 0.041007315 | -1.12335115 | 0.198440292 |
| 0.963552259 | 0.45284506 | -1.0451845 | 0.75346248  | 0.903751142 | 0.044151358 |
| 0.910721762 | 0.1034838  | 0.92982152 | 0.155166173 | 0.865022732 | 0.013041024 |
| 0.994566291 | 0.92016313 | -1.058273  | 0.153389203 | -1.00380388 | 0.944318569 |
| 0.944800002 | 0.32484454 | 0.99770403 | 0.983566475 | -1.07008875 | 0.241060459 |
| 0.88158112  | 0.01590247 | 0.94246093 | 0.479068575 | 0.992895185 | 0.888502202 |
| -1.12803207 | 0.02233273 | 0.99122279 | 0.873710458 | -1.06518758 | 0.222846564 |
| -1.1097134  | 0.2702855  | -1.038963  | 0.483587158 | -1.17641673 | 0.087861695 |
| -1.16453919 | 0.00553042 | -1.1244374 | 0.301666927 | -1.00902238 | 0.865272637 |
| 0.9872247   | 0.82467049 | -1.0088974 | 0.968965642 | 0.987076032 | 0.822651725 |
| -1.02087076 | 0.81463851 | -1.0085174 | 0.871157293 | -1.22590407 | 0.023992289 |
| 0.870330258 | 0.09753779 | -1.1019469 | 0.061331584 | -1.00703875 | 0.932445802 |
| -1.09785009 | 0.13617088 | -1.3263118 | 3.34498E-06 | -1.10769226 | 0.103244738 |

|             |            |            |             |             |             |
|-------------|------------|------------|-------------|-------------|-------------|
| 0.840796382 | 0.01098234 | 0.95664592 | 0.454403944 | 0.984052757 | 0.807962569 |
| 0.917544185 | 0.47818529 | -1.0139602 | 0.807532684 | 0.79870022  | 0.067582377 |
| 0.960639443 | 0.46182614 | -1.0154598 | 0.781790832 | 0.927672886 | 0.171577621 |
| -1.00389516 | 0.96275155 | 0.9657399  | 0.535206529 | 0.956832792 | 0.596532371 |
| 0.802689208 | 0.05674571 | -1.1414958 | 0.039477032 | 0.939961057 | 0.585577587 |
| -1.00416424 | 0.93629114 | -1.0823311 | 0.379739899 | 0.952895977 | 0.355288831 |
| 0.990340472 | 0.86825924 | -1.0216522 | 0.664385817 | -1.06747257 | 0.267224664 |
| 0.901770565 | 0.33294864 | -1.0756163 | 0.202209386 | -1.06915515 | 0.530159894 |
| 0.989908496 | 0.82102766 | -1.0932075 | 0.105390744 | -1.11366678 | 0.019270127 |
| 0.779011252 | 0.03828282 | -1.1168932 | 0.058318998 | -1.02947778 | 0.805766834 |
| 0.985849096 | 0.90502576 | -1.0686157 | 0.195400648 | 0.855627633 | 0.195268274 |
| -1.02882157 | 0.62477556 | 0.89761928 | 0.039599211 | -1.0511104  | 0.391979315 |
| -1.08392953 | 0.19294898 | -1.0307606 | 0.747060399 | -1.06025388 | 0.342773562 |
| -1.1367495  | 0.02654695 | 0.98856518 | 0.828031784 | 0.995813972 | 0.940769846 |
| 0.908121447 | 0.11264469 | 0.98304828 | 0.76834756  | 0.97430903  | 0.664908861 |
| -1.04398737 | 0.55199578 | 0.93539259 | 0.449517986 | -1.02136451 | 0.769945663 |
| 0.96308103  | 0.54177284 | -1.2229652 | 0.017846377 | -1.03910752 | 0.533832926 |
| 0.962658804 | 0.55750684 | -1.015417  | 0.805122843 | 0.935811589 | 0.308128475 |
| 0.956980296 | 0.47606469 | -1.0631666 | 0.35619283  | 0.946454848 | 0.37309722  |
| -1.19128841 | 0.10317647 | -1.0341599 | 0.781485031 | -1.00551859 | 0.958621059 |
| 0.684711945 | 0.03126951 | 0.97944116 | 0.702930543 | 0.757026951 | 0.109936191 |
| 0.960366635 | 0.40410483 | -1.0048125 | 0.954008877 | -1.06607127 | 0.188990358 |
| -1.06276398 | 0.24475316 | 0.95573157 | 0.689900229 | 0.969245108 | 0.54870403  |
| -1.02097419 | 0.74410423 | 0.89758108 | 0.041548424 | -1.02607625 | 0.685695121 |
| 0.988837791 | 0.85049312 | -1.0827533 | 0.177892894 | -1.14849168 | 0.02325473  |
| 0.812402985 | 0.45755422 | 0.93259591 | 0.512457661 | 0.699474342 | 0.203499584 |
| 0.79522085  | 0.16839079 | -1.0178203 | 0.693750453 | -1.0742064  | 0.664449408 |
| -1.05919746 | 0.18727133 | 0.92630542 | 0.517739307 | -1.01946224 | 0.656184831 |
| -1.10641365 | 0.20100694 | 0.83688275 | 0.140035435 | 0.862775976 | 0.064223468 |
| -1.09447087 | 0.07450052 | -1.1147162 | 0.06551789  | -1.02961326 | 0.55897054  |
| -1.05412022 | 0.34936729 | 0.95699051 | 0.475140641 | -1.02485537 | 0.661876255 |
| -1.01283165 | 0.83676582 | 0.90696753 | 0.087990796 | -1.03549339 | 0.573516552 |
| 0.910317824 | 0.26396252 | 0.88483872 | 0.045519146 | -1.08793007 | 0.315822485 |
| 0.993646288 | 0.89959439 | 0.94679547 | 0.450475726 | -1.00161192 | 0.974564008 |
| 0.888122878 | 0.03063807 | -1.0154202 | 0.80370182  | 0.983318086 | 0.754113805 |
| 0.971773627 | 0.38364449 | -1.0081347 | 0.900474008 | 0.997352137 | 0.935474076 |
| 0.930404428 | 0.19442425 | -1.0015574 | 0.979830924 | -1.05254939 | 0.355028554 |
| -1.02503335 | 0.68915126 | -1.0635365 | 0.562030485 | -1.04165097 | 0.509684869 |
| -1.05807568 | 0.32641721 | 0.92436819 | 0.647922778 | -1.01706658 | 0.767691557 |
| -1.35904404 | 0.00014637 | 0.91092151 | 0.057625599 | -1.26588697 | 0.002730617 |
| -1.04765162 | 0.21526375 | 0.96970627 | 0.554787689 | 0.965948113 | 0.354843    |
| -1.04155484 | 0.51985701 | -1.0329814 | 0.610107753 | 0.916352887 | 0.170291269 |
| 0.85403123  | 0.00113334 | 0.98638467 | 0.817951998 | -1.05462498 | 0.251374754 |
| 0.719919363 | 0.00014222 | 0.98533378 | 0.957758449 | 0.957320746 | 0.588825864 |

|             |            |            |             |             |             |
|-------------|------------|------------|-------------|-------------|-------------|
| 0.988824393 | 0.86687277 | -1.0452045 | 0.788646362 | 0.985973818 | 0.833139095 |
| 0.968728937 | 0.5583859  | 0.99269101 | 0.865352009 | -1.01960684 | 0.720312438 |
| 0.872227943 | 0.04069081 | -1.0439844 | 0.583882454 | -1.07338681 | 0.282107619 |
| -1.05569492 | 0.36847003 | -1.0773929 | 0.138943922 | -1.12555689 | 0.052924447 |
| 0.918704905 | 0.67592012 | -1.0038983 | 0.94469971  | 0.82725055  | 0.351355948 |
| -1.13574263 | 0.02546482 | 0.94365301 | 0.350539791 | 0.950454596 | 0.362960693 |
| 0.987421944 | 0.92793139 | -1.0553913 | 0.519927322 | -1.34890152 | 0.036191384 |
| 0.948294873 | 0.34530564 | -1.041114  | 0.426460883 | -1.1676253  | 0.007494934 |
| -1.17245917 | 0.07855687 | 0.98980923 | 0.848705678 | -1.51567947 | 1.94E-05    |
| -1.11660491 | 0.14255438 | -1.0873476 | 0.013012883 | -1.29445008 | 0.00099682  |
| -1.06203319 | 0.34649492 | 0.95464067 | 0.401532154 | -1.14266681 | 0.04002937  |
| 0.902613975 | 0.42124994 | 0.99252694 | 0.90334487  | -1.18654348 | 0.18173701  |
| -1.00267514 | 0.96258567 | -1.0003267 | 0.995448684 | 0.987321207 | 0.822761009 |
| 0.90496229  | 0.11716512 | -1.1590575 | 0.054351418 | 0.95056215  | 0.422371904 |
| 0.945738952 | 0.59333604 | 0.93311934 | 0.067686757 | 0.925551572 | 0.459525558 |
| -1.05797603 | 0.27782696 | -1.0428546 | 0.507202867 | -1.00293044 | 0.954817824 |
| -1.0975755  | 0.04123943 | 0.98621448 | 0.763335111 | -1.09566353 | 0.045036809 |
| -1.09992053 | 0.03252686 | 0.78904824 | 0.004649646 | -1.01002623 | 0.819037292 |
| -1.09998217 | 0.10379252 | 0.95965163 | 0.539675249 | 0.957931365 | 0.458702481 |
| 0.960232684 | 0.57216835 | 0.97542271 | 0.646465882 | -1.02855914 | 0.694857678 |
| -1.18533801 | 0.10145513 | -1.0088992 | 0.892385737 | -1.14203544 | 0.198585114 |
| 0.916125714 | 0.00992737 | 0.98069534 | 0.74553535  | -1.04852438 | 0.1539805   |
| 0.947176437 | 0.19743505 | 0.67040477 | 0.05257699  | 0.855058104 | 0.000414161 |
| -1.38684267 | 0.001664   | -1.0247803 | 0.660268325 | -1.20899485 | 0.059936399 |
| 0.984994155 | 0.70497856 | -1.1611122 | 0.288330249 | -1.00954148 | 0.81196481  |
| 0.967804277 | 0.55666368 | -1.0454535 | 0.428855724 | -1.068917   | 0.233637366 |
| 0.936907099 | 0.28857834 | 0.9525487  | 0.585996124 | 0.968469218 | 0.60040953  |
| -1.05133074 | 0.340129   | -1.1294925 | 0.106224166 | -1.03059876 | 0.564662693 |
| 0.994242449 | 0.93958562 | 0.9672763  | 0.601720478 | -1.22514263 | 0.009813577 |
| -1.00440045 | 0.93964095 | -1.1134807 | 0.398957361 | 0.933291873 | 0.236890563 |
| 0.897025229 | 0.02791642 | -1.0124588 | 0.827925911 | 0.933419221 | 0.157718029 |
| -1.04603267 | 0.75414815 | -1.0913529 | 0.169067303 | 0.90657247  | 0.495639079 |
| -1.05354608 | 0.47459913 | 0.91622836 | 0.403255317 | -1.04601161 | 0.537227082 |
| 0.915742269 | 0.1124502  | 0.96982462 | 0.553649445 | -1.00887915 | 0.871859507 |
| 0.902750647 | 0.05670756 | -1.0214268 | 0.635839888 | 0.972017195 | 0.591238305 |
| -1.07107999 | 0.22602855 | -1.0714685 | 0.117524294 | 0.939862227 | 0.273575426 |
| 0.899071879 | 0.16117199 | -1.0039417 | 0.945787882 | -1.02502672 | 0.742614637 |
| -1.02588776 | 0.64207044 | -1.0518149 | 0.482297786 | -1.10028688 | 0.086194208 |
| -1.00067166 | 0.98810132 | -1.1410782 | 0.201390464 | 0.905407269 | 0.030851548 |
| -1.11666048 | 0.22928138 | 0.9808566  | 0.557748158 | -1.28723793 | 0.00742552  |
| 0.930731957 | 0.4300643  | 0.95786995 | 0.305263714 | -1.00919366 | 0.919638431 |
| -1.05950509 | 0.20195337 | -1.1603584 | 0.137906405 | -1.0643741  | 0.168974035 |
| 0.980219041 | 0.70055525 | 0.97997927 | 0.612746915 | -1.02806958 | 0.594369278 |
| -1.02126526 | 0.73121835 | -1.1581385 | 0.010454528 | -1.02245162 | 0.717026946 |

|             |            |            |             |             |             |
|-------------|------------|------------|-------------|-------------|-------------|
| 0.95049408  | 0.30482329 | -1.0926593 | 0.150824963 | 0.971655133 | 0.559834338 |
| 0.891347438 | 0.28226161 | 0.92942889 | 0.165142023 | 0.808875371 | 0.050240933 |
| -1.14953441 | 0.12121193 | 0.90000306 | 0.170454598 | -1.08210311 | 0.376584736 |
| 0.967910015 | 0.50413098 | -1.0648565 | 0.281112339 | -1.04330603 | 0.385927911 |
| -1.03538393 | 0.54075123 | 0.96868872 | 0.511102966 | -1.0337175  | 0.559600532 |
| -1.05152824 | 0.3269867  | 0.85075965 | 0.263302593 | -1.00771273 | 0.880330581 |
| 0.689617691 | 0.00057928 | -1.0482359 | 0.51825623  | -1.02479246 | 0.810387654 |
| -1.03407866 | 0.57579894 | -1.0419691 | 0.454298123 | 0.974251775 | 0.662979774 |
| 0.793180434 | 0.28931604 | -1.0102395 | 0.846962428 | 0.894728172 | 0.609515253 |
| 0.912088509 | 0.07528469 | -1.0244559 | 0.668239612 | -1.08118093 | 0.129768943 |
| -1.03813456 | 0.74725979 | 0.99088722 | 0.903157738 | 0.752092846 | 0.016901816 |
| -1.15543732 | 0.05311111 | -1.0245564 | 0.659043348 | -1.38488117 | 4.27E-05    |
| 0.995871682 | 0.9493487  | 0.99173688 | 0.853805069 | 0.978160737 | 0.734686361 |
| 0.742064487 | 0.02628608 | -1.111309  | 0.249924998 | 0.953175045 | 0.714805628 |
| -1.06399858 | 0.23752112 | -1.0048288 | 0.957646164 | -1.01042186 | 0.842511392 |
| 0.925918842 | 0.10205872 | -1.0798486 | 0.091768272 | -1.0960795  | 0.052536899 |
| -1.02098296 | 0.74283566 | 0.90851696 | 0.068855316 | -1.11752121 | 0.083310666 |
| 0.953711113 | 0.43423019 | -1.0499909 | 0.426954078 | 0.830756938 | 0.003239377 |
| 0.940546005 | 0.25795719 | -1.0135839 | 0.78412792  | -1.04946416 | 0.371825537 |
| -1.11159461 | 0.23247583 | 0.97070205 | 0.779943499 | -1.04650863 | 0.605949575 |
| -1.04703032 | 0.3983379  | -1.2293915 | 0.023396316 | 0.961880099 | 0.474650971 |
| -1.01749003 | 0.65401566 | -1.0404431 | 0.417259335 | 0.966238169 | 0.375968638 |
| 0.959398525 | 0.42987587 | -1.1537029 | 0.014329368 | -1.04087806 | 0.445350161 |
| -1.0950904  | 0.13734709 | -1.1632781 | 0.004351986 | 0.918638334 | 0.164577538 |
| 0.950264995 | 0.31676678 | 0.87499034 | 0.194183389 | 0.958829048 | 0.408634795 |
| 0.988699154 | 0.88395343 | -1.1711142 | 0.010455726 | -1.051447   | 0.520161937 |
| 0.589329013 | 1.23E-08   | 0.73544104 | 0.161594667 | 0.558808979 | 9.94E-10    |
| 0.96686712  | 0.49618143 | -1.0558297 | 0.288997952 | 0.964354065 | 0.463669251 |
| -1.11787745 | 0.08584161 | 0.99210251 | 0.945543853 | -1.14668142 | 0.036123625 |
| 0.973024022 | 0.56719035 | -1.3131054 | 0.000465293 | -1.06558973 | 0.186695373 |
| -1.11226725 | 0.04578645 | -1.1711366 | 0.018149239 | 0.986053835 | 0.788262317 |
| 0.950649857 | 0.29794977 | 0.82349949 | 0.142736036 | -1.00513762 | 0.915643193 |
| 0.698270382 | 0.01723417 | 0.95194413 | 0.347204753 | -1.09808807 | 0.524646354 |
| 0.95308899  | 0.30959725 | 0.98159838 | 0.689722996 | 0.954400782 | 0.323520273 |
| 0.994762153 | 0.93230823 | -1.2667502 | 0.000427782 | 0.992109669 | 0.898053152 |
| 0.765167378 | 0.04288872 | -1.0233212 | 0.703055873 | 0.880376253 | 0.327954327 |
| -1.10144387 | 0.10953293 | 0.94032873 | 0.256188769 | -1.04545073 | 0.45737165  |
| -1.06301383 | 0.3348633  | -1.022843  | 0.797532716 | 0.86815511  | 0.028473637 |
| -1.00069696 | 0.99088122 | -1.0447983 | 0.420463075 | -1.13269846 | 0.044911071 |
| 0.96462739  | 0.57672064 | -1.0265288 | 0.499047983 | -1.01786396 | 0.783516748 |
| -1.09431216 | 0.14106067 | -1.053478  | 0.321913362 | 0.98192161  | 0.763513723 |
| -1.14927565 | 0.00533906 | -1.0479322 | 0.440338067 | 0.989766359 | 0.830813929 |
| -1.10215252 | 0.45642452 | -1.0791637 | 0.137118049 | -1.13408615 | 0.33616747  |
| -1.03663869 | 0.43885886 | -1.038651  | 0.626586053 | 0.940765117 | 0.191283079 |

|             |            |            |             |             |             |
|-------------|------------|------------|-------------|-------------|-------------|
| 0.945484495 | 0.23790908 | 0.59891554 | 2.63786E-08 | -1.03258993 | 0.497662549 |
| -1.31880835 | 0.00077774 | 0.93934191 | 0.208686996 | -1.10052272 | 0.222780311 |
| 0.959141957 | 0.36093787 | -1.0927221 | 0.169504093 | -1.05288354 | 0.260058167 |
| -1.08987112 | 0.12966386 | -1.1174465 | 0.023149534 | -1.03624771 | 0.52697775  |
| -1.04787218 | 0.57676077 | 0.96490229 | 0.495258407 | 0.999465032 | 0.994896631 |
| -1.05631877 | 0.37910271 | 0.96239036 | 0.429462929 | -1.06870502 | 0.2869288   |
| 0.502266543 | 1.05E-05   | 0.9230911  | 0.586169811 | 0.706604586 | 0.017482622 |
| 0.756680185 | 0.0350881  | -1.1171162 | 0.021705166 | 0.873484507 | 0.298910361 |
| 0.98919939  | 0.77829289 | 0.93797238 | 0.302733473 | -1.00092606 | 0.980846856 |
| -1.04120865 | 0.4734378  | 0.97182703 | 0.825589409 | -1.02629476 | 0.644492815 |
| 0.938769488 | 0.28819946 | -1.0495118 | 0.4193061   | 0.999506572 | 0.993345559 |
| -1.00668404 | 0.89463623 | 0.94621986 | 0.38261744  | -1.08995679 | 0.091085694 |
| -1.09620053 | 0.19118438 | -1.084072  | 0.18902153  | 0.920723941 | 0.239128009 |
| -1.15016424 | 0.03666349 | 0.9847665  | 0.811718103 | -1.05464498 | 0.418690337 |
| -1.02415562 | 0.72022827 | 0.91681839 | 0.155810481 | -1.15774627 | 0.03142966  |
| -1.10264043 | 0.08263232 | 0.97619143 | 0.617054815 | -1.01615928 | 0.77280221  |
| -1.07248966 | 0.16414524 | -1.1137752 | 0.409608284 | 0.920251332 | 0.099729835 |
| -1.00121625 | 0.98479472 | -1.0017593 | 0.969750596 | 0.822390684 | 0.00325956  |
| -1.01979476 | 0.868618   | -1.0152556 | 0.748434588 | -1.05960882 | 0.625460234 |
| -1.07549419 | 0.40207592 | 0.8961286  | 0.163642759 | -1.08236577 | 0.36245404  |
| -1.01979087 | 0.75483603 | -1.0984416 | 0.042897636 | -1.09064345 | 0.170373415 |
| -1.00222784 | 0.95806084 | -1.1302342 | 0.032935976 | 0.98526016  | 0.725806612 |
| -1.01742575 | 0.81150558 | 0.85636735 | 0.068079767 | -1.02961752 | 0.687152794 |
| -1.11538306 | 0.08418463 | -1.2494657 | 0.000684194 | -1.07208137 | 0.2670577   |
| -1.06963034 | 0.16408975 | 0.99611411 | 0.978168923 | 0.994217737 | 0.903719789 |
| -1.11677865 | 0.05488374 | 0.8555697  | 0.231722791 | -1.12132131 | 0.046829204 |
| 0.92540088  | 0.22808084 | 0.93409151 | 0.081304218 | 0.878504927 | 0.046584226 |
| 0.935156213 | 0.32039149 | -1.0985799 | 0.098589222 | -1.12651722 | 0.080377746 |
| 0.881648895 | 0.35381493 | 0.92462458 | 0.188991407 | 0.726383235 | 0.02121949  |
| -1.08261797 | 0.07106006 | -1.0289809 | 0.570609771 | -1.01348038 | 0.757270273 |
| 0.778352393 | 0.40342594 | 0.98717466 | 0.85311377  | 0.747345848 | 0.332068193 |
| 0.9122661   | 0.10375082 | 0.94862404 | 0.422713005 | 0.962891252 | 0.498430372 |
| 0.916670975 | 0.46401908 | -1.0385121 | 0.571038856 | 0.942044711 | 0.614877372 |
| -1.0263147  | 0.63490307 | -1.1060192 | 0.073714235 | 0.968720621 | 0.561479202 |
| 0.814942846 | 0.1018995  | -1.0797988 | 0.127630745 | -1.35155412 | 0.017581793 |
| 0.991448485 | 0.90266341 | -1.0370485 | 0.56900476  | 0.978203127 | 0.753750528 |
| -1.03980969 | 0.53606545 | -1.0813555 | 0.510029811 | 0.870537382 | 0.031257383 |
| 0.846445592 | 0.0035938  | -1.121381  | 0.189315073 | -1.0296709  | 0.595404841 |
| -1.12216007 | 0.04813556 | -1.0036042 | 0.954264471 | -1.0004659  | 0.993509135 |
| -1.05091659 | 0.35396017 | 0.99571817 | 0.919235469 | 0.886010158 | 0.026694008 |
| 0.978648326 | 0.74261271 | 0.97623036 | 0.739881243 | -1.05258197 | 0.43661849  |
| -1.05352393 | 0.18701388 | -1.0889486 | 0.175442432 | -1.00470186 | 0.904740494 |
| -1.0627306  | 0.26851861 | -1.0279913 | 0.565290825 | -1.00336523 | 0.951000808 |
| 0.993975501 | 0.90026473 | -1.0724833 | 0.219102103 | -1.0506284  | 0.308011155 |

|             |            |            |             |             |             |
|-------------|------------|------------|-------------|-------------|-------------|
| -1.31192541 | 0.02449529 | -1.0587589 | 0.373225953 | -1.0199692  | 0.866773967 |
| -1.1523287  | 0.01114271 | -1.0155857 | 0.817912139 | -1.04436648 | 0.424384131 |
| -1.22548961 | 0.09385282 | 0.80283129 | 0.108810165 | 0.826866879 | 0.116652658 |
| 0.927591399 | 0.15378224 | -1.0967065 | 0.036785686 | -1.0197667  | 0.707838578 |
| 0.956608828 | 0.61313935 | 0.98174661 | 0.950859753 | -1.01886546 | 0.831151648 |
| 0.97145763  | 0.70295074 | 0.9786307  | 0.698562786 | 0.966411572 | 0.65285337  |
| -1.01104296 | 0.77652625 | 0.92154034 | 0.491539991 | -1.02529852 | 0.519116178 |
| 0.993964564 | 0.92390094 | 0.90099491 | 0.060593599 | -1.11493848 | 0.090317184 |
| -1.05413853 | 0.3294041  | -1.0412299 | 0.743755499 | 0.957395757 | 0.419932222 |
| -1.03563013 | 0.5269592  | 0.91871001 | 0.230420947 | -1.07783952 | 0.178438991 |
| 0.999030182 | 0.98303297 | 0.68108368 | 1.0897E-07  | -1.04870724 | 0.299683119 |
| -1.09703803 | 0.06388336 | 0.9586693  | 0.443989593 | -1.06575218 | 0.198825028 |
| -1.21031307 | 0.00547826 | -1.0032928 | 0.954214886 | -1.22053719 | 0.003841183 |
| -1.0023637  | 0.96757549 | 0.99157862 | 0.874088144 | 0.964279323 | 0.53188321  |
| -1.08018885 | 0.14727328 | -1.096935  | 0.162838724 | 0.970066906 | 0.564781794 |
| 0.913854134 | 0.13825896 | -1.0125154 | 0.75109996  | -1.00090985 | 0.987936321 |
| -1.14854728 | 0.02140041 | -1.0718347 | 0.207863673 | 0.999153629 | 0.988491973 |
| 0.960908151 | 0.54183554 | 0.99648357 | 0.941755604 | -1.06638131 | 0.326834524 |
| 0.937330083 | 0.48242433 | -1.0736371 | 0.547247825 | -1.23535547 | 0.024767304 |
| -1.09382001 | 0.0377333  | -1.0234287 | 0.669324331 | 0.985808496 | 0.735505012 |
| -1.10764314 | 0.10319444 | -1.0216487 | 0.858098355 | -1.04153238 | 0.512162419 |
| -1.03174832 | 0.50323964 | 0.91263062 | 0.084153969 | -1.00689567 | 0.882755666 |
| 0.700453478 | 8.59E-05   | 0.84948922 | 0.066934461 | -1.06070951 | 0.484815347 |
| 0.980519696 | 0.72233573 | -1.0512049 | 0.511352932 | -1.0788847  | 0.173714887 |
| 0.99742068  | 0.95477459 | 0.9908489  | 0.812166094 | 0.946259103 | 0.228303721 |
| 0.906543293 | 0.2930079  | -1.1015255 | 0.131165424 | 0.837617017 | 0.06045779  |
| -1.02313826 | 0.66960116 | -1.0945958 | 0.097346011 | -1.00351723 | 0.947736983 |
| -1.01438782 | 0.83700324 | -1.0470032 | 0.407160025 | 0.701240181 | 4.01E-06    |
| 0.971762862 | 0.66755827 | 0.92115036 | 0.076124667 | -1.03767857 | 0.579389375 |
| -1.00366665 | 0.9498341  | -1.0387211 | 0.441080721 | 0.966112101 | 0.554068229 |
| -1.08718179 | 0.3023548  | -1.166419  | 0.023346092 | -1.22772988 | 0.013450841 |
| 0.545818    | 1.01E-14   | 0.87504861 | 0.024831087 | 0.707099725 | 1.45E-07    |
| -1.01480893 | 0.58510414 | -1.0375586 | 0.485170106 | -1.01343148 | 0.620160617 |
| -1.00495543 | 0.93561192 | 0.94668466 | 0.36419465  | 0.939472008 | 0.309866863 |
| 0.961192619 | 0.45976321 | -1.0212845 | 0.719930601 | 0.989184148 | 0.838674834 |
| 0.856067149 | 0.04536387 | 0.91055487 | 0.154924915 | -1.00627192 | 0.934606075 |
| 0.86140166  | 0.04874093 | -1.1620755 | 0.106516972 | 0.912380779 | 0.220546639 |
| -1.03783227 | 0.53515918 | -1.0503162 | 0.248655947 | 0.934447509 | 0.259507935 |
| -1.06759826 | 0.23645111 | -1.0878001 | 0.178053604 | -1.01486752 | 0.788092663 |
| -1.22755336 | 0.00813975 | -1.0876509 | 0.075628042 | -1.29412657 | 0.001078492 |
| 0.647353674 | 0.00736816 | 0.85148837 | 0.060329554 | 0.768245152 | 0.097049987 |
| -1.11893941 | 0.08724207 | 0.92652273 | 0.171559386 | -1.15776877 | 0.027200191 |
| -1.09039049 | 0.21928553 | -1.0294125 | 0.525198708 | -1.03805436 | 0.59386258  |
| 0.949975073 | 0.42834656 | -1.0339472 | 0.719272084 | -1.01015231 | 0.875768968 |

|             |            |            |             |             |             |
|-------------|------------|------------|-------------|-------------|-------------|
| -1.05386468 | 0.46947013 | -1.0171406 | 0.751132786 | -1.05765849 | 0.439748764 |
| 0.901916796 | 0.14947261 | 0.9450099  | 0.416688109 | 0.936490283 | 0.35679217  |
| -1.14453016 | 0.10554684 | -1.1242483 | 0.083113979 | -1.11366056 | 0.194817008 |
| -1.00054384 | 0.99055313 | 0.95472125 | 0.427091845 | 0.88788344  | 0.011963108 |
| 0.938435312 | 0.54541735 | 0.80463221 | 0.009059084 | -1.02542486 | 0.810905714 |
| -1.04585613 | 0.48793092 | 0.92940117 | 0.206697585 | 0.892974401 | 0.083543716 |
| 0.957122811 | 0.37501022 | 0.99844579 | 0.953871546 | -1.02758422 | 0.580893337 |
| 0.944983586 | 0.42279881 | -1.1300852 | 0.049687789 | -1.02023187 | 0.776044412 |
| 0.997926603 | 0.97951086 | 0.93095916 | 0.184017855 | 0.917486311 | 0.289155736 |
| 0.897374697 | 0.5774725  | 0.9269456  | 0.321695421 | 0.796897062 | 0.245114784 |
| -1.04454518 | 0.55650865 | -1.0167104 | 0.823595721 | -1.41060799 | 2.05E-05    |
| -1.18700239 | 0.0044903  | 0.94755073 | 0.369218335 | -1.07813786 | 0.198512298 |
| 0.990939907 | 0.88234647 | -1.0132475 | 0.810555683 | 0.914219381 | 0.148675439 |
| 0.969861742 | 0.45425019 | -1.2659452 | 0.002583387 | -1.03686924 | 0.37644422  |
| 0.936861647 | 0.43996594 | 0.88172637 | 0.423617409 | -1.05311248 | 0.53961522  |
| -1.01107891 | 0.88133126 | 0.98710364 | 0.841300937 | -1.01893079 | 0.799461776 |
| 0.983125312 | 0.71804985 | -1.0237371 | 0.737456459 | -1.17060325 | 0.001443125 |
| -1.08935088 | 0.24860004 | -1.0085457 | 0.895218453 | -1.03529217 | 0.638332472 |
| -1.03813101 | 0.60260063 | 0.95310517 | 0.507669645 | -1.00396035 | 0.956088979 |
| 0.906909908 | 0.09702524 | 0.93470401 | 0.343085954 | -1.09802903 | 0.111857409 |
| -1.0931716  | 0.32570507 | 0.98873577 | 0.890637919 | -1.2369224  | 0.021547448 |
| 0.953677895 | 0.54673126 | 0.97376321 | 0.563202606 | 0.99053382  | 0.9036482   |
| -1.04187986 | 0.5317213  | 0.92908909 | 0.484252146 | -1.05756375 | 0.39432891  |
| 0.98233978  | 0.7717622  | -1.0793793 | 0.23932942  | 0.98067576  | 0.750753758 |
| -1.11258675 | 0.02977677 | -1.0592173 | 0.245433001 | 0.915962421 | 0.071772902 |
| 0.910540586 | 0.12461345 | -1.0374988 | 0.60141423  | -1.12166406 | 0.061313571 |
| -1.13663769 | 0.04769004 | -1.0056025 | 0.944887451 | 0.892151749 | 0.076569901 |
| 0.890885792 | 0.04033759 | 0.77469623 | 0.191967026 | 0.943500411 | 0.294944912 |
| -1.02454449 | 0.69990784 | -1.3700441 | 7.89129E-05 | -1.11315606 | 0.092454086 |
| 0.998579163 | 0.97864841 | 0.94402054 | 0.323307318 | 0.953561144 | 0.372538161 |
| 0.986131619 | 0.81956346 | -1.1043217 | 0.110822025 | 0.968601664 | 0.602689296 |
| 0.997984925 | 0.97750071 | 0.99798104 | 0.960479332 | -1.02780872 | 0.701541991 |
| -1.01483249 | 0.81672875 | 0.98695522 | 0.8761156   | -1.04307181 | 0.507605502 |
| 0.755766583 | 1.54E-05   | -1.1395159 | 0.081073981 | 0.722714466 | 1.03E-06    |
| 0.966939146 | 0.7374186  | 0.99946781 | 0.990983544 | -1.03831467 | 0.707729931 |
| 0.899154066 | 0.29757445 | -1.0811077 | 0.292587232 | -1.05929613 | 0.571050144 |
| 0.895235738 | 0.04642307 | -1.0418522 | 0.568472577 | -1.03375115 | 0.543459507 |
| 0.987204404 | 0.76246445 | -1.084705  | 0.165654247 | -1.02515326 | 0.560325938 |
| 0.740496517 | 0.00092862 | -1.3013326 | 0.004932906 | 0.775943284 | 0.004571833 |
| -1.09771224 | 0.29480824 | 0.94210006 | 0.448976908 | 0.909276192 | 0.285288433 |
| -1.05160904 | 0.44856847 | -1.0046434 | 0.943600597 | -1.14119621 | 0.050166671 |
| -1.07568193 | 0.19875818 | -1.1515726 | 0.024814719 | -1.02524696 | 0.658325876 |
| 0.975935254 | 0.62797401 | 0.98149939 | 0.697518145 | -1.09018083 | 0.089817067 |
| -1.00028046 | 0.99578734 | 0.89660804 | 0.074834838 | -1.04379983 | 0.421009509 |

|             |            |            |             |             |             |
|-------------|------------|------------|-------------|-------------|-------------|
| -1.06282242 | 0.38651246 | 0.88107314 | 0.050189247 | -1.12396243 | 0.099840401 |
| 0.704469563 | 0.03523617 | 0.95703345 | 0.428001052 | 0.989506608 | 0.94837393  |
| 0.99292899  | 0.85515305 | -1.141497  | 0.039094293 | -1.00542926 | 0.889214103 |
| 0.964428309 | 0.51080837 | -1.0941905 | 0.094493761 | -1.04878689 | 0.38784256  |
| -1.14700902 | 0.04694188 | -1.0883858 | 0.170213038 | -1.11581696 | 0.110048729 |
| 0.973377845 | 0.51749633 | 0.96251888 | 0.593750962 | -1.10074282 | 0.024315974 |
| 0.968106215 | 0.51028532 | 0.99681722 | 0.959970862 | -1.03395754 | 0.497632249 |
| -1.11093429 | 0.07171684 | 0.6807363  | 2.45683E-08 | -1.09079447 | 0.134953827 |
| 0.823013085 | 0.26037894 | -1.0734251 | 0.480609987 | 0.779865038 | 0.152325803 |
| 0.902814005 | 0.03403029 | -1.1512811 | 0.169068001 | 0.932258436 | 0.141427991 |
| 0.983756518 | 0.80296921 | -1.0830087 | 0.147675204 | 0.925073241 | 0.238332297 |
| -1.0555527  | 0.22207771 | -1.0034126 | 0.936246741 | -1.05465675 | 0.229323203 |
| 0.829342377 | 0.0007733  | 0.96267795 | 0.658948531 | -1.064499   | 0.238917055 |
| 0.977972679 | 0.67468049 | 0.87905597 | 0.149340181 | -1.08227311 | 0.13996684  |
| 0.948626339 | 0.38185205 | -1.0161257 | 0.809176188 | -1.09673656 | 0.128523552 |
| -1.01098621 | 0.85620631 | 0.9891753  | 0.846818533 | 0.989529135 | 0.861417617 |
| -1.10042967 | 0.09776645 | -1.1035796 | 0.05377605  | 0.944071912 | 0.31540294  |
| -1.04013896 | 0.46628833 | 0.99205173 | 0.880579968 | 0.975439387 | 0.644773762 |
| -1.08352802 | 0.20649055 | -1.1554921 | 0.043183423 | 0.969583171 | 0.624465567 |
| -1.00427736 | 0.94266338 | -1.0692226 | 0.681430612 | 0.994273034 | 0.922902088 |
| 0.767123902 | 0.0191002  | -1.0796349 | 0.052769624 | -1.06044902 | 0.59485414  |
| 0.962775084 | 0.3037359  | -1.0223559 | 0.687744206 | -1.01077342 | 0.770405288 |
| -1.01809322 | 0.71763127 | -1.0726274 | 0.303205331 | -1.00770741 | 0.876885904 |
| 0.901450997 | 0.06895404 | -1.0366413 | 0.388775356 | -1.01281084 | 0.820731854 |
| 0.999383939 | 0.98885025 | 0.98488266 | 0.756633664 | -1.03735351 | 0.407139084 |
| -1.01387464 | 0.81913514 | -1.0325047 | 0.578738077 | 0.932054646 | 0.245826514 |
| -1.10666816 | 0.1569163  | 0.9346021  | 0.694425263 | -1.04305323 | 0.552977604 |
| -1.02047026 | 0.84235788 | 0.99348178 | 0.889857806 | -1.19481588 | 0.084899398 |
| -1.02599829 | 0.70032619 | 0.89537113 | 0.096425104 | -1.07016257 | 0.311215021 |
| -1.09910049 | 0.19151418 | -1.038247  | 0.39490774  | -1.09808715 | 0.195816632 |
| -1.1029528  | 0.10478151 | -1.0088987 | 0.866584616 | 0.990674404 | 0.875233174 |
| 0.900012815 | 0.02216106 | 0.94159413 | 0.259219473 | 0.996782662 | 0.94281592  |
| 0.981860908 | 0.80804322 | 0.99237543 | 0.898659224 | -1.15230078 | 0.064063864 |
| -1.03670715 | 0.51758545 | 0.85530032 | 0.011872981 | -1.00334188 | 0.952153899 |
| 0.893334149 | 0.0687705  | 0.99613364 | 0.945869289 | 0.879014252 | 0.038357025 |
| 0.982095773 | 0.77124067 | -1.1071953 | 0.062998595 | -1.10308366 | 0.118405795 |
| 0.854906802 | 0.02441235 | -1.1532108 | 0.027104447 | -1.11447168 | 0.115211507 |
| 0.934674095 | 0.18311355 | -1.0500436 | 0.412062832 | -1.11648926 | 0.032155966 |
| 0.937226813 | 0.19072043 | -1.0259482 | 0.816251638 | -1.05745408 | 0.258553633 |
| -1.02765815 | 0.61583002 | -1.0528554 | 0.164346978 | 0.953728373 | 0.384703613 |
| -1.08178866 | 0.70861985 | 0.99730667 | 0.956598416 | -1.26589431 | 0.264851421 |
| -1.02269017 | 0.66067526 | -1.1387066 | 0.023963956 | -1.03672981 | 0.48097006  |
| -1.03782741 | 0.57345231 | 0.99229738 | 0.8608269   | -1.14420806 | 0.044745034 |
| 0.955046391 | 0.33282074 | -1.0362014 | 0.555658421 | 0.992327388 | 0.870621504 |



|             |            |            |             |             |             |
|-------------|------------|------------|-------------|-------------|-------------|
| 0.990540685 | 0.82185411 | -1.1788214 | 0.023584514 | 0.965966114 | 0.413395888 |
| 0.817228935 | 0.01083325 | -1.2194206 | 0.055628745 | -1.1142302  | 0.162911812 |
| 0.98581571  | 0.80674277 | -1.0787132 | 0.258399627 | 0.922768047 | 0.172334903 |
| 0.946368905 | 0.36019248 | -1.1037246 | 0.172830758 | -1.08704733 | 0.168039703 |
| -1.03527932 | 0.45183473 | -1.0452741 | 0.459165728 | 0.995424083 | 0.920515092 |
| 0.678571216 | 5.10E-06   | -1.0549324 | 0.23697884  | 0.685572802 | 8.19E-06    |
| -1.00437092 | 0.9592441  | -1.062263  | 0.424022781 | 0.949572632 | 0.545021866 |
| -1.10624279 | 0.05475353 | 0.86375734 | 0.010653433 | -1.08051836 | 0.137900794 |
| 0.932008338 | 0.08337343 | 0.90146351 | 0.093403088 | -1.04511819 | 0.273774238 |
| -1.14215585 | 0.12711372 | -1.0881263 | 0.177606552 | -1.23539034 | 0.016957947 |
| 0.884114035 | 0.02752306 | -1.0283687 | 0.681052657 | 0.822648446 | 0.000713833 |
| -1.01232323 | 0.80535125 | -1.0571608 | 0.272083625 | -1.09594813 | 0.069455497 |
| 0.988825423 | 0.83034422 | -1.0218617 | 0.660218795 | 0.981376433 | 0.720121349 |
| -1.0747531  | 0.27414308 | 0.96658114 | 0.532153087 | -1.00036952 | 0.995503127 |
| -1.22453411 | 0.06524172 | 0.958757   | 0.841241991 | -1.20827703 | 0.084454417 |
| -1.19011896 | 0.17612452 | -1.10873   | 0.047252845 | 0.847632223 | 0.198481858 |
| -1.05910784 | 0.37822271 | 0.97405198 | 0.689947769 | 0.891286874 | 0.080624767 |
| -1.16714984 | 0.04359724 | 0.99124671 | 0.85252073  | -1.05045932 | 0.513194518 |
| 0.973838121 | 0.69663567 | 0.88837435 | 0.006756027 | -1.11466036 | 0.114373675 |
| 0.848779325 | 0.01216029 | 0.82831562 | 0.016987312 | -1.02050091 | 0.749271308 |
| -1.00636041 | 0.92809446 | -1.0337    | 0.570802663 | -1.22927167 | 0.004676892 |
| -1.09811646 | 0.08625103 | 0.98596395 | 0.813818318 | 0.999160546 | 0.987547202 |
| 0.87621631  | 0.03505805 | -1.0114809 | 0.803900605 | -1.03230824 | 0.604954795 |
| -1.1154943  | 0.09445792 | 0.70731385 | 3.376E-05   | -1.00815767 | 0.899768514 |
| 0.925689478 | 0.6595254  | 0.92756924 | 0.380055125 | -1.2180961  | 0.262690949 |
| 0.982467883 | 0.73613105 | -1.0751061 | 0.16476323  | -1.00018759 | 0.997147243 |
| -1.03248826 | 0.5040037  | -1.0847464 | 0.046468691 | -1.02192292 | 0.650009588 |
| 0.968755302 | 0.35170152 | -1.2480494 | 0.012545553 | 0.951187356 | 0.144429654 |
| 0.973480478 | 0.63407346 | 0.91391947 | 0.103588467 | 0.974505981 | 0.647389307 |
| 0.977407547 | 0.71717287 | -1.0530785 | 0.300380257 | -1.05575808 | 0.391077302 |
| 0.843903523 | 0.01388596 | -1.0545912 | 0.313057866 | -1.04206424 | 0.539490451 |
| 0.945745653 | 0.24879096 | -1.0323725 | 0.627337628 | -1.14318772 | 0.007143851 |
| 0.943139408 | 0.3742793  | 0.95909777 | 0.699513759 | -1.09212734 | 0.183078758 |
| -1.0829781  | 0.29491315 | 0.9598905  | 0.748389001 | 0.960771338 | 0.597601187 |
| -1.0083837  | 0.88207372 | -1.0001662 | 0.997958026 | 0.912108773 | 0.106358492 |
| 0.915808728 | 0.04807717 | -1.108172  | 0.175337003 | -1.00932184 | 0.831806342 |
| 0.972740502 | 0.69826313 | -1.1532208 | 0.039736843 | 0.89155591  | 0.111369528 |
| -1.08353973 | 0.20156891 | 0.96305215 | 0.553706499 | -1.16729561 | 0.01579361  |
| 0.924845741 | 0.49482274 | -1.0039124 | 0.955677198 | -1.12399755 | 0.308386354 |
| 0.658173865 | 0.04318493 | -1.1348908 | 0.021800445 | 0.924754217 | 0.700055672 |
| 0.550737782 | 0.00279705 | -1.0261164 | 0.674780533 | 0.782971741 | 0.204201571 |
| 0.954608665 | 0.43382115 | 0.96499304 | 0.581164466 | 0.934507916 | 0.255300959 |
| 0.993474861 | 0.90656649 | -1.2242556 | 0.25082758  | -1.04877819 | 0.394757764 |
| -1.01799574 | 0.78604283 | -1.0352194 | 0.510244688 | -1.07095629 | 0.299077472 |

|             |            |            |             |             |             |
|-------------|------------|------------|-------------|-------------|-------------|
| 0.927509461 | 0.1501717  | -1.1614158 | 0.00267928  | -1.10933436 | 0.049161974 |
| -1.07900264 | 0.22136737 | 0.9765309  | 0.485176711 | 0.959769588 | 0.506889697 |
| -1.05347012 | 0.35474244 | -1.1614069 | 0.010143395 | -1.0882567  | 0.13546195  |
| -1.03948185 | 0.47582186 | 0.95120942 | 0.428894968 | 0.943899337 | 0.289109332 |
| 0.918318882 | 0.08251695 | -1.0414024 | 0.545739995 | -1.12132132 | 0.021014935 |
| 0.993252182 | 0.91871239 | -1.0491967 | 0.319972004 | -1.13165867 | 0.066505321 |
| -1.09679265 | 0.12213026 | 0.98041947 | 0.763329136 | -1.08943519 | 0.151143093 |
| -1.08356621 | 0.16427446 | 0.90028318 | 0.169106422 | 0.987300576 | 0.82317643  |
| 0.878905041 | 0.22889398 | 0.95684754 | 0.434447955 | 0.923072962 | 0.453685092 |
| 0.973570959 | 0.7271724  | -1.051283  | 0.255108728 | 0.872500372 | 0.079763203 |
| -1.12296069 | 0.08917133 | 0.9601035  | 0.568263251 | -1.01689823 | 0.803429463 |
| 0.899792447 | 0.04138406 | 0.96245489 | 0.540049794 | 0.975487961 | 0.625293212 |
| -1.00738721 | 0.89579117 | -1.0961043 | 0.42305926  | 0.975400025 | 0.657849458 |
| 0.974748529 | 0.57437709 | -1.002271  | 0.991080444 | -1.05743168 | 0.222652556 |
| 0.687504191 | 0.00921306 | 0.76214254 | 0.159382881 | -1.00352406 | 0.979856751 |
| -1.04097157 | 0.53544259 | 0.97499769 | 0.669039719 | -1.05797505 | 0.385250319 |
| -1.02223428 | 0.71597765 | -1.0401621 | 0.481201772 | 0.963820388 | 0.542516885 |
| 0.938741732 | 0.33969666 | -1.0759719 | 0.267687119 | 0.980804332 | 0.768850564 |
| -1.19096576 | 0.24418834 | -1.0337671 | 0.522171093 | -1.10192334 | 0.51594182  |
| 0.829577081 | 0.02243535 | -1.0095749 | 0.877352581 | 0.938036957 | 0.42446303  |
| -1.05030477 | 0.43647503 | 0.99851703 | 0.978880402 | 0.941076247 | 0.33633333  |
| 0.945238265 | 0.22819332 | 0.9742606  | 0.630657488 | -1.02589288 | 0.58235975  |
| 0.51140744  | 9.31E-06   | 0.9991398  | 0.985809258 | 0.547759566 | 5.25E-05    |
| 0.807934844 | 0.01061903 | -1.0286989 | 0.669998638 | -1.00469325 | 0.953862862 |
| 0.928661557 | 0.12958001 | -1.0558123 | 0.359973537 | 0.957931236 | 0.375333533 |
| 0.983687919 | 0.80460308 | -1.0481224 | 0.412576765 | -1.01470013 | 0.826239194 |
| 0.966335411 | 0.54632834 | -1.055594  | 0.612038532 | -1.03981369 | 0.491810715 |
| 0.818130214 | 0.00188496 | -1.0552489 | 0.484380979 | -1.00078125 | 0.989898668 |
| -1.05845614 | 0.36665282 | 0.9453375  | 0.405113024 | -1.21715251 | 0.002674028 |
| -1.05504782 | 0.33613587 | -1.016563  | 0.746344203 | 0.966089416 | 0.534729399 |
| 0.96814113  | 0.55248127 | 0.95492982 | 0.413246132 | 0.958820666 | 0.440906883 |
| -1.03263512 | 0.63212771 | 0.9450214  | 0.216950771 | 0.969980052 | 0.649525086 |
| -1.21793645 | 0.10195078 | -1.0048342 | 0.972388758 | 0.947214206 | 0.649024584 |
| 0.969360857 | 0.50242881 | -1.0880994 | 0.195264619 | 0.975102193 | 0.586583817 |
| -1.03795538 | 0.45894251 | 0.91407422 | 0.140944379 | 0.918023894 | 0.092536682 |
| 0.972532208 | 0.61398753 | 0.97409918 | 0.690810636 | 0.969698085 | 0.57746277  |
| -1.01286258 | 0.85790563 | -1.2446906 | 0.146111975 | 0.905565405 | 0.168369897 |
| 0.97106314  | 0.58131874 | 0.93736972 | 0.419359282 | 0.961914769 | 0.466338042 |
| 0.923705807 | 0.20316623 | -1.0193575 | 0.760586467 | 0.962221307 | 0.534514414 |
| -1.00518366 | 0.92177603 | 0.9869794  | 0.777755263 | -1.05839683 | 0.283645956 |
| -1.03829159 | 0.52754325 | 0.72596907 | 0.02309511  | 0.976404936 | 0.687759443 |
| 0.903925438 | 0.05851509 | -1.0710964 | 0.397640144 | -1.02274468 | 0.668627716 |
| 0.913908872 | 0.20179772 | 0.99350207 | 0.892647109 | -1.10161542 | 0.170503954 |
| 0.955164269 | 0.40597052 | 0.92515558 | 0.24479002  | 0.904237832 | 0.071593381 |

|             |            |            |             |             |             |
|-------------|------------|------------|-------------|-------------|-------------|
| -1.10562391 | 0.04664728 | -1.0509017 | 0.382659878 | -1.05399763 | 0.29091207  |
| 0.969693721 | 0.58965255 | 0.92610886 | 0.216625446 | -1.07086587 | 0.232665085 |
| 0.95270844  | 0.37374709 | -1.1049125 | 0.115727231 | 0.997331606 | 0.960728381 |
| 0.868671914 | 0.05049366 | -1.1020791 | 0.084035493 | 0.771982202 | 0.000545982 |
| 0.907957982 | 0.09011172 | 0.93672984 | 0.232802747 | -1.02932084 | 0.607577929 |
| 0.93965385  | 0.36823641 | -1.0637073 | 0.358603453 | -1.05330357 | 0.452306328 |
| 0.985425473 | 0.79933592 | 0.95144904 | 0.676133902 | 0.985163182 | 0.795779558 |
| -1.03961165 | 0.45998662 | 0.94871683 | 0.258388648 | -1.03677046 | 0.492047078 |
| -1.10495912 | 0.03330074 | -1.0205745 | 0.685033146 | -1.01076976 | 0.815506692 |
| -1.06568576 | 0.61233102 | 0.97562047 | 0.654811078 | -1.1128467  | 0.395429517 |
| 0.986165549 | 0.66393596 | -1.0385452 | 0.596659923 | 0.999655781 | 0.991425326 |
| -1.06343796 | 0.56910965 | -1.0804904 | 0.149369745 | -1.10472215 | 0.357745941 |
| -1.00530034 | 0.92842474 | -1.0770049 | 0.233775395 | -1.01351973 | 0.819533888 |
| -1.03144498 | 0.50536078 | 0.96646112 | 0.517842791 | 0.907269227 | 0.039737671 |
| 0.992918495 | 0.86321097 | -1.0213935 | 0.721584507 | 0.985424945 | 0.722003545 |
| -1.00131853 | 0.97838596 | 0.97284608 | 0.600472417 | -1.00769898 | 0.874713358 |
| -1.03333697 | 0.48342746 | -1.0144911 | 0.837163332 | 0.998748753 | 0.978604976 |
| -1.03606227 | 0.5301827  | 0.98471787 | 0.779639234 | 0.983039237 | 0.761484461 |
| -1.00483028 | 0.94019636 | 0.95728406 | 0.379883787 | -1.14847842 | 0.034814658 |
| 0.946701151 | 0.43822483 | 0.97091518 | 0.604922505 | -1.00993647 | 0.888406151 |
| 0.967404714 | 0.44428852 | 0.98254946 | 0.745737047 | 0.930651225 | 0.100463874 |
| 0.974923706 | 0.64341344 | 0.81418821 | 0.005091869 | -1.04924503 | 0.382120059 |
| -1.08893315 | 0.74739092 | -1.0083597 | 0.882263154 | 0.992611243 | 0.977622679 |
| -1.00525091 | 0.93862408 | 0.98958071 | 0.879210376 | -1.06830876 | 0.333417421 |
| -1.13084901 | 0.03981539 | -1.0254061 | 0.664183879 | -1.07376536 | 0.228009491 |
| -1.06006997 | 0.42089693 | -1.0177883 | 0.736839854 | 0.930049658 | 0.317844328 |
| -1.17970681 | 0.00036504 | -1.0183176 | 0.692705087 | -1.15952643 | 0.001247785 |
| -1.01308872 | 0.70879259 | -1.0043318 | 0.972501432 | 0.972226723 | 0.419661053 |
| 0.897922229 | 0.03361301 | 0.98000028 | 0.529044719 | -1.05364353 | 0.294659669 |
| 0.982777123 | 0.75228609 | -1.0936797 | 0.4079374   | 0.981697487 | 0.737191253 |
| 0.954773833 | 0.34940017 | -1.0529149 | 0.382630569 | -1.06292726 | 0.21862343  |
| -1.0118212  | 0.80607955 | -1.022086  | 0.638017732 | -1.02865386 | 0.55563041  |
| 0.971817238 | 0.46957505 | -1.0050106 | 0.903551065 | -1.03212686 | 0.424009069 |
| 0.99303426  | 0.92004379 | -1.0498708 | 0.319255915 | -1.12977461 | 0.084030677 |
| 0.925441256 | 0.1256553  | 0.95642096 | 0.34193433  | 0.917634195 | 0.090137148 |
| 0.976694028 | 0.69287411 | -1.0311613 | 0.586466787 | 0.893145892 | 0.062427723 |
| 0.845709628 | 0.00275879 | -1.031621  | 0.628263762 | -1.04576466 | 0.405711196 |
| 0.896100226 | 0.06160495 | -1.1182629 | 0.116839502 | -1.04252796 | 0.471734044 |
| 0.967577779 | 0.64509551 | -1.0170373 | 0.695964306 | 0.932814677 | 0.332753786 |
| -1.03134748 | 0.63165996 | -1.1214677 | 0.040304634 | -1.03456136 | 0.597780716 |
| -1.02045576 | 0.64418425 | -1.0487118 | 0.857259233 | -1.00427203 | 0.922468982 |
| 0.894566997 | 0.04171762 | -1.1554023 | 0.037454701 | -1.0597681  | 0.281883872 |
| 0.93174897  | 0.24671898 | -1.0136983 | 0.816560848 | -1.03594593 | 0.560962865 |
| -1.05820464 | 0.32675486 | -1.0772437 | 0.30552529  | -1.04358887 | 0.458681047 |

|             |            |            |             |             |             |
|-------------|------------|------------|-------------|-------------|-------------|
| 0.913299733 | 0.13066985 | -1.1252077 | 0.008865279 | -1.07958272 | 0.200510309 |
| 0.94023636  | 0.27065201 | -1.0720348 | 0.049645125 | -1.12848461 | 0.033413361 |
| -1.02638453 | 0.58176476 | 0.95510385 | 0.356370901 | -1.00026203 | 0.995572419 |
| -1.08885345 | 0.27667231 | -1.0288681 | 0.605411506 | -1.05259989 | 0.510911448 |
| 0.921278716 | 0.12539434 | -1.0057767 | 0.906910333 | -1.12895045 | 0.025188332 |
| 0.846597759 | 0.08885651 | -1.0738654 | 0.140505012 | 0.769162596 | 0.008524669 |
| 0.84828265  | 0.03960411 | 0.94747518 | 0.174963584 | -1.2236788  | 0.01240491  |
| 0.875454221 | 0.02816385 | -1.0827981 | 0.256179812 | -1.05731346 | 0.348748941 |
| -1.00784195 | 0.89290349 | -1.0166946 | 0.740865548 | -1.09321154 | 0.12863469  |
| 0.854319223 | 0.00548081 | 0.98541952 | 0.805599053 | -1.0303354  | 0.585023423 |
| -1.00912823 | 0.86836022 | 0.97908704 | 0.693806903 | -1.07321876 | 0.200848118 |
| -1.11234511 | 0.07593161 | -1.0010374 | 0.985671087 | -1.11789783 | 0.063563598 |
| 0.980472377 | 0.68742679 | 0.89142353 | 0.112121857 | -1.01993594 | 0.687141801 |
| 0.95940452  | 0.45247721 | -1.1278386 | 0.065651856 | -1.14293168 | 0.018037352 |
| 0.938933191 | 0.24709883 | -1.0255963 | 0.564518479 | 0.840353664 | 0.002115152 |
| 0.76174508  | 0.00169291 | -1.0468149 | 0.395399001 | -1.03650773 | 0.664894231 |
| 0.868904423 | 0.02055441 | -1.1230998 | 0.059758971 | -1.0463023  | 0.445396666 |
| -1.26080501 | 0.00046955 | 0.90812142 | 0.097594297 | -1.00962367 | 0.87820618  |
| 0.861211747 | 0.11590024 | 0.90821401 | 0.109071129 | -1.11220328 | 0.260426559 |
| -1.07426614 | 0.37321943 | -1.0592098 | 0.303475987 | 0.916440563 | 0.278949014 |
| -1.0650378  | 0.22905578 | -1.0218228 | 0.647814129 | -1.14151321 | 0.01346721  |
| -1.04883004 | 0.41827805 | -1.2100463 | 0.017083601 | 0.997010021 | 0.959329556 |
| -1.11808955 | 0.03898284 | -1.0195537 | 0.714551999 | -1.02951993 | 0.583537153 |
| 0.949825039 | 0.24708473 | 0.89507091 | 0.253804583 | -1.03384435 | 0.452575948 |
| 0.938009507 | 0.20256898 | -1.0295521 | 0.710364747 | 0.957698645 | 0.387478017 |
| 0.925858596 | 0.21561143 | 0.98673725 | 0.821702403 | -1.05773225 | 0.365327417 |
| -1.29454093 | 0.00334222 | -1.0368681 | 0.533339811 | -1.28890597 | 0.003870791 |
| -1.03297835 | 0.56746744 | 0.98442831 | 0.774064083 | -1.09137998 | 0.126890978 |
| 0.979212364 | 0.66733211 | -1.0489624 | 0.384896154 | 0.988479754 | 0.812483351 |
| -1.03387539 | 0.58787182 | 0.94228205 | 0.316770381 | -1.01585633 | 0.797807512 |
| 0.926326991 | 0.39022147 | 0.98446347 | 0.749302964 | -1.03166478 | 0.725575763 |
| 0.963463177 | 0.47379424 | -1.0573355 | 0.313190288 | -1.0951903  | 0.083710022 |
| -1.0924802  | 0.08603453 | 0.97493894 | 0.639306536 | 0.986729544 | 0.792681644 |
| 0.959390595 | 0.43997418 | -1.051571  | 0.543886186 | -1.0654816  | 0.239157696 |
| -1.01696599 | 0.72351671 | 0.94529059 | 0.343550117 | -1.009462   | 0.842960235 |
| 0.949288232 | 0.36063416 | 0.9555093  | 0.467560947 | -1.06635244 | 0.260090402 |
| -1.0851301  | 0.21963566 | -1.085049  | 0.386539294 | -1.09129579 | 0.18975409  |
| 0.929028302 | 0.23864717 | 0.97928829 | 0.794062564 | -1.01433939 | 0.818605682 |
| 0.874160172 | 0.04231492 | 0.95643493 | 0.393575349 | 0.950613656 | 0.436889781 |
| 0.978990542 | 0.69384056 | -1.1043289 | 0.095319013 | 0.989975344 | 0.851745039 |
| 0.959401753 | 0.48509175 | 0.99761302 | 0.964029483 | 0.997590085 | 0.967506115 |
| -1.38953247 | 8.93E-05   | 0.98488508 | 0.730527303 | -1.0593809  | 0.460675349 |
| 0.973940312 | 0.67602066 | 0.95315507 | 0.3378065   | -1.01708424 | 0.788524366 |
| -1.06067976 | 0.3488612  | 0.96367297 | 0.549764    | -1.11789519 | 0.079439639 |

|             |            |            |             |             |             |
|-------------|------------|------------|-------------|-------------|-------------|
| 0.945823798 | 0.32901355 | -1.3709061 | 0.0004305   | 0.924547407 | 0.171042566 |
| -1.04347637 | 0.40510711 | -1.0610816 | 0.297827499 | -1.02580658 | 0.617443402 |
| -1.00332326 | 0.9581257  | 0.98870635 | 0.816123794 | -1.05910764 | 0.365288776 |
| -1.0012955  | 0.98453417 | -1.0877931 | 0.174177537 | 0.985716731 | 0.829489896 |
| 0.933306863 | 0.30128986 | 0.92856324 | 0.40522697  | -1.08868411 | 0.204346233 |
| 0.945124086 | 0.36713684 | -1.0385461 | 0.466721859 | -1.07730673 | 0.235406688 |
| -1.19868704 | 0.11446364 | 0.9870568  | 0.797711318 | -1.23628361 | 0.065823029 |
| -1.09902624 | 0.10935923 | -1.125584  | 0.030653939 | 0.99034123  | 0.867722824 |
| 0.998736888 | 0.97964101 | -1.1486865 | 0.00496722  | -1.00605013 | 0.903074011 |
| 0.959209357 | 0.46165222 | 0.95358638 | 0.403522575 | -1.03185714 | 0.578942274 |
| -1.02949332 | 0.76385548 | 0.92516729 | 0.242249765 | -1.17017998 | 0.108411635 |
| 0.957368813 | 0.40550575 | 0.96737865 | 0.593587571 | -1.0523225  | 0.330759145 |
| -1.12087696 | 0.06010437 | -1.0762165 | 0.261008139 | 0.983463603 | 0.780058407 |
| -1.01535319 | 0.90596187 | 0.98401027 | 0.764997615 | -1.10202589 | 0.452478713 |
| -1.05348304 | 0.35035291 | -1.0136823 | 0.818572918 | 0.981336022 | 0.734676821 |
| 0.947872686 | 0.38601517 | -1.067931  | 0.40096329  | 0.991444318 | 0.888965292 |
| -1.0317187  | 0.69119518 | -1.0378414 | 0.556956868 | 0.987680565 | 0.874622161 |
| -1.08813462 | 0.13841394 | -1.1063887 | 0.110682807 | -1.08100468 | 0.171160287 |
| -1.02643695 | 0.64572093 | 0.93911363 | 0.271529977 | 0.933919595 | 0.231097926 |
| -1.07721136 | 0.34304061 | -1.0550095 | 0.295749164 | -1.08039227 | 0.324413013 |
| -1.1357434  | 0.02678233 | -1.0066282 | 0.916736779 | -1.00427428 | 0.939458461 |
| -1.04879529 | 0.24364336 | -1.0482216 | 0.481739812 | 0.984348443 | 0.697818604 |
| 0.880378777 | 0.04122054 | 0.93089889 | 0.283741136 | -1.06357822 | 0.316101942 |
| -1.05563499 | 0.3131168  | 0.94046157 | 0.326991046 | -1.09739057 | 0.086209237 |
| -1.13477489 | 0.01967844 | -1.1542482 | 0.209538363 | -1.04752743 | 0.381155599 |
| 0.958332621 | 0.42330789 | -1.0117172 | 0.841567869 | 0.987961783 | 0.819270657 |
| 0.945195331 | 0.23018108 | 0.89180825 | 0.024019009 | -1.03568844 | 0.453495147 |
| 0.87442249  | 0.00907636 | 0.97441258 | 0.646318969 | 0.997336658 | 0.957288755 |
| 0.972570969 | 0.65085256 | -1.3566572 | 0.002528927 | 0.873631889 | 0.031336902 |
| -1.05925177 | 0.32161342 | -1.0404905 | 0.448287698 | -1.01922937 | 0.74192145  |
| 0.950103403 | 0.25385601 | -1.0437244 | 0.474475113 | 0.967988163 | 0.46664984  |
| 0.9961642   | 0.9494854  | -1.0927112 | 0.492744484 | -1.05295466 | 0.396576076 |
| 0.80988896  | 0.02218874 | 0.90431405 | 0.074541979 | 0.75546893  | 0.002807259 |
| 0.963447244 | 0.50477751 | 0.90446013 | 0.106986511 | 0.954623769 | 0.406070811 |
| -1.13134328 | 0.01752066 | -1.0121884 | 0.87744298  | -1.02818919 | 0.583096553 |
| 0.972381253 | 0.50520575 | 0.95147978 | 0.379732349 | -1.00458588 | 0.913143457 |
| 0.822265043 | 0.23385246 | -1.0282734 | 0.623328417 | 0.998174556 | 0.991072164 |
| -1.14070087 | 0.15368935 | 0.95567033 | 0.562199348 | 0.95747725  | 0.634830015 |
| 0.961760195 | 0.50656093 | 0.96351664 | 0.508949729 | 0.969967981 | 0.60316354  |
| 0.904188939 | 0.09848946 | 0.96437616 | 0.37341656  | -1.13343666 | 0.041271005 |
| 0.967127817 | 0.5978256  | -1.0981431 | 0.130167355 | -1.03192478 | 0.619853402 |
| 0.976272471 | 0.81819465 | 0.99074184 | 0.861791117 | 0.899395559 | 0.312316643 |
| -1.01634301 | 0.81228789 | 0.98448564 | 0.767340494 | -1.05581422 | 0.427495006 |
| -1.08535854 | 0.22569259 | 0.98546729 | 0.782436689 | -1.02396878 | 0.724417295 |

|             |            |            |             |             |              |
|-------------|------------|------------|-------------|-------------|--------------|
| 0.916058826 | 0.18012097 | 0.95621725 | 0.339347712 | -1.02286164 | 0.727603933  |
| 0.962969884 | 0.56065534 | -1.0339135 | 0.503906075 | 0.938073589 | 0.32566399   |
| -1.00741524 | 0.89623862 | 0.98250284 | 0.773798224 | -1.02250345 | 0.694626286  |
| -1.00239808 | 0.98422934 | -1.0763422 | 0.206558672 | 0.742455991 | 0.0167635    |
| 0.906425888 | 0.12222316 | -1.0382706 | 0.401138984 | 0.967334831 | 0.597734303  |
| 0.944991694 | 0.35140376 | -1.0172167 | 0.778484781 | -1.04761494 | 0.442998539  |
| -1.06123123 | 0.24041102 | 0.82151373 | 0.032418877 | -1.01526649 | 0.763329862  |
| 0.950538717 | 0.33700064 | 0.94581291 | 0.319583085 | 0.966971075 | 0.523963953  |
| -1.04193834 | 0.35536095 | -1.0512735 | 0.325042053 | -1.01067951 | 0.810422668  |
| 0.904978985 | 0.10254058 | 0.99901228 | 0.981203999 | -1.14200608 | 0.031460089  |
| -1.20966983 | 0.00763146 | 0.7636054  | 0.102863154 | -1.02583529 | 0.711703652  |
| 0.833629286 | 0.00836028 | -1.0383979 | 0.680386271 | 0.992276014 | 0.907541621  |
| 0.821999192 | 0.00100974 | -1.054802  | 0.36427784  | -1.02517875 | 0.660807915  |
| -1.09256786 | 0.11378821 | 0.9718934  | 0.636039238 | 0.963360329 | 0.500791196  |
| 0.951148215 | 0.3619709  | -1.0066942 | 0.916032278 | -1.01710613 | 0.75672145   |
| 0.950135697 | 0.42865262 | -1.0794692 | 0.465179597 | -1.00489856 | 0.939549596  |
| -1.06595624 | 0.30076782 | -1.0814391 | 0.254192549 | -1.05880647 | 0.354091739  |
| -1.18651809 | 0.08499658 | 0.88120802 | 0.063860042 | -1.00558371 | 0.954650514  |
| -1.00876439 | 0.80282207 | 0.9636231  | 0.568376924 | -1.05165832 | 0.153319515  |
| 0.987095268 | 0.79721704 | 0.97212758 | 0.662678954 | -1.17284075 | 0.0025219    |
| -1.00356342 | 0.94344361 | 0.99485301 | 0.927416788 | 0.960013188 | 0.417145697  |
| 0.995065163 | 0.88379614 | 0.95671829 | 0.715169056 | -1.01363481 | 0.689264808  |
| -1.11870749 | 0.06379833 | -1.0148785 | 0.814286274 | -1.02006403 | 0.738791002  |
| -1.0367219  | 0.54358364 | -1.0112882 | 0.852754885 | 0.979423605 | 0.725904928  |
| -1.06301197 | 0.30973111 | -1.0662086 | 0.20584824  | 0.958409655 | 0.478993792  |
| -1.14790714 | 0.01348463 | -1.0172005 | 0.745913568 | 0.960265884 | 0.455912219  |
| -1.02468482 | 0.70765958 | -1.0320217 | 0.477538032 | -1.22275396 | 0.003001066  |
| 0.939725555 | 0.11378429 | 0.93661915 | 0.280879317 | -1.00363787 | 0.925535192  |
| 0.998304889 | 0.97475765 | 0.92302599 | 0.248495197 | 0.973533334 | 0.61729469   |
| -1.20293215 | 0.01977506 | 0.98837967 | 0.861035766 | -1.19667369 | 0.023334724  |
| -1.04899993 | 0.40877026 | 0.99125745 | 0.876765852 | 0.961660914 | 0.499176338  |
| 0.926786516 | 0.11230509 | -1.0427829 | 0.450147629 | 0.98162091  | 0.69523065   |
| -1.16643165 | 0.0203693  | -1.01164   | 0.832559655 | -1.10108217 | 0.140722766  |
| -1.02510997 | 0.63606912 | -1.0072462 | 0.910787017 | -1.02883229 | 0.587692483  |
| 0.999762712 | 0.99657427 | -1.1045775 | 0.109578357 | -1.00975954 | 0.860538374  |
| 0.969098416 | 0.32652317 | -1.1735589 | 0.106408138 | -1.04124306 | 0.207826795  |
| -1.07306644 | 0.19265282 | 0.98250356 | 0.613820095 | -1.06415021 | 0.249874257  |
| -1.10977526 | 0.32639689 | -1.0406465 | 0.431786613 | -1.06362004 | 0.559991161  |
| -1.00082866 | 0.99486879 | 0.94256171 | 0.241122189 | -1.1858676  | 0.18922762   |
| 0.970934351 | 0.61123322 | -1.0253156 | 0.461231846 | -1.00606917 | 0.916855432  |
| -1.18739288 | 0.25406639 | -1.0024518 | 0.967194842 | -1.13789775 | 0.389748539  |
| 0.936171971 | 0.54495414 | -1.0957929 | 0.126877198 | -1.19749382 | 0.101797392  |
| 0.802954791 | 0.04732435 | -1.0520147 | 0.398566281 | 0.983346475 | 0.8771130797 |
| -1.07907421 | 0.53440497 | -1.0256771 | 0.640525052 | -1.28892959 | 0.041792807  |

|             |            |            |             |             |             |
|-------------|------------|------------|-------------|-------------|-------------|
| -1.11409154 | 0.06621451 | -1.1649639 | 0.021908932 | -1.01644907 | 0.778131657 |
| 0.804022586 | 0.00037068 | -1.0213737 | 0.586716584 | 0.886496204 | 0.040522208 |
| 0.986915362 | 0.81958347 | -1.0257709 | 0.63545801  | 0.968312322 | 0.577569631 |
| -1.0346072  | 0.63958157 | -1.1764009 | 0.039315288 | -1.00221051 | 0.975729249 |
| 0.975761465 | 0.71924279 | -1.1318766 | 0.035585148 | -1.08587128 | 0.230335625 |
| -1.00649678 | 0.93827243 | -1.0184103 | 0.700023579 | 0.979111167 | 0.800747532 |
| -1.13421703 | 0.09109748 | 0.97060542 | 0.645046765 | -1.0169339  | 0.819427962 |
| 0.899902958 | 0.13293076 | 0.98554898 | 0.781058257 | 0.975533046 | 0.721475353 |
| 0.983919352 | 0.7765839  | -1.1380581 | 0.022447546 | -1.01167136 | 0.839012182 |
| -1.25911832 | 0.00159116 | -1.0493406 | 0.134556704 | 0.87831974  | 0.066479878 |
| -1.05333924 | 0.532221   | 0.95138356 | 0.355300271 | -1.17269874 | 0.059239967 |
| -1.06826778 | 0.33555009 | -1.033532  | 0.755015222 | 0.960490088 | 0.555563398 |
| -1.02016172 | 0.70816711 | 0.96934092 | 0.809015319 | 0.965402788 | 0.509668424 |
| 0.998045141 | 0.9729709  | -1.0349346 | 0.554186769 | 0.964187314 | 0.528488336 |
| 0.994412194 | 0.91597083 | -1.2841123 | 0.099064771 | -1.0705034  | 0.202966678 |
| 0.976601387 | 0.67617724 | -1.0704253 | 0.532271411 | -1.0002715  | 0.996175832 |
| 0.948714328 | 0.28269443 | -1.120722  | 0.296478597 | 0.985837817 | 0.769892242 |
| -1.02105038 | 0.72619848 | -1.1231936 | 0.344061053 | 0.974643456 | 0.666021159 |
| -1.07083232 | 0.21408531 | -1.1588253 | 0.013370344 | -1.05048263 | 0.369606198 |
| 0.984079441 | 0.86136076 | 0.8675879  | 0.016522775 | 0.862925337 | 0.112823422 |
| 0.989330354 | 0.86449145 | -1.1408241 | 0.025811747 | -1.02986262 | 0.639982414 |
| -1.25888081 | 0.06158215 | 0.92701758 | 0.298862003 | -1.34131215 | 0.018236597 |
| -1.06536974 | 0.61738069 | -1.1119227 | 0.124064005 | 0.890362372 | 0.360905634 |
| 0.995083026 | 0.90118392 | 0.93335154 | 0.410943913 | 0.989205747 | 0.7846124   |
| -1.04644815 | 0.41312295 | 0.84476363 | 0.02508511  | -1.05205247 | 0.360727659 |
| 0.979251984 | 0.82101353 | -1.2222919 | 0.005340364 | -1.22828682 | 0.029975619 |
| -1.04513512 | 0.4749015  | -1.1214817 | 0.048706123 | -1.01034312 | 0.867427665 |
| 0.997310054 | 0.95179937 | 0.89791176 | 0.125881022 | -1.06709709 | 0.148970818 |
| 0.999726712 | 0.99607927 | -1.1479092 | 0.100973154 | -1.0073164  | 0.895738235 |
| -1.12558554 | 0.0190612  | -1.0473631 | 0.498849373 | -1.03364573 | 0.501817584 |
| -1.00557172 | 0.95667525 | 0.97859348 | 0.684937407 | 0.957486251 | 0.671260224 |
| 0.951758227 | 0.75430606 | -1.0590499 | 0.322725631 | 0.861706549 | 0.347910652 |
| 0.907290009 | 0.08479537 | -1.151138  | 0.010207868 | -1.01361757 | 0.808069222 |
| 0.889107417 | 0.02276639 | -1.0836583 | 0.159913091 | -1.10273784 | 0.056286867 |
| 0.988851859 | 0.84307132 | 0.9615589  | 0.422667004 | 0.957195312 | 0.440994309 |
| -1.03308584 | 0.55486538 | -1.0292405 | 0.628220499 | -1.06272685 | 0.271685605 |
| 0.931685925 | 0.21223524 | -1.0384592 | 0.491094941 | -1.06532327 | 0.26391909  |
| 0.871619627 | 0.01592007 | 0.98400586 | 0.860721626 | -1.00667929 | 0.904440971 |
| 0.990034839 | 0.86020459 | 0.99123049 | 0.888550029 | -1.13668895 | 0.027654262 |
| 0.966840821 | 0.55524069 | -1.1638592 | 0.213692781 | -1.00103118 | 0.985591144 |
| 0.976600551 | 0.6426278  | -1.114156  | 0.394818878 | -1.09234578 | 0.087439985 |
| 0.982216346 | 0.74542042 | 0.97281016 | 0.488378094 | 0.993174191 | 0.901326225 |
| -1.0233478  | 0.64125693 | 0.97657015 | 0.668395638 | -1.02413868 | 0.630157454 |
| 0.928538544 | 0.17504985 | -1.2705594 | 0.012122978 | 0.961839982 | 0.473921073 |

|             |            |            |             |             |             |
|-------------|------------|------------|-------------|-------------|-------------|
| 0.998988244 | 0.98645338 | -1.1303967 | 0.05081013  | 0.982584199 | 0.768320272 |
| -1.05274785 | 0.36486103 | -1.1291456 | 0.008357812 | -1.01589779 | 0.780233721 |
| -1.13787099 | 0.02183235 | -1.012699  | 0.820568118 | -1.1481807  | 0.014484973 |
| -1.01348875 | 0.82253505 | 0.87263347 | 0.007402584 | 0.968913748 | 0.597457164 |
| 0.889595812 | 0.02121564 | -1.0087979 | 0.931749577 | -1.0325137  | 0.518951782 |
| -1.04313306 | 0.44379619 | 0.81674236 | 0.203306962 | 0.94261483  | 0.285113313 |
| -1.03272755 | 0.71559369 | -1.008727  | 0.875970368 | -1.32145126 | 0.002516966 |
| -1.03593215 | 0.48260898 | -1.0600285 | 0.249980737 | -1.00213773 | 0.966044382 |
| -1.0240145  | 0.67390538 | 0.95989237 | 0.470781566 | 0.98963051  | 0.853263112 |
| 0.98098189  | 0.71813509 | -1.0114527 | 0.836106275 | 0.968393038 | 0.546449503 |
| -1.04650516 | 0.36056709 | -1.0522582 | 0.367499527 | 0.980060945 | 0.684465256 |
| -1.03951583 | 0.58210734 | 0.91282917 | 0.104253379 | -1.02598093 | 0.715484128 |
| -1.11565485 | 0.07198557 | -1.0363995 | 0.530246149 | -1.0047804  | 0.936549764 |
| -1.05122379 | 0.40324925 | 0.94646338 | 0.337063978 | 0.807888382 | 0.00069962  |
| 0.906365988 | 0.06894339 | -1.0486596 | 0.353242411 | -1.06301211 | 0.253763125 |
| -1.10095021 | 0.11497491 | -1.0271287 | 0.628351052 | -1.05963921 | 0.338834237 |
| -1.10681064 | 0.03475    | 0.97076405 | 0.549415252 | -1.07477306 | 0.12961078  |
| -1.08770212 | 0.11691453 | -1.2015866 | 0.001263142 | 0.888627534 | 0.029380038 |
| -1.03149044 | 0.60784384 | -1.0518243 | 0.398307488 | -1.06246258 | 0.317630977 |
| -1.01955974 | 0.73817098 | -1.058529  | 0.31643153  | 0.966094165 | 0.55212874  |
| 0.944499264 | 0.33395157 | -1.0019724 | 0.97138666  | -1.04021549 | 0.503698743 |
| -1.12365237 | 0.02077664 | -1.0790506 | 0.206116376 | -1.13190143 | 0.014309288 |
| -1.33197994 | 0.0166904  | -1.0092556 | 0.852410052 | -1.06102774 | 0.611740972 |
| 0.822766173 | 0.0009704  | -1.0621957 | 0.275230501 | -1.02406379 | 0.672140009 |
| -1.18109349 | 0.02218132 | -1.1157155 | 0.218391864 | -1.06258019 | 0.394128334 |
| -1.00284137 | 0.94666392 | 0.98341129 | 0.738910102 | 0.957150845 | 0.304206638 |
| 0.990899821 | 0.88706587 | 0.94799702 | 0.345278185 | -1.03869306 | 0.555960391 |
| -1.03037533 | 0.54915729 | -1.0083527 | 0.875683626 | -1.04174035 | 0.413682488 |
| -1.01970313 | 0.72254821 | -1.0238853 | 0.633979202 | 0.94287975  | 0.286772972 |
| -1.00864489 | 0.87239603 | 0.95460833 | 0.509751145 | 0.943417521 | 0.279689834 |
| -1.09762392 | 0.14954262 | -1.0303639 | 0.617961938 | -1.26147862 | 0.000602389 |
| 0.91178541  | 0.10208451 | 0.97011571 | 0.610969529 | 0.907762219 | 0.087072614 |
| 0.775937187 | 0.03930167 | 0.99973007 | 0.995952371 | 0.999169677 | 0.994506183 |
| 0.968109697 | 0.66393454 | 0.98486049 | 0.800350302 | -1.07605002 | 0.327546585 |
| 0.886534396 | 0.33000624 | -1.0588465 | 0.227574617 | 0.79985785  | 0.073906645 |
| -1.04110144 | 0.58798551 | -1.0171422 | 0.748564281 | 0.968964726 | 0.671371157 |
| -1.02472355 | 0.71424888 | -1.1778097 | 0.008671552 | -1.06713316 | 0.331825364 |
| -1.06285936 | 0.36374795 | 0.93795945 | 0.27152027  | -1.0606044  | 0.380575638 |
| 0.941965788 | 0.21335955 | -1.1125676 | 0.074130121 | -1.0418943  | 0.391174628 |
| -1.16258804 | 0.23618459 | -1.0900198 | 0.083871225 | -1.11265175 | 0.399724098 |
| -1.15228168 | 0.02713677 | 0.956202   | 0.701011604 | 0.988458407 | 0.853103828 |
| 0.913139612 | 0.04186451 | 0.92595975 | 0.174340494 | -1.08696124 | 0.061072748 |
| -1.0778782  | 0.10541716 | 0.96200707 | 0.585843163 | 0.988753765 | 0.804792127 |
| -1.16977061 | 0.02003551 | -1.0738971 | 0.097062095 | -1.01323947 | 0.841405467 |



|             |            |            |             |             |             |
|-------------|------------|------------|-------------|-------------|-------------|
| -1.04552815 | 0.4010569  | -1.0689681 | 0.302534976 | -1.00049935 | 0.992462317 |
| -1.18509531 | 0.00462036 | -1.0641588 | 0.215718732 | -1.01010009 | 0.861786103 |
| 0.731521696 | 0.08451725 | -1.009444  | 0.864124834 | 0.908909554 | 0.593513382 |
| 0.992307691 | 0.89050295 | -1.0115756 | 0.829974706 | 0.963643387 | 0.509927589 |
| 0.953615927 | 0.46587517 | -1.0909407 | 0.177559773 | 0.972130434 | 0.663799624 |
| 0.93468149  | 0.23632794 | 0.90446453 | 0.076135715 | -1.00330202 | 0.953609631 |
| 0.998882941 | 0.98103593 | 0.9410848  | 0.615149161 | -1.04344652 | 0.367567183 |
| 0.934237013 | 0.14120867 | -1.0212945 | 0.777466664 | -1.11179424 | 0.02380332  |
| -1.12151005 | 0.14333878 | 0.89707504 | 0.379276484 | 0.94955135  | 0.505453367 |
| 0.986501637 | 0.80983736 | 0.96845516 | 0.666225908 | -1.08341828 | 0.159755747 |
| 0.807097398 | 0.23867695 | -1.026706  | 0.692775784 | 0.736924686 | 0.095436465 |
| -1.01281897 | 0.78418174 | -1.0173441 | 0.79710212  | -1.12630944 | 0.012969628 |
| -1.15609161 | 0.02984257 | -1.0464426 | 0.343245191 | -1.17630661 | 0.015577328 |
| -1.08425709 | 0.04074088 | -1.108736  | 0.415371879 | -1.0248211  | 0.527797269 |
| -1.01644811 | 0.78820104 | -1.0939084 | 0.156088042 | -1.10279187 | 0.11125053  |
| 0.999130223 | 0.97692818 | -1.0019936 | 0.963723001 | -1.00521842 | 0.862680193 |
| -1.01795373 | 0.68310794 | -1.0866333 | 0.073633236 | 0.974264652 | 0.550111139 |
| -1.11080395 | 0.2375903  | -1.0251053 | 0.706143369 | -1.02642514 | 0.768036442 |
| -1.02916173 | 0.63719302 | -1.1306273 | 0.023363206 | 0.989349784 | 0.860420695 |
| 0.812029823 | 0.18020148 | -1.0874745 | 0.150179616 | -1.18752815 | 0.267355588 |
| -1.00338733 | 0.95321537 | 0.95692538 | 0.805435818 | 0.944273131 | 0.322047402 |
| -1.03282671 | 0.5391429  | 0.87245807 | 0.017843797 | 0.996076744 | 0.940317935 |
| -1.07247145 | 0.16133006 | -1.1474826 | 0.03800329  | -1.04879155 | 0.33788094  |
| 0.919512255 | 0.22368474 | -1.0084812 | 0.881535298 | -1.01295565 | 0.850927727 |
| 0.983213772 | 0.87793214 | 0.91532576 | 0.064107639 | 0.952359905 | 0.658122714 |
| -1.12650957 | 0.04262932 | 0.99646479 | 0.938320225 | 0.985449106 | 0.799285675 |
| -1.00511565 | 0.92694253 | -1.1570159 | 0.06431736  | -1.00676983 | 0.903502329 |
| -1.01077528 | 0.90456872 | 0.96927587 | 0.581011733 | -1.47074573 | 6.43E-05    |
| 0.986610089 | 0.84039664 | 0.9086544  | 0.596514351 | 0.985902774 | 0.832032358 |
| 0.963767943 | 0.48750636 | 0.97227356 | 0.546006558 | -1.01175558 | 0.825626856 |
| -1.05262942 | 0.39245361 | -1.0490381 | 0.464599749 | -1.03318882 | 0.585421304 |
| -1.03376556 | 0.44588069 | 0.99929206 | 0.985422739 | -1.07337414 | 0.10738857  |
| -1.06218811 | 0.4180049  | 0.98548211 | 0.809683552 | -1.36940319 | 8.49E-05    |
| 0.970074767 | 0.58224576 | -1.0240189 | 0.431538708 | -1.08273711 | 0.153412282 |
| -1.02756863 | 0.6786101  | -1.0571437 | 0.205420541 | -1.05260867 | 0.435630638 |
| 0.982077699 | 0.74332235 | -1.0303807 | 0.73506453  | 0.953892287 | 0.394084765 |
| 0.943359105 | 0.10039494 | -1.0783003 | 0.21891827  | 0.91853459  | 0.018187466 |
| -1.04368782 | 0.67585198 | -1.130462  | 0.427428622 | -1.11480375 | 0.290059315 |
| 0.991698691 | 0.87966837 | -1.0028524 | 0.960585816 | 0.943301994 | 0.291599668 |
| 0.904176189 | 0.2072766  | 0.98326994 | 0.748063971 | -1.15260251 | 0.077522878 |
| -1.11070483 | 0.20975678 | -1.032266  | 0.521923695 | -1.04502981 | 0.59655125  |
| -1.13967087 | 0.03092724 | 0.61420911 | 2.42643E-09 | -1.21583954 | 0.001656764 |
| -1.05057264 | 0.47819474 | 0.9396002  | 0.572440611 | -1.14940295 | 0.048846182 |
| -1.09018544 | 0.10105072 | -1.1366371 | 0.029758807 | -1.02797011 | 0.59621036  |

|             |            |            |             |             |             |
|-------------|------------|------------|-------------|-------------|-------------|
| -1.06705451 | 0.28306703 | 0.99533121 | 0.932981971 | -1.04229956 | 0.491816353 |
| -1.04260679 | 0.74189041 | -1.0156788 | 0.8618532   | 0.93095748  | 0.572644785 |
| 0.981977085 | 0.78044752 | 0.98358813 | 0.804760465 | -1.14698411 | 0.03933147  |
| 0.946396564 | 0.3600257  | 0.95652223 | 0.40349128  | 0.926511705 | 0.206379997 |
| -1.04187992 | 0.50074771 | -1.0310061 | 0.609883291 | 0.908750528 | 0.119748212 |
| 0.820257458 | 0.00286285 | -1.0007932 | 0.985439766 | 0.966057529 | 0.588188947 |
| 0.942338634 | 0.61662218 | -1.1190557 | 0.133946063 | 0.972943    | 0.816974275 |
| 0.951416895 | 0.3850412  | 0.94948966 | 0.349308475 | 0.943592618 | 0.31182696  |
| -1.13078025 | 0.22054149 | -1.173895  | 0.017310989 | -1.21386138 | 0.055855629 |
| 0.934731495 | 0.1748819  | -1.0281287 | 0.615706466 | -1.06816124 | 0.184873164 |
| 0.88559353  | 0.03950499 | 0.94544125 | 0.113584607 | -1.01867179 | 0.749206038 |
| -1.09857841 | 0.08554751 | -1.0274324 | 0.791191756 | 0.897688074 | 0.049370341 |
| 0.924995171 | 0.17714051 | -1.0765332 | 0.184058796 | -1.09453909 | 0.118954118 |
| 0.99210618  | 0.87984806 | 0.99902171 | 0.990149851 | -1.2224859  | 0.000316768 |
| 0.907772166 | 0.53189531 | 0.92251258 | 0.33385476  | 0.915469916 | 0.568177101 |
| -1.07728015 | 0.25995329 | -1.1259298 | 0.049390658 | 0.979373949 | 0.751137466 |
| -1.0868721  | 0.04866003 | -1.0823953 | 0.256797746 | 0.983634858 | 0.691026213 |
| -1.07192713 | 0.28917013 | 0.96965434 | 0.554054188 | -1.01073311 | 0.869920566 |
| 0.99772053  | 0.96729434 | -1.0026137 | 0.965376509 | 0.961602684 | 0.482768613 |
| -1.04246111 | 0.55413583 | 0.89944415 | 0.404147777 | -1.05592786 | 0.439363905 |
| -1.14467019 | 0.03578876 | -1.0485415 | 0.468501596 | 0.978239709 | 0.727221453 |
| 0.944422979 | 0.30319162 | 0.93093703 | 0.235714453 | -1.04803483 | 0.397462167 |
| -1.07988445 | 0.18150794 | -1.016101  | 0.792848741 | -1.01758283 | 0.760023258 |
| 0.931633038 | 0.16511192 | -1.0147382 | 0.818349604 | 0.98804723  | 0.812047212 |
| 0.847013939 | 0.22177807 | 0.89989046 | 0.375110398 | -1.04005144 | 0.771129965 |
| 0.962223464 | 0.37026511 | -1.1510531 | 0.016563071 | -1.06641776 | 0.137202753 |
| 0.851881853 | 0.06523822 | -1.0217281 | 0.829199602 | 0.781382772 | 0.005451749 |
| -1.02726976 | 0.47761801 | -1.0550955 | 0.279510625 | 0.971632794 | 0.447665961 |
| 0.89510511  | 0.11227956 | 0.98978141 | 0.859074884 | 0.99966218  | 0.996090462 |
| 0.938205341 | 0.26736974 | -1.0356212 | 0.517106418 | 0.977540584 | 0.691379668 |
| -1.05974708 | 0.2651233  | -1.1407899 | 0.024735748 | -1.02076455 | 0.691602791 |
| 0.990549155 | 0.84008049 | -1.0882117 | 0.111072165 | -1.00140588 | 0.976178444 |
| -1.03919984 | 0.43126885 | 0.82745227 | 0.223474082 | 0.984574812 | 0.749755928 |
| 0.966014303 | 0.56268154 | -1.2284714 | 0.002690293 | 0.968996459 | 0.597914598 |
| 0.986362155 | 0.87056089 | 0.88471581 | 0.004490769 | -1.01440206 | 0.865261654 |
| -1.02168873 | 0.7765399  | -1.049925  | 0.456001289 | -1.0241475  | 0.752307159 |
| -1.12928935 | 0.21850986 | -1.1254961 | 0.037425971 | -1.2087108  | 0.057510925 |
| 0.994065958 | 0.91784268 | 0.96952181 | 0.659469088 | -1.01235919 | 0.831440507 |
| 0.901198027 | 0.05148285 | -1.0127503 | 0.84073167  | 0.947288966 | 0.304457661 |
| 0.880674888 | 0.03968777 | -1.1622534 | 0.008466689 | 0.969555807 | 0.610062604 |
| 0.997881603 | 0.96990125 | -1.1401396 | 0.024760071 | -1.01238121 | 0.82673127  |
| 0.98960559  | 0.84641993 | -1.0754569 | 0.154100373 | 0.963525365 | 0.491856994 |
| -1.09508233 | 0.06704653 | -1.0875867 | 0.534553394 | 0.996511927 | 0.942940624 |
| 0.847621142 | 0.01133051 | -1.0024137 | 0.955100544 | 0.959347779 | 0.513094789 |

|             |            |            |             |             |             |
|-------------|------------|------------|-------------|-------------|-------------|
| -1.02790146 | 0.6692243  | 0.82088162 | 0.024325906 | -1.02254679 | 0.72916744  |
| -1.36482254 | 0.01304588 | -1.0308549 | 0.422799288 | -1.2540215  | 0.067089877 |
| -1.00634519 | 0.9346189  | -1.20038   | 0.010255885 | 0.901204493 | 0.18094216  |
| -1.0797638  | 0.14057695 | 0.95875012 | 0.462421646 | -1.02749467 | 0.599225493 |
| -1.14274556 | 0.01268802 | -1.0735654 | 0.174067903 | -1.0097343  | 0.85218827  |
| -1.0150241  | 0.77330739 | -1.0699615 | 0.154553057 | 0.960388516 | 0.436100964 |
| -1.09368322 | 0.09832892 | 0.96094643 | 0.414952491 | -1.05756257 | 0.297801475 |
| 0.980314548 | 0.73842543 | -1.0528356 | 0.389608483 | 0.943096469 | 0.327030453 |
| 0.952655446 | 0.19754402 | -1.0159272 | 0.851267301 | 0.92478174  | 0.04011756  |
| 0.958392445 | 0.44041107 | -1.0226464 | 0.767066843 | -1.07772906 | 0.176674683 |
| 0.957785745 | 0.48693318 | -1.4767112 | 0.000200605 | 0.934320942 | 0.275119824 |
| -1.06479077 | 0.30332319 | 0.89558233 | 0.060137011 | 0.957960492 | 0.480148655 |
| -1.06772736 | 0.23683592 | 0.95191555 | 0.34962467  | -1.05274117 | 0.352309663 |
| -1.20501505 | 0.00311462 | -1.1265707 | 0.053137896 | -1.03789435 | 0.539517107 |
| -1.04522173 | 0.44949213 | 0.99415542 | 0.916937823 | 0.996722803 | 0.955120096 |
| 0.992657919 | 0.88663258 | 0.97940407 | 0.699815607 | 0.938289776 | 0.221045398 |
| -1.08914002 | 0.13829882 | -1.0477563 | 0.341320504 | 0.955990252 | 0.431242369 |
| 0.982821396 | 0.82612251 | -1.0781679 | 0.237725521 | -1.18667091 | 0.033631519 |
| 0.987903959 | 0.75906433 | -1.0789232 | 0.240930979 | 0.943684785 | 0.147865526 |
| -1.04369592 | 0.36821755 | -1.0347618 | 0.778917318 | -1.07258774 | 0.142907373 |
| -1.48014741 | 1.86E-07   | 0.79408606 | 0.004038897 | -1.691548   | 9.62E-11    |
| -1.02913029 | 0.79957174 | 0.97296757 | 0.595456437 | -1.26124057 | 0.044017165 |
| -1.085824   | 0.06796558 | 0.99550396 | 0.93092247  | -1.03424658 | 0.449504718 |
| 0.977320051 | 0.67079392 | -1.0260926 | 0.61907308  | -1.0189915  | 0.727332017 |
| 0.980446655 | 0.81343643 | -1.0579379 | 0.294779628 | 0.891088954 | 0.171824939 |
| 0.928934969 | 0.1244348  | 0.95790581 | 0.470939791 | 0.976189853 | 0.611966467 |
| 0.979954242 | 0.73161032 | -1.0344936 | 0.365706228 | -1.03724763 | 0.536138517 |
| -1.05951785 | 0.3199172  | -1.037338  | 0.505440991 | -1.15337467 | 0.016398965 |
| 0.988673773 | 0.83505789 | 0.98288313 | 0.78038923  | 0.968369224 | 0.557400984 |
| -1.0143771  | 0.84354212 | -1.0418204 | 0.500522417 | 0.911651296 | 0.204279439 |
| 0.796621474 | 1.32E-05   | -1.125448  | 0.035469899 | 0.854496135 | 0.00163627  |
| -1.0766411  | 0.45450109 | -1.109785  | 0.08949158  | -1.03060336 | 0.759620133 |
| -1.0674571  | 0.36244016 | 0.97332707 | 0.643332294 | -1.17297986 | 0.028912295 |
| -1.08895772 | 0.00772724 | 0.97936172 | 0.686813207 | -1.00282139 | 0.92743013  |
| 0.987661826 | 0.70039159 | -1.0644929 | 0.275706073 | 0.970107888 | 0.348559261 |
| 0.942635956 | 0.33502387 | -1.0173823 | 0.827059667 | -1.02559381 | 0.678960266 |
| -1.01159457 | 0.84934864 | -1.0238137 | 0.553573167 | -1.07254377 | 0.251366202 |
| 0.935062258 | 0.30308763 | 0.99707001 | 0.950586591 | -1.07920286 | 0.24302982  |
| 0.993024989 | 0.91755837 | -1.4040691 | 3.45777E-06 | 0.99929415  | 0.99166823  |
| -1.03507221 | 0.58742019 | -1.2294446 | 0.071963128 | 0.954001604 | 0.45910945  |
| 0.866643487 | 0.0048836  | -1.0157217 | 0.725532778 | -1.08899002 | 0.086021109 |
| 0.947885233 | 0.34413466 | -1.0275681 | 0.614470604 | -1.04377453 | 0.448198074 |
| -1.02466193 | 0.67319862 | 0.8769083  | 0.120552913 | 0.941598921 | 0.299569517 |
| 0.950767328 | 0.39870223 | -1.1054354 | 0.03843198  | 0.968561145 | 0.592613029 |

|             |            |            |             |             |             |
|-------------|------------|------------|-------------|-------------|-------------|
| -1.06854889 | 0.27135854 | -1.0745476 | 0.226225268 | -1.49540386 | 1.10E-08    |
| -1.06123711 | 0.35126236 | -1.0441866 | 0.456036873 | -1.05612115 | 0.391501065 |
| 0.979516788 | 0.69731903 | -1.108357  | 0.064201717 | -1.03741228 | 0.490689119 |
| 0.978937944 | 0.71343963 | -1.0906437 | 0.233303653 | -1.00332398 | 0.954318075 |
| 0.907488327 | 0.08404336 | 0.84344609 | 0.000712555 | -1.00315023 | 0.954727197 |
| 0.9867434   | 0.81080283 | -1.1913963 | 0.079637613 | -1.02571979 | 0.648955406 |
| 0.993895335 | 0.9083306  | -1.087913  | 0.240985187 | -1.14389324 | 0.014017529 |
| -1.0563963  | 0.31195156 | -1.0042316 | 0.891425292 | -1.08652639 | 0.128471403 |
| 0.948117072 | 0.34072931 | -1.0460991 | 0.165976491 | -1.00904896 | 0.871495975 |
| 0.828878749 | 0.0019571  | -1.0366824 | 0.555517729 | 0.959565477 | 0.476975338 |
| -1.03601159 | 0.51817081 | -1.1455125 | 0.028619074 | -1.00767558 | 0.888725691 |
| 0.993985422 | 0.90799775 | -1.0321319 | 0.626276439 | 0.990218299 | 0.850654587 |
| -1.01818897 | 0.63401036 | -1.0957037 | 0.180153718 | 0.961856792 | 0.306215069 |
| 0.900726072 | 0.04792369 | 0.96053113 | 0.52639696  | 0.985396589 | 0.776867311 |
| -1.19304095 | 0.00185021 | -1.0184936 | 0.708446386 | -1.02094848 | 0.701932921 |
| -1.01036342 | 0.85886716 | 0.99218587 | 0.889265583 | -1.04753292 | 0.424507257 |
| 0.898601218 | 0.12020346 | -1.0265342 | 0.650327382 | -1.05794422 | 0.409148881 |
| 0.985173285 | 0.77990873 | -1.0515753 | 0.400529072 | -1.05463961 | 0.321702643 |
| 0.776168279 | 0.00164657 | 0.93581623 | 0.271111277 | 0.970078863 | 0.692608747 |
| 0.93409971  | 0.16808457 | -1.1067008 | 0.114587055 | 0.930880358 | 0.147934358 |
| 0.92351678  | 0.19822435 | 0.94281119 | 0.270808847 | 0.97599295  | 0.692307498 |
| 0.957675248 | 0.50358639 | -1.0269939 | 0.645979101 | 0.950813002 | 0.435690144 |
| 0.930207053 | 0.47319592 | -1.0744457 | 0.198433972 | -1.09533986 | 0.367276758 |
| 0.941045453 | 0.32284517 | -1.0292298 | 0.605640053 | 0.994819881 | 0.932351918 |
| -1.04252359 | 0.40663534 | 0.95698927 | 0.409881675 | 0.913132943 | 0.073546138 |
| 0.911508902 | 0.49280715 | 0.97291969 | 0.611595192 | -1.0633605  | 0.648881733 |
| 0.938438739 | 0.29391961 | -1.0586892 | 0.308093355 | 0.975407509 | 0.679517855 |
| 0.96525749  | 0.4612043  | -1.0198963 | 0.733799181 | -1.04650918 | 0.344269545 |
| 0.885703358 | 0.26013667 | 0.97255015 | 0.610929542 | 0.979302631 | 0.845262844 |
| -1.00549107 | 0.93950268 | -1.1376849 | 0.016197639 | -1.08096217 | 0.283192384 |
| 0.85828629  | 0.00716678 | -1.0547609 | 0.162493496 | 0.992242186 | 0.887226699 |
| 0.98932235  | 0.85458383 | -1.0918505 | 0.094656459 | -1.01373691 | 0.815836958 |
| 0.903187991 | 0.18142987 | -1.0693847 | 0.21854501  | -1.17577299 | 0.035824818 |
| 0.959068731 | 0.38062013 | -1.2685411 | 0.000130954 | -1.08747132 | 0.081773887 |
| -1.08087461 | 0.14628269 | 0.98672032 | 0.844227233 | 0.98707152  | 0.806112147 |
| 0.956800178 | 0.53754688 | 0.87055042 | 0.011820695 | 0.975012777 | 0.723562088 |
| 0.940940706 | 0.57990666 | 0.9733621  | 0.725286698 | 0.975653592 | 0.822458185 |
| 0.944634727 | 0.2051912  | 0.94297318 | 0.234071945 | -1.03083543 | 0.497034043 |
| 0.909548492 | 0.21100741 | 0.96119842 | 0.519775574 | 0.691735807 | 8.57E-06    |
| -1.02402346 | 0.81825791 | 0.89062526 | 0.076907165 | -1.06604855 | 0.536487431 |
| -1.15939011 | 0.09336856 | -1.0131882 | 0.896405684 | -1.7799369  | 1.51E-08    |
| 0.729406556 | 0.00223073 | 0.99068901 | 0.878489618 | 0.93096432  | 0.469665885 |
| 0.960530526 | 0.45952111 | 0.88308367 | 0.015618994 | 0.997662132 | 0.965621403 |
| 0.859779668 | 0.12171934 | 0.66195302 | 0.003308796 | 0.805474264 | 0.028467751 |

|             |            |            |             |             |             |
|-------------|------------|------------|-------------|-------------|-------------|
| -1.0037785  | 0.94297169 | 0.97101073 | 0.625604411 | -1.01219809 | 0.818152716 |
| 0.790822997 | 0.01485089 | 0.98333425 | 0.725654742 | 0.896840072 | 0.248042429 |
| 0.950502924 | 0.32466698 | 0.87491522 | 0.21563528  | -1.05589131 | 0.29166981  |
| 0.909720137 | 0.06859735 | -1.1178256 | 0.126784476 | 0.895055803 | 0.033851292 |
| -1.13293946 | 0.02058407 | 0.98434991 | 0.774001442 | 0.993662667 | 0.903717429 |
| 0.718875803 | 0.11205158 | 0.9219069  | 0.168802486 | 0.79464927  | 0.265567288 |
| 0.884599625 | 0.47977016 | -1.0804264 | 0.308288099 | -1.04790691 | 0.786987926 |
| 0.935865489 | 0.183473   | -1.0175133 | 0.714875944 | 0.898521983 | 0.034028707 |
| -1.09448173 | 0.0743525  | 0.97050287 | 0.572715978 | -1.01438067 | 0.774588317 |
| 0.871324706 | 0.02527628 | 0.87492855 | 0.065900622 | 0.973031962 | 0.649664898 |
| 0.984483019 | 0.76464503 | 0.90268177 | 0.353133155 | -1.02321645 | 0.660543537 |
| -1.00251833 | 0.95842334 | -1.0392459 | 0.389922289 | 0.982282626 | 0.711166984 |
| -1.09457899 | 0.12932709 | 0.89961534 | 0.163560812 | -1.01919556 | 0.747115117 |
| -1.04984978 | 0.30730823 | -1.1475011 | 0.186435992 | -1.02529599 | 0.598791326 |
| 0.928943633 | 0.35804683 | -1.3825682 | 0.000446532 | 0.857075443 | 0.057664765 |
| -1.21606573 | 0.00602917 | 0.83899683 | 0.079587732 | -1.16092336 | 0.033563457 |
| -1.02474361 | 0.63165322 | 0.89148921 | 0.038210358 | -1.10359616 | 0.057085458 |
| -1.03965536 | 0.4995058  | 0.9083073  | 0.321323298 | -1.09614963 | 0.114377225 |
| 0.933482139 | 0.24043926 | 0.94777141 | 0.311248326 | -1.00317343 | 0.956628424 |
| 0.98722797  | 0.83246708 | 0.90615172 | 0.295233893 | -1.04898704 | 0.432496307 |
| -1.10730116 | 0.16396866 | -1.1010047 | 0.064962182 | -1.22356771 | 0.007213476 |
| 0.826975114 | 0.00228983 | -1.0123167 | 0.81090504  | -1.10427092 | 0.100312981 |
| 0.980258706 | 0.71844529 | -1.0668511 | 0.221428586 | -1.04872712 | 0.390973329 |
| -1.0326885  | 0.6086572  | -1.0086719 | 0.966445473 | -1.14358701 | 0.036227555 |
| -1.0117461  | 0.81095126 | 0.95249593 | 0.778678339 | -1.05095215 | 0.310904636 |
| 0.935020072 | 0.38842327 | 0.93031527 | 0.147819582 | 0.960674799 | 0.605737013 |
| -1.03284058 | 0.56572058 | 0.88609853 | 0.018126654 | -1.01444352 | 0.798555854 |
| 0.857561479 | 0.08756531 | 0.9990643  | 0.98757817  | -1.11410195 | 0.226449053 |
| 0.983473258 | 0.80662342 | -1.0597679 | 0.268984586 | -1.07737328 | 0.276196568 |
| 0.993168719 | 0.86502658 | 0.9730344  | 0.571563582 | 0.947885451 | 0.187978113 |
| -1.09122365 | 0.09539472 | -1.097538  | 0.118508337 | 0.983451282 | 0.746839054 |
| 0.97152757  | 0.62888624 | -1.1156787 | 0.024221775 | 0.948993587 | 0.382249689 |
| 0.934377849 | 0.21218822 | 0.96386875 | 0.645337984 | -1.08986281 | 0.115303931 |
| -1.03022823 | 0.63423758 | -1.1238364 | 0.093664168 | -1.07309349 | 0.262042755 |
| 0.771618462 | 0.02358043 | -1.0780311 | 0.144147139 | 0.98869564  | 0.918990935 |
| 0.957681169 | 0.50228811 | -1.0862624 | 0.153843481 | 0.954393336 | 0.469065952 |
| -1.09565383 | 0.20802806 | -1.0276307 | 0.640236663 | -1.09876267 | 0.19447495  |
| 0.902968585 | 0.05865922 | -1.2049214 | 0.003236309 | 0.93353991  | 0.198583019 |
| 0.922334725 | 0.17144709 | -1.1707792 | 0.03343627  | -1.17922432 | 0.006599603 |
| -1.05756046 | 0.37768864 | -1.0240334 | 0.690459567 | 0.955962394 | 0.477197114 |
| 0.85280721  | 0.00688437 | -1.0002751 | 0.996029129 | -1.07965651 | 0.181721835 |
| 0.946516505 | 0.35495264 | -1.1201658 | 0.074817273 | 0.997135927 | 0.961347959 |
| 0.859942353 | 0.00787793 | 0.90222495 | 0.038826377 | 0.90594239  | 0.07632762  |
| -1.09749555 | 0.17720003 | -1.0480387 | 0.546246874 | 0.963018576 | 0.581965947 |

|             |            |            |             |             |             |
|-------------|------------|------------|-------------|-------------|-------------|
| -1.12335806 | 0.06645667 | 0.94599423 | 0.325167117 | -1.07550354 | 0.246247746 |
| -1.03328596 | 0.82870286 | -1.1435097 | 0.134722851 | -1.24933624 | 0.145209618 |
| 0.8306132   | 0.04066526 | 0.97046014 | 0.659819457 | -1.04470525 | 0.623106268 |
| 0.929371213 | 0.16973345 | -1.0009804 | 0.980611734 | -1.13158146 | 0.022546165 |
| -1.03992569 | 0.45896288 | 0.93125453 | 0.171815779 | 0.730918483 | 1.93E-07    |
| 0.867455771 | 0.20304117 | 0.92889784 | 0.219943262 | -1.10406581 | 0.373603622 |
| 0.990255375 | 0.86230576 | -1.0456688 | 0.40981634  | -1.081269   | 0.17009938  |
| 0.865493113 | 0.01410283 | -1.1391995 | 0.04099751  | -1.04718191 | 0.421602009 |
| 0.958604493 | 0.47295688 | -1.0350497 | 0.758034548 | 0.895942395 | 0.065747685 |
| 0.959969906 | 0.41215459 | 0.94346989 | 0.36741863  | 0.976749415 | 0.636033725 |
| -1.00858039 | 0.89435315 | 0.88972947 | 0.10898083  | 0.915329342 | 0.172801622 |
| 0.928892874 | 0.16536766 | 0.97801533 | 0.675608281 | 0.924514553 | 0.140384424 |
| 0.956712064 | 0.44790015 | -1.1550281 | 0.016682319 | -1.02393094 | 0.684479667 |
| -1.0307664  | 0.63562381 | 0.98193952 | 0.773172987 | -1.07731372 | 0.246721325 |
| 0.994236182 | 0.93537982 | 0.94918079 | 0.361306562 | 0.955775833 | 0.526567357 |
| 0.990473752 | 0.82081946 | -1.1524868 | 0.019450816 | -1.04011956 | 0.353807068 |
| -1.07365318 | 0.25914295 | -1.0247534 | 0.656405175 | -1.09149974 | 0.165765316 |
| -1.02727234 | 0.71007852 | 0.95885206 | 0.53944812  | 0.896313885 | 0.13427744  |
| -1.0692168  | 0.34413777 | 0.91462742 | 0.15645335  | -1.067762   | 0.353962143 |
| 0.966658198 | 0.56894263 | -1.2221224 | 0.188513331 | -1.17102775 | 0.010056743 |
| -1.03927275 | 0.63236063 | -1.1043609 | 0.266878637 | 0.829032468 | 0.022926016 |
| -1.02975644 | 0.58130476 | -1.09516   | 0.089883588 | -1.13192428 | 0.022766473 |
| -1.10550753 | 0.25464509 | 0.9541682  | 0.375364913 | 0.873926373 | 0.127742899 |
| -1.01333379 | 0.81925076 | -1.0191672 | 0.864030899 | 0.969505678 | 0.593563397 |
| -1.05316008 | 0.42027475 | 0.88079535 | 0.027973943 | -1.02461756 | 0.704453075 |
| 0.95058151  | 0.406658   | 0.9358413  | 0.249249226 | -1.01663903 | 0.786416911 |
| -1.00258263 | 0.97175355 | 0.91669824 | 0.142873202 | 0.999278566 | 0.992095026 |
| 0.950925785 | 0.46968517 | 0.99606823 | 0.936768676 | -1.04818113 | 0.498838615 |
| 0.913928435 | 0.13243408 | -1.0205432 | 0.752040175 | -1.10861802 | 0.085770608 |
| -1.02738123 | 0.60334973 | 0.96250708 | 0.469401642 | -1.04536295 | 0.394487023 |
| 0.912294811 | 0.17233033 | 0.91026081 | 0.110151543 | 0.99548284  | 0.945861691 |
| -1.09077383 | 0.15822867 | -1.043942  | 0.501765917 | 0.959309164 | 0.496806236 |
| 0.978045789 | 0.67728784 | -1.159746  | 0.041517327 | 0.784701112 | 2.90E-05    |
| -1.22737741 | 0.09672919 | -1.0040662 | 0.923489746 | -1.14613649 | 0.26540545  |
| -1.04114155 | 0.57595713 | -1.0579016 | 0.370397749 | 0.983568392 | 0.817999676 |
| -1.05800442 | 0.36777368 | -1.0432479 | 0.558952801 | -1.08300318 | 0.204478272 |
| 0.983013994 | 0.72320268 | 0.97656419 | 0.736532011 | -1.10633057 | 0.040442106 |
| -1.05089117 | 0.37825474 | -1.0508721 | 0.405375446 | 0.955408292 | 0.417836635 |
| 0.913441565 | 0.22882681 | 0.96650274 | 0.672120743 | -1.05717503 | 0.45799041  |
| -1.23792721 | 0.04898315 | -1.1040729 | 0.066461339 | -1.14111321 | 0.218217354 |
| -1.01439263 | 0.8112144  | -1.1163952 | 0.21170348  | 0.992117094 | 0.894738843 |
| -1.13597182 | 0.02983869 | 0.94387368 | 0.321128689 | -1.02130756 | 0.713533421 |
| 0.935947074 | 0.76425862 | -1.0741295 | 0.267139922 | 0.85659151  | 0.483955136 |
| -1.01755543 | 0.73496657 | -1.0884664 | 0.167595116 | -1.08182593 | 0.129955426 |

|             |            |            |             |             |             |
|-------------|------------|------------|-------------|-------------|-------------|
| 0.987570261 | 0.80050726 | 0.88363973 | 0.09375593  | 0.874049655 | 0.00847718  |
| 0.89980742  | 0.1060104  | -1.0981468 | 0.181157992 | -1.06317533 | 0.344373659 |
| 0.976736255 | 0.60183719 | -1.1106214 | 0.080570248 | -1.10158803 | 0.035471205 |
| 0.939564    | 0.26771313 | 0.98891601 | 0.830068473 | 0.989380535 | 0.848617138 |
| 0.987078601 | 0.87698639 | 0.97468376 | 0.700727786 | -1.03101392 | 0.716358518 |
| -1.05894226 | 0.30373496 | -1.0691797 | 0.275517861 | -1.05343579 | 0.349460565 |
| 0.95841584  | 0.37879661 | 0.98439869 | 0.768064854 | -1.00039523 | 0.993443062 |
| 0.936873379 | 0.48543477 | -1.1092296 | 0.396143721 | -1.29427429 | 0.007504994 |
| 0.953835015 | 0.32299651 | -1.0034773 | 0.961537579 | 0.998097898 | 0.968097468 |
| -1.03299041 | 0.51740361 | 0.96406742 | 0.557996949 | 0.987966751 | 0.80888794  |
| -1.02861425 | 0.61200537 | -1.0256432 | 0.600908049 | 0.966639959 | 0.542086414 |
| -1.02452067 | 0.66841297 | -1.1233492 | 0.042138258 | -1.06518556 | 0.266548211 |
| 0.995816629 | 0.91257722 | 0.96504563 | 0.634323328 | -1.00726371 | 0.849684538 |
| -1.07843913 | 0.23934679 | -1.0285213 | 0.791699644 | 0.935329463 | 0.296869967 |
| -1.12885332 | 0.0478371  | -1.0647914 | 0.296362478 | 0.955126857 | 0.446365189 |
| 0.971121124 | 0.68039828 | 0.99696117 | 0.957711019 | 0.979149416 | 0.766998044 |
| 0.98748495  | 0.86476524 | 0.78601781 | 0.277819351 | -1.04398963 | 0.561022887 |
| -1.06074058 | 0.27631573 | -1.0713765 | 0.183292278 | 0.95726697  | 0.418920058 |
| -1.00811067 | 0.91158762 | 0.96915693 | 0.527429769 | 0.954161821 | 0.519735735 |
| 0.985305445 | 0.7788199  | -1.0381933 | 0.561873605 | 0.977691208 | 0.66877433  |
| 0.880126541 | 0.01074904 | -1.0115614 | 0.798684683 | -1.04001315 | 0.420335521 |
| -1.14506398 | 0.03458031 | -1.0394357 | 0.490128256 | 0.97760488  | 0.718348919 |
| 0.705702824 | 0.00012522 | -1.0403128 | 0.638396145 | 0.6424097   | 2.66E-06    |
| -1.04498178 | 0.43566427 | -1.0389559 | 0.491344316 | -1.09170248 | 0.123186248 |
| 0.91885254  | 0.15478376 | 0.93627565 | 0.174603936 | 0.996914874 | 0.958173262 |
| 0.919736684 | 0.10920155 | 0.99836026 | 0.985960705 | -1.00112124 | 0.982675477 |
| 0.966583722 | 0.57123821 | 0.94854239 | 0.269846399 | -1.1067106  | 0.094990954 |
| 0.990264044 | 0.84142541 | 0.93398729 | 0.17604971  | 0.986834952 | 0.786419163 |
| 0.960567898 | 0.47611307 | -1.197024  | 0.001982667 | -1.01189904 | 0.833691111 |
| -1.05567048 | 0.17625205 | 0.98928534 | 0.848836568 | -1.13264426 | 0.002662903 |
| -1.0441517  | 0.46140459 | 0.98113138 | 0.618258946 | -1.1671537  | 0.010443012 |
| -1.09488304 | 0.1659609  | -1.0119266 | 0.852514806 | 0.969395503 | 0.632073735 |
| 0.838109169 | 0.03903454 | 0.92922934 | 0.225388026 | 0.793918774 | 0.007797541 |
| 0.96791159  | 0.5160769  | -1.1217271 | 0.110339599 | 0.943902877 | 0.252320819 |
| 0.948399046 | 0.74671942 | 0.99273402 | 0.921434464 | 0.965002291 | 0.82803011  |
| 0.727198074 | 0.01134484 | -1.0300147 | 0.583523719 | 0.929489604 | 0.54977695  |
| -1.13909175 | 0.01458701 | 0.99780415 | 0.975893148 | -1.01950175 | 0.709609915 |
| 0.924436316 | 0.20095443 | -1.0019137 | 0.97105473  | 0.933897025 | 0.264776574 |
| -1.01103084 | 0.85957942 | 0.9798714  | 0.675519907 | -1.02088152 | 0.73902606  |
| 0.982471195 | 0.75713609 | -1.0308287 | 0.628914383 | 0.957794608 | 0.451807572 |
| -1.02303991 | 0.73026197 | 0.93047097 | 0.396312935 | -1.04847997 | 0.47445945  |
| -1.15112802 | 0.1385455  | -1.1460173 | 0.018343496 | -1.39056622 | 0.000882192 |
| -1.03770412 | 0.43548568 | -1.1335148 | 0.03716442  | 0.899000663 | 0.027881485 |
| -1.01887044 | 0.7934251  | 0.95850967 | 0.41303803  | 0.96010385  | 0.568938605 |

|             |            |            |             |             |             |
|-------------|------------|------------|-------------|-------------|-------------|
| 0.982648151 | 0.67195831 | -1.1187324 | 0.065439121 | -1.03461308 | 0.411485954 |
| 0.839241111 | 0.00271235 | -1.0098457 | 0.841202675 | 0.999253314 | 0.989356968 |
| 0.89924247  | 0.51517207 | 0.91428281 | 0.115806236 | 0.949009108 | 0.748057414 |
| -1.17276532 | 0.00988606 | -1.1078894 | 0.012274906 | 0.957080589 | 0.46473289  |
| 0.928141691 | 0.09449881 | -1.0904645 | 0.142852346 | 0.852902187 | 0.000629326 |
| -1.06649647 | 0.14515418 | 0.88725641 | 0.069342453 | -1.03215006 | 0.470590051 |
| 0.91705084  | 0.08729801 | 0.82972913 | 0.029532338 | -1.04779286 | 0.351932006 |
| 0.953094732 | 0.37642389 | -1.0509289 | 0.32387376  | 0.945320538 | 0.301181921 |
| 0.931662392 | 0.20251107 | -1.0745167 | 0.661423669 | 0.956444891 | 0.420552047 |
| 0.996801911 | 0.95168967 | -1.0196688 | 0.873218735 | 0.961553492 | 0.459526383 |
| 0.875610693 | 0.03535277 | -1.0589756 | 0.271658807 | -1.03482182 | 0.580314597 |
| -1.04610022 | 0.37190387 | -1.0070227 | 0.908621926 | 0.883484059 | 0.016512597 |
| -1.00093487 | 0.99552482 | -1.0088574 | 0.886911464 | 0.890648883 | 0.487973483 |
| -1.00248715 | 0.95803472 | -1.1228053 | 0.046712193 | -1.08952096 | 0.073617602 |
| -1.09669058 | 0.26380966 | 0.90956304 | 0.155039833 | -1.17217479 | 0.05718741  |
| -1.053156   | 0.4018819  | -1.2615397 | 0.01622375  | -1.00664823 | 0.914315141 |
| 0.97189738  | 0.59732914 | -1.143627  | 0.006205322 | 0.975692965 | 0.648270564 |
| -1.0375449  | 0.64405864 | -1.0740769 | 0.318931656 | 0.988136082 | 0.880964864 |
| 0.944325286 | 0.29330934 | -1.0481236 | 0.257975043 | -1.07101815 | 0.209171603 |
| 0.910044283 | 0.31392101 | -1.0078991 | 0.888267491 | 0.901085701 | 0.266328893 |
| 0.975609739 | 0.69739134 | 0.9758208  | 0.880549311 | 0.985140533 | 0.813541663 |
| 0.871571233 | 0.02315986 | -1.0366183 | 0.548609044 | -1.15695497 | 0.016330304 |
| -1.16356586 | 0.00837681 | 0.9842715  | 0.71885501  | 0.944883634 | 0.310173058 |
| 0.582961163 | 0.00510474 | -1.0370381 | 0.40733229  | 0.846868186 | 0.372424264 |
| 0.791589301 | 0.0221692  | -1.0863694 | 0.101498409 | -1.01382496 | 0.890443117 |
| 0.996728213 | 0.96018291 | -1.0453356 | 0.41406009  | 0.883263192 | 0.062830019 |
| 0.959286119 | 0.19923343 | -1.0019305 | 0.972087192 | -1.02760795 | 0.39821679  |
| -1.001148   | 0.98029521 | -1.112816  | 0.047197156 | -1.13998286 | 0.006474642 |
| -1.05496676 | 0.25797195 | 0.98700506 | 0.832458051 | -1.00737445 | 0.875839311 |
| -1.05259367 | 0.31504467 | -1.0129078 | 0.798746595 | -1.03896033 | 0.452812691 |
| 0.97987436  | 0.69684544 | 0.88429686 | 0.461615603 | 0.99852054  | 0.977350605 |
| -1.00009823 | 0.99858517 | -1.0281389 | 0.557277016 | -1.11956369 | 0.045423363 |
| 0.965319318 | 0.55926345 | -1.0219539 | 0.7914868   | -1.01321519 | 0.827820577 |
| 0.984552202 | 0.75768848 | -1.070637  | 0.270437667 | -1.02880126 | 0.574044241 |
| 0.991099526 | 0.88047574 | 0.99606075 | 0.941615846 | 0.977288347 | 0.699378521 |
| -1.04802672 | 0.28356406 | 0.87563709 | 0.099904977 | -1.03088679 | 0.485448353 |
| -1.03770273 | 0.55478036 | 0.94315107 | 0.283059386 | -1.07160948 | 0.271656261 |
| 0.937630656 | 0.27620732 | 0.99232949 | 0.934127485 | -1.04504822 | 0.454922259 |
| 0.986429418 | 0.7500279  | -1.0313534 | 0.626997095 | 0.950575296 | 0.240060453 |
| -1.03465248 | 0.35849373 | -1.1299172 | 0.042572811 | -1.05263739 | 0.168843596 |
| -1.02450064 | 0.69904554 | -1.1015271 | 0.086274264 | -1.09152821 | 0.16539122  |
| 0.983700298 | 0.81224392 | 0.86472739 | 0.435017947 | -1.08271963 | 0.253455269 |
| 0.969158502 | 0.6824164  | -1.0493771 | 0.629075432 | -1.00471601 | 0.950961859 |
| -1.08791639 | 0.11291948 | 0.92430317 | 0.23358421  | 0.966052495 | 0.511735385 |



|             |            |            |             |             |             |
|-------------|------------|------------|-------------|-------------|-------------|
| -1.03731904 | 0.41069037 | -1.0047901 | 0.881773978 | 0.978965724 | 0.632412448 |
| 0.956906594 | 0.54264081 | 0.98547055 | 0.752819576 | 0.920006054 | 0.25128333  |
| 0.844208762 | 0.0243891  | -1.0960961 | 0.055133395 | -1.0435998  | 0.561867868 |
| 0.970401168 | 0.6634207  | 0.96591542 | 0.495562261 | -1.02498995 | 0.720627839 |
| -1.06609785 | 0.261183   | 0.87926312 | 0.016355926 | -1.04389943 | 0.449249912 |
| -1.04952269 | 0.20535077 | -1.067806  | 0.239310278 | -1.04611484 | 0.237052537 |
| 0.98216693  | 0.7769607  | -1.1433255 | 0.029966953 | -1.09346549 | 0.1632027   |
| -1.07303619 | 0.27219145 | -1.0246857 | 0.629136573 | -1.03978244 | 0.541824349 |
| -1.09946774 | 0.05217854 | -1.1578201 | 0.016458337 | 0.902498529 | 0.036220741 |
| -1.01406407 | 0.78967928 | 0.98318092 | 0.696845592 | -1.02876154 | 0.58852194  |
| 0.978117561 | 0.61825072 | -1.0480074 | 0.454723089 | -1.02838233 | 0.528751936 |
| 0.94328992  | 0.29037285 | 0.98910932 | 0.852320704 | 0.943625039 | 0.293287192 |
| -1.01515304 | 0.76095022 | -1.0868876 | 0.056069231 | -1.04300713 | 0.39571855  |
| -1.13362952 | 0.0435617  | 0.95356016 | 0.201590139 | 0.951129935 | 0.412587716 |
| -1.05184044 | 0.40395994 | 0.99187491 | 0.896261237 | 0.938981146 | 0.29937747  |
| 0.9658263   | 0.77197906 | -1.1525416 | 0.044054561 | 0.958573664 | 0.724433761 |
| 0.984634734 | 0.84214347 | -1.1226178 | 0.134648612 | -1.13436917 | 0.109088018 |
| 0.824828123 | 0.0080285  | 0.98868846 | 0.82858858  | -1.00904711 | 0.898014477 |
| -1.0174859  | 0.84116338 | 0.9796271  | 0.643243121 | -1.25039558 | 0.012143632 |
| 0.962473184 | 0.54821934 | -1.2097418 | 0.010593736 | -1.07852881 | 0.237617363 |
| 0.987811497 | 0.81266271 | -1.1085807 | 0.164346733 | 0.976265275 | 0.64274636  |
| 0.946575712 | 0.42236559 | -1.0668322 | 0.350280526 | -1.04716341 | 0.500281862 |
| 0.984589065 | 0.66586754 | 0.91182556 | 0.107338497 | 0.969969816 | 0.397744039 |
| -1.06531353 | 0.30335021 | -1.0162766 | 0.670195594 | -1.07149221 | 0.261736149 |
| -1.00677828 | 0.92048481 | -1.0695832 | 0.291927272 | -1.09844093 | 0.169076613 |
| -1.07248042 | 0.25926743 | -1.0828628 | 0.215673455 | -1.049539   | 0.434245051 |
| -1.01326796 | 0.71768667 | -1.0102494 | 0.831712637 | 0.920176816 | 0.02573445  |
| -1.0402608  | 0.64389709 | -1.1339401 | 0.019287112 | 0.98352915  | 0.845659232 |
| 0.922427367 | 0.31276934 | -1.0357005 | 0.430302281 | -1.04999853 | 0.540689534 |
| -1.11565437 | 0.14921162 | -1.0250142 | 0.653162908 | -1.16145979 | 0.050426111 |
| -1.07814305 | 0.13091466 | 0.92391982 | 0.113507303 | -1.08172389 | 0.115123918 |
| 0.917665452 | 0.0843842  | 0.96468419 | 0.555959462 | 0.962040991 | 0.431874325 |
| -1.02513263 | 0.6626139  | -1.0767566 | 0.223734115 | -1.04452811 | 0.444659946 |
| -1.05646459 | 0.28234473 | 0.96836035 | 0.788726365 | -1.08000018 | 0.133984179 |
| 0.858493896 | 0.01686028 | -1.0611902 | 0.446112694 | -1.07849146 | 0.227175684 |
| -1.03699492 | 0.39848754 | -1.0071022 | 0.919775421 | -1.09223421 | 0.043568648 |
| 0.997915712 | 0.96759454 | -1.1606385 | 0.089272488 | 0.965201027 | 0.491382775 |
| 0.891170948 | 0.0652612  | 0.9430014  | 0.358004594 | -1.0227093  | 0.71521587  |
| 0.9669472   | 0.542242   | 0.95983565 | 0.429476217 | 0.974859532 | 0.644076906 |
| -1.26393518 | 0.00322366 | -1.0796114 | 0.264331368 | 0.908325415 | 0.210969258 |
| -1.11746011 | 0.04078056 | -1.0905    | 0.018834946 | -1.04999794 | 0.361202858 |
| -1.01412284 | 0.81365806 | 0.95647036 | 0.467935594 | -1.13954573 | 0.031658874 |
| 0.978157949 | 0.60504294 | -1.0293077 | 0.669740778 | 0.98472903  | 0.718395143 |
| 0.898744684 | 0.08405659 | 0.99187918 | 0.894796536 | -1.03798636 | 0.541316125 |

|             |            |            |             |             |             |
|-------------|------------|------------|-------------|-------------|-------------|
| -1.00293493 | 0.97281729 | -1.0534754 | 0.156657762 | -1.17593581 | 0.063735051 |
| 0.934476984 | 0.19777659 | 0.90141118 | 0.226881308 | 0.988896506 | 0.830690384 |
| -1.11550111 | 0.0753367  | -1.1314433 | 0.124999094 | 0.980544907 | 0.74570479  |
| 0.970245847 | 0.5697732  | -1.0016431 | 0.982567358 | -1.00946704 | 0.85907847  |
| -1.04184363 | 0.57539836 | -1.0020174 | 0.967377069 | -1.06522454 | 0.388886784 |
| -1.01567965 | 0.79687165 | 0.99852909 | 0.976079836 | 0.986623007 | 0.82367138  |
| 0.959624443 | 0.49725325 | 0.87893674 | 0.026553819 | 0.997169545 | 0.962683108 |
| 0.968247006 | 0.58505689 | -1.0522747 | 0.318260029 | -1.12790976 | 0.045355202 |
| 0.933892045 | 0.17521472 | 0.93230126 | 0.262116893 | 0.984378433 | 0.753032149 |
| 0.903899126 | 0.19233118 | 0.96175917 | 0.365047942 | 0.942187786 | 0.439875309 |
| 0.977274926 | 0.67053233 | -1.1137998 | 0.039688008 | -1.14613396 | 0.014081456 |
| 0.883404023 | 0.16156236 | -1.0449863 | 0.475399126 | 0.908950795 | 0.2792721   |
| 0.994072568 | 0.90577382 | -1.0362736 | 0.51833775  | 0.903992734 | 0.048476526 |
| -1.04693627 | 0.52228208 | -1.0011201 | 0.9882944   | 0.9364746   | 0.360870511 |
| -1.006708   | 0.91158032 | -1.048127  | 0.378889315 | -1.05366116 | 0.386928552 |
| -1.01581668 | 0.69191069 | 0.97329176 | 0.649339379 | -1.01529112 | 0.70156122  |
| -1.02785054 | 0.62720155 | 0.93195152 | 0.102719009 | -1.16180278 | 0.010098854 |
| 0.926618286 | 0.20242674 | 0.98499992 | 0.804149825 | 0.998299188 | 0.977112834 |
| -1.08173877 | 0.23251212 | -1.0952699 | 0.292528585 | -1.04001949 | 0.548993852 |
| -1.04720751 | 0.43468588 | 0.97011339 | 0.561747482 | -1.39233811 | 6.33E-07    |
| 0.968783221 | 0.56462822 | -1.0317113 | 0.606595906 | -1.02325032 | 0.676140963 |
| 0.999569476 | 0.99390618 | -1.0516975 | 0.344180577 | -1.0906609  | 0.127884722 |
| 0.611230171 | 0.02871001 | -1.0959896 | 0.213076595 | 0.9464588   | 0.802555532 |
| -1.03644546 | 0.50672625 | 0.92395445 | 0.194083791 | 0.990386468 | 0.857534444 |
| -1.21893352 | 0.0706457  | 0.8791874  | 0.037323149 | -1.25223497 | 0.040858208 |
| 0.992773698 | 0.89940161 | 0.99891203 | 0.985283488 | -1.03438067 | 0.556333397 |
| -1.03433634 | 0.57796634 | -1.0944982 | 0.075313481 | -1.00075991 | 0.989997551 |
| -1.05637283 | 0.21632385 | 0.8872882  | 0.124002107 | -1.01353067 | 0.760327518 |
| 0.981607406 | 0.71065275 | -1.0274089 | 0.616894302 | -1.13264815 | 0.015415864 |
| -1.08475649 | 0.16488411 | 0.9387462  | 0.472381331 | 0.970218622 | 0.602941219 |
| -1.02389145 | 0.70036573 | -1.0676234 | 0.196102854 | 0.765013899 | 5.37E-05    |
| -1.05296851 | 0.38032549 | 0.96015084 | 0.570385778 | 0.923307929 | 0.177156583 |
| -1.04805542 | 0.47837086 | 0.89918537 | 0.081841175 | -1.03011402 | 0.653603939 |
| -1.13733073 | 0.03019815 | 0.97798274 | 0.574283965 | 0.960455745 | 0.488124722 |
| 0.817621195 | 0.00248742 | 0.98200015 | 0.747953459 | -1.05570159 | 0.396599455 |
| 0.890389349 | 0.02760928 | -1.0688244 | 0.264762504 | 0.966693128 | 0.511616984 |
| 0.954919246 | 0.41237215 | -1.120808  | 0.085337581 | 0.973065592 | 0.626827607 |
| 0.955529477 | 0.49542648 | -1.0613643 | 0.314078943 | -1.03699763 | 0.585848321 |
| 0.699388759 | 0.00504022 | -1.1584246 | 0.009566366 | 0.995074584 | 0.967930909 |
| -1.00949386 | 0.94015572 | -1.0069181 | 0.902685519 | 0.85471057  | 0.215573569 |
| -1.35390022 | 0.00203049 | -1.0548286 | 0.808354156 | -1.31481172 | 0.00496386  |
| 0.985186853 | 0.78575952 | 0.97974348 | 0.703875981 | -1.09152515 | 0.11478684  |
| -1.09465207 | 0.20825625 | -1.1982625 | 0.097782606 | -1.00989437 | 0.890231821 |
| 0.972186918 | 0.67263867 | -1.0234859 | 0.685944848 | 0.982601728 | 0.792514998 |

|             |            |            |             |             |             |
|-------------|------------|------------|-------------|-------------|-------------|
| -1.0697171  | 0.19856762 | 0.94028516 | 0.311875318 | 0.926799803 | 0.14786093  |
| -1.00848432 | 0.88136462 | 0.93370624 | 0.123500585 | -1.17576438 | 0.005799747 |
| 0.880142484 | 0.02884278 | -1.0744037 | 0.155172596 | -1.09998678 | 0.099456687 |
| -1.05103398 | 0.47206568 | 0.96631548 | 0.555648188 | 0.913999233 | 0.196297411 |
| -1.03282773 | 0.55637188 | 0.95656871 | 0.470020197 | -1.01273266 | 0.81752116  |
| -1.03020806 | 0.6510628  | 0.97666564 | 0.687334563 | 0.91058875  | 0.158096096 |
| -1.08795126 | 0.03210445 | 0.98218036 | 0.785528826 | -1.02520004 | 0.518689751 |
| 0.958600965 | 0.51787224 | -1.0751377 | 0.215445078 | -1.04262584 | 0.523192437 |
| -1.12185194 | 0.0149143  | -1.1884956 | 0.008722988 | -1.09108014 | 0.06187756  |
| 0.983063827 | 0.81340752 | 0.94278735 | 0.255595558 | -1.07191055 | 0.339218405 |
| -1.05865426 | 0.28607484 | -1.0566794 | 0.327878489 | -1.0432876  | 0.42660855  |
| -1.04208498 | 0.45676978 | 0.99335579 | 0.920252707 | 0.983080761 | 0.757543477 |
| 0.98529212  | 0.81731905 | 0.856027   | 0.208974504 | 0.933765316 | 0.287796978 |
| 0.994764434 | 0.94813212 | 0.85215013 | 0.207055652 | 0.936963047 | 0.421129542 |
| 0.734536278 | 0.00992217 | -1.2614775 | 0.01602424  | 0.90881334  | 0.410997441 |
| -1.2641368  | 0.02613457 | 0.9701518  | 0.581407675 | -1.34161375 | 0.005892686 |
| 0.903115829 | 0.06916663 | -1.1919805 | 0.016582919 | -1.17192256 | 0.00559314  |
| -1.14859405 | 0.00793657 | -1.0094041 | 0.888410622 | -1.04725818 | 0.362092011 |
| 0.960897627 | 0.51268613 | 0.92470572 | 0.136403773 | -1.00515797 | 0.932574515 |
| -1.0438277  | 0.32181266 | 0.96272893 | 0.503101679 | -1.03371492 | 0.442904749 |
| -1.4942532  | 0.00034148 | 0.96521861 | 0.536068138 | -2.08952351 | 3.93E-09    |
| 0.676345408 | 0.00051146 | 0.95895026 | 0.544504962 | 0.93365356  | 0.518925911 |
| -1.05595698 | 0.3070783  | -1.0288736 | 0.604059903 | -1.11540485 | 0.043428791 |
| -1.10032053 | 0.12568885 | 0.9990189  | 0.98808661  | -1.04369024 | 0.489549309 |
| 0.935241376 | 0.28786163 | -1.0256012 | 0.512164544 | -1.01048453 | 0.867815861 |
| 0.930710914 | 0.55280206 | -1.0312912 | 0.637168705 | 0.943527249 | 0.630667482 |
| 0.944413737 | 0.28453356 | -1.016212  | 0.726340006 | -1.12141476 | 0.034778806 |
| -1.02067262 | 0.72027716 | -1.0184719 | 0.800337236 | -1.0398768  | 0.494472471 |
| -1.04022275 | 0.44923536 | 0.89541519 | 0.041532894 | -1.03372767 | 0.524122423 |
| -1.03558933 | 0.57585248 | -1.1132988 | 0.056212267 | 0.975894788 | 0.696057215 |
| 0.861017421 | 0.00499462 | -1.1409721 | 0.043662468 | -1.02143257 | 0.679823071 |
| -1.01410422 | 0.80600768 | 0.97860597 | 0.788761387 | -1.02806487 | 0.627733009 |
| 0.975773719 | 0.8877155  | 0.74303369 | 0.012851195 | -1.18570155 | 0.328879723 |
| 0.942375515 | 0.28994076 | -1.1872697 | 0.099698512 | -1.03276443 | 0.563962799 |
| 0.885065535 | 0.02636794 | -1.13883   | 0.021633597 | 0.978898606 | 0.691525181 |
| 0.995806739 | 0.95609119 | -1.0181724 | 0.721365546 | -1.08261792 | 0.300705574 |
| -1.10716724 | 0.10536148 | -1.03674   | 0.553578527 | -1.05418511 | 0.39701694  |
| 0.900292095 | 0.08911803 | -1.0715789 | 0.112904317 | -1.0111754  | 0.855332971 |
| 0.93089113  | 0.48826347 | -1.3821158 | 0.003232222 | 0.765870219 | 0.012034048 |
| 0.944461959 | 0.55346106 | 0.94166138 | 0.572061241 | -1.14666817 | 0.158994562 |
| -1.08133606 | 0.21623919 | -1.0305243 | 0.571421847 | -1.03008664 | 0.637170813 |
| -1.23877666 | 0.00286817 | 0.9767279  | 0.703124527 | -1.63472478 | 2.24E-09    |
| -1.04166514 | 0.50025733 | 0.96354867 | 0.554096502 | 0.966192908 | 0.569847922 |
| -1.32557503 | 1.50E-05   | 0.91411728 | 0.458339223 | -1.45845457 | 4.34E-08    |

|             |            |            |             |             |             |
|-------------|------------|------------|-------------|-------------|-------------|
| -1.2207645  | 0.06243779 | -1.0245884 | 0.647990435 | -1.31954154 | 0.010692866 |
| 0.962937684 | 0.62494875 | 0.95972629 | 0.472709026 | -1.14038244 | 0.093002686 |
| 0.997452352 | 0.98626725 | -1.0071262 | 0.891338507 | -1.06889064 | 0.653355905 |
| 0.906502036 | 0.338178   | 0.92610196 | 0.221947715 | -1.1880482  | 0.095604537 |
| -1.07930334 | 0.12961368 | 0.96762609 | 0.522333523 | 0.928987253 | 0.143206471 |
| -1.00530769 | 0.94406757 | 0.99827434 | 0.97583355  | 0.879010564 | 0.091721572 |
| 0.944277917 | 0.37327501 | -1.1810752 | 0.340004488 | 0.990860137 | 0.886207269 |
| 0.956443888 | 0.47681583 | -1.0264249 | 0.640482747 | -1.11380816 | 0.088650437 |
| 0.939311996 | 0.24093838 | -1.1212512 | 0.036857286 | -1.13302856 | 0.021653035 |
| 0.937906003 | 0.46218308 | -1.1380416 | 0.094496267 | -1.10478229 | 0.254766225 |
| 0.976868984 | 0.85085601 | -1.0185377 | 0.767465458 | -1.17471574 | 0.199158175 |
| -1.16157251 | 0.07922889 | 0.96618992 | 0.573092812 | -1.09879249 | 0.265408879 |
| -1.07456836 | 0.43832936 | 0.85276916 | 0.12652175  | -1.09913141 | 0.309391083 |
| 0.834904678 | 0.03845222 | -1.1465224 | 0.159374987 | 0.908757865 | 0.265468259 |
| -1.06855259 | 0.38010012 | -1.0414074 | 0.518937817 | 0.940986915 | 0.420448121 |
| 0.977790049 | 0.74628516 | -1.2758417 | 0.000797863 | 0.991928913 | 0.907029664 |
| -1.0384017  | 0.67806177 | 0.96175507 | 0.519532183 | -1.20658492 | 0.042311702 |
| -1.03329344 | 0.40982559 | -1.1967836 | 0.003705262 | 0.989913415 | 0.798058779 |
| -1.01323136 | 0.84622634 | -1.2688808 | 0.02714828  | -1.01365762 | 0.841372003 |
| -1.10642062 | 0.08072065 | -1.0653484 | 0.413516019 | 0.976515338 | 0.677387121 |
| -1.03105094 | 0.58326064 | -1.0531878 | 0.726738139 | -1.03644436 | 0.520937725 |
| -1.05251695 | 0.42684328 | -1.0136617 | 0.894227318 | -1.04938824 | 0.454075144 |
| 0.943257298 | 0.26419231 | 0.91298421 | 0.071871994 | -1.16852274 | 0.003995437 |
| 0.933623667 | 0.2433527  | 0.97635526 | 0.751249176 | -1.07679181 | 0.209307663 |
| -1.02716025 | 0.64328663 | -1.0745937 | 0.264921123 | -1.0976025  | 0.111411423 |
| -1.07123593 | 0.38041693 | -1.0972591 | 0.141235313 | -1.04821011 | 0.547632635 |
| -1.03020728 | 0.58008219 | 0.98507786 | 0.776931005 | 0.951739951 | 0.359008844 |
| 0.8786999   | 0.35901088 | -1.1149617 | 0.214153002 | 0.853096297 | 0.26069067  |
| -1.01579692 | 0.74009778 | -1.1508131 | 0.261821255 | -1.01905472 | 0.689598171 |
| 0.991433013 | 0.89197648 | -1.1607122 | 0.080682519 | -1.03454467 | 0.592393403 |
| -1.04377711 | 0.48647511 | -1.0044958 | 0.961336958 | 0.989435079 | 0.862743687 |
| -1.1044675  | 0.25396126 | -1.0195998 | 0.820285048 | -1.24596899 | 0.013586928 |
| 0.915474775 | 0.09482813 | -1.1525216 | 0.063524938 | -1.01891444 | 0.719661851 |
| -1.30006926 | 0.09956669 | 0.84608207 | 0.018935678 | -1.3369424  | 0.069157188 |
| 0.947506003 | 0.22157033 | -1.1696515 | 0.088353837 | -1.03400675 | 0.446443398 |
| -1.09351376 | 0.05899929 | -1.0904509 | 0.032414036 | 0.925507045 | 0.100618466 |
| 0.905015857 | 0.02831884 | 0.99083941 | 0.891986806 | -1.01854617 | 0.679811147 |
| -1.04890183 | 0.38232196 | -1.1017673 | 0.093805112 | -1.00823471 | 0.880301438 |
| 0.963246366 | 0.48880255 | -1.0016383 | 0.976536799 | 0.945579192 | 0.302274558 |
| 0.941132596 | 0.30143838 | -1.0230877 | 0.722447038 | -1.01422938 | 0.808940968 |
| -1.01142528 | 0.8366011  | 0.99951684 | 0.992586642 | 0.901031032 | 0.062655157 |
| -1.14772794 | 0.04115127 | -1.0834984 | 0.174117238 | -1.26852718 | 0.000669544 |
| -1.13137684 | 0.02608512 | -1.0521108 | 0.381249975 | -1.01672999 | 0.759588486 |
| -1.02024103 | 0.76214659 | -1.1310658 | 0.119318976 | -1.19770483 | 0.008353319 |

|             |            |            |             |             |             |
|-------------|------------|------------|-------------|-------------|-------------|
| 0.965905569 | 0.55987606 | -1.0995523 | 0.081551193 | 0.863358376 | 0.016111156 |
| 0.979618732 | 0.82558402 | 0.81463671 | 0.148266288 | 0.768815403 | 0.006584027 |
| -1.04881468 | 0.44685517 | -1.1133762 | 0.02630437  | -1.08023956 | 0.220016579 |
| 0.943976107 | 0.35516839 | -1.1158516 | 0.08787079  | -1.02711141 | 0.66693875  |
| 0.819256357 | 0.16791678 | 0.87913848 | 0.039827023 | -1.06193453 | 0.675185123 |
| -1.04858226 | 0.39109418 | -1.0769292 | 0.393551757 | 0.979924487 | 0.713120799 |
| 0.8862094   | 0.03458    | -1.0063393 | 0.903605628 | -1.05550851 | 0.336536872 |
| -1.1334661  | 0.03771824 | -1.2206935 | 0.208292606 | 0.953809855 | 0.424781566 |
| 0.971039859 | 0.7294201  | -1.1069439 | 0.023580135 | 0.57781156  | 2.84E-08    |
| 0.860897935 | 0.00735322 | -1.0496789 | 0.300102616 | 0.99441832  | 0.917455295 |
| -1.00111743 | 0.98451325 | -1.0239282 | 0.595553188 | 0.845863416 | 0.005065554 |
| 0.968015455 | 0.55542445 | 0.9121854  | 0.09572898  | -1.0655989  | 0.251274805 |
| -1.18198612 | 0.07061925 | 0.89834224 | 0.051079343 | -1.07296588 | 0.440578573 |
| -1.16569603 | 0.00743617 | -0.9999785 | 0.999706293 | 0.954060058 | 0.397222942 |
| 0.997276617 | 0.95951814 | -1.0925738 | 0.112145424 | -1.01002679 | 0.852705853 |
| -1.04929245 | 0.42848737 | -1.1323037 | 0.064588396 | -1.04402699 | 0.478069299 |
| 0.928088479 | 0.4035892  | -1.0515229 | 0.355833521 | -1.01763719 | 0.844391205 |
| 0.89446854  | 0.02192225 | -1.2452922 | 0.001574888 | 0.9661837   | 0.46972508  |
| -1.02851088 | 0.74227279 | -1.0962212 | 0.126125754 | 0.529875628 | 7.44E-10    |
| 0.915155779 | 0.14406727 | 0.6847057  | 0.000153776 | -1.01418732 | 0.814675747 |
| -1.12628953 | 0.01318442 | -1.054181  | 0.400008278 | 0.925930226 | 0.102935982 |
| -1.00956577 | 0.880475   | -1.0795624 | 0.22094604  | 0.961866222 | 0.53983384  |
| 0.883714968 | 0.07317326 | 0.93740321 | 0.652199203 | -1.07398443 | 0.296057478 |
| 0.985189697 | 0.78781445 | -1.1345518 | 0.025316904 | 0.999661046 | 0.995119175 |
| 0.897596711 | 0.05024235 | 0.92969742 | 0.196280216 | -1.03649863 | 0.509128513 |
| -1.02560026 | 0.63502436 | -1.0817509 | 0.187046173 | -1.01265856 | 0.813125058 |
| -1.08842246 | 0.21083066 | 0.77218179 | 0.0034629   | 0.964918567 | 0.595703733 |
| -1.3887802  | 0.00053241 | -1.0043514 | 0.935921278 | -1.21539751 | 0.032957424 |
| -1.12063353 | 0.05593533 | 0.95774992 | 0.454260616 | 0.954666084 | 0.429596791 |
| 0.944844683 | 0.26999605 | -1.1199924 | 0.043424612 | -1.10475911 | 0.055531638 |
| -1.14029261 | 0.10390989 | 0.99981945 | 0.99841792  | -1.0412734  | 0.612401652 |
| 0.724777148 | 0.05419712 | -1.082785  | 0.154743169 | 0.832933295 | 0.268607092 |
| 0.945321834 | 0.33667066 | -1.0159648 | 0.768236902 | -1.03979705 | 0.503940607 |
| -1.00124347 | 0.98513198 | -1.1111709 | 0.086201411 | -1.02907612 | 0.667609509 |
| 0.983724808 | 0.77211862 | -1.1275257 | 0.181407776 | 0.926601974 | 0.181977046 |
| -1.11771399 | 0.03381188 | 0.95672987 | 0.353366472 | 0.923499662 | 0.125191817 |
| -1.047814   | 0.32080533 | 0.76589847 | 0.002778711 | -1.08655886 | 0.080558655 |
| -1.08916332 | 0.13452365 | -1.0175195 | 0.772629932 | -1.00575189 | 0.919110782 |
| 0.949919194 | 0.39047338 | 0.96484594 | 0.443785421 | -1.00685715 | 0.908752888 |
| -1.00380547 | 0.9409896  | 0.90588436 | 0.122614857 | -1.00975099 | 0.850018452 |
| 0.978728712 | 0.71213889 | -1.1369803 | 0.06309528  | -1.016927   | 0.773245037 |
| 0.951514038 | 0.42489927 | -1.1507492 | 0.013820405 | 0.839879439 | 0.006660127 |
| 0.953735081 | 0.34393095 | 0.98289504 | 0.750305683 | 0.813941636 | 0.00011957  |
| 0.982113722 | 0.73957006 | -1.0956999 | 0.090102125 | 0.975357827 | 0.645987029 |

|             |            |            |             |             |             |
|-------------|------------|------------|-------------|-------------|-------------|
| 0.924925886 | 0.20896    | -1.0840883 | 0.232806677 | -1.0811478  | 0.209065867 |
| -1.00616355 | 0.89782038 | -1.3962503 | 0.000440697 | -1.09734739 | 0.05633429  |
| 0.889478246 | 0.09105762 | 0.93334218 | 0.241853353 | 0.984806643 | 0.822881898 |
| -1.0728181  | 0.08967016 | 0.98245844 | 0.729446412 | -1.07380776 | 0.085650674 |
| 0.959880764 | 0.51718889 | -1.0267308 | 0.740879341 | 0.892891895 | 0.07685777  |
| -1.12611703 | 0.02054309 | 0.91878445 | 0.606603875 | 0.980957275 | 0.700739838 |
| 0.868188068 | 0.03437589 | 0.96971162 | 0.598112988 | 0.961600667 | 0.55010046  |
| 0.984091591 | 0.7588819  | -1.013655  | 0.838865923 | -1.05336142 | 0.321724833 |
| 0.976892345 | 0.69645124 | -1.0030181 | 0.957566968 | 0.946415049 | 0.359646199 |
| 0.964910205 | 0.65146493 | 0.97248807 | 0.587314226 | 0.883272717 | 0.120326444 |
| -1.04431068 | 0.25818989 | -1.0335758 | 0.481678534 | 0.923044758 | 0.039475576 |
| -1.04094827 | 0.43362752 | 0.97932929 | 0.7116646   | -1.17776968 | 0.002200747 |
| 0.90015656  | 0.04150602 | 0.91805792 | 0.155493197 | 0.974251268 | 0.606612762 |
| 0.837217004 | 0.00383895 | -1.0219047 | 0.673053437 | -1.00251788 | 0.966036761 |
| 0.981466385 | 0.74946841 | -1.051951  | 0.386129375 | 0.995728755 | 0.941726386 |
| 0.978774664 | 0.69632394 | -1.0494201 | 0.438580111 | 0.949683929 | 0.349279614 |
| -1.02968272 | 0.67443219 | 0.92813969 | 0.13864506  | 0.997262816 | 0.968575246 |
| -1.016858   | 0.78528071 | -1.0495962 | 0.374153658 | -1.01486528 | 0.809947153 |
| -1.00998834 | 0.85724482 | -1.0061184 | 0.921193618 | 0.975639658 | 0.655591038 |
| -1.05498233 | 0.29516664 | -1.067534  | 0.175697952 | -1.01656637 | 0.746798705 |
| 0.971151494 | 0.77577092 | 0.90408007 | 0.14431564  | 0.865996517 | 0.165188377 |
| -1.07239008 | 0.22860029 | -1.0063929 | 0.876069502 | -1.0756988  | 0.209015129 |
| -1.13068146 | 0.44232011 | -1.0144455 | 0.820224362 | -1.2211923  | 0.213369266 |
| 0.936274136 | 0.21086228 | -1.0502979 | 0.328453835 | 0.972164339 | 0.589436609 |
| 0.894277464 | 0.08421084 | -1.0138284 | 0.833734105 | -1.08686502 | 0.195250635 |
| -1.08696914 | 0.16696361 | 0.94889247 | 0.317378629 | -1.0672842  | 0.27884759  |
| 0.966742873 | 0.59120024 | 0.96243503 | 0.523378206 | -1.02149764 | 0.735335431 |
| -1.10177955 | 0.0893426  | 0.99011202 | 0.899906325 | 0.985451061 | 0.794618683 |
| -1.08899403 | 0.07893644 | -1.0180413 | 0.639338    | -1.05380967 | 0.27579007  |
| 0.895548889 | 0.062382   | -1.0422225 | 0.419825115 | -1.02374705 | 0.687161524 |
| -1.08235709 | 0.1075892  | 0.99221407 | 0.877244171 | 0.974853782 | 0.600621893 |
| 0.97259576  | 0.56947188 | -1.1213279 | 0.056651432 | -1.05110715 | 0.309171197 |
| -1.23979146 | 0.0019997  | -1.0596079 | 0.324957355 | -1.21465493 | 0.004838405 |
| -1.05562662 | 0.54921539 | -1.0149928 | 0.786526025 | -1.0681121  | 0.466345834 |
| -1.11257961 | 0.04840014 | -1.0191118 | 0.785615822 | -1.0624359  | 0.256584801 |
| -1.01692038 | 0.79619001 | -1.1474961 | 0.028342843 | -1.08327528 | 0.221315602 |
| -1.00121054 | 0.98346125 | -1.0876527 | 0.132375552 | -1.14873442 | 0.020541629 |
| 0.806028674 | 0.05126784 | -1.0840553 | 0.116784043 | 0.787373482 | 0.031369429 |
| -1.0220101  | 0.66832472 | 0.93128046 | 0.489277454 | 0.91475332  | 0.083568325 |
| -1.0930912  | 0.08816208 | -1.0017569 | 0.975711434 | 0.977602952 | 0.66027255  |
| -1.07413808 | 0.09800549 | 0.95852499 | 0.79053093  | -1.10134442 | 0.027064104 |
| -1.13594661 | 0.02219568 | -1.0782486 | 0.153194784 | -1.00374387 | 0.945207055 |
| -1.00252681 | 0.95914782 | -1.0233287 | 0.717952544 | 0.962051542 | 0.433626651 |
| -1.01699003 | 0.74571945 | 0.9010924  | 0.085887488 | -1.04233634 | 0.425939734 |

|             |            |            |             |             |             |
|-------------|------------|------------|-------------|-------------|-------------|
| -1.07318608 | 0.24951602 | -1.1450309 | 0.034968279 | -1.04483479 | 0.472896298 |
| 0.983632582 | 0.78879957 | -1.0239872 | 0.673889478 | -1.04768334 | 0.450650517 |
| -1.0307966  | 0.56755788 | -1.0168818 | 0.726449896 | -1.11363975 | 0.046170645 |
| 0.917565556 | 0.23629062 | 0.96670942 | 0.561593005 | 0.947723961 | 0.45802776  |
| -1.11063607 | 0.16369143 | -1.0481329 | 0.335367566 | -1.0230123  | 0.7606572   |
| 0.667081433 | 0.00278911 | -1.100833  | 0.052981474 | 0.840777917 | 0.184974797 |
| 0.96258847  | 0.57970503 | -1.1400519 | 0.052676395 | -1.01824552 | 0.79261612  |
| 0.884045039 | 0.3244294  | 0.99616866 | 0.966066598 | 0.89849753  | 0.391610004 |
| 0.986894531 | 0.91351596 | 0.96148419 | 0.460318844 | 0.795437747 | 0.063753757 |
| -1.15847396 | 0.01153513 | 0.96204126 | 0.551920735 | -1.03532447 | 0.539641053 |
| 0.953071805 | 0.43630264 | -1.0347832 | 0.558595934 | -1.20536202 | 0.003573194 |
| 0.963857995 | 0.47319398 | 0.92456235 | 0.471467969 | 0.83272233  | 0.000711798 |
| -1.021425   | 0.63278354 | -1.0165852 | 0.746066714 | -1.02052803 | 0.646916233 |
| 0.811392731 | 0.00478556 | -1.076298  | 0.157176207 | 0.993943181 | 0.932131465 |
| 0.948294983 | 0.36358294 | -1.0650803 | 0.14351748  | 0.8913673   | 0.052275754 |
| -1.04462421 | 0.62356862 | -1.00545   | 0.920376389 | -1.08257253 | 0.373657429 |
| -1.00418126 | 0.94050672 | -1.0579624 | 0.255649691 | 0.981896645 | 0.743954818 |
| 0.998046782 | 0.9730113  | -1.1187267 | 0.034399782 | 0.937305759 | 0.265342785 |
| 0.954259882 | 0.43998073 | -1.0147137 | 0.810671579 | -1.1130567  | 0.080759708 |
| -1.1497866  | 0.08612826 | -1.0243764 | 0.695961525 | -1.14267418 | 0.100625174 |
| 0.868147476 | 0.00563758 | 0.97694949 | 0.660093967 | -1.03451027 | 0.491868367 |
| 0.891972476 | 0.27467588 | -1.0036073 | 0.960204937 | 0.781297376 | 0.020765578 |
| -1.06219777 | 0.40769761 | 0.99718685 | 0.969899549 | -1.10591173 | 0.169586154 |
| 0.785954553 | 0.04409936 | 0.76906737 | 0.04700017  | -1.28706958 | 0.035243779 |
| -1.06661855 | 0.25789739 | 0.96468432 | 0.60145547  | -1.02847637 | 0.620619908 |
| -1.12220866 | 0.02832799 | 0.97715141 | 0.85274577  | 0.97492571  | 0.621671213 |
| 0.577722651 | 0.0014831  | 0.91279716 | 0.453728245 | -1.07137215 | 0.675448159 |
| -1.02346631 | 0.6701336  | 0.91482052 | 0.119274106 | 0.981518627 | 0.731841696 |
| -1.06246056 | 0.28234304 | -1.1282278 | 0.054161269 | -1.03179673 | 0.577094709 |
| -1.02954006 | 0.77849027 | 0.9672713  | 0.51653536  | -1.1167162  | 0.288513791 |
| 0.906962129 | 0.06538357 | 0.96358502 | 0.404132924 | -1.02185058 | 0.678792101 |
| 0.805580757 | 0.07165788 | 0.98052531 | 0.782853007 | 0.945322947 | 0.634632205 |
| -1.07985454 | 0.35998729 | -1.0293277 | 0.619868553 | -1.06938236 | 0.423698598 |
| 0.998838064 | 0.98582631 | -1.062253  | 0.497622631 | -1.01685318 | 0.798493392 |
| -1.0056379  | 0.91502568 | -1.0139681 | 0.804097027 | -1.0043458  | 0.934406218 |
| 0.941109717 | 0.42683321 | -1.1260791 | 0.043836375 | 0.823264652 | 0.013129233 |
| -1.01085025 | 0.82379309 | 0.96194414 | 0.521847147 | 0.994173796 | 0.904020279 |
| -1.03102738 | 0.61819521 | 0.99381001 | 0.938295133 | 0.948220149 | 0.386917975 |
| -1.09054662 | 0.45749107 | -1.0592421 | 0.245576203 | -1.67488941 | 4.33E-05    |
| -1.0818736  | 0.1265418  | 0.9826109  | 0.866158187 | 0.975555285 | 0.627477443 |
| 0.699665769 | 0.09655141 | -1.0355354 | 0.631114064 | 0.797143644 | 0.287746127 |
| 0.963124924 | 0.54826711 | 0.96516265 | 0.762670527 | 0.907439933 | 0.124196578 |
| 0.966577424 | 0.51406918 | -1.0477216 | 0.412137441 | -1.10233285 | 0.065175955 |
| 0.988156607 | 0.8161907  | 0.96794513 | 0.52695548  | 0.924088036 | 0.127530212 |

|             |            |            |             |             |             |
|-------------|------------|------------|-------------|-------------|-------------|
| 0.912180781 | 0.07517581 | -1.0198892 | 0.904725125 | 0.951248437 | 0.328219103 |
| 0.91305556  | 0.0180323  | -1.1171008 | 0.045789667 | 0.945177014 | 0.136307978 |
| 0.904408523 | 0.5183473  | -1.0187978 | 0.739826626 | -1.00869254 | 0.955543627 |
| 0.9585807   | 0.47209134 | -1.2088168 | 0.071065377 | 0.982258061 | 0.760435671 |
| -1.14739636 | 0.01636969 | -1.0243564 | 0.644837274 | -1.2082085  | 0.001242661 |
| 0.922086221 | 0.19819816 | 0.94817669 | 0.652860552 | 0.99197529  | 0.897520038 |
| -1.02350978 | 0.70157467 | -1.0465014 | 0.587160608 | 0.992547481 | 0.901766117 |
| -1.03062455 | 0.56601961 | -1.0883369 | 0.19931904  | -1.05516576 | 0.308550915 |
| -1.01037684 | 0.86477849 | -1.1002073 | 0.074179958 | 0.921401287 | 0.180511132 |
| -1.10688654 | 0.22642925 | 0.97589211 | 0.748755203 | 0.910608761 | 0.264191671 |
| -1.0738513  | 0.2948421  | 0.90508338 | 0.043496237 | -1.04794106 | 0.489890855 |
| -1.06294941 | 0.34664917 | 0.9397808  | 0.312774791 | -1.01445695 | 0.824201018 |
| -1.01383483 | 0.83375313 | -1.2824958 | 0.036229057 | -1.0279153  | 0.674247884 |
| 0.96505585  | 0.65052919 | 0.99848783 | 0.976301085 | -1.03887805 | 0.627168824 |
| -1.09311498 | 0.1550414  | 0.60817405 | 0.022202929 | -1.04676939 | 0.462251384 |
| -1.10175427 | 0.02457568 | 0.99177147 | 0.89479512  | 0.950492108 | 0.23080111  |
| -1.01526362 | 0.79834366 | 0.922769   | 0.126270101 | 0.934749327 | 0.257813339 |
| 0.896626794 | 0.32191592 | 0.96085804 | 0.437154229 | 0.907746954 | 0.379132565 |
| -1.01889991 | 0.72917047 | -1.0034753 | 0.945650615 | 0.909526116 | 0.083634346 |
| -1.05204927 | 0.35641668 | 0.93874942 | 0.095795948 | 0.980501336 | 0.719511442 |
| -1.10421373 | 0.05362053 | 0.85008634 | 0.297956152 | 0.951219414 | 0.32396581  |
| -1.09333296 | 0.13661166 | -1.1437838 | 0.025371459 | 0.995792858 | 0.943344231 |
| 0.95460535  | 0.38585447 | -1.1538937 | 0.012641606 | -1.02847199 | 0.599443537 |
| 0.563169465 | 7.25E-06   | -1.0467847 | 0.465920973 | 0.42202263  | 7.51E-10    |
| -1.13118766 | 0.32479502 | -1.0192484 | 0.753167505 | -1.11007444 | 0.403593365 |
| -1.07782131 | 0.06435754 | 0.88780344 | 0.026716558 | -1.07284239 | 0.082088051 |
| 0.855329977 | 0.00299419 | -1.0116579 | 0.848377299 | 0.947963321 | 0.292308023 |
| -1.08308747 | 0.15399513 | 0.8536039  | 0.061839868 | -1.04461865 | 0.432526366 |
| -1.24515711 | 0.01682132 | -1.0016757 | 0.980259237 | -1.34786596 | 0.001442459 |
| -1.03825186 | 0.52022842 | -1.1044598 | 0.128163932 | 0.978339947 | 0.707235393 |
| -1.06045684 | 0.19349101 | -1.120661  | 0.086063786 | 0.995549822 | 0.920673195 |
| 0.97161278  | 0.5774424  | -1.0277699 | 0.727085692 | 0.960839876 | 0.440240099 |
| -1.05753317 | 0.21850055 | -1.0272037 | 0.665453164 | -1.00721016 | 0.873551516 |
| -1.03801055 | 0.47142713 | -1.0080304 | 0.849303614 | -1.06479819 | 0.227557556 |
| 0.967292339 | 0.61465864 | -1.0201601 | 0.736447129 | -1.10152734 | 0.146734363 |
| 0.961601609 | 0.47208355 | 0.84186173 | 0.120627336 | 0.948797534 | 0.335341791 |
| -1.03275589 | 0.58671395 | -1.0206623 | 0.705322548 | -1.04647214 | 0.444220212 |
| -1.01363707 | 0.77495907 | -1.0571732 | 0.312630901 | 0.865244254 | 0.003350274 |
| 0.843000192 | 0.01225233 | -1.0023478 | 0.962941657 | 0.999275503 | 0.991263011 |
| -1.06160153 | 0.26229019 | -1.072494  | 0.241135014 | -1.04668708 | 0.391016298 |
| 0.910613259 | 0.10141531 | -1.1279431 | 0.027525401 | -1.09099803 | 0.12698292  |
| 0.932003038 | 0.2045382  | 0.71675064 | 0.005673916 | 0.962143467 | 0.484563716 |
| -1.01113932 | 0.76011444 | 0.94112942 | 0.626728402 | 0.95681592  | 0.226695455 |
| -1.02936437 | 0.59308437 | 0.96066986 | 0.316472685 | -1.00281135 | 0.958604828 |



|             |            |            |             |             |             |
|-------------|------------|------------|-------------|-------------|-------------|
| -1.03905933 | 0.48715505 | 0.99030587 | 0.847010817 | -1.01511509 | 0.785177831 |
| -1.00675101 | 0.90954489 | -1.0651634 | 0.257836452 | -1.03738616 | 0.536112939 |
| 0.984221015 | 0.81003419 | -1.4139831 | 0.000270994 | -1.06633352 | 0.333691045 |
| 0.968857894 | 0.53765956 | 0.96203985 | 0.507458987 | -1.07084795 | 0.185192027 |
| 0.830837393 | 0.08557274 | 0.97191857 | 0.525556845 | -1.19957418 | 0.091231924 |
| -1.06098853 | 0.12438354 | -1.0453643 | 0.391673494 | -1.02337179 | 0.544959641 |
| -1.09430943 | 0.03805657 | -1.1007351 | 0.037232264 | 0.88455504  | 0.005476055 |
| -1.15091756 | 0.01860122 | -1.1143223 | 0.040037374 | -1.24450583 | 0.000399053 |
| 0.989594682 | 0.85399285 | 0.96301774 | 0.568480222 | 0.998399162 | 0.977509438 |
| -1.00564926 | 0.93466556 | 0.97074391 | 0.585152031 | -1.07949485 | 0.26839716  |
| -1.14860636 | 0.02267707 | -1.1968476 | 0.003561123 | -1.02623846 | 0.66268111  |
| -1.04969501 | 0.31223002 | -1.0866489 | 0.08362358  | -1.10600029 | 0.038717125 |
| 0.975730449 | 0.66065826 | -1.1017662 | 0.147099714 | 0.981051929 | 0.732395883 |
| 0.989481494 | 0.87927283 | -1.0585379 | 0.285795648 | 0.885754716 | 0.085673755 |
| -1.04806552 | 0.42819802 | -1.06963   | 0.236145814 | -1.18662217 | 0.00525496  |
| 0.961385456 | 0.50160283 | -1.0151782 | 0.784563415 | -1.07635375 | 0.211664941 |
| -1.10940274 | 0.06480361 | 0.98166505 | 0.610297232 | 0.967156863 | 0.546788538 |
| -1.00356401 | 0.95029134 | 0.94547283 | 0.302313447 | -1.02384669 | 0.679872349 |
| 0.989073104 | 0.87581668 | -1.0480219 | 0.395527293 | 0.936747875 | 0.35457623  |
| 0.936867952 | 0.17918347 | -1.0115642 | 0.846076512 | -1.05393333 | 0.277826584 |
| -1.10679484 | 0.0856238  | -1.0058441 | 0.929805439 | -1.03385836 | 0.567909857 |
| 0.877435809 | 0.04928705 | -1.1169789 | 0.034520609 | -1.05726382 | 0.395401176 |
| 0.960909769 | 0.44998516 | -1.1819743 | 0.119959004 | -1.04329827 | 0.42211445  |
| 0.976719168 | 0.69105634 | 0.90633756 | 0.012228674 | 0.944296096 | 0.335302723 |
| -1.09563938 | 0.14897901 | -1.0296384 | 0.493635301 | -1.04103622 | 0.521876874 |
| 0.802670147 | 0.2236283  | -1.1669929 | 0.01010077  | -1.03138436 | 0.863237424 |
| 0.996165795 | 0.92850509 | -1.0151538 | 0.791344105 | 0.957120267 | 0.308354023 |
| -1.04858914 | 0.41386792 | -1.1528008 | 0.042419971 | 0.980839567 | 0.738338199 |
| 0.958095636 | 0.47030804 | -1.0361813 | 0.549750117 | -1.04612698 | 0.447047    |
| -1.01217852 | 0.83732856 | -1.0200468 | 0.67797789  | 0.925889549 | 0.194986693 |
| 0.952505932 | 0.3992359  | -1.1016708 | 0.087628261 | -1.05751338 | 0.333166765 |
| 0.950358191 | 0.37505905 | 0.79963665 | 0.002133462 | 0.960025677 | 0.476680665 |
| -1.08678903 | 0.20129525 | -1.0077861 | 0.89556372  | -1.13155446 | 0.060026089 |
| 0.96422221  | 0.53275475 | 0.92684053 | 0.197387674 | 0.962568955 | 0.513708713 |
| 0.954498084 | 0.38328696 | -1.010109  | 0.855759502 | -1.09280694 | 0.099702303 |
| -1.00367308 | 0.93176017 | -1.1023576 | 0.091999334 | 0.991592984 | 0.843707529 |
| 0.961771533 | 0.54364535 | 0.94807594 | 0.449374722 | 0.981626616 | 0.772336434 |
| 0.933647337 | 0.16860994 | 0.95220153 | 0.311256851 | 0.956467613 | 0.369679776 |
| -1.03913226 | 0.48522816 | 0.98751028 | 0.829097165 | -1.05650733 | 0.318748926 |
| 0.87791661  | 0.28181864 | -1.065938  | 0.33028767  | -1.04066175 | 0.740584045 |
| 0.881211074 | 0.00866613 | 0.97282722 | 0.601217064 | -1.03228603 | 0.496480896 |
| -1.1208211  | 0.05202869 | -1.0883736 | 0.156674171 | -1.05237224 | 0.377812162 |
| -1.20255643 | 0.00360655 | -1.0531509 | 0.41012809  | -1.07631632 | 0.230087958 |
| -1.14468575 | 0.01419013 | -1.0480667 | 0.793593499 | -1.01973585 | 0.715321322 |

|             |            |            |             |             |             |
|-------------|------------|------------|-------------|-------------|-------------|
| 0.647808104 | 0.0486224  | 0.97222983 | 0.51151225  | 0.832129128 | 0.396852864 |
| -1.07397082 | 0.27105922 | -1.1204431 | 0.053553947 | -1.16965817 | 0.017928341 |
| 0.969795692 | 0.7933334  | 0.9705118  | 0.613244049 | 0.986517766 | 0.907668524 |
| 0.955268908 | 0.32112371 | -1.1142764 | 0.070679209 | -1.05474123 | 0.248669683 |
| 0.908887104 | 0.09312171 | -1.1635908 | 0.010667745 | -1.0768496  | 0.190807148 |
| -1.07699576 | 0.17997282 | 0.99784439 | 0.969900209 | 0.993545394 | 0.906033529 |
| -1.02764922 | 0.69798249 | -1.0430024 | 0.515594392 | 0.788492466 | 0.001281845 |
| 0.984055385 | 0.74673255 | 0.91884284 | 0.150499223 | -1.07559054 | 0.146942953 |
| -1.09155612 | 0.28700373 | 0.98141355 | 0.72461795  | 0.888375509 | 0.152056916 |
| 0.908045772 | 0.12041776 | -1.0168517 | 0.696507149 | -1.01065815 | 0.86295258  |
| -1.17556623 | 0.02620704 | 0.99431275 | 0.929069862 | 0.982889608 | 0.808198049 |
| 0.883331069 | 0.05468519 | -1.0948064 | 0.071141484 | 0.497870952 | 1.99E-15    |
| 0.908352356 | 0.04747023 | -1.1063337 | 0.069811718 | 0.919227092 | 0.081157074 |
| 0.894570998 | 0.13423808 | -1.0148998 | 0.902178429 | 0.790744076 | 0.002280045 |
| 0.949103047 | 0.34613368 | -1.0199846 | 0.671537923 | -1.00598535 | 0.913941037 |
| 0.998523813 | 0.98047559 | -1.1017874 | 0.09708112  | 0.972155515 | 0.640257758 |
| -1.00961244 | 0.86440116 | -1.0600155 | 0.340345767 | 0.990811891 | 0.869118082 |
| -1.04596726 | 0.40788713 | 0.90250508 | 0.059604691 | -1.05556657 | 0.320015042 |
| 0.935310964 | 0.48566213 | 0.90386434 | 0.640425228 | -1.11122251 | 0.273167246 |
| -1.05089504 | 0.32602508 | -1.0420411 | 0.523766414 | 0.9479537   | 0.290638327 |
| -1.00731817 | 0.91293712 | 0.99523138 | 0.967420088 | -1.00658195 | 0.921636494 |
| -1.10894477 | 0.09322997 | 0.89737887 | 0.021445462 | -1.129656   | 0.048947555 |
| -1.07040255 | 0.19434309 | -1.1116913 | 0.063518372 | 0.93912526  | 0.230337345 |
| 0.93662023  | 0.27007877 | -1.0345459 | 0.536551007 | -1.04120825 | 0.494867815 |
| -1.0648021  | 0.3074094  | 0.98762816 | 0.859335326 | -1.07282762 | 0.253732825 |
| 0.935471069 | 0.23637845 | -1.0909524 | 0.084432467 | -1.12287141 | 0.042275105 |
| 0.945949321 | 0.41143281 | 0.96666138 | 0.67889852  | 0.958285769 | 0.52825867  |
| 0.990574447 | 0.87582511 | 0.99984672 | 0.998008301 | -1.01345678 | 0.825452507 |
| 0.977508098 | 0.74865505 | -1.0457074 | 0.530229724 | -1.00572649 | 0.935868725 |
| -1.11380687 | 0.1219884  | 0.86844623 | 0.029715898 | -1.13029918 | 0.079816821 |
| 0.800339086 | 0.08945346 | -1.045344  | 0.353512236 | 0.8521717   | 0.219539545 |
| -1.02924988 | 0.73337474 | 0.91310214 | 0.220100392 | -1.0433862  | 0.616022709 |
| 0.96387883  | 0.41759402 | -1.0578365 | 0.310883099 | 0.944853537 | 0.213275149 |
| 0.875575764 | 0.0110572  | -1.0426074 | 0.490400926 | 0.989300511 | 0.832062408 |
| -1.31730683 | 0.00223183 | -1.0545998 | 0.344584242 | -1.18841911 | 0.049279565 |
| 0.968008955 | 0.54532547 | -1.0033942 | 0.950084954 | -1.14465818 | 0.014407829 |
| -1.07454812 | 0.18464961 | -1.1277555 | 0.212337315 | -1.06803857 | 0.223956127 |
| 0.917730144 | 0.13588235 | -1.0067646 | 0.893417988 | -1.11405102 | 0.062186533 |
| -1.04436974 | 0.47003859 | 0.99642967 | 0.957226496 | -1.08975428 | 0.155542143 |
| -1.0820521  | 0.18630891 | -1.1039691 | 0.107970325 | 0.869494737 | 0.021207746 |
| 0.80906487  | 0.00029862 | -1.1250698 | 0.026831074 | 0.963992354 | 0.506015432 |
| -1.05534207 | 0.30456396 | -1.0285891 | 0.633357498 | 0.961814185 | 0.456964109 |
| -1.02337112 | 0.61066882 | -1.0002158 | 0.997187157 | 0.935765617 | 0.146941303 |
| 0.852429573 | 0.06124789 | 0.98269287 | 0.755177625 | 0.973629105 | 0.750210429 |

|             |            |            |             |             |             |
|-------------|------------|------------|-------------|-------------|-------------|
| 0.982861863 | 0.74575548 | 0.98866782 | 0.865812431 | 0.979016257 | 0.690870078 |
| -1.02364706 | 0.68191655 | -1.0930371 | 0.146082081 | -1.0425082  | 0.466140749 |
| 0.866717145 | 0.0062359  | -1.2108798 | 0.00903895  | 0.943967173 | 0.256135304 |
| -1.00958015 | 0.95427402 | -1.0884578 | 0.221955577 | -1.12359423 | 0.484411228 |
| 0.942491622 | 0.28460118 | 0.93298038 | 0.592307558 | 0.965639892 | 0.526150989 |
| -1.10937162 | 0.01198878 | -1.0647315 | 0.459548747 | -1.06151384 | 0.140540268 |
| -1.04170292 | 0.38536141 | 0.98811192 | 0.791600384 | -1.1165668  | 0.021842171 |
| -1.10281553 | 0.0686787  | -1.0313667 | 0.543247254 | 0.916613972 | 0.104193895 |
| 0.946715654 | 0.32123742 | -1.1652345 | 0.080383321 | -1.0206521  | 0.71005656  |
| 0.900775491 | 0.04784587 | 0.95854623 | 0.431535279 | 0.964394512 | 0.485351661 |
| 0.752406265 | 0.00213372 | -1.0469668 | 0.394792204 | 0.84842423  | 0.067702783 |
| 0.994877653 | 0.92549575 | -1.048929  | 0.40327673  | 0.977788291 | 0.682751025 |
| -1.00571078 | 0.91722076 | -1.1518789 | 0.021433249 | 0.918188502 | 0.123419546 |
| -1.00988768 | 0.87064076 | 0.95536211 | 0.441621446 | 0.897946201 | 0.079074246 |
| 0.954885534 | 0.46670639 | 0.97948227 | 0.706547932 | -1.15520024 | 0.025916777 |
| -1.02372719 | 0.62957143 | -1.048763  | 0.363626273 | -1.03208091 | 0.516393908 |
| -1.08175428 | 0.22892114 | -1.0329709 | 0.475202679 | -1.04034769 | 0.542738468 |
| 0.889045404 | 0.03645082 | 0.91973851 | 0.320933632 | -1.1058322  | 0.072011772 |
| -1.02531256 | 0.66567477 | -1.00412   | 0.938500378 | 0.913247064 | 0.1205971   |
| -1.077863   | 0.20186714 | -1.049782  | 0.395476005 | -1.00257044 | 0.96487914  |
| -1.05232588 | 0.3412198  | -1.0022984 | 0.963720632 | -1.0133381  | 0.803949336 |
| -1.04030474 | 0.49577522 | -1.3892161 | 0.052120212 | -1.11076686 | 0.073826798 |
| 0.9859244   | 0.84450628 | -1.0456298 | 0.419101541 | -1.10224895 | 0.181571834 |
| 0.923671395 | 0.11880612 | -1.0281595 | 0.489504548 | 0.994150399 | 0.907196071 |
| -1.14420676 | 0.04058967 | -1.1122571 | 0.026668941 | -1.28415818 | 0.000273389 |
| 0.962320763 | 0.63656865 | 0.94974593 | 0.332063839 | -1.10442389 | 0.224468584 |
| 0.935710302 | 0.23436494 | -1.0273189 | 0.624164356 | -1.09066179 | 0.122111801 |
| 0.96014522  | 0.5431086  | 0.94802613 | 0.305624817 | -1.05108766 | 0.456660086 |
| 0.994051777 | 0.85856225 | 0.9807052  | 0.825916101 | 0.984172918 | 0.634001948 |
| -1.06740806 | 0.27815542 | -1.1605517 | 0.008686015 | 0.984846906 | 0.798590646 |
| 0.985256793 | 0.80589155 | -1.0026218 | 0.961881839 | -1.16303255 | 0.015083084 |
| -1.09029551 | 0.11311265 | -1.0172107 | 0.777670602 | -1.04288759 | 0.437408956 |
| -1.14628688 | 0.04181662 | 0.89011602 | 0.070050628 | -1.02117625 | 0.750164271 |
| -1.17946767 | 0.00928856 | -1.0370956 | 0.454439448 | 0.975823408 | 0.690649568 |
| 0.936030208 | 0.2028649  | -1.1424031 | 0.044081957 | 0.995395522 | 0.928621695 |
| 0.947301681 | 0.46336642 | -1.0113066 | 0.838258014 | -1.0445106  | 0.554919204 |
| 0.927477377 | 0.39741134 | -1.0128853 | 0.824744006 | 0.97464005  | 0.772128234 |
| -1.04771095 | 0.296735   | 0.99960986 | 0.994659737 | 0.960975173 | 0.372164373 |
| -1.05175915 | 0.38163599 | 0.94819692 | 0.321069888 | -1.03360755 | 0.565801381 |
| 0.947953339 | 0.30534911 | -1.1286062 | 0.04045869  | -1.03609025 | 0.495367445 |
| 0.876436283 | 0.02211879 | -1.0617187 | 0.408739089 | 0.944290778 | 0.310311909 |
| 0.982059529 | 0.75191734 | 0.97422965 | 0.604344402 | -1.04431197 | 0.449992348 |
| -1.12993997 | 0.04135226 | -1.1206756 | 0.081612937 | -1.06944267 | 0.255767546 |
| 0.954757203 | 0.44201155 | -1.1014948 | 0.236935576 | 0.978833852 | 0.721824073 |

|             |            |            |             |             |             |
|-------------|------------|------------|-------------|-------------|-------------|
| -1.08604427 | 0.07693077 | -1.0533822 | 0.350768922 | -1.03447259 | 0.462221762 |
| 0.900049613 | 0.05382927 | 0.87703562 | 0.053489352 | 0.958293667 | 0.428630189 |
| -1.00923401 | 0.89395494 | -1.0573472 | 0.100015701 | 0.957552058 | 0.530046217 |
| 0.951795348 | 0.41693217 | -1.1497515 | 0.022832485 | -1.14067956 | 0.033704731 |
| 0.869386585 | 0.03393243 | -1.0874474 | 0.169119637 | -1.00768393 | 0.905692927 |
| -1.0695142  | 0.19137761 | -1.0234224 | 0.667926211 | 0.917858008 | 0.097290759 |
| -1.10720539 | 0.30234542 | -1.0714181 | 0.296776741 | 0.958552582 | 0.666832916 |
| -1.02749474 | 0.63233772 | 0.93015002 | 0.24169089  | 0.985230571 | 0.792811093 |
| -1.09455946 | 0.1757776  | 0.89747126 | 0.039580138 | 0.914945107 | 0.182746519 |
| 0.848482474 | 0.15754396 | -1.0526996 | 0.486531065 | -1.19034523 | 0.134357467 |
| 0.941564602 | 0.23397518 | -1.0888754 | 0.338983904 | -1.15298741 | 0.006259519 |
| 0.989085792 | 0.80484482 | -1.0508586 | 0.267054415 | -1.01002081 | 0.822364615 |
| -1.08456822 | 0.1779811  | -1.0228802 | 0.69407814  | -1.09249905 | 0.142764266 |
| -1.35225052 | 1.39E-05   | -1.0607515 | 0.258547137 | -1.21207066 | 0.00356662  |
| -1.03073305 | 0.53424201 | 0.94273425 | 0.296728519 | 0.977029476 | 0.632996102 |
| -1.0101043  | 0.85421406 | -1.0184423 | 0.749654957 | -1.02754238 | 0.619841302 |
| 0.993108834 | 0.92852985 | -1.0266792 | 0.654168186 | -1.16248023 | 0.054953276 |
| -1.07685858 | 0.46117757 | -1.1208093 | 0.061749154 | -1.44098559 | 0.000573369 |
| -1.11900406 | 0.09044149 | 0.95560643 | 0.325577537 | 0.904633574 | 0.130206775 |
| 0.900824431 | 0.04887749 | 0.98514137 | 0.780346469 | -1.01011491 | 0.846747843 |
| -1.08315966 | 0.16859474 | 0.87429587 | 0.05550318  | -1.0021926  | 0.969619741 |
| 0.923848137 | 0.05581208 | 0.9738082  | 0.662080468 | -1.07694809 | 0.072865098 |
| -1.02408328 | 0.72797757 | -1.0761208 | 0.259001935 | -1.05093573 | 0.46861635  |
| -1.04605908 | 0.43687556 | -1.0371349 | 0.475926181 | -1.04535839 | 0.443691227 |
| -1.10713025 | 0.07139573 | -1.0915185 | 0.374514597 | -1.11870426 | 0.047608156 |
| -1.04209235 | 0.49489377 | -1.0052729 | 0.926013605 | -1.09722923 | 0.127838004 |
| 0.982263205 | 0.73483449 | 0.92695452 | 0.254515264 | -1.09883024 | 0.078609433 |
| 0.882650239 | 0.01880367 | 0.83018126 | 0.110315256 | 0.91601033  | 0.094391439 |
| -1.03512783 | 0.5057567  | -1.084606  | 0.110312406 | -1.12333367 | 0.028115383 |
| 0.928716817 | 0.22432543 | 0.988944   | 0.802349153 | 0.992506784 | 0.900967934 |
| 0.931271722 | 0.23475233 | 0.99267554 | 0.902095094 | -1.00898484 | 0.880573319 |
| 0.956217531 | 0.3880362  | 0.95195384 | 0.438555439 | 0.955736373 | 0.382761407 |
| -1.05724774 | 0.19266158 | -1.011305  | 0.817170427 | -1.02429574 | 0.571787931 |
| -1.13865717 | 0.02628593 | -1.0196629 | 0.72204512  | -1.03862453 | 0.507680075 |
| -1.05221508 | 0.66647709 | -1.1150093 | 0.16176865  | -1.04900854 | 0.685341601 |
| 0.781158855 | 0.02000684 | 0.95495692 | 0.645958342 | 0.813404    | 0.050014042 |
| 0.979366895 | 0.72689616 | 0.99597202 | 0.950880573 | 0.944133803 | 0.33735404  |
| 0.978408372 | 0.70568519 | -1.0647621 | 0.231237322 | -1.26003633 | 0.00018278  |
| -1.08761003 | 0.25134474 | -1.1119926 | 0.069163158 | -1.02852067 | 0.699335745 |
| 0.891869619 | 0.13879658 | 0.9315382  | 0.085779931 | -1.13805216 | 0.095290006 |
| 0.935985104 | 0.22845783 | 0.96489249 | 0.601694616 | -1.02521047 | 0.648449212 |
| -1.01237504 | 0.86765361 | -1.0776549 | 0.198822009 | -1.03703572 | 0.622557304 |
| -1.03927679 | 0.53767442 | -1.0436519 | 0.443375486 | -1.01111699 | 0.859382001 |
| 0.986190733 | 0.80175149 | -1.0470199 | 0.447112127 | 0.996807458 | 0.953944828 |

|             |            |            |             |             |             |
|-------------|------------|------------|-------------|-------------|-------------|
| 0.957819945 | 0.50875824 | -1.028982  | 0.589011675 | -1.01974731 | 0.763934112 |
| -1.00779668 | 0.8643194  | -1.0079601 | 0.878269792 | 0.980695101 | 0.668220819 |
| 0.955768675 | 0.45220494 | -1.1210352 | 0.030876492 | 0.920795259 | 0.17292391  |
| 0.973602983 | 0.60700086 | -1.1167467 | 0.071975969 | 0.92067346  | 0.115798936 |
| -1.07805385 | 0.19089448 | 0.95617234 | 0.45273052  | -1.05549545 | 0.345392058 |
| -1.02259224 | 0.67934978 | -1.0221459 | 0.671967789 | -1.04780585 | 0.388856151 |
| 0.997735249 | 0.96906186 | 0.96545828 | 0.408484184 | 0.925175851 | 0.186998949 |
| -1.01603675 | 0.7324941  | 0.93939432 | 0.276141822 | -1.02188149 | 0.64205414  |
| 0.991229723 | 0.8843357  | -1.0107689 | 0.927670388 | -1.00787268 | 0.896956886 |
| 0.980906262 | 0.73751044 | 0.84303698 | 0.103223325 | 0.980907767 | 0.737530542 |
| 0.955832185 | 0.42149206 | -1.015814  | 0.79262306  | -1.0061045  | 0.913503484 |
| 0.98378636  | 0.78976132 | -1.1169556 | 0.059682609 | -1.04692173 | 0.455546401 |
| 0.99406563  | 0.90176896 | -1.1027244 | 0.182631376 | 0.953777432 | 0.328546668 |
| 0.983483758 | 0.78137399 | 0.85342088 | 0.042196225 | 0.910525216 | 0.122327048 |
| 0.857183629 | 0.13590184 | -1.0792255 | 0.166074485 | 0.853343311 | 0.125092417 |
| 0.724480638 | 0.0570978  | -1.1614183 | 0.04657417  | 0.697426663 | 0.034136646 |
| -1.02692013 | 0.65910619 | 0.9269314  | 0.22715278  | -1.15221679 | 0.021617251 |
| -1.14282458 | 0.02140358 | 0.96720666 | 0.547702205 | -1.01412715 | 0.804266607 |
| 0.991054041 | 0.87967123 | -1.0463506 | 0.487334579 | 0.967539166 | 0.5787728   |
| -1.03689164 | 0.50459063 | -1.1467341 | 0.003790269 | 0.91026573  | 0.086976657 |
| 0.974404102 | 0.61732541 | -1.0031923 | 0.957650571 | 0.97042136  | 0.563036599 |
| -1.15776973 | 0.00425434 | 0.90856655 | 0.069160025 | -1.05335176 | 0.29416871  |
| 0.937332745 | 0.27804992 | -1.0135645 | 0.813195833 | -1.07152384 | 0.247278616 |
| -1.08350344 | 0.14623452 | -1.1008012 | 0.079647794 | 0.886473152 | 0.031007414 |
| 0.984329571 | 0.80390169 | 0.86164479 | 0.013344881 | 0.747734218 | 2.69E-05    |
| -1.03075288 | 0.56080077 | -1.1147624 | 0.022686021 | 0.982972004 | 0.741277365 |
| 0.977195798 | 0.61523616 | -1.0656763 | 0.295931838 | -1.01548454 | 0.737614284 |
| -1.22136966 | 0.00133653 | 0.97744858 | 0.691767088 | 0.959547624 | 0.487551281 |
| -1.09584902 | 0.08615518 | -1.0395944 | 0.489237009 | -1.11596191 | 0.040857574 |
| 0.961674743 | 0.56681684 | 0.97422171 | 0.670288738 | -1.16145559 | 0.031593025 |
| -1.04425254 | 0.20620474 | 0.96553898 | 0.468161716 | 0.945139312 | 0.101281087 |
| 0.93831427  | 0.26707127 | 0.97240023 | 0.641152192 | -1.06490425 | 0.272949433 |
| -1.04836964 | 0.35486596 | 0.85356806 | 0.125706741 | 0.907190604 | 0.059613265 |
| -1.01661826 | 0.73701003 | 0.97811732 | 0.89431155  | -1.02709339 | 0.586293971 |
| -1.02152268 | 0.68092097 | 0.98268048 | 0.771591845 | 0.992411424 | 0.882973491 |
| -1.07918757 | 0.31689979 | -1.0544868 | 0.350453368 | -1.10373388 | 0.196309064 |
| 0.964450622 | 0.4885907  | -1.2181594 | 0.00152803  | -1.12900901 | 0.023163144 |
| -1.02625523 | 0.61467478 | 0.97791076 | 0.680366683 | 0.968700828 | 0.537027237 |
| 0.995710996 | 0.94223797 | 0.89593866 | 0.037793687 | -1.10258302 | 0.103976804 |
| -1.0216443  | 0.70219592 | 0.9660977  | 0.485110736 | 0.963933777 | 0.512449768 |
| 0.938543401 | 0.46887063 | -1.0890391 | 0.154475968 | 0.888652966 | 0.180231175 |
| 0.902290076 | 0.04717194 | -1.0530096 | 0.346602159 | -1.06760206 | 0.201736365 |
| 0.900371597 | 0.11236935 | 0.93672229 | 0.306360792 | -1.07652931 | 0.26176532  |
| 0.937603823 | 0.31631052 | 0.97540744 | 0.632362746 | -1.08950747 | 0.183997721 |

|             |            |            |             |             |             |
|-------------|------------|------------|-------------|-------------|-------------|
| -1.07593376 | 0.44053089 | 0.90217929 | 0.028166487 | -1.07348804 | 0.454796728 |
| 0.945596792 | 0.40637769 | 0.99552615 | 0.939776816 | 0.994702984 | 0.936965425 |
| 0.973008635 | 0.59087079 | 0.99294988 | 0.893013738 | 0.907519429 | 0.060439329 |
| 0.787125317 | 0.00046898 | 0.97907746 | 0.756383031 | 0.547143206 | 6.51E-13    |
| -1.11200078 | 0.14779077 | -1.0309673 | 0.371506125 | 0.899489925 | 0.148666522 |
| -1.01301561 | 0.82122405 | -1.0838293 | 0.16198974  | 0.990929159 | 0.873472862 |
| 0.996306499 | 0.97975808 | 0.98455471 | 0.759623723 | -1.23609673 | 0.150085203 |
| 0.9016066   | 0.04087726 | 0.98417699 | 0.745193528 | -1.00447142 | 0.928421527 |
| 0.860327199 | 0.0101119  | 0.97780895 | 0.664788877 | 0.998899467 | 0.984501725 |
| -1.09718011 | 0.2005274  | 0.98717516 | 0.864777461 | -1.00504009 | 0.944253465 |
| 0.96954763  | 0.60975598 | -1.172695  | 0.003363988 | -1.00979138 | 0.872096547 |
| -1.03710774 | 0.56655375 | -1.0993721 | 0.06967126  | -1.0796935  | 0.230203589 |
| -1.00731716 | 0.87651581 | 0.9934775  | 0.912163897 | -1.01218074 | 0.796409877 |
| -1.16252309 | 0.02493447 | -1.1057593 | 0.076731398 | -1.01381676 | 0.834283977 |
| 0.974660923 | 0.65988538 | 0.98569876 | 0.869036617 | 0.978084364 | 0.70391619  |
| 0.94791078  | 0.27698798 | -1.0407862 | 0.433093459 | -1.0232041  | 0.63958636  |
| -1.1075634  | 0.10564799 | 0.99662893 | 0.958773098 | 0.970863542 | 0.63575407  |
| -1.06359212 | 0.27210875 | 0.88628761 | 0.063459324 | -1.04282557 | 0.453706973 |
| 0.906118132 | 0.27034709 | -1.0592959 | 0.543382742 | 0.974881934 | 0.774918131 |
| -1.08097122 | 0.1951826  | -1.1948161 | 0.010206366 | -1.05459954 | 0.374440114 |
| -1.0313877  | 0.68246793 | -1.1341756 | 0.015963909 | -1.14742068 | 0.072767106 |
| -1.01069892 | 0.87162029 | 0.82032834 | 0.003234033 | 0.952880961 | 0.464680864 |
| -1.05828188 | 0.45169712 | 0.83936775 | 0.018831212 | -1.43080916 | 1.34E-05    |
| -1.02616648 | 0.66455688 | -1.1051683 | 0.084802127 | -1.03132644 | 0.60470933  |
| 0.89755368  | 0.11903398 | 0.83741327 | 0.226927538 | 0.956759539 | 0.519820887 |
| -1.05468489 | 0.40207643 | -1.0545761 | 0.287193361 | 0.960939164 | 0.530021767 |
| -1.06523139 | 0.29660715 | -1.0258583 | 0.652749835 | -1.04318477 | 0.483753058 |
| -1.04804501 | 0.33955183 | -1.0118088 | 0.870309466 | -1.01219091 | 0.804444829 |
| -1.03155739 | 0.59275885 | 0.92013769 | 0.172750862 | -1.03868326 | 0.513809778 |
| 0.950672769 | 0.28989415 | -1.1318609 | 0.055140908 | 0.999726738 | 0.995413614 |
| 0.95773227  | 0.52015991 | 0.96631144 | 0.466208752 | 0.978218528 | 0.742605717 |
| 0.888553151 | 0.03864787 | -1.0753098 | 0.270924638 | -1.06927952 | 0.234709205 |
| -1.16686973 | 0.01294529 | -1.116902  | 0.061979263 | 0.973198198 | 0.652648873 |
| -1.06196203 | 0.29396019 | -1.1230655 | 0.020754106 | -1.05988048 | 0.309839847 |
| -1.07753942 | 0.19257253 | 0.97212769 | 0.650663057 | -1.10244122 | 0.090593353 |
| -1.00701385 | 0.90254162 | -1.2011457 | 0.001729359 | 0.926347564 | 0.183735965 |
| -1.00336058 | 0.96203165 | -1.2213551 | 0.027968479 | -1.05093616 | 0.481861593 |
| -1.01270754 | 0.79405738 | -1.0534398 | 0.384336163 | 0.97606659  | 0.616822087 |
| 0.925367893 | 0.17936808 | -1.0056712 | 0.940281757 | -1.1520415  | 0.016206325 |
| 0.952328773 | 0.3697076  | 0.90363823 | 0.127979652 | 0.98571677  | 0.790923072 |
| -1.00114268 | 0.98236422 | 0.95929981 | 0.580456399 | 0.802241568 | 7.63E-05    |
| 0.990121488 | 0.849646   | -1.0006894 | 0.990761347 | 0.831808131 | 0.000852947 |
| -1.00530989 | 0.91725513 | 0.91602855 | 0.204127182 | 0.990536768 | 0.852045372 |
| 0.903239099 | 0.03674643 | -1.0148666 | 0.815795847 | 0.985698857 | 0.76291778  |

|             |            |            |             |             |             |
|-------------|------------|------------|-------------|-------------|-------------|
| 0.892079898 | 0.03618758 | -1.052769  | 0.394865796 | -1.03787031 | 0.487330209 |
| 0.923135337 | 0.17333091 | -1.0308663 | 0.535105697 | 0.590923882 | 2.00E-12    |
| 0.978059817 | 0.68369818 | 0.90369065 | 0.085184098 | 0.883239775 | 0.025817815 |
| -1.01231877 | 0.82961451 | -1.042245  | 0.385833705 | 0.995723679 | 0.939946147 |
| 0.951193131 | 0.37373299 | 0.98194221 | 0.785783336 | 0.980130404 | 0.720431293 |
| -1.06478008 | 0.32443247 | 0.97476725 | 0.648425    | 0.899463186 | 0.099002734 |
| 0.959254858 | 0.38697751 | -1.0225524 | 0.711688141 | -1.01757725 | 0.716287066 |
| -1.15227239 | 0.10058202 | -1.1741372 | 0.006534171 | -1.06280748 | 0.475829742 |
| -1.00400649 | 0.93724146 | 0.98359971 | 0.771263378 | -1.12758673 | 0.021118632 |
| -1.06888135 | 0.22683262 | -1.0132503 | 0.817644488 | -1.01924083 | 0.72787043  |
| 0.923587774 | 0.40121291 | -1.0098894 | 0.888957937 | 0.878121381 | 0.172225531 |
| -1.05144909 | 0.39935503 | 0.9847728  | 0.751120599 | 0.87811254  | 0.032058169 |
| 0.875264142 | 0.00976424 | 0.95186886 | 0.390772045 | -1.01862589 | 0.711960113 |
| -1.03573024 | 0.51045282 | -1.0259707 | 0.636822697 | -1.13437362 | 0.020924958 |
| 0.959753564 | 0.51015346 | -1.0055126 | 0.915262439 | -1.00561389 | 0.928340257 |
| -1.02194752 | 0.74530554 | 0.93526986 | 0.204646376 | 0.994026755 | 0.928539091 |
| 0.897684201 | 0.14495497 | -1.0302756 | 0.55907611  | -1.04738355 | 0.52850824  |
| -1.07286109 | 0.31102534 | 0.93898404 | 0.190740703 | -1.17274258 | 0.024338869 |
| 0.97921503  | 0.69769541 | -1.0121    | 0.821826827 | -1.10528069 | 0.068209509 |
| 0.969465915 | 0.519961   | 0.86422333 | 0.014830993 | 0.980992578 | 0.690153697 |
| -1.07556081 | 0.14459913 | -1.0490487 | 0.380538794 | 0.971693508 | 0.56192982  |
| 0.98361969  | 0.74892659 | -1.0197443 | 0.731196463 | 0.8842939   | 0.020133999 |
| -1.06655767 | 0.26720695 | 0.60485863 | 2.51809E-12 | -1.03418239 | 0.561116755 |
| -1.06478186 | 0.16906198 | -1.0002716 | 0.996582525 | -1.06657294 | 0.158134262 |
| -1.01961094 | 0.76635487 | 0.9037636  | 0.038503499 | 0.986965676 | 0.840867837 |
| -1.04951158 | 0.39437175 | -1.0093666 | 0.912897052 | -1.08815535 | 0.139199153 |
| -1.076979   | 0.15329391 | -1.0081164 | 0.873537819 | -1.00065872 | 0.989785523 |
| -1.04449652 | 0.45221676 | -1.003385  | 0.950776217 | -1.10488395 | 0.088505533 |
| -1.00373016 | 0.96011682 | 0.72017413 | 0.000961054 | 0.787385676 | 0.002143509 |
| -1.25895353 | 0.00205817 | 0.97708744 | 0.696240896 | -1.14443511 | 0.063101891 |
| 0.979529895 | 0.6837217  | -1.0343469 | 0.499906589 | 0.941494289 | 0.237743626 |
| 0.93085854  | 0.17109745 | 0.97674311 | 0.658755265 | -1.03657514 | 0.489722923 |
| 0.951220952 | 0.32845809 | 0.95768611 | 0.488296335 | -1.10666651 | 0.050715309 |
| -1.001121   | 0.98213012 | -1.1525884 | 0.037278108 | -1.02297111 | 0.65011419  |
| -1.01218073 | 0.84758784 | -1.006605  | 0.9284522   | 0.949366247 | 0.410859162 |
| -1.06345463 | 0.55178494 | 0.98628027 | 0.841540496 | -1.09363834 | 0.387477244 |
| -1.08291776 | 0.14575109 | -1.0855684 | 0.132750418 | -1.00131734 | 0.980627826 |
| -1.08915354 | 0.12877092 | 0.96447497 | 0.453271133 | -1.11811042 | 0.048738424 |
| -1.07957225 | 0.20747095 | -1.0064979 | 0.895762536 | 0.883915316 | 0.044627276 |
| -1.01968277 | 0.73099544 | -1.1401215 | 0.013513642 | -1.00461279 | 0.935268522 |
| -1.04605122 | 0.44348587 | 0.96587309 | 0.548278291 | 0.952171549 | 0.404409954 |
| 0.989179858 | 0.78803921 | 0.95343595 | 0.294364451 | -1.0841856  | 0.04973896  |
| -1.06372587 | 0.19920543 | 0.9190299  | 0.199681815 | 0.977537423 | 0.634575373 |
| 0.93382658  | 0.37836655 | -1.0549507 | 0.346141018 | 0.953143366 | 0.536170514 |

|             |            |            |             |             |             |
|-------------|------------|------------|-------------|-------------|-------------|
| -1.05861267 | 0.27494672 | -1.0199165 | 0.701618655 | 0.973694705 | 0.607822839 |
| -1.03633342 | 0.56672235 | -1.100514  | 0.101554405 | -1.09298018 | 0.156794897 |
| 0.914374745 | 0.10769289 | 0.98135606 | 0.800500257 | 0.951064528 | 0.363253316 |
| 0.89850313  | 0.16019634 | -1.2445577 | 0.003283184 | 0.859837433 | 0.049530681 |
| -1.00098709 | 0.98814008 | -1.0651224 | 0.216915733 | -1.00673652 | 0.919430019 |
| -1.06613101 | 0.5260911  | 0.97867569 | 0.678086093 | -1.04975069 | 0.630462003 |
| -1.0073757  | 0.8791684  | -1.0372769 | 0.473579664 | 0.900702581 | 0.034151095 |
| 0.957472138 | 0.49071608 | -1.0277795 | 0.584363675 | -1.05395476 | 0.405138438 |
| -1.01713226 | 0.86693279 | -1.0845033 | 0.201199782 | 0.563846052 | 5.66E-07    |
| 0.940000699 | 0.24523156 | -1.2615015 | 0.027823093 | -1.19611856 | 0.001277035 |
| -1.05129868 | 0.41652867 | 0.96033381 | 0.456518305 | -1.05540757 | 0.381371579 |
| -1.00108697 | 0.98259907 | -1.049945  | 0.382549389 | -1.03707096 | 0.466021891 |
| 0.902076183 | 0.0457701  | 0.998589   | 0.981314176 | -1.04785929 | 0.357724487 |
| 0.986198724 | 0.77587083 | 0.98500494 | 0.789814026 | 0.972000968 | 0.56119047  |
| 0.957037764 | 0.38639199 | -1.0613573 | 0.311781388 | -1.06695482 | 0.202974057 |
| 0.965298749 | 0.53770596 | -1.0656285 | 0.12026981  | -1.04707223 | 0.422748229 |
| -1.03936729 | 0.51818627 | -1.0450192 | 0.358312066 | -1.17945527 | 0.007473236 |
| 0.936958632 | 0.36393082 | -1.0312539 | 0.691271194 | 0.901485941 | 0.150556882 |
| 0.985508826 | 0.78964643 | 0.98247446 | 0.733395769 | -1.03905741 | 0.48465726  |
| -1.10421762 | 0.08388546 | -1.0400266 | 0.528834304 | 0.971287466 | 0.606876197 |
| 0.919465528 | 0.27343503 | -1.0661029 | 0.24722537  | -1.2749031  | 0.002304309 |
| -1.0217515  | 0.73972854 | 0.95806168 | 0.570991551 | -1.09096219 | 0.182345891 |
| -1.13296187 | 0.02630484 | -1.0328335 | 0.626823072 | -1.02213929 | 0.690168769 |
| -1.05409031 | 0.38616733 | 0.99309665 | 0.945219586 | -1.03771245 | 0.541816818 |
| 0.865868573 | 0.01348026 | 0.94413497 | 0.23737513  | -1.07069875 | 0.230825628 |
| -1.10848764 | 0.02119001 | 0.9723538  | 0.65619787  | 0.993472234 | 0.880562548 |
| -1.02196355 | 0.75334855 | 0.76936163 | 0.01206039  | 0.935210903 | 0.334539044 |
| 0.978481918 | 0.68028214 | 0.91118754 | 0.083083849 | -1.11308619 | 0.046220112 |
| -1.11667534 | 0.02309207 | 0.95192209 | 0.423546033 | -1.09882196 | 0.050866388 |
| 0.915280414 | 0.18935477 | -1.037821  | 0.457256555 | -1.06520219 | 0.347112247 |
| 0.884358403 | 0.02591635 | -1.0916512 | 0.087569122 | -1.00613179 | 0.909692284 |
| -1.25634658 | 0.02322014 | -1.1165784 | 0.027223979 | -1.40173522 | 0.001073611 |
| 0.936293157 | 0.21067302 | -1.0099123 | 0.845227715 | -1.13089382 | 0.021552542 |
| -1.13104623 | 0.03723628 | -1.0566056 | 0.337871562 | -1.03363364 | 0.568448767 |
| -1.06271551 | 0.22650207 | 0.98522169 | 0.802923567 | 0.952426668 | 0.331297643 |
| -1.26886134 | 0.00408151 | 0.90812467 | 0.181021708 | 0.946168859 | 0.488632406 |
| 0.844536764 | 0.06806486 | -1.1159762 | 0.048885781 | 0.692037759 | 0.000162273 |
| -1.0778382  | 0.17889373 | 0.93337999 | 0.225977511 | -1.07597854 | 0.188945605 |
| -1.01556405 | 0.77678968 | 0.99123277 | 0.908045321 | 0.97066086  | 0.585016932 |
| -1.01751392 | 0.73881823 | -1.1905034 | 0.009108434 | 0.946856484 | 0.296556049 |
| -1.00765989 | 0.86721474 | 0.98774784 | 0.82234515  | 0.916209105 | 0.059325881 |
| -1.0104507  | 0.84819318 | -1.0413008 | 0.504944518 | -1.13208022 | 0.025656594 |
| -1.09477815 | 0.25289636 | -1.0651526 | 0.267765131 | -1.18753936 | 0.032598204 |
| -1.14738981 | 0.0252654  | 0.87623592 | 0.003595214 | 0.957661083 | 0.472075999 |



|             |            |            |             |             |             |
|-------------|------------|------------|-------------|-------------|-------------|
| 0.538305095 | 4.44E-15   | 0.95434148 | 0.499808068 | 0.979293841 | 0.716455391 |
| -1.0254263  | 0.65570977 | -1.044675  | 0.408832411 | -1.09093633 | 0.126028703 |
| 0.948247744 | 0.38593567 | -1.0219272 | 0.647572759 | -1.03218722 | 0.604415541 |
| 0.911718035 | 0.10087871 | -1.163932  | 0.02663333  | -1.01874517 | 0.73860702  |
| 0.916069797 | 0.17303183 | -1.0331179 | 0.546147758 | 0.937782173 | 0.316124964 |
| 0.896709656 | 0.1028756  | -1.0655062 | 0.518667038 | -1.05625791 | 0.408510254 |
| 0.959639953 | 0.46431764 | -1.0529757 | 0.324945357 | -1.08073543 | 0.170563379 |
| -1.08982091 | 0.10472017 | -1.1203636 | 0.053815652 | -1.12971401 | 0.023029016 |
| -1.1929548  | 0.06708357 | 0.97549423 | 0.619790904 | -1.08661106 | 0.382825425 |
| 0.978777547 | 0.70203547 | -1.0951217 | 0.257277752 | 0.820273962 | 0.000804984 |
| -1.10392884 | 0.12547803 | 0.50627541 | 6.56574E-10 | -1.0216374  | 0.737449616 |
| -1.00343255 | 0.95634746 | -1.0180238 | 0.746761373 | -1.12388857 | 0.066322345 |
| -1.00505611 | 0.93035522 | -1.0338257 | 0.541978114 | 0.920901991 | 0.157182823 |
| -1.00516884 | 0.93092258 | -1.0214458 | 0.683730663 | -1.04191335 | 0.490922783 |
| 0.987625229 | 0.81231842 | 0.8941534  | 0.017013364 | -1.04561595 | 0.396487727 |
| 0.982334274 | 0.71743202 | 0.97126406 | 0.591808624 | -1.03389107 | 0.499237878 |
| -1.06810823 | 0.18729167 | -1.1780716 | 0.041215245 | 0.932400552 | 0.161719899 |
| -1.05216615 | 0.40262837 | 0.91002309 | 0.120354063 | 0.869284487 | 0.023943323 |
| -1.12562842 | 0.03261053 | -1.0673329 | 0.260544467 | -1.08765538 | 0.125217888 |
| 0.829468649 | 0.00137625 | -1.1306227 | 0.032724639 | 0.969465726 | 0.577918474 |
| -1.08368044 | 0.19032206 | 0.9977849  | 0.971035903 | 0.965177099 | 0.560995339 |
| -1.03588415 | 0.54099482 | -1.012473  | 0.823694525 | 0.849191475 | 0.006144428 |
| 0.996356996 | 0.95245017 | 0.96623203 | 0.590664255 | 0.964418588 | 0.554531461 |
| 0.995499564 | 0.92978121 | 0.95429344 | 0.479504969 | 0.985536052 | 0.775998861 |
| 0.98428013  | 0.75322014 | -1.0866289 | 0.143047425 | -1.09250309 | 0.083341473 |
| -1.00394066 | 0.95360915 | 0.90518869 | 0.061323304 | 0.930738414 | 0.290888627 |
| -1.12729703 | 0.0601408  | 0.98120036 | 0.841422078 | -1.00871038 | 0.88997777  |
| -1.13897179 | 0.0170489  | 0.97538985 | 0.65682282  | -1.06911197 | 0.211495305 |
| 0.965757882 | 0.52769632 | -1.1170008 | 0.087280123 | 0.905805219 | 0.076701754 |
| -1.20355435 | 0.02226278 | -1.0303854 | 0.632903958 | -1.14523258 | 0.090656557 |
| -1.16403165 | 0.13820997 | 0.93522453 | 0.248780985 | -1.1358566  | 0.212354327 |
| 0.876798792 | 0.06544046 | -1.0879278 | 0.160338142 | 0.656364929 | 1.60E-07    |
| 0.891099881 | 0.03902688 | -1.063169  | 0.245673208 | 0.955105848 | 0.40304337  |
| 0.982853391 | 0.76725565 | 0.98175889 | 0.708572519 | 0.986181438 | 0.811761577 |
| -1.18446818 | 0.014716   | 0.96941703 | 0.531597704 | 0.915020646 | 0.191657202 |
| -1.0091747  | 0.85878071 | -1.0375456 | 0.543469048 | 0.980457279 | 0.700762605 |
| -1.17254027 | 0.00395126 | 0.91995786 | 0.127864514 | 0.948746974 | 0.323887206 |
| -1.01573136 | 0.78955726 | -1.03256   | 0.565378607 | 0.992307153 | 0.894923811 |
| 0.959885044 | 0.46933425 | 0.99297573 | 0.907812345 | 0.995047017 | 0.929904892 |
| -1.1612677  | 0.01390168 | 0.98981088 | 0.858828046 | -1.11740247 | 0.064409061 |
| -1.0755725  | 0.26672015 | 0.90342604 | 0.101315058 | -1.01916298 | 0.771093118 |
| 0.859325433 | 0.01947996 | -1.1304106 | 0.019602911 | -1.11574392 | 0.087598613 |
| -1.02033648 | 0.87636977 | -1.0400332 | 0.437148918 | 0.922012728 | 0.531081254 |
| -1.00047338 | 0.99408414 | 0.99462271 | 0.936433196 | 0.967454834 | 0.604669494 |

|             |            |            |             |             |             |
|-------------|------------|------------|-------------|-------------|-------------|
| 0.971862367 | 0.66707046 | -1.1207808 | 0.073202514 | 0.79251236  | 0.00087698  |
| 0.974821021 | 0.73448402 | -1.0058605 | 0.91236801  | 0.95425181  | 0.533935353 |
| -1.08642963 | 0.22152273 | -1.0516486 | 0.362333626 | 0.963233433 | 0.578543004 |
| 0.967599697 | 0.49107407 | 0.99453352 | 0.944735369 | 0.897685413 | 0.027109072 |
| 0.965419569 | 0.51953901 | -1.1165805 | 0.279467799 | -1.0995179  | 0.086227951 |
| -1.05443639 | 0.50788967 | 0.84864675 | 0.022616788 | -1.25480654 | 0.006115926 |
| 0.982869251 | 0.7680624  | -1.0446228 | 0.426617122 | -1.06424197 | 0.290275343 |
| -1.23989085 | 0.00069983 | -1.026635  | 0.653009158 | 0.980415914 | 0.74198484  |
| 0.954774678 | 0.45841501 | -1.1269628 | 0.080781531 | -1.03286265 | 0.603958063 |
| 0.932342003 | 0.21164025 | 0.95569628 | 0.378993358 | 0.821744586 | 0.000829155 |
| -1.13656059 | 0.2123027  | -1.0512477 | 0.348499452 | -1.06612754 | 0.530434367 |
| -1.12188372 | 0.07015988 | 0.94539149 | 0.338884035 | -1.13508321 | 0.046738921 |
| 0.902839377 | 0.09326917 | -1.0853381 | 0.15077761  | 0.857727588 | 0.013123699 |
| -1.16329379 | 0.0337152  | 0.90258291 | 0.086987114 | 0.848592656 | 0.021649399 |
| 0.972212655 | 0.67070536 | 0.99401284 | 0.926636071 | -1.11017672 | 0.118694805 |
| -1.04222888 | 0.64669276 | 0.99692473 | 0.961154994 | 0.837269769 | 0.052915515 |
| 0.959777394 | 0.51450981 | 0.98188355 | 0.887648271 | -1.04128241 | 0.52065986  |
| -1.00962701 | 0.82832136 | 0.93392438 | 0.286760667 | 0.963553619 | 0.402171305 |
| -1.03215074 | 0.6032749  | 0.99321596 | 0.918215486 | -1.00528854 | 0.930885252 |
| 0.938250876 | 0.53816284 | 0.93739776 | 0.391276079 | 0.970931598 | 0.775407805 |
| -1.00602111 | 0.91301617 | -1.0162348 | 0.811022391 | 0.996555862 | 0.9499401   |
| -1.09098316 | 0.13215088 | 0.83472991 | 0.00036804  | 0.980040509 | 0.724728076 |
| 0.842007089 | 0.01201976 | -1.1162981 | 0.047667321 | -1.04855888 | 0.476556283 |
| -1.08389108 | 0.39735944 | -1.0689286 | 0.405606533 | -1.1388255  | 0.174299862 |
| -1.05474905 | 0.32295172 | -1.0382591 | 0.52228268  | -1.09331811 | 0.100792363 |
| 0.990568623 | 0.8540264  | -1.0426683 | 0.487500756 | 0.941833648 | 0.247523006 |
| -1.17997674 | 0.00987634 | -1.1427562 | 0.03579559  | 0.841966415 | 0.007465046 |
| 0.983200412 | 0.79880343 | 0.93782669 | 0.251867812 | -1.00692217 | 0.917319051 |
| 0.895382364 | 0.30559961 | -1.1019651 | 0.34262513  | 0.989975629 | 0.925216783 |
| -1.01674817 | 0.86218345 | -1.1628192 | 0.01877649  | -1.08167069 | 0.413323521 |
| -1.03369396 | 0.47633664 | 0.8216246  | 0.001802105 | 0.990543284 | 0.837841817 |
| 0.990600102 | 0.81566812 | -1.1824618 | 0.019181973 | -1.03323054 | 0.421012371 |
| 0.964033207 | 0.48585852 | 0.96532844 | 0.594629651 | -1.02535922 | 0.633330044 |
| 0.967077612 | 0.39241404 | 0.94548965 | 0.534829399 | -1.04510385 | 0.260909381 |
| 0.98473691  | 0.617055   | 0.87412122 | 0.03605196  | -1.03238644 | 0.301967616 |
| -1.07642974 | 0.33092299 | 0.96367436 | 0.403751002 | -1.24486391 | 0.005139613 |
| 0.936315618 | 0.28873804 | -1.0204541 | 0.739304431 | 0.948993849 | 0.397727883 |
| 0.97887075  | 0.84049263 | 0.97631006 | 0.816607819 | -1.04987255 | 0.646732188 |
| -1.10194088 | 0.10808254 | 0.99055605 | 0.862926945 | 0.943897074 | 0.335423233 |
| -1.115811   | 0.05009859 | 0.9942942  | 0.9203453   | -1.03962883 | 0.480266104 |
| -1.08599761 | 0.26586411 | 0.90448447 | 0.134942841 | 0.943503513 | 0.431509485 |
| 0.951071387 | 0.39288555 | -1.1372153 | 0.178955134 | 0.968197097 | 0.581257173 |
| -1.03784787 | 0.42268203 | -1.0420102 | 0.444569162 | -1.05860566 | 0.220862379 |
| 0.975055079 | 0.62764447 | 0.94593332 | 0.283043216 | -1.03971707 | 0.455230464 |

|             |            |            |             |             |             |
|-------------|------------|------------|-------------|-------------|-------------|
| -1.10352385 | 0.21386288 | 0.94030376 | 0.324179098 | -1.31023184 | 0.001098211 |
| 0.98584421  | 0.74339326 | -1.007924  | 0.905454044 | -1.09291695 | 0.045194046 |
| -1.07334461 | 0.18894941 | -1.0613939 | 0.579350188 | 0.97519177  | 0.638658531 |
| 0.922368986 | 0.24196219 | 0.9850078  | 0.87454924  | -1.18358659 | 0.016817381 |
| -1.11189538 | 0.02123163 | -1.064299  | 0.183084296 | -1.09075841 | 0.057145434 |
| -1.11183539 | 0.04879267 | 0.94837019 | 0.194126927 | -1.0523438  | 0.336226544 |
| -1.15208175 | 0.03206489 | 0.93236395 | 0.185343094 | 0.961236213 | 0.541393789 |
| -1.10396607 | 0.02244468 | 0.96685575 | 0.389200169 | 0.984333273 | 0.708925875 |
| -1.00380374 | 0.93451438 | -1.0001869 | 0.995147288 | 0.97446369  | 0.576130504 |
| -1.06698978 | 0.29979857 | -1.1015751 | 0.203008719 | -1.09484591 | 0.149265869 |
| 0.96301568  | 0.38349513 | -1.0202204 | 0.745709346 | -1.10579153 | 0.022775029 |
| -1.11583382 | 0.08005247 | -1.0056417 | 0.95770828  | -1.13932207 | 0.038360732 |
| -1.17472664 | 0.00820533 | 0.97243558 | 0.639875378 | -1.06636035 | 0.278234695 |
| -1.12827884 | 0.01667715 | -1.071158  | 0.214095339 | -1.03479261 | 0.486799581 |
| -1.01598136 | 0.77186665 | -1.1893339 | 0.021775492 | 0.968007068 | 0.552609249 |
| 0.905062594 | 0.12392259 | -1.1255837 | 0.047201685 | 0.992979788 | 0.912511405 |
| -1.04098125 | 0.43836193 | -1.1223737 | 0.015091552 | -1.01824155 | 0.726649877 |
| 0.958472038 | 0.57619497 | 0.9564802  | 0.394000857 | -1.04919895 | 0.526964199 |
| 0.915104694 | 0.33875438 | -1.1120795 | 0.180603149 | -1.09535228 | 0.326177352 |
| -1.04458238 | 0.30918979 | -1.0124507 | 0.776288537 | -1.1155276  | 0.012870949 |
| -1.02744445 | 0.82463979 | -1.1042141 | 0.067849979 | 0.810973426 | 0.090623738 |
| -1.06743875 | 0.07950134 | -1.0728327 | 0.307948404 | -1.03663268 | 0.328837237 |
| -1.02653791 | 0.72148406 | 0.98031964 | 0.65825918  | -1.13196576 | 0.095692265 |
| 0.969761948 | 0.55108746 | 0.94507725 | 0.287469503 | -1.05934836 | 0.264984649 |
| -1.4533345  | 1.89E-07   | 0.89736841 | 0.098086083 | -1.32616266 | 3.52E-05    |
| 0.966756761 | 0.70373724 | -1.000107  | 0.997980221 | 0.826729543 | 0.035938968 |
| 0.978954041 | 0.67056375 | -1.0549492 | 0.249912479 | -1.00961087 | 0.848202289 |
| 0.874043992 | 0.02048757 | -1.0492691 | 0.440824145 | -1.04049599 | 0.48436074  |
| 0.925424369 | 0.44704519 | -1.0055916 | 0.897044761 | -1.23447862 | 0.042137753 |
| -1.0293578  | 0.51716408 | -1.0563289 | 0.376343735 | 0.973542698 | 0.548240503 |
| -1.03122129 | 0.6537012  | 0.98048787 | 0.738223062 | 0.93587042  | 0.335119433 |
| 0.888852641 | 0.02128503 | 0.90789981 | 0.05304447  | -1.08903156 | 0.09168106  |
| -1.11201183 | 0.11415841 | -1.0377758 | 0.498487866 | 0.905292188 | 0.13818982  |
| 0.952898043 | 0.4960417  | -1.0636029 | 0.338274539 | 0.857703589 | 0.033620967 |
| -1.08733611 | 0.19025692 | 0.99146319 | 0.86825801  | -1.24657912 | 0.000968048 |
| 0.998069145 | 0.96617749 | 0.91582107 | 0.24879767  | -1.05976865 | 0.206206185 |
| 0.901295673 | 0.01685614 | -1.1205213 | 0.221076001 | -1.05408577 | 0.216598104 |
| 0.958066669 | 0.32168995 | 0.96286168 | 0.377012729 | -1.01962586 | 0.651797116 |
| -1.06863981 | 0.23781114 | 0.69375574 | 0.004008629 | -1.04457639 | 0.436348467 |
| 0.806264061 | 0.00632741 | -1.0189861 | 0.608560221 | 0.851717795 | 0.038810155 |
| 0.83959765  | 0.00209205 | -1.0155632 | 0.833458465 | -1.00118153 | 0.98265505  |
| 0.866117322 | 0.19001045 | 0.88475004 | 0.02026859  | -1.08614013 | 0.448762323 |
| -1.11715406 | 0.09160132 | -1.3059629 | 8.0621E-05  | -1.06305433 | 0.347320128 |
| 0.887087178 | 0.00871981 | 0.93180502 | 0.427970893 | 0.937322911 | 0.14717436  |

|             |            |            |             |             |             |
|-------------|------------|------------|-------------|-------------|-------------|
| 0.965024529 | 0.50354153 | 0.88049291 | 0.013341804 | 0.955517699 | 0.393208492 |
| -1.05695267 | 0.60836657 | -1.0879048 | 0.14088756  | 0.702655713 | 0.001806684 |
| 0.977214427 | 0.7673411  | -1.0971195 | 0.363735306 | 0.924333962 | 0.314624776 |
| 0.906115332 | 0.09550481 | -1.0432976 | 0.343786076 | -1.02447398 | 0.678938346 |
| 0.93995594  | 0.3194625  | 0.97499932 | 0.711702619 | 0.994475998 | 0.928706905 |
| 0.996930948 | 0.95768065 | -1.0434464 | 0.395607533 | 0.907275998 | 0.097263308 |
| -1.03506966 | 0.25460854 | -1.1597205 | 0.029163191 | 0.94549044  | 0.066575876 |
| -1.01065495 | 0.87694101 | 0.98575335 | 0.839247214 | -1.1000007  | 0.167515537 |
| 0.988004142 | 0.79892422 | -1.2092993 | 0.003964903 | -1.09222093 | 0.066765357 |
| 0.90078989  | 0.07543934 | -1.0277973 | 0.548157884 | 0.932170192 | 0.228267761 |
| 0.997975037 | 0.97332976 | -1.0240234 | 0.575432159 | -1.01024902 | 0.86645779  |
| 0.98722671  | 0.75534703 | -1.0422975 | 0.337737244 | -1.02718597 | 0.516239752 |
| -1.01685838 | 0.8484344  | 0.9633184  | 0.504450582 | -1.1213508  | 0.193876975 |
| 0.970338373 | 0.55595162 | 0.95471672 | 0.543404136 | 0.948880481 | 0.306391579 |
| -1.01155234 | 0.82755465 | -1.0177531 | 0.746070009 | 0.909350647 | 0.075742032 |
| -1.10439877 | 0.06557426 | -1.0019227 | 0.985912858 | -1.00011588 | 0.998257917 |
| 0.943242807 | 0.35892869 | -1.1294539 | 0.064496369 | 0.889566421 | 0.0693572   |
| 0.988371457 | 0.83165113 | 0.91922708 | 0.060982694 | -1.07221077 | 0.20837306  |
| 0.968169927 | 0.5468763  | -1.0404259 | 0.45672776  | 0.964089432 | 0.496007125 |
| 0.883443684 | 0.03784304 | 0.99729698 | 0.979999074 | 0.970734601 | 0.611922228 |
| -1.1400745  | 0.01331824 | 0.56802085 | 1.40734E-09 | -1.10499798 | 0.05644162  |
| -1.08034292 | 0.46405857 | -1.0516621 | 0.38979645  | -1.0279787  | 0.793305597 |
| -1.02837977 | 0.62162922 | -1.1475476 | 0.029712474 | -1.01533466 | 0.788229957 |
| -1.06149459 | 0.34329906 | 0.99266539 | 0.898876777 | -1.08233494 | 0.21040723  |
| 0.96339425  | 0.56745714 | -1.0452849 | 0.144813362 | -1.14170727 | 0.045813946 |
| 0.995528115 | 0.93239521 | 0.99256293 | 0.913147133 | 0.996473373 | 0.946685786 |
| -1.02106489 | 0.72885653 | 0.93936254 | 0.190143684 | -1.01432793 | 0.812937664 |
| -1.01503919 | 0.78344713 | 0.88472085 | 0.038187881 | 0.931399593 | 0.194099734 |
| 0.959482977 | 0.52601378 | 0.99570236 | 0.943370493 | -1.17027893 | 0.018635919 |
| -1.04193706 | 0.3672718  | -1.0336743 | 0.423296669 | -1.02307188 | 0.61572602  |
| 0.8564448   | 0.00985924 | 0.99285353 | 0.934644813 | -1.05498794 | 0.359429665 |
| -1.00315421 | 0.93574321 | 0.99940322 | 0.990670051 | -1.04610941 | 0.25141639  |
| 0.94539714  | 0.39837168 | -1.0012233 | 0.981497054 | 0.936380578 | 0.323421944 |
| 0.938121588 | 0.50631254 | -1.0148066 | 0.781901676 | -1.01845631 | 0.848807895 |
| -1.01846521 | 0.57371406 | -1.1437171 | 0.038072726 | -1.12158962 | 0.000810793 |
| 0.932355118 | 0.0772893  | -1.0144232 | 0.794680557 | -1.03134996 | 0.430790361 |
| -1.00708145 | 0.89793874 | 0.99671396 | 0.951037402 | 0.996999728 | 0.956440197 |
| 0.979955889 | 0.6709019  | -1.0610539 | 0.313152646 | 0.921541535 | 0.090439803 |
| 0.995257556 | 0.93762481 | -1.0203601 | 0.695437528 | -1.03578189 | 0.563362274 |
| -1.05336869 | 0.38976999 | 0.95361267 | 0.652187687 | 0.99577062  | 0.943914902 |
| -1.11793222 | 0.10192035 | -1.0398433 | 0.491261764 | -1.07247992 | 0.300926603 |
| -1.121352   | 0.033971   | -1.0231719 | 0.715054671 | 0.906598163 | 0.067939575 |
| -1.07700323 | 0.17059682 | 0.98832326 | 0.856885364 | 0.916888203 | 0.110111391 |
| -1.09324038 | 0.21276054 | -1.1363469 | 0.018445313 | 0.941151855 | 0.39474584  |

|             |            |            |             |             |             |
|-------------|------------|------------|-------------|-------------|-------------|
| 0.96780961  | 0.57627281 | -1.0663597 | 0.287624193 | 0.97100695  | 0.615213141 |
| -1.01244792 | 0.83118659 | -1.009459  | 0.862359573 | -1.10642297 | 0.085621481 |
| -1.01694988 | 0.76107055 | -1.069247  | 0.306132031 | -1.02226696 | 0.690413074 |
| -1.02934928 | 0.76017448 | -1.0546206 | 0.244359953 | 0.895451817 | 0.246678893 |
| -1.09611356 | 0.11059886 | -1.1422765 | 0.025541724 | -1.0658587  | 0.264544336 |
| -1.0037952  | 0.96040083 | -1.0108093 | 0.783203698 | -1.05151102 | 0.511162475 |
| 0.996363995 | 0.95674463 | -1.0568393 | 0.405652136 | -1.09751077 | 0.169686683 |
| 0.955788804 | 0.58372814 | -1.0752798 | 0.450423588 | -1.27623834 | 0.004400723 |
| -1.02733049 | 0.58344771 | 0.97674598 | 0.469827739 | -1.00879364 | 0.858504613 |
| -1.00802643 | 0.89106716 | 0.9613043  | 0.314716772 | -1.00833601 | 0.886911341 |
| -1.00803211 | 0.8540147  | -1.0496031 | 0.380553437 | -1.00201242 | 0.963114598 |
| -1.38788723 | 0.01460277 | 0.94986779 | 0.282640873 | -1.59572933 | 0.000698629 |
| -1.14983839 | 0.05210582 | -1.0906987 | 0.156832173 | -1.07225636 | 0.325379726 |
| -1.09336057 | 0.19742849 | -1.126302  | 0.05244153  | -1.07445255 | 0.298414053 |
| -1.09677125 | 0.18432266 | 0.99245396 | 0.910397147 | -1.04123938 | 0.558747271 |
| -1.27816937 | 0.00056519 | 0.95207045 | 0.354906906 | -1.04209505 | 0.540498774 |
| -1.02747699 | 0.60878675 | 0.8709068  | 0.012398083 | -1.00753862 | 0.88710571  |
| -1.06704824 | 0.53072985 | -1.1165921 | 0.124645127 | -1.06039853 | 0.57092084  |
| -1.13114663 | 0.02953375 | -1.0894887 | 0.14663523  | 0.995203361 | 0.93080328  |
| 0.984736069 | 0.83142013 | -1.214153  | 0.001440562 | -1.22212171 | 0.00728849  |
| 0.906707651 | 0.07638544 | 0.99232437 | 0.889098064 | 0.954692655 | 0.396104635 |
| 0.995359222 | 0.93547571 | -1.0594153 | 0.543008164 | -1.01119725 | 0.846356595 |
| -1.29330287 | 0.00022537 | 0.99677807 | 0.95471816  | 0.934639855 | 0.30317215  |
| -1.01550409 | 0.68725169 | -1.0387123 | 0.619002085 | -1.03077204 | 0.428738741 |
| -1.07474252 | 0.23993233 | -1.0503813 | 0.46534407  | -1.00316559 | 0.958637594 |
| -1.0362106  | 0.69423409 | -1.0220567 | 0.791270871 | -1.02888254 | 0.752942293 |
| -1.06047412 | 0.21824674 | -1.0836551 | 0.106065124 | 0.963529502 | 0.434003144 |
| -1.14439376 | 0.33486946 | 0.98362086 | 0.777301502 | -1.11954457 | 0.418837467 |
| -1.07769339 | 0.21380367 | 0.9928284  | 0.868515606 | -1.05536645 | 0.368938224 |
| -1.06374079 | 0.11750851 | -1.2172679 | 0.13593706  | -1.02811242 | 0.478444777 |
| 0.992695463 | 0.83341104 | -1.0599912 | 0.410842728 | -1.01459691 | 0.677781131 |
| 0.985228043 | 0.77148842 | 0.99899488 | 0.988322722 | 0.8154762   | 0.000194735 |
| 0.740804219 | 0.03738051 | -1.0554705 | 0.435311357 | -1.09319971 | 0.528776082 |
| 0.968778768 | 0.51213836 | -1.0190678 | 0.778890283 | -1.06260453 | 0.211935738 |
| -1.12946713 | 0.13354043 | -1.1349063 | 0.019722938 | 0.946626442 | 0.495460984 |
| -1.07822098 | 0.13534171 | -1.092758  | 0.392265627 | 0.995347033 | 0.925544488 |
| -1.13719766 | 0.02563608 | 0.93060342 | 0.197462207 | 0.923407809 | 0.160590516 |
| -1.09983427 | 0.07237339 | 0.9830607  | 0.813094994 | -1.03525753 | 0.507377427 |
| -1.03445796 | 0.4145189  | 0.94053836 | 0.263068009 | -1.09770008 | 0.027722472 |
| -1.06116564 | 0.36090719 | 0.91562909 | 0.1291234   | -1.14708276 | 0.037778078 |
| 0.984118355 | 0.79256055 | 0.91722464 | 0.189496829 | -1.14045362 | 0.034473156 |
| -1.05211023 | 0.41474843 | 0.99860556 | 0.970850259 | -1.07492357 | 0.24755489  |
| 0.971648389 | 0.67080243 | -1.1213333 | 0.064443012 | -1.04900223 | 0.480227032 |
| 0.961780673 | 0.51199198 | -1.0106788 | 0.906486388 | 0.94010382  | 0.300113195 |

|             |            |            |             |             |             |
|-------------|------------|------------|-------------|-------------|-------------|
| 0.980088787 | 0.70211955 | -1.0323145 | 0.502707478 | -1.01189704 | 0.821975154 |
| 0.956573369 | 0.21356273 | 0.96171503 | 0.779297882 | 0.993547445 | 0.855068866 |
| 0.847828217 | 0.08729741 | -1.011813  | 0.844210811 | 0.86782521  | 0.140588409 |
| -1.11832377 | 0.06424794 | -1.0756108 | 0.066016255 | 0.980780255 | 0.744277305 |
| -1.02729978 | 0.78622364 | -1.0148125 | 0.673336199 | -1.02936796 | 0.770703856 |
| 0.818852288 | 0.00853171 | 0.93609182 | 0.200745718 | 0.836538935 | 0.018077412 |
| -1.13125248 | 0.02342289 | -1.0694347 | 0.63485936  | 0.983178837 | 0.749506737 |
| 0.993767828 | 0.91838185 | -1.0169963 | 0.727237792 | 0.991014374 | 0.882387973 |
| -1.02143119 | 0.71127481 | 0.98691079 | 0.869671865 | -1.02230131 | 0.700246471 |
| -1.21823412 | 0.0259771  | -1.0325383 | 0.521913393 | -1.22731423 | 0.021092251 |
| 0.861497415 | 0.01535586 | -1.0478405 | 0.407758412 | -1.00222286 | 0.970389658 |
| -1.02241235 | 0.7311537  | -1.0268688 | 0.611661824 | -1.14154594 | 0.043978788 |
| -1.03385002 | 0.56030889 | -1.0427463 | 0.314160167 | -1.0180435  | 0.754128427 |
| 0.925061956 | 0.18557083 | 0.98837006 | 0.856597465 | 0.991707221 | 0.886542721 |
| 0.999679058 | 0.99446819 | 0.92231183 | 0.187466109 | -1.01193418 | 0.797825761 |
| 0.890681215 | 0.06225688 | -1.0815743 | 0.209973968 | 0.983037232 | 0.779487409 |
| -1.23815289 | 0.08095592 | -1.0691095 | 0.32514883  | -1.25559026 | 0.063467397 |
| -1.02136973 | 0.67206309 | -1.0568547 | 0.353090838 | 0.910013231 | 0.063050391 |
| -1.07202727 | 0.17337623 | -1.0362864 | 0.498519539 | -1.1465737  | 0.008933087 |
| -1.0342197  | 0.54389309 | 0.9109858  | 0.010743192 | -1.00853292 | 0.877992675 |
| 0.99706277  | 0.96646755 | -1.0026213 | 0.978067564 | 0.963795033 | 0.598652276 |
| 0.912663166 | 0.10868376 | -1.0980717 | 0.11983989  | -1.00469573 | 0.933666831 |
| 0.960955905 | 0.44739414 | -1.0030251 | 0.975726519 | 0.875428625 | 0.013427944 |
| -1.26939315 | 0.0438602  | 0.81741624 | 0.008003652 | -1.34024488 | 0.014228666 |
| -1.0278193  | 0.53546985 | -1.0489114 | 0.370350921 | -1.00043601 | 0.992131214 |
| -1.2682216  | 6.46E-07   | -1.0073077 | 0.905002879 | -1.31845863 | 2.15E-08    |
| 0.900414064 | 0.08509071 | -1.0232562 | 0.688228739 | 0.980199696 | 0.739343256 |
| 0.924548707 | 0.14167001 | -1.123041  | 0.183905581 | 0.978341834 | 0.678841559 |
| -1.43894273 | 0.00108872 | -1.0815098 | 0.193743291 | -1.43597483 | 0.001155149 |
| 0.969743908 | 0.65242391 | -1.0901737 | 0.184168642 | 0.92581402  | 0.260853941 |
| -1.02087283 | 0.89077696 | 0.964491   | 0.527174745 | 0.790632019 | 0.122516823 |
| -1.09098328 | 0.02821936 | 0.94151642 | 0.304170052 | -1.01651428 | 0.673108482 |
| 0.778180746 | 0.00370217 | 0.96982027 | 0.508909735 | 0.571790639 | 1.02E-08    |
| -1.11568451 | 0.07469025 | 0.8312141  | 0.003645981 | -1.21751826 | 0.001892076 |
| 0.827277678 | 0.1293439  | -1.2507445 | 0.067948627 | 0.98145172  | 0.879680832 |
| 0.958556242 | 0.30650151 | -1.0368012 | 0.470067752 | -1.05345049 | 0.209528813 |
| 0.993415833 | 0.8467417  | -1.0659891 | 0.21036882  | -1.01606244 | 0.64133777  |
| 0.985858332 | 0.78635611 | 0.95213397 | 0.377206194 | -1.00030059 | 0.995434928 |
| 0.798421399 | 0.00306967 | 0.94698711 | 0.437597156 | 0.940559066 | 0.402300463 |
| -1.0201218  | 0.63991127 | 0.88544828 | 0.034320861 | -1.02108613 | 0.624160917 |
| 0.989400213 | 0.78209858 | 0.97600332 | 0.642539777 | -1.00482469 | 0.900555948 |
| 0.841334084 | 0.08740428 | -1.120493  | 0.329315593 | 0.732601391 | 0.002781273 |
| -1.14135255 | 0.05496888 | -1.0199124 | 0.655842246 | -1.14850336 | 0.044802365 |
| -1.15165406 | 0.06034865 | -1.1308219 | 0.005116462 | -1.08005363 | 0.300034617 |

|             |            |            |             |             |             |
|-------------|------------|------------|-------------|-------------|-------------|
| 0.943876232 | 0.28481541 | -1.0131258 | 0.828194262 | 0.927495953 | 0.164957046 |
| -1.10369012 | 0.22373308 | 0.94205757 | 0.261475124 | -1.2006605  | 0.02651094  |
| 0.97967859  | 0.70079619 | -1.3948302 | 0.002609111 | -1.1535854  | 0.009545205 |
| -1.02505007 | 0.5443459  | -1.0180685 | 0.79279609  | -1.05430861 | 0.19774044  |
| -1.02006612 | 0.8905295  | 0.8600783  | 0.318579795 | 0.937369475 | 0.654383216 |
| 0.711681634 | 0.00656732 | -1.0324641 | 0.411659582 | 0.849036727 | 0.179256489 |
| -1.00854704 | 0.81597298 | 0.82287831 | 0.021976413 | 0.955644398 | 0.217906126 |
| -1.03347359 | 0.54686878 | -1.1457968 | 0.027906777 | -1.04126312 | 0.459775316 |
| 0.94640326  | 0.16581717 | 0.95266223 | 0.695170821 | 0.75302978  | 1.78E-09    |
| 0.992719082 | 0.86589509 | -1.0429597 | 0.309504378 | -1.08786304 | 0.055737339 |
| -1.03308046 | 0.5558625  | -1.0139313 | 0.68580729  | 0.972382337 | 0.612107126 |
| 0.9140311   | 0.29576056 | 0.89899009 | 0.04663818  | -1.05185356 | 0.555132961 |
| -1.01012879 | 0.83507509 | 0.97211306 | 0.698351306 | -1.06534102 | 0.194444654 |
| -1.10353744 | 0.17618068 | 0.89130546 | 0.008837384 | -1.02148668 | 0.768547139 |
| 0.810650023 | 0.01548009 | -1.0025919 | 0.946416057 | -1.04275319 | 0.620006414 |
| -1.26100992 | 0.02682952 | 0.91258767 | 0.360755559 | -1.45540941 | 0.000535345 |
| -1.08159344 | 0.26387073 | -1.0791054 | 0.263617317 | -1.11234768 | 0.131217791 |
| -1.04678856 | 0.42625077 | -1.2412414 | 0.004878531 | -1.00696862 | 0.90354742  |
| 0.985614264 | 0.69802096 | 0.90469886 | 0.066481598 | -1.03890856 | 0.308764353 |
| 0.909871739 | 0.26933107 | -1.2167446 | 0.017687391 | 0.815134756 | 0.019153073 |
| -1.05969555 | 0.16263392 | -1.0277925 | 0.608105112 | -1.03524915 | 0.40139185  |
| 0.86406941  | 0.22763544 | -1.0236294 | 0.567065856 | 0.684512125 | 0.002546092 |
| -1.02071587 | 0.75604536 | 0.99350922 | 0.964014981 | -1.00354819 | 0.957181891 |
| -1.00371913 | 0.94716594 | 0.94343494 | 0.630224727 | -1.15774191 | 0.011209266 |
| -1.03667132 | 0.87638237 | -1.0739957 | 0.054997773 | -1.20643371 | 0.418980754 |
| 0.87984662  | 0.1332261  | -1.0647859 | 0.252826377 | 0.927933545 | 0.376991061 |
| 0.97397795  | 0.62779418 | 0.95571459 | 0.253127582 | -1.05152514 | 0.356951838 |
| -1.54707621 | 0.00019853 | 0.99059742 | 0.827196612 | -1.49049667 | 0.00058794  |
| 0.949279291 | 0.31860085 | -1.0811798 | 0.160957227 | 0.885519547 | 0.022407992 |
| 0.915750401 | 0.46560191 | -1.0058481 | 0.945648691 | -1.0329591  | 0.787605831 |
| 0.959080647 | 0.45149997 | -1.0299015 | 0.543356939 | -1.01649141 | 0.767663819 |
| -1.04222654 | 0.61682934 | 0.96615299 | 0.633845929 | 0.733860985 | 0.00041447  |
| -1.04572474 | 0.45924736 | -1.1012013 | 0.255884394 | -1.03489868 | 0.569745769 |
| 0.982252554 | 0.8379994  | -1.1564898 | 0.159320369 | 0.966698471 | 0.699123622 |
| 0.918568607 | 0.14825333 | 0.93392623 | 0.32950875  | 0.991382149 | 0.881741844 |
| 0.677309544 | 0.01221669 | -1.1235157 | 0.046089473 | 0.920116435 | 0.581742771 |
| -1.13428229 | 0.01790264 | 0.93735339 | 0.087309128 | 0.993551494 | 0.900660719 |
| 0.877510221 | 0.1744099  | 0.86696446 | 0.097412633 | 0.960932064 | 0.67631562  |
| 0.967172755 | 0.61004851 | 0.99074601 | 0.821282069 | -1.01600518 | 0.808125158 |
| 0.981877731 | 0.70906206 | 0.92865222 | 0.53897938  | -1.07524317 | 0.142615675 |
| -1.04694076 | 0.61546229 | -1.0493878 | 0.466040783 | -1.56410903 | 8.40E-06    |
| 0.893041106 | 0.2488273  | -1.0647036 | 0.265837296 | 0.908800034 | 0.328762605 |
| 0.960370049 | 0.45467852 | 0.90625463 | 0.670945087 | 0.997400457 | 0.961515415 |
| 0.980194886 | 0.72182499 | -1.1599107 | 0.082945262 | -1.01731085 | 0.759982916 |

|             |            |            |             |             |             |
|-------------|------------|------------|-------------|-------------|-------------|
| 0.927789561 | 0.09340773 | -1.0464718 | 0.404581348 | 0.911917519 | 0.040328927 |
| -1.14519568 | 0.14981847 | -1.2982668 | 0.020402906 | 0.988993995 | 0.905506765 |
| -1.01270705 | 0.8542896  | 0.92767032 | 0.152316665 | -1.04962859 | 0.482093388 |
| 0.955863777 | 0.37938877 | 0.92776994 | 0.533960081 | 0.816015431 | 0.000200269 |
| 0.967494175 | 0.53526712 | -1.0737716 | 0.201857369 | 0.913084053 | 0.091750686 |
| -1.07588712 | 0.27236663 | 0.87350336 | 0.105673659 | 0.998523434 | 0.982208751 |
| 0.918901767 | 0.11228115 | -1.0926881 | 0.145275924 | -1.03897213 | 0.468667798 |
| 0.803345976 | 0.07915543 | 0.9675562  | 0.706622226 | -1.09706226 | 0.452291837 |
| -1.00393204 | 0.95526118 | -1.0385688 | 0.516197542 | -1.02780961 | 0.695165385 |
| -1.04153014 | 0.52193701 | -1.1283243 | 0.425125193 | -1.05691398 | 0.384469918 |
| -1.00116989 | 0.98620686 | 0.8998599  | 0.045713583 | 0.947452149 | 0.4261696   |
| 0.88795353  | 0.12363966 | 0.97562734 | 0.795922032 | -1.07179907 | 0.365477863 |
| 0.994922822 | 0.91905413 | 0.9659014  | 0.596076814 | -1.02821413 | 0.57908216  |
| 0.993551111 | 0.90235958 | -1.0548529 | 0.278286595 | -1.01075202 | 0.839315677 |
| -1.0603771  | 0.39705208 | -1.1166946 | 0.229443196 | -1.09123868 | 0.209031745 |
| 0.974997724 | 0.61462987 | 0.83158173 | 0.062716821 | 0.979594115 | 0.681717822 |
| 0.887143797 | 0.31097225 | -1.0789784 | 0.162636043 | 0.747793063 | 0.016210566 |
| -1.15600389 | 0.11940732 | -1.1647836 | 0.008570815 | -1.16082965 | 0.109383688 |
| 0.905165356 | 0.028323   | -1.0946448 | 0.044182648 | 0.996959003 | 0.945333528 |
| -1.23678206 | 0.01227231 | -1.024366  | 0.796283734 | -1.22088863 | 0.018288526 |
| -1.03044768 | 0.53557409 | -1.02878   | 0.680042998 | -1.07213605 | 0.153429096 |
| 0.998533687 | 0.97502001 | -1.0242745 | 0.639586694 | -1.06322168 | 0.194342386 |
| 0.974281808 | 0.49647784 | 0.94504028 | 0.290563609 | -1.03285702 | 0.399331612 |
| 0.935969209 | 0.30266489 | -1.1226273 | 0.085176293 | -1.00618356 | 0.923124907 |
| -1.05489562 | 0.5383046  | -1.0525893 | 0.332267307 | -1.10917127 | 0.235102177 |
| 0.943562748 | 0.27272736 | 0.90442729 | 0.415274063 | -1.08064458 | 0.14485442  |
| 0.758890459 | 0.00448716 | -1.0980348 | 0.184852111 | 0.881329744 | 0.180030892 |
| -1.00881766 | 0.76167571 | -1.0091084 | 0.886326959 | -1.0079725  | 0.783816795 |
| 0.949858147 | 0.25100242 | -1.1009618 | 0.158850553 | 0.999821831 | 0.996807801 |
| -1.01163131 | 0.83367398 | 0.93577058 | 0.386104719 | -1.07271575 | 0.205756381 |
| 0.996366569 | 0.94798335 | -1.0634937 | 0.222268168 | 0.923058863 | 0.155210514 |
| -1.08012017 | 0.19915903 | -1.0900287 | 0.106363533 | -1.07880534 | 0.206243083 |
| -1.11141905 | 0.04867205 | -1.0559173 | 0.431646923 | -1.0919773  | 0.098703157 |
| -1.02382914 | 0.75687314 | -1.1157616 | 0.032826674 | -1.0845089  | 0.288526906 |
| 0.892750522 | 0.01863487 | -1.0798072 | 0.514725553 | -1.04595103 | 0.340895331 |
| 0.967708371 | 0.44683486 | 0.96218376 | 0.675565948 | 0.899599726 | 0.016716459 |
| 0.687453034 | 3.47E-09   | -1.0262864 | 0.559734732 | 0.667400215 | 4.35E-10    |
| -1.10449609 | 0.13748807 | -1.0674299 | 0.429625565 | 0.954845794 | 0.486370282 |
| -1.02195056 | 0.68303588 | -1.0363785 | 0.460814221 | 0.95207282  | 0.357232972 |
| 0.965290924 | 0.57914132 | 0.98448877 | 0.738818473 | 0.974732855 | 0.687620818 |
| 0.89249162  | 0.09632367 | 0.97948096 | 0.588121568 | 0.895296367 | 0.105620917 |
| 0.953914649 | 0.34132815 | 0.89098875 | 0.07506396  | -1.03014954 | 0.548103043 |
| 0.970178608 | 0.76225736 | 0.90915149 | 0.274603434 | 0.840070975 | 0.085796123 |
| 0.95451464  | 0.42899552 | -1.0364434 | 0.497651105 | -1.04627025 | 0.442130282 |



|             |            |            |             |             |             |
|-------------|------------|------------|-------------|-------------|-------------|
| 0.979532927 | 0.74955698 | 0.88126863 | 0.179795939 | -1.01728803 | 0.791294203 |
| -1.0493405  | 0.47113728 | -1.0361069 | 0.223463491 | -1.09108099 | 0.194580208 |
| -1.11738771 | 0.12129414 | -1.1030486 | 0.031212676 | -1.07165318 | 0.330723773 |
| 0.914404714 | 0.15933589 | -1.0571413 | 0.315144201 | -1.00184423 | 0.976665515 |
| -1.20491642 | 0.00132016 | 0.88500823 | 0.032159393 | -1.06982912 | 0.225076402 |
| -1.01515134 | 0.87938068 | -1.1108615 | 0.081846554 | 0.88671575  | 0.22813279  |
| -1.07304756 | 0.49921114 | 0.97919248 | 0.689606232 | -1.05243552 | 0.623899298 |
| 0.898421968 | 0.04678699 | -1.0895668 | 0.262059562 | 0.978708498 | 0.684238119 |
| 0.926694541 | 0.1705133  | -1.0255533 | 0.591640596 | -1.09403143 | 0.10688189  |
| 0.898021188 | 0.04771758 | 0.97861721 | 0.615886834 | 0.923339348 | 0.138822594 |
| 0.984484868 | 0.81777492 | 0.71076444 | 3.58818E-08 | -1.02183854 | 0.750290979 |
| 0.902813249 | 0.19297441 | 0.86038016 | 0.026527132 | -1.17621191 | 0.04110624  |
| 0.813843135 | 0.00375729 | 0.94223541 | 0.265584578 | 0.81711228  | 0.00443324  |
| -1.04843825 | 0.35135331 | 0.92961435 | 0.254046124 | 0.934875254 | 0.186388147 |
| 0.97562848  | 0.69209775 | 0.83595928 | 0.010109447 | -1.03241163 | 0.608858588 |
| -1.18996328 | 0.07835434 | 0.90462496 | 0.046324536 | -1.30244605 | 0.008628045 |
| 0.987717278 | 0.88436418 | -1.0529242 | 0.606626037 | -1.17815037 | 0.057827925 |
| 0.913213923 | 0.04770204 | -1.1345357 | 0.035189632 | -1.08595206 | 0.071219557 |
| -1.07215117 | 0.27007205 | -1.0780623 | 0.248657708 | -1.23030076 | 0.001645954 |
| 0.998713508 | 0.988698   | -1.0156489 | 0.815882208 | 0.840728265 | 0.060449505 |
| -1.11699532 | 0.03210537 | -1.0212069 | 0.767119992 | -1.06205235 | 0.236457736 |
| 0.704553751 | 0.01900011 | 0.91734966 | 0.174584433 | -1.04978412 | 0.738508005 |
| -1.10756096 | 0.0298737  | -1.0800352 | 0.16729632  | 0.995900165 | 0.928841558 |
| 0.926725033 | 0.11783237 | 0.89264253 | 0.254604469 | -1.03200239 | 0.513377141 |
| 0.915975962 | 0.22088834 | -1.137702  | 0.218565109 | -1.00394888 | 0.955851808 |
| 0.941915746 | 0.72855162 | -1.0897219 | 0.108428402 | 0.866012839 | 0.405362204 |
| -1.03332504 | 0.54122363 | -1.0169043 | 0.760879295 | -1.04717357 | 0.391103937 |
| -1.04278635 | 0.43822864 | 0.97956362 | 0.698829684 | -1.04206514 | 0.445787262 |
| -1.18421405 | 0.05941977 | -1.0772423 | 0.275491664 | -1.23998035 | 0.017576681 |
| -1.08632626 | 0.33325317 | -1.0073236 | 0.925384364 | 0.973099753 | 0.749042663 |
| -1.05825883 | 0.60158969 | 0.90200764 | 0.135119868 | -1.12069734 | 0.295267475 |
| -1.03920701 | 0.44976221 | 0.89545788 | 0.032536493 | 0.901730472 | 0.045480769 |
| -1.11615101 | 0.07303283 | 0.98979573 | 0.869163707 | -1.04398717 | 0.476904939 |
| -1.13223035 | 0.13543883 | -1.3253312 | 0.005305881 | 0.732490069 | 0.000371767 |
| -1.19217195 | 0.12585936 | -1.0773639 | 0.3821898   | -1.21456593 | 0.091292792 |
| 0.975573122 | 0.77691318 | 0.99773645 | 0.959845588 | -1.11798282 | 0.204572219 |
| 0.899488203 | 0.11733581 | -1.1059377 | 0.113111284 | 0.974407639 | 0.698410998 |
| -1.03219659 | 0.49796267 | 0.79074081 | 0.012154714 | -1.08903372 | 0.071828128 |
| -1.02742931 | 0.56243628 | 0.96536377 | 0.486308585 | -1.14681896 | 0.004692226 |
| -1.09791324 | 0.33635051 | 0.99196029 | 0.9557455   | -1.0878836  | 0.38558655  |
| -1.12683591 | 0.04469936 | -1.0353878 | 0.450880836 | 0.989366428 | 0.854683377 |
| -1.12691927 | 0.21466298 | 0.97731859 | 0.633742916 | -1.23137097 | 0.033103944 |
| 0.995735127 | 0.94700263 | 0.98646068 | 0.848170717 | -1.06518605 | 0.328200066 |
| -1.11457246 | 0.23603651 | 0.75324237 | 0.104362527 | 0.915697552 | 0.334928649 |

|             |            |            |             |             |             |
|-------------|------------|------------|-------------|-------------|-------------|
| 0.967082887 | 0.58104709 | -1.0168319 | 0.755424763 | 0.981819459 | 0.762031908 |
| 0.96719814  | 0.48646699 | -1.1222509 | 0.036077875 | 0.951364116 | 0.299513597 |
| 0.966235967 | 0.55397896 | -1.1379605 | 0.146835126 | -1.10744297 | 0.082490009 |
| -1.01888903 | 0.89009255 | 0.9780995  | 0.795000365 | -1.12858373 | 0.373451382 |
| -1.43864782 | 7.97E-06   | -1.0328922 | 0.765197989 | -1.21805562 | 0.009750638 |
| -1.07634038 | 0.43148036 | -1.0946346 | 0.079077291 | -1.16034623 | 0.114950514 |
| 0.961209771 | 0.5222621  | -1.1519873 | 0.022244622 | 0.959113408 | 0.499658194 |
| 0.897936726 | 0.09478514 | 0.89578517 | 0.184835304 | 0.998480063 | 0.980917845 |
| 0.948695991 | 0.43882325 | -1.1636135 | 0.185769482 | 0.915749008 | 0.197982595 |
| 0.922310502 | 0.12879138 | -1.1515692 | 0.110002973 | 0.997941834 | 0.968797005 |
| 0.795596561 | 0.03965608 | 0.91961943 | 0.213449957 | 0.968746578 | 0.770793421 |
| 0.951356825 | 0.43287195 | -1.0382118 | 0.422972462 | -1.0047845  | 0.939987287 |
| -1.09151585 | 0.31587601 | 0.99813235 | 0.96803105  | -1.07581863 | 0.401888902 |
| 0.607413989 | 0.00131539 | 0.96776362 | 0.734961187 | 0.916978733 | 0.558039693 |
| 0.992669681 | 0.84665957 | -1.062288  | 0.302921552 | 0.950802168 | 0.188343909 |
| 0.869415087 | 0.59622589 | 0.95468344 | 0.627984859 | 0.895246872 | 0.675081853 |
| -1.03064057 | 0.6420384  | 0.90391895 | 0.120349695 | -1.07599771 | 0.26158069  |
| 0.951103441 | 0.4208279  | 0.87070454 | 0.131987673 | 0.824622233 | 0.002907191 |
| 0.777670854 | 0.07624822 | 0.96520205 | 0.559319071 | 0.747518961 | 0.041179505 |
| -1.03437245 | 0.61190754 | -1.0108606 | 0.821309095 | -1.0155783  | 0.816311915 |
| 0.505220444 | 4.04E-13   | 0.97817395 | 0.703501111 | 0.976651616 | 0.743108948 |
| 0.314712306 | 1.55E-12   | -1.163607  | 0.265900865 | 0.460013715 | 1.03E-07    |
| -1.1157026  | 0.13536918 | -1.0806595 | 0.296598774 | 0.995807754 | 0.953826071 |
| 0.949185717 | 0.33685475 | 0.94460782 | 0.541820848 | -1.05388652 | 0.333796349 |
| -1.15870096 | 0.00672765 | -1.0094588 | 0.878762193 | 0.919095641 | 0.112226968 |
| -1.21568942 | 0.07576405 | -1.1236411 | 0.071061523 | -1.04882025 | 0.660307528 |
| -1.04422857 | 0.66396585 | 0.87800082 | 0.059297856 | 0.842051278 | 0.088423211 |
| 0.973417792 | 0.46627511 | 0.96362801 | 0.48279275  | 0.998322988 | 0.963708654 |
| -1.29962834 | 0.00758734 | -1.0827666 | 0.466557454 | 0.851812861 | 0.095283717 |
| -1.04665766 | 0.59063097 | -1.0233105 | 0.716424866 | -1.13687585 | 0.133787604 |
| 0.739901119 | 0.15443686 | -1.0202342 | 0.817723947 | 0.911425242 | 0.65831881  |
| -1.04793029 | 0.39929014 | 0.87584023 | 0.371296071 | -1.00594657 | 0.914712963 |
| -1.15094856 | 0.15933481 | -1.0346025 | 0.372957663 | -1.03803286 | 0.706240436 |
| -1.04527009 | 0.50426669 | 0.7233076  | 0.222648981 | 0.975330989 | 0.705965707 |
| 0.934620259 | 0.17136501 | 0.99385759 | 0.924321549 | 0.905807978 | 0.047493829 |
| -1.00468206 | 0.93823771 | 0.98070556 | 0.753785525 | -1.05284438 | 0.394588068 |
| 0.922222701 | 0.16729557 | 0.97567105 | 0.860118009 | -1.09844245 | 0.110371245 |
| 0.912655116 | 0.37775931 | -1.1850559 | 0.013182326 | -1.12777313 | 0.247124232 |
| 0.88997706  | 0.02850011 | 0.95333646 | 0.508038173 | -1.01611166 | 0.75875982  |
| -1.37409065 | 4.83E-05   | 0.58469674 | 8.68676E-05 | -1.27504628 | 0.001357434 |
| 0.958734328 | 0.61695068 | -1.0263885 | 0.71975754  | -1.20248423 | 0.032034989 |
| -1.10562524 | 0.05244498 | -1.0171107 | 0.753782504 | 0.972502323 | 0.584070987 |
| -1.03511716 | 0.61610105 | -1.0926998 | 0.095526919 | -1.11078704 | 0.130601244 |
| 0.942317239 | 0.48816576 | 0.87289534 | 0.212985594 | 0.905964915 | 0.251080331 |

|             |            |            |             |             |             |
|-------------|------------|------------|-------------|-------------|-------------|
| -1.05014794 | 0.2496958  | 0.84992493 | 0.106567459 | -1.0572606  | 0.191039789 |
| 0.863786401 | 0.01366892 | -1.0805015 | 0.039652356 | 0.994696602 | 0.92656995  |
| -1.14685643 | 0.03656221 | -1.0414882 | 0.668639859 | 0.950824757 | 0.433533498 |
| 0.675814754 | 0.02262318 | -1.0192015 | 0.822285693 | 0.740032082 | 0.076906521 |
| -1.04731049 | 0.3591298  | 0.89469288 | 0.595853254 | 0.98486693  | 0.761453005 |
| 0.893950876 | 0.1011663  | -1.0700237 | 0.224693958 | -1.06797141 | 0.332273552 |
| -1.01851834 | 0.82242065 | -1.1391798 | 0.191511498 | 0.881164759 | 0.125828525 |
| 0.901279405 | 0.06430835 | 0.98187996 | 0.782329042 | -1.06830813 | 0.235088859 |
| 0.980756752 | 0.7220667  | 0.91250019 | 0.065891361 | -1.07449521 | 0.19170372  |
| -1.27193588 | 0.00627294 | 0.99233112 | 0.898389684 | -1.3025956  | 0.002852523 |
| 0.983868393 | 0.75457064 | 0.94897683 | 0.369263733 | 0.947751942 | 0.30447031  |
| 0.930730986 | 0.20263019 | -1.114433  | 0.296458232 | -1.09891495 | 0.095903207 |
| -1.266566   | 0.02093771 | 0.96830208 | 0.536519459 | -1.14976853 | 0.165747862 |
| 0.828797507 | 0.17452918 | -1.1493739 | 0.058068166 | -1.01866718 | 0.892699692 |
| 0.894231748 | 0.54431561 | -1.0091678 | 0.913647995 | 0.757317751 | 0.135073587 |
| 0.94741915  | 0.53781295 | -1.0189907 | 0.711644829 | -1.21649081 | 0.028584084 |
| -1.33533091 | 0.00761353 | -1.0204232 | 0.768818816 | -1.16100103 | 0.158021417 |
| -1.00880537 | 0.91635119 | 0.98259994 | 0.837390892 | -1.04715055 | 0.581485958 |
| 0.926165243 | 0.34789726 | 0.96870372 | 0.452838828 | -1.00246155 | 0.975898088 |
| 0.892776516 | 0.03299435 | -1.0722941 | 0.229515369 | -1.06159893 | 0.25381294  |
| 0.980725824 | 0.76966196 | 0.97649714 | 0.711226411 | -1.14027673 | 0.052263824 |
| -1.05081472 | 0.41143913 | 0.79426685 | 0.173337056 | -1.00039515 | 0.994759786 |
| -1.00873944 | 0.86184207 | 0.98283038 | 0.73029025  | 0.895739188 | 0.031193555 |
| -1.12090051 | 0.04234627 | -1.0464744 | 0.5020341   | -1.02455576 | 0.66023243  |
| 0.942581799 | 0.3633897  | -1.0163944 | 0.842333348 | -1.27200421 | 0.000463484 |
| -1.09423885 | 0.22964567 | 0.93928732 | 0.260061653 | -1.05486816 | 0.474219802 |
| -1.05876859 | 0.21071472 | -1.0511472 | 0.362755301 | -1.08265969 | 0.083811681 |
| 0.996969494 | 0.95472693 | -1.3548654 | 0.000711911 | 0.901005175 | 0.055315527 |
| 0.937033186 | 0.25192535 | -1.0239867 | 0.648816236 | -1.11084052 | 0.066673983 |
| 0.961183576 | 0.47849258 | 0.97779392 | 0.688179753 | -1.08627755 | 0.141575055 |
| 0.965764396 | 0.57990659 | -1.2113372 | 0.058859803 | 0.989521785 | 0.866903926 |
| 0.981831149 | 0.73018513 | -1.0042334 | 0.97541924  | -1.03371134 | 0.533394315 |
| 0.902343799 | 0.37970222 | 0.76480736 | 0.149154854 | 0.836474631 | 0.129652583 |
| -1.01359552 | 0.81035852 | 0.97381363 | 0.761818891 | -1.02623753 | 0.645592354 |
| 0.95781665  | 0.47862614 | -1.0174532 | 0.868823657 | -1.0705096  | 0.264350064 |
| -1.10199022 | 0.16873203 | -1.056854  | 0.508512767 | 0.976306129 | 0.731845027 |
| 0.98832769  | 0.79203864 | -1.1137482 | 0.189127361 | -1.13460024 | 0.006190073 |
| -1.07705389 | 0.33274798 | -1.0235739 | 0.654787359 | -1.16636649 | 0.047707975 |
| 0.990796411 | 0.93812031 | -1.1632066 | 0.02622412  | 0.805721995 | 0.073996148 |
| -1.02346946 | 0.56020217 | -1.0078937 | 0.896014352 | -1.02491351 | 0.536691566 |
| -1.01011645 | 0.84114598 | 0.93747631 | 0.2000136   | -1.04484243 | 0.384014021 |
| 0.848658916 | 0.37729892 | -1.0551721 | 0.332177379 | -1.00907017 | 0.961112595 |
| 0.984482819 | 0.76676145 | 0.92733114 | 0.247329439 | -1.1919778  | 0.00149504  |
| 0.994729152 | 0.94959119 | -1.029849  | 0.693059389 | -1.24091181 | 0.012198388 |

|             |            |            |             |             |             |
|-------------|------------|------------|-------------|-------------|-------------|
| -1.00920356 | 0.91612059 | -1.1416595 | 0.004850162 | -1.19972108 | 0.040153611 |
| 0.970220419 | 0.60535819 | -1.1170486 | 0.04230251  | 0.960281613 | 0.488933013 |
| -1.05672964 | 0.4571613  | -1.1508942 | 0.015404185 | 0.88922353  | 0.116909097 |
| -1.15207997 | 0.04201684 | -1.1159988 | 0.053010081 | -1.22439896 | 0.004336228 |
| 0.983154422 | 0.69809782 | 0.8788207  | 0.043761569 | -1.0049114  | 0.910876017 |
| 0.937196019 | 0.12601666 | 0.99738921 | 0.960762009 | -1.07060282 | 0.107969649 |
| -1.02003465 | 0.65021162 | 0.90765092 | 0.407304844 | -1.02420253 | 0.584759203 |
| -1.26798397 | 0.00416837 | -1.0649431 | 0.266172006 | -1.79527549 | 1.04E-09    |
| 0.960752966 | 0.50473481 | 0.97613387 | 0.690820785 | 0.928745636 | 0.220407404 |
| 0.955940624 | 0.46171798 | -1.1284728 | 0.088261267 | 0.927118545 | 0.218532607 |
| 0.99806764  | 0.98609624 | -1.0387728 | 0.394422216 | -1.21807866 | 0.079805334 |
| 0.993721975 | 0.89144251 | -1.0861135 | 0.281583007 | 0.966436953 | 0.460514811 |
| -1.08750453 | 0.24146543 | 0.772139   | 0.033558743 | -1.00797145 | 0.911157014 |
| 0.848637655 | 0.03010209 | -1.0028756 | 0.942426461 | -1.11141065 | 0.157408426 |
| 0.988208167 | 0.80167321 | -1.0646015 | 0.215795939 | -1.00214935 | 0.963726467 |
| 0.850998411 | 0.00485724 | 0.99859397 | 0.993937808 | -1.04243513 | 0.452457279 |
| 0.93174949  | 0.1958616  | -1.021214  | 0.690619546 | 0.985856444 | 0.792853355 |
| -1.05742276 | 0.53541121 | -1.0199822 | 0.812947088 | 0.986907024 | 0.883493453 |
| 0.971658619 | 0.50418597 | 0.98519383 | 0.863852714 | -1.02204578 | 0.612127187 |
| 0.914993028 | 0.10455807 | -1.0788419 | 0.197552129 | -1.0030488  | 0.955092133 |
| 0.887874073 | 0.11136168 | 0.97928711 | 0.77743543  | 0.927204711 | 0.308198701 |
| 0.716608897 | 0.00335373 | -1.0633266 | 0.370286018 | 0.816567194 | 0.067356159 |
| -1.17114567 | 0.22560646 | 0.99191878 | 0.852947761 | -1.56256963 | 0.00105634  |
| -1.05597769 | 0.33339253 | -1.0900059 | 0.043763973 | 0.937935048 | 0.255945949 |
| 0.994833558 | 0.90126823 | 0.93238748 | 0.113399384 | -1.04785338 | 0.265663591 |
| 0.956067674 | 0.27941387 | -1.4737554 | 9.59664E-06 | -1.01270512 | 0.759984427 |
| 0.923769767 | 0.4005187  | 0.78848299 | 0.000204337 | -1.07588999 | 0.437788024 |
| -1.03597891 | 0.59091493 | 0.91040976 | 0.12840815  | -1.05453994 | 0.420139375 |
| -1.32443237 | 0.00013741 | -1.1367543 | 0.251095981 | -1.10591687 | 0.146936715 |
| 0.939428303 | 0.29311337 | 0.98426633 | 0.73121282  | 0.950628394 | 0.393426611 |
| -1.03483733 | 0.42863595 | 0.9296789  | 0.307845332 | -1.0716783  | 0.112761627 |
| -1.09567528 | 0.22447323 | -1.073113  | 0.342422905 | -1.06236281 | 0.41944877  |
| -1.05388461 | 0.36673039 | -1.004503  | 0.924185767 | -1.09745188 | 0.112630244 |
| -1.16748662 | 0.03304216 | -1.0865814 | 0.136358016 | -1.01718062 | 0.810707192 |
| -1.1142065  | 0.07090117 | 0.97927417 | 0.699523085 | -1.04871162 | 0.421266066 |
| 0.866653884 | 0.03228217 | -1.0130886 | 0.885035773 | -1.00998688 | 0.879268339 |
| -1.01821163 | 0.92369123 | -1.1708665 | 0.000526204 | 0.774158462 | 0.177962991 |
| -1.12310439 | 0.06894197 | -1.0716819 | 0.203736778 | -1.25212622 | 0.000706712 |
| -1.23647322 | 0.01125607 | 0.91467432 | 0.230070658 | -1.14695809 | 0.095715681 |
| 0.992152019 | 0.88400352 | 0.82436171 | 0.080811588 | 0.980291795 | 0.712584693 |
| 0.95697782  | 0.38782003 | -1.2813563 | 0.059703247 | -1.0282149  | 0.583996777 |
| 0.785443296 | 0.18208642 | -1.0324561 | 0.569437017 | -1.02773009 | 0.878885143 |
| 0.983997686 | 0.77521581 | -1.0668411 | 0.125352591 | 0.94333374  | 0.303994617 |
| 0.974467458 | 0.63412928 | 0.95605025 | 0.279221006 | 0.996788375 | 0.952749918 |

|             |            |            |             |             |             |
|-------------|------------|------------|-------------|-------------|-------------|
| -1.04011039 | 0.66036968 | 0.97313924 | 0.772174316 | -1.00572224 | 0.949121827 |
| -1.02821147 | 0.63810326 | 0.93637835 | 0.31909363  | -1.03820914 | 0.526466002 |
| 0.895697551 | 0.06659323 | -1.0763763 | 0.286771564 | -1.04679246 | 0.440349323 |
| 0.975720672 | 0.68155756 | -1.0999648 | 0.111316544 | 0.935110174 | 0.265099421 |
| -1.05931713 | 0.54449485 | 0.98566131 | 0.737900533 | 0.918399649 | 0.371636818 |
| 0.904136506 | 0.10116306 | -1.0564913 | 0.463068628 | 0.731436376 | 3.47E-06    |
| -1.07925201 | 0.27328682 | 0.96754182 | 0.569493889 | 0.812071472 | 0.003853383 |
| 0.972298678 | 0.88645261 | 0.93535967 | 0.349294064 | -1.05248521 | 0.794893048 |
| -1.07310047 | 0.61039742 | 0.90330986 | 0.088886213 | -1.65307748 | 0.000592727 |
| 0.968180689 | 0.75116861 | 0.96625516 | 0.600216721 | -1.15417282 | 0.163348072 |
| -1.04123988 | 0.65097537 | 0.83010487 | 0.325218278 | -1.25648078 | 0.012969807 |
| 0.986667481 | 0.76239265 | -1.0544157 | 0.400698412 | -1.04923119 | 0.281440843 |
| -1.04820134 | 0.30848491 | -1.2145309 | 0.019709998 | -1.04686844 | 0.321619422 |
| 0.86549415  | 0.08919688 | 0.99528016 | 0.930185982 | 0.753922584 | 0.001338178 |
| 0.964748308 | 0.58490796 | -1.0835289 | 0.118088359 | -1.05247032 | 0.437009249 |
| 0.970235065 | 0.56284226 | 0.93402775 | 0.703943052 | 0.995479914 | 0.93076286  |
| -1.15502839 | 0.10980822 | 0.90902161 | 0.095485099 | -1.2098507  | 0.036149945 |
| 0.991599415 | 0.92146313 | -1.1182221 | 0.043484839 | 0.991320009 | 0.918848723 |
| 0.711406665 | 9.03E-07   | 0.98703306 | 0.883963887 | 0.626299975 | 4.11E-10    |
| -1.04472389 | 0.46043339 | -1.0915612 | 0.142179752 | 0.933158921 | 0.244960865 |
| -1.19793589 | 0.1407528  | 0.97271145 | 0.640027661 | 0.878155089 | 0.286905696 |
| 0.892784347 | 0.21289659 | 0.94083363 | 0.3105435   | 0.915755482 | 0.332343396 |
| -1.07736968 | 0.15948218 | -1.0324862 | 0.736401029 | -1.04597757 | 0.393321798 |
| -1.05424197 | 0.35164769 | 0.75329005 | 1.9275E-05  | -1.01985581 | 0.727913947 |
| -1.01038842 | 0.89977967 | 0.91264333 | 0.190251564 | -1.03292085 | 0.69324837  |
| -1.0753596  | 0.28881965 | 0.89431535 | 0.570742601 | -1.02194269 | 0.750170688 |
| -1.25947683 | 0.00259621 | -1.4046604 | 0.016792421 | 0.982018785 | 0.804689842 |
| -1.32847588 | 0.00311483 | -1.0435359 | 0.676133502 | -1.65923842 | 1.01E-06    |
| -1.11751606 | 0.00737902 | -1.0469562 | 0.607562616 | 0.980842294 | 0.629738248 |
| 0.94472888  | 0.46872815 | -1.0263245 | 0.558809473 | -1.09362402 | 0.255798386 |
| 0.961513759 | 0.63996544 | -1.1769662 | 0.000789325 | -1.02586949 | 0.760687654 |
| 0.926587041 | 0.27218971 | 0.91954418 | 0.319355262 | -1.00558567 | 0.935705068 |
| 0.937013502 | 0.43529013 | -1.0892024 | 0.196308033 | 0.809757054 | 0.013674274 |
| 0.953354077 | 0.19895237 | -1.1218582 | 0.030980527 | 0.987039678 | 0.723848575 |
| 0.861889303 | 0.09676151 | 0.95546965 | 0.609418925 | -1.05982774 | 0.511536588 |
| 0.962992924 | 0.57844041 | -1.0125326 | 0.884278122 | -1.15202131 | 0.040619757 |
| -1.02306921 | 0.69907775 | 0.78980742 | 0.000320557 | 0.934719857 | 0.255092337 |
| 0.865119143 | 0.26402305 | 0.97845949 | 0.712813378 | -1.14325864 | 0.301617292 |
| 0.834695761 | 0.00662104 | -1.0814878 | 0.519419979 | 0.99313771  | 0.914659668 |
| 0.987102566 | 0.8243703  | -1.0263206 | 0.773856459 | -1.01658078 | 0.778633943 |
| 0.998438283 | 0.97850208 | 0.94486197 | 0.282443283 | 0.916449868 | 0.136583776 |
| 0.769163042 | 0.0075189  | -1.021417  | 0.707709901 | 0.885457142 | 0.203377642 |
| 0.924281221 | 0.13273258 | 0.92645677 | 0.353837376 | -1.01806794 | 0.729814943 |
| 0.964694841 | 0.44728159 | 0.87381238 | 0.051812387 | -1.05783566 | 0.236350212 |

|             |            |            |             |             |             |
|-------------|------------|------------|-------------|-------------|-------------|
| 0.998404973 | 0.96821328 | -1.0794629 | 0.299688458 | -1.16054498 | 0.00045725  |
| 0.952054015 | 0.19402471 | -1.0124373 | 0.893322419 | -1.00720874 | 0.848252    |
| -1.07149588 | 0.53240782 | -1.0844769 | 0.047030932 | -1.34604479 | 0.009153759 |
| -1.16034325 | 0.00862992 | -1.1331995 | 0.11439079  | 0.942086149 | 0.278952491 |
| -1.027096   | 0.54063875 | 0.95749957 | 0.604814891 | -1.16645154 | 0.000820164 |
| -1.1148012  | 0.19751449 | 0.86820932 | 0.044630766 | -1.04592438 | 0.592036949 |
| -1.03898324 | 0.73051335 | 0.96145354 | 0.636748296 | -1.25131278 | 0.04734706  |
| -1.04614097 | 0.28241727 | 0.97539973 | 0.500578955 | -1.00349302 | 0.933420365 |
| 0.923147378 | 0.40137777 | -1.0908562 | 0.327084893 | 0.912926707 | 0.339547473 |
| 0.998609471 | 0.97059337 | 0.96357328 | 0.584508201 | -1.02000474 | 0.600230676 |
| 0.945680826 | 0.28170858 | -1.0602652 | 0.323148821 | 0.893656672 | 0.032958568 |
| -1.0629049  | 0.36078713 | -1.231393  | 0.110758959 | -1.05580057 | 0.415607166 |
| -1.05421882 | 0.2670575  | -1.0273003 | 0.675329479 | 0.956836874 | 0.352852474 |
| 0.984283393 | 0.8235398  | -1.0477325 | 0.426629707 | 0.974673494 | 0.718122978 |
| 0.871268898 | 0.05233898 | 0.9750185  | 0.662985898 | 0.910029856 | 0.180275287 |
| -1.07579328 | 0.18328507 | 0.85947027 | 0.114804849 | -1.14233753 | 0.017336133 |
| -1.05619749 | 0.53662716 | -1.0999975 | 0.070139546 | 0.807377896 | 0.018302775 |
| 0.91032909  | 0.19981249 | -1.0140491 | 0.767494785 | -1.06526796 | 0.3862352   |
| 0.929116926 | 0.35160134 | -1.1149929 | 0.008550888 | -1.04340527 | 0.589338687 |
| 0.543944661 | 7.56E-14   | 0.9389399  | 0.097502758 | 0.977050116 | 0.704700291 |
| 0.975884437 | 0.62865348 | -1.1343668 | 0.256361808 | -1.15024259 | 0.007300029 |
| 0.8677071   | 0.02308236 | -1.0996978 | 0.087181782 | 0.902850044 | 0.097858661 |
| -1.07531461 | 0.07803591 | -1.0357745 | 0.421755073 | -1.05587827 | 0.184197329 |
| -1.05459734 | 0.22723984 | -1.0693433 | 0.424379093 | -1.052929   | 0.24119555  |
| 0.883536006 | 0.01104721 | -1.0784211 | 0.497200642 | 0.901125185 | 0.031143184 |
| 0.898860209 | 0.1095129  | -1.0979002 | 0.028692311 | 0.759538657 | 0.000101997 |
| -1.04616811 | 0.71373927 | -1.0178335 | 0.852382137 | -1.21842882 | 0.112339206 |
| -1.09389436 | 0.06613169 | -1.0000945 | 0.998001857 | -1.00453631 | 0.924984305 |
| -1.12271811 | 0.00973346 | -1.0000618 | 0.999044543 | -1.04210201 | 0.343787536 |
| -1.10707183 | 0.22594402 | -1.1201536 | 0.092231751 | -1.04242532 | 0.618861122 |
| -1.05384961 | 0.2146105  | 0.92115917 | 0.086822223 | 0.976070916 | 0.564393588 |
| -1.02073455 | 0.60610751 | -1.0386248 | 0.594113637 | 0.976558487 | 0.551347228 |
| 0.941116293 | 0.59008633 | -1.0117168 | 0.867418456 | 0.971666329 | 0.798406664 |
| -1.08591038 | 0.09242841 | 0.96729697 | 0.54210851  | -1.05371201 | 0.281629837 |
| 0.862606507 | 0.15283165 | 0.91492705 | 0.316389267 | -1.0750538  | 0.480718362 |
| -1.06412007 | 0.40108767 | -1.1293241 | 0.09869498  | 0.983259121 | 0.819023873 |
| -1.05075827 | 0.29123225 | 0.96490983 | 0.649842025 | -1.09873042 | 0.047641558 |
| 0.993941578 | 0.90759354 | 0.97126824 | 0.634301301 | 0.914052223 | 0.090340572 |
| -1.05015989 | 0.43060615 | 0.9588879  | 0.406575533 | -1.001086   | 0.986013574 |
| -1.00536341 | 0.89201091 | 0.82456323 | 0.002448202 | -1.00096255 | 0.980517716 |
| -1.19055866 | 0.03311773 | -1.0428197 | 0.304216805 | -1.19842137 | 0.027275708 |
| 0.752548697 | 0.00692962 | 0.99403526 | 0.89117489  | 0.540077883 | 1.27E-07    |
| -1.20568164 | 0.00228027 | 0.96968969 | 0.515670153 | -1.03820061 | 0.523452523 |
| 0.941323444 | 0.66999858 | 0.80521433 | 0.001689387 | -1.16357682 | 0.287814095 |

|             |            |            |             |             |             |
|-------------|------------|------------|-------------|-------------|-------------|
| 0.985105528 | 0.77855616 | -1.1994215 | 0.143188813 | 0.957725139 | 0.419535219 |
| -1.02314791 | 0.67329225 | -1.1119327 | 0.030836774 | -1.01968242 | 0.719442543 |
| -1.11130721 | 0.4026097  | -1.1086516 | 0.020446361 | 0.590127036 | 9.60E-05    |
| 0.911716401 | 0.08935787 | -1.0971259 | 0.269279498 | -1.01704681 | 0.752919574 |
| 0.945455171 | 0.49992195 | 0.9895073  | 0.80157003  | -1.02862418 | 0.733866712 |
| 0.99377272  | 0.9443307  | 0.96189145 | 0.330507107 | 0.895562079 | 0.220816001 |
| 0.750958015 | 0.14498005 | 0.92726146 | 0.502945613 | 0.709154965 | 0.081603079 |
| -1.00347396 | 0.96282126 | -1.0064261 | 0.894566547 | 0.948919839 | 0.481987514 |
| 0.866903267 | 0.5450824  | 0.99118226 | 0.931072094 | 0.777239499 | 0.287382132 |
| -1.3591625  | 0.02443869 | 0.95570948 | 0.539868684 | -1.2770558  | 0.07051173  |
| 0.896287979 | 0.27107932 | -1.1263155 | 0.01328896  | 0.979271867 | 0.832342171 |
| -1.06967609 | 0.37536534 | -1.1527861 | 0.008579548 | -1.0685684  | 0.382701119 |
| -1.14971388 | 0.00676529 | 0.94037078 | 0.322949013 | -1.08744781 | 0.096272273 |
| -1.04914955 | 0.41413064 | 0.91767006 | 0.032818773 | -1.0180218  | 0.760493964 |
| 0.917485256 | 0.27670656 | -1.0319077 | 0.695262514 | 0.871962521 | 0.086130047 |
| -1.02865465 | 0.56248372 | 0.73675855 | 0.003888348 | 0.937691415 | 0.190099055 |
| 0.907174021 | 0.06822372 | -1.0529275 | 0.380886087 | 0.887051126 | 0.026009371 |
| -1.02475629 | 0.64338403 | -1.0213409 | 0.881610192 | -1.06871656 | 0.211223395 |
| 0.952785048 | 0.33529075 | 0.90447427 | 0.06404724  | 0.967943155 | 0.515292904 |
| -1.00937686 | 0.85114514 | -1.0705297 | 0.212182057 | -1.01358315 | 0.78621976  |
| 0.770399179 | 0.01372221 | 0.96757482 | 0.793175166 | 0.374699937 | 3.15E-13    |
| 0.970126002 | 0.38744654 | 0.95473843 | 0.38979095  | 0.962461772 | 0.276580428 |
| -1.02062985 | 0.61185363 | -1.048897  | 0.565613197 | 0.97830981  | 0.585873727 |
| 0.997321597 | 0.97018017 | -1.1308204 | 0.173083688 | -1.23666898 | 0.004389796 |
| 0.930946337 | 0.31047676 | 0.93503077 | 0.730020383 | -1.0835807  | 0.255798927 |
| -1.00995937 | 0.8591907  | -1.020659  | 0.783501189 | -1.02302024 | 0.683886582 |
| 0.996962173 | 0.94523586 | 0.66111638 | 0.083331739 | -1.08315959 | 0.075585084 |
| -1.04431646 | 0.4428071  | -1.2234799 | 0.133896928 | 0.914748847 | 0.117979102 |
| 0.979402816 | 0.53496615 | 0.88626959 | 0.225477713 | 0.96853064  | 0.341656097 |
| 0.925270717 | 0.1767666  | -1.0467911 | 0.546482518 | 0.483451495 | 5.98E-18    |
| -1.34381317 | 0.00042163 | -1.0009613 | 0.984591421 | -1.39422976 | 9.21E-05    |
| 0.947732504 | 0.33933612 | -1.0940697 | 0.128903589 | -1.0367768  | 0.519360782 |
| -1.00216262 | 0.95854091 | 0.95766056 | 0.583207615 | -1.0129156  | 0.757569099 |
| -1.08606606 | 0.04844918 | 0.97617293 | 0.62090024  | 0.995768471 | 0.91777698  |
| 0.930023195 | 0.26357148 | 0.94903853 | 0.322184594 | 0.87575189  | 0.043646968 |
| 0.799098934 | 0.01998132 | 0.98503427 | 0.775148448 | 0.924953111 | 0.407846573 |
| -1.14120618 | 0.14122103 | 0.99001928 | 0.840961139 | -1.04967157 | 0.585926074 |
| 0.761014084 | 0.10421181 | -1.0586436 | 0.2546817   | -1.18152454 | 0.317267425 |
| 0.898209921 | 0.08566314 | 0.66266274 | 0.000183047 | -1.04079965 | 0.517018156 |
| -1.12845514 | 0.04463881 | 0.94237984 | 0.093977868 | 0.928347566 | 0.211325493 |
| 0.866187118 | 0.09024874 | -1.0871206 | 0.041563084 | 0.921630131 | 0.331435406 |
| 0.981335433 | 0.72502401 | -1.0268758 | 0.711814057 | 0.982441542 | 0.740838529 |
| 0.965607926 | 0.59785146 | 0.899412   | 0.135134173 | 0.991957369 | 0.903008222 |
| 0.820023379 | 0.0010424  | -1.0518452 | 0.36731031  | 0.992286773 | 0.892864936 |

|             |            |            |             |             |             |
|-------------|------------|------------|-------------|-------------|-------------|
| -1.01639495 | 0.68368368 | 0.97796409 | 0.615321586 | 0.99837627  | 0.967497762 |
| 0.968905952 | 0.38921571 | -1.0865579 | 0.144666766 | -1.06931494 | 0.071039772 |
| 0.938791626 | 0.62006172 | 0.98340202 | 0.617582038 | 0.969082129 | 0.805122993 |
| 0.906737472 | 0.16111249 | -1.0405224 | 0.486916827 | 0.503081769 | 8.15E-14    |
| -1.08616293 | 0.31377222 | -1.2683942 | 0.003811161 | -1.06872334 | 0.417123761 |
| 0.857037325 | 0.15790711 | 0.96148249 | 0.483616566 | -1.03711729 | 0.736441446 |
| 0.934762223 | 0.48119952 | -1.0677278 | 0.118991016 | -1.05334507 | 0.587036398 |
| 0.99355063  | 0.90483399 | -1.0181    | 0.662595162 | -1.06512099 | 0.246667414 |
| 0.944722427 | 0.64616994 | 0.70435173 | 1.25928E-06 | -1.32597144 | 0.025931842 |
| -1.16189159 | 0.00385912 | 0.92026179 | 0.378178024 | -1.04377912 | 0.392222632 |
| 0.996700523 | 0.94117168 | 0.99523558 | 0.957141644 | -1.02670869 | 0.556783752 |
| -1.10946087 | 0.06191516 | -1.0806046 | 0.640862646 | -1.055264   | 0.327877175 |
| 0.904594686 | 0.22944378 | -1.0495009 | 0.434132837 | 0.815617092 | 0.016683369 |
| 0.837190848 | 0.00338117 | 0.9015499  | 0.083525276 | -1.07433145 | 0.221258404 |
| -1.00669979 | 0.89711089 | 0.79981748 | 0.009691727 | -1.00397329 | 0.938785701 |
| -1.04202926 | 0.44294853 | -1.1037509 | 0.069439314 | -1.02826331 | 0.602943416 |
| 0.943724231 | 0.33997515 | -1.152526  | 0.035881809 | 0.92692768  | 0.212659598 |
| 0.917651417 | 0.19885731 | 0.96422525 | 0.527050983 | 0.983561798 | 0.802848137 |
| 0.988598222 | 0.86722158 | -1.1176457 | 0.007052498 | -1.09748429 | 0.178664743 |
| 0.971731612 | 0.60368084 | -1.0485572 | 0.198124852 | 0.959370568 | 0.453351009 |
| 0.986302069 | 0.82317725 | 0.95917239 | 0.743366346 | 0.938578288 | 0.306687361 |
| -1.12219748 | 0.28936556 | -1.0236145 | 0.736112721 | -1.42711854 | 0.001716464 |
| 0.928962845 | 0.16453718 | -1.0540814 | 0.519740869 | -1.0570072  | 0.293757706 |
| -1.12667872 | 0.04383617 | -1.016944  | 0.876638442 | 0.928672369 | 0.205794944 |
| 0.962248913 | 0.45528514 | -1.041331  | 0.671942976 | 0.946058589 | 0.283335217 |
| 0.855822584 | 0.0087832  | 0.98460936 | 0.774489422 | -1.02697004 | 0.643879152 |
| -1.05911433 | 0.27002732 | 0.95324886 | 0.699006381 | -1.04482333 | 0.398614488 |
| -1.0035048  | 0.95340307 | -1.0520589 | 0.311551052 | -1.01061494 | 0.860034439 |
| 0.975284144 | 0.65746311 | 0.98530285 | 0.741057236 | -1.13557924 | 0.02755399  |
| -1.07525489 | 0.26456118 | -1.0467413 | 0.405442787 | -0.99999747 | 0.999968775 |
| -1.01088847 | 0.94896296 | 0.99639221 | 0.965210911 | 0.880064838 | 0.451368424 |
| -1.14373717 | 0.11700662 | -1.0172991 | 0.768337477 | -1.05930606 | 0.497270215 |
| 0.951097763 | 0.34806038 | -1.1310115 | 0.020120515 | 0.95138808  | 0.350978586 |
| -1.06823048 | 0.24483305 | 0.93718197 | 0.228537988 | -1.1501421  | 0.015820681 |
| -1.10409156 | 0.22487394 | 0.90008714 | 0.08588441  | 0.506008059 | 1.99E-11    |
| -1.13189222 | 0.09003793 | 0.92193019 | 0.223889929 | -1.12055228 | 0.118604861 |
| -1.03786504 | 0.53229464 | -1.1603709 | 0.033745091 | -1.06913816 | 0.263225691 |
| 0.961580478 | 0.76626617 | -1.042083  | 0.45613213  | 0.841910622 | 0.194992835 |
| 0.796618824 | 0.00106049 | 0.98657311 | 0.826641656 | -1.05497795 | 0.418746277 |
| 0.98929144  | 0.80495683 | -1.2547634 | 0.039854604 | 0.974638582 | 0.556259679 |
| 0.791234412 | 0.00258575 | -1.0520662 | 0.33605685  | -1.01869779 | 0.803485623 |
| -1.07218043 | 0.43610646 | -1.153106  | 0.016909014 | 0.955790916 | 0.61279279  |
| 0.893801093 | 0.03316737 | 0.9737661  | 0.605509968 | 0.971284344 | 0.572806439 |
| 0.959890935 | 0.52694123 | 0.9951502  | 0.93263407  | -1.00345334 | 0.957428424 |



|             |            |            |             |             |             |
|-------------|------------|------------|-------------|-------------|-------------|
| -1.11811615 | 0.03083906 | 0.91638517 | 0.095977656 | 0.989313716 | 0.83182146  |
| 0.987455475 | 0.86938352 | -1.0844578 | 0.17935403  | -1.00186054 | 0.980680089 |
| -1.01108116 | 0.86928514 | -1.0749107 | 0.203594693 | -1.09383652 | 0.184027359 |
| -1.10320321 | 0.48751975 | 0.947399   | 0.404833197 | -1.14698142 | 0.333409523 |
| -1.14142942 | 0.02421414 | 0.79719998 | 0.183992118 | -1.00975061 | 0.865545251 |
| -1.01567509 | 0.81823295 | -1.3079451 | 0.00241527  | -1.14192649 | 0.05393156  |
| -1.08634652 | 0.1080626  | 0.98869453 | 0.830836926 | -1.04761617 | 0.362779448 |
| 0.841221052 | 0.16289095 | 0.93363423 | 0.22652579  | -1.14208257 | 0.281834532 |
| -1.08763031 | 0.27645493 | 0.61970638 | 2.22715E-07 | -1.08605473 | 0.284737433 |
| 0.986138181 | 0.80695343 | -1.0470969 | 0.524065232 | -1.13369693 | 0.031572603 |
| -1.08104455 | 0.18551328 | -1.0887981 | 0.156004932 | -1.06247783 | 0.301614912 |
| 0.976636559 | 0.82913101 | -1.0490232 | 0.716554343 | -1.19259041 | 0.112018288 |
| -1.14994406 | 0.02002935 | -1.0279481 | 0.676387285 | 0.921864262 | 0.168469508 |
| -1.46846862 | 3.29E-05   | 0.96108764 | 0.364369377 | -1.12965609 | 0.156122083 |
| 0.975960501 | 0.62520494 | -1.0949184 | 0.226263396 | -1.08071593 | 0.12291897  |
| -1.03793395 | 0.64717261 | -1.0441623 | 0.628568656 | -1.05614563 | 0.502374771 |
| 0.992841887 | 0.90279231 | 0.9493534  | 0.316004405 | -1.00937938 | 0.873896835 |
| -1.01845165 | 0.71316038 | -1.0538651 | 0.418002518 | 0.913241864 | 0.072138122 |
| 0.937626946 | 0.20842017 | 0.97152071 | 0.56843843  | 0.931222441 | 0.164679065 |
| -1.07469033 | 0.37093538 | 0.97776039 | 0.769608022 | 0.907970508 | 0.231843309 |
| -1.10045602 | 0.37695659 | 0.98564768 | 0.829098004 | -1.28973599 | 0.021516941 |
| -1.1369542  | 0.05644304 | 0.83137919 | 0.194298615 | -1.03800924 | 0.573299154 |
| 0.984531592 | 0.84661181 | 0.96642231 | 0.551798328 | -1.03889444 | 0.636165598 |
| 0.93298602  | 0.22031001 | 0.92803427 | 0.272378158 | 0.947736877 | 0.341507405 |
| -1.02579606 | 0.73427693 | -0.9999677 | 0.999494151 | -1.21450206 | 0.011908527 |
| -1.0384363  | 0.51216336 | -1.0001545 | 0.998995931 | -1.10049168 | 0.099690004 |
| 0.863223422 | 0.50591303 | -1.0407184 | 0.60353747  | 0.800014692 | 0.31420639  |
| 0.695545458 | 7.39E-05   | 0.94530536 | 0.326849535 | 0.435856259 | 1.38E-13    |
| 0.993248928 | 0.9168025  | -1.0627385 | 0.299682065 | -1.02018641 | 0.758024801 |
| -1.18599473 | 0.08793391 | -1.1752519 | 0.144354314 | -1.32300547 | 0.006156817 |
| -1.08858163 | 0.41830538 | -1.008583  | 0.883961648 | -1.1110178  | 0.316220285 |
| 0.913088869 | 0.10615805 | -1.3427112 | 0.001013324 | 0.964641665 | 0.518048604 |
| -1.16465883 | 0.0062556  | 0.97593875 | 0.6248888   | -1.16352119 | 0.006573554 |
| 0.93326318  | 0.54019038 | -1.0968121 | 0.258362551 | 0.812695948 | 0.069656679 |
| -1.25231406 | 0.040231   | 0.97927188 | 0.721899463 | -1.38880111 | 0.003365305 |
| 0.914938119 | 0.13266384 | -1.1105563 | 0.038686447 | 0.991461592 | 0.883461768 |
| -1.01976819 | 0.73222389 | -1.0701678 | 0.185664918 | 0.994429698 | 0.922179984 |
| 0.943014147 | 0.44700473 | 0.94237073 | 0.46041713  | -1.05401769 | 0.495124779 |
| 0.960570564 | 0.51178875 | -1.0681287 | 0.542199244 | -1.14426884 | 0.031205211 |
| -1.00987858 | 0.84817702 | -1.0490059 | 0.470535887 | 0.89560116  | 0.035442995 |
| -1.15171518 | 0.08044446 | 0.97792962 | 0.781870959 | 0.89842632  | 0.182328979 |
| -1.06118952 | 0.27700578 | 0.91681454 | 0.126355664 | -1.07119894 | 0.208916386 |
| 0.996557598 | 0.96695967 | -1.0822979 | 0.294104034 | -1.01334716 | 0.873472701 |
| 0.933374277 | 0.219192   | -1.0421704 | 0.473024568 | 0.95879234  | 0.45131695  |

|             |            |            |             |             |             |
|-------------|------------|------------|-------------|-------------|-------------|
| 0.995812059 | 0.94157966 | 0.64200017 | 0.048616418 | 0.901469375 | 0.074362707 |
| -1.30715538 | 0.01119614 | 0.52951706 | 6.12414E-10 | -1.39288144 | 0.001993185 |
| -1.07226831 | 0.24746436 | -1.0674429 | 0.3164464   | -1.03688972 | 0.546380812 |
| 0.989954749 | 0.91575565 | -1.3091973 | 0.008212865 | -1.26186966 | 0.017645198 |
| -1.01368745 | 0.76949703 | 0.97316595 | 0.794786604 | 0.94763877  | 0.249110933 |
| 0.947571315 | 0.39499509 | 0.94682727 | 0.327802628 | -1.04815114 | 0.457246878 |
| -1.00156082 | 0.955029   | -1.1235267 | 0.034074765 | -1.05300353 | 0.066072006 |
| -1.03918741 | 0.34354852 | 0.9289851  | 0.513683007 | -1.1263393  | 0.004601179 |
| -1.28593896 | 0.00753349 | -1.1581118 | 0.175888184 | -1.07628707 | 0.420433542 |
| 0.978060549 | 0.7316064  | 0.9889019  | 0.848715035 | -1.03888779 | 0.555710665 |
| 0.986426372 | 0.78607831 | 0.98087949 | 0.735770091 | 0.907537495 | 0.0580933   |
| -1.01895419 | 0.82058542 | -1.1081436 | 0.185676389 | 0.6823425   | 2.29E-05    |
| 0.953336042 | 0.61665154 | -1.0517732 | 0.41092844  | 0.93770896  | 0.500884997 |
| 0.953924394 | 0.3910839  | 0.96072465 | 0.436425695 | -1.04865192 | 0.387755723 |
| 0.943339157 | 0.42922423 | 0.97665515 | 0.766877781 | -1.00225117 | 0.975616789 |
| -1.17010941 | 0.01987691 | 0.95452548 | 0.393274093 | -1.00006243 | 0.999242505 |
| 0.986290408 | 0.79861426 | -1.1236433 | 0.165231516 | -1.07642527 | 0.177036279 |
| -1.05033701 | 0.35278832 | 0.90611477 | 0.081127081 | 0.595221677 | 1.04E-13    |
| 0.987495282 | 0.83803082 | 0.92370441 | 0.169555539 | 0.937843436 | 0.299558028 |
| 0.774671738 | 0.00081103 | -1.1847026 | 0.102240479 | 0.526421189 | 3.50E-12    |
| 0.962830102 | 0.41568487 | -1.0433511 | 0.480074679 | 0.929211947 | 0.117727396 |
| 0.876593374 | 0.09463724 | 0.89563064 | 0.251039026 | 0.556558655 | 5.09E-10    |
| 0.87721508  | 0.08042855 | 0.92033594 | 0.077723891 | 0.895295999 | 0.138349517 |
| 0.881425356 | 0.11908567 | 0.97510898 | 0.689760719 | 0.78584846  | 0.003818592 |
| 0.924204827 | 0.26774102 | 0.99201445 | 0.771974229 | 0.924178258 | 0.267568541 |
| 0.897030465 | 0.57761537 | 0.92877471 | 0.071761432 | 0.775694723 | 0.195903795 |
| 0.915233532 | 0.17635898 | -1.1465157 | 0.136915342 | 0.794465084 | 0.000788618 |
| 0.92569593  | 0.23411643 | -1.3480981 | 2.26395E-05 | 0.809901291 | 0.00179433  |
| -1.09108243 | 0.36020992 | 0.91595564 | 0.085466333 | -1.06913083 | 0.482198941 |
| -1.24259857 | 0.00191256 | -1.0229799 | 0.78378724  | -1.05463155 | 0.427560048 |
| -1.06303575 | 0.23760932 | 0.93033341 | 0.450055457 | 0.904306874 | 0.054574897 |
| -1.03456816 | 0.60699299 | 0.9675078  | 0.547416806 | 0.561275775 | 5.59E-12    |
| -1.27039607 | 0.00624405 | -1.0331195 | 0.658143548 | -1.31175803 | 0.002128632 |
| -1.04327279 | 0.4196727  | -1.0535323 | 0.429069685 | 0.885629354 | 0.02350682  |
| 0.944855079 | 0.4924936  | -1.0704552 | 0.211471334 | -1.19750093 | 0.032445255 |
| 0.963469216 | 0.5552649  | 0.51081494 | 5.75867E-18 | -1.16797833 | 0.016442159 |
| -1.04200376 | 0.35613401 | 0.84479543 | 0.008038658 | -1.00180254 | 0.967654354 |
| -1.06145248 | 0.27071314 | 0.81479891 | 0.006228976 | 0.988387993 | 0.828288747 |
| -1.3551968  | 0.00291864 | 0.88379828 | 0.00988463  | 0.773812182 | 0.011082656 |
| 0.927341311 | 0.28281374 | -1.070991  | 0.379571581 | 0.884630341 | 0.083585942 |
| 0.9471158   | 0.44769886 | 0.96277909 | 0.608019052 | 0.874046772 | 0.063473264 |
| -1.00962596 | 0.89534505 | 0.95585155 | 0.573318392 | 0.816447958 | 0.007130765 |
| -1.05791686 | 0.30179307 | 0.96141164 | 0.578400514 | -1.04734391 | 0.395461843 |
| 0.96396412  | 0.43030962 | 0.74829299 | 0.140758404 | 0.801645199 | 1.37E-05    |

|             |            |            |             |             |             |
|-------------|------------|------------|-------------|-------------|-------------|
| 0.986558917 | 0.8312749  | 0.84824556 | 0.0138086   | 0.932369658 | 0.272825148 |
| -1.01436583 | 0.71332734 | -1.0670276 | 0.316480031 | 0.869817733 | 0.000670793 |
| -1.57090119 | 9.30E-10   | 0.96572697 | 0.713424696 | -1.54885483 | 2.21E-09    |
| -1.24782261 | 0.01742872 | -1.1448709 | 0.046975223 | -1.28747306 | 0.007086396 |
| 0.815841043 | 5.58E-06   | 0.97277659 | 0.591941047 | 0.759523834 | 8.48E-09    |
| -1.5281651  | 0.00186998 | 0.98173714 | 0.780076182 | -1.3006401  | 0.047515762 |
| 0.986370098 | 0.77957427 | -1.3774386 | 0.000360785 | 0.987191839 | 0.792625696 |
| 0.74829807  | 0.00107305 | -1.0504191 | 0.34925288  | -1.0255771  | 0.764420582 |
| 0.840238466 | 0.03585072 | 0.76956649 | 0.00236944  | 0.995101417 | 0.951798549 |
| 0.872184952 | 0.01102993 | -1.0169939 | 0.789119397 | 0.923662132 | 0.132149414 |
| 0.868371833 | 0.01958183 | -1.1067387 | 0.025718336 | -1.04843569 | 0.423519058 |
| 0.995216899 | 0.94003508 | -1.0483612 | 0.382076956 | 0.781863723 | 0.000288671 |
| 0.977526768 | 0.67144052 | -1.4477679 | 0.000375036 | 0.998233747 | 0.973660181 |
| -1.05413187 | 0.28885084 | 0.63575384 | 2.59537E-08 | -1.04210465 | 0.405709004 |
| 0.951789394 | 0.16397968 | 0.88244384 | 0.084022396 | 0.921677502 | 0.023642353 |
| 0.916374794 | 0.35571106 | 0.73262603 | 7.44315E-05 | 0.742760139 | 0.002501786 |
| 0.937119376 | 0.56019682 | 0.96593321 | 0.523691371 | 0.938577467 | 0.569596241 |
| 0.923921433 | 0.04886602 | 0.99003783 | 0.829197645 | -1.01275487 | 0.748070791 |
| 0.980583083 | 0.73419212 | 0.95251873 | 0.444870826 | -1.01520732 | 0.793765669 |
| 0.915843535 | 0.07572916 | -1.0009364 | 0.980754663 | 0.828384342 | 0.000288821 |
| 0.649651392 | 0.00120634 | -1.0607344 | 0.337843839 | 0.790005168 | 0.067132662 |
| -1.19067821 | 0.04098413 | -1.2941131 | 0.006071257 | -1.43964342 | 5.68E-05    |
| -1.08424532 | 0.30437832 | 0.89206128 | 0.00653736  | -1.12887591 | 0.126017602 |
| 0.915746745 | 0.14861293 | -1.5156039 | 0.002253185 | 0.922277903 | 0.183579539 |
| -1.01249157 | 0.81559619 | -1.1189569 | 0.025140736 | -1.01745787 | 0.745139515 |
| -1.06551867 | 0.15783971 | -1.0025243 | 0.976124765 | -1.05504988 | 0.231768296 |
| -1.01698952 | 0.65492368 | 0.91178371 | 0.258459039 | -1.06019202 | 0.124796922 |
| 0.845062652 | 0.39208571 | 0.98053173 | 0.706519868 | 0.864907826 | 0.460220725 |
| 0.908330865 | 0.09131034 | -1.0828318 | 0.180494324 | -1.03981417 | 0.488076155 |
| 0.932655933 | 0.42354574 | 0.92578302 | 0.229457936 | -1.20441216 | 0.035966759 |
| -1.11876752 | 0.4106164  | 0.94836081 | 0.324248143 | -1.19618635 | 0.191211442 |
| 0.938686833 | 0.39966656 | -1.0811125 | 0.118885399 | 0.976848339 | 0.754518005 |
| -1.01444928 | 0.8060821  | 0.78523522 | 6.06918E-09 | 0.958660209 | 0.470985605 |
| -1.20079745 | 1.10E-05   | 0.98640908 | 0.884485382 | -1.14499566 | 0.000721135 |
| -1.08754261 | 0.09083632 | 0.76830685 | 0.020948544 | -1.02931817 | 0.555718309 |
| -1.02256458 | 0.78222972 | 0.94902096 | 0.188224283 | -1.50150885 | 5.24E-06    |
| -1.02001422 | 0.5773466  | 0.87105718 | 0.019747131 | -1.01685949 | 0.6381027   |
| 0.931994251 | 0.22098188 | 0.71856815 | 8.67895E-09 | 0.837479055 | 0.002921983 |
| -1.19019575 | 0.08031636 | 0.50477716 | 1.44847E-06 | -1.01328134 | 0.893057821 |
| 0.977467837 | 0.75123633 | 0.86931792 | 0.098679304 | -1.24465465 | 0.00345229  |
| -1.01453228 | 0.87903075 | -1.0804127 | 0.325834863 | -1.00472617 | 0.96032656  |
| -1.0167386  | 0.80965928 | -1.0662597 | 0.290183315 | -1.12583832 | 0.089680977 |
| -1.05513622 | 0.2274833  | -1.0112336 | 0.833771249 | 0.911648133 | 0.040067631 |
| 0.968190388 | 0.52993136 | -1.0435387 | 0.340413749 | 0.951947549 | 0.339818918 |

|             |            |            |             |             |             |
|-------------|------------|------------|-------------|-------------|-------------|
| -1.13308875 | 0.02422799 | -1.0799876 | 0.044976153 | -1.06904461 | 0.220662158 |
| 0.972721159 | 0.61262825 | 0.76200095 | 0.169342878 | 0.991401146 | 0.87424412  |
| -1.12423412 | 0.24093524 | -1.0261244 | 0.646531448 | -1.49585155 | 0.00015158  |
| 0.962684379 | 0.5053007  | -1.1442735 | 0.124900602 | 0.839065775 | 0.003129707 |
| 0.90086532  | 0.07300718 | -1.087831  | 0.536526173 | -1.10933872 | 0.074717575 |
| -1.01898331 | 0.67550634 | 0.92787322 | 0.319673687 | -1.03839234 | 0.40285101  |
| 0.926310162 | 0.42206762 | 0.9606196  | 0.492605627 | 0.841102792 | 0.072972539 |
| -1.03292237 | 0.86760055 | -1.1932407 | 1.97586E-05 | 0.846372924 | 0.392229536 |
| 0.939181187 | 0.12703154 | 0.95894324 | 0.393490947 | 0.993064831 | 0.864156874 |
| 0.962298856 | 0.44941595 | -1.3382789 | 0.000637832 | 0.974428752 | 0.609637424 |
| -1.02507484 | 0.51279571 | 0.95106926 | 0.161552504 | 0.879582247 | 0.001227582 |
| 0.970949577 | 0.71596357 | 0.95448245 | 0.416343435 | 0.967973941 | 0.687914452 |
| 0.941035888 | 0.09570897 | 0.92687045 | 0.440299127 | -1.05860589 | 0.117884261 |
| 0.99275834  | 0.92677489 | -1.2046422 | 0.011920362 | 0.936891319 | 0.411238618 |
| -1.05036289 | 0.35177167 | -1.114541  | 0.25547732  | -1.09620316 | 0.084805136 |
| 0.92985902  | 0.08574446 | -1.2750163 | 0.000829032 | -1.1066668  | 0.018036736 |
| -1.33727569 | 0.07919867 | 0.90401904 | 0.025652662 | -1.07279822 | 0.667008855 |
| 0.553968449 | 7.19E-12   | 0.96507757 | 0.489933538 | 0.928806014 | 0.280201664 |
| -1.31535609 | 0.00950123 | 0.98334569 | 0.756462899 | -1.22298071 | 0.053368193 |
| 0.959030866 | 0.53231391 | 0.95018595 | 0.350956877 | -1.18451339 | 0.013863088 |
| -1.10537896 | 0.35178107 | -1.0054092 | 0.956639133 | -1.09419895 | 0.402415474 |
| -1.08131674 | 0.07353395 | 0.9730193  | 0.631511335 | -1.01534448 | 0.723591166 |
| 0.98282748  | 0.81663725 | 0.93775536 | 0.265301133 | 0.980943955 | 0.7967654   |
| -1.13197471 | 0.01891313 | -1.0567178 | 0.222297145 | -1.06713359 | 0.210008849 |
| -1.21014603 | 0.06117998 | 0.89730459 | 0.257174915 | 0.882050795 | 0.213734779 |
| -1.11897968 | 0.16599746 | 0.83719833 | 0.362259724 | -1.24820346 | 0.007694851 |
| -1.18814065 | 0.17104616 | -1.025347  | 0.538985267 | -1.0287607  | 0.820352741 |
| -1.15964314 | 0.01870267 | -1.0084338 | 0.868375661 | -1.38643053 | 1.86E-06    |
| -1.0397703  | 0.788654   | -1.0083438 | 0.825885085 | -1.31622173 | 0.063080346 |
| -1.48575149 | 0.00028402 | 0.8853892  | 0.136821862 | -1.24785801 | 0.034275534 |
| -1.09749169 | 0.15254479 | -1.0756149 | 0.046907235 | -1.44205061 | 5.04E-07    |
| -1.24000916 | 0.03643578 | 0.78990699 | 0.004132484 | -1.29454632 | 0.012813445 |
| 0.886471265 | 0.25260726 | -1.0875294 | 0.114567878 | -1.08751344 | 0.424306027 |
| 0.904990066 | 0.11881411 | -1.0783045 | 0.075156591 | -1.01359599 | 0.831029052 |
| 0.913154815 | 0.1744775  | -1.3119343 | 0.100428724 | -1.28562438 | 0.000364522 |
| 0.856641812 | 1.69E-05   | -1.0079322 | 0.90753393  | -1.01780142 | 0.592093582 |
| -1.08055843 | 0.22192178 | -1.2109035 | 0.065810116 | 0.962862468 | 0.548633786 |
| 0.413329739 | 9.47E-15   | -1.0133836 | 0.842423263 | -1.00396804 | 0.962325689 |
| 0.74420369  | 0.000223   | -1.10909   | 0.336037012 | 0.593520091 | 4.40E-09    |
| 0.604799015 | 1.59E-07   | -1.1399262 | 0.00347606  | -1.36222189 | 0.000503318 |
| -1.17202349 | 0.04025273 | 0.98177805 | 0.805554187 | -1.00947566 | 0.901071389 |
| -1.03543515 | 0.43344055 | -1.011014  | 0.83144618  | 0.947838741 | 0.229987338 |
| -1.02925702 | 0.42334732 | -1.2339633 | 0.039743119 | -1.08205407 | 0.031662576 |
| 0.994721172 | 0.9378055  | 0.98809019 | 0.881588536 | 0.778477728 | 0.000494859 |

|             |            |            |             |             |             |
|-------------|------------|------------|-------------|-------------|-------------|
| -1.00720978 | 0.85141051 | -1.0118362 | 0.924904911 | 0.946425238 | 0.154917054 |
| -1.00153594 | 0.97587582 | -1.1513766 | 0.024887248 | -1.02800976 | 0.586756694 |
| -1.03635778 | 0.4196504  | -1.0489303 | 0.742692676 | 0.920927577 | 0.066113302 |
| -1.22381658 | 0.00540086 | -1.2596993 | 0.027581861 | -1.34345401 | 8.90E-05    |
| -1.14454434 | 0.01535222 | -1.1454007 | 0.038847696 | -1.20373541 | 0.001135947 |
| -1.06816841 | 0.3114639  | -1.114382  | 0.28485726  | -1.1322116  | 0.059666525 |
| 0.859388433 | 0.08970362 | -1.0517482 | 0.630216768 | 0.741989178 | 0.001265597 |
| -1.01540602 | 0.79996929 | 0.95250954 | 0.44317788  | -1.35665442 | 4.88E-06    |
| -1.0554207  | 0.60561206 | -1.1087898 | 0.123620803 | 0.701233629 | 0.001212577 |
| 0.947932092 | 0.29820668 | 0.96212332 | 0.243371367 | -1.08359023 | 0.120647646 |
| 0.879895768 | 0.01682262 | 0.99138863 | 0.890798162 | 0.988660089 | 0.826745812 |
| -1.01855363 | 0.57820894 | 0.8328332  | 0.032738027 | -1.00503127 | 0.879194264 |
| 0.862392298 | 0.01224843 | 0.67461787 | 2.44054E-06 | 0.948280489 | 0.356540625 |
| 0.806004261 | 0.03744914 | 0.72909943 | 0.000388916 | -1.13322663 | 0.2213173   |
| 0.779155773 | 4.29E-08   | 0.98757414 | 0.869102239 | 0.737790175 | 2.39E-10    |
| 0.629784747 | 9.11E-06   | -1.0280036 | 0.533977019 | 0.654258741 | 3.70E-05    |
| -1.51404497 | 5.72E-08   | -1.0222242 | 0.541173432 | -1.66217411 | 2.92E-10    |
| 0.91273298  | 0.15599367 | 0.88073445 | 0.065395783 | -1.0512261  | 0.43461784  |
| -1.27974619 | 0.0379108  | 0.87143684 | 0.00068319  | 0.75016417  | 0.016289208 |
| 0.755572345 | 0.02743683 | -1.1419447 | 0.011191944 | 0.754425222 | 0.026645876 |
| 0.976070486 | 0.56513142 | -1.0064604 | 0.883957316 | -1.00922214 | 0.827185731 |
| -1.08333525 | 0.19276624 | -1.1724501 | 0.026342632 | -1.05853794 | 0.352732208 |
| 0.970905737 | 0.58108056 | -1.1116105 | 0.054896996 | -1.0879552  | 0.118821658 |
| -1.07400295 | 0.10178203 | -1.1417477 | 0.044866723 | 0.816362903 | 1.66E-05    |
| 0.854012674 | 0.19222799 | 0.80761232 | 0.018163232 | -1.02596545 | 0.830954178 |
| 0.80631379  | 0.06854559 | -1.1917771 | 0.005077495 | 0.991088048 | 0.938678209 |
| 0.844733868 | 0.00672626 | 0.81481999 | 0.053774836 | -1.02011485 | 0.740604025 |
| 0.768571623 | 0.00225811 | -1.0257449 | 0.61956366  | 0.696996295 | 5.20E-05    |
| 0.860904916 | 0.02336404 | 0.99985921 | 0.997843504 | -1.07955971 | 0.238094396 |
| -1.00609667 | 0.93437075 | 0.97939761 | 0.529113846 | 0.966085124 | 0.64050831  |
| -1.06090489 | 0.44071293 | -1.0098768 | 0.863993067 | -1.19471992 | 0.023178788 |
| 0.649835695 | 2.71E-05   | -1.0758434 | 0.472639045 | 0.644034405 | 1.95E-05    |
| -1.06107128 | 0.51475204 | 0.77381219 | 2.23267E-08 | 0.952713168 | 0.594236832 |
| -1.12226311 | 0.06593471 | 0.68800786 | 0.000218063 | -1.0701873  | 0.274546089 |
| 0.683923311 | 2.29E-05   | -1.3750597 | 1.14418E-05 | 0.712407107 | 0.000122987 |
| 0.934085165 | 0.38033666 | 0.9163427  | 0.174328781 | -1.03340819 | 0.671589188 |
| -1.016151   | 0.77535431 | -1.1136694 | 0.357051172 | -1.03201739 | 0.574981114 |
| 0.946325431 | 0.17018805 | 0.85736624 | 0.218621294 | -1.07239421 | 0.083878518 |
| 0.900099112 | 0.0890308  | 0.80789109 | 4.58435E-06 | 0.998458522 | 0.979841822 |
| -1.0331667  | 0.6620542  | -1.1246964 | 0.058088645 | -1.0424555  | 0.577756828 |
| -1.05998364 | 0.38634161 | 0.85906082 | 0.006082085 | -1.43581002 | 1.43E-06    |
| 0.978497464 | 0.87253379 | 0.89614836 | 0.013423739 | 0.731218308 | 0.02408068  |
| -1.06797481 | 0.2695636  | -1.0494496 | 0.687879445 | 0.910753096 | 0.118656139 |
| -1.16858881 | 0.00591432 | -1.0257184 | 0.827286829 | -1.07057604 | 0.214972684 |

|             |            |            |             |             |             |
|-------------|------------|------------|-------------|-------------|-------------|
| -1.10205037 | 0.21492032 | -1.0154893 | 0.798290829 | 0.79459618  | 0.004453509 |
| 0.912845939 | 0.27106056 | 0.63349287 | 8.6146E-07  | 0.905488097 | 0.231285951 |
| 0.862054672 | 0.1457302  | 0.98592892 | 0.826046246 | 0.67882286  | 0.000314004 |
| -1.04534761 | 0.21361853 | 0.91413014 | 0.227015078 | -1.01675612 | 0.63913118  |
| 0.979344421 | 0.70276755 | -1.127155  | 0.121692113 | -1.08227918 | 0.15196142  |
| 0.999664997 | 0.99546223 | 0.80490482 | 0.024687127 | 0.840226464 | 0.004463117 |
| -1.27094918 | 0.00115695 | -1.0890339 | 0.349616248 | -1.36534514 | 4.24E-05    |
| -1.37556034 | 0.01592755 | -1.0244843 | 0.695390427 | -1.35342332 | 0.021794783 |
| -1.01389074 | 0.84097447 | 0.67293249 | 1.14956E-05 | 0.970888086 | 0.66761704  |
| -1.09668162 | 0.06328682 | 0.94649451 | 0.478713145 | -1.00802229 | 0.870194299 |
| -1.0862406  | 0.39919655 | 0.89121121 | 0.044084633 | -1.08292343 | 0.416744064 |
| 0.982249426 | 0.64540916 | -1.0109479 | 0.784837334 | 0.920949755 | 0.037970392 |
| -1.08857555 | 0.35716059 | 0.7062341  | 4.80591E-07 | -1.41136579 | 0.000407492 |
| 0.991342441 | 0.89817901 | -1.1336066 | 0.096981335 | 0.934469304 | 0.320767639 |
| -1.09746983 | 0.15514514 | -1.0249487 | 0.713235066 | -1.02377744 | 0.717060233 |
| 0.999479647 | 0.99191742 | 0.89692569 | 0.423363203 | 0.995320093 | 0.927258503 |
| 0.986433163 | 0.73158948 | 0.86491939 | 0.017072335 | 0.878130501 | 0.001824439 |
| 0.958929676 | 0.31309016 | -1.0202876 | 0.713162277 | 0.995517656 | 0.913541585 |
| 0.969268486 | 0.5627948  | 0.72767781 | 0.000138283 | -1.03324141 | 0.544398201 |
| 0.936042828 | 0.13599019 | 0.9072732  | 0.240549684 | 0.95970246  | 0.350431494 |
| 0.962377674 | 0.58766461 | 0.74521746 | 0.005043537 | 0.889018565 | 0.100070661 |
| 0.953188966 | 0.1991368  | -1.0384441 | 0.289153119 | -1.02037163 | 0.586732869 |
| -1.02493598 | 0.50851383 | 0.98160992 | 0.73431422  | 0.884368274 | 0.001619733 |
| -1.0494363  | 0.52179978 | 0.9347074  | 0.254647579 | 0.738008897 | 0.000160801 |
| 0.860443608 | 0.02093456 | -1.1202774 | 0.109743216 | -1.01354216 | 0.832191558 |
| -1.0547263  | 0.19107517 | -1.1130334 | 0.406819006 | -1.04957155 | 0.234499728 |
| -1.19852271 | 0.04675403 | -1.045806  | 0.515524787 | -1.40369228 | 0.000357907 |
| 0.99009164  | 0.90819414 | -1.0063823 | 0.896473927 | -1.08038095 | 0.37236729  |
| -1.07753458 | 0.25238255 | -1.0126096 | 0.898051906 | -1.28234417 | 0.000313454 |
| 0.860852702 | 0.47608755 | 0.98253238 | 0.650719087 | 0.865105778 | 0.490649777 |
| 0.966506077 | 0.34869522 | -1.2903401 | 0.007290355 | -1.04504671 | 0.226775547 |
| 0.875641923 | 0.00948452 | 0.93027088 | 0.289973762 | -1.04868853 | 0.339734942 |
| -1.01882251 | 0.81235835 | -1.0271523 | 0.679557298 | -1.21437566 | 0.016116193 |
| 0.962577801 | 0.35651129 | 0.96589837 | 0.500402565 | 0.953757128 | 0.253398421 |
| -1.35029714 | 2.08E-05   | 0.64533118 | 1.9018E-15  | -1.04141032 | 0.530996115 |
| -1.13739427 | 0.00204116 | 0.97821264 | 0.594934542 | -1.06898062 | 0.098778661 |
| 0.990156872 | 0.86341255 | -1.0816569 | 0.148930157 | 0.828041853 | 0.00173597  |
| -1.14566496 | 0.00661767 | -1.0209229 | 0.637271399 | -1.00446042 | 0.92666858  |
| -1.02141757 | 0.80074497 | 0.85091484 | 0.025577076 | 0.837854251 | 0.038875919 |
| -1.1019187  | 0.08149639 | 0.99270654 | 0.843400735 | -1.002658   | 0.961450303 |
| -1.24627659 | 0.03294521 | 0.95652756 | 0.234987155 | -1.03708078 | 0.718725438 |
| -1.26844238 | 0.01109551 | 0.94519512 | 0.45462765  | -1.18865766 | 0.061214307 |
| -1.18659422 | 0.04050746 | -1.0025624 | 0.967837298 | 0.870803066 | 0.095395776 |
| 0.935207927 | 0.30893758 | 0.91658221 | 0.034882385 | 0.768590132 | 0.000173746 |

|             |            |            |             |             |             |
|-------------|------------|------------|-------------|-------------|-------------|
| 0.928259363 | 0.17718406 | -1.1300265 | 0.175150009 | -1.15722583 | 0.009697441 |
| -1.02461825 | 0.5989631  | -1.2617713 | 0.009124965 | -1.05744969 | 0.22963983  |
| -1.12694236 | 0.00442409 | -1.1418287 | 0.044761199 | 0.95109474  | 0.217856424 |
| -1.03157389 | 0.4095774  | 0.84224533 | 0.414538748 | 0.901965255 | 0.007919685 |
| 0.96057732  | 0.69156452 | 0.93040898 | 0.050388212 | 0.976338351 | 0.813189195 |
| -1.03565036 | 0.58336788 | 0.99615462 | 0.938066189 | -1.00536106 | 0.933190294 |
| -1.03610664 | 0.56453973 | -1.0442568 | 0.581879389 | -1.09152187 | 0.158158942 |
| 0.96362724  | 0.43566591 | 0.90690139 | 0.020748022 | 0.849656418 | 0.001087478 |
| -1.05811844 | 0.45040821 | 0.9416921  | 0.354676923 | -1.4145209  | 2.08E-05    |
| -1.18415444 | 0.00517387 | -1.0506421 | 0.218845975 | -1.04985884 | 0.405071442 |
| 0.982442651 | 0.89202444 | -1.1395631 | 0.026418971 | 0.917001935 | 0.507533399 |
| 0.980787781 | 0.51798406 | 0.99268915 | 0.879396236 | 0.893839247 | 0.000415216 |
| -1.06095724 | 0.46087073 | 0.96364674 | 0.659393459 | 0.71941914  | 0.000126102 |
| 0.960762938 | 0.70035203 | 0.95694598 | 0.424331798 | -1.17873888 | 0.117813691 |
| -1.16373092 | 0.24053412 | 0.84563316 | 0.101276282 | -1.00562801 | 0.965126127 |
| 0.934291182 | 0.20705815 | -1.2457741 | 0.018416235 | -1.1738905  | 0.003947536 |
| -1.02784962 | 0.72173468 | 0.96639128 | 0.676534277 | -1.30010565 | 0.001201784 |
| 0.945763792 | 0.19625654 | 0.95897259 | 0.523348924 | -1.03461877 | 0.428013435 |
| -1.17684348 | 0.03275248 | -1.1076734 | 0.065760142 | -1.06621488 | 0.391973277 |
| 0.741968297 | 0.00623033 | -1.0378311 | 0.422798887 | 0.8101593   | 0.049612068 |
| -1.19978908 | 0.03320136 | -1.1329477 | 0.003045673 | -1.3438258  | 0.000819231 |
| 0.966255667 | 0.56189439 | 0.98240383 | 0.636956123 | 0.892622383 | 0.058723461 |
| -1.05496383 | 0.22730886 | 0.69926998 | 0.000816804 | 0.916018092 | 0.050326506 |
| 0.999378325 | 0.99103378 | -1.0863724 | 0.197455287 | 0.88352425  | 0.028689415 |
| -1.00360466 | 0.95162896 | -1.0889429 | 0.169489582 | -1.08774883 | 0.160049039 |
| -1.0158659  | 0.72133925 | 0.98665174 | 0.776843203 | -1.05082567 | 0.263827321 |
| 0.985659414 | 0.83468513 | -1.1089141 | 0.16986558  | -1.00556029 | 0.936135439 |
| 0.965493214 | 0.56896888 | 0.96666596 | 0.561167638 | 0.84098402  | 0.006600939 |
| 0.911129593 | 0.09590915 | -1.0523209 | 0.696115754 | -1.27163893 | 5.62E-05    |
| -1.12514202 | 0.02656748 | 0.99565897 | 0.884516887 | -1.08927741 | 0.103956204 |
| 0.838353484 | 0.00084397 | 0.79398297 | 0.005461408 | -1.07217584 | 0.167867944 |
| 0.992546441 | 0.85266141 | 0.93192742 | 0.498508358 | 0.983978621 | 0.68863699  |
| 0.798627402 | 0.01471058 | -1.0124036 | 0.92349513  | 0.794418815 | 0.012646953 |
| -1.0306307  | 0.61564929 | 0.96846362 | 0.549627895 | 0.938383563 | 0.291911348 |
| -1.38215769 | 0.00510758 | -1.112588  | 0.170107722 | 0.935522408 | 0.550138724 |
| 0.903412748 | 0.34527345 | 0.98280868 | 0.685673661 | 0.669622158 | 0.000422294 |
| 0.967198533 | 0.56403842 | -1.060919  | 0.429548028 | -1.01789849 | 0.758705038 |
| -1.02179808 | 0.71528624 | 0.78667941 | 0.026022491 | 0.983057652 | 0.772495444 |
| 0.984227026 | 0.80934426 | -1.1496179 | 0.100084347 | 0.965552473 | 0.595129383 |
| -1.07472626 | 0.03137928 | 0.93945033 | 0.292985687 | -1.00639034 | 0.845848237 |
| -1.17152019 | 0.0579021  | -1.0167733 | 0.705679753 | 0.893640978 | 0.174346068 |
| -1.02215823 | 0.58577258 | -1.0590768 | 0.302052502 | 0.956181286 | 0.267298093 |
| -1.09296319 | 0.44139966 | -1.0071749 | 0.904069326 | 0.951627911 | 0.667043469 |
| 0.740554609 | 0.00053598 | 0.96026226 | 0.359828556 | 0.807808963 | 0.011485683 |

|             |            |            |             |             |             |
|-------------|------------|------------|-------------|-------------|-------------|
| 0.953025809 | 0.60348243 | -1.0888967 | 0.221664524 | 0.969392414 | 0.736999725 |
| 0.96579028  | 0.75674479 | 0.99465506 | 0.930627902 | 0.89365425  | 0.31908109  |
| 0.99042728  | 0.88158134 | -1.0190699 | 0.732195075 | 0.92189362  | 0.21116666  |
| -1.01716255 | 0.57164411 | -1.0457964 | 0.39027663  | -1.00179635 | 0.952358917 |
| -1.01752685 | 0.67685614 | 0.98417472 | 0.750213449 | 0.879574368 | 0.003127612 |
| -1.37167058 | 0.00024259 | -1.017914  | 0.659618168 | 0.88948413  | 0.150803879 |
| 0.896124041 | 0.35859439 | 0.72812442 | 0.000793295 | -1.01981697 | 0.869032874 |
| 0.963831522 | 0.49789949 | 0.90713548 | 0.108698175 | -1.00352541 | 0.94826246  |
| -1.01530669 | 0.80186365 | -1.0168778 | 0.880534658 | -1.02721657 | 0.657546269 |
| 0.859828548 | 0.07941156 | 0.88247006 | 0.246354676 | 0.694703237 | 6.95E-05    |
| -1.13716676 | 0.17512428 | 0.98691066 | 0.819497662 | -1.15417608 | 0.131197985 |
| -1.05771173 | 0.2380272  | 0.96726862 | 0.573809937 | -1.05356418 | 0.272086475 |
| 0.96986263  | 0.47916109 | -1.188365  | 0.011063432 | 0.97512601  | 0.559937979 |
| -1.00749497 | 0.85975572 | 0.98433949 | 0.630291185 | 0.902262871 | 0.017785147 |
| -1.26138589 | 0.00946948 | -1.0348645 | 0.67649674  | -1.03715905 | 0.674079086 |
| -1.17981399 | 0.03785204 | 0.98857823 | 0.774925673 | -1.05694932 | 0.478840945 |
| 0.806047406 | 0.00865132 | -1.1932344 | 0.129093362 | 0.646102029 | 1.00E-06    |
| 0.996392669 | 0.98049124 | 0.93044957 | 0.380598393 | -1.08116242 | 0.597953556 |
| -1.14585678 | 0.01734797 | 0.96792427 | 0.724699914 | -1.402445   | 1.21E-07    |
| 0.940599598 | 0.36328745 | 0.80654189 | 0.059787343 | 0.989418408 | 0.874043272 |
| 0.98826176  | 0.8309484  | -1.0968226 | 0.156218555 | -1.05795168 | 0.310655905 |
| -1.03324269 | 0.56113667 | 0.84051576 | 3.49157E-07 | -1.08752944 | 0.139349164 |
| 0.829898896 | 0.05872024 | -1.1058949 | 0.018588162 | 0.789016598 | 0.017374619 |
| -1.01728599 | 0.72316705 | -1.0531213 | 0.522222933 | 0.822002688 | 0.000154107 |
| -1.02753044 | 0.37395883 | 0.79081151 | 0.052666252 | 0.850647759 | 1.93E-06    |
| 0.803926573 | 0.00047529 | -1.021626  | 0.62033904  | 0.526499963 | 2.82E-15    |
| 0.816796482 | 0.00349876 | 0.9375281  | 0.130966273 | 0.908137875 | 0.151547055 |
| -1.03904938 | 0.40951042 | -1.0190659 | 0.827560684 | 0.967746413 | 0.479885917 |
| -1.22644178 | 0.00038501 | -1.0995719 | 0.22697784  | -1.09577713 | 0.095365191 |
| -1.03564482 | 0.50484893 | 0.88707473 | 0.135715666 | -1.08580906 | 0.120414163 |
| -1.01591229 | 0.76946851 | 0.94570375 | 0.705807391 | -1.01281688 | 0.813080429 |
| -1.28791307 | 0.00130137 | -1.2176355 | 0.000808196 | -1.27321539 | 0.002053965 |
| 0.966785167 | 0.64570924 | 0.92683415 | 0.260314328 | 0.98147303  | 0.798961012 |
| 0.974859444 | 0.7180976  | -1.0397103 | 0.482304866 | 0.881604105 | 0.078117854 |
| -1.12254542 | 0.1673878  | -1.0815381 | 0.166762508 | -1.05886346 | 0.491610927 |
| 0.929077591 | 0.31265906 | 0.94400951 | 0.553104938 | 0.512971126 | 1.07E-12    |
| 0.879837447 | 0.06292071 | 0.99182372 | 0.865193862 | 0.730669848 | 2.17E-05    |
| -1.24611731 | 0.00210479 | 0.98273218 | 0.567673605 | -1.40262353 | 7.23E-06    |
| 0.836467239 | 0.00341348 | 0.9348426  | 0.255645075 | -1.06896539 | 0.257566357 |
| -1.4399784  | 0.00033972 | -1.0872882 | 0.211876447 | -1.14109498 | 0.171581446 |
| 0.879708342 | 0.05403784 | 0.93433974 | 0.146382972 | -1.05977228 | 0.376252889 |
| 0.99810786  | 0.97999906 | -1.1482893 | 0.013098399 | 0.877977122 | 0.089263217 |
| -1.01187413 | 0.82000251 | -1.1767507 | 0.00290962  | 0.962811446 | 0.466072243 |
| 0.994171343 | 0.9250223  | 0.8765355  | 0.017201305 | -1.06963465 | 0.281093193 |



|             |            |            |             |             |             |
|-------------|------------|------------|-------------|-------------|-------------|
| 0.957009249 | 0.33321436 | -1.2449585 | 0.004845874 | -1.06128179 | 0.191880853 |
| -1.09300603 | 0.3436976  | -1.1360327 | 0.086591147 | -1.21682104 | 0.039712017 |
| -1.10354081 | 0.22265995 | 0.90498605 | 0.160536573 | -1.09343573 | 0.26829897  |
| -1.01986725 | 0.7670268  | -1.0664989 | 0.439115162 | 0.867822451 | 0.036425603 |
| -1.35364195 | 0.00176963 | 0.82654122 | 0.010846465 | -1.28210241 | 0.009238355 |
| -1.04952668 | 0.29527217 | -1.0088715 | 0.89623951  | -1.015318   | 0.740888856 |
| 0.991955218 | 0.96010866 | -1.3010368 | 0.000301631 | 0.992956517 | 0.965087847 |
| -1.14150733 | 0.28087709 | 0.93337112 | 0.241974606 | 0.974635322 | 0.833327489 |
| -1.07768201 | 0.36921678 | 0.99560592 | 0.963296484 | -1.38591852 | 0.000229371 |
| -1.08637325 | 0.10519611 | -1.0427836 | 0.522406889 | -1.16680777 | 0.003366312 |
| 0.945192914 | 0.33934711 | 0.98694993 | 0.861977481 | 0.853943254 | 0.009245467 |
| 0.985614247 | 0.87307828 | -1.076687  | 0.15814284  | 0.971993511 | 0.754234236 |
| 0.932866954 | 0.34377803 | -1.0468742 | 0.461957918 | -1.07013352 | 0.35567969  |
| -1.0451396  | 0.31957693 | 0.99299457 | 0.876445724 | -1.02338301 | 0.60108587  |
| 0.973091089 | 0.64247135 | -1.1365099 | 0.174970336 | 0.889743332 | 0.050624878 |
| 0.907058242 | 0.31914776 | 0.94691425 | 0.497499418 | 0.832461141 | 0.064139609 |
| 0.990827636 | 0.87781762 | 0.98660501 | 0.839029241 | 0.925457023 | 0.199623413 |
| 0.948861187 | 0.55618645 | -1.4095459 | 0.000462349 | 0.99800764  | 0.982132293 |
| -1.12085642 | 0.14266555 | -1.0097356 | 0.833032927 | 0.962242529 | 0.617796097 |
| -1.04905885 | 0.40256361 | 0.85959937 | 0.350814581 | -1.08212841 | 0.170118283 |
| -1.0368145  | 0.63374511 | -1.0819106 | 0.519754    | -1.00922428 | 0.903587577 |
| 0.887215762 | 0.05562037 | -1.198452  | 0.032795084 | 0.97595606  | 0.692275112 |
| 0.921804265 | 0.16389212 | -1.0052191 | 0.917910262 | 0.902682381 | 0.081604911 |
| -1.07101928 | 0.23219966 | -1.0049983 | 0.932360341 | 0.898524059 | 0.064916064 |
| 0.993931699 | 0.91302784 | -1.0371789 | 0.68754341  | 0.840506239 | 0.00280687  |
| 0.903173672 | 0.6088377  | 0.95841909 | 0.56183792  | 0.782015813 | 0.21934226  |
| -1.08171037 | 0.37022672 | 0.9882923  | 0.789741351 | -1.080386   | 0.377682063 |
| 0.956839111 | 0.60015594 | 0.84724278 | 0.006407982 | 0.870720808 | 0.103864915 |
| -1.17600993 | 0.05458415 | 0.90342359 | 0.299823597 | -1.19755311 | 0.033262852 |
| 0.895025258 | 0.02330322 | 0.81744882 | 0.001361755 | 0.965977581 | 0.469257362 |
| -1.25322765 | 0.00173436 | -1.012635  | 0.887882448 | -1.16654882 | 0.028534863 |
| 0.993750012 | 0.87420758 | -1.0853636 | 0.290225773 | 0.958643458 | 0.288684939 |
| 0.937478627 | 0.51728368 | -1.0330399 | 0.569271809 | -1.08808447 | 0.397816055 |
| -1.02803201 | 0.63129793 | -1.1166401 | 0.149488463 | 0.991250397 | 0.878636799 |
| 0.777212951 | 0.00237887 | 0.95176354 | 0.422488143 | 0.861186422 | 0.063983983 |
| -1.29377707 | 0.00046219 | 0.9362501  | 0.258575399 | -1.54581166 | 5.57E-08    |
| -1.54199381 | 0.00031915 | -1.0009818 | 0.986274462 | -1.18580861 | 0.135866218 |
| -1.34722469 | 4.09E-06   | 0.91054266 | 0.096919702 | 0.996534034 | 0.952568306 |
| -1.06887108 | 0.32867157 | 0.81740052 | 0.312717041 | -1.15296425 | 0.03983919  |
| 0.931200216 | 0.39277805 | -1.1931593 | 0.047136409 | 0.970284285 | 0.71684147  |
| -1.78598709 | 7.87E-15   | 0.95967758 | 0.624794871 | 0.992732678 | 0.894040723 |
| -1.60569119 | 2.41E-05   | -1.1599786 | 0.07768028  | -1.23351425 | 0.045308966 |
| -1.38998183 | 4.10E-05   | -1.1236612 | 0.017362242 | 0.847314284 | 0.028660351 |
| -1.71236689 | 1.91E-05   | -1.0309195 | 0.658201001 | -1.42529148 | 0.003159265 |

|             |            |            |             |             |             |
|-------------|------------|------------|-------------|-------------|-------------|
| -1.26343032 | 0.01377231 | 0.87427671 | 0.001244568 | -1.38278009 | 0.000861959 |
| -1.19291926 | 0.09731647 | -1.0393847 | 0.698067274 | -1.17371311 | 0.131344813 |
| -1.0189513  | 0.63490514 | 0.97074368 | 0.606315404 | 0.94634096  | 0.16640133  |
| -1.09188757 | 0.17560729 | 0.91606205 | 0.27214268  | -1.06923183 | 0.300632835 |
| -1.17025481 | 0.12428794 | -1.4617474 | 1.08754E-06 | -1.43732395 | 0.000688409 |
| 0.927449272 | 0.09833647 | -1.1720131 | 0.164266905 | 0.965236191 | 0.432844696 |
| 0.718956382 | 0.03048149 | -1.2214191 | 0.001124352 | -1.12076866 | 0.445853074 |
| -1.19714183 | 0.02135934 | -1.0708815 | 0.315332082 | 0.974242942 | 0.732301043 |
| 0.949965908 | 0.46235626 | -1.0412084 | 0.627485436 | -1.24647916 | 0.0024647   |
| -1.06436    | 0.24295906 | -1.4848972 | 1.65241E-09 | -1.1320813  | 0.022581685 |
| 0.829743778 | 0.00216399 | -1.4855929 | 0.000301377 | -1.0415095  | 0.485598801 |
| -1.02229036 | 0.72388581 | -1.1791006 | 0.02952869  | -1.03925655 | 0.537699193 |
| -1.02646649 | 0.48965331 | -1.3888267 | 0.005940481 | -1.1047831  | 0.010453567 |
| 0.965020933 | 0.34008809 | -1.1397554 | 0.160002594 | 0.963755594 | 0.322746073 |
| -1.11193299 | 0.17767703 | -1.0469927 | 0.662213844 | -1.00764209 | 0.922292516 |
| 0.976948559 | 0.73088165 | -1.0728473 | 0.079318802 | 0.935671314 | 0.328672284 |
| 0.932973835 | 0.40602535 | -1.0632492 | 0.342580623 | -1.04373296 | 0.607483735 |
| -1.2273247  | 0.00030169 | -1.3344492 | 0.005933973 | -1.07310219 | 0.188710726 |
| -1.15669068 | 0.09762749 | 0.88608958 | 0.00922787  | -1.35356307 | 0.000926879 |
| -1.07254693 | 0.16351885 | 0.92224134 | 0.587829478 | -1.08872333 | 0.092180793 |
| -1.11471979 | 0.02199906 | -1.0652428 | 0.408631178 | -1.02969183 | 0.52777551  |
| 0.896114806 | 0.10811851 | 0.95844302 | 0.543021209 | -1.16545221 | 0.02655561  |
| -1.04487292 | 0.61494012 | 0.96058312 | 0.449872579 | -1.28331533 | 0.005775665 |
| -1.06421088 | 0.41494981 | -1.0215778 | 0.713892221 | -1.08003447 | 0.313985779 |
| -1.12348704 | 0.05825559 | -1.0704807 | 0.277481727 | -1.04493985 | 0.468216234 |
| -1.07716139 | 0.17446779 | -1.101562  | 0.012785583 | 0.893503092 | 0.041850065 |
| 0.933383168 | 0.11791503 | -1.0326465 | 0.389009274 | -1.04364235 | 0.329215782 |
| 0.740122936 | 0.02608282 | -1.095647  | 0.244815209 | 0.859974507 | 0.256433083 |
| 0.959697008 | 0.55316275 | -1.1523241 | 0.040265483 | 0.993410058 | 0.923944305 |
| -1.05537065 | 0.31866791 | -1.0690544 | 0.423759183 | -1.02614406 | 0.631749158 |
| -1.25149834 | 0.06514585 | 0.9923103  | 0.884732997 | -1.14908659 | 0.248638794 |
| -1.12076049 | 0.04727467 | -1.0704253 | 0.434042705 | -1.02403014 | 0.67404158  |
| 0.918755712 | 0.47053199 | -1.2399161 | 6.39339E-05 | 0.930910504 | 0.54178673  |
| 0.892626814 | 0.07358742 | 0.96225163 | 0.406972056 | -1.02141557 | 0.734860724 |
| 0.934549197 | 0.40469753 | -1.2013161 | 0.008496612 | -1.12702068 | 0.143744985 |
| -1.07882805 | 0.47700262 | -1.2184367 | 0.02677463  | 0.943641697 | 0.586293135 |
| 0.88631397  | 0.00947574 | 0.9671174  | 0.660696237 | -1.09414084 | 0.049886029 |
| -1.30555294 | 0.00414012 | -1.0590241 | 0.344821413 | -1.28095916 | 0.007442684 |
| -1.18612105 | 0.11094689 | 0.94704605 | 0.318276807 | -1.48852333 | 0.00039948  |
| -1.03228192 | 0.64974546 | 0.97775642 | 0.606229597 | -1.33795171 | 0.000106517 |
| -1.04639776 | 0.49843688 | 0.94670776 | 0.678752413 | -1.36407231 | 2.09E-05    |
| 0.875281181 | 0.15480223 | -1.0424872 | 0.54863656  | 0.957411549 | 0.63920294  |
| -1.13979177 | 0.34588573 | 0.9829683  | 0.749574247 | -1.11633863 | 0.427320128 |
| -1.17076241 | 0.10010768 | -1.2317535 | 0.085941689 | -1.43877303 | 0.000305827 |

|             |            |            |             |             |             |
|-------------|------------|------------|-------------|-------------|-------------|
| -1.11624843 | 0.20524308 | -1.1633859 | 0.009371445 | -1.20365232 | 0.035149638 |
| -1.0893595  | 0.12403593 | 0.92492385 | 0.506129112 | -1.37488441 | 3.47E-07    |
| 0.973474494 | 0.65394341 | -1.3033984 | 8.37383E-05 | -1.03402607 | 0.577073843 |
| 0.856806479 | 0.03173817 | -1.0567061 | 0.496689208 | -1.01183051 | 0.867348236 |
| -1.01278108 | 0.87898328 | -1.1792881 | 0.125464861 | -1.31117533 | 0.00191772  |
| 0.948011719 | 0.47031649 | -1.1099747 | 0.023793695 | -1.18301272 | 0.026047701 |
| 0.983503454 | 0.67903751 | -1.30667   | 0.004030011 | 0.923003592 | 0.050133795 |
| -1.01640951 | 0.92009958 | -1.2270157 | 0.057328159 | 0.758738408 | 0.093123994 |
| 0.986702951 | 0.9109108  | -1.1377045 | 0.069183654 | 0.945404469 | 0.639203106 |
| 0.93475095  | 0.55383445 | -1.1926613 | 0.010616474 | -1.11587807 | 0.337350346 |
| 0.8924407   | 0.04339881 | 0.99021667 | 0.915576308 | 0.942729027 | 0.288434192 |
| -1.09741538 | 0.02547324 | 0.97342695 | 0.84555187  | 0.929816997 | 0.077633699 |
| 0.930328052 | 0.28519907 | -1.2804875 | 0.011293757 | 0.94383152  | 0.391386707 |
| -1.06832619 | 0.04120688 | -1.0353492 | 0.687040834 | -1.01486645 | 0.642358531 |
| 0.950449746 | 0.25596357 | -1.1658707 | 0.007054992 | 0.893360131 | 0.013737713 |
| 0.952808036 | 0.30008804 | 0.93856018 | 0.292414079 | 0.98454896  | 0.737395886 |
| -1.00952983 | 0.82080509 | 0.88138331 | 0.077203644 | 0.987356879 | 0.761277248 |
| -1.1796933  | 0.02620391 | -1.2158491 | 0.022248931 | -1.2703401  | 0.001668836 |
| 0.994265554 | 0.93596775 | -1.0406393 | 0.589699949 | -1.10588495 | 0.163549403 |
| 0.992783112 | 0.88047423 | 0.91183689 | 0.024859434 | 0.90596659  | 0.044270689 |
| -1.32789685 | 0.01243812 | 0.95463406 | 0.774857773 | -1.18136101 | 0.134345329 |
| 0.99165373  | 0.88434926 | 0.88318735 | 0.30153684  | -1.0419119  | 0.47712513  |
| 0.99863584  | 0.97618642 | 0.92874128 | 0.516724841 | 0.728473362 | 4.94E-09    |
| -1.11935068 | 0.24244425 | -1.0276195 | 0.622402287 | -1.02237896 | 0.817412879 |
| -1.03318495 | 0.51406147 | 0.99895823 | 0.97953668  | 0.764547632 | 1.54E-06    |
| 0.997891189 | 0.96222159 | 0.92219656 | 0.231312461 | 0.985525838 | 0.743688231 |
| -1.00399837 | 0.94945699 | 0.91605811 | 0.007585008 | 0.83852913  | 0.006888608 |
| 0.725265508 | 8.41E-06   | -1.0083317 | 0.851999475 | 0.912293344 | 0.164943973 |
| -1.00760355 | 0.91927167 | 0.99790841 | 0.964020622 | 0.785463133 | 0.002017433 |
| -1.1231385  | 0.03822485 | 0.95263481 | 0.249368632 | -1.03302933 | 0.554619168 |
| -1.03048861 | 0.65938058 | -1.1308876 | 0.094575015 | 0.832199664 | 0.008995704 |
| -1.06280273 | 0.13073395 | -1.0776221 | 0.298773109 | -1.03271702 | 0.420861019 |
| -1.12597748 | 0.21940993 | 0.99490795 | 0.915591721 | -1.04641063 | 0.636635508 |
| -1.2540912  | 0.02247708 | -1.0621336 | 0.584735082 | -1.11377518 | 0.268343713 |
| 0.988609805 | 0.85154248 | -1.1563987 | 0.014234325 | -1.03264301 | 0.600151814 |
| -1.15707281 | 0.02798891 | 0.95228234 | 0.287562398 | -1.13384105 | 0.057059396 |
| -1.17668944 | 0.19070109 | -1.0954723 | 0.343415458 | -1.05081586 | 0.688014977 |
| -1.12019913 | 0.04523742 | 0.99036221 | 0.846233612 | -1.04332127 | 0.447009181 |
| -1.08601447 | 0.10553106 | -1.0171466 | 0.703050782 | 0.970420126 | 0.551625851 |
| 0.977526368 | 0.76897882 | 0.95920625 | 0.509081818 | -1.01492504 | 0.848152023 |
| -1.03037121 | 0.59132988 | 0.9348892  | 0.30642107  | -1.19704216 | 0.002013181 |
| -1.01640236 | 0.78026301 | 0.86719926 | 0.060768951 | -1.13445826 | 0.034126631 |
| 0.995134323 | 0.95621907 | -1.1355593 | 0.023824451 | 0.949250008 | 0.55835863  |
| -1.02472439 | 0.64547061 | 0.82892631 | 0.007705231 | -1.31092166 | 4.11E-06    |

|             |            |            |             |             |             |
|-------------|------------|------------|-------------|-------------|-------------|
| -1.16055645 | 0.16826559 | 0.81828009 | 5.37755E-06 | -1.06720275 | 0.544384837 |
| 0.759009736 | 0.11776084 | -1.0488237 | 0.619654898 | 0.95141005  | 0.775080692 |
| 0.909391537 | 0.03567558 | -1.1343355 | 0.196332941 | 0.894171393 | 0.014092106 |
| 0.966766755 | 0.60525359 | -1.0286468 | 0.644768103 | -1.18213861 | 0.012848356 |
| 0.953578714 | 0.45405902 | -1.0696649 | 0.301787779 | 0.993982832 | 0.924072263 |
| 0.970236031 | 0.62420562 | -1.1991966 | 0.144832186 | 0.965036063 | 0.564090881 |
| -1.07074731 | 0.55725325 | -1.0102231 | 0.854922929 | -1.58394493 | 0.000212652 |
| -1.13888984 | 0.04200567 | 0.97943077 | 0.680021649 | 0.99235404  | 0.902607376 |
| 0.771491485 | 0.00029519 | 0.99789898 | 0.978309559 | 0.707200934 | 3.54E-06    |
| -1.04060181 | 0.27094243 | -1.0329135 | 0.561241644 | 0.920586442 | 0.0246073   |
| 0.877650705 | 0.02521084 | -1.1258554 | 0.045984075 | 0.98205526  | 0.750603886 |
| -1.01885347 | 0.75280518 | -1.0265533 | 0.768106398 | -1.01966671 | 0.74262213  |
| 0.888520175 | 0.06828492 | -1.1627109 | 0.00609299  | -1.04538915 | 0.487726563 |
| -1.01258578 | 0.90607431 | -1.1260549 | 0.270421122 | -1.15145485 | 0.186954663 |
| 0.976112037 | 0.86415921 | 0.80379964 | 0.213404469 | 0.79041629  | 0.100300856 |
| 0.984588524 | 0.86452298 | 0.98200582 | 0.682000068 | 0.793166946 | 0.013393525 |
| 0.982015045 | 0.62158768 | -1.0669977 | 0.322955673 | 0.768157351 | 1.91E-09    |
| -1.24079486 | 0.01226184 | 0.89125672 | 0.073342209 | -1.19998626 | 0.032862055 |
| -1.31584184 | 0.00222393 | 0.86826332 | 0.025149296 | -1.55898631 | 3.21E-06    |
| -1.2277234  | 0.01591055 | -1.0453493 | 0.703080808 | -1.66409653 | 8.94E-08    |
| 0.870580175 | 0.28587049 | -1.0200207 | 0.752069314 | 0.671812286 | 0.003135466 |
| 0.920588443 | 0.5496738  | 0.91045971 | 0.167252537 | 0.910387143 | 0.497461071 |
| 0.819827841 | 0.00065401 | -1.0407617 | 0.269117627 | -1.00231563 | 0.966541542 |
| -1.03804793 | 0.80456581 | -1.0841777 | 0.159672728 | 0.574529085 | 0.000524326 |
| -1.14336734 | 0.19239805 | -1.1366826 | 0.03434918  | -1.40157504 | 0.001592641 |
| 0.950059978 | 0.29599882 | -1.0317265 | 0.624963762 | 0.831368884 | 0.000366178 |
| -1.08354475 | 0.06672163 | -1.1419086 | 0.213907226 | -1.1633429  | 0.000864484 |
| 0.974117202 | 0.70062546 | 0.99229371 | 0.956339695 | -1.09692687 | 0.178373788 |
| -1.15465302 | 0.15840888 | 0.91822982 | 0.350596155 | -1.14324288 | 0.188625525 |
| 0.981021115 | 0.74799211 | 0.9810964  | 0.60376546  | -1.18762764 | 0.005425596 |
| 0.888922453 | 0.04199993 | -1.2815953 | 0.004313447 | 0.979228311 | 0.711803658 |
| -1.20250853 | 0.02219524 | -1.4290469 | 0.000108562 | 0.981912199 | 0.816544027 |
| 0.978628484 | 0.67135689 | -1.3963857 | 0.000164826 | -1.0099473  | 0.845761368 |
| -1.07484168 | 0.20014845 | 0.97526467 | 0.846280455 | 0.991905613 | 0.884418248 |
| 0.943919652 | 0.29221039 | 0.86237816 | 0.286151419 | -1.07230298 | 0.203738779 |
| 0.686614235 | 3.79E-06   | -1.0519441 | 0.360309888 | 0.702577248 | 1.15E-05    |
| 0.929186738 | 0.21529218 | 0.84726144 | 0.27463039  | 0.975549421 | 0.674245534 |
| 0.916014132 | 0.18146518 | -1.115253  | 0.287268508 | 0.93312047  | 0.290174904 |
| -1.26484349 | 0.00287164 | 0.90557936 | 0.04596673  | -1.10580434 | 0.186700821 |
| -1.02410862 | 0.51810239 | -1.0506881 | 0.253887141 | -1.00404762 | 0.912573101 |
| 0.836148007 | 0.01148405 | -1.0415199 | 0.551267245 | 0.688322733 | 1.24E-06    |
| -1.04627278 | 0.51885233 | 0.8396256  | 0.087820071 | -1.01924718 | 0.78537074  |
| 0.907934599 | 0.17475178 | -1.0575449 | 0.349916349 | -1.16869476 | 0.030681256 |
| -1.03196204 | 0.61359362 | 0.85064035 | 0.005987373 | -1.02911675 | 0.644992    |

|             |            |            |             |             |             |
|-------------|------------|------------|-------------|-------------|-------------|
| -1.11572061 | 0.0495038  | -1.0943924 | 0.254413952 | 0.933175052 | 0.209790002 |
| -1.02354417 | 0.63335262 | -1.0711985 | 0.180066857 | 0.919178867 | 0.088059127 |
| 0.996127237 | 0.95478489 | 0.99745302 | 0.963613758 | 0.862715619 | 0.034623854 |
| 0.987273322 | 0.8661074  | 0.97957248 | 0.705148811 | -1.01955058 | 0.798854254 |
| -1.07177106 | 0.63182727 | 0.71259965 | 2.26404E-05 | 0.837281543 | 0.222294685 |
| 0.91230786  | 0.20507254 | 0.93583482 | 0.262567846 | 0.822883787 | 0.00866946  |
| -1.07028459 | 0.1193015  | 0.82515182 | 0.004496306 | 0.75014084  | 1.30E-08    |
| -1.04244989 | 0.5850727  | -1.2745078 | 0.002142215 | 0.936239705 | 0.387896562 |
| 0.957487649 | 0.40636986 | 0.88501847 | 0.001549541 | -1.0206169  | 0.695781523 |
| 0.9642645   | 0.3465977  | 0.99621441 | 0.955963574 | 0.963276178 | 0.333292114 |
| 0.939879409 | 0.32186031 | -1.1529134 | 0.045999354 | -1.10209873 | 0.122828444 |
| -1.0706699  | 0.26859039 | -1.086537  | 0.24248562  | 0.828590404 | 0.003277646 |
| -1.00879134 | 0.86841808 | -1.1019097 | 0.123070195 | 0.950953815 | 0.343154205 |
| 0.87804617  | 0.4329987  | 0.99330145 | 0.902287125 | 0.856705954 | 0.351700636 |
| -1.10403797 | 0.18260189 | -1.0488297 | 0.330092259 | -1.09574157 | 0.217685402 |
| 0.938374652 | 0.42246349 | 0.98618927 | 0.838999017 | 0.888987954 | 0.140659615 |
| -1.05324492 | 0.29277511 | -1.0059027 | 0.938241298 | 0.903230179 | 0.041886425 |
| 0.97154801  | 0.72193626 | 0.80571727 | 0.138972777 | -1.00849638 | 0.916878653 |
| -1.34926849 | 0.00836789 | 0.93790022 | 0.374195474 | 0.739870007 | 0.008024801 |
| 0.982463835 | 0.85796159 | 0.98330934 | 0.69641937  | -1.09379401 | 0.366216373 |
| -1.06138452 | 0.28127701 | -1.0324271 | 0.674960139 | -1.09253219 | 0.111776013 |
| -1.22229283 | 0.01865687 | 0.96395432 | 0.482493194 | -1.42931253 | 6.85E-05    |
| 0.935894343 | 0.42528943 | -1.0117633 | 0.761424567 | 0.914772152 | 0.284879933 |
| 0.91644744  | 0.0919231  | 0.95241452 | 0.435195674 | -1.00609561 | 0.905305787 |
| 0.990065632 | 0.83283911 | -1.049292  | 0.434331517 | -1.09127688 | 0.069015257 |
| -1.00545006 | 0.91205199 | -1.0517064 | 0.341973848 | 0.993379873 | 0.892634189 |
| -1.64565959 | 0.0002838  | 0.75524201 | 0.093944784 | -1.77086633 | 4.28E-05    |
| 0.851661956 | 0.01073494 | -1.1140694 | 0.146417895 | 0.959609579 | 0.500195532 |
| -1.04858528 | 0.41489452 | 0.97257673 | 0.725189161 | -1.07759152 | 0.201112966 |
| 0.9212149   | 0.19797667 | 0.98022363 | 0.684091284 | -1.04150215 | 0.52108914  |
| 0.963811341 | 0.54230105 | 0.9240551  | 0.332013386 | 0.860485658 | 0.015513317 |
| 0.933337227 | 0.38689914 | 0.90211501 | 0.350634985 | -1.22611341 | 0.012728509 |
| 0.877129342 | 0.02185616 | 0.97760928 | 0.818824892 | -1.0590355  | 0.30612277  |
| -1.12012549 | 0.03913374 | -1.0643594 | 0.2595358   | -1.06537167 | 0.243068782 |
| -1.0043456  | 0.93531064 | -1.2943833 | 0.002920277 | 0.925881991 | 0.153372985 |
| -1.06016007 | 0.51436486 | 0.84232451 | 0.04224675  | 0.894627241 | 0.216319904 |
| 0.953456415 | 0.39461966 | -1.0275926 | 0.594625509 | 0.929913194 | 0.196335038 |
| 0.828330674 | 0.00094842 | -1.0573409 | 0.241454559 | -1.10487212 | 0.069441389 |
| 0.998152652 | 0.96353434 | -1.0052566 | 0.915154088 | -1.0112328  | 0.782477268 |
| 0.982044192 | 0.85550331 | -1.6825094 | 0.000162225 | 0.920963729 | 0.409386909 |
| -1.05800992 | 0.16403955 | 0.85968936 | 0.015943442 | -1.01967028 | 0.627966389 |
| -1.26085691 | 0.0412212  | -1.1646212 | 0.010848789 | -1.1573611  | 0.192853752 |
| 0.971069366 | 0.7146775  | 0.91782478 | 0.17887601  | 0.403701681 | 6.91E-16    |
| -1.36075646 | 0.00012951 | 0.98750273 | 0.835058733 | -1.28594245 | 0.00140626  |

|             |            |            |             |             |             |
|-------------|------------|------------|-------------|-------------|-------------|
| -1.01360564 | 0.66726191 | -1.1060831 | 0.207827812 | -1.02196276 | 0.490082623 |
| -1.09253    | 0.3304585  | 0.97251713 | 0.617719608 | -1.24737781 | 0.017446511 |
| -1.04489777 | 0.63468324 | -1.0774157 | 0.170302873 | -1.2205678  | 0.034558111 |
| 0.958498304 | 0.66586385 | 0.97312395 | 0.610509292 | 0.947683664 | 0.584281541 |
| 0.951455356 | 0.51194665 | -1.0793856 | 0.394519226 | 0.553194817 | 1.77E-10    |
| 0.684337074 | 0.00087777 | 0.99255803 | 0.893513261 | 0.825670847 | 0.080779365 |
| 0.794126679 | 0.00452783 | -1.0348379 | 0.527385353 | 0.834389396 | 0.023731385 |
| -1.07285583 | 0.06631125 | 0.97024272 | 0.456275369 | -1.31038333 | 1.98E-09    |
| 0.904075626 | 0.14685192 | 0.80533649 | 0.033173294 | -1.07335504 | 0.306078153 |
| -1.02922233 | 0.521987   | -1.0096182 | 0.811624348 | 0.872986352 | 0.003658614 |
| 0.995503672 | 0.96092202 | -1.055412  | 0.628480029 | 0.862829547 | 0.112913698 |
| -1.05223919 | 0.42113017 | 0.75407498 | 0.000852595 | 0.842519517 | 0.008592317 |
| 0.60967539  | 5.21E-11   | -1.1981708 | 0.018873486 | 0.316130876 | 1.55E-25    |
| 0.973137554 | 0.6448282  | 0.97843116 | 0.488497233 | -1.03751019 | 0.533379461 |
| -1.04557524 | 0.2672052  | -1.0761907 | 0.418745914 | -1.00298485 | 0.940510893 |
| -1.05082015 | 0.40179703 | 0.9527511  | 0.600611337 | 0.672410332 | 1.02E-08    |
| 0.909313493 | 0.18233712 | 0.83044835 | 0.062376013 | 0.949990419 | 0.469089939 |
| -1.25958442 | 0.00320371 | -1.0095105 | 0.900533104 | -1.01163888 | 0.877599256 |
| -1.05763163 | 0.2909982  | 0.91470555 | 0.41116182  | 0.917414145 | 0.106741395 |
| -1.08009233 | 0.37671808 | 0.84793369 | 0.038588866 | 0.887021113 | 0.171185381 |
| -1.13794235 | 0.01531533 | 0.94575762 | 0.142993422 | 0.930011375 | 0.165321238 |
| -1.01414404 | 0.83598061 | 0.87276456 | 0.052089173 | 0.97910131  | 0.755607049 |
| -1.11038676 | 0.16342048 | 0.87431364 | 0.00402629  | -1.08319058 | 0.285681627 |
| -1.08627992 | 0.38254004 | -1.0181668 | 0.844834905 | -1.07777225 | 0.429076553 |
| -1.01107661 | 0.8892076  | 0.96783762 | 0.604885631 | 0.9297012   | 0.358491499 |
| -1.07446473 | 0.44265224 | 0.99622742 | 0.95038165  | -1.05804401 | 0.546016209 |
| 0.977024862 | 0.62900655 | -1.1044299 | 0.096633807 | 0.940214847 | 0.2030083   |
| 0.941771224 | 0.28089239 | 0.97952442 | 0.604889828 | -1.06516632 | 0.256768974 |
| -1.06736362 | 0.31942177 | 0.98568059 | 0.806703989 | -1.128528   | 0.067802436 |
| 0.937306721 | 0.46917137 | -1.0878686 | 0.236585024 | 0.716057964 | 0.000420657 |
| -1.22905404 | 0.0514001  | -1.0919592 | 0.244595706 | -1.07357174 | 0.495741746 |
| 0.954125474 | 0.36287122 | 0.95873434 | 0.426054143 | -1.09002652 | 0.097873297 |
| -1.01535369 | 0.72196761 | 0.89997975 | 0.228108071 | 0.96886175  | 0.46094743  |
| 0.902860476 | 0.24186421 | 0.99348004 | 0.899568357 | 0.874785377 | 0.127203541 |
| 0.860459802 | 0.05141017 | -1.0595325 | 0.395477897 | 0.876962484 | 0.087474087 |
| -1.16630391 | 0.08775217 | -1.0823186 | 0.290513678 | -1.08023636 | 0.386828215 |
| -1.13292367 | 0.02624333 | -1.0114263 | 0.904243153 | -1.05166358 | 0.360342457 |
| -1.13967006 | 0.01223833 | 0.83361354 | 0.024623203 | -1.08677292 | 0.104714128 |
| -1.08315731 | 0.18517537 | -1.0757705 | 0.435019233 | 0.987603146 | 0.834768871 |
| 0.840317144 | 0.00821473 | -1.1201716 | 0.021288671 | 0.919701617 | 0.192200189 |
| -1.08270572 | 0.13342229 | -1.0646738 | 0.260228742 | -1.0882421  | 0.11074166  |
| -1.0198384  | 0.72413661 | -1.1071317 | 0.12255387  | 0.986100667 | 0.801392399 |
| -1.02553751 | 0.65692926 | -1.0141814 | 0.874614551 | 0.957815593 | 0.44857294  |
| -1.09909296 | 0.38617146 | -1.2621911 | 0.028595882 | -1.40321958 | 0.002805899 |

|             |            |            |             |             |             |
|-------------|------------|------------|-------------|-------------|-------------|
| 0.861198129 | 0.01449273 | -1.0332836 | 0.524987608 | -1.01474793 | 0.805418699 |
| 0.939412146 | 0.23010846 | 0.9814552  | 0.66210335  | 0.908431412 | 0.067627173 |
| -1.07560108 | 0.21385186 | 0.86152552 | 0.090080764 | -1.04601358 | 0.440861625 |
| 0.987348291 | 0.82933017 | 0.75648865 | 0.000509228 | -1.13320438 | 0.037997066 |
| 0.942196075 | 0.25948904 | 0.99429056 | 0.948630927 | -1.02722648 | 0.609250165 |
| -1.06522673 | 0.23307825 | -1.1008176 | 0.084236493 | -1.01898517 | 0.721020021 |
| 0.863153352 | 0.02341744 | 0.92439867 | 0.124851862 | 0.907795565 | 0.130978579 |
| -1.0664392  | 0.2539387  | 0.8813119  | 0.038388957 | -1.03387898 | 0.552812631 |
| -1.03808032 | 0.42261818 | -1.0334021 | 0.606302133 | -1.03170368 | 0.502671912 |
| -1.03402512 | 0.54654663 | -1.0868517 | 0.116110595 | 0.962985369 | 0.496909678 |
| 0.832433734 | 0.0011161  | 0.97400597 | 0.636229951 | 0.967925427 | 0.542873325 |
| 0.908416754 | 0.14781802 | -1.054764  | 0.349219819 | -1.11650526 | 0.097834379 |
| 0.969401282 | 0.54942251 | 0.99459535 | 0.960218822 | -1.05789795 | 0.280109893 |
| 0.650039856 | 0.00722509 | -1.0288754 | 0.632220855 | -1.08942104 | 0.580958128 |
| 0.955395443 | 0.4608979  | -1.1642873 | 0.004646341 | -1.00529332 | 0.931841187 |
| -1.14058436 | 0.04789378 | 0.98366307 | 0.777260689 | -1.0108482  | 0.868722887 |
| 0.928873287 | 0.22404077 | -1.0210781 | 0.724076787 | 0.998814406 | 0.984294474 |
| 0.880092946 | 0.07487648 | 0.94621989 | 0.294753025 | 0.950622006 | 0.474538662 |
| -1.01849731 | 0.74126433 | 0.93020844 | 0.173035431 | -1.04315701 | 0.447565196 |
| 0.772581826 | 0.00932029 | -1.0522142 | 0.423261687 | 0.836799732 | 0.067991147 |
| 0.959604828 | 0.51253918 | -1.0785439 | 0.180922403 | -1.01073338 | 0.86510279  |
| 0.848111447 | 0.00500341 | -1.0087721 | 0.850930292 | -1.05202679 | 0.371463725 |
| 0.948375584 | 0.30959146 | 0.88983777 | 0.03894063  | -1.00775363 | 0.88173804  |
| 0.86569388  | 0.036674   | -1.0491265 | 0.371685989 | -1.05904459 | 0.397794721 |
| -1.0547116  | 0.41839697 | -1.022763  | 0.73211381  | -1.01054712 | 0.872992448 |
| 0.714924065 | 0.18555159 | 0.92682508 | 0.146565062 | 0.824065206 | 0.442739838 |
| -1.07835494 | 0.57233851 | -1.0871942 | 0.590000743 | 0.786717424 | 0.076445579 |
| -1.18017177 | 0.01381033 | 0.8751604  | 0.034416643 | 0.89955781  | 0.109664731 |
| -1.02099881 | 0.74628194 | 0.97388799 | 0.685443736 | -1.07280752 | 0.276318351 |
| 0.947846051 | 0.23588265 | 0.88574844 | 0.048110915 | 0.943045109 | 0.194963632 |
| 0.940818741 | 0.32942115 | -1.1110739 | 0.140006018 | 0.958872486 | 0.500957847 |
| 0.90579182  | 0.043558   | -1.063525  | 0.269710744 | 0.991981776 | 0.867065253 |
| -1.03335371 | 0.60628237 | 0.97829803 | 0.819447805 | -1.00680207 | 0.91509398  |
| -1.02189937 | 0.68415497 | -1.0234909 | 0.711916162 | -1.10822263 | 0.057625228 |
| -1.05965455 | 0.30747658 | -1.0543212 | 0.351429818 | -1.00150353 | 0.978785745 |
| 0.978077488 | 0.73416233 | -1.0501024 | 0.348330184 | -1.00678559 | 0.917441941 |
| -1.21521154 | 0.01981474 | 0.94907331 | 0.440788155 | -1.2618237  | 0.005934833 |
| -1.15172968 | 0.0298567  | 0.90920642 | 0.150891237 | -1.12749531 | 0.063423835 |
| -1.02160045 | 0.77072331 | 0.92135778 | 0.744698907 | -1.1075273  | 0.167327721 |
| 0.986967938 | 0.86011478 | -1.0581304 | 0.672162242 | -1.01610854 | 0.830026108 |
| -1.0194012  | 0.71958876 | 0.92411641 | 0.230533667 | -1.01091676 | 0.839181664 |
| 0.963721131 | 0.51786179 | -1.0637528 | 0.337792886 | -1.07796021 | 0.191649101 |
| 0.988355856 | 0.81971638 | 0.95633837 | 0.322207396 | -1.04843586 | 0.359154439 |
| -1.01571719 | 0.75995231 | -1.0452409 | 0.478401115 | -1.05858568 | 0.267207914 |

|             |            |            |             |             |             |
|-------------|------------|------------|-------------|-------------|-------------|
| -1.01860734 | 0.7770682  | -1.0132466 | 0.784426104 | -1.06437671 | 0.339867669 |
| 0.966920177 | 0.61457814 | -1.096326  | 0.15199847  | -1.01432336 | 0.831253212 |
| -1.00933054 | 0.8845762  | -1.0828675 | 0.138662686 | -1.14225317 | 0.041476585 |
| -1.00437397 | 0.93847778 | 0.95152652 | 0.380887027 | 0.984054491 | 0.776285778 |
| -1.01048209 | 0.83410196 | -1.0742085 | 0.275207622 | 0.956012545 | 0.367968565 |
| -1.03410124 | 0.54661047 | -1.004206  | 0.958947128 | 0.986941611 | 0.812928106 |
| 0.998031844 | 0.97274294 | -1.0785581 | 0.237516275 | -1.15389441 | 0.015738407 |
| 0.977221651 | 0.646002   | 0.9544625  | 0.525670055 | -1.12887039 | 0.018472236 |
| -1.06095178 | 0.34213757 | -1.1467571 | 0.070039921 | 0.943257415 | 0.348243153 |
| -1.06928384 | 0.28756093 | -1.027435  | 0.613297171 | -1.01918627 | 0.761748211 |
| 0.990310455 | 0.87062044 | -1.0931766 | 0.122456888 | -1.1502617  | 0.0223267   |
| 0.928086265 | 0.25875387 | 0.95600591 | 0.382905349 | -1.09949115 | 0.152698137 |
| 0.897924869 | 0.06224624 | 0.91656393 | 0.091990368 | 0.951320785 | 0.381384418 |
| -1.04910583 | 0.34991797 | 0.98156034 | 0.775005125 | -1.07845805 | 0.143191489 |
| 0.885333786 | 0.0318123  | 0.93359947 | 0.305531476 | -1.13895148 | 0.022219086 |
| -1.01725633 | 0.7603233  | -1.0016304 | 0.979683031 | 0.899974264 | 0.064344836 |
| -1.00638255 | 0.90199886 | -1.0087881 | 0.877040698 | 0.8920031   | 0.030494013 |
| 0.885522641 | 0.04994923 | 0.98486009 | 0.759339579 | -1.00183139 | 0.976031806 |
| 0.958616341 | 0.46157298 | -1.0525537 | 0.358234413 | 0.96670397  | 0.554894853 |
| -1.00965831 | 0.85893666 | -1.0301098 | 0.607346215 | -1.02065689 | 0.705532631 |
| 0.993659949 | 0.91403262 | 0.95966487 | 0.412816059 | 0.951463592 | 0.399945244 |
| 0.952308085 | 0.37550443 | -1.1108099 | 0.094476695 | -1.03274338 | 0.558202785 |
| -1.0710615  | 0.15960919 | -1.0150221 | 0.811951514 | -1.02841041 | 0.563012907 |
| -1.09299888 | 0.14413681 | 0.99946677 | 0.992880568 | -1.12138699 | 0.061539796 |
| 0.952498001 | 0.45230205 | -1.0191737 | 0.772570435 | -1.07608151 | 0.259056957 |
| 0.9735203   | 0.5770283  | -1.019582  | 0.732950893 | 0.966476148 | 0.478932577 |
| -1.08806742 | 0.18783935 | -1.1111286 | 0.043006944 | 0.907902939 | 0.132622257 |
| 0.991052514 | 0.90588961 | -1.0106961 | 0.848027684 | -1.01312009 | 0.863872644 |
| 0.905279996 | 0.05413075 | -1.0300601 | 0.597766756 | -1.05571458 | 0.288170347 |
| 0.795720687 | 0.00103296 | -1.0600757 | 0.261635461 | -1.06964257 | 0.311107024 |
| 0.960483592 | 0.48549447 | -1.1516616 | 0.023630554 | 0.965827639 | 0.547268936 |
| -1.22264366 | 0.09296538 | 0.89478214 | 0.056323106 | -1.42394423 | 0.004005824 |
| 0.866370454 | 0.01322779 | 0.97615354 | 0.655655472 | -1.00341131 | 0.95171216  |
| -1.02017115 | 0.80240923 | -1.0154626 | 0.794576263 | -1.10559615 | 0.211669148 |
| 0.962817685 | 0.53675913 | -1.0336249 | 0.547862159 | -1.01413895 | 0.818682339 |
| -1.12781135 | 0.02885603 | 0.92067101 | 0.091734254 | -1.03693941 | 0.501128178 |
| 0.977329737 | 0.74116116 | 0.98126193 | 0.753765131 | -1.04348284 | 0.540303219 |
| -1.04547081 | 0.51414924 | 0.9647714  | 0.579215833 | 0.929356928 | 0.284078079 |
| -1.07775778 | 0.10063078 | 0.99736621 | 0.956227467 | -1.00186074 | 0.967072724 |
| -1.09698729 | 0.20432538 | -1.0774841 | 0.243396791 | -1.12188492 | 0.116252426 |
| -1.03645516 | 0.52841754 | -1.2241881 | 0.009928713 | 0.951825801 | 0.385485224 |
| -1.09574397 | 0.09514977 | -1.0952556 | 0.077431685 | -1.11154379 | 0.054626442 |
| -1.02458336 | 0.7436402  | -1.0240997 | 0.718999253 | -1.0225899  | 0.763540769 |
| 0.99132699  | 0.86365353 | -1.0668436 | 0.264689445 | -1.0154365  | 0.762726515 |



|             |            |            |             |             |             |
|-------------|------------|------------|-------------|-------------|-------------|
| 0.75878698  | 0.03606703 | -1.0570601 | 0.638717707 | 0.690426535 | 0.005616411 |
| -1.05120589 | 0.32286378 | -1.0460921 | 0.424349645 | -1.01118135 | 0.825026141 |
| -1.01343627 | 0.79310125 | 0.97092566 | 0.711698729 | -1.01692026 | 0.741652231 |
| 0.994091483 | 0.91836636 | -1.1013462 | 0.119090046 | -1.03161833 | 0.590803325 |
| 0.994716002 | 0.92261627 | -1.0063064 | 0.906995549 | 0.975536387 | 0.650046439 |
| -1.05538872 | 0.37641038 | 0.9916908  | 0.904289257 | -1.00522879 | 0.931560359 |
| -1.04435678 | 0.48891558 | -1.0134633 | 0.844169395 | -1.04919993 | 0.444019783 |
| -1.06273245 | 0.24987918 | -1.0556485 | 0.232284385 | 0.932925801 | 0.189998007 |
| -1.1410776  | 0.06882202 | -1.105772  | 0.168560035 | -1.10055604 | 0.183278286 |
| 0.876086662 | 0.07903406 | 0.95282101 | 0.395552705 | -1.05978471 | 0.435410708 |
| 0.991752457 | 0.80174625 | 0.9706135  | 0.581762787 | 0.96829868  | 0.330730402 |
| -1.06324511 | 0.27278938 | -1.0541062 | 0.478788057 | 0.784994404 | 5.66E-05    |
| -1.14500927 | 0.05915673 | 0.9526798  | 0.341232972 | -1.08807193 | 0.234726555 |
| -1.0433852  | 0.54837656 | 0.73438225 | 0.019661737 | -1.07838309 | 0.287967287 |
| -1.10817512 | 0.02339747 | -1.1263012 | 0.021079528 | 0.937553666 | 0.148774064 |
| 0.914652989 | 0.41344208 | -1.0433522 | 0.405662502 | -1.18180263 | 0.128619773 |
| 0.899206765 | 0.1626213  | -1.1289099 | 0.039811471 | 0.945399234 | 0.457593381 |
| 0.982703746 | 0.78559251 | -1.0645323 | 0.254432802 | 0.932781928 | 0.280419333 |
| 0.890794339 | 0.05462795 | -1.1352718 | 0.040527831 | 0.842666589 | 0.005274246 |
| 0.823737233 | 0.0269661  | -1.0385357 | 0.546350675 | -1.11636029 | 0.202200565 |
| 0.970921481 | 0.75886968 | 0.98989846 | 0.846823004 | 0.93419253  | 0.479716927 |
| -1.00047054 | 0.99411456 | -1.1478651 | 0.057603548 | 0.908117989 | 0.134805511 |
| -1.1158774  | 0.04846441 | -1.026344  | 0.726276985 | 0.996317726 | 0.946083499 |
| -1.01162961 | 0.84571431 | 0.99205504 | 0.808900793 | 0.876321406 | 0.029769576 |
| -1.27126737 | 0.00805233 | 0.92109908 | 0.143404075 | 0.982001267 | 0.835790654 |
| -1.0523646  | 0.41153326 | 0.94589315 | 0.431853213 | 0.889928212 | 0.064028558 |
| -1.03181171 | 0.68964168 | -1.0093599 | 0.895086215 | 0.962696101 | 0.627943128 |
| -1.12928192 | 0.26237528 | -1.047875  | 0.292799401 | 0.93817816  | 0.554657154 |
| -1.14090779 | 0.12271045 | -1.1300354 | 0.263705114 | -1.13769639 | 0.13073819  |
| 0.968757517 | 0.4873839  | 0.94618843 | 0.464271052 | 0.789876212 | 3.23E-06    |
| 0.904585932 | 0.18243668 | -1.0309119 | 0.635261066 | -1.0334571  | 0.659328755 |
| 0.997764957 | 0.96559764 | 0.79579555 | 0.000287007 | -1.09323105 | 0.090061344 |
| 0.961391203 | 0.3531831  | 0.88891924 | 0.172962356 | 0.982809441 | 0.681649618 |
| -1.33135824 | 0.00168588 | 0.87433152 | 0.16604774  | -1.29938471 | 0.003796922 |
| -1.00187384 | 0.96748579 | -1.0103605 | 0.871622263 | -1.02456774 | 0.597657259 |
| -1.12646385 | 0.08829049 | -1.0751527 | 0.187652243 | 0.983540629 | 0.809739198 |
| -1.13872519 | 0.02200701 | 0.99246589 | 0.89871312  | -1.10137681 | 0.085264816 |
| 0.794633677 | 0.01094277 | -1.2093449 | 0.033678471 | 0.693393587 | 0.000101599 |
| -1.17954546 | 0.09475046 | -1.0038073 | 0.9510935   | 0.918225061 | 0.383448953 |
| -1.037948   | 0.44900639 | -1.0752779 | 0.356259377 | -1.02217399 | 0.655179689 |
| -1.31060516 | 0.00134054 | -1.1159473 | 0.311347651 | -1.2485214  | 0.007540022 |
| -1.17178641 | 0.03323515 | -1.0342079 | 0.690641133 | -1.14879233 | 0.061180972 |
| -1.09177353 | 0.11928387 | 0.91335181 | 0.050930224 | -1.05395403 | 0.34766309  |
| 0.925759633 | 0.24586723 | 0.98697295 | 0.860462685 | -1.03824658 | 0.57047361  |

|             |            |            |             |             |             |
|-------------|------------|------------|-------------|-------------|-------------|
| -1.29810954 | 5.12E-05   | -1.016658  | 0.750256706 | -1.1140615  | 0.073893015 |
| -1.05082451 | 0.61750567 | 0.93193244 | 0.09939787  | -1.29152879 | 0.012264525 |
| 0.81100329  | 0.00374637 | -1.2699282 | 0.007863734 | -1.38588713 | 1.72E-05    |
| -1.13345671 | 0.03077357 | 0.97936361 | 0.650122699 | -1.07719783 | 0.193458698 |
| 0.994224318 | 0.92399825 | 0.98443982 | 0.820025401 | -1.25047997 | 0.000511105 |
| -1.13564653 | 0.03260603 | -1.0982909 | 0.094479664 | -1.04562413 | 0.445016875 |
| -1.03032526 | 0.61541244 | 0.92565716 | 0.379624281 | 0.765874915 | 3.55E-05    |
| -1.0286721  | 0.41318464 | -1.0993942 | 0.333412307 | 0.93113298  | 0.042159327 |
| -1.08151245 | 0.05233002 | 0.8827536  | 0.013537647 | 0.907359445 | 0.017062694 |
| 0.976723521 | 0.65715278 | -1.242194  | 0.008932156 | 0.996339533 | 0.944851837 |
| 0.994677477 | 0.87993006 | -1.1132056 | 0.145122073 | 0.977950494 | 0.528699453 |
| 0.935367203 | 0.21010873 | -1.0253973 | 0.652957024 | 0.839309612 | 0.001596625 |
| 0.57991428  | 3.54E-14   | -1.0783539 | 0.256329329 | 0.891019063 | 0.035114665 |
| 0.960012374 | 0.56877819 | -1.0849428 | 0.174564271 | 0.829582666 | 0.011261895 |
| 0.984627168 | 0.81028767 | -1.0056347 | 0.954810684 | 0.878994724 | 0.049647591 |
| 0.986442364 | 0.70455754 | 0.811865   | 0.003912116 | 0.965909259 | 0.337075543 |
| 0.742562253 | 0.03396977 | -1.2844473 | 4.63026E-05 | 0.986322844 | 0.920176311 |
| -1.04890201 | 0.55695068 | -1.0888523 | 0.164733729 | -1.53916399 | 1.94E-06    |
| -1.01037069 | 0.8730519  | -1.0470107 | 0.431688915 | 0.731782245 | 1.06E-05    |
| 0.964341961 | 0.52887387 | 0.85973819 | 0.013447575 | 0.942396981 | 0.304991452 |
| -1.24535485 | 0.01244395 | -1.0334627 | 0.341228384 | -1.11158633 | 0.217814156 |
| -1.06939988 | 0.46180774 | 0.96850484 | 0.421269615 | 0.702860916 | 0.000274257 |
| 0.979904197 | 0.81407693 | -1.068899  | 0.212156467 | -1.08611456 | 0.340528884 |
| 0.876999968 | 0.25720241 | -1.0134993 | 0.704442318 | -1.12034104 | 0.325885324 |
| 0.803067237 | 0.04007426 | 0.96127794 | 0.456694133 | 0.910774471 | 0.373919261 |
| 0.747168959 | 0.02124262 | 0.93253601 | 0.196257374 | -1.08786299 | 0.495830445 |
| 0.991124365 | 0.9131327  | 0.95031952 | 0.477114501 | 0.913447575 | 0.270687434 |
| 0.973494539 | 0.66239828 | 0.91593499 | 0.177215886 | 0.814318756 | 0.001454199 |
| 0.967152453 | 0.38583838 | 0.95642387 | 0.218824725 | 0.995173145 | 0.899680043 |
| 0.910229589 | 0.30042719 | 0.84763779 | 0.232144009 | -1.43363249 | 0.000192597 |
| 0.744063502 | 2.98E-10   | -1.2612806 | 0.005801331 | 0.650218037 | 1.05E-15    |
| -1.04026365 | 0.61862907 | 0.94144166 | 0.351937425 | 0.855694412 | 0.053220952 |
| 0.97462536  | 0.65234216 | -1.1295923 | 0.038015032 | 0.916156675 | 0.128578282 |
| -1.13103196 | 0.17089605 | -1.003903  | 0.963546528 | -1.07046306 | 0.446132943 |
| -1.12241591 | 0.11985435 | 0.76168123 | 0.00400759  | -1.104853   | 0.178037918 |
| -1.05855517 | 0.37541079 | 0.88238527 | 0.151036103 | -1.25000828 | 0.000930285 |
| 0.963167489 | 0.59402663 | -1.1377794 | 0.265058268 | -1.12870865 | 0.089388175 |
| -1.0192128  | 0.70318137 | -1.0191916 | 0.85597528  | -1.09157343 | 0.083472689 |
| 0.893841599 | 0.21233877 | -1.1909996 | 0.160443373 | -1.11608968 | 0.222119092 |
| -1.00768303 | 0.89290804 | 0.98814056 | 0.883941795 | 0.869781615 | 0.016906737 |
| 0.852409954 | 0.15377856 | -1.0000036 | 0.999952954 | -1.00594158 | 0.957396171 |
| 0.968815628 | 0.76313504 | 0.87841111 | 0.001302873 | 0.881271815 | 0.232188267 |
| -1.11269774 | 0.38570468 | -1.1475531 | 0.131890895 | -1.06551268 | 0.605413381 |
| 0.88161601  | 0.15031566 | 0.95813312 | 0.269399178 | -1.05650831 | 0.527062987 |

|             |            |            |             |             |             |
|-------------|------------|------------|-------------|-------------|-------------|
| -1.01702242 | 0.73732181 | 0.91472448 | 0.263261272 | 0.96804274  | 0.51927344  |
| 0.986928176 | 0.80969706 | -1.0167012 | 0.771444559 | 0.87443433  | 0.016814057 |
| 0.917569849 | 0.06651461 | -1.0852955 | 0.360325157 | -1.03615295 | 0.442762202 |
| 0.836638848 | 0.00889351 | -1.0505087 | 0.50295281  | -1.11592418 | 0.100814823 |
| 0.994045364 | 0.93316012 | -1.0325007 | 0.617458873 | -1.06868338 | 0.352849394 |
| -1.01887701 | 0.74890319 | 0.94865384 | 0.454645966 | -1.02842938 | 0.631569022 |
| -1.05908726 | 0.42868456 | -1.0461161 | 0.368194614 | 0.971374609 | 0.688215439 |
| 0.899560384 | 0.13800127 | 0.97785362 | 0.802099335 | 0.94314894  | 0.408749445 |
| 0.796995059 | 0.00010903 | 0.98781852 | 0.829334545 | 0.469715869 | 1.95E-19    |
| -1.30099794 | 0.00028132 | -1.0517648 | 0.649334442 | -1.37186558 | 2.05E-05    |
| 0.963494479 | 0.5146128  | 0.74572551 | 0.006990303 | 0.97459065  | 0.651641403 |
| -1.31885751 | 0.00011835 | -1.0260442 | 0.834022229 | -1.24713102 | 0.001653427 |
| 0.947557011 | 0.67261273 | 0.93242084 | 0.421295734 | -1.15449677 | 0.262177964 |
| -1.08939084 | 0.19964454 | 0.99016743 | 0.844284562 | 0.98245996  | 0.78942865  |
| -1.21555065 | 0.00596927 | 0.99538635 | 0.932536223 | -1.46248857 | 8.21E-07    |
| -1.058711   | 0.40602556 | -1.0116511 | 0.801841228 | 0.731397997 | 2.69E-05    |
| 0.919816967 | 0.20190413 | 0.93421065 | 0.304876075 | -1.15336587 | 0.031718033 |
| 0.987122092 | 0.80065118 | -1.0413536 | 0.569906161 | 0.914742098 | 0.086773513 |
| 0.93906     | 0.29219078 | -1.0690197 | 0.255963521 | 0.745146298 | 7.04E-06    |
| 0.961148292 | 0.46974718 | 0.97415716 | 0.717496024 | -1.02654206 | 0.632265107 |
| 0.948139124 | 0.47501749 | 0.98279535 | 0.805950174 | 0.851671424 | 0.034542458 |
| 0.954332371 | 0.61848999 | 0.79467263 | 9.12193E-05 | 0.92606649  | 0.414102116 |
| -1.08069895 | 0.13381794 | -1.3441961 | 5.74213E-05 | 0.960683983 | 0.434895212 |
| -1.03684769 | 0.54339332 | 0.99254822 | 0.895521235 | -1.27810458 | 0.000120565 |
| -1.15902647 | 0.01431128 | -1.30408   | 0.000205866 | -1.1132031  | 0.071339354 |
| 0.888187289 | 0.12423653 | -1.0878311 | 0.509514439 | 0.8800232   | 0.098121553 |
| 0.983030197 | 0.87122251 | -1.1540373 | 0.034222979 | 0.876621736 | 0.215582083 |
| 0.913161021 | 0.06712475 | -1.3000353 | 0.000317727 | 0.92885509  | 0.134838403 |
| -1.27435498 | 0.00923644 | 0.79922817 | 0.00177498  | -1.29614483 | 0.00555366  |
| 0.879338806 | 0.04362597 | -1.0294979 | 0.654969479 | 0.900565055 | 0.098158334 |
| 0.998704743 | 0.97157223 | -1.0316453 | 0.544471505 | 0.856041178 | 7.41E-05    |
| 0.982776108 | 0.79587933 | 0.92011886 | 0.16474323  | -1.15164608 | 0.039295121 |
| -1.00751505 | 0.87140754 | 0.97131431 | 0.595035926 | 0.957601153 | 0.350836275 |
| -1.05446454 | 0.29107184 | 0.98040269 | 0.790213369 | -1.03731759 | 0.464547501 |
| -1.05359639 | 0.44428794 | 0.90285101 | 0.278343271 | 0.906697563 | 0.154055171 |
| -1.02099518 | 0.79763563 | -1.0247316 | 0.633743544 | 0.978890103 | 0.792326506 |
| 0.8723259   | 0.04557137 | -1.0322046 | 0.594358144 | 0.902612133 | 0.130535222 |
| -1.0232292  | 0.63662106 | 0.87276328 | 0.023333991 | 0.969994063 | 0.531140868 |
| -1.11021089 | 0.04487371 | 0.90675386 | 0.202850776 | -1.05628092 | 0.286898164 |
| -1.21511059 | 6.78E-05   | 0.90642157 | 0.353964758 | 0.929158789 | 0.109125397 |
| 0.806157634 | 0.00732221 | 0.96712114 | 0.494592686 | 0.999128554 | 0.991041681 |
| -1.01772038 | 0.82177187 | -1.1340779 | 0.16677843  | -1.12946128 | 0.122541875 |
| -1.00522741 | 0.96350408 | 0.99350114 | 0.916938578 | -1.01709886 | 0.881728107 |
| 0.850556992 | 0.03497927 | 0.75008389 | 1.27042E-10 | 0.929976375 | 0.336243962 |

|             |            |            |             |             |             |
|-------------|------------|------------|-------------|-------------|-------------|
| -1.07966719 | 0.32085484 | -1.0626095 | 0.367576496 | -1.36544888 | 0.000154658 |
| -1.14544572 | 0.18858145 | 0.99403049 | 0.896997161 | -1.37145691 | 0.003100493 |
| 0.916438456 | 0.28104098 | -1.0980767 | 0.065387971 | -1.17937761 | 0.044369748 |
| 0.974437215 | 0.80688229 | 0.97180475 | 0.674588435 | -1.06749305 | 0.538139728 |
| 0.980540086 | 0.8481442  | 0.82858546 | 0.023485517 | -1.22196026 | 0.054874982 |
| -1.08095561 | 0.27152738 | -1.0752773 | 0.281602431 | -1.30789996 | 0.000336666 |
| -1.10276682 | 0.24033495 | -1.0173131 | 0.723864769 | 0.921787222 | 0.327353109 |
| -1.10903738 | 0.08016483 | -1.0643748 | 0.225700126 | -1.34519259 | 4.39E-06    |
| -1.07813368 | 0.54537507 | -1.003049  | 0.946430229 | -1.18160387 | 0.182719127 |
| -1.22441741 | 0.06254103 | 0.89230616 | 0.146242991 | -1.16538454 | 0.156292094 |
| -1.06116371 | 0.56847251 | -1.2387116 | 0.007916605 | -1.19175229 | 0.09574316  |
| -1.08107911 | 0.26885066 | 0.84502853 | 0.143481429 | -1.05539573 | 0.4430915   |
| -1.10971947 | 0.23739672 | -1.0356306 | 0.641717162 | -1.31264456 | 0.002890133 |
| -1.26050943 | 0.01089457 | -1.2842808 | 0.00187905  | -1.2600015  | 0.011025524 |
| -1.19369178 | 0.0111907  | -1.1250215 | 0.253095149 | 0.955438076 | 0.501622996 |
| -1.13922205 | 0.26117378 | -1.0004846 | 0.995198691 | -1.42373055 | 0.003281595 |
| 0.961739028 | 0.63583879 | 0.99146948 | 0.935526588 | -1.32246634 | 0.001233494 |
| -1.12612747 | 0.06884147 | -1.2843398 | 0.017571877 | -1.22813092 | 0.002229295 |
| -1.00368476 | 0.96855094 | -1.0542458 | 0.454197632 | -1.13397803 | 0.181390106 |
| 0.838836938 | 0.02093685 | 0.92755643 | 0.365454671 | 0.839619253 | 0.021592436 |
| -1.44101813 | 0.00054713 | -1.2273795 | 0.00086015  | -1.32324028 | 0.006737213 |
| -1.16917176 | 0.0064961  | -1.1517776 | 0.258081718 | -1.45400364 | 9.55E-09    |
| -1.22073839 | 0.01154949 | -1.1640277 | 0.15940931  | -1.14388644 | 0.083641855 |
| -1.17735566 | 0.08571301 | -1.1410521 | 0.207643529 | -1.13217083 | 0.188790486 |
| -1.25076492 | 0.01302585 | 0.97294062 | 0.695768444 | -1.13417214 | 0.154178155 |
| -1.02243199 | 0.79774827 | -1.128578  | 0.17079421  | 0.960065264 | 0.638047139 |
| -1.00168314 | 0.98639151 | -1.0900945 | 0.330079456 | -1.11045026 | 0.290513326 |
| 0.996553056 | 0.96808197 | -1.056829  | 0.415686491 | 0.908436418 | 0.268524975 |
| -1.26790393 | 0.04203384 | -1.1618457 | 0.196816524 | -1.10400745 | 0.389096213 |
| 0.87880432  | 0.09581776 | -1.0691337 | 0.418080046 | 0.930741801 | 0.350505788 |
| 0.852493176 | 0.01308219 | -1.1209146 | 0.080043356 | 0.936001478 | 0.292173327 |
| 0.874008221 | 0.09083912 | -1.0215628 | 0.819157842 | -1.08935354 | 0.278685445 |
| 0.940964992 | 0.40127322 | 0.84009394 | 0.021998816 | -1.13869193 | 0.076546936 |
| 0.862031892 | 0.01180624 | -1.4237838 | 0.000796259 | 0.829951956 | 0.001866436 |
| -1.24171294 | 0.00311706 | -1.2599302 | 0.000105716 | -1.23327177 | 0.004107912 |
| 0.857214451 | 0.16211745 | -1.0726898 | 0.361642444 | -1.16723288 | 0.160601362 |
| 0.888724875 | 0.42911388 | -1.1061906 | 0.284021396 | -1.21403898 | 0.195799246 |
| 0.958524835 | 0.61756939 | -1.2094399 | 0.033434192 | -1.0102954  | 0.903797667 |
| -1.03857792 | 0.6477468  | -1.077245  | 0.391542877 | -1.11292929 | 0.199572265 |
| -1.14750964 | 0.05122106 | -1.3551954 | 0.003106225 | -1.11366788 | 0.124556218 |
| -1.03468644 | 0.62897633 | 0.98405965 | 0.85230021  | 0.912884646 | 0.19950859  |
| 0.855413268 | 0.15780572 | -1.3013546 | 0.024675121 | -1.12796066 | 0.274312809 |
| -1.08840029 | 0.37021104 | -1.0058372 | 0.939405996 | -1.25702448 | 0.01801172  |
| -1.24266033 | 0.00743859 | -1.0172409 | 0.784407054 | -1.44787696 | 1.62E-05    |

|             |            |            |             |             |             |
|-------------|------------|------------|-------------|-------------|-------------|
| -1.08071273 | 0.36975302 | 0.97855135 | 0.7826563   | -1.33932627 | 0.001260638 |
| -1.01846741 | 0.78658418 | 0.99508457 | 0.945631069 | -1.08947031 | 0.208070356 |
| -1.06033268 | 0.53838965 | 0.9132656  | 0.117012694 | -1.26663157 | 0.015574502 |
| -1.09657063 | 0.35635489 | -1.1020509 | 0.170390985 | -1.20583152 | 0.064315317 |
| -1.2003266  | 0.0553585  | -1.1189917 | 0.305588739 | -1.36746307 | 0.001453903 |
| -1.18160914 | 0.02823285 | -1.222716  | 0.180136829 | -1.18470518 | 0.025954184 |
| 0.935599124 | 0.34430697 | -1.0236692 | 0.782575127 | 0.990364054 | 0.890143458 |
| 0.8318525   | 0.12084683 | -1.0814418 | 0.346170511 | -1.06724863 | 0.579677664 |
| 0.940494784 | 0.46726373 | 0.96241183 | 0.581006192 | -1.04286861 | 0.618463906 |
| 0.965578393 | 0.6607426  | -1.1473958 | 0.055256479 | -1.1499884  | 0.083969905 |
| -1.25917125 | 0.00088885 | 0.98034774 | 0.856224167 | -1.39652721 | 4.53E-06    |
| -1.06363651 | 0.35792686 | 0.99598306 | 0.965909775 | 0.892078871 | 0.091839055 |
| -1.10947393 | 0.04622525 | -1.1629428 | 0.058512579 | -1.36814553 | 9.76E-08    |
| 0.903232937 | 0.27616643 | -1.0743334 | 0.407115046 | -1.1217261  | 0.219740426 |
| -1.33483595 | 0.00144925 | -1.0184952 | 0.78627417  | -1.3693611  | 0.000585821 |
| -1.10976209 | 0.16008805 | -1.1854332 | 0.077796034 | -1.2266724  | 0.00719443  |
| -1.85976049 | 2.05E-07   | -1.0998506 | 0.341114553 | -1.45896027 | 0.000641204 |
| 0.957204685 | 0.44778748 | -1.2415791 | 0.024109376 | 0.894341426 | 0.05611585  |
| 0.917328426 | 0.25970735 | -1.154732  | 0.057130687 | -1.15780475 | 0.058354355 |
| -1.2126881  | 0.00534248 | -1.0089137 | 0.899263782 | -1.26962795 | 0.000706451 |
| 0.911135738 | 0.12020843 | 0.91938235 | 0.474858976 | 0.887206792 | 0.047266075 |
| 0.844801162 | 0.08872344 | -1.0823936 | 0.348954448 | -1.02899241 | 0.770055487 |
| -1.29663965 | 0.01756703 | -1.0028815 | 0.971214395 | -1.40691893 | 0.002177103 |
| -1.07022736 | 0.52120546 | -1.2088812 | 0.005436666 | -1.18502628 | 0.112143287 |
| 0.987510447 | 0.84671022 | 0.9803218  | 0.766304356 | -1.25815675 | 0.000812168 |
| -1.14851027 | 0.08265702 | -1.1863117 | 0.001458867 | -1.08276796 | 0.31434634  |
| 0.913211068 | 0.14725933 | -1.1517209 | 0.132640539 | 0.898155513 | 0.087630186 |
| -1.10506129 | 0.24142633 | -1.0485929 | 0.583430985 | -1.32538729 | 0.001528971 |
| -1.07988083 | 0.24107547 | -1.1029598 | 0.185757832 | 0.99947816  | 0.993605778 |
| -1.03652986 | 0.45103452 | -1.3309556 | 0.008225696 | -1.11276861 | 0.027831302 |
| -1.05636592 | 0.2973003  | 0.99316466 | 0.904994071 | -1.06138607 | 0.257920516 |
| -1.34675222 | 0.02042866 | -1.1694015 | 0.043682118 | -1.53992944 | 0.001050716 |
| 0.768495141 | 0.00476244 | -1.1291349 | 0.072986358 | 0.83306331  | 0.045981595 |
| 0.938041499 | 0.06774249 | 0.93442707 | 0.254939706 | 0.958813713 | 0.225570542 |
| -1.0896102  | 0.16390517 | 0.8893136  | 0.233176262 | -1.05371377 | 0.393363974 |
| 0.525476463 | 9.03E-20   | -1.3508059 | 0.006425007 | 0.60217772  | 1.30E-15    |
| -1.0107178  | 0.93155245 | -1.1772099 | 0.126495408 | -1.15112304 | 0.259666939 |
| -1.05133014 | 0.69665778 | -1.1105061 | 0.111088787 | 0.93597155  | 0.606512972 |
| 0.98339645  | 0.72134497 | -1.09253   | 0.263375776 | 0.858050193 | 0.001835787 |
| -1.19145003 | 0.00681123 | 0.95775654 | 0.487505868 | -1.11112077 | 0.096225236 |
| -1.09957597 | 0.07591752 | -1.2394416 | 0.013829591 | -1.33927145 | 8.41E-07    |
| -1.15750407 | 0.02282873 | 0.98444136 | 0.809796475 | -1.33692177 | 2.18E-05    |
| 0.982822778 | 0.72624843 | 0.99800711 | 0.966484508 | 0.972165554 | 0.568750821 |
| -1.09989632 | 0.02683173 | 0.99767115 | 0.964471916 | -1.0564008  | 0.195167205 |

|             |            |            |             |             |             |
|-------------|------------|------------|-------------|-------------|-------------|
| -1.15722398 | 0.05088485 | -1.3540803 | 0.018347726 | -1.0548707  | 0.468191346 |
| -1.02258631 | 0.66472087 | 0.83833983 | 0.053734348 | -1.01191818 | 0.818055059 |
| 0.946779285 | 0.42375187 | -1.1224909 | 0.00140663  | 0.87405105  | 0.052363749 |
| 0.790714372 | 0.03487203 | 0.98560089 | 0.812380872 | 0.798473544 | 0.042819796 |
| -1.0087538  | 0.81910462 | 0.8869633  | 0.010804226 | 0.975468241 | 0.515307783 |
| -1.07960365 | 0.07257799 | -1.0500396 | 0.694227448 | -1.19588567 | 7.82E-05    |
| 0.691142216 | 7.21E-07   | 0.83139086 | 0.154039867 | 0.615894324 | 1.10E-09    |
| -1.03635574 | 0.32626212 | 0.89898592 | 0.026584215 | 0.793176541 | 3.57E-08    |
| -1.06478815 | 0.54045315 | -1.1826818 | 0.009352141 | 0.842113845 | 0.097525736 |
| -1.02126658 | 0.68009432 | 0.98493488 | 0.773371789 | -1.00672957 | 0.895368867 |
| 0.923933156 | 0.34844599 | -1.353602  | 1.09447E-05 | 0.89071621  | 0.172200179 |
| 0.979664225 | 0.79163446 | -1.0936695 | 0.074521684 | -1.19022557 | 0.02854254  |
| -1.04307272 | 0.529756   | -1.0192308 | 0.650644721 | 0.791580097 | 0.000929267 |
| 0.561313903 | 6.57E-05   | 0.98540569 | 0.841394813 | 0.283426748 | 5.15E-13    |
| 0.964883011 | 0.63444672 | -1.0315665 | 0.546792462 | 0.601172818 | 8.73E-09    |
| -1.03015894 | 0.72381301 | 0.95301091 | 0.481153724 | 0.259784164 | 3.29E-22    |
| 0.894048464 | 0.20920761 | 0.90604306 | 0.367089139 | 0.267838704 | 8.92E-21    |
| 0.997274236 | 0.95811622 | 0.8691637  | 0.000513088 | 0.63979982  | 1.00E-11    |
| -1.08311399 | 0.13712784 | -1.0507019 | 0.242161895 | -1.0060437  | 0.909746171 |
| 0.981977489 | 0.76803349 | 0.70451812 | 2.06746E-06 | 0.923103267 | 0.197722601 |
| 0.946408988 | 0.72190779 | -1.0170016 | 0.641878215 | 0.456277004 | 4.60E-06    |
| 0.566099564 | 0.0002538  | 0.93383519 | 0.504588972 | 0.272932044 | 3.23E-12    |
| -1.01098456 | 0.83453506 | 0.93864595 | 0.217654451 | 0.848507874 | 0.002620046 |
| -1.20072954 | 0.16996154 | 0.94416459 | 0.495093311 | 0.966354079 | 0.795665738 |
| -1.12670839 | 0.25029309 | -1.1448471 | 0.086164905 | -1.20161066 | 0.079224457 |
| 0.976692492 | 0.77278369 | -1.09873   | 0.163680267 | -1.01153429 | 0.888304488 |
| -1.14478186 | 0.08940083 | 0.25325341 | 2.59898E-14 | 0.734034419 | 0.000225431 |
| -1.10863633 | 0.12056414 | -1.0102285 | 0.892227012 | -1.16544971 | 0.022928651 |
| 0.958483582 | 0.52106566 | -1.0609839 | 0.482190135 | 0.769862862 | 0.000205588 |
| -1.05732207 | 0.50080335 | 0.8516586  | 0.073989573 | 0.957554725 | 0.600072473 |
| -1.17640355 | 0.10785183 | 0.96978988 | 0.555676698 | -1.56450935 | 3.63E-05    |
| -1.2501222  | 0.04127346 | -1.1111157 | 0.051435499 | -1.01317959 | 0.902846598 |
| 0.801341888 | 0.01481452 | -1.0233982 | 0.707662693 | 0.821081912 | 0.029156052 |
| -1.02197265 | 0.60767294 | 0.28242791 | 4.70114E-11 | -1.06891713 | 0.119170788 |
| 0.976529613 | 0.68131949 | 0.22287008 | 2.23782E-14 | 0.903913589 | 0.084743761 |
| -1.08345132 | 0.13219365 | 0.99685948 | 0.952031992 | -1.05768695 | 0.289528538 |
| 0.98149245  | 0.84754472 | -1.1875074 | 0.196847422 | -1.0749031  | 0.458354848 |
| 0.9837664   | 0.81599352 | -1.4081842 | 0.001554252 | -1.13458547 | 0.07683197  |
| -1.17180769 | 0.02019701 | -1.0448534 | 0.591494617 | -1.05866317 | 0.393208088 |
| -1.63755863 | 2.21E-07   | 0.90967592 | 0.231150881 | -1.35438353 | 0.000594296 |
| 0.918178971 | 0.10967928 | -1.2574262 | 0.000933925 | 0.863304637 | 0.007071799 |
| -1.09469244 | 0.10734433 | 0.85490979 | 0.020491248 | -1.081066   | 0.164036463 |
| -1.01406648 | 0.84888619 | -1.2854307 | 0.003517469 | 0.940078533 | 0.400776771 |
| 0.909159756 | 0.13690042 | -1.1154418 | 0.276393233 | -1.2872233  | 0.000193155 |

|             |            |            |             |             |             |
|-------------|------------|------------|-------------|-------------|-------------|
| -1.16489038 | 0.04653548 | -1.0399895 | 0.714854582 | -1.06565239 | 0.399709129 |
| -1.26685118 | 0.00028357 | 0.76100416 | 0.00303334  | -1.25853726 | 0.000400196 |
| -1.0293597  | 0.70070692 | 0.91384802 | 0.036866398 | -1.16369138 | 0.047914147 |
| -1.02210637 | 0.76064379 | 0.9944112  | 0.922742976 | -1.27077621 | 0.001460334 |
| 0.986219358 | 0.75327832 | 0.98338662 | 0.750558306 | -1.15619847 | 0.001700027 |
| -1.08008845 | 0.08052395 | -1.0391237 | 0.693036379 | 0.752725644 | 2.13E-08    |
| 0.961240152 | 0.28004708 | -1.0730408 | 0.318338077 | 0.975470085 | 0.495930351 |
| 0.884248812 | 0.10403986 | -1.1455632 | 0.045074221 | 0.990671947 | 0.900218289 |
| 0.845734584 | 0.05842125 | -1.4022006 | 0.00015648  | -1.24581016 | 0.014133835 |
| -1.21414532 | 0.0031983  | 0.92641602 | 0.151101549 | 0.714393628 | 1.86E-06    |
| 0.982539563 | 0.75950272 | -1.0870723 | 0.136599428 | -1.07868609 | 0.191408528 |
| 0.999738302 | 0.99491856 | 0.9097143  | 0.200182898 | -1.0898001  | 0.04024095  |
| -1.11781841 | 0.09735163 | -1.1360388 | 0.048132998 | -1.13646184 | 0.057908168 |
| 0.752662259 | 0.01605948 | -1.119761  | 0.136883919 | -1.21852027 | 0.089507407 |
| 0.865126675 | 0.04553907 | -1.1760458 | 0.010199802 | 0.985959592 | 0.842382638 |
| -1.03241832 | 0.54376007 | 0.87367309 | 0.076931458 | 0.991549014 | 0.87148921  |
| -1.25846009 | 0.0001748  | 0.95126208 | 0.487145178 | -1.01812919 | 0.753768869 |
| -1.23969105 | 0.01937607 | -1.0702129 | 0.128236408 | -1.46491348 | 7.66E-05    |
| 0.794787406 | 0.00526358 | 0.9629439  | 0.386526686 | 0.979258634 | 0.79165863  |
| -1.12266077 | 0.21386117 | 0.96916429 | 0.391105725 | -1.11386835 | 0.2461941   |
| 0.924711556 | 0.26088149 | -1.0897523 | 0.253053104 | -1.1004709  | 0.170319126 |
| 0.858385751 | 0.00429533 | -1.1467647 | 0.119855977 | -1.053417   | 0.31401219  |
| 0.968042419 | 0.49624025 | 0.99882153 | 0.985103239 | -1.07354879 | 0.140264969 |
| 0.865219399 | 0.00424151 | -1.1088975 | 0.076587324 | 0.79550633  | 1.73E-05    |
| 0.939873589 | 0.34011694 | -1.0465679 | 0.270796197 | 0.943151708 | 0.367699821 |
| 0.971158294 | 0.39262434 | -1.1090114 | 0.122883672 | 0.951732014 | 0.150989196 |
| -1.0097263  | 0.91618561 | -1.179     | 0.155450565 | -1.19457152 | 0.057377235 |
| 0.972014206 | 0.71653913 | 0.99743675 | 0.971203195 | 0.961632257 | 0.616955335 |
| -1.0876017  | 0.2293288  | 0.97039559 | 0.567324971 | -1.01389484 | 0.842384188 |
| -1.06757012 | 0.25553086 | -1.2326954 | 0.000557212 | -1.00659229 | 0.908484079 |
| -1.0543709  | 0.31437243 | -1.2162542 | 0.032389644 | 0.908203    | 0.07025845  |
| -1.14288653 | 0.0106351  | 0.94594398 | 0.484546667 | 0.938295525 | 0.21228763  |
| -1.03197376 | 0.35875533 | -1.1569723 | 0.118787223 | 0.964284036 | 0.289548577 |
| 0.876656794 | 0.02522627 | -1.0068785 | 0.92110093  | 0.953309572 | 0.406712829 |
| 0.983156491 | 0.75792612 | 0.86312452 | 0.005783693 | -1.13116394 | 0.028736546 |
| -1.13750913 | 0.14892787 | -1.2589303 | 1.07386E-05 | -1.43503627 | 0.000138504 |
| -1.13117533 | 0.27978111 | 0.73279653 | 3.76527E-08 | 0.862868135 | 0.196944783 |
| 0.97558859  | 0.60914716 | 0.88182478 | 0.056161481 | 0.96417028  | 0.4509905   |
| -1.09246755 | 0.27368766 | 0.8553882  | 2.62161E-05 | -1.22987907 | 0.012410701 |
| -1.0378167  | 0.57355607 | -1.1714216 | 0.089673932 | -1.10399567 | 0.137070795 |
| -1.00862934 | 0.89084723 | 0.88582089 | 0.12486058  | 0.967116552 | 0.593783544 |
| -1.00430017 | 0.95596779 | 0.86230266 | 0.036484027 | 0.79947525  | 0.005499557 |
| 0.985239872 | 0.89059435 | -1.1168842 | 0.057265369 | 0.845632664 | 0.125026299 |
| -1.05395276 | 0.48835009 | -1.0161081 | 0.760384435 | 0.98386982  | 0.829862735 |

|             |            |            |             |             |             |
|-------------|------------|------------|-------------|-------------|-------------|
| 0.863449765 | 0.02296472 | -1.0544824 | 0.297766501 | 0.93872313  | 0.317800529 |
| 0.992597835 | 0.94424791 | -1.0799671 | 0.027728797 | 0.645796152 | 0.00012551  |
| 0.952201408 | 0.49682147 | 0.93782631 | 0.2665821   | -1.52257678 | 2.78E-07    |
| 0.989374478 | 0.88192701 | -1.1084026 | 0.065975113 | -1.09695275 | 0.201635417 |
| -1.10947015 | 0.22034378 | -1.1481793 | 0.122181295 | -1.38695479 | 0.000265706 |
| 0.926168288 | 0.5374309  | -1.0339557 | 0.768529372 | 0.868058444 | 0.257266479 |
| 0.933829422 | 0.08073233 | 0.96941544 | 0.520771073 | 0.936927077 | 0.096075725 |
| 0.984447298 | 0.68819714 | -1.2554201 | 0.006283146 | 0.972845141 | 0.481610317 |
| 0.748326974 | 1.62E-07   | -1.037762  | 0.574098448 | 0.934061645 | 0.162398446 |
| 0.956894064 | 0.48456438 | -1.0217597 | 0.731110924 | -1.17138554 | 0.014490031 |
| -1.3165078  | 0.00088495 | 0.91010226 | 0.228635148 | -1.64506706 | 4.36E-08    |
| -1.23532688 | 0.0195825  | 0.88349496 | 0.25472405  | -1.27053141 | 0.008630854 |
| -1.14198551 | 0.14484147 | -1.0003253 | 0.996570301 | -1.18836697 | 0.059768545 |
| -1.15876525 | 0.13294934 | 0.94430048 | 0.364852736 | -1.09366684 | 0.358040854 |
| 0.862486221 | 0.17369324 | -1.0435217 | 0.688648082 | 0.836918501 | 0.102908967 |
| 0.958524013 | 0.49101169 | -1.059203  | 0.425278416 | -1.15391375 | 0.022836476 |
| 0.95330162  | 0.41357306 | 0.9608191  | 0.578907644 | -1.06821537 | 0.260581299 |
| 0.941630081 | 0.50047679 | -1.0713252 | 0.414468857 | 0.601270925 | 4.56E-07    |
| -1.01708502 | 0.80462375 | 0.6203074  | 0.000302374 | -1.32141732 | 0.000145678 |
| 0.936566068 | 0.57534178 | 0.95626342 | 0.250057267 | 0.770759341 | 0.029295124 |
| 0.958700457 | 0.25277754 | -1.0165411 | 0.674497679 | 0.980045124 | 0.582903334 |
| -1.02076966 | 0.6499742  | 0.82809141 | 0.000255317 | 0.99706793  | 0.948267467 |
| 0.928716338 | 0.36270731 | 0.99621325 | 0.95189922  | -1.14637519 | 0.095718114 |
| 0.955571834 | 0.33812968 | -1.2856974 | 0.002190271 | -1.01322431 | 0.78101004  |
| -1.01422611 | 0.73966303 | -1.3888464 | 0.000448533 | 0.947489689 | 0.207640627 |
| -1.0583986  | 0.46361101 | -1.1613496 | 0.101357069 | 0.855126504 | 0.046746787 |
| -1.10730185 | 0.09705378 | -1.1348112 | 0.195961088 | 0.94637813  | 0.365230641 |
| -1.1480929  | 0.05247947 | 0.61091219 | 2.68437E-05 | -1.08555019 | 0.243690246 |
| 0.902872915 | 0.06299986 | -1.0085719 | 0.889398002 | 0.977119401 | 0.668836402 |
| 0.874349744 | 0.04484126 | 0.96945876 | 0.595243868 | 0.865113056 | 0.030905035 |
| -1.04202515 | 0.29302865 | 0.79968051 | 0.014698105 | -1.10042151 | 0.016786744 |
| 0.744716595 | 3.55E-06   | -1.1019944 | 0.159892309 | 0.911574064 | 0.110250551 |
| 0.858321565 | 0.00123973 | 0.93842882 | 0.58694736  | 0.996192986 | 0.932465093 |
| -1.04047355 | 0.48240494 | -1.0749287 | 0.052785875 | 0.992665085 | 0.896067054 |
| 0.973426584 | 0.46755875 | 0.97668096 | 0.602568782 | 0.925133095 | 0.039180039 |
| 0.928105138 | 0.20042601 | -1.0384911 | 0.641068147 | 0.890033714 | 0.04796147  |
| -1.31021892 | 0.01568119 | -1.0167625 | 0.725069134 | -1.58592155 | 8.31E-05    |
| 0.927323341 | 0.51250615 | 0.99339727 | 0.876110215 | -1.00128028 | 0.991121075 |
| 0.923630355 | 0.44182333 | 0.91043246 | 0.2276309   | 0.578816606 | 1.98E-06    |
| 0.926652296 | 0.15456814 | -1.1022915 | 0.112458977 | -1.0467236  | 0.390570187 |
| -1.16073621 | 0.00562571 | -1.0247843 | 0.726541339 | 0.867472874 | 0.008068136 |
| -1.13532968 | 0.01512283 | -1.1145897 | 0.048828521 | -1.1700792  | 0.003026372 |
| -1.05269132 | 0.21135297 | 0.93435382 | 0.303568807 | 0.881422938 | 0.003000264 |
| 0.992729158 | 0.8892394  | -1.0545467 | 0.176377442 | -1.06150634 | 0.257475183 |



|             |            |            |             |             |             |
|-------------|------------|------------|-------------|-------------|-------------|
| 0.808608588 | 0.00019173 | 0.81093803 | 0.000549058 | 0.885083439 | 0.02525755  |
| 0.940033215 | 0.33006341 | -1.0288826 | 0.527750177 | -1.02888156 | 0.652696732 |
| 0.689661961 | 0.00201345 | -1.0152208 | 0.788717891 | 0.54034595  | 1.68E-06    |
| -1.00373436 | 0.94670825 | 0.91706383 | 0.022374578 | -1.04601986 | 0.421175744 |
| 0.982117139 | 0.71128924 | -1.0909922 | 0.136132296 | -1.08823348 | 0.086958841 |
| 0.907241054 | 0.34673682 | -1.1733326 | 0.145673729 | -1.02790116 | 0.789458536 |
| -1.13440255 | 0.08908299 | 0.91929409 | 0.465349106 | 0.964270431 | 0.619394195 |
| -1.14512968 | 0.01414687 | 0.64698648 | 8.6603E-05  | 0.75868037  | 3.56E-06    |
| 0.999483394 | 0.99328101 | 0.99510943 | 0.926305887 | 0.899374714 | 0.088230254 |
| 0.964994349 | 0.61722606 | -1.0233561 | 0.656770977 | 0.917997427 | 0.232694325 |
| -1.31961018 | 0.00232388 | -1.0633442 | 0.229833594 | -1.03328241 | 0.707280174 |
| 0.954774057 | 0.3971513  | 0.95791026 | 0.294212225 | -1.0427299  | 0.443683825 |
| -1.17123322 | 0.00685347 | 0.95675481 | 0.400369188 | -1.01826834 | 0.748600293 |
| 0.992436169 | 0.89408878 | -1.0525471 | 0.338545759 | 0.856984058 | 0.008801111 |
| 0.802173729 | 0.00116785 | 0.93813464 | 0.314640388 | 0.950068497 | 0.428934253 |
| -1.09527743 | 0.11014081 | 0.58852336 | 2.33961E-05 | -1.07187292 | 0.220776247 |
| -1.15340513 | 0.02536494 | -1.0807029 | 0.167781696 | 0.900607557 | 0.097392872 |
| -1.2307427  | 0.09279727 | -1.0517288 | 0.303000428 | -1.21856079 | 0.109100671 |
| -1.02768075 | 0.68900255 | 0.94307804 | 0.57004967  | 0.99546538  | 0.946848524 |
| -1.11137182 | 0.27014999 | 0.91107201 | 0.206443929 | 0.991814683 | 0.931212396 |
| -1.02280178 | 0.7062577  | -1.0652567 | 0.241971752 | -1.04099367 | 0.502456694 |
| 0.983857555 | 0.83042228 | -1.019252  | 0.75608994  | 0.882914187 | 0.105460836 |
| -1.22914758 | 0.02322576 | 0.98558585 | 0.8384769   | 0.880323151 | 0.154676136 |
| 0.963465966 | 0.50487794 | -1.0071881 | 0.934488493 | 0.931157059 | 0.203751075 |
| 0.941704716 | 0.12160734 | 0.9804495  | 0.717185598 | 0.929937459 | 0.062510779 |
| 0.960491862 | 0.37540604 | -1.0622501 | 0.287371037 | -1.01677672 | 0.713638653 |
| -1.03086115 | 0.55027662 | 0.94749776 | 0.346299878 | 0.989904508 | 0.841705073 |
| 0.984314907 | 0.70235661 | 0.95322004 | 0.459211953 | -1.0426221  | 0.314988941 |
| 0.959459304 | 0.53054183 | -1.1554428 | 0.012685794 | -1.0731152  | 0.286574441 |
| -1.28190263 | 7.29E-05   | -1.0263103 | 0.677231069 | -1.14207245 | 0.025405652 |
| -1.07528247 | 0.31062135 | -1.1447972 | 0.269974084 | 0.994278344 | 0.935806507 |
| 0.99720184  | 0.96013051 | -1.0606484 | 0.389419564 | 0.873464764 | 0.018712855 |
| 0.943637153 | 0.41951851 | 0.95127812 | 0.600329656 | 0.885775305 | 0.094760137 |
| 0.887663336 | 0.14602894 | -1.0335254 | 0.581754988 | 0.975515116 | 0.760130883 |
| -1.05814934 | 0.34278914 | -1.0163149 | 0.831355262 | -1.06071718 | 0.322669886 |
| 0.934127807 | 0.07708355 | -1.0787716 | 0.394325998 | 0.981114124 | 0.61607863  |
| 0.848942481 | 0.3393771  | -1.0009755 | 0.986033472 | -1.12236393 | 0.499732882 |
| -1.00812025 | 0.84244326 | 0.9546307  | 0.229330358 | 0.936842064 | 0.112997473 |
| -1.03193849 | 0.74019942 | -1.0031445 | 0.944756688 | -1.33347194 | 0.003541033 |
| -1.13212708 | 0.06054539 | -1.0243046 | 0.636751725 | -1.56631136 | 5.48E-09    |
| -1.14485414 | 0.02177647 | 0.98176926 | 0.656588972 | -1.07108356 | 0.23556746  |
| -1.14007539 | 0.07638226 | 0.98635198 | 0.834762537 | -1.19515519 | 0.01726518  |
| -1.10731292 | 0.38605446 | -1.136083  | 0.031514866 | 0.992636126 | 0.949710621 |
| -1.00459582 | 0.92933022 | -1.0807077 | 0.278597007 | 0.917426316 | 0.099799196 |

|             |            |            |             |             |             |
|-------------|------------|------------|-------------|-------------|-------------|
| 0.8899105   | 0.1694513  | 0.91814297 | 0.131712751 | -1.06746409 | 0.439069982 |
| -1.01462463 | 0.84388659 | -1.027199  | 0.708168438 | 0.91827091  | 0.250349311 |
| -1.3374347  | 0.00151328 | -1.0895793 | 0.292989005 | -1.53663339 | 8.01E-06    |
| -1.03344278 | 0.58159415 | 0.97179107 | 0.629960344 | -1.1526999  | 0.02013999  |
| -1.05725571 | 0.05959653 | -1.0143629 | 0.707490666 | -1.06622867 | 0.030905742 |
| 0.964355534 | 0.45783256 | -1.0208115 | 0.903947108 | 0.930040246 | 0.1409444   |
| -1.0338718  | 0.71327171 | 0.91374543 | 0.03011401  | -1.14596228 | 0.136669384 |
| 0.957762693 | 0.43188427 | -1.1029513 | 0.303527869 | 0.858033341 | 0.006904689 |
| 0.877794917 | 0.10266887 | -1.1110725 | 0.109559593 | 0.80708912  | 0.008545286 |
| 0.913921172 | 0.37993034 | -1.208619  | 0.00167244  | 0.834181495 | 0.080200031 |
| -1.17183449 | 0.05760155 | -1.1763273 | 0.029367722 | -1.07868083 | 0.358192902 |
| -1.01073678 | 0.84655332 | 0.87184391 | 0.244875719 | 0.7088467   | 6.53E-08    |
| 0.896115015 | 0.15971338 | 0.93263041 | 0.180980974 | -1.29990385 | 0.001242541 |
| 0.969886004 | 0.5155661  | 0.79764692 | 0.009263743 | 0.946092323 | 0.240760295 |
| -1.04879632 | 0.55620721 | 0.94764646 | 0.466809722 | -1.14614093 | 0.095790482 |
| -1.19312275 | 0.16369492 | -1.4602575 | 6.05084E-05 | 0.832883018 | 0.149468966 |
| 0.775459181 | 0.02610333 | 0.98117119 | 0.749936231 | 0.431502023 | 5.24E-10    |
| 0.934842206 | 0.5406385  | 0.94893763 | 0.075630293 | 0.456924543 | 2.36E-09    |
| -1.09306255 | 0.51632479 | 0.96602722 | 0.479465243 | -1.72763218 | 0.000186387 |
| -1.24672823 | 0.01722002 | 0.91173129 | 0.310044786 | -1.14777845 | 0.130303018 |
| -1.09632436 | 0.26688009 | 0.97783282 | 0.682443831 | -1.14911865 | 0.095731554 |
| -1.12846236 | 0.03060873 | 0.89416352 | 0.159937158 | -1.14741857 | 0.01448948  |
| -1.11207014 | 0.03270021 | 0.94679594 | 0.592980736 | -1.04501318 | 0.367521525 |
| -1.17391234 | 0.07547837 | -1.2151825 | 0.020652261 | -1.07777927 | 0.400878658 |
| 0.990742562 | 0.89614646 | -1.1118292 | 0.05887685  | 0.872340255 | 0.059422337 |
| -1.10199123 | 0.10835092 | -1.1832267 | 0.033120542 | -1.28207684 | 0.000109012 |
| -1.01520409 | 0.75887033 | 0.8951277  | 0.021332896 | -1.11540759 | 0.02972979  |
| -1.15405708 | 0.38712899 | -1.1222333 | 0.15754187  | -1.18921391 | 0.296356905 |
| -1.06828232 | 0.31094725 | -1.1460916 | 0.280374943 | -1.17160835 | 0.017463977 |
| 0.903962519 | 0.58527341 | 0.92414649 | 0.480929323 | -1.05840306 | 0.758789488 |
| -1.21602502 | 0.03765214 | 0.87808199 | 0.23996618  | 0.795908923 | 0.016001867 |
| -1.11143973 | 0.24602989 | 0.9298362  | 0.595457988 | -1.11940113 | 0.215964063 |
| 0.995497623 | 0.93999105 | -1.1158385 | 0.227106196 | -1.04821109 | 0.433474336 |
| -1.24454452 | 0.01269384 | -1.223075  | 0.017289577 | 0.973147831 | 0.749573843 |
| -1.01412529 | 0.7861297  | -1.1537597 | 0.011171704 | 0.968694882 | 0.538953311 |
| 0.971934613 | 0.43999073 | -1.159621  | 0.00348432  | 0.990416451 | 0.793419564 |
| -1.01909251 | 0.72870112 | -1.2456521 | 0.016177072 | -1.00358829 | 0.947595273 |
| 0.975440397 | 0.62035294 | 0.94027706 | 0.389057396 | 0.937978937 | 0.205039732 |
| -1.23254286 | 0.03019072 | -1.264452  | 0.00023341  | 0.918439893 | 0.368949514 |
| 0.962925557 | 0.47603981 | 0.94301726 | 0.235556361 | -1.02210362 | 0.679542515 |
| -1.03393938 | 0.66660505 | -1.0206212 | 0.901611804 | -1.142506   | 0.089530853 |
| -1.04266569 | 0.20192783 | 0.90758008 | 0.139024699 | 0.99452097  | 0.865740352 |
| 0.810888092 | 0.03643795 | -1.0932146 | 0.629927499 | 0.641736566 | 3.21E-05    |
| -1.11015391 | 0.1680026  | 0.94699009 | 0.555303727 | -1.00203481 | 0.978412643 |

|             |            |            |             |             |             |
|-------------|------------|------------|-------------|-------------|-------------|
| -1.03532796 | 0.33880262 | -1.1775874 | 0.075174674 | -1.04205448 | 0.257220423 |
| 0.871004866 | 0.26866983 | -1.0346367 | 0.570573953 | 0.553178507 | 1.35E-05    |
| -1.02441705 | 0.64199485 | -1.0303251 | 0.726110926 | 0.98691446  | 0.799472738 |
| 0.952737256 | 0.34165564 | 0.96718919 | 0.519360486 | 0.903712348 | 0.049882663 |
| 0.96317946  | 0.53601745 | 0.97125797 | 0.428949171 | -1.03963047 | 0.521504229 |
| 0.885373917 | 0.39469718 | 0.85628884 | 0.006019144 | 0.670784357 | 0.00682226  |
| 0.998012429 | 0.95788836 | 0.98740919 | 0.800558561 | -1.01242975 | 0.743140527 |
| -1.12436633 | 0.21998121 | -1.1427254 | 0.161146042 | -1.11649672 | 0.248491169 |
| 0.613631379 | 1.18E-16   | 0.9551356  | 0.387071339 | 0.85472901  | 0.000347671 |
| 0.955278456 | 0.38479445 | -1.1257427 | 0.130093765 | 0.841782477 | 0.00172927  |
| -1.06139452 | 0.53561373 | 0.97350993 | 0.410133538 | 0.901753909 | 0.284044954 |
| -1.22453626 | 0.00248494 | 0.95615545 | 0.648138715 | -1.17906672 | 0.012598043 |
| -1.10916608 | 0.18918207 | -1.0424503 | 0.580520218 | -1.30893205 | 0.001081499 |
| -1.21159478 | 0.01136728 | 0.96096796 | 0.273314358 | -1.11798714 | 0.133561565 |
| -1.06323655 | 0.42461426 | 0.93835575 | 0.608717054 | -1.0536978  | 0.495461548 |
| -1.16473725 | 0.01923347 | -1.1129129 | 0.042945758 | -1.14493017 | 0.036728159 |
| -1.08092254 | 0.23434685 | 0.96388849 | 0.469279    | -1.22835442 | 0.002453766 |
| 0.844670077 | 0.0104559  | -1.0290887 | 0.635966058 | 0.817080709 | 0.002478538 |
| -1.01096184 | 0.82600988 | -1.0444542 | 0.76038326  | 0.919504779 | 0.094851821 |
| -1.12063421 | 0.04327732 | 0.97248546 | 0.460151448 | -1.1173381  | 0.048765262 |
| -1.02987113 | 0.78596281 | -1.0192555 | 0.840735156 | 0.368288161 | 1.02E-12    |
| 0.890852346 | 0.1882199  | 0.94535197 | 0.177049576 | 0.851400639 | 0.069067999 |
| 0.997900778 | 0.98571801 | 0.92184278 | 0.124966369 | 0.494801396 | 1.61E-07    |
| 0.693947417 | 6.98E-07   | 0.96764596 | 0.732081352 | 0.837781885 | 0.00870721  |
| 0.852802841 | 0.01981067 | -1.1884519 | 0.009112317 | 0.697504636 | 1.38E-06    |
| 0.920103688 | 0.28293882 | -1.0374248 | 0.639122625 | 0.837589854 | 0.024855577 |
| 0.92537365  | 0.3028456  | -1.1103992 | 0.158439033 | -1.02888567 | 0.703987445 |
| 0.976629927 | 0.7326173  | -1.1638454 | 0.051594029 | 0.888875238 | 0.092900726 |
| 0.951639797 | 0.67832604 | -1.2542603 | 0.000726048 | -1.00169913 | 0.988657408 |
| 0.975642955 | 0.67801963 | -1.1240621 | 0.076267507 | 0.743968367 | 6.34E-06    |
| -1.29201073 | 0.0001012  | 0.86710581 | 0.029152234 | -1.08549967 | 0.184286596 |
| -1.26795769 | 0.12441419 | 0.94213277 | 0.232425981 | -1.13489674 | 0.40908954  |
| -1.03258939 | 0.47258862 | -1.2064327 | 0.001237521 | -1.07519822 | 0.107806742 |
| 0.97583897  | 0.67550461 | 0.40143486 | 1.87139E-11 | 0.94355439  | 0.321848572 |
| 0.743415687 | 0.00108002 | 0.61875714 | 9.51089E-07 | 0.568575031 | 2.02E-08    |
| 0.897848113 | 0.12815462 | 0.43271221 | 2.26563E-09 | -1.01241048 | 0.860267118 |
| 0.981452637 | 0.83812413 | 0.88973196 | 0.07788339  | 0.965043006 | 0.697951643 |
| -1.25576045 | 0.02941961 | 0.95618274 | 0.502037168 | -1.09964521 | 0.354852539 |
| -1.01291386 | 0.89680193 | 0.78740544 | 0.002966041 | -1.184665   | 0.090995982 |
| 0.974077845 | 0.67954957 | 0.91809633 | 0.25677846  | 0.938040689 | 0.316320297 |
| -1.0717281  | 0.2866897  | 0.9714492  | 0.675673091 | -1.15141239 | 0.032876094 |
| -1.26225262 | 0.01422983 | 0.75027485 | 0.019071103 | 0.949429192 | 0.574676834 |
| 0.753882216 | 5.64E-07   | -1.0256396 | 0.669944627 | 0.776452782 | 4.78E-06    |
| 0.882817171 | 0.11027308 | -1.1368051 | 0.040254691 | -1.01386248 | 0.858325134 |

|             |            |            |             |             |             |
|-------------|------------|------------|-------------|-------------|-------------|
| 0.945415188 | 0.40003294 | -1.3252969 | 0.06956645  | 0.97844469  | 0.743189188 |
| 0.789780782 | 0.00035051 | -1.0200611 | 0.655935268 | 0.93827227  | 0.307243476 |
| -1.18214498 | 0.07069461 | -1.018483  | 0.753847622 | -1.15280455 | 0.122968246 |
| 0.985809613 | 0.79270056 | 0.77660829 | 0.004742956 | -1.03005022 | 0.586543828 |
| 0.912642207 | 0.16819273 | 0.97806673 | 0.751686656 | 0.924827952 | 0.23764634  |
| 0.88216802  | 0.09608662 | -1.0862733 | 0.368246632 | -1.03900856 | 0.607269525 |
| 0.959980816 | 0.53865995 | -1.2135596 | 0.062575915 | -1.07153617 | 0.299860039 |
| 0.685935521 | 5.00E-09   | -1.1892562 | 0.084042736 | -1.03196928 | 0.563842036 |
| 0.968710515 | 0.57711607 | 0.85384951 | 0.015564215 | 0.98206746  | 0.750702559 |
| 0.936295925 | 0.07254174 | -1.0250366 | 0.702389761 | 0.991728765 | 0.818091912 |
| 0.945365624 | 0.31964992 | -1.0875788 | 0.365090225 | -1.04886215 | 0.397493192 |
| 0.964714211 | 0.49044061 | 0.88903504 | 0.021704103 | -1.02490864 | 0.636310262 |
| -1.05705503 | 0.27953941 | 0.97432358 | 0.736011601 | 0.942573275 | 0.249432675 |
| -1.06406737 | 0.3799406  | 0.83205924 | 0.007509708 | 0.950223611 | 0.469835567 |
| -1.17888523 | 0.18682816 | 0.91555518 | 0.159268611 | -1.0667138  | 0.601932735 |
| -1.1280249  | 0.23292784 | -1.0053058 | 0.953711418 | -1.56453175 | 3.92E-05    |
| 0.83343526  | 0.2058986  | -1.0640981 | 0.25601123  | 0.998232386 | 0.990126074 |
| -1.18482218 | 0.00857566 | 0.94170044 | 0.362761422 | -1.35049545 | 1.16E-05    |
| 0.895166631 | 0.12844209 | 0.87280652 | 0.071598463 | 0.992058514 | 0.911897287 |
| 0.719012697 | 0.00015525 | 0.98406393 | 0.808625878 | 0.644645517 | 1.46E-06    |
| 0.980417282 | 0.69410282 | 0.92972087 | 0.184345839 | -1.05028639 | 0.331019071 |
| -1.03952822 | 0.57955525 | -1.1219755 | 0.047208138 | 0.930011058 | 0.301481805 |
| -1.06274556 | 0.17595972 | -1.0645027 | 0.087685092 | 0.808778656 | 1.39E-05    |
| -1.07775494 | 0.17980692 | 0.93493983 | 0.234349864 | 0.714759145 | 1.23E-07    |
| -1.01715242 | 0.71578825 | 0.97801004 | 0.669064637 | 0.696593197 | 2.32E-10    |
| -1.12596872 | 0.23216513 | -1.0218623 | 0.6719729   | 0.914143444 | 0.364624025 |
| 0.979797029 | 0.78761766 | 0.83600001 | 0.013533719 | 0.73554359  | 0.000153145 |
| -1.18593931 | 0.0072981  | -1.0274031 | 0.826975908 | -1.32151039 | 3.01E-05    |
| 0.924546427 | 0.50444977 | -1.3132463 | 0.008570531 | -1.10459535 | 0.397920163 |
| -1.11095832 | 0.18363433 | -1.0387109 | 0.790557627 | -1.10593135 | 0.202939307 |
| -1.10801859 | 0.24213632 | -1.0510685 | 0.42641821  | 0.94982174  | 0.555274891 |
| -1.11085236 | 0.13309499 | -1.0565723 | 0.446282567 | -1.19882615 | 0.011094292 |
| 0.989078886 | 0.87681301 | 0.67160292 | 8.84859E-06 | -1.04283817 | 0.55438296  |
| -1.04103663 | 0.71798572 | -1.1872739 | 0.001160738 | 0.967506329 | 0.766694587 |
| -1.09155514 | 0.15760637 | 0.74453316 | 8.81435E-05 | -1.11957868 | 0.070133353 |
| 0.976642263 | 0.74849723 | 0.96442206 | 0.417899733 | -1.20272538 | 0.014858415 |
| -1.04492353 | 0.62510419 | -1.0689501 | 0.231510025 | -1.24444596 | 0.017764698 |
| -1.14898597 | 0.0702498  | 0.72850958 | 8.4107E-09  | 0.968089637 | 0.667957889 |
| -1.21145672 | 0.00046337 | -1.3853299 | 0.001623802 | -1.16516538 | 0.004417271 |
| -1.10939363 | 0.07462856 | -1.0318884 | 0.678760384 | -1.38824868 | 4.44E-07    |
| -1.25222499 | 0.00225321 | -1.0651956 | 0.306241902 | -1.55957822 | 4.97E-08    |
| -1.39138718 | 6.20E-05   | -1.1834391 | 0.154906579 | -1.11161138 | 0.169507795 |
| 0.9299217   | 0.29078079 | -1.0991622 | 0.231441952 | 0.935356206 | 0.330819446 |
| 0.963230084 | 0.52397877 | 0.472428   | 9.55676E-12 | -1.00818791 | 0.889484085 |

|             |            |            |             |             |             |
|-------------|------------|------------|-------------|-------------|-------------|
| -1.0523121  | 0.58439621 | -1.0936543 | 0.199570366 | -1.01030696 | 0.912292904 |
| -1.09451117 | 0.44182713 | -1.0330476 | 0.646552999 | -1.19504395 | 0.132180413 |
| -1.1372799  | 0.07577147 | 0.94596547 | 0.61808926  | -1.00652038 | 0.927446243 |
| -1.08792794 | 0.33125446 | -1.0664279 | 0.297430596 | -1.1362287  | 0.143170268 |
| -1.06169045 | 0.37816829 | -1.127379  | 0.107937477 | -1.08512791 | 0.230531488 |
| 0.917748057 | 0.2807241  | -1.1985994 | 0.047749746 | -1.20678519 | 0.020580648 |
| -1.37254698 | 0.0001197  | -1.0386127 | 0.616406181 | -1.47035613 | 5.41E-06    |
| -1.04885818 | 0.52065592 | -1.0672436 | 0.211177573 | -1.11071724 | 0.160432821 |
| -1.23220587 | 0.0294121  | -1.0225587 | 0.697573036 | -1.08091745 | 0.408044117 |
| -1.65823146 | 0.00071091 | -1.1265377 | 0.094993765 | -1.41219334 | 0.017502522 |
| -1.20212254 | 0.10785679 | -1.0394678 | 0.612539367 | -1.17755328 | 0.152381979 |
| -1.07781892 | 0.18233846 | 0.91828501 | 0.216054489 | -1.2726149  | 6.21E-05    |
| -1.02208073 | 0.74369336 | -1.0139463 | 0.813457425 | -1.01324498 | 0.843790467 |
| 0.895796806 | 0.04691189 | 0.92905595 | 0.430593459 | 0.895882875 | 0.047097473 |
| -1.04936363 | 0.17836655 | -1.0382513 | 0.748643498 | -1.01686735 | 0.637857133 |
| 0.946840512 | 0.28467633 | -1.0242311 | 0.737411941 | -1.03400571 | 0.511077547 |
| -1.02390355 | 0.73618093 | -1.0925562 | 0.307696422 | -1.0101764  | 0.885128653 |
| -1.01076656 | 0.87897156 | -1.0270418 | 0.693608403 | -1.11555751 | 0.12408462  |
| 0.699781442 | 0.00010905 | -1.1639812 | 0.05918665  | -1.01426995 | 0.868926027 |
| -1.00301237 | 0.96213646 | -1.4750841 | 4.65919E-06 | -1.09295144 | 0.16449162  |
| 0.99756269  | 0.94769547 | 0.97440817 | 0.726660777 | 0.922598566 | 0.033991646 |
| 0.893111454 | 0.26765227 | -1.1683112 | 0.101320576 | 0.727708942 | 0.002672568 |
| -1.03523158 | 0.63735083 | -1.0670472 | 0.64666677  | 0.967658339 | 0.654412333 |
| 0.814058381 | 9.25E-06   | -1.1277299 | 0.290404366 | 0.965733948 | 0.409997885 |
| -1.05457878 | 0.40884789 | 0.98960713 | 0.851309826 | -1.11280687 | 0.099886667 |
| -1.02829586 | 0.72241673 | -1.0118958 | 0.859429664 | 0.915701139 | 0.264733981 |
| -1.08407828 | 0.13879414 | 0.80658057 | 0.000213157 | -1.17722049 | 0.003685937 |
| 0.910223159 | 0.21914268 | 0.96495617 | 0.317227071 | 0.863894676 | 0.058414701 |
| 0.977812395 | 0.52827279 | -1.1006545 | 0.063169684 | 0.969100315 | 0.378520701 |
| 0.786089885 | 0.00872148 | 0.92088543 | 0.242562165 | -1.28494558 | 0.00643115  |
| -1.00651606 | 0.88990988 | 0.97692419 | 0.740019272 | -1.00950265 | 0.840274963 |
| -1.18533202 | 0.00187833 | -1.0046915 | 0.956521637 | -1.09709138 | 0.080328834 |
| 0.986837392 | 0.83270642 | -1.0079159 | 0.900968826 | -1.10430272 | 0.117848634 |
| 0.903605423 | 0.28788321 | 0.84052525 | 1.90594E-05 | 0.911206092 | 0.329179921 |
| 0.992578839 | 0.9326914  | 0.91730628 | 0.396210892 | -1.03634641 | 0.685840652 |
| 0.989246179 | 0.87701685 | 0.96837556 | 0.661697315 | 0.926286434 | 0.275723227 |
| -1.25907169 | 0.03592657 | 0.93686509 | 0.126258986 | -1.22529044 | 0.063104603 |
| 0.95615145  | 0.34447372 | 0.96265248 | 0.553520246 | -1.04107507 | 0.395668609 |
| 0.996986336 | 0.96396004 | 0.59035375 | 1.1005E-08  | 0.952640756 | 0.468724427 |
| 0.9762839   | 0.83858585 | 0.93969686 | 0.252113144 | 0.925940096 | 0.514491985 |
| 0.846709495 | 0.01278385 | 0.91734201 | 0.259193113 | 0.860171361 | 0.023497746 |
| -1.00248107 | 0.9699363  | -1.028588  | 0.428714716 | 0.814768203 | 0.002825499 |
| -1.10000161 | 0.13794946 | -1.030547  | 0.734914057 | -1.05165511 | 0.42966866  |
| -1.00952062 | 0.93015497 | -1.0233258 | 0.623502749 | 0.871571107 | 0.206934203 |

|             |            |            |             |             |             |
|-------------|------------|------------|-------------|-------------|-------------|
| -1.04666765 | 0.5159964  | -1.0289725 | 0.585007321 | 0.998685103 | 0.985021195 |
| -1.31807947 | 0.00743015 | 0.93765203 | 0.307028116 | -1.17384723 | 0.11219498  |
| 0.973550593 | 0.48313797 | 0.95746698 | 0.647172124 | -1.07667087 | 0.056883242 |
| 0.943249725 | 0.26798917 | 0.88922342 | 0.186707072 | 0.962438589 | 0.466455837 |
| 0.925235175 | 0.17571163 | -1.014029  | 0.84196178  | 0.798003514 | 0.000205406 |
| 0.97305928  | 0.55590602 | -1.1817073 | 0.124750623 | -1.00521983 | 0.910469146 |
| -1.00156125 | 0.97113878 | -1.0390022 | 0.419326084 | -1.06346406 | 0.157459281 |
| -1.02576516 | 0.68548065 | -1.0565164 | 0.411958489 | -1.07270045 | 0.26628529  |
| 0.900750986 | 0.18209766 | 0.88170101 | 0.287751318 | 0.924403061 | 0.313893402 |
| -1.21457996 | 0.00184804 | 0.87261788 | 0.039594037 | -1.12093723 | 0.059667363 |
| -1.27922897 | 0.00805459 | 0.97744954 | 0.728812425 | -1.24390673 | 0.018048619 |
| 0.989222896 | 0.81390049 | -1.0365815 | 0.57262603  | 0.966766699 | 0.463811868 |
| -1.34511899 | 0.00092921 | 0.7722708  | 0.019815973 | 0.95557771  | 0.593317033 |
| 0.982461767 | 0.89632743 | -1.1023353 | 0.168252777 | -1.18160848 | 0.222300758 |
| 0.860464805 | 0.00522619 | -1.254825  | 0.026165779 | 0.7872176   | 2.32E-05    |
| -1.06161842 | 0.45772866 | -1.0209611 | 0.586990404 | 0.921203866 | 0.309169401 |
| 0.816705415 | 0.00135861 | 0.88148708 | 0.019091819 | -1.00294661 | 0.961011833 |
| 0.869320717 | 0.03444397 | 0.99351423 | 0.908951277 | 0.660526934 | 3.60E-08    |
| 0.975639984 | 0.69442537 | 0.97678692 | 0.61236854  | 0.598958894 | 4.76E-11    |
| 0.973347295 | 0.80506546 | 0.96397129 | 0.396365902 | -1.04607035 | 0.68087327  |
| 0.982206805 | 0.8361154  | -1.0605152 | 0.351181133 | -1.02781427 | 0.751984102 |
| 0.700810247 | 0.00202606 | 0.98509926 | 0.846782296 | 0.82531439  | 0.085434661 |
| -1.15387737 | 0.05249278 | -1.2037612 | 0.002864941 | -1.35086373 | 0.000113036 |
| 0.962020592 | 0.75431945 | -1.1309448 | 0.17473778  | -1.11294748 | 0.388522934 |
| -1.05816537 | 0.61433098 | -1.1005972 | 0.0411289   | -1.27059145 | 0.036332064 |
| 0.960653054 | 0.53825414 | -1.0421471 | 0.627461281 | 0.973392926 | 0.678971133 |
| -1.12795043 | 0.06675459 | -1.0183007 | 0.893756968 | -1.02165152 | 0.740487202 |
| 0.826283922 | 0.02610064 | 0.98652646 | 0.793688964 | 0.818326377 | 0.019696265 |
| -1.12274267 | 0.05564951 | -1.0574286 | 0.48786334  | 0.881880774 | 0.038301968 |
| -1.10326313 | 0.07802281 | 0.64429348 | 1.20769E-09 | -1.01252531 | 0.82084571  |
| 0.779001682 | 0.0045328  | 0.8060274  | 0.001522706 | 0.977079893 | 0.784290906 |
| -1.13335318 | 0.05277311 | 0.8962487  | 0.085083666 | -1.12962395 | 0.059097183 |
| -1.25940803 | 0.00137345 | -1.1039021 | 0.368169383 | 0.975468528 | 0.717608295 |
| 0.986624974 | 0.80266589 | 0.97302497 | 0.752761203 | -1.08773417 | 0.122649894 |
| -1.07513498 | 0.33434165 | -1.1258006 | 0.28431028  | 0.875248454 | 0.078811955 |
| -1.02943162 | 0.60069768 | -1.1308074 | 0.094313724 | 0.737433072 | 9.76E-07    |
| -1.07973376 | 0.2366916  | -1.0776791 | 0.545916522 | -1.21324364 | 0.003917091 |
| -1.08489442 | 0.04691698 | -1.046222  | 0.687018717 | 0.973475916 | 0.505087226 |
| -1.11147591 | 0.18389274 | -1.0315837 | 0.633298435 | 0.765201544 | 0.00124532  |
| -1.13329711 | 0.05194382 | -1.1650854 | 0.021164981 | -1.08419959 | 0.204570045 |
| 0.974241016 | 0.57168153 | 0.8684216  | 0.096512874 | 0.979336184 | 0.650712884 |
| -1.03553924 | 0.53566285 | -1.049946  | 0.413843227 | 0.9754556   | 0.65910817  |
| -1.04741212 | 0.44396665 | 0.93008411 | 0.19075161  | -1.04400047 | 0.476550395 |
| -1.18280364 | 0.03891842 | -1.0297402 | 0.72941466  | -1.11226167 | 0.185385838 |

|             |            |            |             |             |             |
|-------------|------------|------------|-------------|-------------|-------------|
| -1.13742631 | 0.1098241  | -1.0816373 | 0.2197687   | 0.797695442 | 0.006122877 |
| 0.832356805 | 0.00338045 | -1.0238838 | 0.731068572 | 0.609872954 | 3.86E-11    |
| -1.40274576 | 7.51E-07   | -1.1187224 | 0.041150143 | -1.35613985 | 5.60E-06    |
| -1.13681608 | 0.00177188 | 0.97670785 | 0.752540282 | -1.13669061 | 0.001786746 |
| 0.846896648 | 0.07257758 | -1.0314621 | 0.576262486 | -1.12485067 | 0.20028852  |
| 0.822396176 | 0.01277509 | -1.1395476 | 0.046520232 | 0.486888423 | 4.63E-13    |
| 0.866985056 | 0.06658068 | -1.0215137 | 0.597390994 | -1.1843498  | 0.030685769 |
| -1.25361775 | 0.00577047 | 0.93113935 | 0.367530778 | -1.49257365 | 4.63E-06    |
| 0.889269497 | 0.11769418 | -1.069372  | 0.291421155 | 0.987942662 | 0.870064354 |
| 0.876362442 | 0.03162862 | 0.89520546 | 0.019221272 | -1.49079593 | 1.42E-08    |
| 0.972603228 | 0.48787594 | -1.0450397 | 0.435077685 | -1.05557248 | 0.179539578 |
| -1.10639958 | 0.01165404 | 0.96755043 | 0.585145095 | 0.974414523 | 0.506034782 |
| -1.06452769 | 0.25893379 | -1.1178217 | 0.165948807 | -1.0907326  | 0.118901544 |
| -1.00744646 | 0.93551499 | 0.94677071 | 0.492751444 | 0.633496357 | 6.45E-06    |
| -1.03088276 | 0.67299342 | 0.79619111 | 0.000359776 | -1.03598024 | 0.623890546 |
| 0.972631459 | 0.66134829 | -1.2346483 | 0.000978669 | 0.95047599  | 0.423651551 |
| -1.45579741 | 6.92E-05   | -1.0962486 | 0.022050128 | -1.07708177 | 0.397453128 |
| 0.94814132  | 0.42567612 | 0.70596669 | 0.000329549 | 0.937001215 | 0.331052281 |
| -1.11324564 | 0.16090892 | 0.53396871 | 3.85443E-11 | -1.04628093 | 0.551332076 |
| -1.0687324  | 0.23593961 | -1.0292999 | 0.706276432 | -1.07887821 | 0.176702763 |
| 0.92460924  | 0.47332274 | -1.3750691 | 0.000164787 | -1.20117459 | 0.097063932 |
| 0.897081075 | 0.14477183 | 0.83840153 | 0.020483214 | 0.742866548 | 0.000166009 |
| 0.902225151 | 0.09826086 | 0.84996185 | 0.008819665 | 0.92429586  | 0.20348493  |
| 0.755884269 | 6.60E-06   | 0.97357386 | 0.503566382 | 0.955646337 | 0.421679459 |
| 0.963903094 | 0.50678314 | -1.060843  | 0.132953033 | -1.10911919 | 0.065166213 |
| -1.32397379 | 0.00409291 | -1.0322493 | 0.564901354 | 0.911006295 | 0.323603228 |
| 0.956591305 | 0.49509832 | 0.72920974 | 0.001066432 | 0.982968992 | 0.791350163 |
| -1.03899494 | 0.58082561 | -1.1819483 | 0.023466167 | 0.790630072 | 0.001234171 |
| -1.17411783 | 0.00037382 | -1.0162377 | 0.799173985 | -1.28051306 | 3.02E-07    |
| 0.967561661 | 0.46717898 | -1.1364822 | 0.147492863 | -1.09995017 | 0.039045623 |
| 0.934403219 | 0.31003312 | -1.0298622 | 0.659146962 | 0.918303531 | 0.203488306 |
| -1.03133153 | 0.50949522 | -1.0222976 | 0.771228516 | 0.911666009 | 0.051622768 |
| 0.937687983 | 0.48252835 | 0.91367383 | 0.109397843 | -1.01895876 | 0.837235828 |
| -1.05114277 | 0.38610659 | -1.1137339 | 0.325438356 | 0.902242065 | 0.077124427 |
| -1.12784234 | 0.02674912 | 0.89721576 | 0.145317094 | -1.07857782 | 0.157895006 |
| -1.04079578 | 0.47210958 | 0.8970777  | 0.081373135 | 0.997511926 | 0.964181633 |
| 0.986135069 | 0.84234785 | 0.78114378 | 5.03622E-05 | 0.914268576 | 0.205002426 |
| 0.914913376 | 0.02540591 | -1.044115  | 0.436036238 | 0.967326666 | 0.394194434 |
| 0.965097206 | 0.72748484 | -1.0527139 | 0.585218621 | -1.19455423 | 0.085334079 |
| -1.03191107 | 0.59734208 | -1.0307152 | 0.64149396  | 0.886529015 | 0.046550838 |
| -1.06402542 | 0.23715376 | 0.99048319 | 0.890070732 | -1.05360404 | 0.318986241 |
| -1.00600494 | 0.88121647 | -1.1178478 | 0.010949298 | 0.980709863 | 0.627198704 |
| 0.768803052 | 3.67E-05   | -1.0384467 | 0.405877001 | 0.984336981 | 0.787954398 |
| -1.00270876 | 0.94519338 | 0.97521323 | 0.706088535 | 0.944771202 | 0.152730312 |

|             |            |            |             |             |             |
|-------------|------------|------------|-------------|-------------|-------------|
| -1.0640027  | 0.21207147 | 0.65358748 | 1.50829E-12 | 0.815694796 | 0.000120628 |
| 0.791511415 | 0.27758234 | -1.0584945 | 0.53473132  | 0.929232581 | 0.731942401 |
| -1.03851607 | 0.48633142 | -1.0286195 | 0.623074441 | 0.781578712 | 2.89E-05    |
| -1.01858273 | 0.79683347 | -1.1278038 | 0.026790411 | 0.759818585 | 0.000306984 |
| 0.900307223 | 0.32263732 | 0.98276775 | 0.754128357 | 0.885293254 | 0.251949465 |
| -1.06781485 | 0.4460201  | 0.98568852 | 0.837305849 | -1.14024361 | 0.130515832 |
| -1.21929254 | 0.04580426 | 0.98578563 | 0.712708085 | -1.04842773 | 0.627746925 |
| 0.853312661 | 0.04812531 | 0.86699949 | 0.165127844 | -1.1400821  | 0.100449729 |
| -1.52255472 | 2.50E-05   | 0.92926618 | 0.220006723 | -1.09854478 | 0.306964731 |
| -1.16107418 | 0.08270563 | 0.90562659 | 0.06154206  | 0.490382302 | 2.06E-11    |
| 0.88559579  | 0.01011504 | -1.033916  | 0.406619655 | -1.01496108 | 0.745769582 |
| -1.04623064 | 0.44782939 | 0.60405382 | 1.0093E-11  | -1.30018022 | 4.50E-05    |
| 0.833813162 | 0.00018764 | 0.9725904  | 0.481029043 | -1.11026852 | 0.024807795 |
| -1.01143605 | 0.92089406 | 0.501839   | 1.33941E-19 | 0.879926673 | 0.266689741 |
| -1.08575277 | 0.08381723 | 0.87337095 | 0.528001822 | 0.937731847 | 0.174338051 |
| -1.15248282 | 0.21195652 | -1.0371353 | 0.501740974 | 0.751217764 | 0.013791766 |
| -1.03950377 | 0.78275409 | 0.90065922 | 0.147335285 | -1.07207422 | 0.620665713 |
| 0.904491979 | 0.07995031 | 0.8858987  | 0.254587783 | 0.898830452 | 0.06329371  |
| -1.03453723 | 0.59194117 | -1.0962471 | 0.287103121 | 0.645836939 | 5.25E-09    |
| 0.964751065 | 0.60940787 | -1.0995527 | 0.332116944 | 0.485429104 | 2.16E-14    |
| 0.944868386 | 0.3633902  | -1.0443344 | 0.582507375 | -1.30011162 | 8.79E-05    |
| 0.952256016 | 0.67008204 | -1.3427078 | 0.00209133  | 0.966450485 | 0.766228235 |
| -1.27960642 | 0.03135227 | 0.96197787 | 0.648114965 | -1.08267743 | 0.479413904 |
| -1.00055264 | 0.99423247 | 0.97842805 | 0.634175367 | 0.971564531 | 0.706038098 |
| -1.11044036 | 0.15199784 | -1.1173561 | 0.065896072 | -1.14641365 | 0.063426298 |
| 0.959763668 | 0.48834754 | 0.98936768 | 0.814343299 | 0.915161437 | 0.13787063  |
| 0.950353236 | 0.26944326 | -1.1004321 | 0.404779107 | 0.803599878 | 1.35E-05    |
| 0.870059077 | 0.02180292 | -1.0105551 | 0.822965748 | -1.03609992 | 0.54974537  |
| -1.07408234 | 0.18506566 | 0.96184939 | 0.730517275 | -1.00019071 | 0.997154943 |
| -1.20401052 | 0.00673414 | -1.0536956 | 0.709797216 | -1.14773583 | 0.041168219 |
| -1.2629074  | 0.01456698 | 0.84479099 | 0.004101766 | -1.29716492 | 0.006820105 |
| -1.11788147 | 0.02867497 | 0.96587119 | 0.58358457  | 0.891486383 | 0.024309687 |
| 0.998478537 | 0.98677854 | 0.98686117 | 0.850480903 | -2.77213026 | 1.39E-15    |
| -1.28077632 | 0.03239124 | -1.0842413 | 0.196635594 | -1.12930095 | 0.285260043 |
| 0.978001028 | 0.7871876  | -1.010436  | 0.927901404 | -1.09220985 | 0.286823558 |
| -1.1183592  | 0.2318959  | -1.1547269 | 0.202631421 | -1.12861314 | 0.196505104 |
| -1.18680547 | 0.0518825  | -1.0656214 | 0.407163018 | -1.03378902 | 0.70116586  |
| -1.15797779 | 0.12300251 | -1.2911135 | 0.000824927 | -1.29409732 | 0.008014008 |
| -1.02715313 | 0.73990596 | 0.8430553  | 0.005389932 | -1.34651172 | 0.000499944 |
| -1.04420919 | 0.38268435 | 0.92096388 | 0.076804536 | -1.05363432 | 0.292538284 |
| -1.08870568 | 0.27019415 | -1.0075563 | 0.898804456 | -1.13085217 | 0.112825531 |
| -1.15810284 | 0.05608209 | -1.0435964 | 0.426292781 | -1.14116706 | 0.084673374 |
| -1.02589486 | 0.79085323 | -1.2442737 | 0.001630865 | -1.16214822 | 0.123080667 |
| -1.03043751 | 0.57371605 | -1.4120258 | 0.000460347 | -1.12724946 | 0.027817071 |



|             |            |            |             |             |             |
|-------------|------------|------------|-------------|-------------|-------------|
| 0.901841521 | 0.06733627 | 0.95057649 | 0.311021942 | 0.795665359 | 0.000127199 |
| -1.18732759 | 0.04167512 | -1.0266218 | 0.775001493 | -1.16031909 | 0.076350126 |
| -1.42245859 | 0.00315899 | -1.0872089 | 0.461213152 | -1.34674982 | 0.011667457 |
| -1.31257272 | 0.0064266  | -1.1628538 | 0.071265206 | -1.23591745 | 0.031485353 |
| -1.24367781 | 0.00334528 | 0.99708639 | 0.974955424 | 0.985078479 | 0.833126845 |
| -1.30095306 | 0.00026985 | 0.96148973 | 0.650274709 | 0.993041071 | 0.917939483 |
| 0.955129287 | 0.39612636 | -1.1215356 | 0.225793679 | 0.868019457 | 0.010908968 |
| -1.03935218 | 0.56971671 | -1.3935988 | 0.00012601  | 0.939334839 | 0.357850217 |
| 0.934984516 | 0.32716412 | -1.0262758 | 0.599870683 | -1.22694373 | 0.003991956 |
| -1.17889982 | 0.04796639 | -1.2800326 | 0.002076685 | -1.05265029 | 0.530716541 |
| 0.894288089 | 0.00407431 | -1.323049  | 0.000472012 | 0.8995118   | 0.006278332 |
| 0.872331596 | 0.00488982 | -1.180744  | 0.088996682 | 0.837934768 | 0.000370728 |
| -1.01388399 | 0.78290236 | 0.99109304 | 0.866504798 | 0.921194167 | 0.105082544 |
| 0.942558144 | 0.34198828 | 0.87599023 | 0.020248397 | 0.877430676 | 0.038725053 |
| -1.02864461 | 0.56797736 | -1.1253191 | 0.157120095 | 0.825018667 | 0.000258542 |
| -1.00848274 | 0.85920077 | -1.1334581 | 0.276708795 | 0.966791863 | 0.479149113 |
| -1.04344454 | 0.48591011 | -1.2949862 | 0.00936506  | 0.872907987 | 0.029070301 |
| -1.14620167 | 0.11618687 | -1.1925502 | 0.016314066 | 0.845631251 | 0.054946357 |
| -1.20255929 | 0.10165521 | -1.1056113 | 0.1425402   | -1.26261158 | 0.039951563 |
| 0.980029351 | 0.79141362 | -1.0074764 | 0.890135577 | 0.844119362 | 0.029754703 |
| -1.28021354 | 0.02202416 | -1.071985  | 0.307573738 | 0.544623473 | 3.61E-07    |
| -1.02367777 | 0.80895623 | -1.0845713 | 0.237647573 | -1.05370944 | 0.589257502 |
| -1.00780219 | 0.91147929 | -1.1828978 | 0.043711544 | 0.917082422 | 0.218901191 |
| -1.05499266 | 0.31444997 | 0.93045072 | 0.058092344 | 0.90698859  | 0.069562227 |
| 0.848851985 | 0.00988407 | 0.86846281 | 0.003743398 | 0.815178221 | 0.001548763 |
| -1.07919671 | 0.28443731 | 0.96323792 | 0.45519891  | 0.857917535 | 0.034139404 |
| -1.06664512 | 0.46433482 | 0.91739823 | 0.168097013 | -1.09959907 | 0.282961843 |
| -1.04677135 | 0.51755882 | 0.96960574 | 0.532695182 | 0.97114669  | 0.678172032 |
| -1.2077313  | 0.00115092 | 0.99820751 | 0.969940776 | -1.08747226 | 0.132860789 |
| -1.56168531 | 2.12E-05   | 0.94519817 | 0.356574387 | -1.2347104  | 0.031801675 |
| 0.610825766 | 3.32E-14   | 0.92607661 | 0.372828226 | 0.714334225 | 4.60E-09    |
| -1.1113396  | 0.24302519 | -1.1567193 | 0.194260446 | -1.07659901 | 0.412843085 |
| 0.966662872 | 0.48936306 | 0.80946351 | 0.007376859 | -1.11374594 | 0.03126216  |
| -1.01821849 | 0.7246736  | 0.83316245 | 0.087121327 | 0.922951282 | 0.121737112 |
| -1.21715757 | 0.08098474 | -1.1001852 | 0.325987568 | -1.1953533  | 0.112193178 |
| 0.970395682 | 0.50017339 | 0.91381961 | 0.200782877 | 0.995783557 | 0.924317485 |
| -1.15417412 | 0.00512249 | -1.0200842 | 0.707520587 | 0.977727971 | 0.648416348 |
| 0.910879257 | 0.15204389 | 0.79391024 | 0.000411767 | -1.00652678 | 0.919716482 |
| 0.726472357 | 3.14E-05   | -1.0086166 | 0.903582504 | 0.763195015 | 0.000320977 |
| 0.991572052 | 0.82604888 | -1.2199913 | 0.027158945 | -1.16874209 | 0.000156101 |
| 0.961619587 | 0.73443107 | 0.89557635 | 0.121900238 | 0.666795715 | 0.000858778 |
| -1.01747676 | 0.69088279 | -1.0450149 | 0.426479492 | 0.928968242 | 0.094873223 |
| -1.08669935 | 0.14372007 | -1.0214901 | 0.824912069 | -1.0717399  | 0.221692817 |
| 0.959383445 | 0.61775703 | 0.8935019  | 0.023250271 | 0.593420405 | 5.39E-08    |

|             |            |            |             |             |             |
|-------------|------------|------------|-------------|-------------|-------------|
| 0.890352895 | 0.06403297 | -1.1172557 | 0.220434861 | -1.00331207 | 0.95726361  |
| -1.09135051 | 0.32164624 | 0.90305083 | 0.041030675 | -1.13155597 | 0.163048711 |
| -1.11104513 | 0.11094998 | 0.95454138 | 0.365641758 | -1.03688332 | 0.579538384 |
| 0.928659325 | 0.1281278  | -1.25169   | 0.04714828  | 0.971070354 | 0.542490369 |
| 0.922318182 | 0.15177105 | -1.0329148 | 0.467643803 | 0.995758962 | 0.939370244 |
| -1.04766544 | 0.31712428 | 0.96435148 | 0.463136712 | -1.10051094 | 0.042607118 |
| -1.26224475 | 0.03151836 | -1.0660305 | 0.324045293 | -1.40578265 | 0.002118779 |
| 0.923352869 | 0.05062328 | 0.84458588 | 0.019714002 | -1.0713361  | 0.089774272 |
| 0.996029965 | 0.94483378 | 0.9908481  | 0.811317122 | 0.960630609 | 0.48574446  |
| -1.30236036 | 0.01976176 | 0.90528249 | 0.389780214 | -1.00820544 | 0.941027429 |
| 0.852687397 | 0.00087299 | 0.93769228 | 0.143512243 | 0.876456449 | 0.005143208 |
| 0.978088683 | 0.60825883 | -1.0417663 | 0.468443192 | 0.865754168 | 0.00146398  |
| 0.988085918 | 0.79902605 | 0.74791342 | 0.000899021 | 0.956174928 | 0.343000752 |
| 0.974049839 | 0.54893707 | -1.0036402 | 0.953042355 | 0.911477137 | 0.038094299 |
| 0.938042292 | 0.16814405 | -1.2932481 | 0.004797652 | -1.00559688 | 0.903425156 |
| 0.990962154 | 0.88876043 | -1.0129847 | 0.843356912 | 0.853175704 | 0.017232668 |
| 0.961160716 | 0.59112668 | -1.0210505 | 0.665325758 | -1.37463667 | 6.32E-05    |
| 0.873688797 | 0.15768932 | -1.0361158 | 0.526230742 | 0.889232122 | 0.218261649 |
| 0.97284727  | 0.71045445 | -1.0662672 | 0.169827105 | 0.940289359 | 0.40757673  |
| 0.985138598 | 0.81258784 | -1.2233977 | 0.061237834 | 0.45459894  | 1.39E-17    |
| -1.08400147 | 0.39000075 | 0.99710179 | 0.942253853 | -1.05565943 | 0.563019188 |
| 0.995665068 | 0.89268627 | -1.0165384 | 0.775468912 | -1.05211954 | 0.118795912 |
| 0.978448876 | 0.69884869 | -1.0706683 | 0.537195936 | 0.997561073 | 0.965389104 |
| 0.778571711 | 0.00029631 | 0.90264541 | 0.02749995  | 0.857890403 | 0.02138959  |
| 0.482097585 | 1.56E-11   | 0.93012497 | 0.097654792 | 0.472386901 | 6.54E-12    |
| 0.986999981 | 0.8448286  | 0.97029512 | 0.522471617 | 0.826516435 | 0.005962882 |
| 0.98941466  | 0.89616101 | -1.0221702 | 0.616996037 | 0.753089157 | 0.000961362 |
| -1.06290399 | 0.23846665 | -1.1076965 | 0.029663341 | -1.01658051 | 0.749196727 |
| 0.892674798 | 0.11301079 | 0.94503485 | 0.38540978  | 0.953221521 | 0.499507769 |
| -1.05019339 | 0.23333979 | -1.1041527 | 0.182138688 | -1.01776806 | 0.666401959 |
| 0.970450343 | 0.39646605 | 0.93235625 | 0.460578382 | 0.784022133 | 5.44E-09    |
| 0.935777138 | 0.30310508 | 0.98528727 | 0.841494375 | 0.965415078 | 0.583684303 |
| -1.05666332 | 0.334516   | 0.80083578 | 0.000851067 | 0.859183528 | 0.009716113 |
| 0.779264264 | 1.83E-05   | 0.94277966 | 0.52936452  | 0.852368818 | 0.003943723 |
| -1.01630621 | 0.61586541 | -1.0370475 | 0.261414536 | -1.01939776 | 0.551413001 |
| 0.908207755 | 0.03306718 | 0.99310442 | 0.902147406 | 0.927652237 | 0.093720038 |
| -1.11276462 | 0.06832999 | 0.84952512 | 0.014670299 | -1.29758178 | 3.27E-05    |
| 0.989551934 | 0.85909675 | 0.71340333 | 0.000237054 | 0.867602303 | 0.019314971 |
| 0.985837264 | 0.78240062 | 0.95952455 | 0.537231277 | 0.992331186 | 0.881474281 |
| 0.85391832  | 0.0775779  | 0.99964755 | 0.996550223 | -1.39814562 | 0.000349804 |
| 0.786991214 | 1.25E-06   | 0.947562   | 0.297267505 | 0.727886571 | 1.74E-09    |
| 0.877196855 | 0.07359165 | 0.96470964 | 0.612237433 | 0.884932956 | 0.09443649  |
| 0.882187849 | 0.02944434 | -1.0131595 | 0.748869443 | 0.905183782 | 0.081072166 |
| -1.50837451 | 1.67E-08   | -1.028368  | 0.428864428 | -1.33933569 | 1.76E-05    |

|             |            |            |             |             |             |
|-------------|------------|------------|-------------|-------------|-------------|
| 0.707195147 | 0.00538355 | 0.97655576 | 0.711641543 | 0.821866141 | 0.106293337 |
| 0.944368014 | 0.51013174 | 0.96250012 | 0.502378911 | -1.27144046 | 0.007442765 |
| -1.32112105 | 0.00061619 | 0.97033154 | 0.572361685 | -1.42551273 | 2.34E-05    |
| -1.04388533 | 0.53637655 | 0.97345925 | 0.405041155 | -1.06675854 | 0.353284148 |
| -1.21756289 | 0.00060666 | 0.96631058 | 0.43958786  | -1.25501845 | 9.97E-05    |
| -1.17531046 | 0.05917177 | -1.0483405 | 0.414753793 | 0.865314589 | 0.090007466 |
| -1.28532014 | 0.0031637  | 0.84895333 | 0.007458966 | -1.10920014 | 0.20740988  |
| -1.08267396 | 0.33554253 | -1.0637158 | 0.234632069 | -1.02633908 | 0.751686888 |
| -1.08682351 | 0.22915577 | -1.1320169 | 0.163452143 | -1.00639463 | 0.926149469 |
| -1.01415128 | 0.81678304 | 0.96839429 | 0.467298917 | -1.17711661 | 0.009211899 |
| 0.986354828 | 0.90100485 | 0.9630689  | 0.602364084 | -1.03089503 | 0.783003497 |
| -1.00043818 | 0.99560622 | 0.91244246 | 0.107811106 | -1.10172389 | 0.226514378 |
| 0.791475203 | 0.01797675 | -1.3537084 | 9.64286E-06 | 0.746819873 | 0.003579427 |
| 0.929466779 | 0.37514469 | 0.73833734 | 0.014009784 | 0.938197867 | 0.438816867 |
| 0.989075145 | 0.87078864 | -1.1961084 | 0.042857248 | 0.942555273 | 0.382673807 |
| -1.18203496 | 0.08060865 | -1.2698544 | 0.002895428 | -1.07204078 | 0.462081429 |
| 0.890030527 | 0.10981762 | -1.0883799 | 0.225145041 | 0.737697503 | 8.69E-05    |
| -1.08015355 | 0.28919483 | -1.0331512 | 0.548588993 | 0.888213327 | 0.105646592 |
| 0.95685159  | 0.55175021 | -1.1064906 | 0.232447318 | -1.20346215 | 0.014940698 |
| -1.06513586 | 0.22955227 | -1.0912926 | 0.286871383 | -1.00088339 | 0.986494354 |
| -1.43088669 | 0.0004281  | -1.1453924 | 0.102621556 | -1.13326691 | 0.195389571 |
| 0.98411318  | 0.6603195  | -1.0734207 | 0.305258777 | 0.948010894 | 0.146512167 |
| 0.943763369 | 0.21206175 | 0.98827486 | 0.84580352  | -1.0327639  | 0.484808117 |
| -1.02704828 | 0.52092798 | -1.0398196 | 0.723828915 | 0.912208036 | 0.030331417 |
| 0.995718957 | 0.92582684 | -1.0350093 | 0.665622931 | 0.947968149 | 0.249185239 |
| -1.08626578 | 0.06034949 | 0.71866617 | 0.001105254 | -1.02457091 | 0.57587438  |
| 0.882923619 | 0.01698425 | -1.0090183 | 0.91300071  | 0.90231205  | 0.046907503 |
| 0.904119477 | 0.21553596 | 0.99615648 | 0.954523076 | 0.861498037 | 0.069281501 |
| -1.10057432 | 0.1380423  | -1.0676688 | 0.488672702 | -1.15351188 | 0.029006429 |
| -1.24810881 | 0.03050116 | 0.79247119 | 0.002017051 | -1.19358216 | 0.081674711 |
| 0.959767745 | 0.79903423 | 0.80207932 | 0.003432431 | 0.884972891 | 0.449751496 |
| -1.15315847 | 0.15565205 | 0.95423667 | 0.527432473 | 0.87320161  | 0.17633057  |
| -1.22210992 | 0.06562228 | -1.1096731 | 0.050096601 | 0.886459978 | 0.263808555 |
| -1.25795882 | 0.20062536 | -1.3152126 | 0.005835429 | -1.20196049 | 0.303647518 |
| -1.31668259 | 0.0535639  | 0.97401407 | 0.470642955 | -1.34377828 | 0.038653334 |
| 0.843653464 | 0.01274061 | 0.96361106 | 0.422182767 | -1.10776401 | 0.126669937 |
| 0.947874591 | 0.65236091 | -1.0544946 | 0.204427565 | 0.999100955 | 0.993955163 |
| -1.00129437 | 0.98639972 | 0.85788288 | 0.001520888 | 0.917778286 | 0.261027567 |
| -1.39658724 | 0.00436423 | -1.110183  | 0.018766082 | -1.38433333 | 0.005425545 |
| -1.02749885 | 0.67523778 | 0.95573063 | 0.374284162 | 0.868831487 | 0.033391143 |
| -1.21868888 | 0.00404262 | -1.011076  | 0.891572126 | 0.874733474 | 0.047027791 |
| -1.12942665 | 0.11099975 | -1.094175  | 0.163151381 | -1.25107543 | 0.004295675 |
| 0.939326946 | 0.21373255 | -1.3609243 | 0.003170051 | -1.0726702  | 0.164232767 |
| -1.40472844 | 0.00336271 | 0.8355773  | 0.268013176 | -1.56067314 | 0.000183019 |

|             |            |            |             |             |             |
|-------------|------------|------------|-------------|-------------|-------------|
| -1.09087255 | 0.10780106 | 0.88686179 | 0.230316078 | -1.0893435  | 0.113460873 |
| 0.901617736 | 0.14273959 | 0.95729139 | 0.684183861 | 0.861693005 | 0.03708892  |
| -1.15200925 | 0.08877866 | -1.084195  | 0.649937634 | -1.04990316 | 0.553344206 |
| 0.888501678 | 0.12990796 | -1.3193588 | 0.051883273 | -1.25111193 | 0.005183339 |
| -1.08500488 | 0.36923091 | -1.088775  | 0.20280619  | -1.21378138 | 0.036048899 |
| -1.1091629  | 0.1819067  | 0.91361405 | 0.447885662 | -1.164866   | 0.051461829 |
| -1.27515952 | 0.00113709 | 0.97552067 | 0.744091447 | -1.26245244 | 0.001736473 |
| -1.11971915 | 0.05718298 | -1.1280692 | 0.287673435 | -1.18277517 | 0.005618859 |
| 0.862119778 | 0.00763472 | 0.84665355 | 0.01248847  | 0.821338241 | 0.00054545  |
| 0.71437521  | 2.45E-05   | 0.90312576 | 0.127578302 | 0.645442483 | 1.66E-07    |
| -1.15209181 | 0.0421113  | -1.2263744 | 0.008852201 | 0.995834484 | 0.951277369 |
| -1.10698234 | 0.33223176 | 0.93824749 | 0.205559211 | -1.50719741 | 0.000230048 |
| 0.995655001 | 0.9353165  | -1.5088123 | 0.000485984 | -1.16549425 | 0.005898388 |
| 0.946147781 | 0.25267488 | 0.95392922 | 0.379100274 | 0.987573822 | 0.794945174 |
| -1.30075795 | 0.00739102 | 0.66157764 | 2.22298E-07 | -1.28202427 | 0.011093902 |
| 0.756999483 | 1.36E-06   | -1.0731409 | 0.39107259  | 0.93599583  | 0.201966491 |
| -1.05696087 | 0.56319711 | 0.89065847 | 0.137796868 | 0.819019081 | 0.040775335 |
| -1.20428454 | 0.01329686 | -1.3894503 | 0.000593913 | -1.26746252 | 0.001909791 |
| -1.07626161 | 0.24696745 | 0.93472393 | 0.382149498 | -1.02848738 | 0.65640944  |
| -1.19437528 | 0.0389955  | -1.1729188 | 0.028135675 | -1.25359063 | 0.009440178 |
| -1.12628534 | 0.08879632 | -1.0327214 | 0.582255753 | -1.22216244 | 0.005053763 |
| 0.885972598 | 0.11726876 | 0.85108289 | 0.003940317 | -1.04274808 | 0.584315421 |
| -1.40169615 | 0.00035704 | 0.75830038 | 0.00037135  | -1.33449992 | 0.001950673 |
| -1.29323377 | 0.00020544 | -1.0199361 | 0.77269772  | -1.18144823 | 0.012534545 |
| -1.26412006 | 0.02137104 | -1.2113729 | 0.070408024 | 0.754566798 | 0.006213415 |
| -1.28977037 | 0.00401488 | -1.1251044 | 0.031593448 | -1.03639343 | 0.674456547 |
| -1.08168363 | 0.36966141 | 0.93103119 | 0.141361368 | -1.14030354 | 0.136196861 |
| 0.994661753 | 0.93616815 | -1.0899195 | 0.365952489 | -1.06709231 | 0.333353259 |
| -1.04875676 | 0.38662887 | 0.76012923 | 1.8194E-06  | -1.19269282 | 0.002110144 |
| -1.2513574  | 0.00013865 | -1.0510426 | 0.603300602 | -1.31823629 | 5.29E-06    |
| 0.911186359 | 0.31796999 | -1.189079  | 0.020613397 | -1.26803128 | 0.012860455 |
| -1.12687126 | 0.13294427 | -1.0455315 | 0.481304561 | -1.18820358 | 0.031930316 |
| 0.820420589 | 0.00119741 | -1.0822841 | 0.350400615 | 0.8952107   | 0.061008677 |
| -1.35472144 | 3.33E-06   | -1.2723821 | 0.000914111 | -1.29329023 | 5.27E-05    |
| -1.05675114 | 0.33776114 | -1.2411506 | 0.006348477 | -1.2813665  | 6.25E-05    |
| -1.00880922 | 0.90028671 | -1.5052731 | 2.46841E-05 | -1.21910866 | 0.006295714 |
| -1.00761358 | 0.88633408 | -1.0322902 | 0.624426233 | -1.18164081 | 0.002589146 |
| -1.05402268 | 0.52895912 | 0.91428364 | 0.368727356 | -1.05625444 | 0.512592426 |
| -1.1375512  | 0.0278647  | -1.2002046 | 0.035573906 | -1.0331693  | 0.569461277 |
| -1.0637456  | 0.2912852  | -1.0600938 | 0.504208461 | 0.98844521  | 0.841889173 |
| 0.824587363 | 0.0164984  | 0.99126402 | 0.895554748 | 0.980517895 | 0.801610532 |
| 0.994571239 | 0.94402075 | -1.1246481 | 0.035762962 | -1.05416458 | 0.497165993 |
| -1.04294357 | 0.72328254 | -1.164458  | 0.007335515 | -1.0988434  | 0.428436202 |
| -1.1504979  | 0.03140635 | -1.1247805 | 0.20800778  | -1.31966236 | 5.69E-05    |

|             |            |            |             |             |             |
|-------------|------------|------------|-------------|-------------|-------------|
| -1.20022866 | 0.0447458  | -1.0773377 | 0.345591079 | -1.24747374 | 0.01590904  |
| -1.01365696 | 0.74663737 | -1.0149448 | 0.798589364 | 0.994714998 | 0.899523815 |
| -1.00942603 | 0.8223871  | -1.2999667 | 3.90795E-05 | -1.02610895 | 0.538073646 |
| -1.02065366 | 0.76955077 | -1.1972601 | 0.002632739 | 0.992549237 | 0.914622    |
| 0.939903238 | 0.30487449 | -1.2021431 | 0.010758967 | 0.817245718 | 0.001385247 |
| 0.866509043 | 0.14481744 | -1.0763304 | 0.169397392 | 0.76288058  | 0.007185586 |
| -1.27277315 | 0.00826766 | -1.1008774 | 0.252164209 | -1.49911681 | 2.59E-05    |
| 0.757616579 | 0.01233099 | -1.1568236 | 0.013479423 | -1.1269316  | 0.269815763 |
| -1.05516196 | 0.31899425 | 0.95828404 | 0.46559106  | 0.689110772 | 4.66E-09    |
| 0.963747635 | 0.53073998 | -1.0877866 | 0.284990669 | 0.990342008 | 0.868911886 |
| 0.95710829  | 0.43615438 | 0.87439614 | 0.087686784 | 0.662852805 | 1.12E-09    |
| 0.856078269 | 0.01613633 | -1.1852983 | 0.155947895 | 0.823095237 | 0.002973411 |
| 0.826933799 | 0.00293962 | -1.1296992 | 0.059891095 | 0.806033083 | 0.000845815 |
| -1.05943972 | 0.1817736  | -1.1826588 | 0.06428781  | 0.770332502 | 1.15E-07    |
| 0.986892854 | 0.82386244 | -1.0437118 | 0.310307778 | 0.936486393 | 0.270906927 |
| 0.991717809 | 0.90277447 | 0.98146019 | 0.654556179 | 0.707412482 | 4.42E-06    |
| -1.0167079  | 0.79670297 | -1.0752628 | 0.300629564 | 0.951732195 | 0.442925381 |
| 0.789444853 | 0.08757106 | 0.93626707 | 0.275926645 | 0.80387913  | 0.113975956 |
| -1.00367607 | 0.9737948  | 0.68789842 | 0.000303466 | 0.914283068 | 0.42379055  |
| 0.514560889 | 1.53E-11   | -1.3026351 | 0.004017234 | 0.472918795 | 3.05E-13    |
| -1.09676138 | 0.33621271 | -1.159394  | 0.173312736 | -1.0828598  | 0.406662969 |
| -1.1158572  | 0.06204825 | 0.77778344 | 1.80542E-05 | 0.997494248 | 0.965372419 |
| 0.98967959  | 0.83007431 | 0.88469193 | 0.041048457 | 0.917833692 | 0.080353171 |
| 0.932142615 | 0.4644146  | 0.73051462 | 7.01297E-07 | 0.577728079 | 4.31E-07    |
| 0.947074328 | 0.59997345 | 0.64966445 | 6.28879E-09 | 0.904175366 | 0.332809466 |
| 0.919466066 | 0.2423961  | 0.69553599 | 2.06205E-07 | 0.972296898 | 0.694026713 |
| -1.00814359 | 0.85886985 | 0.77943278 | 3.1528E-07  | 0.938364787 | 0.166848109 |
| -1.31369312 | 0.0006209  | -1.0357104 | 0.554456305 | -1.219223   | 0.010784303 |
| -1.0536662  | 0.39429277 | 0.96186311 | 0.568479626 | -1.00240134 | 0.968717086 |
| -1.36068016 | 3.32E-07   | 0.86645484 | 0.029274781 | -1.30139785 | 6.92E-06    |
| 0.988559078 | 0.77197491 | 0.6999622  | 0.011247443 | -1.00835696 | 0.833957069 |
| -1.01614902 | 0.73922557 | 0.74207281 | 0.009679153 | -1.0443579  | 0.368705478 |
| -1.0144928  | 0.76654571 | 0.76882233 | 0.001398251 | 0.939088272 | 0.198022276 |
| -1.02971549 | 0.66713491 | -1.0572387 | 0.561143366 | 0.885942507 | 0.079335097 |
| -1.0974884  | 0.19548884 | 0.92977242 | 0.211032284 | 0.655952362 | 2.16E-07    |
| -1.14027917 | 0.01542371 | 0.98927423 | 0.823475494 | -1.19582269 | 0.001245311 |
| -1.13145369 | 0.03905696 | 0.73664041 | 0.00227468  | -1.0909265  | 0.141917888 |
| -1.17890545 | 0.05932109 | 0.87734283 | 0.209717321 | 0.929368578 | 0.394990245 |
| 0.801035978 | 0.00193772 | 0.79969505 | 0.002693001 | 0.922355623 | 0.240184336 |
| -1.10297439 | 0.23124699 | 0.94837588 | 0.248114892 | -1.14047907 | 0.110238296 |
| -1.05704184 | 0.46479879 | -1.290398  | 0.001286617 | 0.986097235 | 0.853297978 |
| -1.12957185 | 0.1608454  | -1.0703779 | 0.26885924  | -1.26840226 | 0.007587787 |
| -1.00857734 | 0.88048971 | -1.1129815 | 0.047939912 | -1.01805135 | 0.752896818 |
| 0.873631436 | 0.00746003 | -1.0116706 | 0.770124752 | 0.76589569  | 1.12E-06    |

|             |            |            |             |             |             |
|-------------|------------|------------|-------------|-------------|-------------|
| 0.889996899 | 0.02755645 | 0.95982005 | 0.395498516 | -1.03201228 | 0.542785632 |
| 0.883961538 | 0.01038837 | 0.99035497 | 0.841460594 | 0.8471431   | 0.000757196 |
| 0.871365297 | 0.07148994 | -1.10074   | 0.162104951 | 0.969762728 | 0.683426833 |
| -1.16297519 | 0.00465161 | 0.92232197 | 0.259573984 | 0.98154417  | 0.716956511 |
| 0.984676591 | 0.63966107 | -1.2518287 | 7.72537E-05 | 0.910375387 | 0.005973883 |
| 0.956443219 | 0.37457233 | 0.96563371 | 0.551703943 | -1.07782116 | 0.137733056 |
| 0.9668986   | 0.58961148 | 0.95148134 | 0.562859572 | -1.02073908 | 0.741997512 |
| -1.14308507 | 0.07220722 | 0.89555552 | 0.110881858 | -1.37650084 | 5.50E-05    |
| -1.15638052 | 0.03533394 | -1.1326965 | 0.129584342 | -1.11769808 | 0.104070432 |
| -1.02405493 | 0.60008138 | -1.0280232 | 0.71521461  | 0.798759778 | 6.83E-06    |
| -1.04703122 | 0.40804838 | -1.1740089 | 0.066634383 | 0.948740931 | 0.343997116 |
| -1.12678066 | 0.02296107 | 0.77526444 | 3.6588E-05  | 0.947628097 | 0.296085041 |
| 0.996405448 | 0.96595048 | -1.0372476 | 0.454845111 | -1.08548702 | 0.332981886 |
| 0.922668786 | 0.04406953 | -1.035643  | 0.498938343 | -1.047781   | 0.237045908 |
| -1.05845068 | 0.18681379 | 0.99686954 | 0.946420208 | -1.04020952 | 0.357587163 |
| -1.08028019 | 0.06008036 | 0.91318441 | 0.23053261  | 0.877620943 | 0.002012802 |
| 0.979370868 | 0.75632604 | 0.96783439 | 0.525129984 | 0.964023723 | 0.585808052 |
| 0.793295483 | 0.00064405 | 0.98520332 | 0.651275568 | 0.774556071 | 0.000196109 |
| -1.06596101 | 0.29576496 | -1.0094056 | 0.85140991  | 0.973250233 | 0.655824582 |
| -1.12682819 | 0.0809997  | -1.0727692 | 0.262505449 | 0.967176511 | 0.621168201 |
| 0.981179781 | 0.77574885 | -1.1853389 | 0.023499219 | -1.06715068 | 0.331797558 |
| -1.00790526 | 0.9013528  | -1.041276  | 0.550342338 | -1.01454373 | 0.820225588 |
| 0.659038302 | 5.21E-07   | 0.94393565 | 0.205987146 | 0.87034861  | 0.063005557 |
| -1.07663945 | 0.23618925 | 0.95784469 | 0.437969427 | 0.987894588 | 0.844116389 |
| -1.05606408 | 0.3823356  | -1.0660244 | 0.215240434 | -1.08489198 | 0.19386403  |
| -1.00843375 | 0.82825826 | 0.90039408 | 0.216867933 | 0.985575432 | 0.707552922 |
| 0.963851315 | 0.54343847 | 0.99056455 | 0.809026908 | 0.979052201 | 0.726499842 |
| -1.03082221 | 0.58275232 | 0.9939787  | 0.887483455 | -1.01188353 | 0.830510451 |
| 0.918272331 | 0.17024723 | 0.83830125 | 5.40968E-05 | -1.02009479 | 0.746918117 |
| 0.88081168  | 0.03088529 | -1.023448  | 0.730098493 | -1.10444402 | 0.08841827  |
| 0.982199868 | 0.6432994  | -1.1396364 | 0.045673145 | -1.03832371 | 0.333847349 |
| -1.07688286 | 0.3581724  | 0.98637024 | 0.821407082 | 0.944785951 | 0.480362387 |
| -1.02948391 | 0.52867622 | 0.99101584 | 0.893578134 | -1.11146347 | 0.02498559  |
| -1.10818792 | 0.07789026 | -1.0880271 | 0.209105076 | -1.05931448 | 0.317859701 |
| 0.97817292  | 0.59441004 | 0.93467052 | 0.290048578 | -1.02872881 | 0.494742188 |
| 0.904318587 | 0.10142311 | 0.67354988 | 1.53682E-06 | 0.925816683 | 0.207006355 |
| 0.877518454 | 0.02871092 | -1.0160875 | 0.796694289 | -1.01659249 | 0.778164365 |
| -1.1571791  | 0.03519508 | 0.9923081  | 0.9012379   | -1.01011959 | 0.882086999 |
| -1.02484551 | 0.63377468 | -1.0332777 | 0.399251259 | 0.956058807 | 0.38422009  |
| -1.02004359 | 0.69901141 | -1.0372661 | 0.545947414 | 0.97207726  | 0.58138051  |
| -1.14139764 | 0.02332353 | 0.97588051 | 0.658442954 | 0.984339839 | 0.781577497 |
| 0.978166699 | 0.64458565 | 0.98692195 | 0.830871523 | -1.09902858 | 0.052336955 |
| -1.06394815 | 0.31766558 | -1.1239291 | 0.046197989 | -1.02346853 | 0.707311553 |
| 0.941260493 | 0.21208212 | 0.99204697 | 0.836754659 | -1.07554191 | 0.134559856 |

|             |            |            |             |             |             |
|-------------|------------|------------|-------------|-------------|-------------|
| -1.0343002  | 0.49068427 | 0.98563321 | 0.856994962 | 0.988410806 | 0.811342995 |
| -1.03634205 | 0.5658923  | 0.96060605 | 0.384330012 | 0.951947788 | 0.429004039 |
| -1.03608819 | 0.52566864 | 0.99594794 | 0.943625564 | 0.949167136 | 0.351409429 |
| -1.07091434 | 0.19024941 | -1.003137  | 0.939684784 | -1.05113049 | 0.3385894   |
| -1.06532888 | 0.29098731 | 0.96308556 | 0.535739048 | 0.904020385 | 0.094837875 |
| 0.988133403 | 0.80917249 | 0.96642591 | 0.559288858 | -1.04171553 | 0.409737782 |
| 0.88514856  | 0.04097015 | -1.0194888 | 0.776216799 | 0.978484191 | 0.710332517 |
| -1.02695508 | 0.61623384 | 0.99379125 | 0.903671931 | -1.02596022 | 0.629115148 |
| -1.02900687 | 0.52066471 | 0.89420361 | 0.032863267 | -1.04327153 | 0.342419386 |
| 0.922425211 | 0.16959805 | 0.98649225 | 0.811169771 | 0.93694572  | 0.266466235 |
| 0.88121688  | 0.03623631 | 0.97180111 | 0.550290288 | -1.00513991 | 0.930922197 |
| -1.03598808 | 0.4138562  | -1.100784  | 0.124050456 | -1.05375411 | 0.227959508 |
| -1.00485401 | 0.91630007 | 0.98977026 | 0.8309579   | 0.977065086 | 0.614964877 |
| -1.10232135 | 0.07516693 | -1.0167295 | 0.734129389 | -1.05934574 | 0.287668783 |
| -1.02665086 | 0.63124157 | -1.1175065 | 0.07781749  | -1.07688996 | 0.179641114 |
| 0.960877645 | 0.46153782 | -1.0390835 | 0.492657353 | 0.952108675 | 0.365839827 |
| -1.00666319 | 0.91842215 | 0.94860741 | 0.311549055 | -1.01796764 | 0.783654271 |
| -1.23457118 | 0.00451651 | -1.0467497 | 0.444691085 | 0.946431566 | 0.44201943  |
| -1.06467116 | 0.16135779 | -1.0129562 | 0.794551204 | 0.967126147 | 0.452064556 |
| 0.984698228 | 0.7524713  | -1.0715441 | 0.240759229 | 0.948618163 | 0.283034535 |
| 0.962852367 | 0.57589597 | -1.0575365 | 0.293757076 | -1.08510605 | 0.229921288 |
| 0.989661705 | 0.79313112 | -1.0122374 | 0.784345949 | 0.947673342 | 0.178560652 |
| 0.984604867 | 0.81517087 | 0.89605528 | 0.063852605 | -1.1081107  | 0.125984989 |
| -1.1005205  | 0.13694645 | 0.99921424 | 0.989395192 | 0.982986231 | 0.787812459 |
| -1.00375842 | 0.94674908 | 0.97957614 | 0.632719993 | -1.05375469 | 0.353167557 |
| 0.975593359 | 0.79077437 | -1.1385839 | 0.006534027 | -1.04636539 | 0.626790141 |
| -1.13389534 | 0.13516619 | -1.0611567 | 0.273778211 | 0.916857623 | 0.299409839 |
| -1.0147358  | 0.76371798 | 0.92638129 | 0.166225681 | 0.962333619 | 0.431273484 |
| -1.15932434 | 0.15374808 | -1.0884455 | 0.121140235 | -1.24715885 | 0.035127325 |
| -1.36256282 | 4.27E-06   | -1.1120816 | 0.105588748 | -1.48842743 | 2.04E-08    |
| -1.06063305 | 0.22474719 | 0.85210956 | 0.028477987 | -1.13605951 | 0.010242276 |
| -1.21652025 | 0.04181971 | -1.1026677 | 0.031042813 | -1.15550927 | 0.129970201 |
| -1.05461502 | 0.47400931 | -1.066173  | 0.193350958 | -1.10574515 | 0.178570923 |
| -1.01414439 | 0.7799489  | 0.84608159 | 0.016105913 | -1.07953287 | 0.1319037   |
| 0.98008945  | 0.86600447 | 0.93093771 | 0.075127917 | 0.96276296  | 0.750275006 |
| -1.09101708 | 0.18462995 | -1.0104949 | 0.874990305 | 0.921016293 | 0.209791029 |
| -1.0045801  | 0.94511026 | -1.028316  | 0.661595123 | -1.00614781 | 0.926427426 |
| -1.00653697 | 0.93433136 | 0.88153192 | 0.028202806 | -1.13382475 | 0.116420615 |
| -1.11648566 | 0.18138934 | 0.93700553 | 0.485645778 | -1.24306207 | 0.009916933 |
| 0.990708053 | 0.87978995 | -1.1182663 | 0.182893931 | 0.271077789 | 8.67E-28    |
| 0.937963877 | 0.38655591 | -1.0055343 | 0.909669799 | 0.923914909 | 0.28554274  |
| -1.01763159 | 0.72141301 | -1.1446027 | 0.191841444 | 0.902383061 | 0.039847782 |
| -1.1407213  | 0.23299729 | -1.3262335 | 2.05233E-05 | 0.950100038 | 0.640976125 |
| 0.915059829 | 0.33770537 | -1.1933308 | 0.000529205 | -1.25794946 | 0.015475768 |

|             |            |            |             |             |             |
|-------------|------------|------------|-------------|-------------|-------------|
| -1.01452062 | 0.72293502 | -1.0918123 | 0.354208994 | 0.918658165 | 0.040677985 |
| 0.940080131 | 0.22020917 | -1.0482887 | 0.525241968 | -1.08841863 | 0.094756216 |
| 0.786771795 | 0.00029775 | -1.0605432 | 0.24512286  | 0.838113291 | 0.006200932 |
| 0.93357124  | 0.16462294 | 0.80401642 | 0.071458798 | 0.934247082 | 0.169032904 |
| -1.00779778 | 0.83989171 | -1.0852656 | 0.212273321 | 0.901987181 | 0.009352525 |
| -1.2114728  | 0.01552677 | -1.1603784 | 0.028465972 | -1.17340805 | 0.041975132 |
| 0.939833363 | 0.61299976 | -1.0260227 | 0.745393022 | -1.15809866 | 0.234088185 |
| 0.967804056 | 0.58786998 | -1.1132971 | 0.192795656 | -1.04547117 | 0.462026896 |
| 0.999731552 | 0.99571588 | 0.96121059 | 0.522337093 | 0.977110167 | 0.643633409 |
| -1.00680727 | 0.88671258 | -1.0311902 | 0.677132221 | -1.19425578 | 0.000441015 |
| -1.0685931  | 0.51339069 | 0.99187633 | 0.867773697 | -1.04545715 | 0.66108305  |
| 0.882308305 | 0.03151097 | 0.74156308 | 0.008337762 | 0.8871585   | 0.039385601 |
| 0.877440042 | 0.10277593 | -1.0433589 | 0.64554818  | 0.955297321 | 0.563947303 |
| -1.06353619 | 0.22950634 | -1.0366762 | 0.377175049 | -1.02518203 | 0.625613226 |
| -1.10893813 | 0.06718656 | -1.0727416 | 0.164421611 | 0.939055943 | 0.260953924 |
| 0.961256496 | 0.35551339 | 0.97974403 | 0.742553589 | -1.36575778 | 1.15E-09    |
| 0.967664803 | 0.52563917 | 0.81589434 | 0.000111636 | -1.01517946 | 0.770796988 |
| 0.885925303 | 0.09471938 | 0.80070236 | 3.51063E-07 | 0.839545129 | 0.017307983 |
| 0.834047711 | 0.01688566 | -1.0833355 | 0.301645271 | 0.664522539 | 8.90E-07    |
| 0.945324102 | 0.37629129 | -1.0839153 | 0.511649272 | 0.952891087 | 0.447236334 |
| 0.941828551 | 0.24406516 | 0.92055465 | 0.173588651 | -1.00384897 | 0.94009984  |
| 0.940621248 | 0.18820238 | -1.0221797 | 0.661150572 | 0.954538786 | 0.315570843 |
| -1.21226652 | 0.0009961  | -1.0334166 | 0.490954575 | -1.23203425 | 0.000401654 |
| 0.877608703 | 0.01198377 | 0.99645446 | 0.972031509 | 0.986775032 | 0.791837947 |
| -1.05341733 | 0.26013762 | 0.88560922 | 0.03670612  | -1.10824234 | 0.028730751 |
| -1.08686843 | 0.25675204 | 0.86397234 | 0.068915195 | -1.00166132 | 0.981860463 |
| 0.965616028 | 0.67525341 | -1.0353908 | 0.495506141 | -1.26761358 | 0.006106415 |
| -1.04852959 | 0.21749474 | -1.0464146 | 0.415989941 | -1.02748728 | 0.478292908 |
| 0.963813944 | 0.54598626 | 0.98140002 | 0.659661961 | 0.856079462 | 0.013254234 |
| -1.08768925 | 0.24407893 | -1.0225431 | 0.666549016 | 0.864761298 | 0.046703655 |
| 0.970721785 | 0.56056689 | 0.93324383 | 0.336251936 | 0.716968163 | 2.21E-08    |
| -1.06890878 | 0.02613836 | 0.74279495 | 0.00017099  | -1.04983776 | 0.100844469 |
| -1.01478276 | 0.80357359 | 0.94587675 | 0.381236443 | 0.946098343 | 0.349500447 |
| 0.959388978 | 0.60853924 | 0.94173613 | 0.243303626 | -1.14741152 | 0.093277772 |
| -1.04703183 | 0.35276342 | 0.99137435 | 0.851095099 | 0.722587516 | 1.71E-08    |
| 0.92649417  | 0.14297608 | -1.291128  | 2.421E-05   | -1.03265729 | 0.534150783 |
| 0.750447735 | 0.00018762 | 0.88244097 | 0.015838243 | 0.650740123 | 1.71E-07    |
| 0.885314249 | 0.05118284 | -1.091755  | 0.060197719 | 0.829741753 | 0.003491084 |
| 0.915213083 | 0.21471418 | -1.0887101 | 0.247326924 | 0.820349698 | 0.006969454 |
| -1.01811574 | 0.76875687 | -1.0405461 | 0.634223774 | 0.828779249 | 0.003161066 |
| -1.1270181  | 0.08350755 | 0.99414858 | 0.877766322 | 0.87954075  | 0.063756429 |
| 0.960350897 | 0.48135493 | 0.9783927  | 0.720160001 | 0.97987464  | 0.722993907 |
| -1.15708719 | 0.02692555 | -1.1022377 | 0.178273807 | 0.922403512 | 0.213322519 |
| 0.93127924  | 0.36528652 | 0.97427862 | 0.609663719 | -1.20738076 | 0.019085665 |



|             |            |            |             |             |             |
|-------------|------------|------------|-------------|-------------|-------------|
| 0.882127658 | 0.05339813 | -1.0114146 | 0.698371371 | -1.02197343 | 0.73345248  |
| -1.03448569 | 0.50494459 | 0.89326743 | 0.059852023 | 0.87103866  | 0.008470125 |
| 0.779546223 | 0.00285844 | -1.0412315 | 0.617664448 | 0.779135998 | 0.002804705 |
| -1.0506562  | 0.77094592 | -1.0041173 | 0.933524954 | 0.953537576 | 0.779236431 |
| -1.0793112  | 0.17605988 | -1.0850761 | 0.117746827 | -1.14778692 | 0.016470691 |
| -1.23820276 | 0.02100485 | 0.69223468 | 3.9369E-06  | 0.981002938 | 0.831778108 |
| 0.785411203 | 0.03132397 | 0.82648002 | 0.00290473  | 0.946182786 | 0.614684585 |
| 0.908834841 | 0.02519997 | 0.8806205  | 0.077229902 | 0.915678542 | 0.038470249 |
| -1.03578525 | 0.71003284 | 0.87083263 | 0.026841907 | 0.968143745 | 0.732054933 |
| -1.16462982 | 0.00243799 | 0.98189968 | 0.788660959 | -1.14520573 | 0.006532343 |
| 0.643116241 | 0.00172056 | -1.0195674 | 0.735456322 | 0.829438065 | 0.167817294 |
| -1.03594751 | 0.58249045 | 0.90395387 | 0.121256194 | 0.89223662  | 0.079790064 |
| -1.31064866 | 2.38E-05   | -1.0083085 | 0.91588662  | -1.28516591 | 7.45E-05    |
| -1.13100546 | 0.13619685 | -1.0988733 | 0.143421878 | -1.13371382 | 0.128902965 |
| 0.943721526 | 0.56093485 | 0.80857157 | 9.89953E-05 | 0.899260083 | 0.288267425 |
| -1.15210626 | 0.23571753 | 0.8712241  | 0.089298005 | 0.877812221 | 0.274622514 |
| -1.19878769 | 0.03529401 | -1.0641455 | 0.714204995 | -1.19724701 | 0.036560617 |
| -1.15962769 | 0.14617138 | -1.0039129 | 0.944331281 | -1.07405404 | 0.479974066 |
| -1.04979157 | 0.62737864 | 0.94735682 | 0.549796382 | 0.890377735 | 0.248525416 |
| 0.895765811 | 0.36436428 | 0.73876481 | 0.007655963 | 0.709609914 | 0.006173264 |
| -1.03008596 | 0.62008078 | 0.86875103 | 0.001320199 | 0.866810863 | 0.019683985 |
| 0.860106401 | 0.12537283 | -1.0109915 | 0.907915938 | 0.453583397 | 5.55E-11    |
| -1.0262532  | 0.78304017 | 0.9805531  | 0.683482528 | 0.969088006 | 0.7386894   |
| -1.02486875 | 0.65099117 | 0.94113315 | 0.651941073 | 0.736280745 | 5.84E-07    |
| 0.939555057 | 0.30346855 | 0.96910396 | 0.625073757 | -1.02857253 | 0.640641666 |
| -1.25063752 | 0.0719786  | -1.1672755 | 0.010661295 | -1.3685806  | 0.0128128   |
| 0.99772916  | 0.97837267 | 0.97300637 | 0.737976689 | 0.977220898 | 0.78356835  |
| 0.942149452 | 0.35093785 | -1.0667392 | 0.516802929 | -1.03092815 | 0.632495368 |
| -1.12132667 | 0.06768715 | 0.97387486 | 0.823447344 | -1.03189051 | 0.61130046  |
| -1.04948423 | 0.47164863 | -1.0478367 | 0.580134718 | 0.868467399 | 0.038943198 |
| 0.974229134 | 0.62736966 | -1.3542105 | 0.003875748 | 0.950855071 | 0.350226497 |
| -1.25728551 | 5.07E-05   | -1.0786258 | 0.450298649 | -1.01335975 | 0.799381037 |
| -1.05023405 | 0.36788955 | -1.0620137 | 0.619085013 | -1.11856808 | 0.042700535 |
| 0.801296267 | 0.01326937 | 0.81446358 | 0.001092442 | 0.878181819 | 0.138955499 |
| -1.01580975 | 0.80019537 | 0.67906195 | 0.000196209 | 0.765305357 | 6.40E-05    |
| 0.845742472 | 0.01579786 | 0.96462294 | 0.702024502 | 0.993359412 | 0.921404832 |
| -1.10216669 | 0.222177   | 0.73787367 | 6.76097E-07 | -1.25613473 | 0.005468516 |
| -1.06301757 | 0.32737    | -1.1295512 | 0.047324395 | -1.2765272  | 0.000230521 |
| 0.957842486 | 0.41399494 | -1.2731136 | 0.052650054 | 0.920559829 | 0.119498529 |
| -1.09983364 | 0.14608196 | 0.95608775 | 0.592819813 | -1.22962206 | 0.002283626 |
| 0.60173688  | 6.35E-11   | -1.0262174 | 0.684423233 | 0.451321243 | 7.55E-18    |
| 0.97633516  | 0.55898313 | 0.93386132 | 0.270116584 | 0.926060041 | 0.064706222 |
| 0.830568621 | 0.00662898 | 0.9806683  | 0.770657303 | 0.496389912 | 7.44E-15    |
| -1.07629084 | 0.37336907 | 0.87350121 | 0.014408186 | 0.90825912  | 0.245223717 |

|             |            |            |             |             |             |
|-------------|------------|------------|-------------|-------------|-------------|
| -1.1080867  | 0.34011018 | -1.07728   | 0.157767939 | -1.12038271 | 0.291195536 |
| -1.08316593 | 0.05084612 | -1.0820963 | 0.149620923 | -1.25732023 | 4.77E-07    |
| 0.950162043 | 0.51499411 | 0.90448515 | 0.250871337 | 0.925976206 | 0.328562342 |
| -1.02268502 | 0.67241352 | 0.98420052 | 0.797212127 | -1.06012319 | 0.273388554 |
| -1.15488582 | 0.06193849 | -1.0598225 | 0.391191721 | -1.11460942 | 0.156641982 |
| -1.07767427 | 0.2774968  | -1.1551169 | 0.07267746  | -1.08315268 | 0.246586955 |
| -1.02138482 | 0.65882234 | -1.090247  | 0.168002803 | 0.708455418 | 1.79E-09    |
| 0.984366024 | 0.68506168 | -1.0168564 | 0.750582451 | -1.02586481 | 0.511552602 |
| -1.13675751 | 0.16379979 | -1.0599424 | 0.37093464  | -1.21204864 | 0.038818147 |
| 0.862431172 | 0.09673731 | 0.87534124 | 0.037658181 | -1.16188784 | 0.092327208 |
| 0.801302749 | 0.26767202 | 0.99275794 | 0.85903372  | 0.953392848 | 0.810217317 |
| 0.971178052 | 0.63102945 | 0.64477549 | 1.41378E-08 | 0.714079626 | 8.64E-07    |
| -1.03098865 | 0.58432729 | -1.0166303 | 0.841160018 | -1.14687434 | 0.016659112 |
| 0.919910563 | 0.13306935 | -1.0522507 | 0.634849034 | 0.958044913 | 0.437003323 |
| 0.761720598 | 0.0002977  | -1.0970734 | 0.024376446 | 0.499258638 | 1.14E-13    |
| -1.04652561 | 0.45388008 | -1.078204  | 0.338700054 | 0.889487905 | 0.057289856 |
| 0.843044485 | 0.03531999 | 0.97654554 | 0.654627782 | 0.687484679 | 1.62E-05    |
| -1.48661439 | 0.00016803 | -1.2410308 | 0.006039385 | -1.11860006 | 0.257811549 |
| -1.08832858 | 0.13497006 | 0.94614577 | 0.42043924  | 0.764287665 | 1.22E-05    |
| 0.712071983 | 5.25E-06   | 0.98590742 | 0.76698912  | 0.50934865  | 6.12E-14    |
| -1.01890634 | 0.63603174 | 0.8494659  | 9.41422E-05 | 0.911677199 | 0.022491938 |
| -1.09102979 | 0.08029691 | -1.1713841 | 0.087200237 | 0.91830251  | 0.08689845  |
| -1.05636179 | 0.42699504 | -1.0530366 | 0.557482072 | -1.22709469 | 0.004234754 |
| -1.0707804  | 0.14981754 | 0.95711518 | 0.825443828 | -1.15021626 | 0.00420457  |
| -1.11082119 | 0.1497884  | 0.92211791 | 0.186143583 | -1.12378654 | 0.110547562 |
| -1.07150033 | 0.13685326 | -1.0339549 | 0.54956567  | -1.16018874 | 0.001999899 |
| 0.980221592 | 0.73316619 | 0.97092073 | 0.591985692 | 0.532250793 | 4.28E-15    |
| -1.09270098 | 0.28314469 | 0.82058463 | 0.006878827 | -1.10858459 | 0.212893909 |
| -1.23638083 | 0.0073237  | -1.0395831 | 0.522303909 | 0.937349543 | 0.399066269 |
| -1.20632659 | 0.00156659 | 0.89713094 | 0.175508879 | 0.97545843  | 0.660716413 |
| 0.893108874 | 0.12155643 | -1.1395504 | 0.188134849 | 0.884025696 | 0.092036034 |
| 0.87183083  | 0.07486029 | 0.78743141 | 7.63021E-05 | 0.748124585 | 0.000323439 |
| -1.02598689 | 0.67304486 | -1.0115614 | 0.86463924  | 0.712790464 | 7.55E-07    |
| -1.01821621 | 0.75233203 | 0.98489859 | 0.700517946 | 0.946579198 | 0.339057057 |
| -1.20829877 | 0.01688261 | 0.92341415 | 0.108885253 | -1.22353533 | 0.011131743 |
| -1.05728069 | 0.42964234 | 0.91641312 | 0.208070868 | 0.924298606 | 0.265714293 |
| -1.21593866 | 7.30E-05   | -1.0334016 | 0.485732244 | -1.00752935 | 0.869644544 |
| -1.02893454 | 0.77395128 | -1.0505475 | 0.495925795 | 0.873942959 | 0.17839451  |
| -1.09113261 | 0.0689352  | -1.1002086 | 0.041520546 | -1.04882368 | 0.314908457 |
| -1.15659842 | 0.00235349 | -1.0411865 | 0.491680895 | -1.10969439 | 0.026309502 |
| 0.744224772 | 4.01E-06   | -1.1121604 | 0.199150971 | 0.68200122  | 1.55E-08    |
| 0.97210638  | 0.6119045  | -1.0812493 | 0.309326105 | -1.08634663 | 0.141021085 |
| -1.04563731 | 0.37317424 | 0.99790316 | 0.97039575  | 0.97214432  | 0.572060289 |
| -1.06772828 | 0.36166506 | 0.93849971 | 0.381015507 | -1.02649077 | 0.715007258 |

|             |            |            |             |             |             |
|-------------|------------|------------|-------------|-------------|-------------|
| 0.779681671 | 0.0052435  | 0.82128203 | 0.011779697 | 0.741112871 | 0.000933601 |
| -1.2731191  | 1.06E-05   | 0.99429615 | 0.924981875 | -1.30005085 | 2.38E-06    |
| 0.957268227 | 0.33237138 | 0.97753464 | 0.691308836 | -1.01681119 | 0.710307918 |
| -1.00740417 | 0.95336145 | -1.2385636 | 0.00730827  | -1.03909814 | 0.76116785  |
| -1.18341456 | 0.02787624 | -1.1051584 | 0.158916675 | -1.03380303 | 0.657228972 |
| 0.843236244 | 0.00014552 | -1.1027228 | 0.036119634 | 0.824686265 | 2.41E-05    |
| -1.17594623 | 0.00079873 | 0.82277659 | 0.053525681 | -1.08517646 | 0.078623741 |
| -1.0222773  | 0.82413201 | -1.0908321 | 0.069789485 | -1.01438756 | 0.885417251 |
| -1.00477399 | 0.91664535 | -1.0948785 | 0.05173284  | 0.898140566 | 0.021314223 |
| -1.08528113 | 0.39752864 | 0.84072992 | 0.003908763 | 0.999472204 | 0.995630699 |
| -1.14227757 | 0.07903376 | 0.94810032 | 0.340652572 | -1.6057499  | 4.37E-08    |
| -1.04357084 | 0.51329102 | 0.93642078 | 0.191802948 | -1.12863428 | 0.067335065 |
| -1.15184445 | 0.0222945  | 0.98758391 | 0.861420925 | -1.2682864  | 0.000224751 |
| 0.977902586 | 0.76364688 | 0.86684747 | 0.100516134 | 0.85296854  | 0.036000559 |
| -1.10038187 | 0.15323585 | -1.1478382 | 0.007579709 | -1.03425031 | 0.612120547 |
| 0.999085726 | 0.98905036 | 0.91403473 | 0.049107084 | -1.03881333 | 0.568369971 |
| 0.959162818 | 0.52774005 | 0.97010527 | 0.80989054  | -1.11785727 | 0.095223582 |
| 0.992093916 | 0.87142328 | -1.1657013 | 0.044462433 | 0.957023448 | 0.372141482 |
| -1.0451121  | 0.54966238 | 0.83133805 | 4.66419E-05 | -1.12368277 | 0.117450377 |
| 0.905291007 | 0.18828397 | -1.1094998 | 0.026664386 | 0.873256046 | 0.075089257 |
| -1.02486456 | 0.49740831 | 0.93574084 | 0.503711836 | 0.937637905 | 0.078898306 |
| 0.985062305 | 0.7839201  | 0.92202503 | 0.078701723 | 0.843600189 | 0.002957048 |
| 0.990991764 | 0.88683996 | -1.1201622 | 0.242210657 | 0.980394205 | 0.755597039 |
| 0.974063627 | 0.40944791 | -1.3188521 | 0.000470688 | 0.976801289 | 0.460974653 |
| 0.961665978 | 0.45504317 | -1.0888221 | 0.194737694 | 0.892122169 | 0.03231762  |
| 0.941949183 | 0.13221903 | -1.1672951 | 0.012806147 | 0.917954422 | 0.033025792 |
| -1.00069387 | 0.98467127 | 0.83946519 | 0.021581864 | 0.947900522 | 0.142348158 |
| -1.03899536 | 0.46198667 | -1.0625141 | 0.362543132 | -1.04995193 | 0.34936804  |
| -1.10591674 | 0.00602438 | 0.99540769 | 0.944942783 | 0.966971    | 0.344294145 |
| -1.06424018 | 0.14674008 | -1.0192121 | 0.772861973 | 0.895677784 | 0.011844903 |
| -1.07610876 | 0.23997396 | -1.0088551 | 0.857340625 | 0.949242288 | 0.402507857 |
| -1.07135755 | 0.29664459 | -1.0933858 | 0.228475259 | 0.917789734 | 0.195200824 |
| -1.02398404 | 0.57217192 | 0.93927668 | 0.405171368 | -1.06833991 | 0.118796248 |
| -1.00445677 | 0.94320085 | -1.0083369 | 0.818229287 | 0.967125945 | 0.592753149 |
| 0.894862023 | 0.0347037  | 0.73664559 | 7.62197E-07 | 0.950938378 | 0.330854172 |
| 0.982664451 | 0.64413969 | 0.99799413 | 0.974808161 | 0.977840345 | 0.554164987 |
| 0.891545733 | 0.03704439 | 0.99142212 | 0.786247271 | 0.920130139 | 0.126866213 |
| -1.02023385 | 0.60281621 | -1.0565288 | 0.294524672 | 0.981344032 | 0.624654954 |
| 0.965204921 | 0.44500024 | -1.0061694 | 0.875666425 | -1.06790403 | 0.159258785 |
| -1.05065045 | 0.20379187 | 0.90927993 | 0.010650177 | -1.02616006 | 0.504222389 |
| -1.05710327 | 0.22997439 | -1.1201001 | 0.032387173 | -1.01415088 | 0.759845427 |
| 0.987876061 | 0.78553161 | 0.99681296 | 0.928082615 | 0.968222398 | 0.47219342  |
| -1.09612888 | 0.22967543 | 0.93302282 | 0.106954288 | -1.04350894 | 0.575249349 |
| -1.22050551 | 0.00131913 | -1.020805  | 0.740006656 | -1.31997185 | 1.72E-05    |

|             |            |             |             |             |             |
|-------------|------------|-------------|-------------|-------------|-------------|
| 0.899514494 | 0.09038611 | 0.98632318  | 0.834022324 | 0.632450227 | 7.65E-10    |
| -1.09104688 | 0.31392848 | -1.09666666 | 0.031191738 | -1.18378251 | 0.054218055 |
| -1.23628239 | 0.01093439 | 0.99019306  | 0.874546    | -1.12115049 | 0.160988472 |
| -1.10990066 | 0.07298122 | -1.0587556  | 0.270370819 | -1.19200737 | 0.003255668 |
| -1.12378692 | 0.09861961 | -1.0083359  | 0.826305261 | -1.14888917 | 0.050691891 |
| -1.26063448 | 0.00177487 | -1.0612691  | 0.272908048 | 0.818209995 | 0.006193402 |
| 0.965230254 | 0.29564809 | -1.0192209  | 0.620874809 | 0.967873685 | 0.334183521 |
| -1.34201946 | 0.00026388 | 0.98796791  | 0.793554694 | -1.28452993 | 0.001597237 |
| 0.837468346 | 0.00029759 | 0.98993494  | 0.793252971 | 0.866796639 | 0.002921244 |
| 0.862140817 | 0.03853237 | 0.96053684  | 0.382587623 | 0.912846712 | 0.197786739 |
| -1.08648813 | 0.32936062 | 0.96362987  | 0.409865616 | 0.84835082  | 0.056213199 |
| -1.32720816 | 0.00874292 | 0.99135245  | 0.908896089 | -1.13363958 | 0.233130579 |
| 0.977566699 | 0.75490169 | -1.1220287  | 0.05537155  | -1.06386572 | 0.395695018 |
| -1.55214978 | 0.0001064  | 0.77152277  | 9.35645E-05 | -1.71559273 | 3.98E-06    |
| 0.983695512 | 0.87731507 | 0.96100506  | 0.644507329 | 0.806743639 | 0.047717817 |
| -1.02990931 | 0.47803181 | -1.2438788  | 0.008953708 | 0.94790683  | 0.200180715 |
| -1.13147717 | 0.16380142 | -1.0666132  | 0.263043856 | -1.14714249 | 0.122555021 |
| 0.992462282 | 0.90626717 | -1.1381331  | 0.067873182 | 0.969510675 | 0.630251167 |
| 0.840857635 | 0.000253   | 0.88372084  | 0.084829508 | 0.605489229 | 7.12E-16    |
| 0.88655477  | 0.05793481 | -1.0274097  | 0.42323574  | 0.942967749 | 0.348909418 |
| -1.02774007 | 0.61865936 | -1.1387088  | 0.090259345 | 0.616790815 | 4.68E-12    |
| -1.09617974 | 0.09894592 | -1.064214   | 0.1802324   | -1.01670542 | 0.763113109 |
| -1.04356367 | 0.54050594 | 0.78725434  | 0.001201137 | -1.19910777 | 0.011321986 |
| -1.03921938 | 0.36759147 | 0.93891169  | 0.45772287  | -1.03896349 | 0.370642862 |
| -1.01335132 | 0.83225787 | -1.3080936  | 0.012584459 | -1.02070365 | 0.743546147 |
| 0.858710942 | 0.00111439 | -1.0230115  | 0.754254825 | 0.950554478 | 0.256438079 |
| 0.843661003 | 0.03942922 | -1.2084489  | 0.077106124 | 0.6088361   | 9.58E-08    |
| 0.988969547 | 0.90674588 | 0.96017263  | 0.702874172 | 0.770716398 | 0.007817479 |
| -1.06551895 | 0.54760923 | 0.92724048  | 0.072594877 | 0.760994906 | 0.011875728 |
| 0.940249729 | 0.27878761 | -1.2208141  | 0.026592161 | 0.934263874 | 0.232518732 |
| -1.35094215 | 0.00011811 | 0.93338983  | 0.285935676 | -1.29279321 | 0.000820771 |
| -1.04497347 | 0.60297219 | 0.99504267  | 0.910931849 | 0.911477556 | 0.275203038 |
| 0.990859714 | 0.89329155 | -1.0067198  | 0.914578175 | 0.82822478  | 0.00775905  |
| 0.935265388 | 0.36776499 | -1.0152801  | 0.782484908 | -1.16479389 | 0.043243527 |
| -1.11160221 | 0.04401046 | -1.1174343  | 0.047301279 | -1.04058553 | 0.441414459 |
| -1.21883558 | 0.04139305 | -1.127262   | 0.089292807 | -1.16758373 | 0.10766573  |
| 0.84052172  | 0.1247955  | 0.92690451  | 0.078630403 | 0.778862393 | 0.029038089 |
| -1.26466729 | 0.02317668 | -1.1584726  | 0.021907878 | -1.38881686 | 0.00188359  |
| -1.02991889 | 0.6383598  | 0.90107697  | 0.02214401  | -1.19896431 | 0.005259515 |
| 0.974364676 | 0.85575476 | 0.73891166  | 0.000424748 | 0.835438608 | 0.211475239 |
| -1.03205101 | 0.59585705 | 0.93345486  | 0.468124368 | -1.15470681 | 0.018349825 |
| -1.27535648 | 0.00010153 | 0.91400689  | 0.395003398 | -1.26277308 | 0.0001783   |
| -1.13454097 | 0.05522552 | 0.92231775  | 0.15678305  | -1.03358316 | 0.610169744 |
| -1.09526926 | 0.13021988 | -1.281374   | 0.00119135  | -1.44782153 | 6.93E-08    |

|             |            |            |             |             |             |
|-------------|------------|------------|-------------|-------------|-------------|
| 0.950362419 | 0.34351773 | 0.9525804  | 0.565810647 | -1.03600054 | 0.50959763  |
| 0.854502432 | 0.01967928 | 0.89965605 | 0.126519718 | 0.966281759 | 0.602080466 |
| 0.834132279 | 0.05675524 | -1.0762796 | 0.322898166 | 0.783007692 | 0.011227653 |
| 0.97336548  | 0.59293308 | 0.9184422  | 0.103049612 | -1.20245323 | 0.000554127 |
| -1.00521518 | 0.97566015 | -1.1329923 | 0.192921445 | 0.819248207 | 0.245237924 |
| 0.959016845 | 0.48720551 | 0.59973894 | 2.7218E-05  | 0.847611919 | 0.007808161 |
| 0.855387455 | 0.04359354 | -1.2557724 | 0.027431214 | 0.898061795 | 0.160633755 |
| -1.0003495  | 0.99581772 | -1.0299041 | 0.638523096 | -1.07870735 | 0.258612065 |
| -1.03545087 | 0.45441868 | 0.90730888 | 0.496814246 | 0.971635109 | 0.536303913 |
| -1.0092096  | 0.85100718 | -1.0459752 | 0.450463473 | 0.971064706 | 0.548048573 |
| 0.934760829 | 0.09881188 | -1.1221326 | 0.051762347 | 0.977601946 | 0.575084639 |
| -1.02250276 | 0.66826971 | -1.2089174 | 0.004759036 | 0.884236206 | 0.020781071 |
| -1.13524191 | 0.01675727 | -1.2411955 | 0.000596916 | -1.13907923 | 0.014198507 |
| 0.981986032 | 0.55278538 | 0.89716211 | 0.046592598 | -1.0511449  | 0.107044698 |
| 0.87533584  | 0.00245836 | 0.85853005 | 0.023454026 | 0.899075706 | 0.014027951 |
| -1.0669786  | 0.26336147 | 0.95478917 | 0.621418312 | -1.00297063 | 0.95894653  |
| -1.14195878 | 0.11776555 | -1.0028377 | 0.955190072 | -1.2411752  | 0.012410009 |
| 0.992859984 | 0.84802001 | 0.84013752 | 0.309267775 | 0.961533701 | 0.296527529 |
| -1.17447359 | 0.00365785 | -1.1126661 | 0.079949776 | 0.913629077 | 0.093550817 |
| 0.89125484  | 0.17189556 | 0.90738681 | 0.20398586  | -1.26384832 | 0.006783166 |
| 0.924359944 | 0.43846814 | -1.0196607 | 0.770332527 | 0.73561615  | 0.003578828 |
| -1.06687067 | 0.45488308 | -1.0525067 | 0.273261066 | 0.937268022 | 0.454493407 |
| -1.06351485 | 0.25654987 | -1.0240732 | 0.626305003 | 0.954374973 | 0.388348945 |
| -1.10904298 | 0.45053343 | 0.96543516 | 0.385013743 | -1.00968858 | 0.943812216 |
| -1.03463121 | 0.63612465 | 0.93522828 | 0.200300103 | -1.17816738 | 0.025881381 |
| 0.950109509 | 0.4153926  | -1.1824067 | 0.001928788 | 0.962964503 | 0.547558941 |
| 0.919527002 | 0.31810425 | 0.93422544 | 0.029549564 | 0.856042885 | 0.067363662 |
| 0.943114226 | 0.28577145 | 0.92275363 | 0.060297454 | 0.925969632 | 0.162575986 |
| 0.747306626 | 3.88E-05   | -1.0485367 | 0.41226523  | 0.722351798 | 6.30E-06    |
| 0.979698653 | 0.74686254 | -1.2385295 | 0.013251109 | -1.43508209 | 4.97E-07    |
| 0.982083619 | 0.68131096 | -1.1188588 | 0.003884342 | 0.949901435 | 0.245617403 |
| 0.890328436 | 0.28363504 | 0.96018686 | 0.445928066 | 0.538916835 | 4.15E-07    |
| -1.07932054 | 0.10878224 | -1.1286383 | 0.151374211 | -1.03307374 | 0.489935369 |
| -1.15314094 | 0.01550093 | 0.95248209 | 0.630944378 | -1.2657484  | 0.000125502 |
| -1.18302104 | 0.22507288 | 0.93199679 | 0.416407024 | -1.24260863 | 0.118587795 |
| 0.927373679 | 0.42512897 | -1.0590415 | 0.290164061 | -1.07903953 | 0.421035114 |
| -1.19610206 | 0.04955927 | 0.86241564 | 0.281880108 | -1.0415951  | 0.649327288 |
| 0.979579657 | 0.71166163 | -1.1879339 | 0.019557368 | -1.12951794 | 0.032623293 |
| -1.19499615 | 0.00331666 | -1.0021795 | 0.97227569  | -1.09165298 | 0.136081088 |
| -1.03628658 | 0.5180368  | 0.71265256 | 0.000155905 | 0.963437122 | 0.499455779 |
| -1.05154275 | 0.59303101 | 0.94306088 | 0.285311376 | -1.02695326 | 0.777099976 |
| -1.04281829 | 0.71628487 | 0.99758096 | 0.970387198 | 0.816559243 | 0.083095004 |
| -1.2283571  | 0.0498999  | -1.0248657 | 0.699160264 | -1.3348839  | 0.006765828 |
| -1.04886911 | 0.35289101 | 0.89859685 | 0.017930933 | -1.01453039 | 0.778006258 |

|             |            |            |             |             |             |
|-------------|------------|------------|-------------|-------------|-------------|
| 0.939014014 | 0.11138326 | 0.82679996 | 0.08186917  | 0.990510955 | 0.807190531 |
| 0.969007157 | 0.59538359 | 0.97479001 | 0.587656259 | 0.973012518 | 0.644352518 |
| -1.07292305 | 0.25938556 | -1.2015311 | 0.002168886 | 0.945176468 | 0.365257352 |
| -1.05940378 | 0.31820562 | -1.1549022 | 0.297683982 | 0.909502782 | 0.103527574 |
| -1.05957747 | 0.3418338  | 0.95422342 | 0.619500016 | -1.00659174 | 0.91370133  |
| -1.02613823 | 0.49971865 | -1.2364302 | 0.020832793 | -1.05075716 | 0.197825011 |
| 0.932569438 | 0.12486485 | -1.14391   | 0.018865999 | -1.22879837 | 2.61E-05    |
| 0.967001087 | 0.63955415 | -1.1008325 | 0.103201568 | 0.95460749  | 0.517151033 |
| -1.47533265 | 0.00197966 | 0.86238762 | 0.009192321 | -1.2335599  | 0.084848061 |
| 0.9306737   | 0.33403834 | 0.90066577 | 0.268024136 | 0.549010762 | 6.25E-11    |
| -1.11692066 | 0.10680233 | 0.90867948 | 0.407711275 | 0.939047252 | 0.355054595 |
| 0.815725961 | 0.00017447 | -1.1769221 | 0.117963512 | 0.680356379 | 4.08E-10    |
| -1.13037958 | 0.22836097 | -1.0267313 | 0.606490503 | -1.38725739 | 0.001969267 |
| -1.00340887 | 0.96536668 | -1.0075455 | 0.847399098 | 0.85374363  | 0.04764856  |
| -1.00554766 | 0.92865387 | 0.79486999 | 0.000273624 | 0.928121256 | 0.23046651  |
| 0.870086018 | 0.08013221 | -1.0593296 | 0.354785299 | 0.89683839  | 0.168605503 |
| 0.919565975 | 0.20130668 | 0.98532509 | 0.797305156 | 0.885200079 | 0.065355957 |
| -1.25011708 | 0.01225579 | -1.0622571 | 0.321362044 | -1.0573848  | 0.519766001 |
| -1.36676493 | 5.56E-05   | 0.93270465 | 0.072089838 | -1.31782173 | 0.000299025 |
| -1.12945739 | 0.03777587 | -1.0379649 | 0.409017026 | -1.24983425 | 0.000268166 |
| -1.09101656 | 0.1856904  | -1.0296188 | 0.683658507 | 0.929870622 | 0.268120772 |
| -1.07166781 | 0.25217548 | -1.3204554 | 0.023881569 | 0.986708399 | 0.823782053 |
| -1.05426828 | 0.43850915 | 0.60099709 | 5.99058E-09 | 0.748476351 | 7.78E-05    |
| -1.05849079 | 0.71990518 | 0.94503178 | 0.405382723 | -1.22797268 | 0.198369755 |
| -1.0739214  | 0.39397665 | 0.88341388 | 0.017337045 | -1.41121485 | 0.0001193   |
| 0.849766837 | 0.005217   | -1.2974538 | 0.012359424 | 0.84177818  | 0.003248602 |
| -1.01168375 | 0.85058803 | -1.0505554 | 0.529935029 | 0.822848596 | 0.0024673   |
| 0.939607536 | 0.41756732 | 0.98445113 | 0.799833688 | 0.873638093 | 0.082131796 |
| -1.03884629 | 0.481753   | 0.75579238 | 0.000719778 | -1.01055507 | 0.84599451  |
| 0.966556507 | 0.5874818  | 0.77502157 | 0.000243347 | -1.12649446 | 0.06133857  |
| -1.05111856 | 0.55527433 | -1.0165505 | 0.849540316 | -1.15364687 | 0.09458601  |
| 0.840665782 | 0.03854139 | -1.250489  | 0.00280326  | -1.12924809 | 0.143244797 |
| -1.02424558 | 0.73046303 | -1.0290145 | 0.618817317 | -1.37855267 | 2.28E-05    |
| -1.07385127 | 0.07786244 | -1.0126294 | 0.847570026 | -1.05794509 | 0.16106275  |
| 0.874604741 | 0.04589621 | -1.0058471 | 0.922691826 | -1.01875769 | 0.777897871 |
| -1.11451538 | 0.15486571 | -1.0621326 | 0.377282543 | -1.12976755 | 0.110285222 |
| 0.906672341 | 0.24499012 | -1.1640375 | 0.339748153 | 0.93539143  | 0.426466988 |
| 0.809103404 | 0.00639076 | -1.151807  | 0.094356776 | 0.815188659 | 0.008371823 |
| 0.935635154 | 0.21652954 | 0.92731098 | 0.18264898  | -1.08808251 | 0.118443964 |
| -1.49452531 | 1.74E-05   | 0.94872465 | 0.39487477  | -1.28362783 | 0.004947093 |
| 0.865281629 | 0.09622687 | -1.0551529 | 0.484432227 | -1.04665518 | 0.595846543 |
| -1.02720892 | 0.72883692 | 0.98111854 | 0.724479364 | -1.22922095 | 0.00978021  |
| 0.973982419 | 0.74180234 | 0.9794224  | 0.739973845 | -1.01109467 | 0.890277185 |
| -1.05493113 | 0.67532544 | -1.0290116 | 0.734800258 | -1.07164882 | 0.58802459  |

|             |            |            |             |             |             |
|-------------|------------|------------|-------------|-------------|-------------|
| -1.01174621 | 0.74655372 | 0.93338524 | 0.403230525 | 0.980229814 | 0.580873767 |
| -1.0752535  | 0.34827242 | -1.1809729 | 0.019673542 | 0.729736198 | 0.0001368   |
| 0.972237974 | 0.86233026 | -1.032242  | 0.426887088 | 0.603709259 | 0.002882376 |
| -1.04741934 | 0.59682963 | 0.96390885 | 0.577321736 | 0.997232682 | 0.974726363 |
| -1.08183373 | 0.32370918 | -1.0565932 | 0.466977343 | 0.943753912 | 0.466719955 |
| -1.16461833 | 0.02125937 | 0.92763321 | 0.371472193 | 0.974934895 | 0.694208193 |
| -1.08980472 | 0.1499115  | 0.86816557 | 0.063587157 | -1.07653044 | 0.215783591 |
| 0.996300395 | 0.94785522 | -1.0168726 | 0.754357714 | -1.01656421 | 0.771990737 |
| 0.984956511 | 0.81355576 | -1.2839651 | 0.004905014 | 0.835645715 | 0.006948283 |
| -1.03347216 | 0.76909004 | 0.98084562 | 0.821826822 | -1.0622857  | 0.590411095 |
| 0.961958511 | 0.71945253 | -1.0597586 | 0.454472218 | -1.10987844 | 0.336106257 |
| -1.13202568 | 0.11521845 | -1.0695003 | 0.40236277  | -1.10343938 | 0.209244648 |
| -1.05127544 | 0.3734853  | 0.9737865  | 0.835082765 | 0.969827605 | 0.584696489 |
| -1.06895047 | 0.24797736 | 0.94252552 | 0.105480953 | -1.03203369 | 0.583013688 |
| -1.07172296 | 0.17889447 | 0.82321739 | 0.01412295  | 0.949071025 | 0.308656002 |
| 0.980656411 | 0.72793323 | 0.40219166 | 6.58734E-07 | 0.906640817 | 0.085030596 |
| 0.976333923 | 0.60599069 | 0.99282783 | 0.934417077 | 0.99684177  | 0.9456204   |
| -1.0935149  | 0.08356652 | 0.97152411 | 0.715938898 | 0.944045854 | 0.261148564 |
| 0.987495306 | 0.84861859 | 0.86016536 | 0.022728567 | 0.904536554 | 0.132059093 |
| -1.02143808 | 0.61978309 | -1.0864231 | 0.164905902 | -1.21072017 | 3.70E-05    |
| 0.84199758  | 0.11131653 | 0.91748471 | 0.132710827 | -1.00065251 | 0.995123275 |
| 0.978178645 | 0.58917408 | 0.84846354 | 0.013001228 | 0.986533964 | 0.7397916   |
| -1.01290446 | 0.86040564 | 0.80828754 | 0.061831374 | -1.06532588 | 0.387039104 |
| -1.02059927 | 0.67070368 | 0.92362439 | 0.462710038 | -1.02732141 | 0.574306395 |
| -1.21327482 | 0.01897551 | -1.0653643 | 0.417249078 | 0.808180277 | 0.010146433 |
| -1.11518374 | 0.09755468 | -1.0075892 | 0.892571141 | -1.06143782 | 0.360531398 |
| 0.938438311 | 0.29283164 | -1.0004612 | 0.993584906 | 0.92812899  | 0.217794331 |
| 0.968757656 | 0.53438533 | 0.94401788 | 0.262348556 | -1.23313087 | 0.000128193 |
| -1.15248132 | 0.01511525 | 0.94134563 | 0.284031066 | -1.13398275 | 0.030379268 |
| 0.979970634 | 0.68468833 | 0.9439118  | 0.216547123 | 0.989023288 | 0.82459149  |
| 0.878212087 | 0.10974835 | -1.0482999 | 0.356370206 | -1.01825007 | 0.821688424 |
| 0.999577163 | 0.99571865 | 0.84959493 | 0.016128068 | -1.13953969 | 0.101733801 |
| -1.01113616 | 0.8809888  | 0.92430637 | 0.069549423 | -1.11132567 | 0.157439323 |
| 0.992502742 | 0.93014422 | 0.6672669  | 0.000361461 | -1.00185554 | 0.982770526 |
| 0.983035751 | 0.64672207 | -1.0533739 | 0.205894093 | -1.02571457 | 0.496943648 |
| 0.937833609 | 0.28331533 | -1.0031717 | 0.965352419 | -1.04323637 | 0.477873761 |
| -1.17483343 | 0.14754144 | 0.98577456 | 0.765020361 | -1.06602766 | 0.562247939 |
| -1.14125576 | 0.08781657 | 0.9205883  | 0.305113436 | -1.05914364 | 0.452867379 |
| 0.878866965 | 0.07785008 | -1.0577603 | 0.388957559 | 0.916802813 | 0.231825742 |
| -1.04376935 | 0.33494364 | 0.91764662 | 0.156534407 | -1.00305648 | 0.944998128 |
| -1.04149182 | 0.41094926 | -1.0900796 | 0.095051114 | -1.22924647 | 9.88E-05    |
| -1.02817396 | 0.77783534 | -1.0689765 | 0.243281188 | 0.884875966 | 0.2173558   |
| 0.991698012 | 0.87911556 | -1.0212979 | 0.672341412 | 0.983870605 | 0.766797008 |
| 0.976785893 | 0.81106838 | 0.91520236 | 0.272103318 | -1.06236242 | 0.538710659 |

|             |            |            |             |             |             |
|-------------|------------|------------|-------------|-------------|-------------|
| -1.0964848  | 0.25264097 | 0.97845583 | 0.782370002 | -1.26851889 | 0.004251033 |
| -1.08137388 | 0.16709473 | 0.93384296 | 0.35666915  | -1.06616926 | 0.256439142 |
| -1.06072612 | 0.25662048 | 0.83752369 | 0.042785289 | -1.13835145 | 0.014733455 |
| 0.980974458 | 0.76532515 | 0.9555503  | 0.225984338 | 0.973509828 | 0.676658427 |
| -1.03328156 | 0.53994109 | -1.1406103 | 0.030555867 | 0.935374694 | 0.213575138 |
| -1.20861919 | 0.09907967 | -1.215836  | 0.08035075  | -1.65477493 | 4.21E-05    |
| 0.703095678 | 2.65E-08   | -1.0677592 | 0.392109674 | 0.832837075 | 0.001358991 |
| -1.10565677 | 0.06004408 | 0.80885011 | 0.004654898 | -1.27584909 | 2.13E-05    |
| -1.55559609 | 3.33E-06   | -1.0206589 | 0.644222371 | -1.5395185  | 5.14E-06    |
| -1.15410435 | 0.00149484 | -1.120682  | 0.024030512 | -1.12969725 | 0.006215995 |
| -1.03097185 | 0.61380023 | 0.95391916 | 0.632135376 | -1.10218759 | 0.111260644 |
| 0.993287637 | 0.92097271 | 0.97410155 | 0.632475746 | 0.679877683 | 5.04E-07    |
| 0.971328812 | 0.5705215  | -1.1424986 | 0.178725149 | 0.968164104 | 0.528237938 |
| -1.01054851 | 0.89104515 | 0.91811867 | 0.288284953 | -1.26994801 | 0.002790686 |
| -1.13354567 | 0.14508604 | 0.99598714 | 0.942880256 | 0.884870573 | 0.15488635  |
| -1.13040572 | 0.18692974 | -1.1027939 | 0.06239956  | -1.20440812 | 0.047501343 |
| -1.0282374  | 0.38374433 | 0.83271863 | 0.006038332 | -1.04606292 | 0.161314151 |
| -1.3690765  | 0.02048938 | -1.0188844 | 0.725855603 | 0.883665123 | 0.351335449 |
| -1.02605827 | 0.77842839 | -1.5722664 | 0.000190025 | -1.14237338 | 0.149236323 |
| -1.10930281 | 0.06871679 | 0.91519903 | 0.107427539 | 0.977991397 | 0.691822541 |
| -1.24541468 | 0.00273197 | -1.1466201 | 0.011504276 | -1.06003939 | 0.40758534  |
| 0.840984789 | 0.00035614 | -1.4663461 | 3.76275E-05 | 0.908993654 | 0.040361313 |
| 0.986903612 | 0.74432927 | -1.073161  | 0.104937608 | -1.00684827 | 0.865874937 |
| -1.25123375 | 0.01316742 | -1.0952488 | 0.135861093 | -1.18199836 | 0.061073587 |
| 0.949497473 | 0.25005922 | 0.73254202 | 2.56413E-05 | 0.963243114 | 0.404473414 |
| 0.95858744  | 0.51952929 | -1.1272525 | 0.022465136 | 0.873761511 | 0.043413518 |
| -1.01079368 | 0.82950884 | -1.015286  | 0.843030878 | 0.877015749 | 0.010693611 |
| -1.13399068 | 0.07771911 | 0.9622879  | 0.652048252 | 0.86999636  | 0.051475617 |
| -1.07185283 | 0.35690821 | -1.4089501 | 0.000450377 | -1.02443838 | 0.747686014 |
| -1.0897662  | 0.16475135 | 0.98469559 | 0.628661568 | 0.911404995 | 0.134383472 |
| -1.03564019 | 0.62788793 | 0.98078383 | 0.883288506 | -1.07795471 | 0.300722203 |
| -1.22289151 | 0.02781353 | -1.1945156 | 0.055937374 | -1.14336503 | 0.138015209 |
| -1.25050135 | 0.06680663 | -1.0058836 | 0.916725222 | -1.3016761  | 0.031638529 |
| -1.03842538 | 0.57368329 | 0.97765709 | 0.747584186 | 0.914416425 | 0.184837825 |
| 0.9440357   | 0.18250941 | 0.95278182 | 0.291638474 | 0.731204452 | 1.19E-09    |
| 0.990164786 | 0.87566862 | 0.96129653 | 0.330733057 | -1.00071349 | 0.990990625 |
| 0.9514135   | 0.47136574 | -1.1904266 | 0.051196626 | -1.04077547 | 0.562956434 |
| 0.938961073 | 0.29044944 | 0.98372722 | 0.71422241  | -1.03797675 | 0.530157421 |
| 0.984289547 | 0.7766958  | -1.1362311 | 0.055463979 | -1.08607672 | 0.143018544 |
| -1.00843245 | 0.90405213 | 0.99777508 | 0.964358588 | -1.05195693 | 0.468213989 |
| -1.12429129 | 0.22579924 | 0.91460259 | 0.207175049 | -1.0059954  | 0.950380542 |
| -1.23089947 | 0.02384905 | -1.0492388 | 0.522511522 | 0.880411455 | 0.159713072 |
| -1.16909845 | 0.03765453 | 0.92401574 | 0.200920112 | -1.18970265 | 0.02142795  |
| 0.85793726  | 0.0466119  | 0.9774967  | 0.752592852 | -1.0425346  | 0.582063249 |



|             |            |            |             |             |             |
|-------------|------------|------------|-------------|-------------|-------------|
| 0.986947839 | 0.80616108 | -1.1080664 | 0.25391975  | -1.05201243 | 0.345510748 |
| -1.2745724  | 0.00019166 | -1.2301368 | 0.088741574 | 0.985235899 | 0.806933795 |
| -1.09289027 | 0.14155878 | 0.94527164 | 0.401850908 | -1.13344632 | 0.040079798 |
| 0.809278926 | 0.0293064  | 0.7859911  | 6.34637E-07 | 0.854878999 | 0.102909105 |
| -1.04074171 | 0.67128085 | 0.98113073 | 0.763063027 | 0.982978034 | 0.855125681 |
| 0.982069324 | 0.73301945 | -1.0517617 | 0.465538994 | -1.00515275 | 0.922771439 |
| -1.35735816 | 0.00186031 | 0.92062435 | 0.166674343 | -1.32853314 | 0.003613344 |
| -1.12061506 | 0.0093759  | 0.99071547 | 0.867279131 | -1.28288592 | 2.56E-07    |
| 0.979046169 | 0.74177646 | -1.0675176 | 0.350227059 | 0.820362596 | 0.003107717 |
| 0.866150829 | 0.01376597 | -1.0191599 | 0.843400755 | 0.884929433 | 0.034705548 |
| 0.886997826 | 0.21704699 | 0.98161089 | 0.836189986 | 0.666844376 | 9.45E-05    |
| 0.944551804 | 0.32116949 | -1.191434  | 0.020412452 | -1.06242841 | 0.292556723 |
| 0.956738884 | 0.52802468 | 0.95201639 | 0.516114737 | 0.881621931 | 0.075976884 |
| 0.999458092 | 0.99433338 | 0.87115258 | 0.012361547 | -1.23676836 | 0.007141727 |
| 0.89464744  | 0.04850115 | -1.0213887 | 0.728130831 | -1.15077382 | 0.013772175 |
| 0.652194222 | 2.29E-09   | -1.0461131 | 0.452226722 | 0.649174156 | 1.71E-09    |
| -1.00505264 | 0.91561788 | 0.87380303 | 0.159226172 | 0.893061336 | 0.020444059 |
| -1.02092895 | 0.6661578  | 0.91935993 | 0.372955836 | 0.985358974 | 0.758582516 |
| 0.827213861 | 0.0235607  | 0.93511942 | 0.209117214 | 0.746037736 | 0.000695595 |
| -1.09475633 | 0.51036281 | -1.2995427 | 0.006946961 | -1.06647687 | 0.639464254 |
| -1.00300564 | 0.95096553 | -1.1726473 | 0.000409325 | 0.891213828 | 0.021364587 |
| 0.988882742 | 0.8827993  | -1.1084149 | 0.113292161 | 0.89233904  | 0.137099891 |
| 0.990013627 | 0.86836878 | 0.9113137  | 0.105588459 | 0.953796627 | 0.435976731 |
| -1.18243284 | 0.03204171 | 0.83782727 | 0.070828763 | -1.28182237 | 0.001929765 |
| 0.776388297 | 0.01216648 | -1.0071176 | 0.901389742 | -1.02529557 | 0.79881806  |
| -1.183107   | 0.01531438 | 0.91418085 | 0.203045376 | -1.25041003 | 0.001579179 |
| 0.985456185 | 0.91064626 | -1.0090377 | 0.906167112 | 0.874044998 | 0.304807898 |
| 0.902670197 | 0.22482897 | -1.0061536 | 0.911827584 | -1.01205006 | 0.886323694 |
| 0.871260541 | 0.16445811 | 0.8760989  | 0.030824937 | 0.826253751 | 0.056171178 |
| -1.01696195 | 0.74987656 | -1.0687773 | 0.165794952 | -1.06535793 | 0.23304103  |
| 0.642732467 | 0.0004377  | -1.0298191 | 0.54088318  | -1.03700079 | 0.75921826  |
| 0.978678365 | 0.74818505 | 0.72388902 | 0.000215286 | -1.07910666 | 0.259390664 |
| 0.954774107 | 0.56996436 | -1.0882988 | 0.538281211 | 0.813879157 | 0.013885237 |
| 0.948713429 | 0.59735584 | 0.99168716 | 0.864204322 | -1.07654688 | 0.4598653   |
| 0.865810165 | 0.07015405 | -1.0768825 | 0.330796509 | -1.09816172 | 0.235112518 |
| -1.04602819 | 0.52999399 | -1.1313452 | 0.045512198 | 0.929327488 | 0.307835767 |
| -1.00629107 | 0.94040929 | -1.2500074 | 0.004951976 | 0.97449115  | 0.758169919 |
| 0.773977546 | 0.03903807 | 0.9439692  | 0.556840695 | -1.09579608 | 0.453325384 |
| 0.970974217 | 0.70085179 | -1.3972603 | 6.8773E-06  | 0.933525838 | 0.371108244 |
| 0.993569962 | 0.87161349 | 0.95940988 | 0.751035273 | -1.05167722 | 0.210146986 |
| -1.21265741 | 0.19928341 | 0.86734002 | 0.093654979 | 0.691553441 | 0.016068753 |
| 0.965247592 | 0.53685919 | 0.75488733 | 0.005768499 | -1.01483336 | 0.796817068 |
| -1.17704315 | 0.00525646 | -1.0948241 | 0.090110006 | -1.07867502 | 0.182093145 |
| -1.10534657 | 0.18234519 | 0.96784307 | 0.78273166  | -1.03441637 | 0.649916179 |

|             |            |            |             |             |             |
|-------------|------------|------------|-------------|-------------|-------------|
| 0.978381902 | 0.65661086 | -1.0645951 | 0.35286023  | -1.02538407 | 0.610198246 |
| -1.11516212 | 0.14578536 | 0.88683824 | 0.143846935 | 0.955683637 | 0.541933401 |
| 0.956419177 | 0.64600602 | 0.99008533 | 0.920269892 | -1.16250806 | 0.124408049 |
| 0.694536348 | 0.00167383 | 0.97579316 | 0.7545579   | 0.536814354 | 6.31E-07    |
| -1.07359362 | 0.26459418 | -1.0591273 | 0.42326852  | -1.1392818  | 0.043259907 |
| -1.18656869 | 0.1125377  | 0.94717932 | 0.518526692 | -1.33838749 | 0.008131103 |
| 0.930952917 | 0.25839897 | 0.94645075 | 0.651340702 | -1.0489829  | 0.448505702 |
| 0.882743907 | 0.11144376 | 0.91039925 | 0.223731682 | 0.930251676 | 0.352357167 |
| -1.04617811 | 0.47921259 | -1.0528663 | 0.20024935  | 0.97303682  | 0.667883847 |
| -1.04395946 | 0.4819863  | -1.0799131 | 0.606447957 | 0.889389413 | 0.059000472 |
| -1.087362   | 0.3667348  | -1.0180347 | 0.754663898 | -1.06434059 | 0.500860324 |
| 0.807275883 | 0.00394365 | -1.1328543 | 0.030191439 | 0.683381976 | 1.81E-06    |
| -1.16184014 | 0.00285099 | -1.0573568 | 0.455144648 | -1.09432512 | 0.065675601 |
| 0.986213198 | 0.81323131 | -1.000504  | 0.99181466  | -1.06465184 | 0.288778986 |
| 0.932371346 | 0.075748   | 0.9780616  | 0.765044201 | 0.856527918 | 0.000192064 |
| -1.06130816 | 0.46487915 | 0.70649665 | 0.000691373 | -1.00839306 | 0.918034048 |
| 0.874934017 | 0.02325235 | 0.58715186 | 1.1605E-05  | 0.949808146 | 0.371931894 |
| -1.03770426 | 0.81744158 | -1.0539244 | 0.408075263 | 0.992285681 | 0.961467296 |
| 0.998369307 | 0.97726497 | -1.0732637 | 0.50774422  | 0.929358064 | 0.204226971 |
| -1.09441579 | 0.18440653 | -1.0251552 | 0.693193191 | -1.00292842 | 0.965400643 |
| -1.03044101 | 0.47794652 | 0.81918697 | 0.012394761 | 0.976958196 | 0.580840929 |
| -1.01849857 | 0.87891302 | -1.0694502 | 0.293977478 | -1.07588116 | 0.543902232 |
| -1.00846434 | 0.85162698 | 0.99434798 | 0.926024256 | 0.850345568 | 0.000663784 |
| -1.01757624 | 0.77684203 | 0.92819967 | 0.421627428 | 0.925548801 | 0.211359827 |
| -1.01226229 | 0.81808981 | 0.8407707  | 0.017989071 | -1.18445613 | 0.002240544 |
| -1.06126914 | 0.41509321 | -1.172048  | 0.001675141 | -1.44832286 | 4.30E-06    |
| -1.18836916 | 0.07830833 | -1.0281214 | 0.63721124  | 0.967204572 | 0.730101823 |
| -1.02337757 | 0.62542417 | 0.9811663  | 0.624922238 | -1.04328248 | 0.371976483 |
| -1.43869384 | 1.15E-05   | 0.96724987 | 0.682031418 | -1.17826904 | 0.033497873 |
| -1.18530387 | 0.08210192 | 0.94045145 | 0.287851162 | -1.21891577 | 0.04394013  |
| -1.00163492 | 0.95758495 | 0.96459017 | 0.822088791 | 0.988758649 | 0.713001517 |
| -1.16252751 | 0.02060694 | 0.90923631 | 0.10089326  | 0.954571677 | 0.46461995  |
| 0.962270492 | 0.47687973 | 0.97442362 | 0.700919418 | -1.07979497 | 0.158530738 |
| -1.0641522  | 0.41423713 | -1.0616027 | 0.160064375 | 0.968627596 | 0.67483929  |
| -1.03787912 | 0.53187817 | 0.88467825 | 0.310761013 | -1.04875808 | 0.423980566 |
| -1.13295942 | 0.03535793 | -1.0093603 | 0.836210405 | 0.991388988 | 0.881673302 |
| 0.942412203 | 0.14941009 | -1.2280467 | 0.001447277 | -1.01532208 | 0.709163907 |
| -1.02851128 | 0.67456644 | 0.96257027 | 0.472538715 | 0.925383858 | 0.24932716  |
| -1.02936168 | 0.64366952 | 0.99669996 | 0.963754673 | -1.02350949 | 0.710212052 |
| 0.773903763 | 0.00128907 | -1.062559  | 0.530666924 | 0.811618474 | 0.007754571 |
| 0.892959134 | 0.02951548 | 0.94949821 | 0.275769044 | 0.742758451 | 2.77E-07    |
| 0.924521072 | 0.05040057 | -1.195456  | 0.021165949 | 0.996234657 | 0.923709357 |
| 0.984629009 | 0.78456709 | -1.311164  | 0.006650065 | 0.99769219  | 0.967464041 |
| 0.950275292 | 0.65765635 | 0.95884201 | 0.174926033 | 0.975332665 | 0.828079471 |

|             |            |            |             |             |             |
|-------------|------------|------------|-------------|-------------|-------------|
| -1.3761777  | 0.00066054 | -1.0526639 | 0.419775616 | -1.4207516  | 0.000210164 |
| -1.08468382 | 0.30318939 | 0.96335756 | 0.489853218 | 0.868620406 | 0.077274281 |
| 0.98295765  | 0.8284112  | 0.83937244 | 0.024338071 | -1.03431784 | 0.670699624 |
| 0.912810804 | 0.13784763 | -1.0878243 | 0.160053329 | 0.727547601 | 2.65E-06    |
| -1.08603059 | 0.08825067 | -1.1338939 | 0.034211895 | -1.03000877 | 0.536540489 |
| -1.09462648 | 0.09239078 | 0.90406674 | 0.016028435 | 0.84244367  | 0.001999646 |
| -1.18582448 | 0.01639259 | 0.89506313 | 0.101755226 | -1.02561431 | 0.714532164 |
| 0.903224259 | 0.12349367 | 0.88207407 | 0.048699112 | 0.934626556 | 0.303265105 |
| 0.947436866 | 0.30949514 | 0.71312132 | 3.92964E-05 | 0.938580466 | 0.233698748 |
| 0.914866114 | 0.15610215 | 0.95611334 | 0.379322618 | 0.993135456 | 0.91174528  |
| 0.975376293 | 0.68851895 | 0.92889668 | 0.065384797 | -1.03124749 | 0.620935456 |
| 0.978619885 | 0.68587127 | 0.87171784 | 0.018246589 | -1.12180749 | 0.035031881 |
| -1.06505242 | 0.2599773  | 0.8832105  | 0.282731179 | 0.982000583 | 0.744106807 |
| -1.17912011 | 0.06431289 | -1.3846024 | 0.000532641 | 0.907373773 | 0.270108796 |
| 0.998366523 | 0.97933776 | 0.95405039 | 0.549988346 | -1.1993148  | 0.005506487 |
| 0.978039382 | 0.66340584 | 0.92558589 | 0.331580265 | 0.968711882 | 0.533643941 |
| 0.963636252 | 0.43186246 | 0.92186472 | 0.184809733 | 0.975292722 | 0.59493044  |
| 0.5712672   | 3.21E-07   | -1.0878149 | 0.082268611 | 0.848326465 | 0.092314825 |
| 0.986718747 | 0.83867022 | 0.96940507 | 0.558404036 | -1.06944808 | 0.308848198 |
| 0.936831725 | 0.15077336 | -1.0766925 | 0.287479672 | -1.01091045 | 0.809391763 |
| -1.02679206 | 0.54764578 | 0.96544473 | 0.590978524 | 0.923913402 | 0.07570573  |
| 0.987161168 | 0.87928934 | -1.0064257 | 0.90358433  | 0.932373353 | 0.411961119 |
| 0.833330478 | 0.02381716 | -0.9999812 | 0.999758881 | 0.937166103 | 0.411360717 |
| 0.912393534 | 0.14497887 | 0.96767488 | 0.597479292 | 0.996577587 | 0.956101076 |
| -1.06888044 | 0.1551423  | 0.97717053 | 0.66562891  | 0.897556102 | 0.023061414 |
| -1.23109606 | 0.00270744 | 0.96334378 | 0.502820714 | 0.730112583 | 1.51E-05    |
| 0.862126793 | 0.01583224 | 0.98797033 | 0.890170535 | 0.9880527   | 0.840771371 |
| -1.0043701  | 0.93718978 | -1.2038498 | 0.004664118 | 0.970200951 | 0.585098393 |
| -1.10579902 | 0.18447467 | 0.87585615 | 0.01163688  | 0.867146197 | 0.062068173 |
| 0.997075226 | 0.97056155 | -1.0370827 | 0.439687489 | 0.758256383 | 0.000936337 |
| 0.901121307 | 0.06524427 | 0.69668718 | 0.000413778 | 0.869851751 | 0.014723125 |
| -1.04901773 | 0.37951067 | -1.0579113 | 0.392838695 | 0.828412968 | 0.000986853 |
| -1.00359616 | 0.93321851 | 0.91478707 | 0.051748163 | 0.974552926 | 0.548032462 |
| 0.839395151 | 0.02820107 | 0.98986482 | 0.816532012 | 0.910260509 | 0.2310686   |
| -1.49165115 | 7.02E-05   | -1.192658  | 0.042263929 | 0.778083033 | 0.009147558 |
| -1.01350041 | 0.79384048 | 0.91898093 | 0.285872095 | -1.03978589 | 0.448160992 |
| 0.937787257 | 0.27899054 | 0.86518556 | 0.023254791 | -1.01130605 | 0.848915722 |
| 0.998028704 | 0.98102466 | 0.94615726 | 0.236163443 | 0.667084156 | 9.15E-06    |
| -1.0366692  | 0.50880106 | 0.92503496 | 0.243691181 | 0.899297163 | 0.055147814 |
| 0.950944983 | 0.44636649 | 0.92994776 | 0.227842169 | -1.10126521 | 0.147093764 |
| -1.35829868 | 4.17E-05   | -1.0154146 | 0.782278927 | -1.23754404 | 0.003021026 |
| 0.906274034 | 0.42601054 | -1.0031638 | 0.966473964 | 0.990786161 | 0.940139293 |
| -1.00232853 | 0.92524556 | 0.90008071 | 0.188316039 | -1.00743583 | 0.765127722 |
| 0.809015425 | 0.03576162 | 0.93482991 | 0.228455851 | 0.622904811 | 1.26E-05    |

|             |            |            |             |             |             |
|-------------|------------|------------|-------------|-------------|-------------|
| 0.980934635 | 0.72651963 | 0.87642523 | 0.017913559 | 0.952110426 | 0.374070903 |
| 0.982689024 | 0.70171973 | -1.0250537 | 0.564108003 | -1.10472831 | 0.032421527 |
| 0.995009824 | 0.9563894  | 0.89551248 | 0.160872145 | -1.08988592 | 0.348750941 |
| 0.996763407 | 0.95819642 | 0.93559091 | 0.476130543 | 0.976555923 | 0.701483108 |
| 0.929053526 | 0.23669768 | 0.92699126 | 0.143467465 | 0.885241751 | 0.05259053  |
| 0.744557363 | 0.00028003 | 0.98691991 | 0.823468855 | 0.577408898 | 1.74E-09    |
| 0.949151426 | 0.49623542 | 0.88391161 | 0.140951216 | -1.08149812 | 0.308322595 |
| 0.894938626 | 0.22276389 | 0.94996676 | 0.34736591  | -1.05496938 | 0.55457178  |
| 0.837543299 | 0.0103541  | -1.0263251 | 0.693454959 | 0.934370706 | 0.313479558 |
| 0.790198211 | 0.00057247 | -1.1296459 | 0.081232135 | -1.06571195 | 0.326671915 |
| 0.955014528 | 0.44286947 | 0.83278796 | 0.141717326 | 0.864970456 | 0.018186984 |
| -1.27579139 | 0.00054767 | -1.0418813 | 0.102154734 | 0.913750583 | 0.179033896 |
| 0.912067001 | 0.11407345 | 0.99969436 | 0.997532812 | -1.03447729 | 0.556628467 |
| -1.07342881 | 0.14212404 | -1.0045104 | 0.934795364 | 0.92218941  | 0.094323276 |
| 0.76724303  | 0.00450144 | 0.7769927  | 8.59323E-07 | 0.937604054 | 0.473952998 |
| -1.13818528 | 0.19178    | 0.98704598 | 0.886672358 | -1.04699917 | 0.640906287 |
| -1.05304139 | 0.4409333  | 0.78051857 | 0.000179862 | -1.08202485 | 0.241532104 |
| 0.943836501 | 0.58843689 | 0.90517492 | 0.111077705 | 0.596821787 | 1.06E-05    |
| 0.940460209 | 0.37392302 | 0.80214313 | 0.005304429 | 0.923757505 | 0.251843085 |
| 0.877388958 | 0.00421788 | 0.9939151  | 0.936436395 | -1.08824296 | 0.058608399 |
| -1.04761759 | 0.21209126 | 0.73159675 | 0.00102569  | -1.00326003 | 0.929920018 |
| -1.0189873  | 0.65041248 | 0.88116899 | 0.063319569 | 0.980923462 | 0.642613945 |
| 0.970040162 | 0.54736062 | 0.8285794  | 0.005041993 | -1.00632945 | 0.900510206 |
| 0.960731313 | 0.55259315 | -1.0045621 | 0.939345839 | 0.705570073 | 3.16E-06    |
| 0.983082083 | 0.90948792 | 0.98451999 | 0.814717558 | 0.762849267 | 0.075567921 |
| -1.28844357 | 0.02997644 | -1.0221698 | 0.703465927 | -1.83110167 | 2.06E-06    |
| -1.05098729 | 0.44860891 | 0.96262123 | 0.426678092 | -1.10049433 | 0.147439568 |
| -1.25659942 | 0.00368119 | 0.70323556 | 0.000236723 | -1.36534435 | 0.000123102 |
| 0.942286948 | 0.16331543 | -1.0088439 | 0.9286771   | 0.972091888 | 0.503842797 |
| 0.936617045 | 0.54518638 | 0.96058094 | 0.548293462 | 0.78384694  | 0.027606818 |
| -1.06716777 | 0.51640247 | 0.91092495 | 0.383513205 | -1.13999504 | 0.193580195 |
| 0.981615744 | 0.75753349 | 0.83885487 | 0.013094952 | -1.02043966 | 0.73640716  |
| 0.898668193 | 0.08024324 | 0.93514514 | 0.131352673 | 0.994203488 | 0.923075366 |
| 0.838674843 | 0.00667505 | -1.0394912 | 0.2977519   | 0.597777723 | 4.04E-11    |
| -1.10017496 | 0.27909411 | 0.95063638 | 0.225329203 | 0.800213155 | 0.013570917 |
| -1.14420014 | 0.33506266 | -1.0042827 | 0.932516341 | 0.703642155 | 0.014084199 |
| -1.11221701 | 0.07329574 | 0.75525889 | 0.00010554  | 0.901796898 | 0.08149586  |
| 0.989190952 | 0.84677623 | 0.88466996 | 0.415662553 | 0.886692985 | 0.036202471 |
| 0.984237315 | 0.79729205 | -1.1964766 | 0.120406561 | -1.07198458 | 0.26377852  |
| 0.941627473 | 0.28541155 | 0.93425197 | 0.301209052 | 0.929638408 | 0.19615046  |
| 0.977471985 | 0.75508055 | -1.1710819 | 0.040439634 | 0.838184956 | 0.018522094 |
| 0.896274102 | 0.06167611 | 0.90410685 | 0.020051801 | -1.00642827 | 0.911497618 |
| -1.10939875 | 0.11245375 | 0.92624807 | 0.479320505 | -1.02379365 | 0.716166013 |
| -1.01774948 | 0.93270195 | -1.0958896 | 0.36164543  | -1.13024257 | 0.557395531 |

|             |            |            |             |             |             |
|-------------|------------|------------|-------------|-------------|-------------|
| 0.598528594 | 0.00011171 | -1.0619442 | 0.319371289 | 0.632330842 | 0.000472131 |
| 0.964629248 | 0.21792351 | 0.82382802 | 0.002090729 | 0.928024978 | 0.012460087 |
| -1.34979796 | 0.0003943  | 0.75368798 | 3.25981E-05 | -1.10072757 | 0.231668887 |
| -1.03084413 | 0.37924602 | 0.91428963 | 0.309359714 | 0.979590148 | 0.549813486 |
| -1.03518025 | 0.68770229 | 0.52032681 | 1.74592E-05 | -1.22211882 | 0.022775417 |
| -1.05629465 | 0.63803424 | -1.0492278 | 0.412799081 | -1.24062358 | 0.067983076 |
| -1.02795291 | 0.42242483 | 0.92883931 | 0.192809246 | 0.957374784 | 0.206993259 |
| -1.26302349 | 0.03516908 | 0.98488848 | 0.805552575 | -1.33270102 | 0.010333516 |
| 0.938325393 | 0.21647226 | 0.87644292 | 0.021625329 | -1.01300237 | 0.800611696 |
| -1.07164897 | 0.59177206 | 0.83495058 | 0.016220383 | 0.889412905 | 0.364965665 |
| 0.950761746 | 0.48247988 | 0.84077642 | 0.003837437 | -1.01537987 | 0.831524467 |
| -1.13190366 | 0.00427958 | 0.94171505 | 0.354772639 | -1.07099491 | 0.104436495 |
| -1.02782977 | 0.50549689 | 0.99754724 | 0.990595157 | -1.04911931 | 0.246751161 |
| 0.988332531 | 0.87291704 | 0.83622113 | 0.151979791 | -1.00474065 | 0.948599575 |
| 0.935579656 | 0.44370983 | 0.96388055 | 0.208302686 | -1.06919326 | 0.441565891 |
| 0.909946813 | 0.35826831 | -1.2434295 | 0.008183954 | 0.902940593 | 0.320589612 |
| -1.00783711 | 0.93470696 | 0.95414264 | 0.176378666 | 0.759925283 | 0.005479351 |
| 0.935614913 | 0.26906269 | 0.93367379 | 0.425973563 | 0.924136792 | 0.191141206 |
| -1.21366626 | 0.00200659 | -1.0644184 | 0.591894003 | -1.04010919 | 0.512311941 |
| -1.0957514  | 0.39976271 | 0.98521707 | 0.664072304 | -1.02616738 | 0.811416667 |
| -1.14324458 | 0.09816881 | -1.2821704 | 0.025343964 | -1.20861575 | 0.020785492 |
| -1.00109305 | 0.98736363 | 0.99780349 | 0.965700708 | 0.648825493 | 5.73E-08    |
| -1.04053249 | 0.51285807 | -1.0383565 | 0.770308786 | 0.907413691 | 0.11307492  |
| 0.994733908 | 0.92388909 | 0.99435019 | 0.937040653 | 0.912790277 | 0.102985143 |
| 0.896000045 | 0.04595269 | 0.97621858 | 0.564601109 | 0.937361967 | 0.234041617 |
| -1.25396173 | 0.06965311 | -1.0128467 | 0.756443808 | -1.09357275 | 0.46754127  |
| 0.840952782 | 0.02383805 | 0.90946615 | 0.199301047 | -1.08316731 | 0.288215921 |
| -1.09524039 | 0.38224092 | 0.92727371 | 0.385483261 | 0.890194549 | 0.264999446 |
| 0.980905592 | 0.8371898  | 0.90978608 | 0.357376376 | 0.908564374 | 0.309013596 |
| 0.888625788 | 0.02015325 | -1.012969  | 0.892439383 | 0.908894649 | 0.0579707   |
| -1.01712057 | 0.87591064 | 0.93977565 | 0.301934953 | 0.720729534 | 0.003790668 |
| 0.963923112 | 0.66983706 | -1.0615635 | 0.320794372 | 0.952002031 | 0.568413152 |
| 0.739346057 | 0.01399499 | 0.88428372 | 0.258712196 | 0.829652057 | 0.122044321 |
| 0.945465962 | 0.49326287 | -1.1657328 | 0.059155459 | 0.728723926 | 0.00027598  |
| 0.93494676  | 0.67433715 | 0.81205044 | 0.003732696 | 0.855408664 | 0.331002313 |
| 0.843021686 | 0.01232372 | -1.0515788 | 0.408055676 | -1.00126978 | 0.984714211 |
| 0.872294143 | 0.046721   | -1.0389793 | 0.489960964 | 0.935040528 | 0.321423249 |
| -1.10492666 | 0.10386078 | 0.98752175 | 0.816157172 | 0.910372851 | 0.12533701  |
| 0.929152414 | 0.33313407 | -1.0740351 | 0.561514745 | 0.646302764 | 3.61E-07    |
| 0.977484604 | 0.7244148  | -1.192911  | 0.021493758 | 0.945371705 | 0.385852678 |
| 0.965916136 | 0.82393866 | 0.42064842 | 2.4818E-11  | -1.01043232 | 0.946902492 |
| -1.14116513 | 0.0167749  | -1.1162508 | 0.244034446 | -1.33960975 | 1.22E-06    |
| -1.11607624 | 0.17056564 | 0.94195843 | 0.230558191 | 0.976511155 | 0.764852532 |
| -1.19545091 | 0.01816365 | -1.1396656 | 0.232210255 | -1.04059244 | 0.589280621 |

|             |            |            |             |             |             |
|-------------|------------|------------|-------------|-------------|-------------|
| -1.4350572  | 4.27E-05   | 0.92360454 | 0.35793578  | -1.0193723  | 0.813753545 |
| -1.3160594  | 0.04093153 | 0.7243974  | 0.008957726 | -1.37888823 | 0.017561083 |
| 0.876250382 | 0.11630438 | 0.82058907 | 0.018364104 | -1.01896429 | 0.821280022 |
| -1.36576564 | 0.00399202 | 0.85083801 | 0.314831811 | -1.16400302 | 0.148557193 |
| -1.03047056 | 0.70822183 | 0.94294663 | 0.376859012 | -1.02314852 | 0.775327646 |
| -1.13796576 | 0.01767482 | -1.1222135 | 0.091554653 | -1.34718535 | 6.41E-07    |
| 0.717531312 | 0.00140635 | 0.80085121 | 0.000537741 | 0.640407673 | 3.42E-05    |
| -1.2311723  | 0.00337532 | -1.0159613 | 0.83410459  | -1.36156142 | 3.08E-05    |
| -1.13346247 | 0.05868861 | 0.870973   | 0.036083693 | -1.09796206 | 0.155390847 |
| -1.5322221  | 4.75E-06   | 0.8341613  | 0.247557245 | -1.25709029 | 0.008593052 |
| -1.28485556 | 0.00040518 | -1.0529526 | 0.339036382 | 0.867252415 | 0.036611324 |
| -1.28376221 | 0.00761392 | -1.1230057 | 0.148130507 | -1.11795776 | 0.221105865 |
| 0.995188783 | 0.92723182 | -1.0830913 | 0.280782551 | 0.911388008 | 0.083197849 |
| -1.19219011 | 0.04406978 | -1.0479576 | 0.565685032 | -1.01848018 | 0.830748756 |
| -1.12650255 | 0.12278704 | -1.4573507 | 0.005820816 | -1.05652233 | 0.472386957 |
| -1.04819869 | 0.44981675 | 0.95230777 | 0.557346651 | -1.1101861  | 0.096740662 |
| 0.97312101  | 0.72398566 | -1.3013305 | 0.013940552 | -0.9999308  | 0.999283917 |
| -1.10087304 | 0.17282807 | 0.95108443 | 0.532243474 | 0.859287987 | 0.033655548 |
| -1.09988619 | 0.18241753 | -1.2788253 | 2.14384E-05 | 0.822416816 | 0.007602978 |
| -1.10058082 | 0.19959879 | 0.84649063 | 0.096624768 | -1.42278251 | 1.41E-05    |
| -1.14236194 | 0.02933543 | -1.1979436 | 0.010166801 | -1.08566809 | 0.17250957  |
| -1.06342564 | 0.39487647 | -1.1396842 | 0.0488104   | -1.07190158 | 0.337180453 |
| -1.1501658  | 0.06823442 | -1.3026944 | 0.002646077 | -1.44322273 | 9.90E-06    |
| 0.903527598 | 0.06960067 | -1.0765354 | 0.271953924 | 0.918423444 | 0.126281047 |
| -1.05882968 | 0.40492536 | -1.1807163 | 0.070647867 | -1.16234635 | 0.031445599 |
| -1.23533973 | 0.02726697 | 0.9987597  | 0.981249334 | 0.872051655 | 0.147321777 |
| 0.970121821 | 0.7052491  | -1.0910567 | 0.311277794 | -1.13284023 | 0.12379072  |
| -1.11028529 | 0.16236236 | -1.0184899 | 0.810357481 | -1.15103446 | 0.062179768 |
| 0.983857559 | 0.87609984 | -1.0381761 | 0.547129639 | -1.07618665 | 0.482745154 |
| -1.01117156 | 0.89224672 | -1.0520293 | 0.511546124 | 0.855968352 | 0.062102963 |
| -1.33028633 | 0.00385826 | 0.96717158 | 0.633277609 | -1.52029827 | 4.62E-05    |
| -1.14854478 | 0.03223433 | -1.0491499 | 0.498946936 | -1.07011955 | 0.286794616 |
| -1.06530527 | 0.24639363 | -1.1710512 | 0.036942344 | -1.03503938 | 0.526179938 |
| -1.23304428 | 0.02512079 | -1.0725724 | 0.243803887 | -1.13531393 | 0.168517857 |
| -1.04109483 | 0.51551297 | 0.98320027 | 0.814098725 | -1.50260422 | 1.76E-08    |
| 0.907812833 | 0.354322   | -1.1592757 | 0.054495533 | -1.03489959 | 0.741637337 |
| 0.951744136 | 0.63124716 | 0.83446271 | 0.001708158 | 0.996071657 | 0.969497492 |
| 0.752400701 | 0.03165963 | 0.99132008 | 0.898608154 | -1.16315869 | 0.246301333 |
| -1.19550626 | 0.06305626 | -1.0167417 | 0.859152717 | -1.26691671 | 0.014936927 |
| -1.07511277 | 0.29062654 | -1.1513867 | 0.082886017 | -1.02438093 | 0.724002292 |
| 0.95063367  | 0.34330831 | -1.1831523 | 0.026772261 | -1.06177066 | 0.262687698 |
| 0.994412518 | 0.92564358 | 0.92054336 | 0.428975791 | -1.20059397 | 0.003458413 |
| -1.34351025 | 9.30E-05   | 0.99473765 | 0.948700576 | -1.09374739 | 0.205244913 |
| -1.013512   | 0.85550637 | -1.5413462 | 2.81243E-05 | -1.54041065 | 2.61E-07    |

|             |            |            |             |             |             |
|-------------|------------|------------|-------------|-------------|-------------|
| -1.1179176  | 0.0050323  | -1.0731496 | 0.267377968 | 0.961897183 | 0.312514368 |
| 0.687389732 | 4.20E-06   | -1.0627376 | 0.264653947 | 0.577015527 | 6.25E-10    |
| -1.07263867 | 0.44243583 | -1.096179  | 0.317025445 | 0.984268716 | 0.861753929 |
| -1.20980937 | 0.08332706 | -1.1432947 | 0.033923976 | -1.23341765 | 0.05719379  |
| -1.55418551 | 2.59E-05   | -1.0694836 | 0.519141079 | -1.33730505 | 0.003710506 |
| -1.28114372 | 0.00432563 | 0.943086   | 0.569756014 | -1.00172203 | 0.983566369 |
| -1.24118069 | 0.10314615 | -1.1133436 | 0.408700537 | -1.31054977 | 0.042761411 |
| 0.96800517  | 0.53666323 | -1.0961075 | 0.333708637 | 0.998507643 | 0.97732074  |
| 0.987788518 | 0.77795603 | -1.1044509 | 0.149025466 | 0.567266264 | 2.57E-18    |
| 0.991627836 | 0.93174802 | -1.0974495 | 0.084772661 | 0.84129925  | 0.082635111 |
| 0.915957469 | 0.04203189 | -1.1179431 | 0.067547256 | -1.04811218 | 0.269814578 |
| -1.1452491  | 0.00290494 | -1.1827337 | 0.019817246 | -1.06295022 | 0.165887075 |
| -1.13812399 | 0.11731921 | -1.1976421 | 0.017199646 | -1.10929839 | 0.20740615  |
| -1.0299358  | 0.52031343 | -1.0354554 | 0.364592585 | 0.43428641  | 1.01E-24    |
| 0.99118157  | 0.89101803 | 0.67643354 | 1.9142E-06  | -1.09588185 | 0.160508542 |
| 0.99098798  | 0.91671189 | -1.0571724 | 0.542111513 | -1.47852236 | 3.23E-05    |
| -1.17859035 | 0.07603358 | -1.3012269 | 0.018047244 | -1.06522055 | 0.489663853 |
| -1.25075259 | 0.10648989 | -1.2713578 | 0.015256271 | -1.16993651 | 0.25457693  |
| 0.970533175 | 0.5652212  | -1.0590151 | 0.493380184 | 0.975069219 | 0.627206535 |
| 0.875308603 | 0.09860845 | -1.117289  | 0.3985116   | -1.03143773 | 0.697592427 |
| -1.01763049 | 0.74033864 | -1.1237143 | 0.029911783 | 0.955631069 | 0.390865269 |
| 0.87443282  | 0.05154947 | 0.9658065  | 0.425796515 | -1.06002321 | 0.390851423 |
| 0.94368848  | 0.13326854 | -1.0631052 | 0.533765258 | -1.03186864 | 0.412947123 |
| 0.636761471 | 4.63E-05   | 0.95335858 | 0.262098945 | 0.810098581 | 0.043416116 |
| 0.883573775 | 0.19287939 | 0.98873807 | 0.795402041 | 0.817220699 | 0.036053852 |
| 0.927651009 | 0.49028676 | -1.1070406 | 0.216338526 | 0.901726533 | 0.34296314  |
| 0.945307051 | 0.44924547 | -1.0403738 | 0.389074787 | -1.13419717 | 0.09368431  |
| 0.957625284 | 0.72620954 | 0.91800725 | 0.189257086 | 0.956340157 | 0.718084885 |
| 0.902728443 | 0.02908517 | -1.1947574 | 0.043744946 | 0.823606199 | 8.50E-05    |
| -0.99996795 | 0.99936379 | -1.1315744 | 0.179223231 | 0.913264675 | 0.027393134 |
| -1.00884659 | 0.89038448 | -1.0536132 | 0.703078011 | 0.412019401 | 1.79E-19    |
| 0.951581462 | 0.2149148  | -1.0037138 | 0.943091322 | 0.885828774 | 0.003397608 |
| -1.0632437  | 0.30196853 | -1.0475644 | 0.560021153 | -1.06849123 | 0.265207911 |
| 0.921629784 | 0.46915385 | 0.88811688 | 0.027798558 | 0.919125282 | 0.454540015 |
| -1.19804299 | 0.21610398 | 0.92619165 | 0.260222465 | -1.25291108 | 0.124185343 |
| -1.0810595  | 0.38893065 | -1.0016572 | 0.965422915 | -1.32677507 | 0.002660638 |
| 0.86451156  | 0.01042331 | 0.9759413  | 0.811856854 | 0.801419687 | 0.000173382 |
| 0.946645201 | 0.49678326 | 0.99899993 | 0.991534686 | -1.04035248 | 0.623567576 |
| -1.03710908 | 0.60667762 | 0.69338528 | 0.001330091 | -1.14521259 | 0.059269547 |
| 0.910035793 | 0.13428447 | -1.0821718 | 0.289309336 | 0.873224562 | 0.03317415  |
| 0.938265713 | 0.18327213 | 0.91074024 | 0.450512315 | -1.00839804 | 0.860226277 |
| 0.977083247 | 0.60458476 | 0.96424634 | 0.428481175 | 0.986091081 | 0.754207097 |
| 0.99259904  | 0.82872602 | 0.96891795 | 0.433452077 | -1.00421844 | 0.902414948 |
| -1.08449297 | 0.48702309 | 0.93721354 | 0.31255363  | -1.010781   | 0.92662426  |

|             |            |            |             |             |             |
|-------------|------------|------------|-------------|-------------|-------------|
| 0.911931801 | 0.2051117  | -1.0038927 | 0.922104584 | 0.77660869  | 0.000895294 |
| 0.908850357 | 0.16665524 | -1.0051948 | 0.93015602  | -1.06990784 | 0.326000027 |
| 0.868914802 | 0.44573736 | 0.85139171 | 0.156481467 | 0.765113619 | 0.149099965 |
| -1.19660204 | 0.00078723 | -1.1244427 | 0.420093972 | -1.08272011 | 0.120861301 |
| 0.86797541  | 0.01783733 | -1.2281338 | 0.025973612 | -1.02635255 | 0.65523325  |
| 0.983368333 | 0.74433988 | 0.84793381 | 0.003999738 | 0.914178995 | 0.085185996 |
| 0.964937719 | 0.32928021 | -1.0811809 | 0.334423839 | 0.917177781 | 0.020656322 |
| 0.818180163 | 0.00559142 | -1.1208877 | 0.110673276 | 0.862535307 | 0.03797967  |
| 0.94336889  | 0.36148535 | 0.97808574 | 0.722224198 | -1.08797823 | 0.188737152 |
| -1.01467916 | 0.86320623 | 0.87700007 | 0.007545285 | 0.796624325 | 0.009226832 |
| 0.948260834 | 0.4556716  | 0.96913387 | 0.48420634  | 0.980533259 | 0.782031865 |
| -1.03746944 | 0.51899756 | -1.0140186 | 0.685331494 | -1.01774061 | 0.757504535 |
| -1.00111328 | 0.97758462 | -1.1189723 | 0.336428122 | -1.0183374  | 0.646653121 |
| 0.879747874 | 0.30944038 | 0.9274946  | 0.299676702 | -1.29405235 | 0.043813508 |
| -1.01526105 | 0.7087196  | 0.91060357 | 0.175218727 | 0.777252974 | 6.96E-08    |
| 0.969336689 | 0.67992954 | 0.90314241 | 0.579862597 | -1.06839551 | 0.38213962  |
| 0.885400693 | 0.07824247 | -1.0942826 | 0.079611294 | -1.0642607  | 0.362401469 |
| -1.16467067 | 0.08579172 | -1.1516139 | 0.018167501 | -1.27864904 | 0.006675025 |
| -1.36138828 | 0.00026184 | 0.88595295 | 0.021586517 | -1.46383811 | 1.18E-05    |
| -1.07009293 | 0.55057999 | 0.95097984 | 0.171349234 | 0.973758046 | 0.814494282 |
| -1.06358545 | 0.13932943 | 0.82604023 | 0.00811349  | -1.02392635 | 0.56732305  |
| -1.04922785 | 0.32503165 | -1.0174061 | 0.786328599 | 0.980921978 | 0.692098842 |
| -1.20875606 | 0.00277013 | 0.91780851 | 0.312814639 | -1.50826674 | 8.97E-09    |
| -1.06386348 | 0.14894011 | 0.89173004 | 0.110913102 | 0.952060304 | 0.250366763 |
| 0.994867779 | 0.94084873 | -1.1054191 | 0.08261986  | -1.10257868 | 0.162886998 |
| 0.921307398 | 0.03915542 | 0.97191721 | 0.473023831 | -1.31272614 | 3.96E-09    |
| 0.947375539 | 0.50350673 | 0.79934165 | 0.078488323 | -1.14007171 | 0.108273825 |
| 0.855421749 | 0.02267595 | 0.98100142 | 0.636263936 | 0.67414452  | 2.30E-07    |
| 0.98872971  | 0.8683601  | 0.98264972 | 0.816549073 | 0.901773449 | 0.134593547 |
| 0.898068329 | 0.05792757 | -1.0901388 | 0.208510467 | 0.905450433 | 0.079068861 |
| -1.06702761 | 0.29378801 | -1.1795189 | 0.063390823 | 0.994375775 | 0.926904659 |
| 0.80764916  | 0.00208116 | -1.1369774 | 0.109651565 | 0.647790418 | 2.06E-08    |
| 0.744945493 | 0.00617065 | -1.008467  | 0.940684846 | -1.1142791  | 0.299427661 |
| -1.19638761 | 0.03728211 | -1.0785126 | 0.071329022 | -1.05651583 | 0.515373294 |
| 0.983983261 | 0.82493223 | 0.97968836 | 0.673143522 | 0.852867463 | 0.032811568 |
| -1.09603555 | 0.38764114 | -1.2018776 | 0.003626168 | -1.14912499 | 0.192350952 |
| 0.84461301  | 0.13799596 | 0.98278658 | 0.682924274 | 0.874267437 | 0.236154716 |
| 0.999277386 | 0.99177459 | -1.0557513 | 0.43529061  | 0.889221369 | 0.098335597 |
| 0.985363496 | 0.89468651 | -1.1585455 | 0.000375789 | 0.784651287 | 0.033073801 |
| -1.05429901 | 0.64383672 | -1.0155208 | 0.848555452 | -1.27017076 | 0.040174314 |
| 0.958009935 | 0.70046547 | -1.0168884 | 0.80227505  | -1.0667984  | 0.562343816 |
| 0.929689132 | 0.26458965 | 0.86101532 | 0.032229483 | -1.09819708 | 0.153294777 |
| -1.13127743 | 0.20804191 | 0.85471664 | 0.006545526 | 0.851072383 | 0.101546472 |
| -1.02458562 | 0.75795117 | 0.9609885  | 0.518270344 | 0.922288339 | 0.306846452 |



|             |            |            |             |             |             |
|-------------|------------|------------|-------------|-------------|-------------|
| -1.04903612 | 0.3927639  | 0.84036574 | 0.010997888 | -1.06001562 | 0.298905555 |
| -1.02431125 | 0.72079789 | 0.91299704 | 0.382035803 | 0.503901657 | 3.05E-14    |
| -1.3617574  | 0.00057632 | -1.1125128 | 0.209573061 | -1.79030563 | 6.09E-09    |
| 0.950165252 | 0.39078787 | 0.97760532 | 0.756389158 | 0.806187584 | 0.000602093 |
| -1.09962396 | 0.5292201  | -1.0682366 | 0.533334915 | -1.20351886 | 0.22207573  |
| 0.94008843  | 0.38226393 | 0.95588303 | 0.689060919 | -1.07728242 | 0.29321879  |
| -1.44547492 | 0.00309987 | 0.90122812 | 0.142062934 | -1.22924959 | 0.088403488 |
| 0.958053877 | 0.60209582 | 0.94920659 | 0.64009479  | 0.849758479 | 0.051393956 |
| -1.00925795 | 0.76488534 | -1.0244177 | 0.832803206 | 0.825272793 | 6.57E-08    |
| 0.975157221 | 0.46341059 | -1.0791106 | 0.495387072 | 0.966608152 | 0.32322217  |
| 0.857586509 | 0.11207123 | -1.0251252 | 0.702691556 | 0.866532689 | 0.137839481 |
| 0.8958555   | 0.01478213 | 0.85977216 | 0.12442497  | 0.969688321 | 0.483838607 |
| -1.04059012 | 0.37712157 | -1.0163891 | 0.836546713 | -1.05054293 | 0.274662168 |
| 0.984723285 | 0.80302996 | 0.97371362 | 0.633594061 | 0.964384805 | 0.557341204 |
| -1.13529977 | 0.09687154 | -1.0412886 | 0.54762967  | 0.988304445 | 0.876101326 |
| -1.13079999 | 0.02533236 | -1.4781218 | 2.3436E-05  | -1.12771286 | 0.028614485 |
| -1.23678527 | 0.00471508 | 0.9592941  | 0.484875001 | -1.20440065 | 0.012627619 |
| -1.11243071 | 0.07023989 | 0.80941253 | 0.164291261 | -1.104708   | 0.090030917 |
| 0.974460186 | 0.6683178  | -1.1118226 | 0.136526186 | -1.08219692 | 0.193955623 |
| 0.891695239 | 0.06794515 | -1.3305453 | 0.019836427 | -1.05113621 | 0.421227655 |
| -1.11468547 | 0.19537256 | 0.85511921 | 0.060737822 | -1.13116549 | 0.142487826 |
| -1.0400034  | 0.49834995 | 0.97937501 | 0.499554817 | -1.17328188 | 0.007532585 |
| -1.11186942 | 0.11581293 | 0.84781783 | 1.11332E-05 | -1.27409085 | 0.000592614 |
| -1.16836693 | 0.04214023 | 0.76415561 | 0.006564261 | -1.47989452 | 2.72E-06    |
| 0.998748301 | 0.98868515 | 0.96160925 | 0.373900698 | -1.20871228 | 0.035560928 |
| -1.185506   | 0.00704227 | 0.98486881 | 0.734226573 | -1.27864802 | 0.000167046 |
| 0.918810076 | 0.26239529 | -1.0398008 | 0.527803657 | -1.17522146 | 0.035283834 |
| -1.07531768 | 0.30346177 | -1.0102593 | 0.892393171 | 0.903557602 | 0.152582267 |
| -1.04850745 | 0.31341588 | -1.1412802 | 0.016590199 | -1.19791646 | 0.000288069 |
| -1.11063387 | 0.10413326 | -1.1233049 | 0.112506904 | -1.23264218 | 0.001746414 |
| -1.06360951 | 0.38450473 | -1.1858793 | 0.004628466 | -1.29370601 | 0.00057458  |
| 0.70605087  | 0.00014777 | -1.2464835 | 0.000560906 | 0.91979451  | 0.330839797 |
| -1.0255968  | 0.6795797  | 0.96175955 | 0.528984969 | -1.02858983 | 0.645108171 |
| -1.0712987  | 0.3140615  | -1.1184644 | 0.18202276  | -1.56019838 | 2.16E-08    |
| 0.849766121 | 0.05271249 | -1.065481  | 0.275227174 | 0.843643119 | 0.043365517 |
| 0.854834627 | 0.16683066 | -1.0744044 | 0.284183055 | -1.32646209 | 0.014583571 |
| -1.00049125 | 0.99273223 | -1.1514066 | 0.064682088 | -1.15431777 | 0.009909111 |
| 0.824054235 | 8.09E-06   | -1.0481246 | 0.595078557 | 0.843239983 | 6.13E-05    |
| 0.989112184 | 0.85865859 | -1.1805125 | 0.008483227 | 0.934277495 | 0.271445733 |
| 0.950548919 | 0.48241072 | 0.85726758 | 0.044260674 | -1.06436973 | 0.388135463 |
| -1.17073012 | 0.03251126 | 0.8229021  | 0.007303393 | 0.960580884 | 0.57778736  |
| -1.02543507 | 0.78596165 | -1.0277878 | 0.558436601 | -1.1896808  | 0.064540737 |
| -1.49141723 | 9.00E-06   | -1.1821424 | 0.010939346 | -1.15050956 | 0.090973512 |
| 0.921437181 | 0.24152588 | -1.1895888 | 0.016793176 | 0.901639016 | 0.139825694 |

|             |            |            |             |             |             |
|-------------|------------|------------|-------------|-------------|-------------|
| 0.986268341 | 0.8878284  | 0.80141969 | 0.012068619 | -1.0673576  | 0.506898499 |
| -1.02745917 | 0.7116669  | 0.95765645 | 0.480211008 | -1.26357208 | 0.002249403 |
| 0.905620786 | 0.09565207 | -1.0200029 | 0.771222321 | -1.13811055 | 0.031139047 |
| 0.962675792 | 0.72708312 | -1.0806098 | 0.349679685 | -1.27927807 | 0.027143509 |
| 0.975713356 | 0.76279812 | -1.0488258 | 0.671843033 | 0.633311646 | 6.61E-07    |
| 0.825506162 | 0.00279279 | 0.95309913 | 0.374734713 | 0.774196545 | 0.000107106 |
| -1.20028796 | 0.02119189 | 0.71672809 | 1.64606E-11 | 0.773859247 | 0.001556739 |
| 0.992608238 | 0.94077842 | 0.93589916 | 0.28372497  | 0.543575575 | 1.07E-07    |
| -1.00869057 | 0.82039863 | -1.1022728 | 0.180112467 | 0.850607417 | 8.12E-05    |
| -1.02420249 | 0.57137429 | -1.3769152 | 4.3155E-05  | -1.09352695 | 0.037836479 |
| -1.07834492 | 0.24137169 | -1.1860391 | 0.069247989 | 0.998934623 | 0.986704726 |
| 0.99956028  | 0.99049751 | -1.3094955 | 0.001670989 | -1.03761489 | 0.319617318 |
| 0.973941386 | 0.59897309 | -1.0103839 | 0.881703048 | -1.09054126 | 0.088204741 |
| -1.40541838 | 0.00014813 | -1.0797391 | 0.435108949 | -1.37691134 | 0.000328265 |
| 0.996659439 | 0.96404278 | -1.2014423 | 0.014842631 | -1.03727434 | 0.622374554 |
| 0.631600658 | 2.57E-08   | -1.0605567 | 0.318957476 | 0.534138433 | 3.88E-12    |
| 0.893583846 | 0.00820265 | -1.20383   | 0.092861259 | 0.975274583 | 0.543827215 |
| -1.11668996 | 0.0551373  | 0.84613287 | 0.044123199 | -1.14550132 | 0.019269157 |
| -1.00967283 | 0.85303459 | 0.71684793 | 1.34085E-06 | -1.10016858 | 0.070418968 |
| -1.01929537 | 0.82090122 | 0.87522285 | 0.088784944 | -1.09106833 | 0.304160089 |
| 0.996427172 | 0.94943372 | -1.0093398 | 0.925834304 | 0.953372323 | 0.399095176 |
| 0.951289127 | 0.35036789 | 0.96768995 | 0.390367751 | 0.833352749 | 0.001136376 |
| -1.06676827 | 0.4410244  | -1.0367346 | 0.394071623 | -1.08758393 | 0.317831966 |
| -1.20651604 | 0.06224054 | -1.0667176 | 0.314947861 | 0.989838976 | 0.917877198 |
| 0.979593008 | 0.84611582 | -1.0331743 | 0.378567786 | 0.994332825 | 0.957329379 |
| 0.996758691 | 0.96478632 | -1.1076721 | 0.045382886 | 0.842363812 | 0.02283381  |
| 0.978396393 | 0.74850453 | -1.1432908 | 0.113879013 | 0.740452024 | 4.62E-05    |
| -1.06982312 | 0.30379391 | -1.1678053 | 0.040473304 | -1.19452716 | 0.00844944  |
| 0.98293488  | 0.8054535  | 0.64523872 | 7.91359E-08 | -1.2169519  | 0.00665217  |
| 0.973763565 | 0.66482225 | -1.0028387 | 0.945110782 | -1.31676765 | 3.57E-05    |
| -1.23366306 | 0.04580738 | -1.227086  | 0.000623335 | -1.29614202 | 0.01453302  |
| 0.95747397  | 0.31590006 | -1.0380479 | 0.473383774 | -1.03565639 | 0.417997624 |
| 0.958728646 | 0.58256862 | -1.0961317 | 0.27944892  | -1.00357513 | 0.96282778  |
| 0.911272667 | 0.20100599 | 0.85758843 | 0.008440058 | 0.972819275 | 0.70252504  |
| 0.914153195 | 0.15822766 | 0.98073234 | 0.715031016 | 0.823011088 | 0.003032752 |
| -1.03272375 | 0.48348769 | 0.96668871 | 0.685721897 | -1.16269911 | 0.001705703 |
| 0.926219734 | 0.21040319 | -1.1150302 | 0.274335308 | 0.951479289 | 0.414364929 |
| 0.973342803 | 0.54298824 | 0.93904922 | 0.554461357 | -1.06106395 | 0.184923609 |
| 0.983699455 | 0.87220712 | 0.98778572 | 0.867294002 | 0.797670308 | 0.030439646 |
| 0.948448739 | 0.47634387 | 0.90265549 | 0.136613882 | 0.805467908 | 0.004948338 |
| 0.922408085 | 0.22975447 | -1.1283184 | 0.068771666 | -1.20975921 | 0.005956596 |
| -1.05637833 | 0.46672164 | 0.95538663 | 0.514438769 | -1.10840352 | 0.174668563 |
| 0.893748433 | 0.30103339 | -1.071365  | 0.263669825 | 0.674628036 | 0.000578572 |
| 0.918642781 | 0.38495013 | -1.1606918 | 0.152606551 | -1.07823786 | 0.440221623 |

|             |            |            |             |             |             |
|-------------|------------|------------|-------------|-------------|-------------|
| -1.02072537 | 0.82889306 | -1.0155158 | 0.721238605 | -1.02908639 | 0.762647291 |
| 0.857172501 | 0.0171565  | 0.93266435 | 0.364483068 | 0.933137328 | 0.274296331 |
| -1.15614878 | 0.10376951 | -1.0631042 | 0.39765753  | -1.14155149 | 0.136900058 |
| 0.996333029 | 0.94642424 | 0.95996103 | 0.517519524 | 0.984671255 | 0.777592677 |
| 0.966325445 | 0.46788586 | 0.84411527 | 0.000487885 | -1.08289348 | 0.094971015 |
| 0.940489447 | 0.41473577 | -1.0561235 | 0.370494023 | -1.16867617 | 0.041542649 |
| -1.17907019 | 0.00114452 | -1.0332736 | 0.461532144 | 0.917360573 | 0.077550492 |
| 0.906970566 | 0.19397739 | 0.80967956 | 0.042682046 | -1.06490859 | 0.400660489 |
| -1.43808882 | 0.00025697 | 0.85048626 | 0.032544407 | -1.69323763 | 5.73E-07    |
| -1.06081462 | 0.27019231 | -1.0545156 | 0.428160902 | -1.03755697 | 0.489573073 |
| -1.0243578  | 0.78431682 | -1.3208432 | 0.000479327 | -1.07091954 | 0.436978961 |
| 0.994700617 | 0.92148844 | 0.84039563 | 0.111850472 | -1.05812919 | 0.297061118 |
| 0.935332137 | 0.42004473 | -1.1547769 | 0.14325757  | 0.557424317 | 2.89E-09    |
| 0.833768482 | 0.00067323 | -1.0336649 | 0.727302511 | 0.557037265 | 2.86E-16    |
| 0.97643307  | 0.7805808  | 0.93046242 | 0.255106001 | -1.16003267 | 0.087127026 |
| -1.00648549 | 0.91716709 | -1.2191231 | 0.027909581 | -1.12955665 | 0.054104462 |
| 0.716927881 | 5.89E-06   | 0.94799553 | 0.330775767 | 0.867020059 | 0.03560503  |
| 0.89559045  | 0.35024224 | -1.0026031 | 0.955955193 | 0.743623929 | 0.014326074 |
| -1.06907615 | 0.17789921 | -1.146777  | 0.072086456 | 0.647593103 | 4.07E-12    |
| -1.0831808  | 0.21625356 | -1.0033242 | 0.945055353 | -1.08553647 | 0.204200741 |
| -1.08765077 | 0.08247348 | 0.99948931 | 0.994535077 | -1.01768154 | 0.713466691 |
| -1.1211042  | 0.04319838 | -1.2209866 | 0.035949295 | 0.946153319 | 0.320505022 |
| 0.8214712   | 0.01215611 | -1.0138305 | 0.79646084  | 0.950201623 | 0.503089908 |
| 0.938382844 | 0.3690107  | 0.90201513 | 0.243716827 | -1.05719402 | 0.431679811 |
| -1.0562512  | 0.45506838 | 0.98528691 | 0.78342858  | 0.764137866 | 0.000511185 |
| -1.17547421 | 0.06443221 | -1.0589926 | 0.489006081 | 0.92940402  | 0.396358894 |
| -1.07565008 | 0.27413742 | 0.99409045 | 0.906741935 | 0.887266905 | 0.075552728 |
| -1.12912834 | 0.0291661  | 0.94639782 | 0.520563886 | -1.05864564 | 0.297619289 |
| -1.08390939 | 0.14294377 | -1.0149905 | 0.810851207 | 0.990099756 | 0.855031369 |
| -1.00304968 | 0.95178599 | 0.84837542 | 0.016139071 | 0.813182756 | 0.000129519 |
| 0.914647023 | 0.09180163 | 0.9701227  | 0.796464075 | 0.894551552 | 0.036567359 |
| -1.06431385 | 0.19030289 | 0.80717801 | 5.57941E-05 | 0.963007877 | 0.425992824 |
| -1.30771716 | 0.00272493 | -1.0724591 | 0.278183839 | -1.31548036 | 0.002229186 |
| -1.03036512 | 0.64227298 | 0.97130624 | 0.542344739 | -1.17944775 | 0.012731185 |
| 0.923257704 | 0.08628469 | 0.95200906 | 0.376943446 | 0.918906203 | 0.06970397  |
| -1.36784686 | 9.07E-05   | 0.91725797 | 0.259396045 | -1.30716975 | 0.000653518 |
| -1.22820168 | 0.00030538 | 0.96915375 | 0.657154899 | -1.13467236 | 0.021234797 |
| 0.877273814 | 0.12606139 | 0.98726334 | 0.860763757 | 0.867748719 | 0.098073789 |
| -1.1740369  | 0.04674401 | 0.97650387 | 0.782332616 | -1.18169463 | 0.038818944 |
| 0.880730516 | 0.0259385  | 0.99886419 | 0.986326251 | -1.03557535 | 0.531043896 |
| 0.905828565 | 0.09899063 | -1.0601056 | 0.286208677 | 0.662254869 | 4.33E-09    |
| -1.04476375 | 0.4723199  | -1.0206695 | 0.707295253 | -1.20573538 | 0.003148123 |
| -1.00878602 | 0.87853455 | 0.97805076 | 0.659721275 | 0.840095629 | 0.003465694 |
| 0.922207897 | 0.16227207 | 0.9528074  | 0.356432398 | -1.04002869 | 0.495216165 |

|             |            |            |             |             |             |
|-------------|------------|------------|-------------|-------------|-------------|
| -1.01166803 | 0.84106259 | 0.90174023 | 0.032052458 | 0.794270526 | 0.000194689 |
| -1.0704308  | 0.19641897 | -1.260415  | 0.008986326 | -1.06157459 | 0.255889986 |
| -1.01196334 | 0.82661681 | -1.010291  | 0.873562676 | 0.950966547 | 0.3562473   |
| 0.922205987 | 0.24379692 | -1.0225526 | 0.627484373 | 0.931981976 | 0.309936488 |
| 0.93369054  | 0.20043093 | -1.2209703 | 0.00930567  | 0.751813736 | 1.61E-06    |
| -1.06222505 | 0.1851112  | -1.0988749 | 0.082201545 | 0.978567922 | 0.631913127 |
| -1.01889624 | 0.78295901 | 0.76147383 | 0.002090358 | 0.936622077 | 0.33722986  |
| 0.96967855  | 0.62700091 | -1.0595249 | 0.466408373 | 0.888416584 | 0.065807674 |
| -1.04202728 | 0.42127774 | -1.0562129 | 0.328362476 | 0.921626992 | 0.11400401  |
| 0.917276966 | 0.35263269 | 0.83610317 | 0.003668641 | -1.33278856 | 0.002913243 |
| -1.1649817  | 0.16207842 | -1.1305799 | 0.047472953 | -1.0708822  | 0.527635759 |
| -1.1212962  | 0.07315555 | -1.0958928 | 0.113831602 | -1.13944622 | 0.041931944 |
| -1.32330174 | 0.00108463 | -1.0591245 | 0.319377703 | -1.29963983 | 0.0021032   |
| -1.16482576 | 0.00138956 | 0.68763078 | 2.68337E-08 | -1.32259815 | 8.97E-08    |
| 0.996402964 | 0.95992794 | -1.0537532 | 0.318791605 | -1.18078446 | 0.023720155 |
| -1.21362481 | 0.00558895 | 0.97274086 | 0.611069796 | -1.07182686 | 0.30556519  |
| -1.13809332 | 0.07474076 | -1.0932585 | 0.200018174 | -1.0727264  | 0.328389112 |
| -1.00768281 | 0.93155815 | 0.99811746 | 0.971732687 | -1.16712721 | 0.087165751 |
| -1.24197075 | 0.03922002 | -1.1392098 | 0.005422164 | -1.0781049  | 0.466445037 |
| 0.992912268 | 0.89990724 | 0.88641263 | 0.080218661 | 0.623218076 | 2.35E-11    |
| -1.02274806 | 0.76713584 | 0.99804631 | 0.975350613 | -1.35126156 | 0.000206201 |
| 0.927564131 | 0.25279589 | 0.94436292 | 0.264799416 | 0.997591975 | 0.970570341 |
| -1.13765738 | 0.056298   | -1.0076692 | 0.934189842 | 0.966875764 | 0.612456314 |
| 0.938332568 | 0.3726082  | -1.0456599 | 0.680166987 | 0.94694993  | 0.444687568 |
| -1.06601428 | 0.28401188 | -1.0788127 | 0.231166827 | 0.961054004 | 0.504165256 |
| -1.09733724 | 0.4213342  | -1.1985686 | 0.029696112 | -1.410804   | 0.004061714 |
| 0.93679151  | 0.28567605 | -1.192823  | 0.000272288 | 0.963449838 | 0.541171705 |
| -1.03101109 | 0.60078987 | -1.1199524 | 0.118401755 | -1.0285228  | 0.629836094 |
| -1.1645173  | 0.3217702  | -1.041705  | 0.544871381 | 0.975988352 | 0.87380587  |
| -1.03028334 | 0.52460992 | -1.1079428 | 0.155626605 | -1.12685747 | 0.013187069 |
| 0.908498874 | 0.09370113 | -1.0822895 | 0.3766038   | 0.995987054 | 0.943261098 |
| 0.989777283 | 0.83679053 | -1.2946198 | 0.014801847 | -1.1050903  | 0.049133791 |
| -1.06501792 | 0.28374578 | 0.92220081 | 0.15596548  | 0.987792357 | 0.833583222 |
| -1.0252219  | 0.64337568 | -1.2436346 | 0.005624515 | -1.03945514 | 0.472612524 |
| -1.14436548 | 0.04185106 | -1.1549222 | 0.031074446 | 0.974892565 | 0.69577242  |
| -1.15203577 | 0.11761646 | 0.97405909 | 0.692515666 | -1.21518776 | 0.032882263 |
| -1.08119064 | 0.42518953 | -1.0209655 | 0.770582239 | -1.14259752 | 0.17570471  |
| -1.36249388 | 6.87E-09   | 0.99201974 | 0.892617008 | -1.05932403 | 0.205960395 |
| -1.09951004 | 0.06181583 | 0.88173973 | 0.277124271 | -1.12799278 | 0.01885739  |
| -1.16087498 | 0.09447438 | 0.97405159 | 0.665866742 | 0.738117852 | 0.001050013 |
| 0.983846163 | 0.80965841 | 0.97588805 | 0.675665481 | -1.1064011  | 0.138741641 |
| -1.06934334 | 0.5161924  | 0.83872782 | 0.253300654 | -1.00325866 | 0.974818034 |
| -1.18339912 | 0.02885623 | -1.0318833 | 0.503359303 | 0.976658724 | 0.753987835 |
| -1.03902767 | 0.59189454 | 0.94926144 | 0.358603769 | -1.08861628 | 0.236922347 |

|             |            |            |             |             |             |
|-------------|------------|------------|-------------|-------------|-------------|
| 0.904434004 | 0.04009336 | -1.0207069 | 0.681329442 | 0.859639025 | 0.002535064 |
| -1.10662844 | 0.18131953 | -1.0683467 | 0.260827473 | 0.873952467 | 0.07734139  |
| 0.864997972 | 0.01720058 | 0.96813458 | 0.547502689 | 0.438181252 | 1.54E-19    |
| -1.06112992 | 0.2776678  | 0.93580887 | 0.309615235 | 0.918493929 | 0.121953597 |
| 0.936394658 | 0.24940566 | -1.5132864 | 2.16405E-05 | 0.872023877 | 0.018645006 |
| -1.03596038 | 0.39051515 | -1.0233875 | 0.812805576 | 0.98966457  | 0.800025028 |
| -1.06702908 | 0.22568369 | -1.0478346 | 0.303923182 | -1.01556289 | 0.771608299 |
| -1.01198779 | 0.76620829 | -1.0590854 | 0.253498001 | -1.06155469 | 0.139977678 |
| 0.988562748 | 0.85431273 | -1.1914433 | 0.050687184 | 0.997199637 | 0.964290627 |
| 0.986715512 | 0.81746234 | -1.1070868 | 0.136387438 | -1.04781705 | 0.421458114 |
| 0.601054548 | 7.33E-05   | -1.0067658 | 0.947836343 | 0.424470976 | 1.79E-09    |
| 0.955999618 | 0.4697393  | -1.0459892 | 0.551247523 | -1.00289929 | 0.962812416 |
| 0.961625177 | 0.48960524 | -1.0106573 | 0.881849274 | -1.07663795 | 0.194806109 |
| 0.800905375 | 0.01454412 | 0.98096177 | 0.688837678 | -1.08031808 | 0.383432351 |
| -1.02168079 | 0.71248125 | -1.1731105 | 0.037420793 | -1.2944808  | 4.25E-05    |
| 0.653164113 | 0.00026657 | 0.9019301  | 0.085848632 | 0.706029333 | 0.002374054 |
| 0.800716269 | 0.00821649 | 0.98965786 | 0.848346508 | 0.675794433 | 1.14E-05    |
| -1.06598229 | 0.24954598 | 0.96439332 | 0.523350116 | 0.959361768 | 0.453067963 |
| 0.952399087 | 0.20367014 | -1.1514576 | 0.001080826 | 0.937731112 | 0.095609639 |
| -1.28578065 | 0.01733013 | 0.98669085 | 0.801143747 | -1.39723627 | 0.001893396 |
| -1.01377783 | 0.75847598 | 0.99370805 | 0.874820409 | 0.856139336 | 0.000921905 |
| -1.15319236 | 0.05896856 | -1.0005566 | 0.992912052 | -1.31344144 | 0.000523896 |
| 0.941520411 | 0.1671368  | -1.0937447 | 0.126035861 | 0.991253389 | 0.838994103 |
| 0.970057357 | 0.41406551 | 0.71160236 | 0.005833681 | -1.08976506 | 0.023735311 |
| -1.01053466 | 0.90354555 | 0.86804786 | 0.026005024 | 0.796846998 | 0.010875803 |
| -1.06140789 | 0.18831363 | -1.0410464 | 0.477582433 | -1.08736025 | 0.066566665 |
| 0.91922879  | 0.14168111 | 0.78882469 | 0.009297716 | 0.994962748 | 0.929069803 |
| -1.02635093 | 0.62117196 | -1.0819487 | 0.179373856 | -1.16647587 | 0.004796057 |
| 0.839563666 | 0.01225252 | 0.64987942 | 0.000229686 | -1.21594606 | 0.005419107 |
| -1.0545594  | 0.53588721 | 0.89587102 | 0.180125388 | -1.05385513 | 0.541009727 |
| -1.03723747 | 0.5110487  | 0.92476483 | 0.159967544 | -1.06347515 | 0.270380833 |
| -1.03892589 | 0.59111358 | 0.96354463 | 0.331549777 | -1.17431802 | 0.02697869  |
| 0.865092855 | 0.04258133 | -1.1403338 | 0.205021959 | -1.18395933 | 0.018916541 |
| -1.16245399 | 0.03060988 | 0.89734392 | 0.017739625 | -1.17735621 | 0.01947486  |
| 0.947589289 | 0.52024335 | -1.374666  | 7.07257E-05 | 0.700507622 | 7.77E-05    |
| -1.29643795 | 0.01720515 | -1.0241279 | 0.581823661 | -1.25455019 | 0.036279566 |
| -1.12342355 | 0.22010779 | -1.0091344 | 0.806457109 | -1.19813714 | 0.059264827 |
| -1.18543106 | 0.04042227 | 0.97135082 | 0.736888006 | -1.33050985 | 0.000873262 |
| -1.01980219 | 0.80597819 | -1.0132704 | 0.76930824  | -1.10800686 | 0.202217372 |
| -1.2210115  | 0.00399382 | 0.98008019 | 0.72298549  | -1.68165639 | 1.93E-10    |
| -1.27524663 | 0.01259399 | 0.92767185 | 0.157151537 | -1.59116119 | 8.25E-06    |
| -1.14657447 | 0.15269344 | -1.0554724 | 0.427021962 | -1.30563798 | 0.006562547 |
| 0.730833415 | 3.78E-05   | 0.9685376  | 0.709184632 | 0.705800758 | 6.67E-06    |
| 0.77193095  | 0.0053509  | -1.1322355 | 0.028746443 | 0.65545941  | 1.63E-05    |

|             |            |            |             |             |             |
|-------------|------------|------------|-------------|-------------|-------------|
| -1.10767397 | 0.03449786 | -1.1264544 | 0.097747173 | -1.17895931 | 0.000966296 |
| -1.03825212 | 0.55171406 | -1.1499574 | 0.050262909 | -1.43380105 | 4.37E-07    |
| -1.2956504  | 0.04948805 | -1.0461918 | 0.508146564 | -1.66330625 | 0.000231061 |
| -1.21004344 | 0.00022785 | 0.80289707 | 0.010852712 | -1.4947146  | 3.02E-11    |
| -1.01747057 | 0.87338613 | -1.0914981 | 0.410707075 | -1.07505347 | 0.506319697 |
| -1.06977378 | 0.40468455 | -1.0119621 | 0.899596875 | -1.13388292 | 0.123538157 |
| -1.02400863 | 0.7543839  | -1.2827801 | 0.00331093  | -1.45364001 | 7.52E-06    |
| -1.1666803  | 0.1805236  | -1.0485971 | 0.552791591 | -1.1925123  | 0.127128214 |
| -1.07669491 | 0.38311023 | -1.2808588 | 0.000464333 | -1.05446281 | 0.530657522 |
| -1.0765799  | 0.4658887  | -1.2241608 | 0.036275135 | -1.1638301  | 0.136903668 |
| 0.94920135  | 0.6815111  | -1.0706602 | 0.472132981 | 0.846407628 | 0.192484742 |
| 0.98804503  | 0.89514091 | 0.81109231 | 0.004089668 | -1.16166995 | 0.104770427 |
| -1.0689908  | 0.55123036 | 0.7223881  | 0.000600426 | -1.15786992 | 0.193229152 |
| -1.11241894 | 0.27646328 | -1.1302425 | 0.012099738 | -1.0424579  | 0.669546132 |
| -1.06103646 | 0.59880565 | -1.1470296 | 0.032985483 | -1.13295739 | 0.269754678 |
| -1.09385727 | 0.25133341 | -1.2879916 | 0.054739419 | -1.11311839 | 0.171704166 |
| 0.977792335 | 0.68996068 | -1.3240764 | 3.38045E-07 | -1.19709906 | 0.002224761 |
| -1.06317565 | 0.55147546 | -1.0288791 | 0.793399468 | 0.862432497 | 0.153459646 |
| -1.29548849 | 0.07400191 | -1.1639991 | 0.064013764 | -1.47061336 | 0.008905448 |
| -1.07663034 | 0.23677141 | -1.1406174 | 0.086899354 | -1.06651731 | 0.301375385 |
| 0.972558838 | 0.72647457 | -1.0765281 | 0.519101183 | 0.9736161   | 0.736739682 |
| -1.07618028 | 0.42843572 | 0.98821728 | 0.888357277 | -1.42675956 | 0.000304216 |
| -1.0744554  | 0.31188561 | -1.3456501 | 0.004638958 | -1.24563201 | 0.002889273 |
| -1.03977356 | 0.55399474 | 0.77639655 | 0.050215728 | -1.06891024 | 0.313479463 |
| -1.26892714 | 0.00387911 | -1.1018353 | 0.290388809 | -1.17502799 | 0.045843312 |
| -1.09956335 | 0.30779811 | -1.2567604 | 0.044830711 | -1.25026978 | 0.018796499 |
| -1.16497738 | 0.028081   | -1.2422041 | 0.029371315 | 0.970301044 | 0.657619833 |
| -1.36231406 | 0.00055609 | 0.92239942 | 0.473671313 | -1.26304454 | 0.007617133 |
| -1.09524724 | 0.10530393 | -1.0758294 | 0.348987997 | -1.01178962 | 0.832723852 |
| -1.22374164 | 0.00500077 | -1.1766135 | 0.00533127  | 0.908711935 | 0.170861828 |
| 0.963180257 | 0.60149271 | -1.0512672 | 0.626742972 | -1.03826831 | 0.601110601 |
| 0.954971244 | 0.65986603 | -1.2506495 | 0.121306724 | 0.808837433 | 0.046510379 |
| 0.928332296 | 0.13313064 | -1.3143802 | 4.68473E-05 | -1.21056209 | 0.000254206 |
| -1.05704642 | 0.36325602 | 0.91636985 | 0.274622843 | -1.08305431 | 0.192860401 |
| 0.982061626 | 0.79865573 | -1.1388205 | 0.16349454  | -1.09184941 | 0.218727901 |
| 0.985456389 | 0.79809226 | -1.193436  | 0.014975776 | 0.528684627 | 1.23E-15    |
| 0.88721957  | 0.11884569 | -1.0813703 | 0.237551733 | 0.783340727 | 0.002088958 |
| 0.994329263 | 0.92492371 | -1.2303225 | 0.011201484 | 0.941366777 | 0.318961279 |
| -1.38088421 | 0.0020483  | -1.0375844 | 0.690561867 | -1.21587643 | 0.054834387 |
| 0.824193405 | 0.07919504 | -1.1424299 | 0.054195446 | -1.11728299 | 0.309332066 |
| -1.09710167 | 0.38550255 | -1.2614907 | 0.007921143 | -1.0385559  | 0.722359885 |
| -1.02345464 | 0.67683011 | -1.0821683 | 0.158531327 | 0.904617907 | 0.075580098 |
| 0.976829552 | 0.69697877 | 0.99330035 | 0.92271495  | -1.06236999 | 0.316845744 |
| 0.990819132 | 0.85172722 | -1.0927945 | 0.219377133 | 0.892022767 | 0.023781606 |

|             |            |            |             |             |             |
|-------------|------------|------------|-------------|-------------|-------------|
| -1.03403665 | 0.4410348  | -1.1445995 | 0.200098218 | 0.878028765 | 0.00390271  |
| -1.17757891 | 0.02257802 | 0.9441929  | 0.244150873 | -1.02293538 | 0.745867592 |
| -1.17939849 | 0.05983676 | -1.0707124 | 0.263795074 | -1.15534798 | 0.098263801 |
| 0.898438942 | 0.03439976 | 0.97649473 | 0.737532099 | 0.96501563  | 0.473562501 |
| -1.0951183  | 0.18554711 | 0.98264293 | 0.759833091 | -1.12125909 | 0.096977199 |
| 0.931198086 | 0.27162395 | 0.98245565 | 0.815530779 | -1.02662652 | 0.68381982  |
| 0.659214505 | 3.20E-09   | 0.97181586 | 0.636035045 | 0.589372906 | 2.85E-12    |
| 0.938957394 | 0.2788874  | -1.1901154 | 0.086189065 | 0.949379862 | 0.370994504 |
| -1.19531525 | 0.02984186 | -1.0135996 | 0.900980674 | -1.22906145 | 0.012658008 |
| 0.917952341 | 0.60618727 | -1.089167  | 0.423563457 | -1.0961983  | 0.580273614 |
| -1.08540867 | 0.04199351 | 0.94400944 | 0.302292039 | -1.01415922 | 0.722182228 |
| 0.883184918 | 0.01205676 | 0.91801217 | 0.1589179   | -1.0778701  | 0.122586449 |
| -1.04523674 | 0.28129038 | 0.83826782 | 0.000711329 | 0.732703554 | 3.77E-10    |
| 0.896606171 | 0.03055758 | -1.0394619 | 0.373427752 | 0.988033982 | 0.807362893 |
| -1.00590303 | 0.92203089 | -1.1504762 | 0.049062022 | 0.739158298 | 5.44E-06    |
| 0.854795764 | 0.00360308 | -1.1380606 | 0.137693431 | -1.08148905 | 0.1342915   |
| 0.738519605 | 7.80E-08   | 0.97080127 | 0.550617085 | 0.467234285 | 1.35E-21    |
| 0.82426851  | 0.00444804 | 0.90622541 | 0.151961092 | -1.00462083 | 0.943782977 |
| 0.973467253 | 0.53543254 | -1.0364485 | 0.579268332 | 0.785273143 | 7.35E-07    |
| 0.922402314 | 0.20539996 | 0.7468878  | 7.57968E-06 | -1.08886032 | 0.182356815 |
| 0.965560209 | 0.86968025 | 0.97651654 | 0.681460081 | -1.17262491 | 0.457099746 |
| 0.949381224 | 0.60884295 | -1.0533206 | 0.518611206 | 0.582214204 | 1.79E-06    |
| -1.07001078 | 0.37359477 | -1.151735  | 0.395950407 | -1.05502759 | 0.480614448 |
| 0.832567041 | 0.04741619 | 0.98057269 | 0.620014616 | 0.767038657 | 0.004874849 |
| -1.00504705 | 0.85915313 | 0.98183733 | 0.702892823 | 0.810982939 | 8.88E-10    |
| 0.905582633 | 0.06787056 | -1.0233662 | 0.572273015 | 0.662805565 | 2.83E-10    |
| -1.14392469 | 0.01205389 | 0.82383288 | 0.000233788 | -1.1174918  | 0.036332336 |
| 0.986567444 | 0.87802272 | 0.79064837 | 0.00024922  | 0.860031388 | 0.091302956 |
| -1.19689613 | 0.0090749  | -1.0804592 | 0.138992614 | 0.958782815 | 0.528736462 |
| 0.947965378 | 0.44040731 | 0.72606475 | 2.13745E-08 | 0.934086407 | 0.325740301 |
| -1.11455033 | 0.14717429 | 0.99161598 | 0.897537227 | 0.967439951 | 0.655284134 |
| 0.787592079 | 0.00029119 | 0.97510735 | 0.561195885 | 0.723761093 | 2.68E-06    |
| 0.894472002 | 0.0746878  | -1.0377916 | 0.558536929 | -1.09195869 | 0.157397904 |
| 0.970821907 | 0.58754455 | 0.93996241 | 0.77199464  | -1.03205149 | 0.563428198 |
| 0.923396681 | 0.2211508  | 0.78515041 | 0.020048298 | -1.00251612 | 0.969009353 |
| 0.887608358 | 0.02942139 | -1.1599514 | 0.054315973 | -1.01626547 | 0.763201414 |
| 0.952284056 | 0.4424597  | 0.93048751 | 0.42849009  | 0.619113345 | 4.76E-10    |
| 0.952193238 | 0.34438044 | -1.0256676 | 0.373395374 | 0.857815999 | 0.00424536  |
| -1.06256365 | 0.25182514 | 0.97334443 | 0.613783525 | -1.0119844  | 0.820967638 |
| 0.938168282 | 0.31911757 | -1.2703627 | 2.4032E-05  | 0.881496023 | 0.052003156 |
| -1.18820621 | 0.00149633 | -1.1552143 | 0.105756051 | -1.07323728 | 0.175772851 |
| -1.05970459 | 0.20296967 | -1.1851903 | 0.013337109 | -1.02398196 | 0.600553132 |
| -1.05224111 | 0.18630148 | 0.86082283 | 0.033672821 | 0.972988066 | 0.474706994 |
| 0.942945244 | 0.38100969 | -1.1740806 | 0.033935843 | -1.00144613 | 0.982745529 |

|             |            |            |             |             |             |
|-------------|------------|------------|-------------|-------------|-------------|
| -1.00579408 | 0.95620683 | 0.69620835 | 2.7235E-07  | 0.940652695 | 0.561496788 |
| -1.03426878 | 0.40029908 | 0.90547063 | 0.11140853  | 0.979571623 | 0.60565636  |
| -1.04156933 | 0.45343961 | -1.0285134 | 0.606529921 | 0.447004791 | 9.48E-21    |
| 0.935302116 | 0.30006202 | -1.0701071 | 0.297306278 | -1.08854876 | 0.190001177 |
| 0.989749012 | 0.83128478 | 0.98537061 | 0.783154783 | -1.01586841 | 0.744845549 |
| 0.890978952 | 0.03649214 | 0.97255803 | 0.661435429 | 0.895022682 | 0.044171521 |
| 0.910053164 | 0.0495154  | -1.0030387 | 0.953104531 | 0.882643495 | 0.010238254 |
| -1.02423584 | 0.73527687 | 0.89988272 | 0.049065518 | 0.817565558 | 0.006043643 |
| 0.923226176 | 0.15763412 | 0.64126672 | 4.24947E-09 | 0.918325247 | 0.132243844 |
| 0.963584541 | 0.55924448 | -1.4028363 | 2.10463E-08 | 0.246399822 | 1.07E-28    |
| -1.14436845 | 0.16468647 | -1.0928012 | 0.053725935 | -1.22073671 | 0.041977953 |
| 0.976733939 | 0.73833063 | -1.0797531 | 0.048681503 | 0.966848972 | 0.632543304 |
| -1.2090503  | 0.0001097  | 0.96038242 | 0.545881808 | -1.29983332 | 4.07E-07    |
| 0.923420076 | 0.31396992 | -1.139305  | 0.218381629 | -1.04970859 | 0.538576739 |
| 0.782423004 | 1.57E-05   | 0.84719078 | 0.000110886 | 0.930892488 | 0.171508971 |
| 0.924019898 | 0.2870641  | -1.0952656 | 0.097360587 | -1.08500866 | 0.271866478 |
| -1.47281333 | 0.02866668 | 0.88849479 | 0.069878859 | -1.42035406 | 0.046495017 |
| 0.983175872 | 0.83818346 | -1.0601124 | 0.230475529 | 0.882891581 | 0.137827774 |
| -1.13646437 | 0.11235658 | 0.91420121 | 0.101352995 | -1.17233666 | 0.049875073 |
| 0.904308725 | 0.14969552 | -1.0051977 | 0.912397505 | -1.0135001  | 0.846243997 |
| 0.784335821 | 0.00193237 | 0.98620632 | 0.844466067 | 0.947338455 | 0.470853067 |
| -1.32492919 | 0.00518999 | 0.99283932 | 0.897897442 | -1.17762428 | 0.096157912 |
| 0.743872934 | 3.02E-06   | -1.0216405 | 0.73581602  | 0.90722754  | 0.091911482 |
| 0.80279561  | 0.00043794 | 0.93531779 | 0.487857704 | -1.07778825 | 0.206689102 |
| -1.28295801 | 0.0015271  | -1.017833  | 0.801897669 | 0.919280094 | 0.264176512 |
| -1.15774682 | 0.03069969 | -1.0582558 | 0.218347081 | -1.21729447 | 0.004330157 |
| -1.34564848 | 0.00136828 | 0.83051248 | 0.021447523 | -1.52931044 | 1.17E-05    |
| -1.02386815 | 0.56092552 | 0.87970154 | 0.016287883 | 0.993397246 | 0.870089412 |
| -1.64342905 | 2.94E-05   | 0.79994826 | 0.003681697 | -2.38819026 | 1.02E-10    |
| 0.994463704 | 0.87275071 | -1.2442208 | 0.209899594 | 0.994100643 | 0.864461843 |
| 0.992566635 | 0.84259462 | 0.94804871 | 0.521523349 | 0.864702389 | 0.000280661 |
| 0.793129331 | 0.02000384 | -1.0345389 | 0.670024887 | -1.03258315 | 0.741392395 |
| -1.10569654 | 0.09551951 | -1.0121279 | 0.861608689 | -1.07589988 | 0.222027175 |
| -1.01925394 | 0.75034505 | 0.96195383 | 0.604712797 | -1.06027941 | 0.330703947 |
| -1.01039026 | 0.82216444 | -1.2648336 | 0.018316634 | -1.05271647 | 0.266620229 |
| -1.06278    | 0.36722676 | 0.94230509 | 0.299586955 | -1.00473064 | 0.944069473 |
| -1.01033486 | 0.83204796 | 0.93523804 | 0.258354882 | -1.0611752  | 0.2238018   |
| 0.943485584 | 0.4159294  | -1.2507078 | 0.004097341 | 0.933480594 | 0.336353099 |
| -1.01833656 | 0.75775443 | 0.98981882 | 0.877351844 | 0.943587511 | 0.326290323 |
| -1.18957528 | 0.07941967 | -1.3316985 | 0.001944503 | -1.11859674 | 0.25346736  |
| 0.807532994 | 0.01082032 | -1.1041133 | 0.01728396  | -1.16588123 | 0.06338892  |
| 0.994938663 | 0.87939537 | -1.2232311 | 0.069517165 | 0.980012108 | 0.546644291 |
| 0.916987575 | 0.18773967 | -1.0296641 | 0.400537051 | -1.03769318 | 0.571270013 |
| 0.912571755 | 0.1355708  | 0.98304971 | 0.649370642 | 0.828021887 | 0.002862836 |



|             |            |            |             |             |             |
|-------------|------------|------------|-------------|-------------|-------------|
| -1.16861963 | 0.06493795 | -1.0077906 | 0.936308074 | 0.821283335 | 0.020848607 |
| -1.08225908 | 0.25649334 | -1.0349982 | 0.563706575 | 0.823149054 | 0.006648694 |
| -1.08748346 | 0.24591108 | -1.1649538 | 0.013301473 | -1.05836589 | 0.430972757 |
| 0.914365703 | 0.10838879 | 0.94376786 | 0.211473025 | -1.02060986 | 0.711321092 |
| -1.17856303 | 0.03254454 | -1.0120224 | 0.859015413 | 0.978062426 | 0.768151681 |
| -1.06856352 | 0.30924693 | -1.0453594 | 0.361968429 | 0.435505765 | 4.97E-18    |
| 0.956048123 | 0.34314408 | 0.89005513 | 0.106556773 | -1.06421495 | 0.190999649 |
| -1.05770968 | 0.59358264 | -1.1060704 | 0.091197462 | 0.899682799 | 0.316299402 |
| 0.90926243  | 0.14297133 | -1.1568385 | 0.139320861 | -1.11426297 | 0.096658168 |
| -1.08242112 | 0.30855715 | 0.98132034 | 0.81671743  | -1.26748674 | 0.003292302 |
| 0.955631013 | 0.38955121 | 0.96168931 | 0.245689498 | -1.03234953 | 0.545395808 |
| -1.24407959 | 0.02850676 | 0.95167255 | 0.449001401 | -1.24867681 | 0.026042637 |
| 0.954513195 | 0.5064436  | 0.99679773 | 0.957831262 | 0.904268625 | 0.154047198 |
| -1.00139718 | 0.97967487 | 0.75535915 | 0.001306407 | -1.02059828 | 0.710042994 |
| 0.981112616 | 0.74290848 | 0.96061622 | 0.562351428 | -1.09855473 | 0.109968224 |
| -1.10480371 | 0.16815153 | -1.0327044 | 0.654405124 | -1.05053077 | 0.49255812  |
| -1.18171765 | 0.11753108 | -1.129673  | 0.030403816 | 0.548914969 | 4.96E-07    |
| 0.975398765 | 0.88231821 | -1.0666616 | 0.392521914 | 0.791228945 | 0.167783414 |
| -1.19044284 | 0.00207708 | 0.60175223 | 1.71875E-10 | -1.29053489 | 1.64E-05    |
| -1.05788643 | 0.27164804 | 0.93775582 | 0.177165891 | 0.885142291 | 0.019501376 |
| -1.08858217 | 0.170972   | -1.1418429 | 0.209838255 | 0.95658846  | 0.471223703 |
| 0.951888958 | 0.47330409 | -1.0169427 | 0.793886074 | 0.77853888  | 0.000564936 |
| -1.16862022 | 0.09842004 | -1.1417041 | 0.091175178 | -1.130714   | 0.190487227 |
| -1.253353   | 0.05713114 | 0.88427618 | 0.022441445 | -1.0407258  | 0.73244294  |
| -1.24282939 | 0.00246073 | -1.1915578 | 0.076465522 | -1.31670739 | 0.000181676 |
| 0.960464913 | 0.76510291 | -1.1245657 | 0.097462594 | 0.918171763 | 0.527758434 |
| -1.14374993 | 0.15252132 | 0.9541931  | 0.393841624 | -1.09276489 | 0.342082845 |
| -1.11696723 | 0.07300989 | 0.98710135 | 0.823236867 | -1.10560334 | 0.10282582  |
| 0.846973796 | 0.00738626 | -1.1657484 | 0.036106464 | 0.817660167 | 0.001376831 |
| -1.01547273 | 0.82334036 | 0.70123917 | 0.001352068 | 0.92648428  | 0.269525797 |
| -1.24048827 | 0.01865266 | 0.82973144 | 0.270008956 | -1.33032574 | 0.002221518 |
| 0.821628407 | 0.00082247 | -1.2054056 | 0.001040643 | 0.790941335 | 9.10E-05    |
| -1.32892099 | 2.11E-05   | 0.92102737 | 0.110292896 | -1.16598977 | 0.014813587 |
| -1.34241257 | 0.00689003 | 0.99749008 | 0.96737867  | 0.984153808 | 0.879400502 |
| 0.910916741 | 0.16712237 | 0.92897681 | 0.285380497 | 0.851931929 | 0.019636756 |
| -1.05468671 | 0.36584398 | -1.0504819 | 0.597236032 | 0.766918958 | 3.16E-05    |
| 0.979849586 | 0.69171523 | -1.2048267 | 0.114543671 | 0.976352837 | 0.641188949 |
| 0.949938509 | 0.49564943 | -1.2836199 | 0.000594744 | 0.940884161 | 0.419266865 |
| -1.05232863 | 0.58328173 | 0.93038232 | 0.593339784 | -1.2631837  | 0.014441728 |
| 0.961391624 | 0.48831163 | -1.1811143 | 0.077702236 | 0.977470711 | 0.687929742 |
| 0.851015265 | 0.02693453 | 0.98559901 | 0.811397814 | -1.11889639 | 0.119031326 |
| -1.0275124  | 0.74870779 | 0.95070799 | 0.400461394 | -1.08380647 | 0.343962072 |
| -1.122761   | 0.03801162 | -1.0500839 | 0.478287349 | -1.01630556 | 0.767503073 |
| 0.963630096 | 0.46516254 | 0.96570526 | 0.695974384 | 0.851553473 | 0.00237222  |

|             |            |            |             |             |             |
|-------------|------------|------------|-------------|-------------|-------------|
| 0.87016109  | 0.08644366 | 0.7892854  | 8.01976E-05 | -1.00268277 | 0.973284994 |
| -1.0572908  | 0.36846735 | -1.1301007 | 0.049961218 | -1.17225148 | 0.012413423 |
| 0.729336671 | 1.99E-09   | -1.272844  | 0.025206576 | 0.829685798 | 8.24E-05    |
| 0.956471519 | 0.49847335 | 0.89043716 | 0.087273334 | 0.821554073 | 0.00397566  |
| -1.05438169 | 0.37345656 | 0.9554375  | 0.438329425 | 0.992553032 | 0.899660281 |
| 0.948325901 | 0.33970195 | 0.94067338 | 0.236260338 | 0.611933451 | 3.56E-12    |
| 0.982582425 | 0.8323092  | 0.89066841 | 0.127838621 | -1.14756432 | 0.101391784 |
| 0.948833104 | 0.53155643 | 0.9466361  | 0.555380744 | -1.05537472 | 0.52091827  |
| 0.978890204 | 0.7430017  | 0.63736179 | 1.1001E-10  | -1.04331416 | 0.515267665 |
| -1.06272035 | 0.36816476 | -1.0042542 | 0.952488076 | 0.434650675 | 2.00E-17    |
| 0.908061187 | 0.16152623 | -1.2481534 | 0.011124458 | 0.643669419 | 2.90E-08    |
| 0.802700587 | 0.08283395 | -1.0561968 | 0.319663606 | 0.890603812 | 0.355641174 |
| -1.08950901 | 0.20191426 | 0.88319928 | 0.016883033 | 0.708231405 | 3.20E-06    |
| 0.9928221   | 0.81148644 | -1.2070302 | 0.021786197 | 0.910331201 | 0.002861081 |
| -1.03801149 | 0.55613104 | -1.1812826 | 0.008958745 | 0.849404444 | 0.012287091 |
| 0.823643287 | 0.00643708 | 0.86582214 | 0.001780693 | 0.917030018 | 0.21101506  |
| 0.956290788 | 0.55353239 | 0.84112848 | 0.010570646 | 0.956225241 | 0.552926259 |
| 0.962820469 | 0.45293081 | 0.75409969 | 1.38802E-05 | 0.976048564 | 0.630527934 |
| -1.07994838 | 0.17882264 | 0.70678197 | 5.73072E-08 | -1.03402685 | 0.555921877 |
| -1.0151989  | 0.77516931 | -1.0869949 | 0.316968489 | 0.992493693 | 0.886522421 |
| -1.03239336 | 0.70564291 | 0.92617988 | 0.36198748  | 0.909361339 | 0.262779502 |
| 0.956403306 | 0.3793634  | -1.0981498 | 0.153918528 | 0.843008522 | 0.001294291 |
| 0.997437218 | 0.96965931 | -1.0586013 | 0.399306091 | -1.15659001 | 0.034742469 |
| -1.54800567 | 0.00149374 | -1.0395346 | 0.570587237 | -1.1852372  | 0.198449079 |
| 0.930963786 | 0.16206298 | 0.89368694 | 0.3700608   | 0.930209347 | 0.157444077 |
| -1.00960412 | 0.84369827 | -1.0135006 | 0.840603543 | -1.01253347 | 0.797258561 |
| 0.981425464 | 0.8111773  | 0.91473774 | 0.004507266 | -1.01748005 | 0.82523266  |
| 0.912230101 | 0.18221885 | 0.96337547 | 0.556076258 | -1.07712343 | 0.279280947 |
| 0.855385894 | 0.08684001 | 0.86466277 | 0.03818346  | 0.999463148 | 0.995237773 |
| 0.999345481 | 0.9938873  | 0.77330769 | 0.001169914 | -1.0086635  | 0.919604172 |
| 0.941344056 | 0.57898923 | 0.95045192 | 0.315114465 | -1.1594305  | 0.177572426 |
| 0.874376403 | 0.17860597 | -1.1243205 | 0.042762728 | -1.03577601 | 0.722591092 |
| 0.938920137 | 0.29213841 | 0.97417947 | 0.620640049 | 0.897261481 | 0.07280854  |
| 0.897237893 | 0.17665356 | 0.96661374 | 0.687477193 | 0.819513555 | 0.01499905  |
| 0.70169685  | 5.14E-05   | 0.84621825 | 0.001621611 | 0.5485357   | 7.58E-10    |
| -1.17042987 | 0.05459055 | 0.93934177 | 0.355579141 | -1.26216836 | 0.005290116 |
| 0.669730183 | 1.81E-05   | -1.2125282 | 0.14565347  | 0.780936788 | 0.005355454 |
| 0.743317407 | 8.55E-05   | 0.97695129 | 0.645856405 | 0.716236844 | 1.39E-05    |
| -1.04193215 | 0.70947742 | -1.0475281 | 0.340138708 | 0.817795616 | 0.072197615 |
| 0.809687511 | 0.00742164 | -1.0038767 | 0.960668201 | 0.775022176 | 0.001442206 |
| -1.17661899 | 0.00031155 | -1.1201595 | 0.100873545 | -1.02485129 | 0.563107343 |
| -1.26169342 | 0.00033247 | 0.865895   | 0.113724837 | 0.956596794 | 0.467339667 |
| -1.01597507 | 0.88882892 | 0.89222353 | 0.185691571 | 0.927814585 | 0.509553168 |
| 0.753552608 | 0.01762414 | -1.0442516 | 0.690813817 | 0.67809604  | 0.001431856 |

|             |            |            |             |             |             |
|-------------|------------|------------|-------------|-------------|-------------|
| 0.992769941 | 0.90000109 | -1.0395412 | 0.695358429 | -1.12625961 | 0.043395222 |
| -1.08936309 | 0.04076453 | 0.94120041 | 0.310919753 | -1.07561827 | 0.079828548 |
| -1.00025398 | 0.99690837 | 0.97975288 | 0.797181143 | -1.08597736 | 0.21156333  |
| -1.14036606 | 0.00875024 | 0.73866574 | 0.000415547 | -1.16825752 | 0.002166677 |
| -1.26822864 | 3.70E-05   | -1.0901146 | 0.286115707 | -1.220178   | 0.000410981 |
| -1.07834334 | 0.44552765 | 0.84589259 | 0.05461568  | -1.31335434 | 0.007530971 |
| -1.05631326 | 0.58246235 | 0.75588342 | 0.000188774 | -1.13411383 | 0.20932449  |
| 0.943125614 | 0.28562971 | 0.74034189 | 0.008296612 | -1.12535262 | 0.034044861 |
| -1.02829241 | 0.66956291 | 0.84977475 | 0.036421054 | 0.912038529 | 0.162519333 |
| 0.947471756 | 0.55885465 | -1.0008455 | 0.984091821 | 0.534054338 | 7.78E-09    |
| -1.03226319 | 0.69685575 | -1.2023196 | 0.003657459 | 0.738713309 | 0.000455438 |
| -1.03909116 | 0.52272954 | 0.97197266 | 0.80206159  | -1.23859532 | 0.000716735 |
| -1.13070165 | 0.0207527  | 0.76892806 | 0.026979977 | -1.16011853 | 0.005686753 |
| 0.963451041 | 0.3548258  | -1.0946196 | 0.121591265 | 0.981291509 | 0.637840505 |
| -1.00106107 | 0.98115298 | 0.99376322 | 0.878780548 | -1.06433666 | 0.168641926 |
| 0.927945183 | 0.4817432  | -1.0511264 | 0.448003353 | -1.11495281 | 0.307258529 |
| 0.961293387 | 0.62296262 | -1.1776967 | 0.001323106 | 0.915428255 | 0.273262261 |
| -1.10961155 | 0.32835268 | -1.3100242 | 4.34309E-06 | -1.15668658 | 0.173164632 |
| -1.16910819 | 0.02257691 | -1.0501496 | 0.620099047 | -1.24954885 | 0.001492011 |
| -1.21835573 | 0.05768619 | -1.0097877 | 0.922026379 | -2.11968388 | 1.04E-09    |
| -1.05732563 | 0.32252059 | -1.009351  | 0.86452923  | 0.932966034 | 0.219312251 |
| -1.15557744 | 0.05648045 | 0.96087063 | 0.541863804 | -1.15909821 | 0.051648069 |
| -1.10106116 | 0.01647067 | 0.67321682 | 6.93299E-05 | -1.01964354 | 0.618897955 |
| -1.02146527 | 0.70765962 | 0.93150213 | 0.385356157 | 0.992766116 | 0.8979373   |
| -1.36970189 | 7.51E-06   | 0.97479022 | 0.670087167 | -1.41963529 | 9.96E-07    |
| -1.07432505 | 0.46183958 | -1.1409794 | 0.013373867 | -1.00201371 | 0.983485234 |
| -1.29391726 | 0.00596519 | 0.95396105 | 0.242624605 | -1.20149813 | 0.04628242  |
| 0.927170342 | 0.1394294  | -1.0545184 | 0.240064474 | -1.04736546 | 0.362671814 |
| -1.05205055 | 0.52893595 | -1.0770145 | 0.485190349 | 0.967385608 | 0.680422051 |
| -1.04159616 | 0.34418545 | -1.1977785 | 0.027855872 | -1.05350114 | 0.227619234 |
| -1.01717144 | 0.62013935 | -1.2546671 | 0.035947027 | 0.997557678 | 0.943184024 |
| -1.13317005 | 0.08560319 | -1.1618613 | 0.028248604 | -1.1690307  | 0.033061938 |
| -1.12283764 | 0.04646417 | -1.3109866 | 0.010300576 | -1.01172983 | 0.838223853 |
| -1.15950118 | 0.05979919 | 0.98380691 | 0.771082147 | 0.715339002 | 6.07E-05    |
| -1.22145181 | 0.00620729 | -1.0735057 | 0.343241142 | -1.18452062 | 0.019329474 |
| -1.15139534 | 0.07734322 | -1.0394326 | 0.32435331  | 0.989574754 | 0.894000874 |
| 0.925998079 | 0.15201323 | -1.0716622 | 0.224594278 | -1.07737061 | 0.164744106 |
| 0.820487799 | 0.01871352 | -1.297055  | 0.000140964 | 0.916032215 | 0.287247188 |
| 0.766016394 | 0.00445795 | -1.2046632 | 0.059552569 | 0.699366838 | 0.000206379 |
| -1.12389277 | 0.06549828 | 0.98166578 | 0.837847902 | 0.998051713 | 0.975070375 |
| -1.03715564 | 0.5350183  | 0.93209563 | 0.168742295 | -1.07182551 | 0.240397834 |
| -1.05393932 | 0.38291642 | -1.0037841 | 0.962549644 | -1.13558798 | 0.037838358 |
| 0.940017313 | 0.28459938 | -1.0455755 | 0.301328634 | 0.972286247 | 0.625366409 |
| 0.967729714 | 0.51483357 | 0.98381007 | 0.634627415 | -1.14595827 | 0.008703403 |

|             |            |            |             |             |             |
|-------------|------------|------------|-------------|-------------|-------------|
| 0.991914539 | 0.94454815 | -1.1630134 | 0.039047155 | -1.12379562 | 0.319582815 |
| -1.07430396 | 0.13690843 | -1.0196499 | 0.733428879 | 0.956907095 | 0.357549981 |
| 0.990250606 | 0.80554487 | 0.9665464  | 0.660171627 | 0.885234082 | 0.003277628 |
| 0.940004677 | 0.18035204 | 0.99930257 | 0.992108933 | 0.965545358 | 0.445137753 |
| -1.05124192 | 0.59971939 | -1.0939014 | 0.256666998 | -1.15117909 | 0.142774921 |
| -1.2793194  | 0.0029102  | -1.0140891 | 0.792460137 | -1.32434684 | 0.000791065 |
| 0.895658737 | 0.15297093 | 0.95255429 | 0.553865719 | -1.11407638 | 0.161067641 |
| -1.00176367 | 0.98489613 | 0.73836591 | 0.001363268 | -1.19777639 | 0.05667064  |
| -1.03704312 | 0.59501546 | 0.95115701 | 0.423704401 | -1.07897789 | 0.268724885 |
| -1.07445918 | 0.05016086 | -1.0318221 | 0.594071643 | 0.915272726 | 0.016719905 |
| -1.01545143 | 0.82669116 | -1.1046105 | 0.101519927 | -1.09704623 | 0.189460976 |
| -1.27233402 | 0.2522365  | 0.87559421 | 0.024095587 | -1.3929651  | 0.117107455 |
| -1.09284143 | 0.36123677 | -1.0635545 | 0.223457674 | -1.05749969 | 0.564412134 |
| 0.807661262 | 0.02158496 | -1.0959677 | 0.433700398 | -1.13311485 | 0.171898396 |
| 0.650758967 | 0.0069351  | 0.81677874 | 8.18594E-05 | -1.06133417 | 0.698750675 |
| 0.952629825 | 0.54218696 | -1.0779541 | 0.06341626  | 0.874642823 | 0.096245434 |
| 0.918784728 | 0.2992861  | -1.0019256 | 0.966493174 | -1.00090906 | 0.991070855 |
| 0.997716912 | 0.97796731 | 0.85784871 | 0.111129699 | -1.30941913 | 0.00186787  |
| 0.996472861 | 0.97536428 | -1.2934304 | 0.001944551 | -1.09408036 | 0.433289113 |
| 0.814384445 | 0.00428187 | -1.205191  | 0.017349586 | 0.796940107 | 0.001731757 |
| 0.986325007 | 0.85532716 | -1.344548  | 0.002339572 | 0.850229944 | 0.03536031  |
| -1.02370717 | 0.67663407 | -1.1253444 | 0.08827219  | -1.08203374 | 0.163990769 |
| -1.00994416 | 0.87192205 | 0.90820689 | 0.009596153 | 0.908406755 | 0.121683875 |
| 0.817379294 | 2.30E-06   | -1.0401283 | 0.574729846 | 0.804347247 | 4.98E-07    |
| 0.441725491 | 3.51E-13   | -1.3352491 | 0.170471749 | 0.459009259 | 1.76E-12    |
| 0.938418605 | 0.27761797 | -1.0192629 | 0.84386837  | -1.05222803 | 0.383570158 |
| 0.928202307 | 0.2087676  | -1.0551994 | 0.554140917 | -1.06045712 | 0.320667061 |
| 0.874270122 | 0.01257038 | 0.94084485 | 0.69179339  | 0.886463881 | 0.024391139 |
| -1.11607562 | 0.15688216 | 0.72696829 | 0.00017677  | -1.02582244 | 0.740198979 |
| 0.972773111 | 0.5566922  | 0.86879728 | 0.08753452  | -1.03104107 | 0.515274179 |
| 0.857042416 | 0.01708283 | -1.0774353 | 0.369311896 | 0.859636092 | 0.019255412 |
| 0.986219054 | 0.90726579 | 0.89716183 | 0.344927179 | 0.885063359 | 0.307733053 |
| 0.983494128 | 0.88766621 | 0.82483995 | 0.007123928 | 0.792193087 | 0.052094483 |
| -1.00004235 | 0.99933739 | 0.80603093 | 0.005876539 | 0.748584192 | 5.15E-07    |
| 0.898492    | 0.03591653 | 0.96116714 | 0.481473563 | 0.916951111 | 0.087040313 |
| -1.00233994 | 0.97523191 | 0.98440493 | 0.797919073 | 0.821423451 | 0.011253307 |
| -1.15303553 | 0.01344881 | 0.84272236 | 3.81242E-05 | -1.02467728 | 0.663430495 |
| -1.46912017 | 5.36E-07   | 0.93797362 | 0.457008058 | 0.838326477 | 0.011709441 |
| 0.89182183  | 0.04875153 | 0.94634543 | 0.345533791 | 0.934096976 | 0.235084626 |
| 0.976267414 | 0.69012372 | 0.90447144 | 0.092207123 | 0.949895845 | 0.394784679 |
| -1.00338289 | 0.9495468  | 0.98413985 | 0.759821106 | -1.10668741 | 0.061719479 |
| 0.791204641 | 0.0002611  | 0.96410588 | 0.634663392 | 0.977675939 | 0.707695124 |
| 0.998108186 | 0.97943081 | -1.0260088 | 0.584497088 | 0.858432111 | 0.041551664 |
| -1.33677681 | 6.51E-06   | 0.75975601 | 5.46787E-05 | -1.45473608 | 3.23E-08    |

|             |            |            |             |             |             |
|-------------|------------|------------|-------------|-------------|-------------|
| -1.02064897 | 0.71816498 | 0.97909033 | 0.859216654 | -1.37877884 | 5.20E-07    |
| -1.10454127 | 0.08777365 | 0.95793614 | 0.71545671  | -1.03843284 | 0.512347015 |
| 0.966467452 | 0.45734879 | 0.89680272 | 0.036436405 | 0.932316088 | 0.129861697 |
| 0.907482606 | 0.0974939  | 0.94475505 | 0.25829421  | 0.803637984 | 0.000373966 |
| -1.00791335 | 0.94005026 | 0.67996086 | 3.84121E-06 | 0.859965738 | 0.153941206 |
| -1.22958707 | 0.17454744 | -1.2600696 | 0.000119628 | -1.19756254 | 0.235304453 |
| -1.33547157 | 0.00168666 | 0.80394106 | 0.002116406 | -1.03058359 | 0.731898048 |
| 0.979825311 | 0.75201659 | -1.0311249 | 0.591512634 | 0.844638975 | 0.011084333 |
| 0.998287892 | 0.98142685 | -1.0687561 | 0.27206061  | 0.785227092 | 0.0017218   |
| 0.942065678 | 0.48926719 | -1.0238964 | 0.658440532 | -1.04826551 | 0.58465079  |
| 0.925698125 | 0.28158169 | 0.63874319 | 7.00345E-10 | 0.969248285 | 0.661674553 |
| -1.06360662 | 0.43956028 | -1.0373978 | 0.61755498  | -1.24956721 | 0.006834307 |
| -1.05822133 | 0.33137532 | -1.1407055 | 0.027422366 | -1.0961972  | 0.117498537 |
| 0.965607385 | 0.58963078 | -1.0885529 | 0.137878806 | -1.07600276 | 0.261104351 |
| 0.903140187 | 0.18111332 | -1.022201  | 0.702469099 | -1.00885669 | 0.907081408 |
| -1.07552049 | 0.11482836 | 0.93294277 | 0.133503211 | -1.26943208 | 2.64E-06    |
| 0.894938561 | 0.27048095 | 0.87569359 | 0.025000558 | 0.879739503 | 0.204219181 |
| -1.35526489 | 3.80E-06   | 0.90229378 | 0.328753823 | 0.97022428  | 0.610642425 |
| -1.02241688 | 0.67866373 | -1.0830953 | 0.597317263 | -1.09603197 | 0.090656468 |
| 0.98975717  | 0.90086012 | -1.3536532 | 0.00106148  | -1.06002911 | 0.481567921 |
| 0.84628292  | 0.02341559 | 0.92555873 | 0.233300688 | -1.09411541 | 0.214047514 |
| 0.87842025  | 0.03403741 | 0.98063956 | 0.790611072 | 0.945774096 | 0.353702139 |
| -1.07983279 | 0.09712291 | 0.89628502 | 0.20694166  | -1.02944138 | 0.526260053 |
| -1.00939136 | 0.90592681 | 0.84787154 | 0.023889308 | -1.07687329 | 0.35103863  |
| 0.969258758 | 0.57303868 | 0.96607942 | 0.664736159 | 0.856732674 | 0.006932651 |
| -1.19939438 | 0.03496733 | -1.017915  | 0.759599377 | -1.02472584 | 0.772433818 |
| -1.06172794 | 0.22180222 | -1.3017086 | 0.000146439 | 0.77349533  | 2.23E-06    |
| -1.07800842 | 0.20681668 | -1.0181524 | 0.811817679 | -1.14689295 | 0.023512892 |
| 0.999216571 | 0.99309505 | -1.0918616 | 0.058282893 | 0.953887102 | 0.602618137 |
| -1.21902837 | 0.11537978 | -1.0446323 | 0.663141581 | -1.14755015 | 0.271036401 |
| 0.996363619 | 0.95831493 | -1.0809993 | 0.192562084 | -1.24956629 | 0.002232901 |
| -1.03142667 | 0.6139206  | -1.0595115 | 0.282246703 | -1.03245531 | 0.602578601 |
| -1.10270787 | 0.16746052 | 0.99179247 | 0.920565374 | -1.1868766  | 0.017485712 |
| -1.13372759 | 0.14648054 | -1.1639366 | 0.038452346 | 0.941540226 | 0.482526986 |
| -1.01463282 | 0.86127619 | -1.006959  | 0.907793363 | -1.18053398 | 0.049898219 |
| -1.01035506 | 0.79780693 | -1.0603339 | 0.203310428 | 0.955055993 | 0.255546112 |
| 0.955047819 | 0.37651828 | 0.97155549 | 0.715392068 | 0.932817555 | 0.18320916  |
| -1.22528645 | 0.0030419  | -1.014741  | 0.791442176 | -1.18711097 | 0.011387681 |
| -1.2899545  | 2.39E-05   | -1.1248313 | 0.167321582 | -1.32964286 | 3.45E-06    |
| 0.974185901 | 0.53712519 | 0.98633981 | 0.777618564 | 0.943954694 | 0.176430757 |
| -1.15549136 | 0.12162729 | -1.1185665 | 0.062002103 | -1.33290282 | 0.002848721 |
| -1.09831354 | 0.30821543 | 0.87617718 | 0.148362454 | -1.12930743 | 0.187828818 |
| -1.03425955 | 0.70814631 | -1.2993866 | 0.038978294 | -1.21601421 | 0.033274406 |
| -1.18405401 | 0.01597326 | -1.0753884 | 0.299477998 | -1.39264476 | 9.97E-06    |

|             |            |            |             |             |             |
|-------------|------------|------------|-------------|-------------|-------------|
| -1.23932729 | 0.04745803 | -1.0560559 | 0.375079832 | -1.44419277 | 0.001018768 |
| -1.15410641 | 0.18322694 | -1.1070732 | 0.151245111 | 0.92357408  | 0.457778515 |
| -1.13475249 | 0.29867028 | -1.1937746 | 0.042386226 | -1.23721295 | 0.082896158 |
| 0.991638732 | 0.94382729 | 0.97008386 | 0.714967889 | 0.909158211 | 0.425549475 |
| -1.15833313 | 0.10334522 | -1.0860282 | 0.044015245 | -1.07895457 | 0.395403508 |
| 0.940890934 | 0.4224862  | 0.95678638 | 0.395546679 | -1.01937445 | 0.800025966 |
| 0.970851046 | 0.58891457 | -1.2088449 | 0.005428022 | -1.05060729 | 0.368295168 |
| -1.22714635 | 0.0667766  | -1.3810444 | 2.84077E-07 | -1.63989793 | 3.43E-05    |
| -1.00091621 | 0.98755282 | 0.98892116 | 0.792331188 | -1.00148841 | 0.979786305 |
| 0.985799104 | 0.79152737 | -1.3809791 | 0.000908153 | 0.512354556 | 2.07E-17    |
| -1.24099878 | 0.00103378 | -1.0964802 | 0.316830586 | -1.10564605 | 0.112351486 |
| -1.12465712 | 0.03735075 | -1.0997584 | 0.292828272 | -1.38011728 | 2.97E-07    |
| 0.997768709 | 0.97462873 | -1.0892576 | 0.213394507 | -1.01023078 | 0.884784209 |
| 0.803994192 | 0.10056977 | -1.1003608 | 0.369896385 | -1.07614433 | 0.576427792 |
| 0.920727749 | 0.15521831 | 0.99035559 | 0.927699202 | -1.0790074  | 0.190026181 |
| 0.822451309 | 0.00479179 | -1.0513551 | 0.679250537 | 0.880355296 | 0.060347613 |
| 0.963414995 | 0.40851858 | 0.89780493 | 0.367471793 | 0.865928806 | 0.002194897 |
| 0.833921545 | 0.00029954 | -1.165769  | 0.08952437  | 0.892388879 | 0.018731031 |
| 0.970372892 | 0.60638821 | -1.0522497 | 0.502152362 | 0.841402032 | 0.004373755 |
| -1.05077935 | 0.53511752 | -1.0661742 | 0.244139006 | -1.37300861 | 0.000198471 |
| 0.923997112 | 0.27726991 | -1.3550454 | 0.007530884 | -1.25013267 | 0.003080598 |
| 0.948444638 | 0.1654488  | 0.94441545 | 0.332075694 | -1.06267404 | 0.112210391 |
| 0.959688482 | 0.50152079 | 0.54351695 | 7.68129E-16 | -1.04470623 | 0.475106507 |
| -1.0264291  | 0.70227339 | -1.2359272 | 0.001261121 | -1.13445294 | 0.068591917 |
| -1.18317942 | 0.00890704 | -1.1879221 | 0.002831015 | 0.926260256 | 0.221770282 |
| 0.909573365 | 0.11013656 | 0.91020297 | 0.18401573  | 0.907314823 | 0.101325952 |
| -1.04853408 | 0.43240686 | 0.98312305 | 0.896768004 | 0.965048274 | 0.555130655 |
| 0.948812542 | 0.40929169 | 0.92490434 | 0.178691469 | -1.03086705 | 0.632354705 |
| 0.817895012 | 0.00121129 | 0.90601986 | 0.143121219 | 0.355892441 | 6.63E-24    |
| -1.18644859 | 0.06426799 | 0.69646519 | 7.53081E-11 | -1.03875855 | 0.676008828 |
| 0.968613047 | 0.70715365 | 0.9915547  | 0.857359244 | -1.03469071 | 0.687899383 |
| 0.949116537 | 0.55248763 | 0.92989413 | 0.215787064 | -1.09801677 | 0.289252527 |
| 0.987910078 | 0.81953969 | 0.98845297 | 0.884177817 | 0.838803292 | 0.001657109 |
| 0.972729278 | 0.58936476 | -1.0892526 | 0.240407511 | 0.559924308 | 6.16E-16    |
| -1.0235794  | 0.69592536 | -1.0027117 | 0.942917835 | 0.863620183 | 0.016638579 |
| 0.986288855 | 0.79000378 | 0.93396922 | 0.266262705 | 0.941784591 | 0.250086823 |
| 0.869996279 | 0.00327076 | -1.0165631 | 0.809693915 | 0.904634815 | 0.030967343 |
| -1.51621309 | 0.00015533 | -1.0169879 | 0.786777431 | -1.582997   | 3.79E-05    |
| -1.32719983 | 0.01659147 | 0.95568562 | 0.440648001 | -1.43560433 | 0.002599339 |
| -1.14466138 | 0.00984458 | -1.081497  | 0.196560975 | 0.976597233 | 0.640872968 |
| -1.15325604 | 0.010517   | 0.9947785  | 0.934270484 | -1.33834165 | 1.45E-06    |
| 0.986115367 | 0.8021221  | 0.90275059 | 0.087669417 | -1.02337525 | 0.67892697  |
| 0.876496723 | 0.07418239 | -1.1571918 | 0.112538425 | 0.878803244 | 0.079962145 |
| -1.05161939 | 0.41640614 | 0.97357357 | 0.752331991 | 0.926110662 | 0.217055564 |

|             |            |            |             |             |             |
|-------------|------------|------------|-------------|-------------|-------------|
| -1.03614081 | 0.51125229 | -1.1039897 | 0.262480513 | -1.00774079 | 0.886331991 |
| -1.08560939 | 0.41227389 | 0.93809056 | 0.233665371 | 0.796050206 | 0.025696961 |
| 0.990362508 | 0.87678034 | 0.95233552 | 0.341786614 | 0.815904097 | 0.001864639 |
| -1.04379048 | 0.54747073 | 0.78261806 | 0.000126575 | -1.18248263 | 0.021539072 |
| -1.07153243 | 0.40803986 | 0.96179625 | 0.453477929 | -1.53623971 | 3.40E-06    |
| -1.13830193 | 0.1552576  | 0.78582624 | 2.01056E-06 | -1.39956052 | 0.000447887 |
| -1.11641525 | 0.09071891 | -1.2627718 | 0.026509363 | -1.05433041 | 0.411569106 |
| -1.04407394 | 0.52023714 | -1.4058707 | 0.004369326 | -1.02084712 | 0.758043288 |
| -1.34321697 | 0.00663664 | -1.0211692 | 0.679796573 | -1.13755035 | 0.22272518  |
| -1.10573468 | 0.07928235 | -1.2178234 | 0.000569176 | -1.07236336 | 0.219107718 |
| 0.929878516 | 0.14394332 | 0.98748897 | 0.821461565 | -1.11836511 | 0.026492258 |
| -1.03714618 | 0.57459365 | -1.0141646 | 0.846674396 | 0.897343002 | 0.09931947  |
| 0.985239276 | 0.87230397 | 0.98009591 | 0.74482547  | 0.870484422 | 0.137830274 |
| -1.05430906 | 0.61325971 | 0.93728059 | 0.232924269 | 0.779549982 | 0.02019051  |
| 0.935202472 | 0.15356412 | 0.78093128 | 0.016006157 | 0.736989767 | 1.93E-08    |
| 0.990708075 | 0.90278705 | 0.93080578 | 0.253803217 | -1.13049107 | 0.112753215 |
| -1.10727822 | 0.33417318 | -1.1347879 | 0.079738305 | -1.38087988 | 0.00320461  |
| -1.02512358 | 0.50851752 | -1.0834613 | 0.337628056 | -1.03366267 | 0.378441282 |
| -1.02546404 | 0.67716057 | -1.160047  | 0.104362934 | 0.534538357 | 1.65E-14    |
| 0.861938437 | 0.03874615 | -1.0202512 | 0.755027435 | 0.715128093 | 1.40E-05    |
| -1.02923642 | 0.660305   | -1.0509079 | 0.459436234 | 0.943356914 | 0.375176493 |
| -1.14648864 | 0.05684163 | -1.4742794 | 0.000484849 | -1.1596484  | 0.039629699 |
| 0.94217347  | 0.40611358 | -1.210805  | 0.001261504 | 0.745318111 | 0.000126763 |
| -1.02701948 | 0.76732765 | 0.9797664  | 0.678378689 | 0.768110391 | 0.004798068 |
| 0.654549786 | 0.00109304 | 0.84257456 | 0.010490148 | 0.834515775 | 0.146459072 |
| -1.12339364 | 0.14760176 | 0.76736526 | 0.005769891 | -1.08473337 | 0.309006215 |
| 0.964893225 | 0.67735857 | 0.98861471 | 0.912759814 | -1.36860178 | 0.000553485 |
| 0.838557287 | 0.00582371 | 0.9545798  | 0.319690298 | -1.01882017 | 0.762174241 |
| 0.884444081 | 0.2031212  | -1.069738  | 0.379462912 | 0.760275441 | 0.005770249 |
| -1.07326877 | 0.29055551 | -1.429846  | 0.001206106 | 0.768067597 | 0.000206058 |
| 0.938808163 | 0.42924351 | -1.0209713 | 0.580029326 | 0.678734102 | 9.62E-06    |
| -1.02578151 | 0.6627794  | 0.8652749  | 0.019453621 | -1.10398095 | 0.094142774 |
| 0.876240588 | 0.24387476 | 0.64305324 | 5.81541E-08 | -1.07452821 | 0.524187008 |
| 0.96984747  | 0.24277815 | 0.94786119 | 0.415161337 | 0.952809704 | 0.067682707 |
| -1.11485745 | 0.07867833 | -1.0826886 | 0.262991376 | -1.15319634 | 0.022481573 |
| 0.8521892   | 0.00415173 | -1.0476968 | 0.515268485 | 0.803073846 | 0.00013816  |
| -1.030961   | 0.63269808 | 0.87958041 | 0.15817989  | 0.653339942 | 1.25E-08    |
| 0.995072158 | 0.94445966 | 0.90904897 | 0.440746638 | 0.854432484 | 0.030027494 |
| -1.14858351 | 0.10469259 | -1.0470408 | 0.564034558 | 0.930045621 | 0.39141657  |
| 0.967197732 | 0.66580556 | -1.0265339 | 0.760363881 | -1.08853922 | 0.274206516 |
| -1.19001774 | 0.00949398 | -1.0124771 | 0.84045726  | -1.07974852 | 0.240618288 |
| -1.13220687 | 0.14090869 | 0.87289016 | 0.159542631 | -1.32046692 | 0.00150357  |
| -1.01659876 | 0.76022651 | 0.78685807 | 0.000655991 | -1.12465716 | 0.032972909 |
| -1.11717167 | 0.40623648 | 0.75881193 | 0.000999383 | -1.17795139 | 0.221336273 |

|             |            |            |             |             |             |
|-------------|------------|------------|-------------|-------------|-------------|
| -1.00962502 | 0.89668434 | -1.1716462 | 0.008574304 | 0.826895435 | 0.012366764 |
| -1.09922682 | 0.18805443 | 0.91385987 | 0.425294585 | -1.10115472 | 0.180136487 |
| -1.13520242 | 0.09155466 | 0.98003266 | 0.439945119 | -1.27827089 | 0.00159392  |
| -1.36920605 | 0.00021042 | -1.1488775 | 0.026094821 | -1.0873373  | 0.294003065 |
| -1.30738958 | 2.27E-05   | -1.0183339 | 0.735076328 | -1.33989177 | 5.13E-06    |
| 0.963056664 | 0.50812778 | 0.87611473 | 0.041845238 | 0.706755593 | 1.03E-07    |
| 0.918864119 | 0.06803659 | 0.64131415 | 5.87639E-08 | 0.967068892 | 0.464343915 |
| 0.986885844 | 0.8024908  | 0.87319282 | 0.112059746 | 0.957877394 | 0.416146266 |
| -1.01431636 | 0.82498167 | -1.1228844 | 0.137104499 | 0.996506136 | 0.956567539 |
| -1.15401581 | 0.01843193 | -1.0774298 | 0.253882474 | -1.03051256 | 0.612097174 |
| 0.992728767 | 0.86208187 | -1.2149968 | 0.022819137 | -1.0165624  | 0.695934185 |
| 0.990533989 | 0.88797251 | 0.87009224 | 0.012240529 | -1.05344741 | 0.441823995 |
| -1.02367997 | 0.66886132 | -1.1255767 | 0.37544589  | -1.07738604 | 0.176477749 |
| 0.912516694 | 0.19998986 | -1.0994146 | 0.202276574 | 0.899701545 | 0.139989328 |
| 0.934455331 | 0.15584057 | -1.1607716 | 0.040344184 | -1.05299095 | 0.277816824 |
| -1.16359672 | 0.06040752 | -1.1990413 | 0.017177942 | -1.14946482 | 0.083501745 |
| -1.10249463 | 0.37607495 | -1.0248074 | 0.757651786 | -1.04911042 | 0.662746409 |
| -1.10012525 | 0.01724529 | -1.1219033 | 0.051496541 | 0.826366263 | 8.85E-06    |
| 0.992276936 | 0.81121684 | 0.79699481 | 0.000185516 | -1.025946   | 0.431241551 |
| -1.15356335 | 0.00876637 | 0.85548456 | 0.001149623 | -1.1306096  | 0.023158413 |
| -1.04067527 | 0.61486037 | 0.99015571 | 0.851289424 | -1.04845618 | 0.550598955 |
| -1.1490205  | 0.15228327 | -1.0734156 | 0.272993892 | -1.05216801 | 0.597189794 |
| -1.00314162 | 0.94784569 | 0.99949711 | 0.993220705 | 0.916961718 | 0.074914132 |
| 0.924127252 | 0.2649423  | -1.0984144 | 0.028894081 | -1.2091461  | 0.008979992 |
| -1.05780547 | 0.14145387 | 0.88578286 | 0.076703802 | -1.04327822 | 0.265533115 |
| 0.964719393 | 0.32134448 | 0.98713421 | 0.812818736 | 0.962250614 | 0.288360248 |
| 0.907916461 | 0.09641166 | -1.0216172 | 0.762966572 | 0.841160857 | 0.003758596 |
| -1.06684071 | 0.30910129 | -1.0161792 | 0.734596704 | -1.07212932 | 0.273951575 |
| 0.974223353 | 0.62147824 | -1.1819388 | 0.038978593 | -1.04738261 | 0.382573658 |
| -1.23669449 | 0.00223657 | -1.2194419 | 0.07514805  | 0.917082894 | 0.19635391  |
| 0.988077102 | 0.77927549 | 0.96765877 | 0.400900706 | 0.947747244 | 0.213012545 |
| 0.605540216 | 0.0001531  | 0.98157117 | 0.567101234 | 0.392733195 | 4.69E-10    |
| 0.999881843 | 0.99874324 | -1.0673043 | 0.220202904 | 0.833260889 | 0.017896352 |
| 0.918943412 | 0.04470678 | 0.95319405 | 0.545423856 | 0.979861176 | 0.622818043 |
| -1.24074623 | 0.1011892  | -1.0338797 | 0.728971952 | -1.5584925  | 0.001166173 |
| -1.12728424 | 0.07455188 | -1.0477221 | 0.33308321  | 0.937130277 | 0.328741558 |
| 0.571661281 | 3.72E-10   | -1.0811443 | 0.27028017  | 0.667003906 | 9.28E-07    |
| 0.989720665 | 0.85029993 | -1.0017713 | 0.962689689 | 0.958561717 | 0.44069507  |
| -1.00806205 | 0.8716676  | 0.99016273 | 0.783991415 | 0.748016877 | 2.82E-07    |
| -1.47139141 | 0.00044669 | 0.9731658  | 0.635670875 | -1.15719551 | 0.163007166 |
| 0.428923713 | 7.00E-14   | 0.99791179 | 0.973657743 | 0.688066061 | 4.79E-05    |
| 0.650955311 | 1.34E-10   | -1.0510296 | 0.348139619 | 0.968945232 | 0.562585025 |
| 0.963594473 | 0.51846763 | -1.0139985 | 0.834372855 | 0.945675614 | 0.331973354 |
| 0.973498962 | 0.5249268  | -1.0522226 | 0.23717668  | 0.816747992 | 1.21E-05    |



|             |            |            |             |             |             |
|-------------|------------|------------|-------------|-------------|-------------|
| 0.908968711 | 0.05902706 | 0.52919507 | 3.55759E-06 | -1.21024163 | 0.00031009  |
| -1.16438116 | 0.25282244 | 0.61855093 | 3.5078E-08  | -1.10324498 | 0.458744368 |
| -1.16985479 | 0.09280384 | -1.0318224 | 0.449529618 | -1.03414849 | 0.715593769 |
| -1.00187557 | 0.96609485 | 0.99074211 | 0.942940824 | 0.937261561 | 0.145610478 |
| 0.940005045 | 0.4655784  | 0.98198343 | 0.783631953 | -1.03760076 | 0.66281581  |
| -1.43171344 | 5.79E-05   | 0.68412891 | 3.23725E-06 | -1.09109343 | 0.293499851 |
| 0.86409443  | 0.31721182 | 0.92263914 | 0.145294307 | -1.02786855 | 0.850038581 |
| 0.954986029 | 0.3634102  | 0.69579019 | 1.23502E-09 | 0.735193853 | 1.11E-07    |
| 0.972637837 | 0.51423288 | -1.1977535 | 0.086152389 | -1.01918592 | 0.654680001 |
| -1.00009503 | 0.99873393 | 0.6172618  | 5.08609E-07 | -1.01222534 | 0.839239783 |
| 0.968111036 | 0.66480175 | 0.70310622 | 2.68279E-08 | 0.981133598 | 0.798880859 |
| -1.03075402 | 0.73128268 | 0.95782056 | 0.453349651 | 0.880388447 | 0.152364949 |
| 0.986889199 | 0.85098312 | -1.0267126 | 0.532587105 | -1.00065249 | 0.992590431 |
| 0.950718675 | 0.55589309 | 0.85153629 | 0.002006511 | 0.482139692 | 1.33E-11    |
| 0.695645962 | 9.95E-06   | -1.0132314 | 0.920843843 | 0.543096444 | 4.81E-11    |
| 0.964835877 | 0.59949172 | -1.1590906 | 0.113167055 | 0.898491964 | 0.120083023 |
| 0.890501199 | 0.05560765 | -1.0100793 | 0.820076602 | -1.12503561 | 0.051957734 |
| 0.713339347 | 0.00018506 | -1.0030023 | 0.971725777 | 0.815990522 | 0.019033835 |
| 0.743427185 | 0.00199485 | -1.1294907 | 0.144257909 | 0.84941028  | 0.079232414 |
| 0.851897391 | 0.07940679 | 0.89050238 | 0.426351006 | 0.969135075 | 0.727903218 |
| -1.19746954 | 0.00243021 | -1.0697987 | 0.184978693 | 0.890398422 | 0.045264054 |
| -1.38426682 | 3.38E-05   | 0.89986911 | 0.015625341 | -1.47431737 | 1.54E-06    |
| 0.855278615 | 0.04012097 | 0.94436516 | 0.341204029 | 0.850747478 | 0.034054546 |
| 0.991929088 | 0.85132141 | -1.0612293 | 0.427841765 | -1.01883688 | 0.666230644 |
| -1.01865714 | 0.74754446 | 0.98197031 | 0.836517542 | -1.03549536 | 0.544115561 |
| -1.02445476 | 0.69517911 | -1.1841986 | 0.01902046  | 0.660236497 | 1.00E-08    |
| -1.27513883 | 0.00019495 | 0.88065111 | 0.141955186 | -1.24031997 | 0.000823535 |
| 0.756658717 | 8.22E-05   | 0.50918552 | 2.02004E-12 | 0.932525646 | 0.290317367 |
| 0.848821386 | 0.05546615 | -1.0762897 | 0.28279723  | 0.64834417  | 3.47E-06    |
| -1.20911124 | 0.00066047 | 0.89919964 | 0.078675414 | 0.911057996 | 0.081727427 |
| -1.19887464 | 0.02045214 | 0.85076493 | 0.059955846 | -1.23134266 | 0.008309326 |
| 0.828690774 | 0.00241432 | 0.89856626 | 0.246191408 | 0.767681023 | 3.94E-05    |
| 0.917514141 | 0.30956328 | 0.90108938 | 0.250437051 | 0.704603937 | 0.000111048 |
| 0.908796133 | 0.06986391 | -1.0474926 | 0.416191677 | 0.889208775 | 0.027174606 |
| 0.966321137 | 0.6258723  | -1.2311382 | 0.005483715 | -1.01950507 | 0.783227168 |
| 0.955712249 | 0.70282317 | -1.0678722 | 0.380835262 | 0.946604388 | 0.644072282 |
| -1.01521887 | 0.76743972 | -1.0461464 | 0.299114149 | 0.990815682 | 0.856605353 |
| 0.984796375 | 0.84086598 | 0.90086169 | 0.073214432 | 0.762756136 | 0.000770628 |
| -1.0950174  | 0.46060093 | 0.73051417 | 4.24054E-06 | 0.855649545 | 0.207304317 |
| -1.00401278 | 0.95671837 | -1.167511  | 0.013691335 | -1.30682932 | 0.000607247 |
| -1.11882659 | 0.04423922 | 0.80899635 | 0.002052744 | -1.14067844 | 0.019166459 |
| 0.964096684 | 0.65471896 | 0.70862142 | 0.000134513 | -1.1025251  | 0.235219011 |
| 0.815524131 | 0.00161693 | 0.93575636 | 0.211471887 | 0.937492659 | 0.297843759 |
| -1.09216125 | 0.28007342 | -1.1343851 | 0.102629011 | -1.0090278  | 0.911841716 |

|             |            |            |             |             |             |
|-------------|------------|------------|-------------|-------------|-------------|
| 0.884388813 | 0.08783348 | 0.9065418  | 0.102162752 | 0.799850355 | 0.002589348 |
| 0.994933981 | 0.92455567 | 0.94026689 | 0.466173271 | 0.953466196 | 0.376029768 |
| -1.02651442 | 0.65355657 | 0.96690759 | 0.517893492 | 0.970473111 | 0.607326162 |
| 0.955487202 | 0.42821121 | -1.044574  | 0.535140674 | -1.00494172 | 0.931449658 |
| 0.99917486  | 0.99311098 | 0.61622301 | 0.000141157 | -1.00007643 | 0.999362145 |
| 0.984376505 | 0.77082799 | 0.97336251 | 0.59740772  | 0.798674014 | 0.00010836  |
| 0.96000763  | 0.38630981 | 0.90205929 | 0.180322757 | 0.823922147 | 0.000121532 |
| 0.959801252 | 0.38392034 | -1.0129272 | 0.916636227 | -1.05275854 | 0.276205955 |
| -1.52310953 | 3.77E-06   | -1.2256409 | 0.007679156 | -1.44283219 | 3.82E-05    |
| 0.975444351 | 0.73096379 | -1.1335675 | 0.025340376 | -1.04214902 | 0.568396184 |
| 0.839724299 | 0.02765426 | 0.92966551 | 0.37370992  | 0.997031836 | 0.96941339  |
| -1.01592648 | 0.82547191 | 0.86501025 | 0.021843648 | -1.05302745 | 0.471839456 |
| -1.13318416 | 0.11858517 | -1.1240693 | 0.153547135 | 0.954888329 | 0.560604087 |
| 0.953910813 | 0.66871844 | 0.77061245 | 0.000529442 | -1.04048234 | 0.718864801 |
| 0.854989861 | 0.44778511 | 0.91171453 | 0.089117255 | 0.66707326  | 0.053283333 |
| 0.950393129 | 0.74483839 | -1.0478345 | 0.423857638 | 0.781326942 | 0.118485498 |
| 0.987759479 | 0.83298437 | 0.96641437 | 0.551730704 | 0.982141574 | 0.757730877 |
| -1.00409313 | 0.93767392 | 0.88485838 | 0.204148022 | 0.902761711 | 0.054312415 |
| 0.948213298 | 0.0925898  | 0.94157137 | 0.26797799  | 0.942808806 | 0.063281516 |
| 0.955921009 | 0.45303898 | 0.98127227 | 0.687388738 | -1.06139208 | 0.322276771 |
| -1.31864418 | 0.03767451 | -1.0717221 | 0.144169937 | -1.07951872 | 0.5579781   |
| -1.394311   | 0.00017748 | -1.4248781 | 6.41567E-05 | -1.14597694 | 0.104427952 |
| 0.863525049 | 0.30193004 | -1.0245976 | 0.736812661 | -1.18982266 | 0.222342811 |
| -1.24319407 | 0.00065783 | 0.95145996 | 0.5217797   | -1.1184792  | 0.06824736  |
| -1.07879128 | 0.40251545 | -1.1440169 | 0.064594573 | -1.22171541 | 0.03008938  |
| 0.876954647 | 0.00596094 | 0.95074696 | 0.524424179 | -1.03633142 | 0.439760361 |
| -1.13234296 | 0.06533181 | -1.0071858 | 0.948184037 | -1.11829862 | 0.096334632 |
| -1.20229789 | 0.07153493 | 0.90749419 | 0.637554208 | 0.639953782 | 4.31E-05    |
| -1.07657787 | 0.2313833  | 0.90701703 | 0.532999042 | -1.01173999 | 0.84887239  |
| 0.875658437 | 0.02885089 | -1.0394413 | 0.508537984 | 0.70558382  | 2.53E-07    |
| -1.01859302 | 0.81778126 | -1.065489  | 0.227799469 | -1.11574381 | 0.174392702 |
| 0.892418422 | 0.12209648 | -1.0075736 | 0.808950622 | 0.938738776 | 0.386832277 |
| 0.843031077 | 0.00026361 | 0.8812164  | 0.038627929 | 0.955838546 | 0.305990858 |
| 0.853890387 | 0.00741408 | -1.1023256 | 0.456163569 | 0.996546289 | 0.951614118 |
| 0.943509317 | 0.22213616 | 0.99661315 | 0.967348108 | 0.796470879 | 1.16E-05    |
| -1.05295858 | 0.52859824 | 0.95111122 | 0.723187594 | -1.20457054 | 0.02612586  |
| 0.803376086 | 0.00014285 | -1.1121535 | 0.082983413 | -1.06354599 | 0.254194968 |
| 0.977028516 | 0.71082555 | -1.1338845 | 0.167868101 | 0.945215542 | 0.370230927 |
| -1.03012097 | 0.60171919 | 0.92602087 | 0.099478935 | -1.07332403 | 0.216033898 |
| -1.12051886 | 0.04996457 | -1.202268  | 0.007309419 | 0.982387081 | 0.7553565   |
| -1.07248037 | 0.45148505 | 0.9193852  | 0.405346084 | -1.42698653 | 0.000312594 |
| 0.855896622 | 0.13407481 | 0.95076759 | 0.411199869 | 0.725370599 | 0.00275587  |
| -1.03512812 | 0.55667851 | 0.8362325  | 0.003809621 | 0.90738144  | 0.101722856 |
| 0.980920453 | 0.68678314 | -1.167042  | 0.057467118 | -1.04823459 | 0.325943254 |

|             |            |            |             |             |             |
|-------------|------------|------------|-------------|-------------|-------------|
| -1.00272291 | 0.95662927 | 0.86434287 | 0.049251541 | 0.848944038 | 0.001771138 |
| -1.01566882 | 0.82886008 | 0.93238952 | 0.115049099 | -1.12699972 | 0.100659752 |
| 0.858686387 | 0.00814458 | -1.0130115 | 0.820666784 | 0.981260676 | 0.73425475  |
| 0.774729465 | 1.24E-05   | 0.93448626 | 0.155867454 | -1.05176056 | 0.345203711 |
| 0.6427894   | 4.76E-09   | -1.1355151 | 0.124158779 | 0.922347785 | 0.207855691 |
| 0.911869795 | 0.34353433 | -1.0021594 | 0.96795952  | 0.945964674 | 0.567417136 |
| -1.04284124 | 0.50515137 | 0.91503074 | 0.160192131 | 0.938501436 | 0.314599269 |
| 0.951623562 | 0.32839847 | 0.90526945 | 0.083975623 | 0.871629094 | 0.008483729 |
| -1.03869037 | 0.51320201 | 0.8738752  | 0.02109928  | 0.843321074 | 0.004638464 |
| 0.906483041 | 0.03197563 | -1.099258  | 0.309593385 | 0.938855442 | 0.162812308 |
| 0.971890949 | 0.66091379 | 0.93040611 | 0.483738258 | -1.08273043 | 0.224170093 |
| 0.877191329 | 0.15983627 | 0.87375226 | 0.024639323 | -1.07404387 | 0.440541801 |
| 0.873238582 | 0.07977079 | -1.1541014 | 0.003906206 | 0.872225206 | 0.077295853 |
| 0.942505215 | 0.30336005 | 0.89060402 | 0.023716694 | 0.604376619 | 4.75E-12    |
| 0.88249105  | 0.01361996 | -1.095972  | 0.205920193 | 0.963877638 | 0.456019735 |
| 0.873800298 | 0.08523539 | -1.0089578 | 0.872802122 | -1.35952088 | 0.000200433 |
| -1.00448981 | 0.92119997 | -1.0429666 | 0.430763859 | 0.830888985 | 0.000136248 |
| -1.12646929 | 0.03122899 | 0.79848572 | 0.00081283  | 0.99548345  | 0.93329663  |
| -1.0673105  | 0.51209806 | 0.87432105 | 0.169901186 | 0.887597982 | 0.232341647 |
| 0.790214198 | 8.34E-05   | 0.9455069  | 0.374154775 | 0.97112872  | 0.598394094 |
| 0.975346513 | 0.78223874 | 0.9414418  | 0.235295267 | 0.892967421 | 0.213195944 |
| 0.954123614 | 0.51618421 | 0.97416629 | 0.651772902 | -1.22318767 | 0.007018565 |
| -1.05396176 | 0.18813495 | 0.97413817 | 0.559210452 | 0.96879503  | 0.42487059  |
| 0.926818523 | 0.20213978 | 0.98857509 | 0.859572913 | 0.981408065 | 0.751060957 |
| 0.953287789 | 0.47929977 | -1.0065208 | 0.943894911 | 0.960993539 | 0.555995484 |
| 0.997250258 | 0.97419909 | 0.7964407  | 0.00410314  | 0.958873184 | 0.622210373 |
| -1.05714934 | 0.30202689 | 0.91473671 | 0.12368017  | -1.0425459  | 0.438066627 |
| -1.18475899 | 0.23958102 | 0.81864955 | 0.000148596 | -1.14290183 | 0.352989366 |
| 0.897657814 | 0.08133274 | 0.88885783 | 0.131550574 | 0.715848132 | 1.08E-06    |
| -1.19582663 | 0.02770737 | -1.0227663 | 0.619515886 | -1.29146702 | 0.002075492 |
| 0.916339269 | 0.27124591 | 0.96129372 | 0.46656131  | 0.922378856 | 0.308533127 |
| -1.03545976 | 0.67331481 | -1.0237529 | 0.812917241 | -1.23524929 | 0.012971053 |
| -1.15765788 | 0.00249257 | 0.95747871 | 0.435393441 | -1.15486033 | 0.002899176 |
| -1.01349794 | 0.78885392 | 0.94853705 | 0.559023049 | -1.19344515 | 0.000811009 |
| -1.04726548 | 0.45167513 | -1.0485639 | 0.512103911 | 0.983640948 | 0.787599275 |
| -1.11696505 | 0.23948591 | -1.0366954 | 0.364747848 | -1.11712417 | 0.238889116 |
| -1.08186527 | 0.20109197 | -1.0014324 | 0.980687138 | -1.14399085 | 0.031187313 |
| 0.937670452 | 0.28381496 | 0.84544654 | 0.01550177  | 0.837140578 | 0.004200527 |
| -1.15517418 | 0.0361387  | 0.97453761 | 0.762027403 | -1.08107602 | 0.250563557 |
| -1.08579869 | 0.25063174 | -1.1196035 | 0.038787159 | -1.25886497 | 0.002007454 |
| -1.23470321 | 0.0398924  | -1.1384905 | 0.366991679 | -1.316371   | 0.008195582 |
| -1.13752085 | 0.03482352 | 0.76866307 | 6.58273E-05 | -1.10577687 | 0.096879937 |
| -1.00618436 | 0.93296959 | -1.1073635 | 0.202422149 | -1.01235976 | 0.866924939 |
| 0.789203204 | 0.01287798 | 0.97778127 | 0.776061841 | 0.799624747 | 0.018451897 |

|             |            |            |             |             |             |
|-------------|------------|------------|-------------|-------------|-------------|
| 0.951957105 | 0.43499838 | -1.0092842 | 0.910902346 | 0.861691614 | 0.020995318 |
| 0.837212118 | 0.00481034 | -1.1453551 | 0.004806332 | 0.869133229 | 0.024046769 |
| -1.17958259 | 0.01048822 | -1.0702524 | 0.178610852 | -1.17564991 | 0.012055113 |
| -1.03398122 | 0.66735785 | -1.0070222 | 0.908971163 | 0.911544006 | 0.236281646 |
| -1.20392555 | 0.04118977 | -1.2158417 | 0.040300134 | -1.40109621 | 0.00036952  |
| -1.00512812 | 0.93902024 | -1.0131735 | 0.830365044 | -1.10605843 | 0.135715892 |
| 0.950715796 | 0.59383016 | 0.8890205  | 0.052971209 | 0.809497357 | 0.029018227 |
| -1.20062005 | 0.01628926 | -1.0663757 | 0.34258693  | -1.08417745 | 0.277765041 |
| -1.06601383 | 0.28587    | -1.1068985 | 0.15768523  | 0.94728589  | 0.365228787 |
| -1.20756735 | 0.04860455 | -1.0791025 | 0.450288617 | -1.03952846 | 0.67995149  |
| 0.9816719   | 0.7283508  | 0.90385504 | 0.09515122  | 0.972951669 | 0.606899393 |
| 0.879621312 | 0.12527586 | -1.037839  | 0.612791679 | -1.10593784 | 0.226834833 |
| 0.97522214  | 0.89711608 | 0.97937786 | 0.821678521 | 0.954546197 | 0.810564045 |
| 0.849132496 | 0.29382754 | 0.94371135 | 0.358827392 | -1.01734955 | 0.911632918 |
| 0.992333443 | 0.97446878 | 0.93487722 | 0.269851269 | 0.532945031 | 0.011138653 |
| -1.02059311 | 0.92925678 | -1.1823074 | 0.009516917 | 0.572793324 | 0.018096067 |
| -1.07127374 | 0.76201656 | 0.91629982 | 0.263316467 | 0.614452785 | 0.035822443 |
| -1.0377424  | 0.85600592 | -1.2727865 | 0.008804299 | 0.630711398 | 0.027351397 |
| 0.981093797 | 0.94058934 | -1.0425197 | 0.534157274 | 0.561752524 | 0.027748266 |
| 0.877295963 | 0.26873951 | 0.89982734 | 0.267502316 | 0.97194807  | 0.809013428 |
| 0.895710807 | 0.59018555 | -1.0521934 | 0.493022961 | 0.927406928 | 0.712286479 |
| 0.805172548 | 0.35544688 | -1.1458765 | 0.025598731 | 0.454521421 | 0.001310603 |
| 0.926522626 | 0.51177548 | -1.0105498 | 0.911015601 | 0.91282777  | 0.43338294  |
| 0.828991153 | 0.04095768 | -1.13858   | 0.017600378 | 0.986417127 | 0.879184409 |
| -1.23703326 | 0.12235672 | -1.1784674 | 0.051266724 | 0.817458742 | 0.142771022 |
| -1.19743567 | 0.15831465 | -1.0725635 | 0.718227031 | 0.833170507 | 0.153091059 |
| -1.03332737 | 0.8118618  | -1.0555527 | 0.727356438 | 0.993421252 | 0.961768607 |
| -1.08617877 | 0.24755063 | 0.9470501  | 0.821059904 | -1.04161464 | 0.566624587 |
| 0.736014385 | 0.05682148 | 0.78655007 | 0.298130932 | 0.85467953  | 0.32309342  |
| 0.679074389 | 0.01000321 | 0.86202265 | 0.514370135 | 0.933676381 | 0.637761735 |
| 0.743246061 | 0.00154215 | 0.8440292  | 0.407666107 | 0.897720771 | 0.23025231  |
| 0.984377126 | 0.81992225 | 0.88050285 | 0.619644685 | 0.884228323 | 0.079498315 |
| 0.887579187 | 0.09303685 | -1.0276352 | 0.816870013 | 0.866057458 | 0.04406445  |
| 0.967256435 | 0.59439287 | 0.94040269 | 0.763601379 | -1.0269928  | 0.669951404 |
| 0.985335598 | 0.91109499 | 0.96085592 | 0.86427087  | 0.838027564 | 0.18528537  |
| 0.853650173 | 0.01574656 | 0.86374891 | 0.210403448 | 0.829291349 | 0.004697727 |
| 0.965687102 | 0.52061873 | 0.90251263 | 0.257084751 | 0.996264124 | 0.94499324  |
| -1.03149724 | 0.64143809 | 0.95254145 | 0.721150434 | -1.14962413 | 0.039919963 |
| -1.12914291 | 0.23791881 | 0.96196066 | 0.759321117 | -1.13582638 | 0.216179027 |
| 0.966636734 | 0.5864822  | 0.99071822 | 0.946008084 | -1.00414564 | 0.947052676 |
| -1.00255889 | 0.95993344 | 0.93944016 | 0.380928766 | -1.01333134 | 0.794671041 |
| -1.06050243 | 0.19337014 | 0.91422984 | 0.57137739  | -1.07900083 | 0.093987918 |
| -1.26263944 | 0.01511422 | 0.92693826 | 0.60278256  | -1.73302631 | 2.35E-07    |
| 0.772770012 | 0.00056168 | -1.0213336 | 0.813238811 | 0.950568428 | 0.473747197 |

|             |            |            |             |             |             |
|-------------|------------|------------|-------------|-------------|-------------|
| 0.763571211 | 0.00342694 | 0.83331166 | 0.010577282 | 0.907449491 | 0.27511279  |
| -1.11069603 | 0.10956554 | -1.0794133 | 0.278079647 | 0.923819633 | 0.224776029 |
| -1.08483541 | 0.27096204 | -1.0281866 | 0.656485388 | 0.994951955 | 0.945142131 |
| 0.947200174 | 0.5324918  | 0.74440051 | 0.0291494   | 0.929196038 | 0.398804676 |
| 0.939394663 | 0.2866731  | 0.91858865 | 0.186407128 | -1.06853817 | 0.2589035   |
| -1.04525124 | 0.63302993 | 0.87530972 | 0.016871586 | 0.888273446 | 0.204135396 |
| -1.01715716 | 0.8380771  | -1.0976884 | 0.165010361 | -1.24693738 | 0.010176265 |
| 0.859899008 | 0.07267755 | -1.0866091 | 0.417990359 | 0.788882444 | 0.005759572 |
| 0.97086077  | 0.76544774 | -1.0351386 | 0.579868354 | -1.12029552 | 0.254513099 |
| -1.13281064 | 0.02196657 | -1.1141635 | 0.037345521 | -1.18781247 | 0.001956965 |
| 0.998878666 | 0.98224651 | -1.0186417 | 0.680409932 | -1.10640189 | 0.048948985 |
| 0.965257257 | 0.41265675 | -1.2346557 | 0.027315187 | 0.881023237 | 0.004601665 |
| -1.01352293 | 0.78740454 | 0.92166317 | 0.250798172 | 0.947981949 | 0.285903686 |
| -1.00279638 | 0.97767421 | 0.75971943 | 0.002909208 | 0.920375266 | 0.407191158 |
| -1.03665296 | 0.62533105 | -1.0998406 | 0.146076922 | -1.08556122 | 0.267653368 |
| 0.933323167 | 0.26087257 | -1.1980912 | 0.016775293 | 0.873130709 | 0.029662766 |
| 0.860278054 | 0.10762231 | 0.9711382  | 0.73578296  | 0.87337441  | 0.146844928 |
| 0.946212094 | 0.53535782 | 0.89353801 | 0.057941816 | 0.829131054 | 0.03915051  |
| 0.682973914 | 0.00236934 | -1.0136338 | 0.883735586 | -1.23482806 | 0.083200221 |
| 0.767914858 | 0.00151385 | -1.0755388 | 0.38330262  | 0.711568082 | 7.05E-05    |
| -1.10771783 | 0.14849245 | 0.97634106 | 0.772610371 | -1.05123854 | 0.477065252 |
| 0.940878369 | 0.62233793 | -1.0049164 | 0.960523426 | 0.915441242 | 0.47574613  |
| 0.956905289 | 0.58294251 | 0.99830836 | 0.974562463 | 0.885625242 | 0.133573084 |
| 0.991858546 | 0.86851179 | -1.0917538 | 0.085970192 | -1.03534555 | 0.48274533  |
| 0.922687747 | 0.34928168 | 0.99042987 | 0.823194506 | 0.877785214 | 0.131972749 |
| -1.0618429  | 0.38563362 | 0.98332681 | 0.735734754 | 0.963605612 | 0.591147772 |
| -1.110549   | 0.10895934 | -1.2123289 | 0.057819322 | -1.30926286 | 0.000105057 |
| 0.825393527 | 0.01611632 | -1.0071279 | 0.923161938 | -1.00790913 | 0.919129845 |
| -1.2755493  | 0.01504904 | 0.83397702 | 0.004209011 | -1.25891249 | 0.02107997  |
| 0.979590179 | 0.69829597 | 0.92655597 | 0.410564045 | 0.872417279 | 0.012671573 |
| 0.944805792 | 0.53168699 | -1.0127125 | 0.887185928 | 0.909299446 | 0.296506791 |
| -1.01519455 | 0.78163218 | 0.95455411 | 0.698625439 | -1.10800622 | 0.063527676 |
| -1.16615782 | 0.33091755 | 0.81007635 | 0.010101395 | -1.18702365 | 0.278685911 |
| 0.864063815 | 0.17904389 | 0.91411501 | 0.203686175 | 0.841523994 | 0.11374588  |
| -1.01947577 | 0.82596019 | -1.012161  | 0.922089579 | 0.943868495 | 0.510948213 |
| 0.987654488 | 0.84582708 | 0.96600522 | 0.666215901 | 0.938306787 | 0.321042152 |
| 0.825061679 | 0.02933949 | -1.0113425 | 0.819351119 | 0.781162699 | 0.00577648  |
| -1.23808606 | 0.09660351 | 0.92464183 | 0.361996098 | -1.09196867 | 0.488991118 |
| 0.924707402 | 0.19772097 | 0.96236328 | 0.578338723 | 0.93404806  | 0.260683011 |
| 0.839861551 | 0.10077169 | -1.0756486 | 0.26199101  | 0.756905236 | 0.010149413 |
| -1.03322231 | 0.61291937 | 0.91014201 | 0.228114454 | -1.06005293 | 0.36790736  |
| -1.11046549 | 0.18431145 | -1.0286498 | 0.771758986 | 0.879785284 | 0.106032828 |
| 0.864767207 | 0.03680234 | -1.0617722 | 0.262348904 | 0.907971227 | 0.160563535 |
| -1.04493891 | 0.63466645 | 0.89309119 | 0.215408684 | 0.897744416 | 0.246093448 |

|             |            |            |             |             |             |
|-------------|------------|------------|-------------|-------------|-------------|
| 0.975487125 | 0.6688746  | -1.0227979 | 0.678755041 | 0.977900946 | 0.700114639 |
| -1.21907502 | 0.00840495 | 0.97269013 | 0.860375131 | -1.10438944 | 0.175893766 |
| -1.28133372 | 0.00207522 | 0.96635618 | 0.751037473 | -1.13624139 | 0.101221443 |
| 0.908780099 | 0.21235037 | 0.86034692 | 0.090621127 | 0.555098414 | 2.45E-10    |
| -1.03681419 | 0.48630211 | 0.82071833 | 0.003014367 | -1.13724736 | 0.015749022 |
| -1.33785867 | 9.08E-06   | 0.87310512 | 0.120016518 | -1.38005894 | 1.41E-06    |
| 0.611354421 | 0.00094399 | -1.0691893 | 0.59845572  | 0.828019203 | 0.18511786  |
| -1.17452419 | 0.18920274 | 0.97924345 | 0.728098854 | 0.879121536 | 0.291632132 |
| 0.957808791 | 0.49995103 | 0.81352855 | 0.053461505 | 0.899224849 | 0.100037515 |
| -1.0485423  | 0.49923714 | -1.0172447 | 0.791089338 | -1.40867049 | 8.68E-06    |
| -1.15535256 | 0.02151362 | 0.96614784 | 0.660236493 | -1.0043717  | 0.943237641 |
| 0.983219078 | 0.7942835  | -1.0887387 | 0.215623667 | 0.770484694 | 0.000172922 |
| 0.958912445 | 0.56903106 | -1.1158035 | 0.238801622 | 0.281491109 | 1.29E-23    |
| 0.778376423 | 0.0129041  | -1.0332047 | 0.573729371 | 0.992418833 | 0.938013729 |
| -1.07306264 | 0.24498122 | -1.2998448 | 0.000648024 | -1.03697824 | 0.547531091 |
| -1.02953987 | 0.59098805 | -1.0884347 | 0.273495751 | 0.924704487 | 0.151832263 |
| -1.00152523 | 0.98007477 | -1.046197  | 0.553732664 | -1.01390174 | 0.821055703 |
| -0.99996186 | 0.99950655 | -1.130017  | 0.021401426 | -1.01105518 | 0.858528162 |
| -1.32339266 | 0.01725612 | -1.2539363 | 0.000356226 | -1.35936386 | 0.009436936 |
| -1.0096086  | 0.91649145 | -1.012676  | 0.928938013 | 0.980493328 | 0.829014339 |
| -1.26913088 | 0.00693015 | 0.95698888 | 0.717705908 | -1.37391954 | 0.000444413 |
| 0.770113542 | 0.0017663  | -1.0186406 | 0.77218462  | 0.786728731 | 0.003838061 |
| 0.647472826 | 0.01203166 | -1.4919328 | 4.49102E-07 | 0.912604671 | 0.586701014 |
| -1.0767759  | 0.44528388 | -1.0976217 | 0.132512163 | -1.14939548 | 0.153595438 |
| 0.882770259 | 0.07686785 | -1.0147754 | 0.821194056 | 0.810429655 | 0.003645288 |
| 0.922138607 | 0.29536151 | 0.79256241 | 0.002481744 | -1.02860301 | 0.714576975 |
| 0.685554414 | 0.00355844 | -1.0299676 | 0.762943376 | 0.942821822 | 0.636317869 |
| -1.04716511 | 0.36159109 | -1.1395931 | 0.033800163 | -1.0122542  | 0.808787338 |
| 0.869142687 | 0.23607    | -1.0140902 | 0.795975929 | -1.3686765  | 0.00971825  |
| -1.12491693 | 0.19174613 | 0.97966013 | 0.736440399 | -1.15011305 | 0.122087622 |
| 0.92466351  | 0.26279288 | -1.1768449 | 0.010480224 | 0.930410908 | 0.302005677 |
| -1.12866455 | 0.1067044  | -1.1355432 | 0.269895943 | 0.984800505 | 0.836308928 |
| 0.902976903 | 0.367292   | -1.0048659 | 0.957551547 | -1.03753977 | 0.743949963 |
| 0.868664662 | 0.01388969 | -1.0491003 | 0.574551693 | 0.957802677 | 0.43948918  |
| -1.03896621 | 0.52817223 | 0.89346307 | 0.161550096 | 0.904647317 | 0.101848939 |
| 0.803037542 | 0.00577175 | 0.95075042 | 0.763795944 | 0.876071962 | 0.088573615 |
| 0.91150748  | 0.33723313 | -1.0333566 | 0.734360114 | 0.928009579 | 0.438349232 |
| -1.00930698 | 0.92043364 | 0.95021909 | 0.463300394 | -1.14232767 | 0.155238516 |
| -1.12153658 | 0.01925161 | 0.84280428 | 0.029986475 | -1.11721717 | 0.023475102 |
| -1.44743359 | 0.00564155 | 0.81309942 | 0.100514815 | -1.62254043 | 0.000402494 |
| -1.10140757 | 0.25103363 | 0.94844609 | 0.295320981 | -1.05384638 | 0.531322781 |
| -1.27859516 | 0.01048004 | -1.1455882 | 0.250661482 | -1.07072338 | 0.463976217 |
| 0.966049778 | 0.60314418 | -1.3866044 | 0.000557039 | -1.0389517  | 0.565294255 |
| -1.07597553 | 0.39741014 | 0.94859058 | 0.449056645 | -1.24977319 | 0.012097568 |

|             |            |            |             |             |             |
|-------------|------------|------------|-------------|-------------|-------------|
| 0.957154818 | 0.34978547 | -1.2731212 | 0.001863333 | 0.964474438 | 0.439316934 |
| 0.826898275 | 0.01918726 | 0.96097164 | 0.724226874 | 0.927798691 | 0.345336756 |
| -1.03066586 | 0.50424194 | 0.97564286 | 0.657777761 | 0.979167683 | 0.641239378 |
| -1.00259924 | 0.98130935 | -1.1151433 | 0.075869212 | -1.24883113 | 0.048952558 |
| 0.44679001  | 5.01E-17   | 0.90670416 | 0.204679577 | 0.676166704 | 2.51E-07    |
| 0.768599758 | 0.00360549 | 0.87015608 | 0.151907653 | 0.673688169 | 2.91E-05    |
| 0.672441702 | 0.00013078 | -1.06208   | 0.516877941 | 0.992165435 | 0.93518032  |
| 0.833650321 | 0.01922895 | -1.0542265 | 0.271476169 | 0.991966421 | 0.915177263 |
| 0.99570971  | 0.90572581 | -1.3570266 | 0.020847869 | 0.928188449 | 0.044025496 |
| -1.29451948 | 0.01058101 | -1.1450284 | 0.109599957 | -1.4005929  | 0.001075866 |
| -1.38843657 | 0.01933163 | -1.1026812 | 0.296134571 | -1.64493119 | 0.000581488 |
| 0.965006475 | 0.64813648 | 0.99101084 | 0.891762138 | -1.14404427 | 0.088699881 |
| -1.09385017 | 0.33168686 | -1.1520076 | 0.10509647  | -1.32731605 | 0.003150402 |
| -1.09589556 | 0.11788456 | -1.024609  | 0.602669513 | -1.01512621 | 0.795436752 |
| -1.04967168 | 0.71617215 | 0.71466941 | 8.08048E-05 | -1.02967492 | 0.826331197 |
| -1.17512786 | 0.04496931 | 0.95106124 | 0.269004465 | 0.998087693 | 0.980663376 |
| -1.17709356 | 0.01342771 | -1.1036183 | 0.375336648 | -1.25781539 | 0.00070171  |
| -1.23083869 | 0.006716   | 0.46600425 | 4.07198E-16 | -1.11488856 | 0.145624691 |
| -1.12773494 | 0.11661875 | 0.6404628  | 3.75039E-06 | -1.54233304 | 4.38E-07    |
| -1.04505688 | 0.52734901 | 0.77241157 | 0.009686783 | -1.14399559 | 0.057395792 |
| -1.18228353 | 0.16911289 | 0.81221852 | 0.007905367 | -1.41327329 | 0.005713391 |
| -1.12728692 | 0.15062536 | 0.87506926 | 0.000519749 | -1.20368674 | 0.02815516  |
| -1.31060621 | 0.00236801 | -1.3954655 | 0.0012054   | 0.91862828  | 0.321140327 |
| 0.992714379 | 0.89960541 | -1.1855391 | 0.216457841 | -1.03952816 | 0.504452209 |
| 0.95597812  | 0.47312689 | -1.0853418 | 0.296093871 | -1.2052649  | 0.004132728 |
| -1.02900401 | 0.64437549 | -1.3258853 | 0.003257939 | -1.09713156 | 0.138172871 |
| -1.09311714 | 0.09760483 | -1.0463762 | 0.434887349 | -1.0824021  | 0.139616982 |
| 0.91339346  | 0.33504677 | -1.3505007 | 0.02754373  | -1.07313963 | 0.45177815  |
| 0.971369852 | 0.59465445 | -1.1538108 | 0.074332191 | -1.09406728 | 0.103412436 |
| -1.02809355 | 0.50433028 | -1.2529335 | 0.000846561 | 0.943085224 | 0.160889302 |
| -1.1545933  | 0.15796866 | -1.2371766 | 0.005553042 | -1.11713862 | 0.274770838 |
| 0.901627368 | 0.03927824 | -1.0879309 | 0.268495655 | -1.00916397 | 0.853045338 |
| -1.11719564 | 0.06477853 | -1.0804931 | 0.268725854 | 0.956623854 | 0.453854207 |
| 0.940275239 | 0.34483654 | -1.1648132 | 0.209593651 | 0.911067205 | 0.155279191 |
| 0.838673829 | 0.06228559 | -1.1516138 | 0.091563443 | -1.12020989 | 0.224631295 |
| -1.0824668  | 0.27483224 | -1.0971085 | 0.279079569 | -1.17479562 | 0.029058654 |
| -1.02343127 | 0.78438528 | -1.0822488 | 0.17633869  | 0.959298589 | 0.623782283 |
| 0.947794987 | 0.41303656 | -1.0446742 | 0.486091021 | -1.17417856 | 0.016699308 |
| -1.03046344 | 0.39233343 | -1.1038721 | 0.114473367 | 0.933268139 | 0.052309642 |
| 0.953644377 | 0.52468834 | -1.0580127 | 0.290354547 | -1.19502821 | 0.019720656 |
| 0.968995121 | 0.52368804 | 0.99709168 | 0.975166188 | 0.865398746 | 0.004751412 |
| -1.14406931 | 0.01820605 | -1.0824827 | 0.14996828  | -1.13021665 | 0.030994399 |
| -1.0252823  | 0.65408003 | -1.0752125 | 0.084200263 | -1.14066672 | 0.021137466 |
| -1.0069675  | 0.82274965 | 0.98541872 | 0.884218968 | 0.844024035 | 1.09E-06    |

|             |            |            |             |             |             |
|-------------|------------|------------|-------------|-------------|-------------|
| 0.833943366 | 0.00288844 | 0.9173036  | 0.083903298 | 0.803964609 | 0.000432247 |
| 0.893192252 | 0.0827265  | 0.93227428 | 0.238053921 | 0.753830193 | 4.78E-05    |
| 0.845262359 | 0.201296   | 0.89891824 | 0.104956102 | 0.690868331 | 0.006258396 |
| 0.8221505   | 0.00171362 | 0.9051405  | 0.285601559 | -1.06457038 | 0.296173038 |
| -1.04372318 | 0.41408367 | 0.96019023 | 0.574026074 | 0.869058143 | 0.009269942 |
| 0.966373906 | 0.51768153 | -1.0971685 | 0.275817308 | 0.99555348  | 0.93269899  |
| -1.05008398 | 0.4324658  | -1.246068  | 0.001337771 | -1.0201411  | 0.748152635 |
| -1.15432057 | 0.08884972 | 0.92516809 | 0.029593896 | -1.23186217 | 0.014819318 |
| -1.18408787 | 0.00073978 | -1.119946  | 0.132333658 | -1.0680283  | 0.168971056 |
| 0.91894969  | 0.03771817 | 0.96466534 | 0.466663578 | 0.932459474 | 0.08363448  |
| 0.988407246 | 0.8573966  | -1.0742162 | 0.200621645 | -1.26966158 | 0.000514046 |
| 0.853731653 | 0.00916603 | -1.0584217 | 0.310085736 | -1.08392749 | 0.173961837 |
| 0.964098922 | 0.53441322 | 0.85862197 | 7.97005E-06 | -1.12929751 | 0.042348446 |
| 0.96957813  | 0.57254664 | 0.70654492 | 1.92299E-07 | 0.922224646 | 0.142595116 |
| -1.00325701 | 0.9572525  | -1.0202425 | 0.75496368  | 0.855637847 | 0.01258627  |
| -1.06080865 | 0.0714217  | 0.73797234 | 0.023125147 | -1.03583506 | 0.277562142 |
| -1.01165082 | 0.78339287 | 0.89345595 | 0.062890742 | 0.980262792 | 0.63638373  |
| 0.963137804 | 0.59729067 | 0.97387368 | 0.612697483 | 0.932171934 | 0.324742061 |
| -1.29420552 | 0.00316611 | -1.0735084 | 0.182528798 | 0.940964638 | 0.469067736 |
| -1.13754668 | 0.12862747 | 0.93014168 | 0.246357224 | -1.19649508 | 0.036216657 |
| -1.12021918 | 0.34026405 | -1.0660397 | 0.443370336 | -1.32647513 | 0.020162    |
| -1.07413337 | 0.11513232 | -1.0107595 | 0.821496364 | -1.16300522 | 0.001350554 |
| 0.958146671 | 0.54033718 | 0.93498034 | 0.09592719  | 0.842328293 | 0.016591726 |
| 0.961438014 | 0.52797667 | -1.0921943 | 0.177777977 | 0.88281931  | 0.049115878 |
| -1.04128178 | 0.55642116 | 0.98291199 | 0.769374354 | -1.01279858 | 0.853089725 |
| -1.28114269 | 0.00015387 | 0.83591481 | 0.003399876 | -1.22574263 | 0.001501009 |
| 0.955715218 | 0.39090065 | 0.914814   | 0.107626842 | -1.06772854 | 0.216196369 |
| 0.925208748 | 0.10729915 | 0.78991363 | 0.000264963 | 0.719831238 | 5.60E-09    |
| 0.645853762 | 6.69E-05   | -1.0365362 | 0.268534906 | 0.88329891  | 0.225028654 |
| 0.707495255 | 3.86E-10   | 0.90554514 | 0.021598742 | 0.704745701 | 2.80E-10    |
| 0.921063065 | 0.10911938 | 0.90031025 | 0.143133873 | 0.800088407 | 4.86E-05    |
| 0.947264274 | 0.36022013 | -1.2232917 | 0.019167482 | 0.976214376 | 0.683397236 |
| 0.711028519 | 6.92E-07   | -1.0026832 | 0.974519837 | 0.783406243 | 0.000180136 |
| -1.13440288 | 0.13224173 | -1.022153  | 0.853369589 | 0.801402625 | 0.009665575 |
| 0.998299642 | 0.9914532  | -1.0762465 | 0.105705074 | 0.430723395 | 2.03E-06    |
| -1.08853126 | 0.25676602 | 0.78794083 | 0.001149898 | 0.521065846 | 5.28E-12    |
| 0.940893547 | 0.27201314 | -1.0247581 | 0.694368618 | 0.940201876 | 0.266333802 |
| -1.01903998 | 0.76481993 | -1.0307493 | 0.659457148 | -1.02834126 | 0.657728863 |
| 0.91077204  | 0.06345181 | -1.2444297 | 0.00070556  | -1.01474797 | 0.767705071 |
| 0.934838687 | 0.0890972  | 0.96161608 | 0.458063828 | 0.952380986 | 0.215345467 |
| 0.97224331  | 0.57575085 | 0.94428955 | 0.23243153  | 0.92916935  | 0.14755366  |
| 0.989385236 | 0.91096402 | 0.71605588 | 0.001704165 | -1.06798847 | 0.491602964 |
| 0.980035131 | 0.75644174 | 0.81009198 | 2.18468E-05 | 0.95352448  | 0.465138851 |
| 0.821362167 | 0.01191795 | -1.003409  | 0.946488482 | -1.23977356 | 0.006306991 |



|             |            |            |             |             |             |
|-------------|------------|------------|-------------|-------------|-------------|
| 0.967706282 | 0.46860577 | 0.94910214 | 0.377531226 | 0.903747221 | 0.028546046 |
| -1.05241721 | 0.38372569 | 0.9079566  | 0.117237493 | -1.16169543 | 0.012766955 |
| -1.26062187 | 0.00866901 | -1.0358933 | 0.67076148  | -1.23847049 | 0.014887829 |
| -1.07325741 | 0.59940596 | 0.53397867 | 0.000216973 | -1.28108516 | 0.069628269 |
| 0.939940748 | 0.46290956 | -1.0342083 | 0.651288678 | -1.10475825 | 0.23957935  |
| -1.15688245 | 0.04782575 | 0.96472461 | 0.515774029 | -1.10354668 | 0.176603163 |
| -1.14472961 | 0.45159619 | 0.86389703 | 0.023466689 | -1.36792983 | 0.084522235 |
| -1.13726585 | 0.0701733  | -1.0712638 | 0.16848427  | -1.00262018 | 0.970156034 |
| -1.01997684 | 0.75450368 | -1.0016663 | 0.966032129 | 0.810096751 | 0.001500264 |
| 0.963146534 | 0.49972446 | 0.85061493 | 0.002077553 | -1.00764976 | 0.890828527 |
| -1.27454235 | 0.05611741 | -1.0136706 | 0.886863915 | 0.930272669 | 0.563199812 |
| -1.282944   | 0.00028034 | -1.0344279 | 0.602960458 | -1.07032448 | 0.29364634  |
| 0.953388487 | 0.26685359 | 0.96079965 | 0.598992166 | 0.904883443 | 0.022515176 |
| 0.912062348 | 0.15245116 | 0.9588483  | 0.354279059 | -1.05673173 | 0.388077912 |
| -1.03308766 | 0.54765255 | -1.174802  | 0.007697362 | 0.886946085 | 0.029942178 |
| -1.02217345 | 0.65825592 | -1.2400108 | 0.014345945 | 0.953244348 | 0.335827934 |
| 0.978935181 | 0.84190894 | -1.2232208 | 0.137959619 | -1.06492314 | 0.556230135 |
| 0.963866752 | 0.44285168 | -1.1012437 | 0.254750222 | 0.963531455 | 0.438575509 |
| -1.1765235  | 0.00073977 | -1.0901007 | 0.235815801 | -1.02691392 | 0.561112494 |
| 0.882049295 | 0.03126707 | -1.2195226 | 0.27052226  | -1.01915096 | 0.739463038 |
| 0.813632017 | 0.00295811 | -1.2392766 | 0.003247419 | 0.881053956 | 0.06120637  |
| 0.910616317 | 0.12300729 | 0.96761158 | 0.603000165 | 0.860460421 | 0.014931676 |
| -1.07142934 | 0.25989362 | -1.3488882 | 1.46759E-06 | 0.940595908 | 0.316675017 |
| -1.15521536 | 0.2491894  | -1.1106046 | 0.402251924 | -1.44459255 | 0.004449243 |
| 0.762497156 | 0.0001508  | -1.1606574 | 0.023889255 | 0.521374583 | 1.50E-13    |
| -1.17457472 | 0.03239189 | 0.96011861 | 0.343028787 | -1.35375096 | 0.000125681 |
| 0.927834085 | 0.30114637 | 0.95534542 | 0.47441015  | 0.836641714 | 0.016062044 |
| -1.06625218 | 0.56291869 | -1.0136417 | 0.802100456 | -1.41068295 | 0.002890192 |
| -1.13598663 | 0.07250071 | -1.0563062 | 0.271531621 | -1.19938278 | 0.01164049  |
| -1.05846219 | 0.43669252 | -1.1083429 | 0.337203349 | -1.31930591 | 0.000346325 |
| -1.10920927 | 0.38246996 | -1.0350265 | 0.472690571 | 0.950196867 | 0.666009831 |
| -1.17648929 | 0.03305606 | 0.98568492 | 0.752090621 | 0.948861546 | 0.482875625 |
| 0.78297381  | 0.02938679 | 0.97962052 | 0.718148923 | -1.12480641 | 0.28678384  |
| 0.945176577 | 0.55110116 | 0.78266549 | 0.000508945 | -1.19036427 | 0.069234293 |
| -1.10062047 | 0.12029206 | 0.98928356 | 0.857591507 | 0.975463707 | 0.684128161 |
| -1.09875942 | 0.3161     | -1.118349  | 0.070404868 | 0.982623832 | 0.851317799 |
| -1.17129927 | 0.17594547 | -1.0904559 | 0.487467264 | -1.01407277 | 0.903974791 |
| -1.03046241 | 0.71815186 | 0.7975754  | 0.001268542 | -1.05007975 | 0.557092129 |
| -1.03726069 | 0.7269773  | -1.1341136 | 0.091556932 | -1.06828841 | 0.528930709 |
| -1.04017715 | 0.43215563 | 0.90045889 | 0.149714619 | -1.27466877 | 1.00E-05    |
| 0.841662563 | 0.04024277 | 0.92922135 | 0.508173442 | 0.452279945 | 2.31E-13    |
| 0.954712391 | 0.49571665 | -1.1520575 | 0.046921828 | 0.797695458 | 0.001505925 |
| 0.905412187 | 0.0420383  | -1.1797516 | 0.026611874 | 0.97676633  | 0.624176413 |
| 0.929913405 | 0.22735947 | -1.2049967 | 0.119002968 | -1.03235688 | 0.594742517 |

|             |            |            |             |             |             |
|-------------|------------|------------|-------------|-------------|-------------|
| 0.780427037 | 0.08843453 | -1.1396346 | 0.084203985 | 0.77737697  | 0.083650375 |
| -1.0701913  | 0.64052524 | -1.0494186 | 0.66079355  | -1.39204835 | 0.02598684  |
| -1.13291967 | 0.15669827 | -1.127757  | 0.206331681 | -1.33704455 | 0.001515622 |
| -1.18873102 | 0.2078893  | 0.92305429 | 0.192974816 | -1.25768077 | 0.096737765 |
| -1.00985568 | 0.84993878 | 0.9460528  | 0.553767401 | 0.962674515 | 0.464101366 |
| -1.06387717 | 0.45265984 | -1.1716546 | 0.17513199  | -1.16990999 | 0.060540503 |
| -1.01401908 | 0.87552864 | -1.2376802 | 0.012705444 | -1.07289071 | 0.429883624 |
| 0.715086825 | 0.00028018 | 0.92588987 | 0.463285065 | 0.829925023 | 0.035139372 |
| 0.691553066 | 7.68E-05   | -1.2480015 | 4.35302E-05 | 0.780460383 | 0.005725485 |
| -1.02153645 | 0.76785489 | 0.6527156  | 3.15672E-06 | 0.688680546 | 3.27E-06    |
| 0.950912667 | 0.34801221 | 0.82934424 | 0.007695944 | 0.876825785 | 0.016620866 |
| 0.665729985 | 3.15E-06   | 0.96734824 | 0.489503163 | 0.618695546 | 1.04E-07    |
| -1.02441634 | 0.5577004  | 0.89128047 | 0.058360028 | -1.00578012 | 0.888436358 |
| -1.00005458 | 0.99976004 | 0.85669196 | 0.283801806 | 0.89952109  | 0.560173476 |
| 0.942320103 | 0.22817971 | -1.4346165 | 0.01557162  | 0.962291318 | 0.433769922 |
| -1.02132002 | 0.66959482 | -1.2408592 | 0.016153791 | -1.3447674  | 1.59E-07    |
| -1.30627    | 0.00263071 | -1.1125419 | 0.435121381 | 0.994254738 | 0.946006883 |
| 0.757460502 | 1.69E-06   | 0.97698671 | 0.653582043 | 0.925905261 | 0.141995083 |
| -1.01990522 | 0.87829875 | 0.94592736 | 0.499958046 | -1.10746919 | 0.429057216 |
| 0.936373915 | 0.19591554 | -1.1358282 | 0.155714743 | -1.00841947 | 0.867982968 |
| -1.0254069  | 0.73839267 | 0.64053175 | 3.61381E-06 | -1.04178954 | 0.586094361 |
| -1.04324587 | 0.57982602 | 0.91050219 | 0.281090295 | -1.03106755 | 0.68888996  |
| 0.910573552 | 0.17222013 | 0.96883896 | 0.661144559 | -1.02430238 | 0.72425647  |
| 0.926648844 | 0.42043987 | 0.93344816 | 0.20072245  | -1.11096987 | 0.267059547 |
| 0.942465216 | 0.24430154 | 0.80087801 | 0.006363111 | 0.963791008 | 0.466930562 |
| 0.944932982 | 0.35964778 | 0.9485518  | 0.201986958 | 0.980756189 | 0.752495021 |
| 0.994491595 | 0.93793638 | -1.0771382 | 0.682433254 | 0.875520147 | 0.06516161  |
| -1.02514136 | 0.7689371  | 0.91018093 | 0.058773583 | 0.991284119 | 0.91748296  |
| -1.02392699 | 0.66109376 | -1.0179302 | 0.719185921 | 0.99823745  | 0.973883944 |
| 0.94839735  | 0.43707954 | -1.1415353 | 0.123893671 | 0.921209076 | 0.230506601 |
| 0.956347776 | 0.50322142 | 0.75452866 | 1.28534E-06 | -1.02581913 | 0.70181523  |
| -1.06338474 | 0.20561109 | 0.97463303 | 0.841789306 | -1.03605909 | 0.463411284 |
| 0.927155164 | 0.1798256  | -1.0765576 | 0.147533386 | -1.02863052 | 0.614081829 |
| -1.00816365 | 0.89209767 | -1.0470841 | 0.540734487 | -1.02719369 | 0.654686099 |
| 0.877058958 | 0.01975433 | -1.0453181 | 0.562245807 | 0.984891658 | 0.781424178 |
| -1.00193018 | 0.97266726 | -1.0580233 | 0.408533594 | -1.05579335 | 0.336792816 |
| -1.03868689 | 0.82399057 | -1.1088777 | 0.2756243   | 0.977347483 | 0.893180048 |
| 0.988582307 | 0.86639506 | -1.0532482 | 0.30732274  | -1.15209665 | 0.04191355  |
| -1.07922591 | 0.12579448 | -1.0977243 | 0.134144406 | 0.974941247 | 0.606843315 |
| -1.14144552 | 0.06300154 | -1.0282998 | 0.694236059 | 0.872696533 | 0.055902884 |
| 0.892304537 | 0.04070464 | -1.0002803 | 0.997353084 | 0.720735207 | 1.58E-07    |
| 0.999219079 | 0.98468139 | 0.97570845 | 0.64845182  | 0.975215266 | 0.538083477 |
| 0.986013295 | 0.83539721 | -1.0245166 | 0.721789091 | 0.962043873 | 0.568633081 |
| -1.09591219 | 0.12988675 | 0.98616764 | 0.83420794  | -1.03418371 | 0.574762793 |

|             |            |            |             |             |             |
|-------------|------------|------------|-------------|-------------|-------------|
| -1.00397871 | 0.92066961 | 0.94458368 | 0.239841735 | -1.03908642 | 0.338293963 |
| -1.05986689 | 0.25456765 | 0.93742309 | 0.250732077 | -1.01853461 | 0.717467522 |
| -1.00706619 | 0.90112799 | -1.0691872 | 0.267088558 | 0.955762068 | 0.426030395 |
| 0.9556318   | 0.40801446 | -1.0327701 | 0.557239914 | -1.05789102 | 0.305712334 |
| -1.03398085 | 0.4845906  | -1.069381  | 0.236383625 | -1.02894402 | 0.550393262 |
| -1.04802018 | 0.4494714  | 0.9293729  | 0.667983005 | -1.267942   | 0.000310543 |
| 0.94560263  | 0.3806029  | 0.95620601 | 0.512563507 | 0.936448194 | 0.304002388 |
| -1.06707904 | 0.15361007 | 0.95277632 | 0.328220278 | -1.00526046 | 0.907325036 |
| 0.988223131 | 0.77260409 | 0.85027254 | 0.023728391 | -1.06911698 | 0.107176388 |
| -1.0831268  | 0.38311618 | 0.83277554 | 0.001407528 | 0.98778989  | 0.892886331 |
| 0.890123132 | 0.07420226 | -1.0230082 | 0.576674309 | -1.12239656 | 0.076473669 |
| 0.990178966 | 0.79350419 | 0.98838236 | 0.863127459 | 0.921177644 | 0.033014355 |
| 0.965084847 | 0.27044753 | 0.99437195 | 0.924836671 | -1.00523583 | 0.870643343 |
| 0.992728158 | 0.89314231 | 0.99806548 | 0.961263959 | -1.15726828 | 0.009229661 |
| 0.978905734 | 0.5482543  | -1.0248063 | 0.629404404 | 0.963647105 | 0.298685072 |
| -1.00563924 | 0.91263495 | -1.1499491 | 0.016439457 | 0.942737739 | 0.252836369 |
| -1.08365498 | 0.02292727 | 0.94618719 | 0.313977834 | -1.02652004 | 0.448805509 |
| -1.15437092 | 0.16644142 | 0.98833312 | 0.805717182 | -1.45650453 | 0.000551274 |
| -1.10892948 | 0.13431821 | -1.0800183 | 0.21657838  | 0.90726199  | 0.158231694 |
| -1.00040806 | 0.9922171  | 0.93985432 | 0.331265889 | 0.954995661 | 0.273594389 |
| -1.09461654 | 0.1389899  | 0.99267675 | 0.870458336 | -1.12432443 | 0.056808304 |
| -1.11655081 | 0.23568888 | -1.0081693 | 0.842653919 | -1.02942658 | 0.753610151 |
| 0.815883498 | 0.13783168 | -1.0487164 | 0.60254885  | 0.85640971  | 0.256259635 |
| 0.777264092 | 0.00269302 | 0.97769273 | 0.725526237 | 0.542067085 | 3.81E-10    |
| -1.17120094 | 0.0999455  | 0.92416382 | 0.040250878 | -1.14546446 | 0.156056048 |
| 0.947880856 | 0.57845939 | 0.9088784  | 0.004162874 | 0.733088091 | 0.00203805  |
| -1.08935816 | 0.25125215 | 0.9485423  | 0.332977351 | -1.43805637 | 8.51E-06    |
| 0.966032355 | 0.52780826 | 0.92331801 | 0.027838665 | -1.01427785 | 0.795320653 |
| -1.23239207 | 0.05351224 | 0.8277797  | 0.000501049 | -1.39448743 | 0.002733163 |
| 0.954876058 | 0.3894039  | -1.0520544 | 0.144925338 | -1.08126694 | 0.147848711 |
| 0.904728324 | 0.18193316 | -1.305863  | 0.011779952 | -1.31837322 | 0.00045839  |
| 0.96541081  | 0.49197379 | 0.97077223 | 0.664475675 | 0.963545879 | 0.468612565 |
| -1.00150889 | 0.98074159 | 0.94112761 | 0.150795202 | 0.858926262 | 0.017753624 |
| -1.02471697 | 0.61363578 | -1.0647287 | 0.302098362 | 0.892252987 | 0.021347356 |
| 0.956597436 | 0.46354491 | -1.2204047 | 0.034711645 | 0.870373673 | 0.024764053 |
| 0.721590302 | 0.00240103 | 0.74096819 | 0.030708359 | 0.830813839 | 0.075883123 |
| -1.0094595  | 0.87165139 | 0.71976495 | 0.000137813 | -1.14511612 | 0.023236098 |
| -1.38298682 | 3.58E-08   | -1.229105  | 0.033259728 | -1.06586438 | 0.211510105 |
| -1.14100267 | 0.03746054 | 0.75126803 | 0.00424096  | -1.10170918 | 0.123042292 |
| -1.03728247 | 0.57006771 | -1.0753571 | 0.329270987 | -1.0188066  | 0.772261721 |
| 0.846702574 | 0.00991712 | 0.87512215 | 0.017450919 | 0.894863716 | 0.079933295 |
| -1.60514322 | 0.00042019 | -1.2355091 | 0.050784964 | -1.1258999  | 0.350176301 |
| -1.30719838 | 0.00118135 | -1.0403762 | 0.460203562 | -1.2383743  | 0.008447433 |
| -1.22141217 | 0.02113228 | -1.1505518 | 0.063582918 | -1.0258341  | 0.763116353 |

|             |            |            |             |             |             |
|-------------|------------|------------|-------------|-------------|-------------|
| -1.1776958  | 0.05708323 | 0.99599046 | 0.937350789 | -1.20686964 | 0.02957244  |
| 0.981939725 | 0.73673711 | 0.85250709 | 0.013090905 | -1.07307678 | 0.19653897  |
| -1.45643374 | 0.00050741 | -1.0769267 | 0.129074338 | 0.924703419 | 0.444341938 |
| -1.22537143 | 0.01570776 | -1.0090937 | 0.880836992 | -1.25341677 | 0.00762742  |
| 0.877821302 | 0.10711608 | 0.62161807 | 2.25902E-05 | -1.04230197 | 0.604489953 |
| 0.954425186 | 0.56572478 | -1.0631523 | 0.295754681 | -1.2669663  | 0.00494557  |
| -1.00937653 | 0.83977825 | -1.1744727 | 0.002390199 | -1.08653797 | 0.07642022  |
| -1.0276146  | 0.47935305 | 0.9947399  | 0.932333239 | -1.03548152 | 0.36598113  |
| -1.09386963 | 0.10060591 | 0.91227875 | 0.157562832 | 0.960690028 | 0.458465747 |
| 0.904293249 | 0.09906023 | 0.99648149 | 0.955046303 | 0.883108549 | 0.042888335 |
| -1.10331816 | 0.03022771 | -1.1494947 | 0.273101476 | -1.05139417 | 0.261541423 |
| 0.897601137 | 0.09974906 | -1.2136747 | 0.016439936 | 0.852086141 | 0.016232764 |
| -1.15798151 | 0.00915412 | -1.051829  | 0.550941855 | -1.05640159 | 0.316283842 |
| -1.02855614 | 0.74327111 | -1.0467546 | 0.589206414 | -1.35873085 | 0.000729298 |
| 0.959090299 | 0.42194651 | -1.0870656 | 0.12752914  | -1.04834223 | 0.364471419 |
| 0.988241037 | 0.76919241 | -1.0064484 | 0.949785529 | 0.978329381 | 0.587159184 |
| -1.00574077 | 0.87321731 | -1.0617104 | 0.465488021 | -1.11242506 | 0.004273664 |
| -1.21462138 | 0.02437408 | -1.0971291 | 0.248883754 | -1.34308812 | 0.000903883 |
| 0.853525256 | 0.00633059 | -1.2020717 | 0.026589243 | -1.00336976 | 0.952092284 |
| 0.810304807 | 0.01032445 | -1.09158   | 0.061819006 | -1.14070776 | 0.101975416 |
| -1.07308909 | 0.25136732 | -1.0845976 | 0.038333735 | -1.0522915  | 0.405838235 |
| -1.06741806 | 0.20535911 | -1.0987052 | 0.085343719 | -1.07851105 | 0.143359572 |
| 0.984450779 | 0.79954885 | 0.87179458 | 0.026030743 | 0.997880494 | 0.972566106 |
| 0.857545895 | 0.04530449 | -1.0442544 | 0.331271928 | -1.07349734 | 0.348453185 |
| 0.872477078 | 0.25473953 | -1.0528616 | 0.427982845 | -1.14087065 | 0.271016022 |
| -1.00625368 | 0.88781126 | 0.87756451 | 0.019514829 | -1.04196663 | 0.354125239 |
| -1.15672768 | 0.08002609 | -1.2729798 | 0.006676824 | -1.20068278 | 0.029160278 |
| 0.905180941 | 0.40341075 | 0.91527965 | 0.092101003 | 0.806602739 | 0.074804459 |
| 0.950940416 | 0.50860565 | 0.99070375 | 0.816751919 | 0.979707544 | 0.78727253  |
| -1.17292229 | 0.18007854 | -1.0293314 | 0.421662548 | -1.16244699 | 0.205415729 |
| 0.986998102 | 0.84289383 | -1.1534157 | 0.094816432 | 0.957976653 | 0.516339363 |
| -1.00496528 | 0.94557754 | 0.90314823 | 0.073142577 | -1.14206553 | 0.071400623 |
| -1.02112921 | 0.73648938 | 0.81139119 | 0.010791061 | 0.983882402 | 0.793659901 |
| 0.893812813 | 0.11118196 | -1.0921016 | 0.153370271 | 0.792631975 | 0.001472245 |
| 0.894681644 | 0.06756153 | 0.99926817 | 0.988575845 | 0.982741871 | 0.771529471 |
| -1.01351592 | 0.8595864  | -1.0017232 | 0.977737489 | 0.85975476  | 0.050498592 |
| 0.870918521 | 0.0146309  | 0.98276046 | 0.817477514 | 0.981380118 | 0.732844641 |
| -1.20534643 | 0.00419358 | -1.1033568 | 0.410197169 | -1.05796383 | 0.370901423 |
| -1.03084901 | 0.6007109  | -1.0622775 | 0.175262718 | -1.05526065 | 0.35546898  |
| 0.872853396 | 0.09164266 | -1.0834857 | 0.330175894 | 0.835068054 | 0.026830121 |
| -1.01474102 | 0.73648552 | 0.81380946 | 0.087274527 | -1.02343565 | 0.594529458 |
| -1.04492422 | 0.53990108 | -1.0344921 | 0.655528514 | -1.27131198 | 0.001399137 |
| 0.975104293 | 0.73846585 | -1.3223101 | 0.02094439  | -1.12823812 | 0.114088897 |
| 0.558493923 | 6.58E-13   | -1.0152742 | 0.818441106 | 0.662575373 | 1.68E-08    |

|             |            |            |             |             |             |
|-------------|------------|------------|-------------|-------------|-------------|
| 0.946247611 | 0.4736076  | 0.96576158 | 0.631492249 | 0.871631261 | 0.078349162 |
| -1.27955284 | 0.00936363 | 0.84446187 | 0.008438849 | -1.14143845 | 0.15382544  |
| -1.06684132 | 0.20011117 | 0.94418707 | 0.411013541 | -1.15545418 | 0.005444276 |
| 0.73411576  | 0.00123033 | -1.0599204 | 0.333651097 | 0.971338311 | 0.749387693 |
| 0.854393943 | 0.40940469 | 0.94940371 | 0.494767213 | 0.833382968 | 0.33986404  |
| 0.951617245 | 0.40879553 | 0.85470024 | 0.005922058 | 0.979046371 | 0.723609145 |
| 0.745618597 | 0.00159095 | -1.1918478 | 0.00688842  | 0.705166246 | 0.000223116 |
| 0.953478937 | 0.3531597  | 0.99313286 | 0.905396118 | 0.958556672 | 0.408997606 |
| 0.986953001 | 0.80601294 | 0.88315825 | 0.122450411 | 0.949661902 | 0.336112993 |
| -1.05805788 | 0.42172004 | -1.0200462 | 0.648232146 | 0.96105505  | 0.571127566 |
| -1.03095684 | 0.64416378 | -1.1970513 | 0.014560429 | 0.674823843 | 1.79E-07    |
| 0.953936727 | 0.26796772 | -1.1294656 | 0.110939312 | -1.0203513  | 0.634434694 |
| -1.04608365 | 0.40218116 | 0.8688096  | 0.027535224 | 0.910078927 | 0.083082359 |
| -1.01834951 | 0.63685574 | 0.88590071 | 0.119411641 | 0.982048943 | 0.638133427 |
| -1.04162629 | 0.43353402 | -1.0657038 | 0.489517507 | 0.94505739  | 0.279117782 |
| 0.917780693 | 0.15405504 | -1.107345  | 0.045846755 | 0.982926664 | 0.772788429 |
| -1.06857024 | 0.24781943 | -1.0270942 | 0.768995247 | -1.14976102 | 0.017211292 |
| -1.01008191 | 0.89168467 | 0.90158996 | 0.586399889 | -1.09408708 | 0.225388471 |
| -1.00758905 | 0.92629857 | 0.89957285 | 0.081283956 | -1.20620876 | 0.025083044 |
| -1.07529661 | 0.17432583 | 0.87646258 | 0.140922055 | -1.19228625 | 0.001551859 |
| -1.12764868 | 0.2158108  | 0.88742821 | 0.022589908 | -1.21894051 | 0.043852459 |
| 0.897522556 | 0.01732314 | -1.1360539 | 0.020039554 | 0.985352117 | 0.73878674  |
| -1.49788426 | 1.86E-06   | 0.8770105  | 0.050627008 | -1.89822998 | 1.71E-11    |
| 0.86827086  | 0.11248795 | -1.0668463 | 0.130433369 | 0.540935534 | 3.96E-09    |
| -1.00258913 | 0.95373004 | -1.0173409 | 0.748529368 | 0.787908129 | 1.71E-06    |
| 0.961367217 | 0.43874725 | 0.97701313 | 0.546252163 | -1.03164965 | 0.53986348  |
| 0.957006302 | 0.35882701 | 0.96461167 | 0.488741097 | -1.00131129 | 0.978084    |
| 0.919291369 | 0.22502141 | 0.88335332 | 0.076044124 | 0.763781859 | 0.000244636 |
| 0.941479602 | 0.50431663 | 0.94613757 | 0.539699672 | -1.29153724 | 0.006157409 |
| -1.00600729 | 0.89875418 | 0.88552926 | 0.012178123 | 0.999497972 | 0.991487989 |
| -1.03961467 | 0.6392852  | -1.0009084 | 0.991250689 | 0.854501045 | 0.061778167 |
| -1.12194392 | 0.00914665 | -1.0437223 | 0.319004026 | -1.06054621 | 0.172790398 |
| -1.24005157 | 0.00051637 | -1.1765989 | 0.007217916 | -1.19483801 | 0.00347668  |
| 0.794823913 | 0.02847283 | 0.87802276 | 0.207656338 | 0.847510705 | 0.110623393 |
| -1.13628382 | 0.07639218 | 0.97449295 | 0.716242062 | -1.0702006  | 0.341609795 |
| 0.953028625 | 0.1508868  | 0.94478247 | 0.091118421 | 0.997511505 | 0.940123134 |
| 0.98138319  | 0.65756419 | 0.94914559 | 0.221092157 | 0.893554147 | 0.010024757 |
| 0.916944736 | 0.29148581 | 0.96923055 | 0.702500689 | -1.05679008 | 0.500264275 |
| 0.994313446 | 0.92988267 | 0.87855373 | 0.049776272 | 0.982689613 | 0.787659219 |
| 0.960482615 | 0.39546126 | 0.99719544 | 0.952640603 | -1.11838594 | 0.021044042 |
| 0.923997652 | 0.11408821 | -1.1138062 | 0.032875612 | 0.935787523 | 0.183126636 |
| 0.829309173 | 0.08341984 | 0.83060725 | 0.085959582 | 0.889563044 | 0.274959642 |
| -1.00022897 | 0.99611809 | 0.99473289 | 0.910648207 | 0.836322115 | 0.000352759 |
| -1.0030272  | 0.91727528 | -1.0260481 | 0.378610373 | -1.01506203 | 0.607875857 |

|             |            |            |             |             |             |
|-------------|------------|------------|-------------|-------------|-------------|
| 0.81483448  | 0.01218406 | -1.0472315 | 0.561153019 | -1.17654677 | 0.044252854 |
| 0.930550759 | 0.13343327 | -1.0727636 | 0.142882433 | 0.997045126 | 0.950279873 |
| -1.01879223 | 0.65929455 | 0.99484514 | 0.902510382 | -1.07910696 | 0.075429438 |
| -1.03819964 | 0.41916959 | 0.93647883 | 0.159876745 | -1.0440935  | 0.352922607 |
| 0.636863761 | 2.75E-06   | 0.77765859 | 0.005090694 | -1.27033443 | 0.007486572 |
| 0.942487457 | 0.42972903 | 0.72443985 | 6.55537E-05 | 0.56279726  | 2.89E-10    |
| 0.804346432 | 0.00025897 | -1.0602214 | 0.298006349 | -1.06696647 | 0.249217121 |
| -1.00055953 | 0.99060649 | -1.0017445 | 0.970736491 | -1.12493589 | 0.015930276 |
| 0.953259983 | 0.28735389 | 0.97789232 | 0.61780339  | -1.01993127 | 0.659508327 |
| 0.991388103 | 0.83710604 | -1.010238  | 0.808696964 | -1.00149094 | 0.971744068 |
| 0.781784226 | 3.22E-05   | -1.0432908 | 0.437904492 | -1.01463179 | 0.789816504 |
| 0.999814179 | 0.99808543 | 0.84986939 | 0.039516141 | 0.69821244  | 2.13E-05    |
| 0.946633777 | 0.51307646 | 0.93721114 | 0.439674626 | -1.05823825 | 0.499684502 |
| -1.07060413 | 0.33797805 | 0.93408253 | 0.338207041 | 0.423197816 | 4.43E-17    |
| 0.964705427 | 0.54045986 | 0.86667993 | 0.017441167 | 0.992668437 | 0.900075079 |
| 0.783289505 | 0.00164259 | 0.50919548 | 1.46105E-12 | 0.780517402 | 0.001423448 |
| -1.00052375 | 0.99667311 | 0.80224498 | 0.083625076 | 0.643029814 | 0.000854917 |
| 0.966623688 | 0.72338344 | 0.86682636 | 0.140002448 | 0.758297798 | 0.005398618 |
| -1.06825078 | 0.24123779 | -1.0196564 | 0.728171217 | -1.13048804 | 0.032031943 |
| 0.698337662 | 5.70E-06   | 0.7313587  | 5.38192E-05 | 0.593277055 | 1.27E-09    |
| -1.08028086 | 0.33271555 | -1.0584867 | 0.474955293 | 0.94801009  | 0.502052749 |
| 0.887314852 | 0.05001662 | 0.91071779 | 0.122659433 | 0.833471819 | 0.003502739 |
| 0.844871845 | 0.04629357 | 0.95156286 | 0.550484027 | 0.896372796 | 0.191156709 |
| -1.17814903 | 0.05916404 | -1.1224079 | 0.180159748 | -1.34232902 | 0.001060091 |
| 0.844451927 | 0.02412039 | -1.0997614 | 0.19731548  | 0.603796313 | 5.61E-09    |
| -1.30267885 | 0.01540343 | -1.2377341 | 0.048529552 | -1.08910652 | 0.422715051 |
| -1.05354102 | 0.45811443 | 0.98365638 | 0.814237703 | -1.22815157 | 0.004770648 |
| -1.17968059 | 0.05079429 | -1.0223014 | 0.790728662 | 0.92947519  | 0.38047703  |
| -1.06840486 | 0.17689604 | -1.1016013 | 0.050443424 | -1.17344918 | 0.001682941 |
| -1.08985195 | 0.08484122 | -1.1318024 | 0.014506355 | -1.23113993 | 8.77E-05    |
| -1.24964664 | 0.00585097 | -1.0932876 | 0.255716557 | -1.07972752 | 0.32754785  |
| -1.02104791 | 0.68855103 | 0.97787158 | 0.66679542  | 0.982600567 | 0.735484547 |
| -1.35962137 | 0.0001456  | -1.5722744 | 1.59077E-07 | -1.36069145 | 0.000140678 |
| -1.187467   | 0.01872274 | -1.061374  | 0.404340469 | 0.995074365 | 0.944708113 |
| -1.16749965 | 0.03217785 | 0.92937822 | 0.302927054 | 0.866160857 | 0.046220068 |
| -1.13535381 | 0.08768971 | 0.94956653 | 0.481331877 | -1.11776268 | 0.133011588 |
| -1.12620114 | 0.15737516 | -1.0079883 | 0.923877748 | -1.02378101 | 0.777828018 |
| -1.01554988 | 0.7287879  | -1.0357512 | 0.430989966 | 0.726922627 | 1.99E-09    |
| -1.03218748 | 0.58216736 | -1.0675735 | 0.258283655 | -1.04052215 | 0.490608541 |
| -1.19463856 | 0.02661727 | -1.3412688 | 0.00041622  | -1.36634453 | 0.000194412 |
| -1.28767056 | 0.04156092 | -1.4045887 | 0.00698011  | -1.19584696 | 0.145510435 |
| -1.01262838 | 0.86059301 | 0.97143731 | 0.685270458 | 0.966842123 | 0.637308025 |
| 0.874011304 | 0.06769604 | 0.93721781 | 0.373273463 | 0.947809324 | 0.461175926 |
| -1.13320715 | 0.18288805 | -1.1070933 | 0.277196373 | -1.17410426 | 0.089034396 |

|             |            |            |             |             |             |
|-------------|------------|------------|-------------|-------------|-------------|
| -1.20294974 | 0.22829584 | -1.2523491 | 0.143630738 | -1.38470691 | 0.036352968 |
| -1.07047055 | 0.42146214 | -1.0661291 | 0.449542412 | -1.09839776 | 0.269195978 |
| -1.02775592 | 0.8307017  | 0.95178741 | 0.699718523 | -1.158207   | 0.254190677 |
| -1.16399198 | 0.03361217 | -1.0124408 | 0.859744325 | -1.12815214 | 0.089096914 |
| -1.07571658 | 0.15002557 | 0.99042808 | 0.848123237 | 0.893110429 | 0.027782794 |
| -1.11782444 | 0.01905223 | -1.0221066 | 0.637000967 | -1.0694473  | 0.150858833 |
| 0.99556748  | 0.93822732 | 0.82241492 | 0.001179771 | 0.932411743 | 0.225342645 |
| 0.741934655 | 0.00531143 | -1.023616  | 0.82110553  | -1.04204681 | 0.690039498 |
| 0.985707567 | 0.78905763 | 0.9330779  | 0.201300163 | 0.736220005 | 4.87E-07    |
| -1.18340375 | 0.13503653 | -1.2003988 | 0.105633625 | -1.22143234 | 0.077099361 |
| -1.01017773 | 0.89624745 | -1.0594199 | 0.458414709 | -1.13512388 | 0.106878847 |
| -1.08770134 | 0.37468813 | -1.1099655 | 0.271545688 | -1.08041778 | 0.413791836 |
| 0.963458495 | 0.53686432 | -1.1285291 | 0.048506192 | -1.0636164  | 0.30773309  |
| -1.05101954 | 0.48462    | -1.084555  | 0.256066261 | -1.0879646  | 0.238358811 |
| 0.944073778 | 0.22392721 | 0.99098615 | 0.847236855 | 0.816923359 | 6.72E-05    |
| -1.4004688  | 8.18E-05   | -1.0103915 | 0.896354108 | -1.01539033 | 0.847398627 |
| -1.21273244 | 0.02853765 | -1.0222246 | 0.798558871 | -1.10838598 | 0.235133405 |
| -1.18073396 | 0.01287565 | 0.88457948 | 0.062874298 | 0.993824338 | 0.923919333 |
| -1.15805436 | 0.08029641 | -1.0318022 | 0.705199908 | -1.10440036 | 0.232965794 |
| -1.22041502 | 0.00873687 | -1.1428414 | 0.073656048 | -1.15490162 | 0.054259516 |
| -1.09631513 | 0.1797299  | 0.92794084 | 0.273855122 | 0.876578974 | 0.056743086 |
| -1.03118894 | 0.60273968 | -1.0359859 | 0.549261222 | -1.01948555 | 0.74345208  |
| 0.960273005 | 0.61122146 | -1.1218011 | 0.152950137 | -1.10220025 | 0.225028294 |
| -1.29382458 | 8.25E-05   | -1.2483275 | 0.000560284 | -1.17747158 | 0.009191683 |
| -1.26170799 | 0.00588867 | -1.0472625 | 0.571196218 | -1.09544604 | 0.265677507 |
| -1.10028198 | 0.47092712 | -1.114622  | 0.413309053 | -1.03327734 | 0.804523893 |
| 0.942623142 | 0.46863291 | -1.0610153 | 0.467603257 | 0.869428891 | 0.089680515 |
| -1.28874989 | 0.00850833 | -1.3741475 | 0.001193969 | -1.45669678 | 0.000165418 |
| -1.14861095 | 0.03724418 | -1.0468961 | 0.482876699 | -1.07748433 | 0.254993253 |
| -1.17784108 | 0.02916561 | 0.93470621 | 0.359316699 | 0.873827415 | 0.070293137 |
| 0.9272302   | 0.08841752 | -1.1421787 | 0.00351737  | -1.02142501 | 0.628306751 |
| 0.96873046  | 0.58673961 | 0.97884162 | 0.714228316 | -1.01508744 | 0.797568216 |
| 0.849348646 | 0.01594394 | -1.0014171 | 0.982858494 | 0.94107277  | 0.358690348 |
| 0.87000759  | 0.02205502 | -1.0531382 | 0.384573525 | -1.06464898 | 0.293559948 |
| -1.10545085 | 0.3347688  | -1.0863789 | 0.424745954 | 0.92768905  | 0.46935056  |
| -1.17837428 | 0.03495849 | 0.96251224 | 0.616545674 | -1.03870723 | 0.618678865 |
| 0.941099752 | 0.28050678 | 0.96459602 | 0.520183159 | 0.99564259  | 0.937783582 |
| -1.19211668 | 0.00086066 | -1.1927215 | 0.000834203 | 0.93037449  | 0.152908092 |
| -1.02119641 | 0.67854218 | 0.994795   | 0.917808355 | -1.29356173 | 4.33E-06    |
| 0.930379204 | 0.15414272 | -1.0155711 | 0.758143037 | 0.892856601 | 0.027246331 |
| 0.962288999 | 0.62055563 | 0.77987072 | 0.002174454 | 0.80873885  | 0.008110283 |
| 0.98440923  | 0.78937869 | 0.92393519 | 0.182177541 | 0.968160191 | 0.582691239 |
| 0.974624775 | 0.60798605 | 0.8547038  | 0.002655203 | 0.84860726  | 0.001745533 |
| 0.459958971 | 7.80E-16   | 0.48926762 | 1.69794E-14 | 0.683740155 | 9.33E-07    |

|             |            |            |             |             |             |
|-------------|------------|------------|-------------|-------------|-------------|
| 0.429383389 | 7.15E-19   | 0.62894171 | 9.64809E-10 | 0.741975699 | 1.50E-05    |
| 0.980397168 | 0.66898352 | 0.98864824 | 0.805145113 | -1.040641   | 0.390852237 |
| 0.968162669 | 0.48380165 | 0.86084021 | 0.001906827 | 0.920737873 | 0.077547498 |
| 0.863782306 | 0.01177441 | 0.91317932 | 0.111635713 | 0.981383022 | 0.739169804 |
| 0.96316591  | 0.5058642  | -1.0409742 | 0.476679065 | -1.04481238 | 0.43744021  |
| -1.20899248 | 0.00708546 | -1.1550466 | 0.038062388 | -1.60614044 | 4.40E-09    |
| -1.07155898 | 0.41092233 | 0.96712954 | 0.690182532 | -1.29760524 | 0.002877295 |
| -1.06466424 | 0.26075327 | 0.9329105  | 0.213225631 | 0.992027207 | 0.885095638 |
| 0.954161081 | 0.61043109 | 0.96514787 | 0.699974318 | 0.864251138 | 0.116959129 |
| 0.905145263 | 0.06360012 | -1.0522278 | 0.337584554 | -1.29303695 | 9.75E-06    |
| 0.819421851 | 0.01424697 | 0.84926988 | 0.042470153 | 0.876853116 | 0.100387735 |
| -1.03294593 | 0.42284469 | -1.0344764 | 0.40210414  | -1.05556053 | 0.183546949 |
| -1.05764828 | 0.61323933 | -1.3477455 | 0.009082782 | 0.916919496 | 0.43485935  |
| -1.11547129 | 0.1336551  | -1.1082158 | 0.157954829 | -1.10294839 | 0.177773193 |
| 0.911049157 | 0.41045176 | 0.95982665 | 0.71644952  | -1.18571181 | 0.135158915 |
| 0.888986131 | 0.18217478 | 0.89557069 | 0.210684966 | -1.19855767 | 0.042286181 |
| 0.945926356 | 0.28332843 | 0.65447463 | 3.88583E-11 | -1.11081659 | 0.045384018 |
| -1.16398813 | 0.00512679 | 0.94685047 | 0.298547391 | 0.777386827 | 1.14E-05    |
| -1.01927117 | 0.75917184 | 0.95840038 | 0.495721294 | 0.826548021 | 0.003306307 |
| 0.956509436 | 0.37989192 | 0.95847962 | 0.402180282 | -1.71166331 | 6.38E-15    |
| -1.07845691 | 0.11228715 | 0.96975163 | 0.51427927  | 0.964215836 | 0.439451971 |
| 0.988835251 | 0.7298241  | -1.0606577 | 0.0741995   | 0.798125916 | 4.72E-09    |
| 0.950697206 | 0.32747916 | 0.92200825 | 0.118360024 | 0.955241274 | 0.374772592 |
| 0.840793748 | 0.12047158 | 0.89311629 | 0.308301345 | 0.859875069 | 0.175251055 |
| -1.05363483 | 0.33011486 | -1.0299079 | 0.581641196 | 0.853963676 | 0.004451184 |
| 0.872766962 | 0.15760995 | 0.83589942 | 0.064478863 | 0.989052107 | 0.908139386 |
| 0.81287274  | 0.16163445 | 0.95917658 | 0.776356843 | -1.00993628 | 0.946254963 |
| 0.940335983 | 0.2216117  | -1.0185934 | 0.712594019 | -1.09588622 | 0.071214574 |
| -1.20472133 | 0.03522768 | 0.99088158 | 0.915776509 | -1.15812848 | 0.094379334 |
| 0.992789591 | 0.92727096 | -1.0249274 | 0.756225175 | -1.06187735 | 0.450066661 |
| 0.964872691 | 0.49182031 | 0.92684922 | 0.147298639 | 0.50956537  | 2.79E-18    |
| -1.07939047 | 0.40507107 | 0.93431008 | 0.458684897 | -1.06417252 | 0.497394277 |
| -1.24870487 | 0.04889049 | 0.812437   | 0.064882316 | 0.831676105 | 0.100267427 |
| 0.950068045 | 0.48537852 | 0.8382349  | 0.018928335 | 0.635659264 | 7.89E-08    |
| 0.946250843 | 0.41333253 | 0.61417449 | 1.52897E-09 | 0.724633381 | 1.28E-05    |
| -1.1148957  | 0.26964325 | 0.7499411  | 0.004686031 | -1.34159214 | 0.003934508 |
| 0.988854605 | 0.8820591  | -1.0088429 | 0.90722173  | 0.934325381 | 0.370306911 |
| -1.01499375 | 0.7584912  | -1.0167755 | 0.731103253 | 0.919235676 | 0.086065593 |
| 0.904633364 | 0.23155036 | -1.1451093 | 0.107698329 | -1.12535736 | 0.15968913  |
| -1.11472541 | 0.06967732 | 0.94866094 | 0.373076269 | -1.02269019 | 0.703685254 |
| -1.03673474 | 0.47749088 | -1.1230908 | 0.025254036 | 0.987716886 | 0.80733632  |
| -1.25164248 | 0.00021323 | -1.1115406 | 0.066693981 | -1.37993799 | 5.23E-07    |
| 0.92082666  | 0.13919934 | 0.9288502  | 0.184864939 | 0.957023149 | 0.42757317  |
| 0.893635709 | 0.38626183 | 0.81573653 | 0.119524886 | 0.882389547 | 0.33545402  |



|             |            |            |             |             |             |
|-------------|------------|------------|-------------|-------------|-------------|
| 0.9647707   | 0.47369347 | -1.003792  | 0.939584449 | 0.949312334 | 0.300002832 |
| -1.03645952 | 0.41220191 | -1.0510088 | 0.255989296 | 0.885450169 | 0.006942354 |
| 0.874955904 | 0.02716875 | 0.98501625 | 0.798397979 | -1.02951729 | 0.62289488  |
| 0.969298308 | 0.53096051 | 0.98139123 | 0.705533108 | -1.0425847  | 0.402759651 |
| 0.982150708 | 0.66841851 | -1.0124547 | 0.768377969 | -1.0540748  | 0.213353609 |
| -1.37118074 | 5.94E-05   | -1.1568745 | 0.049204151 | 0.888199381 | 0.107415677 |
| 0.868700855 | 0.09034525 | -1.1152673 | 0.186957463 | 0.987457983 | 0.877679588 |
| -1.14530911 | 0.05651151 | -1.1438345 | 0.058817123 | -1.01197019 | 0.864906854 |
| -1.0431799  | 0.57342293 | 0.88445882 | 0.105753482 | 0.952937596 | 0.521042734 |
| 0.715220824 | 0.00684082 | -1.0608862 | 0.621854869 | -1.09034815 | 0.470987525 |
| 0.921640439 | 0.03744762 | 0.96651652 | 0.377134134 | -1.01207667 | 0.754807836 |
| -1.19669826 | 0.0826282  | -1.2066414 | 0.069794125 | -1.43301806 | 0.000826313 |
| -1.03544089 | 0.44134823 | 0.95639734 | 0.325204152 | -1.08235158 | 0.083678768 |
| 0.872181119 | 0.04230769 | 0.95669193 | 0.503576711 | -1.1269619  | 0.074650192 |
| 0.927368231 | 0.14650137 | 0.9803033  | 0.699037162 | -1.11812933 | 0.033533652 |
| 0.996136358 | 0.93940136 | 0.9335544  | 0.180591951 | 0.942071818 | 0.244234735 |
| -1.00439632 | 0.93093455 | 0.96022205 | 0.423951157 | -1.05402421 | 0.300969367 |
| 0.824484197 | 0.31397202 | 0.73656863 | 0.11319891  | 0.890760504 | 0.544929077 |
| 0.930413815 | 0.13908083 | 0.94313637 | 0.228255147 | 0.992595233 | 0.877616331 |
| 0.712224704 | 5.60E-05   | 0.78650899 | 0.003103955 | 0.893349454 | 0.151618409 |
| -1.09043411 | 0.18332134 | 0.94700067 | 0.400269696 | 0.865997913 | 0.029247569 |
| 0.98782111  | 0.89032209 | -1.0626742 | 0.494828777 | 0.779581427 | 0.006799344 |
| -1.29722089 | 0.00237908 | -1.3105682 | 0.001646569 | 0.771514902 | 0.002449873 |
| 0.908732059 | 0.1036162  | 0.95997582 | 0.482830015 | -1.06057812 | 0.313480808 |
| -1.00358245 | 0.9094896  | 0.92274377 | 0.013044193 | -1.03180649 | 0.321757496 |
| -1.51564659 | 4.35E-08   | -1.1567266 | 0.029809922 | -1.03054191 | 0.646506223 |
| -1.10077367 | 0.07157141 | 0.92050696 | 0.11865737  | 0.996910133 | 0.952974603 |
| -1.03654416 | 0.40177875 | 0.93903314 | 0.144400929 | -1.02486012 | 0.56553351  |
| 0.934556336 | 0.31873897 | -1.005478  | 0.935559785 | 0.917369366 | 0.205214734 |
| -1.10627834 | 0.19937919 | -1.0526035 | 0.51237705  | 0.973875956 | 0.734775625 |
| 0.958363154 | 0.55037194 | 0.96996935 | 0.668277684 | 0.968326469 | 0.651058447 |
| -1.00408361 | 0.95763928 | 0.71709863 | 6.03989E-05 | 0.77166983  | 0.001301295 |
| -1.11680229 | 0.21455317 | -1.0590316 | 0.517112518 | -1.1692367  | 0.081125085 |
| -1.18554073 | 0.0220906  | 0.91568884 | 0.227843944 | -1.05919752 | 0.429233239 |
| 0.972028092 | 0.79766082 | -1.0746872 | 0.515809398 | -0.99998716 | 0.999907393 |
| 0.910187787 | 0.36668296 | -1.1282737 | 0.2481355   | 0.936682933 | 0.529548411 |
| -1.05114879 | 0.4777034  | -1.0409724 | 0.567314125 | -1.05513386 | 0.445120256 |
| -1.03264202 | 0.56298138 | 0.92101593 | 0.141844592 | 0.806742176 | 0.000277447 |
| -1.01159589 | 0.76385078 | 0.99172316 | 0.828504615 | -1.09086784 | 0.026741514 |
| -1.13713605 | 0.16213028 | -1.0684154 | 0.468620613 | -1.19484256 | 0.054786465 |
| -1.04764267 | 0.55500393 | -1.0272332 | 0.732998819 | 0.987285314 | 0.870885054 |
| 0.97219609  | 0.66314872 | 0.76221713 | 9.55276E-05 | 0.912530407 | 0.160874891 |
| 0.876237661 | 0.00378782 | 0.84444045 | 0.000293198 | 0.795235617 | 2.67E-06    |
| -1.35842932 | 2.02E-05   | -1.0224071 | 0.736519582 | -1.22482547 | 0.00312282  |

|             |            |            |             |             |             |
|-------------|------------|------------|-------------|-------------|-------------|
| 0.928551522 | 0.33691812 | 0.83349023 | 0.020862952 | -1.17350455 | 0.04125187  |
| -1.16592744 | 0.15296147 | -1.2895251 | 0.019838645 | -1.43125859 | 0.001333709 |
| -1.36271038 | 0.00372121 | -1.312982  | 0.010040219 | -1.44349834 | 0.000699272 |
| 0.926395404 | 0.11133217 | -1.0009531 | 0.983981329 | 0.912418734 | 0.057543612 |
| -1.04364016 | 0.54558388 | -1.3899001 | 1.93192E-05 | -1.07612754 | 0.300813365 |
| -1.0211129  | 0.68775433 | -1.0191738 | 0.714821979 | 0.697726544 | 4.92E-09    |
| 0.914029318 | 0.22812139 | 0.89755183 | 0.148520929 | -1.10148991 | 0.195448798 |
| -1.03788204 | 0.42357681 | -1.0107516 | 0.817473837 | 0.97554118  | 0.593454284 |
| -1.01472674 | 0.84892556 | -1.038696  | 0.621155542 | -1.20602014 | 0.017464209 |
| 0.950699715 | 0.46353605 | -1.046524  | 0.509474549 | -1.33148646 | 0.000107853 |
| -1.02313727 | 0.68150734 | 0.9969873  | 0.956792931 | 0.799913215 | 0.00017858  |
| 0.72686114  | 0.00049601 | 0.7951475  | 0.010160529 | 0.699653882 | 0.000118805 |
| -1.09673083 | 0.01634261 | 0.99930684 | 0.985214887 | -1.01743743 | 0.64440487  |
| 0.969013493 | 0.50977309 | 0.94361103 | 0.226419632 | -1.03885127 | 0.425180444 |
| 0.966628164 | 0.52893029 | 0.99071872 | 0.862433422 | 0.941610091 | 0.266272436 |
| -1.05081019 | 0.42165619 | 0.82616159 | 0.002908717 | 0.921792931 | 0.188976156 |
| -1.32979579 | 0.03609383 | -1.0932263 | 0.504275986 | -1.33506285 | 0.033691373 |
| -1.01141615 | 0.89994431 | -1.0594956 | 0.522856568 | -1.07814914 | 0.406085659 |
| -1.03210322 | 0.62761866 | -1.2822402 | 0.000328527 | -1.42790363 | 1.08E-06    |
| -1.24877704 | 0.00060599 | -1.2620186 | 0.000351612 | -1.13513159 | 0.042406536 |
| 0.972223351 | 0.55846482 | 0.94623585 | 0.253162849 | 0.879164981 | 0.009458497 |
| -1.01433747 | 0.73415064 | 0.96204525 | 0.357614298 | 0.965778467 | 0.407406592 |
| 0.793588461 | 0.00067684 | 0.79852893 | 0.000911666 | 0.826999077 | 0.004510658 |
| 0.906895917 | 0.09916145 | -1.0220508 | 0.709504348 | -1.00899917 | 0.878322756 |
| 0.702783696 | 8.81E-05   | 0.92031922 | 0.322466289 | 0.933548838 | 0.41192205  |
| 0.680391614 | 1.23E-08   | 0.89082411 | 0.048837356 | 0.70734846  | 1.52E-07    |
| 0.877653611 | 0.07361383 | 0.94915587 | 0.468795304 | 0.941694264 | 0.404650748 |
| 0.998521654 | 0.98008594 | -1.003273  | 0.956033466 | -1.00010152 | 0.998633474 |
| -1.12724109 | 0.16625542 | -1.2176998 | 0.024891368 | 0.98381871  | 0.84912857  |
| -1.27653497 | 0.00573788 | -1.2635884 | 0.007942542 | -1.30651052 | 0.002658362 |
| 0.939687805 | 0.12601195 | -1.023732  | 0.560329274 | -1.09192422 | 0.032347878 |
| -1.16490107 | 0.01116965 | -1.1387473 | 0.029446724 | -1.24757195 | 0.000361092 |
| 0.932507335 | 0.35794664 | -1.0290221 | 0.70571919  | 0.933859401 | 0.367923394 |
| 0.971923265 | 0.70789561 | 0.85181149 | 0.038519353 | 0.863708777 | 0.057893535 |
| -1.08843218 | 0.08965039 | 0.97568572 | 0.617655058 | -1.01992896 | 0.688903556 |
| 0.907759981 | 0.20112141 | 0.95674685 | 0.556774396 | 0.994956197 | 0.94633508  |
| -1.0068039  | 0.95300489 | 0.95547154 | 0.69239883  | 0.789565508 | 0.043956152 |
| 0.994254832 | 0.8736456  | 0.94827304 | 0.146598207 | -1.07805623 | 0.041898698 |
| -1.14245595 | 0.02287412 | 0.93346491 | 0.231112956 | -1.00056273 | 0.992140427 |
| -1.00704991 | 0.90343694 | -1.0133864 | 0.818401419 | 0.958011512 | 0.459948058 |
| 0.971145618 | 0.53870217 | -1.0292642 | 0.544726829 | 0.978132055 | 0.642206087 |
| 0.98098097  | 0.88039599 | 0.9607769  | 0.753955412 | 0.705075505 | 0.008077084 |
| 0.81582241  | 0.00800247 | -1.0873424 | 0.262155069 | 0.881832117 | 0.09457016  |
| 0.890527569 | 0.03557024 | 0.98616499 | 0.796556395 | 0.993395037 | 0.902375724 |

|             |            |            |             |             |             |
|-------------|------------|------------|-------------|-------------|-------------|
| -1.02111195 | 0.69875971 | 0.83391749 | 0.00134819  | 0.838786529 | 0.001860217 |
| 0.956068313 | 0.7824983  | 0.82241519 | 0.232563295 | 0.78971372  | 0.150667142 |
| 0.962791891 | 0.63670341 | 0.35053214 | 2.15597E-18 | 0.466461795 | 3.60E-13    |
| -1.27304111 | 0.00065113 | -1.1902412 | 0.011641585 | -1.12008424 | 0.09472814  |
| 0.90464197  | 0.09406555 | 0.9293581  | 0.218150642 | -1.03893118 | 0.518719699 |
| 0.956100507 | 0.38993551 | 0.97384504 | 0.610955073 | 0.913272365 | 0.085558486 |
| -1.42510464 | 0.00156101 | -1.1015898 | 0.366687908 | -1.06960843 | 0.529307625 |
| -1.00740573 | 0.86796654 | 0.96862076 | 0.473565859 | -1.03434371 | 0.447947746 |
| -1.38923356 | 0.00015272 | -1.5146111 | 3.85821E-06 | -1.22621617 | 0.014446135 |
| 0.863650045 | 0.00383025 | 0.97154372 | 0.554080015 | 0.974786853 | 0.600595086 |
| -1.01868305 | 0.82077407 | -1.0477661 | 0.568450067 | -1.16503811 | 0.065721452 |
| -1.50066182 | 0.00019181 | 0.91572769 | 0.388844679 | -1.2548515  | 0.029237896 |
| -1.05328312 | 0.48186667 | -1.1181195 | 0.133580194 | -1.03482844 | 0.642337889 |
| -1.13681281 | 0.08091541 | -1.0508185 | 0.494612377 | 0.970968756 | 0.684373088 |
| 0.930965134 | 0.13547104 | -1.1843646 | 0.000727497 | -1.02287843 | 0.633676441 |
| 0.985251806 | 0.74758568 | -1.0308273 | 0.51142473  | 0.750946562 | 7.29E-08    |
| -1.00752419 | 0.82975857 | 0.9726017  | 0.426815627 | 0.953853067 | 0.178956266 |
| 0.991012184 | 0.86801429 | 0.99291949 | 0.895936125 | -1.10297746 | 0.075470192 |
| 0.950140083 | 0.20864189 | -1.0409503 | 0.322461152 | 0.964953123 | 0.378670774 |
| 0.991042029 | 0.84997458 | 0.93142474 | 0.139339986 | 0.850493308 | 0.00120206  |
| 0.985492915 | 0.7271891  | -1.0023832 | 0.954658705 | -1.03857006 | 0.367826494 |
| 0.998569511 | 0.97541315 | 0.9626044  | 0.413369082 | 0.898007079 | 0.023775332 |
| -1.00410392 | 0.93769863 | 0.94338    | 0.268712858 | 0.999502362 | 0.992420211 |
| -1.00016562 | 0.99706166 | 0.97876169 | 0.633453331 | -1.00142612 | 0.974718354 |
| 0.965484238 | 0.5490211  | -1.0744124 | 0.223236269 | -1.01543801 | 0.793543901 |
| -1.02375446 | 0.44804843 | -1.0259598 | 0.407791732 | -1.04177374 | 0.188393754 |
| -1.16184633 | 0.04875714 | 0.92047513 | 0.270265026 | 0.882043232 | 0.097356478 |
| -1.24975357 | 0.01517471 | -1.058735  | 0.523463434 | -1.03538963 | 0.697102787 |
| -1.11356813 | 0.42944176 | -1.2971279 | 0.059473586 | -1.22617947 | 0.137119943 |
| -1.14973647 | 0.21175463 | -1.1399326 | 0.240744524 | -1.3633507  | 0.006949419 |
| 0.968338419 | 0.57252901 | -1.120629  | 0.049473071 | -1.03378948 | 0.560013337 |
| -1.02917063 | 0.71222539 | -1.1747607 | 0.042582525 | -1.24986401 | 0.005758851 |
| 0.994210126 | 0.91699477 | -1.0642116 | 0.266746355 | -1.35751    | 1.04E-06    |
| -1.02323454 | 0.68248781 | 0.9132408  | 0.109986679 | 0.728289265 | 5.68E-07    |
| -1.05541325 | 0.36338317 | -1.2038741 | 0.002639309 | -1.29877368 | 4.47E-05    |
| 0.956074256 | 0.49603179 | -1.0049698 | 0.939982696 | -1.01509789 | 0.820008161 |
| -1.39376914 | 0.00617896 | -1.2308652 | 0.080165452 | 0.995272528 | 0.967696635 |
| 0.856799093 | 0.00747809 | 0.93217566 | 0.211910595 | 0.964765082 | 0.521512651 |
| -1.31991913 | 0.08219772 | -1.1845397 | 0.28466439  | -1.14369408 | 0.39537962  |
| 0.922078629 | 0.31840505 | 0.86280209 | 0.072509261 | 0.615065235 | 1.54E-07    |
| 0.977091103 | 0.57365344 | 0.97495138 | 0.53807591  | 0.992740534 | 0.859403173 |
| -1.02183481 | 0.63340871 | -1.0283129 | 0.537871664 | -1.12996636 | 0.008932834 |
| -1.03814221 | 0.4117836  | -1.1096238 | 0.025444948 | -1.2018479  | 0.000159043 |
| -1.06107569 | 0.33302806 | 0.95346183 | 0.4357562   | 0.891931066 | 0.064921159 |

|             |            |            |             |             |             |
|-------------|------------|------------|-------------|-------------|-------------|
| -1.29027216 | 0.0559746  | -1.0871836 | 0.524404297 | -1.38635986 | 0.015347482 |
| 0.967389956 | 0.4365389  | 0.930728   | 0.09541185  | 0.804212765 | 3.78E-06    |
| 0.995614411 | 0.93888715 | -1.0001706 | 0.997625274 | 0.984245203 | 0.781844628 |
| -1.01928658 | 0.68020545 | 0.99845849 | 0.973424895 | 0.965156595 | 0.445023601 |
| 0.936167185 | 0.25091431 | 0.92958877 | 0.204397112 | 0.885173656 | 0.036394699 |
| -1.06875371 | 0.6411679  | 0.89390532 | 0.4326577   | 0.94337647  | 0.682786503 |
| -1.22794115 | 0.0486831  | 0.99453085 | 0.957233314 | 0.963420422 | 0.715731087 |
| -1.10550389 | 0.37676601 | -1.1460852 | 0.230971621 | -1.19329199 | 0.122230296 |
| -1.01080065 | 0.92420457 | 0.84529515 | 0.140655891 | 0.91664673  | 0.442089972 |
| -1.13442326 | 0.11615549 | 0.78365536 | 0.003199791 | 0.967040777 | 0.673009223 |
| 0.966996562 | 0.70562695 | 0.89793124 | 0.228458245 | -1.04431165 | 0.62569604  |
| 0.973562382 | 0.57775853 | -1.0376282 | 0.443428536 | 0.990974938 | 0.850406515 |
| -1.0094245  | 0.9097399  | 0.86403855 | 0.081653776 | 0.851230494 | 0.055698907 |
| 0.908487621 | 0.09126661 | -1.1159272 | 0.054566081 | 0.835051775 | 0.002116843 |
| 0.873984281 | 0.06085763 | -1.0530093 | 0.465971388 | -1.16125206 | 0.038185861 |
| -1.00006896 | 0.99933087 | -1.0284094 | 0.733468703 | -1.14290572 | 0.108510539 |
| -1.10633451 | 0.22959453 | -1.196687  | 0.035314412 | -1.09496378 | 0.280147084 |
| 0.98062408  | 0.82956526 | -1.1057534 | 0.271365954 | -1.16233052 | 0.102137785 |
| -1.15511268 | 0.02676214 | 0.99872946 | 0.984053392 | 0.965213744 | 0.578332737 |
| -1.17015903 | 0.08834379 | -1.1388678 | 0.156701822 | 0.954310564 | 0.607569886 |
| 0.92051276  | 0.25488977 | 0.76661885 | 0.000520562 | 0.74494287  | 0.000144907 |
| -1.00968874 | 0.85989134 | 0.95118128 | 0.361348534 | 0.620743001 | 6.06E-12    |
| -1.05354755 | 0.53618797 | 0.87675346 | 0.12232407  | 0.742955059 | 0.000820071 |
| 0.972751333 | 0.68910777 | -1.0543145 | 0.444634452 | 0.905984856 | 0.156379522 |
| -1.32500617 | 0.00615579 | -1.1060362 | 0.311650767 | 0.813494899 | 0.041191373 |
| -1.03282797 | 0.61309712 | 0.9947942  | 0.934802713 | 0.818544615 | 0.002646496 |
| -1.03726943 | 0.48174407 | 0.97107609 | 0.572244368 | 0.778178803 | 1.08E-05    |
| 0.975927248 | 0.83552059 | 0.94624055 | 0.63803492  | -1.11605832 | 0.351348561 |
| 0.981752545 | 0.56803366 | 0.96289757 | 0.243424877 | 0.974282249 | 0.419939846 |
| 0.9416963   | 0.30444543 | 0.93818819 | 0.275684986 | 0.928267747 | 0.204389432 |
| -1.02985541 | 0.57380004 | -1.0138004 | 0.79304651  | 0.993897353 | 0.90669897  |
| 0.969276508 | 0.71757694 | 0.61167444 | 4.72998E-07 | 0.726852103 | 0.000481999 |
| -1.01812726 | 0.72194895 | -1.0221324 | 0.664650865 | -1.08855263 | 0.09691449  |
| 0.988772544 | 0.91360807 | 0.80329927 | 0.039139104 | 0.745436348 | 0.00642791  |
| -1.01145846 | 0.91693153 | 0.82541446 | 0.083297075 | -1.31481649 | 0.014843721 |
| -1.15333584 | 0.2998137  | -1.0194037 | 0.888368008 | -1.40663103 | 0.015353737 |
| 0.947873916 | 0.41726497 | 0.89788618 | 0.105855412 | -1.08238575 | 0.231990741 |
| -1.04143409 | 0.60608055 | -1.0218421 | 0.783552086 | 0.434421766 | 7.56E-15    |
| -1.01357067 | 0.77773093 | -1.1033859 | 0.043215224 | -1.15118096 | 0.004532231 |
| 0.983905    | 0.83030681 | 0.86771062 | 0.06508596  | 0.962898138 | 0.617865294 |
| 0.840659986 | 0.0027349  | 0.83715954 | 0.002197462 | -1.02023476 | 0.718338528 |
| 0.911268689 | 0.33943515 | 0.85836433 | 0.119004334 | 0.978824992 | 0.825144286 |
| 0.808738193 | 0.0062399  | 0.90806551 | 0.20140497  | 0.909329568 | 0.207884146 |
| 0.909913382 | 0.40277793 | -1.0476704 | 0.679060876 | 0.869344921 | 0.216439515 |

|             |            |            |             |             |             |
|-------------|------------|------------|-------------|-------------|-------------|
| 0.823797339 | 0.00552115 | 0.92586863 | 0.255599039 | 0.690378262 | 9.79E-07    |
| 0.971640574 | 0.58407953 | -1.0357873 | 0.503743312 | -1.04440272 | 0.409250913 |
| 0.988907681 | 0.88241304 | -1.0878379 | 0.266962977 | -1.22409408 | 0.009402259 |
| -1.00683957 | 0.94774158 | -1.0792254 | 0.464592056 | -1.13067392 | 0.240662361 |
| 0.824516452 | 0.04423044 | 0.92820943 | 0.429850374 | 0.981247935 | 0.840580365 |
| -1.55305125 | 5.83E-08   | -1.4346482 | 3.65064E-06 | -1.53362641 | 1.13E-07    |
| -1.05245149 | 0.41023324 | 0.95680319 | 0.476545474 | 0.945608773 | 0.367956482 |
| 0.86816937  | 0.02983403 | 0.90662909 | 0.127642525 | -1.08076856 | 0.225489384 |
| -1.02480562 | 0.70266195 | 0.97494697 | 0.692657007 | 0.980971382 | 0.764649377 |
| -1.02191917 | 0.7583694  | 0.89158176 | 0.107593046 | 0.907760773 | 0.173302307 |
| -1.21911398 | 0.00027643 | -1.0954629 | 0.078882067 | -1.14291025 | 0.01128287  |
| -1.10907629 | 0.03620296 | -1.0019365 | 0.968123352 | 0.952537933 | 0.317438225 |
| 0.937709442 | 0.58056325 | 0.93384412 | 0.556573478 | -1.00018657 | 0.99871934  |
| 0.827329616 | 0.01722321 | 0.79883815 | 0.005212628 | -1.00994471 | 0.89836576  |
| 0.936053227 | 0.24002909 | -1.0085728 | 0.878601029 | -1.06873201 | 0.237301877 |
| 0.981093348 | 0.7539559  | -1.0899141 | 0.161092743 | -1.07744846 | 0.223625474 |
| -1.07987722 | 0.19962681 | -1.0144148 | 0.809815409 | 0.886212705 | 0.046148691 |
| 0.861255471 | 0.05255398 | -1.005729  | 0.939841635 | -1.10001781 | 0.211244261 |
| 0.98693585  | 0.83193399 | 0.94121054 | 0.330231963 | -1.08751499 | 0.179350396 |
| -1.03226546 | 0.73870551 | -1.130715  | 0.200133961 | -1.22296238 | 0.038190991 |
| 0.974987871 | 0.73385132 | 0.9043817  | 0.180749815 | 0.949072035 | 0.483683649 |
| -1.09834223 | 0.01267797 | -1.0494185 | 0.190351526 | 0.990571621 | 0.795493177 |
| -1.0181161  | 0.85497475 | -1.0150674 | 0.878987628 | 0.829016833 | 0.060420997 |
| -1.01714374 | 0.88858316 | -1.187948  | 0.15959909  | -1.10612113 | 0.407298744 |
| -1.04255519 | 0.41383109 | -1.1074311 | 0.048759533 | -1.02686463 | 0.60251313  |
| 0.722493543 | 0.00143121 | 0.85451281 | 0.109735012 | 0.784965735 | 0.015335427 |
| -1.19408578 | 0.14960003 | -1.3910991 | 0.008767494 | -1.26311701 | 0.059525801 |
| 0.867062234 | 0.03892946 | 0.95358633 | 0.483694175 | -1.02676301 | 0.696657122 |
| 0.987942602 | 0.827134   | 0.94870595 | 0.345080027 | -1.13895702 | 0.022277542 |
| 0.930674857 | 0.18518477 | -1.0946566 | 0.096910317 | -1.09596419 | 0.092692088 |
| 0.97467327  | 0.75142438 | 0.89277216 | 0.164971521 | 0.778476791 | 0.003010782 |
| -1.08093987 | 0.41680101 | -1.1317984 | 0.198578812 | 0.956824402 | 0.644499158 |
| 0.871407898 | 0.04905323 | 0.88812067 | 0.088322882 | 0.708634344 | 5.65E-06    |
| 0.94074373  | 0.3069479  | 0.88660163 | 0.047077971 | 0.930646109 | 0.230179274 |
| -1.06381731 | 0.45556331 | 0.90224486 | 0.216788219 | 0.709343181 | 0.000110975 |
| 0.993614607 | 0.94551829 | -1.0664454 | 0.493490264 | 0.757588404 | 0.004380239 |
| -1.24505565 | 0.00019504 | 0.97738071 | 0.677915948 | -1.07555377 | 0.189344664 |
| -1.14688365 | 0.02746593 | -1.053217  | 0.394956868 | 0.969517246 | 0.61074804  |
| 0.898540786 | 0.25979817 | 0.8237562  | 0.043868126 | 0.929914264 | 0.442591478 |
| 0.891610929 | 0.07417101 | -1.1078968 | 0.109713433 | -1.26021205 | 0.00055704  |
| -1.19101113 | 0.02834728 | -1.2100871 | 0.017224992 | -1.13653989 | 0.104810474 |
| 0.910581364 | 0.02465227 | 0.95863798 | 0.301828884 | 0.854522066 | 0.000287619 |
| -1.07467984 | 0.24882583 | 0.91818037 | 0.172765293 | 0.959509553 | 0.5063158   |
| 0.860567442 | 0.00495861 | 0.90281554 | 0.051088341 | 0.754710451 | 1.11E-06    |

|             |            |            |             |             |             |
|-------------|------------|------------|-------------|-------------|-------------|
| -1.01018498 | 0.88004534 | 0.92497987 | 0.248408259 | 0.945912114 | 0.409064452 |
| -1.04648308 | 0.59526407 | -1.2099793 | 0.029126085 | 0.933658069 | 0.422995944 |
| -1.02929711 | 0.76957454 | -1.3067296 | 0.008602347 | -1.33118736 | 0.00515493  |
| -1.20331407 | 0.00453223 | -1.2674308 | 0.000378146 | -1.24678515 | 0.000858456 |
| 0.675567998 | 3.98E-07   | 0.78161879 | 0.000637511 | 0.546120409 | 3.69E-12    |
| 0.859973746 | 0.12698653 | 0.81292809 | 0.037926637 | 0.749084887 | 0.004462746 |
| -1.09660063 | 0.05978181 | 0.80127209 | 2.44164E-05 | -1.01860159 | 0.702227773 |
| 0.955542525 | 0.70482247 | 0.83283558 | 0.131428949 | 0.812581035 | 0.087936713 |
| -1.06938848 | 0.04929104 | -1.0466267 | 0.177475816 | -1.00602894 | 0.857643495 |
| -1.00973728 | 0.87361543 | 0.82954815 | 0.003240268 | 0.585576972 | 4.94E-12    |
| -1.01552833 | 0.7277079  | 0.96408411 | 0.409764687 | -1.01613369 | 0.717632089 |
| -1.131908   | 0.01525798 | 0.95971963 | 0.409261986 | -1.05296377 | 0.301164396 |
| 0.850447128 | 0.00601051 | 0.97956598 | 0.716839034 | 0.702322504 | 7.17E-08    |
| 0.806558883 | 0.00140237 | 0.85520924 | 0.017525336 | 0.804818147 | 0.001267056 |
| -1.06212099 | 0.28296143 | 0.98220124 | 0.747808554 | -1.03875263 | 0.496785343 |
| 0.974329903 | 0.65941675 | -1.0215236 | 0.718096644 | 0.837651908 | 0.003876082 |
| -1.1445564  | 0.01858184 | -1.1038126 | 0.081412355 | -1.28013054 | 4.52E-05    |
| -1.03400543 | 0.70085858 | 0.9114615  | 0.289085002 | 0.868581412 | 0.109536155 |
| 0.924711979 | 0.2498641  | 0.96469017 | 0.595370314 | -1.0304088  | 0.657969617 |
| -1.06901946 | 0.33334017 | -1.0640943 | 0.367588198 | -1.26014097 | 0.001349373 |
| 0.924407726 | 0.03146869 | -1.0158601 | 0.660106793 | 0.927660359 | 0.039515608 |
| 0.933172608 | 0.04261965 | -1.0145976 | 0.665191085 | 0.998271723 | 0.958768926 |
| -1.14352593 | 0.00966067 | 0.92864479 | 0.14435575  | -1.04479574 | 0.384449939 |
| -1.26839376 | 0.00384528 | -1.3075447 | 0.00124734  | -1.17488077 | 0.045422328 |
| -1.00513447 | 0.93207497 | -1.2100142 | 0.002393816 | -1.04110424 | 0.503478566 |
| -1.00868694 | 0.8130039  | 0.95696555 | 0.231980449 | 0.910498519 | 0.012751402 |
| -1.07953971 | 0.15197547 | -1.0110018 | 0.836198951 | -1.07613022 | 0.169305899 |
| 0.92184802  | 0.20275843 | 0.90625884 | 0.124697313 | 0.897455019 | 0.092218657 |
| 0.992416032 | 0.88240893 | 0.90953342 | 0.069650264 | 0.981125089 | 0.711352807 |
| -1.12183099 | 0.09328903 | 0.97967606 | 0.761403938 | -1.12034963 | 0.097014949 |
| -1.05941962 | 0.23497142 | -1.1108122 | 0.033131151 | 0.91328217  | 0.064490212 |
| -1.06608943 | 0.09854159 | -1.0732062 | 0.068955028 | -1.03200781 | 0.411531648 |
| -1.28199455 | 0.01607716 | -1.1001667 | 0.343752799 | -1.0863785  | 0.410767897 |
| 0.981812284 | 0.71986474 | -1.0108109 | 0.833524167 | -1.10148711 | 0.062998786 |
| 0.981802454 | 0.7613714  | 0.9728666  | 0.649379751 | 0.980606043 | 0.74607159  |
| -1.5407035  | 0.0144145  | -1.041364  | 0.813449824 | -1.11642337 | 0.522092745 |
| -1.12490225 | 0.01634624 | 0.94272511 | 0.21951063  | -1.00000476 | 0.99992029  |
| -1.27590943 | 0.00010426 | -1.084998  | 0.166306775 | -1.18462811 | 0.005188803 |
| -1.03660146 | 0.54179262 | -1.0555425 | 0.359974237 | -1.14003433 | 0.029351051 |
| 0.748268109 | 6.84E-06   | 0.78334594 | 0.000102051 | 0.607795929 | 1.31E-11    |
| 0.947300748 | 0.28044531 | 0.9097049  | 0.062028381 | 0.964428515 | 0.468905131 |
| -1.01951221 | 0.71323191 | 0.95643246 | 0.398178869 | 0.937432276 | 0.222093448 |
| -1.135191   | 0.30030818 | 0.87640785 | 0.281402494 | 0.944999621 | 0.642671611 |
| 0.969573308 | 0.55619396 | -1.0817542 | 0.137896014 | 0.981325402 | 0.719292211 |

|             |            |            |             |             |             |
|-------------|------------|------------|-------------|-------------|-------------|
| -1.03458425 | 0.74653569 | -1.0179724 | 0.865486911 | -1.11257368 | 0.312621757 |
| 0.926863542 | 0.24726055 | -1.0705887 | 0.298168863 | 0.850396534 | 0.015668625 |
| -1.06024114 | 0.19559241 | -1.0071284 | 0.874157733 | -1.02546989 | 0.575454882 |
| 0.941358222 | 0.36882163 | -1.0069799 | 0.917307098 | -1.1987729  | 0.008802673 |
| -1.00208528 | 0.97423624 | -1.0035341 | 0.956381969 | -1.04429996 | 0.502465628 |
| 0.952114619 | 0.45843185 | 0.897267   | 0.104822257 | 0.6717728   | 1.42E-07    |
| 0.918612508 | 0.05007707 | -1.0326148 | 0.451872211 | 0.997493274 | 0.952961745 |
| 0.957581279 | 0.25300748 | 0.90016442 | 0.007015298 | -1.03487878 | 0.36482604  |
| -1.17382518 | 0.0787936  | -1.0632181 | 0.496062632 | 0.978968498 | 0.813057077 |
| -1.03012835 | 0.58693822 | -1.0574249 | 0.308496284 | 0.654269392 | 2.07E-10    |
| 0.824136116 | 0.00521866 | -1.0343108 | 0.613570836 | 0.419486643 | 2.54E-18    |
| 0.900504711 | 0.08498911 | -1.0423024 | 0.490810116 | -1.00757579 | 0.89990414  |
| -1.06721782 | 0.21786607 | 0.97560997 | 0.637948275 | -1.0247708  | 0.640986262 |
| -1.13294597 | 0.07966159 | -1.0546908 | 0.449322651 | -1.03945888 | 0.581940653 |
| -1.12392303 | 0.05898275 | -1.076183  | 0.230620842 | -1.27940246 | 0.000155884 |
| -1.18384082 | 0.00493823 | -1.201926  | 0.002338224 | -1.10759139 | 0.081485024 |
| 0.870056197 | 0.14266332 | -1.249576  | 0.020826282 | -1.08604271 | 0.381595521 |
| -1.00236455 | 0.96555972 | 0.96367448 | 0.499657819 | 0.961376047 | 0.472518508 |
| -1.25832854 | 0.00894177 | -1.3088895 | 0.002459914 | -1.36622345 | 0.000534563 |
| -1.01122262 | 0.87925002 | 0.92524238 | 0.292651385 | 0.989125471 | 0.881676893 |
| -1.15256895 | 0.04383228 | 0.82141216 | 0.006021269 | 0.937725031 | 0.354077964 |
| -1.04946712 | 0.32732752 | 0.89936491 | 0.034326998 | 0.964259377 | 0.459432783 |
| 0.953567833 | 0.20370314 | -1.0334998 | 0.376488336 | -1.00242878 | 0.947897985 |
| 0.797067362 | 0.0054065  | 0.7435691  | 0.000386257 | 0.68741981  | 1.35E-05    |
| 0.999263949 | 0.99069356 | 0.99380506 | 0.921586517 | -1.22254289 | 0.002323625 |
| 0.915929214 | 0.1493015  | 0.93020983 | 0.23339403  | 0.949955427 | 0.396178532 |
| -1.04280135 | 0.48168842 | 0.9113606  | 0.122501787 | 0.767068253 | 3.91E-05    |
| 0.878369848 | 0.0206063  | 0.93229593 | 0.202704409 | 0.898718641 | 0.054670882 |
| 0.972752202 | 0.40672253 | 0.96790089 | 0.327784431 | 0.870567036 | 0.000102682 |
| 0.886659836 | 0.03083824 | 0.94635861 | 0.314007074 | 0.972898345 | 0.614572024 |
| 0.844064803 | 0.03425119 | 0.73964487 | 0.000301932 | 0.780842645 | 0.002516851 |
| 0.992369022 | 0.88708575 | -1.0247483 | 0.650718091 | 0.674238161 | 1.19E-09    |
| 0.861980459 | 0.04324844 | 0.98822778 | 0.869506782 | 0.893205061 | 0.121293022 |
| -1.30567133 | 0.02620044 | -1.0111401 | 0.924690443 | -1.02062057 | 0.861757648 |
| 0.986552116 | 0.91059319 | -1.0305886 | 0.802715824 | -1.09726665 | 0.442629193 |
| -1.09369696 | 0.27196532 | -1.1989954 | 0.02863221  | -1.39937283 | 0.000113962 |
| 0.995901121 | 0.95740874 | 0.97370535 | 0.729129454 | -1.07692447 | 0.337325753 |
| -1.27569975 | 0.00091867 | 0.95986617 | 0.557450205 | 0.880738617 | 0.072775939 |
| -1.08246654 | 0.36906412 | -1.1979981 | 0.043759483 | -1.10429359 | 0.261809406 |
| -1.16217459 | 0.04030431 | -1.0608942 | 0.412141674 | -1.11816941 | 0.124213011 |
| -1.22068287 | 0.0188558  | -1.2002125 | 0.03092623  | -1.08856377 | 0.307356364 |
| -1.25238536 | 0.04409114 | -1.3182418 | 0.014330708 | -1.12036005 | 0.302461606 |
| 0.899440497 | 0.03688662 | 0.74476172 | 2.08228E-07 | 0.740731582 | 1.39E-07    |
| 0.980402952 | 0.79567746 | -1.0190899 | 0.804585927 | -1.15810603 | 0.058893563 |

|             |            |            |             |             |             |
|-------------|------------|------------|-------------|-------------|-------------|
| 0.957206523 | 0.48917449 | 0.99965825 | 0.995677593 | -1.0459376  | 0.477606425 |
| -1.27930038 | 3.69E-05   | -1.2194361 | 0.000644964 | -1.50105331 | 8.90E-10    |
| -1.27254872 | 0.00773143 | -1.0607109 | 0.501431691 | -1.45511774 | 7.08E-05    |
| -1.01340939 | 0.87244579 | 0.95408622 | 0.571574414 | 0.895605761 | 0.187417493 |
| -1.1291001  | 0.08025441 | -1.1129179 | 0.122070141 | -1.12148949 | 0.09806456  |
| -1.05078092 | 0.35729848 | 0.9759628  | 0.650169324 | 0.981528098 | 0.728084206 |
| -1.05790602 | 0.51045098 | 0.95754586 | 0.611721199 | -1.02201058 | 0.798732577 |
| -1.05798844 | 0.57272948 | -1.0738944 | 0.476023379 | -1.0990991  | 0.345709085 |
| 0.997804314 | 0.97075784 | 0.9353153  | 0.267518948 | -1.09994901 | 0.116330387 |
| 0.998765825 | 0.98594353 | -1.0400961 | 0.575458585 | -1.17955392 | 0.021577104 |
| -1.00420389 | 0.96356087 | -1.074288  | 0.436471258 | 0.959256772 | 0.6508614   |
| -1.38948551 | 0.0497579  | -1.3954389 | 0.046963991 | -1.33863178 | 0.08076617  |
| -1.0423656  | 0.50467044 | 0.97654899 | 0.702390183 | 0.948983767 | 0.400396438 |
| 0.901918523 | 0.22012285 | 0.94188915 | 0.474944803 | -1.04137797 | 0.62804056  |
| 0.993494502 | 0.9368219  | -1.1041222 | 0.232122319 | -1.09744416 | 0.261602706 |
| 0.971000411 | 0.67280409 | -1.0690379 | 0.339726139 | -1.19277609 | 0.013885954 |
| 0.906112029 | 0.36650784 | -1.2356164 | 0.055879911 | -1.27642494 | 0.028270262 |
| 0.994560361 | 0.9166891  | 0.93772804 | 0.220788356 | 0.832149532 | 0.000834936 |
| 0.995935682 | 0.90953038 | 0.94398895 | 0.111990436 | 0.948048523 | 0.140626758 |
| -1.03090122 | 0.46764995 | 0.9852738  | 0.722791152 | 0.979682739 | 0.62375439  |
| 0.935226313 | 0.19340762 | 0.94228878 | 0.247523085 | -1.05097659 | 0.332523464 |
| -1.04413087 | 0.45010718 | -1.0143772 | 0.802400852 | -1.0263899  | 0.648166644 |
| -1.08208561 | 0.38827207 | -1.0504895 | 0.589319529 | -1.1033578  | 0.283006137 |
| 0.906984559 | 0.03908271 | 0.8859575  | 0.011315122 | 0.919670856 | 0.075245598 |
| 0.814838234 | 2.06E-05   | 0.95268642 | 0.273911483 | 0.836080549 | 0.000148949 |
| -1.01787653 | 0.80255515 | -1.0551859 | 0.449511602 | -1.05676252 | 0.437081017 |
| -1.15784064 | 0.04310922 | 0.96928498 | 0.660981043 | 0.899296247 | 0.13935596  |
| -1.02877014 | 0.55207422 | -1.0428774 | 0.379693388 | -1.00504903 | 0.915775131 |
| -1.14286643 | 0.02532808 | 0.95249347 | 0.405456302 | -1.00802389 | 0.891005102 |
| 0.998735723 | 0.98489243 | -1.1426405 | 0.049999997 | -0.99996891 | 0.999628677 |
| 0.790446436 | 0.00207411 | 0.92287235 | 0.27417717  | 0.891773579 | 0.120760649 |
| -1.04303907 | 0.47237326 | 0.95193886 | 0.40133884  | -1.17180548 | 0.008709151 |
| 0.823185306 | 0.00256205 | 0.76112353 | 4.54205E-05 | 0.675758837 | 4.38E-08    |
| -1.3640237  | 0.00011739 | -1.0966414 | 0.222270078 | 0.907114938 | 0.197496277 |
| 0.997012775 | 0.96180624 | -1.1514251 | 0.027411671 | -1.07873714 | 0.228237312 |
| 0.950668823 | 0.25323255 | 0.91876443 | 0.058363639 | 0.944583813 | 0.198635557 |
| 0.990197378 | 0.78937083 | -1.015183  | 0.682952255 | -1.03547578 | 0.346345241 |
| 0.972339801 | 0.6632767  | 0.87902639 | 0.049192431 | 0.921472189 | 0.207276302 |
| 0.690057654 | 0.0009887  | -1.0671058 | 0.544333247 | 0.926224905 | 0.474675544 |
| -1.01197533 | 0.87346045 | -1.0627596 | 0.416829885 | 0.945832909 | 0.457350409 |
| -1.02597469 | 0.67508885 | -1.1071969 | 0.100003359 | -1.283328   | 0.000140812 |
| 0.922734308 | 0.12603139 | -1.0608904 | 0.258370739 | -1.0551707  | 0.303974163 |
| -1.19021132 | 0.11146768 | -1.0418558 | 0.704659738 | -1.10122694 | 0.374190919 |
| -1.00619917 | 0.89552876 | -1.0848063 | 0.087981658 | -1.08894118 | 0.07448981  |



|             |            |            |             |             |             |
|-------------|------------|------------|-------------|-------------|-------------|
| -1.36036799 | 0.01353272 | -1.4623625 | 0.002640805 | -1.16315294 | 0.215239343 |
| -1.26040244 | 0.00101414 | -1.3285514 | 8.08049E-05 | -1.57710173 | 7.60E-09    |
| 0.93246754  | 0.3202157  | 0.85658629 | 0.030575542 | 0.84944619  | 0.022959101 |
| 0.907490179 | 0.04917566 | -1.1132925 | 0.030291996 | 0.999075084 | 0.984763721 |
| -1.04918002 | 0.23033176 | -1.0258548 | 0.521607068 | 0.670984146 | 5.48E-14    |
| 0.800958129 | 0.0171295  | 0.72366964 | 0.000727257 | 0.705063405 | 0.000293255 |
| -1.05244793 | 0.70294981 | 0.96158619 | 0.770061147 | -1.21067179 | 0.157435448 |
| -1.34700246 | 0.00847064 | 0.86995503 | 0.206611065 | -1.1891134  | 0.117840204 |
| -1.01791143 | 0.83594088 | -1.1103148 | 0.225322376 | -1.15130921 | 0.104456784 |
| -1.12312297 | 0.35085955 | 0.98777452 | 0.920953201 | -1.1568099  | 0.242946737 |
| 0.93089562  | 0.25090029 | -1.1606411 | 0.019187985 | -1.20571642 | 0.003733625 |
| -1.58472972 | 1.45E-05   | -1.4208782 | 0.000613236 | -1.70598938 | 9.52E-07    |
| -1.19685212 | 0.0481623  | 0.90338038 | 0.25793035  | -1.02968724 | 0.743278021 |
| 0.971260837 | 0.57340334 | 0.88186523 | 0.017916712 | 0.91583937  | 0.093421162 |
| -1.09647911 | 0.18381796 | 0.96677464 | 0.623345633 | 0.913382262 | 0.190960326 |
| -1.085282   | 0.32595046 | 0.95304332 | 0.562599609 | 0.984543292 | 0.851040359 |
| 0.850784673 | 0.08460913 | 0.82597938 | 0.042430848 | 0.991769503 | 0.92873063  |
| -1.21043238 | 0.06622745 | -1.1376971 | 0.210758256 | -1.24966707 | 0.03302299  |
| 0.947396911 | 0.3965567  | -1.0143962 | 0.822013212 | -1.17095108 | 0.015668835 |
| 0.796577043 | 0.03011904 | 0.80296233 | 0.036126456 | 0.839155252 | 0.091633199 |
| 0.964649585 | 0.62424835 | 0.97130487 | 0.69179862  | -1.12073819 | 0.124545078 |
| -1.16748235 | 0.13363843 | -1.1165693 | 0.283020692 | -1.15370714 | 0.165419349 |
| 0.965070518 | 0.54815273 | 0.91584508 | 0.140960325 | -1.07098777 | 0.24886635  |
| 0.642730448 | 0.01813542 | -1.0028407 | 0.987577515 | 0.914244649 | 0.623042281 |
| -1.10601375 | 0.17345638 | -1.0511491 | 0.497573625 | -1.0921666  | 0.23271384  |
| -1.00335798 | 0.95714064 | -1.0554005 | 0.389014155 | -1.02148464 | 0.733408384 |
| -1.04893498 | 0.41586183 | -1.1593966 | 0.014072394 | -1.14737639 | 0.021967932 |
| -1.33051423 | 0.00011685 | 0.94015428 | 0.373044484 | -1.02736935 | 0.695844983 |
| -1.13307787 | 0.07149709 | -1.0770958 | 0.279275829 | -1.0551838  | 0.432704095 |
| -1.11054726 | 0.34793786 | -1.0569819 | 0.618798484 | -1.08241508 | 0.477596367 |
| 0.949211197 | 0.39972025 | -1.0421873 | 0.503863835 | 0.996119371 | 0.949745392 |
| -1.06140626 | 0.44544744 | -1.0582291 | 0.468551872 | 0.985471424 | 0.850982417 |
| -1.12307269 | 0.0888489  | 0.98792323 | 0.856729631 | -1.22309182 | 0.004012423 |
| 0.918150537 | 0.13703953 | -1.0492346 | 0.399340935 | -1.04103703 | 0.480214909 |
| -1.02996026 | 0.73445968 | 0.97091974 | 0.73453529  | 0.926724273 | 0.383338112 |
| -1.15049101 | 0.27935242 | -1.1304457 | 0.34345577  | -1.06437441 | 0.628711455 |
| -1.11897765 | 0.22058191 | -1.2222627 | 0.031184565 | -1.16263031 | 0.102474085 |
| 0.868612309 | 0.10592132 | -1.057991  | 0.513267484 | -1.02207354 | 0.799773268 |
| 0.984179315 | 0.93353022 | 0.99569212 | 0.98198555  | -1.08583793 | 0.666946538 |
| -1.03863079 | 0.54270057 | -1.0010153 | 0.986974677 | 0.948479683 | 0.396376814 |
| 0.948397285 | 0.59636055 | -1.0705142 | 0.496137545 | 0.937239494 | 0.517291667 |
| -1.22457081 | 0.00493834 | -1.2249982 | 0.00486972  | -1.21642669 | 0.00643609  |
| -1.08657367 | 0.12359545 | 0.95294213 | 0.367832046 | 0.932783083 | 0.19541715  |
| -1.00844299 | 0.87801769 | -1.1155647 | 0.049914084 | -1.01860689 | 0.736560179 |

|             |            |            |             |             |             |
|-------------|------------|------------|-------------|-------------|-------------|
| -1.05827156 | 0.6412777  | -1.1030335 | 0.420778393 | -1.04019587 | 0.745664524 |
| -1.01257568 | 0.85371202 | -1.022753  | 0.740027528 | -1.03804051 | 0.58222232  |
| -1.00905251 | 0.86725316 | -1.0700169 | 0.212679775 | -1.11463925 | 0.048103978 |
| -1.03249995 | 0.55567329 | -1.0598691 | 0.285822659 | -1.02987805 | 0.587427053 |
| 0.920262026 | 0.25161553 | 0.97317501 | 0.706012166 | 0.878943536 | 0.077545622 |
| -1.01505267 | 0.89719446 | -1.0760254 | 0.527035909 | 0.814903008 | 0.080981678 |
| 0.903830799 | 0.13162752 | -1.0760595 | 0.271945623 | -1.0808454  | 0.244309598 |
| -1.1498598  | 0.05066544 | 0.98190673 | 0.794779097 | -1.11512733 | 0.124624257 |
| 0.919134708 | 0.76041192 | -1.1000945 | 0.730136906 | 0.626141222 | 0.094591815 |
| -1.17597842 | 0.01477677 | 0.96800076 | 0.615331871 | 0.946418613 | 0.395895645 |
| -1.29392195 | 0.00037444 | -1.1699526 | 0.024576382 | -1.19650851 | 0.010722851 |
| -1.080986   | 0.1869874  | 0.91086839 | 0.114944974 | 0.986278299 | 0.81344361  |
| 0.96563217  | 0.65632255 | 0.94387377 | 0.46306276  | 0.973785895 | 0.735259529 |
| 0.927339654 | 0.16979262 | -1.1345966 | 0.023629208 | 0.989927781 | 0.852562775 |
| 0.978283958 | 0.76824694 | 0.98340827 | 0.82229899  | 0.97764976  | 0.761611818 |
| -1.31045857 | 7.10E-05   | -1.08594   | 0.194700707 | -1.09595081 | 0.15029325  |
| 0.988218259 | 0.77794147 | -1.0475771 | 0.271293853 | -1.06239659 | 0.153584221 |
| 0.963448414 | 0.51850009 | -1.0039146 | 0.945883787 | -1.08086452 | 0.180371043 |
| -1.01127835 | 0.86202107 | -1.0615277 | 0.356658382 | -1.11527668 | 0.095131989 |
| -1.27394708 | 0.12018204 | -1.0562881 | 0.722373458 | 0.856118951 | 0.315517177 |
| 0.988953891 | 0.8522372  | 0.98442474 | 0.792398918 | -1.02127799 | 0.724146893 |
| -1.11285313 | 0.06558536 | -1.1692807 | 0.008123698 | 0.980133054 | 0.725649557 |
| 0.902832164 | 0.13041713 | 0.9119667  | 0.17186884  | -1.17763274 | 0.01727902  |
| -1.15860308 | 0.00867594 | 0.97016154 | 0.57739086  | -1.04119418 | 0.458273268 |
| 0.915703156 | 0.15889514 | 0.89934967 | 0.091010138 | -1.06588608 | 0.305241963 |
| -1.34421249 | 0.00468991 | -1.0783343 | 0.45513508  | -1.03283392 | 0.74849462  |
| -1.02327145 | 0.66294675 | 0.88762157 | 0.027177467 | -1.02829858 | 0.597168664 |
| -1.64976689 | 9.66E-05   | 0.88617182 | 0.313604454 | 0.856951917 | 0.199335554 |
| -1.05294039 | 0.54716951 | -1.02971   | 0.732310387 | 0.971041864 | 0.731357417 |
| 0.798750506 | 0.21884036 | -1.0198829 | 0.913601174 | 0.670596997 | 0.031210891 |
| -1.38045606 | 0.00341705 | -1.26093   | 0.031906149 | -1.27017125 | 0.027091715 |
| -1.0729943  | 0.27834229 | 0.98880055 | 0.861682809 | 0.988174876 | 0.853996831 |
| -1.0812295  | 0.1326491  | 0.95541019 | 0.376466139 | -1.03726964 | 0.477447946 |
| -1.14929273 | 0.34610531 | -1.0694426 | 0.648355313 | -1.08519396 | 0.57882293  |
| 0.905099172 | 0.19139561 | -1.1086231 | 0.176896783 | -1.07555651 | 0.338101851 |
| -1.4256203  | 0.00192341 | -1.1862407 | 0.12198315  | -1.29624061 | 0.020530546 |
| 0.898619193 | 0.03575927 | 0.99970095 | 0.995213764 | -1.0090339  | 0.856884596 |
| -1.02593122 | 0.67033769 | -1.0009163 | 0.987839095 | -1.14259853 | 0.030036916 |
| -1.12003071 | 0.1170271  | -1.0491053 | 0.503402073 | -1.12129945 | 0.113497168 |
| -1.0401291  | 0.37891632 | 0.99314595 | 0.87733128  | -1.02741035 | 0.544578129 |
| -1.112623   | 0.1095257  | -1.1282097 | 0.071382194 | -1.08854273 | 0.201314766 |
| -1.16141549 | 0.11228796 | 0.90568971 | 0.289961865 | -1.03323275 | 0.725675724 |
| -1.09346938 | 0.35855379 | 0.96824171 | 0.739320693 | -1.09029296 | 0.37429481  |
| 0.950648908 | 0.43069818 | 0.94597514 | 0.387466244 | -1.05292921 | 0.422008849 |

|             |            |            |             |             |             |
|-------------|------------|------------|-------------|-------------|-------------|
| 0.884010299 | 0.09759391 | -1.0396543 | 0.597037757 | 0.9617568   | 0.596046719 |
| -1.06494515 | 0.40907578 | -1.0803031 | 0.31166305  | -1.00552826 | 0.942157439 |
| -1.28858845 | 0.0379142  | 0.98505747 | 0.899902387 | -1.1211133  | 0.341523638 |
| 0.988172161 | 0.83449683 | -1.0039379 | 0.944967217 | -1.05185277 | 0.376347708 |
| -1.09954371 | 0.11836072 | -1.0854609 | 0.175918141 | -1.11779359 | 0.068020161 |
| -1.02309968 | 0.81472846 | -1.001226  | 0.989966615 | -1.02273771 | 0.817546873 |
| 0.822931538 | 0.00202928 | -1.0167723 | 0.782920553 | -1.07821665 | 0.215389896 |
| 0.938951453 | 0.45492574 | -1.1163533 | 0.194034914 | 0.937817615 | 0.446367788 |
| -1.1277736  | 0.21536892 | 0.92910571 | 0.446622777 | -1.2913936  | 0.01011396  |
| -1.04420723 | 0.82317178 | -1.1130153 | 0.58062859  | 0.893797236 | 0.56243191  |
| 0.99067473  | 0.88561919 | 0.94906154 | 0.4234889   | 0.997793056 | 0.972936608 |
| -1.14992457 | 0.03128008 | -1.0106614 | 0.867302663 | -1.23932863 | 0.001290722 |
| 0.718972012 | 0.00333097 | 0.9345289  | 0.530982678 | 0.939404821 | 0.562916604 |
| -1.06709772 | 0.32436775 | -1.0348178 | 0.602301923 | 0.99040357  | 0.883142262 |
| -1.20792242 | 0.00880618 | 0.96853315 | 0.647247118 | 0.944863695 | 0.417944062 |
| 0.91344675  | 0.11016228 | -1.02858   | 0.615200636 | -1.03047666 | 0.592345817 |
| -1.12273983 | 0.04825868 | -1.0203542 | 0.726373922 | -1.1887375  | 0.003882239 |
| -1.01840371 | 0.77462991 | -1.0333107 | 0.607225601 | -1.01199489 | 0.851465624 |
| -1.51785125 | 0.00092727 | -1.0341846 | 0.778707704 | -1.12923295 | 0.311755449 |
| -1.0027492  | 0.96736825 | 0.98864983 | 0.864952912 | 0.933375594 | 0.306616459 |
| -1.00172236 | 0.97565138 | 0.87951287 | 0.026124396 | -1.11751839 | 0.052860718 |
| -1.10488531 | 0.07678561 | 0.98262279 | 0.752377175 | 0.987577877 | 0.821958427 |
| 0.996801413 | 0.9495268  | -1.0561886 | 0.282682923 | 0.854426718 | 0.002883614 |
| -1.06379056 | 0.60451755 | 0.92456681 | 0.511585449 | 0.943991399 | 0.629226401 |
| -1.07963329 | 0.26859363 | -1.0971147 | 0.181972068 | -1.05571932 | 0.432372202 |
| 0.904897412 | 0.03286251 | 0.97912513 | 0.645673042 | 0.90448483  | 0.032105949 |
| 0.992378767 | 0.88249133 | 0.94678768 | 0.293214423 | -1.03037172 | 0.563788211 |
| -1.05469424 | 0.30186696 | 0.89624932 | 0.036552492 | 0.93553769  | 0.197643027 |
| 0.969664305 | 0.5739405  | -1.0697402 | 0.221086682 | -1.08919594 | 0.122515629 |
| 0.973528722 | 0.61541358 | -1.1666167 | 0.005359588 | -1.00886376 | 0.868613439 |
| -1.07185626 | 0.18361191 | 0.89430613 | 0.034569971 | -1.04126771 | 0.435885844 |
| 0.941351155 | 0.48861067 | -1.0672842 | 0.455754667 | 0.914802048 | 0.308842378 |
| 0.982236077 | 0.76178309 | -1.055378  | 0.363640893 | -1.03644442 | 0.545420404 |
| 0.997425545 | 0.96892959 | 0.95229651 | 0.46130777  | 0.908929637 | 0.152993986 |
| -1.0153215  | 0.80917683 | -1.0275097 | 0.66665338  | 0.925692105 | 0.223189525 |
| -1.02032079 | 0.76036307 | -1.0161869 | 0.80762594  | -1.05309008 | 0.433996459 |
| -1.04200729 | 0.44618489 | -1.0346228 | 0.528258491 | 0.954461012 | 0.388576705 |
| -1.0924476  | 0.09273979 | -1.0360452 | 0.495994128 | 0.987470951 | 0.808108863 |
| -1.12574794 | 0.24963578 | -1.1391249 | 0.206081552 | 0.994603533 | 0.957795185 |
| 0.868508262 | 0.4346623  | 0.86092015 | 0.406785658 | 0.370091002 | 9.04E-07    |
| -1.23745346 | 0.00353505 | -1.2370809 | 0.003578481 | -1.16418508 | 0.033866556 |
| -1.10923722 | 0.24476766 | -1.10471   | 0.263646999 | -1.09238374 | 0.320664507 |
| -1.13244701 | 0.06249249 | -1.0582605 | 0.390291237 | -1.04921578 | 0.465650686 |
| -1.07419206 | 0.49803289 | -1.096214  | 0.38511305  | 0.932266322 | 0.506634967 |

|             |            |            |             |             |             |
|-------------|------------|------------|-------------|-------------|-------------|
| -1.0151063  | 0.85241057 | -1.1053027 | 0.217332158 | -1.19041539 | 0.034194832 |
| -1.03599468 | 0.58858355 | 0.97283555 | 0.673406724 | 0.952797016 | 0.460075058 |
| -1.09455175 | 0.11153134 | 0.8689059  | 0.01487393  | -1.04504715 | 0.433523991 |
| -1.0637225  | 0.355751   | -1.0834053 | 0.232341359 | -1.29412056 | 0.000280463 |
| -1.02948506 | 0.55520684 | -1.1156654 | 0.02951977  | 0.966710177 | 0.492092326 |
| -1.0275556  | 0.65312297 | 0.97335167 | 0.655182704 | 0.992835354 | 0.90528452  |
| 0.934207606 | 0.45691908 | -1.0802703 | 0.399019624 | 0.956556015 | 0.626799281 |
| -1.12524996 | 0.13933456 | 0.99659567 | 0.965572988 | 0.928343278 | 0.348652766 |
| 0.988634812 | 0.84639339 | -1.1717875 | 0.009260712 | -1.02788496 | 0.641403449 |
| 0.942654111 | 0.47676144 | -1.0837422 | 0.333559305 | -1.04046289 | 0.632275413 |
| 0.99036774  | 0.86663544 | -1.0687517 | 0.251511279 | 0.978211242 | 0.702452637 |
| -1.1623718  | 0.09455227 | -1.1200474 | 0.205216832 | -1.23250971 | 0.021693301 |
| -1.06850344 | 0.53741942 | 0.93030106 | 0.501438265 | 0.860212364 | 0.164140304 |
| 0.983455293 | 0.82673375 | -1.0410706 | 0.597826537 | -1.1086565  | 0.179516964 |
| -1.15920181 | 0.01977176 | -1.0357094 | 0.570644044 | 0.993405867 | 0.914717843 |
| -1.09080878 | 0.20698773 | 0.96916199 | 0.647150265 | -1.06774505 | 0.339730798 |
| -1.28872669 | 0.0014113  | -1.1705902 | 0.041300551 | -1.17313594 | 0.0386824   |
| -1.17487329 | 0.09242414 | -1.0890365 | 0.368579556 | -1.08700104 | 0.379097461 |
| -1.15048322 | 0.08955383 | -1.05581   | 0.505826004 | 0.964314581 | 0.655815213 |
| -1.13268087 | 0.28271049 | -1.2143261 | 0.096568395 | -1.10022659 | 0.409132538 |
| -1.19722676 | 0.11134682 | -1.0805342 | 0.489078675 | -1.1315502  | 0.271330293 |
| 0.976226381 | 0.68103803 | -1.0231387 | 0.695930049 | -1.00312716 | 0.957427756 |
| -1.07661723 | 0.40731698 | 0.95785309 | 0.628131722 | 0.961291868 | 0.656951257 |
| -1.06740275 | 0.44907493 | 0.99379549 | 0.942268415 | -1.01488631 | 0.863502643 |
| 0.814168364 | 0.40248971 | 0.90305741 | 0.677216801 | 0.728865251 | 0.19978388  |
| 0.849953724 | 0.52290755 | -1.0476301 | 0.854660626 | 0.857794906 | 0.546569036 |
| 0.656618984 | 0.13546296 | -1.0092907 | 0.973541476 | 0.703263346 | 0.210121331 |
| -1.00644666 | 0.91510384 | 0.9877947  | 0.838591114 | 0.978060951 | 0.713026839 |
| 0.937999161 | 0.25680464 | -1.0233462 | 0.681060009 | -1.09250419 | 0.119000118 |
| -1.0595305  | 0.44305    | 0.98939239 | 0.887207437 | -1.13214843 | 0.103019196 |
| -1.11416162 | 0.34915165 | -1.0452517 | 0.700521439 | 0.680033949 | 0.001402576 |
| 0.96082333  | 0.44237609 | -1.0478659 | 0.369288984 | -1.03086883 | 0.558509501 |
| -1.24816787 | 0.00655466 | -1.1198989 | 0.154242209 | -1.14422906 | 0.091307864 |
| -1.22246229 | 0.00441386 | -1.0716464 | 0.310408852 | -1.1673447  | 0.025986945 |
| -1.14688004 | 0.17357287 | -1.0116475 | 0.907662479 | -1.13952631 | 0.194299942 |
| 0.959194187 | 0.4894089  | -1.0082769 | 0.890983749 | -1.0438639  | 0.476353861 |
| 0.891590663 | 0.04346827 | -1.0038568 | 0.944947802 | 0.924589699 | 0.163407631 |
| -1.02307224 | 0.6806185  | 0.95283203 | 0.384576393 | -1.04625109 | 0.415640768 |
| -1.10474942 | 0.11363403 | -1.1088313 | 0.101169711 | -1.0321002  | 0.612067685 |
| -1.14511549 | 0.05500817 | -1.2511251 | 0.002035312 | -1.20099183 | 0.010519776 |
| -1.03661713 | 0.53773516 | 0.93355942 | 0.240966288 | 0.939000406 | 0.282564658 |
| -1.13897201 | 0.10393152 | -1.0145823 | 0.854680864 | -1.00411901 | 0.958520541 |
| -1.2749386  | 0.07035106 | -1.0514844 | 0.704247779 | 0.567229343 | 7.01E-05    |
| -1.21338607 | 0.00734192 | -1.2966649 | 0.000444087 | -1.14134727 | 0.062140917 |

|             |            |            |             |             |             |
|-------------|------------|------------|-------------|-------------|-------------|
| -1.01254342 | 0.82283416 | 0.99616142 | 0.944913729 | 0.975740951 | 0.659350385 |
| 0.932390754 | 0.29222199 | -1.0558137 | 0.412867595 | -1.06040868 | 0.376765951 |
| 0.934343007 | 0.33545041 | -1.1556086 | 0.043296739 | -1.06770881 | 0.352639521 |
| 0.940453737 | 0.42254835 | 0.96311344 | 0.622783903 | 0.89538097  | 0.151569397 |
| 0.998939965 | 0.98450066 | -1.0029333 | 0.95721383  | 0.970575004 | 0.584863001 |
| -1.16165218 | 0.13913862 | -1.0501318 | 0.626063629 | -1.30144658 | 0.010838459 |
| -1.02834907 | 0.68366212 | 0.97902709 | 0.757277665 | 0.946758615 | 0.426191068 |
| -1.29638287 | 0.0055099  | -1.0395574 | 0.667250668 | 0.953111213 | 0.59476056  |
| -1.03416478 | 0.56433114 | -1.065146  | 0.280735762 | -1.01718882 | 0.76970178  |
| -1.07762735 | 0.0778883  | -1.0024774 | 0.952782155 | -1.00249789 | 0.952393289 |
| 0.956233051 | 0.48227358 | -1.0258973 | 0.687647051 | 0.930298408 | 0.258402652 |
| -1.06291791 | 0.31374235 | -1.0584084 | 0.348344627 | -1.06564408 | 0.294056088 |
| -1.06605362 | 0.51962993 | 0.92968026 | 0.463193904 | 0.816594479 | 0.044942484 |
| -1.13017071 | 0.23200193 | 0.90918884 | 0.351165781 | 0.936990147 | 0.52298767  |
| 0.968378854 | 0.62892788 | 0.96228869 | 0.563369442 | 0.953648452 | 0.475944937 |
| 0.990259806 | 0.89509623 | -1.0006535 | 0.992977842 | 0.981770034 | 0.804288932 |
| -1.0159245  | 0.90832932 | -1.0413159 | 0.768023662 | 0.944833863 | 0.67940884  |
| -1.01454006 | 0.82288621 | 0.95217093 | 0.448399238 | -1.11480674 | 0.096165246 |
| -1.01582086 | 0.83938036 | 0.99455799 | 0.943816931 | 0.960485891 | 0.603052735 |
| 0.98046586  | 0.79486681 | 0.96189545 | 0.608968358 | 0.878568339 | 0.09216535  |
| -1.05144503 | 0.3385728  | -1.0499753 | 0.352100452 | 0.919505981 | 0.112110772 |
| -1.1943532  | 0.06857684 | -1.1533325 | 0.141335851 | -1.1683638  | 0.109310079 |
| -1.16591805 | 0.031415   | -1.0412707 | 0.562908073 | -1.03674222 | 0.60561442  |
| -1.084874   | 0.11568604 | -1.0093754 | 0.85535403  | 0.978488297 | 0.671191643 |
| 0.95605294  | 0.39990436 | 0.92401035 | 0.141505524 | -1.00244868 | 0.963340847 |
| -1.180879   | 0.02416439 | 0.96239386 | 0.594910141 | -1.09579391 | 0.207235431 |
| -1.10181975 | 0.07778167 | -1.0082233 | 0.879856186 | -1.10836114 | 0.061760172 |
| -1.1012306  | 0.09017344 | -1.0058092 | 0.917828314 | 0.996687949 | 0.95287912  |
| 0.98775408  | 0.81619816 | 0.86983235 | 0.010730078 | 0.960432646 | 0.44742774  |
| 0.935851524 | 0.33076579 | -1.0401634 | 0.56237425  | 0.923345263 | 0.242955317 |
| -1.28932941 | 0.0091608  | -1.0597607 | 0.539455015 | -1.23778367 | 0.027262144 |
| 0.992099178 | 0.91938553 | -1.1254362 | 0.135676666 | -1.11349422 | 0.173889171 |
| -1.32369098 | 0.00070878 | -1.0978825 | 0.236679652 | -1.12554377 | 0.13549313  |
| 0.985352934 | 0.76516236 | 0.96869412 | 0.520283012 | 0.850590687 | 0.00176024  |
| 0.934917838 | 0.21530085 | 0.84267781 | 0.002381307 | 0.991593748 | 0.875602111 |
| -1.01407715 | 0.79972323 | -1.095499  | 0.102022609 | -1.09488952 | 0.104078824 |
| -1.2717727  | 0.04227419 | -1.2537651 | 0.055553845 | -1.30574051 | 0.024850491 |
| -1.00553644 | 0.93709571 | 0.96686738 | 0.63043233  | -1.24909125 | 0.002348494 |
| -1.03039248 | 0.62654043 | -1.0302311 | 0.628342425 | -1.04025404 | 0.521595924 |
| -1.1850199  | 0.01097163 | -1.356979  | 1.62306E-05 | -1.26046354 | 0.000709786 |
| 0.981291178 | 0.77872353 | 0.95806377 | 0.524513823 | 0.984902952 | 0.820926789 |
| -1.12483175 | 0.18276177 | -1.1473648 | 0.120595837 | 0.96805874  | 0.711000125 |
| -1.15328437 | 0.02979056 | 0.91613452 | 0.17606106  | -1.02298456 | 0.723457432 |
| -1.04238507 | 0.69155203 | -1.0292165 | 0.783052279 | -1.06214683 | 0.564765756 |

|             |            |            |             |             |             |
|-------------|------------|------------|-------------|-------------|-------------|
| -1.37860024 | 1.57E-05   | -1.1219246 | 0.094704789 | -1.47826146 | 3.91E-07    |
| -1.12255518 | 0.28861648 | -1.215785  | 0.075673838 | -1.11917942 | 0.301231527 |
| -1.00356486 | 0.93852283 | 0.98373943 | 0.722496549 | -1.20002298 | 0.000214902 |
| -1.04191561 | 0.56448007 | -1.1601273 | 0.040696209 | -1.24108538 | 0.003553519 |
| 0.987106625 | 0.887074   | -1.1599943 | 0.108574276 | -1.09916828 | 0.303180565 |
| -1.12709517 | 0.1982408  | 0.94714306 | 0.556812998 | -1.15389674 | 0.124974875 |
| -1.0167272  | 0.87337453 | -1.0588369 | 0.583316177 | 0.953838882 | 0.650073455 |
| 0.805712452 | 0.00924723 | -1.0102956 | 0.898597313 | -1.04099037 | 0.617609061 |
| -1.14168173 | 0.00396226 | -1.1578832 | 0.001569231 | -1.05594421 | 0.221445094 |
| 0.998203249 | 0.98216021 | -1.1850416 | 0.03857224  | -1.11810729 | 0.168892845 |
| 0.940153396 | 0.28695542 | 0.6997003  | 7.63105E-08 | 0.713372585 | 2.65E-07    |
| 0.930887218 | 0.39780793 | 0.7921262  | 0.007613153 | 0.741522807 | 0.000788335 |
| -1.0004777  | 0.99374927 | -1.0035242 | 0.953981272 | -1.0784219  | 0.21881306  |
| -1.35243478 | 0.00071881 | 0.99055583 | 0.910604515 | -1.16149098 | 0.080788531 |
| -1.39982576 | 4.00E-05   | -1.2263685 | 0.00887678  | -1.25677123 | 0.003635244 |
| 0.907765073 | 0.2431794  | 0.68684462 | 2.79737E-05 | 0.653744398 | 3.39E-06    |
| -1.01249546 | 0.90375191 | -1.0084045 | 0.935042836 | -1.07574588 | 0.478100918 |
| 0.939770201 | 0.18427748 | 0.93451566 | 0.148370967 | 0.983417006 | 0.718725337 |
| 0.609841207 | 2.24E-05   | 0.80242912 | 0.043501229 | 0.502623686 | 3.15E-08    |
| 0.789088279 | 0.00067408 | -1.0776181 | 0.259680663 | -1.18769173 | 0.011370953 |
| 0.851241481 | 0.05140478 | 0.96593218 | 0.669766574 | -1.14011977 | 0.110591069 |
| 0.978531841 | 0.78309804 | 0.83666946 | 0.027030539 | -1.03568755 | 0.656650136 |
| 0.833969514 | 0.00361931 | 0.93913101 | 0.297210526 | 0.910921901 | 0.123726148 |
| -1.02281041 | 0.66375636 | -1.0425783 | 0.422556298 | 0.96503979  | 0.493332201 |
| 0.978865394 | 0.63887292 | 0.90213299 | 0.026892792 | 0.968261329 | 0.47917733  |
| -1.02723826 | 0.71376877 | -1.1622317 | 0.043978064 | -1.17770138 | 0.028959793 |
| 0.984737729 | 0.76673007 | -1.0018882 | 0.970962043 | -1.01541374 | 0.767963287 |
| 0.878685373 | 0.08309103 | 0.71427989 | 2.66835E-05 | 0.799680595 | 0.003526818 |
| -1.09235495 | 0.26048291 | 0.74515254 | 0.000386786 | -1.05535807 | 0.490882679 |
| -1.04494141 | 0.29671462 | 0.95594232 | 0.284949249 | 0.897305349 | 0.012097698 |
| 0.971856327 | 0.65137372 | 0.92903196 | 0.246487814 | -1.06378899 | 0.329391884 |
| -1.19147596 | 0.18666809 | -1.0173676 | 0.895899539 | -1.16070855 | 0.26023661  |
| -1.12110806 | 0.25561012 | -1.102135  | 0.332691337 | 0.967951428 | 0.744621859 |
| 0.774555131 | 0.00099542 | 0.75420431 | 0.000320951 | 0.870014764 | 0.063032345 |
| 0.745736786 | 5.21E-05   | 0.84486233 | 0.014470228 | 0.949765736 | 0.443088323 |
| 0.794023308 | 0.00289375 | 0.74430929 | 0.000197233 | 0.916588602 | 0.24364061  |
| -1.04276597 | 0.42931313 | 0.93337288 | 0.195351245 | -1.08270054 | 0.136630138 |
| -1.01280436 | 0.86109227 | -1.3875025 | 3.37634E-05 | -1.3010335  | 0.000620245 |
| -1.0303414  | 0.71801476 | 0.86529355 | 0.084582005 | 0.945174193 | 0.496406287 |
| 0.887059936 | 0.16933667 | 0.87909942 | 0.140024551 | 0.898130333 | 0.217115446 |
| 0.950487285 | 0.33247341 | 0.90229841 | 0.052841368 | 0.991107127 | 0.864058198 |
| 0.71453181  | 2.04E-06   | 0.87885487 | 0.045729334 | 0.928395232 | 0.244456151 |
| 0.944731952 | 0.17957142 | -1.0416138 | 0.333855369 | -1.32178916 | 1.44E-08    |
| 0.942400947 | 0.11338693 | 0.97096396 | 0.427583093 | -1.03044117 | 0.419505445 |

|             |            |            |             |             |             |
|-------------|------------|------------|-------------|-------------|-------------|
| 0.948396303 | 0.27368282 | -1.047237  | 0.339652056 | -1.07160697 | 0.154661784 |
| -1.0082352  | 0.83222078 | 0.97857398 | 0.576316397 | -1.02721765 | 0.488778529 |
| -1.35092694 | 0.00130031 | -1.2604242 | 0.01165427  | -1.41836968 | 0.000234066 |
| -1.1647916  | 0.01472944 | -1.1703058 | 0.012065046 | -1.11550217 | 0.07652593  |
| -1.12934846 | 0.00921985 | -1.1575604 | 0.001998669 | -1.18761551 | 0.000349896 |
| -1.0016564  | 0.95237888 | 0.93625163 | 0.020490992 | -1.00250844 | 0.927970363 |
| -1.05327887 | 0.15147217 | 0.99269684 | 0.837979899 | 0.895103791 | 0.003025004 |
| -1.00934417 | 0.83046912 | -1.0147011 | 0.736988605 | -1.01479143 | 0.735445997 |
| 0.952501448 | 0.36878904 | -1.1369234 | 0.020385905 | -1.22215724 | 0.000453844 |
| -1.12050721 | 0.30093474 | -1.0774016 | 0.496678288 | -1.00242519 | 0.982342061 |
| -1.16621863 | 0.02708433 | 0.96331156 | 0.582950469 | 0.876092894 | 0.055795666 |
| -1.03191188 | 0.59735756 | -1.0096418 | 0.871668484 | -1.06440156 | 0.295820828 |
| 0.990616996 | 0.84452636 | 0.93048294 | 0.137910098 | -1.02620294 | 0.590975459 |
| 0.943255932 | 0.27246896 | -1.0030701 | 0.953820315 | -1.02510071 | 0.639877779 |
| 0.976662247 | 0.65822992 | 0.988409   | 0.827001192 | -1.07557842 | 0.175630265 |
| -1.03936559 | 0.6123162  | -1.060765  | 0.439511095 | 0.870140737 | 0.071833535 |
| -1.01415822 | 0.74679832 | -1.0211692 | 0.630666182 | -1.00489357 | 0.910700399 |
| 0.985736504 | 0.87489143 | 0.93413785 | 0.456370556 | -1.26966531 | 0.011142838 |
| -1.00952855 | 0.83119057 | -1.0684225 | 0.140779845 | 0.982473083 | 0.691171909 |
| 0.999618609 | 0.99615965 | -1.1556306 | 0.07226045  | -1.12337414 | 0.146123477 |
| -1.12431204 | 0.20942752 | -1.1332163 | 0.180805195 | -1.13847055 | 0.165468116 |
| 0.783701979 | 1.00E-06   | 0.91007187 | 0.037357283 | 0.864437856 | 0.001720624 |
| 0.67787492  | 2.50E-10   | 0.82658453 | 0.000368959 | 0.941138015 | 0.231173257 |
| 0.634438378 | 1.86E-07   | 0.81471457 | 0.009402849 | 0.632033775 | 1.55E-07    |
| 0.945731977 | 0.43578082 | 0.96121472 | 0.580053602 | 0.937578537 | 0.368426424 |
| -1.27096867 | 0.00368657 | -1.2053189 | 0.02167157  | -1.27646468 | 0.003156847 |
| 0.977852329 | 0.78170977 | -1.1203516 | 0.163412708 | -1.13656975 | 0.117311962 |
| -1.0005491  | 0.99548679 | 0.98711359 | 0.893691026 | 0.88828919  | 0.225438096 |
| -1.01787044 | 0.76848935 | 0.96834617 | 0.593317098 | -1.04462717 | 0.46902982  |
| 0.887198408 | 0.02837412 | -1.0238778 | 0.658692683 | -1.08527629 | 0.129331421 |
| 0.926706386 | 0.22379674 | 0.95420437 | 0.451806017 | -1.06009846 | 0.349593867 |
| 0.937942875 | 0.23805948 | 0.94458991 | 0.293157053 | 0.986243798 | 0.797416632 |
| 0.949285907 | 0.34211268 | 0.96898391 | 0.564171083 | -1.01460114 | 0.790524271 |
| 0.774558428 | 4.87E-09   | 0.88467995 | 0.001529286 | 0.886486229 | 0.001803052 |
| 0.98138775  | 0.74905942 | 0.97048272 | 0.610224899 | -1.09140072 | 0.140304166 |
| -1.05754257 | 0.41014633 | 0.7076415  | 4.07746E-06 | 0.782234046 | 0.000606166 |
| -1.36640751 | 3.35E-06   | -1.3321988 | 1.4817E-05  | -1.5044628  | 9.49E-09    |
| 0.932214299 | 0.07506208 | 0.90353074 | 0.011305029 | -1.0007097  | 0.985429303 |
| -1.40562174 | 0.00053446 | -1.2660821 | 0.013556294 | -1.49159366 | 6.63E-05    |
| -1.10764908 | 0.07720687 | -1.0575413 | 0.3285929   | -1.06190994 | 0.2945348   |
| 0.880929494 | 0.03242792 | -1.1023614 | 0.097186941 | 0.995586173 | 0.939204661 |
| -1.60709624 | 9.04E-15   | -1.0040587 | 0.928222875 | 0.965271661 | 0.433132544 |
| -1.08393572 | 0.33373396 | -1.1987837 | 0.032572435 | -1.0876238  | 0.313944797 |
| -1.09300201 | 0.0880352  | 0.98029893 | 0.698984949 | -1.0439366  | 0.404565516 |

|             |            |            |             |             |             |
|-------------|------------|------------|-------------|-------------|-------------|
| -1.02683659 | 0.56408509 | -1.0026169 | 0.954537388 | 0.940889024 | 0.187411808 |
| 0.980722149 | 0.69999002 | -1.0801584 | 0.13077004  | -1.09005405 | 0.091923591 |
| 0.940165679 | 0.34587238 | 0.79111182 | 0.000670503 | 0.877707582 | 0.049411365 |
| 0.973364072 | 0.76591291 | -1.0463528 | 0.617560678 | 0.979197411 | 0.816639211 |
| 0.98794627  | 0.75836634 | -1.0775365 | 0.062273484 | 0.993325657 | 0.865065812 |
| -1.00082874 | 0.99219301 | -1.1136233 | 0.207065938 | -1.29820408 | 0.003106833 |
| 0.881052479 | 0.00462339 | 0.89205386 | 0.010112578 | 0.8851643   | 0.006235493 |
| 0.826656231 | 0.00310672 | 0.83116289 | 0.00399133  | 0.821935683 | 0.002375773 |
| 0.986923682 | 0.86910012 | 0.96291117 | 0.636381523 | 0.751919082 | 0.000723385 |
| -1.29686281 | 0.10018346 | -1.0617917 | 0.70113859  | -1.35263395 | 0.057174007 |
| 0.998679238 | 0.98577717 | -1.2541037 | 0.003371858 | -1.6575622  | 7.49E-09    |
| -1.02523759 | 0.76190132 | 0.99544219 | 0.955696035 | -1.00419505 | 0.959396938 |
| 0.92334911  | 0.26911871 | 0.91995792 | 0.247901521 | 0.875978029 | 0.069225264 |
| -1.11755716 | 0.0963701  | -1.0253016 | 0.705095825 | -1.19410025 | 0.00922823  |
| 0.966445707 | 0.55454179 | 0.99009468 | 0.862945451 | 0.974637542 | 0.656221959 |
| 0.951820174 | 0.13589392 | 0.95232485 | 0.140058403 | -1.00584743 | 0.858795589 |
| 0.999713477 | 0.99754091 | 0.92955021 | 0.433367323 | 0.756238938 | 0.003876561 |
| 0.898941537 | 0.1812931  | 0.77125951 | 0.001712909 | 0.745773417 | 0.000464693 |
| -1.09744191 | 0.20420268 | -1.0592212 | 0.429938877 | 0.954915626 | 0.526380957 |
| 0.947020544 | 0.22002293 | 0.81745667 | 2.66544E-05 | 0.779366877 | 5.57E-07    |
| -1.17572622 | 0.05963788 | -1.0606464 | 0.487045475 | -1.03540935 | 0.680811297 |
| 0.967516498 | 0.70581364 | -1.0699039 | 0.44085957  | -1.1984635  | 0.042267268 |
| -1.29937413 | 0.09834938 | -1.2944352 | 0.103214335 | -1.36516274 | 0.050638551 |
| -1.20924943 | 0.10084065 | -1.2425883 | 0.061684109 | -1.17599233 | 0.160101117 |
| 0.70047661  | 0.01763746 | 0.63467117 | 0.002849104 | 0.993631713 | 0.965111997 |
| -1.04727211 | 0.2712639  | 0.96068328 | 0.338714226 | -1.05133275 | 0.233591036 |
| -1.02809386 | 0.72661704 | 0.96722116 | 0.674148679 | -1.17462685 | 0.046112128 |
| -1.1492746  | 0.01045182 | -1.0687049 | 0.210484616 | 0.909855313 | 0.077182637 |
| -1.06790412 | 0.06251739 | -1.0206634 | 0.556210222 | -1.01217038 | 0.727519696 |
| 0.974365414 | 0.66740754 | 0.9637703  | 0.541804523 | 0.861795461 | 0.016524029 |
| 0.937090603 | 0.52215079 | -1.0079825 | 0.937456501 | -1.23380483 | 0.042007047 |
| 0.505721138 | 2.35E-13   | 0.6112517  | 4.52655E-09 | 0.42668717  | 6.20E-17    |
| -1.08327894 | 0.1751017  | -1.1456028 | 0.023308552 | -1.05568823 | 0.356040256 |
| 0.852696579 | 0.00284481 | -1.0117802 | 0.819063043 | -1.01369339 | 0.790526637 |
| -1.11805165 | 0.00480086 | -1.0034558 | 0.927855708 | 0.821783185 | 3.48E-06    |
| 0.906362752 | 0.24137296 | 0.84652824 | 0.049734236 | 0.750417692 | 0.001067773 |
| 0.860791633 | 0.01905026 | 0.92545964 | 0.216959718 | 0.697922824 | 3.63E-07    |
| -1.01524069 | 0.80602279 | 0.8813479  | 0.044200931 | 0.88072556  | 0.04307178  |
| 0.965581057 | 0.42570401 | 0.97087252 | 0.501043509 | 0.978220966 | 0.615887346 |
| -1.25519464 | 0.06726422 | -1.3784884 | 0.010898754 | -1.39101669 | 0.008966524 |
| -1.05559924 | 0.28128325 | 0.66121528 | 3.15235E-11 | 0.866265648 | 0.005582542 |
| 0.956336019 | 0.49864141 | 0.78775356 | 0.0006133   | 0.944110511 | 0.384086275 |
| 0.930116972 | 0.12453404 | 0.88146699 | 0.008834797 | -1.01182498 | 0.801070755 |
| 0.845166796 | 0.07487845 | 0.83202731 | 0.052185027 | 0.835572175 | 0.057667511 |



|             |            |            |             |             |             |
|-------------|------------|------------|-------------|-------------|-------------|
| 0.953721158 | 0.41894881 | -1.0029961 | 0.95917716  | 0.954423165 | 0.426165507 |
| 0.938948888 | 0.39877136 | -1.0390016 | 0.607543292 | -1.05784601 | 0.450979134 |
| 0.988079177 | 0.80831016 | 0.77755216 | 4.31533E-06 | 0.972426878 | 0.572110523 |
| 0.927381739 | 0.15037658 | 0.9808623  | 0.709897376 | 0.984137325 | 0.758169224 |
| 0.70702241  | 4.89E-06   | 0.82806517 | 0.007798836 | 0.851465572 | 0.02215075  |
| -1.00495455 | 0.91688894 | -1.0055795 | 0.906481092 | 0.889822883 | 0.016459584 |
| 0.952624275 | 0.29459121 | -1.0592949 | 0.214476229 | -1.12748796 | 0.011506215 |
| 0.965348752 | 0.6116525  | 0.92024533 | 0.234014445 | 0.847885729 | 0.020411772 |
| 0.677050474 | 1.85E-07   | 0.51887212 | 5.83905E-14 | 0.485370252 | 1.70E-15    |
| 0.702747438 | 1.59E-06   | 0.76961855 | 0.000192787 | 0.737685642 | 2.19E-05    |
| 0.999751541 | 0.99653746 | -1.0164134 | 0.776249181 | -1.08618216 | 0.152746292 |
| -1.13155557 | 0.02399851 | 0.96757796 | 0.538208546 | -1.14344047 | 0.014766493 |
| 0.989993041 | 0.77902312 | -1.1019189 | 0.008748019 | 0.484391331 | 7.25E-27    |
| -1.02333107 | 0.70606924 | 0.9865499  | 0.824677253 | 0.852456557 | 0.011283271 |
| 0.994712805 | 0.86012431 | -1.0014118 | 0.962591237 | -1.01251897 | 0.679398719 |
| -1.09844221 | 0.29588007 | -1.0374762 | 0.680795204 | -1.05819577 | 0.527517265 |
| -1.02054097 | 0.79241949 | -1.0496476 | 0.531183965 | -1.19980884 | 0.021439456 |
| -1.01644087 | 0.74125709 | 0.95540389 | 0.357292132 | -1.00124331 | 0.979917979 |
| -1.06644709 | 0.26657593 | 0.78570585 | 9.83775E-05 | 0.890922637 | 0.048867824 |
| -1.00631162 | 0.93964182 | 0.96920574 | 0.706777948 | -1.12562174 | 0.158279523 |
| -1.01375472 | 0.91897285 | -1.2439961 | 0.108225075 | -1.29043285 | 0.061792759 |
| -1.04148235 | 0.49079972 | 0.88615587 | 0.043957874 | -1.02445995 | 0.681615616 |
| -1.26552219 | 0.02152665 | 0.9161937  | 0.382724295 | 0.898497558 | 0.286641529 |
| 0.972551198 | 0.67714367 | 0.76655529 | 0.000196091 | -1.07395022 | 0.288016124 |
| -1.05366263 | 0.37643806 | -1.0291053 | 0.626474099 | -1.03213071 | 0.591705866 |
| 0.961132857 | 0.26297222 | 0.91716867 | 0.01683328  | 0.980870844 | 0.58380328  |
| 0.838362672 | 0.24872797 | 0.90131366 | 0.494900049 | -1.01822271 | 0.905370257 |
| 0.866409736 | 0.03425846 | 0.93238115 | 0.293576137 | 0.849429446 | 0.01662675  |
| 0.920048778 | 0.04426487 | -1.0167131 | 0.683617511 | 0.957424036 | 0.286921331 |
| -1.04997033 | 0.50387232 | 0.99453838 | 0.940034307 | -1.23661945 | 0.004956034 |
| -1.05419278 | 0.53689336 | 0.83940124 | 0.044096764 | 0.911661636 | 0.280945094 |
| 0.954166563 | 0.45900156 | 0.89075932 | 0.071444476 | 0.597131006 | 4.98E-11    |
| -1.14856981 | 0.3148463  | -1.216492  | 0.15696551  | -1.02280291 | 0.869446387 |
| -1.28279748 | 0.00158669 | -1.3299104 | 0.000360164 | -1.33965309 | 0.000263689 |
| -1.02100275 | 0.66141463 | -1.0961064 | 0.057108014 | -1.12576326 | 0.015123891 |
| 0.895825076 | 0.07919589 | 0.88517566 | 0.052391166 | 0.901049354 | 0.095908133 |
| 0.735335628 | 5.42E-08   | -1.0649124 | 0.201866331 | 0.856016443 | 0.002350299 |
| 0.899985922 | 0.07487543 | 0.91254831 | 0.12054025  | 0.916441292 | 0.138394883 |
| 0.983187917 | 0.76396207 | 0.86927816 | 0.015756341 | 0.912498239 | 0.108959913 |
| -1.00515746 | 0.94931096 | -1.1145218 | 0.18389763  | 0.929698008 | 0.369476992 |
| -1.29675791 | 0.08066194 | -1.1734523 | 0.278021088 | -1.42284138 | 0.019117421 |
| 0.999831918 | 0.99847093 | -1.0253861 | 0.775110356 | -1.29751171 | 0.004286432 |
| -1.15794157 | 0.01594538 | -1.0982272 | 0.117635636 | 0.954846521 | 0.436349668 |
| 0.958829586 | 0.26205539 | 0.94844883 | 0.159388039 | 0.957621484 | 0.248185523 |

|             |            |            |             |             |             |
|-------------|------------|------------|-------------|-------------|-------------|
| 0.899422286 | 0.06050314 | 0.89905134 | 0.059541145 | 0.97956062  | 0.710199251 |
| -1.01600579 | 0.60022739 | 0.98607673 | 0.643446528 | -1.01310512 | 0.667272336 |
| 0.80739678  | 0.01088318 | 0.58610986 | 1.9725E-08  | 0.699389535 | 5.02E-05    |
| 0.88487898  | 0.03021822 | -1.0522416 | 0.358114586 | 0.921127413 | 0.140650854 |
| -1.01290097 | 0.85691584 | -1.1312257 | 0.087116348 | 0.957665565 | 0.54353466  |
| -1.55221735 | 0.00035695 | -1.3695451 | 0.008621945 | -1.49771847 | 0.000937432 |
| 0.96051215  | 0.63506812 | 0.97524308 | 0.767610405 | 0.965390358 | 0.678118528 |
| 0.886320209 | 0.22319562 | -1.0400141 | 0.690264302 | 0.873376594 | 0.172524752 |
| 0.966771587 | 0.66532112 | 0.97691522 | 0.764859484 | -1.11780061 | 0.157530755 |
| 0.858239288 | 0.02131996 | 0.87174932 | 0.037820097 | 0.950752595 | 0.436761775 |
| -1.07255868 | 0.3010277  | 0.96670577 | 0.615751401 | -1.1809947  | 0.016304041 |
| -1.19651422 | 0.07807075 | -1.153998  | 0.157347559 | -1.36538264 | 0.002924318 |
| 0.958653492 | 0.46208622 | -1.1472953 | 0.019392127 | -1.182566   | 0.00481241  |
| -1.35106078 | 6.51E-05   | -1.214324  | 0.007164057 | -1.27901178 | 0.000827398 |
| 0.92395106  | 0.23832574 | 0.92617489 | 0.252712228 | -1.01713194 | 0.798855603 |
| -1.0720886  | 0.34821965 | -1.0684718 | 0.371933861 | -1.16417812 | 0.043607176 |
| -1.02728499 | 0.76374421 | -1.0953045 | 0.31155506  | -1.08057937 | 0.388336632 |
| -1.04737089 | 0.44527179 | -1.0808631 | 0.20190464  | 0.880187189 | 0.038612721 |
| 0.954762699 | 0.48506201 | 0.99390326 | 0.926348062 | 0.89356011  | 0.093194575 |
| -1.13937854 | 0.11733861 | -1.3541384 | 0.000512193 | -1.28285344 | 0.003669904 |
| -1.15101036 | 0.10400389 | -1.1387681 | 0.132367622 | -1.03881976 | 0.656061659 |
| -1.09428006 | 0.34179317 | -1.3025117 | 0.006833602 | -1.03698652 | 0.700553513 |
| -1.28295169 | 0.00805942 | -1.3884665 | 0.00064288  | 0.930768866 | 0.431581916 |
| 0.923684949 | 0.29992108 | 0.93551793 | 0.383385882 | -1.01941646 | 0.800802897 |
| 0.954635479 | 0.53374166 | 0.72394534 | 5.96495E-05 | 0.748480262 | 0.000262484 |
| 0.933583856 | 0.35986513 | 0.97408739 | 0.725613536 | 0.933506941 | 0.359293997 |
| -1.10521523 | 0.11364408 | -1.0064506 | 0.918055729 | -1.08008971 | 0.220890419 |
| -1.19280863 | 0.00223328 | -1.0353122 | 0.529996823 | -1.06097635 | 0.285796632 |
| -1.04753596 | 0.51234915 | -1.0207114 | 0.772060389 | -1.00633914 | 0.928822166 |
| -1.08212512 | 0.19360427 | -1.0784181 | 0.213388415 | -1.08500605 | 0.179252542 |
| -1.21890359 | 0.02522137 | 0.77605906 | 0.004717359 | -1.06154777 | 0.490240902 |
| 0.977034612 | 0.83218409 | 0.81141014 | 0.060785555 | 0.875190276 | 0.227109157 |
| -1.07670127 | 0.32094081 | -1.0286826 | 0.702982089 | 0.832503186 | 0.016106485 |
| 0.92097816  | 0.1993337  | -1.1741066 | 0.014239191 | 0.994334476 | 0.928867337 |
| -1.00310098 | 0.96071825 | 0.92829252 | 0.239602975 | 0.886384665 | 0.059221269 |
| -1.00997272 | 0.83859163 | -1.052508  | 0.295884128 | -1.05885799 | 0.243337559 |
| 0.924654344 | 0.50512164 | -1.2723775 | 0.043940751 | -1.20820518 | 0.111095792 |
| -1.05423585 | 0.29742414 | -1.0356991 | 0.487699244 | 0.99024712  | 0.845934921 |
| -1.12012271 | 0.12355855 | -1.0299437 | 0.685674968 | -1.12133777 | 0.120089459 |
| 0.952520252 | 0.51696841 | 0.94412693 | 0.444071146 | -1.01223169 | 0.871101283 |
| -1.02688367 | 0.68998728 | 0.99565884 | 0.947806641 | -1.02602471 | 0.699268436 |
| -1.07012443 | 0.54609936 | -1.1052565 | 0.373724412 | -1.14070492 | 0.243221955 |
| -1.17502397 | 0.11335355 | -1.3151705 | 0.008457058 | -1.26404132 | 0.023126155 |
| -1.16170244 | 0.24267644 | -1.2957268 | 0.046091678 | -1.49083463 | 0.002688962 |

|             |            |            |             |             |             |
|-------------|------------|------------|-------------|-------------|-------------|
| 0.866100402 | 0.24608043 | 0.90473329 | 0.417692354 | 0.894793951 | 0.368539889 |
| -1.2497541  | 0.0227655  | -1.208083  | 0.051903876 | -1.1295537  | 0.205606567 |
| 0.911814524 | 0.16212096 | -1.0462886 | 0.490195828 | 0.957577097 | 0.508520741 |
| -1.00542814 | 0.87832324 | 0.98097638 | 0.58748179  | -1.03125396 | 0.385740869 |
| 0.93361489  | 0.32963413 | -1.1537687 | 0.045415736 | -1.37654881 | 2.83E-05    |
| -1.10873705 | 0.24576518 | 0.75644604 | 0.002494605 | -1.11431169 | 0.223857869 |
| -1.03308124 | 0.60618989 | -1.0397058 | 0.537607088 | -1.06359846 | 0.330294705 |
| 0.84925228  | 0.0024256  | 0.78780412 | 2.23426E-05 | 0.888934357 | 0.025766846 |
| 0.890509259 | 0.17135541 | -1.0539252 | 0.532709514 | 0.957909003 | 0.609273112 |
| -1.0288893  | 0.49641599 | 0.95943371 | 0.323836992 | -1.03289567 | 0.439840276 |
| -1.0600989  | 0.39249655 | -1.0979871 | 0.173083166 | 0.996229521 | 0.955710085 |
| 0.822863378 | 6.94E-05   | 0.69782916 | 1.19881E-10 | -1.11379374 | 0.020681512 |
| 0.812395877 | 2.46E-05   | 0.97738254 | 0.613191827 | 0.807561587 | 1.56E-05    |
| 0.805032143 | 0.01069945 | 0.88299604 | 0.135015502 | 0.727849423 | 0.000293422 |
| 0.952432122 | 0.37478756 | 0.92114026 | 0.137300993 | -1.38119574 | 2.25E-07    |
| -1.1248063  | 0.13345683 | 0.99269644 | 0.924693882 | 0.896285769 | 0.161807822 |
| -1.07503538 | 0.12823453 | -1.1062863 | 0.035518286 | -1.0868692  | 0.080950804 |
| -1.0464516  | 0.39158761 | -1.0520147 | 0.339084047 | -1.00077868 | 0.988241321 |
| -1.02286899 | 0.68892423 | -1.0623267 | 0.28664169  | -1.03028823 | 0.597518654 |
| 0.990137739 | 0.80976703 | 0.71858264 | 8.07138E-11 | 0.930356233 | 0.083769301 |
| -1.0219301  | 0.67222905 | -1.1221528 | 0.027894619 | 0.926153942 | 0.138328727 |
| -1.00368735 | 0.93914498 | -1.019996  | 0.681539166 | -1.04265715 | 0.387884543 |
| 0.939079424 | 0.12998371 | 0.88039779 | 0.002939382 | 0.943578182 | 0.161149173 |
| -1.02932851 | 0.58266369 | 0.97701321 | 0.65828186  | 0.766079421 | 4.61E-06    |
| 0.951245044 | 0.35290866 | -1.0293673 | 0.589617643 | -1.04236011 | 0.440097352 |
| 0.946001953 | 0.26734994 | -1.0195215 | 0.697809991 | 0.980011572 | 0.685129339 |
| 0.900736316 | 0.06057744 | 0.88569385 | 0.030254355 | -1.08816694 | 0.127181236 |
| -1.18187871 | 0.00099979 | -1.2116627 | 0.000195387 | -1.42434419 | 1.08E-09    |
| -1.09614361 | 0.27231562 | -1.1693367 | 0.064148018 | -1.60688743 | 4.68E-07    |
| 0.719850478 | 0.00023399 | 0.92595344 | 0.360082544 | 0.868937486 | 0.097664348 |
| -1.03225517 | 0.63424365 | -1.0356805 | 0.599383324 | 0.915175042 | 0.187178447 |
| -1.04774096 | 0.69143625 | -1.0160494 | 0.892140995 | -1.05868675 | 0.627549262 |
| -1.2436087  | 0.05475443 | 0.98390336 | 0.884339207 | 0.995807966 | 0.969957515 |
| -1.11298093 | 0.24181004 | -1.0350503 | 0.704774926 | -1.12463324 | 0.199599712 |
| -1.10146774 | 0.15142622 | -1.0906307 | 0.19700055  | -1.16499151 | 0.025393374 |
| 0.884302759 | 0.05923442 | -1.0876488 | 0.193429751 | -1.12384732 | 0.072773873 |
| 0.800634813 | 0.00012502 | 0.92299069 | 0.14188584  | 0.972413981 | 0.604936991 |
| -1.04435159 | 0.68733973 | 0.83922677 | 0.108035724 | -1.07214689 | 0.518731805 |
| 0.564993337 | 9.15E-06   | 0.61068215 | 9.02352E-05 | 0.395026412 | 1.13E-10    |
| 0.681525417 | 1.43E-06   | 0.8710576  | 0.056112656 | 0.694664203 | 3.77E-06    |
| -1.05607508 | 0.48882678 | -1.0844659 | 0.304910955 | -1.12690213 | 0.132829951 |
| 0.858259914 | 0.09202535 | 0.95433986 | 0.602066214 | 0.873448284 | 0.134731459 |
| 0.843917807 | 0.03325784 | 0.93227769 | 0.370561577 | 0.972473371 | 0.720681613 |
| -1.01336386 | 0.78552971 | 0.90552847 | 0.045837666 | -1.0068838  | 0.888140504 |

|             |            |            |             |             |             |
|-------------|------------|------------|-------------|-------------|-------------|
| 0.966564767 | 0.63227765 | -1.0926824 | 0.215136734 | -1.01502859 | 0.833604107 |
| 0.827507359 | 0.01094076 | 0.86540958 | 0.049181883 | 0.907418974 | 0.181834795 |
| 0.754939388 | 0.00276366 | 0.79038406 | 0.011242541 | 0.766813741 | 0.004525838 |
| 0.810715969 | 0.00776897 | 0.72447016 | 8.61844E-05 | 0.840347553 | 0.025812088 |
| 0.893185779 | 0.0558127  | -1.0207003 | 0.724290923 | 0.419734089 | 7.21E-21    |
| 0.970677416 | 0.70306947 | 0.70305705 | 3.25508E-05 | 0.533232848 | 7.21E-11    |
| -1.06172727 | 0.4382433  | 0.90114116 | 0.180383892 | 0.944434815 | 0.459277154 |
| -1.12430095 | 0.14555914 | 0.88432205 | 0.127110941 | -1.1896978  | 0.032927446 |
| -1.07274063 | 0.24918755 | -1.2251514 | 0.001402897 | -1.22339399 | 0.001506191 |
| 0.831410712 | 0.00560466 | 0.96387211 | 0.56752978  | -1.00092878 | 0.988474554 |
| -1.03017445 | 0.61261235 | 0.96916263 | 0.593729553 | -1.00546774 | 0.925915998 |
| 0.940748551 | 0.39574571 | -1.1546658 | 0.048852419 | -1.003244   | 0.963960718 |
| 0.987471951 | 0.75831    | -1.0011149 | 0.978293389 | 0.800243812 | 1.22E-06    |
| 0.977630313 | 0.69040638 | -1.0648498 | 0.271002615 | -1.1218924  | 0.046709918 |
| -1.12586587 | 0.10129759 | -1.1782526 | 0.024954404 | -1.34281926 | 0.000121313 |
| 0.692615795 | 0.00118037 | 0.84508798 | 0.122224149 | 0.868064541 | 0.192427891 |
| 0.78588211  | 0.00014118 | 0.89862167 | 0.074552338 | -1.07864201 | 0.203283915 |
| -1.0330294  | 0.78196932 | -1.1934307 | 0.135999253 | -1.19881121 | 0.126519652 |
| -1.20752946 | 0.00137972 | -1.0412382 | 0.472726131 | -1.0788372  | 0.18016267  |
| -1.08938097 | 0.32248537 | -1.2093682 | 0.030857211 | -1.20699956 | 0.032551026 |
| -1.20548201 | 0.01088433 | -1.0924482 | 0.217358297 | -1.28254392 | 0.000908086 |
| 0.967803168 | 0.50208005 | -1.0560597 | 0.265044602 | -1.0772282  | 0.13038227  |
| 0.74939407  | 0.00134814 | 0.83382255 | 0.037714246 | 0.793978069 | 0.009140109 |
| -1.14392921 | 0.16895131 | 0.98330651 | 0.862078828 | -1.21394849 | 0.049425205 |
| -1.00483972 | 0.95700194 | -1.2258912 | 0.026288529 | -1.13242464 | 0.16868085  |
| 0.791501425 | 0.00043737 | 0.7215767  | 2.85392E-06 | 0.99045363  | 0.878369547 |
| -1.04612405 | 0.45665025 | 0.97102797 | 0.626925622 | -1.02020483 | 0.740715717 |
| 0.944139439 | 0.36380212 | 0.96742754 | 0.599908786 | 0.88581265  | 0.058643131 |
| -1.06384221 | 0.40242326 | -1.2089418 | 0.012405649 | -1.08870747 | 0.251559863 |
| -1.27365762 | 0.00512778 | -1.2539064 | 0.008547584 | -1.24580233 | 0.010503813 |
| -1.04761063 | 0.55654399 | -1.0286237 | 0.720993164 | 0.881524032 | 0.114545457 |
| 0.991695659 | 0.90559642 | 0.88330939 | 0.08190943  | 0.943385134 | 0.408663957 |
| -1.10600172 | 0.18899605 | -1.0269929 | 0.726422506 | -1.01682351 | 0.826464361 |
| 0.95875124  | 0.66465104 | 0.89163778 | 0.240493873 | 0.784171463 | 0.014896882 |
| -1.14874094 | 0.06379409 | -1.1241924 | 0.115943799 | -1.05935256 | 0.434742673 |
| -1.08838651 | 0.17167609 | -1.0738853 | 0.248786878 | -1.42140184 | 4.33E-07    |
| -1.0195923  | 0.65372407 | -1.0386416 | 0.381983299 | 0.980917561 | 0.655989739 |
| -1.22754283 | 0.05353286 | 0.9627575  | 0.716209948 | 0.731802773 | 0.004014168 |
| 0.900166968 | 0.07272255 | -1.0099747 | 0.86349892  | -1.04729485 | 0.424778253 |
| 0.822754579 | 0.0003893  | 0.89042415 | 0.028461608 | 0.655930164 | 5.27E-11    |
| 0.986866692 | 0.82829491 | -1.0322871 | 0.602524924 | 0.998958574 | 0.986358423 |
| -1.29126695 | 0.00109596 | -1.2883402 | 0.001202173 | -1.31525422 | 0.000509685 |
| -1.09411187 | 0.0348006  | 0.88278865 | 0.00406791  | -1.01859465 | 0.65910342  |
| -1.80284781 | 9.29E-09   | -1.3247224 | 0.002055699 | -1.27055266 | 0.007917091 |

|             |            |            |             |             |             |
|-------------|------------|------------|-------------|-------------|-------------|
| 0.911066349 | 0.08428572 | -1.0766837 | 0.16865942  | -1.17046664 | 0.004414805 |
| -1.11782455 | 0.14231094 | 0.92875764 | 0.327546743 | 0.952277162 | 0.516069543 |
| 0.821552359 | 0.00110539 | 0.88424525 | 0.035407472 | 0.637159799 | 1.45E-10    |
| 0.967081136 | 0.59749266 | -1.1538861 | 0.027161149 | -1.06153495 | 0.347575226 |
| 0.958552975 | 0.6246394  | 0.81076774 | 0.018078025 | 0.832368572 | 0.03750906  |
| -1.02490426 | 0.56723906 | 0.92979424 | 0.094261369 | 0.964103778 | 0.396076923 |
| 0.891387091 | 0.01151466 | 0.94734158 | 0.223671886 | -1.07009145 | 0.12903571  |
| 0.989713605 | 0.88803654 | -1.0556353 | 0.462079967 | -1.30017476 | 0.000713921 |
| -1.10163696 | 0.07684926 | -1.0561489 | 0.313194649 | -1.13510573 | 0.021849399 |
| -1.08915701 | 0.17954534 | 0.99430878 | 0.927924876 | -1.00598015 | 0.924716086 |
| -1.02235702 | 0.73844131 | 0.99662285 | 0.95923436  | -1.13885697 | 0.05355815  |
| 0.941008365 | 0.5149836  | -1.0720341 | 0.456641627 | -1.00555041 | 0.952642907 |
| 0.9531734   | 0.65554478 | 0.87611963 | 0.221469929 | 0.94755857  | 0.616439479 |
| -1.38018017 | 0.00339611 | -1.0898252 | 0.416731342 | -1.21049279 | 0.074715523 |
| 0.784673561 | 0.00034398 | 0.67310082 | 7.1062E-08  | 0.769894599 | 0.00013021  |
| 0.622898544 | 2.34E-10   | 0.83995287 | 0.005924343 | 0.874722214 | 0.032167566 |
| -1.23211502 | 0.08208796 | 0.93119263 | 0.54761799  | -1.17696846 | 0.172331794 |
| 0.878579989 | 0.01343703 | -1.0521785 | 0.31964312  | 0.972913064 | 0.589837698 |
| -1.0257354  | 0.76249645 | 0.84605254 | 0.050755508 | 0.888523328 | 0.163466756 |
| -1.00490333 | 0.91357466 | -1.0624067 | 0.182825816 | 0.990145011 | 0.826095092 |
| 0.797538958 | 0.00198566 | 0.54026096 | 4.5454E-12  | 0.500383941 | 8.72E-14    |
| -1.18347477 | 0.12347792 | -1.2411013 | 0.049841655 | -1.43358278 | 0.001502589 |
| 0.993907747 | 0.93605171 | -1.0624044 | 0.428084323 | -1.3066455  | 0.000866862 |
| 0.896963126 | 0.08227379 | -1.0225772 | 0.717604774 | 0.975109657 | 0.683101583 |
| 0.787475389 | 0.01372718 | 0.85129969 | 0.091748969 | 0.833364797 | 0.057137408 |
| 0.853430491 | 0.09908198 | 0.94420627 | 0.5457671   | -1.09278336 | 0.351619515 |
| -1.06185259 | 0.14819761 | 0.87625622 | 0.002121562 | 0.85612125  | 0.00037452  |
| -1.12841098 | 0.22389882 | 0.95169233 | 0.616121919 | -1.16626733 | 0.12310611  |
| -1.1566654  | 0.15540498 | 0.99527008 | 0.962734583 | -1.12763472 | 0.239557964 |
| -1.03870037 | 0.49256611 | 0.99132513 | 0.87461877  | -1.08061392 | 0.164064019 |
| -1.04140941 | 0.31351383 | -1.0024366 | 0.951566746 | -1.0528354  | 0.202220907 |
| 0.997093166 | 0.95598531 | -1.0793332 | 0.151714224 | 0.991956081 | 0.87831126  |
| 0.899485103 | 0.026878   | 0.85941751 | 0.001968209 | 0.82838364  | 0.000168794 |
| 0.821779627 | 0.06325638 | 0.92193291 | 0.435647235 | -1.00020118 | 0.998456281 |
| 0.788328092 | 0.04326253 | -1.0841464 | 0.484952028 | -1.42272033 | 0.003366937 |
| -1.00418676 | 0.96736013 | -1.0765369 | 0.471190031 | -1.16347569 | 0.142116988 |
| 0.937453285 | 0.3543482  | -1.0987171 | 0.178956093 | -1.13424411 | 0.07401416  |
| -1.12951686 | 0.11556845 | -1.0059568 | 0.938116024 | 0.890400199 | 0.13322594  |
| -1.04819085 | 0.35712569 | 0.89509802 | 0.033114937 | 0.762502343 | 1.85E-06    |
| 0.886181175 | 0.11724477 | -1.0344799 | 0.656932305 | -1.04704431 | 0.547265562 |
| -1.04448513 | 0.58579577 | -1.3007388 | 0.001662311 | -1.29574872 | 0.001917549 |
| 0.981764157 | 0.74405635 | -1.1581811 | 0.011453526 | -1.0544484  | 0.34869786  |
| 0.915534531 | 0.0639889  | -1.0024216 | 0.958850658 | -1.36783308 | 1.24E-08    |
| -1.0116648  | 0.91734252 | -1.025416  | 0.822322696 | 0.965868541 | 0.756070944 |

|             |            |            |             |             |             |
|-------------|------------|------------|-------------|-------------|-------------|
| -1.16729057 | 0.00365523 | -1.0116987 | 0.820076536 | 0.972105095 | 0.580541279 |
| -1.16042916 | 0.00075035 | -1.013628  | 0.746259287 | 0.993704715 | 0.879958209 |
| -1.2868617  | 0.00010729 | -1.0637523 | 0.309994685 | 0.983950664 | 0.789481507 |
| 0.967452435 | 0.57941142 | 0.89770912 | 0.074563727 | -1.05411904 | 0.378384863 |
| 0.91274282  | 0.14793104 | -1.1154051 | 0.084774181 | 0.990755685 | 0.88185145  |
| 0.973373285 | 0.42145429 | 0.96453609 | 0.283261656 | -1.04624449 | 0.180456488 |
| 0.901952773 | 0.06546511 | 0.98285025 | 0.753800181 | -1.0816663  | 0.158341319 |
| 0.876179913 | 0.0423894  | 0.8647721  | 0.026267917 | 0.976699676 | 0.71220817  |
| 0.896805185 | 0.15629537 | 0.91242248 | 0.231620446 | 0.745187643 | 0.000285277 |
| 0.955003287 | 0.50153057 | -1.1800525 | 0.018329248 | -1.06284755 | 0.374357959 |
| -1.15483724 | 0.04321042 | -1.2668704 | 0.001268825 | -1.00635024 | 0.927788847 |
| 0.961749082 | 0.44534878 | 0.9044841  | 0.052953595 | 0.909081204 | 0.065667389 |
| -1.1723007  | 0.02555796 | -1.2656265 | 0.001264862 | -1.09358269 | 0.201704799 |
| 0.978904468 | 0.64475745 | 0.93643199 | 0.15899905  | 0.956253107 | 0.335017417 |
| 0.889269438 | 0.12625701 | 0.95791626 | 0.571705063 | -1.11194442 | 0.165972421 |
| -1.15093285 | 0.2282833  | -1.0582867 | 0.625325221 | 0.93016576  | 0.532916427 |
| 0.998230725 | 0.98407787 | -1.1273866 | 0.180284486 | -1.07927579 | 0.391554131 |
| -1.08755997 | 0.29998514 | -1.2540013 | 0.006676746 | -1.4684732  | 1.35E-05    |
| 0.911636134 | 0.23298801 | 0.83463423 | 0.022104125 | 0.91653974  | 0.260853064 |
| -1.02944713 | 0.74007252 | -1.1511057 | 0.111746033 | -1.04520279 | 0.613528503 |
| -1.22221547 | 0.01197738 | -1.0200542 | 0.797856375 | -1.17225157 | 0.044242331 |
| -1.36378142 | 6.55E-05   | -1.2763441 | 0.001256796 | -1.0785557  | 0.295909907 |
| 0.799282016 | 9.38E-05   | 0.78622275 | 3.29066E-05 | 0.899282742 | 0.050466386 |
| -1.01735001 | 0.74257494 | -1.1052835 | 0.060017297 | 0.912880155 | 0.085928205 |
| 0.97549954  | 0.79143559 | 0.76736698 | 0.006413622 | 0.64083108  | 1.47E-05    |
| -1.45347325 | 0.00441451 | -1.3545553 | 0.019300887 | -1.55276381 | 0.000950865 |
| -1.0350516  | 0.60094068 | -1.150183  | 0.037176496 | -1.05865728 | 0.387868013 |
| -1.04096495 | 0.43565717 | -1.0501318 | 0.342884967 | -1.14970158 | 0.008569442 |
| -1.01340771 | 0.82791884 | 0.86059159 | 0.017048085 | 0.933328802 | 0.262830222 |
| -1.04755954 | 0.68987623 | -1.1025268 | 0.403100681 | -1.04785514 | 0.688094468 |
| -1.03569117 | 0.51009309 | 0.98523999 | 0.779655931 | 0.908461225 | 0.075065893 |
| 0.845533703 | 0.02349724 | -1.0609646 | 0.414476144 | 0.934820927 | 0.353118579 |
| -1.01855629 | 0.69615503 | 0.86916303 | 0.004154011 | 0.952824354 | 0.306734785 |
| 0.773203824 | 0.00159076 | 0.85811476 | 0.05293994  | 0.663870083 | 2.24E-06    |
| 0.843717761 | 0.10291512 | 0.95503234 | 0.655082895 | -1.12121405 | 0.2689458   |
| -1.00485829 | 0.89685016 | 0.96744488 | 0.377693489 | 0.974642445 | 0.492975424 |
| 0.977664554 | 0.72127074 | -1.0200726 | 0.753578188 | 0.881907769 | 0.051107078 |
| -1.01181844 | 0.83409555 | 0.87165772 | 0.017120562 | -1.00757981 | 0.892903006 |
| -1.02238576 | 0.72343037 | -1.0831861 | 0.204664546 | -1.04268726 | 0.504665579 |
| 0.780678414 | 0.01777271 | 0.92049914 | 0.416829328 | -1.21933578 | 0.055342889 |
| -1.24810219 | 0.04298079 | -1.1930187 | 0.104606144 | -1.08917233 | 0.427806949 |
| -1.02434708 | 0.53972794 | 0.99238056 | 0.84516612  | 0.941013718 | 0.124675105 |
| -1.11687426 | 0.03773043 | 0.97473261 | 0.623825489 | -1.04024123 | 0.450318847 |
| -1.12615181 | 0.07289354 | -1.0019809 | 0.975803408 | -1.11106992 | 0.110704534 |

|             |            |            |             |             |             |
|-------------|------------|------------|-------------|-------------|-------------|
| -1.18065334 | 0.05166409 | -1.0198498 | 0.814666291 | 0.946137532 | 0.509807588 |
| -1.095548   | 0.19629091 | -1.0260254 | 0.714026519 | -1.00482937 | 0.945182569 |
| -1.01491415 | 0.65417946 | 0.97665743 | 0.475428648 | 0.70131077  | 4.61E-15    |
| 0.87293165  | 0.06467955 | 0.76024572 | 0.000365918 | 0.650063479 | 1.89E-07    |
| 0.989707768 | 0.81452868 | 0.96421621 | 0.410019879 | 0.978092469 | 0.615797133 |
| -1.03068527 | 0.69240626 | 0.89385007 | 0.145596475 | 0.848540928 | 0.035156226 |
| -1.03269283 | 0.47557853 | -1.0175291 | 0.699475319 | 0.80670097  | 1.32E-05    |
| -1.03815056 | 0.54172708 | 0.96083394 | 0.515046414 | -1.0072693  | 0.90587424  |
| 0.938151477 | 0.26859343 | 0.89683482 | 0.061943759 | 0.845419707 | 0.00482998  |
| 0.960085531 | 0.63236928 | 0.93646686 | 0.441526923 | 0.869634658 | 0.104795994 |
| 0.911901472 | 0.13916166 | -1.0015879 | 0.979491209 | 0.966480601 | 0.58121027  |
| 0.916203824 | 0.11631184 | -1.0888035 | 0.12659434  | -1.08316818 | 0.150907708 |
| 0.593624311 | 0.00114761 | 0.80438622 | 0.157338383 | 0.376075295 | 3.38E-08    |
| 0.964088132 | 0.47170328 | -1.0379958 | 0.463075393 | 0.739822925 | 1.93E-07    |
| -1.02490577 | 0.59775172 | -1.0081042 | 0.862398984 | -1.08012571 | 0.102133877 |
| 0.994205684 | 0.86026554 | -1.1080534 | 0.00288316  | -1.0932179  | 0.008947104 |
| -1.02747102 | 0.65369266 | 0.99383538 | 0.91839099  | 0.879138464 | 0.036546222 |
| 0.934241793 | 0.24717056 | 0.95862103 | 0.47044673  | 0.954251949 | 0.424100741 |
| -1.07090001 | 0.25239762 | 0.93745901 | 0.280219504 | 0.992916244 | 0.904872074 |
| -1.07320352 | 0.24984162 | -1.0631865 | 0.317542516 | 0.9631838   | 0.539399509 |
| 0.960490355 | 0.39333743 | 0.91345586 | 0.058610521 | 0.99868585  | 0.977709607 |
| -1.11179533 | 0.2618057  | 0.74538125 | 0.002710336 | 0.727132255 | 0.001241098 |
| 0.865467943 | 0.00433218 | 0.94088431 | 0.214373297 | 0.906747013 | 0.048541769 |
| 0.956939544 | 0.45349042 | 0.66145306 | 3.03451E-09 | -1.05338284 | 0.376268692 |
| -1.09034756 | 0.25887836 | 0.99689347 | 0.967409877 | -1.29050526 | 0.001421417 |
| -1.02436887 | 0.71651647 | -1.0265867 | 0.69233415  | -1.04551773 | 0.502653644 |
| 0.951038682 | 0.36142016 | -1.1411532 | 0.018883371 | -1.19795518 | 0.001662646 |
| -1.03490601 | 0.3103271  | 0.94263796 | 0.08352557  | -1.00906235 | 0.788727436 |
| 0.598900974 | 3.43E-09   | 0.64818002 | 1.95224E-07 | 0.718087671 | 3.02E-05    |
| -1.02040098 | 0.53948676 | 0.86599852 | 5.19268E-05 | -1.02958028 | 0.376699908 |
| -1.50841277 | 6.09E-05   | -1.1180482 | 0.242628582 | -1.86033658 | 2.09E-08    |
| -1.03996361 | 0.64458667 | -1.2105871 | 0.027742068 | -1.50230162 | 1.23E-05    |
| 0.994670811 | 0.92067444 | -1.0234086 | 0.666558875 | 0.944426064 | 0.289127077 |
| 0.998257875 | 0.97857048 | -1.1246569 | 0.074614524 | 0.912400463 | 0.161715348 |
| 0.980526549 | 0.84103615 | -1.1476405 | 0.163928074 | -1.26029842 | 0.021363331 |
| -1.03831961 | 0.50241714 | -1.0505599 | 0.379732164 | -1.05889462 | 0.308748611 |
| -1.12011837 | 0.08186348 | -1.1078155 | 0.115337685 | -1.34708406 | 2.15E-05    |
| 0.806028297 | 0.00046285 | -1.1264702 | 0.044250012 | -1.07304102 | 0.227976162 |
| -1.08959305 | 0.10653576 | -1.0269847 | 0.612554845 | -1.07149084 | 0.192098752 |
| 0.854994758 | 0.04280687 | 0.95075881 | 0.506499853 | 0.960548684 | 0.596162864 |
| 0.907978597 | 0.16703924 | -1.1626844 | 0.03310671  | 0.991937065 | 0.90692432  |
| 0.899558645 | 0.21914789 | 0.90521442 | 0.247283313 | 0.914271118 | 0.29715798  |
| 0.995836813 | 0.95699923 | -1.0104473 | 0.893152096 | -1.05371316 | 0.499816239 |
| 0.930415497 | 0.64292852 | 0.92620669 | 0.622233781 | 0.726659476 | 0.043859963 |

|             |            |            |             |             |             |
|-------------|------------|------------|-------------|-------------|-------------|
| 0.987547151 | 0.83930362 | -1.0980353 | 0.134183828 | -1.21790701 | 0.002271637 |
| -1.11797704 | 0.12252284 | -1.0623394 | 0.398650428 | -1.04564043 | 0.532728119 |
| -1.1875441  | 0.03769072 | -1.0847545 | 0.317700241 | -1.0640147  | 0.445113339 |
| 0.889640172 | 0.37299812 | 0.97537679 | 0.848828762 | -1.19637104 | 0.174102786 |
| -1.05766456 | 0.26814815 | -1.0756117 | 0.151557588 | -1.07014467 | 0.181706868 |
| -1.07332798 | 0.38260849 | -1.0749022 | 0.37290233  | -1.09702899 | 0.254411511 |
| -1.37121552 | 3.54E-05   | -1.1494722 | 0.051598988 | -1.09955944 | 0.180647437 |
| 0.692379141 | 0.04552252 | -1.0437706 | 0.812327972 | 0.970632476 | 0.868771392 |
| -1.35723839 | 2.24E-05   | -1.3877632 | 6.87567E-06 | -1.4338351  | 1.16E-06    |
| -1.02406126 | 0.79744544 | -1.0952361 | 0.328137016 | -1.11667872 | 0.236489811 |
| -1.51939362 | 0.0035765  | -1.2946101 | 0.06538559  | -1.40333535 | 0.016781276 |
| 0.914189291 | 0.42231351 | 0.77180469 | 0.023342685 | 0.864067511 | 0.193501072 |
| 0.835875295 | 0.26664599 | -1.2430789 | 0.178760598 | -1.20627191 | 0.245494488 |
| 0.871702555 | 0.12757264 | 0.94923232 | 0.559476881 | 0.772066683 | 0.005167702 |
| 0.759530185 | 3.08E-08   | 0.82881992 | 4.91986E-05 | 0.915966823 | 0.043851841 |
| 0.992101598 | 0.84359235 | 0.95087886 | 0.213371854 | -1.02395974 | 0.556355417 |
| -1.14903327 | 0.21624205 | -1.1333377 | 0.264571885 | -1.37108398 | 0.006313187 |
| 0.96779176  | 0.4199628  | -1.0007518 | 0.985183779 | 0.958949314 | 0.302729896 |
| 0.94913811  | 0.2781676  | 0.97468988 | 0.592782829 | 0.954961281 | 0.337790684 |
| -1.12345122 | 0.14285076 | -1.0686128 | 0.400337298 | -1.04110683 | 0.608925061 |
| 0.877732757 | 0.11112557 | 0.96009329 | 0.615037985 | 0.907178702 | 0.231581588 |
| -1.00727348 | 0.88829728 | 0.98207133 | 0.725991032 | 0.826811112 | 0.000503593 |
| 0.665828877 | 2.43E-07   | 0.86231796 | 0.035880101 | 0.762805796 | 0.000241729 |
| -1.0095792  | 0.85281897 | 0.99270282 | 0.886659546 | -1.06879632 | 0.198824878 |
| 0.917865901 | 0.22321417 | -1.0444357 | 0.534537213 | 0.970434053 | 0.667816711 |
| 0.826986837 | 0.07152196 | 0.79484968 | 0.030512323 | 0.881582845 | 0.227873712 |
| -1.04490164 | 0.49473254 | 0.9392456  | 0.330965385 | 0.831512836 | 0.005579606 |
| -1.07029039 | 0.3921249  | -1.1826372 | 0.037737837 | -1.08455703 | 0.307210586 |
| 0.895142742 | 0.04085602 | -1.0537281 | 0.326593896 | -1.11284052 | 0.048110927 |
| -1.07200538 | 0.46350716 | 0.87256757 | 0.153556399 | -1.4401814  | 0.000293709 |
| -1.18177134 | 0.02650495 | 0.85491118 | 0.036791896 | 0.85774923  | 0.040793104 |
| -1.22215794 | 0.02284863 | -1.1830103 | 0.054830152 | -1.26433591 | 0.008332457 |
| -1.11945686 | 0.10314173 | -1.1934038 | 0.012081384 | -1.17212671 | 0.023394261 |
| 0.961042199 | 0.76693427 | -1.0251542 | 0.852958824 | -1.23120113 | 0.124822085 |
| 0.974450384 | 0.7347043  | -1.058344  | 0.458728118 | 0.96906262  | 0.680806384 |
| 0.929909518 | 0.16394357 | -1.102556  | 0.063344963 | 0.965601436 | 0.4995542   |
| 0.937217442 | 0.26739551 | -1.0173116 | 0.767869881 | -1.03507628 | 0.553756877 |
| -1.03482887 | 0.56412494 | -1.1276292 | 0.046693562 | -1.05164493 | 0.397143237 |
| -1.03324041 | 0.63141688 | 0.96646034 | 0.616760499 | -1.06292848 | 0.37188874  |
| -1.03200751 | 0.56935309 | 0.98887853 | 0.83972108  | -1.1745232  | 0.00506364  |
| 0.933247224 | 0.2902483  | 0.95630739 | 0.492711857 | -1.08863019 | 0.194789518 |
| -1.23444517 | 0.01858998 | -1.3296645 | 0.001806163 | -1.42009304 | 0.00017022  |
| 0.909213267 | 0.14245304 | -1.0134646 | 0.835095042 | 0.943312501 | 0.365465269 |
| 0.976169907 | 0.72822527 | 0.98217623 | 0.795499443 | -1.27225252 | 0.000981964 |



|             |            |            |             |             |             |
|-------------|------------|------------|-------------|-------------|-------------|
| 0.73332535  | 0.00091139 | 0.94711624 | 0.541036282 | 0.938318802 | 0.474136737 |
| -1.02622785 | 0.6308475  | 0.98709552 | 0.809344729 | 0.969312227 | 0.563108893 |
| 0.96178221  | 0.50371767 | -1.0724947 | 0.231932836 | -1.12160307 | 0.052549771 |
| 0.993369651 | 0.93506033 | -1.0855175 | 0.3171389   | -1.01491037 | 0.856168297 |
| -1.13828194 | 0.25377869 | -1.1622972 | 0.186037435 | -1.1772949  | 0.15184173  |
| -1.15146909 | 0.12158389 | 0.83577117 | 0.050470816 | 0.907397517 | 0.283286993 |
| -1.05965074 | 0.43444614 | -1.1524485 | 0.059084419 | -1.26176648 | 0.002590602 |
| -1.32318731 | 0.00029131 | -1.0887603 | 0.244369821 | 0.94181254  | 0.410346815 |
| 0.911030403 | 0.2302506  | 0.951445   | 0.519607127 | 0.937816725 | 0.406799443 |
| 0.937066824 | 0.33417269 | 0.86874323 | 0.039579156 | 0.931216322 | 0.290116734 |
| 0.985062895 | 0.85282212 | 0.97903382 | 0.793971697 | 0.905066706 | 0.222020604 |
| 0.870031322 | 0.02093886 | 0.85397862 | 0.009319275 | 0.931131427 | 0.228041169 |
| 0.892404457 | 0.05326362 | 0.90255108 | 0.080725454 | 0.862158902 | 0.01281601  |
| -1.00869481 | 0.86202055 | -1.1074782 | 0.044330107 | -1.1014153  | 0.056582473 |
| 0.953648989 | 0.56363231 | 0.92439437 | 0.34010513  | 0.954275511 | 0.569024858 |
| 0.97012892  | 0.55305125 | -1.0694037 | 0.192162536 | -1.0224597  | 0.663713411 |
| 0.892023651 | 0.27831094 | -1.0056815 | 0.956894756 | -1.00124234 | 0.990549059 |
| -1.05173421 | 0.34010282 | 0.96086067 | 0.449465413 | -1.0157889  | 0.766142514 |
| -1.1413544  | 0.03270397 | -1.0265451 | 0.665708242 | 0.951939745 | 0.417684497 |
| -1.09010354 | 0.24307038 | 0.94349501 | 0.429668712 | 0.683654877 | 3.15E-06    |
| -1.06898727 | 0.23723904 | 0.9705025  | 0.593860801 | -1.00753992 | 0.893443178 |
| 0.981737883 | 0.62060351 | -1.0546144 | 0.156684535 | -1.08623841 | 0.029634335 |
| 0.942547798 | 0.27868165 | 0.97780772 | 0.679733595 | -1.03881638 | 0.484257368 |
| 0.988576799 | 0.87573658 | 0.85510596 | 0.03685889  | 0.921365555 | 0.267680193 |
| 0.686400717 | 1.11E-06   | 0.6279634  | 9.20308E-09 | 0.776229999 | 0.000511872 |
| -1.01726415 | 0.79085722 | 0.86992827 | 0.034477135 | 0.9193612   | 0.196066358 |
| 0.953240473 | 0.15282869 | 0.99529521 | 0.88697485  | 0.927000049 | 0.025642045 |
| 0.793196727 | 0.00695315 | 0.93680779 | 0.432473147 | 0.689194076 | 3.56E-05    |
| -1.42170932 | 1.15E-05   | -1.0555036 | 0.461014977 | -1.01065887 | 0.884674275 |
| 0.958930545 | 0.52937231 | 0.96180712 | 0.559092152 | -1.13418903 | 0.062698197 |
| -1.15590074 | 0.16444232 | -1.0292609 | 0.780098149 | -1.26701841 | 0.025211234 |
| -1.02214437 | 0.82580274 | 0.83960835 | 0.083210512 | -1.3038669  | 0.009776312 |
| -1.01673781 | 0.78060477 | 0.98547288 | 0.806016209 | -1.01008874 | 0.866208253 |
| -1.15855422 | 0.10680005 | -1.1517232 | 0.121283065 | -1.18972862 | 0.058118992 |
| -1.0836621  | 0.12513127 | -1.0181631 | 0.728435633 | -1.0192769  | 0.712672049 |
| -1.04641566 | 0.50758954 | 0.98675224 | 0.845290159 | 0.972747454 | 0.686179663 |
| -1.02481855 | 0.69366265 | 0.98251806 | 0.77682079  | 0.991609753 | 0.892247338 |
| -1.01747085 | 0.78940451 | -1.0826309 | 0.223903417 | 0.882301532 | 0.057563245 |
| 0.773750121 | 0.01238191 | 0.77970439 | 0.015083248 | 0.741292321 | 0.003856211 |
| 0.678422477 | 6.82E-05   | 0.84366264 | 0.063856873 | 0.676471701 | 6.12E-05    |
| -1.04575073 | 0.54926257 | 0.93261331 | 0.351492036 | -1.13499193 | 0.093807391 |
| -1.17991679 | 0.07434966 | -1.2311206 | 0.026152683 | -1.35168451 | 0.00164781  |
| -1.11255667 | 0.07415997 | -1.2010172 | 0.002847392 | -1.21503605 | 0.001596452 |
| 0.802840366 | 0.00157397 | 0.81502631 | 0.003063557 | 0.950178215 | 0.44170467  |

|             |            |            |             |             |             |
|-------------|------------|------------|-------------|-------------|-------------|
| -1.00378406 | 0.96727095 | -1.0219598 | 0.813492153 | -1.03460995 | 0.711831453 |
| -1.01715352 | 0.6507227  | 0.94664371 | 0.147975233 | -1.05310823 | 0.171707311 |
| -1.06853795 | 0.05629559 | 0.9601257  | 0.236364472 | -1.02369534 | 0.49365778  |
| 0.903071831 | 0.01945052 | -1.0636279 | 0.150762065 | -1.02684312 | 0.533999438 |
| -1.07665513 | 0.04419551 | -1.0111811 | 0.757590876 | -1.03303087 | 0.368631734 |
| 0.993489059 | 0.89724837 | 0.93049498 | 0.158252549 | 0.885296537 | 0.018939573 |
| -1.11333323 | 0.1525277  | 0.99333424 | 0.928298653 | -1.06228542 | 0.417659266 |
| 0.960228576 | 0.41580729 | -1.0472054 | 0.355494187 | 0.964617727 | 0.469832128 |
| 0.944214469 | 0.67879727 | -1.0798625 | 0.579622792 | -1.18587479 | 0.221618829 |
| 0.889662243 | 0.13771058 | 0.77813082 | 0.002095699 | 0.915979458 | 0.263029342 |
| 0.92691601  | 0.12176704 | 0.86654405 | 0.004477022 | 0.605921133 | 1.95E-14    |
| 0.927151241 | 0.08559444 | -1.0366772 | 0.407952308 | 0.877750091 | 0.00387391  |
| -1.01715652 | 0.79866536 | 0.9763275  | 0.719503303 | 0.933724895 | 0.306073973 |
| -1.05639476 | 0.43085508 | 0.99691319 | 0.964490383 | 0.377113779 | 1.08E-19    |
| -1.01375691 | 0.78095814 | 0.97745338 | 0.642778411 | 0.751155065 | 2.99E-07    |
| 0.978664595 | 0.58303014 | -1.0099638 | 0.800537064 | 0.988949144 | 0.777056898 |
| 0.975489412 | 0.70880038 | 0.99636028 | 0.956209376 | 0.78161935  | 0.000466601 |
| 0.914745873 | 0.13437932 | -1.000099  | 0.9986591   | -1.18513578 | 0.005436994 |
| -1.1099534  | 0.04180216 | -1.1022527 | 0.056869673 | 0.953514236 | 0.345569133 |
| 0.816617625 | 0.09119658 | 0.87716826 | 0.270794226 | 0.850445803 | 0.174728653 |
| -1.01373536 | 0.80069684 | 0.98376777 | 0.762038423 | -1.13278286 | 0.024254947 |
| -1.2507139  | 0.00123622 | -1.2624954 | 0.000800431 | -1.26762871 | 0.000661323 |
| 0.892959876 | 0.08306734 | 0.92197055 | 0.210500797 | -1.00291059 | 0.964005655 |
| -1.1534827  | 0.00463938 | -1.0639357 | 0.205182178 | -1.10542262 | 0.042884914 |
| -1.47626176 | 0.00196698 | -1.1533421 | 0.238446881 | -1.48958151 | 0.00157602  |
| -1.35616664 | 0.00455316 | -1.2301174 | 0.049118062 | -1.03005156 | 0.774594664 |
| 0.931790764 | 0.67611702 | 0.75507531 | 0.100657642 | -1.00482856 | 0.977256975 |
| 0.819103723 | 0.01801009 | 0.96583771 | 0.672474954 | 0.872047052 | 0.099885039 |
| -1.10118407 | 0.04717539 | 0.96754717 | 0.489850152 | -1.05068963 | 0.302014986 |
| -1.26530002 | 5.77E-05   | -1.185727  | 0.002575115 | -1.19893662 | 0.001406991 |
| -1.11000979 | 0.04575842 | -1.0078169 | 0.87930148  | 0.80631918  | 9.53E-05    |
| 0.780339369 | 0.08080549 | 0.85675258 | 0.272245074 | -1.4619316  | 0.008668591 |
| 0.978546916 | 0.59007259 | 0.94662394 | 0.176119674 | -1.01797649 | 0.657913147 |
| 0.993543458 | 0.89528631 | -1.000844  | 0.986322162 | -1.09176537 | 0.078702837 |
| 0.985482416 | 0.78757704 | 0.93743264 | 0.236776963 | 0.963477499 | 0.493799727 |
| -1.0611564  | 0.11499314 | -1.0211426 | 0.574625134 | -1.03011702 | 0.42673104  |
| 0.8982969   | 0.29349582 | -1.1448145 | 0.186631621 | -1.24391924 | 0.035346639 |
| 0.920220707 | 0.01397869 | 0.93097508 | 0.033205705 | -1.00278012 | 0.932696528 |
| 0.996953993 | 0.94665293 | 0.92818168 | 0.106378041 | -1.06272916 | 0.185674179 |
| 0.945558302 | 0.34014631 | 0.8412808  | 0.004429458 | -1.03816368 | 0.522367556 |
| 0.79432605  | 0.00473338 | 0.88168237 | 0.112843496 | 0.843516522 | 0.033789754 |
| 0.910000879 | 0.2510522  | 0.82733913 | 0.023485998 | 0.793409104 | 0.006237747 |
| 0.676606002 | 4.07E-07   | 0.57877935 | 7.83073E-11 | 0.692185005 | 1.38E-06    |
| 0.902771379 | 0.16890526 | -1.0399921 | 0.595122345 | 0.925201694 | 0.293925633 |

|             |            |            |             |             |             |
|-------------|------------|------------|-------------|-------------|-------------|
| -1.07614051 | 0.29278143 | -1.1414488 | 0.060762696 | -1.20639627 | 0.008854911 |
| -1.03086919 | 0.42318019 | -1.0466483 | 0.231449685 | -1.01860183 | 0.626635242 |
| -1.00962743 | 0.85686307 | 0.97963543 | 0.698678237 | 0.973924454 | 0.61927184  |
| 0.756625748 | 0.10236897 | 0.77371462 | 0.132190508 | 0.848945663 | 0.333519885 |
| 0.981561718 | 0.88014731 | 0.88363936 | 0.318424821 | -1.02386003 | 0.848499879 |
| -1.09310698 | 0.12360922 | -1.2373382 | 0.000445744 | -1.27075986 | 9.78E-05    |
| 0.650499911 | 3.33E-08   | 0.85953438 | 0.027284496 | 0.722627594 | 1.02E-05    |
| 0.992910817 | 0.89685456 | 0.93112294 | 0.196943911 | 0.965983783 | 0.5290274   |
| 0.935406069 | 0.29133013 | 0.79238838 | 0.000487393 | 0.858095218 | 0.017912468 |
| -1.05599079 | 0.28299672 | 0.86511928 | 0.005637996 | 0.923802758 | 0.120509806 |
| 0.991093495 | 0.91831768 | -1.1542342 | 0.104379549 | -1.03818797 | 0.667742375 |
| 0.8478211   | 0.12429427 | 0.95378025 | 0.656246704 | 0.953613786 | 0.655062992 |
| -1.14159849 | 0.13484884 | 0.92758283 | 0.392648554 | 0.832238923 | 0.039975483 |
| 0.996613713 | 0.95187975 | -1.0887863 | 0.134276147 | 0.971293905 | 0.604786291 |
| -1.27081925 | 0.0007194  | -1.0431129 | 0.53002595  | -1.13427193 | 0.064622594 |
| -1.01417071 | 0.81576351 | 0.91322954 | 0.136815559 | -1.14385351 | 0.029501893 |
| -1.01908501 | 0.72312054 | 0.92025267 | 0.123309066 | -1.00256273 | 0.961721857 |
| 0.990712971 | 0.86492388 | 0.93941177 | 0.257297915 | 0.961565801 | 0.475886204 |
| -1.21658467 | 0.18800702 | 0.73300632 | 0.039300114 | -1.30271711 | 0.077682653 |
| 0.871889777 | 0.42124014 | 0.91682692 | 0.609795115 | -1.03938335 | 0.820229702 |
| 0.981858078 | 0.85109151 | 0.96818137 | 0.740313059 | 0.972121598 | 0.771935247 |
| -1.07816812 | 0.22565957 | -1.2783311 | 0.000195951 | 0.940046056 | 0.318510217 |
| 0.925036362 | 0.09822127 | 0.98032263 | 0.669501298 | 0.941151678 | 0.195834696 |
| 0.773360853 | 0.0116299  | 0.63270505 | 2.17956E-05 | 0.561874388 | 2.91E-07    |
| -1.2871322  | 0.03029388 | -1.1819423 | 0.146431886 | -1.08177497 | 0.491340433 |
| 0.581090428 | 2.79E-13   | 0.73748987 | 1.56378E-06 | 0.862407941 | 0.011284443 |
| -1.0606385  | 0.4228594  | -1.1146988 | 0.14216991  | 0.96811785  | 0.658459327 |
| -1.02519767 | 0.62538195 | -1.1646314 | 0.004004687 | -1.05387723 | 0.305074522 |
| 0.997914293 | 0.97649361 | -1.0422266 | 0.560059154 | -1.05268614 | 0.469784018 |
| 0.996783755 | 0.95297035 | 0.92088496 | 0.135390383 | 0.973180468 | 0.619090174 |
| 0.998778603 | 0.98539232 | -1.0280772 | 0.678511198 | -1.07296942 | 0.293873078 |
| -1.16281862 | 0.08098966 | -1.102018  | 0.257159344 | -1.08765393 | 0.326310163 |
| -1.0144604  | 0.80261222 | -1.0656375 | 0.270938391 | -1.05057952 | 0.391782766 |
| 0.963882316 | 0.43533718 | -1.051888  | 0.28460049  | -1.14718747 | 0.004916655 |
| 0.996425711 | 0.91212349 | 0.98341903 | 0.606752488 | 0.872266702 | 9.11E-05    |
| -1.01529629 | 0.76280514 | -1.0399663 | 0.437031744 | 0.998770562 | 0.980479645 |
| -1.23108523 | 0.00678983 | -1.4846076 | 1.84639E-06 | -1.19843338 | 0.017499416 |
| -1.07023017 | 0.39731943 | 0.90126351 | 0.196837899 | 0.979911644 | 0.799619972 |
| 0.971780745 | 0.71168888 | -1.0634916 | 0.427804556 | -1.10487875 | 0.201014206 |
| -1.11280352 | 0.11125343 | -1.2308735 | 0.002691909 | 0.970911757 | 0.656513662 |
| -1.16136658 | 0.02617815 | -1.0927034 | 0.181023409 | -1.0279093  | 0.675586874 |
| -1.09829987 | 0.08711625 | -1.0678499 | 0.227752748 | -1.12369551 | 0.034649026 |
| -1.04247055 | 0.50048801 | -1.1346468 | 0.044256513 | -1.00701648 | 0.909642271 |
| -1.00893429 | 0.79099352 | 0.9749699  | 0.451140347 | 0.956545893 | 0.189035166 |

|             |            |            |             |             |             |
|-------------|------------|------------|-------------|-------------|-------------|
| 0.950356123 | 0.32073173 | 0.92066688 | 0.109610277 | 0.733638126 | 1.22E-07    |
| 0.748594211 | 9.80E-08   | 0.8560201  | 0.001696606 | 0.995691822 | 0.927206915 |
| -1.04309639 | 0.53709423 | -1.2283065 | 0.003784219 | -1.19914916 | 0.009916309 |
| -1.01232788 | 0.71818267 | 0.98204566 | 0.593860233 | 0.988607717 | 0.735737616 |
| -1.0225749  | 0.69552933 | -1.0144418 | 0.801445468 | 0.938746002 | 0.270192198 |
| -1.07291932 | 0.42198166 | -1.0037925 | 0.965449117 | -1.36187077 | 0.000808503 |
| 0.97065532  | 0.61522328 | -1.1219454 | 0.056019774 | 0.935896787 | 0.265769277 |
| -1.08066216 | 0.46058849 | -1.1054669 | 0.341038297 | 0.994016297 | 0.954359633 |
| -1.07288584 | 0.56712983 | -1.0849694 | 0.507305694 | -1.19504921 | 0.150536075 |
| 0.987164543 | 0.72348238 | 0.95264057 | 0.187262708 | 0.909407576 | 0.011576294 |
| 0.932372692 | 0.05179347 | 0.99364548 | 0.85697836  | 0.976156528 | 0.495957459 |
| 0.90035174  | 0.10363331 | -1.0423408 | 0.515859431 | 0.971741811 | 0.65300322  |
| 0.806241588 | 0.0017674  | 0.74590273 | 3.94907E-05 | 0.92726519  | 0.253607753 |
| 0.846299487 | 0.02326104 | 0.78569298 | 0.001373557 | 0.773246652 | 0.000695829 |
| -1.24523825 | 0.16629164 | -1.1757932 | 0.30478481  | -1.12981306 | 0.438286896 |
| 0.976527617 | 0.43226031 | 0.97879073 | 0.478217001 | -1.1168163  | 0.000540922 |
| 0.973008032 | 0.66818699 | -1.1398602 | 0.044068038 | -1.23263049 | 0.001750859 |
| 0.960731059 | 0.25554499 | 0.95466783 | 0.188854215 | -1.02428863 | 0.494125966 |
| 0.952804781 | 0.39148928 | 0.88165225 | 0.028520742 | 0.952896135 | 0.392422761 |
| -1.16763458 | 0.35451373 | -1.114361  | 0.516844709 | -1.22422696 | 0.228112367 |
| -1.36407828 | 4.83E-05   | -1.3334171 | 0.000142319 | -1.24605648 | 0.002809698 |
| -1.12490521 | 0.07546045 | 0.97611237 | 0.711074987 | -1.12054796 | 0.085311553 |
| -1.04010255 | 0.48343566 | -1.0999841 | 0.092983262 | -1.18885239 | 0.003039375 |
| 0.946596981 | 0.26766801 | -1.0489534 | 0.333737432 | 0.878895253 | 0.010987252 |
| -1.11627561 | 0.17884227 | -1.0791376 | 0.349831797 | -1.09060975 | 0.287584336 |
| -1.19066122 | 0.00226451 | -1.0234463 | 0.671905767 | -1.02071678 | 0.707811081 |
| -1.2616751  | 0.0033457  | -1.0804087 | 0.311450468 | -1.20212452 | 0.018373973 |
| -1.00544065 | 0.89459937 | -1.0125022 | 0.761681377 | 0.959110856 | 0.310318565 |
| 0.945711569 | 0.32631103 | 0.97386229 | 0.640221294 | 0.893543701 | 0.050832878 |
| -1.08220261 | 0.20396966 | -1.0547734 | 0.389218935 | -1.05069043 | 0.424407366 |
| -1.1232412  | 0.02389934 | -1.0278073 | 0.585522377 | 0.951827676 | 0.32778406  |
| -1.00218216 | 0.9729099  | 0.99092318 | 0.887047453 | 0.983153564 | 0.791316394 |
| -1.03166478 | 0.5952512  | 0.87728695 | 0.028950245 | 0.96715233  | 0.569318428 |
| 0.897809998 | 0.32425574 | 0.86539535 | 0.187751327 | 0.818888503 | 0.070696247 |
| 0.995731985 | 0.94359494 | -1.0472319 | 0.446443998 | -1.00435115 | 0.942745065 |
| 0.974231745 | 0.56716698 | 0.93646564 | 0.153495958 | -1.00584942 | 0.898125983 |
| 0.951393595 | 0.44115161 | -1.0792855 | 0.239957823 | -1.17432031 | 0.01541     |
| 0.913260916 | 0.03342168 | 0.97471354 | 0.540342577 | 0.907377476 | 0.023111331 |
| 0.924585948 | 0.24477136 | 0.9655985  | 0.601702342 | -1.07348776 | 0.292271951 |
| -1.14188029 | 0.08048954 | -1.1063062 | 0.180609352 | -1.3340282  | 0.00029724  |
| -1.23707711 | 0.02515503 | -1.1740335 | 0.088097729 | -1.26127628 | 0.015000129 |
| -1.5612039  | 0.00027596 | -1.6656948 | 4.23877E-05 | -1.93301203 | 4.20E-07    |
| -1.2929022  | 0.01446856 | -1.158403  | 0.15379415  | -1.38304816 | 0.002373075 |
| -1.71263714 | 2.59E-05   | -1.2868436 | 0.035439843 | -1.4176332  | 0.004252522 |

|             |            |            |             |             |             |
|-------------|------------|------------|-------------|-------------|-------------|
| 0.923529851 | 0.1260726  | 0.87183202 | 0.009776435 | -1.02633579 | 0.613685944 |
| -1.15851611 | 0.08545235 | -1.3292246 | 0.001321156 | -1.27745207 | 0.005165758 |
| 0.94258094  | 0.30853716 | -1.0239035 | 0.682942485 | 0.993031821 | 0.903695257 |
| -1.02443589 | 0.71962475 | 0.9857546  | 0.831002212 | -1.05715653 | 0.40976731  |
| 0.986104255 | 0.67353732 | 0.98815716 | 0.719769271 | 0.947484954 | 0.108311947 |
| -1.06374853 | 0.2944835  | -1.0129742 | 0.826060152 | 0.984174577 | 0.785689559 |
| -1.08966914 | 0.14053416 | -1.0442097 | 0.454388691 | -1.10451473 | 0.089083745 |
| -1.06237414 | 0.47488407 | -1.2020679 | 0.032978272 | -1.12864714 | 0.155869154 |
| -1.13640681 | 0.03581033 | 0.8735985  | 0.026890093 | 0.945812374 | 0.352375771 |
| -1.00614806 | 0.92766956 | -1.082034  | 0.245898416 | -1.06971101 | 0.320477977 |
| -1.01310067 | 0.79969647 | -1.0798317 | 0.138248489 | 0.927123873 | 0.144060496 |
| -1.12447299 | 0.10161065 | -1.0911245 | 0.221027909 | -1.23059892 | 0.004751947 |
| -1.13366207 | 0.05138742 | -1.2449734 | 0.001002593 | -1.34883627 | 1.54E-05    |
| -1.03369692 | 0.6388625  | 0.92236474 | 0.254885961 | 0.971277504 | 0.679777828 |
| -1.07736702 | 0.44598726 | -1.043319  | 0.663925737 | -1.2616955  | 0.020143856 |
| -1.07106888 | 0.19351844 | 0.90257929 | 0.054507612 | 0.890590614 | 0.030504818 |
| -1.06685588 | 0.22212211 | -0.9999549 | 0.999316753 | -1.00585436 | 0.91170112  |
| 0.964861853 | 0.665594   | 0.99948796 | 0.995058064 | 0.585860778 | 2.78E-08    |
| 0.931206384 | 0.27696342 | 0.96485705 | 0.58371938  | 0.99938857  | 0.992515009 |
| 0.983784051 | 0.8113622  | 0.98224668 | 0.793717623 | 0.916376126 | 0.20564783  |
| -1.113313   | 0.18479583 | 0.86410372 | 0.073108015 | 0.917939272 | 0.288688354 |
| 0.88330373  | 0.04744293 | 0.96061471 | 0.513985315 | 0.794965638 | 0.000432575 |
| -1.13213113 | 0.32018955 | -1.0329643 | 0.794157365 | -1.41614577 | 0.006842712 |
| 0.956959938 | 0.35377665 | -1.0063605 | 0.893267603 | -1.1155134  | 0.023929419 |
| 0.992670013 | 0.87748212 | 0.90697553 | 0.044684641 | 0.828732637 | 0.000225804 |
| 0.97817245  | 0.67760187 | 0.96868663 | 0.549315462 | 0.977863279 | 0.673256448 |
| 0.83401928  | 0.01847788 | 0.94541092 | 0.455599402 | 0.842014719 | 0.025231343 |
| -1.29054346 | 0.00417725 | 0.94323344 | 0.495899184 | -1.02010767 | 0.816214992 |
| -1.32500387 | 0.00081447 | -1.346089  | 0.000438343 | -1.62691771 | 1.05E-07    |
| -1.01786092 | 0.76231339 | -1.0610377 | 0.31355276  | -1.06565641 | 0.279741122 |
| 0.883576518 | 0.09855257 | -1.2762303 | 0.001658639 | -1.23541689 | 0.005840506 |
| -1.1338428  | 0.10940027 | -1.0933641 | 0.25248277  | -1.21482819 | 0.01466987  |
| -1.04632416 | 0.33853279 | -1.1138203 | 0.025439023 | -1.15875645 | 0.002729065 |
| -1.30907902 | 0.0024524  | -1.4130062 | 0.000149903 | -1.45638315 | 4.55E-05    |
| 0.925326898 | 0.33225503 | 0.90135665 | 0.196007116 | -1.00752458 | 0.925056748 |
| 0.91690663  | 0.45460219 | -1.0382253 | 0.745904657 | -1.44635694 | 0.002279986 |
| -1.01527809 | 0.87380876 | 0.92890414 | 0.441038127 | 0.997014744 | 0.975014464 |
| 0.641480677 | 0.00027885 | 0.77695542 | 0.031312805 | 0.892181442 | 0.322024448 |
| -1.01056834 | 0.82064017 | 0.9578596  | 0.354965115 | -1.00869249 | 0.851921516 |
| -1.10959574 | 0.53297762 | -1.0499663 | 0.769730804 | -1.29276809 | 0.12714655  |
| -1.08615986 | 0.09777539 | -1.0471115 | 0.352135152 | -1.24213587 | 4.83E-05    |
| 0.848346883 | 0.007027   | 0.69997453 | 1.29717E-07 | 0.567277048 | 2.43E-13    |
| -1.26810108 | 0.02027422 | -1.1659131 | 0.127953303 | -1.02751949 | 0.785567781 |
| 0.994170284 | 0.85289293 | -1.0167114 | 0.599568165 | 0.964526018 | 0.254828173 |

|             |            |            |             |             |             |
|-------------|------------|------------|-------------|-------------|-------------|
| -1.00678012 | 0.95734082 | 0.93640084 | 0.603393418 | -1.05233111 | 0.686595884 |
| 0.88846529  | 0.00661409 | -1.0101645 | 0.809980034 | -1.00430654 | 0.918601637 |
| -1.08998908 | 0.06730481 | 0.84795321 | 0.000752103 | -1.05159439 | 0.280461135 |
| 0.807252234 | 0.00230741 | 0.82119533 | 0.00477615  | 0.833247964 | 0.00862816  |
| -1.08722836 | 0.53828619 | 0.849508   | 0.232378207 | 0.752855888 | 0.040223211 |
| -1.01453556 | 0.79359075 | 0.97797004 | 0.686421044 | -1.01672221 | 0.763676578 |
| -1.24110292 | 0.03863845 | -1.1185637 | 0.276346306 | -1.28431891 | 0.017316328 |
| 0.986168821 | 0.7972936  | 0.95382204 | 0.384809212 | 0.842917264 | 0.002540081 |
| 0.880269959 | 0.17916213 | 0.91830065 | 0.36705409  | 0.996207851 | 0.967803771 |
| -1.02929048 | 0.64879702 | -1.0334089 | 0.604262368 | 0.609881106 | 1.83E-10    |
| -1.01919452 | 0.66675682 | 0.85999903 | 0.001151259 | 0.649145263 | 1.29E-13    |
| 0.953692638 | 0.48791429 | -1.0114641 | 0.867281095 | 0.868792532 | 0.043096069 |
| 0.893128238 | 0.11422056 | 0.90285389 | 0.15238185  | 0.807864112 | 0.003746859 |
| -1.0631332  | 0.22918367 | 0.81142065 | 0.000118787 | 0.945335695 | 0.269019991 |
| 0.958812419 | 0.71014422 | -1.1230853 | 0.307074336 | -1.41703307 | 0.003111703 |
| -1.07844101 | 0.2301206  | -1.257294  | 0.000541412 | -1.1021842  | 0.123720787 |
| -1.09879304 | 0.45445893 | 0.98786348 | 0.922568475 | 0.968725045 | 0.800374224 |
| -1.07760093 | 0.20320887 | 0.94199284 | 0.307633    | -1.0088245  | 0.880201303 |
| 0.898199892 | 0.32194342 | -1.096914  | 0.392897737 | -1.01813463 | 0.86772649  |
| 0.942589221 | 0.48162479 | -1.03033   | 0.721666831 | 0.66303239  | 8.45E-06    |
| 0.923884374 | 0.21538516 | 0.84333709 | 0.009298973 | 0.774791748 | 0.000171078 |
| 0.970182319 | 0.62580114 | -1.0081195 | 0.896246162 | -1.17434758 | 0.011895539 |
| 0.974173493 | 0.60846538 | -1.0588446 | 0.265164914 | 0.98698665  | 0.797426176 |
| 0.820051079 | 0.00097335 | 0.88624884 | 0.038256251 | 0.620899174 | 2.50E-11    |
| -1.01420013 | 0.86328107 | 0.84938968 | 0.050228011 | -1.23683791 | 0.011761089 |
| -1.00329095 | 0.9409884  | -1.0258214 | 0.566284109 | 0.831450476 | 0.000108774 |
| 0.982151636 | 0.78357752 | 0.99000887 | 0.87825935  | -1.06378025 | 0.347543124 |
| -1.08636147 | 0.29135274 | 0.96756476 | 0.673120108 | 0.906912931 | 0.214192663 |
| 0.960054997 | 0.46327312 | -1.0943977 | 0.107961775 | 0.962730525 | 0.494214047 |
| -1.04523936 | 0.60640255 | 0.85075411 | 0.063723589 | 0.943837593 | 0.501286567 |
| 0.942858035 | 0.63261831 | 0.58562198 | 5.68962E-05 | 0.53684218  | 4.84E-06    |
| 0.891531696 | 0.24521126 | 0.90635524 | 0.318845964 | 0.729397615 | 0.002122224 |
| -1.14003232 | 0.00156173 | -1.0630939 | 0.125582476 | -1.23737284 | 1.46E-06    |
| 0.797127299 | 0.02534713 | 0.98756762 | 0.899479213 | 0.953834488 | 0.633524279 |
| 0.969655382 | 0.73050168 | -1.1087091 | 0.251343935 | -1.17968693 | 0.068821458 |
| -1.0613454  | 0.34634124 | -1.0613327 | 0.346437436 | -1.05589552 | 0.389308518 |
| 0.855361323 | 0.12373887 | -1.0928561 | 0.378075733 | 0.826994427 | 0.062624648 |
| 0.912870549 | 0.24154364 | 0.83899948 | 0.026582395 | 0.921171937 | 0.290916059 |
| 0.878707055 | 0.12089003 | -1.1610176 | 0.074377157 | 0.845705396 | 0.046013186 |
| -1.01832175 | 0.72928695 | -1.028021  | 0.598624815 | -1.01581886 | 0.764780415 |
| -1.15998517 | 0.00869638 | -1.1486327 | 0.013905416 | 0.876535237 | 0.019013748 |
| 0.923690466 | 0.24497072 | -1.015631  | 0.819202855 | -1.09275896 | 0.194547955 |
| -1.07465244 | 0.57695008 | 0.91807668 | 0.508052964 | 0.890794269 | 0.37134644  |
| -1.02055968 | 0.78468005 | -1.0693131 | 0.369905432 | 0.930022894 | 0.332042542 |

|             |            |            |             |             |             |
|-------------|------------|------------|-------------|-------------|-------------|
| -1.02396228 | 0.55362033 | 0.91772341 | 0.035150523 | 0.958264311 | 0.287997347 |
| 0.98963647  | 0.82618357 | 0.91494188 | 0.06512144  | 0.884571129 | 0.01207576  |
| -1.05899738 | 0.324984   | 0.91077732 | 0.111118828 | 0.890614869 | 0.0497428   |
| 0.761186384 | 5.36E-05   | 0.95720953 | 0.484773452 | 0.923836735 | 0.208018099 |
| 0.97155139  | 0.63453573 | 0.78965892 | 0.000259758 | 0.808227194 | 0.000870391 |
| -1.03613308 | 0.387887   | 0.93096786 | 0.085090553 | 0.954730579 | 0.260942029 |
| -1.06939445 | 0.36315343 | 0.91948747 | 0.256277098 | 0.894791583 | 0.134469187 |
| -1.18329956 | 0.01126397 | 0.94893582 | 0.417268579 | -1.05706231 | 0.390611403 |
| -1.24473705 | 0.00639684 | -1.2249973 | 0.011098201 | -1.28690079 | 0.001882972 |
| 0.897833665 | 0.15202734 | 0.85504948 | 0.039413633 | 0.889774364 | 0.121216404 |
| -1.12631438 | 0.29239377 | -1.1975322 | 0.112956736 | -1.06647408 | 0.567484259 |
| -1.16736254 | 0.08583202 | -1.1143965 | 0.225962013 | -1.11669148 | 0.217388424 |
| -1.20578311 | 0.03498618 | -1.0995582 | 0.277443758 | -1.10455863 | 0.255375124 |
| 0.860725762 | 0.03849702 | 0.92002379 | 0.243516559 | 0.895535901 | 0.124438837 |
| 0.805999231 | 0.03278745 | 0.9230665  | 0.419583471 | -1.00070104 | 0.994345089 |
| -1.19972825 | 0.0499598  | 0.99287693 | 0.937538388 | -1.04909333 | 0.599781269 |
| 0.971227476 | 0.72600227 | -1.0469867 | 0.581835359 | 0.874050231 | 0.110148983 |
| 0.986423464 | 0.77974854 | -1.0104995 | 0.830774934 | 0.82569105  | 0.0002387   |
| -1.00344071 | 0.93463348 | -1.2827181 | 1.92286E-07 | -1.19867587 | 6.19E-05    |
| 0.964993315 | 0.69672634 | 0.86907498 | 0.128694196 | 0.818606159 | 0.032065175 |
| -1.03614803 | 0.6376167  | 0.94535586 | 0.456732586 | -1.04373072 | 0.570383499 |
| -1.12067782 | 0.02543766 | 0.96311875 | 0.45163807  | 0.98892722  | 0.823096871 |
| 0.996568685 | 0.95921421 | -1.0339757 | 0.619519891 | 0.964769226 | 0.594086998 |
| 0.969865491 | 0.81871567 | 0.92062094 | 0.536202532 | -1.1021439  | 0.467293566 |
| 0.944388479 | 0.39079968 | -1.0204473 | 0.760745985 | 0.732325553 | 1.79E-05    |
| 0.954650814 | 0.61075927 | -1.0075622 | 0.934071775 | 0.740983403 | 0.0016865   |
| -1.04708869 | 0.57836364 | 0.92222804 | 0.329579295 | -1.03359927 | 0.689568369 |
| -1.17781349 | 0.08540494 | -1.0928457 | 0.346011448 | 0.929921536 | 0.439988803 |
| -1.03068972 | 0.72772382 | -1.2898769 | 0.004739153 | -1.34477796 | 0.001169223 |
| -1.13645849 | 0.03960559 | -1.0807399 | 0.205938958 | -1.25839243 | 0.000383571 |
| -1.20837121 | 0.04196361 | -1.1376169 | 0.16154817  | -1.40762161 | 0.000416193 |
| 0.789861718 | 0.00036635 | 0.79057977 | 0.000383791 | 0.684581304 | 1.16E-07    |
| 0.971750128 | 0.6323582  | 0.95732398 | 0.467175065 | -1.01017235 | 0.865698749 |
| 0.929931316 | 0.47030294 | 0.73069099 | 0.00274189  | 0.705687386 | 0.000976535 |
| 0.924567696 | 0.08085893 | 0.82040418 | 3.80436E-05 | 0.755374354 | 4.53E-08    |
| 0.661796528 | 5.66E-07   | -1.1030617 | 0.182894311 | -1.34635023 | 0.000145085 |
| -1.0635725  | 0.19145997 | 0.93871205 | 0.180279496 | 0.949567439 | 0.271614999 |
| -1.03490358 | 0.48681283 | -1.0247205 | 0.620235382 | 0.864732192 | 0.004493415 |
| 0.873010802 | 0.21892432 | 0.87122745 | 0.212163556 | 0.734098201 | 0.006511988 |
| -1.02220511 | 0.80715129 | 0.86227707 | 0.103740964 | -1.06994505 | 0.453458779 |
| -1.05689351 | 0.53625884 | -1.0221033 | 0.806662749 | -1.02242058 | 0.803975015 |
| 0.987860407 | 0.80794303 | 0.90408511 | 0.0487461   | -1.073232   | 0.163277505 |
| -1.00412882 | 0.94624097 | -1.0515382 | 0.412319568 | -1.06362601 | 0.315050559 |
| -1.16184345 | 0.0287603  | -1.0617577 | 0.373336096 | -1.12213807 | 0.090043518 |

|             |            |            |             |             |             |
|-------------|------------|------------|-------------|-------------|-------------|
| 0.894101457 | 0.2063502  | 0.77987209 | 0.006341144 | 0.734510429 | 0.000872762 |
| 0.994500213 | 0.92722947 | 0.95383832 | 0.435117558 | 0.599944949 | 1.63E-11    |
| -1.00569611 | 0.93176927 | 0.8941561  | 0.096001918 | 0.928697125 | 0.267574963 |
| -1.12828546 | 0.05063623 | 0.91985471 | 0.172127697 | -1.01356928 | 0.82417284  |
| 0.789346105 | 0.00965082 | 0.92940001 | 0.409773793 | 0.993555681 | 0.941791601 |
| 0.95668023  | 0.37348597 | -1.0340103 | 0.500838861 | 0.463885125 | 1.53E-21    |
| -1.0044921  | 0.96252057 | -1.1521211 | 0.141670351 | -1.17711605 | 0.09163045  |
| 0.98556357  | 0.8554126  | 0.81783989 | 0.01430558  | 0.917079685 | 0.280627485 |
| 0.946691128 | 0.56466803 | 0.82868149 | 0.051936743 | 0.719956162 | 0.001017251 |
| -1.25803448 | 0.00333899 | -1.1249944 | 0.120892091 | -1.16914607 | 0.041262254 |
| 0.97235586  | 0.72518371 | 0.47194706 | 4.91782E-13 | 0.322897573 | 7.04E-20    |
| -1.41685939 | 0.00031309 | -1.1950232 | 0.053960044 | -1.19091579 | 0.058604349 |
| 0.969846762 | 0.72618157 | -1.1278923 | 0.172139672 | 0.996185201 | 0.965109142 |
| 0.664878769 | 3.54E-05   | 0.66946619 | 4.58398E-05 | 0.456171559 | 8.54E-12    |
| 0.853532946 | 0.11031541 | 0.87920613 | 0.192501485 | 0.899884347 | 0.28431898  |
| 0.836151489 | 0.00543745 | 0.92247119 | 0.196910295 | 0.755577546 | 3.24E-05    |
| 0.933016382 | 0.44473229 | 0.96307671 | 0.677776913 | 0.710110321 | 0.000369644 |
| -1.0469408  | 0.54824653 | 0.92425082 | 0.304130609 | 0.813614263 | 0.008851723 |
| 0.881929557 | 0.0597925  | 0.93020154 | 0.273057703 | 0.940211134 | 0.349608181 |
| -1.00726079 | 0.82400658 | -1.0158317 | 0.62948774  | 0.877718844 | 0.00017767  |
| 0.70612529  | 0.00776918 | 0.75157802 | 0.027248347 | -1.04152961 | 0.747618992 |
| 0.958039421 | 0.54081636 | 0.98249961 | 0.800841455 | -1.07094868 | 0.329419182 |
| 0.792007789 | 0.00091503 | 0.75496894 | 9.11932E-05 | 0.697798057 | 1.46E-06    |
| -1.01625628 | 0.77915828 | 0.9881167  | 0.835293429 | 0.408462943 | 1.21E-21    |
| 0.895352886 | 0.067885   | 0.88184023 | 0.038670909 | 0.849233138 | 0.008001068 |
| -1.1592307  | 0.026871   | -1.0237168 | 0.719484454 | -1.0124176  | 0.849956312 |
| -1.0039997  | 0.94892007 | 0.87365347 | 0.033828266 | 0.803072218 | 0.000845804 |
| 0.941630832 | 0.52410455 | -1.0184753 | 0.845985957 | -1.24862746 | 0.021549824 |
| 0.933820955 | 0.52186161 | 0.95467075 | 0.664015455 | -1.27983195 | 0.023991672 |
| 0.935418799 | 0.37257694 | -1.0670219 | 0.386160443 | -1.18324123 | 0.02749763  |
| 0.94215007  | 0.33904448 | 0.91586107 | 0.160589705 | -1.1283416  | 0.055839391 |
| 0.965127129 | 0.54285433 | 0.89073011 | 0.050973048 | 0.922816537 | 0.171524672 |
| 0.947073798 | 0.26592467 | 0.93550978 | 0.173859608 | -1.0326169  | 0.509812881 |
| 0.844844736 | 0.45834542 | 0.78675725 | 0.292744668 | 0.883564222 | 0.585666627 |
| 0.953813468 | 0.56031065 | 0.92741022 | 0.354522951 | -1.10704485 | 0.213014469 |
| 0.790173286 | 0.00059274 | 0.87193472 | 0.038234695 | 0.608459517 | 3.10E-10    |
| -1.04238909 | 0.54159076 | 0.87683614 | 0.057030778 | -1.03693884 | 0.593652619 |
| -1.05754633 | 0.51799374 | -1.1107649 | 0.227140375 | -1.13209047 | 0.154852974 |
| 0.843258897 | 0.1132046  | 0.80478251 | 0.045123142 | 0.866138559 | 0.180330638 |
| 0.936579004 | 0.24756095 | -1.0386779 | 0.501266214 | 0.995191146 | 0.931781696 |
| -1.02468199 | 0.72629463 | 0.90994375 | 0.178882229 | 0.840990005 | 0.015535744 |
| 0.846897108 | 0.10118599 | 0.87984256 | 0.204394312 | -1.03150302 | 0.756783014 |
| -1.16970013 | 0.00773204 | -1.020604  | 0.72018142  | -1.18620344 | 0.003919557 |
| 0.896771164 | 0.12833053 | 0.83024429 | 0.010910494 | 0.713567422 | 1.38E-05    |



|             |            |            |             |             |             |
|-------------|------------|------------|-------------|-------------|-------------|
| -1.18762846 | 0.01123483 | 0.93516581 | 0.310594041 | 0.953135109 | 0.466751147 |
| 0.975955682 | 0.72438381 | -1.1717084 | 0.024892926 | -1.19987027 | 0.010451724 |
| 0.930745748 | 0.29013976 | -1.165008  | 0.027022124 | -1.22206375 | 0.004261043 |
| -1.06823227 | 0.19589104 | -1.003142  | 0.95059808  | 0.92257011  | 0.115674544 |
| 0.91829331  | 0.32013945 | 0.80693604 | 0.014547763 | 0.918624899 | 0.322174536 |
| 0.951537331 | 0.47277695 | -1.0382833 | 0.58675889  | -1.14866493 | 0.048667245 |
| 0.922867336 | 0.09153616 | 0.98819283 | 0.80028722  | -1.00870228 | 0.853564322 |
| 0.988605475 | 0.79241511 | 0.98476572 | 0.72449775  | 0.917016042 | 0.050641839 |
| 0.98965391  | 0.86187881 | 0.9766574  | 0.692917531 | 0.76676073  | 4.17E-05    |
| 0.841804582 | 0.0096947  | 0.97158362 | 0.655206304 | -1.04411604 | 0.504176706 |
| -1.09593587 | 0.16388711 | -1.0582309 | 0.387076152 | 0.938753257 | 0.334534386 |
| 0.834607546 | 0.0327831  | 0.93295133 | 0.403949539 | 0.761762248 | 0.0017305   |
| 0.977187382 | 0.75452516 | 0.88820752 | 0.112280661 | 0.906611438 | 0.187442408 |
| -1.01247066 | 0.73379653 | 0.98920747 | 0.765859453 | -1.06738716 | 0.077676287 |
| -1.11584667 | 0.2078119  | 0.93708456 | 0.45305129  | -1.08512824 | 0.346232622 |
| -1.03437691 | 0.67985648 | -1.1795103 | 0.04767073  | -1.09514538 | 0.269512044 |
| -1.02409655 | 0.6578925  | -1.1681669 | 0.005296712 | -1.12382389 | 0.03341782  |
| -1.12477325 | 0.02483026 | 0.9759873  | 0.635100381 | 0.957874075 | 0.401786922 |
| 0.979961499 | 0.78264512 | 0.90269297 | 0.16660598  | 0.904707705 | 0.175868015 |
| 0.971895172 | 0.69577344 | -1.1350484 | 0.086367288 | -1.33866799 | 0.000181577 |
| -1.01543799 | 0.78811441 | 0.48842925 | 1.0457E-17  | 0.84400139  | 0.004202448 |
| 0.969782939 | 0.57287118 | -1.1160806 | 0.047270077 | -1.18946742 | 0.002256127 |
| -1.04311054 | 0.44399689 | -1.1006405 | 0.085483927 | 0.961495886 | 0.476238302 |
| -1.18071126 | 0.00191309 | -1.158888  | 0.005431687 | -1.14865321 | 0.008699467 |
| -1.043818   | 0.31251511 | -1.0032128 | 0.939495828 | -1.01371972 | 0.747230304 |
| -1.07940122 | 0.19209522 | -1.1680213 | 0.009622727 | -1.05485013 | 0.360013707 |
| 0.955389739 | 0.76630831 | 0.78657629 | 0.121970395 | 0.899420223 | 0.490753184 |
| 0.897871762 | 0.09719456 | -1.035402  | 0.587901714 | 0.956318075 | 0.487010833 |
| -1.07872112 | 0.38640947 | -1.2181826 | 0.026963767 | -1.19708571 | 0.042980261 |
| -1.14765631 | 0.14771233 | -1.1471717 | 0.148934238 | -1.08274901 | 0.400243946 |
| 0.987012081 | 0.83678077 | 0.92626474 | 0.230475795 | 0.967007617 | 0.597430776 |
| -1.14906804 | 0.06732614 | -1.0371481 | 0.626012552 | -1.21281573 | 0.012239292 |
| 0.928489146 | 0.26661359 | -1.0965089 | 0.169084693 | 0.989334407 | 0.871729818 |
| 0.847461505 | 0.08990836 | 0.96640206 | 0.722778232 | 0.754964743 | 0.00492735  |
| -1.01011579 | 0.89301454 | 0.89727279 | 0.151415041 | 0.711552303 | 2.91E-05    |
| -1.20021713 | 0.03150975 | -1.2033962 | 0.029227586 | -1.37387131 | 0.000323279 |
| -1.12145611 | 0.03877385 | 0.9576251  | 0.427089472 | -1.00309004 | 0.954738822 |
| -1.01314171 | 0.82793619 | 0.92299277 | 0.185718736 | 0.916522159 | 0.150606788 |
| -1.03507696 | 0.50462018 | -1.0245622 | 0.638267332 | -1.00612754 | 0.905695849 |
| -1.02996438 | 0.60951203 | -1.0380139 | 0.51894047  | -1.03177179 | 0.588493064 |
| 0.771109114 | 0.0036371  | 0.90360024 | 0.240775852 | 0.876045318 | 0.127362447 |
| -1.07094096 | 0.28164231 | -1.0584308 | 0.371549751 | 0.928511203 | 0.244390567 |
| 0.974775939 | 0.72557282 | -1.2281919 | 0.006379212 | -1.28123189 | 0.001193436 |
| -1.06477586 | 0.33815912 | -1.0239712 | 0.716729009 | -1.16058303 | 0.025788718 |

|             |            |            |             |             |             |
|-------------|------------|------------|-------------|-------------|-------------|
| 0.973690292 | 0.73388569 | -1.1738898 | 0.044772094 | -1.06825857 | 0.401131953 |
| 0.878479303 | 0.11949569 | 0.85393364 | 0.059130444 | 0.659325535 | 4.78E-06    |
| 0.94037364  | 0.37686871 | -1.0566754 | 0.427797151 | -1.10208817 | 0.164625376 |
| 0.964016283 | 0.59941896 | -1.1048288 | 0.15643335  | 0.917253267 | 0.21843472  |
| -1.10497412 | 0.22362612 | -1.1191427 | 0.1707767   | -1.02822167 | 0.732745737 |
| -1.13653558 | 0.07083152 | -1.0408256 | 0.566845719 | 0.969373365 | 0.655982095 |
| -1.02535779 | 0.65330399 | -1.034896  | 0.538717075 | -1.01083453 | 0.846610112 |
| -1.00794446 | 0.9093161  | -1.0727004 | 0.314688711 | 0.649837492 | 7.35E-08    |
| -1.01446157 | 0.8500871  | 0.99478412 | 0.945108232 | -1.0420263  | 0.588324166 |
| -1.12492492 | 0.07708793 | 0.96552339 | 0.593333386 | 0.755884829 | 7.62E-05    |
| 0.859370815 | 0.0015167  | -1.0134353 | 0.769609423 | 0.834841436 | 0.000207336 |
| -1.30452517 | 0.01648865 | -1.0677879 | 0.543906381 | -1.19673212 | 0.100249323 |
| 0.783923542 | 3.16E-05   | 0.9896769  | 0.847108467 | 0.814708432 | 0.000341768 |
| 0.938312988 | 0.33764032 | 0.8677717  | 0.035664397 | 0.89166484  | 0.087181126 |
| 0.898001829 | 0.12723781 | -1.2019015 | 0.010608233 | -1.14660899 | 0.05401934  |
| -1.15201635 | 0.03225226 | 0.97839759 | 0.735727245 | -1.05749592 | 0.389003652 |
| 0.854212078 | 0.00496351 | 0.97470016 | 0.635613495 | -1.04575258 | 0.409112981 |
| -1.15327846 | 0.0084013  | 0.93068013 | 0.173751986 | 0.932984799 | 0.188785384 |
| -1.02373385 | 0.68989708 | -1.1533981 | 0.017992451 | -1.01602193 | 0.78679029  |
| 0.967457925 | 0.59504712 | -1.0267183 | 0.671680868 | 0.523993206 | 1.55E-14    |
| 0.844467735 | 0.00661561 | 0.77685792 | 9.46439E-05 | 0.816503533 | 0.001323826 |
| -1.05018852 | 0.63587319 | -1.0282118 | 0.787784897 | -1.19241638 | 0.092807318 |
| 0.948517018 | 0.24145075 | 0.97093539 | 0.511457072 | 0.813420907 | 2.38E-05    |
| -1.07415743 | 0.22740247 | 0.99122022 | 0.88091559  | -1.06947592 | 0.256673946 |
| 0.917807053 | 0.20838282 | -1.0144395 | 0.83225615  | -1.20825469 | 0.006926056 |
| -1.08314856 | 0.25947874 | -1.0992405 | 0.182647067 | 0.815945109 | 0.005362724 |
| 0.84763414  | 0.00415905 | 0.82662456 | 0.001104712 | 0.840522977 | 0.002695817 |
| -1.09293849 | 0.1176162  | -1.0560705 | 0.333288439 | -1.02640503 | 0.642806651 |
| -1.04782911 | 0.45196407 | -1.1249628 | 0.061543866 | 0.953090333 | 0.439309845 |
| -1.05566881 | 0.2735373  | 0.87828514 | 0.010546401 | 0.953544924 | 0.335711265 |
| 0.861043327 | 0.10613133 | 0.74616264 | 0.002200523 | 0.839734275 | 0.060341494 |
| 0.887122958 | 0.02157719 | 0.93906012 | 0.219442541 | 0.946719693 | 0.284091717 |
| -1.07540997 | 0.26727552 | -1.1764861 | 0.015271976 | 0.994269984 | 0.929724234 |
| 0.813348146 | 0.00275984 | 0.79390045 | 0.000927652 | 0.759279587 | 0.000107023 |
| -1.00252314 | 0.96119849 | 0.96673223 | 0.514472603 | -1.06740672 | 0.211250117 |
| -1.00971827 | 0.8515139  | -1.0950296 | 0.083161842 | 0.979819045 | 0.69330748  |
| 0.793286663 | 0.00060339 | 0.80464124 | 0.0011973   | 0.763375722 | 8.56E-05    |
| 0.851996756 | 0.04452287 | 0.93116688 | 0.363737444 | 0.996737933 | 0.966678925 |
| 0.876263781 | 0.02180652 | 0.88757083 | 0.03749651  | 0.534334332 | 1.13E-15    |
| 0.973560928 | 0.63274502 | 0.99248106 | 0.892821842 | 0.967923117 | 0.561142822 |
| 0.82799886  | 0.02254171 | -1.105446  | 0.217593405 | 0.972675111 | 0.731597605 |
| -1.12224011 | 0.1960598  | -1.1083576 | 0.248027387 | -1.3819491  | 0.000555293 |
| -1.08963261 | 0.33379657 | -1.0132661 | 0.881536936 | 0.977190227 | 0.794204846 |
| -1.20444001 | 5.62E-05   | -1.208855  | 4.1975E-05  | -1.10869844 | 0.018591882 |

|             |            |            |             |             |             |
|-------------|------------|------------|-------------|-------------|-------------|
| 0.966348736 | 0.38284595 | 0.97933402 | 0.593639395 | -1.05547771 | 0.170909213 |
| -1.26623068 | 0.00742398 | -1.0638731 | 0.468591685 | -1.26647825 | 0.007378145 |
| -1.27434465 | 0.00028694 | -1.1160102 | 0.084616545 | 0.979110587 | 0.736726572 |
| -1.11264101 | 0.26506066 | -1.0708819 | 0.473048819 | -1.14773962 | 0.151771835 |
| -1.07224931 | 0.20392299 | -1.0218447 | 0.691908961 | -1.01514324 | 0.782768297 |
| -1.0159577  | 0.80092615 | 0.89108438 | 0.070450531 | -1.03691127 | 0.564236869 |
| 0.92939332  | 0.23860597 | 0.86995972 | 0.027424272 | -1.00643638 | 0.917225514 |
| 0.840072995 | 0.00472949 | 0.87205531 | 0.024420642 | 0.909438069 | 0.114191122 |
| -1.22009799 | 0.00647577 | 0.9968395  | 0.964205255 | 0.854997191 | 0.02986171  |
| 0.984605673 | 0.84623749 | -1.0875282 | 0.296650862 | -1.22347618 | 0.014253833 |
| -1.00207455 | 0.96669876 | -1.0356689 | 0.481181766 | -1.04302392 | 0.397687255 |
| -1.10676772 | 0.05692211 | -1.0269752 | 0.611749005 | -1.05284264 | 0.327723053 |
| 0.989288869 | 0.82301749 | -1.0004508 | 0.992529863 | 0.741588737 | 7.19E-08    |
| 0.794186961 | 0.00012903 | 0.89282659 | 0.047313076 | 0.892039749 | 0.045678628 |
| 0.92780473  | 0.31921105 | -1.1687839 | 0.041129102 | -1.13167236 | 0.102815085 |
| -1.05483739 | 0.39834917 | 0.96644123 | 0.588452669 | -1.07791331 | 0.23677319  |
| -1.01082281 | 0.86547988 | 0.9141821  | 0.161744588 | 0.987562715 | 0.843872434 |
| 0.975176572 | 0.58304838 | -1.013399  | 0.771081238 | -1.06039416 | 0.203135008 |
| -1.06391007 | 0.28578681 | -1.0287686 | 0.62359925  | 0.879893843 | 0.030177243 |
| 0.700446328 | 1.12E-10   | 0.91690753 | 0.057155787 | 0.82433822  | 6.59E-05    |
| 0.989081009 | 0.81428069 | -1.0101045 | 0.829673753 | 0.949838784 | 0.273434291 |
| -1.1644899  | 0.10355103 | -1.1967903 | 0.055973979 | -1.56040527 | 1.14E-05    |
| 0.999414555 | 0.99069378 | -1.0572405 | 0.270322927 | -1.08011348 | 0.128924054 |
| 0.899123598 | 0.10749281 | -1.0581624 | 0.388012058 | -1.08407285 | 0.219377754 |
| 0.919363529 | 0.13458444 | -1.0842952 | 0.149466505 | -1.07744636 | 0.183355434 |
| 0.91728192  | 0.20851482 | -1.1110321 | 0.126457093 | -1.06967413 | 0.32514425  |
| -1.04152253 | 0.37064925 | -1.0552849 | 0.237673225 | -1.09819895 | 0.0424401   |
| -1.01139718 | 0.80421454 | 0.94677679 | 0.234532325 | -1.04622417 | 0.324995969 |
| 0.956817816 | 0.60416439 | 0.87392582 | 0.117246649 | 0.794182165 | 0.00872226  |
| 0.994074936 | 0.91131516 | 0.98068791 | 0.714897486 | 0.914633994 | 0.098711753 |
| -1.09599075 | 0.44209502 | -1.072669  | 0.555887774 | -1.21000816 | 0.113146445 |
| 0.967211838 | 0.56530413 | 0.93242026 | 0.229939316 | -1.1270841  | 0.042681786 |
| 0.792696636 | 0.08422888 | 0.75281352 | 0.036062128 | 0.47423703  | 6.29E-07    |
| -1.0115179  | 0.83323371 | 0.98088604 | 0.722820081 | -1.04007859 | 0.470981974 |
| -1.09297745 | 0.07291725 | -1.0161411 | 0.743089557 | 0.993264868 | 0.889932788 |
| -1.13270782 | 0.12134607 | -1.1382251 | 0.107805252 | -1.10697211 | 0.204738236 |
| -1.01854207 | 0.74004591 | -1.1002181 | 0.088701483 | -1.17706384 | 0.00458037  |
| -1.04525514 | 0.43682668 | -1.0624525 | 0.288402473 | 0.946492848 | 0.334746062 |
| 0.964660753 | 0.68939934 | -1.024201  | 0.79043414  | -1.01766595 | 0.845674572 |
| -1.03493215 | 0.63182675 | 0.78558562 | 0.001329147 | 0.84119334  | 0.018605767 |
| 0.462514884 | 1.85E-06   | 0.58268845 | 0.000437105 | -1.1024899  | 0.501203109 |
| 0.922765025 | 0.21118633 | 0.99407543 | 0.925816945 | -1.01618103 | 0.801467119 |
| 0.607378174 | 2.33E-05   | 0.86749533 | 0.192089392 | 0.818599765 | 0.06833852  |
| 0.719256555 | 0.00041274 | 0.81955365 | 0.026956458 | 0.893102931 | 0.201819932 |

|             |            |            |             |             |             |
|-------------|------------|------------|-------------|-------------|-------------|
| 0.995829342 | 0.96029235 | 0.91891421 | 0.31605026  | -1.02543429 | 0.764883633 |
| 0.922983565 | 0.17554449 | 0.96984484 | 0.602119148 | 0.988537947 | 0.844212799 |
| -1.02744362 | 0.58566416 | 0.95503963 | 0.355571513 | 0.962126102 | 0.437577772 |
| -1.14207025 | 0.18110333 | -1.0803695 | 0.433885238 | -1.04016564 | 0.689522068 |
| 0.977846668 | 0.70462388 | 0.98651583 | 0.81822762  | 0.918898116 | 0.155990823 |
| -1.02018133 | 0.67352458 | 0.89113647 | 0.017855475 | -1.04753133 | 0.329254833 |
| 0.967810972 | 0.60057215 | 0.86897865 | 0.027855535 | 0.914862315 | 0.157824044 |
| -1.06513269 | 0.25062416 | -1.0667114 | 0.239811581 | 0.55499837  | 4.01E-15    |
| -1.18704139 | 0.02315548 | 0.90608914 | 0.184406978 | 0.953842398 | 0.522106618 |
| 0.884341975 | 0.20694814 | 0.56890424 | 2.89084E-07 | -1.07493111 | 0.455949418 |
| -1.04260163 | 0.5433768  | 0.78707484 | 0.000916035 | 0.775262962 | 0.000460697 |
| -1.11205154 | 0.30475887 | 0.99644567 | 0.972416499 | 0.931430539 | 0.491277234 |
| 0.925816478 | 0.42144338 | 0.97158381 | 0.763068833 | -2.02375702 | 9.25E-10    |
| -1.02087014 | 0.70122542 | 0.93770514 | 0.234977225 | 0.793566133 | 6.83E-05    |
| 0.860735629 | 0.03338796 | 0.99320544 | 0.921295418 | 0.899173769 | 0.127635201 |
| 0.895493932 | 0.36829817 | 0.77804799 | 0.043974038 | 0.494432868 | 3.77E-07    |
| 0.858668483 | 0.01799505 | 0.54465041 | 1.89795E-13 | 0.823898699 | 0.003056849 |
| -1.00229518 | 0.96094202 | 0.979345   | 0.656013373 | 0.997743588 | 0.961513849 |
| 0.988374316 | 0.83993341 | 0.70893145 | 1.94179E-07 | 0.841667802 | 0.004185154 |
| -1.13565666 | 0.00382571 | -1.0367284 | 0.395068748 | 0.962142912 | 0.36309262  |
| 0.99791247  | 0.96767314 | -1.0255704 | 0.624757118 | 0.794197802 | 3.82E-05    |
| 0.83071406  | 0.00268113 | 0.91992265 | 0.162304739 | 0.989858406 | 0.863274011 |
| 0.97492529  | 0.75101722 | 0.76652496 | 0.001532924 | 0.7861601   | 0.003847508 |
| -1.07809882 | 0.12511711 | 0.99467809 | 0.912382134 | -1.07808393 | 0.125184929 |
| 0.992419128 | 0.89706494 | -1.0083679 | 0.887345267 | 0.801720464 | 0.000402151 |
| 0.945989306 | 0.43095406 | 0.92175063 | 0.249366092 | 0.840076613 | 0.015883456 |
| -1.02151783 | 0.80849431 | 0.96765406 | 0.708268248 | 0.976290905 | 0.784742268 |
| 0.907671247 | 0.03689476 | 0.98722185 | 0.7773983   | 0.936348229 | 0.152030258 |
| -1.04872796 | 0.47770738 | 0.94153561 | 0.369335999 | 0.986977333 | 0.844579383 |
| 0.606465805 | 0.00040697 | 0.68439289 | 0.006030892 | 0.498504817 | 2.67E-06    |
| 0.926452438 | 0.51874538 | 0.89177554 | 0.334458718 | 0.882750761 | 0.293701727 |
| -1.00560243 | 0.92782675 | -1.2543224 | 0.000523447 | -1.03441567 | 0.583796824 |
| -1.1172139  | 0.25902082 | 0.87643557 | 0.180306518 | 0.947048732 | 0.577837285 |
| -1.13305382 | 0.05203551 | 0.9086777  | 0.133552182 | -1.05550127 | 0.394040215 |
| -1.06492632 | 0.24380079 | -1.0631614 | 0.256299553 | 0.948191111 | 0.323408355 |
| -1.06427407 | 0.21663255 | -1.0065106 | 0.896857207 | 0.993107709 | 0.890119065 |
| 0.951027075 | 0.34817029 | 0.98309846 | 0.749237781 | 0.994755313 | 0.921416647 |
| -1.0224227  | 0.67790338 | 0.76900342 | 7.8404E-06  | 0.994441273 | 0.916787112 |
| -1.16310497 | 0.00919699 | -1.0386172 | 0.500873706 | 0.993408075 | 0.906277257 |
| -1.14660099 | 0.23817296 | -1.206302  | 0.107809946 | -1.27014245 | 0.041832499 |
| -1.01386854 | 0.88628706 | -1.3637736 | 0.002075151 | -1.36309033 | 0.002107117 |
| 0.882412725 | 0.04647618 | -1.096585  | 0.1389042   | -1.03463269 | 0.581393904 |
| -1.06657689 | 0.38632667 | 0.97346616 | 0.716979565 | 0.999605177 | 0.995750151 |
| 0.956724879 | 0.42343617 | 0.99988855 | 0.998386104 | 0.961111354 | 0.472679267 |

|             |            |            |             |             |             |
|-------------|------------|------------|-------------|-------------|-------------|
| -1.0209534  | 0.74410543 | -1.0155384 | 0.808187833 | -1.05306425 | 0.416923563 |
| 0.952830839 | 0.51758361 | 0.94219769 | 0.425709759 | -1.09085214 | 0.246255101 |
| -1.15944568 | 0.01661909 | 0.98418451 | 0.790927401 | 0.934584766 | 0.263225276 |
| -1.42883273 | 0.00029976 | 0.91952462 | 0.367313828 | -1.0538167  | 0.57236975  |
| 0.936065693 | 0.41366449 | 0.67219782 | 7.66256E-06 | 0.989148015 | 0.892283159 |
| 0.956973017 | 0.60570891 | -1.0647402 | 0.462130832 | -1.29538653 | 0.003494272 |
| -1.25480266 | 0.00083651 | -1.0836884 | 0.2154922   | -1.56062001 | 5.30E-09    |
| -1.201049   | 0.01434894 | 0.96224531 | 0.597154441 | -1.01790874 | 0.807228665 |
| 0.892292051 | 0.24947033 | 0.9290229  | 0.455255265 | 0.98615347  | 0.887259866 |
| -1.0130265  | 0.72513018 | 0.94148281 | 0.105450274 | 0.992729788 | 0.842800465 |
| -1.06410326 | 0.38937426 | 0.98564579 | 0.840731291 | -1.08281771 | 0.271399145 |
| -1.03234511 | 0.7649113  | -1.2741479 | 0.026134532 | -1.41852681 | 0.001717236 |
| -1.04001265 | 0.75167322 | -1.0433901 | 0.731932215 | 0.789723346 | 0.060982004 |
| -1.28529042 | 0.05113759 | -1.522208  | 0.001531259 | -1.3611389  | 0.017549427 |
| -1.01751896 | 0.79462432 | -1.1651923 | 0.02518581  | -1.31952209 | 0.000109432 |
| 0.919685317 | 0.49269816 | 0.95055234 | 0.677328722 | 0.88208776  | 0.305253937 |
| -1.25129337 | 0.00719892 | -1.1461303 | 0.094911159 | -1.1181273  | 0.169746281 |
| -1.09567151 | 0.14941756 | 0.94638752 | 0.381673458 | 0.944938406 | 0.368671954 |
| -1.03290828 | 0.66276556 | -1.1335632 | 0.095315161 | -1.19195471 | 0.020988899 |
| -1.06174166 | 0.31443482 | -1.1372975 | 0.033611826 | -1.08518394 | 0.171588436 |
| -1.19501042 | 0.02480221 | -1.1143235 | 0.166324695 | -1.12781197 | 0.124842028 |
| -1.12282536 | 0.03088597 | -1.0715046 | 0.19189202  | -1.03484603 | 0.514957901 |
| -1.27685981 | 0.01096563 | -1.0141264 | 0.880341218 | -1.25610412 | 0.017206347 |
| 0.926150012 | 0.48965428 | 0.90235287 | 0.355678876 | -1.05866182 | 0.607354203 |
| -1.234421   | 0.1307495  | 0.99913371 | 0.994984544 | -1.18182253 | 0.228804147 |
| -1.35798239 | 0.00651743 | -1.2765832 | 0.02795879  | -1.30998944 | 0.015581413 |
| 0.976506311 | 0.6589531  | -1.0297115 | 0.586927588 | -1.232167   | 0.000272021 |
| -1.24367267 | 0.00046729 | -1.359091  | 2.72246E-06 | -1.34032976 | 6.34E-06    |
| 0.939671584 | 0.42916167 | 0.852754   | 0.046359733 | 0.958139241 | 0.586320241 |
| -1.05466495 | 0.24978856 | 0.99563096 | 0.924101654 | 0.975680751 | 0.592668638 |
| 0.943181477 | 0.39824813 | 0.96799296 | 0.637738246 | -1.11886325 | 0.10790918  |
| -1.1004744  | 0.10528106 | 0.95138219 | 0.394885442 | -1.18631521 | 0.004831571 |
| -1.21694504 | 0.17897851 | -1.3553438 | 0.039652494 | -1.35385049 | 0.040346973 |
| 0.964055824 | 0.46691447 | 0.96040301 | 0.422251783 | -1.00761465 | 0.879881464 |
| 0.990569881 | 0.86795295 | 0.85091304 | 0.00624899  | 0.56355176  | 4.97E-14    |
| 0.795454856 | 0.00771607 | -1.0587149 | 0.49301617  | -1.21117828 | 0.024301782 |
| -1.12646137 | 0.29570325 | -1.2471475 | 0.055374086 | -1.21537471 | 0.089435213 |
| -1.07436474 | 0.46158114 | 0.92856727 | 0.446911497 | -1.03261365 | 0.741338551 |
| -1.17355593 | 0.04145487 | -1.1788345 | 0.036271949 | -1.1529619  | 0.068657532 |
| 0.901524567 | 0.14909806 | -1.0821745 | 0.269795846 | -1.04054973 | 0.576969809 |
| 0.988177997 | 0.74976678 | 0.93315008 | 0.067631798 | 0.962140329 | 0.302810647 |
| -1.25418874 | 0.09332892 | 0.9908773  | 0.945142226 | -1.17995469 | 0.217364929 |
| 0.632350792 | 4.86E-07   | 0.74132745 | 0.0004547   | 0.793772598 | 0.005659955 |
| 0.75805809  | 0.00036127 | 0.81727837 | 0.007593639 | 0.895002213 | 0.133064156 |

|             |            |            |             |             |             |
|-------------|------------|------------|-------------|-------------|-------------|
| -1.03760468 | 0.59759959 | 0.97301198 | 0.695470004 | -1.09179801 | 0.2119214   |
| 0.970013752 | 0.67175954 | -1.068708  | 0.356556808 | 0.886433955 | 0.097399985 |
| 0.945567244 | 0.22479926 | 0.99705641 | 0.948669562 | -1.02989911 | 0.520782906 |
| 0.682541169 | 4.61E-08   | 0.56172835 | 3.00873E-13 | 0.639090672 | 7.82E-10    |
| 0.638968832 | 2.25E-07   | 0.59301935 | 5.77237E-09 | 0.621088473 | 5.63E-08    |
| 0.996354121 | 0.9646015  | -1.0846186 | 0.325853858 | 0.912818575 | 0.270446448 |
| 0.677987867 | 1.66E-11   | 0.81604658 | 4.46395E-05 | 0.905910916 | 0.035245767 |
| -1.00354708 | 0.92722028 | 0.97678695 | 0.545263425 | 0.736064296 | 1.28E-10    |
| -1.18860995 | 0.15292278 | -1.2006092 | 0.130874382 | -1.16847371 | 0.196964407 |
| -1.11368531 | 0.24535643 | 0.96104966 | 0.66647298  | -1.11289731 | 0.248434272 |
| 0.978557089 | 0.58465876 | 0.80791814 | 1.49327E-06 | 0.800675416 | 6.52E-07    |
| -1.01383987 | 0.81176967 | -1.1762467 | 0.006601008 | 0.942261295 | 0.305079016 |
| 0.946162054 | 0.53498239 | -1.0962005 | 0.304669592 | -1.10973621 | 0.245237914 |
| 0.81346701  | 0.00458246 | -1.0675551 | 0.352948071 | 0.978576514 | 0.757445905 |
| 0.735735364 | 0.00623912 | 0.84794065 | 0.131824609 | 0.77848044  | 0.023990354 |
| 0.829264656 | 0.01470019 | 0.90524827 | 0.185707832 | 0.985722163 | 0.847170357 |
| 0.990864607 | 0.87677816 | -1.2009572 | 0.003005445 | -1.08541379 | 0.169851633 |
| -1.0254948  | 0.72115118 | 0.953      | 0.495600859 | 0.930684482 | 0.310521608 |
| -1.16061335 | 0.0436991  | -1.0370413 | 0.616024977 | -1.17369721 | 0.030580001 |
| 0.959560059 | 0.6275442  | 0.9708844  | 0.728233589 | -1.21373878 | 0.025989024 |
| 0.85514343  | 0.08721805 | 0.98280173 | 0.847586452 | -1.29927512 | 0.005185201 |
| 0.870895393 | 0.03814469 | 0.84969114 | 0.015323439 | 0.822201108 | 0.003969611 |
| 0.833032827 | 0.00478311 | 0.97261277 | 0.656328256 | 0.65101962  | 5.81E-09    |
| -1.11257483 | 0.28416418 | -1.1224724 | 0.246513106 | -1.1117669  | 0.287421298 |
| 0.960844161 | 0.23760302 | 0.98481524 | 0.649145141 | 0.978872514 | 0.525865849 |
| -1.18608477 | 0.05116131 | -1.1002236 | 0.269218374 | -1.27162393 | 0.006924119 |
| 0.9717659   | 0.85771243 | 0.72691765 | 0.049889671 | -1.16493471 | 0.341221271 |
| -1.11038913 | 0.23713653 | -1.0172179 | 0.846198074 | -1.16773625 | 0.082329201 |
| -1.2622595  | 0.15443603 | -1.0011884 | 0.994150196 | -1.10860096 | 0.52528426  |
| -1.0929459  | 0.17695752 | -1.0159006 | 0.809046266 | -1.05445079 | 0.417994544 |
| 0.586709814 | 1.24E-15   | 0.98310891 | 0.722338007 | 0.977616458 | 0.63693939  |
| -1.18958682 | 0.00744151 | -1.2262906 | 0.001887815 | -1.13084619 | 0.05395388  |
| -1.14052881 | 0.03810579 | -1.1001878 | 0.128490855 | -1.22674363 | 0.001699663 |
| -1.05708879 | 0.17377693 | -1.0101992 | 0.802039407 | -1.03244429 | 0.431403327 |
| 0.966316715 | 0.42016287 | 0.92914827 | 0.087176888 | 0.933289591 | 0.107502293 |
| 0.981854973 | 0.73360244 | -1.1078623 | 0.060997927 | 0.849513438 | 0.00358176  |
| 0.878807581 | 0.10851478 | -1.1287016 | 0.132015638 | -1.26518379 | 0.00442703  |
| 0.983406491 | 0.64658404 | 0.95862377 | 0.249382186 | -1.02740368 | 0.459516728 |
| 0.939362305 | 0.37550188 | -1.0855963 | 0.245857882 | -1.0649392  | 0.37275281  |
| 0.935131977 | 0.43518543 | 0.93856187 | 0.460529919 | -1.02724694 | 0.753874224 |
| -1.18684784 | 0.0062487  | -1.1127574 | 0.081502677 | -1.31982362 | 2.52E-05    |
| 0.973132998 | 0.53000938 | 0.94673191 | 0.209402061 | 0.949556072 | 0.234899733 |
| 0.854359742 | 0.01135318 | 0.99580042 | 0.944372492 | 0.958678797 | 0.485130717 |
| -1.00655022 | 0.92197384 | 0.95108571 | 0.452999144 | 0.990353481 | 0.884383837 |

|             |            |            |             |             |             |
|-------------|------------|------------|-------------|-------------|-------------|
| 0.786046921 | 0.00172231 | 0.81062221 | 0.005734302 | -1.01743795 | 0.813576519 |
| -1.02646993 | 0.78494587 | -1.0072822 | 0.939569484 | -1.08741748 | 0.382926494 |
| 0.918962082 | 0.46278594 | 0.90973658 | 0.411414005 | 0.944618894 | 0.620107071 |
| 0.858366806 | 0.00364914 | 0.77081993 | 3.39985E-06 | 0.832286355 | 0.000586555 |
| -1.32300562 | 0.03442297 | -1.3092123 | 0.041454633 | -1.41003118 | 0.010165389 |
| 0.898676856 | 0.18753244 | 0.88618753 | 0.136957025 | 0.985898435 | 0.859812228 |
| -1.00059791 | 0.99390214 | -1.3195868 | 0.000780507 | -1.2961839  | 0.001564198 |
| 0.996616695 | 0.97848579 | 0.95548103 | 0.717238002 | 0.932813683 | 0.580516075 |
| 0.737355733 | 0.00380141 | 0.68180965 | 0.000366982 | 0.70125673  | 0.000876825 |
| 0.936454504 | 0.27319192 | 0.88568882 | 0.045577023 | -1.08010166 | 0.199382906 |
| -1.04285886 | 0.61688177 | 0.92527895 | 0.355920575 | 0.902516198 | 0.224110041 |
| 0.975849115 | 0.53999444 | 0.90324439 | 0.013071139 | 0.93817638  | 0.113262759 |
| -1.03845252 | 0.53657828 | -1.0434625 | 0.486124755 | -1.05856203 | 0.352361273 |
| -1.08760252 | 0.04469339 | 0.95600439 | 0.275638211 | 0.988378776 | 0.775866415 |
| 0.983081544 | 0.83418957 | -1.2857857 | 0.003090902 | -1.14986753 | 0.090915399 |
| 0.992584158 | 0.92860701 | 0.80751575 | 0.012473296 | 0.999755588 | 0.997652245 |
| -1.08898453 | 0.15063824 | -1.0174054 | 0.769013623 | 0.783333282 | 0.000109304 |
| -1.13019716 | 0.22661274 | -1.2156241 | 0.05624289  | 0.877607396 | 0.197545879 |
| -1.10582994 | 0.30749993 | -1.2694612 | 0.017862267 | -1.30899868 | 0.007940709 |
| 0.89416527  | 0.25146573 | 0.94190706 | 0.537725752 | 0.991897189 | 0.933119588 |
| 0.989777215 | 0.75917728 | 0.99048689 | 0.775495224 | 0.982847731 | 0.606027746 |
| 0.953252532 | 0.12484739 | 0.99142281 | 0.780148287 | 0.981734041 | 0.550797799 |
| 0.912359864 | 0.45184475 | -1.2001294 | 0.137580668 | -1.06343684 | 0.613388326 |
| 0.89439576  | 0.02952066 | -1.0568189 | 0.273115865 | 0.725216002 | 3.45E-08    |
| -1.01904916 | 0.78180553 | 0.92128943 | 0.231833966 | -1.16998983 | 0.024415052 |
| 0.97550196  | 0.71846196 | -1.137278  | 0.065593222 | 0.845916961 | 0.017797791 |
| -1.05938593 | 0.24993943 | -1.0111568 | 0.823847981 | -1.11572184 | 0.031562821 |
| -1.15386368 | 0.09424917 | -1.116487  | 0.195240188 | -1.30409583 | 0.002589504 |
| -1.06025466 | 0.47723767 | 0.88424033 | 0.138179646 | 0.695524674 | 4.50E-05    |
| -1.12427175 | 0.19537165 | -1.0931346 | 0.32332944  | -1.04695627 | 0.609599482 |
| -1.16033483 | 0.04858897 | -1.0853158 | 0.271488169 | -1.27404742 | 0.00179033  |
| -1.07849506 | 0.47896713 | -1.2400021 | 0.047377893 | 0.924827636 | 0.464150945 |
| 0.955532641 | 0.18401071 | 0.99241011 | 0.822503833 | 0.979699413 | 0.546519906 |
| 0.990463742 | 0.82147606 | 0.8453155  | 0.000210661 | 0.964553028 | 0.396865217 |
| 0.95684693  | 0.31933787 | -1.0279228 | 0.532969079 | 0.936184866 | 0.138810421 |
| 0.809933299 | 0.00685276 | 0.847109   | 0.031115709 | 0.827714824 | 0.014641326 |
| -1.04906726 | 0.42534728 | -1.0395112 | 0.518568749 | -1.05649011 | 0.360895514 |
| -1.00192046 | 0.96522463 | -1.0437443 | 0.332729594 | -1.08186564 | 0.078057699 |
| 0.985696218 | 0.65904771 | 0.96514696 | 0.279486227 | 0.783743969 | 6.50E-10    |
| -1.15364686 | 0.00658303 | -1.1235515 | 0.025095386 | -1.09618807 | 0.074845632 |
| 0.879446645 | 0.16993432 | 0.8611278  | 0.111299022 | 0.87089714  | 0.140280049 |
| -1.04938657 | 0.27704282 | -1.0124881 | 0.778476447 | -1.08734817 | 0.061791707 |
| 0.762490739 | 1.98E-06   | 0.87006238 | 0.008382874 | 0.895082712 | 0.033678729 |
| -1.08767764 | 0.27053966 | 0.86143847 | 0.053336248 | -1.04358776 | 0.574320626 |

|             |            |            |             |             |             |
|-------------|------------|------------|-------------|-------------|-------------|
| 0.742855162 | 5.45E-07   | -1.0164337 | 0.756285163 | 0.649314235 | 3.88E-11    |
| 0.991940966 | 0.88968341 | 0.95887568 | 0.47265515  | 0.936370061 | 0.262529485 |
| -1.02172162 | 0.7163067  | 0.9458018  | 0.347733216 | 0.881632174 | 0.036775061 |
| -1.00159468 | 0.98068406 | -1.4000537 | 3.99136E-06 | 0.982125991 | 0.784122849 |
| 0.837261835 | 0.00990782 | 0.71212676 | 4.37321E-06 | 0.778158583 | 0.000400307 |
| -1.06084485 | 0.50055789 | -1.0537172 | 0.550505954 | -1.12521979 | 0.181206796 |
| -1.02328158 | 0.519216   | 0.95780069 | 0.22949234  | 0.981443801 | 0.599641403 |
| 0.653493356 | 2.83E-16   | 0.83490669 | 8.32499E-06 | -1.00749231 | 0.839184412 |
| -1.11321708 | 0.28139314 | -1.0402504 | 0.690482696 | -1.08182269 | 0.428435217 |
| -1.01550859 | 0.82176748 | -1.0706036 | 0.320103148 | -1.03957439 | 0.570444314 |
| 0.92844395  | 0.31597218 | 0.94918507 | 0.480156864 | -1.06433307 | 0.399085014 |
| 0.993037352 | 0.89823175 | -1.0165994 | 0.763224454 | 0.973152803 | 0.618760416 |
| -1.27869107 | 0.00150169 | -1.2071147 | 0.013245213 | 0.957175059 | 0.553837521 |
| 0.882696599 | 0.16258257 | 0.8607832  | 0.094699733 | 0.908224554 | 0.279547241 |
| -1.02491123 | 0.66027849 | -1.0077225 | 0.890614303 | -1.18600453 | 0.003411341 |
| 0.961366307 | 0.32006415 | 0.95528217 | 0.249033818 | 0.888838147 | 0.004069132 |
| -1.04355237 | 0.19754131 | -1.0269292 | 0.419639427 | 0.899097496 | 0.001964197 |
| -1.00148252 | 0.97965757 | 0.9937044  | 0.913442828 | -1.06659523 | 0.26987471  |
| 0.957552378 | 0.40377818 | 0.8565789  | 0.004048374 | 0.899828005 | 0.04548066  |
| -1.4679074  | 3.31E-05   | 0.99385901 | 0.942295577 | -1.33176921 | 0.001347314 |
| 0.988725895 | 0.79632457 | 0.93358436 | 0.121769782 | 0.719343435 | 5.77E-10    |
| 0.917431615 | 0.06918361 | -1.0052501 | 0.91070621  | 0.974684489 | 0.583402664 |
| -1.17598252 | 0.0094521  | 0.98863054 | 0.850108236 | -1.10561115 | 0.101279427 |
| 0.68616382  | 1.90E-07   | 0.94836857 | 0.40396855  | 0.775317071 | 0.000172503 |
| -1.07485295 | 0.35785551 | -1.0015241 | 0.984461745 | 0.985832899 | 0.855235219 |
| 0.857133537 | 0.16451455 | 0.90536475 | 0.367493983 | -1.03178664 | 0.7759313   |
| -1.71901526 | 6.06E-08   | -1.7155889 | 6.60719E-08 | -1.7478076  | 2.97E-08    |
| 0.97219173  | 0.68071733 | -1.0536081 | 0.4469801   | -1.20117475 | 0.009527172 |
| -1.046721   | 0.53087743 | -1.3125371 | 0.000425884 | 0.977264007 | 0.751954423 |
| 0.924045385 | 0.33455112 | -1.0726332 | 0.39126174  | -1.03095157 | 0.708584069 |
| 0.983760103 | 0.8498218  | 0.91566722 | 0.310534784 | 0.817313372 | 0.022802011 |
| -1.41913089 | 0.00496003 | -1.5117244 | 0.001067313 | -1.35546413 | 0.013788819 |
| -1.22318754 | 0.00337566 | -1.2789862 | 0.000438889 | -1.11287723 | 0.109245797 |
| 0.952212677 | 0.5930304  | -1.0329488 | 0.723271969 | 0.952306224 | 0.593770271 |
| -1.0234867  | 0.66586574 | -1.1120393 | 0.052116224 | -1.29141285 | 1.39E-05    |
| -1.10170558 | 0.01420285 | -1.0523184 | 0.187664243 | -1.02102207 | 0.588396712 |
| -1.03820459 | 0.39383315 | -1.0932333 | 0.045905622 | -1.05202814 | 0.25003342  |
| -1.33317436 | 0.00042345 | -1.4577223 | 8.42877E-06 | -1.47241171 | 5.31E-06    |
| 0.997540495 | 0.98150762 | -1.1566274 | 0.174535877 | -1.2604872  | 0.032955139 |
| -1.3556146  | 0.00183115 | -1.194277  | 0.061021678 | -1.41620361 | 0.000434313 |
| -1.31106646 | 0.00622564 | -1.3513232 | 0.002548967 | -1.4154783  | 0.000588411 |
| 0.896480533 | 0.10836148 | 0.96002947 | 0.544766508 | 0.914591592 | 0.18784728  |
| 0.948557445 | 0.36313647 | -1.1501797 | 0.018476806 | -1.1243104  | 0.046814361 |
| -1.00839114 | 0.84197848 | -1.0030848 | 0.941410906 | 0.927934619 | 0.078590445 |



|             |            |            |             |             |             |
|-------------|------------|------------|-------------|-------------|-------------|
| -1.25143888 | 0.09083182 | -1.187867  | 0.191864253 | -1.72787234 | 0.000101703 |
| 0.945455534 | 0.46166947 | 0.8953285  | 0.149701532 | 0.829558562 | 0.016720153 |
| -1.01157374 | 0.84761594 | 0.9581068  | 0.475800596 | -1.01555966 | 0.796564409 |
| 0.931029498 | 0.22192038 | 0.94877231 | 0.367234466 | 0.765249673 | 2.39E-05    |
| -1.02350683 | 0.66476686 | 0.73354708 | 3.48464E-07 | 0.87324987  | 0.013950634 |
| 0.988272326 | 0.87867721 | -1.125843  | 0.129178667 | -1.10232113 | 0.210784373 |
| -1.00150836 | 0.97527742 | 0.90081363 | 0.035440304 | -1.00522734 | 0.914634541 |
| 0.960210166 | 0.59633916 | 0.62229876 | 7.59536E-08 | 0.974693962 | 0.737901054 |
| 0.927858842 | 0.24473372 | -1.0563674 | 0.392875474 | -1.02478509 | 0.702073314 |
| -1.00519079 | 0.94626956 | -1.1110871 | 0.174048606 | -1.1006003  | 0.215431435 |
| -1.0222946  | 0.44949701 | 0.9605777  | 0.170378796 | -1.02634812 | 0.372903766 |
| -1.0376892  | 0.61971572 | 0.91228772 | 0.220905123 | -1.13641262 | 0.090232765 |
| -1.24018821 | 0.04491726 | -1.2327977 | 0.050971831 | -1.18380915 | 0.113347481 |
| -1.02536714 | 0.81983317 | -1.1082893 | 0.351733063 | -1.09563485 | 0.407709041 |
| -1.19606277 | 0.02695346 | -1.2853546 | 0.002381941 | -1.25418935 | 0.005742617 |
| 0.952074861 | 0.3468044  | 0.80386635 | 9.49638E-05 | 0.9233335   | 0.129061005 |
| -1.0728585  | 0.18196837 | -1.1150099 | 0.041071107 | -1.10310055 | 0.064609304 |
| 0.92711969  | 0.25250264 | 0.82029888 | 0.00377951  | 0.807978151 | 0.001941798 |
| 0.750061893 | 0.00044747 | -1.0652463 | 0.414615126 | 0.980598107 | 0.799806938 |
| 0.716206303 | 6.13E-05   | 0.59153712 | 7.65568E-09 | 0.74803653  | 0.00039153  |
| 0.986373343 | 0.9049504  | -1.0124016 | 0.914574268 | -1.01987192 | 0.864035046 |
| 0.802130483 | 0.02167168 | -1.0245051 | 0.796093473 | 0.954444551 | 0.619015197 |
| -1.28671229 | 3.46E-05   | 0.92119218 | 0.147003701 | -1.14037439 | 0.022228463 |
| 0.968599441 | 0.59802498 | -1.1164341 | 0.072650109 | -1.15364474 | 0.02109731  |
| -1.18929349 | 0.09496415 | -1.0182142 | 0.860188743 | 0.979400564 | 0.839058574 |
| -1.27451181 | 0.00531235 | -1.1817524 | 0.050507704 | -1.12956958 | 0.150239242 |
| 0.873810954 | 0.10378039 | 0.92914807 | 0.371309159 | 0.997396203 | 0.974601515 |
| -1.0151033  | 0.69496478 | 0.99594109 | 0.915215434 | -1.00004464 | 0.999067647 |
| 0.978249752 | 0.78555515 | -1.0269461 | 0.742201412 | 0.984776496 | 0.849431614 |
| 0.955874414 | 0.14552646 | -1.0847016 | 0.010256398 | -1.07834458 | 0.016782968 |
| -1.08388618 | 0.22459688 | 0.94174031 | 0.364029932 | -1.04024562 | 0.549853284 |
| -1.13507022 | 0.02512705 | 0.92393438 | 0.156044774 | -1.00058883 | 0.991498656 |
| -1.02090257 | 0.68196749 | 0.90067447 | 0.04198429  | 0.960853707 | 0.429923617 |
| 0.950680749 | 0.32598887 | 0.85682649 | 0.003773269 | 0.820062705 | 0.000280351 |
| 0.945461839 | 0.19381351 | 0.98436398 | 0.713007339 | -1.06624709 | 0.138173522 |
| 0.908722836 | 0.3682281  | -1.1247946 | 0.269847692 | -1.13463397 | 0.23637229  |
| 0.914320982 | 0.40168328 | 0.92881287 | 0.488861827 | -1.0283515  | 0.792916446 |
| 0.975708388 | 0.58432151 | -1.0473192 | 0.305399099 | -1.03453038 | 0.450687797 |
| -1.02867021 | 0.6630415  | 0.98740346 | 0.844969557 | -1.05693157 | 0.394574582 |
| -1.03415875 | 0.52598223 | -1.0401619 | 0.457538015 | -1.03854377 | 0.475426855 |
| 0.829370011 | 0.00076252 | 0.85073329 | 0.003218471 | 0.985904959 | 0.787530722 |
| 0.98266834  | 0.81803008 | 0.47759719 | 1.64498E-13 | 0.391417945 | 2.18E-17    |
| 0.981585282 | 0.80526237 | -1.023741  | 0.755660331 | 0.984320348 | 0.833940858 |
| 0.867492307 | 0.05596399 | 0.9670704  | 0.647234096 | 0.976870715 | 0.748991377 |

|             |            |            |             |             |             |
|-------------|------------|------------|-------------|-------------|-------------|
| -1.17115165 | 0.10580953 | -1.1333039 | 0.198144727 | -1.02854017 | 0.770643479 |
| -1.07836766 | 0.26421829 | -1.1832789 | 0.01487034  | 0.972324069 | 0.676370972 |
| -1.02132536 | 0.77312441 | 0.89471095 | 0.132465109 | 0.792911389 | 0.002402978 |
| 0.77128934  | 0.00220877 | 0.87837305 | 0.114224964 | 0.773695694 | 0.002470666 |
| -1.01759527 | 0.64741963 | 0.98821774 | 0.755847166 | 0.964376935 | 0.343115668 |
| 0.824007719 | 0.15262795 | 0.94940947 | 0.698727478 | 0.77408052  | 0.06025998  |
| -1.0001564  | 0.99805622 | 0.97881725 | 0.73886643  | 0.789095587 | 0.000497816 |
| 0.90437271  | 0.08985873 | 0.98483173 | 0.793813013 | 0.627729207 | 1.02E-10    |
| 0.905442116 | 0.11566632 | 0.9962343  | 0.951793723 | 0.946735232 | 0.382150223 |
| 0.847380175 | 0.00063879 | 0.69601483 | 1.30159E-10 | 0.574249843 | 4.99E-17    |
| 0.811729922 | 0.00315853 | 0.42065052 | 5.53583E-18 | 0.527722264 | 4.79E-13    |
| 0.933830089 | 0.40736131 | 0.91356442 | 0.275060243 | 0.955773892 | 0.583391704 |
| -1.07256781 | 0.15065398 | 0.95374666 | 0.328734079 | 0.949967896 | 0.290184312 |
| -1.03734518 | 0.33341167 | 0.99611525 | 0.917858053 | 0.924393684 | 0.041102508 |
| 0.967591875 | 0.62833529 | 0.91096069 | 0.173877337 | -1.02683301 | 0.697112139 |
| -1.19993857 | 0.05520482 | -1.3047993 | 0.006010384 | -1.27734659 | 0.011056469 |
| -1.02221031 | 0.78138397 | 0.97062099 | 0.706473581 | -1.14647547 | 0.088384928 |
| -1.25405237 | 0.07611157 | -1.4693097 | 0.003315123 | -1.53612475 | 0.001169763 |
| 0.84583868  | 0.00073439 | -1.0106119 | 0.822177334 | -1.08610715 | 0.082873361 |
| -1.13959013 | 0.00892858 | 0.97575162 | 0.612295806 | -1.05241352 | 0.293477593 |
| 0.901320209 | 0.29168261 | 0.67191779 | 0.000152638 | 0.752738625 | 0.005231986 |
| -1.16321514 | 0.07615966 | -1.0085088 | 0.919656714 | -1.17842631 | 0.054751852 |
| 0.820131369 | 0.02553641 | 0.8500617  | 0.06527233  | 0.738434414 | 0.000908443 |
| 0.861471099 | 0.05706828 | 0.92013951 | 0.282583828 | -1.02371984 | 0.760995414 |
| -1.10433988 | 0.03062025 | 0.92800114 | 0.100370364 | -1.09901903 | 0.039308193 |
| 0.916862979 | 0.2639895  | 0.98639163 | 0.859238459 | 0.994238178 | 0.940373478 |
| -1.15400262 | 0.02813757 | 0.95755315 | 0.497358008 | -1.07949655 | 0.233464652 |
| -1.20374935 | 0.03601835 | -1.1145236 | 0.214002506 | 0.856232943 | 0.077457141 |
| 0.951348996 | 0.39190925 | 0.98243138 | 0.760223866 | 0.989380395 | 0.854108853 |
| -1.02225302 | 0.81500572 | -1.0652727 | 0.502255375 | 0.825040655 | 0.044800859 |
| 0.869500225 | 0.02869568 | 0.73554875 | 8.07858E-06 | 0.912467879 | 0.146669825 |
| -1.02026301 | 0.70923519 | -1.0415972 | 0.449637305 | -1.0486017  | 0.379123621 |
| 0.916774694 | 0.09242391 | 0.91556188 | 0.087692168 | 0.972162725 | 0.580066344 |
| -1.19637439 | 0.00455751 | -1.0799718 | 0.209343573 | 0.98082607  | 0.750403606 |
| 0.841172159 | 0.00059883 | 0.75599189 | 2.51717E-07 | 0.776195819 | 1.91E-06    |
| -1.01364223 | 0.81363548 | -1.1708229 | 0.007950485 | 0.990071183 | 0.862162295 |
| -1.15678912 | 0.01864565 | -1.37455   | 2.23192E-06 | -1.43257939 | 1.82E-07    |
| -1.00868456 | 0.84371125 | 0.94944146 | 0.239828354 | -1.04975765 | 0.27088336  |
| 0.93307253  | 0.24645553 | 0.98289022 | 0.771465321 | -1.01762113 | 0.768767472 |
| 0.945358369 | 0.26665643 | 0.9158831  | 0.084928902 | -1.10779176 | 0.045781386 |
| 0.969810233 | 0.62097957 | -1.1067617 | 0.105666536 | -1.08194604 | 0.206815174 |
| -1.07962788 | 0.18270477 | 0.93872901 | 0.27022479  | 0.935944244 | 0.248613985 |
| 0.932247909 | 0.39339361 | 0.95628966 | 0.585871255 | -1.04503538 | 0.591265055 |
| 0.857285923 | 0.16298695 | -1.1990781 | 0.101187923 | -1.27704924 | 0.028811184 |

|             |            |            |             |             |             |
|-------------|------------|------------|-------------|-------------|-------------|
| 0.816058669 | 0.07137043 | -1.040695  | 0.719526857 | -1.10164699 | 0.38489172  |
| 0.885695941 | 0.22290198 | 0.83469746 | 0.07195997  | 0.74264396  | 0.003835734 |
| 0.985572268 | 0.80392455 | 0.86067946 | 0.012789683 | 0.732516876 | 1.90E-06    |
| -1.02452005 | 0.57160201 | -1.0282841 | 0.515037047 | 0.976872747 | 0.584740009 |
| 0.907570966 | 0.159529   | 0.78885044 | 0.00097849  | 0.777450686 | 0.000504973 |
| -1.03925036 | 0.50884044 | -1.011542  | 0.843598579 | 0.927291962 | 0.197782121 |
| -1.1018053  | 0.10278847 | -1.0085503 | 0.884655944 | -1.129007   | 0.042572092 |
| 0.918486132 | 0.18029891 | -1.071083  | 0.277820537 | -1.1052515  | 0.115980989 |
| -1.11408682 | 0.05817961 | -1.0239585 | 0.673104575 | -1.07901695 | 0.178690977 |
| -1.00030305 | 0.99472063 | -1.0411261 | 0.380524278 | 0.972913314 | 0.549406574 |
| -1.12383476 | 0.0392851  | -1.0492638 | 0.38801964  | 0.973299593 | 0.626286295 |
| -1.06127339 | 0.41657792 | -1.0884754 | 0.248323768 | -1.16007714 | 0.045857839 |
| -1.10019728 | 0.05021754 | 0.96786104 | 0.496108047 | -1.20414388 | 0.000272352 |
| -1.42139847 | 0.00029408 | -1.6330933 | 1.54147E-06 | -1.88146009 | 4.91E-09    |
| -1.25693546 | 0.00690608 | -1.2154247 | 0.020041421 | -1.44722899 | 3.20E-05    |
| -1.00866074 | 0.84182284 | 0.89419277 | 0.011998444 | 0.89810934  | 0.015549918 |
| 0.99061218  | 0.86577007 | 0.94112133 | 0.279395609 | -1.01763792 | 0.754104727 |
| -1.03985032 | 0.49346091 | -1.0227211 | 0.693353706 | -1.06648132 | 0.261109451 |
| -1.34631732 | 0.00303611 | -1.4775418 | 0.000152302 | -1.34089595 | 0.003423295 |
| 0.981180563 | 0.74994975 | 0.98327721 | 0.77723318  | -1.01194564 | 0.842059904 |
| -1.17515034 | 0.00721609 | -1.1303407 | 0.038602233 | -1.14419731 | 0.02351932  |
| 0.995188563 | 0.9364636  | -1.1648682 | 0.014225105 | -1.18315429 | 0.00722746  |
| -1.03779005 | 0.5375978  | -1.0736435 | 0.239857739 | 0.956850699 | 0.463874869 |
| -1.08007117 | 0.12150345 | 0.99223787 | 0.874129564 | 0.774391625 | 2.94E-06    |
| 0.953298212 | 0.34668721 | -1.0025727 | 0.959512737 | -1.04773906 | 0.358749958 |
| 0.90897832  | 0.10522134 | 0.85640579 | 0.009844102 | 0.82439922  | 0.001555838 |
| 0.989569739 | 0.85259418 | 0.97229589 | 0.618916441 | -1.04235075 | 0.463363348 |
| -1.02396118 | 0.5554264  | -1.1069668 | 0.013780934 | -1.00597382 | 0.881912227 |
| -1.00318866 | 0.95670151 | -1.0149565 | 0.800184021 | -1.01935348 | 0.743861758 |
| 0.944916169 | 0.31733508 | 0.95060618 | 0.370876518 | -1.00367577 | 0.948128574 |
| 0.98205191  | 0.74053289 | -1.0018947 | 0.972375801 | 0.888604015 | 0.03440405  |
| 0.99551703  | 0.90653229 | 0.9049124  | 0.011310496 | 0.955632134 | 0.238679857 |
| -0.99997413 | 0.99978664 | 0.80470351 | 0.028168091 | 0.891923186 | 0.240237789 |
| -1.09964587 | 0.17654463 | -1.0392683 | 0.58097972  | -1.17885758 | 0.021290712 |
| -1.05288465 | 0.52382804 | -1.0753296 | 0.369880788 | -1.13558203 | 0.119273861 |
| -1.19187999 | 0.03403027 | -1.0876758 | 0.302296212 | -1.18980208 | 0.035773372 |
| -1.08731651 | 0.57917925 | -1.180048  | 0.274738664 | -1.36323134 | 0.043737989 |
| 0.937643151 | 0.24283559 | 0.97777207 | 0.681765578 | 0.998548213 | 0.978839781 |
| 0.909150722 | 0.41587945 | 0.97471051 | 0.826309475 | -1.06492156 | 0.5904032   |
| 0.984968119 | 0.78252312 | 0.73182057 | 4.88719E-07 | -1.00901236 | 0.870084973 |
| -1.26646275 | 0.01010301 | -1.1381739 | 0.149834032 | -1.38410982 | 0.000560054 |
| 0.813282892 | 0.04050152 | 0.81251282 | 0.039626226 | 0.816624194 | 0.044486821 |
| -1.03703616 | 0.56782196 | 0.98884528 | 0.859939272 | 0.146580367 | 1.86E-35    |
| -1.35429114 | 0.03625587 | -1.074219  | 0.614197931 | -1.46040577 | 0.009701649 |

|             |            |            |             |             |             |
|-------------|------------|------------|-------------|-------------|-------------|
| -1.06443203 | 0.64799707 | 0.56751512 | 0.000113584 | -1.29713224 | 0.061103639 |
| 0.938251585 | 0.54438786 | 0.29562558 | 2.45987E-16 | 0.388059441 | 2.12E-12    |
| -1.00800664 | 0.94978931 | 0.96652989 | 0.788138085 | -1.21468527 | 0.128729311 |
| 0.927209074 | 0.2743366  | 0.97036183 | 0.661946769 | 0.68275599  | 8.20E-07    |
| 0.957649033 | 0.64565336 | -1.0745794 | 0.445488907 | -1.23885497 | 0.026058039 |
| -1.07406086 | 0.42312486 | -1.1673167 | 0.086212999 | -1.08502378 | 0.360700533 |
| -1.14395575 | 0.18011878 | 0.97303302 | 0.783570378 | -1.40743989 | 0.001095763 |
| 0.921701601 | 0.24286403 | 0.85951904 | 0.032701774 | 0.809355733 | 0.003418785 |
| -1.22467245 | 0.05353553 | -1.1575764 | 0.159879185 | -1.434094   | 0.000911926 |
| -1.29538516 | 0.00027411 | -1.1409879 | 0.052262732 | -1.0428324  | 0.530580133 |
| -1.39039283 | 3.65E-05   | -1.0447305 | 0.552404752 | 0.975138279 | 0.732185464 |
| -1.18263367 | 0.00618113 | -1.0965593 | 0.123131667 | -1.12115532 | 0.057225946 |
| 0.846553767 | 0.01924908 | 0.92072153 | 0.236695795 | 0.725643138 | 2.23E-05    |
| 0.909340886 | 0.22311459 | 0.91115309 | 0.232827176 | 0.77441575  | 0.001644701 |
| -1.11465306 | 0.09589992 | -1.0308334 | 0.637297023 | -1.03668193 | 0.576105263 |
| -1.02441706 | 0.58015183 | 0.93501341 | 0.126971846 | -1.01789084 | 0.684093842 |
| -1.13145815 | 0.06943411 | -1.2492076 | 0.001540033 | -1.32123138 | 0.000108711 |
| -1.28336836 | 0.00427352 | -1.0953533 | 0.280842308 | -1.06323013 | 0.466522889 |
| -1.0518158  | 0.58229946 | -1.1565689 | 0.116952443 | -1.07565172 | 0.427897936 |
| 0.886040102 | 0.1193226  | -1.1685893 | 0.046470051 | -1.24302372 | 0.006257048 |
| -1.03165431 | 0.76976649 | 0.88187986 | 0.240643119 | 0.928549083 | 0.487099997 |
| -1.13179206 | 0.05052739 | -1.1520407 | 0.026171051 | 0.807435496 | 0.001079573 |
| -1.12144286 | 0.18102819 | 0.96885599 | 0.70980336  | 0.929868981 | 0.393759227 |
| 0.814429816 | 0.00119332 | 0.98152881 | 0.757082338 | 0.946100372 | 0.359655152 |
| -1.03772316 | 0.7719605  | -1.2209644 | 0.122196119 | -1.02062442 | 0.873022174 |
| 0.851147604 | 0.0103751  | 0.98018647 | 0.742785448 | -1.00136035 | 0.982206042 |
| -1.18491234 | 0.01610032 | 0.91072121 | 0.176463264 | 0.781480538 | 0.00067079  |
| -1.11280683 | 0.3770308  | -1.0559839 | 0.651681846 | -1.31349538 | 0.027083514 |
| -1.05007327 | 0.45034804 | -1.1216931 | 0.079553392 | -1.06291634 | 0.34658315  |
| -1.1511248  | 0.04676991 | -1.130499  | 0.081761319 | -1.11758431 | 0.113770438 |
| -1.16348141 | 0.08272156 | -1.1644641 | 0.081069749 | -1.20130254 | 0.036775639 |
| -1.14162929 | 0.09901691 | -1.1805579 | 0.040107039 | -1.04777803 | 0.556657871 |
| 0.996934447 | 0.9540373  | 0.94774961 | 0.316002623 | 0.974653471 | 0.630201065 |
| -1.23480578 | 8.05E-05   | -1.1312188 | 0.015688983 | -1.3869651  | 1.75E-08    |
| -1.03760336 | 0.30098204 | -1.0155103 | 0.664970603 | 0.978399244 | 0.53928693  |
| -1.13365707 | 0.02898838 | -1.0698658 | 0.232358555 | 0.903347928 | 0.074623469 |
| 0.796759986 | 0.04839708 | -1.0621441 | 0.594172153 | -1.08633817 | 0.464790175 |
| 0.44175992  | 3.25E-09   | 0.51037774 | 3.3468E-07  | 0.608637227 | 7.30E-05    |
| 0.899673472 | 0.31299197 | -1.0701255 | 0.51657385  | -1.29434527 | 0.016081414 |
| -1.05406483 | 0.40508047 | -1.022766  | 0.721170214 | -1.0660328  | 0.312708763 |
| -1.00053541 | 0.99367755 | 0.88662198 | 0.07913333  | 0.867869176 | 0.039742511 |
| -1.19445307 | 0.00024661 | -1.1014178 | 0.037310918 | -1.14020765 | 0.005390415 |
| 0.811925222 | 0.10722319 | 0.97299175 | 0.830358882 | 0.701625429 | 0.007354781 |
| 0.942091427 | 0.0969288  | 0.99308618 | 0.844965891 | 0.864785098 | 0.000134343 |

|             |            |            |             |             |             |
|-------------|------------|------------|-------------|-------------|-------------|
| -1.20413889 | 0.10201276 | -1.2488331 | 0.051692564 | -1.21586144 | 0.085763001 |
| 0.980657695 | 0.73027617 | 0.73257044 | 1.00128E-06 | 0.687150579 | 1.52E-08    |
| 0.989300956 | 0.88050726 | 0.84491579 | 0.021608013 | 0.767656587 | 0.000488977 |
| -1.42914197 | 0.000219   | -1.0826996 | 0.381577571 | -1.2306431  | 0.025101946 |
| -1.02606342 | 0.65746707 | -1.0540445 | 0.365763904 | -1.07513992 | 0.214710035 |
| -1.13990889 | 0.20600859 | 0.93402147 | 0.507468326 | -1.16177525 | 0.148519546 |
| 0.886690502 | 0.30353171 | -1.1747722 | 0.169837449 | -1.4335421  | 0.002984223 |
| -1.07856399 | 0.47587254 | 0.97201032 | 0.788570925 | 0.960386483 | 0.702700055 |
| 0.968705969 | 0.7095339  | -1.1014179 | 0.260294214 | -1.1426659  | 0.122123866 |
| -1.30452816 | 0.03294534 | -1.0489919 | 0.695219198 | -1.09920049 | 0.43944378  |
| -1.27307585 | 0.00393627 | -1.261161  | 0.005455546 | -1.41223529 | 7.05E-05    |
| -1.46915136 | 1.06E-05   | -1.5340893 | 1.51899E-06 | -1.47788478 | 8.17E-06    |
| 0.985155415 | 0.88632632 | -1.0976807 | 0.374740167 | 0.970722481 | 0.776452963 |
| -1.0269671  | 0.72237674 | 0.99531888 | 0.95001882  | 0.958866271 | 0.575260768 |
| -1.16918617 | 0.12278734 | 0.97703315 | 0.816600181 | -1.0595033  | 0.564489362 |
| 0.919735004 | 0.38895215 | -1.2654859 | 0.01783381  | -1.21565521 | 0.047621302 |
| 0.809554785 | 0.07642008 | 0.96099253 | 0.734993304 | 0.940553949 | 0.602372456 |
| -1.17578126 | 0.02140446 | -1.072098  | 0.312783853 | -1.24297474 | 0.002421631 |
| -1.04611421 | 0.61636437 | -1.0084434 | 0.925469881 | -1.01065633 | 0.906122918 |
| 0.876668612 | 0.18340915 | -1.1360357 | 0.19714516  | -1.16511283 | 0.123530371 |
| 0.941992886 | 0.4033104  | 0.9312412  | 0.319785054 | -1.09217805 | 0.2192852   |
| -1.36749715 | 4.70E-05   | -1.2834052 | 0.000859728 | -1.20513634 | 0.010820847 |
| 0.757008073 | 0.00282745 | 0.82675711 | 0.0370059   | 0.663331688 | 2.49E-05    |
| 0.828956583 | 0.01308993 | 0.87403988 | 0.070986543 | 0.848914011 | 0.029171513 |
| -1.05271214 | 0.51972599 | -1.0421912 | 0.604286162 | -1.03734051 | 0.645612778 |
| -1.11853997 | 0.20183163 | -1.1816994 | 0.059437878 | 0.985336458 | 0.865340839 |
| -1.01861576 | 0.77227656 | -1.1393268 | 0.044567585 | -1.03297484 | 0.61102283  |
| 0.744372871 | 0.00112751 | 0.92816313 | 0.388655017 | 0.84793     | 0.059775171 |
| -1.09611831 | 0.23148738 | -1.0004325 | 0.995471534 | -1.05949832 | 0.449303255 |
| 0.422470141 | 5.00E-18   | 0.95417033 | 0.486654941 | -1.00825835 | 0.902722256 |
| -1.22062542 | 0.01480999 | 0.98258014 | 0.825172373 | -1.11002447 | 0.192933648 |
| 0.789276455 | 0.00606584 | -1.05498   | 0.520848243 | -1.07764301 | 0.370594706 |
| -1.050303   | 0.51904103 | -1.0347547 | 0.653198651 | -1.10044326 | 0.211026718 |
| 0.853090476 | 0.09054738 | -1.1464256 | 0.144111196 | 0.953042951 | 0.60401634  |
| 0.958981636 | 0.4162963  | -1.1020434 | 0.062749339 | 0.9765784   | 0.644841433 |
| -1.46240363 | 1.65E-05   | -1.1017596 | 0.232727488 | -1.64537548 | 8.26E-08    |
| 0.895134893 | 0.11471065 | -1.043056  | 0.544339925 | -1.04382832 | 0.537320358 |
| 0.810649401 | 0.00228887 | 0.97787625 | 0.734162371 | -1.02423027 | 0.716317303 |
| -1.05922495 | 0.33457019 | 0.98991206 | 0.864408547 | -1.02647081 | 0.660164265 |
| -1.1495826  | 0.00518865 | 0.96054739 | 0.403780467 | 0.734286616 | 3.21E-08    |
| 0.786417922 | 0.00561212 | 0.72862127 | 0.000368165 | 0.800723314 | 0.010033654 |
| 0.659131102 | 8.34E-06   | 0.72417608 | 0.000352931 | 0.703627201 | 0.00011699  |
| 0.899495056 | 0.09785562 | 0.8473943  | 0.011011865 | 0.982588331 | 0.781031088 |
| 0.844352365 | 0.01204277 | 0.84870306 | 0.014737088 | -1.04759916 | 0.478081432 |

|             |            |            |             |             |             |
|-------------|------------|------------|-------------|-------------|-------------|
| -1.0150126  | 0.80380433 | 0.94559393 | 0.352814624 | 0.925479305 | 0.200001917 |
| -1.27891985 | 0.05058917 | -1.0655165 | 0.608068462 | -1.08503021 | 0.509920716 |
| 0.820560961 | 0.01346232 | 0.8334714  | 0.022263603 | 0.943557042 | 0.456042024 |
| -1.19543421 | 0.0594576  | -1.1954422 | 0.059448421 | -1.37601983 | 0.001122401 |
| -1.16938819 | 0.06369638 | -1.193886  | 0.036555494 | -1.34335677 | 0.000758574 |
| -1.04697257 | 0.49715804 | -1.1000808 | 0.161240851 | -1.05472982 | 0.430950001 |
| 0.919737481 | 0.37740768 | -1.0286657 | 0.764835255 | -1.09237554 | 0.351467108 |
| -1.06437903 | 0.49163716 | -1.1465798 | 0.13486115  | -1.0828012  | 0.381226362 |
| 0.841687353 | 0.02529686 | 0.62911209 | 8.70948E-08 | 0.74402197  | 0.000231236 |
| -1.10803126 | 0.28248327 | -1.1734124 | 0.096370522 | -1.22593958 | 0.035598979 |
| 0.961131194 | 0.39229583 | -1.0718124 | 0.13725448  | -1.03028452 | 0.519089669 |
| 0.762954997 | 0.00389849 | -1.1261208 | 0.19095084  | 0.898498619 | 0.237927309 |
| -1.09886029 | 0.34008311 | 0.98198973 | 0.853483554 | -1.02406678 | 0.809070438 |
| 0.912510493 | 0.27651226 | -1.2447216 | 0.011158414 | -1.11595426 | 0.193313855 |
| 0.837307766 | 0.02349042 | -1.0490931 | 0.531754686 | 0.951714333 | 0.518498318 |
| 0.954435511 | 0.39432587 | -1.0460057 | 0.411225521 | 0.913432814 | 0.101297617 |
| 0.789362507 | 0.00688462 | -1.1491054 | 0.104452281 | 0.942103987 | 0.481557327 |
| -1.0019165  | 0.97163561 | -1.031969  | 0.559577949 | -1.22501628 | 0.000387429 |
| -1.10489453 | 0.26446446 | -1.0859947 | 0.355181839 | -1.06695724 | 0.466926991 |
| -1.01638221 | 0.70028293 | -1.0534185 | 0.220583295 | -1.07323843 | 0.098115738 |
| 0.974411797 | 0.75307491 | -1.0126749 | 0.878466739 | 0.966683879 | 0.681008878 |
| 0.855542956 | 0.00427959 | -1.0441364 | 0.412477392 | -1.00841164 | 0.873331006 |
| -1.06745821 | 0.21942461 | -1.110445  | 0.051236767 | -1.09592549 | 0.086965383 |
| 0.990448158 | 0.89060423 | -1.0403955 | 0.570924007 | -1.03274598 | 0.644566842 |
| 0.94429766  | 0.51257153 | -1.0799214 | 0.380443075 | -1.09595776 | 0.296646231 |
| 0.771605862 | 0.01986784 | 0.87688558 | 0.229162162 | 0.972701763 | 0.798731492 |
| -1.06989266 | 0.18410761 | -1.0475889 | 0.358614053 | -1.15437317 | 0.006036896 |
| -1.03327509 | 0.76170451 | -1.0267305 | 0.806907717 | -1.14589128 | 0.210260043 |
| -1.45386124 | 4.94E-05   | -1.2817821 | 0.004996121 | -1.55413799 | 3.18E-06    |
| 0.826026128 | 0.00211793 | 0.8074106  | 0.000663806 | 0.954660777 | 0.436459698 |
| -1.19337007 | 0.07271427 | -1.2717105 | 0.01594461  | -1.13491562 | 0.19559393  |
| 0.845768105 | 0.06183652 | -1.0449511 | 0.618656216 | -1.08177431 | 0.374783695 |
| 0.947446112 | 0.33777532 | -1.0521798 | 0.366215109 | 0.971503574 | 0.606610345 |
| 0.670764431 | 0.00181789 | 0.90364898 | 0.408764633 | -1.00231236 | 0.984926752 |
| -1.32076126 | 0.01611935 | -1.3905175 | 0.004775826 | -1.3270413  | 0.014484186 |
| -1.09344997 | 0.05900985 | 0.99751737 | 0.957392601 | -1.14734966 | 0.004469553 |
| -1.04301894 | 0.62500432 | -1.1120867 | 0.220379104 | 0.947269223 | 0.52989013  |
| -1.12913112 | 0.04792137 | 0.95509761 | 0.447157726 | -1.11535397 | 0.074378268 |
| -1.04868041 | 0.57018599 | -1.133869  | 0.136907943 | -1.22846374 | 0.016595647 |
| -1.30586578 | 0.02720826 | -1.2208377 | 0.095345415 | -1.03825839 | 0.750625373 |
| 0.987925035 | 0.83605143 | -1.0389727 | 0.515614379 | -1.04841841 | 0.421873397 |
| 0.992937533 | 0.92903948 | 0.9008383  | 0.192999797 | -1.21981864 | 0.015184394 |
| -1.07686825 | 0.31056936 | -1.0892796 | 0.242375133 | -1.11910585 | 0.125702181 |
| -1.03750531 | 0.73076761 | -1.0258574 | 0.811371981 | 0.867943619 | 0.188963461 |

|             |            |            |             |             |             |
|-------------|------------|------------|-------------|-------------|-------------|
| 0.966928518 | 0.60173677 | -1.0029804 | 0.963117472 | -1.00098125 | 0.987840987 |
| 0.963633427 | 0.62477733 | 0.91959915 | 0.270650426 | -1.02559913 | 0.738433526 |
| 0.813583944 | 0.053651   | 0.73387311 | 0.00458266  | 0.841279877 | 0.104190824 |
| -1.00138714 | 0.97573275 | 0.93774081 | 0.162196969 | -1.00202989 | 0.964506045 |
| -1.23586769 | 1.19E-05   | -1.2753349 | 9.21039E-07 | -1.17492606 | 0.000550202 |
| 0.935851907 | 0.27932059 | 0.96629986 | 0.574352912 | -1.01770981 | 0.773401731 |
| 0.88751598  | 0.17109919 | 0.95536644 | 0.597730539 | -1.15363168 | 0.10245464  |
| -1.30162223 | 4.46E-06   | -1.2242513 | 0.000253827 | -1.23796321 | 0.000125656 |
| -1.04909463 | 0.55471513 | -1.0809489 | 0.338658554 | -1.08336688 | 0.325096048 |
| -1.17651072 | 0.03894848 | -1.1250818 | 0.130758464 | -1.1695232  | 0.046385808 |
| 0.966283581 | 0.67805549 | 0.9885362  | 0.88893539  | -1.18810417 | 0.040672196 |
| 0.997849169 | 0.98153663 | -1.0998766 | 0.308568067 | 0.937201448 | 0.486732605 |
| -1.03308352 | 0.57421495 | -1.0274051 | 0.640554744 | -1.19580393 | 0.003029668 |
| -1.00833927 | 0.91817205 | 0.88428184 | 0.13225199  | 0.675445325 | 1.00E-05    |
| 0.971986751 | 0.76049305 | 0.8841687  | 0.189958523 | 0.922984495 | 0.391317636 |
| -1.03717213 | 0.68858717 | 0.9939735  | 0.947040064 | -1.03925576 | 0.672459609 |
| -1.58716678 | 7.69E-06   | -1.5055709 | 5.42988E-05 | -1.66865708 | 1.13E-06    |
| -1.13940451 | 0.08026464 | 0.96256278 | 0.604330424 | -1.20878444 | 0.012318894 |
| -1.10742365 | 0.30573859 | -1.358656  | 0.00302696  | -1.42556088 | 0.00070953  |
| -1.52143008 | 1.96E-07   | -1.3198062 | 0.000232758 | -1.37028057 | 3.95E-05    |
| 0.674012302 | 0.00093928 | 0.7737392  | 0.026796263 | 0.991648126 | 0.940930516 |
| 0.997621883 | 0.9691405  | -1.0899278 | 0.165576936 | -1.16432366 | 0.016164347 |
| -1.06575602 | 0.16048312 | -1.0274991 | 0.546924449 | 0.990975045 | 0.840217819 |
| -1.10271112 | 0.25316954 | -1.237709  | 0.014763295 | -1.52064415 | 7.70E-06    |
| -1.03430359 | 0.54732463 | -1.0959574 | 0.105766982 | -1.22716673 | 0.000549374 |
| 0.974320802 | 0.70935346 | 0.98233071 | 0.79833079  | 0.966727928 | 0.62796201  |
| -1.03421168 | 0.60978299 | 0.9556217  | 0.491438372 | -1.187996   | 0.011145206 |
| 0.832929646 | 0.03244878 | 0.81727933 | 0.018767845 | 0.738141552 | 0.000600692 |
| 0.955923195 | 0.512243   | 0.9286874  | 0.283745353 | 0.810792995 | 0.003358405 |
| -1.16600394 | 0.03504501 | 0.91083379 | 0.194061368 | -1.18573483 | 0.019948808 |
| 0.911848182 | 0.16052994 | 0.99842508 | 0.980699907 | -1.12808792 | 0.068590744 |
| 0.928991806 | 0.2174017  | 0.9281647  | 0.21196945  | -1.00107081 | 0.985597802 |
| 0.921443076 | 0.05675641 | -1.0343017 | 0.425695263 | 0.97883307  | 0.612713499 |
| -1.04428482 | 0.20063472 | 0.98794703 | 0.718339536 | -1.03376122 | 0.325252036 |
| -1.03459485 | 0.31985088 | 0.98184888 | 0.590885292 | -1.00528398 | 0.876941728 |
| 0.901439361 | 0.02893069 | -1.044877  | 0.34652744  | 0.807820249 | 2.47E-05    |
| -1.67300299 | 5.78E-07   | -1.2306801 | 0.026099651 | -1.28530353 | 0.007749957 |
| -1.16385199 | 0.01808836 | -1.1324938 | 0.050618953 | -1.14374754 | 0.035381268 |
| -1.03174157 | 0.48465093 | -1.1027428 | 0.03194837  | -1.11972403 | 0.013780152 |
| -1.10143903 | 0.31634126 | 0.90972622 | 0.326400199 | 0.857768549 | 0.114122524 |
| 0.814992966 | 0.00087416 | -1.0174426 | 0.766857951 | 0.756876473 | 1.31E-05    |
| 0.831156062 | 0.01356669 | 0.82253729 | 0.009338691 | 0.923627284 | 0.277700619 |
| -1.01637124 | 0.78739686 | 0.93617596 | 0.275889206 | -1.0514656  | 0.405942055 |
| 0.877340008 | 0.03791901 | -1.0057019 | 0.926665677 | 0.944672664 | 0.358744221 |

|             |            |            |             |             |             |
|-------------|------------|------------|-------------|-------------|-------------|
| -1.08042647 | 0.23166176 | -1.0915357 | 0.176461588 | 0.94534725  | 0.383333496 |
| -1.0216026  | 0.67780804 | 0.94674554 | 0.289579845 | -1.00813894 | 0.874709099 |
| 0.999342959 | 0.98630941 | 0.9604369  | 0.294429981 | -1.02827135 | 0.467803454 |
| 0.987959456 | 0.77169154 | 0.9098262  | 0.026920386 | -1.04413711 | 0.303091102 |
| -1.0743816  | 0.16767381 | -1.0354355 | 0.500154419 | -1.0212282  | 0.683799791 |
| 0.935195361 | 0.50783634 | 0.95270407 | 0.631691099 | 0.937680167 | 0.524720573 |
| -1.06505005 | 0.08694505 | 0.95534604 | 0.211727271 | -1.05459723 | 0.147190185 |
| -1.00366846 | 0.93548661 | 0.99254235 | 0.868585927 | -1.04730445 | 0.309261686 |
| -1.00410297 | 0.94629687 | -1.1530753 | 0.022261481 | 0.9490644   | 0.391410028 |
| -1.13577959 | 0.05442284 | -1.0463762 | 0.486834082 | 0.881398198 | 0.056419396 |
| 0.952671611 | 0.48266885 | 0.95117302 | 0.468635917 | -1.00853177 | 0.901881943 |
| 0.99928094  | 0.9875495  | 0.915885   | 0.06082421  | 0.841687884 | 0.000426382 |
| -1.08697518 | 0.16409449 | 0.98085006 | 0.744884469 | 0.953228715 | 0.421368611 |
| -1.16241378 | 0.01101348 | 0.93701566 | 0.259994122 | 0.865865839 | 0.014731072 |
| 0.913536411 | 0.44363983 | 0.73097627 | 0.00990168  | 0.709788627 | 0.005032925 |
| -1.26205879 | 0.00066521 | 0.98929419 | 0.867887291 | 0.961679142 | 0.546565407 |
| -1.70925409 | 2.45E-09   | -1.7542574 | 6.7426E-10  | -1.49396003 | 1.84E-06    |
| -1.12309974 | 0.0083589  | 0.97856506 | 0.611362707 | -1.07681131 | 0.086593886 |
| -1.03878786 | 0.43372283 | -1.1172047 | 0.02553786  | -1.06982466 | 0.167575767 |
| -1.00888059 | 0.87107303 | -1.0133392 | 0.807847852 | 0.931673841 | 0.197343509 |
| 0.639064311 | 3.47E-10   | 0.92245913 | 0.172368932 | 0.805452184 | 0.000497427 |
| -1.19289783 | 0.10005361 | -1.2325095 | 0.052449245 | -1.27805118 | 0.02373259  |
| -1.14795841 | 0.03159352 | -1.0005391 | 0.9931535   | -1.03491791 | 0.585260573 |
| -1.2453656  | 0.09511545 | -1.1606841 | 0.253719989 | 0.988772024 | 0.930657551 |
| -1.09695592 | 0.15526126 | -1.1116414 | 0.105067598 | 0.933307234 | 0.287124651 |
| -1.040662   | 0.34074691 | 0.97459119 | 0.537421716 | 0.926537082 | 0.071279586 |
| -1.13446288 | 0.15965899 | -1.139228  | 0.146490174 | -1.09125803 | 0.328012064 |
| 0.987058352 | 0.83661778 | 0.88517031 | 0.057589308 | 0.910692222 | 0.142541457 |
| 0.986625415 | 0.77076117 | 0.92932552 | 0.116772204 | 0.993244327 | 0.883342975 |
| 0.971986614 | 0.6220806  | 0.9101272  | 0.106201169 | -1.18023259 | 0.005527157 |
| -1.0231521  | 0.70611288 | 0.99066409 | 0.877123119 | 0.936989147 | 0.285867123 |
| 0.923541672 | 0.40294513 | -1.0771131 | 0.434542115 | -1.01179661 | 0.901540774 |
| -1.1214547  | 0.28599199 | -1.0856828 | 0.442966697 | -1.23368602 | 0.053489927 |
| -1.22518812 | 0.02890251 | -1.1892224 | 0.060728586 | -1.06241554 | 0.506167059 |
| -1.08387958 | 0.23135715 | -1.1384996 | 0.056468887 | -1.26505244 | 0.000852366 |
| -1.05711732 | 0.49916031 | -1.0938672 | 0.276654537 | 0.939988447 | 0.451699435 |
| -1.19449532 | 0.04748937 | -1.1574187 | 0.101027432 | -1.08077386 | 0.379262948 |
| -1.03022439 | 0.65384254 | -1.0898338 | 0.198206376 | -1.0472972  | 0.487034459 |
| -1.23138301 | 0.07442551 | -1.0720929 | 0.545408456 | -1.32973258 | 0.015859732 |
| 0.951515035 | 0.4793301  | -1.090584  | 0.219316979 | -1.54645076 | 6.95E-08    |
| 0.77475979  | 0.05366426 | 0.74074425 | 0.024173232 | 0.637659338 | 0.001008588 |
| -1.2162723  | 0.02845526 | -1.067729  | 0.454327878 | -1.31149454 | 0.002920617 |
| -1.06350018 | 0.52775972 | -1.0944657 | 0.355584033 | -1.32503221 | 0.005318909 |
| 0.936147651 | 0.51805116 | -1.0184306 | 0.857760797 | -1.02954373 | 0.775134611 |



|             |            |            |             |             |             |
|-------------|------------|------------|-------------|-------------|-------------|
| -1.01246775 | 0.84684478 | -1.0269589 | 0.678574178 | -1.19183084 | 0.008132053 |
| 0.987276441 | 0.82761319 | 0.95219528 | 0.406242912 | 0.895716254 | 0.065258488 |
| 0.963389436 | 0.51925249 | -1.0224345 | 0.701078964 | -1.06818085 | 0.256351947 |
| -1.01335404 | 0.87475872 | 0.80472582 | 0.0122152   | 0.861711907 | 0.081262925 |
| -1.15318088 | 0.14100484 | -1.0798768 | 0.424026871 | -1.26302039 | 0.017672685 |
| 0.927229223 | 0.35650139 | 0.9806742  | 0.81106908  | 0.840152516 | 0.036579288 |
| -1.12126392 | 0.41876808 | 0.88348271 | 0.381738534 | 0.991045405 | 0.949179117 |
| 0.761620219 | 0.00516773 | -1.0985719 | 0.318614017 | -1.07884504 | 0.420017066 |
| -1.08852213 | 0.41012973 | -1.0933026 | 0.386530202 | 0.986081185 | 0.891399992 |
| -1.01926701 | 0.76533898 | 0.98391377 | 0.799750589 | 0.92965314  | 0.256604342 |
| -1.15307887 | 0.06869344 | -1.1572365 | 0.062184618 | -1.28095337 | 0.002119144 |
| 0.908269879 | 0.13751771 | -1.0532916 | 0.419491263 | 0.888551114 | 0.069596311 |
| 0.963245932 | 0.32137922 | 0.97046642 | 0.426509765 | 0.933172167 | 0.070019871 |
| -1.09460343 | 0.10485195 | -1.1125232 | 0.056896554 | -1.1358087  | 0.023939035 |
| -1.06881522 | 0.20931316 | 0.99015717 | 0.850907896 | -1.00813189 | 0.877684072 |
| 0.953216159 | 0.65415671 | 0.98752393 | 0.906472548 | 0.950006097 | 0.631604398 |
| 0.927735796 | 0.17409229 | -1.1253215 | 0.034597159 | -1.03685927 | 0.509084752 |
| 0.860842795 | 0.02553094 | 0.90211606 | 0.120143092 | 0.78435912  | 0.000472446 |
| -1.04700596 | 0.52049341 | -1.0725428 | 0.328473074 | -1.12070537 | 0.114424399 |
| 0.868877513 | 0.04471144 | -1.0012238 | 0.985796361 | -1.04721785 | 0.502746597 |
| 0.922782833 | 0.12361088 | 0.92212765 | 0.12039936  | 0.975339103 | 0.628886281 |
| -1.03765268 | 0.69141619 | -1.1226329 | 0.217086328 | -1.14303533 | 0.154702378 |
| -1.13108646 | 0.09673075 | -1.2180464 | 0.009085182 | -1.06221321 | 0.411160139 |
| 0.824318049 | 0.01884943 | -1.009862  | 0.902548318 | -1.21473499 | 0.018087985 |
| -1.13579297 | 0.10433993 | -1.1881046 | 0.029503052 | -1.04152345 | 0.599745172 |
| -1.0711648  | 0.23443884 | -1.0407953 | 0.48730556  | -1.04326057 | 0.462037689 |
| -1.04009723 | 0.25150037 | 0.9968536  | 0.926312325 | -1.0410527  | 0.240733437 |
| -1.19681849 | 0.02826737 | -1.1658946 | 0.059403518 | -1.12862831 | 0.134783054 |
| 0.972376961 | 0.58544935 | 0.91389109 | 0.083429191 | 0.839192515 | 0.001152597 |
| 0.948168799 | 0.19735504 | -1.0635997 | 0.136345778 | 0.945612873 | 0.175922226 |
| 0.980423126 | 0.72733852 | -1.0093222 | 0.869958659 | 0.981771399 | 0.745591614 |
| 0.988838365 | 0.80748956 | -1.0398053 | 0.398245558 | -1.0918936  | 0.060450415 |
| 0.838287668 | 0.45596255 | 0.91723133 | 0.714464014 | 0.865768945 | 0.542054479 |
| -1.2315418  | 0.01327479 | -1.1788695 | 0.047992843 | -1.24608772 | 0.009118663 |
| 0.9338342   | 0.33395736 | 0.81690513 | 0.005700218 | -1.06319327 | 0.386712203 |
| -1.06238827 | 0.60479307 | 0.86099474 | 0.203466709 | -1.19395174 | 0.133164718 |
| 0.936301868 | 0.49443844 | 0.99650626 | 0.970953424 | -1.10107538 | 0.318713751 |
| 0.961696593 | 0.64104201 | -1.0560286 | 0.515589078 | -1.01380071 | 0.869913043 |
| 0.977966583 | 0.73822115 | 0.98964776 | 0.87590435  | -1.06539546 | 0.343777483 |
| 0.795407208 | 0.00188554 | 0.91112013 | 0.189329059 | 0.967584426 | 0.639797652 |
| -1.06545513 | 0.42197631 | -1.0034636 | 0.964965552 | -1.21003287 | 0.018329095 |
| -1.11114833 | 0.05113371 | -1.0033696 | 0.949465516 | -1.1663415  | 0.005213848 |
| -1.0514692  | 0.50081658 | 0.85547247 | 0.039706456 | -1.1151713  | 0.146824081 |
| -1.10637257 | 0.09478501 | -1.3687504 | 2.38448E-06 | -1.27983015 | 0.000119083 |

|             |            |            |             |             |             |
|-------------|------------|------------|-------------|-------------|-------------|
| -1.02803549 | 0.81668186 | -1.2837778 | 0.040018516 | -1.32532812 | 0.021255032 |
| -1.00450315 | 0.92663347 | -1.0697152 | 0.170978069 | -1.0367952  | 0.460102649 |
| 0.916226826 | 0.16347654 | -1.101051  | 0.125938328 | -1.01800751 | 0.774299721 |
| -1.04023556 | 0.39907201 | -1.1445392 | 0.005263617 | -1.16999893 | 0.00134435  |
| 0.968837914 | 0.60030232 | 0.94640509 | 0.363175859 | -1.0208812  | 0.732128307 |
| 0.985831757 | 0.69055818 | -1.0457871 | 0.214640288 | -1.04654081 | 0.207459464 |
| 0.987091628 | 0.7439118  | 0.92131881 | 0.043168103 | 0.869837745 | 0.000876959 |
| 0.991209911 | 0.90537892 | -1.0006498 | 0.993021382 | -1.14152132 | 0.079016146 |
| 0.950911528 | 0.20412001 | 0.94798058 | 0.178138406 | -1.04332571 | 0.283540126 |
| 0.980120022 | 0.72250089 | 0.98486246 | 0.787297695 | 0.949210389 | 0.358243316 |
| 0.918148181 | 0.28093197 | -1.0127272 | 0.872457421 | -1.01114029 | 0.888158009 |
| -1.19107897 | 0.00032751 | -1.0501822 | 0.28713011  | -1.10928071 | 0.026782722 |
| 0.895319871 | 0.11691413 | 0.91277359 | 0.19400258  | 0.865826532 | 0.042674488 |
| 0.970523976 | 0.80406123 | 0.77804626 | 0.041242471 | 0.830091657 | 0.126585657 |
| 0.929292707 | 0.21460936 | -1.049503  | 0.411641741 | -1.37980459 | 1.03E-06    |
| 0.943970769 | 0.40707594 | 0.88825876 | 0.091710417 | -1.05411322 | 0.448371548 |
| -1.10086989 | 0.18521558 | -0.9999413 | 0.999348394 | 0.485525681 | 5.36E-14    |
| 0.771679145 | 0.00114054 | 0.8519985  | 0.038248146 | 0.906884163 | 0.200363785 |
| -1.34314047 | 0.03620574 | -1.1112795 | 0.445604097 | -1.16719447 | 0.265200387 |
| -1.11546272 | 0.09908781 | 0.98945652 | 0.871280512 | 0.792826767 | 0.000772196 |
| -1.0270519  | 0.59493766 | 0.98699708 | 0.794115348 | -1.04265411 | 0.40629761  |
| -1.23448013 | 0.09573544 | -1.0497001 | 0.697742757 | 0.986910145 | 0.915923573 |
| 0.876101549 | 0.31698935 | 0.96714592 | 0.799622141 | 0.851829919 | 0.226065958 |
| 0.984897961 | 0.74178891 | -1.0413936 | 0.381305758 | 0.810734077 | 2.94E-05    |
| -1.05054944 | 0.49365106 | -1.113402  | 0.139127141 | 0.837742828 | 0.016538648 |
| 0.998509386 | 0.98053699 | 0.95083863 | 0.411185797 | -1.00039341 | 0.994867606 |
| 0.906341368 | 0.31778584 | 0.73264121 | 0.002376465 | 0.74971731  | 0.004651239 |
| 0.967466515 | 0.61470112 | 0.85497456 | 0.019964209 | 0.943309952 | 0.375621487 |
| -1.01967779 | 0.84982    | 0.99545827 | 0.964714229 | 0.855250655 | 0.132716292 |
| -1.12270102 | 0.12018008 | -1.0902678 | 0.243528114 | -1.14783978 | 0.065363106 |
| 0.981809589 | 0.64544545 | 0.97727261 | 0.564711213 | 0.664065041 | 2.41E-14    |
| -1.21264645 | 0.00164863 | 0.99923065 | 0.989491665 | -1.03655402 | 0.539686783 |
| -1.10762761 | 0.17551233 | -1.1073427 | 0.176583079 | -1.19760644 | 0.018854756 |
| 0.634103731 | 5.83E-12   | 0.99783799 | 0.966874482 | -1.00610574 | 0.907025469 |
| 0.608954546 | 1.94E-08   | 0.79722678 | 0.003955095 | 0.493400339 | 6.48E-13    |
| -1.13131511 | 0.31289644 | -1.3047776 | 0.032390064 | -1.21364991 | 0.115737705 |
| 0.962681983 | 0.60392112 | -1.1462599 | 0.06651827  | -1.21530395 | 0.009870966 |
| -1.05860783 | 0.18172835 | 0.97235447 | 0.50827     | -1.06592576 | 0.135223573 |
| 0.952372011 | 0.54644997 | -1.0601883 | 0.470432301 | -1.11171215 | 0.19338995  |
| -1.02409984 | 0.63752412 | -1.0264179 | 0.606001726 | -1.15139627 | 0.006990767 |
| 0.942795089 | 0.14952883 | -1.0480345 | 0.249350646 | 0.870224636 | 0.001098577 |
| -1.22723269 | 0.05221613 | -1.0738434 | 0.492661721 | -1.0624855  | 0.559193724 |
| -1.09547875 | 0.14070776 | -1.0357294 | 0.567273956 | -1.06083593 | 0.337213277 |
| 0.872248339 | 0.0907234  | -1.0049577 | 0.9505338   | 0.875145725 | 0.098616623 |

|             |            |            |             |             |             |
|-------------|------------|------------|-------------|-------------|-------------|
| -1.00513725 | 0.94164159 | -1.0993083 | 0.179821286 | 0.932448104 | 0.31991797  |
| -1.29606468 | 0.03016213 | -1.1172579 | 0.345278517 | 0.619001097 | 0.000132335 |
| 0.948795486 | 0.16394896 | 0.98887896 | 0.765138483 | -1.10108755 | 0.012474641 |
| -1.12762422 | 0.28742808 | 0.78459792 | 0.034454572 | 0.944547445 | 0.611915449 |
| -1.01700712 | 0.84212487 | 0.89576798 | 0.197003727 | 0.774592336 | 0.003744143 |
| 0.835640659 | 0.07847255 | 0.87041367 | 0.171315395 | 0.824938698 | 0.059842637 |
| -1.02375119 | 0.64579345 | -1.066618  | 0.209589168 | -1.03957441 | 0.448073561 |
| -1.03574745 | 0.63652799 | 0.99084782 | 0.901454807 | -1.04359965 | 0.56604407  |
| 0.951149248 | 0.43066808 | 0.9576132  | 0.495251389 | 0.839233677 | 0.007507003 |
| 0.909147642 | 0.09581329 | 0.98272597 | 0.757650764 | 0.964561601 | 0.523467838 |
| -1.07283386 | 0.32589864 | -1.1094602 | 0.148778598 | -1.20862945 | 0.009955742 |
| 0.992664574 | 0.864161   | 0.97147909 | 0.502195685 | -1.06487769 | 0.148028744 |
| -1.13902297 | 0.04668611 | 0.91299425 | 0.160285678 | 0.973997383 | 0.681895687 |
| -1.21885795 | 0.00768491 | -1.2225194 | 0.006863939 | -1.45492762 | 2.69E-06    |
| -1.00624238 | 0.89692976 | -1.0205183 | 0.672677399 | -1.09768239 | 0.056491553 |
| -1.06817348 | 0.18694774 | -1.2426954 | 5.10976E-05 | 0.949900225 | 0.302179917 |
| -1.11938188 | 0.04578583 | 0.9293051  | 0.189336442 | -1.0230798  | 0.680720922 |
| -1.036806   | 0.42188024 | -1.0986615 | 0.039813974 | -1.01982273 | 0.66203991  |
| 0.885853393 | 0.0449444  | -1.0756437 | 0.222120638 | 0.958288535 | 0.473582405 |
| -1.10245779 | 0.08273616 | 0.97158596 | 0.603474968 | 0.735828871 | 8.70E-07    |
| 0.835789433 | 0.01149763 | 0.92963143 | 0.291836268 | 0.621288942 | 5.24E-09    |
| -1.0183523  | 0.58003491 | -1.0675328 | 0.050514218 | 0.971676296 | 0.383010959 |
| 0.978849032 | 0.82822235 | -1.0014618 | 0.988168098 | -1.13820827 | 0.192313846 |
| -1.06553764 | 0.27150134 | -1.199512  | 0.002419308 | -1.22635893 | 0.000759191 |
| -1.04415588 | 0.58927462 | 0.49980816 | 7.35566E-12 | 0.928320549 | 0.353996129 |
| -1.36242605 | 0.03445524 | 0.50268354 | 1.19664E-05 | 0.623581781 | 0.001653758 |
| -1.06857112 | 0.22010486 | -1.0745078 | 0.184484713 | -1.12400893 | 0.03312709  |
| -1.01546042 | 0.61082018 | -1.0046337 | 0.877991975 | -1.01396991 | 0.645314317 |
| -1.00534873 | 0.94126294 | 0.96181796 | 0.591261559 | -1.00863307 | 0.9054908   |
| 0.927204665 | 0.38258382 | 0.88801734 | 0.172280495 | -1.06886355 | 0.441322938 |
| 0.952516984 | 0.47204069 | -1.1003396 | 0.16035006  | -1.08679298 | 0.220674283 |
| -1.03056341 | 0.75364573 | -1.0653845 | 0.509767312 | -1.05058325 | 0.607251507 |
| 0.827559196 | 0.11103506 | -1.0696622 | 0.566695625 | -1.1541564  | 0.225062192 |
| 0.90056302  | 0.1043079  | -1.0672036 | 0.309439541 | 0.982502855 | 0.781711077 |
| -1.04644733 | 0.4874296  | 0.80569399 | 0.001587928 | -1.16905172 | 0.019626382 |
| -1.07776609 | 0.38747466 | 0.95554703 | 0.598969599 | -1.28878029 | 0.004680954 |
| 0.987881552 | 0.86501384 | 0.9949351  | 0.943552588 | -1.07405684 | 0.321372927 |
| -1.09657536 | 0.16922956 | -1.2555373 | 0.001135025 | -1.45929461 | 5.00E-07    |
| 0.959003316 | 0.51820973 | 0.96420588 | 0.573525216 | -1.07804871 | 0.248106055 |
| 0.957340335 | 0.51990594 | -1.0751624 | 0.286394253 | -1.13967181 | 0.05732864  |
| -1.0853787  | 0.27675752 | -1.1487766 | 0.068346413 | -1.2281034  | 0.007983234 |
| -1.00604552 | 0.92966105 | -1.1099593 | 0.130654217 | -1.29304899 | 0.000393715 |
| -1.07784948 | 0.27784481 | 0.93336825 | 0.317800164 | 0.945321066 | 0.414549149 |
| -1.22533986 | 0.00995365 | 0.99323124 | 0.929164443 | 0.8852252   | 0.114760857 |

|             |            |            |             |             |             |
|-------------|------------|------------|-------------|-------------|-------------|
| 0.951575922 | 0.4457036  | 0.75554093 | 6.36941E-05 | 0.749876793 | 4.30E-05    |
| -1.06045001 | 0.38233538 | -1.0224342 | 0.740462944 | -1.07563674 | 0.278741112 |
| 0.899882845 | 0.02219703 | 0.95788968 | 0.341082982 | 0.944852663 | 0.210799321 |
| 0.900397705 | 0.10098483 | -1.060239  | 0.356338448 | 0.907305895 | 0.127688039 |
| -1.05749686 | 0.57881841 | -1.1126263 | 0.291102787 | -1.3368298  | 0.005395042 |
| -1.049346   | 0.61403509 | -1.0270137 | 0.779999871 | 0.985005182 | 0.874173841 |
| -1.12586057 | 0.0402123  | -1.2305856 | 0.000541893 | -1.22955995 | 0.000567504 |
| -1.00556576 | 0.92978635 | -1.0681219 | 0.297905238 | -1.06980111 | 0.286654848 |
| 0.923439182 | 0.14559788 | 0.91531875 | 0.106757982 | -1.04219563 | 0.446884657 |
| -1.18749455 | 0.07041522 | -1.1672831 | 0.10243121  | -1.08055334 | 0.40897041  |
| 0.853858051 | 0.05263222 | 0.88192592 | 0.120878352 | 0.767836917 | 0.001653308 |
| -1.12141027 | 0.20539135 | -1.1603093 | 0.102070156 | -1.37809709 | 0.000721841 |
| 0.942004379 | 0.55997171 | -1.1765428 | 0.116339451 | -1.08997874 | 0.401395856 |
| 0.943355016 | 0.44764823 | -1.0355991 | 0.648175567 | -1.07277049 | 0.360922873 |
| 0.969365302 | 0.53362946 | 0.93207116 | 0.162402898 | -1.07499078 | 0.151189527 |
| -1.1477482  | 0.00753419 | -1.0037019 | 0.940911467 | -1.13738307 | 0.012188888 |
| 0.964275141 | 0.59592848 | 0.92481275 | 0.256810043 | -1.01538122 | 0.823740665 |
| 0.888194345 | 0.19576123 | -1.1746536 | 0.08096686  | -1.34934683 | 0.001669377 |
| 0.956438111 | 0.53483643 | 0.98062627 | 0.784841811 | 0.972097649 | 0.693017374 |
| -1.00694597 | 0.81667539 | 0.99506675 | 0.868433366 | 0.981604481 | 0.534696719 |
| -1.08171154 | 0.08039812 | 0.94628136 | 0.215726177 | 0.945282651 | 0.207200376 |
| 0.933817259 | 0.17521009 | -1.0730079 | 0.163204916 | -1.10465276 | 0.050918162 |
| 0.994278155 | 0.92339887 | 0.97487517 | 0.670080567 | 0.973711559 | 0.655599219 |
| -1.0129399  | 0.91717939 | -1.2879232 | 0.044643182 | -1.24609299 | 0.0794441   |
| -1.02390974 | 0.78614466 | -1.0107212 | 0.902512099 | -1.03397088 | 0.701371481 |
| -1.39782417 | 0.00079059 | -1.7017443 | 6.31775E-07 | -1.37472574 | 0.001352841 |
| 0.980215998 | 0.80173002 | -1.2176222 | 0.016040389 | -1.09364737 | 0.263284469 |
| -1.02198272 | 0.76814751 | 0.96454667 | 0.624820185 | 0.938527181 | 0.391165204 |
| 0.835853641 | 0.02563605 | 0.82429367 | 0.016562131 | 0.997474422 | 0.974292611 |
| 0.709540841 | 0.00510502 | 0.86498465 | 0.222435577 | 0.904551824 | 0.397045985 |
| -1.01168987 | 0.8284576  | 0.91155362 | 0.088490938 | 0.913830231 | 0.097174229 |
| 0.978682503 | 0.78467124 | -1.0066786 | 0.932712933 | -1.16003579 | 0.063911681 |
| 0.933227348 | 0.60085032 | -1.3354821 | 0.031897321 | -1.15504119 | 0.277235942 |
| 0.960957698 | 0.55272376 | -1.0795345 | 0.256026818 | -1.20131425 | 0.008072283 |
| -1.15568725 | 0.13196344 | -1.1089378 | 0.279203604 | -1.18009566 | 0.085719557 |
| 0.966287613 | 0.31674193 | -1.0252268 | 0.466030362 | 0.983933466 | 0.635079663 |
| -1.13111512 | 0.11166464 | 0.92261027 | 0.295065471 | -1.07597305 | 0.340728411 |
| -1.01165598 | 0.86045176 | -1.0890305 | 0.19914144  | 0.857551652 | 0.022898113 |
| 0.983083809 | 0.76252085 | 0.99371295 | 0.911025426 | 0.534798282 | 1.42E-15    |
| -1.13292227 | 0.0161015  | -1.1963056 | 0.000764443 | -1.19615765 | 0.000770262 |
| -1.02931606 | 0.4869746  | -1.0326699 | 0.439539386 | -1.00678105 | 0.870570968 |
| -1.34577129 | 0.00237763 | -1.1988539 | 0.056631708 | -1.17462454 | 0.089583475 |
| 0.968170447 | 0.54894089 | 0.76320193 | 5.65584E-06 | 0.948724579 | 0.330753443 |
| 0.76166423  | 6.42E-05   | 0.68296868 | 1.32751E-07 | 0.788329906 | 0.000385213 |

|             |            |            |             |             |             |
|-------------|------------|------------|-------------|-------------|-------------|
| -1.08681888 | 0.19258376 | 0.91712623 | 0.176033803 | 0.982018729 | 0.774767556 |
| -1.4184727  | 0.00021848 | -1.1157301 | 0.219559327 | -1.08573923 | 0.354933552 |
| -1.00220207 | 0.96303381 | -1.1878828 | 0.00060509  | -1.1469878  | 0.005353157 |
| 0.935149043 | 0.25386232 | -1.1529758 | 0.017639251 | -1.02927714 | 0.62164148  |
| -1.12954566 | 0.07153484 | -1.0688395 | 0.319535971 | -1.16672998 | 0.023755207 |
| -1.37358011 | 0.00744721 | 0.99640282 | 0.974923973 | -1.1515408  | 0.221651855 |
| -1.00303767 | 0.94199878 | 0.98511205 | 0.719138291 | 0.936899121 | 0.122089764 |
| -1.32437287 | 0.00781609 | -1.0090994 | 0.929328125 | -1.09184496 | 0.391227711 |
| -1.42150224 | 4.61E-06   | -1.261267  | 0.001425621 | -1.20467556 | 0.009295184 |
| -1.06691509 | 0.11364268 | -1.1350735 | 0.002700476 | -1.19742828 | 4.03E-05    |
| -1.13540445 | 0.04462585 | 0.96137035 | 0.526224571 | -1.0109882  | 0.860202737 |
| -1.07158557 | 0.15206384 | -1.0185196 | 0.701300232 | -1.09150407 | 0.07130679  |
| -1.19502214 | 0.00837037 | -1.1636499 | 0.023648569 | -1.16860667 | 0.020169555 |
| -1.00734615 | 0.91758404 | 0.88410427 | 0.085889393 | -1.06767577 | 0.356455216 |
| 0.823589573 | 0.0493824  | 0.99126376 | 0.927902294 | 0.808865673 | 0.032306563 |
| -1.1345005  | 0.0843635  | -1.011355  | 0.875565228 | 0.963022605 | 0.601707915 |
| -1.03643681 | 0.54663438 | 0.96238535 | 0.518520418 | -1.04874298 | 0.42337458  |
| 0.989427138 | 0.79446681 | 0.92075324 | 0.046943061 | 0.961434119 | 0.337018065 |
| 0.858189436 | 0.00457608 | 0.94442162 | 0.273371883 | 0.952270143 | 0.348134289 |
| -1.10684726 | 0.28449953 | 0.93370932 | 0.468299323 | 0.899554939 | 0.26463762  |
| 0.996504884 | 0.93838995 | 0.97121704 | 0.519897319 | 0.971156075 | 0.519004032 |
| -1.06310607 | 0.45896555 | -1.2253442 | 0.016426962 | -1.16564717 | 0.067178304 |
| 0.95219278  | 0.42147666 | 0.92421098 | 0.198037587 | -1.07318317 | 0.247995148 |
| -1.31099848 | 0.00010989 | -1.1288008 | 0.067210049 | -1.26035568 | 0.000767341 |
| 0.924187908 | 0.16014122 | -1.0295316 | 0.601196353 | 0.767998718 | 1.46E-05    |
| 0.925634457 | 0.31390084 | 0.93387462 | 0.372133545 | 0.918354377 | 0.267496142 |
| 0.998085287 | 0.9821707  | -1.0614484 | 0.487816267 | -1.09099599 | 0.312186652 |
| -1.10540726 | 0.23494763 | -1.0378263 | 0.65808304  | -1.01223288 | 0.884673543 |
| 0.938483473 | 0.24751584 | 0.99913563 | 0.987354163 | 0.9468635   | 0.319198353 |
| -1.06462735 | 0.14322053 | -1.028185  | 0.512464668 | -1.13673967 | 0.003648473 |
| -1.12049089 | 0.25975442 | 0.97215977 | 0.778504464 | -1.10268848 | 0.332133029 |
| -1.24567714 | 0.07765468 | -1.1340232 | 0.307661378 | -1.2235698  | 0.104314804 |
| -1.12820159 | 0.05951255 | 0.9458407  | 0.378139489 | 0.992017941 | 0.898700818 |
| -1.04760161 | 0.36810706 | -1.0565573 | 0.287705659 | -1.15584762 | 0.006590661 |
| -1.04856728 | 0.28395507 | 0.95952564 | 0.349956241 | -1.00320684 | 0.942023398 |
| -1.38542255 | 3.00E-07   | -1.3261287 | 5.12634E-06 | -1.20377161 | 0.001580582 |
| -1.17618629 | 0.09794668 | -1.1680229 | 0.112841265 | -1.53260261 | 4.66E-05    |
| 0.787693359 | 0.01729096 | 0.98284096 | 0.859259915 | 0.977852528 | 0.818539745 |
| -1.05628423 | 0.36331926 | -1.1857515 | 0.006143421 | -1.17496084 | 0.009263107 |
| -1.09895049 | 0.31778774 | 0.62702645 | 6.76102E-06 | 0.883973627 | 0.193091156 |
| -1.27562587 | 0.00064108 | -1.0996341 | 0.162928067 | -1.38387812 | 1.14E-05    |
| -1.29246663 | 0.01202035 | -1.3157584 | 0.007462567 | -1.30917791 | 0.008547346 |
| 0.997372445 | 0.97015146 | 0.94493829 | 0.421951386 | 0.752842366 | 0.000162475 |
| 0.939355203 | 0.29151348 | 0.90251647 | 0.086443175 | 0.914594669 | 0.13434387  |

|             |            |            |             |             |             |
|-------------|------------|------------|-------------|-------------|-------------|
| -1.24713204 | 0.03351566 | -1.0454193 | 0.662538079 | -1.17050273 | 0.125728246 |
| -1.19859841 | 0.01172195 | 0.88992058 | 0.098765263 | -1.14526652 | 0.055929057 |
| -1.07668008 | 0.23121067 | -1.0975704 | 0.132895459 | -1.21232556 | 0.002624143 |
| -1.26821591 | 0.00783637 | -1.6035793 | 1.12047E-06 | -1.39947888 | 0.000263179 |
| -1.01869197 | 0.77572757 | 0.82609603 | 0.004652653 | 0.916746282 | 0.184621468 |
| 0.895435491 | 0.11444213 | -1.0416928 | 0.555363675 | 0.791562437 | 0.001293709 |
| -1.00770246 | 0.90053291 | -1.0252482 | 0.68482453  | -1.07208435 | 0.2596798   |
| -1.14064369 | 0.05665359 | 0.99548115 | 0.946794467 | -1.13945282 | 0.058578519 |
| 0.93688156  | 0.21647404 | -1.022369  | 0.672990721 | -1.01739578 | 0.742060042 |
| -1.07831631 | 0.26459857 | -1.062558  | 0.368323422 | -1.13284367 | 0.067661256 |
| -1.10735084 | 0.39228009 | 0.98242278 | 0.881337321 | -1.29972726 | 0.030864137 |
| -1.2264988  | 0.05193772 | -1.3001415 | 0.013467534 | -1.37942829 | 0.00281071  |
| -1.09356111 | 0.14579669 | -1.0531762 | 0.396350932 | -1.24458622 | 0.000672179 |
| -1.15457017 | 0.06991708 | -1.1803703 | 0.037454143 | -1.25187445 | 0.005541344 |
| 0.953583987 | 0.58679368 | -1.1047504 | 0.256850701 | -1.01087226 | 0.901459411 |
| 0.987795141 | 0.70358854 | -1.0412497 | 0.213436951 | -1.03091279 | 0.347207345 |
| -1.14172533 | 0.26290985 | -1.2197897 | 0.095682081 | -1.36809537 | 0.009873578 |
| -1.14305655 | 0.1004172  | -1.0410479 | 0.61706037  | 0.857803915 | 0.060489695 |
| -1.12654285 | 0.07505809 | -1.1623    | 0.025891476 | -1.0480313  | 0.47786021  |
| -1.0947925  | 0.51414328 | -1.1414165 | 0.341762569 | 0.988751239 | 0.934923243 |
| -1.07214563 | 0.31062002 | -1.1126274 | 0.122719434 | -1.13488701 | 0.068480419 |
| -1.17206844 | 0.01235138 | 0.97297277 | 0.656781277 | -1.00957898 | 0.877026956 |
| -1.01125497 | 0.80678794 | -1.0419212 | 0.371176521 | -1.02180791 | 0.637590974 |
| -1.2232577  | 0.00589509 | -1.2278626 | 0.005089333 | -1.13175615 | 0.083860234 |
| -1.08602455 | 0.12977305 | 0.97006502 | 0.573313714 | -1.03408498 | 0.534677489 |
| -1.0272425  | 0.72133634 | 0.99019784 | 0.895945631 | -1.11114384 | 0.165518499 |
| 0.881665872 | 0.35945162 | -1.1732184 | 0.246189668 | -1.34124648 | 0.035682763 |
| 0.954451853 | 0.36134101 | 0.82244292 | 0.000306246 | 0.952903784 | 0.34499749  |
| 0.86853268  | 0.02617824 | 0.85135975 | 0.01168539  | 0.994310695 | 0.926590532 |
| 0.848328324 | 0.00308733 | 0.86112426 | 0.006767646 | 0.863645867 | 0.007848928 |
| -1.06880655 | 0.61915839 | -1.4327564 | 0.009214299 | -1.14425145 | 0.315890517 |
| 0.950200735 | 0.36361579 | -1.0512746 | 0.373758628 | 0.986745028 | 0.811744361 |
| 0.940420997 | 0.22710405 | 0.96376492 | 0.466063712 | -1.0697293  | 0.18564711  |
| -1.0166538  | 0.5754009  | 0.94126607 | 0.043739676 | -1.02334868 | 0.434444767 |
| -1.04299328 | 0.5157631  | -1.1445874 | 0.040556063 | 0.976262719 | 0.710347136 |
| 0.955483097 | 0.30075089 | -1.0100398 | 0.819568041 | -1.04354434 | 0.332456627 |
| 0.975229555 | 0.75785711 | 0.77355204 | 0.002503869 | 0.884007073 | 0.133592916 |
| -1.00795396 | 0.87051199 | 0.98933944 | 0.825482092 | -1.00055684 | 0.990860172 |
| -1.21500563 | 0.0010652  | -1.0223684 | 0.695810977 | 0.98530649  | 0.793535266 |
| -1.08523433 | 0.01639434 | -1.0325348 | 0.336437289 | 0.99558475  | 0.893862246 |
| -1.03333321 | 0.2831478  | -1.0015592 | 0.959109477 | -1.00279923 | 0.926705801 |
| -1.08207816 | 0.09757857 | 0.9798091  | 0.664588189 | -1.06788054 | 0.166134511 |
| -1.13540616 | 0.16240695 | -1.0641    | 0.491286511 | 0.968072233 | 0.718813669 |
| -1.18372037 | 0.031151   | -1.0961955 | 0.233392301 | -1.45840491 | 7.70E-06    |

|             |            |            |             |             |             |
|-------------|------------|------------|-------------|-------------|-------------|
| 0.972216024 | 0.59839564 | -1.0989558 | 0.081671444 | 0.764534331 | 5.46E-06    |
| -1.0355746  | 0.61158371 | 0.87603248 | 0.058395003 | 0.999773518 | 0.997371395 |
| -1.09233302 | 0.27378648 | 0.9621432  | 0.630941204 | -1.02469017 | 0.761269559 |
| -1.06434508 | 0.28016287 | 0.95027212 | 0.376188614 | -1.00591792 | 0.918167286 |
| 0.91526442  | 0.16042018 | 0.90855241 | 0.129027929 | 0.843853803 | 0.008566746 |
| -1.00419043 | 0.94406776 | -1.0763869 | 0.220082772 | -1.02540308 | 0.674093068 |
| -1.00112107 | 0.98308661 | -1.1014725 | 0.071727023 | 0.980086232 | 0.703706282 |
| -1.05776345 | 0.35262337 | -1.0390877 | 0.524754286 | 0.798099362 | 0.000414165 |
| -1.04741831 | 0.61929802 | 0.71108088 | 0.000545312 | -1.07135489 | 0.460431482 |
| 0.911970619 | 0.07561086 | -1.0400329 | 0.443624175 | 0.708995223 | 1.03E-08    |
| 0.986147964 | 0.7201909  | -1.0696668 | 0.087844503 | 0.974827348 | 0.513251582 |
| -1.33416721 | 7.55E-05   | 0.96716278 | 0.621488743 | 0.975163982 | 0.709824663 |
| -1.03034928 | 0.68202356 | -1.1241717 | 0.112677703 | -1.15952744 | 0.046353052 |
| 0.943804038 | 0.13765876 | -1.0022932 | 0.952626449 | -1.11013643 | 0.008720331 |
| 0.874637575 | 0.22525364 | 0.96041996 | 0.712927025 | 0.930228009 | 0.510533452 |
| -1.1111784  | 0.04853169 | -1.0553057 | 0.309737061 | -1.1300991  | 0.023602522 |
| -1.22718728 | 0.00260248 | -1.0999805 | 0.14732556  | -1.00281519 | 0.965563484 |
| -1.11816742 | 0.48390822 | 0.77059644 | 0.105884496 | -1.11407842 | 0.498298638 |
| -1.10398584 | 0.37337487 | 0.69942773 | 0.002031643 | 0.817218405 | 0.072569158 |
| -1.00036255 | 0.99500857 | 0.90333814 | 0.083656841 | 0.846534537 | 0.005568267 |
| -1.04579529 | 0.51041518 | -1.1124948 | 0.120553934 | -1.17931066 | 0.017995972 |
| -1.02552535 | 0.60488323 | -1.0435171 | 0.383005668 | 0.987318684 | 0.793149611 |
| 0.978047247 | 0.74627981 | 0.94596475 | 0.419311577 | 0.750263745 | 9.80E-05    |
| 0.767931694 | 5.26E-05   | 0.81574189 | 0.001316614 | 0.804679236 | 0.000658282 |
| 0.978503321 | 0.53417391 | -1.0213761 | 0.54510862  | -1.0002489  | 0.994309494 |
| -1.00041362 | 0.99420339 | -1.1115555 | 0.067413232 | -1.14596125 | 0.019666029 |
| -1.01541924 | 0.78919958 | 0.98894157 | 0.845924798 | -1.13128186 | 0.03477514  |
| -1.11475533 | 0.23467309 | -1.2471765 | 0.017853515 | -1.24134556 | 0.020293819 |
| 0.934991557 | 0.30885766 | -1.0457587 | 0.497011045 | -1.11200676 | 0.110524599 |
| 0.989164203 | 0.78508852 | -1.0072083 | 0.857303797 | -1.05015705 | 0.223661521 |
| -1.02923947 | 0.60221038 | 0.97459106 | 0.64150882  | 0.899496112 | 0.059280408 |
| 0.839283216 | 0.01231398 | 0.99742029 | 0.9696764   | -1.0428887  | 0.537285095 |
| -1.07209435 | 0.19387457 | -1.0142243 | 0.790538519 | -1.0314163  | 0.561251745 |
| -1.05349224 | 0.29083436 | -1.0111877 | 0.82069512  | -1.13151776 | 0.014393574 |
| 0.908280524 | 0.28955605 | 0.49286432 | 1.68895E-10 | 0.918206941 | 0.346969879 |
| 0.935866485 | 0.3049149  | 0.85618019 | 0.018631522 | 0.999719339 | 0.99651614  |
| 0.932970081 | 0.32184836 | -1.0948594 | 0.197107196 | 0.981247133 | 0.786036966 |
| -1.00377626 | 0.91345203 | 0.93428693 | 0.054096973 | 0.94264897  | 0.092837282 |
| -1.10677316 | 0.37587609 | -1.0592879 | 0.614258517 | 0.702827316 | 0.003046217 |
| -1.11382809 | 0.08702023 | 0.97442702 | 0.67695286  | 0.593545931 | 2.07E-11    |
| 0.699871823 | 1.96E-08   | 0.94247722 | 0.278801149 | 0.91384285  | 0.1019672   |
| 0.995841133 | 0.93303763 | 0.98071279 | 0.694772837 | -1.20317619 | 0.000439588 |
| -1.04236251 | 0.43882549 | 0.96451288 | 0.499889335 | 0.923716455 | 0.141623704 |
| 0.983148057 | 0.79068611 | -1.0453317 | 0.489536945 | -1.00707217 | 0.912339942 |

|             |            |            |             |             |             |
|-------------|------------|------------|-------------|-------------|-------------|
| -1.02317916 | 0.79625517 | 0.82131315 | 0.030015487 | 0.82338705  | 0.032092286 |
| 0.981540766 | 0.777378   | 0.86370993 | 0.029628178 | 0.905608421 | 0.136358515 |
| 0.960582056 | 0.78445745 | 0.85138518 | 0.27635567  | 0.861761866 | 0.313748602 |
| 0.97875484  | 0.79663063 | -1.1367599 | 0.127989757 | -1.24223514 | 0.011526412 |
| -1.19906092 | 0.00217766 | -1.3829383 | 4.34603E-07 | -1.23572888 | 0.00042896  |
| -1.05541692 | 0.56196016 | -1.175123  | 0.086538793 | -1.14407302 | 0.1511501   |
| -1.05701167 | 0.54193999 | -1.2485249 | 0.017267785 | -1.02609876 | 0.776577068 |
| -1.16771719 | 0.02344959 | -1.0885341 | 0.20736816  | -1.19805754 | 0.008813637 |
| -1.3343247  | 0.01420483 | -1.1436027 | 0.243512443 | -1.03443484 | 0.767215116 |
| 0.806715486 | 4.98E-05   | 0.75850776 | 5.68303E-07 | 0.75562333  | 4.27E-07    |
| -1.02412357 | 0.78794302 | -1.1060668 | 0.258006569 | -1.33188455 | 0.001994498 |
| 0.781879073 | 0.19278889 | 0.76132681 | 0.149647299 | 0.945766737 | 0.766177889 |
| -1.50832206 | 3.83E-06   | -1.22747   | 0.013069552 | -1.27312303 | 0.003813521 |
| 0.935405759 | 0.4625097  | -1.0377551 | 0.682919101 | -1.08615851 | 0.363802195 |
| 0.916786559 | 0.29607636 | -1.1709998 | 0.060545287 | -1.09909611 | 0.256240465 |
| -1.2014358  | 0.06614078 | -1.2058413 | 0.061075937 | -1.34588565 | 0.003693428 |
| 0.985729855 | 0.86752195 | 0.75919359 | 0.002225577 | 0.738918439 | 0.000866425 |
| 0.949553563 | 0.36054486 | 0.99434867 | 0.919950918 | -1.08143725 | 0.168815355 |
| 0.946924183 | 0.32985002 | 0.97267406 | 0.61941769  | 0.893248355 | 0.046748729 |
| 0.915223197 | 0.10729823 | 0.84161039 | 0.002389766 | 0.951841274 | 0.365556865 |
| -1.26532978 | 0.00674537 | 0.9989295  | 0.989813117 | 0.925649199 | 0.358964663 |
| -1.02104733 | 0.58855215 | 0.93019698 | 0.064088901 | -1.05196039 | 0.191279831 |
| 0.979013737 | 0.58052307 | -1.0292026 | 0.45380937  | 0.802071433 | 3.88E-07    |
| -1.05766664 | 0.37368848 | -1.2132594 | 0.003142313 | -1.15466141 | 0.02530625  |
| -1.22247427 | 0.01214897 | -1.1510754 | 0.074631707 | -1.22331079 | 0.011874913 |
| -1.13788676 | 0.07937102 | -1.1537229 | 0.052880909 | -1.10550873 | 0.170670005 |
| 0.940883548 | 0.29183937 | -1.0425558 | 0.469731569 | 0.916432904 | 0.133240371 |
| -1.1032844  | 0.20542639 | -1.1848923 | 0.031217887 | -1.01283457 | 0.868540048 |
| -1.2035952  | 0.03667281 | 0.88152857 | 0.150622379 | 0.73762612  | 0.000891321 |
| -1.104358   | 0.52656024 | -1.2206009 | 0.206024988 | -1.28216697 | 0.116348093 |
| -1.08123868 | 0.1939654  | 0.995999   | 0.946421565 | -1.02425559 | 0.688099554 |
| -1.2132588  | 0.02414669 | -1.1130668 | 0.204014162 | -1.03443982 | 0.686023496 |
| -1.21391371 | 0.03776028 | -1.0775367 | 0.415494728 | 0.722616596 | 0.000762402 |
| 0.930419769 | 0.26542966 | -1.0197253 | 0.76168992  | 0.95371136  | 0.462784531 |
| 0.830025481 | 0.03912943 | 0.93009136 | 0.414380189 | 0.977506874 | 0.797223612 |
| 0.882395103 | 0.21526169 | -1.0899928 | 0.391595503 | -1.20618555 | 0.065686769 |
| 0.952814575 | 0.44306555 | 0.95029758 | 0.418657654 | -1.07262634 | 0.267336226 |
| -1.0259321  | 0.76456249 | -1.0386096 | 0.657806671 | -1.2123967  | 0.027604536 |
| 0.976032829 | 0.65642606 | 0.97734715 | 0.674326071 | 0.958335806 | 0.436041505 |
| -1.09659729 | 0.09456844 | -1.0073551 | 0.892920206 | -1.05686232 | 0.311975633 |
| -1.11458186 | 0.15454496 | 0.98236211 | 0.813649087 | -1.01846663 | 0.80848653  |
| 0.958957319 | 0.38681145 | 0.89527035 | 0.025168495 | -1.01486147 | 0.759930778 |
| 0.897841145 | 0.26651212 | -1.0141252 | 0.88435315  | -1.01929968 | 0.842877551 |
| -1.01961607 | 0.70059528 | 0.92410301 | 0.122122292 | -1.07569173 | 0.152329732 |



|             |            |            |             |             |             |
|-------------|------------|------------|-------------|-------------|-------------|
| -1.06063961 | 0.33602466 | 0.90041928 | 0.089445354 | 0.906471147 | 0.111272749 |
| 0.885432726 | 0.04279199 | 0.88151697 | 0.036028444 | 0.998328708 | 0.977349012 |
| 0.665166226 | 0.00051998 | 0.55901806 | 2.49897E-06 | 0.709250135 | 0.002977093 |
| 0.978276716 | 0.64558707 | 0.92696197 | 0.116105101 | 0.962503125 | 0.424473204 |
| 0.608493671 | 0.00011366 | 0.56139291 | 1.13675E-05 | 0.842214467 | 0.155738323 |
| -1.01485874 | 0.81903753 | -1.1270474 | 0.067755827 | -1.31225702 | 8.99E-05    |
| 0.965131995 | 0.32295797 | 0.9291752  | 0.043789605 | 0.980271789 | 0.577758544 |
| -1.12805802 | 0.02667311 | 0.95084687 | 0.344731842 | -1.04604886 | 0.398292946 |
| -1.05481156 | 0.44810342 | -1.1407479 | 0.06473852  | -1.11411047 | 0.127634131 |
| -1.08724422 | 0.28758078 | -1.0829245 | 0.310903657 | 0.972321184 | 0.719934678 |
| -1.07697212 | 0.51852972 | 0.97797555 | 0.845985153 | -1.0294472  | 0.800192949 |
| 0.981669712 | 0.80787073 | -1.0140315 | 0.854661714 | -1.14928354 | 0.071613036 |
| -1.10799141 | 0.08361475 | -1.0803077 | 0.189828685 | -1.09841188 | 0.112478516 |
| -1.01708247 | 0.90492816 | -1.0597424 | 0.682634804 | -1.01894304 | 0.894728283 |
| 0.845766306 | 0.0830244  | 0.99638386 | 0.969669869 | 0.888385443 | 0.217465655 |
| -1.33217923 | 3.79E-05   | -1.3696514 | 8.42061E-06 | -1.43424899 | 6.33E-07    |
| -1.03775155 | 0.59399476 | -1.1828739 | 0.018455968 | -1.12108942 | 0.103946958 |
| 0.934945328 | 0.41764493 | -1.0397388 | 0.637988282 | -1.0248455  | 0.766847272 |
| -1.08162998 | 0.27054976 | -1.1884631 | 0.017596499 | -1.08779561 | 0.237758777 |
| 0.940519747 | 0.18951017 | 0.99651374 | 0.939954629 | 0.990196097 | 0.83174399  |
| -1.08057686 | 0.30876739 | 0.95827223 | 0.574311871 | -1.1026555  | 0.200607218 |
| 0.924991298 | 0.33381681 | 0.88502489 | 0.132463845 | 0.994630752 | 0.946562702 |
| 0.819466654 | 0.0004698  | 0.89914724 | 0.05178362  | 0.908965219 | 0.079746281 |
| -1.06853474 | 0.37467209 | 0.98720111 | 0.862549511 | 0.841313929 | 0.023400168 |
| -1.12048029 | 0.1474423  | 0.99221617 | 0.919952312 | -1.01013214 | 0.896849417 |
| -1.07622104 | 0.26118747 | 0.94642893 | 0.398458506 | -1.18276989 | 0.012174955 |
| -1.04186607 | 0.43446506 | 0.98761793 | 0.811840772 | 0.951174902 | 0.340798541 |
| 0.880430888 | 0.02325851 | -1.0735112 | 0.198737635 | 0.929822615 | 0.187595957 |
| 0.978895431 | 0.82374343 | -1.1711158 | 0.103183759 | -1.2575307  | 0.019676533 |
| 0.929267935 | 0.44523043 | 0.865232   | 0.134990559 | 0.900071499 | 0.274637537 |
| -1.19185146 | 0.04742497 | -1.5710523 | 2.93989E-06 | -1.32675689 | 0.001888519 |
| 0.909029475 | 0.10528817 | 0.97347302 | 0.644228324 | 0.992806403 | 0.901217728 |
| -1.02802272 | 0.73564674 | -1.0181487 | 0.826035298 | -1.03092614 | 0.709867151 |
| 0.955801397 | 0.32897197 | 0.99273577 | 0.874354763 | 0.988805912 | 0.807138841 |
| -1.00561532 | 0.91150981 | 0.98566402 | 0.774504008 | 0.958963876 | 0.407113883 |
| 0.973516212 | 0.685214   | 0.97981876 | 0.75808116  | -1.07486553 | 0.277862366 |
| -1.20482037 | 0.00293019 | 0.99980816 | 0.997450718 | -1.12861671 | 0.047926863 |
| -1.0148407  | 0.88532714 | -1.0593181 | 0.573193822 | 0.503503458 | 1.08E-08    |
| 0.988798736 | 0.88352526 | -1.0374794 | 0.632602717 | -1.06006145 | 0.449279552 |
| 0.918216456 | 0.0696587  | 0.93857865 | 0.174764477 | -1.07188589 | 0.137903637 |
| -1.23074271 | 0.0016928  | -1.1341079 | 0.050148901 | -1.10346132 | 0.122846315 |
| 0.983900225 | 0.82148821 | -1.1549193 | 0.049246671 | -1.02444548 | 0.737140201 |
| 0.906369688 | 0.10250429 | 0.96860096 | 0.592053727 | 0.915413936 | 0.141182528 |
| -1.03027478 | 0.58416187 | 0.95608428 | 0.410707954 | 0.979412625 | 0.702454856 |

|             |            |            |             |             |             |
|-------------|------------|------------|-------------|-------------|-------------|
| -1.1165925  | 0.16919201 | 0.80530644 | 0.008409354 | 0.734929312 | 0.000277039 |
| -1.15516693 | 0.28706881 | -1.0999402 | 0.480730685 | -1.15166044 | 0.29724165  |
| -1.03299951 | 0.6756204  | 0.9948356  | 0.946751016 | -1.04619147 | 0.56086876  |
| -1.10353055 | 0.23156581 | -1.1363805 | 0.122214076 | -1.10173147 | 0.239283819 |
| 0.942281109 | 0.27158652 | 0.88214073 | 0.022859493 | 0.764241069 | 5.97E-06    |
| 0.890938503 | 0.02606106 | -1.1430598 | 0.010554929 | -1.00918391 | 0.856903998 |
| -1.36027177 | 0.00166254 | -1.0954737 | 0.330727468 | -1.28979316 | 0.008341081 |
| 0.971054777 | 0.65956139 | 0.9519136  | 0.46058406  | 0.926594461 | 0.255325248 |
| -1.09895765 | 0.15113871 | -1.0568061 | 0.397618625 | 0.942025408 | 0.3608067   |
| 0.951683665 | 0.43549812 | 0.96794316 | 0.607329759 | 0.955003478 | 0.46829047  |
| 0.980472534 | 0.84425035 | -1.1396671 | 0.196204292 | -1.13806006 | 0.201001066 |
| -1.14960093 | 0.02557901 | -1.0514863 | 0.41190137  | -1.21001232 | 0.002745589 |
| 0.950734499 | 0.45966116 | 0.85038967 | 0.020437284 | 0.931771149 | 0.302183752 |
| 0.831108848 | 0.01277706 | -1.0200107 | 0.783675004 | 0.872924123 | 0.063811739 |
| 0.85817405  | 0.10082079 | -1.0003379 | 0.997070705 | -1.0855236  | 0.37435483  |
| 0.984049838 | 0.77086862 | 0.89113136 | 0.040595231 | 0.961613544 | 0.479183034 |
| 0.943338759 | 0.29520518 | -1.0831675 | 0.15348748  | 0.946336264 | 0.321991323 |
| 0.980324532 | 0.73132847 | 0.89469974 | 0.058570161 | 0.938323088 | 0.273773891 |
| 0.925706249 | 0.16069298 | -1.0471999 | 0.399222506 | -1.02770063 | 0.616703295 |
| -1.07628817 | 0.13155752 | -1.0762493 | 0.131743303 | -1.10358013 | 0.044967385 |
| 0.900806288 | 0.32797887 | -1.0177722 | 0.868410964 | -1.061982   | 0.572206123 |
| -1.14626906 | 0.06571722 | -1.2916833 | 0.000882194 | -1.27781202 | 0.001382825 |
| -1.17480852 | 0.15218557 | -1.3680007 | 0.006623285 | -1.28535833 | 0.027685589 |
| -1.21259225 | 0.00670886 | -1.1329391 | 0.073380614 | -1.13494899 | 0.069505993 |
| -1.35741708 | 0.01689297 | -1.0568761 | 0.657105828 | -1.14735776 | 0.272256545 |
| 0.982889419 | 0.84058643 | 0.95411427 | 0.58453327  | 0.979085792 | 0.805442938 |
| -1.11260439 | 0.18461401 | 0.91521333 | 0.269427092 | 0.807433657 | 0.009402088 |
| 0.909137644 | 0.16821261 | 0.93922218 | 0.361971064 | 0.964030443 | 0.593374109 |
| -1.01990346 | 0.62111764 | 0.97353438 | 0.501563606 | 0.912875332 | 0.02539892  |
| 0.963388193 | 0.58246271 | -1.1782408 | 0.018363771 | -1.18039596 | 0.017166199 |
| 0.931496125 | 0.14938048 | -1.0089185 | 0.855476493 | 0.951290254 | 0.307959689 |
| 0.960828848 | 0.38112364 | -1.0258751 | 0.574719674 | -1.03343923 | 0.470433108 |
| -1.08849041 | 0.17840562 | 0.92581143 | 0.22051625  | 0.767794179 | 8.60E-05    |
| -1.00778457 | 0.90530843 | -1.0023687 | 0.971045777 | 0.785606196 | 0.000479276 |
| -1.08609396 | 0.31272368 | -1.0070896 | 0.930857198 | 0.871877004 | 0.096473424 |
| 0.896507166 | 0.04907788 | -1.0923508 | 0.109365836 | -1.13208686 | 0.026189432 |
| -1.09250744 | 0.19015146 | 0.9795771  | 0.758163857 | -1.05013298 | 0.466361079 |
| 0.917018412 | 0.22487231 | 0.95733042 | 0.539148519 | 0.973239325 | 0.702155375 |
| -1.07828956 | 0.32874684 | -1.1215059 | 0.139619151 | -1.16025692 | 0.057193901 |
| 0.930957883 | 0.31031045 | 0.98148702 | 0.79008323  | -1.10667687 | 0.152547959 |
| -1.03545086 | 0.64262658 | -1.0603538 | 0.435889622 | -1.06120156 | 0.429693295 |
| 0.755074669 | 0.00469022 | 0.74987204 | 0.003827694 | 0.773480948 | 0.009308142 |
| -1.21527432 | 0.00912664 | -1.1893232 | 0.019613038 | -1.34114228 | 0.000154025 |
| 0.928726831 | 0.2402323  | -1.0148055 | 0.814291559 | 0.972766025 | 0.659203982 |

|             |            |            |             |             |             |
|-------------|------------|------------|-------------|-------------|-------------|
| 0.943700694 | 0.3706809  | -1.0108627 | 0.866962037 | 0.9488282   | 0.416774982 |
| 0.969906719 | 0.6080736  | -1.0036808 | 0.950771085 | -1.01053536 | 0.860225728 |
| -1.01936747 | 0.78102252 | -1.0036367 | 0.958030437 | 0.977291716 | 0.739265441 |
| -1.07760414 | 0.17896245 | -1.2163176 | 0.000767154 | 0.980863628 | 0.726183832 |
| -1.07677741 | 0.37286129 | -1.0732356 | 0.394373785 | -1.18186614 | 0.047338225 |
| 0.937896803 | 0.24627364 | -1.0207813 | 0.708353696 | -1.00592882 | 0.914335538 |
| 0.558352039 | 7.62E-07   | 0.91945129 | 0.42351355  | 0.899484301 | 0.313549671 |
| -1.05844263 | 0.44601879 | -1.0319642 | 0.672330881 | -1.03505593 | 0.643301868 |
| -1.08146787 | 0.24830124 | -1.021258  | 0.755129512 | 0.998358563 | 0.980558888 |
| -1.08617907 | 0.2089469  | -1.1359937 | 0.055006688 | -1.05107794 | 0.446807375 |
| -1.02983653 | 0.69188129 | -1.0325323 | 0.666117236 | 0.830117018 | 0.014621214 |
| -1.03530592 | 0.58441804 | 0.96527519 | 0.577471305 | -1.03369619 | 0.601337267 |
| 0.974578004 | 0.77552179 | -1.0028401 | 0.974936299 | -1.16123953 | 0.101989234 |
| -1.09785098 | 0.31495614 | 0.98734473 | 0.890452058 | 0.847228048 | 0.077261374 |
| 0.910163252 | 0.28623783 | -1.1083553 | 0.244305076 | -1.00996511 | 0.91008479  |
| 0.999896137 | 0.99863657 | 0.9991794  | 0.989224287 | -1.21260251 | 0.002403724 |
| -1.24479212 | 0.00057296 | -1.0676731 | 0.278337244 | -1.11676165 | 0.070270466 |
| -1.31889146 | 0.05930381 | -1.1165334 | 0.446244323 | 0.693376426 | 0.013693574 |
| 0.951010539 | 0.41114686 | -1.0552162 | 0.379403216 | -1.00274095 | 0.964164068 |
| 0.884025441 | 0.09019869 | 0.94327823 | 0.417329129 | 0.845939305 | 0.022929266 |
| -1.0806478  | 0.23168207 | 0.93229917 | 0.279104407 | 0.940563782 | 0.343490292 |
| 0.950460136 | 0.51419344 | 0.87214652 | 0.08274067  | -1.12868697 | 0.123563758 |
| -1.0240979  | 0.70560305 | -1.0874833 | 0.186668286 | -1.06182042 | 0.343002482 |
| 0.909459644 | 0.3042088  | -1.0594156 | 0.530784932 | 0.992241757 | 0.932471146 |
| -1.14307909 | 0.0954638  | -1.0964497 | 0.247739245 | -1.84074274 | 2.67E-10    |
| -1.25060143 | 0.00892942 | -1.0707109 | 0.410736165 | -1.10326567 | 0.238302383 |
| 0.851694372 | 0.02113519 | 0.88756061 | 0.083255565 | 0.921137915 | 0.229485057 |
| -1.17830155 | 0.00081009 | 0.96682565 | 0.468558641 | -1.08110669 | 0.097321053 |
| 0.627693075 | 5.45E-05   | 0.72336212 | 0.003557735 | 0.729000713 | 0.004369751 |
| 0.980754537 | 0.76018182 | 0.94061109 | 0.33807896  | -1.02048802 | 0.750069373 |
| -1.07955976 | 0.18371237 | 0.95204547 | 0.391134489 | 0.961791872 | 0.496064953 |
| -1.14989943 | 0.05549798 | 0.97781334 | 0.754403558 | 0.864795779 | 0.046719595 |
| 0.851383999 | 0.01140818 | -1.0237729 | 0.703521126 | 0.989591    | 0.865338089 |
| 0.939596027 | 0.34523759 | -1.0490702 | 0.467259698 | 0.937179363 | 0.325835743 |
| -1.03495267 | 0.52037224 | 0.9517533  | 0.355874603 | 0.900146041 | 0.052702048 |
| -1.1099306  | 0.06809028 | -1.0812979 | 0.168650943 | -1.09089163 | 0.126285383 |
| -1.04416846 | 0.40997262 | -1.0046975 | 0.92858617  | 0.892147593 | 0.032682674 |
| 0.892993532 | 0.13159925 | 0.88976356 | 0.11993717  | 0.955249432 | 0.53826946  |
| 0.602479869 | 0.00062335 | 0.82768705 | 0.180538479 | 0.817287132 | 0.15358237  |
| 0.502370922 | 2.01E-05   | 0.8882097  | 0.424207002 | 0.63370196  | 0.00309132  |
| -1.20770496 | 0.00713253 | 0.88491522 | 0.075506044 | 0.962570877 | 0.574076569 |
| 0.953423995 | 0.36859532 | 0.97583043 | 0.643717108 | -1.20051127 | 0.001021821 |
| -1.01372738 | 0.79178362 | -1.0131215 | 0.800711449 | 0.983147236 | 0.742124493 |
| -1.01327177 | 0.81335614 | 0.97727867 | 0.680814201 | 0.942228832 | 0.289022199 |

|             |            |            |             |             |             |
|-------------|------------|------------|-------------|-------------|-------------|
| -1.03364627 | 0.35488016 | 0.99959951 | 0.991028891 | -1.06733049 | 0.071665901 |
| 0.94442204  | 0.34830489 | 0.99729767 | 0.964452951 | 0.885460973 | 0.049162235 |
| 0.918545152 | 0.28300604 | 0.9211622  | 0.299266013 | 0.671172319 | 4.73E-06    |
| -1.23746048 | 1.67E-06   | -1.246278  | 8.71864E-07 | -1.30001538 | 1.71E-08    |
| 0.926302691 | 0.29178512 | -1.0079973 | 0.912202791 | -1.01698666 | 0.815674372 |
| -1.06375534 | 0.29616922 | -1.1267187 | 0.046647842 | -1.23697963 | 0.000633056 |
| -1.14920858 | 0.09408829 | 0.87412779 | 0.105049252 | 0.918389231 | 0.30145872  |
| 0.993016808 | 0.92782415 | -1.1611605 | 0.057579122 | -1.10733156 | 0.191093478 |
| -1.04741536 | 0.45656513 | -1.2274053 | 0.001637576 | -1.17823477 | 0.010412251 |
| -1.05584173 | 0.31635465 | -1.0019641 | 0.971000739 | -1.01267547 | 0.815527099 |
| 0.964832518 | 0.3750674  | 0.99885853 | 0.977341003 | 0.993366856 | 0.868562802 |
| 0.898286145 | 0.04866303 | -1.0148582 | 0.782542755 | 0.982798457 | 0.745437409 |
| -1.17088036 | 0.01529925 | -1.1660427 | 0.018038073 | -1.1163075  | 0.086290425 |
| -1.07945306 | 0.21552561 | -1.030553  | 0.623775361 | -1.18356123 | 0.007836357 |
| -1.07341343 | 0.28660483 | -1.097234  | 0.164378024 | -1.17193922 | 0.019389744 |
| -1.08475129 | 0.19214337 | -1.0293981 | 0.639936098 | -1.17522105 | 0.011365069 |
| 0.925206919 | 0.14438049 | -1.008371  | 0.874387494 | -1.04840557 | 0.37175557  |
| -1.19319099 | 0.00077614 | -1.1581914 | 0.004528777 | -1.19036453 | 0.000898806 |
| -1.07409181 | 0.37423348 | -1.004708  | 0.953264299 | 0.847118826 | 0.042321872 |
| -1.09002289 | 0.10311561 | 0.99471508 | 0.91918836  | -1.03228566 | 0.543609263 |
| -1.08303298 | 0.17432932 | -1.1223775 | 0.051409111 | 0.932257883 | 0.231334311 |
| -1.09789196 | 0.1223128  | -1.0776023 | 0.214429321 | -1.02855852 | 0.637888507 |
| 0.994734984 | 0.92445909 | -1.0330555 | 0.559744094 | -1.12901671 | 0.032902467 |
| 0.993789941 | 0.89820291 | -1.0248885 | 0.614045548 | -1.10695176 | 0.040755937 |
| 0.978183297 | 0.6816458  | -1.0634472 | 0.255136605 | 0.968569964 | 0.552929035 |
| -1.04581    | 0.54871093 | 0.94396195 | 0.440557499 | 0.978673388 | 0.772585642 |
| 0.96127328  | 0.60562575 | -1.0670201 | 0.39742195  | 0.920172919 | 0.278835624 |
| 0.944816006 | 0.27789686 | 0.91089947 | 0.077143529 | 0.996762467 | 0.950301173 |
| 0.984959014 | 0.84747839 | -1.0700565 | 0.391708722 | -1.21429051 | 0.016472942 |
| 0.958602766 | 0.32840868 | 0.9751282  | 0.559286855 | -1.09932241 | 0.031458759 |
| -1.03843471 | 0.62957608 | -1.0426462 | 0.59337336  | -1.14912474 | 0.079439679 |
| 0.914638231 | 0.53771454 | 0.72967636 | 0.03283234  | 0.608632381 | 0.001094115 |
| 0.888372843 | 0.12618657 | 0.91199276 | 0.231930152 | -1.03652462 | 0.639672407 |
| -1.45071715 | 3.14E-05   | 0.87383428 | 0.105121123 | 0.898986736 | 0.198638355 |
| 0.905789495 | 0.11188981 | 0.83531732 | 0.004841962 | 0.753664835 | 2.45E-05    |
| -1.01200271 | 0.89793859 | -1.3055181 | 0.00570851  | -1.08697467 | 0.371708861 |
| 0.943745481 | 0.38093795 | -1.0135222 | 0.838390667 | 0.895418059 | 0.097698119 |
| -1.10521855 | 0.06523994 | -1.0806285 | 0.150431163 | -1.00807018 | 0.880368646 |
| 0.947524173 | 0.45573214 | -1.0460001 | 0.53340041  | -1.04835097 | 0.513245675 |
| -1.02668924 | 0.60340284 | 0.96887489 | 0.533075945 | -1.06461885 | 0.219496272 |
| 0.964938601 | 0.55302937 | -1.0707735 | 0.257792205 | -1.05597958 | 0.366331276 |
| 0.968613256 | 0.58179161 | -1.0159995 | 0.783750502 | -1.35383407 | 2.54E-06    |
| -1.05877743 | 0.28179571 | -1.0896379 | 0.108084969 | 0.994397133 | 0.91522338  |
| -1.55095878 | 0.00010238 | -1.4353841 | 0.001079367 | -1.42767345 | 0.001260824 |

|             |            |            |             |             |             |
|-------------|------------|------------|-------------|-------------|-------------|
| -1.18190042 | 0.00073318 | -1.1315092 | 0.010592293 | -1.10225333 | 0.041648372 |
| 0.961083811 | 0.49060555 | 0.94271542 | 0.306906947 | 0.919391711 | 0.147499714 |
| -1.16038803 | 0.01224339 | -1.026829  | 0.646330975 | -1.43891371 | 4.91E-08    |
| -1.04250753 | 0.46464354 | 0.97538255 | 0.661003119 | -1.14806422 | 0.01789742  |
| 0.989163226 | 0.83014133 | -1.0651014 | 0.217523579 | 0.990845563 | 0.856308666 |
| -1.01398874 | 0.84841648 | -1.0513299 | 0.491882476 | -1.0140452  | 0.847816535 |
| -1.01891456 | 0.69870526 | -1.0020207 | 0.966714657 | -1.09537851 | 0.063897541 |
| 0.969507625 | 0.75474606 | 0.85759334 | 0.125187703 | -1.07427122 | 0.470738073 |
| 0.949402433 | 0.41858055 | -1.1281954 | 0.063664519 | 0.981379659 | 0.769064296 |
| -1.04342276 | 0.3193152  | 0.91771564 | 0.047264529 | 0.938868145 | 0.141628405 |
| -1.01394242 | 0.68400124 | -1.0307854 | 0.374175062 | -1.0622856  | 0.079780637 |
| -1.01217017 | 0.84100704 | -1.1037106 | 0.105947632 | -1.12920171 | 0.047870611 |
| 0.99123902  | 0.89244286 | -1.1643227 | 0.022544276 | -1.06236207 | 0.354498998 |
| 0.747469654 | 0.17763383 | 0.60874123 | 0.023626004 | 0.779501841 | 0.24753943  |
| 0.890706564 | 0.13564127 | -1.050409  | 0.522481968 | -1.2000892  | 0.020516616 |
| -1.35826016 | 0.00080058 | -1.3011893 | 0.003492829 | -1.11606441 | 0.207961628 |
| -1.14604689 | 0.06228102 | 0.94410709 | 0.425326726 | -1.09444843 | 0.212926816 |
| 0.976244483 | 0.80278205 | -1.1446425 | 0.164225366 | -1.01657355 | 0.864396843 |
| 0.962297744 | 0.72287613 | -1.0410337 | 0.710602503 | 0.958873355 | 0.698410102 |
| 0.942467705 | 0.28328058 | -1.0826599 | 0.152121168 | -1.08232419 | 0.153697405 |
| -1.10683003 | 0.02909075 | -1.0199922 | 0.663632339 | -1.21738703 | 6.22E-05    |
| -1.01302884 | 0.77423431 | 0.9502905  | 0.26119463  | -1.00868736 | 0.847967558 |
| -1.2899371  | 0.00032935 | -1.0444365 | 0.515023077 | -1.12029668 | 0.092614647 |
| -1.00133902 | 0.98231404 | -1.0341038 | 0.579062072 | -1.24854677 | 0.000517793 |
| -1.01926057 | 0.72453186 | -1.0191872 | 0.725527534 | -1.09352468 | 0.102701272 |
| 0.970859079 | 0.59742727 | 0.96637316 | 0.541507282 | -1.06139737 | 0.289228309 |
| 0.935005554 | 0.30131154 | 0.96857833 | 0.622045396 | 0.922301275 | 0.214505048 |
| -1.03641004 | 0.5203128  | 0.89755915 | 0.055727358 | 0.946905105 | 0.32798289  |
| 0.974631245 | 0.72901006 | 0.91883665 | 0.256384529 | -1.03880256 | 0.608015191 |
| -1.11582692 | 0.09202997 | 0.9995139  | 0.993955826 | 0.998088263 | 0.976216056 |
| -1.05312698 | 0.34420294 | -1.0289326 | 0.601171845 | -1.0286822  | 0.604272609 |
| 0.989607506 | 0.8111221  | 0.93726352 | 0.142224738 | 0.968954417 | 0.471597384 |
| -1.0221978  | 0.63599771 | 0.96094259 | 0.391545583 | -1.05247933 | 0.272390357 |
| -1.0576994  | 0.57511102 | 0.96158274 | 0.695244331 | -1.17820128 | 0.105045376 |
| -1.01709673 | 0.63337624 | 0.99869954 | 0.970761265 | -1.02394557 | 0.505962659 |
| 0.989482447 | 0.87546727 | -1.0035085 | 0.958594084 | -1.19317157 | 0.011109466 |
| 0.970294061 | 0.51332003 | 0.95607233 | 0.331359389 | -1.06467096 | 0.177183782 |
| -1.0423054  | 0.48948217 | 0.94742769 | 0.368444581 | -1.03562052 | 0.559095749 |
| 0.937386236 | 0.17413745 | 0.99844446 | 0.973670121 | 0.97713122  | 0.624179366 |
| 0.956599184 | 0.49491671 | -1.1477873 | 0.037366551 | -1.20533573 | 0.005511788 |
| 0.886888334 | 0.02297466 | 0.89650587 | 0.03771249  | 0.841870154 | 0.00145392  |
| -1.05187158 | 0.48258556 | -1.0921032 | 0.223374631 | -1.14287234 | 0.067345627 |
| -1.02837029 | 0.75560532 | -1.0790785 | 0.398484356 | -1.09319246 | 0.323506526 |
| -1.00814698 | 0.84789544 | -1.1192144 | 0.009879276 | -1.00238885 | 0.955014401 |

|             |            |            |             |             |             |
|-------------|------------|------------|-------------|-------------|-------------|
| -1.09438879 | 0.18207822 | -1.0237442 | 0.726417982 | -1.22846279 | 0.003223755 |
| 0.550983255 | 7.38E-10   | 0.70780536 | 6.53339E-05 | 0.552585638 | 8.45E-10    |
| -1.05728161 | 0.3778203  | 0.90949873 | 0.135770412 | 0.74120773  | 1.40E-05    |
| 0.928110559 | 0.13317076 | 0.8487564  | 0.001477526 | 0.998627967 | 0.977716476 |
| 0.873455126 | 0.17938125 | 0.94607876 | 0.579608531 | -1.00829647 | 0.934099181 |
| 0.858198931 | 0.02310201 | -1.0223249 | 0.73691489  | -1.04755181 | 0.4804633   |
| 0.968743177 | 0.60258338 | 0.9358134  | 0.278749031 | -1.00605966 | 0.920995104 |
| 0.954315287 | 0.52008625 | 0.97146632 | 0.690133382 | -1.09794745 | 0.201262722 |
| -1.06773538 | 0.36154116 | 0.94581449 | 0.437509825 | 0.876610055 | 0.069943659 |
| -1.00797135 | 0.86546775 | 0.97628846 | 0.609007094 | 0.965142958 | 0.450173156 |
| -1.04174259 | 0.43727259 | -1.0191654 | 0.717793786 | -1.10340521 | 0.065097856 |
| -1.12678702 | 0.01342019 | 0.92158859 | 0.085984497 | -1.03595045 | 0.452616879 |
| -1.04158921 | 0.25039161 | 0.97944884 | 0.556239257 | -1.05244344 | 0.150781864 |
| -1.06879621 | 0.24633852 | -1.0568852 | 0.334100913 | 0.944974234 | 0.323209176 |
| 0.957219996 | 0.56891468 | -1.0044538 | 0.9537596   | -1.13829358 | 0.095281568 |
| -1.10666557 | 0.15131617 | 0.86944134 | 0.049540892 | -1.01463066 | 0.835543153 |
| -1.09145476 | 0.24780652 | 0.90254092 | 0.176678254 | 0.83852194  | 0.022406974 |
| -1.07318519 | 0.30410547 | -1.0076251 | 0.911563294 | -1.00959252 | 0.888989187 |
| -1.02786626 | 0.70839486 | 0.8853908  | 0.10169099  | 0.833532793 | 0.015867383 |
| 0.861636026 | 0.02268419 | 0.93092487 | 0.264455855 | 0.997891042 | 0.973588581 |
| -1.05738573 | 0.25135531 | -1.1102025 | 0.03425502  | -1.18128716 | 0.001059719 |
| -1.0181229  | 0.7606919  | 0.9007414  | 0.080447373 | 0.947565271 | 0.362726955 |
| -1.11025309 | 0.26910677 | -1.0440521 | 0.647176916 | -1.40039922 | 0.000704654 |
| -1.02535312 | 0.71575496 | -1.0640733 | 0.367925211 | -1.17522056 | 0.02190878  |
| 0.915857097 | 0.17297958 | 0.98160756 | 0.771649212 | 0.860642977 | 0.022043805 |
| 0.929364909 | 0.09019535 | -1.06759   | 0.129296233 | -1.19489151 | 0.000103271 |
| 0.942009677 | 0.28702996 | -1.0206643 | 0.714188988 | -1.25083347 | 0.000177906 |
| -1.10230612 | 0.10785487 | -1.0140444 | 0.815769372 | -1.05911214 | 0.339293773 |
| 0.947454723 | 0.31608175 | 0.85656819 | 0.005357902 | 0.792812071 | 6.07E-05    |
| 0.912265347 | 0.28379346 | 0.89201794 | 0.18354118  | -1.03469658 | 0.689162761 |
| -1.10851863 | 0.16775904 | -1.0359149 | 0.633937566 | 0.968687313 | 0.667612701 |
| 0.808036719 | 0.00377568 | 0.85823931 | 0.034298495 | 0.972078807 | 0.689032895 |
| 0.998248569 | 0.97231409 | 0.86792125 | 0.006758714 | -1.07898329 | 0.136376736 |
| 0.940921783 | 0.35184498 | 0.93955725 | 0.340580649 | 0.9590542   | 0.521805526 |
| 0.775027863 | 1.45E-05   | 0.99842138 | 0.976511877 | 0.924033403 | 0.144921402 |
| -1.00507495 | 0.884382   | -1.0001779 | 0.995922213 | -1.19417901 | 4.21E-06    |
| 0.760505018 | 0.0863267  | 0.92651138 | 0.628154232 | -1.00131698 | 0.993329517 |
| -1.16087152 | 0.0489575  | -1.1928761 | 0.020793203 | -1.31915239 | 0.000447469 |
| 0.974555643 | 0.61148711 | -1.0515479 | 0.323514486 | -1.01794575 | 0.725765125 |
| 0.966723117 | 0.66699916 | 0.98708435 | 0.868631349 | -1.14506987 | 0.0890544   |
| 0.954561717 | 0.43062159 | 0.9375009  | 0.275338677 | -1.02615482 | 0.66105616  |
| -1.11035969 | 0.11070853 | 0.98981107 | 0.874532033 | -1.00403285 | 0.95051362  |
| 0.977207415 | 0.73990548 | 0.76779475 | 0.000343747 | 0.751430276 | 0.000125091 |
| -1.15584212 | 0.25726289 | -1.082836  | 0.531878295 | -1.50843676 | 0.001995056 |

|             |            |            |             |             |             |
|-------------|------------|------------|-------------|-------------|-------------|
| -1.10211833 | 0.0096915  | -1.0048473 | 0.894370077 | -1.04585649 | 0.221484667 |
| 0.971366633 | 0.58516141 | 0.96507004 | 0.504394462 | 0.963242677 | 0.482044585 |
| -1.0231424  | 0.67751965 | -1.0607228 | 0.286129763 | -1.06334434 | 0.266650277 |
| 0.97849967  | 0.79148994 | 0.82500587 | 0.022397726 | 0.898992878 | 0.198591058 |
| -1.25151798 | 0.00108085 | -1.1940015 | 0.00852531  | -1.21764099 | 0.00372592  |
| 0.9708322   | 0.61572646 | 0.99262103 | 0.899954508 | -1.06245293 | 0.30614542  |
| -1.02125534 | 0.57698788 | 0.96204216 | 0.306444378 | 0.938226685 | 0.094655576 |
| -1.16367166 | 0.0460987  | -1.0990993 | 0.208570114 | -1.24199981 | 0.005118517 |
| 0.988016998 | 0.84811749 | -1.0035057 | 0.955655835 | -1.02259988 | 0.722669659 |
| 0.990924448 | 0.886777   | 0.86251762 | 0.024128246 | 0.855392507 | 0.017537494 |
| -1.09278265 | 0.24523149 | -1.0093062 | 0.902836584 | 0.967886646 | 0.667324417 |
| -1.10076536 | 0.03443887 | -1.0718655 | 0.122576481 | -1.07525071 | 0.106841843 |
| -1.01309092 | 0.793917   | -1.0485232 | 0.343139308 | -1.01685254 | 0.737175417 |
| -1.12623681 | 0.05116396 | -1.1925429 | 0.004641783 | -1.15741471 | 0.017453233 |
| -1.08264887 | 0.28717109 | 0.9956748  | 0.953425023 | -1.13920815 | 0.083356618 |
| -1.13546261 | 0.05200797 | -1.0781106 | 0.244588289 | -1.1698095  | 0.017430217 |
| -1.08358578 | 0.29687076 | 0.95841508 | 0.579593072 | -1.15315316 | 0.06695072  |
| -1.22056256 | 0.00513375 | -1.0372198 | 0.594819371 | 0.887315388 | 0.0857541   |
| -1.26927682 | 0.00109031 | -1.0226912 | 0.746514585 | 0.976089502 | 0.727378455 |
| -1.01988031 | 0.75703464 | 0.90272872 | 0.111847578 | 0.981897135 | 0.774011071 |
| 0.977383725 | 0.57459634 | 0.97766334 | 0.57937569  | -1.05981752 | 0.157299503 |
| -1.03087931 | 0.66147121 | 0.95030298 | 0.463708237 | 0.939007336 | 0.366284309 |
| 0.857470708 | 0.01436351 | 0.99572155 | 0.94401378  | -1.24941334 | 0.000569323 |
| 0.994361489 | 0.9090059  | -1.0582265 | 0.255512821 | 0.96932008  | 0.5295402   |
| -1.07357136 | 0.2114101  | -1.0638796 | 0.274851494 | -1.12910551 | 0.034986931 |
| 0.926792296 | 0.37922131 | 0.95780645 | 0.617184761 | 0.74048146  | 0.000933122 |
| 0.901573961 | 0.08451072 | -1.0442314 | 0.466020575 | 0.882356696 | 0.03837152  |
| -1.00627495 | 0.95220839 | -1.0751122 | 0.488705399 | -1.22259542 | 0.058318104 |
| -1.00858758 | 0.89496124 | -1.0215355 | 0.742272421 | -1.12323777 | 0.077016564 |
| -1.10091022 | 0.01236118 | 0.99499409 | 0.892997552 | -1.02593946 | 0.493377182 |
| -1.14062176 | 0.01359689 | 0.94576276 | 0.284292981 | -1.02419671 | 0.64473003  |
| 0.922774292 | 0.14873163 | 0.93957807 | 0.260953942 | 0.989629918 | 0.85000614  |
| -1.0819181  | 0.1519135  | -1.0421599 | 0.449201999 | -1.1961749  | 0.001688202 |
| -1.08340444 | 0.11529429 | -1.1061316 | 0.048856885 | -1.19905689 | 0.000638044 |
| 0.916795409 | 0.17858523 | 0.84879885 | 0.012913566 | 0.803436558 | 0.001154966 |
| -1.01159456 | 0.8832058  | -1.0767928 | 0.34770284  | -1.20268049 | 0.021778532 |
| -1.03241367 | 0.5361712  | 0.86241631 | 0.005563675 | 0.989705311 | 0.840699576 |
| 0.892268167 | 0.5340547  | 0.90687453 | 0.593683067 | 0.876474264 | 0.472254993 |
| -1.15448263 | 0.1118806  | 0.58492113 | 1.53589E-07 | 0.771700096 | 0.005164926 |
| 0.966402368 | 0.35413956 | -1.007672  | 0.835218559 | 0.937614157 | 0.083801978 |
| -1.03448577 | 0.51087967 | 0.96773005 | 0.524662808 | 0.952250822 | 0.343786987 |
| 0.938688072 | 0.16734086 | -1.0608181 | 0.197075742 | 0.919283284 | 0.068100738 |
| -1.05899897 | 0.33884899 | -1.0217726 | 0.718321211 | -1.1143023  | 0.074027362 |
| -1.00066714 | 0.98983028 | 0.90815382 | 0.069840826 | 0.949984338 | 0.32893927  |

|             |            |            |             |             |             |
|-------------|------------|------------|-------------|-------------|-------------|
| -1.13464503 | 0.00574843 | -1.0191796 | 0.666961751 | -1.09549177 | 0.042577101 |
| -1.14110561 | 0.13792173 | -1.128781  | 0.172655686 | -1.27784837 | 0.007138925 |
| -1.06058558 | 0.4753426  | -1.1494007 | 0.094603008 | -1.19842462 | 0.031236298 |
| -1.10986842 | 0.18242296 | -1.0826507 | 0.308063509 | -1.08916676 | 0.273305403 |
| 0.993250048 | 0.90065704 | 0.95146645 | 0.361009776 | -1.06827105 | 0.226676275 |
| 0.980146647 | 0.70807138 | 0.96454453 | 0.500893406 | -1.02830101 | 0.602506718 |
| -1.02347981 | 0.74945475 | 0.84979101 | 0.028488741 | 0.946541913 | 0.450643839 |
| 0.980693306 | 0.79567638 | 0.94506385 | 0.454006739 | 0.95776374  | 0.566991421 |
| 0.850482115 | 0.00913693 | 0.95797001 | 0.476383744 | 0.888032539 | 0.052461667 |
| 0.953190819 | 0.5594137  | -1.0044467 | 0.956849196 | 0.908620349 | 0.245535072 |
| -1.14079194 | 0.2032218  | -1.2035809 | 0.075567697 | -1.10278721 | 0.342954552 |
| 0.914734469 | 0.26552548 | 0.97359843 | 0.736830068 | 0.884019017 | 0.125496822 |
| 0.91467157  | 0.57900698 | 0.80502653 | 0.180326849 | 0.88072382  | 0.430144304 |
| -1.09122642 | 0.15610555 | -1.0132066 | 0.829666303 | -1.14452439 | 0.030363344 |
| -1.09195316 | 0.09923412 | -1.0563712 | 0.300318955 | 0.927909847 | 0.159399809 |
| -1.02803355 | 0.61789613 | 0.92394716 | 0.156947826 | -1.00874347 | 0.875060842 |
| -1.02241521 | 0.57979825 | -1.0096164 | 0.810857864 | -1.00218343 | 0.956494024 |
| -1.03011446 | 0.61292218 | -1.0881497 | 0.153178013 | 0.907409093 | 0.101450396 |
| -1.00781179 | 0.88294844 | 0.97570917 | 0.642034353 | -1.04149479 | 0.442948762 |
| 0.930786731 | 0.49075544 | 0.95700674 | 0.672445763 | 0.878336448 | 0.214928249 |
| -1.09835391 | 0.12972389 | -1.0403943 | 0.518745151 | -1.21549136 | 0.002302126 |
| 0.952700932 | 0.52272534 | 0.8915377  | 0.133283105 | -1.11780792 | 0.145055349 |
| -1.07236174 | 0.19144309 | -1.0925025 | 0.099679161 | 0.985049803 | 0.776549958 |
| -1.00716176 | 0.85915301 | -1.040736  | 0.322926312 | -1.04900014 | 0.237235733 |
| -1.13476732 | 0.04927249 | -1.0412304 | 0.52300903  | -1.00154077 | 0.98054536  |
| 0.999889165 | 0.99792314 | 0.97276904 | 0.517580735 | 0.771178469 | 1.08E-07    |
| -1.03368508 | 0.46461999 | -1.0061804 | 0.89156279  | -1.07437276 | 0.116631647 |
| 0.999379259 | 0.9844841  | -1.0121945 | 0.704417692 | 0.978984838 | 0.506799309 |
| -1.07754972 | 0.15260692 | -1.122379  | 0.029061291 | -1.08933972 | 0.102267924 |
| -1.04722328 | 0.36355916 | -1.0354834 | 0.491611313 | -1.05745886 | 0.272132977 |
| -1.20498389 | 0.00595886 | 0.94569121 | 0.394902475 | -1.11959249 | 0.088473768 |
| 0.976775108 | 0.75465193 | 0.88328826 | 0.102967142 | -1.17220544 | 0.038307612 |
| 0.888105413 | 0.42103291 | 0.98616047 | 0.924488605 | 0.919549097 | 0.568966326 |
| -1.07237572 | 0.08032402 | 0.95704483 | 0.267703787 | -1.00244114 | 0.950637393 |
| 0.877827815 | 0.48810846 | 0.81082309 | 0.266211654 | 0.812311177 | 0.270366848 |
| -1.0555387  | 0.28263831 | 0.98747988 | 0.801249302 | 0.963777401 | 0.462031654 |
| -1.0653695  | 0.07669977 | 0.97731154 | 0.515800835 | -1.06245059 | 0.089972058 |
| 0.968993297 | 0.55901368 | -1.0401201 | 0.465960764 | 0.967260674 | 0.53697649  |
| -1.04805747 | 0.39583772 | -1.1623043 | 0.008265858 | -1.07645315 | 0.184788781 |
| -1.05638837 | 0.41943684 | -1.1890869 | 0.013021302 | -1.28559236 | 0.000468817 |
| -1.04810692 | 0.40745158 | -1.0318081 | 0.58022827  | -1.06013441 | 0.304062119 |
| -1.05958794 | 0.31727007 | -1.1766561 | 0.006408826 | -1.11936856 | 0.054395236 |
| 0.952502772 | 0.32029352 | 0.9449507  | 0.248274327 | 0.982528597 | 0.717773403 |
| -1.17860748 | 0.21582062 | -1.2946801 | 0.054198453 | -1.32234651 | 0.03781386  |



|             |            |            |             |             |             |
|-------------|------------|------------|-------------|-------------|-------------|
| 0.87208544  | 0.12649351 | 0.85678441 | 0.085323681 | 0.805920948 | 0.017711377 |
| 0.966726534 | 0.5971808  | 0.95755189 | 0.498529467 | 0.964865562 | 0.57652716  |
| 0.948821815 | 0.20630776 | 0.92616752 | 0.067265542 | 0.899999406 | 0.013126459 |
| -1.07186456 | 0.07008328 | -1.0679652 | 0.085631549 | 0.952854979 | 0.203925488 |
| 0.93318193  | 0.2964138  | -1.0197613 | 0.766575785 | 0.978463682 | 0.74121479  |
| 0.918953808 | 0.19696429 | 0.81318845 | 0.002332638 | 0.723281449 | 6.32E-06    |
| -1.01262027 | 0.78318753 | -1.004367  | 0.923808661 | -1.12206034 | 0.014030949 |
| 0.93273575  | 0.42049658 | 0.86987393 | 0.109975924 | 0.689434596 | 6.44E-05    |
| -1.04113738 | 0.5057329  | -1.0394962 | 0.522461648 | -1.11377895 | 0.078951337 |
| 0.975706622 | 0.70032479 | 0.94511541 | 0.3784248   | -1.03221705 | 0.61988556  |
| 0.906923656 | 0.23368044 | 0.87668555 | 0.110541347 | 0.861379253 | 0.071342094 |
| 0.956042418 | 0.37697296 | -1.0023673 | 0.962799588 | -1.07255532 | 0.170835706 |
| 0.991601475 | 0.88320125 | -1.1417129 | 0.024201417 | -1.0194337  | 0.73752949  |
| -1.06064102 | 0.43422693 | -1.1174778 | 0.143004698 | -1.40634833 | 2.97E-05    |
| -1.10268603 | 0.06105682 | 0.95430739 | 0.364061496 | 0.908918567 | 0.067051757 |
| 0.996080696 | 0.94256476 | 0.93175443 | 0.19816499  | 0.999524018 | 0.993030661 |
| 0.967696947 | 0.62066824 | -1.0451902 | 0.505706137 | -1.27114275 | 0.000619613 |
| 0.923670054 | 0.14164731 | -1.0947684 | 0.094736673 | 0.98854997  | 0.829537821 |
| 0.890424385 | 0.07940155 | 0.89132832 | 0.081988665 | -1.07035262 | 0.299555468 |
| 0.848689517 | 0.43554524 | 0.86853615 | 0.502618652 | 0.73747316  | 0.150603994 |
| -1.07268963 | 0.25403818 | 0.95934235 | 0.498165031 | -1.04681333 | 0.455495513 |
| 0.903829636 | 0.24650053 | 0.90827667 | 0.2699003   | -1.04677673 | 0.598477099 |
| -1.02853863 | 0.60588484 | -1.0157148 | 0.774760925 | -1.06261745 | 0.267601216 |
| 0.960136142 | 0.49378545 | 0.98398539 | 0.785565575 | 0.987432819 | 0.831201193 |
| 0.981899387 | 0.83430574 | 0.89379482 | 0.201874312 | -1.04023015 | 0.651744334 |
| -1.03159049 | 0.65440139 | 0.9335235  | 0.323884517 | -1.14503966 | 0.055155692 |
| 0.739947323 | 2.53E-06   | 0.81628594 | 0.00081471  | 0.96198157  | 0.500966616 |
| 0.872424001 | 0.02205175 | -1.0784727 | 0.19739101  | -1.01763979 | 0.763738274 |
| 0.968024041 | 0.82581932 | 0.87513457 | 0.368144836 | -1.0551602  | 0.716273926 |
| 0.830384023 | 0.0103116  | -1.0700864 | 0.336871569 | -1.03623235 | 0.612733404 |
| 0.991314627 | 0.87750491 | -1.0065523 | 0.908127461 | -1.11436895 | 0.0598589   |
| 0.964051851 | 0.47314924 | 0.95365423 | 0.353236887 | -1.11797943 | 0.032076723 |
| -1.09132869 | 0.15737428 | -1.0085749 | 0.889106695 | 0.995921877 | 0.946790137 |
| 0.958904975 | 0.41333836 | -1.020855  | 0.686708085 | -1.02179343 | 0.673571664 |
| -1.00635544 | 0.87803572 | 0.9949977  | 0.903311682 | 0.958949825 | 0.312216136 |
| 0.939137561 | 0.21374625 | 0.98009426 | 0.68862473  | 0.903455601 | 0.046863679 |
| -1.05532551 | 0.4561136  | 0.99971241 | 0.996815526 | -1.1092808  | 0.154044229 |
| 0.955935572 | 0.50706374 | -1.0718044 | 0.308690119 | -1.00433284 | 0.949146801 |
| -1.15679883 | 0.06797869 | -1.1006396 | 0.225436057 | -1.42900762 | 2.95E-05    |
| -1.04558603 | 0.63850581 | 0.91191164 | 0.332783978 | 0.951114721 | 0.597456784 |
| -1.08693057 | 0.32265524 | -1.1176821 | 0.188389231 | -1.18755069 | 0.044419423 |
| 0.93250473  | 0.40757024 | -1.0458033 | 0.594885931 | 0.789486067 | 0.006652825 |
| -1.06526897 | 0.42598155 | -1.0053675 | 0.946104082 | -1.2638812  | 0.004431603 |
| -1.07351226 | 0.28103597 | 0.97530646 | 0.702613335 | -1.10698054 | 0.12457852  |

|             |            |            |             |             |             |
|-------------|------------|------------|-------------|-------------|-------------|
| 0.992102161 | 0.89666743 | -1.0248115 | 0.688305259 | -1.06931555 | 0.274987224 |
| 0.907974167 | 0.04447288 | 0.90653851 | 0.041221067 | -1.00770612 | 0.870629968 |
| 0.971841811 | 0.53087423 | 0.94465733 | 0.214092737 | 0.963491546 | 0.415093372 |
| 0.896707177 | 0.01749024 | -1.0683501 | 0.142873742 | -1.1705001  | 0.00083417  |
| -1.03512442 | 0.31387285 | -1.0372373 | 0.286422299 | 0.98729714  | 0.708030702 |
| -1.17771622 | 0.00262484 | 0.99889367 | 0.983041344 | 0.724595223 | 7.88E-08    |
| -1.02812669 | 0.59948179 | 0.98945065 | 0.840695147 | 0.894416223 | 0.038197977 |
| -1.13470013 | 0.29132175 | -1.0094292 | 0.937209263 | -1.0389825  | 0.748318752 |
| 0.977328298 | 0.77284797 | 0.96982136 | 0.69980209  | 0.863795144 | 0.069487602 |
| -1.10404246 | 0.07185462 | 0.97424564 | 0.630303684 | -1.06068192 | 0.279287447 |
| 0.926269571 | 0.06269864 | 0.97926594 | 0.605201778 | 0.982282248 | 0.659063248 |
| 0.961782428 | 0.43698215 | 0.96007461 | 0.41648347  | -1.00026328 | 0.995798391 |
| -1.40920029 | 0.00064159 | -1.2531091 | 0.020646393 | -1.30648513 | 0.006610359 |
| -1.01936313 | 0.63350873 | -1.0330681 | 0.419546684 | -1.07191197 | 0.088234566 |
| -1.10275085 | 0.06624353 | 0.91395203 | 0.090309359 | 0.936644175 | 0.215021537 |
| -1.05340906 | 0.21726168 | -1.0245732 | 0.562658696 | 0.931446654 | 0.094155084 |
| 0.791947213 | 0.01976496 | 0.85697037 | 0.117733474 | 0.937063541 | 0.505999782 |
| 0.96373822  | 0.50943864 | 0.89492149 | 0.050990687 | 0.959437608 | 0.459780874 |
| -1.00856864 | 0.85807151 | -1.0212491 | 0.659669319 | 0.987841059 | 0.797667526 |
| 0.997280126 | 0.94264862 | 0.96804017 | 0.392520357 | -1.01531054 | 0.688377278 |
| -1.01194748 | 0.86569572 | -1.0044066 | 0.950068041 | -1.07477766 | 0.306765972 |
| 0.922226637 | 0.11992991 | 0.92033443 | 0.111025412 | 0.890644729 | 0.027881748 |
| -1.04036563 | 0.45829776 | -1.025196  | 0.640432297 | 0.951426139 | 0.351431999 |
| -1.00478406 | 0.90918617 | -1.0170027 | 0.687196152 | 0.882946875 | 0.004212644 |
| 0.946215552 | 0.34424468 | -1.0739124 | 0.223764068 | 0.998362242 | 0.977534705 |
| 0.963383186 | 0.53136893 | 0.97273441 | 0.642489099 | 0.877308526 | 0.031347919 |
| -1.07208189 | 0.17981264 | -1.1154843 | 0.037433115 | -1.03754901 | 0.474799342 |
| 0.937305989 | 0.35276316 | 0.9246716  | 0.261893072 | -1.17453575 | 0.023650203 |
| 0.922170597 | 0.05025096 | -1.0011011 | 0.978397614 | 0.982077643 | 0.656636419 |
| 0.763907497 | 0.00011716 | 0.86557579 | 0.030111229 | 0.834289478 | 0.007167687 |
| 0.935122383 | 0.13288868 | 0.97053702 | 0.499215824 | -1.00740207 | 0.867392903 |
| 0.947606693 | 0.26154878 | -1.0765596 | 0.125723475 | 0.887199064 | 0.014613517 |
| -1.01405781 | 0.78302886 | -1.0629849 | 0.231224908 | -1.03523451 | 0.495349389 |
| -1.12335059 | 0.02157039 | -1.0743255 | 0.150408002 | 0.983510324 | 0.736410306 |
| 0.977815915 | 0.79455006 | -1.0677625 | 0.447703629 | -1.00522507 | 0.951748074 |
| 0.915363373 | 0.18583213 | -1.0523972 | 0.442352959 | -1.13390881 | 0.062213283 |
| 0.870414233 | 0.3050304  | 0.93167076 | 0.599592112 | 0.922934477 | 0.552075966 |
| -1.11612315 | 0.21612743 | -1.1509991 | 0.114983161 | -1.25572729 | 0.012193555 |
| -1.02295615 | 0.84675958 | 0.96771732 | 0.779969966 | -1.03565619 | 0.765518801 |
| 0.954617717 | 0.2220861  | -1.0278526 | 0.468140031 | -1.12049333 | 0.003799922 |
| 0.974686955 | 0.63486521 | -1.0385097 | 0.484533632 | 0.936141106 | 0.224333434 |
| 0.898527708 | 0.00758751 | 0.99622965 | 0.922329486 | 0.951359073 | 0.201520433 |
| -1.0586047  | 0.47835119 | 0.96000162 | 0.610941597 | 0.966756327 | 0.673383801 |
| -1.23201181 | 0.04162027 | -1.2121903 | 0.059525554 | -1.33318291 | 0.00575179  |

|             |            |            |             |             |             |
|-------------|------------|------------|-------------|-------------|-------------|
| 0.929013576 | 0.303568   | 0.93653088 | 0.359066618 | -1.05687301 | 0.438608127 |
| -1.17942354 | 0.24107642 | 0.90464226 | 0.474727965 | -1.07893297 | 0.587514574 |
| -1.00045171 | 0.99739724 | 0.90671911 | 0.480397358 | 0.835853976 | 0.19875657  |
| -1.07434542 | 0.20274735 | -1.1361144 | 0.025686091 | -1.08656749 | 0.14131104  |
| 0.973516841 | 0.88410236 | -1.04706   | 0.802814362 | -1.00968108 | 0.958265523 |
| -1.00181844 | 0.98128889 | 0.9914563  | 0.91180772  | -1.14732083 | 0.080347963 |
| -1.04991653 | 0.59617337 | -1.1172775 | 0.230204216 | -1.07928884 | 0.40739174  |
| 0.841322155 | 0.34327145 | 0.81165303 | 0.253266044 | 0.872918906 | 0.455249321 |
| 0.964734173 | 0.62420569 | -1.0519128 | 0.490307569 | -1.17671608 | 0.029719884 |
| -1.03010478 | 0.61096975 | -1.031719  | 0.592322199 | -1.00519247 | 0.929139773 |
| -1.01304895 | 0.80575208 | -1.0475554 | 0.379785304 | -1.02778619 | 0.603520565 |
| -1.30066569 | 0.01741608 | -1.3185627 | 0.012609321 | -1.39973387 | 0.002755099 |
| 0.841392552 | 0.35557183 | 0.85699945 | 0.408700467 | 0.794784472 | 0.220595751 |
| -1.24664342 | 0.01539587 | -1.0731928 | 0.426097553 | -1.04233442 | 0.639729132 |
| -1.04967204 | 0.28615113 | 0.97372382 | 0.55650209  | -1.0229163  | 0.616654398 |
| -1.17823244 | 0.04542108 | -1.1325741 | 0.125861584 | -1.13180834 | 0.12788624  |
| 0.978900272 | 0.67290718 | -1.0100982 | 0.842237744 | -1.01995123 | 0.695712814 |
| -1.14014102 | 0.13436447 | -1.1317268 | 0.157312408 | -1.39102602 | 0.00034274  |
| -1.03869498 | 0.49727106 | -1.0944836 | 0.109971589 | -1.13090609 | 0.031059534 |
| -1.00141059 | 0.98068614 | 0.99610366 | 0.946545257 | -1.18660264 | 0.004673681 |
| 0.99519807  | 0.91279695 | -1.062198  | 0.173529775 | 0.897441823 | 0.016580644 |
| 0.994990199 | 0.89000513 | -1.0081983 | 0.822137195 | -1.04473285 | 0.231296594 |
| 0.859554703 | 0.00494058 | -1.0861902 | 0.115074624 | -1.09067931 | 0.098440691 |
| -1.01570913 | 0.84735347 | -1.1118258 | 0.193948913 | -1.12082456 | 0.162702053 |
| -1.03558991 | 0.56274316 | 0.99313961 | 0.909156332 | -1.10394824 | 0.105423325 |
| 0.976212293 | 0.65207468 | 0.89255651 | 0.036859389 | -1.01217214 | 0.820621114 |
| 0.995914772 | 0.90468536 | -1.1434779 | 0.000236862 | 0.987521397 | 0.713537303 |
| 0.98735553  | 0.86577757 | -1.0721718 | 0.356499532 | -1.20491905 | 0.015987107 |
| 0.992654968 | 0.89610006 | 0.90764407 | 0.09034215  | 0.941919556 | 0.29166618  |
| 0.998169254 | 0.98392148 | 0.94389515 | 0.526195761 | 0.946382457 | 0.545154507 |
| 0.845179028 | 0.41119009 | 0.83370827 | 0.374492706 | 0.9099668   | 0.644116674 |
| -1.02867633 | 0.67915297 | -1.136847  | 0.064625189 | 0.955368944 | 0.50471347  |
| -1.18290782 | 0.10287474 | -1.243774  | 0.035665303 | -1.14723642 | 0.180495799 |
| -1.09349874 | 0.15156275 | -1.0665011 | 0.299391448 | -1.04030537 | 0.522884637 |
| -1.02458228 | 0.63214648 | 0.96402627 | 0.470787147 | 0.982089498 | 0.721522845 |
| 0.979729776 | 0.85235204 | -1.0629192 | 0.579673213 | 0.759058259 | 0.014835764 |
| 0.984785882 | 0.73003724 | -1.1015771 | 0.032975765 | -1.14204422 | 0.004029763 |
| -1.2235949  | 0.0064647  | -1.1596122 | 0.042339814 | -1.2096953  | 0.009922185 |
| 0.969656046 | 0.66407771 | -1.0179721 | 0.801661368 | 0.975356875 | 0.725004549 |
| -1.05572496 | 0.3647072  | -1.0470817 | 0.441389221 | -1.09905353 | 0.117201701 |
| -1.06430795 | 0.20877937 | 0.98279803 | 0.7245797   | 0.957494468 | 0.379230274 |
| 0.984051282 | 0.84820772 | 0.99395234 | 0.942419736 | 0.866479613 | 0.092209367 |
| 0.986888946 | 0.82680776 | 0.93723697 | 0.285036683 | 0.890027809 | 0.05753497  |
| -1.12285164 | 0.09911923 | 0.87619712 | 0.060934506 | -1.11564626 | 0.118846549 |

|             |            |            |             |             |             |
|-------------|------------|------------|-------------|-------------|-------------|
| -1.06113827 | 0.33131626 | 0.91657309 | 0.155922598 | -1.00901129 | 0.882739171 |
| 0.977780194 | 0.65575279 | 0.97405722 | 0.602166512 | 0.889563106 | 0.023335667 |
| 0.886306127 | 0.12951661 | 0.96452774 | 0.646846631 | 0.666389157 | 3.45E-06    |
| -1.06815666 | 0.3286183  | -1.0601714 | 0.386187265 | -1.07191083 | 0.30376987  |
| -1.03179633 | 0.78867329 | -1.2232078 | 0.088681216 | 0.957922428 | 0.712872119 |
| 0.939099954 | 0.20489349 | 0.94472153 | 0.250608877 | 0.996796815 | 0.947997295 |
| -1.04362957 | 0.37057147 | -1.0218887 | 0.648916321 | -1.04531793 | 0.352874557 |
| -1.01982394 | 0.60268906 | -1.0026447 | 0.944093873 | 0.982718647 | 0.643803539 |
| -1.02799482 | 0.6762515  | 0.99921455 | 0.990510327 | -1.00271025 | 0.967321053 |
| -1.20862634 | 0.01780453 | -1.0989522 | 0.228747039 | -1.12910517 | 0.123053801 |
| 0.924370246 | 0.53460217 | 0.96452062 | 0.775139065 | 0.981675887 | 0.883694424 |
| -1.02683656 | 0.80286368 | -1.2234823 | 0.061381259 | -1.14520962 | 0.204494444 |
| 0.999043576 | 0.98113031 | 0.99671636 | 0.935207222 | 0.888020013 | 0.004711818 |
| 0.994128796 | 0.91602666 | 0.91641353 | 0.122211944 | -1.08844043 | 0.133225173 |
| 0.932652246 | 0.2442646  | 0.93404363 | 0.254368768 | -1.0518704  | 0.39695227  |
| 0.779109394 | 0.024562   | 0.87468121 | 0.220007368 | 0.750656221 | 0.010330008 |
| 0.948693161 | 0.32577153 | 0.99312544 | 0.897137647 | 0.938455776 | 0.236938678 |
| 0.931787467 | 0.35697392 | -1.0308178 | 0.69134827  | -1.16632547 | 0.048022191 |
| -1.03560906 | 0.51426026 | 0.9823826  | 0.740031244 | -1.25347484 | 8.89E-05    |
| -1.02579886 | 0.6899914  | 0.96089479 | 0.532643316 | -1.09285122 | 0.167890472 |
| -1.06502474 | 0.34332183 | -1.0407428 | 0.547030257 | -1.11215014 | 0.112575937 |
| -1.00771754 | 0.8936438  | 0.91131977 | 0.1105456   | -1.03935387 | 0.502925677 |
| 0.783453635 | 0.00110541 | 0.82535407 | 0.00896457  | 0.856684224 | 0.033223863 |
| -1.0610977  | 0.27761543 | -1.0508135 | 0.363402957 | -1.0980609  | 0.089356414 |
| -1.15596813 | 0.12105439 | -1.0196716 | 0.833113696 | -1.16811143 | 0.097036645 |
| -1.05812161 | 0.49313848 | 0.99854589 | 0.985885197 | 0.829053144 | 0.025992138 |
| 0.777790155 | 0.00046946 | -1.061084  | 0.383286168 | -1.20120386 | 0.008825752 |
| 0.965585391 | 0.39446936 | 0.89532763 | 0.009009911 | 0.88592886  | 0.004460566 |
| 0.995989585 | 0.93609724 | -1.0638098 | 0.220388584 | -1.00290458 | 0.953853302 |
| -1.02304421 | 0.70619058 | -1.1079419 | 0.093950228 | -1.03407375 | 0.579589825 |
| 0.965142815 | 0.40817337 | 0.89876595 | 0.015204309 | 0.940423884 | 0.15475346  |
| 0.958735622 | 0.47998525 | 0.87999572 | 0.035438068 | -1.05714635 | 0.352430959 |
| 0.943223728 | 0.26681567 | 0.95577677 | 0.38909715  | 0.993181641 | 0.89599692  |
| -1.04047337 | 0.58494686 | -1.0264562 | 0.719037528 | -1.14594885 | 0.064607743 |
| -1.14487123 | 0.02826584 | -1.0522563 | 0.39974515  | 0.976430824 | 0.692597006 |
| 0.893876128 | 0.19323556 | 0.76509943 | 0.002710679 | 0.751446292 | 0.001458211 |
| 0.973246235 | 0.55932303 | 0.94597379 | 0.234150596 | 0.989448432 | 0.819110163 |
| 0.897672956 | 0.53901482 | 0.97050787 | 0.864512164 | 0.835648753 | 0.308407128 |
| -1.03168375 | 0.56471044 | -1.0027962 | 0.958823719 | -1.00385392 | 0.943300631 |
| 0.988793483 | 0.81433805 | -1.0079117 | 0.869548379 | -1.09393217 | 0.065545534 |
| 0.916344241 | 0.08958929 | 0.98798896 | 0.811918073 | 0.910958405 | 0.070487501 |
| 0.817130836 | 0.02059553 | 0.92496744 | 0.360932144 | 0.734713767 | 0.00061014  |
| -1.14067207 | 0.31128767 | 0.92240265 | 0.533121032 | -1.34966451 | 0.023671057 |
| -1.04681571 | 0.57678444 | -1.141301  | 0.110649709 | -1.27707626 | 0.004070681 |

|             |            |            |             |             |             |
|-------------|------------|------------|-------------|-------------|-------------|
| 0.910045928 | 0.05985507 | -1.0700516 | 0.173019888 | -1.05834018 | 0.252603847 |
| 0.907714844 | 0.12400565 | 0.90005248 | 0.095015845 | 0.985930155 | 0.819978785 |
| -1.10422339 | 0.16763884 | -1.2322723 | 0.00474435  | -1.5027996  | 4.41E-07    |
| 0.966349839 | 0.46806025 | 0.98609976 | 0.766195894 | 0.937321675 | 0.172690471 |
| 0.943928987 | 0.09557953 | -1.0541727 | 0.126766021 | -1.00255261 | 0.940531146 |
| -1.02048337 | 0.68140593 | 0.91144468 | 0.064481513 | 0.896010701 | 0.029576994 |
| 0.889513123 | 0.00274901 | 0.9875321  | 0.737843527 | 0.909288523 | 0.013659891 |
| 0.959771271 | 0.55723032 | -1.0062794 | 0.928584968 | -1.13936217 | 0.065987914 |
| 0.99312715  | 0.92620815 | 0.95703412 | 0.555974982 | 0.949322287 | 0.485893213 |
| -1.05806104 | 0.21050157 | -1.0163191 | 0.71766112  | -1.08734693 | 0.065479209 |
| -1.06007346 | 0.3940196  | -1.0858006 | 0.230651601 | -1.12379775 | 0.091367218 |
| -1.05176616 | 0.41986137 | -1.0636916 | 0.324439883 | 0.952323208 | 0.434849668 |
| 0.952835316 | 0.53223525 | 0.89167942 | 0.141598121 | -1.17645441 | 0.039130037 |
| -1.09580529 | 0.19738021 | -1.2681247 | 0.001322016 | 0.77555379  | 0.000640733 |
| -1.01830729 | 0.6958688  | 0.98048725 | 0.671167359 | 0.977410997 | 0.622645573 |
| -1.00931949 | 0.85705167 | 0.98200977 | 0.724564893 | -1.04010398 | 0.446316919 |
| 0.968631647 | 0.69367432 | 0.8853965  | 0.136303892 | 0.934770761 | 0.405677489 |
| 0.977390439 | 0.69910995 | 0.96900304 | 0.594827535 | 0.931085928 | 0.230323277 |
| -1.02292984 | 0.66775161 | -1.1752214 | 0.003319144 | -1.04448327 | 0.411009211 |
| 0.981162456 | 0.75431361 | -1.0741131 | 0.24218263  | -1.15093512 | 0.023872312 |
| 0.986595561 | 0.84390169 | 0.9577651  | 0.529622313 | -1.14824762 | 0.047667009 |
| -1.00725062 | 0.84477515 | -1.0600798 | 0.117971101 | -1.00764168 | 0.836552607 |
| 0.838389799 | 0.00100783 | 0.82868431 | 0.000495596 | 0.804115222 | 7.19E-05    |
| -1.10307431 | 0.07138566 | -1.0300023 | 0.581686083 | 0.930313964 | 0.181282788 |
| -1.00217599 | 0.97680434 | 0.92878286 | 0.325224923 | 0.607733977 | 1.34E-08    |
| -1.13246875 | 0.03168884 | 0.99887375 | 0.98413098  | -1.05474394 | 0.348827499 |
| -1.05309812 | 0.44304993 | -1.0953123 | 0.179572216 | -1.15838448 | 0.032429698 |
| 0.985784024 | 0.8403895  | -1.112427  | 0.137952728 | -1.24356588 | 0.003251996 |
| 0.992806697 | 0.9138625  | -1.1435778 | 0.048425446 | -1.1632909  | 0.026802462 |
| -1.10486853 | 0.15814669 | -1.0367191 | 0.606896539 | -1.34064321 | 9.88E-05    |
| 0.971907209 | 0.35474604 | -1.0431848 | 0.171772179 | 0.98595297  | 0.644920319 |
| -1.01749216 | 0.76756613 | 0.99881863 | 0.983919401 | -1.02585972 | 0.663602925 |
| -1.13689669 | 0.01047295 | 0.94246647 | 0.225834793 | -1.00875875 | 0.857580052 |
| 0.935346052 | 0.41580742 | 0.77342367 | 0.002651015 | 0.862274417 | 0.074635938 |
| 0.707278368 | 0.00014994 | 0.88663205 | 0.162012299 | 0.632291276 | 1.55E-06    |
| -1.33938287 | 0.00298627 | -1.3373032 | 0.003130874 | -1.28773598 | 0.009447644 |
| -1.14452457 | 0.06033079 | -1.1468323 | 0.056719091 | -1.15714377 | 0.042824497 |

**Entinostat U2932 4RH****Fold change P Value**

|             |             |
|-------------|-------------|
| 0.942911485 | 0.158810189 |
| 0.905167427 | 0.069898481 |
| 0.853823247 | 0.002511438 |
| -1.13579952 | 0.008368953 |
| 0.869960563 | 0.040679692 |
| 0.974835364 | 0.702527343 |
| -1.01851134 | 0.663368448 |
| 0.31335114  | 5.63684E-33 |
| 0.944759975 | 0.136416431 |
| 0.8036619   | 1.12439E-08 |
| 0.932770159 | 0.441439244 |
| 0.797497582 | 0.22379537  |
| 0.968706532 | 0.562810738 |
| 0.997973803 | 0.981286621 |
| 0.994657713 | 0.959363615 |
| 0.967784034 | 0.579381845 |
| -1.06121435 | 0.351128951 |
| 0.944325206 | 0.439729782 |
| 0.695331207 | 2.37521E-06 |
| 0.505517324 | 5.08901E-13 |
| -1.0803998  | 0.286099396 |
| -1.13932517 | 0.049374193 |
| -1.07225832 | 0.394678648 |
| 0.954899151 | 0.382313066 |
| 0.988198287 | 0.838465932 |
| -1.24926727 | 0.001289029 |
| 0.959821652 | 0.37673689  |
| -1.41071973 | 0.000292637 |
| 0.604516757 | 0.0002429   |
| -1.23843099 | 0.001539363 |
| 0.879214966 | 0.263151737 |
| 0.908203181 | 0.115495491 |
| -1.07718723 | 0.366996985 |
| 0.938301554 | 0.166676363 |
| -1.06191921 | 0.460684037 |
| -1.00986835 | 0.784519213 |
| 0.887502706 | 0.004112793 |
| 0.481091622 | 1.01873E-12 |
| -1.02500891 | 0.683722332 |
| 0.879663376 | 0.018699766 |
| 0.915510517 | 0.127334544 |
| 0.885527829 | 0.004753696 |

|             |             |
|-------------|-------------|
| 0.743792015 | 4.90243E-05 |
| -1.02221618 | 0.630748231 |
| 0.976587844 | 0.52277428  |
| 0.950848994 | 0.357962035 |
| -1.14643386 | 0.221330059 |
| 0.923637457 | 0.27987191  |
| 0.8813952   | 0.070211329 |
| -1.18038046 | 0.141093567 |
| 0.332024188 | 2.55197E-27 |
| -1.02761024 | 0.632561054 |
| -1.0161437  | 0.688013158 |
| 0.981049512 | 0.82540333  |
| 0.887874167 | 0.006801109 |
| 0.944382881 | 0.255391077 |
| 0.95512616  | 0.556365039 |
| 0.899181845 | 0.245547639 |
| -1.21382867 | 0.043809506 |
| 0.940612146 | 0.450982178 |
| -1.26187955 | 0.000430459 |
| -1.2036642  | 0.003955086 |
| 0.846227152 | 0.000284541 |
| 0.968460697 | 0.576724814 |
| 0.987820674 | 0.800343678 |
| 0.920795014 | 0.052135045 |
| 0.96855873  | 0.574210135 |
| -1.2070498  | 1.33027E-05 |
| -1.11445742 | 0.10868002  |
| 0.979001784 | 0.568649431 |
| -1.11062984 | 0.005683837 |
| -1.03644685 | 0.688072939 |
| 0.779711047 | 0.00027094  |
| -1.65510281 | 1.25402E-07 |
| -1.05008714 | 0.235728004 |
| -1.093536   | 0.388519529 |
| 0.926494551 | 0.240272968 |
| -1.16128245 | 0.069962778 |
| 0.838771223 | 0.025114634 |
| 0.586231377 | 8.046E-10   |
| -1.04759173 | 0.430934143 |
| 0.981383122 | 0.660534267 |
| 0.743114587 | 0.000685096 |
| -1.13588828 | 0.024149634 |
| -1.01795602 | 0.615146375 |
| 0.834126335 | 0.000625905 |

|             |             |
|-------------|-------------|
| 0.847379137 | 0.01245971  |
| 0.987771084 | 0.91165806  |
| -1.13122965 | 0.042725986 |
| 0.947338775 | 0.236541605 |
| -1.0578314  | 0.462734245 |
| -1.26114238 | 0.028038604 |
| -1.08694673 | 0.322556147 |
| -1.02327743 | 0.762150199 |
| 0.956841999 | 0.584686122 |
| 0.928826164 | 0.437739275 |
| 0.807026651 | 0.020555586 |
| -1.03134024 | 0.553006667 |
| -1.0798669  | 0.497040582 |
| 0.859816359 | 0.050320382 |
| 0.927003093 | 0.231966338 |
| -1.15529918 | 0.014839372 |
| 0.833022566 | 0.055866811 |
| 0.821938927 | 0.052767879 |
| -1.02425826 | 0.76910604  |
| -1.02671389 | 0.721266066 |
| 0.859862957 | 0.046790203 |
| -1.35646499 | 7.41987E-05 |
| -1.21233548 | 0.050122245 |
| 0.99234961  | 0.92486443  |
| 0.898260762 | 0.106761756 |
| 0.915994899 | 0.169137396 |
| 0.973201179 | 0.54464676  |
| 0.80260946  | 0.000120661 |
| -1.32600921 | 0.015832266 |
| -1.10527578 | 0.0723451   |
| -1.00853977 | 0.815237648 |
| -1.34743872 | 0.004575158 |
| -1.35927571 | 9.19359E-05 |
| -1.14020092 | 0.118716204 |
| 0.793744996 | 0.000249783 |
| -1.53926234 | 4.84244E-07 |
| 0.920379862 | 0.068991223 |
| 0.944229294 | 0.287874203 |
| 0.868816783 | 0.013090921 |
| 0.470231742 | 1.00109E-17 |
| -1.21356163 | 0.02988221  |
| 0.782988345 | 0.000153366 |
| -1.04331791 | 0.288690877 |
| 0.942264124 | 0.210071404 |



|             |             |
|-------------|-------------|
| -1.23155463 | 0.005133107 |
| 0.969789229 | 0.667950347 |
| 0.964950537 | 0.663768498 |
| 0.718226697 | 1.63031E-05 |
| 0.714523019 | 1.62409E-10 |
| 0.887108872 | 0.105179584 |
| 0.943763133 | 0.233782675 |
| 0.910643913 | 0.076578003 |
| -1.14277895 | 0.014278065 |
| 0.98814188  | 0.872562337 |
| 0.955803217 | 0.51359852  |
| -1.04667696 | 0.45238883  |
| 0.713008127 | 0.000772077 |
| 0.857633594 | 0.007406275 |
| 0.896163539 | 0.100699009 |
| -1.13092529 | 0.036945732 |
| 0.908978524 | 0.045118149 |
| 0.799605098 | 0.009716556 |
| 0.897877225 | 0.005989055 |
| -1.01548126 | 0.758537817 |
| 0.875727981 | 0.053531763 |
| 0.990847732 | 0.852992119 |
| -1.06915262 | 0.215013361 |
| 0.898663456 | 0.12145944  |
| -1.05317106 | 0.457359734 |
| 0.914719506 | 0.174461448 |
| 0.777851744 | 6.59923E-06 |
| 0.935378601 | 0.414947134 |
| -1.09950362 | 0.201472188 |
| -1.32950231 | 0.020445623 |
| 0.967342279 | 0.665725877 |
| -1.02465121 | 0.792827689 |
| 0.950949252 | 0.771587811 |
| 0.982472688 | 0.749651621 |
| 0.982965691 | 0.771831896 |
| -1.39782638 | 0.000170208 |
| -1.19831778 | 0.003226981 |
| 0.965014323 | 0.580541327 |
| 0.879806948 | 0.040438227 |
| 0.948536667 | 0.243175758 |
| 0.731988178 | 0.00087933  |
| 0.99025344  | 0.909264254 |
| -1.01765614 | 0.835571204 |
| -1.0631285  | 0.461776385 |

|             |             |
|-------------|-------------|
| 0.215390548 | 2.48693E-26 |
| 0.902435942 | 0.107587543 |
| -1.07230001 | 0.315336912 |
| 0.923816781 | 0.154830391 |
| 0.714041081 | 0.000358872 |
| 0.903254956 | 0.143443185 |
| -1.00456766 | 0.911023879 |
| 0.936076403 | 0.190331502 |
| 0.944812081 | 0.134319974 |
| 0.947654705 | 0.364410388 |
| -1.04096247 | 0.188573598 |
| 0.746375805 | 6.23537E-05 |
| -1.1053909  | 0.114613144 |
| -1.12517586 | 0.055189836 |
| 0.960534679 | 0.434424778 |
| 0.986565946 | 0.764380764 |
| 0.952876364 | 0.108332971 |
| 0.920318768 | 0.15566329  |
| 0.860299294 | 0.025640368 |
| 0.518746657 | 5.57502E-15 |
| 0.985421481 | 0.85711094  |
| -1.18417974 | 0.002151331 |
| -1.08352931 | 0.207042168 |
| -1.11594896 | 0.106627026 |
| 0.828000108 | 0.031219982 |
| 0.877080838 | 0.014298942 |
| 0.933680981 | 0.227289924 |
| 0.71195869  | 0.008416761 |
| 0.831480603 | 0.068112242 |
| 0.899398319 | 0.195807789 |
| 0.852271007 | 0.033099546 |
| 0.990990424 | 0.882709848 |
| 0.948851384 | 0.411761623 |
| -1.04606325 | 0.480702265 |
| 0.810373886 | 0.012031403 |
| 0.83334191  | 0.05636889  |
| -1.27060887 | 0.00013914  |
| 0.997482165 | 0.964642957 |
| -1.0107402  | 0.790166702 |
| -1.04171088 | 0.722917942 |
| -1.0823963  | 0.370885887 |
| 0.733655511 | 3.76496E-05 |
| -1.00854995 | 0.905897802 |
| 0.731779558 | 0.002471542 |

|             |             |
|-------------|-------------|
| -1.09863261 | 0.150618387 |
| -1.24222863 | 0.00638744  |
| 0.884077617 | 0.221452078 |
| 0.787550526 | 0.000661375 |
| -1.82277248 | 5.06906E-07 |
| 0.665899568 | 3.03435E-08 |
| 0.898017171 | 0.026071663 |
| -1.32501107 | 0.000172921 |
| 0.915513801 | 0.130074326 |
| -1.01100112 | 0.827318427 |
| -1.05980386 | 0.641991561 |
| -1.07603678 | 0.253459428 |
| 0.595991232 | 6.1201E-13  |
| -1.572297   | 0.000514738 |
| -1.08692201 | 0.209146395 |
| -1.05924894 | 0.448625924 |
| -1.22073151 | 0.033543851 |
| -1.03075963 | 0.391407875 |
| -1.69510759 | 1.60164E-07 |
| -1.12037887 | 0.135619988 |
| -1.23200337 | 0.013158781 |
| 0.874383302 | 0.158867542 |
| 0.965684412 | 0.449465113 |
| 0.989796153 | 0.83755906  |
| 0.979599633 | 0.679734775 |
| 0.999732177 | 0.99580995  |
| -1.21401223 | 0.013000061 |
| -1.07797164 | 0.357500974 |
| -1.10683446 | 0.010359991 |
| -1.17760623 | 0.080042312 |
| -1.01273494 | 0.780178644 |
| 0.751373627 | 0.013902849 |
| 0.875966915 | 0.014248877 |
| 0.783217702 | 0.000336913 |
| 0.886571633 | 0.063613967 |
| -1.10274056 | 0.271954056 |
| 0.867838402 | 0.038290538 |
| -1.02887876 | 0.476447987 |
| -1.00542446 | 0.935485124 |
| 0.992732729 | 0.901935744 |
| 0.953430798 | 0.459812003 |
| 0.898787168 | 0.046355402 |
| 0.858066574 | 0.020460147 |
| 0.813087569 | 0.000382708 |

|             |             |
|-------------|-------------|
| -1.08621775 | 0.119882275 |
| 0.968804158 | 0.404464823 |
| -1.06144501 | 0.473767155 |
| -1.04125345 | 0.604337212 |
| 0.870233885 | 0.041086244 |
| -1.0091464  | 0.844484794 |
| 0.929062041 | 0.112361276 |
| 0.857055557 | 0.016655864 |
| -1.00844874 | 0.852002747 |
| 0.816721017 | 0.042349282 |
| 0.89424846  | 0.060369716 |
| 0.944497449 | 0.322468383 |
| -1.20136912 | 0.009253775 |
| 0.885766641 | 0.070222782 |
| 0.80850063  | 0.009073418 |
| 0.91779423  | 0.07232444  |
| -1.07518666 | 0.305296138 |
| 0.980811577 | 0.757478561 |
| -1.06416216 | 0.310950475 |
| 0.901536334 | 0.355282413 |
| -1.53186818 | 0.000703817 |
| -1.00200231 | 0.983421394 |
| 0.934419762 | 0.424664931 |
| 0.676538454 | 0.015750439 |
| -1.09926318 | 0.250794002 |
| 0.712295499 | 3.11214E-08 |
| 0.6892433   | 5.1668E-10  |
| -1.18679676 | 0.00686909  |
| -1.04447448 | 0.436346718 |
| 0.900025048 | 0.118302386 |
| -1.03518776 | 0.602097725 |
| 0.938219966 | 0.035680284 |
| 0.639615628 | 4.98452E-06 |
| -1.03693518 | 0.641153772 |
| -1.32622801 | 0.002895125 |
| 0.807079202 | 0.147772016 |
| 0.919229443 | 0.277880716 |
| -1.26239412 | 0.000142247 |
| 0.888214505 | 0.074867823 |
| 0.97548859  | 0.732679392 |
| 0.992243419 | 0.953837781 |
| -1.13388673 | 0.02760926  |
| 0.925681435 | 0.06320568  |
| 0.879361619 | 0.102691541 |

|             |             |
|-------------|-------------|
| -1.07040614 | 0.205440992 |
| -1.62951205 | 7.48675E-09 |
| -1.11032782 | 0.366236861 |
| -1.0633671  | 0.428005989 |
| 0.73644034  | 1.37089E-05 |
| -1.00654084 | 0.94146275  |
| 0.624009629 | 6.70573E-10 |
| 0.8244314   | 0.024814832 |
| 0.996649546 | 0.956415049 |
| -1.05275792 | 0.170069484 |
| 0.822477754 | 0.10251643  |
| 0.657764056 | 4.90183E-08 |
| 0.727184938 | 3.06188E-06 |
| -1.17520382 | 0.060127141 |
| -1.23512512 | 0.015047738 |
| -1.23083813 | 0.036834827 |
| -1.05058802 | 0.439764656 |
| 0.980680825 | 0.691920379 |
| -1.01873693 | 0.650903558 |
| 0.954076682 | 0.539869045 |
| 0.625039284 | 3.62002E-05 |
| -1.14499413 | 0.075923778 |
| -1.04274622 | 0.663186801 |
| 0.926967518 | 0.175327535 |
| 0.946718077 | 0.126509566 |
| 0.953815514 | 0.567390535 |
| 0.965829947 | 0.495071899 |
| 0.485452973 | 1.25653E-14 |
| 0.875164425 | 0.045192613 |
| 0.89242254  | 0.012101866 |
| -1.03112183 | 0.369995399 |
| 0.767096359 | 0.017202638 |
| -1.26050588 | 0.002805937 |
| 0.684270635 | 1.03778E-10 |
| 0.887674565 | 0.015798701 |
| -1.31046046 | 0.021542259 |
| 0.575211589 | 0.005913032 |
| -1.17914108 | 0.037779163 |
| -1.14785308 | 0.014809861 |
| -1.17936875 | 0.004203392 |
| -1.00936058 | 0.891338637 |
| -1.01560976 | 0.793246431 |
| -1.09848282 | 0.10095898  |
| -1.33477521 | 7.09992E-06 |

|             |             |
|-------------|-------------|
| 0.972904321 | 0.51767894  |
| -1.08766454 | 0.053335762 |
| 0.885509727 | 0.149237454 |
| -1.10644134 | 0.365974047 |
| 0.950053164 | 0.559857998 |
| -1.17651914 | 0.013116883 |
| 0.984367558 | 0.786290574 |
| -1.11177411 | 0.076584935 |
| 0.931792116 | 0.547737444 |
| -1.21905701 | 0.000401039 |
| -1.0306871  | 0.586186718 |
| 0.999710893 | 0.997024542 |
| -1.1770433  | 0.198654019 |
| -1.43364702 | 0.000515795 |
| -1.14771328 | 0.036105792 |
| -1.13995289 | 0.08641554  |
| 0.88964361  | 0.012756657 |
| -1.01423081 | 0.887341422 |
| 0.461641603 | 4.92913E-12 |
| 0.896892887 | 0.066504465 |
| 0.928981615 | 0.228885107 |
| -1.0398331  | 0.45290937  |
| 0.453494392 | 2.08421E-09 |
| 0.859385777 | 0.40722372  |
| 0.883527597 | 0.09950456  |
| -1.06422353 | 0.274893358 |
| -1.00133721 | 0.982408162 |
| 0.936371362 | 0.155368421 |
| 0.787959726 | 0.000358353 |
| 0.993811865 | 0.888718406 |
| 0.986740064 | 0.75404092  |
| -1.1742481  | 0.012712544 |
| 0.875937884 | 0.162993529 |
| 0.815248465 | 0.000145085 |
| -1.18436672 | 0.084395558 |
| 0.995153165 | 0.960479639 |
| 0.848079216 | 0.01171796  |
| -1.02554718 | 0.655496117 |
| 0.95785778  | 0.366414978 |
| -1.12077651 | 0.094841585 |
| -1.11659384 | 0.065596059 |
| 0.853096469 | 0.035370411 |
| -1.13902982 | 0.010629103 |
| 0.9882503   | 0.853518694 |

|             |             |
|-------------|-------------|
| -1.01011286 | 0.748953174 |
| 0.935347092 | 0.286583972 |
| 0.863971753 | 0.237029912 |
| 0.95566156  | 0.51328759  |
| 0.870175205 | 0.216134796 |
| -1.00717113 | 0.854768587 |
| -1.07896781 | 0.045766085 |
| 0.736142861 | 1.95523E-05 |
| 0.96355737  | 0.593707237 |
| -1.06766187 | 0.401069395 |
| 0.826238241 | 0.046967384 |
| -1.24217595 | 0.000209873 |
| -1.19559079 | 0.001907192 |
| -1.13886895 | 0.07257183  |
| -1.20040168 | 0.043560658 |
| 0.897685843 | 0.021110974 |
| 0.94658433  | 0.405640309 |
| -1.00469623 | 0.947651517 |
| -1.11845329 | 0.016420918 |
| 0.566577873 | 3.85987E-09 |
| 0.951549256 | 0.385285349 |
| -1.01337229 | 0.70559968  |
| 0.875439711 | 0.010409109 |
| -1.10801915 | 0.063071199 |
| -1.14619786 | 0.017053358 |
| 0.992163111 | 0.910050172 |
| 0.824225713 | 0.006569828 |
| -1.10531623 | 0.186434727 |
| -1.16594025 | 0.026362012 |
| 0.726521281 | 0.000459228 |
| -1.00810045 | 0.906845473 |
| 0.949621317 | 0.362192354 |
| -1.08945337 | 0.152770805 |
| -1.17184624 | 0.08914695  |
| 0.912321493 | 0.227944799 |
| 0.797104051 | 0.007131799 |
| -1.02389553 | 0.793168967 |
| -1.22259673 | 0.002537379 |
| -1.05806325 | 0.041438037 |
| -1.036735   | 0.495592375 |
| -1.06122206 | 0.397118644 |
| 0.983848467 | 0.683154941 |
| 0.974071482 | 0.529290153 |
| 0.95653768  | 0.371553862 |

|             |             |
|-------------|-------------|
| 0.907748287 | 0.014560942 |
| 0.906887239 | 0.095329546 |
| -1.00446498 | 0.911984748 |
| -1.00654643 | 0.878711002 |
| 0.917099664 | 0.04879428  |
| 0.9898361   | 0.864590465 |
| -1.0508003  | 0.635983476 |
| -1.09994238 | 0.127151652 |
| -1.30609116 | 2.51045E-05 |
| -1.05171226 | 0.452775091 |
| 0.70415996  | 4.8102E-06  |
| 0.954107287 | 0.39520138  |
| 0.98727375  | 0.804974628 |
| -1.16253704 | 0.018066079 |
| 0.889533987 | 0.254481675 |
| -1.13196887 | 0.240515889 |
| -1.13472685 | 0.054039045 |
| -1.10903106 | 0.183573541 |
| 0.930141295 | 0.199068545 |
| -1.02002382 | 0.796438726 |
| 0.881015132 | 0.039607427 |
| -1.33725333 | 0.001651391 |
| -1.00175594 | 0.961096723 |
| 0.844962201 | 0.003953337 |
| -1.08601721 | 0.174818312 |
| -1.00574246 | 0.91243076  |
| -1.01837078 | 0.814848045 |
| 0.990891047 | 0.882951309 |
| 0.989720728 | 0.854827178 |
| 0.657607838 | 9.87468E-14 |
| 0.988133897 | 0.753991285 |
| 0.733910568 | 0.000425761 |
| 0.997260246 | 0.967296844 |
| 0.989033585 | 0.86837342  |
| -1.04351231 | 0.382126493 |
| -1.03680099 | 0.461880015 |
| -1.19639488 | 0.075345002 |
| 0.958506982 | 0.496907863 |
| -1.02686936 | 0.648604261 |
| 0.874240132 | 0.039384314 |
| -1.1485642  | 0.387432081 |
| -1.62331194 | 1.68235E-07 |
| -1.01600877 | 0.782846561 |
| 0.983514727 | 0.774030955 |



|             |             |
|-------------|-------------|
| -1.00081373 | 0.980292583 |
| 0.740738355 | 1.03132E-06 |
| -1.01431405 | 0.824267759 |
| 0.189508794 | 4.73976E-36 |
| -1.05227116 | 0.189722574 |
| -1.06428286 | 0.430009742 |
| -1.0169587  | 0.894815696 |
| 0.982842314 | 0.865333271 |
| 0.994606799 | 0.927108283 |
| 0.903793451 | 0.125219112 |
| 0.721254462 | 0.000968394 |
| 0.889570358 | 0.037930744 |
| -1.00755341 | 0.892282972 |
| -1.01928332 | 0.602102288 |
| -1.06452112 | 0.297088137 |
| 0.920729346 | 0.224364724 |
| 0.916638984 | 0.046105949 |
| -1.01034464 | 0.841726036 |
| -1.10335702 | 0.34439151  |
| -1.11065966 | 0.104030761 |
| 0.995117269 | 0.951590728 |
| -1.15367443 | 0.005052176 |
| 0.891141974 | 0.315093707 |
| 0.862163515 | 0.041988914 |
| 0.919105043 | 0.266632659 |
| -1.20742463 | 0.041086872 |
| -1.2022719  | 0.034147463 |
| -1.02794682 | 0.622613699 |
| -1.15594622 | 0.044332275 |
| 0.955425504 | 0.376481837 |
| 0.9878125   | 0.876465586 |
| -1.28938892 | 0.004102307 |
| 0.830359011 | 0.004022651 |
| 0.89917661  | 0.288649651 |
| -1.1129594  | 0.071280322 |
| -1.07289327 | 0.423041651 |
| -1.11975861 | 0.052794785 |
| 0.886918953 | 0.053723261 |
| 0.949935092 | 0.265346983 |
| -1.47517805 | 0.000363456 |
| -1.10245744 | 0.033395754 |
| 0.631627198 | 8.30619E-06 |
| 0.979731537 | 0.734885312 |
| 0.904623954 | 0.052013241 |

|             |             |
|-------------|-------------|
| -1.10118165 | 0.299181748 |
| 0.946199956 | 0.431937864 |
| -1.03353349 | 0.582446899 |
| -1.0458306  | 0.597323995 |
| 0.745816332 | 8.36501E-05 |
| 0.986457861 | 0.855615    |
| -1.11611996 | 0.104519746 |
| 0.988729652 | 0.866459653 |
| 0.830435257 | 6.97702E-05 |
| 0.855084871 | 0.06054735  |
| 0.933921385 | 0.286174759 |
| 0.825986628 | 0.027603822 |
| -1.07839222 | 0.134146748 |
| 0.910354955 | 0.10300207  |
| 0.855509933 | 0.002242715 |
| 0.737924853 | 0.000143667 |
| 0.981261711 | 0.739005591 |
| -1.14500651 | 0.016470785 |
| 0.988788777 | 0.841919981 |
| 0.964386856 | 0.367214398 |
| 0.935344361 | 0.238084089 |
| 0.981654036 | 0.716594182 |
| 0.978257067 | 0.714780652 |
| -1.00245124 | 0.972450154 |
| 0.886669764 | 0.036210974 |
| -1.04839726 | 0.409932052 |
| 0.955740119 | 0.427938564 |
| -1.1399226  | 0.025470823 |
| 0.772176255 | 0.021154006 |
| -1.06081524 | 0.388088847 |
| 0.978071268 | 0.690263538 |
| 0.870267357 | 0.017412345 |
| -1.06460596 | 0.325572776 |
| -1.07226602 | 0.253707944 |
| -1.13993439 | 0.262599188 |
| -1.07369216 | 0.408653582 |
| 0.982779268 | 0.608428717 |
| 0.969328099 | 0.567738914 |
| -1.18558196 | 0.017231565 |
| -1.10889354 | 0.391169145 |
| 0.940980377 | 0.291912748 |
| 0.857789867 | 0.211493911 |
| -1.08736978 | 0.261584218 |
| -1.06800824 | 0.488416922 |

|             |             |
|-------------|-------------|
| -1.01148739 | 0.86187423  |
| -1.16096654 | 0.042589471 |
| -1.22466616 | 0.069372819 |
| 0.642631228 | 2.86828E-08 |
| -1.06345635 | 0.388528624 |
| -1.2458219  | 0.001326716 |
| -1.04890083 | 0.442131667 |
| -1.05199498 | 0.32103618  |
| 0.529626435 | 9.80974E-14 |
| 0.987433552 | 0.802084141 |
| 0.989602415 | 0.810813777 |
| 0.978422839 | 0.802484634 |
| -1.28435842 | 0.000579924 |
| 0.858336426 | 0.004020991 |
| -1.07603423 | 0.078167279 |
| -1.29355266 | 0.007953168 |
| 0.942833609 | 0.297511697 |
| 0.928319746 | 0.319463668 |
| 0.82488351  | 0.003541478 |
| 0.924422669 | 0.179643875 |
| -1.17895906 | 0.029623294 |
| -1.14282817 | 0.056284514 |
| 0.967609513 | 0.487706434 |
| 0.809648287 | 9.60796E-07 |
| 0.720078908 | 2.01723E-12 |
| 0.964166363 | 0.498897062 |
| -1.17710167 | 0.009272687 |
| -1.1067953  | 0.182558369 |
| 0.919468896 | 0.495772129 |
| -1.07877413 | 0.128398128 |
| 0.9340118   | 0.303680971 |
| -1.29889896 | 0.028448211 |
| -1.08366556 | 0.270237936 |
| 0.978735782 | 0.848855781 |
| -1.09304866 | 0.116295477 |
| -1.05076975 | 0.20726831  |
| -1.03244923 | 0.511731529 |
| 0.922833484 | 0.13526885  |
| -1.3272774  | 0.001785836 |
| -1.09774549 | 0.145919513 |
| 0.872398974 | 0.147230645 |
| -1.15427565 | 0.026159886 |
| 0.978657538 | 0.640898752 |
| -1.08967165 | 0.205169938 |

|             |             |
|-------------|-------------|
| -1.26004461 | 0.000471462 |
| -1.02127717 | 0.693127744 |
| 0.997305752 | 0.946514722 |
| -1.43550573 | 6.92592E-07 |
| 0.991568932 | 0.910942307 |
| -1.03844849 | 0.667083861 |
| 0.98875978  | 0.832382015 |
| -1.12087658 | 0.051267627 |
| -1.10269352 | 0.433645796 |
| 0.9970124   | 0.937119086 |
| 0.67675034  | 1.8457E-05  |
| -1.19777024 | 0.01722137  |
| 0.902214822 | 0.163411747 |
| 0.957968922 | 0.448040644 |
| -1.1260338  | 0.048239246 |
| -1.01811187 | 0.782483043 |
| 0.940116616 | 0.744110824 |
| 0.966714074 | 0.549393843 |
| 0.880491556 | 0.036680569 |
| 0.638345132 | 0.000413422 |
| 0.922948655 | 0.356621379 |
| 0.993179699 | 0.898044375 |
| 0.928395185 | 0.061038246 |
| 0.952190086 | 0.370863683 |
| 0.785812139 | 7.66338E-05 |
| -1.38772166 | 4.29867E-08 |
| 0.946114145 | 0.306618939 |
| -1.02050404 | 0.655734135 |
| -1.16585406 | 0.035465506 |
| -1.06220326 | 0.593312831 |
| 0.78222474  | 0.001108742 |
| 0.871808286 | 0.194272482 |
| -1.02788943 | 0.604645808 |
| -1.03581253 | 0.701449692 |
| -1.00830076 | 0.876887933 |
| -1.10807321 | 0.163239568 |
| -1.40986852 | 5.32369E-05 |
| -1.1206882  | 0.154461554 |
| 0.950673269 | 0.403077905 |
| -1.13003404 | 0.023312707 |
| 0.979820218 | 0.645967104 |
| 0.319923222 | 1.26792E-23 |
| -1.03862081 | 0.407541745 |
| -1.03600134 | 0.524691991 |

|             |             |
|-------------|-------------|
| -1.16584515 | 0.10624577  |
| -1.00624036 | 0.88601591  |
| 0.852243075 | 0.001249584 |
| 0.937855897 | 0.189680056 |
| -1.01678565 | 0.774833466 |
| -1.36854375 | 1.53706E-05 |
| -1.01111613 | 0.939776193 |
| -1.04765194 | 0.491468471 |
| 0.986995813 | 0.831977649 |
| -1.30830683 | 0.002270474 |
| 0.936830925 | 0.385174609 |
| -1.24778394 | 0.01384984  |
| 0.813946787 | 0.000154849 |
| 0.815734089 | 0.013920595 |
| -1.16320184 | 0.0001837   |
| 0.941175552 | 0.305365891 |
| 0.92574276  | 0.227138732 |
| 0.974405155 | 0.713022083 |
| -1.02071611 | 0.692628739 |
| -1.21001854 | 0.001069256 |
| -1.03983385 | 0.409264412 |
| -1.02087014 | 0.698673084 |
| 0.964299224 | 0.531367038 |
| -1.04674351 | 0.265503702 |
| 0.996795836 | 0.957011431 |
| -1.00506927 | 0.919678373 |
| 0.918180411 | 0.258471155 |
| 0.988698972 | 0.818469998 |
| 0.939484486 | 0.16767651  |
| 0.921224063 | 0.366309042 |
| 0.883049951 | 0.006135464 |
| 0.555783392 | 2.08985E-07 |
| -1.12138225 | 0.171611789 |
| 0.624279925 | 3.94752E-05 |
| -1.10653017 | 0.101419462 |
| 0.969992111 | 0.423640226 |
| 0.937836085 | 0.235208213 |
| -1.23517807 | 0.000837186 |
| -1.12210978 | 0.018396274 |
| -1.18854559 | 4.97074E-06 |
| -1.2154346  | 0.00568216  |
| 0.899578929 | 0.070082468 |
| -1.01793116 | 0.705848066 |
| -1.05324075 | 0.555326937 |

|             |             |
|-------------|-------------|
| -1.11797618 | 0.283283861 |
| 0.99115956  | 0.87467782  |
| 0.945214546 | 0.229597913 |
| 0.988732271 | 0.861229669 |
| -1.09621203 | 0.239501583 |
| 0.900625371 | 0.016714214 |
| -1.06397289 | 0.126894066 |
| 0.871955647 | 0.026686537 |
| 0.843822003 | 0.017063628 |
| 0.652449537 | 2.09815E-06 |
| 0.875544052 | 0.118933215 |
| 0.945697311 | 0.334860148 |
| 0.962572352 | 0.471198288 |
| -1.05026999 | 0.264733512 |
| 0.72560666  | 2.30751E-05 |
| -1.31045936 | 0.007028528 |
| 0.962585138 | 0.454334651 |
| -1.11008795 | 0.250680938 |
| 0.93945009  | 0.325767332 |
| 0.92554632  | 0.193996661 |
| -1.33956399 | 2.57975E-05 |
| 0.90841606  | 0.011562706 |
| -1.05593711 | 0.470156982 |
| 0.94542301  | 0.325489683 |
| -1.07476838 | 0.43844559  |
| -1.27415667 | 0.007537514 |
| -1.14089495 | 0.095085473 |
| -1.7430159  | 8.23024E-05 |
| -1.80810236 | 7.92876E-08 |
| 0.998861242 | 0.983137233 |
| -1.09138617 | 0.051377203 |
| -1.24329169 | 0.053958949 |
| -1.06400451 | 0.438034072 |
| 0.786517786 | 0.015544954 |
| 0.949199023 | 0.427619964 |
| -1.09650721 | 0.532093588 |
| 0.939941397 | 0.292071394 |
| -1.13356864 | 0.026407051 |
| 0.860930584 | 0.078537543 |
| 0.891202286 | 0.06694175  |
| -1.07239358 | 0.318065064 |
| -1.21189463 | 0.000424678 |
| 0.8489403   | 0.042182947 |
| -1.2886982  | 0.008464453 |

|             |             |
|-------------|-------------|
| -1.16778604 | 0.02458149  |
| -1.00589683 | 0.923183112 |
| -1.14080123 | 0.187547483 |
| 0.805540124 | 0.002799242 |
| -1.24367691 | 0.000878437 |
| 0.931582344 | 0.24201973  |
| -1.51125958 | 0.000151112 |
| -1.04542946 | 0.41157764  |
| 0.838092103 | 0.137313997 |
| 0.972209656 | 0.743722534 |
| 0.920188649 | 0.154074288 |
| -1.13008725 | 0.181912444 |
| 0.998510243 | 0.985032486 |
| 0.960942473 | 0.583317757 |
| -1.22194587 | 0.009076001 |
| 0.963264436 | 0.483079916 |
| 0.997971994 | 0.967526283 |
| 0.95791087  | 0.25387588  |
| 0.958275399 | 0.42285932  |
| 0.962140872 | 0.706777608 |
| -1.03705654 | 0.596645211 |
| -1.09151816 | 0.122140211 |
| 0.928471806 | 0.36332002  |
| -1.23729269 | 0.010319226 |
| -1.11684807 | 0.151056498 |
| 0.854720543 | 0.048094603 |
| 0.891022989 | 0.0378905   |
| -1.08634285 | 0.267856618 |
| 0.967919493 | 0.687132233 |
| 0.787388838 | 0.000322014 |
| -1.08420855 | 0.149778041 |
| 0.961435066 | 0.561794572 |
| -1.20939309 | 0.001154016 |
| -1.0166954  | 0.758880949 |
| 0.892834946 | 0.062940602 |
| 0.986491356 | 0.785452688 |
| -1.0187698  | 0.714086655 |
| -1.04129199 | 0.452589423 |
| -1.22852899 | 0.002466477 |
| -1.13236183 | 0.053428001 |
| -1.31551586 | 0.02507356  |
| -1.09622987 | 0.308932214 |
| 0.926466518 | 0.416415447 |
| -1.03050083 | 0.61587076  |

|             |             |
|-------------|-------------|
| -1.09480426 | 0.145295112 |
| -1.03450035 | 0.777957814 |
| 0.917505647 | 0.48736253  |
| -1.1180106  | 0.21659702  |
| -1.04189463 | 0.50323783  |
| -1.06934532 | 0.378042702 |
| -1.17823515 | 0.013015361 |
| -1.10849158 | 0.307803599 |
| 0.99036971  | 0.89864802  |
| -1.24522716 | 0.003316975 |
| 0.937291881 | 0.432885955 |
| 0.980151407 | 0.780198678 |
| 0.907748645 | 0.519886805 |
| 0.903162472 | 0.059918158 |
| 0.894173473 | 0.100970358 |
| 0.614146479 | 1.42727E-05 |
| -1.42086067 | 5.276E-06   |
| -1.09098755 | 0.373962087 |
| -1.13310541 | 0.148830065 |
| -1.29378264 | 0.014949955 |
| -1.02610832 | 0.653811348 |
| -1.08984609 | 0.209870138 |
| 0.612356041 | 0.00126104  |
| 0.795394628 | 0.000475629 |
| 0.987272342 | 0.814331027 |
| -1.16987691 | 0.025295775 |
| 0.898698444 | 0.017934837 |
| -1.18083722 | 0.02581875  |
| -1.09362384 | 0.380120932 |
| 0.911887032 | 0.143799053 |
| 0.916201462 | 0.435830583 |
| -1.06093897 | 0.449257456 |
| 0.802746265 | 3.0779E-05  |
| -1.19295103 | 0.022948999 |
| 0.989631924 | 0.867805749 |
| 0.979150016 | 0.639202081 |
| 0.962428285 | 0.520380071 |
| -1.01274661 | 0.804781109 |
| -1.00715299 | 0.904716881 |
| 0.9263366   | 0.219022868 |
| -1.30006759 | 0.001037604 |
| -1.17337053 | 0.070080299 |
| -1.04485074 | 0.512719407 |
| -1.02387282 | 0.532214236 |



|             |             |
|-------------|-------------|
| 0.979166498 | 0.591612906 |
| -1.09458797 | 0.220467408 |
| -1.156345   | 0.092527453 |
| -1.00222366 | 0.956080662 |
| 0.859961987 | 0.007932223 |
| -1.01156105 | 0.825477517 |
| -1.07969482 | 0.11613616  |
| 0.979336109 | 0.814587596 |
| -1.06316831 | 0.231750197 |
| -1.11457055 | 0.027148819 |
| -1.23785759 | 0.003776346 |
| -1.40327276 | 0.000384916 |
| -1.15534601 | 0.073284573 |
| -1.06291252 | 0.486006271 |
| -1.43773091 | 0.000232219 |
| -1.20387677 | 0.009793808 |
| -1.01664012 | 0.7864599   |
| -1.23945008 | 0.071782251 |
| -1.61797215 | 8.02852E-05 |
| -1.53589265 | 9.46714E-05 |
| -1.07228372 | 0.296435638 |
| -1.22031241 | 0.000755513 |
| 0.981299083 | 0.654898584 |
| 0.845177232 | 0.036899012 |
| -1.27523629 | 0.007963531 |
| 0.732974293 | 1.8622E-06  |
| 0.640688842 | 1.21808E-05 |
| 0.949134718 | 0.620248067 |
| 0.866895274 | 0.007953564 |
| -1.0318839  | 0.719300031 |
| 0.965399855 | 0.619391918 |
| -1.05127843 | 0.343357976 |
| 0.763749989 | 0.000114356 |
| 0.95948054  | 0.264471604 |
| -1.21492439 | 0.005487466 |
| -1.08691942 | 0.147924565 |
| 0.986719565 | 0.857494321 |
| -1.00950871 | 0.873526352 |
| 0.938768756 | 0.509807449 |
| 0.951665856 | 0.511701546 |
| -1.03433417 | 0.593059144 |
| -1.02402731 | 0.656886005 |
| -1.08650452 | 0.353171502 |
| -1.07195391 | 0.26460655  |

|             |             |
|-------------|-------------|
| 0.98530231  | 0.825358331 |
| 0.810964656 | 0.000485797 |
| 0.855989375 | 0.022246706 |
| -1.00063525 | 0.992287819 |
| 0.947445718 | 0.568325441 |
| 0.99977773  | 0.996365239 |
| -1.19867671 | 0.068354421 |
| 0.875189591 | 0.038158511 |
| 0.659664263 | 1.66963E-06 |
| 0.894909329 | 0.188931074 |
| 0.966912201 | 0.741556116 |
| 0.674344118 | 4.3297E-07  |
| -1.34807664 | 5.23823E-05 |
| 0.900212974 | 0.090156858 |
| 0.956432403 | 0.626663834 |
| -1.13512481 | 0.04222934  |
| -1.19919123 | 0.002915365 |
| -1.36567156 | 0.001149389 |
| 0.708208561 | 5.39609E-05 |
| -1.2171672  | 0.000749959 |
| 0.970018367 | 0.583377914 |
| 0.979488195 | 0.661918999 |
| 0.83317894  | 0.005949475 |
| 0.994264252 | 0.845882742 |
| 0.752064169 | 3.41447E-07 |
| -1.01212257 | 0.824053623 |
| -1.06325987 | 0.231990524 |
| -1.04484586 | 0.586752398 |
| -1.23052647 | 0.040001695 |
| 0.957799066 | 0.451859381 |
| 0.65374145  | 1.2251E-08  |
| -1.23227977 | 0.042922939 |
| -1.1154321  | 0.28907881  |
| 0.825349213 | 0.000580515 |
| -1.21019812 | 0.018726603 |
| 0.965034928 | 0.440584256 |
| 0.343775535 | 4.46892E-13 |
| -1.0637901  | 0.458403634 |
| 0.934332612 | 0.255834073 |
| -1.10346867 | 0.151709578 |
| -1.19581189 | 0.022227047 |
| -1.05768623 | 0.362615947 |
| 0.57627907  | 3.27349E-10 |
| 0.934989958 | 0.147103096 |

|             |             |
|-------------|-------------|
| 0.441800148 | 1.51113E-17 |
| -1.00980994 | 0.926092425 |
| -1.25722602 | 0.001958123 |
| -1.14890399 | 0.118260344 |
| -1.09290953 | 0.212594754 |
| -1.09575732 | 0.245094785 |
| 0.93935681  | 0.245762924 |
| -1.1606802  | 0.022223058 |
| -1.06768958 | 0.364054695 |
| 0.990940618 | 0.863386107 |
| 0.820713893 | 0.000379777 |
| 0.883039377 | 0.132960962 |
| 0.986892293 | 0.771617449 |
| 0.953461743 | 0.345922418 |
| 0.829533045 | 0.360919925 |
| 0.987590505 | 0.728180599 |
| 0.934202498 | 0.091389689 |
| 0.953105083 | 0.280923744 |
| -1.10252493 | 0.12674093  |
| 0.931280396 | 0.208886848 |
| 0.294519248 | 9.37179E-21 |
| 0.923995395 | 0.221475338 |
| 0.957567589 | 0.341543698 |
| 0.632706505 | 0.00039309  |
| 0.92867226  | 0.51911908  |
| -1.06323976 | 0.501997628 |
| -1.32240497 | 1.42397E-06 |
| 0.986355961 | 0.832250898 |
| 0.681521138 | 4.44805E-07 |
| -1.35369443 | 0.008149921 |
| -1.06397662 | 0.198581279 |
| 0.833376058 | 0.116257733 |
| -1.1174488  | 0.066545826 |
| -1.02444669 | 0.714493359 |
| 0.86374753  | 0.040192916 |
| 0.81325157  | 0.033500072 |
| 0.774523929 | 0.000618915 |
| 0.882882194 | 0.028158002 |
| -1.11237099 | 0.115749819 |
| -1.19439441 | 0.043462422 |
| -1.00016616 | 0.997957335 |
| -1.02222946 | 0.733297784 |
| 0.358889435 | 2.11022E-18 |
| -1.05544171 | 0.300256535 |

|             |             |
|-------------|-------------|
| -1.58791663 | 9.56094E-11 |
| -1.15700401 | 0.034276456 |
| -1.1770746  | 0.004003325 |
| -1.0314128  | 0.608317633 |
| -1.01338761 | 0.838370337 |
| -1.21306358 | 0.006157388 |
| -1.15396957 | 0.033523972 |
| 0.807655084 | 0.000374272 |
| -1.12194848 | 0.000464131 |
| -1.27388566 | 0.007368903 |
| 0.715838353 | 0.025202714 |
| -1.02714854 | 0.62779038  |
| 0.95524427  | 0.317437501 |
| -1.27828938 | 8.84337E-05 |
| 0.937774898 | 0.429558557 |
| -1.19160076 | 0.000156008 |
| -1.0485363  | 0.22045868  |
| 0.949896958 | 0.378063832 |
| -1.04126993 | 0.360208922 |
| 0.917782103 | 0.060488944 |
| -1.03067271 | 0.574616466 |
| -1.16468493 | 0.013712466 |
| 0.836142868 | 0.002554996 |
| 0.957911476 | 0.67618704  |
| -1.06545657 | 0.401479778 |
| 0.599300528 | 7.82235E-12 |
| 0.692299694 | 1.20877E-08 |
| -1.02988875 | 0.607132024 |
| 0.775076579 | 1.39041E-05 |
| -1.36356943 | 0.008001424 |
| 0.682024334 | 1.38989E-05 |
| -1.04043941 | 0.529908921 |
| -1.0150571  | 0.761697026 |
| 0.721734517 | 0.000311406 |
| 0.816124454 | 3.45698E-05 |
| 0.901481165 | 0.111116512 |
| -1.02574684 | 0.665276282 |
| 0.925725303 | 0.222479632 |
| -1.03742484 | 0.325201795 |
| -1.31878877 | 0.005654695 |
| -1.05156246 | 0.239880731 |
| 0.565903067 | 7.19866E-06 |
| 0.939696671 | 0.216514739 |
| -1.13756579 | 0.011975935 |

|             |             |
|-------------|-------------|
| 0.826080131 | 0.008569412 |
| 0.51265225  | 3.3682E-11  |
| -1.13636128 | 0.196310729 |
| 0.855224385 | 0.018276272 |
| -1.27339784 | 0.034453341 |
| -1.11775018 | 0.225172936 |
| 0.941126207 | 0.424267793 |
| 0.934728164 | 0.506495731 |
| 0.908079156 | 0.172166233 |
| -1.26482963 | 0.112291458 |
| -1.05581471 | 0.215016925 |
| 0.54532167  | 8.68638E-10 |
| 0.329310951 | 1.38541E-26 |
| 0.621827157 | 3.10311E-05 |
| 0.851915402 | 0.411964375 |
| 0.767857491 | 0.000624962 |
| 0.806920583 | 0.002853005 |
| 0.77844955  | 1.48511E-05 |
| -1.70874633 | 1.16459E-06 |
| -1.0487557  | 0.150672809 |
| -1.01023072 | 0.859097897 |
| 0.565061582 | 1.83189E-12 |
| -1.23453813 | 0.016870976 |
| 0.910288108 | 0.114949254 |
| -1.02420106 | 0.642370995 |
| -1.01792362 | 0.835631211 |
| 0.719733332 | 0.109146023 |
| -1.01751585 | 0.63334865  |
| -1.12946897 | 0.123137806 |
| -1.12019379 | 0.13430157  |
| -1.08932857 | 0.437116095 |
| -1.05254531 | 0.580935408 |
| -1.0498124  | 0.561784148 |
| 0.84460256  | 0.004805059 |
| 0.975815274 | 0.841775349 |
| -1.13648195 | 0.129580048 |
| -1.08894544 | 0.091554695 |
| 0.600925471 | 3.98889E-09 |
| 0.997537298 | 0.961712874 |
| -1.135855   | 0.10460392  |
| -1.10123005 | 0.070845471 |
| -1.0554298  | 0.411473272 |
| -1.32071583 | 1.67839E-05 |
| -1.02303416 | 0.645446641 |

|             |             |
|-------------|-------------|
| -1.260699   | 0.007861121 |
| -1.24684545 | 0.000566714 |
| 0.766327258 | 0.009621413 |
| -1.1881706  | 0.06555165  |
| 0.998013866 | 0.96390318  |
| -1.07992438 | 0.175230627 |
| -1.1270175  | 0.036256411 |
| -1.40709511 | 2.00045E-06 |
| -1.02152956 | 0.823324353 |
| 0.375509913 | 4.79614E-11 |
| 0.727885357 | 6.16218E-07 |
| -1.18884543 | 0.018896775 |
| 0.866382688 | 0.083819605 |
| 0.950158999 | 0.486673293 |
| 0.980448514 | 0.802827943 |
| -1.25632828 | 0.000315161 |
| -1.56662245 | 8.94814E-05 |
| -1.05323499 | 0.384654572 |
| -1.13479847 | 0.099313    |
| 0.832334079 | 0.000274358 |
| -1.37450939 | 0.009998155 |
| -1.18556346 | 0.02083765  |
| 0.74042504  | 3.41017E-05 |
| 0.964575537 | 0.4574893   |
| -1.10947555 | 0.010043273 |
| -1.08947495 | 0.180638989 |
| -1.06300952 | 0.401796996 |
| -1.10171037 | 0.471883005 |
| -1.06357101 | 0.457194038 |
| 0.909095977 | 0.390853145 |
| 0.933729316 | 0.279907874 |
| -1.03692561 | 0.486815435 |
| 0.62024007  | 1.21991E-11 |
| 0.505215866 | 1.53798E-08 |
| -1.10384668 | 0.279576787 |
| -1.1641179  | 0.040985961 |
| 0.964474361 | 0.75788622  |
| 0.470929657 | 4.58467E-05 |
| -1.02739561 | 0.470378253 |
| -1.14798433 | 0.189567491 |
| -1.01284505 | 0.826904895 |
| -1.04418818 | 0.50230242  |
| 0.983446765 | 0.73226408  |
| -1.03150622 | 0.612537323 |

|             |             |
|-------------|-------------|
| 0.580944371 | 2.99232E-07 |
| 0.435839149 | 2.96068E-09 |
| 0.99057003  | 0.87818964  |
| -1.24163683 | 0.022653862 |
| 0.822726351 | 1.32719E-05 |
| 0.867202214 | 0.009115959 |
| -1.20985128 | 0.001323397 |
| 0.923337083 | 0.068241291 |
| -1.03956288 | 0.549152105 |
| 0.983471198 | 0.717459655 |
| -1.04831704 | 0.410768067 |
| -1.05898936 | 0.434903478 |
| 0.85695502  | 0.01254107  |
| -1.03684218 | 0.461683766 |
| -1.20413437 | 0.04050852  |
| -1.18311896 | 0.179594486 |
| -1.02334141 | 0.59016514  |
| -1.30536423 | 5.5624E-05  |
| -1.22721458 | 0.001474833 |
| -1.16231399 | 0.046623996 |
| -1.03603403 | 0.527996223 |
| -1.04050631 | 0.450172801 |
| -1.21947714 | 0.019981746 |
| 0.979193165 | 0.763328943 |
| -1.2493456  | 0.007549338 |
| 0.897843642 | 0.14673573  |
| 0.960870237 | 0.510552301 |
| 0.990701167 | 0.87249443  |
| 0.908870701 | 0.128485781 |
| -1.0043676  | 0.937328058 |
| -1.05798176 | 0.39721873  |
| -1.15717638 | 0.010585447 |
| -1.14754643 | 0.022360653 |
| -1.12284207 | 0.0318415   |
| 0.831802198 | 0.007159828 |
| -1.00268558 | 0.959565651 |
| -1.12979448 | 0.093527435 |
| 0.929599999 | 0.161890483 |
| -1.06330563 | 0.240857931 |
| -1.18078642 | 0.047051535 |
| -1.03585561 | 0.588099881 |
| 0.924703836 | 0.285856123 |
| -1.01889411 | 0.780056606 |
| -1.03770582 | 0.389859055 |

|             |             |
|-------------|-------------|
| 0.709124841 | 5.62986E-11 |
| 0.878686389 | 0.008446541 |
| -1.01268857 | 0.808564584 |
| 0.694900133 | 0.001745906 |
| -1.07627149 | 0.019028714 |
| -1.10817965 | 0.219894904 |
| -1.04085107 | 0.43766441  |
| -1.13912424 | 0.020809682 |
| 0.996177139 | 0.947250821 |
| -1.03631444 | 0.549951637 |
| -1.05050153 | 0.459752059 |
| 0.689828972 | 8.73761E-06 |
| 0.962821327 | 0.637590771 |
| -1.08434792 | 0.110735225 |
| -1.28960958 | 0.001059929 |
| 0.90980833  | 0.014879307 |
| 0.930732862 | 0.478511056 |
| -1.07722025 | 0.309191976 |
| 0.839280011 | 0.000806327 |
| -1.15476183 | 0.374483433 |
| -1.16974363 | 0.083376337 |
| 0.967015291 | 0.525117419 |
| -1.0736426  | 0.189261433 |
| -1.00519842 | 0.927301363 |
| 0.988177243 | 0.831825512 |
| 0.965390015 | 0.521416979 |
| -1.0048384  | 0.96268898  |
| -1.03186305 | 0.465598862 |
| -1.18100148 | 0.239543087 |
| -1.03469309 | 0.385476661 |
| -1.2502414  | 0.018565976 |
| -1.03098839 | 0.637876294 |
| -1.09369507 | 0.200787434 |
| -1.14141755 | 0.024547893 |
| -1.02547768 | 0.746339235 |
| 0.83057595  | 0.018112459 |
| -1.01340798 | 0.783402363 |
| 0.989282988 | 0.824775574 |
| -1.03414444 | 0.608467951 |
| 0.876458906 | 0.09634379  |
| -1.13778638 | 0.037783745 |
| -1.01951907 | 0.622973942 |
| -1.02394208 | 0.658295668 |
| -1.07916505 | 0.405658209 |



|             |             |
|-------------|-------------|
| 0.78589384  | 6.90929E-06 |
| 0.668915023 | 0.000122971 |
| -1.03010722 | 0.69133168  |
| -1.06578143 | 0.434153333 |
| -1.12313766 | 0.249216529 |
| -1.07988481 | 0.327629946 |
| -1.0445782  | 0.280505596 |
| 0.905311507 | 0.104856198 |
| -1.00012226 | 0.997792296 |
| -1.27585338 | 0.042148996 |
| -1.01972793 | 0.827890581 |
| -1.22220897 | 0.012476237 |
| -1.09866254 | 0.091181417 |
| -1.00177819 | 0.971906327 |
| 0.939059155 | 0.484577058 |
| -1.35000598 | 4.51923E-05 |
| 0.983271248 | 0.864603446 |
| -1.2807804  | 0.000124029 |
| -1.03727017 | 0.586810022 |
| 0.963742116 | 0.634139548 |
| 0.971177317 | 0.548900633 |
| -1.05522169 | 0.344273492 |
| -1.365452   | 0.000541043 |
| -1.14301248 | 0.015575081 |
| -1.14036687 | 0.025215762 |
| -1.0938359  | 0.106029045 |
| -1.12959523 | 0.220464684 |
| -1.07186702 | 0.447532041 |
| 0.881255913 | 0.065249945 |
| -1.36458118 | 2.90685E-05 |
| -1.58173777 | 1.97258E-06 |
| -1.27428277 | 0.008671762 |
| -1.00294776 | 0.967809957 |
| 0.957379934 | 0.714215133 |
| 0.96508865  | 0.603240808 |
| 0.675630351 | 0.000348118 |
| 0.992980489 | 0.89657728  |
| 0.878040874 | 0.140171846 |
| -1.19347049 | 0.096780687 |
| -1.31001374 | 0.001868263 |
| -1.05006992 | 0.367820786 |
| -1.04989948 | 0.375071136 |
| 0.974012854 | 0.678741556 |
| 0.937850115 | 0.317365133 |

|             |             |
|-------------|-------------|
| 0.950015018 | 0.316784926 |
| 0.982374799 | 0.734270759 |
| -1.12685984 | 0.005025717 |
| -1.1947386  | 0.003300938 |
| 0.880690211 | 0.103297354 |
| 0.924974349 | 0.201786139 |
| 0.561706321 | 1.81522E-07 |
| -1.78321272 | 1.08094E-09 |
| -1.22973054 | 0.003348295 |
| -1.24311369 | 0.024019131 |
| -1.32642604 | 0.000309652 |
| -1.03848319 | 0.52061402  |
| -1.25313542 | 0.008544402 |
| -1.60066078 | 2.02688E-05 |
| -1.01897296 | 0.865150478 |
| -1.05407884 | 0.40527147  |
| 0.953483778 | 0.581795725 |
| 0.903901919 | 0.339816159 |
| -1.18139608 | 0.012896396 |
| 0.901471768 | 0.176455371 |
| -1.07479057 | 0.435581469 |
| -1.17941344 | 0.0017476   |
| 0.970301371 | 0.588668701 |
| -1.01070027 | 0.93028282  |
| -1.01729708 | 0.745012587 |
| 0.998921652 | 0.991662923 |
| 0.903734285 | 0.218922636 |
| 0.72497226  | 5.39396E-06 |
| -1.13673136 | 0.023035558 |
| 0.998850075 | 0.985692221 |
| -1.17152242 | 0.005003322 |
| -1.51857567 | 9.33015E-09 |
| -1.15497005 | 0.030981416 |
| 0.903099871 | 0.127032226 |
| -1.05443457 | 0.220512324 |
| 0.87359989  | 0.4284565   |
| -1.13988493 | 0.020953723 |
| -1.13453998 | 0.087089217 |
| 0.941492892 | 0.352355895 |
| -1.13517445 | 0.054516641 |
| -1.00684459 | 0.930700296 |
| 0.904607997 | 0.155608497 |
| 0.549805055 | 7.98458E-05 |
| -1.2387498  | 0.003153232 |

|             |             |
|-------------|-------------|
| 0.992591718 | 0.924981908 |
| -1.04271851 | 0.375795039 |
| 0.951164907 | 0.340044649 |
| -1.08370145 | 0.167844982 |
| -1.06084017 | 0.56415488  |
| -1.43852713 | 0.000117136 |
| -1.01801583 | 0.708695754 |
| 0.960926209 | 0.495040649 |
| -1.00751971 | 0.901419188 |
| 0.925969807 | 0.342376054 |
| 0.963686663 | 0.459411666 |
| -1.05118981 | 0.314621119 |
| 0.907680788 | 0.327795602 |
| 0.940898859 | 0.430683596 |
| 0.999575123 | 0.993489892 |
| -1.02610115 | 0.631824668 |
| 0.820145231 | 8.16719E-05 |
| 0.941209202 | 0.13268039  |
| 0.905646265 | 0.116798408 |
| -1.31155146 | 0.099710466 |
| 0.93383528  | 0.426073135 |
| 0.839052777 | 0.35837137  |
| 0.828670713 | 0.007923612 |
| -1.13817519 | 0.023340622 |
| -1.07491869 | 0.062485395 |
| -1.39426607 | 0.000872725 |
| -1.1933608  | 0.012494201 |
| -1.09614719 | 0.089185495 |
| 0.970443989 | 0.507112927 |
| -1.22521983 | 0.00315178  |
| -1.11870261 | 0.112621733 |
| 0.948666453 | 0.321979588 |
| 0.79863306  | 0.018859142 |
| 0.976526238 | 0.792601868 |
| 0.946507924 | 0.325140106 |
| -1.33046877 | 0.000319834 |
| -1.25176584 | 0.000121316 |
| 0.990690487 | 0.823051036 |
| 0.837123551 | 0.000853897 |
| -1.00202269 | 0.967502904 |
| 0.908271762 | 0.161682383 |
| 0.911931772 | 0.612648989 |
| -1.01736447 | 0.806851711 |
| -1.13044149 | 0.179683334 |

|             |             |
|-------------|-------------|
| -1.11940073 | 0.220702078 |
| -1.02258799 | 0.541944053 |
| -1.36427263 | 0.003194538 |
| 0.989548886 | 0.834582225 |
| -1.43248069 | 0.000297914 |
| -1.09730663 | 0.14659758  |
| 0.960457728 | 0.402871114 |
| 0.99602441  | 0.945323372 |
| -1.1064936  | 0.126217503 |
| -1.09403414 | 0.119399169 |
| -1.00549666 | 0.952569613 |
| -1.05766372 | 0.538699979 |
| 0.731770338 | 0.030543031 |
| -1.43035534 | 0.013938849 |
| -1.23769409 | 0.000259612 |
| -1.08829989 | 0.15216898  |
| -1.53242486 | 8.57366E-07 |
| 0.971091355 | 0.736189622 |
| -1.05625069 | 0.434293109 |
| 0.968296304 | 0.559881445 |
| -1.07128825 | 0.13718106  |
| -1.02942216 | 0.68019047  |
| -1.09645754 | 0.056213576 |
| -1.00284813 | 0.973216512 |
| 0.799000658 | 0.04218342  |
| -1.15230849 | 0.085112759 |
| -1.18418045 | 0.042079953 |
| 0.925359005 | 0.169749311 |
| 0.981005761 | 0.773692045 |
| 0.9178142   | 0.303442897 |
| -1.11467425 | 0.09520863  |
| -1.27469039 | 0.007270691 |
| -1.14211117 | 0.09548419  |
| 0.968704705 | 0.641204034 |
| -1.05612179 | 0.262837696 |
| -1.1215241  | 0.078728118 |
| -1.00162712 | 0.976230575 |
| -1.04244009 | 0.433980449 |
| -1.05640101 | 0.489415435 |
| -1.12040231 | 0.028399494 |
| -1.1010207  | 0.076402577 |
| -1.05469105 | 0.396059795 |
| 0.97254217  | 0.666358355 |
| -1.00895973 | 0.916546583 |

|             |             |
|-------------|-------------|
| -1.03748307 | 0.579691705 |
| 0.962217274 | 0.728779158 |
| -1.18774398 | 0.134387656 |
| -1.2042958  | 0.003001365 |
| 0.776319333 | 0.000604926 |
| 0.997741215 | 0.970664881 |
| 0.604568476 | 1.57648E-11 |
| 0.741190673 | 0.005467348 |
| 0.779305201 | 0.005732508 |
| -1.09082551 | 0.227515747 |
| -1.12287947 | 0.048346961 |
| -1.1280079  | 0.149937321 |
| -1.11778825 | 0.050897289 |
| 0.900222194 | 0.065161706 |
| -1.20572114 | 0.119902832 |
| -1.19641179 | 0.011806095 |
| -1.05051242 | 0.403619477 |
| -1.09054909 | 0.351948876 |
| -1.36533807 | 1.58161E-05 |
| -1.16799283 | 0.006737599 |
| 0.961937845 | 0.444274097 |
| -1.24252459 | 6.12995E-05 |
| -1.10569127 | 0.043004779 |
| -1.10731364 | 0.035454542 |
| -1.03674958 | 0.448077192 |
| -1.40994556 | 5.87959E-05 |
| 0.663935528 | 1.47321E-05 |
| -1.09729765 | 0.298225498 |
| 0.825014572 | 0.023673485 |
| 0.664734433 | 1.22741E-05 |
| -1.18813054 | 0.006432504 |
| 0.987235606 | 0.793827157 |
| 0.939593868 | 0.337918027 |
| -1.11413412 | 0.240552868 |
| 0.96736424  | 0.599807726 |
| -1.1195713  | 0.156384526 |
| -1.09640717 | 0.242840989 |
| 0.965611604 | 0.573207778 |
| 0.951597171 | 0.451429182 |
| 0.905494704 | 0.5116303   |
| 0.817190255 | 0.0015116   |
| 0.978446666 | 0.688791877 |
| -1.34360056 | 5.03746E-07 |
| 0.78969842  | 0.028568472 |

|             |             |
|-------------|-------------|
| -1.00255105 | 0.962137727 |
| -1.20117686 | 0.005112822 |
| -1.14303476 | 0.302678784 |
| -1.10697394 | 0.011730528 |
| 0.994593217 | 0.904690974 |
| -1.0167411  | 0.751660755 |
| 0.665683676 | 1.11039E-06 |
| -1.02923113 | 0.556518568 |
| -1.21907682 | 0.062362582 |
| 0.930447584 | 0.325311113 |
| 0.973731564 | 0.753524297 |
| -1.02159706 | 0.734335064 |
| -1.18603628 | 0.010427911 |
| -1.11375367 | 0.029826996 |
| -1.13886707 | 0.245250592 |
| 0.971751077 | 0.789600872 |
| 0.975308541 | 0.692336563 |
| 0.991804829 | 0.883560865 |
| 0.669719889 | 1.3864E-07  |
| -1.04686565 | 0.488770343 |
| -1.21705331 | 0.008770902 |
| -1.13768614 | 0.116036195 |
| -1.01987527 | 0.795327315 |
| -1.02768753 | 0.665229482 |
| 0.956868558 | 0.545084107 |
| 0.951504021 | 0.503697413 |
| 0.954883614 | 0.457210664 |
| 0.750818674 | 0.000311257 |
| -1.30733752 | 0.001137281 |
| -1.04895023 | 0.527895471 |
| 0.974613243 | 0.795382636 |
| -1.15944157 | 0.008355424 |
| -1.1429488  | 0.093468421 |
| 0.884936906 | 0.012864163 |
| -1.11762123 | 0.261283342 |
| 0.752685471 | 0.001929757 |
| -1.10446532 | 0.24321498  |
| -1.15714864 | 0.077363284 |
| -1.10388389 | 0.190263951 |
| 0.535500362 | 3.34549E-11 |
| -1.20832299 | 0.009486507 |
| -1.11898574 | 0.057204026 |
| 0.894974716 | 0.048170221 |
| 0.826908842 | 0.096484703 |

|             |             |
|-------------|-------------|
| 0.903148573 | 0.104919011 |
| -1.00445006 | 0.940318525 |
| -1.0478118  | 0.372916899 |
| 0.987147265 | 0.793288164 |
| -1.05183713 | 0.323823186 |
| -1.06075384 | 0.263477952 |
| -1.32662382 | 6.89435E-05 |
| -1.38887549 | 0.000247286 |
| -1.06345685 | 0.363356289 |
| -1.02687546 | 0.752667589 |
| 0.88769427  | 0.042965594 |
| -1.23682111 | 0.000790674 |
| 0.997955904 | 0.973953639 |
| 0.964453397 | 0.467172534 |
| 0.902911625 | 0.207378837 |
| -1.24930273 | 0.000223499 |
| -1.10035496 | 0.180729182 |
| 0.990901619 | 0.853136872 |
| 0.947174817 | 0.420957298 |
| -1.15663658 | 0.156270365 |
| -1.29694881 | 6.98236E-05 |
| -1.02440505 | 0.656520586 |
| -1.27029046 | 0.000860208 |
| -1.16821814 | 0.039180519 |
| 0.96565477  | 0.537850917 |
| 0.986407932 | 0.847790071 |
| 0.955539033 | 0.560207957 |
| 0.911243639 | 0.071761761 |
| -1.20221095 | 0.031284249 |
| 0.958359815 | 0.389410773 |
| 0.966025767 | 0.698895982 |
| -1.11001798 | 0.043192935 |
| 0.985737699 | 0.800739531 |
| -1.00203763 | 0.963118561 |
| 0.894002758 | 0.046853985 |
| -1.0067231  | 0.921728884 |
| -1.01815659 | 0.746286262 |
| 0.898967112 | 0.107937383 |
| -1.05453902 | 0.173163592 |
| 0.978125799 | 0.688822201 |
| 0.944327606 | 0.223703643 |
| 0.987696036 | 0.792937229 |
| -1.174877   | 0.030154687 |
| 0.977720128 | 0.521522796 |

|             |             |
|-------------|-------------|
| 0.910859513 | 0.251230286 |
| 0.784378547 | 0.001744198 |
| 0.9993373   | 0.992117842 |
| 0.814882001 | 0.009846778 |
| -1.15171354 | 0.014466584 |
| -1.02810182 | 0.636069131 |
| -1.19758029 | 0.045957912 |
| -1.21711808 | 0.001143025 |
| 0.9395401   | 0.30052553  |
| -1.09217943 | 0.322692215 |
| -1.02305587 | 0.795995466 |
| 0.962775136 | 0.544421989 |
| -1.13609236 | 0.131091028 |
| -1.24618963 | 0.00523664  |
| 0.6748756   | 6.27892E-06 |
| 0.785197927 | 0.000706552 |
| -1.19375489 | 0.047025451 |
| -1.05355473 | 0.39511594  |
| 0.935421525 | 0.480414935 |
| -1.08936744 | 0.244595202 |
| 0.733114644 | 3.24169E-06 |
| 0.877213101 | 0.020544266 |
| -1.12176489 | 0.398770501 |
| 0.993340833 | 0.902297794 |
| 0.899017215 | 0.161145699 |
| -1.12283628 | 0.043620723 |
| 0.761914666 | 7.30491E-05 |
| -1.21295849 | 0.143039817 |
| -1.13352193 | 0.050062775 |
| -1.23465973 | 0.011806607 |
| 0.946566813 | 0.48912379  |
| -1.03287982 | 0.465716873 |
| -1.03185036 | 0.394849567 |
| -1.18022676 | 0.012162195 |
| 0.6934863   | 1.32887E-07 |
| -1.07682774 | 0.162550868 |
| -1.20155767 | 0.041475084 |
| 0.817762748 | 0.000487964 |
| -1.1251009  | 0.033630514 |
| 0.994637337 | 0.916926723 |
| 0.994958397 | 0.929817567 |
| -1.01758939 | 0.651656016 |
| -1.04868455 | 0.179516751 |
| -1.13642324 | 0.03883467  |



|             |             |
|-------------|-------------|
| -1.06107948 | 0.32427847  |
| 0.344659225 | 4.27382E-15 |
| 0.900838318 | 0.128359032 |
| -1.00415411 | 0.917103565 |
| -1.02555134 | 0.562030267 |
| 0.887600634 | 0.226961356 |
| -1.0394135  | 0.647709678 |
| -1.21895795 | 0.005664961 |
| -1.11588491 | 0.145559023 |
| 0.950909406 | 0.282404726 |
| -1.01333735 | 0.832956559 |
| 0.80784883  | 0.000304786 |
| 0.891575161 | 0.045262735 |
| -1.07665695 | 0.265864441 |
| 0.722523279 | 3.72534E-09 |
| 0.985496225 | 0.795047633 |
| -1.10750078 | 0.32840181  |
| -1.22334802 | 0.061039939 |
| -1.16900877 | 0.014316416 |
| 0.826800518 | 0.023068433 |
| 0.933551699 | 0.378603091 |
| -1.09708188 | 0.119463165 |
| -1.16585498 | 0.076191718 |
| 0.877885525 | 0.153115023 |
| 0.901685897 | 0.161678479 |
| -1.00381143 | 0.957159329 |
| 0.997205978 | 0.967808682 |
| 0.892994455 | 0.034949523 |
| 0.954473868 | 0.387178119 |
| -1.12173311 | 0.184180644 |
| 0.803928547 | 0.005962145 |
| -1.31172853 | 0.000413183 |
| 0.849376131 | 0.039550142 |
| -1.04457233 | 0.358755569 |
| -1.15715814 | 0.010175322 |
| -1.08967602 | 0.143070038 |
| 0.997953497 | 0.982068606 |
| 0.902323996 | 0.071932189 |
| 0.965365837 | 0.53046812  |
| 0.940854153 | 0.145495038 |
| -1.19582849 | 0.021808776 |
| 0.901542854 | 0.624923524 |
| 0.950426693 | 0.485164129 |
| 0.897071    | 0.071492481 |

|             |             |
|-------------|-------------|
| -1.0776651  | 0.245753962 |
| 0.958772063 | 0.501750928 |
| 0.651021349 | 2.52155E-08 |
| -1.21505327 | 0.027771363 |
| -1.03095934 | 0.573201999 |
| -1.03591644 | 0.492539445 |
| 0.78646445  | 0.143094814 |
| -1.2539276  | 0.010111651 |
| -1.03714215 | 0.545735324 |
| 0.954221974 | 0.595369964 |
| -1.29036699 | 0.00026296  |
| 0.986809121 | 0.830718065 |
| -1.12883375 | 0.028826172 |
| 0.965009797 | 0.539696166 |
| 0.950451065 | 0.351960606 |
| 0.987882406 | 0.839216861 |
| -1.13657281 | 0.058989817 |
| -1.00380282 | 0.942423729 |
| -1.05689434 | 0.34596892  |
| -1.08772066 | 0.045260967 |
| -1.04978593 | 0.348057528 |
| 0.976077625 | 0.545101671 |
| -1.64479861 | 5.95779E-05 |
| 0.967988795 | 0.565763422 |
| -1.03140466 | 0.61803482  |
| -1.0007454  | 0.992555717 |
| -1.03314036 | 0.584054072 |
| -1.17046469 | 0.057163431 |
| 0.937244305 | 0.262373666 |
| 0.941768959 | 0.300831394 |
| -1.09842701 | 0.103774279 |
| -1.03456404 | 0.497753184 |
| -1.11344987 | 0.051430596 |
| 0.899940978 | 0.072884002 |
| -1.01540787 | 0.810934091 |
| -1.05660669 | 0.371577294 |
| -1.04799561 | 0.255596093 |
| 0.853903816 | 0.002336669 |
| -1.09737216 | 0.218369613 |
| -1.02604314 | 0.599153816 |
| -1.00140021 | 0.983084382 |
| 0.936608243 | 0.322154668 |
| -1.20746239 | 0.008392571 |
| -1.01122323 | 0.784850184 |

|             |             |
|-------------|-------------|
| -1.25536908 | 0.011087259 |
| -1.18307416 | 0.105734897 |
| -1.17836441 | 0.005813808 |
| 0.839614355 | 0.002781623 |
| -1.23303033 | 0.011128597 |
| -1.18012567 | 0.011921723 |
| 0.997337212 | 0.960842551 |
| 0.907231665 | 0.140880141 |
| 0.870247704 | 0.065241539 |
| -1.33604081 | 0.00106443  |
| -1.07996601 | 0.164233828 |
| -1.14093258 | 0.112971186 |
| 0.99481463  | 0.900511309 |
| -1.09647951 | 0.203588625 |
| -1.00420463 | 0.945285991 |
| 0.944035626 | 0.420128811 |
| -1.11163447 | 0.048950201 |
| -1.04024733 | 0.467757456 |
| 0.885053837 | 0.554341112 |
| -1.08325959 | 0.392224348 |
| 0.943079747 | 0.28779009  |
| -1.09986698 | 0.263017252 |
| -1.13222792 | 0.01331422  |
| -1.15685045 | 0.118032862 |
| 0.873787523 | 0.012745061 |
| 0.826752248 | 0.011850663 |
| 0.946515421 | 0.301310782 |
| 0.781422057 | 6.49064E-05 |
| 0.975143185 | 0.632926563 |
| -1.01701402 | 0.853932552 |
| 0.923802684 | 0.12746544  |
| 0.968562214 | 0.604695325 |
| -1.05629216 | 0.174523246 |
| 0.990634045 | 0.839759488 |
| -1.21683853 | 0.002172333 |
| -1.05090374 | 0.591416803 |
| -1.11423709 | 0.016944499 |
| 0.989904565 | 0.838234513 |
| -1.07438526 | 0.316900024 |
| -1.47509803 | 2.43939E-08 |
| 0.973422568 | 0.578509398 |
| 0.740453309 | 0.074692949 |
| 0.765921144 | 0.019348514 |
| -1.08114636 | 0.327355158 |

|             |             |
|-------------|-------------|
| -1.01079449 | 0.83615482  |
| -1.06638208 | 0.122404558 |
| -1.02932117 | 0.633570804 |
| 0.702629332 | 4.09364E-07 |
| 0.914847735 | 0.282008842 |
| 0.959619105 | 0.373034452 |
| 0.903227007 | 0.371820781 |
| 0.770831657 | 6.25631E-06 |
| -1.00570139 | 0.891921132 |
| -1.11319182 | 0.079034987 |
| 0.960616755 | 0.383690303 |
| -1.04630657 | 0.323568378 |
| 0.715282242 | 2.20107E-07 |
| 0.968594002 | 0.58747627  |
| -1.08511833 | 0.133691928 |
| -1.00591189 | 0.94298703  |
| 0.999681742 | 0.993028289 |
| -1.05308207 | 0.353521153 |
| 0.945525621 | 0.419658437 |
| -1.13421299 | 0.148116639 |
| 0.988139374 | 0.791596796 |
| 0.892621997 | 0.06659085  |
| -1.00844837 | 0.874709095 |
| 0.817458086 | 0.000184254 |
| -1.02671586 | 0.732814476 |
| -1.02876371 | 0.584939478 |
| 0.74348917  | 0.005132082 |
| -1.07822066 | 0.341266509 |
| 0.322363915 | 5.96363E-24 |
| 0.990607427 | 0.867808743 |
| -1.10776217 | 0.079863035 |
| -1.12405767 | 0.277430179 |
| -1.40014449 | 8.18704E-05 |
| 0.99712298  | 0.946305049 |
| 0.285166395 | 2.47047E-34 |
| 0.463780243 | 2.12438E-19 |
| -1.02979635 | 0.594140694 |
| -1.1870318  | 0.03393685  |
| 0.883112395 | 0.066172684 |
| 0.985358954 | 0.753452417 |
| -1.06723991 | 0.301921931 |
| -1.13911426 | 0.044832451 |
| -1.22387894 | 0.00651967  |
| -1.13806187 | 0.014106199 |

|             |             |
|-------------|-------------|
| -1.10474075 | 0.085923942 |
| -1.31568783 | 0.111980697 |
| -1.09183627 | 0.084958581 |
| 0.775244256 | 0.005157674 |
| -1.13175339 | 0.12509088  |
| -1.33001295 | 2.53522E-07 |
| 0.903842716 | 0.248064097 |
| -1.02764643 | 0.475434389 |
| -1.23064606 | 0.001714036 |
| 0.780885237 | 1.04228E-05 |
| -1.08448635 | 0.406587016 |
| 0.995619245 | 0.918043761 |
| -1.45258849 | 7.39023E-07 |
| 0.993906051 | 0.887799078 |
| 0.973981177 | 0.738173888 |
| -1.2145971  | 0.008343085 |
| 0.909922818 | 0.075219338 |
| 0.959914162 | 0.411112538 |
| -1.03755197 | 0.508951977 |
| 0.974019482 | 0.631624597 |
| -1.73331424 | 1.48071E-10 |
| 0.967642573 | 0.540419696 |
| 0.96511483  | 0.507390436 |
| 0.710724363 | 0.000457306 |
| 0.988204172 | 0.897982576 |
| 0.998173054 | 0.981011037 |
| 0.83892891  | 0.05132095  |
| 0.901862333 | 0.073984364 |
| -1.08266448 | 0.313816236 |
| 0.856414225 | 0.013825254 |
| -1.03767128 | 0.716872464 |
| -1.02961905 | 0.763978059 |
| -1.05800627 | 0.462223711 |
| -1.18724741 | 0.134835498 |
| 0.942715187 | 0.429138719 |
| -1.05263957 | 0.295499789 |
| -1.0851631  | 0.206616634 |
| 0.829723474 | 0.016426897 |
| 0.933959688 | 0.312816592 |
| 0.977526469 | 0.611020643 |
| 0.936726626 | 0.32567113  |
| -1.02972671 | 0.829068167 |
| -1.0046085  | 0.94852625  |
| -1.01993577 | 0.766169406 |

|             |             |
|-------------|-------------|
| -1.03815817 | 0.560855417 |
| -1.3197339  | 0.001705575 |
| -1.06074274 | 0.302195106 |
| -1.01914051 | 0.569394313 |
| -1.17205646 | 0.008638063 |
| 0.780656454 | 5.2015E-05  |
| -1.02735077 | 0.651422392 |
| 0.978009583 | 0.803267655 |
| 0.930202741 | 0.440108664 |
| 0.951120393 | 0.513076926 |
| -1.0906108  | 0.116003386 |
| -1.02515745 | 0.676350535 |
| 0.744465648 | 7.68279E-06 |
| -1.10408666 | 0.051699704 |
| -1.01021354 | 0.831888767 |
| 0.873075947 | 0.05005118  |
| -1.03727699 | 0.720612585 |
| 0.931785233 | 0.242471462 |
| -1.04992784 | 0.427306285 |
| 0.986848044 | 0.850834078 |
| -1.08761799 | 0.202675785 |
| 0.987721195 | 0.763436307 |
| -1.00010428 | 0.998667274 |
| 0.824118896 | 0.081122517 |
| -1.17484057 | 0.066089593 |
| -1.10597361 | 0.212040302 |
| 0.978392038 | 0.753694427 |
| 0.865113232 | 0.033943616 |
| 0.831820243 | 0.000742969 |
| -1.10962733 | 0.289518936 |
| -1.06401617 | 0.350742572 |
| -1.13554037 | 0.159286754 |
| 0.880277951 | 0.123414129 |
| 0.961106185 | 0.544320761 |
| -1.07843609 | 0.343162106 |
| -1.00299423 | 0.985180756 |
| -1.17483438 | 0.036790567 |
| -1.21783631 | 0.017996673 |
| -1.07924959 | 0.253989603 |
| -1.0753779  | 0.288512079 |
| -1.02807068 | 0.561660223 |
| 0.981005398 | 0.796506691 |
| -1.0134508  | 0.871648183 |
| 0.762725606 | 0.000226754 |

|             |             |
|-------------|-------------|
| 0.454958619 | 4.61604E-14 |
| -1.17822962 | 0.05609424  |
| -1.09546026 | 0.19068904  |
| 0.907574414 | 0.180637203 |
| 0.893630481 | 0.280715956 |
| 0.936450393 | 0.42685388  |
| -1.36323253 | 0.00281565  |
| 0.906009984 | 0.060492578 |
| -1.00738432 | 0.888319968 |
| -1.03936861 | 0.602635457 |
| -1.14914752 | 0.182124013 |
| -1.04840115 | 0.47006676  |
| 0.93515965  | 0.093626511 |
| 0.71088796  | 0.034996889 |
| 0.984428417 | 0.780953019 |
| -1.01926413 | 0.77286981  |
| 0.814638154 | 0.119148432 |
| 0.753596537 | 7.36005E-05 |
| -1.04383656 | 0.369261415 |
| 0.565696109 | 2.98638E-10 |
| -1.03652906 | 0.525094109 |
| -1.09013005 | 0.033953261 |
| -1.35131832 | 0.000316622 |
| -1.34662923 | 0.000122005 |
| 0.845192331 | 0.389626149 |
| -1.0636231  | 0.483359149 |
| 0.835234001 | 0.04573114  |
| -1.14816277 | 0.04685034  |
| -1.07706311 | 0.188621483 |
| 0.76995925  | 0.25747871  |
| 0.964069884 | 0.368494112 |
| 0.982033349 | 0.746089644 |
| 0.651818526 | 0.005003517 |
| 0.896618516 | 0.020458038 |
| 0.869530607 | 0.265794349 |
| -1.07728775 | 0.223497083 |
| -1.05931613 | 0.363803329 |
| 0.994344735 | 0.930907412 |
| 0.968835035 | 0.420378681 |
| -1.01067772 | 0.764906788 |
| -1.15495099 | 0.005616824 |
| 0.979053445 | 0.695936932 |
| -1.0683648  | 0.125839923 |
| -1.01858049 | 0.836342229 |

|             |             |
|-------------|-------------|
| -1.26239439 | 0.049858815 |
| -1.16647508 | 0.003148469 |
| -1.13250852 | 0.112002029 |
| 0.819746134 | 0.002539172 |
| -1.02746356 | 0.610710911 |
| 0.831828554 | 0.015964774 |
| -1.01857527 | 0.773875363 |
| -1.09699312 | 0.128755344 |
| -1.04697024 | 0.692322016 |
| 0.954170506 | 0.67757906  |
| 0.901113888 | 0.026518614 |
| -1.08119031 | 0.380794478 |
| -1.02731668 | 0.59293065  |
| 0.981245377 | 0.70744441  |
| -1.02073447 | 0.829729083 |
| -1.01841573 | 0.794482154 |
| -1.08011073 | 0.400300444 |
| -1.00032479 | 0.994992544 |
| 0.961428957 | 0.470079417 |
| 0.831075663 | 0.00875551  |
| 0.836193161 | 0.029550951 |
| 0.942438512 | 0.136244438 |
| 0.966256487 | 0.566499131 |
| 0.936946836 | 0.136645958 |
| 0.896789226 | 0.24433292  |
| 0.955407698 | 0.421656372 |
| -1.1008903  | 0.290911993 |
| 0.924563148 | 0.249545646 |
| -1.07315988 | 0.356322939 |
| 0.98913437  | 0.834002519 |
| 0.742676727 | 0.006434734 |
| 0.821161814 | 0.043873543 |
| -1.15143153 | 0.17504131  |
| -1.15489974 | 0.007253828 |
| -1.35626718 | 2.94453E-07 |
| 0.853676322 | 0.006949505 |
| 0.920646117 | 0.14579702  |
| 0.982696922 | 0.839649964 |
| -1.12030084 | 0.085707433 |
| 0.973704528 | 0.543805342 |
| 0.94267052  | 0.16571422  |
| -1.14969882 | 0.095508669 |
| -1.41675105 | 9.00596E-06 |
| 0.952127825 | 0.76671235  |



|             |             |
|-------------|-------------|
| -1.07416829 | 0.372396789 |
| -1.05817901 | 0.569256239 |
| -1.34323028 | 0.001276606 |
| -1.33088303 | 0.000799515 |
| 0.991542415 | 0.922238505 |
| -1.11551392 | 0.211556397 |
| -1.02669375 | 0.689317782 |
| 0.546646781 | 5.91378E-10 |
| 0.933330309 | 0.249410719 |
| -1.02938987 | 0.637433486 |
| 0.806721324 | 0.001104808 |
| 0.890197032 | 0.085409759 |
| 0.534344506 | 3.42748E-11 |
| -1.06475533 | 0.33434416  |
| 0.717920236 | 1.14449E-05 |
| 0.976556009 | 0.747572614 |
| -1.05057227 | 0.306409203 |
| -1.08131304 | 0.347339756 |
| -1.38583468 | 2.42368E-05 |
| -1.14419117 | 0.044580005 |
| 0.965346988 | 0.538837543 |
| 0.892972226 | 0.014825821 |
| 0.853528526 | 0.000675619 |
| 0.958119598 | 0.444580851 |
| -1.01945077 | 0.592487456 |
| 0.967968282 | 0.567273024 |
| -1.00874819 | 0.785461859 |
| -1.01101973 | 0.701664791 |
| 0.658671754 | 9.80596E-10 |
| 0.935023146 | 0.191361612 |
| -1.09789723 | 0.399747927 |
| 0.952936359 | 0.527568177 |
| -1.03639247 | 0.575072128 |
| 0.865203593 | 0.000678558 |
| 0.945701718 | 0.320071001 |
| -1.01339873 | 0.706408124 |
| 0.914048471 | 0.097879746 |
| -1.09628585 | 0.239706505 |
| -1.01307927 | 0.82411925  |
| 0.98688128  | 0.842945247 |
| 0.998789568 | 0.967836484 |
| -1.0134362  | 0.794952026 |
| 0.909623959 | 0.16626523  |
| 0.958164208 | 0.445766386 |

|             |             |
|-------------|-------------|
| -1.13300366 | 0.136892878 |
| -1.37542812 | 4.57541E-06 |
| 0.892803098 | 0.340444023 |
| 0.98471852  | 0.656740849 |
| -1.00901488 | 0.850957322 |
| 0.946938116 | 0.577303706 |
| 0.813299534 | 0.020373527 |
| -1.03008962 | 0.569976828 |
| -1.0008544  | 0.989066746 |
| 0.88871243  | 0.025193659 |
| -1.06315574 | 0.355584718 |
| 0.850850605 | 1.48546E-05 |
| -1.35124705 | 2.89312E-07 |
| -1.01315957 | 0.815506214 |
| 0.568565039 | 5.41932E-10 |
| 0.852337602 | 0.001875976 |
| -1.06575088 | 0.166902695 |
| 0.988678372 | 0.773400529 |
| -1.02003322 | 0.78393522  |
| 0.417466716 | 1.24384E-17 |
| 0.670605812 | 4.19364E-07 |
| 0.854672347 | 0.0385969   |
| 0.863396991 | 0.087197203 |
| -1.1863126  | 0.066217064 |
| 0.854316839 | 0.045458526 |
| 0.965261978 | 0.546863341 |
| 0.664341273 | 3.48892E-09 |
| 0.967590298 | 0.782087335 |
| -1.02065265 | 0.538936654 |
| 0.959285428 | 0.418001265 |
| 0.953586158 | 0.272457311 |
| 0.918432648 | 0.171239117 |
| -1.00038401 | 0.990130876 |
| 0.918515453 | 0.192373101 |
| -1.05036319 | 0.509243107 |
| -1.1846222  | 0.007476133 |
| -1.07542723 | 0.543492601 |
| -1.314911   | 5.00487E-05 |
| 0.821316457 | 0.002120949 |
| -1.05788086 | 0.274132794 |
| 0.986311139 | 0.688158222 |
| 0.936192411 | 0.666911612 |
| 0.992464615 | 0.933198142 |
| 0.944543529 | 0.336822582 |

|             |             |
|-------------|-------------|
| -1.0612735  | 0.405111477 |
| 0.838494699 | 0.002609165 |
| 0.921544865 | 0.518444454 |
| 0.948880578 | 0.233667541 |
| -1.04250715 | 0.465974573 |
| -1.11634338 | 0.095860577 |
| -1.12273827 | 0.103570948 |
| -1.07203626 | 0.49922147  |
| -1.12126323 | 0.070162174 |
| -1.00855141 | 0.943977841 |
| -1.0499707  | 0.508284709 |
| -1.1648329  | 0.0938897   |
| 0.87469794  | 0.021941829 |
| -1.03172069 | 0.703854682 |
| -1.15787162 | 0.005753715 |
| -1.14936635 | 0.024598071 |
| -1.14836233 | 0.017317376 |
| 0.73698059  | 5.96263E-05 |
| 0.938139541 | 0.077901131 |
| 0.872686671 | 0.01813173  |
| -1.05304298 | 0.426712361 |
| -1.13258312 | 0.066422323 |
| -1.0369306  | 0.412869308 |
| 0.939703732 | 0.253021316 |
| -1.00064357 | 0.989366896 |
| -1.12918746 | 0.079018108 |
| -1.00409128 | 0.922175502 |
| 0.855918912 | 0.00316462  |
| 0.797649883 | 5.62544E-07 |
| -1.16285944 | 0.033667077 |
| 0.862306701 | 0.501509854 |
| 0.951755795 | 0.250817406 |
| 0.463111874 | 3.30823E-18 |
| 0.920221464 | 0.02809475  |
| -1.08703918 | 0.293737107 |
| 0.993338514 | 0.860515588 |
| -1.07630129 | 0.168060633 |
| -1.15766324 | 0.117879841 |
| 0.87989799  | 0.149508642 |
| 0.785117301 | 0.005916266 |
| -1.31943364 | 1.40503E-06 |
| -1.01087084 | 0.841467676 |
| 0.8892721   | 0.142479881 |
| 0.857762512 | 0.032203044 |

|             |             |
|-------------|-------------|
| 0.602152154 | 9.77085E-10 |
| 0.839449903 | 0.006115685 |
| 0.857567027 | 0.144673722 |
| -1.10061881 | 0.319063323 |
| 0.955430109 | 0.67842551  |
| -1.11937105 | 0.100694266 |
| 0.984887631 | 0.918800779 |
| -1.16257438 | 0.017872202 |
| -1.27873354 | 0.001335856 |
| 0.902397112 | 0.298547527 |
| -1.18869183 | 0.035358584 |
| -1.05231954 | 0.624287589 |
| 0.856555267 | 0.063566963 |
| -1.06399622 | 0.376544384 |
| -1.0741687  | 0.186837355 |
| -1.08148844 | 0.276166869 |
| -1.03873721 | 0.444958289 |
| -1.03512124 | 0.786657508 |
| 0.9666995   | 0.881400925 |
| 0.96649044  | 0.687119744 |
| -1.0607088  | 0.128743927 |
| 0.912930363 | 0.140505696 |
| -1.02561097 | 0.669389597 |
| 0.630748829 | 1.25917E-07 |
| -1.09518031 | 0.054354057 |
| -1.43783022 | 0.000148671 |
| 0.675612567 | 0.027841491 |
| -1.09486195 | 0.177109308 |
| 0.938548088 | 0.303969341 |
| 0.9531943   | 0.439352585 |
| 0.983751378 | 0.704437729 |
| 0.756924868 | 0.000663532 |
| -1.03521812 | 0.600713403 |
| -2.69369616 | 7.68202E-19 |
| 0.988301008 | 0.854833952 |
| -1.259873   | 0.000690461 |
| 0.87144496  | 0.067346646 |
| -1.09436959 | 0.366557571 |
| -1.00101094 | 0.986998956 |
| -1.0409645  | 0.412000972 |
| -1.13047729 | 0.04444731  |
| 0.942998066 | 0.628507686 |
| 0.762224226 | 0.055552236 |
| 0.905168292 | 0.252940792 |

|             |             |
|-------------|-------------|
| 0.92979202  | 0.302065274 |
| 0.802633575 | 0.000610731 |
| 0.943517156 | 0.592656091 |
| -1.08485563 | 0.187943201 |
| 0.833204719 | 0.09013663  |
| -1.01433078 | 0.853299609 |
| -1.36258948 | 2.08126E-05 |
| 0.90156724  | 0.166682549 |
| -1.05099978 | 0.335099627 |
| 0.958168676 | 0.449903715 |
| -1.02917829 | 0.63197519  |
| 0.984094328 | 0.710502932 |
| 0.943904327 | 0.240091619 |
| -1.06716765 | 0.219798933 |
| -1.12055598 | 0.022349756 |
| 0.465991027 | 7.01003E-20 |
| -1.12675592 | 0.046934415 |
| 0.956363402 | 0.411679559 |
| -1.38769048 | 4.84817E-07 |
| -1.05957441 | 0.424098727 |
| -1.01149511 | 0.831063875 |
| -1.09305159 | 0.136538646 |
| -1.09053354 | 0.235387396 |
| 0.775217586 | 0.002317425 |
| 0.923505423 | 0.225051439 |
| -1.13472897 | 0.045501205 |
| -1.23208671 | 0.001442943 |
| 0.826183581 | 0.023183201 |
| 0.946033988 | 0.167456391 |
| -2.00521388 | 1.57418E-09 |
| -1.02824418 | 0.590803061 |
| 0.910199568 | 0.126788589 |
| -1.1392124  | 0.001428995 |
| 0.764684943 | 5.32684E-05 |
| -1.27247586 | 0.004904308 |
| -1.00108006 | 0.98950915  |
| 0.98365752  | 0.635131314 |
| 0.794093939 | 0.029973762 |
| 0.905672078 | 0.162908827 |
| -1.21960941 | 0.024946635 |
| -1.15004692 | 0.121579964 |
| 0.785560497 | 8.32166E-05 |
| 0.933825473 | 0.471815374 |
| 0.894747939 | 0.026082493 |

|             |             |
|-------------|-------------|
| -1.02081275 | 0.852452274 |
| 0.981422514 | 0.674188976 |
| -1.02857725 | 0.7477853   |
| -1.10873036 | 0.201939364 |
| -1.09812767 | 0.043677523 |
| -1.20500303 | 0.105543392 |
| -1.27407243 | 0.000939956 |
| 0.848570423 | 0.030406548 |
| 0.979504309 | 0.70497718  |
| -1.06345887 | 0.276283941 |
| -1.11157497 | 0.076874704 |
| 0.97894931  | 0.621867284 |
| 0.686150903 | 0.000505372 |
| 0.966780905 | 0.794010309 |
| -1.19309322 | 0.102390767 |
| 0.994364986 | 0.943461805 |
| -1.02193094 | 0.725340304 |
| -1.11906455 | 0.134716227 |
| -1.27147663 | 0.003730971 |
| -1.04166749 | 0.385164455 |
| -1.15845264 | 0.043814626 |
| -1.02593853 | 0.675395996 |
| -1.30865122 | 0.021753869 |
| -1.33477346 | 0.000671082 |
| -1.00970581 | 0.902867972 |
| -1.2608699  | 0.10169858  |
| 0.991606628 | 0.869413185 |
| 0.987880652 | 0.866967728 |
| -1.05912014 | 0.457839972 |
| -1.19908022 | 0.033500427 |
| 0.652766046 | 0.000290581 |
| -1.14029498 | 0.036336366 |
| -1.26404444 | 0.009247971 |
| -1.16998887 | 0.037180435 |
| -1.00051751 | 0.993824824 |
| 0.966966852 | 0.572349954 |
| 0.946674663 | 0.639689448 |
| 0.987953322 | 0.835704545 |
| 0.784920087 | 0.013242168 |
| 0.991294426 | 0.890041499 |
| 0.422883627 | 2.30086E-08 |
| 0.497651975 | 1.74799E-07 |
| 0.276534554 | 2.46371E-12 |
| 0.219040136 | 1.37855E-15 |

|             |             |
|-------------|-------------|
| 0.360580465 | 1.04175E-12 |
| 0.847971426 | 0.019853168 |
| 0.859605797 | 0.110386411 |
| 0.936190146 | 0.168311184 |
| -2.17037097 | 2.17419E-08 |
| -1.65869725 | 5.03552E-06 |
| 0.876897026 | 0.027077596 |
| -1.36468853 | 0.002910774 |
| 0.932043545 | 0.081387182 |
| -1.02608427 | 0.779378863 |
| 0.483716963 | 8.28424E-20 |
| 0.763696459 | 1.77801E-07 |
| 0.939036241 | 0.562265694 |
| -1.18330192 | 0.012806952 |
| -1.33897586 | 8.31271E-06 |
| -1.46569788 | 9.18421E-06 |
| -1.35137997 | 0.030367953 |
| -1.15610543 | 0.120774163 |
| -1.10036316 | 0.245461751 |
| 0.836249021 | 0.122079128 |
| -1.12272311 | 0.099281665 |
| -1.19273417 | 0.218334598 |
| -1.0409125  | 0.619756535 |
| -1.13197502 | 0.030571758 |
| 0.61407309  | 2.61125E-12 |
| -1.10630269 | 0.046498176 |
| 0.91843008  | 0.192071263 |
| 0.897586642 | 0.035876618 |
| -1.03637035 | 0.443082949 |
| 0.919069083 | 0.001430925 |
| 0.801791014 | 0.076301578 |
| 0.166715941 | 2.94153E-25 |
| -1.01391453 | 0.797345711 |
| -1.05973867 | 0.114482593 |
| 0.991033541 | 0.87109918  |
| 0.73298332  | 6.64922E-05 |
| 0.886984306 | 0.02566435  |
| -1.27650741 | 0.000716284 |
| -1.14052999 | 0.081863569 |
| -1.11341939 | 0.137714783 |
| -1.23008957 | 0.015890228 |
| -1.11366455 | 0.278205014 |
| 0.854710738 | 0.038557263 |
| -1.11761071 | 0.37632324  |

|             |             |
|-------------|-------------|
| -1.16506475 | 0.014738311 |
| -1.12712596 | 0.069733651 |
| 0.894566996 | 0.008281514 |
| 0.692756807 | 0.000111271 |
| 0.929927312 | 0.197082053 |
| 0.984183573 | 0.788373846 |
| 0.365524983 | 1.72716E-13 |
| 0.960773222 | 0.521619747 |
| 0.971217997 | 0.553764455 |
| 0.647606441 | 1.21283E-09 |
| 0.604417069 | 3.34471E-12 |
| -1.0407929  | 0.313585764 |
| -1.07377409 | 0.287071272 |
| -1.01772582 | 0.679604546 |
| 0.642694573 | 0.000146954 |
| 0.947283419 | 0.481265216 |
| -1.01859413 | 0.668302038 |
| 0.641984291 | 2.35104E-09 |
| -1.07107512 | 0.214896858 |
| 0.796074011 | 0.022880112 |
| 0.96664047  | 0.506613089 |
| -1.01641213 | 0.591907131 |
| 0.993229595 | 0.909531213 |
| 0.829437809 | 0.12313349  |
| -1.01628293 | 0.839489464 |
| 0.999164379 | 0.988529169 |
| 0.876582689 | 0.001956314 |
| -1.02263481 | 0.855717371 |
| 0.928211336 | 0.115783464 |
| 0.924723905 | 0.080556098 |
| 0.939707718 | 0.549017343 |
| -1.19421204 | 0.015219071 |
| 0.948857136 | 0.13606257  |
| -1.10693609 | 0.271132777 |
| -1.03067816 | 0.562071711 |
| 0.658335019 | 2.88618E-05 |
| 0.644990144 | 9.77924E-11 |
| -1.19751387 | 0.023787977 |
| -1.02022992 | 0.819797111 |
| 0.546372733 | 2.56504E-07 |
| -1.05098345 | 0.656833222 |
| 0.950847445 | 0.521713752 |
| -1.15962278 | 0.254564254 |
| 0.753987934 | 0.000417174 |



|             |             |
|-------------|-------------|
| 0.75519217  | 0.00028419  |
| 0.755307004 | 0.008212431 |
| 0.70012317  | 1.63042E-06 |
| 0.278967814 | 1.94996E-10 |
| 0.920985069 | 0.135491    |
| 0.512864649 | 5.31437E-07 |
| 0.916681336 | 0.416725045 |
| 0.625441355 | 7.70861E-07 |
| 0.991818212 | 0.939696454 |
| -1.20534554 | 0.009230316 |
| 0.814154966 | 0.000209063 |
| -1.54827988 | 0.00039948  |
| -1.07811482 | 0.448403517 |
| 0.28793303  | 1.63492E-25 |
| 0.990929661 | 0.873563131 |
| 0.471780289 | 3.6428E-18  |
| 0.479808128 | 2.7098E-21  |
| 0.90197271  | 0.315598879 |
| 0.987981626 | 0.772421016 |
| 0.593975823 | 3.16138E-11 |
| 0.776186986 | 0.00734956  |
| 0.765832593 | 0.00160539  |
| -1.11045886 | 0.097870569 |
| 0.923697485 | 0.511974614 |
| -1.23233008 | 0.02451483  |
| 0.825595636 | 4.8901E-06  |
| -1.05165013 | 0.37236087  |
| -1.04687024 | 0.69949146  |
| -1.4669238  | 0.033249321 |
| -1.23886233 | 0.005902906 |
| -1.86802942 | 1.28351E-11 |
| -1.92663847 | 4.22833E-12 |
| -1.26548624 | 0.001610039 |
| -1.16324197 | 0.038848255 |
| -1.34109753 | 0.000871523 |
| -1.14235248 | 0.0164125   |
| 0.964003686 | 0.659468818 |
| -1.33530001 | 0.003809631 |
| -1.03126786 | 0.766989973 |
| 0.936344803 | 0.313326062 |
| -1.31502395 | 9.84024E-05 |
| 0.891531169 | 0.123105049 |
| 0.947768138 | 0.149080367 |
| 0.980186822 | 0.67074895  |

|             |             |
|-------------|-------------|
| 0.968498638 | 0.538970399 |
| 0.950343497 | 0.452737863 |
| 0.880118661 | 0.026022208 |
| 0.856944272 | 0.056135078 |
| 0.76916129  | 0.000138348 |
| -1.1308035  | 0.151998394 |
| 0.750460846 | 0.000179962 |
| -1.70582341 | 3.90516E-06 |
| -1.0210292  | 0.871119062 |
| -1.14243137 | 0.024624884 |
| 0.970869181 | 0.717383921 |
| 0.998887057 | 0.987389384 |
| -1.39344138 | 3.46304E-06 |
| -1.3011273  | 0.004763563 |
| -1.52203788 | 2.7388E-05  |
| -1.13729145 | 0.036952731 |
| -1.40818314 | 0.005047089 |
| -1.39906813 | 0.000217169 |
| 0.65126635  | 1.64962E-05 |
| -1.49442563 | 1.9023E-05  |
| 0.971842961 | 0.346587227 |
| -1.04827502 | 0.409517297 |
| 0.831543299 | 0.004246964 |
| -1.08329854 | 0.121213918 |
| -1.00813692 | 0.885990503 |
| 0.93748382  | 0.236635599 |
| 0.991953483 | 0.813920103 |
| 0.97078673  | 0.582429456 |
| 0.94901898  | 0.300636425 |
| -1.04915109 | 0.496878392 |
| -1.057823   | 0.496831671 |
| -1.28767361 | 0.00180888  |
| -1.4994809  | 7.70571E-07 |
| 0.874467126 | 0.273986828 |
| -1.00653618 | 0.918486633 |
| -1.36980279 | 0.001746303 |
| -1.36761262 | 0.001681454 |
| -1.04754665 | 0.282788206 |
| -1.0362213  | 0.617578515 |
| -1.23719989 | 0.003988459 |
| -1.17672589 | 0.041929439 |
| 0.91930647  | 0.307089647 |
| 0.60905325  | 5.17962E-08 |
| -1.50012877 | 5.83874E-07 |

|             |             |
|-------------|-------------|
| -1.22518088 | 0.016212412 |
| 0.868202999 | 0.181506778 |
| -1.15460203 | 0.02097544  |
| -1.00435567 | 0.92976177  |
| 0.928348345 | 0.101872106 |
| -1.05535409 | 0.312217054 |
| 0.350607611 | 4.55311E-10 |
| -1.51217252 | 2.11017E-05 |
| -1.4794721  | 2.12064E-05 |
| 0.934608761 | 0.365660758 |
| -1.38714219 | 0.000535515 |
| 0.815923064 | 0.348088644 |
| 0.691136598 | 5.55376E-12 |
| -1.1158001  | 0.237518938 |
| -1.00141878 | 0.985036331 |
| -1.16411983 | 0.155894747 |
| 0.979538764 | 0.735488804 |
| 0.988018458 | 0.77587724  |
| -1.23695979 | 0.015682175 |
| 0.660441178 | 5.29158E-07 |
| -1.03675205 | 0.297828822 |
| -1.1038379  | 0.115357169 |
| -1.45302022 | 0.026734279 |
| 0.952910454 | 0.613135951 |
| 0.96598892  | 0.31015985  |
| 0.922146101 | 0.049571759 |
| 0.95525834  | 0.331930292 |
| 0.773488601 | 0.000223633 |
| 0.97810472  | 0.833134323 |
| 0.865734863 | 0.033797965 |
| 0.940446802 | 0.237173804 |
| -1.09568727 | 0.242013885 |
| -1.0225988  | 0.819227308 |
| 0.597257358 | 3.31883E-09 |
| 0.911594293 | 0.326148084 |
| 0.913347082 | 0.058107368 |
| -1.10286523 | 0.162768833 |
| -1.04078896 | 0.60690305  |
| 0.934923814 | 0.244182569 |
| 0.88742261  | 0.036032374 |
| 0.972376605 | 0.698134344 |
| 0.827989184 | 0.004313519 |
| -1.02981626 | 0.687373494 |
| 0.637282144 | 2.04748E-08 |

|             |             |
|-------------|-------------|
| -1.17336789 | 0.077671692 |
| 0.886303566 | 0.364967297 |
| 0.947527515 | 0.408781059 |
| -1.17687327 | 0.095348938 |
| -1.12886892 | 0.269924244 |
| -1.59846226 | 2.83132E-06 |
| -1.18226578 | 0.040669778 |
| -1.11753154 | 0.024574514 |
| -1.44178667 | 1.02877E-05 |
| -1.37166335 | 0.006986848 |
| -1.23803716 | 0.017540135 |
| -1.22174652 | 0.027099729 |
| -1.18565413 | 0.036338378 |
| -1.24875059 | 0.000866515 |
| -1.12112968 | 0.1980984   |
| -1.40138164 | 0.000265362 |
| -1.2425714  | 0.021773013 |
| 0.992971997 | 0.95885492  |
| 0.788012763 | 0.005019223 |
| 0.982483621 | 0.768923233 |
| -1.2028954  | 0.011827489 |
| -1.09406398 | 0.213914195 |
| -1.61508032 | 3.12359E-07 |
| -1.3070114  | 0.001798012 |
| -1.10329195 | 0.112982077 |
| -1.18417763 | 0.044987551 |
| -1.04332993 | 0.373524332 |
| -1.07803944 | 0.414487853 |
| -1.12583021 | 0.350695646 |
| -1.04613381 | 0.604472425 |
| -1.14498241 | 0.276984339 |
| 0.953184592 | 0.405468266 |
| 0.89496109  | 0.161984577 |
| -1.09866749 | 0.125941339 |
| -1.10060227 | 0.087651213 |
| 0.876611297 | 0.027431502 |
| 0.945008432 | 0.287015401 |
| 0.862745512 | 0.045107635 |
| 0.871265353 | 0.012296676 |
| 0.828510429 | 0.000376324 |
| -1.03568572 | 0.254670413 |
| 0.929042082 | 0.382818895 |
| 0.983057824 | 0.693380435 |
| 0.9054576   | 0.108723032 |

|             |             |
|-------------|-------------|
| -1.6460415  | 3.51701E-10 |
| 0.853079723 | 0.046490553 |
| -1.02214133 | 0.631978251 |
| -1.07151844 | 0.168274723 |
| -1.0076652  | 0.833548447 |
| 0.423379818 | 1.78528E-23 |
| 0.942060842 | 0.56165531  |
| 0.785750833 | 1.08829E-08 |
| -1.10173377 | 0.182657451 |
| -1.02463294 | 0.611491815 |
| 0.898872743 | 0.190241473 |
| -1.03842663 | 0.526215497 |
| 0.995455169 | 0.919010851 |
| -1.05734176 | 0.367185718 |
| -1.04127457 | 0.350663863 |
| 0.989557521 | 0.807611164 |
| -1.32927586 | 0.000825194 |
| 0.855329007 | 0.001484369 |
| -1.03545026 | 0.536140413 |
| -1.00002604 | 0.999717177 |
| 0.806529433 | 0.000451362 |
| 0.94941331  | 0.643303473 |
| -1.28280578 | 0.052151359 |
| -1.33478257 | 0.004315715 |
| 0.957199465 | 0.574726869 |
| -1.08455144 | 0.200477439 |
| 0.780666751 | 0.013002594 |
| -1.06300057 | 0.43121094  |
| -1.2815185  | 0.002317132 |
| -1.39694404 | 2.71944E-08 |
| 0.936242414 | 0.530543009 |
| 0.916724733 | 0.322821447 |
| -1.18116525 | 0.01358441  |
| -1.06363591 | 0.447981703 |
| 0.846882341 | 0.036352906 |
| 0.917267209 | 0.378073997 |
| 0.960388775 | 0.530274394 |
| -1.08411572 | 0.077530469 |
| -1.08163411 | 0.090555216 |
| 0.923784324 | 0.384685873 |
| -1.07172263 | 0.222996025 |
| 0.861122358 | 0.084377343 |
| -1.01143548 | 0.928658815 |
| -1.07611079 | 0.475344651 |

|             |             |
|-------------|-------------|
| 0.907157197 | 0.113878741 |
| -1.31047563 | 0.001385395 |
| 0.974279605 | 0.739957822 |
| -1.00964792 | 0.914755297 |
| 0.815773858 | 0.006508619 |
| -1.08005805 | 0.122305888 |
| 0.77400754  | 5.6288E-06  |
| -1.02682258 | 0.550674689 |
| 0.691089032 | 3.53184E-07 |
| -1.28911819 | 0.004097257 |
| -1.24269257 | 2.68505E-05 |
| -1.05682488 | 0.358256189 |
| -1.18217069 | 0.000948735 |
| -1.03301559 | 0.625803244 |
| -1.12075258 | 0.247372716 |
| -1.49725215 | 2.67074E-06 |
| 0.821023115 | 0.013153762 |
| -1.03721638 | 0.6432562   |
| -1.27556211 | 0.004725595 |
| -1.17360627 | 0.010120949 |
| 0.928214552 | 0.258884782 |
| -1.13110376 | 0.149620344 |
| 0.900866968 | 0.168427637 |
| -1.0548466  | 0.429407829 |
| 0.977143703 | 0.518467862 |
| 0.963695027 | 0.523678056 |
| -1.28691869 | 0.036471332 |
| -1.08623646 | 0.38063313  |
| 0.977061188 | 0.809643318 |
| -1.17462684 | 0.011061797 |
| 0.756366574 | 0.000571215 |
| -1.15411311 | 0.01978326  |
| 0.887833279 | 0.01025098  |
| -1.02758546 | 0.448582488 |
| 0.99656481  | 0.954327735 |
| 0.99654579  | 0.927175101 |
| 0.891927627 | 0.409089364 |
| 0.907273326 | 0.116234505 |
| -1.07288215 | 0.212218293 |
| 0.847451675 | 0.074199069 |
| 0.988453903 | 0.829137416 |
| 0.929521807 | 0.35295693  |
| 0.93145229  | 0.413349158 |
| -1.12726226 | 0.133232037 |

|             |             |
|-------------|-------------|
| 0.968057803 | 0.60274401  |
| 0.626421624 | 1.18654E-05 |
| -1.03869231 | 0.537199125 |
| 0.728396035 | 8.39292E-07 |
| -1.00857916 | 0.880571836 |
| 0.819202903 | 0.004392365 |
| -1.09145542 | 0.357120206 |
| 0.998415349 | 0.97594936  |
| -1.13275325 | 0.09110514  |
| 0.886988492 | 0.185525735 |
| -1.05901752 | 0.552033796 |
| 0.960625979 | 0.57174174  |
| -1.03946126 | 0.641862081 |
| 0.693571389 | 3.30745E-07 |
| -1.06507475 | 0.420102242 |
| -1.19657065 | 0.024693089 |
| -1.04532721 | 0.501204145 |
| -1.08886326 | 0.134691335 |
| 0.845195145 | 0.033018163 |
| 0.940155848 | 0.209502205 |
| -1.13478613 | 0.109490952 |
| -1.08656569 | 0.197734874 |
| -1.26926572 | 0.002319173 |
| 0.575231008 | 6.75161E-06 |
| -1.03186134 | 0.679678713 |
| 0.895660426 | 0.245700603 |
| 0.912897636 | 0.244545582 |
| 0.959047831 | 0.41021026  |
| 0.760334539 | 5.14429E-07 |
| 0.526506462 | 1.19691E-08 |
| 0.891492869 | 0.016897773 |
| -1.33978338 | 0.001026167 |
| -1.36601215 | 0.00080805  |
| 0.846345969 | 0.062106895 |
| -1.19321151 | 0.005434719 |
| 0.522947711 | 1.11691E-11 |
| 0.562766999 | 9.51518E-07 |
| 0.49389543  | 2.63565E-12 |
| 0.575324199 | 1.58084E-14 |
| 0.930217528 | 0.189347802 |
| -1.15309416 | 0.206197448 |
| -1.02203451 | 0.752758565 |
| -1.20278372 | 0.016776503 |
| -1.10933432 | 0.286621712 |

|             |             |
|-------------|-------------|
| 0.960057417 | 0.516133019 |
| -1.03337723 | 0.558203721 |
| -1.02778588 | 0.62859549  |
| 0.941551138 | 0.36041554  |
| -1.00324361 | 0.958967422 |
| -1.09673371 | 0.100440349 |
| 0.992916248 | 0.899865464 |
| -1.01395827 | 0.791507224 |
| 0.935593248 | 0.233310459 |
| 0.954593854 | 0.358412938 |
| -1.02311741 | 0.680410318 |
| -1.10388052 | 0.395763322 |
| 0.948570579 | 0.244846081 |
| 0.828971994 | 0.002755836 |
| 0.806773834 | 0.001729701 |
| 0.733292457 | 7.72906E-07 |
| -1.26132645 | 0.007564132 |
| 0.938707785 | 0.229223851 |
| -1.04569337 | 0.393948552 |
| -1.11971173 | 0.050850377 |
| 0.400596301 | 1.47945E-18 |
| 0.974503225 | 0.473471852 |
| -1.07251361 | 0.294783583 |
| 0.913202101 | 0.03687269  |
| 0.906737518 | 0.061851544 |
| 0.835037912 | 0.006833099 |
| -1.18342514 | 0.012313091 |
| -1.01397549 | 0.716635525 |
| 0.99147562  | 0.909301099 |
| -1.09942009 | 0.08248682  |
| 0.921962117 | 0.510466741 |
| 0.77476082  | 5.72784E-05 |
| -1.21245518 | 0.002845751 |
| -1.03544388 | 0.669269647 |
| 0.797945072 | 0.064830057 |
| -1.06074475 | 0.490253231 |
| 0.942746208 | 0.218633099 |
| 0.991429908 | 0.824320672 |
| 0.989437747 | 0.89562725  |
| 0.877126409 | 0.075578298 |
| 0.910136215 | 0.066390369 |
| -1.07269456 | 0.206787493 |
| -1.00569176 | 0.882146742 |
| -1.06277354 | 0.169202787 |



|             |             |
|-------------|-------------|
| 0.838844718 | 0.063062741 |
| 0.775764195 | 0.000404462 |
| -1.04463616 | 0.611717374 |
| -1.01099687 | 0.848445198 |
| 0.922818373 | 0.163631913 |
| 0.82491903  | 0.014658682 |
| 0.889948907 | 0.020614806 |
| 0.94003416  | 0.508502218 |
| -1.01843266 | 0.782741321 |
| 0.859637765 | 0.026252162 |
| 0.292380947 | 3.31752E-19 |
| -1.21037234 | 0.023342039 |
| 0.976959717 | 0.666702927 |
| -1.08645959 | 0.376607443 |
| -1.25855718 | 0.001233264 |
| 0.944799618 | 0.228859915 |
| -1.13621694 | 0.038725245 |
| 0.978784675 | 0.712776993 |
| 0.993566393 | 0.941636233 |
| -1.13750571 | 0.057314039 |
| -1.0192721  | 0.678517545 |
| -1.07468542 | 0.455147355 |
| -1.19819572 | 0.114544493 |
| 0.988576819 | 0.897153815 |
| -1.4674791  | 1.61422E-05 |
| -1.23843358 | 0.001881563 |
| 0.860453031 | 0.032021471 |
| 0.96435789  | 0.454021872 |
| 0.964288436 | 0.573173871 |
| -1.25822969 | 0.001527345 |
| 0.80365355  | 0.015063787 |
| -1.02047919 | 0.88533789  |
| 0.895820719 | 0.013797411 |
| 0.806551218 | 0.159373879 |
| 0.950543409 | 0.420928545 |
| 0.919357152 | 0.074523845 |
| -1.05515427 | 0.282669124 |
| 0.924044101 | 0.197433481 |
| 0.728508604 | 5.81097E-07 |
| 0.827681114 | 0.013072334 |
| -1.04471189 | 0.567572949 |
| -1.10421269 | 0.400684223 |
| -1.01178675 | 0.745923486 |
| 0.657358107 | 2.09001E-10 |

|             |             |
|-------------|-------------|
| 0.973768426 | 0.399012034 |
| 0.797036877 | 0.048081003 |
| 0.740560972 | 2.10603E-06 |
| 0.620685593 | 2.19344E-05 |
| -1.0043672  | 0.952046452 |
| -1.16993969 | 0.067685309 |
| 0.790137921 | 0.001575513 |
| 0.788566398 | 2.31025E-08 |
| 0.971783286 | 0.768418494 |
| 0.994703537 | 0.930444054 |
| 0.571079066 | 1.35804E-06 |
| 0.716257994 | 1.46369E-08 |
| 0.967882525 | 0.384047466 |
| -1.06548494 | 0.317984815 |
| 0.912829322 | 0.159625546 |
| 0.745229058 | 0.000641036 |
| -1.234639   | 0.023393947 |
| 0.879634818 | 0.142111414 |
| -1.08432208 | 0.333467386 |
| -1.23645464 | 0.067197445 |
| -1.14146389 | 0.002533722 |
| -1.21016618 | 0.001192893 |
| -1.18181225 | 0.001335273 |
| -1.23598065 | 0.009478853 |
| -1.20538688 | 0.012536806 |
| -1.06681358 | 0.235045173 |
| -1.00240724 | 0.976434594 |
| -1.2413539  | 0.000875011 |
| -1.0236931  | 0.626550431 |
| 0.913486581 | 0.329462983 |
| 0.874808508 | 0.022530285 |
| 0.944926968 | 0.109953075 |
| 0.996430122 | 0.949857197 |
| 0.9830626   | 0.772686471 |
| -1.00450543 | 0.944481309 |
| 0.826875793 | 0.002471117 |
| -1.08274237 | 0.203258569 |
| -1.19942274 | 0.040660865 |
| -1.2774895  | 0.000206061 |
| 0.350138704 | 6.14849E-18 |
| -1.18487655 | 0.060109546 |
| 0.791346627 | 0.00055653  |
| -1.1933676  | 0.004921276 |
| -1.15914354 | 0.003903762 |

|             |             |
|-------------|-------------|
| -1.03479117 | 0.662735623 |
| -1.09436357 | 0.123648182 |
| 0.99676791  | 0.964963647 |
| -1.18592495 | 0.0157099   |
| -1.11718806 | 0.031578923 |
| -1.13220659 | 0.023081859 |
| 0.964706263 | 0.520007954 |
| -1.07579426 | 0.232035828 |
| 0.898491681 | 0.095321714 |
| 0.920467064 | 0.048154126 |
| 0.999267506 | 0.989331282 |
| -1.04512855 | 0.40567064  |
| 0.987210195 | 0.752841766 |
| -1.01362572 | 0.853233946 |
| 0.965183929 | 0.413524828 |
| -1.02466143 | 0.560656889 |
| 0.958031518 | 0.590518098 |
| 0.520803045 | 8.79368E-21 |
| 0.533710622 | 3.62177E-09 |
| 0.893836349 | 0.097650548 |
| -1.03234159 | 0.34974883  |
| -1.02430417 | 0.805988842 |
| 0.910443191 | 0.29525881  |
| -1.10500656 | 0.191330674 |
| 0.731152031 | 4.83786E-07 |
| -1.20309962 | 0.058232437 |
| -1.20008803 | 0.009277397 |
| 0.786194943 | 0.003632234 |
| 0.831406286 | 0.037061185 |
| 0.843533545 | 0.050512545 |
| -1.46660906 | 0.000629486 |
| 0.999379796 | 0.990124727 |
| -1.04926303 | 0.678021747 |
| -1.27549663 | 0.012639764 |
| 0.982645325 | 0.821877304 |
| -1.07840123 | 0.341752868 |
| -1.18948778 | 0.026229059 |
| -1.22827021 | 0.012989782 |
| 0.883010352 | 0.29712352  |
| -1.2797126  | 0.055437709 |
| -1.23402971 | 0.001072967 |
| -1.03254807 | 0.699958534 |
| -1.32765953 | 1.01952E-05 |
| -1.03621346 | 0.725003951 |

|             |             |
|-------------|-------------|
| 0.765221923 | 0.003796041 |
| -1.13591339 | 0.139105846 |
| -1.19239306 | 0.010271764 |
| -1.13881501 | 0.113138146 |
| 0.878813559 | 0.022428304 |
| 0.804929672 | 0.002726413 |
| -1.14142598 | 0.044522674 |
| 0.978815117 | 0.749112837 |
| -1.13501258 | 0.015962908 |
| 0.72358855  | 6.89059E-06 |
| -1.11414327 | 0.049980003 |
| -1.18991227 | 0.004331163 |
| 0.973576379 | 0.71017677  |
| -1.05582007 | 0.566059204 |
| 0.647077626 | 2.27639E-07 |
| 0.922355715 | 0.265862585 |
| 0.738657394 | 2.13439E-10 |
| -1.06261372 | 0.160439729 |
| 0.713869717 | 2.34299E-06 |
| -1.04362288 | 0.755479428 |
| 0.990939906 | 0.858095839 |
| 0.748200329 | 0.008563863 |
| -1.18929958 | 0.038131343 |
| 0.929543274 | 0.228870959 |
| -1.03920496 | 0.482814128 |
| -1.03241675 | 0.563174546 |
| 0.974066151 | 0.704963668 |
| -1.07418863 | 0.371226446 |
| -1.13936634 | 0.041612332 |
| -1.22741699 | 0.000415693 |
| -1.10622693 | 0.077281189 |
| -1.46770836 | 0.000170919 |
| -1.11706619 | 0.175839931 |
| -1.34318818 | 0.000233487 |
| -1.00918907 | 0.868508345 |
| -1.16564713 | 0.023962735 |
| -1.05741564 | 0.649310897 |
| -1.07263247 | 0.478478068 |
| -1.19294073 | 0.057861425 |
| -1.42991667 | 1.26633E-05 |
| -1.11022238 | 0.053081017 |
| 0.95656762  | 0.43601982  |
| -1.01635963 | 0.720173374 |
| -1.01688989 | 0.792280065 |

|             |             |
|-------------|-------------|
| -1.14334456 | 0.075879645 |
| 0.954449732 | 0.393152841 |
| -1.02797789 | 0.455896574 |
| -1.06820956 | 0.207226238 |
| 0.928657705 | 0.092921706 |
| -1.01783618 | 0.830548266 |
| 0.995544697 | 0.951678747 |
| 0.995998997 | 0.950603975 |
| 0.982999907 | 0.776940495 |
| -1.08733123 | 0.138457447 |
| -1.05218964 | 0.371775831 |
| 0.993499454 | 0.912194279 |
| 0.568530893 | 1.06874E-07 |
| 0.763698879 | 0.003204852 |
| 0.989463046 | 0.714075854 |
| 0.991003744 | 0.847565922 |
| 0.7822022   | 0.013123139 |
| 0.953988768 | 0.458827255 |
| -1.31254341 | 0.100092604 |
| -1.08598536 | 0.246114193 |
| -1.00579801 | 0.935665647 |
| 0.981161389 | 0.819918967 |
| -1.2680449  | 0.014102383 |
| 0.942783628 | 0.095686185 |
| -1.0308166  | 0.572843387 |
| 0.896561316 | 0.034978411 |
| 0.910679623 | 0.259854031 |
| 0.743677021 | 3.4936E-07  |
| -1.0100022  | 0.907829626 |
| -1.06157954 | 0.287308252 |
| 0.965507028 | 0.619373476 |
| 0.727845605 | 1.73105E-06 |
| 0.851641215 | 0.026330502 |
| 0.912285433 | 0.12915546  |
| -1.45401504 | 1.01932E-07 |
| 0.926342579 | 0.067392176 |
| 0.938081549 | 0.047951309 |
| -1.11591731 | 0.066713595 |
| 0.90512048  | 0.562136852 |
| -1.03372349 | 0.583489503 |
| 0.835630006 | 0.295767107 |
| -1.11492367 | 0.22412859  |
| -1.01281055 | 0.836572275 |
| -1.52649807 | 1.05375E-05 |

|             |             |
|-------------|-------------|
| 0.954558158 | 0.530951321 |
| -1.58399935 | 1.01221E-09 |
| -1.18128349 | 0.008770631 |
| 0.997543262 | 0.973187029 |
| -1.21899001 | 0.00626539  |
| 0.490394727 | 1.41418E-09 |
| 0.954577985 | 0.300613313 |
| 0.765937117 | 0.046268626 |
| 0.955019985 | 0.547910767 |
| 0.970552975 | 0.428929965 |
| -1.03823984 | 0.513630857 |
| -1.01873958 | 0.719240307 |
| 0.706132204 | 0.00028473  |
| 0.541133012 | 1.49029E-12 |
| -1.09475727 | 0.17001257  |
| -1.26844854 | 0.004831817 |
| 0.991403934 | 0.91053698  |
| -1.09124769 | 0.157138278 |
| -1.2429938  | 0.001799516 |
| 0.901816804 | 0.126569609 |
| 0.882201664 | 0.089238746 |
| -1.2275048  | 0.007360104 |
| -1.49055242 | 1.28614E-08 |
| 0.870066367 | 0.013088196 |
| 0.964054424 | 0.55966724  |
| -1.06171396 | 0.42747588  |
| -1.00331966 | 0.949311011 |
| -1.03237719 | 0.689391839 |
| 0.843551954 | 0.020274654 |
| 0.897240491 | 0.048609925 |
| -1.05166921 | 0.435859637 |
| 0.986955839 | 0.8389469   |
| 0.971896704 | 0.617123418 |
| 0.92308592  | 0.38890286  |
| -1.03794056 | 0.432461558 |
| 0.953973463 | 0.377367851 |
| 0.845315428 | 0.000880653 |
| 0.433929059 | 1.90493E-22 |
| 0.944355155 | 0.382002108 |
| 0.9108243   | 0.072266122 |
| -1.23794944 | 0.005278004 |
| 0.927027564 | 0.411941781 |
| -1.0281533  | 0.46630218  |
| -1.00647226 | 0.875717361 |

|             |             |
|-------------|-------------|
| 0.959947288 | 0.308297487 |
| -1.0194691  | 0.654466847 |
| -1.08614749 | 0.287701291 |
| 0.956594847 | 0.375414125 |
| -1.22580932 | 0.00026875  |
| -1.13765099 | 0.048109157 |
| 0.50898293  | 1.11458E-13 |
| -1.06839513 | 0.58205587  |
| 0.994658146 | 0.919683013 |
| 0.858883753 | 0.034218891 |
| 0.968575418 | 0.380238439 |
| -1.2011493  | 0.043812346 |
| -1.2174553  | 0.000204545 |
| -1.00920105 | 0.906200444 |
| -1.18931009 | 0.011391324 |
| -1.21626914 | 0.000243833 |
| -1.0977072  | 0.326978684 |
| 0.899409229 | 0.026650076 |
| -1.1929503  | 0.011273601 |
| -1.00175401 | 0.981799472 |
| 0.883845189 | 0.016566313 |
| 0.909028664 | 0.116705639 |
| -1.15227313 | 0.023834521 |
| 0.99793539  | 0.967216051 |
| 0.936231602 | 0.106873886 |
| 0.63828865  | 9.17729E-07 |
| 0.810554221 | 0.001581683 |
| -1.13679156 | 0.011185344 |
| 0.933792556 | 0.371582074 |
| 0.917745173 | 0.003581427 |
| 0.932183115 | 0.223015485 |
| -1.10634593 | 0.057617458 |
| 0.971881583 | 0.542826648 |
| 0.585844918 | 3.43641E-09 |
| -1.20836314 | 7.75213E-05 |
| -1.30464614 | 5.67421E-05 |
| -1.12560929 | 0.077172141 |
| -1.11445894 | 0.046315379 |
| -1.02929794 | 0.426676087 |
| 0.96961195  | 0.433344206 |
| -1.20421673 | 0.002681399 |
| 0.940150177 | 0.261243201 |
| 0.888973212 | 0.069338198 |
| -1.28676779 | 0.010322484 |

|             |             |
|-------------|-------------|
| -1.19159258 | 0.013683711 |
| 0.957379763 | 0.473480964 |
| 0.827505917 | 0.049352743 |
| 0.958967855 | 0.391357882 |
| -1.2195333  | 0.032112896 |
| -1.01941649 | 0.685159077 |
| -1.12071444 | 0.235087046 |
| 0.607386766 | 1.65213E-10 |
| 0.97194722  | 0.779436077 |
| 0.969153022 | 0.442020121 |
| 0.684234413 | 8.57156E-08 |
| 0.992056268 | 0.890329403 |
| -1.11008537 | 0.276428511 |
| -1.07394281 | 0.452758498 |
| 0.906824668 | 0.027532182 |
| -1.23138945 | 0.01197784  |
| -1.35145642 | 1.22789E-06 |
| -1.35948836 | 3.51012E-05 |
| 0.967983763 | 0.492934418 |
| -1.07244407 | 0.420559051 |
| -1.12078697 | 0.073144545 |
| -1.20943604 | 0.10700001  |
| 0.693447761 | 3.25872E-08 |
| 0.67858525  | 1.3747E-08  |
| -1.16409653 | 0.203239681 |
| 0.867935282 | 0.016825756 |
| 0.945320169 | 0.283834777 |
| 0.349637793 | 1.04685E-23 |
| -1.00168893 | 0.976034025 |
| -1.01952524 | 0.6712393   |
| 0.592869617 | 1.38586E-09 |
| -1.01134156 | 0.84401689  |
| -1.05801329 | 0.276657022 |
| 0.962771186 | 0.695423612 |
| 0.888093204 | 0.02202411  |
| 0.937372127 | 0.292188955 |
| -1.04333573 | 0.402483146 |
| 0.983181229 | 0.873269696 |
| 0.956546879 | 0.292834955 |
| 0.942513128 | 0.300926757 |
| 0.748741865 | 0.000685538 |
| 0.982196092 | 0.822350121 |
| -1.39974969 | 3.91314E-06 |
| 0.888991717 | 0.009768792 |



|             |             |
|-------------|-------------|
| -1.19381406 | 0.024229889 |
| -1.12842994 | 0.141624204 |
| -1.31672312 | 7.42674E-06 |
| -1.1376324  | 0.022303661 |
| -1.2161393  | 0.00827815  |
| 0.932549476 | 0.295671227 |
| -1.02632384 | 0.763251418 |
| -1.11325786 | 0.19898346  |
| -1.25969486 | 0.061058114 |
| -1.04382847 | 0.329378376 |
| -1.07190732 | 0.293225314 |
| -1.12366618 | 0.113737243 |
| -1.25308165 | 0.027740221 |
| -1.22706158 | 0.007332345 |
| -1.52120212 | 4.01784E-11 |
| 0.963110874 | 0.366888945 |
| 0.718794929 | 1.94095E-05 |
| 0.976959217 | 0.647913332 |
| 0.742856663 | 8.73694E-06 |
| 0.712609728 | 1.36694E-10 |
| 0.97499102  | 0.712683065 |
| -1.06601156 | 0.1333814   |
| -1.05758531 | 0.370337078 |
| 0.875169556 | 0.033710214 |
| 0.791276969 | 0.004583127 |
| 0.368777957 | 3.68582E-14 |
| 0.929517464 | 0.214736312 |
| 0.812135397 | 0.000141783 |
| -1.15280487 | 0.081422615 |
| 0.920128362 | 0.293098002 |
| 0.913919236 | 0.153181337 |
| 0.960601485 | 0.533255384 |
| -1.23464419 | 0.004726712 |
| 0.996518037 | 0.945391507 |
| -1.02135274 | 0.609962645 |
| -1.26362401 | 0.01702863  |
| -1.10212928 | 0.231057886 |
| -1.2751925  | 3.39306E-05 |
| -1.15422576 | 0.031410789 |
| -1.25157965 | 0.000693547 |
| -1.08496218 | 0.100857461 |
| -1.12440745 | 0.041979606 |
| 0.784881077 | 0.000213827 |
| 0.959405242 | 0.417701997 |

|             |             |
|-------------|-------------|
| -1.04729611 | 0.718907766 |
| -1.07991022 | 0.564196607 |
| 0.597521221 | 3.40654E-11 |
| -1.18668611 | 0.030757231 |
| -1.07965957 | 0.246571704 |
| 0.928989408 | 0.032408328 |
| 0.980879073 | 0.782011508 |
| -1.0754347  | 0.38116009  |
| -1.03977495 | 0.443873197 |
| -1.17808804 | 0.006525408 |
| -1.66558358 | 3.86821E-11 |
| 0.779916782 | 0.000146213 |
| 0.750117463 | 0.000536225 |
| 0.926838548 | 0.201824551 |
| 0.731409042 | 0.000113758 |
| -1.08391322 | 0.440298135 |
| -1.01636089 | 0.733942614 |
| -1.00405463 | 0.971576392 |
| 0.694481847 | 0.001740445 |
| 0.890143776 | 0.150010829 |
| -1.16612561 | 0.010853089 |
| -1.52678175 | 0.000108233 |
| 0.922354054 | 0.277796101 |
| 0.977477689 | 0.784639166 |
| -1.36878467 | 0.012089988 |
| 0.925275343 | 0.159031308 |
| -1.07375055 | 0.203559709 |
| 0.905098685 | 0.186872115 |
| -1.09059497 | 0.179639968 |
| -1.03437454 | 0.608142078 |
| 0.964724444 | 0.362742307 |
| 0.977265618 | 0.748480061 |
| -1.00599263 | 0.924718132 |
| -1.07389611 | 0.110640306 |
| 0.976618896 | 0.555855668 |
| 0.955825178 | 0.450072195 |
| -1.04515112 | 0.419685831 |
| 0.918625003 | 0.207167656 |
| -1.00678503 | 0.86761291  |
| 0.917464338 | 0.068230835 |
| -1.07605907 | 0.205119294 |
| 0.987689917 | 0.729872285 |
| -1.04622583 | 0.528494911 |
| -1.04178455 | 0.320062252 |

|             |             |
|-------------|-------------|
| 0.710748001 | 0.000586228 |
| 0.979027024 | 0.579666768 |
| -1.067707   | 0.266977577 |
| -1.07085627 | 0.250934416 |
| 0.96829518  | 0.519266198 |
| -1.05911583 | 0.187010235 |
| 0.950702365 | 0.44899693  |
| 0.89328609  | 0.416167968 |
| 0.837370822 | 0.00526987  |
| -1.02703081 | 0.732475389 |
| -1.15552368 | 0.075535435 |
| 0.970809726 | 0.567629819 |
| 0.74754773  | 0.000443426 |
| 0.855836612 | 0.016015907 |
| 0.996551902 | 0.951312756 |
| 0.892184642 | 0.103933613 |
| 0.968502671 | 0.336784916 |
| -1.06886116 | 0.26308693  |
| 0.7805973   | 0.02807057  |
| 0.918069447 | 0.164143773 |
| 0.916194771 | 0.332119958 |
| 0.989742749 | 0.801409605 |
| 0.618161979 | 9.25403E-06 |
| 0.917924144 | 0.209472321 |
| -1.02517528 | 0.676640634 |
| -1.08570041 | 0.176609382 |
| -1.01099155 | 0.920641707 |
| 0.792599622 | 0.000236991 |
| 0.948226632 | 0.406249407 |
| 0.799914876 | 0.00452189  |
| 0.95468037  | 0.456598439 |
| -1.08487281 | 0.095769691 |
| 0.929219424 | 0.127093455 |
| -1.06049471 | 0.530905941 |
| 0.972228569 | 0.525389814 |
| 0.850398882 | 0.191024202 |
| -1.05251354 | 0.340296457 |
| 0.875832335 | 0.08660543  |
| 0.914660518 | 0.167785318 |
| -1.24720444 | 0.012099458 |
| -1.08780708 | 0.239426003 |
| -1.19403725 | 0.006237067 |
| 0.939686746 | 0.16607013  |
| -1.13773507 | 0.041259867 |

|             |             |
|-------------|-------------|
| -1.06119189 | 0.363834325 |
| -1.10908173 | 0.13062735  |
| -1.01464363 | 0.887621119 |
| 0.541881745 | 7.04756E-13 |
| 0.51505172  | 4.86139E-17 |
| -1.10514507 | 0.245690539 |
| 0.827600993 | 0.02582066  |
| -1.01347841 | 0.850253018 |
| 0.962995801 | 0.717783711 |
| 0.91558454  | 0.098643328 |
| -1.03778877 | 0.536481764 |
| -1.19815034 | 0.016986293 |
| -1.19198163 | 0.006570008 |
| 0.940984375 | 0.296097181 |
| -1.23524899 | 0.011092552 |
| 0.950688719 | 0.539820023 |
| 0.908052916 | 0.072410381 |
| -1.12728627 | 0.040564556 |
| 0.938550024 | 0.336695774 |
| 0.95886207  | 0.508511613 |
| -1.20787225 | 0.02745149  |
| -1.35787493 | 0.008238551 |
| 0.968247156 | 0.380761398 |
| 0.727782954 | 6.32722E-07 |
| -1.12347807 | 0.045116642 |
| -1.02161067 | 0.71960301  |
| -1.17405347 | 0.017533669 |
| 0.957040196 | 0.374898223 |
| 0.980848765 | 0.790682806 |
| -1.0719491  | 0.515536307 |
| -1.09123744 | 0.096813717 |
| -1.08249459 | 0.298750617 |
| 0.885170904 | 0.059297671 |
| -1.40463417 | 0.003923344 |
| -1.12457992 | 0.210775621 |
| -1.22153739 | 0.002245294 |
| 0.957237263 | 0.666752524 |
| -1.11056828 | 0.127627194 |
| 0.937301032 | 0.337249771 |
| -1.02271118 | 0.703206008 |
| -1.16180496 | 0.047317943 |
| 0.737403431 | 0.000175776 |
| -1.12739713 | 0.089335282 |
| 0.870976523 | 0.04935885  |

|             |             |
|-------------|-------------|
| 0.909669593 | 0.184010278 |
| 0.98854763  | 0.894517712 |
| -1.10808976 | 0.198231865 |
| 0.700186794 | 2.14245E-08 |
| 0.797953504 | 0.001006494 |
| 0.893907539 | 0.01466576  |
| -1.03817563 | 0.678935939 |
| 0.596274112 | 6.19914E-05 |
| 0.748706413 | 4.07702E-06 |
| 0.998830445 | 0.990835102 |
| 0.93928752  | 0.371538263 |
| 0.943263113 | 0.214824954 |
| -1.05139973 | 0.544155512 |
| -1.36778842 | 4.68195E-05 |
| -1.24226203 | 0.001278766 |
| -1.13587509 | 0.02956901  |
| -1.12315965 | 0.102973014 |
| -1.1179222  | 0.020951328 |
| -1.04153614 | 0.738049905 |
| -1.23045916 | 0.004806763 |
| -1.06790691 | 0.325073977 |
| -1.01305826 | 0.83628747  |
| -1.0818749  | 0.25115298  |
| -1.12709452 | 0.082029577 |
| -1.30880992 | 0.09725308  |
| -1.17585885 | 0.099565725 |
| 0.98034072  | 0.804190834 |
| 0.955009584 | 0.288875343 |
| -1.15170982 | 0.059359025 |
| -1.07831471 | 0.363554293 |
| 0.98773912  | 0.789271278 |
| -1.32470172 | 0.000156485 |
| -1.20067691 | 0.031832473 |
| 0.982112993 | 0.824358653 |
| 0.999013717 | 0.987112072 |
| -1.40218269 | 0.000472279 |
| -1.03988854 | 0.575750656 |
| -1.26887068 | 0.001956371 |
| -1.07935718 | 0.130160611 |
| -1.3650486  | 0.015403339 |
| -1.2661248  | 0.003088143 |
| 0.92280088  | 0.217637546 |
| -1.37374615 | 8.46205E-06 |
| -1.4261307  | 0.00016425  |

|             |             |
|-------------|-------------|
| 0.942593463 | 0.535055815 |
| -1.25913397 | 0.037649523 |
| 0.911305729 | 0.163315958 |
| -1.03285288 | 0.481956463 |
| -1.09511452 | 0.081882733 |
| -1.02678659 | 0.648498074 |
| 0.982202801 | 0.70755771  |
| 0.908909412 | 0.068560486 |
| -1.00545708 | 0.933112201 |
| 0.75027118  | 0.00653594  |
| 0.937428654 | 0.290095977 |
| -1.15323117 | 0.24374641  |
| 0.911554705 | 0.383396626 |
| -1.13877404 | 0.063715278 |
| 0.995999444 | 0.925836485 |
| -1.00702762 | 0.871410134 |
| 0.89093292  | 0.018863547 |
| -1.09646868 | 0.133379247 |
| 0.978171762 | 0.74302558  |
| 0.901160257 | 0.050400488 |
| 0.980201654 | 0.764629081 |
| -1.07889157 | 0.17364623  |
| -1.06882514 | 0.370973008 |
| 0.783702414 | 0.00036539  |
| 0.927663569 | 0.12891799  |
| -1.09725214 | 0.427706018 |
| 0.84507716  | 0.305854361 |
| 0.947632492 | 0.397601117 |
| 0.973003354 | 0.672292356 |
| 0.946139492 | 0.248879431 |
| 0.738954843 | 1.27568E-06 |
| 0.829001365 | 0.000904968 |
| 0.945118409 | 0.48315041  |
| 0.914579678 | 0.386698924 |
| 0.933341552 | 0.282521485 |
| 0.78181016  | 6.81309E-05 |
| 0.78705981  | 0.039093959 |
| -1.00351421 | 0.950681653 |
| 0.957703479 | 0.62810033  |
| -1.03238345 | 0.47680649  |
| 0.858549647 | 0.029445511 |
| 0.888859278 | 0.010096909 |
| 0.861482766 | 0.012716234 |
| -1.17301361 | 0.041566303 |

|             |             |
|-------------|-------------|
| -1.0420271  | 0.627817334 |
| 0.984964775 | 0.763848854 |
| 0.914253044 | 0.089239498 |
| -1.02215452 | 0.799857725 |
| 0.790074676 | 0.018947726 |
| 0.877250836 | 0.009521155 |
| 0.618014301 | 3.66723E-10 |
| -1.0764951  | 0.304199404 |
| -1.01570214 | 0.723013148 |
| 0.789437593 | 0.004105571 |
| 0.938313858 | 0.455260483 |
| -1.0923551  | 0.203331749 |
| -1.04142135 | 0.687540344 |
| 0.881756152 | 0.24619229  |
| 0.88613702  | 0.276274683 |
| -1.17497249 | 0.090580364 |
| -1.0000184  | 0.99968915  |
| -1.18759432 | 0.002330032 |
| 0.894816136 | 0.021890493 |
| -1.1166584  | 0.152507657 |
| 0.841444473 | 0.027022475 |
| 0.70724985  | 0.000715838 |
| 0.663766251 | 5.29114E-06 |
| -1.10138357 | 0.136133179 |
| 0.759772859 | 2.37218E-05 |
| -1.33122205 | 0.020038463 |
| 0.908209734 | 0.188524084 |
| -1.13970901 | 0.01919709  |
| -1.07521388 | 0.36132412  |
| 0.995589757 | 0.945251401 |
| -1.02888999 | 0.40075705  |
| 0.878119201 | 0.170808703 |
| 0.96275613  | 0.67728755  |
| -1.17260025 | 0.017074584 |
| -1.23099964 | 0.00079053  |
| 0.744567496 | 6.00246E-05 |
| 0.86024422  | 0.020834777 |
| -1.05482353 | 0.289012605 |
| -1.11330719 | 0.104401336 |
| 0.817666949 | 0.088168874 |
| -1.09079495 | 0.114871293 |
| -1.2388637  | 0.014414238 |
| -1.18387304 | 0.022123721 |
| -1.13905032 | 0.104389725 |

|             |             |
|-------------|-------------|
| 0.83825684  | 0.003258156 |
| -1.17138809 | 0.039098118 |
| -1.13989231 | 0.090536727 |
| -1.15327978 | 0.01828333  |
| -1.07975045 | 0.235362788 |
| -1.04802857 | 0.579854953 |
| -1.36713555 | 0.002423303 |
| -1.12264303 | 0.021470375 |
| 0.928081707 | 0.173907524 |
| -1.13825825 | 0.021781242 |
| -1.0687868  | 0.242308224 |
| -1.03999011 | 0.475681325 |
| 0.868876876 | 0.080259027 |
| -1.16140561 | 0.014987371 |
| -1.04668568 | 0.28613777  |
| -1.1205231  | 0.02536547  |
| -1.05493218 | 0.382172841 |
| -1.0842223  | 0.009877679 |
| -1.32105131 | 3.58761E-07 |
| 0.96663852  | 0.510568742 |
| 0.79294339  | 0.00044545  |
| -1.08641183 | 0.04571192  |
| 0.875352887 | 0.02098879  |
| -1.03511457 | 0.644092695 |
| -1.33411168 | 0.000439021 |
| 0.995772507 | 0.928847366 |
| 0.95449198  | 0.441163657 |
| 0.899095708 | 0.089060301 |
| 0.941067815 | 0.119151295 |
| -1.16247693 | 0.063898992 |
| 0.815692837 | 0.000843297 |
| -1.13545425 | 0.057214256 |
| 0.954904523 | 0.425999093 |
| -1.04196302 | 0.38914642  |
| -1.04895459 | 0.406483692 |
| -1.05657153 | 0.307914906 |
| 0.979621759 | 0.683164476 |
| -1.0446677  | 0.333294257 |
| 0.953828842 | 0.383474975 |
| 0.944954366 | 0.148418974 |
| 0.985640175 | 0.794126106 |
| -1.37488712 | 9.48093E-07 |
| 0.992021336 | 0.884038458 |
| -1.19157838 | 0.011016329 |



|             |             |
|-------------|-------------|
| -1.03776008 | 0.528976267 |
| -1.06354146 | 0.25400228  |
| 0.940594105 | 0.265394252 |
| -1.14806826 | 0.028602322 |
| 0.714649837 | 0.000504098 |
| -1.01721988 | 0.735920032 |
| 0.624855405 | 3.67079E-06 |
| -1.07962927 | 0.142425432 |
| 0.918081559 | 0.213164988 |
| 0.977184085 | 0.614894183 |
| -1.27671705 | 0.005722199 |
| -1.17730566 | 0.099780689 |
| 0.908441661 | 0.381311729 |
| -1.06306049 | 0.395084682 |
| 0.990493947 | 0.864530792 |
| -1.18501851 | 0.090147905 |
| 0.969132807 | 0.506943259 |
| -1.01181201 | 0.793605185 |
| 0.844612997 | 0.042942912 |
| 0.929092781 | 0.212314747 |
| -1.32282054 | 0.00425851  |
| 0.850531864 | 9.82697E-06 |
| 0.790489961 | 0.00010211  |
| 0.437382227 | 8.09502E-22 |
| 0.925160599 | 0.416206114 |
| 0.912306803 | 0.024883017 |
| -1.07043966 | 0.301268625 |
| 0.965486158 | 0.513016117 |
| 0.994807863 | 0.958111256 |
| 0.871593732 | 0.046766785 |
| 0.862265077 | 0.502892028 |
| 0.998181345 | 0.960228249 |
| 0.868845259 | 0.037739503 |
| 0.904351581 | 0.043741354 |
| -1.03779976 | 0.459499236 |
| -1.02036903 | 0.762688408 |
| -1.37309487 | 0.001379517 |
| 0.948770088 | 0.505497208 |
| 0.853267199 | 0.013805899 |
| -1.30369858 | 1.86836E-06 |
| -1.03518957 | 0.540837951 |
| -1.02247032 | 0.691884314 |
| -1.01239144 | 0.825720438 |
| -1.24705615 | 0.003076786 |

|             |             |
|-------------|-------------|
| -1.14759123 | 0.005463719 |
| 0.935669764 | 0.322077798 |
| 0.896525865 | 0.132193273 |
| -1.26364969 | 0.010685192 |
| -1.0640879  | 0.421996771 |
| -1.13982044 | 0.004760009 |
| -1.22015205 | 0.003457766 |
| 0.92923621  | 0.320803659 |
| -1.05765909 | 0.514053557 |
| 0.945929083 | 0.122605102 |
| -1.02961816 | 0.716763108 |
| -1.01883442 | 0.820330238 |
| -1.03414219 | 0.702034182 |
| 0.871669888 | 0.101552189 |
| -1.25878571 | 0.014434707 |
| -1.23624647 | 0.007251621 |
| 0.755611541 | 3.40813E-06 |
| 0.802584996 | 0.000752674 |
| -1.00090223 | 0.989605909 |
| -1.09864293 | 0.256553318 |
| 0.901080279 | 0.11448451  |
| -1.10031431 | 0.252717939 |
| -1.40302512 | 0.049994173 |
| -1.05177511 | 0.202115874 |
| 0.802339917 | 0.000145649 |
| -1.04843779 | 0.596979164 |
| -1.34434033 | 5.74856E-05 |
| -1.31910002 | 5.55232E-06 |
| -1.01128442 | 0.736455537 |
| -1.07483941 | 0.200934013 |
| -1.10676071 | 0.009751679 |
| 0.973227496 | 0.720048445 |
| -1.02121187 | 0.743684418 |
| -1.00876441 | 0.903912183 |
| -1.04959286 | 0.255844436 |
| -1.31350007 | 0.003120347 |
| -1.01710481 | 0.84030964  |
| -1.3599801  | 0.000288846 |
| -1.33150206 | 8.04692E-08 |
| -1.22343142 | 0.000435851 |
| -1.00006084 | 0.999105185 |
| 0.922390045 | 0.185660087 |
| 0.928744539 | 0.038722938 |
| -1.02282668 | 0.664127257 |

|             |             |
|-------------|-------------|
| 0.99779032  | 0.963023487 |
| 0.551376612 | 1.69609E-09 |
| -1.18557946 | 0.035393542 |
| 0.923653864 | 0.178087586 |
| 0.91741524  | 0.201942194 |
| -1.04703639 | 0.329735493 |
| -1.63613675 | 0.000389301 |
| -1.09954592 | 0.393689783 |
| -1.09698701 | 0.318443852 |
| 0.914411336 | 0.167310795 |
| 0.906650011 | 0.364087715 |
| -1.05249618 | 0.129027647 |
| 0.883664538 | 0.003197876 |
| -1.04351065 | 0.285298192 |
| -1.21625868 | 0.012846352 |
| 0.919005037 | 0.019983089 |
| -1.28989658 | 0.009053017 |
| -1.03727352 | 0.750812454 |
| 0.784856787 | 1.63842E-06 |
| 0.802587961 | 0.002048437 |
| 0.934606742 | 0.430105757 |
| 0.806590518 | 0.066207425 |
| 0.810965769 | 0.005210582 |
| 0.988736445 | 0.82303903  |
| 0.950644316 | 0.641344575 |
| 0.857000716 | 0.038649355 |
| -1.19644182 | 0.024500795 |
| 0.976195363 | 0.733162143 |
| 0.871159972 | 0.038527495 |
| 0.984287374 | 0.789731767 |
| -1.29289687 | 0.000489646 |
| -1.29718381 | 0.00402801  |
| -1.23630761 | 0.003132142 |
| 0.982503914 | 0.856574643 |
| -1.08201519 | 0.176256769 |
| -1.09456156 | 0.195005353 |
| 0.992901222 | 0.921251003 |
| 0.937880991 | 0.515484196 |
| 0.9593806   | 0.467468515 |
| 0.962390375 | 0.544021965 |
| 0.643493818 | 6.97587E-06 |
| -1.01806806 | 0.842727088 |
| -1.05087417 | 0.233953532 |
| -1.06622541 | 0.4289196   |

|             |             |
|-------------|-------------|
| -1.32418957 | 0.000173414 |
| -1.2849704  | 0.001085431 |
| 0.941129388 | 0.382054013 |
| 0.974819558 | 0.75869557  |
| -1.03993997 | 0.553358928 |
| 0.847358011 | 0.136520783 |
| -1.0624051  | 0.170950546 |
| -1.08653049 | 0.302661704 |
| 0.906989969 | 0.393067467 |
| -1.27405787 | 1.43795E-05 |
| -1.33297931 | 0.00027868  |
| 0.971494775 | 0.488086396 |
| 0.996230287 | 0.953622408 |
| -1.01431506 | 0.831048945 |
| -1.01435052 | 0.790635984 |
| 0.983420512 | 0.813014214 |
| -1.18304651 | 0.033734776 |
| 0.854486471 | 0.075787934 |
| 0.970161615 | 0.599979934 |
| -1.61272548 | 1.47557E-05 |
| 0.768733444 | 1.69135E-05 |
| -1.20169209 | 0.026463762 |
| 0.906091118 | 0.059027035 |
| -1.15285829 | 0.03990095  |
| -1.17554922 | 0.060125818 |
| 0.914564257 | 0.25731183  |
| 0.994831541 | 0.889662431 |
| -1.028773   | 0.492588199 |
| -1.00892668 | 0.85820606  |
| -1.07120259 | 0.269721972 |
| -1.21596542 | 0.025822869 |
| 0.865774657 | 0.097501304 |
| 0.637051048 | 8.4409E-11  |
| -1.05096381 | 0.328000456 |
| 0.980916791 | 0.804080483 |
| 0.906255798 | 0.236682905 |
| 0.984262691 | 0.775334546 |
| 0.874944763 | 0.133531603 |
| -1.19877903 | 0.142325685 |
| 0.938379714 | 0.063377951 |
| 0.946399621 | 0.214572092 |
| 0.955965173 | 0.352619682 |
| -1.30484978 | 0.002363769 |
| 0.895550927 | 0.433329225 |

|             |             |
|-------------|-------------|
| -1.21488059 | 0.095452994 |
| 0.999168695 | 0.990175362 |
| 0.889029633 | 0.069437714 |
| 0.856628426 | 0.017354029 |
| 0.946754859 | 0.405864562 |
| -1.06167977 | 0.346378928 |
| -1.22924517 | 0.018485863 |
| -1.36138117 | 0.005981717 |
| -1.01427887 | 0.786717164 |
| -1.57359295 | 8.65925E-06 |
| -1.11548148 | 0.033608979 |
| -1.09412917 | 0.529431325 |
| 0.901002569 | 0.032823854 |
| -1.12926555 | 0.053532105 |
| 0.878029195 | 0.07142595  |
| 0.844775537 | 0.036910304 |
| 0.969274589 | 0.428984986 |
| 0.88205824  | 0.041412937 |
| -1.02140603 | 0.718048043 |
| 0.768315211 | 0.202782522 |
| 0.809888842 | 0.147873076 |
| 0.665362235 | 2.77809E-08 |
| -1.01539713 | 0.827732922 |
| 0.910050289 | 0.154143068 |
| -1.09846333 | 0.130312528 |
| 0.890856974 | 0.196009605 |
| 0.569640831 | 3.7536E-08  |
| -1.14560146 | 0.021542003 |
| 0.853869718 | 0.045371747 |
| 0.978454342 | 0.71370194  |
| -1.16989508 | 0.011342039 |
| -1.02313995 | 0.721653582 |
| 0.757439424 | 0.172092815 |
| -1.13580095 | 0.004311227 |
| -1.10411734 | 0.165259126 |
| -1.07943207 | 0.424981902 |
| 0.895140236 | 0.146751019 |
| -1.15848502 | 0.178517664 |
| -1.07529792 | 0.166626033 |
| -1.17613762 | 0.024051078 |
| -1.2045392  | 0.016279397 |
| 0.939863635 | 0.330234347 |
| -1.07984562 | 0.100430008 |
| -1.11525287 | 0.285274734 |

|             |             |
|-------------|-------------|
| 0.991780651 | 0.939836381 |
| -1.01888127 | 0.815851485 |
| -1.20640264 | 0.083893183 |
| 0.779326531 | 0.003389458 |
| -1.27765986 | 0.001169214 |
| -1.23304305 | 0.001221279 |
| -1.12482413 | 0.049873827 |
| 0.785054187 | 2.01636E-06 |
| 0.769792518 | 0.000664171 |
| 0.989911701 | 0.785231064 |
| -1.16375632 | 0.195626347 |
| -2.17374537 | 2.69037E-07 |
| -1.27424998 | 0.007085755 |
| -1.2647646  | 0.010062181 |
| -1.48969643 | 0.000993961 |
| 0.922028081 | 0.146870776 |
| -1.06716264 | 0.262019943 |
| -1.18771197 | 0.003631169 |
| -1.26658506 | 0.154214598 |
| -1.1885754  | 0.124596511 |
| 0.819100709 | 0.030202896 |
| -1.3372469  | 0.01399311  |
| -1.05325494 | 0.317420515 |
| 0.771129075 | 1.7233E-05  |
| 0.906867878 | 0.288005517 |
| -1.06835609 | 0.196250078 |
| 0.966122501 | 0.430197564 |
| 0.689017333 | 2.55523E-07 |
| 0.697289756 | 2.87825E-06 |
| -1.5622558  | 1.22708E-06 |
| -1.16564045 | 0.201744476 |
| -1.16689177 | 0.081084865 |
| -1.16478199 | 0.02768319  |
| -1.14246472 | 0.035173756 |
| 0.997819725 | 0.9697505   |
| -1.06794978 | 0.368407067 |
| 0.793671013 | 0.000836324 |
| 0.991656976 | 0.934922689 |
| 0.996693815 | 0.974125738 |
| 0.799343144 | 7.23096E-06 |
| 0.992476691 | 0.951269083 |
| -1.02766523 | 0.761858243 |
| -1.22702512 | 0.013737868 |
| -1.1418399  | 0.147199846 |

|             |             |
|-------------|-------------|
| -1.09407474 | 0.155646719 |
| 0.964772449 | 0.520613921 |
| -1.02201563 | 0.768490779 |
| 0.94487504  | 0.496479535 |
| 0.921268839 | 0.273471441 |
| -1.09427092 | 0.235176548 |
| 0.960397052 | 0.591114836 |
| 0.938151187 | 0.454516065 |
| -1.11755991 | 0.190943235 |
| -1.05025661 | 0.342816099 |
| -1.13154042 | 0.0366154   |
| 0.999373385 | 0.994979388 |
| 0.126701761 | 1.78913E-28 |
| 0.974710596 | 0.722631843 |
| 0.926021936 | 0.322999374 |
| 0.839185778 | 0.07630332  |
| 0.939760318 | 0.444919282 |
| 0.712758614 | 0.000813241 |
| -1.08785969 | 0.366454046 |
| 0.975592812 | 0.615518466 |
| -1.01585976 | 0.814431889 |
| -1.05404242 | 0.259931564 |
| 0.723568829 | 7.14549E-06 |
| -1.11460108 | 0.034835677 |
| -1.02638881 | 0.673948542 |
| 0.960456078 | 0.539149881 |
| -1.00775202 | 0.89348467  |
| 0.928271087 | 0.190073221 |
| -1.30417287 | 0.00281221  |
| 0.588631068 | 8.72065E-20 |
| 0.905448092 | 0.080513304 |
| 0.807776558 | 2.88103E-05 |
| 0.971760377 | 0.620238671 |
| 0.772237313 | 0.000139962 |
| 0.857312716 | 0.004120017 |
| 0.619849262 | 1.01026E-09 |
| -1.04197156 | 0.527199936 |
| -1.05224114 | 0.195030908 |
| -1.04923363 | 0.483562835 |
| 0.960700769 | 0.277086586 |
| -1.24698773 | 0.010509587 |
| -1.12464139 | 0.119882721 |
| 0.414493789 | 1.69772E-07 |
| 0.297718835 | 4.50945E-23 |

|             |             |
|-------------|-------------|
| 0.871782234 | 0.002519674 |
| 0.960211995 | 0.519909358 |
| -1.33433045 | 0.000613823 |
| -1.37970126 | 0.001981686 |
| 0.845864583 | 0.015065348 |
| 0.629447558 | 9.6846E-08  |
| 0.802202926 | 0.000556596 |
| -1.09417245 | 0.050634327 |
| -1.16816304 | 0.002195194 |
| -1.01738183 | 0.794227934 |
| -1.08930917 | 0.141292874 |
| 0.8033554   | 0.292203712 |
| -1.00208324 | 0.970679108 |
| -1.00922447 | 0.906291155 |
| -1.11378673 | 0.224038258 |
| -1.14590694 | 0.291103348 |
| -1.01321762 | 0.837960882 |
| -1.17854116 | 0.08835951  |
| 0.9917627   | 0.895125154 |
| 0.975252999 | 0.718037195 |
| 0.770503639 | 0.002425585 |
| -1.02429816 | 0.838825194 |
| 0.986694491 | 0.898448303 |
| -1.1524817  | 0.065495338 |
| -1.00487383 | 0.932494305 |
| -1.23924134 | 0.021661241 |
| -1.3970143  | 0.000518267 |
| 0.982781456 | 0.888436221 |
| -1.0472806  | 0.486546129 |
| -1.20578614 | 0.250392549 |
| -1.06061176 | 0.264379746 |
| 0.886284982 | 0.031699346 |
| -1.10108635 | 0.371741897 |
| -1.11224061 | 0.077555634 |
| 0.919798872 | 0.164222624 |
| -1.08026955 | 0.479112306 |
| -1.07768292 | 0.457344386 |
| -1.09133661 | 0.103528777 |
| -1.33571596 | 0.040257422 |
| -1.0249892  | 0.741945259 |
| 0.980881964 | 0.79912124  |
| -1.22755716 | 0.007695209 |
| -1.2152306  | 0.064004568 |
| 0.783798111 | 0.002406237 |



|             |             |
|-------------|-------------|
| -1.05900378 | 0.569348217 |
| -1.16581797 | 0.02810289  |
| -1.26242395 | 0.001172207 |
| 0.951082019 | 0.426270617 |
| -1.07158039 | 0.386015435 |
| -1.13954239 | 0.029232483 |
| 0.809251259 | 0.00495924  |
| -1.24929422 | 0.002232058 |
| 0.889018493 | 0.070744357 |
| -1.05172823 | 0.529052764 |
| -1.12300303 | 0.081914454 |
| 0.785706748 | 6.37904E-07 |
| 0.884206652 | 0.090835799 |
| -1.18414119 | 0.021087677 |
| -1.03341455 | 0.482146053 |
| -1.15538638 | 0.060766964 |
| 0.995025906 | 0.960702216 |
| -1.51921502 | 2.3723E-07  |
| 0.817067591 | 0.061315123 |
| -1.01955486 | 0.798182263 |
| -1.09040755 | 0.328137114 |
| -1.05674884 | 0.688589964 |
| 0.985350051 | 0.759829031 |
| -1.04014739 | 0.747823412 |
| -1.0043668  | 0.911962582 |
| -1.00919662 | 0.871912576 |
| -1.21955336 | 0.07252154  |
| -1.03368956 | 0.519701807 |
| -1.23728946 | 0.002261882 |
| -1.11944581 | 0.209349692 |
| -1.01176354 | 0.866515206 |
| 0.844462535 | 0.152593286 |
| -1.10992409 | 0.050218839 |
| -1.26238721 | 0.007761847 |
| 0.821229732 | 0.00045949  |
| -1.11462705 | 0.007060963 |
| -1.48775844 | 1.99133E-07 |
| 0.796852745 | 0.00074691  |
| 0.754234898 | 0.007179659 |
| 0.993790825 | 0.918646761 |
| -1.0447338  | 0.318936146 |
| -1.16393495 | 0.005423077 |
| 0.866927161 | 0.022325707 |
| -1.02657067 | 0.664892813 |

|             |             |
|-------------|-------------|
| -1.02665346 | 0.549665366 |
| 0.869612182 | 0.236748605 |
| 0.805414881 | 0.001559893 |
| 0.887528541 | 0.035886871 |
| 0.588759685 | 7.8142E-12  |
| 0.604872344 | 0.000157832 |
| 0.986868803 | 0.848901996 |
| 0.853497068 | 0.004497074 |
| -1.02130086 | 0.734532083 |
| -1.07975675 | 0.384261548 |
| 0.929818561 | 0.365431284 |
| -1.20724527 | 0.038231721 |
| 0.97994203  | 0.829440448 |
| -1.03204405 | 0.821132866 |
| -1.1006539  | 0.203375895 |
| -1.06188634 | 0.428621779 |
| 0.58290806  | 2.02623E-08 |
| 0.902923837 | 0.020717025 |
| 0.957444341 | 0.574645423 |
| 0.647368356 | 0.001864656 |
| 0.753118584 | 0.00017736  |
| 0.379757865 | 2.38983E-10 |
| -1.01617146 | 0.751673543 |
| -1.00940177 | 0.840419658 |
| 0.970130037 | 0.350783931 |
| -1.05069784 | 0.365195502 |
| 0.946311541 | 0.129039065 |
| -1.05646228 | 0.358959764 |
| 0.920675945 | 0.024793027 |
| 0.978388862 | 0.677322607 |
| 0.893577393 | 0.056023055 |
| 0.794854662 | 0.001088922 |
| -1.42131206 | 0.000344947 |
| 0.858989    | 0.000533949 |
| 0.96718117  | 0.677677193 |
| 0.524646556 | 9.82685E-14 |
| 0.753307599 | 0.000157187 |
| 0.861316683 | 0.020677643 |
| -1.10826592 | 0.184647515 |
| -1.03558532 | 0.493420404 |
| 0.995020675 | 0.920001847 |
| -1.02165067 | 0.713458532 |
| 0.684451278 | 3.71801E-11 |
| -1.01662962 | 0.751625976 |

|             |             |
|-------------|-------------|
| 0.639673882 | 1.01006E-08 |
| 0.801846226 | 0.000166435 |
| 0.930804013 | 0.359999986 |
| 0.8852778   | 0.069582402 |
| 0.706575532 | 9.51924E-06 |
| -1.08322456 | 0.043352199 |
| -1.04877011 | 0.401685074 |
| -1.02690045 | 0.760125928 |
| -1.12929733 | 0.167888303 |
| 0.910087355 | 0.087819547 |
| -1.16587064 | 0.084340758 |
| 0.973378969 | 0.564683325 |
| -1.0759779  | 0.199579107 |
| 0.992635224 | 0.857668242 |
| 0.850651199 | 0.009617979 |
| -1.0487037  | 0.196095908 |
| 0.844954088 | 0.001511752 |
| -1.1965354  | 0.014686344 |
| -1.03549153 | 0.587695454 |
| 0.780386152 | 0.003057806 |
| 0.813543455 | 0.000143184 |
| -1.07292786 | 0.193969907 |
| -1.05218673 | 0.166763924 |
| 0.717039158 | 8.81803E-08 |
| 0.992336103 | 0.871486416 |
| 0.812360054 | 0.00208142  |
| 0.852998232 | 0.010946149 |
| 0.90659702  | 0.087128961 |
| 0.884965776 | 0.010777634 |
| 0.982337105 | 0.723673736 |
| -1.07773537 | 0.435412856 |
| 0.790576277 | 0.022082432 |
| -1.00808655 | 0.85985426  |
| 0.801441926 | 0.003102663 |
| 0.73905491  | 8.10197E-06 |
| -1.08133966 | 0.325327395 |
| -1.05656534 | 0.589543987 |
| 0.982497869 | 0.790426205 |
| -1.13453653 | 0.08577739  |
| 0.808669148 | 0.000540582 |
| 0.986975659 | 0.692172788 |
| 0.393870091 | 9.44554E-24 |
| 0.999458477 | 0.994740575 |
| -1.00939896 | 0.817770923 |

|             |             |
|-------------|-------------|
| -1.01196166 | 0.840789698 |
| -1.04077981 | 0.320701647 |
| 0.923755825 | 0.04757049  |
| 0.768622666 | 0.000353932 |
| 0.998639382 | 0.987136826 |
| -1.30244143 | 0.000751654 |
| -1.3511934  | 0.000791035 |
| 0.94644657  | 0.331093807 |
| -1.19378255 | 0.009998955 |
| -1.17936073 | 0.003271973 |
| -1.05574539 | 0.357883529 |
| -1.13424218 | 0.244329379 |
| 0.978996434 | 0.810601556 |
| 0.820425706 | 0.010859732 |
| -1.23786545 | 0.000832281 |
| -1.27910088 | 1.03854E-05 |
| 0.970644378 | 0.659526492 |
| -1.05551213 | 0.172691904 |
| -1.03816517 | 0.411682718 |
| 0.787584165 | 0.001425715 |
| -1.07555796 | 0.140791869 |
| 0.895423035 | 0.126076351 |
| -1.05826408 | 0.269017239 |
| 0.969183524 | 0.638094911 |
| -1.23770889 | 0.017729649 |
| 0.987525104 | 0.813929439 |
| 0.673940415 | 1.29906E-10 |
| 0.935487068 | 0.205833553 |
| 0.805880709 | 1.62078E-06 |
| 0.804759266 | 0.016784575 |
| -1.05388136 | 0.483829811 |
| 0.904320992 | 0.226868318 |
| -1.01128474 | 0.78459595  |
| -1.17083603 | 0.02174544  |
| 0.947827096 | 0.316893303 |
| 0.820726857 | 0.008480495 |
| -1.09682662 | 0.069619471 |
| -1.36603463 | 0.010866896 |
| -1.3182569  | 0.006590975 |
| 0.965589461 | 0.366647493 |
| -1.17760063 | 0.042033378 |
| -1.03095553 | 0.744987072 |
| -1.04128017 | 0.643782628 |
| 0.955618139 | 0.525973958 |

|             |             |
|-------------|-------------|
| 0.911690324 | 0.416582508 |
| -1.00568236 | 0.934788691 |
| 0.999173565 | 0.98688001  |
| -1.09960576 | 0.125053788 |
| -1.03680902 | 0.51017195  |
| -1.38127791 | 0.000223023 |
| 0.906003823 | 0.069785663 |
| -1.09736215 | 0.105360805 |
| 0.934393763 | 0.062692687 |
| 0.872991284 | 0.021032244 |
| -1.26015755 | 0.013755416 |
| -1.09132249 | 0.042275969 |
| 0.923706884 | 0.150084406 |
| -1.23753006 | 0.007286427 |
| 0.847678392 | 0.020907218 |
| 0.955883925 | 0.507704997 |
| 0.836301044 | 0.043525376 |
| 0.793900805 | 0.043371321 |
| -1.26008958 | 0.000557732 |
| 0.722301187 | 5.35166E-07 |
| -1.25859691 | 0.002988995 |
| -1.40160403 | 5.50851E-06 |
| 0.961319995 | 0.421826005 |
| -1.16419119 | 0.102800176 |
| -1.06112941 | 0.384226033 |
| 0.900092741 | 0.031438925 |
| -1.32217624 | 0.002734945 |
| -1.02071514 | 0.74973319  |
| -1.01196317 | 0.820288372 |
| -1.11337242 | 0.030323047 |
| -1.15856424 | 0.03680075  |
| -1.14540444 | 0.076155865 |
| -1.18275481 | 0.035897258 |
| -1.23130432 | 0.00305559  |
| -1.41251954 | 0.002407681 |
| -1.15758847 | 0.164409659 |
| -1.32441427 | 0.002062545 |
| -1.2207375  | 0.037586441 |
| -1.1980844  | 0.122199447 |
| -1.20194923 | 0.020866158 |
| -1.1338707  | 0.084551905 |
| 0.976891663 | 0.567337731 |
| 0.855177897 | 0.026843309 |
| -1.06266505 | 0.192881384 |

|             |             |
|-------------|-------------|
| -1.10500913 | 0.063076922 |
| -1.01978441 | 0.78127476  |
| 0.786988371 | 0.000459396 |
| 0.85270417  | 0.095013794 |
| 0.76951062  | 0.000535358 |
| 0.352757901 | 2.31049E-21 |
| 0.884267166 | 0.274819962 |
| -1.01876755 | 0.634858286 |
| -1.03086695 | 0.576473379 |
| 0.82402812  | 0.067819567 |
| 0.993667233 | 0.906445077 |
| 0.962032399 | 0.450623011 |
| -1.00276218 | 0.962330737 |
| -1.02208507 | 0.747569127 |
| 0.997901175 | 0.976762293 |
| -1.12790346 | 0.056179273 |
| -1.01221047 | 0.839511477 |
| -1.0021989  | 0.974254233 |
| 0.947562574 | 0.377543736 |
| -1.00053696 | 0.99451242  |
| -1.1079228  | 0.27296489  |
| -1.17571217 | 0.022966995 |
| -1.1666409  | 0.045505279 |
| -1.01506596 | 0.827934304 |
| 0.914441649 | 0.198172731 |
| 0.911076253 | 0.133421042 |
| 0.844832893 | 0.014649987 |
| 0.928694292 | 0.10852934  |
| -1.15178984 | 0.031573264 |
| 0.765859472 | 0.01146379  |
| -1.23819283 | 0.000540175 |
| 0.990895632 | 0.871890921 |
| 0.595488305 | 4.1567E-09  |
| 0.965537021 | 0.499234176 |
| -1.00440701 | 0.951690978 |
| -1.02887722 | 0.702935506 |
| 0.978946355 | 0.668179109 |
| 0.923457313 | 0.097806993 |
| 0.684216401 | 1.39997E-05 |
| -1.03043687 | 0.737855349 |
| -1.06511306 | 0.32989792  |
| 0.898952926 | 0.045756847 |
| 0.816351541 | 0.003225059 |
| -1.08153142 | 0.210377622 |

|             |             |
|-------------|-------------|
| 0.469725214 | 2.56939E-10 |
| 0.883574477 | 0.188782897 |
| -1.01555651 | 0.850944389 |
| -1.22088415 | 0.009684575 |
| 0.989609353 | 0.891527922 |
| 0.996956801 | 0.955961145 |
| -1.22357506 | 0.02568866  |
| -1.22799248 | 0.017462238 |
| 0.829068253 | 0.002116984 |
| -1.03838871 | 0.475472155 |
| 0.822175818 | 0.131239474 |
| 0.922916001 | 0.277343976 |
| 0.478593823 | 3.79198E-10 |
| -1.10699503 | 0.080881813 |
| 0.848269715 | 0.384435362 |
| 0.964652705 | 0.729077342 |
| 0.638329554 | 0.000284791 |
| -1.11440648 | 0.246067043 |
| 0.964807175 | 0.598295971 |
| 0.987658456 | 0.846234254 |
| 0.895814842 | 0.472105647 |
| 0.96968732  | 0.427448819 |
| -1.17838873 | 0.079536556 |
| 0.890106496 | 0.098898876 |
| 0.868019539 | 0.1057571   |
| -1.01456844 | 0.766178256 |
| -1.45054437 | 0.000228733 |
| -1.23836776 | 3.70246E-05 |
| -1.03116667 | 0.563076779 |
| 0.799213032 | 0.047631933 |
| 0.987455927 | 0.730133082 |
| -1.01098053 | 0.807916231 |
| -1.1420357  | 0.110704187 |
| 0.84264449  | 0.012549135 |
| -1.08364216 | 0.363827578 |
| -1.1098002  | 0.090437872 |
| 0.962723739 | 0.404657993 |
| 0.911878102 | 0.090581496 |
| 0.783471826 | 0.018426089 |
| 0.896664955 | 0.002506258 |
| 0.970626578 | 0.724278227 |
| -1.00467737 | 0.911896031 |
| -1.05980592 | 0.548434582 |
| -1.17798194 | 0.004395848 |

|             |             |
|-------------|-------------|
| -1.38854848 | 0.000533914 |
| -1.47259805 | 1.58317E-07 |
| -1.00297764 | 0.91685658  |
| 0.934141769 | 0.338338988 |
| 0.880874414 | 0.022257102 |
| 0.966962247 | 0.664878642 |
| 0.864990419 | 0.01000176  |
| 0.964863024 | 0.372116509 |
| 0.986425583 | 0.833066909 |
| -1.02380749 | 0.720370029 |
| -1.22599109 | 0.001240852 |
| -1.25250571 | 0.003396254 |
| 0.986390178 | 0.879751996 |
| 0.830877903 | 0.000424118 |
| -1.26171046 | 0.000695997 |
| -1.18130955 | 0.000113287 |
| 0.961267158 | 0.437847559 |
| 0.836595353 | 0.080816499 |
| 0.966354375 | 0.544422697 |
| -1.14117689 | 0.02564397  |
| 0.976254117 | 0.651368413 |
| 0.82332585  | 7.52148E-05 |
| -1.07905013 | 0.348126614 |
| 0.582668762 | 1.15418E-10 |
| 0.950679779 | 0.292243674 |
| -1.00265997 | 0.952099025 |
| -1.05483128 | 0.222242855 |
| 0.700153781 | 1.03676E-06 |
| -1.20898402 | 0.001708712 |
| 0.529365005 | 5.44766E-08 |
| -1.44765037 | 4.3045E-08  |
| 0.848741929 | 0.489470658 |
| -1.10712596 | 0.05556351  |
| 0.875614987 | 0.267495609 |
| 0.897652346 | 0.043174787 |
| -1.10950773 | 0.031361598 |
| -1.20338195 | 0.045308886 |
| 0.775829265 | 5.60633E-05 |
| -1.00712721 | 0.896312854 |
| 0.991882125 | 0.856654765 |
| -1.37315823 | 4.53345E-06 |
| 0.797821082 | 0.022722291 |
| -1.1036681  | 0.150598374 |
| -1.04514989 | 0.4992935   |



|             |             |
|-------------|-------------|
| 0.994070204 | 0.938986239 |
| -1.07481077 | 0.147606859 |
| -1.42089057 | 0.000200656 |
| 0.942189292 | 0.581555629 |
| 0.995673983 | 0.932947565 |
| -1.19312699 | 0.000137612 |
| -1.1820164  | 0.018849601 |
| -1.26447731 | 0.001903077 |
| -1.13270609 | 0.001191509 |
| -1.41259757 | 0.007794987 |
| 0.933883698 | 0.182995542 |
| 0.986108625 | 0.809908687 |
| 0.994686506 | 0.913467463 |
| 0.996375965 | 0.953354281 |
| -1.097064   | 0.074733584 |
| 0.900576873 | 0.08851988  |
| 0.966314273 | 0.553205884 |
| 0.723724491 | 4.55611E-06 |
| 0.948625331 | 0.427013241 |
| 0.993594143 | 0.92098389  |
| 0.999839548 | 0.997732762 |
| -1.33548421 | 0.019787393 |
| 0.970009634 | 0.716495551 |
| 0.880885342 | 0.202897117 |
| 0.679747917 | 0.001233269 |
| -1.09804637 | 0.11390467  |
| -1.20215435 | 0.01280763  |
| -1.19128741 | 0.000470932 |
| 0.707851966 | 1.25299E-05 |
| -1.09741897 | 0.304608008 |
| -1.10872195 | 0.053212585 |
| 0.425108923 | 8.01108E-14 |
| -1.00394919 | 0.939384225 |
| -1.13945974 | 0.112872629 |
| 0.803088982 | 0.006426535 |
| -1.11347039 | 0.094618772 |
| 0.669195074 | 6.10712E-09 |
| 0.915362995 | 0.141895535 |
| 0.363697645 | 7.13676E-18 |
| 0.767892564 | 1.15804E-05 |
| 0.929984056 | 0.61740052  |
| 0.599739029 | 9.83941E-06 |
| 0.982489062 | 0.753498787 |
| 0.901932532 | 0.061098727 |

|             |             |
|-------------|-------------|
| -1.28485715 | 0.027334482 |
| -1.03292576 | 0.797539018 |
| -1.17356982 | 0.000767156 |
| -1.07708627 | 0.35072554  |
| -1.07044037 | 0.372888323 |
| 0.959509731 | 0.546042395 |
| 0.976916326 | 0.641635435 |
| -1.15745232 | 0.093272306 |
| -1.12127677 | 0.109345455 |
| -1.03470342 | 0.574443958 |
| -1.01975206 | 0.707586138 |
| 0.953961608 | 0.257492375 |
| -1.10246012 | 0.407284301 |
| 0.862327517 | 0.074592201 |
| -1.03138665 | 0.634769362 |
| 0.901939129 | 0.474236858 |
| -1.04742577 | 0.473194634 |
| 0.550594931 | 7.4846E-08  |
| 0.883682837 | 0.030629295 |
| 0.729024486 | 6.31204E-07 |
| 0.695141591 | 1.86962E-08 |
| 0.827566375 | 3.31277E-06 |
| -1.01670578 | 0.600605705 |
| -1.0594261  | 0.213476142 |
| -1.45154054 | 0.001713433 |
| -1.35568005 | 0.01531556  |
| -1.47296378 | 0.012217528 |
| 0.962276985 | 0.821442413 |
| -1.38946429 | 4.73811E-05 |
| -1.08091553 | 0.154507515 |
| -1.05897575 | 0.319052893 |
| -1.02269612 | 0.552765178 |
| -1.01628028 | 0.837751239 |
| -1.04572137 | 0.312631348 |
| 0.99250287  | 0.931771257 |
| -1.09470968 | 0.181940401 |
| -1.03740197 | 0.465173203 |
| 0.880557329 | 0.023098878 |
| 0.971624016 | 0.337635359 |
| 0.734744857 | 1.03314E-06 |
| 0.974553935 | 0.714135117 |
| 0.697320511 | 0.000383836 |
| -1.18344722 | 0.013361348 |
| -1.20014098 | 0.100818708 |

|             |             |
|-------------|-------------|
| 0.778593643 | 0.000111283 |
| 0.956649597 | 0.308522127 |
| -1.0780897  | 0.091790715 |
| 0.976536589 | 0.680143189 |
| 0.870515782 | 0.020019877 |
| 0.960201855 | 0.482294603 |
| -1.00734289 | 0.900985357 |
| 0.929424157 | 0.11363776  |
| -1.65213186 | 9.61121E-07 |
| -1.05957948 | 0.499495562 |
| 0.969931483 | 0.499762813 |
| -1.00319717 | 0.954712972 |
| 0.949864141 | 0.314076999 |
| -1.04181499 | 0.478487852 |
| 0.998063544 | 0.948031663 |
| -1.04677308 | 0.164353041 |
| 0.983720375 | 0.817889132 |
| -1.0400167  | 0.496460832 |
| 0.854528631 | 0.014130668 |
| -1.22477027 | 0.009282407 |
| 0.893957982 | 0.28218831  |
| -1.06603248 | 0.533989228 |
| -1.03834965 | 0.33585326  |
| -1.13132431 | 0.052506732 |
| -1.01492007 | 0.683974222 |
| -1.12000583 | 0.006582456 |
| -1.14683503 | 0.041912603 |
| -1.27454415 | 0.003188696 |
| -1.04270349 | 0.674650965 |
| -1.02877444 | 0.693571052 |
| -1.17667357 | 0.158871354 |
| -1.24488745 | 0.023852996 |
| 0.846729723 | 0.029944304 |
| -1.05005369 | 0.601344549 |
| -1.01569466 | 0.62157724  |
| 0.968887119 | 0.612162714 |
| -1.26842708 | 0.000931763 |
| -1.08995342 | 0.400367147 |
| 0.936676974 | 0.618344697 |
| 0.891663878 | 0.093558161 |
| 0.965634342 | 0.524664902 |
| -1.02507085 | 0.880760304 |
| -1.20505791 | 0.004898978 |
| -1.3075921  | 0.000251872 |

|             |             |
|-------------|-------------|
| -1.34368117 | 9.52204E-05 |
| -1.24123348 | 0.003240744 |
| -1.13549131 | 0.225590493 |
| -1.04157204 | 0.280308202 |
| -1.16209505 | 0.038510988 |
| 0.996822341 | 0.971361628 |
| 0.983274453 | 0.563458238 |
| 0.744018077 | 5.05524E-07 |
| 0.973308627 | 0.681983871 |
| 0.881023449 | 0.008742525 |
| -1.01884511 | 0.807084575 |
| -1.03303361 | 0.543144936 |
| -1.35181834 | 0.003882565 |
| -1.2540735  | 0.000247022 |
| -1.06014199 | 0.350921491 |
| -1.10731556 | 0.223729367 |
| -1.06261126 | 0.307044148 |
| -1.0954175  | 0.126741643 |
| 0.822489457 | 0.008907923 |
| 0.700433294 | 4.43648E-05 |
| 0.888650804 | 0.1451987   |
| 0.991203165 | 0.89456175  |
| 0.982082915 | 0.735047457 |
| -1.38268048 | 1.63455E-05 |
| -1.14230314 | 0.030550266 |
| 0.943271712 | 0.259607869 |
| -1.07449119 | 0.352256917 |
| 0.91467772  | 0.179619327 |
| 0.933859661 | 0.290256559 |
| 0.9199884   | 0.044273847 |
| -1.11943921 | 0.028418241 |
| -1.52294649 | 4.10162E-08 |
| 0.870645135 | 0.060608234 |
| 0.971342682 | 0.345082261 |
| 0.922371887 | 0.125468874 |
| -1.25146838 | 0.000748455 |
| -1.13834143 | 0.034199166 |
| -1.11798607 | 0.02033324  |
| -1.56169557 | 6.2483E-11  |
| -1.05011227 | 0.36353081  |
| 0.970661591 | 0.695841514 |
| -1.02428275 | 0.770431151 |
| 0.981601824 | 0.594270544 |
| -1.41989959 | 2.9415E-06  |

|             |             |
|-------------|-------------|
| 0.928416878 | 0.275833033 |
| 0.980636902 | 0.734581405 |
| -1.29687186 | 2.5735E-08  |
| -1.03018145 | 0.576876696 |
| 0.970905022 | 0.622510818 |
| -1.21414551 | 0.006695534 |
| 0.952981106 | 0.217309909 |
| -1.12878756 | 0.047279139 |
| 0.876952618 | 0.042477661 |
| 0.980123457 | 0.631117903 |
| -1.22995029 | 0.035688276 |
| 0.896811663 | 0.021841853 |
| -1.14806811 | 0.066852397 |
| -1.10208784 | 0.162098475 |
| -1.01699669 | 0.739268328 |
| -1.10808712 | 0.038781602 |
| 0.963939501 | 0.671805176 |
| -1.07524213 | 0.188311753 |
| -1.16885792 | 0.008273781 |
| 0.982162315 | 0.604666222 |
| -1.15577476 | 0.121498052 |
| -1.00288817 | 0.982807206 |
| -1.03468452 | 0.598700745 |
| 0.465883843 | 1.78282E-14 |
| -1.08182326 | 0.43345356  |
| 0.676114319 | 2.26906E-12 |
| 0.733517422 | 3.24792E-15 |
| 0.597954709 | 2.10345E-13 |
| 0.836509703 | 0.000342826 |
| 0.741252937 | 0.000145346 |
| 0.839920228 | 0.025991614 |
| 0.931108205 | 0.30618258  |
| -1.51212985 | 3.75596E-05 |
| -1.00473733 | 0.939087789 |
| -1.03710123 | 0.526974244 |
| 0.578405296 | 1.86285E-16 |
| 0.543256871 | 6.65615E-11 |
| 0.930129653 | 0.389039326 |
| 0.586601691 | 1.28744E-15 |
| -1.13568902 | 0.021513689 |
| 0.62493679  | 1.26678E-05 |
| 0.695849018 | 3.07088E-06 |
| 0.928701721 | 0.302602621 |
| 0.96824871  | 0.775724876 |

|             |             |
|-------------|-------------|
| -1.0533389  | 0.32316321  |
| -1.05847795 | 0.323512458 |
| -1.13258936 | 0.232350345 |
| -1.07321222 | 0.255257118 |
| 0.633449674 | 1.21212E-10 |
| -1.31609607 | 0.014512224 |
| -1.08446947 | 0.212546261 |
| -1.26843895 | 0.000124473 |
| -1.11210408 | 0.192869658 |
| 0.970056523 | 0.669612813 |
| -1.02073607 | 0.673827028 |
| 0.820552879 | 0.001506175 |
| -1.07447171 | 0.157746973 |
| 0.817934539 | 0.015357531 |
| 0.975412681 | 0.463602152 |
| -1.09067523 | 0.342243206 |
| 0.889447377 | 0.026390306 |
| 0.568662146 | 7.25873E-08 |
| 0.969358    | 0.791493641 |
| 0.913100633 | 0.175026046 |
| 0.921722702 | 0.188305491 |
| -1.0070229  | 0.894752379 |
| -1.09531769 | 0.09737128  |
| 0.904678944 | 0.017652078 |
| 0.913183827 | 0.032697981 |
| 0.928214691 | 0.152894181 |
| 0.841612048 | 0.054082805 |
| -1.0315707  | 0.647948971 |
| -1.1268585  | 0.030776421 |
| -1.06211059 | 0.579693321 |
| 0.682603213 | 8.07215E-09 |
| 0.768247477 | 1.66553E-07 |
| -1.10695138 | 0.047736129 |
| -1.02409772 | 0.599464568 |
| 0.386531053 | 2.33392E-17 |
| -1.15483847 | 0.064308749 |
| 0.84163813  | 0.001123802 |
| 0.95626684  | 0.424652952 |
| 0.49085892  | 1.60147E-15 |
| 0.957801616 | 0.216363366 |
| 0.688390333 | 4.24971E-06 |
| 0.809060033 | 0.034669687 |
| 0.841511785 | 0.001980323 |
| -1.03258665 | 0.612380691 |

|             |             |
|-------------|-------------|
| 0.822972785 | 0.058720947 |
| -1.04516036 | 0.594586964 |
| -1.03108575 | 0.774125549 |
| 0.961637772 | 0.630959789 |
| -1.01873627 | 0.783859133 |
| -1.01450871 | 0.797236635 |
| 0.906025449 | 0.01026174  |
| -1.09807402 | 0.150554795 |
| -1.13254212 | 0.266324572 |
| -1.09262437 | 0.163808041 |
| -1.39627591 | 1.92862E-07 |
| 0.998677468 | 0.982976426 |
| 0.887356732 | 0.168669544 |
| 0.895507221 | 0.590306517 |
| -1.23314155 | 0.012837963 |
| 0.976298972 | 0.775275235 |
| 0.821847321 | 0.00568106  |
| -1.06041328 | 0.354288604 |
| -1.25886251 | 0.043826671 |
| 0.778597389 | 0.002985767 |
| 0.983130105 | 0.716738414 |
| 0.979769903 | 0.658116268 |
| -1.1944646  | 0.016245153 |
| 0.945732969 | 0.143638527 |
| 0.807837653 | 0.078914784 |
| 0.866069365 | 0.321139352 |
| 0.985589091 | 0.642229067 |
| -1.00475712 | 0.964770002 |
| -1.32295231 | 0.001878544 |
| -1.02780277 | 0.703663244 |
| 0.98431198  | 0.792798582 |
| -1.03992168 | 0.544910201 |
| 0.999637194 | 0.996141819 |
| -1.14674317 | 0.264212911 |
| 0.979032509 | 0.654573052 |
| 0.9638798   | 0.602164347 |
| -1.01837063 | 0.719487256 |
| 0.937308574 | 0.244186958 |
| -1.12665074 | 0.071703602 |
| -1.19206619 | 0.0925751   |
| 0.885784201 | 0.235223931 |
| -1.03193944 | 0.566716631 |
| 0.951705997 | 0.314635435 |
| -1.10492223 | 0.067561215 |

|             |             |
|-------------|-------------|
| -1.0275457  | 0.598092904 |
| -1.00311943 | 0.954248513 |
| 0.931885775 | 0.24410591  |
| 0.854777889 | 0.0085991   |
| 0.499583569 | 1.10523E-12 |
| -1.04058559 | 0.646266948 |
| 0.831047816 | 0.003533822 |
| 0.972566997 | 0.533000475 |
| 0.794693796 | 0.000199378 |
| -1.16822231 | 0.025603531 |
| -1.06388034 | 0.147278586 |
| 0.744472939 | 4.13294E-05 |
| -1.13191272 | 0.188429479 |
| -1.00545656 | 0.928659584 |
| 0.96562212  | 0.487650609 |
| 0.988279997 | 0.806803998 |
| 0.97027374  | 0.427262881 |
| 0.969350835 | 0.600217353 |
| 0.973517681 | 0.688574367 |
| 0.522039587 | 1.95987E-13 |
| 0.875866985 | 0.001428946 |
| 0.998686401 | 0.982995119 |
| -1.00538429 | 0.870669953 |
| 0.988553918 | 0.800281508 |
| -1.30334391 | 0.000151404 |
| 0.978846432 | 0.717368638 |
| 0.848814111 | 0.071799203 |
| -1.02668137 | 0.666357823 |
| -1.27876884 | 0.000841185 |
| -1.12040807 | 0.098074065 |
| 0.977980391 | 0.821492734 |
| 0.856468166 | 0.015895679 |
| -1.08108693 | 0.15562866  |
| -1.04110089 | 0.46011512  |
| 0.917302034 | 0.180571501 |
| 0.949334144 | 0.281019194 |
| 0.874235798 | 0.036651088 |
| -1.04439883 | 0.240716671 |
| -1.00996057 | 0.864196011 |
| 0.941457339 | 0.135869124 |
| 0.920894517 | 0.144165677 |
| -1.03166183 | 0.683058238 |
| 0.952547204 | 0.189795422 |
| 0.994380836 | 0.894933634 |



|             |             |
|-------------|-------------|
| 0.994811159 | 0.909971102 |
| -1.04308642 | 0.324214055 |
| 0.909044689 | 0.090018873 |
| -1.00018858 | 0.995389728 |
| 0.972593219 | 0.515379219 |
| 0.971744692 | 0.629351399 |
| -1.04461602 | 0.403840825 |
| -1.04219345 | 0.437334334 |
| 0.871002979 | 0.026358073 |
| 0.913112936 | 0.100321215 |
| 0.9733464   | 0.637023672 |
| -1.07842105 | 0.066399377 |
| 0.973711992 | 0.461819961 |
| -1.12445009 | 0.047889948 |
| 0.930132387 | 0.351764024 |
| 0.975645219 | 0.591304953 |
| 0.847688959 | 0.199453407 |
| 0.708751703 | 8.93952E-05 |
| -1.03171363 | 0.383162155 |
| 0.990216197 | 0.905649058 |
| 0.96662742  | 0.524015123 |
| 0.95617598  | 0.136959653 |
| 0.932405175 | 0.272396946 |
| 0.874454239 | 0.569914248 |
| -1.03083198 | 0.602035503 |
| -1.16397445 | 0.036705499 |
| -1.08569022 | 0.098265842 |
| -1.02959184 | 0.576777929 |
| 0.90260537  | 0.06757754  |
| -1.03266098 | 0.620889749 |
| -1.12148425 | 0.050565848 |
| -1.11590235 | 0.053454308 |
| -1.15326397 | 0.09680619  |
| -1.08261352 | 0.130216364 |
| -1.13656429 | 0.045912001 |
| -1.03513504 | 0.442589383 |
| 0.951894128 | 0.309498139 |
| -1.0404822  | 0.441556416 |
| -1.00336676 | 0.926444618 |
| -1.09403371 | 0.19876747  |
| -1.3033372  | 0.000970971 |
| 0.911523838 | 0.129609256 |
| -1.03764937 | 0.276332593 |
| 0.997336155 | 0.956853337 |

|             |             |
|-------------|-------------|
| 0.992355229 | 0.892488773 |
| 0.985875112 | 0.886596337 |
| 0.956829197 | 0.426376967 |
| -1.01327571 | 0.696185368 |
| 0.928231192 | 0.327439861 |
| -1.12645016 | 0.03415308  |
| 0.943833531 | 0.236956793 |
| -1.03582112 | 0.386069781 |
| 0.972127141 | 0.640956553 |
| 0.993690125 | 0.925069303 |
| -1.03246284 | 0.607966898 |
| -1.0424682  | 0.524549413 |
| 0.959468981 | 0.593044323 |
| 0.98051353  | 0.698214701 |
| -1.00372521 | 0.951334359 |
| -1.07771576 | 0.041978281 |
| 0.941094385 | 0.300638587 |
| 0.999220854 | 0.987624345 |
| 0.909371949 | 0.091314477 |
| -1.02308641 | 0.637183724 |
| 0.943339688 | 0.77600376  |
| -1.12277513 | 0.155542779 |
| -1.03973483 | 0.448214359 |
| 0.930258121 | 0.280027032 |
| -1.14190695 | 0.049290952 |
| 0.823167922 | 0.00286817  |
| -1.01724498 | 0.781869745 |
| -1.01865934 | 0.621493401 |
| 0.977084089 | 0.664631434 |
| -1.01613496 | 0.781383317 |
| 0.963208458 | 0.538520076 |
| 0.981296741 | 0.719199621 |
| -1.03578487 | 0.506976488 |
| 0.979287824 | 0.686884236 |
| 0.711644025 | 0.108693317 |
| -1.00796701 | 0.788407144 |
| -1.06174215 | 0.136632506 |
| 0.84876332  | 0.001788339 |
| 0.986063159 | 0.811660691 |
| -1.09730181 | 0.152743268 |
| -1.01627083 | 0.879115505 |
| 0.717154482 | 9.54416E-05 |
| 0.714297403 | 1.14004E-05 |
| 0.93445371  | 0.604630713 |

|             |             |
|-------------|-------------|
| 0.710461779 | 0.018981525 |
| -1.05858177 | 0.349927016 |
| 0.828277999 | 0.001003685 |
| 0.937677731 | 0.42195221  |
| -1.05809622 | 0.452068107 |
| -1.12689493 | 0.027789949 |
| -1.03127698 | 0.715370119 |
| 0.924122163 | 0.175625788 |
| 0.935591426 | 0.088675641 |
| 0.948169503 | 0.320759326 |
| 0.919276601 | 0.169983832 |
| 0.986079563 | 0.785118231 |
| 0.823138891 | 0.000567183 |
| -1.70042918 | 1.40772E-06 |
| 0.363757012 | 6.49027E-17 |
| 0.848045541 | 0.001560872 |
| -1.24425321 | 0.003195707 |
| 0.852438828 | 0.000144581 |
| -1.03467621 | 0.633643933 |
| 0.917556459 | 0.15544617  |
| -1.02320407 | 0.624580283 |
| -1.11110422 | 0.041219686 |
| -1.01166664 | 0.887952596 |
| -1.10832137 | 0.2260109   |
| -1.20798897 | 0.017869544 |
| 0.999347721 | 0.991994664 |
| 0.877631216 | 0.003894032 |
| 0.575809094 | 0.000772949 |
| 0.904536488 | 0.36572744  |
| 0.550726647 | 8.85624E-20 |
| 0.518823716 | 4.81474E-05 |
| 0.925058176 | 0.118042678 |
| 0.577156957 | 1.22187E-12 |
| 0.931233672 | 0.241392203 |
| 0.941877704 | 0.330120173 |
| -1.10238084 | 0.128344862 |
| 0.921385395 | 0.146819821 |
| 0.975222065 | 0.626118957 |
| 0.935399004 | 0.204491488 |
| -1.00274625 | 0.979570079 |
| 0.840110611 | 0.010996324 |
| -1.11665146 | 0.014837675 |
| -1.05755935 | 0.276549251 |
| -1.035318   | 0.301692152 |

|             |             |
|-------------|-------------|
| -1.40933184 | 1.46002E-05 |
| 0.933446513 | 0.155692829 |
| -1.12418934 | 0.096068416 |
| 0.729515735 | 6.60687E-05 |
| 0.842212897 | 0.001765294 |
| 0.976707249 | 0.675432558 |
| -1.09195954 | 0.082769708 |
| -1.14474003 | 0.042112129 |
| -1.02462875 | 0.504467934 |
| -1.05617123 | 0.164744008 |
| -1.24434189 | 0.012923728 |
| 0.809803159 | 0.000168269 |
| -1.0584408  | 0.377632334 |
| 0.951401786 | 0.409057095 |
| -1.31791019 | 0.004365625 |
| 0.965377174 | 0.439314754 |
| -1.16481449 | 0.087005157 |
| -1.14529713 | 0.140799758 |
| 0.945267573 | 0.242819736 |
| -1.0360921  | 0.51915073  |
| 0.969703848 | 0.53604496  |
| 0.997196201 | 0.944742497 |
| 0.938417498 | 0.067113097 |
| 0.809165732 | 0.080165297 |
| 0.981910887 | 0.711598673 |
| -1.04073292 | 0.739448703 |
| 0.970624379 | 0.579151775 |
| 0.993700104 | 0.89961979  |
| -1.04269549 | 0.534138826 |
| -1.073219   | 0.062162551 |
| 0.255513714 | 5.99113E-22 |
| -1.113632   | 0.051375331 |
| 0.849691743 | 3.75528E-06 |
| 0.92600136  | 0.043179814 |
| -1.01162576 | 0.858276392 |
| 0.642550996 | 9.19289E-15 |
| 0.985363986 | 0.789267907 |
| -1.06514026 | 0.203901641 |
| -1.02711259 | 0.682939724 |
| 0.718998151 | 0.003218363 |
| 0.695523858 | 0.007046012 |
| 0.757719545 | 0.000954902 |
| 0.801593235 | 0.073931888 |
| 0.856686044 | 0.206783831 |

|             |             |
|-------------|-------------|
| 0.685063741 | 0.001436395 |
| 0.755752817 | 0.066250404 |
| 0.826230887 | 0.016312311 |
| -1.04552354 | 0.411312347 |
| -1.06570713 | 0.328869501 |
| 0.919959394 | 0.10730924  |
| -1.18643993 | 0.061232282 |
| -1.1639995  | 0.099593699 |
| 0.775608383 | 0.001622738 |
| -1.31784718 | 0.000202398 |
| -1.2247197  | 0.010038656 |
| 0.664082077 | 3.61184E-08 |
| 0.913767849 | 0.165267168 |
| -1.24191497 | 0.003932183 |
| 0.922874078 | 0.206103767 |
| -1.05004167 | 0.575764031 |
| 0.96838614  | 0.715553677 |
| -1.0119108  | 0.818851672 |
| -1.02856398 | 0.677939079 |
| -1.16343392 | 0.04662688  |
| 0.785329594 | 0.000168669 |
| -1.08826989 | 0.269446431 |
| 0.946820958 | 0.244318228 |
| -1.06061045 | 0.281379401 |
| -1.14770888 | 0.137919001 |
| 0.932529023 | 0.149151996 |
| 0.927497229 | 0.128882931 |
| 0.534855007 | 8.05688E-09 |
| 0.971047281 | 0.496680083 |
| 0.96554826  | 0.554901271 |
| -1.08786019 | 0.158447399 |
| 0.985105395 | 0.718725368 |
| 0.816042949 | 0.022284167 |
| 0.94635517  | 0.207244625 |
| 0.66577109  | 3.20521E-07 |
| 0.971105531 | 0.606836539 |
| 0.955034925 | 0.41887788  |
| -1.00224193 | 0.962872144 |
| 0.916112294 | 0.109585418 |
| 0.985978114 | 0.759195367 |
| 0.935264481 | 0.633362011 |
| -1.0764206  | 0.325825734 |
| 0.720941353 | 0.003872283 |
| 0.901823928 | 0.170841227 |

|             |             |
|-------------|-------------|
| 0.920371536 | 0.084132872 |
| -1.0218938  | 0.627291597 |
| 0.885343062 | 0.002196332 |
| -1.25307294 | 0.000631733 |
| -1.2215756  | 0.062199762 |
| 0.690035272 | 2.21828E-06 |
| 0.943313785 | 0.470056168 |
| 0.943813925 | 0.109999556 |
| 0.948717359 | 0.290289482 |
| -1.25094805 | 0.000415017 |
| 0.881826629 | 0.388442946 |
| -1.02090567 | 0.608092381 |
| 0.945474434 | 0.219509817 |
| 0.94424624  | 0.275489812 |
| 0.901127507 | 0.010196078 |
| 0.918956423 | 0.368274913 |
| 0.572297715 | 1.83023E-08 |
| 0.85700909  | 0.076531593 |
| -1.19224956 | 0.095317041 |
| 0.953523677 | 0.462284698 |
| -1.07871298 | 0.417653713 |
| 0.921028377 | 0.20383561  |
| 0.935148109 | 0.212235551 |
| 0.885151082 | 0.025313675 |
| 0.552723908 | 5.12899E-10 |
| -1.04420001 | 0.277802822 |
| 0.893193421 | 0.058379555 |
| -1.19122071 | 0.013775529 |
| 0.76575397  | 0.006141661 |
| 0.935746638 | 0.047685633 |
| 0.993280256 | 0.878721153 |
| 0.691348437 | 2.84731E-08 |
| 0.977600234 | 0.745366518 |
| -1.07790984 | 0.26159493  |
| 0.9649607   | 0.568310271 |
| 0.952962302 | 0.237132549 |
| 0.875913416 | 0.046264743 |
| -1.11745817 | 0.028956218 |
| 0.972158527 | 0.708210551 |
| 0.38655586  | 2.74944E-16 |
| 0.98543942  | 0.735861699 |
| -1.09319437 | 0.410352301 |
| -1.11517752 | 0.103509342 |
| 0.879398541 | 0.054864849 |

|             |             |
|-------------|-------------|
| -1.01107026 | 0.833825842 |
| 0.926743503 | 0.261228648 |
| -1.20503896 | 0.02114461  |
| -1.15280122 | 0.008304861 |
| -1.03257471 | 0.495418569 |
| -1.09331245 | 0.3608476   |
| 0.883702192 | 0.031620315 |
| 0.968274963 | 0.429367592 |
| -1.10992501 | 0.141067302 |
| 0.925135858 | 0.166953828 |
| 0.983488498 | 0.738471156 |
| 0.904702996 | 0.105386596 |
| -1.09267611 | 0.432185676 |
| 0.934337779 | 0.361721569 |
| -1.24879633 | 0.00500242  |
| 0.443013794 | 1.02168E-15 |
| -1.06167933 | 0.32150889  |
| 0.919182328 | 0.231853204 |
| -1.19544193 | 0.003229791 |
| -1.36873292 | 0.000587813 |
| 0.97109315  | 0.806075275 |
| -1.14976593 | 0.110425369 |
| 0.962473248 | 0.482581761 |
| -1.06858619 | 0.209877341 |
| 0.935959532 | 0.2311828   |
| 0.922924321 | 0.140879584 |
| -1.10066474 | 0.125216647 |
| 0.981825003 | 0.811315272 |
| -1.2051307  | 0.000355667 |
| -1.04597081 | 0.416572017 |
| 0.923684067 | 0.258513024 |
| 0.588587577 | 2.27163E-08 |
| -1.23495047 | 0.003092178 |
| -1.02719949 | 0.585785817 |
| -1.36214987 | 0.000143911 |
| 0.910323099 | 0.08779327  |
| 0.991887363 | 0.878824122 |
| 0.905783229 | 0.145761241 |
| 0.46364484  | 9.57039E-11 |
| 0.794874944 | 0.013083888 |
| -1.06196919 | 0.263604449 |
| -1.09153045 | 0.144107928 |
| -1.0284525  | 0.779001509 |
| 0.662986172 | 1.33118E-09 |

|             |             |
|-------------|-------------|
| 0.927243854 | 0.039709133 |
| 0.991269368 | 0.837366278 |
| -1.0401864  | 0.176998021 |
| -1.20118066 | 0.006900021 |
| 0.992186119 | 0.867063496 |
| -1.12967096 | 0.058836775 |
| -1.17072701 | 0.006148205 |
| -1.05421103 | 0.550507607 |
| 0.9269026   | 0.302163568 |
| 0.99754082  | 0.950882299 |
| -1.08286784 | 0.469434025 |
| 0.903179381 | 0.205678663 |
| 0.962703152 | 0.496789732 |
| -1.06077446 | 0.314308197 |
| 0.798365224 | 0.001122982 |
| 0.951180158 | 0.334800954 |
| -1.13114441 | 0.251277358 |
| -1.05313581 | 0.43482492  |
| -1.07801964 | 0.350182192 |
| 0.867719283 | 0.004026624 |
| -1.08154163 | 0.082891624 |
| 0.706661764 | 4.33215E-08 |
| -1.01447303 | 0.861862778 |
| -1.43452317 | 1.36285E-05 |
| 0.842737637 | 0.041353636 |
| 0.841553385 | 0.007532775 |
| -1.04252946 | 0.299847565 |
| 0.783447183 | 8.74057E-06 |
| 0.841731129 | 0.199460818 |
| -1.08335794 | 0.421947837 |
| -1.09541141 | 0.014372065 |
| -1.02776191 | 0.773233754 |
| 0.970922    | 0.624708325 |
| 0.904965869 | 0.30012937  |
| -1.13647646 | 0.068344352 |
| 0.829110274 | 0.000219123 |
| -1.0316815  | 0.531892889 |
| -1.01197206 | 0.822412293 |
| 0.972326436 | 0.500750342 |
| 0.750653049 | 0.008856211 |
| -1.35753724 | 3.83584E-05 |
| -1.16851774 | 0.009281979 |
| -1.03785074 | 0.387084529 |
| 0.922811797 | 0.303260992 |



|             |             |
|-------------|-------------|
| -1.00743631 | 0.904214434 |
| 0.851071074 | 0.013221773 |
| 0.960444358 | 0.733216659 |
| -1.14573078 | 0.090076086 |
| -1.2519132  | 0.030810465 |
| 0.488040616 | 2.74556E-15 |
| -1.35470899 | 0.000155192 |
| -1.01368037 | 0.787615772 |
| -1.0236046  | 0.655176114 |
| 0.801123784 | 0.00130371  |
| -1.01058986 | 0.812238751 |
| 0.771844806 | 0.120502726 |
| 0.969888453 | 0.504879757 |
| -1.01172198 | 0.835657314 |
| 0.899411582 | 0.132402706 |
| -1.00317565 | 0.963629707 |
| 0.954179352 | 0.528724333 |
| -1.32733249 | 0.000197317 |
| 0.771065615 | 8.64204E-05 |
| -1.02679505 | 0.624614487 |
| 0.997682097 | 0.96385809  |
| -1.01449925 | 0.873235647 |
| 0.811285801 | 0.000917948 |
| 0.640479492 | 9.53854E-12 |
| -1.37774378 | 1.46977E-05 |
| -1.08078933 | 0.355596363 |
| 0.957410093 | 0.468433228 |
| -1.00921833 | 0.903860956 |
| 0.817461814 | 0.000773065 |
| 0.376104243 | 6.85871E-24 |
| 0.97828295  | 0.49549219  |
| -1.09570834 | 0.193270344 |
| 0.815774184 | 0.00037956  |
| -1.10277681 | 0.099967374 |
| 0.885862269 | 0.030250913 |
| 0.983164582 | 0.70813584  |
| 0.665066902 | 0.000501193 |
| 0.974950845 | 0.769710806 |
| -1.32875245 | 0.005867619 |
| -1.35807495 | 1.06126E-05 |
| 0.639623549 | 3.2625E-06  |
| 0.936201104 | 0.155607232 |
| -1.10965087 | 0.098284317 |
| -1.19203307 | 0.030965827 |

|             |             |
|-------------|-------------|
| -1.05104805 | 0.418409605 |
| -1.12208259 | 0.01084621  |
| 0.981616873 | 0.705517791 |
| 0.847716792 | 0.01718502  |
| -1.52627395 | 1.85893E-05 |
| -1.18283591 | 0.107504627 |
| -1.39381839 | 1.0261E-06  |
| -1.00493537 | 0.930428421 |
| 0.967650468 | 0.574182575 |
| 0.739480413 | 0.002156895 |
| -1.04542961 | 0.637125123 |
| 0.712670331 | 0.002145355 |
| -1.03724359 | 0.541960615 |
| -1.25934606 | 0.002436337 |
| 0.898348527 | 0.205812693 |
| 0.847988801 | 0.08245548  |
| -1.10432239 | 0.366536113 |
| -1.01682709 | 0.855921845 |
| -1.38648825 | 0.000658797 |
| 0.755253647 | 4.36612E-06 |
| 0.992159219 | 0.884037953 |
| -1.29415565 | 0.010477349 |
| -1.01376411 | 0.865283833 |
| 0.774235364 | 1.97017E-08 |
| -1.00067981 | 0.994433256 |
| -1.13498265 | 0.027184196 |
| 0.794823586 | 5.08446E-05 |
| -1.42462134 | 0.000134191 |
| -1.0825523  | 0.301434033 |
| -1.02278569 | 0.707839336 |
| -1.0246217  | 0.661288125 |
| -1.072609   | 0.247699795 |
| -1.16321686 | 0.091781656 |
| -1.23151077 | 0.019888992 |
| -1.02774131 | 0.564970799 |
| 0.720392488 | 0.000229653 |
| 0.838666943 | 0.007925663 |
| -1.20469331 | 0.040414189 |
| 0.948326339 | 0.481755277 |
| 0.469162134 | 4.0046E-11  |
| 0.557487375 | 4.47385E-11 |
| 0.757434886 | 2.22006E-05 |
| -1.10071008 | 0.335192616 |
| 0.90634555  | 0.318611964 |

|             |             |
|-------------|-------------|
| 0.991742805 | 0.91255611  |
| 0.889939569 | 0.137824485 |
| -1.02910433 | 0.792547958 |
| 0.997486242 | 0.97856303  |
| -1.02972165 | 0.562297283 |
| -1.15623985 | 0.214362097 |
| -1.24012608 | 0.023185879 |
| 0.940160219 | 0.578657719 |
| 0.934679186 | 0.233853624 |
| 0.9315568   | 0.443717578 |
| 0.913167388 | 0.176748537 |
| -1.21058886 | 0.131437571 |
| 0.923765958 | 0.293562064 |
| -1.019881   | 0.801151729 |
| -1.04340161 | 0.310600195 |
| -1.48721955 | 0.000145128 |
| -1.09987225 | 0.199160729 |
| -1.14454468 | 0.050090331 |
| -1.0891973  | 0.13453757  |
| 0.975366857 | 0.675950046 |
| -1.06022685 | 0.356865736 |
| -1.10994506 | 0.06239179  |
| -1.2998938  | 0.00490036  |
| -1.0883297  | 0.281790503 |
| 0.853646235 | 0.000868176 |
| 0.937767886 | 0.491126555 |
| 0.959872322 | 0.579432008 |
| 0.681480663 | 4.32923E-08 |
| 0.946344951 | 0.271903283 |
| -1.20635448 | 0.06509422  |
| -1.11448595 | 0.056754519 |
| 0.911595227 | 0.414107823 |
| -1.02557683 | 0.756053493 |
| 0.972618815 | 0.635387779 |
| -1.15983405 | 0.003224085 |
| -1.16475302 | 0.010203751 |
| -1.19492055 | 0.002462213 |
| 0.984297421 | 0.782844258 |
| -1.13938548 | 0.100457821 |
| -1.0446592  | 0.379808539 |
| -1.00520736 | 0.92536725  |
| 0.966939363 | 0.761489263 |
| -1.16053885 | 0.00961556  |
| 0.946434121 | 0.380600632 |

|             |             |
|-------------|-------------|
| 0.946816353 | 0.369633665 |
| -1.07967142 | 0.161319813 |
| -1.1472156  | 0.028093413 |
| -1.27769531 | 0.00108051  |
| -1.15564609 | 0.051821789 |
| -1.01207022 | 0.769301713 |
| 0.924657094 | 0.415932024 |
| -1.29536285 | 0.002925481 |
| 0.854995944 | 0.066418088 |
| -1.04178861 | 0.394846555 |
| -1.00869118 | 0.882003575 |
| -1.06766191 | 0.355473315 |
| -1.13798964 | 0.015413452 |
| -1.04247012 | 0.636324854 |
| -2.3527635  | 2.8694E-15  |
| -1.06441891 | 0.262442964 |
| -1.2271067  | 0.121302878 |
| -1.15161862 | 0.33253863  |
| 0.961099619 | 0.378243142 |
| 0.963959519 | 0.517897342 |
| 0.774013328 | 9.08244E-10 |
| -1.32712741 | 6.13403E-05 |
| -1.15123001 | 0.191095415 |
| -1.16927022 | 0.073745687 |
| 0.766968705 | 2.55621E-05 |
| 0.935266655 | 0.618317893 |
| 0.855130652 | 0.010442226 |
| 0.981929334 | 0.72983183  |
| -1.05369627 | 0.341279537 |
| 0.855865692 | 0.154887697 |
| 0.813133749 | 0.000891361 |
| 0.881656835 | 0.002445379 |
| -1.14251158 | 0.022506413 |
| -1.03020132 | 0.474482102 |
| 0.831966642 | 0.000976173 |
| 0.953841726 | 0.293517987 |
| -1.13616749 | 0.320488044 |
| -1.03582997 | 0.657539845 |
| -1.04914541 | 0.387885155 |
| 0.972107552 | 0.639162927 |
| -1.05792991 | 0.354776174 |
| 0.950166251 | 0.372459247 |
| -1.04577181 | 0.487521735 |
| 0.990871521 | 0.871007106 |

|             |             |
|-------------|-------------|
| 0.972612351 | 0.540306032 |
| -1.0035551  | 0.953397464 |
| 0.404023085 | 1.09424E-14 |
| 0.934013505 | 0.085904556 |
| 0.988673182 | 0.736475285 |
| 0.992385244 | 0.892806604 |
| -1.12441148 | 0.373358341 |
| -1.02895528 | 0.642811534 |
| -1.12889047 | 0.133128303 |
| 0.910947341 | 0.270992274 |
| 0.983220289 | 0.757033872 |
| 0.984175199 | 0.775986475 |
| 0.992807189 | 0.875627337 |
| -1.01821648 | 0.7148284   |
| 0.884528455 | 0.020478604 |
| 0.903379085 | 0.062344057 |
| -1.03404509 | 0.576780788 |
| -1.03720278 | 0.363299437 |
| 0.956108939 | 0.396597057 |
| -1.02103985 | 0.619011888 |
| 0.978514722 | 0.671642548 |
| -1.04940832 | 0.396029989 |
| 0.87199454  | 0.002782358 |
| 0.691045736 | 0.000653101 |
| -1.06431018 | 0.244631706 |
| -1.2236837  | 0.034017602 |
| -1.12990606 | 0.227017456 |
| -1.1740185  | 0.097144214 |
| 0.937950881 | 0.06069825  |
| 0.823972558 | 0.003405805 |
| 0.897168223 | 0.428827417 |
| -1.16341933 | 0.003932875 |
| 0.849801938 | 0.030185591 |
| 0.744830374 | 0.000102591 |
| -1.15074733 | 0.11556794  |
| 0.94270225  | 0.669656789 |
| 0.966938799 | 0.629480984 |
| 0.782070951 | 0.001292388 |
| 0.633266271 | 4.73663E-08 |
| -1.40373984 | 0.026312698 |
| 0.988115375 | 0.821285647 |
| 0.808963814 | 0.00064302  |
| 0.982997292 | 0.813799057 |
| -1.2553733  | 0.018588019 |

|             |             |
|-------------|-------------|
| 0.844061559 | 0.027085948 |
| 0.938944099 | 0.330349176 |
| 0.954117787 | 0.164475147 |
| 0.863348239 | 0.062880719 |
| 0.99030647  | 0.759555966 |
| 0.978842738 | 0.553527049 |
| 0.764986879 | 0.000544378 |
| 0.966524794 | 0.273049882 |
| -1.03878173 | 0.552258976 |
| 0.96601249  | 0.290587402 |
| 0.97555378  | 0.646162675 |
| -1.06287902 | 0.13071574  |
| 0.762529997 | 1.32108E-06 |
| 0.550399254 | 2.13059E-07 |
| -1.07401129 | 0.142737885 |
| 0.971428901 | 0.854346882 |
| 0.999759166 | 0.995971518 |
| 0.989081225 | 0.707007712 |
| 0.920363859 | 0.118698866 |
| 0.916057941 | 0.204682604 |
| 0.980867283 | 0.764456903 |
| 0.920113144 | 0.119185017 |
| 0.712635927 | 4.17298E-05 |
| 0.759378275 | 1.46931E-06 |
| -1.11979268 | 0.054322379 |
| 0.948926292 | 0.480649428 |
| -1.01666662 | 0.710958169 |
| 0.89395316  | 0.125253365 |
| 0.992042941 | 0.851544873 |
| -1.16607422 | 0.077564857 |
| -1.02189117 | 0.677943635 |
| -1.10281012 | 0.086324408 |
| 0.931352339 | 0.254366395 |
| 0.838242217 | 0.152919083 |
| -1.28311014 | 0.005438649 |
| -1.13244968 | 0.320239656 |
| -1.09295435 | 0.220631519 |
| -1.06134705 | 0.369867745 |
| -1.09124362 | 0.132584548 |
| 0.779685775 | 0.00417225  |
| -1.05529643 | 0.107371793 |
| -1.05235334 | 0.175491352 |
| 0.590444637 | 7.84785E-12 |
| 0.773922973 | 0.00328744  |

|             |             |
|-------------|-------------|
| 0.801934707 | 0.00730425  |
| 0.83295769  | 0.010258959 |
| 0.976615436 | 0.670384572 |
| -1.00424007 | 0.93920503  |
| 0.851461903 | 0.11538191  |
| 0.895778387 | 0.039964884 |
| 0.561140327 | 5.53182E-10 |
| 0.7123466   | 2.03836E-05 |
| 0.991565759 | 0.837588563 |
| 0.921428857 | 0.095533262 |
| -1.05099699 | 0.371930612 |
| 0.905379591 | 0.031305679 |
| 0.960933886 | 0.514014283 |
| -1.21781117 | 0.056240332 |
| 0.950812057 | 0.499510836 |
| -1.19527847 | 0.036843959 |
| -1.28722224 | 8.7146E-05  |
| -1.056787   | 0.438960583 |
| -1.06201593 | 0.613278365 |
| -1.02239855 | 0.671383167 |
| -1.02322679 | 0.802298562 |
| 0.83149507  | 0.125734461 |
| 0.749135117 | 0.000644179 |
| -1.64707233 | 3.84923E-08 |
| -1.70453612 | 1.45868E-07 |
| 0.982765775 | 0.634613379 |
| -1.08194716 | 0.259131449 |
| -1.32698319 | 1.21299E-06 |
| -1.01748046 | 0.639379458 |
| -1.00481415 | 0.948722913 |
| -1.2318257  | 0.0349097   |
| -1.22528748 | 8.75529E-05 |
| -1.21445225 | 0.009994829 |
| -1.09397391 | 0.388886633 |
| -1.06035659 | 0.308609204 |
| -1.02190486 | 0.650871068 |
| -1.04943293 | 0.409473252 |
| -1.16342102 | 0.034674844 |
| -1.02071661 | 0.742841711 |
| -1.27880604 | 0.082908162 |
| 0.829048703 | 0.025476765 |
| -1.00642877 | 0.901680318 |
| -1.45978187 | 4.02696E-05 |
| -1.11167378 | 0.095293601 |

|             |             |
|-------------|-------------|
| 0.656842704 | 0.00022093  |
| -1.03208714 | 0.503103377 |
| -1.015372   | 0.7526387   |
| 0.9656804   | 0.369367822 |
| -1.01287822 | 0.80810653  |
| -1.16327735 | 0.010589256 |
| -1.20537708 | 0.021733848 |
| -1.42706099 | 0.000308349 |
| -1.00771728 | 0.925796345 |
| -1.01416392 | 0.824505028 |
| -1.08164593 | 0.173741794 |
| 0.839799871 | 0.011478389 |
| 0.998662564 | 0.977428098 |
| 0.730870463 | 0.000310877 |
| 0.850061398 | 0.014661014 |
| 0.68995167  | 9.8826E-07  |
| -1.05722576 | 0.367915456 |
| 0.978114857 | 0.625786875 |
| -1.04297089 | 0.515840808 |
| -1.04171356 | 0.546123751 |
| 0.23246393  | 6.59909E-26 |
| -1.10247471 | 0.0854686   |
| 0.613731915 | 4.02688E-05 |
| -1.07950856 | 0.062332883 |
| 0.806280979 | 0.042798688 |
| -1.56006467 | 0.001052308 |
| -1.16022457 | 0.004663447 |
| 0.989971121 | 0.866906528 |
| -1.15158577 | 0.086642647 |
| -1.14640573 | 0.007435168 |
| -1.13982728 | 0.021350994 |
| 0.839359809 | 0.037793927 |
| 0.812216629 | 0.00027669  |
| -1.0434449  | 0.500527329 |
| -1.32125591 | 0.000180059 |
| -1.01760525 | 0.813126893 |
| -1.29394288 | 0.028699893 |
| -1.10851549 | 0.303493117 |
| -1.01196952 | 0.866709185 |
| 0.943681682 | 0.389818655 |
| 0.874207895 | 0.0681489   |
| 0.976774263 | 0.577516765 |
| -1.10962798 | 0.065802731 |
| -1.04984852 | 0.441714142 |



|             |             |
|-------------|-------------|
| 0.910999346 | 0.091683902 |
| 0.810977028 | 5.39511E-05 |
| 0.993689671 | 0.889953542 |
| -1.03237239 | 0.640779499 |
| 0.936724135 | 0.317357848 |
| -1.33205637 | 0.063318366 |
| 0.887701651 | 0.278963223 |
| -1.16604578 | 0.008575366 |
| -1.09191906 | 0.157609792 |
| -1.38972523 | 8.55503E-07 |
| 0.674369544 | 0.000111971 |
| -1.21897201 | 0.015612927 |
| 0.895273297 | 0.116889486 |
| 0.772437598 | 0.000973031 |
| 0.994983489 | 0.91944152  |
| 0.975184357 | 0.697447513 |
| -2.15800662 | 8.97759E-16 |
| 0.862622041 | 0.001178545 |
| -1.12603733 | 0.036719539 |
| 0.862953682 | 0.008102575 |
| -1.03590919 | 0.395235177 |
| 0.973892141 | 0.710312938 |
| -1.15612769 | 0.093932053 |
| -1.1740566  | 0.003707056 |
| -1.45624886 | 0.00402148  |
| -1.0306026  | 0.698259233 |
| -1.03649711 | 0.609677742 |
| 0.985687761 | 0.825034319 |
| -1.04861127 | 0.379418976 |
| -1.02066871 | 0.683044509 |
| 0.976886434 | 0.739199195 |
| 0.852612525 | 0.452813273 |
| 0.930048235 | 0.447138188 |
| 0.833746449 | 0.010927578 |
| -1.04154722 | 0.639115518 |
| 0.907170005 | 0.097507605 |
| 0.313725767 | 2.52311E-25 |
| 0.882322385 | 0.001794964 |
| 0.590013622 | 3.83679E-07 |
| 0.856135768 | 0.113687022 |
| -1.03169407 | 0.650535713 |
| 0.89517354  | 0.081390612 |
| 0.904449827 | 0.345435124 |
| 0.912088631 | 0.180485234 |

|             |             |
|-------------|-------------|
| -1.15643517 | 0.054477867 |
| 0.944592352 | 0.393030805 |
| 0.950390783 | 0.421199876 |
| 0.907187937 | 0.109599995 |
| -1.12877928 | 0.062612167 |
| 0.966048101 | 0.459885313 |
| -1.09124085 | 0.153861907 |
| 0.550531882 | 7.57693E-12 |
| -1.82867719 | 1.18602E-07 |
| -1.17131613 | 0.100099846 |
| 0.942554546 | 0.158050153 |
| -1.22129952 | 0.103449648 |
| -1.14884584 | 0.10806765  |
| 0.826651939 | 0.009860903 |
| 0.713345595 | 2.42539E-05 |
| -1.1130173  | 0.032018041 |
| -1.04945063 | 0.577711933 |
| -1.35319011 | 4.00123E-06 |
| -1.08277278 | 0.163894606 |
| -1.07055679 | 0.332719683 |
| -1.04616239 | 0.386242617 |
| 0.86584244  | 0.060875216 |
| -1.01821857 | 0.683233553 |
| 0.675509124 | 2.36201E-07 |
| -1.14587021 | 0.13255078  |
| 0.963675831 | 0.744095927 |
| -1.5291721  | 5.04104E-07 |
| 0.930560065 | 0.09083279  |
| -1.18259485 | 0.112505394 |
| 0.82912552  | 0.001504399 |
| 0.860735319 | 0.041810854 |
| -1.00479263 | 0.913281798 |
| 0.958939452 | 0.48231831  |
| -1.06360534 | 0.271112307 |
| -1.0901772  | 0.276543885 |
| 0.952751091 | 0.370039939 |
| 0.909916507 | 0.021756243 |
| 0.88771398  | 0.170098622 |
| -1.13663362 | 0.081022699 |
| -1.00109484 | 0.973090383 |
| -1.05624349 | 0.338336464 |
| -1.08514634 | 0.129351357 |
| 0.961655423 | 0.432490944 |
| 0.764914806 | 5.67493E-06 |

|             |             |
|-------------|-------------|
| 0.566502344 | 1.3629E-09  |
| -1.06177666 | 0.359186589 |
| 0.904187213 | 0.182704274 |
| 0.946759948 | 0.146592894 |
| 0.453179987 | 1.86068E-12 |
| 0.964089192 | 0.474082873 |
| -1.05362495 | 0.558615327 |
| 0.964554019 | 0.583726233 |
| -1.06302442 | 0.339067461 |
| 0.741202458 | 6.21193E-08 |
| 0.765949968 | 0.009813464 |
| -1.07320204 | 0.228535944 |
| 0.878164121 | 0.010006072 |
| 0.79874478  | 0.001120764 |
| 0.88631586  | 0.041945716 |
| -1.01654847 | 0.593419559 |
| -1.00524222 | 0.88882572  |
| -1.0379349  | 0.488465679 |
| 0.898509427 | 0.007068077 |
| -1.1235755  | 0.441232526 |
| -1.03795836 | 0.439449943 |
| 0.673885488 | 7.06117E-06 |
| 0.895565922 | 0.019322814 |
| -1.15876486 | 0.03364901  |
| -1.28549008 | 0.000186177 |
| 0.885039154 | 0.55605421  |
| 0.678656466 | 2.5273E-05  |
| 0.893316834 | 0.122005374 |
| -1.34935393 | 0.001155655 |
| 0.972154292 | 0.769731972 |
| 0.998286542 | 0.979026821 |
| -1.26825426 | 0.008174079 |
| -1.20197472 | 0.001463457 |
| -1.04519943 | 0.272261548 |
| -1.19005266 | 0.004675844 |
| -1.23670768 | 0.00991472  |
| 0.855740428 | 0.181043968 |
| -1.1305678  | 0.028727827 |
| 0.968075389 | 0.560811234 |
| -1.036      | 0.493113356 |
| -1.14355851 | 0.064596128 |
| -1.095713   | 0.28948046  |
| -1.05952386 | 0.418470961 |
| 0.855019854 | 0.195575213 |

|             |             |
|-------------|-------------|
| 0.887510359 | 0.014108104 |
| -1.04645635 | 0.463755956 |
| -1.0133759  | 0.905538628 |
| -1.01426056 | 0.750753883 |
| -1.06285516 | 0.304236695 |
| 0.925772854 | 0.187399949 |
| -1.04702138 | 0.691716292 |
| -1.00259397 | 0.981644331 |
| -1.0447614  | 0.456189758 |
| 0.997906202 | 0.979714878 |
| -1.10796265 | 0.402508582 |
| 0.950265633 | 0.518734524 |
| -1.01058052 | 0.901967126 |
| -1.04405665 | 0.504079227 |
| -1.19505521 | 0.108416508 |
| 0.964568026 | 0.797991239 |
| 0.857999306 | 0.018045405 |
| -1.08578444 | 0.436799988 |
| -1.30840702 | 0.023058649 |
| -1.00865997 | 0.889040303 |
| 0.998960002 | 0.987612246 |
| -1.04901524 | 0.669357731 |
| -1.13514145 | 0.091489662 |
| -1.00453624 | 0.94091696  |
| -1.07313578 | 0.509777805 |
| 0.887063592 | 0.108067636 |
| -1.06076682 | 0.570627368 |
| -1.01758139 | 0.802276694 |
| 0.923668054 | 0.272936661 |
| 0.981856222 | 0.826278155 |
| -1.1635192  | 0.530452581 |
| -1.1030412  | 0.130917064 |
| -1.02787798 | 0.769118991 |
| 0.935911504 | 0.360148522 |
| -1.0962764  | 0.163469569 |
| 0.905957222 | 0.440928741 |
| -1.17742427 | 0.19906443  |
| -1.1637009  | 0.375516546 |
| 0.981983985 | 0.860755364 |
| -1.10344344 | 0.528297384 |
| -1.1466064  | 0.176120966 |
| -1.06476137 | 0.216584072 |
| -1.09195846 | 0.307355006 |
| -1.04515776 | 0.642216765 |

|             |             |
|-------------|-------------|
| 0.993562764 | 0.932737938 |
| 0.968344008 | 0.798355362 |
| -1.02101467 | 0.83337301  |
| -1.11392199 | 0.341819183 |
| 0.982161278 | 0.695784483 |
| -1.12392985 | 0.07115084  |
| -1.03605574 | 0.609431881 |
| -1.08830372 | 0.258623544 |
| 0.968917214 | 0.59155666  |
| -1.50777686 | 9.34992E-06 |
| 0.818717839 | 0.002145338 |
| -1.43148658 | 0.000275824 |
| -1.1899486  | 0.005249959 |
| 0.567902596 | 2.41678E-10 |
| 0.969884398 | 0.662471742 |
| 0.524663349 | 8.44438E-08 |
| 0.90793579  | 0.12795445  |
| 0.32338084  | 2.77106E-13 |
| 0.371173807 | 5.28574E-17 |
| 0.528441031 | 3.34336E-10 |
| 0.464018227 | 3.13224E-11 |
| 0.442978054 | 8.01204E-13 |
| 0.692131044 | 7.66469E-07 |
| -1.00244825 | 0.953742383 |
| 0.245198646 | 1.42809E-16 |
| 0.303162265 | 4.08541E-18 |
| -1.13961236 | 0.038712999 |
| 0.519699935 | 1.65124E-12 |
| 0.936064281 | 0.486528939 |
| 0.542450905 | 1.12689E-09 |
| 0.438668555 | 1.10829E-11 |
| 0.395677753 | 1.49527E-12 |
| 0.400214495 | 1.79E-14    |
| 0.60905524  | 1.50256E-07 |
| 0.852070498 | 0.169100257 |
| 0.525193835 | 2.15426E-09 |
| 0.945468276 | 0.193285765 |
| 0.681590094 | 4.11943E-05 |
| 0.842588906 | 0.000206438 |
| 0.92473293  | 0.16673587  |
| -1.18076733 | 0.039961031 |
| -1.137238   | 0.104161481 |
| 0.981584326 | 0.762510426 |
| 0.96510071  | 0.767651375 |

|             |             |
|-------------|-------------|
| -1.05200602 | 0.742428095 |
| -1.1587145  | 0.218304126 |
| -1.38717531 | 0.048643537 |
| -1.47244693 | 0.001371265 |
| -1.45244841 | 9.91618E-08 |
| 0.740469089 | 3.67163E-05 |
| 0.859920442 | 0.089194126 |
| 0.737893893 | 0.001606533 |
| -1.07359842 | 0.363203957 |
| -1.32662353 | 0.000251624 |
| -1.0262035  | 0.661080959 |
| 0.951559757 | 0.470167304 |
| -1.23764794 | 1.9551E-05  |
| -1.07151126 | 0.170203839 |
| -1.13920371 | 0.228465788 |
| 0.326583581 | 2.37298E-25 |
| -1.05370537 | 0.478877474 |
| 0.624076987 | 1.41448E-09 |
| 0.904082395 | 0.27119808  |
| -1.08448071 | 0.366461948 |
| -1.24843912 | 0.005310874 |
| -1.16141908 | 0.180211742 |
| -1.17109479 | 0.000393629 |
| 0.845460061 | 0.106122815 |
| -1.32368978 | 0.056340032 |
| -1.16090046 | 0.265053602 |
| -1.15529234 | 0.043984903 |
| -1.29954848 | 0.003526033 |
| -1.26553262 | 0.001187849 |
| -1.13629248 | 0.024838824 |
| -1.1662362  | 0.110444522 |
| -1.06033799 | 0.379903952 |
| -1.19406607 | 0.08586104  |
| -1.11250289 | 0.185445753 |
| -1.06956534 | 0.455907906 |
| -1.26243231 | 0.002915733 |
| -1.27815506 | 0.004469265 |
| -1.02752247 | 0.543748753 |
| -1.14062699 | 0.145474862 |
| -1.13385863 | 0.136305617 |
| -1.22964594 | 0.199277439 |
| -1.12912975 | 0.111787483 |
| -1.03789028 | 0.744555036 |
| 0.824897895 | 0.005392768 |

|             |             |
|-------------|-------------|
| -1.09844481 | 0.448195906 |
| -1.20167978 | 0.059836835 |
| -1.23512129 | 0.018735651 |
| 0.698000609 | 6.40667E-06 |
| -1.14469131 | 0.174027532 |
| -1.1751244  | 0.068292848 |
| -1.13550272 | 0.033071504 |
| -1.18728548 | 0.009489979 |
| -1.05682879 | 0.563461146 |
| 0.51619028  | 5.00829E-18 |
| 0.864724786 | 0.030802396 |
| 0.9986648   | 0.979480681 |
| 0.692191988 | 5.28313E-07 |
| -1.15261063 | 0.004493254 |
| -1.01810291 | 0.667882545 |
| -1.03410434 | 0.53389857  |
| 0.962757607 | 0.428520529 |
| 0.931941377 | 0.197717769 |
| 0.798749896 | 0.001392849 |
| 0.976386972 | 0.695321249 |
| 0.834257748 | 0.001441962 |
| -1.15048741 | 0.042130213 |
| 0.689986848 | 3.80992E-05 |
| 0.88489435  | 0.006606649 |
| 0.85869897  | 0.036622718 |
| 0.960991846 | 0.313104746 |
| 0.848213146 | 0.00443187  |
| -1.02567456 | 0.651847871 |
| -1.00127712 | 0.980993446 |
| -1.11033351 | 0.064301613 |
| -1.11168204 | 0.201072508 |
| 0.963329969 | 0.513158232 |
| 0.754126275 | 0.008792668 |
| 0.961618939 | 0.556637282 |
| -1.13971309 | 0.024050749 |
| 0.417903952 | 6.57201E-27 |
| 0.978288029 | 0.724476289 |
| -1.08224709 | 0.131437773 |
| 0.874037086 | 0.151732259 |
| -1.07972968 | 0.036314076 |
| -1.14877149 | 0.033954694 |
| 0.897616575 | 0.018808058 |
| -1.18710271 | 0.073486425 |
| -1.05502788 | 0.451746419 |

|             |             |
|-------------|-------------|
| 0.304782752 | 8.36843E-27 |
| -1.22159894 | 0.001187262 |
| 0.93356862  | 0.152206033 |
| -1.01241608 | 0.839699405 |
| 0.98792818  | 0.829250707 |
| -1.17881792 | 0.106483509 |
| -1.07325697 | 0.403939238 |
| 0.986000324 | 0.853052826 |
| -1.00642912 | 0.919889486 |
| -1.05845619 | 0.37116287  |
| 0.996203635 | 0.957031606 |
| -1.37306005 | 0.001433695 |
| -1.06984353 | 0.306134082 |
| -1.04247186 | 0.496567143 |
| -1.03966509 | 0.557669634 |
| -1.03760894 | 0.650176451 |
| 0.935785846 | 0.31795699  |
| 0.954361722 | 0.482333474 |
| 0.886832511 | 0.022387877 |
| 0.813515657 | 0.037744118 |
| -1.10234498 | 0.180153549 |
| 0.952902703 | 0.34238422  |
| 0.988563861 | 0.846967718 |
| -1.04873714 | 0.357483769 |
| -1.01699701 | 0.728282509 |
| 0.938473269 | 0.195420252 |
| -1.12565073 | 0.045431898 |
| -1.1028146  | 0.083062526 |
| -1.0437088  | 0.472109824 |
| -1.06727523 | 0.328113682 |
| -1.04104221 | 0.49353684  |
| 0.906373617 | 0.166576905 |
| -1.05013555 | 0.398529735 |
| 0.98309172  | 0.76425534  |
| 0.972873684 | 0.634058763 |
| -1.12054396 | 0.04644374  |
| -1.07864221 | 0.171318588 |
| -1.02470904 | 0.683351164 |
| 0.967157063 | 0.533116674 |
| 0.941995767 | 0.276764032 |
| -1.10991534 | 0.119993721 |
| -1.2007206  | 0.019345191 |
| 0.990791199 | 0.880331426 |
| 0.987565247 | 0.831796305 |



|             |             |
|-------------|-------------|
| 0.955036092 | 0.466795666 |
| -1.02180144 | 0.691600151 |
| 0.995030011 | 0.93816766  |
| -1.04841347 | 0.495636449 |
| -1.13185493 | 0.112970116 |
| -1.05515469 | 0.505419793 |
| -1.08271404 | 0.278666129 |
| 0.85183513  | 0.02327066  |
| -1.04284102 | 0.53775937  |
| -1.02740357 | 0.645473765 |
| -1.00528272 | 0.932790514 |
| -1.01037264 | 0.86523248  |
| -1.03698462 | 0.425199948 |
| -1.02408551 | 0.703704178 |
| 0.959482807 | 0.482225396 |
| -1.00728362 | 0.898951445 |
| 0.93918418  | 0.228069409 |
| -1.06291158 | 0.291328119 |
| -1.17740246 | 0.01190407  |
| 0.970634102 | 0.556558163 |
| 0.865540107 | 0.031581388 |
| 0.963657947 | 0.510093224 |
| -1.0911208  | 0.049848703 |
| -1.05666405 | 0.347885711 |
| 0.86664948  | 0.035955759 |
| -1.13344494 | 0.138868013 |
| -1.02462196 | 0.72237484  |
| -1.07070813 | 0.18432033  |
| 0.971254734 | 0.669010913 |
| -1.05694715 | 0.534502519 |
| -1.00307677 | 0.96144098  |
| -1.07899485 | 0.282281863 |
| -1.01119246 | 0.855262296 |
| 0.997455725 | 0.963076816 |
| 0.979072745 | 0.708967421 |
| -1.10769123 | 0.086043272 |
| 0.956256728 | 0.473937716 |
| -1.19775977 | 0.015713264 |
| -1.11509727 | 0.062293348 |
| -1.14815769 | 0.053824657 |
| 0.995210828 | 0.934934574 |
| -1.16861737 | 0.017852065 |
| -1.02844556 | 0.607032362 |
| 0.931130752 | 0.246050689 |

|             |             |
|-------------|-------------|
| -1.06410792 | 0.253909713 |
| -1.02332793 | 0.746007672 |
| -1.02396188 | 0.703074749 |
| -1.03964053 | 0.452828071 |
| -1.01615204 | 0.768601384 |
| 0.940434582 | 0.248106789 |
| -1.0861993  | 0.17357936  |
| -1.10423498 | 0.067638535 |
| -1.14996646 | 0.01411747  |
| 0.998030343 | 0.971281108 |
| 0.990781721 | 0.866195396 |
| -1.15513805 | 0.048646619 |
| 0.900053686 | 0.066599797 |
| -1.01277736 | 0.852440066 |
| 0.930265307 | 0.202921741 |
| -1.00524714 | 0.941002888 |
| 0.986082739 | 0.832415747 |
| -1.06671679 | 0.324605922 |
| -1.09406704 | 0.071232258 |
| -1.05249711 | 0.391825372 |
| 0.914879875 | 0.064291006 |
| -1.0046008  | 0.924853152 |
| 0.987668885 | 0.835566723 |
| 0.98933155  | 0.859160958 |
| 0.264635973 | 7.53702E-28 |
| -1.06979478 | 0.333911396 |
| 0.927798882 | 0.285704825 |
| -1.01430013 | 0.810376033 |
| 0.994405204 | 0.933990941 |
| 0.964230403 | 0.492757231 |
| 0.950524394 | 0.302438948 |
| 0.981032095 | 0.740033465 |
| -1.02478724 | 0.651885928 |
| 0.925670164 | 0.220910036 |
| 0.952184738 | 0.375025987 |
| -1.01979074 | 0.708584148 |
| 0.938708041 | 0.312435203 |
| -1.04245688 | 0.462646386 |
| -1.07928617 | 0.177970554 |
| -1.08290499 | 0.203182569 |
| -1.10518429 | 0.469982277 |
| -1.08979263 | 0.24669773  |
| -1.06148437 | 0.254417307 |
| -1.03095426 | 0.74047114  |

|             |             |
|-------------|-------------|
| 0.954218192 | 0.338270483 |
| -1.19455085 | 0.014095758 |
| 0.972734906 | 0.631500591 |
| -1.10560797 | 0.110552066 |
| 0.972182078 | 0.641479789 |
| -1.0780439  | 0.183741043 |
| -1.08131999 | 0.175830299 |
| -1.18299082 | 0.068867959 |
| 0.967866553 | 0.529554212 |
| -1.02352092 | 0.737041585 |
| -1.07498598 | 0.163711974 |
| 0.99689262  | 0.958839929 |
| 0.915137562 | 0.160642675 |
| -1.01081957 | 0.855497951 |
| 0.957924554 | 0.504967465 |
| -1.09780273 | 0.188785025 |
| -1.01731106 | 0.731207978 |
| 0.963917678 | 0.464086233 |
| -1.00963948 | 0.876766009 |
| 0.955297368 | 0.467943341 |
| 0.889322858 | 0.056412183 |
| -1.14456008 | 0.015424459 |
| 0.970036567 | 0.549398106 |
| -1.02944103 | 0.553937252 |
| -1.01118171 | 0.840652825 |
| -1.02800951 | 0.598754687 |
| -1.00694559 | 0.905870881 |
| -1.04338167 | 0.443074135 |
| 0.939142219 | 0.219937439 |
| -1.07853015 | 0.115189661 |
| -1.09951549 | 0.172003757 |
| -1.07738439 | 0.250994515 |
| 0.991429767 | 0.900839659 |
| -1.10312564 | 0.115649681 |
| -1.1423831  | 0.030896506 |
| -1.05877987 | 0.597917428 |
| -1.01023967 | 0.887980482 |
| -1.12930891 | 0.092916191 |
| 0.980889341 | 0.759130429 |
| 0.96353003  | 0.557045811 |
| -1.15204686 | 0.018745475 |
| 0.964454528 | 0.568760325 |
| -1.0102709  | 0.859303839 |
| -1.06539592 | 0.336651406 |

|             |             |
|-------------|-------------|
| -1.06727652 | 0.26948479  |
| -1.11891988 | 0.043467053 |
| 0.840807663 | 0.003969348 |
| -1.42801236 | 2.83104E-05 |
| 0.853843036 | 0.44142289  |
| -1.0126528  | 0.828579803 |
| 0.89700074  | 0.124101333 |
| -1.10304075 | 0.127080747 |
| -1.08378334 | 0.087452346 |
| 0.997644556 | 0.97389539  |
| -1.0721682  | 0.161999986 |
| -1.00842167 | 0.901786307 |
| -1.02615421 | 0.655332709 |
| -1.18491081 | 0.008123801 |
| -1.04936238 | 0.478797228 |
| 0.836734369 | 0.024282572 |
| 0.879265202 | 0.016517263 |
| -1.04134196 | 0.559145124 |
| -1.00637888 | 0.8918867   |
| -1.02770219 | 0.585683014 |
| -1.0335463  | 0.530960587 |
| 0.968308296 | 0.518056842 |
| -1.06554584 | 0.322456029 |
| 0.937834414 | 0.216262196 |
| -1.09209476 | 0.104441106 |
| 0.97604292  | 0.685582753 |
| -1.05931661 | 0.318020274 |
| -1.18580899 | 0.055521704 |
| 0.911307965 | 0.097393487 |
| 0.903572331 | 0.117755037 |
| -1.06691886 | 0.347718522 |
| 0.496524499 | 1.58878E-14 |
| 0.932397516 | 0.193449786 |
| 0.788577295 | 0.000596145 |
| 0.92295762  | 0.167685613 |
| -1.09158261 | 0.09391584  |
| -1.02034229 | 0.763962386 |
| -1.02328277 | 0.680999147 |
| -1.02402221 | 0.633344669 |
| 0.967431205 | 0.583361676 |
| -1.01487752 | 0.762299339 |
| 0.961654514 | 0.442738927 |
| 0.998885962 | 0.985881605 |
| -1.05147368 | 0.328727886 |

|             |             |
|-------------|-------------|
| 0.985969962 | 0.837041602 |
| 0.999291824 | 0.989588258 |
| -1.15706427 | 0.03517134  |
| -1.15763595 | 0.014105343 |
| 0.980626281 | 0.663723591 |
| 0.917643406 | 0.048602981 |
| 0.975982306 | 0.67507524  |
| -1.00649344 | 0.91838567  |
| -1.04405466 | 0.43026158  |
| -1.05339529 | 0.447089832 |
| -1.01057733 | 0.857930493 |
| -1.0402285  | 0.48872269  |
| -1.04139346 | 0.421610241 |
| 0.90757657  | 0.107751359 |
| -1.00427839 | 0.942516668 |
| 0.997900787 | 0.966184363 |
| -1.04755379 | 0.479531711 |
| 0.959063471 | 0.461803073 |
| 0.989779408 | 0.85023611  |
| -1.13309441 | 0.074762995 |
| -1.0748204  | 0.212079176 |
| -1.02924288 | 0.649062687 |
| 0.976160735 | 0.756869676 |
| -1.01892195 | 0.834182257 |
| -1.06053567 | 0.299431    |
| -1.26621319 | 0.005649057 |
| 0.992140144 | 0.918702679 |
| -1.08250441 | 0.252585404 |
| 0.965535483 | 0.453518777 |
| -1.00401208 | 0.949513461 |
| 0.962919211 | 0.542770837 |
| -1.0561571  | 0.427817922 |
| 0.949474881 | 0.362121558 |
| 0.92957885  | 0.327798373 |
| -1.03381235 | 0.65663634  |
| -1.15001014 | 0.016398498 |
| -1.03191534 | 0.615181541 |
| -1.05102596 | 0.394848491 |
| -1.08925739 | 0.189123696 |
| -1.02685608 | 0.672376877 |
| 0.981877448 | 0.794789464 |
| -1.08084721 | 0.177094735 |
| 0.945779253 | 0.299730724 |
| 0.891262161 | 0.028745331 |

|             |             |
|-------------|-------------|
| -1.11497618 | 0.22825657  |
| -1.03789851 | 0.575133296 |
| 0.99971363  | 0.995312902 |
| -1.04533846 | 0.406893181 |
| 0.946769636 | 0.325968785 |
| -1.19013776 | 0.0117978   |
| -1.06031327 | 0.374366157 |
| -1.05067851 | 0.364132461 |
| 0.846152664 | 0.071947966 |
| 0.93246098  | 0.222243426 |
| 0.942449676 | 0.265590366 |
| -1.10114044 | 0.229577952 |
| -1.05939164 | 0.323117917 |
| 0.990309868 | 0.856908134 |
| 0.992615199 | 0.903962089 |
| 0.971535958 | 0.649214069 |
| 0.994640887 | 0.939120774 |
| 0.741595072 | 0.000754381 |
| 0.99229804  | 0.910858807 |
| -1.06034581 | 0.391286443 |
| -1.0123338  | 0.835875487 |
| 0.996384849 | 0.956476915 |
| -1.0508054  | 0.35744447  |
| 0.960846073 | 0.493166946 |
| -1.09322615 | 0.211511425 |
| -1.05469361 | 0.249456107 |
| 0.973353636 | 0.758107295 |
| 0.958207606 | 0.436981807 |
| -1.01845607 | 0.736408657 |
| 0.968177502 | 0.513345337 |
| -1.00369288 | 0.936735486 |
| 0.83117367  | 0.004020499 |
| -1.09349705 | 0.092911887 |
| -1.0740493  | 0.197274617 |
| 0.797886445 | 0.00413758  |
| -1.03248354 | 0.612195402 |
| 0.851754532 | 0.06283372  |
| -1.01415256 | 0.793201128 |
| 0.970400069 | 0.577029647 |
| -1.19180166 | 0.029814626 |
| 0.95867617  | 0.447677025 |
| -1.03185442 | 0.619823906 |
| -1.07119113 | 0.284170068 |
| -1.35312336 | 0.001674395 |

|             |             |
|-------------|-------------|
| 0.89775344  | 0.057256503 |
| -1.12182644 | 0.082072384 |
| 0.914814911 | 0.152479893 |
| 0.78471284  | 0.00279302  |
| 0.61975397  | 2.69329E-08 |
| -1.01425093 | 0.816014284 |
| 0.982860331 | 0.820657126 |
| 0.975592601 | 0.670850781 |
| -1.00653276 | 0.921840224 |
| -1.00703835 | 0.900713631 |
| -1.04326828 | 0.407853907 |
| 0.984553599 | 0.811551545 |
| -1.01776328 | 0.753638855 |
| 0.932779808 | 0.167547568 |
| -1.03893565 | 0.453275482 |
| 0.911088044 | 0.178738178 |
| -1.03473569 | 0.541619738 |
| -1.03327892 | 0.657701765 |
| -1.01620881 | 0.78228956  |
| 0.993493635 | 0.923980324 |
| -1.08863474 | 0.129607991 |
| 0.992836278 | 0.905292702 |
| 0.931891314 | 0.207088162 |
| 0.95749019  | 0.453330371 |
| -1.04518032 | 0.469110411 |
| 0.959822201 | 0.502379022 |
| 0.86807797  | 0.152202255 |
| -1.13104426 | 0.046274198 |
| -1.09889481 | 0.20572634  |
| -1.16669053 | 0.015310422 |
| 0.94262098  | 0.237100656 |
| -1.03868522 | 0.518925018 |
| 0.988437405 | 0.844042503 |
| 0.987824194 | 0.839124527 |
| -1.0515208  | 0.411215732 |
| 0.794183529 | 0.000567583 |
| 0.974018534 | 0.632162228 |
| -1.02505617 | 0.658254361 |
| 0.977161199 | 0.732209439 |
| -1.06117419 | 0.30138259  |
| 0.884489309 | 0.030507586 |
| -1.05730434 | 0.394134251 |
| -1.03503449 | 0.521498205 |
| 0.892662803 | 0.112431674 |

|             |             |
|-------------|-------------|
| -1.07463464 | 0.228322917 |
| -1.0227011  | 0.679977349 |
| -1.13008379 | 0.033078117 |
| 0.954959282 | 0.398730927 |
| 0.950717927 | 0.36806464  |
| -1.1099037  | 0.139291562 |
| -1.08076403 | 0.171874031 |
| -1.25650273 | 0.046838098 |
| 0.973037284 | 0.610474294 |
| -1.04653308 | 0.432667659 |
| 0.91207548  | 0.213065807 |
| -1.01466198 | 0.767514828 |
| 0.915512326 | 0.154453381 |
| 0.715884133 | 2.4611E-05  |
| -1.06280064 | 0.426654909 |
| -1.05266251 | 0.371204663 |
| -1.11843013 | 0.047984561 |
| -1.00958264 | 0.859719495 |
| -1.14597525 | 0.015290742 |
| 0.968166788 | 0.593899996 |
| 0.927326921 | 0.24352029  |
| -1.01658285 | 0.769745081 |
| 0.911571453 | 0.10810207  |
| 0.890784443 | 0.040403292 |
| -1.07501587 | 0.252348337 |
| -1.00324173 | 0.960159677 |
| -1.06058019 | 0.467404072 |
| -1.07054962 | 0.258158103 |
| -1.02321937 | 0.656708368 |
| 0.994433437 | 0.914247418 |
| -1.01324911 | 0.799549784 |
| 0.59613477  | 4.90666E-05 |
| -1.0463408  | 0.442557182 |
| 0.956368396 | 0.495405183 |
| -1.01157586 | 0.844737422 |
| 0.88879371  | 0.04025355  |
| -1.0961761  | 0.161472962 |
| -1.20208998 | 0.019835078 |
| -1.11843482 | 0.148338457 |
| 0.980815132 | 0.77098994  |
| -1.03319381 | 0.56792955  |
| -1.01085771 | 0.880959831 |
| 0.942093433 | 0.400000239 |
| -1.00009236 | 0.998948081 |



|             |             |
|-------------|-------------|
| 0.935265679 | 0.255266531 |
| 0.967407197 | 0.452454685 |
| 0.930804823 | 0.23693909  |
| -1.06298352 | 0.338861476 |
| -1.06799946 | 0.262578009 |
| -1.19368805 | 0.02604738  |
| -1.04234817 | 0.488288939 |
| 0.978604278 | 0.693268422 |
| -1.03622478 | 0.502983719 |
| 0.902508636 | 0.076839367 |
| 0.996276032 | 0.953222284 |
| -1.65860656 | 3.55331E-10 |
| 0.975903499 | 0.612519367 |
| 0.944502585 | 0.31209982  |
| -1.10265392 | 0.117080884 |
| -1.07841639 | 0.307604403 |
| 0.968194792 | 0.579667694 |
| -1.21379784 | 0.037061175 |
| -1.06556394 | 0.308298348 |
| 0.923117213 | 0.195913534 |
| -1.10796786 | 0.168720058 |
| 0.878780013 | 0.02598132  |
| 0.925998924 | 0.23715469  |
| 0.998702058 | 0.985932402 |
| 0.994612717 | 0.922293128 |
| 0.746693261 | 6.73185E-05 |
| 0.98707626  | 0.852187324 |
| 0.843344549 | 0.001823942 |
| -1.02165416 | 0.681441106 |
| -1.00079213 | 0.990145953 |
| -1.07027234 | 0.259872477 |
| 0.998097803 | 0.972890205 |
| 0.81758569  | 0.095617211 |
| -1.00366881 | 0.94309826  |
| 0.96952293  | 0.716142132 |
| -1.12170395 | 0.090284428 |
| -1.05582739 | 0.359653541 |
| -1.05073857 | 0.435626504 |
| 0.943625936 | 0.299756178 |
| 0.950931407 | 0.365888922 |
| -1.02405188 | 0.70174539  |
| -1.00638098 | 0.924667936 |
| -1.02259393 | 0.641746087 |
| -1.02864794 | 0.842860564 |

|             |             |
|-------------|-------------|
| -1.01638287 | 0.808913614 |
| -1.11228296 | 0.039969729 |
| 0.925962101 | 0.23851502  |
| -1.01800518 | 0.724267055 |
| -1.01272248 | 0.833666248 |
| -1.08786088 | 0.248375948 |
| 0.990641596 | 0.873960779 |
| -1.02004072 | 0.75750518  |
| -1.00517463 | 0.930879168 |
| 0.975548613 | 0.655036251 |
| -1.04362305 | 0.51527649  |
| -1.04038248 | 0.493501635 |
| -1.04977134 | 0.430524819 |
| 0.955643909 | 0.45457424  |
| 0.966800957 | 0.628495184 |
| 0.974639985 | 0.614794823 |
| -1.05217465 | 0.322833855 |
| 0.986946504 | 0.802520719 |
| -1.03474623 | 0.570907998 |
| -1.02396174 | 0.724940585 |
| 0.945657697 | 0.454986463 |
| -1.02260161 | 0.766430385 |
| -1.01936786 | 0.795436282 |
| -1.01089898 | 0.839159668 |
| -1.09292593 | 0.37769458  |
| 0.974541975 | 0.6807017   |
| -1.03689101 | 0.536671279 |
| 0.907560331 | 0.036876551 |
| 0.937281716 | 0.266073926 |
| -1.07013548 | 0.251947698 |
| 0.979450815 | 0.768700216 |
| 0.950129189 | 0.362291086 |
| -1.11135683 | 0.078837619 |
| -1.12245023 | 0.20345278  |
| -1.0311908  | 0.64930626  |
| -1.07734602 | 0.170308456 |
| 0.989016463 | 0.824838879 |
| 0.973963162 | 0.606335142 |
| 0.938154927 | 0.186659223 |
| -1.09710463 | 0.248274481 |
| 0.965949905 | 0.525565318 |
| -1.02651435 | 0.632981965 |
| 0.961948627 | 0.563404559 |
| 0.971707865 | 0.651847042 |

|             |             |
|-------------|-------------|
| -1.13432061 | 0.08686308  |
| -1.31145074 | 5.00869E-05 |
| -1.05880041 | 0.32021697  |
| -1.03637249 | 0.627588966 |
| 0.919063768 | 0.15907371  |
| 0.980932687 | 0.765139416 |
| -1.01728979 | 0.79531884  |
| -1.04486615 | 0.523647003 |
| -1.07491851 | 0.223217027 |
| 0.964548557 | 0.50749334  |
| -1.00150979 | 0.977577355 |
| 0.893664264 | 0.163154806 |
| 0.927622796 | 0.218368188 |
| 0.98732415  | 0.806828416 |
| 0.992161712 | 0.89791481  |
| -1.11629745 | 0.06111032  |
| -1.00469798 | 0.946942836 |
| 0.997724502 | 0.97170694  |
| 0.956599394 | 0.473736204 |
| 0.972435673 | 0.738261562 |
| 0.99052822  | 0.851361611 |
| 0.957416021 | 0.415002596 |
| -1.08545518 | 0.220143301 |
| -1.02429818 | 0.680167638 |
| -1.02024646 | 0.707153753 |
| -1.07229009 | 0.214199059 |
| -1.0782129  | 0.232150977 |
| -1.00724676 | 0.894439176 |
| -1.13248201 | 0.07427416  |
| -1.0660128  | 0.367190701 |
| -1.03985083 | 0.497536335 |
| -1.09202561 | 0.198018021 |
| -1.22664312 | 0.003998804 |
| 0.904356972 | 0.071722608 |
| 0.988807869 | 0.84391993  |
| -1.08056185 | 0.262572767 |
| 0.925581226 | 0.216636937 |
| 0.913304056 | 0.092946939 |
| 0.912102857 | 0.187586637 |
| 0.95848302  | 0.49804679  |
| 0.805173082 | 0.00145182  |
| -1.0449957  | 0.582796433 |
| -1.04482803 | 0.404684539 |
| 0.997162263 | 0.958371351 |

|             |             |
|-------------|-------------|
| 0.675880233 | 6.01292E-06 |
| -1.09152236 | 0.119450116 |
| -1.18029068 | 0.021645725 |
| -1.05730042 | 0.394523832 |
| -1.01130808 | 0.864457833 |
| -1.18539848 | 0.0061494   |
| -1.14015235 | 0.039030703 |
| 0.886481522 | 0.120882877 |
| -1.00924658 | 0.863636111 |
| 0.858126457 | 0.020649427 |
| 0.870352074 | 0.041651039 |
| -1.00499332 | 0.933232252 |
| 0.998601558 | 0.97643586  |
| 0.944591201 | 0.388669907 |
| 0.950987282 | 0.378364684 |
| -1.01583354 | 0.761515564 |
| -1.05258185 | 0.391686472 |
| 0.872933639 | 0.038201005 |
| 0.987050524 | 0.789956986 |
| -1.11692034 | 0.079710266 |
| -1.12627373 | 0.07928816  |
| 0.834959628 | 0.020719863 |
| -1.17910967 | 0.0607741   |
| 0.714293421 | 2.27344E-05 |
| -1.00727384 | 0.91511366  |
| -1.0193294  | 0.770273277 |
| 0.964483315 | 0.575219783 |
| -1.03190647 | 0.634799849 |
| 0.723334688 | 0.000180453 |
| 0.97091868  | 0.557423599 |
| 0.963683754 | 0.527720738 |
| 0.854982377 | 0.16367085  |
| 0.957064682 | 0.41152972  |
| -1.06770037 | 0.22091957  |
| 0.946749061 | 0.311625277 |
| -1.03054514 | 0.637338174 |
| -1.03183162 | 0.528846976 |
| 0.982748825 | 0.815293035 |
| 0.958736172 | 0.551937241 |
| 0.953796627 | 0.408924108 |
| 0.972219903 | 0.737940634 |
| -1.02658305 | 0.629132316 |
| 0.844845666 | 0.005879833 |
| -1.05192128 | 0.475903149 |

|             |             |
|-------------|-------------|
| -1.03988243 | 0.497077921 |
| -1.09642219 | 0.135231729 |
| -1.15686364 | 0.052140149 |
| -1.00293994 | 0.966646643 |
| 0.96295514  | 0.493191444 |
| -1.01530402 | 0.815203013 |
| -1.16899615 | 0.016897074 |
| 0.881846812 | 0.010586411 |
| 0.976678588 | 0.671447934 |
| 0.980480319 | 0.742076805 |
| 0.987377799 | 0.832654262 |
| 0.909645589 | 0.087142325 |
| -1.0493246  | 0.446882889 |
| -1.00400417 | 0.938386433 |
| -1.09142322 | 0.226708697 |
| -1.00623571 | 0.920004583 |
| 0.952368075 | 0.362812589 |
| 0.954816817 | 0.383522452 |
| 0.975779388 | 0.633125878 |
| -1.13105971 | 0.132714416 |
| 0.988526664 | 0.879315404 |
| -1.04078414 | 0.370856826 |
| -1.32429233 | 0.000162607 |
| -1.06486496 | 0.374470418 |
| 0.949536432 | 0.461159828 |
| 0.848864396 | 0.008171775 |
| -1.02152781 | 0.668648913 |
| 0.974363955 | 0.663585717 |
| -1.13371629 | 0.022875893 |
| 0.932465944 | 0.270356972 |
| -1.02265164 | 0.708830117 |
| -1.06685728 | 0.306174702 |
| -1.14258182 | 0.076870289 |
| 0.855476603 | 0.003015429 |
| -1.0241782  | 0.701201077 |
| -1.01465851 | 0.806721532 |
| -1.05895764 | 0.409972163 |
| 0.939503704 | 0.27101184  |
| -1.03386663 | 0.564792816 |
| -1.04571311 | 0.492346824 |
| -1.14166525 | 0.016385479 |
| 0.883737426 | 0.132459325 |
| -1.06165678 | 0.298609766 |
| 0.949842439 | 0.359879933 |

|             |             |
|-------------|-------------|
| -1.04008501 | 0.506781617 |
| -1.06835419 | 0.18626532  |
| -1.25384748 | 0.001075699 |
| -1.16801578 | 0.028133907 |
| -1.01886622 | 0.777483508 |
| -1.0118788  | 0.877924307 |
| 0.998613072 | 0.977750033 |
| -1.0037617  | 0.955739848 |
| -1.02878719 | 0.626020081 |
| 0.984471177 | 0.776148553 |
| 0.820000354 | 0.001683564 |
| -1.1536056  | 0.017566311 |
| -1.04341331 | 0.531643134 |
| 0.658977617 | 3.03507E-06 |
| 0.946447353 | 0.276918419 |
| -1.04513683 | 0.434172893 |
| 0.812292663 | 0.218857356 |
| 0.950769096 | 0.40359325  |
| -1.02492948 | 0.672579943 |
| 0.946274459 | 0.292212506 |
| 0.886080922 | 0.052314329 |
| -1.05362029 | 0.32616245  |
| -1.01082135 | 0.841525408 |
| 0.985767653 | 0.776425416 |
| -1.07081583 | 0.260914417 |
| -1.04926385 | 0.400593225 |
| -1.05392021 | 0.518035302 |
| -1.07310471 | 0.180160317 |
| -1.08078154 | 0.20086703  |
| -1.1553327  | 0.02275609  |
| -1.1861702  | 0.01592028  |
| -1.03211011 | 0.648948509 |
| -1.0027073  | 0.963245375 |
| -1.05053964 | 0.422687579 |
| -1.23980233 | 0.017284208 |
| -1.05914753 | 0.29750029  |
| -1.13405459 | 0.027666896 |
| 0.999517686 | 0.994040675 |
| -1.04266834 | 0.474413271 |
| -1.06776827 | 0.252390274 |
| -1.11131886 | 0.044298406 |
| 0.975853978 | 0.680411865 |
| -1.0503186  | 0.53194823  |
| -1.17099785 | 0.010564356 |

|             |             |
|-------------|-------------|
| -1.06632998 | 0.218305674 |
| 0.962674464 | 0.489474255 |
| 0.899147874 | 0.041192453 |
| -1.04081077 | 0.518265664 |
| -1.10527843 | 0.09771432  |
| -1.1031753  | 0.062913197 |
| 0.99643725  | 0.960549101 |
| 0.934162353 | 0.235074679 |
| 0.999407546 | 0.991393321 |
| 0.964116492 | 0.574801049 |
| 0.920190311 | 0.150744623 |
| 0.91703705  | 0.219188911 |
| 0.911376507 | 0.094402913 |
| 0.981696034 | 0.762725594 |
| 0.951873401 | 0.432368315 |
| -1.02310433 | 0.711610733 |
| -1.04221186 | 0.522291736 |
| -1.26028508 | 0.004050899 |
| 0.968383113 | 0.580258756 |
| 0.962784962 | 0.550962595 |
| -1.03726829 | 0.500215814 |
| -1.03813398 | 0.539378472 |
| 0.987116747 | 0.810664387 |
| -1.15004597 | 0.017836624 |
| 0.973111242 | 0.65335076  |
| 0.99461597  | 0.923043464 |
| 0.953585693 | 0.596093085 |
| -1.09240681 | 0.127447626 |
| 0.817836698 | 0.026457246 |
| 0.982877458 | 0.746408009 |
| 0.999873628 | 0.997849601 |
| 0.963446461 | 0.569331371 |
| -1.01923423 | 0.71706247  |
| -1.04230348 | 0.548533523 |
| -1.04738669 | 0.431154731 |
| -1.0344248  | 0.569556018 |
| 0.966664585 | 0.605505099 |
| -1.03094557 | 0.524130422 |
| -1.05639248 | 0.454471598 |
| -1.06039313 | 0.269313231 |
| 0.999191663 | 0.990599231 |
| -1.07234195 | 0.246812085 |
| -1.11177739 | 0.119947152 |
| 0.970873685 | 0.654666733 |

|             |             |
|-------------|-------------|
| 0.937775349 | 0.288583872 |
| 0.960842364 | 0.498107063 |
| -1.04744769 | 0.398418292 |
| -1.05667577 | 0.421039526 |
| 0.977091625 | 0.728733688 |
| -1.12150845 | 0.096977621 |
| -1.05740675 | 0.317729906 |
| -1.0119968  | 0.837926619 |
| 0.994860264 | 0.934825699 |
| 0.893980158 | 0.154162977 |
| 0.96633331  | 0.555142234 |
| -1.00192546 | 0.976678234 |
| 0.916548094 | 0.08410818  |
| -1.12163633 | 0.093349247 |
| 0.996730462 | 0.956607106 |
| 0.958412017 | 0.470255962 |
| 0.924579418 | 0.182500739 |
| -1.03739653 | 0.508561405 |
| -1.13943732 | 0.050856357 |
| 0.974695108 | 0.672403857 |
| -1.03261876 | 0.618646154 |
| -1.05141925 | 0.424853105 |
| 0.883520044 | 0.050331621 |
| 0.981922259 | 0.765845339 |
| -1.07993014 | 0.222574689 |
| -1.15975011 | 0.014780099 |
| 0.995832241 | 0.936239978 |
| 0.99896901  | 0.986721572 |
| -1.04893018 | 0.433279166 |
| -1.01596484 | 0.771414422 |
| 0.940134176 | 0.354827126 |
| 0.871375116 | 0.039165231 |
| -1.03757459 | 0.645480443 |
| -1.08305697 | 0.156950968 |
| -1.11901323 | 0.038136011 |
| 0.964283132 | 0.463284451 |
| 0.93036058  | 0.205111498 |
| 0.917126904 | 0.20430863  |
| 0.88163885  | 0.082114408 |
| 0.975872825 | 0.668339327 |
| 0.961815901 | 0.594705111 |
| -1.01235516 | 0.82331719  |
| -1.15223648 | 0.015944503 |
| -1.07419516 | 0.238452113 |



|             |             |
|-------------|-------------|
| -1.03175164 | 0.597243934 |
| -1.07516967 | 0.225817595 |
| 0.975563311 | 0.64475075  |
| -1.02735978 | 0.629944644 |
| 0.992272432 | 0.882227583 |
| 0.984977059 | 0.823602383 |
| -1.06723475 | 0.314296778 |
| 0.980339034 | 0.711633307 |
| -1.07912098 | 0.125905186 |
| 0.999123481 | 0.990492654 |
| -1.07788493 | 0.144057093 |
| -1.04100173 | 0.463353149 |
| -1.07816065 | 0.135594848 |
| -1.04350502 | 0.425638074 |
| 0.820106206 | 0.008256674 |
| -1.00641895 | 0.903026018 |
| -1.00671693 | 0.924176249 |
| -1.03371214 | 0.617646765 |
| 0.966745469 | 0.575877928 |
| -1.01728687 | 0.7207117   |
| 0.892955306 | 0.101226725 |
| -1.01816861 | 0.727084024 |
| -1.06766857 | 0.349978335 |
| -1.10024668 | 0.155689081 |
| 0.958538003 | 0.310438216 |
| -1.14055324 | 0.020320895 |
| -1.04613418 | 0.418627794 |
| -1.05018636 | 0.334916715 |
| 0.970549145 | 0.587842887 |
| -1.06044711 | 0.338490408 |
| -1.00379083 | 0.945230117 |
| -1.02945276 | 0.614290798 |
| 0.993179058 | 0.914541919 |
| 0.876494272 | 0.389291682 |
| -1.05183229 | 0.477106912 |
| -1.17548508 | 0.026243351 |
| 0.989167407 | 0.886565727 |
| -1.04907188 | 0.453378078 |
| -1.14269651 | 0.081134613 |
| -1.0007495  | 0.992582011 |
| -1.00993072 | 0.854898904 |
| -1.16177559 | 0.018665084 |
| 0.919459685 | 0.1194015   |
| -1.03670511 | 0.521068104 |

|             |             |
|-------------|-------------|
| -1.08423369 | 0.403003402 |
| 0.98794817  | 0.836141002 |
| 0.947130499 | 0.412774331 |
| -1.03582381 | 0.653165325 |
| 0.942390931 | 0.301382484 |
| -1.19410059 | 0.001305903 |
| 0.988253036 | 0.843509637 |
| -1.01709938 | 0.735193535 |
| 0.989195631 | 0.884056892 |
| -1.01052113 | 0.871127604 |
| -1.12502183 | 0.03825457  |
| 0.996556261 | 0.955181165 |
| -1.02885331 | 0.616117593 |
| 0.876107324 | 0.028758914 |
| -1.04015855 | 0.500444874 |
| 0.859401107 | 0.013908238 |
| 0.73961301  | 4.84345E-07 |
| -1.07018848 | 0.25611014  |
| -1.02295325 | 0.615663749 |
| -1.13677689 | 0.062430504 |
| 0.965969481 | 0.58647064  |
| -1.00201603 | 0.968474742 |
| -1.00346035 | 0.95860558  |
| 0.983948061 | 0.735964563 |
| -1.06277364 | 0.303263279 |
| -1.00832027 | 0.906332077 |
| 0.920617419 | 0.222711712 |
| -1.08407139 | 0.176663629 |
| -1.06248982 | 0.42312871  |
| 0.931440236 | 0.214093813 |
| -1.06495125 | 0.265228315 |
| -1.04800449 | 0.391806263 |
| -1.02140017 | 0.734777574 |
| -1.01890481 | 0.750845456 |
| 0.88514036  | 0.021887404 |
| 0.929625588 | 0.739248642 |
| -1.01739556 | 0.791236023 |
| -1.01244944 | 0.865770925 |
| 0.997539345 | 0.970875356 |
| -1.08700915 | 0.15799564  |
| -1.07217683 | 0.157975863 |
| -1.06508606 | 0.290544529 |
| -1.02831357 | 0.630565281 |
| 0.961327891 | 0.560679025 |

|             |             |
|-------------|-------------|
| -1.18650833 | 0.011996497 |
| 0.994698313 | 0.934490464 |
| -1.04417779 | 0.429935603 |
| 0.950179606 | 0.457559397 |
| -1.14040952 | 0.024511431 |
| 0.961378013 | 0.443981455 |
| -1.03255279 | 0.660570591 |
| -1.03183047 | 0.635732138 |
| 0.99556866  | 0.932133708 |
| -1.13742495 | 0.068743771 |
| -1.02848387 | 0.624185837 |
| -1.04704204 | 0.431693052 |
| -1.14364909 | 0.022011438 |
| 0.976492483 | 0.680937811 |
| -1.10232059 | 0.095105675 |
| -1.14833684 | 0.021704417 |
| -1.0100025  | 0.845315345 |
| -1.00676456 | 0.920279104 |
| 0.990225993 | 0.853923233 |
| -1.02406952 | 0.619377394 |
| -1.12632754 | 0.049690697 |
| -1.0570038  | 0.298939413 |
| -1.04403919 | 0.496561611 |
| -1.01425752 | 0.788465916 |
| 0.953405006 | 0.390724431 |
| 0.921841192 | 0.240115068 |
| 0.973448383 | 0.628993073 |
| 0.875578658 | 0.007454309 |
| -1.10216808 | 0.093968431 |
| -1.07510401 | 0.218979692 |
| -1.08817788 | 0.556898187 |
| -1.03393367 | 0.591109956 |
| 0.941767449 | 0.258429839 |
| 0.936167094 | 0.219661978 |
| 0.974022199 | 0.64658615  |
| 0.878763411 | 0.006254832 |
| 0.960666589 | 0.524288172 |
| -1.10071844 | 0.117708738 |
| -1.00359809 | 0.951278479 |
| 0.972057319 | 0.557737621 |
| -1.21084067 | 0.000223546 |
| -1.01297828 | 0.842197073 |
| -1.15935081 | 0.010652764 |
| 0.859629884 | 0.015097271 |

|             |             |
|-------------|-------------|
| 0.983258228 | 0.79079192  |
| 0.608744697 | 6.23118E-09 |
| -1.06281091 | 0.42190534  |
| -1.00955662 | 0.847402124 |
| -1.06913459 | 0.225298469 |
| -1.06612612 | 0.296552741 |
| 0.918224721 | 0.283269787 |
| 0.980626998 | 0.681036031 |
| -1.14576456 | 0.02231184  |
| 0.686623826 | 2.88623E-06 |
| -1.03592533 | 0.559439884 |
| -1.06342669 | 0.26544818  |
| -1.12049683 | 0.018670654 |
| -1.05552942 | 0.349130915 |
| -1.05760077 | 0.377151072 |
| -1.04558407 | 0.524455883 |
| 0.973296188 | 0.611740355 |
| 0.8313471   | 0.001467107 |
| -1.08943493 | 0.154974989 |
| -1.00577947 | 0.948475896 |
| 0.946461712 | 0.281296943 |
| 0.886490133 | 0.037494286 |
| 0.931380137 | 0.105125613 |
| 0.949943346 | 0.436350306 |
| -1.00931238 | 0.891964428 |
| 0.936207754 | 0.281626078 |
| 0.895815357 | 0.118668891 |
| -1.07992345 | 0.138500687 |
| -1.0061295  | 0.915749469 |
| -1.08842661 | 0.251077117 |
| -1.1208575  | 0.047131028 |
| -1.07496908 | 0.198760577 |
| -1.01113013 | 0.877092007 |
| -1.01665423 | 0.770418397 |
| -1.02905779 | 0.695170719 |
| -1.0635913  | 0.289034429 |
| 0.993918098 | 0.911792939 |
| -1.2372177  | 0.006266093 |
| 0.977081757 | 0.67693353  |
| 0.909125107 | 0.082584598 |
| -1.01869318 | 0.779896871 |
| -1.02387138 | 0.695107907 |
| -1.0296921  | 0.618888745 |
| -1.00291065 | 0.950579136 |

|             |             |
|-------------|-------------|
| 0.988577781 | 0.817034243 |
| -1.00537335 | 0.922110343 |
| -1.01511661 | 0.800539216 |
| -1.01710789 | 0.74785442  |
| -1.02612452 | 0.596943125 |
| -1.0742348  | 0.129871706 |
| 0.953798478 | 0.411109281 |
| -1.00669622 | 0.921376329 |
| -1.06658963 | 0.382233473 |
| -1.06153964 | 0.439609241 |
| 0.991081584 | 0.867674341 |
| 0.964522471 | 0.53935258  |
| 0.946570733 | 0.320187659 |
| -1.09889587 | 0.052606384 |
| 0.809919759 | 0.02538515  |
| -1.0705486  | 0.326860932 |
| -1.06152609 | 0.362806003 |
| 0.657249964 | 1.73304E-06 |
| -1.11706982 | 0.042821559 |
| -1.00134417 | 0.981777826 |
| 0.79784938  | 0.007523305 |
| -1.01682548 | 0.778662282 |
| -1.019158   | 0.767429084 |
| -1.03911877 | 0.597866613 |
| 0.975541728 | 0.641713334 |
| -1.01912375 | 0.747016837 |
| 0.942913392 | 0.462029981 |
| -1.02038469 | 0.685006384 |
| 0.995798873 | 0.949809454 |
| -1.08129035 | 0.19327771  |
| -1.01916351 | 0.742550525 |
| 0.95523085  | 0.444942127 |
| -1.21976381 | 0.049578685 |
| 0.991130714 | 0.895179246 |
| -1.06986227 | 0.217234987 |
| -1.0283633  | 0.671058101 |
| 0.98840799  | 0.865286268 |
| -1.14942275 | 0.086068685 |
| -1.04618168 | 0.447084558 |
| 0.918083169 | 0.270257282 |
| -1.08911447 | 0.092560716 |
| 0.986011205 | 0.818286779 |
| -1.26794633 | 0.030720018 |
| -1.26733692 | 0.001393462 |

|             |             |
|-------------|-------------|
| 0.99303056  | 0.890637325 |
| 0.983987934 | 0.780109205 |
| -1.13510785 | 0.059398336 |
| -1.04715946 | 0.419952876 |
| -1.05342001 | 0.330690357 |
| 0.986847514 | 0.814579704 |
| 0.998859947 | 0.982769369 |
| 0.935684413 | 0.26678445  |
| 0.975399147 | 0.754265046 |
| -1.91243266 | 5.01155E-07 |
| -1.07161919 | 0.150819729 |
| 0.862809911 | 0.009771769 |
| 0.938417485 | 0.36340548  |
| -1.10049133 | 0.130710195 |
| 0.975586723 | 0.698332997 |
| -1.03858616 | 0.542429818 |
| 0.984596107 | 0.838452692 |
| 0.975791261 | 0.698267549 |
| -1.01422908 | 0.810721447 |
| -1.03853767 | 0.474564929 |
| 0.974528198 | 0.604984303 |
| 0.945422364 | 0.352941404 |
| 0.685416052 | 0.005272601 |
| 0.991219427 | 0.888143313 |
| 0.914798866 | 0.082567533 |
| -1.05519427 | 0.33929932  |
| -1.12862494 | 0.175636684 |
| -1.10627284 | 0.064570063 |
| -1.00065178 | 0.992053141 |
| -1.26395441 | 0.027015224 |
| -1.07437744 | 0.409743419 |
| 0.911735879 | 0.118192681 |
| 0.96432063  | 0.582799893 |
| 0.963303108 | 0.576570201 |
| -1.02707666 | 0.633471104 |
| -1.03913457 | 0.521383408 |
| -1.04278189 | 0.494384208 |
| 0.971881458 | 0.597538065 |
| 0.952140386 | 0.312709027 |
| -1.07405061 | 0.396820725 |
| 0.973611742 | 0.679939314 |
| 0.980956307 | 0.759120172 |
| -1.11908782 | 0.030651164 |
| 0.905785178 | 0.051702998 |

|             |             |
|-------------|-------------|
| -1.0286202  | 0.6192043   |
| -1.00432253 | 0.946229819 |
| -1.0700338  | 0.281472263 |
| 0.860128841 | 0.025257379 |
| -1.15274247 | 0.025896973 |
| 0.976969821 | 0.720046155 |
| -1.04779456 | 0.365569862 |
| -1.13307261 | 0.044424806 |
| -1.01756117 | 0.727789481 |
| -1.07700398 | 0.191254017 |
| -1.0748688  | 0.148234881 |
| -1.06997059 | 0.243985212 |
| -1.03287166 | 0.559850883 |
| -1.02676408 | 0.693171953 |
| -1.12238274 | 0.08947931  |
| 0.965548119 | 0.497453445 |
| -1.0483774  | 0.408714837 |
| -1.01219399 | 0.867853165 |
| -1.15850447 | 0.015054183 |
| 0.928344051 | 0.113608072 |
| -1.07057135 | 0.28288008  |
| 0.94026505  | 0.362465441 |
| -1.01143881 | 0.820581069 |
| 0.99413438  | 0.942471444 |
| 0.995503413 | 0.927179432 |
| -1.01711968 | 0.786357763 |
| -1.0341332  | 0.607133494 |
| -1.02954266 | 0.638185847 |
| -1.11103583 | 0.02821768  |
| -1.09408269 | 0.093585639 |
| -1.15265751 | 0.04143779  |
| -1.0424323  | 0.462088527 |
| 0.993773334 | 0.918544673 |
| -1.01764071 | 0.777058621 |
| -1.0129355  | 0.806734202 |
| -1.08198311 | 0.267681962 |
| -1.01533895 | 0.816868989 |
| 0.989164052 | 0.891861142 |
| -1.03151493 | 0.612575873 |
| -1.04719743 | 0.466104884 |
| -1.12091695 | 0.03669535  |
| 0.98711079  | 0.820043175 |
| 0.946624805 | 0.351983967 |
| 0.889081842 | 0.237244699 |

|             |             |
|-------------|-------------|
| 0.875778291 | 0.083504825 |
| 0.943804049 | 0.363715224 |
| -1.00646384 | 0.913178272 |
| -1.13542869 | 0.034895426 |
| 0.880178965 | 0.063817566 |
| -1.04080641 | 0.591438642 |
| -1.03345702 | 0.841024438 |
| -1.10265524 | 0.212324481 |
| -1.01649487 | 0.736542614 |
| -1.10454975 | 0.125852764 |
| 0.956250135 | 0.392754629 |
| -1.01040531 | 0.849902263 |
| 0.984154173 | 0.831853157 |
| -1.01514816 | 0.858014652 |
| 0.993973669 | 0.920133236 |
| -1.08451697 | 0.184260083 |
| 0.911316706 | 0.160926639 |
| -1.08754686 | 0.255373245 |
| 0.964673436 | 0.519271257 |
| -1.05518218 | 0.385937106 |
| -1.17013795 | 0.033982134 |
| -1.06358871 | 0.313753448 |
| -1.07062075 | 0.286959361 |
| -1.02167459 | 0.732533734 |
| 0.995224424 | 0.935812527 |
| -1.1653328  | 0.020974454 |
| -1.18270089 | 0.00367972  |
| -1.05815073 | 0.350733579 |
| -1.06123215 | 0.225007103 |
| -1.07229014 | 0.199921197 |
| 0.979081836 | 0.73808583  |
| -1.00107174 | 0.984145457 |
| -1.02694197 | 0.679186784 |
| -1.13533948 | 0.023457577 |
| -1.11915533 | 0.074972739 |
| 0.965900519 | 0.507595804 |
| 0.962182482 | 0.544874105 |
| -1.00438499 | 0.938536522 |
| 0.901889469 | 0.082472006 |
| 0.966074138 | 0.551770319 |
| -1.04381361 | 0.431411479 |
| 0.841784658 | 0.018505573 |
| -1.02691715 | 0.661190212 |
| -1.12449655 | 0.03320608  |



|             |             |
|-------------|-------------|
| -1.0113508  | 0.840309668 |
| 0.97715268  | 0.728649658 |
| -1.07994745 | 0.210282212 |
| -1.11818115 | 0.042735107 |
| -1.25065859 | 0.000850741 |
| -1.07851995 | 0.13508889  |
| -1.01857072 | 0.852612385 |
| -1.00245401 | 0.962080586 |
| -1.04254453 | 0.548005886 |
| -1.00071122 | 0.990074293 |
| -1.12267414 | 0.10243994  |
| 0.9558651   | 0.400374441 |
| -1.04044081 | 0.472011157 |
| -1.12779129 | 0.034987489 |
| 0.998794055 | 0.985653635 |
| -1.03845059 | 0.570151597 |
| 0.929221651 | 0.14593646  |
| 0.887508844 | 0.090947892 |
| -1.03294619 | 0.567274796 |
| -1.07703508 | 0.291856712 |
| 0.972570096 | 0.637365877 |
| 0.977646713 | 0.656597584 |
| 0.987583141 | 0.883488405 |
| -1.01814231 | 0.741373997 |
| -1.16823098 | 0.01992978  |
| 0.982800841 | 0.787104573 |
| -1.18544991 | 0.005981215 |
| 0.959582803 | 0.407259733 |
| 0.914308869 | 0.099320583 |
| -1.11412933 | 0.14537453  |
| -1.17498367 | 0.00840276  |
| 0.990626717 | 0.856036228 |
| -1.0837023  | 0.144223511 |
| 0.959305365 | 0.660943796 |
| 0.881575184 | 0.035873495 |
| 0.982460799 | 0.741772987 |
| 0.916135012 | 0.16324248  |
| 0.966496761 | 0.647642461 |
| 0.973637445 | 0.603695104 |
| 0.994445906 | 0.925514935 |
| -1.02613334 | 0.677648936 |
| -1.03582973 | 0.52694174  |
| -1.05926631 | 0.309506384 |
| 0.931677434 | 0.276497012 |

|             |             |
|-------------|-------------|
| 0.986535907 | 0.840553887 |
| 0.990727126 | 0.857924867 |
| -1.06329208 | 0.274240264 |
| 0.971431615 | 0.645118306 |
| 0.987834073 | 0.823141586 |
| -1.17511027 | 0.009293975 |
| -1.00662614 | 0.903613754 |
| 0.902964618 | 0.061669269 |
| -1.06236763 | 0.292411581 |
| 0.999567041 | 0.993868928 |
| 0.985205367 | 0.769467038 |
| 0.965830372 | 0.609877961 |
| 0.964355679 | 0.500799154 |
| 0.955757404 | 0.55731473  |
| 0.899298143 | 0.170210691 |
| -1.01745749 | 0.754199132 |
| 0.950107288 | 0.420271818 |
| -1.04310473 | 0.518441629 |
| -1.10467789 | 0.123032177 |
| -1.11933791 | 0.12020672  |
| 0.947836628 | 0.346637629 |
| 0.949558634 | 0.391251791 |
| -1.03458703 | 0.59489166  |
| -1.01746394 | 0.77242018  |
| -1.13972146 | 0.026221872 |
| -1.14807449 | 0.046414569 |
| 0.996142927 | 0.944756921 |
| 0.926909044 | 0.136340942 |
| -1.12014002 | 0.040048483 |
| -1.00267635 | 0.956678794 |
| 0.946900548 | 0.419767719 |
| -1.05554591 | 0.369854016 |
| 0.96549228  | 0.557476332 |
| 0.989000013 | 0.819795988 |
| -1.05950324 | 0.325902024 |
| -1.0086726  | 0.863577465 |
| -1.01170096 | 0.861187702 |
| -1.00007623 | 0.998781662 |
| -1.0744796  | 0.190071754 |
| 0.960653359 | 0.488803671 |
| 0.921523953 | 0.498980343 |
| -1.16921864 | 0.015940032 |
| -1.00471615 | 0.926805648 |
| 0.907509796 | 0.08300127  |

|             |             |
|-------------|-------------|
| 0.959326127 | 0.559858715 |
| 0.893573846 | 0.057376995 |
| -1.11851217 | 0.078964531 |
| 0.915887699 | 0.143036179 |
| 0.986949514 | 0.881701146 |
| -1.11787834 | 0.066721145 |
| -1.02291227 | 0.677507943 |
| -1.05779898 | 0.383856681 |
| 0.889907485 | 0.044225651 |
| 0.943392864 | 0.406548716 |
| -1.0727161  | 0.323253889 |
| -1.01744045 | 0.767776447 |
| -1.04654074 | 0.435014324 |
| -1.06866703 | 0.349755184 |
| 0.965879657 | 0.509758474 |
| -1.10621063 | 0.089914394 |
| -1.03406647 | 0.575539769 |
| -1.07563369 | 0.316295041 |
| -1.04832409 | 0.471777136 |
| 0.967465392 | 0.497462709 |
| -1.04163303 | 0.490662361 |
| 0.967352074 | 0.593753418 |
| -1.04346104 | 0.406519176 |
| -1.00620883 | 0.931308587 |
| -1.08127997 | 0.168166816 |
| -1.02736283 | 0.693949521 |
| -1.02139794 | 0.71775474  |
| -1.02091548 | 0.714138863 |
| -1.04405846 | 0.512340444 |
| -1.0000045  | 0.999939389 |
| -1.16931923 | 0.011040662 |
| -1.04434627 | 0.507502913 |
| 0.689474718 | 5.51901E-07 |
| 0.926242118 | 0.13555562  |
| 0.93561634  | 0.307683113 |
| 0.947507616 | 0.441802972 |
| 0.985938866 | 0.793941661 |
| -1.14615439 | 0.012627385 |
| -1.05198494 | 0.339077119 |
| -1.14453535 | 0.044369091 |
| -1.06371027 | 0.251035298 |
| 0.994244551 | 0.921335126 |
| 0.934766012 | 0.319604623 |
| 0.971570309 | 0.568838774 |

|             |             |
|-------------|-------------|
| -1.15415482 | 0.005771545 |
| 0.954283051 | 0.369066007 |
| -1.08994993 | 0.224679511 |
| 0.994085232 | 0.922164502 |
| -1.01277801 | 0.794817747 |
| -1.02525616 | 0.675096147 |
| 0.932051037 | 0.192328139 |
| -1.04718833 | 0.488652557 |
| 0.94498955  | 0.217016282 |
| -1.04226677 | 0.472998729 |
| 0.959273228 | 0.506016355 |
| 0.889420953 | 0.114602094 |
| -1.07460692 | 0.188284037 |
| -1.05054813 | 0.304660335 |
| -1.07203889 | 0.248328074 |
| 0.973696161 | 0.702117358 |
| -1.03623654 | 0.555372339 |
| -1.24256389 | 0.000345156 |
| -1.05514282 | 0.390037821 |
| -1.01983669 | 0.677078632 |
| -1.00573043 | 0.927808477 |
| 0.893673492 | 0.090430899 |
| 0.985644944 | 0.791034662 |
| -1.05145534 | 0.258829618 |
| 0.960247829 | 0.400923695 |
| 0.938830482 | 0.5267373   |
| 0.990886508 | 0.894991016 |
| 0.960662579 | 0.424585812 |
| 0.7122714   | 4.84839E-06 |
| 0.966924817 | 0.493083283 |
| 0.948788068 | 0.392484667 |
| -1.08200817 | 0.288745231 |
| -1.31149788 | 0.000210642 |
| 0.909179066 | 0.087928701 |
| -1.0007625  | 0.990435599 |
| 0.903861582 | 0.108806664 |
| -1.00859463 | 0.88876265  |
| 0.891721365 | 0.039609355 |
| 0.967154816 | 0.546621262 |
| -1.02489144 | 0.766009706 |
| 0.952165236 | 0.355705413 |
| -1.02796491 | 0.689458769 |
| -1.07549349 | 0.258632488 |
| 0.979676791 | 0.771496962 |

|             |             |
|-------------|-------------|
| -1.01049338 | 0.874146748 |
| 0.930983759 | 0.148805435 |
| 0.996555064 | 0.956287404 |
| -1.05526228 | 0.40729944  |
| -1.01280488 | 0.856587227 |
| -1.15903796 | 0.00439601  |
| -1.02380661 | 0.673992464 |
| -1.03510701 | 0.606172691 |
| -1.04281652 | 0.544067011 |
| 0.9904315   | 0.859233418 |
| 0.993665214 | 0.90745302  |
| 0.989774392 | 0.846094357 |
| -1.01645652 | 0.759326931 |
| 0.973101359 | 0.606547151 |
| 0.978134215 | 0.689979152 |
| -1.20049177 | 0.003251253 |
| 0.940059153 | 0.371792106 |
| -1.07038195 | 0.325477987 |
| 0.908885529 | 0.091429131 |
| -1.03243065 | 0.595074408 |
| -1.11589336 | 0.123921721 |
| -1.06790622 | 0.232309404 |
| 0.996469226 | 0.959710456 |
| 0.978428957 | 0.687754244 |
| -1.01098158 | 0.833018987 |
| 0.963702292 | 0.565288962 |
| -1.03218757 | 0.567894722 |
| -1.18323022 | 0.025714019 |
| -1.04679751 | 0.533164402 |
| -1.07547384 | 0.267559389 |
| 0.977175482 | 0.765739471 |
| 0.993417695 | 0.923824307 |
| 0.999526789 | 0.994447431 |
| -1.05000518 | 0.416850706 |
| 0.921883927 | 0.171348315 |
| 0.900613541 | 0.116228691 |
| -1.06512877 | 0.305745172 |
| -1.072795   | 0.167079988 |
| -1.02217634 | 0.666607315 |
| 0.974223984 | 0.648873244 |
| -1.02075452 | 0.752624584 |
| 0.733612695 | 9.30408E-06 |
| -1.10863323 | 0.093536324 |
| -1.03604291 | 0.594375955 |

|             |             |
|-------------|-------------|
| 0.931462232 | 0.270957815 |
| -1.01945131 | 0.673155768 |
| 0.938163331 | 0.226287828 |
| 0.955110007 | 0.537313722 |
| -1.14522393 | 0.026193444 |
| -1.10892081 | 0.173991385 |
| -1.03746199 | 0.562316884 |
| -1.02412928 | 0.669269444 |
| 0.924904669 | 0.190041113 |
| 0.949211557 | 0.365163595 |
| 0.984443775 | 0.794206873 |
| 0.983136108 | 0.792859499 |
| 0.96972837  | 0.550844902 |
| -1.08440439 | 0.172741674 |
| -1.08422997 | 0.119011003 |
| -1.15542553 | 0.011120614 |
| -1.02200981 | 0.628523234 |
| 0.984755432 | 0.769454649 |
| 0.999172085 | 0.988483327 |
| -1.05565806 | 0.344148419 |
| -1.06709375 | 0.292204962 |
| 0.992368482 | 0.890475314 |
| 0.94233132  | 0.342240903 |
| -1.08576526 | 0.112643341 |
| 0.921272536 | 0.358095165 |
| 0.979878582 | 0.751871715 |
| 0.991166301 | 0.8958632   |
| -1.01979633 | 0.745315283 |
| 0.986208709 | 0.836448455 |
| 0.973782268 | 0.697245814 |
| -1.02744952 | 0.575455173 |
| 0.94498896  | 0.341205974 |
| 0.962809196 | 0.509241063 |
| 0.998489072 | 0.977539544 |
| 0.930220147 | 0.233574835 |
| -1.04277511 | 0.492470938 |
| 0.974185987 | 0.656395526 |
| -1.24214321 | 0.001265312 |
| 0.976031289 | 0.69168864  |
| -1.04105121 | 0.477834395 |
| -1.10784161 | 0.161448035 |
| -1.0097578  | 0.875573049 |
| -1.01278247 | 0.822651048 |
| 0.835505025 | 0.074585787 |

|             |             |
|-------------|-------------|
| 0.714750982 | 0.088546877 |
| -1.0576702  | 0.40546799  |
| -1.0348074  | 0.45443121  |
| 0.939670635 | 0.326062607 |
| -1.07492961 | 0.199918207 |
| 0.958957997 | 0.514177316 |
| -1.04648028 | 0.391760995 |
| 0.940377959 | 0.458073936 |
| -1.05151918 | 0.372267068 |
| -1.06449511 | 0.353762779 |
| 0.950739082 | 0.466721614 |
| -1.10026051 | 0.166792162 |
| 0.972926382 | 0.627917008 |
| 0.99372266  | 0.910417965 |
| -1.01541881 | 0.830018552 |
| -1.12901127 | 0.017189843 |
| -1.02329802 | 0.716178818 |
| -1.00134093 | 0.991928534 |
| -1.03526687 | 0.51441008  |
| 0.984499761 | 0.770180868 |
| -1.03431408 | 0.675887473 |
| -1.00951213 | 0.860661762 |
| 0.947319332 | 0.309088182 |
| 0.997614829 | 0.972170488 |
| -1.10544088 | 0.085252597 |
| 0.983493142 | 0.766622664 |
| 0.990619666 | 0.850973424 |
| 0.925598008 | 0.309398873 |
| -1.08069883 | 0.204641654 |
| -1.10395708 | 0.132836029 |
| -1.05031828 | 0.438115955 |
| -1.05263307 | 0.457894492 |
| 0.955126365 | 0.348245408 |
| -1.06076546 | 0.35171779  |
| 0.956948499 | 0.422334844 |
| -1.10624897 | 0.208371159 |
| -1.10741378 | 0.038290583 |
| 0.902400471 | 0.091380464 |
| -1.09149042 | 0.108263077 |
| -1.02147675 | 0.69807827  |
| 0.937518599 | 0.295013624 |
| 0.871188879 | 0.024374475 |
| -1.13779755 | 0.066453203 |
| 0.912979197 | 0.144270847 |

|             |             |
|-------------|-------------|
| -1.02326144 | 0.616486678 |
| -1.11531901 | 0.051028671 |
| -1.00951387 | 0.87159516  |
| -1.10753726 | 0.049620505 |
| -1.08537021 | 0.27202893  |
| -1.00561855 | 0.918115142 |
| 0.945478326 | 0.255413651 |
| -1.13041461 | 0.108378051 |
| -1.13784301 | 0.021734509 |
| 0.974395818 | 0.716588959 |
| -1.08187582 | 0.150257166 |
| 0.916224332 | 0.169850393 |
| -1.10464094 | 0.117458364 |
| -1.08290344 | 0.241077074 |
| 0.958771058 | 0.5280871   |
| -1.10192168 | 0.174658956 |
| 0.961450095 | 0.488130321 |
| 0.988207543 | 0.814768537 |
| 0.977778891 | 0.703810857 |
| 0.98446667  | 0.765000677 |
| 0.968016471 | 0.528190021 |
| 0.997407812 | 0.965166205 |
| -1.03568458 | 0.534318737 |
| 0.990161699 | 0.870775554 |
| -1.01257428 | 0.818972117 |
| 0.996463772 | 0.940302142 |
| -1.01947931 | 0.758757922 |
| 0.942379974 | 0.303701946 |
| -1.06703793 | 0.410010366 |
| 0.988984903 | 0.831439398 |
| -1.03151809 | 0.520896091 |
| -1.05695347 | 0.318019719 |
| 0.992379506 | 0.893446291 |
| -1.09070614 | 0.187441571 |
| -1.04800289 | 0.45877204  |
| -1.04708472 | 0.418030343 |
| -1.0506542  | 0.333032076 |
| -1.13185412 | 0.052944434 |
| 0.885725839 | 0.028553033 |
| -1.00738149 | 0.897087288 |
| -1.0398923  | 0.491556775 |
| -1.21441523 | 0.003849439 |
| 0.948941379 | 0.351135254 |
| -1.04410823 | 0.380494061 |



|             |             |
|-------------|-------------|
| -1.04116906 | 0.481406699 |
| 0.810971478 | 0.003429131 |
| -1.11668123 | 0.024188715 |
| 0.907787048 | 0.094978728 |
| -1.08220099 | 0.185879646 |
| 0.814787437 | 0.02040169  |
| 0.967686572 | 0.577016907 |
| -1.0718007  | 0.21909481  |
| 0.895978671 | 0.081437257 |
| 0.9999064   | 0.998837657 |
| -1.0683931  | 0.261148354 |
| 0.96074895  | 0.510331532 |
| 0.904317555 | 0.053178895 |
| -1.04275078 | 0.535083351 |
| 0.972016104 | 0.702996679 |
| -1.01721043 | 0.758258536 |
| -1.1505699  | 0.024018973 |
| 0.963371668 | 0.501206062 |
| -1.06342316 | 0.397981502 |
| -1.0103173  | 0.866921188 |
| 0.995460486 | 0.940155681 |
| -1.15285112 | 0.03322248  |
| 0.976660282 | 0.668773881 |
| 0.815525054 | 0.005640264 |
| -1.13762844 | 0.139211731 |
| 0.8109605   | 0.001400725 |
| 0.93710856  | 0.25539593  |
| 0.725376136 | 1.30989E-07 |
| -1.36216122 | 0.008892285 |
| -1.19584804 | 0.013800929 |
| 0.70093489  | 0.001399241 |
| 0.909701261 | 0.080521384 |
| -1.0447866  | 0.382959009 |
| 0.647546974 | 6.31837E-09 |
| 0.77654879  | 0.000936482 |
| 0.912274854 | 0.573681769 |
| -1.02079935 | 0.717894869 |
| 0.752920412 | 0.009619447 |
| -1.04833224 | 0.410678661 |
| 0.822299809 | 0.003665901 |
| 0.713189061 | 0.001202415 |
| -1.01980782 | 0.795954106 |
| -1.04928604 | 0.593915628 |
| 0.939686648 | 0.212825972 |

|             |             |
|-------------|-------------|
| 0.702848954 | 0.00011571  |
| -1.0577309  | 0.419865648 |
| -1.15421455 | 0.113389302 |
| -1.07781177 | 0.561700188 |
| -1.08627992 | 0.124997914 |
| -1.25734758 | 0.006435446 |
| 0.60651354  | 1.39307E-05 |
| -1.01652794 | 0.906163184 |
| 0.898652719 | 0.072270027 |
| 0.541732178 | 7.10279E-16 |
| -1.03890094 | 0.506442588 |
| 0.685929839 | 5.57983E-07 |
| 0.991705704 | 0.939085645 |
| 0.62675297  | 3.06925E-06 |
| 0.687871522 | 1.76437E-06 |
| -1.35905203 | 0.000713847 |
| -1.06334979 | 0.262990548 |
| 0.350243045 | 1.35669E-17 |
| 0.911746758 | 0.084153996 |
| -1.05948334 | 0.30368907  |
| 0.99042622  | 0.892072628 |
| 0.798078758 | 0.053664189 |
| -1.12175899 | 0.081270966 |
| -1.01171018 | 0.823937675 |
| -1.18944544 | 0.091999557 |
| 0.826221544 | 0.005050321 |
| 0.775329041 | 0.00026391  |
| -1.29584459 | 0.000943715 |
| 0.818829124 | 0.307315458 |
| -1.04361542 | 0.580279866 |
| -1.08480201 | 0.227211102 |
| -1.09102677 | 0.391257606 |
| -1.53206431 | 2.14841E-05 |
| -1.1867752  | 0.007674688 |
| 0.828486328 | 0.007604286 |
| -1.06654977 | 0.065241467 |
| 0.967624566 | 0.529048278 |
| 0.937375439 | 0.104564062 |
| -1.26069454 | 0.012478085 |
| -1.06485395 | 0.13784029  |
| 0.996281639 | 0.948607878 |
| 0.993057254 | 0.921662791 |
| 0.731320326 | 2.33492E-05 |
| 0.99799302  | 0.967906404 |

|             |             |
|-------------|-------------|
| -1.08841031 | 0.252679946 |
| -1.08488279 | 0.11686827  |
| -1.06632623 | 0.494598842 |
| -1.06299961 | 0.311393317 |
| -1.15595984 | 0.21063785  |
| -1.0312903  | 0.549744457 |
| 0.668458067 | 2.08276E-06 |
| 0.975877424 | 0.773046491 |
| -1.09154787 | 0.340993536 |
| -1.02407365 | 0.690286935 |
| -1.05002796 | 0.611535808 |
| 0.980119264 | 0.726595884 |
| -1.01320941 | 0.720817506 |
| 0.698669712 | 0.000102999 |
| 0.469687512 | 3.01801E-09 |
| 0.684241929 | 0.001421936 |
| 0.974268797 | 0.525520088 |
| 0.885449417 | 0.082067027 |
| -1.11361199 | 0.086661556 |
| -1.20832188 | 0.000438998 |
| 0.978359907 | 0.728993422 |
| -1.16213764 | 0.033144891 |
| -1.03474477 | 0.661507318 |
| 0.532836323 | 7.36832E-07 |
| 0.325959915 | 4.25125E-17 |
| 0.540897163 | 2.51448E-08 |
| -1.03975683 | 0.527803746 |
| -1.07366448 | 0.235523839 |
| -1.08646067 | 0.301717348 |
| 0.729737115 | 0.000531562 |
| -1.0085418  | 0.942505201 |
| -1.14374071 | 0.061507664 |
| -1.04039354 | 0.686419893 |
| -1.03483401 | 0.819860712 |
| -1.00509689 | 0.925322424 |
| 0.963207056 | 0.583858908 |
| 0.692124011 | 7.46761E-10 |
| 0.949364791 | 0.457078449 |
| 0.822979368 | 0.105986707 |
| 0.52218076  | 9.78919E-07 |
| 0.624236535 | 5.2504E-08  |
| 0.983689736 | 0.762110808 |
| -1.27689147 | 0.004493182 |
| 0.88094244  | 0.04273747  |

|             |             |
|-------------|-------------|
| -1.32196691 | 0.016477881 |
| -1.0535204  | 0.431817095 |
| 0.834930422 | 0.062044017 |
| 0.753280123 | 0.001871036 |
| 0.4933299   | 2.1872E-08  |
| -1.01634289 | 0.840721002 |
| 0.968105971 | 0.637256392 |
| -1.04270419 | 0.551623819 |
| 0.340052027 | 4.16149E-10 |
| 0.668431614 | 3.96468E-07 |
| 0.901911122 | 0.098844308 |
| 0.807831511 | 0.000994572 |
| 0.884495414 | 0.005927319 |
| 0.936910539 | 0.14848916  |
| 0.39351588  | 5.82564E-20 |
| 0.485970869 | 1.13424E-06 |
| 0.953626182 | 0.352679122 |
| 0.998689095 | 0.977770246 |
| 0.937058839 | 0.241483896 |
| -1.05131387 | 0.354941005 |
| -1.0151289  | 0.836787728 |
| 0.951180218 | 0.278829067 |
| 0.996942889 | 0.958421207 |
| -1.02035318 | 0.635323582 |
| 0.701768975 | 1.27884E-07 |
| -1.00410865 | 0.959173169 |
| 0.950192143 | 0.336082204 |
| -1.05849407 | 0.682714947 |
| 0.975970264 | 0.744658001 |
| -1.43633241 | 0.000782676 |
| -1.06126893 | 0.306836954 |
| -1.02932183 | 0.512492605 |
| 0.960225106 | 0.396140951 |
| -1.11371344 | 0.348571981 |
| -1.10799927 | 0.080428869 |
| -1.23757174 | 0.001401238 |
| -1.03753886 | 0.726752091 |
| -1.03065676 | 0.492259614 |
| -1.00288204 | 0.952560365 |
| -1.1164567  | 0.02965078  |
| -1.16364191 | 0.119810222 |
| 0.897867383 | 0.010376291 |
| 0.979652502 | 0.764308411 |
| 0.61959981  | 2.86081E-06 |

|             |             |
|-------------|-------------|
| -1.10764796 | 0.305256138 |
| -1.09259619 | 0.47336532  |
| 0.945783331 | 0.38277801  |
| 0.959482527 | 0.439207343 |
| 0.831717292 | 0.011268806 |
| 0.995495579 | 0.920491293 |
| 0.610125774 | 8.21671E-10 |
| 0.870237817 | 0.030969175 |
| 0.948981838 | 0.36548238  |
| -1.07119445 | 0.314654039 |
| -1.06184797 | 0.326886063 |
| -1.0511591  | 0.74020993  |
| 0.992949562 | 0.950832166 |
| -1.19866708 | 0.099056862 |
| 0.98704465  | 0.817316637 |
| 0.955392129 | 0.216623473 |
| -1.02387377 | 0.560184267 |
| 0.985115469 | 0.788203087 |
| -1.11006796 | 0.062504793 |
| -1.01852022 | 0.729049577 |
| -1.1079362  | 0.139086891 |
| -1.38685122 | 8.18809E-05 |
| -1.0318809  | 0.463960355 |
| -1.06400941 | 0.108328406 |
| -1.11535176 | 0.028386256 |
| 0.908189043 | 0.251825366 |
| -1.28235534 | 0.028500573 |
| -1.17770418 | 0.120007791 |
| -1.03392387 | 0.490894645 |
| -1.33562614 | 0.010150549 |
| 0.964872418 | 0.46341959  |
| -1.10805554 | 0.102621473 |
| 0.885552577 | 0.471628856 |
| 0.798981443 | 0.003019347 |
| 0.665766299 | 1.6034E-08  |
| -1.1616907  | 0.013925199 |
| 0.986417119 | 0.79481515  |
| 0.747845085 | 1.07032E-07 |
| 0.877280707 | 0.001140919 |
| 0.956797934 | 0.425918628 |
| 0.860177053 | 0.00153799  |
| 0.99939438  | 0.986786719 |
| -1.0100133  | 0.840977538 |
| -1.05667206 | 0.442805503 |

|             |             |
|-------------|-------------|
| -1.21454051 | 0.000228414 |
| 0.981734842 | 0.806869801 |
| 0.788397353 | 1.80513E-07 |
| 0.992232742 | 0.957143613 |
| 0.92671877  | 0.593038676 |
| 0.991452556 | 0.781568991 |
| -1.07543534 | 0.17977027  |
| 0.99538355  | 0.94064947  |
| 0.892669093 | 0.004912408 |
| 0.938243593 | 0.250520731 |
| -1.06551664 | 0.268098652 |
| 0.989497898 | 0.849092799 |
| 0.810713659 | 0.000655005 |
| 0.995167529 | 0.924351005 |
| 0.861793217 | 0.016026855 |
| 0.481684084 | 6.27359E-14 |
| 0.969814398 | 0.597887675 |
| 0.911913735 | 0.173377135 |
| 0.876003588 | 0.002313092 |
| 0.553462481 | 6.21296E-12 |
| 0.982798792 | 0.8076897   |
| -1.00092855 | 0.987433692 |
| 0.918691006 | 0.145862326 |
| 0.875610572 | 0.081065187 |
| 0.922140816 | 0.089971426 |
| -1.09167699 | 0.099396267 |
| 0.904173722 | 0.158662909 |
| 0.686581209 | 0.008116525 |
| 0.842273613 | 0.002057334 |
| 0.940390985 | 0.165720397 |
| -1.15831215 | 0.057008377 |
| -1.19446931 | 0.001721997 |
| 0.962948284 | 0.582821983 |
| -1.14312328 | 0.073016706 |
| -1.32832276 | 0.000555458 |
| 0.860711906 | 0.225499914 |
| -1.03930962 | 0.547719393 |
| 0.862799854 | 0.025315696 |
| 0.994528987 | 0.953804571 |
| -1.1421405  | 0.091888558 |
| -1.08441317 | 0.470176464 |
| 0.954137936 | 0.557561561 |
| 0.928382261 | 0.438565948 |
| -1.2847199  | 0.00037752  |

|             |             |
|-------------|-------------|
| -1.08178144 | 0.52364628  |
| 0.737580752 | 3.38494E-05 |
| 0.997881929 | 0.962766497 |
| 0.714317743 | 4.90676E-08 |
| -1.13964295 | 0.031528962 |
| -1.30614791 | 3.74358E-05 |
| 0.954689532 | 0.306025406 |
| 0.782128977 | 0.000142776 |
| -1.17361204 | 0.002368381 |
| -1.34944987 | 4.68581E-05 |
| -1.22328979 | 0.000279865 |
| -1.24985767 | 4.46631E-06 |
| 0.922293872 | 0.388630506 |
| -1.09657417 | 0.095239941 |
| -1.33091504 | 0.000246162 |
| 0.837218183 | 0.011287805 |
| -1.37692543 | 1.81142E-05 |
| -1.12501857 | 0.331075555 |
| 0.646940716 | 7.67294E-09 |
| -1.01242024 | 0.850632521 |
| -1.14224149 | 0.01126143  |
| 0.957748138 | 0.523126378 |
| -1.3453916  | 0.003098007 |
| -1.13516239 | 0.119179823 |
| -1.0780726  | 0.29198971  |
| -1.16565137 | 0.298007487 |
| -1.03452087 | 0.430724072 |
| -1.05556596 | 0.554785507 |
| 0.913113891 | 0.261393892 |
| 0.887086234 | 0.105654777 |
| 0.941967719 | 0.232187917 |
| -1.01246142 | 0.863905661 |
| 0.916899057 | 0.144756756 |
| -1.10325784 | 0.432378363 |
| -1.12576177 | 0.040933588 |
| 0.968326715 | 0.639511012 |
| -1.24804435 | 0.006231349 |
| -1.04889161 | 0.529526661 |
| -1.07699908 | 0.231017327 |
| 0.8297934   | 0.026805837 |
| -1.19233028 | 0.002225892 |
| -1.20954896 | 0.017469278 |
| -1.07291732 | 0.395825631 |
| -1.23442747 | 0.010910357 |

|             |             |
|-------------|-------------|
| -1.10414901 | 0.139270674 |
| -1.36102043 | 0.000153599 |
| -1.17802715 | 0.030733732 |
| -1.36985933 | 0.000201518 |
| -1.1206808  | 0.085121692 |
| -1.08261266 | 0.373142579 |
| -1.13233281 | 0.067305297 |
| 0.971283777 | 0.685845011 |
| -1.01917469 | 0.746320121 |
| -1.06949573 | 0.317088574 |
| -1.09739197 | 0.213399214 |
| -1.01092951 | 0.888428731 |
| -1.39128298 | 2.66393E-05 |
| -1.03298498 | 0.4321559   |
| -1.37870263 | 7.45591E-10 |
| -1.01679336 | 0.80652657  |
| -1.29056544 | 0.000922506 |
| 0.976794718 | 0.678736917 |
| -1.47871055 | 0.000383493 |
| -1.05235584 | 0.344875678 |
| 0.8096728   | 0.001389083 |
| 0.823084491 | 0.000602568 |
| -1.29957108 | 0.010595825 |
| 0.835639483 | 0.343605795 |
| 0.992693056 | 0.920746156 |
| -1.29900658 | 0.001772598 |
| -1.09243597 | 0.083656751 |
| -1.26340552 | 0.031015263 |
| 0.856283801 | 0.168592526 |
| 0.988954083 | 0.802821489 |
| 0.898213407 | 0.166763318 |
| 0.958613037 | 0.63777502  |
| -1.05717746 | 0.575128    |
| -1.00246427 | 0.96480396  |
| 0.813719273 | 0.032225728 |
| -1.27932755 | 0.000467521 |
| 0.994862214 | 0.925883095 |
| 0.996113817 | 0.930294043 |
| -1.11132023 | 0.017770552 |
| -1.20651247 | 0.079792247 |
| -1.35918331 | 0.006271474 |
| -1.15532281 | 0.057522481 |
| -1.08869785 | 0.190270293 |
| 0.875579174 | 0.303642749 |



|             |             |
|-------------|-------------|
| 0.425255927 | 7.11163E-15 |
| -1.26816306 | 0.027224406 |
| 0.913032566 | 0.498735276 |
| 0.893563992 | 0.095520549 |
| -1.01422168 | 0.772800013 |
| 0.989136059 | 0.793051488 |
| 0.838455408 | 0.028883596 |
| -1.38600641 | 0.000440019 |
| -1.28053969 | 0.000438128 |
| 0.775990669 | 0.000126994 |
| -1.08309236 | 0.218976825 |
| -1.37442579 | 0.000905083 |
| -1.23055014 | 3.89876E-05 |
| 0.549786604 | 7.81631E-08 |
| 0.89752433  | 0.012764654 |
| -1.09773374 | 0.239940246 |
| 0.93591218  | 0.061600459 |
| -1.01681449 | 0.78316299  |
| 0.960005243 | 0.691631866 |
| 0.804414526 | 0.005182386 |
| 0.879968918 | 0.015236068 |
| 0.769952022 | 0.000816576 |
| 0.633410637 | 1.42639E-10 |
| -1.05562187 | 0.402850778 |
| 0.875959889 | 0.12156946  |
| 0.955440115 | 0.291837443 |
| -1.09535262 | 0.429431164 |
| -1.07139321 | 0.544851587 |
| 0.984361583 | 0.599529424 |
| 0.237833128 | 8.62529E-18 |
| -1.06753314 | 0.230539932 |
| 0.979580281 | 0.670546749 |
| 0.879869291 | 0.267406168 |
| -1.0616429  | 0.157674273 |
| 0.91438632  | 0.075796825 |
| 0.890627197 | 0.00220683  |
| 0.974468182 | 0.767952168 |
| 0.582338105 | 2.1799E-12  |
| -1.22052816 | 0.010178814 |
| -1.03668255 | 0.754497589 |
| 0.617562935 | 2.50293E-06 |
| 0.94238961  | 0.449371424 |
| 0.849237297 | 0.182353753 |
| 0.969078998 | 0.636755725 |

|             |             |
|-------------|-------------|
| 0.983955956 | 0.914084227 |
| 0.9221543   | 0.316649291 |
| -1.01845771 | 0.671476719 |
| -1.02900789 | 0.575832945 |
| -1.11199593 | 0.030123228 |
| -1.18465676 | 0.040611986 |
| 0.807453808 | 0.001143329 |
| -1.11029176 | 0.097816634 |
| -1.07168386 | 0.223759588 |
| 0.885542752 | 0.022645993 |
| 0.788643512 | 0.003427323 |
| -1.01519706 | 0.839916857 |
| 0.736612524 | 0.000788904 |
| 0.934940158 | 0.333952387 |
| 0.919250033 | 0.127255123 |
| 0.977932537 | 0.692365165 |
| 0.949090921 | 0.416550982 |
| 0.603242557 | 3.47141E-16 |
| -1.13025376 | 0.200346815 |
| -1.33310802 | 0.024247429 |
| -1.11508406 | 0.125037819 |
| 0.808995744 | 0.003762479 |
| 0.916759814 | 0.258174167 |
| 0.970049578 | 0.672483333 |
| -1.02769059 | 0.634667008 |
| -1.11985283 | 0.391929665 |
| 0.988450627 | 0.86363571  |
| -1.19523381 | 0.040131998 |
| -1.00014797 | 0.997224862 |
| -1.3149329  | 0.000252739 |
| -1.05747639 | 0.373794668 |
| -1.07325507 | 0.235095047 |
| 0.84018907  | 0.000580433 |
| -1.1596844  | 0.234892764 |
| -1.00352849 | 0.95698615  |
| 0.842685477 | 0.047354572 |
| 0.938099841 | 0.423792571 |
| 0.846618849 | 0.006589039 |
| -1.02656107 | 0.528476156 |
| 0.677883429 | 1.05285E-07 |
| 0.915966027 | 0.071681474 |
| -1.09968904 | 0.011659481 |
| -1.03206659 | 0.566200097 |
| 0.342467795 | 3.9931E-19  |

|             |             |
|-------------|-------------|
| -1.22419266 | 0.006334909 |
| 0.667340613 | 0.015857877 |
| 0.850610227 | 0.227063684 |
| 0.801661039 | 0.002901568 |
| 0.737121672 | 3.6263E-05  |
| 0.738251649 | 0.000252241 |
| 0.888619773 | 0.016249677 |
| -1.09101203 | 0.278948038 |
| -1.0102763  | 0.932101796 |
| -1.17216925 | 0.033946451 |
| -1.13364699 | 0.008706309 |
| -1.12441491 | 0.08158816  |
| 0.988976494 | 0.818113063 |
| -1.03678866 | 0.441041349 |
| -1.47459258 | 0.007295165 |
| 0.604252363 | 5.04299E-14 |
| -1.01327958 | 0.790523083 |
| -1.31194058 | 0.000942065 |
| 0.984353174 | 0.758707355 |
| -1.1696841  | 0.001864005 |
| -1.09354067 | 0.111820669 |
| -1.20216885 | 0.00620004  |
| 0.856245712 | 0.062961255 |
| 0.924376139 | 0.067285836 |
| -1.09579515 | 0.021827668 |
| 0.988789265 | 0.838381259 |
| -1.03813954 | 0.445601743 |
| 0.874031028 | 0.007781194 |
| 0.978117127 | 0.688942022 |
| -1.13941845 | 0.072343176 |
| -1.03536578 | 0.497240954 |
| -1.01999649 | 0.601663439 |
| 0.760620254 | 0.000303237 |
| 0.812632856 | 0.000837639 |
| 0.883357868 | 0.469482827 |
| 0.958112637 | 0.354154451 |
| -1.03373331 | 0.617027728 |
| -1.00692842 | 0.8783864   |
| 0.961119499 | 0.490775271 |
| 0.746054598 | 2.34923E-09 |
| 0.623958644 | 0.000686893 |
| 0.996514512 | 0.954516396 |
| -1.04789205 | 0.470797395 |
| 0.823955595 | 6.79462E-05 |

|             |             |
|-------------|-------------|
| -1.0135879  | 0.793661091 |
| -1.03624616 | 0.299930515 |
| 0.835140922 | 3.93786E-05 |
| 0.776968761 | 0.001085782 |
| 0.977918394 | 0.684658846 |
| 0.961813458 | 0.503891944 |
| -1.01475867 | 0.843101981 |
| 0.952135726 | 0.195172109 |
| -1.03124822 | 0.43970564  |
| 0.656044694 | 8.85128E-12 |
| -1.20143681 | 0.016068828 |
| 0.991993132 | 0.891584424 |
| -1.08314415 | 0.263461491 |
| -1.04070548 | 0.433623343 |
| -1.41930339 | 5.64161E-08 |
| -1.02257602 | 0.77982251  |
| 0.875778351 | 0.09207984  |
| 0.904505593 | 0.062419457 |
| 0.998134748 | 0.976886579 |
| -1.21026834 | 0.031905878 |
| 0.799432554 | 9.47694E-05 |
| -1.08357461 | 0.090066744 |
| -1.12609949 | 0.061041634 |
| 0.732445793 | 1.16035E-05 |
| 0.861501237 | 0.015491624 |
| -1.0414444  | 0.585395798 |
| 0.947011514 | 0.541387139 |
| 0.79717228  | 3.04658E-07 |
| -1.05673497 | 0.470138455 |
| 0.983534111 | 0.752862644 |
| -1.37238544 | 1.57888E-05 |
| 0.846882815 | 0.013491486 |
| 0.743800714 | 0.006132331 |
| -1.36598196 | 0.00015538  |
| 0.712390535 | 1.26456E-06 |
| 0.942667069 | 0.260286256 |
| -1.09717873 | 0.161985025 |
| 0.953350648 | 0.468814763 |
| 0.847687543 | 0.013353732 |
| 0.909855357 | 0.017049967 |
| -1.08152081 | 0.256479017 |
| -1.25956235 | 0.007733269 |
| -1.24698418 | 0.001555408 |
| -1.02161979 | 0.741698825 |

|             |             |
|-------------|-------------|
| -1.04008082 | 0.481736186 |
| -1.1127073  | 0.191427636 |
| 0.953637302 | 0.660618041 |
| -1.00473212 | 0.96110779  |
| 0.976189497 | 0.6379621   |
| -1.09637652 | 0.265679409 |
| 0.983403291 | 0.798960829 |
| 0.960413962 | 0.66974347  |
| 0.900871431 | 0.061676511 |
| -1.05820498 | 0.474216697 |
| 0.985974232 | 0.868029288 |
| -1.16095531 | 0.080594926 |
| -1.13332375 | 0.072544948 |
| -1.02849593 | 0.616441643 |
| -1.02339469 | 0.744482432 |
| -1.05376634 | 0.521262512 |
| -1.00601733 | 0.90199459  |
| -1.08602637 | 0.066546186 |
| -1.13075287 | 0.112784625 |
| 0.920301691 | 0.118655285 |
| -1.00494889 | 0.909067919 |
| -1.03863224 | 0.553795393 |
| 0.915074613 | 0.20136385  |
| 0.83939915  | 0.000684162 |
| 0.850797021 | 0.001195064 |
| -1.29459168 | 0.004027916 |
| -1.15028227 | 0.014067884 |
| -1.05740424 | 0.40614693  |
| -1.11463359 | 0.12465386  |
| 0.909668028 | 0.095221209 |
| -1.03182466 | 0.651553056 |
| -1.20335797 | 0.059557477 |
| -1.1060725  | 0.224023726 |
| -1.30344442 | 0.000110512 |
| 0.902229164 | 0.064457602 |
| 0.988017707 | 0.847120561 |
| -1.17618547 | 0.074929702 |
| -1.2196312  | 0.005335514 |
| -1.01743351 | 0.682379036 |
| -1.15008013 | 0.028094536 |
| 0.839416211 | 0.003572212 |
| -1.21191308 | 0.077133443 |
| 0.657675345 | 5.65041E-06 |
| -1.05002859 | 0.38873522  |

|             |             |
|-------------|-------------|
| -1.4049908  | 1.51781E-06 |
| 0.991811274 | 0.874197407 |
| -1.27717504 | 0.001306315 |
| 0.928760637 | 0.074262679 |
| 0.973853054 | 0.650533405 |
| -1.22948999 | 0.005129104 |
| 0.847264046 | 0.007162954 |
| -1.01839142 | 0.718218323 |
| -1.08545469 | 0.426370871 |
| -1.32131534 | 0.000727643 |
| -1.41974277 | 2.72519E-06 |
| -1.19176516 | 0.002234239 |
| -1.12384623 | 0.059074516 |
| -1.13087558 | 0.158173622 |
| -1.02741221 | 0.381890034 |
| -1.04418055 | 0.71518615  |
| -1.04480374 | 0.559977952 |
| 0.980151421 | 0.720024543 |
| -1.29319328 | 6.79858E-05 |
| 0.877410233 | 0.04849761  |
| -1.15046687 | 0.07927759  |
| 0.868951942 | 0.0284934   |
| -1.08224956 | 0.124266887 |
| -1.80465628 | 3.30018E-16 |
| 0.985832464 | 0.785243235 |
| -1.00037998 | 0.995227836 |
| -1.08822871 | 0.05078002  |
| -1.01256045 | 0.753570962 |
| -1.04031946 | 0.227359694 |
| -1.05211119 | 0.213444271 |
| -1.16990495 | 0.018463193 |
| -1.05138096 | 0.476367772 |
| 0.647203682 | 5.81185E-05 |
| -1.04716229 | 0.469126726 |
| -1.00445383 | 0.95658917  |
| 0.910172244 | 0.178024574 |
| 0.827495166 | 0.000347952 |
| 0.908855807 | 0.098708445 |
| -1.0460799  | 0.342202975 |
| -1.19694247 | 0.009262518 |
| -1.66014066 | 7.8984E-06  |
| -1.09284064 | 0.030180839 |
| -1.51041773 | 3.1643E-13  |
| -1.12328076 | 0.029263676 |

|             |             |
|-------------|-------------|
| -1.04586704 | 0.442303093 |
| 0.817351344 | 0.001516972 |
| -1.13178892 | 0.065197786 |
| 0.845532838 | 0.026366785 |
| -1.24327328 | 0.004399433 |
| 0.998501723 | 0.969666385 |
| -1.03115118 | 0.70750749  |
| 0.969557475 | 0.507892438 |
| -1.11105351 | 0.142990764 |
| -1.03902608 | 0.555181003 |
| -1.05250981 | 0.331626291 |
| -1.09567825 | 0.155252743 |
| -1.01254825 | 0.819296519 |
| -1.26111288 | 0.002765132 |
| -1.07514597 | 0.458977193 |
| -1.05880817 | 0.125633047 |
| -1.01819641 | 0.64485014  |
| -1.07321055 | 0.047981831 |
| -1.11851512 | 0.023938739 |
| 0.959994381 | 0.584816401 |
| 0.945318989 | 0.329092923 |
| 0.998449217 | 0.977952058 |
| -1.12570004 | 0.202583014 |
| -1.17782093 | 0.004024263 |
| -1.04887179 | 0.500238081 |
| -1.04720914 | 0.730994015 |
| 0.885198288 | 0.042662209 |
| 0.831191462 | 0.287912479 |
| 0.902969018 | 0.155129229 |
| -1.00838688 | 0.902959919 |
| 0.946312941 | 0.480287775 |
| -1.01131436 | 0.850042013 |
| -1.03401983 | 0.473796932 |
| -1.0722498  | 0.187827795 |
| -1.03023862 | 0.675950957 |
| 0.938312613 | 0.212845586 |
| 0.984793369 | 0.787418536 |
| 0.832642791 | 0.116593468 |
| -1.12163643 | 0.026262508 |
| -1.26320149 | 0.000617683 |
| -1.01369488 | 0.774804273 |
| 0.972807323 | 0.55474878  |
| -1.26078185 | 2.44374E-05 |
| -1.41650083 | 7.90323E-05 |

|             |             |
|-------------|-------------|
| 0.970691113 | 0.588927121 |
| -1.10601982 | 0.089426279 |
| -1.04832731 | 0.360609127 |
| 0.968602715 | 0.780426786 |
| -1.16186838 | 0.113661752 |
| -1.05027506 | 0.444562009 |
| -1.06763903 | 0.375913096 |
| -1.2173841  | 0.076818017 |
| -1.27501391 | 0.007669786 |
| 0.940345569 | 0.23918959  |
| -1.15464105 | 0.030348165 |
| -1.05750115 | 0.226233273 |
| -1.01436234 | 0.710157425 |
| 0.855464745 | 0.007713644 |
| 0.856354802 | 0.000168603 |
| -1.09723442 | 0.244542552 |
| -1.39800217 | 0.002291165 |
| -1.27565118 | 0.014456452 |
| 0.793576308 | 0.001409626 |
| -1.3193701  | 0.016740363 |
| -1.48185924 | 2.73907E-06 |
| -1.07830399 | 0.101094216 |
| 0.973838809 | 0.511448171 |
| -1.06962745 | 0.512756691 |
| -1.35099717 | 0.014207454 |
| 0.969736012 | 0.643673604 |
| 0.981386358 | 0.813888307 |
| 0.967013791 | 0.536156392 |
| -1.34544363 | 0.000106152 |
| -1.38847219 | 0.000387759 |
| 0.755389639 | 5.03215E-07 |
| 0.978442862 | 0.714333234 |
| -1.0134784  | 0.735845301 |
| -1.03469671 | 0.644548639 |
| -1.48416989 | 0.000905455 |
| 0.633815854 | 0.000214533 |
| -1.09847663 | 0.169646594 |
| 0.857828122 | 0.029523402 |
| 0.966469985 | 0.365945258 |
| -1.09735077 | 0.014025758 |
| -1.05966873 | 0.301055305 |
| 0.906016252 | 0.002103941 |
| 0.560496601 | 1.22744E-08 |
| 0.97643135  | 0.612051456 |



|             |             |
|-------------|-------------|
| 0.925332541 | 0.366653472 |
| 0.963547319 | 0.269544889 |
| 0.924992594 | 0.208851558 |
| -1.03435178 | 0.447172405 |
| 0.837384445 | 0.043764417 |
| -1.08981375 | 0.438934387 |
| 0.91492816  | 0.175460382 |
| 0.963425965 | 0.779556095 |
| 0.971956777 | 0.664440578 |
| 0.76066174  | 3.49909E-06 |
| -1.07319774 | 0.147032494 |
| -1.40753078 | 5.76134E-05 |
| -1.12917346 | 0.20119946  |
| -1.23517966 | 0.027141844 |
| -1.10964452 | 0.099089101 |
| -1.15795562 | 0.010720968 |
| 0.783278637 | 1.16054E-07 |
| 0.968647652 | 0.448115891 |
| 0.981733718 | 0.748639968 |
| -1.06582789 | 0.237721631 |
| -1.03640836 | 0.38659255  |
| -1.49649143 | 2.96643E-05 |
| -1.09496672 | 0.172143824 |
| -1.05761633 | 0.322616314 |
| -1.24741095 | 0.010114367 |
| 0.859657512 | 0.087774854 |
| -1.2210077  | 0.015130498 |
| -1.35351153 | 0.000385221 |
| 0.904800396 | 0.211832359 |
| -1.10487551 | 0.262444261 |
| -1.36969159 | 0.013240612 |
| -1.0007819  | 0.990657833 |
| 0.948012743 | 0.361907059 |
| 0.952251181 | 0.689033525 |
| 0.863081945 | 0.022129129 |
| 0.949355573 | 0.367641062 |
| 0.875204377 | 0.007701196 |
| 0.956988692 | 0.438136043 |
| 0.919821525 | 0.339708468 |
| 0.998426758 | 0.977819835 |
| 0.898182037 | 0.029305083 |
| 0.581268679 | 6.02447E-12 |
| 0.840035296 | 0.017057534 |
| -1.24626579 | 0.002330851 |

|             |             |
|-------------|-------------|
| -1.17278522 | 0.035334159 |
| 0.852558833 | 0.005384451 |
| -1.00534078 | 0.924049562 |
| -1.01892475 | 0.697903483 |
| -1.11037578 | 0.160364124 |
| 0.824656386 | 0.011773502 |
| 0.767460598 | 2.43595E-05 |
| 0.959387872 | 0.525457778 |
| 0.983743374 | 0.796952452 |
| -1.0241125  | 0.797828252 |
| -1.01418361 | 0.876834489 |
| -1.06124005 | 0.641891733 |
| -1.04638549 | 0.759010035 |
| -1.24314921 | 0.002598384 |
| 0.947199521 | 0.311543124 |
| -1.34234002 | 0.00138416  |
| -1.03699521 | 0.508696641 |
| -1.28587258 | 0.002110623 |
| -1.03612896 | 0.527678774 |
| 0.963625322 | 0.698617131 |
| -1.03173714 | 0.775620482 |
| 0.987983463 | 0.838506624 |
| -1.15204469 | 0.042135207 |
| -1.12798236 | 0.03814666  |
| -1.19167616 | 0.030094122 |
| 0.930661227 | 0.50985722  |
| -1.038221   | 0.433677847 |
| 0.985258509 | 0.699039926 |
| 0.938575381 | 0.083685745 |
| 0.973696119 | 0.519225695 |
| -1.08746149 | 0.140127251 |
| -1.06372437 | 0.292954211 |
| 0.99777896  | 0.953805709 |
| -1.05094836 | 0.155355737 |
| -1.11608201 | 0.020834695 |
| 0.805467464 | 7.17947E-05 |
| -1.03467828 | 0.502847878 |
| 0.991166892 | 0.890017666 |
| 0.927357471 | 0.141410834 |
| 0.966315011 | 0.409158644 |
| 0.960276298 | 0.379264348 |
| 0.992975196 | 0.91046458  |
| 0.970226537 | 0.615329142 |
| -1.08644004 | 0.107601952 |

|             |             |
|-------------|-------------|
| -1.06292614 | 0.274948378 |
| 0.958137386 | 0.30585857  |
| 0.997321257 | 0.962504521 |
| 0.939603422 | 0.245380562 |
| -1.06771537 | 0.180686187 |
| 0.911964724 | 0.102371681 |
| 0.995779579 | 0.938941355 |
| -1.02663677 | 0.574771323 |
| 0.981126706 | 0.755007637 |
| -1.03130763 | 0.565924498 |
| 0.987255255 | 0.822307991 |
| 0.966696274 | 0.557666254 |
| 0.943640095 | 0.268948596 |
| 0.980542371 | 0.621531997 |
| 0.985925529 | 0.654936507 |
| -1.00873714 | 0.903826558 |
| -1.14521093 | 0.068530351 |
| -1.14657741 | 0.19154348  |
| 0.933821606 | 0.239196518 |
| 0.883079899 | 0.046105613 |
| 0.80574978  | 0.010928217 |
| 0.959601089 | 0.245905802 |
| -1.57666453 | 7.04741E-06 |
| 0.986901136 | 0.731605875 |
| 0.945341791 | 0.170259536 |
| 0.797182237 | 9.07615E-05 |
| 0.84838664  | 0.0009635   |
| 0.86950063  | 0.101140739 |
| 0.93427553  | 0.636080802 |
| -1.07184947 | 0.171655849 |
| -1.01275301 | 0.674453638 |
| 0.701133582 | 0.000124078 |
| 0.86018012  | 0.00229273  |
| 0.990463524 | 0.879870216 |
| 0.903088298 | 0.051194596 |
| 0.723120104 | 1.67461E-05 |
| 0.830732892 | 0.00297096  |
| -1.28007151 | 0.002844057 |
| 0.852990228 | 0.002785288 |
| 0.994335175 | 0.924483344 |
| 0.991326521 | 0.899475956 |
| -1.4855657  | 3.48976E-05 |
| -1.11842757 | 0.271165145 |
| -1.13314062 | 0.210867676 |

|             |             |
|-------------|-------------|
| 0.908173079 | 0.058833683 |
| 0.809654713 | 0.032892191 |
| -1.24303874 | 2.22538E-07 |
| -1.25357577 | 1.60092E-06 |
| -1.10226274 | 0.4243397   |
| -1.0338961  | 0.691553018 |
| 0.922531944 | 0.026319834 |
| -1.1696652  | 0.07779603  |
| -1.02671976 | 0.706458002 |
| -1.29603336 | 0.004182762 |
| -1.21486193 | 0.139030988 |
| 0.850721286 | 0.138681523 |
| 0.883559414 | 0.013624621 |
| -1.46636847 | 6.08369E-05 |
| 0.962297528 | 0.588585579 |
| -1.19937425 | 0.026373755 |
| 0.836429621 | 0.024831133 |
| 0.531877266 | 9.14436E-16 |
| 0.97005314  | 0.514690789 |
| 0.796216029 | 0.003916939 |
| 0.899516591 | 0.050818004 |
| 0.663981299 | 2.03604E-06 |
| 0.745500914 | 6.47638E-09 |
| -1.18700065 | 0.107018278 |
| -1.03438828 | 0.505035604 |
| -1.04013833 | 0.436478264 |
| -1.01629821 | 0.759647565 |
| 0.994865938 | 0.918916522 |
| 0.965803178 | 0.535683338 |
| 0.920711457 | 0.066809424 |
| -1.01362321 | 0.823107132 |
| 0.874734804 | 0.036578053 |
| 0.942596475 | 0.226420914 |
| -1.02922293 | 0.712817548 |
| 0.652847468 | 1.06698E-06 |
| -1.00587052 | 0.896336821 |
| -1.05232285 | 0.363143191 |
| -1.38240966 | 4.21637E-06 |
| -1.00087184 | 0.991585479 |
| 0.922792757 | 0.05093748  |
| 0.860704485 | 0.140669011 |
| 0.976440129 | 0.67391453  |
| 0.941353705 | 0.277166798 |
| -1.03689119 | 0.587538659 |

|             |             |
|-------------|-------------|
| -1.01762904 | 0.731436716 |
| -1.21770253 | 0.010697553 |
| -1.01590723 | 0.753446089 |
| -1.01437627 | 0.792810721 |
| -1.16042529 | 0.037767496 |
| -1.33010196 | 0.003052195 |
| -1.22860745 | 0.006851418 |
| -1.31985579 | 3.76111E-05 |
| -1.09076634 | 0.544496395 |
| -1.17379678 | 0.07052436  |
| -1.04137632 | 0.38285393  |
| -1.09200528 | 0.422952252 |
| 0.888237015 | 0.081852899 |
| -1.27638349 | 0.005772873 |
| -1.05760536 | 0.307673914 |
| 0.746832679 | 1.14631E-10 |
| 0.24505452  | 2.79069E-14 |
| 0.924049523 | 0.073994585 |
| 0.868268922 | 0.008629441 |
| 0.855384142 | 0.0248483   |
| 0.923284788 | 0.186415062 |
| 0.944260241 | 0.287775504 |
| 0.910199438 | 0.017378615 |
| 0.979849022 | 0.660545835 |
| -1.07766625 | 0.070157166 |
| 0.945634263 | 0.248180211 |
| -1.05640074 | 0.261952621 |
| 0.98328032  | 0.673408525 |
| 0.885191886 | 0.073915878 |
| 0.896076056 | 0.162613934 |
| 0.949097055 | 0.485957992 |
| 0.984151211 | 0.856674252 |
| 0.618288976 | 5.25927E-11 |
| 0.847397026 | 0.000582404 |
| 0.891656429 | 0.00420621  |
| -1.2083407  | 0.034315055 |
| -1.00607162 | 0.911445354 |
| -1.30859147 | 0.001131483 |
| -1.24553545 | 8.45036E-06 |
| -1.09293138 | 0.048268755 |
| -1.0213212  | 0.689621277 |
| -1.03204268 | 0.464371085 |
| 0.877456006 | 0.317838344 |
| 0.987723417 | 0.786772388 |

|             |             |
|-------------|-------------|
| 0.897413211 | 0.397179371 |
| 0.971550881 | 0.447809386 |
| 0.809159472 | 0.031448557 |
| -1.13473984 | 0.34956994  |
| 0.884508277 | 0.140226083 |
| 0.961273563 | 0.497740568 |
| -1.10107738 | 0.173767329 |
| -1.32306542 | 0.000588507 |
| -1.321969   | 5.86334E-05 |
| 0.968505922 | 0.460538319 |
| 0.990389499 | 0.88835736  |
| -1.09497011 | 0.312522544 |
| -1.23602314 | 0.002539363 |
| -1.17062893 | 0.000617643 |
| 0.516536258 | 1.383E-09   |
| -1.06254495 | 0.446207707 |
| 0.913324759 | 0.104572086 |
| 0.968023069 | 0.466843012 |
| 0.847407143 | 0.003853094 |
| -1.05088522 | 0.406296352 |
| -1.12607132 | 0.019818461 |
| 0.582459172 | 4.57494E-07 |
| 0.723053161 | 0.000479718 |
| 0.75861118  | 0.014493287 |
| 0.98792223  | 0.641202313 |
| -1.02420888 | 0.82497974  |
| -1.08842937 | 0.3239872   |
| 0.872094593 | 0.157935992 |
| -1.04272509 | 0.631589481 |
| 0.894521833 | 0.087842821 |
| 0.970427929 | 0.581817313 |
| 0.856104376 | 0.054156398 |
| -1.0408578  | 0.362513593 |
| 0.438825292 | 2.57984E-19 |
| -1.11131644 | 0.026133288 |
| -1.16730502 | 0.117440046 |
| -1.05884809 | 0.270479928 |
| 0.779373171 | 0.003242383 |
| -1.4681272  | 0.000119927 |
| -1.07619217 | 0.489183569 |
| 0.941856953 | 0.510325751 |
| 0.972918686 | 0.424248534 |
| 0.926458119 | 0.277411931 |
| -1.03379575 | 0.864645022 |

|             |             |
|-------------|-------------|
| -1.07710592 | 0.252993556 |
| 0.435293631 | 1.33369E-11 |
| 0.989295023 | 0.849317389 |
| -1.05058298 | 0.238333935 |
| 0.931774214 | 0.381145701 |
| 0.808000818 | 0.157732588 |
| 0.905691995 | 0.603477254 |
| -1.15221895 | 0.014952224 |
| -1.09218801 | 0.087808638 |
| -1.00795386 | 0.900487872 |
| -1.08175708 | 0.036474098 |
| 0.900002427 | 0.045397174 |
| 0.940017869 | 0.222098689 |
| -1.01152182 | 0.792379975 |
| -1.02133059 | 0.728067701 |
| -1.01535987 | 0.894544595 |
| -1.16985063 | 0.156883718 |
| 0.971589462 | 0.633442422 |
| 0.929634533 | 0.161691253 |
| 0.983431653 | 0.747959201 |
| 0.990302349 | 0.805974747 |
| 0.96734543  | 0.49312811  |
| 0.911551984 | 0.500507181 |
| 0.846427801 | 0.079122748 |
| 0.927034126 | 0.137246689 |
| 0.908574537 | 0.33355509  |
| -1.14306219 | 0.051144243 |
| -1.14109848 | 0.056708508 |
| 0.914789608 | 0.086772456 |
| -1.05166275 | 0.296636061 |
| 0.888834003 | 0.228590058 |
| 0.830048253 | 0.246619216 |
| -1.10754169 | 0.046870599 |
| -1.00813973 | 0.915150593 |
| 0.877440393 | 0.584492275 |
| -1.1678159  | 0.038989378 |
| -1.02844115 | 0.456399199 |
| 0.918109516 | 0.723181271 |
| -1.0127424  | 0.86571597  |
| -1.03822904 | 0.580616927 |
| 0.868164191 | 0.006499459 |
| -1.04459797 | 0.39888687  |
| -1.12025004 | 0.032650139 |
| -1.01660764 | 0.704296688 |

|             |             |
|-------------|-------------|
| -1.31850198 | 0.001372089 |
| -1.13469558 | 0.042676581 |
| 0.985676464 | 0.789384207 |
| 0.980333731 | 0.59764973  |
| -1.07858625 | 0.25328192  |
| -1.1080242  | 0.291072866 |
| -1.01046168 | 0.83220355  |
| 0.961244642 | 0.583119179 |
| -1.06204202 | 0.158113555 |
| 0.817966364 | 0.313170719 |
| 0.974318967 | 0.833392789 |
| -1.05204741 | 0.276950574 |
| -1.07307299 | 0.225686855 |
| -1.08019841 | 0.23289461  |
| 0.981063023 | 0.739125253 |
| -1.02011604 | 0.780545022 |
| -1.11075368 | 0.524363717 |
| -1.06322616 | 0.435807618 |
| -1.08743152 | 0.180167322 |
| -1.03377031 | 0.418945405 |
| 0.898126651 | 0.055289445 |
| 0.953466487 | 0.498759014 |
| 0.961506008 | 0.512862714 |
| 0.880314829 | 0.122959846 |
| -1.00996328 | 0.876520434 |
| -1.07936436 | 0.229849098 |
| 0.987887424 | 0.818042736 |
| 0.955015694 | 0.209639078 |
| -1.11324795 | 0.02670892  |
| -1.11378467 | 0.045147243 |
| 0.869856878 | 0.052368661 |
| -1.00734239 | 0.860993337 |
| -1.12587299 | 0.028061247 |
| 0.898518398 | 0.592724265 |
| -1.09143941 | 0.162741792 |
| -1.19570169 | 0.148987221 |
| -1.08560555 | 0.082007912 |
| -1.03599563 | 0.433318826 |
| -1.11472166 | 0.139719179 |
| -1.23621195 | 9.73224E-05 |
| -1.03071535 | 0.656413072 |
| -1.08585087 | 0.182606765 |
| -1.01605786 | 0.670184902 |
| -1.04833001 | 0.338163435 |



|             |             |
|-------------|-------------|
| 0.993865348 | 0.88378091  |
| 0.955338388 | 0.546556491 |
| 0.997419902 | 0.983518067 |
| -1.02672164 | 0.579053773 |
| -1.00320646 | 0.940380569 |
| -1.10158673 | 0.259939026 |
| 0.990103415 | 0.858049819 |
| -1.00402896 | 0.943571393 |
| -1.19660333 | 0.000729559 |
| -1.08316919 | 0.0839184   |
| 0.954115829 | 0.56822522  |
| -1.09039558 | 0.461303435 |
| 0.994633942 | 0.923600968 |
| 0.990126144 | 0.927767779 |
| -1.23014131 | 1.86698E-05 |
| -1.0741987  | 0.619185856 |
| -1.03810242 | 0.324472272 |
| -1.04043432 | 0.3857218   |
| -1.03054289 | 0.604196169 |
| -1.07328651 | 0.062433595 |
| -1.19244073 | 0.017325067 |
| -1.09024316 | 0.173264951 |
| -1.0588024  | 0.248308151 |
| 0.990500822 | 0.921563554 |
| -1.05862361 | 0.223170127 |
| 0.996799945 | 0.938246134 |
| -1.04440995 | 0.419346734 |
| 0.997801753 | 0.960780526 |
| 0.809595793 | 0.017702283 |
| 0.982391012 | 0.725431797 |
| -1.15165836 | 0.088302458 |
| 0.989010847 | 0.849390057 |
| -1.04307752 | 0.449197667 |
| 0.932066284 | 0.456850727 |
| 0.90043303  | 0.046610301 |
| 0.974001001 | 0.718474076 |
| 0.993265885 | 0.916257148 |
| 0.88368041  | 0.082845068 |
| 0.950701886 | 0.407908098 |
| -1.11757958 | 0.116221548 |
| 0.998525443 | 0.979576895 |
| -1.00749048 | 0.967179468 |
| 0.856717613 | 0.000239535 |
| -1.02487476 | 0.46682268  |

|             |             |
|-------------|-------------|
| -1.01528966 | 0.751162912 |
| 0.942460674 | 0.296842526 |
| -1.22210254 | 0.042425544 |
| 0.995776982 | 0.943473736 |
| 0.967193856 | 0.40679564  |
| -1.07342706 | 0.346914789 |
| -1.04238106 | 0.491460209 |
| -1.05070927 | 0.450402849 |
| 0.991847347 | 0.929848011 |
| -1.05075095 | 0.471443404 |
| -1.20676333 | 0.077792381 |
| -1.03124212 | 0.59294883  |
| -1.0126398  | 0.813300896 |
| 0.808005986 | 0.350558082 |
| -1.0410018  | 0.569743302 |
| 0.919838164 | 0.097666412 |
| 0.989774586 | 0.81810533  |
| -1.04776708 | 0.391378257 |
| -1.03906748 | 0.536459826 |
| 0.961585515 | 0.824432472 |
| -1.0506581  | 0.346014033 |
| -1.01658381 | 0.905501838 |
| -1.20799768 | 0.101785819 |
| -1.04509853 | 0.396517006 |
| 0.835094868 | 0.175794048 |
| -1.04257413 | 0.527485855 |
| -1.03012219 | 0.623473279 |
| 0.987787918 | 0.901482269 |
| -1.02772099 | 0.469689005 |
| 0.976558925 | 0.655362946 |
| -1.13984163 | 0.145694205 |
| -1.06357745 | 0.154360349 |
| -1.02428467 | 0.7001839   |
| -1.1391453  | 0.028256334 |
| 0.865038097 | 0.428134043 |
| -1.06165655 | 0.382731174 |
| 0.871413111 | 0.198369021 |
| 0.914220122 | 0.089271478 |
| 0.991023658 | 0.853726646 |
| 0.858257621 | 0.168348418 |
| -1.00312174 | 0.960221477 |
| 0.989171756 | 0.876781246 |
| 0.978153754 | 0.612571355 |
| -1.0148464  | 0.675360053 |

|             |             |
|-------------|-------------|
| -1.23208162 | 2.78531E-05 |
| -1.002307   | 0.961310047 |
| 0.960533635 | 0.819282343 |
| 0.996337696 | 0.938387717 |
| 0.933804268 | 0.242888318 |
| -1.1018412  | 0.159852359 |
| -1.14759117 | 0.045387403 |
| -1.11433302 | 0.388925171 |
| 0.968364408 | 0.524655466 |
| -1.02873418 | 0.584579483 |
| -1.10509842 | 0.241616123 |
| 0.995581687 | 0.913419654 |
| 0.953681867 | 0.237620992 |
| -1.19690097 | 0.119041047 |
| -1.01847816 | 0.646079674 |
| -1.31548551 | 5.60642E-05 |
| 0.974494962 | 0.586096539 |
| 0.774205526 | 0.154033807 |
| 0.953277346 | 0.348677418 |
| -1.09897554 | 0.364510859 |
| -1.01359291 | 0.783900086 |
| -1.39440871 | 8.25957E-07 |
| 0.905235696 | 0.054628257 |
| -1.03552287 | 0.483612277 |
| -1.02803454 | 0.664626511 |
| -1.04977825 | 0.239249579 |
| -1.15324466 | 0.025048482 |
| 0.898407328 | 0.143538098 |
| 0.691656182 | 0.002161353 |
| -1.03811755 | 0.521501654 |
| 0.480914311 | 5.69772E-07 |
| -1.24407584 | 0.000214436 |
| -1.09082826 | 0.155158039 |
| 0.961248119 | 0.520508997 |
| -1.11762563 | 0.045113941 |
| 0.793128136 | 0.03475772  |
| 0.941111572 | 0.264100742 |
| 0.877235286 | 0.052843911 |
| 0.992847685 | 0.87269277  |
| -1.03371318 | 0.46858423  |
| -1.06141641 | 0.517206592 |
| -1.06182796 | 0.238709439 |
| -1.0867596  | 0.169320055 |
| -1.12441991 | 0.117675624 |

|             |             |
|-------------|-------------|
| 0.529823217 | 0.02996907  |
| -1.01018442 | 0.788173667 |
| -1.17413273 | 0.017749944 |
| 0.745425077 | 8.52957E-05 |
| -1.0010306  | 0.986020054 |
| 0.95265022  | 0.278013281 |
| 0.996583974 | 0.951890927 |
| -1.02579892 | 0.673216499 |
| -1.02019589 | 0.759663205 |
| -1.08498745 | 0.431136211 |
| -1.0774793  | 0.148643182 |
| -1.16548432 | 0.024902565 |
| 0.951578455 | 0.557881628 |
| -1.17790137 | 0.040323043 |
| -1.01463069 | 0.816471757 |
| -1.16598215 | 0.133260112 |
| -1.02588704 | 0.895097351 |
| -1.00420087 | 0.976952931 |
| -1.00815147 | 0.880206649 |
| 0.788927326 | 0.091450921 |
| -1.01694237 | 0.824267995 |
| -1.04701527 | 0.277314596 |
| -1.0018646  | 0.974254854 |
| -1.14349971 | 0.038674122 |
| 0.988890086 | 0.797512863 |
| 0.964883519 | 0.483513708 |
| -1.02369168 | 0.78957098  |
| 0.970772535 | 0.452244038 |
| -1.03654488 | 0.338674307 |
| 0.997584955 | 0.966831659 |
| -1.05115991 | 0.224557905 |
| 0.951562205 | 0.395007577 |
| 0.891680613 | 0.476961169 |
| -1.06660412 | 0.330414721 |
| -1.20812852 | 0.03049391  |
| -1.15999149 | 0.093142193 |
| 0.941215059 | 0.294533082 |
| -1.1543033  | 0.019992262 |
| 0.962120056 | 0.384683762 |
| -1.04643867 | 0.345960719 |
| -1.04931564 | 0.545641227 |
| 0.990610998 | 0.849430862 |
| -1.08099396 | 0.30776185  |
| -1.06972589 | 0.204811216 |

|             |             |
|-------------|-------------|
| -1.05530635 | 0.628617626 |
| -1.00095756 | 0.987021701 |
| 0.956510073 | 0.809934699 |
| -1.00211704 | 0.969599466 |
| 0.961071465 | 0.350595646 |
| -1.198545   | 0.213400524 |
| 0.912890899 | 0.101798787 |
| 0.987021594 | 0.852106879 |
| 0.956340445 | 0.381581914 |
| -1.04223683 | 0.502024584 |
| 0.964375447 | 0.482382674 |
| -1.21328443 | 0.000603205 |
| 0.943814749 | 0.263894152 |
| -1.03828024 | 0.474983554 |
| 0.867258511 | 0.334922995 |
| 0.935572635 | 0.264931489 |
| -1.08386751 | 0.224984041 |
| -1.01320425 | 0.807146697 |
| -1.00768541 | 0.914462074 |
| 0.999310544 | 0.988805972 |
| 0.940457706 | 0.259383024 |
| 0.997004949 | 0.953035978 |
| -1.15788705 | 0.226040628 |
| 0.616363848 | 0.022312286 |
| -1.21706517 | 5.16924E-05 |
| 0.994316491 | 0.926142523 |
| -1.22743079 | 0.000402738 |
| 0.935383198 | 0.20330653  |
| -1.15151559 | 0.137969754 |
| -1.0884548  | 0.222732963 |
| -1.32145067 | 0.011298718 |
| 0.80986896  | 0.116510597 |
| -1.05792902 | 0.386124611 |
| 0.961689651 | 0.520678991 |
| -1.02445098 | 0.670659424 |
| 0.884571127 | 0.323829423 |
| 0.931464549 | 0.288468268 |
| 0.989542047 | 0.860029765 |
| -1.06897325 | 0.27449323  |
| -1.06165402 | 0.306199832 |
| -1.00482915 | 0.965159082 |
| -1.14829921 | 0.086944595 |
| -1.01574845 | 0.816592554 |
| -1.05269086 | 0.454914545 |

|             |             |
|-------------|-------------|
| 0.985604642 | 0.837269435 |
| 0.798647471 | 0.145705404 |
| -1.20327439 | 0.004901985 |
| 0.98419848  | 0.756372648 |
| 0.873833098 | 0.01385196  |
| -1.00805107 | 0.88511921  |
| 0.708905367 | 0.046182739 |
| 0.924060452 | 0.244261155 |
| 0.919733066 | 0.150617626 |
| 0.999520417 | 0.992904664 |
| -1.1023492  | 0.145736301 |
| -1.00431543 | 0.962729003 |
| -1.0350714  | 0.452531454 |
| 0.98120243  | 0.783029751 |
| 0.949716881 | 0.589722827 |
| -1.38615001 | 0.003953871 |
| 0.96577383  | 0.388935119 |
| -1.31698353 | 0.08951181  |
| 0.904907761 | 0.072789222 |
| -1.16449864 | 0.058052453 |
| 0.901315    | 0.026089231 |
| 0.930423717 | 0.166122288 |
| -1.00352734 | 0.920235606 |
| -1.04333949 | 0.178129742 |
| 0.975949586 | 0.618706699 |
| -1.19025214 | 0.006444709 |
| -1.07215044 | 0.116756309 |
| -1.03734181 | 0.395279843 |
| 0.93479054  | 0.123728793 |
| -1.02068956 | 0.685561188 |
| -1.08086445 | 0.206039954 |
| 0.9662536   | 0.517241978 |
| -1.06671326 | 0.22391526  |
| 0.948728714 | 0.307288627 |
| -1.15527822 | 0.042427747 |
| 0.926247894 | 0.133907178 |
| 0.930152657 | 0.231495834 |
| 0.940056593 | 0.695997185 |
| -1.07735735 | 0.244744946 |
| 0.90745868  | 0.038379084 |
| 0.999893052 | 0.997630883 |
| 0.813975382 | 0.003606392 |
| 0.928542398 | 0.324795306 |
| -1.00366285 | 0.954010831 |

|             |             |
|-------------|-------------|
| -1.03689602 | 0.253212386 |
| -1.10324027 | 0.0581542   |
| 0.990594243 | 0.882837369 |
| 0.990650584 | 0.926643694 |
| -1.00837137 | 0.869409366 |
| 0.978634209 | 0.687550933 |
| 0.922230087 | 0.22669182  |
| -1.01761349 | 0.733504242 |
| -1.06735265 | 0.082294745 |
| -1.05145518 | 0.249178466 |
| 0.925961675 | 0.401016012 |
| -1.06743713 | 0.216741337 |
| 0.906054805 | 0.060617816 |
| 0.990305926 | 0.803625819 |
| -1.22337731 | 0.000941485 |
| 0.983121984 | 0.692557222 |
| 0.926124211 | 0.343740893 |
| 0.988167618 | 0.863767201 |
| 0.97994393  | 0.682545151 |
| 0.965370589 | 0.412450022 |
| 0.950261298 | 0.368822117 |
| 0.96492949  | 0.431581882 |
| 0.972682196 | 0.693935039 |
| -1.02070103 | 0.720455822 |
| 0.926317987 | 0.216526402 |
| -1.05566379 | 0.295055142 |
| 0.999546317 | 0.993086964 |
| -1.07166808 | 0.290718001 |
| -1.26489798 | 0.000876968 |
| -1.03028381 | 0.572937176 |
| 0.945762256 | 0.241283223 |
| 0.986773113 | 0.808798262 |
| 0.792804735 | 0.268108119 |
| 0.908541182 | 0.067543572 |
| 0.997968044 | 0.968894382 |
| -1.11353998 | 0.029683836 |
| -1.19733358 | 0.01846298  |
| 0.943109221 | 0.483105864 |
| -1.01398867 | 0.852587596 |
| 0.923381475 | 0.214297599 |
| 0.932234962 | 0.208485804 |
| -1.07548929 | 0.082346749 |
| 0.961756109 | 0.33451868  |
| 0.956325259 | 0.432264446 |

|             |             |
|-------------|-------------|
| 0.816707578 | 0.015153565 |
| -1.03293145 | 0.542450317 |
| 0.863184231 | 0.427834993 |
| 0.460105162 | 2.48468E-14 |
| -1.0136745  | 0.778875237 |
| -1.24977321 | 0.007865287 |
| -1.39261671 | 0.002782187 |
| 0.992879707 | 0.911957663 |
| 0.93313798  | 0.22389513  |
| -1.02354769 | 0.743737773 |
| -1.1789054  | 0.143345117 |
| 0.768624794 | 0.259600109 |
| -1.2859353  | 0.011648615 |
| -1.23648903 | 0.009558376 |
| -1.01576901 | 0.697268354 |
| 0.944677571 | 0.208063714 |
| -1.06945749 | 0.154618621 |
| -1.09274803 | 0.109151102 |
| -1.04772621 | 0.769799378 |
| 0.859824961 | 0.154144086 |
| 0.998815758 | 0.979868692 |
| -1.01000571 | 0.827347426 |
| 0.996839977 | 0.955457235 |
| 0.814895327 | 0.0004676   |
| -1.08318757 | 0.194417465 |
| -1.00382899 | 0.955604383 |
| 0.911644061 | 0.033289497 |
| 0.896312021 | 0.047862216 |
| 0.960797565 | 0.619269291 |
| 0.993312886 | 0.896420194 |
| -1.09315941 | 0.072065492 |
| -1.11005508 | 0.146063948 |
| 0.973792208 | 0.589699868 |
| 0.950468321 | 0.79729371  |
| -1.27782864 | 6.17705E-05 |
| 0.998534131 | 0.983388801 |
| 0.925707289 | 0.389261999 |
| -1.0231807  | 0.653548061 |
| 0.706846015 | 0.000581356 |
| -1.07279237 | 0.196501143 |
| 0.960543156 | 0.396882305 |
| -1.0376213  | 0.522935111 |
| 0.889480924 | 0.01711462  |
| -1.01517165 | 0.709016158 |



|             |             |
|-------------|-------------|
| -1.07744847 | 0.471107175 |
| -1.15418863 | 0.01129664  |
| -1.01391751 | 0.778749926 |
| -1.01015813 | 0.913414752 |
| 0.909326604 | 0.059457861 |
| -1.10820056 | 0.08098023  |
| -1.19841667 | 0.017851965 |
| -1.18979593 | 0.011678612 |
| -1.04095692 | 0.5054647   |
| -1.07795279 | 0.179505161 |
| 0.725398705 | 0.059775635 |
| 0.943398332 | 0.199054509 |
| -1.03949485 | 0.775284104 |
| -1.09037741 | 0.091616193 |
| -1.04413999 | 0.390601501 |
| -1.13520985 | 0.065922341 |
| 0.809727139 | 0.097094843 |
| -1.07450499 | 0.238938343 |
| 0.850136867 | 0.076711117 |
| -1.08942872 | 0.096832044 |
| 0.943065159 | 0.391508369 |
| -1.15005726 | 0.036163349 |
| -1.01159299 | 0.850151703 |
| 0.946122987 | 0.300915479 |
| -1.08529856 | 0.263870774 |
| 0.992504786 | 0.918700045 |
| -1.08811257 | 0.120965756 |
| -1.01199687 | 0.819798886 |
| -1.04768065 | 0.436829623 |
| -1.07569471 | 0.24149966  |
| 0.77367129  | 0.295585343 |
| 0.703461617 | 0.159016443 |
| 0.919417978 | 0.129026065 |
| -1.09835001 | 0.061044288 |
| -1.16156616 | 0.010453616 |
| -1.23656774 | 0.000263695 |
| -1.00471378 | 0.982884247 |
| 0.862412158 | 0.061315793 |
| 0.974413397 | 0.623000659 |
| -1.03143944 | 0.677146553 |
| -1.15226897 | 0.308493422 |
| -1.1018019  | 0.116919948 |
| -1.00615426 | 0.929515979 |
| 0.963767251 | 0.373772163 |

|             |             |
|-------------|-------------|
| 0.82704563  | 0.20887336  |
| 0.830188437 | 0.02253382  |
| -1.11928682 | 0.108630066 |
| -1.00893311 | 0.912116148 |
| -1.01964836 | 0.780232878 |
| -1.04133944 | 0.431889841 |
| -1.1210692  | 0.115668183 |
| 0.989321902 | 0.881799144 |
| 0.994265139 | 0.872857596 |
| -1.13363307 | 0.222498841 |
| 0.989156866 | 0.833705447 |
| -1.0411832  | 0.481073352 |
| 0.781455993 | 4.56222E-06 |
| -1.20150765 | 0.003413705 |
| -1.00610183 | 0.898392315 |
| -1.03649866 | 0.531251574 |
| 0.813570074 | 0.271095255 |
| -1.1432293  | 0.061436698 |
| 0.778576916 | 0.363125628 |
| -1.03483063 | 0.723066383 |
| -1.05552325 | 0.395454047 |
| -1.01081129 | 0.828655452 |
| 0.948151846 | 0.176552001 |
| -1.02729145 | 0.567364445 |
| -1.02382468 | 0.585230638 |
| -1.03222118 | 0.514148234 |
| -1.0163303  | 0.791071276 |
| -1.1346791  | 0.359396322 |
| -1.06455695 | 0.165583682 |
| 0.944802784 | 0.251175556 |
| 0.989301517 | 0.856738265 |
| -1.04592593 | 0.582275066 |
| -1.05166549 | 0.365627034 |
| 0.994028943 | 0.957697238 |
| 0.836014551 | 0.234215817 |
| -1.32766861 | 0.021092242 |
| -1.00313956 | 0.956522566 |
| 0.997081828 | 0.976412506 |
| 0.991289225 | 0.875799257 |
| -1.01530797 | 0.769821621 |
| -1.00902173 | 0.875365759 |
| -1.01731815 | 0.757727236 |
| -1.10514813 | 0.127440577 |
| 0.763614911 | 3.40707E-05 |

|             |             |
|-------------|-------------|
| -1.05618435 | 0.398479754 |
| -1.28823127 | 1.91445E-05 |
| -1.00239899 | 0.963438503 |
| -1.09041209 | 0.04431408  |
| -1.45485611 | 0.018977941 |
| -1.06568718 | 0.39904832  |
| 0.926791269 | 0.143298978 |
| -1.07698693 | 0.291063896 |
| 0.986734776 | 0.867568981 |
| -1.06001283 | 0.657014389 |
| -1.17987092 | 0.082890666 |
| 0.977041512 | 0.668774096 |
| 0.918553636 | 0.050805988 |
| -1.02231654 | 0.60778106  |
| 0.847502888 | 0.022144117 |
| -1.0033307  | 0.949267881 |
| 0.959154957 | 0.256099099 |
| 0.939989361 | 0.278423384 |
| 0.944981078 | 0.663501923 |
| 0.968387768 | 0.633025744 |
| 0.989763777 | 0.860191027 |
| -1.05338837 | 0.647996083 |
| 0.894992805 | 0.362863652 |
| 0.855895902 | 0.070199263 |
| -1.03541386 | 0.547767075 |
| 0.941252004 | 0.36718085  |
| 0.995081029 | 0.925627021 |
| -1.0214837  | 0.67073796  |
| -1.04961664 | 0.332174926 |
| 0.939560566 | 0.08009268  |
| -1.07139987 | 0.225675688 |
| 0.934203745 | 0.15155221  |
| -1.09441574 | 0.33688213  |
| 0.996727118 | 0.948575701 |
| -1.03175581 | 0.52630588  |
| -1.00538381 | 0.929429112 |
| -1.0586219  | 0.544562737 |
| 0.990715874 | 0.850889424 |
| -1.00662989 | 0.920824283 |
| -1.0121524  | 0.861437032 |
| -1.23460362 | 0.041540474 |
| 0.896256538 | 0.419929451 |
| -1.12221398 | 0.037134883 |
| -1.21319233 | 0.0404028   |

|             |             |
|-------------|-------------|
| 0.790054659 | 0.063096728 |
| 0.969879017 | 0.695292227 |
| -1.153787   | 0.020877334 |
| 0.964938377 | 0.419421881 |
| -1.00748656 | 0.907170272 |
| 0.974066206 | 0.85616591  |
| -1.07725272 | 0.265497219 |
| -1.05713666 | 0.215708007 |
| 0.991240654 | 0.966358828 |
| 0.974183642 | 0.684669398 |
| 0.923443468 | 0.310451191 |
| -1.0242502  | 0.615952167 |
| 0.980428815 | 0.723764414 |
| -1.02352807 | 0.698264333 |
| 0.945643093 | 0.216129796 |
| -1.37803329 | 0.002009743 |
| -1.3835051  | 0.006232342 |
| 0.952501933 | 0.365700709 |
| 0.851309711 | 0.137795663 |
| -1.06434998 | 0.456377337 |
| -1.05456071 | 0.330694704 |
| 0.996622543 | 0.947476995 |
| 0.985936543 | 0.826355345 |
| -1.04680767 | 0.402960309 |
| -1.0809528  | 0.175920505 |
| 0.953257083 | 0.356484183 |
| -1.07121669 | 0.204312197 |
| -1.03662588 | 0.471961971 |
| -1.05543257 | 0.674125171 |
| 0.792511275 | 0.007360849 |
| -1.05825761 | 0.206766768 |
| 0.984920314 | 0.700218592 |
| -1.10284417 | 0.208636754 |
| 0.940065414 | 0.4855392   |
| -1.00673604 | 0.902909113 |
| 0.824523791 | 0.355790943 |
| 0.955137369 | 0.617684085 |
| 0.941105248 | 0.259060985 |
| 0.965893896 | 0.50923989  |
| -1.03286538 | 0.485318867 |
| -1.05766909 | 0.3578056   |
| 0.975226168 | 0.614491915 |
| 0.792367362 | 0.203145042 |
| -1.04427536 | 0.662578405 |

|             |             |
|-------------|-------------|
| -1.09795133 | 0.066365368 |
| 0.949285783 | 0.617445638 |
| 0.199792735 | 9.70019E-18 |
| -1.03257003 | 0.497519449 |
| 0.957402771 | 0.462346179 |
| 0.944540405 | 0.710821383 |
| 0.931103292 | 0.26550269  |
| -1.09020117 | 0.163929482 |
| 0.96487989  | 0.545079569 |
| -1.05659837 | 0.325955883 |
| 0.992692393 | 0.962011366 |
| -1.05855328 | 0.455295538 |
| 0.973877768 | 0.569651131 |
| 0.969437588 | 0.627357262 |
| -1.09686504 | 0.114434671 |
| 0.26689679  | 6.80924E-18 |
| 0.914803338 | 0.125958037 |
| -1.13809295 | 0.213988753 |
| -1.06309439 | 0.291017266 |
| -1.0177039  | 0.783821425 |
| 0.934029553 | 0.305697816 |
| -1.09365736 | 0.212884341 |
| -1.01382139 | 0.763802666 |
| -1.14165977 | 0.051201235 |
| 0.90124475  | 0.649089788 |
| 0.969349083 | 0.572285576 |
| -1.26941078 | 0.107382212 |
| 0.867988528 | 0.019486404 |
| 0.888908647 | 0.150195933 |
| -1.17222285 | 0.122804646 |
| -1.05767767 | 0.334688893 |
| -1.00289453 | 0.955153131 |
| 0.980348949 | 0.695176479 |
| 0.885523487 | 0.066105049 |
| 0.994404156 | 0.933054873 |
| 0.977408047 | 0.706991662 |
| -1.40848561 | 0.000902311 |
| -1.03260238 | 0.555765567 |
| 0.967084504 | 0.5762602   |
| 0.928733619 | 0.236391887 |
| 0.955557163 | 0.378763357 |
| 0.978234945 | 0.724972576 |
| -1.02246861 | 0.723223546 |
| 0.992278686 | 0.910708424 |

|             |             |
|-------------|-------------|
| -1.00073227 | 0.987468822 |
| 0.974243198 | 0.70216726  |
| -1.04491106 | 0.378523315 |
| -1.12261525 | 0.092660704 |
| 0.920631181 | 0.203589211 |
| -1.03700769 | 0.524813347 |
| -1.04818704 | 0.506790651 |
| -1.15261194 | 0.043753688 |
| -1.11849082 | 0.077154466 |
| -1.23054787 | 0.012891213 |
| 0.854392062 | 0.01541407  |
| 0.931612845 | 0.153912839 |
| 0.876476214 | 0.033057725 |
| -1.128767   | 0.040660054 |
| 0.997641492 | 0.98617273  |
| 0.944353497 | 0.312203258 |
| 0.977455768 | 0.701054577 |
| -1.03708215 | 0.570480388 |
| 0.974980118 | 0.716196432 |
| -1.1784546  | 0.02552581  |
| -1.12111437 | 0.247161734 |
| -1.00189436 | 0.971029131 |
| -1.03156667 | 0.432154029 |
| 0.961017903 | 0.585453118 |
| -1.00558511 | 0.937503562 |
| 0.860107773 | 0.385989153 |
| -1.16077854 | 0.108636337 |
| 0.952056181 | 0.42079372  |
| -1.45701675 | 2.26501E-06 |
| -1.050851   | 0.447838674 |
| -1.04315249 | 0.339838008 |
| 0.943801948 | 0.443840675 |
| 0.965458382 | 0.540439862 |
| 0.972124137 | 0.628193074 |
| 0.986294495 | 0.834444115 |
| -1.04564202 | 0.363429426 |
| 0.993749341 | 0.909942035 |
| 0.933457852 | 0.25632363  |
| -1.09348522 | 0.233547905 |
| 0.971976177 | 0.615327881 |
| 0.969920578 | 0.539102398 |
| 0.962149007 | 0.393632887 |
| 0.986006884 | 0.79386958  |
| 0.783043239 | 0.083249819 |

|             |             |
|-------------|-------------|
| -1.00855793 | 0.895578778 |
| -1.04097516 | 0.443260398 |
| -1.20573123 | 0.014625624 |
| 0.920171358 | 0.07390356  |
| 0.875774345 | 0.097786084 |
| -1.05996836 | 0.201858719 |
| -1.02203942 | 0.73459255  |
| 0.993344916 | 0.914327579 |
| -1.01618425 | 0.781178083 |
| -1.01193483 | 0.839294561 |
| 0.996179543 | 0.965166243 |
| 0.969675266 | 0.547929524 |
| 0.835863521 | 0.000882938 |
| -1.07812128 | 0.186908204 |
| 0.767925314 | 0.315201061 |
| 0.947000634 | 0.31633014  |
| -1.01123295 | 0.807224356 |
| 0.941351956 | 0.248388995 |
| -1.01560987 | 0.878404677 |
| -1.06607882 | 0.254861896 |
| -1.0540152  | 0.266793694 |
| 0.99937711  | 0.990902494 |
| -1.02937447 | 0.667196205 |
| -1.00463386 | 0.928881202 |
| -1.06399444 | 0.422890483 |
| -1.19190881 | 0.002149815 |
| -1.04913162 | 0.345967629 |
| 0.97296493  | 0.59746906  |
| -1.19689239 | 0.012563788 |
| -1.01065826 | 0.886147915 |
| -1.18466193 | 0.067832517 |
| -1.06536874 | 0.477310684 |
| 0.99587401  | 0.941353432 |
| -1.08321226 | 0.156689879 |
| -1.21999989 | 0.000783211 |
| -1.055649   | 0.27502191  |
| -1.07180139 | 0.446456572 |
| 0.994997245 | 0.959152064 |
| 0.942074813 | 0.223606373 |
| 0.927475308 | 0.189714003 |
| -1.02334322 | 0.691936358 |
| 0.999229116 | 0.987249381 |
| 0.924853933 | 0.199188512 |
| -1.03856272 | 0.545066067 |

|             |             |
|-------------|-------------|
| -1.06033246 | 0.341623919 |
| 0.973784594 | 0.64240106  |
| -1.03433332 | 0.591882861 |
| 0.965498583 | 0.549160448 |
| 0.954614601 | 0.330966265 |
| -1.05707089 | 0.384303705 |
| 0.946788294 | 0.312523279 |
| 0.97661324  | 0.616083109 |
| -1.04788022 | 0.37214996  |
| 0.971080507 | 0.597258765 |
| 0.95642927  | 0.413097257 |
| 0.951475015 | 0.655706123 |
| -1.00901796 | 0.843038865 |
| 0.986415018 | 0.814810605 |
| 0.883763554 | 0.017237441 |
| -1.1110076  | 0.049297383 |
| 0.803830696 | 0.014026159 |
| 0.870777926 | 0.488898409 |
| -1.1003914  | 0.179655659 |
| 0.98610476  | 0.778079944 |
| 0.800434144 | 0.002169969 |
| 0.908069087 | 0.309623744 |
| 0.993112955 | 0.855585608 |
| -1.04376019 | 0.474790516 |
| 0.934913525 | 0.260988942 |
| -1.12045594 | 0.096919337 |
| -1.14089376 | 0.017690847 |
| -1.07953788 | 0.123053694 |
| 0.639609424 | 2.01818E-07 |
| 0.948755638 | 0.352100044 |
| -1.06520645 | 0.250868152 |
| -1.12224676 | 0.018315895 |
| -1.13981749 | 0.019358088 |
| 0.774281118 | 0.001266933 |
| -1.04291194 | 0.482071703 |
| -1.13818088 | 0.019084612 |
| -1.08088003 | 0.179223882 |
| 0.995051116 | 0.923780873 |
| 0.99272057  | 0.874316935 |
| -1.00776214 | 0.900268577 |
| -1.12469733 | 0.028921962 |
| -1.03105524 | 0.594277782 |
| 0.997093607 | 0.933952044 |
| 0.951862896 | 0.387698613 |



|             |             |
|-------------|-------------|
| 0.921180359 | 0.424100912 |
| 0.865638234 | 0.160972496 |
| -1.01494146 | 0.781188951 |
| -1.00768416 | 0.896543299 |
| -1.31253378 | 0.04511446  |
| 0.945267633 | 0.451732468 |
| 0.93381283  | 0.195237335 |
| 0.879167935 | 0.03781045  |
| -1.05089528 | 0.309943476 |
| 0.837606974 | 0.001264956 |
| -1.30126107 | 0.003307162 |
| 0.916490574 | 0.195466818 |
| 0.939427341 | 0.312220716 |
| -1.2318294  | 0.002348098 |
| 0.917376842 | 0.171364721 |
| -1.0243708  | 0.672674198 |
| 0.980365869 | 0.817359987 |
| -1.10078422 | 0.129060087 |
| 0.903640987 | 0.364901935 |
| 0.996814626 | 0.96721452  |
| 0.97478857  | 0.671763246 |
| -1.42919771 | 0.000174514 |
| -1.00393887 | 0.949098049 |
| 0.958360841 | 0.464315372 |
| -1.07266506 | 0.283512792 |
| -1.07440391 | 0.085830201 |
| 0.980806395 | 0.780457354 |
| -1.20495852 | 0.006843389 |
| -1.04364766 | 0.447433398 |
| -1.01678209 | 0.755445495 |
| 0.752783494 | 0.000255543 |
| 0.999417285 | 0.992324833 |
| -1.08948492 | 0.074189801 |
| -1.10485877 | 0.031524512 |
| -1.21640457 | 0.110923645 |
| 0.984540404 | 0.785670432 |
| -1.02041829 | 0.691937145 |
| 0.958528346 | 0.333687934 |
| -1.11807767 | 0.171826818 |
| -1.07127745 | 0.104033742 |
| -1.13738906 | 0.02956999  |
| 0.95619164  | 0.420328037 |
| 0.926224975 | 0.174784523 |
| -1.04887814 | 0.361643764 |

|             |             |
|-------------|-------------|
| 0.984730514 | 0.821473798 |
| 0.984253514 | 0.861353735 |
| -1.04254889 | 0.432712763 |
| 0.966357275 | 0.569194248 |
| 0.992437584 | 0.898542118 |
| -1.02228936 | 0.636167606 |
| -1.43661833 | 7.70154E-05 |
| 0.89030358  | 0.040865991 |
| -1.1794457  | 0.028190264 |
| 0.931004829 | 0.225843365 |
| 0.756146383 | 0.00349667  |
| 0.940808587 | 0.327741906 |
| 0.996517399 | 0.949865301 |
| 0.952559653 | 0.388839335 |
| -1.31647103 | 0.004432859 |
| 0.929951848 | 0.232701072 |
| -1.00699081 | 0.878340685 |
| 0.942604401 | 0.679993627 |
| 0.933753744 | 0.655014451 |
| 0.996820148 | 0.958409451 |
| 0.913005403 | 0.177891996 |
| -1.13841216 | 0.145881451 |
| -1.0129447  | 0.773074835 |
| -1.02126145 | 0.681881546 |
| 0.961744404 | 0.259475197 |
| 0.958375276 | 0.480781509 |
| -1.2733617  | 0.005784865 |
| -1.04979298 | 0.399748752 |
| 0.936949671 | 0.28776852  |
| -1.0815945  | 0.235809076 |
| -1.10135411 | 0.236657037 |
| 0.958696594 | 0.454591781 |
| 0.79403961  | 8.40873E-05 |
| 0.946358335 | 0.316587482 |
| 0.841969303 | 0.394972446 |
| -1.04372313 | 0.41484598  |
| -1.10842314 | 0.071540165 |
| 0.957205145 | 0.437409213 |
| -1.02692496 | 0.489262193 |
| 0.881460507 | 0.316755452 |
| 0.986793107 | 0.824894982 |
| 0.989904526 | 0.866648429 |
| 0.986442745 | 0.818104477 |
| -1.06297653 | 0.458560249 |

|             |             |
|-------------|-------------|
| -1.1309875  | 0.05540361  |
| 0.962383857 | 0.402252544 |
| -1.03439136 | 0.370066167 |
| -1.03558282 | 0.401158564 |
| 0.919920868 | 0.184542479 |
| 0.926202325 | 0.103041236 |
| 0.871111708 | 0.044833841 |
| -1.04721281 | 0.505327891 |
| 0.898030285 | 0.152731761 |
| -1.03724963 | 0.463906051 |
| -1.02539801 | 0.766363214 |
| 0.932011908 | 0.195661713 |
| 0.825860729 | 0.003572849 |
| 0.917800996 | 0.223895423 |
| 0.840376163 | 4.42207E-05 |
| 0.775961088 | 0.001085891 |
| 0.999045542 | 0.986291291 |
| -1.06961456 | 0.248009613 |
| -1.13226012 | 0.069696184 |
| 0.94308669  | 0.357706216 |
| 0.929198548 | 0.313489937 |
| -1.01743265 | 0.749320612 |
| -1.08270219 | 0.288605323 |
| 0.945333852 | 0.433392498 |
| 0.946834699 | 0.346465011 |
| -1.03228726 | 0.449015867 |
| 0.979978018 | 0.745689223 |
| -1.04385078 | 0.419115641 |
| 0.947591116 | 0.290974862 |
| -1.1523885  | 0.040412714 |
| 0.982619098 | 0.802968362 |
| 0.912120156 | 0.208129107 |
| -1.0673986  | 0.234810967 |
| 0.962558705 | 0.51987581  |
| 0.872623724 | 0.076018618 |
| 0.982545743 | 0.759856338 |
| -1.02705334 | 0.675464256 |
| 0.957780892 | 0.718414457 |
| 0.876744613 | 0.004338069 |
| -1.02289558 | 0.559705233 |
| -1.13310866 | 0.047385107 |
| 0.935390404 | 0.398087676 |
| -1.16964481 | 0.05883572  |
| 0.857772605 | 0.262570581 |

|             |             |
|-------------|-------------|
| 0.982565823 | 0.692747892 |
| -1.09920489 | 0.310313901 |
| 0.966254838 | 0.648761887 |
| 0.966152786 | 0.565215102 |
| -1.04029887 | 0.320003946 |
| -1.04629027 | 0.492689998 |
| 0.981899745 | 0.725496936 |
| -1.23619893 | 0.009559874 |
| 0.956102424 | 0.402204974 |
| 0.923783995 | 0.083762183 |
| -1.11438905 | 0.034899049 |
| 0.954555775 | 0.397503497 |
| -1.03948059 | 0.456065603 |
| 0.920792317 | 0.134935671 |
| 0.804829465 | 0.212910272 |
| -1.03042497 | 0.514662358 |
| -1.02340495 | 0.804194228 |
| 0.913279795 | 0.153731631 |
| 0.926036237 | 0.134196001 |
| -1.11491722 | 0.075861388 |
| -1.01945474 | 0.723413472 |
| -1.06388026 | 0.520172515 |
| -1.21842669 | 0.02013404  |
| -1.06299659 | 0.23915306  |
| 0.928423529 | 0.066243382 |
| 0.784496919 | 0.000265095 |
| -1.09107568 | 0.026301837 |
| -1.00923463 | 0.841114113 |
| 0.708344417 | 0.028996525 |
| -1.01963213 | 0.68599642  |
| -1.07329173 | 0.227377788 |
| 0.333266547 | 6.74542E-12 |
| 0.975706916 | 0.545376248 |
| 0.756598367 | 0.034658273 |
| -1.28491813 | 0.002342239 |
| 0.925965969 | 0.15047263  |
| 0.994308475 | 0.913120233 |
| 0.909254257 | 0.107152427 |
| -1.05748483 | 0.412400031 |
| 0.867213098 | 0.050740234 |
| 0.968239063 | 0.54239733  |
| 0.950293368 | 0.416834632 |
| -1.12379652 | 0.129816249 |
| 0.898373842 | 0.118725945 |

|             |             |
|-------------|-------------|
| 0.969226193 | 0.588435841 |
| -1.20380194 | 0.0084403   |
| 0.993231942 | 0.867593317 |
| -1.10072652 | 0.175358301 |
| 0.927961132 | 0.275488003 |
| 0.997604118 | 0.959797823 |
| 0.947862012 | 0.330119006 |
| -1.012162   | 0.841047321 |
| -1.02883057 | 0.58134668  |
| -1.0434477  | 0.28475346  |
| 0.789221237 | 0.276667762 |
| 0.980109496 | 0.683603258 |
| 0.979834031 | 0.761375528 |
| -1.06729176 | 0.222681055 |
| -1.00706062 | 0.899335219 |
| -1.15952308 | 0.069413274 |
| -1.36890147 | 0.005250258 |
| -1.02362852 | 0.639141298 |
| -1.04197187 | 0.509819176 |
| 0.946898523 | 0.3262515   |
| 0.955230522 | 0.372006808 |
| -1.01024441 | 0.876872821 |
| -1.124488   | 0.041855595 |
| -1.03162916 | 0.595415817 |
| -1.02272492 | 0.638379495 |
| 0.977492432 | 0.723098574 |
| -1.13139525 | 0.006691924 |
| 0.964046437 | 0.368518745 |
| -1.15135706 | 0.095497032 |
| -1.05194238 | 0.475958182 |
| -1.24935552 | 0.03272542  |
| 0.680023087 | 7.14011E-09 |
| -1.0391433  | 0.356902657 |
| 0.728497712 | 0.021815337 |
| -1.08075372 | 0.188408072 |
| 0.993420018 | 0.935940799 |
| -1.00859663 | 0.890268669 |
| 0.939444411 | 0.313712354 |
| -1.18640685 | 0.00810279  |
| -1.04463601 | 0.259863893 |
| 0.885287973 | 0.099010099 |
| 0.987521922 | 0.884644545 |
| 0.984551184 | 0.758446203 |
| -1.05074996 | 0.317532469 |

|             |             |
|-------------|-------------|
| 0.964429081 | 0.343045704 |
| -1.06683414 | 0.186488187 |
| 0.980958192 | 0.731104043 |
| 0.964919953 | 0.502905289 |
| 0.988341046 | 0.816379294 |
| -1.01284342 | 0.802176746 |
| -1.07961317 | 0.311779643 |
| -1.04729559 | 0.388604491 |
| -1.02265963 | 0.736621009 |
| 0.976613337 | 0.85529636  |
| 0.920167538 | 0.054036608 |
| 0.93391717  | 0.148398225 |
| 0.99258461  | 0.85134136  |
| -1.00533263 | 0.942952631 |
| -1.04443743 | 0.775995766 |
| -1.1505601  | 0.077897954 |
| 0.801621298 | 0.043417673 |
| 0.876352646 | 0.000496063 |
| 0.884352259 | 0.272565441 |
| 0.960136301 | 0.403206286 |
| 0.819012876 | 0.027592481 |
| -1.06021573 | 0.387676984 |
| -1.08007273 | 0.039896704 |
| 0.949123102 | 0.808122467 |
| -1.11064035 | 0.04604705  |
| -1.00845978 | 0.88256689  |
| -1.02422174 | 0.720562739 |
| 0.980504309 | 0.636958271 |
| -1.01546321 | 0.829704672 |
| 0.945335547 | 0.258259154 |
| -1.0827557  | 0.293824861 |
| -1.00753309 | 0.854340068 |
| 0.879299276 | 0.047007182 |
| 0.952519057 | 0.396637478 |
| -1.16534042 | 0.013792465 |
| -1.17846798 | 0.248590811 |
| 0.978832592 | 0.731719212 |
| -1.13195855 | 0.025821185 |
| 0.959069356 | 0.509801939 |
| 0.888456877 | 0.205781094 |
| 0.991266007 | 0.870393461 |
| 0.998225519 | 0.976177301 |
| -1.06590122 | 0.523133787 |
| -1.02191488 | 0.632922567 |

|             |             |
|-------------|-------------|
| -1.04645637 | 0.583943683 |
| 0.933475821 | 0.228994875 |
| -1.0081322  | 0.889481422 |
| -1.01247266 | 0.76004793  |
| 0.91496131  | 0.12914907  |
| -1.18796756 | 0.121531512 |
| 0.974213916 | 0.798159012 |
| -1.05129971 | 0.300842036 |
| -1.06663601 | 0.158441742 |
| -1.04165871 | 0.590624662 |
| 0.973005048 | 0.58552077  |
| -1.00041052 | 0.994156995 |
| -1.03314096 | 0.607791645 |
| -1.30700959 | 0.01229958  |
| -1.06523254 | 0.341632683 |
| -1.13987619 | 0.011279408 |
| 0.912096811 | 0.528155954 |
| 0.984299782 | 0.764213089 |
| -1.06135577 | 0.315949718 |
| 0.987871101 | 0.826031482 |
| -1.16595369 | 0.029078775 |
| -1.28606736 | 0.001966877 |
| 0.889105361 | 0.084868546 |
| 0.971599932 | 0.823588805 |
| -1.25774433 | 0.10593094  |
| -1.08785997 | 0.439963108 |
| -1.03949045 | 0.322640389 |
| -1.11642028 | 0.068210635 |
| -1.05332548 | 0.442310604 |
| -1.14146044 | 0.011934382 |
| -1.12303779 | 0.125426311 |
| 0.870528558 | 0.101443839 |
| -1.14094586 | 0.036263712 |
| 0.92356441  | 0.12494475  |
| 0.79822336  | 0.000461494 |
| 0.988838984 | 0.844197897 |
| -1.01286135 | 0.857909413 |
| 0.917271709 | 0.398649777 |
| 0.775940254 | 0.001785252 |
| -1.08597527 | 0.047127301 |
| 0.939799568 | 0.244390837 |
| 0.928757118 | 0.184834396 |
| 0.809515529 | 0.020591793 |
| 0.894747813 | 0.276937439 |

|             |             |
|-------------|-------------|
| 0.968941168 | 0.524581003 |
| -1.19052135 | 0.01901696  |
| 0.977369836 | 0.757172261 |
| 0.89166761  | 0.044537762 |
| 0.973607759 | 0.596038863 |
| -1.14561257 | 0.019482345 |
| -1.53298799 | 5.48075E-07 |
| 0.897284824 | 0.03619303  |
| -1.17979755 | 0.096403585 |
| 0.982341324 | 0.711788072 |
| -1.04672999 | 0.426959139 |
| 0.871051203 | 0.477069549 |
| 0.979562502 | 0.708274131 |
| -1.14535834 | 0.081287166 |
| -1.02524472 | 0.859319983 |
| -1.0888006  | 0.09763782  |
| -1.01400342 | 0.723559957 |
| 0.999850307 | 0.998929639 |
| -1.00091094 | 0.991302631 |
| -1.05799103 | 0.31173147  |
| -1.0220904  | 0.688359046 |
| 0.508221883 | 1.62656E-07 |
| 0.872097362 | 0.548462081 |
| 0.953537336 | 0.364715051 |
| 0.985803686 | 0.77942206  |
| -1.20662541 | 0.001100911 |
| -1.01890984 | 0.751338277 |
| -1.02922185 | 0.613098184 |
| -1.02968106 | 0.597788352 |
| -1.01520266 | 0.788104099 |
| -1.02384135 | 0.708558748 |
| -1.0350111  | 0.701589848 |
| -1.04167707 | 0.409313576 |
| -1.0561811  | 0.337325881 |
| 0.963485318 | 0.494726971 |
| -1.01624987 | 0.778965445 |
| -1.13175161 | 0.017791962 |
| -1.01531578 | 0.767737238 |
| 0.934720651 | 0.473221407 |
| 0.952822891 | 0.363112787 |
| 0.95329816  | 0.411266711 |
| 0.891506484 | 0.195812772 |
| -1.00083856 | 0.991917288 |
| -1.01786497 | 0.775241958 |



|             |             |
|-------------|-------------|
| 0.920217946 | 0.211938431 |
| 0.843373754 | 0.163196174 |
| 0.868119365 | 0.011701569 |
| -1.20138984 | 0.031069737 |
| 0.825463283 | 0.09503749  |
| 0.953111631 | 0.357531779 |
| 0.960041336 | 0.486828507 |
| 0.861273083 | 0.163961259 |
| -1.03037106 | 0.505359647 |
| 0.957136252 | 0.710886333 |
| 0.872782677 | 0.257481032 |
| -1.19309594 | 0.003485485 |
| -1.06861504 | 0.282475625 |
| 0.987357484 | 0.821734031 |
| -1.06146277 | 0.322665485 |
| -1.08185914 | 0.278841029 |
| 0.977285075 | 0.709090283 |
| 0.921617131 | 0.210987964 |
| -1.01769884 | 0.7757201   |
| 0.91060561  | 0.379045655 |
| 0.88989256  | 0.498685503 |
| 0.968466807 | 0.508076406 |
| -1.05188117 | 0.33284432  |
| -1.15677503 | 0.025240093 |
| -1.02666048 | 0.658860319 |
| 0.892465775 | 0.683615753 |
| -1.29378509 | 0.122405001 |
| 0.902497971 | 0.020759766 |
| 0.654815663 | 1.44459E-06 |
| 0.949626271 | 0.302319295 |
| -1.01759505 | 0.755933655 |
| 0.946836513 | 0.379002748 |
| -1.01409331 | 0.867103663 |
| -1.0789986  | 0.136344061 |
| 0.964554091 | 0.502325318 |
| 0.98313402  | 0.603932304 |
| 0.965660125 | 0.527135288 |
| 0.967394794 | 0.591984601 |
| 0.855721838 | 0.008468243 |
| -1.25347176 | 0.003967685 |
| -1.04320855 | 0.259535886 |
| 0.976936649 | 0.711898031 |
| -1.03715014 | 0.429969123 |
| -1.04585325 | 0.578505969 |

|             |             |
|-------------|-------------|
| 0.963755885 | 0.58235887  |
| 0.940399108 | 0.259722146 |
| 0.991473681 | 0.895971273 |
| -1.10202998 | 0.109852752 |
| 0.908291672 | 0.635409134 |
| -1.03436402 | 0.544385313 |
| -1.34630837 | 0.037357294 |
| -1.07864871 | 0.18021766  |
| -1.23200855 | 0.022387671 |
| -1.32258917 | 0.000405108 |
| -1.24153277 | 0.001225647 |
| -1.29963289 | 0.042981434 |
| -1.06506955 | 0.27106284  |
| 0.961973963 | 0.53905724  |
| 0.990690783 | 0.928572032 |
| -1.00179927 | 0.972233197 |
| -1.0630637  | 0.175231039 |
| -1.00056721 | 0.989622034 |
| 0.965301559 | 0.542288912 |
| 0.995408797 | 0.948850232 |
| -1.2350407  | 0.043376622 |
| -1.03511228 | 0.29698512  |
| 0.890449796 | 0.007277382 |
| -1.09929328 | 0.342035034 |
| 0.921423855 | 0.044245432 |
| -1.14459379 | 0.017977953 |
| 0.997483253 | 0.967095002 |
| -1.04661206 | 0.38494522  |
| -1.12066379 | 0.138876719 |
| 0.974317263 | 0.653947466 |
| -1.07480068 | 0.139462745 |
| 0.975322555 | 0.86191795  |
| -1.07149661 | 0.344707851 |
| -1.0584793  | 0.302099076 |
| 0.908272147 | 0.072581196 |
| -1.06547581 | 0.263018383 |
| -1.05933273 | 0.444845049 |
| 0.993281657 | 0.902338035 |
| 0.983346672 | 0.709327919 |
| 0.983345061 | 0.853850205 |
| 0.970464619 | 0.741132419 |
| -1.04692226 | 0.310047383 |
| -1.01999781 | 0.703102873 |
| 0.878097019 | 0.03749586  |

|             |             |
|-------------|-------------|
| -1.01645217 | 0.740444497 |
| 0.98231119  | 0.866796841 |
| -1.21285783 | 0.033620229 |
| -1.03043862 | 0.539013284 |
| -1.01912976 | 0.738572695 |
| -1.01253495 | 0.807190564 |
| 0.913125635 | 0.374914718 |
| 0.963607882 | 0.536068075 |
| 0.929094482 | 0.73541377  |
| -1.13280349 | 0.017230133 |
| 0.709872859 | 0.004499116 |
| -1.29147156 | 0.00094118  |
| -1.02826599 | 0.668894893 |
| -1.10453042 | 0.449660227 |
| 0.9815845   | 0.721808479 |
| 0.890919858 | 0.015660269 |
| 0.975411478 | 0.694121601 |
| 0.75645242  | 2.28216E-05 |
| -1.00642218 | 0.90539244  |
| -1.10158766 | 0.274334984 |
| -1.03079827 | 0.576496554 |
| 0.947072022 | 0.163265924 |
| -1.00311174 | 0.952677508 |
| 0.921415738 | 0.179842666 |
| 0.884599934 | 0.01852218  |
| -1.06178199 | 0.442578325 |
| 0.699624142 | 3.25929E-05 |
| -1.0586883  | 0.251294441 |
| 0.933640974 | 0.285716982 |
| 0.962813962 | 0.428480505 |
| 0.946717491 | 0.297374087 |
| -1.02173419 | 0.657008108 |
| -1.05305072 | 0.724897029 |
| -1.0524974  | 0.279552805 |
| -1.03238779 | 0.606608539 |
| 0.830706198 | 0.156456166 |
| 0.993203864 | 0.908991963 |
| -1.05498671 | 0.397776688 |
| -1.06233161 | 0.323474682 |
| -1.00427619 | 0.947193023 |
| -1.06655877 | 0.290261123 |
| 0.992496901 | 0.875678474 |
| 0.971371342 | 0.823587029 |
| -1.04531425 | 0.341077683 |

|             |             |
|-------------|-------------|
| -1.0631481  | 0.197883311 |
| -1.02283311 | 0.772383264 |
| -1.0542306  | 0.248559706 |
| 0.969960128 | 0.587695276 |
| -1.04654482 | 0.58710477  |
| -1.01599456 | 0.79827448  |
| 0.662721596 | 0.005325041 |
| -1.11460964 | 0.403850195 |
| -1.00160645 | 0.966792703 |
| 0.987774933 | 0.826770411 |
| 0.98666983  | 0.820642378 |
| 0.964959102 | 0.479242466 |
| 0.873704793 | 0.05691626  |
| 0.985503801 | 0.823859071 |
| 0.992888649 | 0.914671625 |
| 0.984829183 | 0.7830561   |
| 0.957093713 | 0.38068533  |
| 0.911236058 | 0.148965575 |
| -1.16550068 | 0.199626885 |
| 0.971023573 | 0.734255597 |
| -1.09227848 | 0.163241722 |
| -1.10446421 | 0.021998622 |
| 0.924513587 | 0.28109064  |
| -1.11611625 | 0.082385515 |
| -1.063176   | 0.204692246 |
| -1.01734641 | 0.76109343  |
| -1.02668283 | 0.680430237 |
| -1.02647995 | 0.697356614 |
| 0.851493394 | 0.23783147  |
| 0.991468238 | 0.843184138 |
| 0.901982764 | 0.730159374 |
| -1.01258099 | 0.822562863 |
| 0.98385132  | 0.89075446  |
| -1.01783428 | 0.746439264 |
| -1.4641349  | 0.003075004 |
| 0.939619185 | 0.376864123 |
| 0.924570864 | 0.216307666 |
| 0.976153578 | 0.661015016 |
| 0.983556609 | 0.772227191 |
| -1.08370402 | 0.136032274 |
| 0.994934201 | 0.938375608 |
| 0.989185393 | 0.781527681 |
| -1.03872074 | 0.488110647 |
| 0.990796313 | 0.847937414 |

|             |             |
|-------------|-------------|
| -1.1958399  | 0.133204111 |
| -1.05498712 | 0.325358546 |
| -1.00119331 | 0.99205531  |
| 0.917640907 | 0.103895773 |
| -1.15344214 | 0.107578587 |
| 0.970002861 | 0.688385784 |
| -1.00204689 | 0.957836692 |
| -1.04169603 | 0.519999743 |
| 0.949882348 | 0.341427156 |
| 0.977475525 | 0.680242534 |
| 0.998990089 | 0.98233131  |
| 0.959959651 | 0.407509575 |
| -1.39244085 | 6.03752E-06 |
| -1.07934842 | 0.192160013 |
| -1.05345011 | 0.325337952 |
| 0.95587144  | 0.454227447 |
| -1.02685997 | 0.651931882 |
| 0.981835058 | 0.77883812  |
| -1.29934179 | 0.005993381 |
| 0.968030756 | 0.443549847 |
| 0.943694224 | 0.351558105 |
| -1.15245815 | 0.003454988 |
| 0.966543403 | 0.686245722 |
| -1.02657204 | 0.635871996 |
| -1.05499467 | 0.242776748 |
| 0.983966466 | 0.861780755 |
| 0.919880504 | 0.123133323 |
| 0.833211778 | 0.010817081 |
| 0.956301664 | 0.503390699 |
| 0.936081764 | 0.259029863 |
| 0.908780123 | 0.238622126 |
| 0.976383431 | 0.678171332 |
| -1.01966395 | 0.470026873 |
| -1.0909107  | 0.158878529 |
| 0.987667468 | 0.81630367  |
| 0.95132978  | 0.513442357 |
| 0.934501058 | 0.363917776 |
| -1.26290923 | 0.000250261 |
| 0.971401419 | 0.597537526 |
| -1.25788965 | 0.003301566 |
| 0.765135405 | 0.092144739 |
| 0.991466962 | 0.894820421 |
| -1.01818472 | 0.796740412 |
| -1.14910331 | 0.035153034 |

|             |             |
|-------------|-------------|
| 0.97551551  | 0.732026445 |
| 0.812110101 | 0.004725418 |
| 0.908317548 | 0.246086914 |
| 0.839484417 | 0.000339595 |
| -1.1341067  | 0.233427394 |
| -1.03829001 | 0.560787441 |
| -1.10636371 | 0.043934675 |
| -1.0187069  | 0.792360163 |
| 0.799211747 | 0.00735597  |
| 0.67284088  | 0.045155644 |
| -1.33580213 | 0.00024406  |
| -1.0048758  | 0.933236293 |
| 0.974316522 | 0.672457532 |
| -1.11189578 | 0.011627043 |
| 0.981866625 | 0.828018333 |
| -1.10267807 | 0.188942504 |
| -1.17987018 | 0.000868016 |
| -1.12251213 | 0.121104763 |
| 0.944000333 | 0.423470296 |
| 0.998929701 | 0.985300278 |
| -1.10535704 | 0.269686849 |
| 0.905220055 | 0.208377196 |
| -1.0602738  | 0.373218443 |
| -1.06152657 | 0.332979081 |
| 0.968132441 | 0.500868191 |
| -1.02214941 | 0.71676935  |
| 0.913723561 | 0.159174456 |
| -1.04117851 | 0.466226256 |
| -1.24538133 | 0.000924962 |
| -1.01453583 | 0.785971598 |
| -1.09961818 | 0.124944203 |
| -1.0970751  | 0.198676929 |
| 0.91644298  | 0.173251332 |
| 0.748357419 | 8.56675E-06 |
| -1.08921249 | 0.395457284 |
| -1.05496809 | 0.598644463 |
| 0.99417664  | 0.914723006 |
| -1.0921581  | 0.042362259 |
| 0.850073306 | 0.063436978 |
| 0.895983187 | 0.218027376 |
| -1.03385844 | 0.615525737 |
| -1.05132314 | 0.376029535 |
| 0.988293803 | 0.814638627 |
| -1.04001597 | 0.461205517 |

|             |             |
|-------------|-------------|
| 0.976236943 | 0.731721953 |
| 0.886617198 | 0.461248555 |
| 0.974815388 | 0.512498904 |
| -1.00406335 | 0.941193683 |
| -1.17315341 | 0.021526635 |
| -1.00247936 | 0.952544236 |
| -1.13002021 | 0.015526795 |
| -1.05702271 | 0.337147512 |
| 0.836392672 | 0.301470441 |
| -1.01808742 | 0.704405074 |
| -1.0053273  | 0.935466823 |
| 0.975239535 | 0.569109568 |
| 0.998207562 | 0.972857676 |
| -1.05407577 | 0.322811761 |
| -1.14540962 | 0.027266756 |
| -1.05735364 | 0.356866321 |
| 0.933016118 | 0.227477944 |
| 0.990198802 | 0.854984252 |
| -1.014793   | 0.815818736 |
| 0.992594577 | 0.900329921 |
| -1.04625644 | 0.681843959 |
| -1.05400584 | 0.155742272 |
| -1.07486383 | 0.149126744 |
| 0.954960844 | 0.413356203 |
| -1.08389062 | 0.072006547 |
| -1.06769085 | 0.27960739  |
| -1.13938196 | 0.070080323 |
| -1.13734728 | 0.209828136 |
| -1.00031221 | 0.996262451 |
| -1.04442708 | 0.545412992 |
| -1.0496187  | 0.418426066 |
| 0.989029591 | 0.806085451 |
| -1.13007386 | 0.108755727 |
| 0.996331574 | 0.947301216 |
| 0.917234108 | 0.160666819 |
| 0.9425269   | 0.342651934 |
| -1.12849455 | 0.07976748  |
| -1.02852711 | 0.576782272 |
| -1.00245798 | 0.960163418 |
| 0.988355297 | 0.829277103 |
| 0.875717401 | 0.528629337 |
| 0.944751532 | 0.268475519 |
| -1.32017702 | 8.93703E-05 |
| -1.06147036 | 0.210449825 |

|             |             |
|-------------|-------------|
| 0.918160359 | 0.047046533 |
| 0.899545424 | 0.171870281 |
| 0.978088464 | 0.704513903 |
| -1.05621963 | 0.363893749 |
| 0.961911928 | 0.399738663 |
| 0.770958264 | 0.001279187 |
| 0.950133599 | 0.549605212 |
| -1.04980219 | 0.348773216 |
| -1.00331287 | 0.934262164 |
| -1.14671756 | 0.116344418 |
| 0.939798284 | 0.258443542 |
| -1.0124386  | 0.803578046 |
| 0.947148417 | 0.302837197 |
| 0.961248514 | 0.547251106 |
| -1.02172952 | 0.842434228 |
| -1.00243511 | 0.984787749 |
| 0.779602564 | 0.000314538 |
| -1.2360141  | 0.006477842 |
| -1.07525009 | 0.288191222 |
| 0.937514017 | 0.311645989 |
| -1.31070491 | 0.000297912 |
| -1.0087256  | 0.871744245 |
| -1.04032312 | 0.520439002 |
| -1.02928426 | 0.654816537 |
| -1.12737044 | 0.494505852 |
| 0.901864322 | 0.053059914 |
| -1.09358689 | 0.065204304 |
| -1.0406722  | 0.243248472 |
| -1.00171049 | 0.975828612 |
| -1.01564822 | 0.805516451 |
| -1.058664   | 0.39667922  |
| 0.992334539 | 0.872822298 |
| -1.14926109 | 0.037846773 |
| -1.03733283 | 0.628700246 |
| 0.998254911 | 0.975240049 |
| 0.993935666 | 0.889252594 |
| 0.972982507 | 0.700843722 |
| -1.07058245 | 0.276640297 |
| -1.08627527 | 0.469747822 |
| 0.80745767  | 0.294401525 |
| 0.847387675 | 0.38819379  |
| 0.955851051 | 0.446730633 |
| -1.05009112 | 0.382543786 |
| 0.982337481 | 0.786222598 |



|             |             |
|-------------|-------------|
| -1.04211464 | 0.427097684 |
| -1.0292998  | 0.640315851 |
| 0.989432555 | 0.84972346  |
| 0.928636554 | 0.175468697 |
| -1.04170053 | 0.400024305 |
| -1.00288065 | 0.965414654 |
| -1.03894468 | 0.518770541 |
| 0.995495484 | 0.937070763 |
| 0.862084331 | 0.167477468 |
| 0.954849225 | 0.547749112 |
| -1.01204562 | 0.858814501 |
| 0.993390146 | 0.896062082 |
| 0.962587176 | 0.498299291 |
| -1.02215643 | 0.630225314 |
| -1.03225048 | 0.819833025 |
| 0.951724388 | 0.445505386 |
| 0.912131642 | 0.13195898  |
| -1.18182377 | 0.013808271 |
| -1.19150827 | 0.242977034 |
| -1.04640382 | 0.57056695  |
| -1.18177412 | 0.01007009  |
| 0.982364001 | 0.70167018  |
| 0.456639079 | 4.77812E-07 |
| -1.05645045 | 0.498340036 |
| -1.11216664 | 0.031301994 |
| -1.0492443  | 0.470586116 |
| 0.969850782 | 0.589551827 |
| 0.946402315 | 0.373604736 |
| -1.04220805 | 0.510461054 |
| -1.04626261 | 0.416359092 |
| -1.0799899  | 0.161154994 |
| -1.00202107 | 0.97596281  |
| 0.955443194 | 0.701992227 |
| 0.955710661 | 0.330040421 |
| -1.07517021 | 0.152503941 |
| -1.11566348 | 0.051277568 |
| 0.946163772 | 0.43941308  |
| -1.04177418 | 0.442750964 |
| -1.075757   | 0.241067944 |
| 0.953781401 | 0.370571994 |
| 0.948108131 | 0.371214539 |
| -1.00697366 | 0.894694338 |
| 0.979166923 | 0.763657311 |
| -1.00663216 | 0.904379189 |

|             |             |
|-------------|-------------|
| -1.00321499 | 0.948334733 |
| -1.01575889 | 0.783851991 |
| -1.04494113 | 0.419295153 |
| 0.888584638 | 0.099037595 |
| -1.11277312 | 0.061481691 |
| -1.20066853 | 0.010118716 |
| 0.985350155 | 0.798314351 |
| -1.06889083 | 0.207340124 |
| -1.00711107 | 0.877328821 |
| 0.979576997 | 0.869306276 |
| 0.985195812 | 0.641853379 |
| -1.23041743 | 0.058730381 |
| 0.973188443 | 0.644537622 |
| 0.959826348 | 0.378455466 |
| 0.954458607 | 0.261242862 |
| -1.08265617 | 0.106745787 |
| -1.00403598 | 0.93125016  |
| -1.07363392 | 0.210583646 |
| -1.0462518  | 0.482467498 |
| 0.895623339 | 0.121853945 |
| -1.03342376 | 0.447865248 |
| -1.02581117 | 0.642271248 |
| 0.891131407 | 0.663154515 |
| 0.913264052 | 0.185820963 |
| 0.993192425 | 0.907266021 |
| -1.00211312 | 0.976694396 |
| -1.05287589 | 0.240681979 |
| 0.951895759 | 0.160390906 |
| -1.00320157 | 0.948623473 |
| -1.03941428 | 0.483288016 |
| 0.960394124 | 0.413426745 |
| -1.14234378 | 0.007209313 |
| -1.06621102 | 0.108243364 |
| -1.03950629 | 0.578475118 |
| 0.978578522 | 0.665473721 |
| -1.14449919 | 0.027075324 |
| 0.968841565 | 0.555783079 |
| -1.02183654 | 0.708459693 |
| 0.929783798 | 0.310830528 |
| -1.14127593 | 0.043846598 |
| -1.09676092 | 0.038774086 |
| 0.999187037 | 0.987905578 |
| 0.970752176 | 0.62488792  |
| 0.887912784 | 0.042341581 |

|             |             |
|-------------|-------------|
| -1.00243058 | 0.967378176 |
| -1.13356934 | 0.027612321 |
| -1.00683944 | 0.885219273 |
| -1.12376945 | 0.137803673 |
| 0.937169674 | 0.223284088 |
| 0.892955747 | 0.243934864 |
| -1.09871292 | 0.2328099   |
| 0.990486112 | 0.871802174 |
| -1.1609023  | 0.01253308  |
| 0.943843519 | 0.2927792   |
| 0.964164551 | 0.50647493  |
| -1.06465164 | 0.291696041 |
| -1.08407829 | 0.103554501 |
| 0.982678592 | 0.750898772 |
| -1.0442364  | 0.425020575 |
| -1.06511335 | 0.44687051  |
| 0.993476309 | 0.911898402 |
| -1.04679213 | 0.465426245 |
| -1.14678475 | 0.148788055 |
| 0.948466281 | 0.510041989 |
| -1.03527047 | 0.506171503 |
| 0.994105073 | 0.919802303 |
| 0.983983195 | 0.760698565 |
| -1.05694435 | 0.213487765 |
| 0.929779433 | 0.14802647  |
| 0.989982065 | 0.870520014 |
| -1.19125118 | 0.042117174 |
| -1.03090078 | 0.591678561 |
| 0.961166158 | 0.418733385 |
| -1.00357769 | 0.953610272 |
| -1.08553354 | 0.35706101  |
| -1.03731357 | 0.480760257 |
| 0.996816191 | 0.949959855 |
| -1.00749808 | 0.889033946 |
| -1.08831262 | 0.079277475 |
| -1.08835734 | 0.139453497 |
| -1.21124546 | 0.005201876 |
| 0.995203971 | 0.938259738 |
| -1.02123491 | 0.746461183 |
| -1.02767214 | 0.612990185 |
| 0.980140973 | 0.735002041 |
| -1.11164169 | 0.178458355 |
| -1.01986086 | 0.755528282 |
| -1.04498304 | 0.483314309 |

|             |             |
|-------------|-------------|
| -1.06041857 | 0.304157318 |
| -1.01171578 | 0.819222647 |
| -1.04310734 | 0.505075664 |
| -1.06380373 | 0.356328318 |
| 0.97745898  | 0.73162007  |
| -1.09800073 | 0.137769994 |
| -1.54874952 | 0.000294172 |
| -1.04850049 | 0.417754401 |
| 0.940408591 | 0.2180627   |
| -1.00165754 | 0.976586392 |
| -1.10704466 | 0.295509323 |
| -1.01700177 | 0.746860516 |
| 0.946305718 | 0.357105834 |
| -1.11671631 | 0.393637206 |
| -1.05111263 | 0.371409563 |
| -1.05653663 | 0.373276368 |
| 0.971779403 | 0.715703737 |
| 0.992619006 | 0.895536233 |
| 0.988440378 | 0.837567277 |
| 0.958964923 | 0.592158318 |
| -1.03504526 | 0.540335073 |
| 0.965167246 | 0.384237383 |
| -1.05429257 | 0.38926501  |
| -1.0568375  | 0.303147826 |
| -1.22855115 | 0.000257551 |
| -1.02975032 | 0.58066999  |
| 0.911993113 | 0.052416361 |
| 0.980374664 | 0.690820818 |
| 0.896774106 | 0.080258044 |
| -1.01865272 | 0.749321021 |
| -1.00990313 | 0.825108208 |
| 0.962844714 | 0.533264254 |
| 0.786766389 | 0.009782913 |
| 0.96850279  | 0.566265361 |
| -1.01305072 | 0.797726905 |
| -1.02925513 | 0.49275358  |
| 0.886418965 | 0.461433277 |
| 0.959776508 | 0.653593722 |
| -1.0812925  | 0.185761175 |
| 0.988661864 | 0.849738339 |
| 0.995347645 | 0.941255157 |
| 0.884085592 | 0.241187222 |
| 0.980028733 | 0.7676275   |
| -1.06175319 | 0.373934637 |

|             |             |
|-------------|-------------|
| 0.947696105 | 0.409014651 |
| 0.935284555 | 0.303844478 |
| -1.04128686 | 0.476139154 |
| 0.86178325  | 0.222828222 |
| -1.04359857 | 0.498115059 |
| 0.903951923 | 0.099213317 |
| -1.0165994  | 0.743546605 |
| 0.918740988 | 0.111399878 |
| 0.981190635 | 0.668261583 |
| 0.976464638 | 0.693510899 |
| 0.944664744 | 0.410686873 |
| -1.04415868 | 0.518279537 |
| -1.02556886 | 0.655959214 |
| -1.02083269 | 0.709573096 |
| 0.988329255 | 0.830187009 |
| -1.05955591 | 0.371089441 |
| -1.04560141 | 0.46888496  |
| -1.19104471 | 0.07846399  |
| 0.972719108 | 0.429882882 |
| -1.03824847 | 0.458779499 |
| 0.999916345 | 0.998668714 |
| 0.99458225  | 0.872489533 |
| 0.961420159 | 0.509633272 |
| -1.10918301 | 0.084714485 |
| -1.00705376 | 0.906538477 |
| 0.99228084  | 0.886400981 |
| -1.09354165 | 0.172550271 |
| -1.01290644 | 0.741465631 |
| 0.959607263 | 0.443157692 |
| -1.33860501 | 0.000380816 |
| -1.07264989 | 0.22756968  |
| -1.10097211 | 0.046028934 |
| -1.00347567 | 0.957234947 |
| 0.991724294 | 0.873895576 |
| -1.05326198 | 0.349797443 |
| -1.05376059 | 0.104395576 |
| 0.959821694 | 0.446320184 |
| 0.971412983 | 0.783759928 |
| -1.07540435 | 0.573042266 |
| 0.913826799 | 0.124146796 |
| -1.45025601 | 0.015698768 |
| -1.23827103 | 0.053538256 |
| 0.954064501 | 0.665317982 |
| -1.11256639 | 0.384673431 |

|             |             |
|-------------|-------------|
| -1.00195993 | 0.973015841 |
| 0.861652871 | 0.012191085 |
| 0.917826511 | 0.141512772 |
| -1.16105801 | 0.043558528 |
| -1.09075589 | 0.206266934 |
| -1.11289905 | 0.204240861 |
| 0.919180784 | 0.254724393 |
| -1.01904713 | 0.78592876  |
| -1.03540251 | 0.543079529 |
| 0.871263863 | 0.051725977 |
| -1.0252668  | 0.763906664 |
| 0.996182992 | 0.955333551 |
| -1.00688848 | 0.897510302 |
| 0.947232561 | 0.349872093 |
| -1.10053686 | 0.075530922 |
| 0.925157246 | 0.173349318 |
| -1.0198978  | 0.686277271 |
| -1.01530597 | 0.798402477 |
| -1.06163968 | 0.276710805 |
| 0.838271164 | 0.059030585 |
| -1.00430768 | 0.945472666 |
| -1.32462924 | 0.023515869 |
| 0.988983481 | 0.930278547 |
| 0.95798482  | 0.282166883 |
| 0.946231064 | 0.31984838  |
| -1.20612678 | 0.047090133 |
| -1.03909463 | 0.53455103  |
| 0.996205948 | 0.93201965  |
| 0.893572961 | 0.047066488 |
| 0.958404263 | 0.389180483 |
| 0.990509306 | 0.925716226 |
| 0.982108847 | 0.908987086 |
| -1.0151631  | 0.786957662 |
| 0.94247231  | 0.24241816  |
| -1.04657536 | 0.422783588 |
| -1.01307957 | 0.81338672  |
| -1.00220345 | 0.968820508 |
| -1.03811278 | 0.500846526 |
| 0.99873407  | 0.982225917 |
| -1.12415195 | 0.044239958 |
| 0.978535965 | 0.67062056  |
| 0.972812078 | 0.618180415 |
| 0.994294332 | 0.907945601 |
| 0.997197728 | 0.958708633 |

|             |             |
|-------------|-------------|
| -1.03541604 | 0.560005807 |
| -1.02353985 | 0.680772226 |
| -1.06141669 | 0.2805604   |
| 0.964649753 | 0.547456162 |
| -1.02130851 | 0.670485904 |
| 0.951656407 | 0.36936623  |
| -1.19911473 | 0.043736525 |
| -1.06903686 | 0.186850675 |
| -1.13512718 | 0.027916729 |
| 0.98265903  | 0.74224996  |
| 0.930762745 | 0.151326536 |
| -1.09980693 | 0.179794412 |
| 0.97646618  | 0.691180693 |
| 0.878789889 | 0.033733081 |
| -1.02224343 | 0.679553821 |
| 0.923600474 | 0.19109864  |
| -1.06686019 | 0.172836603 |
| -1.06398354 | 0.244937545 |
| -1.04391556 | 0.477380351 |
| -1.09480237 | 0.122034289 |
| 0.991555259 | 0.885408772 |
| 0.973025627 | 0.578633784 |
| 0.993523491 | 0.955547286 |
| -1.02363772 | 0.677542941 |
| 0.987218631 | 0.856225499 |
| -1.1020445  | 0.025264428 |
| -1.07927686 | 0.238963828 |
| -1.00503673 | 0.919756147 |
| -1.12997835 | 0.029577123 |
| -1.11013904 | 0.055321567 |
| -1.05947283 | 0.368554661 |
| -1.03272582 | 0.564358502 |
| 0.941568669 | 0.618137889 |
| -1.11876064 | 0.136197186 |
| -1.00451632 | 0.97079649  |
| -1.0903525  | 0.246977309 |
| -1.013782   | 0.837336122 |
| -1.10359259 | 0.144419613 |
| -1.06955312 | 0.16244985  |
| -1.12098332 | 0.367835662 |
| 0.984389326 | 0.801875003 |
| 0.999542073 | 0.991654352 |
| -1.0546794  | 0.247522741 |
| -1.08148987 | 0.236335638 |

|             |             |
|-------------|-------------|
| -1.05536757 | 0.310176255 |
| -1.0244152  | 0.676227386 |
| 0.867569429 | 0.428003076 |
| -1.01782657 | 0.75284367  |
| -1.00885986 | 0.892012155 |
| 0.97941521  | 0.713751305 |
| -1.03519291 | 0.463110808 |
| 0.936794437 | 0.157568849 |
| 0.92959102  | 0.348596535 |
| 0.935220628 | 0.238619306 |
| 0.895591277 | 0.542397168 |
| -1.09659366 | 0.051406738 |
| -1.06610628 | 0.329109224 |
| -1.03922161 | 0.323145593 |
| -1.05751462 | 0.358864865 |
| -1.06444119 | 0.041817813 |
| 0.934331855 | 0.123053595 |
| 0.901509165 | 0.24381313  |
| 0.978295349 | 0.718699593 |
| -1.07167372 | 0.653515237 |
| -1.05079951 | 0.391585258 |
| 0.985480004 | 0.780640291 |
| -1.10289032 | 0.051931583 |
| -1.01585652 | 0.81835069  |
| -1.14047317 | 0.236081811 |
| -1.00738768 | 0.89837569  |
| 0.995177391 | 0.930774201 |
| -1.49813007 | 3.18329E-05 |
| -1.00278389 | 0.966866225 |
| 0.998704604 | 0.980500815 |
| 0.89520855  | 0.06827433  |
| -1.0900725  | 0.051195397 |
| -1.24221745 | 0.004910968 |
| -1.13063917 | 0.029484721 |
| 0.912097149 | 0.164439315 |
| -1.04068668 | 0.471087402 |
| -1.01289387 | 0.714826191 |
| -1.05358547 | 0.609897011 |
| -1.04287801 | 0.44696272  |
| -1.17293888 | 0.048239614 |
| -1.05447321 | 0.524054148 |
| -1.05453629 | 0.372034225 |
| 0.991818183 | 0.905773466 |
| 0.977793575 | 0.666085023 |



|             |             |
|-------------|-------------|
| -1.08583089 | 0.174612335 |
| 0.90279034  | 0.420712353 |
| 0.983732849 | 0.801524154 |
| -1.02107436 | 0.728096938 |
| 0.916079021 | 0.153347177 |
| 0.998043697 | 0.975471148 |
| 0.887526906 | 0.316229158 |
| 0.978249655 | 0.700501101 |
| -1.03977455 | 0.695613706 |
| -1.06508381 | 0.204522882 |
| -1.04923802 | 0.407497021 |
| 0.99559704  | 0.934782417 |
| -1.01038195 | 0.856917906 |
| -1.03866802 | 0.470327122 |
| -1.02654725 | 0.865359511 |
| 0.985083317 | 0.819068986 |
| -1.00616913 | 0.882153716 |
| -1.12963942 | 0.065711664 |
| 0.987871503 | 0.826496556 |
| 0.981613409 | 0.791512048 |
| 0.987801052 | 0.845640824 |
| -1.0243549  | 0.66351697  |
| -1.1034469  | 0.088681165 |
| -1.06158846 | 0.240186323 |
| -1.1481532  | 0.308291822 |
| -1.10486834 | 0.023036594 |
| 0.873523609 | 0.118244344 |
| -1.08890828 | 0.027638068 |
| -1.16539701 | 0.029949172 |
| -1.10559688 | 0.083448313 |
| -1.00239682 | 0.96311872  |
| 0.951411941 | 0.292275926 |
| -1.05082934 | 0.311124598 |
| -1.01666519 | 0.781752161 |
| 0.972769477 | 0.743300544 |
| 0.974929393 | 0.737013763 |
| -1.11224719 | 0.280856887 |
| 0.888885369 | 0.045159784 |
| -1.0062531  | 0.905438024 |
| 0.929354218 | 0.229440909 |
| -1.03119947 | 0.585148331 |
| -1.05270261 | 0.343018533 |
| -1.06358869 | 0.210012337 |
| -1.09439083 | 0.158245535 |

|             |             |
|-------------|-------------|
| -1.04360524 | 0.508103174 |
| -1.11526267 | 0.371754967 |
| 0.898717122 | 0.169816957 |
| 0.976402012 | 0.64349028  |
| -1.00276567 | 0.957628044 |
| 0.915970166 | 0.094167539 |
| -1.01541795 | 0.774893791 |
| -1.05237848 | 0.392550933 |
| -1.02314893 | 0.540738583 |
| -1.04172326 | 0.457956735 |
| -1.09222146 | 0.15802182  |
| 0.944064345 | 0.344897882 |
| 0.971383465 | 0.598283221 |
| -1.02015594 | 0.741705453 |
| -1.00393837 | 0.946272456 |
| -1.11201132 | 0.043888565 |
| -1.07138998 | 0.229669826 |
| -1.26836686 | 0.003772583 |
| -1.02592731 | 0.519488063 |
| 0.980198016 | 0.672985461 |
| -1.5046161  | 7.38547E-08 |
| -1.27528977 | 0.035184055 |
| 0.963763945 | 0.407408868 |
| -1.09716833 | 0.089802077 |
| 0.832071424 | 0.031550596 |
| -1.00502534 | 0.915867175 |
| -1.03981865 | 0.509011887 |
| -1.08045585 | 0.184685478 |
| -1.09199535 | 0.111839867 |
| -1.13643835 | 0.081248466 |
| -1.05207978 | 0.288935003 |
| -1.07504667 | 0.463559605 |
| -1.08891759 | 0.2359365   |
| 0.95828996  | 0.172158901 |
| -1.02399443 | 0.463215627 |
| 0.972322277 | 0.645810417 |
| -1.16109757 | 0.016595823 |
| -1.06181438 | 0.357108601 |
| -1.17813861 | 0.018213573 |
| 0.944985482 | 0.374223821 |
| -1.03763946 | 0.451764178 |
| -1.00664205 | 0.906464183 |
| 0.922817224 | 0.167802753 |
| -1.16817355 | 0.011431926 |

|             |             |
|-------------|-------------|
| -1.84144827 | 3.23252E-14 |
| -1.1215317  | 0.075177576 |
| -1.09289326 | 0.099093856 |
| 0.978720324 | 0.710584568 |
| 0.959367215 | 0.45519668  |
| -1.07733133 | 0.185001366 |
| -1.02126707 | 0.692511623 |
| -1.02075698 | 0.703794488 |
| 0.99783789  | 0.968993344 |
| 0.963632027 | 0.523080715 |
| -1.02472544 | 0.655190677 |
| -1.0224576  | 0.670757434 |
| -1.00434222 | 0.908799287 |
| 0.890951368 | 0.0295595   |
| 0.932553813 | 0.200544666 |
| -1.06937845 | 0.250197131 |
| -1.15169348 | 0.041759448 |
| -1.05353514 | 0.331239188 |
| -1.08107816 | 0.312311351 |
| -1.00435388 | 0.92937805  |
| 0.955646916 | 0.460844772 |
| 0.954789978 | 0.474418975 |
| -1.14377854 | 0.185462714 |
| -1.15197215 | 0.023989333 |
| 0.977823765 | 0.654227348 |
| -1.08224126 | 0.558289003 |
| -1.01550049 | 0.798471092 |
| -1.08901747 | 0.079114367 |
| 0.856546721 | 0.15233323  |
| -1.0875596  | 0.247662511 |
| 0.93066963  | 0.194243334 |
| -1.15166391 | 0.018827544 |
| 0.906053362 | 0.195163942 |
| -1.0660721  | 0.181606271 |
| 0.969137844 | 0.554864061 |
| 0.979090325 | 0.767672222 |
| -1.13679979 | 0.245987777 |
| 0.937208849 | 0.150073722 |
| 0.810338976 | 0.006935298 |
| -1.15466108 | 0.167619643 |
| -1.79223134 | 1.12389E-08 |
| 0.948320724 | 0.591327427 |
| -1.10704456 | 0.065351393 |
| 0.82591695  | 0.051618007 |

|             |             |
|-------------|-------------|
| -1.03064875 | 0.567492634 |
| 0.824730784 | 0.043585837 |
| -1.00835725 | 0.871156158 |
| -1.08623759 | 0.110080256 |
| -1.01154311 | 0.827161486 |
| 0.796282444 | 0.269811132 |
| 0.850779062 | 0.352508507 |
| 0.996253622 | 0.939459334 |
| 0.935175524 | 0.182354267 |
| -1.0460594  | 0.455098704 |
| 0.928708465 | 0.160493178 |
| -1.03908433 | 0.428159527 |
| -1.14591593 | 0.024073434 |
| -1.02994403 | 0.534544365 |
| 0.82828549  | 0.021436068 |
| -1.14979064 | 0.046240851 |
| -1.03034068 | 0.55792645  |
| -1.16110362 | 0.011669804 |
| -1.05474046 | 0.362168819 |
| -1.0223671  | 0.715946683 |
| -1.15481402 | 0.051375699 |
| -1.01411893 | 0.814047276 |
| 0.945185145 | 0.310073943 |
| 0.970691371 | 0.635804368 |
| 0.994531336 | 0.91054729  |
| 0.901198429 | 0.183846609 |
| 0.990450623 | 0.864382314 |
| -1.17026789 | 0.080642211 |
| -1.06078082 | 0.387634081 |
| 0.999044952 | 0.981094185 |
| 0.953746708 | 0.361254519 |
| -1.12945197 | 0.045417079 |
| -1.01991586 | 0.715182191 |
| -1.09712386 | 0.142252016 |
| 0.922044243 | 0.46886712  |
| -1.03706734 | 0.572032011 |
| -1.06305518 | 0.397447213 |
| -1.05812623 | 0.28967153  |
| -1.16908878 | 0.009796855 |
| -1.07866466 | 0.234031553 |
| -1.01810511 | 0.752653326 |
| 0.983887352 | 0.783800441 |
| -1.1270847  | 0.032981265 |
| -1.06845725 | 0.334788305 |

|             |             |
|-------------|-------------|
| -1.05659178 | 0.379253288 |
| 0.989530523 | 0.944545028 |
| 0.9812914   | 0.831780914 |
| -1.04273455 | 0.430038987 |
| 0.763812366 | 4.03977E-06 |
| 0.905845249 | 0.374144126 |
| 0.98160125  | 0.742316907 |
| -1.02072141 | 0.720053188 |
| -1.03094518 | 0.604491388 |
| 0.971937662 | 0.567105778 |
| -1.00829729 | 0.89780463  |
| 0.90675523  | 0.067466176 |
| 0.948189381 | 0.362144121 |
| -1.07713139 | 0.247783482 |
| -1.04633725 | 0.52598605  |
| -1.06461977 | 0.142358355 |
| 0.870784794 | 0.030633948 |
| 0.931900589 | 0.331669216 |
| -1.11225513 | 0.13507769  |
| 0.959169213 | 0.48410972  |
| 0.937669844 | 0.425019017 |
| -1.04936732 | 0.365942291 |
| 0.979700076 | 0.814766949 |
| -1.05028597 | 0.398790677 |
| -1.00153696 | 0.980876426 |
| -1.06378946 | 0.312084899 |
| -1.02108287 | 0.774639582 |
| 0.988131913 | 0.863484866 |
| 0.955504038 | 0.443123016 |
| -1.13960848 | 0.014426251 |
| 0.975553087 | 0.710642479 |
| -1.09442512 | 0.143121223 |
| 0.810464126 | 0.000221435 |
| -1.14306461 | 0.274816397 |
| -1.06038748 | 0.416752373 |
| -1.06228736 | 0.334724757 |
| 0.949583726 | 0.287134633 |
| -1.09174531 | 0.122036709 |
| 0.989197208 | 0.884440006 |
| -1.14433938 | 0.208669364 |
| 0.865136085 | 0.018318646 |
| -1.02136607 | 0.712790532 |
| 0.804596346 | 0.326626183 |
| -1.13158968 | 0.019067871 |

|             |             |
|-------------|-------------|
| 0.994093927 | 0.904719629 |
| 0.965964913 | 0.591949119 |
| 0.948181779 | 0.240666984 |
| 0.945906419 | 0.322227912 |
| -1.15052614 | 0.099390406 |
| -1.01467381 | 0.792692887 |
| 0.988551738 | 0.810795506 |
| -1.2472943  | 0.020872251 |
| -1.04116596 | 0.398336425 |
| -1.01291273 | 0.797709048 |
| 0.922752843 | 0.151813268 |
| 0.813298835 | 0.000551913 |
| 0.962804555 | 0.323055374 |
| -1.0343355  | 0.596973772 |
| 0.983874383 | 0.78694085  |
| 0.980025114 | 0.776607516 |
| 0.896169319 | 0.142180722 |
| 0.926143828 | 0.158214204 |
| 0.89476287  | 0.130492132 |
| 0.901491112 | 0.053140027 |
| -1.02479803 | 0.614214826 |
| -1.09249879 | 0.16250563  |
| 0.419293789 | 2.45489E-14 |
| 0.94737415  | 0.338862652 |
| -1.06889994 | 0.260908369 |
| -1.10029106 | 0.068275971 |
| 0.93819254  | 0.289640889 |
| -1.00541251 | 0.912093117 |
| 0.949914036 | 0.363480689 |
| -1.08257119 | 0.049801875 |
| -1.07329385 | 0.229861827 |
| 0.983809064 | 0.801311847 |
| 0.794502911 | 0.007983416 |
| -1.03313297 | 0.516315591 |
| -1.07538369 | 0.657871091 |
| 0.957540177 | 0.722377999 |
| -1.04317485 | 0.416243434 |
| 0.984594575 | 0.799056165 |
| 0.956690309 | 0.476222228 |
| -1.11730138 | 0.056468968 |
| -1.17043891 | 0.020164696 |
| -1.3481667  | 0.002366074 |
| 0.969515977 | 0.51384     |
| -1.09694112 | 0.198300226 |

|             |             |
|-------------|-------------|
| -1.06105141 | 0.155244843 |
| -1.01223985 | 0.828047181 |
| -1.17565453 | 0.322627904 |
| -1.00005804 | 0.999226354 |
| 0.918660415 | 0.058065646 |
| -1.02196994 | 0.61978495  |
| 0.946071287 | 0.269805236 |
| 0.996165766 | 0.943406867 |
| 0.944449838 | 0.302205958 |
| 0.939203042 | 0.238544633 |
| 0.992970743 | 0.909154161 |
| -1.08870121 | 0.095310877 |
| 0.875454136 | 0.426022472 |
| -1.12938717 | 0.012346718 |
| -1.30181223 | 0.002133888 |
| -1.03456279 | 0.581636139 |
| -1.06310897 | 0.25898618  |
| -1.01471701 | 0.854563736 |
| -1.00812607 | 0.881373219 |
| 0.965972258 | 0.710350608 |
| -1.14283741 | 0.039196837 |
| -1.00892973 | 0.880388209 |
| 0.990466696 | 0.863216435 |
| 0.736147983 | 0.103213661 |
| -1.04803573 | 0.638186218 |
| 0.966072502 | 0.59948077  |
| -1.03262514 | 0.319927999 |
| 0.949057457 | 0.263162095 |
| 0.959057983 | 0.375723244 |
| -1.05357384 | 0.306421163 |
| 0.989569656 | 0.840681625 |
| 0.963036788 | 0.497465049 |
| -1.0898623  | 0.157785528 |
| 0.880538476 | 0.014228974 |
| -1.01952686 | 0.745084526 |
| -1.1069461  | 0.022691169 |
| 0.861351958 | 0.020049905 |
| -1.09745019 | 0.118056719 |
| -1.00140214 | 0.973924028 |
| -1.03663962 | 0.33228752  |
| -1.04999031 | 0.436882747 |
| -1.00219533 | 0.974708047 |
| 0.848512999 | 0.035482739 |
| -1.11817072 | 0.037243422 |

|             |             |
|-------------|-------------|
| 0.9636936   | 0.406359821 |
| -1.10404812 | 0.174270301 |
| -1.02812964 | 0.70586608  |
| 0.981006336 | 0.781085145 |
| -1.02382497 | 0.67780157  |
| -1.01694749 | 0.657581683 |
| -1.1866334  | 0.009073164 |
| -1.10100404 | 0.135797453 |
| -1.02367894 | 0.626070247 |
| 0.957893858 | 0.412639565 |
| -1.0951782  | 0.04429452  |
| 0.897920787 | 0.05407757  |
| -1.11628395 | 0.02948701  |
| -1.06084849 | 0.334663745 |
| -1.07832795 | 0.214860642 |
| -1.01773406 | 0.88349105  |
| 0.92755175  | 0.335432509 |
| 0.966417789 | 0.627240506 |
| -1.20535065 | 0.034476424 |
| -1.00696875 | 0.913048477 |
| 0.917344558 | 0.099665444 |
| 0.975039922 | 0.71119239  |
| -1.00340457 | 0.924648541 |
| -1.11798284 | 0.072519134 |
| 0.978701703 | 0.750497434 |
| -1.0452199  | 0.474243125 |
| 0.954764721 | 0.207285646 |
| 0.952558317 | 0.56941388  |
| 0.887586686 | 0.13821208  |
| -1.12041757 | 0.134309123 |
| 0.959749162 | 0.405976451 |
| -1.03242389 | 0.516531013 |
| 0.983243609 | 0.76633484  |
| -1.11418308 | 0.037118878 |
| -1.03184617 | 0.614341917 |
| -1.05161296 | 0.243568219 |
| 0.981350194 | 0.714118873 |
| -1.03791623 | 0.54582822  |
| -1.04297984 | 0.445906839 |
| 0.972713863 | 0.717089011 |
| -1.06267002 | 0.256310938 |
| 0.970957385 | 0.620654692 |
| 0.960933434 | 0.352071117 |
| -1.05992547 | 0.341543274 |



|              |             |
|--------------|-------------|
| -1.18870455  | 0.048461829 |
| -1.06098448  | 0.259706184 |
| -1.11276557  | 0.081931634 |
| 0.995417456  | 0.931023907 |
| 0.968515905  | 0.661841002 |
| -1.200111118 | 0.003726634 |
| 0.9411057    | 0.318633963 |
| 0.902446084  | 0.086281082 |
| 0.98630193   | 0.782807149 |
| -1.12450241  | 0.131060948 |
| -1.08403852  | 0.139059913 |
| 0.92295922   | 0.362777442 |
| -1.08197442  | 0.120870857 |
| -1.11287728  | 0.139031936 |
| -1.06885773  | 0.271405698 |
| -1.04259072  | 0.294394116 |
| -1.00964299  | 0.865137653 |
| 0.960370697  | 0.496502465 |
| -1.11008311  | 0.114344673 |
| -1.43275002  | 1.0547E-07  |
| 0.971597902  | 0.600672704 |
| -1.03371908  | 0.55704448  |
| 0.816973802  | 0.360086874 |
| 0.952221505  | 0.364717178 |
| -1.2234083   | 0.065742622 |
| -1.08988902  | 0.137552371 |
| 0.970623712  | 0.623055073 |
| -1.00057148  | 0.989649256 |
| -1.00925348  | 0.853887257 |
| 0.979491864  | 0.721277107 |
| 0.775272024  | 0.00011147  |
| -1.01969192  | 0.739519892 |
| 0.948665016  | 0.426332809 |
| 0.971725161  | 0.621728922 |
| 0.932422974  | 0.27492556  |
| 0.934908194  | 0.194826486 |
| -1.14916493  | 0.015900649 |
| 0.873536399  | 0.046277869 |
| 0.790946735  | 0.060374584 |
| 0.864625707  | 0.250735505 |
| -1.32790674  | 0.003689445 |
| -1.00841506  | 0.878662644 |
| -1.1441675   | 0.063243728 |
| 0.961857129  | 0.56049668  |

|             |             |
|-------------|-------------|
| -1.09971794 | 0.071903558 |
| -1.00187619 | 0.973583469 |
| 0.981976029 | 0.750229751 |
| 0.970570443 | 0.665566967 |
| -1.09062954 | 0.117733506 |
| 0.951662465 | 0.452245134 |
| -1.0936831  | 0.02317128  |
| 0.925937344 | 0.241373102 |
| -1.07029492 | 0.143069702 |
| -1.0820702  | 0.278276351 |
| -1.03002396 | 0.578336353 |
| -1.00699363 | 0.899629125 |
| 0.901369113 | 0.109637892 |
| 0.878102936 | 0.111423457 |
| 0.848085126 | 0.159105036 |
| -1.26416687 | 0.026120078 |
| 0.964033941 | 0.50789154  |
| 0.986268512 | 0.784181406 |
| -1.00174798 | 0.977086462 |
| 0.973960247 | 0.541093429 |
| -2.24863513 | 2.91201E-10 |
| 0.807752863 | 0.048469985 |
| -1.16678822 | 0.005088329 |
| -1.12487415 | 0.060872138 |
| 0.964718336 | 0.567075752 |
| -1.05129385 | 0.678991018 |
| 0.989991232 | 0.849921291 |
| -1.03453367 | 0.552831044 |
| 0.960188099 | 0.435732576 |
| -1.16438881 | 0.017590326 |
| -1.05647291 | 0.28718926  |
| 0.951340246 | 0.383318536 |
| -1.02682984 | 0.878848198 |
| -1.11813608 | 0.049379107 |
| -1.03189836 | 0.559430588 |
| -1.08795255 | 0.272071453 |
| -1.0259052  | 0.680662076 |
| 0.996654784 | 0.956155316 |
| 0.770305737 | 0.013902048 |
| -1.05963218 | 0.548063657 |
| 0.958068366 | 0.495993092 |
| -1.56919585 | 2.06704E-08 |
| -1.01947376 | 0.749715243 |
| -1.27127316 | 0.000163191 |

|             |             |
|-------------|-------------|
| -1.35901728 | 0.005022102 |
| -1.03021196 | 0.699915244 |
| -1.05535612 | 0.716365144 |
| -1.18514442 | 0.100285053 |
| 0.967916591 | 0.513525318 |
| 0.995415937 | 0.951443644 |
| -1.08351037 | 0.214552468 |
| -1.06038853 | 0.349737314 |
| -1.01666026 | 0.755538658 |
| -1.0462258  | 0.603789899 |
| -1.16945056 | 0.211788814 |
| -1.03976363 | 0.643235058 |
| 0.934917744 | 0.46816993  |
| 0.917609028 | 0.316409765 |
| 0.975166504 | 0.738442222 |
| 0.986957709 | 0.849958156 |
| -1.21533986 | 0.035248066 |
| -1.01720954 | 0.666903793 |
| 0.957025613 | 0.517688274 |
| -1.03832356 | 0.510820396 |
| -1.03310687 | 0.5590471   |
| -1.04341112 | 0.509049443 |
| -1.02456805 | 0.641101725 |
| -1.03638353 | 0.54194326  |
| -1.0233571  | 0.689814431 |
| -1.17541864 | 0.042578839 |
| -1.03607776 | 0.510212875 |
| 0.902698435 | 0.467109609 |
| -1.04074924 | 0.39925493  |
| -1.013976   | 0.826619509 |
| -1.08246666 | 0.200505562 |
| -1.24230565 | 0.014820135 |
| -1.07821039 | 0.152883326 |
| 0.994609822 | 0.972592187 |
| 0.993467508 | 0.881076639 |
| 0.960346754 | 0.386460439 |
| 0.919875799 | 0.064713301 |
| 0.982605871 | 0.747392157 |
| -1.09968606 | 0.082616443 |
| 0.937941137 | 0.275456012 |
| -1.06649625 | 0.245402192 |
| -1.46455681 | 3.70858E-07 |
| 0.959805635 | 0.450262318 |
| -1.19027386 | 0.010714161 |

|             |             |
|-------------|-------------|
| 0.962140858 | 0.516716307 |
| 0.894192041 | 0.234377238 |
| 0.985094997 | 0.810125924 |
| -1.02902254 | 0.645371224 |
| -1.00613142 | 0.965972108 |
| -1.0349884  | 0.533450291 |
| 0.991465441 | 0.878301124 |
| -1.07071943 | 0.250332988 |
| 0.783836309 | 0.005677162 |
| -1.04363893 | 0.430337861 |
| 0.950845499 | 0.382705649 |
| 0.998472132 | 0.977837159 |
| -1.1705772  | 0.0880201   |
| 0.986912772 | 0.81197135  |
| -1.07343697 | 0.190732454 |
| -1.03982691 | 0.520023556 |
| 0.940990192 | 0.495577409 |
| 0.975577955 | 0.602921178 |
| 0.754547944 | 0.001664544 |
| -1.12916939 | 0.047196016 |
| 0.981286425 | 0.685435379 |
| -1.14153193 | 0.040382522 |
| -1.09502351 | 0.185240315 |
| -1.09211565 | 0.116042677 |
| 0.95202406  | 0.366092363 |
| -1.04585935 | 0.400865708 |
| -1.14695747 | 0.045327262 |
| -1.46353062 | 7.91342E-05 |
| 0.941519367 | 0.305871816 |
| 0.889425935 | 0.025241893 |
| 0.978010135 | 0.780416661 |
| 0.810725678 | 0.204966825 |
| -1.05670904 | 0.345871467 |
| -1.1186554  | 0.096966328 |
| -1.04397641 | 0.448564235 |
| -1.03927349 | 0.454164845 |
| 0.982235228 | 0.70207752  |
| -1.12830985 | 0.036279346 |
| 0.99035119  | 0.870833337 |
| 0.933326165 | 0.182333076 |
| 0.954075584 | 0.420898949 |
| 0.952296353 | 0.432551861 |
| 0.929138175 | 0.144309584 |
| 0.994093522 | 0.913073695 |

|             |             |
|-------------|-------------|
| -1.13989004 | 0.037467661 |
| -1.04348763 | 0.37539239  |
| -1.12344232 | 0.0930178   |
| -1.04916828 | 0.243104931 |
| 0.916557438 | 0.171058217 |
| 0.982613784 | 0.725861486 |
| -1.04028303 | 0.546686717 |
| -1.02117918 | 0.688398189 |
| -1.02242078 | 0.711365485 |
| 0.935379951 | 0.399343994 |
| 0.991115565 | 0.814929901 |
| 0.9253829   | 0.133270102 |
| -1.08764559 | 0.101101872 |
| 0.976154377 | 0.683029319 |
| -1.13767336 | 0.03116285  |
| -1.03084912 | 0.58072408  |
| -1.00449559 | 0.948596698 |
| -1.06306945 | 0.320969872 |
| 0.97861564  | 0.695787588 |
| -1.09092125 | 0.091412463 |
| 0.978533321 | 0.832739767 |
| 0.997335359 | 0.963088267 |
| -1.37264694 | 0.051010093 |
| 0.988584803 | 0.826090276 |
| -1.07169973 | 0.280444995 |
| 0.96020686  | 0.498046488 |
| 0.967244764 | 0.596890521 |
| -1.14556859 | 0.018663318 |
| -1.05457425 | 0.269274019 |
| 0.960447565 | 0.489292575 |
| 0.986932063 | 0.786663641 |
| 0.995301995 | 0.923089201 |
| -1.31709976 | 0.000114203 |
| -1.22281147 | 0.02927813  |
| -1.13700781 | 0.01842469  |
| 0.980786008 | 0.765235288 |
| -1.03211928 | 0.588537013 |
| 0.872658985 | 0.213329307 |
| 0.983372652 | 0.741336923 |
| -1.07608128 | 0.158294872 |
| 0.959469298 | 0.334334428 |
| 0.972625574 | 0.610146426 |
| -1.02166489 | 0.663805679 |
| 0.988812765 | 0.828510378 |

|             |             |
|-------------|-------------|
| 0.970443774 | 0.62298155  |
| 0.901907565 | 0.097951622 |
| 0.997652317 | 0.964613122 |
| -1.10370524 | 0.175242664 |
| -1.07995283 | 0.305265758 |
| 0.545195238 | 1.87434E-05 |
| -1.01125539 | 0.870690157 |
| 0.939591918 | 0.617162154 |
| 0.900020695 | 0.387475147 |
| 0.965611391 | 0.536399585 |
| 0.981847365 | 0.76614545  |
| 0.821319186 | 0.000303964 |
| -1.08022383 | 0.085950136 |
| -1.03607369 | 0.619738743 |
| 0.858157289 | 0.010825123 |
| -1.06875822 | 0.455389664 |
| 0.921957441 | 0.150058949 |
| 0.974290181 | 0.652509997 |
| 0.971096526 | 0.627977331 |
| -1.23267915 | 0.011402465 |
| -1.02865399 | 0.566834112 |
| 0.82514786  | 0.069034565 |
| -1.01440332 | 0.843966966 |
| -1.06599948 | 0.586595084 |
| -1.09712186 | 0.10613234  |
| -1.12172474 | 0.028898448 |
| 0.775925863 | 0.127210555 |
| -1.07654803 | 0.178879352 |
| 0.914334623 | 0.11430688  |
| -1.238459   | 0.042619274 |
| 0.978619475 | 0.678832357 |
| 0.890941447 | 0.330727484 |
| 0.97546834  | 0.766476983 |
| 0.922323484 | 0.219886619 |
| -1.02147567 | 0.686957398 |
| 0.747532846 | 0.000328436 |
| 0.986749375 | 0.783165782 |
| 0.91743621  | 0.163194758 |
| -1.46455443 | 0.001751487 |
| -1.01648612 | 0.748337417 |
| 0.837101191 | 0.40346923  |
| -1.01474254 | 0.814841337 |
| -1.043434   | 0.414955458 |
| -1.04006825 | 0.444522766 |

|             |             |
|-------------|-------------|
| 0.951350054 | 0.329244718 |
| 0.980475707 | 0.599067249 |
| 0.915284405 | 0.569152359 |
| -1.1010707  | 0.105125334 |
| -1.2235786  | 0.000618998 |
| -1.04341452 | 0.497810954 |
| 0.958945474 | 0.490056093 |
| 0.963812046 | 0.483458129 |
| -1.05671795 | 0.36458546  |
| -1.09831497 | 0.263510545 |
| -1.00710153 | 0.916714905 |
| -1.02300476 | 0.724926231 |
| -1.06715267 | 0.322911505 |
| -1.09091268 | 0.270029105 |
| -1.07705498 | 0.234452497 |
| 0.990122124 | 0.813584936 |
| 0.96018035  | 0.493950143 |
| -1.0034247  | 0.975126785 |
| -1.0368337  | 0.504230941 |
| -1.12211327 | 0.03933629  |
| -1.04400346 | 0.395150952 |
| 0.994617473 | 0.927513084 |
| -1.01778958 | 0.741298965 |
| 0.410100005 | 2.98593E-10 |
| 0.958541993 | 0.734169446 |
| 0.982652155 | 0.660972136 |
| 0.962320495 | 0.447995429 |
| -1.0766627  | 0.186472167 |
| -1.23602314 | 0.02065224  |
| -1.01027527 | 0.860748259 |
| 0.936840083 | 0.149134012 |
| -1.07224529 | 0.180224512 |
| -1.02036706 | 0.655394554 |
| -1.0345017  | 0.512423137 |
| -1.00949977 | 0.886058466 |
| 0.940010272 | 0.257603147 |
| -1.07431055 | 0.229206668 |
| 0.958304508 | 0.370304544 |
| -1.09226134 | 0.186022328 |
| 0.931627089 | 0.185179962 |
| -1.0451543  | 0.435278119 |
| -1.05058345 | 0.372143587 |
| -1.00968831 | 0.790410691 |
| -1.06864903 | 0.222843613 |

|             |             |
|-------------|-------------|
| -1.03955419 | 0.481784167 |
| -1.1425406  | 0.027855695 |
| -1.15718089 | 0.030859275 |
| 0.972908522 | 0.592435415 |
| -1.19502815 | 0.098006998 |
| 0.987517024 | 0.741754562 |
| -1.05572579 | 0.206157741 |
| -1.05784569 | 0.335858946 |
| -1.00079061 | 0.988904659 |
| -1.17132089 | 0.024649023 |
| 0.953754416 | 0.426147617 |
| 0.951776403 | 0.303175024 |
| 0.990510796 | 0.864619656 |
| 0.962591397 | 0.58441544  |
| -1.18327834 | 0.00599446  |
| -1.06977123 | 0.25171202  |
| -1.1144884  | 0.054198626 |
| -1.1083192  | 0.075805876 |
| 0.841101341 | 0.016596337 |
| -1.01395053 | 0.77358061  |
| 0.962861687 | 0.516437325 |
| -1.01980955 | 0.763969333 |
| -1.09125842 | 0.101399974 |
| 0.87239945  | 0.024437081 |
| -1.1179099  | 0.079627236 |
| -1.36004779 | 0.090752622 |
| 0.977149308 | 0.589756801 |
| -1.00657593 | 0.909849987 |
| -1.13295983 | 0.038611819 |
| -1.00949631 | 0.872629844 |
| -1.02129352 | 0.714353133 |
| 0.95064366  | 0.377861855 |
| -1.09010637 | 0.185530832 |
| -1.12972    | 0.040270031 |
| 0.980028354 | 0.704850208 |
| -1.11698664 | 0.012138516 |
| 0.933667107 | 0.286634401 |
| -1.13232346 | 0.014524625 |
| -1.00607802 | 0.912076514 |
| -1.04754744 | 0.699651779 |
| 0.957968916 | 0.35897251  |
| 0.930194125 | 0.212895768 |
| -1.04264679 | 0.493579896 |
| -1.1450072  | 0.014001239 |



|             |             |
|-------------|-------------|
| 0.852058563 | 0.460068253 |
| -1.07708446 | 0.252316418 |
| 0.987451976 | 0.914080315 |
| -1.00981247 | 0.831608137 |
| 0.98946697  | 0.850425313 |
| -1.00309856 | 0.955023584 |
| 0.808313764 | 0.003612087 |
| 0.952207873 | 0.327076694 |
| -1.02735743 | 0.741691985 |
| -1.09618489 | 0.13884303  |
| 0.984421294 | 0.825201662 |
| 0.469241708 | 8.66825E-17 |
| 0.974512131 | 0.588087608 |
| 0.814699174 | 0.00714546  |
| 0.983173362 | 0.75869404  |
| -1.04357991 | 0.480803135 |
| -1.05534722 | 0.338246766 |
| 0.873309353 | 0.014957676 |
| -1.04352609 | 0.656471607 |
| 0.933970488 | 0.178269045 |
| 0.957000631 | 0.510707423 |
| -1.06417943 | 0.308550622 |
| -1.04091367 | 0.441963955 |
| -1.08665876 | 0.163007861 |
| 0.977299838 | 0.707776432 |
| -1.05969338 | 0.30261147  |
| -1.10225449 | 0.152756817 |
| 0.986459484 | 0.822038527 |
| -1.04749601 | 0.514024815 |
| -1.09711643 | 0.182299937 |
| 0.773112461 | 0.050755299 |
| -1.03931098 | 0.648835371 |
| -1.03625403 | 0.432563235 |
| -1.03010145 | 0.559337003 |
| -1.18702942 | 0.050783342 |
| 0.913536959 | 0.09628576  |
| -1.00346725 | 0.948658831 |
| -1.15283443 | 0.015192197 |
| 0.991049172 | 0.88079069  |
| 0.979875299 | 0.73135247  |
| -1.00343529 | 0.950306935 |
| 0.891195327 | 0.0308944   |
| 0.924028047 | 0.085571261 |
| -1.10277553 | 0.246610359 |

|             |             |
|-------------|-------------|
| 0.87700907  | 0.01654472  |
| 0.966433437 | 0.54970858  |
| 0.989424196 | 0.83319258  |
| -1.11983783 | 0.49699863  |
| 0.996245765 | 0.945531969 |
| -1.10663618 | 0.014048935 |
| -1.06393536 | 0.189937645 |
| -1.04631508 | 0.39389952  |
| -1.06140318 | 0.280767235 |
| 0.99424672  | 0.911387159 |
| 0.921222184 | 0.356115507 |
| -1.06787309 | 0.234869646 |
| -1.08482196 | 0.141296537 |
| 0.998957406 | 0.98622376  |
| -1.0454496  | 0.483360683 |
| 0.994839334 | 0.915160176 |
| 0.906787268 | 0.13555273  |
| -1.00659134 | 0.905045593 |
| -1.04650204 | 0.432983438 |
| -1.0797753  | 0.191570061 |
| -1.00199292 | 0.970237061 |
| -1.06526231 | 0.277407309 |
| -1.05503988 | 0.459579224 |
| -1.06178221 | 0.236625583 |
| -1.11429056 | 0.097653508 |
| -1.12269051 | 0.157980029 |
| -1.05941872 | 0.300832469 |
| -1.03224866 | 0.634858134 |
| 0.993446124 | 0.844294687 |
| 0.983342067 | 0.778934177 |
| 0.970352674 | 0.618857755 |
| 0.895107394 | 0.043806417 |
| 0.976675002 | 0.719904194 |
| 0.951054691 | 0.415576334 |
| 0.958651012 | 0.413866233 |
| -1.09176586 | 0.236255227 |
| -1.03460241 | 0.701429531 |
| -1.07801435 | 0.095236192 |
| 0.989293793 | 0.851461494 |
| 0.920539563 | 0.11478164  |
| 0.955654268 | 0.421229496 |
| -1.02629507 | 0.650552272 |
| -1.01776602 | 0.764345324 |
| -1.11675313 | 0.070214034 |

|             |             |
|-------------|-------------|
| -1.08607341 | 0.076837597 |
| -1.00216341 | 0.967876726 |
| -1.02842557 | 0.684588583 |
| -1.02119867 | 0.729687772 |
| -1.03077547 | 0.639291642 |
| -1.09014984 | 0.09502021  |
| 0.818630757 | 0.04562107  |
| -1.1197657  | 0.049820121 |
| 0.987213811 | 0.845810714 |
| -1.24893028 | 0.057739108 |
| 0.979022766 | 0.67338493  |
| -1.03029454 | 0.502398442 |
| -1.07377263 | 0.236680748 |
| -1.15257856 | 0.028521255 |
| -1.01575095 | 0.747965417 |
| -1.01502133 | 0.785280915 |
| -1.03640591 | 0.643093527 |
| -1.08505442 | 0.416837471 |
| 0.958777108 | 0.521348178 |
| -1.02724817 | 0.606054126 |
| 0.887040055 | 0.040993419 |
| -1.03230452 | 0.436081865 |
| 0.968730197 | 0.642565109 |
| 0.873752527 | 0.022608397 |
| 0.967069833 | 0.547604659 |
| 0.948861916 | 0.385504764 |
| -1.05473711 | 0.315200622 |
| 0.982990346 | 0.740431124 |
| 0.97727958  | 0.657407726 |
| -1.08993691 | 0.158066956 |
| -1.04510273 | 0.459803056 |
| -1.06238139 | 0.24467557  |
| -1.03559942 | 0.410766252 |
| -1.06745543 | 0.255748096 |
| -1.36440852 | 0.01067362  |
| 0.716901184 | 0.00210892  |
| 0.949716585 | 0.388833672 |
| -1.01138362 | 0.844660337 |
| 0.992282117 | 0.915204355 |
| -1.09107899 | 0.257463326 |
| -1.04912781 | 0.381087041 |
| 0.878423988 | 0.083302528 |
| 0.987358785 | 0.838470555 |
| -1.03004165 | 0.59341522  |

|             |             |
|-------------|-------------|
| 0.887614554 | 0.071266842 |
| 0.948061674 | 0.243544965 |
| 0.944032641 | 0.339332707 |
| -1.05875363 | 0.274424174 |
| -1.21872535 | 0.000984775 |
| -1.00575187 | 0.915426864 |
| -1.00270045 | 0.963205283 |
| -1.08845116 | 0.072739972 |
| 0.883878519 | 0.045448555 |
| -1.15109853 | 0.017187639 |
| -1.07858444 | 0.18060398  |
| 0.999520814 | 0.993760393 |
| -1.07632608 | 0.131274893 |
| -1.04107198 | 0.503124539 |
| -1.19851662 | 0.080896763 |
| 0.733179152 | 0.066605419 |
| -1.10572667 | 0.099093088 |
| 0.949380669 | 0.360532667 |
| -1.02380325 | 0.692065728 |
| -1.12633701 | 0.031672688 |
| 0.946472483 | 0.291069677 |
| -1.02655114 | 0.595478087 |
| 0.963904084 | 0.536249091 |
| -1.00186927 | 0.972740298 |
| 0.813606741 | 0.001944021 |
| 0.995698736 | 0.933927199 |
| -1.06356077 | 0.182522249 |
| -1.03817968 | 0.528586817 |
| -1.10724459 | 0.056930726 |
| -1.01987262 | 0.772787338 |
| 0.913942076 | 0.010304838 |
| 0.933711383 | 0.232301614 |
| -1.02480889 | 0.630231366 |
| -1.02828888 | 0.570153249 |
| -1.12375574 | 0.027548518 |
| -1.08078869 | 0.307665949 |
| -1.01798678 | 0.732602268 |
| -1.04819574 | 0.36185826  |
| -1.16262975 | 0.013590171 |
| 0.998389192 | 0.977019727 |
| 0.887216204 | 0.174432253 |
| 0.985467074 | 0.773507393 |
| 0.939310847 | 0.339899746 |
| -1.11885884 | 0.083552905 |

|             |             |
|-------------|-------------|
| -1.12349107 | 0.221736797 |
| -1.08161092 | 0.245712922 |
| 0.961560604 | 0.441891007 |
| 0.60821242  | 2.70325E-10 |
| 0.943891879 | 0.427934393 |
| -1.03294723 | 0.571575956 |
| -1.21340484 | 0.188329528 |
| -1.03869104 | 0.445886506 |
| 0.895740554 | 0.056233357 |
| -1.00499536 | 0.944746236 |
| -1.16673289 | 0.013312051 |
| 0.966598436 | 0.593003826 |
| 0.887191826 | 0.013205458 |
| -1.09923203 | 0.153019129 |
| 0.96251411  | 0.512867009 |
| -1.05653586 | 0.263885115 |
| 0.966845003 | 0.589257949 |
| -1.04384952 | 0.443266307 |
| 0.993816333 | 0.944393507 |
| -1.04989433 | 0.415666655 |
| -1.12774752 | 0.115450927 |
| -1.01286172 | 0.846136775 |
| -1.09663346 | 0.222381797 |
| 0.852541389 | 0.009426131 |
| 0.893490378 | 0.104649201 |
| -1.05616209 | 0.389901825 |
| -1.03067505 | 0.61636099  |
| 0.991896501 | 0.867932652 |
| 0.992517424 | 0.89699746  |
| 0.957762421 | 0.365892779 |
| -1.10532967 | 0.139187702 |
| -1.10801267 | 0.071266797 |
| 0.961747424 | 0.518589606 |
| -1.03687801 | 0.525903787 |
| -1.04646565 | 0.425778533 |
| -1.01826061 | 0.751314499 |
| 0.90292155  | 0.151280131 |
| -1.04418176 | 0.373081315 |
| 0.989090637 | 0.848153286 |
| 0.941162861 | 0.266413424 |
| -1.08770332 | 0.107941811 |
| 0.91560993  | 0.096510186 |
| -1.1140943  | 0.037816156 |
| 0.927220387 | 0.117597929 |

|             |             |
|-------------|-------------|
| 0.939915602 | 0.248808923 |
| 0.872802718 | 0.022632169 |
| 0.972476358 | 0.60841906  |
| 0.955925666 | 0.429466426 |
| 0.979616398 | 0.713451354 |
| -1.14995609 | 0.031112304 |
| 0.949636176 | 0.283422039 |
| 0.958230759 | 0.617047058 |
| -1.06255323 | 0.235254496 |
| -1.0090756  | 0.868923173 |
| -1.04608876 | 0.633425067 |
| 0.751712518 | 1.16818E-05 |
| 0.954266009 | 0.350632308 |
| 0.945832349 | 0.297964562 |
| 0.98342463  | 0.788368896 |
| -1.02440858 | 0.718261751 |
| 0.923848556 | 0.282587354 |
| 0.949107883 | 0.450834242 |
| -1.03320899 | 0.546136035 |
| -1.15981268 | 0.00311164  |
| -1.09581278 | 0.068430262 |
| -1.06366611 | 0.234551398 |
| 0.951144457 | 0.387342313 |
| 0.962418408 | 0.398712187 |
| 0.970576678 | 0.647901772 |
| -1.12626628 | 0.039295852 |
| -1.02908706 | 0.577789426 |
| 0.975645461 | 0.66973869  |
| 0.990713039 | 0.900278755 |
| -1.03867221 | 0.595709924 |
| -1.08944247 | 0.095569698 |
| 0.970393114 | 0.563062368 |
| 0.987472095 | 0.804604684 |
| -1.06557656 | 0.207543973 |
| -1.02993276 | 0.639927357 |
| -1.22090811 | 0.05728937  |
| -1.10674299 | 0.065623556 |
| 0.954824706 | 0.407370493 |
| 0.957730794 | 0.474812897 |
| -1.06059747 | 0.301561781 |
| 0.969497755 | 0.597483026 |
| -1.01704664 | 0.6762933   |
| 0.94402624  | 0.230828113 |
| 0.985334546 | 0.848717462 |

|             |             |
|-------------|-------------|
| 0.95371888  | 0.362919382 |
| -1.08585666 | 0.189004252 |
| -1.0375091  | 0.503844703 |
| 0.940802055 | 0.420377915 |
| -1.0674423  | 0.327624517 |
| -1.10304722 | 0.332769739 |
| -1.03849989 | 0.435763967 |
| -1.03910189 | 0.542813739 |
| 0.735929468 | 0.003664424 |
| -1.13396598 | 0.020532131 |
| 0.94798336  | 0.385847258 |
| -1.17249641 | 0.002244412 |
| 0.978123614 | 0.662473925 |
| -1.0311163  | 0.530779232 |
| -1.00096558 | 0.984757869 |
| 0.934400099 | 0.238650342 |
| -1.05039659 | 0.411198379 |
| 0.849856559 | 0.02612012  |
| 0.956831037 | 0.421232077 |
| 0.962451786 | 0.499464771 |
| -1.00185342 | 0.98062153  |
| 0.960931959 | 0.538896656 |
| 0.916344993 | 0.115703369 |
| 0.934684053 | 0.267565686 |
| -1.00445134 | 0.937483867 |
| -1.11087441 | 0.018757436 |
| -1.0762064  | 0.290448946 |
| -1.06611479 | 0.2280191   |
| 0.941151266 | 0.204138544 |
| -1.05104364 | 0.457971036 |
| -1.0288519  | 0.598119052 |
| -1.6789051  | 2.18552E-06 |
| 0.940284759 | 0.241240289 |
| -1.007764   | 0.893770616 |
| -1.0473706  | 0.356066828 |
| 0.999014467 | 0.990132436 |
| 0.723926467 | 0.000785254 |
| -1.12581302 | 0.035811684 |
| 0.994813816 | 0.923932554 |
| -1.12046918 | 0.032458222 |
| -1.1344083  | 0.007551208 |
| 0.863389466 | 0.008833407 |
| -1.2892533  | 0.002038304 |
| -1.00067205 | 0.991068354 |

|             |             |
|-------------|-------------|
| -1.02932534 | 0.616061816 |
| -1.05005436 | 0.387019438 |
| 0.993798632 | 0.918876075 |
| -1.03541779 | 0.532257439 |
| 0.976729366 | 0.71216905  |
| -1.02205537 | 0.741150122 |
| -1.0074967  | 0.894204907 |
| -1.04216462 | 0.431609067 |
| -1.07691828 | 0.4359037   |
| 0.857338291 | 0.007894434 |
| 0.9938166   | 0.922582629 |
| 0.937662473 | 0.306244174 |
| -1.04745027 | 0.423146544 |
| 0.877602901 | 0.03172035  |
| 0.966027245 | 0.510607507 |
| -1.00165158 | 0.973254617 |
| -1.11989038 | 0.025648446 |
| 0.946057061 | 0.361714296 |
| 0.978804745 | 0.692854106 |
| -1.00336876 | 0.951811335 |
| 0.928403846 | 0.225497066 |
| 0.917608648 | 0.139342827 |
| 0.959148897 | 0.496506389 |
| -1.01420893 | 0.78289565  |
| -1.03950679 | 0.443051869 |
| -1.08513507 | 0.229980365 |
| -1.02920001 | 0.646471996 |
| -1.04541913 | 0.404359795 |
| 0.970761623 | 0.590483923 |
| -1.09983623 | 0.231938556 |
| -1.36808242 | 0.003034705 |
| 0.865551586 | 0.043729248 |
| 0.962650063 | 0.487883658 |
| -1.04810216 | 0.422629438 |
| -1.07361397 | 0.294955772 |
| -1.08727897 | 0.107258873 |
| 0.971000617 | 0.579910627 |
| -1.01816198 | 0.758296416 |
| 0.922862245 | 0.158846981 |
| 0.971824279 | 0.628840872 |
| -1.01330746 | 0.839393929 |
| -1.04820952 | 0.457716016 |
| -1.05778607 | 0.664448264 |
| 0.973214692 | 0.670841677 |



|             |             |
|-------------|-------------|
| 0.876344811 | 0.050521745 |
| 0.948362813 | 0.481508856 |
| -1.11657151 | 0.105778681 |
| -1.02496475 | 0.605835352 |
| -1.00088026 | 0.987127625 |
| -1.21245234 | 0.018815843 |
| 0.883406258 | 0.038070961 |
| -1.0245067  | 0.687013217 |
| -1.05640029 | 0.379877305 |
| 0.804973036 | 0.000257309 |
| -1.24406099 | 0.035792917 |
| -1.04854955 | 0.449606518 |
| 0.927339748 | 0.212709783 |
| -1.01106757 | 0.874586382 |
| 0.944105324 | 0.386771711 |
| 0.740647232 | 0.001502962 |
| -1.10745295 | 0.108680669 |
| 0.98230284  | 0.686269663 |
| 0.917112419 | 0.158675497 |
| 0.934349281 | 0.512028461 |
| -1.12889502 | 0.030913949 |
| -1.02947254 | 0.612139156 |
| -1.05661982 | 0.408725077 |
| -1.1920829  | 0.068253019 |
| -1.08124402 | 0.149595394 |
| 0.981180076 | 0.712349313 |
| 0.927460795 | 0.22879119  |
| -1.10670603 | 0.131160205 |
| 0.995409292 | 0.965805357 |
| -1.03335756 | 0.731741327 |
| 0.949112267 | 0.263334449 |
| 0.971987921 | 0.484007154 |
| -1.02597705 | 0.625199829 |
| 0.940772512 | 0.121721663 |
| 0.957760278 | 0.163939333 |
| -1.21893699 | 0.010905832 |
| 0.975948742 | 0.693360921 |
| -1.09264613 | 0.405147997 |
| -1.08950837 | 0.154794432 |
| 0.993809811 | 0.910000225 |
| 0.998316676 | 0.981766511 |
| -1.09966396 | 0.108705635 |
| -1.08919984 | 0.068615646 |
| -1.06985194 | 0.197815456 |

|             |             |
|-------------|-------------|
| -1.28585443 | 0.002238927 |
| -1.08733905 | 0.058570955 |
| -1.04640657 | 0.397578796 |
| -1.15681275 | 0.037536608 |
| -1.04357349 | 0.34414806  |
| 0.932042806 | 0.186379969 |
| -1.05301766 | 0.425440303 |
| 0.970404178 | 0.47832059  |
| 0.983307865 | 0.715787824 |
| 0.972484276 | 0.654149709 |
| -1.04129917 | 0.349615463 |
| -1.09150669 | 0.159851795 |
| 0.978319585 | 0.710108913 |
| -1.08167901 | 0.11380717  |
| -1.0814608  | 0.155867108 |
| -1.00996199 | 0.877146905 |
| 0.968590094 | 0.537619039 |
| -1.09536111 | 0.23246     |
| -1.10472497 | 0.28338251  |
| 0.997516748 | 0.953549342 |
| 0.770160473 | 0.036264076 |
| -1.08094482 | 0.037610506 |
| -1.14569869 | 0.068236925 |
| -1.11287721 | 0.041411207 |
| -1.2505243  | 0.000751128 |
| 0.830437655 | 0.040344866 |
| 0.914636006 | 0.078403757 |
| -1.27074756 | 8.56549E-05 |
| 0.995789854 | 0.966894421 |
| 0.970530187 | 0.5031652   |
| -1.13962778 | 0.060444332 |
| -1.05611901 | 0.276487111 |
| -1.00563438 | 0.93258848  |
| -1.0357141  | 0.620166372 |
| -1.50790988 | 2.66323E-08 |
| -1.0110364  | 0.809754186 |
| -1.05409498 | 0.216523011 |
| -1.02853989 | 0.51395743  |
| -1.00793006 | 0.887581001 |
| 0.939864715 | 0.416699031 |
| -1.0543257  | 0.332210046 |
| -1.0556283  | 0.619164569 |
| 0.963528094 | 0.566959297 |
| 0.977946597 | 0.614411356 |

|             |             |
|-------------|-------------|
| -1.03546196 | 0.512585926 |
| 0.808822937 | 0.053492619 |
| 0.946668744 | 0.482592002 |
| 0.957721132 | 0.460395148 |
| -1.10314303 | 0.117032718 |
| 0.98114588  | 0.742582626 |
| -1.02239615 | 0.462542312 |
| -1.05206741 | 0.459449213 |
| -1.04476912 | 0.357027291 |
| 0.971594726 | 0.619115103 |
| -1.03510293 | 0.56991434  |
| -1.0840924  | 0.054351479 |
| -1.09909556 | 0.282597407 |
| -1.02009753 | 0.696903458 |
| 0.986855226 | 0.801867742 |
| -1.0001297  | 0.998050263 |
| 0.958540506 | 0.505371037 |
| 0.996456027 | 0.948542093 |
| -1.03840493 | 0.483028369 |
| 0.985392606 | 0.801371185 |
| -1.01072094 | 0.83582672  |
| 0.996226738 | 0.971355882 |
| -1.06274731 | 0.285175005 |
| -1.02653097 | 0.676509742 |
| 0.983788018 | 0.801873075 |
| 0.933481821 | 0.196119259 |
| 0.998896856 | 0.985348072 |
| 0.917271033 | 0.115950657 |
| -1.0471829  | 0.479881135 |
| 0.974265774 | 0.566323406 |
| -1.04604047 | 0.440398852 |
| -1.12533843 | 0.003682676 |
| -1.09457231 | 0.176375326 |
| 0.810885887 | 0.032451336 |
| -1.03956211 | 0.235271302 |
| -1.09647998 | 0.021486885 |
| 0.960893383 | 0.469442344 |
| -1.03890244 | 0.424181615 |
| 0.974755941 | 0.674073639 |
| -1.13935632 | 0.034005967 |
| 0.928245743 | 0.271320072 |
| -1.06274607 | 0.252708211 |
| 0.95132618  | 0.354362681 |
| 0.966284565 | 0.629548076 |

|             |             |
|-------------|-------------|
| -1.02361744 | 0.689915434 |
| -1.11344238 | 0.068264496 |
| -1.10886224 | 0.06568199  |
| -1.06867449 | 0.484186062 |
| 0.989536898 | 0.853192835 |
| -1.17695885 | 0.03644695  |
| 0.970875237 | 0.660141597 |
| -1.3926049  | 0.000172846 |
| -1.03705545 | 0.459840636 |
| -1.0308251  | 0.603423219 |
| -1.07789225 | 0.088754165 |
| -1.68170769 | 0.000193821 |
| 0.995806102 | 0.952542832 |
| 0.98998724  | 0.883569519 |
| -1.23851617 | 0.002955527 |
| -1.08180856 | 0.245281968 |
| -1.03508024 | 0.515356709 |
| 0.910113565 | 0.363887014 |
| 0.919560198 | 0.13398049  |
| -1.19209614 | 0.017856747 |
| -1.05587503 | 0.320302237 |
| -1.02816504 | 0.629165026 |
| 0.985809446 | 0.826843608 |
| -1.04284221 | 0.274657133 |
| 0.958708959 | 0.489939179 |
| -1.19662595 | 0.051182    |
| -1.03579585 | 0.458790131 |
| -1.24774497 | 0.116158267 |
| -1.10750193 | 0.091773435 |
| -1.02016009 | 0.60944437  |
| -1.07756768 | 0.03577527  |
| 0.870357663 | 0.008699672 |
| -1.09296388 | 0.529770756 |
| -1.09297627 | 0.069878736 |
| -1.08955475 | 0.287984524 |
| -1.0262755  | 0.603716049 |
| 0.918250653 | 0.133688602 |
| 0.970465583 | 0.566061883 |
| -1.04646291 | 0.275196583 |
| -1.1212941  | 0.08123423  |
| 0.989306418 | 0.859787562 |
| -1.10136747 | 0.124102641 |
| -1.11571137 | 0.109584356 |
| 0.941766913 | 0.314019717 |

|             |             |
|-------------|-------------|
| -1.06945032 | 0.204764035 |
| 0.965984329 | 0.330897594 |
| -1.11666592 | 0.249479238 |
| -1.0353665  | 0.559533306 |
| -1.11496151 | 0.275686487 |
| -1.02231045 | 0.764198301 |
| -1.03430562 | 0.526110122 |
| -1.10774942 | 0.097753421 |
| -1.02021559 | 0.726801947 |
| -1.18881027 | 0.049863351 |
| -1.03609619 | 0.553962501 |
| -1.02863734 | 0.661722462 |
| -1.02315617 | 0.688552888 |
| -1.06827936 | 0.260559637 |
| -1.02006884 | 0.668065268 |
| 0.90776684  | 0.117341341 |
| -1.35802374 | 0.013727641 |
| -1.07741303 | 0.139220409 |
| -1.10603629 | 0.05064521  |
| 0.863654489 | 0.010254488 |
| 0.891523677 | 0.10506034  |
| 0.983973997 | 0.774163262 |
| -1.04349152 | 0.416888922 |
| -1.26843627 | 0.04450649  |
| -1.10083469 | 0.033382372 |
| -1.32986459 | 1.00445E-08 |
| 0.931943202 | 0.243710028 |
| -1.11968915 | 0.036127397 |
| -1.20603826 | 0.081108767 |
| -1.06616426 | 0.349147306 |
| 0.945191851 | 0.708046543 |
| -1.01503027 | 0.700748536 |
| 0.662483875 | 6.8832E-06  |
| -1.24450146 | 0.000629143 |
| 0.802167776 | 0.078970616 |
| -1.05900916 | 0.167725843 |
| -1.0025043  | 0.941654552 |
| 0.918071344 | 0.107925359 |
| 0.987015031 | 0.857788687 |
| 0.978951746 | 0.617445834 |
| 0.966360422 | 0.376055196 |
| 0.820731256 | 0.051593313 |
| -1.0500584  | 0.471710711 |
| -1.17435683 | 0.033355927 |

|             |             |
|-------------|-------------|
| -1.08049766 | 0.153405544 |
| -1.17827905 | 0.04559241  |
| -1.03461459 | 0.524707714 |
| 0.968932678 | 0.439816422 |
| -1.04290217 | 0.771111346 |
| 0.80785245  | 0.081688946 |
| -1.00439907 | 0.904441703 |
| 0.982229107 | 0.742546961 |
| 0.837879892 | 3.55264E-05 |
| -1.04379689 | 0.324033584 |
| -1.0164011  | 0.768163487 |
| 0.983102023 | 0.842095107 |
| -1.02888638 | 0.55688772  |
| -1.04286414 | 0.561716837 |
| 0.988223877 | 0.888302296 |
| -1.37902627 | 0.002632642 |
| -1.03165719 | 0.655485222 |
| 0.947000055 | 0.343977235 |
| -1.03767161 | 0.323964128 |
| 0.733943616 | 0.000585352 |
| 0.998054683 | 0.962255516 |
| 0.832847527 | 0.132421492 |
| 0.99006096  | 0.879659274 |
| -1.11733585 | 0.051723038 |
| 0.984241043 | 0.945296162 |
| 0.930094156 | 0.391901102 |
| -1.022595   | 0.68108417  |
| -1.41839284 | 0.002309569 |
| 0.90633982  | 0.062556652 |
| 0.974219172 | 0.828183081 |
| -1.03027969 | 0.590389829 |
| 0.500923534 | 2.25638E-11 |
| -1.04174172 | 0.498277615 |
| -1.04005487 | 0.654099417 |
| -1.07450706 | 0.219995186 |
| -1.00376821 | 0.980118629 |
| -1.04833909 | 0.364191954 |
| -1.05144193 | 0.599398784 |
| 0.867580421 | 0.033414712 |
| 0.911322134 | 0.062203966 |
| -1.28038252 | 0.008728466 |
| 0.880697939 | 0.19601206  |
| 0.987822856 | 0.820370874 |
| 0.994941254 | 0.928039009 |

|             |             |
|-------------|-------------|
| -1.01239139 | 0.780055231 |
| 0.987669448 | 0.894129436 |
| -1.06527858 | 0.359543351 |
| 0.993710125 | 0.901861593 |
| 0.905186617 | 0.065401292 |
| -1.03810297 | 0.573093518 |
| -1.1241682  | 0.029651457 |
| -1.0540228  | 0.668905443 |
| -1.01772905 | 0.801691225 |
| -1.04071568 | 0.529940169 |
| -1.0889548  | 0.211008053 |
| -1.1604086  | 0.055403054 |
| 0.998388223 | 0.974307067 |
| 0.964462832 | 0.493554466 |
| 0.970200854 | 0.661308437 |
| -1.11059577 | 0.040626822 |
| 0.829210071 | 0.115541197 |
| -1.19654382 | 0.055344082 |
| -1.01033093 | 0.817050856 |
| -1.1202662  | 0.171759757 |
| -1.06545807 | 0.193059826 |
| -1.01904429 | 0.687489593 |
| -1.03707873 | 0.342969858 |
| -1.03116072 | 0.631341157 |
| -1.06665335 | 0.457838895 |
| 0.991690207 | 0.874123687 |
| 0.918119688 | 0.362409892 |
| 0.996103212 | 0.892668194 |
| 0.976083143 | 0.58727599  |
| -1.08065445 | 0.16273267  |
| 0.939611582 | 0.267020774 |
| 0.991145609 | 0.881315621 |
| 0.979197262 | 0.689674473 |
| -1.04734699 | 0.543606025 |
| -1.0331507  | 0.488462875 |
| 0.953652829 | 0.272838606 |
| 0.818147711 | 0.000397651 |
| 0.984122309 | 0.809087577 |
| -1.09399148 | 0.095195052 |
| -1.00423499 | 0.947022302 |
| 0.936139791 | 0.330475075 |
| 0.98920201  | 0.825994331 |
| -1.01626894 | 0.871852773 |
| 0.977323838 | 0.69611857  |

|             |             |
|-------------|-------------|
| -1.03239587 | 0.622836412 |
| 0.967930688 | 0.625302387 |
| -1.01498255 | 0.83373786  |
| -1.03939038 | 0.540385504 |
| -1.02036956 | 0.715328337 |
| -1.06792757 | 0.508018869 |
| -0.99993682 | 0.999515825 |
| -1.04231866 | 0.434455018 |
| 0.926732097 | 0.170737017 |
| 0.997825015 | 0.967433574 |
| -1.05201514 | 0.456022297 |
| -1.12051793 | 0.148120185 |
| 0.853045265 | 0.023144941 |
| -1.06812321 | 0.195821952 |
| -1.0258515  | 0.682081376 |
| -1.16444945 | 0.122074439 |
| -1.22061618 | 0.022091843 |
| -1.00922393 | 0.838388477 |
| -1.18589941 | 0.008609375 |
| 0.995450875 | 0.959985825 |
| 0.978283519 | 0.664121678 |
| 0.997467126 | 0.986089718 |
| 0.962801287 | 0.411394255 |
| 0.927982801 | 0.124372315 |
| -1.15140655 | 0.051737332 |
| 0.81923214  | 0.250196356 |
| -1.0571744  | 0.301674108 |
| 0.958762728 | 0.435891584 |
| -1.24108771 | 0.017136581 |
| -1.00129909 | 0.987842609 |
| -1.18276978 | 0.125355413 |
| 0.895414008 | 0.033119145 |
| -1.06831377 | 0.27641344  |
| 0.825411235 | 0.022927713 |
| -1.26150755 | 0.044771174 |
| 0.880211348 | 0.147599655 |
| 0.939594524 | 0.353362176 |
| 0.940815107 | 0.194555528 |
| -1.12094173 | 0.017185166 |
| 0.883950235 | 0.2056806   |
| -1.05206246 | 0.386190974 |
| -1.14594544 | 0.158042461 |
| 0.923331721 | 0.218036063 |
| 0.893002167 | 0.216632978 |



|             |             |
|-------------|-------------|
| -1.08378157 | 0.187633928 |
| -1.00706969 | 0.882878599 |
| -1.06731776 | 0.263660316 |
| -1.06850554 | 0.624978728 |
| -1.29241334 | 0.000987752 |
| -1.13577218 | 0.175861033 |
| -1.02967792 | 0.635913081 |
| -1.17654167 | 0.013034774 |
| -1.01893264 | 0.782256766 |
| -1.08344651 | 0.132186699 |
| 0.935697367 | 0.542522814 |
| -1.03949434 | 0.541924032 |
| -1.10511212 | 0.252982162 |
| 0.715157114 | 0.026607272 |
| -1.00792091 | 0.835720701 |
| 0.827006536 | 0.472519246 |
| -1.08435011 | 0.215137541 |
| 0.868458242 | 0.026472282 |
| 0.823373229 | 0.168098856 |
| -1.12896147 | 0.072546266 |
| 0.988181173 | 0.868948601 |
| 0.210762917 | 2.875E-17   |
| -1.11887232 | 0.125738763 |
| -1.01996754 | 0.714776511 |
| 0.850527982 | 0.003091514 |
| -1.05341452 | 0.631436929 |
| 0.853235757 | 0.114996629 |
| 0.955472611 | 0.220163651 |
| -1.07938606 | 0.42220416  |
| -1.11614029 | 0.19782399  |
| 0.909942165 | 0.652720448 |
| 0.863614584 | 0.010253104 |
| -1.41567251 | 0.000865623 |
| -1.06877489 | 0.31703098  |
| 0.966276081 | 0.484843744 |
| 0.982480486 | 0.769460785 |
| -1.02213856 | 0.706485078 |
| -1.04623728 | 0.661812909 |
| -1.07647474 | 0.160471324 |
| -1.21684823 | 0.008545741 |
| -1.19064488 | 0.042012868 |
| 0.95539138  | 0.371389144 |
| -1.16411714 | 0.030633466 |
| 0.791546794 | 0.008182248 |

|             |             |
|-------------|-------------|
| -1.03437185 | 0.425110733 |
| -1.07499769 | 0.21337282  |
| 0.909563262 | 0.143835075 |
| 0.844333161 | 0.315273098 |
| 0.883078908 | 0.015984867 |
| -1.07332543 | 0.297156296 |
| 0.996265924 | 0.963494628 |
| -1.0688713  | 0.231424944 |
| -1.01708907 | 0.75638485  |
| -1.34492906 | 0.000930027 |
| 0.871346394 | 0.010260238 |
| -1.09572006 | 0.106330435 |
| -1.36080843 | 0.003064845 |
| 0.90790104  | 0.481995971 |
| 0.886843905 | 0.5149684   |
| -1.15952468 | 0.095067319 |
| -1.213315   | 0.069177783 |
| 0.982791993 | 0.835288607 |
| 0.936618325 | 0.422423083 |
| -1.01096164 | 0.834169536 |
| -1.11537705 | 0.104546229 |
| -1.0014554  | 0.980711668 |
| 0.937130752 | 0.197496221 |
| 0.926246384 | 0.16844475  |
| -1.12229692 | 0.079313367 |
| -1.11907226 | 0.134913688 |
| -1.0686384  | 0.146707065 |
| 0.92681262  | 0.158996901 |
| -1.07876118 | 0.182659151 |
| -1.05888219 | 0.306959889 |
| -1.06915706 | 0.289834529 |
| -1.04373874 | 0.421855938 |
| 0.858002442 | 0.192410127 |
| -1.0033534  | 0.952549924 |
| -1.02989882 | 0.627734599 |
| 0.931221246 | 0.310601221 |
| -1.043501   | 0.340853324 |
| -1.3271131  | 0.000468459 |
| 0.88846408  | 0.322949935 |
| 0.97372152  | 0.50389299  |
| -1.06144396 | 0.238066923 |
| -1.01054323 | 0.954836423 |
| -1.00803912 | 0.879257423 |
| -1.16172574 | 0.077214615 |

|             |             |
|-------------|-------------|
| -1.42665251 | 0.000138946 |
| 0.967132418 | 0.56797438  |
| 0.946402653 | 0.457905804 |
| -1.24259892 | 0.002335305 |
| -1.09322307 | 0.045677549 |
| -1.04383677 | 0.308554457 |
| -1.02221911 | 0.615483019 |
| -1.83978076 | 3.31229E-10 |
| 0.909019482 | 0.115471427 |
| 0.934147652 | 0.267381815 |
| -1.03202747 | 0.776468912 |
| -1.01286742 | 0.781784871 |
| 0.955046294 | 0.518828401 |
| 0.935417892 | 0.368847721 |
| -1.00245289 | 0.958614417 |
| -1.11991288 | 0.04402524  |
| 0.953692253 | 0.383601281 |
| -1.19891061 | 0.047670214 |
| 0.998888692 | 0.979348556 |
| 0.969793057 | 0.571012946 |
| 0.886551807 | 0.107053715 |
| 0.816377016 | 0.067051615 |
| -1.3170586  | 0.037178426 |
| -1.10378616 | 0.082471316 |
| -1.11078059 | 0.014440604 |
| -1.04086987 | 0.334307189 |
| -1.11304195 | 0.257460032 |
| -1.04041591 | 0.546980077 |
| -1.20044782 | 0.009996954 |
| -1.03168824 | 0.598232733 |
| -1.17405343 | 0.000452851 |
| -1.07043586 | 0.364048396 |
| -1.13512537 | 0.03225927  |
| 0.989388863 | 0.880750397 |
| 0.982864307 | 0.769500403 |
| -1.03673541 | 0.581823128 |
| 0.867359517 | 0.451294043 |
| -1.10224253 | 0.125517649 |
| -1.02862837 | 0.728377678 |
| -1.1201647  | 0.039424066 |
| -1.02477479 | 0.62997776  |
| 0.870443944 | 0.440753323 |
| 0.933674013 | 0.227435792 |
| -1.03625207 | 0.512699172 |

|             |             |
|-------------|-------------|
| -1.01344111 | 0.881318297 |
| -1.02385231 | 0.690157833 |
| 0.969890059 | 0.605406615 |
| 0.982997669 | 0.774566968 |
| 0.867370263 | 0.137926576 |
| 0.924806754 | 0.201283858 |
| -1.02410289 | 0.730954275 |
| 0.843930768 | 0.390005439 |
| -1.30962988 | 0.055259071 |
| 0.962780581 | 0.70998152  |
| -1.04394546 | 0.630233994 |
| 0.999475987 | 0.990575801 |
| -1.03711497 | 0.429576646 |
| 0.843218395 | 0.045929908 |
| -1.04015117 | 0.549175152 |
| -1.07194493 | 0.186316728 |
| -1.07715981 | 0.405435502 |
| 0.978681032 | 0.801209784 |
| 0.6611129   | 1.09869E-08 |
| -1.02670321 | 0.656092544 |
| 0.787575196 | 0.05320772  |
| 0.812221563 | 0.024653903 |
| -1.04298347 | 0.423994529 |
| -1.06387733 | 0.275637098 |
| 0.849611339 | 0.051083687 |
| -1.08001242 | 0.261426763 |
| -1.13270707 | 0.093672026 |
| -1.4333759  | 0.000249318 |
| -1.05832777 | 0.16109757  |
| -1.17430698 | 0.044044591 |
| -1.04225056 | 0.621908371 |
| -1.08429351 | 0.244172075 |
| 0.96059237  | 0.629101237 |
| -1.02120726 | 0.570131985 |
| -1.02618727 | 0.769894178 |
| 0.970816663 | 0.662348424 |
| 0.944038871 | 0.330837982 |
| -1.0898189  | 0.505683147 |
| 0.808628314 | 0.001616904 |
| 0.957445026 | 0.458268761 |
| 0.988230079 | 0.838281688 |
| 0.922714979 | 0.398321697 |
| 0.963071832 | 0.468852055 |
| -1.03610413 | 0.4532859   |

|             |             |
|-------------|-------------|
| -1.01071915 | 0.790179668 |
| -1.02384715 | 0.530808727 |
| -1.0886669  | 0.44287206  |
| 0.945596016 | 0.309696097 |
| -1.10215503 | 0.029234165 |
| -1.19840909 | 0.034203429 |
| -1.18974992 | 0.121586785 |
| -1.01189561 | 0.777005623 |
| 0.791545851 | 0.016608351 |
| 0.966780806 | 0.37256913  |
| -1.05740685 | 0.281969617 |
| -1.20657751 | 0.006407635 |
| 0.911608428 | 0.054512784 |
| 0.919893964 | 0.242763836 |
| 0.888175424 | 0.093486403 |
| -1.01197324 | 0.826996143 |
| 0.875683714 | 0.136907666 |
| -1.021997   | 0.764854724 |
| -1.06797586 | 0.404335622 |
| 0.956721563 | 0.470962759 |
| 0.973745835 | 0.598208734 |
| 0.85529623  | 0.012762313 |
| -1.0026111  | 0.948797207 |
| -1.03955361 | 0.376720151 |
| 0.919932008 | 0.081693079 |
| 0.773304995 | 0.000250049 |
| -1.2179057  | 0.113103814 |
| -1.03754716 | 0.444434    |
| 0.965511056 | 0.419873295 |
| -1.21306882 | 0.023824732 |
| -1.00132487 | 0.974827618 |
| -1.00972955 | 0.807607134 |
| -1.21189471 | 0.091883826 |
| -1.06404496 | 0.202422494 |
| 0.96227773  | 0.707445573 |
| -1.09231571 | 0.23442537  |
| -1.09278693 | 0.061452257 |
| -1.01153422 | 0.826634534 |
| -1.0066543  | 0.914701269 |
| -1.04060932 | 0.314616077 |
| -1.04944092 | 0.547666277 |
| 0.729375063 | 0.00293108  |
| -1.00741755 | 0.899726987 |
| -1.38601707 | 0.024571739 |

|             |             |
|-------------|-------------|
| -1.01407474 | 0.793386921 |
| 0.909566773 | 0.08478772  |
| 0.732676507 | 0.016045699 |
| -1.01704287 | 0.752974245 |
| -1.0808203  | 0.350839837 |
| -1.11330666 | 0.23332188  |
| 0.825872544 | 0.327601148 |
| 0.998500726 | 0.983909819 |
| 0.792937512 | 0.326959814 |
| -1.37260081 | 0.020404266 |
| 0.816001754 | 0.043755235 |
| 0.97599542  | 0.748357653 |
| 0.921384133 | 0.104084289 |
| -1.0117505  | 0.841932886 |
| -1.00744803 | 0.924914364 |
| -1.04782334 | 0.339550684 |
| -1.00419913 | 0.936496923 |
| 0.884213182 | 0.022872652 |
| 0.960509189 | 0.421552492 |
| -1.04655614 | 0.362017602 |
| 0.40177583  | 3.67672E-12 |
| 0.985300593 | 0.67221589  |
| -1.03408309 | 0.405891714 |
| -1.39370061 | 2.21556E-05 |
| -1.16387786 | 0.034328751 |
| -1.00740227 | 0.894959371 |
| -1.10220928 | 0.031579432 |
| 0.956458187 | 0.430814998 |
| 0.955602764 | 0.178698547 |
| 0.519227251 | 3.59516E-16 |
| -1.43423228 | 2.72548E-05 |
| -1.02007953 | 0.722471664 |
| -1.01027751 | 0.805692097 |
| -1.02630303 | 0.528095491 |
| 0.883668934 | 0.059398605 |
| -1.0282869  | 0.766632763 |
| -1.14303396 | 0.136560864 |
| -1.13887403 | 0.434747554 |
| -1.05107707 | 0.42007709  |
| -1.10182213 | 0.104817956 |
| 0.868134389 | 0.095257984 |
| -1.10472955 | 0.067048222 |
| 0.939455173 | 0.347895517 |
| 0.953798196 | 0.412080443 |

|             |             |
|-------------|-------------|
| 0.991441243 | 0.829391479 |
| -1.06900926 | 0.072216381 |
| 0.973552546 | 0.833213098 |
| 0.531045715 | 1.3437E-12  |
| -1.03768308 | 0.650869819 |
| -1.13614732 | 0.241272891 |
| 0.985970467 | 0.882463289 |
| -1.0188188  | 0.73059607  |
| -1.10160653 | 0.435505293 |
| -1.04596587 | 0.369678003 |
| 0.911585555 | 0.042630223 |
| 0.982930756 | 0.753203384 |
| -1.03827779 | 0.650648933 |
| 0.9732128   | 0.641197757 |
| -1.09283742 | 0.089853128 |
| 0.967616466 | 0.539161407 |
| 0.959426084 | 0.494107163 |
| -1.01507439 | 0.821683538 |
| -1.07616339 | 0.287045014 |
| 0.893200039 | 0.044583637 |
| -1.00641014 | 0.917533426 |
| -1.46463471 | 0.000830855 |
| -1.12512014 | 0.028263834 |
| 0.976248028 | 0.679035299 |
| 0.958032751 | 0.405799394 |
| 0.949394165 | 0.368355864 |
| -1.13118374 | 0.020291552 |
| 0.972386742 | 0.640354177 |
| -1.0242921  | 0.6706219   |
| 0.97738258  | 0.72361921  |
| 0.874992578 | 0.431272407 |
| -1.03973048 | 0.645823611 |
| -1.07617851 | 0.171433445 |
| -1.05145493 | 0.375373875 |
| 0.490281524 | 4.74855E-12 |
| -1.07035272 | 0.34769045  |
| -1.02734824 | 0.650000538 |
| 0.896607231 | 0.408922842 |
| 0.968512469 | 0.628151467 |
| -1.16172343 | 0.001082309 |
| -1.01969088 | 0.793383955 |
| 0.883614785 | 0.1693466   |
| -1.05224952 | 0.325731932 |
| 0.983562313 | 0.79751258  |

|             |             |
|-------------|-------------|
| 0.970164584 | 0.549948668 |
| 0.998166168 | 0.980922136 |
| -1.10227562 | 0.149815437 |
| 0.974089834 | 0.852481937 |
| 0.955544628 | 0.428785365 |
| 0.976698804 | 0.727644303 |
| -1.04822284 | 0.356884025 |
| 0.974358251 | 0.832472625 |
| -1.16703035 | 0.048198096 |
| -1.02256568 | 0.696191748 |
| -1.04961852 | 0.408285692 |
| -1.22172324 | 0.071731558 |
| 0.984543996 | 0.790281494 |
| -1.41645687 | 0.000137305 |
| 0.933362289 | 0.169536952 |
| -1.21221692 | 0.020939466 |
| 0.980251352 | 0.734645352 |
| 0.919965336 | 0.09757254  |
| 0.990297845 | 0.847884284 |
| -1.03141905 | 0.699916133 |
| -1.22837459 | 0.0609129   |
| -1.13450158 | 0.060579661 |
| -1.10286672 | 0.227476669 |
| 0.9333811   | 0.223099808 |
| -1.06151489 | 0.427370704 |
| -1.07391483 | 0.217587359 |
| 0.822577007 | 0.377797815 |
| 0.598112382 | 1.30004E-07 |
| 0.985031707 | 0.816129441 |
| -1.31185249 | 0.007772244 |
| 0.896718213 | 0.299511351 |
| 0.925476058 | 0.167328296 |
| -1.18851557 | 0.002148486 |
| 0.759030421 | 0.017108999 |
| -1.35452691 | 0.006439658 |
| 0.976135498 | 0.679901254 |
| -1.10813103 | 0.076833332 |
| -1.11115775 | 0.174496959 |
| -1.03025113 | 0.626628281 |
| 0.989601214 | 0.838684947 |
| 0.930072567 | 0.364578093 |
| -1.18023468 | 0.003410051 |
| -1.12174142 | 0.171350379 |
| 0.95217825  | 0.380867969 |



|             |             |
|-------------|-------------|
| 0.987329894 | 0.823834094 |
| -1.1874129  | 0.097810092 |
| -1.10212893 | 0.10905526  |
| -1.17095317 | 0.102476621 |
| -1.02800405 | 0.552122402 |
| 0.949894146 | 0.416695859 |
| -1.07534391 | 0.010865507 |
| 0.984861955 | 0.706020606 |
| -1.11655397 | 0.228726637 |
| 0.9081715   | 0.140241554 |
| 0.866005983 | 0.005840167 |
| 0.64773733  | 2.47282E-06 |
| 0.935616659 | 0.486196359 |
| 0.968886111 | 0.564757816 |
| 0.833690046 | 0.016149471 |
| 0.943283314 | 0.376289886 |
| -1.0599705  | 0.284180144 |
| 0.590653705 | 6.19013E-14 |
| -1.01396973 | 0.821706612 |
| 0.469953303 | 1.28585E-14 |
| 0.885001868 | 0.010677006 |
| 0.581219329 | 4.10084E-09 |
| 0.862946284 | 0.050025617 |
| 0.615936993 | 1.28934E-07 |
| -1.14942006 | 0.053005957 |
| 0.721164004 | 0.097708225 |
| 0.79065702  | 0.000626791 |
| 0.947052252 | 0.400270219 |
| -1.19177773 | 0.068742351 |
| -1.15611621 | 0.033644197 |
| 0.883630785 | 0.019074368 |
| 0.52067235  | 9.21104E-14 |
| -1.48405091 | 1.8815E-05  |
| 0.951634728 | 0.345526862 |
| -1.26714954 | 0.005631222 |
| -1.11991116 | 0.07645941  |
| 0.969796935 | 0.490814523 |
| 0.882853375 | 0.023881995 |
| 0.541860778 | 6.02166E-08 |
| 0.907006639 | 0.166143653 |
| 0.932078821 | 0.32653849  |
| 0.875765548 | 0.072778913 |
| -1.03645282 | 0.510139917 |
| 0.802486726 | 1.48336E-05 |

|             |             |
|-------------|-------------|
| 0.899027843 | 0.097969686 |
| 0.944539546 | 0.145402799 |
| -1.21696359 | 0.002174431 |
| -1.40559423 | 0.00040473  |
| 0.796530023 | 6.60084E-07 |
| -1.12914653 | 0.352850723 |
| 0.979162022 | 0.667750771 |
| 0.814423103 | 0.017659512 |
| -1.00554524 | 0.945728711 |
| 0.927371149 | 0.152380682 |
| -1.02922984 | 0.625253654 |
| 0.788671248 | 0.000445681 |
| -1.02294054 | 0.672096096 |
| 0.916063102 | 0.080490222 |
| 0.93939218  | 0.079824504 |
| 0.89229087  | 0.2294114   |
| 0.933655459 | 0.538124368 |
| 0.99273488  | 0.853353454 |
| 0.992131776 | 0.891144033 |
| 0.841502496 | 0.000798082 |
| 0.54286035  | 1.12729E-05 |
| -1.32975988 | 0.001204637 |
| -1.10010197 | 0.226613434 |
| -1.03971338 | 0.519447896 |
| 0.927847474 | 0.163205538 |
| -1.02809304 | 0.53440287  |
| -1.12567141 | 0.002606927 |
| 0.831741516 | 0.349280513 |
| -1.09092597 | 0.125518233 |
| -1.19155477 | 0.047619053 |
| -1.02603526 | 0.850087387 |
| 0.838899814 | 0.022104525 |
| 0.989202772 | 0.852611898 |
| -1.10603988 | 0.009996097 |
| -1.01037475 | 0.833078484 |
| -1.51256811 | 3.78583E-06 |
| -1.0765073  | 0.041761722 |
| 0.893269246 | 0.052321439 |
| -1.08580609 | 0.403085416 |
| -1.07771929 | 0.300029099 |
| -1.05456239 | 0.575709751 |
| -1.14145112 | 0.059008295 |
| 0.945872943 | 0.211047106 |
| -1.01448986 | 0.779526401 |

|             |             |
|-------------|-------------|
| -1.00996119 | 0.854729274 |
| -1.08713784 | 0.129805293 |
| -1.38363068 | 0.001784406 |
| 0.843336645 | 0.004032669 |
| -1.13967124 | 0.025976076 |
| -1.03538315 | 0.439834096 |
| 0.951845112 | 0.604078616 |
| 0.901238508 | 0.59298386  |
| -1.04659427 | 0.265617736 |
| 0.960818871 | 0.43156825  |
| 0.900713623 | 0.007441539 |
| -1.08144667 | 0.335653874 |
| 0.997980345 | 0.955221383 |
| 0.886046543 | 0.130156511 |
| -1.03335262 | 0.533187574 |
| -1.03778371 | 0.375980368 |
| -1.08629629 | 0.612404341 |
| 0.982271109 | 0.792627936 |
| -1.47691003 | 0.000340824 |
| -1.18417278 | 0.014016489 |
| -1.00307988 | 0.977106395 |
| -1.0455031  | 0.30351526  |
| -1.10103957 | 0.200922562 |
| -1.09933873 | 0.069924702 |
| 0.789469214 | 0.021412501 |
| -1.28178809 | 0.003070667 |
| -1.04208266 | 0.741363662 |
| -1.18181027 | 0.008434214 |
| -1.10994131 | 0.474326995 |
| -1.19183134 | 0.090904861 |
| -1.33623256 | 3.42615E-05 |
| -1.26830624 | 0.021371885 |
| -1.24628803 | 0.039275641 |
| 0.985224563 | 0.814056075 |
| -1.14862611 | 0.040537351 |
| 0.974767379 | 0.438395291 |
| -1.06333837 | 0.331703173 |
| 0.510414324 | 8.28721E-11 |
| 0.654421243 | 5.58878E-07 |
| 0.868586608 | 0.097211942 |
| -1.05083595 | 0.514194193 |
| -1.00104024 | 0.981286779 |
| -1.11949241 | 0.002608218 |
| 0.643382372 | 2.42939E-08 |

|             |             |
|-------------|-------------|
| -1.0483023  | 0.22186287  |
| -1.09664367 | 0.073386822 |
| 0.942886907 | 0.186132096 |
| -1.350932   | 6.81491E-05 |
| 0.973793033 | 0.624332975 |
| -1.24950966 | 0.00109498  |
| 0.867168161 | 0.109932211 |
| -1.26702865 | 0.00023566  |
| 0.824751714 | 0.069045862 |
| 0.964854951 | 0.485182707 |
| -1.07685706 | 0.159073811 |
| 0.999408713 | 0.985707112 |
| 0.96805329  | 0.572004251 |
| -1.04889949 | 0.63859084  |
| 0.79795307  | 4.05867E-07 |
| 0.69233304  | 0.000270193 |
| -1.62979107 | 8.86651E-10 |
| -1.05719246 | 0.384719218 |
| 0.831184789 | 0.116469912 |
| 0.72721688  | 0.01276596  |
| -1.04043816 | 0.347700827 |
| 0.981114377 | 0.754599836 |
| 0.917091287 | 0.109517813 |
| 0.93128633  | 0.102740767 |
| -1.272768   | 0.048555777 |
| -1.14541833 | 0.246269102 |
| -1.21542877 | 0.001938198 |
| 0.783945625 | 0.004492481 |
| -1.07231884 | 0.281379927 |
| -1.01471903 | 0.843099526 |
| -1.17183266 | 0.042003691 |
| 0.724628182 | 0.001167477 |
| -1.034346   | 0.710180793 |
| -1.0434706  | 0.49160679  |
| 0.484171349 | 4.41749E-12 |
| -1.02434489 | 0.756225184 |
| -1.05106393 | 0.376610937 |
| -1.1329866  | 0.002696426 |
| 0.925602784 | 0.208798565 |
| -1.19761946 | 0.018514387 |
| -1.5649521  | 1.23188E-08 |
| 0.780573324 | 0.07171842  |
| 0.957897175 | 0.468752538 |
| 0.98724324  | 0.814146331 |

|             |             |
|-------------|-------------|
| 0.876795781 | 0.095283607 |
| 0.940806847 | 0.460040138 |
| 0.720043582 | 0.001901696 |
| -1.0032405  | 0.927186812 |
| 0.95990375  | 0.455240198 |
| 0.949906326 | 0.384721226 |
| -1.2818798  | 0.000796369 |
| -1.3514069  | 0.022420885 |
| -1.04523487 | 0.520640257 |
| 0.98775753  | 0.801136667 |
| -1.28068033 | 0.013961674 |
| -1.0833288  | 0.04347326  |
| -1.67556549 | 6.31352E-07 |
| -1.10743868 | 0.137185058 |
| 0.984623325 | 0.811062498 |
| -1.03549906 | 0.498108102 |
| 0.917653449 | 0.034516841 |
| 0.913866072 | 0.033113274 |
| -1.09998023 | 0.081113809 |
| -1.03653709 | 0.414818813 |
| 0.938254678 | 0.368661585 |
| -1.05282874 | 0.168459459 |
| 0.972017978 | 0.446461453 |
| 0.885696637 | 0.110664027 |
| 0.976737654 | 0.710928777 |
| -1.0042902  | 0.915669446 |
| -1.27667101 | 0.008204207 |
| -1.15834906 | 0.092979352 |
| -1.22718412 | 0.002504589 |
| 0.877557536 | 0.534233133 |
| 0.997874673 | 0.953138238 |
| -1.03297233 | 0.5137911   |
| 0.952289601 | 0.534363116 |
| -1.04212905 | 0.318806297 |
| 0.983083061 | 0.791910967 |
| -1.13124197 | 0.003030938 |
| 0.840723581 | 0.003739512 |
| -1.02567047 | 0.600614986 |
| 0.846155228 | 0.050637791 |
| -1.00766331 | 0.889455208 |
| -1.12837531 | 0.235009993 |
| -1.19021395 | 0.05934144  |
| -1.10119904 | 0.24207235  |
| 0.819020201 | 0.003438024 |

|             |             |
|-------------|-------------|
| -1.09134258 | 0.114232577 |
| -1.06863745 | 0.154537158 |
| -1.04785609 | 0.250197287 |
| 0.877698752 | 0.000980234 |
| 0.962044375 | 0.702683509 |
| 0.9742109   | 0.682287091 |
| -1.02737944 | 0.660654148 |
| 0.851345663 | 0.001234823 |
| -1.26192955 | 0.00281911  |
| 0.903475439 | 0.08569911  |
| 0.959889375 | 0.753826366 |
| 0.842592569 | 4.43433E-07 |
| 0.853793315 | 0.052367337 |
| -1.11301424 | 0.305325784 |
| -1.22310748 | 0.120836464 |
| -1.21006052 | 0.000733026 |
| -1.23417697 | 0.008273837 |
| -1.07938261 | 0.078672227 |
| -1.01873748 | 0.803634567 |
| 0.74684644  | 0.007378612 |
| -1.27324107 | 0.005411984 |
| 0.955415794 | 0.441457262 |
| 0.934156522 | 0.125904783 |
| 0.892937823 | 0.044674733 |
| 0.92982407  | 0.223172988 |
| -1.06216949 | 0.175219339 |
| 0.92148957  | 0.24041634  |
| 0.861339872 | 0.01820082  |
| -1.21413671 | 0.000853232 |
| -1.00168087 | 0.97420601  |
| -1.09424183 | 0.076426163 |
| -1.03620432 | 0.378966995 |
| 0.595956514 | 3.59488E-07 |
| -1.01430371 | 0.813016333 |
| 0.829751669 | 0.098020108 |
| 0.789299686 | 0.030809591 |
| 0.884759413 | 0.037693197 |
| -1.11902186 | 0.061181315 |
| -1.01330984 | 0.840957255 |
| -1.00027562 | 0.993287843 |
| 0.809985127 | 0.012656777 |
| -1.03869231 | 0.346517675 |
| -1.14854231 | 0.232211232 |
| 0.971708512 | 0.726240048 |

|             |             |
|-------------|-------------|
| -1.05145861 | 0.588071953 |
| 0.925541061 | 0.49186141  |
| 0.903610599 | 0.120632037 |
| 0.9716181   | 0.339888848 |
| 0.886657155 | 0.005379529 |
| 0.927455697 | 0.352825839 |
| 0.944298152 | 0.630429058 |
| -1.08073152 | 0.156174056 |
| -1.01837218 | 0.763645243 |
| 0.75988076  | 0.001988913 |
| 0.99975075  | 0.99788366  |
| -1.10419    | 0.039737082 |
| 0.997855557 | 0.960313261 |
| 0.935820277 | 0.12065003  |
| -1.04187222 | 0.636416342 |
| -1.13234911 | 0.11538298  |
| 0.726599288 | 0.000173018 |
| 0.95770561  | 0.770060658 |
| -1.32385509 | 5.26122E-06 |
| 0.991520179 | 0.899012685 |
| -1.05647052 | 0.32272873  |
| -1.05211053 | 0.367730384 |
| 0.642391951 | 2.76369E-05 |
| 0.879641188 | 0.010160626 |
| 0.893995927 | 0.000510412 |
| 0.441021114 | 1.68007E-19 |
| -1.16013217 | 0.029081499 |
| 0.934789604 | 0.149208831 |
| -1.17974169 | 0.003374156 |
| -1.19385922 | 0.001291515 |
| -1.04857787 | 0.380079433 |
| -1.12446967 | 0.121448151 |
| -1.24769953 | 0.003768848 |
| 0.866041076 | 0.045274477 |
| 0.945783939 | 0.502648697 |
| 0.568410746 | 1.95794E-10 |
| 0.80382026  | 0.002056412 |
| -1.43675191 | 2.05438E-06 |
| -1.06324314 | 0.297409132 |
| -1.03285971 | 0.735611817 |
| 0.943672783 | 0.376891908 |
| 0.903718066 | 0.183850061 |
| -1.06323088 | 0.240189233 |
| -1.03474895 | 0.58289364  |

|             |             |
|-------------|-------------|
| -1.09508381 | 0.048559752 |
| -1.3573828  | 0.001814381 |
| -1.06872675 | 0.408895442 |
| -1.02733618 | 0.68473697  |
| -1.21629569 | 0.037941439 |
| -1.04350743 | 0.355929603 |
| 0.953377024 | 0.767586806 |
| -1.24136987 | 0.080805168 |
| -1.2913561  | 0.003124873 |
| 0.956528222 | 0.380570186 |
| 0.909264692 | 0.109629489 |
| 0.968542021 | 0.724671664 |
| -1.20549983 | 0.013020404 |
| -1.06987342 | 0.130199173 |
| 0.966649979 | 0.563968427 |
| 0.794214527 | 0.021153796 |
| 0.954976558 | 0.443340916 |
| -1.00314399 | 0.971880224 |
| -1.02237638 | 0.774021453 |
| -1.03054295 | 0.598285069 |
| -1.02003414 | 0.793617816 |
| 0.997577922 | 0.96852101  |
| -1.01152742 | 0.843263404 |
| 0.997171433 | 0.960397134 |
| 0.857248835 | 0.007543355 |
| 0.910336747 | 0.636837712 |
| 0.96224458  | 0.659700091 |
| 0.912518775 | 0.278787203 |
| -1.26324618 | 0.006492203 |
| -1.05877527 | 0.234415984 |
| -1.27020698 | 0.000961413 |
| 0.952170322 | 0.219078774 |
| -1.25393735 | 0.026310131 |
| -1.00011234 | 0.998442541 |
| 0.964837241 | 0.652357599 |
| -1.50528222 | 2.30406E-07 |
| -1.17191676 | 0.164481537 |
| -1.0425082  | 0.476767312 |
| -1.29766947 | 0.000310107 |
| -1.01981873 | 0.81340845  |
| 0.990082719 | 0.85559044  |
| -1.00519092 | 0.959861017 |
| 0.928807925 | 0.320667486 |
| -1.43229317 | 0.0027953   |



|             |             |
|-------------|-------------|
| -1.31606381 | 0.004188442 |
| 0.965427376 | 0.737749186 |
| 0.878165771 | 0.001698172 |
| -1.05782286 | 0.384035232 |
| -1.28528001 | 0.015799867 |
| 0.958269471 | 0.345330919 |
| -1.03241571 | 0.830669668 |
| -1.09990834 | 0.21498323  |
| 0.88430314  | 0.081857017 |
| 0.981804755 | 0.729517986 |
| -1.13818977 | 0.029620028 |
| 0.967085701 | 0.592025411 |
| -1.14713372 | 0.000585135 |
| -1.006834   | 0.854612008 |
| -1.04420258 | 0.579963423 |
| -1.18424103 | 0.015237131 |
| 0.905198583 | 0.234512041 |
| -1.08715343 | 0.120719466 |
| -1.23224964 | 0.018997459 |
| -1.16544601 | 0.003185642 |
| -1.03267244 | 0.48798839  |
| -1.21152495 | 0.006050376 |
| -1.30085727 | 0.003737978 |
| -1.00659106 | 0.931211162 |
| -1.16312503 | 0.015071503 |
| 0.955940899 | 0.407819119 |
| -1.11205002 | 0.017664    |
| 0.937677419 | 0.626612053 |
| -1.07569911 | 0.294532365 |
| -1.08406045 | 0.13754757  |
| -1.1946233  | 0.141423871 |
| -1.1290991  | 0.035054611 |
| 0.879281184 | 0.274770799 |
| 0.985149774 | 0.810956308 |
| -1.00325258 | 0.968010267 |
| 0.964224206 | 0.732295573 |
| -1.08270378 | 0.082090311 |
| -1.30464911 | 0.004231325 |
| -1.21257293 | 0.07279023  |
| -1.1763742  | 0.023325864 |
| -1.35456618 | 2.99721E-05 |
| 0.998556048 | 0.987568347 |
| -1.05170792 | 0.71549845  |
| -1.32914189 | 0.003867736 |

|             |             |
|-------------|-------------|
| -1.12715867 | 0.168543913 |
| -1.24909786 | 0.000160306 |
| 0.973971087 | 0.660080496 |
| 0.980744976 | 0.782502576 |
| -1.16083639 | 0.078037203 |
| -1.11215581 | 0.153508959 |
| 0.996840117 | 0.937201142 |
| 0.574495837 | 0.001161408 |
| 0.815375698 | 0.092282893 |
| -1.41433025 | 0.003444576 |
| 0.951648621 | 0.371620836 |
| 0.993221534 | 0.86709107  |
| -1.01807606 | 0.789894206 |
| 0.989914421 | 0.749593644 |
| 0.921489184 | 0.070206133 |
| 0.959500768 | 0.37486497  |
| 0.879535042 | 0.003256533 |
| -1.096848   | 0.206406442 |
| -1.29275739 | 0.000686567 |
| 0.956342094 | 0.355943124 |
| -1.09729904 | 0.400818561 |
| -1.01361151 | 0.814520648 |
| 0.671037129 | 6.21452E-12 |
| -1.17346399 | 0.09939123  |
| 0.787343994 | 1.2616E-05  |
| 0.910727989 | 0.03972334  |
| 0.960213962 | 0.519778101 |
| 0.997280716 | 0.966842829 |
| 0.819733812 | 0.009959464 |
| 0.9937727   | 0.909426611 |
| 0.923146184 | 0.243138487 |
| -1.01634427 | 0.684540998 |
| -1.11163736 | 0.272638123 |
| -1.11577453 | 0.260549868 |
| -1.11766487 | 0.073394574 |
| -1.06785508 | 0.313987136 |
| -1.01808208 | 0.884495175 |
| 0.943636942 | 0.299378583 |
| -1.12236463 | 0.025166818 |
| -1.0609396  | 0.445698627 |
| -1.04304896 | 0.450032957 |
| -1.06527952 | 0.280664925 |
| -1.20335949 | 0.041062985 |
| -1.19214289 | 0.001578853 |

|             |             |
|-------------|-------------|
| -1.17306209 | 0.140202338 |
| 0.905190895 | 0.56816663  |
| -1.0032901  | 0.940870561 |
| -1.14966201 | 0.036458307 |
| 0.86920666  | 0.030382608 |
| 0.98426853  | 0.796950177 |
| -1.61160447 | 0.00013045  |
| -1.04421086 | 0.491305729 |
| 0.696577215 | 1.57427E-06 |
| 0.902558701 | 0.005935597 |
| -1.1880181  | 0.003656531 |
| 0.940460524 | 0.302826454 |
| 0.961884455 | 0.543302121 |
| -1.15950925 | 0.166439353 |
| 0.890868592 | 0.41493035  |
| 0.737461423 | 0.001434435 |
| 0.780601397 | 9.81013E-09 |
| -1.39571051 | 0.000191728 |
| -1.44121338 | 7.80265E-05 |
| -1.64814873 | 1.37667E-07 |
| 0.658772988 | 0.002017504 |
| 0.950070114 | 0.710849762 |
| 0.899554106 | 0.059064222 |
| 0.480688918 | 9.96847E-06 |
| -1.21732037 | 0.057934459 |
| 0.920996376 | 0.095804074 |
| -1.15812671 | 0.001188633 |
| 0.970765038 | 0.663611637 |
| 0.92331155  | 0.430892848 |
| -1.16895764 | 0.01108664  |
| 0.902288685 | 0.074452032 |
| -1.02466263 | 0.756875112 |
| 0.965322303 | 0.488821293 |
| 0.989212301 | 0.846184408 |
| -1.01895709 | 0.730597807 |
| 0.755746404 | 0.000330225 |
| 0.993224989 | 0.908033646 |
| 0.986753408 | 0.837725557 |
| -1.2751041  | 0.002103633 |
| -1.03007904 | 0.421910644 |
| 0.586873847 | 2.20099E-10 |
| -1.03198604 | 0.653082508 |
| -1.20882232 | 0.009244098 |
| 0.961662274 | 0.530657466 |

|             |             |
|-------------|-------------|
| -1.00753917 | 0.890874708 |
| 0.965411018 | 0.471176546 |
| -1.13970687 | 0.060208452 |
| -1.05870659 | 0.453807693 |
| 0.895570369 | 0.446530819 |
| 0.939231265 | 0.384778561 |
| 0.808339776 | 7.50936E-06 |
| 0.991065214 | 0.906046846 |
| 0.993378768 | 0.898645677 |
| -1.02018498 | 0.604190848 |
| 0.964164307 | 0.558668715 |
| -1.04922582 | 0.434930851 |
| -1.05044647 | 0.353479206 |
| 0.823591541 | 0.243631542 |
| -1.14357738 | 0.072762881 |
| 0.884379392 | 0.124287932 |
| -1.02512207 | 0.613412774 |
| -1.12296674 | 0.15641783  |
| 0.753101218 | 0.012275223 |
| 0.963334945 | 0.705670067 |
| -1.16864089 | 0.006237686 |
| -1.07557391 | 0.382493254 |
| 0.846424227 | 0.048189508 |
| 0.964100981 | 0.475230441 |
| -1.10771724 | 0.034200801 |
| -1.01675679 | 0.735714631 |
| -1.61633779 | 0.00044319  |
| 0.846358872 | 0.008185641 |
| -1.04519416 | 0.447281694 |
| -1.11013128 | 0.102841465 |
| 0.914180378 | 0.141338596 |
| -1.04538424 | 0.576969766 |
| -1.07778344 | 0.18289012  |
| 0.92773912  | 0.167842618 |
| 0.926094852 | 0.154580656 |
| 0.845184545 | 0.064177661 |
| -1.00538102 | 0.923382176 |
| 0.898414727 | 0.051701059 |
| 0.935987146 | 0.106162965 |
| 0.632778549 | 2.43206E-05 |
| -1.04641969 | 0.26129029  |
| -1.06829938 | 0.553561287 |
| 0.54227809  | 3.62516E-10 |
| -1.22002064 | 0.010190219 |

|             |             |
|-------------|-------------|
| 0.938907258 | 0.048764043 |
| -1.35225615 | 0.001489364 |
| -1.202792   | 0.04957245  |
| -1.0104778  | 0.915362682 |
| 0.501602766 | 1.51107E-12 |
| 0.794291751 | 0.036941943 |
| -1.04560716 | 0.568796559 |
| 0.923943337 | 0.039670235 |
| 0.815296679 | 0.004314128 |
| 0.869586851 | 0.002853103 |
| 0.909634877 | 0.305507596 |
| 0.685917111 | 1.72906E-07 |
| 0.371475162 | 1.58214E-22 |
| -1.03431391 | 0.568112939 |
| -1.01023999 | 0.798700989 |
| 0.723266507 | 9.95096E-07 |
| -1.04473761 | 0.536570311 |
| -1.15076229 | 0.065832507 |
| 0.918647348 | 0.112180682 |
| 0.775249181 | 0.004765244 |
| 0.92494689  | 0.136294973 |
| -1.02791293 | 0.685039124 |
| 0.997000765 | 0.967816705 |
| 0.958282105 | 0.652123895 |
| 0.985389246 | 0.852350343 |
| 0.974593041 | 0.782737816 |
| 0.899556839 | 0.031178388 |
| -1.08478456 | 0.145349029 |
| 0.95849386  | 0.516223931 |
| 0.675612607 | 4.91978E-05 |
| -1.10827016 | 0.325068696 |
| -1.01695169 | 0.743809353 |
| 0.988846136 | 0.793312654 |
| 0.843983484 | 0.05467769  |
| 0.8488986   | 0.034304433 |
| 0.991441768 | 0.922957987 |
| 0.912269231 | 0.098435701 |
| -1.10444402 | 0.053981008 |
| -1.04961554 | 0.419432163 |
| 0.976627698 | 0.710507874 |
| -1.02435904 | 0.646286306 |
| -1.04678371 | 0.412582624 |
| 0.970160198 | 0.593780887 |
| -1.39656594 | 0.003182069 |

|             |             |
|-------------|-------------|
| -1.01467719 | 0.806326322 |
| 0.988641551 | 0.825261519 |
| -1.03660023 | 0.537578215 |
| -1.01154095 | 0.845958162 |
| -1.04352926 | 0.418363561 |
| -1.09248535 | 0.097145849 |
| -1.00085843 | 0.989196169 |
| -1.00009374 | 0.998665453 |
| -1.01507391 | 0.747580634 |
| -1.0019438  | 0.972037027 |
| 0.928855958 | 0.171381818 |
| 0.920511153 | 0.210889661 |
| 0.980176624 | 0.699444287 |
| 0.930644101 | 0.643043757 |
| 0.92696548  | 0.222428742 |
| 0.991351498 | 0.894144009 |
| 0.94544625  | 0.353858486 |
| -1.0431125  | 0.550836854 |
| -1.07134881 | 0.217456862 |
| 0.350222201 | 2.56105E-15 |
| -1.13880115 | 0.042494602 |
| 0.871643524 | 0.017969656 |
| -1.1028402  | 0.063563353 |
| -1.06608726 | 0.345941408 |
| -1.00269982 | 0.967228293 |
| 0.78271831  | 0.331968009 |
| 0.844288901 | 0.207920981 |
| 0.983333603 | 0.797179126 |
| 0.879190846 | 0.048937162 |
| -1.16702796 | 0.001076922 |
| -1.10155174 | 0.124535851 |
| 0.94798518  | 0.26940841  |
| -1.02031568 | 0.751869189 |
| -1.02608    | 0.62887412  |
| 0.980852603 | 0.732356869 |
| -1.12894719 | 0.067255099 |
| -1.22159407 | 0.01688284  |
| -1.06296864 | 0.339085322 |
| 0.943388478 | 0.427954601 |
| 0.982080917 | 0.808096617 |
| 0.892606085 | 0.037446796 |
| -1.06337348 | 0.283918322 |
| 0.935528858 | 0.198083128 |
| -1.02918827 | 0.573373175 |

|             |             |
|-------------|-------------|
| -1.06218691 | 0.355915438 |
| 0.998421324 | 0.981109372 |
| -1.06761918 | 0.308730715 |
| -1.02045896 | 0.720379434 |
| -1.03430546 | 0.498928688 |
| 0.937350161 | 0.24694545  |
| -1.04265097 | 0.469923094 |
| -1.01981974 | 0.695548925 |
| 0.975342125 | 0.687494206 |
| 0.983924756 | 0.795968601 |
| -1.00981858 | 0.870174136 |
| 0.920857705 | 0.212752009 |
| -1.03603945 | 0.533849843 |
| 0.988423207 | 0.819698819 |
| -1.02158575 | 0.700632951 |
| 0.987434108 | 0.821579066 |
| 0.936310387 | 0.206155501 |
| 0.922734705 | 0.190270039 |
| -1.01735015 | 0.763955422 |
| -1.00159172 | 0.976535849 |
| -1.03849194 | 0.522255091 |
| -1.06494155 | 0.254983612 |
| 0.991787338 | 0.86461701  |
| 0.940626217 | 0.312194304 |
| -1.06205917 | 0.353130419 |
| 0.955495148 | 0.345395255 |
| 0.917106868 | 0.177128331 |
| 0.985285794 | 0.845419259 |
| 0.982510537 | 0.728367414 |
| 0.998763902 | 0.985081486 |
| 0.903437005 | 0.082578238 |
| -1.21824109 | 0.098825267 |
| -1.1010552  | 0.091218421 |
| -1.0479783  | 0.557594019 |
| -1.04734326 | 0.451185397 |
| 0.951291143 | 0.355314709 |
| 0.928549451 | 0.28790588  |
| -1.10357434 | 0.151337598 |
| 0.958125105 | 0.344202451 |
| -1.11371605 | 0.140760453 |
| -1.02915835 | 0.612597949 |
| -1.01074598 | 0.843333164 |
| -1.10709421 | 0.174198728 |
| 0.988472907 | 0.819226242 |

|             |             |
|-------------|-------------|
| 0.670732981 | 0.002985186 |
| -1.03175957 | 0.534814497 |
| 0.889587731 | 0.024725331 |
| -1.04599234 | 0.438022618 |
| -1.10556036 | 0.070025944 |
| 0.999788212 | 0.997216863 |
| -1.15342376 | 0.02587575  |
| 0.961853166 | 0.460368604 |
| -1.10553224 | 0.163837182 |
| -1.07517457 | 0.331008842 |
| 0.946771853 | 0.101431386 |
| 0.823460665 | 0.000917715 |
| -1.06392217 | 0.381598139 |
| -1.07420524 | 0.313230914 |
| 0.849319749 | 0.000492717 |
| -1.29100677 | 0.021944783 |
| 0.920546565 | 0.274855386 |
| -1.06123075 | 0.355891946 |
| 0.919391641 | 0.159112948 |
| 0.986991681 | 0.878515019 |
| -1.02751058 | 0.777695018 |
| 0.982821576 | 0.785925308 |
| 0.99593675  | 0.940503966 |
| -1.06789666 | 0.271566905 |
| -1.07182169 | 0.429873637 |
| 0.866797695 | 0.02428921  |
| -1.08833158 | 0.282663681 |
| -1.06684513 | 0.549165096 |
| -1.02764773 | 0.746866062 |
| 0.796300703 | 6.08385E-06 |
| -1.1997769  | 0.017430902 |
| 0.986297018 | 0.790334967 |
| -1.07098816 | 0.108683809 |
| -1.19412952 | 0.04524607  |
| -1.1017634  | 0.038650151 |
| -1.00505239 | 0.941703931 |
| -1.16699785 | 0.007010553 |
| 0.691169912 | 8.98888E-05 |
| 0.934009368 | 0.484970517 |
| -1.00577513 | 0.906576035 |
| -1.1750497  | 0.048578399 |
| -1.21607943 | 0.009328713 |
| -1.05432313 | 0.34448667  |
| -1.08734312 | 0.208292588 |



|             |             |
|-------------|-------------|
| -1.12150204 | 0.058239676 |
| -1.18691289 | 0.08826458  |
| -1.20344462 | 0.009768274 |
| -1.16296749 | 0.009920032 |
| -1.30949414 | 4.20184E-05 |
| 0.961260376 | 0.498550582 |
| 0.731898726 | 2.40148E-06 |
| -1.04548509 | 0.199944848 |
| 0.954093898 | 0.239251055 |
| 0.966027822 | 0.515262998 |
| -1.0213328  | 0.550810507 |
| 0.940152914 | 0.246542446 |
| 0.963149318 | 0.484829919 |
| 0.982765859 | 0.807962065 |
| 0.904707969 | 0.124781083 |
| 0.968136852 | 0.369878109 |
| 0.979870242 | 0.882370683 |
| -1.50285948 | 5.56876E-06 |
| 0.802116952 | 0.001163857 |
| -1.00381158 | 0.947296823 |
| -1.25655262 | 0.009454188 |
| 0.700547458 | 0.00024393  |
| -1.10466714 | 0.251649943 |
| -1.06458934 | 0.587242994 |
| 0.927422497 | 0.472908865 |
| -1.10219093 | 0.431684618 |
| 0.828687577 | 0.024754099 |
| 0.910748038 | 0.132403449 |
| 0.93296337  | 0.074885771 |
| -1.40524502 | 0.000393169 |
| 0.937339774 | 0.097118516 |
| -1.07719836 | 0.349782613 |
| -1.09703511 | 0.108443776 |
| -1.22801267 | 0.024454374 |
| -1.06854519 | 0.368256161 |
| -1.21104729 | 0.004001394 |
| -1.12314628 | 0.102877431 |
| 0.968352123 | 0.520169027 |
| -1.19095508 | 0.05454898  |
| 0.89051803  | 0.04534118  |
| 0.999566003 | 0.996876613 |
| -1.06217004 | 0.566577365 |
| -1.08643023 | 0.500109281 |
| -1.20329263 | 0.03663752  |

|             |             |
|-------------|-------------|
| 0.954886816 | 0.360628025 |
| 0.997032761 | 0.956615723 |
| -1.0150686  | 0.745963324 |
| 0.99573061  | 0.948312589 |
| -1.12539393 | 0.101399134 |
| 0.992496632 | 0.897386611 |
| 0.928218997 | 0.305424302 |
| 0.80302919  | 0.002904987 |
| 0.46069786  | 6.6495E-20  |
| -1.22167543 | 0.00460139  |
| 0.87622677  | 0.023551398 |
| -1.26227708 | 0.000959424 |
| -1.08542174 | 0.520685014 |
| -1.01087862 | 0.870265499 |
| -1.40637715 | 6.43681E-06 |
| 0.794651299 | 0.001381682 |
| 0.98335696  | 0.796296188 |
| -1.01251665 | 0.808524702 |
| 0.776101306 | 7.54107E-05 |
| -1.01549953 | 0.778581547 |
| 0.996438883 | 0.961741923 |
| -1.09151676 | 0.352254448 |
| -1.0020069  | 0.968776965 |
| -1.39039566 | 8.3841E-07  |
| -1.15150008 | 0.018938324 |
| -1.07398683 | 0.351374515 |
| 0.760871271 | 0.011991516 |
| -1.03642494 | 0.464953306 |
| -1.27951744 | 0.008196264 |
| -1.00397313 | 0.949425882 |
| -1.00309442 | 0.932302581 |
| -1.0630837  | 0.364094247 |
| -1.03345206 | 0.477817378 |
| -1.10053045 | 0.059411395 |
| -1.03004556 | 0.66388714  |
| -1.01450303 | 0.858944933 |
| 0.984764707 | 0.818908384 |
| -1.12097048 | 0.021795172 |
| 0.959334721 | 0.418352852 |
| 0.970412504 | 0.508288145 |
| 0.885564548 | 0.121729578 |
| -1.03053587 | 0.699813158 |
| 0.944156287 | 0.614464848 |
| 0.902014115 | 0.173812503 |

|             |             |
|-------------|-------------|
| -1.24405664 | 0.006114418 |
| -1.27318804 | 0.021487048 |
| -1.24205355 | 0.009132406 |
| 0.945118455 | 0.594531961 |
| -1.21286471 | 0.064226724 |
| -1.32098732 | 0.000213253 |
| 0.917004209 | 0.297684579 |
| -1.25540193 | 0.000253245 |
| -1.1443943  | 0.280124616 |
| -1.10573213 | 0.349295586 |
| -1.29614694 | 0.015224592 |
| -1.01670958 | 0.813176552 |
| -1.25482325 | 0.011855025 |
| -1.13996872 | 0.141401459 |
| 0.918270281 | 0.21121234  |
| -1.13877408 | 0.262598542 |
| -1.14420979 | 0.105918392 |
| -1.21319123 | 0.003856775 |
| -1.15411127 | 0.128563698 |
| 0.984074168 | 0.828762885 |
| -1.06173805 | 0.549100958 |
| -1.34965945 | 1.37673E-06 |
| 0.957310783 | 0.569670249 |
| -1.05242799 | 0.586012825 |
| -1.03181934 | 0.720565916 |
| -1.00433685 | 0.960119059 |
| 0.963881652 | 0.709252737 |
| 0.938799845 | 0.465375425 |
| -1.12826352 | 0.294335504 |
| 0.95041101  | 0.507375521 |
| 0.937622647 | 0.304854468 |
| -1.02956913 | 0.710902093 |
| -1.01959344 | 0.788350319 |
| 0.829608672 | 0.001826936 |
| -1.0819391  | 0.265086495 |
| -1.06569279 | 0.560741771 |
| -1.24164812 | 0.149626927 |
| -1.06655397 | 0.448264038 |
| -1.11579225 | 0.1891544   |
| -1.08906606 | 0.221624422 |
| -1.02859303 | 0.689442307 |
| -1.02568241 | 0.81695707  |
| -1.09333626 | 0.345397144 |
| -1.27431369 | 0.003043863 |

|             |             |
|-------------|-------------|
| -1.30335509 | 0.003193016 |
| -1.02059122 | 0.762998495 |
| -1.06728973 | 0.494198433 |
| -1.12545978 | 0.238202114 |
| -1.25443861 | 0.018399686 |
| -1.07652677 | 0.32349392  |
| -1.06382609 | 0.379144673 |
| 0.965053859 | 0.761879663 |
| 0.980018375 | 0.810567662 |
| -1.162093   | 0.063793274 |
| -1.31732178 | 9.80987E-05 |
| 0.997765985 | 0.97330797  |
| -1.26993194 | 1.89462E-05 |
| -1.19277789 | 0.06206333  |
| -1.213261   | 0.028725787 |
| -1.18158898 | 0.026460887 |
| -1.18872226 | 0.102835033 |
| 0.943173284 | 0.310938557 |
| -1.19311402 | 0.023547587 |
| -1.4320335  | 1.51457E-06 |
| 0.982174857 | 0.761416277 |
| -1.07031331 | 0.487882676 |
| -1.53007713 | 0.000188006 |
| -1.42090272 | 0.001519682 |
| -1.22285573 | 0.002997461 |
| -1.02248443 | 0.777504611 |
| 0.951825819 | 0.427401778 |
| -1.25667924 | 0.009038794 |
| -1.09785053 | 0.155681534 |
| -1.11839977 | 0.021523138 |
| -1.04396513 | 0.412561075 |
| -1.21121694 | 0.129937132 |
| 0.643346509 | 8.20412E-06 |
| 0.990504954 | 0.78201102  |
| -1.08444867 | 0.188069571 |
| 0.698306665 | 1.45901E-10 |
| -1.07206176 | 0.575604446 |
| 0.8507884   | 0.211248868 |
| 0.922767336 | 0.090966973 |
| -1.10723674 | 0.107507046 |
| -1.29249198 | 9.49734E-06 |
| -1.40261632 | 1.43915E-06 |
| -1.05707599 | 0.264539028 |
| -1.03421626 | 0.424724821 |

|             |             |
|-------------|-------------|
| 0.976033041 | 0.741336036 |
| 0.98276515  | 0.735762584 |
| -1.03722181 | 0.592347781 |
| 0.845097615 | 0.126641177 |
| 0.951105235 | 0.191819387 |
| -1.07278955 | 0.098749733 |
| 0.655058924 | 3.59442E-08 |
| 0.842413414 | 1.51877E-05 |
| 0.921132397 | 0.423675785 |
| -1.00279455 | 0.956358475 |
| 0.979222047 | 0.802746695 |
| -1.0579155  | 0.470037277 |
| 0.933773757 | 0.308706959 |
| 0.331443485 | 3.67449E-11 |
| 0.528220633 | 1.42244E-11 |
| 0.269580902 | 1.13176E-21 |
| 0.288089702 | 1.02952E-19 |
| 0.62720415  | 2.47242E-12 |
| 0.922297589 | 0.132153939 |
| 0.957184    | 0.478762055 |
| 0.489076644 | 2.23604E-05 |
| 0.271379781 | 2.79922E-12 |
| 0.900137568 | 0.048232597 |
| -1.05974257 | 0.660813384 |
| -1.0586845  | 0.580826103 |
| 0.836350261 | 0.032207997 |
| 0.870890437 | 0.082648264 |
| -1.18995487 | 0.010277065 |
| 0.853428953 | 0.019201955 |
| -1.023116   | 0.782157209 |
| -1.26938626 | 0.01985069  |
| -1.02430332 | 0.822893302 |
| 0.789102812 | 0.00942496  |
| -1.13162858 | 0.004857834 |
| 0.853033068 | 0.007818217 |
| -1.00280053 | 0.957657862 |
| -1.08451428 | 0.405189852 |
| -1.08128488 | 0.269141694 |
| -1.13266635 | 0.065411484 |
| -1.29399022 | 0.003067349 |
| 0.896685444 | 0.042510946 |
| -1.22263453 | 0.000616895 |
| -1.02414496 | 0.744927692 |
| -1.28098276 | 0.000247875 |

|             |             |
|-------------|-------------|
| -1.00749777 | 0.920935854 |
| -1.19745422 | 0.004580785 |
| -1.05133939 | 0.506632151 |
| -1.40790068 | 1.35408E-05 |
| -1.20252404 | 0.00010165  |
| 0.809482067 | 9.66794E-06 |
| -1.06999339 | 0.067297467 |
| 0.995718888 | 0.954223982 |
| -1.06937692 | 0.442229106 |
| 0.700593115 | 6.04117E-07 |
| -1.13245098 | 0.034233166 |
| -1.06169524 | 0.149157225 |
| -1.1696551  | 0.021205363 |
| 0.946439031 | 0.63200082  |
| -1.06629348 | 0.368433708 |
| -1.01789391 | 0.735425711 |
| 0.965098154 | 0.53565911  |
| -1.17518247 | 0.075713526 |
| -1.14655848 | 0.088967335 |
| -1.06093236 | 0.522914356 |
| -1.26240213 | 0.001346659 |
| -1.02879629 | 0.581558337 |
| -1.10018688 | 0.049041627 |
| 0.723100907 | 1.35552E-08 |
| 0.837143823 | 0.007910935 |
| 0.980430228 | 0.563002867 |
| -1.01024147 | 0.911786893 |
| 0.98397468  | 0.836215715 |
| -1.11956117 | 0.107839145 |
| 0.979805201 | 0.721298023 |
| 0.974341324 | 0.62008062  |
| -1.02613125 | 0.611261049 |
| -1.01259745 | 0.714173267 |
| -1.03694007 | 0.528505822 |
| -1.19701167 | 0.001830219 |
| -1.39582068 | 0.00038301  |
| 0.970468268 | 0.791611089 |
| 0.969398526 | 0.520537781 |
| -1.24036752 | 0.009411572 |
| -1.13679619 | 0.055676065 |
| 0.956538725 | 0.478901734 |
| 0.764374865 | 0.001023551 |
| 0.915416209 | 0.415057829 |
| 0.960758537 | 0.5972249   |

|             |             |
|-------------|-------------|
| 0.98811387  | 0.849497236 |
| 0.678434189 | 0.000561144 |
| -1.50070577 | 5.83286E-07 |
| -1.21223882 | 0.009532639 |
| -1.44623343 | 5.1044E-05  |
| -1.10751337 | 0.41224506  |
| -1.02045286 | 0.600763585 |
| 0.982060728 | 0.643130164 |
| -1.03024162 | 0.538730331 |
| -1.00472435 | 0.940264455 |
| -1.7898272  | 7.81783E-10 |
| -1.13970752 | 0.142319562 |
| -1.02924427 | 0.749291915 |
| -1.23477905 | 0.033384418 |
| 0.795243516 | 0.03732372  |
| -1.05149521 | 0.414709741 |
| -1.22038208 | 0.001162326 |
| 0.763625488 | 0.003636788 |
| -1.32653125 | 0.000120886 |
| 0.792865036 | 0.050994108 |
| 0.985557695 | 0.691659198 |
| 0.955092283 | 0.312297013 |
| -1.21710482 | 0.018066351 |
| 0.952351166 | 0.303786091 |
| 0.9593877   | 0.331300793 |
| -1.06388444 | 0.424122661 |
| 0.965259899 | 0.560428972 |
| -1.01012991 | 0.885462985 |
| -1.02182593 | 0.689857375 |
| -1.06256771 | 0.357335221 |
| -1.07406391 | 0.070840313 |
| 0.813391818 | 0.000647531 |
| 0.969037181 | 0.485664898 |
| -1.01375196 | 0.808542885 |
| 0.867348956 | 0.000300816 |
| 0.984495866 | 0.787063518 |
| -1.30742755 | 0.016476871 |
| 0.945335911 | 0.625274148 |
| 0.657208406 | 0.000143632 |
| -1.00401591 | 0.939725505 |
| 0.955016745 | 0.376984698 |
| -1.07568576 | 0.154886019 |
| -1.03002438 | 0.469332154 |
| 0.973613547 | 0.610221898 |

|             |             |
|-------------|-------------|
| 0.997112181 | 0.956714704 |
| -1.04256632 | 0.510447083 |
| 0.578962555 | 1.42476E-05 |
| 0.924086693 | 0.160702917 |
| -1.00327184 | 0.946547701 |
| -1.03165581 | 0.762375609 |
| 0.939195017 | 0.392840894 |
| 0.913191063 | 0.095000866 |
| 0.858672206 | 0.015719381 |
| -1.0088701  | 0.901315884 |
| -1.12158487 | 0.191433153 |
| 0.995985219 | 0.941132618 |
| -1.09893373 | 0.099024265 |
| 0.914271199 | 0.120202456 |
| 0.941176256 | 0.349714682 |
| 0.989386468 | 0.84966733  |
| 0.939489724 | 0.318968812 |
| 0.980965404 | 0.874729453 |
| -1.11664646 | 0.109830736 |
| -1.17879704 | 0.088354352 |
| -1.05634319 | 0.36107987  |
| 0.945707629 | 0.463623323 |
| 0.967983553 | 0.713935653 |
| -1.00350508 | 0.949909464 |
| 0.974761402 | 0.506085451 |
| -1.12201349 | 0.013566253 |
| -1.068589   | 0.195088736 |
| 0.990418726 | 0.815906336 |
| -1.01450195 | 0.827002381 |
| -1.28389924 | 6.66117E-05 |
| 0.938286805 | 0.373033909 |
| -1.02933815 | 0.606391144 |
| 0.781030936 | 0.001048918 |
| 0.783934818 | 0.003937944 |
| -1.08456305 | 0.174950401 |
| 0.992255188 | 0.83783048  |
| 0.895222561 | 0.517485782 |
| 0.924044008 | 0.056295704 |
| -1.19162067 | 0.068567547 |
| -1.4123989  | 1.96955E-06 |
| -1.02969173 | 0.61135881  |
| -1.10988521 | 0.156520601 |
| 0.856172657 | 0.188726375 |
| 0.903693287 | 0.054262161 |



|             |             |
|-------------|-------------|
| 0.808358496 | 0.014000591 |
| 0.909695419 | 0.202600172 |
| -1.52326715 | 1.13997E-05 |
| -1.03186714 | 0.599190065 |
| -1.01959108 | 0.505321604 |
| -1.00279961 | 0.954279423 |
| -1.18091211 | 0.070690864 |
| 0.778667024 | 2.70282E-05 |
| 0.843681024 | 0.034827453 |
| 0.897495014 | 0.292221039 |
| -1.12482632 | 0.1558581   |
| 0.794451901 | 0.000104762 |
| -1.12717133 | 0.125556945 |
| -1.00014539 | 0.997528554 |
| -1.20259159 | 0.025792745 |
| 0.919616017 | 0.50563061  |
| 0.406202942 | 6.97706E-11 |
| 0.284340477 | 4.35173E-16 |
| -1.66185298 | 0.000464198 |
| 0.960922811 | 0.65857071  |
| -1.25272746 | 0.008129075 |
| -1.19917036 | 0.001540961 |
| -1.12040377 | 0.022668638 |
| -1.14266197 | 0.137510336 |
| 0.926630901 | 0.287395912 |
| -1.23841472 | 0.00070539  |
| -1.14058377 | 0.009514509 |
| -1.08680269 | 0.614547641 |
| -1.09015938 | 0.186919486 |
| -1.00126368 | 0.994546467 |
| 0.884321322 | 0.185992703 |
| -1.15118499 | 0.123956009 |
| -1.04422998 | 0.471352126 |
| -1.03023404 | 0.726887788 |
| 0.912102975 | 0.079309775 |
| 0.942342055 | 0.110443803 |
| -1.055628   | 0.322737493 |
| 0.92801662  | 0.140291524 |
| 0.967752949 | 0.728392923 |
| -1.07083125 | 0.199115505 |
| -1.09139327 | 0.261374276 |
| -1.01736071 | 0.596779688 |
| 0.711591151 | 0.000995515 |
| 0.992451349 | 0.919660514 |

|             |             |
|-------------|-------------|
| 0.960948565 | 0.27307396  |
| 0.675399575 | 0.002474894 |
| 0.984306477 | 0.760351061 |
| 0.942925405 | 0.249355481 |
| -1.07261713 | 0.249626562 |
| 0.71081056  | 0.019618371 |
| -1.0216869  | 0.569646578 |
| -1.20670171 | 0.051777688 |
| 0.944218508 | 0.168138577 |
| 0.819825388 | 0.00036569  |
| 0.97944722  | 0.828796817 |
| -1.19380019 | 0.007555135 |
| -1.17820658 | 0.039993228 |
| -1.11127131 | 0.155399043 |
| -1.11943869 | 0.144599148 |
| -1.08580083 | 0.198154003 |
| -1.08851852 | 0.195438575 |
| 0.90469533  | 0.121269778 |
| 0.986622633 | 0.785993501 |
| -1.05139616 | 0.366415241 |
| 0.29453587  | 7.42671E-16 |
| 0.921420336 | 0.349518484 |
| 0.46424192  | 2.13326E-08 |
| 0.783211956 | 0.000422364 |
| 0.7025376   | 2.0337E-06  |
| 0.861839661 | 0.058054614 |
| 0.899535818 | 0.161333158 |
| 0.865037334 | 0.039939272 |
| 0.891763241 | 0.339495435 |
| 0.754631815 | 1.47536E-05 |
| 0.976730526 | 0.701027244 |
| -1.1087904  | 0.500056742 |
| 0.991921695 | 0.855520016 |
| -1.07553172 | 0.21559715  |
| 0.505981186 | 1.28523E-10 |
| -1.07198675 | 0.32329398  |
| -1.02667676 | 0.773934094 |
| -1.171078   | 0.126621506 |
| -1.16732726 | 0.121978807 |
| 0.825070608 | 0.003644991 |
| -1.1839556  | 0.01131747  |
| -1.0167859  | 0.856954318 |
| 0.855386261 | 0.002745773 |
| -1.04359215 | 0.580583379 |

|             |             |
|-------------|-------------|
| 0.948435475 | 0.427176672 |
| 0.797631626 | 0.000580205 |
| -1.03617539 | 0.696878811 |
| -1.10066077 | 0.081999838 |
| -1.07828751 | 0.254495833 |
| 0.904341677 | 0.179995867 |
| -1.03815079 | 0.572888904 |
| 0.843537971 | 0.002746377 |
| -1.02814895 | 0.626192323 |
| 0.928644443 | 0.044253217 |
| 0.972699071 | 0.622695252 |
| -1.00624464 | 0.904671051 |
| -1.06714192 | 0.206270823 |
| -1.0955168  | 0.198966539 |
| -1.00709592 | 0.954399967 |
| -1.38194597 | 0.002056488 |
| 0.956636226 | 0.756588046 |
| -1.28363595 | 0.000184364 |
| -1.00951756 | 0.89541956  |
| 0.517052306 | 6.16948E-11 |
| 0.975714319 | 0.625038119 |
| 0.823726394 | 0.007315654 |
| 0.870287992 | 0.002820134 |
| 0.81684274  | 0.000555827 |
| 0.734578772 | 1.63524E-08 |
| 0.905351216 | 0.315706134 |
| 0.921706638 | 0.284290339 |
| -1.20221582 | 0.003951823 |
| -1.02749924 | 0.817126554 |
| -1.2945602  | 0.001697106 |
| -1.04139454 | 0.641905029 |
| -1.10747904 | 0.14444801  |
| -1.06128631 | 0.402605446 |
| 0.963721221 | 0.73998372  |
| -1.2169048  | 0.002232384 |
| -1.19229758 | 0.019982487 |
| -1.2285014  | 0.025269658 |
| -1.16914245 | 0.04247053  |
| -1.1230423  | 0.028143864 |
| -1.40393171 | 2.1571E-07  |
| -1.30796265 | 0.000337957 |
| -1.04827415 | 0.537583992 |
| -1.05223571 | 0.457897477 |
| 0.9902517   | 0.86743057  |

|             |             |
|-------------|-------------|
| 0.946178412 | 0.552965208 |
| -1.13518865 | 0.28147932  |
| -1.07205226 | 0.331788372 |
| -1.13695157 | 0.141228462 |
| -1.1039209  | 0.148036276 |
| 0.968789151 | 0.688877812 |
| -1.47180579 | 5.16726E-06 |
| 0.983511901 | 0.82256016  |
| -1.24558763 | 0.022292376 |
| -1.20531538 | 0.190278704 |
| -1.0812857  | 0.490552854 |
| -1.09136617 | 0.120839816 |
| 0.948039402 | 0.425543172 |
| -1.05769976 | 0.304447346 |
| 0.950450861 | 0.156174154 |
| -1.01939446 | 0.70543095  |
| 0.923986132 | 0.262068264 |
| -1.02459619 | 0.729831939 |
| -1.01818788 | 0.833739057 |
| -1.18288737 | 0.010194144 |
| 0.946183764 | 0.141014925 |
| 0.815026381 | 0.047678644 |
| -1.00885124 | 0.904409735 |
| 0.893230071 | 0.009526448 |
| 0.999296177 | 0.991241158 |
| 0.804795457 | 0.007494784 |
| -1.29247153 | 1.42778E-05 |
| 0.880229284 | 0.097554544 |
| -1.04817495 | 0.18878546  |
| -1.47380827 | 5.41093E-05 |
| -1.0403922  | 0.400252285 |
| -1.03678292 | 0.490137235 |
| 0.900866785 | 0.100261674 |
| -1.07676443 | 0.436928085 |
| 0.913052627 | 0.304744376 |
| 0.942119443 | 0.395003391 |
| -1.30734627 | 0.015380912 |
| 0.946345478 | 0.245955981 |
| 0.983844761 | 0.807413322 |
| 0.742695883 | 0.014126824 |
| 0.773134715 | 0.000206247 |
| -1.00154893 | 0.981219677 |
| -1.15210375 | 0.02945493  |
| 0.855647812 | 0.153202752 |

|             |             |
|-------------|-------------|
| 0.977134655 | 0.741491361 |
| -1.16841087 | 0.122726106 |
| -1.02666906 | 0.491068052 |
| 0.927107588 | 0.152872761 |
| 0.788868549 | 0.000105439 |
| 0.833732527 | 0.000232616 |
| 0.99063677  | 0.827330495 |
| 0.969020085 | 0.616505563 |
| 0.995362128 | 0.952282419 |
| 0.86430788  | 0.017251691 |
| -1.24295201 | 0.018437116 |
| -1.0310408  | 0.507399976 |
| -1.10145036 | 0.258329525 |
| -1.14160556 | 0.331522498 |
| 0.715475856 | 2.87314E-08 |
| -1.03705107 | 0.650867752 |
| 0.928623961 | 0.22181647  |
| 0.734591633 | 1.4065E-05  |
| 0.605850546 | 9.37362E-11 |
| 0.833532516 | 0.100405084 |
| 0.881244724 | 0.14909814  |
| 0.503770926 | 6.7231E-08  |
| -1.19242323 | 0.01809906  |
| 0.488546617 | 3.38242E-07 |
| 0.590701082 | 1.73273E-05 |
| -1.03803005 | 0.567051572 |
| 0.984601817 | 0.810329269 |
| 0.607491308 | 1.89939E-07 |
| 0.89835595  | 0.075712171 |
| -1.0368956  | 0.510555717 |
| 0.889016894 | 0.168537029 |
| -1.05603685 | 0.392162389 |
| 0.940994778 | 0.377307277 |
| -1.05061348 | 0.361239296 |
| -1.03688741 | 0.628178061 |
| 0.657776264 | 4.49246E-10 |
| -1.32847921 | 4.66943E-05 |
| -1.05420428 | 0.193229766 |
| 0.77748369  | 0.002269599 |
| -1.08659014 | 0.192689735 |
| -1.0016881  | 0.970796587 |
| 0.986118718 | 0.803902422 |
| 0.99530112  | 0.937789982 |
| -1.08320942 | 0.318054901 |

|             |             |
|-------------|-------------|
| 0.832951089 | 0.024887433 |
| 0.675109267 | 2.12902E-08 |
| -1.31118524 | 3.89842E-05 |
| 0.995096855 | 0.900104986 |
| -1.00743866 | 0.935203507 |
| 0.748393133 | 0.000350044 |
| -1.09138693 | 0.256355374 |
| -1.19983339 | 0.024302512 |
| -1.01279465 | 0.863882185 |
| -1.76104143 | 4.97001E-13 |
| 0.997737419 | 0.954790712 |
| 0.94594231  | 0.156930805 |
| -1.12765755 | 0.032720978 |
| 0.719901505 | 0.000693051 |
| -1.12882564 | 0.096692859 |
| 0.87685847  | 0.041753295 |
| -1.14727122 | 0.120397714 |
| 0.898516717 | 0.112594299 |
| 0.734504834 | 0.000146058 |
| -1.02080023 | 0.711937347 |
| -1.26912585 | 0.032452037 |
| 0.664517195 | 8.44751E-07 |
| 0.968252138 | 0.599948184 |
| 0.929117769 | 0.195045736 |
| -1.09217948 | 0.11482301  |
| 0.985340228 | 0.875164554 |
| 0.967885754 | 0.615467428 |
| 0.835711254 | 0.011819213 |
| -1.22371639 | 1.42005E-05 |
| -1.00214894 | 0.962156639 |
| 0.894542093 | 0.098113072 |
| 0.993349147 | 0.886324733 |
| -1.12526923 | 0.200107065 |
| -1.00048379 | 0.993270583 |
| -1.102019   | 0.071415128 |
| 0.961422166 | 0.479239633 |
| -1.06737091 | 0.354857403 |
| 0.984470751 | 0.687315105 |
| 0.898004491 | 0.293546898 |
| -1.0529816  | 0.386376939 |
| 0.999782337 | 0.996669684 |
| 0.994114801 | 0.88287843  |
| 0.982579023 | 0.764636204 |
| 0.998296738 | 0.965444725 |

|             |             |
|-------------|-------------|
| -1.02320867 | 0.642338727 |
| 0.885890732 | 0.572121467 |
| 0.922189005 | 0.138825663 |
| 0.709518297 | 1.21224E-05 |
| 0.964495848 | 0.732475353 |
| -1.04658179 | 0.596430146 |
| -1.17210985 | 0.107335673 |
| 0.940946175 | 0.441118631 |
| -1.0366841  | 0.694134658 |
| 0.510287587 | 1.17134E-10 |
| -1.00361385 | 0.937195949 |
| -1.24193155 | 0.000566403 |
| -1.15779432 | 0.002087515 |
| 0.927818596 | 0.513749932 |
| -1.02221826 | 0.639872267 |
| 0.743364981 | 0.010837655 |
| 0.996497878 | 0.980073545 |
| 0.944309743 | 0.312864506 |
| 0.792556684 | 0.000521372 |
| 0.561864964 | 4.00233E-11 |
| -1.30480126 | 7.23625E-05 |
| -1.02242503 | 0.846752639 |
| -1.01405562 | 0.900877926 |
| 0.934049722 | 0.373824345 |
| -1.29721441 | 0.000674348 |
| 0.904919419 | 0.09540474  |
| 0.86154969  | 0.001905921 |
| 0.995434082 | 0.938373363 |
| 0.931339613 | 0.187102401 |
| -1.11730503 | 0.097956797 |
| -1.37176172 | 0.001207144 |
| 0.966707177 | 0.49741544  |
| -2.69648296 | 3.88915E-15 |
| -1.15573941 | 0.204394975 |
| -1.19608832 | 0.033357395 |
| -1.16807464 | 0.098903608 |
| -1.06984677 | 0.436575705 |
| -1.15793396 | 0.123097081 |
| -1.14736715 | 0.092620062 |
| -1.15417948 | 0.005144613 |
| -1.26166111 | 0.003582868 |
| -1.21515477 | 0.012254582 |
| -1.36278472 | 0.002134599 |
| -1.00440777 | 0.934135819 |

|             |             |
|-------------|-------------|
| 0.869075627 | 0.014155261 |
| -1.10623116 | 0.225186064 |
| -1.25160263 | 0.054163238 |
| -1.14058327 | 0.175877142 |
| 0.862454119 | 0.041948767 |
| 0.935511796 | 0.327513403 |
| -1.0081146  | 0.880864623 |
| 0.944926038 | 0.404916632 |
| -1.2537353  | 0.001593365 |
| -1.30185898 | 0.002030809 |
| 0.932562542 | 0.066168436 |
| 0.821596402 | 9.35673E-05 |
| 0.961490601 | 0.433760109 |
| 0.848225844 | 0.010076058 |
| 0.677796764 | 1.42778E-10 |
| -1.01586217 | 0.741112198 |
| -1.04895394 | 0.433833495 |
| 0.987384672 | 0.882454088 |
| -1.20210657 | 0.102338122 |
| 0.963407651 | 0.625298017 |
| 0.424229926 | 5.17294E-11 |
| -1.12904936 | 0.213057415 |
| 0.861195328 | 0.036274941 |
| 0.917971156 | 0.110347451 |
| 0.844523282 | 0.007923541 |
| 0.867977965 | 0.049626269 |
| -1.05662885 | 0.53187337  |
| 0.97123823  | 0.679148691 |
| -1.14675306 | 0.015822884 |
| -1.30101844 | 0.00807558  |
| 0.728589516 | 2.11697E-08 |
| 0.939859939 | 0.490945143 |
| -1.04991749 | 0.321753484 |
| 0.93761871  | 0.211981766 |
| 0.910222866 | 0.398380243 |
| -1.05419908 | 0.238410888 |
| 0.987797075 | 0.803576047 |
| 0.932495279 | 0.281488033 |
| 0.842975193 | 0.018434301 |
| -1.29945384 | 7.86674E-09 |
| 0.599625373 | 4.27945E-05 |
| -1.00801201 | 0.854590762 |
| -1.06179521 | 0.289389875 |
| 0.613362988 | 2.36251E-07 |



|             |             |
|-------------|-------------|
| -1.05013925 | 0.42921059  |
| -1.10716332 | 0.249199737 |
| -1.0653193  | 0.334499771 |
| 0.983103569 | 0.723375484 |
| -1.08199727 | 0.162255937 |
| -1.01944286 | 0.677910547 |
| -1.17567888 | 0.130751355 |
| -1.05147595 | 0.213615602 |
| 0.914648972 | 0.124837505 |
| 0.917648689 | 0.437855439 |
| 0.967378818 | 0.466279906 |
| 0.895995325 | 0.013464126 |
| 0.975648734 | 0.600851209 |
| -1.02019359 | 0.648348376 |
| -1.08326278 | 0.086371561 |
| 0.949481061 | 0.425826411 |
| -1.40317035 | 2.43416E-05 |
| 0.815389853 | 0.034797878 |
| 0.816278628 | 0.008058245 |
| 0.429633577 | 8.19374E-19 |
| -1.04634555 | 0.628410142 |
| -1.09553963 | 0.006241533 |
| 0.958080141 | 0.447902835 |
| 0.839849117 | 0.009276577 |
| 0.493868999 | 4.3894E-11  |
| 0.860899817 | 0.028496835 |
| 0.796767491 | 0.007097198 |
| -1.04085466 | 0.437377848 |
| 0.848759483 | 0.023766898 |
| -1.01290399 | 0.753551411 |
| 0.808679063 | 1.44033E-07 |
| 0.962279637 | 0.549508098 |
| 0.865255311 | 0.013414597 |
| 0.823692444 | 0.000579855 |
| 0.927755715 | 0.023056268 |
| 0.954557666 | 0.295367153 |
| -1.23805612 | 0.000481255 |
| -1.08846953 | 0.155749524 |
| -1.02481219 | 0.635328096 |
| -1.21214165 | 0.032726296 |
| 0.729120863 | 2.00832E-09 |
| 0.885494645 | 0.096115037 |
| 0.843006641 | 0.003570278 |
| -1.3223731  | 3.56992E-05 |

|             |             |
|-------------|-------------|
| 0.842368223 | 0.156699389 |
| -1.23642181 | 0.017217455 |
| -1.36274643 | 0.000169154 |
| -1.08214639 | 0.257755434 |
| -1.15004139 | 0.012402901 |
| 0.878493971 | 0.127954413 |
| 0.959645052 | 0.61409325  |
| -1.08052226 | 0.347682925 |
| 0.96150132  | 0.568653445 |
| -1.14044406 | 0.033867321 |
| 0.768599133 | 0.02018503  |
| -1.20250683 | 0.023664688 |
| 0.921873877 | 0.399591007 |
| 0.824691384 | 0.022121628 |
| 0.915615683 | 0.195226679 |
| -1.06744776 | 0.490042164 |
| 0.756331614 | 0.000271758 |
| 0.883945436 | 0.092542859 |
| -1.1558483  | 0.054404473 |
| 0.975721894 | 0.637871351 |
| -1.12796314 | 0.212410936 |
| 0.924864646 | 0.035633463 |
| 0.998758136 | 0.978468601 |
| 0.991150679 | 0.830424432 |
| -1.01740616 | 0.708235379 |
| -1.05238035 | 0.241691941 |
| 0.918085918 | 0.096621258 |
| 0.895017487 | 0.173586836 |
| 0.971747189 | 0.654338811 |
| -1.24016139 | 0.035403046 |
| 0.85750561  | 0.342432221 |
| 0.890383783 | 0.245864634 |
| 0.970383513 | 0.779257453 |
| -1.22787211 | 0.251578758 |
| -1.29295818 | 0.070804881 |
| 0.98622165  | 0.834211669 |
| 0.965322986 | 0.766352507 |
| 0.887653562 | 0.120488598 |
| -1.23253653 | 0.06791762  |
| 0.90622422  | 0.132101488 |
| 0.952767143 | 0.465584477 |
| -1.24288749 | 0.005473807 |
| -1.0907852  | 0.086372293 |
| -1.54669421 | 0.000238185 |

|             |             |
|-------------|-------------|
| -1.00748231 | 0.889050506 |
| 0.851595826 | 0.024925365 |
| 0.947163189 | 0.508942398 |
| 0.99193254  | 0.916461922 |
| -1.25986003 | 0.013183987 |
| -1.15921315 | 0.059081308 |
| -1.28940137 | 0.000703478 |
| -1.18995976 | 0.004210597 |
| 0.921833959 | 0.134150476 |
| 0.888252243 | 0.109482186 |
| -1.00086829 | 0.989863245 |
| -1.42185457 | 0.001324041 |
| -1.25936342 | 6.82519E-05 |
| 0.977579568 | 0.637663983 |
| -1.42758156 | 0.000408812 |
| -1.00810113 | 0.875381556 |
| -1.15080657 | 0.146070098 |
| -1.31614184 | 0.000390545 |
| -1.1821802  | 0.010135203 |
| -1.21577548 | 0.023734025 |
| -1.23283496 | 0.003545032 |
| -1.01186374 | 0.877339714 |
| -1.42855878 | 0.000179075 |
| -1.20580346 | 0.005401125 |
| 0.833824358 | 0.07155502  |
| -1.14771464 | 0.109428571 |
| -1.12672311 | 0.174919979 |
| 0.996227742 | 0.954903996 |
| -1.17549692 | 0.004513585 |
| -1.26529355 | 7.07152E-05 |
| -1.25700726 | 0.016350451 |
| -1.12476372 | 0.13900036  |
| 0.792593097 | 0.000184017 |
| -1.41621699 | 2.11883E-07 |
| -1.24108688 | 0.000389828 |
| -1.09274307 | 0.208482645 |
| -1.18423857 | 0.002295188 |
| -1.17070297 | 0.063043895 |
| 0.979205656 | 0.713881702 |
| 0.895733293 | 0.062931856 |
| 0.993311945 | 0.931686522 |
| 0.982701056 | 0.821943355 |
| -1.0370921  | 0.759040288 |
| -1.30507436 | 0.000102309 |

|             |             |
|-------------|-------------|
| -1.1553954  | 0.109706716 |
| 0.954800452 | 0.273093351 |
| 0.905791457 | 0.020945781 |
| 0.966280752 | 0.623291988 |
| 0.723536122 | 1.50556E-06 |
| 0.75610464  | 0.005593276 |
| -1.31979393 | 0.002629923 |
| -1.10867656 | 0.340054404 |
| 0.819880611 | 0.000477588 |
| 0.903873706 | 0.08993027  |
| 0.761977365 | 1.04367E-05 |
| 0.901175985 | 0.102040608 |
| 0.832865367 | 0.004098419 |
| 0.84175654  | 0.000173624 |
| 0.985290273 | 0.80260153  |
| 0.756967872 | 0.00013674  |
| -1.01775806 | 0.784348978 |
| 0.799900057 | 0.106171966 |
| 0.804222657 | 0.055240545 |
| 0.43325496  | 5.94766E-15 |
| 0.980770656 | 0.839127784 |
| -1.00321753 | 0.955672418 |
| 0.974506802 | 0.593608457 |
| 0.560643008 | 1.35534E-07 |
| 0.889659598 | 0.261705395 |
| 0.906194392 | 0.17125444  |
| -1.00143655 | 0.974889823 |
| -1.11087761 | 0.166847648 |
| -1.13084043 | 0.048395078 |
| -1.27440344 | 2.75462E-05 |
| -1.0482722  | 0.238007944 |
| 0.938495193 | 0.190508424 |
| -1.01038358 | 0.831177548 |
| -1.13231379 | 0.072020169 |
| 0.638282081 | 5.20738E-08 |
| -1.17340304 | 0.003571384 |
| -1.10622044 | 0.089546799 |
| 0.957509869 | 0.613340594 |
| -1.00834301 | 0.9032837   |
| -1.19709538 | 0.030481058 |
| -1.01857823 | 0.807931074 |
| -1.08149028 | 0.364676006 |
| 0.97306142  | 0.631048606 |
| 0.85991835  | 0.003022106 |

|             |             |
|-------------|-------------|
| 0.98990874  | 0.844452045 |
| -1.0162153  | 0.730408436 |
| 0.993587483 | 0.931859477 |
| -1.08719834 | 0.107768116 |
| -1.00435257 | 0.89514228  |
| 0.997970544 | 0.967570371 |
| -1.08287082 | 0.204838921 |
| -1.3350646  | 0.000220209 |
| -1.13956882 | 0.057462062 |
| 0.740416098 | 1.46324E-08 |
| -1.02196925 | 0.694926287 |
| -1.00887543 | 0.863049543 |
| -1.48736139 | 1.68195E-05 |
| -1.08041343 | 0.052671317 |
| 0.985381738 | 0.730219141 |
| 0.935869206 | 0.105066072 |
| 0.873487944 | 0.04797425  |
| 0.693437434 | 4.68266E-07 |
| -1.04915743 | 0.43114788  |
| -1.07213247 | 0.304223453 |
| -1.03102945 | 0.647038363 |
| 0.939726956 | 0.329905016 |
| 0.976200428 | 0.743186773 |
| -1.07505892 | 0.245520653 |
| 0.879598367 | 0.04312801  |
| -1.08538621 | 0.038051953 |
| 0.984251395 | 0.793057751 |
| 0.934573174 | 0.223317734 |
| -1.0436971  | 0.488626692 |
| -1.02142759 | 0.712575749 |
| -1.0121704  | 0.754981344 |
| 0.96695534  | 0.6758281   |
| -1.01287565 | 0.781161741 |
| -1.08986679 | 0.137991581 |
| 0.977909225 | 0.58992572  |
| -1.01194633 | 0.844736329 |
| -1.01093691 | 0.852249651 |
| -1.08270007 | 0.244749116 |
| 0.995368634 | 0.928121769 |
| 0.998089684 | 0.970260959 |
| 0.945437995 | 0.326357846 |
| -1.02691971 | 0.579000755 |
| -1.10331478 | 0.115501242 |
| -1.0095399  | 0.843729557 |

|             |             |
|-------------|-------------|
| 0.95977293  | 0.401921952 |
| -1.01554886 | 0.803780448 |
| 0.884899201 | 0.031884389 |
| -1.0186799  | 0.721474278 |
| -1.04706481 | 0.441713681 |
| 0.979651789 | 0.677658144 |
| -1.10330975 | 0.097269331 |
| 0.932869882 | 0.193412013 |
| -1.02579262 | 0.567137367 |
| -1.0008028  | 0.989012306 |
| 0.956909964 | 0.457578875 |
| -1.06989783 | 0.121432183 |
| -1.06282518 | 0.189581225 |
| 0.926476093 | 0.160658909 |
| 0.968679845 | 0.561639065 |
| 0.975091486 | 0.641143344 |
| 0.965113833 | 0.58445116  |
| -1.00724065 | 0.919537252 |
| -1.07816823 | 0.093866226 |
| 0.969013596 | 0.520331226 |
| 0.931505215 | 0.296184052 |
| 0.978277891 | 0.579863376 |
| 0.947116499 | 0.414340058 |
| -1.01704738 | 0.79090747  |
| 0.942583927 | 0.294932344 |
| 0.93864438  | 0.497387213 |
| -1.04857897 | 0.569293384 |
| -1.02540439 | 0.606483328 |
| -1.1957575  | 0.085885821 |
| -1.39627498 | 9.99597E-07 |
| -1.01107246 | 0.819164975 |
| -1.05375619 | 0.579784621 |
| -1.05353773 | 0.482508134 |
| -1.05047878 | 0.329276298 |
| 0.923660758 | 0.506074513 |
| -1.00389255 | 0.952428596 |
| -1.03894162 | 0.565495978 |
| -1.23876294 | 0.008770701 |
| -1.12056141 | 0.167611845 |
| 0.307013414 | 1.01481E-25 |
| -1.06417307 | 0.400296332 |
| 0.936067543 | 0.181108201 |
| 0.989860113 | 0.925951715 |
| -1.33315316 | 0.002797515 |

|             |             |
|-------------|-------------|
| 0.988815872 | 0.782036829 |
| -1.10645769 | 0.047236852 |
| 0.830050833 | 0.004028082 |
| -1.0165328  | 0.738101674 |
| 0.903524192 | 0.010511036 |
| -1.31514345 | 0.000763772 |
| -1.15022686 | 0.256256846 |
| -1.14017171 | 0.033243367 |
| 0.969982817 | 0.542893717 |
| -1.11367512 | 0.027139893 |
| 0.967245307 | 0.742478138 |
| 0.912362683 | 0.111609104 |
| -1.01292504 | 0.871102534 |
| -1.20164215 | 0.000644139 |
| -1.01203415 | 0.829701165 |
| -1.48324337 | 8.96013E-13 |
| -1.04426652 | 0.403602704 |
| 0.893023773 | 0.117938739 |
| 0.710547973 | 2.25065E-05 |
| 0.967203385 | 0.59891279  |
| 0.957644821 | 0.39880798  |
| 0.90894504  | 0.042435236 |
| -1.24896853 | 0.000181691 |
| -1.0077423  | 0.878455278 |
| -1.09743564 | 0.046974422 |
| -1.13432746 | 0.088579737 |
| -1.17485441 | 0.057631105 |
| 0.951667336 | 0.197625336 |
| 0.843548834 | 0.006994205 |
| -1.01659173 | 0.818520725 |
| 0.675619188 | 2.82583E-10 |
| 0.985088475 | 0.608170202 |
| -1.11152737 | 0.077318819 |
| -1.09315242 | 0.273329845 |
| 0.817004333 | 0.000130956 |
| -1.0509938  | 0.337173477 |
| 0.645029074 | 1.0863E-07  |
| 0.850353848 | 0.010437582 |
| 0.887207632 | 0.0956853   |
| -1.11151958 | 0.087566199 |
| 0.96239947  | 0.574270523 |
| -1.01102987 | 0.848266492 |
| 0.871139775 | 0.035996649 |
| -1.04848948 | 0.546238146 |

|             |             |
|-------------|-------------|
| -1.04619206 | 0.480054028 |
| 0.901727881 | 0.045471277 |
| 0.745011189 | 0.000517222 |
| -1.12204655 | 0.498239164 |
| 0.951594361 | 0.376740218 |
| 0.579041758 | 1.29305E-07 |
| 0.885797265 | 0.271956433 |
| 0.937071742 | 0.123300336 |
| 0.90052044  | 0.270261464 |
| 0.918921041 | 0.08325099  |
| 0.684760782 | 0.006514022 |
| 0.857143474 | 0.019212878 |
| -1.26772941 | 0.000161416 |
| -1.2143753  | 0.020551791 |
| 0.963421311 | 0.708094977 |
| 0.905313402 | 0.403252667 |
| -1.20034271 | 0.034056395 |
| -1.37320686 | 0.002609907 |
| -1.11813195 | 0.266900042 |
| 0.899387169 | 0.382077253 |
| -1.04928868 | 0.421904446 |
| 0.497582606 | 1.93663E-09 |
| 0.946924652 | 0.562741329 |
| 0.820323979 | 0.000562686 |
| -1.14601222 | 0.027176676 |
| -1.26373692 | 0.060052081 |
| 0.991081487 | 0.914932188 |
| -1.08018154 | 0.228592222 |
| -1.08340476 | 0.197622894 |
| 0.865910146 | 0.035184519 |
| -1.00289322 | 0.957115277 |
| -1.06297146 | 0.245069235 |
| -1.09442826 | 0.100390624 |
| -1.0048618  | 0.95548666  |
| 0.784368238 | 0.000238549 |
| -1.03562783 | 0.604611578 |
| -1.34319807 | 0.000440334 |
| -1.28639919 | 0.000153688 |
| -1.01819988 | 0.731633886 |
| -1.08693264 | 0.201886038 |
| 0.529780917 | 4.05195E-14 |
| 0.975072092 | 0.53800749  |
| 0.610375141 | 6.31525E-10 |
| 0.83773182  | 0.03511046  |



|             |             |
|-------------|-------------|
| -1.26619177 | 0.031147943 |
| -1.33504894 | 1.83567E-09 |
| 0.812070632 | 0.010046934 |
| -1.10527391 | 0.063193265 |
| -1.06567592 | 0.403424357 |
| -1.17319548 | 0.022888681 |
| 0.641283511 | 8.20973E-13 |
| 0.966197637 | 0.377509003 |
| -1.11628695 | 0.230974803 |
| -1.37447661 | 0.000627246 |
| -1.03056292 | 0.879581642 |
| 0.718913878 | 1.29424E-06 |
| -1.08696652 | 0.13845301  |
| -1.15122244 | 0.012881093 |
| 0.605638113 | 2.62861E-09 |
| 0.802495952 | 0.000594608 |
| 0.718543485 | 0.000108159 |
| -1.08748512 | 0.395884136 |
| 0.688153895 | 1.29493E-08 |
| 0.507675112 | 5.14719E-14 |
| 0.879376313 | 0.001901039 |
| -1.00583735 | 0.905644039 |
| -1.1279069  | 0.084610081 |
| -1.133348   | 0.009901581 |
| -1.16941604 | 0.033986282 |
| -1.18114252 | 0.00061262  |
| 0.518932647 | 9.75127E-16 |
| -1.21463194 | 0.021006815 |
| -1.06546764 | 0.408437415 |
| 0.867799453 | 0.014793617 |
| -1.09756325 | 0.200696612 |
| 0.737965051 | 0.000180355 |
| 0.569707298 | 8.74858E-13 |
| 0.88466857  | 0.035822693 |
| -1.22327248 | 0.011213017 |
| -1.16136766 | 0.037140856 |
| -1.00733933 | 0.872893404 |
| 0.910212964 | 0.345334807 |
| -1.03569155 | 0.458724665 |
| 0.947178007 | 0.238807068 |
| 0.743033908 | 3.6312E-06  |
| -1.04303746 | 0.450498925 |
| 0.923227292 | 0.113822741 |
| -1.02625315 | 0.717419049 |

|             |             |
|-------------|-------------|
| 0.64501413  | 4.12008E-06 |
| -1.17137016 | 0.002422199 |
| 0.970733524 | 0.508698865 |
| -1.01964246 | 0.877446974 |
| -1.00446161 | 0.952573962 |
| 0.879279038 | 0.00320505  |
| -1.17529458 | 0.000829103 |
| -1.03514864 | 0.727599449 |
| 0.984842282 | 0.737258856 |
| 0.952004515 | 0.610355201 |
| -1.54604727 | 2.86974E-07 |
| -1.08114599 | 0.233901711 |
| -1.28517243 | 0.000109318 |
| 0.939154235 | 0.399618484 |
| 0.977458674 | 0.731224328 |
| -1.04717946 | 0.490112914 |
| -1.00482533 | 0.94177553  |
| -1.04020821 | 0.422846571 |
| -1.09455976 | 0.223006334 |
| 0.876004239 | 0.081891286 |
| 0.991123543 | 0.805060855 |
| -1.03116203 | 0.57651966  |
| 0.935562242 | 0.297309878 |
| 0.959168854 | 0.192811444 |
| 0.890040076 | 0.029080944 |
| -1.06376269 | 0.119981547 |
| 0.942205891 | 0.103424867 |
| 0.949393641 | 0.319027433 |
| -1.07539133 | 0.043786894 |
| 0.947277589 | 0.205723552 |
| 0.987393425 | 0.837947773 |
| -1.01725586 | 0.794632341 |
| 0.947565049 | 0.202050998 |
| -1.04773368 | 0.456173244 |
| 0.954969418 | 0.372787544 |
| 0.965445556 | 0.354416717 |
| 0.976904522 | 0.665103507 |
| 0.999062567 | 0.980538771 |
| -1.04058646 | 0.391222942 |
| -1.0189633  | 0.626739543 |
| -1.06330479 | 0.185203765 |
| 0.983810002 | 0.715837699 |
| 0.931389519 | 0.350966862 |
| -1.19166944 | 0.004289683 |

|             |             |
|-------------|-------------|
| 0.60675512  | 6.24379E-11 |
| -1.18921485 | 0.04821305  |
| -1.16564337 | 0.062129092 |
| -1.25825076 | 0.000177603 |
| -1.1396123  | 0.065240609 |
| 0.832080044 | 0.0116787   |
| -1.04764026 | 0.170596578 |
| -1.33131684 | 0.000370651 |
| 0.921359505 | 0.079618309 |
| -1.0336136  | 0.638276688 |
| -1.05419536 | 0.533773802 |
| -1.0895989  | 0.413028437 |
| -1.15111851 | 0.056858935 |
| -1.5303939  | 0.000165575 |
| 0.910265287 | 0.378965653 |
| 0.996216338 | 0.927117307 |
| -1.16703752 | 0.083188249 |
| 0.97705794  | 0.718105563 |
| 0.595963246 | 2.14938E-16 |
| -1.10110383 | 0.127052687 |
| 0.691144691 | 1.04383E-08 |
| -1.02272853 | 0.682757484 |
| -1.23828473 | 0.003192977 |
| -1.11131472 | 0.015787504 |
| -1.03119878 | 0.624011557 |
| 0.923753689 | 0.078445047 |
| 0.730353753 | 0.000267902 |
| 0.820305165 | 0.04027389  |
| 0.805381649 | 0.043869347 |
| -1.00593976 | 0.916631505 |
| -1.28580787 | 0.0010313   |
| 0.965088012 | 0.67423485  |
| 0.723011575 | 1.50335E-05 |
| -1.02360154 | 0.752769727 |
| 0.949738926 | 0.319268302 |
| 0.972432931 | 0.768982577 |
| 0.683552457 | 0.001223113 |
| -1.38936948 | 0.001861769 |
| -1.27015915 | 0.000332919 |
| 0.957361622 | 0.760425867 |
| -1.1482888  | 0.023118909 |
| -1.35863867 | 2.29885E-06 |
| -1.04267545 | 0.519223557 |
| -1.40004975 | 5.57054E-07 |

|             |             |
|-------------|-------------|
| 0.950156802 | 0.341487898 |
| -1.14813533 | 0.039320293 |
| 0.833403821 | 0.05561236  |
| -1.19177238 | 0.000958835 |
| 0.929703922 | 0.669257237 |
| -1.0051192  | 0.932289523 |
| 0.926024106 | 0.313754272 |
| -1.06183118 | 0.369957155 |
| 0.947553329 | 0.249060291 |
| 0.954515321 | 0.342152259 |
| 0.946422028 | 0.176051187 |
| 0.7875728   | 2.41231E-05 |
| -1.16626286 | 0.004158362 |
| -1.00813059 | 0.791183383 |
| 0.940484419 | 0.148821763 |
| 0.951855578 | 0.393459324 |
| -1.4472818  | 4.72232E-05 |
| -1.02114889 | 0.576157743 |
| 0.9835251   | 0.754756522 |
| -1.40784546 | 0.000134528 |
| 0.841828914 | 0.093270405 |
| 0.944341986 | 0.508280786 |
| 0.838243142 | 0.001795023 |
| 0.819365052 | 0.149273519 |
| -1.3983924  | 1.94246E-05 |
| -1.19192772 | 0.006791887 |
| 0.849654737 | 0.05555786  |
| -1.00913184 | 0.86772548  |
| 0.859370743 | 0.023382877 |
| -1.05065823 | 0.437821469 |
| 0.882107908 | 0.005941189 |
| 0.503190428 | 3.9233E-08  |
| -1.01090996 | 0.817551424 |
| -1.1941423  | 0.002965755 |
| -1.3924997  | 0.01904453  |
| 0.944175997 | 0.542935566 |
| -1.03820563 | 0.675659903 |
| -1.1223009  | 0.042501428 |
| -1.22117922 | 0.001105977 |
| -1.03406408 | 0.543466377 |
| -1.00115947 | 0.990154931 |
| 0.73340299  | 0.009210876 |
| -1.31446674 | 0.01009748  |
| 0.974497083 | 0.6139498   |

|             |             |
|-------------|-------------|
| -1.0975246  | 0.02020267  |
| 0.927005579 | 0.203905996 |
| -1.02311622 | 0.712760306 |
| 0.899007137 | 0.06854249  |
| -1.13474765 | 0.040913928 |
| -1.02241475 | 0.561801521 |
| -1.03538424 | 0.440834516 |
| 0.832657651 | 0.012965211 |
| 0.993844935 | 0.959005853 |
| 0.580935381 | 1.07609E-09 |
| -1.05428085 | 0.436429194 |
| 0.679394602 | 3.67743E-10 |
| -1.02129513 | 0.834845123 |
| -1.0840549  | 0.305503693 |
| 0.973636792 | 0.665711776 |
| 0.836072894 | 0.025685189 |
| 0.899248619 | 0.107187661 |
| -1.16123212 | 0.088325429 |
| -1.15799603 | 0.044668449 |
| -1.27370393 | 9.076E-05   |
| -1.01432602 | 0.827547301 |
| 0.95056869  | 0.400312808 |
| 0.981594769 | 0.784852929 |
| -1.22426605 | 0.204954613 |
| -1.16006174 | 0.079254025 |
| 0.955365448 | 0.417602072 |
| 0.867496653 | 0.024398925 |
| 0.904535393 | 0.193820029 |
| 0.965871291 | 0.521370094 |
| -1.19568239 | 0.005901764 |
| -1.16416389 | 0.075925089 |
| -1.19605936 | 0.033039383 |
| -1.34638442 | 7.26631E-05 |
| -1.05419426 | 0.188643774 |
| 0.956619411 | 0.501618443 |
| -1.1032005  | 0.196757896 |
| -1.05361567 | 0.533562145 |
| 0.843962572 | 0.027049235 |
| -1.00289417 | 0.956880129 |
| -1.18362863 | 0.052916    |
| -1.14651445 | 0.115505655 |
| -1.27546654 | 0.00260414  |
| -1.10844462 | 0.201409291 |
| -1.29996864 | 0.043662847 |

|             |             |
|-------------|-------------|
| 0.976978099 | 0.519801661 |
| 0.747080014 | 0.000368291 |
| 0.506552998 | 9.82368E-05 |
| -1.01424041 | 0.871592902 |
| -1.1441766  | 0.093886937 |
| 0.903626461 | 0.120446265 |
| -1.09978568 | 0.112041885 |
| 0.958583741 | 0.456619164 |
| 0.90000671  | 0.105346011 |
| -1.0825673  | 0.480177632 |
| -1.0672659  | 0.547006902 |
| -1.06571542 | 0.414843907 |
| 0.917206953 | 0.126763978 |
| 0.955232746 | 0.4259293   |
| -1.06534437 | 0.218685492 |
| 0.969080117 | 0.57625769  |
| -1.05655903 | 0.238551164 |
| 0.993689881 | 0.901110243 |
| 0.804033807 | 0.00160132  |
| -1.35720853 | 2.12704E-09 |
| -1.02351307 | 0.827646277 |
| -1.06373499 | 0.134011463 |
| -1.16146837 | 0.043979008 |
| 0.961688615 | 0.416356432 |
| 0.695618177 | 3.19636E-05 |
| -1.07185554 | 0.287935664 |
| 0.920293773 | 0.170631547 |
| -1.07885022 | 0.140693653 |
| 0.96119732  | 0.486947128 |
| -1.00675573 | 0.892433119 |
| -1.07477923 | 0.370520318 |
| -1.0978118  | 0.239472893 |
| 0.908452811 | 0.197742497 |
| 0.905901384 | 0.252555278 |
| -1.01337973 | 0.721716231 |
| 0.976411091 | 0.688486216 |
| -1.15320237 | 0.199158278 |
| -1.12327749 | 0.131944202 |
| 0.894462929 | 0.126345842 |
| -1.05259413 | 0.249506702 |
| -1.31687978 | 7.23855E-07 |
| 0.844878323 | 0.091136044 |
| 0.927219656 | 0.171735609 |
| -1.12118717 | 0.24719653  |

|             |             |
|-------------|-------------|
| -1.28532671 | 0.002658348 |
| 0.921586426 | 0.149593657 |
| -1.09688239 | 0.07771552  |
| -1.02835336 | 0.664097919 |
| -1.06067746 | 0.271997454 |
| -1.39378576 | 0.004818795 |
| 0.879636636 | 0.021438531 |
| -1.28095024 | 1.63834E-05 |
| -1.17354901 | 0.065686334 |
| -1.17836947 | 0.000333552 |
| -1.09877775 | 0.122837762 |
| 0.753700441 | 0.000106506 |
| -1.00449352 | 0.930226269 |
| -1.28444072 | 0.001809284 |
| -1.05580496 | 0.524532635 |
| -1.3728263  | 0.001080758 |
| -1.03052093 | 0.347291496 |
| 0.964087693 | 0.782060694 |
| -1.29852422 | 0.005835138 |
| 0.887679796 | 0.037464529 |
| -1.06056548 | 0.40363223  |
| 0.991248766 | 0.84726969  |
| -1.05623445 | 0.179376706 |
| -1.09613482 | 0.298314067 |
| 0.91150881  | 0.042415771 |
| 0.734778467 | 1.70527E-05 |
| 0.944352719 | 0.25361411  |
| 0.885859164 | 0.088748207 |
| -1.04599677 | 0.549540467 |
| 0.94042734  | 0.318750698 |
| -1.00353828 | 0.960967431 |
| -1.0428355  | 0.639280907 |
| -1.28967825 | 0.037847933 |
| 0.973016782 | 0.682937173 |
| 0.800197503 | 2.89455E-06 |
| 0.964051094 | 0.562786397 |
| 0.980682694 | 0.77743272  |
| -1.03360552 | 0.57759014  |
| -1.04521169 | 0.429525947 |
| -1.04377725 | 0.539196603 |
| -1.08980693 | 0.372401651 |
| 0.951532333 | 0.580406823 |
| -1.19929489 | 0.016338898 |
| -1.13645228 | 0.094853331 |

|             |             |
|-------------|-------------|
| -1.0324597  | 0.551311743 |
| 0.939057098 | 0.303823952 |
| -1.1541345  | 0.019516401 |
| 0.983164184 | 0.85808557  |
| 0.865344437 | 0.128104496 |
| -1.01664043 | 0.75567401  |
| -1.2817952  | 0.01027836  |
| -1.3548175  | 2.11994E-09 |
| 0.775345416 | 0.000208672 |
| 0.860313001 | 0.010097779 |
| 0.747105084 | 0.003684245 |
| -1.01561313 | 0.786710137 |
| 0.868768598 | 0.048343375 |
| -1.19336382 | 0.023772708 |
| -1.05887058 | 0.304198023 |
| 0.755302565 | 1.82135E-05 |
| 0.900105001 | 0.030449971 |
| 0.948289641 | 0.271074793 |
| 0.817127811 | 0.016252644 |
| -1.13819113 | 0.34762939  |
| 0.892774182 | 0.023318868 |
| 0.830892272 | 0.017381257 |
| 0.914123865 | 0.142138902 |
| -1.14659076 | 0.077980963 |
| 0.923435413 | 0.417684611 |
| -1.28330191 | 0.000483965 |
| 0.871642051 | 0.295122587 |
| -1.07025199 | 0.419142867 |
| 0.871737933 | 0.16611187  |
| -1.09511403 | 0.08919875  |
| -1.01691824 | 0.887411923 |
| -1.08118323 | 0.24769678  |
| 0.833628265 | 0.028740761 |
| -1.43002405 | 0.000673637 |
| -1.00024545 | 0.997500547 |
| 0.992356792 | 0.914575071 |
| 0.971272621 | 0.728395279 |
| 0.965828977 | 0.775148618 |
| 0.873980707 | 0.083050356 |
| -1.08591944 | 0.042806101 |
| 0.782635328 | 0.104380651 |
| -1.04676163 | 0.425457384 |
| -1.25494502 | 0.000164007 |
| -1.01807692 | 0.809960387 |



|             |             |
|-------------|-------------|
| 0.933585584 | 0.165534606 |
| 0.889757478 | 0.119590003 |
| -1.03521206 | 0.721193066 |
| 0.533790783 | 5.23653E-07 |
| -1.1675408  | 0.017181162 |
| -1.26292273 | 0.032022867 |
| -1.07308402 | 0.265099997 |
| -1.04913886 | 0.536274153 |
| 0.973392365 | 0.672055091 |
| -1.00729705 | 0.905199736 |
| -1.12001585 | 0.223363236 |
| 0.675927243 | 1.03721E-06 |
| -1.16992314 | 0.001873003 |
| -1.02632798 | 0.658511352 |
| 0.8309752   | 1.36389E-05 |
| 0.94649665  | 0.499272558 |
| 0.905593848 | 0.088680331 |
| -1.02819483 | 0.862308059 |
| -1.00599244 | 0.91691444  |
| 0.940856501 | 0.367627087 |
| -1.03249556 | 0.449349381 |
| 0.984350405 | 0.895692342 |
| 0.83183119  | 0.000138266 |
| -1.06021111 | 0.343396558 |
| -1.15951537 | 0.006960199 |
| -1.18819397 | 0.020813588 |
| -1.11882701 | 0.248077287 |
| -1.11924677 | 0.020207252 |
| -1.21616586 | 0.011916991 |
| -1.00099779 | 0.99174522  |
| -1.00909028 | 0.768376688 |
| 0.913465803 | 0.157424312 |
| -1.11192384 | 0.053298774 |
| 0.960649469 | 0.597421535 |
| 0.946692948 | 0.358029932 |
| -1.05567433 | 0.352980593 |
| -1.00940819 | 0.818259373 |
| -1.02425559 | 0.720313007 |
| -1.04021737 | 0.528874971 |
| 0.99610013  | 0.958886148 |
| -1.0034534  | 0.945962617 |
| -1.00784631 | 0.842755225 |
| 0.9440396   | 0.311650107 |
| -1.02888009 | 0.804497706 |

|             |             |
|-------------|-------------|
| -1.20378914 | 0.040388208 |
| 0.965510882 | 0.655335579 |
| -1.07730914 | 0.349633544 |
| 0.684727752 | 6.8274E-08  |
| -1.04446916 | 0.364096873 |
| 0.804982017 | 0.000135716 |
| -1.08338783 | 0.249387047 |
| -1.02717799 | 0.681786239 |
| -1.03740313 | 0.4883422   |
| 0.945661545 | 0.370427574 |
| 0.999445518 | 0.992879457 |
| -1.3155801  | 3.665E-06   |
| -1.061633   | 0.284800074 |
| 0.933997162 | 0.437191425 |
| -1.10402768 | 0.121099405 |
| -1.04262068 | 0.414383127 |
| -1.01096154 | 0.816577137 |
| 0.872116436 | 0.159733873 |
| 0.986071113 | 0.830868059 |
| -1.07729208 | 0.102121486 |
| 0.939551798 | 0.159353067 |
| -1.04762988 | 0.584956987 |
| 0.915364846 | 0.264227094 |
| -1.00077138 | 0.990121518 |
| 0.969151834 | 0.500517349 |
| 0.775290696 | 0.000316579 |
| 0.966174138 | 0.565686392 |
| 0.907558024 | 0.083913825 |
| -1.10974222 | 0.169669523 |
| 0.713827477 | 8.09499E-05 |
| 0.904927729 | 0.076537289 |
| 0.987672034 | 0.819202134 |
| 0.997930194 | 0.961423363 |
| 0.955245408 | 0.557739212 |
| 0.877444927 | 0.164561328 |
| -1.03638824 | 0.486957852 |
| 0.9523703   | 0.409698954 |
| 0.676219914 | 1.62706E-05 |
| -1.12044523 | 0.040400199 |
| -1.14927463 | 0.038477632 |
| -1.36700244 | 3.03433E-05 |
| -1.06425063 | 0.613847456 |
| -1.03141332 | 0.215401821 |
| 0.300567011 | 4.01242E-17 |

|             |             |
|-------------|-------------|
| 0.958064502 | 0.437371232 |
| -1.30863478 | 2.24395E-07 |
| -1.21447791 | 0.037428704 |
| 0.93586724  | 0.286423624 |
| 0.924449114 | 0.206940435 |
| 0.713392103 | 4.34186E-05 |
| -1.04153873 | 0.595351842 |
| -1.01696158 | 0.852438021 |
| 0.930070034 | 0.282046593 |
| -1.03514571 | 0.593308511 |
| 0.798338506 | 0.000392277 |
| 0.960068365 | 0.541064995 |
| 0.955204101 | 0.427333708 |
| 0.970753253 | 0.535204825 |
| 0.72827874  | 0.000813263 |
| -1.22931639 | 0.039658358 |
| -1.09947227 | 0.160078227 |
| 0.60971979  | 2.13329E-05 |
| 0.963712363 | 0.591507987 |
| -1.05139793 | 0.257181962 |
| -1.03838277 | 0.311125946 |
| -1.03992265 | 0.347124331 |
| -1.01284462 | 0.800402591 |
| 0.644747018 | 2.29311E-08 |
| 0.825445215 | 0.2045971   |
| -1.38618551 | 0.005813898 |
| 0.912210473 | 0.164198289 |
| -1.34508753 | 0.000235538 |
| -1.03990325 | 0.356375566 |
| 0.662592827 | 0.000340683 |
| -1.09099549 | 0.385413356 |
| -1.0687231  | 0.271313829 |
| -1.01185689 | 0.844799042 |
| 0.646132474 | 4.15688E-09 |
| 0.679967311 | 4.88168E-05 |
| 0.731665474 | 0.028165979 |
| -1.01781655 | 0.762811705 |
| 0.906335022 | 0.084608308 |
| -1.09092975 | 0.163150201 |
| 0.924219351 | 0.16320562  |
| 0.83366622  | 0.015378222 |
| 0.982150256 | 0.754813707 |
| -1.05601612 | 0.400652375 |
| -1.19002722 | 0.405208768 |

|             |             |
|-------------|-------------|
| 0.471700534 | 1.18203E-07 |
| 0.97513496  | 0.387256802 |
| -1.14474617 | 0.094156328 |
| -1.01349189 | 0.69724236  |
| -1.18331514 | 0.054303259 |
| -1.12538116 | 0.312088748 |
| 0.940266821 | 0.076524116 |
| -1.08824058 | 0.437289561 |
| -1.03408418 | 0.513037915 |
| 0.893800823 | 0.385299184 |
| 0.949485843 | 0.470965637 |
| -1.03953016 | 0.354685714 |
| -1.15894173 | 0.000689855 |
| -1.02157109 | 0.771210277 |
| 0.969323919 | 0.719482265 |
| -1.00429424 | 0.9665945   |
| 0.669291101 | 9.05512E-05 |
| 0.935641834 | 0.269267384 |
| -1.1134123  | 0.077169613 |
| -1.0163069  | 0.881209949 |
| -1.26238162 | 0.004977709 |
| 0.647585351 | 5.17023E-08 |
| 0.916645612 | 0.154821253 |
| 0.901151318 | 0.06387613  |
| 0.989782629 | 0.849179621 |
| -1.10486029 | 0.418285031 |
| -1.09380858 | 0.233895212 |
| 0.901705855 | 0.320842601 |
| -1.24826791 | 0.021147128 |
| 0.969327357 | 0.530188153 |
| 0.794745724 | 0.038352043 |
| -1.01948773 | 0.822681516 |
| 0.803117582 | 0.070628939 |
| 0.716954147 | 0.000144016 |
| 0.855816619 | 0.332467728 |
| -1.02610297 | 0.697443005 |
| 0.969686519 | 0.648325318 |
| 0.91695553  | 0.156358082 |
| 0.789206055 | 0.002697702 |
| 0.986815001 | 0.837130397 |
| 0.942016804 | 0.701687916 |
| -1.27762349 | 2.80069E-05 |
| -1.07564151 | 0.36051364  |
| 0.997508285 | 0.972959832 |

|             |             |
|-------------|-------------|
| 0.995804113 | 0.958815513 |
| -1.14887652 | 0.294554502 |
| 0.993441771 | 0.936925129 |
| -1.088016   | 0.419148324 |
| 0.804612757 | 0.008663731 |
| -1.23512199 | 0.000195617 |
| 0.508632319 | 7.17618E-09 |
| -1.31718726 | 0.000158449 |
| -1.0182511  | 0.781408055 |
| -1.14724728 | 0.107301261 |
| 0.951297059 | 0.455644023 |
| -1.27694517 | 0.008912842 |
| 0.993716965 | 0.904996745 |
| -1.01716637 | 0.842512958 |
| -1.06433056 | 0.4154879   |
| -1.16399034 | 0.017325532 |
| 0.912669537 | 0.239055424 |
| 0.997759429 | 0.974395167 |
| 0.922019508 | 0.254450559 |
| -1.58606252 | 6.90775E-08 |
| -1.01917194 | 0.750632419 |
| -1.10456629 | 0.171148581 |
| -1.05925844 | 0.447179299 |
| 0.973659359 | 0.628111289 |
| -1.00993973 | 0.885059079 |
| -1.08939625 | 0.361924367 |
| -1.14951273 | 0.086402382 |
| -1.19514051 | 0.019224603 |
| 0.87572276  | 0.206934999 |
| -1.06933882 | 0.415094879 |
| -1.40150613 | 0.000756205 |
| -1.0694926  | 0.290938624 |
| -1.05611141 | 0.316374327 |
| -1.03031033 | 0.743873298 |
| -1.21747324 | 0.002319265 |
| -1.25925787 | 0.030170094 |
| -1.04696348 | 0.655999794 |
| -1.09719579 | 0.475018026 |
| -1.16140072 | 0.117591815 |
| -1.03272508 | 0.637054864 |
| 0.991779038 | 0.876698291 |
| -1.15386677 | 0.020140568 |
| -1.13216409 | 0.081352024 |
| -1.41038722 | 1.93415E-05 |

|             |             |
|-------------|-------------|
| -1.01806811 | 0.640285302 |
| 0.56949996  | 3.21082E-10 |
| 0.964953237 | 0.695368031 |
| -1.09299467 | 0.413683952 |
| -1.1797935  | 0.090071679 |
| -1.20032783 | 0.032421455 |
| -1.27331678 | 0.069211239 |
| 0.995896959 | 0.937621505 |
| 0.693646487 | 2.05529E-11 |
| 0.843057088 | 0.086307515 |
| 0.983032477 | 0.686308008 |
| -1.06459663 | 0.155602341 |
| -1.24946994 | 0.008324001 |
| 0.512832885 | 2.14352E-20 |
| -1.04235106 | 0.521879558 |
| -1.34643797 | 0.001091651 |
| 0.942669478 | 0.51845178  |
| 0.970574578 | 0.827362273 |
| -1.03922189 | 0.459909632 |
| 0.944996986 | 0.478315656 |
| 0.931123066 | 0.17943755  |
| -1.08332016 | 0.240182636 |
| -1.0097731  | 0.799078316 |
| 0.951220609 | 0.62527601  |
| 0.826396245 | 0.047182415 |
| -1.03189337 | 0.77263902  |
| -1.19019511 | 0.021959685 |
| 0.937506782 | 0.602003768 |
| 0.913296409 | 0.05198855  |
| 0.949074231 | 0.196972707 |
| 0.600919959 | 1.00503E-10 |
| 0.907418422 | 0.017289044 |
| -1.10417149 | 0.097953895 |
| 0.943795016 | 0.607464036 |
| 0.83692308  | 0.222860852 |
| -1.07906539 | 0.400187637 |
| 0.767841898 | 1.23436E-05 |
| -1.08149764 | 0.332628894 |
| -1.03066791 | 0.669406401 |
| 0.87511099  | 0.035954971 |
| -1.04744595 | 0.331132209 |
| -1.00531759 | 0.9055929   |
| 0.927079188 | 0.030967268 |
| -1.14820815 | 0.238317339 |

|             |             |
|-------------|-------------|
| 0.804117222 | 0.003723013 |
| 0.926612471 | 0.26849238  |
| 0.862596871 | 0.422603865 |
| -1.08570551 | 0.108790643 |
| -1.00544759 | 0.925631991 |
| 0.952412541 | 0.344888318 |
| 0.895754245 | 0.003687694 |
| 0.789375333 | 0.001267577 |
| -1.07225155 | 0.275652506 |
| 0.833011969 | 0.034407729 |
| 0.983240993 | 0.811971517 |
| -1.17678171 | 0.005817032 |
| -1.00288776 | 0.941952426 |
| -1.13116696 | 0.328018234 |
| 0.890528781 | 0.005782899 |
| -1.08474197 | 0.28345466  |
| -1.20750593 | 0.007456776 |
| -1.27569178 | 0.007172023 |
| -1.55551236 | 7.57408E-07 |
| 0.999917831 | 0.999421359 |
| -1.07128916 | 0.099508881 |
| -1.06059098 | 0.229333787 |
| -1.32872855 | 1.83649E-05 |
| 0.986643375 | 0.751672719 |
| 0.961283264 | 0.569636824 |
| -1.29718109 | 1.24443E-08 |
| -1.28378437 | 0.0029736   |
| 0.747917656 | 5.8406E-05  |
| 0.806561904 | 0.002602969 |
| 0.873082796 | 0.017743628 |
| 0.995545364 | 0.942108103 |
| 0.652655532 | 3.14101E-08 |
| -1.02192844 | 0.834428966 |
| -1.19045636 | 0.042648622 |
| 0.789125716 | 0.001935225 |
| -1.27016166 | 0.027155535 |
| 0.866287661 | 0.206112121 |
| 0.932431371 | 0.32065844  |
| -1.15514314 | 0.198823059 |
| -1.19344733 | 0.125802852 |
| 0.985975589 | 0.89914883  |
| 0.958764765 | 0.517708996 |
| -1.01978842 | 0.840337815 |
| 0.918158614 | 0.281055914 |

|             |             |
|-------------|-------------|
| -1.01366309 | 0.807981597 |
| 0.491356842 | 8.2266E-15  |
| -1.82376913 | 2.68683E-09 |
| 0.739574493 | 4.4594E-06  |
| 0.771662877 | 0.089638196 |
| -1.011503   | 0.871059843 |
| -1.48061759 | 0.001723456 |
| 0.871862523 | 0.099091397 |
| 0.767259706 | 9.71994E-12 |
| 0.972825673 | 0.422198654 |
| 0.914224548 | 0.349909687 |
| -1.00982522 | 0.823646785 |
| 0.90940059  | 0.038143555 |
| 0.989614314 | 0.865656338 |
| -1.10289728 | 0.19773153  |
| -1.02538386 | 0.640876264 |
| -1.30717453 | 0.000482573 |
| -1.11764052 | 0.059133196 |
| -1.13326408 | 0.042006497 |
| -1.07689357 | 0.23389366  |
| -1.21059477 | 0.024882706 |
| -1.18297574 | 0.005102759 |
| -1.37250107 | 1.44002E-05 |
| -1.42421894 | 1.66504E-05 |
| -1.04140935 | 0.646258872 |
| -1.34952529 | 8.12053E-06 |
| -1.04501428 | 0.558353289 |
| 0.95800278  | 0.541883624 |
| -1.27044204 | 3.91493E-06 |
| -1.35105536 | 1.6119E-05  |
| -1.30671324 | 0.000367244 |
| 0.852493708 | 0.066494368 |
| 0.976258502 | 0.694547283 |
| -1.49097376 | 2.57242E-07 |
| -1.08268526 | 0.337981307 |
| -1.00059095 | 0.995807742 |
| -1.1067654  | 0.064134085 |
| 0.843060276 | 6.01462E-05 |
| -1.066446   | 0.297734122 |
| -1.15052537 | 0.055719621 |
| -1.09310801 | 0.220482977 |
| -1.15380193 | 0.125941557 |
| -1.12966307 | 0.140321455 |
| 0.852905861 | 0.025190446 |



|             |             |
|-------------|-------------|
| 0.991685419 | 0.932118396 |
| -1.35197934 | 0.000124868 |
| 0.978832318 | 0.715759673 |
| -1.16907219 | 0.155462439 |
| 0.65005893  | 2.12014E-06 |
| 0.785248717 | 0.00022865  |
| 0.797879346 | 0.004879756 |
| 0.518181681 | 1.7918E-08  |
| 0.884416624 | 0.002064039 |
| -1.00773462 | 0.855101431 |
| -1.11787484 | 0.08581648  |
| -1.02641122 | 0.481264511 |
| -1.10125772 | 0.058587233 |
| -1.21041259 | 0.025860886 |
| -1.19793834 | 0.017820939 |
| 0.545733378 | 1.17819E-11 |
| 0.923000174 | 0.055776458 |
| -1.17199782 | 0.006730338 |
| -1.00185081 | 0.971609852 |
| -1.18835493 | 0.044840957 |
| -1.01385386 | 0.807448375 |
| 0.818704773 | 0.000403646 |
| -1.26834495 | 0.006109416 |
| 0.942192517 | 0.548391426 |
| -1.09454763 | 0.396629002 |
| 0.887167777 | 0.107771471 |
| 0.670858625 | 2.60722E-07 |
| -1.1903788  | 0.009733668 |
| -1.17942472 | 0.021252984 |
| -1.33757549 | 1.47369E-05 |
| -1.27813477 | 0.020416582 |
| 0.949062156 | 0.228571407 |
| -1.12348743 | 0.132460366 |
| -1.17022766 | 0.032869548 |
| 0.742073708 | 1.52752E-05 |
| -1.01165152 | 0.800583571 |
| -1.03415999 | 0.580830053 |
| -1.03250592 | 0.471716132 |
| 0.850150257 | 0.116244648 |
| 0.692179176 | 6.82926E-06 |
| -1.00173746 | 0.979266134 |
| -1.16154408 | 0.050410148 |
| 0.747517589 | 0.009128366 |
| -1.05799178 | 0.563055494 |

|             |             |
|-------------|-------------|
| -1.19607183 | 0.063413821 |
| 0.933474845 | 0.276783969 |
| -1.22366823 | 0.025222375 |
| 0.966129549 | 0.529270691 |
| -1.21859951 | 9.48491E-05 |
| -1.01793466 | 0.812680142 |
| 0.954709687 | 0.337888657 |
| -1.14494477 | 0.073818897 |
| -1.77740982 | 8.38569E-08 |
| 0.92289146  | 0.135813306 |
| 0.951653116 | 0.57347723  |
| -1.07895931 | 0.162466486 |
| 0.638733199 | 1.30462E-06 |
| 0.692799918 | 1.45205E-09 |
| -1.02075486 | 0.810359429 |
| -1.06541489 | 0.310323211 |
| 0.882244117 | 0.063784963 |
| 0.789502706 | 0.048414246 |
| 0.662627233 | 2.26357E-11 |
| -1.19579423 | 0.007083886 |
| -1.01317803 | 0.783805844 |
| -1.07346977 | 0.204549173 |
| 0.869344197 | 0.070122384 |
| 0.945229554 | 0.42586458  |
| 0.926671317 | 0.299745439 |
| 0.892769652 | 0.190908313 |
| 0.996421673 | 0.956887889 |
| -1.02711808 | 0.623459627 |
| 0.941530467 | 0.271234516 |
| 0.527900821 | 7.33573E-18 |
| -1.02037387 | 0.699482992 |
| -1.04295375 | 0.374771807 |
| -1.32294399 | 0.001835793 |
| -1.06600119 | 0.322675312 |
| 0.973002358 | 0.551720282 |
| -1.34675702 | 0.000181208 |
| -1.10662415 | 0.062379477 |
| -1.01676614 | 0.844307928 |
| -1.10112901 | 0.226973335 |
| -1.03540478 | 0.532974212 |
| 0.706517213 | 2.54281E-07 |
| -1.13860349 | 0.036455617 |
| 0.850971927 | 0.006486446 |
| 0.980774311 | 0.735435378 |

|             |             |
|-------------|-------------|
| -1.06347368 | 0.289853514 |
| 0.869646012 | 0.009646076 |
| -1.02161885 | 0.69376416  |
| -1.12032316 | 0.104103427 |
| 0.955849295 | 0.397382507 |
| -1.06673113 | 0.156648563 |
| 0.992033464 | 0.906280085 |
| 0.936182718 | 0.299890056 |
| 0.837737224 | 0.000987842 |
| -1.19920113 | 0.053702743 |
| 0.94554633  | 0.605337576 |
| -1.22175437 | 0.002325935 |
| -1.1586435  | 0.07497779  |
| -1.25673429 | 5.42238E-06 |
| -1.20287905 | 0.012408189 |
| 0.982899599 | 0.797986105 |
| -1.013851   | 0.847477656 |
| -1.22823145 | 0.024306871 |
| -1.10132673 | 0.350742239 |
| 0.643543343 | 1.92957E-10 |
| -1.2154427  | 0.012598558 |
| 0.924899795 | 0.235318627 |
| 0.94604824  | 0.405215678 |
| -1.01351014 | 0.850366561 |
| -1.05830491 | 0.341705457 |
| -1.45835615 | 0.001765855 |
| -1.11355001 | 0.081345337 |
| -1.02145377 | 0.715904111 |
| 0.82038512  | 0.199170281 |
| -1.01527407 | 0.746136454 |
| 0.953409966 | 0.399967208 |
| 0.967218172 | 0.504795531 |
| 0.980634118 | 0.738066559 |
| 0.868315881 | 0.010850796 |
| -1.04175384 | 0.529784238 |
| -1.20070769 | 0.044719747 |
| 0.85699136  | 0.118019858 |
| -1.2039795  | 0.000130283 |
| -1.32354808 | 6.5976E-07  |
| 0.678650272 | 4.77933E-05 |
| -1.12237512 | 0.091949322 |
| -1.02765528 | 0.791317881 |
| -1.01090527 | 0.885523955 |
| 0.999690021 | 0.99653158  |

|             |             |
|-------------|-------------|
| 0.880625955 | 0.010212283 |
| -1.0074293  | 0.921555628 |
| 0.479403774 | 1.79873E-17 |
| 0.957899889 | 0.430108569 |
| 0.991947222 | 0.886621701 |
| 0.976348257 | 0.559986176 |
| -1.02293078 | 0.670142988 |
| -1.10728849 | 0.013459184 |
| -1.002612   | 0.966781027 |
| -1.01612859 | 0.782464763 |
| 0.428094223 | 2.33474E-09 |
| 0.900333781 | 0.095161989 |
| 0.996002859 | 0.943495603 |
| -1.02407751 | 0.787706223 |
| -1.24734083 | 0.000351294 |
| 0.747754454 | 0.010169586 |
| 0.63123162  | 5.58165E-07 |
| 0.968154645 | 0.557935161 |
| 0.949641159 | 0.178459827 |
| -1.36208868 | 0.003876277 |
| 0.843766476 | 0.000330322 |
| -1.18649147 | 0.0244792   |
| -1.08884782 | 0.053048987 |
| -1.0603277  | 0.118586386 |
| 0.784596858 | 0.006743141 |
| -1.00069973 | 0.987579507 |
| -1.05084141 | 0.383723967 |
| -1.0485454  | 0.369024608 |
| -1.04288516 | 0.536239198 |
| -1.1018532  | 0.260345844 |
| -1.06198539 | 0.281321724 |
| -1.12254841 | 0.107672556 |
| -1.15941033 | 0.038635153 |
| -1.17903611 | 0.018488159 |
| 0.642438609 | 2.07528E-06 |
| -1.16496564 | 0.153989431 |
| -1.00401816 | 0.966058534 |
| -1.20675499 | 0.024152837 |
| 0.978603739 | 0.786467086 |
| -1.60876605 | 2.31361E-09 |
| -1.52206052 | 4.22016E-05 |
| -1.06606018 | 0.500394942 |
| 0.714258744 | 1.21514E-05 |
| 0.623573002 | 2.25344E-06 |

|             |             |
|-------------|-------------|
| -1.20384362 | 0.000240528 |
| -1.20203528 | 0.004885293 |
| -1.17619138 | 0.21339226  |
| -1.39705796 | 5.48595E-09 |
| -1.0305238  | 0.78210082  |
| -1.08268913 | 0.326930123 |
| -1.35608722 | 0.000172904 |
| 0.982434264 | 0.876639591 |
| -1.19230611 | 0.041079213 |
| -1.17628669 | 0.111962469 |
| 0.847601729 | 0.196212668 |
| -1.01297837 | 0.887624206 |
| -1.14725898 | 0.222261236 |
| -1.0331262  | 0.737932722 |
| 0.946037403 | 0.622230085 |
| -1.06362153 | 0.42879292  |
| -1.17825277 | 0.004977609 |
| -1.00450806 | 0.965064    |
| -1.43398329 | 0.014119695 |
| -1.15585364 | 0.022645116 |
| -1.02590467 | 0.747784824 |
| -1.42812085 | 0.000294291 |
| -1.24416434 | 0.003031351 |
| -1.09701528 | 0.163202402 |
| -1.17396748 | 0.047026716 |
| -1.30959145 | 0.005025733 |
| 0.914889566 | 0.194119871 |
| -1.13712437 | 0.132870981 |
| 0.973212358 | 0.62494308  |
| 0.90311872  | 0.145370733 |
| -1.02512849 | 0.729531959 |
| 0.983238302 | 0.871627548 |
| -1.21430653 | 0.000207159 |
| -1.09440131 | 0.141818667 |
| 0.987499084 | 0.859269081 |
| 0.49736361  | 3.52527E-17 |
| 0.838186025 | 0.023145352 |
| -1.01871904 | 0.758698746 |
| -1.160328   | 0.141187278 |
| -1.03848133 | 0.728116588 |
| 0.906877167 | 0.360203845 |
| 0.945503833 | 0.315628028 |
| -1.03053899 | 0.617464375 |
| 0.977866269 | 0.650384182 |

|             |             |
|-------------|-------------|
| 0.917543198 | 0.051053064 |
| -1.05855416 | 0.417269558 |
| -1.10651367 | 0.243452628 |
| -1.00483048 | 0.922557482 |
| -1.0244421  | 0.722929578 |
| 0.98187042  | 0.776669509 |
| 0.39690811  | 1.06852E-21 |
| 0.892760568 | 0.053996166 |
| 0.967374314 | 0.679872958 |
| -1.08008144 | 0.64264298  |
| -1.00384905 | 0.922567209 |
| -1.04123801 | 0.401643459 |
| 0.724255337 | 1.30651E-10 |
| 0.971548037 | 0.559308224 |
| 0.712842507 | 6.15498E-07 |
| -1.12421175 | 0.027102557 |
| 0.466103465 | 1.17484E-21 |
| -1.00689403 | 0.916309031 |
| 0.896792277 | 0.014496667 |
| -1.01154943 | 0.856082795 |
| -1.10740174 | 0.633276996 |
| 0.584934991 | 2.11908E-06 |
| -1.00732342 | 0.923284936 |
| 0.772363545 | 0.006018382 |
| 0.697491866 | 6.99186E-18 |
| 0.663543123 | 3.06056E-10 |
| -1.19803149 | 0.000968023 |
| 0.819018969 | 0.026825526 |
| 0.835033873 | 0.008877629 |
| 0.97066093  | 0.66664836  |
| 0.993305888 | 0.927758041 |
| 0.780623724 | 0.000182703 |
| -1.0230848  | 0.711361945 |
| -1.22420772 | 0.00046654  |
| -1.04009345 | 0.544049431 |
| -1.0323019  | 0.553244532 |
| 0.578105229 | 8.6762E-12  |
| -1.0321639  | 0.540179313 |
| -1.0468169  | 0.386334711 |
| 0.895737009 | 0.088516519 |
| 0.89018342  | 0.028030361 |
| -1.12012983 | 0.014693231 |
| -1.01098719 | 0.77500741  |
| 0.978022816 | 0.739583783 |

|             |             |
|-------------|-------------|
| 0.733692364 | 0.004608567 |
| -1.02231822 | 0.580930135 |
| 0.410157287 | 1.06478E-22 |
| -1.09608654 | 0.156992337 |
| 0.983490766 | 0.730776009 |
| 0.943948667 | 0.288557631 |
| 0.887886678 | 0.014181691 |
| 0.846612203 | 0.021767191 |
| 0.983744571 | 0.769874113 |
| 0.521181533 | 2.37204E-14 |
| -1.14658135 | 0.158828568 |
| 0.927167585 | 0.285549228 |
| -1.29145537 | 6.84751E-07 |
| -1.13656765 | 0.108278018 |
| -1.02420915 | 0.645277946 |
| -1.12669295 | 0.110414636 |
| -1.24567473 | 0.207509256 |
| 0.942938226 | 0.480403969 |
| -1.19629065 | 0.027802511 |
| -1.12211195 | 0.099929587 |
| -1.12183531 | 0.128631399 |
| -1.15283834 | 0.146546952 |
| 0.866955019 | 0.014878748 |
| -1.13376011 | 0.036748086 |
| 0.901056632 | 0.168215582 |
| -1.29343444 | 0.000270843 |
| -1.30726975 | 0.003569514 |
| -1.04825223 | 0.247591167 |
| -1.50999265 | 0.000385824 |
| -1.00886477 | 0.799052036 |
| 0.932513221 | 0.067135707 |
| 0.855910332 | 0.113335676 |
| -1.09863953 | 0.117999929 |
| 0.955374883 | 0.447280171 |
| -1.08025985 | 0.097425176 |
| 0.998354581 | 0.980469651 |
| -1.03055165 | 0.535426501 |
| -1.0740705  | 0.318443272 |
| 0.953140051 | 0.416508843 |
| -1.07087521 | 0.483674331 |
| -1.23143643 | 0.012934312 |
| -1.00036191 | 0.991365775 |
| -1.01926843 | 0.770006219 |
| 0.936530954 | 0.282312045 |

|             |             |
|-------------|-------------|
| 0.860942084 | 0.075794723 |
| 0.825735557 | 0.007517053 |
| 0.953659177 | 0.509697799 |
| 0.952246282 | 0.376171233 |
| -1.06791262 | 0.384041482 |
| 0.316148031 | 3.38459E-24 |
| -1.00059876 | 0.989884606 |
| 0.851435552 | 0.129694341 |
| -1.01423672 | 0.825985193 |
| -1.22497726 | 0.011006616 |
| -1.04074559 | 0.448587851 |
| -1.20738627 | 0.057343629 |
| 0.921393174 | 0.244681572 |
| -1.04784113 | 0.395418872 |
| 0.794318701 | 0.000207378 |
| -1.12229606 | 0.111692117 |
| 0.549461252 | 5.13447E-07 |
| 0.849070902 | 0.332966763 |
| -1.37750333 | 2.12621E-07 |
| 0.951619202 | 0.332069475 |
| 0.994768267 | 0.931975938 |
| 0.756654156 | 0.000148317 |
| -1.12576517 | 0.206552429 |
| -1.06974643 | 0.564046233 |
| -1.29017441 | 0.000471147 |
| 0.951186068 | 0.710928647 |
| -1.13039776 | 0.190982142 |
| -1.06475924 | 0.304233199 |
| 0.892707541 | 0.062416107 |
| -1.11546937 | 0.116217072 |
| -1.31800388 | 0.003006334 |
| 0.714248977 | 1.33245E-07 |
| -1.25096343 | 0.000556305 |
| -1.06372434 | 0.557920065 |
| 0.875984934 | 0.051990366 |
| 0.695057374 | 7.42906E-08 |
| -1.00561454 | 0.91309383  |
| 0.897396539 | 0.153973031 |
| -1.45833878 | 0.000149066 |
| -1.00438822 | 0.938433924 |
| 0.996055483 | 0.955761749 |
| -1.21179392 | 0.026667338 |
| -1.0051904  | 0.924581747 |
| 0.851422049 | 0.002351204 |



|             |             |
|-------------|-------------|
| -1.1274021  | 0.13795829  |
| -1.25949574 | 0.000426703 |
| 0.953875809 | 0.285898511 |
| 0.775159738 | 0.000269707 |
| 0.94203763  | 0.316076665 |
| 0.554380205 | 6.19469E-15 |
| -1.24036558 | 0.011758374 |
| -1.0868746  | 0.322379903 |
| -1.05702332 | 0.395447343 |
| 0.497922849 | 1.79341E-14 |
| 0.62947686  | 8.54544E-09 |
| 0.90376598  | 0.419379246 |
| 0.630124421 | 4.93696E-09 |
| 0.919415808 | 0.007176592 |
| 0.95330371  | 0.451024977 |
| 0.944232374 | 0.405374151 |
| 0.974805651 | 0.734878066 |
| 0.977135607 | 0.646274009 |
| -1.02581039 | 0.653571272 |
| -1.02366263 | 0.658065507 |
| 0.979419582 | 0.805312575 |
| 0.82842953  | 0.000444964 |
| -1.20596162 | 0.007303966 |
| -1.18870409 | 0.190962753 |
| 0.951915378 | 0.33313893  |
| 0.988618352 | 0.81335172  |
| -1.16967075 | 0.049815303 |
| -1.10404725 | 0.151163639 |
| -1.09122593 | 0.333998617 |
| -1.17430769 | 0.064313095 |
| -1.28249118 | 0.025496946 |
| -1.14359207 | 0.178829007 |
| 0.945932422 | 0.352296523 |
| 0.925745354 | 0.334317722 |
| 0.601965383 | 5.58619E-08 |
| -1.19801212 | 0.028174038 |
| 0.728822033 | 0.000487612 |
| 0.759770396 | 0.000239535 |
| 0.75757296  | 0.014321478 |
| 0.801785616 | 0.005219539 |
| 0.980780824 | 0.647386641 |
| -1.01888689 | 0.758767738 |
| 0.84885975  | 0.152287621 |
| 0.524177354 | 7.79853E-07 |

|             |             |
|-------------|-------------|
| -1.06109633 | 0.30677899  |
| -1.06463937 | 0.130849852 |
| -1.00049098 | 0.994024284 |
| -1.18635029 | 0.000835331 |
| -1.36698046 | 2.34508E-07 |
| -1.33043929 | 0.005263374 |
| -1.08129535 | 0.433496124 |
| -1.04078413 | 0.46477273  |
| 0.94025246  | 0.347611755 |
| 0.530409406 | 5.89273E-09 |
| 0.794895489 | 0.006512884 |
| -1.15391047 | 0.019807478 |
| -1.26374682 | 3.20982E-05 |
| -1.04807881 | 0.244342444 |
| -1.12067832 | 0.0136695   |
| -1.13468133 | 0.236584703 |
| -1.09894176 | 0.242458453 |
| -1.09676814 | 0.384929546 |
| -1.16939651 | 0.022374599 |
| -1.73809509 | 1.40068E-06 |
| 0.873159774 | 0.01849413  |
| -1.18743127 | 0.024408654 |
| -1.09821217 | 0.019438467 |
| -1.0183556  | 0.748042072 |
| -1.28429991 | 0.000234145 |
| -1.23309005 | 0.034774656 |
| -1.05367385 | 0.563651935 |
| 0.987359619 | 0.801718717 |
| -1.04889983 | 0.553489265 |
| -1.05948701 | 0.181679196 |
| 0.984414843 | 0.647406946 |
| -1.14176669 | 0.068774162 |
| -1.33436903 | 4.9804E-06  |
| 0.71783167  | 7.06888E-05 |
| -1.54315603 | 9.01009E-08 |
| -1.05600487 | 0.489358147 |
| -1.03843432 | 0.479049309 |
| 0.972107473 | 0.730174685 |
| 0.830157893 | 0.042952135 |
| -1.14490611 | 0.033779664 |
| -1.06289701 | 0.301174394 |
| -1.16594848 | 0.012944617 |
| -1.03920179 | 0.504529817 |
| -1.11207305 | 0.038357225 |

|             |             |
|-------------|-------------|
| -1.07640771 | 0.528912454 |
| -1.01000797 | 0.834617849 |
| 0.913563478 | 0.02643018  |
| -1.00521982 | 0.909491289 |
| -1.01155963 | 0.903809903 |
| -1.40658198 | 6.76078E-05 |
| -1.2379438  | 0.00693651  |
| -1.01259671 | 0.893027461 |
| 0.999429283 | 0.993334365 |
| 0.946913509 | 0.133909613 |
| -1.25721389 | 0.00180315  |
| -1.35512455 | 0.15003021  |
| -1.11841142 | 0.250873222 |
| -1.16265057 | 0.100798688 |
| 0.991845826 | 0.957518657 |
| 0.840589821 | 0.032509616 |
| -1.16209081 | 0.068542356 |
| -1.22984524 | 0.015068055 |
| -1.02917914 | 0.801583433 |
| 0.888709185 | 0.092220772 |
| 0.904473335 | 0.187225933 |
| -1.08734142 | 0.139821139 |
| 0.860054353 | 0.016805388 |
| 0.90084984  | 0.008324333 |
| 0.471895191 | 5.72187E-12 |
| -1.02260121 | 0.701258275 |
| -1.05671496 | 0.350415139 |
| 0.89135316  | 0.031348786 |
| -1.17173255 | 0.043090214 |
| 0.960046771 | 0.386214217 |
| 0.892648369 | 0.075582641 |
| 0.822182731 | 0.104509375 |
| 0.806093897 | 0.07157573  |
| 0.807755159 | 9.92892E-05 |
| 0.928395921 | 0.141101189 |
| 0.798240676 | 0.004004225 |
| -1.00703779 | 0.900287514 |
| 0.729193872 | 2.02775E-05 |
| -1.02401249 | 0.677642181 |
| 0.87171436  | 0.025901002 |
| -1.06576169 | 0.235833827 |
| 0.871393403 | 0.025460958 |
| 0.97513186  | 0.731833921 |
| -1.32829777 | 9.57683E-06 |

|             |             |
|-------------|-------------|
| -1.43930924 | 3.12378E-08 |
| -1.02549379 | 0.661499215 |
| 0.954330161 | 0.309485025 |
| 0.825766512 | 0.001595187 |
| 0.924511427 | 0.455090394 |
| -1.12107304 | 0.450067608 |
| -1.26819205 | 0.008869394 |
| -1.03772606 | 0.566296491 |
| 0.905773684 | 0.182429553 |
| -1.02541081 | 0.770839236 |
| 0.95678801  | 0.536360948 |
| -1.2973468  | 0.001787713 |
| -1.16548217 | 0.010484622 |
| -1.1169946  | 0.092031948 |
| 0.890777827 | 0.129864821 |
| -1.19076901 | 0.000322784 |
| 0.905036782 | 0.321371888 |
| 0.88369593  | 0.040918146 |
| -1.14835493 | 0.012042114 |
| -1.10141154 | 0.245465168 |
| -1.00590834 | 0.934671848 |
| -1.02937282 | 0.629093219 |
| 0.992850327 | 0.875252779 |
| -1.16308714 | 0.060301961 |
| -1.10762913 | 0.068881521 |
| -1.1298769  | 0.152024348 |
| 0.8043011   | 3.76076E-05 |
| -1.22693013 | 0.001006886 |
| -1.06054942 | 0.517074969 |
| -1.14562998 | 0.276844854 |
| -1.112638   | 0.129794682 |
| -1.13943099 | 0.036869115 |
| -1.13032475 | 0.085244272 |
| 0.959117132 | 0.626112571 |
| -1.14668808 | 0.103866557 |
| -1.07267106 | 0.085275107 |
| 0.866847706 | 0.007675867 |
| -1.21359919 | 0.004598101 |
| -1.47621136 | 3.18133E-09 |
| 0.98526125  | 0.725722606 |
| -1.31901442 | 0.003938513 |
| -1.10810371 | 0.265136081 |
| -1.1868488  | 0.060986164 |
| -1.38834779 | 1.1689E-05  |

|             |             |
|-------------|-------------|
| -1.45564522 | 0.00081101  |
| -1.04372691 | 0.688835911 |
| -1.23844336 | 0.081509231 |
| -1.0487706  | 0.68966356  |
| -1.14320345 | 0.137208517 |
| -1.20875459 | 0.01492566  |
| -1.08336669 | 0.146961482 |
| -1.72136057 | 7.34715E-06 |
| -1.06865118 | 0.260843985 |
| 0.514635838 | 2.70404E-17 |
| -1.0856423  | 0.192194634 |
| -1.31249943 | 7.96817E-06 |
| 0.969507564 | 0.659579818 |
| -1.04085745 | 0.760260425 |
| -1.03373499 | 0.564922781 |
| 0.868270693 | 0.038049762 |
| 0.867578652 | 0.002483689 |
| 0.894419894 | 0.0211      |
| -1.03166415 | 0.593339733 |
| -1.33845807 | 0.000552397 |
| -1.26969395 | 0.001644688 |
| -1.00089349 | 0.981159847 |
| -1.07637471 | 0.231446158 |
| -1.143634   | 0.053165307 |
| 0.942517703 | 0.343661109 |
| 0.867733331 | 0.018403334 |
| 0.932824592 | 0.250920616 |
| -1.15040638 | 0.030831478 |
| 0.289717739 | 1.31548E-27 |
| -1.09051365 | 0.342601039 |
| 0.994252625 | 0.945828688 |
| -1.17221233 | 0.0745201   |
| 0.970848704 | 0.579430793 |
| 0.728269217 | 7.52514E-08 |
| 0.855997482 | 0.011366507 |
| 0.986690872 | 0.796059672 |
| 0.973675003 | 0.557792948 |
| -1.55512462 | 6.82886E-05 |
| -1.35784339 | 0.009948181 |
| 0.966390551 | 0.501142902 |
| -1.25790047 | 8.11842E-05 |
| -1.11345402 | 0.058179255 |
| 0.913877383 | 0.218873944 |
| 0.820988432 | 0.002245295 |

|             |             |
|-------------|-------------|
| -1.02850116 | 0.602815667 |
| 0.689962604 | 0.000458384 |
| 0.927009658 | 0.228071376 |
| -1.06349666 | 0.388401875 |
| -1.65014531 | 1.47447E-07 |
| -1.34667896 | 0.001661614 |
| -1.06126395 | 0.356473861 |
| 0.959112787 | 0.533660576 |
| -1.16496812 | 0.149688487 |
| -1.01105577 | 0.84559187  |
| 0.938690239 | 0.20239364  |
| -1.0046027  | 0.943577873 |
| -1.04296806 | 0.649584096 |
| 0.714731987 | 0.002124929 |
| 0.824279727 | 0.000109809 |
| -1.31661268 | 0.00066164  |
| -1.46205967 | 0.000628485 |
| 0.982782302 | 0.643188136 |
| 0.588623687 | 5.01321E-12 |
| 0.644040739 | 6.30648E-08 |
| 0.987681941 | 0.849959801 |
| -1.14554468 | 0.058300687 |
| 0.723037698 | 3.0179E-05  |
| 0.839607557 | 0.056416151 |
| 0.731992825 | 0.013972979 |
| -1.28363823 | 0.002645412 |
| -1.06194047 | 0.484776109 |
| -1.0284236  | 0.649356814 |
| 0.784997675 | 0.014016167 |
| 0.67125323  | 1.63343E-07 |
| 0.619015776 | 1.44839E-07 |
| 0.982441756 | 0.761424011 |
| -1.00794472 | 0.943996397 |
| 0.986470839 | 0.6014182   |
| -1.08674593 | 0.175920177 |
| -1.00466387 | 0.9309042   |
| -1.00002806 | 0.999648667 |
| 0.775100563 | 0.000674672 |
| 0.880389563 | 0.13494863  |
| -1.05409528 | 0.495649232 |
| -1.14733859 | 0.038160672 |
| -1.34918258 | 0.0006849   |
| -1.18612683 | 0.002443779 |
| -1.07924274 | 0.566915513 |

|             |             |
|-------------|-------------|
| 0.960398155 | 0.584359828 |
| 0.950935453 | 0.481376297 |
| -1.2555293  | 0.00323402  |
| 0.9749367   | 0.749262913 |
| -1.24080999 | 0.000454468 |
| 0.719335345 | 3.24955E-07 |
| -1.01577746 | 0.731790942 |
| 0.878258346 | 0.016645599 |
| -1.06326829 | 0.341827023 |
| 0.956601328 | 0.454771284 |
| -1.07131739 | 0.105238893 |
| 0.960025397 | 0.546341064 |
| -1.03360853 | 0.546115462 |
| 0.481196257 | 2.03117E-14 |
| -1.03139838 | 0.514351397 |
| -1.16342383 | 0.060651794 |
| -1.24009636 | 0.054194926 |
| 0.804738517 | 7.66879E-07 |
| -1.0582835  | 0.085168565 |
| -1.15199298 | 0.009388743 |
| -1.03854574 | 0.633109914 |
| 0.923209674 | 0.407277653 |
| -1.04815704 | 0.328835416 |
| -1.13874629 | 0.069091395 |
| -1.01846199 | 0.629073555 |
| 0.990522602 | 0.791739702 |
| 0.800795747 | 0.000277427 |
| -1.03784711 | 0.557958287 |
| -1.02587998 | 0.629012122 |
| 0.89117186  | 0.08733129  |
| 0.90370269  | 0.021008437 |
| 0.417511334 | 2.98791E-09 |
| 0.67214802  | 2.07112E-06 |
| -1.06724355 | 0.119402949 |
| 0.965513324 | 0.787172707 |
| 0.987798839 | 0.852879363 |
| 0.537786675 | 1.69432E-11 |
| 0.993949856 | 0.911726776 |
| 0.755795922 | 6.06311E-07 |
| -1.43197816 | 0.001008474 |
| 0.745919664 | 0.001041352 |
| 0.898172384 | 0.052453076 |
| 0.969498777 | 0.589427691 |
| 0.930799958 | 0.093297856 |

|             |             |
|-------------|-------------|
| -1.06925422 | 0.181621329 |
| 0.945541078 | 0.672296645 |
| 0.986373184 | 0.881587889 |
| -1.03756981 | 0.404332348 |
| -1.11351309 | 0.207031938 |
| -1.08349438 | 0.333529941 |
| -1.04103641 | 0.782106514 |
| 0.908665419 | 0.061982674 |
| 0.989847159 | 0.810072444 |
| 0.878185697 | 0.033728242 |
| 0.950411111 | 0.497061815 |
| 0.761997076 | 0.003100287 |
| -1.11307916 | 0.131311394 |
| 0.513080482 | 1.96628E-10 |
| 0.657564232 | 6.62027E-07 |
| 0.846340388 | 0.017062029 |
| 0.995736233 | 0.942798248 |
| 0.664927468 | 1.09136E-05 |
| 0.917491756 | 0.349414031 |
| 0.977807238 | 0.803265043 |
| -1.03720186 | 0.521651371 |
| -1.30146466 | 0.000563518 |
| 0.904683997 | 0.18335728  |
| -1.04544584 | 0.306275131 |
| -1.10043706 | 0.099729597 |
| 0.760082483 | 4.04368E-05 |
| -1.14200775 | 0.033226978 |
| 0.904800475 | 0.132046077 |
| 0.669835573 | 1.37365E-05 |
| 0.931742726 | 0.183805787 |
| -1.22105627 | 0.011112284 |
| 0.702287045 | 1.80958E-07 |
| 0.479557321 | 6.37183E-12 |
| 0.861359251 | 0.005600629 |
| 0.972384489 | 0.690132205 |
| -1.13485081 | 0.288907964 |
| -1.00550711 | 0.914339767 |
| 0.79597642  | 0.004030918 |
| 0.741254769 | 0.017514984 |
| -1.30637111 | 0.00061633  |
| -1.2187317  | 0.000634004 |
| -1.05820655 | 0.489514265 |
| -1.06842933 | 0.285838569 |
| -1.02747273 | 0.738591038 |



|             |             |
|-------------|-------------|
| 0.846915611 | 0.02240956  |
| 0.980666456 | 0.716010171 |
| 0.915790151 | 0.135080313 |
| -1.05381344 | 0.362231636 |
| -1.00579249 | 0.951828014 |
| -1.02983641 | 0.586911821 |
| 0.888079765 | 0.014010519 |
| -1.10337983 | 0.039993879 |
| -1.52466748 | 3.60468E-06 |
| 0.949266675 | 0.472314191 |
| -1.0623808  | 0.436362495 |
| -1.28897981 | 0.000786227 |
| 0.997423582 | 0.974014202 |
| 0.997659062 | 0.98302836  |
| 0.558277113 | 0.006270405 |
| 0.75117298  | 0.071358071 |
| -1.15757232 | 0.014835334 |
| 0.988499978 | 0.824802009 |
| 0.962402686 | 0.222539998 |
| 0.979150305 | 0.725259442 |
| -1.15968175 | 0.258761043 |
| 0.922391088 | 0.331822876 |
| 0.996151533 | 0.978249549 |
| -1.07008672 | 0.265266122 |
| -1.3821336  | 0.000693419 |
| 0.951050055 | 0.278543554 |
| -1.21362459 | 0.004956582 |
| 0.53794087  | 8.73838E-08 |
| 0.916895858 | 0.160418122 |
| 0.649009513 | 1.32813E-09 |
| -1.10579612 | 0.211723597 |
| -1.06575044 | 0.38340247  |
| -1.01550589 | 0.726145055 |
| -1.04258396 | 0.465631683 |
| 0.868031769 | 0.004016968 |
| -1.08240663 | 0.334772167 |
| -1.03147368 | 0.564520568 |
| -1.04194797 | 0.512686762 |
| -1.03091208 | 0.592376275 |
| 0.996516071 | 0.951182289 |
| -1.12599237 | 0.20387809  |
| 0.867810927 | 0.171456418 |
| 0.928767648 | 0.210983334 |
| -1.09416454 | 0.063635729 |

|             |             |
|-------------|-------------|
| 0.898026638 | 0.035164518 |
| -1.1355266  | 0.08144794  |
| -1.02055695 | 0.715016897 |
| 0.990828273 | 0.862616957 |
| -1.17373831 | 0.01450503  |
| 0.96939173  | 0.748697528 |
| -1.02284576 | 0.719311789 |
| 0.822501576 | 0.000281458 |
| 0.828718354 | 0.001950822 |
| 0.936471952 | 0.146827801 |
| -1.17905865 | 0.013722208 |
| -1.02506378 | 0.788737904 |
| 0.936886087 | 0.394187816 |
| 0.575379002 | 2.12561E-13 |
| 0.948681453 | 0.287106997 |
| -1.15282787 | 0.070039981 |
| 0.892193584 | 0.0143462   |
| 0.989323247 | 0.842701602 |
| 0.955125266 | 0.643704576 |
| -1.00711956 | 0.898383108 |
| 0.991638642 | 0.925902056 |
| -1.25030929 | 0.003003315 |
| 0.951011442 | 0.208130855 |
| -1.00238431 | 0.967873299 |
| 0.897129484 | 0.111831967 |
| 0.958113139 | 0.615666369 |
| -1.14854668 | 0.012110326 |
| -1.01717663 | 0.905354436 |
| 0.755653481 | 2.53231E-05 |
| -1.16303503 | 0.061333968 |
| -1.03178168 | 0.692145821 |
| -1.17142347 | 0.059554467 |
| -1.18173916 | 0.000653313 |
| -1.17699343 | 0.001874771 |
| -1.06603551 | 0.298524324 |
| -1.1693696  | 0.098279517 |
| -1.33478147 | 1.55927E-05 |
| 0.884970012 | 0.044690961 |
| -1.25053741 | 0.001570335 |
| -1.24359647 | 0.003300648 |
| -1.39797737 | 0.001499435 |
| -1.0836194  | 0.182816791 |
| -1.122677   | 0.118603447 |
| 0.832843146 | 0.051912076 |

|             |             |
|-------------|-------------|
| -1.03669609 | 0.567197156 |
| 0.94033637  | 0.312998855 |
| -1.09697972 | 0.143003368 |
| 0.982257298 | 0.817794072 |
| -1.21521204 | 0.032349467 |
| -1.09592675 | 0.174406266 |
| 0.881534749 | 0.186379276 |
| -1.01067822 | 0.885961078 |
| -1.00736045 | 0.902044508 |
| -1.03155058 | 0.740914258 |
| -1.02432985 | 0.651865919 |
| -1.0331742  | 0.693493533 |
| 0.991718458 | 0.965812376 |
| -1.01682915 | 0.914250911 |
| 0.470248146 | 0.002651879 |
| 0.506469808 | 0.004362324 |
| 0.521141525 | 0.005682702 |
| 0.630783583 | 0.027388039 |
| 0.471955491 | 0.004758377 |
| 0.94585997  | 0.636601674 |
| 0.865815024 | 0.481505919 |
| 0.476565818 | 0.002390845 |
| 0.951119113 | 0.66622904  |
| 0.914690581 | 0.32380754  |
| 0.855022126 | 0.252870469 |
| 0.841107152 | 0.175167579 |
| -1.07115671 | 0.618045424 |
| 0.967291271 | 0.640048263 |
| 0.976732036 | 0.881701106 |
| 0.941999825 | 0.681775084 |
| 0.953494605 | 0.594449845 |
| 0.97120642  | 0.672928174 |
| 0.919496426 | 0.234080207 |
| -1.05285099 | 0.410950796 |
| 0.960747556 | 0.762235944 |
| 0.873674418 | 0.037901744 |
| 0.945073012 | 0.300127345 |
| 0.953500392 | 0.475200506 |
| -1.02322267 | 0.82237878  |
| 0.96364722  | 0.552888927 |
| -1.04897588 | 0.349244042 |
| -1.04575138 | 0.320308266 |
| -1.7340156  | 2.29541E-07 |
| -1.23329846 | 0.004272939 |

|             |             |
|-------------|-------------|
| 0.842958224 | 0.057693132 |
| 0.883776339 | 0.060847581 |
| 0.940295882 | 0.40412348  |
| 0.95993153  | 0.637683882 |
| -1.09393188 | 0.128137047 |
| 0.982717276 | 0.850677776 |
| -1.11798909 | 0.183866042 |
| 0.831987679 | 0.029875767 |
| -1.05104259 | 0.615780037 |
| 0.988535982 | 0.828123671 |
| -1.25860256 | 2.77627E-05 |
| 0.89526165  | 0.012543298 |
| -1.01032914 | 0.836521262 |
| 0.948913652 | 0.599703812 |
| 0.997324251 | 0.970974428 |
| 0.931221856 | 0.245803362 |
| 0.865165287 | 0.121194152 |
| 0.988419165 | 0.895919575 |
| 0.937052734 | 0.588607201 |
| 0.809092023 | 0.009701387 |
| 0.931421232 | 0.313224479 |
| -1.16849119 | 0.211046169 |
| 0.981529034 | 0.816023187 |
| -1.12316262 | 0.021760247 |
| 0.831280107 | 0.034577334 |
| -1.11550501 | 0.116953539 |
| -1.26483458 | 0.000590989 |
| -1.15792364 | 0.062998046 |
| -1.19825442 | 0.067404493 |
| 0.995737966 | 0.935966192 |
| -1.00660495 | 0.942083605 |
| -1.03630165 | 0.512881071 |
| 0.820488055 | 0.212080935 |
| 0.989801641 | 0.924256867 |
| 0.87489368  | 0.131625826 |
| 0.912953996 | 0.15782656  |
| 0.932734839 | 0.421113724 |
| 0.952520617 | 0.701614063 |
| 0.908992773 | 0.117751868 |
| 0.831952254 | 0.084039777 |
| -1.02085891 | 0.749121966 |
| -1.0586046  | 0.467951779 |
| 0.88248785  | 0.070941275 |
| 0.996673361 | 0.97123667  |

|             |             |
|-------------|-------------|
| 0.91258678  | 0.118831035 |
| 0.914865284 | 0.224385682 |
| 0.979032961 | 0.783104415 |
| 0.617137301 | 4.45415E-08 |
| -1.1202987  | 0.031928417 |
| -1.18401985 | 0.006252352 |
| 0.822408952 | 0.170038858 |
| 0.960701377 | 0.741610714 |
| 0.963321805 | 0.558504772 |
| -1.33921787 | 0.000103972 |
| -1.06462439 | 0.30905657  |
| 0.727743197 | 8.5702E-06  |
| 0.289209325 | 3.43772E-23 |
| 0.928446852 | 0.44925497  |
| -1.02476336 | 0.685061471 |
| 0.906597888 | 0.074180544 |
| 0.959906311 | 0.503401142 |
| 0.906955122 | 0.117491286 |
| -1.22710679 | 0.078295475 |
| 0.9755786   | 0.786373897 |
| -1.33240125 | 0.001350903 |
| 0.862301418 | 0.067401361 |
| -1.03495154 | 0.837995291 |
| 0.943171653 | 0.545614736 |
| 0.954366512 | 0.502128392 |
| 0.927048363 | 0.327819784 |
| 0.959798241 | 0.741618768 |
| 0.923625905 | 0.118546643 |
| -1.19122985 | 0.140747943 |
| -1.21449816 | 0.033455177 |
| -1.01473783 | 0.833384597 |
| -1.26676679 | 0.002272509 |
| -1.01553789 | 0.891258448 |
| -1.00473663 | 0.932288329 |
| 0.957260362 | 0.471288955 |
| 0.918867103 | 0.272268444 |
| 0.917331288 | 0.371218132 |
| 0.881649222 | 0.178085186 |
| -1.11960847 | 0.021042543 |
| -1.33328634 | 0.029027718 |
| -1.06763133 | 0.435211432 |
| 0.937712926 | 0.490571926 |
| -1.1276821  | 0.074427914 |
| -1.40055637 | 0.000249473 |

|             |             |
|-------------|-------------|
| -1.00448902 | 0.923500839 |
| 0.95015144  | 0.518712409 |
| 0.979330133 | 0.643864613 |
| -1.1685031  | 0.163737872 |
| 0.890945666 | 0.087390368 |
| 0.700561183 | 0.000133255 |
| 0.698336593 | 0.000463183 |
| -1.13067604 | 0.109082325 |
| 0.988572467 | 0.751654241 |
| -1.24274097 | 0.029943663 |
| -1.66966797 | 0.000412113 |
| -1.0574     | 0.475204182 |
| -1.44897797 | 0.00016604  |
| 0.970818101 | 0.609369898 |
| 0.950721749 | 0.704701198 |
| 0.95454792  | 0.55649261  |
| -1.14762702 | 0.035321345 |
| -1.19746372 | 0.017723313 |
| -1.33134213 | 0.000375057 |
| -1.02046439 | 0.771080458 |
| -1.10218363 | 0.421590836 |
| -1.24352063 | 0.01048697  |
| 0.979261826 | 0.805658038 |
| -1.07009543 | 0.245418579 |
| -1.24865424 | 0.000777162 |
| 0.969978404 | 0.622692797 |
| -1.14131493 | 0.015390347 |
| -1.12439422 | 0.213490343 |
| 0.968499647 | 0.557779316 |
| 0.988534655 | 0.780719498 |
| -1.12670768 | 0.239918196 |
| 0.9855657   | 0.767869622 |
| 0.861483342 | 0.014130208 |
| 0.997193068 | 0.96546344  |
| -1.15406088 | 0.12686447  |
| -1.18178307 | 0.023860631 |
| 0.992967074 | 0.933531444 |
| -1.15997765 | 0.026395706 |
| 0.948379098 | 0.133613901 |
| -1.32936187 | 0.000326211 |
| 0.952611793 | 0.326913069 |
| -1.08312156 | 0.154236415 |
| -1.12903352 | 0.032867603 |
| 0.847328994 | 1.72601E-06 |

|             |             |
|-------------|-------------|
| 0.848527805 | 0.006636587 |
| 0.779445944 | 0.000269478 |
| 0.751333034 | 0.03211186  |
| -1.00117719 | 0.98424795  |
| 0.966436766 | 0.514213554 |
| -1.01749435 | 0.742536338 |
| 0.985661651 | 0.816078671 |
| -1.17309059 | 0.059190622 |
| -1.07117918 | 0.151021551 |
| -1.05488143 | 0.183702341 |
| -1.1609872  | 0.024683245 |
| 0.98580389  | 0.807812853 |
| 0.840760517 | 0.00449008  |
| 0.894635789 | 0.045647886 |
| 0.913889876 | 0.141748269 |
| -1.03832934 | 0.246421313 |
| 0.976533916 | 0.573503636 |
| 0.866912671 | 0.048294349 |
| 0.999811079 | 0.998201918 |
| -1.19856007 | 0.034532289 |
| -1.18937082 | 0.147429033 |
| -1.09723023 | 0.042511868 |
| 0.808007635 | 0.003329441 |
| 0.87561401  | 0.036444714 |
| -1.01312302 | 0.849434742 |
| -1.31345543 | 3.914E-05   |
| 0.983245921 | 0.748210942 |
| 0.680854235 | 7.14306E-11 |
| 0.845253597 | 0.102168383 |
| 0.715619406 | 9.86981E-10 |
| 0.846683524 | 0.001734583 |
| 0.957264855 | 0.460149439 |
| 0.793026567 | 0.000344485 |
| 0.931135511 | 0.390961394 |
| 0.518193192 | 0.000116618 |
| 0.568151373 | 3.92703E-10 |
| -1.06134166 | 0.282991161 |
| 0.974452093 | 0.681561102 |
| -1.03672917 | 0.467686441 |
| 0.98401776  | 0.680501743 |
| 0.926399434 | 0.132100994 |
| -1.11359977 | 0.262332116 |
| 0.929476686 | 0.263284971 |
| -1.1928249  | 0.023458479 |

|             |             |
|-------------|-------------|
| -1.01185333 | 0.794308664 |
| -1.08395903 | 0.171515768 |
| -1.17757379 | 0.059792814 |
| -1.32552269 | 0.039882083 |
| -1.14956521 | 0.101977572 |
| -1.04257851 | 0.564683931 |
| -1.24372525 | 0.22645268  |
| 0.942997672 | 0.402939583 |
| 0.83643519  | 0.006393723 |
| -1.03748018 | 0.508348252 |
| 0.869939942 | 0.267124132 |
| 0.988865194 | 0.861946358 |
| 0.941857686 | 0.164887341 |
| -1.10940735 | 0.107422014 |
| 0.8090445   | 0.000237943 |
| -1.10418823 | 0.049460063 |
| -1.12695435 | 0.265537906 |
| -1.02871898 | 0.554476556 |
| 0.888234682 | 0.011714141 |
| -1.04909442 | 0.402093078 |
| 0.998971123 | 0.98765633  |
| 0.90455301  | 0.099017572 |
| -1.02196419 | 0.721317731 |
| -1.25504009 | 0.072183415 |
| 0.518942065 | 1.17223E-13 |
| -1.3704673  | 7.20051E-05 |
| -1.05945305 | 0.42437206  |
| -1.14466995 | 0.225510767 |
| -1.17747677 | 0.022621947 |
| -1.45610224 | 3.39183E-06 |
| 0.91669532  | 0.463139449 |
| 0.999393822 | 0.993517865 |
| -1.00838531 | 0.939393696 |
| -1.10337884 | 0.299935934 |
| 0.983681788 | 0.787497842 |
| 0.972300261 | 0.763951117 |
| 0.976988394 | 0.840734821 |
| -1.24377929 | 0.010895295 |
| -1.16214118 | 0.155217283 |
| -1.17188483 | 0.002398401 |
| 0.376167463 | 1.04444E-16 |
| 0.745859418 | 6.34945E-05 |
| 0.969288792 | 0.515983809 |
| -1.24826275 | 0.000468107 |



|             |             |
|-------------|-------------|
| 0.779959334 | 0.087687756 |
| -1.41914328 | 0.018782664 |
| -1.44634449 | 8.6457E-05  |
| -1.25013409 | 0.105587656 |
| -1.03040145 | 0.563983676 |
| -1.16058467 | 0.074424096 |
| -1.35905058 | 0.001040349 |
| 0.798685849 | 0.011822051 |
| 0.796726382 | 0.010860832 |
| 0.702140431 | 8.49444E-06 |
| 0.978213326 | 0.680284249 |
| 0.626653883 | 1.89333E-07 |
| -1.00122244 | 0.976275485 |
| 0.805462285 | 0.236304493 |
| -1.03529628 | 0.479715942 |
| -1.33393182 | 2.91198E-07 |
| -1.13687686 | 0.135673222 |
| -1.05325993 | 0.319626395 |
| 0.879774344 | 0.321849064 |
| 0.979202735 | 0.677133459 |
| -1.05472846 | 0.478951006 |
| -1.19796659 | 0.021077721 |
| -1.00846343 | 0.901407759 |
| -1.09568491 | 0.334487607 |
| 0.974210399 | 0.605841738 |
| -1.14491403 | 0.0315736   |
| -1.04827969 | 0.507137541 |
| -1.0479325  | 0.580032432 |
| 0.933674903 | 0.206226537 |
| 0.895418918 | 0.108436946 |
| -1.00718608 | 0.914301686 |
| -1.13085878 | 0.01318751  |
| -1.08358017 | 0.155023221 |
| -1.00498259 | 0.933908566 |
| 0.973427097 | 0.623789027 |
| -1.07655419 | 0.193495048 |
| -1.02752283 | 0.873580736 |
| 0.967783224 | 0.631715083 |
| 0.907327339 | 0.052425104 |
| 0.818987909 | 0.005930316 |
| 0.740727462 | 9.93892E-07 |
| -1.07450835 | 0.081665927 |
| -1.12504571 | 0.086435222 |
| -1.01379114 | 0.818940678 |

|             |             |
|-------------|-------------|
| -1.02310216 | 0.567342414 |
| -1.14217495 | 0.011030862 |
| -1.01041394 | 0.854973215 |
| -1.00110754 | 0.983847153 |
| 0.972712017 | 0.562516533 |
| -1.20321553 | 0.0040315   |
| 0.966709878 | 0.594764934 |
| -1.01624854 | 0.720767368 |
| 0.989409333 | 0.795073296 |
| -1.05526157 | 0.556101053 |
| 0.944008555 | 0.371399825 |
| 0.983367872 | 0.656637415 |
| -1.00775132 | 0.80975689  |
| -1.13633112 | 0.021758713 |
| 0.96245212  | 0.282951291 |
| 0.902976926 | 0.050504817 |
| -1.00077102 | 0.982158911 |
| -1.20919507 | 0.068922443 |
| 0.842696567 | 0.01487824  |
| -1.04069006 | 0.342322019 |
| -1.15928169 | 0.017344664 |
| 0.990274489 | 0.915728306 |
| 0.902950671 | 0.453101055 |
| 0.643928071 | 1.09421E-06 |
| -1.01419392 | 0.881875554 |
| 0.685544524 | 0.000234853 |
| -1.50734699 | 8.68862E-07 |
| -1.01769392 | 0.748303266 |
| -1.28360605 | 0.02200012  |
| -1.13091396 | 0.024645236 |
| -1.27558165 | 0.001786089 |
| 0.951707151 | 0.334958208 |
| 0.997713488 | 0.970764875 |
| 0.850779559 | 0.001435753 |
| -1.02241268 | 0.7137261   |
| 0.781076426 | 0.019270788 |
| -1.30856834 | 2.30615E-05 |
| -1.02189344 | 0.669394605 |
| 0.945300946 | 0.366945216 |
| 0.982752642 | 0.786959254 |
| 0.979831224 | 0.744651324 |
| 0.856613465 | 0.22403807  |
| -1.22987427 | 0.010653509 |
| -1.25924041 | 0.008376636 |

|             |             |
|-------------|-------------|
| -1.12093275 | 0.180389196 |
| -1.09024308 | 0.11502738  |
| 0.930985539 | 0.484524837 |
| -1.25973829 | 0.006456679 |
| 0.935624644 | 0.406420446 |
| -1.14772286 | 0.09359163  |
| -1.03821296 | 0.417920305 |
| 0.972687158 | 0.472116899 |
| -1.04910171 | 0.376067405 |
| 0.923436602 | 0.189470333 |
| 0.990680383 | 0.83291292  |
| 0.987462273 | 0.845638676 |
| -1.02025642 | 0.713045216 |
| -1.14926269 | 0.109662071 |
| -1.1037295  | 0.061209269 |
| 0.896295122 | 0.008554569 |
| 0.990135831 | 0.782337072 |
| -1.29710354 | 0.00308581  |
| 0.814579618 | 0.000542393 |
| 0.900711628 | 0.19190716  |
| -1.09283055 | 0.150339509 |
| -1.1178635  | 0.032943152 |
| 0.981601793 | 0.763525166 |
| -1.110656   | 0.167355155 |
| -1.07034324 | 0.568583204 |
| -1.13557195 | 0.005538502 |
| -1.1205922  | 0.16865441  |
| 0.797838112 | 0.061568874 |
| -1.06506137 | 0.40806476  |
| -1.13063521 | 0.300461895 |
| -1.10474108 | 0.135429773 |
| -1.29984602 | 0.000630997 |
| -1.05434998 | 0.395702627 |
| 0.91949808  | 0.231259199 |
| -1.03709795 | 0.544000726 |
| 0.796354901 | 0.003921342 |
| 0.946582757 | 0.320751884 |
| -1.15441979 | 0.02538762  |
| 0.998023697 | 0.972780246 |
| 0.472394289 | 4.80606E-13 |
| -1.00159545 | 0.970740962 |
| -1.24691052 | 0.003099586 |
| -1.02836621 | 0.711084431 |
| -1.00975046 | 0.876365641 |

|             |             |
|-------------|-------------|
| 0.882713602 | 0.109047416 |
| -1.16722265 | 0.096663835 |
| -1.22788365 | 0.000133725 |
| -1.02160559 | 0.814317277 |
| 0.872571267 | 0.474516308 |
| 0.972041349 | 0.635974349 |
| 0.51609767  | 6.68798E-10 |
| 0.991496713 | 0.867295647 |
| 0.956724702 | 0.409466506 |
| -1.10290811 | 0.16571242  |
| 0.698957178 | 1.26539E-06 |
| -1.10769326 | 0.018577983 |
| 0.960940853 | 0.458469219 |
| 0.944558733 | 0.142247    |
| 0.895470382 | 0.037245345 |
| 0.961238022 | 0.508147964 |
| -1.02564951 | 0.657271933 |
| -1.2808193  | 0.001375216 |
| -1.05528936 | 0.511099155 |
| -1.19494615 | 0.001368081 |
| -1.33518565 | 0.003932879 |
| -1.09711068 | 0.039967049 |
| -2.04164806 | 5.17764E-13 |
| 0.521703831 | 8.48314E-10 |
| 0.813286954 | 2.13528E-05 |
| -1.02243193 | 0.662238481 |
| -1.06769506 | 0.173445375 |
| 0.70764475  | 5.55583E-06 |
| -1.20508928 | 0.042351029 |
| -1.00299656 | 0.949315422 |
| 0.94200862  | 0.471697776 |
| -1.07950022 | 0.077794461 |
| -1.23378541 | 0.000677061 |
| 0.743186049 | 0.00525019  |
| -1.06299324 | 0.391468136 |
| 0.956488708 | 0.183500937 |
| 0.975150178 | 0.553088368 |
| -1.16549969 | 0.065305909 |
| -1.03541775 | 0.591733488 |
| -1.15252059 | 0.003910276 |
| -1.03763423 | 0.456106421 |
| 0.957611913 | 0.68473009  |
| 0.856407416 | 0.00167474  |
| -1.0011677  | 0.968010342 |

|             |             |
|-------------|-------------|
| -1.12098472 | 0.153678123 |
| 0.998411125 | 0.973270463 |
| -1.03664484 | 0.395243777 |
| 0.997546446 | 0.957651701 |
| -1.01925236 | 0.825521998 |
| 0.445938536 | 3.8642E-15  |
| -1.02908757 | 0.60847221  |
| 0.910384123 | 0.052230366 |
| -1.01816923 | 0.687646492 |
| -1.09894558 | 0.028324151 |
| 0.966108948 | 0.527575878 |
| 0.682062795 | 7.37893E-06 |
| -1.01117008 | 0.894406157 |
| 0.392840028 | 1.53633E-18 |
| 0.898803306 | 0.072928238 |
| 0.894005244 | 0.13409954  |
| 0.620642785 | 0.000352733 |
| 0.746605868 | 0.003424367 |
| -1.15401847 | 0.012943992 |
| 0.635178616 | 4.49068E-08 |
| -1.00078024 | 0.992159511 |
| 0.796521219 | 0.00035368  |
| 0.848021523 | 0.051143962 |
| -1.28067006 | 0.005264205 |
| 0.709456769 | 1.77809E-05 |
| -1.20421113 | 0.084312464 |
| -1.10335055 | 0.164525849 |
| -1.16249985 | 0.074242208 |
| -1.17415004 | 0.001622485 |
| -1.21880115 | 0.000172816 |
| 0.977414691 | 0.769697576 |
| -1.04136796 | 0.436339593 |
| -1.32459255 | 0.000445472 |
| 0.988189243 | 0.867482843 |
| 0.827783577 | 0.00964786  |
| -1.24212524 | 0.004434055 |
| -1.0953193  | 0.276880403 |
| 0.726334192 | 1.8546E-09  |
| -1.19268312 | 0.003270898 |
| -1.30744629 | 0.001145204 |
| -1.14454564 | 0.269845372 |
| 0.934555086 | 0.345484853 |
| -1.10532679 | 0.171272108 |
| -1.26801891 | 0.013241752 |

|             |             |
|-------------|-------------|
| -1.07724794 | 0.62559428  |
| -1.20102479 | 0.033739415 |
| -1.1490585  | 0.280430891 |
| -1.0431442  | 0.546695011 |
| 0.888521124 | 0.021681318 |
| -1.07858406 | 0.106448163 |
| 0.939813227 | 0.281466324 |
| -1.10306472 | 0.343885478 |
| 0.723373315 | 1.45768E-07 |
| -1.14859013 | 0.217328036 |
| 0.978873113 | 0.7833893   |
| -1.09590568 | 0.333837254 |
| -1.15789697 | 0.01767423  |
| -1.23049509 | 0.004921544 |
| 0.754010702 | 1.52416E-07 |
| 0.960821763 | 0.614922794 |
| -1.1131833  | 0.216320392 |
| 0.98030145  | 0.759165106 |
| -1.02545141 | 0.761298539 |
| -1.13319085 | 0.093311867 |
| -1.06822909 | 0.333600734 |
| -1.02941236 | 0.623205999 |
| -1.06524166 | 0.428849267 |
| -1.15274184 | 0.022400956 |
| 0.983054704 | 0.833784937 |
| 0.932616164 | 0.598267225 |
| 0.818813088 | 0.016755781 |
| -1.38820731 | 0.000855747 |
| -1.1279306  | 0.068940162 |
| 0.824172282 | 0.010612654 |
| -1.09364908 | 0.044646342 |
| 0.971544614 | 0.621268313 |
| 0.988640191 | 0.862399679 |
| -1.0896157  | 0.151983474 |
| -1.18386907 | 0.107133491 |
| 0.964705368 | 0.637649422 |
| 0.899258312 | 0.061894717 |
| 0.763734005 | 1.47228E-06 |
| -1.14941053 | 0.007754935 |
| 0.946581036 | 0.276392864 |
| 0.818527805 | 0.012206091 |
| 0.912213085 | 0.122358132 |
| 0.857042633 | 0.003107862 |
| 0.836872325 | 0.012153854 |

|             |             |
|-------------|-------------|
| 0.873315406 | 0.035170155 |
| 0.982404962 | 0.701403731 |
| 0.930349511 | 0.121530194 |
| -1.02200097 | 0.699863332 |
| -1.03789741 | 0.50962706  |
| -1.45351923 | 1.01504E-06 |
| -1.27227738 | 0.005587222 |
| -1.0107037  | 0.847588298 |
| 0.892369947 | 0.219029076 |
| -1.00925493 | 0.861665715 |
| 0.936956292 | 0.411112174 |
| 0.975921409 | 0.546211805 |
| 0.906495848 | 0.377164818 |
| -1.17594001 | 0.027996694 |
| -1.06467139 | 0.579134247 |
| -1.12553528 | 0.180046628 |
| -1.07957114 | 0.141397402 |
| 0.823964263 | 0.000475571 |
| 0.806552792 | 0.001033385 |
| -1.67831044 | 2.47887E-14 |
| 0.886076584 | 0.012479055 |
| 0.848346579 | 4.79541E-06 |
| 0.988984796 | 0.829423391 |
| 0.973694952 | 0.809271452 |
| 0.897084352 | 0.045979499 |
| -1.04496407 | 0.645098065 |
| -1.08735331 | 0.568597511 |
| -1.04088776 | 0.42405157  |
| -1.22139377 | 0.024185968 |
| -1.17109592 | 0.050398738 |
| 0.629008109 | 2.89821E-12 |
| -1.18814562 | 0.063655943 |
| 0.764185222 | 0.01800783  |
| 0.610976256 | 1.04956E-08 |
| 0.792046384 | 0.001006989 |
| -1.45979255 | 0.000288042 |
| -1.0122513  | 0.871950321 |
| 0.943239085 | 0.230285223 |
| -1.20077715 | 0.031458883 |
| 0.892366562 | 0.057541691 |
| 0.951320399 | 0.326832601 |
| -1.28487913 | 4.5726E-05  |
| 0.992406904 | 0.89019842  |
| 0.871612057 | 0.290581906 |

|             |             |
|-------------|-------------|
| 0.926220839 | 0.128957473 |
| 0.879085498 | 0.00439469  |
| 0.945535586 | 0.345257848 |
| 0.917343488 | 0.086754536 |
| 0.944896965 | 0.180972222 |
| 0.891131472 | 0.117303023 |
| 0.961307509 | 0.630701743 |
| 0.96213722  | 0.581525558 |
| 0.906185495 | 0.192405221 |
| -1.22087984 | 0.09973488  |
| -1.05860199 | 0.14229096  |
| -1.21391909 | 0.061559754 |
| -1.02440346 | 0.593496694 |
| -1.10853271 | 0.122946067 |
| 0.954627913 | 0.368317553 |
| 0.933278431 | 0.17875583  |
| -1.00971102 | 0.848594319 |
| 0.803783671 | 0.255088538 |
| -1.03495046 | 0.477597623 |
| 0.733638768 | 0.000198615 |
| 0.939291959 | 0.333864453 |
| 0.807489371 | 0.019045357 |
| 0.827229324 | 0.023888601 |
| -1.13065283 | 0.038262662 |
| 0.965544851 | 0.267738898 |
| 0.893779972 | 0.090911525 |
| -1.01797608 | 0.734359371 |
| -1.01626066 | 0.705586265 |
| 0.990909517 | 0.892497654 |
| -1.26093571 | 0.004291549 |
| 0.910967397 | 0.193186707 |
| 0.809014214 | 0.007575927 |
| -1.39936736 | 0.000347978 |
| 0.997304604 | 0.970319538 |
| -1.10073261 | 0.387298165 |
| 0.841606865 | 0.101088847 |
| -1.15645901 | 0.041979409 |
| 0.944673328 | 0.307010297 |
| 0.747261123 | 4.06423E-10 |
| -1.14765225 | 0.134635808 |
| -1.00872075 | 0.912174583 |
| 0.922636233 | 0.216465349 |
| 0.822251664 | 3.89269E-05 |
| -1.25197602 | 0.001168658 |



|             |             |
|-------------|-------------|
| -1.21101801 | 0.015408534 |
| -1.28537813 | 0.02137435  |
| -1.27304006 | 0.021609564 |
| 0.927545606 | 0.117118414 |
| 0.963131759 | 0.594911885 |
| 0.830168786 | 0.000695415 |
| 0.995706417 | 0.95368177  |
| 0.955276171 | 0.325499502 |
| 0.962327847 | 0.617181048 |
| -1.41293338 | 5.47584E-06 |
| 0.818568361 | 0.00067039  |
| 0.826050533 | 0.030569001 |
| -1.00835508 | 0.824067834 |
| -1.16578267 | 0.002091476 |
| 0.856335753 | 0.005459413 |
| 0.918907787 | 0.172780263 |
| -1.14122987 | 0.323511348 |
| -1.15265747 | 0.119741064 |
| -1.32703016 | 5.75946E-05 |
| -1.13509472 | 0.042457488 |
| 0.648512848 | 2.18172E-12 |
| -1.04241325 | 0.323664083 |
| 0.917763386 | 0.186066024 |
| 0.960104411 | 0.487534186 |
| 0.832689925 | 0.031987834 |
| 0.664846373 | 2.74359E-09 |
| 0.982875573 | 0.810080033 |
| 0.959614125 | 0.487705762 |
| 0.875390242 | 0.12478254  |
| -1.02642831 | 0.759679202 |
| -1.12989204 | 0.00353995  |
| -1.16961823 | 0.009309365 |
| 0.977073551 | 0.759451822 |
| 0.877322613 | 0.089174    |
| 0.997637239 | 0.961693818 |
| 0.992508171 | 0.920265475 |
| 0.774890415 | 0.030170724 |
| 0.996351415 | 0.919633143 |
| -1.1160182  | 0.058772725 |
| -1.05145763 | 0.387828858 |
| 0.970888868 | 0.5350545   |
| 0.549013761 | 1.72394E-05 |
| 0.795416473 | 0.003101594 |
| -1.065497   | 0.243268705 |

|             |             |
|-------------|-------------|
| 0.889034031 | 0.03285886  |
| 0.89780128  | 0.508397109 |
| 0.370404052 | 1.93557E-17 |
| 0.872895132 | 0.04638389  |
| -1.03563085 | 0.554021575 |
| 0.93345507  | 0.189289036 |
| 0.98323995  | 0.874236814 |
| 0.993975123 | 0.891693621 |
| -1.31705834 | 0.001225742 |
| 0.960397035 | 0.408319024 |
| -1.04411316 | 0.597664577 |
| 0.963828506 | 0.7176105   |
| -1.05988305 | 0.431009202 |
| 0.92350266  | 0.274497986 |
| -1.01594878 | 0.738734292 |
| 0.838422237 | 0.00033024  |
| 0.990678752 | 0.788248283 |
| -1.00570211 | 0.916641246 |
| 0.995674366 | 0.914505597 |
| 0.903510752 | 0.036647593 |
| 0.941993693 | 0.157357332 |
| -1.0019578  | 0.96641149  |
| -1.02259734 | 0.670023151 |
| 0.921606474 | 0.073738333 |
| -1.10700499 | 0.086660197 |
| -1.0976762  | 0.003716246 |
| 0.892805114 | 0.133319104 |
| 0.958557995 | 0.635825688 |
| -1.09434139 | 0.507464795 |
| -1.25795872 | 0.042448802 |
| -1.03617931 | 0.533168885 |
| -1.28374422 | 0.00216969  |
| -1.40350024 | 1.15002E-07 |
| 0.815913136 | 0.000607949 |
| -1.11921893 | 0.060897326 |
| 0.977552494 | 0.730379683 |
| 0.943587023 | 0.620123023 |
| -1.01558023 | 0.782003047 |
| -1.07679459 | 0.638738607 |
| 0.67908115  | 1.28973E-05 |
| -1.04228932 | 0.316159733 |
| -1.08107484 | 0.08916668  |
| -1.14911067 | 0.003342021 |
| 0.946649338 | 0.370344789 |

|             |             |
|-------------|-------------|
| -1.3883942  | 0.014917663 |
| 0.744401275 | 4.59466E-09 |
| 0.920506009 | 0.152416605 |
| -1.03977695 | 0.401177826 |
| 0.96335357  | 0.514019323 |
| -1.34444566 | 0.041709196 |
| 0.91141458  | 0.366236208 |
| -1.19769923 | 0.114798716 |
| 0.823997292 | 0.090737534 |
| -1.04875155 | 0.549249979 |
| -1.07626965 | 0.40926179  |
| 0.857662382 | 0.002245466 |
| 0.874249219 | 0.108567543 |
| 0.856639355 | 0.007632104 |
| -1.11018876 | 0.143132807 |
| -1.11220757 | 0.199349741 |
| -1.23513487 | 0.014028634 |
| -1.20177036 | 0.047124622 |
| -1.08500969 | 0.203036915 |
| 0.964660096 | 0.692624995 |
| 0.81200168  | 0.005492321 |
| 0.557496335 | 5.44875E-15 |
| 0.79111777  | 0.0071541   |
| 0.748629066 | 9.62845E-05 |
| 0.855377586 | 0.119264207 |
| 0.735802487 | 1.17575E-05 |
| 0.784698371 | 1.8935E-05  |
| -1.28874277 | 0.034298611 |
| 0.99134056  | 0.787192473 |
| -1.05476671 | 0.361526581 |
| -1.05476861 | 0.309607384 |
| 0.787499096 | 0.007408098 |
| 0.98060852  | 0.698132306 |
| 0.718195857 | 0.002339308 |
| -1.38714659 | 0.003976476 |
| -1.31499051 | 0.049514384 |
| -1.08504471 | 0.21803346  |
| 0.406044069 | 4.03809E-16 |
| -1.19349317 | 0.0004738   |
| -1.12497195 | 0.12395186  |
| -1.01156237 | 0.835958796 |
| 0.892418369 | 0.2429287   |
| 0.874148622 | 0.076852344 |
| -1.04053438 | 0.724013774 |

|             |             |
|-------------|-------------|
| 0.637353306 | 1.20709E-08 |
| -1.06288082 | 0.248182082 |
| -1.24180637 | 0.005618175 |
| -1.07794501 | 0.471539807 |
| 0.802321867 | 0.022390571 |
| -1.54437584 | 7.84245E-08 |
| 0.884592243 | 0.051598452 |
| -1.1182551  | 0.083350406 |
| -1.16283492 | 0.021791728 |
| 0.971791671 | 0.684867581 |
| -1.08731688 | 0.105882099 |
| 0.905927858 | 0.045231468 |
| -1.02518023 | 0.830611469 |
| -1.1326665  | 0.112055313 |
| 0.912462886 | 0.105403383 |
| 0.915675855 | 0.15178663  |
| 0.896022689 | 0.069050189 |
| -1.04076849 | 0.598036748 |
| -1.05303068 | 0.405763601 |
| -1.16394042 | 0.114822366 |
| 0.852901858 | 0.036341727 |
| -1.02498885 | 0.50027056  |
| 0.785827606 | 0.016915443 |
| -1.26207363 | 0.059224793 |
| -1.03454526 | 0.505003199 |
| 0.825907751 | 0.053010152 |
| -1.58371882 | 0.000384197 |
| -1.15809418 | 0.033812035 |
| 0.999525409 | 0.99318007  |
| -1.16989218 | 0.00495053  |
| 0.822415096 | 0.018633977 |
| 0.892042495 | 0.234978365 |
| 0.91378553  | 0.192740345 |
| 0.969021223 | 0.597348463 |
| 0.881705842 | 0.131991268 |
| 0.730774039 | 0.001434275 |
| -1.10584667 | 0.071849774 |
| 0.894117544 | 0.069672287 |
| 0.796316505 | 0.01872208  |
| -1.26094433 | 0.000541223 |
| -1.07978424 | 0.326850627 |
| 0.924838642 | 0.059098156 |
| 0.935406971 | 0.284579148 |
| 0.8056154   | 9.51793E-05 |

|             |             |
|-------------|-------------|
| 0.923355419 | 0.238037289 |
| -1.1214078  | 0.183400239 |
| -1.19548672 | 0.074261184 |
| -1.17110946 | 0.014418273 |
| 0.602835375 | 7.8916E-10  |
| 0.803161905 | 0.028408239 |
| 0.982715109 | 0.717570256 |
| 0.895382965 | 0.358887843 |
| 0.995614368 | 0.895638785 |
| 0.592636982 | 1.01749E-11 |
| 0.974248323 | 0.555945686 |
| -1.02585508 | 0.607710492 |
| 0.819768763 | 0.000917381 |
| 0.800869231 | 0.001003751 |
| -1.08540233 | 0.146118299 |
| 0.886436208 | 0.044828695 |
| -1.41926167 | 5.84305E-08 |
| 0.820410125 | 0.026212854 |
| -1.05304637 | 0.445755675 |
| -1.26342416 | 0.001203616 |
| 0.920675119 | 0.024020406 |
| 0.996914066 | 0.926403441 |
| -1.0034269  | 0.945675736 |
| -1.06914761 | 0.399200184 |
| -1.05740983 | 0.354783842 |
| 0.9218701   | 0.029544928 |
| 0.954986117 | 0.385705426 |
| -1.0717454  | 0.277121591 |
| 0.97264216  | 0.59038077  |
| -1.07926828 | 0.261918485 |
| 0.902391901 | 0.037153001 |
| -1.051992   | 0.18865863  |
| -1.01175584 | 0.907339344 |
| -1.015205   | 0.768061941 |
| 0.91732729  | 0.157329044 |
| -1.10802737 | 0.550909873 |
| 0.993244832 | 0.887005188 |
| -1.11274344 | 0.071665488 |
| -1.23824713 | 0.000594787 |
| 0.634162577 | 1.94006E-10 |
| -1.00198148 | 0.968347657 |
| 0.983210416 | 0.747398869 |
| 0.902105694 | 0.399237075 |
| -1.02642288 | 0.619226528 |

|             |             |
|-------------|-------------|
| 0.989230829 | 0.917982394 |
| 0.922384838 | 0.218767222 |
| -1.08465524 | 0.074248008 |
| 0.98474528  | 0.818545898 |
| 0.942411989 | 0.359695874 |
| 0.732104918 | 1.58158E-05 |
| -1.00099711 | 0.981312888 |
| -1.13469304 | 0.001404714 |
| 0.90160671  | 0.251976352 |
| 0.620375089 | 5.63221E-12 |
| 0.501851889 | 1.93859E-14 |
| 0.91440652  | 0.139903811 |
| 0.949882354 | 0.328816804 |
| -1.01012523 | 0.885888879 |
| -1.21351088 | 0.002336747 |
| -1.22441906 | 0.000894645 |
| -1.14767302 | 0.146818921 |
| 0.971070108 | 0.591971262 |
| -1.36790083 | 0.000510862 |
| -1.37560889 | 5.89419E-05 |
| -1.00278708 | 0.967873762 |
| -1.23747193 | 5.88229E-05 |
| -1.05065046 | 0.186791094 |
| 0.659578057 | 2.07524E-06 |
| -1.32703431 | 3.65014E-05 |
| 0.976589444 | 0.694663199 |
| 0.817999161 | 0.001293228 |
| 0.923944332 | 0.151444826 |
| 0.894550529 | 0.001385686 |
| 0.9287085   | 0.178433686 |
| 0.774325704 | 0.001839464 |
| 0.705308555 | 2.7151E-08  |
| 0.970530798 | 0.678369826 |
| -1.16336542 | 0.200116766 |
| -1.14297159 | 0.270436504 |
| -1.40539394 | 9.55293E-05 |
| -1.02635146 | 0.735345282 |
| 0.900277351 | 0.135897985 |
| -1.1510747  | 0.113627    |
| -1.14003072 | 0.072421244 |
| -1.11051813 | 0.208474896 |
| -1.20069052 | 0.099642793 |
| 0.738355956 | 1.09472E-07 |
| -1.17992081 | 0.03402357  |

|             |             |
|-------------|-------------|
| -1.01889509 | 0.76680703  |
| -1.46863095 | 3.93574E-09 |
| -1.27353426 | 0.007549373 |
| 0.920940421 | 0.323018708 |
| -1.05907807 | 0.403059042 |
| -1.11633317 | 0.043977575 |
| 0.976260503 | 0.778428802 |
| -1.11782029 | 0.267128161 |
| 0.919094067 | 0.163265299 |
| -1.35668802 | 5.69052E-05 |
| -1.09815639 | 0.3102162   |
| -1.26214038 | 0.161171753 |
| -1.1227936  | 0.06625819  |
| -1.18365036 | 0.047713176 |
| -1.10902486 | 0.212177595 |
| -1.05835531 | 0.416764593 |
| -1.13509517 | 0.246960647 |
| 0.847348228 | 0.002365756 |
| 0.965637286 | 0.331367118 |
| 0.988929888 | 0.79005601  |
| -1.04525507 | 0.387897703 |
| -1.10397813 | 0.087115037 |
| -1.2576396  | 0.014467728 |
| -1.03790965 | 0.42373983  |
| 0.852748774 | 0.000627749 |
| 0.863503652 | 0.042195136 |
| 0.955744552 | 0.524976856 |
| -1.00288924 | 0.951689431 |
| 0.992141677 | 0.892394349 |
| -1.08672272 | 0.216489122 |
| 0.761308549 | 0.000429843 |
| -1.21084776 | 0.00179543  |
| 0.754434598 | 2.78259E-05 |
| 0.884860564 | 0.107403532 |
| -1.00832867 | 0.894389009 |
| 0.971392937 | 0.510414743 |
| -1.02423344 | 0.516832962 |
| 0.911261089 | 0.152760777 |
| 0.935016247 | 0.530581641 |
| -1.12598026 | 0.116574126 |
| -1.06439863 | 0.309591646 |
| -1.0513881  | 0.337146746 |
| 0.989787817 | 0.924356864 |
| -1.11227971 | 0.027136756 |

|             |             |
|-------------|-------------|
| 0.998917839 | 0.992864739 |
| -1.26708624 | 0.000795545 |
| 0.833080586 | 0.011396085 |
| -1.05185319 | 0.299252987 |
| 0.678985176 | 1.57858E-13 |
| 0.766630225 | 0.004753766 |
| -1.04557638 | 0.73948929  |
| -1.03262936 | 0.769406248 |
| -1.05644408 | 0.522555939 |
| -1.2526886  | 0.073410911 |
| -1.02501326 | 0.690410879 |
| -1.51175313 | 7.68368E-05 |
| -1.17060509 | 0.081973361 |
| 0.954680408 | 0.371596757 |
| -1.01723757 | 0.8036611   |
| -1.04733106 | 0.577676756 |
| 0.92920019  | 0.428136121 |
| -1.12434348 | 0.254955088 |
| -1.24352715 | 0.00110963  |
| 0.945045514 | 0.582133528 |
| -1.20493817 | 0.013591033 |
| -1.24489639 | 0.035716327 |
| -1.05753689 | 0.345906431 |
| -1.03087886 | 0.867449412 |
| -1.2574177  | 0.0027784   |
| -1.00761141 | 0.903254602 |
| -1.17662823 | 0.007250787 |
| -1.1714195  | 0.025181417 |
| -1.09253568 | 0.198319675 |
| -1.24396919 | 0.053837609 |
| -1.10035645 | 0.125237634 |
| 0.937028525 | 0.405220959 |
| -1.44448879 | 1.12E-06    |
| -1.02441455 | 0.67153055  |
| 0.938466178 | 0.466421367 |
| -1.14275319 | 0.302902352 |
| -1.20772093 | 0.042233847 |
| -1.1894378  | 0.047818159 |
| -1.56419579 | 0.022441311 |
| 0.976466487 | 0.701813233 |
| -1.06715565 | 0.516130903 |
| -1.31748573 | 0.000201247 |
| 0.968833684 | 0.553296366 |
| 0.986809578 | 0.808502876 |



|             |             |
|-------------|-------------|
| -1.11150704 | 0.385683909 |
| -1.00746464 | 0.912619265 |
| -1.17631356 | 0.003796867 |
| 0.971202617 | 0.590217693 |
| -1.03157035 | 0.66639113  |
| -1.10349295 | 0.395964332 |
| -1.04815623 | 0.479440884 |
| -1.14867366 | 0.052336076 |
| -1.16274355 | 0.585918847 |
| -1.10121949 | 0.139887939 |
| -1.35339936 | 4.23155E-05 |
| -1.05879211 | 0.331212488 |
| 0.980760101 | 0.804631206 |
| -1.03770346 | 0.497710528 |
| -1.09843578 | 0.210809682 |
| -1.17188466 | 0.014507616 |
| -1.03904447 | 0.363789354 |
| -1.05748811 | 0.333616376 |
| -1.01651715 | 0.799623679 |
| -1.02319321 | 0.881686574 |
| -1.04467054 | 0.464706593 |
| -1.0665491  | 0.262419455 |
| 0.967772551 | 0.624555724 |
| -1.05512228 | 0.325162543 |
| 0.997830022 | 0.972017201 |
| -1.18168336 | 0.101675633 |
| -1.04305072 | 0.425509502 |
| 0.979372452 | 0.861383435 |
| -1.11516977 | 0.205980037 |
| -1.16428701 | 0.403405904 |
| -1.26875472 | 0.027782971 |
| -1.02278154 | 0.727595523 |
| -1.12005104 | 0.030908972 |
| -1.41299233 | 0.021858286 |
| -1.13520106 | 0.098234138 |
| -1.15969656 | 0.178536239 |
| 0.982919498 | 0.729846551 |
| 0.959682241 | 0.49437456  |
| -1.14970019 | 0.055143065 |
| -1.04202559 | 0.357406337 |
| -1.16972757 | 0.020364673 |
| -1.0439098  | 0.64477713  |
| -1.12514881 | 0.227024589 |
| 0.924322643 | 0.222368791 |

|             |             |
|-------------|-------------|
| -1.04843304 | 0.520503164 |
| -1.14340618 | 0.08206644  |
| 0.984228489 | 0.894337704 |
| -1.05072291 | 0.386505619 |
| -1.08985108 | 0.15594806  |
| -1.01504628 | 0.878190907 |
| -1.02420192 | 0.692134877 |
| -1.06560169 | 0.451031927 |
| -1.47755543 | 0.000155239 |
| -1.21828439 | 0.309971077 |
| -1.03177913 | 0.631324397 |
| -1.11078682 | 0.102075457 |
| 0.921441334 | 0.449434275 |
| -1.13226315 | 0.062476082 |
| -1.06861202 | 0.343798707 |
| -1.14571464 | 0.017991256 |
| 0.998809181 | 0.983480376 |
| -1.01421523 | 0.824585202 |
| 0.960576448 | 0.736723617 |
| -1.08635896 | 0.220358059 |
| -1.05204176 | 0.370039847 |
| -1.04070818 | 0.47352622  |
| -1.06443647 | 0.220509888 |
| -1.09229581 | 0.460258323 |
| -1.10897763 | 0.137128018 |
| 0.94593832  | 0.228485541 |
| -1.00207347 | 0.968074548 |
| -1.00554909 | 0.914136202 |
| -1.02177815 | 0.693931428 |
| -1.0600359  | 0.277049348 |
| -1.0345944  | 0.511936538 |
| -1.0651024  | 0.469966997 |
| -1.13413157 | 0.036950219 |
| -1.15927619 | 0.029003724 |
| 0.985656026 | 0.818508135 |
| -1.19568866 | 0.008697595 |
| 0.988842538 | 0.835038275 |
| 0.958657304 | 0.417359528 |
| -1.02620403 | 0.800342727 |
| -1.09011539 | 0.631936959 |
| -1.18884    | 0.016408655 |
| -1.02293398 | 0.797991373 |
| -1.03702998 | 0.580428199 |
| -1.06160788 | 0.571130047 |

|             |             |
|-------------|-------------|
| 0.999787584 | 0.997896419 |
| -1.156552   | 0.029385769 |
| 0.945027014 | 0.315794144 |
| -1.0496821  | 0.467857935 |
| -1.08142543 | 0.115617647 |
| 0.98526688  | 0.806017783 |
| -1.06742461 | 0.475606138 |
| -1.02567154 | 0.748463545 |
| -1.01589325 | 0.789314304 |
| -1.18360867 | 0.045743432 |
| -1.0785995  | 0.19273966  |
| -1.29021103 | 0.005668392 |
| -1.04591342 | 0.675777128 |
| -1.1493947  | 0.071932397 |
| -1.01208579 | 0.845838869 |
| -1.16097558 | 0.032628373 |
| -1.19566111 | 0.021306502 |
| -1.14232125 | 0.162957227 |
| -1.16488611 | 0.065197536 |
| -1.12643191 | 0.30440684  |
| 0.994166431 | 0.958233406 |
| -1.00533132 | 0.9275678   |
| -1.02220786 | 0.804701549 |
| -1.03524381 | 0.687146795 |
| 0.85745227  | 0.530554441 |
| 0.964821056 | 0.887876953 |
| 0.818301369 | 0.473100467 |
| 0.978065934 | 0.71308974  |
| -1.11117853 | 0.064463718 |
| -1.10073748 | 0.205126928 |
| -1.15318564 | 0.218442303 |
| -1.00105146 | 0.9838389   |
| -1.16853817 | 0.051961949 |
| -1.32300726 | 0.000122532 |
| -1.20796523 | 0.062632091 |
| -1.06122939 | 0.325235828 |
| 0.977797695 | 0.687338478 |
| 0.993226367 | 0.902314301 |
| -1.18324419 | 0.00886055  |
| -1.24582317 | 0.002434547 |
| 0.948405804 | 0.365020634 |
| -1.11525774 | 0.17126634  |
| 0.887960046 | 0.370410015 |
| -1.2575487  | 0.001711803 |

|             |             |
|-------------|-------------|
| -1.06854633 | 0.23668674  |
| -1.14042162 | 0.050951334 |
| -1.09968368 | 0.179542112 |
| 0.98028355  | 0.794212595 |
| -1.0894663  | 0.120706498 |
| -1.51410146 | 0.000117079 |
| -1.00654147 | 0.924228341 |
| 0.953314727 | 0.596395259 |
| -1.046508   | 0.43598325  |
| -1.04035752 | 0.345748357 |
| -1.02040945 | 0.75063895  |
| -1.00955255 | 0.87469622  |
| -1.07794995 | 0.450200948 |
| 0.919931132 | 0.413317025 |
| 0.978419729 | 0.742687813 |
| -1.07315457 | 0.343539082 |
| 0.996356314 | 0.978774082 |
| 0.910998049 | 0.152194418 |
| 0.967408946 | 0.668975572 |
| 0.891082655 | 0.132535151 |
| -1.0207291  | 0.694464306 |
| -1.14886682 | 0.152256562 |
| -1.11484875 | 0.123471882 |
| 0.997305628 | 0.95796152  |
| -1.05835283 | 0.28904982  |
| -1.09317279 | 0.219200705 |
| -1.06836559 | 0.225419838 |
| 0.980403049 | 0.724595574 |
| -1.02113002 | 0.693386408 |
| -1.0261943  | 0.70339193  |
| -1.31022732 | 0.005781748 |
| -1.14529631 | 0.087751237 |
| -1.18086911 | 0.037731059 |
| 0.88737433  | 0.018419386 |
| -1.14990343 | 0.011936375 |
| -1.08027722 | 0.164782625 |
| -1.13798645 | 0.268300643 |
| -1.23896544 | 0.003286634 |
| 0.927226341 | 0.222167206 |
| -1.22536473 | 0.002632093 |
| 0.9175962   | 0.203996895 |
| -1.02064867 | 0.815477424 |
| -1.01257606 | 0.845642958 |
| -1.10068176 | 0.360748555 |

|             |             |
|-------------|-------------|
| -1.43814635 | 1.71484E-06 |
| -1.00665803 | 0.951172814 |
| -1.26091068 | 5.47044E-06 |
| -1.09465206 | 0.20710365  |
| -1.06165722 | 0.513452425 |
| 0.881511492 | 0.175406356 |
| 0.965958803 | 0.739431589 |
| -1.12627559 | 0.14300995  |
| -1.1484236  | 0.002707556 |
| -1.06307277 | 0.448181704 |
| 0.819847144 | 0.001060965 |
| 0.671562435 | 1.62262E-05 |
| -1.44899634 | 1.15202E-07 |
| -1.00977319 | 0.908384667 |
| -1.13727857 | 0.092659455 |
| 0.786030265 | 0.004888043 |
| -1.17814267 | 0.114595622 |
| -1.00297125 | 0.949019374 |
| 0.457831521 | 1.20185E-09 |
| -1.00254388 | 0.96925873  |
| -1.10629512 | 0.216813468 |
| -1.08707469 | 0.291924356 |
| 0.802791047 | 0.000538611 |
| -1.01065908 | 0.837956023 |
| -1.04721814 | 0.312606857 |
| -1.09010836 | 0.241697457 |
| -1.02407126 | 0.646569386 |
| 0.899821353 | 0.155283423 |
| 0.963766432 | 0.636613967 |
| 0.925174485 | 0.067761462 |
| -1.176769   | 0.012301943 |
| -1.41978861 | 0.009856334 |
| -1.09789774 | 0.352032545 |
| 0.949901814 | 0.486514157 |
| 0.958916481 | 0.532051694 |
| 0.982928078 | 0.81659162  |
| -1.03802035 | 0.480995505 |
| -1.43043334 | 7.82372E-06 |
| 0.901876423 | 0.215160777 |
| 0.964315185 | 0.67442412  |
| 0.973598792 | 0.608465016 |
| -1.01461605 | 0.819094172 |
| -1.32015344 | 1.60768E-08 |
| -1.02346808 | 0.531806796 |

|             |             |
|-------------|-------------|
| -1.06283079 | 0.208873154 |
| -1.03599557 | 0.362766212 |
| -1.43181004 | 0.000165644 |
| -1.22731095 | 0.001340264 |
| -1.16254967 | 0.001507214 |
| -1.00608894 | 0.82664959  |
| 0.943116166 | 0.106498875 |
| -1.01544713 | 0.724285326 |
| -1.27681168 | 3.09479E-05 |
| 0.912930673 | 0.406723771 |
| 0.979541689 | 0.761171108 |
| -1.10130887 | 0.108468562 |
| 0.988871069 | 0.815928318 |
| -1.08312694 | 0.135486296 |
| -1.07933955 | 0.156180119 |
| 0.796638416 | 0.004070351 |
| 0.979729131 | 0.638321788 |
| -1.04945869 | 0.597194516 |
| 0.855535018 | 0.000876855 |
| -1.08097192 | 0.328069913 |
| -1.29834826 | 0.006521992 |
| 0.845128766 | 0.000357313 |
| 0.944440251 | 0.258873755 |
| 0.587612203 | 4.41448E-09 |
| 0.896174763 | 0.128788305 |
| -1.3214778  | 0.00086107  |
| -1.22176075 | 0.015885493 |
| 0.985578958 | 0.88103072  |
| 0.977203736 | 0.70163935  |
| -1.13274474 | 0.022687738 |
| -1.14722819 | 0.030614303 |
| 0.97131671  | 0.590061717 |
| -1.02707499 | 0.624727878 |
| 0.943435985 | 0.118335115 |
| -1.12539808 | 0.048200101 |
| 0.816312876 | 0.003960325 |
| -1.55025866 | 1.48243E-09 |
| -1.00653851 | 0.866783597 |
| -1.41350986 | 0.000441913 |
| -1.02399177 | 0.677755507 |
| 0.965679838 | 0.547760563 |
| 0.965145539 | 0.431443749 |
| -1.13820832 | 0.123069694 |
| -1.00773349 | 0.880919684 |

|             |             |
|-------------|-------------|
| 0.926393658 | 0.09964162  |
| -1.17323871 | 0.002449998 |
| 0.81125347  | 0.002152733 |
| 0.938337894 | 0.483579996 |
| 0.984121313 | 0.684819157 |
| -1.40109089 | 0.000193993 |
| 0.876287261 | 0.003237361 |
| 0.760784282 | 4.40319E-05 |
| 0.819620655 | 0.015414729 |
| -1.13528082 | 0.417822495 |
| -1.48978231 | 1.54396E-06 |
| -1.02393446 | 0.773701735 |
| 0.862868836 | 0.043747211 |
| -1.05649409 | 0.406410092 |
| -1.03316596 | 0.572050092 |
| 0.968467521 | 0.330320349 |
| 0.868094229 | 0.132272649 |
| 0.716486201 | 8.91367E-05 |
| -1.10555278 | 0.171145905 |
| 0.806236858 | 8.91346E-06 |
| -1.0474598  | 0.58382296  |
| -1.13147067 | 0.161542925 |
| -1.55762694 | 0.006248091 |
| -1.2761402  | 0.036699674 |
| -1.01812158 | 0.902146663 |
| -1.03671826 | 0.389343748 |
| -1.05172323 | 0.525078741 |
| 0.98612124  | 0.790818837 |
| -1.00265846 | 0.939012281 |
| -1.05169962 | 0.405348362 |
| -1.26591729 | 0.023144848 |
| 0.858885663 | 0.0354163   |
| -1.06743812 | 0.267232856 |
| 0.967062971 | 0.513742034 |
| 0.873579977 | 0.000776796 |
| 0.743868908 | 0.000773404 |
| 0.740018757 | 1.07794E-05 |
| 0.936341153 | 0.28801707  |
| 0.962903468 | 0.390176226 |
| -1.3995774  | 0.007840862 |
| 0.960454592 | 0.420597898 |
| -1.02821591 | 0.672837242 |
| -1.16392216 | 0.001883726 |
| 0.786557628 | 0.012249346 |

|             |             |
|-------------|-------------|
| -1.03667831 | 0.538402565 |
| -1.04437094 | 0.560184464 |
| 0.962443665 | 0.439852812 |
| -1.13644178 | 0.016500632 |
| 0.891974173 | 0.0997367   |
| -1.05730575 | 0.242369485 |
| 0.965317637 | 0.444802558 |
| 0.786256148 | 0.000996716 |
| 0.496272363 | 5.42819E-15 |
| 0.664635985 | 7.01019E-08 |
| -1.05415577 | 0.358921219 |
| 0.997217055 | 0.958419644 |
| 0.544267182 | 2.53968E-23 |
| 0.895454202 | 0.075059087 |
| 0.997671661 | 0.938229936 |
| -1.11347684 | 0.232177693 |
| -1.13066529 | 0.11604308  |
| -1.00430885 | 0.930591989 |
| 0.962647997 | 0.509332356 |
| 0.998252309 | 0.983204229 |
| -1.315477   | 0.045115886 |
| -1.113939   | 0.071024939 |
| -1.0169206  | 0.866653159 |
| -1.38504109 | 9.24731E-06 |
| -1.10186456 | 0.103742956 |
| -1.00982128 | 0.781393527 |
| -1.01033648 | 0.946025364 |
| 0.93342721  | 0.301296627 |
| 0.981646995 | 0.648855396 |
| -1.00534713 | 0.941604879 |
| 0.847959991 | 0.057368683 |
| 0.730816213 | 6.83451E-06 |
| 0.665011427 | 0.004226993 |
| -1.2109545  | 0.013400061 |
| -1.23544661 | 3.95093E-05 |
| 0.971047055 | 0.634666598 |
| 0.934228798 | 0.167953161 |
| 0.861135952 | 0.012742854 |
| 0.951525055 | 0.380369716 |
| 0.808531392 | 0.010866497 |
| -1.2128888  | 0.191656175 |
| -1.21807699 | 0.02793429  |
| -1.03562681 | 0.554891805 |
| 0.997628315 | 0.949193884 |



|             |             |
|-------------|-------------|
| -1.00340034 | 0.95126439  |
| 0.975589237 | 0.415551358 |
| 0.518378314 | 7.0606E-11  |
| 0.887949145 | 0.034999044 |
| -1.00335723 | 0.962393976 |
| -1.26092493 | 0.049436806 |
| -1.11866572 | 0.189617516 |
| 0.978948168 | 0.828818772 |
| -1.1007943  | 0.221800704 |
| -1.02543306 | 0.698330764 |
| -1.16410476 | 0.027549672 |
| -1.30596551 | 0.00994501  |
| -1.21270204 | 0.001345356 |
| -1.39380173 | 1.40023E-05 |
| -1.0183441  | 0.785096341 |
| -1.03913073 | 0.603928571 |
| 0.885983065 | 0.179974085 |
| -1.194546   | 0.004655054 |
| 0.893042627 | 0.091565544 |
| -1.2438702  | 0.010229295 |
| -1.18125829 | 0.055336024 |
| -1.24043499 | 0.02575013  |
| -1.18460599 | 0.066768996 |
| -1.03439568 | 0.657464192 |
| 0.627249868 | 5.91157E-08 |
| 0.967712396 | 0.660952048 |
| -1.04660178 | 0.467200517 |
| 0.983485795 | 0.762821023 |
| 0.973669602 | 0.706206928 |
| -1.15942144 | 0.016836636 |
| 0.86077837  | 0.086938496 |
| 0.967836117 | 0.765615849 |
| 0.885703935 | 0.105757764 |
| 0.946030046 | 0.385031392 |
| 0.968220266 | 0.607873098 |
| -1.10818373 | 0.038751259 |
| -1.25374361 | 0.058031332 |
| 0.986435614 | 0.786606233 |
| -1.06642264 | 0.379043183 |
| -1.04123113 | 0.590176058 |
| -1.10819612 | 0.126296704 |
| -1.13773994 | 0.252547093 |
| -1.20529516 | 0.067876978 |
| -1.09601816 | 0.47305542  |

|             |             |
|-------------|-------------|
| 0.867656439 | 0.251953601 |
| -1.15270085 | 0.140870551 |
| -1.05468239 | 0.417280968 |
| -1.05404904 | 0.140573542 |
| -1.31874148 | 0.000220553 |
| -1.20314807 | 0.040207675 |
| 0.947495225 | 0.393967635 |
| 0.942112194 | 0.250527632 |
| 0.944109836 | 0.494659982 |
| -1.08755888 | 0.048577864 |
| -1.01701317 | 0.804170872 |
| -1.12764343 | 0.010346082 |
| 0.938113131 | 0.161400765 |
| 0.619235781 | 3.08226E-07 |
| -1.39530057 | 1.13064E-07 |
| 0.845152044 | 0.033696024 |
| -1.00288642 | 0.951154005 |
| -1.00911545 | 0.863604676 |
| 0.970508835 | 0.596341137 |
| 0.984991283 | 0.713494516 |
| -1.06489238 | 0.222944114 |
| 0.993312467 | 0.88931267  |
| 0.933881813 | 0.100040713 |
| 0.931276289 | 0.178981928 |
| -1.01337852 | 0.804189431 |
| 0.897450268 | 0.033303498 |
| 0.996008128 | 0.941805588 |
| -1.29754245 | 1.41266E-06 |
| -1.50466255 | 8.12037E-06 |
| 0.817519643 | 0.019052173 |
| 0.968222105 | 0.628417581 |
| -1.10994543 | 0.37607844  |
| 0.957102216 | 0.694467683 |
| -1.182513   | 0.06929974  |
| -1.34394172 | 4.35536E-05 |
| -1.20328555 | 0.005386272 |
| 0.895827364 | 0.045628007 |
| 0.932573612 | 0.517870636 |
| 0.292988814 | 1.11242E-14 |
| 0.661274544 | 3.02895E-07 |
| -1.16503399 | 0.056247715 |
| -1.03503418 | 0.700672686 |
| 0.976959101 | 0.765206065 |
| 0.900013485 | 0.034436554 |

|             |             |
|-------------|-------------|
| 0.979249878 | 0.76780251  |
| 0.927409022 | 0.298755803 |
| 0.759953144 | 0.003413316 |
| 0.894794729 | 0.148695124 |
| -1.18700219 | 0.004486635 |
| 0.578227661 | 3.48341E-09 |
| 0.923218587 | 0.302240915 |
| -1.04671938 | 0.567311014 |
| -1.29696364 | 6.92023E-05 |
| 0.89518792  | 0.089214308 |
| 0.996457948 | 0.951750005 |
| -1.0261215  | 0.719199753 |
| 0.790522315 | 4.10538E-07 |
| 0.93157312  | 0.215041613 |
| -1.2717252  | 0.001355873 |
| 0.944246672 | 0.594710378 |
| -1.03438339 | 0.567594015 |
| -1.24591694 | 0.065267083 |
| 0.995062105 | 0.929742831 |
| -1.21275445 | 0.028576072 |
| -1.20508262 | 0.011017631 |
| -1.06084168 | 0.227947761 |
| 0.886768034 | 0.164625837 |
| -1.3743049  | 0.001737949 |
| 0.997574769 | 0.978366872 |
| -1.09129988 | 0.167098785 |
| -1.1368194  | 0.037576174 |
| 0.892790219 | 0.076369054 |
| -1.24078165 | 0.004804532 |
| -1.15801054 | 0.082390531 |
| -1.05598273 | 0.491331114 |
| 0.915520472 | 0.212698579 |
| -1.09348836 | 0.243127847 |
| 0.775082947 | 0.010929689 |
| -1.12293838 | 0.119380407 |
| -1.54656529 | 2.59958E-09 |
| -1.01841074 | 0.673147249 |
| 0.764625414 | 0.012519787 |
| -1.023665   | 0.685561351 |
| 0.706539461 | 1.12297E-08 |
| 0.942097386 | 0.329857228 |
| -1.14617918 | 0.071009873 |
| 0.960643348 | 0.337984251 |
| -1.30978618 | 0.003000476 |

|             |             |
|-------------|-------------|
| -1.0932304  | 0.098113454 |
| 0.949132614 | 0.488214284 |
| 0.648100061 | 4.40662E-10 |
| -1.03457767 | 0.591822555 |
| 0.926388584 | 0.37801264  |
| -1.01114503 | 0.796336862 |
| -1.13560969 | 0.005488198 |
| -1.1035116  | 0.183460435 |
| -1.1292565  | 0.027544613 |
| -1.06265192 | 0.337575986 |
| -1.22737803 | 0.002992224 |
| 0.996200249 | 0.967417681 |
| -1.08884677 | 0.429451397 |
| -1.29270551 | 0.017898913 |
| 0.61273159  | 2.86287E-10 |
| -1.07339283 | 0.24962578  |
| -1.03867746 | 0.748598284 |
| 0.969841915 | 0.54788165  |
| 0.868803923 | 0.098544623 |
| -1.0638919  | 0.173096855 |
| 0.55974884  | 2.93413E-11 |
| -1.23456562 | 0.055491185 |
| -1.2626533  | 0.003295053 |
| -1.08269304 | 0.201261536 |
| 0.776837247 | 0.009423588 |
| -1.20406561 | 0.054411639 |
| 0.876819139 | 0.002221001 |
| -1.18106891 | 0.09587856  |
| -1.17034128 | 0.125269031 |
| -1.12010187 | 0.043872888 |
| -1.01712065 | 0.672048726 |
| 0.907230633 | 0.06916596  |
| 0.977608003 | 0.628580617 |
| -1.01321318 | 0.899537685 |
| -1.4171759  | 0.00370714  |
| -1.32258431 | 0.008082767 |
| -1.08252848 | 0.256441657 |
| 0.929047576 | 0.338087787 |
| 0.688810048 | 1.12415E-09 |
| 0.83017981  | 0.017485711 |
| -1.14109435 | 0.1022304   |
| -1.04710736 | 0.415384681 |
| 0.968726953 | 0.498836187 |
| 0.962133006 | 0.729890991 |

|             |             |
|-------------|-------------|
| -1.03252941 | 0.53196652  |
| -1.00330291 | 0.937142158 |
| -1.09426423 | 0.141055517 |
| -1.06285124 | 0.308909844 |
| -1.00053663 | 0.993149288 |
| -1.01366048 | 0.68542007  |
| -1.12859655 | 0.031790984 |
| -1.03868352 | 0.55300666  |
| 0.646642099 | 4.2785E-07  |
| -1.12097105 | 0.099100044 |
| -1.07919639 | 0.277839729 |
| 0.819679377 | 0.000253146 |
| -1.06415596 | 0.372966488 |
| -1.03968993 | 0.401061901 |
| -1.1444354  | 0.079824946 |
| -1.01053766 | 0.927926407 |
| -1.16758157 | 0.085104854 |
| -1.25175811 | 0.007091945 |
| 0.91314031  | 0.241310572 |
| -1.0901989  | 0.325491203 |
| -1.26236895 | 0.003861818 |
| -1.06161007 | 0.407700973 |
| 0.960276465 | 0.448198437 |
| 0.90514972  | 0.061131776 |
| 0.544293086 | 2.56989E-08 |
| -1.43230121 | 0.006090491 |
| 0.990140098 | 0.880278701 |
| -1.14553479 | 0.010333807 |
| -1.02409996 | 0.697662155 |
| 0.953352745 | 0.681636693 |
| 0.878110895 | 0.017240312 |
| -1.00733152 | 0.91951852  |
| 0.965313643 | 0.454237342 |
| 0.589518292 | 7.86658E-09 |
| 0.955208723 | 0.656375761 |
| 0.9753904   | 0.505926448 |
| 0.908206389 | 0.132214176 |
| 0.968437909 | 0.56802003  |
| -1.36728968 | 5.90526E-06 |
| -1.4714133  | 0.000354111 |
| -1.29521542 | 0.018953366 |
| 0.970295591 | 0.442527818 |
| 0.969627341 | 0.554674739 |
| -1.08811723 | 0.1990274   |

|             |             |
|-------------|-------------|
| -1.08872048 | 0.312894185 |
| -1.00244266 | 0.972224018 |
| 0.694769923 | 1.74286E-15 |
| 0.722728144 | 3.60083E-05 |
| -1.00737104 | 0.867725487 |
| 0.854499754 | 0.043360601 |
| 0.929108367 | 0.106394887 |
| 0.993794759 | 0.919058571 |
| 0.860767398 | 0.011256711 |
| 0.98820498  | 0.889063502 |
| 0.89013636  | 0.063560374 |
| 0.972406019 | 0.611887657 |
| 0.365454466 | 1.67608E-08 |
| -1.12598919 | 0.0223869   |
| 0.984311259 | 0.734292892 |
| -1.11048423 | 0.002378354 |
| 0.948043105 | 0.378375767 |
| 0.94520887  | 0.336765306 |
| -1.12395317 | 0.053574609 |
| -1.09355908 | 0.146665835 |
| -1.01808926 | 0.703459224 |
| 0.663739778 | 5.43115E-05 |
| 0.90457119  | 0.043464509 |
| -1.08625678 | 0.161565091 |
| -1.48907421 | 2.63939E-06 |
| -1.11541776 | 0.103543872 |
| 0.988331131 | 0.830404565 |
| -1.03076058 | 0.369822781 |
| 0.693785932 | 5.77614E-06 |
| 0.988812801 | 0.732181908 |
| -1.64437508 | 2.51688E-06 |
| -1.40230564 | 0.000193492 |
| -1.00998232 | 0.853155152 |
| 0.811243176 | 0.002069233 |
| -1.03437717 | 0.730400767 |
| -1.01755336 | 0.755893368 |
| -1.20272128 | 0.00561734  |
| -1.04057382 | 0.494399336 |
| -1.11146828 | 0.04819454  |
| 0.965443743 | 0.643258597 |
| -1.01877988 | 0.788210917 |
| 0.857950209 | 0.077545701 |
| -1.19224983 | 0.026398585 |
| 0.917680154 | 0.580970825 |

|             |             |
|-------------|-------------|
| -1.28918329 | 0.000127432 |
| -1.01843489 | 0.798158119 |
| -1.14544959 | 0.0980792   |
| -1.09605745 | 0.48408416  |
| -1.10654728 | 0.048314052 |
| -1.18673746 | 0.037786009 |
| -1.16734076 | 0.03129542  |
| -1.04405763 | 0.811146795 |
| -1.51559553 | 5.26536E-08 |
| -1.11504286 | 0.242693161 |
| -1.14719283 | 0.32160692  |
| 0.821847548 | 0.082694924 |
| -1.12195788 | 0.474329697 |
| 0.731157715 | 0.00086333  |
| 0.839936396 | 0.000139977 |
| -1.04048202 | 0.32556716  |
| -1.32469161 | 0.014276827 |
| 0.98210401  | 0.655746417 |
| 0.924397756 | 0.104814002 |
| -1.03984937 | 0.619685566 |
| 0.896212299 | 0.179181281 |
| 0.895527638 | 0.03618492  |
| 0.81549151  | 0.004525352 |
| -1.03166595 | 0.544705412 |
| -1.18875651 | 0.016060405 |
| 0.797646484 | 0.033034589 |
| 0.786071722 | 0.000411473 |
| -1.24522714 | 0.00737288  |
| -1.01438585 | 0.788035926 |
| -1.50572617 | 6.21204E-05 |
| 0.773501838 | 0.000920331 |
| -1.19538648 | 0.041876696 |
| -1.26295844 | 0.001167207 |
| -1.23652494 | 0.117355811 |
| 0.998206592 | 0.981239323 |
| 0.949828151 | 0.32196387  |
| -1.07668886 | 0.207045152 |
| 0.987025954 | 0.8256539   |
| 0.982806263 | 0.799003252 |
| 0.938968032 | 0.257549252 |
| -1.12021561 | 0.084943766 |
| -1.39522852 | 0.00032839  |
| -1.02721353 | 0.676205352 |
| -1.24899531 | 0.002177807 |

|             |             |
|-------------|-------------|
| 0.887913051 | 0.183958944 |
| -1.01686612 | 0.756079245 |
| -1.14257553 | 0.025208989 |
| -1.01774882 | 0.829421841 |
| -1.10084151 | 0.395963014 |
| 0.816356153 | 0.027701537 |
| -1.22414119 | 0.008131128 |
| -1.05901565 | 0.430893225 |
| -1.05739624 | 0.470488906 |
| 0.912813054 | 0.177116894 |
| 0.994551641 | 0.946299065 |
| -1.09658883 | 0.120985706 |
| 0.86193792  | 0.012670391 |
| -1.06192655 | 0.230797797 |
| -1.02616025 | 0.753100628 |
| -1.05818833 | 0.2705396   |
| -1.11058668 | 0.319231296 |
| -1.08831098 | 0.112201277 |
| -1.02469905 | 0.687382753 |
| 0.740861208 | 0.000139199 |
| 0.967643264 | 0.558120265 |
| 0.940217068 | 0.101699255 |
| -1.03182793 | 0.564671663 |
| -1.07891567 | 0.30356087  |
| 0.816298279 | 0.004528985 |
| 0.957994405 | 0.506871228 |
| 0.921552246 | 0.016558324 |
| 0.717361727 | 0.000180224 |
| -1.09293506 | 0.227224672 |
| -1.13381795 | 0.063362098 |
| -1.1757202  | 0.121145478 |
| -1.27846852 | 0.01628506  |
| 0.947748929 | 0.369496585 |
| -1.15191048 | 0.120864808 |
| -1.01511741 | 0.772222277 |
| -1.06803953 | 0.337490903 |
| 0.944182969 | 0.357670234 |
| 0.992902501 | 0.912513836 |
| 0.610786138 | 7.09099E-06 |
| 0.62512376  | 2.87116E-06 |
| -1.16868512 | 0.040444318 |
| -1.15074456 | 0.128334857 |
| -1.19438896 | 0.003726278 |
| -1.01473468 | 0.825285122 |



|             |             |
|-------------|-------------|
| -1.06917867 | 0.468517591 |
| -1.08632305 | 0.030915407 |
| 0.976442426 | 0.485966271 |
| 0.989177283 | 0.798053648 |
| -1.01520495 | 0.675415262 |
| 0.864113833 | 0.005383028 |
| -1.00247271 | 0.973491662 |
| -1.01913023 | 0.703301462 |
| -1.32269643 | 0.047470561 |
| -1.00601407 | 0.938686844 |
| 0.673614611 | 5.20136E-11 |
| 0.885312639 | 0.006705412 |
| 0.986312809 | 0.836264239 |
| 0.426394655 | 2.75872E-17 |
| 0.857104167 | 0.002638505 |
| 0.914699013 | 0.026395103 |
| 0.877288249 | 0.052753973 |
| -1.17492643 | 0.008109771 |
| -1.0436003  | 0.397367353 |
| 0.892132615 | 0.336850005 |
| 0.982800413 | 0.748217257 |
| -1.31631611 | 0.000104426 |
| -1.04439121 | 0.500959735 |
| -1.08220856 | 0.107926979 |
| -1.35049958 | 0.015089672 |
| -1.15847477 | 0.15852875  |
| -1.10203023 | 0.565901619 |
| -1.04206019 | 0.616433315 |
| 0.984094685 | 0.736742917 |
| -1.145068   | 0.01494543  |
| 0.838411544 | 0.001087746 |
| -1.47279238 | 0.007523075 |
| -1.07044555 | 0.094674053 |
| -1.09506022 | 0.069246861 |
| 0.904216369 | 0.067722664 |
| -1.01749849 | 0.64152737  |
| -1.33142995 | 0.006511474 |
| 0.985917815 | 0.666427338 |
| -1.07079203 | 0.137617057 |
| -1.00355952 | 0.951515267 |
| 0.842829437 | 0.032980996 |
| 0.845164634 | 0.043308309 |
| 0.679559637 | 5.15312E-07 |
| -1.00212361 | 0.977034202 |

|             |             |
|-------------|-------------|
| -1.12318934 | 0.098374652 |
| 0.967275161 | 0.38102864  |
| 0.994228874 | 0.913229255 |
| 0.841155394 | 0.307267764 |
| -1.02601962 | 0.835153672 |
| -1.26861729 | 0.000107856 |
| 0.835917808 | 0.009574296 |
| 0.967164196 | 0.54361436  |
| 0.767759504 | 9.5447E-05  |
| 0.907412278 | 0.058386358 |
| 0.943480003 | 0.50568774  |
| -1.04824916 | 0.657608785 |
| 0.945009796 | 0.519495996 |
| -1.02978885 | 0.601973986 |
| -1.29536643 | 0.000292074 |
| -1.03626289 | 0.555852062 |
| -1.06783187 | 0.221690739 |
| 0.956112383 | 0.414619651 |
| -1.17379302 | 0.280614916 |
| -1.01385447 | 0.935470013 |
| -1.12788814 | 0.220392646 |
| -1.00535667 | 0.930992125 |
| 0.993577927 | 0.889860744 |
| 0.346877462 | 5.16946E-15 |
| -1.12870079 | 0.290625558 |
| 0.788539901 | 9.73652E-05 |
| -1.05650367 | 0.454109101 |
| -1.12590532 | 0.023029888 |
| 0.971760134 | 0.686241605 |
| -1.02612474 | 0.63717031  |
| -1.17630857 | 0.017844552 |
| -1.03674014 | 0.672245932 |
| -1.04109436 | 0.48406558  |
| 0.986603139 | 0.774323039 |
| 0.930502079 | 0.02991442  |
| 0.971833099 | 0.570442064 |
| -1.38973713 | 4.25828E-05 |
| 0.958631786 | 0.597539746 |
| -1.13199564 | 0.113423355 |
| 0.90261584  | 0.126483873 |
| -1.01998515 | 0.763446514 |
| -1.35045417 | 7.98446E-07 |
| -1.01432505 | 0.817452824 |
| 0.967998234 | 0.334452253 |

|             |             |
|-------------|-------------|
| 0.624519806 | 1.00657E-12 |
| 0.998619492 | 0.976678562 |
| -1.14347734 | 0.053547817 |
| 0.976826124 | 0.490519369 |
| 0.949593051 | 0.36604124  |
| -1.22052658 | 0.025911185 |
| -1.01428457 | 0.810655684 |
| 0.863690349 | 0.166086004 |
| -1.0432592  | 0.730219083 |
| 0.979348907 | 0.568021788 |
| -1.0571201  | 0.12044907  |
| -1.00865554 | 0.892383286 |
| 0.843597737 | 0.012044522 |
| 0.829338709 | 0.011430654 |
| -1.0752787  | 0.64425524  |
| -1.07157671 | 0.025181359 |
| -1.1434725  | 0.039375685 |
| 0.992376282 | 0.827056755 |
| 0.96155833  | 0.486654142 |
| -1.15393114 | 0.392083593 |
| -1.22559453 | 0.005452378 |
| -1.02628308 | 0.691049866 |
| -1.13660132 | 0.025484794 |
| 0.984449722 | 0.750317607 |
| -1.03527372 | 0.669436485 |
| -1.07291614 | 0.201452182 |
| -1.25099395 | 0.004588879 |
| 0.983278034 | 0.680730442 |
| -1.01918345 | 0.73725355  |
| -1.04403588 | 0.486016223 |
| -1.03922385 | 0.444903503 |
| -1.04059498 | 0.536034937 |
| 0.934991105 | 0.254281178 |
| 0.926938349 | 0.486820581 |
| 0.900170784 | 0.086204371 |
| -1.03706508 | 0.425685054 |
| -1.21936027 | 0.003181526 |
| 0.991103601 | 0.830572276 |
| -1.03715192 | 0.586557978 |
| -1.21042809 | 0.013172079 |
| -1.25485367 | 0.017234853 |
| -1.53936028 | 0.000408549 |
| -1.17974438 | 0.109740464 |
| -1.28795278 | 0.034841977 |

|             |             |
|-------------|-------------|
| 0.911777715 | 0.076825477 |
| -1.11284163 | 0.208432195 |
| 0.85344693  | 0.007996921 |
| -1.1013313  | 0.154920892 |
| 0.89909787  | 0.002178856 |
| -1.12992124 | 0.041136053 |
| -1.09935748 | 0.104762159 |
| -1.14829247 | 0.105909549 |
| 0.971115417 | 0.623629435 |
| 0.955896332 | 0.504980804 |
| 0.976547096 | 0.643838802 |
| -1.29127722 | 0.000634256 |
| -1.52459736 | 1.30632E-08 |
| -1.07324098 | 0.318647499 |
| -1.16350656 | 0.124579788 |
| 0.917020796 | 0.102475505 |
| 0.912866883 | 0.087578099 |
| 0.55367034  | 2.15244E-09 |
| 0.871655111 | 0.038937312 |
| 0.867958809 | 0.042555272 |
| -1.04584038 | 0.577167208 |
| 0.819606911 | 0.001980009 |
| -1.30499013 | 0.035900144 |
| 0.98251299  | 0.70906648  |
| 0.930108738 | 0.133010746 |
| 0.975212885 | 0.636421784 |
| 0.995614306 | 0.953293248 |
| -1.06078735 | 0.491724999 |
| -1.35814801 | 0.000306702 |
| -1.06096005 | 0.314145163 |
| -1.09063637 | 0.243845929 |
| -1.22702394 | 0.010513756 |
| -1.11013697 | 0.030083469 |
| -1.30400964 | 0.002798919 |
| 0.936886266 | 0.414766075 |
| -1.19564014 | 0.126670051 |
| -1.07030757 | 0.477635647 |
| 0.863151098 | 0.202807687 |
| -1.0672111  | 0.164388194 |
| -1.06378451 | 0.710538527 |
| -1.3333983  | 2.84509E-07 |
| 0.54213206  | 1.604E-14   |
| -1.0732213  | 0.479704231 |
| 0.960263323 | 0.201836182 |

|             |             |
|-------------|-------------|
| -1.08251677 | 0.530981962 |
| -1.06527757 | 0.136678206 |
| 0.835113879 | 0.000265473 |
| 0.993922677 | 0.927744274 |
| 0.582464495 | 0.000193514 |
| -1.02003131 | 0.719220928 |
| -1.30332657 | 0.012008953 |
| 0.992359971 | 0.887501146 |
| 0.794968631 | 0.017623387 |
| 0.508058553 | 5.54502E-15 |
| 0.703339633 | 9.77846E-11 |
| 0.915013017 | 0.196332256 |
| 0.934286111 | 0.338561366 |
| 0.890741745 | 0.025442425 |
| -1.40732057 | 0.003701208 |
| -1.21272312 | 0.003079227 |
| -1.15633526 | 0.250499906 |
| 0.907045713 | 0.098458039 |
| 0.892631268 | 0.294972966 |
| 0.582373647 | 2.95165E-08 |
| 0.746473022 | 2.35948E-05 |
| 0.934306835 | 0.275826817 |
| 0.926037121 | 0.136085063 |
| 0.624925323 | 3.79452E-11 |
| -1.0679112  | 0.423643768 |
| 0.905276112 | 0.028389337 |
| -1.01735163 | 0.793040528 |
| 0.813495831 | 0.010403901 |
| 0.999317305 | 0.990171231 |
| 0.813815439 | 0.019259945 |
| 0.628379605 | 0.00037558  |
| 0.728408719 | 0.002037768 |
| -1.11351521 | 0.008447682 |
| -1.1114939  | 0.28834512  |
| -1.13118523 | 0.171746817 |
| -1.0803408  | 0.222902016 |
| 0.87168776  | 0.174979686 |
| 0.855244749 | 0.047192949 |
| 0.737675525 | 0.000495739 |
| 0.904095337 | 0.05867071  |
| -1.03113447 | 0.57600421  |
| -1.02944986 | 0.669038285 |
| 0.761237332 | 0.038057409 |
| 0.892047435 | 0.129102958 |

|             |             |
|-------------|-------------|
| 0.942866816 | 0.144471821 |
| 0.891724103 | 0.018590004 |
| 0.816646054 | 0.000916088 |
| -1.03265393 | 0.607349787 |
| 0.845379256 | 0.0074328   |
| 0.968118414 | 0.430326502 |
| 0.882326462 | 0.09277749  |
| -1.08980133 | 0.185494539 |
| -1.0138067  | 0.859585587 |
| -1.03281553 | 0.665055219 |
| -1.08599331 | 0.464064095 |
| 0.935592463 | 0.454803156 |
| -1.11848766 | 0.201017629 |
| 0.877309293 | 0.069568708 |
| 0.994615225 | 0.95645323  |
| 0.956237394 | 0.624126228 |
| 0.884785647 | 0.145493472 |
| 0.945514523 | 0.254454737 |
| -1.11152161 | 0.01414064  |
| 0.91040314  | 0.306610669 |
| 0.961516519 | 0.602758228 |
| -1.09174045 | 0.082243509 |
| -1.19456187 | 0.010351772 |
| -1.08485408 | 0.542415358 |
| 0.758707742 | 0.000109876 |
| 0.576636176 | 1.32823E-07 |
| -1.07241193 | 0.399329625 |
| 0.901913466 | 0.273890383 |
| -1.26899862 | 0.007930889 |
| -1.09706598 | 0.132497734 |
| -1.40215835 | 0.000476305 |
| 0.757130749 | 3.85884E-05 |
| 0.978631906 | 0.718274541 |
| 0.813179971 | 0.043281728 |
| 0.66356596  | 8.77423E-13 |
| -1.29449576 | 0.00080886  |
| -1.00110723 | 0.981137391 |
| 0.839650972 | 0.000769506 |
| 0.777182614 | 0.024825649 |
| -1.00118318 | 0.989510846 |
| -1.09167851 | 0.328181387 |
| 0.92858132  | 0.144195721 |
| 0.936984915 | 0.289343829 |
| 0.941005904 | 0.366410588 |

|             |             |
|-------------|-------------|
| 0.801868608 | 0.014622366 |
| 0.715152193 | 8.15415E-07 |
| 0.97732036  | 0.729624293 |
| 0.91803971  | 0.162382849 |
| 0.781917869 | 0.007253929 |
| 0.61309576  | 9.96239E-14 |
| -1.04036809 | 0.678450192 |
| 0.892144119 | 0.156525287 |
| 0.674949542 | 0.000116157 |
| -1.03440432 | 0.652631694 |
| 0.375468133 | 2.61564E-17 |
| -1.19126039 | 0.058201368 |
| 0.872803299 | 0.123628691 |
| 0.473508249 | 3.88104E-11 |
| 0.762280041 | 0.007423806 |
| 0.783608199 | 0.000231019 |
| 0.70283442  | 0.000256448 |
| 0.859791489 | 0.051722518 |
| 0.926887634 | 0.250365715 |
| 0.92331799  | 0.016953244 |
| -1.08200814 | 0.533633916 |
| -1.12681035 | 0.092241097 |
| 0.677898723 | 2.99457E-07 |
| 0.375140113 | 2.06074E-23 |
| 0.851920185 | 0.009216545 |
| 0.895242049 | 0.094072714 |
| 0.865372904 | 0.02351532  |
| -1.17259619 | 0.095379797 |
| -1.26828429 | 0.029406839 |
| -1.11509155 | 0.148154062 |
| -1.17720213 | 0.01080732  |
| 0.865570318 | 0.015874329 |
| 0.951844458 | 0.31214595  |
| 0.88969753  | 0.606733249 |
| -1.08772506 | 0.302032437 |
| 0.722750104 | 5.7531E-06  |
| 0.899837147 | 0.124220118 |
| -1.03861007 | 0.661274315 |
| 0.870142836 | 0.194486221 |
| -1.01152457 | 0.838779682 |
| 0.808356225 | 0.003350548 |
| 0.932814183 | 0.488182489 |
| -1.04309842 | 0.459496753 |
| 0.672438169 | 6.85984E-07 |

|             |             |
|-------------|-------------|
| -1.0581654  | 0.391770519 |
| -1.22124089 | 0.005239327 |
| -1.32951844 | 8.87076E-05 |
| -1.13137973 | 0.017614156 |
| 0.892656125 | 0.186925732 |
| -1.14231461 | 0.058053901 |
| -1.03226345 | 0.499626817 |
| 0.962929167 | 0.387179819 |
| 0.754363261 | 1.62392E-05 |
| -1.08241622 | 0.222723288 |
| -1.01488479 | 0.820787646 |
| 0.869162038 | 0.094979575 |
| -1.06334277 | 0.406616252 |
| -1.06916595 | 0.070600272 |
| -1.15548371 | 0.098580369 |
| -1.0004777  | 0.995343959 |
| -1.01027974 | 0.849038117 |
| 0.944561383 | 0.267717585 |
| -1.01812447 | 0.806594892 |
| -1.17794991 | 0.027997201 |
| 0.790766419 | 0.000123951 |
| -1.0768632  | 0.176648903 |
| 0.983923245 | 0.76828046  |
| -1.17197138 | 0.002922839 |
| -1.03901414 | 0.366950454 |
| -1.17512017 | 0.007281656 |
| 0.748713254 | 0.063578757 |
| 0.921795166 | 0.207431901 |
| -1.11950234 | 0.19884891  |
| -1.06625176 | 0.496807871 |
| 0.917931984 | 0.180774099 |
| -1.01174209 | 0.875929849 |
| 0.952972654 | 0.46929915  |
| 0.743926442 | 0.003199192 |
| 0.753750542 | 0.000376852 |
| -1.1151045  | 0.192987479 |
| 0.972896032 | 0.613636156 |
| 0.987600585 | 0.835454246 |
| -1.14509988 | 0.010832124 |
| 0.984694783 | 0.789418507 |
| 0.834671711 | 0.039117868 |
| -1.01422182 | 0.823540421 |
| -1.21734686 | 0.008862225 |
| -1.00454504 | 0.944591855 |



|             |             |
|-------------|-------------|
| -1.11432437 | 0.171041911 |
| 0.721920239 | 0.000209142 |
| -1.20528802 | 0.009102881 |
| 0.970624304 | 0.66900401  |
| 0.978163505 | 0.786428818 |
| -1.09686861 | 0.188637037 |
| 0.983949254 | 0.771509052 |
| 0.652706332 | 9.30493E-08 |
| -1.15481873 | 0.062276355 |
| 0.749121543 | 4.79364E-05 |
| 0.987766253 | 0.787042723 |
| -1.22831906 | 0.060816437 |
| 0.880035164 | 0.020591679 |
| 0.962293855 | 0.561650799 |
| -1.07837712 | 0.282109129 |
| -1.06200808 | 0.354172752 |
| -1.03471829 | 0.528320372 |
| 0.938822354 | 0.231047844 |
| -0.99993628 | 0.99913457  |
| 0.566754633 | 1.38438E-12 |
| 0.874738896 | 0.029471787 |
| -1.15874134 | 0.157744703 |
| 0.794183955 | 3.62546E-06 |
| -1.0219243  | 0.712703166 |
| -1.19021547 | 0.012482027 |
| 0.829438017 | 0.010059024 |
| 0.882140951 | 0.02716978  |
| -1.04210668 | 0.463663455 |
| 0.907530775 | 0.121481509 |
| -1.01315881 | 0.790522183 |
| 0.910238219 | 0.306174582 |
| 0.964080012 | 0.472877958 |
| -1.09949661 | 0.149422667 |
| 0.840250185 | 0.010719787 |
| -1.12071718 | 0.031352299 |
| -1.02063822 | 0.692726363 |
| 0.763860109 | 8.84596E-05 |
| -1.05384101 | 0.503453676 |
| 0.443877072 | 3.08607E-20 |
| 0.977236234 | 0.681232243 |
| 0.947588858 | 0.505746282 |
| -1.27654299 | 0.007651381 |
| -1.03310391 | 0.712823309 |
| 0.978672438 | 0.614120184 |

|             |             |
|-------------|-------------|
| 0.966880106 | 0.390479863 |
| -1.25591417 | 0.009594502 |
| 0.930873558 | 0.256600392 |
| -1.12472445 | 0.220277817 |
| -1.03081917 | 0.578063194 |
| -1.03439454 | 0.590567589 |
| 0.999239126 | 0.990161743 |
| 0.966234413 | 0.563647789 |
| 0.925076663 | 0.272271144 |
| -1.12180169 | 0.154656978 |
| -1.00736313 | 0.882520489 |
| -1.13210914 | 0.020893908 |
| -1.01297832 | 0.788858948 |
| -1.03193243 | 0.575836222 |
| -1.18024919 | 0.030408347 |
| -1.08449707 | 0.201352655 |
| -1.02678431 | 0.677647733 |
| -1.04487564 | 0.339129757 |
| 0.822532997 | 0.001278413 |
| 0.90324335  | 0.026583405 |
| -1.08142553 | 0.098160343 |
| -1.60661682 | 3.72992E-06 |
| -1.06969933 | 0.183244291 |
| -1.05249281 | 0.434396901 |
| -1.06040096 | 0.294008653 |
| 0.898990416 | 0.122306206 |
| -1.01296594 | 0.776066435 |
| -1.01359475 | 0.767735692 |
| 0.791024211 | 0.007693681 |
| 0.997128374 | 0.957014195 |
| 0.942501554 | 0.618900727 |
| 0.935068401 | 0.249127521 |
| 0.355829041 | 1.97232E-10 |
| -1.02473572 | 0.653488251 |
| -1.095594   | 0.065754072 |
| -1.00180326 | 0.981927481 |
| -1.24477521 | 0.000212036 |
| 0.834957945 | 0.002359385 |
| 0.98989183  | 0.910081367 |
| 0.947446198 | 0.451947203 |
| 0.269970371 | 1.9158E-12  |
| -1.17856546 | 0.012441778 |
| 0.716139022 | 0.003054439 |
| 0.865683187 | 0.105065509 |

|             |             |
|-------------|-------------|
| 0.967453722 | 0.693674516 |
| 0.960513761 | 0.493134569 |
| -1.03675115 | 0.467884853 |
| -1.07283152 | 0.476444145 |
| -1.00598532 | 0.919516254 |
| -1.02778995 | 0.563552321 |
| 0.905460166 | 0.115756605 |
| 0.687357447 | 6.16885E-09 |
| 0.916726073 | 0.241049842 |
| 0.946210211 | 0.567934235 |
| 0.718553431 | 1.11784E-05 |
| 0.822657212 | 0.062199022 |
| -1.86092628 | 2.46971E-08 |
| 0.668518441 | 6.12927E-10 |
| 0.798314052 | 0.00182858  |
| 0.398139598 | 5.08576E-10 |
| 0.862311326 | 0.02126756  |
| 0.971782758 | 0.541625527 |
| 0.62305852  | 4.72166E-11 |
| 0.965676709 | 0.4101289   |
| 0.912680644 | 0.080697456 |
| 0.925224264 | 0.192668372 |
| 0.916189619 | 0.27653694  |
| 0.998139981 | 0.969374776 |
| 0.871782089 | 0.022822985 |
| 0.850061218 | 0.024077532 |
| -1.01713093 | 0.846651289 |
| 0.969274652 | 0.493486825 |
| 0.976872072 | 0.726478592 |
| 0.379991881 | 1.4097E-09  |
| 0.67358805  | 0.001441989 |
| 0.999013599 | 0.987233478 |
| 0.94683459  | 0.576261944 |
| 0.99320261  | 0.914008143 |
| -1.06131564 | 0.269877367 |
| 0.872567231 | 0.008415774 |
| 0.942592273 | 0.270096227 |
| -1.00158094 | 0.976377631 |
| -1.10318343 | 0.084727622 |
| -1.13864617 | 0.262604075 |
| -1.13936193 | 0.179180311 |
| -1.0172182  | 0.781968597 |
| -1.12763532 | 0.109430669 |
| 0.951302796 | 0.366752937 |

|             |             |
|-------------|-------------|
| -1.11883288 | 0.081296452 |
| -1.06526886 | 0.39779755  |
| 0.918644198 | 0.161920625 |
| 0.830130946 | 0.048656493 |
| 0.866304452 | 0.079159034 |
| -1.10490126 | 0.244071072 |
| -1.26512222 | 0.00056347  |
| -1.14235848 | 0.071506794 |
| -1.1108022  | 0.287831154 |
| -1.06439592 | 0.094101215 |
| -1.12328298 | 0.110298394 |
| -1.20092235 | 0.089615782 |
| 0.844796168 | 0.177224712 |
| -1.35151134 | 0.02017807  |
| -1.21293082 | 0.005283453 |
| 0.938996802 | 0.605682909 |
| -1.17775994 | 0.046350632 |
| -1.07330382 | 0.262500131 |
| -1.18885735 | 0.022869756 |
| 0.946373864 | 0.354366823 |
| -1.18456225 | 0.032471136 |
| 0.961132933 | 0.451395302 |
| -1.18501865 | 0.07273824  |
| -1.13379918 | 0.25991536  |
| 0.946220336 | 0.688681581 |
| -1.20321681 | 0.09275038  |
| -1.19421516 | 0.001655203 |
| -1.23562537 | 0.000660751 |
| -1.10236372 | 0.217550302 |
| 0.986494004 | 0.767419282 |
| -1.02260798 | 0.746109436 |
| -1.10050886 | 0.105170027 |
| -1.1828285  | 0.249369987 |
| 0.987281976 | 0.798773555 |
| 0.559034838 | 3.02342E-14 |
| -1.19179487 | 0.038413931 |
| -1.45248698 | 0.001671415 |
| -1.0135347  | 0.889979149 |
| -1.29236667 | 0.001493748 |
| -1.01651189 | 0.818010217 |
| 0.976268642 | 0.520101953 |
| -1.37131208 | 0.020798772 |
| -1.0159043  | 0.844608713 |
| 0.997564086 | 0.973372604 |

|             |             |
|-------------|-------------|
| -1.10758329 | 0.147442629 |
| -1.08653122 | 0.250607449 |
| -1.08899413 | 0.066869051 |
| 0.663871674 | 8.28396E-09 |
| 0.777489526 | 0.001565426 |
| 0.929473244 | 0.375947108 |
| 0.905150494 | 0.033780402 |
| 0.920430164 | 0.036163049 |
| -1.11948431 | 0.347842405 |
| -1.08568835 | 0.373816195 |
| 0.847884935 | 0.00010599  |
| 0.935988308 | 0.254508272 |
| -1.12244579 | 0.198019257 |
| 0.886513688 | 0.089988345 |
| 0.813627106 | 0.061024775 |
| 0.931413557 | 0.342936109 |
| -1.15666397 | 0.016694537 |
| -1.00810716 | 0.908812154 |
| -1.14386929 | 0.067771419 |
| -1.25220167 | 0.01031822  |
| -1.27889369 | 0.008356039 |
| 0.809096499 | 0.001951475 |
| 0.614131978 | 1.75591E-10 |
| 0.922769381 | 0.418612549 |
| 0.987591803 | 0.710369227 |
| -1.24088584 | 0.014645003 |
| -1.1431155  | 0.403885939 |
| -1.1782929  | 0.066488694 |
| -1.06817666 | 0.684146903 |
| -1.02023442 | 0.758985014 |
| -1.00219683 | 0.963470018 |
| -1.1215354  | 0.071603183 |
| -1.2893814  | 0.000136447 |
| -1.068527   | 0.105672891 |
| 0.916766547 | 0.044221004 |
| 0.957940859 | 0.42564123  |
| -1.08113915 | 0.328753802 |
| -1.03477272 | 0.350435833 |
| -1.07786164 | 0.288896206 |
| -1.01958941 | 0.820955007 |
| -1.20101958 | 0.003614279 |
| -1.0010625  | 0.980428044 |
| 0.96519941  | 0.55765026  |
| -1.15006851 | 0.039761532 |

|             |             |
|-------------|-------------|
| 0.837339001 | 0.018315802 |
| -1.02365508 | 0.807064687 |
| 0.905210486 | 0.387357404 |
| 0.886893148 | 0.020413498 |
| -1.19960956 | 0.16395858  |
| -1.11670966 | 0.173505892 |
| -1.41723789 | 3.95668E-05 |
| 0.740835964 | 0.019988478 |
| 0.769970559 | 0.012139513 |
| -1.10199835 | 0.107322233 |
| 0.763299374 | 0.002062383 |
| 0.982914661 | 0.665477686 |
| 0.958992954 | 0.49301709  |
| -1.03527356 | 0.399873772 |
| -1.21246383 | 0.021154092 |
| -1.08095771 | 0.350686382 |
| 0.947781056 | 0.363057087 |
| 0.774344201 | 0.013461515 |
| -1.40648761 | 0.000963912 |
| -1.02429496 | 0.804488403 |
| -1.03126895 | 0.359983474 |
| 0.990342413 | 0.753198124 |
| 0.979995814 | 0.868024301 |
| 0.752268457 | 5.1658E-07  |
| -1.06105909 | 0.385860262 |
| 0.856638609 | 0.027836792 |
| -1.17881655 | 0.001639124 |
| -1.43931981 | 6.45362E-05 |
| 0.797592559 | 0.007752593 |
| -1.03355464 | 0.713250158 |
| -1.18517236 | 0.025029347 |
| 0.965840864 | 0.744252562 |
| 0.935847595 | 0.05498769  |
| 0.936348216 | 0.125500218 |
| -1.02506795 | 0.574992866 |
| 0.86484251  | 0.057973113 |
| -1.06837449 | 0.272322789 |
| -1.08117577 | 0.080431418 |
| 0.747826281 | 3.16944E-12 |
| -1.18823947 | 0.001233976 |
| -1.14451535 | 0.1496555   |
| -1.14862119 | 0.002619238 |
| 0.935019929 | 0.191992685 |
| -1.15600546 | 0.060134558 |

|             |             |
|-------------|-------------|
| 0.706251961 | 1.53318E-08 |
| 0.931606011 | 0.227730806 |
| 0.859785151 | 0.013038271 |
| 0.870008783 | 0.038142387 |
| 0.836222059 | 0.009432121 |
| -1.14985863 | 0.114726972 |
| 0.957468058 | 0.2258123   |
| 0.974615536 | 0.485436783 |
| -1.14691843 | 0.170047379 |
| -1.03315955 | 0.633277745 |
| -1.21386881 | 0.01076709  |
| -1.07212715 | 0.205745247 |
| -1.1638485  | 0.043739529 |
| 0.820966161 | 0.029352014 |
| -1.20102111 | 0.001773003 |
| 0.92515577  | 0.052656545 |
| 0.960230248 | 0.219612376 |
| 0.977104089 | 0.690356805 |
| 0.99210825  | 0.878406763 |
| -1.18776652 | 0.04716722  |
| 0.684339017 | 8.5233E-12  |
| 0.992064998 | 0.864531275 |
| 0.978634304 | 0.721252133 |
| 0.727429959 | 5.44135E-06 |
| -1.15180203 | 0.074990341 |
| -1.11209225 | 0.33578254  |
| -1.67448588 | 1.86719E-07 |
| -1.26466986 | 0.001117338 |
| 0.918152109 | 0.243378547 |
| -1.1704755  | 0.057598056 |
| 0.980940619 | 0.82390685  |
| -1.24051898 | 0.076769249 |
| -1.13088517 | 0.066507925 |
| -1.01256506 | 0.891459052 |
| -1.32775739 | 2.20831E-06 |
| -1.08538968 | 0.036556364 |
| -1.05472117 | 0.22724742  |
| -1.29810128 | 0.001240408 |
| 0.949171649 | 0.6238081   |
| -1.27165836 | 0.012325237 |
| -1.2693797  | 0.015194276 |
| 0.814229441 | 0.003348476 |
| 0.985150342 | 0.795988717 |
| 0.89882631  | 0.01341303  |

|             |             |
|-------------|-------------|
| -1.67337031 | 0.000227746 |
| 0.902558089 | 0.181024694 |
| -1.04805548 | 0.434399615 |
| 0.897844332 | 0.067882919 |
| 0.911942304 | 0.089609068 |
| -1.1695539  | 0.046670781 |
| -1.0109921  | 0.822193867 |
| 0.913939219 | 0.242818309 |
| -1.04724695 | 0.471511797 |
| -1.00292538 | 0.969668818 |
| -1.00525706 | 0.856925387 |
| 0.943315932 | 0.434569174 |
| -1.25004443 | 0.037864874 |
| -1.36075209 | 0.006818093 |
| -1.24474758 | 0.007450961 |
| -1.1501965  | 0.009150147 |
| -1.11794538 | 0.03659993  |
| -1.01972427 | 0.766419204 |
| -1.08453431 | 0.295881818 |
| 0.720847099 | 8.13281E-05 |
| -1.13908344 | 0.259876774 |
| -1.09263329 | 0.346220043 |
| -1.16920479 | 0.007045918 |
| -1.27396471 | 0.000179835 |
| 0.894765065 | 0.280474638 |
| -1.12194284 | 0.173798041 |
| -1.05131304 | 0.541864491 |
| -1.0017189  | 0.964141355 |
| -1.05040711 | 0.543428599 |
| -1.25737123 | 6.71367E-10 |
| -1.10358921 | 0.138620289 |
| -1.03071443 | 0.584507496 |
| -1.16625516 | 0.003421635 |
| 0.809948885 | 0.000127086 |
| -1.01265178 | 0.769138702 |
| -1.12478767 | 0.26987233  |
| -1.09026948 | 0.418329096 |
| 0.934626848 | 0.136095282 |
| -1.11024629 | 0.110872482 |
| 0.92037084  | 0.12068869  |
| 0.931805939 | 0.183403821 |
| 0.291796971 | 2.03267E-22 |
| 0.977014457 | 0.75777425  |
| 0.880817049 | 0.086858412 |



|             |             |
|-------------|-------------|
| -1.02989792 | 0.760222599 |
| 0.95221207  | 0.467183856 |
| 0.94008068  | 0.39995085  |
| 0.724363338 | 0.000200183 |
| -1.00946558 | 0.804753807 |
| 0.699625204 | 0.009823816 |
| 0.825885783 | 0.004158762 |
| 0.56050014  | 8.81429E-14 |
| -1.13840195 | 0.041672071 |
| 0.57016272  | 3.00382E-17 |
| 0.536624704 | 1.1687E-12  |
| -1.05621826 | 0.507513279 |
| -1.01664647 | 0.732483084 |
| 0.996168595 | 0.918984151 |
| -1.08506084 | 0.232942315 |
| -1.19936761 | 0.055821993 |
| -1.10783966 | 0.199057404 |
| -1.54078212 | 0.001087312 |
| -1.01652004 | 0.727287538 |
| 0.954250971 | 0.335163642 |
| 0.836799665 | 0.073380598 |
| -1.19022072 | 0.042046273 |
| 0.730167349 | 0.000607709 |
| -1.13217943 | 0.111309447 |
| -1.12073656 | 0.013648742 |
| -1.03995862 | 0.612445719 |
| -1.03857802 | 0.553472856 |
| 0.925406317 | 0.372611029 |
| 0.933332206 | 0.237724578 |
| 0.883156055 | 0.189991072 |
| 0.97019879  | 0.628659235 |
| -1.09124625 | 0.108588171 |
| 0.984052407 | 0.752485648 |
| 0.991089062 | 0.883031582 |
| 0.844947793 | 0.000801964 |
| -1.10927747 | 0.075398253 |
| -1.37441405 | 2.24517E-06 |
| 0.993863289 | 0.888377531 |
| -1.07536744 | 0.224381533 |
| -1.13868221 | 0.012194494 |
| -1.11090534 | 0.093725042 |
| 0.891528908 | 0.048067333 |
| -1.02161997 | 0.79407623  |
| -1.15791682 | 0.18367501  |

|             |             |
|-------------|-------------|
| -1.09987037 | 0.392810703 |
| 0.814037545 | 0.041351522 |
| 0.595447298 | 3.77888E-12 |
| 0.972562019 | 0.516089125 |
| 0.823330168 | 0.006036082 |
| 0.96938134  | 0.593341489 |
| -1.0671267  | 0.270969956 |
| -1.05586818 | 0.38929428  |
| -1.04788994 | 0.405662044 |
| 0.944379398 | 0.214729198 |
| 0.950810347 | 0.365404366 |
| -1.19349855 | 0.018239919 |
| -1.33971231 | 1.05792E-07 |
| -1.91790253 | 2.2318E-09  |
| -1.40184527 | 0.000119373 |
| 0.892900378 | 0.010996962 |
| 0.979077542 | 0.704892132 |
| 0.997565005 | 0.965845932 |
| -1.36315559 | 0.002085896 |
| -1.04550244 | 0.45635604  |
| -1.11087579 | 0.07435816  |
| -1.24082955 | 0.000732078 |
| 0.851063379 | 0.009319632 |
| 0.797436076 | 2.41451E-05 |
| -1.04199245 | 0.417812065 |
| 0.857265852 | 0.010301599 |
| 0.95200758  | 0.385048162 |
| -1.02995823 | 0.462701708 |
| -1.10951149 | 0.080647201 |
| 0.887377077 | 0.037898926 |
| -1.00609749 | 0.911457554 |
| 0.969815898 | 0.424532363 |
| 0.891181776 | 0.236880285 |
| -1.10214246 | 0.166612786 |
| -1.17502572 | 0.049662254 |
| -1.12708502 | 0.144025689 |
| -1.10590542 | 0.505118552 |
| -1.00802861 | 0.88394246  |
| 0.803244633 | 0.064693345 |
| 0.961707831 | 0.477612389 |
| -1.31573117 | 0.003102301 |
| 0.638828095 | 3.08872E-05 |
| 0.11516864  | 4.42439E-38 |
| -1.40916592 | 0.018512193 |

|             |             |
|-------------|-------------|
| -1.90071389 | 1.71701E-05 |
| 0.39087211  | 2.71823E-12 |
| -1.09969842 | 0.454173016 |
| 0.759471664 | 0.000182659 |
| -1.03600699 | 0.706923913 |
| -1.04431055 | 0.62624849  |
| -1.10351004 | 0.324392923 |
| 0.841418504 | 0.015480544 |
| -1.21695513 | 0.061161093 |
| -1.21711712 | 0.004608915 |
| 0.993357405 | 0.92777781  |
| -1.15920299 | 0.015104521 |
| 0.701560751 | 4.0174E-06  |
| 0.828396749 | 0.017948319 |
| -1.03557409 | 0.587449453 |
| -1.09434953 | 0.042314526 |
| -1.32897239 | 8.12252E-05 |
| 0.87949444  | 0.130429611 |
| -1.00568967 | 0.950675056 |
| -1.13521843 | 0.102911908 |
| 0.939554292 | 0.558637997 |
| 0.905187534 | 0.113361753 |
| -1.00738316 | 0.931013286 |
| 0.863809517 | 0.017962523 |
| 0.994238186 | 0.963913441 |
| 0.955134145 | 0.452581826 |
| 0.91613876  | 0.205040942 |
| 0.98705706  | 0.913949553 |
| -1.10521831 | 0.125365156 |
| -1.06928608 | 0.336987876 |
| -1.3474933  | 0.000995769 |
| -1.14482872 | 0.092260971 |
| -1.01394581 | 0.794928871 |
| -1.48796926 | 8.78482E-11 |
| -1.01206023 | 0.7357971   |
| -1.02515747 | 0.658523208 |
| 0.972431083 | 0.804663488 |
| 0.604789155 | 6.0711E-05  |
| -1.21028175 | 0.071499912 |
| -1.20404083 | 0.004579793 |
| -1.04418503 | 0.52291999  |
| -1.08668931 | 0.071631653 |
| 0.667978271 | 0.002499243 |
| 0.934745477 | 0.061327617 |

|             |             |
|-------------|-------------|
| -1.26584715 | 0.039427764 |
| 0.675035479 | 4.70519E-09 |
| 0.697881975 | 5.42003E-06 |
| -1.05222778 | 0.574246148 |
| -1.05248473 | 0.379305182 |
| -1.15459013 | 0.165718223 |
| -1.42296016 | 0.003580529 |
| 0.930572869 | 0.497479814 |
| 0.933128322 | 0.418577702 |
| -1.18610238 | 0.165621077 |
| -1.30600711 | 0.001565147 |
| -1.40075404 | 8.35643E-05 |
| 0.910958452 | 0.374442799 |
| 0.974880948 | 0.7340972   |
| -1.21699704 | 0.054021126 |
| -1.22771683 | 0.037800686 |
| 0.961332098 | 0.737256554 |
| -1.25382413 | 0.001668084 |
| 0.915860328 | 0.330278102 |
| -1.07915587 | 0.438816261 |
| -1.06370274 | 0.387873479 |
| -1.27969744 | 0.00097419  |
| 0.564884209 | 3.66472E-08 |
| 0.830103005 | 0.013738085 |
| -1.09202068 | 0.27173438  |
| -1.03009767 | 0.733648963 |
| -1.12595432 | 0.066836865 |
| 0.878022625 | 0.135245302 |
| 0.971002376 | 0.699514408 |
| 0.988089    | 0.858677669 |
| -1.09911549 | 0.237824363 |
| 0.951322123 | 0.549324207 |
| -1.26048795 | 0.003435196 |
| -1.04946708 | 0.602612772 |
| -1.09677277 | 0.076417009 |
| -1.46115715 | 1.71089E-05 |
| -1.12385825 | 0.096814924 |
| 0.977739235 | 0.732562726 |
| -1.06657727 | 0.28024823  |
| 0.700379772 | 8.08494E-10 |
| 0.874395529 | 0.112794847 |
| 0.769073126 | 0.003038999 |
| -1.01270485 | 0.841614174 |
| -1.1215026  | 0.083824968 |

|             |             |
|-------------|-------------|
| -1.0711655  | 0.254499783 |
| 0.935022164 | 0.587228188 |
| -1.06839644 | 0.396361083 |
| -1.2760971  | 0.011118779 |
| -1.47377578 | 1.90169E-05 |
| -1.21892453 | 0.004723651 |
| -1.09748787 | 0.326812564 |
| -1.10682362 | 0.264992713 |
| 0.720932532 | 5.75592E-05 |
| -1.13202485 | 0.194978154 |
| -1.03178294 | 0.499024788 |
| 0.903254677 | 0.261577456 |
| 0.967670941 | 0.738522285 |
| -1.16135383 | 0.078095178 |
| -1.06923511 | 0.38323577  |
| -1.11692666 | 0.046686329 |
| -1.07672941 | 0.383571737 |
| -1.27954763 | 2.62621E-05 |
| -1.07510559 | 0.416570089 |
| -1.13390252 | 0.004171036 |
| -1.01711171 | 0.836814214 |
| -1.06674856 | 0.221949666 |
| -1.06357768 | 0.245873256 |
| -1.02985531 | 0.673563447 |
| -1.15361862 | 0.106091518 |
| -1.07180955 | 0.523561048 |
| -1.14811265 | 0.008086668 |
| -1.20823626 | 0.083879317 |
| -1.39551883 | 0.000244376 |
| 0.959703591 | 0.490039845 |
| -1.19150644 | 0.075203921 |
| -1.21533582 | 0.030623813 |
| -1.10082936 | 0.090993479 |
| 0.923863632 | 0.517962864 |
| -1.23964052 | 0.060365773 |
| -1.15246328 | 0.003411362 |
| -1.19932393 | 0.038522975 |
| -1.07657422 | 0.224107017 |
| -1.23288334 | 0.014886542 |
| -1.07631488 | 0.534135616 |
| -1.15720797 | 0.01553452  |
| -1.21035154 | 0.019410273 |
| -1.07331744 | 0.332440295 |
| 0.93084223  | 0.503662477 |

|             |             |
|-------------|-------------|
| -1.06515856 | 0.328835493 |
| -1.17779564 | 0.034207745 |
| 0.913847652 | 0.392736701 |
| 0.954228602 | 0.306258598 |
| -1.25427986 | 3.61062E-06 |
| -1.13079002 | 0.04772512  |
| -1.13812336 | 0.138415688 |
| -1.2997405  | 4.9238E-06  |
| -1.27062988 | 0.004438663 |
| -1.01651037 | 0.831958304 |
| -1.02107309 | 0.800629547 |
| -1.28701557 | 0.008670164 |
| -1.0823903  | 0.174813038 |
| 0.742215179 | 0.000500592 |
| 0.940130931 | 0.50843783  |
| -1.09520268 | 0.319885246 |
| -1.45036497 | 0.000204636 |
| -1.12211047 | 0.121382134 |
| -1.22719874 | 0.042810817 |
| -1.35607335 | 6.52954E-05 |
| -1.18274828 | 0.142114468 |
| -1.169344   | 0.013530353 |
| 0.97173252  | 0.524386999 |
| -1.52822004 | 6.25534E-06 |
| -1.21673432 | 0.000882422 |
| -1.16371786 | 0.033362104 |
| -1.10749711 | 0.125052806 |
| 0.900845656 | 0.215174598 |
| 0.695899407 | 2.17993E-06 |
| -1.16748816 | 0.033621691 |
| -1.18797809 | 0.010386765 |
| -1.13844717 | 0.032341238 |
| -1.02124945 | 0.618813254 |
| 0.967100747 | 0.321673086 |
| -1.03749486 | 0.282023115 |
| 0.880736253 | 0.008162826 |
| -1.26196076 | 0.013156402 |
| -1.05182223 | 0.420392676 |
| -1.05712414 | 0.216344645 |
| 0.862254674 | 0.126663332 |
| 0.872834849 | 0.022822363 |
| 0.976131165 | 0.740082139 |
| -1.26953511 | 0.00020616  |
| 0.995484022 | 0.9415904   |

|             |             |
|-------------|-------------|
| 0.947579058 | 0.403470827 |
| 0.971606325 | 0.575782836 |
| -1.00163261 | 0.966029515 |
| -1.12027174 | 0.008454413 |
| -1.03241755 | 0.536614977 |
| 0.872188079 | 0.17929169  |
| -1.02350103 | 0.523157513 |
| 0.997456193 | 0.955099586 |
| 0.949355676 | 0.394177129 |
| 0.902672766 | 0.11963252  |
| -1.05195035 | 0.46346684  |
| 0.954937087 | 0.319414595 |
| -1.04226284 | 0.486823988 |
| 0.950738112 | 0.380628988 |
| 0.849834776 | 0.170684782 |
| -1.01194388 | 0.854417228 |
| -1.56861859 | 1.72316E-07 |
| -1.04145565 | 0.342279255 |
| -1.12458287 | 0.018310985 |
| -1.02528292 | 0.646997208 |
| 0.880522247 | 0.03363557  |
| -1.27955489 | 0.023100895 |
| -1.05052837 | 0.433863958 |
| -1.29295052 | 0.05177546  |
| -1.00287179 | 0.964536344 |
| 0.955284133 | 0.274834582 |
| -1.09711284 | 0.299516148 |
| 0.891976996 | 0.074559866 |
| 0.99778657  | 0.961739833 |
| -1.23388821 | 0.000564126 |
| -1.0781493  | 0.21807036  |
| 0.903570301 | 0.287290076 |
| -1.36756521 | 0.004792957 |
| -1.10155361 | 0.289752196 |
| -1.25316806 | 0.001310372 |
| -1.192043   | 0.035923028 |
| -1.00738623 | 0.93337402  |
| 0.99198375  | 0.903440832 |
| -1.17259219 | 0.169726464 |
| -1.4643104  | 1.22299E-06 |
| 0.631272693 | 0.000795115 |
| -1.24625373 | 0.014310146 |
| -1.19485801 | 0.071624028 |
| -1.00583331 | 0.954475509 |

|             |             |
|-------------|-------------|
| -1.15183681 | 0.031088168 |
| -1.01020511 | 0.862901583 |
| -1.08397602 | 0.16649069  |
| 0.843838419 | 0.047636064 |
| -1.183658   | 0.082819269 |
| 0.932118389 | 0.390710055 |
| 0.987998304 | 0.931818879 |
| -1.05596595 | 0.562261143 |
| -1.0008666  | 0.993267154 |
| 0.996972856 | 0.962165058 |
| -1.20556198 | 0.018099015 |
| 0.862749555 | 0.024568605 |
| 0.938461626 | 0.095378904 |
| -1.2477966  | 0.000171345 |
| 0.985449488 | 0.780655467 |
| 0.937461207 | 0.546267354 |
| -1.04708039 | 0.401946998 |
| 0.873326177 | 0.04264627  |
| -1.04953675 | 0.498902705 |
| -1.16191957 | 0.032531566 |
| -1.07613949 | 0.158953553 |
| -1.26076494 | 0.015433906 |
| -1.02797048 | 0.706477928 |
| -1.09572731 | 0.256876647 |
| -1.00650301 | 0.933284885 |
| -1.03761992 | 0.521046393 |
| -1.07586735 | 0.035567793 |
| -1.19654694 | 0.028458554 |
| 0.865765442 | 0.006647902 |
| -1.06569386 | 0.12452991  |
| -1.02481958 | 0.665578305 |
| -1.16401722 | 0.001655672 |
| 0.963086958 | 0.873386497 |
| -1.33017247 | 0.000919941 |
| 0.981167773 | 0.787609485 |
| -1.06263093 | 0.603434256 |
| -1.13543074 | 0.189928124 |
| -1.05974893 | 0.488988482 |
| 0.957120373 | 0.511546161 |
| 0.904521829 | 0.157588986 |
| -1.26640546 | 0.003927018 |
| -1.13654567 | 0.018809296 |
| -1.19955558 | 0.017266065 |
| -1.29103792 | 7.30993E-05 |



|             |             |
|-------------|-------------|
| -1.24194126 | 0.073486469 |
| -1.05775512 | 0.252744731 |
| -1.07699121 | 0.236280232 |
| -1.14961061 | 0.004038059 |
| 0.965952397 | 0.566517637 |
| -1.0102061  | 0.776874464 |
| 0.859049322 | 0.000327179 |
| -1.1449158  | 0.072706572 |
| -1.03432573 | 0.392534426 |
| -1.07020227 | 0.233032443 |
| -1.10905491 | 0.192368661 |
| -1.15026632 | 0.00331841  |
| 0.869292491 | 0.048528826 |
| 0.922500333 | 0.504324424 |
| -1.38028079 | 1.00957E-06 |
| -1.09441376 | 0.196630993 |
| 0.480847143 | 3.33303E-14 |
| 0.954542236 | 0.539776524 |
| -1.23979023 | 0.123373121 |
| 0.825897966 | 0.004858679 |
| -1.02546983 | 0.616327744 |
| 0.959910675 | 0.743162636 |
| 0.805393195 | 0.104235114 |
| 0.853177493 | 0.001080239 |
| 0.933226793 | 0.338441838 |
| 0.883843511 | 0.047459816 |
| 0.758076686 | 0.00635849  |
| -1.05242431 | 0.43752429  |
| 0.895708447 | 0.287013096 |
| -1.09647452 | 0.214328977 |
| 0.689700961 | 7.09311E-13 |
| -1.02738011 | 0.644237976 |
| -1.18038313 | 0.030147656 |
| 0.980172982 | 0.700985601 |
| 0.470540874 | 6.87661E-14 |
| -1.0300188  | 0.807995537 |
| -1.06404355 | 0.398127797 |
| -1.05755205 | 0.189373981 |
| -1.15214993 | 0.083850356 |
| -1.27023628 | 1.50755E-05 |
| 0.986235195 | 0.732159162 |
| 0.913914474 | 0.386633011 |
| -1.10270452 | 0.114795212 |
| 0.799986585 | 0.006853795 |

|             |             |
|-------------|-------------|
| 0.892080891 | 0.107026873 |
| 0.574879511 | 1.53746E-05 |
| 0.99370397  | 0.865981232 |
| 0.927899548 | 0.506112484 |
| 0.779962088 | 0.004710319 |
| 0.824655457 | 0.059402857 |
| -1.0140813  | 0.784111257 |
| -1.21691289 | 0.010379007 |
| 0.744603589 | 2.01944E-05 |
| 0.968568262 | 0.572111726 |
| -1.04917978 | 0.501274736 |
| -1.02849439 | 0.514628618 |
| 0.867774625 | 0.030780375 |
| -1.20107083 | 0.013175362 |
| -1.08930136 | 0.079256206 |
| -1.05833003 | 0.255614358 |
| 0.971717932 | 0.605059907 |
| 0.980056103 | 0.653733435 |
| 0.98833281  | 0.843167789 |
| 0.650521089 | 2.21436E-10 |
| 0.623747205 | 6.49432E-09 |
| 0.946696458 | 0.099388784 |
| 0.94353216  | 0.555775978 |
| -1.25294981 | 0.000232063 |
| 0.949629672 | 0.51867166  |
| 0.355417276 | 1.62395E-09 |
| -1.12465436 | 0.032309129 |
| -1.07137071 | 0.025354141 |
| 0.979967704 | 0.779929779 |
| 0.947442024 | 0.532099575 |
| -1.09913772 | 0.165094969 |
| -1.07585762 | 0.446955259 |
| -1.17325086 | 0.177082556 |
| -1.19142751 | 0.007824066 |
| -1.08777581 | 0.200598616 |
| -1.18412779 | 0.054451268 |
| -1.14134784 | 0.069500717 |
| -1.59081084 | 3.99489E-09 |
| -1.01205651 | 0.852986701 |
| -1.15821542 | 0.033482384 |
| -1.25828598 | 0.00324898  |
| -1.22202374 | 0.004697441 |
| 0.949754683 | 0.454223848 |
| 0.873081528 | 0.079939154 |

|             |             |
|-------------|-------------|
| 0.822748327 | 0.003867541 |
| -1.15532715 | 0.034708464 |
| 0.948607931 | 0.244012835 |
| -1.02795438 | 0.662762887 |
| -1.35177234 | 0.003961407 |
| -1.14127258 | 0.169755731 |
| -1.19999243 | 0.002094079 |
| -1.01746486 | 0.783484722 |
| -1.04883    | 0.380694453 |
| 0.950918434 | 0.591008257 |
| 0.798001031 | 0.006527644 |
| -1.31528133 | 0.003395622 |
| -1.23739305 | 0.041264666 |
| -1.12065092 | 0.140957914 |
| -1.04210327 | 0.409964635 |
| 0.998232693 | 0.971692985 |
| -1.17678419 | 0.020540304 |
| -1.37780904 | 0.00083292  |
| 0.890140008 | 0.10849513  |
| 0.986112302 | 0.639778167 |
| 0.972565863 | 0.530628257 |
| -1.08366639 | 0.112811521 |
| 0.83636492  | 0.003994413 |
| -1.27447484 | 0.053905141 |
| -1.0798587  | 0.379222743 |
| -1.32349547 | 0.004352295 |
| -1.00344012 | 0.965567132 |
| 0.959449429 | 0.575059314 |
| -1.06739079 | 0.40743774  |
| 0.953218362 | 0.68507999  |
| 0.982581009 | 0.743270066 |
| -1.18204229 | 0.037657949 |
| -1.06077217 | 0.655019578 |
| -1.20561251 | 0.006990999 |
| -1.26262358 | 0.016922027 |
| -1.04102615 | 0.241295188 |
| -1.08897397 | 0.268150757 |
| -1.11506052 | 0.10272836  |
| 0.581977657 | 2.67056E-13 |
| -1.18019976 | 0.001726359 |
| 0.985934704 | 0.732828861 |
| -1.00423301 | 0.963977547 |
| 0.819328986 | 0.000484626 |
| 0.708946607 | 1.16836E-06 |

|             |             |
|-------------|-------------|
| -1.03149325 | 0.625105898 |
| 0.93529205  | 0.451268652 |
| -1.06657302 | 0.178156632 |
| 0.997549605 | 0.966492928 |
| -1.2014728  | 0.007681532 |
| -1.01672217 | 0.884994246 |
| 0.888723984 | 0.006307167 |
| -1.07283282 | 0.492184433 |
| -1.27921866 | 0.000766048 |
| -1.20735071 | 1.99671E-05 |
| -1.03821169 | 0.546251517 |
| -1.1159178  | 0.025073798 |
| 0.995614798 | 0.946404255 |
| 0.930937192 | 0.313947774 |
| 0.825545802 | 0.052126434 |
| 0.984043199 | 0.823488802 |
| -1.1465998  | 0.024237648 |
| 0.961068338 | 0.332404608 |
| 0.916402867 | 0.096921606 |
| 0.782838853 | 0.011794106 |
| -1.07546637 | 0.112464825 |
| -1.15958086 | 0.076728144 |
| -1.10114715 | 0.116966836 |
| -1.33173534 | 4.88591E-05 |
| 0.640802098 | 8.8952E-11  |
| 0.94451933  | 0.455987026 |
| -1.02451074 | 0.777750441 |
| -1.18128043 | 0.050917255 |
| -1.05875459 | 0.297811892 |
| -1.1262255  | 0.0067154   |
| -1.07619121 | 0.465446624 |
| -1.10037304 | 0.436915464 |
| -1.05667256 | 0.38288759  |
| -1.07235859 | 0.178395714 |
| -1.0927098  | 0.048028193 |
| -1.2111623  | 0.001137329 |
| -1.40325409 | 0.000899053 |
| 0.886481957 | 0.220229517 |
| -1.22404725 | 0.001337354 |
| 0.798908208 | 0.019926723 |
| -1.24403924 | 0.001980438 |
| -1.24341115 | 0.031556231 |
| 0.807912843 | 0.003574101 |
| 0.929686648 | 0.21983375  |

|             |             |
|-------------|-------------|
| -1.11273819 | 0.295972427 |
| -1.19420674 | 0.013429085 |
| -1.2565465  | 0.00044462  |
| -1.46838274 | 4.13375E-05 |
| 0.864635154 | 0.028656145 |
| 0.857907936 | 0.030188298 |
| -1.02327887 | 0.70793229  |
| -1.35619028 | 3.56203E-05 |
| -1.10345496 | 0.064373771 |
| -1.11677431 | 0.104510452 |
| -1.23628811 | 0.078447067 |
| -1.33254441 | 0.007178672 |
| -1.12397845 | 0.05906372  |
| -1.21406333 | 0.015672073 |
| 0.858556222 | 0.085059378 |
| 0.992666591 | 0.81952634  |
| -1.13431972 | 0.286799346 |
| 0.83024925  | 0.023838693 |
| -1.15221629 | 0.035366887 |
| -1.07455234 | 0.604209546 |
| -1.15762015 | 0.036026007 |
| 0.983209071 | 0.783480841 |
| -1.0751793  | 0.117293775 |
| -1.24512831 | 0.002908366 |
| -1.03444129 | 0.53050187  |
| -1.09679142 | 0.22314743  |
| -1.1241836  | 0.394095049 |
| -1.0001343  | 0.997893706 |
| 0.997955621 | 0.973636064 |
| 0.926265325 | 0.154783079 |
| -1.08869223 | 0.52589945  |
| -1.03905881 | 0.494863496 |
| 0.989821059 | 0.839508961 |
| -1.06432552 | 0.038024018 |
| 0.931318724 | 0.273726949 |
| -1.07678314 | 0.095400652 |
| 0.86974756  | 0.090455405 |
| -1.03337181 | 0.500265562 |
| 0.945195917 | 0.321067658 |
| 0.993019647 | 0.83275022  |
| -1.0150033  | 0.624459906 |
| -1.09115899 | 0.067688817 |
| -1.04274496 | 0.642470333 |
| -1.30667525 | 0.000916021 |

|             |             |
|-------------|-------------|
| 0.763870405 | 5.15419E-06 |
| -1.01295327 | 0.851534857 |
| -1.02422801 | 0.765550989 |
| -1.19534021 | 0.002895961 |
| 0.978624255 | 0.729685236 |
| -1.03431653 | 0.571902908 |
| -1.01585086 | 0.766137723 |
| 0.860802787 | 0.015403617 |
| 0.986880836 | 0.887255684 |
| 0.837988733 | 0.001018445 |
| 0.963236455 | 0.337910505 |
| -1.08992254 | 0.205794802 |
| -1.01575372 | 0.830297456 |
| 0.954555652 | 0.230857521 |
| 0.931185848 | 0.516544336 |
| -1.19202429 | 0.001501677 |
| -1.02748663 | 0.677344381 |
| -1.04796126 | 0.768626949 |
| 0.758739216 | 0.015303751 |
| 0.942816107 | 0.311844079 |
| -1.0881002  | 0.21693154  |
| -1.03558601 | 0.473400859 |
| 0.802874401 | 0.00219905  |
| 0.738252231 | 5.40356E-06 |
| -1.00629278 | 0.857350178 |
| -1.02552608 | 0.65819051  |
| -1.14356181 | 0.022180658 |
| -1.371223   | 0.000965476 |
| -1.06172773 | 0.364034884 |
| -1.00551717 | 0.890439741 |
| -1.09746761 | 0.096437124 |
| -1.10006794 | 0.164272101 |
| -1.05446631 | 0.320678132 |
| 0.958451544 | 0.388849301 |
| 0.976447514 | 0.792014243 |
| -1.06739309 | 0.31266181  |
| -1.12432419 | 0.097069538 |
| 0.941693776 | 0.087507407 |
| 0.755023433 | 0.016582606 |
| 0.667549803 | 2.40169E-08 |
| 0.906387187 | 0.075089114 |
| -1.00466767 | 0.925198617 |
| -1.06602905 | 0.234622476 |
| 0.986830649 | 0.835963775 |

|              |             |
|--------------|-------------|
| -1.00824089  | 0.926299831 |
| 0.871723676  | 0.041020203 |
| 0.736334987  | 0.041178177 |
| -1.17885163  | 0.052326194 |
| -1.209171109 | 0.001402706 |
| -1.12118119  | 0.221264537 |
| -1.01714934  | 0.851399372 |
| -1.21482973  | 0.005001489 |
| -1.20617678  | 0.105324602 |
| 0.791629892  | 1.31245E-05 |
| -1.221461    | 0.027335419 |
| -1.05688966  | 0.767923639 |
| -1.15531762  | 0.076133212 |
| -1.05900112  | 0.527925368 |
| -1.20672594  | 0.026470126 |
| -1.13365222  | 0.205301023 |
| 0.773867399  | 0.004211722 |
| -1.1308716   | 0.03280325  |
| -1.02621588  | 0.642667315 |
| 0.816595899  | 0.000440468 |
| 0.860202639  | 0.076933065 |
| 0.971002596  | 0.445362876 |
| 0.828259038  | 8.03269E-06 |
| -1.15262393  | 0.027073533 |
| -1.13484588  | 0.107983428 |
| -1.31027346  | 0.000447179 |
| 0.991998923  | 0.888914197 |
| -1.1090294   | 0.182836066 |
| 0.761106991  | 0.002617766 |
| -1.19593514  | 0.255658932 |
| -1.05918576  | 0.337204399 |
| 0.998086193  | 0.981739237 |
| 0.681857242  | 9.8612E-05  |
| 0.953849104  | 0.464142171 |
| -1.03772296  | 0.675949518 |
| -1.28163027  | 0.016023235 |
| -1.05735284  | 0.376597166 |
| -1.25166835  | 0.010851043 |
| 0.940695218  | 0.264602288 |
| 0.959126869  | 0.444554768 |
| -1.01798399  | 0.81335225  |
| -1.1024691   | 0.047223107 |
| -1.09254756  | 0.360527287 |
| -1.14669385  | 0.008687431 |

|             |             |
|-------------|-------------|
| 0.968435201 | 0.599075239 |
| 0.890925085 | 0.05405732  |
| 0.811004357 | 0.063141971 |
| 0.992763443 | 0.879013568 |
| 0.860894743 | 0.214612036 |
| -1.23347066 | 0.001877496 |
| 0.985434493 | 0.681669366 |
| -1.13600841 | 0.019325964 |
| -1.1075496  | 0.149337903 |
| 0.989733018 | 0.895068077 |
| -1.1243763  | 0.30883277  |
| -1.05034437 | 0.519224685 |
| -1.19375335 | 0.003606993 |
| -1.18693315 | 0.230010454 |
| 0.926005473 | 0.421162932 |
| -1.46600597 | 1.8015E-07  |
| -1.30000951 | 0.000375045 |
| -1.10253928 | 0.241107563 |
| -1.01547734 | 0.828330951 |
| -1.04039371 | 0.394637812 |
| -1.15993533 | 0.054333131 |
| 0.951293925 | 0.534919619 |
| -1.00361447 | 0.946425044 |
| 0.923234182 | 0.285563716 |
| -1.04938677 | 0.536010904 |
| -1.18299876 | 0.012081396 |
| -1.04632585 | 0.388449433 |
| 0.984834605 | 0.78030415  |
| -1.21320634 | 0.047539918 |
| 0.762994472 | 0.006433072 |
| -1.23531254 | 0.017882428 |
| 0.985715783 | 0.80467627  |
| 0.950383771 | 0.534675405 |
| 0.96649621  | 0.460929003 |
| 0.881945243 | 0.015313753 |
| -1.05758172 | 0.39904375  |
| -1.20444805 | 0.002973922 |
| 0.404191539 | 3.647E-12   |
| -1.11160012 | 0.172525441 |
| -1.0610668  | 0.203960569 |
| -1.10240866 | 0.126437253 |
| -1.0254101  | 0.72730864  |
| 0.984695884 | 0.795391429 |
| -1.05949918 | 0.290728028 |



|             |             |
|-------------|-------------|
| 0.866353347 | 0.075449001 |
| -1.16834772 | 0.251250128 |
| -1.09963486 | 0.223746846 |
| -1.07809237 | 0.359834707 |
| 0.853578465 | 0.004595972 |
| 0.841164666 | 0.001175037 |
| -1.36002884 | 0.001672033 |
| 0.868822939 | 0.038586932 |
| 0.984775166 | 0.81373467  |
| 0.891223874 | 0.07325451  |
| -1.07741667 | 0.45865847  |
| -1.14037169 | 0.034957166 |
| 0.780739089 | 0.000597299 |
| 0.999632898 | 0.995939304 |
| 0.800407486 | 0.018461173 |
| -1.05704286 | 0.317060086 |
| -1.01301163 | 0.815655299 |
| 0.971969693 | 0.623450946 |
| -1.06575117 | 0.245844287 |
| -1.05365115 | 0.281202971 |
| -1.11704792 | 0.300244349 |
| -1.19977571 | 0.015253058 |
| -1.35824693 | 0.007879587 |
| -1.12833483 | 0.082974106 |
| -1.13129273 | 0.323965787 |
| 0.990430392 | 0.910758319 |
| 0.72159086  | 0.000136408 |
| -1.01875816 | 0.786271704 |
| -1.0290818  | 0.472734218 |
| -1.08596651 | 0.226660159 |
| -1.08221465 | 0.10926463  |
| 0.99605624  | 0.93073446  |
| 0.762007928 | 5.71786E-05 |
| 0.81360451  | 0.002450971 |
| 0.961950569 | 0.634106929 |
| -1.10646721 | 0.06769078  |
| -1.11786029 | 0.100547386 |
| 0.99790006  | 0.976341109 |
| -1.21547623 | 0.013607402 |
| -1.06291008 | 0.386290196 |
| -1.0765676  | 0.327436301 |
| 0.694476113 | 0.00033804  |
| -1.32146013 | 0.000299316 |
| 0.859051876 | 0.018018209 |

|             |             |
|-------------|-------------|
| 0.940834212 | 0.346286984 |
| -1.00567114 | 0.924294357 |
| 0.973199592 | 0.693918588 |
| -1.06678952 | 0.243998827 |
| -1.26234566 | 0.006532938 |
| -1.01580352 | 0.775457589 |
| -1.08698885 | 0.426630864 |
| 0.96466341  | 0.628754873 |
| -1.09088447 | 0.200394976 |
| -1.02653423 | 0.688632889 |
| 0.871428333 | 0.06763623  |
| -1.09288673 | 0.164704041 |
| -1.29722341 | 0.005454176 |
| 0.805548144 | 0.022508082 |
| -1.03219761 | 0.718307013 |
| -1.17359837 | 0.010670861 |
| -1.14225601 | 0.03034513  |
| 0.814582335 | 0.159194435 |
| 0.961646216 | 0.521715589 |
| 0.922339386 | 0.262838265 |
| -1.0366968  | 0.576374639 |
| -1.0776815  | 0.337930043 |
| 0.987532884 | 0.842165434 |
| -1.09174332 | 0.341630009 |
| -2.19355005 | 8.20489E-14 |
| -1.17940307 | 0.0503165   |
| -1.00420322 | 0.950740847 |
| -1.02913259 | 0.536987118 |
| 0.90379774  | 0.345144387 |
| -1.0374994  | 0.563542404 |
| 0.937180849 | 0.258772957 |
| 0.91296367  | 0.207389381 |
| 0.962936103 | 0.541120489 |
| 0.982861139 | 0.792625429 |
| -1.06988147 | 0.208808614 |
| -1.14602043 | 0.018330175 |
| 0.958142172 | 0.414960932 |
| -1.08973137 | 0.250142967 |
| 0.84311088  | 0.226186386 |
| 0.411152652 | 1.51702E-07 |
| -1.04694105 | 0.499401781 |
| -1.11996643 | 0.035756144 |
| 0.898869035 | 0.042820376 |
| -1.07912259 | 0.176288547 |

|             |             |
|-------------|-------------|
| -1.02197818 | 0.542409272 |
| 0.752189743 | 1.77987E-05 |
| 0.711901078 | 6.39973E-05 |
| -1.20448676 | 1.86466E-05 |
| 0.971201194 | 0.686062118 |
| -1.15833934 | 0.015163687 |
| 0.815275264 | 0.015395283 |
| -1.05223543 | 0.511275141 |
| -1.30373015 | 7.41018E-05 |
| 0.977807026 | 0.67780429  |
| 0.949137993 | 0.197725788 |
| -1.05680484 | 0.303402727 |
| -1.08541721 | 0.198570732 |
| -1.20601284 | 0.003348719 |
| -1.2258742  | 0.003133348 |
| -1.25821857 | 0.000463917 |
| -1.12411972 | 0.029994406 |
| -1.2106062  | 0.000310118 |
| 0.959696055 | 0.608162722 |
| 0.940990603 | 0.247162095 |
| 0.945485156 | 0.337637349 |
| 0.906986394 | 0.106621165 |
| -1.10035145 | 0.090146445 |
| -1.04166159 | 0.403398825 |
| -1.08015796 | 0.155169538 |
| -1.05476314 | 0.475646198 |
| 0.990481075 | 0.900379594 |
| -1.1111293  | 0.046814279 |
| -1.11053892 | 0.186848504 |
| -1.0416776  | 0.345077267 |
| -1.28625028 | 0.002067504 |
| 0.762081338 | 0.064339659 |
| -1.20939643 | 0.015695336 |
| 0.770358466 | 0.002385436 |
| 0.803529734 | 0.000755063 |
| -1.17671587 | 0.08450493  |
| 0.812574474 | 0.002542192 |
| -1.06425393 | 0.246531945 |
| -1.01689973 | 0.816189904 |
| -1.16783136 | 0.003277147 |
| 0.952181202 | 0.416070978 |
| -1.45730813 | 2.32649E-08 |
| 0.996119629 | 0.941277767 |
| -1.2777006  | 0.022846929 |

|             |             |
|-------------|-------------|
| -1.03994255 | 0.404856074 |
| 0.919434047 | 0.147717331 |
| -1.45285679 | 2.63174E-08 |
| -1.15456607 | 0.013918264 |
| 0.934744451 | 0.187485052 |
| -1.03722756 | 0.615382353 |
| -1.1392481  | 0.009074793 |
| -1.06341371 | 0.535649341 |
| 0.918935634 | 0.19005049  |
| 0.966608736 | 0.425446955 |
| -1.02338515 | 0.497419707 |
| -1.14639759 | 0.026817537 |
| -1.1118675  | 0.1074488   |
| 0.815968314 | 0.34410931  |
| -1.03467734 | 0.657231703 |
| -1.18155159 | 0.058096688 |
| -1.07448999 | 0.32012925  |
| 0.989514703 | 0.912789131 |
| -1.10895283 | 0.341724013 |
| -1.08077241 | 0.161155851 |
| -1.11043907 | 0.024508164 |
| -1.08191942 | 0.085220205 |
| -1.13135006 | 0.06832711  |
| -1.29242676 | 8.03462E-05 |
| -1.04570587 | 0.410263668 |
| -1.10077532 | 0.090320048 |
| -1.02113622 | 0.746571003 |
| 0.902409354 | 0.068646017 |
| -1.07352937 | 0.340563692 |
| -1.08339104 | 0.21537989  |
| 0.989564928 | 0.847382304 |
| 0.999636231 | 0.993357542 |
| -1.15984919 | 0.002209836 |
| -1.0963019  | 0.359422862 |
| -1.00485167 | 0.891573352 |
| -1.07749531 | 0.271265405 |
| -1.06442697 | 0.178746558 |
| -1.04299223 | 0.482635475 |
| 0.991217581 | 0.851664895 |
| -1.13639184 | 0.052817289 |
| 0.899017235 | 0.042684441 |
| -1.0470493  | 0.523078847 |
| -1.03725419 | 0.684133278 |
| -1.02528124 | 0.555641301 |

|             |             |
|-------------|-------------|
| 0.969140251 | 0.640381042 |
| 0.624009786 | 2.42192E-07 |
| 0.69340008  | 3.07151E-07 |
| 0.918228521 | 0.08695015  |
| -1.02671881 | 0.791923104 |
| 0.977270514 | 0.726481784 |
| 0.944004902 | 0.346138883 |
| -1.1230523  | 0.113951825 |
| 0.792457979 | 0.001902285 |
| 0.943729357 | 0.219731944 |
| 0.992871804 | 0.891615219 |
| -1.02529349 | 0.594812325 |
| -1.07963795 | 0.033271039 |
| 0.956891686 | 0.440991287 |
| -1.21632102 | 0.013071991 |
| 0.908868575 | 0.175650776 |
| 0.867927138 | 0.064000799 |
| -1.17695615 | 0.020214236 |
| 0.906622195 | 0.185544721 |
| -1.03629896 | 0.576611714 |
| -1.21326788 | 0.000184614 |
| 0.879529325 | 0.033048876 |
| -1.24472744 | 0.02318284  |
| -1.21684494 | 0.005869047 |
| 0.984882507 | 0.811743631 |
| -1.28266031 | 2.87496E-07 |
| -1.26320643 | 9.93029E-05 |
| -1.08105384 | 0.19631505  |
| 0.7928597   | 6.0961E-05  |
| -1.06317326 | 0.47325969  |
| 0.94922889  | 0.482484408 |
| -1.00838986 | 0.90595376  |
| 0.98515242  | 0.767196751 |
| 0.926306695 | 0.24295943  |
| 0.925545311 | 0.153257563 |
| -1.13990838 | 0.00039618  |
| -1.04998658 | 0.756784145 |
| -1.06275496 | 0.414689063 |
| -1.0195327  | 0.702873612 |
| -1.0692302  | 0.395938231 |
| -1.04112467 | 0.494277142 |
| -1.01034987 | 0.873858195 |
| 0.830968207 | 0.009758849 |
| -1.6279421  | 0.000313806 |

|             |             |
|-------------|-------------|
| -1.09970616 | 0.01134899  |
| 0.909379712 | 0.078172656 |
| -1.11373163 | 0.054172175 |
| 0.860966915 | 0.072807982 |
| -1.26438157 | 0.000667141 |
| -1.06872018 | 0.262040301 |
| -1.00266462 | 0.94365714  |
| -1.3986095  | 3.45762E-05 |
| -1.18999984 | 0.007542513 |
| 0.79087893  | 0.000539504 |
| 0.929277539 | 0.33579124  |
| 0.964159744 | 0.413002543 |
| 0.954584073 | 0.352340463 |
| -1.16297203 | 0.014256719 |
| -1.36927749 | 8.44276E-05 |
| -1.04128071 | 0.529567297 |
| 0.937940479 | 0.404223502 |
| 0.893387865 | 0.104661171 |
| -1.1229144  | 0.099029253 |
| -1.06854569 | 0.2996588   |
| -1.07220514 | 0.090985973 |
| -1.10344    | 0.159902506 |
| -1.17979528 | 0.008761216 |
| -1.01883983 | 0.706148366 |
| 0.997458705 | 0.964009136 |
| 0.821772543 | 0.026026539 |
| -1.13109783 | 0.041398608 |
| -1.02072353 | 0.844222946 |
| -1.35316044 | 1.90688E-05 |
| -1.02105607 | 0.577017859 |
| -1.00313965 | 0.951745406 |
| 0.965997129 | 0.53095987  |
| -1.09545584 | 0.098178306 |
| -1.06807993 | 0.19372708  |
| 0.831840987 | 0.005569142 |
| -1.63712317 | 5.50417E-08 |
| 0.893394917 | 0.032118114 |
| 0.899851184 | 0.56474215  |
| 0.865250534 | 0.109264303 |
| 0.927323267 | 0.043904658 |
| 0.933942544 | 0.18779428  |
| 0.984075943 | 0.723890587 |
| -1.08139491 | 0.193313566 |
| 0.970837022 | 0.572204355 |

|             |             |
|-------------|-------------|
| -1.08421256 | 0.071069632 |
| -1.23655949 | 0.018815915 |
| -1.32740127 | 0.001062629 |
| -1.13917438 | 0.097110929 |
| -1.05146995 | 0.356827965 |
| -1.12188553 | 0.035339225 |
| 0.919034694 | 0.248051232 |
| 0.940457367 | 0.416151074 |
| 0.989194554 | 0.856694436 |
| 0.986193578 | 0.86538399  |
| 0.887629998 | 0.248895884 |
| -1.11889709 | 0.161871415 |
| 0.814938936 | 0.205760605 |
| -1.26113319 | 0.000345357 |
| -1.02464607 | 0.644290898 |
| 0.945588922 | 0.314506837 |
| 0.999217106 | 0.984370392 |
| -1.07898251 | 0.197860908 |
| -1.05919998 | 0.279097597 |
| 0.911217315 | 0.372440626 |
| -1.20850932 | 0.003023401 |
| 0.979077882 | 0.779983204 |
| 0.998889072 | 0.983284289 |
| -1.09970999 | 0.021162256 |
| 0.994180515 | 0.926348652 |
| 0.714321259 | 1.30099E-10 |
| -1.00568798 | 0.900130001 |
| -1.03117642 | 0.338369321 |
| 0.890884933 | 0.028942238 |
| -1.0800488  | 0.132048815 |
| -1.0573968  | 0.395147568 |
| -1.10415168 | 0.190987868 |
| 0.951398308 | 0.734851891 |
| 0.983528479 | 0.673492849 |
| 0.814007729 | 0.275150217 |
| -1.0834116  | 0.113563566 |
| 0.993675916 | 0.857178623 |
| -1.0804621  | 0.154372299 |
| -1.12353059 | 0.03829855  |
| -1.14305185 | 0.052479766 |
| -1.09998841 | 0.096160841 |
| -1.28549019 | 5.54041E-05 |
| 0.957108321 | 0.370188587 |
| -1.08400854 | 0.541279611 |

|             |             |
|-------------|-------------|
| 0.968636504 | 0.719229119 |
| 0.992658859 | 0.908278466 |
| 0.934545657 | 0.105106304 |
| -1.06595341 | 0.094740624 |
| 0.960644113 | 0.542993559 |
| 0.73703501  | 1.75207E-05 |
| -1.16636436 | 0.001303828 |
| 0.57195527  | 2.60538E-08 |
| 0.969576563 | 0.609726637 |
| -1.04034325 | 0.536389445 |
| 0.945105778 | 0.489385298 |
| 0.947135666 | 0.286577469 |
| -1.08040685 | 0.181546539 |
| -1.68848442 | 4.09378E-09 |
| 0.925573439 | 0.135938062 |
| 0.981570576 | 0.733034941 |
| -1.21610179 | 0.004496793 |
| -1.0688338  | 0.216514162 |
| -1.06752279 | 0.318582204 |
| 0.875718052 | 0.527806232 |
| -1.14147426 | 0.034122858 |
| -1.00465794 | 0.957254938 |
| -1.04931187 | 0.378596773 |
| -1.00775286 | 0.896418122 |
| 0.973232966 | 0.756082338 |
| -1.09287165 | 0.204164502 |
| 0.833425137 | 0.002410742 |
| -1.07565369 | 0.213125594 |
| 0.87519134  | 0.368376043 |
| -1.00035115 | 0.996011301 |
| -1.09638196 | 0.108197433 |
| -1.12063421 | 0.028737444 |
| -1.0551021  | 0.38273466  |
| -1.10136349 | 0.063233807 |
| 0.985237125 | 0.71878348  |
| 0.977628773 | 0.652112148 |
| -1.16458276 | 0.038292543 |
| -1.14746121 | 0.046428922 |
| -1.30785901 | 0.001160007 |
| 0.903706572 | 0.288009963 |
| -1.09362851 | 0.288614776 |
| 0.865803463 | 0.09096869  |
| -1.08685729 | 0.295366293 |
| -1.20674493 | 0.005626447 |



|             |             |
|-------------|-------------|
| -1.20682192 | 0.003136452 |
| -1.01628988 | 0.731855666 |
| 0.95259813  | 0.288325201 |
| -1.17765401 | 0.00054577  |
| -1.06809942 | 0.057618525 |
| 0.69172733  | 2.81888E-09 |
| 0.994942091 | 0.923425205 |
| 0.923771327 | 0.506557047 |
| -1.09818818 | 0.241286595 |
| -1.03881106 | 0.48297838  |
| -1.00431339 | 0.915328399 |
| -1.04989314 | 0.33220508  |
| -1.30036351 | 0.00755733  |
| -1.02784768 | 0.495172262 |
| -1.01151898 | 0.827049274 |
| -1.03405401 | 0.425211673 |
| 0.924084886 | 0.419675829 |
| 0.992416454 | 0.891636594 |
| -1.14514736 | 0.006116553 |
| 0.954458793 | 0.221486155 |
| -1.11817433 | 0.115860369 |
| 0.927725277 | 0.148970325 |
| -1.0601006  | 0.275470135 |
| 0.944390706 | 0.175185995 |
| 0.965554367 | 0.547713714 |
| 0.906764647 | 0.104194332 |
| -1.10244369 | 0.062231064 |
| -1.25724981 | 0.001650648 |
| 0.986611091 | 0.740278159 |
| 0.946957549 | 0.404046747 |
| 0.979986228 | 0.647432225 |
| 0.882989611 | 0.01129874  |
| 0.982972892 | 0.734829576 |
| -1.09932024 | 0.059285016 |
| -1.00505952 | 0.953271271 |
| -1.13764056 | 0.055887768 |
| 0.914322845 | 0.506760022 |
| -1.0790484  | 0.389925238 |
| -1.05639676 | 0.640677188 |
| -1.05716556 | 0.145085403 |
| 0.922597117 | 0.139281388 |
| -1.00278823 | 0.942707041 |
| 0.989956963 | 0.899779866 |
| -1.34822183 | 0.004215395 |

|             |             |
|-------------|-------------|
| -1.07395121 | 0.318689975 |
| 0.927002021 | 0.588363373 |
| -1.07589115 | 0.597719136 |
| 0.992024078 | 0.88604076  |
| -1.43378731 | 0.054452835 |
| -1.19339135 | 0.025796893 |
| -1.06985022 | 0.46317409  |
| 0.850040201 | 0.372602878 |
| -1.23236475 | 0.005901805 |
| -1.12090208 | 0.054131198 |
| 0.990726317 | 0.85970714  |
| -1.15569122 | 0.182473445 |
| 0.761004718 | 0.146393384 |
| -1.14084028 | 0.140515686 |
| 0.937286668 | 0.1558709   |
| -1.22570706 | 0.01395018  |
| 0.995539128 | 0.929418729 |
| -1.10129664 | 0.268414498 |
| -1.10090384 | 0.089283912 |
| -1.03342871 | 0.572834905 |
| 0.984784484 | 0.727353933 |
| -1.04997298 | 0.18294614  |
| -1.09825046 | 0.075003307 |
| -1.24015016 | 0.009991632 |
| 0.987252685 | 0.831628964 |
| -1.05296381 | 0.335424791 |
| -1.07037016 | 0.050721953 |
| -1.16063716 | 0.051899431 |
| 0.957051414 | 0.438058815 |
| 0.877796883 | 0.155632031 |
| 0.821498696 | 0.337290156 |
| -1.04408481 | 0.528394906 |
| -1.17769208 | 0.112019908 |
| -1.05325569 | 0.402151517 |
| -1.09856001 | 0.067855307 |
| 0.842983594 | 0.124667334 |
| -1.17765507 | 0.000509197 |
| 0.990609752 | 0.895081786 |
| 0.921587568 | 0.25228518  |
| -1.02214155 | 0.713433122 |
| -1.11178991 | 0.035002338 |
| 0.91517408  | 0.29370714  |
| -1.05441345 | 0.381336465 |
| -1.14100705 | 0.061414501 |

|             |             |
|-------------|-------------|
| 0.931037046 | 0.243020436 |
| 0.829153496 | 0.000452323 |
| 0.672110611 | 5.08792E-06 |
| -1.15577196 | 0.034884432 |
| -1.07610064 | 0.530594717 |
| 0.992208663 | 0.873673345 |
| -1.08099463 | 0.105446605 |
| 0.986471223 | 0.717773782 |
| 0.913332762 | 0.173732471 |
| -1.10812505 | 0.190872673 |
| 0.863190463 | 0.247465832 |
| -1.02550205 | 0.812354059 |
| 0.928271306 | 0.0700653   |
| -1.19916282 | 0.00189552  |
| -1.10179027 | 0.10751789  |
| 0.78860715  | 0.032051493 |
| 0.920410024 | 0.124251276 |
| -1.09867551 | 0.221249726 |
| -1.51681623 | 2.02761E-10 |
| -1.148191   | 0.034007499 |
| -1.17898311 | 0.015556531 |
| -1.13163605 | 0.035196279 |
| 0.832295432 | 0.012211627 |
| -1.08698082 | 0.128816634 |
| -1.045834   | 0.628173965 |
| 0.938961104 | 0.445107417 |
| -1.28608011 | 0.000462928 |
| 0.941964262 | 0.148610639 |
| -1.01617437 | 0.748981869 |
| 0.961841365 | 0.520263796 |
| 0.966660637 | 0.429120216 |
| -1.01958042 | 0.744707772 |
| -1.00873511 | 0.868028813 |
| -1.18893265 | 0.020056098 |
| 0.976373678 | 0.691882368 |
| 0.896137688 | 0.20329912  |
| 0.975517706 | 0.593481501 |
| 0.922040786 | 0.643907441 |
| -1.05672408 | 0.309986699 |
| -1.09633479 | 0.059420804 |
| 0.9874125   | 0.803021513 |
| 0.908739217 | 0.263260325 |
| -1.40583246 | 0.010682075 |
| -1.27406337 | 0.00441464  |

|             |             |
|-------------|-------------|
| -1.17028372 | 0.0022614   |
| -1.00566685 | 0.92767251  |
| -1.45631336 | 2.20029E-06 |
| -1.12783342 | 0.01303138  |
| -1.00259551 | 0.939535022 |
| 0.961536618 | 0.428101933 |
| 0.905201959 | 0.009993657 |
| -1.01524037 | 0.828581213 |
| 0.966835556 | 0.650899632 |
| -1.07300865 | 0.119441982 |
| -1.12070765 | 0.099063023 |
| 0.989183883 | 0.861613539 |
| -1.17354902 | 0.042090464 |
| 0.811351415 | 0.004294424 |
| 0.981366977 | 0.685290009 |
| 0.97975868  | 0.69148039  |
| 0.826329931 | 0.021401938 |
| -1.04641349 | 0.444136218 |
| -1.22197709 | 0.000352303 |
| -1.28084126 | 0.000143615 |
| -1.09149547 | 0.204794462 |
| -1.08861016 | 0.02464136  |
| 0.825929637 | 0.000402913 |
| 0.994524706 | 0.918388982 |
| 0.652764838 | 4.65172E-07 |
| -1.07354531 | 0.213678066 |
| -1.18874416 | 0.012571173 |
| -1.1188432  | 0.118342026 |
| -1.07498603 | 0.281233065 |
| -1.2148065  | 0.007229269 |
| -1.04296615 | 0.173870504 |
| 0.973664199 | 0.649374926 |
| -1.08835887 | 0.085699496 |
| 0.854793169 | 0.059538224 |
| 0.665420051 | 1.31062E-05 |
| -1.2631707  | 0.016018095 |
| -1.12142315 | 0.109172682 |
